# Supplementary material for: Aspergillus fumigatus versus Genus Aspergillus: Conservation, Adaptive Evolution and Specific Virulence Genes
Source: MDPI journal article supplement (doi:10.3390/microorganisms9102014), 2021-09-23
Supplement: s1 [file s1]

# Additional file 1

**This PDF file includes:**

## **1. Supplemental note**

- (i) Recombination breakpoints**
- (ii) Positive selection in genes classified under KOG functional categories**
  - *Metabolism*
  - *Cellular processes and signaling*
  - *Information storage and processing*

**References**

## **2. Supplementary figures**

- **Figs. S1, S2 and S3**

## **3. Additional data file 1**

## **4. Additional data file 2**

## **5. Additional data file 3**

**Other Additional file for this manuscript includes the following:**

## **Additional file 2**

- **Captions for Tables S1 to S15 (Sheet in excel file)**
- **Tables S1 to S15 (Sheets in excel file)**

---

\* Corresponding author

Address correspondence to Prof. Dr. Thomas Dandekar, [dandekar@biozentrum.uni-wuerzburg.de](mailto:dandekar@biozentrum.uni-wuerzburg.de)

Note: We recommend to use bookmarks for navigation.

## Supplemental Note

### Recombination breakpoints

Recombination is a phenomenon that occurs in the genomes of many organisms through the exchange or transfer of genomic fragments demarcated by recombination breakpoints. In the evolution of fungi, recombination is documented as one of the major forces driving diversity and adaptation [1, 2] subsequently resulting in the creation of mosaic sequences where the evolutionary history at each site may be different. With recombination, nucleotide sites in a sequence do not evolve along a single tree, but instead along a set of correlated trees [3]. Violating this tree-like assumption of evolution can lead to serious consequences when performing positive selection analysis [4]. Thus, the evolution of homologous recombinant sequences must be modelled by several phylogenies, one for each nonrecombinant fragment in the alignment [5]. The widely used likelihood methods for quantifying selection pressure on codon alignments [6] may suffer from high rates of false positives when the sequences being analyzed have undergone recombination [4, 7]. Therefore, we analyze the presence of recombination breakpoints in SCOs clusters. We used the Genetic Algorithm Recombination Detection (GARD) tool that implements the likelihood-based model selection procedure and uses the genetic algorithm to screen MSA for recombination breakpoints and quantifies the strength of support for their location [5, 8]. We implemented the Shimodaira-Hasegawa (SH) test to reject the potentially recombinant areas which might be due to substitution rate variation and not the recombination, since only a subset of recombination breakpoints convey any selective advantage, and the majority may be selectively neutral with limited biological significance [9]. We found that significant recombination events occurred in 879 single copy ortholog clusters (Additional file 2: Table S15).

We further conducted GO over-representation analysis of proteins that possibly experienced recombination. In the BP terms, the top two enriched GO terms were response to stress and purine ribonucleotide biosynthetic process, the MF terms were structural constituents of ribosome and phospholipase D (PLD) activity, and the CC terms were related to organelle and mitochondria. Here we have highlighted the role of proteins under BP and MF categories. Detailed alignments are listed in (Additional file 2: Table S5) including the low-level over-representation of recombination breakpoints. Studies have shown the positive correlation between stress and recombination activity [10, 11]. In *Drosophila melanogaster*, it has also been suggested that stress-induced recombination might be a mechanism of evolvability as

certain types of stress, for instance heat shock stress, have the capacity to stimulate evolutionary changes [12]. Several stress-related proteins of *A. fumigatus* and *A. nidulans* have previously shown to be involved in recombination [13-16]. Highly significant over-representation of the GO category, cellular response to stress (GO:0033554, FDR 1.44E-03), suggest recombination might be a general stress response in aspergilli. The increased genetic flexibility by recombination might facilitate evolutionary adaptation of fungi to stressful environments.

Purines are essential nutrients required for functions as diverse as signal transduction, energy metabolism, and DNA synthesis. They are also required by the pathogenic fungi to enable growth and dissemination in the host. Due to varying concentrations of purines in their environmental niches and the host, most of the fungal pathogens can degrade, salvage, and synthesize de novo purines through several conserved enzymatic steps [17]. The purine nucleotide biosynthesis pathway is conserved between yeast and humans and is critically important for the normal functioning of cells. Additionally, dysregulation of this pathway can result in cytotoxicity [18]. High-frequency genetic variation in two purine biosynthesis genes influences survival of bacterial pathogen *Campylobacter jejuni* under stress and promotes its success as a pathogen [19]. We found that the over-representation of the GO category, purine ribonucleotide biosynthetic process (GO:0009152, FDR 1.82E-03), suggests the recombination in these genes could be the adaptive strategy of aspergilli.

Highly transcribed genes, such as the ribosomal genes, are more susceptible to recombination [20]. In agreement with this, we also found over-representation of several ribosome-related GO terms such as ribosome biogenesis (GO:0042254, FDR 2.54E-02), ribosome (GO:0005840, FDR 2.83E-02) and structural constituent of ribosome (GO:0003735, 2.77E-02) (Additional file 1: Table S5). Other than their primary functions in protein translation, ribosomal proteins (RPs) are found to have extra-ribosomal functions that are related to regulation of apoptosis, cell cycle arrest, cell proliferation, cell migration and invasion, and DNA damage repair [21, 22]. In response to DNA damage, RPs can help to maintain genomic stability by regulating the activity of the relevant key transcription factors [23]. To support the hyphal growth, the number of ribosomes in an ungerminated spore is insufficient, therefore, ribosome production is a major synthetic process during the early minutes of germination in filamentous fungi [24]. This process results in a 10-fold increase in the number of ribosomes actively engaged in translation within the first few minutes [25-27]. The degree of transcription involved enhances the opportunity for recombination. Thus, the over-representation of ribosome related GO terms in

recombination breakpoints containing proteins is not surprising as there the transcription is strong.

Phospholipases are ubiquitous enzymes that participate in multiple cellular functions such as vesicular trafficking, receptor signaling and signal transduction. Phospholipase D (PLD) catalyzes the hydrolysis of phosphatidylcholine into phosphatidic acid (PA). The PLD encoding gene modulates the internalization of this pathogen into epithelial cells and represents a virulence factor of *A. fumigatus* in IA under immunosuppression by corticosteroids [28]. PLD activity and its presence in the nucleus are necessary for signaling and the completion of meiosis [29, 30]. Therefore, over-representation of phospholipase D activity is not surprising.

### **Positive selection in genes classified under KOG functional categories**

#### ***Metabolism***

Inhaled resting conidia in immunocompromised individuals become metabolically active within 30 min of ingestion. Cellular energy is essential for the multiplication and stress tolerance. *Aspergillus* species have an remarkable capacity for energy generation, and high efficiency to acquire and utilize a wide range of resources and can store considerable quantities of nutrients within the cell; all traits which contribute to their energy-generating capacity and competitive ability [31]. *A. fumigatus* and some other aspergilli possess and express multiple genes for the enzymes that regulate pathways which allow fungi to adapt their primary carbon metabolism requirement in the niche they inhabit and confer a selective advantage [32]. Also, the possibilities of positive selection signatures in other metabolic genes can be expected. Our scan revealed that several genes involved in metabolic processes evolve under positive selection pressure. This also includes eleven differentially expressed metabolic genes during conidial/hyphae growth. Positive selection pressure was observed in five genes (Afua\_2g15730, Afua\_2g17080, Afua\_6g04500, Afua\_1g07220 and Afua\_3g08480) in KOG class carbohydrate transport and metabolism. Interestingly, a highly significant positive selection signal (Benjamini-Yekutieli, q-value 0) was observed in a key regulatory glycolytic enzyme 6-phosphofructo-2-kinase 1 coding gene (Afua\_1g07220) which catalyzes the conversion of fructose 6-phosphate and ATP to fructose 1,6-bisphosphate and ADP. In response to the cells energy requirements, this enzyme can increase or decrease the rate of glycolysis through allosteric inhibition.

Active fatty acid and lipid metabolism ensure the capability of *A. fumigatus* for using alternative carbon sources in the stressful host environment in infected tissue during invasive



aspergillosis [33, 34]. Additionally, also serve as the energy source for intracellular growth of *A. fumigatus* conidia [35]. Triacylglycerides (TAGs) are a class of neutral lipids that represent the most important primary storage form of energy for eukaryotic cells, which is often synthesized via multiple pathways. Phospholipid:DAG acyltransferase (PDAT) that transfer a fatty acyl moiety from a phospholipid (PL) to diacylglycerol (DAG) to form TAG represents one such acyl-CoA-independent TAG synthesis pathway. This membrane-localized enzyme coding gene Afua\_3g09950 was identified as PSG by our analysis. The artificial microRNA silencing of PDAT suggests that membrane lipid turnover and TAG synthesis mediated by PDAT is essential for vigorous growth of alga *Chlamydomonas reinhardtii* under favorable culture conditions and for membrane lipid degradation with concomitant production of TAG for survival under stress [36]. BlastP based similarity search shows *A. fumigatus* PDAT shares 43% sequence similarity with *C. reinhardtii* PDAT. Further, having similar domains and similar GO annotations of both the proteins indicate their similar functions. Five genes involved in oxidative stress response (Afua\_4g04710, Afua\_3g11330, Afua\_1g10930, Afua\_3g09950 and Afua\_2g11510) were found to be positively selected. We also found the signal of positive selection in acyl-CoA thioesterase II coding gene Afua\_1g15170 which highly downregulates during 16 h of conidia growth. The enzyme is involved in lipid metabolism [37] as mentioned in later in the manuscript however, its role in *A. fumigatus* is not yet characterized. The Afua\_5g08930 *ivdA* gene codes for the isovaleryl-CoA dehydrogenase enzyme, which participates in branched-chain amino acid leucine catabolic process and fatty acid beta-oxidation, (and) was found to be evolved under positive selection. The distant bacterial homolog *Mycobacterium tuberculosis* acyl-CoA dehydrogenase *mbtN*, which shows about 25% sequence identity to *A. fumigatus* Isovaleryl-CoA dehydrogenase and contains similar domain composition and GO annotation, is considered a virulence factor because of its involvement in the production of mycobactins and possibly vital for the iron acquisition within the macrophage [38, 39]. Another mitochondrial enzyme 3-methylcrotonyl-CoA carboxylase subunit alpha coding gene Afua\_5g08910 *mccA*, involved in leucine degradation, was evolved under positive selection. This enzyme showed differential expression during conidia growth [40], oxygen-limitation [41], and host neutrophil interaction [42]. In oxygen-limiting conditions many pathogens are able to use leucine as the sole carbon or nitrogen source through the leucine degradation pathway leading to acetyl-CoA and acetoacetate, an important end-product of energy metabolism [43].

In fact, metabolism cannot proceed without energy, and thus adaptive evolution is expected in genes involved in the energy production and conversion subcategory, if the host encounters

pathogen adaptation. *A. fumigatus* generate energy in vivo during fungal pathogenesis to drive the metabolic pathways required for fungal growth, host tissue invasion, and disease development using different mechanisms [44]. Mitochondrial respiration is active in hypoxia and critical for fungal pathogenesis [45, 46]. Interruption of mitochondrial respiration in *A. fumigatus* significantly impaired growth in normoxia and hypoxia, conidial germination, and displayed attenuated virulence [47]. Positive selection was observed for electron transfer flavoprotein-ubiquinone oxidoreductase (ETF:QO) coding gene Afua\_3g10110, which is critical for linking central metabolism with the respiratory chain [48]. The Afua\_3g08770 *grim-19* gene codes for the component of mitochondrial respiratory chain NADH:ubiquinone oxidoreductase complex (complex I), which catalyzes the first step of electron transfer in the oxidative phosphorylation system (OXPHOS), was positively selected. Elimination of *grim-19* destroys the assembly and electron transfer activity of complex I and influences the other complexes in the mitochondrial respiratory chain [49, 50]. It also influences the Warburg effect, favors cell protection and/or prevent aberrant cell growth, apoptosis and also appears to regulate innate and acquired immune responses in mouse models [50-52]. The subunit of mitochondrial matrix pyruvate dehydrogenase (PDH) complex, E1 component subunit alpha coding gene Afua\_1g06960, was found to be rapidly evolved. The PDH complex catalyzes the overall conversion of pyruvate into acetyl-CoA and CO<sub>2</sub>, and thereby provides the primary link between the glycolytic pathway to the tricarboxylic acid (TCA) cycle. The product of PSG acetate kinase Afua\_3g10750 *ack* gene converts acetyl phosphate to acetate along with the phosphorylation of ADP and is one of the most prominent ATP-generating reactions in anaerobic respiration. Therefore, *ack* is involved in glucose fermentation to acetate. The growth of a bacterial mutant lacking *ack* has been shown to be inhibited by glucose, suggesting that *ack* is involved in excretion of excess carbohydrate [53]. Positive selection of *A. fumigatus* *Ack* may therefore be the pathogens strategy to escape with the host interference during anaerobic respiration.

The amino acid asparagine is required for the synthesis of many important cellular proteins in normal cells. Differential expression of asparagine synthetase Afua\_4g06900 *asn2* has been observed during early developmental stages of *A. fumigatus* conidia [40]. *asn2* and an another asparaginase family protein Afua\_5g11570 showed the signature of positive selection. The positive selection was seen for the gene Afua\_5g11450 which encodes for the regulatory protein of arginine metabolism. Arginine can be used as a nitrogen compound to repress the secretion of the alkaline protease that *A. fumigatus* uses to degrade and destroy the host complement system ability to make fungal hyphae susceptible to phagocytosis [54]. The

biosynthesis of arginine is important for pathogenicity, hyphal growth, and siderophore biosynthesis, which is coordinated by the supply of ornithine that is produced either by mitochondrial glutamate or in the cytosol by hydrolysis of arginine [55].

### **Cellular processes and signaling**

A high number of PSGs annotated are involved in cellular processes and signaling (Additional file 2: Table S8). Majorly involved functional subcategories were signal transduction mechanisms; intracellular trafficking, secretion, and vesicular transport, posttranslational modification, protein turnover, chaperones, and others (Fig. 6). During the conidial growth, like other filamentous fungi, a germ tube apical extension of *A. fumigatus*, a mode of growth that involves the establishment of a stable axis of polarity, followed by the maintenance of growth in the same direction, is regulated by several polarity maintenance genes [56]. The ability to sustain polarization requires a constant stream of new cell wall and plasma membrane material to the hyphal apex [57]. The Centrin-binding protein coding gene Afua\_1g13700 *sfi1*, essential for the initiation of spindle pole body duplication [58] and critical in the cell division cycle, was found to be positively selected. PSG Afua\_3g14340 *mad2* which codes for the evolutionarily conserved central component of the mitotic checkpoint complex, is essential for the spindle assembly checkpoint mechanism [59]. PSG Afua\_2g06110 *arp4* codes for a cytoskeletal protein involved in histone acetylation, histone exchange, and regulation of nucleosome density. In *C. albicans*, a mutant phenotype of *arp4* resulted in a decrease of cell size [60]. Several genes related to vesicles were positively selected (KOG class - 'U', Additional file 2: Table S8). Membrane-enclosed vesicles of the secretory system transport here components. The latter are required for membrane and cell wall biogenesis to the growing tip cell [61]. Besides involvement in growth, vesicles participate in importing nutrients from the host and exporting virulence factors to extracellular space. Differentially expressed PSGs during the conidia growth include the clathrin heavy chain, mitochondrial import receptor subunit Afua\_1g11860 *tom22*, and Rab small monomeric GTPase Afua\_5g12130 *rab7*. The clathrin heavy chain is involved in the formation of coated vesicles and clathrin-dependent endocytosis. *tom22* mediates protein import into the mitochondrial matrix and mitochondrial outer membrane [62]. *rab7* plays a central role in the transport steps connecting late endosomes to upstream and downstream endocytic compartments and possibly to the phagocytic route [63]. The components of the cytoplasmic dynein complex, dynein family protein coding gene Afua\_5g08510 *nudN*, showed the signature of positive selection. The cytoplasmic dynein complex play roles in mitotic regulation and intracellular transport of vesicles and organelles

[64]. Selection pressure was also observed on several genes involved in signal transduction mechanisms (KOG class - 'T', Additional file 2: Table S8). For instance, Afua\_4g04710 *pyp1*, which has an ortholog in *Schizosaccharomyces pombe*, is involved in MAP kinase tyrosine phosphatase activity, negative regulation of G2/M transition of mitotic cell cycle, stress response, and osmo-sensory signaling pathway [65] and was found to be evolved under positive selection. Since *pyp1* is annotated as negative regulator of stress-activated MAPK cascade, it probably can control the functional consequence of MAPK activity in *A. fumigatus*, such as cell wall integrity, fungal morphology, and oxidative stress [66]. Protein phosphatase 2C (Afua\_1g15800) mutants of *A. fumigatus* grow better than wild type in iron excess conditions [67]. Besides serine/threonine phosphatase activity, protein phosphatase 2C orthologs in fungi are involved in diverse functions (reviewed in [68]), including the virulence [69] in human fungal pathogen *Candida albicans*. Another important gene that evolved under adaptive evolution includes Afua\_4g08050 *sac1*, which is required for virulence of *C. albicans* and its mutants. This gene also has induces attenuated filamentous growth and biofilm formation, hypersensitivity to cell wall stresses, and changed content and distribution of chitin [70]. Furthermore, several genes coding for proteins involved in posttranslational modification, protein turnover, and chaperone activity were positively selected (KOG class - 'O', Additional file 1: Table S8). This subcategory also includes Afua\_3g12290 *dim1*, which is an essential gene for the viability of *A. fumigatus* [71]. The ortholog of *dim1* is involved in mRNA splicing, regulation of DNA methylation, mitotic spindle formation, and chromosome segregation [72].

### **Information storage and processing**

In this category 33 PSGs were identified and among them most participate in transcription and related processes (Additional file 1: Table S8). PSG Afua\_3g10240 *not1* codes a scaffold protein which is a critical component of Ccr4-Not complex regulating gene expression, mRNA turnover, translational repression, and transcription [73]. Not protein subunits have been found to repress transcription of promoters without a canonical TATA sequence and among the different components of Ccr4-Not complex, only *not1* is known to be essential for yeast viability [73] and growth [74]. The complex in general is regulatory and it regulates cellular processes upon sensing the nutrient levels and other signals and it is thought to be required to keep cells in the appropriate state and to respond to extracellular signals [75]. The ortholog of Afua\_2g05020 *dopA* codes a regulatory protein which has been discovered to play a role in several processes, including transport from Golgi to endosome, hyphal growth, cell morphogenesis, spatiotemporal organization of multicellular structures, conidium formation

and endoplasmic reticulum organization and viability [76]. PSG Afua\_5g04200 *rpc82* codes for the RNA polymerase C subunit protein, which has been identified to be essential for yeast cell viability [77]. Additionally, this protein was also annotated with the GO term ‘pathogenesis’ (GO:0009405). The ortholog of C6 transcription factor (Afua\_6g11110) regulates cell wall architecture, hyphal morphogenesis, virulence, and drug sensitivity in *C. albicans* [78]. In yeast, this protein participates in the regulation of glucose metabolism and fermentation [79]. Afua\_5g12190 *taf30* codes a hub protein in the *A. fumigatus* interactome [80], which interacts with many complexes, such as general transcription factors that make up the RNA polymerase II preinitiation complex, chromatin remodeling complexes, and the histone modification enzymes. The highly conserved domain “Yeats” containing the *taf30* ortholog of yeast was found to affect the cell growth in a negative way, in which cells grow better than wild-type in stress conditions when this domain is absent [81]. Some genes involved in the initiation of transcription for instance, Afua\_8g04950 *tsm1* and Afua\_8g04350, were also found to be evolved under positive selection. Moreover, positive selected genes are involved in DNA replication, recombination, and repair. For instance, gene Afua\_2g10140 *mcm7* that codes a part of MCM complex, which plays a role in initiation and regulation of DNA replication, was found to be positively selected. Higher amounts of evolutionarily conserved MCM proteins has been observed in proliferating cells [82]. Afua\_5g03320 *ssl2* provides DNA helicase functions and participates in transcription and DNA repair. Furthermore, the ortholog of *ssl2* leads to growth defects when mutated in yeast [83] and is also essential for cell viability [84]. Under the subcategory RNA processing and modification, Afua\_1g14310 *pan3*, the required subunit of the PAN enzyme the function of which is to shorten mRNA poly(A) tails [85] and regulate the activity of post replication repair complexes [86], was identified.

## References

1. Arenas M: **The importance and application of the ancestral recombination graph.** *Front Genet* 2013, **4**:206.
2. Awadalla P: **The evolutionary genomics of pathogen recombination.** *Nat Rev Genet* 2003, **4**:50-60.
3. Hudson RR: **Properties of a neutral allele model with intragenic recombination.** *Theor Popul Biol* 1983, **23**:183-201.
4. Shriner D, Nickle DC, Jensen MA, Mullins JI: **Potential impact of recombination on sitewise approaches for detecting positive natural selection.** *Genet Res* 2003, **81**:115-121.

5. Kosakovsky Pond SL, Posada D, Gravenor MB, Woelk CH, Frost SD: **Automated phylogenetic detection of recombination using a genetic algorithm.** *Mol Biol Evol* 2006, **23**:1891-1901.
6. Nielsen R, Yang Z: **Likelihood models for detecting positively selected amino acid sites and applications to the HIV-1 envelope gene.** *Genetics* 1998, **148**:929-936.
7. Anisimova M, Nielsen R, Yang Z: **Effect of recombination on the accuracy of the likelihood method for detecting positive selection at amino acid sites.** *Genetics* 2003, **164**:1229-1236.
8. Kosakovsky Pond SL, Posada D, Gravenor MB, Woelk CH, Frost SD: **GARD: a genetic algorithm for recombination detection.** *Bioinformatics* 2006, **22**:3096-3098.
9. Archer J, Pinney JW, Fan J, Simon-Loriere E, Arts EJ, Negroni M, Robertson DL: **Identifying the important HIV-1 recombination breakpoints.** *PLoS Comput Biol* 2008, **4**:e1000178.
10. Parsons PA: **Evolutionary Rates - Effects of Stress Upon Recombination.** *Biological Journal of the Linnean Society* 1988, **35**:49-68.
11. Bellini A, Girard PM, Lambert S, Tessier L, Sage E, Francesconi S: **Stress activated protein kinase pathway modulates homologous recombination in fission yeast.** *PLoS One* 2012, **7**:e47987.
12. Zhong WH, Priest NK: **Stress-induced recombination and the mechanism of evolvability.** *Behavioral Ecology and Sociobiology* 2011, **65**:493-502.
13. Semighini CP, von Zeska Kress Fagundes MR, Ferreira JC, Pascon RC, de Souza Goldman MH, Goldman GH: **Different roles of the Mre11 complex in the DNA damage response in *Aspergillus nidulans*.** *Mol Microbiol* 2003, **48**:1693-1709.
14. Malavazi I, Lima JF, von Zeska Kress Fagundes MR, Efimov VP, de Souza Goldman MH, Goldman GH: **The *Aspergillus nidulans* sldI(RAD50) gene interacts with bimE(APC1), a homologue of an anaphase-promoting complex subunit.** *Mol Microbiol* 2005, **57**:222-237.
15. Krappmann S, Sasse C, Braus GH: **Gene targeting in *Aspergillus fumigatus* by homologous recombination is facilitated in a nonhomologous end-joining-deficient genetic background.** *Eukaryot Cell* 2006, **5**:212-215.
16. Karanyi Z, Holb I, Hornok L, Pocsí I, Miskei M: **FSRD: fungal stress response database.** *Database (Oxford)* 2013, **2013**:bat037.
17. Chitty JL, Fraser JA: **Purine Acquisition and Synthesis by Human Fungal Pathogens.** *Microorganisms* 2017, **5**.
18. Kowalski D, Pendyala L, Daignan-Fornier B, Howell SB, Huang RY: **Dysregulation of purine nucleotide biosynthesis pathways modulates cisplatin cytotoxicity in *Saccharomyces cerevisiae*.** *Mol Pharmacol* 2008, **74**:1092-1100.
19. Cameron A, Huynh S, Scott NE, Firdich E, Apel D, Foster LJ, Parker CT, Gaynor EC: **High-Frequency Variation of Purine Biosynthesis Genes Is a Mechanism of Success in *Campylobacter jejuni*.** *MBio* 2015, **6**:e00612-00615.
20. Lisby M, Rothstein R: **Cell biology of mitotic recombination.** *Cold Spring Harb Perspect Biol* 2015, **7**:a016535.
21. Xu X, Xiong X, Sun Y: **The role of ribosomal proteins in the regulation of cell proliferation, tumorigenesis, and genomic integrity.** *Sci China Life Sci* 2016, **59**:656-672.
22. Nakamura S, Sato H, Tanaka R, Yaguchi T: **Verification of Ribosomal Proteins of *Aspergillus fumigatus* for Use as Biomarkers in MALDI-TOF MS Identification.** *Mass Spectrom (Tokyo)* 2016, **5**:A0049.
23. Kim TH, Leslie P, Zhang Y: **Ribosomal proteins as unrevealed caretakers for cellular stress and genomic instability.** *Oncotarget* 2014, **5**:860-871.
24. Bhabhra R, Askew DS: **Thermotolerance and virulence of *Aspergillus fumigatus*: role of the fungal nucleolus.** *Med Mycol* 2005, **43** Suppl 1:S87-93.
25. Winther MD, Stevens L: **RNA synthesis during the germination of conidia of *Aspergillus nidulans*.** *Microbios* 1981, **30**:153-162.
26. Mirkes PE: **Polysomes, ribonucleic acid, and protein synthesis during germination of *Neurospora crassa* conidia.** *J Bacteriol* 1974, **117**:196-202.

27. Brogden KA, Phillips M, Thurston JR, Richard JL: **Electron microscopic examination of ribosome preparations from germinated spores of *Aspergillus fumigatus*.** *Mycopathologia* 1984, **86**:59-64.
28. Li X, Gao M, Han X, Tao S, Zheng D, Cheng Y, Yu R, Han G, Schmidt M, Han L: **Disruption of the phospholipase D gene attenuates the virulence of *Aspergillus fumigatus*.** *Infect Immun* 2012, **80**:429-440.
29. Sung TC, Roper RL, Zhang Y, Rudge SA, Temel R, Hammond SM, Morris AJ, Moss B, Engebrecht J, Frohman MA: **Mutagenesis of phospholipase D defines a superfamily including a trans-Golgi viral protein required for poxvirus pathogenicity.** *EMBO J* 1997, **16**:4519-4530.
30. Rose K, Rudge SA, Frohman MA, Morris AJ, Engebrecht J: **Phospholipase D signaling is essential for meiosis.** *Proc Natl Acad Sci U S A* 1995, **92**:12151-12155.
31. Cray JA, Bell AN, Bhaganna P, Mswaka AY, Timson DJ, Hallsworth JE: **The biology of habitat dominance; can microbes behave as weeds?** *Microb Biotechnol* 2013, **6**:453-492.
32. Flipphi M, Sun J, Robellet X, Karaffa L, Fekete E, Zeng AP, Kubicek CP: **Biodiversity and evolution of primary carbon metabolism in *Aspergillus nidulans* and other *Aspergillus* spp.** *Fungal Genet Biol* 2009, **46** Suppl 1:S19-S44.
33. Ebel F, Schwienbacher M, Beyer J, Heesemann J, Brakhage AA, Brock M: **Analysis of the regulation, expression, and localisation of the isocitrate lyase from *Aspergillus fumigatus*, a potential target for antifungal drug development.** *Fungal Genet Biol* 2006, **43**:476-489.
34. Bishai W: **Lipid lunch for persistent pathogen.** *Nature* 2000, **406**:683-685.
35. Olivas I, Royuela M, Romero B, Monteiro MC, Minguez JM, Laborda F, De Lucas JR: **Ability to grow on lipids accounts for the fully virulent phenotype in neutropenic mice of *Aspergillus fumigatus* null mutants in the key glyoxylate cycle enzymes.** *Fungal Genet Biol* 2008, **45**:45-60.
36. Moore TS, Du Z, Chen Z: **Membrane lipid biosynthesis in *Chlamydomonas reinhardtii*. In vitro biosynthesis of diacylglyceryltrimethylhomoserine.** *Plant Physiol* 2001, **125**:423-429.
37. Hunt MC, Siponen MI, Alexson SE: **The emerging role of acyl-CoA thioesterases and acyltransferases in regulating peroxisomal lipid metabolism.** *Biochim Biophys Acta* 2012, **1822**:1397-1410.
38. Madigan CA, Martinot AJ, Wei JR, Madduri A, Cheng TY, Young DC, Layre E, Murry JP, Rubin EJ, Moody DB: **Lipidomic analysis links mycobactin synthase K to iron uptake and virulence in *M. tuberculosis*.** *PLoS Pathog* 2015, **11**:e1004792.
39. De Voss JJ, Rutter K, Schroeder BG, Su H, Zhu Y, Barry CE, 3rd: **The salicylate-derived mycobactin siderophores of *Mycobacterium tuberculosis* are essential for growth in macrophages.** *Proc Natl Acad Sci U S A* 2000, **97**:1252-1257.
40. Cagas SE, Jain MR, Li H, Perlin DS: **The proteomic signature of *Aspergillus fumigatus* during early development.** *Mol Cell Proteomics* 2011, **10**:M111 010108.
41. Kroll K, Pahtz V, Hillmann F, Vaknin Y, Schmidt-Heck W, Roth M, Jacobsen ID, Osherov N, Brakhage AA, Kniemeyer O: **Identification of hypoxia-inducible target genes of *Aspergillus fumigatus* by transcriptome analysis reveals cellular respiration as an important contributor to hypoxic survival.** *Eukaryot Cell* 2014, **13**:1241-1253.
42. McDonagh A, Fedorova ND, Crabtree J, Yu Y, Kim S, Chen D, Loss O, Cairns T, Goldman G, Armstrong-James D, et al: **Sub-telomere directed gene expression during initiation of invasive aspergillosis.** *PLoS Pathog* 2008, **4**:e1000154.
43. Tielens AG, van Grinsven KW, Henze K, van Hellemond JJ, Martin W: **Acetate formation in the energy metabolism of parasitic helminths and protists.** *Int J Parasitol* 2010, **40**:387-397.
44. Willger SD, Grahl N, Cramer RA, Jr.: ***Aspergillus fumigatus* metabolism: clues to mechanisms of in vivo fungal growth and virulence.** *Med Mycol* 2009, **47** Suppl 1:S72-79.

45. Poyton RO, Castello PR, Ball KA, Woo DK, Pan N: **Mitochondria and hypoxic signaling: a new view.** *Ann N Y Acad Sci* 2009, **1177**:48-56.
46. Kwast KE, Burke PV, Staahl BT, Poyton RO: **Oxygen sensing in yeast: evidence for the involvement of the respiratory chain in regulating the transcription of a subset of hypoxic genes.** *Proc Natl Acad Sci U S A* 1999, **96**:5446-5451.
47. Grahl N, Dinamarco TM, Willger SD, Goldman GH, Cramer RA: **Aspergillus fumigatus mitochondrial electron transport chain mediates oxidative stress homeostasis, hypoxia responses and fungal pathogenesis.** *Mol Microbiol* 2012, **84**:383-399.
48. Watmough NJ, Frerman FE: **The electron transfer flavoprotein: ubiquinone oxidoreductases.** *Biochim Biophys Acta* 2010, **1797**:1910-1916.
49. Lu H, Cao X: **GRIM-19 is essential for maintenance of mitochondrial membrane potential.** *Mol Biol Cell* 2008, **19**:1893-1902.
50. Huang G, Lu H, Hao A, Ng DC, Ponniah S, Guo K, Lufei C, Zeng Q, Cao X: **GRIM-19, a cell death regulatory protein, is essential for assembly and function of mitochondrial complex I.** *Mol Cell Biol* 2004, **24**:8447-8456.
51. Nallar SC, Kalvakolanu DV: **GRIM-19: A master regulator of cytokine induced tumor suppression, metastasis and energy metabolism.** *Cytokine Growth Factor Rev* 2017, **33**:1-18.
52. Maximo V, Botelho T, Capela J, Soares P, Lima J, Taveira A, Amaro T, Barbosa AP, Preto A, Harach HR, et al: **Somatic and germline mutation in GRIM-19, a dual function gene involved in mitochondrial metabolism and cell death, is linked to mitochondrion-rich (Hurthle cell) tumours of the thyroid.** *Br J Cancer* 2005, **92**:1892-1898.
53. Grundy FJ, Waters DA, Allen SH, Henkin TM: **Regulation of the Bacillus subtilis acetate kinase gene by CcpA.** *J Bacteriol* 1993, **175**:7348-7355.
54. Rambach G, Dum D, Mohsenipour I, Hagleitner M, Wurzner R, Lass-Flörl C, Speth C: **Secretion of a fungal protease represents a complement evasion mechanism in cerebral aspergillosis.** *Mol Immunol* 2010, **47**:1438-1449.
55. Schafferer L, Beckmann N, Binder U, Brosch G, Haas H: **AmcA-a putative mitochondrial ornithine transporter supporting fungal siderophore biosynthesis.** *Front Microbiol* 2015, **6**:252.
56. Momany M: **Polarity in filamentous fungi: establishment, maintenance and new axes.** *Curr Opin Microbiol* 2002, **5**:580-585.
57. Steinberg G: **Hyphal growth: a tale of motors, lipids, and the Spitzenkörper.** *Eukaryot Cell* 2007, **6**:351-360.
58. Lee IJ, Wang N, Hu W, Schott K, Bahler J, Giddings TH, Jr., Pringle JR, Du LL, Wu JQ: **Regulation of spindle pole body assembly and cytokinesis by the centrin-binding protein Sfi1 in fission yeast.** *Mol Biol Cell* 2014, **25**:2735-2749.
59. Nezi L, Rancati G, De Antoni A, Pasqualato S, Piatti S, Musacchio A: **Accumulation of Mad2-Cdc20 complex during spindle checkpoint activation requires binding of open and closed conformers of Mad2 in Saccharomyces cerevisiae.** *J Cell Biol* 2006, **174**:39-51.
60. Lu Y, Su C, Mao X, Raniga PP, Liu H, Chen J: **Efg1-mediated recruitment of NuA4 to promoters is required for hypha-specific Swi/Snf binding and activation in Candida albicans.** *Mol Biol Cell* 2008, **19**:4260-4272.
61. Riquelme M, Yarden O, Bartnicki-Garcia S, Bowman B, Castro-Longoria E, Free SJ, Fleissner A, Freitag M, Lew RR, Mourino-Perez R, et al: **Architecture and development of the Neurospora crassa hypha -- a model cell for polarized growth.** *Fungal Biol* 2011, **115**:446-474.
62. Wiedemann N, Frazier AE, Pfanner N: **The protein import machinery of mitochondria.** *J Biol Chem* 2004, **279**:14473-14476.
63. Novick P, Zerial M: **The diversity of Rab proteins in vesicle transport.** *Curr Opin Cell Biol* 1997, **9**:496-504.
64. Zhang J, Li S, Musa S, Zhou H, Xiang X: **Dynein light intermediate chain in Aspergillus nidulans is essential for the interaction between heavy and intermediate chains.** *J Biol Chem* 2009, **284**:34760-34768.



65. Santo PD, Blanchard B, Hoffman CS: **The *Schizosaccharomyces pombe* pyp1 protein tyrosine phosphatase negatively regulates nutrient monitoring pathways.** *J Cell Sci* 1996, **109** ( Pt 7):1919-1925.
66. Valiante V, Heinekamp T, Jain R, Hartl A, Brakhage AA: **The mitogen-activated protein kinase MpkA of *Aspergillus fumigatus* regulates cell wall signaling and oxidative stress response.** *Fungal Genet Biol* 2008, **45**:618-627.
67. Winkelstroter LK, Dolan SK, Fernanda Dos Reis T, Bom VL, Alves de Castro P, Hagiwara D, Alowni R, Jones GW, Doyle S, Brown NA, Goldman GH: **Systematic Global Analysis of Genes Encoding Protein Phosphatases in *Aspergillus fumigatus*.** *G3 (Bethesda)* 2015, **5**:1525-1539.
68. Arino J, Casamayor A, Gonzalez A: **Type 2C protein phosphatases in fungi.** *Eukaryot Cell* 2011, **10**:21-33.
69. Feng J, Zhao J, Li J, Zhang L, Jiang L: **Functional characterization of the PP2C phosphatase CaPtc2p in the human fungal pathogen *Candida albicans*.** *Yeast* 2010, **27**:753-764.
70. Zhang B, Yu Q, Jia C, Wang Y, Xiao C, Dong Y, Xu N, Wang L, Li M: **The actin-related protein Sac1 is required for morphogenesis and cell wall integrity in *Candida albicans*.** *Fungal Genet Biol* 2015, **81**:261-270.
71. Carr PD, Tuckwell D, Hey PM, Simon L, d'Enfert C, Birch M, Oliver JD, Bromley MJ: **The transposon *impala* is activated by low temperatures: use of a controlled transposition system to identify genes critical for viability of *Aspergillus fumigatus*.** *Eukaryot Cell* 2010, **9**:438-448.
72. Berry LD, Gould KL: **Fission yeast *dim1(+)* encodes a functionally conserved polypeptide essential for mitosis.** *J Cell Biol* 1997, **137**:1337-1354.
73. Bhaskar V, Basquin J, Conti E: **Architecture of the ubiquitylation module of the yeast Ccr4-Not complex.** *Structure* 2015, **23**:921-928.
74. Maillet L, Tu C, Hong YK, Shuster EO, Collart MA: **The essential function of Not1 lies within the Ccr4-Not complex.** *J Mol Biol* 2000, **303**:131-143.
75. Collart MA: **Global control of gene expression in yeast by the Ccr4-Not complex.** *Gene* 2003, **313**:1-16.
76. Pascon RC, Miller BL: **Morphogenesis in *Aspergillus nidulans* requires Dopey (DopA), a member of a novel family of leucine zipper-like proteins conserved from yeast to humans.** *Mol Microbiol* 2000, **36**:1250-1264.
77. Chiannilkulchai N, Stalder R, Riva M, Carles C, Werner M, Sentenac A: **RPC82 encodes the highly conserved, third-largest subunit of RNA polymerase C (III) from *Saccharomyces cerevisiae*.** *Mol Cell Biol* 1992, **12**:4433-4440.
78. Moreno I, Martinez-Esparza M, Laforet LC, Sentandreu R, Ernst JF, Valentin E: **Dosage-dependent roles of the Cwt1 transcription factor for cell wall architecture, morphogenesis, drug sensitivity and virulence in *Candida albicans*.** *Yeast* 2010, **27**:77-87.
79. Gasmi N, Jacques PE, Klimova N, Guo X, Ricciardi A, Robert F, Turcotte B: **The switch from fermentation to respiration in *Saccharomyces cerevisiae* is regulated by the Ert1 transcriptional activator/repressor.** *Genetics* 2014, **198**:547-560.
80. Kaltdorf M, Srivastava M, Gupta SK, Liang C, Binder J, Dietl AM, Meir Z, Haas H, Oshero N, Krappmann S, Dandekar T: **Systematic Identification of Anti-Fungal Drug Targets by a Metabolic Network Approach.** *Front Mol Biosci* 2016, **3**:22.
81. Schulze JM, Kane CM, Ruiz-Manzano A: **The YEATS domain of Taf14 in *Saccharomyces cerevisiae* has a negative impact on cell growth.** *Mol Genet Genomics* 2010, **283**:365-380.
82. Tye BK: **MCM proteins in DNA replication.** *Annu Rev Biochem* 1999, **68**:649-686.
83. Flom G, Weekes J, Johnson JL: **Novel interaction of the Hsp90 chaperone machine with Ssl2, an essential DNA helicase in *Saccharomyces cerevisiae*.** *Curr Genet* 2005, **47**:368-380.
84. Qiu H, Park E, Prakash L, Prakash S: **The *Saccharomyces cerevisiae* DNA repair gene RAD25 is required for transcription by RNA polymerase II.** *Genes Dev* 1993, **7**:2161-2171.

85. Brown CE, Tarun SZ, Jr., Boeck R, Sachs AB: **PAN3 encodes a subunit of the Pab1p-dependent poly(A) nuclease in *Saccharomyces cerevisiae*.** *Mol Cell Biol* 1996, **16**:5744-5753.
86. Hammet A, Pike BL, Heierhorst J: **Posttranscriptional regulation of the RAD5 DNA repair gene by the Dun1 kinase and the Pan2-Pan3 poly(A)-nuclease complex contributes to survival of replication blocks.** *J Biol Chem* 2002, **277**:22469-22474.

## Supplementary figures

**Figure S1: Proteins-protein interactions (PPIs) map.** PPIs between *A. fumigatus* proteins coded by positively selected genes (PSGs) and human proteins. Orange - *A. fumigatus* proteins and blue - human proteins.

**Figure S2: Gene Ontology (GO) overrepresentation analysis.** Biological process (GO) significantly overrepresented in human proteins targeted by *A. fumigatus* virulence related proteins coded by multi-copy category positively selected genes (PSGs).

**Figure S3: *A. fumigatus* and *A. fischeri* genome synteny map.** Image was generated using the Mauve genome alignment tool. Upper and lower lines of the genomes correspond to *A. fumigatus* and *A. fischeri* respectively. Red vertical bars indicate concatenated chromosomal boundaries. Color-coded syntenic blocks indicate conserved segments (LCBs; Locally Collinear Blocks) identified by Mauve (minimum LCB weight = 999). Plots of sequence similarity are shown within each syntenic block. Regions with no color indicate no detectable homology between the two genomes with the settings used in Mauve. Unmatched regions (white area) within an LCBs indicate the presence of strain-specific sequence. The connecting lines between blocks indicate the location of each block in two genomes. Homologous regions with possible rearrangements are shown in first row.

### Figure S1

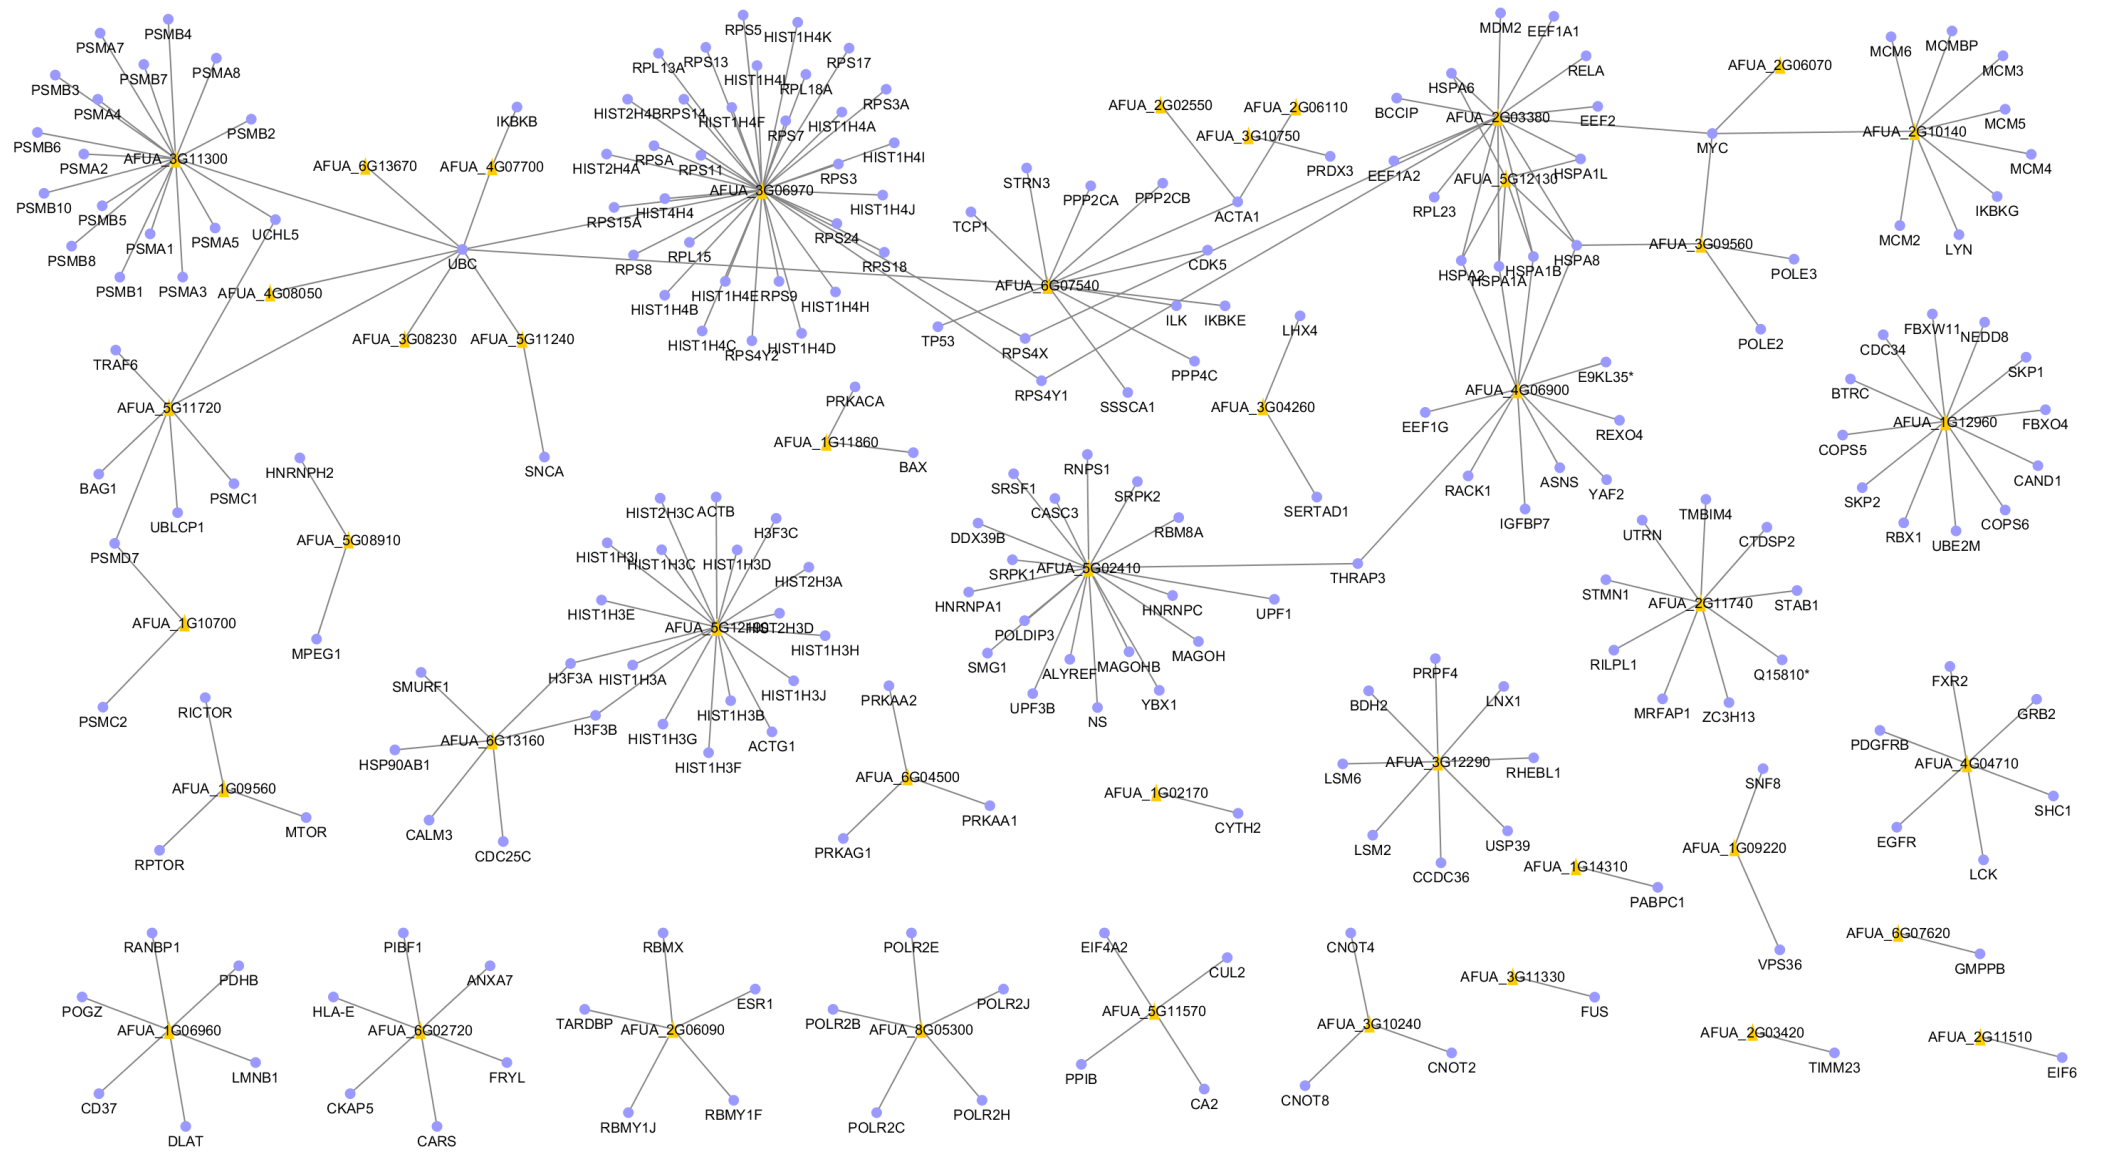

Figure S2

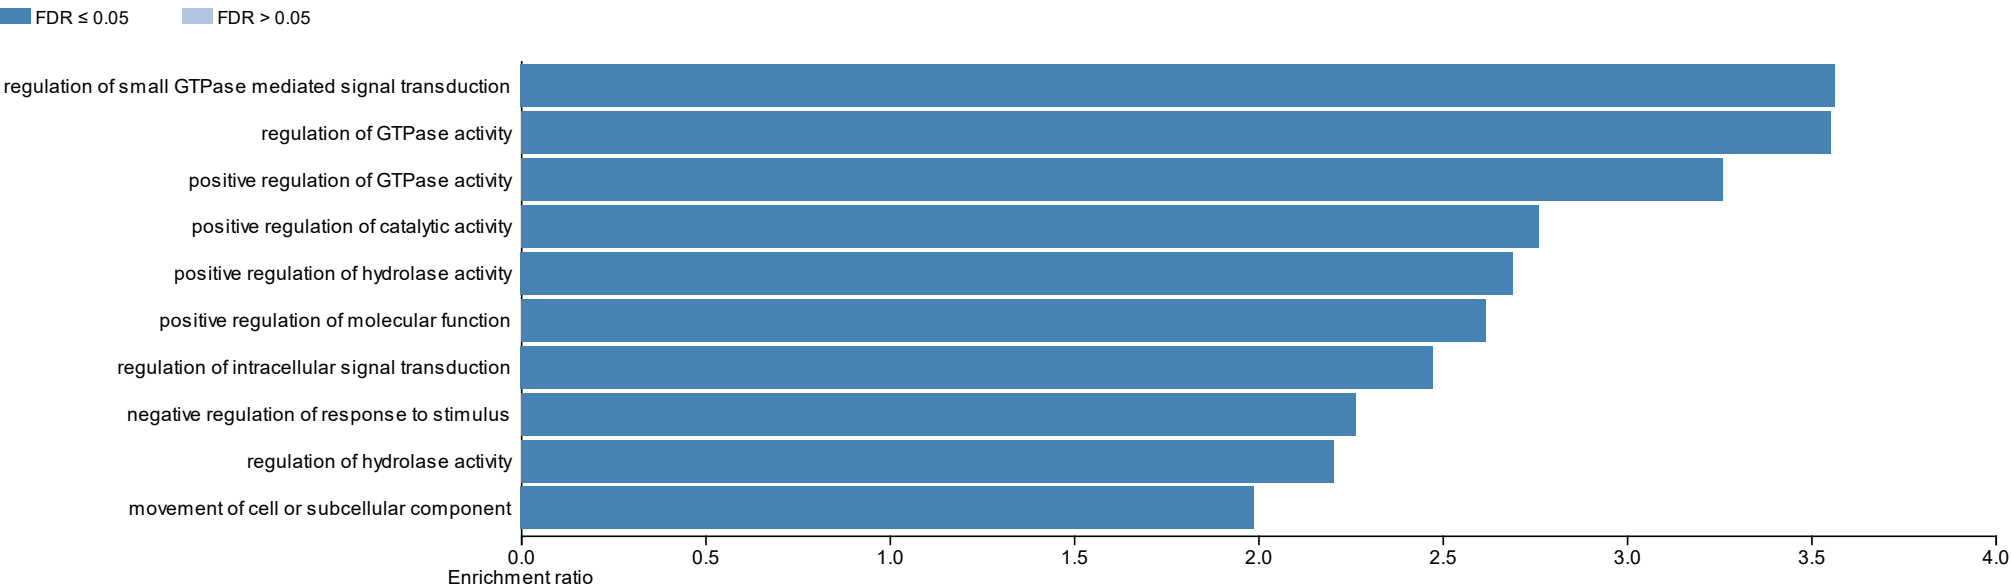

Figure S3

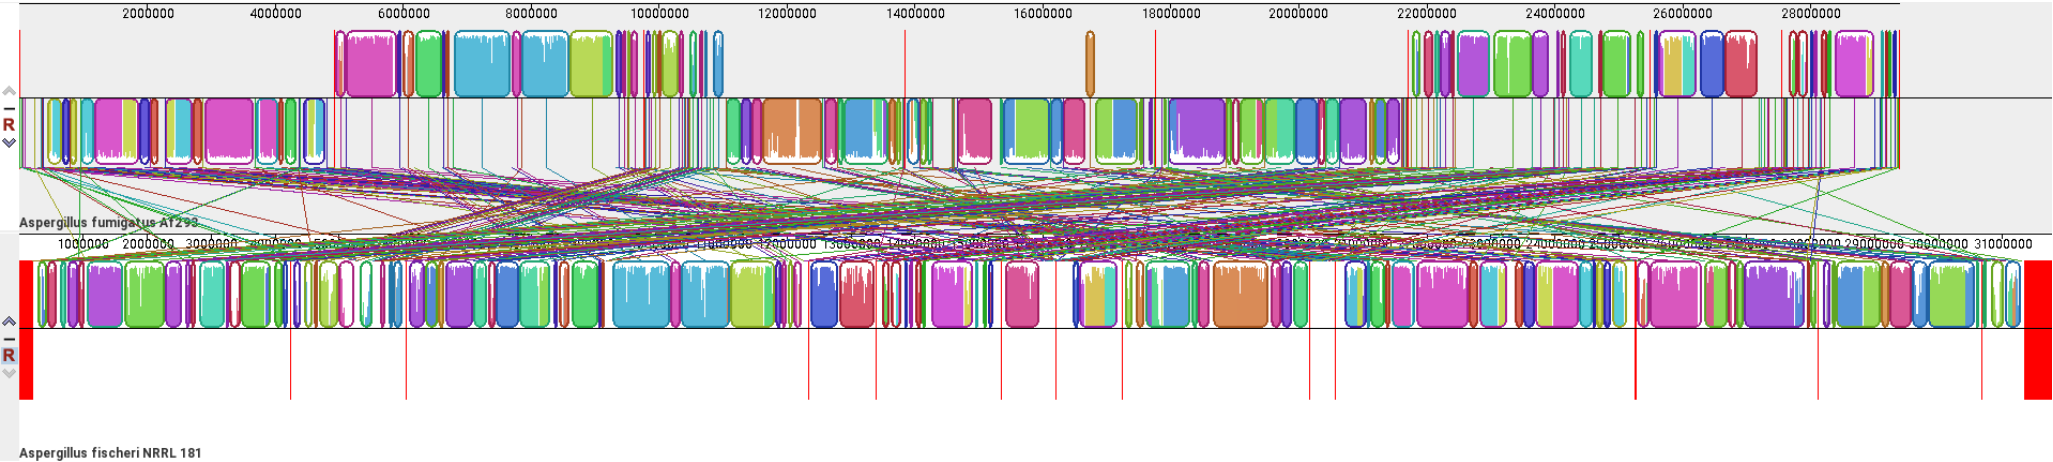

**Additional data file 1:** Clusters of orthologues identified by OrthoMCL (inflation index: 1.5). Abbreviations - abra : *Aspergillus brasiliensis*, acar : *A. carbonarius*, acla : *A. clavatus*, afis : *A. fischeri*, afla : *A. flavus*, afum : *A. fumigatus*, agla : *A. glaucus*, akaw : *A. kawachii*, alue : *A. luchuensis*, anid : *A. nidulans*, anig : *A. niger*, aora : *A. oryzae*, asyd : *A. sydowii*, ater : *A. terreus*, atub : *A. tubingenesis*, aver : *A. versicolor*, awen : *A. wentii*, azon : *A. zonatus*.

Group1: abra|OJJ66207.1 abra|OJJ67944.1 abra|OJJ69734.1 abra|OJJ73921.1 abra|OJJ75305.1 abra|OJJ75840.1 abra|OJJ73699.1 abra|OJJ69537.1 abra|OJJ78094.1 acar|OOF90653.1 acar|OOF94187.1 acar|OOG00776.1 acar|OOG01052.1 acar|OOF92566.1 acar|OOF93189.1 acar|OOF97512.1 acar|OOF98777.1 acla|EAW07798.1 acla|EAW08899.1 acla|EAW11681.1 akaw|GAA89528.1 akaw|GAA90187.1 akaw|GAA91252.1 aluc|OJZ80511.1 aluc|OJZ82816.1 aluc|OJZ88125.1 aluc|OJZ89282.1 aluc|OJZ83162.1 anid|CBF73441.1 anid|CBF90374.1 anid|CBF87872.1 anig|EHA17891.1 anig|EHA21256.1 anig|EHA21434.1 anig|EHA25711.1 anig|EHA28226.1 anig|EHA18088.1 anig|EHA19858.1 anig|EHA25622.1 anig|EHA25682.1 anig|EHA23283.1 aory|EIT74664.1 aory|EIT83097.1 aory|EIT80579.1 aory|EIT81467.1 aory|EIT83286.1 asyd|OJJ56148.1 asyd|OJJ63431.1 atub|OJI87775.1 atub|OJI89047.1 atub|OJI90732.1 atub|OJI88419.1 aver|OJI97506.1 aver|OJI99587.1 aver|OJJ03355.1 aver|OJJ05088.1 aver|OJJ08114.1 aver|OJJ03487.1 awen|OJJ29812.1 awen|OJJ35864.1 awen|OJJ38889.1 azon|OJJ42489.1 azon|OJJ4494.1 azon|OJJ46205.1 azon|OJJ47369.1 azon|OJJ45854.1 afis|EAW22835.1 afla|EED50110.1 afla|EED51745.1 afum|EAL90367.2 agla|OJJ78560.1 akaw|GAA89080.1 aory|EIT81736.1 ater|EAU35730.1 abra|OJJ67593.1 akaw|GAA89112.1 atub|OJI88453.1 acar|OOF91540.1 abra|OJJ70223.1 afla|EED52040.1 afum|EAL91343.1 akaw|GAA85904.1 aluc|OJZ91163.1 anid|CBF80212.1 atub|OJI83179.1 acar|OOF96620.1 akaw|GAA84550.1 atub|OJI85517.1 afla|EED52433.1 acla|EAW10758.1 afis|EAW16932.1 afla|EED48405.1 afla|EED51820.1 afla|EED51822.1 afla|EED52154.1 aory|EIT74440.1 anid|CBF73982.1 ater|EAU33387.1

Group2: abra|OJJ67588.1 abra|OJJ73922.1 abra|OJJ75304.1 acar|OOF99263.1 acar|OOG01053.1 acar|OOF99291.1 acar|OOF99559.1 acla|EAW07086.1 acla|EAW08665.1 acla|EAW08900.1 acla|EAW11679.1 acla|EAW15286.1 acla|EAW07799.1 afis|EAW16180.1 afis|EAW16446.1 afis|EAW20684.1 afla|EED44993.1 afla|EED47804.1 afla|EED49850.1 afla|EED50111.1 afla|EED52159.1 afum|EAL89049.1 afum|EAL91342.1 akaw|GAA82422.1 akaw|GAA89107.1 akaw|GAA89529.1 anid|CBF73453.1 anid|CBF87069.1 anid|CBF76036.1 anid|CBF87869.1 anid|CBF90372.1 anig|EHA17890.1 anig|EHA25707.1 anig|EHA20896.1 anig|EHA21433.1 anig|EHA24938.1 aory|EIT73739.1 aory|EIT74412.1 aory|EIT74615.1 aory|EIT80956.1 asyd|OJJ56147.1 asyd|OJJ63429.1 ater|EAU29302.1 ater|EAU30156.1 ater|EAU37759.1 ater|EAU30201.1 atub|OJI86150.1 atub|OJI88448.1 atub|OJI88518.1 atub|OJI90731.1 aver|OJI97508.1 aver|OJI99595.1 aver|OJJ03909.1 aver|OJJ05087.1 aver|OJI99581.1 aver|OJI99596.1 aver|OJJ07364.1 aver|OJJ08120.1 aver|OJJ08464.1 aver|OJI99625.1 aver|OJJ07311.1 aver|OJJ08781.1 awen|OJJ36076.1 awen|OJJ38362.1 awen|OJJ32929.1 awen|OJJ38888.1 azon|OJJ42030.1 azon|OJJ42483.1 azon|OJJ46579.1 azon|OJJ48580.1 afis|EAW22836.1 afum|EAL90366.1 agla|OJJ80563.1 aluc|OJZ85583.1 aluc|OJZ88124.1 asyd|OJJ61536.1 ater|EAU38874.1 awen|OJJ32292.1 abra|OJJ67652.1 afis|EAW16453.1 afis|EAW25605.1 agla|OJJ79232.1 akaw|GAA89168.1 aluc|OJZ81665.1 anig|EHA25778.1 ater|EAU33874.1 aver|OJJ07366.1 azon|OJJ50363.1 acla|EAW14636.1 ater|EAU36802.1 awen|OJJ34576.1 afum|EAL88812.1 aver|OJI99592.1 asyd|OJJ52456.1 aver|OJJ03957.1 awen|OJJ34650.1

Group3: abra|OJJ67584.1 abra|OJJ67975.1 abra|OJJ75778.1 abra|OJJ77754.1 acar|OOF92816.1 acar|OOF96723.1 acla|EAW08895.1 acla|EAW11760.1 acla|EAW12170.1 acla|EAW12336.1 acla|EAW14856.1 afla|EED47354.1 afla|EED52019.1 afla|EED47890.1 afla|EED48583.1 agla|OJJ79933.1 agla|OJJ80111.1 agla|OJJ83619.1 agla|OJJ86349.1 akaw|GAA84491.1 akaw|GAA85345.1 akaw|GAA87318.1 akaw|GAA91228.1 akaw|GAA92525.1 akaw|GAA90346.1 akaw|GAA85925.1 aluc|OJZ82842.1 aluc|OJZ85886.1 aluc|OJZ89214.1 aluc|OJZ90707.1 aluc|OJZ91539.1 aluc|OJZ91139.1 anid|CBF71467.1 anid|CBF83055.1 anid|CBF86052.1 anid|CBF87072.1 anid|CBF88289.1 anig|EHA19567.1 anig|EHA20193.1 anig|EHA21280.1 anig|EHA22576.1 anig|EHA24574.1 anig|EHA24700.1 anig|EHA28244.1 aory|EIT73118.1 aory|EIT76300.1 aory|EIT77964.1 aory|EIT81441.1 aory|EIT82867.1 ater|EAU29417.1 ater|EAU31921.1 ater|EAU32663.1 ater|EAU36720.1 atub|OJI79672.1 atub|OJI83150.1 atub|OJI85993.1 atub|OJI91114.1 atub|OJI82134.1 atub|OJI85578.1 atub|OJI89072.1 atub|OJI82802.1 aver|OJI96730.1 aver|OJJ05906.1 awen|OJJ29758.1 awen|OJJ34705.1 awen|OJJ40111.1 awen|OJJ29917.1 awen|OJJ30910.1 awen|OJJ38044.1 awen|OJJ39589.1 awen|OJJ29944.1 afis|EAW23793.1 afum|EAL87227.2 asyd|OJJ62861.1 aver|OJI96914.1 asyd|OJJ61528.1 abra|OJJ70374.1 acar|OOF91895.1 afis|EAW16886.1 afum|EAL86424.2 ater|EAU30225.1 azon|OJJ48577.1 acar|OOF93599.1 azon|OJJ49991.1 afla|EED46560.1 akaw|GAA87467.1 aluc|OJZ88529.1

Group4: abra|OJJ67662.1 abra|OJJ77815.1 abra|OJJ78181.1 abra|OJJ74373.1 abra|OJJ78098.1 abra|OJJ76619.1 acar|OOF91828.1 acar|OOF91847.1 acar|OOF92934.1 acar|OOF94993.1 acar|OOF97632.1 acar|OOF95055.1 acar|OOF95122.1 acla|EAW07064.1 afis|EAW19759.1 afis|EAW23638.1 akaw|GAA83602.1 akaw|GAA84851.1 akaw|GAA92094.1 akaw|GAA83831.1 akaw|GAA85928.1 akaw|GAA89177.1 akaw|GAA86655.1 akaw|GAA85575.1 akaw|GAA85859.1 aluc|OJZ81656.1 aluc|OJZ83631.1 aluc|OJZ90887.1 aluc|OJZ91221.1 aluc|OJZ81972.1 aluc|OJZ86820.1 aluc|OJZ89749.1 aluc|OJZ92392.1 aluc|OJZ83511.1 aluc|OJZ89332.1 aluc|OJZ91137.1 anid|CBF80211.1 anid|CBF82304.1 anig|EHA19289.1 anig|EHA24757.1 anig|EHA19606.1 anig|EHA25789.1 anig|EHA26583.1 aory|EIT74370.1 aory|EIT76972.1 ater|EAU35165.1 ater|EAU36856.1 atub|OJI79585.1 atub|OJI79696.1 atub|OJI83697.1 atub|OJI85053.1 atub|OJI86822.1 atub|OJI82881.1 atub|OJI88527.1 atub|OJI90000.1 atub|OJI83148.1 aver|OJJ04870.1 aver|OJJ06306.1

aver|OJJ07785.1 awen|OJJ29662.1 awen|OJJ29874.1 awen|OJJ33672.1 agla|OJJ83634.1 asyd|OJJ52727.1  
aver|OJJ02001.1 azon|OJJ47400.1 afla|EED51023.1 abra|OJJ74811.1 acar|OOF95802.1 afla|EED52130.1  
afum|EAL85129.1 atub|OJI85468.1 abra|OJJ77455.1 afla|EED49595.1 anig|EHA19288.1 asyd|OJJ56406.1  
ater|EAU32666.1 ater|EAU38928.1 ater|EAU39559.1 anid|CBF79115.1 afis|EAW19771.1 akaw|GAA84588.1  
akaw|GAA84589.1 aluc|OJZ89334.1 atub|OJI82404.1

Group5: abra|OJJ67238.1 abra|OJJ68732.1 acar|OOF92227.1 acar|OOF98313.1 acla|EAW12167.1  
acla|EAW12516.1 afis|EAW15603.1 afis|EAW17072.1 afis|EAW19893.1 afis|EAW21005.1 afis|EAW24131.1  
afis|EAW24651.1 afis|EAW22083.1 afis|EAW24734.1 afla|EED46089.1 afla|EED46801.1 afla|EED48098.1  
afila|EED52234.1 afla|EED48355.1 afla|EED49615.1 afla|EED55083.1 afla|EED56403.1 afum|EAL85692.1  
afum|EAL89381.1 afum|EAL91987.1 afum|EAL85730.1 afum|EAL86560.1 agla|OJJ79085.1 agla|OJJ82566.1  
agla|OJJ86784.1 agla|OJJ87207.1 akaw|GAA89881.1 akaw|GAA91663.1 aluc|OJZ81798.1 aluc|OJZ87737.1  
anid|CBF75787.1 anid|CBF86562.1 anid|CBF86663.1 anig|EHA20229.1 anig|EHA22418.1 aory|EIT72725.1  
aory|EIT74466.1 aory|EIT76413.1 aory|EIT80974.1 aory|EIT81644.1 aory|EIT83015.1 asyd|OJJ59270.1  
asyd|OJJ64851.1 asyd|OJJ60947.1 asyd|OJJ64782.1 asyd|OJJ65051.1 ater|EAU30561.1 ater|EAU31344.1  
ater|EAU38103.1 atub|OJI80903.1 atub|OJI84369.1 aver|OJI98893.1 aver|OJI99174.1 aver|OJJ00274.1  
aver|OJJ08481.1 aver|OJI98963.1 aver|OJJ01883.1 aver|OJJ07136.1 awen|OJJ30103.1 awen|OJJ40222.1  
awen|OJJ41358.1 awen|OJJ31256.1 awen|OJJ37981.1 azon|OJJ46971.1 azon|OJJ48822.1 azon|OJJ73660.1  
acar|OOG00838.1 akaw|GAA88498.1 aluc|OJZ88393.1 anig|EHA18121.1 aory|EIT72296.1 atub|OJI90988.1  
awen|OJJ38335.1 anid|CBF74724.1 aluc|OJZ80164.1 aory|EIT76217.1 ater|EAU32520.1

Group6: abra|OJJ65900.1 abra|OJJ66009.1 abra|OJJ67667.1 abra|OJJ67833.1 abra|OJJ70432.1  
abra|OJJ73134.1 abra|OJJ74399.1 abra|OJJ77760.1 abra|OJJ66336.1 abra|OJJ75222.1 abra|OJJ75882.1  
acla|EAW13531.1 acla|EAW13625.1 afis|EAW16387.1 afis|EAW17052.1 afla|EED45665.1 afla|EED48448.1  
afla|EED47332.1 afla|EED53171.1 afla|EED57354.1 akaw|GAA83600.1 akaw|GAA86003.1 akaw|GAA89183.1  
akaw|GAA90148.1 akaw|GAA92662.1 akaw|GAA84585.1 akaw|GAA90211.1 akaw|GAA90881.1  
aluc|OJZ81649.1 aluc|OJZ82246.1 aluc|OJZ82952.1 aluc|OJZ90228.1 aluc|OJZ92394.1 aluc|OJZ89329.1  
aluc|OJZ83585.1 aluc|OJZ83788.1 aluc|OJZ90116.1 anig|EHA19545.1 anig|EHA19698.1 anig|EHA26581.1  
anig|EHA21367.1 anig|EHA23246.1 anig|EHA25794.1 anig|EHA28496.1 aory|EIT80163.1 aory|EIT82886.1  
asyd|OJJ53336.1 asyd|OJJ54299.1 ater|EAU30237.1 ater|EAU33224.1 atub|OJI80755.1 atub|OJI84681.1  
atub|OJI86824.1 atub|OJI87738.1 atub|OJI88533.1 atub|OJI89152.1 atub|OJI89184.1 atub|OJI85471.1  
atub|OJI88192.1 atub|OJI87802.1 aver|OJI96712.1 aver|OJJ08408.1 awen|OJJ30102.1 awen|OJJ41501.1  
awen|OJJ41603.1 awen|OJJ31974.1 acar|OOF99302.1 afis|EAW21094.1 aory|EIT75368.1 ater|EAU31345.1  
acar|OOF92089.1 aver|OJJ07905.1 aluc|OJZ83134.1 awen|OJJ35031.1 acar|OOF98127.1 afum|EAL87813.1  
afum|EAL92117.1 anid|CBF75778.1 afis|EAW17483.1 anid|CBF84683.1 akaw|GAA83278.1

Group7: abra|OJJ65820.1 abra|OJJ66803.1 acar|OOF90643.1 acar|OOF94182.1 afis|EAW16457.1  
afis|EAW21767.1 afla|EED55145.1 afla|EED55917.1 akaw|GAA92417.1 akaw|GAA93242.1 anid|CBF75176.1  
anid|CBF84668.1 anid|CBF85153.1 anid|CBF88209.1 anid|CBF75912.1 anid|CBF80593.1 anid|CBF80303.1  
anid|CBF80770.1 anig|EHA18419.1 anig|EHA24965.1 anig|EHA21352.1 aory|EIT76564.1 aory|EIT81636.1  
aory|EIT81823.1 asyd|OJJ52880.1 asyd|OJJ54446.1 asyd|OJJ60235.1 asyd|OJJ61610.1 ater|EAU32131.1  
ater|EAU35090.1 ater|EAU37273.1 aver|OJJ04030.1 aver|OJJ08401.1 aver|OJJ08851.1 aver|OJJ07396.1  
azon|OJJ42892.1 azon|OJJ45918.1 azon|OJJ48221.1 azon|OJJ48680.1 azon|OJJ49289.1 agla|OJJ83550.1  
anig|EHA26118.1 awen|OJJ41193.1 azon|OJJ42522.1 abra|OJJ67032.1 acla|EAW08788.1 afis|EAW19897.1  
afis|EAW23754.1 agla|OJJ82646.1 akaw|GAA92151.1 aluc|OJZ85558.1 ater|EAU30865.1 atub|OJI79347.1  
abra|OJJ76132.1 acar|OOF99791.1 acla|EAW09686.1 afis|EAW21453.1 afla|EED55883.1 afum|EAL92472.1  
agla|OJJ85599.1 akaw|GAA88835.1 aluc|OJZ89593.1 anid|CBF76549.1 anig|EHA23018.1 aory|EIT76608.1  
asyd|OJJ61156.1 atub|OJI85209.1 aver|OJJ00478.1 awen|OJJ39247.1 azon|OJJ51608.1 abra|OJJ77926.1  
acar|OOF89902.1 afum|EAL87190.2 akaw|GAA83738.1 aluc|OJZ90994.1 atub|OJI82984.1 aver|OJJ07910.1  
aver|OJJ00933.1

Group8: abra|OJJ66275.1 abra|OJJ77982.1 abra|OJJ70821.1 abra|OJJ71091.1 abra|OJJ75537.1  
abra|OJJ78258.1 acar|OOF97571.1 acar|OOF98050.1 acar|OOG00735.1 acar|OOF98604.1 acla|EAW07624.1  
acla|EAW08950.1 acla|EAW09019.1 acla|EAW09117.1 acla|EAW13520.1 acla|EAW15062.1 afla|EED45116.1  
afla|EED47649.1 afla|EED49862.1 afla|EED51183.1 akaw|GAA82870.1 akaw|GAA91957.1 akaw|GAA85998.1  
aluc|OJZ82661.1 aluc|OJZ84344.1 aluc|OJZ87437.1 aluc|OJZ91057.1 aluc|OJZ91332.1 anig|EHA18001.1  
anig|EHA18935.1 anig|EHA20663.1 anig|EHA27435.1 anig|EHA27680.1 anig|EHA19760.1 anig|EHA23147.1  
anig|EHA23656.1 anig|EHA20014.1 aory|EIT73707.1 aory|EIT80187.1 aory|EIT83384.1 asyd|OJJ57246.1  
asyd|OJJ60063.1 asyd|OJJ63687.1 atub|OJI81211.1 atub|OJI83130.1 atub|OJI83325.1 atub|OJI88893.1  
atub|OJI89724.1 atub|OJI83053.1 atub|OJI89947.1 aver|OJI99011.1 aver|OJJ08178.1 awen|OJJ29725.1  
awen|OJJ32235.1 awen|OJJ34622.1 afla|EED49876.1 afum|EAL85113.2 akaw|GAA87094.1 aory|EIT83412.1  
ater|EAU38971.1 afis|EAW16804.1 agla|OJJ85462.1 anid|CBF80487.1 ater|EAU29410.1 azon|OJJ42361.1  
acla|EAW10019.1 afis|EAW20415.1 afum|EAL89230.2 anid|CBF85555.1 ater|EAU29808.1 azon|OJJ43495.1  
aver|OJI97248.1 afum|EAL91103.2 akaw|GAA83290.1 akaw|GAA83291.1 afla|EED45117.1 aver|OJJ08105.1

Group9: abra|OJJ68001.1 abra|OJJ69377.1 abra|OJJ77432.1 abra|OJJ78055.1 acar|OOF92044.1  
acar|OOF94347.1 afis|EAW19338.1 afis|EAW24682.1 afis|EAW20700.1 afis|EAW24697.1 afis|EAW25724.1  
afla|EED45393.1 afla|EED47975.1 afla|EED51175.1 afla|EED57518.1 afum|EAL84397.1 afum|EAL84875.1  
afum|EAL89339.1 afum|EAL94057.1 agla|OJJ83163.1 agla|OJJ85718.1 agla|OJJ88362.1 akaw|GAA85937.1  
akaw|GAA88581.1 akaw|GAA88246.1 akaw|GAA90949.1 aluc|OJZ82213.1 aluc|OJZ82875.1 aluc|OJZ88485.1



aluc|OJZ91125.1 anid|CBF70387.1 anid|CBF79143.1 anid|CBF90097.1 anid|CBF74114.1 anid|CBF80184.1  
anig|EHA21301.1 anig|EHA28527.1 aory|EIT75060.1 aory|EIT80443.1 aory|EIT79828.1 aory|EIT81356.1  
aory|EIT81872.1 aory|EIT82404.1 asyd|OJJ53903.1 asyd|OJJ56275.1 asyd|OJJ57401.1 asyd|OJJ57276.1  
asyd|OJJ58638.1 asyd|OJJ62031.1 ater|EAU31624.1 ater|EAU37396.1 ater|EAU31762.1 ater|EAU38791.1  
atub|OJI79831.1 atub|OJI83136.1 atub|OJI88222.1 atub|OJI89099.1 aver|OJI96122.1 aver|OJJ01245.1  
aver|OJI99530.1 aver|OJJ08000.1 aver|OJJ08490.1 awen|OJJ32995.1 awen|OJJ37839.1 awen|OJJ40791.1  
azon|OJJ48191.1 azon|OJJ48520.1 acla|EAW14609.1 azon|OJJ43922.1 acla|EAW13612.1 afla|EED53479.1  
anig|EHA20150.1 anig|EHA19826.1 afla|EED51738.1 afla|EED51739.1 ater|EAU33967.1

Group10: abra|OJJ73857.1 abra|OJJ76179.1 acar|OOF94216.1 acar|OOF99761.1 acar|OOG01005.1  
acla|EAW07747.1 acla|EAW09647.1 afis|EAW17299.1 afis|EAW22784.1 afis|EAW20842.1 afis|EAW21493.1  
afla|EED48870.1 afla|EED50046.1 afum|EAL84790.1 afum|EAL92512.1 afum|EAL90415.1 agla|OJJ83596.1  
agla|OJJ85655.1 akaw|GAA82124.1 akaw|GAA89472.1 akaw|GAA92487.1 aluc|OJZ80154.1 aluc|OJZ88191.1  
aluc|OJZ92051.1 aluc|OJZ91499.1 anid|CBF76107.1 anid|CBF87969.1 anid|CBF76478.1 anid|CBF80461.1  
anid|CBF83927.1 anig|EHA17943.1 anig|EHA22980.1 anig|EHA22539.1 aory|EIT74611.1 aory|EIT76730.1  
aory|EIT80155.1 aory|EIT81260.1 asyd|OJJ53335.1 asyd|OJJ61118.1 asyd|OJJ55439.1 asyd|OJJ60355.1  
asyd|OJJ63488.1 ater|EAU29437.1 ater|EAU35045.1 ater|EAU38925.1 ater|EAU29951.1 atub|OJI80378.1  
atub|OJI90790.1 atub|OJI85952.1 atub|OJI86482.1 aver|OJI97441.1 aver|OJJ06514.1 aver|OJI99693.1  
aver|OJJ08409.1 aver|OJJ00436.1 awen|OJJ36113.1 awen|OJJ38951.1 awen|OJJ39202.1 awen|OJJ40168.1  
azon|OJJ49724.1 azon|OJJ51661.1 abra|OJJ70289.1 acar|OOF91742.1 akaw|GAA92859.1 aluc|OJZ82554.1  
anig|EHA22518.1 atub|OJI88795.1 awen|OJJ38795.1 afla|EED57355.1 afla|EED55928.1

Group11: abra|OJJ66566.1 abra|OJJ74913.1 acar|OOF91007.1 acar|OOF95904.1 acla|EAW08458.1  
acla|EAW10929.1 afis|EAW20932.1 afis|EAW23503.1 afla|EED50286.1 afla|EED57404.1 afum|EAL84702.1  
afum|EAL87958.1 agla|OJJ83956.1 agla|OJJ86749.1 akaw|GAA83509.1 akaw|GAA91151.1 aluc|OJZ81479.1  
aluc|OJZ92486.1 anid|CBF82508.1 anid|CBF89725.1 anig|EHA18724.1 anig|EHA18871.1 anig|EHA25948.1  
anig|EHA26487.1 aory|EIT77296.1 aory|EIT80109.1 asyd|OJJ54080.1 asyd|OJJ62235.1 ater|EAU35292.1  
ater|EAU38577.1 atub|OJI86917.1 atub|OJI88701.1 aver|OJI96344.1 aver|OJJ08658.1 awen|OJJ34386.1  
awen|OJJ39829.1 azon|OJJ47952.1 azon|OJJ48118.1 acar|OOF91006.1 acla|EAW10930.1 afis|EAW20931.1  
afla|EED50285.1 afum|EAL84703.2 agla|OJJ83957.1 akaw|GAA91152.1 anid|CBF82510.1 anig|EHA25947.1  
aory|EIT77323.1 asyd|OJJ54081.1 ater|EAU38576.1 aver|OJJ08657.1 awen|OJJ34387.1 azon|OJJ48119.1  
abra|OJJ68224.1 acar|OOF95905.1 acla|EAW08457.1 afis|EAW23498.1 afla|EED57403.1 afum|EAL87965.1  
akaw|GAA83219.1 aluc|OJZ83721.1 anig|EHA18870.1 aory|EIT80136.1 ater|EAU35291.1 atub|OJI90095.1  
awen|OJJ39827.1 anig|EHA26486.1 atub|OJI86918.1 agla|OJJ83079.1

Group12: abra|OJJ67365.1 abra|OJJ70373.1 abra|OJJ72695.1 abra|OJJ77105.1 abra|OJJ78039.1  
abra|OJJ77002.1 acar|OOF90082.1 acar|OOF91896.1 acar|OOF92990.1 acar|OOF91448.1 acla|EAW08775.1  
acla|EAW12337.1 afis|EAW16885.1 afis|EAW20732.1 afis|EAW25626.1 afla|EED47350.1 afla|EED50231.1  
afla|EED54427.1 afum|EAL84314.2 afum|EAL86423.2 agla|OJJ78903.1 agla|OJJ79932.1 agla|OJJ85297.1  
akaw|GAA86951.1 akaw|GAA91977.1 aluc|OJZ80600.1 aluc|OJZ84401.1 aluc|OJZ82637.1 aluc|OJZ84514.1  
anid|CBF80656.1 anid|CBF82934.1 anid|CBF83105.1 anig|EHA27442.1 anig|EHA27812.1 aory|EIT75862.1  
aory|EIT77345.1 aory|EIT81172.1 aory|EIT81924.1 aory|EIT82860.1 asyd|OJJ53449.1 asyd|OJJ54612.1  
asyd|OJJ61456.1 ater|EAU30228.1 ater|EAU38239.1 atub|OJI88868.1 atub|OJI89567.1 atub|OJI89671.1  
aver|OJJ00792.1 aver|OJJ05324.1 aver|OJJ07546.1 aver|OJJ08303.1 awen|OJJ29598.1 awen|OJJ29759.1  
awen|OJJ31482.1 awen|OJJ34518.1 awen|OJJ36047.1 azon|OJJ42524.1 afla|EED55182.1 akaw|GAA87046.1  
anig|EHA27731.1 aory|EIT81588.1 asyd|OJJ55521.1 ater|EAU32705.1 aver|OJJ06599.1 azon|OJJ50398.1  
afla|EED48862.1 ater|EAU32222.1

Group13: abra|OJJ74143.1 abra|OJJ77919.1 acar|OOF95048.1 acar|OOF95115.1 acar|OOF95586.1  
acar|OOF98862.1 acar|OOF99364.1 afla|EED47372.1 afla|EED48594.1 akaw|GAA83744.1 akaw|GAA89741.1  
akaw|GAA92822.1 akaw|GAA92977.1 aluc|OJZ80240.1 aluc|OJZ91576.1 aluc|OJZ80643.1 aluc|OJZ90987.1  
anid|CBF75107.1 anid|CBF76688.1 anid|CBF85354.1 anid|CBF86773.1 anig|EHA19692.1 anig|EHA27189.1  
aory|EIT73093.1 aory|EIT82880.1 asyd|OJJ59996.1 asyd|OJJ61226.1 asyd|OJJ64036.1 asyd|OJJ64686.1  
ater|EAU32382.1 ater|EAU33556.1 atub|OJI82978.1 atub|OJI87498.1 aver|OJI98121.1 aver|OJJ00549.1  
aver|OJJ02295.1 aver|OJI98789.1 abra|OJJ69652.1 acar|OOF98861.1 acla|EAW06691.1 afis|EAW16074.1  
afla|EED48593.1 afum|EAL88706.2 agla|OJJ86094.1 akaw|GAA91631.1 aluc|OJZ82458.1 anid|CBF75109.1  
anig|EHA28317.1 aory|EIT73047.1 ater|EAU33557.1 atub|OJI87980.1 awen|OJJ30359.1 azon|OJJ45380.1  
acla|EAW06690.1 afis|EAW16075.1 afum|EAL88707.1 awen|OJJ30358.1 abra|OJJ76634.1 afla|EED53145.1  
agla|OJJ82986.1 anig|EHA22603.1 aory|EIT75089.1 ater|EAU37809.1 atub|OJI86025.1 awen|OJJ31622.1  
azon|OJJ47320.1

Group14: abra|OJJ65763.1 abra|OJJ65764.1 abra|OJJ68458.1 abra|OJJ70187.1 acar|OOF91603.1  
acar|OOF93288.1 acar|OOF99308.1 acar|OOF99313.1 afis|EAW16734.1 afis|EAW19114.1 afla|EED45012.1  
afla|EED57380.1 afla|EED57383.1 afum|EAL86261.1 afum|EAL86308.1 afum|EAL86264.1 afum|EAL93846.1  
akaw|GAA83845.1 akaw|GAA86588.1 akaw|GAA92381.1 aluc|OJZ83240.1 aluc|OJZ85135.1 aluc|OJZ90870.1  
anid|CBF74944.1 anid|CBF83824.1 anid|CBF84265.1 anig|EHA19590.1 anig|EHA25367.1 anig|EHA21095.1  
anig|EHA22863.1 aory|EIT73582.1 aory|EIT75916.1 aory|EIT80067.1 aory|EIT80069.1 asyd|OJJ57214.1  
asyd|OJJ58070.1 asyd|OJJ63941.1 asyd|OJJ60903.1 asyd|OJJ63609.1 asyd|OJJ63938.1 atub|OJI80457.1  
atub|OJI82868.1 atub|OJI87697.1 aver|OJI97001.1 aver|OJJ00229.1 aver|OJJ03075.1 aver|OJJ04337.1  
aver|OJJ07009.1 awen|OJJ30374.1 awen|OJJ30814.1 awen|OJJ32530.1 acla|EAW14406.1 agla|OJJ89198.1

azon|OJJ47391.1 aver|OJI97004.1 aver|OJI97328.1 awen|OJJ40814.1 azon|OJJ50090.1 ater|EAU37377.1  
azon|OJJ42904.1 ater|EAU38814.1 asyd|OJJ55207.1

Group15: abra|OJJ69361.1 abra|OJJ71787.1 abra|OJJ75622.1 acar|OOF94364.1 acar|OOF96466.1  
acar|OOG00218.1 acla|EAW08453.1 acla|EAW09357.1 acla|EAW14751.1 afis|EAW21780.1 afis|EAW23502.1  
afis|EAW24282.1 afla|EED46347.1 afla|EED47994.1 afum|EAL85951.1 afum|EAL87959.1 afum|EAL92809.1  
agla|OJJ80637.1 agla|OJJ84344.1 akaw|GAA84369.1 akaw|GAA85124.1 akaw|GAA88230.1 aluc|OJZ82194.1  
aluc|OJZ86517.1 aluc|OJZ89073.1 anig|EHA22129.1 anig|EHA23464.1 anig|EHA28543.1 aory|EIT79847.1  
aory|EIT81244.1 asyd|OJJ53917.1 asyd|OJJ56885.1 asyd|OJJ61185.1 asyd|OJJ62326.1 ater|EAU31230.1  
ater|EAU38460.1 atub|OJI84007.1 atub|OJI85713.1 atub|OJI88241.1 aver|OJI96431.1 aver|OJJ00509.1  
aver|OJJ08015.1 awen|OJJ33015.1 awen|OJJ34069.1 awen|OJJ39823.1 azon|OJJ47947.1 azon|OJJ48162.1  
azon|OJJ48502.1 afla|EED57398.1 anid|CBF76607.1 agla|OJJ86745.1 abra|OJJ74918.1 acar|OOF95909.1  
akaw|GAA83505.1 aluc|OJZ92489.1 anid|CBF89735.1 anig|EHA26483.1 aory|EIT80098.1 asyd|OJJ62232.1  
ater|EAU35287.1 atub|OJI86922.1 aver|OJI96341.1

Group16: abra|OJJ69532.1 abra|OJJ73245.1 abra|OJJ75746.1 abra|OJJ71793.1 acar|OOF90431.1  
acar|OOF92663.1 acar|OOG00484.1 acar|OOF96473.1 acla|EAW06919.1 acla|EAW08051.1 afis|EAW16536.1  
afis|EAW23087.1 afla|EED48561.1 afla|EED48728.1 afla|EED56133.1 afum|EAL88392.1 afum|EAL89133.1  
agla|OJJ82786.1 agla|OJJ89597.1 akaw|GAA84479.1 akaw|GAA85117.1 akaw|GAA87935.1 akaw|GAA88383.1  
aluc|OJZ81182.1 aluc|OJZ82371.1 aluc|OJZ86523.1 aluc|OJZ89199.1 anid|CBF75152.1 anid|CBF81741.1  
anid|CBF82143.1 anig|EHA18500.1 anig|EHA23358.1 anig|EHA28393.1 anig|EHA22123.1 aory|EIT73145.1  
aory|EIT73234.1 aory|EIT76572.1 aory|EIT79614.1 asyd|OJJ54322.1 asyd|OJJ59597.1 asyd|OJJ59975.1  
asyd|OJJ56163.1 atub|OJI83999.1 atub|OJI91379.1 atub|OJI85591.1 aver|OJJ02316.1 aver|OJJ05102.1  
aver|OJJ05276.1 aver|OJJ02671.1 awen|OJJ30245.1 awen|OJJ39992.1 awen|OJJ40286.1 ater|EAU36211.1  
ater|EAU36599.1 atub|OJI88071.1 awen|OJJ36697.1 azon|OJJ47500.1 azon|OJJ49147.1 afla|EED56590.1  
agla|OJJ79942.1 anig|EHA23359.1

Group17: abra|OJJ67548.1 abra|OJJ67738.1 abra|OJJ69732.1 abra|OJJ75389.1 abra|OJJ67871.1  
acar|OOF90253.1 acar|OOF90937.1 acar|OOF94189.1 acar|OOF94221.1 acar|OOF94457.1 acla|EAW11677.1  
acla|EAW12103.1 afla|EED45500.1 afla|EED48836.1 afla|EED51171.1 afla|EED52156.1 akaw|GAA88112.1  
akaw|GAA90185.1 akaw|GAA92429.1 akaw|GAA92752.1 akaw|GAA91880.1 aluc|OJZ81382.1 aluc|OJZ81593.1  
aluc|OJZ83164.1 aluc|OJZ92960.1 aluc|OJZ82019.1 anid|CBF73431.1 anid|CBF87554.1 anig|EHA18677.1  
anig|EHA25848.1 anig|EHA26015.1 anig|EHA28228.1 anig|EHA22237.1 aory|EIT74393.1 aory|EIT75554.1  
aory|EIT81271.1 aory|EIT82420.1 aory|EIT81347.1 ater|EAU30799.1 ater|EAU34705.1 atub|OJI84570.1  
atub|OJI87418.1 atub|OJI87773.1 atub|OJI88590.1 atub|OJI91588.1 aver|OJJ08108.1 aver|OJJ08968.1  
azon|OJJ42487.1 azon|OJJ45532.1 afis|EAW17283.1 afum|EAL86701.1 agla|OJJ81086.1 anid|CBF82821.1  
asyd|OJJ52999.1 asyd|OJJ61577.1 aver|OJJ00899.1 awen|OJJ35752.1 afla|EED45454.1 anid|CBF80162.1  
aver|OJI99518.1

Group18: abra|OJJ67797.1 abra|OJJ73515.1 abra|OJJ68679.1 abra|OJJ70328.1 abra|OJJ76402.1  
acar|OOF91783.1 acar|OOF92181.1 acar|OOG00703.1 acla|EAW07449.1 acla|EAW12568.1 afis|EAW18727.1  
afis|EAW22482.1 afis|EAW24082.1 afla|EED45270.1 afla|EED51391.1 afum|EAL90712.1 afum|EAL91937.1  
agla|OJJ79953.1 agla|OJJ82286.1 agla|OJJ87548.1 akaw|GAA82322.1 akaw|GAA89832.1 akaw|GAA92583.1  
akaw|GAA87464.1 aluc|OJZ81855.1 aluc|OJZ82597.1 aluc|OJZ88532.1 aluc|OJZ91810.1 anig|EHA18233.1  
anig|EHA22369.1 anig|EHA27480.1 anig|EHA22803.1 aory|EIT73742.1 aory|EIT78822.1 aory|EIT80707.1  
asyd|OJJ53887.1 asyd|OJJ62829.1 ater|EAU30215.1 ater|EAU30505.1 ater|EAU39231.1 ater|EAU38177.1  
atub|OJI84423.1 atub|OJI88833.1 atub|OJI91117.1 atub|OJI86266.1 aver|OJI96872.1 aver|OJJ07985.1  
awen|OJJ29718.1 awen|OJJ32268.1 awen|OJJ35101.1 acla|EAW14021.1 aluc|OJZ90857.1 anid|CBF88889.1  
atub|OJI82853.1 azon|OJJ50007.1 afla|EED50684.1 afla|EED54508.1 acar|OOF99644.1 afum|EAL93452.1  
aory|EIT78049.1

Group19: abra|OJJ67556.1 abra|OJJ67739.1 abra|OJJ69721.1 abra|OJJ75388.1 abra|OJJ67870.1  
acar|OOF90043.1 acar|OOF90938.1 acar|OOF94195.1 acar|OOF94224.1 acar|OOF94458.1 acla|EAW11676.1  
acla|EAW12104.1 afla|EED45513.1 afla|EED48837.1 afla|EED51172.1 afla|EED52163.1 akaw|GAA88108.1  
akaw|GAA90174.1 akaw|GAA92430.1 akaw|GAA92751.1 akaw|GAA91879.1 aluc|OJZ81378.1 aluc|OJZ81592.1  
aluc|OJZ92959.1 aluc|OJZ82020.1 aluc|OJZ83176.1 anid|CBF73444.1 anid|CBF82822.1 anid|CBF87553.1  
anig|EHA18673.1 anig|EHA25849.1 anig|EHA26016.1 anig|EHA28250.1 anig|EHA22236.1 aory|EIT74418.1  
aory|EIT75385.1 aory|EIT81285.1 aory|EIT82421.1 aory|EIT81323.1 asyd|OJJ52998.1 asyd|OJJ61578.1  
atub|OJI84572.1 atub|OJI87417.1 atub|OJI87761.1 atub|OJI91584.1 atub|OJI88591.1 aver|OJJ00900.1  
aver|OJJ08115.1 aver|OJJ08967.1 azon|OJJ42478.1 azon|OJJ45531.1 afis|EAW17282.1 afum|EAL86700.1  
agla|OJJ81085.1 ater|EAU30800.1 ater|EAU34706.1 awen|OJJ35753.1 anid|CBF80164.1 aver|OJI99519.1

Group20: abra|OJJ67608.1 abra|OJJ70431.1 acar|OOF89840.1 acar|OOF91955.1 acla|EAW11023.1  
acla|EAW14999.1 afis|EAW18722.1 afis|EAW19401.1 afis|EAW20837.1 afis|EAW24523.1 afla|EED45470.1  
acla|EED46489.1 afla|EED50679.1 afum|EAL84797.1 afum|EAL86188.1 afum|EAL93446.1 agla|OJJ79209.1  
agla|OJJ83714.1 akaw|GAA89124.1 akaw|GAA90149.1 aluc|OJZ81714.1 aluc|OJZ83199.1 anid|CBF74338.1  
anid|CBF82877.1 aory|EIT72354.1 aory|EIT75736.1 asyd|OJJ57954.1 asyd|OJJ59255.1 asyd|OJJ61569.1  
ater|EAU30785.1 ater|EAU36144.1 ater|EAU36801.1 atub|OJI87739.1 atub|OJI88468.1 aver|OJJ00889.1  
aver|OJJ01866.1 awen|OJJ32698.1 awen|OJJ34547.1 azon|OJJ42767.1 azon|OJJ43003.1 anig|EHA25725.1  
agla|OJJ78774.1 anig|EHA21062.1 abra|OJJ76408.1 acar|OOF99650.1 acla|EAW14020.1 agla|OJJ80462.1

akaw|GAA82327.1 aluc|OJZ91804.1 anid|CBF70690.1 anig|EHA22798.1 asyd|OJJ58469.1 ater|EAU38182.1 atub|OJI86258.1 aver|OJJ01070.1 awen|OJJ32266.1 azon|OJJ46779.1 azon|OJJ51803.1 asyd|OJJ51967.1

Group21: abra|OJJ67735.1 abra|OJJ68593.1 abra|OJJ73309.1 abra|OJJ77765.1 acar|OOF90932.1 acar|OOF97505.1 acla|EAW12049.1 acla|EAW12177.1 afis|EAW17018.1 afis|EAW19983.1 afila|EED45460.1 afila|EED45667.1 afila|EED48486.1 afila|EED52023.1 afum|EAL84933.1 afum|EAL86540.1 akaw|GAA89817.1 akaw|GAA92425.1 aluc|OJZ81597.1 aluc|OJZ81873.1 anid|CBF69451.1 anid|CBF80428.1 anid|CBF82812.1 anid|CBF83139.1 anid|CBF88295.1 anid|CBF89312.1 anid|CBF86046.1 anig|EHA20911.1 anig|EHA25844.1 anig|EHA28237.1 aory|EIT73076.1 aory|EIT75517.1 aory|EIT81451.1 aory|EIT82410.1 aory|EIT79328.1 asyd|OJJ61573.1 asyd|OJJ62373.1 ater|EAU29529.1 ater|EAU30794.1 ater|EAU31923.1 ater|EAU35431.1 ater|EAU36706.1 atub|OJI80342.1 atub|OJI87755.1 aver|OJI96507.1 aver|OJJ00893.1 aver|OJJ07788.1 aver|OJJ06454.1 agla|OJJ79464.1 atub|OJI88585.1 awen|OJJ38079.1 azon|OJJ46787.1 azon|OJJ47411.1 akaw|GAA90162.1 aluc|OJZ83185.1 abra|OJJ70061.1 anig|EHA21035.1 acar|OOF91380.1 anig|EHA28257.1

Group22: abra|OJJ67988.1 abra|OJJ68663.1 abra|OJJ71084.1 abra|OJJ76673.1 acar|OOF92030.1 acar|OOF92164.1 acar|OOF98052.1 acar|OOF99336.1 akaw|GAA82877.1 akaw|GAA83886.1 akaw|GAA89737.1 akaw|GAA89804.1 akaw|GAA90960.1 akaw|GAA92519.1 akaw|GAA92933.1 aluc|OJZ80647.1 aluc|OJZ81887.1 aluc|OJZ82526.1 aluc|OJZ82862.1 aluc|OJZ87444.1 aluc|OJZ91142.1 aluc|OJZ91532.1 anig|EHA18444.1 anig|EHA19537.1 anig|EHA19580.1 anig|EHA20668.1 anig|EHA21292.1 anig|EHA22353.1 anig|EHA22571.1 anig|EHA27186.1 anig|EHA27490.1 anig|EHA22492.1 atub|OJI81204.1 atub|OJI82798.1 atub|OJI83155.1 atub|OJI84440.1 atub|OJI85986.1 atub|OJI87502.1 atub|OJI89087.1 atub|OJI87377.1 atub|OJI87376.1 awen|OJJ30975.1 awen|OJJ34464.1 azon|OJJ42197.1 azon|OJJ43917.1 azon|OJJ50236.1 azon|OJJ45149.1 azon|OJJ45207.1 afis|EAW19725.1 afila|EED53110.1 afum|EAL86801.1 agla|OJJ84005.1 aory|EIT74790.1 ater|EAU37613.1 abra|OJJ77748.1 aluc|OJZ90809.1 agla|OJJ88178.1 azon|OJJ46566.1 azon|OJJ42198.1

Group23: abra|OJJ70376.1 abra|OJJ76944.1 acar|OOF91394.1 acar|OOF91893.1 acar|OOF94281.1 acla|EAW09924.1 acla|EAW12333.1 acla|EAW12657.1 acla|EAW13468.1 afis|EAW16889.1 afis|EAW18023.1 afis|EAW20581.1 afis|EAW21172.1 afila|EED47357.1 afila|EED52279.1 afila|EED54755.1 afum|EAL84483.1 afum|EAL86427.2 afum|EAL92192.1 afum|EAL91835.1 agla|OJJ79937.1 agla|OJJ80007.1 agla|OJJ88693.1 akaw|GAA87096.1 akaw|GAA88352.1 akaw|GAA91976.1 aluc|OJZ82303.1 aluc|OJZ84342.1 aluc|OJZ82638.1 aory|EIT79353.1 aory|EIT82885.1 asyd|OJJ54585.1 asyd|OJJ55452.1 ater|EAU35839.1 ater|EAU37103.1 atub|OJI88134.1 atub|OJI89726.1 atub|OJI88871.1 aver|OJJ06525.1 aver|OJJ07569.1 awen|OJJ29755.1 awen|OJJ33285.1 awen|OJJ36510.1 azon|OJJ42518.1 azon|OJJ46073.1 azon|OJJ50660.1 abra|OJJ69460.1 anid|CBF83321.1 anig|EHA28452.1 asyd|OJJ60544.1 aver|OJI99870.1 azon|OJJ44385.1 anid|CBF76070.1 anid|CBF80669.1 anig|EHA27432.1 ater|EAU29931.1 ater|EAU30227.1 anig|EHA27678.1 aory|EIT74323.1

Group24: abra|OJJ69144.1 abra|OJJ70352.1 abra|OJJ77612.1 acar|OOF91158.1 acar|OOF99116.1 acla|EAW06570.1 acla|EAW08667.1 acla|EAW13589.1 afis|EAW15744.1 afis|EAW16026.1 afis|EAW20014.1 afum|EAL84904.1 afum|EAL85604.1 afum|EAL88655.1 agla|OJJ81906.1 agla|OJJ86054.1 agla|OJJ87984.1 akaw|GAA84019.1 akaw|GAA86313.1 aluc|OJZ80922.1 aluc|OJZ86130.1 anid|CBF71034.1 anid|CBF77968.1 anid|CBF84719.1 anig|EHA19425.1 anig|EHA24491.1 aory|EIT75778.1 aory|EIT81521.1 aory|EIT83013.1 asyd|OJJ52664.1 asyd|OJJ53328.1 asyd|OJJ55266.1 asyd|OJJ60058.1 ater|EAU29366.1 ater|EAU30124.1 ater|EAU32401.1 atub|OJI79926.1 atub|OJI82658.1 aver|OJJ02231.1 aver|OJJ04691.1 aver|OJJ06960.1 aver|OJJ08416.1 awen|OJJ30028.1 awen|OJJ38444.1 azon|OJJ43750.1 azon|OJJ45430.1 azon|OJJ48427.1 ater|EAU33615.1 awen|OJJ30431.1 awen|OJJ41731.1 afila|EED46021.1 afila|EED56407.1 anid|CBF75022.1 acla|EAW12683.1 afis|EAW17846.1 afum|EAL91655.1 ater|EAU33048.1 afila|EED51306.1

Group25: abra|OJJ70961.1 abra|OJJ76031.1 acar|OOF98169.1 acar|OOF99897.1 acla|EAW09101.1 acla|EAW09782.1 acla|EAW10522.1 afis|EAW21356.1 afis|EAW25044.1 afis|EAW25699.1 afis|EAW25729.1 afila|EED45847.1 afila|EED55407.1 afila|EED55771.1 afum|EAL84400.2 afum|EAL89712.1 afum|EAL92371.2 agla|OJJ78663.1 agla|OJJ87377.1 agla|OJJ89150.1 agla|OJJ88275.1 akaw|GAA82986.1 akaw|GAA91201.1 aluc|OJZ81536.1 aluc|OJZ87571.1 aluc|OJZ89483.1 anid|CBF76249.1 anid|CBF85912.1 anig|EHA20773.1 anig|EHA23111.1 anig|EHA25900.1 aory|EIT75461.1 aory|EIT80822.1 aory|EIT75500.1 aory|EIT76538.1 asyd|OJJ59042.1 asyd|OJJ60969.1 asyd|OJJ64398.1 ater|EAU35202.1 ater|EAU35794.1 ater|EAU36445.1 ater|EAU37742.1 atub|OJI81078.1 atub|OJI85318.1 aver|OJI98494.1 aver|OJJ00294.1 aver|OJJ01637.1 awen|OJJ37057.1 awen|OJJ39342.1 awen|OJJ40655.1 azon|OJJ51688.1 ater|EAU36998.1 afila|EED54858.1 anid|CBF69709.1 atub|OJI88650.1 aory|EIT79380.1

Group26: abra|OJJ71513.1 abra|OJJ73019.1 abra|OJJ77809.1 acar|OOF96188.1 acar|OOF96228.1 acar|OOF96266.1 acar|OOF98958.1 acla|EAW07995.1 acla|EAW11308.1 acla|EAW15070.1 afis|EAW18195.1 afis|EAW23030.1 afis|EAW20042.1 afila|EED45337.1 afila|EED54986.1 afila|EED56290.1 afum|EAL85162.1 afum|EAL88452.1 afum|EAL87556.1 agla|OJJ85896.1 agla|OJJ89448.1 agla|OJJ88920.1 akaw|GAA83840.1 akaw|GAA85596.1 akaw|GAA89403.1 aluc|OJZ83533.1 aluc|OJZ86251.1 aluc|OJZ90876.1 anid|CBF80914.1 anid|CBF86102.1 anig|EHA19596.1 anig|EHA24355.1 anig|EHA21614.1 aory|EIT73286.1 aory|EIT80288.1 asyd|OJJ56326.1 asyd|OJJ64481.1 ater|EAU29627.1 ater|EAU33801.1 atub|OJI82424.1 atub|OJI82873.1 atub|OJI84291.1 aver|OJI98582.1 aver|OJJ06387.1 awen|OJJ30557.1 awen|OJJ35716.1 azon|OJJ44174.1 azon|OJJ45510.1 azon|OJJ46319.1 anid|CBF84784.1 anid|CBF84786.1 aory|EIT73629.1 asyd|OJJ63232.1 ater|EAU38649.1 aver|OJI97724.1 awen|OJJ31798.1

Group27: abra|OJJ67095.1 abra|OJJ67686.1 abra|OJJ69631.1 abra|OJJ76432.1 acar|OOF92679.1  
acar|OOF94074.1 acar|OOF94144.1 acar|OOF99676.1 acla|EAW10021.1 acla|EAW12377.1 acla|EAW13992.1  
afis|EAW16823.1 afis|EAW18700.1 afis|EAW22316.1 afla|EED50648.1 afla|EED55075.1 afum|EAL86374.1  
afum|EAL90874.1 afum|EAL93422.1 agla|OJJ79102.1 agla|OJJ82361.1 akaw|GAA82347.1 akaw|GAA89198.1  
akaw|GAA91066.1 akaw|GAA91611.1 aluc|OJJ81632.1 aluc|OJJ82438.1 aluc|OJJ87880.1 aluc|OJJ91780.1  
anid|CBF70637.1 anid|CBF82989.1 anig|EHA20183.1 anig|EHA25811.1 anig|EHA28335.1 aory|EIT78077.1  
aory|EIT81953.1 aory|EIT82431.1 asyd|OJJ52074.1 asyd|OJJ54406.1 asyd|OJJ58493.1 asyd|OJJ64734.1  
ater|EAU29368.1 ater|EAU35424.1 ater|EAU38206.1 atub|OJI80771.1 atub|OJI86236.1 atub|OJI88003.1  
atub|OJI88548.1 aver|OJI98838.1 aver|OJJ01096.1 aver|OJJ03029.1 awen|OJJ32183.1 awen|OJJ40928.1  
azon|OJJ46764.1 anig|EHA22777.1

Group28: abra|OJJ68117.1 abra|OJJ77078.1 abra|OJJ68815.1 acar|OOF90616.1 acar|OOF92960.1  
acar|OOF93911.1 afis|EAW17741.1 afis|EAW17974.1 afla|EED45883.1 afla|EED55321.1 afum|EAL91555.1  
afum|EAL91783.1 agla|OJJ81756.1 agla|OJJ85465.1 agla|OJJ89268.1 akaw|GAA86898.1 akaw|GAA86975.1  
akaw|GAA90440.1 aluc|OJJ84488.1 aluc|OJJ85787.1 aluc|OJJ88708.1 aluc|OJJ90021.1 anid|CBF71442.1  
anid|CBF84572.1 anig|EHA24771.1 anig|EHA27397.1 anig|EHA27792.1 aory|EIT75581.1 aory|EIT76204.1  
asyd|OJJ53389.1 asyd|OJJ54954.1 ater|EAU30960.1 ater|EAU35114.1 ater|EAU36891.1 atub|OJI79571.1  
atub|OJI84786.1 atub|OJI89592.1 atub|OJI91296.1 aver|OJI99661.1 aver|OJJ03907.1 aver|OJJ07242.1  
aver|OJJ08354.1 awen|OJJ32944.1 awen|OJJ39601.1 azon|OJJ42107.1 azon|OJJ42757.1 azon|OJJ42786.1  
azon|OJJ44596.1 azon|OJJ47560.1 acla|EAW11105.1 afla|EED52131.1 acla|EAW12809.1 ater|EAU36942.1  
awen|OJJ32177.1 aory|EIT74465.1

Group29: anid|CBF71484.1 anid|CBF71852.1 anid|CBF76028.1 anid|CBF80836.1 anid|CBF81153.1  
anid|CBF81850.1 anid|CBF84162.1 anid|CBF84238.1 anid|CBF86037.1 anid|CBF89606.1 anid|CBF80194.1  
anid|CBF80847.1 anid|CBF84163.1 anid|CBF76085.1 anid|CBF71848.1 anid|CBF80228.1 anid|CBF81852.1  
anid|CBF80226.1 anid|CBF82237.1 anid|CBF81848.1 anid|CBF86356.1 anid|CBF80843.1 anid|CBF80845.1  
anid|CBF76165.1 anid|CBF80196.1 anid|CBF76161.1 anid|CBF80272.1 anid|CBF80253.1 anid|CBF80230.1  
anid|CBF82238.1 anid|CBF80252.1 anid|CBF80219.1 anid|CBF89288.1 anid|CBF81155.1 anid|CBF76163.1  
anid|CBF84359.1 anid|CBF89285.1 anid|CBF80218.1 anid|CBF82246.1 anid|CBF87221.1 anid|CBF81844.1  
anid|CBF89286.1 anid|CBF81853.1 anid|CBF71850.1 anid|CBF74006.1 anid|CBF78409.1 anid|CBF87223.1  
anid|CBF81157.1 anid|CBF79347.1 acar|OOF89759.1 afis|EAW17204.1 afis|EAW17205.1 afis|EAW22029.1  
agla|OJJ82974.1 aory|EIT76232.1

Group30: abra|OJJ68096.1 abra|OJJ70248.1 abra|OJJ73110.1 abra|OJJ74007.1 acar|OOF92551.1  
acar|OOF93899.1 acar|OOG00337.1 acar|OOG01129.1 afla|EED44907.1 afla|EED44932.1 afla|EED56562.1  
agla|OJJ78703.1 agla|OJJ88418.1 akaw|GAA86542.1 akaw|GAA86880.1 akaw|GAA88056.1 akaw|GAA92925.1  
akaw|GAA87488.1 aluc|OJJ81318.1 aluc|OJJ82516.1 aluc|OJJ85090.1 aluc|OJJ88037.1 aluc|OJJ90004.1  
anid|CBF74975.1 anid|CBF78035.1 anid|CBF81473.1 anig|EHA17810.1 anig|EHA18624.1 anig|EHA25311.1  
anig|EHA27379.1 anig|EHA20903.1 aory|EIT73500.1 aory|EIT73507.1 asyd|OJJ55224.1 asyd|OJJ59448.1  
asyd|OJJ60089.1 asyd|OJJ61384.1 asyd|OJJ57439.1 ater|EAU39548.1 ater|EAU39587.1 atub|OJI80509.1  
atub|OJI84804.1 atub|OJI91521.1 atub|OJI90644.1 aver|OJJ00711.1 aver|OJJ04176.1 aver|OJJ05739.1  
aver|OJJ02824.1 awen|OJJ33639.1 awen|OJJ40047.1 acla|EAW07039.1 afis|EAW16665.1 afum|EAL89269.1  
azon|OJJ50123.1

Group31: abra|OJJ69067.1 abra|OJJ70519.1 abra|OJJ77965.1 acar|OOF91229.1 acar|OOF97409.1  
acar|OOF98850.1 acla|EAW08156.1 acla|EAW08763.1 afis|EAW15666.1 afis|EAW16089.1 afis|EAW23194.1  
afla|EED46889.1 afla|EED47060.1 afla|EED48625.1 afum|EAL85682.1 afum|EAL88289.1 afum|EAL88721.1  
agla|OJJ81804.1 agla|OJJ86130.1 agla|OJJ86345.1 akaw|GAA83366.1 akaw|GAA83698.1 akaw|GAA90597.1  
aluc|OJJ83864.1 aluc|OJJ91035.1 aluc|OJJ86055.1 anid|CBF71178.1 anid|CBF74704.1 anid|CBF75129.1  
anig|EHA19005.1 anig|EHA19734.1 anig|EHA24556.1 aory|EIT72496.1 aory|EIT73097.1 asyd|OJJ55863.1  
asyd|OJJ60218.1 asyd|OJJ59982.1 ater|EAU32505.1 ater|EAU33161.1 ater|EAU36321.1 atub|OJI79852.1  
atub|OJI83031.1 atub|OJI90232.1 aver|OJJ02309.1 aver|OJJ04050.1 aver|OJJ04804.1 awen|OJJ30341.1  
awen|OJJ38341.1 awen|OJJ36585.1 azon|OJJ42517.1 azon|OJJ43041.1 aory|EIT72708.1 acla|EAW06676.1  
azon|OJJ47622.1

Group32: abra|OJJ66128.1 abra|OJJ70165.1 abra|OJJ77944.1 acar|OOF90574.1 acar|OOF94003.1  
afis|EAW24242.1 afis|EAW25195.1 afum|EAL85910.2 afum|EAL89210.1 anid|CBF71201.1 anid|CBF74964.1  
asyd|OJJ52805.1 asyd|OJJ59802.1 ater|EAU29607.1 ater|EAU33975.1 ater|EAU34693.1 atub|OJI87381.1  
atub|OJI87443.1 aver|OJI96126.1 aver|OJJ03002.1 aver|OJI98905.1 aver|OJI99605.1 aver|OJJ03852.1  
afla|EED47392.1 akaw|GAA83719.1 aluc|OJJ91014.1 anid|CBF89341.1 aory|EIT73813.1 aory|EIT76002.1  
atub|OJI83005.1 aver|OJJ05262.1 awen|OJJ36264.1 azon|OJJ48048.1 agla|OJJ85483.1 akaw|GAA86612.1  
akaw|GAA92274.1 aluc|OJJ85163.1 aluc|OJJ90168.1 atub|OJI80439.1 atub|OJI81596.1 anig|EHA19716.1  
ater|EAU36085.1 aver|OJJ08785.1 afum|EAL91911.1 acar|OOF93333.1 acar|OOF98718.1 asyd|OJJ55517.1  
aver|OJJ06595.1 afla|EED45160.1 afla|EED54076.1 anid|CBF82991.1 azon|OJJ46519.1 asyd|OJJ52549.1

Group33: abra|OJJ66203.1 abra|OJJ68990.1 abra|OJJ74346.1 acar|OOF91561.1 acar|OOF91930.1  
acar|OOF95383.1 acla|EAW07400.1 acla|EAW14202.1 afis|EAW19080.1 afis|EAW22426.1 afla|EED50168.1  
afla|EED52504.1 afum|EAL91073.1 afum|EAL90765.1 afum|EAL93809.1 agla|OJJ84526.1 agla|OJJ87597.1  
agla|OJJ84718.1 akaw|GAA86684.1 akaw|GAA89082.1 aluc|OJJ80508.1 aluc|OJJ85975.1 aluc|OJJ89784.1  
anid|CBF76870.1 anid|CBF79672.1 anid|CBF88817.1 anig|EHA24631.1 anig|EHA26999.1 anig|EHA25684.1

aory|EIT76001.1 aory|EIT82781.1 asyd|OJJ52200.1 asyd|OJJ58034.1 asyd|OJJ61321.1 asyd|OJJ62887.1  
ater|EAU32126.1 ater|EAU32863.1 ater|EAU32522.1 ater|EAU39281.1 atub|OJI85021.1 atub|OJI88421.1  
aver|OJI96939.1 aver|OJJ00646.1 aver|OJJ04365.1 aver|OJJ05950.1 aver|OJJ07745.1 awen|OJJ32472.1  
awen|OJJ35005.1 awen|OJJ34090.1 azon|OJJ45647.1 azon|OJJ46232.1 akaw|GAA90510.1 atub|OJI79765.1

Group34: abra|OJJ71614.1 abra|OJJ77069.1 acar|OOF92952.1 acar|OOF96330.1 acla|EAW13507.1  
acla|EAW15156.1 afis|EAW20123.1 afis|EAW21377.1 afis|EAW20124.1 afis|EAW20605.1 afila|EED47726.1  
afila|EED57252.1 afum|EAL84455.1 afum|EAL85242.1 agla|OJJ88636.1 agla|OJJ88823.1 akaw|GAA86984.1  
akaw|GAA89313.1 aluc|OJJ84477.1 aluc|OJJ86355.1 anid|CBF84947.1 anid|CBF86944.1 anig|EHA21535.1  
anig|EHA27785.1 aory|EIT73980.1 aory|EIT77148.1 asyd|OJJ55590.1 asyd|OJJ63148.1 ater|EAU35261.1  
ater|EAU38740.1 atub|OJI84179.1 atub|OJI89602.1 aver|OJI97806.1 aver|OJJ06669.1 awen|OJJ31893.1  
awen|OJJ33448.1 azon|OJJ46243.1 azon|OJJ50705.1 abra|OJJ71611.1 acar|OOF96327.1 acla|EAW15155.1  
afila|EED57253.1 afum|EAL85241.2 agla|OJJ88828.1 akaw|GAA89316.1 anid|CBF84945.1 aory|EIT74161.1  
asyd|OJJ63149.1 atub|OJI84182.1 aver|OJI97805.1 awen|OJJ31892.1 azon|OJJ42421.1 azon|OJJ46244.1

Group35: afis|EAW16487.1 afis|EAW19960.1 afila|EED48721.1 afila|EED49671.1 afum|EAL84955.1  
afum|EAL89081.1 agla|OJJ79324.1 agla|OJJ82857.1 agla|OJJ88164.1 aory|EIT73140.1 aory|EIT80950.1  
aory|EIT75645.1 aory|EIT79202.1 ater|EAU35270.1 ater|EAU36551.1 abra|OJJ68065.1 acla|EAW06870.1  
afila|EED45908.1 akaw|GAA90894.1 aluc|OJJ82935.1 anid|CBF75512.1 anid|CBF84598.1 anig|EHA21355.1  
anig|EHA22760.1 asyd|OJJ53379.1 atub|OJI89164.1 aver|OJJ02547.1 awen|OJJ29993.1 azon|OJJ49197.1  
abra|OJJ71770.1 akaw|GAA85137.1 aluc|OJJ86500.1 anig|EHA22144.1 atub|OJI84026.1 azon|OJJ48613.1  
abra|OJJ78207.1 acar|OOF98647.1 acla|EAW11241.1 afis|EAW18262.1 afum|EAL87626.1 akaw|GAA85819.1  
aluc|OJJ291280.1 anid|CBF79531.1 anig|EHA19965.1 asyd|OJJ57895.1 ater|EAU33270.1 atub|OJI83270.1  
aver|OJJ04500.1 awen|OJJ30636.1 afila|EED47227.1 asyd|OJJ59741.1 awen|OJJ40346.1 aver|OJJ08364.1

Group36: abra|OJJ72217.1 abra|OJJ77905.1 abra|OJJ77236.1 abra|OJJ77528.1 acar|OOF93116.1  
acar|OOF98878.1 acar|OOF99197.1 acar|OOF96839.1 acla|EAW06700.1 acla|EAW13243.1 afis|EAW16233.1  
afis|EAW16245.1 afis|EAW17393.1 afila|EED49461.1 afila|EED53306.1 afila|EED53348.1 afum|EAL88856.1  
afum|EAL88873.1 afum|EAL91231.1 akaw|GAA83757.1 akaw|GAA84092.1 akaw|GAA90707.1 aluc|OJJ81007.1  
aluc|OJJ84646.1 aluc|OJJ90974.1 anig|EHA19353.1 anig|EHA19676.1 anig|EHA27930.1 aory|EIT74908.1  
aory|EIT75241.1 aory|EIT79470.1 atub|OJI82578.1 atub|OJI82965.1 atub|OJI89434.1 awen|OJJ30211.1  
awen|OJJ30227.1 awen|OJJ37422.1 afila|EED48174.1 agla|OJJ80414.1 akaw|GAA84718.1 aluc|OJJ86969.1  
anig|EHA21681.1 aory|EIT83042.1 atub|OJI83552.1 awen|OJJ31302.1 agla|OJJ86254.1 anid|CBF78900.1  
asyd|OJJ64603.1 ater|EAU37455.1 aver|OJI98700.1 acla|EAW06515.1 ater|EAU33711.1

Group37: abra|OJJ72940.1 abra|OJJ77077.1 acar|OOF92763.1 acar|OOF92959.1 acar|OOF97146.1  
afis|EAW18980.1 afis|EAW21099.1 afis|EAW24628.1 afila|EED53187.1 afila|EED54887.1 agla|OJJ80287.1  
agla|OJJ82940.1 akaw|GAA86976.1 akaw|GAA91285.1 aluc|OJJ82784.1 aluc|OJJ84487.1 anig|EHA18922.1  
anig|EHA21226.1 aory|EIT75171.1 aory|EIT79411.1 asyd|OJJ58358.1 asyd|OJJ60157.1 ater|EAU34862.1  
ater|EAU37837.1 atub|OJI89016.1 atub|OJI89593.1 aver|OJJ02049.1 aver|OJJ04107.1 awen|OJJ31588.1  
awen|OJJ37322.1 azon|OJJ47304.1 azon|OJJ47677.1 abra|OJJ70575.1 acla|EAW08374.1 afis|EAW23403.1  
afila|EED47010.1 afum|EAL88067.1 agla|OJJ86391.1 akaw|GAA83419.1 aluc|OJJ83919.1 anid|CBF74791.1  
anig|EHA19052.1 aory|EIT72601.1 ater|EAU36372.1 atub|OJI90290.1 awen|OJJ39474.1 acla|EAW14304.1  
afum|EAL93716.2 anid|CBF69653.1 asyd|OJJ59075.1 aver|OJJ01668.1 anig|EHA27791.1

Group38: abra|OJJ65887.1 abra|OJJ73728.1 abra|OJJ73840.1 abra|OJJ75062.1 acar|OOF94948.1  
acar|OOF97272.1 acar|OOG00894.1 acar|OOG00991.1 acla|EAW07735.1 acla|EAW09321.1 afis|EAW21824.1  
afis|EAW24409.1 afila|EED45566.1 afila|EED50029.1 afum|EAL86078.1 afum|EAL92840.1 agla|OJJ83601.1  
agla|OJJ85455.1 agla|OJJ89020.1 akaw|GAA86017.1 akaw|GAA88434.1 akaw|GAA88674.1 akaw|GAA89458.1  
aluc|OJJ88209.1 aluc|OJJ88322.1 aluc|OJJ90245.1 aluc|OJJ92628.1 anid|CBF84638.1 anid|CBF87998.1  
anig|EHA17956.1 anig|EHA18058.1 anig|EHA26362.1 aory|EIT74733.1 aory|EIT75750.1 asyd|OJJ53366.1  
asyd|OJJ63506.1 ater|EAU38301.1 ater|EAU38950.1 atub|OJI81673.1 atub|OJI87058.1 atub|OJI90810.1  
atub|OJI90917.1 aver|OJI97424.1 aver|OJJ08381.1 awen|OJJ32729.1 awen|OJJ37942.1 awen|OJJ38966.1  
awen|OJJ41210.1 azon|OJJ46022.1 azon|OJJ48676.1 aory|EIT76918.1

Group39: abra|OJJ66342.1 abra|OJJ71162.1 abra|OJJ75572.1 acar|OOF89825.1 acar|OOF94094.1  
acar|OOF94165.1 acar|OOF97998.1 acla|EAW09994.1 acla|EAW10337.1 afis|EAW21096.1 afis|EAW25252.1  
afila|EED51678.1 afila|EED53719.1 afila|EED54679.1 afum|EAL86170.1 afum|EAL89914.1 afum|EAL92119.1  
agla|OJJ80114.1 agla|OJJ89225.1 akaw|GAA82817.1 akaw|GAA84323.1 akaw|GAA90216.1 aluc|OJJ83127.1  
aluc|OJJ87378.1 aluc|OJJ89020.1 anid|CBF80117.1 anid|CBF85345.1 anig|EHA20610.1 anig|EHA23510.1  
anig|EHA28188.1 aory|EIT75350.1 aory|EIT78900.1 aory|EIT80684.1 asyd|OJJ54726.1 asyd|OJJ64027.1  
atub|OJI81268.1 atub|OJI85769.1 atub|OJI87806.1 aver|OJI98113.1 aver|OJJ07441.1 awen|OJJ36352.1  
awen|OJJ40966.1 awen|OJJ38784.1 ater|EAU34396.1 azon|OJJ44550.1 abra|OJJ67575.1 acar|OOF90092.1  
akaw|GAA89104.1 anig|EHA25706.1 atub|OJI88443.1 afis|EAW24500.1

Group40: abra|OJJ73400.1 abra|OJJ73868.1 acar|OOG00598.1 acar|OOG01011.1 acla|EAW07007.1  
acla|EAW07756.1 afis|EAW16623.1 afis|EAW19494.1 afis|EAW22793.1 afila|EED44972.1 afila|EED48978.1  
afila|EED50061.1 afila|EED56714.1 afum|EAL87000.1 afum|EAL89214.1 afum|EAL90406.1 agla|OJJ83569.1  
agla|OJJ85298.1 akaw|GAA83092.1 akaw|GAA89474.1 akaw|GAA89692.1 aluc|OJJ80692.1 aluc|OJJ88189.1  
aluc|OJJ88639.1 anid|CBF81984.1 anid|CBF87954.1 anig|EHA17940.1 anig|EHA18328.1 anig|EHA27323.1

aory|EIT73515.1 aory|EIT73856.1 aory|EIT74647.1 aory|EIT79983.1 asyd|OJJ56154.1 asyd|OJJ59777.1  
asyd|OJJ63479.1 ater|EAU34806.1 ater|EAU36732.1 ater|EAU38918.1 atub|OJI87552.1 atub|OJI90788.1  
atub|OJI91225.1 aver|OJI97451.1 aver|OJJ02509.1 aver|OJJ05094.1 awen|OJJ36912.1 awen|OJJ38940.1  
azon|OJJ45543.1 azon|OJJ49714.1 anid|CBF75442.1

Group41: abra|OJJ65606.1 abra|OJJ68131.1 abra|OJJ68372.1 abra|OJJ69834.1 acar|OOF90085.1  
acar|OOF93362.1 acar|OOG00535.1 afla|EED45615.1 afla|EED45682.1 afla|EED54532.1 agla|OJJ80470.1  
agla|OJJ80842.1 agla|OJJ83418.1 akaw|GAA86911.1 akaw|GAA87826.1 aluc|OJZ85462.1 aluc|OJZ90034.1  
anig|EHA25004.1 anig|EHA25073.1 anig|EHA27410.1 aory|EIT75511.1 aory|EIT75540.1 aory|EIT78869.1  
aory|EIT81830.1 asyd|OJJ52349.1 asyd|OJJ56735.1 asyd|OJJ60489.1 atub|OJI80101.1 atub|OJI84772.1  
aver|OJI99815.1 aver|OJJ05882.1 aver|OJJ05988.1 awen|OJJ32535.1 awen|OJJ33535.1 awen|OJJ34624.1  
awen|OJJ35129.1 awen|OJJ40106.1 acla|EAW07472.1 afis|EAW17054.1 afum|EAL86551.2 akaw|GAA83834.1  
aluc|OJZ90883.1 anid|CBF86106.1 ater|EAU30279.1 atub|OJI82467.1 anig|EHA19603.1 atub|OJI82878.1  
azon|OJJ47403.1 afla|EED57508.1

Group42: abra|OJJ65781.1 abra|OJJ69519.1 abra|OJJ69805.1 acar|OOF93570.1 acar|OOF94236.1  
acla|EAW09965.1 acla|EAW15041.1 afis|EAW17149.1 afis|EAW21123.1 afis|EAW24564.1 afla|EED50957.1  
afla|EED51796.1 afla|EED54117.1 afla|EED57909.1 afum|EAL86225.1 afum|EAL92146.1 agla|OJJ78698.1  
agla|OJJ79809.1 agla|OJJ80088.1 akaw|GAA87854.1 akaw|GAA88307.1 akaw|GAA90882.1 aluc|OJZ82358.1  
aluc|OJZ82950.1 aluc|OJZ85496.1 anid|CBF77670.1 anid|CBF87020.1 anig|EHA21430.1 anig|EHA25029.1  
anig|EHA28405.1 aory|EIT76140.1 aory|EIT77042.1 aory|EIT81685.1 aory|EIT82334.1 asyd|OJJ53106.1  
asyd|OJJ60460.1 ater|EAU32188.1 ater|EAU36777.1 atub|OJI80069.1 atub|OJI88083.1 atub|OJI89182.1  
aver|OJI99780.1 aver|OJJ03746.1 awen|OJJ36453.1 awen|OJJ37008.1 awen|OJJ40041.1 azon|OJJ44424.1  
azon|OJJ50127.1 aver|OJI99293.1

Group43: abra|OJJ67343.1 abra|OJJ74161.1 abra|OJJ74904.1 acar|OOF92471.1 acar|OOF95566.1  
acar|OOF95902.1 afis|EAW18497.1 afis|EAW23515.1 afis|EAW24769.1 afum|EAL89410.1 afum|EAL93187.1  
agla|OJJ83565.1 agla|OJJ85096.1 agla|OJJ86763.1 agla|OJJ88214.1 akaw|GAA83518.1 akaw|GAA86474.1  
akaw|GAA89723.1 aluc|OJZ80660.1 aluc|OJZ85015.1 aluc|OJZ92477.1 anid|CBF70261.1 anid|CBF89705.1  
anig|EHA25236.1 anig|EHA26493.1 anig|EHA27172.1 aory|EIT77595.1 aory|EIT78639.1 aory|EIT80122.1  
asyd|OJJ58753.1 asyd|OJJ62252.1 asyd|OJJ62467.1 atub|OJI80582.1 atub|OJI86908.1 atub|OJI87516.1  
aver|OJI96362.1 aver|OJJ01361.1 awen|OJJ31051.1 awen|OJJ37928.1 awen|OJJ39840.1 acla|EAW08468.1  
afla|EED49731.1 afum|EAL87948.1 anid|CBF89382.1 ater|EAU35304.1 azon|OJJ43252.1 ater|EAU34034.1  
aver|OJI96602.1 afla|EED57415.1

Group44: abra|OJJ68123.1 abra|OJJ69603.1 abra|OJJ72218.1 acar|OOF92701.1 acar|OOF93917.1  
acar|OOF96841.1 acla|EAW12866.1 acla|EAW14975.1 afis|EAW17815.1 afis|EAW24499.1 afla|EED45599.1  
afla|EED51849.1 afla|EED54703.1 afum|EAL86169.1 afum|EAL91624.1 agla|OJJ78971.1 agla|OJJ85550.1  
agla|OJJ81686.1 akaw|GAA84717.1 akaw|GAA86904.1 akaw|GAA91591.1 aluc|OJZ82414.1 aluc|OJZ86970.1  
aluc|OJZ90027.1 anig|EHA21680.1 anig|EHA27403.1 anig|EHA28353.1 aory|EIT75721.1 aory|EIT78771.1  
aory|EIT81733.1 asyd|OJJ54895.1 asyd|OJJ58303.1 asyd|OJJ56516.1 asyd|OJJ56725.1 atub|OJI83551.1  
atub|OJI84780.1 atub|OJI88027.1 aver|OJJ02109.1 aver|OJJ05998.1 aver|OJJ06206.1 awen|OJJ32626.1  
awen|OJJ36932.1 anid|CBF73850.1 ater|EAU30287.1 azon|OJJ50345.1 anid|CBF80089.1 ater|EAU31562.1  
awen|OJJ33657.1 ater|EAU29952.1

Group45: abra|OJJ68536.1 abra|OJJ72481.1 acar|OOF90150.1 acar|OOF94753.1 acla|EAW10385.1  
acla|EAW12826.1 afis|EAW17874.1 afis|EAW17991.1 afis|EAW25211.1 afla|EED45114.1 afla|EED51912.1  
afla|EED46241.1 afum|EAL89872.1 afum|EAL91801.1 afum|EAL91682.1 agla|OJJ80251.1 agla|OJJ83074.1  
akaw|GAA86216.1 akaw|GAA91315.1 aluc|OJZ82750.1 aluc|OJZ90468.1 anid|CBF79986.1 anid|CBF89933.1  
anig|EHA21199.1 anig|EHA23927.1 aory|EIT73554.1 aory|EIT76181.1 aory|EIT76362.1 ater|EAU31453.1  
ater|EAU37217.1 ater|EAU31502.1 ater|EAU33093.1 atub|OJI81892.1 atub|OJI88986.1 aver|OJI96221.1  
aver|OJJ02185.1 awen|OJJ41004.1 awen|OJJ41694.1 azon|OJJ45116.1 azon|OJJ46814.1 azon|OJJ48270.1  
azon|OJJ48393.1 acla|EAW12711.1 asyd|OJJ58240.1 asyd|OJJ62114.1 awen|OJJ41555.1 anid|CBF69461.1  
aver|OJJ01892.1 asyd|OJJ59277.1

Group46: abra|OJJ72575.1 abra|OJJ77969.1 acar|OOF94684.1 acar|OOF98846.1 akaw|GAA82423.1  
akaw|GAA87621.1 akaw|GAA83693.1 akaw|GAA85201.1 aluc|OJZ90556.1 aluc|OJZ91039.1 anig|EHA19738.1  
anig|EHA24003.1 asyd|OJJ54419.1 asyd|OJJ59096.1 atub|OJI81979.1 atub|OJI83035.1 acla|EAW06671.1  
afis|EAW16094.1 afla|EED48630.1 afla|EED56583.1 afum|EAL88726.1 agla|OJJ88578.1 anid|CBF85458.1  
aory|EIT73102.1 aory|EIT79674.1 asyd|OJJ58704.1 asyd|OJJ64100.1 ater|EAU30075.1 ater|EAU33170.1  
aver|OJI98183.1 aver|OJJ01316.1 awen|OJJ30336.1 awen|OJJ40588.1 azon|OJJ42310.1 azon|OJJ45364.1  
abra|OJJ76510.1 acar|OOF99461.1 afla|EED54610.1 agla|OJJ87529.1 aluc|OJZ91695.1 anig|EHA22708.1  
aory|EIT78921.1 ater|EAU38073.1 atub|OJI86149.1 aver|OJJ01687.1 aver|OJJ06547.1 awen|OJJ36612.1  
agla|OJJ86127.1 anid|CBF70342.1

Group47: acar|OOF91492.1 acar|OOF98333.1 acar|OOF92665.1 acar|OOF93877.1 afis|EAW15510.1  
afis|EAW17137.1 afis|EAW16415.1 afis|EAW16568.1 afis|EAW17138.1 afis|EAW25618.1 afum|EAL89039.1  
afum|EAL89165.1 anid|CBF80635.1 anid|CBF89254.1 ater|EAU31707.1 ater|EAU36836.1 abra|OJJ74339.1  
acla|EAW07389.1 afis|EAW22415.1 afla|EED52493.1 afum|EAL90777.1 agla|OJJ87679.1 akaw|GAA86691.1  
aluc|OJZ89792.1 anid|CBF88800.1 anig|EHA27005.1 aory|EIT82748.1 asyd|OJJ62896.1 ater|EAU39292.1

atub|OJI85014.1 aver|OJI96948.1 awen|OJJ34994.1 azon|OJJ45637.1 agla|OJJ82753.1 anig|EHA22499.1  
atub|OJI84627.1 afis|EAW19287.1 acla|EAW06953.1 awen|OJJ40251.1 azon|OJJ49111.1 acar|OOG00127.1  
akaw|GAA86019.1 aluc|OJZ90247.1 asyd|OJJ61228.1 aver|OJJ00551.1 anid|CBF76692.1 akaw|GAA91465.1  
aluc|OJZ82070.1 afum|EAL84308.2

Group48: abra|OJJ66388.1 abra|OJJ69074.1 acla|EAW08755.1 acla|EAW11763.1 afis|EAW15677.1  
afis|EAW23796.1 afis|EAW25170.1 afla|EED46854.1 afla|EED51603.1 afla|EED53628.1 afum|EAL85670.1  
afum|EAL87230.1 afum|EAL89843.1 akaw|GAA90254.1 akaw|GAA90605.1 aluc|OJZ83086.1 aluc|OJZ86063.1  
anid|CBF71157.1 anid|CBF79858.1 anid|CBF85251.1 aory|EIT72587.1 aory|EIT74962.1 aory|EIT80702.1  
asyd|OJJ51987.1 asyd|OJJ54461.1 asyd|OJJ54551.1 asyd|OJJ55842.1 asyd|OJJ58159.1 asyd|OJJ59172.1  
asyd|OJJ62925.1 ater|OJJ64763.1 ater|EAU31334.1 ater|EAU32484.1 ater|EAU34334.1 atub|OJI79860.1  
atub|OJI87858.1 aver|OJI98064.1 aver|OJJ04243.1 aver|OJJ04785.1 aver|OJJ07708.1 awen|OJJ30141.1  
awen|OJJ33753.1 awen|OJJ38354.1 azon|OJJ42861.1 azon|OJJ43857.1 acar|OOF91216.1 agla|OJJ81826.1  
anig|EHA24550.1

Group49: abra|OJJ66054.1 abra|OJJ67991.1 abra|OJJ68633.1 acar|OOF92033.1 acar|OOF92137.1  
acla|EAW07055.1 acla|EAW12619.1 afis|EAW16409.1 afis|EAW16681.1 afis|EAW18065.1 afla|EED45379.1  
afla|EED47440.1 afla|EED51440.1 afum|EAL84867.1 afum|EAL89033.1 afum|EAL89285.1 afum|EAL91877.1  
akaw|GAA89772.1 akaw|GAA90957.1 aluc|OJZ81922.1 aluc|OJZ82865.1 anid|CBF73413.1 anid|CBF86422.1  
anid|CBF87201.1 anig|EHA21295.1 anig|EHA22325.1 aory|EIT80529.1 aory|EIT81893.1 aory|EIT82380.1  
asyd|OJJ59980.1 asyd|OJJ64938.1 ater|EAU30466.1 ater|EAU35871.1 atub|OJI84474.1 atub|OJI89090.1  
aver|OJI99059.1 aver|OJJ02311.1 awen|OJJ36169.1 awen|OJJ41452.1 azon|OJJ47178.1 azon|OJJ48910.1  
agla|OJJ87352.1 anid|CBF75131.1 aver|OJJ01785.1 asyd|OJJ59979.1 anid|CBF75132.1 aver|OJJ02312.1

Group50: abra|OJJ69511.1 abra|OJJ74314.1 acar|OOF94242.1 acar|OOF95413.1 acla|EAW07365.1  
acla|EAW09962.1 afis|EAW21133.1 afis|EAW22392.1 afla|EED46140.1 afla|EED56055.1 afum|EAL90799.1  
afum|EAL92151.1 agla|OJJ80083.1 agla|OJJ87654.1 akaw|GAA86711.1 akaw|GAA88313.1 aluc|OJZ82349.1  
aluc|OJZ89812.1 anid|CBF87003.1 anid|CBF88741.1 anig|EHA27022.1 anig|EHA28411.1 aory|EIT76474.1  
aory|EIT76698.1 asyd|OJJ60468.1 asyd|OJJ63953.1 ater|EAU36765.1 ater|EAU39326.1 atub|OJI84993.1  
atub|OJI88091.1 aver|OJI96988.1 aver|OJI99788.1 awen|OJJ34969.1 awen|OJJ36463.1 acar|OOF94243.1  
acla|EAW09961.1 afis|EAW21134.1 afum|EAL92153.1 agla|OJJ80077.1 anid|CBF87002.1 aory|EIT76417.1  
ater|EAU36766.1 awen|OJJ36462.1 azon|OJJ44415.1 azon|OJJ44422.1 azon|OJJ45618.1 afla|EED46139.1

Group51: abra|OJJ66047.1 abra|OJJ76934.1 abra|OJJ77452.1 acar|OOF91381.1 acar|OOF99274.1  
afis|EAW19956.1 afis|EAW22115.1 afla|EED52041.1 afla|EED54167.1 afla|EED55064.1 afum|EAL84958.1  
afum|EAL91070.1 agla|OJJ80818.1 agla|OJJ80927.1 akaw|GAA84156.1 akaw|GAA87105.1 aluc|OJZ81077.1  
aluc|OJZ84333.1 anig|EHA19285.1 anig|EHA27667.1 aory|EIT73694.1 aory|EIT75905.1 aory|EIT81463.1  
aory|EIT81952.1 asyd|OJJ52197.1 asyd|OJJ52737.1 asyd|OJJ53817.1 asyd|OJJ54624.1 ater|EAU29271.1  
ater|EAU29317.1 ater|EAU36080.1 atub|OJI82508.1 atub|OJI89736.1 aver|OJI95757.1 aver|OJI99556.1  
aver|OJJ02993.1 aver|OJJ07236.1 aver|OJJ07532.1 aver|OJJ07918.1 awen|OJJ35197.1 awen|OJJ41937.1  
anid|CBF78465.1 asyd|OJJ54956.1 azon|OJJ42548.1 afla|EED45216.1 agla|OJJ85358.1

Group52: abra|OJJ67587.1 abra|OJJ72232.1 abra|OJJ68022.1 abra|OJJ71087.1 acar|OOF96856.1  
acar|OOF98832.1 afis|EAW19900.1 afis|EAW25740.1 afla|EED45923.1 afla|EED46506.1 afla|EED55031.1  
afla|EED50270.1 afla|EED55600.1 akaw|GAA82874.1 akaw|GAA83260.1 akaw|GAA90929.1 aluc|OJZ80366.1  
aluc|OJZ82896.1 aluc|OJZ83766.1 anig|EHA20401.1 anig|EHA20666.1 anig|EHA21320.1 aory|EIT72370.1  
aory|EIT77313.1 aory|EIT81962.1 aory|EIT82672.1 ater|EAU30170.1 ater|EAU30810.1 ater|EAU34044.1  
atub|OJI81207.1 atub|OJI89121.1 atub|OJI90137.1 afum|EAL85004.1 agla|OJJ80468.1 akaw|GAA8705.1  
aluc|OJZ86982.1 anid|CBF73897.1 anig|EHA21665.1 aory|EIT75502.1 atub|OJI83537.1 acar|OOF92065.1  
afis|EAW17166.1 awen|OJJ30813.1 aluc|OJZ87441.1 afla|EED45753.1 ater|EAU38566.1

Group53: acla|EAW06287.1 acla|EAW08342.1 acla|EAW12933.1 acla|EAW13032.1 afis|EAW17635.1  
afis|EAW17710.1 afis|EAW18392.1 afis|EAW23377.1 afla|EED45712.1 afla|EED50529.1 afla|EED53015.1  
afla|EED55580.1 afum|EAL88094.1 afum|EAL91525.1 afum|EAL93068.1 afum|EAL91450.1 akaw|GAA83332.1  
akaw|GAA86352.1 akaw|GAA90807.1 akaw|GAA83394.1 anid|CBF70766.1 anid|CBF74845.1 anid|CBF76926.1  
anid|CBF90134.1 aory|EIT75805.1 aory|EIT77402.1 aory|EIT82175.1 aory|EIT82691.1 ater|EAU31902.1  
ater|EAU32280.1 ater|EAU35631.1 ater|EAU37071.1 awen|OJJ37126.1 awen|OJJ37209.1 acar|OOF97170.1  
agla|OJJ86446.1 azon|OJJ50825.1 agla|OJJ81264.1 aluc|OJZ84881.1 anig|EHA27829.1 asyd|OJJ57069.1  
atub|OJI90195.1 aver|OJJ03229.1 azon|OJJ50909.1 aluc|OJZ83828.1 asyd|OJJ62014.1

Group54: abra|OJJ65575.1 abra|OJJ65577.1 abra|OJJ66394.1 abra|OJJ68072.1 abra|OJJ78158.1  
acar|OOF90635.1 acar|OOF94051.1 acar|OOF94121.1 agla|OJJ81248.1 agla|OJJ85122.1 agla|OJJ89317.1  
akaw|GAA90259.1 akaw|GAA92419.1 aluc|OJZ80816.1 aluc|OJZ83081.1 aluc|OJZ87399.1 anid|CBF80614.1  
anid|CBF80695.1 anig|EHA19835.1 anig|EHA28144.1 anig|EHA19917.1 anig|EHA20628.1 anig|EHA26671.1  
ater|EAU29371.1 ater|EAU30114.1 atub|OJI81247.1 atub|OJI87864.1 aver|OJI97590.1 aver|OJJ07256.1  
awen|OJJ29741.1 awen|OJJ32237.1 awen|OJJ32260.1 afis|EAW17155.1 afum|EAL86727.1 aory|EIT76930.1  
azon|OJJ42341.1 afla|EED50167.1 asyd|OJJ52055.1 atub|OJI88902.1 abra|OJJ66294.1 abra|OJJ71136.1  
akaw|GAA82838.1 azon|OJJ45212.1 awen|OJJ36390.1 azon|OJJ42821.1

Group55: abra|OJJ66953.1 abra|OJJ70025.1 acar|OOF93535.1 acar|OOF93655.1 agla|OJJ79210.1  
agla|OJJ85149.1 akaw|GAA87635.1 akaw|GAA92208.1 aluc|OJZ85251.1 aluc|OJZ85625.1 anig|EHA24903.1  
anig|EHA25451.1 aory|EIT80438.1 aory|EIT82112.1 asyd|OJJ55882.1 asyd|OJJ65094.1 ater|EAU32531.1  
ater|EAU37243.1 atub|OJI79418.1 atub|OJI80318.1 aver|OJJ99218.1 aver|OJJ04827.1 awen|OJJ30173.1  
awen|OJJ38273.1 awen|OJJ41598.1 acla|EAW08800.1 afis|EAW15597.1 afla|EED50419.1 afum|EBA27239.1  
anid|CBF78088.1 azon|OJJ43909.1 asyd|OJJ55868.1 acar|OOF93534.1 acla|EAW08799.1 afis|EAW15598.1  
afum|EAL85734.1 agla|OJJ88612.1 akaw|GAA87636.1 anid|CBF78056.1 anig|EHA25452.1 aory|EIT82031.1  
ater|EAU32530.1 atub|OJI80317.1 aver|OJJ04811.1 azon|OJJ43905.1

Group56: agla|OJJ81571.1 agla|OJJ85255.1 asyd|OJJ54206.1 asyd|OJJ59064.1 asyd|OJJ54427.1  
ater|EAU31423.1 ater|EAU38101.1 aver|OJJ01658.1 aver|OJJ01906.1 awen|OJJ30145.1 awen|OJJ31520.1  
abra|OJJ76240.1 acar|OOF99485.1 acla|EAW14198.1 afis|EAW18923.1 afla|EED50910.1 afum|EAL93655.1  
agla|OJJ85250.1 akaw|GAA82174.1 aluc|OJZ91991.1 anid|CBF69674.1 anig|EHA22937.1 aory|EIT79045.1  
asyd|OJJ59065.1 ater|EAU38098.1 atub|OJI86426.1 awen|OJJ31518.1 azon|OJJ47234.1 abra|OJJ76243.1  
acar|OOF99488.1 acla|EAW06837.1 afis|EAW18926.1 afla|EED50916.1 afum|EAL93657.1 akaw|GAA82176.1  
aluc|OJZ91988.1 anid|CBF69676.1 anig|EHA22935.1 aory|EIT78980.1 atub|OJI86423.1 azon|OJJ47236.1  
afis|EAW16385.1 afla|EED48287.1 afum|EAL89013.2 aory|EIT72910.1

Group57: abra|OJJ69646.1 abra|OJJ77015.1 abra|OJJ77136.1 acar|OOF90285.1 acar|OOF91423.1  
acar|OOF91458.1 acla|EAW09001.1 acla|EAW10860.1 acla|EAW12947.1 acla|EAW13503.1 afis|EAW17722.1  
afis|EAW20602.1 afis|EAW20998.1 afum|EAL84459.1 afum|EAL91537.1 agla|OJJ78915.1 agla|OJJ79354.1  
agla|OJJ88647.1 akaw|GAA87035.1 akaw|GAA90793.1 akaw|GAA91624.1 aluc|OJZ82450.1 aluc|OJZ84416.1  
aluc|OJZ84546.1 anig|EHA27739.1 anig|EHA27843.1 anig|EHA28324.1 aory|EIT75439.1 aory|EIT77113.1  
asyd|OJJ52539.1 asyd|OJJ55599.1 atub|OJI87989.1 atub|OJI89534.1 atub|OJI89658.1 aver|OJJ03865.1  
aver|OJJ06679.1 awen|OJJ33394.1 awen|OJJ35790.1 afla|EED45724.1 afla|EED47731.1 anid|CBF86932.1  
ater|EAU35247.1 azon|OJJ43330.1 agla|OJJ84075.1

Group58: acar|OOF92599.1 acar|OOF92620.1 abra|OJJ72332.1 acar|OOF94882.1 acla|EAW11990.1  
afis|EAW19630.1 afla|EED56982.1 afum|EAL86892.1 agla|OJJ80775.1 akaw|GAA86084.1 aluc|OJZ90316.1  
anid|CBF71323.1 anig|EHA23803.1 aory|EIT77586.1 asyd|OJJ55109.1 ater|EAU32896.1 atub|OJI81744.1  
aver|OJJ07097.1 awen|OJJ41874.1 azon|OJJ47072.1 abra|OJJ72333.1 acar|OOF94880.1 acla|EAW11989.1  
afis|EAW19629.1 afla|EED56981.1 afum|EAL86893.1 akaw|GAA86085.1 anid|CBF71321.1 aory|EIT77447.1  
ater|EAU32897.1 azon|OJJ47071.1 abra|OJJ72335.1 acla|EAW11987.1 afis|EAW19627.1 afla|EED56979.1  
afum|EAL86894.1 agla|OJJ80773.1 akaw|GAA86087.1 anid|CBF71319.1 aory|EIT77480.1 asyd|OJJ55111.1  
ater|EAU32899.1 aver|OJJ07095.1 azon|OJJ47069.1

Group59: acar|OOF92600.1 acar|OOF92621.1 abra|OJJ76130.1 acar|OOF99793.1 acla|EAW09689.1  
afis|EAW21450.1 afla|EED55879.1 afum|EAL92469.1 agla|OJJ85598.1 akaw|GAA88837.1 aluc|OJZ89591.1  
anid|CBF76555.1 anig|EHA23020.1 aory|EIT76712.1 asyd|OJJ61157.1 ater|EAU35092.1 atub|OJI85211.1  
aver|OJJ00479.1 awen|OJJ39248.1 azon|OJJ51607.1 abra|OJJ76131.1 acar|OOF99792.1 acla|EAW09687.1  
afis|EAW21452.1 afla|EED55881.1 afum|EAL92471.1 akaw|GAA88836.1 aluc|OJZ89592.1 anid|CBF76551.1  
anig|EHA23019.1 aory|EIT76739.1 ater|EAU35091.1 atub|OJI85210.1 abra|OJJ77110.1 acla|EAW09688.1  
afis|EAW21451.1 afla|EED55880.1 afum|EAL92470.1 akaw|GAA90818.1 aluc|OJZ84519.1 anid|CBF76553.1  
anig|EHA27817.1 aory|EIT76614.1 atub|OJI89561.1

Group60: afis|EAW15375.1 afis|EAW19388.1 afis|EAW19745.1 afis|EAW19746.1 afis|EAW20418.1  
afis|EAW20688.1 afis|EAW21002.1 afis|EAW24636.1 afis|EAW25758.1 afis|EAW25761.1 afis|EAW17293.1  
afis|EAW15376.1 afis|EAW17294.1 afis|EAW24637.1 afis|EAW15377.1 afis|EAW24638.1 afis|EAW15378.1  
afis|EAW19381.1 afis|EAW22065.1 afis|EAW22066.1 afis|EAW24635.1 afis|EAW24639.1 afis|EAW24640.1  
afis|EAW25759.1 afis|EAW22048.1 afis|EAW22062.1 afis|EAW23656.1 afis|EAW23657.1 afis|EAW25774.1  
afis|EAW25760.1 anid|CBF76095.1 anid|CBF82248.1 ater|EAU29403.1 ater|EAU37740.1 acar|OOF89756.1  
afum|EAL89306.1 asyd|OJJ55339.1 aver|OJJ07727.1 ater|EAU31660.1 aory|EIT81932.1 asyd|OJJ56289.1  
afila|EED45889.1 aory|EIT75613.1 aluc|OJZ79928.1

Group61: abra|OJJ65992.1 abra|OJJ66994.1 abra|OJJ68819.1 acar|OOF90628.1 acar|OOF92880.1  
afis|EAW20003.1 afis|EAW20740.1 afla|EED46008.1 afla|EED47482.1 afla|EED49530.1 agla|OJJ87844.1  
agla|OJJ87962.1 akaw|GAA90432.1 akaw|GAA90866.1 akaw|GAA92170.1 aluc|OJZ82967.1 aluc|OJZ85578.1  
aluc|OJZ85795.1 anig|EHA18425.1 anig|EHA21383.1 anig|EHA24761.1 anig|EHA24941.1 aory|EIT75392.1  
aory|EIT79965.1 aory|EIT82595.1 asyd|OJJ52756.1 asyd|OJJ53312.1 asyd|OJJ54834.1 atub|OJI79374.1  
atub|OJI79581.1 atub|OJI89200.1 atub|OJI91621.1 aver|OJJ07327.1 aver|OJJ08431.1 aver|OJJ08738.1  
azon|OJJ43639.1 azon|OJJ50209.1 acla|EAW13602.1 afum|EAL84916.1 anid|CBF80344.1 anid|CBF84693.1  
ater|EAU37349.1 awen|OJJ30010.1

Group62: abra|OJJ68708.1 abra|OJJ69824.1 acar|OOF92210.1 acar|OOF93339.1 acla|EAW08971.1  
acla|EAW12537.1 afis|EAW15450.1 afis|EAW24112.1 afla|EED46821.1 afla|EED56823.1 akaw|GAA87836.1  
akaw|GAA89862.1 aluc|OJZ81821.1 aluc|OJZ85472.1 anig|EHA22396.1 anig|EHA25013.1 atub|OJI80091.1  
atub|OJI84392.1 awen|OJJ41377.1 awen|OJJ41767.1 abra|OJJ68707.1 acar|OOF92209.1 acla|EAW12538.1  
afis|EAW24111.1 afum|EAL91965.1 agla|OJJ87188.1 akaw|GAA89861.1 aluc|OJZ81823.1 anid|CBF86525.1  
anig|EHA22395.1 aory|EIT72582.1 asyd|OJJ64873.1 ater|EAU30539.1 atub|OJI84393.1 aver|OJI98986.1



azon|OJJ48844.1 afum|EAL91966.1 agla|OJJ87189.1 anid|CBF86527.1 aory|EIT72529.1 asyd|OJJ64872.1  
ater|EAU30540.1 aver|OJI98984.1

Group63: agla|OJJ80048.1 agla|OJJ86306.1 agla|OJJ89670.1 agla|OJJ81524.1 agla|OJJ84920.1  
agla|OJJ81876.1 agla|OJJ88808.1 akaw|GAA92616.1 akaw|GAA92655.1 akaw|GAA93101.1 akaw|GAA93218.1  
akaw|GAA93326.1 akaw|GAA93341.1 akaw|GAA93349.1 akaw|GAA92654.1 anid|CBF73635.1 anid|CBF78260.1  
anid|CBF84144.1 anid|CBF84167.1 anid|CBF74958.1 anid|CBF73637.1 anid|CBF75922.1 anid|CBF82905.1  
anid|CBF83997.1 anid|CBF84165.1 anid|CBF89628.1 anid|CBF84258.1 anid|CBF83995.1 anid|CBF89115.1  
anid|CBF79097.1 anid|CBF80200.1 anid|CBF79095.1 anid|CBF77664.1 anid|CBF80044.1 anid|CBF78884.1  
anid|CBF78717.1 anid|CBF74110.1 anid|CBF74956.1 anid|CBF83687.1 acar|OOG00276.1 aluc|OJZ79659.1  
afum|EAL90122.1 akaw|GAA93209.1

Group64: agla|OJJ84606.1 agla|OJJ86279.1 anid|CBF78809.1 anid|CBF85739.1 asyd|OJJ64288.1  
asyd|OJJ65260.1 aver|OJI98381.1 aver|OJI99411.1 awen|OJJ30086.1 awen|OJJ30833.1 awen|OJJ38668.1  
azon|OJJ44554.1 azon|OJJ44649.1 abra|OJJ67129.1 acar|OOF98424.1 afis|EAW19329.1 afla|EED47551.1  
afum|EAL94046.1 akaw|GAA91039.1 aluc|OJZ87849.1 anig|EHA20152.1 aory|EIT74544.1 ater|EAU29453.1  
atub|OJI80799.1 abra|OJJ67137.1 acar|OOF98421.1 acla|EAW14610.1 afis|EAW19339.1 afla|EED47549.1  
afum|EAL94058.1 akaw|GAA91032.1 aluc|OJZ87840.1 anid|CBF78807.1 anig|EHA20314.1 aory|EIT74530.1  
asyd|OJJ65259.1 ater|EAU29452.1 atub|OJI80806.1 aver|OJI99410.1 agla|OJJ83890.1 awen|OJJ41067.1  
agla|OJJ89228.1 awen|OJJ40968.1

Group65: abra|OJJ65919.1 abra|OJJ71178.1 acar|OOF94968.1 acar|OOF97988.1 acla|EAW10328.1  
acla|EAW13616.1 afis|EAW19973.1 afis|EAW25266.1 afla|EED50456.1 afla|EED53730.1 afum|EAL84937.1  
afum|EAL89929.1 agla|OJJ80057.1 agla|OJJ89242.1 akaw|GAA82807.1 akaw|GAA92313.1 aluc|OJZ87365.1  
aluc|OJZ90211.1 anid|CBF84421.1 anid|CBF85372.1 anig|EHA20600.1 anig|EHA23709.1 aory|EIT75304.1  
aory|EIT82028.1 asyd|OJJ53545.1 asyd|OJJ57927.1 asyd|OJJ64047.1 ater|EAU31473.1 ater|EAU34407.1  
atub|OJI81279.1 atub|OJI81642.1 aver|OJI97591.1 aver|OJI98132.1 aver|OJI98886.1 aver|OJJ08208.1  
awen|OJJ36011.1 awen|OJJ40979.1 azon|OJJ42397.1 azon|OJJ44566.1 azon|OJJ45171.1 azon|OJJ50333.1  
asyd|OJJ54388.1

Group66: abra|OJJ66757.1 abra|OJJ68421.1 abra|OJJ70242.1 acar|OOF92554.1 acar|OOF93838.1  
afis|EAW19495.1 afis|EAW21208.1 afum|EAL86999.1 afum|EAL92219.1 agla|OJJ78585.1 agla|OJJ81224.1  
agla|OJJ86343.1 agla|OJJ87022.1 akaw|GAA86545.1 akaw|GAA89691.1 akaw|GAA92527.1 aluc|OJZ80693.1  
aluc|OJZ85093.1 aluc|OJZ90076.1 anig|EHA20997.1 anig|EHA27322.1 anig|EHA25314.1 aory|EIT73935.1  
aory|EIT77370.1 asyd|OJJ59201.1 asyd|OJJ59780.1 ater|EAU34261.1 ater|EAU34807.1 atub|OJI80506.1  
atub|OJI87553.1 atub|OJI84632.1 atub|OJI84730.1 aver|OJJ01814.1 aver|OJJ02507.1 awen|OJJ36122.1  
awen|OJJ36911.1 azon|OJJ42905.1 azon|OJJ45981.1 acla|EAW11883.1 afla|EED50220.1 afla|EED56713.1  
anid|CBF75444.1

Group67: abra|OJJ67357.1 abra|OJJ69620.1 abra|OJJ69925.1 acar|OOF92464.1 acar|OOF92686.1  
acar|OOF93436.1 acla|EAW06385.1 acla|EAW08905.1 afis|EAW15491.1 afis|EAW18491.1 afla|EED49005.1  
afla|EED52913.1 afum|EAL85832.1 afum|EAL93181.1 agla|OJJ80168.1 agla|OJJ85086.1 akaw|GAA86464.1  
akaw|GAA87732.1 akaw|GAA91604.1 aluc|OJZ82429.1 aluc|OJZ85004.1 aluc|OJZ85363.1 anig|EHA25223.1  
anig|EHA25546.1 anig|EHA28342.1 aory|EIT78593.1 aory|EIT82534.1 asyd|OJJ53723.1 asyd|OJJ56020.1  
asyd|OJJ58801.1 ater|EAU29917.1 ater|EAU32628.1 atub|OJI80207.1 atub|OJI80594.1 atub|OJI88012.1  
awen|OJJ31044.1 awen|OJJ38147.1 azon|OJJ43140.1 azon|OJJ50555.1 anid|CBF70161.1 aver|OJJ01405.1  
aver|OJJ04967.1

Group68: abra|OJJ69659.1 abra|OJJ71032.1 acar|OOF92597.1 acar|OOF92618.1 acar|OOF92644.1  
acar|OOF98104.1 aluc|OJZ82466.1 aluc|OJZ87497.1 anig|EHA20713.1 anig|EHA28309.1 atub|OJI81151.1  
atub|OJI87972.1 acla|EAW08698.1 acla|EAW12766.1 afis|EAW15737.1 afis|EAW17928.1 afla|EED49112.1  
afla|EED51315.1 afum|EAL85611.1 afum|EAL91739.1 agla|OJJ81894.1 agla|OJJ83005.1 akaw|GAA91638.1  
akaw|GAA91639.1 aluc|OJZ82465.1 anid|CBF71049.1 anid|CBF80811.1 anig|EHA28310.1 aory|EIT78548.1  
aory|EIT81553.1 asyd|OJJ52673.1 asyd|OJJ54450.1 ater|EAU32405.1 ater|EAU33543.1 atub|OJI87973.1  
aver|OJJ04699.1 aver|OJJ07704.1 awen|OJJ38433.1 awen|OJJ41618.1 azon|OJJ43810.1 azon|OJJ48339.1  
akaw|GAA82922.1

Group69: abra|OJJ70622.1 abra|OJJ71755.1 abra|OJJ72061.1 abra|OJJ76523.1 acar|OOF96715.1  
acar|OOF96808.1 acar|OOF99444.1 acla|EAW13671.1 acla|EAW14172.1 afis|EAW15618.1 afis|EAW18886.1  
afla|EED50879.1 afla|EED53904.1 afla|EED57853.1 agla|OJJ80215.1 agla|OJJ80629.1 akaw|GAA8436.1  
akaw|GAA84874.1 aluc|OJZ84834.1 aluc|OJZ86797.1 aluc|OJZ91685.1 anig|EHA21886.1 anig|EHA22697.1  
anig|EHA25744.1 aory|EIT78491.1 aory|EIT78970.1 aory|EIT81115.1 ater|EAU31982.1 ater|EAU32969.1  
ater|EAU38058.1 atub|OJI83721.1 atub|OJI86137.1 aver|OJJ01614.1 aver|OJJ02222.1 awen|OJJ32444.1  
awen|OJJ38463.1 azon|OJJ47202.1 azon|OJJ47982.1 afum|EAL93619.1 anid|CBF69896.1 asyd|OJJ59001.1

Group70: agla|OJJ81088.1 agla|OJJ81098.1 agla|OJJ84079.1 agla|OJJ81610.1 agla|OJJ85958.1  
agla|OJJ84407.1 anid|CBF70684.1 anid|CBF83505.1 anid|CBF86544.1 anid|CBF70985.1 anid|CBF73878.1  
anid|CBF76072.1 anid|CBF76571.1 anid|CBF77622.1 anid|CBF78018.1 anid|CBF78361.1 anid|CBF79546.1  
anid|CBF82083.1 anid|CBF84126.1 anid|CBF88413.1 anid|CBF88708.1 anid|CBF89022.1 anid|CBF89295.1  
ater|EAU29721.1 ater|EAU32284.1 ater|EAU32866.1 ater|EAU33186.1 ater|EAU30981.1 ater|EAU30143.1

ater|EAU35995.1 abra|OJJ69716.1 aluc|OJZ83181.1 anig|EHA28255.1 aory|EIT76332.1 atub|OJI87756.1  
awen|OJJ29588.1 acar|OOF89784.1 aluc|OJZ82089.1 asyd|OJJ55193.1 agla|OJJ85314.1 agla|OJJ88024.1

Group71: abra|OJJ65673.1 abra|OJJ68238.1 abra|OJJ66038.1 abra|OJJ68515.1 abra|OJJ74212.1  
abra|OJJ74240.1 acar|OOF92683.1 acar|OOF95490.1 acar|OOF95508.1 afla|EED47448.1 afla|EED57720.1  
akaw|GAA86780.1 akaw|GAA86806.1 akaw|GAA91332.1 aluc|OJZ79540.1 aluc|OJZ89922.1 aluc|OJZ82729.1  
aluc|OJZ89892.1 anig|EHA21182.1 anig|EHA27091.1 anig|EHA27122.1 aory|EIT79930.1 aory|EIT81920.1  
atub|OJI84883.1 atub|OJI84915.1 atub|OJI88962.1 aver|OJI97104.1 aver|OJJ03419.1 acla|EAW07265.1  
afum|EAL90895.1 ater|EAU34298.1 agla|OJJ87719.1 anid|CBF88605.1 awen|OJJ34900.1 azon|OJJ50067.1  
afis|EAW22286.1 anid|CBF88560.1 asyd|OJJ63833.1 ater|EAU34323.1 asyd|OJJ63857.1

Group72: abra|OJJ66697.1 abra|OJJ68381.1 acar|OOF93705.1 acar|OOF93791.1 acar|OOF93987.1  
acla|EAW11832.1 acla|EAW12357.1 afis|EAW16780.1 afis|EAW19443.1 afla|EED56190.1 afla|EED56651.1  
afum|EAL86351.1 afum|EAL87052.1 agla|OJJ79770.1 agla|OJJ81157.1 akaw|GAA89641.1 akaw|GAA92564.1  
aluc|OJZ80748.1 aluc|OJZ90112.1 anid|CBF80588.1 anid|CBF81398.1 anig|EHA20960.1 anig|EHA27274.1  
aory|EIT73439.1 aory|EIT79687.1 asyd|OJJ54689.1 asyd|OJJ59403.1 ater|EAU30272.1 ater|EAU34745.1  
atub|OJI84692.1 atub|OJI87197.1 atub|OJI87605.1 aver|OJI99850.1 aver|OJJ02870.1 aver|OJJ07480.1  
aver|OJJ07987.1 awen|OJJ29847.1 awen|OJJ36844.1 azon|OJJ42956.1 azon|OJJ50350.1

Group73: abra|OJJ68502.1 abra|OJJ73653.1 acar|OOF98748.1 acar|OOG00831.1 acla|EAW07563.1  
acla|EAW12139.1 acla|EAW15367.1 afis|EAW17197.1 afis|EAW17227.1 afis|EAW22597.1 afla|EED45179.1  
afla|EED51197.1 afla|EED51520.1 afla|EED54722.1 afum|EAL86625.1 afum|EAL86649.1 afum|EAL90601.1  
agla|OJJ80961.1 agla|OJJ86657.1 akaw|GAA88505.1 akaw|GAA92769.1 aluc|OJZ82715.1 aluc|OJZ88400.1  
anid|CBF69884.1 anid|CBF89553.1 anig|EHA18128.1 anig|EHA21170.1 aory|EIT73539.1 aory|EIT78945.1  
aory|EIT80690.1 asyd|OJJ59011.1 asyd|OJJ65377.1 ater|EAU31751.1 ater|EAU39106.1 atub|OJI88949.1  
atub|OJI90995.1 aver|OJI99545.1 aver|OJJ01604.1 awen|OJJ35225.1 azon|OJJ51827.1

Group74: abra|OJJ66378.1 abra|OJJ68574.1 abra|OJJ75363.1 acar|OOF89872.1 acar|OOF92870.1  
akaw|GAA90247.1 akaw|GAA91914.1 aluc|OJZ81966.1 aluc|OJZ83093.1 atub|OJI84517.1 atub|OJI87392.1  
atub|OJI87843.1 acla|EAW08967.1 agla|OJJ89584.1 anid|CBF87061.1 anig|EHA22281.1 anig|EHA28155.1  
asyd|OJJ60430.1 ater|EAU36814.1 aver|OJI99753.1 afla|EED48897.1 afum|EAL93812.1 akaw|GAA92059.1  
aluc|OJZ92932.1 azon|OJJ46231.1 afis|EAW19083.1 agla|OJJ81069.1 anig|EHA26039.1 aory|EIT81242.1  
ater|EAU36156.1 awen|OJJ35776.1 azon|OJJ45936.1 acla|EAW14375.1 afla|EED54315.1 aory|EIT76109.1  
ater|EAU32130.1 awen|OJJ32478.1 afla|EED46053.1 aory|EIT83489.1

Group75: abra|OJJ66645.1 abra|OJJ77622.1 acar|OOF93665.1 acar|OOF93749.1 acar|OOF99113.1  
afis|EAW19398.1 afis|EAW25441.1 afla|EED46395.1 afla|EED56341.1 afum|EAL87096.1 afum|EAL90099.1  
agla|OJJ81109.1 agla|OJJ84218.1 akaw|GAA84009.1 akaw|GAA89598.1 aluc|OJZ80804.1 aluc|OJZ80911.1  
anid|CBF74274.1 anid|CBF85786.1 anig|EHA19435.1 anig|EHA27230.1 aory|EIT72345.1 aory|EIT73378.1  
aory|EIT83124.1 ater|EAU33678.1 ater|EAU36124.1 atub|OJI82668.1 atub|OJI87652.1 acla|EAW10153.1  
acla|EAW11788.1 afla|EED50354.1 asyd|OJJ51908.1 asyd|OJJ64317.1 aver|OJJ05362.1 awen|OJJ36793.1  
azon|OJJ43006.1 azon|OJJ43662.1 aver|OJI98410.1 awen|OJJ30031.1

Group76: abra|OJJ68339.1 abra|OJJ77792.1 acar|OOF89870.1 acar|OOF90688.1 acar|OOF90718.1  
agla|OJJ81064.1 agla|OJJ85571.1 aluc|OJZ80535.1 aluc|OJZ83619.1 anig|EHA18777.1 anig|EHA25660.1  
asyd|OJJ53057.1 asyd|OJJ61781.1 atub|OJI88396.1 atub|OJI89992.1 aver|OJI95881.1 aver|OJJ03787.1  
awen|OJJ29921.1 awen|OJJ33519.1 awen|OJJ38011.1 abra|OJJ66230.1 afis|EAW16867.1 afla|EED45515.1  
afla|EED46127.1 afum|EAL90432.1 akaw|GAA89059.1 akaw|GAA92106.1 anid|CBF80612.1 aory|EIT76508.1  
asyd|OJJ64304.1 ater|EAU31983.1 aver|OJI98397.1 awen|OJJ35964.1 azon|OJJ42115.1 ater|EAU33486.1  
aory|EIT73494.1 acar|OOF90354.1 afla|EED44960.1 awen|OJJ35329.1

Group77: abra|OJJ68971.1 abra|OJJ74920.1 acar|OOF91548.1 acar|OOF95911.1 acla|EAW08451.1  
acla|EAW14216.1 afis|EAW19065.1 afis|EAW23496.1 afla|EED54431.1 afla|EED57396.1 afum|EAL87967.1  
afum|EAL93794.1 agla|OJJ83427.1 agla|OJJ84542.1 agla|OJJ86743.1 akaw|GAA83503.1 akaw|GAA90498.1  
aluc|OJZ85958.1 aluc|OJZ92491.1 anid|CBF79648.1 anid|CBF89739.1 anig|EHA24643.1 anig|EHA26481.1  
aory|EIT75884.1 aory|EIT80127.1 asyd|OJJ52407.1 asyd|OJJ58022.1 asyd|OJJ62230.1 ater|EAU32108.1  
ater|EAU35285.1 atub|OJI79746.1 atub|OJI86924.1 aver|OJI96339.1 aver|OJJ04377.1 awen|OJJ31497.1  
awen|OJJ39821.1 azon|OJJ46209.1 azon|OJJ47945.1 anid|CBF76133.1

Group78: abra|OJJ72527.1 abra|OJJ73074.1 abra|OJJ74512.1 acar|OOF95231.1 acar|OOG00307.1  
afis|EAW15886.1 afis|EAW22192.1 afla|EED49069.1 afla|EED49846.1 afla|EED56486.1 afum|EAL88520.1  
afum|EAL90999.1 akaw|GAA82087.1 akaw|GAA86250.1 akaw|GAA88087.1 aluc|OJZ81351.1 aluc|OJZ90507.1  
aluc|OJZ92093.1 anig|EHA18653.1 anig|EHA23964.1 anig|EHA26848.1 aory|EIT72810.1 aory|EIT82565.1  
ater|EAU31708.1 ater|EAU34200.1 atub|OJI81931.1 atub|OJI86526.1 atub|OJI91555.1 aver|OJI97191.1  
aver|OJJ02116.1 aver|OJJ08595.1 awen|OJJ34773.1 awen|OJJ36745.1 azon|OJJ45756.1 azon|OJJ45757.1  
acla|EAW11155.1 anid|CBF88404.1 asyd|OJJ63749.1 aory|EIT83409.1

Group79: abra|OJJ69282.1 abra|OJJ71129.1 acar|OOF90163.1 acar|OOF98023.1 acar|OOF94440.1  
acla|EAW10369.1 acla|EAW14671.1 afis|EAW24202.1 afis|EAW25223.1 afla|EED48070.1 afla|EED53683.1  
afum|EAL85872.1 afum|EAL89884.1 agla|OJJ79190.1 agla|OJJ79675.1 akaw|GAA82845.1 akaw|GAA88154.1  
aluc|OJZ82110.1 aluc|OJZ87406.1 anid|CBF74328.1 anid|CBF85271.1 anig|EHA20636.1 anig|EHA28620.1

aory|EIT75297.1 aory|EIT83329.1 asyd|OJJ53993.1 asyd|OJJ62910.1 ater|EAU31153.1 ater|EAU34382.1 atub|OJI81240.1 atub|OJI88326.1 aver|OJI98079.1 aver|OJJ08091.1 awen|OJJ33096.1 awen|OJJ40889.1 azon|OJJ42425.1 azon|OJJ44518.1 azon|OJJ44851.1

Group80: abra|OJJ69429.1 abra|OJJ76880.1 abra|OJJ74397.1 abra|OJJ75836.1 acar|OOF94306.1 acar|OOF95338.1 akaw|GAA84546.1 akaw|GAA87295.1 aluc|OJZ89279.1 aluc|OJZ89723.1 asyd|OJJ56900.1 asyd|OJJ58390.1 ater|EAU31031.1 ater|EAU36089.1 ater|EAU36364.1 ater|EAU36837.1 ater|EAU36966.1 ater|EAU39346.1 atub|OJI85077.1 atub|OJI85520.1 aver|OJJ02028.1 aver|OJJ03392.1 agla|OJJ83397.1 akaw|GAA88295.1 aluc|OJZ82266.1 anig|EHA28477.1 atub|OJI88172.1 anid|CBF82791.1 anig|EHA23290.1 anig|EHA26951.1 aory|EIT80997.1 aver|OJI99456.1 acla|EAW13699.1 afum|EAL86287.1 anid|CBF80711.1 awen|OJJ32049.1 afla|EED52718.1 afla|EED52719.1

Group81: abra|OJJ72988.1 abra|OJJ77279.1 acar|OOF93153.1 acar|OOF96164.1 acla|EAW08023.1 acla|EAW13278.1 afis|EAW17339.1 afis|EAW23057.1 afum|EAL88423.2 afum|EAL91183.1 akaw|GAA85562.1 akaw|GAA90670.1 aluc|OJZ83496.1 aluc|OJZ84689.1 anig|EHA24331.1 anig|EHA27964.1 asyd|OJJ54336.1 asyd|OJJ56391.1 ater|EAU33849.1 ater|EAU37607.1 atub|OJI82390.1 atub|OJI89393.1 aver|OJJ05288.1 aver|OJJ06322.1 awen|OJJ35679.1 awen|OJJ40816.1 afla|EED51042.1 afla|EED54960.1 agla|OJJ79345.1 agla|OJJ89418.1 anid|CBF81037.1 aory|EIT80299.1 azon|OJJ44147.1 azon|OJJ50224.1 anid|CBF84215.1 aory|EIT77041.1 asyd|OJJ57175.1 aver|OJJ03139.1

Group82: abra|OJJ73798.1 abra|OJJ76038.1 acar|OOF99891.1 acar|OOG00949.1 acla|EAW07105.1 acla|EAW07691.1 afla|EED45540.1 afla|EED49992.1 agla|OJJ86348.1 agla|OJJ87936.1 akaw|GAA88927.1 akaw|GAA89416.1 aluc|OJZ88257.1 aluc|OJZ89493.1 anid|CBF71497.1 anid|CBF88069.1 anig|EHA18002.1 anig|EHA23106.1 aory|EIT74740.1 aory|EIT75450.1 asyd|OJJ54934.1 asyd|OJJ60320.1 asyd|OJJ63552.1 ater|EAU32047.1 ater|EAU38995.1 atub|OJI85309.1 atub|OJI90856.1 aver|OJI97382.1 aver|OJI99669.1 aver|OJJ07264.1 awen|OJJ34497.1 awen|OJJ34697.1 awen|OJJ35343.1 azon|OJJ45277.1 azon|OJJ49485.1 azon|OJJ49775.1 afis|EAW22706.1 afum|EAL90486.1

Group83: abra|OJJ74861.1 abra|OJJ78108.1 aluc|OJZ91173.1 aluc|OJZ92439.1 anig|EHA19866.1 anig|EHA26528.1 atub|OJI83187.1 atub|OJI86868.1 acar|OOF95861.1 agla|OJJ86823.1 akaw|GAA83559.1 akaw|GAA85898.1 awen|OJJ39889.1 azon|OJJ43220.1 acar|OOF98757.1 acla|EAW06608.1 afis|EAW16215.1 afla|EED48709.1 afum|EAL88842.1 agla|OJJ86220.1 anid|CBF79542.1 aory|EIT73181.1 asyd|OJJ57900.1 ater|EAU33259.1 aver|OJJ04494.1 awen|OJJ30257.1 azon|OJJ43953.1 abra|OJJ78109.1 acla|EAW06607.1 afis|EAW16216.1 afla|EED48710.1 afum|EAL88843.1 akaw|GAA85897.1 anid|CBF79540.1 aory|EIT73231.1 ater|EAU33260.1 awen|OJJ30256.1 azon|OJJ43954.1

Group84: afla|EED45777.1 afla|EED56579.1 afla|EED46479.1 afla|EED47420.1 aory|EIT72361.1 aory|EIT81890.1 aory|EIT75763.1 aory|EIT79626.1 asyd|OJJ54274.1 asyd|OJJ58712.1 asyd|OJJ61516.1 asyd|OJJ61954.1 aver|OJI96045.1 aver|OJJ00852.1 aver|OJJ01325.1 aver|OJJ05230.1 abra|OJJ67908.1 afum|EAL86295.1 agla|OJJ85785.1 aluc|OJZ81978.1 anig|EHA22277.1 atub|OJI84530.1 awen|OJJ29991.1 azon|OJJ42128.1 abra|OJJ70236.1 akaw|GAA86549.1 aluc|OJZ85097.1 anid|CBF73730.1 anig|EHA25319.1 asyd|OJJ53339.1 ater|EAU37949.1 atub|OJI80501.1 aver|OJJ08406.1 awen|OJJ31368.1 awen|OJJ35920.1 asyd|OJJ65167.1 aver|OJI99319.1 awen|OJJ39978.1

Group85: abra|OJJ69585.1 acar|OOF91569.1 acla|EAW14381.1 acla|EAW14383.1 acla|EAW14384.1 afis|EAW19087.1 afis|EAW19089.1 afis|EAW19090.1 afla|EED54319.1 afla|EED54321.1 afla|EED54322.1 afum|EAL93817.1 afum|EAL93819.1 afum|EAL93820.1 agla|OJJ84514.1 agla|OJJ84515.1 agla|OJJ84517.1 akaw|GAA91580.1 akaw|GAA91581.1 akaw|GAA91583.1 aluc|OJZ82402.1 anid|CBF79686.1 anid|CBF79690.1 anid|CBF79692.1 anig|EHA28363.1 aory|EIT76048.1 aory|EIT76070.1 aory|EIT76088.1 asyd|OJJ58048.1 ater|EAU32135.1 ater|EAU32138.1 ater|EAU32139.1 atub|OJI88039.1 aver|OJJ04355.1 awen|OJJ32484.1 azon|OJJ46222.1 azon|OJJ46228.1 azon|OJJ46230.1

Group86: abra|OJJ65665.1 abra|OJJ65727.1 abra|OJJ70427.1 abra|OJJ73414.1 acar|OOG00335.1 acar|OOG00616.1 acla|EAW07048.1 acla|EAW10826.1 agla|OJJ78693.1 agla|OJJ85646.1 aluc|OJZ81154.1 aluc|OJZ88623.1 anid|CBF79793.1 anid|CBF82339.1 asyd|OJJ56350.1 asyd|OJJ56512.1 asyd|OJJ58126.1 aver|OJJ04280.1 aver|OJJ06363.1 awen|OJJ30203.1 awen|OJJ36125.1 azon|OJJ43588.1 azon|OJJ45284.1 afis|EAW21006.1 afum|EAL84365.1 agla|OJJ85438.1 akaw|GAA93193.1 atub|OJI88767.1 afla|EED56769.1 akaw|GAA83077.1 akaw|GAA93192.1 aory|EIT73951.1 atub|OJI91208.1 ater|EAU37240.1 afla|EED48948.1 aory|EIT79979.1 aory|EIT74379.1

Group87: abra|OJJ73172.1 abra|OJJ75139.1 acar|OOF97197.1 acar|OOG00411.1 acla|EAW06855.1 acla|EAW08318.1 afis|EAW16472.1 afis|EAW23353.1 afla|EED47207.1 afla|EED55602.1 afum|EAL88123.1 afum|EAL89066.1 agla|OJJ82874.1 agla|OJJ86473.1 akaw|GAA87999.1 akaw|GAA88746.1 aluc|OJZ81255.1 aluc|OJZ92706.1 anid|CBF74897.1 anid|CBF81437.1 anig|EHA18563.1 anig|EHA26294.1 aory|EIT79222.1 aory|EIT82665.1 asyd|OJJ59426.1 asyd|OJJ60103.1 ater|EAU35596.1 ater|EAU36570.1 atub|OJI87132.1 atub|OJI91451.1 aver|OJJ02845.1 aver|OJJ04159.1 awen|OJJ39536.1 awen|OJJ40364.1 azon|OJJ47731.1 azon|OJJ49213.1 anid|CBF74899.1

Group88: afis|EAW16767.1 afis|EAW20787.1 afis|EAW20816.1 aluc|OJZ89742.1 aluc|OJZ90793.1 atub|OJI82782.1 atub|OJI85059.1 aver|OJJ04748.1 aver|OJJ08594.1 awen|OJJ33411.1 awen|OJJ35564.1 afla|EED55613.1 anig|EHA22174.1 afum|EAL84837.1 afum|EAL86763.1 anid|CBF71491.1 asyd|OJJ52867.1

asyd|OJJ53645.1 asyd|OJJ54618.1 ater|EAU29406.1 awen|OJJ33444.1 azon|OJJ43208.1 afla|EED51750.1  
agla|OJJ87003.1 akaw|GAA87278.1 anig|EHA19527.1 aory|EIT80503.1 asyd|OJJ56543.1 azon|OJJ47397.1  
awen|OJJ33735.1 anid|CBF80305.1 aver|OJJ07540.1 awen|OJJ40176.1 agla|OJJ79599.1 akaw|GAA83902.1  
anid|CBF86026.1 anid|CBF80765.1

Group89: aory|EIT73009.1 aory|EIT82639.1 abra|OJJ75430.1 acar|OOF90776.1 acla|EAW13800.1  
acla|EAW13801.1 acla|EAW13802.1 afis|EAW18330.1 afis|EAW18331.1 afis|EAW18332.1 afla|EED48794.1  
afla|EED48795.1 afla|EED49574.1 afum|EAL87695.1 afum|EAL87696.1 afum|EAL87697.1 agla|OJJ88054.1  
akaw|GAA84206.1 akaw|GAA84207.1 aluc|OJZ88883.1 aluc|OJZ88884.1 anid|CBF79398.1 anid|CBF79400.1  
anid|CBF79402.1 anig|EHA23623.1 aory|EIT72994.1 aory|EIT73029.1 asyd|OJJ57827.1 ater|EAU33343.1  
ater|EAU33344.1 atub|OJI85907.1 atub|OJI85908.1 atub|OJI85909.1 aver|OJJ04565.1 awen|OJJ30712.1  
azon|OJJ43305.1 afla|EED48796.1

Group90: aory|EIT73779.1 aory|EIT77467.1 awen|OJJ29827.1 awen|OJJ36939.1 abra|OJJ65853.1  
acar|OOF95014.1 acla|EAW11610.1 afis|EAW23843.1 afla|EED56987.1 afum|EAL93778.1 agla|OJJ78690.1  
akaw|GAA92291.1 aluc|OJZ90188.1 anig|EHA23687.1 ater|EAU31468.1 atub|OJI81615.1 aver|OJI99116.1  
awen|OJJ29704.1 azon|OJJ46986.1 abra|OJJ77924.1 acar|OOF90880.1 afla|EED45127.1 akaw|GAA83740.1  
aluc|OJZ90991.1 anid|CBF86319.1 anig|EHA19699.1 asyd|OJJ64996.1 atub|OJI82982.1 acar|OOG00327.1  
asyd|OJJ55713.1 atub|OJI87196.1 aver|OJJ06799.1 afum|EAL87274.1 agla|OJJ86442.1 asyd|OJJ62873.1  
ater|EAU31778.1 aver|OJI96926.1

Group91: abra|OJJ67337.1 acar|OOF92476.1 acla|EAW06397.1 afis|EAW18501.1 afla|EED52900.1  
afum|EAL93192.1 agla|OJJ85126.1 akaw|GAA86479.1 aluc|OJZ85020.1 anid|CBF75182.1 anig|EHA25241.1  
aory|EIT78666.1 asyd|OJJ59951.1 ater|EAU30070.1 atub|OJI80577.1 aver|OJJ02338.1 awen|OJJ31055.1  
azon|OJJ50565.1 abra|OJJ69524.1 acar|OOF94230.1 acla|EAW11627.1 afis|EAW23829.1 afla|EED54410.1  
afum|EAL87261.1 agla|OJJ82483.1 akaw|GAA88301.1 aluc|OJZ82364.1 anid|CBF75186.1 anig|EHA28401.1  
aory|EIT75866.1 ater|EAU31384.1 atub|OJI88078.1 awen|OJJ38733.1 azon|OJJ50221.1 afla|EED51976.1  
aory|EIT81396.1 agla|OJJ78561.1

Group92: abra|OJJ66053.1 abra|OJJ66142.1 abra|OJJ74823.1 abra|OJJ77498.1 acar|OOF98679.1  
acar|OOF99228.1 afla|EED49691.1 afla|EED54455.1 afla|EED57013.1 agla|OJJ78526.1 agla|OJJ80805.1  
agla|OJJ83730.1 akaw|GAA84123.1 akaw|GAA88361.1 aluc|OJZ81040.1 aluc|OJZ82294.1 anig|EHA18383.1  
anig|EHA19327.1 anig|EHA25403.1 aory|EIT81151.1 aory|EIT82306.1 ater|EAU29270.1 ater|EAU38253.1  
atub|OJI82544.1 atub|OJI88145.1 aver|OJJ01748.1 aver|OJJ01775.1 aver|OJJ08353.1 awen|OJJ34671.1  
awen|OJJ41918.1 afis|EAW19512.1 afum|EAL86984.1 anid|CBF89390.1 asyd|OJJ59158.1 azon|OJJ42220.1  
aory|EIT77599.1

Group93: abra|OJJ67791.1 abra|OJJ73324.1 abra|OJJ75373.1 acar|OOF94472.1 acar|OOF95395.1  
afis|EAW17263.1 afis|EAW17790.1 afla|EED48868.1 afla|EED50759.1 afum|EAL86680.1 afum|EAL91599.1  
akaw|GAA92735.1 akaw|GAA92794.1 aluc|OJZ88714.1 aluc|OJZ92943.1 aluc|OJZ88755.1 anig|EHA18417.1  
anig|EHA26030.1 atub|OJI87402.1 atub|OJI91301.1 atub|OJI91325.1 awen|OJJ32920.1 awen|OJJ35770.1  
acla|EAW12886.1 agla|OJJ84166.1 akaw|GAA92711.1 anid|CBF75220.1 aory|EIT78062.1 asyd|OJJ53461.1  
ater|EAU29261.1 aver|OJJ08294.1 abra|OJJ67793.1 anid|CBF75222.1 aory|EIT78107.1 ater|EAU29259.1  
awen|OJJ32922.1

Group94: abra|OJJ68844.1 abra|OJJ73357.1 acar|OOF90545.1 acar|OOG00565.1 acla|EAW06977.1  
acla|EAW15277.1 afis|EAW16591.1 afis|EAW20248.1 afla|EED45005.1 afla|EED57097.1 afum|EAL85366.1  
afum|EAL89187.1 akaw|GAA83127.1 akaw|GAA90404.1 aluc|OJZ85824.1 aluc|OJZ88683.1 anid|CBF78712.1  
anid|CBF81894.1 anig|EHA18363.1 anig|EHA24737.1 aory|EIT73755.1 aory|EIT82298.1 asyd|OJJ59680.1  
asyd|OJJ63029.1 ater|EAU32039.1 ater|EAU36671.1 atub|OJI79611.1 atub|OJI91263.1 aver|OJI97939.1  
aver|OJJ02608.1 awen|OJJ31246.1 awen|OJJ40224.1 azon|OJJ48439.1 azon|OJJ49082.1 agla|OJJ82668.1  
azon|OJJ45914.1

Group95: abra|OJJ69553.1 abra|OJJ70394.1 aory|EIT78629.1 aory|EIT82274.1 acar|OOF91880.1  
afla|EED57090.1 agla|OJJ82606.1 akaw|GAA91965.1 aluc|OJZ82652.1 anid|CBF75146.1 anig|EHA27420.1  
asyd|OJJ59972.1 ater|EAU30264.1 atub|OJI88884.1 aver|OJJ02319.1 awen|OJJ41493.1 abra|OJJ71088.1  
acar|OOF98047.1 acla|EAW06408.1 afis|EAW18512.1 afla|EED52888.1 afum|EAL93207.1 agla|OJJ85018.1  
akaw|GAA82873.1 aluc|OJZ87440.1 anid|CBF70237.1 anig|EHA20665.1 asyd|OJJ58768.1 ater|EAU29455.1  
atub|OJI81208.1 aver|OJJ01377.1 awen|OJJ31066.1 azon|OJJ46021.1 acar|OOF98419.1 acar|OOF99514.1  
azon|OJJ42344.1

Group96: abra|OJJ71749.1 abra|OJJ72735.1 acar|OOF90204.1 acar|OOF95966.1 afla|EED52022.1  
afla|EED52611.1 afum|EAL85108.1 afum|EAL87310.1 agla|OJJ78437.1 agla|OJJ82556.1 akaw|GAA85163.1  
akaw|GAA85341.1 aluc|OJZ86473.1 aluc|OJZ90703.1 anig|EHA22158.1 anig|EHA24129.1 aory|EIT73811.1  
aory|EIT74178.1 aory|EIT81402.1 asyd|OJJ54106.1 asyd|OJJ56840.1 aver|OJJ03498.1 aver|OJJ08629.1  
awen|OJJ31677.1 awen|OJJ33864.1 afis|EAW23882.1 agla|OJJ80999.1 anid|CBF77189.1 ater|EAU33464.1  
atub|OJI82130.1 atub|OJI84056.1 azon|OJJ42521.1 azon|OJJ48689.1 acla|EAW11571.1 afis|EAW19784.1  
afla|EED45206.1

Group97: abra|OJJ71850.1 abra|OJJ73479.1 acar|OOF96520.1 acar|OOG00674.1 acla|EAW06803.1  
acla|EAW13882.1 afis|EAW16352.1 afis|EAW18594.1 afla|EED52753.1 afla|EED53519.1 afum|EAL88977.1

afum|EAL93302.1 agla|OJJ81646.1 agla|OJJ88248.1 akaw|GAA85067.1 akaw|GAA87429.1 aluc|OJZ86584.1 aluc|OJZ88568.1 anid|CBF70389.1 anid|CBF89223.1 anig|EHA18265.1 anig|EHA22076.1 aory|EIT75113.1 aory|EIT78157.1 asyd|OJJ58637.1 asyd|OJJ62519.1 ater|EAU34109.1 ater|EAU34888.1 atub|OJI83939.1 atub|OJI91154.1 aver|OJI96638.1 aver|OJJ01243.1 awen|OJJ31157.1 awen|OJJ37755.1 azon|OJJ45016.1 azon|OJJ46632.1

Group98: abra|OJJ72143.1 abra|OJJ77114.1 acar|OOF93003.1 acar|OOF96781.1 acla|EAW12957.1 acla|EAW14937.1 afis|EAW17702.1 afis|EAW24453.1 afum|EAL86122.1 afum|EAL91517.1 agla|OJJ79467.1 agla|OJJ80300.1 akaw|GAA84780.1 akaw|GAA90815.1 aluc|OJZ84523.1 aluc|OJZ86900.1 anid|CBF73820.1 anid|CBF89927.1 anig|EHA21742.1 anig|EHA27821.1 aory|EIT75637.1 aory|EIT83612.1 asyd|OJJ56569.1 asyd|OJJ62120.1 atub|OJI83619.1 atub|OJI89556.1 aver|OJI96228.1 aver|OJJ06153.1 awen|OJJ32744.1 awen|OJJ37133.1 azon|OJJ45294.1 azon|OJJ50831.1 afla|EED55221.1 ater|EAU29992.1 ater|EAU31909.1 afla|EED45698.1

Group99: abra|OJJ72622.1 abra|OJJ76815.1 acar|OOF91310.1 acar|OOF94641.1 acla|EAW11602.1 acla|EAW13375.1 afis|EAW20489.1 afis|EAW23856.1 afum|EAL84566.1 afum|EAL87284.1 agla|OJJ82510.1 agla|OJJ84827.1 akaw|GAA85243.1 akaw|GAA87206.1 aluc|OJZ84225.1 aluc|OJZ90600.1 anid|CBF77244.1 anid|CBF79220.1 anig|EHA24038.1 anig|EHA27574.1 aory|EIT74289.1 aory|EIT77786.1 asyd|OJJ55735.1 asyd|OJJ56812.1 ater|EAU29567.1 ater|EAU33499.1 atub|OJI82024.1 atub|OJI89859.1 aver|OJJ03523.1 aver|OJJ06821.1 awen|OJJ33189.1 awen|OJJ33817.1 azon|OJJ46391.1 azon|OJJ48719.1 afla|EED52576.1 afla|EED44774.1

Group100: abra|OJJ73827.1 abra|OJJ74268.1 acar|OOF95463.1 acar|OOG00979.1 acla|EAW07312.1 acla|EAW07722.1 afis|EAW22334.1 afis|EAW22754.1 afla|EED50015.1 afla|EED57748.1 afum|EAL90445.1 afum|EAL90858.1 agla|OJJ83671.1 agla|OJJ87714.1 akaw|GAA86755.1 akaw|GAA89445.1 aluc|OJZ88222.1 aluc|OJZ89865.1 anid|CBF88019.1 anid|CBF88645.1 anig|EHA17969.1 anig|EHA27065.1 aory|EIT74682.1 aory|EIT81059.1 asyd|OJJ63522.1 asyd|OJJ63881.1 ater|EAU38966.1 ater|EAU39471.1 atub|OJI84943.1 atub|OJI90822.1 aver|OJI97058.1 aver|OJI97408.1 awen|OJJ34912.1 awen|OJJ35426.1 azon|OJJ45572.1 azon|OJJ49750.1

Group101: abra|OJJ76503.1 abra|OJJ76504.1 acar|OOF99462.1 acar|OOF99465.1 afis|EAW18906.1 afis|EAW18907.1 afla|EED50840.1 afla|EED50841.1 afum|EAL93638.1 afum|EAL93639.1 agla|OJJ81511.1 agla|OJJ81512.1 akaw|GAA82419.1 akaw|GAA82420.1 aluc|OJZ91697.1 aluc|OJZ91699.1 anid|CBF69713.1 anid|CBF69715.1 anig|EHA22712.1 anig|EHA22713.1 aory|EIT78986.1 aory|EIT79030.1 asyd|OJJ59043.1 asyd|OJJ59044.1 ater|EAU38075.1 ater|EAU38076.1 atub|OJI86152.1 atub|OJI86154.1 aver|OJJ01638.1 aver|OJJ01639.1 awen|OJJ32463.1 awen|OJJ32464.1 azon|OJJ47220.1 azon|OJJ47221.1 acla|EAW14191.1 acla|EAW14192.1

Group102: afis|EAW17317.1 afis|EAW24567.1 afla|EED50210.1 afla|EED51099.1 afla|EED56609.1 afla|EED57630.1 anid|CBF82898.1 anid|CBF82901.1 aory|EIT75441.1 aory|EIT77262.1 aory|EIT79641.1 aory|EIT81362.1 aory|EIT82960.1 aory|EIT82255.1 aory|EIT81401.1 ater|EAU30305.1 ater|EAU39298.1 awen|OJJ35064.1 awen|OJJ38659.1 abra|OJJ69840.1 acar|OOF93363.1 acla|EAW13292.1 afla|EED57061.1 afum|EAL91153.1 akaw|GAA87820.1 aluc|OJZ85456.1 anig|EHA24998.1 asyd|OJJ62103.1 asyd|OJJ63346.1 atub|OJI80107.1 aver|OJI96209.1 aver|OJI97614.1 afla|EED52057.1 afum|EAL86230.1 acla|EAW15044.1 azon|OJJ48710.1

Group103: afla|EED46026.1 afla|EED49987.1 akaw|GAA89413.1 akaw|GAA90839.1 aluc|OJZ82994.1 aluc|OJZ88260.1 aory|EIT74653.1 aory|EIT75776.1 atub|OJI89228.1 atub|OJI90859.1 awen|OJJ30039.1 awen|OJJ35338.1 abra|OJJ65964.1 acar|OOF92910.1 acla|EAW13583.1 afis|EAW20018.1 afis|EAW22701.1 afum|EAL84899.2 afum|EAL90491.1 agla|OJJ87998.1 anid|CBF84731.1 anig|EHA21408.1 asyd|OJJ53303.1 ater|EAU29378.1 ater|EAU39001.1 aver|OJJ08438.1 azon|OJJ43685.1 abra|OJJ73794.1 acar|OOG00953.1 acla|EAW07686.1 agla|OJJ79008.1 anid|CBF88080.1 anig|EHA18005.1 asyd|OJJ63557.1 aver|OJI97375.1 azon|OJJ49780.1

Group104: agla|OJJ79992.1 agla|OJJ79999.1 azon|OJJ42536.1 azon|OJJ46701.1 abra|OJJ72154.1 acar|OOF95729.1 afis|EAW21487.1 afla|EED50612.1 agla|OJJ88432.1 anid|CBF86065.1 anig|EHA21734.1 aory|EIT78148.1 asyd|OJJ57414.1 ater|EAU29971.1 awen|OJJ31235.1 abra|OJJ77874.1 agla|OJJ85397.1 akaw|GAA83778.1 aluc|OJZ90949.1 anig|EHA19656.1 atub|OJI82940.1 azon|OJJ42437.1 afis|EAW18426.1 aluc|OJZ92434.1 awen|OJJ38296.1 akaw|GAA83564.1 ater|EAU38826.1 afla|EED48407.1 afla|EED49503.1 aory|EIT82647.1 awen|OJJ38298.1 agla|OJJ81249.1 aver|OJJ05768.1 asyd|OJJ52949.1 aver|OJI97602.1 azon|OJJ46505.1

Group105: abra|OJJ76497.1 acar|OOF99470.1 acla|EAW14363.1 afis|EAW18913.1 afla|EED50836.1 afum|EAL93644.1 agla|OJJ81517.1 akaw|GAA82414.1 aluc|OJZ91703.1 anid|CBF69695.1 anig|EHA22717.1 aory|EIT79010.1 asyd|OJJ59053.1 ater|EAU38080.1 atub|OJI86163.1 aver|OJJ01647.1 awen|OJJ31506.1 azon|OJJ41989.1 azon|OJJ47222.1 abra|OJJ76500.1 acar|OOF99467.1 acla|EAW14196.1 afis|EAW18912.1 afla|EED50837.1 afum|EAL93643.1 akaw|GAA82416.1 aluc|OJZ91702.1 anid|CBF69697.1 anig|EHA22716.1 aory|EIT79064.1 asyd|OJJ59051.1 ater|EAU38079.1 atub|OJI86161.1 awen|OJJ31505.1 azon|OJJ47223.1 azon|OJJ41991.1

Group106: abra|OJJ72950.1 abra|OJJ74416.1 acla|EAW06831.1 acla|EAW11196.1 afis|EAW15926.1 afis|EAW16381.1 afis|EAW19938.1 afum|EAL88562.1 afum|EAL89006.1 akaw|GAA85531.1 akaw|GAA87307.1 aluc|OJZ83460.1 aluc|OJZ89710.1 anid|CBF81021.1 anid|CBF89371.1 atub|OJI82352.1 atub|OJI85092.1 aver|OJI96612.1 aver|OJJ06329.1 awen|OJJ35654.1 awen|OJJ37914.1 acar|OOF96132.1 afla|EED54935.1 agla|OJJ89379.1 anig|EHA24304.1 aory|EIT80345.1 asyd|OJJ56383.1 ater|EAU35529.1 azon|OJJ48008.1 acar|OOF95327.1 afla|EED49933.1 anig|EHA26941.1 aory|EIT83444.1 asyd|OJJ62476.1 ater|EAU34071.1

Group107: abra|OJJ68266.1 acar|OOF97546.1 acla|EAW06826.1 afis|EAW16377.1 afla|EED53460.1 afum|EAL89002.1 agla|OJJ78595.1 akaw|GAA91930.1 aluc|OJZ82692.1 anid|CBF74547.1 anig|EHA27369.1 aory|EIT75115.1 asyd|OJJ57687.1 ater|EAU34075.1 atub|OJI88924.1 aver|OJJ05493.1 awen|OJJ37911.1 azon|OJJ45090.1 abra|OJJ68268.1 acar|OOF97548.1 acla|EAW07026.1 afis|EAW16652.1 afla|EED44948.1 afum|EAL89256.1 agla|OJJ78685.1 akaw|GAA91932.1 aluc|OJZ82690.1 anid|CBF74545.1 anig|EHA27367.1 aory|EIT73496.1 ater|EAU39576.1 atub|OJI88922.1 aver|OJJ05494.1 awen|OJJ40062.1 azon|OJJ45565.1

Group108: abra|OJJ69218.1 acar|OOF91100.1 acla|EAW08627.1 afis|EAW15804.1 afla|EED51241.1 afum|EAL85546.1 agla|OJJ81971.1 akaw|GAA92227.1 aluc|OJZ86200.1 anid|CBF70912.1 anig|EHA24423.1 aory|EIT83194.1 asyd|OJJ52602.1 ater|EAU33444.1 atub|OJI79993.1 aver|OJJ04628.1 awen|OJJ38514.1 azon|OJJ43738.1 abra|OJJ69219.1 acar|OOF91099.1 acla|EAW08626.1 afis|EAW15805.1 afla|EED51240.1 afum|EAL85545.1 akaw|GAA92228.1 aluc|OJZ86201.1 anid|CBF70910.1 anig|EHA24422.1 aory|EIT83177.1 asyd|OJJ52601.1 ater|EAU33443.1 atub|OJI79994.1 aver|OJJ04627.1 awen|OJJ38516.1 azon|OJJ43737.1

Group109: abra|OJJ73774.1 acar|OOG00931.1 acla|EAW07658.1 afis|EAW22676.1 afla|EED49957.1 afum|EAL90516.1 agla|OJJ79041.1 akaw|GAA88402.1 aluc|OJZ88280.1 anid|CBF88133.1 anig|EHA18025.1 aory|EIT83452.1 asyd|OJJ63590.1 ater|EAU39033.1 atub|OJI90880.1 aver|OJI97343.1 awen|OJJ35305.1 azon|OJJ49811.1 abra|OJJ73775.1 acar|OOG00932.1 acla|EAW07660.1 afis|EAW22677.1 afla|EED49958.1 afum|EAL90515.1 agla|OJJ79040.1 akaw|GAA88401.1 aluc|OJZ88279.1 anid|CBF88131.1 anig|EHA18024.1 aory|EIT83440.1 asyd|OJJ63589.1 ater|EAU39032.1 atub|OJI90879.1 aver|OJI97344.1 azon|OJJ49810.1

Group110: abra|OJJ74284.1 acar|OOF89817.1 acla|EAW07328.1 afis|EAW22360.1 afla|EED57768.1 afum|EAL90831.1 agla|OJJ87609.1 akaw|GAA86740.1 aluc|OJZ89849.1 anid|CBF88679.1 anig|EHA27050.1 aory|EIT81097.1 asyd|OJJ63900.1 ater|EAU39494.1 atub|OJI84957.1 aver|OJI97040.1 awen|OJJ34934.1 azon|OJJ45587.1 abra|OJJ74285.1 acar|OOF95446.1 acla|EAW07329.1 afis|EAW22361.1 afla|EED57769.1 afum|EAL90830.1 agla|OJJ87610.1 akaw|GAA86739.1 aluc|OJZ89848.1 anid|CBF88686.1 anig|EHA27049.1 aory|EIT81110.1 asyd|OJJ63902.1 ater|EAU39495.1 atub|OJI84958.1 aver|OJI97038.1 awen|OJJ34935.1

Group111: abra|OJJ74383.1 acar|OOF95354.1 acla|EAW07424.1 afis|EAW22450.1 afla|EED54465.1 afum|EAL90741.1 agla|OJJ87572.1 akaw|GAA87284.1 aluc|OJZ89735.1 anid|CBF88925.1 anig|EHA26961.1 aory|EIT81125.1 asyd|OJJ62853.1 ater|EAU39257.1 atub|OJI85066.1 aver|OJI96906.1 awen|OJJ35075.1 azon|OJJ50032.1 abra|OJJ74384.1 acar|OOF95353.1 acla|EAW07423.1 afis|EAW22449.1 afla|EED54467.1 afum|EAL90742.1 akaw|GAA87285.1 aluc|OJZ89734.1 anid|CBF88927.1 anig|EHA26960.1 aory|EIT81127.1 asyd|OJJ62852.1 ater|EAU39255.1 atub|OJI85067.1 aver|OJI96905.1 awen|OJJ35076.1 azon|OJJ50031.1

Group112: abra|OJJ75811.1 acar|OOG00066.1 acla|EAW14862.1 afis|EAW24390.1 afla|EED47820.1 afum|EAL86062.1 agla|OJJ78870.1 akaw|GAA84525.1 aluc|OJZ89258.1 anid|CBF73709.1 anig|EHA23310.1 aory|EIT77118.1 asyd|OJJ56644.1 ater|EAU30344.1 atub|OJI85541.1 aver|OJJ06082.1 awen|OJJ32814.1 azon|OJJ49018.1 abra|OJJ75812.1 acar|OOG00063.1 acla|EAW14861.1 afis|EAW24389.1 afum|EAL86061.1 agla|OJJ83285.1 akaw|GAA84526.1 aluc|OJZ89259.1 anid|CBF73707.1 anig|EHA23309.1 aory|EIT77172.1 asyd|OJJ56645.1 ater|EAU30345.1 atub|OJI85540.1 aver|OJJ06081.1 awen|OJJ32815.1 azon|OJJ49017.1

Group113: abra|OJJ77674.1 acar|OOF99062.1 acla|EAW06583.1 afis|EAW16009.1 afla|EED56386.1 afum|EAL88639.1 agla|OJJ86034.1 akaw|GAA83958.1 aluc|OJZ80845.1 anid|CBF74571.1 anig|EHA19478.1 aory|EIT83011.1 asyd|OJJ57651.1 ater|EAU33634.1 atub|OJI82722.1 aver|OJJ05511.1 awen|OJJ30456.1 azon|OJJ45447.1 abra|OJJ77675.1 acar|OOF99061.1 acla|EAW06587.1 afis|EAW16010.1 afla|EED56387.1 afum|EAL88640.1 agla|OJJ86035.1 akaw|GAA83957.1 aluc|OJZ80844.1 anid|CBF74569.1 anig|EHA19479.1 aory|EIT82998.1 ater|EAU33633.1 atub|OJI82723.1 aver|OJJ05510.1 awen|OJJ30455.1 azon|OJJ45446.1

Group114: abra|OJJ65981.1 abra|OJJ73719.1 acar|OOF92892.1 acar|OOG00881.1 acla|EAW07608.1 acla|EAW13600.1 afis|EAW20005.1 afis|EAW22638.1 afla|EED46007.1 afla|EED49889.1 afum|EAL84913.1 afum|EAL90554.2 akaw|GAA88444.1 akaw|GAA90854.1 aluc|OJZ82979.1 aluc|OJZ88332.1 anid|CBF84697.1 anid|CBF88205.1 anig|EHA18067.1 anig|EHA21394.1 asyd|OJJ53314.1 asyd|OJJ63639.1 atub|OJI89212.1 atub|OJI90927.1 aver|OJI97297.1 aver|OJJ08429.1 awen|OJJ30019.1 awen|OJJ35261.1 agla|OJJ80980.1 aory|EIT72460.1 aory|EIT75522.1 ater|EAU29347.1 ater|EAU39068.1 azon|OJJ44553.1

Group115: abra|OJJ66667.1 abra|OJJ72896.1 acar|OOF93682.1 acar|OOF93767.1 acar|OOF96087.1 acla|EAW11355.1 acla|EAW11808.1 afis|EAW18139.1 afis|EAW19418.1 afla|EED50375.1 afla|EED58065.1 afum|EAL87076.1 afum|EAL87496.1 agla|OJJ81131.1 agla|OJJ83822.1 akaw|GAA85483.1 akaw|GAA89616.1 aluc|OJZ80780.1 aluc|OJZ83405.1 anig|EHA24256.1 anig|EHA27249.1 aory|EIT79750.1 aory|EIT83148.1 atub|OJI82294.1 atub|OJI87632.1 awen|OJJ35581.1 awen|OJJ36816.1 azon|OJJ42986.1 azon|OJJ46941.1 anid|CBF74365.1 asyd|OJJ57784.1 ater|EAU34724.1 aver|OJJ05380.1 ater|EAU35462.1

Group116: abra|OJJ69228.1 abra|OJJ71754.1 asyd|OJJ52597.1 asyd|OJJ53400.1 aver|OJJ04201.1  
aver|OJJ04624.1 abra|OJJ69224.1 acar|OOF91096.1 acla|EAW08622.1 afis|EAW15810.1 afila|EED51237.1  
afum|EAL85541.1 agla|OJJ81976.1 akaw|GAA92232.1 aluc|OJZ86204.1 anid|CBF70905.1 anig|EHA24418.1  
aory|EIT83188.1 ater|EAU33440.1 atub|OJI79998.1 awen|OJJ38521.1 azon|OJJ43734.1 acar|OOF91092.1  
acla|EAW08620.1 afila|EAW15813.1 afila|EED51233.1 afum|EAL85538.1 akaw|GAA92236.1 aluc|OJZ86208.1  
anid|CBF70903.1 aory|EIT83195.1 ater|EAU33435.1 atub|OJI80002.1 awen|OJJ38526.1

Group117: abra|OJJ69289.1 abra|OJJ70324.1 acar|OOF91780.1 acar|OOF94433.1 acla|EAW12318.1  
acla|EAW14678.1 afis|EAW16903.1 afis|EAW24209.1 afila|EED45264.1 afila|EED48062.1 afum|EAL85879.1  
afum|EAL86439.1 akaw|GAA88161.1 akaw|GAA92580.1 aluc|OJZ82118.1 aluc|OJZ82593.1 anig|EHA27482.1  
anig|EHA28613.1 asyd|OJJ53986.1 asyd|OJJ54375.1 ater|EAU30213.1 ater|EAU31159.1 atub|OJI88319.1  
atub|OJI88828.1 aver|OJJ05329.1 aver|OJJ08084.1 awen|OJJ29716.1 awen|OJJ33087.1 azon|OJJ42612.1  
azon|OJJ44859.1 agla|OJJ79662.1 anid|CBF74267.1 aory|EIT83358.1 aory|EIT73698.1

Group118: abra|OJJ69846.1 abra|OJJ72321.1 acar|OOF94891.1 acar|OOF97566.1 afis|EAW19582.1  
afis|EAW19642.1 afila|EED47805.1 afila|EED56993.1 agla|OJJ79220.1 agla|OJJ80784.1 akaw|GAA86072.1  
akaw|GAA87813.1 aluc|OJZ85448.1 aluc|OJZ90307.1 anig|EHA23794.1 anig|EHA24991.1 aory|EIT77130.1  
aory|EIT77504.1 atub|OJI80119.1 atub|OJI81731.1 aver|OJJ05597.1 aver|OJJ07110.1 acla|EAW12002.1  
afum|EAL86880.1 anid|CBF71346.1 asyd|OJJ55096.1 ater|EAU32886.1 awen|OJJ41887.1 azon|OJJ42708.1  
azon|OJJ46844.1 acla|EAW07815.1 anid|CBF74628.1 asyd|OJJ57585.1 ater|EAU30349.1

Group119: abra|OJJ70036.1 abra|OJJ72033.1 acla|EAW08504.1 acla|EAW09509.1 afis|EAW17096.1  
afis|EAW21624.1 afila|EED48527.1 afila|EED57027.1 afila|EED57851.1 akaw|GAA84899.1 akaw|GAA88365.1  
aluc|OJZ82290.1 aluc|OJZ86772.1 anig|EHA18733.1 anig|EHA21909.1 anig|EHA26569.1 aory|EIT72294.1  
aory|EIT73160.1 aory|EIT81085.1 ater|EAU38312.1 ater|EAU38711.1 atub|OJI83756.1 atub|OJI88149.1  
aver|OJJ03867.1 aver|OJJ08171.1 acar|OOF96691.1 afum|EAL92660.1 agla|OJJ79695.1 anid|CBF71556.1  
asyd|OJJ52536.1 awen|OJJ33874.1 azon|OJJ48675.1 afila|EED46381.1 afila|EED46382.1

Group120: abra|OJJ72283.1 abra|OJJ78033.1 acar|OOF92932.1 acar|OOF94938.1 afila|EED49548.1  
afila|EED50919.1 aluc|OJZ90262.1 aluc|OJZ91590.1 aory|EIT79028.1 aory|EIT82573.1 asyd|OJJ53419.1  
asyd|OJJ54983.1 asyd|OJJ55080.1 asyd|OJJ65156.1 aver|OJJ07128.1 aver|OJJ08332.1 awen|OJJ32213.1  
awen|OJJ32251.1 awen|OJJ41909.1 afis|EAW20797.1 afum|EAL84832.1 agla|OJJ85015.1 akaw|GAA86035.1  
anid|CBF71371.1 anig|EHA23758.1 ater|EAU32868.1 atub|OJI81688.1 azon|OJJ47360.1 abra|OJJ76621.1  
afila|EED51770.1 akaw|GAA92835.1 anig|EHA22614.1 aory|EIT81741.1 atub|OJI86039.1

Group121: abra|OJJ74623.1 abra|OJJ74837.1 acar|OOF95085.1 acar|OOF95151.1 acar|OOF95841.1  
acla|EAW10761.1 acla|EAW14613.1 afis|EAW19343.1 afis|EAW24815.1 afila|EED47168.1 afila|EED50136.1  
afila|EED56891.1 afum|EAL89459.1 afum|EAL94062.1 akaw|GAA81986.1 akaw|GAA83583.1 aluc|OJZ92204.1  
aluc|OJZ92414.1 anig|EHA26551.1 anig|EHA26754.1 aory|EIT74736.1 aory|EIT79324.1 aory|EIT77583.1  
ater|EAU36492.1 ater|EAU39073.1 atub|OJI86632.1 atub|OJI86844.1 azon|OJJ48665.1 azon|OJJ49253.1  
agla|OJJ82911.1 anid|CBF85881.1 asyd|OJJ64378.1 aver|OJI98474.1 awen|OJJ40401.1

Group122: agla|OJJ84376.1 agla|OJJ85709.1 asyd|OJJ57959.1 asyd|OJJ61061.1 abra|OJJ71937.1  
acar|OOF96594.1 acar|OOF96595.1 acla|EAW09592.1 acla|EAW09593.1 afis|EAW21545.1 afis|EAW21546.1  
afila|EED55996.1 afila|EED55997.1 afum|EAL92565.1 afum|EAL92566.1 agla|OJJ85708.1 akaw|GAA84987.1  
aluc|OJZ86674.1 anid|CBF76366.1 anid|CBF76368.1 anig|EHA21999.1 anig|EHA22000.1 aory|EIT76685.1  
aory|EIT76776.1 asyd|OJJ61062.1 ater|EAU34993.1 ater|EAU34994.1 atub|OJI83854.1 aver|OJJ00378.1  
aver|OJJ00379.1 awen|OJJ39144.1 awen|OJJ39146.1 azon|OJJ51476.1 azon|OJJ51477.1

Group123: abra|OJJ67331.1 acar|OOF92482.1 acla|EAW06403.1 afis|EAW18507.1 afila|EED52893.1  
afum|EAL93201.1 agla|OJJ85114.1 akaw|GAA86485.1 aluc|OJZ85026.1 anid|CBF70247.1 anig|EHA25247.1  
aory|EIT78591.1 asyd|OJJ58761.1 ater|EAU30064.1 atub|OJI80571.1 aver|OJJ01371.1 awen|OJJ31060.1  
azon|OJJ50571.1 abra|OJJ67332.1 acar|OOF92481.1 acla|EAW06402.1 afis|EAW18506.1 afila|EED52895.1  
afum|EAL93200.1 akaw|GAA86484.1 aluc|OJZ85025.1 anig|EHA25246.1 aory|EIT78664.1 asyd|OJJ58760.1  
ater|EAU30065.1 atub|OJI80572.1 aver|OJJ01368.1 awen|OJJ31059.1 azon|OJJ50569.1

Group124: abra|OJJ68518.1 acar|OOF92724.1 acla|EAW12845.1 afis|EAW18008.1 afila|EED51887.1  
afum|EAL91820.1 agla|OJJ80274.1 akaw|GAA91330.1 aluc|OJZ82732.1 anid|CBF80034.1 anig|EHA21184.1  
aory|EIT81755.1 asyd|OJJ58272.1 ater|EAU31524.1 atub|OJI88965.1 aver|OJJ02152.1 awen|OJJ41532.1  
azon|OJJ48252.1 atub|OJI79785.1 abra|OJJ69012.1 acar|OOF92723.1 acla|EAW12846.1 afis|EAW18009.1  
afila|EED51886.1 afum|EAL91821.1 agla|OJJ80275.1 akaw|GAA90529.1 aluc|OJZ85998.1 anid|CBF80035.1  
anig|EHA24612.1 aory|EIT81715.1 ater|EAU31525.1 awen|OJJ41531.1 azon|OJJ48251.1

Group125: abra|OJJ69958.1 acar|OOF93468.1 acla|EAW08829.1 afis|EAW15568.1 afila|EED49078.1  
afum|EAL85765.1 agla|OJJ85182.1 akaw|GAA87702.1 aluc|OJZ85324.1 anid|CBF78110.1 anig|EHA25514.1  
aory|EIT82568.1 ater|EAU32562.1 atub|OJI80248.1 abra|OJJ69959.1 acla|EAW08833.1 afis|EAW15567.1  
afila|EED49076.1 afila|EED49077.1 afum|EAL85766.1 agla|OJJ85184.1 akaw|GAA87701.1 anid|CBF78112.1  
anid|CBF78114.1 aory|EIT82498.1 aory|EIT82525.1 asyd|OJJ55899.1 ater|EAU32566.1 atub|OJI80249.1  
aver|OJJ04844.1 awen|OJJ38227.1 azon|OJJ43068.1 acla|EAW08832.1 azon|OJJ47853.1

Group126: abra|OJJ71382.1 acar|OOF97787.1 acla|EAW10157.1 afis|EAW25437.1 afla|EED53925.1 afum|EAL90095.1 agla|OJJ87082.1 akaw|GAA82612.1 aluc|OJZ87158.1 anid|CBF77596.1 anig|EHA20417.1 aory|EIT78347.1 asyd|OJJ53142.1 ater|EAU34609.1 atub|OJI81482.1 aver|OJJ03710.1 awen|OJJ41165.1 azon|OJJ44743.1 abra|OJJ71383.1 acar|OOF97786.1 acla|EAW10158.1 afis|EAW25436.1 afla|EED53924.1 afum|EAL90094.1 agla|OJJ87081.1 akaw|GAA82611.1 aluc|OJZ87157.1 anid|CBF77594.1 anig|EHA20416.1 aory|EIT78262.1 asyd|OJJ53143.1 ater|EAU34608.1 atub|OJI81483.1 aver|OJJ03709.1

Group127: abra|OJJ72469.1 acar|OOF94768.1 acla|EAW12702.1 afis|EAW17865.1 afla|EED46230.1 afum|EAL91673.1 agla|OJJ83099.1 akaw|GAA86207.1 aluc|OJZ90456.1 anid|CBF76910.1 anig|EHA23918.1 aory|EIT76409.1 asyd|OJJ57089.1 ater|EAU33080.1 atub|OJI81883.1 aver|OJJ03211.1 awen|OJJ41706.1 azon|OJJ48402.1 abra|OJJ72470.1 acar|OOF94765.1 acla|EAW12703.1 afis|EAW17866.1 afla|EED46231.1 afum|EAL91674.1 agla|OJJ83086.1 akaw|GAA86208.1 aluc|OJZ90457.1 anid|CBF76912.1 anig|EHA23919.1 aory|EIT76527.1 ater|EAU33081.1 atub|OJI81884.1 awen|OJJ41705.1 azon|OJJ48401.1

Group128: abra|OJJ72932.1 acar|OOF96112.1 acla|EAW06458.1 afis|EAW15954.1 afla|EED58104.1 afum|EAL88587.1 agla|OJJ89359.1 akaw|GAA85514.1 aluc|OJZ83442.1 anid|CBF81063.1 anig|EHA24288.1 aory|EIT79164.1 asyd|OJJ56456.1 ater|EAU35503.1 atub|OJI82333.1 aver|OJJ06266.1 awen|OJJ35622.1 azon|OJJ46902.1 abra|OJJ72934.1 acar|OOF96115.1 acla|EAW06457.1 afis|EAW15953.1 afla|EED58105.1 afum|EAL88586.1 akaw|GAA85515.1 aluc|OJZ83443.1 anid|CBF81061.1 anig|EHA24289.1 aory|EIT79130.1 asyd|OJJ56455.1 ater|EAU35504.1 atub|OJI82334.1 aver|OJJ06267.1 awen|OJJ35623.1

Group129: abra|OJJ76465.1 acar|OOF99703.1 acla|EAW13966.1 afis|EAW18675.1 afla|EED50624.1 afum|EAL93395.2 agla|OJJ82401.1 aluc|OJZ91745.1 anid|CBF70588.1 anig|EHA22748.1 aory|EIT78145.1 asyd|OJJ58523.1 ater|EAU38235.1 atub|OJI86203.1 aver|OJJ01124.1 awen|OJJ32147.1 azon|OJJ46731.1 abra|OJJ76466.1 acar|OOF99704.1 acla|EAW13965.1 afis|EAW18674.1 afla|EED50625.1 afum|EAL93394.1 akaw|GAA82377.1 aluc|OJZ91744.1 anid|CBF70586.1 anig|EHA22747.1 aory|EIT77989.1 asyd|OJJ58524.1 ater|EAU38236.1 atub|OJI86202.1 aver|OJJ01125.1 awen|OJJ32146.1 azon|OJJ46730.1

Group130: abra|OJJ66702.1 abra|OJJ76322.1 acar|OOF93706.1 acar|OOF93792.1 afla|EED45227.1 afla|EED56652.1 anid|CBF78509.1 anid|CBF81402.1 anig|EHA22872.1 anig|EHA27277.1 aory|EIT73751.1 aory|EIT79654.1 asyd|OJJ59404.1 asyd|OJJ65313.1 ater|EAU29738.1 ater|EAU34746.1 atub|OJI86345.1 atub|OJI87602.1 acla|EAW11833.1 afis|EAW19444.1 afum|EAL87051.1 agla|OJJ81158.1 akaw|GAA89644.1 aluc|OJZ80745.1 aver|OJJ02869.1 awen|OJJ36845.1 azon|OJJ42319.1 azon|OJJ42955.1 acar|OOF97765.1 akaw|GAA82251.1 aluc|OJZ91893.1 aver|OJI99451.1 awen|OJJ40922.1

Group131: abra|OJJ68714.1 abra|OJJ76939.1 acar|OOF91389.1 acar|OOF92214.1 afum|EAL84486.2 afum|EAL91972.2 aluc|OJZ81814.1 aluc|OJZ84338.1 anig|EHA22401.1 anig|EHA27672.1 atub|OJI84386.1 atub|OJI89730.1 awen|OJJ33278.1 awen|OJJ41371.1 azon|OJJ48840.1 azon|OJJ50652.1 acla|EAW12532.1 acla|EAW13466.1 afis|EAW20578.1 afis|EAW24117.1 afla|EED46815.1 afla|EED52313.1 agla|OJJ88717.1 akaw|GAA87100.1 akaw|GAA89867.1 anid|CBF86537.1 aory|EIT74384.1 asyd|OJJ64866.1 ater|EAU37106.1 aver|OJI98979.1 anid|CBF78940.1 asyd|OJJ55646.1 aver|OJJ06731.1

Group132: abra|OJJ69799.1 abra|OJJ75720.1 acar|OOF90260.1 acar|OOF93578.1 afis|EAW21759.1 afis|EAW24741.1 afum|EAL89387.1 afum|EAL92789.1 akaw|GAA84456.1 akaw|GAA87860.1 aluc|OJZ85501.1 aluc|OJZ89172.1 anid|CBF80400.1 anid|CBF83678.1 anig|EHA23383.1 anig|EHA25034.1 aory|EIT75373.1 aory|EIT79769.1 asyd|OJJ54761.1 asyd|OJJ55920.1 asyd|OJJ60823.1 atub|OJI80064.1 atub|OJI85618.1 aver|OJJ00149.1 aver|OJJ04873.1 aver|OJJ07409.1 azon|OJJ45021.1 azon|OJJ48200.1 acla|EAW09376.1 afla|EED45538.1 agla|OJJ84391.1 ater|EAU38431.1 awen|OJJ34043.1

Group133: abra|OJJ71453.1 abra|OJJ72857.1 acar|OOF96054.1 acar|OOF97693.1 acar|OOF97744.1 acar|OOF98763.1 afis|EAW22749.1 afis|EAW24033.1 afla|EED45033.1 afla|EED49120.1 afum|EAL87464.1 afum|EAL90450.1 akaw|GAA82558.1 akaw|GAA85456.1 aluc|OJZ83364.1 aluc|OJZ87090.1 anig|EHA20361.1 anig|EHA24229.1 aory|EIT73568.1 aory|EIT78580.1 asyd|OJJ59869.1 asyd|OJJ65349.1 ater|EAU29414.1 ater|EAU29711.1 atub|OJI81548.1 atub|OJI82255.1 aver|OJI99497.1 aver|OJJ02418.1 acla|EAW11389.1 agla|OJJ86999.1 anid|CBF75320.1 awen|OJJ35505.1 azon|OJJ46979.1

Group134: abra|OJJ72895.1 abra|OJJ73247.1 acar|OOF96086.1 acar|OOG00487.1 acla|EAW06921.1 acla|EAW11356.1 afis|EAW16538.1 afis|EAW18138.1 afla|EED56131.1 afla|EED58064.1 afum|EAL87495.1 afum|EAL89135.1 agla|OJJ82784.1 agla|OJJ83821.1 akaw|GAA85482.1 akaw|GAA87933.1 aluc|OJZ81180.1 aluc|OJZ83404.1 anig|EHA18498.1 anig|EHA24255.1 aory|EIT76761.1 aory|EIT79757.1 ater|EAU35461.1 ater|EAU36601.1 atub|OJI82293.1 atub|OJI91377.1 awen|OJJ35580.1 awen|OJJ40283.1 azon|OJJ46943.1 azon|OJJ49145.1 anid|CBF81745.1 asyd|OJJ59599.1 aver|OJJ02669.1

Group135: anid|CBF74543.1 anid|CBF80800.1 asyd|OJJ54487.1 asyd|OJJ57688.1 aver|OJJ05495.1 aver|OJJ07692.1 awen|OJJ30771.1 awen|OJJ31710.1 abra|OJJ67440.1 acar|OOF92387.1 acar|OOF92388.1 acla|EAW06324.1 afis|EAW18438.1 afla|EED52977.1 afum|EAL93120.1 agla|OJJ85004.1 akaw|GAA86390.1 aluc|OJZ84924.1 anid|CBF70039.1 anig|EHA25142.1 anig|EHA25143.1 aory|EIT78691.1 aory|EIT78713.1 asyd|OJJ58866.1 ater|EAU29862.1 atub|OJI80675.1 aver|OJJ01467.1 azon|OJJ50475.1 acla|EAW06323.1 afis|EAW18437.1 afum|EAL93119.1 ater|EAU29854.1 afla|EED52975.1



Group136: aory|EIT76219.1 abra|OJJ66160.1 acla|EAW07091.1 ater|EAU30184.1 abra|OJJ76943.1 acar|OOF91392.1 acla|EAW14645.1 afis|EAW23759.1 afla|EED45469.1 afum|EAL87193.2 agla|OJJ78794.1 akaw|GAA87097.1 aluc|OJZ84341.1 anid|CBF86208.1 anig|EHA27675.1 anig|EHA27676.1 aory|EIT75611.1 asyd|OJJ64548.1 atub|OJI89727.1 aver|OJI98644.1 awen|OJJ40873.1 afis|EAW21192.1 anid|CBF78488.1 asyd|OJJ58352.1 ater|EAU36866.1 aver|OJJ02055.1 awen|OJJ31298.1 afis|EAW22111.1 afla|EED48116.1 aver|OJJ07112.1 azon|OJJ50585.1 awen|OJJ29841.1 awen|OJJ30060.1

Group137: abra|OJJ68073.1 acar|OOF92659.1 acla|EAW14013.1 afis|EAW18719.1 afla|EED50674.1 afum|EAL93443.2 agla|OJJ82339.1 akaw|GAA92398.1 aluc|OJZ83259.1 anid|CBF70677.1 anig|EHA21113.1 aory|EIT78139.1 asyd|OJJ58472.1 ater|EAU38185.1 atub|OJI87680.1 aver|OJJ01073.1 awen|OJJ32224.1 azon|OJJ46775.1 abra|OJJ68477.1 acar|OOF92676.1 acla|EAW07215.1 afis|EAW22228.1 afla|EED57619.1 afum|EAL90966.1 agla|OJJ87821.1 anid|CBF88467.1 anig|EHA21112.1 aory|EIT82940.1 asyd|OJJ63779.1 ater|EAU34233.1 aver|OJI97158.1 awen|OJJ34810.1 azon|OJJ45740.1

Group138: abra|OJJ71306.1 acar|OOF97864.1 acla|EAW10234.1 afis|EAW25358.1 afla|EED53840.1 afum|EAL90020.1 agla|OJJ83908.1 akaw|GAA82685.1 aluc|OJZ87238.1 anid|CBF77463.1 anig|EHA20484.1 aory|EIT78472.1 asyd|OJJ53218.1 ater|EAU34506.1 atub|OJI81404.1 aver|OJJ03634.1 awen|OJJ41084.1 azon|OJJ44664.1 abra|OJJ71307.1 acla|EAW10233.1 afis|EAW25359.1 afla|EED53841.1 afum|EAL90021.1 agla|OJJ83909.1 akaw|GAA82684.1 aluc|OJZ87237.1 anid|CBF77461.1 aory|EIT78435.1 asyd|OJJ53217.1 ater|EAU34507.1 atub|OJI81405.1 awen|OJJ41085.1 azon|OJJ44665.1

Group139: abra|OJJ71587.1 acar|OOF96317.1 acla|EAW15133.1 afis|EAW20105.1 afla|EED53369.1 afum|EAL85222.1 agla|OJJ88850.1 akaw|GAA89336.1 aluc|OJZ86327.1 anid|CBF84906.1 anig|EHA21551.1 aory|EIT75191.1 asyd|OJJ63169.1 ater|EAU38724.1 atub|OJI84207.1 aver|OJI97785.1 awen|OJJ31876.1 azon|OJJ46259.1 abra|OJJ71588.1 acla|EAW15132.1 afis|EAW20104.1 afum|EAL85221.1 agla|OJJ88849.1 akaw|GAA89335.1 aluc|OJZ86328.1 anid|CBF84908.1 anig|EHA21550.1 aory|EIT75224.1 asyd|OJJ63168.1 atub|OJI84206.1 aver|OJI97786.1 awen|OJJ31877.1 azon|OJJ46257.1

Group140: abra|OJJ72666.1 acar|OOF94609.1 acla|EAW11529.1 afis|EAW23925.1 afla|EED50596.1 afum|EAL87350.1 agla|OJJ79403.1 akaw|GAA85287.1 aluc|OJZ90645.1 anid|CBF77250.1 anig|EHA24080.1 aory|EIT82072.1 asyd|OJJ56809.1 ater|EAU32310.1 atub|OJI82075.1 aver|OJJ03525.1 awen|OJJ39029.1 azon|OJJ51358.1 abra|OJJ72668.1 acla|EAW11530.1 afis|EAW23924.1 afla|EED50597.1 afum|EAL87349.1 agla|OJJ79402.1 akaw|GAA85288.1 aluc|OJZ90646.1 anid|CBF77248.1 anig|EHA24081.1 aory|EIT78140.1 asyd|OJJ56810.1 ater|EAU32312.1 awen|OJJ39031.1 azon|OJJ51359.1

Group141: abra|OJJ74273.1 acar|OOF95457.1 acla|EAW07318.1 afis|EAW22350.1 afla|EED57754.1 afum|EAL90842.1 agla|OJJ87709.1 akaw|GAA86750.1 aluc|OJZ89860.1 anid|CBF88653.1 anig|EHA27060.1 aory|EIT81054.1 ater|EAU39489.1 aver|OJI97054.1 awen|OJJ34904.1 azon|OJJ45578.1 abra|OJJ74279.1 acar|OOF95452.1 acla|EAW07323.1 afis|EAW22355.1 afla|EED57761.1 afum|EAL90836.1 agla|OJJ87608.1 akaw|GAA86745.1 aluc|OJZ89854.1 anid|CBF88666.1 anig|EHA27055.1 aory|EIT81031.1 asyd|OJJ63892.1 atub|OJI84952.1 aver|OJI97047.1 awen|OJJ34929.1 azon|OJJ45582.1

Group142: abra|OJJ68218.1 abra|OJJ69789.1 acar|OOF93590.1 acar|OOF97507.1 agla|OJJ78902.1 agla|OJJ86249.1 akaw|GAA83228.1 akaw|GAA87869.1 aluc|OJZ83728.1 aluc|OJZ85510.1 anid|CBF84393.1 anid|CBF86693.1 atub|OJI80056.1 atub|OJI90104.1 acla|EAW09054.1 acla|EAW12123.1 afis|EAW25629.1 afla|EED55183.1 afum|EAL84317.1 anig|EHA18876.1 aory|EIT80665.1 aory|EIT81643.1 asyd|OJJ55507.1 ater|EAU32706.1 aver|OJJ06584.1 aver|OJJ08175.1 awen|OJJ36048.1 azon|OJJ43184.1 afla|EED51722.1 anig|EHA25042.1 asyd|OJJ53581.1 anid|CBF83169.1

Group143: abra|OJJ68305.1 abra|OJJ68976.1 afla|EED55146.1 afla|EED57528.1 agla|OJJ80112.1 agla|OJJ84537.1 akaw|GAA83169.1 akaw|GAA90501.1 aluc|OJZ83668.1 aluc|OJZ85964.1 aory|EIT81602.1 aory|EIT81847.1 asyd|OJJ59831.1 asyd|OJJ65307.1 atub|OJI79752.1 atub|OJI90039.1 awen|OJJ31501.1 awen|OJJ36340.1 azon|OJJ46215.1 azon|OJJ48729.1 acar|OOF91551.1 acar|OOF96683.1 acla|EAW14213.1 afis|EAW19068.1 afum|EAL93797.1 anid|CBF78527.1 anig|EHA18823.1 anig|EHA24640.1 aver|OJI99445.1 afla|EED54434.1 aory|EIT75875.1 ater|EAU32117.1

Group144: abra|OJJ69780.1 abra|OJJ73124.1 acar|OOF90902.1 acar|OOF91910.1 afis|EAW16809.1 afis|EAW20667.1 afis|EAW16810.1 atub|OJI88609.1 atub|OJI91509.1 awen|OJJ29822.1 awen|OJJ37778.1 azon|OJJ42117.1 azon|OJJ42607.1 afis|EAW17206.1 afis|EAW23422.1 afla|EED49098.1 afum|EAL85399.1 afum|EAL86742.1 afum|EBA27333.1 agla|OJJ84598.1 akaw|GAA88041.1 akaw|GAA92683.1 aluc|OJZ81300.1 aluc|OJZ85605.1 anig|EHA18609.1 ater|EAU32778.1 anig|EHA25864.1 afum|EAL86743.1 afis|EAW20625.1 afla|EED49487.1 atub|OJI83712.1 aluc|OJZ90138.1

Group145: abra|OJJ70543.1 abra|OJJ73773.1 acar|OOF94608.1 acar|OOG00929.1 afis|EAW15411.1 afis|EAW22675.1 afum|EAL84235.1 afum|EAL90517.1 akaw|GAA83389.1 akaw|GAA88403.1 aluc|OJZ83888.1 aluc|OJZ88281.1 anid|CBF74491.1 anid|CBF88137.1 anig|EHA18026.1 anig|EHA19025.1 aory|EIT72732.1 aory|EIT83438.1 asyd|OJJ57716.1 asyd|OJJ63598.1 ater|EAU36301.1 ater|EAU39034.1 atub|OJI90255.1 atub|OJI90881.1 azon|OJJ45068.1 azon|OJJ49812.1 acla|EAW07657.1 afla|EED49956.1 agla|OJJ79042.1 aver|OJI97338.1 aver|OJJ05451.1 awen|OJJ35304.1

Group146: abra|OJJ70875.1 abra|OJJ77724.1 acar|OOF98245.1 acar|OOF99016.1 acla|EAW10463.1 acla|EAW10819.1 acla|EAW11708.1 afis|EAW23731.1 afis|EAW25104.1 afum|EAL87170.1 afum|EAL89775.1 akaw|GAA83911.1 akaw|GAA91738.1 akaw|GAA93340.1 aluc|OJZ87647.1 aluc|OJZ90786.1 ater|EAU29552.1 ater|EAU31452.1 atub|OJI80998.1 atub|OJI82773.1 afla|EED55342.1 anid|CBF82779.1 anid|CBF86021.1 anig|EHA20840.1 asyd|OJJ55916.1 asyd|OJJ64453.1 ater|EAU39370.1 aver|OJI98556.1 aver|OJJ04856.1 awen|OJJ40718.1 anig|EHA19519.1 azon|OJJ48020.1

Group147: abra|OJJ73071.1 abra|OJJ77012.1 acla|EAW09005.1 acla|EAW15322.1 afis|EAW20323.1 afis|EAW25545.1 akaw|GAA87037.1 akaw|GAA88090.1 aluc|OJZ81354.1 aluc|OJZ84412.1 asyd|OJJ54270.1 asyd|OJJ55537.1 ater|EAU32181.1 ater|EAU39595.1 atub|OJI89661.1 atub|OJI91558.1 aver|OJJ05226.1 aver|OJJ06615.1 acar|OOG00304.1 afla|EED44875.1 afum|EAL85448.1 agla|OJJ78910.1 anid|CBF82101.1 anid|CBF83180.1 anig|EHA18655.1 aory|EIT83261.1 awen|OJJ36038.1 azon|OJJ51343.1 afla|EED54130.1 afum|EAL84263.1 anig|EHA27738.1 aory|EIT76050.1

Group148: abra|OJJ76652.1 abra|OJJ77533.1 acar|OOF99194.1 acar|OOF99350.1 afla|EED53116.1 afla|EED53300.1 akaw|GAA84088.1 akaw|GAA92992.1 aluc|OJZ81003.1 aluc|OJZ91553.1 anid|CBF82367.1 anid|CBF86914.1 anig|EHA19357.1 anig|EHA22588.1 asyd|OJJ54198.1 asyd|OJJ64607.1 ater|EAU30240.1 ater|EAU37451.1 ater|EAU37789.1 atub|OJI82582.1 atub|OJI86006.1 aver|OJI96893.1 aver|OJJ08526.1 aver|OJI98704.1 awen|OJJ31647.1 awen|OJJ37655.1 acla|EAW06705.1 agla|OJJ88350.1 aory|EIT74767.1 aory|EIT74899.1 azon|OJJ44918.1 asyd|OJJ53794.1

Group149: acar|OOF94510.1 acar|OOG00617.1 agla|OJJ78704.1 agla|OJJ82589.1 agla|OJJ88673.1 awen|OJJ33431.1 awen|OJJ40048.1 abra|OJJ73366.1 acar|OOG00573.1 acla|EAW12876.1 afis|EAW17800.1 afum|EAL91608.1 akaw|GAA83118.1 aluc|OJZ88674.1 anid|CBF87487.1 anig|EHA18356.1 asyd|OJJ52958.1 ater|EAU31398.1 atub|OJI91255.1 aver|OJJ08926.1 abra|OJJ73415.1 afla|EED44896.1 akaw|GAA83076.1 aluc|OJZ88622.1 anig|EHA18315.1 aory|EIT83248.1 asyd|OJJ62646.1 atub|OJI91207.1 aver|OJJ07782.1 azon|OJJ50122.1 afis|EAW20384.1 asyd|OJJ54467.1

Group150: acar|OOF95065.1 acar|OOF95131.1 acar|OOF95066.1 acar|OOF95132.1 abra|OJJ74648.1 acla|EAW10738.1 acla|EAW10739.1 afis|EAW24835.1 afis|EAW24836.1 afla|EED47139.1 afla|EED47140.1 afum|EAL89480.1 afum|EAL89481.2 agla|OJJ82028.1 akaw|GAA81962.1 akaw|GAA81963.1 aluc|OJZ92226.1 anid|CBF74584.1 anid|CBF74586.1 anig|EHA26730.1 aory|EIT79207.1 aory|EIT79226.1 asyd|OJJ57656.1 ater|EAU36469.1 ater|EAU36470.1 atub|OJI86656.1 aver|OJJ05516.1 aver|OJJ05517.1 awen|OJJ40422.1 awen|OJJ40423.1 azon|OJJ49280.1 azon|OJJ49281.1

Group151: acar|OOF95215.1 acar|OOG00549.1 afla|EED45224.1 afla|EED52255.1 afla|EED57542.1 afum|EAL86491.1 afum|EAL91022.1 aory|EIT73609.1 aory|EIT74331.1 aory|EIT81831.1 asyd|OJJ52204.1 asyd|OJJ54774.1 asyd|OJJ64753.1 ater|EAU30189.1 ater|EAU32767.1 ater|EAU34175.1 aver|OJI98855.1 aver|OJJ07392.1 aver|OJJ07305.1 abra|OJJ74541.1 acla|EAW07155.1 acla|EAW12276.1 afis|EAW16964.1 agla|OJJ87885.1 akaw|GAA82061.1 aluc|OJZ92121.1 anid|CBF86686.1 anig|EHA26824.1 atub|OJI86554.1 awen|OJJ34744.1 azon|OJJ42779.1 anid|CBF80465.1

Group152: anig|EHA18119.1 anig|EHA26153.1 awen|OJJ35539.1 awen|OJJ38334.1 acla|EAW13628.1 afis|EAW24672.1 acar|OOG00839.1 afla|EED48354.1 afum|EAL92114.1 akaw|GAA88497.1 aluc|OJZ88392.1 anid|CBF87369.1 anig|EHA18120.1 aory|EIT72297.1 asyd|OJJ53356.1 atub|OJI90987.1 aver|OJJ08385.1 acar|OOG00840.1 acla|EAW07713.1 afis|EAW20752.1 afla|EED48353.1 afum|EAL84865.1 agla|OJJ88184.1 akaw|GAA88496.1 anid|CBF82358.1 aory|EIT72300.1 asyd|OJJ54748.1 azon|OJJ43889.1 afum|EAL86291.2 afis|EAW21091.1 aver|OJJ08174.1 asyd|OJJ54203.1

Group153: asyd|OJJ60702.1 asyd|OJJ64821.1 aver|OJI98934.1 aver|OJJ00028.1 abra|OJJ72028.1 acar|OOF96677.1 afis|EAW21619.1 afla|EED57848.1 akaw|GAA84904.1 aluc|OJZ86765.1 anid|CBF83493.1 anig|EHA21914.1 aory|EIT81067.1 ater|EAU38309.1 atub|OJI83762.1 awen|OJJ37096.1 azon|OJJ48684.1 abra|OJJ77154.1 acar|OOF93040.1 acla|EAW12917.1 afis|EAW17740.1 afla|EED45741.1 afum|EAL91554.1 agla|OJJ81711.1 akaw|GAA90776.1 aluc|OJZ84568.1 anid|CBF86610.1 anig|EHA27862.1 aory|EIT75552.1 ater|EAU31867.1 atub|OJI89514.1 azon|OJJ50798.1

Group154: atub|OJI81651.1 atub|OJI86062.1 abra|OJJ65911.1 acar|OOF94961.1 acla|EAW12054.1 afis|EAW19697.1 afla|EED57032.1 afum|EAL86830.1 agla|OJJ80819.1 akaw|GAA92321.1 aluc|OJZ90219.1 anid|CBF71392.1 anig|EHA23717.1 aory|EIT82283.1 asyd|OJJ55041.1 ater|EAU33691.1 aver|OJI98387.1 awen|OJJ41939.1 azon|OJJ50749.1 abra|OJJ76597.1 akaw|GAA82501.1 aluc|OJZ91610.1 anig|EHA22639.1 acla|EAW11329.1 afis|EAW18166.1 afla|EED56329.1 afum|EAL87526.1 agla|OJJ85952.1 anid|CBF85749.1 aory|EIT73387.1 asyd|OJJ64295.1 aver|OJJ07167.1

Group155: abra|OJJ66622.1 acar|OOF91045.1 acla|EAW10875.1 afis|EAW20983.1 afla|EED50338.1 afum|EAL84647.2 agla|OJJ84060.1 akaw|GAA91103.1 aluc|OJZ81427.1 anid|CBF82618.1 anig|EHA25995.1 aory|EIT77260.1 asyd|OJJ54020.1 ater|EAU38633.1 atub|OJI88753.1 aver|OJJ08720.1 awen|OJJ34328.1 azon|OJJ48073.1 afla|EED50340.1 akaw|GAA91102.1 aluc|OJZ81426.1 acar|OOF91046.1 acla|EAW10874.1 afis|EAW20984.1 afla|EED50339.1 afum|EAL84646.1 agla|OJJ84063.1 anid|CBF82622.1 aory|EIT77350.1 atub|OJI88754.1 awen|OJJ34327.1 azon|OJJ48069.1

Group156: abra|OJJ68143.1 acar|OOF97481.1 acla|EAW13069.1 afis|EAW17595.1 afla|EED49225.1 afum|EAL91408.1 agla|OJJ81333.1 akaw|GAA92375.1 aluc|OJZ83234.1 anid|CBF90206.1 anig|EHA21091.1 aory|EIT83153.1 asyd|OJJ61974.1 ater|EAU37033.1 atub|OJI87702.1 aver|OJI96067.1 awen|OJJ37251.1 azon|OJJ50946.1 abra|OJJ68185.1 acla|EAW13066.1 afis|EAW17598.1 afla|EED49223.1 afum|EAL91411.1 agla|OJJ81335.1 akaw|GAA83261.1 aluc|OJZ83767.1 anid|CBF90203.1 asyd|OJJ61976.1 ater|EAU37035.1 atub|OJI90138.1 aver|OJI96069.1 awen|OJJ37248.1

Group157: abra|OJJ70602.1 acar|OOF97117.1 acla|EAW08180.1 afis|EAW23215.1 afla|EED47037.1 afum|EAL88269.1 akaw|GAA89942.1 aluc|OJZ83947.1 anig|EHA19076.1 aory|EIT72544.1 asyd|OJJ60180.1 ater|EAU36345.1 atub|OJI90318.1 awen|OJJ39449.1 abra|OJJ70604.1 acar|OOF97116.1 acla|EAW08178.1 afis|EAW23213.1 afum|EBA27340.1 agla|OJJ78731.1 akaw|GAA89944.1 aluc|OJZ83949.1 anid|CBF74742.1 anig|EHA19078.1 aory|EIT72666.1 asyd|OJJ60182.1 ater|EAU36343.1 atub|OJI90320.1 aver|OJJ04082.1 awen|OJJ39447.1 azon|OJJ47649.1 anid|CBF74745.1

Group158: abra|OJJ71268.1 acar|OOF97905.1 acar|OOF97907.1 acla|EAW10269.1 acla|EAW10270.1 afis|EAW25324.1 afis|EAW25325.1 afla|EED53799.1 afla|EED53800.1 afum|EAL89985.1 afum|EAL89986.1 agla|OJJ83862.1 agla|OJJ83863.1 akaw|GAA82722.1 aluc|OJZ87276.1 anid|CBF75258.1 anid|CBF75260.1 anig|EHA20517.1 anig|EHA20518.1 aory|EIT78367.1 aory|EIT78397.1 asyd|OJJ59900.1 asyd|OJJ59901.1 ater|EAU34470.1 atub|OJI81365.1 aver|OJJ02385.1 aver|OJJ02386.1 awen|OJJ41038.1 awen|OJJ41039.1 azon|OJJ44627.1 ater|EAU34472.1 ater|EAU34471.1

Group159: abra|OJJ72382.1 acar|OOF94837.1 acla|EAW11953.1 acla|EAW11954.1 afis|EAW19590.1 afis|EAW19591.1 afla|EED56945.1 afum|EAL86927.1 afum|EAL86928.1 agla|OJJ80730.1 agla|OJJ80732.1 akaw|GAA86129.1 akaw|GAA86131.1 aluc|OJZ90369.1 anid|CBF71264.1 anid|CBF71266.1 anig|EHA23843.1 anig|EHA23844.1 aory|EIT77519.1 aory|EIT77568.1 asyd|OJJ55144.1 asyd|OJJ55146.1 ater|EAU32934.1 ater|EAU32936.1 atub|OJI81795.1 aver|OJJ07061.1 aver|OJJ07063.1 awen|OJJ41805.1 awen|OJJ41808.1 azon|OJJ47024.1 azon|OJJ47026.1 acar|OOF94836.1

Group160: abra|OJJ72953.1 acar|OOF96134.1 acla|EAW11198.1 afis|EAW15928.1 afla|EED54933.1 afum|EAL88564.1 agla|OJJ89377.1 akaw|GAA85534.1 aluc|OJZ83463.1 anid|CBF81024.1 anig|EHA24306.1 aory|EIT80331.1 asyd|OJJ56385.1 ater|EAU35524.1 atub|OJI82355.1 aver|OJJ06327.1 awen|OJJ35652.1 azon|OJJ46886.1 abra|OJJ72954.1 acar|OOF96135.1 acla|EAW11199.1 afis|EAW15929.1 afla|EED54932.1 afum|EAL88565.1 akaw|GAA85535.1 anid|CBF81026.1 anig|EHA24307.1 aory|EIT80358.1 asyd|OJJ56386.1 ater|EAU35523.1 awen|OJJ35651.1 azon|OJJ46887.1

Group161: abra|OJJ74876.1 acar|OOF95878.1 acar|OOF95879.1 acla|EAW08494.1 acla|EAW08495.1 afis|EAW23540.1 afis|EAW23541.1 afla|EED57438.1 afla|EED57439.1 afum|EAL87925.1 afum|EAL87926.1 agla|OJJ86795.1 akaw|GAA83544.1 akaw|GAA83545.1 aluc|OJZ92453.1 anid|CBF89661.1 anid|CBF89663.1 anig|EHA26514.1 anig|EHA26515.1 aory|EIT80116.1 aory|EIT80129.1 asyd|OJJ62276.1 asyd|OJJ62277.1 ater|EAU35326.1 ater|EAU35327.1 atub|OJI86881.1 atub|OJI86882.1 aver|OJI96385.1 aver|OJI96386.1 awen|OJJ39871.1 awen|OJJ39872.1 azon|OJJ43230.1

Group162: abra|OJJ75341.1 acar|OOF89856.1 acla|EAW09853.1 afis|EAW21282.1 afla|EED54833.1 afum|EAL92299.1 akaw|GAA92034.1 aluc|OJZ92904.1 anid|CBF83359.1 anig|EHA26059.1 aory|EIT79370.1 ater|EAU35911.1 atub|OJI87363.1 awen|OJJ39417.1 abra|OJJ75940.1 acar|OOF99970.1 acla|EAW09854.1 afis|EAW21281.1 afla|EED54832.1 afum|EAL92298.1 agla|OJJ87478.1 akaw|GAA84642.1 aluc|OJZ89387.1 anid|CBF83358.1 anig|EHA23197.1 aory|EIT79445.1 asyd|OJJ60618.1 ater|EAU35910.1 atub|OJI85410.1 aver|OJI99942.1 awen|OJJ39418.1 azon|OJJ44300.1

Group163: abra|OJJ75791.1 acar|OOG00087.1 acar|OOG00097.1 acla|EAW14890.1 acla|EAW14891.1 afis|EAW24412.1 afis|EAW24413.1 afla|EED47763.1 afla|EED47764.1 afum|EAL86081.1 afum|EAL86082.1 agla|OJJ79215.1 agla|OJJ79216.1 akaw|GAA84506.1 akaw|GAA84510.1 aluc|OJZ89235.1 aluc|OJZ89239.1 anid|CBF73743.1 anid|CBF73745.1 anig|EHA23328.1 aory|EIT77117.1 aory|EIT77194.1 asyd|OJJ56623.1 ater|EAU30316.1 ater|EAU30317.1 atub|OJI85559.1 aver|OJJ06102.1 aver|OJJ06103.1 awen|OJJ32796.1 awen|OJJ32798.1 azon|OJJ49036.1 azon|OJJ49037.1

Group164: abra|OJJ76816.1 acar|OOF91311.1 acla|EAW13376.1 afis|EAW20490.1 afla|EED44773.1 afum|EAL84564.1 agla|OJJ84837.1 akaw|GAA87205.1 aluc|OJZ84226.1 anig|EHA27575.1 aory|EIT77777.1 asyd|OJJ55730.1 atub|OJI89858.1 aver|OJJ06816.1 awen|OJJ33190.1 azon|OJJ46392.1 abra|OJJ76822.1 acar|OOF91317.1 acla|EAW13382.1 afis|EAW20496.1 afla|EED44772.1 afum|EAL84558.1 agla|OJJ84806.1 akaw|GAA87200.1 aluc|OJZ84233.1 anid|CBF79209.1 anig|EHA27580.1 aory|EIT77769.1 ater|EAU37190.1 atub|OJI89852.1 awen|OJJ33196.1 azon|OJJ46400.1

Group165: abra|OJJ78214.1 acla|EAW11236.1 afis|EAW18269.1 afla|EED48735.1 afum|EAL87634.1 agla|OJJ88158.1 akaw|GAA85813.1 aluc|OJZ91286.1 anid|CBF79514.1 anig|EHA19971.1 aory|EIT73143.1 asyd|OJJ57887.1 ater|EAU33276.1 atub|OJI83276.1 aver|OJJ04507.1 awen|OJJ30643.1 azon|OJJ47972.1 abra|OJJ78215.1 acar|OOF98641.1 acla|EAW11235.1 afis|EAW18270.1 afla|EED48736.1 afum|EAL87635.1 agla|OJJ88157.1 akaw|GAA85812.1 aluc|OJZ91287.1 anid|CBF79512.1 anig|EHA19972.1 aory|EIT73147.1 asyd|OJJ57886.1 atub|OJI83277.1 aver|OJJ04508.1

Group166: abra|OJJ65897.1 abra|OJJ72196.1 acar|OOF94957.1 acar|OOF96818.1 agla|OJJ80319.1  
agla|OJJ83741.1 agla|OJJ82619.1 akaw|GAA84738.1 akaw|GAA86008.1 aluc|OJZ86948.1 aluc|OJZ90234.1  
anig|EHA21698.1 anig|EHA23734.1 asyd|OJJ53466.1 asyd|OJJ56558.1 ater|EAU29975.1 ater|EAU30764.1  
atub|OJI81664.1 atub|OJI83575.1 aver|OJJ06162.1 aver|OJJ08289.1 azon|OJJ44535.1 azon|OJJ49495.1  
acla|EAW07004.1 afis|EAW16621.1 afis|EAW23621.1 afla|EED55210.1 afum|EAL89216.2 anid|CBF73835.1  
awen|OJJ32732.1 awen|OJJ40080.1

Group167: abra|OJJ66384.1 abra|OJJ76979.1 acar|OOF91425.1 acar|OOF94058.1 acar|OOF94128.1  
acla|EAW11869.1 acla|EAW15042.1 afis|EAW19480.1 afis|EAW24565.1 afla|EED48343.1 afla|EED56690.1  
afum|EAL86228.1 afum|EAL87015.1 akaw|GAA87066.1 akaw|GAA90250.1 aluc|OJZ83090.1 aluc|OJZ84377.1  
anig|EHA27710.1 anig|EHA28152.1 aory|EIT73915.1 aory|EIT76297.1 atub|OJI87853.1 atub|OJI89692.1  
azon|OJJ42424.1 azon|OJJ42921.1 asyd|OJJ56521.1 ater|EAU34790.1 aver|OJJ06201.1 awen|OJJ36886.1  
anid|CBF84609.1 ater|EAU37362.1

Group168: abra|OJJ66675.1 abra|OJJ75504.1 acar|OOF90835.1 acar|OOF93687.1 acar|OOF93772.1  
afis|EAW16470.1 afis|EAW19425.1 afum|EAL87069.1 afum|EAL89064.1 akaw|GAA84268.1 akaw|GAA89623.1  
aluc|OJZ80773.1 aluc|OJZ88960.1 anig|EHA23560.1 anig|EHA27257.1 atub|OJI85829.1 atub|OJI87625.1  
acla|EAW06851.1 afla|EED50383.1 agla|OJJ81137.1 anid|CBF74378.1 aory|EIT83131.1 asyd|OJJ57778.1  
ater|EAU34729.1 aver|OJJ05387.1 awen|OJJ36823.1 azon|OJJ42980.1 afla|EED49104.1 asyd|OJJ57938.1  
aver|OJJ04456.1 aory|EIT82490.1

Group169: abra|OJJ67685.1 abra|OJJ69630.1 acar|OOF92680.1 acar|OOF94075.1 acar|OOF94145.1  
acar|OOF96015.1 afum|EAL86373.1 afum|EAL87420.1 akaw|GAA89197.1 akaw|GAA91610.1 aluc|OJZ81633.1  
aluc|OJZ82435.1 anig|EHA25810.1 anig|EHA28336.1 atub|OJI88006.1 atub|OJI88547.1 afla|EED55077.1  
aory|EIT81950.1 acla|EAW12376.1 afis|EAW16822.1 agla|OJJ86924.1 anid|CBF82987.1 asyd|OJJ64732.1  
ater|EAU35425.1 aver|OJI98836.1 awen|OJJ35458.1 azon|OJJ51285.1 anid|CBF77369.1 asyd|OJJ53260.1  
aver|OJJ03591.1 acla|EAW11432.1

Group170: acar|OOF91973.1 acar|OOF94079.1 acar|OOF94149.1 acar|OOF99292.1 afla|EED45949.1  
afila|EED47803.1 aluc|OJZ79501.1 aluc|OJZ79636.1 aluc|OJZ81691.1 aluc|OJZ80076.1 aory|EIT75701.1  
aory|EIT77131.1 asyd|OJJ52720.1 asyd|OJJ61396.1 asyd|OJJ61537.1 ater|EAU29987.1 ater|EAU30155.1  
aver|OJJ00725.1 aver|OJJ04752.1 awen|OJJ32293.1 awen|OJJ35892.1 abra|OJJ67625.1 acla|EAW15287.1  
afis|EAW20776.1 afum|EAL84844.1 agla|OJJ85083.1 akaw|GAA89145.1 anid|CBF87439.1 anig|EHA25753.1  
atub|OJI88489.1 azon|OJJ42146.1

Group171: acar|OOF92319.1 acar|OOF92361.1 abra|OJJ67475.1 acla|EAW06297.1 afis|EAW18404.1  
afila|EED53004.1 afum|EAL93084.1 agla|OJJ84961.1 akaw|GAA86362.1 aluc|OJZ84889.1 anid|CBF70745.1  
anig|EHA25118.1 aory|EIT77437.1 asyd|OJJ58438.1 ater|EAU29821.1 atub|OJI80708.1 aver|OJJ01038.1  
awen|OJJ31746.1 abra|OJJ67478.1 acla|EAW06294.1 afis|EAW18400.1 afla|EED53006.1 afum|EAL93078.1  
agla|OJJ84971.1 akaw|GAA86360.1 anid|CBF70749.1 aory|EIT77424.1 ater|EAU29816.1 atub|OJI80711.1  
awen|OJJ31749.1 azon|OJJ50474.1

Group172: acar|OOF98484.1 acar|OOF98497.1 abra|OJJ78390.1 acar|OOF98498.1 acla|EAW09142.1  
acla|EAW09143.1 afis|EAW22004.1 afis|EAW22005.1 afla|EED46729.1 afum|EAL93019.1 afum|EAL93020.1  
agla|OJJ84093.1 agla|OJJ84094.1 akaw|GAA85641.1 akaw|GAA85642.1 aluc|OJZ91469.1 anid|CBF82660.1  
anid|CBF82662.1 anig|EHA20131.1 aory|EIT77865.1 aory|EIT77967.1 asyd|OJJ61666.1 asyd|OJJ61667.1  
ater|EAU31123.1 ater|EAU31125.1 atub|OJI83462.1 aver|OJJ00987.1 awen|OJJ34299.1 awen|OJJ34300.1  
azon|OJJ43338.1 azon|OJJ43339.1

Group173: afis|EAW21024.1 afis|EAW22408.1 afum|EAL90784.1 afum|EAL92063.1 awen|OJJ31391.1  
abra|OJJ74333.1 acar|OOF95396.1 acla|EAW07383.1 afla|EED56072.1 akaw|GAA86696.1 aluc|OJZ89796.1  
anid|CBF88792.1 anig|EHA27010.1 aory|EIT76782.1 asyd|OJJ62898.1 ater|EAU39300.1 atub|OJI85009.1  
aver|OJI96952.1 awen|OJJ34988.1 acar|OOF95397.1 acla|EAW07385.1 afis|EAW22410.1 afla|EED52490.1  
afum|EAL90782.1 akaw|GAA86694.1 anid|CBF88794.1 aory|EIT82779.1 ater|EAU39295.1 azon|OJJ50553.1  
anig|EHA27008.1 aver|OJI96951.1

Group174: afla|EED46122.1 afla|EED53117.1 afla|EED48931.1 afla|EED51100.1 akaw|GAA86153.1  
akaw|GAA92990.1 aory|EIT74792.1 aory|EIT79985.1 aory|EIT81307.1 atub|OJI81824.1 atub|OJI86011.1  
abra|OJJ72410.1 acar|OOF94819.1 acla|EAW14266.1 afis|EAW19012.1 afum|EAL93746.1 agla|OJJ81770.1  
aluc|OJZ90394.1 anig|EHA23863.1 aory|EIT76367.1 ater|EAU37790.1 awen|OJJ31644.1 abra|OJJ76649.1  
acar|OOF99352.1 aluc|OJZ91559.1 anid|CBF86747.1 anig|EHA22591.1 asyd|OJJ64703.1 aver|OJI98807.1  
azon|OJJ47337.1 afis|EAW16798.1

Group175: afum|EAL87729.1 afum|EAL88789.1 abra|OJJ65746.1 afis|EAW16109.1 afla|EED49345.1  
agla|OJJ83935.1 akaw|GAA93207.1 aory|EIT79717.1 asyd|OJJ57625.1 ater|EAU33192.1 awen|OJJ41813.1  
azon|OJJ42378.1 abra|OJJ77889.1 acar|OOF98892.1 afla|EED48269.1 akaw|GAA83769.1 aluc|OJZ90959.1  
anig|EHA19664.1 asyd|OJJ64307.1 atub|OJI82950.1 aver|OJJ00097.1 aory|EIT72931.1 ater|EAU33625.1  
acla|EAW06656.1 aluc|OJZ79714.1 asyd|OJJ60763.1 afla|EED57955.1 agla|OJJ86139.1 awen|OJJ38786.1  
aory|EIT79719.1 aver|OJJ05561.1

Group176: ater|EAU33722.1 ater|EAU38738.1 abra|OJJ71609.1 acar|OOF96326.1 acla|EAW15150.1  
acla|EAW15152.1 afis|EAW20118.1 afis|EAW20120.1 afla|EED53353.1 afla|EED57256.1 afum|EAL85235.1  
afum|EBA27224.1 agla|OJJ88826.1 agla|OJJ88831.1 akaw|GAA89318.1 akaw|GAA89319.1 aluc|OJZ86351.1  
aluc|OJZ86353.1 anid|CBF84937.1 anid|CBF84939.1 anig|EHA21536.1 aory|EIT74846.1 asyd|OJJ63156.1  
ater|EAU38737.1 atub|OJJ84184.1 aver|OJJ97800.1 aver|OJJ97801.1 awen|OJJ31888.1 azon|OJJ46246.1  
aory|EIT74143.1 asyd|OJJ63154.1

Group177: awen|OJJ33301.1 awen|OJJ37090.1 abra|OJJ76956.1 acar|OOF91397.1 acla|EAW13475.1  
afla|EED52244.1 agla|OJJ88687.1 akaw|GAA87087.1 aluc|OJZ84351.1 anid|CBF78932.1 anig|EHA27688.1  
aory|EIT74404.1 asyd|OJJ62348.1 ater|EAU37096.1 atub|OJJ89715.1 azon|OJJ50794.1 abra|OJJ77159.1  
acar|OOF93045.1 acla|EAW12913.1 afis|EAW17747.1 afla|EED45747.1 afum|EAL91559.1 agla|OJJ81707.1  
akaw|GAA90772.1 aluc|OJZ84572.1 anid|CBF86617.1 aory|EIT75770.1 asyd|OJJ64815.1 ater|EAU31860.1  
atub|OJJ89510.1 aver|OJJ98928.1

Group178: abra|OJJ65971.1 acar|OOF92902.1 acla|EAW13592.1 afis|EAW20012.1 afla|EED46018.1  
afum|EAL84906.1 akaw|GAA90846.1 aluc|OJZ82987.1 anid|CBF84721.1 anig|EHA21402.1 aory|EIT75680.1  
asyd|OJJ53329.1 ater|EAU29354.1 atub|OJJ89221.1 aver|OJJ08415.1 awen|OJJ30025.1 abra|OJJ65972.1  
acar|OOF92900.1 acla|EAW13593.1 afis|EAW20011.1 afla|EED46017.1 afum|EAL84907.1 agla|OJJ87976.1  
anid|CBF83963.1 anig|EHA21401.1 aory|EIT75560.1 asyd|OJJ61425.1 ater|EAU29353.1 aver|OJJ00759.1  
awen|OJJ30024.1 azon|OJJ43649.1

Group179: abra|OJJ66528.1 acar|OOF90981.1 acla|EAW10962.1 afis|EAW20897.1 afla|EED50247.1  
afum|EAL84735.1 agla|OJJ84007.1 akaw|GAA91185.1 aluc|OJZ81518.1 anid|CBF82460.1 anig|EHA25916.1  
aory|EIT77290.1 ater|EAU38531.1 atub|OJJ88667.1 awen|OJJ34450.1 azon|OJJ51738.1 abra|OJJ66529.1  
acar|OOF90980.1 acla|EAW10961.1 afis|EAW20898.1 afla|EED50248.1 afum|EAL84734.2 agla|OJJ84008.1  
akaw|GAA91184.1 aluc|OJZ81519.1 anid|CBF82458.1 aory|EIT77356.1 asyd|OJJ54115.1 atub|OJJ88668.1  
aver|OJJ08620.1 azon|OJJ51737.1

Group180: abra|OJJ66543.1 acar|OOF90995.1 afla|EED50933.1 agla|OJJ78717.1 akaw|GAA91168.1  
aluc|OJZ81496.1 anid|CBF71517.1 anig|EHA25934.1 aory|EIT79048.1 asyd|OJJ54917.1 ater|EAU29874.1  
atub|OJJ88685.1 aver|OJJ07286.1 awen|OJJ30168.1 abra|OJJ67418.1 acar|OOF92403.1 acla|EAW06346.1  
afis|EAW18457.1 afla|EED52951.1 afum|EAL93142.1 agla|OJJ85040.1 akaw|GAA86410.1 aluc|OJZ84950.1  
anid|CBF70055.1 anig|EHA25165.1 aory|EIT78701.1 asyd|OJJ58858.1 atub|OJJ80652.1 aver|OJJ01459.1  
awen|OJJ31009.1 azon|OJJ50523.1

Group181: abra|OJJ67409.1 acar|OOF92406.1 acla|EAW06349.1 afis|EAW18461.1 afla|EED52947.1  
afum|EAL93147.1 agla|OJJ85045.1 akaw|GAA86418.1 aluc|OJZ84959.1 anid|CBF70089.1 anig|EHA25173.1  
aory|EIT78700.1 asyd|OJJ58841.1 ater|EAU29879.1 atub|OJJ80641.1 aver|OJJ01443.1 awen|OJJ31013.1  
azon|OJJ50526.1 abra|OJJ67410.1 acar|OOF92404.1 afis|EAW18460.1 afla|EED52948.1 afum|EAL93146.1  
akaw|GAA86417.1 aluc|OJZ84958.1 anid|CBF70087.1 anig|EHA25172.1 aory|EIT78733.1 ater|EAU29878.1  
atub|OJJ80642.1 awen|OJJ31012.1

Group182: abra|OJJ67954.1 acar|OOF92799.1 acla|EAW11644.1 afis|EAW23813.1 afis|EAW23814.1  
afla|EED51991.1 afla|EED52002.1 afum|EAL87248.1 agla|OJJ82453.1 akaw|GAA91242.1 akaw|GAA91243.1  
aluc|OJZ82827.1 anid|CBF79881.1 anig|EHA21264.1 anig|EHA21265.1 aory|EIT81469.1 aory|EIT81487.1  
asyd|OJJ58172.1 ater|EAU31366.1 atub|OJJ89057.1 aver|OJJ04231.1 awen|OJJ33769.1 azon|OJJ46009.1  
anid|CBF79883.1 asyd|OJJ58173.1 acla|EAW11643.1 afum|EAL87249.1 agla|OJJ82454.1 ater|EAU31369.1  
awen|OJJ33770.1 azon|OJJ42873.1

Group183: abra|OJJ68614.1 acar|OOF92124.1 acar|OOF92125.1 acla|EAW12605.1 acla|EAW12606.1  
afis|EAW18078.1 afis|EAW18079.1 afla|EED51472.1 afla|EED51473.1 afum|EAL91890.1 afum|EAL91891.1  
agla|OJJ87372.1 akaw|GAA92907.1 akaw|GAA92908.1 aluc|OJZ81940.1 aluc|OJZ81941.1 anid|CBF86395.1  
anid|CBF86397.1 anig|EHA22308.1 aory|EIT80638.1 aory|EIT80738.1 asyd|OJJ64952.1 asyd|OJJ64954.1  
ater|EAU30443.1 ater|EAU30445.1 atub|OJJ84493.1 atub|OJJ84494.1 aver|OJJ99074.1 aver|OJJ99076.1  
awen|OJJ41467.1 azon|OJJ48924.1

Group184: abra|OJJ71429.1 acar|OOF90402.1 acla|EAW10109.1 afis|EAW25478.1 afla|EED53973.1  
afum|EAL90141.1 akaw|GAA82574.1 aluc|OJZ87109.1 anid|CBF77705.1 anig|EHA20376.1 asyd|OJJ53075.1  
ater|EAU34650.1 atub|OJJ81530.1 aver|OJJ03772.1 awen|OJJ41218.1 azon|OJJ44787.1 abra|OJJ71430.1  
acla|EAW10108.1 afis|EAW25479.1 afla|EED53974.1 afum|EAL90144.1 akaw|GAA82573.1 aluc|OJZ87108.1  
anid|CBF77703.1 anig|EHA20375.1 aory|EIT78327.1 asyd|OJJ53074.1 ater|EAU34651.1 atub|OJJ81531.1  
awen|OJJ41220.1 azon|OJJ44786.1

Group185: abra|OJJ73132.1 acar|OOF90742.1 acla|EAW13627.1 afis|EAW21092.1 afla|EED48284.1  
afum|EAL92115.1 akaw|GAA92664.1 aluc|OJZ90118.1 anid|CBF83072.1 anig|EHA19695.1 anig|EHA19696.1  
asyd|OJJ52355.1 ater|EAU32835.1 atub|OJJ84679.1 aver|OJJ00828.1 awen|OJJ31224.1 azon|OJJ46149.1  
acar|OOF90935.1 anid|CBF82817.1 aver|OJJ00896.1 acar|OOF90741.1 afis|EAW15628.1 afum|EAL85706.1  
aory|EIT80551.1 asyd|OJJ61575.1 acar|OOF98130.1 acar|OOG00091.1 acla|EAW08502.1 afla|EED51590.1  
asyd|OJJ61486.1 aory|EIT72957.1

Group186: abra|OJJ74487.1 acar|OOF95262.1 acla|EAW07208.1 afis|EAW22220.1 afla|EED57613.1 afum|EAL90974.1 agla|OJJ87824.1 akaw|GAA87381.1 aluc|OJZ89631.1 anig|EHA26874.1 ater|EAU34230.1 atub|OJI85171.1 aver|OJI97165.1 awen|OJJ34805.1 abra|OJJ74488.1 acar|OOF95261.1 acla|EAW07207.1 afis|EAW22219.1 afla|EED57612.1 afum|EAL90975.1 agla|OJJ87825.1 akaw|GAA87382.1 aluc|OJZ89630.1 anid|CBF88457.1 anig|EHA26873.1 aory|EIT82983.1 asyd|OJJ63772.1 ater|EAU34229.1 atub|OJI85172.1 aver|OJI97166.1 azon|OJJ45743.1

Group187: abra|OJJ74835.1 acar|OOF95828.1 acla|EAW09102.1 afis|EAW25706.1 afla|EED55155.1 afum|EAL84379.1 akaw|GAA83585.1 aluc|OJZ92412.1 anid|CBF83935.1 anig|EHA26553.1 aory|EIT81620.1 asyd|OJJ55434.1 ater|EAU32723.1 atub|OJI86842.1 aver|OJJ06511.1 awen|OJJ36213.1 azon|OJJ43614.1 abra|OJJ76623.1 acar|OOF99375.1 acla|EAW10020.1 afis|EAW22744.1 afla|EED50498.1 afum|EAL90452.1 akaw|GAA92834.1 aluc|OJZ91589.1 anig|EHA22613.1 aory|EIT82109.1 ater|EAU34860.1 atub|OJI86038.1 awen|OJJ40151.1 azon|OJJ48726.1

Group188: abra|OJJ74864.1 acar|OOF95864.1 acar|OOF95866.1 acla|EAW08515.1 acla|EAW08517.1 afis|EAW23553.1 afis|EAW23555.1 afla|EED57448.1 afla|EED57450.1 afum|EAL87911.1 afum|EAL87913.1 agla|OJJ86813.1 agla|OJJ86815.1 akaw|GAA83554.1 akaw|GAA83556.1 aluc|OJZ92442.1 anid|CBF89641.1 anid|CBF89643.1 anig|EHA26525.1 aory|EIT80074.1 aory|EIT80092.1 asyd|OJJ62288.1 asyd|OJJ62290.1 ater|EAU35336.1 ater|EAU35338.1 atub|OJI86871.1 aver|OJI96396.1 aver|OJI96398.1 awen|OJJ39884.1 awen|OJJ39886.1 azon|OJJ43221.1

Group189: abra|OJJ75158.1 acar|OOF97180.1 acar|OOF97181.1 acla|EAW08333.1 acla|EAW08334.1 afis|EAW23368.1 afis|EAW23369.1 afla|EED55588.1 afla|EED55589.1 afum|EAL88104.2 afum|EAL88105.1 agla|OJJ86455.1 agla|OJJ86456.1 akaw|GAA88764.1 akaw|GAA88769.1 aluc|OJZ92728.1 anid|CBF74819.1 anid|CBF74821.1 anig|EHA26273.1 aory|EIT82662.1 aory|EIT82702.1 asyd|OJJ60141.1 asyd|OJJ60142.1 ater|EAU35619.1 ater|EAU35620.1 atub|OJI87152.1 aver|OJJ04121.1 awen|OJJ39518.1 awen|OJJ39519.1 azon|OJJ47713.1 azon|OJJ47715.1

Group190: abra|OJJ75500.1 acar|OOF90833.1 acla|EAW09294.1 afis|EAW21853.1 afla|EED46457.1 afum|EAL92866.1 agla|OJJ84283.1 akaw|GAA84266.1 aluc|OJZ88959.1 anid|CBF76739.1 anig|EHA23561.1 aory|EIT72412.1 asyd|OJJ61254.1 ater|EAU30852.1 atub|OJI85830.1 aver|OJJ00577.1 awen|OJJ34137.1 azon|OJJ44207.1 abra|OJJ75502.1 acar|OOF90834.1 acla|EAW09295.1 afis|EAW21852.1 afla|EED46458.1 afum|EAL92865.1 akaw|GAA84267.1 anid|CBF76737.1 aory|EIT72344.1 asyd|OJJ61253.1 ater|EAU30851.1 awen|OJJ34135.1 azon|OJJ44209.1

Group191: abra|OJJ76457.1 acar|OOF99697.1 acla|EAW13972.1 acla|EAW13973.1 afis|EAW18681.1 afis|EAW18682.1 afla|EED50628.1 afum|EAL93402.1 afum|EAL93403.1 agla|OJJ82393.1 agla|OJJ82394.1 akaw|GAA82369.1 akaw|GAA82370.1 aluc|OJZ91752.1 aluc|OJZ91753.1 anid|CBF70601.1 anid|CBF70603.1 anig|EHA22755.1 anig|EHA22756.1 aory|EIT78067.1 asyd|OJJ58516.1 asyd|OJJ58517.1 ater|EAU38228.1 atub|OJI86210.1 atub|OJI86211.1 aver|OJJ01117.1 aver|OJJ01118.1 awen|OJJ32153.1 azon|OJJ46737.1 afla|EED50629.1 aory|EIT78047.1

Group192: abra|OJJ77384.1 acla|EAW09036.1 afla|EED56897.1 akaw|GAA91377.1 aluc|OJZ84792.1 anig|EHA28060.1 aory|EIT77450.1 asyd|OJJ57351.1 ater|EAU38783.1 atub|OJI89290.1 aver|OJJ05814.1 awen|OJJ35827.1 abra|OJJ78137.1 acar|OOF99382.1 acla|EAW14634.1 afis|EAW22732.1 afla|EED55765.1 afum|EAL90463.1 agla|OJJ78522.1 aluc|OJZ82078.1 anid|CBF78393.1 ater|EAU30739.1 awen|OJJ32040.1 azon|OJJ47350.1 acar|OOF96813.1 anig|EHA25049.1 aluc|OJZ82079.1 atub|OJI88447.1 akaw|GAA87875.1 aluc|OJZ85516.1 atub|OJI80050.1

Group193: abra|OJJ67081.1 abra|OJJ68837.1 abra|OJJ69761.1 agla|OJJ84620.1 agla|OJJ89301.1 aory|EIT74438.1 aory|EIT79603.1 asyd|OJJ52546.1 asyd|OJJ57148.1 asyd|OJJ63033.1 ater|EAU29247.1 ater|EAU29286.1 ater|EAU32050.1 ater|EAU35700.1 aver|OJI97935.1 aver|OJJ03858.1 awen|OJJ30061.1 awen|OJJ31262.1 acar|OOF90552.1 acla|EAW15294.1 afis|EAW20307.1 afla|EED52202.1 afla|EED56612.1 afum|EAL85435.2 akaw|GAA90413.1 aluc|OJZ85816.1 anid|CBF85212.1 atub|OJI79602.1 awen|OJJ29673.1 azon|OJJ45897.1

Group194: abra|OJJ67792.1 abra|OJJ73325.1 anig|EHA18415.1 anig|EHA18416.1 acla|EAW12887.1 afis|EAW17789.1 afla|EED50756.1 afum|EAL91598.1 agla|OJJ84165.1 akaw|GAA92793.1 aluc|OJZ88713.1 anid|CBF75218.1 aory|EIT78111.1 asyd|OJJ53462.1 ater|EAU29260.1 atub|OJI91300.1 aver|OJJ08293.1 awen|OJJ32921.1 acar|OOF95394.1 abra|OJJ75374.1 acar|OOF94473.1 afis|EAW17262.1 afla|EED48869.1 afum|EAL86679.1 akaw|GAA92734.1 aluc|OJZ92942.1 anig|EHA26031.1 aory|EIT81203.1 atub|OJI87401.1 awen|OJJ35771.1

Group195: abra|OJJ68217.1 abra|OJJ69796.1 acar|OOF92535.1 acar|OOF97501.1 akaw|GAA83229.1 akaw|GAA87863.1 aluc|OJZ83729.1 aluc|OJZ85504.1 anig|EHA18877.1 anig|EHA25036.1 aory|EIT80435.1 aory|EIT81864.1 atub|OJI80061.1 atub|OJI90106.1 awen|OJJ31685.1 awen|OJJ32019.1 azon|OJJ42231.1 azon|OJJ46071.1 acla|EAW15175.1 afis|EAW20145.1 afla|EED51644.1 afum|EAL85260.1 agla|OJJ89015.1 anid|CBF81813.1 asyd|OJJ59648.1 ater|EAU39446.1 aver|OJJ02634.1 asyd|OJJ58357.1 ater|EAU33077.1 aver|OJJ02050.1

Group196: abra|OJJ68439.1 abra|OJJ71007.1 acar|OOF93955.1 acar|OOF98135.1 afis|EAW19801.1  
afis|EAW25026.1 agla|OJJ79158.1 agla|OJJ87950.1 akaw|GAA82946.1 akaw|GAA86933.1 aluc|OJZ87524.1  
aluc|OJZ90058.1 anid|CBF81549.1 anid|CBF82379.1 anig|EHA20734.1 anig|EHA21013.1 asyd|OJJ54138.1  
asyd|OJJ59494.1 ater|EAU30748.1 ater|EAU35761.1 atub|OJI81124.1 atub|OJI84749.1 aver|OJJ02780.1  
aver|OJJ08598.1 acla|EAW10559.1 afla|EED55448.1 afum|EAL89669.1 aory|EIT80786.1 awen|OJJ40613.1  
azon|OJJ49462.1

Group197: abra|OJJ69676.1 abra|OJJ72100.1 acar|OOF90056.1 acar|OOF96745.1 aluc|OJZ82484.1  
aluc|OJZ86855.1 anig|EHA21784.1 anig|EHA28290.1 asyd|OJJ60799.1 asyd|OJJ62562.1 atub|OJI83664.1  
atub|OJI87948.1 awen|OJJ31984.1 awen|OJJ34027.1 afis|EAW21744.1 afum|EAL92777.1 agla|OJJ81779.1  
agla|OJJ84428.1 akaw|GAA84821.1 akaw|GAA88801.1 ater|EAU32512.1 aver|OJI96686.1 azon|OJJ42257.1  
acla|EAW09389.1 afla|EED58033.1 anid|CBF83660.1 aory|EIT79754.1 ater|EAU38444.1 aver|OJJ00132.1  
acar|OOF95939.1

Group198: abra|OJJ72836.1 abra|OJJ73712.1 agla|OJJ78798.1 agla|OJJ86951.1 akaw|GAA85433.1  
akaw|GAA88451.1 aluc|OJZ83336.1 aluc|OJZ88338.1 anig|EHA18073.1 anig|EHA24212.1 aory|EIT75956.1  
aory|EIT78575.1 asyd|OJJ53233.1 asyd|OJJ54785.1 ater|EAU29729.1 ater|EAU32826.1 atub|OJI82233.1  
atub|OJI90934.1 aver|OJJ03618.1 aver|OJJ07380.1 awen|OJJ35489.1 awen|OJJ38098.1 acar|OOF96038.1  
acla|EAW11404.1 afis|EAW24017.1 afla|EED49142.1 afum|EAL87447.1 anid|CBF77418.1 azon|OJJ47000.1  
afla|EED54085.1

Group199: acar|OOF90457.1 acar|OOF90464.1 abra|OJJ71887.1 acla|EAW09633.1 afis|EAW21507.1  
afla|EED55944.1 afum|EAL92527.1 agla|OJJ85669.1 akaw|GAA85029.1 aluc|OJZ86625.1 anid|CBF76445.1  
anig|EHA22041.1 asyd|OJJ61103.1 ater|EAU35031.1 atub|OJI83900.1 aver|OJJ00420.1 awen|OJJ39188.1  
azon|OJJ51505.1 acla|EAW09634.1 afis|EAW21506.1 afla|EED55943.1 afum|EAL92526.1 anid|CBF76447.1  
asyd|OJJ61104.1 ater|EAU35032.1 aver|OJJ00421.1 awen|OJJ39189.1 acar|OOF96550.1 anig|EHA22040.1  
afum|EAL92525.1

Group200: acar|OOF98095.1 acar|OOF99166.1 acla|EAW06529.1 acla|EAW10590.1 afis|EAW16066.1  
afis|EAW24978.1 afla|EED48587.1 afla|EED55481.1 afum|EAL88698.1 afum|EAL89638.1 anid|CBF75098.1  
anid|CBF81606.1 asyd|OJJ59522.1 asyd|OJJ60007.1 ater|EAU33563.1 ater|EAU35727.1 aver|OJJ02278.1  
aver|OJJ02750.1 awen|OJJ30369.1 awen|OJJ40575.1 azon|OJJ45388.1 azon|OJJ49435.1 abra|OJJ71044.1  
agla|OJJ79139.1 akaw|GAA82912.1 aluc|OJZ87482.1 anig|EHA20704.1 aory|EIT73215.1 aory|EIT80785.1  
atub|OJI81166.1

Group201: afla|EED48129.1 afla|EED48474.1 anid|CBF75189.1 anid|CBF83027.1 aory|EIT73105.1  
aory|EIT76193.1 aory|EIT79635.1 asyd|OJJ55485.1 asyd|OJJ56197.1 asyd|OJJ59940.1 ater|EAU31592.1  
ater|EAU31786.1 aver|OJJ02347.1 aver|OJJ05124.1 aver|OJJ06564.1 aver|OJJ08128.1 azon|OJJ42131.1  
azon|OJJ45782.1 azon|OJJ42807.1 abra|OJJ70953.1 acar|OOF98179.1 asyd|OJJ60083.1 asyd|OJJ64199.1  
aver|OJI98288.1 aver|OJJ07880.1 afla|EED56568.1 aver|OJJ04169.1 anid|CBF87321.1 asyd|OJJ59110.1  
aver|OJJ01702.1

Group202: agla|OJJ79264.1 agla|OJJ81588.1 asyd|OJJ56968.1 asyd|OJJ61442.1 aver|OJJ00778.1  
aver|OJJ03319.1 azon|OJJ43207.1 azon|OJJ51818.1 abra|OJJ67615.1 acar|OOF91964.1 afla|EED44878.1  
akaw|GAA89133.1 aluc|OJZ81703.1 anig|EHA25732.1 aory|EIT83259.1 atub|OJI88479.1 awen|OJJ36276.1  
abra|OJJ68338.1 acar|OOF97638.1 akaw|GAA92100.1 aluc|OJZ83625.1 anid|CBF83952.1 anig|EHA18778.1  
atub|OJI89994.1 awen|OJJ35809.1 azon|OJJ47565.1 akaw|GAA92300.1 aluc|OJZ90197.1 anig|EHA23695.1  
atub|OJI81624.1

Group203: asyd|OJJ55488.1 asyd|OJJ61510.1 asyd|OJJ61953.1 asyd|OJJ60082.1 aver|OJI96044.1  
aver|OJJ00847.1 aver|OJJ06567.1 awen|OJJ33588.1 awen|OJJ35927.1 abra|OJJ70268.1 afla|EED46478.1  
agla|OJJ78786.1 akaw|GAA86529.1 aluc|OJZ85077.1 anid|CBF83020.1 anig|EHA25292.1 aory|EIT72376.1  
aory|EIT82615.1 ater|EAU38779.1 atub|OJI80521.1 azon|OJJ42129.1 abra|OJJ70950.1 acar|OOF98180.1  
akaw|GAA82994.1 aluc|OJZ87579.1 anig|EHA20781.1 atub|OJI81070.1 afla|EED49569.1 aver|OJJ04168.1  
azon|OJJ42134.1

Group204: asyd|OJJ62594.1 awen|OJJ38006.1 awen|OJJ39405.1 abra|OJJ75729.1 acar|OOF90233.1  
afis|EAW24067.1 afla|EED54453.1 afum|EAL91923.1 agla|OJJ87782.1 akaw|GAA84464.1 aluc|OJZ89181.1  
anid|CBF83672.1 anig|EHA23374.1 aory|EIT81134.1 asyd|OJJ60812.1 ater|EAU32054.1 atub|OJI85608.1  
aver|OJJ00139.1 abra|OJJ75956.1 acar|OOF99957.1 acla|EAW09841.1 akaw|GAA84658.1 aluc|OJZ89405.1  
anid|CBF83380.1 anig|EHA23182.1 aory|EIT79378.1 ater|EAU35927.1 atub|OJI85392.1 afis|EAW21294.1  
afum|EAL92311.1

Group205: awen|OJJ32368.1 awen|OJJ32676.1 azon|OJJ42336.1 azon|OJJ46795.1 abra|OJJ68299.1  
acar|OOF95350.1 acar|OOF97574.1 acla|EAW14263.1 afla|EED54478.1 akaw|GAA83175.1 aluc|OJZ83673.1  
anid|CBF85201.1 anig|EHA18829.1 aory|EIT80470.1 asyd|OJJ63024.1 ater|EAU32059.1 atub|OJI90044.1  
aver|OJJ00341.1 awen|OJJ32193.1 abra|OJJ74389.1 akaw|GAA87289.1 aluc|OJZ89730.1 aory|EIT81129.1  
atub|OJI85071.1 aory|EIT79607.1 asyd|OJJ55922.1 afla|EED56619.1 aver|OJI97944.1 afla|EED51613.1  
agla|OJJ81483.1

Group206: abra|OJJ66942.1 acar|OOF91706.1 acar|OOF91708.1 acla|EAW14500.1 acla|EAW14501.1 afis|EAW19214.1 afis|EAW19215.1 afla|EED47685.1 afla|EED47686.1 afum|EAL93947.1 afum|EAL93948.1 agla|OJJ88482.1 akaw|GAA91478.1 akaw|GAA91479.1 aluc|OJZ85640.1 anid|CBF78591.1 anig|EHA24894.1 aory|EIT80213.1 aory|EIT80244.1 asyd|OJJ65083.1 ater|EAU37253.1 atub|OJI79431.1 aver|OJI99209.1 awen|OJJ37572.1 azon|OJJ51231.1 anid|CBF78589.1 ater|EAU37254.1 aver|OJI99208.1 awen|OJJ37571.1 asyd|OJJ65084.1

Group207: abra|OJJ67140.1 acar|OOF98417.1 acla|EAW14599.1 afis|EAW19328.1 afum|EAL94045.1 agla|OJJ86277.1 akaw|GAA91029.1 aluc|OJZ87832.1 anid|CBF83940.1 anig|EHA20311.1 aory|EIT74592.1 asyd|OJJ53609.1 ater|EAU29456.1 atub|OJI80809.1 aver|OJJ08139.1 awen|OJJ30097.1 azon|OJJ44450.1 abra|OJJ67993.1 acar|OOF92035.1 acla|EAW13634.1 afis|EAW23673.1 afla|EED47394.1 afum|EAL87116.1 akaw|GAA90955.1 aluc|OJZ82867.1 anig|EHA21297.1 aory|EIT81925.1 atub|OJI89092.1 azon|OJJ45993.1 afla|EED47553.1

Group208: abra|OJJ70660.1 acar|OOF97061.1 acla|EAW15046.1 afis|EAW23152.1 afla|EED48515.1 afum|EAL86237.1 agla|OJJ89650.1 akaw|GAA89996.1 aluc|OJZ84010.1 anid|CBF74423.1 anig|EHA19132.1 aory|EIT73250.1 asyd|OJJ57754.1 ater|EAU36259.1 atub|OJI90379.1 aver|OJJ05413.1 awen|OJJ36648.1 azon|OJJ47567.1 acla|EAW08098.1 afum|EAL88329.1 agla|OJJ89649.1 anig|EHA19133.1 azon|OJJ47566.1 acar|OOF97062.1 afis|EAW24607.1 anid|CBF87133.1 aory|EIT73278.1 asyd|OJJ60373.1 ater|EAU36260.1 aver|OJI99708.1

Group209: abra|OJJ71126.1 acar|OOF98025.1 acar|OOF98026.1 acla|EAW10372.1 acla|EAW10373.1 afis|EAW25219.1 afis|EAW25220.1 afla|EED53686.1 afla|EED53687.1 afum|EAL89880.1 afum|EAL89881.1 agla|OJJ79187.1 akaw|GAA82848.1 akaw|GAA82849.1 aluc|OJZ87409.1 anid|CBF85301.1 anig|EHA20639.1 aory|EIT75287.1 aory|EIT75345.1 asyd|OJJ62915.1 asyd|OJJ62916.1 ater|EAU34378.1 ater|EAU34379.1 atub|OJI81236.1 atub|OJI81237.1 aver|OJI98074.1 awen|OJJ40885.1 awen|OJJ40886.1 azon|OJJ44513.1 azon|OJJ44514.1

Group210: abra|OJJ73704.1 afis|EAW17806.1 afla|EED53530.1 afum|EBA27423.1 agla|OJJ78725.1 akaw|GAA88459.1 aluc|OJZ88348.1 ater|EAU30902.1 aver|OJI99268.1 awen|OJJ40823.1 afis|EAW16815.1 afis|EAW17324.1 afla|EED44724.1 afla|EED45247.1 akaw|GAA89045.1 aory|EIT72906.1 aory|EIT73594.1 asyd|OJJ53750.1 ater|EAU36770.1 azon|OJJ45102.1 aver|OJI98047.1 agla|OJJ86073.1 aory|EIT75237.1 asyd|OJJ57660.1 atub|OJI88380.1 aver|OJJ05522.1 asyd|OJJ62943.1 agla|OJJ80314.1 aluc|OJZ80551.1 anig|EHA27689.1

Group211: abra|OJJ74957.1 acar|OOF97356.1 acla|EAW08414.1 afis|EAW23455.1 afla|EED57346.1 afum|EAL88011.1 agla|OJJ86695.1 akaw|GAA83465.1 akaw|GAA83466.1 aluc|OJZ92529.1 anid|CBF89806.1 anig|EHA26445.1 anig|EHA26446.1 aory|EIT80091.1 asyd|OJJ62193.1 ater|EAU36921.1 atub|OJI86965.1 atub|OJI86966.1 aver|OJI96302.1 awen|OJJ39774.1 azon|OJJ47901.1 acla|EAW08415.1 afis|EAW23454.1 afla|EED57349.1 afum|EAL88012.1 agla|OJJ86696.1 anid|CBF89804.1 ater|EAU36920.1 aver|OJI96305.1 awen|OJJ39775.1

Group212: abra|OJJ75967.1 acar|OOF99952.1 acla|EAW09831.1 afis|EAW21302.1 afla|EED57262.1 afum|EAL92319.1 agla|OJJ87435.1 akaw|GAA88989.1 aluc|OJZ89414.1 anid|CBF83395.1 anig|EHA23173.1 aory|EIT74086.1 asyd|OJJ60638.1 ater|EAU35935.1 atub|OJI85381.1 aver|OJI99960.1 awen|OJJ39396.1 azon|OJJ44280.1 acla|EAW09826.1 afis|EAW21307.1 afum|EAL92323.1 anid|CBF83397.1 asyd|OJJ60645.1 ater|EAU35937.1 aver|OJI99963.1 afis|EAW21308.1 afum|EAL92324.1 anid|CBF83399.1 asyd|OJJ60644.1 ater|EAU35938.1

Group213: abra|OJJ76386.1 acar|OOF99627.1 acla|EAW14037.1 acla|EAW14038.1 afis|EAW18743.1 afis|EAW18744.1 afla|EED50699.1 afla|EED50700.1 afum|EAL93469.1 afum|EAL93470.1 agla|OJJ82309.1 akaw|GAA82305.1 akaw|GAA82306.1 aluc|OJZ91827.1 aluc|OJZ91828.1 anid|CBF69994.1 anid|CBF69996.1 anig|EHA22816.1 aory|EIT78103.1 aory|EIT78138.1 asyd|OJJ58888.1 asyd|OJJ58889.1 ater|EAU37870.1 ater|EAU37873.1 atub|OJI86282.1 atub|OJI86283.1 aver|OJJ01489.1 awen|OJJ32308.1 awen|OJJ32309.1 azon|OJJ42718.1

Group214: abra|OJJ65770.1 abra|OJJ69062.1 acar|OOF91221.1 acar|OOG00531.1 afla|EED46866.1 afla|EED56884.1 akaw|GAA90592.1 akaw|GAA90890.1 aluc|OJZ82939.1 aluc|OJZ86050.1 anig|EHA21359.1 anig|EHA24561.1 aory|EIT72522.1 aory|EIT77460.1 atub|OJI79847.1 atub|OJI89171.1 aver|OJJ03011.1 aver|OJJ07939.1 afis|EAW15670.1 afum|EAL85677.1 anid|CBF81578.1 asyd|OJJ53834.1 ater|EAU32494.1 awen|OJJ38346.1 acla|EAW11671.1 agla|OJJ81808.1 agla|OJJ85313.1 awen|OJJ38760.1 azon|OJJ42640.1

Group215: abra|OJJ66046.1 abra|OJJ74366.1 abra|OJJ77282.1 acar|OOF95364.1 acar|OOG00557.1 afis|EAW16747.1 afis|EAW22442.1 afla|EED54458.1 afla|EED54746.1 afum|EAL86322.1 afum|EAL90749.1 akaw|GAA86664.1 akaw|GAA90667.1 aluc|OJZ84692.1 aluc|OJZ89761.1 anig|EHA26981.1 anig|EHA27968.1 aory|EIT81130.1 aory|EIT81408.1 atub|OJI85041.1 atub|OJI89390.1 awen|OJJ35068.1 awen|OJJ37925.1 acla|EAW07417.1 agla|OJJ87580.1 anid|CBF88847.1 asyd|OJJ62866.1 ater|EAU39262.1 aver|OJI96919.1

Group216: abra|OJJ67846.1 abra|OJJ69869.1 acar|OOF90337.1 acar|OOF92827.1 acla|EAW11753.1 acla|EAW15317.1 akaw|GAA87787.1 akaw|GAA91854.1 aluc|OJZ82045.1 aluc|OJZ85422.1 anig|EHA22212.1 anig|EHA25601.1 asyd|OJJ52765.1 asyd|OJJ58155.1 ater|EAU31327.1 ater|EAU32679.1 aver|OJJ04248.1



aver|OJJ08748.1 awen|OJJ31347.1 awen|OJJ33731.1 afis|EAW23786.1 afla|EED51595.1 afum|EAL87220.2  
agla|OJJ78939.1 anid|CBF79847.1 atub|OJI84604.1 azon|OJJ42847.1 atub|OJI80153.1 aory|EIT80419.1

Group217: abra|OJJ69627.1 abra|OJJ76818.1 acar|OOF91313.1 acar|OOF92684.1 acla|EAW08738.1  
acla|EAW13378.1 agla|OJJ84834.1 agla|OJJ86329.1 akaw|GAA87204.1 akaw|GAA91607.1 anig|EHA27577.1  
anig|EHA28339.1 atub|OJI88009.1 atub|OJI89856.1 awen|OJJ33192.1 awen|OJJ38390.1 azon|OJJ43848.1  
azon|OJJ46477.1 afis|EAW15698.1 afla|EED51354.1 afum|EAL85650.1 aluc|OJZ82432.1 anid|CBF78282.1  
aory|EIT80486.1 asyd|OJJ56072.1 ater|EAU39440.1 aver|OJJ05015.1 aluc|OJZ84228.1 asyd|OJJ52533.1

Group218: abra|OJJ69629.1 abra|OJJ74245.1 acar|OOF92681.1 acar|OOF95485.1 afla|EED55078.1  
afla|EED57736.1 aluc|OJZ82434.1 aluc|OJZ89887.1 asyd|OJJ63867.1 asyd|OJJ64731.1 acla|EAW07299.1  
agla|OJJ87688.1 akaw|GAA91609.1 anig|EHA28337.1 aory|EIT81976.1 atub|OJI84920.1 atub|OJI88007.1  
aver|OJI98835.1 awen|OJJ34926.1 afis|EAW22346.1 afum|EAL90846.1 akaw|GAA86775.1 anid|CBF82985.1  
anig|EHA27086.1 ater|EAU39484.1 aver|OJI97072.1 azon|OJJ50069.1 ater|EAU35426.1 aory|EIT79895.1

Group219: abra|OJJ69794.1 abra|OJJ76964.1 acar|OOF93584.1 acar|OOG00383.1 agla|OJJ81809.1  
agla|OJJ84793.1 agla|OJJ85103.1 aluc|OJZ84359.1 aluc|OJZ85505.1 anig|EHA25037.1 anig|EHA27695.1  
atub|OJI80060.1 atub|OJI89709.1 awen|OJJ30169.1 awen|OJJ37984.1 azon|OJJ46123.1 azon|OJJ46412.1  
acla|EAW11252.1 afis|EAW18245.1 afla|EED44938.1 afum|EAL87610.1 akaw|GAA87864.1 aory|EIT73480.1  
asyd|OJJ60485.1 ater|EAU30027.1 aver|OJI99811.1 acar|OOF91408.1 ater|EAU29360.1 akaw|GAA87080.1

Group220: abra|OJJ72131.1 abra|OJJ76584.1 acar|OOF96771.1 acar|OOF99402.1 agla|OJJ80546.1  
agla|OJJ86323.1 agla|OJJ89016.1 akaw|GAA82487.1 akaw|GAA84791.1 aluc|OJZ86889.1 aluc|OJZ91622.1  
anig|EHA21754.1 anig|EHA22647.1 asyd|OJJ57662.1 asyd|OJJ58966.1 atub|OJI83630.1 atub|OJI86075.1  
aver|OJJ01560.1 aver|OJJ05524.1 awen|OJJ32389.1 awen|OJJ32572.1 awen|OJJ33544.1 acla|EAW14111.1  
afis|EAW18813.1 afum|EAL93549.1 anid|CBF69799.1 aory|EIT77991.1 ater|EAU37980.1 azon|OJJ47150.1

Group221: acar|OOF92608.1 acar|OOF92629.1 abra|OJJ67199.1 acar|OOF98365.1 acla|EAW14525.1  
acla|EAW14526.1 afis|EAW19243.1 afis|EAW19244.1 afla|EED47633.1 afla|EED47634.1 afum|EAL93972.1  
afum|EAL93973.1 agla|OJJ88454.1 akaw|GAA90979.1 akaw|GAA90980.1 aluc|OJZ87775.1 anid|CBF78652.1  
anig|EHA20259.1 aory|EIT80236.1 asyd|OJJ65195.1 ater|EAU29500.1 atub|OJI80870.1 aver|OJI99344.1  
awen|OJJ37599.1 azon|OJJ51254.1 agla|OJJ88453.1 anid|CBF78654.1 azon|OJJ51255.1 ater|EAU29499.1

Group222: afis|EAW21841.1 afis|EAW25659.1 agla|OJJ84294.1 agla|OJJ87901.1 aory|EIT72356.1  
aory|EIT79167.1 asyd|OJJ52337.1 asyd|OJJ61239.1 asyd|OJJ54547.1 aver|OJI96725.1 aver|OJI96959.1  
aver|OJJ07630.1 aver|OJJ00562.1 abra|OJJ68267.1 acar|OOF97547.1 acla|EAW09304.1 afla|EED46529.1  
afum|EAL92853.1 akaw|GAA91931.1 aluc|OJZ82691.1 anid|CBF76711.1 anig|EHA27368.1 ater|EAU38518.1  
atub|OJI88923.1 awen|OJJ34124.1 azon|OJJ44222.1 aluc|OJZ80200.1 afla|EED47266.1 anid|CBF85164.1

Group223: afla|EED48230.1 afla|EED58028.1 anid|CBF83667.1 anid|CBF86363.1 aory|EIT72902.1  
aory|EIT79778.1 asyd|OJJ60808.1 asyd|OJJ64969.1 aver|OJI99093.1 aver|OJJ00136.1 awen|OJJ30134.1  
awen|OJJ35830.1 abra|OJJ72106.1 acar|OOF96749.1 acla|EAW09385.1 afis|EAW21750.1 afum|EAL92781.2  
agla|OJJ84424.1 akaw|GAA84816.1 aluc|OJZ86861.1 anig|EHA21779.1 ater|EAU38440.1 atub|OJI83659.1  
awen|OJJ34031.1 azon|OJJ48204.1 anid|CBF83471.1 ater|EAU34242.1 aver|OJJ00014.1 asyd|OJJ60689.1

Group224: azon|OJJ42769.1 azon|OJJ50372.1 abra|OJJ71617.1 acar|OOF96333.1 afla|EED57118.1  
agla|OJJ80138.1 akaw|GAA89310.1 aluc|OJZ86358.1 anig|EHA21532.1 aory|EIT73985.1 atub|OJI84176.1  
awen|OJJ40249.1 abra|OJJ77100.1 acar|OOF92984.1 acla|EAW12282.1 afis|EAW16959.1 afla|EED45239.1  
afum|EAL86486.1 akaw|GAA86956.1 aluc|OJZ84508.1 anid|CBF80512.1 anig|EHA27807.1 aory|EIT73744.1  
asyd|OJJ54736.1 ater|EAU30185.1 atub|OJI89572.1 aver|OJJ07435.1 agla|OJJ85349.1 awen|OJJ30386.1

Group225: azon|OJJ46793.1 azon|OJJ51796.1 abra|OJJ77127.1 acar|OOF93013.1 acla|EAW12902.1  
afis|EAW16407.1 afla|EED51674.1 agla|OJJ81607.1 akaw|GAA90801.1 aluc|OJZ84537.1 anid|CBF82038.1  
anig|EHA27835.1 aory|EIT79575.1 asyd|OJJ59200.1 ater|EAU36805.1 atub|OJI89543.1 aver|OJJ01812.1  
awen|OJJ36343.1 acar|OOF93300.1 afla|EED49754.1 aory|EIT81671.1 asyd|OJJ54221.1 acar|OOF99299.1  
aory|EIT77631.1 afla|EED48439.1 awen|OJJ38768.1 aory|EIT80498.1 afum|EAL91133.1 aver|OJJ05173.1

Group226: abra|OJJ67152.1 acar|OOF90071.1 acar|OOF98406.1 acla|EAW14572.1 acla|EAW14573.1  
afis|EAW19295.1 afis|EAW19296.1 afla|EED47590.1 afla|EED47591.1 afum|EAL94014.1 afum|EAL94015.1  
agla|OJJ88385.1 akaw|GAA91020.1 akaw|GAA91021.1 aluc|OJZ87823.1 aluc|OJZ87824.1 anid|CBF78768.1  
anid|CBF78770.1 anig|EHA20303.1 aory|EIT74518.1 aory|EIT74526.1 asyd|OJJ65238.1 ater|EAU29476.1  
ater|EAU29477.1 atub|OJI80820.1 atub|OJI80821.1 aver|OJI99388.1 awen|OJJ37646.1 azon|OJJ44911.1

Group227: abra|OJJ67842.1 acar|OOF92019.1 afis|EAW19539.1 afla|EED54092.1 afum|EAL86968.1  
akaw|GAA91848.1 aluc|OJZ82050.1 anid|CBF75400.1 anig|EHA22208.1 aory|EIT75915.1 asyd|OJJ63641.1  
ater|EAU35153.1 atub|OJI84608.1 aver|OJI97295.1 azon|OJJ48646.1 abra|OJJ76922.1 acar|OOF91369.1  
afla|EED54074.1 akaw|GAA87116.1 aluc|OJZ84322.1 anid|CBF71754.1 anig|EHA27657.1 asyd|OJJ61735.1  
atub|OJI89746.1 aver|OJI95828.1 awen|OJJ33258.1 anid|CBF71752.1 azon|OJJ44017.1 aory|EIT75930.1

Group228: abra|OJJ68668.1 acar|OOF92168.1 acla|EAW12580.1 afis|EAW24068.1 afla|EED51407.1  
afum|EAL91924.1 agla|OJJ87316.1 aluc|OJZ81882.1 anid|CBF86457.1 anig|EHA22358.1 aory|EIT80674.1

asyd|OJJ64915.1 ater|EAU30490.1 atub|OJI84435.1 aver|OJI99035.1 awen|OJJ41422.1 azon|OJJ48887.1  
acla|EAW12579.1 afis|EAW24069.1 afla|EED51406.1 afum|EAL91925.1 agla|OJJ87315.1 akaw|GAA89809.1  
aluc|OJZ81881.1 anid|CBF86458.1 aory|EIT80695.1 asyd|OJJ64914.1 awen|OJJ41421.1 azon|OJJ48886.1

Group229: abra|OJJ68715.1 acar|OOF92215.1 acar|OOF92216.1 acla|EAW12530.1 acla|EAW12531.1  
afis|EAW24118.1 afis|EAW24119.1 afla|EED46814.1 afum|EAL91973.1 afum|EAL91974.1 agla|OJJ87193.1  
akaw|GAA89868.1 aluc|OJZ81813.1 anid|CBF86539.1 anid|CBF86540.1 anig|EHA22402.1 anig|EHA22403.1  
aory|EIT72603.1 aory|EIT72683.1 asyd|OJJ64863.1 asyd|OJJ64865.1 ater|EAU30546.1 ater|EAU30547.1  
atub|OJI84385.1 aver|OJI98974.1 aver|OJI98978.1 awen|OJJ41370.1 azon|OJJ48839.1 afla|EED46813.1

Group230: abra|OJJ68757.1 acar|OOF92245.1 acla|EAW12494.1 afis|EAW24151.1 afla|EED46780.1  
afum|EAL92006.1 akaw|GAA89901.1 aluc|OJZ81770.1 anid|CBF77913.1 anig|EHA22446.1 aory|EIT72705.1  
asyd|OJJ55298.1 ater|EAU30583.1 atub|OJI84342.1 aver|OJJ06928.1 awen|OJJ41327.1 abra|OJJ68758.1  
acla|EAW12493.1 afis|EAW24152.1 afla|EED46779.1 afum|EAL92007.1 agla|OJJ89543.1 akaw|GAA89902.1  
aluc|OJZ81769.1 anid|CBF77911.1 aory|EIT72741.1 atub|OJI84341.1 awen|OJJ41326.1 azon|OJJ48800.1

Group231: abra|OJJ70392.1 acar|OOF90061.1 acla|EAW12387.1 acla|EAW12388.1 afis|EAW16834.1  
afis|EAW16835.1 afla|EED47328.1 afum|EAL86381.1 afum|EAL86382.2 agla|OJJ81545.1 agla|OJJ89426.1  
akaw|GAA91967.1 aluc|OJZ82649.1 anid|CBF74687.1 anid|CBF74689.1 anig|EHA27422.1 anig|EHA27423.1  
aory|EIT82824.1 asyd|OJJ60210.1 ater|EAU30239.1 atub|OJI88881.1 aver|OJJ04058.1 awen|OJJ35685.1  
azon|OJJ44153.1 acar|OOF90060.1 afla|EED47327.1 aory|EIT82846.1 ater|EAU30242.1 acar|OOF91882.1

Group232: abra|OJJ70540.1 acar|OOF97393.1 acla|EAW08138.1 acla|EAW08139.1 afis|EAW23174.1  
afis|EAW23175.1 afla|EED46944.1 afla|EED46945.1 afum|EAL88308.1 afum|EAL88309.1 agla|OJJ89686.1  
agla|OJJ89687.1 akaw|GAA83385.1 akaw|GAA83386.1 aluc|OJZ83885.1 anid|CBF74496.1 anid|CBF74498.1  
anig|EHA19022.1 aory|EIT72667.1 aory|EIT72762.1 asyd|OJJ57719.1 asyd|OJJ57720.1 ater|EAU36303.1  
ater|EAU36304.1 atub|OJI90252.1 aver|OJJ05448.1 awen|OJJ36603.1 azon|OJJ47603.1 azon|OJJ47604.1

Group233: abra|OJJ73887.1 acar|OOG01025.1 acar|OOG01026.1 acla|EAW07769.1 acla|EAW07771.1  
afis|EAW22805.1 afis|EAW22807.1 afla|EED50075.1 afum|EAL90394.1 afum|EBA27407.1 agla|OJJ83582.1  
akaw|GAA89498.1 akaw|GAA89499.1 aluc|OJZ88162.1 anid|CBF87924.1 anig|EHA17916.1 anig|EHA17917.1  
aory|EIT74704.1 asyd|OJJ63459.1 asyd|OJJ63460.1 ater|EAU38903.1 ater|EAU38904.1 atub|OJI90761.1  
aver|OJI97472.1 aver|OJI97473.1 awen|OJJ38923.1 azon|OJJ49700.1 aory|EIT74626.1 afla|EED50076.1

Group234: abra|OJJ74769.1 acar|OOF95760.1 acla|EAW10642.1 afis|EAW24924.1 afla|EED55549.1  
afum|EAL89579.1 agla|OJJ82153.1 akaw|GAA83643.1 aluc|OJZ92352.1 anid|CBF75699.1 anig|EHA26622.1  
aory|EIT82671.1 asyd|OJJ57496.1 atub|OJI86780.1 aver|OJJ05684.1 awen|OJJ40521.1 azon|OJJ49380.1  
abra|OJJ74770.1 acla|EAW10641.1 afis|EAW24925.1 afla|EED55548.1 afum|EAL89580.1 akaw|GAA83642.1  
anid|CBF75701.1 aory|EIT82683.1 ater|EAU35655.1 atub|OJI86781.1 aver|OJJ05683.1 azon|OJJ49381.1

Group235: abra|OJJ74915.1 acar|OOF95906.1 acar|OOF95907.1 acla|EAW08455.1 acla|EAW08456.1  
afis|EAW23499.1 afis|EAW23500.1 afla|EED57400.1 afla|EED57401.1 afum|EAL87962.2 afum|EAL87963.1  
agla|OJJ86747.1 agla|OJJ86748.1 akaw|GAA83507.1 akaw|GAA83508.1 aluc|OJZ92487.1 anid|CBF89730.1  
anid|CBF89731.1 anig|EHA26485.1 aory|EIT80151.1 aory|EIT80164.1 asyd|OJJ62234.1 ater|EAU35289.1  
ater|EAU35290.1 atub|OJI86920.1 aver|OJI96343.1 awen|OJJ39825.1 azon|OJJ47949.1 azon|OJJ47950.1

Group236: abra|OJJ75075.1 acar|OOF97258.1 acar|OOF97259.1 acla|EAW08256.1 afis|EAW23290.1  
afis|EAW23291.1 afla|EED55682.1 afum|EAL88189.1 agla|OJJ86548.1 akaw|GAA88687.1 akaw|GAA88688.1 aluc|OJZ92641.1  
anid|CBF89509.1 anig|EHA26351.1 aory|EIT77074.1 asyd|OJJ62397.1 ater|EAU37583.1 atub|OJI87072.1  
aver|OJI96531.1 awen|OJJ39667.1 azon|OJJ47797.1 aory|EIT77075.1 acla|EAW08258.1 afis|EAW23291.1  
afis|EAW23291.1 afla|EED55680.1 afum|EAL88188.1 anid|CBF89508.1 asyd|OJJ62398.1 ater|EAU37582.1 azon|OJJ47796.1

Group237: abra|OJJ75137.1 acar|OOF97199.1 acar|OOF97200.1 afis|EAW23348.1 afis|EAW23350.1  
afis|EAW23351.1 afla|EED55617.1 afum|EAL88126.1 afum|EAL88128.1 agla|OJJ86478.1 akaw|GAA88743.1 aluc|OJZ92703.1  
anid|CBF74910.1 anig|EHA26296.1 anig|EHA26297.1 aory|EIT81793.1 asyd|OJJ60100.1 ater|EAU35593.1  
atub|OJI87130.1 aver|OJJ04162.1 awen|OJJ39539.1 awen|OJJ39543.1 azon|OJJ47741.1 agla|OJJ80588.1  
aver|OJJ04161.1 anid|CBF74914.1 aory|EIT81802.1 ater|EAU35592.1 azon|OJJ47736.1 afla|EED55618.1

Group238: abra|OJJ75492.1 acar|OOF90824.1 acar|OOF90825.1 acla|EAW11224.1 acla|EAW11225.1  
afis|EAW18278.1 afis|EAW18279.1 afla|EED48745.1 afla|EED48746.1 afum|EAL87644.1 afum|EAL87645.1  
agla|OJJ88147.1 agla|OJJ88148.1 akaw|GAA84257.1 akaw|GAA84258.1 aluc|OJZ88951.1 anid|CBF79492.1  
anid|CBF79494.1 anig|EHA23569.1 anig|EHA23570.1 aory|EIT73072.1 aory|EIT73086.1 asyd|OJJ57877.1  
ater|EAU33284.1 ater|EAU33285.1 atub|OJI85838.1 aver|OJJ04517.1 awen|OJJ30651.1 azon|OJJ47964.1

Group239: abra|OJJ75717.1 acar|OOG00139.1 acar|OOG00141.1 acla|EAW09392.1 acla|EAW09394.1  
afis|EAW21739.1 afis|EAW21741.1 afla|EED58014.1 afla|EED58016.1 afum|EAL92773.1 afum|EAL92774.1  
agla|OJJ84432.1 agla|OJJ84449.1 akaw|GAA84452.1 akaw|GAA84453.1 aluc|OJZ89169.1 anid|CBF83696.1  
anid|CBF83699.1 anig|EHA23386.1 aory|EIT79752.1 aory|EIT79775.1 asyd|OJJ60825.1 ater|EAU38420.1  
ater|EAU38429.1 atub|OJI85621.1 aver|OJJ00151.1 awen|OJJ34021.1 awen|OJJ34023.1 azon|OJJ48535.1

Group240: abra|OJJ77333.1 acar|OOF93207.1 acla|EAW13139.1 afis|EAW17511.1 afla|EED49310.1 afum|EAL91331.1 agla|OJJ81447.1 akaw|GAA91425.1 aluc|OJZ84741.1 anid|CBF71568.1 anig|EHA28015.1 aory|EIT82226.1 asyd|OJJ61881.1 ater|EAU36952.1 atub|OJI89340.1 aver|OJI95979.1 awen|OJJ37333.1 azon|OJJ51021.1 afla|EED49307.1 afum|EAL91330.1 anid|CBF71531.1 asyd|OJJ61893.1 aver|OJI95989.1 azon|OJJ51020.1 acla|EAW13140.1 afis|EAW17512.1 anig|EHA28014.1 aory|EIT82236.1 awen|OJJ37334.1

Group241: abra|OJJ65980.1 abra|OJJ66239.1 acar|OOF90701.1 acar|OOF92893.1 acla|EAW11609.1 acla|EAW15289.1 afis|EAW23842.1 afis|EAW24576.1 akaw|GAA89050.1 akaw|GAA90853.1 aluc|OJZ80544.1 aluc|OJZ82980.1 anig|EHA21395.1 anig|EHA25651.1 asyd|OJJ54925.1 asyd|OJJ65267.1 ater|EAU32172.1 ater|EAU33781.1 atub|OJI88387.1 atub|OJI89213.1 aver|OJI99419.1 aver|OJJ07270.1 afla|EED45390.1 afum|EAL87273.1 agla|OJJ87625.1 anid|CBF78824.1 aory|EIT82439.1 azon|OJJ46551.1

Group242: abra|OJJ66056.1 abra|OJJ77098.1 afla|EED49909.1 afla|EED53379.1 akaw|GAA86958.1 akaw|GAA93126.1 aluc|OJZ81108.1 aluc|OJZ84506.1 anid|CBF80783.1 anid|CBF84621.1 anig|EHA19261.1 anig|EHA27805.1 aory|EIT72449.1 aory|EIT75126.1 asyd|OJJ54497.1 asyd|OJJ55641.1 ater|EAU30218.1 ater|EAU30988.1 atub|OJJ82471.1 atub|OJI89574.1 aver|OJJ06724.1 aver|OJJ07683.1 awen|OJJ29737.1 awen|OJJ33568.1 acar|OOF92980.1 afis|EAW17111.1 afum|EAL86575.1 agla|OJJ79951.1

Group243: abra|OJJ66383.1 abra|OJJ71952.1 acar|OOF94059.1 acar|OOF94129.1 acar|OOF96603.1 afla|EED51643.1 afla|EED53089.1 akaw|GAA84976.1 akaw|GAA90249.1 aluc|OJZ83091.1 aluc|OJZ86686.1 aory|EIT74787.1 aory|EIT80741.1 atub|OJI83839.1 atub|OJI87845.1 azon|OJJ48234.1 azon|OJJ51069.1 azon|EAU12654.1 abra|EAU18031.1 abra|EAU1842.1 agla|OJJ85401.1 anid|CBF76050.1 anig|EHA21987.1 asyd|OJJ52485.1 ater|EAU36811.1 aver|OJJ03921.1 awen|OJJ41506.1 ater|EAU35537.1

Group244: abra|OJJ67133.1 abra|OJJ72705.1 akaw|GAA85309.1 akaw|GAA91036.1 aluc|OJZ87846.1 aluc|OJZ90669.1 atub|OJI80802.1 atub|OJI82099.1 aver|OJI96726.1 aver|OJJ07629.1 acar|OOF95940.1 anig|EHA24103.1 asyd|OJJ64079.1 azon|OJJ42255.1 afis|EAW22517.1 afum|EAL90676.1 aory|EIT73492.1 azon|OJJ49956.1 abra|OJJ75758.1 afla|EED44952.1 akaw|GAA84490.1 aluc|OJZ89211.1 anid|CBF85166.1 anig|EHA23347.1 asyd|OJJ54548.1 ater|EAU33498.1 atub|OJI85581.1 awen|OJJ40261.1

Group245: abra|OJJ68302.1 abra|OJJ74425.1 acar|OOF90436.1 acar|OOF90443.1 acar|OOF96685.1 afis|EAW24469.1 afis|EAW25516.1 aluc|OJZ80145.1 aluc|OJZ83671.1 aluc|OJZ89698.1 atub|OJI85105.1 atub|OJI90042.1 awen|OJJ34908.1 awen|OJJ41259.1 acla|EAW14952.1 afla|EED55056.1 afum|EAL86141.1 afum|EAL90181.1 agla|OJJ87287.1 akaw|GAA83172.1 anid|CBF77786.1 anig|EHA18826.1 aory|EIT81972.1 asyd|OJJ56269.1 ater|EAU33362.1 aver|OJJ08496.1 azon|OJJ42850.1 asyd|OJJ54439.1

Group246: abra|OJJ68357.1 abra|OJJ70141.1 afla|EED46535.1 afla|EED53487.1 akaw|GAA86624.1 akaw|GAA92129.1 aluc|OJZ83593.1 aluc|OJZ85179.1 anig|EHA18753.1 anig|EHA25391.1 aory|EIT72381.1 aory|EIT74971.1 asyd|OJJ56981.1 asyd|OJJ60301.1 ater|EAU38514.1 ater|EAU39003.1 atub|OJI80418.1 atub|OJI89965.1 awen|OJJ34116.1 awen|OJJ34635.1 acar|OOF93592.1 afis|EAW19844.1 afum|EAL85050.1 agla|OJJ84299.1 anid|CBF87147.1 aver|OJI99641.1 aver|OJJ03306.1 azon|OJJ50352.1

Group247: abra|OJJ71231.1 abra|OJJ72448.1 acar|OOF94788.1 acar|OOF97944.1 afla|EED46190.1 afla|EED56273.1 akaw|GAA82757.1 akaw|GAA86186.1 aluc|OJZ87316.1 aluc|OJZ90432.1 ater|EAU33047.1 ater|EAU33789.1 afis|EAW1329.1 atub|OJI81864.1 awen|OJJ31638.1 awen|OJJ41732.1 acla|EAW12682.1 afis|EAW17845.1 afum|EAL91654.1 agla|OJJ81772.1 agla|OJJ83123.1 anig|EHA20550.1 asyd|OJJ55268.1 aver|OJJ06959.1 azon|OJJ48428.1 anid|CBF77966.1 anig|EHA23901.1 aory|EIT76458.1

Group248: acar|OOF95098.1 acar|OOF95164.1 acar|OOF96577.1 afis|EAW21529.1 afis|EAW24614.1 agla|OJJ80793.1 agla|OJJ81846.1 agla|OJJ85693.1 agla|OJJ84478.1 aory|EIT76721.1 aory|EIT79947.1 asyd|OJJ52471.1 asyd|OJJ61079.1 ater|EAU31519.1 ater|EAU35012.1 abra|OJJ71920.1 acla|EAW09610.1 afla|EED47452.1 afla|EED55978.1 afum|EAL92550.1 akaw|GAA85002.1 aluc|OJZ86657.1 anid|CBF76400.1 anig|EHA22014.1 atub|OJI83870.1 aver|OJJ00395.1 awen|OJJ39164.1 azon|OJJ51493.1

Group249: afis|EAW16443.1 afis|EAW16700.1 afla|EED45811.1 afla|EED46054.1 anid|CBF78974.1 anid|CBF82132.1 anid|CBF88938.1 aory|EIT75703.1 aory|EIT80899.1 asyd|OJJ54312.1 asyd|OJJ55669.1 asyd|OJJ62858.1 aver|OJI95760.1 aver|OJI96910.1 aver|OJJ05266.1 aver|OJJ06750.1 abra|OJJ67169.1 acar|OOF97010.1 afla|EED55529.1 afum|EAL89297.1 akaw|GAA91005.1 aluc|OJZ87806.1 anig|EHA20288.1 ater|EAU36196.1 atub|OJI80839.1 azon|OJJ50602.1 afla|EED49535.1 aory|EIT82649.1

Group250: afis|EAW18309.1 afis|EAW25696.1 awen|OJJ30683.1 awen|OJJ32214.1 abra|OJJ75441.1 acar|OOF90786.1 acla|EAW13822.1 afla|EED53243.1 afum|EAL87675.1 agla|OJJ88078.1 akaw|GAA84216.1 aluc|OJZ88894.1 anid|CBF79436.1 anig|EHA23612.1 aory|EIT72989.1 asyd|OJJ54980.1 asyd|OJJ57846.1 ater|EAU33319.1 atub|OJI85895.1 aver|OJJ04318.1 aver|OJJ04546.1 awen|OJJ32538.1 azon|OJJ43103.1 afla|EED50918.1 aory|EIT74822.1 aory|EIT78997.1 asyd|OJJ52725.1 ater|EAU32817.1

Group251: afla|EED51654.1 afla|EED52464.1 aluc|OJZ84281.1 aluc|OJZ87033.1 anig|EHA25215.1 anig|EHA26913.1 anig|EHA27626.1 aory|EIT80434.1 aory|EIT82812.1 asyd|OJJ54529.1 asyd|OJJ62992.1 atub|OJI83482.1 atub|OJI89800.1 aver|OJI97976.1 aver|OJJ07658.1 abra|OJJ76870.1 acla|EAW10087.1 afis|EAW16918.1 akaw|GAA87153.1 anid|CBF80752.1 awen|OJJ30986.1 afis|EAW25500.1 afla|EED50854.1 afum|EAL90166.1 agla|OJJ87304.1 aory|EIT79059.1 awen|OJJ41242.1 azon|OJJ44808.1

Group252: agla|OJJ82640.1 agla|OJJ85276.1 asyd|OJJ57347.1 asyd|OJJ65114.1 aver|OJI99240.1  
aver|OJJ05818.1 aver|OJJ00352.1 aver|OJJ05340.1 awen|OJJ30078.1 awen|OJJ32593.1 abra|OJJ78114.1  
acar|OOF98754.1 acla|EAW07003.1 afis|EAW16620.1 afla|EED48645.1 afum|EAL89217.1 agla|OJJ84764.1  
akaw|GAA85893.1 aluc|OJJ291179.1 anid|CBF81971.1 anig|EHA19870.1 aory|EIT73182.1 ater|EAU36705.1  
atub|OJI83191.1 azon|OJJ42184.1 aory|EIT73798.1 asyd|OJJ61034.1 ater|EAU37620.1

Group253: asyd|OJJ62591.1 asyd|OJJ64803.1 abra|OJJ77288.1 acar|OOF93165.1 acla|EAW12880.1  
afis|EAW17797.1 afla|EED45790.1 afum|EAL91605.2 agla|OJJ88361.1 akaw|GAA90661.1 aluc|OJJ284699.1  
anid|CBF86643.1 anig|EHA27974.1 aory|EIT75720.1 ater|EAU31827.1 atub|OJI89383.1 aver|OJI98916.1  
awen|OJJ37068.1 acar|OOF93164.1 afis|EAW17799.1 afla|EED45791.1 afum|EAL91607.1 ater|EAU31828.1  
anid|CBF86641.1 aver|OJI98917.1 agla|OJJ78851.1 awen|OJJ37061.1 aory|EIT75595.1

Group254: abra|OJJ67087.1 afum|EAL86535.1 agla|OJJ83616.1 anid|CBF75171.1 anig|EHA20191.1  
abra|OJJ67973.1 acar|OOF92814.1 acla|EAW11761.1 afis|EAW23794.1 afla|EED48581.1 akaw|GAA91229.1  
aluc|OJJ28841.1 anig|EHA21278.1 aory|EIT73168.1 asyd|OJJ62859.1 atub|OJI89071.1 aver|OJI96912.1  
awen|OJJ80931.1 azon|OJJ44002.1 akaw|GAA90147.1 aluc|OJJ291537.1 anig|EHA22574.1 atub|OJI87737.1  
akaw|GAA92523.1 asyd|OJJ60253.1 atub|OJI85991.1 azon|OJJ46498.1 azon|OJJ45663.1

Group255: abra|OJJ67268.1 acar|OOF98298.1 acar|OOF98299.1 afis|EAW17109.1 afla|EED55276.1  
afum|EAL86573.1 agla|OJJ88998.1 akaw|GAA91683.1 aluc|OJJ287711.1 anid|CBF85644.1 anig|EHA20205.1  
anig|EHA20206.1 aory|EIT83585.1 asyd|OJJ64238.1 asyd|OJJ64239.1 ater|EAU29281.1 ater|EAU39434.1  
atub|OJI80931.1 aver|OJI98331.1 aver|OJI98331.1 aory|EIT78607.1 aory|EIT78620.1 ater|EAU39435.1 afis|EAW17112.1  
afum|EAL86576.1 anid|CBF85642.1 aory|EIT83532.1 afla|EED55275.1 aory|EIT83583.1

Group256: abra|OJJ67322.1 acar|OOF92491.1 acar|OOF92492.1 acla|EAW06413.1 acla|EAW06414.1  
afis|EAW18517.1 afis|EAW18518.1 afla|EED52880.1 afla|EED52881.1 afum|EAL93212.1 afum|EAL93213.1  
agla|OJJ85130.1 akaw|GAA86495.1 akaw|GAA86496.1 aluc|OJJ285037.1 aluc|OJJ285038.1 anid|CBF70228.1  
anid|CBF70230.1 anig|EHA25256.1 aory|EIT78607.1 aory|EIT78620.1 asyd|OJJ58772.1 ater|EAU30052.1  
ater|EAU30053.1 atub|OJI80559.1 aver|OJJ01381.1 awen|OJJ31070.1 azon|OJJ50580.1

Group257: abra|OJJ67358.1 acar|OOF92463.1 acla|EAW06384.1 afis|EAW18490.1 afla|EED52916.1  
afum|EAL93180.1 agla|OJJ85085.1 akaw|GAA86463.1 aluc|OJJ285003.1 anid|CBF70157.1 anig|EHA25222.1  
aory|EIT78645.1 asyd|OJJ58803.1 ater|EAU29914.1 atub|OJI80595.1 aver|OJJ01407.1 awen|OJJ31043.1  
azon|OJJ50554.1 abra|OJJ67360.1 acla|EAW06383.1 afis|EAW18489.1 afla|EED52917.1 afum|EAL93179.1  
akaw|GAA86461.1 anid|CBF70155.1 anig|EHA25220.1 aory|EIT78598.1 asyd|OJJ58804.1

Group258: abra|OJJ68582.1 atub|OJI91460.1 azon|OJJ47723.1 abra|OJJ75562.1 acar|OOF94716.1  
acla|EAW13645.1 asyd|OJJ52397.1 ater|EAU35611.1 aver|OJJ01926.1 awen|OJJ38360.1 azon|OJJ47155.1  
abra|OJJ76231.1 afis|EAW24533.1 afla|EED47408.1 afum|EAL86199.1 anid|CBF69447.1 anig|EHA18750.1  
acla|EAW08325.1 afis|EAW23360.1 afla|EED55598.1 afum|EBA27335.1 agla|OJJ86466.1 aluc|OJJ292717.1  
anig|EHA26282.1 aory|EIT82668.1 asyd|OJJ60112.1 ater|EAU35434.1 anig|EHA22166.1

Group259: abra|OJJ68687.1 acar|OOF92189.1 acar|OOF92190.1 acla|EAW12558.1 acla|EAW12560.1  
afis|EAW24090.1 afis|EAW24092.1 afla|EED46847.1 afla|EED46849.1 afum|EAL91945.1 afum|EAL91947.2  
agla|OJJ87160.1 agla|OJJ87166.1 akaw|GAA89840.1 akaw|GAA89842.1 aluc|OJJ281846.1 anid|CBF86494.1  
anig|EHA22376.1 aory|EIT72742.1 asyd|OJJ64893.1 ater|EAU30514.1 ater|EAU30516.1 atub|OJI84415.1  
aver|OJI99014.1 awen|OJJ41397.1 awen|OJJ41399.1 azon|OJJ48865.1 aory|EIT72593.1

Group260: abra|OJJ68761.1 acar|OOF92248.1 acla|EAW12490.1 afis|EAW24155.1 afla|EED46777.1  
afum|EAL92010.1 akaw|GAA89905.1 aluc|OJJ281765.1 anid|CBF77904.1 anig|EHA22449.1 asyd|OJJ55301.1  
atub|OJI84337.1 abra|OJJ68762.1 acla|EAW12489.1 afis|EAW24156.1 afum|EAL92011.1 agla|OJJ89525.1  
akaw|GAA89906.1 aluc|OJJ281764.1 anid|CBF77902.1 anig|EHA22450.1 aory|EIT72652.1 asyd|OJJ55302.1  
ater|EAU30587.1 atub|OJI84336.1 aver|OJJ06924.1 awen|OJJ41322.1 azon|OJJ48795.1

Group261: abra|OJJ69707.1 acar|OOF94204.1 acla|EAW14911.1 afla|EED55248.1 agla|OJJ79247.1  
akaw|GAA90156.1 aluc|OJJ283191.1 anid|CBF73771.1 anig|EHA28261.1 aory|EIT77697.1 asyd|OJJ56592.1  
atub|OJI87748.1 awen|OJJ35897.1 azon|OJJ50407.1 abra|OJJ72111.1 acar|OOF90025.1 afis|EAW24432.1  
afum|EAL86100.1 akaw|GAA84811.1 aluc|OJJ286866.1 anig|EHA21775.1 ater|EAU30013.1 atub|OJI83654.1  
aver|OJJ06133.1 awen|OJJ32770.1 aory|EIT83627.1 azon|OJJ44000.1 afla|EED49732.1

Group262: abra|OJJ69819.1 acar|OOF93344.1 afis|EAW15617.1 afla|EED52777.1 afum|EAL85718.1  
agla|OJJ79351.1 akaw|GAA87841.1 aluc|OJJ285477.1 anid|CBF76275.1 anig|EHA25018.1 aory|EIT78176.1  
asyd|OJJ60985.1 ater|EAU37197.1 atub|OJI80086.1 aver|OJJ00304.1 abra|OJJ74486.1 acar|OOF95263.1  
acla|EAW08782.1 afla|EED57614.1 akaw|GAA87379.1 aluc|OJJ289633.1 anig|EHA26875.1 aory|EIT82993.1  
atub|OJI85170.1 awen|OJJ40133.1 ater|EAU36083.1 asyd|OJJ52418.1 aver|OJJ03363.1

Group263: abra|OJJ70208.1 acar|OOF90365.1 acla|EAW13177.1 afis|EAW22620.1 afla|EED51827.1  
afum|EAL87187.2 agla|OJJ85385.1 akaw|GAA86568.1 aluc|OJJ285119.1 anid|CBF84539.1 anig|EHA25339.1  
aory|EIT81723.1 asyd|OJJ53483.1 ater|EAU32773.1 atub|OJI80474.1 aver|OJJ08276.1 awen|OJJ33335.1  
azon|OJJ51798.1 acla|EAW11725.1 afis|EAW23750.1 asyd|OJJ64104.1 aver|OJI98187.1 azon|OJJ51793.1  
afum|EAL90576.1 afla|EED53104.1 anid|CBF85467.1 agla|OJJ87544.1 aory|EIT74796.1

Group264: anig|EHA20613.1 atub|OJI81264.1 abra|OJJ71157.1 acar|OOF98002.1 acla|EAW10341.1 afis|EAW25250.1 afla|EED53714.1 afum|EAL89912.1 agla|OJJ89220.1 akaw|GAA82821.1 aluc|OJZ87382.1 anid|CBF85305.1 aory|EIT74933.1 asyd|OJJ63998.1 ater|EAU34356.1 aver|OJI98087.1 awen|OJJ40962.1 azon|OJJ44543.1 acla|EAW10342.1 afis|EAW25247.1 afla|EED53713.1 afum|EAL89909.1 agla|OJJ89214.1 akaw|GAA82822.1 aluc|OJZ87383.1 anid|CBF85306.1 awen|OJJ40961.1 azon|OJJ44529.1

Group265: abra|OJJ71667.1 acar|OOF96377.1 acar|OOF96378.1 acla|EAW15205.1 acla|EAW15206.1 afis|EAW20170.1 afis|EAW20171.1 afla|EED57177.1 afla|EED57179.1 afum|EAL85288.1 afum|EAL85289.1 agla|OJJ88759.1 akaw|GAA89264.1 akaw|GAA89265.1 aluc|OJZ86409.1 anid|CBF85026.1 anid|CBF85028.1 anig|EHA21490.1 aory|EIT73988.1 aory|EIT74058.1 asyd|OJJ63103.1 ater|EAU35205.1 ater|EAU35206.1 atub|OJI84122.1 aver|OJI97858.1 aver|OJI97859.1 awen|OJJ32067.1 azon|OJJ46099.1

Group266: abra|OJJ74363.1 acar|OOF95367.1 agla|OJJ88403.1 akaw|GAA86667.1 aluc|OJZ89764.1 anid|CBF83899.1 anig|EHA26984.1 asyd|OJJ55412.1 atub|OJI85038.1 aver|OJJ06490.1 awen|OJJ32658.1 abra|OJJ75265.1 acar|OOF94538.1 afis|EAW20807.1 afla|EED46108.1 afum|EAL84821.1 akaw|GAA91801.1 aluc|OJZ92823.1 anid|CBF87420.1 anig|EHA26186.1 aory|EIT76498.1 atub|OJI87279.1 atub|OJI84647.1 afla|EED56188.1 anig|EHA20917.1 aory|EIT73391.1 akaw|GAA92694.1 aluc|OJZ90152.1

Group267: abra|OJJ75148.1 acar|OOF97189.1 acar|OOF97190.1 acla|EAW08321.1 acla|EAW08322.1 afis|EAW23356.1 afis|EAW23357.1 afla|EED55606.1 afla|EED55607.1 afum|EAL88119.2 afum|EAL88120.2 agla|OJJ86469.1 akaw|GAA88753.1 akaw|GAA88754.1 aluc|OJZ92713.1 aluc|OJZ92714.1 anid|CBF74884.1 anig|EHA26286.1 anig|CBF87274.1 asyd|OJJ81807.1 ater|EAU35607.1 ater|EAU35608.1 atub|OJI87139.1 atub|OJI87140.1 aver|OJJ04153.1 awen|OJJ39530.1 azon|OJJ47726.1 azon|OJJ47728.1

Group268: abra|OJJ75712.1 acar|OOG00147.1 acla|EAW09400.1 afis|EAW21736.1 afla|EED58008.1 afum|EAL92769.1 agla|OJJ79847.1 akaw|GAA84446.1 aluc|OJZ89163.1 anig|EHA23391.1 aory|EIT79742.1 ater|EAU38417.1 atub|OJI85627.1 awen|OJJ34009.1 abra|OJJ75713.1 acar|OOG00146.1 acla|EAW09399.1 afla|EED58009.1 afum|EAL92770.1 agla|OJJ88777.1 akaw|GAA84447.1 aluc|OJZ89164.1 anig|EHA23390.1 aory|EIT79726.1 asyd|OJJ65106.1 atub|OJI85626.1 aver|OJI99233.1 azon|OJJ48541.1

Group269: abra|OJJ76491.1 acar|OOF99722.1 acar|OOF99723.1 acla|EAW13941.1 acla|EAW13944.1 afis|EAW18652.1 afis|EAW18653.1 afla|EED52680.1 afla|EED52681.1 afum|EAL93368.1 afum|EAL93369.1 agla|OJJ82422.1 akaw|GAA82406.1 akaw|GAA82407.1 aluc|OJZ91713.1 aluc|OJZ91714.1 anid|CBF70539.1 anid|CBF70540.1 anig|EHA22724.1 aory|EIT74312.1 aory|EIT74318.1 asyd|OJJ58549.1 ater|EAU38259.1 ater|EAU38260.1 atub|OJI86172.1 aver|OJJ01147.1 awen|OJJ32120.1 azon|OJJ46706.1

Group270: abra|OJJ76517.1 acar|OOF99456.1 acla|EAW14184.1 acla|EAW14185.1 afis|EAW18899.1 afis|EAW18900.1 afla|EED50848.1 afla|EED50853.1 afum|EAL93631.1 afum|EAL93632.1 agla|OJJ81505.1 akaw|GAA82429.1 akaw|GAA82430.1 aluc|OJZ91689.1 anid|CBF69917.1 anid|CBF69919.1 anig|EHA22702.1 aory|EIT78983.1 aory|EIT79046.1 asyd|OJJ58989.1 ater|EAU38067.1 ater|EAU38068.1 atub|OJI86142.1 aver|OJJ01626.1 aver|OJJ01627.1 awen|OJJ32457.1 azon|OJJ47214.1 azon|OJJ47215.1

Group271: abra|OJJ76807.1 acar|OOF91299.1 acla|EAW13366.1 afis|EAW20480.1 afla|EED44787.1 afum|EAL84574.1 agla|OJJ84832.1 akaw|GAA87216.1 aluc|OJZ84214.1 anid|CBF79227.1 anig|EHA27567.1 aory|EIT77778.1 asyd|OJJ5739.1 ater|EAU29559.1 atub|OJI89869.1 aver|OJJ06825.1 awen|OJJ33179.1 azon|OJJ46382.1 afla|EED44788.1 aory|EIT77780.1 awen|OJJ33175.1 azon|OJJ46828.1 acar|OOF91301.1 acla|EAW13367.1 afis|EAW20481.1 afum|EAL84573.1 akaw|GAA87215.1 aluc|OJZ84215.1

Group272: abra|OJJ77199.1 acar|OOF93082.1 acar|OOF93087.1 acla|EAW13188.1 acla|EAW13189.1 afis|EAW17452.1 afis|EAW17453.1 afla|EED49369.1 afla|EED49370.1 afum|EAL91280.1 afum|EAL91281.2 agla|OJJ80350.1 agla|OJJ80360.1 akaw|GAA90742.1 aluc|OJZ84606.1 anid|CBF71675.1 anid|CBF71677.1 anig|EHA27895.1 anig|EHA27896.1 aory|EIT79469.1 aory|EIT79540.1 asyd|OJJ61825.1 ater|EAU33932.1 ater|EAU33933.1 atub|OJI89473.1 aver|OJI95925.1 awen|OJJ37394.1 azon|OJJ51067.1

Group273: abra|OJJ77369.1 acar|OOF93239.1 acla|EAW13106.1 acla|EAW13107.1 afis|EAW17558.1 afla|EED49266.1 afla|EED49267.1 afum|EAL91372.1 agla|OJJ81410.1 akaw|GAA91392.1 akaw|GAA91393.1 aluc|OJZ84778.1 aluc|OJZ84779.1 anid|CBF90279.1 anig|EHA28046.1 aory|EIT82182.1 aory|EIT82245.1 asyd|OJJ61916.1 ater|EAU36989.1 atub|OJI89303.1 aver|OJI96009.1 awen|OJJ37296.1 azon|OJJ50989.1 afis|EAW17557.1 afum|EAL91371.1 agla|OJJ81411.1 anid|CBF90281.1 asyd|OJJ61917.1

Group274: abra|OJJ66221.1 abra|OJJ69595.1 aluc|OJZ80527.1 aluc|OJZ90304.1 anig|EHA19754.1 anig|EHA25667.1 aver|OJI98854.1 aver|OJJ06288.1 acar|OOF90660.1 acar|OOF90661.1 acla|EAW08925.1 afis|EAW17322.1 afum|EAL91158.1 agla|OJJ87386.1 akaw|GAA89065.1 anig|EHA25668.1 asyd|OJJ56432.1 ater|EAU32950.1 atub|OJI88403.1 awen|OJJ39606.1 azon|OJJ46461.1 akaw|GAA86069.1 awen|OJJ39353.1 acla|EAW09791.1 afis|EAW21345.1 afum|EAL92362.1 azon|OJJ51694.1

Group275: abra|OJJ68039.1 abra|OJJ73342.1 acar|OOF91804.1 acar|OOF94627.1 akaw|GAA83140.1 akaw|GAA90913.1 aluc|OJZ82913.1 aluc|OJZ88697.1 anig|EHA18377.1 anig|EHA21336.1 asyd|OJJ53721.1 asyd|OJJ60902.1 atub|OJI89139.1 atub|OJI91278.1 aver|OJJ00228.1 aver|OJJ07846.1 awen|OJJ29994.1 awen|OJJ33889.1 azon|OJJ42783.1 azon|OJJ50111.1 acla|EAW06969.1 afis|EAW24632.1 afla|EED55052.1 afum|EAL86254.1 anid|CBF83822.1 aory|EIT81944.1 ater|EAU36659.1

Group276: acar|OOF92615.1 acar|OOF92636.1 abra|OJJ69082.1 acar|OOF91209.1 acla|EAW08752.1 afis|EAW15684.1 afla|EED51370.1 afum|EAL85664.1 agla|OJJ81833.1 akaw|GAA90611.1 akaw|GAA90612.1 aluc|OJZ86070.1 anid|CBF71148.1 anig|EHA24544.1 aory|EIT80661.1 asyd|OJJ55837.1 ater|EAU32473.1 atub|OJI79866.1 atub|OJI79867.1 aver|OJJ04780.1 awen|OJJ38376.1 azon|OJJ43860.1 acla|EAW08751.1 afis|EAW15685.1 afla|EED51369.1 afum|EAL85663.1 anid|CBF71146.1

Group277: acar|OOF93141.1 acar|OOF96894.1 asyd|OJJ55471.1 asyd|OJJ61030.1 asyd|OJJ57185.1 abra|OJJ72261.1 acla|EAW13265.1 afis|EAW16849.1 afla|EED49789.1 afum|EAL86395.1 agla|OJJ88181.1 akaw|GAA84669.1 aluc|OJZ87020.1 anid|CBF84231.1 anig|EHA21635.1 aory|EIT77692.1 ater|EAU33865.1 atub|OJI83498.1 aver|OJJ00350.1 aver|OJJ03105.1 awen|OJJ36910.1 azon|OJJ50296.1 acla|EAW12401.1 afla|EED51180.1 aory|EIT81355.1 anid|CBF89260.1 azon|OJJ50917.1

Group278: acar|OOF94414.1 acar|OOF97591.1 afis|EAW24229.1 afis|EAW24933.1 afla|EED46551.1 afla|EED48042.1 afum|EAL85898.1 afum|EAL89589.1 aory|EIT77904.1 aory|EIT83324.1 asyd|OJJ53967.1 asyd|OJJ64678.1 ater|EAU29958.1 ater|EAU31178.1 aver|OJI98780.1 aver|OJJ08063.1 anig|EHA28592.1 abra|OJI69311.1 acla|EAW14698.1 agla|OJJ79642.1 akaw|GAA88180.1 aluc|OJZ82140.1 anid|CBF74228.1 anig|EHA24084.1 atub|OJI88297.1 awen|OJJ33068.1 azon|OJJ48455.1

Group279: acla|EAW07586.1 acla|EAW11103.1 afis|EAW17139.1 afis|EAW25619.1 anid|CBF80637.1 anid|CBF89256.1 acar|OOF93375.1 abra|OJJ69171.1 acar|OOF91133.1 afla|EED55556.1 agla|OJJ80465.1 akaw|GAA86292.1 aluc|OJZ86158.1 anig|EHA24466.1 asyd|OJJ61355.1 ater|EAU32675.1 atub|OJI79950.1 aver|OJJ08508.1 afla|EED47413.1 azon|OJJ38095.1 aluc|OJZ82069.1 anid|CBF87524.1 ater|EAU31706.1 atub|OJI84626.1 akaw|GAA91464.1 anig|EHA22500.1 aory|EIT82677.1

Group280: afis|EAW18048.1 afis|EAW24488.1 afum|EAL86157.1 afum|EAL86730.1 afum|EAL91860.1 abra|OJJ68602.1 acar|OOF92112.1 acla|EAW12637.1 afla|EED51498.1 agla|OJJ85419.1 akaw|GAA91926.1 aluc|OJZ81954.1 anid|CBF79800.1 anig|EHA22293.1 aory|EIT80704.1 asyd|OJJ58129.1 ater|EAU31275.1 atub|OJI84505.1 aver|OJJ04276.1 awen|OJJ32709.1 awen|OJJ41486.1 azon|OJJ48216.1 afla|EED48171.1 agla|OJJ83081.1 aory|EIT83032.1 ater|EAU38954.1 aver|OJI98885.1

Group281: afla|EED45594.1 afla|EED53079.1 aory|EIT74816.1 aory|EIT75766.1 abra|OJJ66499.1 asyd|OJJ54572.1 aver|OJJ07582.1 azon|OJJ50366.1 abra|OJJ72643.1 acar|OOF94628.1 akaw|GAA85264.1 aluc|OJZ90622.1 anid|CBF69513.1 anig|EHA24059.1 asyd|OJJ56879.1 ater|EAU39542.1 atub|OJI82048.1 aver|OJJ08508.1 afla|EED47413.1 aory|EIT81918.1 aver|OJI99560.1 afla|EED52187.1 aory|EIT74424.1 ater|EAU31590.1 awen|OJJ31457.1 asyd|OJJ56253.1 ater|EAU31815.1

Group282: afla|EED51568.1 afla|EED51716.1 afla|EED56540.1 agla|OJJ78952.1 agla|OJJ80278.1 aory|EIT79700.1 aory|EIT80654.1 aory|EIT80755.1 asyd|OJJ57607.1 asyd|OJJ58114.1 aver|OJJ04291.1 aver|OJJ05577.1 awen|OJJ33707.1 awen|OJJ34440.1 abra|OJJ67863.1 acar|OOF92843.1 acla|EAW11735.1 afis|EAW23768.1 afum|EAL87202.1 agla|OJJ85386.1 akaw|GAA91870.1 aluc|OJZ82029.1 anid|CBF79783.1 anig|EHA22227.1 ater|EAU31312.1 atub|OJI84583.1 azon|OJJ42833.1

Group283: afum|EAL85403.1 afum|EAL87814.1 aory|EIT74045.1 aory|EIT79062.1 ater|EAU31644.1 ater|EAU36768.1 atub|OJI87665.1 atub|OJI90002.1 abra|OJJ65728.1 acar|OOF93412.1 afis|EAW19529.1 afla|EED50913.1 akaw|GAA93255.1 aluc|OJZ83633.1 asyd|OJJ62934.1 azon|OJJ46829.1 awen|OJJ30425.1 afis|EAW16772.1 akaw|GAA92091.1 anid|CBF73717.1 anig|EHA18786.1 asyd|OJJ64570.1 aver|OJI97354.1 aver|OJI98056.1 aver|OJI98667.1 afla|EED57223.1 asyd|OJJ63582.1

Group284: afum|EAL86514.1 afum|EAL91321.1 asyd|OJJ52759.1 asyd|OJJ54478.1 asyd|OJJ61874.1 azon|OJJ42558.1 azon|OJJ51475.1 azon|OJJ51028.1 abra|OJJ74834.1 acar|OOF95824.1 acla|EAW13149.1 afis|EAW17498.1 afla|EED49318.1 agla|OJJ81459.1 akaw|GAA83586.1 aluc|OJZ92411.1 anid|CBF71582.1 anig|EHA26554.1 aory|EIT82205.1 ater|EAU34444.1 ater|EAU36943.1 atub|OJI86841.1 aver|OJI95972.1 awen|OJJ37343.1 acla|EAW12237.1 afis|EAW16990.1 aver|OJJ08741.1

Group285: agla|OJJ79575.1 agla|OJJ86866.1 agla|OJJ88176.1 agla|OJJ89239.1 asyd|OJJ62473.1 asyd|OJJ64049.1 ater|EAU34049.1 ater|EAU34409.1 aver|OJI96608.1 aver|OJI98135.1 awen|OJJ38034.1 awen|OJJ40680.1 awen|OJJ40981.1 abra|OJJ74157.1 acar|OOF95570.1 acla|EAW12279.1 afis|EAW16961.1 afla|EED49740.1 afum|EAL86487.2 akaw|GAA89727.1 aluc|OJZ80656.1 anid|CBF89363.1 anig|EHA27176.1 aory|EIT75292.1 atub|OJI87511.1 azon|OJJ44568.1 anid|CBF85376.1

Group286: akaw|GAA84498.1 akaw|GAA89765.1 anig|EHA23338.1 anig|EHA27214.1 aver|OJJ00853.1 aver|OJJ07847.1 abra|OJJ75781.1 acar|OOF91480.1 acla|EAW10808.1 afis|EAW24770.1 afla|EED55185.1 afum|EAL89411.1 agla|OJJ83340.1 aluc|OJZ80618.1 aluc|OJZ89223.1 anid|CBF86704.1 aory|EIT83621.1 asyd|OJJ64740.1 ater|EAU37121.1 atub|OJI85569.1 atub|OJI87472.1 aver|OJI98844.1 awen|OJJ29862.1 anid|CBF83000.1 afla|EED53623.1 aory|EIT75056.1 asyd|OJJ61517.1

Group287: asyd|OJJ54631.1 asyd|OJJ65150.1 asyd|OJJ58326.1 abra|OJJ68110.1 afla|EED53398.1 akaw|GAA86893.1 aluc|OJZ90016.1 anid|CBF80628.1 anig|EHA27391.1 aory|EIT74923.1 ater|EAU36928.1 atub|OJI84791.1 aver|OJJ07525.1 awen|OJJ33176.1 abra|OJJ71207.1 acar|OOF97964.1 afla|EED54683.1 akaw|GAA82777.1 aluc|OJZ87336.1 anid|CBF80110.1 anig|EHA20573.1 aory|EIT78795.1 atub|OJI81308.1 aver|OJJ02085.1 afla|EED46389.1 aory|EIT72418.1 atub|OJI84522.1

Group288: awen|OJJ30753.1 awen|OJJ31728.1 awen|OJJ30755.1 awen|OJJ31726.1 abra|OJJ67455.1  
acar|OOF92379.1 afis|EAW18419.1 afum|EAL93103.1 akaw|GAA86376.1 aluc|OJZ84910.1 anid|CBF70711.1  
asyd|OJJ58453.1 ater|EAU29836.1 atub|OJI80688.1 aver|OJJ01052.1 azon|OJJ50489.1 acar|OOF92377.1  
asyd|OJJ58451.1 acla|EAW06310.1 afla|EED52989.1 agla|OJJ84987.1 anid|CBF70709.1 aory|EIT78704.1  
ater|EAU29837.1 aver|OJJ01053.1 ater|EAU29835.1 asyd|OJJ58452.1

Group289: azon|OJJ42747.1 azon|OJJ51180.1 abra|OJJ76401.1 acar|OOF99642.1 acla|EAW14023.1  
afis|EAW18729.1 afla|EED50685.1 afum|EAL93454.1 agla|OJJ82287.1 akaw|GAA82321.1 aluc|OJZ91811.1  
anid|CBF70016.1 anig|EHA22804.1 aory|EIT78004.1 asyd|OJJ58877.1 ater|EAU38175.1 atub|OJI86267.1  
aver|OJJ01479.1 awen|OJJ32270.1 akaw|GAA82320.1 aluc|OJZ91812.1 acar|OOF99643.1 acla|EAW14022.1  
afis|EAW18728.1 afum|EAL93453.1 anid|CBF70018.1 ater|EAU38176.1

Group290: abra|OJJ65930.1 acar|OOF94991.1 acla|EAW12067.1 afis|EAW19710.1 afla|EED57049.1  
afum|EAL86817.2 agla|OJJ82841.1 akaw|GAA92305.1 akaw|GAA92306.1 aluc|OJZ90202.1 anid|CBF84278.1  
anig|EHA23699.1 aory|EIT82284.1 asyd|OJJ57230.1 ater|EAU32834.1 atub|OJI81631.1 aver|OJJ03059.1  
awen|OJJ32205.1 azon|OJJ42677.1 afla|EED57054.1 acar|OOF94992.1 acla|EAW12066.1 afis|EAW19709.1  
afum|EAL86818.1 aory|EIT82258.1 ater|EAU32836.1 azon|OJJ42678.1

Group291: abra|OJJ66585.1 acar|OOF91022.1 acla|EAW10906.1 acla|EAW10907.1 afis|EAW20951.1  
afis|EAW20952.1 afla|EED50307.1 afla|EED50308.1 afum|EAL84682.1 afum|EAL84683.2 agla|OJJ83929.1  
akaw|GAA91132.1 akaw|GAA91134.1 aluc|OJZ81461.1 anid|CBF82552.1 anid|CBF82554.1 anig|EHA25968.1  
aory|EIT77335.1 aory|EIT77337.1 asyd|OJJ54058.1 ater|EAU38602.1 ater|EAU38603.1 atub|OJI88718.1  
aver|OJJ08683.1 awen|OJJ34364.1 awen|OJJ34365.1 azon|OJJ48100.1

Group292: abra|OJJ66932.1 acar|OOF91699.1 acla|EAW14495.1 afis|EAW19209.1 afla|EED52263.1  
afum|EAL93939.2 agla|OJJ85720.1 akaw|GAA91486.1 aluc|OJZ85648.1 anid|CBF69569.1 anig|EHA24885.1  
asyd|OJJ59150.1 ater|EAU34159.1 atub|OJI79439.1 aver|OJJ02018.1 awen|OJJ34677.1 azon|OJJ45456.1  
acar|OOF91700.1 agla|OJJ85500.1 anid|CBF78572.1 anig|EHA24886.1 asyd|OJJ65074.1 ater|EAU37259.1  
aver|OJI99199.1 awen|OJJ37563.1 azon|OJJ51226.1 aver|OJJ01740.1

Group293: abra|OJJ67205.1 acar|OOF98357.1 acar|OOF98358.1 acla|EAW14519.1 afis|EAW19237.1  
afila|EED47640.1 afum|EAL93965.2 agla|OJJ88462.1 akaw|GAA90972.1 akaw|GAA90973.1 aluc|OJZ87769.1  
anid|CBF78640.1 anig|EHA20253.1 aory|EIT80182.1 asyd|OJJ65189.1 ater|EAU37226.1 atub|OJI80876.1  
aver|OJJ99338.1 awen|OJJ37593.1 azon|OJJ51248.1 acla|EAW14518.1 afis|EAW19236.1 afla|EED47646.1  
afum|EAL93964.1 anid|CBF78638.1 aory|EIT80263.1 ater|EAU37227.1

Group294: abra|OJJ67284.1 afla|EED54338.1 afum|EAL87110.1 agla|OJJ82024.1 akaw|GAA86525.1  
aluc|OJZ85073.1 anid|CBF71655.1 anig|EHA25287.1 aory|EIT76146.1 asyd|OJJ61837.1 ater|EAU32860.1  
atub|OJI80525.1 aver|OJI95936.1 awen|OJJ36119.1 abra|OJJ68987.1 acar|OOF91558.1 afla|EED48927.1  
akaw|GAA90508.1 aluc|OJZ85973.1 anid|CBF87485.1 anig|EHA24632.1 aory|EIT79999.1 ater|EAU31715.1  
atub|OJI79761.1 asyd|OJJ52961.1 aver|OJJ08927.1 awen|OJJ41925.1

Group295: abra|OJJ68390.1 afla|EED49558.1 agla|OJJ87147.1 aory|EIT82645.1 atub|OJI84701.1  
abra|OJJ77648.1 acar|OOF99088.1 acla|EAW12091.1 afis|EAW19985.1 afum|EBA27209.1 akaw|GAA83987.1  
aluc|OJZ80881.1 anid|CBF87267.1 anig|EHA19455.1 asyd|OJJ62371.1 ater|EAU33659.1 atub|OJI82696.1  
aver|OJI98437.1 awen|OJJ38077.1 azon|OJJ42589.1 anid|CBF73965.1 aver|OJI96505.1 afla|EED52196.1  
aory|EIT74391.1 ater|EAU29811.1 aluc|OJZ83787.1 anid|CBF85559.1

Group296: abra|OJJ69188.1 acar|OOF91124.1 acla|EAW08657.1 afis|EAW15774.1 afla|EED51274.1  
afum|EAL85575.1 agla|OJJ81937.1 akaw|GAA86276.1 akaw|GAA86277.1 aluc|OJZ86174.1 anid|CBF70974.1  
anig|EHA24450.1 anig|EHA24451.1 aory|EIT81499.1 asyd|OJJ52632.1 ater|EAU32367.1 atub|OJI79966.1  
aver|OJJ04660.1 awen|OJJ38481.1 azon|OJJ43782.1 acla|EAW08658.1 afis|EAW15773.1 afla|EED49465.1  
anid|CBF70972.1 ater|EAU32368.1 azon|OJJ43781.1 aory|EIT79571.1

Group297: abra|OJJ69236.1 acar|OOF91082.1 acar|OOF91084.1 acla|EAW08611.1 acla|EAW08613.1  
afis|EAW15821.1 afis|EAW15822.1 afla|EED51224.1 afla|EED51226.1 afum|EAL85529.1 afum|EAL85530.1  
agla|OJJ81985.1 akaw|GAA92244.1 akaw|GAA92246.1 aluc|OJZ86216.1 anid|CBF70886.1 anid|CBF70887.1  
anig|EHA24410.1 aory|EIT83181.1 aory|EIT83189.1 asyd|OJJ52589.1 ater|EAU33426.1 ater|EAU33427.1  
atub|OJI80011.1 aver|OJJ04616.1 awen|OJJ38535.1 azon|OJJ43727.1

Group298: abra|OJJ70462.1 acar|OOF97462.1 acar|OOF97465.1 acla|EAW13051.1 acla|EAW13053.1  
afis|EAW17613.1 afis|EAW17616.1 afla|EED49204.1 afla|EED49207.1 afum|EAL91426.1 afum|EAL91429.1  
agla|OJJ81324.1 akaw|GAA83308.1 akaw|GAA83311.1 aluc|OJZ83805.1 anid|CBF90169.1 anid|CBF90172.1  
anig|EHA18952.1 aory|EIT78583.1 aory|EIT83172.1 asyd|OJJ61991.1 ater|EAU37048.1 ater|EAU37050.1  
atub|OJI90172.1 aver|OJI96083.1 awen|OJJ37229.1 azon|OJJ50932.1

Group299: abra|OJJ71130.1 acar|OOF98022.1 acla|EAW10367.1 acla|EAW10368.1 afis|EAW25224.1  
afis|EAW25225.1 afla|EED53669.1 afla|EED53682.1 afum|EAL89885.1 afum|EAL89886.1 akaw|GAA82844.1  
aluc|OJZ87405.1 anid|CBF85264.1 anid|CBF85265.1 anig|EHA20634.1 anig|EHA20635.1 aory|EIT75307.1  
aory|EIT75353.1 ater|EAU34383.1 ater|EAU34384.1 atub|OJI81241.1 aver|OJI98082.1 aver|OJI98083.1  
agla|OJJ79183.1 asyd|OJJ62906.1 awen|OJJ40890.1 azon|OJJ44519.1

Group300: abra|OJJ72036.1 acar|OOF94174.1 acla|EAW09507.1 afla|EED57855.1 agla|OJJ82582.1  
akaw|GAA84897.1 aluc|OJZ86774.1 anid|CBF83512.1 anig|EHA21907.1 aory|EIT81060.1 asyd|OJJ53748.1  
asyd|OJJ60708.1 ater|EAU38317.1 atub|OJI83747.1 aver|OJJ00034.1 awen|OJJ33880.1 abra|OJJ72037.1  
afla|EED56917.1 akaw|GAA84896.1 aluc|OJZ86775.1 anid|CBF73981.1 anig|EHA21906.1 aory|EIT77541.1  
asyd|OJJ55360.1 atub|OJI83746.1 aver|OJJ06443.1 aver|OJJ07863.1

Group301: abra|OJJ72938.1 acar|OOF96120.1 acar|OOF96121.1 acla|EAW06452.1 acla|EAW06453.1  
afis|EAW15949.1 afla|EED58109.1 afla|EED58110.1 afum|EAL88582.1 agla|OJJ89365.1 akaw|GAA85519.1  
aluc|OJZ83447.1 anid|CBF81052.1 anig|EHA24293.1 anig|EHA24294.1 aory|EIT79139.1 aory|EIT79141.1  
asyd|OJJ56450.1 ater|EAU35509.1 atub|OJI82338.1 atub|OJI82339.1 aver|OJJ06272.1 awen|OJJ35627.1  
azon|OJJ46898.1 anid|CBF81054.1 ater|EAU35508.1 aver|OJJ06271.1

Group302: abra|OJJ73010.1 acar|OOF96182.1 acar|OOF96183.1 acla|EAW08002.1 acla|EAW08003.1  
afis|EAW23037.1 afis|EAW23038.1 afla|EED54980.1 afum|EAL88443.1 afum|EAL88444.1 agla|OJJ89440.1  
akaw|GAA85588.1 akaw|GAA85589.1 aluc|OJZ83525.1 anid|CBF80929.1 anid|CBF80931.1 anig|EHA24348.1  
aory|EIT80318.1 aory|EIT80383.1 asyd|OJJ56316.1 ater|EAU29618.1 ater|EAU29621.1 atub|OJI82414.1  
aver|OJJ06398.1 awen|OJJ35704.1 azon|OJJ44166.1 afla|EED54979.1

Group303: abra|OJJ73242.1 acar|OOG00479.1 acar|OOG00481.1 acla|EAW06915.1 acla|EAW06916.1  
afis|EAW16532.1 afis|EAW16533.1 afla|EED56136.1 afla|EED56140.1 afum|EAL89129.1 afum|EAL89130.2  
agla|OJJ82788.1 akaw|GAA87938.1 akaw|GAA87939.1 aluc|OJZ81186.1 anid|CBF81734.1 anid|CBF81736.1  
anig|EHA18503.1 aory|EIT76580.1 aory|EIT76630.1 asyd|OJJ59594.1 ater|EAU36595.1 ater|EAU36596.1  
atub|OJI91382.1 aver|OJJ02674.1 awen|OJJ40289.1 azon|OJJ49150.1

Group304: abra|OJJ73503.1 acar|OOG00688.1 acla|EAW07435.1 acla|EAW07436.1 afis|EAW22461.1  
afis|EAW22462.1 afla|EED54482.1 afla|EED54483.1 afum|EAL90729.1 afum|EAL90730.1 agla|OJJ87561.1  
akaw|GAA87450.1 akaw|GAA87451.1 aluc|OJZ88545.1 anid|CBF88911.1 anid|CBF88912.1 anig|EHA18245.1  
aory|EIT81150.1 asyd|OJJ62841.1 ater|EAU39244.1 atub|OJI91130.1 aver|OJI96884.1 aver|OJI96885.1  
awen|OJJ35087.1 awen|OJJ35088.1 azon|OJJ50020.1 aory|EIT81157.1

Group305: abra|OJJ74418.1 acar|OOF95322.1 acar|OOF95325.1 acla|EAW06834.1 afla|EED53447.1  
afla|EED53451.1 agla|OJJ88208.1 akaw|GAA87309.1 akaw|GAA87312.1 aluc|OJZ89705.1 aluc|OJZ89708.1  
anid|CBF89366.1 anid|CBF89368.1 anig|EHA26939.1 aory|EIT75073.1 asyd|OJJ62474.1 ater|EAU34066.1  
ater|EAU34069.1 atub|OJI85094.1 aver|OJI96610.1 awen|OJJ37916.1 awen|OJJ37920.1 azon|OJJ45806.1  
acar|OOF90541.1 acla|EAW11778.1 azon|OJJ50188.1 aory|EIT75099.1

Group306: abra|OJJ76286.1 acar|OOF99527.1 acla|EAW14330.1 afis|EAW18958.1 afum|EAL93691.1  
akaw|GAA82215.1 aory|EIT76999.1 asyd|OJJ59136.1 awen|OJJ31557.1 azon|OJJ47274.1 abra|OJJ76287.1  
acar|OOF99530.1 acla|EAW14329.1 afis|EAW18959.1 afla|EED51005.1 afum|EAL93692.1 agla|OJJ85336.1  
akaw|GAA82216.1 aluc|OJZ91935.1 anid|CBF69598.1 anig|EHA22895.1 aory|EIT76941.1 ater|EAU38141.1  
atub|OJI86377.1 aver|OJJ01725.1 awen|OJJ31558.1 azon|OJJ47275.1

Group307: abra|OJJ77576.1 acar|OOF99151.1 acla|EAW06541.1 acla|EAW06542.1 afis|EAW16053.1  
afis|EAW16054.1 afla|EED56444.1 afla|EED56445.1 afum|EAL88685.1 afum|EAL88686.1 agla|OJJ86087.1  
akaw|GAA84049.1 aluc|GAA84050.1 aluc|OJZ80961.1 anid|CBF75070.1 anid|CBF75072.1 anig|EHA19396.1  
aory|EIT72818.1 asyd|OJJ60021.1 ater|EAU33580.1 ater|EAU33584.1 atub|OJI82625.1 aver|OJJ02264.1  
awen|OJJ30385.1 awen|OJJ30389.1 azon|OJJ45401.1 aory|EIT72866.1

Group308: abra|OJJ77839.1 acar|OOF98932.1 acla|EAW11284.1 afis|EAW18216.1 afla|EED56254.1  
afum|EAL87582.1 akaw|GAA83808.1 aory|EIT73366.1 ater|EAU33774.1 azon|OJJ50174.1 abra|OJJ77840.1  
acar|OOF98931.1 acla|EAW11283.1 afis|EAW18217.1 afla|EED56253.1 afum|EAL87583.1 agla|OJJ85865.1  
akaw|GAA83807.1 aluc|OJZ90915.1 anid|CBF86146.1 anig|EHA19627.1 aory|EIT73438.1 asyd|OJJ64511.1  
atub|OJI82907.1 aver|OJI98609.1 awen|OJJ30595.1 azon|OJJ50175.1

Group309: abra|OJJ65742.1 abra|OJJ77048.1 acar|OOF91730.1 acar|OOF92937.1 aluc|OJZ84452.1  
aluc|OJZ86322.1 atub|OJI84212.1 atub|OJI89624.1 acla|EAW13550.1 afis|EAW20627.1 afla|EED49777.1  
afum|EAL84441.1 agla|OJJ86946.1 akaw|GAA87005.1 anid|CBF83228.1 anig|EHA27767.1 aory|EIT77606.1  
asyd|OJJ55581.1 ater|EAU32164.1 aver|OJJ06660.1 awen|OJJ33462.1 azon|OJJ50718.1 afla|EED52520.1  
anig|EHA19838.1 aory|EIT82787.1 awen|OJJ33741.1

Group310: abra|OJJ66443.1 abra|OJJ68021.1 abra|OJJ68923.1 acar|OOF91508.1 acar|OOF92064.1  
agla|OJJ78513.1 agla|OJJ81294.1 agla|OJJ85809.1 akaw|GAA90325.1 akaw|GAA90930.1 aluc|OJZ82895.1  
aluc|OJZ85908.1 anig|EHA21319.1 anig|EHA24684.1 aory|EIT75910.1 aory|EIT81247.1 asyd|OJJ59089.1  
asyd|OJJ63774.1 atub|OJI79692.1 atub|OJI89120.1 aver|OJI97163.1 aver|OJJ01679.1 acla|EAW09049.1  
afla|EED46360.1 ater|EAU34525.1 awen|OJJ36242.1

Group311: abra|OJJ68133.1 abra|OJJ69675.1 acar|OOF90055.1 acar|OOF90087.1 acla|EAW12871.1  
afis|EAW17819.1 afla|EED45605.1 afum|EAL91629.1 agla|OJJ81780.1 akaw|GAA86913.1 akaw|GAA88800.1  
aluc|OJZ90036.1 anid|CBF71190.1 anig|EHA27411.1 aory|EIT75710.1 asyd|OJJ55855.1 atub|OJI84770.1  
atub|OJI87949.1 aver|OJJ04798.1 awen|OJJ38287.1 acla|EAW08770.1 afis|EAW15658.1 afum|EAL85688.2  
aluc|OJZ82483.1 anig|EHA28291.1 ater|EAU32513.1



Group312: abra|OJJ68841.1 abra|OJJ73289.1 afis|EAW20222.1 afis|EAW20406.1 afla|EED48455.1  
afla|EED50145.1 anig|EHA24185.1 anig|EHA24740.1 aory|EIT74688.1 aory|EIT83472.1 asyd|OJJ57669.1  
asyd|OJJ58613.1 asyd|OJJ59804.1 asyd|OJJ64211.1 aver|OJJ97339.1 aver|OJJ01220.1 aver|OJJ02487.1  
acar|OOF90549.1 agla|OJJ82202.1 akaw|GAA90408.1 aluc|OJZ85820.1 anid|CBF70434.1 ater|EAU37675.1  
atub|OJI79606.1 awen|OJJ30933.1 acar|OOG00326.1

Group313: abra|OJJ71059.1 abra|OJJ73085.1 akaw|GAA82900.1 akaw|GAA88075.1 anig|EHA18644.1  
anig|EHA20691.1 ater|EAU29720.1 ater|EAU35713.1 atub|OJI81179.1 atub|OJI91543.1 aver|OJJ02730.1  
aver|OJJ06544.1 awen|OJJ34513.1 awen|OJJ40561.1 acar|OOF98083.1 acla|EAW10600.1 afis|EAW24968.1  
afum|EAL89627.1 agla|OJJ82234.1 aluc|OJZ87469.1 anid|CBF81643.1 aory|EIT80808.1 asyd|OJJ59538.1  
azon|OJJ49422.1 afla|EED57716.1 aory|EIT79920.1

Group314: abra|OJJ77512.1 abra|OJJ78209.1 acar|OOF98645.1 acar|OOF99212.1 agla|OJJ84617.1  
agla|OJJ88162.1 akaw|GAA84108.1 akaw|GAA85817.1 aluc|OJZ81024.1 aluc|OJZ91282.1 atub|OJI82559.1  
atub|OJI83272.1 awen|OJJ30638.1 awen|OJJ31266.1 afis|EAW18264.1 anid|CBF79534.1 anig|EHA19340.1  
aory|EIT75007.1 asyd|OJJ57897.1 aver|OJJ04470.1 azon|OJJ47978.1 afla|EED48723.1 afum|EAL87628.1  
anig|EHA19967.1 ater|EAU33271.1 aory|EIT73106.1

Group315: acar|OOF95616.1 acar|OOF95668.1 afum|EAL86712.1 afum|EAL89365.2 aluc|OJZ83797.1  
aluc|OJZ91020.1 atub|OJI83012.1 atub|OJI90166.1 abra|OJJ70451.1 afis|EAW19928.1 afis|EAW24742.1  
agla|OJJ88966.1 akaw|GAA83713.1 anid|CBF78706.1 anig|EHA18945.1 asyd|OJJ64219.1 ater|EAU37496.1  
aver|OJJ98040.1 awen|OJJ98302.1 awen|OJJ33410.1 azon|OJJ45929.1 afla|EED48357.1 afis|EAW16196.1  
afum|EAL89388.1 asyd|OJJ61748.1 aver|OJI95845.1

Group316: acla|EAW06814.1 acla|EAW11026.1 afis|EAW16363.1 afis|EAW20840.1 afum|EAL84793.1  
afum|EAL88988.1 agla|OJJ78575.1 agla|OJJ80753.1 aver|OJI96276.1 aver|OJI96627.1 awen|OJJ37768.1  
awen|OJJ40172.1 abra|OJJ73491.1 acar|OOG00684.1 afla|EED53503.1 agla|OJJ79965.1 akaw|GAA87440.1  
aluc|OJZ87406.1 anid|CBF89245.1 anig|EHA18255.1 aory|EIT74859.1 asyd|OJJ62507.1 ater|EAU34089.1  
atub|OJI91142.1 azon|OJJ45066.1 asyd|OJJ62165.1

Group317: acla|EAW11040.1 acla|EAW11477.1 afla|EED47466.1 afla|EED49623.1 afla|EED50532.1  
agla|OJJ82839.1 agla|OJJ86906.1 aory|EIT79957.1 aory|EIT81005.1 aory|EIT82111.1 awen|OJJ31954.1  
awen|OJJ35441.1 azon|OJJ45954.1 azon|OJJ51301.1 abra|OJJ72795.1 acar|OOF89880.1 afis|EAW23976.1  
afum|EAL87406.1 akaw|GAA85398.1 aluc|OJZ83292.1 anid|CBF77345.1 anig|EHA24176.1 asyd|OJJ53272.1  
ater|EAU29776.1 atub|OJI82193.1 aver|OJJ03577.1

Group318: afla|EED44930.1 afla|EED51540.1 ater|EAU31301.1 ater|EAU38559.1 awen|OJJ33684.1  
awen|OJJ36221.1 abra|OJJ67873.1 acar|OOF92853.1 acla|EAW11724.1 afis|EAW23749.1 afum|EAL87183.1  
agla|OJJ78962.1 agla|OJJ89691.1 akaw|GAA91882.1 aluc|OJZ82015.1 anid|CBF79817.1 anig|EHA22241.1  
aory|EIT80515.1 asyd|OJJ58137.1 atub|OJI84564.1 aver|OJJ04268.1 azon|OJJ42827.1 aver|OJJ03949.1  
afis|EAW24762.1 afum|EAL89404.1 asyd|OJJ52466.1

Group319: afla|EED50195.1 afla|EED57633.1 anid|CBF78576.1 anid|CBF84581.1 anid|CBF88483.1  
aory|EIT77388.1 aory|EIT82958.1 asyd|OJJ59798.1 asyd|OJJ63787.1 asyd|OJJ65070.1 aver|OJI97151.1  
aver|OJJ99195.1 aver|OJJ02491.1 abra|OJJ74472.1 acar|OOF95272.1 acla|EAW07225.1 afis|EAW22239.1  
afum|EAL90953.1 agla|OJJ87812.1 akaw|GAA87366.1 aluc|OJZ89647.1 anig|EHA26885.1 ater|EAU34246.1  
atub|OJI85157.1 awen|OJJ34817.1 azon|OJJ45732.1

Group320: aluc|OJZ79781.1 aluc|OJZ80029.1 aluc|OJZ80242.1 aluc|OJZ79859.1 aluc|OJZ80430.1  
abra|OJJ65440.1 acla|EAW11311.1 afis|EAW16412.1 afla|EED56291.1 afum|EAL87548.1 akaw|GAA92640.1  
anid|CBF73419.1 anig|EHA17691.1 asyd|OJJ52220.1 ater|EAU33807.1 aver|OJI98367.1 awen|OJJ29583.1  
afis|EAW18185.1 akaw|GAA92960.1 anid|CBF85719.1 aory|EIT73430.1 asyd|OJJ64275.1 awen|OJJ30543.1  
akaw|GAA89012.1 akaw|GAA93064.1 akaw|GAA93159.1

Group321: aluc|OJZ81129.1 aluc|OJZ82063.1 awen|OJJ30180.1 awen|OJJ35549.1 awen|OJJ30187.1  
abra|OJJ65739.1 acar|OOF99878.1 acla|EAW14576.1 afla|EED53062.1 agla|OJJ86268.1 akaw|GAA91460.1  
anid|CBF78777.1 aory|EIT74772.1 asyd|OJJ65241.1 atub|OJI84621.1 aver|OJI99392.1 azon|OJJ44977.1  
abra|OJJ72613.1 afla|EED51141.1 anig|EHA24034.1 atub|OJI82018.1 awen|OJJ38779.1 aory|EIT81339.1  
aory|EIT74785.1 akaw|GAA85238.1 aluc|OJZ90594.1

Group322: asyd|OJJ56859.1 abra|OJJ67208.1 acar|OOF98353.1 acla|EAW14728.1 afla|EED53515.1  
akaw|GAA90969.1 aluc|OJZ87766.1 anid|CBF73997.1 anig|EHA20250.1 asyd|OJJ51948.1 ater|EAU33288.1  
atub|OJI80879.1 aver|OJI96457.1 awen|OJJ36200.1 azon|OJJ50142.1 azon|OJJ46441.1 azon|OOF99565.1  
afla|EED49927.1 agla|OJJ84266.1 akaw|GAA82243.1 aluc|OJZ91902.1 ater|EAU35687.1 acla|EAW09973.1  
acla|EAW10724.1 agla|OJJ84410.1 agla|OJJ79135.1

Group323: abra|OJJ66489.1 acar|OOF90965.1 acar|OOF90966.1 acla|EAW10979.1 acla|EAW10980.1  
afis|EAW20879.1 afis|EAW20880.1 afla|EED45565.1 afum|EAL84752.1 afum|EAL84753.1 agla|OJJ83989.1  
akaw|GAA92472.1 akaw|GAA92473.1 aluc|OJZ81546.1 anid|CBF82862.1 anid|CBF82864.1 anig|EHA25889.1  
aory|EIT75388.1 aory|EIT75432.1 asyd|OJJ61598.1 ater|EAU30811.1 atub|OJI88638.1 aver|OJJ00922.1  
awen|OJJ34480.1 azon|OJJ51757.1 afla|EED45564.1

Group324: abra|OJJ67172.1 acar|OOF98391.1 acla|EAW14551.1 afis|EAW19268.1 afla|EED47606.1 afum|EAL93995.1 agla|OJJ88427.1 akaw|GAA91002.1 aluc|OJZ87803.1 anid|CBF78699.1 anig|EHA20284.1 aory|EIT80198.1 asyd|OJJ65220.1 ater|EAU29549.1 atub|OJI80844.1 aver|OJI99369.1 awen|OJJ37629.1 azon|OJJ47017.1 afla|EED47607.1 anid|CBF78697.1 aory|EIT80260.1 acar|OOF98392.1 acla|EAW14552.1 afis|EAW19269.1 afum|EAL93996.1 anig|EHA20285.1

Group325: abra|OJJ67303.1 acar|OOF92510.1 acla|EAW06432.1 afis|EAW18538.1 afla|EED52858.1 afum|EAL93236.1 agla|OJJ84448.1 akaw|GAA86513.1 aluc|OJZ85058.1 anig|EHA25273.1 aory|EIT78604.1 asyd|OJJ52110.1 atub|OJI80542.1 aver|OJJ05256.1 awen|OJJ36329.1 azon|OJJ42393.1 agla|OJJ82374.1 asyd|OJJ52384.1 aver|OJI96494.1 afis|EAW24603.1 afla|EED52462.1 aory|EIT82755.1 atub|OJI80421.1 aver|OJJ01939.1 asyd|OJJ53464.1 aver|OJJ08291.1

Group326: abra|OJJ68235.1 acar|OOF93581.1 acla|EAW10392.1 afis|EAW25199.1 afum|EBA27389.1 agla|OJJ85249.1 anid|CBF85213.1 asyd|OJJ54665.1 ater|EAU34341.1 atub|OJI83115.1 aver|OJI97964.1 awen|OJJ33408.1 abra|OJJ71100.1 afla|EED53646.1 akaw|GAA82868.1 aluc|OJZ87435.1 anig|EHA20657.1 aory|EIT75355.1 atub|OJI81213.1 azon|OJJ47678.1 aver|OJJ02024.1 awen|OJJ31517.1 asyd|OJJ63002.1 agla|OJJ86390.1 awen|OJJ39475.1 agla|OJJ89313.1

Group327: abra|OJJ68548.1 acar|OOF92744.1 acla|EAW12819.1 acla|EAW12820.1 afis|EAW17984.1 afis|EAW17985.1 afla|EED51920.1 afla|EED51921.1 afum|EAL91793.1 afum|EAL91794.1 agla|OJJ80241.1 akaw|GAA91305.1 akaw|GAA91306.1 aluc|OJZ82765.1 anid|CBF79988.1 anid|CBF79990.1 anig|EHA21208.1 aory|EIT81392.1 aory|EIT81447.1 asyd|OJJ58239.1 ater|EAU31494.1 ater|EAU31495.1 atub|OJI88997.1 aver|OJJ02186.1 awen|OJJ41561.1 azon|OJJ48276.1

Group328: abra|OJJ68713.1 acar|OOF92213.1 acla|EAW11027.1 afis|EAW20841.1 afla|EED46816.1 afum|EAL84792.1 agla|OJJ80754.1 akaw|GAA89866.1 aluc|OJZ81815.1 anid|CBF86535.1 anig|EHA22400.1 aory|EIT72698.1 asyd|OJJ62166.1 ater|EAU30544.1 atub|OJI84387.1 aver|OJI96277.1 awen|OJJ40171.1 azon|OJJ50392.1 afis|EAW24116.1 anid|CBF84526.1 acla|EAW12533.1 agla|OJJ88735.1 afum|EAL91971.1 awen|OJJ41372.1 aver|OJI98980.1 asyd|OJJ64867.1

Group329: abra|OJJ70297.1 acar|OOF91751.1 afis|EAW16949.1 afla|EED54756.1 afum|EAL86476.1 agla|OJJ79025.1 akaw|GAA93023.1 aluc|OJZ82562.1 anid|CBF73556.1 anig|EHA27157.1 aory|EIT79421.1 asyd|OJJ56717.1 atub|OJI88804.1 aver|OJJ06008.1 awen|OJJ32083.1 azon|OJJ45848.1 acar|OOF95544.1 agla|OJJ86358.1 akaw|GAA86838.1 aluc|OJZ89957.1 atub|OJI84849.1 agla|OJJ82216.1 ater|EAU31076.1 azon|OJJ46662.1 ater|EAU29923.1 awen|OJJ38719.1

Group330: abra|OJJ70396.1 acar|OOG01144.1 acla|EAW11244.1 afis|EAW19549.1 afla|EED49895.1 afum|EAL89219.1 agla|OJJ88525.1 akaw|GAA91962.1 aluc|OJZ82655.1 anig|EHA24571.1 asyd|OJJ65105.1 ater|EAU33680.1 atub|OJI88886.1 aver|OJI99232.1 awen|OJJ31981.1 azon|OJJ47790.1 afis|EAW18105.1 akaw|GAA92884.1 aory|EIT77372.1 afis|EAW16617.1 afum|EAL86960.1 anig|EHA27418.1 afla|EED50268.1 anid|CBF84502.1 asyd|OJJ53512.1 aver|OJI96187.1

Group331: abra|OJJ71980.1 acar|OOF96631.1 acla|EAW09559.1 acla|EAW09561.1 afis|EAW21576.1 afis|EAW21578.1 afla|EED57795.1 afum|EAL92595.1 afum|EAL92596.1 agla|OJJ85761.1 akaw|GAA84949.1 akaw|GAA84950.1 aluc|OJZ86717.1 anid|CBF76292.1 anid|CBF76294.1 anig|EHA21962.1 awen|EIT81026.1 aory|EIT81117.1 asyd|OJJ61004.1 ater|EAU34955.1 ater|EAU34956.1 atub|OJI83812.1 aver|OJJ00322.1 awen|OJJ39103.1 azon|OJJ51431.1 afla|EED57794.1

Group332: abra|OJJ75736.1 acar|OOF89930.1 acla|EAW14905.1 afis|EAW24426.1 afla|EED55252.1 afum|EAL86094.1 agla|OJJ79240.1 akaw|GAA84469.1 aluc|OJZ89188.1 anid|CBF73780.1 anig|EHA23369.1 aory|EIT83550.1 asyd|OJJ56598.1 ater|EAU30018.1 atub|OJI85602.1 aver|OJJ06127.1 awen|OJJ32778.1 azon|OJJ44006.1 acla|EAW14906.1 afis|EAW24427.1 afla|EED55251.1 afum|EAL86095.1 aluc|OJZ89187.1 anig|EHA23370.1 ater|EAU30019.1 awen|OJJ32779.1

Group333: abra|OJJ75938.1 acar|OOF99972.1 acar|OOF99973.1 acla|EAW09855.1 acla|EAW09856.1 afis|EAW21271.1 afis|EAW21280.1 afla|EED54831.1 afum|EAL92286.1 afum|EAL92296.1 agla|OJJ87477.1 akaw|GAA84639.1 akaw|GAA84640.1 aluc|OJZ89385.1 anid|CBF83352.1 anid|CBF83354.1 anig|EHA23199.1 aory|EIT79381.1 aory|EIT79404.1 asyd|OJJ60616.1 ater|EAU35907.1 ater|EAU35908.1 atub|OJI85413.1 aver|OJI99940.1 awen|OJJ39421.1 azon|OJJ44303.1

Group334: abra|OJJ76077.1 acar|OOF99848.1 acar|OOF99849.1 acla|EAW09743.1 acla|EAW09744.1 afis|EAW21398.1 afis|EAW21399.1 afla|EED55817.1 afla|EED55818.1 afum|EAL92412.1 afum|EAL92413.1 agla|OJJ85524.1 akaw|GAA88889.1 akaw|GAA88890.1 aluc|OJZ89533.1 anid|CBF83833.1 anig|EHA23070.1 aory|EIT76532.1 aory|EIT76875.1 asyd|OJJ60909.1 ater|EAU35159.1 atub|OJI85272.1 aver|OJJ00236.1 awen|OJJ39304.1 azon|OJJ51548.1 ater|EAU35160.1

Group335: abra|OJJ78321.1 acar|OOF98553.1 acla|EAW09204.1 acla|EAW09205.1 afis|EAW21942.1 afis|EAW21943.1 afla|EED46659.1 afla|EED46660.1 afum|EAL92956.1 afum|EAL92957.1 agla|OJJ84181.1 akaw|GAA85707.1 akaw|GAA85708.1 aluc|OJZ91396.1 anid|CBF84053.1 anid|CBF84055.1 anig|EHA20073.1 aory|EIT77914.1 aory|EIT77936.1 asyd|OJJ61344.1 ater|EAU30947.1 ater|EAU30991.1 atub|OJI83388.1 aver|OJJ00669.1 awen|OJJ34234.1 azon|OJJ43402.1

Group336: abra|OJJ65726.1 abra|OJJ73290.1 abra|OJJ77740.1 akaw|GAA83889.1 akaw|GAA92713.1 aluc|OJZ88758.1 aluc|OJZ90806.1 acar|OOF98988.1 acla|EAW12295.1 agla|OJJ85902.1 anig|EHA19533.1 aory|EIT79001.1 asyd|OJJ59393.1 ater|EAU30964.1 atub|OJI82795.1 atub|OJI91329.1 awen|OJJ36235.1 afis|EAW16926.1 afla|EED50932.1 anid|CBF79557.1 anig|EHA18455.1 aver|OJJ02879.1 afum|EAL87839.1 afis|EAW17484.1 agla|OJJ87319.1

Group337: abra|OJJ66243.1 abra|OJJ72838.1 afla|EED45789.1 afla|EED49140.1 aluc|OJZ80548.1 aluc|OJZ83338.1 anig|EHA24214.1 anig|EHA25648.1 aory|EIT75668.1 aory|EIT78573.1 atub|OJI82235.1 atub|OJI88383.1 acar|OOF96040.1 acla|EAW11403.1 afis|EAW24018.1 afum|EAL87448.1 akaw|GAA85435.1 akaw|GAA89048.1 anid|CBF87091.1 asyd|OJJ55451.1 ater|EAU29728.1 awen|OJJ35491.1 azon|OJJ46999.1 aver|OJJ06524.1 agla|OJJ78562.1

Group338: abra|OJJ66379.1 abra|OJJ67896.1 acar|OOF92868.1 acar|OOF94061.1 acar|OOF94131.1 akaw|GAA90248.1 akaw|GAA91900.1 aluc|OJZ81994.1 aluc|OJZ83092.1 anid|CBF82331.1 anid|CBF84191.1 anig|EHA22262.1 anig|EHA28154.1 atub|OJI84544.1 atub|OJI87844.1 afis|EAW20565.1 afla|EED45271.1 afum|EAL84496.1 agla|OJJ81768.1 aory|EIT73641.1 asyd|OJJ57136.1 ater|EAU32199.1 aver|OJJ03167.1 awen|OJJ36239.1 azon|OJJ45336.1

Group339: abra|OJJ66548.1 abra|OJJ77152.1 aluc|OJZ81501.1 aluc|OJZ84566.1 anig|EHA25929.1 anig|EHA27860.1 atub|OJI88680.1 atub|OJI89516.1 awen|OJJ34406.1 awen|OJJ37097.1 acar|OOF89954.1 afis|EAW17738.1 afla|EED50272.1 afum|EAL91553.1 agla|OJJ84037.1 akaw|GAA90778.1 akaw|GAA91173.1 anid|CBF82482.1 aory|EIT77312.1 asyd|OJJ54103.1 ater|EAU31869.1 aver|OJJ08632.1 azon|OJJ48148.1 acar|OOF93038.1 aory|EIT75734.1

Group340: abra|OJJ69049.1 abra|OJJ77527.1 akaw|GAA84093.1 akaw|GAA90580.1 aluc|OJZ81008.1 aluc|OJZ86038.1 anig|EHA19352.1 anig|EHA24573.1 asyd|OJJ51977.1 asyd|OJJ54328.1 atub|OJI79825.1 atub|OJI82576.1 acar|OOF99199.1 acla|EAW06702.1 afis|EAW16247.1 afum|EAL88875.1 agla|OJJ86256.1 anid|CBF82150.1 aory|EIT75005.1 ater|EAU37457.1 aver|OJJ05282.1 awen|OJJ30209.1 azon|OJJ43933.1 afla|EED53308.1 asyd|OJJ57961.1

Group341: abra|OJJ69066.1 abra|OJJ69440.1 acar|OOF91217.1 acar|OOF94300.1 afla|EED46891.1 afla|EED47923.1 akaw|GAA88378.1 akaw|GAA90596.1 aluc|OJZ82276.1 aluc|OJZ86054.1 anig|EHA24557.1 anig|EHA28470.1 aory|EIT72607.1 aory|EIT83373.1 atub|OJI79851.1 atub|OJI88163.1 awen|OJJ32949.1 awen|OJJ38342.1 acla|EAW08762.1 afis|EAW24340.1 afum|EAL86011.1 agla|OJJ83225.1 ater|EAU30407.1 aver|OJI96736.1 azon|OJJ48971.1

Group342: abra|OJJ70211.1 abra|OJJ76495.1 acar|OOF92571.1 acar|OOF99727.1 akaw|GAA82411.1 akaw|GAA86565.1 aluc|OJZ85115.1 aluc|OJZ91709.1 azon|OJJ46702.1 azon|OJJ50101.1 acla|EAW13937.1 afis|EAW18648.1 afla|EED52691.1 afum|EAL93364.1 agla|OJJ82426.1 anid|CBF70533.1 anig|EHA22720.1 anig|EHA25335.1 aory|EIT74236.1 asyd|OJJ58553.1 atub|OJI80479.1 atub|OJI86168.1 aver|OJJ01151.1 awen|OJJ32116.1 ater|EAU38263.1

Group343: abra|OJJ74685.1 abra|OJJ77443.1 acar|OOF95646.1 acar|OOF95697.1 asyd|OJJ52766.1 asyd|OJJ57547.1 asyd|OJJ56548.1 aver|OJJ05631.1 aver|OJJ06174.1 aver|OJJ08749.1 awen|OJJ30371.1 awen|OJJ40449.1 acla|EAW10711.1 afis|EAW24859.1 afla|EED47099.1 afum|EAL89507.1 agla|OJJ82077.1 akaw|GAA81929.1 aluc|OJZ92262.1 anid|CBF75821.1 anig|EHA26697.1 aory|EIT72503.1 ater|EAU36441.1 atub|OJI86696.1 azon|OJJ49305.1

Group344: abra|OJJ75156.1 abra|OJJ77714.1 acar|OOF97183.1 acar|OOF99026.1 akaw|GAA83918.1 akaw|GAA88762.1 aluc|OJZ90779.1 aluc|OJZ92725.1 anig|EHA19512.1 anig|EHA26276.1 ater|EAU35617.1 ater|EAU38821.1 atub|OJI82766.1 atub|OJI87150.1 acla|EAW08331.1 afis|EAW23366.1 afla|EED55592.1 afum|EAL88107.1 agla|OJJ86458.1 anid|CBF74825.1 aory|EIT82696.1 asyd|OJJ60139.1 aver|OJJ04123.1 awen|OJJ39521.1 azon|OJJ47717.1

Group345: acar|OOF90695.1 acar|OOF91261.1 afla|EED44834.1 afla|EED46120.1 agla|OJJ84890.1 agla|OJJ88358.1 anid|CBF79319.1 anid|CBF85127.1 asyd|OJJ55782.1 asyd|OJJ63353.1 aver|OJI97608.1 aver|OJJ06871.1 aver|OJJ07891.1 abra|OJJ76767.1 acla|EAW13321.1 afis|EAW20436.1 afum|EAL84616.1 akaw|GAA87259.1 aluc|OJZ84170.1 anig|EHA27531.1 aory|EIT77716.1 ater|EAU37722.1 atub|OJI89914.1 awen|OJJ33127.1 azon|OJJ46343.1

Group346: acar|OOG00252.1 acar|OOG00270.1 abra|OJJ66461.1 afis|EAW24599.1 agla|OJJ80217.1 aver|OJI96133.1 abra|OJJ67546.1 akaw|GAA88114.1 aluc|OJZ81386.1 anig|EHA18679.1 atub|OJI91591.1 abra|OJJ70572.1 acar|OOF97149.1 afla|EED47007.1 akaw|GAA83416.1 aluc|OJZ83916.1 anid|CBF74799.1 anig|EHA19049.1 aory|EIT72694.1 asyd|OJJ60153.1 ater|EAU36375.1 atub|OJI90286.1 aver|OJJ04111.1 awen|OJJ39478.1 awen|OJJ33480.1

Group347: acla|EAW06619.1 acla|EAW13553.1 awen|OJJ30278.1 awen|OJJ33599.1 azon|OJJ42199.1 azon|OJJ50720.1 abra|OJJ77044.1 acar|OOF90272.1 afis|EAW16146.1 afis|EAW20629.1 afla|EED49763.1 afum|EAL84438.1 afum|EAL88775.1 agla|OJJ80445.1 agla|OJJ86199.1 akaw|GAA87009.1 aluc|OJZ84447.1 anid|CBF84471.1 anig|EHA27764.1 aory|EIT77658.1 asyd|OJJ53537.1 ater|EAU32165.1 atub|OJI89628.1 aver|OJJ08214.1 azon|OJJ43971.1

Group348: acla|EAW07744.1 acla|EAW10138.1 afis|EAW20748.1 afis|EAW22781.1 afla|EED47130.1  
afla|EED50040.1 afum|EAL84866.1 afum|EAL90418.1 anid|CBF71564.1 anid|CBF87981.1 ater|EAU33992.1  
ater|EAU38933.1 awen|OJJ36890.1 awen|OJJ38956.1 abra|OJJ73849.1 acar|OOG00999.1 agla|OJJ83643.1  
akaw|GAA89466.1 aluc|OJJ88200.1 anig|EHA17948.1 aory|EIT79245.1 asyd|OJJ63496.1 atub|OJI90798.1  
aver|OJI97433.1 azon|OJJ49728.1

Group349: afis|EAW15424.1 afis|EAW16124.1 afum|EAL84220.1 afum|EAL88754.1 aory|EIT73054.1  
aory|EIT80955.1 abra|OJJ69804.1 acar|OOF93572.1 acla|EAW06641.1 afla|EED48664.1 agla|OJJ86166.1  
akaw|GAA87855.1 aluc|OJJ85497.1 anid|CBF85532.1 anig|EHA25030.1 asyd|OJJ64135.1 ater|EAU37174.1  
atub|OJI80068.1 aver|OJI98218.1 awen|OJJ30306.1 azon|OJJ48681.1 acar|OOF91913.1 afla|EED47503.1  
aory|EIT74578.1 ater|EAU33207.1

Group350: afis|EAW20695.1 afis|EAW25202.1 afum|EAL86271.1 afum|EAL89865.1 anid|CBF80363.1  
anid|CBF85220.1 asyd|OJJ54819.1 asyd|OJJ60277.1 asyd|OJJ62998.1 ater|EAU34342.1 ater|EAU35428.1  
aver|OJI97968.1 aver|OJJ07342.1 abra|OJJ71102.1 acar|OOF98041.1 acla|EAW10389.1 afla|EED53649.1  
agla|OJJ88973.1 akaw|GAA82866.1 aluc|OJJ87433.1 anig|EHA20655.1 aory|EIT75301.1 atub|OJI81215.1  
awen|OJJ40837.1 azon|OJJ46857.1

Group351: afla|EED45001.1 afla|EED45531.1 akaw|GAA83108.1 akaw|GAA90569.1 anig|EHA18348.1  
anig|EHA22621.1 aory|EIT73636.1 aory|EIT75377.1 abra|OJJ68866.1 akaw|GAA90387.1 aluc|OJJ85844.1  
anig|EHA24720.1 asyd|OJJ56361.1 ater|EAU36829.1 atub|OJI79632.1 aver|OJJ06353.1 abra|OJJ73381.1  
acar|OOF90417.1 agla|OJJ82635.1 aluc|OJJ88657.1 anid|CBF90081.1 atub|OJI91243.1 awen|OJJ40195.1  
azon|OJJ49062.1 awen|OJJ33525.1

Group352: afla|EED45010.1 afla|EED45410.1 anig|EHA21017.1 anig|EHA22867.1 aory|EIT73809.1  
aory|EIT82470.1 aver|OJI96998.1 aver|OJJ03416.1 azon|OJJ43608.1 azon|OJJ47388.1 abra|OJJ68444.1  
acar|OOF93950.1 afis|EAW19806.1 afla|EED50514.1 afum|EAL85087.1 akaw|GAA86929.1 aluc|OJJ90053.1  
anid|CBF86126.1 asyd|OJJ63944.1 ater|EAU30743.1 atub|OJI84753.1 aver|OJJ08602.1 awen|OJJ34562.1  
anid|CBF82389.1 asyd|OJJ54133.1

Group353: afla|EED45238.1 afla|EED49404.1 aory|EIT73665.1 aory|EIT79465.1 asyd|OJJ56263.1  
asyd|OJJ61698.1 asyd|OJJ56732.1 aver|OJI95784.1 aver|OJJ05991.1 aver|OJJ08503.1 awen|OJJ33602.1  
awen|OJJ36942.1 abra|OJJ77040.1 acar|OOF90076.1 acla|EAW13556.1 afis|EAW24047.1 agla|OJJ78446.1  
akaw|GAA87012.1 aluc|OJJ84442.1 anid|CBF83192.1 anig|EHA27761.1 ater|EAU32167.1 atub|OJI89631.1  
azon|OJJ50725.1 agla|OJJ78918.1

Group354: afla|EED45547.1 afla|EED48860.1 afum|EAL84770.1 afum|EAL86315.1 aory|EIT75539.1  
aory|EIT81273.1 awen|OJJ29954.1 awen|OJJ34505.1 abra|OJJ67746.1 acar|OOF90945.1 acla|EAW12433.1  
afis|EAW20865.1 agla|OJJ83914.1 akaw|GAA92437.1 aluc|OJJ81583.1 anid|CBF80387.1 anig|EHA25856.1  
asyd|OJJ61074.1 ater|EAU30808.1 atub|OJI88598.1 aver|OJJ00391.1 azon|OJJ51781.1 acla|EAW10996.1  
agla|OJJ79837.1 afis|EAW16740.1

Group355: afla|EED45554.1 afla|EED57298.1 aory|EIT74121.1 aory|EIT75629.1 asyd|OJJ56283.1  
asyd|OJJ61592.1 asyd|OJJ61824.1 ater|EAU30081.1 ater|EAU30816.1 aver|OJI95924.1 aver|OJJ00914.1  
aver|OJJ08478.1 abra|OJJ67752.1 acar|OOF90956.1 acla|EAW10988.1 afis|EAW20872.1 afum|EAL84762.1  
agla|OJJ83979.1 akaw|GAA92442.1 aluc|OJJ81577.1 anid|CBF82847.1 anig|EHA25861.1 atub|OJI88603.1  
awen|OJJ34489.1 azon|OJJ51766.1

Group356: afla|EED55154.1 afla|EED56856.1 aory|EIT77459.1 aory|EIT81607.1 asyd|OJJ52781.1  
asyd|OJJ53407.1 asyd|OJJ55050.1 aver|OJI99562.1 aver|OJJ04194.1 aver|OJJ08759.1 abra|OJJ76674.1  
acar|OOF99335.1 acla|EAW09104.1 afis|EAW25708.1 afum|EAL84381.1 agla|OJJ85490.1 akaw|GAA92518.1  
aluc|OJJ91531.1 anid|CBF83922.1 anig|EHA22570.1 ater|EAU32722.1 atub|OJI85985.1 anig|EHA19936.1  
asyd|OJJ55429.1 aver|OJJ06508.1

Group357: afum|EAL90938.1 afum|EAL91118.1 abra|OJJ70518.1 acar|OOF97412.1 acla|EAW08157.1  
afis|EAW23195.1 afla|EED57873.1 afum|EAL88288.2 agla|OJJ86332.1 akaw|GAA83365.1 aluc|OJJ83863.1  
anid|CBF74706.1 anig|EHA19003.1 aory|EIT83278.1 asyd|OJJ60219.1 ater|EAU36323.1 atub|OJI90231.1  
aver|OJJ04049.1 awen|OJJ39425.1 azon|OJJ47626.1 afis|EAW20299.1 agla|OJJ84725.1 asyd|OJJ62722.1  
aver|OJJ01792.1 azon|OJJ49994.1

Group358: agla|OJJ79814.1 agla|OJJ81857.1 agla|OJJ83394.1 asyd|OJJ52362.1 asyd|OJJ57936.1  
asyd|OJJ60297.1 aver|OJI99638.1 aver|OJJ01984.1 aver|OJJ04458.1 aver|OJJ30856.1 awen|OJJ34435.1  
awen|OJJ40033.1 acla|EAW09090.1 afis|EAW25682.1 afla|EED48118.1 afum|EAL84352.1 anid|CBF71525.1  
aory|EIT76242.1 acla|EAW09112.1 afis|EAW25714.1 afum|EAL84386.2 anid|CBF74681.1 anid|CBF87142.1  
ater|EAU32480.1 azon|OJJ46476.1

Group359: agla|OJJ83698.1 agla|OJJ89439.1 akaw|GAA85587.1 akaw|GAA85825.1 aluc|OJJ83524.1  
aluc|OJJ291276.1 anig|EHA19962.1 anig|EHA24347.1 asyd|OJJ56315.1 asyd|OJJ58149.1 atub|OJI82413.1  
atub|OJI83265.1 abra|OJJ73009.1 acar|OOF96181.1 acla|EAW08004.1 afis|EAW23039.1 afla|EED45399.1  
afum|EAL88442.1 anid|CBF80933.1 aory|EIT82471.1 ater|EAU29619.1 aver|OJJ06399.1 awen|OJJ35703.1  
azon|OJJ44165.1 aver|OJJ04255.1

Group360: aluc|OJZ83601.1 aluc|OJZ88595.1 anig|EHA18289.1 anig|EHA18760.1 asyd|OJJ56054.1  
asyd|OJJ61370.1 atub|OJI89973.1 atub|OJI91180.1 aver|OJJ00697.1 aver|OJJ04995.1 awen|OJJ35022.1  
awen|OJJ37732.1 abra|OJJ73445.1 acar|OOG00650.1 acla|EAW06781.1 afis|EAW16331.1 afla|EED53547.1  
afum|EAL88956.1 agla|OJJ88261.1 akaw|GAA83049.1 anid|CBF84027.1 aory|EIT75029.1 ater|EAU34127.1  
azon|OJJ45215.1 akaw|GAA92121.1

Group361: anid|CBF79016.1 anid|CBF89281.1 anid|CBF89401.1 anid|CBF82943.1 abra|OJJ69545.1  
acla|EAW15297.1 afis|EAW17240.1 afla|EED45268.1 agla|OJJ88965.1 akaw|GAA91212.1 aluc|OJZ82859.1  
aory|EIT72628.1 asyd|OJJ65384.1 ater|EAU37653.1 aver|OJI95878.1 awen|OJJ31342.1 atub|OJI81111.1  
anig|EHA23888.1 aory|EIT73575.1 asyd|OJJ53722.1 anig|EHA19683.1 awen|OJJ36938.1 anid|CBF75970.1  
ater|EAU39534.1 ater|EAU39535.1

Group362: anid|CBF80391.1 anid|CBF83286.1 asyd|OJJ54788.1 asyd|OJJ57255.1 aver|OJJ03039.1  
aver|OJJ07376.1 abra|OJJ68496.1 acar|OOF98751.1 acla|EAW15364.1 afis|EAW17224.1 afla|EED51521.1  
afum|EAL86646.1 agla|OJJ86656.1 akaw|GAA92774.1 aluc|OJZ82709.1 anid|CBF80759.1 anig|EHA21164.1  
aory|EIT80558.1 ater|EAU37673.1 atub|OJI88942.1 azon|OJJ42623.1 azon|OJJ42665.1 asyd|OJJ57905.1  
aver|OJJ04489.1 azon|OJJ45203.1

Group363: asyd|OJJ54205.1 asyd|OJJ55560.1 ater|EAU32170.1 ater|EAU32943.1 abra|OJJ75335.1  
acar|OOF94500.1 acla|EAW13560.1 afis|EAW20637.1 afla|EED49750.1 afum|EAL84431.1 akaw|GAA92029.1  
aluc|OJZ92899.1 anid|CBF83194.1 anig|EHA26064.1 aory|EIT77711.1 atub|OJI87357.1 awen|OJJ33608.1  
abra|OJJ77031.1 acar|OOF91467.1 agla|OJJ78916.1 akaw|GAA87020.1 aluc|OJZ84434.1 anig|EHA27753.1  
atub|OJI89639.1 aver|OJJ06641.1

Group364: atub|OJI82939.1 atub|OJI88437.1 abra|OJJ67568.1 afla|EED50521.1 akaw|GAA89098.1  
anig|EHA25700.1 ater|EAU33843.1 abra|OJJ72071.1 acla|EAW14867.1 afis|EAW19913.1 afum|EAL84993.2  
agla|OJJ81787.1 aory|EIT77284.1 ater|EAU32297.1 abra|OJJ77873.1 acar|OOF98898.1 aluc|OJZ90946.1  
anig|EHA19655.1 aory|EIT82039.1 acar|OOG00619.1 afla|EED50223.1 anig|EHA19654.1 afla|EED50520.1  
awen|OJJ34149.1 ater|EAU39457.1

Group365: awen|OJJ31642.1 awen|OJJ39457.1 abra|OJJ70593.1 acar|OOF97125.1 acar|OOF97948.1  
acla|EAW08187.1 afis|EAW23221.1 afla|EED47029.1 afum|EAL88263.1 agla|OJJ86378.1 akaw|GAA83438.1  
aluc|OJZ83939.1 anid|CBF76684.1 anig|EHA19069.1 ater|EAU36352.1 atub|OJI90312.1 abra|OJJ71237.1  
afla|EED56272.1 akaw|GAA82751.1 aluc|OJZ87308.1 anig|EHA20544.1 aory|EIT73409.1 asyd|OJJ56499.1  
atub|OJI81337.1 aver|OJJ06220.1

Group366: abra|OJJ66082.1 acar|OOF99287.1 acla|EAW06431.1 afis|EAW24735.1 afla|EED52785.1  
afum|EAL89382.1 akaw|GAA84164.1 aluc|OJZ81089.1 anid|CBF79598.1 anig|EHA19281.1 aory|EIT78193.1  
asyd|OJJ57988.1 ater|EAU31606.1 atub|OJI82495.1 aver|OJJ04414.1 awen|OJJ40223.1 afis|EAW18537.1  
afla|EED56576.1 afum|EAL93235.1 anid|CBF82125.1 aory|EIT79676.1 awen|OJJ36227.1 ater|EAU32072.1  
asyd|OJJ54295.1 aver|OJJ05250.1

Group367: abra|OJJ67359.1 acar|OOF93335.1 acla|EAW10444.1 afla|EED55318.1 agla|OJJ89047.1  
akaw|GAA86462.1 anid|CBF87506.1 anig|EHA25221.1 aory|EIT76259.1 asyd|OJJ58362.1 ater|EAU39395.1  
aver|OJJ02044.1 awen|OJJ40742.1 abra|OJJ70853.1 acar|OOF98263.1 afis|EAW25123.1 afum|EAL89794.1  
akaw|GAA91720.1 aluc|OJZ87668.1 anid|CBF85688.1 anig|EHA20859.1 asyd|OJJ64259.1 atub|OJI80975.1  
aver|OJI98351.1 azon|OJJ44113.1

Group368: abra|OJJ67850.1 acar|OOF92831.1 acla|EAW11749.1 afis|EAW23782.1 afum|EAL87216.1  
agla|OJJ78934.1 akaw|GAA91858.1 aluc|OJZ82041.1 anig|EHA22215.1 atub|OJI84600.1 awen|OJJ33726.1  
abra|OJJ75896.1 acar|OOG00008.1 afla|EED49453.1 agla|OJJ80043.1 akaw|GAA84602.1 aluc|OJZ89346.1  
anig|EHA23235.1 aory|EIT79472.1 asyd|OJJ57259.1 ater|EAU39366.1 atub|OJI85452.1 aver|OJJ03037.1  
awen|OJJ36056.1 azon|OJJ50429.1

Group369: abra|OJJ68472.1 acar|OOF94211.1 acla|EAW13768.1 afis|EAW19790.1 afla|EED45871.1  
afum|EAL94073.1 akaw|GAA92393.1 aluc|OJZ83253.1 anid|CBF79916.1 anig|EHA21107.1 asyd|OJJ58193.1  
ater|EAU36161.1 atub|OJI87684.1 aver|OJJ04212.1 awen|OJJ31450.1 acla|EAW14615.1 afis|EAW19353.1  
afla|EED46572.1 anid|CBF76648.1 asyd|OJJ61206.1 aver|OJJ00530.1 acar|OOF94212.1 ater|EAU38489.1  
aory|EIT77883.1 afum|EAL85101.1

Group370: abra|OJJ68801.1 acar|OOF91599.1 acla|EAW13559.1 afis|EAW20636.1 afum|EAL84432.1  
akaw|GAA90452.1 aluc|OJZ85772.1 anig|EHA24781.1 aory|EIT77665.1 ater|EAU37652.1 atub|OJI79557.1  
awen|OJJ33440.1 azon|OJJ50788.1 abra|OJJ70265.1 afla|EED54696.1 akaw|GAA86532.1 aluc|OJZ85080.1  
anid|CBF85668.1 anig|EHA25295.1 aory|EIT78807.1 asyd|OJJ64247.1 aver|OJJ04749.1 afla|EED50779.1  
aver|OJI98338.1 aory|EIT77987.1

Group371: abra|OJJ68927.1 acar|OOF90675.1 agla|OJJ86552.1 akaw|GAA90318.1 aluc|OJZ85915.1  
anig|EHA24679.1 atub|OJI79705.1 aver|OJJ00751.1 abra|OJJ69600.1 acar|OOF93267.1 afis|EAW19224.1  
afla|EED48204.1 anid|CBF83972.1 asyd|OJJ61415.1 awen|OJJ38318.1 abra|OJJ77028.1 afum|EAL93955.1  
akaw|GAA87023.1 aluc|OJZ84430.1 anig|EHA27749.1 aory|EIT72916.1 atub|OJI89644.1 aver|OJJ08327.1  
aver|OJJ02995.1 awen|OJJ29960.1

Group372: abra|OJJ70648.1 acar|OOF97073.1 acla|EAW08111.1 acla|EAW08112.1 afis|EAW23139.1 afis|EAW23140.1 afla|EED48502.1 afum|EAL88341.1 afum|EAL88342.1 agla|OJJ89661.1 akaw|GAA89984.1 aluc|OJZ83998.1 anid|CBF74444.1 anid|CBF74446.1 anig|EHA19121.1 aory|EIT73212.1 aory|EIT73270.1 asyd|OJJ57742.1 ater|EAU36277.1 atub|OJI90367.1 aver|OJJ05425.1 awen|OJJ36636.1 azon|OJJ47580.1 afla|EED48503.1 ater|EAU36278.1

Group373: abra|OJJ70697.1 acar|OOF90045.1 acla|EAW08067.1 afis|EAW23103.1 afla|EED48544.1 afum|EAL88376.1 agla|OJJ89639.1 akaw|GAA90028.1 akaw|GAA90029.1 aluc|OJZ84044.1 anid|CBF81363.1 anig|EHA19166.1 aory|EIT73061.1 asyd|OJJ59383.1 ater|EAU36232.1 atub|OJI90416.1 aver|OJJ02890.1 awen|OJJ36677.1 azon|OJJ47521.1 afla|EED48545.1 acla|EAW08068.1 afis|EAW23104.1 afum|EAL88375.1 anid|CBF81365.1 aory|EIT73082.1

Group374: abra|OJJ71208.1 acar|OOF97959.1 afla|EED54682.1 akaw|GAA82776.1 aluc|OJZ87335.1 anid|CBF80112.1 anig|EHA20571.1 anig|EHA20572.1 aory|EIT78810.1 asyd|OJJ65149.1 ater|EAU36930.1 atub|OJI81309.1 aver|OJJ02086.1 azon|OJJ44458.1 acar|OOF96688.1 afla|EED54681.1 asyd|OJJ65153.1 ater|EAU36931.1 acar|OOF97963.1 aory|EIT78922.1 afla|EED46387.1 afla|EED46388.1 aory|EIT72360.1 asyd|OJJ58325.1 atub|OJI84521.1

Group375: abra|OJJ72278.1 acar|OOF94942.1 afis|EAW20802.1 afla|EED56693.1 afum|EBA27208.1 agla|OJJ85014.1 akaw|GAA86030.1 aluc|OJZ90257.1 anid|CBF71378.1 anig|EHA23752.1 aory|EIT73887.1 asyd|OJJ55075.1 ater|EAU32872.1 atub|OJI81683.1 aver|OJJ07133.1 awen|OJJ41914.1 azon|OJJ47367.1 afis|EAW22078.1 afum|EAL91092.1 anid|CBF82802.1 asyd|OJJ57118.1 ater|EAU30146.1 afla|EED49551.1 aory|EIT82585.1 aory|EIT82590.1

Group376: abra|OJJ72657.1 acar|OOF94617.1 acla|EAW11521.1 afis|EAW23933.1 afla|EED50585.1 afum|EAL87357.1 agla|OJJ79413.1 akaw|GAA85279.1 akaw|GAA85280.1 aluc|OJZ90638.1 anid|CBF77273.1 anig|EHA24073.1 aory|EIT82169.1 asyd|OJJ56797.1 ater|EAU32304.1 atub|OJI82066.1 aver|OJJ03537.1 awen|OJJ39022.1 azon|OJJ51347.1 acla|EAW11520.1 afum|EAL87358.1 aory|EIT82139.1 afis|EAW23932.1 afla|EED50586.1 azon|OJJ51348.1

Group377: abra|OJJ72828.1 acar|OOF93602.1 acla|EAW14973.1 afis|EAW24498.1 afla|EED56620.1 afum|EAL86168.1 agla|OJJ79958.1 anid|CBF85575.1 aory|EIT79659.1 asyd|OJJ64180.1 ater|EAU31051.1 aver|OJJ07247.1 awen|OJJ34897.1 abra|OJJ75484.1 akaw|GAA84250.1 aluc|OJZ88942.1 anid|CBF80279.1 anig|EHA23578.1 atub|OJI85847.1 ater|EAU34059.1 anid|CBF71459.1 asyd|OJJ54948.1 afla|EED52220.1 aory|EIT74386.1 aver|OJI98257.1

Group378: abra|OJJ74406.1 acar|OOF95334.1 acla|EAW06822.1 afis|EAW16185.1 afla|EED53465.1 afum|EAL88816.2 agla|OJJ78591.1 akaw|GAA87300.1 aluc|OJZ89718.1 anid|CBF89935.1 anig|EHA26946.1 aory|EIT74868.1 asyd|OJJ62121.1 ater|EAU34079.1 atub|OJI85082.1 aver|OJI96229.1 awen|OJJ37907.1 azon|OJJ45085.1 afis|EAW16370.1 acla|EAW11051.1 afla|EED49634.1 aory|EIT80960.1 azon|OJJ45955.1 ater|EAU36747.1 azon|OJJ45949.1

Group379: abra|OJJ76313.1 acar|OOF99561.1 acar|OOF99562.1 acla|EAW14106.1 afis|EAW18806.1 afis|EAW18807.1 afla|EED50770.1 afum|EAL93542.1 afum|EAL93543.1 agla|OJJ80536.1 akaw|GAA82241.1 aluc|OJZ91904.1 anid|CBF69790.1 anig|EHA22880.1 aory|EIT78083.1 asyd|OJJ58961.1 ater|EAU37958.1 atub|OJI86354.1 aver|OJJ01555.1 awen|OJJ32382.1 azon|OJJ47143.1 agla|OJJ80538.1 acla|EAW14105.1 anid|CBF69788.1 awen|OJJ32381.1

Group380: abra|OJJ76772.1 acar|OOF91266.1 acla|EAW13327.1 afis|EAW20442.1 afla|EED44828.1 afum|EAL84610.2 agla|OJJ84883.1 akaw|GAA87253.1 akaw|GAA87254.1 aluc|OJZ84176.1 anid|CBF79308.1 anig|EHA27535.1 aory|EIT77723.1 asyd|OJJ55777.1 ater|EAU37717.1 atub|OJI89908.1 atub|OJI89909.1 aver|OJJ06866.1 awen|OJJ33132.1 azon|OJJ46347.1 acla|EAW13326.1 afis|EAW20441.1 afla|EED44829.1 afum|EAL84611.1 anid|CBF79310.1

Group381: abra|OJJ77345.1 acar|OOF93215.1 acla|EAW13129.1 acla|EAW13130.1 afis|EAW17533.1 afis|EAW17534.1 afla|EED49295.1 afla|EED49296.1 afum|EAL91347.1 afum|EAL91348.1 agla|OJJ81437.1 akaw|GAA91415.1 akaw|GAA91416.1 aluc|OJZ84756.1 anid|CBF90328.1 anid|CBF90329.1 anig|EHA28025.1 aory|EIT82179.1 asyd|OJJ61906.1 ater|EAU36962.1 ater|EAU36963.1 atub|OJI89328.1 aver|OJI95999.1 awen|OJJ37319.1 azon|OJJ51011.1

Group382: abra|OJJ66008.1 abra|OJJ66036.1 abra|OJJ72701.1 agla|OJJ79097.1 agla|OJJ82950.1 asyd|OJJ54673.1 asyd|OJJ57511.1 aver|OJJ05668.1 aver|OJJ07496.1 acar|OOF92090.1 acar|GAA90880.1 aluc|OJZ82953.1 anig|EHA21368.1 aory|EIT75821.1 atub|OJI89185.1 awen|OJJ30435.1 atub|OJI87431.1 abra|OJJ67817.1 afum|EAL86776.1 anid|CBF79156.1 ater|EAU38014.1 afla|EED45927.1 afla|EED45926.1 anid|CBF75733.1

Group383: abra|OJJ66089.1 abra|OJJ76716.1 acar|OOF95538.1 afis|EAW21215.1 afla|EED53625.1 afum|EAL92226.1 aluc|OJZ91496.1 anig|EHA22536.1 aory|EIT75031.1 ater|EAU38549.1 atub|OJI85949.1 aver|OJI98307.1 aver|OJI99282.1 awen|OJJ30167.1 abra|OJJ66099.1 acla|EAW14986.1 afis|EAW24508.1 afum|EBA27258.1 agla|OJJ86285.1 anid|CBF78328.1 asyd|OJJ56085.1 aver|OJJ05028.1 akaw|GAA92484.1 awen|OJJ36979.1

Group384: abra|OJJ66370.1 abra|OJJ77693.1 acar|OOF98983.1 acar|OOF99046.1 akaw|GAA83937.1 akaw|GAA90239.1 atub|OJI82743.1 atub|OJI87834.1 acla|EAW06572.1 afis|EAW16024.1 afla|EED56405.1 afum|EAL88653.1 agla|OJJ81572.1 aluc|OJZ83101.1 anid|CBF75012.1 anig|EHA19493.1 anig|EHA28166.1 aory|EIT83000.1 asyd|OJJ60056.1 ater|EAU33617.1 aver|OJJ02233.1 awen|OJJ30433.1 azon|OJJ45432.1 aluc|OJZ80819.1

Group385: abra|OJJ67097.1 abra|OJJ77658.1 aluc|OJZ80870.1 aluc|OJZ87876.1 anig|EHA19465.1 anig|EHA20181.1 atub|OJI80773.1 atub|OJI82707.1 acar|OOF98457.1 acar|OOF99078.1 acla|EAW06500.1 afis|EAW15996.1 afla|EED56370.1 afum|EAL88628.2 agla|OJJ86011.1 akaw|GAA83977.1 akaw|GAA91064.1 anid|CBF81691.1 aory|EIT73327.1 asyd|OJJ59562.1 ater|EAU33651.1 aver|OJJ02706.1 awen|OJJ30473.1 azon|OJJ45465.1

Group386: abra|OJJ67844.1 abra|OJJ76158.1 acar|OOF92021.1 acar|OOF99774.1 akaw|GAA82106.1 akaw|GAA91850.1 aluc|OJZ82048.1 aluc|OJZ92070.1 anig|EHA22210.1 anig|EHA22999.1 atub|OJI84606.1 atub|OJI86502.1 awen|OJJ37808.1 awen|OJJ39219.1 acla|EAW09660.1 afis|EAW21479.1 afla|EED55911.1 afum|EAL92499.1 agla|OJJ85632.1 anid|CBF76506.1 aory|EIT76810.1 asyd|OJJ61132.1 aver|OJJ00453.1 azon|OJJ51636.1

Group387: abra|OJJ68864.1 abra|OJJ75043.1 acar|OOF90525.1 acar|OOF97290.1 akaw|GAA88660.1 akaw|GAA90389.1 aluc|OJZ85842.1 aluc|OJZ92609.1 atub|OJI79630.1 atub|OJI87043.1 awen|OJJ31662.1 awen|OJJ39696.1 acla|EAW08232.1 afis|EAW23266.1 afla|EED55747.1 afum|EAL88213.1 agla|OJJ86586.1 anid|CBF84130.1 anig|EHA24722.1 aory|EIT83228.1 asyd|OJJ57114.1 ater|EAU37532.1 aver|OJJ03186.1 azon|OJJ47828.1

Group388: abra|OJJ70275.1 abra|OJJ75558.1 acar|OOF90876.1 acar|OOF98673.1 agla|OJJ82823.1 agla|OJJ88521.1 akaw|GAA84313.1 akaw|GAA92874.1 aluc|OJZ82537.1 aluc|OJZ89008.1 anig|EHA22505.1 anig|EHA23520.1 asyd|OJJ55019.1 asyd|OJJ59700.1 atub|OJI85781.1 atub|OJI88781.1 aver|OJJ02587.1 aver|OJJ07186.1 awen|OJJ32269.1 awen|OJJ32616.1 anid|CBF78793.1 afla|EED45595.1 aory|EIT75779.1 aory|EIT75483.1

Group389: abra|OJJ70579.1 abra|OJJ75835.1 akaw|GAA83423.1 akaw|GAA84545.1 aluc|OJZ83923.1 aluc|OJZ89278.1 anig|EHA19056.1 anig|EHA23291.1 atub|OJI85521.1 atub|OJI90295.1 awen|OJJ32048.1 awen|OJJ39470.1 acar|OOF97142.1 acla|EAW08201.1 afis|EAW23235.1 afla|EED47014.1 afum|EAL88247.1 agla|OJJ86395.1 anid|CBF75150.1 aory|EIT72630.1 asyd|OJJ59974.1 ater|EAU36368.1 aver|OJJ02317.1 azon|OJJ47672.1

Group390: abra|OJJ70867.1 abra|OJJ72108.1 acar|OOF90121.1 acar|OOF96751.1 aluc|OJZ86863.1 aluc|OJZ87652.1 anig|EHA20846.1 anig|EHA21778.1 aory|EIT75800.1 aory|EIT76249.1 atub|OJI80991.1 atub|OJI83657.1 acla|EAW10459.1 afis|EAW25108.1 afla|EED55334.1 afum|EAL89779.1 anid|CBF86068.1 asyd|OJJ64458.1 ater|EAU39378.1 aver|OJI98561.1 awen|OJJ37055.1 azon|OJJ44547.1 akaw|GAA84814.1 afla|EED45959.1

Group391: acar|OOF90694.1 acar|OOF95969.1 afla|EED46110.1 afla|EED52607.1 agla|OJJ82549.1 agla|OJJ84416.1 awen|OJJ31372.1 awen|OJJ33859.1 abra|OJJ72741.1 acla|EAW11574.1 afis|EAW23880.1 afum|EAL87308.1 akaw|GAA85352.1 aluc|OJZ90714.1 anid|CBF77193.1 anig|EHA24133.1 aory|EIT74176.1 asyd|OJJ56836.1 ater|EAU33467.1 atub|OJI82140.1 aver|OJJ03501.1 azon|OJJ48693.1 asyd|OJJ58816.1 aory|EIT76373.1

Group392: acar|OOF92653.1 acar|OOG00348.1 abra|OJJ69030.1 afla|EED56357.1 akaw|GAA90546.1 aluc|OJZ86016.1 anig|EHA24595.1 aory|EIT73420.1 ater|EAU31400.1 atub|OJI79805.1 awen|OJJ34779.1 abra|OJJ73125.1 acla|EAW07183.1 afis|EAW22196.1 afum|EAL90995.1 agla|OJJ87849.1 akaw|GAA88040.1 aluc|OJZ81299.1 anid|CBF88408.1 anig|EHA18608.1 asyd|OJJ63753.1 atub|OJI91508.1 aver|OJI97188.1 azon|OJJ45760.1

Group393: acar|OOF94038.1 acar|OOF94108.1 abra|OJJ77702.1 acar|OOF99038.1 acla|EAW12405.1 afis|EAW16864.1 afla|EED51093.1 afum|EAL86403.2 agla|OJJ78684.1 akaw|GAA83928.1 aluc|OJZ90767.1 anig|EHA19502.1 aory|EIT81997.1 asyd|OJJ62647.1 ater|EAU37649.1 atub|OJI82755.1 awen|OJJ36987.1 azon|OJJ45261.1 acla|EAW15311.1 akaw|GAA90280.1 aluc|OJZ83060.1 anig|EHA28126.1 atub|OJI87886.1 awen|OJJ38066.1

Group394: acar|OOF95062.1 acar|OOF95129.1 afla|EED47135.1 afla|EED49651.1 anid|CBF74606.1 anid|CBF84541.1 asyd|OJJ53476.1 asyd|OJJ57659.1 aver|OJJ05520.1 aver|OJJ08280.1 abra|OJJ74650.1 acla|EAW10735.1 afis|EAW24839.1 afum|EAL89485.1 agla|OJJ82030.1 akaw|GAA81960.1 aluc|OJZ92229.1 anig|EHA26728.1 aory|EIT79283.1 ater|EAU36464.1 atub|OJI86659.1 awen|OJJ40425.1 azon|OJJ49283.1 ater|EAU29279.1

Group395: afis|EAW18417.1 afis|EAW22052.1 afum|EAL86752.2 afum|EAL93101.1 aory|EIT78709.1 aory|EIT83477.1 asyd|OJJ51851.1 asyd|OJJ58449.1 awen|OJJ30750.1 awen|OJJ31731.1 abra|OJJ65787.1 acar|OOF92376.1 acla|EAW06308.1 agla|OJJ84984.1 akaw|GAA86375.1 anid|CBF70714.1 anig|EHA25131.1 ater|EAU29833.1 atub|OJI80690.1 aver|OJJ01050.1 azon|OJJ50491.1 abra|OJJ67456.1 aluc|OJZ84908.1 akaw|GAA92636.1

Group396: afis|EAW19022.1 afis|EAW24624.1 afis|EAW25668.1 afum|EAL84338.1 afum|EAL93753.1  
ater|EAU32064.1 ater|EAU33941.1 ater|EAU38525.1 abra|OJJ68917.1 acar|OOF91505.1 acla|EAW14258.1  
afila|EED56624.1 agla|OJJ82736.1 akaw|GAA90332.1 aluc|OJZ85900.1 anid|CBF79090.1 anid|CBF85580.1  
anig|EHA24692.1 aory|EIT79597.1 asyd|OJJ64176.1 atub|OJI79685.1 aver|OJI98251.1 awen|OJJ31400.1  
aver|OJJ08543.1

Group397: afila|EED46864.1 afila|EED51110.1 aory|EIT72646.1 aory|EIT81348.1 ater|EAU32491.1  
ater|EAU37681.1 abra|OJJ65858.1 acar|OOF95019.1 acla|EAW14585.1 agla|OJJ81814.1 akaw|GAA92287.1  
aluc|OJZ90184.1 anig|EHA23683.1 atub|OJI81611.1 awen|OJJ38347.1 abra|OJJ76688.1 acar|OOF99324.1  
akaw|GAA92506.1 aluc|OJZ91519.1 anid|CBF73586.1 anig|EHA22557.1 asyd|OJJ56216.1 atub|OJI85974.1  
aver|OJJ05148.1

Group398: afila|EED49844.1 afila|EED50421.1 anid|CBF71215.1 anid|CBF78131.1 aory|EIT82058.1  
aory|EIT83396.1 asyd|OJJ55867.1 asyd|OJJ57404.1 azon|OJJ43885.1 azon|OJJ46240.1 abra|OJJ70022.1  
acar|OOF93528.1 acla|EAW08798.1 afis|EAW15601.1 afum|EAL85732.1 akaw|GAA87639.1 aluc|OJZ85254.1  
anig|EHA25455.1 ater|EAU32528.1 atub|OJI80314.1 aver|OJJ02118.1 aver|OJJ04809.1 awen|OJJ38276.1  
asyd|OJJ57345.1

Group399: agla|OJJ82200.1 agla|OJJ84366.1 abra|OJJ67531.1 afis|EAW24553.1 afila|EED51537.1  
afum|EAL86218.1 aluc|OJZ87028.1 anid|CBF78469.1 anig|EHA21629.1 asyd|OJJ57285.1 ater|EAU37648.1  
atub|OJI83486.1 aver|OJJ05871.1 awen|OJJ38297.1 abra|OJJ68399.1 acar|OOF93974.1 akaw|GAA92548.1  
aluc|OJZ90097.1 anig|EHA20979.1 aory|EIT74555.1 atub|OJI84709.1 awen|OJJ37870.1 awen|OJJ40901.1  
ater|EAU36047.1

Group400: agla|OJJ84117.1 agla|OJJ84488.1 ater|EAU31647.1 ater|EAU32102.1 ater|EAU32790.1  
awen|OJJ34277.1 awen|OJJ34655.1 awen|OJJ38014.1 awen|OJJ38039.1 abra|OJJ74152.1 acar|OOF95573.1  
afila|EED54552.1 akaw|GAA89731.1 aluc|OJZ80652.1 anig|EHA27180.1 aory|EIT78872.1 asyd|OJJ61410.1  
atub|OJI87507.1 aver|OJJ00740.1 akaw|GAA89130.1 anig|EHA25730.1 atub|OJI88476.1 anid|CBF73465.1  
aluc|OJZ81708.1

Group401: akaw|GAA85083.1 akaw|GAA91235.1 aluc|OJZ82835.1 aluc|OJZ86559.1 atub|OJI83963.1  
atub|OJI89065.1 abra|OJJ67962.1 acar|OOF92808.1 acla|EAW11652.1 afis|EAW23801.1 afila|EED51619.1  
afum|EAL87235.2 agla|OJJ78848.1 anig|EHA21273.1 aory|EIT80604.1 asyd|OJJ61019.1 ater|EAU31355.1  
awen|OJJ33760.1 azon|OJJ42864.1 abra|OJJ71827.1 acar|OOF96504.1 anid|CBF85398.1 anig|EHA22090.1  
ater|EAU39385.1

Group402: akaw|GAA91381.1 akaw|GAA92466.1 aluc|OJZ81553.1 aluc|OJZ84788.1 anig|EHA25881.1  
anig|EHA28056.1 atub|OJI88632.1 atub|OJI89294.1 abra|OJJ66481.1 acar|OOF93248.1 afila|EED46099.1  
anid|CBF82158.1 aory|EIT76444.1 asyd|OJJ54333.1 ater|EAU37661.1 aver|OJJ05287.1 awen|OJJ41952.1  
abra|OJJ77379.1 afila|EED46096.1 anid|CBF82155.1 afila|EED46097.1 akaw|GAA92464.1 anid|CBF82156.1  
aory|EIT76468.1

Group403: aory|EIT74183.1 aory|EIT82897.1 ater|EAU31229.1 ater|EAU37935.1 aver|OJJ03325.1  
aver|OJJ08019.1 abra|OJJ69359.1 acar|OOF94365.1 acla|EAW14750.1 afis|EAW24281.1 afila|EED47995.1  
afum|EAL85950.1 agla|OJJ80635.1 akaw|GAA88229.1 aluc|OJZ82191.1 anid|CBF74148.1 anig|EHA28544.1  
asyd|OJJ53921.1 asyd|OJJ56960.1 atub|OJI88244.1 awen|OJJ33016.1 azon|OJJ48501.1 acar|OOF90185.1  
afila|EED52650.1

Group404: awen|OJJ30773.1 awen|OJJ31708.1 abra|OJJ68030.1 acar|OOF92075.1 afila|EED45369.1  
agla|OJJ84153.1 akaw|GAA90923.1 aluc|OJZ82903.1 aory|EIT82429.1 ater|EAU36888.1 atub|OJI89129.1  
abra|OJJ70336.1 acla|EAW11117.1 afila|EED51703.1 aluc|OJZ82606.1 anig|EHA27474.1 aory|EIT81577.1  
asyd|OJJ64590.1 ater|EAU34064.1 atub|OJI88841.1 aver|OJI98688.1 azon|OJJ45907.1 aver|OJI98018.1  
afila|EED55092.1

Group405: abra|OJJ66091.1 acla|EAW07082.1 afila|EED53627.1 aory|EIT75030.1 asyd|OJJ64735.1  
ater|EAU38556.1 aver|OJJ06182.1 awen|OJJ30165.1 abra|OJJ77781.1 afis|EAW19895.1 afum|EAL92224.2  
agla|OJJ86287.1 akaw|GAA83866.1 aluc|OJZ90834.1 anid|CBF78324.1 anig|EHA19557.1 atub|OJI82820.1  
aver|OJI98311.1 awen|OJJ36980.1 afis|EAW21213.1 asyd|OJJ56540.1 asyd|OJJ56087.1 aver|OJJ05030.1  
awen|OJJ33354.1

Group406: abra|OJJ66593.1 acar|OOF91028.1 acla|EAW10898.1 afis|EAW20960.1 afum|EAL84673.1  
agla|OJJ83918.1 akaw|GAA91124.1 aluc|OJZ81454.1 anid|CBF82567.1 anig|EHA25974.1 aory|EIT77369.1  
asyd|OJJ54050.1 ater|EAU38610.1 atub|OJI88727.1 aver|OJJ08692.1 awen|OJJ34357.1 azon|OJJ48093.1  
acla|EAW10899.1 afis|EAW20959.1 afila|EED50315.1 afum|EAL84674.1 akaw|GAA91125.1 aluc|OJZ81455.1  
aory|EIT77298.1

Group407: anid|CBF79149.1 abra|OJJ68851.1 acar|OOF93604.1 afis|EAW23435.1 afila|EED49617.1  
akaw|GAA87401.1 aluc|OJZ87639.1 anid|CBF79147.1 anig|EHA25624.1 aory|EIT80987.1 ater|EAU36062.1  
atub|OJI79619.1 abra|OJJ76884.1 afila|EED53582.1 anid|CBF85241.1 asyd|OJJ56896.1 afis|EAW23434.1  
aory|EIT80692.1 ater|EAU31633.1 atub|OJI88357.1 afila|EED51736.1 aory|EIT80667.1 aory|EIT75082.1  
atub|OJI81007.1



Group408: abra|OJJ66957.1 acar|OOF93651.1 acla|EAW14508.1 afis|EAW19221.1 afla|EED47668.1  
agla|OJJ88465.1 akaw|GAA92204.1 aluc|OJZ85619.1 anid|CBF78606.1 anig|EHA24907.1 azon|OJJ51238.1  
abra|OJJ69809.1 acar|OOF93568.1 akaw|GAA87851.1 aluc|OJZ85491.1 aory|EIT82845.1 atub|OJI80074.1  
awen|OJJ37584.1 azon|OJJ46584.1 afla|EED52824.1 asyd|OJJ65099.1 aver|OJI99225.1 afla|EED47373.1  
atub|OJI79412.1

Group409: abra|OJJ66987.1 acar|OOF93625.1 acla|EAW08983.1 afis|EAW24689.1 afla|EED48347.1  
afum|EAL89330.1 agla|OJJ83266.1 akaw|GAA92176.1 aluc|OJZ85586.1 anid|CBF73671.1 anig|EHA24935.1  
aory|EIT76285.1 asyd|OJJ56664.1 ater|EAU31416.1 atub|OJI79381.1 aver|OJJ06059.1 awen|OJJ32833.1  
azon|OJJ49002.1 acla|EAW14852.1 afis|EAW24379.1 afla|EED47832.1 afum|EAL86051.1 aory|EIT77109.1  
ater|EAU30357.1

Group410: abra|OJJ67104.1 acar|OOF95836.1 afla|EED47889.1 aluc|OJZ82016.1 anig|EHA22240.1  
aory|EIT77218.1 atub|OJI84565.1 abra|OJJ75997.1 acar|OOF99928.1 acla|EAW09808.1 afis|EAW21328.1  
afum|EED57286.1 afum|EAL92346.2 agla|OJJ87411.1 akaw|GAA88962.1 aluc|OJZ89443.1 anid|CBF83430.1  
anig|EHA23143.1 aory|EIT74039.1 asyd|OJJ60660.1 ater|EAU35953.1 aver|OJI99983.1 awen|OJJ39370.1  
azon|OJJ51710.1

Group411: abra|OJJ67606.1 acar|OOF93337.1 acla|EAW11030.1 afis|EAW20824.1 afla|EED45471.1  
afum|EAL84805.1 akaw|GAA89123.1 aluc|OJZ81715.1 anid|CBF77690.1 anig|EHA25724.1 aory|EIT75480.1  
asyd|OJJ60009.1 ater|EAU37676.1 atub|OJI88467.1 aver|OJJ04442.1 awen|OJJ36217.1 afla|EED52784.1  
aory|EIT78156.1 atub|OJI87922.1 acar|OOF98999.1 akaw|GAA83906.1 anig|EHA19524.1 aver|OJJ02276.1  
azon|OJJ50341.1

Group412: afis|EAW15422.1 afum|EAL84222.1 abra|OJJ74863.1 acar|OOF95863.1 acla|EAW08764.1  
afum|EED57451.1 agla|OJJ81802.1 akaw|GAA83557.1 aluc|OJZ92441.1 anid|CBF89639.1 anig|EHA26526.1  
aory|EIT80148.1 asyd|OJJ62291.1 ater|EAU32509.1 atub|OJI86870.1 aver|OJI96399.1 awen|OJJ39887.1  
azon|OJJ50235.1 afum|EAL85683.1 afis|EAW15665.1 afla|EED46890.1 awen|OJJ38340.1 acla|EAW08989.1  
aory|EIT72560.1

Group413: abra|OJJ67909.1 acar|OOF98177.1 afla|EED46476.1 agla|OJJ79399.1 anig|EHA22276.1  
aory|EIT72342.1 asyd|OJJ61955.1 ater|EAU37942.1 aver|OJI96047.1 awen|OJJ33590.1 azon|OJJ42127.1  
abra|OJJ70267.1 akaw|GAA86530.1 aluc|OJZ85078.1 anid|CBF83033.1 anig|EHA25293.1 asyd|OJJ61489.1  
atub|OJI80520.1 aver|OJJ00830.1 aory|EIT73700.1 asyd|OJJ55487.1 aver|OJJ06566.1 afla|EED45145.1  
aory|EIT82578.1

Group414: abra|OJJ68074.1 acar|OOF96032.1 acla|EAW11411.1 afis|EAW24010.1 afla|EED49151.1  
afum|EAL87440.1 agla|OJJ86942.1 akaw|GAA92399.1 aluc|OJZ83260.1 anid|CBF77404.1 anig|EHA21114.1  
aory|EIT79051.1 asyd|OJJ53240.1 ater|EAU29741.1 atub|OJI87679.1 aver|OJJ03610.1 awen|OJJ35482.1  
azon|OJJ51266.1 aory|EIT78571.1 afla|EED50884.1 ater|EAU38050.1 asyd|OJJ59006.1 aver|OJJ01610.1  
awen|OJJ37601.1

Group415: abra|OJJ68223.1 acla|EAW07100.1 afis|EAW20575.1 afum|EAL84490.1 akaw|GAA83221.1  
aluc|OJZ83722.1 anig|EHA18872.1 atub|OJI90097.1 azon|OJJ50650.1 abra|OJJ76992.1 acar|OOF91437.1  
afum|EED52310.1 agla|OJJ88718.1 akaw|GAA87054.1 aluc|OJZ84392.1 anid|CBF78937.1 anig|EHA27721.1  
aory|EIT74487.1 asyd|OJJ55645.1 ater|EAU37109.1 atub|OJI89679.1 aver|OJJ06730.1 awen|OJJ33275.1  
acla|EAW13463.1

Group416: abra|OJJ68471.1 acar|OOF94213.1 acla|EAW13767.1 afis|EAW19791.1 afis|EAW22422.1  
afum|EED45872.1 afum|EAL85100.2 afum|EAL90770.1 agla|OJJ87604.1 akaw|GAA92392.1 aluc|OJZ83252.1  
anid|CBF88815.1 anig|EHA21105.1 aory|EIT75744.1 asyd|OJJ62890.1 ater|EAU36158.1 atub|OJI87685.1  
awen|OJJ35001.1 azon|OJJ50741.1 acla|EAW07396.1 ater|EAU39285.1 anig|EHA21106.1 afla|EED52500.1  
aory|EIT82777.1

Group417: abra|OJJ69765.1 afis|EAW19682.1 afla|EED54789.1 afum|EAL86840.1 agla|OJJ80273.1  
akaw|GAA87888.1 aluc|OJZ85533.1 anid|CBF74487.1 anig|EHA25064.1 aory|EIT79365.1 asyd|OJJ57713.1  
awen|OJJ37833.1 abra|OJJ73953.1 acar|OOG01081.1 akaw|GAA89558.1 aluc|OJZ88091.1 anig|EHA17861.1  
asyd|OJJ58685.1 ater|EAU36023.1 atub|OJI90699.1 anid|CBF87757.1 aver|OJI97605.1 aory|EIT73667.1  
asyd|OJJ63356.1

Group418: abra|OJJ70549.1 afla|EED53198.1 agla|OJJ89090.1 akaw|GAA83393.1 aluc|OJZ83893.1  
asyd|OJJ55203.1 atub|OJI90260.1 aver|OJJ07013.1 abra|OJJ70550.1 acar|OOF97171.1 acla|EAW08341.1  
afis|EAW23376.1 afla|EED55581.1 afum|EAL88095.1 agla|OJJ86447.1 anid|CBF74843.1 anig|EHA19029.1  
asyd|OJJ60130.1 ater|EAU35630.1 atub|OJI90261.1 aver|OJJ04131.1 awen|OJJ39507.1 azon|OJJ47706.1  
aory|EIT74938.1

Group419: agla|OJJ85379.1 asyd|OJJ59944.1 aver|OJJ02344.1 abra|OJJ77167.1 acar|OOF93057.1  
acla|EAW12893.1 afis|EAW17769.1 afla|EED45780.1 afum|EAL91577.1 agla|OJJ81693.1 akaw|GAA90765.1  
aluc|OJZ84580.1 anid|CBF86634.1 anig|EHA27873.1 asyd|OJJ64807.1 ater|EAU31848.1 atub|OJI89500.1  
aver|OJI98920.1 awen|OJJ37072.1 acar|OOF91588.1 afla|EED45781.1 aory|EIT75674.1 afla|EED45782.1  
aory|EIT75774.1

Group420: acar|OOF98107.1 akaw|GAA82924.1 anig|EHA20714.1 atub|OJI81150.1 abra|OJJ71031.1  
acar|OOF98105.1 afis|EAW24984.1 afla|EED55473.1 afum|EBA27385.1 agla|OJJ82277.1 akaw|GAA82923.1  
anid|CBF81625.1 aory|EIT80888.1 asyd|OJJ59528.1 ater|EAU35736.1 aver|OJJ02742.1 awen|OJJ40581.1  
azon|OJJ49444.1 acla|EAW10584.1 afis|EAW24985.1 afum|EBA27386.1 anid|CBF81605.1 aory|EIT80797.1  
aver|OJJ02751.1

Group421: abra|OJJ71639.1 acar|OOF96356.1 acla|EAW15180.1 afis|EAW20150.1 afla|EED57200.1  
afum|EAL85264.1 agla|OJJ88784.1 akaw|GAA89286.1 akaw|GAA89287.1 aluc|OJZ86382.1 anid|CBF84986.1  
anig|EHA21512.1 aory|EIT73993.1 asyd|OJJ63125.1 ater|EAU38765.1 atub|OJI84151.1 aver|OJI97830.1  
awen|OJJ32023.1 azon|OJJ46067.1 acla|EAW15179.1 afis|EAW20149.1 anid|CBF84984.1 aory|EIT74054.1  
afum|EAL85265.1

Group422: abra|OJJ71666.1 acar|OOF96376.1 acla|EAW15203.1 acla|EAW15204.1 afis|EAW20168.1  
afis|EAW20169.1 afla|EED57180.1 afum|EAL85286.1 afum|EAL85287.1 agla|OJJ88761.1 akaw|GAA89266.1  
akaw|GAA89267.1 aluc|OJZ86408.1 anid|CBF85015.1 anid|CBF85017.1 anig|EHA21491.1 aory|EIT74089.1  
asyd|OJJ63104.1 ater|EAU38800.1 atub|OJI84123.1 aver|OJI97857.1 awen|OJJ32065.1 awen|OJJ32066.1  
azon|OJJ46098.1

Group423: abra|OJJ72573.1 acar|OOF94686.1 akaw|GAA85199.1 aluc|OJZ90554.1 anig|EHA24001.1  
atub|OJI81977.1 abra|OJJ77405.1 acar|OOF93271.1 acla|EAW13764.1 afis|EAW19795.1 afla|EED52177.1  
afum|EAL85095.2 agla|OJJ83624.1 akaw|GAA91360.1 aluc|OJZ84812.1 anig|EHA28076.1 aory|EIT74472.1  
asyd|OJJ54440.1 asyd|OJJ56546.1 ater|EAU36883.1 atub|OJI89273.1 aver|OJJ06176.1 awen|OJJ36480.1  
azon|OJJ42299.1

Group424: abra|OJJ73313.1 acar|OOG00380.1 afis|EAW20348.1 afla|EED51166.1 agla|OJJ89330.1  
akaw|GAA92810.1 aluc|OJZ88733.1 anid|CBF85228.1 anig|EHA18436.1 aory|EIT82315.1 asyd|OJJ62986.1  
atub|OJI91309.1 aver|OJI97982.1 awen|OJJ29882.1 afis|EAW17164.1 anid|CBF76678.1 asyd|OJJ61222.1  
aver|OJI96139.1 anid|CBF80144.1 aory|EIT81349.1 aver|OJI99535.1 afla|EED57011.1 asyd|OJJ61869.1  
aver|OJI95967.1

Group425: abra|OJJ73412.1 acar|OOG00609.1 akaw|GAA83079.1 aluc|OJZ88625.1 anid|CBF80318.1  
anig|EHA18317.1 asyd|OJJ57587.1 atub|OJI91210.1 aver|OJJ05595.1 awen|OJJ38061.1 abra|OJJ76670.1  
acar|OOF99340.1 acla|EAW09094.1 afis|EAW25688.1 afla|EED55156.1 afum|EAL84357.1 agla|OJJ78885.1  
akaw|GAA92522.1 aluc|OJZ91536.1 anig|EHA22573.1 aory|EIT81660.1 ater|EAU32946.1 atub|OJI85990.1  
awen|OJJ41728.1

Group426: abra|OJJ74271.1 acar|OOF95459.1 acla|EAW07315.1 afis|EAW22331.1 afla|EED57752.1  
afum|EAL90861.1 agla|OJJ87711.1 akaw|GAA86752.1 aluc|OJZ89862.1 anid|CBF88649.1 anig|EHA27062.1  
aory|EIT81123.1 asyd|OJJ63884.1 ater|EAU39460.1 atub|OJI84946.1 aver|OJI97056.1 awen|OJJ34909.1  
azon|OJJ45576.1 abra|OJJ74564.1 acar|OOF95196.1 akaw|GAA82037.1 aluc|OJZ92145.1 anig|EHA26804.1  
atub|OJI86574.1

Group427: abra|OJJ74337.1 acar|OOF95390.1 acla|EAW07388.1 afis|EAW22412.1 afla|EED52492.1  
afum|EAL90780.1 agla|OJJ80127.1 akaw|GAA86692.1 aluc|OJZ89793.1 anid|CBF88798.1 anig|EHA27006.1  
aory|EIT82382.1 asyd|OJJ53735.1 ater|EAU31070.1 atub|OJI89739.1 aver|OJJ07850.1 awen|OJJ33265.1  
azon|OJJ45636.1 afis|EAW15417.1 afla|EED50613.1 afum|EAL84228.1 aory|EIT78052.1 ater|EAU37467.1  
awen|OJJ32510.1

Group428: abra|OJJ76931.1 acar|OOF90090.1 acla|EAW13434.1 afis|EAW20550.1 afla|EED45551.1  
afum|EAL84510.1 akaw|GAA87109.1 aluc|OJZ84329.1 anid|CBF73888.1 anig|EHA27663.1 anig|EHA27664.1  
aory|EIT75407.1 asyd|OJJ63884.1 ater|EAU31070.1 atub|OJI89739.1 aver|OJJ07850.1 awen|OJJ33265.1  
azon|OJJ50631.1 acar|OOF99064.1 acla|EAW11193.1 afis|EAW15923.1 afum|EAL88560.2 ater|EAU32036.1  
awen|OJJ35657.1

Group429: abra|OJJ77163.1 acar|OOF93049.1 acla|EAW11721.1 afis|EAW23742.1 afla|EED45436.1  
afum|EAL87179.1 agla|OJJ81702.1 akaw|GAA90769.1 aluc|OJZ84576.1 anid|CBF86622.1 anig|EHA27869.1  
aory|EIT82382.1 asyd|OJJ65088.1 ater|EAU37973.1 atub|OJI89506.1 aver|OJI99214.1 awen|OJJ37083.1  
azon|OJJ42895.1 anid|CBF87116.1 awen|OJJ35821.1 ater|EAU31855.1 asyd|OJJ64812.1 aver|OJI98925.1  
anid|CBF71823.1

Group430: abra|OJJ65741.1 abra|OJJ71669.1 asyd|OJJ61538.1 asyd|OJJ63100.1 aver|OJI97862.1  
aver|OJI98822.1 aver|OJJ00865.1 acar|OOF96381.1 acla|EAW15209.1 afis|EAW20174.1 afla|EED57174.1  
afum|EAL85292.1 agla|OJJ88756.1 akaw|GAA89262.1 aluc|OJZ86412.1 anid|CBF85033.1 anig|EHA21487.1  
aory|EIT74095.1 ater|EAU35210.1 atub|OJI84119.1 awen|OJJ41764.1 azon|OJJ46103.1 afla|EED54878.1

Group431: abra|OJJ65836.1 abra|OJJ67758.1 abra|OJJ72366.1 afum|EAL87737.1 afum|EAL88791.1  
agla|OJJ79294.1 agla|OJJ80455.1 akaw|GAA87903.1 akaw|GAA92853.1 akaw|GAA92883.1 akaw|GAA93148.1  
anig|EHA21873.1 anig|EHA26120.1 azon|OJJ46212.1 azon|OJJ47661.1 acar|OOF97545.1 aluc|OJZ80010.1  
aluc|OJZ90353.1 anid|CBF79035.1 asyd|OJJ52047.1 atub|OJI81780.1 agla|OJJ84748.1 akaw|GAA86116.1

Group432: abra|OJJ65984.1 abra|OJJ67112.1 abra|OJJ73081.1 acar|OOF92889.1 acar|OOF98440.1  
akaw|GAA88080.1 akaw|GAA90857.1 akaw|GAA91052.1 aluc|OJZ81343.1 aluc|OJZ82976.1 aluc|OJZ87863.1  
anig|EHA18648.1 anig|EHA20169.1 anig|EHA21392.1 atub|OJI80785.1 atub|OJI89209.1 atub|OJI91548.1  
azon|OJJ42157.1 azon|OJJ42333.1 azon|OJJ42440.1 azon|OJJ42744.1 anid|CBF71426.1 awen|OJJ31434.1

Group433: abra|OJJ66045.1 abra|OJJ73392.1 abra|OJJ77643.1 afla|EED46392.1 afla|EED49513.1  
atub|OJI82691.1 atub|OJI87256.1 atub|OJI87448.1 atub|OJI91231.1 acar|OOF99092.1 agla|OJJ85351.1  
akaw|GAA83097.1 akaw|GAA83991.1 aluc|OJZ80886.1 aluc|OJZ88644.1 anig|EHA18335.1 anig|EHA19451.1  
aory|EIT72357.1 asyd|OJJ54995.1 aver|OJJ07206.1 awen|OJJ40082.1 afis|EAW17049.1 aver|OJI95758.1

Group434: abra|OJJ67714.1 abra|OJJ68753.1 akaw|GAA89213.1 akaw|GAA89897.1 aluc|OJZ81616.1  
aluc|OJZ81774.1 anig|EHA22442.1 anig|EHA25827.1 atub|OJI84347.1 atub|OJI88567.1 acar|OOF92242.1  
acla|EAW12498.1 afis|EAW24147.1 afla|EED46784.1 afum|EAL92002.1 agla|OJJ87227.1 anid|CBF77921.1  
aory|EIT72760.1 asyd|OJJ55295.1 ater|EAU30579.1 aver|OJJ06931.1 awen|OJJ41332.1 azon|OJJ48802.1

Group435: abra|OJJ70999.1 abra|OJJ75834.1 acar|OOF98141.1 acla|EAW10556.1 afis|EAW25023.1  
afla|EED55445.1 afum|EAL89672.1 agla|OJJ89191.1 akaw|GAA82949.1 aluc|OJZ87528.1 anid|CBF81543.1  
anig|EHA20738.1 aory|EIT80817.1 asyd|OJJ59491.1 ater|EAU35764.1 atub|OJI81120.1 aver|OJJ02783.1  
awen|OJJ40617.1 azon|OJJ49465.1 akaw|GAA84544.1 aluc|OJZ89277.1 anig|EHA23292.1 atub|OJI85522.1

Group436: abra|OJJ73227.1 abra|OJJ77180.1 acar|OOF91798.1 acar|OOG00465.1 agla|OJJ82802.1  
agla|OJJ84567.1 asyd|OJJ52864.1 asyd|OJJ59702.1 acla|EAW06901.1 afis|EAW16518.1 afla|EED56153.1  
afum|EAL89113.1 akaw|GAA87953.1 aluc|OJZ81201.1 anid|CBF75551.1 anig|EHA18516.1 aory|EIT76710.1  
ater|EAU36584.1 atub|OJI91396.1 aver|OJJ02585.1 aver|OJJ08843.1 awen|OJJ40305.1 azon|OJJ49166.1

Group437: abra|OJJ75244.1 abra|OJJ75269.1 acar|OOF94534.1 acar|OOF94549.1 akaw|GAA91787.1  
akaw|GAA91807.1 aluc|OJZ92806.1 aluc|OJZ92829.1 anig|EHA26180.1 anig|EHA26203.1 atub|OJI87249.1  
atub|OJI87286.1 acla|EAW12239.1 afis|EAW16988.1 afla|EED48988.1 afum|EAL86512.1 agla|OJJ79828.1  
anid|CBF87433.1 aory|EIT80045.1 ater|EAU31739.1 aver|OJJ08882.1 awen|OJJ35990.1 asyd|OJJ52913.1

Group438: abra|OJJ75609.1 abra|OJJ76068.1 akaw|GAA84359.1 akaw|GAA88899.1 aluc|OJZ89061.1  
aluc|OJZ89522.1 anig|EHA23079.1 anig|EHA23477.1 atub|OJI85281.1 atub|OJI85725.1 acar|OOG00229.1  
acla|EAW09371.1 afis|EAW21764.1 afla|EED46335.1 afum|EAL92794.1 agla|OJJ84387.1 anid|CBF83753.1  
aory|EIT81195.1 asyd|OJJ60858.1 ater|EAU38451.1 aver|OJJ00182.1 awen|OJJ34047.1 azon|OJJ48184.1

Group439: acar|OOF90104.1 acar|OOF90211.1 acar|OOF90646.1 akaw|GAA86640.1 akaw|GAA87321.1  
akaw|GAA88463.1 akaw|GAA90279.1 aluc|OJZ83061.1 aluc|OJZ88352.1 aluc|OJZ85197.1 anig|EHA18084.1  
anig|EHA28127.1 atub|OJI80404.1 atub|OJI87885.1 atub|OJI90947.1 azon|OJJ42159.1 azon|OJJ48921.1  
azon|OJJ43897.1 azon|OJJ46414.1 abra|OJJ73701.1 afla|EED57243.1 aory|EIT74140.1 awen|OJJ30907.1

Group440: acar|OOF90258.1 acar|OOF90411.1 acar|OOF94537.1 akaw|GAA90238.1 akaw|GAA91802.1  
aluc|OJZ83102.1 aluc|OJZ92824.1 atub|OJI87281.1 atub|OJI87833.1 awen|OJJ33606.1 awen|OJJ39914.1  
abra|OJJ75266.1 acla|EAW08995.1 afla|EED48390.1 afum|EAL91138.1 anig|EHA26183.1 aory|EIT83109.1  
ater|EAU30261.1 ater|EAU37025.1 azon|OJJ45138.1 anig|EHA27462.1 ater|EAU34045.1 acar|OOF95569.1

Group441: acar|OOF94062.1 acar|OOF94132.1 abra|OJJ66364.1 acla|EAW08975.1 afis|EAW15454.1  
afla|EED54752.1 afum|EAL84191.1 agla|OJJ80556.1 akaw|GAA90237.1 aluc|OJZ83103.1 anid|CBF80456.1  
anig|EHA28167.1 aory|EIT78886.1 asyd|OJJ54768.1 ater|EAU32265.1 atub|OJI87832.1 aver|OJJ07399.1  
awen|OJJ36431.1 azon|OJJ43598.1 atub|OJI80330.1 afla|EED48876.1 aory|EIT81202.1 awen|OJJ31672.1

Group442: acla|EAW10867.1 acla|EAW11076.1 afla|EED50345.1 afla|EED55539.1 afum|EAL84638.1  
afum|EAL87765.1 aory|EIT77302.1 aory|EIT80884.1 asyd|OJJ54018.1 asyd|OJJ56874.1 abra|OJJ66629.1  
acar|OOF91053.1 afis|EAW20991.1 agla|OJJ84069.1 akaw|GAA91096.1 aluc|OJZ81419.1 anid|CBF82616.1  
anig|EHA26002.1 ater|EAU38640.1 atub|OJI88762.1 aver|OJJ08722.1 awen|OJJ34319.1 azon|OJJ48065.1

Group443: afis|EAW17232.1 afis|EAW21390.1 afum|EAL86652.1 afum|EAL92404.2 aory|EIT72927.1  
aory|EIT76529.1 azon|OJJ48879.1 azon|OJJ50259.1 azon|OJJ51536.1 abra|OJJ65877.1 abra|OJJ76067.1  
acar|OOF99863.1 acla|EAW09752.1 afla|EED48188.1 akaw|GAA88900.1 aluc|OJZ89521.1 anid|CBF83840.1  
anig|EHA23080.1 asyd|OJJ60914.1 ater|EAU35174.1 atub|OJI85282.1 aver|OJJ00241.1 awen|OJJ30796.1

Group444: afis|EAW19359.1 afis|EAW20492.1 aver|OJJ07259.1 aver|OJJ07872.1 awen|OJJ33502.1  
awen|OJJ34946.1 abra|OJJ66132.1 acar|OOF94018.1 acla|EAW14627.1 afla|EED56212.1 afum|EAL84562.1  
agla|OJJ80511.1 akaw|GAA92689.1 aluc|OJZ90147.1 anid|CBF73880.1 anig|EHA20923.1 aory|EIT73321.1  
asyd|OJJ64747.1 ater|EAU37645.1 atub|OJI84652.1 awen|OJJ38031.1 asyd|OJJ53765.1 asyd|OJJ54937.1

Group445: afis|EAW20796.1 afis|EAW22075.1 afum|EAL84833.1 afum|EAL91095.1 anid|CBF71369.1  
anid|CBF82800.1 ater|EAU30149.1 ater|EAU32867.1 abra|OJJ72284.1 acar|OOF94937.1 afla|EED49547.1  
agla|OJJ85016.1 akaw|GAA86036.1 aluc|OJZ90263.1 anig|EHA23759.1 aory|EIT73956.1 asyd|OJJ55081.1  
asyd|OJJ57119.1 atub|OJI81689.1 aver|OJJ07127.1 awen|OJJ41908.1 azon|OJJ47364.1 afla|EED56697.1

Group446: afla|EED44969.1 afla|EED46569.1 afla|EED51147.1 aory|EIT73475.1 aory|EIT77864.1  
aory|EIT81352.1 asyd|OJJ56870.1 asyd|OJJ61208.1 abra|OJJ75570.1 acar|OOF90888.1 acla|EAW09352.1

afis|EAW21817.1 afum|EAL92833.1 agla|OJJ84325.1 akaw|GAA84321.1 aluc|OJZ89018.1 anid|CBF76652.1  
anig|EHA23512.1 ater|EAU38486.1 atub|OJI85771.1 aver|OJJ00532.1 awen|OJJ34091.1 azon|OJJ44255.1

Group447: afila|EED47292.1 afila|EED54844.1 agla|OJJ87461.1 agla|OJJ89110.1 aory|EIT79178.1  
aory|EIT79336.1 asyd|OJJ60317.1 asyd|OJJ60627.1 asyd|OJJ62712.1 abra|OJJ75953.1 acar|OOF99959.1  
acla|EAW09843.1 afis|EAW21292.1 afum|EAL92309.1 akaw|GAA84656.1 aluc|OJZ89402.1 anid|CBF83376.1  
anig|EHA23185.1 ater|EAU35925.1 atub|OJI85395.1 aver|OJJ99951.1 awen|OJJ39407.1 azon|OJJ44290.1

Group448: afila|EED48892.1 afila|EED55381.1 aory|EIT80798.1 aory|EIT81174.1 asyd|OJJ56534.1  
asyd|OJJ64421.1 aver|OJI98520.1 aver|OJJ06188.1 abra|OJJ70928.1 acar|OOF98198.1 acla|EAW10494.1  
afis|EAW25073.1 afum|EAL89742.1 agla|OJJ89119.1 akaw|GAA83014.1 aluc|OJZ87599.1 anid|CBF85962.1  
anig|EHA20799.1 ater|EAU39552.1 atub|OJI81048.1 awen|OJJ40684.1 azon|OJJ44061.1 awen|OJJ34526.1

Group449: afila|EED54572.1 afila|EED56566.1 asyd|OJJ53770.1 asyd|OJJ62761.1 ater|EAU30266.1  
ater|EAU39167.1 aver|OJI96804.1 aver|OJJ07878.1 abra|OJJ73591.1 acar|OOG00775.1 acla|EAW07510.1  
afis|EAW22541.1 afum|EAL90653.1 agla|OJJ80900.1 akaw|GAA88561.1 aluc|OJZ88459.1 anid|CBF89038.1  
anig|EHA18179.1 aory|EIT78798.1 aory|EIT79646.1 atub|OJI91057.1 awen|OJJ35170.1 azon|OJJ49937.1

Group450: agla|OJJ78857.1 agla|OJJ87323.1 abra|OJJ66001.1 acar|OOF92098.1 acla|EAW11077.1  
afila|EED45932.1 akaw|GAA90873.1 aluc|OJZ82959.1 anid|CBF84691.1 anig|EHA21375.1 aory|EIT75815.1  
asyd|OJJ53330.1 ater|EAU32160.1 atub|OJI89191.1 aver|OJJ08414.1 azon|OJJ46594.1 afila|EED53485.1  
aory|EIT75146.1 asyd|OJJ61788.1 aver|OJI95887.1 ater|EAU32697.1 asyd|OJJ55442.1 ater|EAU35122.1

Group451: agla|OJJ81417.1 agla|OJJ84332.1 abra|OJJ77363.1 acar|OOF93232.1 acla|EAW13113.1  
afis|EAW17551.1 afila|EED49274.1 afum|EAL91365.1 akaw|GAA91399.1 aluc|OJZ84772.1 anid|CBF82159.1  
anig|EHA28040.1 aory|EIT82213.1 asyd|OJJ54334.1 ater|EAU36983.1 atub|OJI89309.1 awen|OJJ32551.1  
azon|OJJ50995.1 afis|EAW17400.1 afila|EED46104.1 afum|EAL91238.1 anid|CBF79798.1 aory|EIT76423.1

Group452: akaw|GAA83965.1 akaw|GAA90739.1 aluc|OJZ80854.1 aluc|OJZ84609.1 abra|OJJ77200.1  
acar|OOF93088.1 acla|EAW13191.1 afis|EAW17450.1 afila|EED49372.1 afum|EAL91278.2 agla|OJJ80362.1  
akaw|GAA90738.1 aluc|OJZ84610.1 anid|CBF71683.1 anig|EHA27899.1 aory|EIT79587.1 asyd|OJJ61822.1  
ater|EAU33930.1 atub|OJI89471.1 aver|OJI95922.1 awen|OJJ37396.1 azon|OJJ51068.1 anig|EHA27898.1

Group453: anid|CBF69431.1 anid|CBF73986.1 abra|OJJ66331.1 acar|OOG00530.1 acla|EAW09349.1  
afis|EAW21804.1 afila|EED56853.1 afum|EAL92830.1 agla|OJJ79164.1 akaw|GAA90208.1 aluc|OJZ83137.1  
anig|EHA28196.1 aory|EIT77503.1 asyd|OJJ65096.1 ater|EAU38484.1 atub|OJI87797.1 aver|OJI99221.1  
azon|OJJ47555.1 aver|OJJ01938.1 afila|EED46583.1 aory|EIT77946.1 asyd|OJJ52385.1 agla|OJJ83529.1

Group454: anid|CBF73961.1 anid|CBF84419.1 asyd|OJJ53557.1 asyd|OJJ53743.1 asyd|OJJ57304.1  
ater|EAU32191.1 ater|EAU37274.1 aver|OJJ05855.1 aver|OJJ07856.1 aver|OJJ08197.1 abra|OJJ66428.1  
acla|EAW13742.1 afis|EAW19838.1 afila|EED45944.1 afum|EAL85055.2 agla|OJJ84458.1 akaw|GAA90293.1  
aluc|OJZ83045.1 anig|EHA28114.1 aory|EIT75577.1 atub|OJI87903.1 awen|OJJ29654.1 azon|OJJ42315.1

Group455: aory|EIT75378.1 aory|EIT78539.1 awen|OJJ34056.1 awen|OJJ35494.1 azon|OJJ46995.1  
azon|OJJ50589.1 abra|OJJ72842.1 acar|OOF96043.1 acla|EAW11400.1 afis|EAW24021.1 afila|EED45752.1  
afila|EED49134.1 afila|EED49135.1 afum|EAL87451.1 agla|OJJ86954.1 akaw|GAA85444.1 aluc|OJZ83350.1  
anid|CBF77424.1 anig|EHA24217.1 asyd|OJJ53230.1 ater|EAU29725.1 atub|OJI82243.1 aver|OJJ03622.1

Group456: asyd|OJJ51978.1 asyd|OJJ52250.1 asyd|OJJ56074.1 abra|OJJ76969.1 acar|OOF91414.1  
acla|EAW13273.1 acla|EAW13494.1 afis|EAW20594.1 afila|EED47642.1 afum|EAL84467.1 agla|OJJ88662.1  
akaw|GAA87075.1 aluc|OJZ84365.1 anid|CBF78279.1 anig|EHA27700.1 aory|EIT80239.1 ater|EAU35240.1  
atub|OJI89703.1 aver|OJJ05017.1 awen|OJJ33318.1 azon|OJJ50690.1 afis|EAW17345.1 afum|EAL91189.2

Group457: asyd|OJJ52031.1 asyd|OJJ52140.1 abra|OJJ68385.1 acar|OOF93982.1 acla|EAW12147.1  
afila|EED51420.1 afum|EAL86589.1 anid|CBF81959.1 aory|EIT80646.1 aver|OJJ05804.1 abra|OJJ68386.1  
afis|EAW17129.1 akaw|GAA92560.1 aluc|OJZ90106.1 anig|EHA20964.1 ater|EAU31612.1 atub|OJI84696.1  
awen|OJJ32473.1 azon|OJJ46830.1 afis|EAW25756.1 akaw|GAA93234.1 aluc|OJZ79642.1 asyd|OJJ57363.1

Group458: asyd|OJJ57402.1 asyd|OJJ58377.1 abra|OJJ75419.1 acar|OOF90764.1 acla|EAW13791.1  
afis|EAW18341.1 afila|EED54057.1 afum|EAL87704.1 agla|OJJ88043.1 akaw|GAA84194.1 aluc|OJZ88871.1  
anid|CBF79375.1 anig|EHA23633.1 asyd|OJJ57817.1 ater|EAU34676.1 atub|OJI85920.1 aver|OJJ04178.1  
awen|OJJ35725.1 azon|OJJ42531.1 acar|OOF90590.1 ater|EAU35690.1 awen|OJJ36256.1 asyd|OJJ60091.1

Group459: asyd|OJJ59828.1 asyd|OJJ60302.1 asyd|OJJ60331.1 aver|OJI99642.1 aver|OJJ02459.1  
aver|OJI99677.1 awen|OJJ29685.1 awen|OJJ30621.1 awen|OJJ36172.1 abra|OJJ77900.1 acar|OOF98884.1  
acla|EAW11251.1 afis|EAW18246.1 afila|EED56217.1 afum|EAL87611.1 agla|OJJ85824.1 akaw|GAA83762.1  
aluc|OJZ90969.1 anid|CBF87149.1 anig|EHA19671.1 aory|EIT73372.1 ater|EAU33739.1 atub|OJI82960.1

Group460: asyd|OJJ60480.1 asyd|OJJ61028.1 awen|OJJ32562.1 awen|OJJ36305.1 azon|OJJ43188.1  
azon|OJJ47398.1 afum|EAL86366.1 abra|OJJ75145.1 akaw|GAA88750.1 aluc|OJZ92710.1 anig|EHA26289.1  
acar|OOF98762.1 ater|EAU36669.1 acla|EAW09016.1 aver|OJJ99800.1 afila|EED54373.1 aluc|OJZ81261.1  
aory|EIT75853.1 ater|EAU36009.1 aver|OJJ07827.1 atub|OJI87136.1 ater|EAU33600.1 asyd|OJJ53703.1

Group461: ater|EAU29737.1 ater|EAU36828.1 abra|OJJ68505.1 acar|OOF90180.1 acar|OOF91789.1  
acla|EAW11100.1 afis|EAW20763.1 afla|EED53200.1 afum|EAL84856.1 agla|OJJ84006.1 akaw|GAA92768.1  
aluc|OJJ82717.1 anid|CBF80354.1 anig|EHA21171.1 aory|EIT75122.1 asyd|OJJ54828.1 atub|OJJ88951.1  
aver|OJJ07333.1 awen|OJJ29787.1 azon|OJJ42797.1 asyd|OJJ58563.1 aver|OJJ01162.1 azon|OJJ42773.1

Group462: atub|OJJ83219.1 atub|OJJ83220.1 abra|OJJ73330.1 afla|EED57225.1 agla|OJJ88240.1  
akaw|GAA92790.1 anid|CBF74610.1 anig|EHA18401.1 aory|EIT73990.1 ater|EAU30210.1 atub|OJJ91293.1  
aver|OJJ05551.1 awen|OJJ36971.1 abra|OJJ78150.1 acar|OOF91819.1 agla|OJJ79110.1 akaw|GAA85875.1  
aluc|OJJ91202.1 anig|EHA19907.1 asyd|OJJ55391.1 aver|OJJ08266.1 agla|OJJ78827.1 azon|OJJ42621.1

Group463: azon|OJJ45795.1 azon|OJJ48029.1 abra|OJJ67774.1 acla|EAW12350.1 afis|EAW16775.1  
afla|EED45004.1 afum|EAL86344.1 agla|OJJ83713.1 aory|EIT73669.1 asyd|OJJ60273.1 ater|EAU32446.1  
atub|OJJ80491.1 aver|OJJ07654.1 awen|OJJ34537.1 acla|EAW13294.1 afla|EED47565.1 afum|EAL86272.1  
aory|EIT74524.1 awen|OJJ35954.1 ater|EAU33716.1 aver|OJJ06720.1 afis|EAW20694.1 ater|EAU36512.1

Group464: abra|OJJ65849.1 acla|EAW08786.1 afis|EAW15938.1 aluc|OJJ80301.1 ater|EAU31058.1  
atub|OJJ87454.1 aver|OJJ96479.1 awen|OJJ39979.1 abra|OJJ70264.1 agla|OJJ88746.1 akaw|GAA86533.1  
aluc|OJJ85081.1 anig|EHA25296.1 aory|EIT73096.1 asyd|OJJ55484.1 atub|OJJ80518.1 aver|OJJ06563.1  
abra|OJJ70920.1 acar|OOF98204.1 akaw|GAA83020.1 aluc|OJJ87606.1 atub|OJJ81042.1 asyd|OJJ52755.1

Group465: abra|OJJ66209.1 acar|OOF90651.1 acla|EAW06843.1 afis|EAW20271.1 afum|EAL85405.2  
akaw|GAA89078.1 aluc|OJJ80513.1 anig|EHA25680.1 aory|EIT83312.1 asyd|OJJ60801.1 ater|EAU35068.1  
atub|OJJ88417.1 abra|OJJ67048.1 afla|EED52068.1 anig|EHA18595.1 azon|OJJ42510.1 afla|EED52437.1  
aluc|OJJ90229.1 anig|EHA23731.1 ater|EAU37218.1 afla|EED52417.1 akaw|GAA86004.1 azon|OJJ50736.1

Group466: anid|CBF73652.1 abra|OJJ78129.1 acar|OOF90670.1 acla|EAW14637.1 afla|EED45059.1  
akaw|GAA85878.1 aluc|OJJ91191.1 anid|CBF78296.1 anig|EHA19887.1 asyd|OJJ56106.1 atub|OJJ83210.1  
aver|OJJ05048.1 azon|OJJ45964.1 acla|EAW11632.1 asyd|OJJ52073.1 ater|EAU31025.1 atub|OJJ91230.1  
aver|OJJ03030.1 afla|EED45199.1 aory|EIT73607.1 asyd|OJJ59264.1 awen|OJJ35370.1 aver|OJJ99658.1

Group467: abra|OJJ66772.1 acar|OOF93853.1 acla|EAW08992.1 afis|EAW15416.1 afla|EED48724.1  
afum|EAL84229.2 agla|OJJ79941.1 anid|CBF81992.1 anig|EHA27337.1 aory|EIT73206.1 asyd|OJJ56162.1  
ater|EAU32712.1 aver|OJJ05101.1 awen|OJJ39993.1 azon|OJJ42917.1 abra|OJJ75745.1 akaw|GAA84478.1  
aluc|OJJ89198.1 anig|EHA23360.1 atub|OJJ85592.1 afla|EED55174.1 aory|EIT81585.1 awen|OJJ36897.1

Group468: abra|OJJ67101.1 acar|OOF98451.1 afis|EAW20274.1 afla|EED57102.1 afum|EAL85408.1  
agla|OJJ87503.1 akaw|GAA91060.1 aluc|OJJ87872.1 anid|CBF78242.1 anig|EHA20178.1 aory|EIT82822.1  
asyd|OJJ56196.1 ater|EAU31785.1 atub|OJJ80777.1 aver|OJJ05123.1 awen|OJJ35879.1 afla|EED48128.1  
aory|EIT76261.1 agla|OJJ85549.1 asyd|OJJ61684.1 ater|EAU38792.1 aver|OJJ03092.1 awen|OJJ29992.1

Group469: abra|OJJ67813.1 acar|OOF89857.1 afis|EAW19368.1 afla|EED48200.1 afum|EAL94087.1  
akaw|GAA87912.1 aluc|OJJ85623.1 anid|CBF87299.1 anig|EHA18476.1 aory|EIT72963.1 asyd|OJJ57229.1  
ater|EAU30775.1 atub|OJJ79416.1 aver|OJJ03060.1 awen|OJJ32619.1 agla|OJJ83617.1 afis|EAW24515.1  
afla|EED47664.1 afum|EAL86181.1 aluc|OJJ88782.1 anid|CBF84276.1 aory|EIT80178.1 atub|OJJ91354.1

Group470: abra|OJJ67869.1 acar|OOF92849.1 afla|EED51544.1 agla|OJJ78960.1 akaw|GAA91876.1  
aluc|OJJ82023.1 anid|CBF79791.1 anig|EHA22232.1 aory|EIT80600.1 asyd|OJJ58125.1 ater|EAU31305.1  
atub|OJJ84576.1 aver|OJJ04281.1 awen|OJJ33687.1 abra|OJJ68892.1 acla|EAW11730.1 afis|EAW23762.1  
afum|EAL87195.1 agla|OJJ82460.1 akaw|GAA90357.1 aluc|OJJ85875.1 anig|EHA24715.1 atub|OJJ79661.1

Group471: abra|OJJ67925.1 acar|OOF92776.1 afis|EAW17948.1 afum|EAL91758.1 agla|OJJ89340.1  
akaw|GAA91272.1 aluc|OJJ82797.1 anid|CBF80065.1 anig|EHA21238.1 ater|EAU31422.1 atub|OJJ89028.1  
aver|OJJ02091.1 awen|OJJ41595.1 azon|OJJ48310.1 abra|OJJ74125.1 acla|EAW14963.1 afla|EED48217.1  
akaw|GAA89760.1 aluc|OJJ80623.1 anig|EHA27208.1 aory|EIT72959.1 asyd|OJJ58320.1 awen|OJJ31633.1

Group472: abra|OJJ67981.1 acla|EAW10293.1 afis|EAW16666.1 afla|EED50863.1 afum|EAL89270.1  
agla|OJJ79452.1 akaw|GAA91221.1 aluc|OJJ82849.1 anid|CBF83064.1 anig|EHA21286.1 aory|EIT78981.1  
asyd|OJJ53493.1 ater|EAU38052.1 atub|OJJ89079.1 aver|OJJ08255.1 awen|OJJ41013.1 abra|OJJ74173.1  
acar|OOF95553.1 akaw|GAA86843.1 aluc|OJJ89962.1 anig|EHA27162.1 atub|OJJ84843.1 agla|OJJ89278.1

Group473: awen|OJJ41504.1 abra|OJJ71797.1 acar|OOF96477.1 acla|EAW13728.1 afis|EAW18033.1  
afum|EAL91844.1 agla|OJJ85408.1 akaw|GAA85113.1 aluc|OJJ86527.1 anid|CBF81681.1 anig|EHA22119.1  
aory|EIT81720.1 asyd|OJJ53625.1 asyd|OJJ58292.1 atub|OJJ83995.1 aver|OJJ05942.1 awen|OJJ31297.1  
azon|OJJ50337.1 acar|OOF92709.1 afla|EED51862.1 anid|CBF80076.1 ater|EAU31550.1 aver|OJJ02132.1

Group474: abra|OJJ68397.1 acar|OOF94205.1 acla|EAW12189.1 afis|EAW23755.1 afla|EED52086.1  
afum|EAL87191.1 akaw|GAA92551.1 aluc|OJJ90099.1 anid|CBF84318.1 anig|EHA20976.1 aory|EIT76905.1  
asyd|OJJ55649.1 ater|EAU29520.1 atub|OJJ84707.1 aver|OJJ06734.1 awen|OJJ34639.1 acla|EAW14123.1  
afla|EED45259.1 aory|EIT73569.1 ater|EAU38832.1 afis|EAW18834.1 afum|EAL93570.1 afis|EAW20404.1

Group475: abra|OJJ68432.1 acar|OOF93958.1 afis|EAW25721.1 afla|EED52101.1 afum|EAL84395.2  
agla|OJJ87948.1 akaw|GAA86939.1 akaw|GAA86940.1 aluc|OJJ90065.1 anid|CBF82387.1 anig|EHA21009.1

aory|EIT76909.1 asyd|OJJ54134.1 ater|EAU30751.1 atub|OJI84742.1 aver|OJJ08601.1 awen|OJJ29682.1  
afla|EED52100.1 anid|CBF82386.1 aory|EIT76914.1 afla|EED45119.1 aory|EIT73766.1 ater|EAU30752.1

Group476: abra|OJJ68512.1 akaw|GAA91334.1 aluc|OJZ82727.1 anig|EHA21180.1 atub|OJI88960.1  
abra|OJJ69632.1 acar|OOF92677.1 acla|EAW10562.1 afis|EAW25029.1 afla|EED55452.1 afum|EAL89666.1  
agla|OJJ79155.1 akaw|GAA91612.1 aluc|OJZ82439.1 anid|CBF81553.1 anig|EHA28334.1 aory|EIT80876.1  
asyd|OJJ59496.1 ater|EAU35758.1 atub|OJI88002.1 aver|OJJ02778.1 awen|OJJ40610.1 azon|OJJ49459.1

Group477: afum|EAL94100.1 abra|OJJ73872.1 afla|EED45842.1 akaw|GAA89484.1 aluc|OJZ88178.1  
anid|CBF80737.1 anig|EHA17930.1 aory|EIT75520.1 asyd|OJJ55544.1 ater|EAU35671.1 atub|OJI90777.1  
aver|OJJ06622.1 awen|OJJ38075.1 abra|OJJ78163.1 akaw|GAA85862.1 aluc|OJZ91217.1 anig|EHA19923.1  
asyd|OJJ61397.1 atub|OJI83235.1 afis|EAW20414.1 afum|EBA27371.1 ater|EAU29532.1 aver|OJJ00726.1

Group478: abra|OJJ72302.1 acar|OOF94922.1 acla|EAW10039.1 afis|EAW24476.1 afla|EED56937.1  
afum|EAL86149.1 agla|OJJ86412.1 akaw|GAA86053.1 aluc|OJZ90283.1 anid|CBF78363.1 anig|EHA23773.1  
aory|EIT77524.1 asyd|OJJ57323.1 ater|EAU29927.1 atub|OJI81707.1 aver|OJJ05837.1 awen|OJJ40788.1  
acla|EAW12030.1 afis|EAW24671.1 afum|EAL89324.1 anig|EHA28157.1 azon|OJJ48190.1 awen|OJJ34571.1

Group479: abra|OJJ72891.1 acar|OOF96081.1 acla|EAW11359.1 afis|EAW18135.1 afla|EED58060.1  
afum|EAL87492.1 akaw|GAA85478.1 aluc|OJZ83399.1 anid|CBF75378.1 anid|CBF84404.1 aory|EIT72894.1  
aory|EIT79796.1 asyd|OJJ53570.1 asyd|OJJ59841.1 ater|EAU35458.1 atub|OJI82285.1 aver|OJJ02448.1  
aver|OJJ08185.1 awen|OJJ35577.1 afla|EED56220.1 aory|EIT73370.1 afla|EED48228.1 ater|EAU33738.1

Group480: abra|OJJ73797.1 acar|OOG00952.1 acla|EAW07688.1 afis|EAW22703.1 afla|EED49989.1  
afum|EAL90489.1 agla|OJJ79006.1 akaw|GAA89415.1 aluc|OJZ88258.1 anid|CBF88074.1 anig|EHA18003.1  
aory|EIT73485.1 asyd|OJJ63555.1 ater|EAU38999.1 atub|OJI90857.1 aver|OJI97379.1 awen|OJJ35340.1  
azon|OJJ49778.1 aory|EIT74604.1 afis|EAW21081.1 afum|EAL92102.1 agla|OJJ79284.1 afla|EED44920.1

Group481: abra|OJJ74536.1 acar|OOF96722.1 afla|EED46724.1 akaw|GAA82065.1 aluc|OJZ92117.1  
anig|EHA26827.1 aory|EIT77932.1 asyd|OJJ61662.1 ater|EAU31119.1 atub|OJI86550.1 abra|OJJ78387.1  
acar|OOF98501.1 acla|EAW09146.1 afis|EAW22000.1 afum|EAL93015.1 agla|OJJ84097.1 akaw|GAA85645.1  
aluc|OJZ91466.1 anid|CBF82670.1 atub|OJI83459.1 aver|OJJ00983.1 awen|OJJ34296.1 azon|OJJ43342.1

Group482: abra|OJJ76072.1 acar|OOF99854.1 afis|EAW16839.1 afla|EED55812.1 afum|EAL86386.1  
agla|OJJ80806.1 akaw|GAA88895.1 aluc|OJZ89526.1 anid|CBF73895.1 anig|EHA23075.1 aory|EIT76740.1  
asyd|OJJ53659.1 ater|EAU36679.1 atub|OJI85277.1 aver|OJJ07767.1 abra|OJJ76505.1 akaw|GAA92900.1  
anig|EHA22711.1 acar|OOF99003.1 agla|OJJ79991.1 awen|OJJ36307.1 acla|EAW12392.1 anig|EHA25400.1

Group483: abra|OJJ76831.1 acar|OOF91325.1 acla|EAW13393.1 afis|EAW16462.1 afla|EED45207.1  
afum|EAL89058.1 agla|OJJ84801.1 akaw|GAA87191.1 aluc|OJZ84243.1 anid|CBF75808.1 anig|EHA27588.1  
aory|EIT73549.1 asyd|OJJ55721.1 atub|OJI89840.1 aver|OJJ06807.1 awen|OJJ33206.1 azon|OJJ46480.1  
awen|OJJ33434.1 acla|EAW06841.1 asyd|OJJ57540.1 aver|OJJ05638.1 afis|EAW20505.1 afum|EAL84551.1

Group484: abra|OJJ76940.1 acar|OOF91390.1 acla|EAW09287.1 afis|EAW21860.1 afla|EED45974.1  
afum|EAL92873.1 agla|OJJ79533.1 akaw|GAA87099.1 aluc|OJZ84339.1 anid|CBF89674.1 anig|EHA27673.1  
aory|EIT75604.1 asyd|OJJ62270.1 ater|EAU29774.1 atub|OJI89729.1 aver|OJI96379.1 awen|OJJ34144.1  
azon|OJJ50245.1 afla|EED46450.1 agla|OJJ84275.1 aory|EIT72411.1 ater|EAU30859.1 azon|OJJ43482.1

Group485: abra|OJJ77386.1 acar|OOF93255.1 acla|EAW11088.1 afis|EAW20767.1 afla|EED50191.1  
afum|EAL84852.1 akaw|GAA91375.1 aluc|OJZ84794.1 anid|CBF73862.1 anig|EHA28062.1 aory|EIT77384.1  
asyd|OJJ56520.1 ater|EAU31812.1 atub|OJI89288.1 aver|OJJ06202.1 awen|OJJ33710.1 azon|OJJ50068.1  
awen|OJJ34924.1 acla|EAW07300.1 aory|EIT79889.1 ater|EAU39485.1 asyd|OJJ57568.1 aver|OJJ05611.1

Group486: abra|OJJ78343.1 acar|OOF98537.1 acla|EAW13688.1 afis|EAW19912.1 afla|EED47242.1  
afum|EAL84995.1 agla|OJJ84607.1 akaw|GAA85690.1 aluc|OJZ91415.1 anid|CBF87843.1 anig|EHA20088.1  
aory|EIT79169.1 asyd|OJJ61361.1 ater|EAU31064.1 atub|OJI83410.1 aver|OJJ00688.1 awen|OJJ33622.1  
azon|OJJ43388.1 afla|EED46677.1 anid|CBF84039.1 aory|EIT77968.1 awen|OJJ34250.1 agla|OJJ88201.1

Group487: abra|OJJ65482.1 abra|OJJ70272.1 awen|OJJ34689.1 awen|OJJ34690.1 acar|OOF93269.1  
afum|EAL92101.1 agla|OJJ82948.1 aluc|OJZ82533.1 abra|OJJ68088.1 acla|EAW15262.1 afla|EED50507.1  
akaw|GAA86873.1 aluc|OJZ89997.1 anig|EHA27372.1 ater|EAU33813.1 atub|OJI84811.1 afis|EAW21079.1  
aory|EIT82101.1 acar|OOF90259.1 agla|OJJ86366.1 awen|OJJ32169.1 anig|EHA17942.1

Group488: abra|OJJ67142.1 abra|OJJ74374.1 acar|OOF95362.1 acar|OOF98414.1 akaw|GAA87274.1  
akaw|GAA91027.1 aluc|OJZ87830.1 aluc|OJZ89747.1 atub|OJI80811.1 atub|OJI85055.1 acla|EAW13670.1  
afis|EAW19949.1 afla|EED45542.1 afum|EAL84966.1 anid|CBF80394.1 anig|EHA20309.1 aory|EIT75592.1  
asyd|OJJ54728.1 ater|EAU31211.1 aver|OJJ07440.1 azon|OJJ45120.1 anig|EHA26970.1

Group489: abra|OJJ68479.1 abra|OJJ69702.1 akaw|GAA88821.1 akaw|GAA92402.1 aluc|OJZ82505.1  
aluc|OJZ83263.1 atub|OJI87674.1 atub|OJI87926.1 acar|OOF92670.1 acla|EAW15184.1 afis|EAW20154.1  
afla|EED57195.1 afum|EAL85269.1 agla|OJJ88775.1 anid|CBF84996.1 anig|EHA28265.1 aory|EIT74166.1  
asyd|OJJ63119.1 ater|EAU38769.1 aver|OJI97839.1 awen|OJJ32030.1 azon|OJJ46082.1

Group490: abra|OJJ69764.1 abra|OJJ76049.1 acla|EAW08772.1 acla|EAW09780.1 aluc|OJZ85534.1  
aluc|OJZ89505.1 ater|EAU29246.1 ater|EAU35201.1 acar|OOF99880.1 afis|EAW21358.1 afla|EED55773.1  
afum|EAL92373.1 agla|OJJ85477.1 akaw|GAA88916.1 anid|CBF76263.1 anig|EHA23095.1 aory|EIT76750.1  
asyd|OJJ60971.1 atub|OJI85298.1 aver|OJJ00296.1 awen|OJJ39340.1 azon|OJJ51686.1

Group491: abra|OJJ74560.1 abra|OJJ78116.1 asyd|OJJ52502.1 asyd|OJJ54384.1 atub|OJI83194.1  
atub|OJI86158.1 acla|EAW12888.1 afis|EAW17788.1 afum|EAL91597.1 acar|OOF98752.1 afla|EED48713.1  
agla|OJJ82644.1 akaw|GAA85891.1 aluc|OJZ91181.1 aluc|OJZ92144.1 anid|CBF84655.1 anig|EHA26805.1  
aory|EIT73117.1 ater|EAU33264.1 awen|OJJ36279.1 anig|EHA19872.1 anig|EHA19902.1

Group492: acar|OOF93735.1 acar|OOF93823.1 abra|OJJ66740.1 acla|EAW07107.1 afis|EAW19478.1  
afla|EED56686.1 afum|EAL87018.1 agla|OJJ78581.1 akaw|GAA89678.1 aluc|OJZ80708.1 anid|CBF69805.1  
anig|EHA27309.1 aory|EIT73937.1 asyd|OJJ58969.1 ater|EAU30765.1 atub|OJI87566.1 aver|OJJ01564.1  
awen|OJJ40135.1 azon|OJJ45831.1 afis|EAW22119.1 agla|OJJ81206.1 afum|EAL91067.1

Group493: acar|OOF95045.1 acar|OOF95112.1 abra|OJJ73294.1 acla|EAW14608.1 afis|EAW19337.1  
afum|EAL94055.1 agla|OJJ79423.1 akaw|GAA92709.1 aluc|OJZ88753.1 anid|CBF90107.1 anig|EHA18454.1  
asyd|OJJ59230.1 ater|EAU30249.1 atub|OJI91323.1 aver|OJJ07884.1 awen|OJJ40776.1 afis|EAW24675.1  
afla|EED54362.1 asyd|OJJ57396.1 ater|EAU31824.1 aver|OJJ01840.1 asyd|OJJ53780.1

Group494: acar|OOF95079.1 acar|OOF95144.1 afla|EED48018.1 afla|EED48886.1 anig|EHA24784.1  
anig|EHA26744.1 aory|EIT81173.1 aory|EIT82914.1 awen|OJJ31657.1 awen|OJJ37608.1 abra|OJJ74633.1  
acla|EAW14723.1 afis|EAW24259.1 afum|EAL85927.2 akaw|GAA81976.1 aluc|OJZ92213.1 asyd|OJJ62240.1  
ater|EAU31205.1 atub|OJI86644.1 aver|OJI96349.1 awen|OJJ34660.1 azon|OJJ51810.1

Group495: acar|OOG00243.1 acar|OOG00261.1 acar|OOG00244.1 acar|OOG00262.1 abra|OJJ67538.1  
acla|EAW06974.1 afis|EAW16588.1 afla|EED56077.1 afum|EAL89183.1 agla|OJJ78537.1 akaw|GAA88121.1  
aluc|OJZ81394.1 anid|CBF78530.1 anig|EHA18687.1 aory|EIT76791.1 asyd|OJJ65303.1 atub|OJI91599.1  
aver|OJI99441.1 awen|OJJ37035.1 azon|OJJ49092.1 awen|OJJ37036.1 awen|OJJ40227.1

Group496: acla|EAW12269.1 acla|EAW15163.1 agla|OJJ78609.1 agla|OJJ88803.1 ater|EAU31506.1  
ater|EAU38748.1 aver|OJI97813.1 aver|OJI98043.1 abra|OJJ71622.1 acar|OOF96339.1 afis|EAW20132.1  
afla|EED57220.1 afum|EAL85248.1 akaw|GAA89303.1 aluc|OJZ86365.1 anid|CBF84960.1 anig|EHA21527.1  
aory|EIT74164.1 asyd|OJJ63141.1 atub|OJI84169.1 awen|OJJ31998.1 azon|OJJ50773.1

Group497: afis|EAW15552.1 afis|EAW16853.1 anid|CBF75924.1 anid|CBF80262.1 anid|CBF83068.1  
abra|OJJ72655.1 akaw|GAA83700.1 aluc|OJZ91032.1 aory|EIT81911.1 ater|EAU36759.1 atub|OJI83029.1  
aver|OJJ04021.1 awen|OJJ30091.1 ater|EAU37833.1 aluc|OJZ90302.1 agla|OJJ89297.1 afla|EED47474.1  
awen|OJJ38684.1 agla|OJJ80033.1 asyd|OJJ61018.1 ater|EAU29857.1 atub|OJI81728.1

Group498: afis|EAW16688.1 afis|EAW25102.1 ater|EAU31451.1 ater|EAU31645.1 ater|EAU39369.1  
awen|OJJ29684.1 awen|OJJ39500.1 awen|OJJ40716.1 abra|OJJ70876.1 acar|OOF98244.1 acla|EAW10465.1  
afla|EED55343.1 afum|EAL89773.1 agla|OJJ85448.1 akaw|GAA91739.1 aluc|OJZ87646.1 anid|CBF86019.1  
anig|EHA20839.1 asyd|OJJ64452.1 atub|OJI80999.1 aver|OJI98555.1 azon|OJJ42298.1

Group499: afis|EAW17401.1 afis|EAW23311.1 agla|OJJ82761.1 agla|OJJ86536.1 asyd|OJJ52975.1  
asyd|OJJ54697.1 asyd|OJJ62410.1 aver|OJI96543.1 aver|OJJ08941.1 abra|OJJ75086.1 acar|OOF97247.1  
acla|EAW08278.1 afla|EED55666.1 afum|EAL88166.1 akaw|GAA88698.1 aluc|OJZ92652.1 anid|CBF89498.1  
aory|EIT81808.1 ater|EAU35550.1 atub|OJI87083.1 awen|OJJ39656.1 azon|OJJ47784.1

Group500: afis|EAW18163.1 afis|EAW21088.1 afum|EAL87523.1 afum|EAL92111.1 abra|OJJ77694.1  
acar|OOF99045.1 acla|EAW11332.1 afla|EED56330.1 agla|OJJ85962.1 akaw|GAA83936.1 aluc|OJZ90757.1  
anid|CBF85753.1 anig|EHA19494.1 aory|EIT73367.1 asyd|OJJ64297.1 ater|EAU33690.1 atub|OJI82744.1  
aver|OJI98390.1 awen|OJJ30508.1 azon|OJJ50317.1 acla|EAW10845.1 acla|EAW13632.1

Group501: afla|EED45701.1 afla|EED55177.1 aory|EIT75733.1 aory|EIT81570.1 ater|EAU31908.1  
ater|EAU32716.1 azon|OJJ50388.1 azon|OJJ50758.1 abra|OJJ68251.1 acar|OOF97530.1 acla|EAW09063.1  
afis|EAW25635.1 afum|EAL84323.1 agla|OJJ78897.1 akaw|GAA83210.1 aluc|OJZ83712.1 anid|CBF83153.1  
anig|EHA18863.1 asyd|OJJ55515.1 atub|OJI90087.1 aver|OJJ06592.1 awen|OJJ36092.1

Group502: afla|EED49422.1 afla|EED56716.1 afla|EED53576.1 aory|EIT73869.1 aory|EIT74843.1  
aory|EIT79474.1 abra|OJJ66759.1 acar|OOF93842.1 acla|EAW11885.1 afis|EAW19497.1 afum|EAL86996.1  
agla|OJJ81661.1 akaw|GAA89696.1 aluc|OJZ80689.1 anid|CBF75434.1 anig|EHA27326.1 asyd|OJJ59785.1  
ater|EAU34809.1 atub|OJI87548.1 aver|OJJ02503.1 awen|OJJ36914.1 azon|OJJ42897.1

Group503: afla|EED49854.1 afla|EED57953.1 asyd|OJJ60093.1 asyd|OJJ60346.1 ater|EAU29423.1  
ater|EAU34802.1 aver|OJI97568.1 aver|OJI99687.1 aver|OJJ03906.1 aver|OJJ04180.1 aver|OJI98275.1  
aver|OJJ03018.1 acla|EAW11879.1 afis|EAW19490.1 afla|EED45383.1 afum|EAL87004.1 anid|CBF87414.1  
aory|EIT82446.1 aory|EIT83413.1 asyd|OJJ65387.1 awen|OJJ36906.1 azon|OJJ47353.1

Group504: afla|EED52027.1 afla|EED55465.1 aory|EIT80878.1 aory|EIT81484.1 awen|OJJ35115.1  
awen|OJJ40599.1 abra|OJJ77085.1 acar|OOF92969.1 acla|EAW10573.1 afis|EAW24994.1 afum|EAL89655.1

agla|OJJ82261.1 akaw|GAA86970.1 aluc|OJZ84494.1 anid|CBF81588.1 anig|EHA27797.1 asyd|OJJ59513.1  
ater|EAU35745.1 atub|OJI89586.1 aver|OJJ02760.1 azon|OJJ49449.1 azon|OJJ49978.1

Group505: afila|EED54894.1 afila|EED55162.1 aory|EIT79416.1 aory|EIT81659.1 abra|OJJ69688.1  
acar|OOF93996.1 afis|EAW25764.1 akaw|GAA88812.1 aluc|OJZ82495.1 anig|EHA28277.1 aory|EIT79352.1  
asyd|OJJ53577.1 atub|OJI87936.1 aver|OJJ08180.1 awen|OJJ29839.1 azon|OJJ45270.1 acla|EAW12187.1  
afis|EAW17124.1 afum|EAL86585.1 anid|CBF83965.1 asyd|OJJ61426.1 aver|OJJ00760.1

Group506: afum|EAL86746.1 afum|EAL86767.1 afum|EAL90935.1 afum|EAL91121.1 awen|OJJ29553.1  
awen|OJJ29590.1 awen|OJJ29640.1 abra|OJJ65612.1 afis|EAW15508.1 agla|OJJ81552.1 aver|OJJ03119.1  
abra|OJJ66326.1 afis|EAW20713.1 afila|EED52357.1 agla|OJJ80478.1 akaw|GAA87890.1 anid|CBF84445.1  
anig|EHA21856.1 asyd|OJJ52037.1 azon|OJJ42065.1 asyd|OJJ62703.1 asyd|OJJ51872.1

Group507: agla|OJJ78579.1 agla|OJJ86328.1 agla|OJJ87482.1 agla|OJJ87483.1 azon|OJJ42717.1  
azon|OJJ45989.1 abra|OJJ77701.1 acar|OOF99039.1 acla|EAW09904.1 afis|EAW17120.1 afila|EED48004.1  
akaw|GAA83929.1 aluc|OJZ90766.1 anig|EHA19500.1 aory|EIT82898.1 asyd|OJJ57236.1 ater|EAU33755.1  
atub|OJI82754.1 aver|OJJ00941.1 awen|OJJ35399.1 anid|CBF87717.1 aver|OJJ03049.1

Group508: agla|OJJ79099.1 agla|OJJ80685.1 abra|OJJ65682.1 afis|EAW18187.1 afum|EAL87550.1  
abra|OJJ67677.1 acar|OOF92161.1 afila|EED45129.1 agla|OJJ82590.1 akaw|GAA83877.1 aluc|OJZ81891.1  
anig|EHA22351.1 ater|EAU32846.1 atub|OJI84444.1 afis|EAW17780.1 akaw|GAA89800.1 aver|OJJ08350.1  
awen|OJJ31361.1 acla|EAW13858.1 anid|CBF83961.1 aory|EIT73733.1 ater|EAU34039.1

Group509: agla|OJJ79128.1 agla|OJJ84540.1 asyd|OJJ53810.1 asyd|OJJ58024.1 aver|OJJ04376.1  
aver|OJJ07911.1 awen|OJJ31498.1 awen|OJJ36278.1 abra|OJJ68972.1 acar|OOF91549.1 acla|EAW14215.1  
afis|EAW19066.1 afila|EED54432.1 afum|EAL93795.1 akaw|GAA90499.1 aluc|OJZ85961.1 anid|CBF79650.1  
anig|EHA24642.1 aory|EIT75890.1 ater|EAU32114.1 atub|OJI79748.1 azon|OJJ46211.1

Group510: agla|OJJ81570.1 agla|OJJ84260.1 asyd|OJJ54207.1 asyd|OJJ61270.1 awen|OJJ30146.1  
awen|OJJ34161.1 abra|OJJ78235.1 acar|OOF98625.1 acla|EAW09275.1 afis|EAW21872.1 afila|EED46436.1  
afum|EAL92886.1 akaw|GAA85790.1 aluc|OJZ91309.1 anid|CBF76772.1 anig|EHA19993.1 aory|EIT72312.1  
ater|EAU30870.1 atub|OJI83302.1 aver|OJJ00599.1 aver|OJJ01907.1 azon|OJJ43468.1

Group511: agla|OJJ82328.1 agla|OJJ89180.1 ater|EAU35772.1 ater|EAU39458.1 atub|OJI81101.1  
atub|OJI87185.1 awen|OJJ30919.1 awen|OJJ40626.1 abra|OJJ70986.1 acar|OOF98145.1 acla|EAW10546.1  
afis|EAW25014.1 afila|EED55435.1 afum|EAL89682.1 akaw|GAA82963.1 aluc|OJZ87544.1 anid|CBF81525.1  
anig|EHA20748.1 aory|EIT80926.1 asyd|OJJ59480.1 aver|OJJ02794.1 azon|OJJ49057.1

Group512: agla|OJJ83608.1 agla|OJJ87442.1 anig|EHA21812.1 anig|EHA23178.1 ater|EAU35930.1  
ater|EAU39415.1 awen|OJJ36034.1 awen|OJJ39401.1 abra|OJJ75961.1 acar|OOF99954.1 acla|EAW09837.1  
afis|EAW21297.1 afila|EED54848.1 afum|EAL92314.1 akaw|GAA84661.1 aluc|OJZ89409.1 anid|CBF83385.1  
aory|EIT79420.1 asyd|OJJ60632.1 atub|OJI85387.1 aver|OJI99955.1 azon|OJJ44285.1

Group513: akaw|GAA83114.1 akaw|GAA92362.1 aluc|OJZ79905.1 aluc|OJZ81127.1 aluc|OJZ88669.1  
aluc|OJZ88850.1 abra|OJJ73371.1 acar|OOG00577.1 acla|EAW06992.1 afis|EAW16606.1 afila|EED45025.1  
afum|EAL89203.1 agla|OJJ82647.1 anid|CBF81913.1 anig|EHA18352.1 aory|EIT73821.1 asyd|OJJ59694.1  
ater|EAU36688.1 atub|OJI91251.1 aver|OJJ02593.1 awen|OJJ40200.1 azon|OJJ49067.1

Group514: akaw|GAA89013.1 akaw|GAA93063.1 akaw|GAA93173.1 aluc|OJZ79783.1 aluc|OJZ79855.1  
aluc|OJZ80033.1 aluc|OJZ80379.1 acar|OOF93307.1 acla|EAW11112.1 afis|EAW25575.1 afila|EED45095.1  
afum|EAL84285.2 agla|OJJ78554.1 anid|CBF80123.1 anig|EHA17692.1 aory|EIT73824.1 asyd|OJJ58342.1  
ater|EAU31353.1 aver|OJJ02069.1 awen|OJJ38810.1 agla|OJJ85585.1 awen|OJJ40900.1

Group515: asyd|OJJ54189.1 asyd|OJJ55024.1 ater|EAU32854.1 ater|EAU36887.1 aver|OJJ07182.1  
aver|OJJ08550.1 abra|OJJ69557.1 acar|OOF91593.1 acla|EAW12881.1 afis|EAW17796.1 afila|EED57033.1  
afum|EAL91604.2 agla|OJJ89112.1 akaw|GAA91566.1 aluc|OJZ82384.1 anid|CBF71395.1 anig|EHA28379.1  
aory|EIT82249.1 atub|OJI88056.1 awen|OJJ41608.1 azon|OJJ48327.1 agla|OJJ84736.1

Group516: asyd|OJJ54603.1 asyd|OJJ56125.1 asyd|OJJ60498.1 aver|OJI99822.1 aver|OJJ05067.1  
aver|OJJ07552.1 abra|OJJ67246.1 acar|OOF98311.1 acla|EAW08524.1 afis|EAW23563.1 afum|EAL87905.1  
agla|OJJ80849.1 akaw|GAA91666.1 aluc|OJZ87731.1 anid|CBF69379.1 anig|EHA20223.1 aory|EIT74378.1  
ater|EAU37656.1 atub|OJI80909.1 awen|OJJ30069.1 awen|OJJ37809.1 anid|CBF78333.1

Group517: asyd|OJJ55069.1 asyd|OJJ55250.1 ater|EAU31464.1 ater|EAU32149.1 aver|OJJ06973.1  
aver|OJJ07142.1 abra|OJJ77233.1 acar|OOF93115.1 acla|EAW12666.1 afis|EAW17830.1 afila|EED46172.1  
afum|EAL91640.1 agla|OJJ80651.1 akaw|GAA90709.1 aluc|OJZ84643.1 anid|CBF77996.1 anig|EHA27929.1  
aory|EIT74935.1 atub|OJI89438.1 awen|OJJ41759.1 azon|OJJ48451.1 afila|EED53219.1

Group518: aver|OJJ00309.1 aver|OJJ08547.1 abra|OJJ66043.1 afis|EAW24627.1 afum|EAL86253.1  
abra|OJJ69961.1 acar|OOF99004.1 acla|EAW11755.1 afila|EED51597.1 agla|OJJ78815.1 akaw|GAA87698.1  
aluc|OJZ85322.1 anid|CBF76281.1 anig|EHA25512.1 aory|EIT80452.1 asyd|OJJ60989.1 ater|EAU31328.1  
atub|OJI80251.1 awen|OJJ31328.1 afis|EAW23788.1 afum|EAL87222.1 awen|OJJ33732.1



Group519: awen|OJJ30937.1 awen|OJJ35649.1 acar|OOF98703.1 afla|EED50782.1 aory|EIT78014.1  
abra|OJJ75482.1 afis|EAW24629.1 agla|OJJ82330.1 anid|CBF87140.1 asyd|OJJ53426.1 ater|EAU36583.1  
aver|OJJ08319.1 acar|OOF93299.1 anid|CBF82039.1 asyd|OJJ54222.1 aver|OJJ05174.1 anig|EHA20951.1  
atub|OJI84677.1 acar|OOF99300.1 ater|EAU34863.1 ater|EAU32944.1 awen|OJJ32536.1

Group520: azon|OJJ42806.1 azon|OJJ43585.1 asyd|OJJ55440.1 abra|OJJ73119.1 acla|EAW13712.1  
afum|EAL91905.2 aluc|OJZ80612.1 asyd|OJJ57580.1 aver|OJJ05600.1 abra|OJJ75285.1 acar|OOF91874.1  
afla|EED47775.1 akaw|GAA91823.1 aluc|OJZ92846.1 anig|EHA26164.1 atub|OJI87302.1 awen|OJJ38175.1  
akaw|GAA85218.1 aver|OJJ06515.1 afis|EAW18097.1 aory|EIT77197.1 aory|EIT77132.1

Group521: abra|OJJ65490.1 anig|EHA18426.1 atub|OJI91620.1 anid|CBF78136.1 abra|OJJ70409.1  
acla|EAW12074.1 afis|EAW19715.1 afla|EED47481.1 afum|EAL86812.1 agla|OJJ83008.1 akaw|GAA91946.1  
aluc|OJZ82672.1 anid|CBF82263.1 anig|EHA21039.1 aory|EIT79956.1 asyd|OJJ52475.1 atub|OJI88908.1  
aver|OJJ03940.1 awen|OJJ33572.1 acar|OOF90658.1 afla|EED47480.1 aory|EIT79950.1

Group522: abra|OJJ65676.1 acar|OOF97626.1 afla|EED58063.1 agla|OJJ89300.1 aluc|OJZ79543.1  
aory|EIT79786.1 ater|EAU33067.1 aver|OJJ03420.1 awen|OJJ35949.1 azon|OJJ46841.1 abra|OJJ72223.1  
acar|OOF96846.1 afum|EAL86781.1 agla|OJJ85961.1 akaw|GAA84714.1 aluc|OJZ86973.1 anid|CBF77158.1  
anig|EHA21675.1 asyd|OJJ56903.1 atub|OJI83548.1 aver|OJJ03390.1 awen|OJJ36080.1

Group523: abra|OJJ65756.1 acla|EAW07338.1 afis|EAW19764.1 afla|EED46307.1 afum|EAL84477.1  
agla|OJJ89164.1 anid|CBF85553.1 aory|EIT76353.1 asyd|OJJ64152.1 ater|EAU36860.1 aver|OJI99267.1  
abra|OJJ66793.1 acar|OOF93870.1 akaw|GAA86858.1 aluc|OJZ89981.1 anig|EHA27353.1 aory|EIT73825.1  
atub|OJI84829.1 azon|OJJ50413.1 afum|EAL85138.1 aver|OJI98232.1 afla|EED44981.1

Group524: abra|OJJ65922.1 acar|OOF94983.1 afla|EED52093.1 aluc|OJZ90209.1 anig|EHA23706.1  
atub|OJI81639.1 aver|OJJ07181.1 awen|OJJ29695.1 abra|OJJ68440.1 acar|OOF93953.1 afis|EAW19803.1  
afla|EED52094.1 agla|OJJ87952.1 akaw|GAA86932.1 aluc|OJZ90057.1 anid|CBF82416.1 anig|EHA21014.1  
aory|EIT76923.1 asyd|OJJ54150.1 ater|EAU30746.1 atub|OJI84750.1 aver|OJJ08591.1

Group525: asyd|OJJ65354.1 ater|EAU38218.1 awen|OJJ32091.1 azon|OJJ46668.1 abra|OJJ67699.1  
afis|EAW16912.1 afla|EED51126.1 agla|OJJ81314.1 akaw|GAA89208.1 aluc|OJZ81621.1 anid|CBF84302.1  
anig|EHA25822.1 aory|EIT81344.1 asyd|OJJ55578.1 atub|OJI88559.1 aver|OJJ06657.1 akaw|GAA90566.1  
anid|CBF90346.1 ater|EAU37575.1 asyd|OJJ62616.1 aver|OJJ03451.1 aver|OJI99503.1

Group526: acla|EAW15302.1 anid|CBF84723.1 abra|OJJ76196.1 acar|OOF99748.1 afla|EED52713.1  
agla|OJJ81243.1 akaw|GAA82138.1 aluc|OJZ92033.1 anig|EHA22966.1 aory|EIT78196.1 ater|EAU38283.1  
atub|OJI86466.1 awen|OJJ32095.1 azon|OJJ46673.1 afis|EAW20227.1 afum|EAL85344.1 aver|OJJ08433.1  
afis|EAW25742.1 afla|EED46022.1 aory|EIT75659.1 asyd|OJJ53309.1 awen|OJJ30032.1

Group527: abra|OJJ66248.1 acar|OOF90703.1 afis|EAW15427.1 afla|EED56771.1 afum|EAL84216.1  
agla|OJJ83506.1 akaw|GAA89041.1 aluc|OJZ80554.1 anid|CBF78298.1 anig|EHA25643.1 aory|EIT73857.1  
asyd|OJJ61726.1 ater|EAU33504.1 atub|OJI88377.1 aver|OJJ05045.1 awen|OJJ38047.1 atub|OJI82848.1  
aver|OJJ05231.1 afla|EED52547.1 aory|EIT74224.1 asyd|OJJ56102.1 aluc|OJZ90847.1

Group528: abra|OJJ67067.1 acar|OOF90566.1 afis|EAW22299.1 afla|EED53134.1 afum|EAL91113.1  
agla|OJJ82720.1 anid|CBF85181.1 anig|EHA18939.1 aory|EIT75127.1 ater|EAU32823.1 atub|OJI88353.1  
aver|OJJ05787.1 awen|OJJ31414.1 abra|OJJ77976.1 akaw|GAA83682.1 aluc|OJZ91051.1 anig|EHA19748.1  
atub|OJI83047.1 azon|OJJ42193.1 anid|CBF87385.1 akaw|GAA89027.1 aluc|OJZ80577.1

Group529: abra|OJJ67286.1 afla|EED54791.1 anid|CBF87758.1 anig|EHA25285.1 aory|EIT79425.1  
asyd|OJJ63355.1 atub|OJI80526.1 aver|OJI97606.1 abra|OJJ70023.1 acar|OOF93529.1 afis|EAW15602.1  
afla|EED50420.1 afum|EAL85731.1 agla|OJJ81554.1 akaw|GAA87638.1 aluc|OJZ85253.1 anid|CBF78955.1  
anig|EHA25454.1 aory|EIT82173.1 ater|EAU32529.1 atub|OJI80315.1 awen|OJJ38274.1

Group530: abra|OJJ67324.1 acar|OOF92489.1 acla|EAW06411.1 afis|EAW18515.1 afla|EED52883.1  
afum|EAL93210.1 agla|OJJ85106.1 akaw|GAA86492.1 aluc|OJZ85034.1 anid|CBF84636.1 anig|EHA25254.1  
aory|EIT78633.1 atub|OJI80563.1 aver|OJJ08377.1 awen|OJJ31069.1 azon|OJJ50578.1 acar|OOF91935.1  
afla|EED47190.1 akaw|GAA89092.1 anig|EHA25694.1 aory|EIT79183.1 atub|OJI88431.1

Group531: abra|OJJ67569.1 akaw|GAA89099.1 anig|EHA25701.1 aver|OJJ07705.1 abra|OJJ70824.1  
acar|OOF91940.1 acla|EAW09022.1 afis|EAW17020.1 afla|EED57105.1 agla|OJJ89322.1 akaw|GAA89419.1  
aluc|OJZ88254.1 anid|CBF86050.1 anig|EHA17999.1 aory|EIT74056.1 atub|OJI90852.1 awen|OJJ32256.1  
azon|OJJ49710.1 acla|EAW10946.1 akaw|GAA89819.1 aluc|OJZ81871.1 aver|OJJ07786.1

Group532: abra|OJJ67571.1 acar|OOF91945.1 acla|EAW07104.1 afis|EAW17308.1 afla|EED57039.1  
afum|EAL91143.1 agla|OJJ83702.1 akaw|GAA84673.1 aluc|OJZ87016.1 anid|CBF79774.1 aory|EIT77654.1  
asyd|OJJ58117.1 atub|OJI88439.1 aver|OJJ04288.1 awen|OJJ30697.1 acar|OOG00400.1 afla|EED49713.1  
agla|OJJ88113.1 asyd|OJJ58093.1 atub|OJI83503.1 asyd|OJJ53589.1 aver|OJJ08159.1

Group533: abra|OJJ67572.1 acar|OOF91946.1 afla|EED57712.1 agla|OJJ83703.1 akaw|GAA89101.1  
anid|CBF79773.1 anig|EHA25703.1 aory|EIT79942.1 asyd|OJJ58116.1 ater|EAU33168.1 atub|OJI88440.1

aver|OJJ04289.1 awen|OJJ30698.1 abra|OJJ77771.1 acar|OOF93071.1 agla|OJJ86555.1 akaw|GAA83875.1  
aluc|OJZ90821.1 anig|EHA19547.1 atub|OJI82809.1 azon|OJJ50365.1 azon|OJJ42498.1

Group534: abra|OJJ67769.1 acla|EAW13437.1 afis|EAW17522.1 agla|OJJ79313.1 aory|EIT83023.1  
ater|EAU39522.1 awen|OJJ32751.1 azon|OJJ42601.1 abra|OJJ74180.1 acar|OOF95540.1 akaw|GAA86835.1  
aluc|OJZ89954.1 anig|EHA27155.1 atub|OJI84852.1 abra|OJJ78121.1 akaw|GAA89008.1 aluc|OJZ80000.1  
anig|EHA19877.1 atub|OJI83202.1 aver|OJI97603.1 azon|OJJ43572.1 awen|OJJ34683.1

Group535: abra|OJJ67872.1 acla|EAW11678.1 akaw|GAA91881.1 aluc|OJZ82018.1 anid|CBF73446.1  
anig|EHA22238.1 atub|OJI84569.1 aver|OJJ08116.1 abra|OJJ69722.1 acar|OOF94194.1 afla|EED52162.1  
akaw|GAA90175.1 aluc|OJZ83175.1 anig|EHA28249.1 aory|EIT74416.1 asyd|OJJ54298.1 atub|OJI87762.1  
awen|OJJ40352.1 azon|OJJ42479.1 acar|OOF99262.1 acar|OOF99303.1 atub|OJI80754.1

Group536: abra|OJJ68322.1 acar|OOF97579.1 acla|EAW08933.1 afis|EAW15466.1 afla|EED51782.1  
afum|EAL85856.1 akaw|GAA92073.1 aluc|OJZ83651.1 anid|CBF83126.1 anig|EHA18802.1 aory|EIT81734.1  
asyd|OJJ55850.1 ater|EAU34052.1 atub|OJI90020.1 awen|OJJ29732.1 azon|OJJ48706.1 anig|EHA24765.1  
afla|EED45870.1 aory|EIT75363.1 aver|OJJ04793.1 awen|OJJ38111.1 akaw|GAA83679.1

Group537: abra|OJJ68433.1 acar|OOF93957.1 afla|EED52099.1 agla|OJJ87949.1 akaw|GAA86938.1  
aluc|OJZ90064.1 anid|CBF82384.1 anig|EHA21010.1 aory|EIT76917.1 asyd|OJJ54135.1 ater|EAU30750.1  
atub|OJI84743.1 aver|OJJ08600.1 abra|OJJ68434.1 afla|EED52098.1 akaw|GAA86937.1 aluc|OJZ90063.1  
anid|CBF82382.1 asyd|OJJ54136.1 atub|OJI84744.1 awen|OJJ29691.1 azon|OJJ48597.1

Group538: abra|OJJ68774.1 acar|OOF92259.1 acla|EAW12478.1 afla|EED46766.1 afum|EAL92024.1  
agla|OJJ89513.1 akaw|GAA89917.1 aluc|OJZ81752.1 anid|CBF77878.1 anig|EHA22460.1 asyd|OJJ55313.1  
ater|EAU30598.1 atub|OJI84323.1 aver|OJJ06913.1 awen|OJJ41310.1 azon|OJJ48783.1 azon|OJJ48784.1  
acar|OOF92261.1 acla|EAW12477.1 agla|OJJ89512.1 akaw|GAA89918.1 ater|EAU30599.1

Group539: abra|OJJ69330.1 acar|OOF94397.1 acla|EAW14710.1 afis|EAW24245.1 afla|EED48029.1  
afum|EAL85913.2 agla|OJJ79629.1 akaw|GAA88201.1 aluc|OJZ82162.1 anid|CBF86924.1 anig|EHA28570.1  
aory|EIT83325.1 asyd|OJJ55608.1 ater|EAU32738.1 atub|OJI88275.1 aver|OJJ06683.1 awen|OJJ38017.1  
azon|OJJ51787.1 asyd|OJJ53731.1 afis|EAW23670.1 afum|EAL87115.1 agla|OJJ81340.1

Group540: abra|OJJ70397.1 acar|OOF91879.1 acla|EAW07052.1 afis|EAW25614.1 afla|EED45236.1  
agla|OJJ79504.1 akaw|GAA91961.1 aluc|OJZ82656.1 anig|EHA27417.1 aory|EIT73635.1 ater|EAU31421.1  
atub|OJI88887.1 awen|OJJ37774.1 azon|OJJ44467.1 acar|OOF98993.1 agla|OJJ88672.1 asyd|OJJ54458.1  
ater|EAU30186.1 aver|OJJ07698.1 awen|OJJ33156.1 afla|EED53590.1 aory|EIT75094.1

Group541: abra|OJJ70452.1 acar|OOF95031.1 acla|EAW08562.1 afis|EAW23604.1 afla|EED52317.1  
afum|EAL86541.1 agla|OJJ83593.1 akaw|GAA90131.1 aluc|OJZ83218.1 anid|CBF81471.1 anig|EHA21076.1  
aory|EIT74491.1 asyd|OJJ52470.1 atub|OJI87719.1 aver|OJJ03017.1 awen|OJJ36161.1 azon|OJJ45785.1  
aver|OJJ03945.1 agla|OJJ79566.1 awen|OJJ39928.1 asyd|OJJ59447.1 aver|OJJ02825.1

Group542: abra|OJJ70674.1 acar|OOF97053.1 acla|EAW08090.1 afis|EAW23125.1 afla|EED48525.1  
afum|EAL88355.1 agla|OJJ87945.1 akaw|GAA90006.1 aluc|OJZ84022.1 anid|CBF74410.1 anig|EHA19143.1  
aory|EIT73109.1 asyd|OJJ57761.1 ater|EAU36253.1 atub|OJI90393.1 aver|OJJ05405.1 awen|OJJ36655.1  
azon|OJJ47551.1 awen|OJJ33435.1 afla|EED47672.1 aory|EIT80214.1 ater|EAU37239.1

Group543: abra|OJJ71147.1 acar|OOF98008.1 acla|EAW10357.1 afis|EAW25237.1 afla|EED53704.1  
afum|EAL89898.1 agla|OJJ89205.1 akaw|GAA82830.1 aluc|OJZ87391.1 anid|CBF85312.1 anig|EHA20620.1  
aory|EIT75340.1 asyd|OJJ64005.1 ater|EAU34361.1 atub|OJI81256.1 aver|OJI98093.1 awen|OJJ40948.1  
azon|OJJ44541.1 afis|EAW25236.1 afum|EAL89897.1 awen|OJJ40953.1 azon|OJJ44540.1

Group544: abra|OJJ72457.1 acar|OOF94781.1 acla|EAW12689.1 afis|EAW17853.1 afla|EED46207.1  
afum|EAL91661.1 agla|OJJ83117.1 akaw|GAA86193.1 aluc|OJZ90443.1 anid|CBF77956.1 anig|EHA23907.1  
aory|EIT76431.1 asyd|OJJ61702.1 ater|EAU33055.1 atub|OJI81872.1 aver|OJI95791.1 awen|OJJ41720.1  
azon|OJJ48418.1 afla|EED45133.1 aory|EIT73615.1 awen|OJJ30412.1 agla|OJJ86835.1

Group545: abra|OJJ73099.1 acar|OOG00332.1 acla|EAW07049.1 afis|EAW16675.1 afla|EED49659.1  
afum|EBA27373.1 agla|OJJ78688.1 akaw|GAA88064.1 aluc|OJZ81327.1 anid|CBF89880.1 anig|EHA18631.1  
aory|EIT80967.1 asyd|OJJ54564.1 ater|EAU33734.1 atub|OJI91530.1 aver|OJJ07590.1 awen|OJJ40031.1  
azon|OJJ50640.1 acla|EAW08376.1 afis|EAW23405.1 afum|EAL88065.2 ater|EAU37518.1

Group546: abra|OJJ74582.1 acar|OOF90133.1 acla|EAW13424.1 afis|EAW16727.1 afla|EED45977.1  
afum|EAL86301.1 agla|OJJ78669.1 akaw|GAA82023.1 aluc|OJZ92160.1 anid|CBF85294.1 anig|EHA26789.1  
aory|EIT75394.1 asyd|OJJ58681.1 ater|EAU38428.1 atub|OJI86588.1 aver|OJJ01293.1 azon|OJJ50620.1  
acar|OOF98979.1 afla|EED51702.1 aory|EIT80478.1 aver|OJI99084.1 anid|CBF71192.1

Group547: abra|OJJ76094.1 acar|OOF99830.1 acar|OOF99831.1 acla|EAW09725.1 afis|EAW21416.1  
afla|EED55842.1 afum|EAL92431.1 agla|OJJ85546.1 akaw|GAA88872.1 akaw|GAA88873.1 aluc|OJZ89550.1  
anid|CBF83794.1 anig|EHA23056.1 aory|EIT76615.1 asyd|OJJ60885.1 ater|EAU35132.1 atub|OJI85255.1  
atub|OJI85256.1 aver|OJJ00209.1 awen|OJJ39286.1 azon|OJJ51568.1 aory|EIT76662.1

Group548: abra|OJJ76170.1 acar|OOF99769.1 acla|EAW13698.1 afis|EAW21484.1 afla|EED55916.1 afum|EAL92504.1 agla|OJJ85638.1 akaw|GAA82116.1 aluc|OJZ92060.1 anid|CBF76494.1 anig|EHA22989.1 aory|EIT76674.1 asyd|OJJ61126.1 ater|EAU35054.1 atub|OJI86492.1 aver|OJJ00447.1 awen|OJJ39213.1 azon|OJJ51641.1 acla|EAW09655.1 afla|EED49764.1 aory|EIT77609.1 awen|OJJ29776.1

Group549: abra|OJJ66058.1 abra|OJJ74755.1 akaw|GAA83656.1 akaw|GAA93128.1 aluc|OJZ81105.1 aluc|OJZ92336.1 atub|OJI82473.1 atub|OJI86765.1 awen|OJJ33564.1 awen|OJJ36363.1 afla|EED47092.1 agla|OJJ80118.1 anig|EHA19264.1 ater|EAU30986.1 acar|OOF95748.1 anid|CBF84619.1 anig|EHA26635.1 aory|EIT72514.1 asyd|OJJ55640.1 aver|OJJ06723.1 aory|EIT72452.1

Group550: abra|OJJ68047.1 abra|OJJ70802.1 acar|OOF96908.1 acar|OOF96943.1 aory|EIT72863.1 aory|EIT81579.1 acla|EAW11122.1 afis|EAW15851.1 afla|EED56522.1 afum|EAL88487.1 agla|OJJ87257.1 akaw|GAA90118.1 aluc|OJZ84148.1 anid|CBF81176.1 anig|EHA21341.1 asyd|OJJ59292.1 ater|EAU31666.1 atub|OJI90520.1 aver|OJJ02983.1 awen|OJJ36776.1 azon|OJJ47422.1

Group551: abra|OJJ69621.1 abra|OJJ74815.1 abra|OJJ78091.1 afis|EAW21065.1 afis|EAW22323.1 afla|EED44992.1 afla|EED49898.1 akaw|GAA85057.1 akaw|GAA85907.1 aluc|OJZ86595.1 aluc|OJZ91160.1 anig|EHA19855.1 anig|EHA26580.1 aory|EIT72455.1 aory|EIT73686.1 atub|OJI83175.1 atub|OJI83928.1 acar|OOF98779.1 afum|EAL86268.1 aver|OJJ04473.1 awen|OJJ40160.1

Group552: abra|OJJ72113.1 abra|OJJ72712.1 anig|EHA21773.1 anig|EHA24109.1 atub|OJI82107.1 atub|OJI83652.1 acar|OOF96753.1 acla|EAW14914.1 afis|EAW24435.1 afla|EED55246.1 afum|EAL86103.1 agla|OJJ79250.1 akaw|GAA84809.1 aluc|OJZ86868.1 anid|CBF73765.1 aory|EIT83588.1 asyd|OJJ56590.1 ater|EAU30011.1 aver|OJJ06135.1 awen|OJJ32764.1 azon|OJJ43998.1

Group553: abra|OJJ73065.1 abra|OJJ73716.1 acar|OOG00294.1 acar|OOG00876.1 akaw|GAA88095.1 akaw|GAA88447.1 aluc|OJZ81361.1 aluc|OJZ88334.1 anig|EHA18070.1 anig|EHA18661.1 atub|OJI90930.1 atub|OJI91565.1 azon|OJJ45231.1 azon|OJJ46835.1 azon|OJJ51792.1 acla|EAW10825.1 afis|EAW24747.1 afla|EED47445.1 afum|EAL89394.1 aory|EIT81906.1 awen|OJJ29808.1

Group554: acar|OOF91686.1 acar|OOF91797.1 ater|EAU30834.1 ater|EAU37279.1 awen|OJJ37554.1 awen|OJJ37864.1 abra|OJJ66921.1 acla|EAW14487.1 afis|EAW19196.1 afla|EED47712.1 afum|EAL93928.1 agla|OJJ88511.1 akaw|GAA91498.1 aluc|OJZ85659.1 anid|CBF78550.1 anig|EHA24874.1 aory|EIT80197.1 asyd|OJJ65057.1 atub|OJI79452.1 aver|OJI99182.1 azon|OJJ51215.1

Group555: acar|OOF93691.1 acar|OOF93775.1 abra|OJJ66681.1 acla|EAW11818.1 afis|EAW19429.1 afla|EED56633.1 afum|EAL87065.1 agla|OJJ81141.1 akaw|GAA89626.1 aluc|OJZ80768.1 anid|CBF74384.1 anig|EHA27260.1 aory|EIT79639.1 asyd|OJJ57774.1 ater|EAU34732.1 atub|OJI87621.1 awen|OJJ36828.1 azon|OJJ42976.1 aver|OJJ05392.1 aver|OJJ05391.1 awen|OJJ36827.1

Group556: acar|OOF94034.1 acar|OOF94104.1 afis|EAW20233.1 afis|EAW24546.1 afum|EAL85350.1 afum|EAL86210.1 ater|EAU29965.1 ater|EAU37764.1 abra|OJJ66417.1 afla|EED55131.1 akaw|GAA90283.1 aluc|OJZ83057.1 anig|EHA28123.1 aory|EIT81603.1 asyd|OJJ56039.1 atub|OJI87890.1 aver|OJJ04985.1 awen|OJJ41447.1 azon|OJJ47374.1 abra|OJJ67779.1 ater|EAU37374.1

Group557: acar|OOG00254.1 acar|OOG01226.1 acar|OOG01227.1 abra|OJJ70128.1 acla|EAW13482.1 afis|EAW20590.1 afla|EED52238.1 afum|EAL84471.1 agla|OJJ88668.1 akaw|GAA86642.1 aluc|OJZ85199.1 anid|CBF85436.1 anig|EHA25406.1 aory|EIT74451.1 asyd|OJJ64088.1 ater|EAU35229.1 atub|OJI80402.1 aver|OJI98172.1 awen|OJJ36225.1 acar|OOF91412.1 awen|OJJ33308.1

Group558: acla|EAW09303.1 acla|EAW15329.1 afum|EAL85377.2 afum|EAL92855.1 asyd|OJJ53789.1 asyd|OJJ61241.1 abra|OJJ75519.1 acar|OOF90846.1 afis|EAW21843.1 afla|EED46527.1 agla|OJJ84291.1 akaw|GAA84283.1 aluc|OJZ88976.1 anid|CBF76715.1 anig|EHA23549.1 aory|EIT72431.1 ater|EAU38520.1 atub|OJI85813.1 awen|OJJ34127.1 azon|OJJ44216.1 azon|OJJ51717.1

Group559: acla|EAW09341.1 acla|EAW11685.1 afis|EAW21796.1 afis|EAW23700.1 afum|EAL87141.1 afum|EAL92821.1 abra|OJJ75576.1 acar|OOF90894.1 afla|EED46599.1 agla|OJJ84330.1 akaw|GAA84328.1 aluc|OJZ89025.1 anid|CBF76627.1 anig|EHA23507.1 aory|EIT77837.1 asyd|OJJ61195.1 ater|EAU38478.1 atub|OJI85765.1 aver|OJJ00519.1 awen|OJJ34081.1 azon|OJJ44259.1

Group560: afis|EAW16155.1 afis|EAW23200.1 afum|EAL88027.1 afum|EAL88283.1 ater|EAU36328.1 ater|EAU36668.1 abra|OJJ70513.1 acar|OOF97416.1 acla|EAW08162.1 afla|EED47054.1 agla|OJJ78748.1 akaw|GAA83360.1 aluc|OJZ83858.1 anid|CBF74719.1 anig|EHA18999.1 aory|EIT72491.1 asyd|OJJ60202.1 atub|OJI90225.1 aver|OJJ04064.1 awen|OJJ39430.1 azon|OJJ47634.1

Group561: afis|EAW17104.1 afis|EAW25308.1 agla|OJJ88961.1 agla|OJJ89287.1 abra|OJJ71251.1 acar|OOF97919.1 acla|EAW10284.1 afum|EAL89971.1 akaw|GAA82736.1 aluc|OJZ87291.1 anid|CBF75291.1 anig|EHA20532.1 aory|EIT78474.1 asyd|OJJ59887.1 ater|EAU34456.1 atub|OJI81350.1 aver|OJJ02399.1 awen|OJJ41022.1 azon|OJJ44609.1 asyd|OJJ65171.1 afla|EED53785.1

Group562: afis|EAW19712.1 afis|EAW25702.1 afum|EAL84375.1 afum|EAL86815.1 abra|OJJ77041.1 acar|OOF90274.1 afla|EED50904.1 akaw|GAA87011.1 aluc|OJZ84444.1 anig|EHA27762.1 aory|EIT79058.1

asyd|OJJ63378.1 ater|EAU32932.1 atub|OJI89630.1 aver|OJJ05795.1 awen|OJJ39868.1 anid|CBF81946.1  
agla|OJJ84461.1 aver|OJI97557.1 ater|EAU34785.1 asyd|OJJ57373.1

Group563: afis|EAW22109.1 afis|EAW22582.1 afum|EAL90617.1 afum|EAL91075.1 abra|OJJ73636.1  
acar|OOG00816.1 acla|EAW07548.1 afla|EED54627.1 agla|OJJ80942.1 akaw|GAA88519.1 aluc|OJZ88414.1  
anid|CBF88345.1 anig|EHA18141.1 aory|EIT78908.1 asyd|OJJ63718.1 ater|EAU39122.1 atub|OJI91010.1  
aver|OJI97222.1 awen|OJJ35210.1 azon|OJJ49899.1 anid|CBF89563.1

Group564: afla|EED44994.1 afla|EED49089.1 asyd|OJJ52855.1 asyd|OJJ55885.1 aver|OJJ04830.1  
aver|OJJ08832.1 awen|OJJ36406.1 awen|OJJ39156.1 abra|OJJ70006.1 acar|OOF93512.1 acla|EAW15361.1  
agla|OJJ83218.1 akaw|GAA87655.1 aluc|OJZ85273.1 anid|CBF78094.1 anig|EHA25471.1 aory|EIT82516.1  
ater|EAU34442.1 atub|OJI80297.1 aory|EIT73678.1 aver|OJJ01999.1

Group565: afla|EED45878.1 afla|EED45984.1 afla|EED47653.1 afum|EAL84420.1 afum|EAL86318.1  
aory|EIT75536.1 aory|EIT75748.1 aory|EIT80201.1 acar|OOF99716.1 acla|EAW12434.1 afis|EAW16743.1  
akaw|GAA82399.1 aluc|OJZ91723.1 anid|CBF89574.1 anig|EHA22730.1 asyd|OJJ62337.1 ater|EAU30784.1  
atub|OJI86180.1 aver|OJI96442.1 awen|OJJ29697.1 anid|CBF83502.1

Group566: afla|EED45981.1 afla|EED55382.1 aory|EIT75435.1 aory|EIT80896.1 ater|EAU33990.1  
ater|EAU39553.1 abra|OJJ70929.1 acar|OOF98196.1 acla|EAW10495.1 afis|EAW25072.1 afum|EAL89741.1  
agla|OJJ89122.1 akaw|GAA83013.1 aluc|OJZ87598.1 anid|CBF85960.1 anig|EHA20798.1 asyd|OJJ64420.1  
atub|OJI81049.1 aver|OJI98519.1 awen|OJJ40683.1 azon|OJJ44060.1

Group567: afla|EED48911.1 afla|EED51260.1 aory|EIT81176.1 aory|EIT81506.1 awen|OJJ29671.1  
awen|OJJ38491.1 abra|OJJ69199.1 acar|OOF91116.1 acla|EAW08647.1 afis|EAW15784.1 afum|EAL85566.1  
agla|OJJ81947.1 akaw|GAA92212.1 aluc|OJZ86184.1 anid|CBF70950.1 anig|EHA24440.1 asyd|OJJ52622.1  
ater|EAU32357.1 atub|OJI79976.1 aver|OJJ04649.1 azon|OJJ43792.1

Group568: afla|EED51201.1 afla|EED53566.1 asyd|OJJ62648.1 asyd|OJJ65376.1 aver|OJI96748.1  
aver|OJI99544.1 abra|OJJ73167.1 acar|OOG00407.1 acla|EAW06285.1 afis|EAW22140.1 afum|EAL91050.1  
agla|OJJ87935.1 akaw|GAA88004.1 aluc|OJZ81260.1 anid|CBF89140.1 anig|EHA18567.1 aory|EIT75205.1  
ater|EAU34142.1 atub|OJI91456.1 awen|OJJ34714.1 azon|OJJ50465.1

Group569: afum|EAL87769.1 afum|EAL87803.1 akaw|GAA92345.1 akaw|GAA93055.1 akaw|GAA92650.1  
akaw|GAA93090.1 awen|OJJ29538.1 awen|OJJ29541.1 abra|OJJ65531.1 acla|EAW13472.1 aluc|OJZ79518.1  
anid|CBF73631.1 anig|EHA21825.1 abra|OJJ65574.1 agla|OJJ85769.1 abra|OJJ65598.1 ater|EAU30115.1  
acar|OOF90498.1 ater|EAU30117.1 acla|EAW11437.1 anig|EHA21861.1

Group570: agla|OJJ78645.1 agla|OJJ81233.1 agla|OJJ83403.1 abra|OJJ71870.1 acar|OOF96539.1  
acla|EAW13900.1 afis|EAW18612.1 afla|EED52733.1 afum|EAL93322.1 akaw|GAA85045.1 aluc|OJZ86609.1  
anid|CBF70422.1 anig|EHA22057.1 aory|EIT78158.1 asyd|OJJ58619.1 ater|EAU34909.1 atub|OJI83917.1  
aver|OJJ01226.1 awen|OJJ32073.1 azon|OJJ46654.1 agla|OJJ81232.1

Group571: agla|OJJ82854.1 agla|OJJ88960.1 abra|OJJ71795.1 acar|OOF96475.1 acla|EAW12077.1  
afis|EAW19718.1 afla|EED52815.1 afum|EAL86808.1 akaw|GAA85115.1 aluc|OJZ86525.1 anid|CBF78801.1  
anig|EHA22121.1 aory|EIT78250.1 asyd|OJJ55181.1 ater|EAU34844.1 atub|OJI83997.1 aver|OJJ07026.1  
acar|OOG00120.1 anid|CBF84151.1 asyd|OJJ65073.1 aver|OJI99198.1

Group572: agla|OJJ83728.1 agla|OJJ88980.1 abra|OJJ65910.1 acar|OOF90095.1 afla|EED53605.1  
afum|EAL88809.2 akaw|GAA92322.1 aluc|OJZ90220.1 anid|CBF70180.1 anig|EHA23718.1 aory|EIT75102.1  
atub|OJI81652.1 aver|OJJ03066.1 abra|OJJ66145.1 afis|EAW16403.1 anid|CBF86674.1 aver|OJJ05884.1  
awen|OJJ29890.1 afis|EAW16176.1 aver|OJJ01772.1 asyd|OJJ52559.1

Group573: akaw|GAA82012.1 akaw|GAA83300.1 anig|EHA23471.1 anig|EHA26778.1 azon|OJJ46821.1  
azon|OJJ49225.1 abra|OJJ74596.1 acar|OOF95173.1 acla|EAW10785.1 afis|EAW24793.1 afla|EED47193.1  
afum|EAL89435.1 agla|OJJ82887.1 aluc|OJZ92171.1 anid|CBF81462.1 aory|EIT79250.1 asyd|OJJ59441.1  
ater|EAU36515.1 atub|OJI86603.1 aver|OJJ02832.1 awen|OJJ40374.1

Group574: aluc|OJZ79634.1 aluc|OJZ79637.1 aluc|OJZ79681.1 aluc|OJZ90921.1 abra|OJJ77846.1  
acar|OOF98926.1 acla|EAW11277.1 afis|EAW18223.1 afla|EED56246.1 afum|EAL87589.2 agla|OJJ85859.1  
akaw|GAA83801.1 anid|CBF86151.1 anig|EHA19633.1 aory|EIT73368.1 asyd|OJJ64517.1 ater|EAU33768.1  
atub|OJI82913.1 aver|OJI98615.1 awen|OJJ30601.1 azon|OJJ50167.1

Group575: aluc|OJZ79645.1 aluc|OJZ80467.1 anid|CBF81159.1 anid|CBF87224.1 anid|CBF82244.1  
agla|OJJ86031.1 akaw|GAA88990.1 awen|OJJ36065.1 abra|OJJ70212.1 afla|EED52528.1 akaw|GAA86564.1  
anig|EHA25334.1 aory|EIT82764.1 atub|OJI80480.1 acar|OOG00877.1 asyd|OJJ57261.1 aver|OJJ03035.1  
azon|OJJ47412.1 awen|OJJ30459.1 azon|OJJ45449.1 aluc|OJZ85114.1

Group576: aluc|OJZ80315.1 aluc|OJZ86416.1 anid|CBF76119.1 anid|CBF85040.1 atub|OJI80382.1  
atub|OJI84115.1 abra|OJJ71674.1 acar|OOF96385.1 acla|EAW15213.1 afis|EAW20178.1 afla|EED57170.1  
afum|EAL85296.1 agla|OJJ84688.1 akaw|GAA89258.1 anig|EHA21483.1 aory|EIT74051.1 asyd|OJJ63096.1  
ater|EAU35214.1 aver|OJI97866.1 awen|OJJ31177.1 azon|OJJ46108.1

Group577: aluc|OJZ87121.1 aluc|OJZ90552.1 anig|EHA20385.1 anig|EHA23999.1 atub|OJI81520.1  
atub|OJI81975.1 awen|OJJ29935.1 awen|OJJ40118.1 awen|OJJ31429.1 awen|OJJ33906.1 abra|OJJ70173.1  
acar|OOF90667.1 afla|EED52274.1 akaw|GAA82584.1 asyd|OJJ53431.1 aver|OJJ04439.1 azon|OJJ42631.1  
abra|OJJ72571.1 aory|EIT80573.1 afla|EED51481.1 aory|EIT83049.1

Group578: aluc|OJZ89485.1 aluc|OJZ91533.1 asyd|OJJ52882.1 asyd|OJJ54759.1 atub|OJI85315.1  
atub|OJI85987.1 abra|OJJ76672.1 acar|OOF99337.1 afla|EED47468.1 akaw|GAA92520.1 anid|CBF87401.1  
anig|EHA18623.1 aory|EIT79967.1 ater|EAU31454.1 aver|OJJ08854.1 awen|OJJ38083.1 agla|OJJ86847.1  
ater|EAU36924.1 awen|OJJ41649.1 aver|OJJ00789.1 aver|OJJ07411.1

Group579: anid|CBF70118.1 anid|CBF76209.1 awen|OJJ38751.1 awen|OJJ40905.1 abra|OJJ66448.1  
acla|EAW11664.1 afis|EAW15397.1 agla|OJJ79144.1 asyd|OJJ56278.1 ater|EAU32821.1 aver|OJJ08485.1  
awen|OJJ37492.1 abra|OJJ67824.1 acar|OOF93612.1 akaw|GAA91839.1 anig|EHA22193.1 atub|OJI84618.1  
acla|EAW11665.1 awen|OJJ38753.1 aver|OJJ05914.1 aluc|OJZ82059.1

Group580: anid|CBF71344.1 anid|CBF71770.1 asyd|OJJ55097.1 asyd|OJJ55529.1 aver|OJJ07109.1  
aver|OJJ07313.1 abra|OJJ72319.1 acar|OOF94892.1 acla|EAW12001.1 afis|EAW19641.1 afla|EED56992.1  
afum|EAL86881.1 agla|OJJ80783.1 akaw|GAA86071.1 aluc|OJZ90306.1 anig|EHA23792.1 aory|EIT77578.1  
ater|EAU32888.1 atub|OJI81730.1 awen|OJJ41886.1 azon|OJJ50727.1

Group581: anid|CBF80560.1 anid|CBF82261.1 abra|OJJ66944.1 akaw|GAA91476.1 aluc|OJZ85637.1  
atub|OJI79427.1 abra|OJJ71064.1 acar|OOF90585.1 acla|EAW07015.1 afis|EAW25726.1 afla|EED53906.1  
aory|EIT78492.1 asyd|OJJ52818.1 ater|EAU32822.1 aver|OJJ07278.1 awen|OJJ38756.1 azon|OJJ42176.1  
aver|OJJ08797.1 awen|OJJ32537.1 afum|EAL87822.1 acla|EAW11668.1

Group582: asyd|OJJ52091.1 asyd|OJJ52556.1 asyd|OJJ55512.1 asyd|OJJ65388.1 abra|OJJ68248.1  
acar|OOF97527.1 acla|EAW09059.1 afis|EAW25632.1 afla|EED55180.1 afum|EAL84320.1 agla|OJJ78899.1  
akaw|GAA83213.1 aluc|OJZ83715.1 anid|CBF83158.1 anig|EHA18866.1 aory|EIT81642.1 ater|EAU32718.1  
atub|OJI90091.1 aver|OJJ06589.1 awen|OJJ36052.1 aver|OJJ03845.1

Group583: asyd|OJJ52420.1 asyd|OJJ54955.1 abra|OJJ76861.1 acar|OOF91348.1 acla|EAW13422.1  
afis|EAW20534.1 afla|EED52483.1 afum|EAL84524.1 agla|OJJ84698.1 akaw|GAA87161.1 aluc|OJZ84273.1  
anid|CBF71440.1 anig|EHA27615.1 aory|EIT82754.1 asyd|OJJ55687.1 ater|EAU37151.1 atub|OJI89810.1  
aver|OJJ06771.1 aver|OJJ07241.1 awen|OJJ33240.1 anid|CBF78998.1

Group584: asyd|OJJ53054.1 asyd|OJJ62331.1 aver|OJI96437.1 aver|OJJ03790.1 abra|OJJ67212.1  
acar|OOF98347.1 acla|EAW08554.1 afis|EAW23596.1 afla|EED55272.1 afum|EAL87871.1 agla|OJJ86856.1  
akaw|GAA90965.1 aluc|OJZ87761.1 anid|CBF89583.1 anig|EHA20246.1 aory|EIT83575.1 ater|EAU35356.1  
atub|OJI80883.1 awen|OJJ39918.1 azon|OJJ45892.1 anid|CBF77738.1

Group585: asyd|OJJ53773.1 asyd|OJJ64196.1 aver|OJI98285.1 aver|OJJ01986.1 abra|OJJ71111.1  
acar|OOF98036.1 acla|EAW10381.1 afis|EAW25212.1 afla|EED53666.1 afum|EAL89873.1 agla|OJJ88949.1  
akaw|GAA82858.1 aluc|OJZ87423.1 anid|CBF85604.1 anig|EHA19933.1 anig|EHA20646.1 aory|EIT75278.1  
ater|EAU34369.1 atub|OJI81225.1 awen|OJJ40874.1 azon|OJJ46813.1

Group586: asyd|OJJ54182.1 asyd|OJJ55740.1 aver|OJJ06826.1 aver|OJJ08558.1 abra|OJJ76808.1  
acar|OOF91302.1 acla|EAW13368.1 afis|EAW20482.1 afla|EED44786.1 afum|EAL84572.1 akaw|GAA87214.1  
aluc|OJZ84216.1 anid|CBF79229.1 anig|EHA27568.1 aory|EIT73548.1 aory|EIT77772.1 ater|EAU29560.1  
atub|OJI89868.1 awen|OJJ33180.1 azon|OJJ46383.1 afla|EED45102.1

Group587: asyd|OJJ54581.1 asyd|OJJ54583.1 asyd|OJJ59186.1 awen|OJJ29889.1 awen|OJJ35053.1  
awen|OJJ38450.1 azon|OJJ44478.1 azon|OJJ45681.1 abra|OJJ67703.1 acar|OOF97596.1 agla|OJJ81404.1  
akaw|GAA89211.1 aluc|OJZ81618.1 anig|EHA25825.1 ater|EAU38935.1 atub|OJI88562.1 acar|OOG00088.1  
afla|EED51583.1 aory|EIT80517.1 afis|EAW20205.1 afla|EED51443.1

Group588: asyd|OJJ60296.1 asyd|OJJ62116.1 aver|OJI96223.1 aver|OJI99634.1 aver|OJJ02653.1  
aver|OJJ06318.1 abra|OJJ68285.1 acar|OOF90110.1 afis|EAW22106.1 afla|EED55144.1 afum|EAL91085.1  
agla|OJJ82696.1 akaw|GAA83187.1 aluc|OJZ83686.1 anid|CBF87172.1 anig|EHA18840.1 aory|EIT81583.1  
asyd|OJJ56395.1 ater|EAU32730.1 atub|OJI90057.1 awen|OJJ40235.1

Group589: ater|EAU35203.1 ater|EAU36444.1 abra|OJJ76030.1 acar|OOF99899.1 acla|EAW09783.1  
afis|EAW21355.1 afla|EED55770.1 afum|EAL92370.2 agla|OJJ87376.1 aluc|OJZ89481.1 anid|CBF76251.1  
anig|EHA23112.1 aory|EIT76609.1 asyd|OJJ60968.1 atub|OJI85319.1 aver|OJJ00292.1 awen|OJJ39343.1  
azon|OJJ51689.1 afla|EED53075.1 aory|EIT74793.1 asyd|OJJ59168.1

Group590: azon|OJJ46530.1 azon|OJJ50393.1 acla|EAW13391.1 afla|EED49406.1 agla|OJJ78968.1  
aory|EIT79482.1 asyd|OJJ52710.1 aver|OJJ04739.1 awen|OJJ35362.1 acar|OOF92857.1 afis|EAW24526.1  
agla|OJJ81446.1 akaw|GAA82748.1 afum|EAL86190.1 ater|EAU37241.1 atub|OJI83744.1 afis|EAW22564.1  
afum|EAL94067.1 agla|OJJ81434.1 aluc|OJZ87304.1 ater|EAU36467.1

Group591: abra|OJJ65586.1 acla|EAW06849.1 afum|EAL86639.1 anid|CBF87353.1 asyd|OJJ53531.1  
ater|EAU31407.1 aver|OJJ08219.1 abra|OJJ68254.1 acar|OOF97533.1 afla|EED51066.1 akaw|GAA83207.1

aluc|OJZ83709.1 anig|EHA18860.1 aory|EIT77028.1 ater|EAU32153.1 atub|OJI90081.1 aver|OJJ00862.1  
awen|OJJ38280.1 azon|OJJ43291.1 asyd|OJJ61534.1 azon|OJJ43503.1

Group592: abra|OJJ65854.1 acar|OOF95015.1 acla|EAW13528.1 afis|EAW20729.1 afla|EED48906.1  
afum|EAL84879.1 agla|OJJ84616.1 akaw|GAA92290.1 aluc|OJZ90187.1 anid|CBF85584.1 anig|EHA23686.1  
aory|EIT81194.1 asyd|OJJ64174.1 atub|OJI81614.1 aver|OJJ06463.1 awen|OJJ29911.1 azon|OJJ42620.1  
afla|EED55134.1 aory|EIT81587.1 ater|EAU32788.1 aver|OJI98249.1

Group593: abra|OJJ66409.1 acar|OOF97558.1 acla|EAW15053.1 afla|EED47219.1 aluc|OJZ81110.1  
anid|CBF76141.1 aory|EIT79310.1 ater|EAU32457.1 aver|OJJ03023.1 awen|OJJ37014.1 abra|OJJ67968.1  
afis|EAW17012.1 afla|EED55205.1 agla|OJJ86640.1 aory|EIT83525.1 azon|OJJ42140.1 aory|EIT79570.1  
akaw|GAA86290.1 awen|OJJ29897.1 aver|OJJ06536.1 asyd|OJJ54884.1

Group594: abra|OJJ66784.1 afla|EED47234.1 anid|CBF87107.1 aory|EIT79229.1 abra|OJJ75747.1  
acar|OOG00125.1 acla|EAW09092.1 afla|EED52418.1 agla|OJJ82218.1 akaw|GAA84480.1 aluc|OJZ89200.1  
anig|EHA23357.1 aory|EIT83316.1 asyd|OJJ56738.1 ater|EAU31807.1 atub|OJI85590.1 aver|OJJ05987.1  
awen|OJJ41471.1 azon|OJJ44445.1 afum|EAL84355.1 afis|EAW25686.1

Group595: abra|OJJ67354.1 akaw|GAA86466.1 aluc|OJZ85007.1 asyd|OJJ58136.1 ater|EAU35299.1  
atub|OJI80590.1 aver|OJJ04269.1 awen|OJJ33479.1 abra|OJJ69839.1 akaw|GAA87821.1 aluc|OJZ85457.1  
anid|CBF84465.1 anig|EHA24999.1 atub|OJI80106.1 azon|OJJ47408.1 afla|EED57088.1 aory|EIT82252.1  
awen|OJJ29832.1 asyd|OJJ53544.1 aver|OJJ08209.1 awen|OJJ37797.1

Group596: abra|OJJ67576.1 acla|EAW07712.1 afis|EAW19707.1 afla|EED52185.1 afum|EAL86292.2  
agla|OJJ80363.1 akaw|GAA89105.1 anid|CBF82328.1 aory|EIT74319.1 asyd|OJJ59047.1 ater|EAU32212.1  
atub|OJI88444.1 aver|OJJ01643.1 awen|OJJ35443.1 azon|OJJ49488.1 asyd|OJJ52892.1 aver|OJJ08863.1  
afum|EBA27291.1 afis|EAW25591.1 awen|OJJ40142.1 agla|OJJ81186.1

Group597: abra|OJJ67718.1 afis|EAW16742.1 afla|EED49725.1 afum|EAL86317.2 aory|EIT77616.1  
abra|OJJ76618.1 akaw|GAA86494.1 aluc|OJZ85036.1 anig|EHA22616.1 aory|EIT76392.1 asyd|OJJ54900.1  
ater|EAU30402.1 atub|OJI86041.1 awen|OJJ32259.1 asyd|OJJ60225.1 atub|OJI80561.1 aver|OJJ04042.1  
afla|EED46080.1 afla|EED46081.1 agla|OJJ80285.1 awen|OJJ32907.1

Group598: abra|OJJ67990.1 acar|OOF92032.1 afis|EAW22103.1 afla|EED45380.1 akaw|GAA90958.1  
aluc|OJZ82864.1 anig|EHA21294.1 aory|EIT82399.1 atub|OJI89089.1 awen|OJJ36170.1 abra|OJJ71233.1  
akaw|GAA82755.1 aluc|OJZ87312.1 anid|CBF84724.1 anig|EHA20548.1 asyd|OJJ53307.1 atub|OJI81333.1  
aver|OJJ08434.1 azon|OJJ43637.1 abra|OJJ76888.1 afis|EAW16705.1

Group599: abra|OJJ68494.1 acar|OOF98749.1 acla|EAW12142.1 afis|EAW17194.1 afla|EED45176.1  
afum|EAL86622.1 agla|OJJ86660.1 akaw|GAA92776.1 aluc|OJZ82707.1 anid|CBF69890.1 anig|EHA21162.1  
aory|EIT73731.1 asyd|OJJ59007.1 ater|EAU34144.1 atub|OJI88940.1 aver|OJJ01608.1 awen|OJJ34716.1  
agla|OJJ87933.1 anid|CBF89139.1 asyd|OJJ62650.1 aver|OJI96750.1

Group600: abra|OJJ69337.1 acar|OOF94389.1 acla|EAW06601.1 afis|EAW16003.1 afla|EED48032.1  
afum|EAL88635.2 agla|OJJ79631.1 akaw|GAA88207.1 aluc|OJZ82169.1 anid|CBF85846.1 anig|EHA28563.1  
aory|EIT83338.1 asyd|OJJ53958.1 ater|EAU31185.1 atub|OJI88268.1 aver|OJJ08054.1 awen|OJJ33053.1  
azon|OJJ48464.1 asyd|OJJ64357.1 ater|EAU33640.1 aver|OJI98453.1

Group601: abra|OJJ69426.1 acar|OOF94310.1 acla|EAW08550.1 afis|EAW23591.1 afum|EAL87875.1  
akaw|GAA88292.1 aluc|OJZ82263.1 anid|CBF73805.1 anig|EHA28480.1 asyd|OJJ56617.1 aver|OJJ06107.1  
awen|OJJ35870.1 abra|OJJ69775.1 acar|OOF93598.1 afla|EED45633.1 akaw|GAA87878.1 aluc|OJZ85519.1  
anig|EHA25052.1 aory|EIT75817.1 atub|OJI80047.1 azon|OJJ47676.1

Group602: abra|OJJ69887.1 acar|OOF93848.1 acla|EAW11893.1 afis|EAW19504.1 afla|EED46651.1  
agla|OJJ81680.1 akaw|GAA87765.1 aluc|OJZ85400.1 anid|CBF87939.1 anig|EHA25582.1 aory|EIT77814.1  
asyd|OJJ63469.1 ater|EAU38715.1 atub|OJI80171.1 aver|OJI97463.1 awen|OJJ36926.1 azon|OJJ45056.1  
akaw|GAA89704.1 aluc|OJZ80680.1 anig|EHA27332.1 atub|OJI87539.1

Group603: abra|OJJ70214.1 acar|OOF92565.1 afla|EED46373.1 akaw|GAA86562.1 aluc|OJZ85112.1  
anid|CBF78840.1 anig|EHA25332.1 aory|EIT77546.1 ater|EAU29773.1 atub|OJI80482.1 azon|OJJ45196.1  
afis|EAW23745.1 anid|CBF78842.1 afla|EED52200.1 asyd|OJJ65270.1 aver|OJI99422.1 awen|OJJ33680.1  
akaw|GAA93170.1 aluc|OJZ83029.1 aory|EIT74347.1 afla|EED56929.1

Group604: abra|OJJ70243.1 anig|EHA25313.1 abra|OJJ71272.1 acar|OOF92553.1 afis|EAW17415.1  
afla|EED48947.1 agla|OJJ88526.1 akaw|GAA82718.1 aluc|OJZ87272.1 anid|CBF75478.1 anig|EHA20513.1  
asyd|OJJ63978.1 ater|EAU39296.1 atub|OJI81370.1 aver|OJI96975.1 awen|OJJ31635.1 azon|OJJ46586.1  
afla|EED48946.1 agla|OJJ87753.1 aory|EIT79982.1 aory|EIT80005.1

Group605: abra|OJJ70312.1 acar|OOF93014.1 acla|EAW13439.1 afis|EAW20553.1 afla|EED45906.1  
afum|EAL84508.1 agla|OJJ80823.1 akaw|GAA93011.1 aluc|OJZ82574.1 anid|CBF78981.1 anig|EHA27499.1  
aory|EIT75600.1 asyd|OJJ55678.1 ater|EAU37124.1 atub|OJI88818.1 aver|OJJ06761.1 awen|OJJ41921.1  
azon|OJJ42685.1 anig|EHA23882.1 afla|EED52345.1 aory|EIT74410.1

Group606: abra|OJJ70650.1 acar|OOF97072.1 acla|EAW08109.1 afis|EAW23142.1 afla|EED47570.1 afum|EAL88339.1 agla|OJJ89659.1 akaw|GAA89986.1 aluc|OJZ84000.1 anid|CBF74440.1 anig|EHA19122.1 aory|EIT73130.1 asyd|OJJ57744.1 ater|EAU36275.1 atub|OJI90369.1 aver|OJJ05423.1 awen|OJJ36638.1 azon|OJJ47578.1 afla|EED44702.1 aluc|OJZ80351.1 aory|EIT79586.1

Group607: abra|OJJ70731.1 acar|OOF97007.1 acla|EAW11182.1 afis|EAW15913.1 afla|EED57767.1 afum|EAL88548.2 agla|OJJ89577.1 akaw|GAA90059.1 aluc|OJZ84076.1 anid|CBF81305.1 anig|EHA19195.1 aory|EIT81027.1 asyd|OJJ59352.1 ater|EAU36192.1 atub|OJI90448.1 aver|OJJ02922.1 awen|OJJ36717.1 azon|OJJ47476.1 acla|EAW10824.1 afum|EAL89393.1 awen|OJJ36142.1

Group608: abra|OJJ70975.1 acar|OOF98156.1 acla|EAW10534.1 afis|EAW25001.1 afla|EED55421.1 afum|EAL89697.1 agla|OJJ89163.1 akaw|GAA82974.1 aluc|OJZ87557.1 anid|CBF81488.1 anig|EHA20760.1 atub|OJI81090.1 awen|OJJ40638.1 abra|OJJ71753.1 aluc|OJZ84833.1 anig|EHA25743.1 asyd|OJJ53401.1 ater|EAU35784.1 aver|OJJ04200.1 asyd|OJJ61749.1 aver|OJI95846.1

Group609: abra|OJJ71034.1 acar|OOF98103.1 acla|EAW10585.1 afla|EED55474.1 afum|EAL89644.1 agla|OJJ82278.1 akaw|GAA93319.1 aluc|OJZ87495.1 anid|CBF81619.1 anig|EHA20712.1 asyd|OJJ59527.1 ater|EAU35735.1 atub|OJI81154.1 aver|OJJ02744.1 awen|OJJ40580.1 azon|OJJ49440.1 afis|EAW24983.1 akaw|GAA82920.1 acla|EAW12399.1 afis|EAW16847.1 afum|EAL86393.1

Group610: abra|OJJ71163.1 acar|OOF97997.1 acla|EAW14151.1 afis|EAW18864.1 afla|EED53721.1 afum|EAL93596.1 agla|OJJ85239.1 akaw|GAA82816.1 aluc|OJZ87377.1 anid|CBF85347.1 anig|EHA20609.1 aory|EIT75273.1 asyd|OJJ64028.1 ater|EAU34397.1 atub|OJI81269.1 aver|OJI98114.1 awen|OJJ32721.1 azon|OJJ50355.1 afla|EED45395.1 aory|EIT82387.1 awen|OJJ39952.1

Group611: abra|OJJ71567.1 acar|OOF96301.1 acla|EAW12384.1 afis|EAW16831.1 afla|EED47160.1 afum|EAL86379.1 akaw|GAA89357.1 aluc|OJZ86304.1 anid|CBF69502.1 anig|EHA21568.1 aory|EIT79185.1 asyd|OJJ63349.1 ater|EAU36074.1 atub|OJI84232.1 aver|OJI97611.1 awen|OJJ31351.1 azon|OJJ50260.1 asyd|OJJ59227.1 aver|OJJ01837.1 azon|OJJ48154.1 awen|OJJ35570.1

Group612: abra|OJJ71741.1 acar|OOF96432.1 acla|EAW06445.1 afis|EAW18550.1 afla|EED52825.1 afum|EAL93250.1 agla|OJJ81594.1 akaw|GAA85155.1 aluc|OJZ86482.1 anid|CBF70273.1 anig|EHA22165.1 aory|EIT78166.1 asyd|OJJ58746.1 ater|EAU33222.1 atub|OJI84048.1 aver|OJJ01356.1 awen|OJJ31108.1 azon|OJJ46554.1 ater|EAU31802.1 afla|EED56761.1 aory|EIT73941.1

Group613: abra|OJJ72042.1 acar|OOF96701.1 acla|EAW09503.1 afis|EAW21633.1 afla|EED57861.1 afum|EAL92666.2 agla|OJJ79697.1 akaw|GAA84891.1 aluc|OJZ86780.1 anid|CBF83510.1 anig|EHA21902.1 aory|EIT81075.1 asyd|OJJ60709.1 ater|EAU38319.1 atub|OJI83740.1 aver|OJJ00035.1 awen|OJJ33882.1 azon|OJJ48672.1 afum|EAL91062.1 acla|EAW07114.1 afis|EAW22126.1

Group614: abra|OJJ72229.1 acar|OOF96852.1 acla|EAW12118.1 afis|EAW17264.1 afla|EED48866.1 afum|EAL86681.1 agla|OJJ84958.1 akaw|GAA84708.1 aluc|OJZ86979.1 anig|EHA21670.1 aory|EIT81253.1 atub|OJI83541.1 azon|OJJ50249.1 abra|OJJ75321.1 acar|OOF94506.1 akaw|GAA92016.1 aluc|OJZ92882.1 anig|EHA26078.1 atub|OJI87341.1 acar|OOF94471.1 ater|EAU36154.1

Group615: abra|OJJ72267.1 acar|OOG00128.1 acla|EAW10037.1 afis|EAW23420.1 afla|EED49100.1 afum|EAL84260.1 akaw|GAA86022.1 anig|EHA23745.1 ater|EAU37850.1 atub|OJI81675.1 abra|OJJ73122.1 acar|OOF92500.1 afis|EAW22027.1 akaw|GAA88043.1 aluc|OJZ81302.1 anig|EHA18611.1 aory|EIT82499.1 atub|OJI91511.1 afum|EAL88049.1 acla|EAW12426.1 afis|EAW15611.1

Group616: abra|OJJ72269.1 acar|OOF90351.1 afis|EAW19947.1 afla|EED46130.1 afum|EAL84968.2 agla|OJJ85569.1 akaw|GAA86024.1 aluc|OJZ90251.1 anid|CBF84249.1 anig|EHA23747.1 aory|EIT76460.1 asyd|OJJ57200.1 ater|EAU30029.1 atub|OJI81677.1 aver|OJJ03090.1 awen|OJJ32569.1 afum|EAL90430.1 akaw|GAA84794.1 aluc|OJZ86886.1 atub|OJI83633.1 awen|OJJ31250.1

Group617: abra|OJJ72859.1 acar|OOF96056.1 acla|EAW11387.1 afis|EAW18109.1 afla|EED49118.1 afum|EAL87466.1 agla|OJJ86997.1 akaw|GAA85458.1 aluc|OJZ83366.1 anid|CBF75326.1 anig|EHA24231.1 aory|EIT78544.1 asyd|OJJ59867.1 ater|EAU29709.1 atub|OJI82257.1 aver|OJJ02421.1 awen|OJJ35507.1 azon|OJJ46977.1 afla|EED55499.1 agla|OJJ87955.1 aory|EIT80816.1

Group618: abra|OJJ72915.1 acar|OOF96097.1 acla|EAW11688.1 afis|EAW15970.1 afla|EED58087.1 afum|EAL87149.1 agla|OJJ83846.1 aluc|OJZ83425.1 anig|EHA24277.1 aory|EIT79158.1 asyd|OJJ56475.1 ater|EAU35478.1 atub|OJI82311.1 aver|OJJ06243.1 awen|OJJ35603.1 azon|OJJ46922.1 anid|CBF69504.1 asyd|OJJ59223.1 aver|OJJ01833.1 acla|EAW11689.1 afis|EAW23705.1

Group619: abra|OJJ73104.1 acar|OOG00342.1 acla|EAW12431.1 afis|EAW16738.1 afla|EED44914.1 afum|EAL86313.2 agla|OJJ82713.1 akaw|GAA88061.1 aluc|OJZ81323.1 anid|CBF82088.1 anig|EHA18629.1 aory|EIT73472.1 asyd|OJJ54256.1 ater|EAU39589.1 atub|OJI91526.1 aver|OJJ05209.1 awen|OJJ39338.1 anid|CBF75878.1 asyd|OJJ60230.1 aver|OJJ04036.1 azon|OJJ51650.1

Group620: abra|OJJ73308.1 acar|OOG00533.1 acla|EAW12048.1 afis|EAW17017.1 afla|EED45666.1 akaw|GAA89816.1 aluc|OJZ81874.1 anig|EHA21034.1 aory|EIT81376.1 asyd|OJJ54465.1 ater|EAU36711.1

aver|OJJ07789.1 awen|OJJ31272.1 azon|OJJ47410.1 afla|EED48480.1 anid|CBF86045.1 anig|EHA28230.1  
afla|EED52021.1 anid|CBF73486.1 aver|OJJ06468.1 anid|CBF89301.1

Group621: abra|OJJ74126.1 acar|OOF95610.1 afis|EAW24721.1 afla|EED53234.1 afum|EAL89370.1  
agla|OJJ87996.1 akaw|GAA89758.1 aluc|OJZ80625.1 anid|CBF82175.1 anig|EHA27207.1 aory|EIT74852.1  
asyd|OJJ54960.1 atub|OJI87480.1 aver|OJJ08805.1 awen|OJJ30037.1 azon|OJJ43678.1 asyd|OJJ64485.1  
atub|OJI88492.1 aver|OJI98586.1 aver|OJJ07231.1 asyd|OJJ52829.1

Group622: abra|OJJ74136.1 acar|OOF95594.1 acla|EAW07094.1 afis|EAW22104.1 afla|EED54116.1  
afum|EAL91087.1 akaw|GAA89750.1 aluc|OJZ80634.1 anid|CBF79913.1 anig|EHA27198.1 aory|EIT76054.1  
asyd|OJJ58191.1 ater|EAU32259.1 atub|OJI87489.1 aver|OJJ04214.1 awen|OJJ34666.1 azon|OJJ50218.1  
acla|EAW11902.1 afis|EAW19515.1 afum|EAL86981.2 anid|CBF86632.1

Group623: abra|OJJ74191.1 acar|OOF95530.1 acla|EAW07243.1 afis|EAW22264.1 afla|EED57656.1  
afum|EAL90916.1 agla|OJJ87791.1 akaw|GAA86826.1 aluc|OJZ89944.1 anid|CBF88515.1 anig|EHA27143.1  
aory|EIT80760.1 asyd|OJJ63805.1 ater|EAU34274.1 atub|OJI84862.1 aver|OJI97133.1 awen|OJJ34837.1  
azon|OJJ45710.1 afla|EED51484.1 asyd|OJJ58154.1 aver|OJJ04249.1

Group624: abra|OJJ74556.1 acar|OOF95199.1 acla|EAW12292.1 afis|EAW16945.1 afla|EED46082.1  
afum|EAL86472.2 agla|OJJ89555.1 akaw|GAA82040.1 aluc|OJZ92139.1 anid|CBF88435.1 anig|EHA26810.1  
aory|EIT76401.1 asyd|OJJ63762.1 ater|EAU35227.1 atub|OJI86571.1 aver|OJI97178.1 awen|OJJ36332.1  
azon|OJJ46487.1 acla|EAW11680.1 afis|EAW23697.1 anid|CBF76117.1

Group625: abra|OJJ74819.1 acar|OOF95807.1 acla|EAW08501.1 afis|EAW16872.1 afum|EAL86410.2  
akaw|GAA83596.1 aluc|OJZ92398.1 anid|CBF86626.1 anig|EHA26567.1 asyd|OJJ64810.1 ater|EAU32516.1  
atub|OJI86828.1 aver|OJI98923.1 awen|OJJ32502.1 azon|OJJ43488.1 acar|OOF90627.1 afis|EAW17135.1  
afla|EED45618.1 anig|EHA24760.1 aory|EIT75444.1 ater|EAU38152.1

Group626: abra|OJJ76271.1 acar|OOF99519.1 afis|EAW24673.1 akaw|GAA82204.1 aluc|OJZ91949.1  
anid|CBF90103.1 anig|EHA22908.1 atub|OJI86394.1 aver|OJI96119.1 abra|OJJ77743.1 afis|EAW19876.1  
afla|EED56872.1 agla|OJJ82021.1 anid|CBF74093.1 asyd|OJJ65119.1 ater|EAU36111.1 aver|OJI99248.1  
awen|OJJ34656.1 awen|OJJ38125.1 aory|EIT77510.1 asyd|OJJ62028.1

Group627: abra|OJJ76451.1 acar|OOF99694.1 acla|EAW13977.1 afis|EAW18686.1 afla|EED53481.1  
afum|EAL89344.2 akaw|GAA82363.1 aluc|OJZ91759.1 anig|EHA22761.1 aory|EIT75172.1 asyd|OJJ58512.1  
ater|EAU38222.1 atub|OJI86217.1 aver|OJJ01113.1 awen|OJJ32157.1 azon|OJJ46741.1 acla|EAW13614.1  
afis|EAW16454.1 anig|EHA20148.1 afum|EAL93407.1 afis|EAW24702.1

Group628: abra|OJJ76531.1 acar|OOF99442.1 acla|EAW12929.1 afis|EAW17727.1 afla|EED48895.1  
afum|EAL91542.1 agla|OJJ87872.1 akaw|GAA82443.1 aluc|OJZ91673.1 anid|CBF90286.1 anig|EHA22691.1  
aory|EIT81184.1 asyd|OJJ61920.1 ater|EAU36831.1 atub|OJI86128.1 aver|OJI96012.1 awen|OJJ39163.1  
azon|OJJ44435.1 acar|OOF93188.1 acla|EAW12526.1 awen|OJJ40114.1

Group629: abra|OJJ76817.1 acar|OOF91312.1 acla|EAW13377.1 afis|EAW19711.1 afla|EED47757.1  
afum|EAL86816.2 agla|OJJ84836.1 aluc|OJZ84227.1 anid|CBF79211.1 anig|EHA27576.1 aory|EIT77795.1  
asyd|OJJ55731.1 ater|EAU30448.1 atub|OJI89857.1 aver|OJJ06817.1 awen|OJJ33191.1 azon|OJJ46393.1  
aory|EIT77115.1 afla|EED44738.1 asyd|OJJ54596.1 aver|OJJ07556.1

Group630: abra|OJJ76842.1 acar|OOF89970.1 acla|EAW13405.1 afis|EAW20516.1 afla|EED52466.1  
afum|EAL84541.1 agla|OJJ84774.1 akaw|GAA87180.1 aluc|OJZ84253.1 anid|CBF79059.1 anig|EHA27598.1  
aory|EIT82819.1 asyd|OJJ55708.1 ater|EAU37185.1 atub|OJI89830.1 aver|OJJ06794.1 awen|OJJ33222.1  
azon|OJJ45121.1 aluc|OJZ87023.1 anig|EHA21634.1 atub|OJI83495.1

Group631: abra|OJJ77007.1 acar|OOF91453.1 acla|EAW15047.1 afis|EAW24611.1 afla|EED47377.1  
afum|EAL86241.1 agla|OJJ78906.1 akaw|GAA87041.1 aluc|OJZ84406.1 anid|CBF83177.1 anig|EHA27736.1  
aory|EIT75955.1 asyd|OJJ55523.1 ater|EAU32183.1 atub|OJI89666.1 aver|OJJ06601.1 awen|OJJ36042.1  
azon|OJJ45129.1 acla|EAW15048.1 aory|EIT82833.1 afla|EED54123.1

Group632: abra|OJJ77033.1 acar|OOF91472.1 acla|EAW07271.1 afis|EAW22292.1 afla|EED57692.1  
afum|EAL90889.1 agla|OJJ87756.1 akaw|GAA87018.1 aluc|OJZ84436.1 anid|CBF88573.1 anig|EHA27755.1  
aory|EIT79900.1 asyd|OJJ63839.1 ater|EAU34305.1 atub|OJI89637.1 aver|OJI97098.1 awen|OJJ34866.1  
azon|OJJ45662.1 afla|EED51864.1 aory|EIT81771.1 awen|OJJ30800.1

Group633: abra|OJJ77037.1 acar|OOF90079.1 acla|EAW13558.1 afis|EAW20634.1 afla|EED49758.1  
afum|EAL84434.1 agla|OJJ86283.1 akaw|GAA87014.1 aluc|OJZ84440.1 anid|CBF83213.1 anig|EHA27759.1  
aory|EIT77698.1 asyd|OJJ65203.1 ater|EAU32169.1 atub|OJI89633.1 aver|OJJ06646.1 awen|OJJ33605.1  
azon|OJJ50726.1 asyd|OJJ55565.1 azon|OJJ42610.1 aver|OJI99352.1

Group634: abra|OJJ77109.1 acar|OOF92994.1 afla|EED51851.1 agla|OJJ86977.1 akaw|GAA90819.1  
aluc|OJZ84518.1 anid|CBF89943.1 anig|EHA27816.1 aory|EIT81728.1 asyd|OJJ62111.1 ater|EAU31034.1  
atub|OJI89562.1 aver|OJJ03877.1 awen|OJJ33658.1 acla|EAW14977.1 aver|OJI96219.1 asyd|OJJ57090.1  
ater|EAU34328.1 awen|OJJ33488.1 aver|OJJ03210.1 asyd|OJJ62627.1



Group635: abra|OJJ77191.1 acar|OOF93077.1 acla|EAW13182.1 afis|EAW17458.1 afla|EED49364.1 afum|EAL91286.1 agla|OJJ80049.1 akaw|GAA90749.1 aluc|OJZ84599.1 anid|CBF71666.1 anig|EHA27889.1 aory|EIT79494.1 asyd|OJJ59263.1 ater|EAU33943.1 atub|OJI89480.1 aver|OJJ01874.1 awen|OJJ37389.1 azon|OJJ51062.1 agla|OJJ80359.1 asyd|OJJ61831.1 aver|OJI95930.1

Group636: abra|OJJ77325.1 acar|OOF93201.1 acla|EAW13147.1 afis|EAW17500.1 afla|EED45479.1 afum|EAL91323.1 agla|OJJ81453.1 akaw|GAA91431.1 aluc|OJZ84735.1 anid|CBF71578.1 anig|EHA28008.1 aory|EIT82181.1 asyd|OJJ61876.1 ater|EAU36946.1 atub|OJI89346.1 aver|OJI95974.1 awen|OJJ37341.1 azon|OJJ51026.1 agla|OJJ78829.1 aory|EIT75365.1 asyd|OJJ62947.1

Group637: abra|OJJ77475.1 acar|OOF99250.1 acla|EAW06757.1 afis|EAW16307.1 afla|EED53242.1 afum|EAL88929.1 agla|OJJ88269.1 akaw|GAA84143.1 aluc|OJZ81063.1 anid|CBF69567.1 anig|EHA19305.1 aory|EIT75142.1 asyd|OJJ59151.1 ater|EAU29335.1 atub|OJI82522.1 aver|OJJ08866.1 awen|OJJ34880.1 azon|OJJ44967.1 aver|OJJ01741.1 awen|OJJ36323.1 asyd|OJJ52895.1

Group638: abra|OJJ78236.1 acar|OOF98624.1 acla|EAW09274.1 afis|EAW21874.1 afla|EED46435.1 afum|EAL92888.1 agla|OJJ84259.1 akaw|GAA85789.1 aluc|OJZ91310.1 anid|CBF76774.1 anig|EHA19994.1 aory|EIT72385.1 asyd|OJJ61272.1 ater|EAU30873.1 atub|OJI83303.1 aver|OJJ00600.1 awen|OJJ34162.1 azon|OJJ43467.1 afla|EED46434.1 awen|OJJ34163.1 asyd|OJJ61271.1

Group639: abra|OJJ65541.1 abra|OJJ65833.1 abra|OJJ67278.1 akaw|GAA92069.1 akaw|GAA92846.1 asyd|OJJ52003.1 asyd|OJJ62485.1 acar|OOF95207.1 afla|EED55152.1 agla|OJJ86434.1 anid|CBF76638.1 anig|EHA18761.1 aory|EIT81617.1 aver|OJJ07599.1 awen|OJJ31646.1 aluc|OJZ88789.1 acar|OOG00873.1 agla|OJJ79830.1 asyd|OJJ54555.1 awen|OJJ30844.1

Group640: abra|OJJ65699.1 abra|OJJ77440.1 aluc|OJZ81081.1 aluc|OJZ88716.1 asyd|OJJ59917.1 asyd|OJJ61765.1 aver|OJI96472.1 aver|OJJ02369.1 afla|EED56833.1 afum|EAL84269.2 agla|OJJ80658.1 akaw|GAA84158.1 anid|CBF85281.1 anig|EHA18818.1 aory|EIT73911.1 ater|EAU34168.1 atub|OJI82505.1 awen|OJJ30259.1 akaw|GAA92795.1 anig|EHA28199.1

Group641: abra|OJJ66191.1 abra|OJJ68084.1 acar|OOF91939.1 acar|OOF93882.1 akaw|GAA86869.1 akaw|GAA89096.1 anig|EHA25698.1 anig|EHA27364.1 atub|OJI84816.1 atub|OJI88435.1 acla|EAW09010.1 afis|EAW25589.1 afum|EAL84297.2 aluc|OJZ89993.1 asyd|OJJ61550.1 aver|OJJ00875.1 awen|OJJ41959.1 afla|EED48865.1 anid|CBF82995.1 aory|EIT81254.1

Group642: abra|OJJ68152.1 abra|OJJ75347.1 aluc|OJZ83228.1 aluc|OJZ92909.1 atub|OJI87369.1 atub|OJI87708.1 acar|OOF94489.1 acla|EAW08546.1 afis|EAW23583.1 afla|EED48907.1 afum|EAL87881.1 akaw|GAA92040.1 anid|CBF87513.1 anig|EHA21084.1 anig|EHA26055.1 aory|EIT81206.1 ater|EAU36167.1 awen|OJJ30073.1 asyd|OJJ52977.1 aver|OJJ08943.1

Group643: abra|OJJ70063.1 abra|OJJ75532.1 akaw|GAA84171.1 akaw|GAA87613.1 akaw|GAA91952.1 aluc|OJZ81096.1 aluc|OJZ82666.1 aluc|OJZ85234.1 anig|EHA19275.1 anig|EHA25438.1 anig|EHA27440.1 atub|OJI80344.1 atub|OJI82486.1 atub|OJI88899.1 acar|OOF93551.1 afis|EAW25548.1 afla|EED45174.1 afla|EED46370.1 anid|CBF82283.1 aory|EIT81213.1

Group644: abra|OJJ74604.1 abra|OJJ77441.1 acar|OOF95100.1 acar|OOF95166.1 acla|EAW10775.1 afis|EAW24801.1 afla|EED47186.1 afum|EAL89442.1 agla|OJJ82895.1 akaw|GAA82004.1 aluc|OJZ92183.1 anid|CBF81510.1 anig|EHA26770.1 aory|EIT79225.1 asyd|OJJ59469.1 ater|EAU36506.1 atub|OJI86611.1 aver|OJJ02805.1 awen|OJJ40384.1 azon|OJJ49233.1

Group645: acar|OOF90070.1 acar|OOF90633.1 akaw|GAA85210.1 akaw|GAA92948.1 abra|OJJ65532.1 anig|EHA21123.1 abra|OJJ67562.1 afla|EED57361.1 akaw|GAA84330.1 aluc|OJZ89029.1 aory|EIT78652.1 ater|EAU36945.1 atub|OJI85762.1 awen|OJJ30886.1 abra|OJJ72584.1 afla|EED44973.1 aluc|OJZ90565.1 anig|EHA24011.1 atub|OJI81988.1 afla|EED52856.1

Group646: acar|OOF90425.1 acar|OOF90429.1 acar|OOF93386.1 abra|OJJ69872.1 acla|EAW08934.1 afis|EAW15465.1 afla|EED46918.1 afum|EAL85857.1 agla|OJJ78859.1 akaw|GAA87784.1 aluc|OJZ85419.1 anid|CBF71773.1 anig|EHA25598.1 aory|EIT72659.1 asyd|OJJ61719.1 ater|EAU32668.1 atub|OJI80156.1 aver|OJI95813.1 awen|OJJ38110.1 azon|OJJ43167.1

Group647: acar|OOF90437.1 acar|OOF90444.1 abra|OJJ68818.1 acla|EAW13660.1 afis|EAW19540.1 agla|OJJ84857.1 akaw|GAA90433.1 aluc|OJZ85794.1 anid|CBF73461.1 anig|EHA24767.1 aory|EIT74867.1 asyd|OJJ55924.1 ater|EAU34189.1 atub|OJI79580.1 azon|OJJ42666.1 afum|EAL84970.1 azon|OJJ45282.1 afis|EAW19943.1 agla|OJJ79424.1 agla|OJJ89038.1

Group648: acar|OOF90442.1 acar|OOF90448.1 abra|OJJ78364.1 acar|OOF98523.1 acla|EAW09171.1 afis|EAW21975.1 afla|EED46698.1 afum|EAL92990.1 agla|OJJ84127.1 akaw|GAA85669.1 aluc|OJZ91440.1 anid|CBF82718.1 anig|EHA20104.1 aory|EIT77954.1 asyd|OJJ61636.1 ater|EAU31093.1 atub|OJI83434.1 aver|OJJ00959.1 awen|OJJ34268.1 azon|OJJ43367.1

Group649: acar|OOF90479.1 acar|OOF90486.1 acar|OOF96185.1 abra|OJJ73013.1 acla|EAW07999.1 afis|EAW23034.1 afla|EED54982.1 afum|EAL88447.1 agla|OJJ89443.1 akaw|GAA85592.1 aluc|OJZ83528.1

anid|CBF80924.1 anig|EHA24351.1 aory|EIT80284.1 asyd|OJJ56320.1 ater|EAU29623.1 atub|OJI82417.1  
aver|OJJ06394.1 awen|OJJ35708.1 azon|OJJ44168.1

Group650: acar|OOF90594.1 acar|OOG00347.1 abra|OJJ73121.1 afis|EAW19817.1 afla|EED53226.1  
afum|EAL85074.1 akaw|GAA88044.1 aluc|OJZ81304.1 anid|CBF82022.1 anig|EHA18612.1 aory|EIT75068.1  
asyd|OJJ56203.1 ater|EAU29416.1 atub|OJI91512.1 aver|OJJ05130.1 awen|OJJ36147.1 azon|OJJ42172.1  
azon|OJJ50764.1 aver|OJJ06466.1 ater|EAU34240.1

Group651: acar|OOF90625.1 acar|OOF90863.1 acar|OOF92572.1 acar|OOF94857.1 akaw|GAA86114.1  
akaw|GAA86569.1 akaw|GAA90436.1 aluc|OJZ85120.1 aluc|OJZ85791.1 aluc|OJZ90350.1 atub|OJI79576.1  
atub|OJI80473.1 atub|OJI81777.1 azon|OJJ43546.1 abra|OJJ70235.1 afla|EED57683.1 akaw|GAA86570.1  
anig|EHA25341.1 aory|EIT79899.1 anig|EHA23836.1

Group652: acar|OOF92603.1 acar|OOF92624.1 asyd|OJJ51990.1 asyd|OJJ56630.1 abra|OJJ68460.1  
acla|EAW14885.1 afis|EAW24404.1 afla|EED47809.1 afum|EAL86075.1 agla|OJJ89341.1 akaw|GAA92382.1  
aluc|OJZ83241.1 anid|CBF73735.1 anig|EHA21096.1 aory|EIT77126.1 ater|EAU30327.1 atub|OJI87696.1  
aver|OJJ06096.1 awen|OJJ32804.1 azon|OJJ49024.1

Group653: acar|OOF92614.1 acar|OOF92635.1 awen|OJJ30756.1 awen|OJJ31725.1 abra|OJJ67454.1  
acla|EAW06311.1 afis|EAW18420.1 afla|EED52988.1 afum|EAL93104.1 agla|OJJ84988.1 akaw|GAA86377.1  
aluc|OJZ84911.1 anid|CBF70700.1 anig|EHA25132.1 aory|EIT78732.1 asyd|OJJ58461.1 ater|EAU29838.1  
atub|OJI80687.1 aver|OJJ01061.1 azon|OJJ50488.1

Group654: acar|OOF93661.1 acar|OOF93745.1 abra|OJJ66641.1 acla|EAW11784.1 afis|EAW19394.1  
afum|EAL87100.1 agla|OJJ81105.1 akaw|GAA89594.1 aluc|OJZ80808.1 anid|CBF74281.1 anig|EHA27226.1  
aory|EIT83121.1 asyd|OJJ56700.1 ater|EAU36057.1 atub|OJI87656.1 aver|OJJ05358.1 awen|OJJ36788.1  
azon|OJJ43011.1 asyd|OJJ51861.1 aver|OJJ06025.1

Group655: acar|OOF93670.1 acar|OOF93754.1 abra|OJJ66651.1 acla|EAW11794.1 afis|EAW19404.1  
afla|EED50359.1 afum|EAL87091.1 agla|OJJ81118.1 akaw|GAA89603.1 aluc|OJZ80795.1 anid|CBF74343.1  
anig|EHA27236.1 aory|EIT83145.1 asyd|OJJ51900.1 asyd|OJJ57797.1 ater|EAU36141.1 atub|OJI87646.1  
aver|OJJ05367.1 awen|OJJ36800.1 azon|OJJ42998.1

Group656: acar|OOF93714.1 acar|OOF93801.1 agla|OJJ81170.1 agla|OJJ82654.1 abra|OJJ66712.1  
acla|EAW11843.1 afis|EAW19454.1 afla|EED56662.1 afum|EAL87042.1 akaw|GAA89654.1 aluc|OJZ80735.1  
anid|CBF81419.1 anig|EHA27286.1 aory|EIT79629.1 asyd|OJJ59414.1 ater|EAU34757.1 atub|OJI87592.1  
aver|OJJ02859.1 awen|OJJ36855.1 azon|OJJ42945.1

Group657: acar|OOF94063.1 acar|OOF94133.1 abra|OJJ66361.1 acla|EAW10010.1 afis|EAW21046.1  
afla|EED51624.1 afum|EAL92082.1 agla|OJJ82364.1 akaw|GAA90234.1 aluc|OJZ83107.1 anid|CBF87132.1  
anig|EHA28170.1 aory|EIT80496.1 asyd|OJJ60365.1 atub|OJI87827.1 aver|OJI99702.1 awen|OJJ32176.1  
afla|EED48902.1 aory|EIT81167.1 awen|OJJ36966.1

Group658: acar|OOF94066.1 acar|OOF94136.1 abra|OJJ66356.1 acla|EAW10006.1 afis|EAW21050.1  
afla|EED51620.1 afum|EAL92086.1 akaw|GAA90230.1 aluc|OJZ83111.1 anid|CBF87104.1 anig|EHA28174.1  
aory|EIT76079.1 asyd|OJJ60388.1 ater|EAU36822.1 atub|OJI87823.1 aver|OJI99717.1 awen|OJJ32173.1  
afla|EED54348.1 asyd|OJJ53360.1 aver|OJJ07646.1

Group659: acar|OOF95099.1 acar|OOF95165.1 asyd|OJJ59458.1 asyd|OJJ62484.1 abra|OJJ74605.1  
acla|EAW10774.1 afis|EAW24802.1 afla|EED47184.1 afum|EAL89443.1 agla|OJJ82896.1 akaw|GAA82003.1  
aluc|OJZ92184.1 anid|CBF81490.1 anig|EHA26769.1 aory|EIT79286.1 ater|EAU36505.1 atub|OJI86612.1  
aver|OJJ02815.1 awen|OJJ40385.1 azon|OJJ49235.1

Group660: acar|OOF95626.1 acar|OOF95677.1 abra|OJJ74662.1 acla|EAW10965.1 afis|EAW20769.1  
afla|EED50244.1 afum|EAL84738.2 agla|OJJ84002.1 akaw|GAA81949.1 aluc|OJZ92239.1 anig|EHA26715.1  
asyd|OJJ54118.1 ater|EAU32725.1 atub|OJI86673.1 aver|OJJ08618.1 awen|OJJ34453.1 acar|OOF90978.1  
afis|EAW20895.1 aory|EIT77360.1 ater|EAU38529.1

Group661: acar|OOF95637.1 acar|OOF95688.1 aver|OJJ05622.1 aver|OJJ07803.1 abra|OJJ74674.1  
acla|EAW10723.1 afis|EAW24850.1 afla|EED47121.1 afum|EAL89496.1 agla|OJJ82064.1 akaw|GAA81939.1  
aluc|OJZ92251.1 anid|CBF75837.1 anig|EHA26705.1 aory|EIT79282.1 asyd|OJJ57556.1 ater|EAU36453.1  
atub|OJI86684.1 awen|OJJ40435.1 azon|OJJ49296.1

Group662: acar|OOF96241.1 acar|OOF96278.1 afum|EAL85174.2 afum|EAL87772.2 abra|OJJ71525.1  
acla|EAW15082.1 afis|EAW20054.1 afla|EED45326.1 agla|OJJ88906.1 akaw|GAA89392.1 aluc|OJZ86265.1  
anid|CBF84810.1 anig|EHA21603.1 aory|EIT73801.1 asyd|OJJ63220.1 ater|EAU38663.1 atub|OJI84278.1  
aver|OJI97735.1 awen|OJJ31812.1 azon|OJJ46310.1

Group663: acar|OOF96244.1 acar|OOF96281.1 afum|EAL85177.1 afum|EAL87761.1 abra|OJJ71529.1  
acla|EAW15085.1 afis|EAW20057.1 afla|EED45323.1 agla|OJJ88903.1 akaw|GAA89389.1 aluc|OJZ86269.1  
anid|CBF84842.1 anig|EHA21601.1 aory|EIT73791.1 asyd|OJJ63216.1 ater|EAU38666.1 atub|OJI84273.1  
aver|OJI97739.1 awen|OJJ31816.1 azon|OJJ46307.1

Group664: acar|OOF96246.1 acar|OOF96283.1 afum|EAL85179.1 afum|EAL87759.1 abra|OJJ71533.1  
acla|EAW15087.1 afis|EAW20059.1 afla|EED45321.1 agla|OJJ88901.1 akaw|GAA89387.1 aluc|OJZ86271.1  
anid|CBF84838.1 anig|EHA21598.1 aory|EIT73620.1 asyd|OJJ63214.1 ater|EAU38668.1 atub|OJI84270.1  
aver|OJI97741.1 awen|OJJ31819.1 azon|OJJ46305.1

Group665: acar|OOF96247.1 acar|OOF96284.1 afum|EAL85180.1 afum|EAL87758.1 abra|OJJ71534.1  
acla|EAW15088.1 afis|EAW20060.1 afla|EED45319.1 agla|OJJ88899.1 akaw|GAA89386.1 aluc|OJZ86272.1  
anid|CBF84836.1 anig|EHA21597.1 aory|EIT73579.1 asyd|OJJ63213.1 ater|EAU38669.1 atub|OJI84268.1  
aver|OJI97742.1 awen|OJJ31820.1 azon|OJJ46304.1

Group666: acar|OOF97654.1 acar|OOF97701.1 abra|OJJ71503.1 acla|EAW10045.1 afis|EAW25539.1  
afla|EED44716.1 afum|EAL90202.1 agla|OJJ87266.1 akaw|GAA82517.1 aluc|OJZ87044.1 anid|CBF77824.1  
anig|EHA20317.1 aory|EIT83461.1 asyd|OJJ53006.1 ater|EAU33380.1 atub|OJI81591.1 aver|OJJ03837.1  
awen|OJJ41281.1 azon|OJJ49499.1 afla|EED44715.1

Group667: acar|OOF97687.1 acar|OOF97737.1 abra|OJJ71461.1 acla|EAW10090.1 afis|EAW25497.1  
afla|EED53997.1 afum|EAL90163.1 agla|OJJ87307.1 akaw|GAA82552.1 aluc|OJZ87083.1 anid|CBF77751.1  
anig|EHA20354.1 aory|EIT78321.1 asyd|OJJ53046.1 asyd|OJJ54800.1 ater|EAU34668.1 atub|OJI81554.1  
aver|OJI95782.1 aver|OJJ03799.1 awen|OJJ41240.1

Group668: acar|OOF99309.1 acar|OOF99314.1 abra|OJJ74376.1 akaw|GAA87275.1 aluc|OJZ89746.1  
anig|EHA26968.1 atub|OJI85056.1 abra|OJJ78032.1 akaw|GAA85950.1 aluc|OJZ91112.1 anig|EHA19809.1  
aory|EIT82873.1 asyd|OJJ64719.1 ater|EAU30104.1 atub|OJI83109.1 aver|OJJ05112.1 awen|OJJ33401.1  
azon|OJJ45152.1 acla|EAW11016.1 awen|OJJ38250.1

Group669: acla|EAW06566.1 acla|EAW13723.1 afis|EAW16030.1 afis|EAW19868.1 afum|EAL85029.1  
afum|EAL88661.1 agla|OJJ86058.1 agla|OJJ87705.1 awen|OJJ30418.1 awen|OJJ39976.1 abra|OJJ67634.1  
acar|OOF91979.1 afla|EED48196.1 akaw|GAA89153.1 aluc|OJZ81683.1 anig|EHA25759.1 aory|EIT72945.1  
asyd|OJJ52747.1 atub|OJI88498.1 azon|OJJ45425.1

Group670: acla|EAW07085.1 acla|EAW08664.1 abra|OJJ67836.1 afum|EAL87810.1 agla|OJJ83639.1  
akaw|GAA84845.1 aluc|OJZ86826.1 anig|EHA28243.1 asyd|OJJ62960.1 ater|EAU36707.1 atub|OJI89149.1  
aver|OJJ06460.1 aver|OJJ03911.1 anig|EHA28234.1 asyd|OJJ64572.1 atub|OJI83692.1 aver|OJI98007.1  
anid|CBF78723.1 aver|OJI98669.1 aver|OJJ06464.1

Group671: acla|EAW10425.1 acla|EAW11189.1 afum|EAL88556.2 afum|EAL89817.2 abra|OJJ70818.1  
acar|OOF98284.1 afis|EAW25144.1 afla|EED55301.1 agla|OJJ89017.1 akaw|GAA91697.1 aluc|OJZ87695.1  
anid|CBF85681.1 anig|EHA20883.1 aory|EIT83608.1 asyd|OJJ64255.1 ater|EAU39416.1 atub|OJI80947.1  
aver|OJI98346.1 awen|OJJ40769.1 azon|OJJ46879.1

Group672: afis|EAW16434.1 afis|EAW20510.1 agla|OJJ84787.1 agla|OJJ85600.1 abra|OJJ76837.1  
acar|OOF91329.1 acla|EAW13399.1 afla|EED52451.1 afum|EAL84546.1 akaw|GAA87186.1 aluc|OJZ84248.1  
anid|CBF79187.1 anig|EHA27593.1 aory|EIT82791.1 asyd|OJJ55716.1 ater|EAU37204.1 atub|OJI89835.1  
aver|OJJ06802.1 awen|OJJ33211.1 azon|OJJ46484.1

Group673: afis|EAW17153.1 afis|EAW21838.1 afum|EAL87745.2 afum|EBA27475.1 abra|OJJ75520.1  
acar|OOF90847.1 acla|EAW09307.1 afla|EED46537.1 agla|OJJ84300.1 akaw|GAA84284.1 aluc|OJZ88977.1  
anid|CBF76703.1 anig|EHA23548.1 aory|EIT72350.1 asyd|OJJ61234.1 ater|EAU38513.1 atub|OJI85812.1  
aver|OJJ00557.1 awen|OJJ34114.1 azon|OJJ44226.1

Group674: afis|EAW17990.1 afis|EAW20711.1 afum|EAL91127.1 afum|EAL91800.1 abra|OJJ68535.1  
acar|OOF92737.1 acla|EAW12825.1 afla|EED51913.1 agla|OJJ80250.1 akaw|GAA91316.1 aluc|OJZ82748.1  
anid|CBF79983.1 anig|EHA21198.1 aory|EIT81369.1 asyd|OJJ58245.1 ater|EAU31501.1 atub|OJI88983.1  
aver|OJJ02181.1 awen|OJJ41556.1 azon|OJJ48271.1

Group675: afis|EAW19531.1 afis|EAW22425.1 afum|EAL86975.1 afum|EAL90766.1 abra|OJJ74345.1  
acar|OOF95384.1 acla|EAW07399.1 afla|EED52503.1 agla|OJJ87607.1 akaw|GAA86685.1 aluc|OJZ89785.1  
anid|CBF88811.1 anig|EHA27000.1 asyd|OJJ62888.1 ater|EAU39282.1 atub|OJI85020.1 aver|OJI96940.1  
awen|OJJ35004.1 azon|OJJ42263.1 azon|OJJ45640.1

Group676: afis|EAW23730.1 afis|EAW25103.1 awen|OJJ30012.1 awen|OJJ40717.1 abra|OJJ65991.1  
acar|OOF92881.1 acla|EAW10464.1 acla|EAW11709.1 afla|EED46010.1 afum|EAL87168.1 akaw|GAA90865.1  
aluc|OJZ82968.1 anid|CBF78451.1 anid|CBF84695.1 anig|EHA21384.1 aory|EIT75669.1 ater|EAU34822.1  
atub|OJI89201.1 aver|OJJ08430.1 azon|OJJ48019.1

Group677: afla|EED45834.1 afla|EED51243.1 aory|EIT75702.1 aory|EIT83187.1 abra|OJJ69216.1  
acar|OOF91102.1 acla|EAW08629.1 afis|EAW15802.1 afum|EAL85548.1 agla|OJJ81969.1 akaw|GAA92225.1  
aluc|OJZ86198.1 anid|CBF70916.1 anig|EHA24425.1 asyd|OJJ52604.1 ater|EAU33446.1 atub|OJI79990.1  
aver|OJJ04630.1 awen|OJJ38512.1 azon|OJJ43740.1

Group678: afla|EED46513.1 afla|EED55226.1 aory|EIT72395.1 aory|EIT83617.1 abra|OJJ72126.1  
acar|OOF96766.1 acla|EAW14932.1 afis|EAW24447.1 afum|EAL86116.1 agla|OJJ80293.1 akaw|GAA84797.1

aluc|OJZ86883.1 anid|CBF73809.1 anig|EHA21761.1 asyd|OJJ56577.1 ater|EAU29999.1 atub|OJI83636.1  
aver|OJJ06146.1 awen|OJJ32750.1 azon|OJJ43988.1

Group679: afla|EED46574.1 afla|EED49749.1 afla|EED52838.1 akaw|GAA87766.1 akaw|GAA91614.1  
aluc|OJZ82440.1 aluc|OJZ85401.1 aluc|OJZ82904.1 anig|EHA21327.1 anig|EHA28333.1 aory|EIT77940.1  
aory|EIT78630.1 abra|OJJ69634.1 agla|OJJ80224.1 asyd|OJJ52421.1 ater|EAU37501.1 atub|OJI88000.1  
awen|OJJ31941.1 atub|OJI89130.1 akaw|GAA90922.1

Group680: afla|EED47735.1 afla|EED54121.1 abra|OJJ66976.1 acar|OOF93637.1 acla|EAW08563.1  
afis|EAW23605.1 afum|EAL87861.1 agla|OJJ86863.1 akaw|GAA92189.1 aluc|OJZ85601.1 anid|CBF89577.1  
anig|EHA24923.1 aory|EIT75914.1 aory|EIT77123.1 asyd|OJJ62333.1 ater|EAU35372.1 atub|OJI79396.1  
aver|OJI96439.1 awen|OJJ39929.1 ater|EAU39302.1

Group681: agla|OJJ78415.1 agla|OJJ84293.1 abra|OJJ69363.1 acar|OOF94362.1 acla|EAW14753.1  
afis|EAW24284.1 afla|EED47992.1 afum|EAL85953.1 akaw|GAA88232.1 aluc|OJZ82196.1 anid|CBF74135.1  
anig|EHA28541.1 aory|EIT79812.1 asyd|OJJ53915.1 ater|EAU31232.1 atub|OJI88239.1 aver|OJJ08013.1  
awen|OJJ33012.1 azon|OJJ48503.1 agla|OJJ83146.1

Group682: agla|OJJ78543.1 agla|OJJ79518.1 anid|CBF74064.1 anid|CBF77736.1 anid|CBF83503.1  
anid|CBF87508.1 anid|CBF88991.1 anid|CBF89857.1 abra|OJJ69705.1 acla|EAW09195.1 afis|EAW18410.1  
afla|EED46570.1 afum|EAL93090.1 aluc|OJZ80203.1 aory|EIT77911.1 asyd|OJJ53853.1 awen|OJJ41393.1  
asyd|OJJ62070.1 anid|CBF73616.1 asyd|OJJ56787.1

Group683: agla|OJJ79096.1 agla|OJJ82949.1 abra|OJJ65777.1 acar|OOF92088.1 afla|EED45916.1  
akaw|GAA90885.1 aluc|OJZ82946.1 anid|CBF84425.1 anig|EHA21364.1 aory|EIT75550.1 atub|OJI89178.1  
abra|OJJ72700.1 afis|EAW19995.1 afum|EAL84921.1 asyd|OJJ54671.1 aver|OJJ07499.1 awen|OJJ30436.1  
afla|EED49831.1 asyd|OJJ53641.1 aver|OJJ01165.1

Group684: agla|OJJ79930.1 agla|OJJ82748.1 awen|OJJ29762.1 awen|OJJ33576.1 abra|OJJ70370.1  
acar|OOF91900.1 acla|EAW12338.1 afis|EAW16884.1 afla|EED47358.1 afum|EAL86420.1 akaw|GAA91980.1  
aluc|OJZ82634.1 anid|CBF80682.1 anig|EHA27445.1 aory|EIT82887.1 asyd|OJJ54592.1 ater|EAU30230.1  
atub|OJI88865.1 aver|OJJ07560.1 azon|OJJ50386.1

Group685: akaw|GAA85714.1 akaw|GAA87141.1 aluc|OJZ84296.1 aluc|OJZ91389.1 aory|EIT81041.1  
aory|EIT81749.1 atub|OJI83382.1 atub|OJI89773.1 abra|OJJ78316.1 acar|OOF90169.1 acla|EAW09510.1  
afis|EAW21622.1 afla|EED51839.1 afum|EAL92658.1 anig|EHA20067.1 asyd|OJJ65401.1 ater|EAU38311.1  
aver|OJI95769.1 awen|OJJ38680.1 azon|OJJ47988.1

Group686: aluc|OJZ79488.1 aluc|OJZ79629.1 abra|OJJ68492.1 acar|OOF90053.1 acla|EAW12140.1  
afis|EAW17196.1 afla|EED45178.1 afum|EAL86624.1 agla|OJJ86658.1 akaw|GAA92778.1 aluc|OJZ82705.1  
anid|CBF69887.1 anig|EHA21160.1 aory|EIT73771.1 asyd|OJJ59009.1 ater|EAU31750.1 atub|OJI88938.1  
aver|OJJ01606.1 azon|OJJ51828.1 asyd|OJJ53646.1

Group687: anid|CBF84338.1 anid|CBF85236.1 abra|OJJ66254.1 acar|OOF90725.1 acla|EAW13654.1  
afis|EAW19951.1 afum|EAL84964.1 aluc|OJZ80562.1 atub|OJI88369.1 aver|OJI97993.1 abra|OJJ68406.1  
afla|EED50983.1 akaw|GAA92542.1 aluc|OJZ90090.1 anig|EHA20984.1 aory|EIT75403.1 asyd|OJJ62976.1  
atub|OJI84715.1 afla|EED45866.1 aory|EIT77017.1

Group688: aory|EIT72414.1 aory|EIT75970.1 abra|OJJ66829.1 acar|OOF91607.1 acla|EAW14412.1  
afis|EAW19120.1 afla|EED46512.1 afla|EED54294.1 afum|EAL93852.1 agla|OJJ80435.1 akaw|GAA90466.1  
aluc|OJZ85758.1 anid|CBF75403.1 anig|EHA24798.1 asyd|OJJ59823.1 ater|EAU37383.1 atub|OJI79543.1  
aver|OJJ02464.1 awen|OJJ37451.1 azon|OJJ51128.1

Group689: aory|EIT73542.1 aory|EIT78881.1 awen|OJJ31263.1 awen|OJJ35154.1 awen|OJJ38678.1  
abra|OJJ73576.1 acar|OOG00757.1 acla|EAW07494.1 afis|EAW22527.1 afla|EED54555.1 afum|EAL90667.1  
agla|OJJ88671.1 akaw|GAA88574.1 aluc|OJZ88476.1 anig|EHA18193.1 asyd|OJJ54459.1 ater|EAU39184.1  
atub|OJI91071.1 aver|OJJ07697.1 azon|OJJ49947.1

Group690: asyd|OJJ52010.1 asyd|OJJ52511.1 asyd|OJJ58584.1 abra|OJJ76189.1 acar|OOF99753.1  
acla|EAW13913.1 afis|EAW18624.1 afum|EAL93335.1 agla|OJJ81236.1 akaw|GAA82133.1 aluc|OJZ92039.1  
anid|CBF70490.1 anig|EHA22972.1 aory|EIT78164.1 ater|EAU34924.1 atub|OJI86473.1 aver|OJJ01188.1  
awen|OJJ32087.1 azon|OJJ46666.1 afla|EED52723.1

Group691: asyd|OJJ52365.1 asyd|OJJ62740.1 aver|OJI96783.1 aver|OJJ01982.1 abra|OJJ74531.1  
acar|OOF95221.1 acla|EAW07161.1 afis|EAW22176.1 afla|EED57555.1 afum|EAL91013.1 agla|OJJ87878.1  
akaw|GAA82069.1 aluc|OJZ92113.1 anid|CBF89075.1 anig|EHA26832.1 aory|EIT81844.1 ater|EAU34181.1  
atub|OJI86546.1 awen|OJJ34753.1 azon|OJJ45807.1

Group692: asyd|OJJ52442.1 asyd|OJJ59129.1 ater|EAU33481.1 ater|EAU38150.1 abra|OJJ76293.1  
acar|OOF99538.1 acla|EAW14323.1 afis|EAW18965.1 afla|EED51014.1 afum|EAL93697.2 agla|OJJ85347.1  
akaw|GAA82221.1 aluc|OJZ91929.1 anid|CBF69609.1 anig|EHA22891.1 aory|EIT76953.1 atub|OJI86372.1  
aver|OJJ01717.1 awen|OJJ31565.1 azon|OJJ46798.1

Group693: asyd|OJJ52683.1 asyd|OJJ58527.1 aver|OJJ01128.1 aver|OJJ08669.1 abra|OJJ76471.1  
acar|OOF99708.1 acla|EAW13962.1 afis|EAW18671.1 afla|EED50620.1 afum|EAL93390.1 agla|OJJ82404.1  
akaw|GAA82383.1 aluc|OJZ91738.1 anid|CBF70581.1 anig|EHA22744.1 aory|EIT78086.1 ater|EAU38240.1  
atub|OJI86196.1 awen|OJJ32143.1 azon|OJJ46724.1

Group694: asyd|OJJ52787.1 asyd|OJJ58807.1 aver|OJJ01410.1 aver|OJJ08762.1 abra|OJJ67374.1  
acar|OOF92437.1 acla|EAW06381.1 afis|EAW18487.1 afla|EED52921.1 afum|EAL93176.1 agla|OJJ85082.1  
akaw|GAA86448.1 aluc|OJZ84991.1 anid|CBF70149.1 anig|EHA25203.1 aory|EIT78597.1 ater|EAU29912.1  
atub|OJI80609.1 awen|OJJ31041.1 azon|OJJ48423.1

Group695: asyd|OJJ54188.1 asyd|OJJ58628.1 aver|OJJ01234.1 aver|OJJ08551.1 abra|OJJ71860.1  
acar|OOF96532.1 acla|EAW13891.1 afis|EAW18603.1 afla|EED52744.1 afum|EAL93311.1 agla|OJJ81655.1  
akaw|GAA85055.1 aluc|OJZ86597.1 anid|CBF70407.1 anig|EHA22065.1 aory|EIT78216.1 ater|EAU34898.1  
atub|OJI83926.1 awen|OJJ31169.1 azon|OJJ46646.1

Group696: asyd|OJJ54443.1 asyd|OJJ57339.1 awen|OJJ33856.1 awen|OJJ40919.1 abra|OJJ66256.1  
acar|OOF90727.1 aluc|OJZ80564.1 anig|EHA25634.1 atub|OJI88367.1 awen|OJJ38260.1 abra|OJJ77747.1  
akaw|GAA83887.1 aluc|OJZ90808.1 anid|CBF81976.1 anig|EHA19536.1 aory|EIT82874.1 atub|OJI82797.1  
aver|OJJ05823.1 azon|OJJ50277.1 afla|EED47338.1

Group697: asyd|OJJ55918.1 asyd|OJJ60822.1 aver|OJJ00148.1 aver|OJJ04871.1 abra|OJJ75721.1  
acar|OOF90261.1 acla|EAW09377.1 afis|EAW21758.1 afla|EED58019.1 afum|EAL92788.2 agla|OJJ84392.1  
akaw|GAA84457.1 aluc|OJZ89173.1 anid|CBF83680.1 anig|EHA23382.1 aory|EIT79759.1 ater|EAU38432.1  
atub|OJI85617.1 awen|OJJ34042.1 azon|OJJ48199.1

Group698: asyd|OJJ57403.1 asyd|OJJ62790.1 aver|OJI96837.1 aver|OJJ07752.1 abra|OJJ73561.1  
acar|OOG00743.1 acla|EAW07478.1 afis|EAW22510.1 afla|EED54538.1 afum|EAL90683.1 agla|OJJ80868.1  
akaw|GAA88593.1 aluc|OJZ88500.1 anid|CBF88979.1 anig|EHA18209.1 aory|EIT78737.1 ater|EAU39204.1  
atub|OJI91087.1 awen|OJJ35136.1 azon|OJJ49963.1

Group699: asyd|OJJ61696.1 asyd|OJJ63657.1 aver|OJI95780.1 aver|OJI97277.1 abra|OJJ73686.1  
acar|OOG00858.1 acla|EAW07601.1 afis|EAW22632.1 afla|EED49882.1 afum|EAL90561.1 agla|OJJ80987.1  
akaw|GAA88473.1 aluc|OJZ88363.1 anid|CBF88232.1 anig|EHA18095.1 aory|EIT72462.1 ater|EAU39076.1  
atub|OJI90959.1 awen|OJJ35254.1 azon|OJJ49852.1

Group700: asyd|OJJ63591.1 asyd|OJJ65132.1 abra|OJJ65990.1 acar|OOF92883.1 acla|EAW13601.1  
afis|EAW20004.1 afla|EED46009.1 afum|EAL84915.1 agla|OJJ87963.1 akaw|GAA90864.1 aluc|OJZ82969.1  
anig|EHA21385.1 aory|EIT75787.1 ater|EAU29342.1 atub|OJI89202.1 aver|OJJ07612.1 awen|OJJ30013.1  
azon|OJJ43642.1 aver|OJI97342.1 ater|EAU30135.1

Group701: ater|EAU29422.1 ater|EAU29976.1 awen|OJJ32730.1 awen|OJJ40859.1 abra|OJJ72200.1  
acar|OOF96820.1 acla|EAW14947.1 afis|EAW24462.1 afla|EED55204.1 afum|EAL86133.1 agla|OJJ80320.1  
akaw|GAA84736.1 aluc|OJZ86950.1 anid|CBF73838.1 anig|EHA21697.1 aory|EIT83625.1 asyd|OJJ56557.1  
atub|OJI83573.1 aver|OJJ06163.1 azon|OJJ45283.1

Group702: aver|OJI99622.1 aver|OJJ08782.1 abra|OJJ69941.1 acar|OOF93451.1 acla|EAW08881.1  
afis|EAW15514.1 afla|EED49021.1 agla|OJJ80185.1 akaw|GAA87718.1 aluc|OJZ85345.1 anid|CBF87265.1  
anig|EHA25533.1 asyd|OJJ60386.1 ater|EAU32610.1 atub|OJI80225.1 aver|OJI99715.1 awen|OJJ38168.1  
azon|OJJ43128.1 afum|EAL85817.1 aory|EIT82522.1

Group703: aver|OJJ00302.1 aver|OJJ08608.1 abra|OJJ68423.1 acar|OOF93930.1 acla|EAW11595.1  
afis|EAW23861.1 afla|EED51802.1 afum|EAL87289.1 agla|OJJ87920.1 akaw|GAA86949.1 aluc|OJZ90074.1  
anid|CBF82425.1 anig|EHA20999.1 aory|EIT81707.1 asyd|OJJ54128.1 asyd|OJJ60984.1 ater|EAU30753.1  
atub|OJI84732.1 awen|OJJ36149.1 azon|OJJ43896.1

Group704: aver|OJJ03177.1 aver|OJJ07034.1 abra|OJJ72236.1 acar|OOF96858.1 acla|EAW14993.1  
afis|EAW24519.1 afla|EED47314.1 afum|EAL86185.1 akaw|GAA84703.1 aluc|OJZ86984.1 anid|CBF71222.1  
anig|EHA21663.1 aory|EIT82888.1 asyd|OJJ55173.1 ater|EAU29959.1 atub|OJI83535.1 awen|OJJ32602.1  
afla|EED57070.1 aory|EIT82265.1 azon|OJJ48731.1

Group705: azon|OJJ42149.1 azon|OJJ43551.1 abra|OJJ67976.1 acar|OOF92817.1 acla|EAW11759.1  
afis|EAW23792.1 afla|EED51600.1 afum|EAL87226.1 agla|OJJ78821.1 akaw|GAA91227.1 aluc|OJZ82843.1  
anid|CBF79854.1 anig|EHA21281.1 aory|EIT80489.1 asyd|OJJ58158.1 ater|EAU31332.1 atub|OJI89073.1  
aver|OJJ04245.1 awen|OJJ33749.1 awen|OJJ34607.1

Group706: azon|OJJ42457.1 azon|OJJ44531.1 abra|OJJ77870.1 acar|OOF98903.1 afla|EED56222.1  
akaw|GAA83780.1 aluc|OJZ90944.1 anid|CBF86194.1 anig|EHA19652.1 aory|EIT73290.1 asyd|OJJ64539.1  
ater|EAU33742.1 atub|OJI82936.1 aver|OJI98635.1 awen|OJJ38717.1 acla|EAW11254.1 afis|EAW19361.1  
afum|EAL94081.1 afla|EED49734.1 aory|EIT77649.1

Group707: azon|OJJ43566.1 azon|OJJ47404.1 azon|OJJ43567.1 abra|OJJ73130.1 acla|EAW12351.1  
afis|EAW16776.1 afla|EED50851.1 afum|EAL86345.1 agla|OJJ79835.1 anig|EHA18704.1 aory|EIT78959.1

ater|EAU34771.1 azon|OJJ42286.1 akaw|GAA89139.1 aluc|OJZ81697.1 aory|EIT81792.1 atub|OJI88483.1  
awen|OJJ29815.1 afla|EED55657.1 awen|OJJ34470.1

Group708: abra|OJJ65712.1 acla|EAW11438.1 afis|EAW24094.1 awen|OJJ32718.1 azon|OJJ51154.1  
abra|OJJ68624.1 acla|EAW12144.1 aluc|OJZ81931.1 aory|EIT78678.1 asyd|OJJ58603.1 atub|OJI84484.1  
abra|OJJ70046.1 acar|OOF98851.1 acla|EAW07758.1 akaw|GAA93052.1 anig|EHA25445.1 atub|OJI80326.1  
ater|EAU38181.1 azon|OJJ51651.1 awen|OJJ36405.1

Group709: abra|OJJ65771.1 acar|OOG00532.1 afis|EAW15669.1 afum|EAL85679.1 agla|OJJ81807.1  
akaw|GAA90889.1 aluc|OJZ82940.1 anig|EHA21360.1 asyd|OJJ53833.1 ater|EAU32495.1 atub|OJI89172.1  
aver|OJJ07938.1 awen|OJJ38345.1 abra|OJJ69063.1 acar|OOF91220.1 akaw|GAA90593.1 aluc|OJZ86051.1  
anig|EHA24560.1 atub|OJI79848.1 aver|OJJ03010.1

Group710: abra|OJJ65912.1 acar|OOF94962.1 afla|EED52047.1 agla|OJJ80820.1 akaw|GAA92320.1  
aluc|OJZ90218.1 anig|EHA23716.1 aory|EIT81383.1 atub|OJI81650.1 abra|OJJ78044.1 agla|OJJ88747.1  
aluc|OJZ80304.1 anid|CBF82048.1 asyd|OJJ54231.1 ater|EAU30133.1 atub|OJI87457.1 aver|OJJ05184.1  
awen|OJJ39981.1 awen|OJJ41941.1 ater|EAU32853.1

Group711: abra|OJJ66027.1 acar|OOF98054.1 akaw|GAA84509.1 aluc|OJZ89238.1 atub|OJI87439.1  
awen|OJJ39904.1 azon|OJJ45880.1 abra|OJJ68242.1 acar|OOG00392.1 acla|EAW08538.1 afis|EAW23576.1  
afla|EED48210.1 afum|EAL87889.1 anid|CBF86753.1 aory|EIT72922.1 asyd|OJJ64708.1 ater|EAU32766.1  
aver|OJI98810.1 awen|OJJ29877.1 acar|OOG00089.1

Group712: abra|OJJ66125.1 acar|OOF94014.1 acla|EAW12396.1 afis|EAW16844.1 afla|EED54593.1  
afum|EAL86390.1 akaw|GAA92685.1 aluc|OJZ90143.1 anid|CBF82122.1 anig|EHA20926.1 aory|EIT78860.1  
asyd|OJJ54293.1 ater|EAU29537.1 ater|EAU37948.1 atub|OJI84656.1 aver|OJJ08125.1 awen|OJJ41474.1  
anid|CBF87727.1 awen|OJJ36145.1 aver|OJJ05248.1

Group713: abra|OJJ66251.1 acar|OOF90722.1 acla|EAW13684.1 afis|EAW19922.1 afla|EED50973.1  
afum|EAL84987.2 agla|OJJ79334.1 akaw|GAA89036.1 aluc|OJZ80559.1 anid|CBF78449.1 anig|EHA25638.1  
aory|EIT77050.1 asyd|OJJ52716.1 ater|EAU39414.1 atub|OJI88372.1 aver|OJJ04745.1 awen|OJJ29958.1  
ater|EAU38132.1 awen|OJJ36275.1 anid|CBF71116.1

Group714: abra|OJJ66260.1 acar|OOF90729.1 afla|EED53425.1 agla|OJJ88623.1 aluc|OJZ80567.1  
anid|CBF87285.1 anig|EHA25631.1 aory|EIT75214.1 asyd|OJJ56365.1 atub|OJI88364.1 aver|OJJ06349.1  
awen|OJJ40804.1 azon|OJJ42356.1 abra|OJJ68264.1 acar|OOF97543.1 akaw|GAA83201.1 aluc|OJZ83702.1  
anig|EHA18853.1 atub|OJI90074.1 acla|EAW12046.1

Group715: abra|OJJ66444.1 acar|OOG00548.1 acla|EAW08961.1 afis|EAW15440.1 afla|EED49520.1  
afum|EAL84206.1 agla|OJJ89304.1 akaw|GAA86649.1 aluc|OJZ85207.1 anid|CBF80104.1 anig|EHA26091.1  
aory|EIT82592.1 asyd|OJJ58321.1 aver|OJI98310.1 awen|OJJ32245.1 azon|OJJ50232.1 asyd|OJJ56181.1  
aver|OJJ02088.1 asyd|OJJ52211.1 awen|OJJ36078.1

Group716: abra|OJJ66628.1 acar|OOF91051.1 acla|EAW10868.1 afis|EAW20990.1 afla|EED46119.1  
afum|EAL84639.1 agla|OJJ84068.1 akaw|GAA91097.1 aluc|OJZ81420.1 anid|CBF82620.1 anig|EHA26001.1  
aory|EIT77263.1 asyd|OJJ54019.1 ater|EAU38639.1 atub|OJI88761.1 aver|OJJ08721.1 awen|OJJ34320.1  
azon|OJJ48067.1 aory|EIT76479.1 afla|EED50344.1

Group717: abra|OJJ66789.1 acar|OOF93863.1 afla|EED49543.1 akaw|GAA86855.1 aluc|OJZ89976.1  
anig|EHA27350.1 aory|EIT82644.1 atub|OJI84832.1 acla|EAW08552.1 afis|EAW23594.1 afum|EAL87873.1  
agla|OJJ86851.1 aver|OJJ05126.1 awen|OJJ39916.1 azon|OJJ45890.1 afla|EED49567.1 aory|EIT82571.1  
aver|OJI96425.1 anid|CBF82020.1 asyd|OJJ56199.1

Group718: abra|OJJ66926.1 acar|OOF91694.1 akaw|GAA91491.1 anig|EHA24880.1 atub|OJI79444.1  
abra|OJJ67524.1 acar|OOG00111.1 agla|OJJ87236.1 awen|OJJ29656.1 aluc|OJZ85159.1 anid|CBF84480.1  
aver|OJI96719.1 awen|OJJ39541.1 afis|EAW23743.1 asyd|OJJ53652.1 aver|OJI98697.1 asyd|OJJ64600.1  
agla|OJJ88829.1 aver|OJJ04862.1 ater|EAU31016.1

Group719: abra|OJJ66927.1 acar|OOF91695.1 acla|EAW14492.1 afis|EAW19206.1 afla|EED47706.1  
afum|EAL93936.1 agla|OJJ88505.1 akaw|GAA91490.1 aluc|OJZ85652.1 anid|CBF78561.1 anig|EHA24881.1  
aory|EIT80267.1 asyd|OJJ65063.1 ater|EAU37266.1 atub|OJI79443.1 aver|OJI99187.1 awen|OJJ37559.1  
azon|OJJ51221.1 ater|EAU31748.1 awen|OJJ37930.1

Group720: abra|OJJ66958.1 acar|OOF93650.1 acla|EAW14962.1 afis|EAW24485.1 afla|EED45449.1  
afum|EAL86154.1 agla|OJJ88956.1 akaw|GAA92203.1 aluc|OJZ85618.1 anid|CBF82826.1 anig|EHA24908.1  
aory|EIT82465.1 asyd|OJJ55929.1 ater|EAU37956.1 atub|OJI79411.1 aver|OJJ04879.1 awen|OJJ34538.1  
azon|OJJ51794.1 agla|OJJ83743.1 aver|OJJ00902.1

Group721: abra|OJJ67036.1 acla|EAW07070.1 afis|EAW20317.1 afum|EAL85445.1 agla|OJJ78448.1  
akaw|GAA93114.1 abra|OJJ72609.1 acar|OOF94646.1 akaw|GAA85235.1 aluc|OJZ90591.1 anig|EHA24030.1  
atub|OJI82014.1 azon|OJJ44436.1 aver|OJJ06054.1 acla|EAW08310.1 asyd|OJJ57393.1 azon|OJJ45053.1  
acla|EAW15313.1 afla|EED55819.1 aory|EIT76576.1

Group722: abra|OJJ67530.1 afis|EAW20793.1 anig|EHA18697.1 ater|EAU31981.1 atub|OJI91610.1  
aver|OJJ05285.1 abra|OJJ74028.1 acar|OOG01145.1 afla|EED54908.1 agla|OJJ83374.1 akaw|GAA87511.1  
aluc|OJJ88009.1 anid|CBF87701.1 anig|EHA17789.1 aory|EIT80304.1 asyd|OJJ63330.1 atub|OJI90618.1  
awen|OJJ38650.1 aver|OJI97632.1 anid|CBF84596.1

Group723: abra|OJJ67629.1 acar|OOF91975.1 acla|EAW08578.1 afis|EAW19829.1 afla|EED55476.1  
afum|EAL85063.1 akaw|GAA89149.1 aluc|OJJ81687.1 anid|CBF81789.1 anig|EHA25756.1 aory|EIT80791.1  
asyd|OJJ59633.1 ater|EAU38817.1 atub|OJI88494.1 aver|OJJ08870.1 azon|OJJ44622.1 acar|OOF94209.1  
anid|CBF87415.1 asyd|OJJ52901.1 acla|EAW12655.1

Group724: abra|OJJ67755.1 agla|OJJ81288.1 aver|OJJ06529.1 awen|OJJ36303.1 abra|OJJ68240.1  
acar|OOF91925.1 afis|EAW22251.1 afla|EED45387.1 anig|EHA27220.1 aory|EIT82443.1 asyd|OJJ64210.1  
atub|OJI82856.1 awen|OJJ29879.1 afla|EED49833.1 agla|OJJ89342.1 aory|EIT83402.1 awen|OJJ29870.1  
anid|CBF88940.1 aver|OJI99604.1 asyd|OJJ56544.1

Group725: abra|OJJ68054.1 acla|EAW07812.1 afla|EED48275.1 agla|OJJ87900.1 akaw|GAA90900.1  
aluc|OJJ82926.1 anid|CBF87851.1 anig|EHA21348.1 aory|EIT72960.1 asyd|OJJ56525.1 ater|EAU29450.1  
atub|OJI89156.1 aver|OJJ06198.1 awen|OJJ31590.1 aluc|OJJ80199.1 asyd|OJJ63418.1 ater|EAU38861.1  
aver|OJI97520.1 awen|OJJ38874.1 awen|OJJ39633.1

Group726: abra|OJJ68111.1 acla|EAW15307.1 afla|EED55277.1 agla|OJJ83148.1 akaw|GAA92450.1  
aluc|OJJ81568.1 anig|EHA27392.1 aory|EIT75017.1 asyd|OJJ62945.1 ater|EAU32219.1 atub|OJI88617.1  
aver|OJI98045.1 awen|OJJ35781.1 afla|EED53156.1 awen|OJJ29938.1 ater|EAU30130.1 asyd|OJJ62946.1  
aver|OJI98044.1 aver|OJJ07921.1 aver|OJJ03358.1

Group727: abra|OJJ68833.1 acar|OOF90556.1 acla|EAW11325.1 afis|EAW18170.1 afla|EED56323.1  
afum|EAL87532.1 agla|OJJ85940.1 akaw|GAA90418.1 aluc|OJJ85812.1 anid|CBF82352.1 anig|EHA24747.1  
aory|EIT73358.1 asyd|OJJ54213.1 ater|EAU33984.1 atub|OJI79598.1 aver|OJJ08518.1 awen|OJJ31290.1  
ater|EAU33834.1 awen|OJJ30517.1 aluc|OJJ80361.1

Group728: abra|OJJ68942.1 acar|OOF91523.1 acla|EAW14240.1 afis|EAW19040.1 afla|EED50395.1  
afum|EAL93769.1 agla|OJJ84572.1 akaw|GAA90311.1 aluc|OJJ85928.1 anig|EHA24668.1 aory|EIT82123.1  
asyd|OJJ65324.1 ater|EAU32079.1 atub|OJI79718.1 aver|OJI99469.1 azon|OJJ46176.1 afla|EED56613.1  
agla|OJJ84621.1 aory|EIT79679.1 awen|OJJ31261.1

Group729: abra|OJJ69052.1 acar|OOF91238.1 afis|EAW20344.1 afla|EED45064.1 afum|EAL85464.1  
agla|OJJ85556.1 akaw|GAA90584.1 aluc|OJJ86042.1 anid|CBF85628.1 anig|EHA24569.1 aory|EIT73572.1  
asyd|OJJ57132.1 ater|EAU37144.1 atub|OJI79829.1 aver|OJJ03172.1 awen|OJJ38366.1 azon|OJJ45225.1  
ater|EAU37679.1 afla|EED56599.1 aory|EIT79596.1

Group730: abra|OJJ69229.1 acar|OOF91091.1 acla|EAW12717.1 afis|EAW15814.1 afla|EED52103.1  
afum|EAL85537.1 agla|OJJ83067.1 akaw|GAA92237.1 aluc|OJJ86209.1 anid|CBF70901.1 anig|EHA24417.1  
asyd|OJJ52596.1 ater|EAU33434.1 atub|OJI80003.1 aver|OJJ04623.1 awen|OJJ38527.1 afis|EAW17879.1  
afum|EAL91687.1 aver|OJJ05547.1 awen|OJJ41685.1

Group731: abra|OJJ69242.1 acar|OOF91077.1 acla|EAW08606.1 afis|EAW15827.1 afla|EED51218.1  
afum|EAL85524.1 agla|OJJ81990.1 akaw|GAA92251.1 aluc|OJJ86222.1 anid|CBF70872.1 anig|EHA24405.1  
aory|EIT80412.1 asyd|OJJ52582.1 ater|EAU33421.1 atub|OJI80016.1 aver|OJJ04610.1 awen|OJJ38541.1  
azon|OJJ43722.1 asyd|OJJ54750.1 aver|OJJ07417.1

Group732: abra|OJJ69380.1 acar|OOF94345.1 acla|EAW08419.1 afis|EAW23450.1 afla|EED57353.1  
afum|EBA27331.1 agla|OJJ86147.1 akaw|GAA88248.1 aluc|OJJ82215.1 anid|CBF89797.1 anig|EHA28525.1  
aory|EIT80130.1 asyd|OJJ53729.1 atub|OJI88220.1 aver|OJI98284.1 awen|OJJ31384.1 azon|OJJ47909.1  
asyd|OJJ62197.1 aver|OJI96309.1 awen|OJJ39779.1

Group733: abra|OJJ69833.1 acar|OOF93358.1 afla|EED54260.1 agla|OJJ79197.1 akaw|GAA87827.1  
aluc|OJJ85463.1 anid|CBF88684.1 anig|EHA25005.1 aory|EIT76164.1 asyd|OJJ56863.1 atub|OJI80100.1  
aver|OJJ03462.1 awen|OJJ32851.1 abra|OJJ70031.1 acla|EAW15278.1 afis|EAW16787.1 afum|EAL86357.1  
anig|EHA18716.1 ater|EAU36812.1 atub|OJI79320.1

Group734: abra|OJJ69864.1 acar|OOF90332.1 afis|EAW22301.1 afla|EED45628.1 agla|OJJ82723.1  
akaw|GAA87792.1 aluc|OJJ85427.1 anid|CBF85184.1 anig|EHA25606.1 aory|EIT75771.1 ater|EAU32684.1  
atub|OJI80148.1 aver|OJI96605.1 awen|OJJ31411.1 azon|OJJ42404.1 acar|OOF91868.1 afla|EED49499.1  
aory|EIT82625.1 asyd|OJJ62470.1 ater|EAU38702.1

Group735: abra|OJJ70266.1 afla|EED54695.1 akaw|GAA86531.1 aluc|OJJ85079.1 anig|EHA25294.1  
aory|EIT78911.1 atub|OJI80519.1 abra|OJJ78041.1 acla|EAW08785.1 afis|EAW15939.1 afla|EED54424.1  
afum|EAL88574.1 agla|OJJ80367.1 aluc|OJJ80302.1 asyd|OJJ52753.1 ater|EAU31057.1 atub|OJI87455.1  
aver|OJI96478.1 awen|OJJ39980.1 ater|EAU37127.1

Group736: abra|OJJ70395.1 acar|OOF90083.1 afla|EED52271.1 agla|OJJ85325.1 akaw|GAA91963.1  
aluc|OJJ82654.1 anig|EHA27419.1 aory|EIT74349.1 asyd|OJJ61023.1 atub|OJI88885.1 aver|OJJ00344.1

awen|OJJ33584.1 af|a|EED48143.1 aory|EIT74445.1 asyd|OJJ58659.1 af|a|EED52287.1 af|a|EED55148.1 aory|EIT81619.1 awen|OJJ34668.1 awen|OJJ37795.1

Group737: abra|OJJ70402.1 acar|OOF93249.1 acla|EAW14348.1 afis|EAW20782.1 af|a|EED52329.1 afum|EAL84841.1 ag|a|OJJ85851.1 aory|EIT74419.1 asyd|OJJ62498.1 ater|EAU32955.1 aver|OJJ96618.1 azon|OJJ44872.1 abra|OJJ77381.1 akaw|GAA91380.1 aluc|OJJ84789.1 anig|EHA28057.1 atub|OJJ89293.1 aory|EIT74407.1 ater|EAU31843.1 azon|OJJ50673.1

Group738: acla|EAW07697.1 afis|EAW22714.1 afum|EAL90480.1 ag|a|OJJ78998.1 azon|OJJ49768.1 abra|OJJ76709.1 acar|OOF98067.1 akaw|GAA92489.1 aluc|OJJ91501.1 anid|CBF75580.1 anig|EHA22541.1 atub|OJJ85954.1 awen|OJJ37863.1 af|a|EED45147.1 aory|EIT73529.1 asyd|OJJ55486.1 aver|OJJ06565.1 awen|OJJ35349.1 awen|OJJ33591.1 azon|OJJ42132.1

Group739: abra|OJJ70566.1 acla|EAW08365.1 afis|EAW23395.1 af|a|EED55562.1 afum|EAL88075.1 ag|a|OJJ86422.1 akaw|GAA83410.1 aluc|OJJ83909.1 anid|CBF74809.1 anig|EHA19043.1 aory|EIT82686.1 asyd|OJJ60147.1 ater|EAU35648.1 atub|OJJ90280.1 aver|OJJ04116.1 awen|OJJ39484.1 azon|OJJ47686.1 acla|EAW12884.1 afis|EAW17793.1 afum|EAL91602.1

Group740: abra|OJJ70960.1 acar|OOF98170.1 acla|EAW10521.1 afis|EAW25045.1 af|a|EED48351.1 afum|EAL89713.1 ag|a|OJJ89149.1 akaw|GAA82987.1 aluc|OJJ87572.1 anid|CBF85914.1 anig|EHA20774.1 aory|EIT80893.1 asyd|OJJ64399.1 ater|EAU35795.1 atub|OJJ81077.1 aver|OJJ98495.1 awen|OJJ40656.1 azon|OJJ44034.1 aory|EIT72298.1 af|a|EED55406.1

Group741: abra|OJJ71146.1 acar|OOF98009.1 acar|OOF98010.1 acla|EAW10360.1 afis|EAW25233.1 af|a|EED53679.1 afum|EAL89894.1 ag|a|OJJ79174.1 akaw|GAA82831.1 aluc|OJJ87392.1 anid|CBF85327.1 anig|EHA20621.1 anig|EHA20622.1 aory|EIT75303.1 asyd|OJJ64017.1 ater|EAU34392.1 atub|OJJ81254.1 aver|OJJ98103.1 awen|OJJ40899.1 azon|OJJ44526.1

Group742: abra|OJJ71723.1 acar|OOF96427.1 acla|EAW10027.1 afis|EAW15606.1 afum|EAL85727.1 akaw|GAA85167.1 aluc|OJJ86469.1 anig|EHA21441.1 atub|OJJ84060.1 azon|OJJ45251.1 af|a|EED55033.1 ag|a|OJJ82925.1 aory|EIT76156.1 asyd|OJJ53836.1 af|a|EED48194.1 aory|EIT72936.1 azon|OJJ45977.1 af|a|EED54138.1 aory|EIT81964.1 asyd|OJJ56435.1

Group743: abra|OJJ71853.1 acar|OOF96523.1 af|a|EED52750.1 afum|EAL93305.1 ag|a|OJJ81650.1 akaw|GAA85064.1 aluc|OJJ86587.1 anid|CBF70395.1 anig|EHA22073.1 aory|EIT78183.1 asyd|OJJ58634.1 atub|OJJ83936.1 aver|OJJ01240.1 awen|OJJ31160.1 acla|EAW13885.1 afis|EAW18597.1 ater|EAU34891.1 azon|OJJ46636.1 asyd|OJJ54226.1 aver|OJJ05179.1

Group744: abra|OJJ72081.1 acar|OOF90349.1 af|a|EED45358.1 ag|a|OJJ82915.1 aluc|OJJ86835.1 aory|EIT82374.1 asyd|OJJ56205.1 atub|OJJ83683.1 aver|OJJ05132.1 awen|OJJ35919.1 azon|OJJ42174.1 af|a|EED45415.1 akaw|GAA92568.1 aluc|OJJ82578.1 anig|EHA22490.1 aory|EIT73709.1 asyd|OJJ65181.1 aver|OJJ99335.1 aory|EIT82376.1 awen|OJJ39611.1

Group745: abra|OJJ72207.1 acar|OOF96828.1 acla|EAW14969.1 afis|EAW24492.1 af|a|EED54697.1 afum|EAL86161.1 ag|a|OJJ80329.1 akaw|GAA84727.1 aluc|OJJ86959.1 anid|CBF71478.1 anig|EHA21689.1 aory|EIT78783.1 asyd|OJJ54943.1 ater|EAU29944.1 atub|OJJ83564.1 aver|OJJ07252.1 awen|OJJ33962.1 azon|OJJ42613.1 azon|OJJ48606.1 awen|OJJ32703.1

Group746: abra|OJJ72535.1 acar|OOF94717.1 acla|EAW12742.1 afis|EAW17905.1 af|a|EED46297.1 afum|EAL91714.1 ag|a|OJJ83037.1 akaw|GAA86257.1 aluc|OJJ90515.1 anid|CBF76985.1 anig|EHA23970.1 aory|EIT76354.1 asyd|OJJ57035.1 ater|EAU33123.1 atub|OJJ81939.1 aver|OJJ03257.1 awen|OJJ41645.1 azon|OJJ48367.1 aluc|OJJ90514.1 aory|EIT76342.1

Group747: abra|OJJ72848.1 acar|OOF96049.1 acla|EAW11395.1 afis|EAW24026.1 af|a|EED49128.1 afum|EAL87457.1 ag|a|OJJ86959.1 akaw|GAA85449.1 aluc|OJJ83357.1 anid|CBF84482.1 anig|EHA24222.1 aory|EIT78568.1 asyd|OJJ53530.1 ater|EAU29718.1 atub|OJJ82248.1 aver|OJJ08220.1 awen|OJJ35499.1 azon|OJJ43175.1 acla|EAW12378.1 awen|OJJ40008.1

Group748: abra|OJJ73145.1 acar|OOG00357.1 acla|EAW07021.1 afis|EAW16647.1 af|a|EED45442.1 afum|EAL89251.1 ag|a|OJJ82595.1 akaw|GAA88027.1 aluc|OJJ81286.1 anid|CBF82058.1 anig|EHA18585.1 aory|EIT82414.1 asyd|OJJ54238.1 ater|EAU39572.1 atub|OJJ91493.1 aver|OJJ05190.1 awen|OJJ40067.1 azon|OJJ45557.1 aver|OJJ01178.1 af|a|EED50972.1

Group749: abra|OJJ73181.1 acar|OOG00417.1 af|a|EED47213.1 afum|EAL89070.1 akaw|GAA87994.1 aluc|OJJ81249.1 anig|EHA18557.1 ater|EAU36561.1 awen|OJJ40360.1 azon|OJJ49208.1 acla|EAW06859.1 afis|EAW16476.1 ag|a|OJJ82869.1 anid|CBF75495.1 aory|EIT79277.1 asyd|OJJ59750.1 atub|OJJ91445.1 aver|OJJ02537.1 acar|OOG00418.1 atub|OJJ91444.1

Group750: abra|OJJ73280.1 acar|OOG00516.1 acla|EAW06955.1 afis|EAW16570.1 af|a|EED56094.1 afum|EAL89167.1 ag|a|OJJ82745.1 akaw|GAA92725.1 aluc|OJJ88769.1 anid|CBF81824.1 anig|EHA18465.1 aory|EIT76687.1 asyd|OJJ59656.1 ater|EAU36631.1 atub|OJJ91342.1 aver|OJJ02626.1 awen|OJJ40248.1 azon|OJJ49110.1 afum|EAL87777.1 aory|EIT72969.1



Group751: abra|OJJ73388.1 acar|OOG00590.1 acla|EAW07000.1 afis|EAW16615.1 afla|EED44990.1  
afum|EAL89221.1 agla|OJJ82629.1 akaw|GAA83101.1 aluc|OJZ88649.1 anid|CBF82980.1 anig|EHA18340.1  
aory|EIT73600.1 asyd|OJJ53668.1 ater|EAU36700.1 atub|OJI91236.1 aver|OJJ07774.1 awen|OJJ40187.1  
azon|OJJ49474.1 anig|EHA18404.1 ater|EAU37639.1

Group752: abra|OJJ73407.1 acar|OOG00604.1 acla|EAW07012.1 afis|EAW16632.1 afla|EED48324.1  
afum|EAL89228.1 agla|OJJ82617.1 akaw|GAA83084.1 aluc|OJZ88631.1 anid|CBF82011.1 anig|EHA18321.1  
aory|EIT73498.1 asyd|OJJ56190.1 ater|EAU36752.1 atub|OJI91215.1 aver|OJJ05118.1 awen|OJJ40077.1  
azon|OJJ43490.1 aory|EIT76284.1 afla|EED48295.1

Group753: abra|OJJ73423.1 acar|OOG00627.1 acla|EAW07036.1 afis|EAW16662.1 afla|EED44895.1  
afum|EAL89266.1 agla|OJJ78707.1 akaw|GAA83069.1 aluc|OJZ88620.1 anid|CBF84550.1 anig|EHA18311.1  
aory|EIT83238.1 asyd|OJJ53473.1 ater|EAU31782.1 atub|OJI91205.1 aver|OJJ08283.1 awen|OJJ40051.1  
azon|OJJ47485.1 afla|EED56569.1 aory|EIT79633.1

Group754: abra|OJJ73685.1 acar|OOG00855.1 acar|OOG00856.1 acla|EAW07600.1 afis|EAW22631.1  
afum|EAL90492.1 agla|OJJ79009.1 akaw|GAA89412.1 aluc|OJZ88261.1 anid|CBF88081.1 anig|EHA18006.1  
aory|EIT74617.1 asyd|OJJ63558.1 ater|EAU39002.1 atub|OJI90860.1 aver|OJI97374.1 awen|OJJ35337.1  
azon|OJJ49781.1 ater|EAU30260.1 awen|OJJ38024.1

Group755: abra|OJJ73793.1 acar|OOG00954.1 acla|EAW07685.1 afis|EAW22700.1 afla|EED49986.1  
afum|EAL90492.1 agla|OJJ79009.1 akaw|GAA89412.1 aluc|OJZ88261.1 anid|CBF88081.1 anig|EHA18006.1  
aory|EIT74617.1 asyd|OJJ63558.1 ater|EAU39002.1 atub|OJI90860.1 aver|OJI97374.1 awen|OJJ35337.1  
azon|OJJ49781.1 ater|EAU30260.1 awen|OJJ38024.1

Group756: abra|OJJ73803.1 acar|OOG00958.1 acla|EAW07675.1 afis|EAW22690.1 afla|EED49983.1  
afum|EAL90502.1 agla|OJJ79015.1 akaw|GAA89422.1 aluc|OJZ88250.1 anid|CBF88089.1 anig|EHA17993.1  
aory|EIT74622.1 asyd|OJJ63564.1 ater|EAU39009.1 atub|OJI90849.1 aver|OJI97369.1 awen|OJJ33510.1  
azon|OJJ49784.1 acar|OOG00352.1 afla|EED46078.1

Group757: abra|OJJ73866.1 acar|OOF97590.1 acla|EAW06976.1 afis|EAW16590.1 afla|EED46107.1  
afum|EAL89185.1 agla|OJJ83704.1 akaw|GAA89476.1 aluc|OJZ88187.1 anid|CBF76004.1 anig|EHA17938.1  
aory|EIT76398.1 asyd|OJJ57426.1 ater|EAU29326.1 atub|OJI90786.1 aver|OJJ03990.1 awen|OJJ40225.1  
azon|OJJ49083.1 anid|CBF75976.1 asyd|OJJ60263.1

Group758: abra|OJJ74117.1 acar|OOG01222.1 acla|EAW07959.1 afis|EAW22994.1 afla|EED58187.1  
afum|EAL90205.1 agla|OJJ83290.1 akaw|GAA87590.1 aluc|OJZ87915.1 anid|CBF87568.1 anig|EHA17710.1  
aory|EIT79090.1 asyd|OJJ63243.1 ater|EAU30624.1 atub|OJI90527.1 aver|OJI97713.1 awen|OJJ38567.1  
azon|OJJ50434.1 anig|EHA17709.1 afum|EAL90206.1

Group759: abra|OJJ74269.1 acar|OOF95462.1 acla|EAW07313.1 afis|EAW22333.1 afla|EED57749.1  
afum|EAL90859.1 agla|OJJ87713.1 akaw|GAA86754.1 aluc|OJZ89864.1 anid|CBF78344.1 anig|EHA27064.1  
aory|EIT81050.1 asyd|OJJ56131.1 ater|EAU39462.1 atub|OJI84944.1 aver|OJJ05072.1 awen|OJJ34911.1  
asyd|OJJ61756.1 aver|OJI95855.1 agla|OJJ78853.1

Group760: abra|OJJ74757.1 acar|OOF95750.1 acla|EAW10654.1 afis|EAW24913.1 afla|EED46998.1  
afum|EAL89567.1 agla|OJJ82924.1 akaw|GAA83654.1 aluc|OJZ92341.1 anid|CBF75675.1 anig|EHA26633.1  
aory|EIT72680.1 asyd|OJJ57485.1 ater|EAU36385.1 atub|OJI86767.1 aver|OJJ05695.1 awen|OJJ40509.1  
azon|OJJ49368.1 afla|EED48195.1 aory|EIT72956.1

Group761: abra|OJJ74761.1 acar|OOF95754.1 acla|EAW10650.1 afis|EAW24917.1 afla|EED47002.1  
afum|EAL89572.2 agla|OJJ82145.1 akaw|GAA83650.1 aluc|OJZ92345.1 anid|CBF75683.1 anig|EHA26629.1  
aory|EIT72569.1 asyd|OJJ57489.1 ater|EAU36381.1 atub|OJI86771.1 aver|OJJ05691.1 awen|OJJ40513.1  
azon|OJJ49372.1 anid|CBF75685.1 atub|OJI86772.1

Group762: abra|OJJ74833.1 acar|OOF95823.1 acla|EAW11247.1 afis|EAW18253.1 afla|EED56199.1  
afum|EAL87616.1 agla|OJJ88191.1 akaw|GAA83587.1 aluc|OJZ92410.1 anid|CBF86203.1 anig|EHA26555.1  
aory|EIT73440.1 asyd|OJJ58331.1 ater|EAU33725.1 atub|OJI86840.1 aver|OJJ02080.1 awen|OJJ30627.1  
azon|OJJ47986.1 aver|OJI98640.1 asyd|OJJ64544.1

Group763: abra|OJJ74891.1 acar|OOF95894.1 acla|EAW12408.1 afis|EAW17228.1 afla|EED45013.1  
agla|OJJ86664.1 akaw|GAA83528.1 aluc|OJZ92468.1 anig|EHA26500.1 aory|EIT73647.1 asyd|OJJ62261.1  
ater|EAU35311.1 atub|OJI86897.1 aver|OJI96370.1 awen|OJJ39852.1 afla|EED54064.1 aory|EIT76126.1  
asyd|OJJ56095.1 aver|OJJ05039.1 afla|EED46550.1

Group764: abra|OJJ74964.1 acar|OOF97350.1 acla|EAW08410.1 afis|EAW23459.1 afla|EED57342.1  
afum|EAL88007.2 agla|OJJ86690.1 akaw|GAA83462.1 aluc|OJZ92534.1 anid|CBF89818.1 anig|EHA26441.1  
aory|EIT80102.1 asyd|OJJ62188.1 ater|EAU37472.1 atub|OJI86970.1 aver|OJI96297.1 awen|OJJ39771.1  
azon|OJJ47905.1 afla|EED57341.1 aory|EIT80055.1

Group765: abra|OJJ75326.1 acar|OOF90139.1 acla|EAW12017.1 afis|EAW19657.1 afla|EED57008.1  
afum|EAL86866.1 agla|OJJ80802.1 akaw|GAA92021.1 aluc|OJZ92889.1 anid|CBF82008.1 anig|EHA26074.1

aory|EIT82264.1 asyd|OJJ55074.1 asyd|OJJ65337.1 ater|EAU32873.1 atub|OJI87347.1 aver|OJI99483.1  
aver|OJJ07134.1 awen|OJJ41915.1 agla|OJJ85377.1

Group766: abra|OJJ75618.1 acar|OOG00217.1 acla|EAW09356.1 afis|EAW21782.1 afla|EED46350.1  
afum|EAL92810.1 agla|OJJ84341.1 akaw|GAA84367.1 aluc|OJZ89071.1 anid|CBF76611.1 anig|EHA23465.1  
aory|EIT81207.1 asyd|OJJ61187.1 ater|EAU38459.1 atub|OJI85717.1 aver|OJJ00510.1 awen|OJJ34070.1  
azon|OJJ48159.1 afum|EAL85431.1 anid|CBF76609.1

Group767: abra|OJJ75770.1 acla|EAW09729.1 afis|EAW21415.1 afla|EED54885.1 afum|EAL92430.1  
agla|OJJ78973.1 akaw|GAA89736.1 aluc|OJZ82585.1 anid|CBF82747.1 aory|EIT79345.1 asyd|OJJ54779.1  
ater|EAU34053.1 atub|OJI87188.1 awen|OJJ30924.1 azon|OJJ44473.1 afis|EAW17192.1 afum|EAL86620.1  
akaw|GAA92574.1 anid|CBF80434.1 agla|OJJ79605.1

Group768: abra|OJJ75774.1 acla|EAW12650.1 afis|EAW18035.1 afla|EED45683.1 afum|EAL91846.1  
agla|OJJ82507.1 anid|CBF81936.1 anig|EHA18442.1 aory|EIT76073.1 asyd|OJJ58678.1 ater|EAU31610.1  
atub|OJI87184.1 aver|OJJ01290.1 awen|OJJ30920.1 acar|OOG00708.1 afla|EED54070.1 asyd|OJJ57410.1  
aver|OJJ05771.1 awen|OJJ35374.1 aory|EIT75690.1

Group769: abra|OJJ76070.1 acar|OOF99859.1 acla|EAW09749.1 afis|EAW21393.1 afla|EED55810.1  
afum|EAL92407.1 agla|OJJ85517.1 akaw|GAA88897.1 aluc|OJZ89524.1 anid|CBF71432.1 anig|EHA23077.1  
aory|EIT76869.1 asyd|OJJ61713.1 ater|EAU35164.1 atub|OJI85279.1 aver|OJJ07221.1 awen|OJJ39311.1  
azon|OJJ51541.1 asyd|OJJ54970.1 ater|EAU32747.1

Group770: abra|OJJ76073.1 acar|OOF99853.1 afis|EAW16840.1 afla|EED47451.1 afum|EAL86387.1  
akaw|GAA88894.1 aluc|OJZ89527.1 anig|EHA23074.1 aory|EIT81896.1 atub|OJI85276.1 aver|OJJ06456.1  
awen|OJJ36309.1 abra|OJJ76507.1 agla|OJJ80808.1 akaw|GAA92901.1 anid|CBF73893.1 anig|EHA22710.1  
asyd|OJJ53660.1 ater|EAU36678.1 aver|OJJ07768.1

Group771: abra|OJJ76117.1 acar|OOF99808.1 acla|EAW09703.1 afis|EAW21437.1 afla|EED45636.1  
afum|EAL92452.2 agla|OJJ85581.1 akaw|GAA88850.1 aluc|OJZ89574.1 anid|CBF76585.1 anig|EHA23033.1  
aory|EIT76558.1 asyd|OJJ61172.1 ater|EAU35108.1 atub|OJI85230.1 aver|OJJ00497.1 awen|OJJ39261.1  
azon|OJJ51593.1 aory|EIT75602.1 afla|EED55865.1

Group772: abra|OJJ76529.1 acar|OOF99449.1 acla|EAW14176.1 afis|EAW18891.1 afla|EED50873.1  
afum|EBA27495.1 agla|OJJ81497.1 akaw|GAA82440.1 akaw|GAA82441.1 aluc|OJZ91675.1 aluc|OJZ91676.1  
anid|CBF69904.1 anig|EHA22693.1 aory|EIT79015.1 asyd|OJJ58997.1 ater|EAU38063.1 atub|OJI86130.1  
aver|OJJ01619.1 awen|OJJ32450.1 azon|OJJ47208.1

Group773: abra|OJJ77055.1 acar|OOF92945.1 acla|EAW13514.1 afis|EAW19907.1 afla|EED54205.1  
afum|EAL84999.1 agla|OJJ88625.1 akaw|GAA86997.1 aluc|OJZ84460.1 anid|CBF86958.1 anig|EHA27775.1  
aory|EIT76071.1 asyd|OJJ55597.1 ater|EAU35255.1 atub|OJI89615.1 aver|OJJ06677.1 awen|OJJ33456.1  
azon|OJJ50712.1 afis|EAW20612.1 acla|EAW13697.1

Group774: abra|OJJ77217.1 acar|OOF93104.1 acla|EAW09073.1 afis|EAW16463.1 afla|EED45621.1  
afum|EAL89059.1 akaw|GAA90721.1 aluc|OJZ84628.1 anid|CBF82099.1 anig|EHA27915.1 aory|EIT75489.1  
ater|EAU35691.1 atub|OJI89451.1 azon|OJJ51362.1 awen|OJJ34525.1 acla|EAW06842.1 afis|EAW25646.1  
asyd|OJJ54269.1 agla|OJJ79388.1 afum|EAL84332.1

Group775: abra|OJJ77859.1 acar|OOF98914.1 acla|EAW11267.1 afis|EAW18231.1 afla|EED52136.1  
afum|EAL87599.1 agla|OJJ85846.1 akaw|GAA83790.1 aluc|OJZ90933.1 anid|CBF86176.1 anig|EHA19643.1  
aory|EIT73335.1 asyd|OJJ64527.1 ater|EAU33760.1 atub|OJI82925.1 aver|OJI98625.1 awen|OJJ30611.1  
azon|OJJ48005.1 azon|OJJ42776.1 awen|OJJ36209.1

Group776: abra|OJJ77974.1 acar|OOF98840.1 acla|EAW06664.1 afis|EAW16101.1 afla|EED48636.1  
afum|EAL88733.1 agla|OJJ86121.1 akaw|GAA83686.1 aluc|OJZ91047.1 anid|CBF85446.1 anig|EHA19744.1  
aory|EIT73060.1 asyd|OJJ64094.1 ater|EAU33175.1 aver|OJI98176.1 awen|OJJ30331.1 azon|OJJ45359.1  
anid|CBF85444.1 asyd|OJJ64092.1 atub|OJI83043.1

Group777: abra|OJJ78228.1 acar|OOF98631.1 afis|EAW21866.1 afla|EED46443.1 afum|EAL92880.2  
agla|OJJ84269.1 akaw|GAA85796.1 aluc|OJZ91303.1 anid|CBF76759.1 anig|EHA19985.1 aory|EIT72387.1  
asyd|OJJ61264.1 ater|EAU30863.1 atub|OJI83294.1 aver|OJJ00590.1 awen|OJJ34155.1 azon|OJJ43474.1  
afila|EED54738.1 anid|CBF76761.1 aver|OJJ00591.1

Group778: abra|OJJ78259.1 acar|OOF98601.1 acla|EAW09251.1 afis|EAW21896.1 afla|EED46412.1  
afum|EBA27479.1 agla|OJJ84236.1 akaw|GAA85766.1 aluc|OJZ91333.1 anig|EHA20015.1 aory|EIT72351.1  
asyd|OJJ61292.1 ater|EAU30891.1 atub|OJI83326.1 aver|OJJ00618.1 awen|OJJ34185.1 azon|OJJ43448.1  
aluc|OJZ91334.1 akaw|GAA85767.1 anid|CBF76812.1

Group779: abra|OJJ66219.1 abra|OJJ77447.1 awen|OJJ34603.1 awen|OJJ39635.1 acar|OOF90664.1  
afila|EED48277.1 afila|EED48278.1 akaw|GAA89067.1 aluc|OJZ80525.1 anig|EHA25670.1 anig|EHA25671.1  
aory|EIT72908.1 aory|EIT72950.1 ater|EAU37355.1 atub|OJI88405.1 anid|CBF74667.1 acar|OOF90665.1  
anid|CBF74669.1 awen|OJJ34600.1

Group780: abra|OJJ67019.1 abra|OJJ74812.1 akaw|GAA83601.1 akaw|GAA93299.1 anig|EHA25612.1 anig|EHA26582.1 afis|EAW20313.1 afla|EED56766.1 afum|EAL85436.1 agla|OJJ83095.1 aluc|OJJ292393.1 ater|EAU31040.1 atub|OJI86823.1 awen|OJJ33515.1 acla|EAW07069.1 aory|EIT73952.1 asyd|OJJ56123.1 aver|OJJ05065.1 azon|OJJ42468.1

Group781: abra|OJJ67077.1 abra|OJJ70209.1 akaw|GAA86567.1 akaw|GAA91080.1 aluc|OJZ85118.1 aluc|OJZ87895.1 anig|EHA20194.1 anig|EHA25338.1 aory|EIT75167.1 aory|EIT80564.1 atub|OJI80475.1 atub|OJI80757.1 acar|OOF90366.1 afis|EAW16753.1 afla|EED51374.1 afum|EAL86325.1 agla|OJJ78769.1 aver|OJJ05553.1 afla|EED53531.1

Group782: abra|OJJ68020.1 abra|OJJ77410.1 acar|OOF92063.1 acar|OOF93277.1 akaw|GAA90931.1 akaw|GAA91354.1 anig|EHA21318.1 anig|EHA28081.1 atub|OJI89119.1 atub|OJI89267.1 acla|EAW09048.1 afla|EED46361.1 agla|OJJ81295.1 aluc|OJZ82894.1 aory|EIT81187.1 asyd|OJJ63773.1 aver|OJI97164.1 awen|OJJ30865.1 aluc|OJZ84818.1

Group783: abra|OJJ68371.1 abra|OJJ72091.1 acar|OOF96736.1 acla|EAW09472.1 afis|EAW21661.1 afla|EED57928.1 afum|EAL92696.1 agla|OJJ79735.1 akaw|GAA84829.1 aluc|OJZ86846.1 anid|CBF83566.1 anig|EHA21792.1 aory|EIT82318.1 asyd|OJJ60745.1 ater|EAU38349.1 atub|OJI83673.1 aver|OJJ00077.1 awen|OJJ33927.1 azon|OJJ48635.1

Group784: acar|OOF90452.1 acar|OOF90459.1 abra|OJJ71882.1 acla|EAW13911.1 afis|EAW18623.1 afla|EED52721.1 afum|EAL93333.1 agla|OJJ81237.1 akaw|GAA85034.1 aluc|OJZ86620.1 anid|CBF70493.1 anig|EHA22046.1 aory|EIT78225.1 asyd|OJJ58583.1 ater|EAU34923.1 atub|OJI83905.1 aver|OJJ01187.1 awen|OJJ32086.1 azon|OJJ46665.1

Group785: acar|OOF90454.1 acar|OOF90462.1 abra|OJJ71884.1 acla|EAW09637.1 afis|EAW21503.1 afla|EED55939.1 afum|EAL92522.1 agla|OJJ85666.1 akaw|GAA85032.1 aluc|OJZ86622.1 anid|CBF76453.1 anig|EHA22044.1 aory|EIT76619.1 asyd|OJJ61107.1 ater|EAU35035.1 atub|OJI83903.1 aver|OJJ00424.1 awen|OJJ39192.1 azon|OJJ51508.1

Group786: acar|OOF90455.1 acar|OOF90461.1 abra|OJJ71885.1 acla|EAW09636.1 afis|EAW21504.1 afla|EED55940.1 afum|EAL92523.1 agla|OJJ85667.1 akaw|GAA85031.1 aluc|OJZ86623.1 anid|CBF76451.1 anig|EHA22043.1 aory|EIT76886.1 asyd|OJJ61106.1 ater|EAU35034.1 atub|OJI83902.1 aver|OJJ00423.1 awen|OJJ39191.1 azon|OJJ51507.1

Group787: acar|OOF90456.1 acar|OOF90463.1 abra|OJJ71886.1 acla|EAW09635.1 afis|EAW21505.1 afla|EED55941.1 afum|EAL92524.1 agla|OJJ85668.1 akaw|GAA85030.1 aluc|OJZ86624.1 anid|CBF76449.1 anig|EHA22042.1 aory|EIT76597.1 asyd|OJJ61105.1 ater|EAU35033.1 atub|OJI83901.1 aver|OJJ00422.1 awen|OJJ39190.1 azon|OJJ51506.1

Group788: acar|OOF90909.1 acar|OOF90910.1 abra|OJJ67526.1 afla|EED49685.1 anig|EHA18706.1 aory|EIT81018.1 asyd|OJJ57249.1 ater|EAU38522.1 aver|OJJ03045.1 awen|OJJ31267.1 abra|OJJ75516.1 acar|OOF90843.1 afla|EED46523.1 akaw|GAA84280.1 aluc|OJZ88973.1 anig|EHA23552.1 atub|OJI85817.1 aory|EIT72379.1 agla|OJJ87127.1

Group789: acar|OOF92001.1 acar|OOF92003.1 abra|OJJ67845.1 acla|EAW11054.1 afis|EAW20822.1 afla|EED52866.1 afum|EAL84807.1 agla|OJJ88409.1 akaw|GAA91851.1 aluc|OJZ82047.1 anid|CBF78348.1 anig|EHA22211.1 aory|EIT78637.1 asyd|OJJ56141.1 atub|OJI84605.1 aver|OJJ05080.1 awen|OJJ29709.1 azon|OJJ45742.1 awen|OJJ34808.1

Group790: acar|OOF92286.1 acar|OOF92327.1 abra|OJJ67516.1 acla|EAW06255.1 afis|EAW18362.1 afla|EED53043.1 afum|EAL93033.1 agla|OJJ84926.1 akaw|GAA86324.1 aluc|OJZ84848.1 anid|CBF70825.1 anig|EHA25082.1 aory|EIT77408.1 asyd|OJJ58399.1 ater|EAU32230.1 atub|OJI80748.1 aver|OJJ01000.1 awen|OJJ31788.1 azon|OJJ50438.1

Group791: acar|OOF92287.1 acar|OOF92328.1 abra|OJJ67515.1 acla|EAW06254.1 afis|EAW18361.1 afla|EED53044.1 afum|EAL93032.2 agla|OJJ84925.1 akaw|GAA86325.1 aluc|OJZ84849.1 anid|CBF70827.1 anig|EHA25083.1 aory|EIT77438.1 asyd|OJJ58398.1 ater|EAU32229.1 atub|OJI80747.1 aver|OJJ00999.1 awen|OJJ31789.1 azon|OJJ42001.1

Group792: acar|OOF92288.1 acar|OOF92329.1 abra|OJJ67514.1 acla|EAW06260.1 afis|EAW18367.1 afla|EED53038.1 afum|EAL93041.1 agla|OJJ84931.1 akaw|GAA86326.1 aluc|OJZ84850.1 anid|CBF70815.1 anig|EHA25084.1 aory|EIT77399.1 asyd|OJJ58404.1 ater|EAU32236.1 atub|OJI80746.1 aver|OJJ01005.1 awen|OJJ31783.1 azon|OJJ50443.1

Group793: acar|OOF92289.1 acar|OOF92330.1 abra|OJJ67513.1 acla|EAW06259.1 afis|EAW18366.1 afla|EED53039.1 afum|EAL93040.1 agla|OJJ84930.1 akaw|GAA86327.1 aluc|OJZ84851.1 anid|CBF70817.1 anig|EHA25085.1 aory|EIT77396.1 asyd|OJJ58403.1 ater|EAU32235.1 atub|OJI80745.1 aver|OJJ01004.1 awen|OJJ31784.1 azon|OJJ50442.1

Group794: acar|OOF92291.1 acar|OOF92332.1 abra|OJJ67510.1 afis|EAW18368.1 afla|EED53037.1 afum|EAL93043.1 agla|OJJ84933.1 akaw|GAA86329.1 aluc|OJZ84854.1 anid|CBF70814.1 anig|EHA25087.1

aory|EIT77401.1 asyd|OJJ58405.1 ater|EAU32238.1 atub|OJI80742.1 aver|OJJ01006.1 awen|OJJ31781.1  
azon|OJJ43320.1 acla|EAW06262.1

Group795: acar|OOF92293.1 acar|OOF92334.1 abra|OJJ67507.1 acla|EAW06264.1 afis|EAW18370.1  
afla|EED53036.1 afum|EAL93045.1 agla|OJJ84935.1 akaw|GAA86331.1 aluc|OJZ84856.1 anid|CBF70808.1  
anig|EHA25089.1 aory|EIT77405.1 asyd|OJJ58408.1 ater|EAU32240.1 atub|OJI80740.1 aver|OJJ01010.1  
awen|OJJ31779.1 azon|OJJ50445.1

Group796: acar|OOF92297.1 acar|OOF92338.1 abra|OJJ67503.1 acla|EAW06267.1 afis|EAW18373.1  
afla|EED53033.1 afum|EAL93048.1 agla|OJJ84937.1 akaw|GAA86335.1 aluc|OJZ84860.1 anid|CBF70800.1  
anig|EHA25093.1 aory|EIT77403.1 asyd|OJJ58411.1 ater|EAU32243.1 atub|OJI80736.1 aver|OJJ01013.1  
awen|OJJ31777.1 azon|OJJ50448.1

Group797: acar|OOF92298.1 acar|OOF92339.1 abra|OJJ67502.1 acla|EAW06268.1 afis|EAW18374.1  
afla|EED53032.1 afum|EAL93049.1 agla|OJJ84938.1 akaw|GAA86336.1 aluc|OJZ84861.1 anid|CBF70798.1  
anig|EHA25094.1 aory|EIT77421.1 asyd|OJJ58412.1 ater|EAU32244.1 atub|OJI80735.1 aver|OJJ01014.1  
awen|OJJ31766.1 azon|OJJ50449.1

Group798: acar|OOF92299.1 acar|OOF92340.1 abra|OJJ67501.1 acla|EAW06269.1 afis|EAW18375.1  
afla|EED53031.1 afum|EAL93050.1 agla|OJJ84939.1 akaw|GAA86337.1 aluc|OJZ84862.1 anid|CBF70797.1  
anig|EHA25095.1 aory|EIT77415.1 asyd|OJJ58413.1 ater|EAU32245.1 atub|OJI80734.1 aver|OJJ01015.1  
awen|OJJ31767.1 azon|OJJ50450.1

Group799: acar|OOF92301.1 acar|OOF92342.1 abra|OJJ67499.1 acla|EAW06271.1 afis|EAW18377.1  
afla|EED53029.1 afum|EAL93052.1 agla|OJJ84941.1 akaw|GAA86339.1 aluc|OJZ84864.1 anid|CBF70793.1  
anig|EHA25096.1 aory|EIT77426.1 asyd|OJJ58415.1 ater|EAU32247.1 atub|OJI80732.1 aver|OJJ01017.1  
awen|OJJ31769.1 azon|OJJ50452.1

Group800: acar|OOF92303.1 acar|OOF92343.1 abra|OJJ67498.1 acla|EAW06272.1 afis|EAW18378.1  
afla|EED53028.1 afum|EAL93053.1 agla|OJJ84942.1 akaw|GAA86340.1 aluc|OJZ84865.1 anid|CBF70791.1  
anig|EHA25097.1 aory|EIT77397.1 asyd|OJJ58416.1 ater|EAU32248.1 atub|OJI80731.1 aver|OJJ01018.1  
awen|OJJ31770.1 azon|OJJ50453.1

Group801: acar|OOF92304.1 acar|OOF92345.1 abra|OJJ67496.1 acla|EAW06274.1 afis|EAW18380.1  
afla|EED53026.1 afum|EAL93055.1 agla|OJJ84944.1 akaw|GAA86342.1 aluc|OJZ84867.1 anid|CBF70787.1  
anig|EHA25099.1 aory|EIT77406.1 asyd|OJJ58418.1 ater|EAU32249.1 atub|OJI80729.1 aver|OJJ01020.1  
awen|OJJ31772.1 azon|OJJ50455.1

Group802: acar|OOF92305.1 acar|OOF92346.1 abra|OJJ67495.1 acla|EAW06275.1 afis|EAW18381.1  
afla|EED53025.1 afum|EAL93056.1 agla|OJJ84945.1 akaw|GAA86343.1 aluc|OJZ84869.1 anid|CBF70785.1  
anig|EHA25100.1 aory|EIT77407.1 asyd|OJJ58419.1 ater|EAU32250.1 atub|OJI80728.1 aver|OJJ01021.1  
awen|OJJ31773.1 azon|OJJ50456.1

Group803: acar|OOF92306.1 acar|OOF92347.1 abra|OJJ67494.1 acla|EAW06276.1 afis|EAW18382.1  
afla|EED53024.1 afum|EAL93057.1 agla|OJJ84946.1 akaw|GAA86344.1 aluc|OJZ84870.1 anid|CBF70783.1  
anig|EHA25101.1 aory|EIT77418.1 asyd|OJJ58420.1 ater|EAU32251.1 atub|OJI80727.1 aver|OJJ01022.1  
awen|OJJ31774.1 azon|OJJ50457.1

Group804: acar|OOF92307.1 acar|OOF92348.1 abra|OJJ67492.1 acla|EAW06278.1 afis|EAW18384.1  
afla|EED53022.1 afum|EAL93059.1 agla|OJJ84948.1 akaw|GAA86346.1 aluc|OJZ84872.1 anid|CBF70781.1  
anig|EHA25103.1 aory|EIT77395.1 asyd|OJJ58422.1 ater|EAU32253.1 atub|OJI80726.1 aver|OJJ01023.1  
awen|OJJ31775.1 azon|OJJ50458.1

Group805: acar|OOF92308.1 acar|OOF92349.1 abra|OJJ67491.1 acla|EAW06279.1 afis|EAW18385.1  
afla|EED53021.1 afum|EAL93060.1 agla|OJJ84949.1 akaw|GAA86347.1 aluc|OJZ84874.1 anid|CBF70779.1  
anig|EHA25104.1 aory|EIT77414.1 asyd|OJJ58423.1 ater|EAU32254.1 atub|OJI80725.1 aver|OJJ01024.1  
awen|OJJ31776.1 azon|OJJ45926.1

Group806: acar|OOF92310.1 acar|OOF92351.1 abra|OJJ67490.1 acla|EAW06282.1 afis|EAW18388.1  
afla|EED53019.1 afum|EAL93063.1 agla|OJJ84951.1 akaw|GAA86348.1 aluc|OJZ84875.1 anid|CBF70772.1  
anig|EHA25106.1 aory|EIT77433.1 asyd|OJJ58427.1 ater|EAU32261.1 atub|OJI80723.1 aver|OJJ01028.1  
awen|OJJ31763.1 azon|OJJ50461.1

Group807: acar|OOF92311.1 acar|OOF92352.1 abra|OJJ67489.1 acla|EAW06284.1 afis|EAW18390.1  
afla|EED53017.1 afum|EAL93065.1 agla|OJJ84953.1 akaw|GAA86350.1 aluc|OJZ84878.1 anid|CBF70776.1  
anig|EHA25107.1 aory|EIT77439.1 asyd|OJJ58425.1 ater|EAU32263.1 atub|OJI80721.1 aver|OJJ01026.1  
awen|OJJ31761.1 azon|OJJ50464.1

Group808: acar|OOF92312.1 acar|OOF92353.1 abra|OJJ67488.1 acla|EAW06286.1 afis|EAW18391.1  
afla|EED53016.1 afum|EAL93066.1 agla|OJJ84955.1 akaw|GAA86351.1 aluc|OJZ84880.1 anid|CBF70777.1  
anig|EHA25110.1 aory|EIT77398.1 asyd|OJJ58424.1 ater|EAU32278.1 atub|OJI80719.1 aver|OJJ01025.1  
awen|OJJ31758.1 azon|OJJ50466.1

Group809: acar|OOF92314.1 acar|OOF92355.1 abra|OJJ67485.1 acla|EAW06289.1 afis|EAW18394.1  
afla|EED53013.1 afum|EAL93070.1 agla|OJJ84966.1 akaw|GAA86354.1 aluc|OJZ84883.1 anid|CBF70762.1  
anig|EHA25112.1 aory|EIT77419.1 asyd|OJJ58430.1 ater|EAU32282.1 atub|OJI80717.1 aver|OJJ01032.1  
awen|OJJ31756.1 azon|OJJ50472.1

Group810: acar|OOF92317.1 acar|OOF92359.1 abra|OJJ67482.1 acla|EAW06291.1 afis|EAW18397.1  
afla|EED53009.1 afum|EAL93074.1 agla|OJJ84968.1 akaw|GAA86357.1 aluc|OJZ84886.1 anid|CBF70756.1  
anig|EHA25115.1 aory|EIT77428.1 asyd|OJJ58434.1 ater|EAU32285.1 atub|OJI80714.1 aver|OJJ01035.1  
awen|OJJ31754.1 azon|OJJ50470.1

Group811: acar|OOF92318.1 acar|OOF92360.1 afum|EAL85117.1 afum|EAL93075.1 abra|OJJ67480.1  
acla|EAW06292.1 afis|EAW18398.1 afla|EED53008.1 akaw|GAA86358.1 aluc|OJZ84887.1 anid|CBF70755.1  
anig|EHA25116.1 aory|EIT77431.1 asyd|OJJ58436.1 ater|EAU29814.1 atub|OJI80713.1 aver|OJJ01036.1  
awen|OJJ31752.1 azon|OJJ50468.1

Group812: acar|OOF92320.1 acar|OOF92362.1 abra|OJJ67474.1 acla|EAW06298.1 afis|EAW18405.1  
afla|EED53003.1 afum|EAL93085.1 agla|OJJ84956.1 akaw|GAA86363.1 aluc|OJZ84891.1 anid|CBF69754.1  
anig|EHA25120.1 aory|EIT77409.1 asyd|OJJ58942.1 ater|EAU29822.1 atub|OJI80707.1 aver|OJJ01538.1  
awen|OJJ31745.1 azon|OJJ50505.1

Group813: acar|OOF92596.1 acar|OOF92617.1 abra|OJJ68969.1 acla|EAW14218.1 afis|EAW19063.1  
afla|EED54429.1 afum|EAL93792.1 agla|OJJ84544.1 akaw|GAA90496.1 aluc|OJZ85956.1 anid|CBF79645.1  
anig|EHA24645.1 aory|EIT75848.1 asyd|OJJ58020.1 ater|EAU32106.1 atub|OJI79744.1 aver|OJJ04379.1  
awen|OJJ31494.1 azon|OJJ46207.1

Group814: acar|OOF92598.1 acar|OOF92619.1 abra|OJJ68487.1 acla|EAW06807.1 afis|EAW16356.1  
afla|EED53514.1 afum|EAL88981.1 agla|OJJ88237.1 akaw|GAA92784.1 aluc|OJZ82699.1 anid|CBF89230.1  
anig|EHA21155.1 aory|EIT74940.1 asyd|OJJ62515.1 ater|EAU34103.1 atub|OJI88931.1 aver|OJI96634.1  
awen|OJJ37760.1 azon|OJJ45058.1

Group815: acar|OOF92601.1 acar|OOF92622.1 abra|OJJ77122.1 acla|EAW12935.1 afis|EAW17711.1  
afla|EED45713.1 afum|EAL91526.1 agla|OJJ81737.1 akaw|GAA90806.1 aluc|OJZ84532.1 anid|CBF76922.1  
anig|EHA27830.1 aory|EIT75682.1 asyd|OJJ57071.1 ater|EAU31890.1 atub|OJI89548.1 aver|OJJ03227.1  
awen|OJJ37125.1 azon|OJJ50824.1

Group816: acar|OOF92602.1 acar|OOF92623.1 abra|OJJ75110.1 acla|EAW08316.1 afis|EAW23324.1  
afla|EED55642.1 afum|EAL88155.1 agla|OJJ86519.1 akaw|GAA88719.1 aluc|OJZ92676.1 anid|CBF89451.1  
anig|EHA26322.1 aory|EIT81779.1 asyd|OJJ62432.1 ater|EAU35572.1 atub|OJI87104.1 aver|OJI96568.1  
awen|OJJ39570.1 azon|OJJ47763.1

Group817: acar|OOF92604.1 acar|OOF92625.1 abra|OJJ78212.1 acla|EAW11239.1 afis|EAW18266.1  
afla|EED48732.1 afum|EAL87631.1 agla|OJJ88160.1 akaw|GAA85815.1 aluc|OJZ91284.1 anid|CBF79520.1  
anig|EHA19969.1 aory|EIT73261.1 asyd|OJJ57890.1 ater|EAU33273.1 atub|OJI83274.1 aver|OJJ04504.1  
awen|OJJ30640.1 azon|OJJ47975.1

Group818: acar|OOF92606.1 acar|OOF92627.1 abra|OJJ72009.1 acla|EAW09531.1 afis|EAW21601.1  
afla|EED57828.1 afum|EAL92620.1 agla|OJJ85796.1 akaw|GAA84924.1 aluc|OJZ86745.1 anid|CBF83460.1  
anig|EHA21934.1 aory|EIT81025.1 asyd|OJJ60683.1 ater|EAU38291.1 atub|OJI83782.1 aver|OJJ00008.1  
awen|OJJ39081.1 azon|OJJ51413.1

Group819: acar|OOF92607.1 acar|OOF92628.1 abra|OJJ71278.1 acla|EAW10260.1 afis|EAW25333.1  
afla|EED53813.1 afum|EAL89996.1 agla|OJJ83874.1 akaw|GAA82710.1 aluc|OJZ87265.1 anid|CBF75238.1  
anig|EHA20507.1 aory|EIT78421.1 asyd|OJJ59912.1 ater|EAU34479.1 atub|OJI81377.1 aver|OJJ02374.1  
awen|OJJ41027.1 azon|OJJ44637.1

Group820: acar|OOF92609.1 acar|OOF92630.1 abra|OJJ74612.1 acla|EAW10770.1 afis|EAW24806.1  
afla|EED47177.1 afum|EAL89448.1 agla|OJJ82901.1 akaw|GAA81996.1 aluc|OJZ92192.1 anid|CBF85894.1  
anig|EHA26762.1 aory|EIT79234.1 asyd|OJJ64389.1 ater|EAU36500.1 atub|OJI86621.1 aver|OJI98483.1  
awen|OJJ40390.1 azon|OJJ49240.1

Group821: acar|OOF92610.1 acar|OOF92631.1 abra|OJJ71181.1 acla|EAW10323.1 afis|EAW25269.1  
afla|EED53734.1 afum|EAL89932.1 agla|OJJ89237.1 akaw|GAA82804.1 aluc|OJZ87362.1 anid|CBF85380.1  
anig|EHA20597.1 aory|EIT75356.1 asyd|OJJ64050.1 ater|EAU34412.1 atub|OJI81283.1 aver|OJI98136.1  
awen|OJJ40983.1 azon|OJJ44569.1

Group822: acar|OOF92611.1 acar|OOF92632.1 abra|OJJ72794.1 acla|EAW11478.1 afis|EAW23975.1  
afla|EED50533.1 afum|EAL87405.1 agla|OJJ86905.1 akaw|GAA85397.1 aluc|OJZ83290.1 anid|CBF77343.1  
anig|EHA24175.1 aory|EIT82080.1 asyd|OJJ53273.1 ater|EAU29777.1 atub|OJI82192.1 aver|OJJ03576.1  
awen|OJJ35440.1 azon|OJJ51303.1

Group823: acar|OOF92612.1 acar|OOF92633.1 abra|OJJ66525.1 acla|EAW10966.1 afis|EAW20894.1  
afla|EED50243.1 afum|EAL84739.1 agla|OJJ84001.1 akaw|GAA91188.1 aluc|OJZ81515.1 anid|CBF82444.1

anig|EHA25913.1 aory|EIT77371.1 asyd|OJJ54119.1 ater|EAU38528.1 atub|OJI88664.1 aver|OJJ08617.1  
awen|OJJ34454.1 azon|OJJ51741.1

Group824: acar|OOF92616.1 acar|OOF92637.1 abra|OJJ76860.1 acla|EAW13421.1 afis|EAW20532.1  
afla|EED52482.1 afum|EAL84525.1 agla|OJJ84699.1 akaw|GAA87162.1 aluc|OJZ84272.1 anid|CBF79000.1  
anig|EHA27614.1 aory|EIT82763.1 asyd|OJJ55688.1 ater|EAU37152.1 atub|OJI89811.1 aver|OJJ06772.1  
awen|OJJ33239.1 azon|OJJ50618.1

Group825: acar|OOF93657.1 acar|OOF93741.1 abra|OJJ66636.1 acla|EAW11779.1 afis|EAW19389.1  
afla|EED50347.1 afum|EAL87106.1 agla|OJJ81100.1 akaw|GAA89589.1 aluc|OJZ80813.1 anid|CBF74291.1  
anig|EHA27221.1 aory|EIT81936.1 asyd|OJJ51912.1 ater|EAU36052.1 atub|OJI87662.1 aver|OJJ05353.1  
awen|OJJ36782.1 azon|OJJ43016.1

Group826: acar|OOF93659.1 acar|OOF93743.1 abra|OJJ66639.1 acla|EAW11782.1 afis|EAW19392.1  
afla|EED50350.1 afum|EAL87102.1 agla|OJJ81103.1 akaw|GAA89592.1 aluc|OJZ80810.1 anid|CBF74285.1  
anig|EHA27224.1 aory|EIT81937.1 asyd|OJJ51914.1 ater|EAU36055.1 atub|OJI87658.1 aver|OJJ05356.1  
awen|OJJ36785.1 azon|OJJ43013.1

Group827: acar|OOF93660.1 acar|OOF93744.1 abra|OJJ66640.1 acla|EAW11783.1 afis|EAW19393.1  
afla|EED50351.1 agla|OJJ81104.1 akaw|GAA89593.1 aluc|OJZ80809.1 anig|EHA27225.1 aory|EIT81941.1  
asyd|OJJ51863.1 ater|EAU36056.1 atub|OJI87657.1 aver|OJJ05357.1 awen|OJJ36787.1 azon|OJJ43012.1  
afum|EAL87101.1 anid|CBF74283.1

Group828: acar|OOF93663.1 acar|OOF93747.1 abra|OJJ66643.1 acla|EAW11786.1 afis|EAW19396.1  
afla|EED50352.1 afum|EAL87098.1 agla|OJJ81107.1 akaw|GAA89596.1 aluc|OJZ80806.1 anid|CBF74278.1  
anig|EHA27228.1 aory|EIT83119.1 asyd|OJJ51859.1 ater|EAU36122.1 atub|OJI87654.1 aver|OJJ05360.1  
awen|OJJ36791.1 azon|OJJ43008.1

Group829: acar|OOF93667.1 acar|OOF93751.1 abra|OJJ66647.1 acla|EAW11790.1 afis|EAW19400.1  
afla|EED50355.1 afum|EAL87094.1 agla|OJJ81111.1 akaw|GAA89600.1 aluc|OJZ80802.1 anid|CBF74336.1  
anig|EHA27232.1 aory|EIT83130.1 asyd|OJJ51906.1 ater|EAU36126.1 atub|OJI87650.1 aver|OJJ05363.1  
awen|OJJ36795.1 azon|OJJ43004.1

Group830: acar|OOF93669.1 acar|OOF93753.1 abra|OJJ66649.1 acla|EAW11792.1 afis|EAW19403.1  
afla|EED50358.1 afum|EAL87092.1 agla|OJJ81117.1 akaw|GAA89602.1 aluc|OJZ80800.1 anid|CBF74298.1  
anig|EHA27234.1 aory|EIT83146.1 asyd|OJJ51902.1 ater|EAU36143.1 atub|OJI87648.1 aver|OJJ05365.1  
awen|OJJ36798.1 azon|OJJ43001.1

Group831: acar|OOF93671.1 acar|OOF93755.1 abra|OJJ66653.1 acla|EAW11795.1 afis|EAW19405.1  
afla|EED50361.1 afum|EAL87090.1 agla|OJJ81119.1 akaw|GAA89604.1 aluc|OJZ80794.1 anid|CBF74345.1  
anig|EHA27237.1 aory|EIT83126.1 asyd|OJJ57796.1 ater|EAU36140.1 atub|OJI87645.1 aver|OJJ05368.1  
awen|OJJ36801.1 azon|OJJ42997.1

Group832: acar|OOF93672.1 acar|OOF93756.1 abra|OJJ66655.1 acla|EAW11796.1 afis|EAW19406.1  
afla|EED50362.1 afum|EAL87088.1 agla|OJJ81120.1 akaw|GAA89605.1 aluc|OJZ80793.1 anid|CBF74347.1  
anig|EHA27238.1 aory|EIT83144.1 asyd|OJJ57795.1 ater|EAU36139.1 atub|OJI87644.1 aver|OJJ05369.1  
awen|OJJ36802.1 azon|OJJ42996.1

Group833: acar|OOF93673.1 acar|OOF93757.1 abra|OJJ66656.1 acla|EAW11797.1 afis|EAW19407.1  
afla|EED50363.1 afum|EAL87087.1 agla|OJJ81121.1 akaw|GAA89606.1 aluc|OJZ80792.1 anid|CBF74349.1  
anig|EHA27239.1 aory|EIT83134.1 asyd|OJJ57794.1 ater|EAU36138.1 atub|OJI87643.1 aver|OJJ05370.1  
awen|OJJ36803.1 azon|OJJ42995.1

Group834: acar|OOF93674.1 acar|OOF93758.1 abra|OJJ66657.1 acla|EAW11798.1 afis|EAW19408.1  
afla|EED50364.1 afum|EAL87086.1 agla|OJJ81122.1 akaw|GAA89607.1 aluc|OJZ80791.1 anid|CBF74356.1  
anig|EHA27240.1 aory|EIT83115.1 asyd|OJJ57793.1 ater|EAU34715.1 atub|OJI87642.1 aver|OJJ05371.1  
awen|OJJ36804.1 azon|OJJ42994.1

Group835: acar|OOF93676.1 acar|OOF93761.1 abra|OJJ66660.1 acla|EAW11802.1 afis|EAW19412.1  
afla|EED50367.1 afum|EAL87082.1 agla|OJJ81126.1 akaw|GAA89610.1 aluc|OJZ80788.1 anid|CBF74358.1  
anig|EHA27242.1 aory|EIT83138.1 asyd|OJJ57789.1 ater|EAU34718.1 atub|OJI87639.1 aver|OJJ05375.1  
awen|OJJ36808.1 azon|OJJ42992.1

Group836: acar|OOF93677.1 acar|OOF93762.1 abra|OJJ66661.1 acla|EAW11803.1 afis|EAW19413.1  
afla|EED50368.1 afum|EAL87081.1 agla|OJJ81127.1 akaw|GAA89611.1 aluc|OJZ80787.1 anid|CBF74360.1  
anig|EHA27243.1 aory|EIT83132.1 asyd|OJJ57788.1 ater|EAU34719.1 atub|OJI87638.1 aver|OJJ05376.1  
awen|OJJ36809.1 azon|OJJ42991.1

Group837: acar|OOF93678.1 acar|OOF93763.1 abra|OJJ66662.1 acla|EAW11804.1 afis|EAW19414.1  
afla|EED50369.1 afum|EAL87080.2 agla|OJJ81128.1 akaw|GAA89612.1 aluc|OJZ80786.1 anid|CBF74362.1  
anig|EHA27244.1 aory|EIT83123.1 asyd|OJJ57787.1 ater|EAU34720.1 atub|OJI87636.1 aver|OJJ05377.1  
awen|OJJ36810.1 azon|OJJ42990.1

Group838: acar|OOF93679.1 acar|OOF93765.1 abra|OJJ66664.1 acla|EAW11805.1 afis|EAW19415.1  
afla|EED50371.1 afum|EAL87079.1 agla|OJJ81129.1 akaw|GAA89613.1 aluc|OJZ80783.1 anid|CBF74364.1  
anig|EHA27246.1 aory|EIT83116.1 asyd|OJJ57785.1 ater|EAU34721.1 atub|OJI87635.1 aver|OJJ05379.1  
awen|OJJ36812.1 azon|OJJ42989.1

Group839: acar|OOF93681.1 acar|OOF93764.1 abra|OJJ66666.1 acla|EAW11807.1 afis|EAW19417.1  
afla|EED50373.1 afum|EAL87077.1 agla|OJJ81130.1 akaw|GAA89615.1 aluc|OJZ80781.1 anid|CBF86348.1  
anig|EHA27248.1 aory|EIT83140.1 asyd|OJJ64978.1 ater|EAU34723.1 atub|OJI87633.1 aver|OJI99100.1  
awen|OJJ36815.1 azon|OJJ42987.1

Group840: acar|OOF93685.1 acar|OOF93770.1 abra|OJJ66671.1 acla|EAW11812.1 afis|EAW19422.1  
afla|EED50379.1 afum|EAL87072.1 agla|OJJ81134.1 akaw|GAA89620.1 aluc|OJZ80776.1 anid|CBF74373.1  
anig|EHA27253.1 aory|EIT83120.1 asyd|OJJ57781.1 ater|EAU34726.1 atub|OJI87628.1 aver|OJJ05384.1  
awen|OJJ36820.1 azon|OJJ42982.1

Group841: acar|OOF93686.1 acar|OOF93771.1 abra|OJJ66672.1 acla|EAW11813.1 afis|EAW19423.1  
afla|EED50380.1 afum|EAL87071.1 agla|OJJ81135.1 akaw|GAA89621.1 aluc|OJZ80775.1 anid|CBF74375.1  
anig|EHA27254.1 aory|EIT83122.1 asyd|OJJ57780.1 ater|EAU34727.1 atub|OJI87627.1 aver|OJJ05385.1  
awen|OJJ36821.1 azon|OJJ42981.1

Group842: acar|OOF93690.1 acar|OOF93776.1 abra|OJJ66680.1 acla|EAW11817.1 afis|EAW19428.1  
afla|EED56632.1 afum|EAL87066.1 agla|OJJ81140.1 akaw|GAA89625.1 aluc|OJZ80769.1 anid|CBF74382.1  
anig|EHA27259.1 aory|EIT79645.1 asyd|OJJ57775.1 ater|EAU34731.1 atub|OJI87622.1 aver|OJJ05390.1  
awen|OJJ36826.1 azon|OJJ42977.1

Group843: acar|OOF93692.1 acar|OOF93778.1 abra|OJJ66683.1 acla|EAW11820.1 afis|EAW19431.1  
afla|EED56635.1 afum|EAL87063.1 agla|OJJ81143.1 akaw|GAA89628.1 aluc|OJZ80766.1 anid|CBF81374.1  
anig|EHA27262.1 aory|EIT79669.1 asyd|OJJ59388.1 ater|EAU34734.1 atub|OJI87619.1 aver|OJJ02885.1  
awen|OJJ36832.1 azon|OJJ42974.1

Group844: acar|OOF93693.1 acar|OOF93777.1 abra|OJJ66682.1 acla|EAW11819.1 afis|EAW19430.1  
afla|EED56634.1 afum|EAL87064.1 agla|OJJ81142.1 akaw|GAA89627.1 aluc|OJZ80767.1 anid|CBF74386.1  
anig|EHA27261.1 aory|EIT79632.1 asyd|OJJ57773.1 ater|EAU34733.1 atub|OJI87620.1 aver|OJJ05393.1  
awen|OJJ36829.1 azon|OJJ42975.1

Group845: acar|OOF93696.1 acar|OOF93781.1 abra|OJJ66687.1 acla|EAW11822.1 afis|EAW19433.1  
afla|EED56638.1 afum|EAL87062.1 agla|OJJ81145.1 akaw|GAA89631.1 aluc|OJZ80762.1 anid|CBF81380.1  
anig|EHA27265.1 aory|EIT79671.1 asyd|OJJ59391.1 ater|EAU34735.1 atub|OJI87616.1 aver|OJJ02881.1  
awen|OJJ36833.1 azon|OJJ42972.1

Group846: acar|OOF93699.1 acar|OOF93784.1 abra|OJJ66690.1 acla|EAW11825.1 afis|EAW19436.1  
afla|EED56641.1 afum|EAL87059.1 agla|OJJ81148.1 akaw|GAA89634.1 aluc|OJZ80759.1 anid|CBF81383.1  
anig|EHA27268.1 aory|EIT79678.1 asyd|OJJ59395.1 ater|EAU34738.1 atub|OJI87613.1 aver|OJJ02877.1  
awen|OJJ36834.1 azon|OJJ42969.1

Group847: acar|OOF93701.1 acar|OOF93787.1 abra|OJJ66693.1 acla|EAW11828.1 afis|EAW19440.1  
afla|EED56647.1 afum|EAL87056.1 agla|OJJ81155.1 akaw|GAA89637.1 aluc|OJZ80752.1 anid|CBF79760.1  
anig|EHA27271.1 aory|EIT79660.1 asyd|OJJ58101.1 ater|EAU34741.1 atub|OJI87609.1 aver|OJJ04303.1  
awen|OJJ36840.1 azon|OJJ42961.1

Group848: acar|OOF93703.1 acar|OOF93790.1 abra|OJJ66695.1 acla|EAW11830.1 afis|EAW19442.1  
afla|EED56649.1 afum|EAL87054.1 agla|OJJ81153.1 akaw|GAA89639.1 aluc|OJZ80750.1 anid|CBF81395.1  
anig|EHA27272.1 aory|EIT79630.1 asyd|OJJ59401.1 ater|EAU34743.1 atub|OJI87607.1 aver|OJJ02872.1  
awen|OJJ36842.1 azon|OJJ42958.1

Group849: acar|OOF93707.1 acar|OOF93793.1 abra|OJJ66703.1 acla|EAW11834.1 afis|EAW19445.1  
afla|EED56653.1 afum|EAL87050.1 agla|OJJ81160.1 akaw|GAA89645.1 aluc|OJZ80744.1 anid|CBF81404.1  
anig|EHA27278.1 aory|EIT79624.1 asyd|OJJ59405.1 ater|EAU34747.1 atub|OJI87601.1 aver|OJJ02868.1  
awen|OJJ36846.1 azon|OJJ42954.1

Group850: acar|OOF93708.1 acar|OOF93794.1 abra|OJJ66704.1 acla|EAW11835.1 afis|EAW19446.1  
afla|EED56654.1 afum|EAL87049.1 agla|OJJ81161.1 akaw|GAA89646.1 aluc|OJZ80743.1 anid|CBF81405.1  
anig|EHA27279.1 aory|EIT79662.1 asyd|OJJ59406.1 ater|EAU34748.1 atub|OJI87600.1 aver|OJJ02867.1  
awen|OJJ36847.1 azon|OJJ42953.1

Group851: acar|OOF93709.1 acar|OOF93795.1 abra|OJJ66706.1 acla|EAW11837.1 afis|EAW19448.1  
afla|EED56656.1 afum|EBA27299.1 agla|OJJ81163.1 akaw|GAA89648.1 aluc|OJZ80741.1 anid|CBF81409.1  
anig|EHA27281.1 aory|EIT79680.1 asyd|OJJ59408.1 ater|EAU34750.1 atub|OJI87598.1 aver|OJJ02865.1  
awen|OJJ36849.1 azon|OJJ42951.1

Group852: acar|OOF93710.1 acar|OOF93796.1 abra|OJJ66708.1 acla|EAW11839.1 afis|EAW19450.1  
afla|EED56658.1 afum|EAL87046.1 agla|OJJ81165.1 akaw|GAA89650.1 aluc|OJZ80739.1 anid|CBF81412.1

anig|EHA27283.1 aory|EIT79655.1 asyd|OJJ59410.1 ater|EAU34752.1 atub|OJI87596.1 aver|OJJ02863.1  
awen|OJJ36851.1 azon|OJJ42949.1

Group853: acar|OOF93711.1 acar|OOF93797.1 abra|OJJ66709.1 acla|EAW11840.1 afis|EAW19451.1  
afla|EED56659.1 afum|EAL87045.1 agla|OJJ81166.1 akaw|GAA89651.1 aluc|OJZ80738.1 anid|CBF81414.1  
anig|EHA27284.1 aory|EIT79675.1 asyd|OJJ59411.1 ater|EAU34753.1 atub|OJI87595.1 aver|OJJ02862.1  
awen|OJJ36852.1 azon|OJJ42948.1

Group854: acar|OOF93715.1 acar|OOF93802.1 abra|OJJ66713.1 acla|EAW11844.1 afis|EAW19455.1  
afla|EED56663.1 afum|EAL87041.1 agla|OJJ81171.1 akaw|GAA89655.1 aluc|OJZ80734.1 anid|CBF81421.1  
anig|EHA27287.1 aory|EIT79656.1 asyd|OJJ59415.1 ater|EAU34758.1 atub|OJI87591.1 aver|OJJ02858.1  
awen|OJJ36856.1 azon|OJJ42944.1

Group855: acar|OOF93716.1 acar|OOF93803.1 abra|OJJ66714.1 acla|EAW11845.1 afis|EAW19456.1  
afla|EED56664.1 afum|EAL87040.1 agla|OJJ81173.1 akaw|GAA89656.1 aluc|OJZ80733.1 anid|CBF81423.1  
anig|EHA27288.1 aory|EIT79663.1 asyd|OJJ59416.1 ater|EAU34759.1 atub|OJI87590.1 aver|OJJ02857.1  
awen|OJJ36858.1 azon|OJJ42943.1

Group856: acar|OOF93717.1 acar|OOF93804.1 abra|OJJ66715.1 acla|EAW11846.1 afis|EAW19457.1  
afla|EED56665.1 afum|EAL87039.1 agla|OJJ81174.1 akaw|GAA89657.1 aluc|OJZ80732.1 anid|CBF81425.1  
anig|EHA27289.1 aory|EIT79668.1 asyd|OJJ59417.1 ater|EAU34760.1 atub|OJI87589.1 aver|OJJ02856.1  
awen|OJJ36859.1 azon|OJJ42942.1

Group857: acar|OOF93718.1 acar|OOF93805.1 abra|OJJ66716.1 acla|EAW11847.1 afis|EAW19458.1  
afla|EED56669.1 afum|EAL87038.1 agla|OJJ81175.1 akaw|GAA89658.1 aluc|OJZ80731.1 anid|CBF81427.1  
anig|EHA27290.1 aory|EIT79631.1 asyd|OJJ59418.1 ater|EAU34761.1 atub|OJI87588.1 aver|OJJ02851.1  
awen|OJJ36860.1 azon|OJJ42941.1

Group858: acar|OOF93721.1 acar|OOF93808.1 abra|OJJ66719.1 acla|EAW11850.1 afis|EAW19461.1  
afla|EED56672.1 afum|EAL87035.1 agla|OJJ81178.1 akaw|GAA89661.1 aluc|OJZ80728.1 anid|CBF74529.1  
anig|EHA27293.1 aory|EIT82995.1 asyd|OJJ57737.1 ater|EAU34764.1 atub|OJI87584.1 aver|OJJ05430.1  
awen|OJJ36863.1 azon|OJJ42938.1

Group859: acar|OOF93723.1 acar|OOF93810.1 abra|OJJ66721.1 acla|EAW11852.1 afis|EAW19463.1  
afla|EED56674.1 afum|EAL87033.1 agla|OJJ81180.1 akaw|GAA89663.1 aluc|OJZ80726.1 anid|CBF75491.1  
anig|EHA27294.1 aory|EIT73836.1 asyd|OJJ59753.1 ater|EAU34766.1 atub|OJI87582.1 aver|OJJ02535.1  
awen|OJJ36865.1 azon|OJJ42936.1

Group860: acar|OOF93724.1 acar|OOF93811.1 abra|OJJ66722.1 acla|EAW11853.1 afis|EAW19464.1  
afla|EED56675.1 afum|EAL87032.1 agla|OJJ81181.1 akaw|GAA89664.1 aluc|OJZ80725.1 anid|CBF75490.1  
anig|EHA27295.1 aory|EIT73882.1 asyd|OJJ59754.1 ater|EAU34768.1 atub|OJI87581.1 aver|OJJ02534.1  
awen|OJJ36866.1 azon|OJJ42935.1

Group861: acar|OOF93726.1 acar|OOF93814.1 abra|OJJ66726.1 acla|EAW11856.1 afis|EAW19467.1  
afla|EED56677.1 afum|EAL87029.1 agla|OJJ81187.1 akaw|GAA89667.1 aluc|OJZ80722.1 anid|CBF75486.1  
anig|EHA27298.1 aory|EIT73931.1 asyd|OJJ59756.1 ater|EAU34777.1 atub|OJI87578.1 aver|OJJ02532.1  
awen|OJJ36872.1 azon|OJJ42932.1

Group862: acar|OOF93727.1 acar|OOF93815.1 abra|OJJ66727.1 acla|EAW11857.1 afis|EAW19468.1  
afla|EED56678.1 afum|EAL87028.1 agla|OJJ81188.1 akaw|GAA89668.1 aluc|OJZ80721.1 anid|CBF75484.1  
anig|EHA27299.1 aory|EIT73958.1 asyd|OJJ59757.1 ater|EAU34778.1 atub|OJI87577.1 aver|OJJ02531.1  
awen|OJJ36873.1 azon|OJJ42931.1

Group863: acar|OOF93728.1 acar|OOF93816.1 abra|OJJ66728.1 acla|EAW11858.1 afis|EAW19469.1  
afla|EED56679.1 afum|EAL87027.1 agla|OJJ81190.1 akaw|GAA89669.1 aluc|OJZ80720.1 anid|CBF75482.1  
anig|EHA27300.1 aory|EIT73843.1 asyd|OJJ59758.1 ater|EAU34779.1 atub|OJI87576.1 aver|OJJ02530.1  
awen|OJJ36874.1 azon|OJJ42930.1

Group864: acar|OOF93729.1 acar|OOF93817.1 abra|OJJ66731.1 acla|EAW11859.1 afis|EAW19470.1  
afla|EED56680.1 afum|EAL87026.1 agla|OJJ81191.1 akaw|GAA89670.1 aluc|OJZ80718.1 anid|CBF75480.1  
anig|EHA27301.1 aory|EIT73854.1 asyd|OJJ59759.1 ater|EAU34780.1 atub|OJI87574.1 aver|OJJ02529.1  
awen|OJJ36875.1 azon|OJJ42929.1

Group865: acar|OOF93731.1 acar|OOF93819.1 abra|OJJ66733.1 acla|EAW11861.1 afis|EAW19472.1  
afla|EED56682.1 afum|EAL87024.1 agla|OJJ81193.1 akaw|GAA89672.1 aluc|OJZ80716.1 anid|CBF75474.1  
anig|EHA27303.1 aory|EIT73961.1 asyd|OJJ59761.1 ater|EAU34782.1 atub|OJI87572.1 aver|OJJ02527.1  
awen|OJJ36877.1 azon|OJJ42927.1

Group866: acar|OOF93734.1 acar|OOF93822.1 abra|OJJ66736.1 acla|EAW11864.1 afis|EAW19475.1  
afla|EED56683.1 afum|EAL87021.1 agla|OJJ81198.1 akaw|GAA89675.1 aluc|OJZ80711.1 anid|CBF75470.1  
anig|EHA27306.1 aory|EIT73904.1 asyd|OJJ59764.1 ater|EAU34787.1 atub|OJI87569.1 aver|OJJ02524.1  
awen|OJJ36880.1 azon|OJJ42925.1



Group867: acar|OOF93736.1 acar|OOF93825.1 abra|OJJ66739.1 acla|EAW11866.1 afis|EAW19477.1  
afla|EED56685.1 afum|EAL87019.1 agla|OJJ81207.1 akaw|GAA89677.1 aluc|OJZ80709.1 anid|CBF71519.1  
anig|EHA27308.1 aory|EIT73831.1 asyd|OJJ54916.1 ater|EAU34789.1 atub|OJI87567.1 aver|OJJ07287.1  
awen|OJJ36882.1 azon|OJJ42923.1

Group868: acar|OOF93739.1 acar|OOF93829.1 abra|OJJ66743.1 acla|EAW11872.1 afis|EAW19483.1  
afla|EED56701.1 afum|EAL87012.1 agla|OJJ81208.1 akaw|GAA89681.1 aluc|OJZ80704.1 anid|CBF75464.1  
anig|EHA27313.1 aory|EIT73864.1 asyd|OJJ59767.1 ater|EAU34796.1 atub|OJI87562.1 aver|OJJ02520.1  
awen|OJJ36895.1 azon|OJJ42918.1

Group869: acar|OOF94046.1 acar|OOF94116.1 agla|OJJ78942.1 agla|OJJ84364.1 agla|OJJ88800.1  
asyd|OJJ55478.1 asyd|OJJ56071.1 aver|OJJ05014.1 aver|OJJ06558.1 akaw|GAA90264.1 aluc|OJZ83077.1  
anig|EHA28141.1 ater|EAU36656.1 atub|OJI87869.1 awen|OJJ30395.1 aory|EIT78619.1 azon|OJJ48036.1  
anig|EHA28514.1 awen|OJJ34834.1

Group870: acar|OOF94064.1 acar|OOF94134.1 abra|OJJ66360.1 acla|EAW10009.1 afis|EAW21047.1  
afla|EED51623.1 afum|EAL92083.1 agla|OJJ82365.1 akaw|GAA90233.1 aluc|OJZ83108.1 anid|CBF87099.1  
anig|EHA28171.1 aory|EIT80605.1 asyd|OJJ60391.1 ater|EAU36819.1 atub|OJI87826.1 aver|OJI99720.1  
awen|OJJ32175.1 azon|OJJ46754.1

Group871: acar|OOF94087.1 acar|OOF94157.1 abra|OJJ66351.1 acla|EAW06467.1 afis|EAW15962.1  
afla|EED58095.1 afum|EAL88595.1 agla|OJJ89350.1 akaw|GAA90224.1 aluc|OJZ83117.1 anid|CBF81081.1  
anig|EHA28180.1 aory|EIT79147.1 asyd|OJJ56464.1 ater|EAU35492.1 atub|OJI87817.1 aver|OJJ06256.1  
awen|OJJ35612.1 azon|OJJ46912.1

Group872: acar|OOF94090.1 acar|OOF94160.1 abra|OJJ66347.1 acla|EAW09988.1 afis|EAW21105.1  
afla|EED51687.1 afum|EAL92126.1 agla|OJJ80110.1 akaw|GAA90221.1 aluc|OJZ83120.1 anid|CBF87045.1  
anig|EHA28184.1 aory|EIT80607.1 asyd|OJJ60445.1 ater|EAU36794.1 atub|OJI87813.1 aver|OJI99763.1  
awen|OJJ36366.1 azon|OJJ43506.1

Group873: acar|OOF94095.1 acar|OOF94164.1 abra|OJJ66343.1 acla|EAW09991.1 afis|EAW21101.1  
afla|EED48394.1 afum|EAL92122.1 agla|OJJ80116.1 akaw|GAA90217.1 aluc|OJZ83126.1 anid|CBF87046.1  
atub|OJI87807.1 aver|OJI99762.1 awen|OJJ37901.1 azon|OJJ44446.1 acla|EAW09992.1 awen|OJJ36357.1  
afla|EED51683.1 asyd|OJJ60444.1

Group874: acar|OOF95064.1 acar|OOF95130.1 abra|OJJ74649.1 acla|EAW10737.1 afis|EAW24838.1  
afla|EED47138.1 afum|EAL89484.1 agla|OJJ82029.1 akaw|GAA81961.1 aluc|OJZ92227.1 anid|CBF74603.1  
anig|EHA26729.1 aory|EIT79201.1 asyd|OJJ57657.1 ater|EAU36468.1 atub|OJI86657.1 aver|OJJ05518.1  
awen|OJJ40424.1 azon|OJJ49282.1

Group875: acar|OOF95067.1 acar|OOF95133.1 abra|OJJ74647.1 acla|EAW10740.1 afis|EAW24834.1  
afla|EED47141.1 afum|EAL89479.1 agla|OJJ82027.1 akaw|GAA81964.1 aluc|OJZ92225.1 anid|CBF74582.1  
anig|EHA26731.1 aory|EIT79244.1 asyd|OJJ57655.1 ater|EAU36471.1 atub|OJI86655.1 aver|OJJ05515.1  
awen|OJJ40421.1 azon|OJJ49279.1

Group876: acar|OOF95068.1 acar|OOF95134.1 abra|OJJ74646.1 acla|EAW10741.1 afis|EAW24833.1  
afla|EED47142.1 afum|EAL89478.1 agla|OJJ82026.1 akaw|GAA81965.1 aluc|OJZ92224.1 anid|CBF74580.1  
anig|EHA26732.1 aory|EIT79261.1 asyd|OJJ57654.1 ater|EAU36472.1 atub|OJI86654.1 aver|OJJ05514.1  
awen|OJJ40420.1 azon|OJJ49278.1

Group877: acar|OOF95069.1 acar|OOF95135.1 abra|OJJ68490.1 acla|EAW10742.1 afis|EAW24832.1  
afla|EED47143.1 afum|EAL89477.1 agla|OJJ82025.1 akaw|GAA92780.1 aluc|OJZ82703.1 anid|CBF74578.1  
anig|EHA21158.1 aory|EIT79304.1 asyd|OJJ57653.1 ater|EAU36473.1 atub|OJI88936.1 aver|OJJ05513.1  
awen|OJJ40419.1 azon|OJJ49277.1

Group878: acar|OOF95070.1 acar|OOF95136.1 abra|OJJ74645.1 acla|EAW10743.1 afis|EAW24831.1  
afla|EED47144.1 afum|EAL89476.1 agla|OJJ82019.1 akaw|GAA81966.1 aluc|OJZ92223.1 anid|CBF74576.1  
anig|EHA26733.1 aory|EIT79280.1 asyd|OJJ57652.1 ater|EAU36474.1 atub|OJI86653.1 aver|OJJ05512.1  
awen|OJJ40418.1 azon|OJJ49276.1

Group879: acar|OOF95076.1 acar|OOF95140.1 abra|OJJ74640.1 acla|EAW10748.1 afis|EAW24826.1  
afla|EED47149.1 afum|EAL89470.1 agla|OJJ82015.1 akaw|GAA81971.1 aluc|OJZ92219.1 anid|CBF85858.1  
anig|EHA26739.1 aory|EIT79249.1 asyd|OJJ64367.1 ater|EAU36479.1 atub|OJI86650.1 aver|OJI98462.1  
awen|OJJ40412.1 azon|OJJ49262.1

Group880: acar|OOF95080.1 acar|OOF95145.1 abra|OJJ74631.1 acla|EAW10753.1 afis|EAW24822.1  
afla|EED47153.1 afum|EAL89466.1 agla|OJJ82920.1 akaw|GAA81978.1 aluc|OJZ92212.1 anid|CBF85851.1  
anig|EHA26746.1 aory|EIT79200.1 asyd|OJJ64363.1 ater|EAU36483.1 atub|OJI86641.1 aver|OJI98458.1  
awen|OJJ40408.1 azon|OJJ49257.1

Group881: acar|OOF95083.1 acar|OOF95148.1 abra|OJJ74626.1 acla|EAW10756.1 afis|EAW24818.1  
afla|EED47162.1 afum|EAL91338.1 akaw|GAA81982.1 aluc|OJZ92208.1 anid|CBF85876.1 anig|EHA26750.1

aory|EIT79206.1 asyd|OJJ64375.1 ater|EAU36488.1 atub|OJI86637.1 aver|OJI98471.1 awen|OJJ40404.1  
afum|EAL89462.1 afis|EAW17523.1

Group882: acar|OOF95084.1 acar|OOF95149.1 abra|OJJ74624.1 acla|EAW10760.1 afis|EAW24816.1  
afla|EED47167.1 afum|EAL89460.2 agla|OJJ82910.1 akaw|GAA81984.1 aluc|OJZ92206.1 anid|CBF85879.1  
anig|EHA26752.1 aory|EIT79187.1 asyd|OJJ64377.1 ater|EAU39452.1 atub|OJI86635.1 aver|OJI98473.1  
awen|OJJ40402.1 azon|OJJ43613.1

Group883: acar|OOF95086.1 acar|OOF95152.1 abra|OJJ74618.1 acla|EAW10764.1 afis|EAW24812.1  
afla|EED47171.1 afum|EAL89455.1 agla|OJJ82907.1 akaw|GAA81988.1 aluc|OJZ92201.1 anid|CBF85885.1  
anig|EHA26756.1 aory|EIT79186.1 asyd|OJJ64381.1 ater|EAU36495.1 atub|OJI86629.1 aver|OJI98477.1  
awen|OJJ40396.1 azon|OJJ49249.1

Group884: acar|OOF95087.1 acar|OOF95153.1 abra|OJJ74617.1 acla|EAW10765.1 afis|EAW24811.1  
afla|EED47172.1 afum|EAL89454.1 agla|OJJ82906.1 akaw|GAA81989.1 aluc|OJZ92200.1 anid|CBF85886.1  
anig|EHA26757.1 aory|EIT79291.1 asyd|OJJ64382.1 ater|EAU36496.1 atub|OJI86627.1 aver|OJI98478.1  
awen|OJJ40395.1 azon|OJJ49248.1

Group885: acar|OOF95089.1 acar|OOF95155.1 abra|OJJ74615.1 acla|EAW10767.1 afis|EAW24809.1  
afla|EED47174.1 afum|EAL89452.1 agla|OJJ82904.1 akaw|GAA81991.1 aluc|OJZ92198.1 anid|CBF85888.1  
anig|EHA26759.1 aory|EIT79300.1 asyd|OJJ64384.1 ater|EAU36497.1 atub|OJI86625.1 aver|OJI98480.1  
awen|OJJ40393.1 azon|OJJ49246.1

Group886: acar|OOF95090.1 acar|OOF95156.1 abra|OJJ74614.1 acla|EAW10768.1 afis|EAW24808.1  
afla|EED47175.1 afum|EAL89450.2 agla|OJJ82903.1 akaw|GAA81992.1 aluc|OJZ92197.1 anid|CBF85890.1  
anig|EHA26760.1 aory|EIT79254.1 asyd|OJJ64385.1 ater|EAU36498.1 atub|OJI86624.1 aver|OJI98481.1  
awen|OJJ40392.1 azon|OJJ49245.1

Group887: acar|OOF95091.1 acar|OOF95157.1 abra|OJJ74613.1 acla|EAW10769.1 afis|EAW24807.1  
afla|EED47176.1 afum|EAL89449.1 agla|OJJ82902.1 akaw|GAA81995.1 aluc|OJZ92193.1 anid|CBF85892.1  
anig|EHA26761.1 aory|EIT79197.1 asyd|OJJ64387.1 ater|EAU36499.1 atub|OJI86622.1 aver|OJI98482.1  
awen|OJJ40391.1 azon|OJJ49241.1

Group888: acar|OOF95092.1 acar|OOF95158.1 abra|OJJ74611.1 acla|EAW10771.1 afis|EAW24805.1  
afla|EED47180.1 afum|EAL89447.1 agla|OJJ82900.1 akaw|GAA81997.1 aluc|OJZ92191.1 anid|CBF81492.1  
anig|EHA26763.1 aory|EIT79217.1 asyd|OJJ59459.1 ater|EAU36502.1 atub|OJI86620.1 aver|OJJ02814.1  
awen|OJJ40389.1 azon|OJJ49239.1

Group889: acar|OOF95093.1 acar|OOF95159.1 abra|OJJ74610.1 acla|EAW10772.1 afis|EAW24804.1  
afla|EED47181.1 afum|EAL89446.1 agla|OJJ82899.1 akaw|GAA81998.1 aluc|OJZ92190.1 anid|CBF81493.1  
anig|EHA26764.1 aory|EIT79264.1 asyd|OJJ59460.1 ater|EAU36503.1 atub|OJI86619.1 aver|OJJ02813.1  
awen|OJJ40388.1 azon|OJJ49238.1

Group890: acar|OOF95095.1 acar|OOF95162.1 abra|OJJ74608.1 acla|EAW10773.1 afis|EAW24803.1  
afla|EED47183.1 afum|EAL89444.1 agla|OJJ82897.1 akaw|GAA82000.1 aluc|OJZ92188.1 anid|CBF81495.1  
anig|EHA26765.1 aory|EIT79220.1 asyd|OJJ59463.1 ater|EAU36504.1 atub|OJI86617.1 aver|OJJ02811.1  
azon|OJJ49236.1 awen|OJJ40386.1

Group891: acar|OOF95101.1 acar|OOF95167.1 abra|OJJ74603.1 acla|EAW10776.1 afis|EAW24798.1  
afla|EED47189.1 afum|EAL89440.1 agla|OJJ82894.1 akaw|GAA82005.1 aluc|OJZ92182.1 anid|CBF81508.1  
anig|EHA26771.1 aory|EIT79258.1 asyd|OJJ59468.1 ater|EAU36507.1 atub|OJI86610.1 aver|OJJ02806.1  
awen|OJJ40383.1 azon|OJJ49232.1

Group892: acar|OOF95102.1 acar|OOF95168.1 afis|EAW19312.1 afis|EAW24797.1 awen|OJJ34628.1  
awen|OJJ40382.1 abra|OJJ74602.1 acla|EAW10777.1 afla|EED47188.1 afum|EAL89439.1 akaw|GAA82006.1  
aluc|OJZ92181.1 anid|CBF81506.1 anig|EHA26772.1 asyd|OJJ60343.1 ater|EAU36508.1 atub|OJI86609.1  
aver|OJI99684.1 aory|EIT79270.1

Group893: acar|OOF95104.1 acar|OOF95170.1 abra|OJJ74600.1 acla|EAW10779.1 afis|EAW24795.1  
afla|EED47187.1 afum|EAL89437.1 agla|OJJ82891.1 akaw|GAA82008.1 aluc|OJZ92179.1 anid|CBF81503.1  
anig|EHA26774.1 aory|EIT79230.1 asyd|OJJ59466.1 ater|EAU36510.1 atub|OJI86607.1 aver|OJJ02808.1  
awen|OJJ40380.1 azon|OJJ49230.1

Group894: acar|OOF95106.1 acar|OOF95172.1 abra|OJJ74598.1 acla|EAW10781.1 afis|EAW24788.1  
afla|EED47191.1 afum|EAL89427.1 agla|OJJ82890.1 akaw|GAA82010.1 aluc|OJZ92176.1 anid|CBF81466.1  
anig|EHA26776.1 aory|EIT79298.1 asyd|OJJ59443.1 ater|EAU36513.1 atub|OJI86605.1 aver|OJJ02830.1  
awen|OJJ40378.1 azon|OJJ49229.1

Group895: acar|OOF95629.1 acar|OOF95680.1 abra|OJJ74664.1 acla|EAW10731.1 afis|EAW24844.1  
afla|EED47127.1 afum|EAL89490.1 agla|OJJ82044.1 akaw|GAA81947.1 aluc|OJZ92241.1 anid|CBF75849.1  
anig|EHA26713.1 aory|EIT79274.1 asyd|OJJ57571.1 ater|EAU36460.1 atub|OJI86675.1 aver|OJJ05608.1  
awen|OJJ40429.1 azon|OJJ49290.1

Group896: acar|OOF95630.1 acar|OOF95681.1 abra|OJJ74665.1 acla|EAW10730.1 afis|EAW24845.1  
afla|EED47126.1 afum|EAL89491.1 agla|OJJ82045.1 akaw|GAA81946.1 aluc|OJZ92242.1 anid|CBF75847.1  
anig|EHA26712.1 aory|EIT79168.1 asyd|OJJ57562.1 ater|EAU36459.1 atub|OJI86676.1 aver|OJJ05616.1  
awen|OJJ40430.1 azon|OJJ49291.1

Group897: acar|OOF95631.1 acar|OOF95683.1 abra|OJJ74666.1 acla|EAW10729.1 afis|EAW24846.1  
afla|EED47125.1 afum|EAL89492.1 agla|OJJ82058.1 akaw|GAA81945.1 aluc|OJZ92244.1 anid|CBF75845.1  
anig|EHA26711.1 aory|EIT79177.1 asyd|OJJ57561.1 ater|EAU36457.1 atub|OJI86678.1 aver|OJJ05617.1  
awen|OJJ40431.1 azon|OJJ49292.1

Group898: acar|OOF95632.1 acar|OOF95684.1 abra|OJJ74671.1 acla|EAW10726.1 afis|EAW24849.1  
afla|EED47122.1 afum|EAL89495.1 agla|OJJ82061.1 akaw|GAA81942.1 aluc|OJZ92248.1 anid|CBF75839.1  
anig|EHA26708.1 aory|EIT79246.1 asyd|OJJ57557.1 ater|EAU36454.1 atub|OJI86681.1 aver|OJJ05621.1  
awen|OJJ40434.1 azon|OJJ49295.1

Group899: acar|OOF95633.1 acar|OOF95685.1 abra|OJJ74668.1 acla|EAW10728.1 afis|EAW24847.1  
afla|EED47124.1 afum|EAL89493.1 agla|OJJ82059.1 akaw|GAA81944.1 aluc|OJZ92246.1 anid|CBF75843.1  
anig|EHA26710.1 aory|EIT79296.1 asyd|OJJ57560.1 ater|EAU36456.1 atub|OJI86679.1 aver|OJJ05618.1  
awen|OJJ40432.1 azon|OJJ49293.1

Group900: acar|OOF95638.1 acar|OOF95689.1 abra|OJJ74675.1 acla|EAW10722.1 afis|EAW24851.1  
afla|EED47120.1 afum|EAL89498.1 agla|OJJ82065.1 akaw|GAA81938.1 aluc|OJZ92252.1 anid|CBF75835.1  
anig|EHA26704.1 aory|EIT79290.1 asyd|OJJ57555.1 ater|EAU36452.1 atub|OJI86685.1 aver|OJJ05623.1  
awen|OJJ40436.1 azon|OJJ49297.1

Group901: acar|OOF95639.1 acar|OOF95690.1 abra|OJJ74677.1 acla|EAW10720.1 afis|EAW24853.1  
afla|EED47118.1 afum|EAL89500.1 agla|OJJ82067.1 akaw|GAA81937.1 aluc|OJZ92254.1 anid|CBF75831.1  
anig|EHA26703.1 aory|EIT79297.1 asyd|OJJ57553.1 ater|EAU36449.1 atub|OJI86687.1 aver|OJJ05625.1  
awen|OJJ40438.1 azon|OJJ49299.1

Group902: acar|OOF95640.1 acar|OOF95691.1 abra|OJJ74678.1 acla|EAW10719.1 afis|EAW24854.1  
afla|EED47117.1 afum|EAL89501.1 agla|OJJ82068.1 akaw|GAA81936.1 aluc|OJZ92255.1 anid|CBF90310.1  
anig|EHA26702.1 aory|EIT79215.1 asyd|OJJ61915.1 ater|EAU36448.1 atub|OJI86688.1 aver|OJI96008.1  
awen|OJJ40439.1 azon|OJJ46990.1

Group903: acar|OOF95641.1 acar|OOF95692.1 abra|OJJ74679.1 acla|EAW10716.1 afis|EAW24855.1  
afla|EED47094.1 afum|EAL89503.2 agla|OJJ82069.1 akaw|GAA81935.1 aluc|OJZ92256.1 anid|CBF75829.1  
anig|EHA26701.1 aory|EIT72488.1 asyd|OJJ57552.1 ater|EAU36447.1 atub|OJI86690.1 aver|OJJ05626.1  
awen|OJJ40443.1 azon|OJJ49301.1

Group904: acar|OOF95643.1 acar|OOF95694.1 abra|OJJ74681.1 acla|EAW10714.1 afis|EAW24856.1  
afla|EED47096.1 afum|EAL89504.1 agla|OJJ82071.1 akaw|GAA81933.1 aluc|OJZ92258.1 anid|CBF75827.1  
anig|EHA26700.1 aory|EIT72489.1 asyd|OJJ57550.1 ater|EAU36446.1 atub|OJI86692.1 aver|OJJ05628.1  
awen|OJJ40445.1 azon|OJJ49302.1

Group905: acar|OOF95644.1 acar|OOF95695.1 abra|OJJ74683.1 acla|EAW10713.1 afis|EAW24857.1  
afla|EED47097.1 afum|EAL89505.2 agla|OJJ82072.1 akaw|GAA81931.1 aluc|OJZ92260.1 anid|CBF75825.1  
anig|EHA26699.1 aory|EIT72494.1 asyd|OJJ57549.1 ater|EAU36443.1 atub|OJI86694.1 aver|OJJ05629.1  
awen|OJJ40446.1 azon|OJJ49303.1

Group906: acar|OOF95645.1 acar|OOF95696.1 abra|OJJ74684.1 acla|EAW10712.1 afis|EAW24858.1  
afla|EED47098.1 afum|EAL89506.2 agla|OJJ82073.1 akaw|GAA81930.1 aluc|OJZ92261.1 anid|CBF75823.1  
anig|EHA26698.1 aory|EIT72492.1 asyd|OJJ57548.1 ater|EAU36442.1 atub|OJI86695.1 aver|OJJ05630.1  
awen|OJJ40447.1 azon|OJJ49304.1

Group907: acar|OOF95647.1 acar|OOF95698.1 abra|OJJ74686.1 acla|EAW10710.1 afis|EAW24860.1  
afla|EED47100.1 afum|EAL89509.1 agla|OJJ82078.1 akaw|GAA81928.1 aluc|OJZ92263.1 anid|CBF75819.1  
anig|EHA26696.1 aory|EIT72779.1 asyd|OJJ57546.1 ater|EAU36440.1 atub|OJI86697.1 aver|OJJ05632.1  
awen|OJJ40450.1 azon|OJJ49306.1

Group908: acar|OOF95648.1 acar|OOF95699.1 abra|OJJ74687.1 acla|EAW10709.1 afis|EAW24861.1  
afla|EED47101.1 afum|EAL89510.1 agla|OJJ82079.1 akaw|GAA81927.1 aluc|OJZ92264.1 anid|CBF75817.1  
anig|EHA26695.1 aory|EIT72784.1 asyd|OJJ57545.1 ater|EAU36439.1 atub|OJI86698.1 aver|OJJ05633.1  
awen|OJJ40451.1 azon|OJJ49307.1

Group909: acar|OOF95649.1 acar|OOF95700.1 abra|OJJ74688.1 acla|EAW10708.1 afis|EAW24862.1  
afla|EED47102.1 afum|EAL89511.1 agla|OJJ82080.1 akaw|GAA81926.1 aluc|OJZ92265.1 anid|CBF75815.1  
anig|EHA26694.1 aory|EIT72778.1 asyd|OJJ57544.1 ater|EAU36438.1 atub|OJI86699.1 aver|OJJ05634.1  
awen|OJJ40452.1 azon|OJJ49308.1

Group910: acar|OOF95650.1 acar|OOF95701.1 abra|OJJ74689.1 acla|EAW10707.1 afis|EAW24863.1  
afla|EED47103.1 afum|EAL89513.1 agla|OJJ82081.1 akaw|GAA81925.1 aluc|OJZ92266.1 anid|CBF75813.1

anig|EHA26693.1 aory|EIT72782.1 asyd|OJJ57543.1 ater|EAU36437.1 atub|OJI86700.1 aver|OJJ05635.1  
awen|OJJ40453.1 azon|OJJ49309.1

Group911: acar|OOF95651.1 acar|OOF95702.1 abra|OJJ74690.1 acla|EAW10706.1 afis|EAW24864.1  
afla|EED47104.1 afum|EAL89514.1 agla|OJJ82082.1 akaw|GAA81924.1 aluc|OJZ92267.1 anid|CBF75811.1  
anig|EHA26692.1 aory|EIT72780.1 asyd|OJJ57542.1 ater|EAU36436.1 atub|OJI86701.1 aver|OJJ05636.1  
awen|OJJ40454.1 azon|OJJ49310.1

Group912: acar|OOF95653.1 acar|OOF95704.1 abra|OJJ74693.1 acla|EAW10705.1 afis|EAW24865.1  
afla|EED47106.1 afum|EAL89515.1 agla|OJJ82083.1 akaw|GAA81923.1 aluc|OJZ92270.1 anid|CBF75809.1  
anig|EHA26691.1 aory|EIT72781.1 asyd|OJJ57541.1 ater|EAU36435.1 atub|OJI86704.1 aver|OJJ05637.1  
awen|OJJ40455.1 azon|OJJ49311.1

Group913: acar|OOF95660.1 acar|OOF95711.1 abra|OJJ68465.1 acla|EAW10698.1 afis|EAW24872.1  
afla|EED47112.1 afum|EAL89522.1 agla|OJJ82093.1 akaw|GAA92385.1 aluc|OJZ83244.1 anid|CBF75794.1  
anig|EHA21099.1 aory|EIT79170.1 asyd|OJJ57530.1 ater|EAU36429.1 atub|OJI87692.1 aver|OJJ05648.1  
awen|OJJ40463.1 azon|OJJ49323.1

Group914: acar|OOF95661.1 acar|OOF95712.1 abra|OJJ68466.1 acla|EAW10697.1 afis|EAW24873.1  
afla|EED47113.1 afum|EAL89523.1 agla|OJJ82094.1 akaw|GAA92386.1 aluc|OJZ83245.1 anid|CBF75792.1  
anig|EHA21100.1 aory|EIT79294.1 asyd|OJJ57531.1 ater|EAU36428.1 atub|OJI87691.1 aver|OJJ05647.1  
awen|OJJ40464.1 azon|OJJ49324.1

Group915: acar|OOF95662.1 acar|OOF95713.1 abra|OJJ68467.1 acla|EAW10696.1 afis|EAW24874.1  
afla|EED47114.1 afum|EAL89524.1 agla|OJJ82095.1 akaw|GAA92388.1 aluc|OJZ83248.1 anid|CBF75790.1  
anig|EHA21101.1 aory|EIT79175.1 asyd|OJJ57532.1 ater|EAU36427.1 atub|OJI87689.1 aver|OJJ05646.1  
awen|OJJ40465.1 azon|OJJ49325.1

Group916: acar|OOF95663.1 acar|OOF95714.1 abra|OJJ74702.1 acla|EAW10695.1 afis|EAW24875.1  
afla|EED47115.1 afum|EAL89525.1 agla|OJJ82096.1 akaw|GAA81917.1 aluc|OJZ92279.1 anid|CBF75789.1  
anig|EHA26685.1 aory|EIT79273.1 asyd|OJJ57533.1 ater|EAU36426.1 atub|OJI86712.1 aver|OJJ05645.1  
awen|OJJ40466.1 azon|OJJ49328.1

Group917: acar|OOF95665.1 acar|OOF95716.1 abra|OJJ74704.1 acla|EAW10693.1 afis|EAW24877.1  
afla|EED47089.1 afum|EAL89527.1 agla|OJJ82098.1 akaw|GAA81914.1 aluc|OJZ92284.1 anid|CBF75758.1  
anig|EHA26684.1 aory|EIT72484.1 asyd|OJJ57527.1 ater|EAU36424.1 atub|OJI86715.1 aver|OJJ05651.1  
awen|OJJ40467.1 azon|OJJ49330.1

Group918: acar|OOF96224.1 acar|OOF96262.1 abra|OJJ71508.1 acla|EAW15066.1 afis|EAW20038.1  
afla|EED45342.1 afum|EAL85159.1 agla|OJJ88925.1 akaw|GAA89405.1 aluc|OJZ86247.1 anid|CBF84777.1  
anig|EHA21617.1 aory|EIT73643.1 asyd|OJJ63237.1 ater|EAU38653.1 atub|OJI84295.1 aver|OJI97719.1  
awen|OJJ31793.1 azon|OJJ43703.1

Group919: acar|OOF96229.1 acar|OOF96267.1 abra|OJJ71515.1 acla|EAW15072.1 afis|EAW20044.1  
afla|EED45336.1 afum|EAL85164.2 agla|OJJ88918.1 akaw|GAA89401.1 aluc|OJZ86253.1 anid|CBF84789.1  
anig|EHA21612.1 aory|EIT73570.1 asyd|OJJ63230.1 ater|EAU38648.1 atub|OJI84290.1 aver|OJI97726.1  
awen|OJJ31800.1 azon|OJJ46321.1

Group920: acar|OOF96233.1 acar|OOF96270.1 abra|OJJ71517.1 acla|EAW15075.1 afis|EAW20046.1  
afla|EED45334.1 afum|EAL85167.1 agla|OJJ88914.1 akaw|GAA89400.1 aluc|OJZ86256.1 anid|CBF84795.1  
anig|EHA21610.1 aory|EIT73786.1 asyd|OJJ63227.1 ater|EAU38656.1 atub|OJI84287.1 aver|OJI97728.1  
awen|OJJ31804.1 azon|OJJ46318.1

Group921: acar|OOF96234.1 acar|OOF96271.1 abra|OJJ71518.1 acla|EAW15076.1 afis|EAW20047.1  
afla|EED45333.1 afum|EAL85168.2 agla|OJJ88913.1 akaw|GAA89399.1 aluc|OJZ86257.1 anid|CBF84797.1  
anig|EHA21609.1 aory|EIT73741.1 asyd|OJJ63226.1 ater|EAU38657.1 atub|OJI84286.1 aver|OJI97729.1  
awen|OJJ31805.1 azon|OJJ46317.1

Group922: acar|OOF96235.1 acar|OOF96272.1 abra|OJJ71519.1 acla|EAW15077.1 afis|EAW20048.1  
afla|EED45332.1 afum|EAL85169.1 agla|OJJ88912.1 akaw|GAA89398.1 aluc|OJZ86258.1 anid|CBF84799.1  
anig|EHA21608.1 aory|EIT73661.1 asyd|OJJ63225.1 ater|EAU38658.1 atub|OJI84285.1 aver|OJI97730.1  
awen|OJJ31806.1 azon|OJJ46316.1

Group923: acar|OOF96236.1 acar|OOF96273.1 abra|OJJ71520.1 acla|EAW15078.1 afis|EAW20049.1  
afum|EAL85170.2 agla|OJJ88911.1 akaw|GAA89397.1 aluc|OJZ86259.1 anid|CBF84801.1 anig|EHA21607.1  
aory|EIT73827.1 asyd|OJJ63224.1 ater|EAU38659.1 atub|OJI84284.1 aver|OJI97731.1 awen|OJJ31807.1  
azon|OJJ46315.1 afla|EED45331.1

Group924: acar|OOF96239.1 acar|OOF96276.1 abra|OJJ71523.1 acla|EAW15080.1 afis|EAW20052.1  
afla|EED45328.1 afum|EAL85172.1 agla|OJJ88908.1 akaw|GAA89394.1 aluc|OJZ86262.1 anid|CBF84806.1  
anig|EHA21605.1 aory|EIT73685.1 asyd|OJJ63222.1 ater|EAU38661.1 atub|OJI84281.1 aver|OJI97733.1  
awen|OJJ31810.1 azon|OJJ46312.1

Group925: acar|OOF96240.1 acar|OOF96277.1 abra|OJJ71524.1 acla|EAW15081.1 afis|EAW20053.1  
afla|EED45327.1 afum|EAL85173.2 agla|OJJ88907.1 akaw|GAA89393.1 aluc|OJZ86263.1 anid|CBF84808.1  
anig|EHA21604.1 aory|EIT73613.1 asyd|OJJ63221.1 ater|EAU38662.1 atub|OJI84280.1 aver|OJI97734.1  
awen|OJJ31811.1 azon|OJJ46311.1

Group926: acar|OOF96242.1 acar|OOF96279.1 abra|OJJ71527.1 acla|EAW15083.1 afis|EAW20055.1  
afla|EED45325.1 afum|EAL85175.2 agla|OJJ88905.1 akaw|GAA89391.1 aluc|OJZ86266.1 anid|CBF84813.1  
anig|EHA21602.1 aory|EIT73716.1 asyd|OJJ63218.1 ater|EAU38664.1 atub|OJI84275.1 aver|OJI97737.1  
awen|OJJ31814.1 azon|OJJ46309.1

Group927: acar|OOF96243.1 acar|OOF96280.1 afum|EAL85176.2 afum|EAL87762.1 abra|OJJ71528.1  
acla|EAW15084.1 afis|EAW20056.1 afla|EED45324.1 agla|OJJ88904.1 akaw|GAA89390.1 aluc|OJZ86268.1  
anid|CBF84817.1 aory|EIT73595.1 asyd|OJJ63217.1 ater|EAU38665.1 atub|OJI84274.1 aver|OJI97738.1  
awen|OJJ31815.1 azon|OJJ46308.1

Group928: acar|OOF96245.1 acar|OOF96282.1 abra|OJJ71531.1 acla|EAW15086.1 afis|EAW20058.1  
afla|EED45322.1 afum|EAL85178.1 agla|OJJ88902.1 akaw|GAA89388.1 aluc|OJZ86270.1 anid|CBF84840.1  
anig|EHA21599.1 aory|EIT73696.1 asyd|OJJ63215.1 ater|EAU38667.1 atub|OJI84271.1 aver|OJI97740.1  
awen|OJJ31817.1 azon|OJJ46306.1

Group929: acar|OOF96248.1 acar|OOF96285.1 afum|EAL85181.2 afum|EAL87756.2 abra|OJJ71535.1  
acla|EAW15089.1 afis|EAW20061.1 afla|EED45318.1 agla|OJJ88898.1 akaw|GAA89385.1 aluc|OJZ86273.1  
anid|CBF84834.1 anig|EHA21596.1 aory|EIT73796.1 asyd|OJJ63212.1 ater|EAU38670.1 atub|OJI84267.1  
aver|OJI97743.1 awen|OJJ31821.1

Group930: acar|OOF96249.1 acar|OOF96286.1 abra|OJJ71537.1 acla|EAW15090.1 afis|EAW20062.1  
afla|EED45317.1 afum|EAL85182.2 agla|OJJ88897.1 akaw|GAA89384.1 aluc|OJZ86274.1 anid|CBF84832.1  
anig|EHA21595.1 aory|EIT73715.1 asyd|OJJ63211.1 ater|EAU38671.1 atub|OJI84266.1 aver|OJI97744.1  
awen|OJJ31822.1 azon|OJJ46303.1

Group931: acar|OOF96250.1 acar|OOF96287.1 abra|OJJ71540.1 acla|EAW15095.1 afis|EAW20064.1  
afla|EED45313.1 afum|EAL85184.1 agla|OJJ88893.1 akaw|GAA89381.1 aluc|OJZ86278.1 anid|CBF84828.1  
anig|EHA21593.1 aory|EIT73604.1 asyd|OJJ63209.1 ater|EAU38673.1 atub|OJI84261.1 aver|OJI97746.1  
awen|OJJ31825.1 azon|OJJ46300.1

Group932: acar|OOF96251.1 acar|OOF96290.1 abra|OJJ71543.1 acla|EAW15097.1 afis|EAW20069.1  
afla|EED45310.1 afum|EAL85187.1 agla|OJJ88891.1 akaw|GAA89379.1 aluc|OJZ86281.1 anid|CBF84823.1  
anig|EHA21590.1 aory|EIT73765.1 asyd|OJJ63206.1 ater|EAU38675.1 atub|OJI84258.1 aver|OJI97749.1  
awen|OJJ31828.1 azon|OJJ46296.1

Group933: acar|OOF96252.1 acar|OOF96291.1 abra|OJJ71545.1 acla|EAW15099.1 afis|EAW20071.1  
afla|EED45308.1 afum|EAL85189.1 agla|OJJ88889.1 akaw|GAA89377.1 aluc|OJZ86283.1 anid|CBF84845.1  
anig|EHA21588.1 aory|EIT73815.1 asyd|OJJ63204.1 ater|EAU38676.1 atub|OJI84255.1 aver|OJI97751.1  
awen|OJJ31830.1 azon|OJJ46294.1

Group934: acar|OOF96254.1 acar|OOF96293.1 abra|OJJ71549.1 acla|EAW15103.1 afis|EAW20075.1  
afla|EED45304.1 afum|EAL85193.2 agla|OJJ88885.1 akaw|GAA89373.1 aluc|OJZ86287.1 anid|CBF84853.1  
anig|EHA21584.1 aory|EIT73551.1 asyd|OJJ63200.1 ater|EAU38683.1 atub|OJI84251.1 aver|OJI97755.1  
awen|OJJ31834.1 azon|OJJ46290.1

Group935: acar|OOF96255.1 acar|OOF96294.1 abra|OJJ71550.1 acla|EAW15104.1 afis|EAW20076.1  
afla|EED45302.1 afum|EAL85194.1 agla|OJJ88884.1 akaw|GAA89372.1 aluc|OJZ86288.1 anid|CBF84855.1  
anig|EHA21583.1 aory|EIT73645.1 asyd|OJJ63199.1 ater|EAU38684.1 atub|OJI84250.1 aver|OJI97756.1  
awen|OJJ31835.1 azon|OJJ46289.1

Group936: acar|OOF96256.1 acar|OOF96295.1 abra|OJJ71551.1 acla|EAW15105.1 afis|EAW20077.1  
afla|EED45298.1 afum|EAL85195.1 agla|OJJ88883.1 akaw|GAA89371.1 aluc|OJZ86289.1 anid|CBF84867.1  
anig|EHA21582.1 aory|EIT73681.1 asyd|OJJ63198.1 ater|EAU38685.1 atub|OJI84249.1 aver|OJI97757.1  
awen|OJJ31836.1 azon|OJJ46288.1

Group937: acar|OOF96257.1 acar|OOF96296.1 abra|OJJ71554.1 acla|EAW15108.1 afis|EAW20079.1  
afla|EED45296.1 afum|EAL85198.1 agla|OJJ88880.1 akaw|GAA89368.1 aluc|OJZ86292.1 anid|CBF84858.1  
anig|EHA21579.1 aory|EIT73808.1 asyd|OJJ63195.1 ater|EAU38687.1 atub|OJI84246.1 aver|OJI97760.1  
awen|OJJ31839.1 azon|OJJ46284.1

Group938: acar|OOF96906.1 acar|OOF96942.1 abra|OJJ70803.1 acla|EAW11121.1 afis|EAW15850.1  
afla|EED56523.1 afum|EAL88486.1 agla|OJJ87258.1 akaw|GAA90119.1 aluc|OJZ84149.1 anid|CBF81174.1  
anig|EHA19253.1 aory|EIT72791.1 asyd|OJJ59291.1 ater|EAU31665.1 atub|OJI90521.1 aver|OJJ02984.1  
awen|OJJ36777.1 azon|OJJ47421.1

Group939: acar|OOF96913.1 acar|OOF96948.1 abra|OJJ70797.1 acla|EAW11126.1 afis|EAW15855.1  
afla|EED56517.1 afum|EAL88491.1 agla|OJJ87252.1 akaw|GAA90113.1 aluc|OJZ84142.1 anid|CBF81185.1

anig|EHA19250.1 aory|EIT72794.1 asyd|OJJ59297.1 ater|EAU31670.1 atub|OJI90516.1 aver|OJJ02978.1  
awen|OJJ36772.1 azon|OJJ47426.1

Group940: acar|OOF96914.1 acar|OOF96949.1 abra|OJJ70796.1 acla|EAW11127.1 afis|EAW15856.1  
afla|EED56516.1 afum|EAL88492.1 agla|OJJ87251.1 akaw|GAA90112.1 aluc|OJZ84141.1 anid|CBF81187.1  
anig|EHA19249.1 aory|EIT72847.1 asyd|OJJ59298.1 ater|EAU31671.1 atub|OJI90515.1 aver|OJJ02977.1  
awen|OJJ36771.1 azon|OJJ47427.1

Group941: acar|OOF96916.1 acar|OOF96951.1 abra|OJJ70794.1 acla|EAW11129.1 afis|EAW15858.1  
afla|EED56514.1 afum|EAL88494.1 agla|OJJ87249.1 akaw|GAA90110.1 aluc|OJZ84139.1 anid|CBF81191.1  
anig|EHA19247.1 aory|EIT72852.1 asyd|OJJ59300.1 ater|EAU31673.1 atub|OJI90513.1 aver|OJJ02975.1  
awen|OJJ36769.1 azon|OJJ47429.1

Group942: acar|OOF96917.1 acar|OOF96952.1 abra|OJJ70793.1 acla|EAW11130.1 afis|EAW15861.1  
afla|EED56513.1 afum|EAL88496.1 agla|OJJ87248.1 akaw|GAA90109.1 aluc|OJZ84138.1 anid|CBF81193.1  
anig|EHA19246.1 aory|EIT72867.1 asyd|OJJ59301.1 ater|EAU31674.1 atub|OJI90512.1 aver|OJJ02974.1  
awen|OJJ36768.1 azon|OJJ47430.1

Group943: acar|OOF96918.1 acar|OOF96953.1 abra|OJJ70792.1 acla|EAW11131.1 afis|EAW15862.1  
afla|EED56512.1 afum|EAL88497.1 agla|OJJ87247.1 akaw|GAA90108.1 aluc|OJZ84137.1 anid|CBF81194.1  
anig|EHA19245.1 aory|EIT72817.1 asyd|OJJ59302.1 ater|EAU31675.1 atub|OJI90511.1 aver|OJJ02973.1  
awen|OJJ36767.1 azon|OJJ48009.1

Group944: acar|OOF96919.1 acar|OOF96954.1 abra|OJJ70791.1 acla|EAW11132.1 afis|EAW15863.1  
afla|EED56511.1 afum|EAL88498.1 agla|OJJ87246.1 akaw|GAA90107.1 aluc|OJZ84136.1 anid|CBF81196.1  
anig|EHA19244.1 aory|EIT72814.1 asyd|OJJ59303.1 ater|EAU31676.1 atub|OJI90510.1 aver|OJJ02972.1  
awen|OJJ36766.1 azon|OJJ47431.1

Group945: acar|OOF96921.1 acar|OOF96956.1 abra|OJJ70789.1 acla|EAW11133.1 afis|EAW15865.1  
afla|EED56510.1 afum|EAL88499.1 agla|OJJ87244.1 akaw|GAA90105.1 aluc|OJZ84134.1 anid|CBF81200.1  
anig|EHA19242.1 aory|EIT72849.1 asyd|OJJ59304.1 ater|EAU31678.1 atub|OJI90508.1 aver|OJJ02971.1  
awen|OJJ36765.1 azon|OJJ47433.1

Group946: acar|OOF96924.1 acar|OOF96959.1 abra|OJJ70786.1 acla|EAW11135.1 afis|EAW15867.1  
afla|EED56508.1 afum|EAL88501.1 agla|OJJ87241.1 akaw|GAA90103.1 aluc|OJZ84131.1 anid|CBF81205.1  
anig|EHA19239.1 aory|EIT72789.1 asyd|OJJ59307.1 ater|EAU31680.1 atub|OJI90505.1 aver|OJJ02968.1  
awen|OJJ36762.1 azon|OJJ47436.1

Group947: acar|OOF96927.1 acar|OOF96962.1 abra|OJJ70781.1 acla|EAW11138.1 afis|EAW15869.1  
afla|EED56505.1 afum|EAL88503.1 agla|OJJ87238.1 akaw|GAA90100.1 aluc|OJZ84128.1 anid|CBF81211.1  
anig|EHA19236.1 aory|EIT72793.1 asyd|OJJ59310.1 ater|EAU31686.1 atub|OJI90502.1 aver|OJJ02965.1  
awen|OJJ36760.1 azon|OJJ47439.1

Group948: acar|OOF96928.1 acar|OOF96963.1 abra|OJJ70780.1 acla|EAW11139.1 afis|EAW15870.1  
afla|EED56504.1 afum|EAL88504.1 agla|OJJ87237.1 akaw|GAA90099.1 aluc|OJZ84127.1 anid|CBF81213.1  
anig|EHA19235.1 aory|EIT72861.1 asyd|OJJ59311.1 ater|EAU31687.1 atub|OJI90501.1 aver|OJJ02964.1  
awen|OJJ36759.1 azon|OJJ47440.1

Group949: acar|OOF96930.1 acar|OOF96965.1 abra|OJJ70778.1 acla|EAW11141.1 afis|EAW15872.1  
afla|EED56503.1 afum|EAL88506.1 agla|OJJ87235.1 akaw|GAA90097.1 aluc|OJZ84125.1 anid|CBF81219.1  
anig|EHA19233.1 aory|EIT72819.1 asyd|OJJ59312.1 ater|EAU31689.1 atub|OJI90499.1 aver|OJJ02963.1  
awen|OJJ36758.1 azon|OJJ47442.1

Group950: acar|OOF96931.1 acar|OOF96966.1 abra|OJJ70777.1 acla|EAW11142.1 afis|EAW15873.1  
afla|EED56502.1 afum|EBA27350.1 akaw|GAA90096.1 aluc|OJZ84124.1 anid|CBF81221.1 anig|EHA19232.1  
aory|EIT72844.1 asyd|OJJ59313.1 ater|EAU31690.1 atub|OJI90497.1 aver|OJJ02962.1 awen|OJJ36757.1  
azon|OJJ47443.1 afum|EBA27351.1

Group951: acar|OOF96932.1 acar|OOF96967.1 abra|OJJ70776.1 acla|EAW11143.1 afis|EAW15874.1  
afla|EED56501.1 afum|EAL88508.1 agla|OJJ87234.1 akaw|GAA90095.1 aluc|OJZ84123.1 anid|CBF81222.1  
anig|EHA19231.1 aory|EIT72827.1 asyd|OJJ59314.1 ater|EAU31691.1 atub|OJI90495.1 aver|OJJ02961.1  
awen|OJJ36756.1 azon|OJJ47444.1

Group952: acar|OOF97657.1 acar|OOF97704.1 abra|OJJ71500.1 acla|EAW10048.1 afis|EAW25536.1  
afla|EED44712.1 afum|EAL90200.1 agla|OJJ87267.1 akaw|GAA82520.1 aluc|OJZ87047.1 anid|CBF77819.1  
anig|EHA20320.1 aory|EIT83462.1 asyd|OJJ53009.1 ater|EAU33377.1 atub|OJI81588.1 aver|OJJ03834.1  
awen|OJJ41278.1 azon|OJJ49501.1

Group953: acar|OOF97658.1 acar|OOF97705.1 abra|OJJ71499.1 acla|EAW10050.1 afis|EAW25534.1  
afla|EED44709.1 afum|EAL90198.1 agla|OJJ87269.1 akaw|GAA82521.1 aluc|OJZ87048.1 anid|CBF77817.1  
anig|EHA20321.1 aory|EIT83458.1 asyd|OJJ53010.1 ater|EAU33376.1 atub|OJI81587.1 aver|OJJ03833.1  
awen|OJJ41276.1 azon|OJJ49508.1

Group954: acar|OOF97660.1 acar|OOF97707.1 abra|OJJ71497.1 acla|EAW10052.1 afis|EAW25532.1  
afla|EED54033.1 afum|EAL90196.2 agla|OJJ87270.1 akaw|GAA82523.1 aluc|OJZ87050.1 anid|CBF77813.1  
anig|EHA20323.1 aory|EIT78299.1 asyd|OJJ53012.1 ater|EAU33374.1 atub|OJI81585.1 aver|OJJ03831.1  
awen|OJJ41274.1 azon|OJJ49506.1

Group955: acar|OOF97661.1 acar|OOF97708.1 abra|OJJ71496.1 acla|EAW10053.1 afis|EAW25531.1  
afla|EED54032.1 afum|EBA27398.1 agla|OJJ87271.1 akaw|GAA82524.1 aluc|OJZ87051.1 anid|CBF77811.1  
anig|EHA20324.1 aory|EIT78333.1 asyd|OJJ53013.1 ater|EAU33373.1 atub|OJI81584.1 aver|OJJ03830.1  
awen|OJJ41273.1 azon|OJJ49505.1

Group956: acar|OOF97663.1 acar|OOF97710.1 abra|OJJ71494.1 acla|EAW10055.1 afis|EAW25529.1  
afla|EED54030.1 afum|EAL90194.1 agla|OJJ87273.1 akaw|GAA82526.1 aluc|OJZ87053.1 anid|CBF77821.1  
anig|EHA20326.1 aory|EIT78259.1 asyd|OJJ53015.1 ater|EAU33372.1 atub|OJI81582.1 aver|OJJ03828.1  
awen|OJJ41271.1 azon|OJJ49509.1

Group957: acar|OOF97664.1 acar|OOF97711.1 abra|OJJ71493.1 acla|EAW10057.1 afis|EAW25527.1  
afla|EED54028.1 afum|EAL90192.1 agla|OJJ87275.1 akaw|GAA82527.1 aluc|OJZ87054.1 anid|CBF77805.1  
anig|EHA20327.1 aory|EIT78292.1 asyd|OJJ53017.1 ater|EAU33370.1 atub|OJI81581.1 aver|OJJ03826.1  
awen|OJJ41269.1 azon|OJJ49511.1

Group958: acar|OOF97666.1 acar|OOF97713.1 abra|OJJ71491.1 acla|EAW10059.1 afis|EAW25525.1  
afla|EED55229.1 afum|EAL90190.2 agla|OJJ81067.1 akaw|GAA82529.1 aluc|OJZ87056.1 anid|CBF77802.1  
anig|EHA20329.1 aory|EIT83576.1 asyd|OJJ53019.1 ater|EAU32314.1 atub|OJI81579.1 aver|OJJ03824.1  
awen|OJJ40768.1 azon|OJJ44041.1

Group959: acar|OOF97669.1 acar|OOF97715.1 abra|OJJ71489.1 acla|EAW10061.1 afis|EAW25523.1  
afla|EED54026.1 afum|EAL90188.2 agla|OJJ87278.1 akaw|GAA82531.1 aluc|OJZ87058.1 anid|CBF77800.1  
anig|EHA20331.1 aory|EIT78257.1 asyd|OJJ53021.1 ater|EAU33368.1 atub|OJI81577.1 aver|OJJ03822.1  
awen|OJJ41267.1 azon|OJJ44832.1

Group960: acar|OOF97671.1 acar|OOF97718.1 abra|OJJ71486.1 acla|EAW10064.1 afis|EAW25521.1  
afla|EED54023.1 afum|EAL90186.2 agla|OJJ87281.1 akaw|GAA82534.1 aluc|OJZ87061.1 anid|CBF77796.1  
anig|EHA20334.1 aory|EIT78303.1 asyd|OJJ53024.1 ater|EAU33367.1 atub|OJI81574.1 aver|OJJ03819.1  
awen|OJJ41264.1 azon|OJJ44829.1

Group961: acar|OOF97672.1 acar|OOF97719.1 abra|OJJ71485.1 acla|EAW10065.1 afis|EAW25520.1  
afla|EED54022.1 afum|EAL90185.1 agla|OJJ87282.1 akaw|GAA82535.1 aluc|OJZ87062.1 anid|CBF77794.1  
anig|EHA20335.1 aory|EIT78334.1 asyd|OJJ53025.1 ater|EAU33366.1 atub|OJI81573.1 aver|OJJ03818.1  
awen|OJJ41263.1 azon|OJJ44828.1

Group962: acar|OOF97673.1 acar|OOF97720.1 abra|OJJ71481.1 acla|EAW10068.1 afis|EAW25517.1  
afla|EED54017.1 afum|EAL90182.1 agla|OJJ87286.1 akaw|GAA82538.1 aluc|OJZ87066.1 anid|CBF77788.1  
anig|EHA20338.1 aory|EIT78273.1 asyd|OJJ53028.1 ater|EAU33363.1 atub|OJI81570.1 aver|OJJ03816.1  
awen|OJJ41260.1 azon|OJJ44825.1

Group963: acar|OOF97674.1 acar|OOF97721.1 abra|OJJ71478.1 acla|EAW10071.1 afis|EAW25515.1  
afla|EED54016.1 afum|EAL90180.1 agla|OJJ87288.1 akaw|GAA82539.1 aluc|OJZ87067.1 anid|CBF77785.1  
anig|EHA20339.1 aory|EIT78267.1 asyd|OJJ53029.1 ater|EAU33361.1 atub|OJI81569.1 aver|OJJ03815.1  
awen|OJJ41258.1 azon|OJJ44824.1

Group964: acar|OOF97675.1 acar|OOF97723.1 abra|OJJ71476.1 acla|EAW10073.1 afis|EAW25513.1  
afla|EED54014.1 afum|EAL90178.1 agla|OJJ87291.1 akaw|GAA82540.1 aluc|OJZ87070.1 anid|CBF77781.1  
anig|EHA20340.1 aory|EIT78254.1 asyd|OJJ53031.1 ater|EAU33359.1 atub|OJI81567.1 aver|OJJ03813.1  
awen|OJJ41256.1 azon|OJJ44821.1

Group965: acar|OOF97678.1 acar|OOF97726.1 abra|OJJ71474.1 acla|EAW10076.1 afis|EAW25510.1  
afla|EED54011.1 afum|EAL90176.2 agla|OJJ87295.1 akaw|GAA82542.1 aluc|OJZ87072.1 anid|CBF77775.1  
anig|EHA20342.1 aory|EIT78253.1 asyd|OJJ53034.1 ater|EAU33357.1 atub|OJI81565.1 aver|OJJ03810.1  
awen|OJJ41252.1 azon|OJJ44819.1

Group966: acar|OOF97679.1 acar|OOF97727.1 abra|OJJ71472.1 acla|EAW10078.1 afis|EAW25508.1  
afla|EED54008.1 afum|EAL90174.1 agla|OJJ87297.1 akaw|GAA82544.1 aluc|OJZ87074.1 anid|CBF77772.1  
anig|EHA20343.1 aory|EIT78280.1 asyd|OJJ53036.1 ater|EAU33355.1 atub|OJI81563.1 aver|OJJ03808.1  
awen|OJJ41250.1 azon|OJJ44817.1

Group967: acar|OOF97680.1 acar|OOF97729.1 abra|OJJ71470.1 acla|EAW10081.1 afis|EAW25506.1  
afla|EED54006.1 afum|EAL90172.1 agla|OJJ87298.1 akaw|GAA82545.1 aluc|OJZ87075.1 anid|CBF77768.1  
anig|EHA20345.1 aory|EIT78338.1 asyd|OJJ53037.1 ater|EAU33354.1 atub|OJI81561.1 aver|OJJ03807.1  
awen|OJJ41249.1 azon|OJJ44816.1

Group968: acar|OOF97681.1 acar|OOF97730.1 abra|OJJ71469.1 acla|EAW10082.1 afis|EAW25505.1  
afla|EED54005.1 afum|EAL90171.1 agla|OJJ87299.1 akaw|GAA82546.1 aluc|OJZ87076.1 anid|CBF77766.1

anig|EHA20346.1 aory|EIT78265.1 asyd|OJJ53038.1 ater|EAU33353.1 atub|OJI81560.1 aver|OJJ03806.1  
awen|OJJ41248.1 azon|OJJ44813.1

Group969: acar|OOF97682.1 acar|OOF97731.1 abra|OJJ71468.1 acla|EAW10083.1 afis|EAW25504.1  
afla|EED54003.1 afum|EAL90170.1 agla|OJJ87300.1 akaw|GAA82547.1 aluc|OJZ87077.1 anid|CBF77764.1  
anig|EHA20347.1 aory|EIT78261.1 asyd|OJJ53039.1 ater|EAU33352.1 atub|OJI81559.1 aver|OJJ03805.1  
awen|OJJ41247.1 azon|OJJ44812.1

Group970: acar|OOF97684.1 acar|OOF97734.1 abra|OJJ71464.1 acla|EAW10086.1 afis|EAW25501.1  
afla|EED54000.1 afum|EAL90167.1 agla|OJJ87303.1 akaw|GAA82550.1 aluc|OJZ87080.1 anid|CBF77756.1  
anig|EHA20351.1 aory|EIT78290.1 asyd|OJJ53043.1 ater|EAU34671.1 atub|OJI81557.1 aver|OJJ03801.1  
awen|OJJ41243.1 azon|OJJ44809.1

Group971: acar|OOF97685.1 acar|OOF97735.1 abra|OJJ71465.1 acla|EAW10085.1 afis|EAW25502.1  
afla|EED54001.1 afum|EAL90168.1 agla|OJJ87302.1 akaw|GAA82549.1 aluc|OJZ87079.1 anid|CBF77758.1  
anig|EHA20350.1 aory|EIT78293.1 asyd|OJJ53042.1 ater|EAU34672.1 atub|OJI81558.1 aver|OJJ03802.1  
awen|OJJ41244.1 azon|OJJ44810.1

Group972: acar|OOF97686.1 acar|OOF97736.1 abra|OJJ71463.1 acla|EAW10088.1 afis|EAW25499.1  
afla|EED53999.1 afum|EAL90165.1 agla|OJJ87305.1 akaw|GAA82551.1 aluc|OJZ87081.1 anid|CBF77754.1  
anig|EHA20352.1 aory|EIT78297.1 asyd|OJJ53044.1 ater|EAU34670.1 atub|OJI81556.1 aver|OJJ03800.1  
awen|OJJ41241.1 azon|OJJ44807.1

Group973: acar|OOF97690.1 acar|OOF97740.1 abra|OJJ71458.1 acla|EAW10091.1 afis|EAW25496.1  
afla|EED53996.1 afum|EAL90162.1 agla|OJJ87309.1 akaw|GAA82553.1 aluc|OJZ87085.1 anid|CBF77749.1  
anig|EHA20355.1 aory|EIT78288.1 asyd|OJJ53047.1 ater|EAU34667.1 atub|OJI81553.1 aver|OJJ03798.1  
awen|OJJ41238.1 azon|OJJ44804.1

Group974: acar|OOF97691.1 acar|OOF97741.1 abra|OJJ71456.1 acla|EAW10093.1 afis|EAW25494.1  
afla|EED53994.1 afum|EAL90160.1 agla|OJJ87311.1 akaw|GAA82555.1 aluc|OJZ87087.1 anid|CBF77745.1  
anig|EHA20357.1 aory|EIT78318.1 asyd|OJJ53049.1 ater|EAU34665.1 atub|OJI81551.1 aver|OJJ03796.1  
awen|OJJ41236.1 azon|OJJ44802.1

Group975: acar|OOF97692.1 acar|OOF97742.1 abra|OJJ71455.1 acla|EAW10094.1 afis|EAW25493.1  
afla|EED53993.1 afum|EAL90158.1 akaw|GAA82556.1 aluc|OJZ87088.1 anig|EHA20359.1 aory|EIT78309.1  
asyd|OJJ53050.1 ater|EAU34664.1 atub|OJI81550.1 aver|OJJ03795.1 awen|OJJ41235.1 azon|OJJ44801.1  
afum|EAL90159.1 anig|EHA20358.1

Group976: acar|OOF97694.1 acar|OOF97743.1 abra|OJJ71454.1 acla|EAW10095.1 afis|EAW25492.1  
afla|EED53992.1 afum|EAL90157.1 agla|OJJ87140.1 akaw|GAA82557.1 aluc|OJZ87089.1 anid|CBF77743.1  
anig|EHA20360.1 aory|EIT78276.1 asyd|OJJ53051.1 ater|EAU34663.1 atub|OJI81549.1 aver|OJJ03794.1  
awen|OJJ41234.1 azon|OJJ44799.1

Group977: acar|OOF97695.1 acar|OOF97745.1 abra|OJJ71451.1 acla|EAW10096.1 afis|EAW25491.1  
afla|EED53991.1 afum|EAL90156.1 agla|OJJ87139.1 akaw|GAA82559.1 aluc|OJZ87091.1 anid|CBF77741.1  
anig|EHA20362.1 aory|EIT78277.1 asyd|OJJ53052.1 ater|EAU34662.1 atub|OJI81547.1 aver|OJJ03792.1  
awen|OJJ41233.1 azon|OJJ44798.1

Group978: acar|OOF97697.1 acar|OOF97747.1 abra|OJJ71447.1 acla|EAW10099.1 afis|EAW25488.1  
afla|EED53986.1 afum|EAL90153.1 agla|OJJ87136.1 akaw|GAA82562.1 aluc|OJZ87094.1 anid|CBF77724.1  
anig|EHA20365.1 aory|EIT78270.1 asyd|OJJ53061.1 ater|EAU34659.1 atub|OJI81544.1 aver|OJJ03783.1  
awen|OJJ41229.1 azon|OJJ44796.1

Group979: acar|OOF97698.1 acar|OOF97748.1 abra|OJJ71446.1 acla|EAW10100.1 afis|EAW25487.1  
afla|EED53985.1 afum|EAL90152.1 agla|OJJ87135.1 akaw|GAA82563.1 aluc|OJZ87095.1 anid|CBF77722.1  
anig|EHA20366.1 aory|EIT78345.1 asyd|OJJ53062.1 ater|EAU34658.1 atub|OJI81543.1 aver|OJJ03782.1  
awen|OJJ41228.1 azon|OJJ44795.1

Group980: acar|OOF97699.1 acar|OOF97749.1 abra|OJJ71444.1 acla|EAW10102.1 afis|EAW25485.1  
afla|EED53983.1 afum|EAL90150.1 agla|OJJ87133.1 akaw|GAA82565.1 aluc|OJZ87097.1 anid|CBF77713.1  
anig|EHA20368.1 aory|EIT78331.1 asyd|OJJ53067.1 ater|EAU34656.1 atub|OJI81541.1 aver|OJJ03778.1  
awen|OJJ41226.1 azon|OJJ44781.1

Group981: acar|OOF98471.1 acar|OOF98473.1 abra|OJJ78401.1 acla|EAW09131.1 afis|EAW22015.1  
afla|EED46740.1 afum|EAL93030.1 agla|OJJ84082.1 akaw|GAA85630.1 aluc|OJZ91480.1 anid|CBF82625.1  
anig|EHA20142.1 aory|EIT77878.1 asyd|OJJ54012.1 ater|EAU31136.1 atub|OJI83473.1 aver|OJJ08730.1  
awen|OJJ34311.1 azon|OJJ43327.1

Group982: acar|OOF98472.1 acar|OOF98486.1 abra|OJJ78402.1 acla|EAW09130.1 afis|EAW22016.1  
afla|EED46741.1 afum|EAL93031.1 agla|OJJ84081.1 akaw|GAA85629.1 aluc|OJZ91481.1 anid|CBF82627.1  
anig|EHA20143.1 aory|EIT77969.1 asyd|OJJ54011.1 ater|EAU31137.1 atub|OJI83474.1 aver|OJJ08731.1  
awen|OJJ34312.1 azon|OJJ43328.1



Group983: acar|OOF98475.1 acar|OOF98487.1 abra|OJJ78399.1 acla|EAW09133.1 afis|EAW22013.1  
afla|EED46738.1 afum|EAL93028.1 agla|OJJ84084.1 akaw|GAA85632.1 aluc|OJZ91478.1 anid|CBF82644.1  
anig|EHA20140.1 aory|EIT77900.1 asyd|OJJ61676.1 ater|EAU31135.1 atub|OJI83471.1 aver|OJJ00997.1  
awen|OJJ34309.1 azon|OJJ48062.1

Group984: acar|OOF98476.1 acar|OOF98489.1 abra|OJJ78398.1 acla|EAW09134.1 afis|EAW22012.1  
afla|EED46737.1 afum|EAL93027.1 agla|OJJ84085.1 akaw|GAA85633.1 aluc|OJZ91477.1 anid|CBF82646.1  
anig|EHA20139.1 aory|EIT77930.1 asyd|OJJ61675.1 ater|EAU31134.1 atub|OJI83470.1 aver|OJJ00996.1  
awen|OJJ34308.1 azon|OJJ48061.1

Group985: acar|OOF98478.1 acar|OOF98491.1 abra|OJJ78396.1 acla|EAW09136.1 afis|EAW22011.1  
afla|EED46735.1 afum|EAL93026.1 agla|OJJ84087.1 akaw|GAA85635.1 aluc|OJZ91475.1 anid|CBF82649.1  
anig|EHA20137.1 aory|EIT77821.1 asyd|OJJ61673.1 ater|EAU31132.1 atub|OJI83468.1 aver|OJJ00994.1  
awen|OJJ34306.1 azon|OJJ43333.1

Group986: acar|OOF98481.1 acar|OOF98494.1 abra|OJJ78393.1 acla|EAW09139.1 afis|EAW22008.1  
afla|EED46732.1 afum|EAL93023.1 agla|OJJ84090.1 akaw|GAA85638.1 aluc|OJZ91472.1 anid|CBF82655.1  
anig|EHA20134.1 aory|EIT77839.1 asyd|OJJ61670.1 ater|EAU31130.1 atub|OJI83465.1 aver|OJJ00991.1  
awen|OJJ34303.1 azon|OJJ43335.1

Group987: acar|OOF98482.1 acar|OOF98495.1 abra|OJJ78391.1 acla|EAW09141.1 afis|EAW22006.1  
afla|EED46730.1 afum|EAL93021.2 agla|OJJ84092.1 akaw|GAA85640.1 aluc|OJZ91470.1 anid|CBF82659.1  
anig|EHA20132.1 aory|EIT77908.1 asyd|OJJ61668.1 ater|EAU31128.1 atub|OJI83463.1 aver|OJJ00989.1  
awen|OJJ34301.1 azon|OJJ43337.1

Group988: acar|OOF98483.1 acar|OOF98496.1 abra|OJJ78392.1 acla|EAW09140.1 afis|EAW22007.1  
afla|EED46731.1 afum|EAL93022.1 agla|OJJ84091.1 akaw|GAA85639.1 aluc|OJZ91471.1 anid|CBF82657.1  
anig|EHA20133.1 aory|EIT77818.1 asyd|OJJ61669.1 ater|EAU31129.1 atub|OJI83464.1 aver|OJJ00990.1  
awen|OJJ34302.1 azon|OJJ43336.1

Group989: acar|OOF98531.1 acar|OOF98532.1 abra|OJJ78355.1 acla|EAW09180.1 afis|EAW21966.1  
afla|EED46687.1 afum|EAL92980.1 agla|OJJ84137.1 akaw|GAA85679.1 aluc|OJZ91430.1 anid|CBF82734.1  
anig|EHA20099.1 aory|EIT77938.1 asyd|OJJ61626.1 ater|EAU31086.1 atub|OJI83423.1 aver|OJJ00951.1  
awen|OJJ34260.1 azon|OJJ43377.1

Group990: acla|EAW12052.1 acla|EAW15326.1 afis|EAW19692.1 afis|EAW20347.1 afla|EED45214.1  
afla|EED48467.1 afum|EAL85467.1 afum|EAL86834.1 aory|EIT73589.1 aory|EIT76272.1 asyd|OJJ53694.1  
asyd|OJJ62962.1 aver|OJI98005.1 aver|OJJ07810.1 acar|OOF91909.1 anid|CBF75992.1 ater|EAU37786.1  
awen|OJJ38808.1 azon|OJJ45237.1

Group991: afis|EAW15984.1 afis|EAW22037.1 abra|OJJ77639.1 acar|OOF99107.1 acla|EAW06489.1  
afla|EED56354.1 afum|EAL88616.1 agla|OJJ85987.1 akaw|GAA83995.1 aluc|OJZ80891.1 anid|CBF85810.1  
anig|EHA19447.1 aory|EIT73316.1 asyd|OJJ64340.1 ater|EAU33668.1 atub|OJI82687.1 aver|OJI98433.1  
awen|OJJ30486.1 azon|OJJ45477.1

Group992: afis|EAW16169.1 afis|EAW20696.1 abra|OJJ78079.1 acar|OOF98785.1 acla|EAW06612.1  
afla|EED48696.1 afum|EAL88803.1 agla|OJJ86214.1 akaw|GAA85915.1 aluc|OJZ91151.1 anid|CBF79561.1  
anig|EHA19849.1 aory|EIT73253.1 asyd|OJJ57924.1 ater|EAU33245.1 atub|OJI83165.1 aver|OJJ04468.1  
awen|OJJ30269.1 azon|OJJ43965.1

Group993: afis|EAW16186.1 afis|EAW21276.1 afum|EAL88817.1 afum|EAL92291.2 abra|OJJ66405.1  
acla|EAW11035.1 afla|EED49635.1 agla|OJJ80815.1 akaw|GAA90273.1 aluc|OJZ83068.1 anig|EHA28132.1  
aory|EIT80977.1 asyd|OJJ54301.1 ater|EAU36744.1 atub|OJI87878.1 azon|OJJ42729.1 ater|EAU31600.1  
azon|OJJ45943.1 anid|CBF80686.1

Group994: afis|EAW16703.1 afis|EAW22511.1 abra|OJJ73562.1 acar|OOG00744.1 acla|EAW07479.1  
afla|EED54539.1 afum|EAL90682.1 agla|OJJ80876.1 akaw|GAA88592.1 aluc|OJZ88499.1 anid|CBF88981.1  
anig|EHA18208.1 aory|EIT78923.1 asyd|OJJ62789.1 ater|EAU39198.1 atub|OJI91086.1 aver|OJI96836.1  
awen|OJJ35137.1 azon|OJJ49962.1

Group995: afis|EAW17302.1 afis|EAW21312.1 abra|OJJ75975.1 acar|OOF99944.1 acla|EAW09822.1  
afla|EED57269.1 afum|EAL92328.1 agla|OJJ87430.1 akaw|GAA88981.1 aluc|OJZ89422.1 anid|CBF83405.1  
anig|EHA23165.1 aory|EIT74144.1 asyd|OJJ60646.1 ater|EAU35941.1 atub|OJI85371.1 aver|OJI99964.1  
awen|OJJ39388.1 azon|OJJ44276.1

Group996: afis|EAW20681.1 afis|EAW24898.1 abra|OJJ74730.1 acar|OOF89795.1 acla|EAW10669.1  
afla|EED46977.1 afum|EAL89552.2 agla|OJJ82121.1 akaw|GAA81887.1 aluc|OJZ92314.1 anid|CBF75653.1  
anig|EHA26655.1 aory|EIT72604.1 asyd|OJJ57466.1 ater|EAU36401.1 atub|OJI86743.1 aver|OJJ05715.1  
awen|OJJ40490.1 azon|OJJ49353.1

Group997: afis|EAW21461.1 afis|EAW22039.1 abra|OJJ76153.1 acar|OOF89976.1 acla|EAW09678.1  
afla|EED55893.1 afum|EAL92480.1 agla|OJJ85609.1 akaw|GAA82102.1 aluc|OJZ92076.1 anid|CBF76534.1

anig|EHA23002.1 aory|EIT76550.1 asyd|OJJ61148.1 ater|EAU35074.1 atub|OJI86506.1 aver|OJJ00470.1  
awen|OJJ39238.1 azon|OJJ51616.1

Group998: afis|EAW24479.1 afis|EAW24670.1 abra|OJJ67630.1 acar|OOF91977.1 afis|EAW16900.1  
afla|EED52360.1 afla|EED53180.1 afum|EAL86435.1 akaw|GAA89150.1 aluc|OJZ81686.1 anig|EHA25757.1  
aory|EIT74904.1 atub|OJI88495.1 azon|OJJ45915.1 abra|OJJ70817.1 acla|EAW12031.1 afum|EAL86150.1  
anig|EHA28156.1 awen|OJJ40789.1

Group999: afla|EED44958.1 afla|EED54307.1 aory|EIT73482.1 aory|EIT76036.1 abra|OJJ68802.1  
acar|OOF91598.1 acla|EAW12204.1 afis|EAW17076.1 afum|EAL86562.1 agla|OJJ84498.1 akaw|GAA90451.1  
aluc|OJZ85773.1 anid|CBF78312.1 anig|EHA24780.1 asyd|OJJ52532.1 ater|EAU37366.1 atub|OJI79558.1  
aver|OJJ03869.1 awen|OJJ32505.1

Group1000: afla|EED47569.1 afla|EED49784.1 abra|OJJ77270.1 acar|OOF93140.1 acla|EAW13268.1  
afis|EAW17349.1 afum|EAL91192.2 agla|OJJ88227.1 akaw|GAA90678.1 aluc|OJZ84677.1 anid|CBF84233.1  
anig|EHA27955.1 aory|EIT77705.1 asyd|OJJ57184.1 ater|EAU33864.1 atub|OJI89403.1 aver|OJJ03106.1  
awen|OJJ34563.1 azon|OJJ50311.1

Group1001: afla|EED51012.1 afla|EED56994.1 aory|EIT76959.1 aory|EIT77587.1 abra|OJJ72322.1  
acar|OOF94890.1 acla|EAW12003.1 afis|EAW19643.1 afum|EAL86879.1 agla|OJJ80785.1 akaw|GAA86073.1  
aluc|OJZ90308.1 anig|EHA23795.1 asyd|OJJ58365.1 ater|EAU32885.1 atub|OJI81732.1 aver|OJJ02041.1  
awen|OJJ41894.1 azon|OJJ42706.1

Group1002: afla|EED51028.1 afla|EED52463.1 aver|OJJ01603.1 aver|OJJ05985.1 abra|OJJ72678.1  
acar|OOF97379.1 acla|EAW12138.1 afis|EAW17198.1 afum|EAL86626.2 akaw|GAA85296.1 aluc|OJZ90655.1  
anid|CBF69883.1 anig|EHA24091.1 aory|EIT82808.1 asyd|OJJ56742.1 asyd|OJJ59012.1 atub|OJI82085.1  
afla|EED45180.1 aory|EIT73605.1

Group1003: agla|OJJ78416.1 agla|OJJ80642.1 abra|OJJ72427.1 acar|OOF94806.1 acla|EAW12660.1  
afis|EAW17824.1 afla|EED46164.1 afum|EAL91634.1 akaw|GAA86168.1 aluc|OJZ90411.1 anid|CBF78007.1  
anig|EHA23877.1 aory|EIT76471.1 asyd|OJJ55244.1 ater|EAU33025.1 atub|OJI81842.1 aver|OJJ06980.1  
awen|OJJ41754.1 azon|OJJ48444.1

Group1004: agla|OJJ78484.1 agla|OJJ87510.1 abra|OJJ75909.1 acar|OOF99994.1 acla|EAW09880.1  
afis|EAW21246.1 afla|EED54806.1 afum|EAL92259.1 akaw|GAA84615.1 aluc|OJZ89359.1 anid|CBF83238.1  
anig|EHA23222.1 aory|EIT79446.1 asyd|OJJ60599.1 ater|EAU35886.1 atub|OJI85439.1 aver|OJI99922.1  
awen|OJJ36559.1 azon|OJJ44332.1

Group1005: agla|OJJ78485.1 agla|OJJ87511.1 abra|OJJ75908.1 acar|OOF99995.1 acla|EAW09881.1  
afis|EAW21245.1 afla|EED54805.1 afum|EAL92258.1 akaw|GAA84614.1 aluc|OJZ89358.1 anid|CBF83236.1  
anig|EHA23223.1 aory|EIT79346.1 asyd|OJJ60600.1 ater|EAU35885.1 atub|OJI85440.1 aver|OJI99923.1  
awen|OJJ36558.1 azon|OJJ44333.1

Group1006: agla|OJJ78486.1 agla|OJJ87512.1 abra|OJJ75907.1 acar|OOF99996.1 acla|EAW09882.1  
afis|EAW21244.1 afla|EED54804.1 afum|EAL92257.1 akaw|GAA84613.1 aluc|OJZ89357.1 anid|CBF83253.1  
anig|EHA23224.1 aory|EIT79338.1 asyd|OJJ60588.1 ater|EAU35884.1 atub|OJI85441.1 aver|OJI99911.1  
awen|OJJ36555.1 azon|OJJ44334.1

Group1007: agla|OJJ78634.1 agla|OJJ84721.1 asyd|OJJ56854.1 asyd|OJJ56884.1 aver|OJJ03469.1  
aver|OJJ07611.1 afla|EED52628.1 aory|EIT74179.1 afis|EAW23894.1 afum|EAL87322.1 acar|OOF92970.1  
acla|EAW11559.1 akaw|GAA86969.1 aluc|OJZ84495.1 anid|CBF77167.1 ater|EAU33448.1 atub|OJI89585.1  
awen|OJJ39055.1 azon|OJJ51386.1

Group1008: agla|OJJ80738.1 agla|OJJ86280.1 abra|OJJ77802.1 acar|OOF90102.1 agla|OJJ86304.1  
akaw|GAA83847.1 aluc|OJZ90868.1 anig|EHA19588.1 aory|EIT75382.1 asyd|OJJ55038.1 atub|OJI82866.1  
aver|OJJ07235.1 awen|OJJ36240.1 awen|OJJ37877.1 afla|EED45523.1 asyd|OJJ54957.1 agla|OJJ79081.1  
akaw|GAA91814.1 anig|EHA23349.1

Group1009: agla|OJJ82043.1 agla|OJJ82886.1 abra|OJJ74586.1 acar|OOF95180.1 acla|EAW10792.1  
afis|EAW24784.1 afla|EED47201.1 afum|EAL89423.1 akaw|GAA82019.1 aluc|OJZ92164.1 anid|CBF81451.1  
anig|EHA26785.1 aory|EIT79216.1 asyd|OJJ59433.1 ater|EAU36525.1 atub|OJI86593.1 aver|OJJ02838.1  
awen|OJJ40369.1 azon|OJJ49218.1

Group1010: agla|OJJ82106.1 agla|OJJ85287.1 abra|OJJ74712.1 acar|OOF95721.1 acla|EAW10686.1  
afis|EAW24884.1 afla|EED47082.1 afum|EAL89534.1 akaw|GAA81905.1 aluc|OJZ92293.1 anid|CBF75745.1  
anig|EHA26676.1 aory|EIT72490.1 asyd|OJJ57520.1 ater|EAU36417.1 atub|OJI86723.1 aver|OJJ05658.1  
awen|OJJ40474.1 azon|OJJ49338.1

Group1011: agla|OJJ82204.1 agla|OJJ88613.1 abra|OJJ66850.1 acar|OOF91626.1 acla|EAW14428.1  
afis|EAW19135.1 afla|EED54279.1 afum|EAL93867.1 akaw|GAA91556.1 aluc|OJZ85734.1 anid|CBF86332.1  
anig|EHA24816.1 aory|EIT76149.1 asyd|OJJ64990.1 ater|EAU37406.1 atub|OJI79519.1 aver|OJI99110.1  
awen|OJJ37471.1 azon|OJJ51151.1

Group1012: agla|OJJ87407.1 agla|OJJ87526.1 abra|OJJ76001.1 acar|OOF99924.1 acla|EAW09804.1  
afis|EAW21332.1 afla|EED57290.1 afum|EAL92350.1 akaw|GAA88959.1 aluc|OJZ89446.1 anid|CBF83435.1  
anig|EHA23140.1 aory|EIT74092.1 asyd|OJJ60664.1 ater|EAU35958.1 atub|OJI85347.1 aver|OJI99987.1  
awen|OJJ39366.1 azon|OJJ51705.1

Group1013: akaw|GAA87623.1 akaw|GAA91524.1 abra|OJJ66888.1 acar|OOF91659.1 acla|EAW14460.1  
afis|EAW19168.1 afla|EED54229.1 afum|EAL93898.1 agla|OJJ88556.1 aluc|OJZ85694.1 anid|CBF86275.1  
anig|EHA24847.1 aory|EIT75898.1 asyd|OJJ65023.1 ater|EAU37305.1 atub|OJI79484.1 aver|OJI99142.1  
awen|OJJ37521.1 azon|OJJ51187.1

Group1014: akaw|GAA90564.1 akaw|GAA91190.1 abra|OJJ66522.1 acar|OOF90976.1 acla|EAW10968.1  
afis|EAW20892.1 afla|EED45587.1 afum|EAL84741.1 agla|OJJ84000.1 aluc|OJZ81513.1 anid|CBF82751.1  
anig|EHA25911.1 aory|EIT75801.1 asyd|OJJ61613.1 ater|EAU30831.1 atub|OJI88662.1 aver|OJJ00936.1  
awen|OJJ34455.1 azon|OJJ51742.1

Group1015: akaw|GAA91161.1 akaw|GAA92850.1 atub|OJI87463.1 atub|OJI88691.1 abra|OJJ66554.1  
acar|OOF90999.1 acla|EAW10940.1 afla|EED50275.1 afum|EAL84713.1 agla|OJJ83968.1 aluc|OJZ81489.1  
anid|CBF82446.1 ater|EAU38568.1 aver|OJJ08627.1 awen|OJJ34399.1 azon|OJJ48135.1 afis|EAW20921.1  
aory|EIT77308.1 aluc|OJZ79652.1

Group1016: aluc|OJZ80175.1 aluc|OJZ91283.1 abra|OJJ78210.1 acla|EAW11240.1 afis|EAW18265.1  
afum|EAL87630.1 agla|OJJ88161.1 akaw|GAA85816.1 anid|CBF79522.1 anig|EHA19968.1 aory|EIT73099.1  
asyd|OJJ57891.1 ater|EAU33272.1 atub|OJI83273.1 aver|OJJ04503.1 awen|OJJ30639.1 azon|OJJ47977.1  
afla|EED48730.1 afla|EED48731.1

Group1017: anid|CBF75896.1 anid|CBF87037.1 abra|OJJ68334.1 acar|OOF97603.1 acla|EAW09978.1  
afis|EAW21111.1 afla|EED51763.1 afum|EAL92134.1 agla|OJJ80102.1 akaw|GAA92087.1 aluc|OJZ83637.1  
anig|EHA18789.1 aory|EIT79989.1 asyd|OJJ60451.1 ater|EAU36787.1 atub|OJI90006.1 aver|OJI99769.1  
awen|OJJ36440.1 azon|OJJ44433.1

Group1018: anid|CBF76123.1 anid|CBF81569.1 abra|OJJ71017.1 acar|OOF98123.1 acla|EAW10567.1  
afis|EAW25033.1 afla|EED55458.1 afum|EAL89661.1 agla|OJJ82245.1 akaw|GAA82938.1 aluc|OJZ87515.1  
anig|EHA20726.1 aory|EIT80849.1 asyd|OJJ59506.1 ater|EAU35752.1 atub|OJI81135.1 aver|OJJ02768.1  
awen|OJJ40606.1 azon|OJJ49455.1

Group1019: anid|CBF84679.1 anid|CBF86911.1 asyd|OJJ53342.1 asyd|OJJ64609.1 awen|OJJ34698.1  
awen|OJJ40005.1 abra|OJJ69889.1 acar|OOF93409.1 afla|EED48936.1 agla|OJJ87937.1 akaw|GAA85843.1  
akaw|GAA87761.1 aluc|OJZ85395.1 anig|EHA25579.1 aory|EIT80037.1 ater|EAU30714.1 atub|OJI80176.1  
aver|OJJ08403.1 aver|OJI98705.1

Group1020: anid|CBF85624.1 anid|CBF85626.1 abra|OJJ69051.1 acar|OOF91239.1 afis|EAW20343.1  
afla|EED45065.1 afum|EAL85460.1 akaw|GAA90583.1 aluc|OJZ86041.1 anig|EHA24570.1 aory|EIT73625.1  
asyd|OJJ57131.1 ater|EAU37680.1 atub|OJI79828.1 aver|OJJ03173.1 awen|OJJ38367.1 azon|OJJ45226.1  
awen|OJJ38122.1 agla|OJJ87449.1

Group1021: aory|EIT72521.1 aory|EIT77023.1 abra|OJJ69072.1 acar|OOF91232.1 acla|EAW08768.1  
afis|EAW15662.1 afla|EED46885.1 afum|EAL85686.1 agla|OJJ81784.1 akaw|GAA90603.1 aluc|OJZ86061.1  
anid|CBF71182.1 anig|EHA24552.1 asyd|OJJ55861.1 atub|OJI79858.1 aver|OJJ04802.1 awen|OJJ38338.1  
azon|OJJ43025.1 afla|EED51086.1

Group1022: aory|EIT72608.1 aory|EIT74906.1 asyd|OJJ54447.1 asyd|OJJ56044.1 aver|OJJ04989.1  
aver|OJJ07712.1 abra|OJJ68724.1 acar|OOF92223.1 afla|EED46807.1 akaw|GAA89875.1 aluc|OJZ81804.1  
anig|EHA22412.1 asyd|OJJ56930.1 atub|OJI84376.1 awen|OJJ34986.1 azon|OJJ48830.1 acla|EAW12522.1  
afla|EED53315.1 ater|EAU31747.1

Group1023: aory|EIT76145.1 aory|EIT78526.1 abra|OJJ72823.1 acar|OOF96028.1 acla|EAW11415.1  
afis|EAW24006.1 afla|EED49155.1 afum|EAL87436.1 agla|OJJ86937.1 akaw|GAA85424.1 aluc|OJZ83325.1  
anid|CBF77396.1 anig|EHA24203.1 asyd|OJJ53244.1 ater|EAU29745.1 atub|OJI82222.1 aver|OJJ03606.1  
awen|OJJ35478.1 azon|OJJ51270.1

Group1024: aory|EIT76394.1 aory|EIT77963.1 abra|OJJ78294.1 acar|OOF98573.1 acla|EAW09222.1  
afis|EAW21926.1 afla|EED46618.1 afum|EAL92939.1 agla|OJJ84196.1 akaw|GAA85733.1 aluc|OJZ91368.1  
anid|CBF76880.1 anig|EHA20046.1 asyd|OJJ61326.1 ater|EAU30932.1 atub|OJI83361.1 aver|OJJ00651.1  
awen|OJJ34216.1 azon|OJJ43418.1

Group1025: aory|EIT81453.1 aory|EIT82110.1 abra|OJJ76662.1 acar|OOF99341.1 afis|EAW20834.1  
afla|EED52049.1 afum|EAL84798.1 agla|OJJ80143.1 akaw|GAA93003.1 aluc|OJZ91540.1 anid|CBF88060.1  
anig|EHA22577.1 asyd|OJJ54521.1 atub|OJI85994.1 aver|OJJ07664.1 awen|OJJ36032.1 afla|EED50429.1  
aver|OJI97388.1 asyd|OJJ63546.1

Group1026: asyd|OJJ51877.1 asyd|OJJ54109.1 abra|OJJ66556.1 acar|OOF91001.1 acla|EAW10938.1  
afis|EAW20923.1 afla|EED50277.1 afum|EAL84711.1 agla|OJJ83966.1 akaw|GAA91159.1 aluc|OJZ81487.1

anid|CBF82451.1 anig|EHA25940.1 aory|EIT77347.1 ater|EAU38570.1 atub|OJI88693.1 aver|OJJ08625.1  
awen|OJJ34397.1 azon|OJJ48133.1

Group1027: asyd|OJJ51975.1 asyd|OJJ60994.1 abra|OJJ71988.1 acar|OOF96641.1 acla|EAW09550.1  
afis|EAW21586.1 afla|EED57807.1 afum|EAL92604.1 agla|OJJ85779.1 akaw|GAA84941.1 aluc|OJJ86725.1  
anid|CBF76287.1 anig|EHA21954.1 aory|EIT81038.1 ater|EAU34945.1 atub|OJI83803.1 aver|OJJ00314.1  
awen|OJJ39095.1 azon|OJJ51428.1

Group1028: asyd|OJJ52256.1 asyd|OJJ61135.1 abra|OJJ76154.1 acar|OOF99776.1 acla|EAW09663.1  
afis|EAW21474.1 afla|EED46116.1 afum|EAL92493.1 agla|OJJ85624.1 akaw|GAA82103.1 aluc|OJJ92074.1  
anid|CBF76511.1 anig|EHA23001.1 aory|EIT76380.1 ater|EAU35059.1 atub|OJI86505.1 aver|OJJ00457.1  
awen|OJJ39223.1 azon|OJJ51633.1

Group1029: asyd|OJJ52749.1 asyd|OJJ64102.1 abra|OJJ77967.1 acar|OOF98848.1 acla|EAW06673.1  
afis|EAW16092.1 afla|EED48628.1 afum|EAL88724.1 agla|OJJ86129.1 akaw|GAA83695.1 aluc|OJJ91037.1  
anid|CBF85462.1 anig|EHA19736.1 aory|EIT73247.1 ater|EAU33164.1 atub|OJI83033.1 aver|OJI98185.1  
awen|OJJ30338.1 azon|OJJ45366.1

Group1030: asyd|OJJ53223.1 asyd|OJJ57663.1 aver|OJJ03629.1 aver|OJJ05525.1 abra|OJJ71299.1  
acar|OOF97871.1 afis|EAW25353.1 afla|EED53834.1 afum|EAL90015.1 agla|OJJ83901.1 akaw|GAA82690.1  
aluc|OJJ87244.1 anid|CBF77438.1 anig|EHA20489.1 aory|EIT78444.1 ater|EAU34501.1 atub|OJI81398.1  
awen|OJJ41076.1 azon|OJJ44658.1

Group1031: asyd|OJJ53278.1 asyd|OJJ56762.1 abra|OJJ72786.1 acar|OOF96003.1 acla|EAW11483.1  
afis|EAW23970.1 afla|EED50538.1 afum|EAL87400.1 agla|OJJ86899.1 akaw|GAA85393.1 aluc|OJJ83284.1  
anid|CBF77331.1 anig|EHA24170.1 aory|EIT82142.1 ater|EAU29782.1 atub|OJI82187.1 aver|OJJ03570.1  
awen|OJJ38973.1 azon|OJJ51308.1

Group1032: asyd|OJJ53282.1 asyd|OJJ56766.1 abra|OJJ72783.1 acar|OOF96001.1 acla|EAW11484.1  
afis|EAW23969.1 afla|EED50540.1 afum|EAL87399.1 agla|OJJ86898.1 akaw|GAA85391.1 aluc|OJJ83282.1  
anid|CBF77330.1 anig|EHA24169.1 aory|EIT82164.1 ater|EAU29783.1 atub|OJI82186.1 aver|OJJ03568.1  
awen|OJJ38974.1 azon|OJJ51309.1

Group1033: asyd|OJJ53391.1 asyd|OJJ55131.1 abra|OJJ72369.1 acar|OOF94851.1 acla|EAW11966.1  
afis|EAW19602.1 afla|EED56958.1 afum|EAL86916.1 agla|OJJ80744.1 akaw|GAA86119.1 aluc|OJJ90357.1  
anid|CBF71283.1 anig|EHA23833.1 aory|EIT77537.1 ater|EAU32923.1 atub|OJI81785.1 aver|OJJ07072.1  
awen|OJJ41838.1 azon|OJJ47049.1

Group1034: asyd|OJJ53445.1 asyd|OJJ58376.1 abra|OJJ68456.1 acar|OOF93941.1 afla|EED51144.1  
akaw|GAA86918.1 aluc|OJJ90041.1 anid|CBF87350.1 anig|EHA21029.1 aory|EIT81354.1 asyd|OJJ61782.1  
ater|EAU30292.1 atub|OJI84765.1 aver|OJI95882.1 awen|OJJ41192.1 azon|OJJ51544.1 asyd|OJJ60364.1  
aver|OJI99700.1 aver|OJJ08306.1

Group1035: asyd|OJJ53802.1 asyd|OJJ61125.1 abra|OJJ76171.1 acar|OOF99768.1 acla|EAW09654.1  
afis|EAW21485.1 afla|EED55918.1 afum|EAL92505.1 agla|OJJ85644.1 akaw|GAA82117.1 aluc|OJJ92059.1  
anid|CBF76492.1 anig|EHA22988.1 aory|EIT76579.1 ater|EAU35053.1 atub|OJI86491.1 aver|OJJ00446.1  
awen|OJJ39212.1 azon|OJJ51642.1

Group1036: asyd|OJJ55564.1 asyd|OJJ65204.1 aver|OJI99353.1 aver|OJJ06645.1 abra|OJJ77036.1  
acar|OOF92935.1 acla|EAW13557.1 afis|EAW20633.1 afla|EED49759.1 afum|EAL84435.1 agla|OJJ86284.1  
akaw|GAA87015.1 aluc|OJJ84439.1 anid|CBF83215.1 anig|EHA27758.1 aory|EIT77675.1 ater|EAU32168.1  
atub|OJI89634.1 awen|OJJ33604.1

Group1037: asyd|OJJ55692.1 asyd|OJJ57944.1 aver|OJJ04452.1 aver|OJJ06777.1 abra|OJJ76856.1  
acar|OOF91342.1 acla|EAW13417.1 afis|EAW20528.1 afla|EED52477.1 afum|EAL84529.1 agla|OJJ84707.1  
akaw|GAA87166.1 aluc|OJJ84268.1 anid|CBF79013.1 anig|EHA27610.1 aory|EIT82744.1 ater|EAU37160.1  
atub|OJI89815.1 awen|OJJ33235.1

Group1038: asyd|OJJ57870.1 asyd|OJJ61020.1 abra|OJJ75464.1 acar|OOF90276.1 acla|EAW13831.1  
afis|EAW18300.1 afla|EED48769.1 afum|EAL87666.1 agla|OJJ88123.1 akaw|GAA84237.1 aluc|OJJ88920.1  
anid|CBF79478.1 anig|EHA23592.1 aory|EIT73032.1 ater|EAU33308.1 atub|OJI85872.1 aver|OJJ04524.1  
awen|OJJ30675.1 azon|OJJ43275.1

Group1039: ater|EAU29462.1 ater|EAU34080.1 ater|EAU38788.1 abra|OJJ74396.1 acar|OOF95340.1  
acla|EAW06820.1 afis|EAW16368.1 afla|EED53468.1 afum|EAL88993.1 agla|OJJ78589.1 akaw|GAA87294.1  
aluc|OJJ89724.1 anid|CBF89352.1 anig|EHA26952.1 aory|EIT74981.1 asyd|OJJ62501.1 atub|OJI85076.1  
aver|OJI96622.1 awen|OJJ37773.1

Group1040: ater|EAU30138.1 ater|EAU38860.1 abra|OJJ73936.1 acar|OOG01067.1 acla|EAW07813.1  
afis|EAW22849.1 afla|EED50124.1 afum|EAL90351.1 agla|OJJ83475.1 akaw|GAA89542.1 aluc|OJJ88108.1  
anid|CBF87853.1 anig|EHA17877.1 aory|EIT74737.1 asyd|OJJ63417.1 atub|OJI90715.1 aver|OJI97521.1  
awen|OJJ38872.1 azon|OJJ49662.1

Group1041: ater|EAU30572.1 ater|EAU36084.1 abra|OJJ68744.1 acar|OOF90309.1 acla|EAW14290.1  
afis|EAW18993.1 afla|EED46791.1 afum|EAL93728.1 agla|OJJ82981.1 akaw|GAA89891.1 aluc|OJZ81782.1  
anid|CBF77932.1 anig|EHA22433.1 aory|EIT72766.1 asyd|OJJ52417.1 atub|OJI84356.1 aver|OJJ03362.1  
awen|OJJ31615.1 azon|OJJ47315.1

Group1042: ater|EAU30835.1 ater|EAU31368.1 abra|OJJ68417.1 acar|OOF91799.1 acla|EAW08827.1  
afis|EAW15570.1 afla|EED51627.1 afum|EAL85763.1 agla|OJJ85441.1 akaw|GAA92531.1 aluc|OJZ90080.1  
anig|EHA20993.1 aory|EIT80506.1 asyd|OJJ57633.1 atub|OJI84726.1 aver|OJJ04438.1 awen|OJJ38058.1  
awen|OJJ38229.1 aver|OJI95759.1

Group1043: atub|OJI80331.1 atub|OJI90561.1 abra|OJJ74085.1 acar|OOG01195.1 acla|EAW07929.1  
afis|EAW22967.1 afla|EED54404.1 afum|EAL90230.1 agla|OJJ83320.1 akaw|GAA87565.1 aluc|OJZ87950.1  
anid|CBF87610.1 anig|EHA17736.1 aory|EIT75873.1 asyd|OJJ63271.1 ater|EAU30655.1 aver|OJI97686.1  
awen|OJJ38596.1 azon|OJJ47331.1

Group1044: aver|OJI96628.1 aver|OJJ08269.1 abra|OJJ73489.1 acar|OOG00683.1 acla|EAW06813.1  
afis|EAW16362.1 afla|EED53506.1 afum|EAL88987.1 agla|OJJ79111.1 akaw|GAA87438.1 aluc|OJZ88559.1  
anid|CBF89241.1 anig|EHA18256.1 aory|EIT75032.1 asyd|OJJ62508.1 ater|EAU34090.1 atub|OJI91144.1  
awen|OJJ37766.1 asyd|OJJ55388.1

Group1045: aver|OJI96684.1 aver|OJJ05918.1 abra|OJJ73439.1 acar|OOG00645.1 acla|EAW06773.1  
afis|EAW16324.1 afla|EED53558.1 afum|EAL88947.1 agla|OJJ88286.1 akaw|GAA83054.1 aluc|OJZ88601.1  
anid|CBF89160.1 anig|EHA18295.1 aory|EIT74902.1 asyd|OJJ62559.1 ater|EAU34133.1 atub|OJI91186.1  
awen|OJJ37724.1 azon|OJJ44983.1

Group1046: aver|OJI98887.1 aver|OJJ06757.1 abra|OJJ77001.1 acar|OOF91446.1 acla|EAW13450.1  
afis|EAW20561.1 afla|EED52343.1 afum|EAL84500.1 agla|OJJ88729.1 akaw|GAA87047.1 aluc|OJZ84400.1  
anid|CBF78975.1 anig|EHA27730.1 aory|EIT74333.1 asyd|OJJ55674.1 ater|EAU37119.1 atub|OJI89672.1  
awen|OJJ33268.1 azon|OJJ50642.1

Group1047: aver|OJI98940.1 aver|OJI99461.1 abra|OJJ69903.1 acar|OOF93421.1 acla|EAW08920.1  
afis|EAW15474.1 afla|EED46925.1 afum|EAL85847.1 agla|OJJ89052.1 akaw|GAA87749.1 aluc|OJZ85382.1  
anid|CBF86601.1 anig|EHA25565.1 aory|EIT72600.1 asyd|OJJ64827.1 ater|EAU32654.1 atub|OJI80188.1  
awen|OJJ36395.1 azon|OJJ44109.1

Group1048: aver|OJJ00758.1 aver|OJJ05227.1 abra|OJJ75869.1 acar|OOG00025.1 acla|EAW09931.1  
afis|EAW21178.1 afla|EED54765.1 afum|EAL92198.1 agla|OJJ79995.1 akaw|GAA84575.1 aluc|OJZ89312.1  
anid|CBF82104.1 anig|EHA23255.1 aory|EIT79387.1 asyd|OJJ54271.1 ater|EAU35844.1 atub|OJI85487.1  
awen|OJJ36517.1 afla|EED54766.1

Group1049: aver|OJJ01895.1 aver|OJJ04283.1 abra|OJJ68598.1 acar|OOF92108.1 acla|EAW12641.1  
afis|EAW18044.1 afla|EED51502.1 afum|EAL91855.2 agla|OJJ85415.1 akaw|GAA91922.1 aluc|OJZ81958.1  
anid|CBF79781.1 anig|EHA22289.1 aory|EIT80736.1 asyd|OJJ58122.1 ater|EAU31279.1 atub|OJI84509.1  
awen|OJJ41490.1 azon|OJJ48220.1

Group1050: aver|OJJ05206.1 aver|OJJ06610.1 aluc|OJZ88621.1 anig|EHA18312.1 atub|OJI91206.1  
abra|OJJ73422.1 acar|OOG00625.1 acla|EAW07037.1 afis|EAW16663.1 afla|EED44906.1 afum|EAL89267.1  
agla|OJJ78706.1 akaw|GAA83070.1 anid|CBF82078.1 aory|EIT73489.1 asyd|OJJ54252.1 ater|EAU39585.1  
awen|OJJ40050.1 azon|OJJ50117.1

Group1051: aver|OJJ07706.1 aver|OJJ08297.1 abra|OJJ76161.1 acar|OOF95039.1 afis|EAW19929.1  
afum|EAL84979.1 agla|OJJ80644.1 akaw|GAA82108.1 aluc|OJZ92068.1 anid|CBF84561.1 anig|EHA22995.1  
aory|EIT79289.1 asyd|OJJ53459.1 ater|EAU31756.1 atub|OJI86499.1 awen|OJJ33359.1 awen|OJJ33575.1  
acla|EAW13677.1 afla|EED47286.1

Group1052: awen|OJJ29714.1 awen|OJJ31500.1 abra|OJJ72682.1 acar|OOF95931.1 acla|EAW12316.1  
afis|EAW16904.1 afla|EED45262.1 afum|EAL86440.1 agla|OJJ84538.1 akaw|GAA85300.1 aluc|OJZ90660.1  
anid|CBF80774.1 anig|EHA24095.1 aory|EIT73651.1 asyd|OJJ54502.1 ater|EAU30211.1 atub|OJI82089.1  
aver|OJJ07679.1 azon|OJJ46214.1

Group1053: awen|OJJ30059.1 awen|OJJ32960.1 abra|OJJ69424.1 acar|OOF94312.1 acla|EAW14803.1  
afis|EAW24334.1 afla|EED47930.1 afum|EAL86004.1 agla|OJJ83203.1 akaw|GAA88290.1 aluc|OJZ82260.1  
anig|EHA28482.1 aory|EIT79819.1 ater|EAU30414.1 atub|OJI88178.1 anid|CBF74037.1 aver|OJJ07954.1  
azon|OJJ48958.1 asyd|OJJ53852.1

Group1054: awen|OJJ30747.1 awen|OJJ31734.1 abra|OJJ67459.1 acar|OOF92371.1 acla|EAW06307.1  
afis|EAW18416.1 afla|EED52993.1 afum|EAL93098.1 agla|OJJ84982.1 akaw|GAA86374.1 aluc|OJZ84905.1  
anid|CBF70716.1 anig|EHA25129.1 aory|EIT77436.1 asyd|OJJ58446.1 ater|EAU29831.1 atub|OJI80693.1  
aver|OJJ01046.1 azon|OJJ50492.1

Group1055: awen|OJJ30760.1 awen|OJJ31721.1 abra|OJJ67449.1 acar|OOF90341.1 acla|EAW06315.1  
afis|EAW18429.1 afla|EED52984.1 afum|EAL93109.1 agla|OJJ84994.1 akaw|GAA86381.1 aluc|OJZ84915.1

anid|CBF70683.1 anig|EHA25136.1 aory|EIT78705.1 asyd|OJJ58466.1 ater|EAU29845.1 atub|OJI80683.1  
aver|OJJ01065.1 azon|OJJ50482.1

Group1056: awen|OJJ30764.1 awen|OJJ31717.1 abra|OJJ67446.1 acar|OOF90343.1 acla|EAW06317.1  
afis|EAW18431.1 afla|EED52982.1 afum|EAL93111.2 agla|OJJ84997.1 akaw|GAA86383.1 aluc|OJZ84917.1  
anid|CBF70025.1 anig|EHA25137.1 aory|EIT78725.1 asyd|OJJ58872.1 ater|EAU29847.1 atub|OJI80681.1  
aver|OJJ01475.1 azon|OJJ50481.1

Group1057: awen|OJJ30768.1 awen|OJJ31713.1 abra|OJJ67442.1 acar|OOF92386.1 acla|EAW06321.1  
afis|EAW18435.1 afla|EED52980.1 afum|EAL93116.1 agla|OJJ85002.1 akaw|GAA86387.1 aluc|OJZ84922.1  
anid|CBF70033.1 anig|EHA25140.1 aory|EIT78731.1 asyd|OJJ58868.1 ater|EAU29851.1 atub|OJI80677.1  
aver|OJJ01470.1 azon|OJJ50478.1

Group1058: awen|OJJ30787.1 awen|OJJ31694.1 abra|OJJ75327.1 acar|OOF90141.1 acla|EAW15368.1  
afila|EED45606.1 akaw|GAA92022.1 aluc|OJZ92890.1 anig|EHA26073.1 aory|EIT75814.1 ater|EAU36093.1  
atub|OJI87348.1 aver|OJI99803.1 akaw|GAA86921.1 aluc|OJZ90045.1 anig|EHA21025.1 ater|EAU38089.1  
atub|OJI84761.1 asyd|OJJ52000.1

Group1059: awen|OJJ31367.1 awen|OJJ39791.1 awen|OJJ33381.1 awen|OJJ35034.1 azon|OJJ43925.1  
azon|OJJ44485.1 abra|OJJ70024.1 acar|OOF93532.1 afla|EED45807.1 agla|OJJ82719.1 akaw|GAA87637.1  
aluc|OJZ85252.1 anig|EHA25453.1 atub|OJI80316.1 aver|OJJ07005.1 acar|OOF93530.1 agla|OJJ78997.1  
aver|OJJ04358.1 asyd|OJJ58045.1

Group1060: awen|OJJ32955.1 awen|OJJ34548.1 abra|OJJ69452.1 acar|OOF94289.1 acla|EAW14816.1  
afis|EAW24346.1 afla|EED47917.1 afum|EAL86016.1 agla|OJJ83207.1 akaw|GAA88367.1 aluc|OJZ82288.1  
anid|CBF74019.1 anig|EHA28460.1 aory|EIT83370.1 asyd|OJJ53841.1 ater|EAU30400.1 atub|OJI88151.1  
aver|OJJ07944.1 azon|OJJ48966.1

Group1061: awen|OJJ35632.1 awen|OJJ41410.1 abra|OJJ68673.1 acar|OOF92174.1 acla|EAW12575.1  
afis|EAW24073.1 afla|EED51400.1 afum|EAL91929.1 agla|OJJ87142.1 akaw|GAA89826.1 aluc|OJZ81862.1  
anid|CBF86467.1 anig|EHA22364.1 aory|EIT80717.1 asyd|OJJ64908.1 ater|EAU30495.1 atub|OJI84429.1  
aver|OJI99030.1 azon|OJJ48882.1

Group1062: awen|OJJ35956.1 awen|OJJ39245.1 abra|OJJ76134.1 acar|OOF99789.1 acla|EAW09684.1  
afis|EAW21455.1 afla|EED55885.1 afum|EAL92474.1 agla|OJJ85603.1 akaw|GAA88833.1 aluc|OJZ89596.1  
anid|CBF76546.1 anig|EHA23016.1 aory|EIT76856.1 asyd|OJJ61154.1 ater|EAU35080.1 atub|OJI85207.1  
aver|OJJ00476.1 azon|OJJ51610.1

Group1063: awen|OJJ35989.1 awen|OJJ38023.1 abra|OJJ75270.1 acar|OOF94533.1 acla|EAW12238.1  
afis|EAW16989.1 afla|EED48968.1 afum|EAL86513.1 agla|OJJ79827.1 akaw|GAA91808.1 aluc|OJZ92830.1  
anid|CBF87435.1 anig|EHA26179.1 aory|EIT79996.1 asyd|OJJ52914.1 ater|EAU31738.1 atub|OJI87287.1  
aver|OJJ08884.1 azon|OJJ50274.1

Group1064: awen|OJJ36336.1 awen|OJJ40727.1 abra|OJJ70865.1 acar|OOF98251.1 acla|EAW10457.1  
afis|EAW25110.1 afla|EED55332.1 afum|EAL89781.1 agla|OJJ89071.1 akaw|GAA91732.1 aluc|OJZ87654.1  
anid|CBF86071.1 anig|EHA20848.1 aory|EIT76213.1 asyd|OJJ64460.1 ater|EAU39380.1 atub|OJI80988.1  
aver|OJI98563.1 azon|OJJ44099.1

Group1065: awen|OJJ38099.1 awen|OJJ40555.1 abra|OJJ74809.1 acar|OOF95801.1 acla|EAW10605.1  
afis|EAW24962.1 afla|EED55500.1 afum|EAL89620.1 agla|OJJ82197.1 akaw|GAA83603.1 aluc|OJZ92391.1  
anid|CBF81656.1 anig|EHA26584.1 aory|EIT80890.1 asyd|OJJ59547.1 ater|EAU35693.1 atub|OJI86821.1  
aver|OJJ02721.1 azon|OJJ49417.1

Group1066: awen|OJJ40158.1 awen|OJJ41199.1 abra|OJJ71411.1 acar|OOF97761.1 acla|EAW10126.1  
afis|EAW25462.1 afla|EED53951.1 afum|EAL90125.1 agla|OJJ87114.1 akaw|GAA82589.1 aluc|OJZ87129.1  
anid|CBF77649.1 anig|EHA20391.1 aory|EIT78320.1 asyd|OJJ53118.1 ater|EAU34631.1 atub|OJI81511.1  
aver|OJJ03736.1 azon|OJJ44770.1

Group1067: azon|OJJ42233.1 azon|OJJ45236.1 acla|EAW12053.1 afis|EAW19693.1 afla|EED48466.1  
afum|EAL86833.1 aory|EIT76269.1 asyd|OJJ62963.1 aver|OJI98004.1 acla|EAW15332.1 afis|EAW20372.1  
afila|EED45213.1 afum|EAL85486.1 anid|CBF75994.1 aory|EIT73663.1 asyd|OJJ53695.1 ater|EAU37785.1  
aver|OJJ07811.1 awen|OJJ38807.1

Group1068: azon|OJJ43179.1 azon|OJJ47539.1 abra|OJJ70678.1 acar|OOF97049.1 acla|EAW08086.1  
afis|EAW23122.1 afla|EED48531.1 afum|EAL88358.1 agla|OJJ89617.1 akaw|GAA90010.1 aluc|OJZ84026.1  
anid|CBF74402.1 anig|EHA19147.1 aory|EIT73068.1 asyd|OJJ57764.1 ater|EAU36250.1 atub|OJI90398.1  
aver|OJJ05402.1 awen|OJJ36659.1

Group1069: azon|OJJ44484.1 azon|OJJ48556.1 abra|OJJ75695.1 acar|OOG00157.1 acla|EAW09413.1  
afis|EAW21723.1 afla|EED57992.1 afum|EAL92756.1 agla|OJJ79861.1 akaw|GAA84431.1 aluc|OJZ89146.1  
anid|CBF83716.1 anig|EHA23402.1 aory|EIT79772.1 asyd|OJJ60837.1 ater|EAU38407.1 atub|OJI85642.1  
aver|OJJ00161.1 awen|OJJ33996.1

Group1070: azon|OJJ45306.1 azon|OJJ46721.1 abra|OJJ76474.1 acar|OOF99711.1 acla|EAW13959.1 afis|EAW18668.1 afla|EED52660.1 afum|EAL93386.1 agla|OJJ82407.1 akaw|GAA82386.1 aluc|OJZ91735.1 anid|CBF70575.1 anig|EHA22741.1 aory|EIT74271.1 asyd|OJJ58530.1 ater|EAU38243.1 atub|OJI86193.1 aver|OJJ01132.1 awen|OJJ32140.1

Group1071: azon|OJJ45770.1 azon|OJJ47370.1 abra|OJJ72219.1 agla|OJJ78976.1 anig|EHA21679.1 awen|OJJ32400.1 abra|OJJ74055.1 acar|OOG01168.1 acla|EAW13644.1 afla|EED58134.1 afum|EAL84922.1 akaw|GAA87537.1 aluc|OJZ87980.1 anig|EHA17763.1 aory|EIT79161.1 asyd|OJJ57210.1 ater|EAU30685.1 atub|OJI90590.1 aver|OJJ03079.1

Group1072: azon|OJJ45841.1 azon|OJJ45942.1 abra|OJJ69362.1 acar|OOF94363.1 acla|EAW14752.1 afis|EAW24283.1 afla|EED47993.1 afum|EAL85952.1 agla|OJJ83145.1 akaw|GAA88231.1 aluc|OJZ82195.1 anid|CBF74136.1 anig|EHA28542.1 aory|EIT79842.1 asyd|OJJ53916.1 ater|EAU31231.1 atub|OJI88240.1 aver|OJJ08014.1 awen|OJJ33013.1

Group1073: azon|OJJ50179.1 azon|OJJ50395.1 abra|OJJ68426.1 acar|OOF93927.1 acla|EAW11928.1 afis|EAW19562.1 afla|EED50583.1 afum|EAL86950.1 agla|OJJ81713.1 akaw|GAA86946.1 aluc|OJZ90071.1 anid|CBF89380.1 anig|EHA21002.1 aory|EIT82053.1 asyd|OJJ62464.1 ater|EAU31050.1 atub|OJI84735.1 aver|OJI96599.1 awen|OJJ35963.1

Group1074: abra|OJJ65489.1 acar|OOF90657.1 afis|EAW25622.1 afla|EED47479.1 afum|EAL85425.1 agla|OJJ86171.1 akaw|GAA88141.1 aluc|OJZ85402.1 anig|EHA18427.1 aory|EIT79955.1 asyd|OJJ55499.1 ater|EAU36065.1 atub|OJI91619.1 aver|OJJ06577.1 afla|EED49747.1 afum|EAL84310.1 akaw|GAA87767.1 aory|EIT77702.1 aluc|OJZ79947.1

Group1075: abra|OJJ65876.1 aory|EIT76450.1 abra|OJJ68863.1 acar|OOF90526.1 afis|EAW20215.1 akaw|GAA90390.1 aluc|OJZ85841.1 anig|EHA24723.1 atub|OJI79629.1 awen|OJJ31221.1 abra|OJJ77712.1 acar|OOF99028.1 agla|OJJ85976.1 aluc|OJZ90777.1 asyd|OJJ59565.1 atub|OJI82764.1 awen|OJJ41677.1 aver|OJJ02704.1 azon|OJJ46135.1

Group1076: afla|EED47310.1 aory|EIT82826.1 abra|OJJ77715.1 acar|OOF99024.1 acla|EAW06603.1 afis|EAW16220.1 afum|EAL88848.1 agla|OJJ86232.1 akaw|GAA83917.1 aluc|OJZ90780.1 anig|EHA19513.1 asyd|OJJ59566.1 atub|OJI82767.1 aver|OJJ02703.1 awen|OJJ29818.1 azon|OJJ42618.1 acar|OOF98224.1 ater|EAU33263.1 awen|OJJ30252.1

Group1077: abra|OJJ65944.1 acar|OOF92929.1 acla|EAW13567.1 afis|EAW20033.1 afla|EED46044.1 afum|EAL84883.1 agla|OJJ88021.1 akaw|GAA90822.1 aluc|OJZ83013.1 anid|CBF84765.1 anig|EHA21428.1 aory|EIT75479.1 asyd|OJJ53284.1 ater|EAU29399.1 atub|OJI89248.1 aver|OJJ08457.1 awen|OJJ30056.1 azon|OJJ46327.1 afla|EED46043.1

Group1078: abra|OJJ65999.1 acar|OOF92101.1 afla|EED56561.1 agla|OJJ88417.1 akaw|GAA90871.1 aluc|OJZ82962.1 anig|EHA21378.1 asyd|OJJ57315.1 atub|OJI89194.1 aver|OJJ05846.1 awen|OJJ33380.1 azon|OJJ44468.1 anid|CBF79162.1 akaw|GAA92926.1 aluc|OJZ82517.1 anig|EHA20902.1 ater|EAU38011.1 asyd|OJJ62803.1 aver|OJI96849.1

Group1079: abra|OJJ66158.1 acar|OOG00538.1 acla|EAW08523.1 afis|EAW23562.1 afum|EAL87906.1 agla|OJJ80848.1 asyd|OJJ55543.1 aver|OJJ06621.1 abra|OJJ67247.1 acar|OOF89887.1 afla|EED52167.1 akaw|GAA91667.1 aluc|OJZ87730.1 anig|EHA20222.1 aory|EIT74456.1 ater|EAU35672.1 atub|OJI80910.1 afla|EED47300.1 aory|EIT82893.1

Group1080: abra|OJJ66244.1 acla|EAW14177.1 afis|EAW16160.1 afla|EED50871.1 afum|EBA27496.1 agla|OJJ81498.1 akaw|GAA89047.1 aluc|OJZ80549.1 anid|CBF69906.1 anig|EHA25647.1 aory|EIT79021.1 asyd|OJJ58996.1 ater|EAU33887.1 atub|OJI88382.1 aver|OJJ01620.1 azon|OJJ47209.1 acar|OOF99450.1 afis|EAW18892.1 afla|EED48908.1

Group1081: abra|OJJ66266.1 acar|OOF97511.1 akaw|GAA89028.1 aluc|OJZ80576.1 anig|EHA25621.1 atub|OJI88355.1 abra|OJJ69860.1 afla|EED45622.1 agla|OJJ84525.1 akaw|GAA87796.1 aluc|OJZ85431.1 anid|CBF86345.1 anig|EHA25610.1 aory|EIT75614.1 asyd|OJJ64976.1 ater|EAU32692.1 atub|OJI80144.1 aver|OJI99098.1 awen|OJJ32475.1

Group1082: abra|OJJ66514.1 acar|OOF90929.1 acla|EAW15358.1 afis|EAW20353.1 afla|EED45813.1 afum|EAL85471.1 agla|OJJ82840.1 akaw|GAA91197.1 aluc|OJZ81532.1 anid|CBF78206.1 anig|EHA25904.1 aory|EIT75838.1 atub|OJI88655.1 aver|OJJ04934.1 awen|OJJ30867.1 azon|OJJ42291.1 afla|EED50237.1 aluc|OJZ81531.1 anig|EHA25905.1

Group1083: abra|OJJ66594.1 acar|OOF91029.1 acla|EAW10897.1 afis|EAW20961.1 afla|EED50316.1 afum|EAL84672.1 agla|OJJ83917.1 akaw|GAA91123.1 aluc|OJZ81453.1 anid|CBF82569.1 anig|EHA25975.1 aory|EIT77366.1 asyd|OJJ54049.1 ater|EAU38611.1 atub|OJI88728.1 aver|OJJ08694.1 awen|OJJ34356.1 azon|OJJ48092.1 aory|EIT77330.1

Group1084: abra|OJJ66648.1 acar|OOF93752.1 acla|EAW11791.1 afis|EAW19402.1 afla|EED50356.1 afum|EAL87093.1 agla|OJJ81115.1 akaw|GAA89601.1 aluc|OJZ80801.1 anid|CBF74340.1 anig|EHA27233.1

aory|EIT83133.1 asyd|OJJ51904.1 ater|EAU36127.1 atub|OJI87649.1 aver|OJJ05364.1 awen|OJJ36797.1  
azon|OJJ43002.1 acar|OOF93668.1

Group1085: abra|OJJ66851.1 acar|OOF91627.1 acla|EAW14429.1 afis|EAW19136.1 afla|EED54277.1  
afum|EAL93868.1 agla|OJJ88615.1 akaw|GAA91555.1 aluc|OJZ85733.1 anid|CBF86327.1 anig|EHA24817.1  
aory|EIT75982.1 asyd|OJJ64992.1 ater|EAU37407.1 atub|OJI79518.1 aver|OJI99111.1 awen|OJJ37473.1  
azon|OJJ51152.1 anid|CBF86329.1

Group1086: abra|OJJ66857.1 acar|OOF91634.1 acla|EAW14436.1 afis|EAW19144.1 afla|EED54269.1  
afum|EAL93875.1 agla|OJJ88587.1 akaw|GAA91548.1 aluc|OJZ85726.1 anid|CBF86314.1 anig|EHA24822.1  
aory|EIT75975.1 asyd|OJJ64999.1 ater|EAU37416.1 atub|OJI79512.1 aver|OJI99119.1 awen|OJJ37483.1  
azon|OJJ51160.1 aory|EIT76087.1

Group1087: abra|OJJ66865.1 acar|OOF91641.1 acla|EAW14441.1 afis|EAW19149.1 afla|EED54264.1  
afum|EAL93880.1 agla|OJJ88575.1 akaw|GAA91543.1 aluc|OJZ85717.1 anid|CBF86306.1 anig|EHA24827.1  
aory|EIT76024.1 asyd|OJJ65005.1 ater|EAU37422.1 atub|OJI79507.1 aver|OJI99124.1 awen|OJJ37502.1  
azon|OJJ51167.1 afla|EED54263.1

Group1088: abra|OJJ67116.1 acar|OOF98436.1 acla|EAW13746.1 afis|EAW19825.1 afla|EED56208.1  
afum|EAL85067.1 agla|OJJ83144.1 akaw|GAA91049.1 aluc|OJZ87859.1 anid|CBF83120.1 anig|EHA20165.1  
aory|EIT73304.1 asyd|OJJ61473.1 ater|EAU31280.1 atub|OJI80788.1 aver|OJJ00814.1 awen|OJJ36528.1  
azon|OJJ47562.1 agla|OJJ79980.1

Group1089: abra|OJJ67209.1 acar|OOF98351.1 afis|EAW19743.1 afum|EAL86783.1 akaw|GAA90968.1  
aluc|OJZ87765.1 anig|EHA20249.1 ater|EAU29472.1 atub|OJI80880.1 abra|OJJ75764.1 afla|EED56526.1  
aory|EIT82926.1 asyd|OJJ58672.1 atub|OJI87194.1 aver|OJJ01283.1 awen|OJJ30928.1 azon|OJJ42672.1  
awen|OJJ34642.1 aver|OJJ07429.1

Group1090: abra|OJJ67296.1 acar|OOF92515.1 afla|EED45654.1 agla|OJJ79150.1 akaw|GAA86517.1  
aluc|OJZ85063.1 anid|CBF81698.1 anig|EHA25277.1 aory|EIT75443.1 asyd|OJJ59570.1 atub|OJI80535.1  
aver|OJJ02697.1 acar|OOF90954.1 afla|EED50408.1 aory|EIT82054.1 asyd|OJJ59578.1 ater|EAU32270.1  
aver|OJJ02691.1 awen|OJJ36407.1

Group1091: abra|OJJ67369.1 acla|EAW10405.1 afis|EAW25166.1 afla|EED44928.1 afum|EAL89839.1  
anid|CBF85620.1 aory|EIT77682.1 asyd|OJJ64202.1 ater|EAU31038.1 aver|OJI98291.1 abra|OJJ68396.1  
akaw|GAA92552.1 aluc|OJZ90100.1 anig|EHA20975.1 aory|EIT83236.1 atub|OJI84706.1 awen|OJJ34638.1  
aory|EIT73481.1 afla|EED49793.1

Group1092: abra|OJJ67422.1 acar|OOF91907.1 acla|EAW06342.1 afis|EAW18454.1 afla|EED52954.1  
afum|EAL93139.1 agla|OJJ84146.1 akaw|GAA86407.1 anig|EHA25162.1 aory|EIT78718.1 asyd|OJJ58854.1  
ater|EAU29871.1 atub|OJI80655.1 aver|OJJ01455.1 azon|OJJ50520.1 anid|CBF71560.1 asyd|OJJ54214.1  
aver|OJJ08517.1 agla|OJJ85037.1

Group1093: abra|OJJ67523.1 awen|OJJ30978.1 abra|OJJ69776.1 acar|OOF93595.1 acla|EAW11058.1  
afis|EAW20815.1 afla|EED53102.1 afum|EBA27207.1 agla|OJJ81282.1 akaw|GAA87877.1 aluc|OJZ85518.1  
anid|CBF86687.1 anig|EHA25051.1 aory|EIT74763.1 asyd|OJJ64752.1 ater|EAU38934.1 atub|OJI80048.1  
aver|OJI98853.1 azon|OJJ45137.1

Group1094: abra|OJJ67596.1 acla|EAW12346.1 afis|EAW20358.1 afla|EED57868.1 afum|EAL90941.1  
agla|OJJ88440.1 akaw|GAA89115.1 aluc|OJZ81724.1 anid|CBF77124.1 anig|EHA25715.1 aory|EIT81103.1  
asyd|OJJ62720.1 ater|EAU34084.1 atub|OJI88457.1 aver|OJI99735.1 awen|OJJ36944.1 afum|EAL85475.1  
afum|EAL91116.1 asyd|OJJ60405.1

Group1095: abra|OJJ67622.1 acar|OOF91970.1 acla|EAW12407.1 afis|EAW16866.1 afla|EED45897.1  
afum|EAL86405.2 akaw|GAA89142.1 aluc|OJZ81694.1 anig|EHA25737.1 aory|EIT75474.1 asyd|OJJ56695.1  
atub|OJI88486.1 aver|OJJ06029.1 awen|OJJ33543.1 azon|OJJ42803.1 acar|OOF91765.1 awen|OJJ34441.1  
azon|OJJ50737.1 afla|EED52164.1

Group1096: abra|OJJ67694.1 acar|OOF90173.1 acla|EAW12072.1 afis|EAW19713.1 afla|EED56920.1  
afum|EAL86814.1 akaw|GAA89203.1 aluc|OJZ81627.1 anid|CBF82745.1 anig|EHA25816.1 aory|EIT72578.1  
asyd|OJJ61617.1 atub|OJI88553.1 aver|OJJ00940.1 awen|OJJ31364.1 azon|OJJ47340.1 acar|OOF91834.1  
afila|EED46824.1 aory|EIT77570.1

Group1097: abra|OJJ67728.1 acar|OOF89960.1 afis|EAW20574.1 afla|EED52326.1 afum|EAL84491.1  
agla|OJJ89291.1 akaw|GAA89222.1 aluc|OJZ81606.1 anid|CBF87431.1 anig|EHA25839.1 aory|EIT74400.1  
asyd|OJJ52907.1 atub|OJI88579.1 aver|OJJ08876.1 awen|OJJ30548.1 awen|OJJ29983.1 akaw|GAA85320.1  
aluc|OJZ90681.1 anig|EHA27494.1

Group1098: abra|OJJ67796.1 agla|OJJ84477.1 abra|OJJ75071.1 acar|OOF97263.1 acla|EAW08252.1  
afis|EAW23286.1 afla|EED55688.1 afum|EAL88193.1 akaw|GAA88683.1 aluc|OJZ92637.1 anid|CBF89516.1  
anig|EHA26354.1 aory|EIT77084.1 asyd|OJJ62394.1 ater|EAU37586.1 atub|OJI87068.1 aver|OJI96527.1  
awen|OJJ39670.1 azon|OJJ47800.1



Group1099: aory|EIT77379.1 abra|OJJ71274.1 acar|OOF97900.1 acla|EAW10254.1 afis|EAW25337.1  
afla|EED53807.1 afum|EAL90000.1 agla|OJJ83868.1 akaw|GAA82716.1 aluc|OJZ87270.1 anid|CBF75246.1  
anig|EHA20511.1 asyd|OJJ59907.1 ater|EAU34477.1 atub|OJI81372.1 aver|OJJ02378.1 awen|OJJ41034.1  
azon|OJJ44631.1 aory|EIT78377.1

Group1100: abra|OJJ67904.1 acar|OOF92874.1 acla|EAW11719.1 afis|EAW23740.1 afla|EED51530.1  
afum|EAL87177.1 agla|OJJ78966.1 akaw|GAA91909.1 aluc|OJZ81983.1 anid|CBF73900.1 anig|EHA22271.1  
aory|EIT80572.1 asyd|OJJ65360.1 atub|OJI84535.1 aver|OJI99509.1 awen|OJJ33676.1 azon|OJJ44443.1  
afla|EED57578.1 aory|EIT82975.1

Group1101: ater|EAU31288.1 awen|OJJ33664.1 abra|OJJ75236.1 acar|OOF94556.1 acla|EAW11702.1  
afis|EAW23723.1 afla|EED53191.1 afum|EAL87163.1 akaw|GAA91779.1 aluc|OJZ92797.1 anid|CBF86826.1  
anig|EHA26211.1 aory|EIT74820.1 asyd|OJJ56249.1 atub|OJI87241.1 aver|OJJ08511.1 azon|OJJ44225.1  
afla|EED51505.1 aory|EIT80632.1

Group1102: abra|OJJ67986.1 acar|OOF92028.1 acla|EAW13238.1 afis|EAW21052.1 afla|EED48858.1  
akaw|GAA91216.1 aluc|OJZ82854.1 anid|CBF73882.1 anig|EHA21290.1 aory|EIT79551.1 asyd|OJJ57026.1  
ater|EAU38426.1 atub|OJI89084.1 aver|OJJ06477.1 afum|EAL92088.2 asyd|OJJ55377.1 aory|EIT81277.1  
anid|CBF77000.1 aver|OJJ03264.1

Group1103: abra|OJJ68002.1 akaw|GAA90948.1 aluc|OJZ82876.1 anig|EHA21302.1 atub|OJI89100.1  
abra|OJJ77430.1 afis|EAW24679.1 afum|EAL89347.1 anid|CBF90095.1 asyd|OJJ62032.1 awen|OJJ40790.1  
azon|OJJ48192.1 afla|EED49910.1 aory|EIT72471.1 asyd|OJJ57385.1 ater|EAU31630.1 anid|CBF88170.1  
aver|OJI97314.1 awen|OJJ32480.1

Group1104: abra|OJJ68219.1 acar|OOF97509.1 acla|EAW09056.1 afis|EAW25630.1 afla|EED55187.1  
afum|EAL84318.1 agla|OJJ78900.1 akaw|GAA83227.1 aluc|OJZ83727.1 anid|CBF83164.1 anig|EHA18875.1  
aory|EIT83560.1 asyd|OJJ55506.1 ater|EAU32707.1 atub|OJI90103.1 aver|OJJ06581.1 awen|OJJ36050.1  
azon|OJJ50396.1 acla|EAW09057.1

Group1105: abra|OJJ68227.1 afla|EED48923.1 anid|CBF73570.1 aory|EIT80015.1 asyd|OJJ56694.1  
aver|OJJ06030.1 abra|OJJ72608.1 acar|OOF94647.1 afis|EAW20314.1 afla|EED52548.1 afum|EAL85437.1  
akaw|GAA85234.1 aluc|OJZ90590.1 anig|EHA24029.1 ater|EAU33505.1 atub|OJI82013.1 awen|OJJ33813.1  
azon|OJJ48723.1 aory|EIT74186.1

Group1106: abra|OJJ68422.1 acar|OOF97621.1 acla|EAW10999.1 afis|EAW20862.1 afla|EED45444.1  
afum|EAL84773.1 agla|OJJ83749.1 akaw|GAA92526.1 aluc|OJZ90075.1 anid|CBF71444.1 anig|EHA20998.1  
aory|EIT82447.1 asyd|OJJ60710.1 ater|EAU30805.1 atub|OJI84731.1 aver|OJJ00036.1 awen|OJJ34508.1  
azon|OJJ51786.1 agla|OJJ89303.1

Group1107: abra|OJJ68428.1 acar|OOF94918.1 afis|EAW23747.1 afla|EED51539.1 afum|EAL87182.1  
agla|OJJ79306.1 akaw|GAA86943.1 aluc|OJZ90068.1 anid|CBF81672.1 anig|EHA21006.1 aory|EIT80703.1  
asyd|OJJ59555.1 ater|EAU31300.1 atub|OJI84739.1 aver|OJI97564.1 awen|OJJ33683.1 azon|OJJ44480.1  
anig|EHA25691.1 aver|OJJ02713.1

Group1108: abra|OJJ68521.1 acar|OOF92726.1 acla|EAW12843.1 afis|EAW18006.1 afla|EED51889.1  
afum|EAL91818.1 agla|OJJ80269.1 akaw|GAA91328.1 aluc|OJZ82735.1 anid|CBF80030.1 anig|EHA21186.1  
aory|EIT82919.1 asyd|OJJ58269.1 ater|EAU31522.1 atub|OJI88969.1 aver|OJJ02154.1 awen|OJJ41536.1  
azon|OJJ48254.1 agla|OJJ80268.1

Group1109: abra|OJJ68529.1 acar|OOF92733.1 acla|EAW12835.1 afis|EAW18000.1 afla|EED51896.1  
afum|EAL91811.1 agla|OJJ80263.1 akaw|GAA91321.1 aluc|OJZ82742.1 anid|CBF80021.1 anig|EHA21193.1  
aory|EIT76177.1 asyd|OJJ58263.1 ater|EAU31512.1 atub|OJI88977.1 aver|OJJ02161.1 awen|OJJ41542.1  
azon|OJJ48260.1 aory|EIT76174.1

Group1110: abra|OJJ68552.1 acar|OOF92747.1 acla|EAW12815.1 afis|EAW17980.1 afla|EED51925.1  
afum|EAL91789.1 agla|OJJ80237.1 akaw|GAA91301.1 aluc|OJZ82769.1 anid|CBF79979.1 anig|EHA21211.1  
aory|EIT81371.1 asyd|OJJ58235.1 ater|EAU31490.1 atub|OJI89000.1 aver|OJJ02190.1 awen|OJJ41565.1  
azon|OJJ48280.1 akaw|GAA92005.1

Group1111: abra|OJJ68565.1 acar|OOF92758.1 acla|EAW12801.1 afis|EAW17967.1 afla|EED51939.1  
afum|EAL91776.1 agla|OJJ80213.1 akaw|GAA91289.1 aluc|OJZ82780.1 anid|CBF79959.1 anig|EHA21223.1  
aory|EIT81465.1 asyd|OJJ58221.1 ater|EAU31477.1 atub|OJI89013.1 aver|OJJ02201.1 awen|OJJ41577.1  
azon|OJJ48290.1 akaw|GAA91288.1

Group1112: abra|OJJ68634.1 acar|OOF92138.1 acla|EAW12618.1 afis|EAW18066.1 afla|EED51450.1  
afum|EBA27443.1 agla|OJJ87353.1 akaw|GAA89773.1 aluc|OJZ81921.1 anid|CBF86420.1 anig|EHA22326.1  
anig|EHA22327.1 aory|EIT80631.1 asyd|OJJ64939.1 ater|EAU30462.1 atub|OJI84473.1 aver|OJI99061.1  
awen|OJJ41453.1 azon|OJJ48911.1

Group1113: abra|OJJ68759.1 acar|OOF92246.1 acla|EAW12492.1 afis|EAW24153.1 afla|EED46778.1  
afum|EAL92008.1 agla|OJJ89544.1 akaw|GAA89903.1 aluc|OJZ81767.1 anid|CBF77909.1 anig|EHA22447.1

aory|EIT72606.1 asyd|OJJ55299.1 ater|EAU30585.1 atub|OJI84340.1 aver|OJJ06926.1 awen|OJJ41324.1 azon|OJJ48798.1 ater|EAU30584.1

Group1114: abra|OJJ68992.1 acar|OOF92704.1 acla|EAW12644.1 afis|EAW18041.1 afla|EED51855.1 afla|EED51856.1 afum|EAL91852.1 agla|OJJ85413.1 akaw|GAA90512.1 aluc|OJZ85977.1 anid|CBF80101.1 anig|EHA24629.1 aory|EIT81757.1 asyd|OJJ58297.1 ater|EAU31556.1 atub|OJI79767.1 aver|OJJ02127.1 awen|OJJ41496.1 azon|OJJ48224.1

Group1115: abra|OJJ69111.1 acar|OOF91183.1 acla|EAW08721.1 afis|EAW15726.1 afla|EED51338.1 afum|EAL85621.1 agla|OJJ81865.1 akaw|GAA90636.1 aluc|OJZ86100.1 anid|CBF71089.1 anig|EHA24519.1 aory|EIT81534.1 asyd|OJJ52700.1 ater|EAU32431.1 atub|OJI79895.1 aver|OJJ04728.1 awen|OJJ38410.1 azon|OJJ43832.1 afla|EED51337.1

Group1116: abra|OJJ69231.1 acar|OOF91089.1 acla|EAW08618.1 afis|EAW15816.1 afla|EED51231.1 afum|EAL85535.1 agla|OJJ81980.1 akaw|GAA92239.1 aluc|OJZ86211.1 anid|CBF70897.1 anig|EHA24415.1 aory|EIT83178.1 asyd|OJJ52594.1 ater|EAU33432.1 atub|OJI80005.1 aver|OJJ04621.1 awen|OJJ38530.1 azon|OJJ43732.1 atub|OJI80006.1

Group1117: abra|OJJ69301.1 acar|OOF94424.1 acla|EAW14687.1 afis|EAW24218.1 afla|EED48053.1 afum|EAL85887.1 agla|OJJ79652.1 akaw|GAA88170.1 aluc|OJZ82129.1 anid|CBF74250.1 anig|EHA28602.1 aory|EIT83328.1 asyd|OJJ53976.1 ater|EAU31168.1 atub|OJI88307.1 aver|OJJ08075.1 awen|OJJ33078.1 azon|OJJ44868.1 aory|EIT83336.1

Group1118: abra|OJJ69328.1 acar|OOF94399.1 acla|EAW14712.1 afis|EAW24247.1 afla|EED48026.1 afum|EAL85915.1 agla|OJJ79626.1 akaw|GAA88199.1 aluc|OJZ82160.1 anid|CBF74202.1 anig|EHA28572.1 aory|EIT83332.1 asyd|OJJ53955.1 ater|EAU31188.1 atub|OJI88277.1 aver|OJJ08051.1 awen|OJJ33059.1 azon|OJJ48467.1 afla|EED48027.1

Group1119: abra|OJJ69488.1 acar|OOF94260.1 acla|EAW09905.1 afis|EAW21154.1 afla|EED54658.1 afum|EAL92172.1 agla|OJJ80039.1 akaw|GAA88332.1 aluc|OJZ82327.1 anid|CBF86989.1 anig|EHA28431.1 aory|EIT78787.1 asyd|OJJ60510.1 ater|EAU39556.1 atub|OJI88111.1 aver|OJI99836.1 awen|OJJ36482.1 azon|OJJ44363.1 anig|EHA21818.1

Group1120: abra|OJJ69514.1 acar|OOF94239.1 acla|EAW09954.1 afis|EAW21142.1 afla|EED46141.1 afum|EAL92161.1 agla|OJJ80069.1 akaw|GAA88310.1 aluc|OJZ82352.1 anid|CBF87008.1 anig|EHA28408.1 aory|EIT76511.1 asyd|OJJ60471.1 ater|EAU36763.1 atub|OJI88088.1 aver|OJI99791.1 awen|OJJ36466.1 azon|OJJ44412.1 azon|OJJ42893.1

Group1121: abra|OJJ69523.1 acar|OOF94231.1 acla|EAW09971.1 afis|EAW21117.1 afla|EED51790.1 afum|EAL92141.1 agla|OJJ80094.1 akaw|GAA88302.1 aluc|OJZ82363.1 anid|CBF87028.1 anig|EHA28402.1 aory|EIT81753.1 asyd|OJJ60456.1 ater|EAU36782.1 atub|OJI88079.1 aver|OJJ06754.1 awen|OJJ36447.1 azon|OJJ44428.1 aver|OJI99774.1

Group1122: abra|OJJ69615.1 acar|OOF92691.1 acla|EAW12075.1 afis|EAW19716.1 afla|EED53109.1 afum|EAL86811.1 agla|OJJ80862.1 akaw|GAA91599.1 aluc|OJZ82423.1 anid|CBF80080.1 anig|EHA28346.1 aory|EIT74768.1 asyd|OJJ58309.1 ater|EAU37777.1 atub|OJI88017.1 aver|OJJ02103.1 awen|OJJ35106.1 azon|OJJ45858.1 awen|OJJ34696.1

Group1123: abra|OJJ69668.1 acar|OOF95768.1 acla|EAW10632.1 afis|EAW24935.1 afla|EED55537.1 afum|EAL87763.1 agla|OJJ82162.1 akaw|GAA91646.1 aluc|OJZ82473.1 anid|CBF75718.1 anig|EHA28300.1 aory|EIT80819.1 asyd|OJJ57503.1 ater|EAU35664.1 atub|OJI87964.1 aver|OJJ05675.1 awen|OJJ40530.1 azon|OJJ49390.1 afum|EAL89592.1

Group1124: abra|OJJ69841.1 acar|OOF93364.1 acla|EAW13293.1 afis|EAW24568.1 afla|EED56610.1 afum|EAL91152.1 akaw|GAA87819.1 aluc|OJZ85455.1 anid|CBF82896.1 anig|EHA24997.1 aory|EIT81324.1 asyd|OJJ62102.1 ater|EAU39297.1 atub|OJI80109.1 aver|OJI96208.1 afis|EAW17316.1 aory|EIT82251.1 ater|EAU30304.1 aory|EIT79627.1

Group1125: abra|OJJ69857.1 acar|OOF93382.1 acla|EAW08537.1 afis|EAW23575.1 afla|EED57541.1 afum|EAL87890.1 agla|OJJ85306.1 akaw|GAA87799.1 aluc|OJZ85434.1 anig|EHA24980.1 aory|EIT81841.1 asyd|OJJ56731.1 atub|OJI80134.1 awen|OJJ38171.1 azon|OJJ45131.1 agla|OJJ86836.1 awen|OJJ39903.1 azon|OJJ45879.1 afla|EED54164.1

Group1126: abra|OJJ70048.1 acar|OOF93540.1 afla|EED47673.1 agla|OJJ79802.1 akaw|GAA87627.1 aluc|OJZ85243.1 anid|CBF84432.1 aory|EIT85443.1 asyd|OJJ61842.1 ater|EAU34191.1 atub|OJI80328.1 aver|OJJ05342.1 awen|OJJ36937.1 aver|OJI95942.1 agla|OJJ80121.1 asyd|OJJ53636.1 aver|OJJ01170.1 ater|EAU29232.1

Group1127: abra|OJJ70093.1 acla|EAW12322.1 afis|EAW17167.1 afla|EED51057.1 afum|EAL89052.1 agla|OJJ78763.1 akaw|GAA87602.1 aluc|OJZ85222.1 anig|EHA25426.1 aory|EIT76987.1 ater|EAU34026.1 atub|OJI80361.1 azon|OJJ42125.1 akaw|GAA87480.1 aluc|OJZ88046.1 anig|EHA17818.1 ater|EAU29611.1 atub|OJI90654.1 awen|OJJ36983.1

Group1128: abra|OJJ70121.1 acar|OOF92449.1 acla|EAW11044.1 afis|EAW16194.1 afla|EED48259.1 afum|EAL88825.1 akaw|GAA86648.1 aluc|OJZ85206.1 anid|CBF74996.1 anig|EHA25410.1 aory|EIT72896.1 ater|EAU34204.1 atub|OJI80396.1 aver|OJJ05082.1 azon|OJJ46585.1 afla|EED53310.1 aory|EIT74931.1 azon|OJJ45951.1 afla|EED49627.1

Group1129: abra|OJJ70144.1 acar|OOF96811.1 afla|EED52394.1 akaw|GAA90567.1 akaw|GAA90568.1 aluc|OJZ86936.1 anig|EHA25649.1 aory|EIT83282.1 asyd|OJJ53406.1 atub|OJI88384.1 aver|OJJ04195.1 awen|OJJ35567.1 azon|OJJ42608.1 akaw|GAA84747.1 anig|EHA21708.1 atub|OJI83585.1 afla|EED52395.1 anig|EHA25751.1 akaw|GAA91340.1

Group1130: abra|OJJ70231.1 acar|OOF91736.1 acla|EAW11658.1 afis|EAW20417.1 afla|EED53976.1 agla|OJJ82616.1 aluc|OJZ90859.1 aver|OJJ06455.1 awen|OJJ40076.1 azon|OJJ45549.1 abra|OJJ73408.1 acar|OOG00605.1 akaw|GAA83083.1 aluc|OJZ88630.1 anig|EHA18320.1 aory|EIT74373.1 atub|OJI91214.1 afla|EED52225.1 agla|OJJ88203.1

Group1131: abra|OJJ70466.1 acar|OOF97458.1 acla|EAW13048.1 afis|EAW17619.1 afla|EED49199.1 afla|EED49200.1 afum|EAL91432.1 agla|OJJ81306.1 akaw|GAA83315.1 aluc|OJZ83810.1 anid|CBF90163.1 anig|EHA18955.1 aory|EIT78513.1 asyd|OJJ61994.1 ater|EAU37053.1 atub|OJI90177.1 aver|OJI96086.1 awen|OJJ37225.1 azon|OJJ50928.1

Group1132: abra|OJJ70467.1 acar|OOF97457.1 acla|EAW13047.1 afis|EAW17620.1 afla|EED49197.1 afla|EED49198.1 afum|EAL91433.2 agla|OJJ81305.1 akaw|GAA83316.1 aluc|OJZ83811.1 anid|CBF90161.1 anig|EHA18956.1 aory|EIT78563.1 asyd|OJJ61995.1 ater|EAU37054.1 atub|OJI90178.1 aver|OJI96087.1 awen|OJJ37224.1 azon|OJJ50927.1

Group1133: abra|OJJ70612.1 acar|OOF97110.1 acla|EAW13015.1 afis|EAW17652.1 afla|EED50506.1 afum|EAL91467.1 agla|OJJ79552.1 akaw|GAA89951.1 aluc|OJZ83958.1 anid|CBF90075.1 anig|EHA19086.1 aory|EIT82132.1 asyd|OJJ62041.1 ater|EAU37088.1 atub|OJI90330.1 aver|OJI96147.1 awen|OJJ37193.1 azon|OJJ50892.1 aver|OJJ07605.1

Group1134: abra|OJJ70647.1 acar|OOF97074.1 acla|EAW08113.1 afis|EAW23138.1 afla|EED48501.1 afum|EAL88343.1 agla|OJJ89662.1 akaw|GAA89983.1 aluc|OJZ83997.1 anid|CBF74448.1 anig|EHA19120.1 aory|EIT73103.1 asyd|OJJ57741.1 ater|EAU36279.1 atub|OJI90366.1 aver|OJJ05426.1 awen|OJJ36635.1 azon|OJJ47581.1 awen|OJJ36634.1

Group1135: abra|OJJ70656.1 acar|OOF97066.1 acla|EAW08103.1 afis|EAW23148.1 afla|EED48511.1 afum|EAL88333.1 agla|OJJ89654.1 akaw|GAA89992.1 aluc|OJZ84006.1 anid|CBF74430.1 anig|EHA19128.1 aory|EIT73155.1 asyd|OJJ57750.1 ater|EAU32975.1 atub|OJI90375.1 aver|OJJ05417.1 awen|OJJ36643.1 azon|OJJ47571.1 acar|OOG00309.1

Group1136: abra|OJJ70745.1 acar|OOF96999.1 acla|EAW11175.1 afis|EAW15906.1 afla|EED56463.1 afum|EAL88541.1 agla|OJJ89566.1 akaw|GAA90066.1 aluc|OJZ84090.1 anid|CBF81270.1 anig|EHA19203.1 aory|EIT72857.1 asyd|OJJ59333.1 ater|EAU36183.1 atub|OJI90461.1 aver|OJJ02941.1 awen|OJJ36725.1 azon|OJJ47484.1 ater|EAU30153.1

Group1137: abra|OJJ70747.1 acar|OOF96998.1 acla|EAW11174.1 afis|EAW15905.1 afla|EED56464.1 afum|EAL88540.1 agla|OJJ89565.1 akaw|GAA90067.1 aluc|OJZ84091.1 anid|CBF81274.1 anig|EHA19204.1 aory|EIT72825.1 asyd|OJJ59334.1 ater|EAU36182.1 atub|OJI90462.1 aver|OJJ02940.1 awen|OJJ36726.1 azon|OJJ47471.1 aory|EIT72838.1

Group1138: abra|OJJ70748.1 acar|OOF96997.1 acla|EAW11173.1 afis|EAW15904.1 afla|EED56466.1 afum|EAL88539.1 agla|OJJ89564.1 akaw|GAA90068.1 aluc|OJZ84092.1 anid|CBF81276.1 anig|EHA19205.1 aory|EIT72390.1 asyd|OJJ59335.1 ater|EAU36181.1 atub|OJI90463.1 aver|OJJ02939.1 awen|OJJ36727.1 azon|OJJ47470.1 afla|EED46475.1

Group1139: abra|OJJ70830.1 afis|EAW19787.1 afla|EED45955.1 afum|EAL85107.2 agla|OJJ88990.1 anid|CBF74550.1 anig|EHA20974.1 aory|EIT75768.1 asyd|OJJ57685.1 ater|EAU34824.1 aver|OJJ04314.1 awen|OJJ33838.1 abra|OJJ76587.1 acar|OOF99400.1 akaw|GAA82491.1 aluc|OJZ91619.1 anig|EHA22646.1 atub|OJI86072.1 asyd|OJJ52721.1

Group1140: abra|OJJ70840.1 acar|OOF98274.1 acla|EAW13281.1 afis|EAW17336.1 afla|EED46105.1 afum|EAL91180.1 agla|OJJ82057.1 akaw|GAA91708.1 aluc|OJZ87681.1 anid|CBF85633.1 anig|EHA20871.1 aory|EIT76521.1 asyd|OJJ56056.1 ater|EAU33888.1 atub|OJI80962.1 aver|OJJ04998.1 awen|OJJ33506.1 azon|OJJ50300.1 azon|OJJ51817.1

Group1141: abra|OJJ70845.1 acar|OOF98270.1 acla|EAW10436.1 afis|EAW25131.1 afla|EED55314.1 afum|EAL89802.1 agla|OJJ89035.1 akaw|GAA91713.1 aluc|OJZ87676.1 anid|CBF86816.1 anig|EHA20866.1 aory|EIT83519.1 asyd|OJJ64657.1 ater|EAU39403.1 atub|OJI80967.1 aver|OJI98760.1 awen|OJJ40756.1 azon|OJJ44121.1 aver|OJJ02113.1

Group1142: abra|OJJ70882.1 acar|OOF98239.1 acla|EAW10470.1 afis|EAW25097.1 afla|EED55351.1 afum|EAL89768.1 agla|OJJ85476.1 akaw|GAA91744.1 aluc|OJZ87640.1 anid|CBF86010.1 anig|EHA20834.1

aory|EIT80916.1 asyd|OJJ64447.1 ater|EAU39355.1 atub|OJI81005.1 aver|OJI98550.1 awen|OJJ40711.1 azon|OJJ44087.1 ater|EAU29372.1

Group1143: abra|OJJ70985.1 acar|OOF98146.1 acla|EAW10545.1 afis|EAW25013.1 afla|EED55432.1 afum|EAL89683.1 agla|OJJ89177.1 akaw|GAA82964.1 aluc|OJZ87545.1 aluc|OJZ87546.1 anid|CBF81523.1 anig|EHA20749.1 aory|EIT80770.1 asyd|OJJ59478.1 ater|EAU35773.1 atub|OJI81100.1 aver|OJJ02795.1 awen|OJJ40627.1 azon|OJJ49056.1

Group1144: abra|OJJ71009.1 acar|OOF98133.1 acla|EAW10561.1 afis|EAW25028.1 afla|EED55451.1 afum|EAL89667.1 agla|OJJ79156.1 agla|OJJ82560.1 akaw|GAA82944.1 aluc|OJZ87522.1 anid|CBF81555.1 anig|EHA20732.1 aory|EIT80765.1 asyd|OJJ59497.1 ater|EAU35759.1 atub|OJI81127.1 aver|OJJ02777.1 awen|OJJ40611.1 azon|OJJ49460.1

Group1145: abra|OJJ71029.1 acar|OOF98110.1 acla|EAW10582.1 afis|EAW24987.1 afla|EED55471.1 afum|EAL89647.1 agla|OJJ82275.1 akaw|GAA82926.1 aluc|OJZ87501.1 anid|CBF81601.1 anig|EHA20716.1 aory|EIT80792.1 asyd|OJJ59520.1 ater|EAU35738.1 atub|OJI81148.1 aver|OJJ02753.1 awen|OJJ40583.1 azon|OJJ41984.1 azon|OJJ49442.1

Group1146: abra|OJJ71043.1 acar|OOF98096.1 acla|EAW10591.1 afis|EAW24977.1 afla|EED55482.1 afum|EAL89637.1 agla|OJJ79140.1 akaw|GAA82913.1 aluc|OJZ87485.1 anid|CBF81627.1 anig|EHA20706.1 aory|EIT80881.1 asyd|OJJ59529.1 ater|EAU35726.1 atub|OJI81163.1 aver|OJJ02741.1 awen|OJJ40574.1 azon|OJJ49436.1 afla|EED55483.1

Group1147: abra|OJJ71134.1 acar|OOF98018.1 acla|EAW10363.1 afis|EAW25229.1 afla|EED53673.1 afum|EAL89890.2 agla|OJJ79179.1 akaw|GAA82840.1 aluc|OJZ87401.1 anid|CBF85338.1 anig|EHA20630.1 aory|EIT75324.1 asyd|OJJ64023.1 ater|EAU34387.1 atub|OJI81245.1 aver|OJI98109.1 awen|OJJ40894.1 azon|OJJ44523.1 aory|EIT75321.1

Group1148: abra|OJJ71194.1 acar|OOF97972.1 acla|EAW10310.1 afis|EAW25283.1 afla|EED53749.1 afum|EAL89946.1 agla|OJJ89257.1 akaw|GAA82789.1 aluc|OJZ87348.1 anid|CBF85422.1 anig|EHA20584.1 aory|EIT78394.1 asyd|OJJ64075.1 ater|EAU34425.1 atub|OJI81295.1 aver|OJI98162.1 awen|OJJ40996.1 azon|OJJ44586.1 asyd|OJJ60350.1

Group1149: abra|OJJ71328.1 acar|OOF97846.1 acla|EAW10211.1 afis|EAW25383.1 afla|EED53860.1 afum|EAL90041.1 agla|OJJ83775.1 akaw|GAA82664.1 aluc|OJZ87214.1 anid|CBF77488.1 anig|EHA20465.1 aory|EIT78406.1 asyd|OJJ53195.1 ater|EAU34529.1 atub|OJI81425.1 aver|OJJ03655.1 awen|OJJ41109.1 azon|OJJ44687.1 aory|EIT78415.1

Group1150: abra|OJJ71401.1 acar|OOF97769.1 acla|EAW10133.1 afis|EAW25454.1 afla|EED53942.1 afla|EED53943.1 afum|EAL90113.1 agla|OJJ87107.1 akaw|GAA82596.1 aluc|OJZ87141.1 anid|CBF77635.1 anig|EHA20399.1 aory|EIT78263.1 asyd|OJJ53125.1 ater|EAU34624.1 atub|OJI81501.1 aver|OJJ03729.1 awen|OJJ41186.1 azon|OJJ44762.1

Group1151: abra|OJJ71618.1 acar|OOF96335.1 acla|EAW13285.1 afis|EAW17333.1 afla|EED57246.1 afum|EAL91170.2 akaw|GAA89309.1 aluc|OJZ86359.1 anid|CBF84952.1 anig|EHA21531.1 aory|EIT74025.1 asyd|OJJ63145.1 ater|EAU38742.1 atub|OJI84175.1 aver|OJI97809.1 azon|OJJ50869.1 acla|EAW10844.1 afla|EED47443.1 aory|EIT81909.1

Group1152: abra|OJJ71994.1 acar|OOF96648.1 acla|EAW09538.1 afis|EAW21594.1 afla|EED57816.1 afum|EAL92612.1 agla|OJJ85787.1 akaw|GAA84934.1 aluc|OJZ86732.1 anid|CBF83446.1 anig|EHA21947.1 aory|EIT81030.1 asyd|OJJ60671.1 ater|EAU34930.1 atub|OJI83796.1 aver|OJI99994.1 awen|OJJ39087.1 azon|OJJ51418.1 ater|EAU32744.1

Group1153: abra|OJJ72045.1 acar|OOF96703.1 acla|EAW09501.1 afis|EAW21635.1 afla|EED48487.1 afum|EAL92669.1 agla|OJJ79700.1 akaw|GAA84889.1 aluc|OJZ86782.1 anid|CBF83498.1 anig|EHA21900.1 aory|EIT83266.1 asyd|OJJ60712.1 ater|EAU38321.1 atub|OJI83738.1 aver|OJJ00045.1 awen|OJJ33884.1 azon|OJJ48669.1 aory|EIT73220.1

Group1154: abra|OJJ72230.1 acar|OOF96853.1 acla|EAW14990.1 afis|EAW25547.1 afla|EED47847.1 afum|EAL86183.1 agla|OJJ80332.1 akaw|GAA84707.1 aluc|OJZ86980.1 anid|CBF74013.1 anig|EHA21669.1 aory|EIT77206.1 asyd|OJJ56425.1 atub|OJI83540.1 aver|OJJ06292.1 awen|OJJ32605.1 afis|EAW24517.1 asyd|OJJ53838.1 aver|OJJ07941.1

Group1155: abra|OJJ72280.1 acar|OOF94941.1 afis|EAW20800.1 afla|EED49545.1 afum|EAL84829.1 agla|OJJ85012.1 akaw|GAA86032.1 aluc|OJZ90259.1 anid|CBF71374.1 anig|EHA23754.1 aory|EIT82577.1 asyd|OJJ55077.1 ater|EAU32870.1 atub|OJI81685.1 aver|OJJ07131.1 awen|OJJ41912.1 azon|OJJ47358.1 anig|EHA23755.1 afum|EAL84830.1

Group1156: abra|OJJ72423.1 acar|OOF90372.1 acla|EAW12860.1 afis|EAW17809.1 afla|EED46159.1 afum|EAL91617.1 agla|OJJ80653.1 akaw|GAA86165.1 aluc|OJZ90406.1 anid|CBF78020.1 anig|EHA23874.1 aory|EIT76396.1 asyd|OJJ55235.1 ater|EAU33015.1 atub|OJI81837.1 aver|OJJ06988.1 awen|OJJ41763.1 azon|OJJ44903.1 afla|EED46160.1

Group1157: abra|OJJ72434.1 acar|OOF94801.1 acla|EAW12667.1 afis|EAW17831.1 afla|EED46173.1 afum|EAL91641.1 agla|OJJ80640.1 akaw|GAA86174.1 aluc|OJZ90417.1 anid|CBF77994.1 anig|EHA23885.1 aory|EIT76438.1 asyd|OJJ55252.1 ater|EAU33034.1 atub|OJI81850.1 aver|OJI99643.1 awen|OJJ41750.1 azon|OJJ48442.1 aver|OJJ06972.1

Group1158: abra|OJJ72484.1 acar|OOF94751.1 acla|EAW12715.1 afis|EAW17877.1 afla|EED46293.1 afum|EAL91685.1 agla|OJJ83069.1 akaw|GAA86219.1 aluc|OJZ90471.1 anid|EHA23930.1 aory|EIT76328.1 asyd|OJJ61521.1 ater|EAU33097.1 atub|OJI81895.1 aver|OJJ05549.1 awen|OJJ41687.1 asyd|OJJ57661.1 aver|OJJ05523.1 aver|OJJ01273.1

Group1159: abra|OJJ72549.1 acar|OOF94703.1 acla|EAW12754.1 afis|EAW17917.1 afla|EED46320.1 afum|EBA27439.1 agla|OJJ83026.1 akaw|GAA85181.1 aluc|OJZ90537.1 anid|CBF76959.1 anig|EHA23985.1 aory|EIT81197.1 atub|OJI81958.1 awen|OJJ41628.1 asyd|OJJ57052.1 aver|OJJ03244.1 azon|OJJ48353.1 ater|EAU33139.1 asyd|OJJ57051.1

Group1160: acla|EAW12414.1 acar|OOF98070.1 afla|EED52231.1 agla|OJJ84011.1 anid|CBF69489.1 aory|EIT74442.1 asyd|OJJ59240.1 ater|EAU37441.1 awen|OJJ35818.1 azon|OJJ49326.1 acar|OOG00738.1 asyd|OJJ60713.1 ater|EAU30842.1 aver|OJJ00046.1 afla|EED47470.1 aory|EIT79973.1 ater|EAU31019.1 azon|OJJ48614.1 aver|OJJ01850.1

Group1161: abra|OJJ72629.1 acar|OOF94635.1 acla|EAW11593.1 afis|EAW23864.1 afla|EED52589.1 afum|EAL87292.1 agla|OJJ82532.1 akaw|GAA85249.1 aluc|OJZ90606.1 anid|CBF77222.1 anig|EHA24044.1 aory|EIT74309.1 asyd|OJJ56820.1 ater|EAU33487.1 atub|OJI82030.1 aver|OJJ03515.1 awen|OJJ33839.1 azon|OJJ48708.1 awen|OJJ33432.1

Group1162: abra|OJJ72716.1 acar|OOF95949.1 acla|EAW11552.1 afis|EAW23901.1 afla|EED52636.1 afum|EAL87328.1 agla|OJJ79367.1 akaw|GAA85324.1 aluc|OJZ90685.1 anid|CBF77143.1 anig|EHA24113.1 aory|EIT74168.1 asyd|OJJ56912.1 ater|EAU32337.1 atub|OJI82111.1 aver|OJJ03380.1 awen|OJJ39048.1 azon|OJJ51378.1 afis|EAW25771.1

Group1163: abra|OJJ72751.1 acar|OOF95974.1 acla|EAW11510.1 afis|EAW23943.1 afla|EED50573.1 afum|EAL87368.1 agla|OJJ79431.1 akaw|GAA85363.1 aluc|OJZ90725.1 anid|CBF77256.1 anig|EHA24143.1 aory|EIT82138.1 asyd|OJJ56806.1 ater|EAU36036.1 atub|OJI82153.1 aver|OJJ03528.1 awen|OJJ39012.1 azon|OJJ51337.1 awen|OJJ40567.1

Group1164: abra|OJJ72900.1 acar|OOF89981.1 acla|EAW11351.1 afis|EAW18143.1 afla|EED58069.1 afum|EAL87500.1 agla|OJJ80189.1 akaw|GAA85487.1 aluc|OJZ83409.1 anid|CBF81125.1 anig|EHA24260.1 aory|EIT79709.1 asyd|OJJ56489.1 atub|OJI82297.1 aver|OJJ06229.1 awen|OJJ35585.1 awen|OJJ38003.1 aver|OJJ03876.1 ater|EAU30131.1

Group1165: abra|OJJ72905.1 acar|OOF89821.1 acla|EAW11349.1 afis|EAW18146.1 afla|EED58074.1 afum|EAL87503.1 agla|OJJ83830.1 akaw|GAA85490.1 aluc|OJZ83415.1 anid|CBF81118.1 anig|EHA24264.1 asyd|OJJ56487.1 ater|EAU35469.1 atub|OJI82302.1 aver|OJJ06232.1 awen|OJJ35589.1 azon|OJJ46936.1 afla|EED58073.1 afum|EAL87504.1

Group1166: abra|OJJ72907.1 acar|OOF96090.1 acla|EAW11346.1 afis|EAW18148.1 afla|EED58076.1 afum|EAL87506.1 agla|OJJ83833.1 akaw|GAA85492.1 aluc|OJZ83417.1 anid|CBF81114.1 anig|EHA24266.1 aory|EIT79127.1 ater|EAU35470.1 atub|OJI82304.1 aver|OJJ06234.1 awen|OJJ35591.1 azon|OJJ46913.1 asyd|OJJ56485.1 asyd|OJJ57077.1

Group1167: abra|OJJ73268.1 acar|OOG00508.1 acla|EAW06945.1 afis|EAW16559.1 afla|EED56102.1 afum|EAL89157.1 agla|OJJ82763.1 akaw|GAA87914.1 aluc|OJZ81161.1 anid|CBF81806.1 anig|EHA18478.1 aory|EIT76895.1 asyd|OJJ59644.1 ater|EAU36627.1 atub|OJI91356.1 aver|OJJ02638.1 awen|OJJ40257.1 azon|OJJ49121.1 acar|OOF91712.1

Group1168: abra|OJJ73284.1 acar|OOG00520.1 acla|EAW06959.1 afis|EAW16574.1 afla|EED56090.1 afum|EAL89171.2 agla|OJJ82706.1 akaw|GAA92721.1 aluc|OJZ88765.1 anid|CBF81830.1 anig|EHA18461.1 aory|EIT76622.1 asyd|OJJ59660.1 ater|EAU36642.1 atub|OJI91338.1 aver|OJJ02622.1 awen|OJJ40244.1 azon|OJJ49105.1 asyd|OJJ52085.1

Group1169: abra|OJJ73346.1 acar|OOG00556.1 acla|EAW06973.1 afis|EAW16587.1 afla|EED56078.1 afum|EAL89182.1 agla|OJJ82679.1 akaw|GAA83136.1 aluc|OJZ88693.1 anid|CBF81890.1 anig|EHA18373.1 aory|EIT76830.1 asyd|OJJ59676.1 ater|EAU36664.1 ater|EAU39117.1 atub|OJI91273.1 aver|OJJ02610.1 awen|OJJ40228.1 azon|OJJ49093.1

Group1170: abra|OJJ73352.1 acar|OOG00563.1 acla|EAW12784.1 afis|EAW19851.1 afla|EED52646.1 afum|EAL85042.1 agla|OJJ81301.1 akaw|GAA83131.1 aluc|OJZ88687.1 anid|CBF73979.1 anig|EHA18367.1 aory|EIT74299.1 asyd|OJJ54702.1 ater|EAU32479.1 atub|OJI91267.1 aver|OJJ07471.1 awen|OJJ32014.1 azon|OJJ46075.1 afis|EAW17946.1

Group1171: abra|OJJ73409.1 acar|OOG00606.1 acla|EAW07013.1 afis|EAW16640.1 afla|EED44962.1 afum|EAL89242.1 agla|OJJ82610.1 akaw|GAA83082.1 aluc|OJZ88629.1 anid|CBF82018.1 anig|EHA18319.1

aory|EIT73512.1 asyd|OJJ56191.1 ater|EAU36751.1 atub|OJI91213.1 aver|OJJ05120.1 awen|OJJ40074.1 azon|OJJ45550.1 anid|CBF76269.1

Group1172: abra|OJJ73438.1 acar|OOG00644.1 acla|EAW06774.1 afis|EAW16325.1 afla|EED53556.1 afum|EAL88949.1 agla|OJJ88288.1 akaw|GAA83055.1 aluc|OJZ88602.1 anid|CBF89162.1 anig|EHA18296.1 aory|EIT75182.1 asyd|OJJ62547.1 ater|EAU34132.1 atub|OJI91187.1 aver|OJI96673.1 awen|OJJ37725.1 azon|OJJ44985.1 afla|EED53557.1

Group1173: abra|OJJ73449.1 acar|OOG00652.1 acla|EAW11065.1 afis|EAW20809.1 afla|EED50135.1 afum|EAL84819.1 akaw|GAA83047.1 aluc|OJZ88592.1 anid|CBF69930.1 anig|EHA18288.1 aory|EIT74700.1 asyd|OJJ58924.1 ater|EAU34826.1 atub|OJI91178.1 aver|OJJ01520.1 awen|OJJ29971.1 azon|OJJ46931.1 asyd|OJJ52486.1 aver|OJJ03920.1

Group1174: abra|OJJ73545.1 acar|OOG00719.1 acla|EAW07464.1 afis|EAW22495.1 afla|EED54524.1 afum|EAL90698.1 agla|OJJ82639.1 akaw|GAA88607.1 aluc|OJZ88515.1 anid|CBF78415.1 anig|EHA18221.1 aory|EIT78926.1 asyd|OJJ58988.1 atub|OJI91100.1 aver|OJJ01628.1 afis|EAW23820.1 afla|EED45632.1 afum|EAL87255.1 aory|EIT75782.1

Group1175: abra|OJJ73649.1 acar|OOG00830.1 acla|EAW07562.1 afis|EAW22596.1 afla|EED54646.1 afum|EAL90602.1 agla|OJJ80960.1 akaw|GAA88506.1 aluc|OJZ88401.1 anid|CBF88373.1 anig|EHA18129.1 aory|EIT78830.1 asyd|OJJ63733.1 ater|EAU39107.1 atub|OJI90997.1 aver|OJI97208.1 awen|OJJ35224.1 azon|OJJ49885.1 afla|EED54647.1

Group1176: abra|OJJ73717.1 acla|EAW14401.1 afis|EAW16390.1 afla|EED52126.1 afum|EAL89016.2 agla|OJJ84496.1 akaw|GAA88446.1 aluc|OJZ88333.1 anid|CBF79713.1 anig|EHA18069.1 aory|EIT74447.1 asyd|OJJ58060.1 ater|EAU37368.1 atub|OJI90929.1 aver|OJJ04343.1 awen|OJJ32507.1 azon|OJJ45230.1 afis|EAW19108.1 afum|EAL93839.1

Group1177: abra|OJJ73743.1 acar|OOG00906.1 acla|EAW07637.1 afis|EAW22657.1 afla|EED49925.1 afum|EAL90535.1 agla|OJJ81040.1 akaw|GAA88422.1 aluc|OJZ88309.1 anid|CBF80225.1 anig|EHA18046.1 aory|EIT72274.1 asyd|OJJ54399.1 ater|EAU39050.1 atub|OJI90904.1 aver|OJJ05335.1 awen|OJJ35266.1 azon|OJJ49829.1 ater|EAU30036.1

Group1178: abra|OJJ73792.1 acar|OOG00955.1 afis|EAW22699.1 afla|EED49985.1 afum|EAL90493.1 agla|OJJ79011.1 akaw|GAA89411.1 aluc|OJZ88262.1 anid|CBF88085.1 anig|EHA18007.1 aory|EIT74716.1 asyd|OJJ63561.1 ater|EAU39007.1 atub|OJI90861.1 aver|OJI97372.1 awen|OJJ35335.1 acar|OOF98064.1 anid|CBF78395.1 acla|EAW07684.1

Group1179: abra|OJJ73822.1 acar|OOG00974.1 acla|EAW07711.1 afis|EAW22727.1 afla|EED50013.1 afum|EAL90468.2 agla|OJJ83675.1 akaw|GAA89441.1 aluc|OJZ88226.1 anid|CBF88026.1 anig|EHA17974.1 aory|EIT74607.1 asyd|OJJ63528.1 ater|EAU38970.1 atub|OJI90827.1 aver|OJI97403.1 awen|OJJ35422.1 azon|OJJ49754.1 aory|EIT74669.1

Group1180: abra|OJJ73906.1 acar|OOG01039.1 acla|EAW07784.1 afis|EAW22820.1 afla|EED50095.1 afum|EBA27405.1 agla|OJJ83518.1 akaw|GAA89513.1 aluc|OJZ88141.1 anid|CBF87897.1 anig|EHA17904.1 aory|EIT74756.1 asyd|OJJ63443.1 ater|EAU38890.1 atub|OJI90744.1 aver|OJI97493.1 awen|OJJ38907.1 azon|OJJ49688.1 afla|EED50094.1

Group1181: abra|OJJ73972.1 acar|OOG01099.1 acla|EAW07843.1 afis|EAW22879.1 afla|EED50182.1 afum|EAL90320.1 akaw|GAA89575.1 aluc|OJZ88072.1 anid|CBF87810.1 anig|EHA17845.1 aory|EIT83503.1 asyd|OJJ63389.1 ater|EAU38843.1 atub|OJI90681.1 aver|OJI97546.1 awen|OJJ38843.1 azon|OJJ49640.1 afla|EED46055.1 azon|OJJ45935.1

Group1182: abra|OJJ73974.1 acar|OOG01101.1 acla|EAW07845.1 afis|EAW22881.1 afla|EED50179.1 afum|EAL90318.1 agla|OJJ83449.1 akaw|GAA89577.1 aluc|OJZ88070.1 anid|CBF87807.1 anig|EHA17843.1 aory|EIT77377.1 asyd|OJJ63387.1 ater|EAU38845.1 atub|OJI90679.1 aver|OJI97548.1 awen|OJJ38841.1 azon|OJJ49638.1 agla|OJJ83448.1

Group1183: abra|OJJ73990.1 acar|OOG01116.1 acla|EAW07861.1 afis|EAW22896.1 afla|EED54867.1 afum|EAL90302.1 agla|OJJ83416.1 akaw|GAA87473.1 aluc|OJZ88055.1 anid|CBF87777.1 anig|EHA17827.1 aory|EIT79357.1 asyd|OJJ63370.1 atub|OJI90663.1 aver|OJI97576.1 awen|OJJ38822.1 azon|OJJ49621.1 ater|EAU35980.1 awen|OJJ38821.1

Group1184: abra|OJJ74134.1 acar|OOF95597.1 acla|EAW08432.1 afis|EAW23475.1 afla|EED57371.1 afum|EAL87990.1 agla|OJJ86714.1 akaw|GAA89752.1 aluc|OJZ80631.1 anid|CBF89773.1 anig|EHA27200.1 aory|EIT80150.1 asyd|OJJ62211.1 ater|EAU36905.1 atub|OJI87487.1 aver|OJI96322.1 awen|OJJ37876.1 asyd|OJJ52090.1 aver|OJJ03003.1

Group1185: abra|OJJ74469.1 acar|OOF95278.1 acla|EAW07228.1 afis|EAW22242.1 afla|EED57635.1 afum|EAL90951.1 agla|OJJ87809.1 akaw|GAA87362.1 aluc|OJZ89651.1 anid|CBF88489.1 anig|EHA26889.1 aory|EIT82991.1 asyd|OJJ63790.1 ater|EAU34249.1 atub|OJI85153.1 aver|OJI97147.1 awen|OJJ34820.1 azon|OJJ45730.1 aver|OJJ06299.1

Group1186: acar|OOF99264.1 awen|OJJ30905.1 agla|OJJ80074.1 akaw|GAA89762.1 aluc|OJZ80621.1 anid|CBF86745.1 anig|EHA27210.1 aory|EIT75558.1 asyd|OJJ64702.1 ater|EAU30235.1 atub|OJI87475.1 aver|OJI98806.1 acar|OOF99265.1 afla|EED49606.1 aory|EIT80966.1 azon|OJJ42634.1 asyd|OJJ53572.1 aory|EIT80991.1 aver|OJI99007.1

Group1187: abra|OJJ74764.1 acar|OOF95757.1 acla|EAW10646.1 afis|EAW24920.1 afla|EED55553.1 afum|EAL89575.1 agla|OJJ82149.1 akaw|GAA83647.1 aluc|OJZ92348.1 anig|EHA26626.1 aory|EIT82708.1 asyd|OJJ57492.1 asyd|OJJ62481.1 ater|EAU35652.1 atub|OJI86775.1 aver|OJJ05688.1 awen|OJJ40517.1 azon|OJJ49376.1 anid|CBF75691.1

Group1188: abra|OJJ74777.1 acar|OOF95766.1 acla|EAW10634.1 afis|EAW24932.1 afla|EED55541.1 afum|EAL89588.1 agla|OJJ82160.1 akaw|GAA83635.1 aluc|OJZ92358.1 anid|CBF75714.1 anig|EHA26615.1 aory|EIT82707.1 asyd|OJJ57501.1 ater|EAU35662.1 atub|OJI86788.1 aver|OJJ05677.1 awen|OJJ40528.1 azon|OJJ49389.1 afum|EAL87767.1

Group1189: abra|OJJ74785.1 acar|OOF95775.1 acla|EAW10626.1 afis|EAW24941.1 afla|EED55524.1 afum|EAL89598.1 agla|OJJ82168.1 akaw|GAA83628.1 aluc|OJZ92365.1 anig|EHA26608.1 aory|EIT80862.1 asyd|OJJ57516.1 ater|EAU35668.1 atub|OJI86795.1 aver|OJJ05663.1 awen|OJJ40535.1 azon|OJJ46849.1 azon|OJJ49396.1 afla|EED47694.1

Group1190: abra|OJJ74880.1 acar|OOF95883.1 acla|EAW08490.1 afis|EAW23536.1 afla|EED57434.1 afum|EAL87930.1 agla|OJJ86791.1 akaw|GAA83540.1 aluc|OJZ92457.1 anid|CBF89670.1 anig|EHA26510.1 aory|EIT80126.1 asyd|OJJ62272.1 ater|EAU35322.1 atub|OJI86886.1 aver|OJI96381.1 awen|OJJ39866.1 azon|OJJ43234.1 afla|EED57433.1

Group1191: abra|OJJ74903.1 acar|OOF95901.1 acla|EAW08469.1 afis|EAW23516.1 afla|EED57417.1 afum|EAL87947.2 agla|OJJ86764.1 akaw|GAA83519.1 aluc|OJZ92476.1 anid|CBF89704.1 anig|EHA26494.1 aory|EIT80064.1 asyd|OJJ62253.1 ater|EAU35305.1 atub|OJI86907.1 aver|OJI96363.1 awen|OJJ39841.1 azon|OJJ43251.1 aory|EIT80158.1

Group1192: abra|OJJ74942.1 acar|OOF97373.1 acla|EAW08428.1 afis|EAW23472.1 afla|EED57368.1 afum|EAL87994.1 agla|OJJ86711.1 akaw|GAA83479.1 aluc|OJZ92516.1 anid|CBF89779.1 anig|EHA26459.1 aory|EIT80072.1 asyd|OJJ62207.1 ater|EAU36908.1 atub|OJI86949.1 aver|OJI96319.1 awen|OJJ39798.1 azon|OJJ47919.1 awen|OJJ40002.1

Group1193: abra|OJJ75019.1 acar|OOF89964.1 akaw|GAA88640.1 aluc|OJZ92586.1 anid|CBF84112.1 anig|EHA26399.1 atub|OJI87018.1 abra|OJJ75020.1 acla|EAW08212.1 afis|EAW23246.1 afla|EED55727.1 afum|EAL88235.1 agla|OJJ86614.1 aory|EIT83220.1 asyd|OJJ57103.1 ater|EAU37528.1 aver|OJJ03196.1 awen|OJJ39724.1 azon|OJJ47850.1

Group1194: abra|OJJ75054.1 acar|OOF97283.1 acla|EAW08239.1 afis|EAW23273.1 afla|EED51546.1 afum|EAL88206.1 agla|OJJ86575.1 akaw|GAA88667.1 aluc|OJZ92619.1 anid|CBF89542.1 anig|EHA26369.1 aory|EIT77094.1 asyd|OJJ62380.1 ater|EAU37558.1 atub|OJI87053.1 aver|OJI96514.1 awen|OJJ39684.1 azon|OJJ47821.1 aory|EIT80554.1

Group1195: abra|OJJ75063.1 acar|OOF97271.1 acla|EAW08246.1 afis|EAW23280.1 afla|EED55696.1 afum|EAL88199.1 agla|OJJ86567.1 akaw|GAA88675.1 aluc|OJZ92629.1 anid|CBF89529.1 anig|EHA26361.1 aory|EIT77085.1 asyd|OJJ62387.1 ater|EAU37578.1 atub|OJI87059.1 aver|OJI96520.1 awen|OJJ39677.1 azon|OJJ43147.1 awen|OJJ31335.1

Group1196: abra|OJJ75119.1 acar|OOF97214.1 acla|EAW09724.1 afis|EAW21417.1 afum|EAL92432.2 aluc|OJZ92686.1 anig|EHA26314.1 atub|OJI87114.1 azon|OJJ50750.1 abra|OJJ75768.1 afla|EED52344.1 agla|OJJ78972.1 aory|EIT74507.1 asyd|OJJ58674.1 atub|OJI87190.1 aver|OJJ01285.1 awen|OJJ30922.1 asyd|OJJ52504.1 aver|OJJ03875.1

Group1197: aver|OJJ04160.1 afis|EAW19670.1 afla|EED46493.1 afum|EAL92627.1 agla|OJJ86969.1 anid|CBF74912.1 anig|EHA22175.1 aory|EIT72425.1 asyd|OJJ60375.1 ater|EAU35595.1 atub|OJI91472.1 aver|OJJ05939.1 awen|OJJ39537.1 azon|OJJ51156.1 agla|OJJ86474.1 asyd|OJJ53618.1 awen|OJJ30584.1 asyd|OJJ60102.1 asyd|OJJ53622.1

Group1198: abra|OJJ75142.1 acar|OOF97194.1 anid|CBF74890.1 anig|EHA26291.1 asyd|OJJ60105.1 ater|EAU35601.1 aver|OJJ04157.1 awen|OJJ39534.1 abra|OJJ76897.1 afla|EED44885.1 agla|OJJ86440.1 akaw|GAA87147.1 aluc|OJZ84290.1 anig|EHA27630.1 aory|EIT83262.1 asyd|OJJ57332.1 atub|OJI89779.1 aver|OJJ05829.1 awen|OJJ40829.1

Group1199: abra|OJJ75173.1 acar|OOF94605.1 acla|EAW13003.1 afis|EAW17665.1 afla|EED50492.1 afum|EAL91479.1 agla|OJJ79538.1 akaw|GAA88780.1 aluc|OJZ92741.1 anid|CBF90049.1 anig|EHA26262.1 aory|EIT82090.1 asyd|OJJ62054.1 ater|EAU31988.1 atub|OJI87166.1 aver|OJI96160.1 awen|OJJ37176.1 azon|OJJ50876.1 asyd|OJJ61465.1

Group1200: abra|OJJ75218.1 acar|OOF94566.1 acla|EAW12260.1 afis|EAW16969.1 afla|EED48292.1 afum|EAL86497.1 agla|OJJ79785.1 akaw|GAA91768.1 aluc|OJZ92782.1 anig|EHA26228.1 aory|EIT76281.1

asyd|OJJ64772.1 atub|OJI87224.1 aver|OJI98872.1 awen|OJJ35998.1 azon|OJJ50271.1 abra|OJJ76878.1 afum|EAL87809.1 ater|EAU38553.1

Group1201: abra|OJJ75219.1 acar|OOF94565.1 acla|EAW12259.1 afis|EAW16978.1 afla|EED48290.1 afum|EAL86504.1 agla|OJJ79786.1 akaw|GAA91769.1 aluc|OJZ92783.1 anig|EHA26227.1 aory|EIT76317.1 asyd|OJJ64771.1 atub|OJI87225.1 aver|OJI98871.1 awen|OJJ35997.1 azon|OJJ50269.1 anig|EHA26226.1 afum|EAL86503.1 afla|EED48291.1

Group1202: abra|OJJ75302.1 acar|OOF92541.1 acla|EAW09084.1 afis|EAW25675.1 afla|EED47643.1 afum|EAL84345.1 agla|OJJ86330.1 akaw|GAA91835.1 aluc|OJZ92857.1 anid|CBF78280.1 anig|EHA26149.1 aory|EIT76311.1 asyd|OJJ52225.1 ater|EAU36081.1 atub|OJI87314.1 aver|OJJ05016.1 awen|OJJ35856.1 azon|OJJ42600.1 asyd|OJJ56073.1

Group1203: abra|OJJ75308.1 acar|OOF94521.1 acla|EAW12232.1 afis|EAW16996.1 afla|EED48959.1 afum|EAL86520.1 agla|OJJ79823.1 akaw|GAA91992.1 aluc|OJZ92862.1 anid|CBF87466.1 anig|EHA26103.1 aory|EIT80011.1 asyd|OJJ52936.1 ater|EAU31732.1 atub|OJI87320.1 aver|OJJ08903.1 awen|OJJ35985.1 azon|OJJ47407.1 azon|OJJ50280.1

Group1204: abra|OJJ75752.1 acar|OOG00116.1 acla|EAW09398.1 afis|EAW16786.1 afla|EED47412.1 afum|EAL86356.1 agla|OJJ78549.1 akaw|GAA84485.1 aluc|OJZ89206.1 anid|CBF84608.1 anig|EHA23353.1 aory|EIT81898.1 asyd|OJJ60434.1 ater|EAU37659.1 atub|OJI85586.1 aver|OJI99756.1 awen|OJJ40856.1 azon|OJJ42408.1 ater|EAU30953.1

Group1205: abra|OJJ75970.1 acar|OOF99950.1 acla|EAW09828.1 afis|EAW21305.1 afla|EED57265.1 afum|EAL92321.1 akaw|GAA88986.1 aluc|OJZ89417.1 anid|CBF71434.1 anig|EHA23171.1 aory|EIT73994.1 asyd|OJJ65347.1 ater|EAU35936.1 atub|OJI85377.1 aver|OJJ07224.1 awen|OJJ39393.1 azon|OJJ50301.1 asyd|OJJ54967.1 ater|EAU32173.1

Group1206: abra|OJJ75996.1 acar|OOF99929.1 acla|EAW09809.1 afis|EAW21327.1 afla|EED57285.1 afum|EAL92345.1 agla|OJJ87412.1 akaw|GAA88963.1 aluc|OJZ89442.1 anid|CBF83428.1 anig|EHA23144.1 aory|EIT74010.1 asyd|OJJ60659.1 ater|EAU35952.1 atub|OJI85351.1 aver|OJI99982.1 awen|OJJ39371.1 azon|OJJ51711.1 afla|EED57284.1

Group1207: abra|OJJ76229.1 acar|OOF99477.1 acla|EAW07053.1 afis|EAW16679.1 afla|EED45240.1 afum|EAL89283.1 akaw|GAA82167.1 aluc|OJZ92000.1 anid|CBF82050.1 aory|EIT73588.1 asyd|OJJ54232.1 ater|EAU29467.1 atub|OJI86434.1 aver|OJJ05185.1 awen|OJJ36977.1 azon|OJJ42100.1 akaw|GAA92942.1 atub|OJI86436.1 akaw|GAA82166.1

Group1208: abra|OJJ76593.1 acar|OOF99394.1 acla|EAW14308.1 afis|EAW18977.1 afla|EED53193.1 afum|EAL93713.2 agla|OJJ82935.1 akaw|GAA82497.1 aluc|OJZ91613.1 anid|CBF69648.1 anig|EHA22642.1 aory|EIT74974.1 asyd|OJJ59078.1 ater|EAU38168.1 atub|OJI86066.1 aver|OJJ01671.1 awen|OJJ31583.1 azon|OJJ47298.1 afla|EED53194.1

Group1209: abra|OJJ76704.1 acar|OOF89909.1 acla|EAW07574.1 afis|EAW22608.1 afla|EED49806.1 afum|EAL90590.1 agla|OJJ87452.1 akaw|GAA92495.1 aluc|OJZ91507.1 anid|CBF80167.1 aory|EIT77615.1 asyd|OJJ63679.1 atub|OJI85959.1 aver|OJI97260.1 awen|OJJ35236.1 azon|OJJ49875.1 agla|OJJ80978.1 anid|CBF88267.1 aver|OJI99521.1

Group1210: abra|OJJ76824.1 acar|OOF91318.1 acla|EAW13384.1 afis|EAW20498.1 afla|EED44740.1 afum|EAL84556.1 akaw|GAA87198.1 aluc|OJZ84235.1 anid|CBF79206.1 anig|EHA27582.1 aory|EIT77799.1 asyd|OJJ55728.1 ater|EAU37192.1 atub|OJI89850.1 aver|OJJ06814.1 awen|OJJ33198.1 azon|OJJ46398.1 aory|EIT77801.1 afla|EED44741.1

Group1211: abra|OJJ76859.1 acar|OOF91347.1 acla|EAW13420.1 afis|EAW20531.1 afla|EED52481.1 afum|EAL84526.1 agla|OJJ84700.1 akaw|GAA87163.1 aluc|OJZ84271.1 anid|CBF79002.1 anig|EHA27613.1 aory|EIT82813.1 asyd|OJJ55689.1 ater|EAU32506.1 atub|OJI89812.1 aver|OJJ06773.1 awen|OJJ33238.1 azon|OJJ50610.1 afis|EAW15383.1

Group1212: abra|OJJ76952.1 acar|OOF91399.1 acla|EAW13478.1 afis|EAW20585.1 afla|EED52259.1 afum|EAL84480.1 agla|OJJ80829.1 akaw|GAA87090.1 aluc|OJZ84348.1 anid|CBF78926.1 anig|EHA27685.1 aory|EIT76185.1 asyd|OJJ55629.1 ater|EAU37094.1 atub|OJI89720.1 aver|OJJ06706.1 awen|OJJ33298.1 azon|OJJ50675.1 afis|EAW16394.1

Group1213: abra|OJJ76962.1 acla|EAW13481.1 afis|EAW20589.1 afla|EED52239.1 afum|EAL84472.1 akaw|GAA87081.1 aluc|OJZ84357.1 anid|CBF80645.1 anig|EHA27694.1 aory|EIT74320.1 asyd|OJJ54615.1 ater|EAU35228.1 atub|OJI89710.1 aver|OJJ07544.1 azon|OJJ44240.1 acla|EAW11256.1 afis|EAW18243.1 afum|EAL87607.1 ater|EAU38946.1

Group1214: abra|OJJ77019.1 acla|EAW12022.1 afis|EAW20396.1 afla|EED51074.1 afum|EAL86857.1 akaw|GAA87033.1 aluc|OJZ84419.1 anig|EHA27741.1 aory|EIT83235.1 asyd|OJJ61467.1 ater|EAU34588.1 atub|OJI89655.1 aver|OJJ07304.1 awen|OJJ32287.1 afis|EAW19666.1 aory|EIT77057.1 ater|EAU30085.1 ater|EAU31682.1 aver|OJJ00806.1



Group1215: abra|OJJ77072.1 acar|OOF96452.1 acla|EAW11107.1 afis|EAW23663.1 afla|EED48431.1 afum|EAL85154.2 agla|OJJ81757.1 aluc|OJZ84480.1 anid|CBF75932.1 aory|EIT81669.1 atub|OJI89599.1 aver|OJI99663.1 awen|OJJ32900.1 afla|EED51081.1 aory|EIT77059.1 agla|OJJ80484.1 awen|OJJ40921.1 awen|OJJ40116.1 awen|OJJ32943.1

Group1216: akaw|GAA86981.1 anig|EHA27470.1 azon|OJJ46863.1 acla|EAW08585.1 afis|EAW16399.1 afum|EAL89027.1 azon|OJJ47065.1 acla|EAW11106.1 afla|EED48430.1 agla|OJJ80486.1 aory|EIT76978.1 atub|OJI88846.1 awen|OJJ32901.1 afla|EED51080.1 agla|OJJ88498.1 akaw|GAA92594.1 aluc|OJZ82611.1 afla|EED54189.1 awen|OJJ34609.1

Group1217: abra|OJJ77092.1 acar|OOG00596.1 afis|EAW17058.1 afla|EED52120.1 afum|EAL86554.1 akaw|GAA86963.1 aluc|OJZ84501.1 anid|CBF88306.1 anig|EHA27801.1 asyd|OJJ62781.1 ater|EAU31929.1 atub|OJI89579.1 aver|OJI96826.1 azon|OJJ45055.1 acar|OOF90672.1 aory|EIT74489.1 azon|OJJ43507.1 afla|EED52121.1 anid|CBF88998.1

Group1218: abra|OJJ77232.1 acar|OOF93114.1 afla|EED48701.1 agla|OJJ83280.1 akaw|GAA90710.1 aluc|OJZ84642.1 anid|CBF78734.1 anig|EHA27928.1 aory|EIT73111.1 asyd|OJJ55609.1 atub|OJI89439.1 aver|OJJ06684.1 awen|OJJ30084.1 abra|OJJ77423.1 acla|EAW13221.1 afis|EAW20821.1 afum|EAL84808.1 ater|EAU31194.1 awen|OJJ31931.1

Group1219: abra|OJJ77364.1 acar|OOF93233.1 acla|EAW13112.1 afis|EAW17552.1 afla|EED49273.1 afum|EAL91366.1 agla|OJJ81416.1 akaw|GAA91398.1 aluc|OJZ84773.1 anid|CBF90298.1 anig|EHA28041.1 aory|EIT82235.1 asyd|OJJ61925.1 ater|EAU36982.1 atub|OJI89308.1 aver|OJI96017.1 awen|OJJ37301.1 azon|OJJ50994.1 anid|CBF87295.1

Group1220: abra|OJJ77453.1 acar|OOF99273.1 acla|EAW12649.1 afis|EAW18036.1 afla|EED54071.1 afum|EAL91847.1 agla|OJJ78571.1 akaw|GAA84155.1 aluc|OJZ81076.1 anid|CBF81938.1 anig|EHA19286.1 aory|EIT76067.1 asyd|OJJ57409.1 ater|EAU29318.1 ater|EAU31609.1 atub|OJI82509.1 aver|OJJ05772.1 awen|OJJ34693.1 azon|OJJ48230.1

Group1221: abra|OJJ77467.1 acar|OOF99267.1 acla|EAW07127.1 afla|EED54176.1 agla|OJJ87943.1 akaw|GAA84150.1 aluc|OJZ81071.1 anig|EHA19298.1 aory|EIT75990.1 asyd|OJJ52794.1 ater|EAU29321.1 atub|OJI82515.1 aver|OJJ08772.1 awen|OJJ34711.1 akaw|GAA91805.1 atub|OJI87284.1 asyd|OJJ64953.1 aver|OJI99075.1 aluc|OJZ92827.1

Group1222: abra|OJJ77471.1 acar|OOF99253.1 acla|EAW06761.1 afis|EAW16311.1 afla|EED54184.1 afum|EAL88933.1 agla|OJJ88270.1 akaw|GAA84146.1 aluc|OJZ81067.1 anid|CBF69560.1 anig|EHA19302.1 asyd|OJJ59156.1 ater|EAU29331.1 atub|OJI88508.1 aver|OJJ01746.1 awen|OJJ37711.1 azon|OJJ44970.1 aluc|OJZ81673.1 anig|EHA25767.1

Group1223: abra|OJJ77555.1 acar|OOF99172.1 acla|EAW06522.1 afis|EAW16238.1 afla|EED53339.1 afum|EAL88859.1 agla|OJJ86247.1 akaw|GAA84068.1 aluc|OJZ80982.1 anid|CBF78861.1 anig|EHA19378.1 aory|EIT78064.1 asyd|OJJ64575.1 atub|OJI82604.1 aver|OJI98672.1 awen|OJJ30219.1 azon|OJJ43941.1 afla|EED50785.1 agla|OJJ79233.1

Group1224: abra|OJJ77564.1 acar|OOF99168.1 acla|EAW06526.1 afis|EAW16070.1 afla|EED48589.1 afum|EAL88702.1 agla|OJJ86098.1 akaw|GAA84062.1 aluc|OJZ80974.1 anid|CBF75103.1 anig|EHA19385.1 aory|EIT83270.1 asyd|OJJ60005.1 ater|EAU33561.1 atub|OJI82611.1 aver|OJJ02281.1 awen|OJJ30365.1 azon|OJJ45384.1 afla|EED57884.1

Group1225: abra|OJJ77597.1 acar|OOF99129.1 acla|EAW06561.1 afis|EAW16035.1 afla|EED56421.1 afum|EAL88666.2 agla|OJJ86065.1 akaw|GAA84031.1 aluc|OJZ80937.1 anig|EHA19414.1 aory|EIT72879.1 ater|EAU33605.1 atub|OJI82644.1 awen|OJJ34579.1 azon|OJJ45420.1 aluc|OJZ83622.1 akaw|GAA92103.1 anig|EHA27514.1 atub|OJI87849.1

Group1226: abra|OJJ77599.1 acar|OOF99127.1 acla|EAW06563.1 afis|EAW16033.1 afla|EED56415.1 afla|EED56416.1 afum|EAL88664.1 agla|OJJ86061.1 akaw|GAA84029.1 aluc|OJZ80934.1 anid|CBF75034.1 anig|EHA19416.1 aory|EIT72886.1 asyd|OJJ60050.1 ater|EAU33608.1 atub|OJI82646.1 aver|OJJ02239.1 awen|OJJ30414.1 azon|OJJ45422.1

Group1227: abra|OJJ77664.1 acar|OOF99071.1 acla|EAW06508.1 afis|EAW24531.1 afla|EED56377.1 agla|OJJ85724.1 akaw|GAA83971.1 aluc|OJZ80864.1 anig|EHA19471.1 aory|EIT73456.1 ater|EAU33642.1 atub|OJI82713.1 aver|OJJ02022.1 awen|OJJ30465.1 azon|OJJ45455.1 afum|EAL86197.1 asyd|OJJ54667.1 afum|EAL86196.1 agla|OJJ86406.1

Group1228: abra|OJJ77796.1 acar|OOF90711.1 akaw|GAA89038.1 aluc|OJZ80557.1 anig|EHA25640.1 atub|OJI88374.1 aver|OJJ02063.1 awen|OJJ38007.1 abra|OJJ77916.1 afla|EED51608.1 agla|OJJ82626.1 anid|CBF73906.1 anig|EHA18406.1 aory|EIT80458.1 asyd|OJJ53666.1 ater|EAU37641.1 aver|OJJ07773.1 awen|OJJ40190.1 agla|OJJ83009.1

Group1229: abra|OJJ77806.1 acar|OOF98961.1 afis|EAW18189.1 afla|EED56286.1 afum|EAL87553.1 agla|OJJ86044.1 akaw|GAA83843.1 aluc|OJZ90873.1 anid|CBF86100.1 anig|EHA19593.1 aory|EIT73443.1

asyd|OJJ61783.1 ater|EAU33804.1 atub|OJI82872.1 aver|OJI95883.1 awen|OJJ30553.1 azon|OJJ45513.1  
aver|OJI98581.1 asyd|OJJ64479.1

Group1230: abra|OJJ77818.1 acar|OOF98950.1 acla|EAW11305.1 afis|EAW18192.1 afla|EED56282.1  
afum|EAL87560.1 agla|OJJ85885.1 akaw|GAA83828.1 aluc|OJZ90890.1 anid|CBF86109.1 anig|EHA19609.1  
aory|EIT73431.1 asyd|OJJ64488.1 ater|EAU33797.1 atub|OJI82884.1 aver|OJI98589.1 awen|OJJ30564.1  
azon|OJJ45507.1 aory|EIT73332.1

Group1231: abra|OJJ77831.1 acar|OOF98939.1 acla|EAW11295.1 afis|EAW18207.1 afla|EED56264.1  
afum|EAL87572.1 agla|OJJ85875.1 akaw|GAA83816.1 aluc|OJZ90905.1 anid|CBF86133.1 anig|EHA19620.1  
aory|EIT73347.1 asyd|OJJ64503.1 ater|EAU33782.1 atub|OJI82898.1 aver|OJI98602.1 awen|OJJ30579.1  
azon|OJJ45497.1 afla|EED56263.1

Group1232: abra|OJJ77887.1 acar|OOF90364.1 afis|EAW17355.1 afla|EED49462.1 agla|OJJ82474.1  
akaw|GAA82230.1 aluc|OJZ91918.1 anig|EHA19662.1 aory|EIT79498.1 asyd|OJJ56938.1 ater|EAU29950.1  
aver|OJJ03347.1 awen|OJJ32673.1 azon|OJJ46453.1 asyd|OJJ57438.1 aver|OJJ05740.1 awen|OJJ31966.1  
asyd|OJJ57599.1 anig|EHA23994.1

Group1233: abra|OJJ77901.1 acar|OOF98882.1 acla|EAW06511.1 afis|EAW16229.1 afla|EED53352.1  
afum|EAL88852.1 agla|OJJ86237.1 akaw|GAA83761.1 aluc|OJZ90970.1 anid|CBF86221.1 anig|EHA19672.1  
aory|EIT75062.1 asyd|OJJ64562.1 ater|EAU33715.1 atub|OJI82961.1 aver|OJI98659.1 awen|OJJ30233.1  
azon|OJJ43950.1 anid|CBF86220.1

Group1234: abra|OJJ78153.1 acar|OOF98713.1 acla|EAW12149.1 afis|EAW17172.1 afla|EED45420.1  
afum|EAL86603.1 akaw|GAA85873.1 aluc|OJZ91205.1 anig|EHA19910.1 aory|EIT82401.1 ater|EAU31964.1  
atub|OJI83222.1 aver|OJJ03361.1 awen|OJJ31986.1 azon|OJJ49155.1 akaw|GAA92449.1 atub|OJI88616.1  
aluc|OJZ81569.1 anig|EHA25894.1

Group1235: abra|OJJ78155.1 acar|OOF90381.1 acla|EAW11243.1 afis|EAW18260.1 afla|EED48719.1  
afum|EAL87623.1 agla|OJJ88167.1 akaw|GAA85871.1 aluc|OJZ91207.1 anid|CBF79523.1 anig|EHA19911.1  
aory|EIT73142.1 asyd|OJJ57893.1 ater|EAU33268.1 atub|OJI83223.1 aver|OJJ04502.1 awen|OJJ30632.1  
awen|OJJ30633.1 azon|OJJ47984.1

Group1236: abra|OJJ78254.1 acar|OOF98608.1 acla|EAW09255.1 afis|EAW21892.1 afla|EED46416.1  
afum|EAL92906.1 agla|OJJ84240.1 akaw|GAA85772.1 aluc|OJZ91328.1 anid|CBF76804.1 anig|EHA20010.1  
aory|EIT72374.1 asyd|OJJ61288.1 atub|OJI83321.1 aver|OJJ00614.1 awen|OJJ34181.1 azon|OJJ43451.1  
acar|OOF99280.1 ater|EAU36657.1

Group1237: abra|OJJ78362.1 acar|OOF98525.1 acla|EAW09173.1 afis|EAW21973.1 afla|EED46696.1  
afum|EAL92988.1 agla|OJJ84129.1 akaw|GAA85671.1 aluc|OJZ91436.1 anid|CBF82714.1 anig|EHA20102.1  
aory|EIT77832.1 asyd|OJJ61638.1 ater|EAU31091.1 atub|OJI83430.1 aver|OJJ00961.1 awen|OJJ34266.1  
azon|OJJ43370.1 aory|EIT77819.1

Group1238: abra|OJJ68129.1 abra|OJJ70102.1 acla|EAW12416.1 akaw|GAA87598.1 akaw|GAA86909.1  
aluc|OJZ85218.1 aluc|OJZ90032.1 anig|EHA18784.1 anig|EHA27408.1 anig|EHA25422.1 atub|OJI80367.1  
atub|OJI84774.1 awen|OJJ39118.1 anid|CBF75781.1 ater|EAU32451.1 azon|OJJ42520.1 afla|EED47323.1  
aory|EIT82878.1

Group1239: abra|OJJ73597.1 abra|OJJ74454.1 acar|OOF95298.1 acar|OOG00783.1 akaw|GAA87348.1  
akaw|GAA88555.1 aluc|OJZ88453.1 aluc|OJZ89666.1 anig|EHA18174.1 anig|EHA26903.1 atub|OJI85134.1  
atub|OJI91051.1 afla|EED49261.1 aory|EIT82199.1 asyd|OJJ62434.1 ater|EAU29287.1 aver|OJI96570.1  
aver|OJI98026.1

Group1240: acar|OOF90451.1 acar|OOF90458.1 abra|OJJ71881.1 acla|EAW13910.1 afis|EAW18622.1  
afla|EED52720.1 afum|EAL93332.1 agla|OJJ81238.1 akaw|GAA85035.1 aluc|OJZ86619.1 anid|CBF70495.1  
anig|EHA22047.1 asyd|OJJ58582.1 ater|EAU34922.1 atub|OJI83907.1 aver|OJJ01186.1 awen|OJJ32085.1  
azon|OJJ46664.1

Group1241: acar|OOF90710.1 acar|OOF98737.1 atub|OJI84596.1 atub|OJI89205.1 abra|OJJ65987.1  
afis|EAW19527.1 afla|EED49678.1 agla|OJJ87966.1 akaw|GAA90861.1 aluc|OJZ82972.1 anid|CBF78948.1  
anig|EHA21389.1 aory|EIT80959.1 asyd|OJJ55653.1 ater|EAU29344.1 aver|OJJ06737.1 awen|OJJ30016.1  
azon|OJJ43646.1

Group1242: acar|OOF91721.1 acar|OOF91725.1 abra|OJJ73107.1 afis|EAW19523.1 afla|EED54039.1  
afum|EAL84403.1 akaw|GAA88059.1 aluc|OJZ81321.1 anid|CBF87177.1 anig|EHA18627.1 aory|EIT74598.1  
asyd|OJJ63343.1 ater|EAU32279.1 atub|OJI91524.1 aver|OJI97618.1 azon|OJJ45982.1 afis|EAW25732.1  
ater|EAU37760.1

Group1243: acar|OOF92284.1 acar|OOF92325.1 abra|OJJ67518.1 acla|EAW06257.1 afis|EAW18364.1  
afla|EED53041.1 afum|EAL93037.1 agla|OJJ84927.1 aluc|OJZ84846.1 anid|CBF70821.1 anig|EHA25081.1  
aory|EIT77411.1 asyd|OJJ58401.1 ater|EAU32232.1 atub|OJI80749.1 aver|OJJ01002.1 awen|OJJ31787.1  
azon|OJJ42024.1

Group1244: acar|OOF92296.1 acar|OOF92337.1 abra|OJJ67504.1 acla|EAW06266.1 afis|EAW18372.1  
afla|EED53034.1 afum|EAL93047.1 agla|OJJ84936.1 akaw|GAA86334.1 aluc|OJZ84859.1 anid|CBF70802.1  
anig|EHA25092.1 asyd|OJJ58410.1 ater|EAU32242.1 atub|OJI80737.1 aver|OJJ01012.1 awen|OJJ31778.1  
azon|OJJ50447.1

Group1245: acar|OOF92300.1 acar|OOF92341.1 abra|OJJ67500.1 acla|EAW06270.1 afis|EAW18376.1  
afla|EED53030.1 afum|EAL93051.1 agla|OJJ84940.1 akaw|GAA86338.1 aluc|OJZ84863.1 anid|CBF70795.1  
aory|EIT77422.1 asyd|OJJ58414.1 ater|EAU32246.1 atub|OJI80733.1 aver|OJJ01016.1 awen|OJJ31768.1  
azon|OJJ50451.1

Group1246: acar|OOF92302.1 acar|OOF92344.1 abra|OJJ67497.1 acla|EAW06273.1 afis|EAW18379.1  
afla|EED53027.1 afum|EAL93054.1 agla|OJJ84943.1 akaw|GAA86341.1 aluc|OJZ84866.1 anid|CBF70789.1  
anig|EHA25098.1 aory|EIT77417.1 asyd|OJJ58417.1 atub|OJI80730.1 aver|OJJ01019.1 awen|OJJ31771.1  
azon|OJJ50454.1

Group1247: acar|OOF92313.1 acar|OOF92354.1 abra|OJJ67486.1 acla|EAW06288.1 afis|EAW18393.1  
afla|EED53014.1 afum|EAL93069.1 agla|OJJ84960.1 akaw|GAA86353.1 aluc|OJZ84882.1 anid|CBF70764.1  
anig|EHA25111.1 asyd|OJJ58429.1 ater|EAU32281.1 atub|OJI80718.1 aver|OJJ01031.1 azon|OJJ50467.1  
awen|OJJ31757.1

Group1248: acar|OOF92613.1 acar|OOF92634.1 abra|OJJ68141.1 acla|EAW07634.1 afis|EAW22654.1  
afla|EED49922.1 afum|EAL90538.1 agla|OJJ81037.1 akaw|GAA92377.1 aluc|OJZ83236.1 anid|CBF88199.1  
anig|EHA21093.1 asyd|OJJ63635.1 ater|EAU39052.1 atub|OJI87700.1 aver|OJI97301.1 awen|OJJ35269.1  
azon|OJJ49838.1

Group1249: acar|OOF93658.1 acar|OOF93742.1 abra|OJJ66637.1 acla|EAW11780.1 afis|EAW19390.1  
afla|EED50348.1 afum|EAL87105.1 agla|OJJ81101.1 akaw|GAA89590.1 aluc|OJZ80812.1 anig|EHA27222.1  
aory|EIT81938.1 asyd|OJJ51911.1 ater|EAU36053.1 atub|OJI87661.1 aver|OJJ05352.1 awen|OJJ36783.1  
azon|OJJ43015.1

Group1250: acar|OOF93662.1 acar|OOF93746.1 abra|OJJ66642.1 acla|EAW11785.1 afis|EAW19395.1  
afum|EAL87099.1 agla|OJJ81106.1 akaw|GAA89595.1 aluc|OJZ80807.1 anid|CBF74279.1 anig|EHA27227.1  
aory|EIT83136.1 asyd|OJJ51860.1 ater|EAU36121.1 atub|OJI87655.1 aver|OJJ05359.1 awen|OJJ36789.1  
azon|OJJ43009.1

Group1251: acar|OOF93664.1 acar|OOF93748.1 abra|OJJ66644.1 acla|EAW11787.1 afis|EAW19397.1  
afla|EED50353.1 afum|EAL87097.1 agla|OJJ81108.1 akaw|GAA89597.1 aluc|OJZ80805.1 anid|CBF74276.1  
anig|EHA27229.1 aory|EIT83127.1 ater|EAU36123.1 atub|OJI87653.1 aver|OJJ05361.1 awen|OJJ36792.1  
azon|OJJ43007.1

Group1252: acar|OOF93684.1 acar|OOF93769.1 abra|OJJ66669.1 acla|EAW11810.1 afis|EAW19420.1  
afla|EED50377.1 afum|EAL87074.1 agla|OJJ81132.1 akaw|GAA89618.1 aluc|OJZ80778.1 anid|CBF74369.1  
anig|EHA27251.1 aory|EIT83135.1 asyd|OJJ57783.1 atub|OJI87630.1 aver|OJJ05382.1 awen|OJJ36818.1  
azon|OJJ42984.1

Group1253: acar|OOF93697.1 acar|OOF93782.1 abra|OJJ66688.1 acla|EAW11823.1 afis|EAW19434.1  
afla|EED56639.1 afum|EAL87061.1 agla|OJJ81146.1 akaw|GAA89632.1 aluc|OJZ80761.1 anid|CBF81381.1  
anig|EHA27266.1 aory|EIT79620.1 asyd|OJJ59392.1 ater|EAU34736.1 atub|OJI87615.1 aver|OJJ02880.1  
azon|OJJ42971.1

Group1254: acar|OOF93702.1 acar|OOF93788.1 abra|OJJ66694.1 acla|EAW11829.1 afis|EAW19441.1  
afla|EED56648.1 afum|EAL87055.1 agla|OJJ81154.1 akaw|GAA89638.1 aluc|OJZ80751.1 anid|CBF81393.1  
aory|EIT79649.1 asyd|OJJ59399.1 ater|EAU34742.1 atub|OJI87608.1 aver|OJJ02873.1 awen|OJJ36841.1  
azon|OJJ42959.1

Group1255: acar|OOF93712.1 acar|OOF93798.1 abra|OJJ66710.1 acla|EAW11841.1 afis|EAW19452.1  
afla|EED56660.1 afum|EAL87044.1 agla|OJJ81167.1 akaw|GAA89652.1 aluc|OJZ80737.1 anid|CBF81416.1  
anig|EHA27285.1 asyd|OJJ59412.1 ater|EAU34754.1 atub|OJI87594.1 aver|OJJ02861.1 azon|OJJ42947.1  
awen|OJJ36853.1

Group1256: acar|OOF93719.1 acar|OOF93806.1 abra|OJJ66717.1 acla|EAW11848.1 afis|EAW19459.1  
afla|EED56670.1 afum|EAL87037.1 agla|OJJ81176.1 akaw|GAA89659.1 aluc|OJZ80730.1 anig|EHA27291.1  
aory|EIT79651.1 asyd|OJJ59419.1 ater|EAU34762.1 atub|OJI87586.1 aver|OJJ02850.1 awen|OJJ36861.1  
azon|OJJ42940.1

Group1257: acar|OOF93720.1 acar|OOF93807.1 abra|OJJ66718.1 acla|EAW11849.1 afis|EAW19460.1  
afla|EED56671.1 afum|EAL87036.1 agla|OJJ81177.1 akaw|GAA89660.1 aluc|OJZ80729.1 anid|CBF81429.1  
anig|EHA27292.1 asyd|OJJ59420.1 ater|EAU34763.1 atub|OJI87585.1 aver|OJJ02849.1 awen|OJJ36862.1  
azon|OJJ42939.1

Group1258: acar|OOF93730.1 acar|OOF93818.1 abra|OJJ66732.1 acla|EAW11860.1 afis|EAW19471.1  
afla|EED56681.1 afum|EAL87025.1 agla|OJJ81192.1 akaw|GAA89671.1 aluc|OJZ80717.1 anid|CBF75472.1

anig|EHA27302.1 asyd|OJJ59760.1 ater|EAU34781.1 atub|OJI87573.1 aver|OJJ02528.1 awen|OJJ36876.1 azon|OJJ42928.1

Group1259: acar|OOF93732.1 acar|OOF93820.1 abra|OJJ66734.1 acla|EAW11862.1 afis|EAW19473.1 afia|EED57650.1 afum|EAL87023.1 agla|OJJ81195.1 akaw|GAA89673.1 aluc|OJZ80715.1 anid|CBF71137.1 anig|EHA27304.1 asyd|OJJ55833.1 ater|EAU34783.1 atub|OJI87571.1 aver|OJJ04775.1 awen|OJJ36878.1 azon|OJJ48920.1

Group1260: acar|OOF93733.1 acar|OOF93821.1 abra|OJJ66735.1 acla|EAW11863.1 afis|EAW19474.1 afum|EAL87022.1 agla|OJJ81194.1 akaw|GAA89674.1 aluc|OJZ80713.1 anid|CBF75476.1 anig|EHA27305.1 aory|EIT73892.1 asyd|OJJ59763.1 ater|EAU34784.1 atub|OJI87570.1 aver|OJJ02525.1 awen|OJJ36879.1 azon|OJJ42926.1

Group1261: acar|OOF93738.1 acar|OOF93827.1 abra|OJJ66742.1 acla|EAW11870.1 afis|EAW19481.1 afia|EED56691.1 afum|EAL87014.1 akaw|GAA89679.1 aluc|OJZ80707.1 anid|CBF75468.1 anig|EHA27311.1 aory|EIT73840.1 asyd|OJJ59765.1 ater|EAU34793.1 atub|OJI87564.1 aver|OJJ02523.1 awen|OJJ36887.1 azon|OJJ42920.1

Group1262: acar|OOF94028.1 acar|OOF94098.1 abra|OJJ66425.1 acla|EAW06805.1 afis|EAW16354.1 afia|EED53518.1 afum|EAL88979.1 akaw|GAA90289.1 aluc|OJZ83051.1 anid|CBF89224.1 anig|EHA28115.1 aory|EIT74854.1 asyd|OJJ62518.1 ater|EAU34107.1 atub|OJI87897.1 aver|OJI96637.1 awen|OJJ37758.1 azon|OJJ47345.1

Group1263: acar|OOF94037.1 acar|OOF94107.1 abra|OJJ71135.1 afia|EED48894.1 akaw|GAA82839.1 aluc|OJZ87400.1 anig|EHA20629.1 aory|EIT81248.1 atub|OJI81246.1 abra|OJJ74706.1 acar|OOF89904.1 akaw|GAA81911.1 aluc|OJZ92286.1 anig|EHA26682.1 atub|OJI86717.1 awen|OJJ33632.1 abra|OJJ76740.1 asyd|OJJ65386.1

Group1264: acar|OOF94049.1 acar|OOF94119.1 akaw|GAA85929.1 akaw|GAA90360.1 aluc|OJZ85872.1 aluc|OJZ91136.1 atub|OJI79658.1 atub|OJI83147.1 abra|OJJ78065.1 acla|EAW14269.1 afis|EAW19008.1 afia|EED49855.1 afum|EAL93742.1 anid|CBF71642.1 anig|EHA24713.1 asyd|OJJ61653.1 anid|CBF82888.1 awen|OJJ32641.1

Group1265: acar|OOF94065.1 acar|OOF94135.1 abra|OJJ66358.1 acla|EAW10008.1 afis|EAW21048.1 afia|EED51622.1 afum|EAL92084.1 akaw|GAA90232.1 aluc|OJZ83109.1 anid|CBF87100.1 anig|EHA28172.1 aory|EIT80748.1 asyd|OJJ60390.1 ater|EAU36820.1 atub|OJI87825.1 aver|OJI99719.1 awen|OJJ32174.1 azon|OJJ46753.1

Group1266: acar|OOF94088.1 acar|OOF94158.1 abra|OJJ66350.1 acla|EAW09997.1 afis|EAW21076.1 afia|EED51677.1 afum|EAL92099.1 akaw|GAA90223.1 aluc|OJZ83118.1 anid|CBF87050.1 anig|EHA28181.1 aory|EIT80671.1 asyd|OJJ60442.1 ater|EAU36800.1 atub|OJI87816.1 aver|OJI99760.1 awen|OJJ36350.1 azon|OJJ45249.1

Group1267: acar|OOF95043.1 acar|OOF95110.1 abra|OJJ70456.1 awen|OJJ40126.1 abra|OJJ75241.1 acla|EAW14126.1 afis|EAW18829.1 afia|EED52811.1 afum|EAL93563.1 akaw|GAA91784.1 aluc|OJZ92803.1 anig|EHA26206.1 aory|EIT77227.1 ater|EAU33497.1 atub|OJI87246.1 awen|OJJ39969.1 aory|EIT73400.1 awen|OJJ40159.1

Group1268: acar|OOF95074.1 acar|OOF95139.1 abra|OJJ74641.1 acla|EAW10747.1 afis|EAW24827.1 afia|EED47148.1 afum|EAL89472.1 agla|OJJ82016.1 akaw|GAA81970.1 aluc|OJZ92220.1 anid|CBF85861.1 anig|EHA26738.1 asyd|OJJ64368.1 ater|EAU36478.1 atub|OJI86651.1 aver|OJI98463.1 awen|OJJ40413.1 azon|OJJ49263.1

Group1269: acar|OOF95075.1 acar|OOF95141.1 abra|OJJ74639.1 acla|EAW10749.1 afis|EAW24825.1 afia|EED47150.1 afum|EAL89469.1 agla|OJJ82013.1 akaw|GAA81972.1 aluc|OJZ92218.1 anid|CBF85857.1 anig|EHA26740.1 asyd|OJJ64366.1 ater|EAU36480.1 atub|OJI86649.1 aver|OJI98461.1 awen|OJJ40411.1 azon|OJJ49260.1

Group1270: acar|OOF95077.1 acar|OOF95142.1 abra|OJJ74637.1 acla|EAW10754.1 afis|EAW24823.1 afia|EED47152.1 afum|EAL89467.1 agla|OJJ82011.1 akaw|GAA81974.1 aluc|OJZ92216.1 anid|CBF85853.1 anig|EHA26742.1 aory|EIT79248.1 asyd|OJJ64364.1 atub|OJI86647.1 aver|OJI98459.1 awen|OJJ40409.1 azon|OJJ49258.1

Group1271: acar|OOF95081.1 acar|OOF95146.1 abra|OJJ74628.1 acla|EAW10751.1 afis|EAW24820.1 afia|EED47156.1 afum|EAL89464.1 agla|OJJ82918.1 akaw|GAA81980.1 aluc|OJZ92210.1 anid|CBF85872.1 anig|EHA26748.1 asyd|OJJ64373.1 ater|EAU36485.1 atub|OJI86639.1 aver|OJI98469.1 awen|OJJ40406.1 azon|OJJ49255.1

Group1272: acar|OOF95103.1 acar|OOF95169.1 abra|OJJ74601.1 acla|EAW10778.1 afis|EAW24796.1 afum|EAL89438.1 agla|OJJ82892.1 akaw|GAA82007.1 aluc|OJZ92180.1 anid|CBF81504.1 anig|EHA26773.1 aory|EIT79228.1 asyd|OJJ59467.1 ater|EAU36509.1 atub|OJI86608.1 aver|OJJ02807.1 awen|OJJ40381.1 azon|OJJ49231.1

Group1273: acar|OOF95628.1 acar|OOF95679.1 abra|OJJ74663.1 acla|EAW10732.1 afis|EAW24843.1  
afla|EED47128.1 afum|EAL89489.1 agla|OJJ82033.1 akaw|GAA81948.1 aluc|OJZ92240.1 anid|CBF75851.1  
anig|EHA26714.1 aory|EIT79238.1 asyd|OJJ57572.1 ater|EAU36461.1 atub|OJI86674.1 aver|OJJ05607.1  
awen|OJJ40428.1

Group1274: acar|OOF95634.1 acar|OOF95682.1 abra|OJJ74669.1 acla|EAW10727.1 afis|EAW24848.1  
afla|EED47123.1 afum|EAL89494.1 agla|OJJ82060.1 akaw|GAA81943.1 aluc|OJZ92247.1 anid|CBF75841.1  
anig|EHA26709.1 aory|EIT79325.1 asyd|OJJ57559.1 ater|EAU36455.1 atub|OJI86680.1 aver|OJJ05619.1  
awen|OJJ40433.1

Group1275: acar|OOF95654.1 acar|OOF95705.1 abra|OJJ74694.1 acla|EAW10704.1 afis|EAW24866.1  
afla|EED47107.1 afum|EAL89516.1 agla|OJJ82084.1 akaw|GAA81922.1 aluc|OJZ92271.1 anid|CBF75806.1  
anig|EHA26690.1 asyd|OJJ57539.1 ater|EAU36434.1 atub|OJI86706.1 aver|OJJ05639.1 awen|OJJ40457.1  
azon|OJJ49316.1

Group1276: acar|OOF95656.1 acar|OOF95707.1 abra|OJJ74696.1 acla|EAW10702.1 afis|EAW24868.1  
afla|EED47108.1 afum|EAL89518.1 agla|OJJ82086.1 akaw|GAA81921.1 aluc|OJZ92273.1 anid|CBF75804.1  
anig|EHA26689.1 asyd|OJJ57537.1 ater|EAU36432.1 atub|OJI86708.1 aver|OJJ05641.1 awen|OJJ40459.1  
azon|OJJ49318.1

Group1277: acar|OOF95657.1 acar|OOF95708.1 abra|OJJ74697.1 acla|EAW10701.1 afis|EAW24869.1  
afla|EED47109.1 afum|EAL89519.1 agla|OJJ82088.1 akaw|GAA81920.1 aluc|OJZ92276.1 anid|CBF75800.1  
anig|EHA26688.1 asyd|OJJ57528.1 ater|EAU36431.1 atub|OJI86709.1 aver|OJJ05650.1 awen|OJJ40460.1  
azon|OJJ49320.1

Group1278: acar|OOF95658.1 acar|OOF95709.1 abra|OJJ74699.1 acla|EAW10700.1 afis|EAW24870.1  
afla|EED47110.1 afum|EAL89520.1 agla|OJJ82091.1 akaw|GAA81919.1 aluc|OJZ92277.1 anid|CBF75798.1  
anig|EHA26687.1 asyd|OJJ57529.1 ater|EAU36430.1 atub|OJI86710.1 aver|OJJ05649.1 awen|OJJ40461.1  
azon|OJJ49322.1

Group1279: acar|OOF96222.1 acar|OOF96260.1 abra|OJJ71506.1 acla|EAW15064.1 afis|EAW20036.1  
afum|EAL85157.1 agla|OJJ88927.1 akaw|GAA89407.1 aluc|OJZ86245.1 anid|CBF84773.1 anig|EHA21619.1  
aory|EIT73713.1 asyd|OJJ63239.1 ater|EAU38654.1 atub|OJI84297.1 aver|OJI97717.1 awen|OJJ31791.1  
azon|OJJ46325.1

Group1280: acar|OOF96232.1 acar|OOF96269.1 abra|OJJ71516.1 acla|EAW15074.1 afis|EAW20045.1  
afla|EED45335.1 afum|EAL85166.1 agla|OJJ88916.1 aluc|OJZ86255.1 anid|CBF84793.1 anig|EHA21611.1  
aory|EIT73562.1 asyd|OJJ63228.1 ater|EAU38655.1 atub|OJI84288.1 aver|OJI97727.1 awen|OJJ31802.1  
azon|OJJ46323.1

Group1281: acar|OOF96253.1 acar|OOF96292.1 abra|OJJ71548.1 acla|EAW15102.1 afis|EAW20074.1  
afla|EED45305.1 afum|EAL85192.1 agla|OJJ88886.1 akaw|GAA89374.1 aluc|OJZ86286.1 anig|EHA21585.1  
aory|EIT73597.1 asyd|OJJ63201.1 ater|EAU38682.1 atub|OJI84252.1 aver|OJI97754.1 awen|OJJ31833.1  
azon|OJJ46291.1

Group1282: acar|OOF96903.1 acar|OOF96938.1 abra|OJJ70807.1 acla|EAW10044.1 afis|EAW25540.1  
afum|EAL90203.1 agla|OJJ87262.1 akaw|GAA90121.1 aluc|OJZ84153.1 anid|CBF77829.1 anig|EHA19257.1  
aory|EIT82996.1 asyd|OJJ53004.1 ater|EAU31663.1 atub|OJI90525.1 aver|OJJ03839.1 awen|OJJ36781.1  
azon|OJJ43018.1

Group1283: acar|OOF96912.1 acar|OOF96947.1 abra|OJJ70798.1 acla|EAW11125.1 afis|EAW15854.1  
afla|EED56518.1 afum|EAL88490.1 agla|OJJ87253.1 akaw|GAA90114.1 aluc|OJZ84143.1 anid|CBF81183.1  
anig|EHA19251.1 asyd|OJJ59296.1 ater|EAU31669.1 atub|OJI90517.1 aver|OJJ02979.1 awen|OJJ36773.1  
azon|OJJ47425.1

Group1284: acar|OOF96922.1 acar|OOF96957.1 abra|OJJ70788.1 acla|EAW11134.1 afis|EAW15866.1  
afla|EED56509.1 afum|EAL88500.1 agla|OJJ87243.1 akaw|GAA90104.1 aluc|OJZ84133.1 anid|CBF81202.1  
anig|EHA19241.1 asyd|OJJ59305.1 ater|EAU31679.1 atub|OJI90507.1 aver|OJJ02970.1 awen|OJJ36764.1  
azon|OJJ47434.1

Group1285: acar|OOF96933.1 acar|OOF96968.1 asyd|OJJ59315.1 abra|OJJ70775.1 acla|EAW11144.1  
afis|EAW15875.1 afla|EED56500.1 afum|EAL88509.2 agla|OJJ87233.1 aluc|OJZ84122.1 anid|CBF81224.1  
anig|EHA19230.1 aory|EIT72804.1 ater|EAU31692.1 atub|OJI90494.1 aver|OJJ02960.1 awen|OJJ36755.1  
azon|OJJ47445.1

Group1286: acar|OOF96934.1 acar|OOF96969.1 azon|OJJ42010.1 azon|OJJ45917.1 abra|OJJ68484.1  
acla|EAW11145.1 afis|EAW15876.1 afla|EED56499.1 afum|EAL88510.1 agla|OJJ87232.1 akaw|GAA91928.1  
aluc|OJZ82694.1 anid|CBF81226.1 anig|EHA21141.1 aory|EIT72869.1 atub|OJI88926.1 aver|OJJ02959.1  
awen|OJJ36754.1

Group1287: acar|OOF96935.1 acar|OOF96970.1 abra|OJJ68483.1 acla|EAW11146.1 afis|EAW15877.1  
afla|EED56498.1 afum|EAL88511.1 agla|OJJ87231.1 akaw|GAA91929.1 aluc|OJZ82693.1 anid|CBF81228.1

anig|EHA21140.1 aory|EIT72870.1 ater|EAU31697.1 atub|OJI88925.1 aver|OJJ02958.1 awen|OJJ36753.1  
azon|OJJ47446.1

Group1288: acar|OOF96937.1 acar|OOF96973.1 abra|OJJ70773.1 acla|EAW11149.1 afis|EAW15880.1  
afla|EED56492.1 afum|EAL88514.1 agla|OJJ89541.1 akaw|GAA90092.1 aluc|OJZ84119.1 anid|CBF81234.1  
anig|EHA19228.1 aory|EIT72835.1 asyd|OJJ59317.1 atub|OJI90492.1 aver|OJJ02956.1 awen|OJJ36751.1  
azon|OJJ47448.1

Group1289: acar|OOF97655.1 acar|OOF97702.1 abra|OJJ71502.1 acla|EAW10046.1 afis|EAW25538.1  
afla|EED44714.1 afum|EAL90201.1 akaw|GAA82518.1 aluc|OJZ87045.1 anid|CBF77822.1 anig|EHA20318.1  
aory|EIT83463.1 asyd|OJJ53007.1 ater|EAU33379.1 atub|OJI81590.1 aver|OJJ03836.1 awen|OJJ41280.1  
azon|OJJ49503.1

Group1290: acar|OOF97659.1 acar|OOF97706.1 abra|OJJ71498.1 acla|EAW10051.1 afis|EAW25533.1  
afla|EED44708.1 afum|EAL90197.1 akaw|GAA82522.1 aluc|OJZ87049.1 anid|CBF77815.1 anig|EHA20322.1  
aory|EIT83464.1 asyd|OJJ53011.1 ater|EAU33375.1 atub|OJI81586.1 aver|OJJ03832.1 awen|OJJ41275.1  
azon|OJJ49507.1

Group1291: acar|OOF97662.1 acar|OOF97709.1 abra|OJJ71495.1 acla|EAW10054.1 afis|EAW25530.1  
afla|EED54031.1 afum|EBA27397.1 agla|OJJ87272.1 akaw|GAA82525.1 aluc|OJZ87052.1 anid|CBF77809.1  
anig|EHA20325.1 aory|EIT78310.1 asyd|OJJ53014.1 atub|OJI81583.1 aver|OJJ03829.1 awen|OJJ41272.1  
azon|OJJ49504.1

Group1292: acar|OOF97667.1 acar|OOF97714.1 abra|OJJ71490.1 acla|EAW10060.1 afis|EAW25524.1  
afla|EED54027.1 afum|EAL90189.1 agla|OJJ87277.1 akaw|GAA82530.1 aluc|OJZ87057.1 anig|EHA20330.1  
aory|EIT78322.1 asyd|OJJ53020.1 ater|EAU33369.1 atub|OJI81578.1 aver|OJJ03823.1 awen|OJJ41268.1  
azon|OJJ49513.1

Group1293: acar|OOF97670.1 acar|OOF97717.1 abra|OJJ71487.1 acla|EAW10063.1 afis|EAW25522.1  
afla|EED54024.1 afum|EAL90187.1 agla|OJJ87280.1 akaw|GAA82533.1 aluc|OJZ87060.1 anid|CBF77798.1  
anig|EHA20333.1 aory|EIT78336.1 asyd|OJJ53023.1 atub|OJI81575.1 aver|OJJ03820.1 awen|OJJ41265.1  
azon|OJJ44830.1

Group1294: acar|OOF97677.1 acar|OOF97725.1 abra|OJJ71475.1 acla|EAW10075.1 afis|EAW25511.1  
afla|EED54012.1 afum|EAL90177.1 agla|OJJ87294.1 akaw|GAA82541.1 aluc|OJZ87071.1 anid|CBF77777.1  
aory|EIT78286.1 asyd|OJJ53033.1 ater|EAU33358.1 atub|OJI81566.1 aver|OJJ03811.1 awen|OJJ41253.1  
azon|OJJ44820.1

Group1295: acar|OOF97683.1 acar|OOF97732.1 abra|OJJ71466.1 acla|EAW10084.1 afis|EAW25503.1  
afla|EED54002.1 afum|EAL90169.2 agla|OJJ87301.1 akaw|GAA82548.1 aluc|OJZ87078.1 anid|CBF77762.1  
anig|EHA20348.1 aory|EIT78296.1 asyd|OJJ53041.1 ater|EAU33351.1 aver|OJJ03803.1 awen|OJJ41245.1  
azon|OJJ44811.1

Group1296: acar|OOF97696.1 acar|OOF97746.1 ater|EAU30101.1 ater|EAU30103.1 abra|OJJ71449.1  
afla|EED53988.1 agla|OJJ87138.1 akaw|GAA82561.1 aluc|OJZ87092.1 anid|CBF77728.1 anig|EHA20364.1  
aory|EIT78348.1 asyd|OJJ53059.1 atub|OJI81546.1 aver|OJJ03785.1 awen|OJJ41230.1 acla|EAW14376.1  
aver|OJI99265.1

Group1297: acar|OOF98470.1 acar|OOF98485.1 abra|OJJ78403.1 acla|EAW14650.1 afis|EAW17292.1  
afla|EED46742.1 agla|OJJ84080.1 akaw|GAA85628.1 aluc|OJZ91482.1 anid|CBF82629.1 anig|EHA20144.1  
aory|EIT77955.1 asyd|OJJ54010.1 ater|EAU31138.1 atub|OJI83475.1 aver|OJJ08732.1 awen|OJJ34313.1  
azon|OJJ43329.1

Group1298: acar|OOF98474.1 acar|OOF98488.1 abra|OJJ78400.1 acla|EAW09132.1 afis|EAW22014.1  
afla|EED46739.1 afum|EAL93029.1 agla|OJJ84083.1 akaw|GAA85631.1 aluc|OJZ91479.1 anid|CBF82642.1  
anig|EHA20141.1 aory|EIT77943.1 asyd|OJJ61677.1 atub|OJI83472.1 aver|OJJ00998.1 awen|OJJ34310.1  
azon|OJJ48063.1

Group1299: acar|OOF98480.1 acar|OOF98493.1 abra|OJJ78394.1 acla|EAW09138.1 afis|EAW22009.1  
afla|EED46733.1 afum|EAL93024.1 agla|OJJ84089.1 akaw|GAA85637.1 aluc|OJZ91473.1 anid|CBF82653.1  
anig|EHA20135.1 aory|EIT77921.1 asyd|OJJ61671.1 atub|OJI83466.1 aver|OJJ00992.1 awen|OJJ34304.1  
azon|OJJ48064.1

Group1300: acar|OOG00033.1 acar|OOG00123.1 abra|OJJ75863.1 acla|EAW14825.1 afis|EAW24354.1  
afla|EED47909.1 afum|EAL86025.2 agla|OJJ83234.1 akaw|GAA84569.1 aluc|OJZ89305.1 anig|EHA23261.1  
aory|EIT83374.1 asyd|OJJ53696.1 ater|EAU30389.1 atub|OJI85494.1 aver|OJJ07812.1 awen|OJJ32871.1  
azon|OJJ48979.1

Group1301: acla|EAW14649.1 afis|EAW22112.1 afis|EAW24562.1 afum|EAL86223.1 asyd|OJJ54831.1  
asyd|OJJ65331.1 aver|OJJ07476.1 afla|EED54620.1 agla|OJJ78532.1 anid|CBF80350.1 aory|EIT78818.1  
ater|EAU31010.1 ater|EAU33401.1 ater|EAU36517.1 aver|OJJ07330.1 acla|EAW15031.1 aver|OJI99476.1  
afis|EAW21218.1

Group1302: acla|EAW08761.1 acla|EAW12263.1 abra|OJJ69061.1 acar|OOF91222.1 afis|EAW15671.1  
afla|EED46862.1 afum|EAL85676.2 akaw|GAA90591.1 aluc|OJZ86049.1 anid|CBF71172.1 anig|EHA24562.1  
aory|EIT72618.1 asyd|OJJ55852.1 ater|EAU32490.1 atub|OJI79846.1 aver|OJJ04795.1 awen|OJJ38348.1  
azon|OJJ43869.1

Group1303: acla|EAW09069.1 acla|EAW11073.1 afla|EED55166.1 afla|EED57249.1 anid|CBF83136.1  
anid|CBF84254.1 aory|EIT74130.1 aory|EIT81645.1 asyd|OJJ55425.1 asyd|OJJ57203.1 ater|EAU32710.1  
ater|EAU33927.1 aver|OJJ03086.1 aver|OJJ06504.1 afis|EAW25639.1 afum|EAL84326.1 agla|OJJ78892.1  
awen|OJJ36107.1

Group1304: acla|EAW09129.1 acla|EAW11451.1 aory|EIT74374.1 abra|OJJ77018.1 acar|OOF95335.1  
afla|EED56545.1 akaw|GAA90906.1 aluc|OJZ82920.1 atub|OJI89146.1 awen|OJJ36105.1 acar|OOF91778.1  
afla|EED52330.1 agla|OJJ85629.1 ater|EAU39199.1 awen|OJJ32501.1 azon|OJJ46534.1 aory|EIT79688.1  
anid|CBF87732.1

Group1305: afis|EAW16696.1 afis|EAW24556.1 afum|EAL86220.1 afum|EAL89293.1 abra|OJJ70132.1  
acar|OOF96170.1 afla|EED46901.1 agla|OJJ88675.1 akaw|GAA86632.1 aluc|OJZ85189.1 anid|CBF81791.1  
anig|EHA25402.1 aory|EIT72585.1 asyd|OJJ60097.1 ater|EAU32525.1 atub|OJI80408.1 aver|OJJ04183.1  
awen|OJJ36331.1

Group1306: afis|EAW17245.1 afis|EAW25661.1 abra|OJJ68041.1 acar|OOF90403.1 acla|EAW12126.1  
afla|EED56768.1 afum|EAL86664.2 akaw|GAA90912.1 aluc|OJZ82914.1 anid|CBF84467.1 anig|EHA21337.1  
aory|EIT73930.1 asyd|OJJ53543.1 atub|OJI89140.1 aver|OJJ08210.1 awen|OJJ40087.1 ater|EAU38594.1  
aver|OJJ03052.1

Group1307: afla|EED44734.1 afla|EED49486.1 agla|OJJ78680.1 agla|OJJ85924.1 abra|OJJ66288.1  
aory|EIT79948.1 aver|OJJ07505.1 abra|OJJ77218.1 akaw|GAA90720.1 aluc|OJZ84629.1 atub|OJI89450.1  
afis|EAW23523.1 afla|EED47473.1 azon|OJJ42569.1 aory|EIT77798.1 ater|EAU36203.1 aver|OJJ07255.1  
anid|CBF78331.1

Group1308: afla|EED47371.1 afla|EED50262.1 afla|EED50950.1 ater|EAU30176.1 ater|EAU32383.1  
ater|EAU38563.1 afis|EAW17332.1 agla|OJJ84032.1 anid|CBF85356.1 afum|EAL91169.1 aory|EIT76964.1  
asyd|OJJ62637.1 asyd|OJJ62661.1 aver|OJI96759.1 aver|OJI99292.1 awen|OJJ34422.1 aory|EIT82881.1  
anid|CBF89127.1

Group1309: afla|EED50259.1 afla|EED52529.1 aory|EIT74308.1 aory|EIT77339.1 abra|OJJ66540.1  
acar|OOF90993.1 acla|EAW10950.1 afis|EAW20911.1 afum|EAL84723.1 akaw|GAA91175.1 aluc|OJZ81504.1  
anid|CBF82490.1 anig|EHA25926.1 asyd|OJJ54107.1 ater|EAU38544.1 atub|OJI88677.1 aver|OJJ08628.1  
awen|OJJ34431.1

Group1310: agla|OJJ78539.1 agla|OJJ78727.1 abra|OJJ72757.1 acar|OOF95978.1 acla|EAW11507.1  
afla|EED52511.1 afum|EAL91104.2 akaw|GAA85367.1 aluc|OJZ90731.1 anid|CBF77292.1 anig|EHA24147.1  
aory|EIT82146.1 asyd|OJJ56788.1 ater|EAU31605.1 atub|OJI82157.1 aver|OJJ03548.1 awen|OJJ39008.1  
aory|EIT82761.1

Group1311: agla|OJJ78573.1 agla|OJJ78791.1 asyd|OJJ53623.1 asyd|OJJ55815.1 awen|OJJ34401.1  
awen|OJJ38082.1 afla|EED55668.1 aory|EIT77088.1 asyd|OJJ64785.1 aver|OJI98897.1 anid|CBF79150.1  
akaw|GAA92796.1 aluc|OJZ88717.1 anig|EHA28200.1 anid|CBF85279.1 asyd|OJJ62636.1 aver|OJJ05940.1  
asyd|OJJ61766.1

Group1312: agla|OJJ78989.1 agla|OJJ83687.1 abra|OJJ73813.1 acar|OOG00968.1 acla|EAW07700.1  
afis|EAW22717.1 afla|EED50003.1 afum|EAL90477.1 akaw|GAA89432.1 aluc|OJZ88237.1 anid|CBF88050.1  
anig|EHA17984.1 asyd|OJJ63539.1 ater|EAU38986.1 atub|OJI90839.1 aver|OJI97394.1 awen|OJJ35411.1  
azon|OJJ49765.1

Group1313: agla|OJJ80769.1 agla|OJJ80770.1 abra|OJJ72336.1 acar|OOF94879.1 acla|EAW11986.1  
afis|EAW19626.1 afla|EED56978.1 afum|EAL86895.1 akaw|GAA86088.1 aluc|OJZ90317.1 anid|CBF71317.1  
asyd|OJJ55112.1 ater|EAU32900.1 atub|OJI81745.1 aver|OJJ07094.1 awen|OJJ41873.1 azon|OJJ47068.1  
aory|EIT77552.1

Group1314: agla|OJJ80830.1 agla|OJJ84729.1 awen|OJJ32928.1 awen|OJJ33337.1 abra|OJJ74236.1  
afla|EED48423.1 aluc|OJZ89898.1 anig|EHA27098.1 aory|EIT80749.1 atub|OJI84909.1 acla|EAW13274.1  
afis|EAW17343.1 afum|EBA27425.1 anid|CBF71489.1 asyd|OJJ51916.1 afla|EED51567.1 aory|EIT83078.1  
ater|EAU30102.1

Group1315: agla|OJJ81338.1 agla|OJJ84780.1 awen|OJJ36016.1 awen|OJJ38019.1 abra|OJJ73446.1  
acar|OOF98836.1 afis|EAW24692.1 afla|EED45076.1 afum|EAL89334.1 akaw|GAA89024.1 aluc|OJZ80580.1  
anid|CBF76032.1 anig|EHA25618.1 aory|EIT73772.1 asyd|OJJ52453.1 ater|EAU33313.1 atub|OJI88350.1  
aver|OJJ03963.1

Group1316: agla|OJJ83725.1 agla|OJJ88209.1 awen|OJJ30544.1 awen|OJJ37831.1 azon|OJJ42347.1  
azon|OJJ45910.1 ater|EAU34086.1 acar|OOF92105.1 aver|OJJ07715.1 acar|OOF99481.1 afis|EAW19566.1

afis|EAW19382.1 aluc|OJZ85537.1 ater|EAU36043.1 afis|EAW19567.1 anig|EHA22173.1 aver|OJJ07008.1 asyd|OJJ55209.1

Group1317: agla|OJJ84608.1 agla|OJJ88488.1 abra|OJJ68915.1 acar|OOF91503.1 acla|EAW14256.1 afis|EAW19024.1 afla|EED56627.1 afum|EAL93755.1 akaw|GAA90334.1 aluc|OJZ85898.1 anid|CBF73887.1 anig|EHA24694.1 aory|EIT79613.1 asyd|OJJ53658.1 ater|EAU32066.1 atub|OJI79683.1 aver|OJJ07766.1 awen|OJJ31397.1

Group1318: akaw|GAA84492.1 akaw|GAA92643.1 abra|OJJ68086.1 acar|OOF93885.1 afis|EAW23619.1 afum|EAL87843.1 akaw|GAA86871.1 aluc|OJZ89995.1 anig|EHA27365.1 asyd|OJJ55804.1 atub|OJI84813.1 aver|OJJ03908.1 awen|OJJ33610.1 abra|OJJ75773.1 afla|EED51751.1 aory|EIT80721.1 ater|EAU34085.1 azon|OJJ50739.1

Group1319: akaw|GAA88994.1 akaw|GAA93237.1 aluc|OJZ79544.1 aluc|OJZ80344.1 abra|OJJ70263.1 acar|OOF91460.1 afla|EED57905.1 agla|OJJ83807.1 akaw|GAA86534.1 aluc|OJZ85082.1 anid|CBF78690.1 aory|EIT82332.1 asyd|OJJ53892.1 ater|EAU33679.1 atub|OJI80517.1 aver|OJJ07990.1 afla|EED57907.1 aory|EIT82357.1

Group1320: akaw|GAA89097.1 akaw|GAA93124.1 abra|OJJ70832.1 acla|EAW13725.1 afla|EED45954.1 agla|OJJ89628.1 aluc|OJZ83078.1 anig|EHA20972.1 aory|EIT73606.1 asyd|OJJ52723.1 atub|OJI87867.1 aver|OJJ04315.1 awen|OJJ32035.1 azon|OJJ46438.1 awen|OJJ34430.1 akaw|GAA90262.1 aory|EIT75383.1 awen|OJJ34591.1

Group1321: aluc|OJZ85535.1 aluc|OJZ86787.1 anig|EHA19890.1 anig|EHA21895.1 atub|OJI83732.1 atub|OJI89790.1 abra|OJJ69763.1 ater|EAU29245.1 abra|OJJ72050.1 acar|OOF96707.1 afla|EED57904.1 agla|OJJ78987.1 akaw|GAA84884.1 aory|EIT82360.1 asyd|OJJ61024.1 aver|OJJ01910.1 awen|OJJ33896.1 azon|OJJ45975.1

Group1322: anid|CBF69554.1 anid|CBF74620.1 asyd|OJJ57601.1 asyd|OJJ59165.1 aver|OJJ01755.1 aver|OJJ05583.1 abra|OJJ77468.1 acar|OOF99266.1 acla|EAW07128.1 afis|EAW22137.1 afla|EED54177.1 afum|EAL91053.1 akaw|GAA84149.1 aluc|OJZ81070.1 anig|EHA19299.1 ater|EAU29324.1 atub|OJI82516.1 awen|OJJ34710.1

Group1323: anid|CBF71205.1 anid|CBF74966.1 anid|CBF89272.1 abra|OJJ69173.1 acar|OOF91131.1 afla|EED55558.1 agla|OJJ84719.1 akaw|GAA86289.1 aluc|OJZ86160.1 anig|EHA24464.1 asyd|OJJ61621.1 ater|EAU32677.1 aver|OJJ00945.1 awen|OJJ38097.1 azon|OJJ42541.1 aory|EIT82704.1 atub|OJI79952.1 ater|EAU34906.1

Group1324: anid|CBF77312.1 anid|CBF84491.1 abra|OJJ72772.1 acar|OOF95991.1 afis|EAW23959.1 afla|EED50553.1 afum|EAL87388.1 agla|OJJ86884.1 akaw|GAA85381.1 aluc|OJZ90749.1 anig|EHA24160.1 aory|EIT82046.1 asyd|OJJ56774.1 ater|EAU29793.1 atub|OJI82175.1 aver|OJJ03559.1 awen|OJJ38988.1 azon|OJJ51320.1

Group1325: anid|CBF87056.1 anid|CBF87058.1 abra|OJJ66247.1 acar|OOF90705.1 acla|EAW07050.1 afis|EAW17102.1 afla|EED51639.1 afum|EAL89282.1 akaw|GAA89043.1 aluc|OJZ80553.1 anig|EHA25644.1 aory|EIT80540.1 atub|OJI88378.1 aver|OJI99751.1 awen|OJJ37983.1 afis|EAW16677.1 afla|EED47132.1 aory|EIT79173.1

Group1326: anig|EHA19581.1 anig|EHA25318.1 awen|OJJ33562.1 awen|OJJ34654.1 abra|OJJ70237.1 acar|OOF92557.1 afis|EAW21623.1 afla|EED53598.1 afum|EAL92659.1 agla|OJJ88653.1 akaw|GAA86548.1 aluc|OJZ85096.1 anid|CBF79555.1 aory|EIT74955.1 asyd|OJJ57931.1 atub|OJI80502.1 aver|OJJ04466.1 azon|OJJ45043.1

Group1327: anig|EHA20767.1 anig|EHA21813.1 atub|OJI81082.1 abra|OJJ70967.1 acar|OOF98164.1 acla|EAW10527.1 afis|EAW25039.1 afla|EED55413.1 afum|EAL89707.1 agla|OJJ89154.1 akaw|GAA82981.1 aluc|OJZ87565.1 anid|CBF85903.1 aory|EIT80777.1 asyd|OJJ64393.1 ater|EAU35789.1 aver|OJI98488.1 awen|OJJ40645.1

Group1328: anig|EHA20833.1 afum|EAL89767.1 abra|OJJ70883.1 acar|OOF98234.1 acla|EAW10471.1 afis|EAW25096.1 afla|EED55352.1 agla|OJJ89081.1 akaw|GAA87402.1 aluc|OJZ87638.1 anid|CBF86008.1 aory|EIT80853.1 asyd|OJJ64446.1 ater|EAU39354.1 atub|OJI81009.1 aver|OJI98549.1 awen|OJJ40710.1 azon|OJJ44086.1

Group1329: anig|EHA21819.1 anig|EHA24599.1 abra|OJJ69025.1 acar|OOF92661.1 acla|EAW07121.1 afis|EAW22131.1 afla|EED51689.1 afum|EAL91059.1 akaw|GAA90542.1 aluc|OJZ86012.1 aory|EIT80445.1 ater|EAU33620.1 atub|OJI79801.1 awen|OJJ32638.1 azon|OJJ42095.1 afla|EED56398.1 aory|EIT83004.1 aver|OJJ06436.1

Group1330: anig|EHA25931.1 anig|EHA28231.1 abra|OJJ66546.1 acla|EAW07078.1 afla|EED45458.1 akaw|GAA91171.1 aluc|OJZ81499.1 aory|EIT82415.1 ater|EAU30796.1 atub|OJI88682.1 aver|OJJ06470.1 akaw|GAA92427.1 anig|EHA25846.1 atub|OJI88588.1 acar|OOF90934.1 anid|CBF82815.1 asyd|OJJ61574.1 aver|OJJ00895.1



Group1331: aory|EIT72308.1 aory|EIT72311.1 abra|OJJ69636.1 acar|OOF92673.1 acla|EAW10864.1  
afis|EAW20994.1 afum|EAL84634.1 agla|OJJ84072.1 akaw|GAA91616.1 aluc|OJZ82442.1 anid|CBF82637.1  
anig|EHA28331.1 asyd|OJJ54015.1 ater|EAU38643.1 atub|OJI87998.1 aver|OJJ08726.1 awen|OJJ34316.1  
azon|OJJ48058.1

Group1332: aory|EIT72309.1 aory|EIT72310.1 abra|OJJ66632.1 acar|OOF91054.1 acla|EAW10863.1  
afis|EAW20995.1 afum|EAL84633.1 agla|OJJ84073.1 akaw|GAA91095.1 aluc|OJZ81416.1 anid|CBF82633.1  
anig|EHA26004.1 asyd|OJJ54013.1 ater|EAU38644.1 atub|OJI88764.1 aver|OJJ08728.1 awen|OJJ34315.1  
azon|OJJ48060.1

Group1333: asyd|OJJ52021.1 asyd|OJJ52275.1 abra|OJJ73341.1 acar|OOG00528.1 acla|EAW13716.1  
afis|EAW19870.1 afla|EED53094.1 afum|EAL85027.1 akaw|GAA83141.1 aluc|OJZ88698.1 anid|CBF81882.1  
anig|EHA18378.1 aory|EIT74789.1 asyd|OJJ59668.1 ater|EAU30732.1 atub|OJI91279.1 aver|OJJ02615.1  
ater|EAU36648.1

Group1334: asyd|OJJ52762.1 asyd|OJJ62749.1 abra|OJJ73605.1 acar|OOG00789.1 acla|EAW07522.1  
afis|EAW22552.1 afla|EED54584.1 afum|EAL90643.1 agla|OJJ80914.1 akaw|GAA88548.1 aluc|OJZ88444.1  
anid|CBF89060.1 anig|EHA18168.1 aory|EIT78947.1 ater|EAU39152.1 atub|OJI91042.1 aver|OJI96789.1  
awen|OJJ35183.1

Group1335: asyd|OJJ54165.1 asyd|OJJ59819.1 aver|OJJ02469.1 aver|OJJ08576.1 abra|OJJ76687.1  
acar|OOF99325.1 acla|EAW12040.1 afis|EAW19689.1 afla|EED56767.1 afum|EAL86837.2 akaw|GAA92507.1  
aluc|OJZ91520.1 anid|CBF75398.1 anig|EHA22558.1 aory|EIT73885.1 ater|EAU37774.1 atub|OJI85975.1  
awen|OJJ31435.1

Group1336: asyd|OJJ54481.1 asyd|OJJ64266.1 abra|OJJ70844.1 acar|OOF98271.1 acla|EAW10435.1  
afis|EAW25133.1 afla|EED55313.1 afum|EAL89804.1 agla|OJJ89034.1 akaw|GAA91712.1 aluc|OJZ87677.1  
anid|CBF85703.1 anig|EHA20867.1 aory|EIT83632.1 ater|EAU39404.1 atub|OJI80966.1 aver|OJI98358.1  
awen|OJJ40757.1

Group1337: asyd|OJJ55684.1 asyd|OJJ56117.1 aver|OJJ05058.1 aver|OJJ06768.1 abra|OJJ76907.1  
acar|OOF91355.1 afis|EAW20540.1 afla|EED52439.1 afum|EAL84518.2 akaw|GAA87131.1 aluc|OJZ84306.1  
anid|CBF78991.1 anig|EHA27642.1 aory|EIT82783.1 ater|EAU37140.1 atub|OJI89762.1 awen|OJJ33246.1  
azon|OJJ50626.1

Group1338: asyd|OJJ56868.1 asyd|OJJ60506.1 aver|OJI99831.1 aver|OJJ03458.1 aver|OJJ05527.1  
abra|OJJ65536.1 afis|EAW19680.1 afum|EAL86843.1 aluc|OJZ79939.1 anig|EHA19938.1 abra|OJJ65772.1  
atub|OJI89174.1 awen|OJJ39572.1 awen|OJJ39573.1 ater|EAU37595.1 anid|CBF80809.1 aory|EIT76448.1  
ater|EAU39331.1

Group1339: asyd|OJJ58286.1 asyd|OJJ62494.1 abra|OJJ69000.1 acar|OOF92712.1 afis|EAW18028.1  
afla|EED51869.1 afum|EAL91839.1 agla|OJJ85399.1 akaw|GAA90519.1 aluc|OJZ85984.1 anid|CBF80060.1  
anig|EHA24622.1 aory|EIT81740.1 ater|EAU31540.1 atub|OJI79774.1 aver|OJJ02138.1 awen|OJJ41513.1  
azon|OJJ48929.1

Group1340: asyd|OJJ60628.1 abra|OJJ75954.1 acar|OOF99958.1 acla|EAW09842.1 afis|EAW21293.1  
afla|EED54845.1 afum|EAL92310.1 agla|OJJ87460.1 akaw|GAA84657.1 aluc|OJZ89403.1 anid|CBF83378.1  
anig|EHA23184.1 aory|EIT79413.1 ater|EAU35926.1 atub|OJI85394.1 aver|OJI99952.1 awen|OJJ39406.1  
azon|OJJ44289.1

Group1341: ater|EAU29424.1 ater|EAU33846.1 abra|OJJ77281.1 acar|OOF93155.1 acla|EAW13280.1  
afis|EAW17337.1 afla|EED51045.1 afum|EAL91181.1 agla|OJJ79349.1 akaw|GAA90668.1 aluc|OJZ84691.1  
anid|CBF87334.1 anig|EHA27966.1 aory|EIT77013.1 asyd|OJJ56362.1 atub|OJI89391.1 aver|OJJ06352.1  
azon|OJJ44714.1

Group1342: ater|EAU29807.1 ater|EAU31871.1 abra|OJJ77150.1 acar|OOF93036.1 acla|EAW12919.1  
afis|EAW17736.1 afla|EED45737.1 afum|EAL91551.1 agla|OJJ81714.1 akaw|GAA90780.1 aluc|OJZ84564.1  
anid|CBF86592.1 anig|EHA27858.1 asyd|OJJ64830.1 atub|OJI89518.1 aver|OJI98943.1 awen|OJJ37099.1  
azon|OJJ50800.1

Group1343: ater|EAU31940.1 ater|EAU38199.1 abra|OJJ76424.1 acar|OOF99668.1 acla|EAW14001.1  
afis|EAW18709.1 afla|EED50658.1 afum|EAL93432.1 akaw|GAA82339.1 aluc|OJZ91788.1 anid|CBF70654.1  
anig|EHA22785.1 aory|EIT78023.1 asyd|OJJ58483.1 atub|OJI86244.1 aver|OJJ01086.1 awen|OJJ32192.1  
azon|OJJ46757.1

Group1344: ater|EAU35144.1 ater|EAU37867.1 abra|OJJ77032.1 acar|OOF91470.1 acla|EAW13563.1  
afis|EAW20685.1 afla|EED49742.1 afum|EAL84413.1 agla|OJJ80325.1 akaw|GAA87019.1 aluc|OJZ84435.1  
anid|CBF83195.1 anig|EHA27754.1 aory|EIT77691.1 asyd|OJJ55559.1 atub|OJI89638.1 aver|OJJ06640.1  
awen|OJJ34542.1

Group1345: ater|EAU35442.1 ater|EAU37095.1 abra|OJJ76968.1 acar|OOF91413.1 acla|EAW13484.1  
afis|EAW20592.1 afla|EED52233.1 afum|EAL84469.1 agla|OJJ79954.1 akaw|GAA87076.1 aluc|OJZ84364.1

anid|CBF78915.1 anig|EHA27699.1 asyd|OJJ55617.1 ater|EAU35238.1 atub|OJI89704.1 aver|OJJ06692.1 awen|OJJ33552.1

Group1346: ater|EAU35971.1 ater|EAU38852.1 abra|OJJ76019.1 acar|OOF99906.1 acla|EAW09787.1 afis|EAW21351.1 afla|EED55763.1 afum|EAL92366.1 agla|OJJ80812.1 akaw|GAA88941.1 aluc|OJZ89466.1 anid|CBF76199.1 anig|EHA23122.1 aory|EIT76697.1 asyd|OJJ60381.1 atub|OJI85329.1 aver|OJI99710.1 awen|OJJ39349.1

Group1347: aver|OJI97203.1 aver|OJJ08497.1 abra|OJJ74529.1 acar|OOF95222.1 acla|EAW07163.1 afis|EAW22178.1 afla|EED57557.1 afum|EAL91011.1 agla|OJJ87877.1 akaw|GAA82071.1 aluc|OJZ92111.1 anid|CBF88382.1 aory|EIT81848.1 asyd|OJJ63737.1 ater|EAU34183.1 atub|OJI86544.1 awen|OJJ34758.1 azon|OJJ45803.1

Group1348: awen|OJJ29894.1 awen|OJJ38081.1 abra|OJJ76942.1 akaw|GAA87098.1 aluc|OJZ84340.1 anig|EHA27674.1 atub|OJI89728.1 acla|EAW12080.1 afis|EAW19721.1 agla|OJJ86006.1 aver|OJI96480.1 acar|OOF91391.1 afla|EED57523.1 afum|EAL86805.2 anig|EHA19572.1 ater|EAU30973.1 atub|OJI83020.1 ater|EAU34067.1

Group1349: awen|OJJ30757.1 awen|OJJ31724.1 abra|OJJ67453.1 acar|OOF92380.1 acla|EAW06312.1 afis|EAW18421.1 afla|EED52987.1 afum|EAL93105.1 akaw|GAA86378.1 aluc|OJZ84912.1 anid|CBF70698.1 anig|EHA25133.1 aory|EIT78706.1 asyd|OJJ58462.1 ater|EAU29839.1 atub|OJI80686.1 aver|OJJ01062.1 azon|OJJ50486.1

Group1350: awen|OJJ30769.1 awen|OJJ31712.1 abra|OJJ67441.1 acar|OOF92385.1 acla|EAW06322.1 afis|EAW18436.1 afla|EED52979.1 afum|EAL93117.1 agla|OJJ85003.1 akaw|GAA86388.1 aluc|OJZ84923.1 anid|CBF70035.1 anig|EHA25141.1 asyd|OJJ58867.1 ater|EAU29852.1 atub|OJI80676.1 aver|OJJ01469.1 azon|OJJ50477.1

Group1351: awen|OJJ30784.1 awen|OJJ31697.1 abra|OJJ77412.1 acar|OOF93279.1 acla|EAW08581.1 afis|EAW17309.1 afla|EED48984.1 afum|EAL91144.1 agla|OJJ85394.1 akaw|GAA91352.1 aluc|OJZ84821.1 anid|CBF89993.1 anig|EHA28083.1 asyd|OJJ62080.1 ater|EAU35447.1 atub|OJI89265.1 aver|OJI96188.1 azon|OJJ44474.1

Group1352: awen|OJJ30785.1 awen|OJJ31696.1 abra|OJJ67989.1 acar|OOF92031.1 afis|EAW24766.1 afla|EED47575.1 afum|EAL89408.2 agla|OJJ88067.1 akaw|GAA90959.1 aluc|OJZ82863.1 anid|CBF90079.1 anig|EHA21293.1 aory|EIT74521.1 asyd|OJJ62039.1 ater|EAU29463.1 atub|OJI89088.1 aver|OJI96145.1 azon|OJJ46302.1

Group1353: awen|OJJ32597.1 awen|OJJ38114.1 abra|OJJ77103.1 acar|OOF92988.1 afla|EED45185.1 akaw|GAA86953.1 aluc|OJZ84512.1 anid|CBF81557.1 anig|EHA27810.1 aory|EIT73710.1 asyd|OJJ59498.1 ater|EAU38093.1 atub|OJI89569.1 aver|OJJ02776.1 azon|OJJ42741.1 afla|EED47336.1 aory|EIT82859.1 aver|OJJ03900.1

Group1354: awen|OJJ32803.1 awen|OJJ35367.1 abra|OJJ75800.1 acar|OOG00076.1 acla|EAW14886.1 afis|EAW24405.1 afla|EED47807.1 afum|EAL86076.1 agla|OJJ78882.1 akaw|GAA84516.1 aluc|OJZ89248.1 anid|CBF75173.1 anig|EHA23319.1 aory|EIT77184.1 asyd|OJJ59956.1 ater|EAU30320.1 atub|OJI85550.1 aver|OJJ02333.1

Group1355: awen|OJJ34458.1 awen|OJJ34686.1 abra|OJJ66071.1 acar|OOG00583.1 acla|EAW08522.1 afis|EAW16392.1 afla|EED52127.1 afum|EAL89031.1 akaw|GAA84173.1 aluc|OJZ81098.1 anid|CBF81685.1 anig|EHA19273.1 aory|EIT74371.1 asyd|OJJ62625.1 ater|EAU29596.1 atub|OJI82482.1 aver|OJI96704.1 azon|OJJ43880.1

Group1356: azon|OJJ42761.1 azon|OJJ42890.1 azon|OJJ42564.1 azon|OJJ50002.1 azon|OJJ44488.1 azon|OJJ42513.1 azon|OJJ43493.1 azon|OJJ42351.1 azon|OJJ42537.1 azon|OJJ48473.1 azon|OJJ43882.1 azon|OJJ44466.1 azon|OJJ51813.1 azon|OJJ42495.1 azon|OJJ46515.1 afla|EED48610.1 afla|EED57034.1 aory|EIT82256.1

Group1357: azon|OJJ42597.1 azon|OJJ49266.1 abra|OJJ70118.1 acla|EAW12241.1 afis|EAW21131.1 agla|OJJ80450.1 asyd|OJJ55221.1 atub|OJI80395.1 aver|OJI97990.1 awen|OJJ37684.1 asyd|OJJ61887.1 afum|EAL84504.1 agla|OJJ80675.1 afis|EAW20557.1 awen|OJJ35176.1 azon|OJJ42354.1 asyd|OJJ59262.1 anig|EHA25411.1

Group1358: azon|OJJ43518.1 azon|OJJ49486.1 abra|OJJ66404.1 acla|EAW12367.1 afis|EAW20845.1 agla|OJJ86411.1 akaw|GAA90272.1 aluc|OJZ83069.1 anid|CBF78174.1 anig|EHA28133.1 asyd|OJJ55965.1 atub|OJI87877.1 aver|OJJ04911.1 awen|OJJ36259.1 abra|OJJ68228.1 afum|EAL84788.1 acar|OOG00612.1 azon|OJJ45925.1

Group1359: azon|OJJ44012.1 azon|OJJ45468.1 abra|OJJ69814.1 acar|OOF93561.1 acla|EAW11673.1 afis|EAW23690.1 afla|EED51830.1 afum|EAL87135.1 agla|OJJ79265.1 akaw|GAA87843.1 aluc|OJZ85481.1 anid|CBF80383.1 anig|EHA25021.1 aory|EIT81761.1 asyd|OJJ54786.1 atub|OJI80083.1 aver|OJJ07379.1 awen|OJJ38091.1

Group1360: abra|OJJ65585.1 afum|EBA27422.1 abra|OJJ65589.1 asyd|OJJ55957.1 abra|OJJ68807.1  
afla|EED46563.1 aluc|OJZ85779.1 anid|CBF70722.1 aory|EIT77899.1 atub|OJI79564.1 awen|OJJ35847.1  
acla|EAW13291.1 afis|EAW17318.1 afum|EAL91154.1 azon|OJJ50647.1 aver|OJJ04903.1 afum|EAL89333.1  
azon|OJJ50595.1

Group1361: abra|OJJ65623.1 acar|OOF97131.1 acla|EAW12840.1 afum|EAL87789.1 agla|OJJ86050.1  
akaw|GAA92893.1 anid|CBF78703.1 asyd|OJJ62680.1 ater|EAU36754.1 awen|OJJ36388.1 azon|OJJ43355.1  
afla|EED54881.1 aory|EIT79373.1 acar|OOF98798.1 acla|EAW11601.1 aluc|OJZ85600.1 atub|OJI79395.1  
anig|EHA24924.1

Group1362: abra|OJJ65672.1 afis|EAW16875.1 afum|EAL86412.1 aluc|OJZ79539.1 ater|EAU30978.1  
aver|OJJ03435.1 awen|OJJ36144.1 azon|OJJ46815.1 abra|OJJ67798.1 aluc|OJZ90858.1 atub|OJI82852.1  
abra|OJJ68250.1 acar|OOF97529.1 akaw|GAA83211.1 aluc|OJZ83713.1 anig|EHA18864.1 atub|OJI90088.1  
ater|EAU37972.1

Group1363: abra|OJJ65773.1 acar|OOF92085.1 agla|OJJ81015.1 akaw|GAA90888.1 aluc|OJZ82942.1  
anid|CBF86755.1 anig|EHA21361.1 asyd|OJJ61469.1 ater|EAU35421.1 atub|OJI89175.1 aver|OJJ00810.1  
awen|OJJ34702.1 afla|EED45830.1 akaw|GAA85168.1 aluc|OJZ86468.1 anig|EHA21442.1 aory|EIT75507.1  
azon|OJJ48930.1

Group1364: abra|OJJ65864.1 acar|OOF95036.1 akaw|GAA92281.1 aluc|OJZ90178.1 anid|CBF80753.1  
anig|EHA23677.1 asyd|OJJ54523.1 atub|OJI81605.1 aver|OJJ07660.1 abra|OJJ69850.1 acar|OOF93373.1  
afla|EED55058.1 akaw|GAA87808.1 aluc|OJZ85443.1 anig|EHA24987.1 aory|EIT81967.1 atub|OJI80124.1  
azon|OJJ46475.1

Group1365: abra|OJJ65896.1 acar|OOF94956.1 acla|EAW11696.1 afis|EAW23713.1 afla|EED44871.1  
afum|EAL87157.1 agla|OJJ81717.1 akaw|GAA86009.1 aluc|OJZ90235.1 anid|CBF83004.1 anig|EHA23735.1  
aory|EIT82717.1 asyd|OJJ61502.1 ater|EAU31796.1 atub|OJI81665.1 aver|OJJ00840.1 awen|OJJ37102.1  
azon|OJJ50803.1

Group1366: abra|OJJ65913.1 acar|OOF94964.1 acla|EAW12019.1 afis|EAW19660.1 afla|EED57030.1  
afum|EAL86863.1 agla|OJJ80822.1 akaw|GAA92319.1 aluc|OJZ90217.1 anid|CBF71390.1 anig|EHA23715.1  
aory|EIT82277.1 asyd|OJJ55042.1 ater|EAU32852.1 atub|OJI81649.1 aver|OJJ07166.1 awen|OJJ41922.1  
azon|OJJ42684.1

Group1367: abra|OJJ65945.1 acar|OOF92928.1 acla|EAW13569.1 afis|EAW20032.1 afla|EED46042.1  
afum|EAL84884.1 agla|OJJ88019.1 akaw|GAA90823.1 aluc|OJZ83012.1 anid|CBF84764.1 anig|EHA21427.1  
aory|EIT75566.1 asyd|OJJ53285.1 ater|EAU29398.1 atub|OJI89247.1 aver|OJJ08456.1 awen|OJJ30055.1  
azon|OJJ43701.1

Group1368: abra|OJJ65946.1 acar|OOF92925.1 acla|EAW13570.1 afis|EAW20031.1 afla|EED46041.1  
afum|EAL84885.1 agla|OJJ88018.1 akaw|GAA90824.1 aluc|OJZ83011.1 anid|CBF84760.1 anig|EHA21426.1  
aory|EIT75583.1 asyd|OJJ53286.1 ater|EAU29395.1 atub|OJI89246.1 aver|OJJ08455.1 awen|OJJ30054.1  
azon|OJJ43702.1

Group1369: abra|OJJ65948.1 acar|OOF92924.1 acla|EAW13571.1 afis|EAW20030.1 afla|EED46039.1  
afum|EAL84887.1 agla|OJJ88016.1 akaw|GAA90826.1 aluc|OJZ83009.1 anid|CBF84756.1 anig|EHA21424.1  
aory|EIT75781.1 asyd|OJJ53288.1 ater|EAU29393.1 atub|OJI89244.1 aver|OJJ08453.1 awen|OJJ30052.1  
azon|OJJ43700.1

Group1370: abra|OJJ65949.1 acar|OOF92923.1 acla|EAW13572.1 afis|EAW20029.1 afla|EED46038.1  
afum|EAL84888.1 agla|OJJ88015.1 akaw|GAA90827.1 aluc|OJZ83008.1 anid|CBF84754.1 anig|EHA21423.1  
aory|EIT75542.1 asyd|OJJ53289.1 ater|EAU29392.1 atub|OJI89243.1 aver|OJJ08452.1 awen|OJJ30051.1  
azon|OJJ43698.1

Group1371: abra|OJJ65951.1 acar|OOF92921.1 acla|EAW13573.1 afis|EAW20028.1 afla|EED46037.1  
afum|EAL84889.1 agla|OJJ88000.1 akaw|GAA90828.1 aluc|OJZ83006.1 anid|CBF84753.1 anig|EHA21422.1  
aory|EIT75829.1 asyd|OJJ53290.1 ater|EAU29391.1 atub|OJI89241.1 aver|OJJ08450.1 awen|OJJ30042.1  
azon|OJJ43688.1

Group1372: abra|OJJ65952.1 acar|OOF92920.1 acla|EAW13574.1 afis|EAW20027.1 afla|EED46036.1  
afum|EAL84890.1 agla|OJJ88001.1 akaw|GAA90829.1 aluc|OJZ83005.1 anid|CBF84751.1 anig|EHA21421.1  
aory|EIT75375.1 asyd|OJJ53291.1 ater|EAU29390.1 atub|OJI89240.1 aver|OJJ08449.1 awen|OJJ30043.1  
azon|OJJ43689.1

Group1373: abra|OJJ65954.1 acar|OOF92918.1 acla|EAW13575.1 afis|EAW20026.1 afla|EED46034.1  
afum|EAL84891.1 agla|OJJ88004.1 akaw|GAA90831.1 aluc|OJZ83003.1 anid|CBF84749.1 anig|EHA21419.1  
aory|EIT75468.1 asyd|OJJ53293.1 ater|EAU29388.1 atub|OJI89237.1 aver|OJJ08447.1 awen|OJJ30045.1  
azon|OJJ43691.1

Group1374: abra|OJJ65956.1 acar|OOF92916.1 acla|EAW13577.1 afis|EAW20024.1 afla|EED46032.1  
afum|EAL84893.1 agla|OJJ88006.1 akaw|GAA90833.1 aluc|OJZ83001.1 anid|CBF84745.1 anig|EHA21417.1

aory|EIT75584.1 asyd|OJJ53295.1 ater|EAU29386.1 atub|OJI89235.1 aver|OJJ08445.1 awen|OJJ30046.1 azon|OJJ43693.1

Group1375: abra|OJJ65957.1 acar|OOF92915.1 acla|EAW13578.1 afis|EAW20023.1 afla|EED46031.1 afum|EAL84894.1 agla|OJJ88007.1 akaw|GAA90834.1 aluc|OJZ83000.1 anid|CBF84743.1 anig|EHA21416.1 aory|EIT75718.1 asyd|OJJ53296.1 ater|EAU29385.1 atub|OJI89234.1 aver|OJJ08444.1 awen|OJJ30047.1 azon|OJJ43694.1

Group1376: abra|OJJ65958.1 acar|OOF92914.1 acla|EAW13579.1 afis|EAW20022.1 afla|EED46030.1 afum|EAL84895.1 agla|OJJ88011.1 akaw|GAA90835.1 aluc|OJZ82999.1 anid|CBF84741.1 anig|EHA21415.1 aory|EIT75399.1 asyd|OJJ53297.1 ater|EAU29384.1 atub|OJI89233.1 aver|OJJ08443.1 awen|OJJ30048.1 azon|OJJ43695.1

Group1377: abra|OJJ65959.1 acar|OOF92913.1 acla|EAW13580.1 afis|EAW20021.1 afla|EED46029.1 afum|EAL84896.2 agla|OJJ88012.1 akaw|GAA90836.1 aluc|OJZ82998.1 anid|CBF84739.1 anig|EHA21414.1 aory|EIT75790.1 asyd|OJJ53298.1 ater|EAU29383.1 atub|OJI89232.1 aver|OJJ08442.1 awen|OJJ30049.1 azon|OJJ43696.1

Group1378: abra|OJJ65963.1 acar|OOF92911.1 acla|EAW13582.1 afis|EAW20019.1 afla|EED46027.1 afum|EAL84898.1 agla|OJJ87997.1 akaw|GAA90838.1 aluc|OJZ82995.1 anid|CBF84733.1 anig|EHA21410.1 aory|EIT75391.1 asyd|OJJ53302.1 ater|EAU29380.1 atub|OJI89229.1 aver|OJJ08439.1 awen|OJJ30040.1 azon|OJJ43684.1

Group1379: abra|OJJ65969.1 acar|OOF92904.1 acla|EAW13590.1 afis|EAW20013.1 afla|EED46020.1 afum|EAL84905.1 agla|OJJ87978.1 akaw|GAA90844.1 aluc|OJZ82989.1 anid|CBF84715.1 anig|EHA21404.1 aory|EIT75372.1 asyd|OJJ53326.1 ater|EAU29355.1 atub|OJI89223.1 aver|OJJ08417.1 awen|OJJ30027.1 azon|OJJ43661.1

Group1380: abra|OJJ65976.1 acar|OOF92896.1 acla|EAW13597.1 afis|EAW20007.1 afla|EED46013.1 afum|EAL84911.1 agla|OJJ87972.1 akaw|GAA90850.1 aluc|OJZ82983.1 anid|CBF84706.1 anig|EHA21397.1 aory|EIT75456.1 asyd|OJJ53321.1 ater|EAU29349.1 atub|OJI89217.1 aver|OJJ08422.1 awen|OJJ30020.1 azon|OJJ49472.1

Group1381: abra|OJJ65993.1 acar|OOF92879.1 acla|EAW13603.1 afis|EAW15644.1 afla|EED45983.1 agla|OJJ87961.1 akaw|GAA90867.1 aluc|OJZ82966.1 anid|CBF80346.1 anig|EHA21382.1 aory|EIT75657.1 asyd|OJJ54833.1 atub|OJI89199.1 aver|OJJ07328.1 awen|OJJ30009.1 azon|OJJ46985.1 asyd|OJJ52075.1 aver|OJJ03028.1

Group1382: abra|OJJ65998.1 acar|OOF92102.1 akaw|GAA90870.1 aluc|OJZ82963.1 anig|EHA21379.1 atub|OJI89195.1 abra|OJJ66040.1 acla|EAW10004.1 afis|EAW21054.1 afum|EAL92090.1 agla|OJJ81308.1 anid|CBF83224.1 aory|EIT77099.1 asyd|OJJ55572.1 ater|EAU37572.1 aver|OJJ06651.1 awen|OJJ33474.1 afla|EED55697.1

Group1383: abra|OJJ66217.1 acar|OOF89906.1 acla|EAW11713.1 afis|EAW19322.1 afla|EED48416.1 afum|EAL94040.1 agla|OJJ88754.1 akaw|GAA89069.1 aluc|OJZ80523.1 anid|CBF74663.1 anig|EHA25672.1 aory|EIT83055.1 asyd|OJJ54973.1 atub|OJI88407.1 aver|OJJ07218.1 awen|OJJ33251.1 azon|OJJ50629.1 awen|OJJ34601.1

Group1384: abra|OJJ66228.1 acar|OOF90678.1 acla|EAW07009.1 afis|EAW16625.1 afla|EED44976.1 afum|EAL89212.2 akaw|GAA89061.1 aluc|OJZ80533.1 anig|EHA25662.1 aory|EIT73723.1 asyd|OJJ56749.1 ater|EAU36726.1 atub|OJI88398.1 aver|OJJ05982.1 awen|OJJ40148.1 azon|OJJ42882.1 acar|OOG00595.1 azon|OJJ42590.1

Group1385: abra|OJJ66483.1 acar|OOF90960.1 acla|EAW10986.1 afis|EAW20874.1 afla|EED45556.1 afum|EAL84760.1 agla|OJJ83981.1 akaw|GAA92468.1 aluc|OJZ81551.1 anid|CBF82851.1 anig|EHA25883.1 aory|EIT75688.1 asyd|OJJ61594.1 ater|EAU30815.1 atub|OJI88634.1 aver|OJJ00916.1 awen|OJJ34486.1 azon|OJJ51763.1

Group1386: akaw|GAA92469.1 aluc|OJZ81550.1 atub|OJI88635.1 abra|OJJ66485.1 acar|OOF90962.1 acla|EAW10984.1 afis|EAW20876.1 afla|EED45558.1 afum|EAL84757.1 agla|OJJ83983.1 anid|CBF82855.1 anig|EHA25885.1 aory|EIT75434.1 asyd|OJJ61595.1 ater|EAU30813.1 aver|OJJ00918.1 awen|OJJ34484.1 azon|OJJ51761.1

Group1387: abra|OJJ66488.1 acar|OOF90964.1 acla|EAW10981.1 afis|EAW20878.1 afla|EED45563.1 afum|EAL84754.1 agla|OJJ83988.1 akaw|GAA92471.1 aluc|OJZ81547.1 anid|CBF82860.1 anig|EHA25888.1 aory|EIT75724.1 asyd|OJJ61597.1 ater|EAU38706.1 atub|OJI88637.1 aver|OJJ00921.1 awen|OJJ34481.1 azon|OJJ51758.1

Group1388: abra|OJJ66491.1 acar|OOF90967.1 acla|EAW10978.1 afis|EAW20881.1 afla|EED45568.1 afum|EAL84751.1 agla|OJJ83990.1 akaw|GAA91209.1 aluc|OJZ81544.1 anid|CBF82866.1 anig|EHA25891.1 aory|EIT75376.1 asyd|OJJ61599.1 ater|EAU30823.1 atub|OJI88640.1 aver|OJJ00923.1 awen|OJJ34479.1 azon|OJJ51756.1

Group1389: abra|OJJ66504.1 acar|OOF90968.1 acla|EAW10977.1 afis|EAW20882.1 afla|EED45567.1 afum|EAL84750.1 agla|OJJ83991.1 akaw|GAA91206.1 aluc|OJZ81541.1 anid|CBF82764.1 anig|EHA25895.1 aory|EIT75654.1 asyd|OJJ61604.1 ater|EAU30824.1 atub|OJI88645.1 aver|OJJ00927.1 awen|OJJ34478.1 azon|OJJ51755.1

Group1390: abra|OJJ66506.1 acar|OOF90970.1 acla|EAW10975.1 afis|EAW20885.1 afla|EED45570.1 afum|EAL84748.1 agla|OJJ83992.1 akaw|GAA91204.1 aluc|OJZ81539.1 anid|CBF82758.1 anig|EHA25897.1 aory|EIT75723.1 asyd|OJJ61607.1 ater|EAU30825.1 atub|OJI88647.1 aver|OJJ00930.1 awen|OJJ34462.1 azon|OJJ51752.1

Group1391: abra|OJJ66507.1 acar|OOF90971.1 acla|EAW10974.1 afis|EAW20886.1 afla|EED45571.1 afum|EAL84747.1 agla|OJJ83993.1 akaw|GAA91203.1 aluc|OJZ81538.1 anid|CBF82760.1 anig|EHA25898.1 aory|EIT75837.1 asyd|OJJ61606.1 ater|EAU30826.1 atub|OJI88648.1 aver|OJJ00929.1 awen|OJJ34461.1 azon|OJJ51750.1

Group1392: abra|OJJ66508.1 acar|OOF90972.1 acla|EAW10973.1 afis|EAW20887.1 afla|EED45572.1 afum|EAL84746.1 agla|OJJ83994.1 akaw|GAA91202.1 aluc|OJZ81537.1 anid|CBF82762.1 anig|EHA25899.1 aory|EIT75742.1 asyd|OJJ61605.1 ater|EAU30827.1 atub|OJI88649.1 aver|OJJ00928.1 awen|OJJ34460.1 azon|OJJ51749.1

Group1393: abra|OJJ66518.1 acar|OOF90973.1 acla|EAW10971.1 afis|EAW20888.1 afla|EED45576.1 afum|EAL84745.1 agla|OJJ83996.1 akaw|GAA91193.1 aluc|OJZ81526.1 anid|CBF82768.1 anig|EHA25908.1 aory|EIT75514.1 asyd|OJJ61601.1 ater|EAU30828.1 atub|OJI88659.1 aver|OJJ00925.1 awen|OJJ34459.1 azon|OJJ51748.1

Group1394: abra|OJJ66532.1 acar|OOF90983.1 acla|EAW10960.1 afis|EAW20899.1 afla|EED50249.1 afum|EAL84733.1 agla|OJJ84012.1 akaw|GAA91183.1 aluc|OJZ81520.1 anid|CBF82455.1 anig|EHA25917.1 aory|EIT77292.1 asyd|OJJ54114.1 ater|EAU38532.1 atub|OJI88669.1 aver|OJJ08621.1 awen|OJJ34449.1 azon|OJJ51735.1

Group1395: abra|OJJ66534.1 acar|OOF90986.1 acla|EAW10958.1 afis|EAW20901.1 afla|EED50251.1 afum|EAL84730.1 agla|OJJ84015.1 akaw|GAA91181.1 aluc|OJZ81522.1 anid|CBF82453.1 anig|EHA25920.1 aory|EIT77336.1 asyd|OJJ54112.1 ater|EAU38534.1 atub|OJI88671.1 aver|OJJ08623.1 awen|OJJ34447.1 azon|OJJ51733.1

Group1396: abra|OJJ66536.1 acar|OOF90987.1 acla|EAW10955.1 afis|EAW20906.1 afla|EED50254.1 afum|EAL84727.1 agla|OJJ84022.1 akaw|GAA91179.1 aluc|OJZ81524.1 anid|CBF82467.1 anig|EHA25922.1 aory|EIT77306.1 asyd|OJJ54098.1 ater|EAU38536.1 atub|OJI88673.1 aver|OJJ08640.1 awen|OJJ34445.1 azon|OJJ51728.1

Group1397: abra|OJJ66538.1 acar|OOF90989.1 acla|EAW10953.1 afis|EAW20908.1 afla|EED50256.1 afum|EAL84725.1 agla|OJJ84024.1 akaw|GAA91177.1 aluc|OJZ81509.1 anid|CBF82471.1 anig|EHA25924.1 aory|EIT77316.1 asyd|OJJ54100.1 ater|EAU38538.1 atub|OJI88675.1 aver|OJJ08638.1 awen|OJJ34443.1 azon|OJJ51720.1

Group1398: abra|OJJ66542.1 acar|OOF90994.1 acla|EAW09002.1 afis|EAW25543.1 afla|EED50261.1 afum|EAL84261.1 agla|OJJ84031.1 akaw|GAA91167.1 aluc|OJZ81495.1 anid|CBF80805.1 anig|EHA25935.1 aory|EIT77304.1 asyd|OJJ54485.1 ater|EAU38562.1 atub|OJI88686.1 aver|OJJ07694.1 awen|OJJ34423.1 azon|OJJ49761.1

Group1399: abra|OJJ66544.1 acar|OOF90996.1 acla|EAW10945.1 afis|EAW20913.1 afla|EED50263.1 afum|EAL84721.1 agla|OJJ79574.1 akaw|GAA91169.1 aluc|OJZ81497.1 anid|CBF84410.1 anig|EHA25933.1 aory|EIT77352.1 asyd|OJJ53562.1 ater|EAU38564.1 atub|OJI88684.1 aver|OJJ08190.1 awen|OJJ34421.1 azon|OJJ48150.1

Group1400: abra|OJJ66552.1 acar|OOF89951.1 acla|EAW10941.1 afis|EAW20919.1 afla|EED50273.1 afum|EAL84715.1 agla|OJJ80887.1 akaw|GAA91165.1 aluc|OJZ81492.1 anid|CBF82484.1 anig|EHA25937.1 aory|EIT77325.1 asyd|OJJ54104.1 atub|OJI88688.1 aver|OJJ08631.1 awen|OJJ34402.1 azon|OJJ49948.1 awen|OJJ35153.1

Group1401: abra|OJJ66558.1 acar|OOF90013.1 acla|EAW10937.1 afis|EAW20924.1 afla|EED50278.1 afum|EAL84710.1 agla|OJJ83965.1 akaw|GAA91158.1 aluc|OJZ81486.1 anid|CBF82449.1 anig|EHA25941.1 aory|EIT77317.1 asyd|OJJ54111.1 ater|EAU38571.1 atub|OJI88694.1 aver|OJJ08624.1 awen|OJJ34396.1 azon|OJJ48132.1

Group1402: abra|OJJ66562.1 acar|OOF91003.1 acla|EAW10934.1 afis|EAW20927.1 afla|EED50281.1 afum|EAL84707.1 agla|OJJ83961.1 akaw|GAA91155.1 aluc|OJZ81483.1 anid|CBF82497.1 anig|EHA25944.1 aory|EIT77267.1 asyd|OJJ54088.1 ater|EAU38573.1 atub|OJI88698.1 aver|OJJ08650.1 awen|OJJ34392.1 azon|OJJ48123.1

Group1403: abra|OJJ66563.1 acar|OOF91004.1 acla|EAW10933.1 afis|EAW20928.1 afla|EED50282.1 afum|EAL84706.1 agla|OJJ83960.1 akaw|GAA91154.1 aluc|OJZ81482.1 anid|CBF82515.1 anig|EHA25945.1

aory|EIT77363.1 asyd|OJJ54084.1 ater|EAU38574.1 atub|OJI88699.1 aver|OJJ08654.1 awen|OJJ34390.1 azon|OJJ48122.1

Group1404: abra|OJJ66564.1 acar|OOF91005.1 acla|EAW10932.1 afis|EAW20929.1 afla|EED50283.1 afum|EAL84705.1 agla|OJJ83959.1 akaw|GAA91153.1 aluc|OJZ81481.1 anid|CBF82513.1 anig|EHA25946.1 aory|EIT77279.1 asyd|OJJ54083.1 ater|EAU38575.1 atub|OJI88700.1 aver|OJJ08655.1 awen|OJJ34389.1 azon|OJJ48121.1

Group1405: abra|OJJ66568.1 acar|OOF91009.1 acla|EAW10927.1 afis|EAW20402.1 afla|EED50288.1 afum|EAL85501.1 agla|OJJ83952.1 akaw|GAA91149.1 aluc|OJZ81476.1 anid|CBF82504.1 anig|EHA25950.1 aory|EIT77254.1 asyd|OJJ54078.1 ater|EAU38579.1 atub|OJI88703.1 aver|OJJ08660.1 awen|OJJ34384.1 azon|OJJ48115.1

Group1406: abra|OJJ66570.1 acar|OOF91010.1 acla|EAW10924.1 afis|EAW20934.1 afla|EED50291.1 afum|EAL84700.1 agla|OJJ83951.1 akaw|GAA91148.1 aluc|OJZ81474.1 anid|CBF82532.1 anig|EHA25951.1 aory|EIT77301.1 asyd|OJJ54076.1 ater|EAU38580.1 atub|OJI88704.1 aver|OJJ08663.1 awen|OJJ34382.1 azon|OJJ48114.1

Group1407: abra|OJJ66573.1 acar|OOF91014.1 acla|EAW10917.1 afis|EAW20941.1 afla|EED50296.1 afum|EAL84693.1 agla|OJJ83946.1 akaw|GAA91145.1 aluc|OJZ81471.1 anid|CBF82534.1 anig|EHA25956.1 aory|EIT77257.1 asyd|OJJ54069.1 ater|EAU38586.1 atub|OJI88707.1 aver|OJJ08673.1 awen|OJJ34376.1 azon|OJJ50768.1

Group1408: abra|OJJ66576.1 acar|OOF91017.1 acla|EAW10914.1 afis|EAW20944.1 afla|EED50298.1 afum|EAL84690.2 agla|OJJ83943.1 akaw|GAA91142.1 aluc|OJZ81468.1 anid|CBF82539.1 anig|EHA25959.1 aory|EIT77376.1 asyd|OJJ54066.1 ater|EAU38588.1 atub|OJI88710.1 aver|OJJ08676.1 awen|OJJ34372.1 azon|OJJ48108.1

Group1409: abra|OJJ66577.1 acar|OOF91018.1 acla|EAW10913.1 afis|EAW20945.1 afla|EED50299.1 afum|EAL84689.2 agla|OJJ83941.1 akaw|GAA91141.1 aluc|OJZ81467.1 anid|CBF82541.1 anig|EHA25960.1 aory|EIT77303.1 asyd|OJJ54065.1 ater|EAU38596.1 atub|OJI88711.1 aver|OJJ08677.1 awen|OJJ34371.1 azon|OJJ48107.1

Group1410: abra|OJJ66579.1 acar|OOF91019.1 acla|EAW10911.1 afis|EAW20947.1 afla|EED50301.1 afum|EAL84687.1 agla|OJJ83939.1 akaw|GAA91139.1 aluc|OJZ81465.1 anid|CBF82545.1 anig|EHA25962.1 aory|EIT77341.1 asyd|OJJ54063.1 ater|EAU38598.1 atub|OJI88713.1 aver|OJJ08679.1 awen|OJJ34369.1 azon|OJJ48105.1

Group1411: abra|OJJ66580.1 acar|OOF91020.1 acla|EAW10910.1 afis|EAW20948.1 afla|EED50302.1 afum|EAL84686.1 agla|OJJ83938.1 akaw|GAA91138.1 aluc|OJZ81464.1 anid|CBF82547.1 anig|EHA25963.1 aory|EIT77278.1 asyd|OJJ54062.1 ater|EAU38599.1 atub|OJI88714.1 aver|OJJ08680.1 awen|OJJ34368.1 azon|OJJ48104.1

Group1412: abra|OJJ66581.1 acar|OOF89819.1 acla|EAW10909.1 afis|EAW20949.1 afla|EED50303.1 afum|EAL84685.1 agla|OJJ83936.1 akaw|GAA91137.1 aluc|OJZ81463.1 anid|CBF82549.1 anig|EHA25964.1 aory|EIT77276.1 asyd|OJJ54061.1 ater|EAU38600.1 atub|OJI88715.1 aver|OJJ08681.1 awen|OJJ34367.1 azon|OJJ48103.1

Group1413: abra|OJJ66583.1 acar|OOF91021.1 acla|EAW10908.1 afis|EAW20950.1 afla|EED50305.1 afum|EAL84684.1 agla|OJJ83930.1 akaw|GAA91135.1 aluc|OJZ81462.1 anid|CBF82550.1 anig|EHA25966.1 aory|EIT77342.1 asyd|OJJ54060.1 ater|EAU38601.1 atub|OJI88716.1 aver|OJJ08682.1 awen|OJJ34366.1 azon|OJJ48101.1

Group1414: abra|OJJ66587.1 acar|OOF91024.1 acla|EAW10904.1 afis|EAW20954.1 afla|EED50310.1 afum|EAL84680.2 agla|OJJ83925.1 akaw|GAA91130.1 aluc|OJZ81459.1 anid|CBF82558.1 anig|EHA25970.1 aory|EIT77289.1 asyd|OJJ54056.1 ater|EAU38605.1 atub|OJI88720.1 aver|OJJ08685.1 awen|OJJ34362.1 azon|OJJ48098.1

Group1415: abra|OJJ66588.1 acar|OOF91025.1 acla|EAW10903.1 afis|EAW20955.1 afla|EED50311.1 afum|EAL84679.1 agla|OJJ83924.1 akaw|GAA91129.1 aluc|OJZ81458.1 anid|CBF82560.1 anig|EHA25971.1 aory|EIT77266.1 asyd|OJJ54054.1 ater|EAU38606.1 atub|OJI88721.1 aver|OJJ08687.1 awen|OJJ34361.1 azon|OJJ48097.1

Group1416: abra|OJJ66589.1 acar|OOF91026.1 acla|EAW10902.1 afis|EAW20956.1 afla|EED50312.1 afum|EAL84677.1 agla|OJJ83922.1 akaw|GAA91128.1 aluc|OJZ81457.1 anid|CBF82562.1 anig|EHA25972.1 aory|EIT77295.1 asyd|OJJ54052.1 ater|EAU38607.1 atub|OJI88722.1 aver|OJJ08688.1 awen|OJJ34360.1 azon|OJJ48096.1

Group1417: abra|OJJ66590.1 acar|OOF91027.1 acla|EAW10901.1 afis|EAW20957.1 afla|EED50313.1 afum|EAL84676.1 agla|OJJ83920.1 akaw|GAA91127.1 aluc|OJZ81456.1 anid|CBF82564.1 anig|EHA25973.1 aory|EIT77362.1 asyd|OJJ54051.1 ater|EAU38608.1 atub|OJI88723.1 aver|OJJ08689.1 awen|OJJ34359.1 azon|OJJ48095.1

Group1418: abra|OJJ66596.1 acar|OOF91030.1 acla|EAW10896.1 afis|EAW20962.1 afla|EED50317.1 afum|EAL84671.1 agla|OJJ83916.1 akaw|GAA91122.1 aluc|OJZ81450.1 anid|CBF82571.1 anig|EHA25976.1 aory|EIT77307.1 asyd|OJJ54048.1 ater|EAU38612.1 atub|OJI88729.1 aver|OJJ08695.1 awen|OJJ34354.1 azon|OJJ48091.1

Group1419: abra|OJJ66598.1 acar|OOF91031.1 acla|EAW10895.1 afis|EAW20963.1 afla|EED50318.1 afum|EAL84670.1 agla|OJJ83915.1 akaw|GAA91121.1 aluc|OJZ81449.1 anid|CBF82572.1 anig|EHA25977.1 aory|EIT77348.1 asyd|OJJ54047.1 ater|EAU38613.1 atub|OJI88730.1 aver|OJJ08696.1 awen|OJJ34352.1 azon|OJJ48089.1

Group1420: abra|OJJ66600.1 acar|OOF91033.1 acla|EAW10892.1 afis|EAW20966.1 afla|EED50320.1 afum|EAL84667.1 agla|OJJ84043.1 akaw|GAA91119.1 aluc|OJZ81446.1 anid|CBF82578.1 anig|EHA25979.1 aory|EIT77255.1 asyd|OJJ54042.1 ater|EAU38616.1 atub|OJI88732.1 aver|OJJ08699.1 awen|OJJ34349.1 azon|OJJ48086.1

Group1421: abra|OJJ66601.1 acar|OOF91034.1 acla|EAW10891.1 afis|EAW20967.1 afla|EED50321.1 afum|EAL84666.1 agla|OJJ84044.1 akaw|GAA91118.1 aluc|OJZ81445.1 anid|CBF82580.1 anig|EHA25980.1 aory|EIT77332.1 asyd|OJJ54041.1 ater|EAU38617.1 atub|OJI88733.1 aver|OJJ08700.1 awen|OJJ34348.1 azon|OJJ48085.1

Group1422: abra|OJJ66604.1 acar|OOF90114.1 acla|EAW10889.1 afis|EAW20969.1 afla|EED50323.1 afum|EAL84665.1 agla|OJJ84046.1 akaw|GAA91116.1 aluc|OJZ81442.1 anid|CBF82584.1 anig|EHA25982.1 aory|EIT77349.1 asyd|OJJ54039.1 ater|EAU38619.1 atub|OJI88736.1 aver|OJJ08701.1 awen|OJJ34346.1 azon|OJJ48084.1

Group1423: abra|OJJ66606.1 acar|OOF90112.1 acla|EAW10887.1 afis|EAW20971.1 afla|EED50325.1 afum|EAL84663.1 agla|OJJ84048.1 akaw|GAA91114.1 aluc|OJZ81440.1 anid|CBF82585.1 anig|EHA25984.1 aory|EIT77291.1 asyd|OJJ54037.1 ater|EAU38620.1 atub|OJI88738.1 aver|OJJ08703.1 awen|OJJ34344.1 azon|OJJ48083.1

Group1424: abra|OJJ66610.1 acar|OOF91035.1 acla|EAW10886.1 afis|EAW20972.1 afla|EED50326.1 afum|EAL84661.1 agla|OJJ84050.1 akaw|GAA91113.1 aluc|OJZ81439.1 anid|CBF82587.1 anig|EHA25985.1 aory|EIT77361.1 asyd|OJJ54036.1 ater|EAU38622.1 atub|OJI88742.1 aver|OJJ08704.1 awen|OJJ34341.1 azon|OJJ48081.1

Group1425: abra|OJJ66612.1 acar|OOF91036.1 acla|EAW10884.1 afis|EAW20974.1 afla|EED50329.1 afum|EAL84659.1 agla|OJJ84052.1 akaw|GAA91111.1 aluc|OJZ81437.1 anid|CBF82593.1 anig|EHA25987.1 aory|EIT77331.1 asyd|OJJ54033.1 ater|EAU38624.1 atub|OJI88744.1 aver|OJJ08707.1 awen|OJJ34339.1 azon|OJJ48079.1

Group1426: abra|OJJ66613.1 acar|OOF91038.1 acla|EAW10883.1 afis|EAW20975.1 afla|EED50330.1 afum|EAL84658.1 agla|OJJ84053.1 akaw|GAA91110.1 aluc|OJZ81436.1 anid|CBF82595.1 anig|EHA25988.1 aory|EIT77270.1 asyd|OJJ54032.1 ater|EAU38625.1 atub|OJI88745.1 aver|OJJ08708.1 awen|OJJ34337.1 azon|OJJ48078.1

Group1427: abra|OJJ66617.1 acar|OOF91040.1 acla|EAW10880.1 afis|EAW20978.1 afla|EED50333.1 afum|EAL84655.1 agla|OJJ84055.1 akaw|GAA91108.1 aluc|OJZ81432.1 anid|CBF82598.1 anig|EHA25990.1 aory|EIT77374.1 asyd|OJJ54030.1 ater|EAU38627.1 atub|OJI88748.1 aver|OJJ08710.1 awen|OJJ34334.1 azon|OJJ48076.1

Group1428: abra|OJJ66619.1 acar|OOF91042.1 acla|EAW10878.1 afis|EAW20980.1 afla|EED50335.1 afum|EAL84651.2 agla|OJJ84057.1 akaw|GAA91106.1 aluc|OJZ81430.1 anid|CBF71772.1 anig|EHA25992.1 aory|EIT77286.1 asyd|OJJ61720.1 ater|EAU38628.1 atub|OJI88750.1 aver|OJI95814.1 awen|OJJ34332.1 azon|OJJ48074.1

Group1429: abra|OJJ66624.1 acar|OOF91048.1 acla|EAW10872.1 afis|EAW20986.1 afla|EED50341.1 afum|EAL84644.1 agla|OJJ84065.1 akaw|GAA91101.1 aluc|OJZ81425.1 anid|CBF82611.1 anig|EHA25997.1 aory|EIT77327.1 asyd|OJJ54022.1 ater|EAU38635.1 atub|OJI88756.1 aver|OJJ08718.1 awen|OJJ34325.1 azon|OJJ48071.1

Group1430: abra|OJJ66627.1 acar|OOF91052.1 acla|EAW10869.1 afis|EAW20989.1 afla|EED50343.1 afum|EAL84640.2 agla|OJJ84067.1 akaw|GAA91098.1 aluc|OJZ81421.1 anid|CBF82605.1 anig|EHA26000.1 aory|EIT77281.1 asyd|OJJ54026.1 ater|EAU38638.1 atub|OJI88760.1 aver|OJJ08714.1 awen|OJJ34321.1 azon|OJJ48066.1

Group1431: abra|OJJ66749.1 acar|OOF93832.1 acla|EAW11875.1 afis|EAW19486.1 afla|EED56704.1 afum|EAL87008.1 agla|OJJ81211.1 akaw|GAA89685.1 aluc|OJZ80700.1 anid|CBF75460.1 anig|EHA27316.1 aory|EIT73946.1 asyd|OJJ59769.1 ater|EAU34799.1 atub|OJI87559.1 aver|OJJ02516.1 awen|OJJ36902.1 azon|OJJ42915.1

Group1432: abra|OJJ66751.1 acar|OOF93833.1 acla|EAW11876.1 afis|EAW19487.1 afla|EED56705.1 afum|EAL87007.1 agla|OJJ81213.1 akaw|GAA89686.1 aluc|OJZ80699.1 anid|CBF75458.1 anig|EHA27317.1

aory|EIT73903.1 asyd|OJJ59771.1 ater|EAU34800.1 atub|OJI87558.1 aver|OJJ02515.1 awen|OJJ36903.1 azon|OJJ42913.1

Group1433: abra|OJJ66752.1 acar|OOF93834.1 acla|EAW11877.1 afis|EAW19488.1 afla|EED56706.1 afum|EAL87006.1 agla|OJJ81214.1 akaw|GAA89687.1 aluc|OJZ80698.1 anid|CBF75456.1 anig|EHA27318.1 aory|EIT73834.1 asyd|OJJ59772.1 ater|EAU34801.1 atub|OJI87557.1 aver|OJJ02514.1 awen|OJJ36904.1 azon|OJJ42912.1

Group1434: abra|OJJ66753.1 acar|OOF93835.1 acla|EAW11880.1 afis|EAW19491.1 afla|EED56710.1 afum|EAL87003.1 agla|OJJ81220.1 akaw|GAA89688.1 aluc|OJZ80697.1 anid|CBF75452.1 anig|EHA27319.1 aory|EIT73847.1 asyd|OJJ59774.1 ater|EAU34803.1 atub|OJI87556.1 aver|OJJ02512.1 awen|OJJ36907.1 azon|OJJ42909.1

Group1435: abra|OJJ66755.1 acar|OOF93836.1 acla|EAW11881.1 afis|EAW19492.1 afla|EED56711.1 afum|EAL87002.1 agla|OJJ81221.1 akaw|GAA89689.1 aluc|OJZ80696.1 anid|CBF75450.1 anig|EHA27320.1 aory|EIT73907.1 asyd|OJJ59775.1 ater|EAU34804.1 atub|OJI87555.1 aver|OJJ02511.1 awen|OJJ36908.1 azon|OJJ42908.1

Group1436: abra|OJJ66773.1 acar|OOF91583.1 acla|EAW15030.1 afis|EAW20305.1 agla|OJJ85746.1 akaw|GAA87178.1 aluc|OJZ84255.1 asyd|OJJ60493.1 atub|OJI89828.1 awen|OJJ36138.1 acla|EAW10581.1 afla|EED52812.1 aory|EIT78206.1 awen|OJJ37047.1 afis|EAW17210.1 azon|OJJ49313.1 afum|EAL85433.1 awen|OJJ32513.1

Group1437: abra|OJJ66819.1 acar|OOF91602.1 acla|EAW14405.1 afis|EAW19113.1 afla|EED54301.1 afum|EAL93845.1 agla|OJJ84489.1 akaw|GAA90457.1 aluc|OJZ85767.1 anid|CBF79734.1 anig|EHA24786.1 aory|EIT76106.1 asyd|OJJ58069.1 ater|EAU37372.1 atub|OJI79552.1 aver|OJJ04338.1 awen|OJJ32523.1 azon|OJJ50791.1

Group1438: abra|OJJ66828.1 acar|OOF91606.1 acla|EAW14411.1 afis|EAW19119.1 afla|EED54295.1 afum|EAL93851.1 agla|OJJ80434.1 akaw|GAA90464.1 aluc|OJZ85759.1 anid|CBF79724.1 anig|EHA24797.1 aory|EIT76143.1 asyd|OJJ58075.1 ater|EAU37382.1 atub|OJI79544.1 aver|OJJ04332.1 awen|OJJ37450.1 azon|OJJ51127.1

Group1439: abra|OJJ66830.1 acar|OOF91608.1 acla|EAW14413.1 afis|EAW19121.1 afla|EED54293.1 afum|EAL93853.1 agla|OJJ80436.1 akaw|GAA90467.1 aluc|OJZ85757.1 anid|CBF79722.1 anig|EHA24799.1 aory|EIT76028.1 asyd|OJJ58077.1 ater|EAU37384.1 atub|OJI79542.1 aver|OJJ04330.1 awen|OJJ37452.1 azon|OJJ51129.1

Group1440: abra|OJJ66832.1 acar|OOF91609.1 acla|EAW14414.1 afis|EAW19122.1 afla|EED54292.1 afum|EAL93854.1 agla|OJJ80437.1 akaw|GAA90468.1 aluc|OJZ85756.1 anid|CBF79720.1 anig|EHA24800.1 aory|EIT76096.1 asyd|OJJ58078.1 ater|EAU37385.1 atub|OJI79541.1 aver|OJJ04329.1 awen|OJJ37453.1 azon|OJJ51130.1

Group1441: abra|OJJ66833.1 acar|OOF91610.1 acla|EAW14415.1 afis|EAW19123.1 afla|EED54291.1 afum|EAL93855.1 agla|OJJ80438.1 akaw|GAA90469.1 aluc|OJZ85755.1 anid|CBF79718.1 anig|EHA24801.1 aory|EIT76111.1 asyd|OJJ58079.1 ater|EAU37386.1 atub|OJI79540.1 aver|OJJ04328.1 awen|OJJ37454.1 azon|OJJ51131.1

Group1442: abra|OJJ66834.1 acar|OOF91611.1 acla|EAW14416.1 afis|EAW19124.1 afla|EED54290.1 afum|EAL93856.1 agla|OJJ80439.1 akaw|GAA90470.1 aluc|OJZ85754.1 anid|CBF79717.1 anig|EHA24802.1 aory|EIT76047.1 asyd|OJJ58080.1 ater|EAU37387.1 atub|OJI79538.1 aver|OJJ04327.1 awen|OJJ37455.1 azon|OJJ51134.1

Group1443: abra|OJJ66835.1 acar|OOF91613.1 acla|EAW14419.1 afis|EAW19126.1 afla|EED54288.1 afum|EAL93858.1 agla|OJJ80441.1 akaw|GAA90472.1 aluc|OJZ85752.1 anid|CBF79737.1 anig|EHA24804.1 aory|EIT75920.1 asyd|OJJ58083.1 ater|EAU37393.1 atub|OJI79535.1 aver|OJJ04325.1 awen|OJJ37457.1 azon|OJJ51137.1

Group1444: abra|OJJ66836.1 acar|OOF91614.1 acla|EAW14420.1 afis|EAW19127.1 afla|EED54287.1 afum|EAL93859.1 agla|OJJ88596.1 akaw|GAA90473.1 aluc|OJZ85751.1 anid|CBF79739.1 anig|EHA24805.1 aory|EIT75974.1 asyd|OJJ58084.1 ater|EAU37394.1 atub|OJI79534.1 aver|OJJ04324.1 awen|OJJ37459.1 azon|OJJ51138.1

Group1445: abra|OJJ66840.1 acar|OOF91617.1 agla|OJJ85152.1 akaw|GAA90476.1 aluc|OJZ85747.1 anig|EHA24808.1 atub|OJI79532.1 aver|OJI98647.1 awen|OJJ33714.1 asyd|OJJ59197.1 azon|OJJ44469.1 acla|EAW12945.1 afla|EED50142.1 aluc|OJZ85744.1 aory|EIT74655.1 asyd|OJJ64551.1 atub|OJI79529.1 azon|OJJ49271.1

Group1446: abra|OJJ66843.1 acar|OOF91620.1 acla|EAW14417.1 afis|EAW19130.1 afla|EED54284.1 afum|EAL93862.1 agla|OJJ88602.1 akaw|GAA90479.1 aluc|OJZ85740.1 anid|CBF79758.1 anig|EHA24811.1 aory|EIT76041.1 asyd|OJJ58100.1 ater|EAU37398.1 atub|OJI79525.1 aver|OJJ04304.1 awen|OJJ37465.1 azon|OJJ51143.1



Group1447: abra|OJJ66846.1 acar|OOF91624.1 acla|EAW14425.1 afis|EAW19132.1 afla|EED54281.1 afum|EAL93864.1 agla|OJJ88607.1 akaw|GAA91559.1 aluc|OJZ85737.1 anid|CBF86338.1 anig|EHA24813.1 aory|EIT76060.1 asyd|OJJ64988.1 ater|EAU37405.1 atub|OJI79522.1 aver|OJI99108.1 awen|OJJ37468.1 azon|OJJ51146.1

Group1448: abra|OJJ66847.1 acar|OOF91625.1 acla|EAW14426.1 afis|EAW19133.1 afla|EED54280.1 afum|EAL93865.1 agla|OJJ88608.1 akaw|GAA91558.1 aluc|OJZ85736.1 anid|CBF86336.1 anig|EHA24814.1 aory|EIT76085.1 asyd|OJJ64989.1 ater|EAU37401.1 atub|OJI79521.1 aver|OJI99109.1 awen|OJJ37469.1 azon|OJJ51147.1

Group1449: abra|OJJ66853.1 acar|OOF91629.1 acla|EAW14431.1 afis|EAW19138.1 afla|EED54275.1 afum|EAL93870.1 agla|OJJ88617.1 akaw|GAA91553.1 aluc|OJZ85731.1 anid|CBF86324.1 anig|EHA24818.1 aory|EIT75921.1 asyd|OJJ64993.1 ater|EAU37408.1 atub|OJI79516.1 aver|OJI99112.1 awen|OJJ37475.1 azon|OJJ51155.1

Group1450: abra|OJJ66854.1 acar|OOF91630.1 acla|EAW14432.1 afis|EAW19139.1 afla|EED54274.1 afum|EAL93871.2 agla|OJJ88591.1 akaw|GAA91552.1 aluc|OJZ85730.1 anid|CBF86322.1 anig|EHA24819.1 aory|EIT75977.1 asyd|OJJ64994.1 ater|EAU37410.1 atub|OJI79515.1 aver|OJI99113.1 awen|OJJ37476.1 azon|OJJ51157.1

Group1451: abra|OJJ66855.1 acar|OOF91632.1 acla|EAW14433.1 afis|EAW19141.1 afla|EED54272.1 afum|EAL93872.1 agla|OJJ88589.1 akaw|GAA91551.1 aluc|OJZ85728.1 anid|CBF86321.1 anig|EHA24820.1 aory|EIT76058.1 asyd|OJJ64995.1 ater|EAU37412.1 atub|OJI79514.1 aver|OJI99115.1 awen|OJJ37481.1 azon|OJJ51158.1

Group1452: abra|OJJ66856.1 acar|OOF91633.1 acla|EAW14434.1 afis|EAW19142.1 afla|EED54271.1 afum|EAL93873.1 agla|OJJ88588.1 akaw|GAA91550.1 aluc|OJZ85727.1 anid|CBF86317.1 anig|EHA24821.1 aory|EIT76153.1 asyd|OJJ64997.1 ater|EAU37413.1 atub|OJI79513.1 aver|OJI99117.1 awen|OJJ37482.1 azon|OJJ51159.1

Group1453: abra|OJJ66858.1 acar|OOF91636.1 acla|EAW14437.1 afis|EAW19145.1 afla|EED54268.1 afum|EAL93876.1 agla|OJJ88586.1 akaw|GAA91547.1 aluc|OJZ85725.1 anid|CBF86313.1 anig|EHA24823.1 aory|EIT76154.1 asyd|OJJ65000.1 ater|EAU37417.1 atub|OJI79511.1 aver|OJI99120.1 awen|OJJ37484.1 azon|OJJ51161.1

Group1454: abra|OJJ66861.1 acar|OOF91638.1 acla|EAW14438.1 afis|EAW19146.1 afla|EED54267.1 afum|EAL93877.1 agla|OJJ88584.1 akaw|GAA91546.1 aluc|OJZ85721.1 anid|CBF86311.1 anig|EHA24824.1 aory|EIT76119.1 asyd|OJJ65001.1 ater|EAU37420.1 atub|OJI79510.1 aver|OJI99121.1 awen|OJJ37485.1 azon|OJJ51163.1

Group1455: abra|OJJ66864.1 acar|OOF91640.1 acla|EAW14440.1 afis|EAW19148.1 afla|EED54265.1 afum|EAL93879.1 agla|OJJ88576.1 akaw|GAA91544.1 aluc|OJZ85719.1 anid|CBF86308.1 anig|EHA24826.1 aory|EIT75979.1 asyd|OJJ65004.1 ater|EAU37421.1 atub|OJI79508.1 aver|OJI99123.1 awen|OJJ37501.1 azon|OJJ51166.1

Group1456: abra|OJJ66866.1 acar|OOF91643.1 acla|EAW14442.1 afis|EAW19150.1 afla|EED54257.1 afum|EAL93881.1 agla|OJJ88572.1 akaw|GAA91542.1 aluc|OJZ85716.1 anid|CBF86305.1 anig|EHA24828.1 aory|EIT76051.1 asyd|OJJ65006.1 ater|EAU37424.1 atub|OJI79506.1 aver|OJI99125.1 awen|OJJ37503.1 azon|OJJ51168.1

Group1457: abra|OJJ66869.1 acar|OOF91646.1 acla|EAW14445.1 afis|EAW19153.1 afla|EED54252.1 afum|EAL93884.1 agla|OJJ88569.1 akaw|GAA91539.1 aluc|OJZ85712.1 anid|CBF86299.1 anig|EHA24831.1 aory|EIT76023.1 asyd|OJJ65009.1 ater|EAU37426.1 atub|OJI79503.1 aver|OJI99128.1 awen|OJJ37506.1 azon|OJJ51172.1

Group1458: abra|OJJ66871.1 acar|OOF91647.1 acla|EAW14446.1 afis|EAW19154.1 afla|EED54251.1 afum|EAL93885.1 agla|OJJ88568.1 akaw|GAA91538.1 aluc|OJZ85711.1 anid|CBF86297.1 anig|EHA24832.1 aory|EIT75939.1 asyd|OJJ65010.1 ater|EAU37427.1 atub|OJI79502.1 aver|OJI99129.1 awen|OJJ37507.1 azon|OJJ51173.1

Group1459: abra|OJJ66873.1 acar|OOF91649.1 acla|EAW14448.1 afis|EAW19156.1 afla|EED54246.1 afum|EAL93887.1 agla|OJJ88566.1 akaw|GAA91536.1 aluc|OJZ85708.1 anid|CBF86294.1 anig|EHA24834.1 aory|EIT75988.1 asyd|OJJ65012.1 ater|EAU37429.1 atub|OJI79499.1 aver|OJI99131.1 awen|OJJ37509.1 azon|OJJ51174.1

Group1460: abra|OJJ66874.1 acar|OOF91650.1 acla|EAW14449.1 afis|EAW19157.1 afla|EED54245.1 afum|EBA27505.1 agla|OJJ88565.1 akaw|GAA91535.1 aluc|OJZ85707.1 anid|CBF86292.1 anig|EHA24835.1 aory|EIT75937.1 asyd|OJJ65013.1 ater|EAU37430.1 atub|OJI79498.1 aver|OJI99132.1 awen|OJJ37510.1 azon|OJJ51175.1

Group1461: abra|OJJ66875.1 acar|OOF91651.1 acla|EAW14450.1 afis|EAW19158.1 afla|EED54244.1 afum|EBA27506.1 agla|OJJ88564.1 akaw|GAA91534.1 aluc|OJZ85706.1 anid|CBF86291.1 anig|EHA24836.1

aory|EIT76133.1 asyd|OJJ65014.1 ater|EAU37431.1 atub|OJI79497.1 aver|OJI99133.1 awen|OJJ37511.1 azon|OJJ51176.1

Group1462: abra|OJJ66879.1 acar|OOF91654.1 acla|EAW14454.1 afis|EAW19162.1 afla|EED54240.1 afum|EAL93892.2 agla|OJJ88562.1 akaw|GAA91530.1 aluc|OJZ85703.1 anid|CBF86285.1 anig|EHA24840.1 aory|EIT76157.1 asyd|OJJ65017.1 ater|EAU37311.1 atub|OJI79493.1 aver|OJI99135.1 awen|OJJ37515.1 azon|OJJ51178.1

Group1463: abra|OJJ66880.1 acar|OOF91655.1 acla|EAW14455.1 afis|EAW19163.1 afla|EED54239.1 afum|EAL93893.1 agla|OJJ88561.1 akaw|GAA91529.1 aluc|OJZ85702.1 anid|CBF86282.1 anig|EHA24841.1 aory|EIT76014.1 asyd|OJJ65018.1 ater|EAU37310.1 atub|OJI79492.1 aver|OJI99136.1 awen|OJJ37516.1 azon|OJJ51181.1

Group1464: abra|OJJ66883.1 acar|OOF91657.1 acla|EAW14457.1 afis|EAW19165.1 afla|EED54232.1 afum|EAL93895.1 agla|OJJ88559.1 akaw|GAA91527.1 aluc|OJZ85699.1 anid|CBF86279.1 anig|EHA24843.1 aory|EIT75967.1 asyd|OJJ65020.1 ater|EAU37308.1 atub|OJI79489.1 aver|OJI99138.1 awen|OJJ37518.1 azon|OJJ51185.1

Group1465: abra|OJJ66887.1 acar|OOF91660.1 acla|EAW14459.1 afis|EAW19167.1 afla|EED54230.1 afum|EAL93897.1 agla|OJJ88557.1 akaw|GAA91525.1 aluc|OJZ85696.1 anid|CBF86276.1 anig|EHA24846.1 aory|EIT75971.1 asyd|OJJ65022.1 ater|EAU37306.1 atub|OJI79485.1 aver|OJI99141.1 awen|OJJ37520.1 azon|OJJ51186.1

Group1466: abra|OJJ66889.1 acar|OOF91661.1 acla|EAW14461.1 afis|EAW19169.1 afla|EED54228.1 afum|EAL93899.1 agla|OJJ88555.1 akaw|GAA91523.1 aluc|OJZ85693.1 anid|CBF86273.1 anig|EHA24848.1 aory|EIT76026.1 asyd|OJJ65024.1 ater|EAU37304.1 atub|OJI79483.1 aver|OJI99143.1 awen|OJJ37522.1 azon|OJJ51188.1

Group1467: abra|OJJ66890.1 acar|OOF91662.1 acla|EAW14462.1 afis|EAW19170.1 afla|EED54226.1 afum|EAL93900.1 agla|OJJ88554.1 akaw|GAA91522.1 aluc|OJZ85692.1 anid|CBF86271.1 anig|EHA24849.1 aory|EIT75952.1 asyd|OJJ65025.1 ater|EAU37303.1 atub|OJI79482.1 aver|OJI99144.1 awen|OJJ37523.1 azon|OJJ51189.1

Group1468: abra|OJJ66891.1 acar|OOF91663.1 acla|EAW14463.1 afis|EAW19171.1 afla|EED54224.1 afum|EAL93901.1 agla|OJJ88553.1 akaw|GAA91521.1 aluc|OJZ85691.1 anid|CBF86270.1 anig|EHA24850.1 aory|EIT75965.1 asyd|OJJ65026.1 ater|EAU37302.1 atub|OJI79481.1 aver|OJI99145.1 awen|OJJ37524.1 azon|OJJ51190.1

Group1469: abra|OJJ66893.1 acar|OOF91664.1 acla|EAW14465.1 afis|EAW19173.1 afla|EED54222.1 afum|EAL93903.1 agla|OJJ88551.1 akaw|GAA91519.1 aluc|OJZ85689.1 anid|CBF86266.1 anig|EHA24852.1 aory|EIT76009.1 asyd|OJJ65029.1 ater|EAU37300.1 atub|OJI79479.1 aver|OJI99148.1 awen|OJJ37526.1 azon|OJJ51193.1

Group1470: abra|OJJ66894.1 acar|OOF91665.1 acla|EAW14466.1 afis|EAW19174.1 afla|EED54221.1 afum|EAL93904.1 agla|OJJ88550.1 akaw|GAA91518.1 aluc|OJZ85688.1 anid|CBF86265.1 anig|EHA24853.1 aory|EIT76027.1 asyd|OJJ65030.1 ater|EAU37299.1 atub|OJI79478.1 aver|OJI99149.1 awen|OJJ37527.1 azon|OJJ51194.1

Group1471: abra|OJJ66895.1 acar|OOF91666.1 acla|EAW14467.1 afis|EAW19175.1 afla|EED54220.1 afum|EAL93905.1 agla|OJJ88548.1 akaw|GAA91517.1 aluc|OJZ85687.1 anid|CBF86263.1 anig|EHA24854.1 aory|EIT75931.1 asyd|OJJ65031.1 ater|EAU37298.1 atub|OJI79477.1 aver|OJI99150.1 awen|OJJ37528.1 azon|OJJ51195.1

Group1472: abra|OJJ66896.1 acar|OOF91667.1 acla|EAW14468.1 afis|EAW19176.1 afla|EED54219.1 afum|EAL93906.1 agla|OJJ88547.1 akaw|GAA91516.1 aluc|OJZ85686.1 anid|CBF86262.1 anig|EHA24855.1 aory|EIT76150.1 asyd|OJJ65032.1 ater|EAU37297.1 atub|OJI79476.1 aver|OJI99151.1 awen|OJJ37530.1 azon|OJJ51196.1

Group1473: abra|OJJ66897.1 acar|OOF91668.1 acla|EAW14469.1 afis|EAW19177.1 afla|EED54218.1 afum|EAL93907.1 agla|OJJ88546.1 akaw|GAA91515.1 aluc|OJZ85685.1 anid|CBF86260.1 anig|EHA24856.1 aory|EIT75968.1 asyd|OJJ65033.1 ater|EAU37296.1 atub|OJI79475.1 aver|OJI99152.1 awen|OJJ37531.1 azon|OJJ51197.1

Group1474: abra|OJJ66899.1 acar|OOF91671.1 acla|EAW14470.1 afis|EAW19179.1 afla|EED54217.1 afum|EAL93909.1 agla|OJJ88544.1 akaw|GAA91513.1 aluc|OJZ85683.1 anid|CBF86259.1 anig|EHA24858.1 aory|EIT76147.1 asyd|OJJ65035.1 ater|EAU37294.1 atub|OJI79473.1 aver|OJI99154.1 awen|OJJ37533.1 azon|OJJ51199.1

Group1475: abra|OJJ66900.1 acar|OOF91672.1 acla|EAW14471.1 afis|EAW19180.1 afla|EED54216.1 afum|EAL93910.1 agla|OJJ88543.1 akaw|GAA91512.1 aluc|OJZ85682.1 anid|CBF86257.1 anig|EHA24859.1 aory|EIT76034.1 asyd|OJJ65036.1 ater|EAU37293.1 atub|OJI79472.1 aver|OJI99155.1 awen|OJJ37534.1 azon|OJJ51200.1

Group1476: abra|OJJ66903.1 acar|OOF91673.1 acla|EAW14473.1 afis|EAW19182.1 afla|EED54213.1 afum|EAL93912.1 agla|OJJ88540.1 akaw|GAA91510.1 aluc|OJZ85680.1 anid|CBF86253.1 anig|EHA24861.1 aory|EIT76125.1 asyd|OJJ65038.1 ater|EAU37291.1 atub|OJI79470.1 aver|OJI99157.1 awen|OJJ37536.1 azon|OJJ51202.1

Group1477: abra|OJJ66905.1 acar|OOF91675.1 acla|EAW14474.1 afis|EAW19183.1 afla|EED54212.1 afum|EAL93913.1 agla|OJJ88539.1 akaw|GAA91509.1 aluc|OJZ85676.1 anid|CBF86252.1 anig|EHA24864.1 aory|EIT75985.1 asyd|OJJ65041.1 ater|EAU37290.1 atub|OJI79467.1 aver|OJI99159.1 awen|OJJ37538.1 azon|OJJ51203.1

Group1478: abra|OJJ66906.1 acar|OOF91676.1 acla|EAW14475.1 afis|EAW19184.1 afla|EED54211.1 afum|EAL93915.1 akaw|GAA91508.1 aluc|OJZ85675.1 anid|CBF86250.1 anig|EHA24865.1 aory|EIT76099.1 asyd|OJJ65042.1 ater|EAU37289.1 atub|OJI79466.1 aver|OJI99160.1 awen|OJJ37539.1 azon|OJJ51204.1 agla|OJJ88538.1

Group1479: abra|OJJ66907.1 acar|OOF91677.1 acla|EAW14476.1 afla|EED54210.1 afum|EAL93916.1 agla|OJJ88537.1 akaw|GAA91507.1 aluc|OJZ85673.1 anid|CBF86248.1 anig|EHA24866.1 aory|EIT76017.1 asyd|OJJ65043.1 ater|EAU37287.1 atub|OJI79465.1 aver|OJI99162.1 awen|OJJ37542.1 afis|EAW19185.1 azon|OJJ51206.1

Group1480: abra|OJJ66909.1 acar|OOF91679.1 acla|EAW14478.1 afis|EAW19187.1 afla|EED47724.1 afum|EAL93918.1 agla|OJJ88534.1 akaw|GAA91505.1 aluc|OJZ85671.1 anid|CBF86246.1 anig|EHA24868.1 aory|EIT77160.1 asyd|OJJ65044.1 ater|EAU37286.1 atub|OJI79463.1 aver|OJI99165.1 awen|OJJ37545.1 azon|OJJ51210.1

Group1481: abra|OJJ66911.1 acar|OOF91680.1 acla|EAW14480.1 afis|EAW19189.1 afla|EED47722.1 afum|EAL93921.1 agla|OJJ88532.1 akaw|GAA91504.1 aluc|OJZ85670.1 anid|CBF86243.1 anig|EHA24869.1 aory|EIT77116.1 asyd|OJJ65046.1 ater|EAU37285.1 atub|OJI79462.1 aver|OJI99167.1 awen|OJJ37549.1 azon|OJJ51211.1

Group1482: abra|OJJ66915.1 acar|OOF91682.1 acla|EAW14482.1 afis|EAW19191.1 afla|EED47718.1 afum|EAL93922.1 agla|OJJ88518.1 akaw|GAA91503.1 aluc|OJZ85665.1 anid|CBF86239.1 anig|EHA24870.1 aory|EIT80246.1 asyd|OJJ65049.1 ater|EAU37284.1 atub|OJI79458.1 aver|OJI99171.1 awen|OJJ37551.1 azon|OJJ51212.1

Group1483: abra|OJJ66918.1 acar|OOF91685.1 acla|EAW14485.1 afis|EAW19194.1 afla|EED47714.1 afum|EAL93925.2 agla|OJJ88515.1 akaw|GAA91500.1 aluc|OJZ85661.1 anid|CBF78544.1 anig|EHA24872.1 aory|EIT80273.1 asyd|OJJ65054.1 ater|EAU37281.1 atub|OJI79455.1 aver|OJI99177.1 awen|OJJ37552.1 azon|OJJ51213.1

Group1484: abra|OJJ66919.1 acar|OOF91687.1 acla|EAW14486.1 afis|EAW19195.1 afla|EED47713.1 afum|EAL93927.2 agla|OJJ88514.1 akaw|GAA91499.1 aluc|OJZ85660.1 anid|CBF78546.1 anig|EHA24873.1 aory|EIT80279.1 asyd|OJJ65055.1 ater|EAU37280.1 atub|OJI79454.1 aver|OJI99178.1 awen|OJJ37553.1 azon|OJJ51214.1

Group1485: abra|OJJ66923.1 acar|OOF91690.1 acla|EAW14489.1 afis|EAW19203.1 afla|EED47709.1 afum|EAL93933.1 agla|OJJ88509.1 akaw|GAA91496.1 aluc|OJZ85657.1 anid|CBF78554.1 anig|EHA24876.1 aory|EIT80207.1 asyd|OJJ65059.1 ater|EAU37277.1 atub|OJI79449.1 aver|OJI99184.1 awen|OJJ37556.1 azon|OJJ51219.1

Group1486: abra|OJJ66924.1 acar|OOF91692.1 acla|EAW14490.1 afis|EAW19204.1 afla|EED47708.1 afum|EAL93934.1 agla|OJJ88508.1 akaw|GAA91493.1 aluc|OJZ85654.1 anid|CBF78558.1 anig|EHA24878.1 aory|EIT80227.1 asyd|OJJ65061.1 ater|EAU37268.1 atub|OJI79446.1 aver|OJI99185.1 awen|OJJ37557.1 azon|OJJ51220.1

Group1487: abra|OJJ66928.1 acar|OOF91696.1 acla|EAW14493.1 afis|EAW19207.1 afla|EED47705.1 afum|EAL93937.1 agla|OJJ88504.1 akaw|GAA91489.1 aluc|OJZ85651.1 anid|CBF78563.1 anig|EHA24882.1 aory|EIT80245.1 asyd|OJJ65064.1 ater|EAU37265.1 atub|OJI79442.1 aver|OJI99188.1 awen|OJJ37560.1 azon|OJJ51222.1

Group1488: abra|OJJ66931.1 acar|OOF91698.1 acla|EAW14494.1 afis|EAW19208.1 afla|EED47703.1 afum|EAL93938.2 agla|OJJ88501.1 akaw|GAA91487.1 aluc|OJZ85649.1 anid|CBF78566.1 anig|EHA24884.1 aory|EIT80217.1 asyd|OJJ65067.1 ater|EAU37260.1 atub|OJI79440.1 aver|OJI99191.1 awen|OJJ37562.1 azon|OJJ51225.1

Group1489: abra|OJJ66934.1 acar|OOF91701.1 acla|EAW14496.1 afis|EAW19210.1 afla|EED47702.1 afum|EAL93940.1 agla|OJJ88490.1 akaw|GAA91485.1 aluc|OJZ85647.1 anid|CBF78570.1 anig|EHA24887.1 aory|EIT80269.1 asyd|OJJ65075.1 ater|EAU37258.1 atub|OJI79438.1 aver|OJI99200.1 awen|OJJ37564.1 azon|OJJ51227.1

Group1490: afum|EAL92928.1 abra|OJJ78283.1 acar|OOF98585.1 acla|EAW09232.1 afis|EAW21916.1 afla|EED46633.1 agla|OJJ84207.1 akaw|GAA85744.1 aluc|OJZ91357.1 anig|EHA20035.1 aory|EIT77912.1

asyd|OJJ61312.1 ater|EAU30918.1 atub|OJI83350.1 aver|OJJ00637.1 awen|OJJ34206.1 azon|OJJ43428.1  
anid|CBF76852.1

Group1491: abra|OJJ66937.1 acar|OOF91703.1 acla|EAW15005.1 afis|EAW24537.1 afla|EED47700.1  
afum|EAL86201.1 agla|OJJ86874.1 akaw|GAA91483.1 aluc|OJZ85645.1 anig|EHA24890.1 aory|EIT80258.1  
asyd|OJJ63536.1 ater|EAU39600.1 atub|OJI79436.1 aver|OJI96723.1 awen|OJJ38055.1 azon|OJJ42331.1  
agla|OJJ81013.1

Group1492: abra|OJJ66938.1 acar|OOF91704.1 acla|EAW14497.1 afis|EAW19211.1 afla|EED47699.1  
afum|EAL93941.1 agla|OJJ88486.1 akaw|GAA91482.1 aluc|OJZ85644.1 anid|CBF78583.1 anig|EHA24891.1  
aory|EIT80265.1 asyd|OJJ65078.1 ater|EAU37256.1 atub|OJI79435.1 aver|OJI99203.1 awen|OJJ37565.1  
azon|OJJ51228.1

Group1493: abra|OJJ66940.1 acar|OOF91705.1 acla|EAW14498.1 afis|EAW19212.1 afla|EED47698.1  
afum|EBA27508.1 agla|OJJ88485.1 akaw|GAA91481.1 aluc|OJZ85642.1 anid|CBF78581.1 anig|EHA24892.1  
aory|EIT80243.1 asyd|OJJ65076.1 ater|EAU37255.1 atub|OJI79433.1 aver|OJI99201.1 awen|OJJ37568.1  
azon|OJJ51229.1

Group1494: abra|OJJ66948.1 acar|OOF91714.1 acla|EAW14503.1 afis|EAW19217.1 afla|EED47682.1  
afum|EAL93950.1 agla|OJJ88478.1 akaw|GAA91472.1 aluc|OJZ85632.1 anid|CBF78594.1 anig|EHA24899.1  
aory|EIT80231.1 asyd|OJJ65091.1 ater|EAU37251.1 atub|OJI79422.1 aver|OJI99216.1 awen|OJJ37574.1  
azon|OJJ51234.1

Group1495: abra|OJJ66952.1 acar|OOF93656.1 acla|EAW14505.1 afis|EAW19218.1 afla|EED47681.1  
afum|EAL93951.2 akaw|GAA91468.1 aluc|OJZ85626.1 anid|CBF78597.1 anig|EHA24902.1 aory|EIT80228.1  
asyd|OJJ65093.1 ater|EAU37250.1 atub|OJI79419.1 aver|OJI99217.1 azon|OJJ51235.1 agla|OJJ88477.1  
awen|OJJ37576.1

Group1496: abra|OJJ66955.1 acar|OOF93653.1 acla|EAW14506.1 afis|EAW19219.1 afla|EED47670.1  
afum|EAL93952.1 agla|OJJ88476.1 akaw|GAA92206.1 aluc|OJZ85621.1 anid|CBF78603.1 anig|EHA24905.1  
aory|EIT80271.1 asyd|OJJ65097.1 ater|EAU37238.1 atub|OJI79414.1 aver|OJI99223.1 awen|OJJ37577.1  
azon|OJJ51236.1

Group1497: abra|OJJ66956.1 acar|OOF93652.1 acla|EAW14507.1 afis|EAW19220.1 afla|EED47669.1  
afum|EAL93953.1 agla|OJJ88464.1 akaw|GAA92205.1 aluc|OJZ85620.1 anid|CBF78605.1 anig|EHA24906.1  
aory|EIT80172.1 asyd|OJJ65098.1 ater|EAU37237.1 atub|OJI79413.1 aver|OJI99224.1 awen|OJJ37583.1  
azon|OJJ51237.1

Group1498: abra|OJJ66962.1 acar|OOF93645.1 acla|EAW14512.1 afis|EAW19230.1 afla|EED47658.1  
afum|EAL93959.1 agla|OJJ88473.1 akaw|GAA92199.1 aluc|OJZ85614.1 anid|CBF78614.1 anig|EHA24912.1  
aory|EIT80215.1 asyd|OJJ65178.1 ater|EAU37233.1 atub|OJI79407.1 aver|OJI99331.1 awen|OJJ37588.1  
azon|OJJ51242.1

Group1499: abra|OJJ66980.1 acar|OOF93631.1 acla|EAW11770.1 afis|EAW23678.1 afla|EED52197.1  
afum|EAL87121.1 agla|OJJ78538.1 akaw|GAA92184.1 aluc|OJZ85594.1 anid|CBF89572.1 anig|EHA24928.1  
aory|EIT74397.1 asyd|OJJ62335.1 ater|EAU35375.1 atub|OJI79390.1 aver|OJI96441.1 awen|OJJ35575.1  
azon|OJJ43197.1

Group1500: abra|OJJ66988.1 acar|OOF93624.1 acla|EAW09074.1 afis|EAW25663.1 afla|EED46073.1  
afum|EAL84335.1 akaw|GAA92175.1 aluc|OJZ85585.1 anid|CBF84674.1 anig|EHA24936.1 aory|EIT83504.1  
asyd|OJJ53347.1 atub|OJI79380.1 aver|OJJ08397.1 awen|OJJ35373.1 azon|OJJ45069.1 afla|EED55027.1  
aory|EIT81986.1

Group1501: abra|OJJ66992.1 acar|OOF93622.1 acla|EAW15343.1 afis|EAW20364.1 afla|EED51949.1  
afum|EAL85480.2 agla|OJJ81790.1 akaw|GAA92172.1 aluc|OJZ85580.1 anid|CBF69463.1 anig|EHA24939.1  
aory|EIT81480.1 asyd|OJJ59276.1 ater|EAU36758.1 atub|OJI79376.1 aver|OJJ01891.1 awen|OJJ32524.1  
azon|OJJ50243.1

Group1502: abra|OJJ67094.1 acla|EAW11007.1 akaw|GAA91067.1 aluc|OJZ87881.1 anig|EHA20184.1  
atub|OJI80770.1 abra|OJJ69053.1 acar|OOF91237.1 afum|EAL86660.1 abra|OJJ72679.1 acar|OOF95928.1  
afis|EAW19541.1 agla|OJJ88408.1 anig|EHA24092.1 ater|EAU39521.1 atub|OJI82086.1 acar|OOF91465.1  
afum|EAL86967.1

Group1503: abra|OJJ67118.1 acar|OOF98434.1 acla|EAW11710.1 afis|EAW23729.1 afla|EED47523.1  
afum|EAL87167.1 agla|OJJ88177.1 akaw|GAA91047.1 aluc|OJZ87857.1 anid|CBF69394.1 anig|EHA20163.1  
aory|EIT74567.1 asyd|OJJ52918.1 ater|EAU30755.1 atub|OJI80790.1 aver|OJJ08888.1 awen|OJJ32546.1  
azon|OJJ51795.1

Group1504: abra|OJJ67150.1 acar|OOF98408.1 acla|EAW14575.1 afis|EAW19299.1 afla|EED47588.1  
afum|EAL94018.1 agla|OJJ88383.1 akaw|GAA91023.1 aluc|OJZ87826.1 anid|CBF78774.1 anig|EHA20305.1  
aory|EIT74538.1 asyd|OJJ65240.1 ater|EAU29474.1 atub|OJI80817.1 aver|OJI99390.1 awen|OJJ37648.1  
azon|OJJ44913.1

Group1505: abra|OJJ67151.1 acar|OOF98407.1 acla|EAW14574.1 afis|EAW19297.1 afla|EED47589.1 afum|EAL94016.1 agla|OJJ88384.1 akaw|GAA91022.1 aluc|OJZ87825.1 anid|CBF78772.1 anig|EHA20304.1 aory|EIT74535.1 asyd|OJJ65239.1 ater|EAU29475.1 atub|OJI80819.1 aver|OJI99389.1 awen|OJJ37647.1 azon|OJJ44912.1

Group1506: abra|OJJ67153.1 acar|OOF98405.1 acla|EAW14571.1 afis|EAW19294.1 afla|EED47592.1 afum|EAL94013.1 agla|OJJ88386.1 akaw|GAA91019.1 aluc|OJZ87821.1 anid|CBF78767.1 anig|EHA20302.1 aory|EIT74534.1 asyd|OJJ65237.1 ater|EAU29478.1 atub|OJI80823.1 aver|OJI99386.1 awen|OJJ37645.1 azon|OJJ44910.1

Group1507: abra|OJJ67154.1 acar|OOF98404.1 acla|EAW14570.1 afis|EAW19283.1 afla|EED47593.1 afum|EAL94009.1 agla|OJJ88395.1 akaw|GAA91018.1 aluc|OJZ87820.1 anid|CBF78763.1 anig|EHA20301.1 aory|EIT80189.1 asyd|OJJ65235.1 ater|EAU29479.1 atub|OJI80824.1 aver|OJI99384.1 awen|OJJ37644.1 azon|OJJ44909.1

Group1508: abra|OJJ67157.1 acar|OOF98402.1 acla|EAW14568.1 afis|EAW19281.1 afla|EED47596.1 afum|EAL94007.1 agla|OJJ88393.1 akaw|GAA91015.1 aluc|OJZ87816.1 anid|CBF78760.1 anig|EHA20297.1 aory|EIT80256.1 asyd|OJJ65233.1 ater|EAU29482.1 atub|OJI80828.1 aver|OJI99382.1 awen|OJJ37642.1 azon|OJJ44906.1

Group1509: abra|OJJ67159.1 acar|OOF98400.1 acla|EAW14567.1 afis|EAW19280.1 afla|EED47598.1 afum|EAL94006.1 agla|OJJ88391.1 akaw|GAA91013.1 aluc|OJZ87814.1 anid|CBF78756.1 anig|EHA20295.1 aory|EIT80259.1 asyd|OJJ65231.1 ater|EAU29483.1 atub|OJI80830.1 aver|OJI99380.1 awen|OJJ37640.1 azon|OJJ44904.1

Group1510: abra|OJJ67163.1 acar|OOF98397.1 acla|EAW14565.1 afis|EAW19278.1 afla|EED47600.1 afum|EAL94004.1 agla|OJJ88389.1 akaw|GAA91011.1 aluc|OJZ87812.1 anid|CBF78752.1 anig|EHA20294.1 aory|EIT80253.1 asyd|OJJ65229.1 ater|EAU29485.1 atub|OJI80832.1 aver|OJI99378.1 awen|OJJ37638.1 azon|OJJ44882.1

Group1511: abra|OJJ67164.1 acar|OOF98398.1 acla|EAW14564.1 afis|EAW19277.1 afla|EED47601.1 afum|EAL94003.1 agla|OJJ88396.1 akaw|GAA91010.1 aluc|OJZ87811.1 anid|CBF78750.1 anig|EHA20293.1 aory|EIT80205.1 asyd|OJJ65228.1 ater|EAU29486.1 atub|OJI80833.1 aver|OJI99377.1 awen|OJJ37637.1 azon|OJJ44883.1

Group1512: abra|OJJ67173.1 acar|OOF98390.1 acla|EAW14550.1 afis|EAW19267.1 afla|EED47608.1 afum|EAL93994.1 agla|OJJ88426.1 akaw|GAA91001.1 aluc|OJZ87802.1 anid|CBF78695.1 anig|EHA20283.1 aory|EIT80277.1 asyd|OJJ65218.1 ater|EAU29548.1 atub|OJI80845.1 aver|OJI99368.1 awen|OJJ37628.1 azon|OJJ47016.1

Group1513: abra|OJJ67175.1 acar|OOF98388.1 acla|EAW14548.1 afis|EAW19265.1 afla|EED47609.1 afum|EAL93992.1 agla|OJJ88424.1 akaw|GAA90999.1 aluc|OJZ87800.1 anid|CBF78691.1 anig|EHA20281.1 aory|EIT80181.1 asyd|OJJ65216.1 ater|EAU29546.1 atub|OJI80847.1 aver|OJI99366.1 awen|OJJ37626.1 azon|OJJ47015.1

Group1514: abra|OJJ67176.1 acar|OOF98386.1 acla|EAW14547.1 afis|EAW19264.1 afla|EED47610.1 afum|EAL93991.1 agla|OJJ88423.1 akaw|GAA90998.1 aluc|OJZ87799.1 anid|CBF78688.1 anig|EHA20280.1 aory|EIT80241.1 asyd|OJJ65214.1 ater|EAU29545.1 atub|OJI80848.1 aver|OJI99364.1 awen|OJJ37625.1 azon|OJJ47014.1

Group1515: abra|OJJ67178.1 acar|OOF98385.1 acla|EAW14545.1 afis|EAW19263.1 afla|EED47612.1 afum|EAL93990.1 agla|OJJ88421.1 aluc|OJZ87797.1 anid|CBF78684.1 anig|EHA20278.1 aory|EIT80200.1 asyd|OJJ65212.1 ater|EAU29543.1 atub|OJI80850.1 aver|OJI99362.1 awen|OJJ37623.1 azon|OJJ47012.1 aory|EIT80261.1

Group1516: abra|OJJ67179.1 acar|OOF98384.1 acla|EAW14544.1 afis|EAW19262.1 afla|EED47613.1 afum|EAL93989.1 agla|OJJ88420.1 akaw|GAA90997.1 aluc|OJZ87796.1 anid|CBF78682.1 anig|EHA20277.1 aory|EIT80281.1 asyd|OJJ65211.1 ater|EAU29542.1 atub|OJI80851.1 aver|OJI99361.1 awen|OJJ37622.1 azon|OJJ47011.1

Group1517: abra|OJJ67180.1 acar|OOF98382.1 acla|EAW14543.1 afis|EAW19261.1 afla|EED47614.1 afum|EAL93988.1 agla|OJJ88433.1 akaw|GAA90996.1 aluc|OJZ87795.1 anid|CBF78680.1 anig|EHA20276.1 aory|EIT80274.1 asyd|OJJ65210.1 ater|EAU29514.1 atub|OJI80852.1 aver|OJI99360.1 awen|OJJ37621.1 azon|OJJ47010.1

Group1518: abra|OJJ67182.1 acar|OOF98380.1 acla|EAW14541.1 afis|EAW19259.1 afla|EED47616.1 afum|EAL93986.1 agla|OJJ88436.1 akaw|GAA90994.1 aluc|OJZ87793.1 anid|CBF78678.1 anig|EHA20274.1 aory|EIT80183.1 asyd|OJJ65209.1 ater|EAU29516.1 atub|OJI80854.1 aver|OJI99358.1 awen|OJJ37620.1 azon|OJJ47009.1

Group1519: abra|OJJ67183.1 acar|OOF98379.1 acla|EAW14540.1 afis|EAW19258.1 afla|EED47618.1 afum|EAL93985.1 agla|OJJ88437.1 akaw|GAA90993.1 aluc|OJZ87792.1 anid|CBF78676.1 anig|EHA20273.1

aory|EIT80276.1 asyd|OJJ65208.1 ater|EAU29517.1 atub|OJI80855.1 aver|OJI99357.1 awen|OJJ37619.1 azon|OJJ47008.1

Group1520: abra|OJJ67187.1 acar|OOF98377.1 acla|EAW14537.1 afis|EAW19253.1 afla|EED47621.1 afum|EAL93982.1 agla|OJJ88444.1 akaw|GAA90990.1 aluc|OJZ87788.1 anid|CBF78671.1 anig|EHA20270.1 aory|EIT80226.1 asyd|OJJ65205.1 ater|EAU29510.1 atub|OJI80859.1 aver|OJI99354.1 awen|OJJ37616.1 azon|OJJ47005.1

Group1521: abra|OJJ67189.1 acar|OOF98374.1 acla|EAW14534.1 afis|EAW19252.1 afla|EED47626.1 afum|EAL93981.1 agla|OJJ88445.1 akaw|GAA90988.1 aluc|OJZ87786.1 anid|CBF78669.1 anig|EHA20266.1 aory|EIT80202.1 asyd|OJJ65202.1 ater|EAU29506.1 atub|OJI80861.1 aver|OJI99351.1 awen|OJJ37615.1 azon|OJJ47004.1

Group1522: abra|OJJ67190.1 acar|OOF98373.1 acla|EAW14533.1 afis|EAW19251.1 afla|EED47627.1 afum|EAL93980.1 agla|OJJ88446.1 akaw|GAA90987.1 aluc|OJZ87785.1 anid|CBF78667.1 anig|EHA20265.1 aory|EIT80224.1 asyd|OJJ65201.1 ater|EAU29505.1 atub|OJI80862.1 aver|OJI99350.1 awen|OJJ37614.1 azon|OJJ51262.1

Group1523: abra|OJJ67192.1 acar|OOF98372.1 acla|EAW14532.1 afis|EAW19250.1 afla|EED47628.1 afum|EAL93979.1 agla|OJJ88447.1 akaw|GAA90986.1 aluc|OJZ87784.1 anid|CBF78663.1 anig|EHA20264.1 aory|EIT80188.1 asyd|OJJ65199.1 ater|EAU29504.1 atub|OJI80863.1 aver|OJI99348.1 awen|OJJ37612.1 azon|OJJ51261.1

Group1524: abra|OJJ67193.1 acar|OOF98371.1 acla|EAW14531.1 afis|EAW19249.1 afla|EED47629.1 afum|EAL93978.1 agla|OJJ88448.1 akaw|GAA90985.1 aluc|OJZ87782.1 anid|CBF78665.1 anig|EHA20263.1 aory|EIT80199.1 asyd|OJJ65200.1 ater|EAU29503.1 atub|OJI80865.1 aver|OJI99349.1 awen|OJJ37611.1 azon|OJJ51260.1

Group1525: abra|OJJ67195.1 acar|OOF98369.1 acla|EAW14529.1 afis|EAW19247.1 afla|EED47631.1 afum|EAL93976.1 agla|OJJ88450.1 akaw|GAA90983.1 aluc|OJZ87780.1 anid|CBF78658.1 anig|EHA20262.1 aory|EIT80177.1 asyd|OJJ65197.1 ater|EAU29501.1 atub|OJI80867.1 aver|OJI99346.1 awen|OJJ37604.1 azon|OJJ51257.1

Group1526: abra|OJJ67200.1 acar|OOF98364.1 acla|EAW14524.1 afis|EAW19242.1 afla|EED47635.1 afum|EAL93971.2 agla|OJJ88455.1 akaw|GAA90978.1 aluc|OJZ87774.1 anid|CBF78650.1 anig|EHA20258.1 aory|EIT80223.1 asyd|OJJ65194.1 ater|EAU29498.1 atub|OJI80871.1 aver|OJI99343.1 awen|OJJ37598.1 azon|OJJ51253.1

Group1527: abra|OJJ67201.1 acar|OOF98362.1 acla|EAW14523.1 afis|EAW19241.1 afla|EED47636.1 afum|EAL93970.2 agla|OJJ88456.1 akaw|GAA90977.1 aluc|OJZ87773.1 anid|CBF78648.1 anig|EHA20257.1 aory|EIT80218.1 asyd|OJJ65193.1 ater|EAU29497.1 atub|OJI80872.1 aver|OJI99342.1 awen|OJJ37597.1 azon|OJJ51252.1

Group1528: abra|OJJ67202.1 acar|OOF98361.1 acla|EAW14522.1 afis|EAW19240.1 afla|EED47637.1 afum|EAL93969.1 agla|OJJ88458.1 akaw|GAA90976.1 aluc|OJZ87772.1 anid|CBF78646.1 anig|EHA20256.1 aory|EIT80185.1 asyd|OJJ65192.1 ater|EAU37223.1 atub|OJI80873.1 aver|OJI99341.1 awen|OJJ37596.1 azon|OJJ51251.1

Group1529: abra|OJJ67203.1 acar|OOF98360.1 acla|EAW14521.1 afis|EAW19239.1 afla|EED47638.1 afum|EBA27509.1 agla|OJJ88459.1 akaw|GAA90975.1 aluc|OJZ87771.1 anid|CBF78644.1 anig|EHA20255.1 aory|EIT80222.1 asyd|OJJ65191.1 ater|EAU37224.1 atub|OJI80874.1 aver|OJI99340.1 awen|OJJ37595.1 azon|OJJ51250.1

Group1530: abra|OJJ67204.1 acar|OOF98359.1 acla|EAW14520.1 afis|EAW19238.1 afla|EED47639.1 afum|EAL93966.1 agla|OJJ88461.1 akaw|GAA90974.1 aluc|OJZ87770.1 anid|CBF78642.1 anig|EHA20254.1 aory|EIT80175.1 asyd|OJJ65190.1 ater|EAU37225.1 atub|OJI80875.1 aver|OJI99339.1 awen|OJJ37594.1 azon|OJJ51249.1

Group1531: abra|OJJ67213.1 acar|OOF98346.1 acla|EAW08553.1 afis|EAW23595.1 afla|EED47505.1 afum|EAL87872.1 agla|OJJ86855.1 akaw|GAA90964.1 aluc|OJZ87760.1 anid|CBF89585.1 anig|EHA20245.1 aory|EIT74581.1 asyd|OJJ62318.1 ater|EAU35355.1 atub|OJI80884.1 aver|OJI96426.1 awen|OJJ39917.1 azon|OJJ45891.1

Group1532: abra|OJJ67215.1 acar|OOF98343.1 acla|EAW10167.1 afis|EAW25427.1 afla|EED53915.1 afum|EAL90086.1 agla|OJJ87071.1 akaw|GAA90962.1 aluc|OJZ87757.1 anid|CBF77551.1 anig|EHA20243.1 aory|EIT78350.1 asyd|OJJ53152.1 ater|EAU34597.1 atub|OJI80886.1 aver|OJJ03699.1 awen|OJJ41156.1 azon|OJJ44734.1

Group1533: abra|OJJ67225.1 acar|OOF98326.1 acla|EAW10408.1 afis|EAW25160.1 afla|EED53622.1 afum|EAL89835.1 agla|OJJ88637.1 akaw|GAA91652.1 aluc|OJZ87749.1 anid|CBF80654.1 anig|EHA20237.1 aory|EIT75132.1 asyd|OJJ54613.1 ater|EAU34333.1 atub|OJI80894.1 aver|OJJ07545.1 awen|OJJ33447.1 azon|OJJ50704.1

Group1534: abra|OJJ67239.1 acar|OOF89889.1 acla|EAW13993.1 afis|EAW18701.1 afla|EED50650.1 afum|EAL93424.1 agla|OJJ82360.1 akaw|GAA91664.1 aluc|OJZ87736.1 anid|CBF70640.1 anig|EHA20228.1 aory|EIT78150.1 asyd|OJJ58491.1 ater|EAU38205.1 atub|OJI80904.1 aver|OJJ01094.1 awen|OJJ32184.1 azon|OJJ48705.1

Group1535: abra|OJJ67298.1 acar|OOF92514.1 acla|EAW15241.1 afis|EAW20208.1 afla|EED57135.1 afum|EAL85325.1 agla|OJJ84656.1 akaw|GAA86516.1 aluc|OJZ85061.1 anid|CBF85098.1 anig|EHA25276.1 aory|EIT74134.1 asyd|OJJ63059.1 ater|EAU32018.1 atub|OJI80536.1 aver|OJI97904.1 awen|OJJ31212.1 azon|OJJ46148.1

Group1536: abra|OJJ67306.1 acar|OOF92507.1 acla|EAW06427.1 afis|EAW18531.1 afla|EED52870.1 afum|EAL93228.1 agla|OJJ85144.1 akaw|GAA86509.1 aluc|OJZ85052.1 anid|CBF70204.1 anig|EHA25269.1 aory|EIT78588.1 asyd|OJJ58784.1 ater|EAU30039.1 atub|OJI80546.1 aver|OJJ01392.1 awen|OJJ31089.1 azon|OJJ50594.1

Group1537: abra|OJJ67308.1 acar|OOF92504.1 acla|EAW06424.1 afis|EAW18528.1 afla|EED52873.1 afum|EAL93225.1 agla|OJJ85141.1 akaw|GAA86507.1 aluc|OJZ85050.1 anid|CBF70208.1 anig|EHA25267.1 aory|EIT78611.1 asyd|OJJ58781.1 ater|EAU30041.1 atub|OJI80548.1 aver|OJJ01389.1 awen|OJJ31086.1 azon|OJJ50591.1

Group1538: abra|OJJ67310.1 acar|OOF92502.1 acla|EAW06422.1 afis|EAW18526.1 afla|EED52875.1 afum|EAL93221.1 agla|OJJ85140.1 akaw|GAA86505.1 aluc|OJZ85048.1 anid|CBF70211.1 anig|EHA25265.1 aory|EIT78615.1 asyd|OJJ58779.1 ater|EAU30043.1 atub|OJI80550.1 aver|OJJ01388.1 awen|OJJ31080.1 azon|OJJ50588.1

Group1539: abra|OJJ67311.1 acar|OOF92501.1 acla|EAW06421.1 afis|EAW18525.1 afla|EED52876.1 afum|EAL93220.1 agla|OJJ85139.1 akaw|GAA86504.1 aluc|OJZ85047.1 anid|CBF70213.1 anig|EHA25264.1 aory|EIT78600.1 asyd|OJJ58778.1 ater|EAU30044.1 atub|OJI80551.1 aver|OJJ01387.1 awen|OJJ31079.1 azon|OJJ50587.1

Group1540: abra|OJJ67319.1 acar|OOF92496.1 acla|EAW06417.1 afis|EAW18521.1 afla|EED52877.1 afum|EAL93216.1 agla|OJJ85133.1 akaw|GAA86499.1 aluc|OJZ85041.1 anid|CBF70223.1 anig|EHA25259.1 aory|EIT78623.1 asyd|OJJ58774.1 ater|EAU30049.1 atub|OJI80556.1 aver|OJJ01383.1 awen|OJJ31073.1 azon|OJJ49993.1

Group1541: abra|OJJ67321.1 acar|OOF92493.1 acla|EAW06415.1 afis|EAW18519.1 afla|EED52879.1 afum|EAL93214.1 agla|OJJ85131.1 akaw|GAA86497.1 aluc|OJZ85039.1 anid|CBF70226.1 anig|EHA25257.1 aory|EIT78673.1 asyd|OJJ58773.1 ater|EAU30051.1 atub|OJI80558.1 aver|OJJ01382.1 awen|OJJ31071.1 azon|OJJ50581.1

Group1542: abra|OJJ67323.1 acar|OOF92490.1 acla|EAW06412.1 afis|EAW18516.1 afla|EED52882.1 afum|EAL93211.1 agla|OJJ85129.1 akaw|GAA86493.1 aluc|OJZ85035.1 anid|CBF70232.1 anig|EHA25255.1 aory|EIT78656.1 asyd|OJJ58771.1 ater|EAU30054.1 atub|OJI80562.1 aver|OJJ01380.1 awen|OJJ31592.1 azon|OJJ50579.1

Group1543: abra|OJJ67325.1 acar|OOF92488.1 acla|EAW06410.1 afis|EAW18514.1 afla|EED52884.1 afum|EAL93209.1 agla|OJJ85107.1 akaw|GAA86491.1 aluc|OJZ85033.1 anid|CBF70234.1 anig|EHA25253.1 aory|EIT78594.1 asyd|OJJ58770.1 ater|EAU30055.1 atub|OJI80564.1 aver|OJJ01379.1 awen|OJJ31068.1 azon|OJJ50577.1

Group1544: abra|OJJ67326.1 acar|OOF92487.1 acla|EAW06409.1 afis|EAW18513.1 afla|EED52887.1 afum|EAL93208.1 agla|OJJ85108.1 akaw|GAA86490.1 aluc|OJZ85032.1 anid|CBF70236.1 anig|EHA25252.1 aory|EIT78631.1 asyd|OJJ58769.1 ater|EAU30057.1 atub|OJI80565.1 aver|OJJ01378.1 awen|OJJ31067.1 azon|OJJ50576.1

Group1545: abra|OJJ67327.1 acar|OOF92486.1 acla|EAW06407.1 afis|EAW18511.1 afla|EED52889.1 afum|EAL93206.1 agla|OJJ85109.1 akaw|GAA86489.1 aluc|OJZ85030.1 anid|CBF70239.1 anig|EHA25251.1 aory|EIT78676.1 asyd|OJJ58767.1 ater|EAU30058.1 atub|OJI80567.1 aver|OJJ01376.1 awen|OJJ31065.1 azon|OJJ50575.1

Group1546: abra|OJJ67328.1 acar|OOF92485.1 acla|EAW06406.1 afis|EAW18510.1 afla|EED52890.1 afum|EAL93205.1 agla|OJJ85110.1 akaw|GAA86488.1 aluc|OJZ85029.1 anid|CBF70241.1 anig|EHA25250.1 aory|EIT78606.1 asyd|OJJ58766.1 ater|EAU30059.1 atub|OJI80568.1 aver|OJJ01375.1 awen|OJJ31064.1 azon|OJJ50574.1

Group1547: abra|OJJ67329.1 acar|OOF92483.1 acla|EAW06405.1 afis|EAW18509.1 afla|EED52891.1 afum|EAL93204.1 agla|OJJ85111.1 akaw|GAA86487.1 aluc|OJZ85028.1 anid|CBF70243.1 anig|EHA25249.1 aory|EIT78599.1 asyd|OJJ58765.1 ater|EAU30060.1 atub|OJI80569.1 aver|OJJ01374.1 awen|OJJ31063.1 azon|OJJ50573.1

Group1548: abra|OJJ67330.1 acar|OOF92484.1 acla|EAW06404.1 afis|EAW18508.1 afla|EED52894.1 afum|EAL93203.1 agla|OJJ85112.1 akaw|GAA86486.1 aluc|OJZ85027.1 anid|CBF70245.1 anig|EHA25248.1

aory|EIT78590.1 asyd|OJJ58762.1 ater|EAU30063.1 atub|OJI80570.1 aver|OJJ01372.1 awen|OJJ31061.1 azon|OJJ50572.1

Group1549: abra|OJJ67334.1 acar|OOF92479.1 acla|EAW06400.1 afis|EAW18504.1 afla|EED52897.1 afum|EAL93197.1 agla|OJJ85119.1 akaw|GAA86482.1 aluc|OJZ85023.1 anid|CBF70249.1 anig|EHA25244.1 aory|EIT78613.1 asyd|OJJ58759.1 ater|EAU30067.1 atub|OJI80574.1 aver|OJJ01367.1 awen|OJJ31058.1 azon|OJJ50567.1

Group1550: abra|OJJ67335.1 acar|OOF92478.1 acla|EAW06399.1 afis|EAW18503.1 afla|EED52898.1 afum|EAL93196.2 agla|OJJ85118.1 akaw|GAA86481.1 aluc|OJZ85022.1 anid|CBF70251.1 anig|EHA25243.1 aory|EIT78654.1 asyd|OJJ58758.1 ater|EAU30068.1 atub|OJI80575.1 aver|OJJ01366.1 awen|OJJ31057.1 azon|OJJ50568.1

Group1551: abra|OJJ67336.1 acar|OOF92477.1 acla|EAW06398.1 afis|EAW18502.1 afla|EED52899.1 afum|EAL93195.1 agla|OJJ85123.1 akaw|GAA86480.1 aluc|OJZ85021.1 anid|CBF70253.1 anig|EHA25242.1 aory|EIT78660.1 asyd|OJJ58757.1 ater|EAU30069.1 atub|OJI80576.1 aver|OJJ01365.1 awen|OJJ31056.1 azon|OJJ50566.1

Group1552: abra|OJJ67339.1 acar|OOF92474.1 acla|EAW06395.1 afis|EAW18499.1 afla|EED52902.1 afum|EAL93190.1 agla|OJJ85128.1 akaw|GAA86477.1 aluc|OJZ85018.1 anid|CBF70257.1 anig|EHA25239.1 aory|EIT78634.1 asyd|OJJ58755.1 ater|EAU30071.1 atub|OJI80579.1 aver|OJJ01363.1 awen|OJJ31053.1 azon|OJJ50563.1

Group1553: abra|OJJ67340.1 acar|OOF92473.1 acla|EAW06394.1 afis|EAW18498.1 afla|EED52903.1 afum|EAL93188.1 agla|OJJ85105.1 akaw|GAA86476.1 aluc|OJZ85017.1 anid|CBF70259.1 anig|EHA25238.1 aory|EIT78622.1 asyd|OJJ58754.1 ater|EAU30072.1 atub|OJI80580.1 aver|OJJ01362.1 awen|OJJ31052.1 azon|OJJ50564.1

Group1554: abra|OJJ67346.1 acar|OOF92469.1 acla|EAW06390.1 afis|EAW18496.1 afla|EED52907.1 afum|EAL93186.1 agla|OJJ85091.1 akaw|GAA86472.1 aluc|OJZ85013.1 anid|CBF70170.1 anig|EHA25234.1 aory|EIT78612.1 asyd|OJJ58795.1 ater|EAU30073.1 atub|OJI80584.1 aver|OJJ01400.1 awen|OJJ31049.1 azon|OJJ50560.1

Group1555: abra|OJJ67347.1 acar|OOF92468.1 acla|EAW06389.1 afis|EAW18495.1 afla|EED52908.1 afum|EAL93185.1 agla|OJJ85090.1 akaw|GAA86471.1 aluc|OJZ85012.1 anid|CBF70168.1 anig|EHA25233.1 aory|EIT78663.1 asyd|OJJ58797.1 ater|EAU29921.1 atub|OJI80585.1 aver|OJJ01401.1 awen|OJJ31048.1 azon|OJJ50559.1

Group1556: abra|OJJ67350.1 acar|OOF92466.1 acla|EAW06386.1 afis|EAW18492.1 afla|EED52912.1 afum|EAL93182.1 agla|OJJ85087.1 akaw|GAA86468.1 aluc|OJZ85009.1 anid|CBF70162.1 anig|EHA25230.1 aory|EIT78650.1 asyd|OJJ58800.1 ater|EAU29918.1 atub|OJI80588.1 aver|OJJ01404.1 awen|OJJ31045.1 azon|OJJ50556.1

Group1557: abra|OJJ67375.1 acar|OOF92436.1 acla|EAW06380.1 afis|EAW18486.1 afla|EED52922.1 afum|EAL93175.1 agla|OJJ85081.1 akaw|GAA86447.1 aluc|OJZ84990.1 anid|CBF70147.1 anig|EHA25202.1 aory|EIT78638.1 asyd|OJJ58808.1 ater|EAU29911.1 atub|OJI80610.1 aver|OJJ01411.1 awen|OJJ31033.1 azon|OJJ50552.1

Group1558: abra|OJJ67377.1 acar|OOF92435.1 acla|EAW06379.1 afis|EAW18485.1 afla|EED52923.1 afum|EBA27486.1 agla|OJJ85074.1 akaw|GAA86446.1 aluc|OJZ84988.1 anid|CBF70145.1 anig|EHA25201.1 aory|EIT78668.1 asyd|OJJ58809.1 ater|EAU29910.1 atub|OJI80611.1 aver|OJJ01412.1 awen|OJJ31035.1 azon|OJJ50550.1

Group1559: abra|OJJ67380.1 acar|OOF92432.1 acla|EAW06377.1 afis|EAW18483.1 afla|EED52925.1 afum|EAL93172.1 agla|OJJ85072.1 akaw|GAA86444.1 aluc|OJZ84986.1 anid|CBF86341.1 anig|EHA25199.1 aory|EIT78658.1 asyd|OJJ64985.1 ater|EAU29909.1 atub|OJI80614.1 aver|OJI99105.1 awen|OJJ31037.1 azon|OJJ50548.1

Group1560: abra|OJJ67381.1 acar|OOF92433.1 acla|EAW06376.1 afis|EAW18482.1 afla|EED52926.1 afum|EAL93171.1 agla|OJJ85063.1 akaw|GAA86443.1 aluc|OJZ84985.1 anid|CBF86343.1 anig|EHA25198.1 aory|EIT78671.1 asyd|OJJ64984.1 ater|EAU29908.1 atub|OJI80615.1 aver|OJI99104.1 awen|OJJ31038.1 azon|OJJ50547.1

Group1561: abra|OJJ67385.1 acar|OOF92428.1 acla|EAW06374.1 afis|EAW18480.1 afla|EED52929.1 afum|EAL93169.1 agla|OJJ85066.1 akaw|GAA86439.1 aluc|OJZ84981.1 anid|CBF70139.1 anig|EHA25194.1 aory|EIT78702.1 asyd|OJJ58812.1 ater|EAU29896.1 atub|OJI80620.1 aver|OJJ01415.1 awen|OJJ31040.1 azon|OJJ50545.1

Group1562: abra|OJJ67387.1 acar|OOF92427.1 acla|EAW06372.1 afis|EAW18478.1 afla|EED52932.1 afum|EAL93166.1 agla|OJJ85068.1 akaw|GAA86437.1 aluc|OJZ84980.1 anid|CBF70136.1 anig|EHA25192.1 aory|EIT78730.1 asyd|OJJ58814.1 ater|EAU29895.1 atub|OJI80622.1 aver|OJJ01417.1 awen|OJJ31031.1 azon|OJJ50544.1



Group1563: abra|OJJ67393.1 acar|OOF92423.1 acla|EAW06370.1 afis|EAW18476.1 afla|EED52934.1 afum|EAL93163.1 agla|OJJ85071.1 akaw|GAA86434.1 aluc|OJZ84976.1 anid|CBF70132.1 anig|EHA25188.1 aory|EIT78693.1 asyd|OJJ58817.1 ater|EAU29893.1 atub|OJI80625.1 aver|OJJ01421.1 awen|OJJ31029.1 azon|OJJ50542.1

Group1564: abra|OJJ67394.1 acar|OOF92422.1 acla|EAW06369.1 afis|EAW18475.1 afla|EED52935.1 afum|EAL93162.1 agla|OJJ85062.1 akaw|GAA86433.1 aluc|OJZ84975.1 anid|CBF70116.1 anig|EHA25187.1 aory|EIT78723.1 asyd|OJJ58819.1 ater|EAU29892.1 atub|OJI80626.1 aver|OJJ01423.1 awen|OJJ31028.1 azon|OJJ50541.1

Group1565: abra|OJJ67395.1 acar|OOF92421.1 acla|EAW06368.1 afis|EAW18474.1 afla|EED52936.1 afum|EAL93161.1 agla|OJJ85061.1 akaw|GAA86432.1 aluc|OJZ84974.1 anid|CBF70108.1 anig|EHA25186.1 aory|EIT78688.1 asyd|OJJ58823.1 ater|EAU29891.1 atub|OJI80627.1 aver|OJJ01427.1 awen|OJJ31026.1 azon|OJJ50540.1

Group1566: abra|OJJ67396.1 acar|OOF92419.1 acla|EAW06364.1 afis|EAW18473.1 afla|EED52937.1 afum|EAL93160.2 agla|OJJ85060.1 akaw|GAA86431.1 aluc|OJZ84973.1 anid|CBF70107.1 anig|EHA25185.1 aory|EIT78722.1 asyd|OJJ58827.1 ater|EAU29890.1 atub|OJI80628.1 aver|OJJ01430.1 awen|OJJ31025.1 azon|OJJ50539.1

Group1567: abra|OJJ67398.1 acar|OOF92418.1 acla|EAW06362.1 afis|EAW18471.1 afla|EED52939.1 afum|EAL93158.1 agla|OJJ85056.1 akaw|GAA86429.1 aluc|OJZ84971.1 anid|CBF70105.1 anig|EHA25183.1 aory|EIT78698.1 asyd|OJJ58829.1 ater|EAU29888.1 atub|OJI80630.1 aver|OJJ01432.1 awen|OJJ31023.1 azon|OJJ50537.1

Group1568: abra|OJJ67399.1 acar|OOF92417.1 acla|EAW06359.1 afis|EAW18470.1 afla|EED52940.1 afum|EAL93156.1 agla|OJJ85055.1 akaw|GAA86428.1 aluc|OJZ84969.1 anid|CBF70103.1 anig|EHA25182.1 aory|EIT78679.1 asyd|OJJ58830.1 ater|EAU29887.1 atub|OJI80631.1 aver|OJJ01433.1 awen|OJJ31022.1 azon|OJJ50536.1

Group1569: abra|OJJ67400.1 acar|OOF92416.1 acla|EAW06358.1 afis|EAW18469.1 afla|EED52941.1 afum|EAL93155.1 agla|OJJ85054.1 akaw|GAA86427.1 aluc|OJZ84968.1 anid|CBF70101.1 anig|EHA25181.1 aory|EIT78712.1 asyd|OJJ58831.1 ater|EAU29886.1 atub|OJI80632.1 aver|OJJ01434.1 awen|OJJ31021.1 azon|OJJ50535.1

Group1570: abra|OJJ67401.1 acar|OOF92415.1 acla|EAW06357.1 afis|EAW18468.1 afla|EED52942.1 afum|EAL93154.1 agla|OJJ85053.1 akaw|GAA86426.1 aluc|OJZ84967.1 anid|CBF70100.1 anig|EHA25180.1 aory|EIT78694.1 asyd|OJJ58832.1 ater|EAU29885.1 atub|OJI80633.1 aver|OJJ01435.1 awen|OJJ31020.1 azon|OJJ50534.1

Group1571: abra|OJJ67403.1 acar|OOF92413.1 acla|EAW06355.1 afis|EAW18466.1 afla|EED52944.1 afum|EAL93152.1 agla|OJJ85051.1 akaw|GAA86424.1 aluc|OJZ84965.1 anid|CBF70096.1 anig|EHA25178.1 aory|EIT78707.1 asyd|OJJ58834.1 ater|EAU29883.1 atub|OJI80635.1 aver|OJJ01437.1 awen|OJJ31018.1 azon|OJJ50532.1

Group1572: abra|OJJ67411.1 acar|OOF89994.1 acla|EAW06348.1 afis|EAW18459.1 afla|EED52949.1 afum|EAL93145.1 agla|OJJ85042.1 akaw|GAA86416.1 aluc|OJZ84957.1 anid|CBF70085.1 anig|EHA25171.1 aory|EIT78721.1 asyd|OJJ58842.1 ater|EAU29877.1 atub|OJI80643.1 aver|OJJ01444.1 awen|OJJ31011.1 azon|OJJ50525.1

Group1573: abra|OJJ67412.1 acar|OOF89992.1 acla|EAW06347.1 afis|EAW18458.1 afla|EED52950.1 afum|EAL93143.1 agla|OJJ85041.1 akaw|GAA86415.1 aluc|OJZ84956.1 anid|CBF70084.1 anig|EHA25170.1 aory|EIT78692.1 asyd|OJJ58843.1 ater|EAU29876.1 atub|OJI80644.1 aver|OJJ01445.1 awen|OJJ31010.1 azon|OJJ50524.1

Group1574: abra|OJJ67419.1 acar|OOF92402.1 acla|EAW06345.1 afis|EAW18456.1 afla|EED52952.1 afum|EAL93141.1 agla|OJJ85039.1 akaw|GAA86409.1 aluc|OJZ84949.1 anid|CBF70053.1 anig|EHA25164.1 aory|EIT78736.1 asyd|OJJ58857.1 ater|EAU29873.1 atub|OJI80653.1 aver|OJJ01458.1 awen|OJJ31008.1 azon|OJJ50522.1

Group1575: abra|OJJ67421.1 acar|OOF92401.1 acla|EAW06344.1 afis|EAW18455.1 afla|EED52953.1 afum|EAL93140.1 agla|OJJ85038.1 akaw|GAA86408.1 aluc|OJZ84947.1 anid|CBF70057.1 anig|EHA25163.1 aory|EIT78696.1 asyd|OJJ58855.1 ater|EAU29872.1 atub|OJI80654.1 aver|OJJ01456.1 awen|OJJ31007.1 azon|OJJ50521.1

Group1576: abra|OJJ67423.1 acar|OOF89873.1 acla|EAW06341.1 afis|EAW18453.1 afla|EED52955.1 afum|EAL93138.1 agla|OJJ85032.1 akaw|GAA86406.1 aluc|OJZ84944.1 anid|CBF70061.1 anig|EHA25161.1 aory|EIT78714.1 asyd|OJJ58853.1 ater|EAU29870.1 atub|OJI80656.1 aver|OJJ01454.1 awen|OJJ31005.1 azon|OJJ50519.1

Group1577: abra|OJJ67424.1 acar|OOF89874.1 acla|EAW06340.1 afis|EAW18452.1 afla|EED52956.1 afum|EAL93137.1 agla|OJJ85030.1 akaw|GAA86405.1 aluc|OJZ84943.1 anid|CBF70062.1 anig|EHA25160.1

aory|EIT78680.1 asyd|OJJ58852.1 ater|EAU29869.1 atub|OJI80657.1 aver|OJJ01453.1 awen|OJJ31004.1 azon|OJJ50517.1

Group1578: abra|OJJ67426.1 acar|OOF92399.1 acla|EAW06338.1 afis|EAW18450.1 afla|EED52958.1 afum|EAL93135.1 agla|OJJ85028.1 akaw|GAA86404.1 aluc|OJZ84941.1 anid|CBF70064.1 anig|EHA25158.1 aory|EIT78699.1 asyd|OJJ58850.1 ater|EAU29868.1 atub|OJI80659.1 aver|OJJ01451.1 awen|OJJ31002.1 azon|OJJ50516.1

Group1579: abra|OJJ67429.1 acar|OOF92397.1 acla|EAW06335.1 afis|EAW18447.1 afla|EED52963.1 afum|EAL93132.1 agla|OJJ85024.1 akaw|GAA86401.1 aluc|OJZ84937.1 anid|CBF70070.1 anig|EHA25155.1 aory|EIT78728.1 asyd|OJJ58847.1 ater|EAU29866.1 atub|OJI80662.1 aver|OJJ01448.1 awen|OJJ30999.1 azon|OJJ50513.1

Group1580: abra|OJJ67431.1 anig|EHA25151.1 atub|OJI80666.1 abra|OJJ69856.1 acar|OOF97498.1 akaw|GAA87800.1 aluc|OJZ85435.1 anig|EHA24981.1 atub|OJI80133.1 abra|OJJ75776.1 acar|OOF95028.1 acla|EAW07821.1 afis|EAW22857.1 afla|EED47892.1 afum|EAL90343.1 akaw|GAA86398.1 aory|EIT77247.1 aluc|OJZ84933.1

Group1581: abra|OJJ67434.1 acar|OOF92394.1 acla|EAW06332.1 afis|EAW18445.1 afla|EED52967.1 afum|EAL93130.1 agla|OJJ85021.1 akaw|GAA86396.1 aluc|OJZ84930.1 anid|CBF70041.1 anig|EHA25149.1 aory|EIT78729.1 asyd|OJJ58865.1 ater|EAU29864.1 atub|OJI80669.1 aver|OJJ01466.1 awen|OJJ30993.1 azon|OJJ50510.1

Group1582: abra|OJJ67435.1 acar|OOF92393.1 acla|EAW06331.1 afis|EAW18444.1 afla|EED52968.1 afum|EAL93128.1 agla|OJJ85020.1 akaw|GAA86395.1 aluc|OJZ84929.1 anid|CBF70043.1 anig|EHA25148.1 aory|EIT78686.1 asyd|OJJ58864.1 ater|EAU29863.1 atub|OJI80670.1 aver|OJJ01465.1 awen|OJJ30992.1 azon|OJJ50511.1

Group1583: abra|OJJ67437.1 acar|OOF92391.1 acla|EAW06327.1 afis|EAW18441.1 afla|EED52972.1 afum|EAL93123.1 agla|OJJ85006.1 akaw|GAA86393.1 aluc|OJZ84927.1 anid|CBF70049.1 anig|EHA25146.1 aory|EIT78690.1 asyd|OJJ58861.1 ater|EAU29860.1 atub|OJI80672.1 aver|OJJ01462.1 awen|OJJ30989.1 azon|OJJ50507.1

Group1584: abra|OJJ67438.1 acar|OOF92389.1 acla|EAW06328.1 afis|EAW18442.1 afla|EED52971.1 afum|EAL93125.1 agla|OJJ85008.1 akaw|GAA86392.1 aluc|OJZ84926.1 anid|CBF70047.1 anig|EHA25145.1 aory|EIT78682.1 asyd|OJJ58862.1 ater|EAU29859.1 atub|OJI80673.1 aver|OJJ01463.1 awen|OJJ30990.1 azon|OJJ50508.1

Group1585: abra|OJJ67439.1 acar|OOF92390.1 acla|EAW06329.1 afis|EAW18443.1 afla|EED52970.1 afum|EAL93126.1 agla|OJJ85009.1 akaw|GAA86391.1 aluc|OJZ84925.1 anid|CBF70045.1 anig|EHA25144.1 aory|EIT78727.1 asyd|OJJ58863.1 ater|EAU29858.1 atub|OJI80674.1 aver|OJJ01464.1 awen|OJJ30991.1 azon|OJJ50509.1

Group1586: abra|OJJ67452.1 acla|EAW06313.1 afla|EED52986.1 akaw|GAA86379.1 aluc|OJZ84913.1 anid|CBF70694.1 anig|EHA25134.1 aory|EIT78726.1 ater|EAU29843.1 atub|OJI80685.1 azon|OJJ50483.1 afis|EAW18422.1 afum|EAL93106.1 asyd|OJJ58464.1 aver|OJJ01063.1 awen|OJJ31723.1 agla|OJJ84990.1 awen|OJJ30758.1

Group1587: abra|OJJ67471.1 acar|OOF89932.1 acla|EAW06300.1 afis|EAW18407.1 afla|EED52997.1 afum|EAL93087.1 agla|OJJ84959.1 akaw|GAA86365.1 aluc|OJZ84895.1 anid|CBF70741.1 anig|EHA25122.1 aory|EIT77423.1 asyd|OJJ58439.1 ater|EAU29825.1 atub|OJI80705.1 aver|OJJ01039.1 awen|OJJ31743.1 azon|OJJ50501.1

Group1588: abra|OJJ67609.1 acar|OOF91956.1 acla|EAW11006.1 afis|EAW20847.1 afla|EED45466.1 afum|EAL84786.1 akaw|GAA89125.1 aluc|OJZ81713.1 anid|CBF82875.1 anig|EHA25726.1 aory|EIT75524.1 asyd|OJJ61570.1 ater|EAU30786.1 atub|OJI88471.1 aver|OJJ00890.1 awen|OJJ34544.1 azon|OJJ42460.1 ater|EAU37631.1

Group1589: abra|OJJ67742.1 acar|OOF90949.1 acla|EAW10991.1 afis|EAW20869.1 afla|EED45539.1 afum|EAL84765.1 agla|OJJ83977.1 akaw|GAA92433.1 aluc|OJZ81588.1 anid|CBF82842.1 anig|EHA25852.1 aory|EIT75440.1 asyd|OJJ61589.1 ater|EAU30819.1 atub|OJI88594.1 aver|OJJ00911.1 awen|OJJ34495.1 azon|OJJ51769.1

Group1590: abra|OJJ67743.1 acar|OOF90948.1 acla|EAW10992.1 afis|EAW20868.1 afla|EED45543.1 afum|EAL84766.2 agla|OJJ83976.1 akaw|GAA92434.1 aluc|OJZ81586.1 anid|CBF82840.1 anig|EHA25853.1 aory|EIT75711.1 asyd|OJJ61588.1 ater|EAU30820.1 atub|OJI88595.1 aver|OJJ00910.1 awen|OJJ34498.1 azon|OJJ51773.1

Group1591: abra|OJJ67744.1 acar|OOF90947.1 acla|EAW10993.1 afis|EAW20867.1 afla|EED45544.1 afum|EAL84767.1 agla|OJJ83975.1 akaw|GAA92435.1 aluc|OJZ81585.1 anid|CBF82838.1 anig|EHA25854.1 aory|EIT75422.1 asyd|OJJ61587.1 ater|EAU30821.1 atub|OJI88596.1 aver|OJJ00909.1 awen|OJJ34499.1 azon|OJJ51774.1

Group1592: abra|OJJ67747.1 acar|OOF90944.1 acla|EAW10997.1 afis|EAW20864.1 afla|EED45548.1 afum|EAL84771.1 agla|OJJ83751.1 akaw|GAA92438.1 aluc|OJZ81582.1 anid|CBF82835.1 anig|EHA25857.1 aory|EIT75692.1 asyd|OJJ61584.1 ater|EAU30807.1 atub|OJI88599.1 aver|OJJ00906.1 awen|OJJ34506.1 azon|OJJ51784.1

Group1593: abra|OJJ67748.1 acar|OOF90943.1 acla|EAW10998.1 afis|EAW20863.1 afla|EED45549.1 afum|EAL84772.1 agla|OJJ83750.1 akaw|GAA92439.1 aluc|OJZ81581.1 anid|CBF82833.1 anig|EHA25858.1 aory|EIT75610.1 asyd|OJJ61583.1 ater|EAU30806.1 atub|OJI88600.1 aver|OJJ00905.1 awen|OJJ34507.1 azon|OJJ51785.1

Group1594: abra|OJJ67749.1 acar|OOF90950.1 acla|EAW10990.1 afis|EAW20870.1 afla|EED45552.1 afum|EAL84764.1 agla|OJJ83978.1 akaw|GAA92440.1 aluc|OJZ81580.1 anid|CBF82844.1 anig|EHA25859.1 aory|EIT75541.1 asyd|OJJ61590.1 ater|EAU30818.1 atub|OJI88601.1 aver|OJJ00912.1 awen|OJJ34494.1 azon|OJJ51768.1

Group1595: abra|OJJ67799.1 acar|OOF94206.1 agla|OJJ79105.1 anid|CBF81915.1 asyd|OJJ59697.1 ater|EAU35300.1 aver|OJJ04270.1 awen|OJJ41729.1 azon|OJJ43893.1 asyd|OJJ65109.1 aver|OJI99236.1 asyd|OJJ55389.1 aver|OJJ08268.1 aver|OJJ02590.1 awen|OJJ34589.1 asyd|OJJ54350.1 aver|OJJ05302.1 asyd|OJJ58135.1

Group1596: abra|OJJ67847.1 acar|OOF92828.1 acla|EAW11752.1 afis|EAW23785.1 afla|EED51594.1 afum|EAL87219.2 agla|OJJ78938.1 akaw|GAA91855.1 aluc|OJZ82044.1 anid|CBF79845.1 anig|EHA22213.1 aory|EIT80570.1 asyd|OJJ58153.1 ater|EAU31326.1 atub|OJI84603.1 aver|OJJ04251.1 awen|OJJ33730.1 azon|OJJ42852.1

Group1597: abra|OJJ67848.1 acar|OOF92829.1 acla|EAW11751.1 afis|EAW23784.1 afla|EED51593.1 afum|EAL87218.2 agla|OJJ78937.1 akaw|GAA91856.1 aluc|OJZ82043.1 anid|CBF79841.1 anig|EHA22214.1 aory|EIT80650.1 asyd|OJJ58152.1 ater|EAU31325.1 atub|OJI84602.1 aver|OJJ04252.1 awen|OJJ33729.1 azon|OJJ42853.1

Group1598: abra|OJJ67851.1 acar|OOF92832.1 acla|EAW11748.1 afis|EAW23781.1 afla|EED51585.1 afum|EAL87215.1 agla|OJJ78933.1 akaw|GAA91859.1 aluc|OJZ82040.1 anid|CBF79839.1 anig|EHA22216.1 aory|EIT80522.1 asyd|OJJ58148.1 ater|EAU31322.1 atub|OJI84599.1 aver|OJJ04256.1 awen|OJJ33724.1 azon|OJJ42856.1

Group1599: abra|OJJ67859.1 acar|OOF92840.1 acla|EAW11739.1 afis|EAW23772.1 afla|EED51573.1 afum|EAL87206.1 agla|OJJ78947.1 akaw|GAA91866.1 aluc|OJZ82033.1 anid|CBF79823.1 anig|EHA22223.1 aory|EIT80715.1 asyd|OJJ58141.1 ater|EAU31316.1 atub|OJI84588.1 aver|OJJ04264.1 awen|OJJ33703.1 azon|OJJ42837.1

Group1600: abra|OJJ67861.1 acar|OOF92839.1 acla|EAW11737.1 afis|EAW23770.1 afla|EED51571.1 afum|EAL87204.1 agla|OJJ78949.1 anid|CBF79821.1 anig|EHA22225.1 aory|EIT80633.1 asyd|OJJ58138.1 ater|EAU31314.1 aver|OJJ04267.1 awen|OJJ33705.1 azon|OJJ42836.1 akaw|GAA91868.1 aluc|OJZ82031.1 atub|OJI84586.1

Group1601: abra|OJJ67865.1 acar|OOF92845.1 acla|EAW11734.1 afis|EAW23766.1 afla|EED51552.1 afum|EAL87199.1 agla|OJJ78956.1 akaw|GAA91872.1 aluc|OJZ82027.1 anid|CBF79770.1 anig|EHA22229.1 aory|EIT80651.1 asyd|OJJ58112.1 ater|EAU31310.1 atub|OJI84581.1 aver|OJJ04293.1 awen|OJJ33692.1 azon|OJJ42832.1

Group1602: abra|OJJ67866.1 acar|OOF92846.1 acla|EAW11733.1 afis|EAW23765.1 afla|EED51550.1 afum|EAL87198.1 agla|OJJ78957.1 akaw|GAA91873.1 aluc|OJZ82026.1 anid|CBF79772.1 anig|EHA22230.1 aory|EIT80718.1 asyd|OJJ58110.1 ater|EAU31311.1 atub|OJI84579.1 aver|OJJ04294.1 awen|OJJ33689.1 azon|OJJ42830.1

Group1603: abra|OJJ67881.1 acar|OOF92865.1 acla|EAW11722.1 afis|EAW23744.1 afla|EED51536.1 afum|EAL87180.1 agla|OJJ78963.1 akaw|GAA91888.1 aluc|OJZ82009.1 anid|CBF81714.1 anig|EHA22248.1 aory|EIT80594.1 asyd|OJJ59582.1 ater|EAU31299.1 atub|OJI84558.1 aver|OJJ02687.1 awen|OJJ33679.1 azon|OJJ42820.1

Group1604: abra|OJJ67913.1 acar|OOF92766.1 acla|EAW12796.1 afis|EAW17959.1 afla|EED51948.1 afum|EAL91770.1 agla|OJJ80207.1 akaw|GAA91283.1 aluc|OJZ82786.1 anid|CBF79950.1 anig|EHA21227.1 aory|EIT81390.1 asyd|OJJ58216.1 ater|EAU31448.1 atub|OJI89018.1 aver|OJJ02206.1 awen|OJJ41583.1 azon|OJJ48295.1

Group1605: abra|OJJ67915.1 acar|OOF92767.1 acla|EAW12794.1 afis|EAW17957.1 afla|EED51950.1 afum|EAL91768.1 agla|OJJ80204.1 akaw|GAA91281.1 aluc|OJZ82788.1 anid|CBF79947.1 anig|EHA21229.1 aory|EIT81406.1 asyd|OJJ58214.1 ater|EAU31445.1 atub|OJI89020.1 aver|OJJ02208.1 awen|OJJ41585.1 azon|OJJ48297.1

Group1606: abra|OJJ67917.1 acar|OOF92769.1 acla|EAW12792.1 afis|EAW17955.1 afla|EED51952.1 afum|EAL91766.1 agla|OJJ80202.1 akaw|GAA91279.1 aluc|OJZ82790.1 anid|CBF79943.1 anig|EHA21231.1

aory|EIT81414.1 asyd|OJJ58212.1 ater|EAU31443.1 atub|OJI89021.1 aver|OJJ02210.1 awen|OJJ41587.1 azon|OJJ48302.1

Group1607: abra|OJJ67918.1 acar|OOF92770.1 acla|EAW12791.1 afis|EAW17951.1 afla|EED51953.1 afum|EAL91761.1 agla|OJJ80201.1 akaw|GAA91278.1 aluc|OJZ82791.1 anid|CBF79941.1 anig|EHA21232.1 aory|EIT81400.1 asyd|OJJ58211.1 ater|EAU31442.1 atub|OJI89022.1 aver|OJJ02211.1 awen|OJJ41588.1 azon|OJJ48303.1

Group1608: abra|OJJ67919.1 acar|OOF92771.1 acla|EAW12790.1 afis|EAW17952.1 afla|EED51954.1 afum|EAL91762.1 agla|OJJ80200.1 akaw|GAA91277.1 aluc|OJZ82792.1 anid|CBF79939.1 anig|EHA21233.1 aory|EIT81379.1 asyd|OJJ58210.1 ater|EAU31441.1 atub|OJI89023.1 aver|OJJ02212.1 awen|OJJ41589.1 azon|OJJ48304.1

Group1609: abra|OJJ67920.1 acar|OOF92772.1 acla|EAW12789.1 afis|EAW17953.1 afla|EED51955.1 afum|EAL91763.1 agla|OJJ80199.1 akaw|GAA91276.1 aluc|OJZ82793.1 anid|CBF79934.1 anig|EHA21234.1 aory|EIT81461.1 asyd|OJJ58207.1 ater|EAU31440.1 atub|OJI89024.1 aver|OJJ02215.1 awen|OJJ41590.1 azon|OJJ48305.1

Group1610: abra|OJJ67922.1 acar|OOF92773.1 acla|EAW12788.1 afis|EAW17954.1 afla|EED51956.1 afum|EAL91765.1 agla|OJJ80198.1 akaw|GAA91275.1 aluc|OJZ82794.1 anid|CBF79932.1 anig|EHA21235.1 aory|EIT81403.1 asyd|OJJ58206.1 ater|EAU31439.1 atub|OJI89025.1 aver|OJJ02216.1 awen|OJJ41591.1 azon|OJJ48306.1

Group1611: abra|OJJ67923.1 acar|OOF92774.1 acla|EAW12787.1 afis|EAW17950.1 afla|EED51957.1 afum|EAL91760.1 agla|OJJ80197.1 akaw|GAA91274.1 aluc|OJZ82795.1 anid|CBF79931.1 anig|EHA21236.1 aory|EIT81374.1 asyd|OJJ58205.1 ater|EAU31438.1 atub|OJI89026.1 aver|OJJ02217.1 awen|OJJ41592.1 azon|OJJ48308.1

Group1612: abra|OJJ67926.1 acar|OOF92775.1 acla|EAW12785.1 afis|EAW17947.1 afla|EED51959.1 afum|EAL91757.1 agla|OJJ80195.1 akaw|GAA91271.1 aluc|OJZ82798.1 anid|CBF79929.1 anig|EHA21239.1 aory|EIT81382.1 asyd|OJJ58204.1 ater|EAU31431.1 atub|OJI89029.1 aver|OJJ04202.1 awen|OJJ41596.1 azon|OJJ48312.1

Group1613: abra|OJJ67928.1 acar|OOF92777.1 acla|EAW12781.1 afis|EAW17943.1 afla|EED51961.1 afum|EAL91754.1 agla|OJJ82989.1 akaw|GAA91269.1 aluc|OJZ82800.1 anid|CBF79925.1 anig|EHA21240.1 aory|EIT81385.1 asyd|OJJ58202.1 ater|EAU31396.1 atub|OJI89031.1 aver|OJJ04207.1 awen|OJJ41600.1 azon|OJJ48323.1

Group1614: abra|OJJ67929.1 acar|OOF92779.1 acla|EAW11622.1 afis|EAW23836.1 afla|EED51962.1 afum|EAL87267.1 agla|OJJ82498.1 akaw|GAA91268.1 aluc|OJZ82801.1 anid|CBF79923.1 anig|EHA21242.1 aory|EIT81370.1 asyd|OJJ58200.1 ater|EAU31395.1 atub|OJI89032.1 aver|OJJ04208.1 awen|OJJ33798.1 azon|OJJ48745.1

Group1615: abra|OJJ67936.1 acar|OOF92785.1 acla|EAW11625.1 afis|EAW23831.1 afla|EED51974.1 afum|EAL87263.1 agla|OJJ82481.1 akaw|GAA91260.1 aluc|OJZ82808.1 anid|CBF79904.1 anig|EHA21248.1 aory|EIT81407.1 asyd|OJJ58187.1 ater|EAU31385.1 atub|OJI89039.1 aver|OJJ04218.1 awen|OJJ33789.1 azon|OJJ48757.1

Group1616: abra|OJJ67938.1 acar|OOF92787.1 acla|EAW11628.1 afis|EAW23828.1 afla|EED51977.1 afum|EAL87260.1 agla|OJJ82484.1 akaw|GAA91258.1 aluc|OJZ82810.1 anid|CBF79908.1 anig|EHA21249.1 aory|EIT81387.1 asyd|OJJ58189.1 ater|EAU31383.1 atub|OJI89040.1 aver|OJJ04216.1 awen|OJJ33787.1 azon|OJJ48759.1

Group1617: abra|OJJ67940.1 acar|OOF92789.1 acla|EAW11630.1 afis|EAW23826.1 afla|EED51980.1 afum|EAL87258.1 agla|OJJ82486.1 akaw|GAA91256.1 aluc|OJZ82812.1 anid|CBF79911.1 anig|EHA21252.1 aory|EIT81452.1 asyd|OJJ58190.1 ater|EAU31381.1 atub|OJI89043.1 aver|OJJ04215.1 awen|OJJ33784.1 azon|OJJ42886.1

Group1618: abra|OJJ67942.1 acar|OOF92791.1 acla|EAW11636.1 afis|EAW23821.1 afla|EED51983.1 afum|EAL87256.1 agla|OJJ82468.1 akaw|GAA91254.1 aluc|OJZ82814.1 anid|CBF79894.1 anig|EHA21254.1 aory|EIT81391.1 asyd|OJJ58182.1 ater|EAU31373.1 atub|OJI89045.1 aver|OJJ04224.1 awen|OJJ33777.1 azon|OJJ42883.1

Group1619: abra|OJJ67951.1 acar|OOF92798.1 acla|EAW11641.1 afis|EAW23816.1 afla|EED51989.1 afum|EAL87251.1 agla|OJJ82462.1 akaw|GAA91246.1 aluc|OJZ82824.1 anid|CBF79887.1 anig|EHA21262.1 aory|EIT81439.1 asyd|OJJ58175.1 ater|EAU31371.1 atub|OJI89053.1 aver|OJJ04229.1 awen|OJJ33773.1 azon|OJJ42877.1

Group1620: abra|OJJ67957.1 acar|OOF92802.1 acla|EAW11646.1 afis|EAW23810.1 afla|EED52005.1 afum|EAL87244.1 agla|OJJ82450.1 akaw|GAA91239.1 aluc|OJZ82830.1 anid|CBF79876.1 anig|EHA21268.1 aory|EIT81434.1 asyd|OJJ58169.1 ater|EAU31363.1 atub|OJI89060.1 aver|OJJ04234.1 awen|OJJ33766.1 azon|OJJ42870.1

Group1621: abra|OJJ67958.1 acar|OOF92803.1 acla|EAW11647.1 afis|EAW23809.1 afla|EED52006.1 afum|EAL87243.1 agla|OJJ82449.1 akaw|GAA91238.1 aluc|OJZ82831.1 anid|CBF79874.1 anig|EHA21269.1 aory|EIT81404.1 asyd|OJJ58168.1 ater|EAU31362.1 atub|OJI89061.1 aver|OJJ04235.1 awen|OJJ33765.1 azon|OJJ42868.1

Group1622: abra|OJJ67977.1 acar|OOF92819.1 acla|EAW11758.1 afis|EAW23791.1 afla|EED51599.1 afum|EAL87225.1 agla|OJJ78819.1 akaw|GAA91226.1 aluc|OJZ82844.1 anid|CBF79853.1 anig|EHA21282.1 aory|EIT80507.1 asyd|OJJ58157.1 ater|EAU31330.1 atub|OJI89074.1 aver|OJJ04246.1 awen|OJJ33746.1 azon|OJJ42843.1

Group1623: abra|OJJ67978.1 acar|OOF92818.1 acla|EAW11757.1 afis|EAW23790.1 afla|EED51598.1 afum|EAL87224.1 agla|OJJ78817.1 akaw|GAA91225.1 aluc|OJZ82845.1 anid|CBF79851.1 anig|EHA21283.1 aory|EIT80526.1 asyd|OJJ58156.1 ater|EAU31329.1 atub|OJI89075.1 aver|OJJ04247.1 awen|OJJ33745.1 azon|OJJ42844.1

Group1624: abra|OJJ68015.1 acar|OOF92057.1 acla|EAW08795.1 afis|EAW15605.1 afla|EED55861.1 afum|EAL85728.1 agla|OJJ79064.1 akaw|GAA90936.1 aluc|OJZ82888.1 anid|CBF69625.1 anig|EHA21314.1 aory|EIT76549.1 asyd|OJJ59120.1 ater|EAU37248.1 atub|OJI89113.1 aver|OJJ01709.1 awen|OJJ32398.1 azon|OJJ43874.1

Group1625: abra|OJJ68016.1 acar|OOF92058.1 afla|EED54104.1 agla|OJJ80413.1 akaw|GAA90935.1 aluc|OJZ82889.1 anid|CBF83706.1 anig|EHA21315.1 aory|EIT77159.1 asyd|OJJ53740.1 atub|OJI89114.1 aver|OJJ07853.1 awen|OJJ35049.1 azon|OJJ42272.1 acla|EAW14887.1 awen|OJJ34541.1 aory|EIT75976.1 awen|OJJ30142.1

Group1626: abra|OJJ68060.1 acar|OOF92081.1 acla|EAW13655.1 afis|EAW19935.1 afla|EED45904.1 afum|EAL84975.2 agla|OJJ79327.1 akaw|GAA90896.1 aluc|OJZ82932.1 anid|CBF84602.1 anig|EHA21353.1 aory|EIT75822.1 asyd|OJJ53375.1 ater|EAU36898.1 atub|OJI89161.1 aver|OJJ08369.1 awen|OJJ29978.1 azon|OJJ50215.1

Group1627: abra|OJJ68075.1 acar|OOF94470.1 acla|EAW12117.1 afis|EAW17265.1 afla|EED48857.1 afum|EAL86682.1 agla|OJJ85378.1 akaw|GAA92736.1 aluc|OJZ92944.1 anid|CBF87528.1 anig|EHA26028.1 aory|EIT81286.1 asyd|OJJ52984.1 ater|EAU36128.1 atub|OJI87403.1 aver|OJJ08953.1 awen|OJJ35769.1 azon|OJJ50248.1

Group1628: abra|OJJ68089.1 acar|OOF93893.1 acla|EAW15283.1 afis|EAW17127.1 afla|EED48286.1 afum|EAL86587.1 agla|OJJ78597.1 akaw|GAA86874.1 aluc|OJZ89998.1 anid|CBF80813.1 anig|EHA27373.1 aory|EIT72919.1 asyd|OJJ54451.1 ater|EAU34073.1 atub|OJI84810.1 aver|OJJ07703.1 awen|OJJ29885.1 azon|OJJ50148.1

Group1629: abra|OJJ68125.1 acar|OOF93919.1 acla|EAW12869.1 afis|EAW17817.1 afla|EED45601.1 afum|EAL91627.1 agla|OJJ81689.1 akaw|GAA86906.1 aluc|OJZ90029.1 anid|CBF80748.1 anig|EHA27405.1 aory|EIT75765.1 asyd|OJJ54539.1 ater|EAU30285.1 atub|OJI84778.1 aver|OJJ07642.1 awen|OJJ36934.1 azon|OJJ42822.1

Group1630: abra|OJJ68126.1 acar|OOF93920.1 acla|EAW12870.1 afis|EAW17818.1 afla|EED45602.1 afum|EAL91628.1 agla|OJJ85762.1 akaw|GAA86907.1 aluc|OJZ90030.1 anid|CBF80750.1 anig|EHA27406.1 asyd|OJJ62953.1 atub|OJI84777.1 aver|OJJ07643.1 awen|OJJ31294.1 azon|OJJ50609.1 aver|OJI98031.1 asyd|OJJ54538.1

Group1631: abra|OJJ68139.1 acar|OOF98356.1 acla|EAW14517.1 afis|EAW19235.1 afla|EED47647.1 afum|EAL93963.1 agla|OJJ88463.1 akaw|GAA92378.1 aluc|OJZ83237.1 anid|CBF78634.1 anig|EHA21094.1 aory|EIT80221.1 asyd|OJJ65123.1 ater|EAU37228.1 atub|OJI87699.1 aver|OJI99251.1 awen|OJJ37592.1 azon|OJJ51245.1

Group1632: abra|OJJ68145.1 acar|OOF89988.1 acla|EAW07390.1 afis|EAW22416.1 afla|EED52494.1 afum|EAL90776.1 agla|OJJ87680.1 akaw|GAA92373.1 aluc|OJZ83231.1 anid|CBF88053.1 anig|EHA21089.1 aory|EIT82805.1 asyd|OJJ63540.1 ater|EAU39291.1 atub|OJI87705.1 aver|OJI97393.1 awen|OJJ34995.1 azon|OJJ45638.1

Group1633: agla|OJJ86892.1 akaw|GAA88060.1 aluc|OJZ81322.1 abra|OJJ68375.1 agla|OJJ79451.1 aluc|OJZ90115.1 anig|EHA18628.1 ater|EAU37955.1 atub|OJI84684.1 awen|OJJ35546.1 azon|OJJ50297.1 acar|OOF90164.1 atub|OJI82870.1 awen|OJJ29729.1 acar|OOF90659.1 afla|EED57502.1 ater|EAU37868.1 atub|OJI91525.1

Group1634: abra|OJJ68168.1 acar|OOF97466.1 acla|EAW13054.1 afis|EAW17612.1 afla|EED49203.1 afum|EAL91425.1 agla|OJJ81325.1 akaw|GAA83275.1 aluc|OJZ83781.1 anid|CBF90174.1 anig|EHA18921.1 aory|EIT78579.1 asyd|OJJ61990.1 ater|EAU37047.1 atub|OJI90151.1 aver|OJI96082.1 awen|OJJ37230.1 azon|OJJ50933.1

Group1635: abra|OJJ68169.1 acar|OOF97467.1 acla|EAW13055.1 afis|EAW17611.1 afla|EED49202.1 afum|EAL91424.1 agla|OJJ81326.1 akaw|GAA83274.1 aluc|OJZ83780.1 anid|CBF90175.1 anig|EHA18920.1

aory|EIT78562.1 asyd|OJJ61989.1 ater|EAU37046.1 atub|OJI90150.1 aver|OJI96081.1 awen|OJJ37231.1 azon|OJJ50934.1

Group1636: abra|OJJ68171.1 acar|OOF97468.1 acla|EAW13056.1 afis|EAW17610.1 afla|EED49201.1 afum|EAL91423.1 agla|OJJ81331.1 akaw|GAA83273.1 aluc|OJZ83779.1 anid|CBF90177.1 anig|EHA18919.1 aory|EIT78514.1 asyd|OJJ61988.1 ater|EAU37045.1 atub|OJI90149.1 aver|OJI96080.1 awen|OJJ37232.1 azon|OJJ50935.1

Group1637: abra|OJJ68172.1 acar|OOF97470.1 acla|EAW13057.1 afis|EAW17609.1 afla|EED49213.1 afum|EAL91422.1 agla|OJJ81356.1 akaw|GAA83272.1 aluc|OJZ83778.1 anid|CBF90179.1 anig|EHA18918.1 aory|EIT83168.1 asyd|OJJ61987.1 ater|EAU37044.1 atub|OJI90148.1 aver|OJI96079.1 awen|OJJ37233.1 azon|OJJ50936.1

Group1638: abra|OJJ68173.1 acar|OOF97471.1 acla|EAW13058.1 afis|EAW17608.1 afla|EED49214.1 afum|EAL91421.1 agla|OJJ81355.1 akaw|GAA83271.1 aluc|OJZ83777.1 anid|CBF90181.1 anig|EHA18917.1 aory|EIT83162.1 asyd|OJJ61986.1 ater|EAU37043.1 atub|OJI90147.1 aver|OJI96078.1 awen|OJJ37234.1 azon|OJJ50937.1

Group1639: abra|OJJ68176.1 acar|OOF97473.1 acla|EAW13060.1 afis|EAW17604.1 afla|EED49217.1 afum|EAL91417.1 agla|OJJ81352.1 akaw|GAA83268.1 aluc|OJZ83774.1 anid|CBF90186.1 anig|EHA18914.1 aory|EIT83159.1 asyd|OJJ61983.1 ater|EAU37041.1 atub|OJI90145.1 aver|OJI96075.1 awen|OJJ37237.1 azon|OJJ50939.1

Group1640: abra|OJJ68177.1 acar|OOF97474.1 acla|EAW13061.1 afis|EAW17603.1 afla|EED49218.1 afum|EAL91416.1 agla|OJJ81351.1 akaw|GAA83267.1 aluc|OJZ83773.1 anid|CBF90188.1 anig|EHA18913.1 aory|EIT83167.1 asyd|OJJ61982.1 ater|EAU37040.1 atub|OJI90144.1 aver|OJI96074.1 awen|OJJ37238.1 azon|OJJ50940.1

Group1641: abra|OJJ68181.1 acar|OOF97477.1 acla|EAW13063.1 afis|EAW17601.1 afla|EED49220.1 afum|EBA27434.1 agla|OJJ81348.1 akaw|GAA83265.1 aluc|OJZ83771.1 anid|CBF90190.1 anig|EHA18911.1 aory|EIT83161.1 asyd|OJJ61981.1 ater|EAU37038.1 atub|OJI90142.1 aver|OJI96073.1 awen|OJJ37244.1 azon|OJJ50942.1

Group1642: abra|OJJ68182.1 acar|OOF97476.1 acla|EAW13064.1 afis|EAW17600.1 afla|EED49221.1 afum|EAL91414.1 agla|OJJ81347.1 akaw|GAA83264.1 aluc|OJZ83770.1 anid|CBF90192.1 anig|EHA18910.1 aory|EIT83165.1 asyd|OJJ61980.1 ater|EAU37037.1 atub|OJI90141.1 aver|OJI96072.1 awen|OJJ37245.1 azon|OJJ50943.1

Group1643: abra|OJJ68184.1 acar|OOF97479.1 acla|EAW13065.1 afis|EAW17599.1 afla|EED49222.1 afum|EAL91412.2 agla|OJJ81345.1 akaw|GAA83262.1 aluc|OJZ83768.1 anid|EHA18908.1 aory|EIT83170.1 asyd|OJJ61978.1 ater|EAU37036.1 atub|OJI90139.1 aver|OJI96070.1 awen|OJJ37247.1 azon|OJJ50945.1 anid|CBF90194.1

Group1644: abra|OJJ68190.1 acar|OOF97486.1 acla|EAW13072.1 afis|EAW17592.1 afla|EED49230.1 afum|EAL91405.1 agla|OJJ81357.1 akaw|GAA83255.1 aluc|OJZ83756.1 anid|CBF90212.1 anig|EHA18903.1 aory|EIT83166.1 asyd|OJJ61969.1 ater|EAU37029.1 atub|OJI90131.1 aver|OJI96062.1 awen|OJJ37254.1 azon|OJJ50949.1

Group1645: abra|OJJ68193.1 acar|OOF97489.1 acla|EAW13076.1 afis|EAW17588.1 afla|EED49234.1 afum|EAL91401.1 agla|OJJ81364.1 akaw|GAA83252.1 aluc|OJZ83753.1 anid|CBF90220.1 anig|EHA18900.1 aory|EIT83171.1 asyd|OJJ61966.1 ater|EAU37023.1 atub|OJI90128.1 aver|OJI96058.1 awen|OJJ37258.1 azon|OJJ50953.1

Group1646: abra|OJJ68194.1 acar|OOF97490.1 acla|EAW13077.1 afis|EAW17587.1 afla|EED49235.1 afum|EAL91400.1 agla|OJJ81365.1 akaw|GAA83251.1 aluc|OJZ83752.1 anid|CBF90222.1 anig|EHA18899.1 aory|EIT83154.1 asyd|OJJ61965.1 ater|EAU37022.1 atub|OJI90127.1 aver|OJI96057.1 awen|OJJ37259.1 azon|OJJ50954.1

Group1647: abra|OJJ68196.1 acar|OOF97491.1 acla|EAW13079.1 afis|EAW17585.1 afla|EED49237.1 afum|EAL91398.2 agla|OJJ81368.1 akaw|GAA83249.1 aluc|OJZ83750.1 anid|CBF90225.1 anig|EHA18897.1 aory|EIT83169.1 asyd|OJJ61963.1 ater|EAU37020.1 atub|OJI90125.1 aver|OJI96055.1 awen|OJJ37261.1 azon|OJJ50956.1

Group1648: abra|OJJ68197.1 acar|OOF89886.1 acla|EAW13080.1 afis|EAW17584.1 afla|EED49239.1 afum|EAL91397.1 agla|OJJ81369.1 akaw|GAA83248.1 aluc|OJZ83749.1 anid|CBF90227.1 anig|EHA18896.1 aory|EIT82222.1 asyd|OJJ61962.1 ater|EAU37019.1 atub|OJI90124.1 aver|OJI96054.1 awen|OJJ37262.1 azon|OJJ50957.1

Group1649: abra|OJJ68199.1 acar|OOF90119.1 acla|EAW13081.1 afis|EAW17583.1 afla|EED49240.1 afum|EAL91396.1 agla|OJJ81370.1 akaw|GAA83247.1 aluc|OJZ83748.1 anid|CBF90229.1 anig|EHA18895.1 aory|EIT82239.1 asyd|OJJ61961.1 ater|EAU37018.1 atub|OJI90123.1 aver|OJI96053.1 awen|OJJ37265.1 azon|OJJ50959.1

Group1650: abra|OJJ68200.1 acar|OOF90117.1 acla|EAW13083.1 afis|EAW17581.1 afla|EED49241.1  
agla|OJJ81372.1 akaw|GAA83245.1 aluc|OJZ83747.1 anid|CBF90232.1 anig|EHA18893.1 aory|EIT82216.1  
asyd|OJJ61959.1 ater|EAU37016.1 atub|OJI90122.1 aver|OJI96051.1 awen|OJJ37267.1 azon|OJJ50960.1  
afum|EAL91394.1

Group1651: abra|OJJ68201.1 acar|OOF90116.1 acla|EAW13084.1 afis|EAW17580.1 afla|EED49242.1  
afum|EAL91393.1 agla|OJJ81379.1 akaw|GAA83244.1 aluc|OJZ83746.1 anid|CBF90234.1 anig|EHA18892.1  
aory|EIT82232.1 asyd|OJJ61958.1 ater|EAU37015.1 atub|OJI90121.1 aver|OJI96050.1 awen|OJJ37268.1  
azon|OJJ50961.1

Group1652: abra|OJJ68203.1 acar|OOF90234.1 acla|EAW13086.1 afis|EAW17579.1 afla|EED49243.1  
afum|EAL91392.1 agla|OJJ81378.1 akaw|GAA83243.1 aluc|OJZ83744.1 anid|CBF90238.1 anig|EHA18891.1  
aory|EIT82211.1 asyd|OJJ61957.1 ater|EAU37014.1 atub|OJI90120.1 aver|OJI96049.1 awen|OJJ37269.1  
azon|OJJ50962.1

Group1653: abra|OJJ68204.1 acar|OOF90236.1 acla|EAW13087.1 afis|EAW17577.1 afla|EED49244.1  
afum|EAL91390.1 agla|OJJ81377.1 akaw|GAA83242.1 aluc|OJZ83741.1 anid|CBF90245.1 anig|EHA18890.1  
aory|EIT82198.1 asyd|OJJ61951.1 ater|EAU37013.1 atub|OJI90119.1 aver|OJI96042.1 awen|OJJ37270.1  
azon|OJJ50969.1

Group1654: abra|OJJ68205.1 acar|OOF90235.1 acla|EAW13088.1 afis|EAW17576.1 afla|EED49245.1  
afum|EAL91389.1 agla|OJJ81381.1 akaw|GAA83241.1 aluc|OJZ83740.1 anid|CBF90247.1 anig|EHA18889.1  
aory|EIT82237.1 asyd|OJJ61950.1 ater|EAU37012.1 atub|OJI90118.1 aver|OJI96041.1 awen|OJJ37271.1  
azon|OJJ50971.1

Group1655: abra|OJJ68207.1 acar|OOF97493.1 acla|EAW13090.1 afis|EAW17574.1 afla|EED49247.1  
afum|EAL91387.1 agla|OJJ81384.1 akaw|GAA83239.1 aluc|OJZ83738.1 anid|CBF90250.1 anig|EHA18887.1  
aory|EIT82189.1 asyd|OJJ61948.1 ater|EAU37010.1 atub|OJI90116.1 aver|OJI96040.1 awen|OJJ37273.1  
azon|OJJ50973.1

Group1656: abra|OJJ68211.1 acar|OOF97495.1 acla|EAW12973.1 afis|EAW17691.1 afla|EED50453.1  
afum|EAL91505.1 agla|OJJ79488.1 akaw|GAA83235.1 aluc|OJZ83734.1 anid|CBF89980.1 anig|EHA18883.1  
aory|EIT82051.1 asyd|OJJ62090.1 ater|EAU31953.1 atub|OJI90112.1 aver|OJI96196.1 awen|OJJ37145.1  
azon|OJJ50845.1

Group1657: abra|OJJ68212.1 acar|OOF97496.1 acla|EAW12972.1 afis|EAW17692.1 afla|EED50452.1  
afum|EAL91506.1 agla|OJJ79487.1 akaw|GAA83234.1 aluc|OJZ83733.1 anid|CBF89978.1 anig|EHA18882.1  
aory|EIT82145.1 asyd|OJJ62091.1 ater|EAU31958.1 atub|OJI90111.1 aver|OJI96197.1 awen|OJJ37144.1  
azon|OJJ50844.1

Group1658: abra|OJJ68249.1 acar|OOF97528.1 acla|EAW09061.1 afis|EAW25634.1 afla|EED55178.1  
afum|EAL84322.1 agla|OJJ78898.1 akaw|GAA83212.1 aluc|OJZ83714.1 anid|CBF83155.1 anig|EHA18865.1  
aory|EIT81648.1 asyd|OJJ55514.1 ater|EAU32715.1 atub|OJI90089.1 aver|OJJ06591.1 awen|OJJ36053.1  
azon|OJJ50759.1

Group1659: abra|OJJ68257.1 acar|OOF97534.1 acla|EAW09064.1 afis|EAW25636.1 afla|EED55176.1  
afum|EAL84324.1 agla|OJJ78896.1 akaw|GAA83205.1 aluc|OJZ83707.1 anid|CBF83151.1 anig|EHA18858.1  
aory|EIT81641.1 asyd|OJJ55516.1 ater|EAU32717.1 atub|OJI90079.1 aver|OJJ06593.1 awen|OJJ36093.1  
azon|OJJ50756.1

Group1660: abra|OJJ68259.1 acar|OOF97536.1 acla|EAW14109.1 afis|EAW18811.1 afla|EED50761.1  
afum|EAL93547.1 agla|OJJ80544.1 akaw|GAA92415.1 aluc|OJZ83273.1 anid|CBF69795.1 anig|EHA18856.1  
aory|EIT78026.1 asyd|OJJ58964.1 ater|EAU37966.1 atub|OJI87668.1 aver|OJJ01558.1 awen|OJJ32387.1  
azon|OJJ47147.1

Group1661: abra|OJJ68274.1 acar|OOF97552.1 acla|EAW09071.1 agla|OJJ78841.1 akaw|GAA83195.1  
aluc|OJZ83697.1 anid|CBF78459.1 anig|EHA18848.1 asyd|OJJ64190.1 ater|EAU32708.1 atub|OJI90068.1  
aver|OJI98267.1 awen|OJJ35541.1 azon|OJJ44995.1 acar|OOF92523.1 azon|OJJ42182.1 afla|EED55164.1  
azon|OJJ45941.1

Group1662: abra|OJJ68281.1 acar|OOF97555.1 acla|EAW09093.1 afis|EAW25687.1 afla|EED55157.1  
afum|EAL84356.1 agla|OJJ78886.1 akaw|GAA83191.1 aluc|OJZ83690.1 anid|CBF83933.1 anig|EHA18844.1  
aory|EIT81633.1 asyd|OJJ55435.1 ater|EAU32721.1 atub|OJI90062.1 aver|OJJ06512.1 awen|OJJ36120.1  
azon|OJJ50742.1

Group1663: abra|OJJ68301.1 acar|OOF96686.1 acla|EAW12631.1 afis|EAW18053.1 afla|EED56195.1  
afum|EAL91864.1 agla|OJJ87336.1 akaw|GAA83173.1 aluc|OJZ83672.1 anid|CBF83350.1 anig|EHA18827.1  
aory|EIT73338.1 asyd|OJJ60615.1 ater|EAU34830.1 atub|OJI90043.1 aver|OJI99939.1 awen|OJJ41435.1  
azon|OJJ48899.1

Group1664: abra|OJJ68398.1 acar|OOF93975.1 acla|EAW08574.1 afis|EAW23634.1 afla|EED47506.1  
afum|EAL87826.1 akaw|GAA92549.1 aluc|OJZ90098.1 anig|EHA20978.1 aory|EIT74517.1 asyd|OJJ54836.1

atub|OJJ84708.1 aver|OJJ07325.1 azon|OJJ50231.1 aory|EIT74543.1 asyd|OJJ53612.1 aver|OJJ07720.1 awen|OJJ29655.1

Group1665: abra|OJJ68415.1 acar|OOG00093.1 acla|EAW11055.1 afis|EAW20382.1 afum|EAL85495.1 agla|OJJ83841.1 akaw|GAA92533.1 aluc|OJZ90082.1 anid|CBF70730.1 anig|EHA20991.1 asyd|OJJ56111.1 ater|EAU30781.1 atub|OJJ84724.1 aver|OJJ05054.1 awen|OJJ30077.1 azon|OJJ48238.1 anid|CBF78288.1 acla|EAW15020.1

Group1666: abra|OJJ68449.1 acar|OOF93946.1 acla|EAW11772.1 afis|EAW23677.1 afla|EED54146.1 afum|EAL87120.1 agla|OJJ78443.1 akaw|GAA86924.1 aluc|OJZ90048.1 anid|CBF75094.1 anig|EHA21022.1 aory|EIT75945.1 asyd|OJJ60010.1 ater|EAU29439.1 atub|OJJ84758.1 aver|OJJ02275.1 awen|OJJ38063.1 azon|OJJ50775.1

Group1667: abra|OJJ68459.1 acar|OOF92643.1 acla|EAW08639.1 afis|EAW15792.1 afla|EED51253.1 afum|EAL85558.1 agla|OJJ81955.1 akaw|GAA92421.1 aluc|OJZ80815.1 anid|CBF70968.1 anig|EHA21125.1 aory|EIT81555.1 asyd|OJJ52614.1 ater|EAU32350.1 atub|OJJ87664.1 aver|OJJ04641.1 awen|OJJ38500.1 azon|OJJ43801.1

Group1668: abra|OJJ68464.1 acar|OOF94169.1 acla|EAW10056.1 afis|EAW25528.1 afla|EED54029.1 afum|EAL90193.2 agla|OJJ87274.1 akaw|GAA92384.1 aluc|OJZ83243.1 anid|CBF77807.1 anig|EHA21098.1 aory|EIT78344.1 asyd|OJJ53016.1 ater|EAU33371.1 atub|OJJ87693.1 aver|OJJ03827.1 awen|OJJ41270.1 azon|OJJ49510.1

Group1669: abra|OJJ68468.1 acar|OOF89893.1 acla|EAW10429.1 afis|EAW25140.1 afla|EED55305.1 afum|EAL89812.1 agla|OJJ89027.1 akaw|GAA92389.1 aluc|OJZ83249.1 anid|CBF86095.1 anig|EHA21102.1 aory|EIT83530.1 asyd|OJJ64474.1 ater|EAU39409.1 atub|OJJ87688.1 aver|OJJ98578.1 awen|OJJ40764.1 azon|OJJ44129.1

Group1670: abra|OJJ68475.1 acar|OOF92975.1 acla|EAW06477.1 afis|EAW15972.1 afla|EED58084.1 afum|EAL88604.1 agla|OJJ83843.1 akaw|GAA92396.1 aluc|OJZ83256.1 anid|CBF81100.1 anig|EHA21110.1 aory|EIT79134.1 asyd|OJJ56477.1 ater|EAU35476.1 atub|OJJ87682.1 aver|OJJ06241.1 awen|OJJ35600.1 azon|OJJ46920.1

Group1671: abra|OJJ68476.1 acar|OOF99927.1 acla|EAW09807.1 afis|EAW21329.1 afla|EED57287.1 afum|EAL92347.1 agla|OJJ87410.1 akaw|GAA92397.1 aluc|OJZ83258.1 anid|CBF83431.1 anig|EHA21111.1 aory|EIT74125.1 asyd|OJJ60661.1 ater|EAU35955.1 atub|OJJ87681.1 aver|OJJ99984.1 awen|OJJ39369.1 azon|OJJ51709.1

Group1672: abra|OJJ68478.1 acar|OOF96519.1 acla|EAW13881.1 afis|EAW18593.1 afla|EED52754.1 afum|EAL93301.1 agla|OJJ81645.1 akaw|GAA92401.1 aluc|OJZ83262.1 anid|CBF70381.1 anig|EHA21115.1 aory|EIT78198.1 asyd|OJJ58642.1 ater|EAU34887.1 atub|OJJ87675.1 aver|OJJ01248.1 awen|OJJ31156.1 azon|OJJ46631.1

Group1673: abra|OJJ68485.1 acar|OOG00353.1 acla|EAW07017.1 afis|EAW16643.1 afla|EED44966.1 afum|EAL89246.1 agla|OJJ82604.1 akaw|GAA92786.1 aluc|OJZ82697.1 anid|CBF82045.1 anig|EHA21146.1 aory|EIT73490.1 asyd|OJJ54225.1 ater|EAU39568.1 atub|OJJ88929.1 aver|OJJ05178.1 awen|OJJ40071.1 azon|OJJ45553.1

Group1674: abra|OJJ68486.1 acar|OOF95442.1 acla|EAW07333.1 afis|EAW22365.1 afla|EED57773.1 afum|EBA27416.1 agla|OJJ87616.1 akaw|GAA92785.1 aluc|OJZ82698.1 anid|CBF88690.1 anig|EHA21153.1 aory|EIT81113.1 asyd|OJJ63908.1 ater|EAU39499.1 atub|OJJ88930.1 aver|OJJ97033.1 awen|OJJ34939.1 azon|OJJ45591.1

Group1675: abra|OJJ68497.1 acar|OOF99362.1 acla|EAW14277.1 afis|EAW18997.1 afla|EED53139.1 afum|EAL93732.1 agla|OJJ80191.1 akaw|GAA92773.1 aluc|OJZ82710.1 anid|CBF86779.1 anig|EHA21165.1 aory|EIT74918.1 asyd|OJJ64682.1 ater|EAU37806.1 atub|OJJ88943.1 aver|OJJ98784.1 awen|OJJ31625.1 azon|OJJ47325.1

Group1676: abra|OJJ68499.1 acar|OOF93648.1 acla|EAW14509.1 afis|EAW19222.1 afla|EED47663.1 afum|EAL93954.1 agla|OJJ88466.1 akaw|GAA92772.1 aluc|OJZ82712.1 anid|CBF78608.1 anig|EHA21167.1 aory|EIT80278.1 asyd|OJJ65103.1 ater|EAU37236.1 atub|OJJ88945.1 aver|OJJ99230.1 awen|OJJ37585.1 azon|OJJ51239.1

Group1677: abra|OJJ68500.1 acar|OOF92674.1 acla|EAW08059.1 afis|EAW23095.1 afla|EED48553.1 afum|EAL88383.1 agla|OJJ89607.1 akaw|GAA92771.1 aluc|OJZ82713.1 anid|CBF75180.1 anig|EHA21168.1 aory|EIT73191.1 asyd|OJJ59952.1 ater|EAU36223.1 atub|OJJ88946.1 aver|OJJ02337.1 awen|OJJ36686.1 azon|OJJ47510.1

Group1678: abra|OJJ68501.1 acar|OOF89894.1 acla|EAW11963.1 afis|EAW19600.1 afla|EED56956.1 afum|EAL86918.1 agla|OJJ80742.1 akaw|GAA92770.1 aluc|OJZ82714.1 anid|CBF71291.1 anig|EHA21169.1 aory|EIT77492.1 asyd|OJJ55128.1 ater|EAU32925.1 atub|OJJ88947.1 aver|OJJ07076.1 awen|OJJ41841.1 azon|OJJ47038.1



Group1679: abra|OJJ68507.1 acar|OOF92954.1 acla|EAW07233.1 afis|EAW22254.1 afla|EED57640.1 afum|EAL90924.1 agla|OJJ87802.1 akaw|GAA92766.1 aluc|OJZ82719.1 anid|CBF88500.1 anig|EHA21173.1 aory|EIT82931.1 asyd|OJJ63795.1 ater|EAU34255.1 atub|OJI88953.1 aver|OJI97142.1 awen|OJJ34826.1 azon|OJJ45723.1

Group1680: abra|OJJ68510.1 acar|OOF92672.1 acla|EAW07690.1 afis|EAW22705.1 afla|EED49991.1 afum|EAL90487.1 agla|OJJ79004.1 akaw|GAA92761.1 aluc|OJZ82724.1 anid|CBF88071.1 anig|EHA21178.1 aory|EIT74613.1 asyd|OJJ63553.1 ater|EAU38996.1 atub|OJI88958.1 aver|OJI97381.1 awen|OJJ35342.1 azon|OJJ49776.1

Group1681: abra|OJJ68511.1 acar|OOF92678.1 acla|EAW14940.1 afis|EAW24455.1 afla|EED55219.1 afum|EAL86124.1 agla|OJJ80302.1 akaw|GAA91335.1 aluc|OJZ82725.1 anid|CBF75392.1 anig|EHA21179.1 aory|EIT83615.1 asyd|OJJ59834.1 ater|EAU29438.1 atub|OJI88959.1 aver|OJJ02454.1 awen|OJJ32742.1 azon|OJJ45292.1

Group1682: abra|OJJ68517.1 acar|OOF99154.1 acla|EAW06536.1 afis|EAW16059.1 afla|EED48573.1 afum|EAL88692.1 agla|OJJ86106.1 akaw|GAA91331.1 aluc|OJZ82731.1 anid|CBF75082.1 anig|EHA21183.1 aory|EIT73064.1 asyd|OJJ60019.1 ater|EAU33575.1 atub|OJI88964.1 aver|OJJ02266.1 awen|OJJ30380.1 azon|OJJ45396.1

Group1683: abra|OJJ68524.1 acar|OOF92729.1 acla|EAW12839.1 afis|EAW18004.1 afla|EED51892.1 afum|EAL91815.2 agla|OJJ80272.1 akaw|GAA91325.1 aluc|OJZ82738.1 anid|CBF80032.1 anig|EHA21189.1 aory|EIT76182.1 asyd|OJJ58271.1 ater|EAU31516.1 atub|OJI88973.1 aver|OJJ02153.1 awen|OJJ41538.1 azon|OJJ48256.1

Group1684: abra|OJJ68526.1 acar|OOF92730.1 acla|EAW12838.1 afis|EAW18003.1 afla|EED51893.1 afum|EAL91814.2 agla|OJJ80266.1 akaw|GAA91324.1 aluc|OJZ82739.1 anid|CBF80026.1 anig|EHA21190.1 aory|EIT76172.1 asyd|OJJ58266.1 ater|EAU31515.1 atub|OJI88974.1 aver|OJJ02157.1 awen|OJJ41539.1 azon|OJJ48257.1

Group1685: abra|OJJ68527.1 acar|OOF92731.1 acla|EAW12837.1 afis|EAW18002.1 afla|EED51894.1 afum|EAL91813.1 agla|OJJ80265.1 akaw|GAA91323.1 aluc|OJZ82740.1 anid|CBF80025.1 anig|EHA21191.1 aory|EIT76169.1 asyd|OJJ58265.1 ater|EAU31514.1 atub|OJI88975.1 aver|OJJ02158.1 awen|OJJ41540.1 azon|OJJ48258.1

Group1686: abra|OJJ68528.1 acar|OOF92732.1 acla|EAW12836.1 afis|EAW18001.1 afla|EED51895.1 afum|EAL91812.1 agla|OJJ80264.1 akaw|GAA91322.1 aluc|OJZ82741.1 anid|CBF80023.1 anig|EHA21192.1 aory|EIT76176.1 asyd|OJJ58264.1 ater|EAU31513.1 atub|OJI88976.1 aver|OJJ02160.1 awen|OJJ41541.1 azon|OJJ48259.1

Group1687: abra|OJJ68531.1 acar|OOF92734.1 acla|EAW12834.1 afis|EAW17999.1 afla|EED51899.1 afum|EAL91810.1 agla|OJJ80262.1 akaw|GAA91320.1 aluc|OJZ82743.1 anid|CBF80019.1 anig|EHA21194.1 aory|EIT76173.1 asyd|OJJ58262.1 ater|EAU31511.1 atub|OJI88978.1 aver|OJJ02162.1 awen|OJJ41543.1 azon|OJJ48261.1

Group1688: abra|OJJ68532.1 acar|OOF92735.1 acla|EAW12833.1 afis|EAW17998.1 afla|EED51900.1 afum|EAL91809.2 agla|OJJ80261.1 akaw|GAA91319.1 aluc|OJZ82744.1 anid|CBF80017.1 anig|EHA21195.1 aory|EIT76171.1 asyd|OJJ58261.1 ater|EAU31510.1 atub|OJI88979.1 aver|OJJ02163.1 awen|OJJ41544.1 azon|OJJ48262.1

Group1689: abra|OJJ68533.1 acar|OOF92736.1 afis|EAW17997.1 afla|EED51903.1 afum|EAL91807.2 akaw|GAA91318.1 aluc|OJZ82746.1 anig|EHA21196.1 aory|EIT76183.1 asyd|OJJ58260.1 atub|OJI88980.1 aver|OJJ02164.1 awen|OJJ41545.1 acla|EAW12832.1 agla|OJJ80257.1 ater|EAU31509.1 azon|OJJ48263.1 anid|CBF80015.1

Group1690: abra|OJJ68537.1 acar|OOF90151.1 acla|EAW12827.1 afis|EAW17992.1 afla|EED51911.1 afum|EAL91802.1 agla|OJJ80253.1 akaw|GAA91314.1 aluc|OJZ82751.1 anid|CBF80004.1 anig|EHA21200.1 aory|EIT76179.1 asyd|OJJ58250.1 ater|EAU31503.1 atub|OJI88987.1 aver|OJJ02174.1 awen|OJJ41554.1 azon|OJJ48269.1

Group1691: abra|OJJ68538.1 acar|OOF90152.1 acla|EAW12828.1 afis|EAW17993.1 afla|EED51908.1 afum|EAL91803.1 agla|OJJ80254.1 akaw|GAA91313.1 aluc|OJZ82752.1 anid|CBF80005.1 anig|EHA21201.1 aory|EIT76170.1 asyd|OJJ58251.1 ater|EAU31504.1 atub|OJI88988.1 aver|OJJ02173.1 awen|OJJ41553.1 azon|OJJ48268.1

Group1692: abra|OJJ68541.1 acar|OOF92739.1 acla|EAW12829.1 afis|EAW17994.1 afla|EED51907.1 afum|EAL91804.1 agla|OJJ80255.1 akaw|GAA91312.1 aluc|OJZ82753.1 anid|CBF80009.1 anig|EHA21202.1 aory|EIT76184.1 asyd|OJJ58256.1 ater|EAU31505.1 atub|OJI88990.1 aver|OJJ02167.1 awen|OJJ41551.1 azon|OJJ48267.1

Group1693: abra|OJJ68542.1 acar|OOF92740.1 acla|EAW12830.1 afis|EAW17995.1 afla|EED51906.1 afum|EAL91805.1 agla|OJJ80259.1 akaw|GAA91311.1 aluc|OJZ82755.1 anid|CBF80011.1 anig|EHA21203.1

aory|EIT76180.1 asyd|OJJ58257.1 ater|EAU31507.1 atub|OJI88991.1 aver|OJJ02166.1 awen|OJJ41550.1 azon|OJJ48266.1

Group1694: abra|OJJ68544.1 acar|OOF92742.1 acla|EAW12823.1 afis|EAW17988.1 afla|EED51915.1 afum|EAL91797.1 agla|OJJ80248.1 akaw|GAA91309.1 aluc|OJZ82759.1 anid|CBF79996.1 anig|EHA21205.1 aory|EIT81365.1 asyd|OJJ58247.1 ater|EAU31498.1 atub|OJI88993.1 aver|OJJ02179.1 awen|OJJ41558.1 azon|OJJ48273.1

Group1695: abra|OJJ68546.1 acar|OOF92743.1 acla|EAW12822.1 afis|EAW17987.1 afla|EED51916.1 afum|EAL91796.1 agla|OJJ80242.1 akaw|GAA91308.1 aluc|OJZ82762.1 anid|CBF80000.1 anig|EHA21206.1 aory|EIT81367.1 asyd|OJJ58248.1 ater|EAU31497.1 atub|OJI88995.1 aver|OJJ02176.1 awen|OJJ41559.1 azon|OJJ48274.1

Group1696: abra|OJJ68549.1 acar|OOF92745.1 acla|EAW12818.1 afis|EAW17983.1 afla|EED51922.1 afum|EAL91792.1 agla|OJJ80240.1 akaw|GAA91304.1 aluc|OJZ82766.1 anid|CBF79992.1 anig|EHA21209.1 aory|EIT81388.1 asyd|OJJ58238.1 ater|EAU31493.1 atub|OJI88998.1 aver|OJJ02187.1 awen|OJJ41562.1 azon|OJJ48277.1

Group1697: abra|OJJ68554.1 acar|OOF92749.1 acla|EAW12813.1 afis|EAW17978.1 afla|EED51927.1 afum|EAL91787.1 agla|OJJ80235.1 akaw|GAA91299.1 aluc|OJZ82771.1 anid|CBF79976.1 anig|EHA21213.1 aory|EIT81454.1 asyd|OJJ58232.1 ater|EAU31489.1 atub|OJI89002.1 aver|OJJ02192.1 awen|OJJ41567.1 azon|OJJ44836.1

Group1698: abra|OJJ68555.1 acar|OOF92750.1 acla|EAW12812.1 afis|EAW17977.1 afla|EED51928.1 afum|EAL91786.1 agla|OJJ80234.1 akaw|GAA91298.1 aluc|OJZ82772.1 anid|CBF79975.1 anig|EHA21214.1 aory|EIT81416.1 asyd|OJJ58231.1 ater|EAU31488.1 atub|OJI89003.1 aver|OJJ02193.1 awen|OJJ41568.1 azon|OJJ44837.1

Group1699: abra|OJJ68556.1 acar|OOF92751.1 acla|EAW12811.1 afis|EAW17976.1 afla|EED51929.1 afum|EAL91785.1 agla|OJJ80233.1 akaw|GAA91297.1 aluc|OJZ82773.1 anid|CBF79973.1 anig|EHA21215.1 aory|EIT81423.1 asyd|OJJ58230.1 ater|EAU31487.1 atub|OJI89004.1 aver|OJJ02194.1 awen|OJJ41569.1 azon|OJJ44838.1

Group1700: abra|OJJ68557.1 acar|OOF92752.1 acla|EAW12810.1 afis|EAW17975.1 afla|EED51930.1 afum|EAL91784.1 agla|OJJ80232.1 akaw|GAA91296.1 aluc|OJZ82774.1 anid|CBF79972.1 anig|EHA21216.1 aory|EIT81446.1 asyd|OJJ58229.1 ater|EAU31486.1 atub|OJI89005.1 aver|OJJ02195.1 awen|OJJ41570.1 azon|OJJ48283.1

Group1701: abra|OJJ68559.1 acar|OOF92754.1 acla|EAW12806.1 afis|EAW17972.1 afla|EED51932.1 afum|EAL91781.1 agla|OJJ80230.1 akaw|GAA91294.1 aluc|OJZ82775.1 anid|CBF79968.1 anig|EHA21218.1 aory|EIT81462.1 asyd|OJJ58227.1 ater|EAU31482.1 atub|OJI89007.1 aver|OJJ02197.1 awen|OJJ41572.1 azon|OJJ48285.1

Group1702: abra|OJJ68561.1 acar|OOF92755.1 acla|EAW12804.1 afis|EAW17970.1 afla|EED51934.1 afum|EAL91779.1 agla|OJJ80228.1 akaw|GAA91292.1 aluc|OJZ82777.1 anid|CBF79964.1 anig|EHA21220.1 aory|EIT81427.1 asyd|OJJ58224.1 ater|EAU31480.1 atub|OJI89009.1 aver|OJJ02198.1 awen|OJJ41574.1 azon|OJJ48287.1

Group1703: abra|OJJ68564.1 acar|OOF92757.1 acla|EAW12802.1 afis|EAW17968.1 afla|EED51937.1 afum|EAL91777.1 agla|OJJ80226.1 akaw|GAA91290.1 aluc|OJZ82779.1 anid|CBF79961.1 anig|EHA21222.1 aory|EIT81398.1 asyd|OJJ58222.1 ater|EAU31478.1 atub|OJI89012.1 aver|OJJ02200.1 awen|OJJ41576.1 azon|OJJ48289.1

Group1704: abra|OJJ68567.1 acar|OOF92761.1 acla|EAW12798.1 afis|EAW17964.1 afla|EED51946.1 afum|EAL91774.1 agla|OJJ80209.1 akaw|GAA91286.1 aluc|OJZ82782.1 anid|CBF79954.1 anig|EHA21225.1 aory|EIT81431.1 asyd|OJJ58218.1 ater|EAU31450.1 atub|OJI89015.1 aver|OJJ02204.1 awen|OJJ41580.1 azon|OJJ48293.1

Group1705: abra|OJJ68599.1 acar|OOF92109.1 acla|EAW12640.1 afis|EAW18045.1 afla|EED51501.1 afum|EAL91857.1 agla|OJJ85416.1 akaw|GAA91923.1 aluc|OJZ81957.1 anid|CBF79779.1 anig|EHA22290.1 aory|EIT80534.1 asyd|OJJ58121.1 ater|EAU31278.1 atub|OJI84508.1 aver|OJJ04284.1 awen|OJJ41489.1 azon|OJJ48219.1

Group1706: abra|OJJ68601.1 acar|OOF92111.1 acla|EAW12638.1 afis|EAW18047.1 afla|EED51499.1 afum|EAL91859.1 agla|OJJ85418.1 akaw|GAA91925.1 aluc|OJZ81955.1 anid|CBF79776.1 anig|EHA22292.1 aory|EIT80455.1 asyd|OJJ58119.1 ater|EAU31276.1 atub|OJI84506.1 aver|OJJ04286.1 awen|OJJ41487.1 azon|OJJ48217.1

Group1707: abra|OJJ68605.1 acar|OOF92114.1 acla|EAW12588.1 afis|EAW18087.1 afla|EED51483.1 afum|EAL91899.1 agla|OJJ85421.1 akaw|GAA92916.1 aluc|OJZ81952.1 anid|CBF79764.1 anig|EHA22301.1 aory|EIT80442.1 asyd|OJJ58103.1 ater|EAU30435.1 atub|OJI84502.1 aver|OJJ04301.1 awen|OJJ41480.1 azon|OJJ48212.1

Group1708: abra|OJJ68606.1 acar|OOF92117.1 acla|EAW12587.1 afis|EAW18086.1 afla|EED51480.1 afum|EAL91898.1 agla|OJJ85422.1 akaw|GAA92915.1 aluc|OJZ81948.1 anid|CBF79762.1 anig|EHA22302.1 aory|EIT80466.1 asyd|OJJ58102.1 ater|EAU30436.1 atub|OJI84501.1 aver|OJJ04302.1 awen|OJJ41479.1 azon|OJJ48211.1

Group1709: abra|OJJ68607.1 acar|OOF92118.1 acla|EAW12593.1 afis|EAW18085.1 afla|EED51479.1 afum|EAL91897.1 agla|OJJ85423.1 akaw|GAA92914.1 aluc|OJZ81947.1 anid|CBF86384.1 aory|EIT80735.1 asyd|OJJ64960.1 ater|EAU30437.1 atub|OJI84500.1 aver|OJI99082.1 awen|OJJ41478.1 azon|OJJ48210.1 aory|EIT81994.1

Group1710: abra|OJJ68608.1 acar|OOF92119.1 acla|EAW12594.1 afis|EAW18084.1 afla|EED51478.1 afum|EAL91896.1 agla|OJJ85424.1 akaw|GAA92913.1 aluc|OJZ81946.1 anid|CBF86386.1 anig|EHA22303.1 aory|EIT80678.1 asyd|OJJ64959.1 ater|EAU30438.1 atub|OJI84499.1 aver|OJI99081.1 awen|OJJ41477.1 azon|OJJ48209.1

Group1711: abra|OJJ68610.1 acar|OOF92120.1 acla|EAW12601.1 afis|EAW18083.1 afla|EED51477.1 afum|EAL91895.1 agla|OJJ85446.1 akaw|GAA92912.1 aluc|OJZ81945.1 anid|CBF86388.1 anig|EHA22304.1 aory|EIT80541.1 asyd|OJJ64958.1 ater|EAU30439.1 atub|OJI84498.1 aver|OJI99080.1 awen|OJJ41472.1 azon|OJJ48931.1

Group1712: abra|OJJ68611.1 acar|OOF92121.1 acla|EAW12602.1 afis|EAW18082.1 afla|EED51476.1 afum|EAL91894.1 agla|OJJ85447.1 akaw|GAA92911.1 aluc|OJZ81944.1 anid|CBF86390.1 anig|EHA22305.1 aory|EIT80460.1 asyd|OJJ64957.1 ater|EAU30440.1 atub|OJI84497.1 aver|OJI99079.1 awen|OJJ41470.1 azon|OJJ48927.1

Group1713: abra|OJJ68612.1 acar|OOF92122.1 acla|EAW12603.1 afis|EAW18081.1 afla|EED51475.1 afum|EAL91893.1 agla|OJJ87374.1 akaw|GAA92910.1 aluc|OJZ81943.1 anid|CBF86391.1 anig|EHA22306.1 aory|EIT80723.1 asyd|OJJ64956.1 ater|EAU30441.1 atub|OJI84496.1 aver|OJI99078.1 awen|OJJ41469.1 azon|OJJ48926.1

Group1714: abra|OJJ68613.1 acar|OOF92123.1 acla|EAW12604.1 afis|EAW18080.1 afla|EED51474.1 afum|EAL91892.1 agla|OJJ87373.1 akaw|GAA92909.1 aluc|OJZ81942.1 anid|CBF86393.1 anig|EHA22307.1 aory|EIT80697.1 asyd|OJJ64955.1 ater|EAU30442.1 atub|OJI84495.1 aver|OJI99077.1 awen|OJJ41468.1 azon|OJJ48925.1

Group1715: abra|OJJ68615.1 acar|OOF92126.1 acla|EAW12607.1 afis|EAW18077.1 afla|EED51471.1 afum|EAL91889.1 agla|OJJ87370.1 akaw|GAA92906.1 aluc|OJZ81939.1 anid|CBF86404.1 anig|EHA22309.1 aory|EIT80562.1 asyd|OJJ64951.1 ater|EAU30446.1 atub|OJI84492.1 aver|OJI99073.1 awen|OJJ41466.1 azon|OJJ48923.1

Group1716: abra|OJJ68617.1 acar|OOF92128.1 acla|EAW12609.1 afis|EAW18075.1 afla|EED51467.1 afum|EAL91887.1 agla|OJJ87367.1 akaw|GAA92904.1 aluc|OJZ81937.1 anid|CBF86400.1 anig|EHA22311.1 aory|EIT80468.1 asyd|OJJ64949.1 ater|EAU30452.1 atub|OJI84490.1 aver|OJI99071.1 awen|OJJ41464.1 azon|OJJ48919.1

Group1717: abra|OJJ68618.1 acar|OOF92129.1 acla|EAW12610.1 afis|EAW18074.1 afla|EED51464.1 afum|EAL91886.1 agla|OJJ87366.1 akaw|GAA92903.1 aluc|OJZ81936.1 anid|CBF86398.1 anig|EHA22312.1 aory|EIT80711.1 asyd|OJJ64948.1 ater|EAU30454.1 atub|OJI84489.1 aver|OJI99070.1 awen|OJJ41463.1 azon|OJJ48918.1

Group1718: abra|OJJ68619.1 acar|OOF92130.1 acla|EAW12611.1 afis|EAW18073.1 afla|EED51463.1 afum|EAL91885.1 agla|OJJ87365.1 akaw|GAA92899.1 aluc|OJZ81935.1 anid|CBF86406.1 anig|EHA22313.1 aory|EIT80619.1 asyd|OJJ64947.1 ater|EAU30455.1 atub|OJI84488.1 aver|OJI99069.1 awen|OJJ41462.1 azon|OJJ48917.1

Group1719: abra|OJJ68620.1 acar|OOF92131.1 acla|EAW13703.1 afis|EAW19885.1 afla|EED57031.1 afum|EAL85012.1 agla|OJJ89079.1 akaw|GAA92898.1 aluc|OJZ81934.1 anid|CBF82756.1 anig|EHA22314.1 aory|EIT82313.1 asyd|OJJ61608.1 ater|EAU33697.1 atub|OJI84487.1 aver|OJJ00931.1 awen|OJJ36996.1 azon|OJJ42189.1

Group1720: abra|OJJ68623.1 acar|OOF92133.1 acla|EAW12612.1 afis|EAW18072.1 afla|EED51461.1 afum|EAL91884.1 agla|OJJ87364.1 akaw|GAA92897.1 aluc|OJZ81932.1 anid|CBF86411.1 anig|EHA22316.1 aory|EIT80603.1 asyd|OJJ64944.1 ater|EAU30457.1 atub|OJI84485.1 aver|OJI99066.1 awen|OJJ41459.1 azon|OJJ48916.1

Group1721: abra|OJJ68626.1 acar|OOF92136.1 acla|EAW12613.1 afis|EAW18071.1 afla|EED51460.1 afum|EAL91883.1 agla|OJJ87363.1 akaw|GAA92895.1 aluc|OJZ81929.1 anid|CBF86413.1 anig|EHA22318.1 aory|EIT80647.1 asyd|OJJ64943.1 ater|EAU30458.1 atub|OJI84481.1 aver|OJI99065.1 awen|OJJ41458.1 azon|OJJ48915.1

Group1722: abra|OJJ68636.1 acar|OOF92140.1 acla|EAW12615.1 afis|EAW18069.1 afla|EED51458.1 afum|EAL91881.2 agla|OJJ87356.1 akaw|GAA89775.1 aluc|OJZ81919.1 anid|CBF86416.1 anig|EHA22328.1

aory|EIT80491.1 asyd|OJJ64941.1 ater|EAU30460.1 atub|OJI84471.1 aver|OJI99063.1 awen|OJJ41456.1 azon|OJJ48913.1

Group1723: abra|OJJ68637.1 acar|OOF92141.1 acla|EAW12614.1 afis|EAW18070.1 afla|EED51459.1 afum|EAL91882.1 agla|OJJ87357.1 akaw|GAA89776.1 aluc|OJZ81918.1 anid|CBF86415.1 anig|EHA22329.1 aory|EIT80742.1 asyd|OJJ64942.1 ater|EAU30459.1 atub|OJI84470.1 aver|OJI99064.1 awen|OJJ41457.1 azon|OJJ48914.1

Group1724: abra|OJJ68642.1 acar|OOF92146.1 acla|EAW12620.1 afis|EAW18064.1 afla|EED51433.1 afum|EAL91876.1 akaw|GAA89782.1 aluc|OJZ81910.1 anid|CBF86424.1 anig|EHA22334.1 aory|EIT80728.1 asyd|OJJ64937.1 ater|EAU30467.1 atub|OJI84463.1 aver|OJI99058.1 awen|OJJ41451.1 azon|OJJ48909.1 agla|OJJ87350.1

Group1725: abra|OJJ68643.1 acar|OOF92145.1 acla|EAW12621.1 afis|EAW18063.1 afla|EED51432.1 afum|EAL91875.1 agla|OJJ87349.1 akaw|GAA89783.1 aluc|OJZ81908.1 anid|CBF86426.1 anig|EHA22335.1 aory|EIT80621.1 asyd|OJJ64936.1 ater|EAU30468.1 atub|OJI84461.1 aver|OJI99057.1 awen|OJJ41449.1 azon|OJJ48908.1

Group1726: abra|OJJ68647.1 acar|OOF92149.1 acla|EAW12623.1 afis|EAW18061.1 afla|EED51429.1 afum|EAL91872.1 agla|OJJ87325.1 akaw|GAA89787.1 aluc|OJZ81904.1 anid|CBF86430.1 anig|EHA22339.1 aory|EIT80637.1 asyd|OJJ64934.1 ater|EAU30473.1 atub|OJI84457.1 aver|OJI99054.1 awen|OJJ41445.1 azon|OJJ48907.1

Group1727: abra|OJJ68648.1 acar|OOF92150.1 acla|EAW12624.1 afis|EAW18060.1 afla|EED51428.1 afum|EAL91871.1 agla|OJJ87326.1 akaw|GAA89788.1 aluc|OJZ81903.1 anid|CBF86432.1 anig|EHA22340.1 aory|EIT80552.1 asyd|OJJ64933.1 ater|EAU30474.1 atub|OJI84456.1 aver|OJI99053.1 awen|OJJ41444.1 azon|OJJ48905.1

Group1728: abra|OJJ68649.1 acar|OOF92151.1 acla|EAW12625.1 afis|EAW18059.1 afla|EED51427.1 afum|EAL91870.1 agla|OJJ87327.1 akaw|GAA89789.1 aluc|OJZ81902.1 anid|CBF86434.1 anig|EHA22341.1 aory|EIT80495.1 asyd|OJJ64932.1 ater|EAU30475.1 atub|OJI84455.1 aver|OJI99051.1 awen|OJJ41442.1 azon|OJJ48904.1

Group1729: abra|OJJ68650.1 acar|OOF92152.1 acla|EAW12626.1 afis|EAW18058.1 afla|EED51426.1 afum|EBA27442.1 agla|OJJ87328.1 akaw|GAA89790.1 aluc|OJZ81901.1 anid|CBF86435.1 anig|EHA22342.1 aory|EIT80761.1 asyd|OJJ64931.1 ater|EAU30476.1 atub|OJI84454.1 aver|OJI99050.1 awen|OJJ41441.1 azon|OJJ48903.1

Group1730: abra|OJJ68652.1 acar|OOF92153.1 acla|EAW12628.1 afis|EAW18056.1 afla|EED51423.1 afum|EAL91867.1 agla|OJJ87330.1 akaw|GAA89792.1 aluc|OJZ81899.1 anid|CBF86443.1 anig|EHA22344.1 aory|EIT80509.1 asyd|OJJ64928.1 ater|EAU30478.1 atub|OJI84452.1 aver|OJI99047.1 awen|OJJ41439.1 azon|OJJ48901.1

Group1731: abra|OJJ68655.1 acar|OOF92155.1 acla|EAW12630.1 afis|EAW18054.1 afla|EED51421.1 afum|EAL91865.1 agla|OJJ87335.1 akaw|GAA89794.1 aluc|OJZ81897.1 anid|CBF86438.1 anig|EHA22345.1 aory|EIT80746.1 asyd|OJJ64927.1 ater|EAU30479.1 atub|OJI84450.1 aver|OJI99045.1 awen|OJJ41436.1 azon|OJJ48900.1

Group1732: abra|OJJ68656.1 acar|OOF92156.1 acla|EAW12632.1 afis|EAW18052.1 afla|EED51418.1 afum|EAL91863.1 agla|OJJ87339.1 akaw|GAA89795.1 aluc|OJZ81896.1 anid|CBF86439.1 anig|EHA22346.1 aory|EIT80553.1 asyd|OJJ64925.1 ater|EAU30480.1 atub|OJI84449.1 aver|OJI99044.1 awen|OJJ41433.1 azon|OJJ48898.1

Group1733: abra|OJJ68657.1 acar|OOF92157.1 acla|EAW12633.1 afis|EAW18051.1 afla|EED51417.1 afum|EAL91862.1 agla|OJJ87340.1 akaw|GAA89796.1 aluc|OJZ81895.1 anid|CBF86440.1 anig|EHA22347.1 aory|EIT80630.1 asyd|OJJ64924.1 ater|EAU30481.1 atub|OJI84448.1 aver|OJI99043.1 awen|OJJ41432.1 azon|OJJ48897.1

Group1734: abra|OJJ68659.1 acar|OOF92159.1 acla|EAW12590.1 afis|EAW24059.1 afla|EED51416.1 afum|EAL91914.1 agla|OJJ87341.1 akaw|GAA89797.1 aluc|OJZ81894.1 anid|CBF86444.1 anig|EHA22348.1 aory|EIT80652.1 asyd|OJJ64923.1 ater|EAU30482.1 atub|OJI84447.1 aver|OJI99042.1 awen|OJJ41431.1 azon|OJJ48896.1

Group1735: abra|OJJ68660.1 acar|OOF92158.1 acla|EAW12591.1 afis|EAW24060.1 afla|EED51415.1 afum|EAL91915.1 agla|OJJ87342.1 akaw|GAA89798.1 aluc|OJZ81893.1 anid|CBF86446.1 anig|EHA22349.1 aory|EIT80731.1 asyd|OJJ64922.1 ater|EAU30483.1 atub|OJI84446.1 aver|OJI99041.1 awen|OJJ41430.1 azon|OJJ48895.1

Group1736: abra|OJJ68662.1 acar|OOF92162.1 acla|EAW12586.1 afis|EAW24062.1 afla|EED51412.1 afum|EAL91917.1 agla|OJJ87344.1 akaw|GAA89802.1 aluc|OJZ81889.1 anid|CBF86449.1 anig|EHA22352.1 aory|EIT80533.1 asyd|OJJ64920.1 ater|EAU30484.1 atub|OJI84442.1 aver|OJI99040.1 awen|OJJ41428.1 azon|OJJ48893.1

Group1737: abra|OJJ68664.1 acar|OOF92165.1 acla|EAW12585.1 afis|EAW24063.1 afla|EED51411.1 afum|EAL91918.1 agla|OJJ87345.1 akaw|GAA89805.1 aluc|OJZ81886.1 anid|CBF86451.1 anig|EHA22354.1 aory|EIT80561.1 asyd|OJJ64919.1 ater|EAU30485.1 atub|OJI84439.1 aver|OJI99039.1 awen|OJJ41426.1 azon|OJJ48891.1

Group1738: abra|OJJ68665.1 acar|OOF92167.1 acla|EAW12584.1 afis|EAW24064.1 afla|EED51410.1 afum|EAL91919.1 agla|OJJ87346.1 akaw|GAA89806.1 aluc|OJZ81885.1 anid|CBF86452.1 anig|EHA22355.1 aory|EIT80617.1 asyd|OJJ64918.1 ater|EAU30486.1 atub|OJI84438.1 aver|OJI99038.1 awen|OJJ41425.1 azon|OJJ48890.1

Group1739: abra|OJJ68666.1 acar|OOF92166.1 acla|EAW12583.1 afis|EAW24065.1 afla|EED51409.1 afum|EAL91920.1 agla|OJJ87347.1 akaw|GAA89807.1 aluc|OJZ81884.1 anid|CBF86454.1 anig|EHA22356.1 aory|EIT80471.1 asyd|OJJ64917.1 ater|EAU30487.1 atub|OJI84437.1 aver|OJI99037.1 awen|OJJ41424.1 azon|OJJ48889.1

Group1740: abra|OJJ68670.1 acar|OOF92170.1 acla|EAW12577.1 afis|EAW24071.1 afla|EED51404.1 afum|EAL91927.1 agla|OJJ87312.1 akaw|GAA89811.1 aluc|OJZ81879.1 anid|CBF86462.1 anig|EHA22359.1 aory|EIT80762.1 asyd|OJJ64912.1 ater|EAU30492.1 atub|OJI84433.1 aver|OJI99033.1 awen|OJJ41419.1 azon|OJJ48884.1

Group1741: abra|OJJ68677.1 acar|OOF92179.1 acla|EAW12570.1 afis|EAW24080.1 afla|EED51393.1 afum|EAL91935.1 agla|OJJ87151.1 akaw|GAA89830.1 aluc|OJZ81857.1 anid|CBF86478.1 anig|EHA22367.1 aory|EIT80640.1 asyd|OJJ64902.1 ater|EAU30501.1 atub|OJI84425.1 aver|OJI99024.1 awen|OJJ41418.1 azon|OJJ48875.1

Group1742: abra|OJJ68678.1 acar|OOF92180.1 acla|EAW12569.1 afis|EAW24081.1 afla|EED51392.1 afum|EAL91936.1 agla|OJJ87152.1 akaw|GAA89831.1 aluc|OJZ81856.1 anid|CBF86480.1 anig|EHA22368.1 aory|EIT80524.1 asyd|OJJ64901.1 ater|EAU30504.1 atub|OJI84424.1 aver|OJI99022.1 awen|OJJ41407.1 azon|OJJ48873.1

Group1743: abra|OJJ68681.1 acar|OOF92183.1 acla|EAW12566.1 afis|EAW24084.1 afla|EED51389.1 afum|EAL91939.1 agla|OJJ87154.1 akaw|GAA89834.1 aluc|OJZ81852.1 anid|CBF86484.1 anig|EHA22370.1 aory|EIT80477.1 asyd|OJJ64899.1 ater|EAU30507.1 atub|OJI84421.1 aver|OJI99020.1 awen|OJJ41405.1 azon|OJJ48871.1

Group1744: abra|OJJ68682.1 acar|OOF92184.1 acla|EAW12565.1 afis|EAW24085.1 afla|EED51388.1 afum|EAL91940.1 agla|OJJ87155.1 akaw|GAA89835.1 aluc|OJZ81851.1 anid|CBF86486.1 anig|EHA22371.1 aory|EIT80535.1 asyd|OJJ64898.1 ater|EAU30508.1 atub|OJI84420.1 aver|OJI99019.1 awen|OJJ41404.1 azon|OJJ48870.1

Group1745: abra|OJJ68684.1 acar|OOF92186.1 acla|EAW12563.1 afis|EAW24087.1 afla|EED51386.1 afum|EAL91942.1 agla|OJJ87157.1 akaw|GAA89837.1 aluc|OJZ81849.1 anid|CBF86489.1 anig|EHA22373.1 aory|EIT80476.1 asyd|OJJ64896.1 ater|EAU30511.1 atub|OJI84418.1 aver|OJI99017.1 awen|OJJ41402.1 azon|OJJ48868.1

Group1746: abra|OJJ68685.1 acar|OOF92187.1 acla|EAW12562.1 afis|EAW24088.1 afla|EED46851.1 afum|EAL91943.1 agla|OJJ87158.1 akaw|GAA89838.1 aluc|OJZ81848.1 anid|CBF86491.1 anig|EHA22374.1 aory|EIT72584.1 asyd|OJJ64895.1 ater|EAU30512.1 atub|OJI84417.1 aver|OJI99016.1 awen|OJJ41401.1 azon|OJJ48867.1

Group1747: abra|OJJ68686.1 acar|OOF92188.1 acla|EAW12561.1 afis|EAW24089.1 afla|EED46850.1 afum|EAL91944.1 agla|OJJ87159.1 akaw|GAA89839.1 aluc|OJZ81847.1 anid|CBF86493.1 anig|EHA22375.1 aory|EIT72520.1 asyd|OJJ64894.1 ater|EAU30513.1 atub|OJI84416.1 aver|OJI99015.1 awen|OJJ41400.1 azon|OJJ48866.1

Group1748: abra|OJJ68689.1 acar|OOF92193.1 acla|EAW12555.1 afis|EAW24096.1 afla|EED46838.1 afum|EAL91950.1 agla|OJJ87169.1 akaw|GAA89844.1 aluc|OJZ81843.1 anid|CBF86498.1 anig|EHA22379.1 aory|EIT72590.1 asyd|OJJ64889.1 ater|EAU30523.1 atub|OJI84411.1 aver|OJI99003.1 awen|OJJ41394.1 azon|OJJ48862.1

Group1749: abra|OJJ68690.1 acar|OOF92194.1 acla|EAW12554.1 afis|EAW24097.1 afla|EED46837.1 afum|EAL91951.2 agla|OJJ87171.1 akaw|GAA89845.1 aluc|OJZ81842.1 anid|CBF86500.1 anig|EHA22380.1 aory|EIT72693.1 asyd|OJJ64888.1 ater|EAU30524.1 atub|OJI84410.1 aver|OJI99002.1 awen|OJJ41392.1 azon|OJJ48861.1

Group1750: abra|OJJ68691.1 acar|OOF92195.1 acla|EAW12553.1 afis|EAW24098.1 afla|EED46836.1 afum|EAL91952.1 agla|OJJ87172.1 akaw|GAA89846.1 aluc|OJZ81841.1 anid|CBF86501.1 anig|EHA22381.1 aory|EIT72579.1 asyd|OJJ64887.1 ater|EAU30525.1 atub|OJI84409.1 aver|OJI99001.1 awen|OJJ41391.1 azon|OJJ48860.1

Group1751: abra|OJJ68692.1 acar|OOF92196.1 acla|EAW12552.1 afis|EAW24099.1 afla|EED46835.1 afum|EAL91953.2 agla|OJJ87173.1 akaw|GAA89847.1 aluc|OJZ81840.1 anid|CBF86503.1 anig|EHA22382.1

aory|EIT72533.1 asyd|OJJ64886.1 ater|EAU30526.1 atub|OJI84408.1 aver|OJI99000.1 awen|OJJ41390.1 azon|OJJ48859.1

Group1752: abra|OJJ68693.1 acar|OOF92197.1 acla|EAW12551.1 afis|EAW24100.1 afla|EED46834.1 afum|EAL91954.1 agla|OJJ87174.1 akaw|GAA89848.1 aluc|OJZ81838.1 anid|CBF86505.1 anig|EHA22383.1 aory|EIT72706.1 asyd|OJJ64885.1 ater|EAU30527.1 atub|OJI84407.1 aver|OJI98999.1 awen|OJJ41389.1 azon|OJJ48858.1

Group1753: abra|OJJ68695.1 acar|OOF92199.1 acla|EAW12549.1 afis|EAW24101.1 afla|EED46832.1 afum|EAL91955.1 agla|OJJ87176.1 akaw|GAA89850.1 aluc|OJZ81836.1 anid|CBF86507.1 anig|EHA22385.1 aory|EIT72575.1 asyd|OJJ64883.1 ater|EAU30529.1 atub|OJI84405.1 aver|OJI98997.1 awen|OJJ41387.1 azon|OJJ48856.1

Group1754: abra|OJJ68696.1 acar|OOF92200.1 acla|EAW12548.1 afis|EAW24102.1 afla|EED46831.1 afum|EAL91956.1 agla|OJJ87177.1 akaw|GAA89851.1 aluc|OJZ81835.1 anid|CBF86509.1 anig|EHA22386.1 aory|EIT72546.1 asyd|OJJ64882.1 ater|EAU30530.1 atub|OJI84404.1 aver|OJI98996.1 awen|OJJ41386.1 azon|OJJ48855.1

Group1755: abra|OJJ68697.1 acar|OOF92201.1 acla|EAW12547.1 afis|EAW24103.1 afla|EED46830.1 afum|EAL91957.1 agla|OJJ87178.1 akaw|GAA89852.1 aluc|OJZ81834.1 anid|CBF86511.1 anig|EHA22387.1 aory|EIT72771.1 asyd|OJJ64881.1 ater|EAU30531.1 atub|OJI84403.1 aver|OJI98995.1 awen|OJJ41385.1 azon|OJJ48854.1

Group1756: abra|OJJ68698.1 acar|OOF92202.1 acla|EAW12546.1 afis|EAW24104.1 afla|EED46829.1 afum|EAL91958.1 agla|OJJ87179.1 akaw|GAA89853.1 aluc|OJZ81833.1 anid|CBF86513.1 anig|EHA22388.1 aory|EIT72709.1 asyd|OJJ64880.1 ater|EAU30532.1 atub|OJI84402.1 aver|OJI98994.1 awen|OJJ41384.1 azon|OJJ48853.1

Group1757: abra|OJJ68703.1 acar|OOF92205.1 acla|EAW12542.1 afis|EAW24107.1 afla|EED46826.1 afum|EAL91961.1 agla|OJJ87182.1 akaw|GAA89857.1 aluc|OJZ81828.1 anid|CBF86518.1 anig|EHA22391.1 aory|EIT72757.1 asyd|OJJ64877.1 ater|EAU30535.1 atub|OJI84398.1 aver|OJI98990.1 awen|OJJ41381.1 azon|OJJ48850.1

Group1758: abra|OJJ68704.1 acar|OOF92206.1 acla|EAW12541.1 afis|EAW24108.1 afla|EED46825.1 afum|EAL91962.1 agla|OJJ87183.1 akaw|GAA89858.1 aluc|OJZ81826.1 anid|CBF86520.1 anig|EHA22392.1 aory|EIT72547.1 asyd|OJJ64876.1 ater|EAU30536.1 atub|OJI84396.1 aver|OJI98989.1 awen|OJJ41380.1 azon|OJJ48848.1

Group1759: abra|OJJ68706.1 acar|OOF92208.1 acla|EAW12539.1 afis|EAW24110.1 afla|EED46822.1 afum|EAL91964.1 agla|OJJ87185.1 akaw|GAA89860.1 aluc|OJZ81824.1 anid|CBF86523.1 anig|EHA22394.1 aory|EIT72674.1 asyd|OJJ64874.1 ater|EAU30538.1 atub|OJI84394.1 aver|OJI98987.1 awen|OJJ41378.1 azon|OJJ48846.1

Group1760: abra|OJJ68709.1 acar|OOF92211.1 acla|EAW12536.1 afis|EAW24113.1 afla|EED46820.1 afum|EAL91967.1 agla|OJJ87190.1 akaw|GAA89863.1 aluc|OJZ81818.1 anid|CBF86529.1 anig|EHA22397.1 aory|EIT72599.1 asyd|OJJ64871.1 ater|EAU30541.1 atub|OJI84391.1 aver|OJI98983.1 awen|OJJ41375.1 azon|OJJ48843.1

Group1761: abra|OJJ68710.1 acar|OOF92212.1 acla|EAW12535.1 afis|EAW24114.1 afla|EED46819.1 afum|EAL91968.1 agla|OJJ87191.1 akaw|GAA89864.1 aluc|OJZ81817.1 anid|CBF86531.1 anig|EHA22398.1 aory|EIT72684.1 asyd|OJJ64870.1 ater|EAU30542.1 atub|OJI84390.1 aver|OJI98982.1 awen|OJJ41374.1 azon|OJJ48842.1

Group1762: abra|OJJ68717.1 acar|OOF92217.1 acla|EAW12529.1 afis|EAW24120.1 afla|EED46812.1 afum|EAL91975.1 agla|OJJ87194.1 akaw|GAA89869.1 aluc|OJZ81812.1 anid|CBF86542.1 anig|EHA22405.1 aory|EIT72532.1 asyd|OJJ64862.1 ater|EAU30548.1 atub|OJI84384.1 aver|OJI98973.1 awen|OJJ41369.1 azon|OJJ48836.1

Group1763: abra|OJJ68719.1 acar|OOF92218.1 acla|EAW12528.1 afis|EAW24121.1 afla|EED46810.1 afum|EAL91977.1 agla|OJJ87196.1 akaw|GAA89870.1 aluc|OJZ81810.1 anid|CBF86546.1 anig|EHA22407.1 aory|EIT72617.1 asyd|OJJ64860.1 ater|EAU30549.1 atub|OJI84382.1 aver|OJI98972.1 awen|OJJ41368.1 azon|OJJ48835.1

Group1764: abra|OJJ68722.1 acar|OOF92221.1 acla|EAW12524.1 afis|EAW24124.1 afla|EED46809.1 afum|EAL91980.1 agla|OJJ87199.1 akaw|GAA89872.1 aluc|OJZ81807.1 anid|CBF86551.1 anig|EHA22410.1 aory|EIT72759.1 asyd|OJJ64857.1 ater|EAU30551.1 atub|OJI84379.1 aver|OJI98969.1 awen|OJJ41365.1 azon|OJJ48832.1

Group1765: abra|OJJ68723.1 acar|OOF92222.1 acla|EAW12523.1 afis|EAW24125.1 afla|EED46808.1 afum|EAL91981.1 agla|OJJ87200.1 akaw|GAA89873.1 aluc|OJZ81806.1 anid|CBF86553.1 anig|EHA22411.1 aory|EIT72530.1 asyd|OJJ64856.1 ater|EAU30552.1 atub|OJI84378.1 aver|OJI98968.1 awen|OJJ41364.1 azon|OJJ48831.1

Group1766: abra|OJJ68725.1 acar|OOF92224.1 acla|EAW12521.1 afis|EAW24126.1 afla|EED46806.1 afum|EAL91982.1 agla|OJJ87202.1 akaw|GAA89876.1 aluc|OJZ81803.1 anid|CBF86555.1 anig|EHA22413.1 aory|EIT72636.1 asyd|OJJ64855.1 ater|EAU30553.1 atub|OJI84375.1 aver|OJI98967.1 awen|OJJ41363.1 azon|OJJ48829.1

Group1767: abra|OJJ68728.1 acar|OOF92225.1 acla|EAW12520.1 afis|EAW24127.1 afla|EED46805.1 afum|EAL91983.1 agla|OJJ87203.1 akaw|GAA89877.1 aluc|OJZ81802.1 anid|CBF86557.1 anig|EHA22414.1 aory|EIT72714.1 asyd|OJJ64854.1 ater|EAU30557.1 atub|OJI84374.1 aver|OJI98966.1 awen|OJJ41362.1 azon|OJJ48827.1

Group1768: abra|OJJ68729.1 acar|OOF92226.1 acla|EAW12519.1 afis|EAW24128.1 afla|EED46804.1 afum|EAL91984.1 agla|OJJ87204.1 akaw|GAA89878.1 aluc|OJZ81801.1 anid|CBF86559.1 anig|EHA22415.1 aory|EIT72675.1 asyd|OJJ64853.1 ater|EAU30558.1 atub|OJI84372.1 aver|OJI98965.1 awen|OJJ41361.1 azon|OJJ48825.1

Group1769: abra|OJJ68730.1 acar|OOF92228.1 acla|EAW12518.1 afis|EAW24129.1 afla|EED46803.1 afum|EAL91985.1 agla|OJJ87205.1 akaw|GAA89879.1 aluc|OJZ81800.1 anid|CBF86560.1 anig|EHA22416.1 aory|EIT72669.1 asyd|OJJ64852.1 ater|EAU30559.1 atub|OJI84371.1 aver|OJI98964.1 awen|OJJ41360.1 azon|OJJ48824.1

Group1770: abra|OJJ68734.1 acar|OOF92230.1 acla|EAW12513.1 afis|EAW24133.1 afla|EED46800.1 afum|EAL91988.1 agla|OJJ87210.1 akaw|GAA89882.1 aluc|OJZ81796.1 anid|CBF86566.1 anig|EHA22420.1 aory|EIT72682.1 asyd|OJJ64849.1 ater|EAU30562.1 atub|OJI84367.1 aver|OJI98961.1 awen|OJJ41356.1 azon|OJJ48819.1

Group1771: abra|OJJ68735.1 acar|OOF92231.1 acla|EAW12512.1 afis|EAW24134.1 afla|EED46799.1 afum|EAL91989.2 agla|OJJ87211.1 akaw|GAA89883.1 aluc|OJZ81794.1 anid|CBF86568.1 anig|EHA22421.1 aory|EIT72755.1 asyd|OJJ64848.1 ater|EAU30563.1 atub|OJI84366.1 aver|OJI98960.1 awen|OJJ41355.1 azon|OJJ48818.1

Group1772: abra|OJJ68736.1 acar|OOF92232.1 acla|EAW12511.1 afis|EAW24135.1 afla|EED46798.1 afum|EAL91990.1 agla|OJJ87212.1 akaw|GAA89884.1 aluc|OJZ81793.1 anid|CBF86570.1 anig|EHA22422.1 aory|EIT72542.1 asyd|OJJ64847.1 ater|EAU30564.1 atub|OJI84365.1 aver|OJI98959.1 awen|OJJ41354.1 azon|OJJ48817.1

Group1773: abra|OJJ68738.1 acar|OOF92234.1 afis|EAW24137.1 afla|EED46797.1 afum|EAL91992.1 agla|OJJ87215.1 akaw|GAA89886.1 aluc|OJZ81789.1 anid|CBF77943.1 anig|EHA22426.1 aory|EIT72631.1 asyd|OJJ55282.1 ater|EAU30566.1 atub|OJI84363.1 aver|OJJ06946.1 awen|OJJ41352.1 azon|OJJ48815.1 acla|EAW12509.1

Group1774: abra|OJJ68739.1 acar|OOF92235.1 acla|EAW12508.1 afis|EAW24138.1 afla|EED46796.1 afum|EAL91993.1 agla|OJJ87216.1 akaw|GAA89887.1 aluc|OJZ81788.1 anid|CBF77941.1 anig|EHA22427.1 aory|EIT72772.1 asyd|OJJ55283.1 ater|EAU30567.1 atub|OJI84362.1 aver|OJJ06945.1 awen|OJJ41351.1 azon|OJJ48814.1

Group1775: abra|OJJ68742.1 acar|OOF90307.1 acla|EAW12506.1 afis|EAW24141.1 afla|EED46793.1 afum|EAL91996.1 agla|OJJ87220.1 akaw|GAA89889.1 aluc|OJZ81784.1 anid|CBF77936.1 anig|EHA22431.1 aory|EIT72574.1 asyd|OJJ55286.1 ater|EAU30570.1 atub|OJI84358.1 aver|OJJ06942.1 awen|OJJ41347.1 azon|OJJ48811.1

Group1776: abra|OJJ68743.1 acar|OOF90308.1 acla|EAW12505.1 afis|EAW24142.1 afla|EED46792.1 afum|EAL91997.1 agla|OJJ87221.1 akaw|GAA89890.1 aluc|OJZ81783.1 anid|CBF77934.1 anig|EHA22432.1 aory|EIT72571.1 asyd|OJJ55287.1 ater|EAU30571.1 atub|OJI84357.1 aver|OJJ06941.1 awen|OJJ41346.1 azon|OJJ48810.1

Group1777: abra|OJJ68748.1 acar|OOF92236.1 acla|EAW12503.1 afis|EAW24143.1 afla|EED46789.1 afum|EAL91998.1 agla|OJJ87222.1 akaw|GAA89892.1 aluc|OJZ81779.1 anid|CBF77930.1 anig|EHA22436.1 aory|EIT72633.1 asyd|OJJ55290.1 ater|EAU30574.1 atub|OJI84353.1 aver|OJJ06939.1 awen|OJJ41345.1 azon|OJJ48809.1

Group1778: abra|OJJ68749.1 acar|OOF92237.1 acla|EAW12502.1 afis|EAW24144.1 afla|EED46788.1 afum|EAL91999.1 agla|OJJ87223.1 akaw|GAA89893.1 aluc|OJZ81778.1 anid|CBF77928.1 anig|EHA22438.1 aory|EIT72562.1 asyd|OJJ55291.1 ater|EAU30575.1 atub|OJI84351.1 aver|OJJ06936.1 awen|OJJ41336.1 azon|OJJ48806.1

Group1779: abra|OJJ68750.1 acar|OOF92238.1 acla|EAW12501.1 afis|EAW24145.1 afla|EED46787.1 afum|EAL92000.1 agla|OJJ87224.1 akaw|GAA89894.1 aluc|OJZ81777.1 anid|CBF77926.1 anig|EHA22439.1 aory|EIT72718.1 asyd|OJJ55292.1 ater|EAU30576.1 atub|OJI84350.1 aver|OJJ06935.1 awen|OJJ41335.1 azon|OJJ48804.1

Group1780: abra|OJJ68752.1 acar|OOF92239.1 acla|EAW12499.1 afis|EAW24146.1 afla|EED46783.1 afum|EAL92001.1 agla|OJJ87226.1 akaw|GAA89896.1 aluc|OJZ81775.1 anid|CBF77923.1 anig|EHA22441.1

aory|EIT72696.1 asyd|OJJ55294.1 ater|EAU30578.1 atub|OJI84348.1 aver|OJJ06932.1 awen|OJJ41333.1 azon|OJJ48803.1

Group1781: abra|OJJ68756.1 acar|OOF92244.1 acla|EAW12495.1 afis|EAW24150.1 afla|EED46781.1 afum|EAL92005.1 agla|OJJ89542.1 akaw|GAA89900.1 aluc|OJZ81771.1 anid|CBF77915.1 anig|EHA22445.1 aory|EIT72518.1 asyd|OJJ55297.1 ater|EAU30582.1 atub|OJI84344.1 aver|OJJ06929.1 awen|OJJ41328.1 azon|OJJ48801.1

Group1782: abra|OJJ68763.1 acar|OOF92249.1 acla|EAW12488.1 afis|EAW24157.1 afla|EED46776.1 afum|EAL92012.2 agla|OJJ89524.1 akaw|GAA89907.1 aluc|OJZ81762.1 anid|CBF77900.1 anig|EHA22451.1 aory|EIT72774.1 asyd|OJJ55303.1 ater|EAU30588.1 atub|OJI84334.1 aver|OJJ06923.1 awen|OJJ41321.1 azon|OJJ48794.1

Group1783: abra|OJJ68766.1 acar|OOF92252.1 acla|EAW12485.1 afis|EAW24160.1 afla|EED46773.1 afum|EAL92016.1 agla|OJJ89521.1 akaw|GAA89910.1 aluc|OJZ81759.1 anid|CBF77894.1 anig|EHA22453.1 aory|EIT72644.1 asyd|OJJ55306.1 ater|EAU30591.1 atub|OJI84331.1 aver|OJJ06920.1 awen|OJJ41318.1 azon|OJJ48791.1

Group1784: abra|OJJ68768.1 acar|OOF92253.1 acla|EAW12484.1 afis|EAW24161.1 afla|EED46772.1 afum|EAL92017.1 agla|OJJ89519.1 akaw|GAA89911.1 aluc|OJZ81758.1 anid|CBF77892.1 anig|EHA22454.1 aory|EIT72707.1 asyd|OJJ55307.1 ater|EAU30592.1 atub|OJI84329.1 aver|OJJ06919.1 awen|OJJ41316.1 azon|OJJ48790.1

Group1785: abra|OJJ68769.1 acar|OOF92254.1 acla|EAW12483.1 afis|EAW24162.1 afla|EED46771.1 afum|EAL92018.1 agla|OJJ89518.1 akaw|GAA89912.1 aluc|OJZ81757.1 anid|CBF77890.1 anig|EHA22455.1 aory|EIT72701.1 asyd|OJJ55308.1 ater|EAU30593.1 atub|OJI84328.1 aver|OJJ06918.1 awen|OJJ41315.1 azon|OJJ48789.1

Group1786: abra|OJJ68770.1 acar|OOF92255.1 acla|EAW12482.1 afis|EAW24163.1 afla|EED46770.1 afum|EAL92020.1 agla|OJJ89517.1 akaw|GAA89913.1 aluc|OJZ81756.1 anid|CBF77888.1 anig|EHA22456.1 aory|EIT72763.1 asyd|OJJ55309.1 ater|EAU30594.1 atub|OJI84327.1 aver|OJJ06917.1 awen|OJJ41314.1 azon|OJJ48788.1

Group1787: abra|OJJ68785.1 acar|OOF92269.1 acla|EAW12469.1 afis|EAW24172.1 afla|EED46757.1 afum|EAL92034.1 agla|OJJ89503.1 akaw|GAA89927.1 aluc|OJZ81743.1 anid|CBF77861.1 anig|EHA22469.1 aory|EIT72255.1 asyd|OJJ55323.1 ater|EAU30607.1 atub|OJI84314.1 aver|OJJ06905.1 awen|OJJ41300.1 azon|OJJ48774.1

Group1788: abra|OJJ68788.1 acar|OOF92272.1 acla|EAW12466.1 afis|EAW24175.1 afla|EED46754.1 afum|EAL92037.1 agla|OJJ89499.1 akaw|GAA89929.1 aluc|OJZ81740.1 anid|CBF77855.1 anig|EHA22472.1 aory|EIT72259.1 asyd|OJJ55326.1 ater|EAU30610.1 atub|OJI84311.1 aver|OJJ06902.1 awen|OJJ41295.1 azon|OJJ48771.1

Group1789: abra|OJJ68790.1 acar|OOF92274.1 acla|EAW12463.1 afis|EAW24178.1 afla|EED46751.1 afum|EAL92040.1 agla|OJJ89496.1 akaw|GAA89932.1 aluc|OJZ81736.1 anid|CBF77849.1 anig|EHA22475.1 aory|EIT72252.1 asyd|OJJ55329.1 ater|EAU30613.1 atub|OJI84308.1 aver|OJJ06899.1 awen|OJJ41291.1 azon|OJJ48765.1

Group1790: abra|OJJ68793.1 acar|OOF92278.1 acla|EAW12460.1 afis|EAW24182.1 afla|EED46749.1 afum|EAL92042.1 agla|OJJ89493.1 akaw|GAA89933.1 aluc|OJZ81734.1 anid|CBF77844.1 anig|EHA22478.1 aory|EIT72258.1 asyd|OJJ55332.1 ater|EAU30615.1 atub|OJI84305.1 aver|OJJ06896.1 awen|OJJ41288.1 azon|OJJ48762.1

Group1791: abra|OJJ68794.1 acar|OOF92277.1 acla|EAW12459.1 afis|EAW24183.1 afla|EED46748.1 afum|EAL92043.1 agla|OJJ89492.1 akaw|GAA89934.1 aluc|OJZ81733.1 anid|CBF77842.1 anig|EHA22479.1 aory|EIT72260.1 asyd|OJJ55333.1 ater|EAU30616.1 atub|OJI84304.1 aver|OJJ06895.1 awen|OJJ41287.1 azon|OJJ48769.1

Group1792: abra|OJJ68797.1 acar|OOF92281.1 acla|EAW14657.1 afis|EAW24186.1 afla|EED46746.1 afum|EAL92046.1 agla|OJJ89489.1 akaw|GAA89936.1 aluc|OJZ81730.1 anid|CBF77836.1 anig|EHA22482.1 aory|EIT72257.1 asyd|OJJ55336.1 ater|EAU30619.1 atub|OJI84301.1 aver|OJJ06891.1 awen|OJJ41284.1 azon|OJJ43704.1

Group1793: abra|OJJ68827.1 acla|EAW12865.1 afis|EAW17814.1 afla|EED45598.1 afum|EAL91623.1 agla|OJJ81685.1 akaw|GAA90426.1 aluc|OJZ85803.1 anid|CBF79113.1 anig|EHA24752.1 aory|EIT75707.1 asyd|OJJ54395.1 atub|OJI79588.1 aver|OJJ07596.1 awen|OJJ31341.1 anid|CBF80733.1 awen|OJJ36931.1 asyd|OJJ54560.1

Group1794: abra|OJJ68855.1 acar|OOF90533.1 acla|EAW15256.1 afis|EAW20230.1 afla|EED57124.1 afum|EAL85347.2 agla|OJJ84632.1 akaw|GAA90398.1 aluc|OJZ85833.1 anid|CBF85122.1 anig|EHA24730.1 aory|EIT74034.1 asyd|OJJ63044.1 ater|EAU32032.1 atub|OJI79621.1 aver|OJI97919.1 awen|OJJ31233.1 azon|OJJ46156.1



Group1795: abra|OJJ68856.1 acar|OOF90532.1 afla|EED57125.1 afum|EAL85346.1 agla|OJJ84633.1 akaw|GAA90397.1 aluc|OJZ85834.1 anid|CBF85120.1 anig|EHA24729.1 aory|EIT74077.1 ater|EAU32031.1 atub|OJI79622.1 aver|OJI97918.1 awen|OJJ31232.1 azon|OJJ46155.1 acla|EAW15255.1 afis|EAW20229.1 asyd|OJJ63045.1

Group1796: abra|OJJ68859.1 acar|OOF90530.1 acla|EAW15250.1 afis|EAW20218.1 afla|EED57129.1 afum|EAL85333.1 agla|OJJ84638.1 akaw|GAA90394.1 aluc|OJZ85837.1 anid|CBF85115.1 anig|EHA24726.1 aory|EIT74090.1 asyd|OJJ63049.1 ater|EAU32027.1 atub|OJI79625.1 aver|OJI97914.1 awen|OJJ31228.1 azon|OJJ46151.1

Group1797: abra|OJJ68871.1 acar|OOF89965.1 acla|EAW15248.1 afis|EAW20214.1 afla|EED57130.1 afum|EAL85331.1 agla|OJJ84640.1 akaw|GAA90383.1 aluc|OJZ85848.1 anid|CBF85111.1 anig|EHA28098.1 aory|EIT74018.1 asyd|OJJ63051.1 ater|EAU32024.1 atub|OJI79636.1 aver|OJI97912.1 awen|OJJ31220.1 azon|OJJ46137.1

Group1798: abra|OJJ68913.1 acar|OOF91500.1 acla|EAW15323.1 afis|EAW20327.1 afla|EED57093.1 afum|EAL85453.1 agla|OJJ86344.1 akaw|GAA90336.1 aluc|OJZ85896.1 anid|CBF87781.1 anig|EHA24696.1 aory|EIT82282.1 asyd|OJJ63373.1 ater|EAU32055.1 atub|OJI79681.1 aver|OJI97573.1 awen|OJJ39915.1 azon|OJJ45889.1

Group1799: abra|OJJ68918.1 acar|OOF91506.1 acla|EAW14259.1 afis|EAW19021.1 afla|EED56623.1 afum|EAL93752.1 agla|OJJ84614.1 akaw|GAA90331.1 aluc|OJZ85901.1 anid|CBF85579.1 anig|EHA24691.1 aory|EIT79672.1 asyd|OJJ64177.1 ater|EAU32063.1 atub|OJI79686.1 aver|OJI98253.1 awen|OJJ31311.1 azon|OJJ46160.1

Group1800: abra|OJJ68919.1 acar|OOF91507.1 acla|EAW14260.1 afis|EAW19020.1 afla|EED56622.1 afum|EAL93751.1 agla|OJJ84615.1 akaw|GAA90330.1 aluc|OJZ85902.1 anid|CBF85577.1 anig|EHA24690.1 aory|EIT79600.1 asyd|OJJ64178.1 ater|EAU32062.1 atub|OJI79687.1 aver|OJI98254.1 awen|OJJ31310.1 azon|OJJ46161.1

Group1801: abra|OJJ68926.1 acar|OOF91512.1 acla|EAW14248.1 afis|EAW19032.1 afla|EED50385.1 afum|EAL93761.1 agla|OJJ84590.1 akaw|GAA90322.1 aluc|OJZ85911.1 anid|CBF79596.1 anig|EHA24681.1 aory|EIT83141.1 asyd|OJJ57985.1 ater|EAU32071.1 atub|OJI79701.1 aver|OJJ04415.1 awen|OJJ31461.1 azon|OJJ46163.1

Group1802: abra|OJJ68929.1 acar|OOF90676.1 afis|EAW19225.1 afum|EAL93956.1 agla|OJJ89343.1 akaw|GAA90320.1 aluc|OJZ85913.1 anid|CBF90358.1 anig|EHA24677.1 aory|EIT72912.1 asyd|OJJ55570.1 ater|EAU37576.1 atub|OJI79703.1 aver|OJJ06649.1 awen|OJJ29830.1 afla|EED51132.1 aory|EIT81305.1 agla|OJJ81307.1

Group1803: abra|OJJ68932.1 acar|OOF91515.1 acla|EAW14247.1 afis|EAW19033.1 afla|EED50387.1 afum|EAL93762.2 agla|OJJ84588.1 akaw|GAA90317.1 aluc|OJZ85916.1 anid|CBF79600.1 anig|EHA24675.1 aory|EIT83129.1 asyd|OJJ57990.1 ater|EAU32073.1 atub|OJI79707.1 aver|OJJ04412.1 awen|OJJ31463.1 azon|OJJ46164.1

Group1804: abra|OJJ68933.1 acar|OOF91516.1 acla|EAW14246.1 afla|EED50389.1 agla|OJJ84587.1 akaw|GAA90316.1 aluc|OJZ85917.1 anig|EHA24674.1 aory|EIT83117.1 asyd|OJJ57991.1 ater|EAU32074.1 atub|OJI79710.1 aver|OJJ04411.1 awen|OJJ31464.1 azon|OJJ46166.1 afum|EAL93763.1 anid|CBF79601.1 afis|EAW19034.1

Group1805: abra|OJJ68937.1 acar|OOF91518.1 acla|EAW14243.1 afis|EAW19037.1 afla|EED50391.1 afum|EAL93766.1 agla|OJJ84584.1 akaw|GAA90314.1 aluc|OJZ85922.1 anid|CBF79605.1 anig|EHA24672.1 aory|EIT82128.1 asyd|OJJ57993.1 ater|EAU32076.1 atub|OJI79712.1 aver|OJJ04409.1 awen|OJJ31466.1 azon|OJJ46169.1

Group1806: abra|OJJ68941.1 acar|OOF91521.1 acla|EAW14242.1 afis|EAW19038.1 afla|EED50393.1 afum|EAL93767.1 agla|OJJ84582.1 akaw|GAA90312.1 aluc|OJZ85927.1 anid|CBF79609.1 anig|EHA24670.1 aory|EIT82042.1 asyd|OJJ57994.1 ater|EAU32077.1 atub|OJI79716.1 aver|OJJ04408.1 awen|OJJ31468.1 azon|OJJ46172.1

Group1807: abra|OJJ68943.1 acar|OOF91522.1 acla|EAW14241.1 afis|EAW19039.1 afla|EED50394.1 afum|EAL93768.1 agla|OJJ84573.1 akaw|GAA90310.1 aluc|OJZ85929.1 anid|CBF79610.1 anig|EHA24669.1 aory|EIT82167.1 asyd|OJJ57995.1 ater|EAU32078.1 atub|OJI79717.1 aver|OJJ04407.1 awen|OJJ31469.1 azon|OJJ46173.1

Group1808: abra|OJJ68944.1 acar|OOF91524.1 acla|EAW14239.1 afis|EAW19041.1 afla|EED50396.1 afum|EAL93770.1 agla|OJJ84564.1 akaw|GAA90309.1 aluc|OJZ85930.1 anid|CBF79612.1 anig|EHA24667.1 aory|EIT82062.1 asyd|OJJ57999.1 ater|EAU32080.1 atub|OJI79719.1 aver|OJJ04403.1 awen|OJJ31470.1 azon|OJJ46179.1

Group1809: abra|OJJ68945.1 acar|OOF91525.1 acla|EAW14238.1 afis|EAW19042.1 afla|EED50397.1 afum|EAL93771.1 agla|OJJ84563.1 akaw|GAA90308.1 aluc|OJZ85931.1 anid|CBF79613.1 anig|EHA24666.1

aory|EIT82121.1 asyd|OJJ57998.1 ater|EAU32081.1 atub|OJI79720.1 aver|OJJ04404.1 awen|OJJ31471.1 azon|OJJ46181.1

Group1810: abra|OJJ68948.1 acar|OOF91526.1 acla|EAW14236.1 afis|EAW19044.1 afla|EED50401.1 afum|EAL93773.1 agla|OJJ84561.1 akaw|GAA90306.1 aluc|OJZ85934.1 anig|EHA24664.1 aory|EIT82075.1 ater|EAU32083.1 atub|OJI79723.1 azon|OJJ46184.1 anid|CBF79617.1 asyd|OJJ58000.1 aver|OJJ04402.1 awen|OJJ31473.1

Group1811: abra|OJJ68949.1 acar|OOF91527.1 acla|EAW14235.1 afis|EAW19045.1 afla|EED50402.1 afum|EAL93774.1 agla|OJJ84560.1 akaw|GAA90305.1 aluc|OJZ85935.1 anid|CBF79619.1 anig|EHA24663.1 aory|EIT82000.1 asyd|OJJ58001.1 ater|EAU32084.1 atub|OJI79724.1 aver|OJJ04400.1 awen|OJJ31474.1 azon|OJJ46188.1

Group1812: abra|OJJ68952.1 acar|OOF91530.1 acla|EAW14234.1 afis|EAW19046.1 afla|EED50405.1 afum|EAL93775.1 agla|OJJ84559.1 akaw|GAA90481.1 aluc|OJZ85938.1 anid|CBF79621.1 anig|EHA24661.1 aory|EIT82119.1 asyd|OJJ58003.1 ater|EAU32085.1 atub|OJI79726.1 aver|OJJ04398.1 awen|OJJ31475.1 azon|OJJ46189.1

Group1813: abra|OJJ68953.1 acar|OOF91531.1 acla|EAW14233.1 afis|EAW19047.1 afla|EED50406.1 afum|EAL93776.1 agla|OJJ84558.1 akaw|GAA90482.1 aluc|OJZ85939.1 anid|CBF79622.1 anig|EHA24660.1 aory|EIT82158.1 asyd|OJJ58004.1 ater|EAU32086.1 atub|OJI79727.1 aver|OJJ04397.1 awen|OJJ31477.1 azon|OJJ46190.1

Group1814: abra|OJJ68956.1 acar|OOF91535.1 acla|EAW14229.1 afis|EAW19052.1 afla|EED54409.1 afum|EAL93781.1 agla|OJJ84555.1 akaw|GAA90484.1 aluc|OJZ85942.1 anid|CBF79627.1 anig|EHA24657.1 aory|EIT75857.1 asyd|OJJ58009.1 ater|EAU32089.1 atub|OJI79730.1 aver|OJJ04391.1 awen|OJJ31483.1 azon|OJJ46193.1

Group1815: abra|OJJ68957.1 acar|OOF91534.1 acla|EAW14228.1 afis|EAW19053.1 afla|EED54411.1 afum|EAL93782.1 agla|OJJ84554.1 akaw|GAA90485.1 aluc|OJZ85943.1 anid|CBF79628.1 anig|EHA24656.1 aory|EIT75871.1 asyd|OJJ58010.1 ater|EAU32090.1 atub|OJI79731.1 aver|OJJ04390.1 awen|OJJ31484.1 azon|OJJ46194.1

Group1816: abra|OJJ68959.1 acar|OOF91537.1 acla|EAW14226.1 afis|EAW19055.1 afla|EED54413.1 afum|EAL93784.1 agla|OJJ84552.1 akaw|GAA90487.1 aluc|OJZ85945.1 anid|CBF79630.1 anig|EHA24654.1 aory|EIT75877.1 asyd|OJJ58012.1 ater|EAU32091.1 atub|OJI79733.1 aver|OJJ04388.1 awen|OJJ31486.1 azon|OJJ46196.1

Group1817: abra|OJJ68960.1 acar|OOF91538.1 acla|EAW14225.1 afis|EAW19056.1 afla|EED54414.1 afum|EAL93785.1 agla|OJJ84551.1 akaw|GAA90488.1 aluc|OJZ85946.1 anid|CBF79632.1 anig|EHA24653.1 aory|EIT75852.1 asyd|OJJ58013.1 ater|EAU32092.1 atub|OJI79734.1 aver|OJJ04387.1 awen|OJJ31487.1 azon|OJJ46197.1

Group1818: abra|OJJ68961.1 acar|OOF91539.1 acla|EAW14224.1 afis|EAW19057.1 afla|EED54415.1 afum|EAL93786.1 agla|OJJ84550.1 akaw|GAA90489.1 aluc|OJZ85947.1 anid|CBF79634.1 anig|EHA24652.1 aory|EIT75893.1 asyd|OJJ58014.1 ater|EAU32093.1 atub|OJI79735.1 aver|OJJ04386.1 awen|OJJ31488.1 azon|OJJ46199.1

Group1819: abra|OJJ68963.1 acar|OOF91541.1 acla|EAW14223.1 afis|EAW19058.1 afla|EED54418.1 afum|EAL93787.1 agla|OJJ84549.1 akaw|GAA90491.1 aluc|OJZ85950.1 anid|CBF79638.1 anig|EHA24650.1 aory|EIT75892.1 asyd|OJJ58015.1 ater|EAU32094.1 atub|OJI79738.1 aver|OJJ04385.1 awen|OJJ31489.1 azon|OJJ46201.1

Group1820: abra|OJJ68965.1 acar|OOF91542.1 acla|EAW14222.1 afis|EAW19059.1 afla|EED54421.1 afum|EAL93788.1 agla|OJJ84548.1 akaw|GAA90492.1 aluc|OJZ85952.1 anid|CBF79639.1 anig|EHA24649.1 aory|EIT75888.1 asyd|OJJ58016.1 ater|EAU32095.1 atub|OJI79740.1 aver|OJJ04384.1 awen|OJJ31490.1 azon|OJJ46202.1

Group1821: abra|OJJ68966.1 acar|OOF91544.1 acla|EAW14221.1 afis|EAW19060.1 afla|EED54422.1 afum|EAL93789.1 agla|OJJ84547.1 akaw|GAA90493.1 aluc|OJZ85953.1 anid|CBF79640.1 anig|EHA24648.1 aory|EIT75846.1 asyd|OJJ58017.1 ater|EAU32098.1 atub|OJI79741.1 aver|OJJ04382.1 awen|OJJ31491.1 azon|OJJ46203.1

Group1822: abra|OJJ68967.1 acar|OOF91545.1 acla|EAW14220.1 afis|EAW19061.1 afla|EED54423.1 afum|EAL93790.1 agla|OJJ84546.1 akaw|GAA90494.1 aluc|OJZ85954.1 anid|CBF79641.1 anig|EHA24647.1 aory|EIT75876.1 asyd|OJJ58018.1 ater|EAU32099.1 atub|OJI79742.1 aver|OJJ04381.1 awen|OJJ31492.1 azon|OJJ46204.1

Group1823: abra|OJJ68968.1 acar|OOF91546.1 acla|EAW14219.1 afis|EAW19062.1 afla|EED54428.1 afum|EAL93791.1 agla|OJJ84545.1 akaw|GAA90495.1 aluc|OJZ85955.1 anid|CBF79643.1 anig|EHA24646.1 aory|EIT75878.1 asyd|OJJ58019.1 ater|EAU32105.1 atub|OJI79743.1 aver|OJJ04380.1 awen|OJJ31493.1 azon|OJJ46206.1

Group1824: abra|OJJ68970.1 acar|OOF91547.1 acla|EAW14217.1 afis|EAW19064.1 afla|EED54430.1 afum|EAL93793.2 agla|OJJ84543.1 akaw|GAA90497.1 aluc|OJZ85957.1 anid|CBF79646.1 anig|EHA24644.1 aory|EIT75886.1 asyd|OJJ58021.1 ater|EAU32107.1 atub|OJI79745.1 aver|OJJ04378.1 awen|OJJ31496.1 azon|OJJ46208.1

Group1825: abra|OJJ68973.1 acar|OOF91550.1 acla|EAW14214.1 afis|EAW19067.1 afla|EED54433.1 afum|EAL93796.1 agla|OJJ84539.1 akaw|GAA90500.1 aluc|OJZ85962.1 anid|CBF79652.1 anig|EHA24641.1 aory|EIT75842.1 asyd|OJJ58025.1 ater|EAU32115.1 atub|OJI79749.1 aver|OJJ04374.1 awen|OJJ31499.1 azon|OJJ46213.1

Group1826: abra|OJJ68978.1 acar|OOF91553.1 acla|EAW14210.1 afis|EAW19071.1 afla|EED54436.1 afum|EAL93799.1 agla|OJJ84534.1 akaw|GAA90503.1 aluc|OJZ85966.1 anid|CBF79663.1 anig|EHA24638.1 aory|EIT75872.1 asyd|OJJ58028.1 ater|EAU32119.1 atub|OJI79754.1 aver|OJJ04371.1 awen|OJJ31503.1 azon|OJJ46218.1

Group1827: abra|OJJ68982.1 acar|OOF91554.1 acla|EAW14209.1 afis|EAW19072.1 afla|EED54437.1 afum|EAL93800.1 agla|OJJ84532.1 akaw|GAA90504.1 aluc|OJZ85968.1 anid|CBF79661.1 anig|EHA24637.1 aory|EIT75860.1 asyd|OJJ58029.1 ater|EAU32120.1 atub|OJI79756.1 aver|OJJ04370.1 awen|OJJ32466.1 azon|OJJ46219.1

Group1828: abra|OJJ68984.1 acar|OOF91555.1 acla|EAW14207.1 afis|EAW19074.1 afla|EED54439.1 afum|EAL93802.1 agla|OJJ84529.1 akaw|GAA90506.1 aluc|OJZ85970.1 anid|CBF79667.1 anig|EHA24635.1 aory|EIT75870.1 asyd|OJJ58031.1 ater|EAU32122.1 atub|OJI79758.1 aver|OJJ04368.1 awen|OJJ32468.1 azon|OJJ46238.1

Group1829: abra|OJJ68991.1 acar|OOF92703.1 acla|EAW12643.1 afis|EAW18042.1 afla|EED51854.1 afum|EAL91853.1 agla|OJJ85414.1 akaw|GAA90511.1 aluc|OJZ85976.1 anid|CBF80097.1 anig|EHA24630.1 aory|EIT81766.1 asyd|OJJ58299.1 ater|EAU31557.1 atub|OJI79766.1 aver|OJJ02125.1 awen|OJJ41492.1 azon|OJJ48223.1

Group1830: abra|OJJ68994.1 acar|OOF92705.1 acla|EAW12645.1 afis|EAW18040.1 afla|EED51857.1 afum|EAL91851.1 agla|OJJ85412.1 akaw|GAA90513.1 aluc|OJZ85978.1 anid|CBF80103.1 anig|EHA24628.1 aory|EIT81744.1 asyd|OJJ58296.1 ater|EAU31555.1 atub|OJI79768.1 aver|OJJ02128.1 awen|OJJ41497.1 azon|OJJ48225.1

Group1831: abra|OJJ68996.1 acar|OOF92707.1 acla|EAW12647.1 afis|EAW18038.1 afla|EED51860.1 afum|EAL91849.1 agla|OJJ85410.1 akaw|GAA90515.1 aluc|OJZ85980.1 anid|CBF80073.1 anig|EHA24626.1 aory|EIT81689.1 asyd|OJJ58294.1 ater|EAU31552.1 atub|OJI79770.1 aver|OJJ02130.1 awen|OJJ41499.1 azon|OJJ48227.1

Group1832: abra|OJJ68997.1 acar|OOF92708.1 acla|EAW12648.1 afis|EAW18037.1 afla|EED51861.1 afum|EAL91848.1 agla|OJJ85409.1 akaw|GAA90516.1 aluc|OJZ85981.1 anid|CBF80074.1 anig|EHA24625.1 aory|EIT81730.1 asyd|OJJ58293.1 ater|EAU31551.1 atub|OJI79771.1 aver|OJJ02131.1 awen|OJJ41500.1 azon|OJJ48228.1

Group1833: abra|OJJ69004.1 acar|OOF92717.1 acla|EAW12855.1 afis|EAW18018.1 afla|EED51873.1 afum|EAL91830.1 agla|OJJ85372.1 akaw|GAA90522.1 aluc|OJZ85990.1 anid|CBF80052.1 anig|EHA24620.1 aory|EIT81725.1 asyd|OJJ58280.1 ater|EAU31534.1 atub|OJI79779.1 aver|OJJ02143.1 awen|OJJ41521.1 azon|OJJ48243.1

Group1834: abra|OJJ69005.1 acar|OOF92718.1 acla|EAW12854.1 afla|EED51874.1 afum|EAL91829.1 akaw|GAA90523.1 aluc|OJZ85991.1 anig|EHA24619.1 aory|EIT81686.1 ater|EAU31533.1 atub|OJI79780.1 afis|EAW18017.1 asyd|OJJ58279.1 aver|OJJ02144.1 awen|OJJ41522.1 agla|OJJ85371.1 anid|CBF80050.1 azon|OJJ48244.1

Group1835: abra|OJJ69008.1 acar|OOF92719.1 acla|EAW12850.1 afis|EAW18013.1 afla|EED51883.1 afum|EAL91825.1 agla|OJJ80286.1 akaw|GAA90525.1 aluc|OJZ85994.1 anid|CBF80040.1 anig|EHA24616.1 aory|EIT81726.1 asyd|OJJ58275.1 ater|EAU31529.1 atub|OJI79782.1 aver|OJJ02149.1 awen|OJJ41528.1 azon|OJJ48248.1

Group1836: abra|OJJ69010.1 acar|OOF92721.1 acla|EAW12848.1 afis|EAW18011.1 afla|EED51885.1 afum|EAL91823.1 agla|OJJ80283.1 akaw|GAA90527.1 aluc|OJZ85996.1 anid|CBF80037.1 anig|EHA24614.1 aory|EIT81760.1 asyd|OJJ58273.1 ater|EAU31527.1 atub|OJI79784.1 aver|OJJ02151.1 awen|OJJ41530.1 azon|OJJ48250.1

Group1837: azon|OJJ51098.1 abra|OJJ74349.1 acar|OOF95381.1 acla|EAW07403.1 afis|EAW22429.1 afla|EED52507.1 afum|EAL90762.1 agla|OJJ87594.1 akaw|GAA86681.1 aluc|OJZ89781.1 anid|CBF88824.1 anig|EHA26996.1 aory|EIT82792.1 asyd|OJJ62884.1 ater|EAU39278.1 atub|OJI85025.1 aver|OJI96936.1 awen|OJJ35008.1

Group1838: abra|OJJ69024.1 acar|OOF92985.1 acla|EAW06466.1 afis|EAW15961.1 afla|EED58096.1 afum|EAL88594.1 agla|OJJ89351.1 akaw|GAA90541.1 aluc|OJZ86011.1 anid|CBF81079.1 anig|EHA24600.1

aory|EIT79116.1 asyd|OJJ56463.1 ater|EAU35493.1 atub|OJI79800.1 aver|OJJ06258.1 awen|OJJ35613.1 azon|OJJ46911.1

Group1839: abra|OJJ69026.1 acar|OOF92660.1 acla|EAW12556.1 afis|EAW24095.1 afla|EED46839.1 afum|EAL91949.1 agla|OJJ87168.1 akaw|GAA92787.1 aluc|OJZ82696.1 anid|CBF75138.1 anig|EHA21145.1 aory|EIT72775.1 asyd|OJJ59978.1 ater|EAU30520.1 atub|OJI88928.1 aver|OJJ02313.1 awen|OJJ41395.1 azon|OJJ48863.1

Group1840: abra|OJJ69029.1 acar|OOF92658.1 acla|EAW10072.1 afis|EAW25514.1 afla|EED54015.1 afum|EAL90179.1 agla|OJJ87289.1 akaw|GAA90545.1 aluc|OJZ86015.1 anid|CBF77783.1 anig|EHA24596.1 aory|EIT78264.1 asyd|OJJ53030.1 ater|EAU33360.1 atub|OJI79804.1 aver|OJJ03814.1 awen|OJJ41257.1 azon|OJJ44822.1

Group1841: abra|OJJ69034.1 acar|OOF89828.1 acla|EAW08636.1 afis|EAW15795.1 afla|EED51250.1 afum|EAL85555.1 agla|OJJ81958.1 akaw|GAA90549.1 aluc|OJZ86019.1 anid|CBF70929.1 anig|EHA24592.1 aory|EIT81525.1 asyd|OJJ52611.1 ater|EAU32347.1 atub|OJI79808.1 aver|OJJ04638.1 awen|OJJ38503.1 azon|OJJ43748.1

Group1842: abra|OJJ69036.1 acar|OOF92649.1 acla|EAW12687.1 afis|EAW17850.1 afla|EED46204.1 afum|EAL91659.1 agla|OJJ83119.1 akaw|GAA90551.1 aluc|OJZ86021.1 anid|CBF77960.1 anig|EHA24590.1 aory|EIT76404.1 asyd|OJJ55272.1 ater|EAU33052.1 atub|OJI79810.1 aver|OJJ06955.1 awen|OJJ41723.1 azon|OJJ44821.1

Group1843: abra|OJJ69037.1 acar|OOF92647.1 acla|EAW14104.1 afis|EAW18805.1 afla|EED50771.1 afum|EAL93541.1 agla|OJJ80535.1 akaw|GAA90552.1 aluc|OJZ86022.1 anid|CBF88044.1 anig|EHA24589.1 aory|EIT78003.1 asyd|OJJ63545.1 ater|EAU37943.1 atub|OJI79811.1 aver|OJI97389.1 awen|OJJ32380.1 azon|OJJ47142.1

Group1844: abra|OJJ69038.1 acar|OOF92646.1 acla|EAW06768.1 afis|EAW16318.1 afla|EED53563.1 afum|EAL88942.1 agla|OJJ88279.1 akaw|GAA90553.1 aluc|OJZ86023.1 anid|CBF89147.1 anig|EHA24588.1 aory|EIT74896.1 asyd|OJJ62568.1 ater|EAU34139.1 atub|OJI79812.1 aver|OJI96692.1 awen|OJJ37718.1 azon|OJJ44975.1

Group1845: abra|OJJ69039.1 acar|OOF92645.1 acla|EAW11330.1 afis|EAW18165.1 afla|EED53435.1 afum|EAL87525.2 agla|OJJ85953.1 akaw|GAA90554.1 aluc|OJZ86024.1 anid|CBF85751.1 anig|EHA24587.1 aory|EIT74836.1 asyd|OJJ64296.1 ater|EAU36013.1 atub|OJI79813.1 aver|OJI98389.1 awen|OJJ30512.1 azon|OJJ50291.1

Group1846: abra|OJJ69057.1 acar|OOF91226.1 acla|EAW08757.1 afis|EAW15674.1 afla|EED46856.1 afum|EAL85673.1 agla|OJJ81821.1 akaw|GAA90587.1 aluc|OJZ86045.1 anid|CBF71161.1 anig|EHA24566.1 aory|EIT72754.1 asyd|OJJ55844.1 ater|EAU32486.1 atub|OJI79842.1 aver|OJJ04787.1 awen|OJJ38352.1 azon|OJJ42790.1

Group1847: abra|OJJ69058.1 acar|OOF91225.1 acla|EAW08756.1 afis|EAW15673.1 afla|EED46857.1 afum|EAL85675.1 agla|OJJ81820.1 akaw|GAA90588.1 aluc|OJZ86046.1 anid|CBF71163.1 anig|EHA24565.1 aory|EIT72609.1 asyd|OJJ55845.1 ater|EAU32487.1 atub|OJI79843.1 aver|OJJ04788.1 awen|OJJ38351.1 azon|OJJ42791.1

Group1848: abra|OJJ69064.1 acar|OOF91219.1 acla|EAW08760.1 afis|EAW15668.1 afla|EED46876.1 afum|EAL85680.1 agla|OJJ81806.1 akaw|GAA90594.1 aluc|OJZ86052.1 anid|CBF71174.1 anig|EHA24559.1 aory|EIT72756.1 asyd|OJJ55853.1 ater|EAU32503.1 atub|OJI79849.1 aver|OJJ04796.1 awen|OJJ38344.1 azon|OJJ43043.1

Group1849: abra|OJJ69065.1 acar|OOF91218.1 acla|EAW08759.1 afis|EAW15667.1 afla|EED46877.1 afum|EAL85681.1 agla|OJJ81805.1 akaw|GAA90595.1 aluc|OJZ86053.1 anid|CBF71176.1 anig|EHA24558.1 aory|EIT72761.1 asyd|OJJ55854.1 ater|EAU32504.1 atub|OJI79850.1 aver|OJJ04797.1 awen|OJJ38343.1 azon|OJJ43042.1

Group1850: abra|OJJ69071.1 acar|OOF91231.1 acla|EAW08767.1 afis|EAW15663.1 afla|EED46886.1 afum|EAL85685.1 agla|OJJ81785.1 akaw|GAA90602.1 aluc|OJZ86060.1 anid|CBF71180.1 anig|EHA24553.1 aory|EIT72594.1 asyd|OJJ55862.1 ater|EAU32510.1 atub|OJI79857.1 aver|OJJ04803.1 awen|OJJ38339.1 azon|OJJ43024.1

Group1851: abra|OJJ69078.1 acar|OOF91213.1 afis|EAW15680.1 afla|EED46852.1 afum|EAL85668.1 akaw|GAA90607.1 aluc|OJZ86066.1 anid|CBF71154.1 anig|EHA24548.1 aory|EIT72663.1 asyd|OJJ59218.1 ater|EAU32482.1 atub|OJI79862.1 aver|OJJ01828.1 awen|OJJ38357.1 azon|OJJ48601.1 asyd|OJJ55840.1 aver|OJJ04783.1

Group1852: abra|OJJ69080.1 acar|OOF91211.1 acla|EAW08754.1 afis|EAW15682.1 afla|EED51372.1 afum|EAL85666.1 agla|OJJ81831.1 akaw|GAA90609.1 aluc|OJZ86068.1 anid|CBF71152.1 anig|EHA24546.1 aory|EIT80462.1 asyd|OJJ55839.1 ater|EAU32475.1 atub|OJI79864.1 aver|OJJ04782.1 awen|OJJ38374.1 azon|OJJ43858.1

Group1853: abra|OJJ69081.1 acar|OOF91210.1 acla|EAW08753.1 afis|EAW15683.1 afla|EED51371.1 afum|EAL85665.1 agla|OJJ81832.1 akaw|GAA90610.1 aluc|OJZ86069.1 anid|CBF71150.1 anig|EHA24545.1 aory|EIT80441.1 asyd|OJJ55838.1 ater|EAU32474.1 atub|OJI79865.1 aver|OJJ04781.1 awen|OJJ38375.1 azon|OJJ43859.1

Group1854: abra|OJJ69084.1 acar|OOF91208.1 acla|EAW08750.1 afis|EAW15686.1 afla|EED51368.1 afum|EAL85662.1 agla|OJJ81834.1 akaw|GAA90613.1 aluc|OJZ86071.1 anid|CBF71144.1 anig|EHA24543.1 aory|EIT80616.1 asyd|OJJ55836.1 ater|EAU32467.1 atub|OJI79868.1 aver|OJJ04779.1 awen|OJJ38377.1 azon|OJJ43861.1

Group1855: abra|OJJ69089.1 acar|OOF91204.1 acla|EAW08743.1 afis|EAW15693.1 afla|EED51360.1 afum|EAL85655.1 agla|OJJ81840.1 akaw|GAA90618.1 aluc|OJZ86078.1 anid|CBF71129.1 anig|EHA24538.1 aory|EIT80527.1 asyd|OJJ55829.1 ater|EAU32462.1 atub|OJI79875.1 aver|OJJ04771.1 awen|OJJ38384.1 azon|OJJ43853.1

Group1856: abra|OJJ69090.1 acar|OOF91203.1 acla|EAW08742.1 afis|EAW15694.1 afla|EED51359.1 afum|EAL85654.1 agla|OJJ81841.1 akaw|GAA90619.1 aluc|OJZ86079.1 anid|CBF71127.1 anig|EHA24537.1 aory|EIT80431.1 asyd|OJJ55828.1 ater|EAU32461.1 atub|OJI79876.1 aver|OJJ04770.1 awen|OJJ38385.1 azon|OJJ43852.1

Group1857: abra|OJJ69091.1 acar|OOF91202.1 acla|EAW08741.1 afis|EAW15695.1 afla|EED51358.1 afum|EAL85653.1 agla|OJJ81842.1 akaw|GAA90620.1 aluc|OJZ86080.1 anid|CBF71119.1 anig|EHA24535.1 aory|EIT80729.1 asyd|OJJ55827.1 ater|EAU32460.1 atub|OJI79877.1 aver|OJJ04769.1 awen|OJJ38386.1 azon|OJJ43850.1

Group1858: abra|OJJ69093.1 acar|OOF91201.1 acla|EAW08740.1 afis|EAW15696.1 afla|EED51357.1 afum|EAL85652.2 agla|OJJ81850.1 akaw|GAA90621.1 aluc|OJZ86081.1 anid|CBF71121.1 anig|EHA24534.1 aory|EIT80641.1 asyd|OJJ55826.1 ater|EAU32455.1 atub|OJI79878.1 aver|OJJ04768.1 awen|OJJ38389.1 azon|OJJ43849.1

Group1859: abra|OJJ69094.1 acar|OOF91200.1 acla|EAW08737.1 afis|EAW15699.1 afla|EED51353.1 afum|EAL85649.1 agla|OJJ81849.1 akaw|GAA90622.1 aluc|OJZ86083.1 anid|CBF71123.1 anig|EHA24532.1 aory|EIT80448.1 asyd|OJJ55825.1 ater|EAU32452.1 atub|OJI79879.1 aver|OJJ04767.1 awen|OJJ38391.1 azon|OJJ43847.1

Group1860: abra|OJJ69099.1 acar|OOF91197.1 acla|EAW08734.1 afis|EAW15702.1 afla|EED51349.1 afum|EAL85645.1 agla|OJJ81844.1 akaw|GAA90625.1 aluc|OJZ86088.1 anid|CBF71108.1 anig|EHA24529.1 aory|EIT80559.1 asyd|OJJ52712.1 ater|EAU32442.1 atub|OJI79884.1 aver|OJJ04741.1 awen|OJJ38396.1 azon|OJJ43845.1

Group1861: abra|OJJ69100.1 acar|OOF91196.1 acla|EAW08733.1 afis|EAW15707.1 afla|EED51348.1 afum|EAL85640.1 agla|OJJ81851.1 akaw|GAA90626.1 aluc|OJZ86089.1 anid|CBF71106.1 anig|EHA24528.1 aory|EIT80499.1 asyd|OJJ52711.1 atub|OJI79885.1 aver|OJJ04740.1 awen|OJJ38397.1 ater|EAU32441.1 azon|OJJ43844.1

Group1862: abra|OJJ69104.1 acar|OOF91194.1 acla|EAW08728.1 afis|EAW15703.1 afla|EED51345.1 afum|EAL85644.1 agla|OJJ81855.1 akaw|GAA90629.1 aluc|OJZ86092.1 anid|CBF71100.1 anig|EHA24525.1 aory|EIT80418.1 asyd|OJJ52707.1 ater|EAU32438.1 atub|OJI79888.1 aver|OJJ04736.1 awen|OJJ38402.1 azon|OJJ43841.1

Group1863: abra|OJJ69108.1 acar|OOF91181.1 acla|EAW08724.1 afis|EAW15732.1 afla|EED51341.1 afum|EAL85615.2 agla|OJJ81861.1 akaw|GAA90633.1 aluc|OJZ86096.1 anid|CBF71094.1 anig|EHA24522.1 aory|EIT81523.1 asyd|OJJ52704.1 ater|EAU32434.1 atub|OJI79892.1 aver|OJJ04733.1 awen|OJJ38406.1 azon|OJJ43836.1

Group1864: abra|OJJ69110.1 acar|OOF91184.1 acla|EAW08722.1 afis|EAW15730.1 afla|EED51339.1 afum|EAL85617.1 agla|OJJ81864.1 akaw|GAA90635.1 aluc|OJZ86098.1 anid|CBF71090.1 anig|EHA24520.1 aory|EIT81546.1 asyd|OJJ52701.1 ater|EAU32432.1 atub|OJI79894.1 aver|OJJ04729.1 awen|OJJ38409.1 azon|OJJ43833.1

Group1865: abra|OJJ69113.1 acar|OOF91185.1 acla|EAW08719.1 afis|EAW15728.1 afla|EED51335.1 afum|EAL85619.1 agla|OJJ81867.1 akaw|GAA90638.1 aluc|OJZ86102.1 anid|CBF71085.1 anig|EHA24517.1 aory|EIT81524.1 asyd|OJJ52698.1 ater|EAU32430.1 atub|OJI79897.1 aver|OJJ04726.1 awen|OJJ38412.1 azon|OJJ43830.1

Group1866: abra|OJJ69116.1 acar|OOF91188.1 acla|EAW08716.1 afis|EAW15724.1 afla|EED51332.1 afum|EAL85623.1 agla|OJJ81870.1 akaw|GAA90641.1 aluc|OJZ86105.1 anid|CBF71079.1 anig|EHA24515.1 aory|EIT81503.1 asyd|OJJ52695.1 ater|EAU32427.1 atub|OJI79900.1 aver|OJJ04723.1 awen|OJJ38415.1 azon|OJJ43827.1

Group1867: abra|OJJ69119.1 acar|OOF91191.1 acla|EAW08713.1 afis|EAW15721.1 afla|EED51329.1 afum|EAL85626.1 agla|OJJ81873.1 akaw|GAA90644.1 aluc|OJZ86108.1 anid|CBF71075.1 anig|EHA24513.1

aory|EIT81515.1 asyd|OJJ52692.1 ater|EAU32424.1 atub|OJI79903.1 aver|OJJ04720.1 awen|OJJ38418.1  
azon|OJJ43824.1

Group1868: abra|OJJ69120.1 acar|OOF91192.1 acla|EAW08712.1 afis|EAW15720.1 afla|EED51328.1  
afum|EAL85628.1 agla|OJJ81874.1 akaw|GAA90645.1 aluc|OJZ86109.1 anid|CBF71073.1 anig|EHA24512.1  
aory|EIT81554.1 asyd|OJJ52691.1 ater|EAU32423.1 atub|OJI79904.1 aver|OJJ04719.1 awen|OJJ38419.1  
azon|OJJ43823.1

Group1869: abra|OJJ69121.1 acar|OOF91193.1 acla|EAW08711.1 afis|EAW15719.1 afla|EED51327.1  
afum|EAL85629.2 agla|OJJ81875.1 akaw|GAA90646.1 aluc|OJZ86110.1 anid|CBF71071.1 anig|EHA24511.1  
aory|EIT81517.1 asyd|OJJ52690.1 ater|EAU32420.1 atub|OJI79905.1 aver|OJJ04718.1 awen|OJJ38420.1  
azon|OJJ43822.1

Group1870: abra|OJJ69122.1 acar|OOF91178.1 acla|EAW08710.1 afis|EAW15718.1 afla|EED51326.1  
afum|EAL85630.2 agla|OJJ81877.1 akaw|GAA90647.1 aluc|OJZ86111.1 anid|CBF71070.1 anig|EHA24510.1  
aory|EIT81526.1 asyd|OJJ52689.1 ater|EAU32421.1 atub|OJI79906.1 aver|OJJ04717.1 awen|OJJ38421.1  
azon|OJJ43821.1

Group1871: abra|OJJ69123.1 acar|OOF91177.1 acla|EAW08709.1 afis|EAW15717.1 afla|EED51325.1  
afum|EAL85631.1 agla|OJJ81878.1 akaw|GAA90648.1 aluc|OJZ86112.1 anid|CBF71068.1 anig|EHA24509.1  
aory|EIT81505.1 asyd|OJJ52688.1 ater|EAU32422.1 atub|OJI79907.1 aver|OJJ04716.1 awen|OJJ38422.1  
azon|OJJ43820.1

Group1872: abra|OJJ69125.1 acar|OOF91175.1 acla|EAW08707.1 afis|EAW15715.1 afla|EED51323.1  
afum|EAL85633.1 agla|OJJ81886.1 akaw|GAA90650.1 aluc|OJZ86114.1 anid|CBF71064.1 anig|EHA24507.1  
aory|EIT81539.1 asyd|OJJ52685.1 ater|EAU32419.1 atub|OJI79909.1 aver|OJJ04713.1 awen|OJJ38425.1  
azon|OJJ43818.1

Group1873: abra|OJJ69126.1 acar|OOF91174.1 acla|EAW08706.1 afis|EAW15714.1 afla|EED51322.1  
afum|EAL85634.1 agla|OJJ81887.1 akaw|GAA90651.1 aluc|OJZ86115.1 anid|CBF71058.1 anig|EHA24506.1  
aory|EIT81529.1 asyd|OJJ52680.1 ater|EAU32418.1 atub|OJI79910.1 aver|OJJ04706.1 awen|OJJ38426.1  
azon|OJJ43817.1

Group1874: abra|OJJ69127.1 acar|OOF91173.1 acla|EAW08705.1 afis|EAW15713.1 afla|EED51321.1  
afum|EAL85635.1 agla|OJJ81888.1 akaw|GAA90652.1 aluc|OJZ86116.1 anid|CBF71060.1 anig|EHA24505.1  
aory|EIT81530.1 asyd|OJJ52679.1 ater|EAU32417.1 atub|OJI79911.1 aver|OJJ04705.1 awen|OJJ38427.1  
azon|OJJ43816.1

Group1875: abra|OJJ69128.1 acar|OOF91172.1 acla|EAW08704.1 afis|EAW15712.1 afla|EED51320.1  
afum|EAL85636.1 agla|OJJ81889.1 akaw|GAA90653.1 aluc|OJZ86117.1 anid|CBF71057.1 anig|EHA24504.1  
aory|EIT81550.1 asyd|OJJ52678.1 ater|EAU32416.1 atub|OJI79912.1 aver|OJJ04704.1 awen|OJJ38428.1  
azon|OJJ43815.1

Group1876: abra|OJJ69131.1 acar|OOF91169.1 acla|EAW08701.1 afis|EAW15709.1 afla|EED51317.1  
afum|EAL85638.1 agla|OJJ81892.1 akaw|GAA90656.1 aluc|OJZ86120.1 anid|CBF71053.1 anig|EHA24501.1  
aory|EIT81516.1 asyd|OJJ52675.1 ater|EAU32414.1 atub|OJI79916.1 aver|OJJ04701.1 awen|OJJ38431.1  
azon|OJJ43812.1

Group1877: abra|OJJ69132.1 acar|OOF91168.1 acla|EAW08700.1 afis|EAW15708.1 afla|EED51316.1  
afum|EAL85639.1 agla|OJJ81893.1 akaw|GAA90657.1 aluc|OJZ86121.1 anid|CBF71051.1 anig|EHA24500.1  
aory|EIT81557.1 asyd|OJJ52674.1 ater|EAU32413.1 atub|OJI79917.1 aver|OJJ04700.1 awen|OJJ38432.1  
azon|OJJ43811.1

Group1878: abra|OJJ69136.1 acar|OOF91164.1 acla|EAW08697.1 afis|EAW15738.1 afla|EED51314.1  
afum|EAL85610.1 agla|OJJ81895.1 akaw|GAA86320.1 aluc|OJZ86124.1 anid|CBF71047.1 anig|EHA24497.1  
aory|EIT81566.1 asyd|OJJ52672.1 ater|EAU32406.1 atub|OJI79920.1 aver|OJJ04698.1 awen|OJJ38434.1  
azon|OJJ43808.1

Group1879: abra|OJJ69138.1 acar|OOF91163.1 acla|EAW08696.1 afis|EAW15739.1 afla|EED51313.1  
afum|EAL85609.1 agla|OJJ81900.1 akaw|GAA86319.1 aluc|OJZ86125.1 anid|CBF71045.1 anig|EHA24496.1  
aory|EIT81532.1 asyd|OJJ52671.1 ater|EAU32408.1 atub|OJI79921.1 aver|OJJ04697.1 awen|OJJ38438.1  
azon|OJJ43807.1

Group1880: abra|OJJ69143.1 acar|OOF91159.1 acla|EAW08666.1 afis|EAW15743.1 afla|EED51309.1  
afum|EAL85605.1 agla|OJJ81904.1 akaw|GAA86314.1 aluc|OJZ86129.1 anid|CBF71038.1 anig|EHA24492.1  
aory|EIT81535.1 asyd|OJJ52666.1 ater|EAU32402.1 atub|OJI79925.1 aver|OJJ04693.1 awen|OJJ38443.1  
azon|OJJ43749.1

Group1881: abra|OJJ69147.1 acar|OOF91156.1 acla|EAW08669.1 afis|EAW15757.1 afla|EED51302.1  
afum|EAL85591.1 agla|OJJ81905.1 akaw|GAA86311.1 aluc|OJZ86133.1 anid|CBF71025.1 anig|EHA24488.1  
aory|EIT81545.1 asyd|OJJ52660.1 ater|EAU32400.1 atub|OJI79929.1 aver|OJJ04688.1 awen|OJJ38445.1  
azon|OJJ43751.1

Group1882: abra|OJJ69154.1 acar|OOF91149.1 acla|EAW08671.1 afis|EAW15753.1 afla|EED51298.1 afum|EAL85596.1 agla|OJJ81909.1 akaw|GAA86308.1 aluc|OJZ86141.1 anid|CBF71023.1 anig|EHA24483.1 aory|EIT81538.1 asyd|OJJ52659.1 ater|EAU32397.1 atub|OJI79933.1 aver|OJJ04687.1 awen|OJJ38453.1 azon|OJJ43753.1

Group1883: abra|OJJ69155.1 acar|OOF91148.1 acla|EAW08672.1 afis|EAW15752.1 afla|EED51297.1 afum|EAL85597.1 agla|OJJ81910.1 akaw|GAA86307.1 aluc|OJZ86142.1 anid|CBF71021.1 anig|EHA24482.1 aory|EIT81540.1 asyd|OJJ52658.1 ater|EAU32396.1 atub|OJI79934.1 aver|OJJ04686.1 awen|OJJ38454.1 azon|OJJ43754.1

Group1884: abra|OJJ69156.1 acar|OOF91147.1 acla|EAW08673.1 afis|EAW15751.1 afla|EED51296.1 afum|EAL85598.1 agla|OJJ81911.1 akaw|GAA86306.1 aluc|OJZ86143.1 anid|CBF71019.1 anig|EHA24481.1 aory|EIT81520.1 asyd|OJJ52657.1 ater|EAU32395.1 atub|OJI79935.1 aver|OJJ04685.1 awen|OJJ38455.1 azon|OJJ43755.1

Group1885: abra|OJJ69157.1 acar|OOF91146.1 acla|EAW08674.1 afis|EAW15750.1 afum|EAL85599.1 agla|OJJ81913.1 akaw|GAA86305.1 aluc|OJZ86144.1 anid|CBF71017.1 anig|EHA24480.1 aory|EIT81492.1 asyd|OJJ52656.1 ater|EAU32394.1 atub|OJI79936.1 aver|OJJ04684.1 awen|OJJ38456.1 azon|OJJ43756.1 afla|EED51295.1

Group1886: abra|OJJ69158.1 acar|OOF91145.1 acla|EAW08675.1 afis|EAW15749.1 afla|EED51294.1 afum|EAL85600.1 agla|OJJ81914.1 akaw|GAA86304.1 aluc|OJZ86145.1 anid|CBF71015.1 anig|EHA24479.1 aory|EIT81541.1 asyd|OJJ52655.1 ater|EAU32393.1 atub|OJI79937.1 aver|OJJ04683.1 awen|OJJ38457.1 azon|OJJ43757.1

Group1887: abra|OJJ69159.1 acar|OOF91144.1 acla|EAW08676.1 afis|EAW15748.1 afla|EED51293.1 afum|EAL85601.1 agla|OJJ81915.1 akaw|GAA86303.1 aluc|OJZ86146.1 anid|CBF71013.1 anig|EHA24478.1 aory|EIT81547.1 asyd|OJJ52654.1 ater|EAU32392.1 atub|OJI79938.1 aver|OJJ04682.1 awen|OJJ38458.1 azon|OJJ43759.1

Group1888: abra|OJJ69161.1 acar|OOF91141.1 acla|EAW08678.1 afis|EAW15746.1 afla|EED51291.1 afum|EAL85602.1 agla|OJJ81917.1 akaw|GAA86301.1 aluc|OJZ86148.1 anid|CBF71009.1 anig|EHA24476.1 aory|EIT81488.1 asyd|OJJ52651.1 ater|EAU32390.1 atub|OJI79940.1 aver|OJJ04680.1 awen|OJJ38460.1 azon|OJJ43761.1

Group1889: abra|OJJ69162.1 acar|OOF91140.1 acla|EAW08679.1 afis|EAW15754.1 afla|EED51290.1 afum|EAL85595.1 agla|OJJ81918.1 akaw|GAA86300.1 aluc|OJZ86149.1 anid|CBF71007.1 anig|EHA24475.1 aory|EIT81493.1 asyd|OJJ52650.1 ater|EAU32389.1 atub|OJI79941.1 aver|OJJ04679.1 awen|OJJ38462.1 azon|OJJ43762.1

Group1890: abra|OJJ69164.1 acar|OOF91139.1 acla|EAW08680.1 afis|EAW15758.1 afla|EED51289.1 afum|EAL85590.1 agla|OJJ81920.1 akaw|GAA86299.1 aluc|OJZ86151.1 anid|CBF71006.1 anig|EHA24474.1 aory|EIT81496.1 asyd|OJJ52648.1 ater|EAU32388.1 atub|OJI79943.1 aver|OJJ04677.1 awen|OJJ38466.1 azon|OJJ43764.1

Group1891: abra|OJJ69165.1 acar|OOF91138.1 acla|EAW08681.1 afis|EAW15759.1 afla|EED51288.1 afum|EAL85589.1 agla|OJJ81921.1 akaw|GAA86298.1 aluc|OJZ86152.1 anid|CBF71004.1 anig|EHA24473.1 aory|EIT81511.1 asyd|OJJ52647.1 ater|EAU32387.1 atub|OJI79944.1 aver|OJJ04676.1 awen|OJJ38467.1 azon|OJJ43765.1

Group1892: abra|OJJ69166.1 acar|OOF91137.1 acla|EAW08682.1 afis|EAW15760.1 afla|EED51287.1 afum|EAL85588.1 agla|OJJ81922.1 akaw|GAA86297.1 aluc|OJZ86153.1 anid|CBF71002.1 anig|EHA24472.1 aory|EIT81510.1 asyd|OJJ52646.1 ater|EAU32386.1 atub|OJI79945.1 aver|OJJ04675.1 awen|OJJ38468.1 azon|OJJ43766.1

Group1893: abra|OJJ69167.1 acar|OOF91136.1 acla|EAW08683.1 afis|EAW15761.1 afla|EED51286.1 afum|EAL85587.1 agla|OJJ81923.1 akaw|GAA86296.1 aluc|OJZ86154.1 anid|CBF71000.1 anig|EHA24471.1 aory|EIT81497.1 asyd|OJJ52645.1 ater|EAU32385.1 atub|OJI79946.1 aver|OJJ04674.1 awen|OJJ38469.1 azon|OJJ43767.1

Group1894: abra|OJJ69168.1 acar|OOF91135.1 acla|EAW08684.1 afis|EAW15762.1 afla|EED51285.1 afum|EAL85586.1 agla|OJJ81924.1 akaw|GAA86295.1 aluc|OJZ86155.1 anid|CBF70998.1 anig|EHA24470.1 aory|EIT81522.1 asyd|OJJ52644.1 ater|EAU32384.1 atub|OJI79947.1 aver|OJJ04673.1 awen|OJJ38470.1 azon|OJJ43769.1

Group1895: abra|OJJ69177.1 acar|OOF91129.1 acla|EAW08686.1 afis|EAW15763.1 afla|EED51284.1 afum|EAL85585.1 agla|OJJ81925.1 akaw|GAA86287.1 aluc|OJZ86163.1 anid|CBF70996.1 anig|EHA24461.1 aory|EIT81489.1 asyd|OJJ52643.1 ater|EAU32378.1 atub|OJI79955.1 aver|OJJ04672.1 awen|OJJ38471.1 azon|OJJ43770.1

Group1896: abra|OJJ69178.1 acar|OOF90317.1 acla|EAW08687.1 afis|EAW15764.1 afla|EED51283.1 afum|EAL85584.1 agla|OJJ81927.1 akaw|GAA86286.1 aluc|OJZ86164.1 anid|CBF70994.1 anig|EHA24460.1

aory|EIT81513.1 asyd|OJJ52642.1 ater|EAU32377.1 atub|OJI79956.1 aver|OJJ04670.1 awen|OJJ38472.1 azon|OJJ43772.1

Group1897: abra|OJJ69179.1 acar|OOF90318.1 acla|EAW08688.1 afis|EAW15765.1 afla|EED51282.1 afum|EAL85583.1 agla|OJJ81928.1 akaw|GAA86285.1 aluc|OJZ86165.1 anid|CBF70993.1 anig|EHA24459.1 aory|EIT81558.1 asyd|OJJ52641.1 ater|EAU32376.1 atub|OJI79957.1 aver|OJJ04669.1 awen|OJJ38473.1 azon|OJJ43773.1

Group1898: abra|OJJ69180.1 acar|OOF90319.1 acla|EAW08689.1 afis|EAW15766.1 afla|EED51281.1 afum|EAL85582.1 agla|OJJ81930.1 akaw|GAA86284.1 aluc|OJZ86166.1 anig|EHA24458.1 aory|EIT81544.1 asyd|OJJ52640.1 ater|EAU32375.1 atub|OJI79958.1 awen|OJJ38474.1 anid|CBF70991.1 aver|OJJ04668.1 azon|OJJ43774.1

Group1899: abra|OJJ69181.1 acar|OOF90321.1 acla|EAW08690.1 afis|EAW15767.1 afla|EED51280.1 afum|EAL85581.1 agla|OJJ81931.1 akaw|GAA86283.1 aluc|OJZ86167.1 anid|CBF70989.1 anig|EHA24457.1 aory|EIT81536.1 asyd|OJJ52639.1 ater|EAU32374.1 atub|OJI79959.1 aver|OJJ04667.1 awen|OJJ38475.1 azon|OJJ43775.1

Group1900: abra|OJJ69183.1 acar|OOF90320.1 acla|EAW08691.1 afis|EAW15768.1 afla|EED51279.1 afum|EAL85580.1 agla|OJJ81932.1 akaw|GAA86282.1 aluc|OJZ86168.1 anid|CBF70987.1 anig|EHA24456.1 aory|EIT81531.1 asyd|OJJ52638.1 ater|EAU32373.1 atub|OJI79960.1 aver|OJJ04666.1 awen|OJJ38476.1 azon|OJJ43776.1

Group1901: abra|OJJ69184.1 acar|OOF91128.1 acla|EAW08662.1 afis|EAW15769.1 afla|EED51278.1 afum|EAL85579.1 agla|OJJ81933.1 akaw|GAA86281.1 aluc|OJZ86170.1 anid|CBF70983.1 anig|EHA24455.1 aory|EIT81490.1 asyd|OJJ52636.1 ater|EAU32372.1 atub|OJI79962.1 aver|OJJ04664.1 awen|OJJ38477.1 azon|OJJ43777.1

Group1902: abra|OJJ69186.1 acar|OOF91126.1 acla|EAW08660.1 afis|EAW15771.1 afla|EED51276.1 afum|EAL85577.1 agla|OJJ81935.1 akaw|GAA86279.1 aluc|OJZ86172.1 anid|CBF70979.1 anig|EHA24453.1 aory|EIT81507.1 asyd|OJJ52634.1 ater|EAU32370.1 atub|OJI79964.1 aver|OJJ04662.1 awen|OJJ38479.1 azon|OJJ43779.1

Group1903: abra|OJJ69187.1 acar|OOF91125.1 acla|EAW08659.1 afis|EAW15772.1 afla|EED51275.1 afum|EAL85576.1 agla|OJJ81936.1 akaw|GAA86278.1 aluc|OJZ86173.1 anid|CBF70977.1 anig|EHA24452.1 aory|EIT81560.1 asyd|OJJ52633.1 ater|EAU32369.1 atub|OJI79965.1 aver|OJJ04661.1 awen|OJJ38480.1 azon|OJJ43780.1

Group1904: abra|OJJ69189.1 acar|OOF91122.1 acla|EAW08656.1 afis|EAW15775.1 afla|EED51271.1 afum|EAL85574.1 agla|OJJ81938.1 akaw|GAA86275.1 aluc|OJZ86175.1 anid|CBF70976.1 anig|EHA24449.1 aory|EIT81533.1 asyd|OJJ52631.1 ater|EAU32366.1 atub|OJI79967.1 aver|OJJ04659.1 awen|OJJ38482.1 azon|OJJ43783.1

Group1905: abra|OJJ69191.1 acar|OOF91120.1 acla|EAW08654.1 afis|EAW15777.1 afla|EED51268.1 afum|EAL85572.1 agla|OJJ81940.1 akaw|GAA86273.1 aluc|OJZ86177.1 anid|CBF70933.1 anig|EHA24447.1 aory|EIT81563.1 asyd|OJJ52629.1 ater|EAU32364.1 atub|OJI79969.1 aver|OJJ04657.1 awen|OJJ38484.1 azon|OJJ43785.1

Group1906: abra|OJJ69192.1 acar|OOF91121.1 acla|EAW08653.1 afis|EAW15778.1 afla|EED51266.1 afum|EAL85571.1 agla|OJJ81941.1 akaw|GAA86272.1 aluc|OJZ86178.1 anid|CBF70935.1 anig|EHA24446.1 aory|EIT81565.1 asyd|OJJ52628.1 ater|EAU32363.1 atub|OJI79970.1 aver|OJJ04656.1 awen|OJJ38485.1 azon|OJJ43786.1

Group1907: abra|OJJ69193.1 acar|OOF91119.1 acla|EAW08652.1 afis|EAW15779.1 afla|EED51265.1 afum|EAL85570.1 agla|OJJ81942.1 akaw|GAA86271.1 aluc|OJZ86179.1 anid|CBF70937.1 anig|EHA24445.1 aory|EIT81542.1 asyd|OJJ52627.1 ater|EAU32362.1 atub|OJI79971.1 aver|OJJ04655.1 awen|OJJ38486.1 azon|OJJ43787.1

Group1908: abra|OJJ69194.1 acar|OOF91118.1 acla|EAW08651.1 afis|EAW15780.1 afla|EED51264.1 afum|EBA27235.1 agla|OJJ81943.1 akaw|GAA86270.1 aluc|OJZ86180.1 anid|CBF70939.1 anig|EHA24444.1 aory|EIT81528.1 asyd|OJJ52626.1 ater|EAU32361.1 atub|OJI79972.1 aver|OJJ04654.1 awen|OJJ38487.1 azon|OJJ43788.1

Group1909: abra|OJJ69196.1 acar|OOF90027.1 acla|EAW08650.1 afis|EAW15781.1 afla|EED51263.1 afum|EAL85569.1 agla|OJJ81944.1 akaw|GAA92209.1 aluc|OJZ86181.1 anid|CBF70941.1 anig|EHA24443.1 aory|EIT81567.1 asyd|OJJ52625.1 ater|EAU32360.1 atub|OJI79973.1 aver|OJJ04652.1 awen|OJJ38488.1 azon|OJJ43789.1

Group1910: abra|OJJ69197.1 acar|OOF90026.1 acla|EAW08649.1 afis|EAW15782.1 afla|EED51262.1 afum|EAL85568.1 agla|OJJ81945.1 akaw|GAA92210.1 aluc|OJZ86182.1 anid|CBF70945.1 anig|EHA24442.1 aory|EIT81562.1 asyd|OJJ52624.1 ater|EAU32359.1 atub|OJI79974.1 aver|OJJ04651.1 awen|OJJ38489.1 azon|OJJ43790.1



Group1911: abra|OJJ69198.1 acar|OOF91117.1 acla|EAW08648.1 afis|EAW15783.1 afla|EED51261.1 afum|EAL85567.1 agla|OJJ81946.1 akaw|GAA92211.1 aluc|OJZ86183.1 anid|CBF70946.1 anig|EHA24441.1 aory|EIT81552.1 asyd|OJJ52623.1 ater|EAU32358.1 atub|OJI79975.1 aver|OJJ04650.1 awen|OJJ38490.1 azon|OJJ43791.1

Group1912: abra|OJJ69200.1 acar|OOF91115.1 acla|EAW08646.1 afis|EAW15785.1 afla|EED51259.1 afum|EAL85565.1 agla|OJJ81948.1 akaw|GAA92213.1 aluc|OJZ86185.1 anid|CBF70954.1 anig|EHA24439.1 aory|EIT81568.1 asyd|OJJ52621.1 ater|EAU32356.1 atub|OJI79977.1 aver|OJJ04648.1 awen|OJJ38492.1 azon|OJJ43794.1

Group1913: abra|OJJ69204.1 acar|OOF91112.1 acla|EAW08643.1 afis|EAW15788.1 afla|EED51257.1 afum|EAL85562.1 agla|OJJ81951.1 akaw|GAA92216.1 aluc|OJZ86188.1 anid|CBF70960.1 anig|EHA24435.1 aory|EIT81501.1 asyd|OJJ52618.1 ater|EAU32353.1 atub|OJI79980.1 aver|OJJ04645.1 awen|OJJ38496.1 azon|OJJ43797.1

Group1914: abra|OJJ69205.1 acar|OOF91109.1 acla|EAW08642.1 afis|EAW15789.1 afla|EED51256.1 afum|EAL85561.1 agla|OJJ81952.1 akaw|GAA92217.1 aluc|OJZ86189.1 anid|CBF70962.1 anig|EHA24434.1 aory|EIT81537.1 asyd|OJJ52617.1 ater|EAU32352.1 atub|OJI79981.1 aver|OJJ04644.1 awen|OJJ38497.1 azon|OJJ43798.1

Group1915: abra|OJJ69206.1 acar|OOF91111.1 acla|EAW08641.1 afis|EAW15790.1 afla|EED51255.1 afum|EAL85560.1 agla|OJJ81953.1 akaw|GAA92218.1 aluc|OJZ86190.1 anid|CBF70964.1 anig|EHA24433.1 aory|EIT81514.1 asyd|OJJ52616.1 ater|EAU32351.1 atub|OJI79982.1 aver|OJJ04643.1 awen|OJJ38498.1 azon|OJJ43799.1

Group1916: abra|OJJ69208.1 acar|OOF91108.1 acla|EAW08638.1 afis|EAW15793.1 afla|EED51252.1 afum|EAL85557.1 agla|OJJ81956.1 akaw|GAA92219.1 aluc|OJZ86191.1 anid|CBF70970.1 anig|EHA24431.1 aory|EIT81504.1 asyd|OJJ52613.1 ater|EAU32349.1 atub|OJI79983.1 aver|OJJ04640.1 awen|OJJ38501.1 azon|OJJ43802.1

Group1917: abra|OJJ69209.1 acar|OOF91107.1 acla|EAW08637.1 afis|EAW15794.1 afla|EED51251.1 afum|EAL85556.1 agla|OJJ81957.1 akaw|GAA92220.1 aluc|OJZ86192.1 anid|CBF70931.1 anig|EHA24430.1 aory|EIT81500.1 asyd|OJJ52612.1 ater|EAU32348.1 atub|OJI79984.1 aver|OJJ04639.1 awen|OJJ38502.1 azon|OJJ43803.1

Group1918: abra|OJJ69210.1 acar|OOF91106.1 acla|EAW08635.1 afis|EAW15796.1 afla|EED51249.1 afum|EAL85554.1 agla|OJJ81960.1 akaw|GAA92221.1 aluc|OJZ86193.1 anid|CBF70927.1 anig|EHA24429.1 aory|EIT81508.1 asyd|OJJ52610.1 ater|EAU32346.1 atub|OJI79985.1 aver|OJJ04637.1 awen|OJJ38504.1 azon|OJJ43747.1

Group1919: abra|OJJ69211.1 acar|OOF91105.1 acla|EAW08634.1 afis|EAW15797.1 afla|EED51248.1 afum|EAL85553.2 agla|OJJ81961.1 akaw|GAA92222.1 aluc|OJZ86194.1 anid|CBF70925.1 anig|EHA24428.1 aory|EIT81561.1 asyd|OJJ52609.1 ater|EAU32345.1 atub|OJI79986.1 aver|OJJ04636.1 awen|OJJ38505.1 azon|OJJ43746.1

Group1920: abra|OJJ69212.1 acar|OOF91104.1 acla|EAW08633.1 afis|EAW15798.1 afla|EED51247.1 afum|EAL85552.1 agla|OJJ81962.1 akaw|GAA92223.1 aluc|OJZ86195.1 anid|CBF70923.1 anig|EHA24427.1 aory|EIT81502.1 asyd|OJJ52608.1 ater|EAU32344.1 atub|OJI79988.1 aver|OJJ04635.1 awen|OJJ38506.1 azon|OJJ43745.1

Group1921: abra|OJJ69215.1 acar|OOF91103.1 acla|EAW08630.1 afis|EAW15801.1 afla|EED51244.1 afum|EAL85549.2 agla|OJJ81968.1 akaw|GAA92224.1 aluc|OJZ86196.1 anid|CBF70918.1 anig|EHA24426.1 aory|EIT83186.1 asyd|OJJ52605.1 ater|EAU33447.1 atub|OJI79989.1 aver|OJJ04632.1 awen|OJJ38510.1 azon|OJJ43742.1

Group1922: abra|OJJ69217.1 acar|OOF91101.1 acla|EAW08628.1 afis|EAW15803.1 afla|EED51242.1 afum|EAL85547.1 agla|OJJ81970.1 akaw|GAA92226.1 aluc|OJZ86199.1 anid|CBF70914.1 anig|EHA24424.1 aory|EIT83176.1 asyd|OJJ52603.1 ater|EAU33445.1 atub|OJI79991.1 aver|OJJ04629.1 awen|OJJ38513.1 azon|OJJ43739.1

Group1923: abra|OJJ69222.1 acar|OOF91098.1 acla|EAW12739.1 afis|EAW17902.1 afla|EED51238.1 afum|EAL91710.1 agla|OJJ81973.1 akaw|GAA92230.1 aluc|OJZ86202.1 anid|CBF70908.1 anig|EHA24420.1 aory|EIT83180.1 asyd|OJJ52599.1 ater|EAU33438.1 atub|OJI79996.1 aver|OJJ04626.1 awen|OJJ38518.1 azon|OJJ43736.1

Group1924: abra|OJJ69230.1 acar|OOF91090.1 acla|EAW08619.1 afis|EAW15815.1 afla|EED51232.1 afum|EAL85536.1 agla|OJJ81979.1 akaw|GAA92238.1 aluc|OJZ86210.1 anid|CBF70899.1 anig|EHA24416.1 aory|EIT83190.1 asyd|OJJ52595.1 ater|EAU33433.1 atub|OJI80004.1 aver|OJJ04622.1 awen|OJJ38528.1 azon|OJJ43733.1

Group1925: abra|OJJ69232.1 acar|OOF91088.1 acla|EAW08617.1 afis|EAW15817.1 afla|EED51230.1 afum|EAL85534.1 agla|OJJ81981.1 akaw|GAA92240.1 aluc|OJZ86212.1 anid|CBF70895.1 anig|EHA24414.1

aory|EIT83179.1 asyd|OJJ52593.1 ater|EAU33431.1 atub|OJI80007.1 aver|OJJ04620.1 awen|OJJ38531.1 azon|OJJ43731.1

Group1926: abra|OJJ69234.1 acar|OOF91086.1 acla|EAW08615.1 afis|EAW15819.1 afla|EED51228.1 afum|EAL85532.1 agla|OJJ81983.1 akaw|GAA92242.1 aluc|OJZ86214.1 anid|CBF70891.1 anig|EHA24412.1 aory|EIT83174.1 asyd|OJJ52591.1 ater|EAU33429.1 atub|OJI80009.1 aver|OJJ04618.1 awen|OJJ38533.1 azon|OJJ43729.1

Group1927: abra|OJJ69235.1 acar|OOF91085.1 acla|EAW08614.1 afis|EAW15820.1 afla|EED51227.1 afum|EAL85531.1 agla|OJJ81984.1 akaw|GAA92243.1 aluc|OJZ86215.1 anid|CBF70889.1 anig|EHA24411.1 aory|EIT83196.1 asyd|OJJ52590.1 ater|EAU33428.1 atub|OJI80010.1 aver|OJJ04617.1 awen|OJJ38534.1 azon|OJJ43728.1

Group1928: abra|OJJ69237.1 acar|OOF91081.1 acla|EAW08610.1 afis|EAW15823.1 afla|EED51223.1 afum|EAL85528.1 agla|OJJ81986.1 akaw|GAA92247.1 aluc|OJZ86217.1 anid|CBF70884.1 anig|EHA24409.1 aory|EIT83191.1 asyd|OJJ52588.1 ater|EAU33425.1 atub|OJI80012.1 aver|OJJ04615.1 awen|OJJ38536.1 azon|OJJ43726.1

Group1929: abra|OJJ69238.1 acar|OOF91080.1 acla|EAW08609.1 afis|EAW15824.1 afla|EED51221.1 afum|EAL85527.1 agla|OJJ81987.1 akaw|GAA92248.1 aluc|OJZ86218.1 anid|CBF70878.1 anig|EHA24408.1 aory|EIT80400.1 asyd|OJJ52586.1 ater|EAU33424.1 atub|OJI80013.1 aver|OJJ04613.1 awen|OJJ38538.1 azon|OJJ43725.1

Group1930: abra|OJJ69239.1 acar|OOF91079.1 acla|EAW08608.1 afis|EAW15825.1 afla|EED51220.1 afum|EAL85526.1 agla|OJJ81988.1 akaw|GAA92249.1 aluc|OJZ86220.1 anid|CBF70876.1 anig|EHA24407.1 aory|EIT80394.1 asyd|OJJ52584.1 ater|EAU33423.1 atub|OJI80014.1 aver|OJJ04612.1 awen|OJJ38539.1 azon|OJJ43724.1

Group1931: abra|OJJ69240.1 acar|OOF91078.1 acla|EAW08607.1 afis|EAW15826.1 afla|EED51219.1 afum|EAL85525.1 agla|OJJ81989.1 akaw|GAA92250.1 aluc|OJZ86221.1 anid|CBF70874.1 anig|EHA24406.1 aory|EIT80397.1 asyd|OJJ52583.1 ater|EAU33422.1 atub|OJI80015.1 aver|OJJ04611.1 awen|OJJ38540.1 azon|OJJ43723.1

Group1932: abra|OJJ69244.1 acar|OOF91076.1 acla|EAW08605.1 afis|EAW15828.1 afla|EED51217.1 afum|EAL85523.1 agla|OJJ81992.1 akaw|GAA92252.1 aluc|OJZ86225.1 anid|CBF70869.1 anig|EHA24403.1 aory|EIT80398.1 asyd|OJJ52580.1 ater|EAU33419.1 atub|OJI80018.1 aver|OJJ04608.1 awen|OJJ38542.1 azon|OJJ43721.1

Group1933: abra|OJJ69247.1 acla|EAW08602.1 afis|EAW15831.1 afla|EED51215.1 afum|EAL85521.1 agla|OJJ81995.1 akaw|GAA92254.1 aluc|OJZ86228.1 anid|CBF70863.1 anig|EHA24401.1 aory|EIT80403.1 asyd|OJJ52577.1 ater|EAU33417.1 atub|OJI80021.1 aver|OJJ04606.1 awen|OJJ38544.1 azon|OJJ43718.1 aory|EIT80399.1

Group1934: abra|OJJ69248.1 acar|OOF91073.1 acla|EAW08601.1 afis|EAW15832.1 afla|EED51214.1 afum|EAL85520.1 agla|OJJ81996.1 akaw|GAA92255.1 aluc|OJZ86229.1 anid|CBF70861.1 anig|EHA24400.1 aory|EIT80409.1 asyd|OJJ52576.1 ater|EAU33416.1 atub|OJI80022.1 aver|OJJ04605.1 awen|OJJ38545.1 azon|OJJ43717.1

Group1935: abra|OJJ69249.1 acar|OOF91072.1 acla|EAW08600.1 afis|EAW15833.1 afla|EED51213.1 afum|EAL85519.1 agla|OJJ81997.1 akaw|GAA92256.1 aluc|OJZ86230.1 anid|CBF70859.1 anig|EHA24399.1 aory|EIT80405.1 asyd|OJJ52575.1 ater|EAU33415.1 atub|OJI80023.1 aver|OJJ04604.1 awen|OJJ38546.1 azon|OJJ43716.1

Group1936: abra|OJJ69250.1 acar|OOF91071.1 acla|EAW08599.1 afis|EAW15834.1 afla|EED51212.1 afum|EAL85518.1 agla|OJJ81998.1 akaw|GAA92257.1 aluc|OJZ86231.1 anid|CBF70858.1 anig|EHA24398.1 aory|EIT80395.1 asyd|OJJ52574.1 ater|EAU33414.1 atub|OJI80024.1 aver|OJJ04603.1 awen|OJJ38547.1 azon|OJJ43715.1

Group1937: abra|OJJ69252.1 acar|OOF91069.1 acla|EAW08597.1 afis|EAW15836.1 afla|EED51210.1 afum|EAL85515.1 agla|OJJ82000.1 akaw|GAA92259.1 aluc|OJZ86232.1 anid|CBF70854.1 anig|EHA24397.1 aory|EIT80401.1 asyd|OJJ52573.1 ater|EAU33412.1 atub|OJI80026.1 aver|OJJ04602.1 awen|OJJ38550.1 azon|OJJ43713.1

Group1938: atub|OJI80028.1 abra|OJJ69256.1 acar|OOF91065.1 acla|EAW08593.1 afis|EAW15841.1 afla|EED51208.1 afum|EAL85510.1 agla|OJJ84917.1 akaw|GAA92262.1 aluc|OJZ86236.1 anid|CBF70845.1 anig|EHA24392.1 aory|EIT80413.1 asyd|OJJ52568.1 ater|EAU33394.1 aver|OJJ04597.1 awen|OJJ38555.1 azon|OJJ43711.1

Group1939: abra|OJJ69257.1 acar|OOF91064.1 acla|EAW08592.1 afis|EAW15842.1 afla|EED51207.1 afum|EAL85509.1 agla|OJJ84916.1 akaw|GAA92263.1 aluc|OJZ86237.1 anid|CBF70843.1 anig|EHA24391.1 aory|EIT80396.1 asyd|OJJ52567.1 ater|EAU33393.1 atub|OJI80029.1 aver|OJJ04596.1 awen|OJJ38556.1 azon|OJJ43710.1

Group1940: abra|OJJ69259.1 acar|OOF91063.1 acla|EAW08590.1 afis|EAW15844.1 afla|EED51205.1 afum|EAL85507.1 agla|OJJ84915.1 akaw|GAA92265.1 aluc|OJZ86239.1 anid|CBF70839.1 anig|EHA24390.1 asyd|OJJ52565.1 ater|EAU33391.1 atub|OJI80031.1 aver|OJJ04594.1 awen|OJJ38559.1 azon|OJJ43708.1 awen|OJJ38558.1

Group1941: abra|OJJ69262.1 acar|OOF91060.1 acla|EAW08589.1 afis|EAW15846.1 afla|EED51204.1 afum|EAL85505.1 agla|OJJ84913.1 akaw|GAA92267.1 aluc|OJZ86241.1 anid|CBF70835.1 anig|EHA24388.1 aory|EIT80414.1 asyd|OJJ52564.1 ater|EAU33390.1 atub|OJI80033.1 aver|OJJ04592.1 awen|OJJ38561.1 azon|OJJ48761.1

Group1942: abra|OJJ69263.1 acar|OOF91059.1 acla|EAW08588.1 afis|EAW15847.1 afla|EED51203.1 afum|EAL85504.1 agla|OJJ84911.1 akaw|GAA92268.1 aluc|OJZ86242.1 anid|CBF70833.1 anig|EHA24387.1 aory|EIT80410.1 asyd|OJJ52563.1 ater|EAU33389.1 atub|OJI80034.1 aver|OJJ04591.1 awen|OJJ38562.1 azon|OJJ43615.1

Group1943: abra|OJJ69268.1 acar|OOF89861.1 acla|EAW14653.1 afis|EAW24188.1 afla|EED48081.1 afum|EAL85861.1 agla|OJJ79691.1 akaw|GAA88143.1 aluc|OJZ82097.1 anid|CBF74306.1 anig|EHA28632.1 aory|EIT82476.1 asyd|OJJ54008.1 ater|EAU31140.1 atub|OJI88340.1 aver|OJJ08103.1 awen|OJJ33111.1 azon|OJJ41999.1

Group1944: abra|OJJ69275.1 acar|OOF94447.1 acla|EAW14663.1 afis|EAW24194.1 afla|EED48077.1 afum|EAL85866.1 agla|OJJ79684.1 akaw|GAA88148.1 aluc|OJZ82102.1 anid|CBF74313.1 anig|EHA28627.1 aory|EIT82481.1 asyd|OJJ54002.1 ater|EAU31145.1 atub|OJI88333.1 aver|OJJ08099.1 awen|OJJ33105.1 azon|OJJ44844.1

Group1945: abra|OJJ69276.1 acar|OOF94446.1 acla|EAW14664.1 afis|EAW24195.1 afla|EED48076.1 afum|EAL85867.1 agla|OJJ79683.1 akaw|GAA88149.1 aluc|OJZ82103.1 anid|CBF74315.1 anig|EHA28626.1 aory|EIT82479.1 asyd|OJJ54001.1 ater|EAU31146.1 atub|OJI88332.1 aver|OJJ08098.1 awen|OJJ33104.1 azon|OJJ44845.1

Group1946: abra|OJJ69277.1 acar|OOF94445.1 acla|EAW14665.1 afis|EAW24196.1 afla|EED48075.1 afum|EAL85868.1 agla|OJJ79682.1 akaw|GAA88150.1 aluc|OJZ82104.1 anid|CBF74317.1 anig|EHA28625.1 aory|EIT82482.1 asyd|OJJ54000.1 ater|EAU31147.1 atub|OJI88331.1 aver|OJJ08097.1 awen|OJJ33103.1 azon|OJJ44846.1

Group1947: abra|OJJ69278.1 acar|OOF94444.1 acla|EAW14666.1 afis|EAW24197.1 afla|EED48074.1 afum|EAL85869.1 agla|OJJ79681.1 akaw|GAA88151.1 aluc|OJZ82105.1 anid|CBF74319.1 anig|EHA28624.1 aory|EIT82477.1 asyd|OJJ53999.1 ater|EAU31148.1 atub|OJI88330.1 aver|OJJ08096.1 awen|OJJ33102.1 azon|OJJ44847.1

Group1948: abra|OJJ69279.1 acar|OOF94443.1 acla|EAW14668.1 afis|EAW24199.1 afla|EED48073.1 afum|EAL85871.1 agla|OJJ79678.1 akaw|GAA88152.1 aluc|OJZ82106.1 anid|CBF74323.1 anig|EHA28623.1 aory|EIT83321.1 asyd|OJJ53996.1 ater|EAU31150.1 atub|OJI88329.1 aver|OJJ08094.1 awen|OJJ33099.1 azon|OJJ44848.1

Group1949: abra|OJJ69281.1 acar|OOF94441.1 acla|EAW14670.1 afis|EAW24201.1 afla|EED48071.1 afum|EBA27248.1 agla|OJJ79676.1 akaw|GAA88153.1 aluc|OJZ82109.1 anid|CBF74326.1 anig|EHA28621.1 aory|EIT83320.1 asyd|OJJ53994.1 ater|EAU31152.1 atub|OJI88327.1 aver|OJJ08092.1 awen|OJJ33097.1 azon|OJJ44850.1

Group1950: abra|OJJ69283.1 acar|OOF94439.1 acla|EAW14672.1 afis|EAW24203.1 afla|EED48069.1 afum|EAL85873.2 agla|OJJ79674.1 akaw|GAA88155.1 aluc|OJZ82112.1 anid|CBF74330.1 anig|EHA28619.1 aory|EIT83340.1 asyd|OJJ53992.1 ater|EAU31154.1 atub|OJI88325.1 aver|OJJ08090.1 awen|OJJ33095.1 azon|OJJ44852.1

Group1951: abra|OJJ69284.1 acar|OOF94438.1 acla|EAW14673.1 afis|EAW24204.1 afla|EED48067.1 afum|EAL85874.2 agla|OJJ79673.1 akaw|GAA88156.1 aluc|OJZ82113.1 anid|CBF74332.1 anig|EHA28618.1 aory|EIT83335.1 asyd|OJJ53991.1 ater|EAU31155.1 atub|OJI88324.1 aver|OJJ08089.1 awen|OJJ33094.1 azon|OJJ44854.1

Group1952: abra|OJJ69285.1 acar|OOF94436.1 acla|EAW14674.1 afis|EAW24205.1 afla|EED48066.1 afum|EAL85875.1 agla|OJJ79672.1 akaw|GAA88157.1 aluc|OJZ82114.1 anid|CBF74272.1 anig|EHA28617.1 aory|EIT83356.1 asyd|OJJ53990.1 ater|EAU31156.1 atub|OJI88323.1 aver|OJJ08088.1 awen|OJJ33093.1 azon|OJJ44855.1

Group1953: abra|OJJ69286.1 acar|OOF94437.1 acla|EAW14675.1 afis|EAW24206.1 afla|EED48065.1 afum|EAL85876.1 agla|OJJ79671.1 akaw|GAA88158.1 aluc|OJZ82115.1 anid|CBF74271.1 anig|EHA28616.1 aory|EIT83359.1 asyd|OJJ53989.1 ater|EAU31157.1 atub|OJI88322.1 aver|OJJ08087.1 awen|OJJ33092.1 azon|OJJ44856.1

Group1954: abra|OJJ69288.1 acar|OOF94434.1 acla|EAW14677.1 afis|EAW24208.1 afla|EED48063.1 afum|EAL85878.1 agla|OJJ79669.1 akaw|GAA88160.1 aluc|OJZ82117.1 anid|CBF74269.1 anig|EHA28614.1

aory|EIT83351.1 asyd|OJJ53987.1 ater|EAU31158.1 atub|OJI88320.1 aver|OJJ08085.1 awen|OJJ33089.1 azon|OJJ44858.1

Group1955: abra|OJJ69292.1 acar|OOF94431.1 acla|EAW14680.1 afis|EAW24211.1 afla|EED48060.1 afum|EAL85880.1 agla|OJJ79654.1 akaw|GAA88163.1 aluc|OJZ82121.1 anid|CBF74263.1 anig|EHA28611.1 aory|EIT83350.1 asyd|OJJ53983.1 ater|EAU31161.1 atub|OJI88317.1 aver|OJJ08082.1 awen|OJJ33085.1 azon|OJJ44861.1

Group1956: abra|OJJ69293.1 acar|OOF94430.1 acla|EAW14681.1 afis|EAW24212.1 afla|EED48059.1 afum|EAL85881.1 agla|OJJ79663.1 akaw|GAA88164.1 aluc|OJZ82122.1 anid|CBF74261.1 anig|EHA28610.1 aory|EIT83323.1 asyd|OJJ53982.1 ater|EAU31162.1 atub|OJI88316.1 aver|OJJ08081.1 awen|OJJ33084.1 azon|OJJ44862.1

Group1957: abra|OJJ69294.1 acar|OOF94429.1 acla|EAW14682.1 afis|EAW24213.1 afla|EED48058.1 afum|EAL85882.1 agla|OJJ79665.1 akaw|GAA88165.1 aluc|OJZ82123.1 anid|CBF74260.1 anig|EHA28609.1 aory|EIT83345.1 asyd|OJJ53981.1 ater|EAU31163.1 atub|OJI88315.1 aver|OJJ08080.1 awen|OJJ33083.1 azon|OJJ44863.1

Group1958: abra|OJJ69296.1 acar|OOF94428.1 acla|EAW14683.1 afis|EAW24214.1 afla|EED48057.1 afum|EAL85883.1 agla|OJJ79666.1 akaw|GAA88166.1 aluc|OJZ82125.1 anid|CBF74258.1 anig|EHA28607.1 aory|EIT83357.1 asyd|OJJ53980.1 ater|EAU31164.1 atub|OJI88313.1 aver|OJJ08079.1 awen|OJJ33082.1 azon|OJJ44864.1

Group1959: abra|OJJ69297.1 acar|OOF94427.1 acla|EAW14684.1 afis|EAW24215.1 afla|EED48056.1 afum|EAL85884.1 agla|OJJ79667.1 akaw|GAA88167.1 aluc|OJZ82126.1 anid|CBF74256.1 anig|EHA28606.1 aory|EIT83352.1 asyd|OJJ53979.1 ater|EAU31165.1 atub|OJI88312.1 aver|OJJ08078.1 awen|OJJ33081.1 azon|OJJ44865.1

Group1960: abra|OJJ69298.1 acar|OOF94425.1 acla|EAW14685.1 afis|EAW24216.1 afla|EED48055.1 afum|EAL85885.1 agla|OJJ79668.1 akaw|GAA88168.1 aluc|OJZ82127.1 anid|CBF74254.1 anig|EHA28605.1 aory|EIT83339.1 asyd|OJJ53978.1 ater|EAU31166.1 atub|OJI88311.1 aver|OJJ08077.1 awen|OJJ33080.1 azon|OJJ44866.1

Group1961: abra|OJJ69299.1 acar|OOF94426.1 acla|EAW14686.1 afis|EAW24217.1 afla|EED48054.1 afum|EAL85886.1 agla|OJJ79653.1 akaw|GAA88169.1 aluc|OJZ82128.1 anid|CBF74252.1 anig|EHA28603.1 aory|EIT83360.1 asyd|OJJ53977.1 ater|EAU31167.1 atub|OJI88310.1 aver|OJJ08076.1 awen|OJJ33079.1 azon|OJJ44867.1

Group1962: abra|OJJ69302.1 acar|OOF94423.1 acla|EAW14688.1 afis|EAW24219.1 afla|EED48052.1 afum|EAL85888.1 agla|OJJ79651.1 akaw|GAA88171.1 aluc|OJZ82130.1 anid|CBF74248.1 anig|EHA28601.1 aory|EIT83354.1 asyd|OJJ53975.1 ater|EAU31169.1 atub|OJI88306.1 aver|OJJ08074.1 awen|OJJ33077.1 azon|OJJ44869.1

Group1963: abra|OJJ69305.1 acar|OOF94420.1 acla|EAW14691.1 afis|EAW24222.1 afla|EED48050.1 afum|EAL85891.2 agla|OJJ79648.1 akaw|GAA88174.1 aluc|OJZ82134.1 anid|CBF74239.1 anig|EHA28597.1 aory|EIT83349.1 asyd|OJJ53971.1 ater|EAU31172.1 atub|OJI88303.1 aver|OJJ08070.1 awen|OJJ33074.1 azon|OJJ44873.1

Group1964: abra|OJJ69307.1 acar|OOF94419.1 acla|EAW14694.1 afis|EAW24225.1 afla|EED48046.1 afum|EAL85893.1 agla|OJJ79646.1 akaw|GAA88176.1 aluc|OJZ82136.1 anid|CBF74234.1 anig|EHA28595.1 aory|EIT83343.1 asyd|OJJ53969.1 ater|EAU31174.1 atub|OJI88301.1 aver|OJJ08067.1 awen|OJJ33071.1 azon|OJJ44875.1

Group1965: abra|OJJ69308.1 acar|OOF94418.1 acla|EAW14695.1 afis|EAW24226.1 afla|EED48045.1 afum|EAL85894.1 agla|OJJ79645.1 akaw|GAA88177.1 aluc|OJZ82137.1 anid|CBF74232.1 anig|EHA28594.1 aory|EIT83341.1 asyd|OJJ53968.1 ater|EAU31175.1 atub|OJI88300.1 aver|OJJ08066.1 awen|OJJ33070.1 azon|OJJ44877.1

Group1966: abra|OJJ69312.1 acar|OOF94415.1 acla|EAW14738.1 afis|EAW24269.1 afla|EED48008.1 afum|EAL85937.1 agla|OJJ79596.1 akaw|GAA88181.1 aluc|OJZ82141.1 anid|CBF74167.1 anig|EHA28591.1 aory|EIT82915.1 asyd|OJJ53936.1 ater|EAU31214.1 atub|OJI88296.1 aver|OJJ08034.1 awen|OJJ33031.1 azon|OJJ44848.1

Group1967: abra|OJJ69313.1 acar|OOF94413.1 acla|EAW14737.1 afis|EAW24268.1 afla|EED48009.1 afum|EAL85936.1 agla|OJJ79597.1 akaw|GAA88182.1 aluc|OJZ82142.1 anid|CBF74169.1 anig|EHA28589.1 aory|EIT82903.1 asyd|OJJ53937.1 ater|EAU31213.1 atub|OJI88295.1 aver|OJJ08035.1 awen|OJJ33032.1 azon|OJJ44847.1

Group1968: abra|OJJ69314.1 acar|OOF94412.1 acla|EAW14736.1 afis|EAW24267.1 afla|EED48010.1 afum|EAL85935.1 agla|OJJ79598.1 akaw|GAA88183.1 aluc|OJZ82143.1 anid|CBF74171.1 anig|EHA28588.1 aory|EIT82909.1 asyd|OJJ53938.1 ater|EAU31212.1 atub|OJI88294.1 aver|OJJ08036.1 awen|OJJ33033.1 azon|OJJ44846.1

Group1969: abra|OJJ69315.1 acar|OOF90302.1 acla|EAW14734.1 afis|EAW24266.1 afla|EED48011.1 afum|EAL85934.1 agla|OJJ79606.1 akaw|GAA88184.1 aluc|OJZ82144.1 anid|CBF74173.1 anig|EHA28586.1 aory|EIT82916.1 asyd|OJJ53940.1 ater|EAU31210.1 atub|OJI88292.1 aver|OJJ08037.1 awen|OJJ33034.1 azon|OJJ48485.1

Group1970: abra|OJJ69316.1 acar|OOF90303.1 acla|EAW14732.1 afis|EAW24265.1 afla|EED48012.1 afum|EAL85933.1 agla|OJJ79607.1 akaw|GAA88185.1 aluc|OJZ82145.1 anid|CBF74175.1 anig|EHA28585.1 aory|EIT82905.1 asyd|OJJ53941.1 ater|EAU31209.1 atub|OJI88291.1 aver|OJJ08038.1 awen|OJJ33035.1 azon|OJJ48484.1

Group1971: abra|OJJ69319.1 acar|OOF94411.1 acla|EAW14726.1 afis|EAW24262.1 akaw|GAA88188.1 aluc|OJZ82148.1 ater|EAU31207.1 atub|OJI88287.1 aver|OJJ08043.1 awen|OJJ33039.1 azon|OJJ48479.1 afum|EAL85930.1 agla|OJJ79610.1 anid|CBF74186.1 anig|EHA28582.1 aory|EIT82904.1 asyd|OJJ53946.1 afla|EED48015.1

Group1972: abra|OJJ69329.1 acar|OOF94398.1 acla|EAW14711.1 afis|EAW24246.1 afla|EED48028.1 afum|EAL85914.1 agla|OJJ79627.1 akaw|GAA88200.1 aluc|OJZ82161.1 anid|CBF74210.1 anig|EHA28571.1 aory|EIT83355.1 asyd|OJJ53956.1 ater|EAU31187.1 atub|OJI88276.1 aver|OJJ08052.1 awen|OJJ33058.1 azon|OJJ48466.1

Group1973: abra|OJJ69332.1 acar|OOF94395.1 acla|EAW14708.1 afis|EAW24239.1 afla|EED48031.1 afum|EAL85907.1 agla|OJJ79630.1 akaw|GAA88203.1 aluc|OJZ82164.1 anid|CBF74213.1 anig|EHA28568.1 aory|EIT83322.1 asyd|OJJ53957.1 ater|EAU31186.1 atub|OJI88273.1 aver|OJJ08053.1 awen|OJJ33054.1 azon|OJJ48465.1

Group1974: anig|EHA28560.1 abra|OJJ69342.1 acar|OOF94385.1 acla|EAW14704.1 afis|EAW24235.1 afla|EED48036.1 afum|EAL85904.1 agla|OJJ79636.1 akaw|GAA88211.1 aluc|OJZ82174.1 anid|CBF74219.1 aory|EIT83346.1 asyd|OJJ53961.1 ater|EAU31183.1 atub|OJI88263.1 aver|OJJ08057.1 awen|OJJ33063.1 azon|OJJ48461.1

Group1975: abra|OJJ69343.1 acar|OOF94386.1 acla|EAW14703.1 afis|EAW24234.1 afla|EED48037.1 afum|EAL85903.1 agla|OJJ79637.1 akaw|GAA88212.1 aluc|OJZ82175.1 anid|CBF74221.1 anig|EHA28559.1 aory|EIT83326.1 asyd|OJJ53962.1 ater|EAU31182.1 atub|OJI88262.1 aver|OJJ08058.1 awen|OJJ33064.1 azon|OJJ48460.1

Group1976: abra|OJJ69345.1 acar|OOF94379.1 acla|EAW14701.1 afis|EAW24232.1 afla|EED48039.1 afum|EAL85901.2 agla|OJJ79639.1 akaw|GAA88214.1 aluc|OJZ82177.1 anid|CBF74223.1 anig|EHA28557.1 aory|EIT83353.1 asyd|OJJ53964.1 ater|EAU31180.1 atub|OJI88260.1 aver|OJJ08060.1 awen|OJJ33065.1 azon|OJJ48458.1

Group1977: abra|OJJ69346.1 acar|OOF94378.1 acla|EAW14700.1 afis|EAW24231.1 afla|EED48040.1 afum|EAL85900.1 agla|OJJ79640.1 akaw|GAA88215.1 aluc|OJZ82178.1 anid|CBF74224.1 anig|EHA28556.1 aory|EIT83342.1 asyd|OJJ53965.1 ater|EAU31179.1 atub|OJI88259.1 aver|OJJ08061.1 awen|OJJ33066.1 azon|OJJ48457.1

Group1978: abra|OJJ69349.1 acar|OOF94376.1 acla|EAW14739.1 afis|EAW24270.1 afla|EED48007.1 afum|EAL85938.1 agla|OJJ79595.1 akaw|GAA88219.1 aluc|OJZ82181.1 anid|CBF74165.1 anig|EHA28553.1 aory|EIT82896.1 asyd|OJJ53935.1 ater|EAU31215.1 atub|OJI88254.1 aver|OJJ08033.1 awen|OJJ33030.1 azon|OJJ48489.1

Group1979: abra|OJJ69351.1 acar|OOF94375.1 acla|EAW14740.1 afis|EAW24271.1 afla|EED48006.1 afum|EAL85939.1 agla|OJJ79594.1 akaw|GAA88220.1 aluc|OJZ82183.1 anid|CBF74163.1 anig|EHA28552.1 aory|EIT82918.1 asyd|OJJ53933.1 ater|EAU31216.1 atub|OJI88253.1 aver|OJJ08031.1 awen|OJJ33028.1 azon|OJJ48490.1

Group1980: abra|OJJ69353.1 acar|OOF94372.1 acla|EAW14743.1 afis|EAW24274.1 afla|EED48002.1 afum|EAL85942.1 agla|OJJ79587.1 akaw|GAA88222.1 aluc|OJZ82186.1 anid|CBF74158.1 anig|EHA28550.1 aory|EIT82912.1 asyd|OJJ53927.1 ater|EAU31221.1 atub|OJI88251.1 aver|OJJ08026.1 awen|OJJ33023.1 azon|OJJ48494.1

Group1981: abra|OJJ69355.1 acar|OOF94370.1 acla|EAW14745.1 afis|EAW24276.1 afla|EED48000.1 afum|EAL85945.1 agla|OJJ79585.1 akaw|GAA88224.1 aluc|OJZ82187.1 anid|CBF74156.1 anig|EHA28548.1 aory|EIT82907.1 asyd|OJJ53925.1 ater|EAU31219.1 atub|OJI88249.1 aver|OJJ08024.1 awen|OJJ33021.1 azon|OJJ48496.1

Group1982: abra|OJJ69357.1 acar|OOF94367.1 acla|EAW14748.1 afis|EAW24279.1 afla|EED47997.1 afum|EAL85948.1 agla|OJJ80633.1 akaw|GAA88227.1 aluc|OJZ82189.1 anid|CBF74151.1 anig|EHA28546.1 aory|EIT82902.1 asyd|OJJ53923.1 ater|EAU31228.1 atub|OJI88246.1 aver|OJJ08021.1 awen|OJJ33018.1 azon|OJJ48499.1

Group1983: abra|OJJ69366.1 acar|OOF94359.1 acla|EAW14756.1 afis|EAW24287.1 afla|EED47989.1 afum|EAL85956.1 agla|OJJ83152.1 akaw|GAA88235.1 aluc|OJZ82200.1 anid|CBF74129.1 anig|EHA28539.1

aory|EIT79810.1 asyd|OJJ53912.1 ater|EAU31238.1 atub|OJI88236.1 aver|OJJ08010.1 awen|OJJ33009.1 azon|OJJ48506.1

Group1984: abra|OJJ69367.1 acar|OOF94358.1 acla|EAW14757.1 afis|EAW24288.1 afla|EED47988.1 afum|EAL85957.1 agla|OJJ83153.1 akaw|GAA88236.1 aluc|OJZ82201.1 anid|CBF74127.1 anig|EHA28538.1 aory|EIT79844.1 asyd|OJJ53911.1 ater|EAU31239.1 atub|OJI88235.1 aver|OJJ08009.1 awen|OJJ33008.1 azon|OJJ48507.1

Group1985: abra|OJJ69369.1 acar|OOF89837.1 acla|EAW14759.1 afis|EAW24290.1 afla|EED47986.1 afum|EAL85958.1 agla|OJJ83155.1 akaw|GAA88238.1 aluc|OJZ82203.1 anid|CBF74125.1 anig|EHA28536.1 aory|EIT79849.1 asyd|OJJ53909.1 ater|EAU31240.1 atub|OJI88233.1 aver|OJJ08007.1 awen|OJJ33006.1 azon|OJJ48509.1

Group1986: abra|OJJ69370.1 acar|OOF94357.1 acla|EAW14760.1 afis|EAW24291.1 afla|EED47985.1 afum|EAL85959.1 agla|OJJ83156.1 akaw|GAA88239.1 aluc|OJZ82204.1 anid|CBF74123.1 anig|EHA28535.1 aory|EIT79854.1 asyd|OJJ53908.1 ater|EAU31241.1 atub|OJI88232.1 aver|OJJ08006.1 awen|OJJ33005.1 azon|OJJ48510.1

Group1987: abra|OJJ69371.1 acar|OOF94355.1 acla|EAW14761.1 afis|EAW24292.1 afla|EED47984.1 afum|EAL85960.1 agla|OJJ83157.1 akaw|GAA88240.1 aluc|OJZ82205.1 anid|CBF74121.1 anig|EHA28534.1 aory|EIT79808.1 asyd|OJJ53907.1 ater|EAU31242.1 atub|OJI88231.1 aver|OJJ08005.1 awen|OJJ33004.1 azon|OJJ48511.1

Group1988: abra|OJJ69373.1 acar|OOF94354.1 acla|EAW14763.1 afis|EAW24294.1 afla|EED47982.1 afum|EAL85962.1 agla|OJJ83159.1 akaw|GAA88242.1 aluc|OJZ82208.1 anid|CBF74118.1 anig|EHA28532.1 aory|EIT79845.1 asyd|OJJ53905.1 ater|EAU31244.1 atub|OJI88228.1 aver|OJJ08003.1 awen|OJJ33001.1 azon|OJJ48513.1

Group1989: abra|OJJ69375.1 acar|OOF94351.1 acla|EAW14765.1 afis|EAW24296.1 afla|EED47980.1 afum|EAL85964.1 agla|OJJ83161.1 akaw|GAA88244.1 aluc|OJZ82210.1 anid|CBF75402.1 anig|EHA28530.1 aory|EIT79827.1 asyd|OJJ59822.1 ater|EAU31246.1 atub|OJI88226.1 aver|OJJ02465.1 awen|OJJ32998.1 azon|OJJ48514.1

Group1990: abra|OJJ69376.1 acar|OOF94349.1 acla|EAW14766.1 afis|EAW24297.1 afla|EED47979.1 afum|EAL85965.1 agla|OJJ83162.1 akaw|GAA88245.1 aluc|OJZ82211.1 anid|CBF74116.1 anig|EHA28529.1 aory|EIT79833.1 asyd|OJJ53904.1 ater|EAU31248.1 atub|OJI88225.1 aver|OJJ08001.1 awen|OJJ32997.1 azon|OJJ48515.1

Group1991: abra|OJJ69381.1 acar|OOF94344.1 acla|EAW14768.1 afis|EAW24299.1 afla|EED47973.1 afum|EAL85967.1 agla|OJJ83167.1 akaw|GAA88249.1 aluc|OJZ82216.1 anid|CBF74108.1 anig|EHA28524.1 aory|EIT79831.1 asyd|OJJ53901.1 ater|EAU31250.1 atub|OJI88219.1 aver|OJJ07998.1 awen|OJJ32993.1 azon|OJJ48523.1

Group1992: abra|OJJ69383.1 acar|OOF94343.1 acla|EAW14770.1 afis|EAW24301.1 afla|EED47971.1 afum|EAL85969.1 agla|OJJ83169.1 akaw|GAA88251.1 aluc|OJZ82217.1 anid|CBF74104.1 anig|EHA28523.1 aory|EIT79840.1 asyd|OJJ53899.1 ater|EAU31252.1 atub|OJI88218.1 aver|OJJ07996.1 awen|OJJ32991.1 azon|OJJ48525.1

Group1993: abra|OJJ69384.1 acar|OOF94342.1 acla|EAW14771.1 afis|EAW24302.1 afla|EED47970.1 afum|EAL85970.1 agla|OJJ83170.1 akaw|GAA88252.1 aluc|OJZ82218.1 anid|CBF74102.1 anig|EHA28522.1 aory|EIT79832.1 asyd|OJJ53898.1 ater|EAU31253.1 atub|OJI88217.1 aver|OJJ07995.1 awen|OJJ32990.1 azon|OJJ45840.1

Group1994: abra|OJJ69385.1 acar|OOF94341.1 acla|EAW14772.1 afis|EAW24303.1 afla|EED47969.1 afum|EAL85971.1 agla|OJJ83171.1 akaw|GAA88253.1 aluc|OJZ82219.1 anid|CBF74100.1 anig|EHA28521.1 aory|EIT79817.1 asyd|OJJ53897.1 ater|EAU31256.1 atub|OJI88216.1 aver|OJJ07994.1 awen|OJJ32989.1 azon|OJJ48526.1

Group1995: abra|OJJ69386.1 acar|OOF94340.1 acla|EAW14773.1 afis|EAW24304.1 afla|EED47968.1 afum|EAL85972.1 agla|OJJ83172.1 akaw|GAA88254.1 aluc|OJZ82220.1 anid|CBF79548.1 anig|EHA28520.1 aory|EIT79824.1 asyd|OJJ62162.1 ater|EAU31257.1 atub|OJI88215.1 aver|OJI96272.1 awen|OJJ32988.1 azon|OJJ48527.1

Group1996: abra|OJJ69387.1 acar|OOF94339.1 acla|EAW14774.1 afis|EAW24305.1 afla|EED47965.1 afum|EAL85973.1 agla|OJJ83173.1 akaw|GAA88255.1 aluc|OJZ82221.1 anid|CBF74098.1 anig|EHA28519.1 aory|EIT79856.1 asyd|OJJ53896.1 ater|EAU31258.1 atub|OJI88214.1 aver|OJJ07993.1 awen|OJJ32987.1 azon|OJJ48932.1

Group1997: abra|OJJ69398.1 acar|OOF94332.1 acla|EAW14780.1 afis|EAW24311.1 afla|EED47956.1 afum|EAL85979.1 agla|OJJ83179.1 akaw|GAA88264.1 aluc|OJZ82234.1 anid|CBF74081.1 anig|EHA28507.1 aory|EIT79851.1 asyd|OJJ53882.1 ater|EAU31264.1 atub|OJI88204.1 aver|OJJ07980.1 awen|OJJ32981.1 azon|OJJ48936.1

Group1998: abra|OJJ69400.1 acar|OOF94330.1 acla|EAW14782.1 afis|EAW24313.1 afla|EED47954.1 afum|EAL85981.1 agla|OJJ83181.1 akaw|GAA88266.1 aluc|OJZ82236.1 anid|CBF74079.1 anig|EHA28505.1 aory|EIT79862.1 asyd|OJJ53880.1 ater|EAU31266.1 atub|OJI88202.1 aver|OJJ07978.1 awen|OJJ32979.1 azon|OJJ48938.1

Group1999: abra|OJJ69402.1 acar|OOF94329.1 acla|EAW14784.1 afis|EAW24315.1 afla|EED47952.1 afum|EAL85983.1 agla|OJJ83183.1 akaw|GAA88267.1 aluc|OJZ82238.1 anid|CBF74078.1 anig|EHA28503.1 aory|EIT79841.1 asyd|OJJ53878.1 ater|EAU31267.1 atub|OJI88200.1 aver|OJJ07976.1 awen|OJJ32977.1 azon|OJJ48940.1

Group2000: abra|OJJ69404.1 acar|OOF94327.1 acla|EAW14786.1 afis|EAW24317.1 afla|EED47950.1 afum|EAL85985.1 agla|OJJ83185.1 akaw|GAA88269.1 aluc|OJZ82240.1 anid|CBF74074.1 anig|EHA28501.1 aory|EIT79859.1 asyd|OJJ53876.1 ater|EAU31270.1 atub|OJI88198.1 aver|OJJ07974.1 awen|OJJ32975.1 azon|OJJ48942.1

Group2001: abra|OJJ69405.1 acar|OOF94326.1 acla|EAW14787.1 afis|EAW24318.1 afla|EED47949.1 afum|EAL85987.1 agla|OJJ83186.1 akaw|GAA88270.1 aluc|OJZ82242.1 anid|CBF74073.1 anig|EHA28500.1 aory|EIT79816.1 asyd|OJJ53875.1 ater|EAU31271.1 atub|OJI88196.1 aver|OJJ07973.1 awen|OJJ32974.1 azon|OJJ48943.1

Group2002: abra|OJJ69410.1 acar|OOF94323.1 afla|EED47946.1 afum|EAL85990.1 akaw|GAA88277.1 aluc|OJZ82247.1 anid|CBF74069.1 anig|EHA28494.1 aory|EIT79850.1 asyd|OJJ53873.1 ater|EAU31273.1 atub|OJI88191.1 aver|OJJ07971.1 azon|OJJ48945.1 acla|EAW14789.1 afis|EAW24320.1 agla|OJJ83189.1 awen|OJJ32972.1

Group2003: abra|OJJ69411.1 acar|OOF94322.1 acla|EAW14790.1 afis|EAW24321.1 afla|EED47945.1 afum|EAL85991.1 agla|OJJ83190.1 akaw|GAA88278.1 aluc|OJZ82248.1 anid|CBF74068.1 anig|EHA28493.1 aory|EIT79836.1 asyd|OJJ53872.1 ater|EAU31274.1 atub|OJI88190.1 aver|OJJ07970.1 awen|OJJ32971.1 azon|OJJ48946.1

Group2004: abra|OJJ69412.1 acar|OOF94321.1 acla|EAW14791.1 afis|EAW24322.1 afla|EED47944.1 afum|EAL85992.1 agla|OJJ83191.1 akaw|GAA88279.1 aluc|OJZ82249.1 anid|CBF74066.1 anig|EHA28492.1 aory|EIT79820.1 asyd|OJJ53871.1 ater|EAU30430.1 atub|OJI88189.1 aver|OJJ07969.1 awen|OJJ32970.1 azon|OJJ48947.1

Group2005: abra|OJJ69413.1 acar|OOF94320.1 acla|EAW14793.1 afis|EAW24324.1 afla|EED47942.1 afum|EAL85994.1 akaw|GAA88281.1 aluc|OJZ82250.1 anid|CBF74060.1 anig|EHA28491.1 aory|EIT79823.1 asyd|OJJ53870.1 atub|OJI88187.1 aver|OJJ07968.1 awen|OJJ33577.1 azon|OJJ42851.1 afla|EED51658.1 aory|EIT80622.1

Group2006: abra|OJJ69414.1 acar|OOF94318.1 acla|EAW14795.1 afis|EAW24326.1 afla|EED47940.1 afum|EAL85996.1 agla|OJJ83193.1 akaw|GAA88282.1 aluc|OJZ82251.1 anid|CBF74056.1 anig|EHA28490.1 aory|EIT79834.1 asyd|OJJ53868.1 ater|EAU30427.1 atub|OJI88186.1 aver|OJJ07966.1 awen|OJJ32968.1 azon|OJJ48949.1

Group2007: abra|OJJ69415.1 acar|OOF94317.1 acla|EAW14796.1 afis|EAW24327.1 afla|EED47939.1 afum|EAL85997.1 agla|OJJ83194.1 akaw|GAA88283.1 aluc|OJZ82252.1 anid|CBF74054.1 anig|EHA28489.1 aory|EIT79852.1 asyd|OJJ53867.1 ater|EAU30426.1 atub|OJI88185.1 aver|OJJ07965.1 awen|OJJ32967.1 azon|OJJ48950.1

Group2008: abra|OJJ69417.1 acar|OOF94315.1 acla|EAW14798.1 afis|EAW24329.1 afla|EED47937.1 afum|EAL85999.1 agla|OJJ83196.1 akaw|GAA88285.1 aluc|OJZ82254.1 anid|CBF74052.1 anig|EHA28487.1 aory|EIT79861.1 asyd|OJJ53865.1 atub|OJI88183.1 aver|OJJ07963.1 awen|OJJ32965.1 azon|OJJ48953.1 ater|EAU30424.1

Group2009: abra|OJJ69419.1 acar|OOF90227.1 acla|EAW14799.1 afis|EAW24330.1 afla|EED47935.1 afum|EAL86000.1 agla|OJJ83197.1 akaw|GAA88286.1 aluc|OJZ82255.1 anid|CBF74050.1 anig|EHA28486.1 aory|EIT79863.1 asyd|OJJ53863.1 ater|EAU30422.1 atub|OJI88182.1 aver|OJJ07962.1 awen|OJJ32964.1 azon|OJJ48954.1

Group2010: abra|OJJ69420.1 acar|OOF90228.1 acla|EAW14800.1 afis|EAW24331.1 afla|EED47933.1 afum|EAL86001.1 agla|OJJ83198.1 akaw|GAA88287.1 aluc|OJZ82256.1 anid|CBF74048.1 anig|EHA28485.1 aory|EIT79848.1 asyd|OJJ53862.1 ater|EAU30418.1 atub|OJI88181.1 aver|OJJ07961.1 awen|OJJ32963.1 azon|OJJ48955.1

Group2011: abra|OJJ69421.1 acar|OOF90226.1 acla|EAW14801.1 afis|EAW24332.1 afla|EED47932.1 afum|EAL86002.1 agla|OJJ83199.1 akaw|GAA88288.1 aluc|OJZ82258.1 anid|CBF74045.1 anig|EHA28484.1 aory|EIT79839.1 asyd|OJJ53857.1 ater|EAU30417.1 atub|OJI88180.1 aver|OJJ07958.1 awen|OJJ32962.1 azon|OJJ48960.1

Group2012: abra|OJJ69423.1 acar|OOF94313.1 acla|EAW14802.1 afis|EAW24333.1 afla|EED47931.1 afum|EAL86003.1 agla|OJJ83202.1 akaw|GAA88289.1 aluc|OJZ82259.1 anid|CBF74039.1 anig|EHA28483.1

aory|EIT79843.1 asyd|OJJ53859.1 ater|EAU30416.1 atub|OJI88179.1 aver|OJJ07959.1 awen|OJJ32961.1 azon|OJJ48959.1

Group2013: abra|OJJ69446.1 acar|OOF94294.1 acla|EAW14811.1 afis|EAW24341.1 afla|EED47922.1 afum|EAL86012.1 agla|OJJ83224.1 akaw|GAA88372.1 aluc|OJZ82282.1 anid|CBF74027.1 anig|EHA28465.1 aory|EIT83372.1 asyd|OJJ53846.1 ater|EAU30406.1 atub|OJI88157.1 aver|OJJ07948.1 awen|OJJ32950.1 azon|OJJ48970.1

Group2014: abra|OJJ69448.1 acar|OOF94293.1 acla|EAW14812.1 afis|EAW24342.1 afla|EED47920.1 afum|EAL86013.1 agla|OJJ83223.1 akaw|GAA88371.1 aluc|OJZ82283.1 anid|CBF74025.1 anig|EHA28464.1 aory|EIT83362.1 asyd|OJJ53845.1 ater|EAU30404.1 atub|OJI88155.1 aver|OJJ07947.1 awen|OJJ32951.1 azon|OJJ48969.1

Group2015: abra|OJJ69449.1 acar|OOF94292.1 acla|EAW14813.1 afis|EAW24343.1 afla|EED47919.1 afum|EAL86014.1 agla|OJJ83210.1 akaw|GAA88370.1 aluc|OJZ82285.1 anid|CBF74028.1 anig|EHA28463.1 aory|EIT83364.1 asyd|OJJ53847.1 ater|EAU30403.1 atub|OJI88154.1 aver|OJJ07949.1 awen|OJJ32952.1 azon|OJJ48968.1

Group2016: abra|OJJ69453.1 acar|OOF94288.1 acla|EAW14817.1 afis|EAW24347.1 afla|EED47916.1 afum|EAL86017.1 agla|OJJ83206.1 akaw|GAA88359.1 aluc|OJZ82296.1 anid|CBF74017.1 anig|EHA28459.1 aory|EIT83378.1 asyd|OJJ53840.1 ater|EAU30399.1 atub|OJI88143.1 aver|OJJ07943.1 awen|OJJ32956.1 azon|OJJ48964.1

Group2017: abra|OJJ69456.1 acar|OOF94285.1 acla|EAW14821.1 afis|EAW24349.1 afla|EED47914.1 afum|EAL86019.2 agla|OJJ81762.1 akaw|GAA88356.1 aluc|OJZ82299.1 anid|CBF76155.1 anig|EHA28456.1 aory|EIT83376.1 asyd|OJJ52360.1 ater|EAU30395.1 atub|OJI88140.1 aver|OJJ01988.1 awen|OJJ32875.1 azon|OJJ48976.1

Group2018: abra|OJJ69457.1 acar|OOF94284.1 acla|EAW14820.1 afis|EAW24350.1 afla|EED47913.1 afum|EAL86020.2 agla|OJJ81761.1 akaw|GAA88355.1 aluc|OJZ82300.1 anid|CBF76157.1 anig|EHA28455.1 aory|EIT83375.1 asyd|OJJ52359.1 ater|EAU30394.1 atub|OJI88139.1 aver|OJJ01990.1 awen|OJJ32874.1 azon|OJJ48975.1

Group2019: abra|OJJ69458.1 acar|OOF94283.1 acla|EAW14819.1 afis|EAW24351.1 afla|EED47912.1 afum|EAL86021.1 agla|OJJ81760.1 akaw|GAA88354.1 aluc|OJZ82301.1 anid|CBF76159.1 anig|EHA28454.1 aory|EIT83371.1 asyd|OJJ52358.1 ater|EAU30393.1 atub|OJI88137.1 aver|OJJ01991.1 awen|OJJ32873.1 azon|OJJ48974.1

Group2020: abra|OJJ69459.1 acar|OOF94282.1 acla|EAW09925.1 afis|EAW21173.1 afla|EED54758.1 afum|EAL92193.1 agla|OJJ80005.1 akaw|GAA88353.1 aluc|OJZ82302.1 anid|CBF83317.1 anig|EHA28453.1 aory|EIT79382.1 asyd|OJJ60559.1 ater|EAU35840.1 atub|OJI88135.1 aver|OJI99885.1 awen|OJJ36511.1 azon|OJJ44387.1

Group2021: abra|OJJ69463.1 acar|OOF94278.1 acla|EAW09922.1 afis|EAW21170.1 afla|EED54735.1 afum|EAL92189.2 agla|OJJ80010.1 akaw|GAA88349.1 aluc|OJZ82306.1 anid|CBF83232.1 anig|EHA28450.1 aory|EIT78745.1 asyd|OJJ60541.1 ater|EAU35837.1 atub|OJI88132.1 aver|OJI99868.1 awen|OJJ36507.1 azon|OJJ44379.1

Group2022: abra|OJJ69467.1 acar|OOF94275.1 acla|EAW09920.1 afis|EAW21168.1 afla|EED54732.1 afum|EAL92187.1 agla|OJJ80012.1 akaw|GAA88346.1 aluc|OJZ82311.1 anid|CBF86960.1 anig|EHA28447.1 aory|EIT78891.1 asyd|OJJ60539.1 ater|EAU35835.1 atub|OJI88129.1 aver|OJI99866.1 awen|OJJ36505.1 azon|OJJ44377.1

Group2023: abra|OJJ69468.1 acar|OOF94274.1 acla|EAW09919.1 afis|EAW21167.1 afla|EED54731.1 afum|EAL92186.1 agla|OJJ80013.1 akaw|GAA88345.1 aluc|OJZ82312.1 anid|CBF86961.1 anig|EHA28446.1 aory|EIT78775.1 asyd|OJJ60537.1 ater|EAU35834.1 atub|OJI88128.1 aver|OJI99864.1 awen|OJJ36504.1 azon|OJJ44376.1

Group2024: abra|OJJ69469.1 acar|OOF94273.1 acla|EAW09918.1 afis|EAW21166.1 afla|EED54730.1 afum|EAL92185.1 agla|OJJ80015.1 akaw|GAA88344.1 aluc|OJZ82313.1 anid|CBF86963.1 anig|EHA28445.1 aory|EIT78843.1 asyd|OJJ60536.1 ater|EAU35833.1 atub|OJI88127.1 aver|OJI99863.1 awen|OJJ36503.1 azon|OJJ44375.1

Group2025: abra|OJJ69471.1 acar|OOF94272.1 acla|EAW09917.1 afis|EAW21165.1 afla|EED54729.1 afum|EAL92184.1 agla|OJJ80016.1 akaw|GAA88343.1 aluc|OJZ82314.1 anid|CBF86964.1 anig|EHA28444.1 aory|EIT78934.1 asyd|OJJ60535.1 ater|EAU35832.1 atub|OJI88126.1 aver|OJI99862.1 awen|OJJ36500.1 azon|OJJ44374.1

Group2026: abra|OJJ69473.1 acar|OOF94270.1 acla|EAW09915.1 afis|EAW21163.1 afla|EED54726.1 afum|EAL92182.1 agla|OJJ80020.1 akaw|GAA88342.1 aluc|OJZ82316.1 anid|CBF86968.1 anig|EHA28442.1 aory|EIT78844.1 asyd|OJJ60532.1 ater|EAU35829.1 atub|OJI88125.1 aver|OJI99859.1 awen|OJJ36497.1 azon|OJJ44372.1



Group2027: abra|OJJ69474.1 acar|OOF94268.1 acla|EAW09914.1 afis|EAW21162.1 afla|EED54725.1 afum|EAL92181.1 agla|OJJ80021.1 akaw|GAA88341.1 aluc|OJZ82317.1 anid|CBF86970.1 anig|EHA28441.1 aory|EIT78833.1 asyd|OJJ60531.1 ater|EAU35828.1 atub|OJI88124.1 aver|OJI99858.1 awen|OJJ36496.1 azon|OJJ44371.1

Group2028: abra|OJJ69475.1 acar|OOF94269.1 acla|EAW09913.1 afis|EAW21161.1 afla|EED54724.1 afum|EAL92180.1 agla|OJJ80022.1 akaw|GAA88340.1 aluc|OJZ82318.1 anid|CBF86972.1 anig|EHA28440.1 aory|EIT78951.1 asyd|OJJ60530.1 ater|EAU35827.1 atub|OJI88123.1 aver|OJI99857.1 awen|OJJ36495.1 azon|OJJ44370.1

Group2029: abra|OJJ69477.1 acar|OOF94265.1 acla|EAW09911.1 afis|EAW21160.1 afla|EED54649.1 afum|EAL92178.1 agla|OJJ80028.1 akaw|GAA88338.1 aluc|OJZ82320.1 anid|CBF86977.1 anig|EHA28438.1 aory|EIT78896.1 asyd|OJJ60527.1 ater|EAU35822.1 atub|OJI88120.1 aver|OJI99855.1 awen|OJJ36492.1 azon|OJJ44365.1

Group2030: abra|OJJ69481.1 acar|OOF94263.1 acla|EAW09908.1 akaw|GAA88335.1 aluc|OJZ82323.1 anig|EHA28435.1 atub|OJI88117.1 awen|OJJ36488.1 agla|OJJ80036.1 afis|EAW21157.1 afum|EAL92175.1 afla|EED54653.1 aory|EIT78820.1 ater|EAU35819.1 anid|CBF86982.1 asyd|OJJ60523.1 aver|OJI99847.1 azon|OJJ44359.1

Group2031: abra|OJJ69483.1 acar|OOF94262.1 acla|EAW09907.1 afis|EAW21156.1 afla|EED54652.1 afum|EAL92174.1 agla|OJJ80037.1 akaw|GAA88334.1 aluc|OJZ82324.1 anid|CBF86984.1 anig|EHA28434.1 aory|EIT78871.1 asyd|OJJ60518.1 ater|EAU35818.1 atub|OJI88116.1 aver|OJI99845.1 awen|OJJ36487.1 azon|OJJ44360.1

Group2032: abra|OJJ69485.1 acar|OOF94261.1 acla|EAW09906.1 afis|EAW21155.1 afla|EED54661.1 afum|EAL92173.1 agla|OJJ80038.1 akaw|GAA88333.1 aluc|OJZ82326.1 anid|CBF86986.1 anig|EHA28432.1 aory|EIT78925.1 asyd|OJJ60520.1 ater|EAU35817.1 atub|OJI88114.1 aver|OJI99846.1 awen|OJJ36486.1 azon|OJJ44362.1

Group2033: abra|OJJ69492.1 acar|OOF94251.1 acla|EAW09902.1 afis|EAW21150.1 afla|EED54662.1 afum|EAL92169.1 agla|OJJ78417.1 akaw|GAA88328.1 aluc|OJZ82332.1 anid|CBF75144.1 anig|EHA28428.1 aory|EIT78748.1 asyd|OJJ59971.1 ater|EAU36738.1 atub|OJI88108.1 aver|OJJ02320.1 awen|OJJ36477.1 asyd|OJJ54978.1

Group2034: abra|OJJ69496.1 acar|OOF94254.1 acla|EAW09950.1 afis|EAW21146.1 afla|EED46146.1 afum|EAL92165.1 agla|OJJ80070.1 akaw|GAA88325.1 aluc|OJZ82336.1 anid|CBF87010.1 anig|EHA28424.1 aory|EIT76496.1 asyd|OJJ60472.1 ater|EAU36761.1 atub|OJI88104.1 aver|OJI99792.1 awen|OJJ36469.1 azon|OJJ44354.1

Group2035: abra|OJJ69497.1 acar|OOF94256.1 acla|EAW09951.1 afis|EAW21145.1 afla|EED46147.1 afum|EAL92164.1 agla|OJJ80071.1 akaw|GAA88324.1 aluc|OJZ82337.1 anid|CBF86995.1 anig|EHA28423.1 aory|EIT76462.1 asyd|OJJ60473.1 ater|EAU36757.1 atub|OJI88103.1 aver|OJI99793.1 awen|OJJ36470.1 azon|OJJ44355.1

Group2036: abra|OJJ69498.1 acar|OOF94257.1 acla|EAW09952.1 afis|EAW21144.1 afla|EED46148.1 afum|EAL92163.1 agla|OJJ80072.1 akaw|GAA88323.1 aluc|OJZ82338.1 anid|CBF86997.1 anig|EHA28422.1 aory|EIT76514.1 asyd|OJJ60474.1 ater|EAU36756.1 atub|OJI88102.1 aver|OJI99794.1 awen|OJJ36471.1 azon|OJJ44356.1

Group2037: abra|OJJ69505.1 acar|OOF94247.1 acla|EAW09957.1 afis|EAW21136.1 afla|EED51811.1 afum|EAL92155.1 agla|OJJ80076.1 akaw|GAA88318.1 aluc|OJZ82344.1 anid|CBF87016.1 anig|EHA28416.1 aory|EIT81758.1 asyd|OJJ60463.1 ater|EAU36774.1 atub|OJI88096.1 aver|OJI99783.1 awen|OJJ36456.1 azon|OJJ44420.1

Group2038: abra|OJJ69506.1 acar|OOF94246.1 acla|EAW09958.1 afis|EAW21137.1 afla|EED51812.1 afum|EAL92156.1 agla|OJJ80081.1 akaw|GAA88317.1 aluc|OJZ82345.1 anid|CBF87014.1 anig|EHA28415.1 aory|EIT81705.1 asyd|OJJ60464.1 ater|EAU36773.1 atub|OJI88095.1 aver|OJI99784.1 awen|OJJ36457.1 azon|OJJ44418.1

Group2039: abra|OJJ69508.1 acar|OOF94245.1 acla|EAW09959.1 afis|EAW21138.1 afla|EED51813.1 afum|EAL92157.2 agla|OJJ80080.1 akaw|GAA88316.1 aluc|OJZ82346.1 anid|CBF87012.1 anig|EHA28414.1 aory|EIT81694.1 asyd|OJJ60465.1 ater|EAU36772.1 atub|OJI88094.1 aver|OJI99785.1 awen|OJJ36458.1 azon|OJJ44419.1

Group2040: abra|OJJ69510.1 acar|OOF94244.1 acla|EAW09960.1 afis|EAW21135.1 afla|EED46138.1 afum|EAL92154.1 agla|OJJ80078.1 akaw|GAA88314.1 aluc|OJZ82348.1 anid|CBF87000.1 anig|EHA28412.1 aory|EIT76494.1 asyd|OJJ60467.1 ater|EAU36767.1 atub|OJI88092.1 aver|OJI99787.1 awen|OJJ36461.1 azon|OJJ44416.1

Group2041: abra|OJJ69513.1 acar|OOF94240.1 acla|EAW09955.1 afis|EAW21141.1 afla|EED46142.1 afum|EAL92160.1 agla|OJJ80068.1 akaw|GAA88311.1 aluc|OJZ82351.1 anid|CBF87007.1 anig|EHA28409.1

aory|EIT76415.1 asyd|OJJ60470.1 ater|EAU36762.1 atub|OJI88089.1 aver|OJI99790.1 awen|OJJ36465.1 azon|OJJ44413.1

Group2042: abra|OJJ69516.1 acar|OOF94238.1 acla|EAW09964.1 afis|EAW21124.1 afla|EED51799.1 afum|EAL92147.1 agla|OJJ80086.1 akaw|GAA88308.1 aluc|OJZ82354.1 anid|CBF87018.1 anig|EHA28406.1 aory|EIT81724.1 asyd|OJJ60461.1 ater|EAU36776.1 atub|OJI88086.1 aver|OJI99781.1 awen|OJJ36454.1 azon|OJJ44423.1

Group2043: abra|OJJ69520.1 acar|OOF94237.1 acla|EAW09966.1 afis|EAW21122.1 afla|EED51795.1 afum|EAL92145.1 agla|OJJ80089.1 akaw|GAA88306.1 aluc|OJZ82359.1 anid|CBF87021.1 anig|EHA28404.1 aory|EIT81713.1 asyd|OJJ60459.1 ater|EAU36778.1 atub|OJI88082.1 aver|OJI99779.1 awen|OJJ36452.1 azon|OJJ44425.1

Group2044: abra|OJJ69522.1 acar|OOF94233.1 acla|EAW09968.1 afis|EAW21120.1 afla|EED51793.1 afum|EBA27448.1 agla|OJJ80091.1 akaw|GAA88305.1 aluc|OJZ82362.1 anid|CBF87025.1 anig|EHA28403.1 aory|EIT81754.1 asyd|OJJ60457.1 ater|EAU36779.1 atub|OJI88080.1 aver|OJI99777.1 awen|OJJ36450.1 azon|OJJ44427.1

Group2045: abra|OJJ69525.1 acar|OOF94229.1 acla|EAW09972.1 afis|EAW21116.1 afla|EED51767.1 afum|EAL92139.1 agla|OJJ80095.1 akaw|GAA88300.1 aluc|OJZ82365.1 anid|CBF87030.1 anig|EHA28400.1 aory|EIT79993.1 asyd|OJJ60455.1 ater|EAU36783.1 atub|OJI88077.1 aver|OJI99773.1 awen|OJJ36446.1 azon|OJJ44429.1

Group2046: abra|OJJ69529.1 afis|EAW22089.1 afla|EED53382.1 aory|EIT74986.1 asyd|OJJ58665.1 ater|EAU39308.1 azon|OJJ42020.1 abra|OJJ77940.1 acar|OOF93336.1 acla|EAW10026.1 akaw|GAA83724.1 aluc|OJZ91007.1 asyd|OJJ53344.1 atub|OJI82999.1 aver|OJJ08400.1 afla|EED53383.1 azon|OJJ45239.1 anid|CBF70508.1

Group2047: abra|OJJ69535.1 acar|OOF95965.1 acla|EAW11570.1 afis|EAW23883.1 afla|EED52612.1 afum|EAL87311.1 agla|OJJ82570.1 akaw|GAA88385.1 aluc|OJZ82373.1 anid|CBF77187.1 anig|EHA28391.1 aory|EIT74250.1 asyd|OJJ56841.1 ater|EAU33463.1 atub|OJI88069.1 aver|OJJ03497.1 awen|OJJ33865.1 azon|OJJ48688.1

Group2048: abra|OJJ69536.1 acar|OOF91604.1 acla|EAW14409.1 afis|EAW19117.1 afla|EED54297.1 afum|EAL93849.1 agla|OJJ80432.1 akaw|GAA91927.1 aluc|OJZ82695.1 anid|CBF79728.1 anig|EHA21143.1 aory|EIT75966.1 asyd|OJJ58073.1 ater|EAU37379.1 atub|OJI88927.1 aver|OJJ04334.1 awen|OJJ37447.1 azon|OJJ51125.1

Group2049: abra|OJJ69575.1 acar|OOF91580.1 acla|EAW14394.1 afis|EAW19102.1 afla|EED54308.1 afum|EAL93834.1 agla|OJJ84500.1 akaw|GAA91572.1 aluc|OJZ82392.1 anid|CBF79696.1 anig|EHA28372.1 aory|EIT75942.1 asyd|OJJ58050.1 ater|EAU32151.1 atub|OJI88049.1 aver|OJJ04353.1 awen|OJJ32495.1 azon|OJJ46034.1

Group2050: abra|OJJ69580.1 acar|OOF91573.1 acla|EAW14388.1 afis|EAW19095.1 afla|EED54328.1 afum|EAL93826.1 agla|OJJ84506.1 akaw|GAA91576.1 aluc|OJZ82398.1 anid|CBF79705.1 anig|EHA28367.1 aory|EIT75940.1 asyd|OJJ58055.1 ater|EAU32143.1 atub|OJI88044.1 aver|OJJ04348.1 awen|OJJ32488.1 azon|OJJ46043.1

Group2051: abra|OJJ69583.1 acar|OOF91571.1 acla|EAW14386.1 afis|EAW19092.1 afla|EED54327.1 afum|EAL93823.1 agla|OJJ84509.1 akaw|GAA91578.1 aluc|OJZ82400.1 anid|CBF79709.1 anig|EHA28365.1 asyd|OJJ58057.1 ater|EAU32141.1 atub|OJI88041.1 aver|OJJ04346.1 awen|OJJ32486.1 azon|OJJ46045.1 afum|EAL93822.1

Group2052: abra|OJJ69584.1 acar|OOF91570.1 acla|EAW14385.1 afis|EAW19091.1 afla|EED54326.1 afum|EAL93821.1 agla|OJJ84512.1 akaw|GAA91579.1 aluc|OJZ82401.1 anid|CBF79711.1 anig|EHA28364.1 aory|EIT76092.1 asyd|OJJ58058.1 ater|EAU32140.1 atub|OJI88040.1 aver|OJJ04345.1 awen|OJJ32485.1 azon|OJJ46046.1

Group2053: abra|OJJ69587.1 acar|OOF91568.1 acla|EAW14380.1 afis|EAW19086.1 afla|EED54318.1 afum|EAL93816.1 agla|OJJ84518.1 akaw|GAA91584.1 aluc|OJZ82404.1 anid|CBF79684.1 anig|EHA28362.1 aory|EIT76159.1 asyd|OJJ58047.1 ater|EAU32134.1 atub|OJI88037.1 aver|OJJ04356.1 awen|OJJ32483.1 azon|OJJ46227.1

Group2054: abra|OJJ69588.1 acar|OOF91567.1 acla|EAW14379.1 afis|EAW19085.1 afla|EED54317.1 afum|EAL93815.1 agla|OJJ84521.1 akaw|GAA91585.1 aluc|OJZ82406.1 anid|CBF79683.1 anig|EHA28361.1 aory|EIT75897.1 asyd|OJJ58046.1 ater|EAU32133.1 atub|OJI88036.1 aver|OJJ04357.1 awen|OJJ32482.1 azon|OJJ46226.1

Group2055: abra|OJJ69590.1 acar|OOF91565.1 acla|EAW14378.1 afis|EAW19084.1 afla|EED54316.1 afum|EAL93814.1 agla|OJJ84522.1 akaw|GAA91586.1 aluc|OJZ82408.1 anid|CBF79676.1 anig|EHA28360.1 aory|EIT75902.1 asyd|OJJ58038.1 ater|EAU32132.1 atub|OJI88034.1 aver|OJJ04362.1 awen|OJJ32481.1 azon|OJJ46224.1

Group2056: abra|OJJ69592.1 anid|CBF82180.1 anig|EHA28357.1 ater|EAU30193.1 abra|OJJ73493.1 acar|OOG00685.1 afis|EAW20408.1 afum|EAL89236.1 agla|OJJ88380.1 akaw|GAA87442.1 aluc|OJZ88555.1 anig|EHA18253.1 atub|OJI91140.1 awen|OJJ31333.1 azon|OJJ49482.1 afis|EAW19984.1 afum|EAL84932.1 anid|CBF84172.1

Group2057: abra|OJJ69602.1 acar|OOF92702.1 acla|EAW10013.1 afis|EAW21041.1 afla|EED51373.1 afum|EAL92080.1 agla|OJJ84213.1 akaw|GAA91590.1 aluc|OJZ82413.1 anid|CBF80091.1 anig|EHA28354.1 aory|EIT80745.1 asyd|OJJ58302.1 ater|EAU31725.1 atub|OJI88028.1 aver|OJJ02110.1 awen|OJJ32696.1 azon|OJJ50700.1

Group2058: abra|OJJ69616.1 acar|OOF92690.1 acla|EAW12076.1 afis|EAW19717.1 afla|EED53108.1 afum|EAL86810.1 agla|OJJ80861.1 akaw|GAA91600.1 aluc|OJZ82424.1 anid|CBF80078.1 anig|EHA28345.1 aory|EIT74760.1 asyd|OJJ58310.1 ater|EAU37776.1 atub|OJI88016.1 aver|OJJ02101.1 awen|OJJ35107.1 azon|OJJ49987.1

Group2059: abra|OJJ69628.1 afla|EED55079.1 agla|OJJ86032.1 aluc|OJZ82433.1 anid|CBF82983.1 anig|EHA28338.1 asyd|OJJ64730.1 ater|EAU30171.1 atub|OJI88008.1 aver|OJI98834.1 awen|OJJ30457.1 azon|OJJ45448.1 acar|OOF92682.1 afis|EAW16821.1 afum|EAL86371.1 acla|EAW12375.1 aory|EIT81573.1 akaw|GAA91608.1

Group2060: abra|OJJ69635.1 acar|OOF93616.1 acla|EAW15185.1 afis|EAW20155.1 afla|EED55122.1 afum|EAL85270.1 agla|OJJ89111.1 akaw|GAA91615.1 aluc|OJZ82441.1 anid|CBF69484.1 anig|EHA28332.1 aory|EIT79219.1 asyd|OJJ59246.1 atub|OJI87999.1 aver|OJJ01857.1 awen|OJJ36185.1 aory|EIT81639.1 afla|EED47294.1

Group2061: abra|OJJ69637.1 acar|OOF92675.1 acla|EAW12571.1 afis|EAW24079.1 afla|EED51394.1 afum|EAL91934.1 agla|OJJ87150.1 akaw|GAA91617.1 aluc|OJZ82443.1 anid|CBF86476.1 anig|EHA28330.1 aory|EIT80502.1 asyd|OJJ64903.1 ater|EAU30500.1 atub|OJI87997.1 aver|OJI99025.1 awen|OJJ41417.1 azon|OJJ48876.1

Group2062: azon|OJJ44974.1 abra|OJJ73161.1 acar|OOG00404.1 acla|EAW06767.1 afis|EAW16317.1 afla|EED53564.1 afum|EAL88940.1 agla|OJJ88278.1 akaw|GAA88011.1 aluc|OJZ81269.1 anid|CBF89145.1 anig|EHA18569.1 aory|EIT75175.1 asyd|OJJ62569.1 ater|EAU34140.1 atub|OJI91476.1 aver|OJI96693.1 awen|OJJ37717.1

Group2063: abra|OJJ69655.1 acar|OOG00750.1 acla|EAW07485.1 afis|EAW22518.1 afla|EED54547.1 afum|EAL90675.1 agla|OJJ80878.1 akaw|GAA91634.1 aluc|OJZ82461.1 anid|CBF88995.1 anig|EHA28314.1 aory|EIT78864.1 asyd|OJJ62783.1 ater|EAU39191.1 atub|OJI87977.1 aver|OJI96828.1 awen|OJJ35145.1 azon|OJJ49955.1

Group2064: abra|OJJ69657.1 acar|OOF95821.1 acla|EAW11286.1 afis|EAW18213.1 afla|EED56258.1 afum|EAL87579.1 agla|OJJ85869.1 akaw|GAA91636.1 aluc|OJZ82463.1 anid|CBF75160.1 anig|EHA28312.1 aory|EIT73422.1 asyd|OJJ59962.1 ater|EAU33776.1 atub|OJI87975.1 aver|OJJ02328.1 awen|OJJ30591.1 azon|OJJ50185.1

Group2065: abra|OJJ69663.1 acar|OOF98113.1 acla|EAW10577.1 afis|EAW24990.1 afla|EED55469.1 afum|EAL89650.1 agla|OJJ82264.1 akaw|GAA91641.1 aluc|OJZ82468.1 anid|CBF81596.1 anig|EHA28307.1 aory|EIT80882.1 asyd|OJJ59517.1 ater|EAU35741.1 atub|OJI87970.1 aver|OJJ02756.1 awen|OJJ40595.1 azon|OJJ49446.1

Group2066: abra|OJJ69664.1 acar|OOG00819.1 acla|EAW07551.1 afis|EAW22585.1 afla|EED54630.1 afum|EAL90614.1 agla|OJJ80945.1 akaw|GAA91642.1 aluc|OJZ82469.1 anid|CBF88352.1 anig|EHA28306.1 aory|EIT78765.1 asyd|OJJ63721.1 ater|EAU39114.1 atub|OJI87968.1 aver|OJI97219.1 awen|OJJ35213.1 azon|OJJ49896.1

Group2067: abra|OJJ69665.1 acar|OOG00018.1 acla|EAW09937.1 afis|EAW21182.1 afla|EED54777.1 afum|EAL92203.1 agla|OJJ79988.1 akaw|GAA91643.1 aluc|OJZ82470.1 anid|CBF83310.1 anig|EHA28303.1 aory|EIT79439.1 asyd|OJJ60549.1 ater|EAU35848.1 atub|OJI87967.1 aver|OJI99875.1 awen|OJJ36521.1 azon|OJJ44397.1

Group2068: abra|OJJ69666.1 acar|OOG00019.1 acla|EAW09936.1 afis|EAW21181.1 afla|EED54778.1 afum|EAL92202.1 agla|OJJ79998.1 akaw|GAA91644.1 aluc|OJZ82471.1 anid|CBF83308.1 anig|EHA28302.1 aory|EIT79454.1 asyd|OJJ60550.1 ater|EAU35847.1 atub|OJI87966.1 aver|OJI99876.1 awen|OJJ36520.1 azon|OJJ44396.1

Group2069: abra|OJJ69667.1 acar|OOF97488.1 acla|EAW13075.1 afis|EAW17589.1 afla|EED49233.1 afum|EAL91402.1 agla|OJJ81360.1 akaw|GAA91645.1 aluc|OJZ82472.1 anid|CBF90218.1 anig|EHA28301.1 aory|EIT83160.1 asyd|OJJ61967.1 ater|EAU37024.1 atub|OJI87965.1 aver|OJI96059.1 awen|OJJ37257.1 azon|OJJ50952.1

Group2070: abra|OJJ69669.1 acar|OOF95822.1 acla|EAW06663.1 afis|EAW16102.1 afla|EED48637.1 afum|EAL88734.1 agla|OJJ86131.1 akaw|GAA91647.1 aluc|OJZ82474.1 anid|CBF85442.1 anig|EHA28299.1

aory|EIT73069.1 asyd|OJJ64091.1 ater|EAU33179.1 atub|OJI87963.1 aver|OJI98175.1 awen|OJJ30330.1 azon|OJJ45358.1

Group2071: abra|OJJ69677.1 acar|OOF92983.1 acla|EAW14808.1 afis|EAW24337.1 afla|EED47927.1 afum|EAL86008.1 agla|OJJ83205.1 akaw|GAA88802.1 aluc|OJZ82485.1 anid|CBF74030.1 anig|EHA28289.1 aory|EIT79853.1 asyd|OJJ53849.1 ater|EAU30411.1 atub|OJI87947.1 aver|OJJ07950.1 awen|OJJ32957.1 azon|OJJ48963.1

Group2072: abra|OJJ69682.1 acar|OOF93221.1 acla|EAW13124.1 afis|EAW17540.1 afla|EED49287.1 afum|EAL91354.1 agla|OJJ81429.1 akaw|GAA92416.1 aluc|OJZ83274.1 anid|CBF90315.1 anig|EHA28284.1 aory|EIT82215.1 asyd|OJJ61912.1 ater|EAU36970.1 atub|OJI87666.1 aver|OJI96005.1 awen|OJJ37313.1 azon|OJJ51005.1

Group2073: abra|OJJ69687.1 acar|OOF92648.1 acla|EAW10319.1 afis|EAW25273.1 afla|EED53738.1 afum|EAL89936.1 agla|OJJ89247.1 akaw|GAA88811.1 aluc|OJZ82494.1 anid|CBF85387.1 anig|EHA28278.1 aory|EIT75306.1 asyd|OJJ64055.1 ater|EAU34416.1 atub|OJI87938.1 aver|OJI98140.1 awen|OJJ40987.1 azon|OJJ44574.1

Group2074: abra|OJJ69698.1 acar|OOF90521.1 acla|EAW15242.1 afis|EAW20209.1 afla|EED57134.1 afum|EAL85326.1 agla|OJJ84655.1 akaw|GAA88816.1 aluc|OJZ82500.1 anid|CBF85100.1 anig|EHA28270.1 aory|EIT74032.1 asyd|OJJ63057.1 ater|EAU32019.1 atub|OJI87931.1 aver|OJI97905.1 awen|OJJ31213.1 azon|OJJ46146.1

Group2075: abra|OJJ69699.1 acar|OOF95410.1 acla|EAW07370.1 afis|EAW22395.1 afla|EED56059.1 afum|EAL90796.1 agla|OJJ87658.1 akaw|GAA88818.1 aluc|OJZ82502.1 anid|CBF88747.1 anig|EHA28269.1 aory|EIT76693.1 asyd|OJJ63956.1 ater|EAU39322.1 atub|OJI87929.1 aver|OJI96985.1 awen|OJJ34973.1 azon|OJJ45622.1

Group2076: abra|OJJ69701.1 acar|OOF93222.1 acla|EAW13123.1 afis|EAW17541.1 afla|EED49286.1 afum|EAL91355.1 agla|OJJ81428.1 akaw|GAA88820.1 aluc|OJZ82504.1 anid|CBF90313.1 anig|EHA28266.1 aory|EIT82202.1 asyd|OJJ61913.1 ater|EAU36971.1 atub|OJI87927.1 aver|OJI96006.1 awen|OJJ37312.1 azon|OJJ51004.1

Group2077: abra|OJJ69703.1 acar|OOF98863.1 acla|EAW06689.1 afis|EAW16076.1 afla|EED48596.1 afum|EAL88708.1 agla|OJJ86093.1 akaw|GAA88822.1 aluc|OJZ82506.1 anid|CBF75115.1 anig|EHA28263.1 aory|EIT73056.1 asyd|OJJ59995.1 ater|EAU33555.1 atub|OJI87925.1 aver|OJJ02296.1 awen|OJJ30357.1 azon|OJJ45379.1

Group2078: abra|OJJ69718.1 acar|OOF94196.1 acla|EAW09976.1 afis|EAW21113.1 afla|EED51764.1 afum|EAL92136.1 agla|OJJ80098.1 akaw|GAA90171.1 aluc|OJZ83179.1 anid|CBF87036.1 anig|EHA28253.1 aory|EIT80019.1 asyd|OJJ60452.1 ater|EAU36786.1 atub|OJI87758.1 aver|OJI99770.1 awen|OJJ36441.1 azon|OJJ44432.1

Group2079: abra|OJJ69746.1 acar|OOF94176.1 acla|EAW09985.1 afis|EAW21108.1 afla|EED51696.1 afum|EAL92129.1 agla|OJJ80107.1 akaw|GAA90198.1 aluc|OJZ83150.1 anid|CBF87041.1 anig|EHA28216.1 aory|EIT80588.1 asyd|OJJ60448.1 ater|EAU36792.1 atub|OJI87787.1 aver|OJI99766.1 awen|OJJ36382.1 azon|OJJ51534.1

Group2080: aver|OJJ05453.1 abra|OJJ70544.1 acar|OOF94607.1 acla|EAW08135.1 afis|EAW23171.1 afla|EED46949.1 afum|EAL88312.2 agla|OJJ89683.1 akaw|GAA83390.1 aluc|OJZ83889.1 anid|CBF74485.1 anig|EHA19026.1 aory|EIT72627.1 asyd|OJJ57712.1 ater|EAU36300.1 atub|OJI90256.1 awen|OJJ36606.1 azon|OJJ47601.1

Group2081: abra|OJJ69784.1 acar|OOF95612.1 afum|EAL89018.1 anid|CBF84864.1 anig|EHA25046.1 asyd|OJJ56179.1 atub|OJI80053.1 aver|OJJ05815.1 abra|OJJ77383.1 acar|OOF93253.1 agla|OJJ82715.1 akaw|GAA91378.1 aluc|OJZ84791.1 anig|EHA28059.1 atub|OJI89291.1 awen|OJJ36484.1 aver|OJI99823.1 asyd|OJJ57350.1

Group2082: abra|OJJ69822.1 acar|OOF93341.1 acla|EAW08969.1 afis|EAW15448.1 afla|EED56825.1 afum|EAL84198.2 agla|OJJ86271.1 akaw|GAA87838.1 aluc|OJZ85474.1 anid|CBF78305.1 anig|EHA25015.1 aory|EIT73942.1 asyd|OJJ56090.1 ater|EAU30838.1 atub|OJI80089.1 aver|OJJ05033.1 awen|OJJ31223.1 azon|OJJ45071.1

Group2083: abra|OJJ69827.1 acar|OOF93352.1 afla|EED55192.1 akaw|GAA87833.1 aluc|OJZ85469.1 anid|CBF78301.1 anig|EHA25010.1 aory|EIT83545.1 asyd|OJJ56100.1 atub|OJI80094.1 aver|OJJ05043.1 acla|EAW08979.1 afis|EAW15430.1 afum|EAL84213.1 ater|EAU32701.1 awen|OJJ33446.1 afla|EED47528.1 aory|EIT74571.1

Group2084: abra|OJJ69888.1 acar|OOF93408.1 acla|EAW10806.1 afis|EAW24768.1 afla|EED49741.1 afum|EAL89409.1 agla|OJJ82608.1 akaw|GAA87764.1 aluc|OJZ85399.1 anid|CBF69441.1 anig|EHA25581.1 aory|EIT77620.1 ater|EAU36289.1 atub|OJI80172.1 awen|OJJ39939.1 acar|OOF92530.1 asyd|OJJ60681.1 aver|OJJ00006.1

Group2085: abra|OJJ69898.1 acar|OOF93417.1 acla|EAW08922.1 afis|EAW15471.1 afla|EED46922.1 afum|EAL85850.1 agla|OJJ80151.1 akaw|GAA87752.1 aluc|OJZ85385.1 anid|CBF78234.1 anig|EHA25569.1 aory|EIT72668.1 asyd|OJJ56036.1 ater|EAU32657.1 atub|OJI80185.1 aver|OJJ04982.1 awen|OJJ38121.1 azon|OJJ48022.1

Group2086: abra|OJJ69901.1 acar|OOF93419.1 acla|EAW08921.1 afis|EAW15473.1 afla|EED46923.1 afum|EAL85848.1 akaw|GAA87750.1 aluc|OJZ85383.1 anid|CBF78228.1 anig|EHA25567.1 aory|EIT72551.1 asyd|OJJ56034.1 ater|EAU32656.1 atub|OJI80187.1 aver|OJJ04980.1 awen|OJJ38126.1 azon|OJJ43160.1 agla|OJJ80154.1

Group2087: abra|OJJ69906.1 acar|OOF93423.1 acla|EAW08918.1 afis|EAW15476.1 afla|EED46939.1 afum|EAL85845.1 agla|OJJ80155.1 akaw|GAA87747.1 aluc|OJZ85380.1 anid|CBF78226.1 anig|EHA25563.1 aory|EIT72564.1 asyd|OJJ56033.1 ater|EAU32651.1 atub|OJI80190.1 aver|OJJ04979.1 awen|OJJ38133.1 azon|OJJ43159.1

Group2088: abra|OJJ69914.1 acar|OOF93426.1 acla|EAW08915.1 afis|EAW15479.1 afla|EED46934.1 afum|EAL85842.1 agla|OJJ80158.1 akaw|GAA87742.1 aluc|OJZ85374.1 anid|CBF78221.1 anig|EHA25558.1 aory|EIT72728.1 asyd|OJJ56028.1 ater|EAU32648.1 atub|OJI80195.1 aver|OJJ04975.1 awen|OJJ38138.1 azon|OJJ43152.1

Group2089: abra|OJJ69916.1 acar|OOF93428.1 acla|EAW08912.1 afis|EAW15483.1 afla|EED46930.1 afla|EED48092.1 afum|EAL85839.1 agla|OJJ80162.1 akaw|GAA87740.1 aluc|OJZ85372.1 anig|EHA25556.1 aory|EIT72736.1 asyd|OJJ56026.1 ater|EAU32647.1 atub|OJI80198.1 aver|OJJ04973.1 awen|OJJ38142.1 azon|OJJ43148.1

Group2090: abra|OJJ69940.1 acar|OOF93449.1 acla|EAW08883.1 afis|EAW15506.1 afla|EED49019.1 afum|EAL85818.1 agla|OJJ80183.1 akaw|GAA87719.1 aluc|OJZ85347.1 anid|CBF84473.1 anig|EHA25534.1 aory|EIT82494.1 asyd|OJJ53540.1 ater|EAU32612.1 atub|OJI80223.1 aver|OJJ08213.1 awen|OJJ38166.1 azon|OJJ45800.1

Group2091: abra|OJJ69952.1 acar|OOF93462.1 acla|EAW08870.1 afis|EAW15524.1 afla|EED49034.1 afum|EAL85804.1 agla|OJJ85222.1 akaw|GAA87707.1 aluc|OJZ85330.1 anig|EHA25519.1 aory|EIT82486.1 asyd|OJJ55992.1 ater|EAU32599.1 atub|OJI80242.1 aver|OJJ04940.1 awen|OJJ38188.1 azon|OJJ43107.1 afla|EED49033.1

Group2092: abra|OJJ69953.1 acar|OOF93463.1 acla|EAW08869.1 afis|EAW15525.1 afla|EED49036.1 afum|EAL85803.1 agla|OJJ85221.1 akaw|GAA87706.1 aluc|OJZ85329.1 anid|CBF78217.1 anig|EHA25518.1 aory|EIT82537.1 asyd|OJJ55991.1 ater|EAU32598.1 atub|OJI80243.1 aver|OJJ04939.1 awen|OJJ38189.1 azon|OJJ43106.1

Group2093: abra|OJJ69955.1 acar|OOF93465.1 acla|EAW08867.1 afis|EAW15527.1 afla|EED49038.1 afum|EAL85801.1 agla|OJJ85219.1 akaw|GAA87704.1 aluc|OJZ85327.1 anid|CBF78212.1 anig|EHA25517.1 aory|EIT82564.1 asyd|OJJ55989.1 ater|EAU32597.1 atub|OJI80245.1 aver|OJJ04937.1 awen|OJJ38191.1 azon|OJJ43104.1

Group2094: abra|OJJ69962.1 acar|OOF93470.1 acla|EAW08834.1 afis|EAW15566.1 afla|EED49075.1 afum|EAL85767.2 agla|OJJ85185.1 akaw|GAA87697.1 aluc|OJZ85321.1 anid|CBF78116.1 anig|EHA25511.1 aory|EIT82536.1 asyd|OJJ55900.1 ater|EAU32567.1 atub|OJI80252.1 aver|OJJ04845.1 awen|OJJ38226.1 azon|OJJ43069.1

Group2095: abra|OJJ69963.1 acar|OOF93471.1 acla|EAW08835.1 afis|EAW15565.1 afla|EED49074.1 agla|OJJ85186.1 akaw|GAA87696.1 aluc|OJZ85320.1 anid|CBF78118.1 anig|EHA25510.1 aory|EIT82524.1 asyd|OJJ55901.1 ater|EAU32568.1 atub|OJI80253.1 aver|OJJ04846.1 awen|OJJ38225.1 azon|OJJ43070.1 afum|EAL85768.1

Group2096: abra|OJJ69971.1 acar|OOF93475.1 acla|EAW08842.1 afis|EAW15559.1 afla|EED49063.1 afum|EAL85773.1 agla|OJJ85195.1 akaw|GAA87690.1 aluc|OJZ85311.1 anid|CBF78159.1 anig|EHA25506.1 aory|EIT82560.1 asyd|OJJ55960.1 ater|EAU32575.1 atub|OJI80260.1 aver|OJJ04906.1 awen|OJJ38217.1 azon|OJJ43077.1

Group2097: abra|OJJ69974.1 acar|OOF93479.1 acla|EAW08844.1 afis|EAW15556.1 afla|EED49061.1 afum|EAL85776.1 agla|OJJ85198.1 akaw|GAA87687.1 aluc|OJZ85307.1 anid|CBF78163.1 anig|EHA25503.1 aory|EIT82517.1 asyd|OJJ55964.1 ater|EAU32577.1 atub|OJI80264.1 aver|OJJ04910.1 awen|OJJ38214.1 azon|OJJ43081.1

Group2098: abra|OJJ69975.1 acar|OOF93481.1 acla|EAW08846.1 afis|EAW15554.1 afla|EED49057.1 afum|EAL85779.1 agla|OJJ85201.1 akaw|GAA87686.1 aluc|OJZ85306.1 anid|CBF78167.1 anig|EHA25502.1 aory|EIT82497.1 asyd|OJJ55968.1 ater|EAU32580.1 atub|OJI80265.1 aver|OJJ04915.1 awen|OJJ38210.1 azon|OJJ43084.1

Group2099: abra|OJJ69978.1 acar|OOF93484.1 acla|EAW08847.1 afis|EAW15549.1 afla|EED49055.1 afum|EAL85783.1 agla|OJJ85202.1 akaw|GAA87683.1 aluc|OJZ85302.1 anid|CBF78165.1 anig|EHA25499.1

aory|EIT82558.1 asyd|OJJ55969.1 ater|EAU32583.1 atub|OJI80268.1 aver|OJJ04916.1 awen|OJJ38209.1 azon|OJJ43086.1

Group2100: abra|OJJ69979.1 acar|OOF93483.1 acla|EAW08849.1 afis|EAW15547.1 afla|EED49054.1 afum|EAL85785.1 agla|OJJ85205.1 akaw|GAA87682.1 aluc|OJZ85301.1 anid|CBF78176.1 anig|EHA25498.1 aory|EIT82504.1 asyd|OJJ55970.1 ater|EAU32582.1 atub|OJI80269.1 aver|OJJ04917.1 awen|OJJ38208.1 azon|OJJ43087.1

Group2101: abra|OJJ69982.1 acar|OOF93486.1 acla|EAW08852.1 afis|EAW15544.1 afla|EED49051.1 afum|EAL85787.1 agla|OJJ85207.1 akaw|GAA87680.1 aluc|OJZ85298.1 anid|CBF78182.1 anig|EHA25496.1 aory|EIT82527.1 asyd|OJJ55973.1 ater|EAU32584.1 atub|OJI80272.1 aver|OJJ04921.1 awen|OJJ38205.1 azon|OJJ43090.1

Group2102: abra|OJJ69983.1 acar|OOF93487.1 acla|EAW08853.1 afis|EAW15543.1 afla|EED49050.1 afum|EAL85788.1 agla|OJJ85208.1 akaw|GAA87679.1 aluc|OJZ85297.1 anid|CBF78183.1 anig|EHA25495.1 aory|EIT82528.1 asyd|OJJ55974.1 ater|EAU32585.1 atub|OJI80273.1 aver|OJJ04922.1 awen|OJJ38204.1 azon|OJJ43091.1

Group2103: abra|OJJ69984.1 acar|OOF93489.1 acla|EAW08855.1 afis|EAW15541.1 afla|EED49049.1 afum|EAL85789.1 agla|OJJ85209.1 akaw|GAA87677.1 aluc|OJZ85295.1 anid|CBF78187.1 anig|EHA25493.1 aory|EIT82548.1 asyd|OJJ55976.1 ater|EAU32586.1 atub|OJI80275.1 aver|OJJ04924.1 awen|OJJ38202.1 azon|OJJ43093.1

Group2104: abra|OJJ69985.1 acar|OOF93490.1 acla|EAW08856.1 afis|EAW15540.1 afla|EED49048.1 afum|EAL85790.1 agla|OJJ85210.1 akaw|GAA87676.1 aluc|OJZ85294.1 anid|CBF78189.1 anig|EHA25492.1 aory|EIT82530.1 asyd|OJJ55977.1 ater|EAU32587.1 atub|OJI80276.1 aver|OJJ04925.1 awen|OJJ38201.1 azon|OJJ43094.1

Group2105: abra|OJJ69987.1 acar|OOF93491.1 acla|EAW08858.1 afis|EAW15538.1 afla|EED49046.1 afum|EAL85792.1 agla|OJJ85211.1 akaw|GAA87674.1 aluc|OJZ85292.1 anid|CBF78193.1 anig|EHA25490.1 aory|EIT82570.1 asyd|OJJ55979.1 ater|EAU32589.1 atub|OJI80278.1 aver|OJJ04927.1 awen|OJJ38200.1 azon|OJJ43095.1

Group2106: abra|OJJ69989.1 acar|OOF93494.1 acla|EAW08861.1 afis|EAW15533.1 afla|EED49044.1 afum|EAL85795.1 agla|OJJ85214.1 akaw|GAA87672.1 aluc|OJZ85290.1 anid|CBF78199.1 anig|EHA25488.1 aory|EIT82552.1 asyd|OJJ55983.1 ater|EAU32592.1 atub|OJI80280.1 aver|OJJ04930.1 awen|OJJ38197.1 azon|OJJ43096.1

Group2107: abra|OJJ69990.1 acar|OOF93496.1 acla|EAW08863.1 afis|EAW15531.1 afla|EED49042.1 afum|EAL85797.1 agla|OJJ85216.1 akaw|GAA87671.1 aluc|OJZ85289.1 anid|CBF78202.1 anig|EHA25486.1 aory|EIT82550.1 asyd|OJJ55985.1 ater|EAU32594.1 atub|OJI80281.1 aver|OJJ04932.1 awen|OJJ38195.1 azon|OJJ43099.1

Group2108: abra|OJJ69991.1 acar|OOF93497.1 acla|EAW08864.1 afis|EAW15530.1 afla|EED49041.1 afum|EAL85798.1 agla|OJJ85217.1 akaw|GAA87670.1 aluc|OJZ85288.1 anid|CBF78204.1 anig|EHA25485.1 aory|EIT82567.1 asyd|OJJ55986.1 ater|EAU32595.1 atub|OJI80282.1 aver|OJJ04933.1 awen|OJJ38194.1 azon|OJJ43100.1

Group2109: abra|OJJ69995.1 acar|OOF93502.1 acla|EAW08824.1 afis|EAW15573.1 afla|EED49082.1 afum|EAL85761.1 agla|OJJ85179.1 akaw|GAA87666.1 aluc|OJZ85284.1 anid|CBF78105.1 anig|EHA25481.1 aory|EIT82549.1 asyd|OJJ55895.1 ater|EAU32558.1 atub|OJI80286.1 aver|OJJ04840.1 awen|OJJ38232.1 azon|OJJ43064.1

Group2110: abra|OJJ70001.1 acar|OOF93507.1 acla|EAW08818.1 afis|EAW15579.1 afla|EED49093.1 afum|EAL85755.1 agla|OJJ85173.1 akaw|GAA87660.1 aluc|OJZ85278.1 anid|CBF78100.1 anig|EHA25475.1 aory|EIT82531.1 asyd|OJJ55889.1 ater|EAU32551.1 atub|OJI80292.1 aver|OJJ04834.1 awen|OJJ38241.1 azon|OJJ43058.1

Group2111: abra|OJJ70003.1 acar|OOF93509.1 acla|EAW08816.1 afis|EAW15581.1 afla|EED49090.1 afum|EAL85753.2 agla|OJJ85170.1 akaw|GAA87657.1 aluc|OJZ85276.1 anid|CBF78096.1 anig|EHA25473.1 aory|EIT82539.1 asyd|OJJ55886.1 ater|EAU32549.1 atub|OJI80294.1 aver|OJJ04831.1 awen|OJJ38243.1 azon|OJJ43055.1

Group2112: abra|OJJ70008.1 acar|OOF93514.1 acla|EAW08815.1 afis|EAW15582.1 afla|EED49088.1 afum|EAL85752.1 agla|OJJ85169.1 akaw|GAA87654.1 aluc|OJZ85271.1 anid|CBF78090.1 anig|EHA25470.1 aory|EIT82507.1 asyd|OJJ55883.1 ater|EAU32547.1 atub|OJI80300.1 aver|OJJ04828.1 awen|OJJ38246.1 azon|OJJ43052.1

Group2113: abra|OJJ70011.1 acar|OOF93517.1 acla|EAW08813.1 afis|EAW15584.1 afla|EED54445.1 afum|EAL85748.2 agla|OJJ85162.1 akaw|GAA87651.1 aluc|OJZ85267.1 anid|CBF78060.1 anig|EHA25466.1 aory|EIT81147.1 ater|EAU32545.1 atub|OJI80303.1 aver|OJJ04813.1 awen|OJJ38249.1 azon|OJJ43030.1 anig|EHA25467.1

Group2114: abra|OJJ70013.1 acar|OOF93519.1 acla|EAW08811.1 afis|EAW15586.1 afla|EED54443.1 afum|EAL85746.1 agla|OJJ85166.1 akaw|GAA87649.1 aluc|OJZ85264.1 anid|CBF78063.1 anig|EHA25464.1 aory|EIT81154.1 asyd|OJJ55870.1 ater|EAU32543.1 atub|OJI80305.1 aver|OJJ04815.1 awen|OJJ38252.1 azon|OJJ43032.1

Group2115: abra|OJJ70014.1 acar|OOF93520.1 acla|EAW08809.1 afis|EAW15587.1 afla|EED50410.1 afum|EAL85745.1 agla|OJJ85161.1 akaw|GAA87648.1 aluc|OJZ85263.1 anid|CBF78069.1 anig|EHA25463.1 aory|EIT82131.1 asyd|OJJ55872.1 ater|EAU32541.1 atub|OJI80306.1 aver|OJJ04817.1 awen|OJJ38254.1 azon|OJJ43033.1

Group2116: abra|OJJ70015.1 acar|OOF93521.1 acla|EAW08808.1 afis|EAW15588.1 afla|EED50411.1 afum|EAL85744.1 agla|OJJ85160.1 akaw|GAA87646.1 aluc|OJZ85261.1 anid|CBF78071.1 anig|EHA25462.1 aory|EIT82015.1 asyd|OJJ55873.1 ater|EAU32539.1 atub|OJI80307.1 aver|OJJ04818.1 awen|OJJ38255.1 azon|OJJ43038.1

Group2117: abra|OJJ70016.1 acar|OOF93522.1 acla|EAW08807.1 afis|EAW15589.1 afla|EED50412.1 afum|EAL85743.1 agla|OJJ85159.1 akaw|GAA87645.1 aluc|OJZ85260.1 anid|CBF78072.1 anig|EHA25461.1 aory|EIT82097.1 asyd|OJJ55874.1 ater|EAU32538.1 atub|OJI80308.1 aver|OJJ04819.1 awen|OJJ38262.1 azon|OJJ43023.1

Group2118: abra|OJJ70018.1 acar|OOF93524.1 acla|EAW08805.1 afis|EAW15591.1 afla|EED50414.1 afum|EAL85741.1 agla|OJJ85157.1 akaw|GAA87643.1 aluc|OJZ85258.1 anid|CBF78076.1 anig|EHA25459.1 aory|EIT82095.1 asyd|OJJ55876.1 ater|EAU32537.1 atub|OJI80310.1 aver|OJJ04821.1 awen|OJJ38264.1 azon|OJJ43021.1

Group2119: abra|OJJ70026.1 acar|OOF93536.1 acla|EAW08802.1 afis|EAW15595.1 afla|EED50418.1 afum|EAL85736.2 agla|OJJ85151.1 akaw|GAA87634.1 aluc|OJZ85250.1 anid|CBF78087.1 anig|EHA25450.1 aory|EIT82070.1 asyd|OJJ55881.1 ater|EAU32532.1 atub|OJI80319.1 aver|OJJ04826.1 awen|OJJ38271.1 azon|OJJ43910.1

Group2120: abra|OJJ70042.1 acar|OOF93537.1 acla|EAW08803.1 afis|EAW15594.1 afla|EED50417.1 afum|EAL85737.2 agla|OJJ85153.1 akaw|GAA87633.1 aluc|OJZ85249.1 anid|CBF78085.1 anig|EHA25449.1 aory|EIT82162.1 asyd|OJJ55880.1 ater|EAU32533.1 atub|OJI80320.1 aver|OJJ04825.1 awen|OJJ38270.1 azon|OJJ43912.1

Group2121: abra|OJJ70083.1 acla|EAW11426.1 afis|EAW20385.1 afla|EED45578.1 afum|EAL85496.1 agla|OJJ83253.1 akaw|GAA87604.1 aluc|OJZ85224.1 anid|CBF86057.1 anig|EHA25428.1 aory|EIT75627.1 asyd|OJJ54466.1 ater|EAU32965.1 atub|OJI80357.1 aver|OJJ07783.1 awen|OJJ30093.1 afis|EAW16167.1 aory|EIT75578.1

Group2122: abra|OJJ70153.1 acar|OOF93582.1 afis|EAW17230.1 agla|OJJ86975.1 akaw|GAA84496.1 aluc|OJZ89221.1 anig|EHA23341.1 asyd|OJJ53738.1 ater|EAU34915.1 atub|OJI85571.1 aver|OJI98051.1 afis|EAW19779.1 afla|EED45371.1 afum|EAL85119.2 anid|CBF71521.1 aory|EIT82393.1 asyd|OJJ62940.1 afis|EAW20309.1

Group2123: abra|OJJ70159.1 acar|OOF93314.1 acla|EAW06525.1 afis|EAW16241.1 afla|EED57104.1 afum|EAL88863.1 agla|OJJ88977.1 akaw|GAA86606.1 aluc|OJZ85156.1 anid|CBF78253.1 anig|EHA25372.1 aory|EIT73977.1 asyd|OJJ56050.1 ater|EAU34336.1 atub|OJI80433.1 aver|OJJ04993.1 awen|OJJ36019.1 azon|OJJ42535.1

Group2124: abra|OJJ70295.1 acar|OOF91749.1 acla|EAW10279.1 afis|EAW25315.1 afla|EED49708.1 afum|EAL89976.1 agla|OJJ88748.1 aluc|OJZ82560.1 anig|EHA22521.1 aory|EIT77651.1 asyd|OJJ62816.1 ater|EAU32274.1 atub|OJI88802.1 aver|OJI96860.1 awen|OJJ40751.1 azon|OJJ44610.1 awen|OJJ41048.1 agla|OJJ80540.1

Group2125: abra|OJJ70321.1 acar|OOF91776.1 acla|EAW12313.1 afis|EAW16939.1 afla|EED45249.1 afum|EAL86466.1 agla|OJJ79973.1 akaw|GAA92577.1 aluc|OJZ82590.1 anid|CBF75409.1 anig|EHA27485.1 aory|EIT73687.1 asyd|OJJ59815.1 ater|EAU30208.1 atub|OJI88825.1 aver|OJJ02473.1 awen|OJJ29713.1 azon|OJJ45106.1

Group2126: abra|OJJ70342.1 acar|OOF91814.1 abra|OJJ74452.1 acla|EAW12256.1 afla|EED48966.1 afum|EAL86656.1 agla|OJJ87924.1 akaw|GAA87346.1 aluc|OJZ89668.1 anig|EHA26906.1 aory|EIT79988.1 asyd|OJJ52239.1 atub|OJI85132.1 awen|OJJ31495.1 afla|EED48965.1 anig|EHA26905.1 aver|OJJ02177.1 aory|EIT83308.1

Group2127: abra|OJJ70367.1 acar|OOF91904.1 acla|EAW12332.1 afis|EAW16890.1 afla|EED53384.1 afum|EAL86428.2 agla|OJJ79944.1 akaw|GAA91984.1 aluc|OJZ82629.1 anid|CBF80798.1 anig|EHA27448.1 aory|EIT75200.1 asyd|OJJ54488.1 ater|EAU30224.1 atub|OJI88862.1 aver|OJJ07691.1 awen|OJJ29748.1 azon|OJJ50203.1

Group2128: abra|OJJ70389.1 acar|OOF90063.1 acla|EAW12390.1 afis|EAW16837.1 afla|EED47319.1 afum|EAL86385.1 agla|OJJ83707.1 akaw|GAA91969.1 aluc|OJZ82647.1 anid|CBF80639.1 anig|EHA27425.1

aory|EIT82834.1 asyd|OJJ54621.1 ater|EAU30244.1 atub|OJI88879.1 aver|OJJ07537.1 awen|OJJ33871.1 azon|OJJ43960.1

Group2129: abra|OJJ70449.1 acar|OOF91831.1 acla|EAW09124.1 afis|EAW24708.1 afla|EED52336.1 afum|EAL89350.1 agla|OJJ82814.1 akaw|GAA90132.1 aluc|OJZ83215.1 anid|CBF83955.1 anig|EHA21075.1 aory|EIT74337.1 asyd|OJJ61431.1 ater|EAU37947.1 atub|OJI87721.1 aver|OJJ00766.1 awen|OJJ39949.1 azon|OJJ51122.1

Group2130: abra|OJJ70463.1 acar|OOF97461.1 acla|EAW13050.1 afis|EAW17617.1 afla|EED49208.1 afum|EAL91430.1 agla|OJJ81323.1 akaw|GAA83312.1 aluc|OJZ83806.1 anid|CBF90167.1 anig|EHA18953.1 aory|EIT83163.1 asyd|OJJ61992.1 ater|EAU37051.1 atub|OJI90173.1 aver|OJI96084.1 awen|OJJ37228.1 azon|OJJ50931.1

Group2131: abra|OJJ70464.1 acar|OOF97459.1 acla|EAW13049.1 afis|EAW17618.1 afla|EED49209.1 afum|EAL91431.1 agla|OJJ81322.1 akaw|GAA83313.1 aluc|OJZ83807.1 anid|CBF90165.1 anig|EHA18954.1 aory|EIT83149.1 asyd|OJJ61993.1 ater|EAU37052.1 atub|OJI90174.1 aver|OJI96085.1 awen|OJJ37227.1 azon|OJJ50930.1

Group2132: abra|OJJ70468.1 acar|OOF97456.1 acla|EAW13046.1 afis|EAW17621.1 afla|EED49196.1 afum|EAL91434.1 agla|OJJ81304.1 akaw|GAA83317.1 aluc|OJZ83812.1 anid|CBF90159.1 anig|EHA18957.1 aory|EIT78509.1 asyd|OJJ61996.1 ater|EAU37055.1 atub|OJI90179.1 aver|OJI96088.1 awen|OJJ37223.1 azon|OJJ50926.1

Group2133: abra|OJJ70469.1 acar|OOF97455.1 acla|EAW13045.1 afis|EAW17622.1 afla|EED49195.1 afum|EAL91435.1 agla|OJJ81303.1 akaw|GAA83318.1 aluc|OJZ83813.1 anid|CBF90157.1 anig|EHA18958.1 aory|EIT78576.1 asyd|OJJ61997.1 ater|EAU37056.1 atub|OJI90180.1 aver|OJI96089.1 awen|OJJ37222.1 azon|OJJ50925.1

Group2134: abra|OJJ70470.1 acar|OOF97453.1 acla|EAW13044.1 afis|EAW17623.1 afla|EED49194.1 afum|EAL91437.1 agla|OJJ81302.1 akaw|GAA83319.1 aluc|OJZ83814.1 anid|CBF90156.1 anig|EHA18959.1 aory|EIT78552.1 asyd|OJJ61998.1 ater|EAU37057.1 atub|OJI90181.1 aver|OJI96090.1 awen|OJJ37221.1 azon|OJJ50924.1

Group2135: abra|OJJ70473.1 acar|OOF97452.1 acla|EAW13041.1 afis|EAW17626.1 afla|EED49192.1 afum|EAL91440.1 agla|OJJ81276.1 akaw|GAA83322.1 aluc|OJZ83817.1 anid|CBF90150.1 anig|EHA18962.1 aory|EIT78505.1 asyd|OJJ62001.1 ater|EAU37060.1 atub|OJI90184.1 aver|OJI96093.1 awen|OJJ37218.1 azon|OJJ50921.1

Group2136: abra|OJJ70475.1 acar|OOF97450.1 acla|EAW13039.1 afis|EAW17628.1 afla|EED49190.1 afum|EAL91442.1 agla|OJJ81275.1 akaw|GAA83324.1 aluc|OJZ83819.1 anid|CBF90147.1 anig|EHA18964.1 aory|EIT78550.1 asyd|OJJ62002.1 ater|EAU37062.1 atub|OJI90186.1 aver|OJI96094.1 awen|OJJ37216.1 azon|OJJ50919.1

Group2137: abra|OJJ70476.1 acar|OOF97449.1 acla|EAW13038.1 afis|EAW17629.1 afla|EED49189.1 afum|EAL91443.1 agla|OJJ81272.1 akaw|GAA83325.1 aluc|OJZ83820.1 anid|CBF90141.1 anig|EHA18965.1 aory|EIT78529.1 asyd|OJJ62006.1 ater|EAU37063.1 atub|OJI90187.1 aver|OJI96098.1 awen|OJJ37215.1 azon|OJJ50916.1

Group2138: abra|OJJ70477.1 acar|OOF97448.1 acla|EAW13037.1 afis|EAW17630.1 afla|EED49188.1 afum|EAL91445.1 agla|OJJ81271.1 akaw|GAA83326.1 aluc|OJZ83822.1 anid|CBF90143.1 anig|EHA18966.1 aory|EIT78536.1 asyd|OJJ62005.1 ater|EAU37065.1 atub|OJI90189.1 aver|OJI96096.1 awen|OJJ37214.1 azon|OJJ50914.1

Group2139: abra|OJJ70478.1 acar|OOF97447.1 acla|EAW13036.1 afis|EAW17631.1 afla|EED49187.1 afum|EAL91446.1 agla|OJJ81270.1 akaw|GAA83327.1 aluc|OJZ83823.1 anid|CBF90145.1 anig|EHA18967.1 aory|EIT78534.1 asyd|OJJ62004.1 ater|EAU37066.1 atub|OJI90190.1 aver|OJI96095.1 awen|OJJ37213.1 azon|OJJ50913.1

Group2140: abra|OJJ70481.1 acar|OOF97444.1 acla|EAW13035.1 afis|EAW17632.1 afla|EED49186.1 afum|EAL91447.1 agla|OJJ81269.1 akaw|GAA83329.1 aluc|OJZ83825.1 anid|CBF90139.1 anig|EHA18969.1 aory|EIT78523.1 asyd|OJJ62011.1 ater|EAU37067.1 atub|OJI90192.1 aver|OJI96103.1 awen|OJJ37212.1 azon|OJJ50912.1

Group2141: abra|OJJ70482.1 acar|OOF97443.1 acla|EAW13034.1 afis|EAW17633.1 afla|EED50531.1 afum|EAL91448.1 agla|OJJ81266.1 akaw|GAA83330.1 aluc|OJZ83826.1 anid|CBF90137.1 anig|EHA18970.1 aory|EIT82093.1 asyd|OJJ62012.1 ater|EAU37069.1 atub|OJI90193.1 aver|OJI96104.1 awen|OJJ37211.1 azon|OJJ50911.1

Group2142: abra|OJJ70483.1 acar|OOF97442.1 acla|EAW13033.1 afis|EAW17634.1 afla|EED50530.1 afum|EAL91449.1 agla|OJJ81265.1 akaw|GAA83331.1 aluc|OJZ83827.1 anid|CBF90135.1 anig|EHA18971.1 aory|EIT82030.1 asyd|OJJ62013.1 ater|EAU37070.1 atub|OJI90194.1 aver|OJI96105.1 awen|OJJ37210.1 azon|OJJ50910.1



Group2143: abra|OJJ70484.1 acar|OOF97441.1 acla|EAW13031.1 afis|EAW17636.1 afla|EED50528.1 afum|EAL91451.2 agla|OJJ81263.1 akaw|GAA83333.1 aluc|OJZ83829.1 anid|CBF90132.1 anig|EHA18972.1 aory|EIT82038.1 asyd|OJJ62015.1 ater|EAU37072.1 atub|OJI90196.1 aver|OJI96106.1 awen|OJJ37208.1 azon|OJJ50908.1

Group2144: abra|OJJ70488.1 acar|OOF97438.1 acla|EAW13028.1 afis|EAW17639.1 afla|EED50524.1 afum|EAL91454.1 agla|OJJ79567.1 akaw|GAA83336.1 aluc|OJZ83832.1 anid|CBF90125.1 anig|EHA18975.1 aory|EIT82049.1 asyd|OJJ62018.1 ater|EAU37075.1 atub|OJI90199.1 aver|OJI96109.1 awen|OJJ37206.1 azon|OJJ50905.1

Group2145: abra|OJJ70489.1 acar|OOF97437.1 acla|EAW13027.1 afis|EAW17640.1 afla|EED50523.1 afum|EAL91455.1 agla|OJJ79568.1 akaw|GAA83337.1 aluc|OJZ83833.1 anig|EHA18976.1 aory|EIT82102.1 asyd|OJJ62019.1 ater|EAU37076.1 atub|OJI90200.1 aver|OJI96110.1 awen|OJJ37205.1 azon|OJJ50904.1 anid|CBF90123.1

Group2146: abra|OJJ70490.1 acar|OOF97436.1 acla|EAW13026.1 afis|EAW17641.1 afla|EED50522.1 afum|EAL91456.1 agla|OJJ79569.1 akaw|GAA83338.1 aluc|OJZ83834.1 anid|CBF90121.1 anig|EHA18977.1 aory|EIT82016.1 asyd|OJJ62020.1 ater|EAU37077.1 atub|OJI90201.1 aver|OJI96111.1 awen|OJJ37204.1 azon|OJJ50903.1

Group2147: abra|OJJ70492.1 acar|OOF97435.1 acla|EAW13025.1 afis|EAW17642.1 afla|EED50518.1 afum|EAL91457.1 agla|OJJ79562.1 akaw|GAA83340.1 aluc|OJZ83836.1 anid|CBF90119.1 anig|EHA18979.1 aory|EIT82059.1 asyd|OJJ62021.1 ater|EAU37078.1 atub|OJI90203.1 aver|OJI96112.1 awen|OJJ37203.1 azon|OJJ50902.1

Group2148: abra|OJJ70493.1 acar|OOF97432.1 acla|EAW13024.1 afis|EAW17643.1 afla|EED50517.1 afum|EAL91458.1 agla|OJJ79561.1 akaw|GAA83341.1 aluc|OJZ83837.1 anid|CBF90118.1 anig|EHA18980.1 aory|EIT82149.1 asyd|OJJ62022.1 ater|EAU37079.1 atub|OJI90204.1 aver|OJI96113.1 awen|OJJ37202.1 azon|OJJ50901.1

Group2149: abra|OJJ70495.1 acar|OOF97431.1 acla|EAW13022.1 afis|EAW17645.1 afla|EED50512.1 afum|EAL91460.1 agla|OJJ79559.1 akaw|GAA83343.1 aluc|OJZ83840.1 anid|CBF90114.1 anig|EHA18982.1 aory|EIT82064.1 asyd|OJJ62024.1 ater|EAU37081.1 atub|OJI90206.1 aver|OJI96115.1 awen|OJJ37200.1 azon|OJJ50899.1

Group2150: abra|OJJ70498.1 acar|OOF97428.1 acla|EAW08176.1 afis|EAW23212.1 afla|EED47039.1 afum|EAL88272.1 agla|OJJ78733.1 akaw|GAA83346.1 aluc|OJZ83843.1 anid|CBF74740.1 anig|EHA18985.1 aory|EIT72595.1 asyd|OJJ60184.1 ater|EAU36340.1 atub|OJI90209.1 aver|OJJ04080.1 awen|OJJ39445.1 azon|OJJ47647.1

Group2151: abra|OJJ70499.1 acar|OOF97427.1 acla|EAW08175.1 afis|EAW23211.1 afla|EED47040.1 afum|EAL88273.1 agla|OJJ78734.1 akaw|GAA83347.1 aluc|OJZ83844.1 anid|CBF74738.1 anig|EHA18986.1 aory|EIT72653.1 asyd|OJJ60185.1 ater|EAU36339.1 atub|OJI90210.1 aver|OJJ04079.1 awen|OJJ39444.1 azon|OJJ47646.1

Group2152: abra|OJJ70500.1 acar|OOF97425.1 acla|EAW08174.1 afis|EAW23210.1 afla|EED47041.1 afum|EAL88274.1 agla|OJJ78735.1 akaw|GAA83348.1 aluc|OJZ83845.1 anid|CBF74736.1 anig|EHA18987.1 aory|EIT72592.1 asyd|OJJ60186.1 ater|EAU36338.1 atub|OJI90211.1 aver|OJJ04078.1 awen|OJJ39443.1 azon|OJJ47645.1

Group2153: abra|OJJ70504.1 acar|OOF97421.1 acla|EAW08170.1 afis|EAW23206.1 afla|EED47047.1 afum|EAL88277.1 agla|OJJ78739.1 akaw|GAA83353.1 aluc|OJZ83849.1 anid|CBF74734.1 anig|EHA18991.1 aory|EIT72747.1 asyd|OJJ60189.1 ater|EAU36334.1 atub|OJI90215.1 aver|OJJ04075.1 awen|OJJ39438.1 azon|OJJ47641.1

Group2154: abra|OJJ70509.1 acar|OOF97420.1 acla|EAW08166.1 afis|EAW23204.1 afla|EED47050.1 afum|EAL88279.1 agla|OJJ78743.1 akaw|GAA83356.1 aluc|OJZ83854.1 anid|CBF74730.1 anig|EHA18995.1 aory|EIT72509.1 asyd|OJJ60194.1 ater|EAU36332.1 atub|OJI90221.1 aver|OJJ04071.1 awen|OJJ39434.1 azon|OJJ47638.1

Group2155: abra|OJJ70510.1 acar|OOF97419.1 acla|EAW08165.1 afis|EAW23203.1 afla|EED47051.1 afum|EAL88280.1 agla|OJJ78745.1 akaw|GAA83357.1 aluc|OJZ83855.1 anid|CBF74728.1 anig|EHA18996.1 aory|EIT72511.1 asyd|OJJ60195.1 ater|EAU36331.1 atub|OJI90222.1 aver|OJJ04070.1 awen|OJJ39433.1 azon|OJJ47637.1

Group2156: abra|OJJ70512.1 acar|OOF97417.1 acla|EAW08163.1 afis|EAW23201.1 afla|EED47053.1 afum|EAL88282.1 agla|OJJ78747.1 akaw|GAA83359.1 aluc|OJZ83857.1 anid|CBF74721.1 anig|EHA18998.1 aory|EIT72498.1 asyd|OJJ60201.1 ater|EAU36329.1 atub|OJI90224.1 aver|OJJ04065.1 awen|OJJ39431.1 azon|OJJ47635.1

Group2157: abra|OJJ70514.1 acar|OOF97415.1 acla|EAW08161.1 afis|EAW23199.1 afla|EED47055.1 afum|EAL88284.1 agla|OJJ78749.1 akaw|GAA83361.1 aluc|OJZ83859.1 anid|CBF74717.1 anig|EHA19000.1

aory|EIT72508.1 asyd|OJJ60203.1 ater|EAU36327.1 atub|OJI90226.1 aver|OJJ04063.1 awen|OJJ39429.1 azon|OJJ47633.1

Group2158: abra|OJJ70515.1 acar|OOF97414.1 acla|EAW08160.1 afis|EAW23198.1 afla|EED47056.1 afum|EAL88285.1 agla|OJJ86331.1 akaw|GAA83362.1 aluc|OJZ83860.1 anid|CBF74715.1 anig|EHA19001.1 aory|EIT72476.1 asyd|OJJ60205.1 ater|EAU36325.1 atub|OJI90228.1 aver|OJJ04062.1 awen|OJJ39428.1 azon|OJJ47632.1

Group2159: abra|OJJ70521.1 acar|OOF97407.1 acla|EAW08154.1 afis|EAW23185.1 afla|EED47062.1 afum|EAL88298.1 agla|OJJ86360.1 akaw|GAA83368.1 aluc|OJZ83866.1 anid|CBF74698.1 anig|EHA19007.1 aory|EIT72505.1 asyd|OJJ60215.1 ater|EAU36320.1 atub|OJI90234.1 aver|OJJ04053.1 awen|OJJ36587.1 azon|OJJ47619.1

Group2160: abra|OJJ70522.1 acar|OOF97406.1 acla|EAW08153.1 afis|EAW23186.1 afla|EED47064.1 afum|EAL88297.1 agla|OJJ86361.1 akaw|GAA83369.1 aluc|OJZ83867.1 anid|CBF74696.1 anig|EHA19008.1 aory|EIT72495.1 asyd|OJJ60214.1 ater|EAU36319.1 atub|OJI90235.1 aver|OJJ04054.1 awen|OJJ36588.1 azon|OJJ47618.1

Group2161: abra|OJJ70529.1 acar|OOF97402.1 acla|EAW08142.1 afis|EAW23178.1 afla|EED49000.1 afum|EAL88305.1 agla|OJJ89690.1 akaw|GAA83374.1 aluc|OJZ83872.1 anid|CBF74512.1 anig|EHA19013.1 aory|EIT80028.1 asyd|OJJ57730.1 ater|EAU36311.1 atub|OJI90240.1 aver|OJJ05439.1 awen|OJJ36601.1 azon|OJJ47607.1

Group2162: abra|OJJ70532.1 acar|OOF97400.1 acla|EAW08145.1 afis|EAW23181.1 afla|EED47073.1 afum|EAL88302.1 akaw|GAA83377.1 aluc|OJZ83875.1 anid|CBF74516.1 anig|EHA19015.1 aory|EIT72487.1 asyd|OJJ57732.1 ater|EAU36314.1 atub|OJI90243.1 aver|OJJ05437.1 awen|OJJ36597.1 azon|OJJ47611.1 agla|OJJ86370.1

Group2163: abra|OJJ70536.1 acar|OOF97397.1 acla|EAW08148.1 afis|EAW23191.1 afla|EED47070.1 afum|EAL88292.1 agla|OJJ86367.1 akaw|GAA83381.1 aluc|OJZ83880.1 anid|CBF74521.1 anig|EHA19018.1 aory|EIT72473.1 asyd|OJJ57733.1 ater|EAU36315.1 atub|OJI90247.1 aver|OJJ05434.1 awen|OJJ36593.1 azon|OJJ47612.1

Group2164: abra|OJJ70537.1 acar|OOF97396.1 acla|EAW08149.1 afis|EAW23190.1 afla|EED47069.1 afum|EAL88293.1 agla|OJJ86365.1 akaw|GAA83382.1 aluc|OJZ83881.1 anid|CBF74523.1 anig|EHA19019.1 aory|EIT72486.1 asyd|OJJ57734.1 ater|EAU36309.1 atub|OJI90249.1 aver|OJJ05433.1 awen|OJJ36592.1 azon|OJJ47614.1

Group2165: abra|OJJ70539.1 acar|OOF97394.1 acla|EAW08151.1 afis|EAW23188.1 afla|EED47067.1 afum|EAL88295.1 agla|OJJ86363.1 akaw|GAA83384.1 aluc|OJZ83884.1 anid|CBF74527.1 anig|EHA19021.1 aory|EIT72500.1 asyd|OJJ57736.1 ater|EAU36310.1 atub|OJI90251.1 aver|OJJ05431.1 awen|OJJ36590.1 azon|OJJ47616.1

Group2166: abra|OJJ70541.1 acar|OOF97392.1 acla|EAW08137.1 afis|EAW23173.1 afla|EED46946.1 afum|EAL88310.1 agla|OJJ89685.1 akaw|GAA83387.1 aluc|OJZ83886.1 anid|CBF74495.1 anig|EHA19023.1 aory|EIT72576.1 asyd|OJJ57718.1 ater|EAU36302.1 atub|OJI90253.1 aver|OJJ05449.1 awen|OJJ36604.1 azon|OJJ47602.1

Group2167: abra|OJJ70552.1 acar|OOF97168.1 acla|EAW08344.1 afis|EAW23379.1 afla|EED55578.1 afum|EAL88092.1 agla|OJJ86444.1 akaw|GAA83396.1 aluc|OJZ83895.1 anid|CBF74849.1 anig|EHA19031.1 aory|EIT82685.1 asyd|OJJ60128.1 ater|EAU35633.1 atub|OJI90263.1 aver|OJJ04133.1 awen|OJJ39503.1 azon|OJJ47704.1

Group2168: abra|OJJ70554.1 acar|OOF97165.1 acla|EAW08350.1 afis|EAW23383.1 afla|EED55571.1 afum|EAL88088.1 agla|OJJ86437.1 akaw|GAA83399.1 aluc|OJZ83897.1 anid|CBF74854.1 anig|EHA19034.1 aory|EIT82660.1 asyd|OJJ60126.1 ater|EAU35636.1 atub|OJI90267.1 aver|OJJ04136.1 awen|OJJ39498.1 azon|OJJ47700.1

Group2169: abra|OJJ70555.1 acar|OOF97164.1 acla|EAW08353.1 afis|EAW23384.1 afla|EED55572.1 afum|EAL88087.1 agla|OJJ86436.1 akaw|GAA83400.1 aluc|OJZ83898.1 anid|CBF74856.1 anig|EHA19035.1 aory|EIT82663.1 asyd|OJJ60125.1 ater|EAU35637.1 atub|OJI90268.1 aver|OJJ04137.1 awen|OJJ39497.1 azon|OJJ47699.1

Group2170: abra|OJJ70556.1 acar|OOF97163.1 acla|EAW08354.1 afis|EAW23385.1 afla|EED55573.1 afum|EAL88086.2 agla|OJJ86435.1 akaw|GAA83401.1 aluc|OJZ83899.1 anid|CBF74875.1 anig|EHA19036.1 aory|EIT82690.1 asyd|OJJ60114.1 ater|EAU35638.1 atub|OJI90269.1 aver|OJJ04148.1 awen|OJJ39496.1 azon|OJJ47698.1

Group2171: abra|OJJ70557.1 acar|OOF97162.1 acla|EAW08355.1 afis|EAW23386.1 afla|EED55574.1 afum|EAL88085.1 agla|OJJ86432.1 akaw|GAA83402.1 aluc|OJZ83900.1 anid|CBF74873.1 anig|EHA19037.1 aory|EIT82673.1 asyd|OJJ60115.1 ater|EAU35639.1 atub|OJI90270.1 aver|OJJ04147.1 awen|OJJ39495.1 azon|OJJ47696.1

Group2172: abra|OJJ70559.1 acar|OOF97161.1 acla|EAW08357.1 afis|EAW23388.1 afla|EED55576.1 afum|EAL88083.1 agla|OJJ86430.1 akaw|GAA83404.1 aluc|OJZ83903.1 anid|CBF74870.1 anig|EHA19038.1 aory|EIT82706.1 asyd|OJJ60117.1 ater|EAU35640.1 atub|OJI90272.1 aver|OJJ04145.1 awen|OJJ39493.1 azon|OJJ47694.1

Group2173: abra|OJJ70560.1 acar|OOF97160.1 acla|EAW08358.1 afis|EAW23389.1 afla|EED55568.1 afum|EAL88082.1 agla|OJJ86428.1 akaw|GAA83405.1 aluc|OJZ83904.1 anid|CBF74868.1 anig|EHA19039.1 aory|EIT82664.1 asyd|OJJ60118.1 ater|EAU35642.1 atub|OJI90273.1 aver|OJJ04144.1 awen|OJJ39492.1 azon|OJJ47693.1

Group2174: abra|OJJ70561.1 acar|OOF97158.1 acla|EAW08360.1 afis|EAW23391.1 afla|EED55566.1 afum|EAL88080.1 agla|OJJ86426.1 akaw|GAA83406.1 aluc|OJZ83905.1 anid|CBF74864.1 anig|EHA19040.1 aory|EIT82703.1 asyd|OJJ60121.1 ater|EAU35644.1 atub|OJI90276.1 aver|OJJ04141.1 awen|OJJ39488.1 azon|OJJ47691.1

Group2175: abra|OJJ70564.1 acar|OOF97156.1 acla|EAW08362.1 afis|EAW23393.1 afla|EED55564.1 afum|EAL88077.1 agla|OJJ86420.1 akaw|GAA83408.1 aluc|OJZ83907.1 anid|CBF74860.1 anig|EHA19042.1 aory|EIT82692.1 asyd|OJJ60123.1 ater|EAU35646.1 atub|OJI90278.1 aver|OJJ04139.1 awen|OJJ39486.1 azon|OJJ47689.1

Group2176: abra|OJJ70567.1 acar|OOF97155.1 acla|EAW08366.1 afis|EAW23396.1 afla|EED55560.1 afum|EAL88074.1 agla|OJJ86410.1 akaw|GAA83411.1 aluc|OJZ83910.1 anid|CBF74807.1 anig|EHA19044.1 aory|EIT82680.1 asyd|OJJ60148.1 ater|EAU35649.1 atub|OJI90281.1 aver|OJJ04115.1 awen|OJJ39483.1 azon|OJJ48236.1

Group2177: abra|OJJ70568.1 acar|OOF97154.1 acla|EAW08367.1 afis|EAW23397.1 afla|EED55559.1 afum|EAL88073.1 agla|OJJ86409.1 akaw|GAA83412.1 aluc|OJZ83911.1 anid|CBF74805.1 anig|EHA19045.1 aory|EIT82705.1 asyd|OJJ60149.1 ater|EAU35650.1 atub|OJI90282.1 aver|OJJ04114.1 awen|OJJ39482.1 azon|OJJ47684.1

Group2178: abra|OJJ70569.1 acar|OOF97152.1 acla|EAW08371.1 afis|EAW23398.1 afla|EED55554.1 afum|EAL88072.1 agla|OJJ86403.1 akaw|GAA83413.1 aluc|OJZ83913.1 anid|CBF74803.1 anig|EHA19046.1 aory|EIT82712.1 asyd|OJJ60150.1 ater|EAU35651.1 atub|OJI90283.1 aver|OJJ04113.1 awen|OJJ39481.1 azon|OJJ47683.1

Group2179: abra|OJJ70570.1 acar|OOF97151.1 acla|EAW08370.1 afis|EAW23399.1 afla|EED47005.1 afum|EAL88071.1 agla|OJJ86402.1 akaw|GAA83414.1 aluc|OJZ83914.1 anid|CBF74801.1 anig|EHA19047.1 aory|EIT72537.1 asyd|OJJ60152.1 ater|EAU36378.1 atub|OJI90284.1 aver|OJJ04112.1 awen|OJJ39480.1 azon|OJJ47682.1

Group2180: abra|OJJ70571.1 acar|OOF97150.1 acla|EAW08369.1 afis|EAW23400.1 afla|EED47006.1 afum|EAL88070.1 agla|OJJ86401.1 akaw|GAA83415.1 aluc|OJZ83915.1 anid|CBF73601.1 anig|EHA19048.1 aory|EIT72638.1 asyd|OJJ56680.1 ater|EAU36377.1 atub|OJI90285.1 aver|OJJ06043.1 awen|OJJ39479.1 azon|OJJ47681.1

Group2181: abra|OJJ70574.1 acar|OOF97147.1 acla|EAW08373.1 afis|EAW23402.1 afla|EED47009.1 afum|EAL88068.1 agla|OJJ86389.1 akaw|GAA83418.1 aluc|OJZ83918.1 anid|CBF74795.1 anig|EHA19051.1 aory|EIT72635.1 asyd|OJJ60155.1 ater|EAU36373.1 atub|OJI90289.1 aver|OJJ04109.1 awen|OJJ39476.1 azon|OJJ47679.1

Group2182: abra|OJJ70576.1 acar|OOF97145.1 acla|EAW08375.1 afis|EAW23404.1 afla|EED47011.1 afum|EAL88066.1 agla|OJJ86392.1 akaw|GAA83420.1 aluc|OJZ83920.1 anid|CBF74793.1 anig|EHA19053.1 aory|EIT72673.1 asyd|OJJ60156.1 ater|EAU36371.1 atub|OJI90292.1 aver|OJJ04108.1 awen|OJJ39473.1 azon|OJJ47675.1

Group2183: abra|OJJ70577.1 acar|OOF97144.1 acla|EAW08203.1 afis|EAW23237.1 afla|EED47012.1 afum|EAL88245.1 agla|OJJ86393.1 akaw|GAA83421.1 aluc|OJZ83921.1 anid|CBF74787.1 anig|EHA19054.1 aory|EIT72690.1 asyd|OJJ60159.1 ater|EAU36370.1 atub|OJI90293.1 aver|OJJ04105.1 awen|OJJ39472.1 azon|OJJ47674.1

Group2184: abra|OJJ70578.1 acar|OOF97143.1 acla|EAW08202.1 afis|EAW23236.1 afla|EED47013.1 afum|EAL88246.1 agla|OJJ86394.1 akaw|GAA83422.1 aluc|OJZ83922.1 anid|CBF74785.1 anig|EHA19055.1 aory|EIT72768.1 asyd|OJJ60160.1 ater|EAU36369.1 atub|OJI90294.1 aver|OJJ04104.1 awen|OJJ39471.1 azon|OJJ47673.1

Group2185: abra|OJJ70580.1 acar|OOF97138.1 acla|EAW08200.1 afis|EAW23234.1 afla|EED47015.1 afum|EAL88248.1 agla|OJJ86396.1 akaw|GAA83424.1 aluc|OJZ83925.1 anid|CBF74783.1 anig|EHA19057.1 aory|EIT72553.1 asyd|OJJ60161.1 ater|EAU36367.1 atub|OJI90297.1 aver|OJJ04103.1 awen|OJJ39469.1 azon|OJJ47669.1

Group2186: abra|OJJ70582.1 acar|OOF97137.1 acla|EAW08198.1 afis|EAW23232.1 afla|EED47016.1 afum|EAL88250.1 agla|OJJ86398.1 akaw|GAA83426.1 aluc|OJZ83927.1 anid|CBF74779.1 anig|EHA19059.1

aory|EIT72651.1 asyd|OJJ60163.1 ater|EAU36361.1 atub|OJI90299.1 aver|OJJ04101.1 awen|OJJ39467.1 azon|OJJ47667.1

Group2187: abra|OJJ70584.1 acar|OOF97136.1 acla|EAW08197.1 afis|EAW23231.1 afla|EED47019.1 afum|EAL88252.1 agla|OJJ86399.1 akaw|GAA83427.1 aluc|OJZ83928.1 anid|CBF74777.1 anig|EHA19060.1 aory|EIT72752.1 asyd|OJJ60164.1 ater|EAU36360.1 atub|OJI90300.1 aver|OJJ04100.1 awen|OJJ39466.1 azon|OJJ47666.1

Group2188: abra|OJJ70585.1 acar|OOF97135.1 acla|EAW08196.1 afis|EAW23230.1 afla|EED47020.1 afum|EAL88253.1 agla|OJJ86400.1 akaw|GAA83428.1 aluc|OJZ83929.1 anid|CBF74775.1 anig|EHA19061.1 aory|EIT72543.1 asyd|OJJ60165.1 ater|EAU36359.1 atub|OJI90301.1 aver|OJJ04099.1 awen|OJJ39465.1 azon|OJJ47665.1

Group2189: abra|OJJ70589.1 acar|OOF97128.1 acla|EAW08192.1 afis|EAW23226.1 afla|EED47024.1 afum|EAL88257.1 agla|OJJ86383.1 akaw|GAA83433.1 aluc|OJZ83934.1 anid|CBF74767.1 anig|EHA19065.1 aory|EIT72765.1 asyd|OJJ60169.1 ater|EAU36356.1 atub|OJI90306.1 aver|OJJ04095.1 awen|OJJ39461.1 azon|OJJ47660.1

Group2190: abra|OJJ70592.1 acar|OOF97126.1 acla|EAW08188.1 afis|EAW23222.1 afla|EED47028.1 afum|EAL88262.1 agla|OJJ86379.1 akaw|GAA83437.1 aluc|OJZ83938.1 anid|CBF74759.1 anig|EHA19068.1 aory|EIT72692.1 asyd|OJJ60173.1 ater|EAU36353.1 atub|OJI90311.1 aver|OJJ04091.1 awen|OJJ39458.1 azon|OJJ47656.1

Group2191: abra|OJJ70594.1 acar|OOF97124.1 acla|EAW08186.1 afis|EAW23220.1 afla|EED47030.1 afum|EAL88264.1 agla|OJJ86377.1 akaw|GAA83439.1 aluc|OJZ83940.1 anid|CBF74757.1 anig|EHA19070.1 aory|EIT72550.1 asyd|OJJ60174.1 ater|EAU36351.1 atub|OJI90313.1 aver|OJJ04089.1 awen|OJJ39456.1 azon|OJJ47654.1

Group2192: abra|OJJ70595.1 acar|OOF97123.1 acla|EAW08185.1 afis|EAW23219.1 afla|EED47031.1 afum|EAL88265.1 agla|OJJ86376.1 akaw|GAA83440.1 aluc|OJZ83941.1 anid|CBF74755.1 anig|EHA19071.1 aory|EIT72573.1 asyd|OJJ60175.1 ater|EAU36350.1 atub|OJI90314.1 aver|OJJ04088.1 awen|OJJ39455.1 azon|OJJ47653.1

Group2193: abra|OJJ70600.1 acar|OOF97120.1 acla|EAW08182.1 afis|EAW23217.1 afla|EED47035.1 afum|EAL88267.1 agla|OJJ86373.1 akaw|GAA89940.1 aluc|OJZ83945.1 anid|CBF74749.1 anig|EHA19074.1 aory|EIT72655.1 asyd|OJJ60178.1 ater|EAU36347.1 atub|OJI90316.1 aver|OJJ04084.1 awen|OJJ39451.1 azon|OJJ47651.1

Group2194: abra|OJJ70606.1 acar|OOF97115.1 acla|EAW13020.1 afis|EAW17647.1 afla|EED50511.1 afum|EAL91462.1 agla|OJJ79557.1 akaw|GAA89946.1 aluc|OJZ83952.1 anid|CBF90111.1 anig|EHA19080.1 aory|EIT82166.1 asyd|OJJ62026.1 ater|EAU37083.1 atub|OJI90323.1 aver|OJI96117.1 awen|OJJ37198.1 azon|OJJ50897.1

Group2195: abra|OJJ70607.1 acar|OOF97114.1 acla|EAW13019.1 afis|EAW17648.1 afla|EED50510.1 afum|EAL91464.1 agla|OJJ79556.1 akaw|GAA89947.1 aluc|OJZ83954.1 anid|CBF90087.1 anig|EHA19081.1 aory|EIT82125.1 asyd|OJJ62036.1 ater|EAU37084.1 atub|OJI90324.1 aver|OJI96142.1 awen|OJJ37197.1 azon|OJJ50896.1

Group2196: abra|OJJ70608.1 acar|OOF97113.1 acla|EAW13018.1 afis|EAW17649.1 afla|EED50509.1 afum|EAL91465.1 agla|OJJ79555.1 akaw|GAA89948.1 aluc|OJZ83955.1 anid|CBF90085.1 anig|EHA19082.1 aory|EIT82043.1 asyd|OJJ62037.1 ater|EAU37085.1 atub|OJI90325.1 aver|OJI96143.1 awen|OJJ37196.1 azon|OJJ50895.1

Group2197: abra|OJJ70611.1 acar|OOF97111.1 acla|EAW13016.1 afis|EAW17651.1 afla|EED50508.1 afum|EAL91466.1 agla|OJJ79553.1 akaw|GAA89950.1 aluc|OJZ83957.1 anid|CBF90077.1 anig|EHA19084.1 aory|EIT82060.1 asyd|OJJ62040.1 ater|EAU37087.1 atub|OJI90327.1 aver|OJI96146.1 awen|OJJ37194.1 azon|OJJ50893.1

Group2198: abra|OJJ70613.1 acar|OOF97109.1 acla|EAW13014.1 afis|EAW17653.1 afla|EED50505.1 afum|EAL91468.1 agla|OJJ79551.1 akaw|GAA89952.1 aluc|OJZ83959.1 anid|CBF90074.1 anig|EHA19087.1 aory|EIT82010.1 asyd|OJJ62042.1 ater|EAU37089.1 atub|OJI90331.1 aver|OJI96148.1 awen|OJJ37192.1 azon|OJJ50891.1

Group2199: abra|OJJ70616.1 acar|OOF97105.1 acla|EAW13011.1 afis|EAW17656.1 afla|EED50502.1 afum|EAL91471.1 agla|OJJ79549.1 akaw|GAA89955.1 aluc|OJZ83962.1 anid|CBF90066.1 anig|EHA19090.1 aory|EIT82103.1 asyd|OJJ62045.1 ater|EAU31997.1 atub|OJI90334.1 aver|OJI96151.1 awen|OJJ37187.1 azon|OJJ50889.1

Group2200: abra|OJJ70617.1 acar|OOF97104.1 acla|EAW13010.1 afis|EAW17657.1 afla|EED50501.1 afum|EAL91472.1 agla|OJJ79548.1 akaw|GAA89956.1 aluc|OJZ83963.1 anid|CBF90065.1 anig|EHA19091.1 aory|EIT82023.1 asyd|OJJ62046.1 ater|EAU31996.1 atub|OJI90335.1 aver|OJI96152.1 awen|OJJ37186.1 azon|OJJ50888.1

Group2201: abra|OJJ70618.1 acar|OOF97103.1 acla|EAW13009.1 afis|EAW17658.1 afla|EED50500.1 afum|EAL91473.1 agla|OJJ79547.1 akaw|GAA89957.1 aluc|OJZ83964.1 anid|CBF90063.1 anig|EHA19092.1 aory|EIT82147.1 asyd|OJJ62048.1 ater|EAU31994.1 atub|OJI90337.1 aver|OJI96153.1 awen|OJJ37185.1 azon|OJJ50886.1

Group2202: abra|OJJ70619.1 acar|OOF97102.1 acla|EAW13008.1 afis|EAW17659.1 afla|EED50499.1 afum|EAL91474.1 agla|OJJ79546.1 akaw|GAA89958.1 aluc|OJZ83965.1 anid|CBF90061.1 anig|EHA19093.1 aory|EIT82055.1 asyd|OJJ62049.1 ater|EAU31993.1 atub|OJI90338.1 aver|OJI96154.1 awen|OJJ37184.1 azon|OJJ50885.1

Group2203: abra|OJJ70620.1 acar|OOF97101.1 acla|EAW13007.1 afis|EAW17660.1 afla|EED50497.1 afum|EAL91475.1 agla|OJJ79529.1 akaw|GAA89959.1 aluc|OJZ83966.1 anid|CBF90059.1 anig|EHA19094.1 aory|EIT82172.1 asyd|OJJ62050.1 ater|EAU31992.1 atub|OJI90339.1 aver|OJI96155.1 awen|OJJ37182.1 azon|OJJ50884.1

Group2204: abra|OJJ70625.1 acar|OOF97099.1 acla|EAW13005.1 afis|EAW17663.1 afla|EED50495.1 afum|EAL91477.2 agla|OJJ79532.1 akaw|GAA89963.1 aluc|OJZ83970.1 anid|CBF90056.1 anig|EHA19099.1 aory|EIT82160.1 asyd|OJJ62052.1 ater|EAU31990.1 atub|OJI90343.1 aver|OJI96158.1 awen|OJJ37179.1 azon|OJJ50881.1

Group2205: abra|OJJ70626.1 acar|OOF97098.1 acla|EAW08131.1 afis|EAW23168.1 afla|EED46953.1 afum|EAL88316.1 agla|OJJ89679.1 akaw|GAA89964.1 aluc|OJZ83971.1 anid|CBF74478.1 anig|EHA19100.1 aory|EIT72624.1 asyd|OJJ57707.1 ater|EAU36297.1 atub|OJI90344.1 aver|OJJ05457.1 awen|OJJ36615.1 azon|OJJ47598.1

Group2206: abra|OJJ70627.1 acar|OOF97097.1 acla|EAW08130.1 afis|EAW23167.1 afla|EED46954.1 afum|EAL88317.2 agla|OJJ89678.1 akaw|GAA89965.1 aluc|OJZ83972.1 anid|CBF74476.1 anig|EHA19101.1 aory|EIT72656.1 asyd|OJJ57706.1 ater|EAU36296.1 atub|OJI90345.1 aver|OJJ05458.1 awen|OJJ36616.1 azon|OJJ41979.1

Group2207: abra|OJJ70628.1 acar|OOF97096.1 acla|EAW08129.1 afis|EAW23166.1 afla|EED46955.1 afum|EAL88318.1 agla|OJJ89677.1 akaw|GAA89966.1 aluc|OJZ83974.1 anid|CBF74475.1 anig|EHA19102.1 aory|EIT72623.1 asyd|OJJ57705.1 ater|EAU36295.1 atub|OJI90347.1 aver|OJJ05459.1 awen|OJJ36617.1 azon|OJJ47597.1

Group2208: abra|OJJ70629.1 acar|OOF97095.1 acla|EAW08128.1 afis|EAW23165.1 afla|EED46957.1 afum|EBA27343.1 agla|OJJ89676.1 akaw|GAA89967.1 aluc|OJZ83976.1 anid|CBF74473.1 anig|EHA19103.1 aory|EIT72540.1 asyd|OJJ57704.1 ater|EAU36294.1 atub|OJI90349.1 aver|OJJ05460.1 awen|OJJ36618.1 azon|OJJ47595.1

Group2209: abra|OJJ70630.1 acar|OOF97093.1 acla|EAW08126.1 afis|EAW23163.1 afla|EED46958.1 afum|EAL88320.1 agla|OJJ89674.1 akaw|GAA89969.1 aluc|OJZ83978.1 anid|CBF74467.1 anig|EHA19105.1 aory|EIT72637.1 asyd|OJJ57700.1 ater|EAU36293.1 atub|OJI90351.1 aver|OJJ05464.1 awen|OJJ36620.1 azon|OJJ47593.1

Group2210: abra|OJJ70639.1 acar|OOF97080.1 acla|EAW08118.1 afis|EAW23133.1 afla|EED48995.1 afum|EAL88348.1 agla|OJJ89666.1 akaw|GAA89975.1 aluc|OJZ83986.1 anid|CBF74456.1 anig|EHA19112.1 aory|EIT80032.1 asyd|OJJ57677.1 ater|EAU36286.1 atub|OJI90358.1 aver|OJJ05483.1 awen|OJJ36627.1 azon|OJJ47586.1

Group2211: abra|OJJ70640.1 acar|OOF97081.1 acla|EAW08117.1 afis|EAW23134.1 afla|EED48497.1 afum|EAL88347.1 agla|OJJ89665.1 akaw|GAA89976.1 aluc|OJZ83987.1 anid|CBF74455.1 anig|EHA19113.1 aory|EIT73203.1 asyd|OJJ57676.1 ater|EAU36282.1 atub|OJI90359.1 aver|OJJ05482.1 awen|OJJ36630.1 azon|OJJ47584.1

Group2212: abra|OJJ70646.1 acar|OOF97075.1 acla|EAW08114.1 afis|EAW23137.1 afla|EED48500.1 afum|EAL88344.1 agla|OJJ89663.1 akaw|GAA89982.1 aluc|OJZ83996.1 anid|CBF74450.1 anig|EHA19119.1 aory|EIT73193.1 asyd|OJJ57740.1 ater|EAU36280.1 atub|OJI90365.1 aver|OJJ05427.1 awen|OJJ36633.1 azon|OJJ47582.1

Group2213: abra|OJJ70653.1 acar|OOF97070.1 acla|EAW08106.1 afis|EAW23145.1 afla|EED48508.1 afum|EAL88336.1 agla|OJJ89657.1 akaw|GAA89989.1 aluc|OJZ84003.1 anid|CBF74436.1 anig|EHA19125.1 aory|EIT73083.1 asyd|OJJ57747.1 ater|EAU36266.1 atub|OJI90372.1 aver|OJJ05420.1 awen|OJJ36640.1 azon|OJJ47574.1

Group2214: abra|OJJ70654.1 acar|OOF97068.1 acla|EAW08105.1 afis|EAW23146.1 afla|EED48509.1 afum|EAL88335.1 agla|OJJ89656.1 akaw|GAA89990.1 aluc|OJZ84004.1 anid|CBF74434.1 anig|EHA19126.1 aory|EIT73165.1 asyd|OJJ57748.1 ater|EAU36265.1 atub|OJI90373.1 aver|OJJ05419.1 awen|OJJ36641.1 azon|OJJ47573.1

Group2215: abra|OJJ70657.1 acar|OOF97065.1 acla|EAW08102.1 afis|EAW23149.1 afla|EED48512.1 afum|EAL88332.1 agla|OJJ89653.1 akaw|GAA89993.1 aluc|OJZ84007.1 anid|CBF74428.1 anig|EHA19129.1

aory|EIT73157.1 asyd|OJJ57751.1 ater|EAU36263.1 atub|OJI90376.1 aver|OJJ05416.1 awen|OJJ36645.1 azon|OJJ47570.1

Group2216: abra|OJJ70659.1 acar|OOF97063.1 acla|EAW08100.1 afis|EAW23151.1 afla|EED48514.1 afum|EAL88330.2 agla|OJJ89651.1 akaw|GAA89995.1 aluc|OJZ84009.1 anid|CBF74424.1 anig|EHA19131.1 aory|EIT73110.1 asyd|OJJ57753.1 ater|EAU36261.1 atub|OJI90378.1 aver|OJJ05414.1 awen|OJJ36647.1 azon|OJJ47568.1

Group2217: abra|OJJ70661.1 acar|OOF97060.1 acla|EAW08097.1 afis|EAW23153.1 afla|EED48516.1 afum|EAL88328.1 agla|OJJ89648.1 akaw|GAA89997.1 aluc|OJZ84011.1 anid|CBF74421.1 anig|EHA19134.1 aory|EIT73108.1 asyd|OJJ57755.1 ater|EAU36258.1 atub|OJI90380.1 aver|OJJ05412.1 awen|OJJ36649.1 azon|OJJ47553.1

Group2218: abra|OJJ70666.1 acar|OOF97058.1 acla|EAW08096.1 afis|EAW23154.1 afla|EED48519.1 afum|EAL88327.2 agla|OJJ89646.1 akaw|GAA90001.1 aluc|OJZ84016.1 anid|CBF74419.1 anig|EHA19138.1 aory|EIT73174.1 asyd|OJJ57756.1 ater|EAU36257.1 atub|OJI90387.1 aver|OJJ05411.1 awen|OJJ36650.1 azon|OJJ47545.1

Group2219: abra|OJJ70669.1 acar|OOF97057.1 acla|EAW08094.1 afis|EAW23129.1 afla|EED48521.1 afum|EAL88351.1 agla|OJJ89645.1 akaw|GAA90002.1 aluc|OJZ84017.1 anid|CBF74417.1 anig|EHA19139.1 aory|EIT73127.1 asyd|OJJ57757.1 ater|EAU36256.1 atub|OJI90389.1 aver|OJJ05410.1 awen|OJJ36651.1 azon|OJJ47547.1

Group2220: abra|OJJ70671.1 acar|OOF97055.1 acla|EAW08093.1 afis|EAW23128.1 afla|EED48522.1 afum|EAL88352.1 agla|OJJ89644.1 akaw|GAA90003.1 aluc|OJZ84019.1 anid|CBF74413.1 anig|EHA19140.1 aory|EIT73195.1 asyd|OJJ57758.1 ater|EAU36255.1 atub|OJI90390.1 aver|OJJ05408.1 awen|OJJ36652.1 azon|OJJ47548.1

Group2221: abra|OJJ70672.1 acar|OOF97054.1 acla|EAW08092.1 afis|EAW23127.1 afla|EED48523.1 afum|EAL88353.1 agla|OJJ89643.1 akaw|GAA90004.1 aluc|OJZ84020.1 anid|CBF74412.1 anig|EHA19141.1 aory|EIT73139.1 asyd|OJJ57759.1 ater|EAU36254.1 atub|OJI90391.1 aver|OJJ05407.1 awen|OJJ36653.1 azon|OJJ47549.1

Group2222: abra|OJJ70675.1 acar|OOF97052.1 acla|EAW08089.1 afis|EAW23124.1 afla|EED48528.1 afum|EAL88356.1 agla|OJJ89641.1 akaw|GAA90007.1 aluc|OJZ84023.1 anid|CBF74406.1 anig|EHA19144.1 aory|EIT73244.1 asyd|OJJ57762.1 ater|EAU36252.1 atub|OJI90395.1 aver|OJJ05404.1 awen|OJJ36656.1 azon|OJJ47552.1

Group2223: abra|OJJ70677.1 acar|OOF97050.1 acla|EAW08087.1 afis|EAW23123.1 afla|EED48530.1 afum|EAL88357.1 agla|OJJ89616.1 akaw|GAA90009.1 aluc|OJZ84025.1 anid|CBF74404.1 anig|EHA19146.1 aory|EIT73116.1 asyd|OJJ57763.1 ater|EAU36251.1 atub|OJI90397.1 aver|OJJ05403.1 awen|OJJ36658.1 azon|OJJ47540.1

Group2224: abra|OJJ70680.1 acar|OOF97047.1 acla|EAW08084.1 afis|EAW23120.1 afla|EED48533.1 afum|EAL88360.1 agla|OJJ89619.1 akaw|GAA90012.1 aluc|OJZ84028.1 anid|CBF74398.1 anig|EHA19149.1 aory|EIT73210.1 asyd|OJJ57766.1 ater|EAU36249.1 atub|OJI90400.1 aver|OJJ05400.1 awen|OJJ36661.1 azon|OJJ47537.1

Group2225: abra|OJJ70681.1 acar|OOF97046.1 acla|EAW08083.1 afis|EAW23119.1 afla|EED48534.1 afum|EAL88361.1 agla|OJJ89621.1 akaw|GAA90013.1 aluc|OJZ84029.1 anid|CBF74396.1 anig|EHA19150.1 aory|EIT73258.1 asyd|OJJ57767.1 ater|EAU36248.1 atub|OJI90401.1 aver|OJJ05399.1 awen|OJJ36662.1 azon|OJJ47536.1

Group2226: abra|OJJ70684.1 acar|OOF97043.1 acla|EAW08078.1 afis|EAW23117.1 afla|EED48535.1 afum|EAL88363.1 agla|OJJ89624.1 akaw|GAA90016.1 aluc|OJZ84032.1 anid|CBF74393.1 anig|EHA19153.1 aory|EIT73171.1 asyd|OJJ57769.1 ater|EAU36245.1 atub|OJI90404.1 aver|OJJ05397.1 awen|OJJ36665.1 azon|OJJ47534.1

Group2227: abra|OJJ70685.1 acar|OOF97042.1 acla|EAW08077.1 afis|EAW23116.1 afla|EED48536.1 afum|EAL88364.1 agla|OJJ89625.1 akaw|GAA90017.1 aluc|OJZ84033.1 anid|CBF74391.1 anig|EHA19154.1 aory|EIT73186.1 asyd|OJJ57770.1 ater|EAU36244.1 atub|OJI90405.1 aver|OJJ05396.1 awen|OJJ36666.1 azon|OJJ47533.1

Group2228: abra|OJJ70686.1 acar|OOF97041.1 afis|EAW23115.1 afla|EED53328.1 afum|EAL88365.1 agla|OJJ89626.1 akaw|GAA90018.1 aluc|OJZ84034.1 anid|CBF76024.1 anig|EHA19155.1 aory|EIT74989.1 asyd|OJJ52450.1 ater|EAU36243.1 atub|OJI90406.1 aver|OJJ03966.1 awen|OJJ36667.1 azon|OJJ47532.1 aory|EIT74930.1

Group2229: abra|OJJ70689.1 acar|OOF97038.1 acla|EAW08076.1 afis|EAW23111.1 afla|EED48537.1 afum|EAL88368.1 agla|OJJ89630.1 akaw|GAA90021.1 aluc|OJZ84037.1 anid|CBF74389.1 anig|EHA19158.1 aory|EIT73070.1 asyd|OJJ57771.1 ater|EAU36239.1 atub|OJI90409.1 aver|OJJ05395.1 awen|OJJ36670.1 azon|OJJ47529.1

Group2230: abra|OJJ70694.1 acar|OOF97035.1 acla|EAW08071.1 afis|EAW23107.1 afla|EED48541.1 afum|EAL88372.1 agla|OJJ89636.1 akaw|GAA90025.1 aluc|OJZ84041.1 anid|CBF81370.1 anig|EHA19163.1 aory|EIT73129.1 asyd|OJJ59386.1 ater|EAU36235.1 atub|OJI90413.1 aver|OJJ02887.1 awen|OJJ36674.1 azon|OJJ47524.1

Group2231: abra|OJJ70696.1 acar|OOF97033.1 acla|EAW08069.1 afis|EAW23105.1 afla|EED48543.1 afum|EAL88374.1 agla|OJJ89638.1 akaw|GAA90027.1 aluc|OJZ84043.1 anid|CBF81367.1 anig|EHA19165.1 aory|EIT73169.1 asyd|OJJ59384.1 ater|EAU36233.1 atub|OJI90415.1 aver|OJJ02889.1 awen|OJJ36676.1 azon|OJJ47522.1

Group2232: abra|OJJ70700.1 acar|OOF90048.1 acla|EAW08065.1 afis|EAW23101.1 afla|EED48549.1 afum|EAL88377.1 agla|OJJ89613.1 akaw|GAA90031.1 aluc|OJZ84046.1 anid|CBF81359.1 anig|EHA19167.1 aory|EIT73156.1 asyd|OJJ59381.1 ater|EAU36227.1 atub|OJI90418.1 aver|OJJ02892.1 awen|OJJ36680.1 azon|OJJ47517.1

Group2233: abra|OJJ70701.1 acar|OOF89978.1 acla|EAW08064.1 afis|EAW23100.1 afla|EED48548.1 afum|EAL88378.2 agla|OJJ89612.1 akaw|GAA90032.1 aluc|OJZ84047.1 anid|EHA19168.1 aory|EIT73049.1 asyd|OJJ59380.1 ater|EAU36228.1 atub|OJI90419.1 aver|OJJ02893.1 awen|OJJ36681.1 azon|OJJ47516.1 anid|CBF81358.1

Group2234: abra|OJJ70702.1 acar|OOF89980.1 acla|EAW08063.1 afis|EAW23099.1 afla|EED48547.1 afum|EAL88379.1 agla|OJJ89611.1 akaw|GAA90033.1 aluc|OJZ84049.1 anid|CBF81356.1 anig|EHA19169.1 aory|EIT73063.1 asyd|OJJ59379.1 ater|EAU36230.1 atub|OJI90420.1 aver|OJJ02894.1 awen|OJJ36682.1 azon|OJJ47515.1

Group2235: abra|OJJ70704.1 acar|OOF97032.1 acla|EAW08061.1 afis|EAW23097.1 afla|EED48551.1 afum|EAL88381.2 agla|OJJ89609.1 akaw|GAA90035.1 aluc|OJZ84051.1 anid|CBF81352.1 anig|EHA19171.1 aory|EIT73218.1 asyd|OJJ59377.1 ater|EAU36225.1 atub|OJI90422.1 aver|OJJ02896.1 awen|OJJ36684.1 azon|OJJ47512.1

Group2236: abra|OJJ70705.1 acar|OOF97031.1 acla|EAW08060.1 afis|EAW23096.1 afla|EED48552.1 afum|EAL88382.2 agla|OJJ89608.1 akaw|GAA90036.1 aluc|OJZ84052.1 anid|CBF81350.1 anig|EHA19172.1 aory|EIT73272.1 asyd|OJJ59376.1 ater|EAU36224.1 atub|OJI90423.1 aver|OJJ02897.1 awen|OJJ36685.1 azon|OJJ47511.1

Group2237: abra|OJJ70706.1 acar|OOF97029.1 acla|EAW08058.1 afis|EAW23094.1 afla|EED48554.1 afum|EAL88384.2 agla|OJJ89606.1 akaw|GAA90037.1 aluc|OJZ84053.1 anid|CBF87089.1 anig|EHA19173.1 aory|EIT73275.1 asyd|OJJ60399.1 atub|OJI90424.1 aver|OJI99728.1 awen|OJJ36688.1 azon|OJJ47509.1 aory|EIT73221.1

Group2238: abra|OJJ70708.1 acar|OOF97028.1 acla|EAW08056.1 afis|EAW23092.1 afla|EED48556.1 afum|EBA27345.1 agla|OJJ89604.1 akaw|GAA90039.1 aluc|OJZ84055.1 anid|CBF81348.1 anig|EHA19176.1 aory|EIT73227.1 asyd|OJJ59374.1 ater|EAU36215.1 atub|OJI90426.1 aver|OJJ02900.1 awen|OJJ36690.1 azon|OJJ47506.1

Group2239: abra|OJJ70710.1 acar|OOF97026.1 acla|EAW08054.1 afis|EAW23090.1 afla|EED48558.1 afum|EAL88389.1 agla|OJJ89602.1 akaw|GAA90041.1 aluc|OJZ84057.1 anid|CBF81345.1 anig|EHA19177.1 aory|EIT73059.1 asyd|OJJ59372.1 ater|EAU36213.1 atub|OJI90428.1 aver|OJJ02902.1 awen|OJJ36692.1 azon|OJJ47504.1

Group2240: abra|OJJ70711.1 acar|OOF97025.1 acla|EAW08053.1 afis|EAW23089.1 afla|EED48559.1 afum|EAL88390.1 agla|OJJ89601.1 akaw|GAA90042.1 aluc|OJZ84058.1 anid|CBF81343.1 anig|EHA19178.1 aory|EIT73173.1 asyd|OJJ59371.1 ater|EAU36212.1 atub|OJI90429.1 aver|OJJ02903.1 awen|OJJ36694.1 azon|OJJ47503.1

Group2241: abra|OJJ70714.1 acar|OOF97022.1 acla|EAW08049.1 afis|EAW23085.1 afla|EED48563.1 afum|EAL88394.1 agla|OJJ89595.1 akaw|GAA90045.1 aluc|OJZ84061.1 anid|CBF81339.1 anig|EHA19181.1 aory|EIT73232.1 asyd|OJJ59369.1 ater|EAU36209.1 atub|OJI90432.1 aver|OJJ02905.1 awen|OJJ36699.1 azon|OJJ47498.1

Group2242: abra|OJJ70715.1 acar|OOF97021.1 acla|EAW08048.1 afis|EAW23084.1 afla|EED48564.1 afum|EAL88395.1 agla|OJJ89594.1 akaw|GAA90046.1 aluc|OJZ84062.1 anid|CBF81337.1 anig|EHA19182.1 aory|EIT73208.1 asyd|OJJ59368.1 ater|EAU36208.1 atub|OJI90433.1 aver|OJJ02906.1 awen|OJJ36700.1 azon|OJJ47497.1

Group2243: abra|OJJ70716.1 acar|OOF97020.1 acla|EAW08047.1 afis|EAW23083.1 afla|EED48565.1 afum|EAL88396.1 agla|OJJ89592.1 akaw|GAA90047.1 aluc|OJZ84063.1 anid|CBF81335.1 anig|EHA19183.1 aory|EIT73176.1 asyd|OJJ59367.1 ater|EAU36207.1 atub|OJI90434.1 aver|OJJ02907.1 awen|OJJ36701.1 azon|OJJ47496.1

Group2244: abra|OJJ70717.1 acar|OOF97019.1 acla|EAW08046.1 afis|EAW23082.1 afla|EED48566.1 afum|EAL88397.1 agla|OJJ89591.1 akaw|GAA90048.1 aluc|OJZ84064.1 anid|CBF81333.1 anig|EHA19184.1

aory|EIT73236.1 asyd|OJJ59366.1 ater|EAU36206.1 atub|OJI90435.1 aver|OJJ02908.1 awen|OJJ36702.1 azon|OJJ47495.1

Group2245: abra|OJJ70718.1 acar|OOF97018.1 acla|EAW08044.1 afis|EAW23080.1 afla|EED48567.1 afum|EAL88399.1 agla|OJJ89588.1 akaw|GAA90049.1 aluc|OJZ84065.1 anid|CBF81330.1 anig|EHA19185.1 aory|EIT73202.1 asyd|OJJ59364.1 ater|EAU36205.1 atub|OJI90436.1 aver|OJJ02910.1 awen|OJJ36704.1 azon|OJJ47494.1

Group2246: abra|OJJ70719.1 acar|OOF97017.1 acla|EAW08043.1 afis|EAW23079.1 afla|EED48568.1 afum|EAL88400.1 agla|OJJ89587.1 akaw|GAA90050.1 aluc|OJZ84066.1 anid|CBF81328.1 anig|EHA19186.1 aory|EIT73095.1 asyd|OJJ59363.1 ater|EAU36204.1 atub|OJI90437.1 aver|OJJ02911.1 awen|OJJ36705.1 azon|OJJ47493.1

Group2247: abra|OJJ70720.1 acar|OOF97016.1 acla|EAW08042.1 afis|EAW23078.1 afla|EED48569.1 afum|EAL88401.1 agla|OJJ89586.1 akaw|GAA90051.1 aluc|OJZ84067.1 anid|CBF81326.1 anig|EHA19187.1 aory|EIT73149.1 asyd|OJJ59362.1 ater|EAU36202.1 atub|OJI90438.1 aver|OJJ02912.1 awen|OJJ36706.1 azon|OJJ47489.1

Group2248: abra|OJJ70722.1 acar|OOF97015.1 afis|EAW23077.1 afla|EED48570.1 afum|EAL88402.1 agla|OJJ89585.1 akaw|GAA90052.1 aluc|OJZ84068.1 anid|CBF81324.1 anig|EHA19188.1 aory|EIT73161.1 asyd|OJJ59361.1 ater|EAU36201.1 atub|OJI90440.1 aver|OJJ02913.1 awen|OJJ36707.1 azon|OJJ47490.1 aver|OJJ06633.1

Group2249: abra|OJJ70726.1 acar|OOF97013.1 acla|EAW08040.1 afis|EAW23075.1 afla|EED56447.1 afum|EAL88404.1 agla|OJJ89582.1 akaw|GAA90054.1 aluc|OJZ84071.1 anid|CBF81318.1 anig|EHA19190.1 aory|EIT72820.1 asyd|OJJ59359.1 ater|EAU36199.1 atub|OJI90443.1 aver|OJJ02915.1 awen|OJJ36709.1 azon|OJJ47492.1

Group2250: abra|OJJ70727.1 acar|OOF97012.1 acla|EAW08039.1 afis|EAW23074.1 afla|EED56449.1 afum|EAL88405.1 agla|OJJ89581.1 akaw|GAA90055.1 aluc|OJZ84072.1 anid|CBF81316.1 anig|EHA19191.1 aory|EIT72790.1 asyd|OJJ59358.1 ater|EAU36198.1 atub|OJI90444.1 aver|OJJ02916.1 awen|OJJ36710.1 azon|OJJ47487.1

Group2251: abra|OJJ70728.1 acar|OOF97011.1 acla|EAW08038.1 afis|EAW23073.1 afla|EED56450.1 afum|EAL88406.1 agla|OJJ89580.1 akaw|GAA90056.1 aluc|OJZ84073.1 anid|CBF81314.1 anig|EHA19192.1 aory|EIT72843.1 asyd|OJJ59357.1 ater|EAU36197.1 atub|OJI90445.1 aver|OJJ02917.1 awen|OJJ36711.1 azon|OJJ47488.1

Group2252: abra|OJJ70729.1 acar|OOF97009.1 acla|EAW11184.1 afis|EAW15915.1 afla|EED56455.1 afum|EAL88550.2 agla|OJJ89579.1 akaw|GAA90057.1 aluc|OJZ84074.1 anid|CBF81309.1 anig|EHA19193.1 aory|EIT72851.1 asyd|OJJ59354.1 ater|EAU36193.1 atub|OJI90446.1 aver|OJJ02920.1 awen|OJJ36715.1 azon|OJJ47474.1

Group2253: abra|OJJ70733.1 acar|OOF97005.1 acla|EAW11180.1 afis|EAW15911.1 afla|EED56457.1 afum|EAL88546.2 agla|OJJ89575.1 akaw|GAA90061.1 aluc|OJZ84078.1 anid|CBF81301.1 anig|EHA19197.1 aory|EIT72816.1 asyd|OJJ59350.1 ater|EAU36191.1 atub|OJI90450.1 aver|OJJ02924.1 awen|OJJ36719.1 azon|OJJ47478.1

Group2254: abra|OJJ70735.1 acar|OOF97004.1 acla|EAW11179.1 afis|EAW15910.1 afla|EED56458.1 afum|EAL88545.1 agla|OJJ89574.1 akaw|GAA90062.1 aluc|OJZ84080.1 anid|CBF81299.1 anig|EHA19198.1 aory|EIT72821.1 asyd|OJJ59349.1 ater|EAU36189.1 atub|OJI90451.1 aver|OJJ02925.1 awen|OJJ36720.1 azon|OJJ47479.1

Group2255: abra|OJJ70738.1 acar|OOF97003.1 acla|EAW11178.1 afis|EAW15909.1 afla|EED56459.1 afum|EAL88544.1 agla|OJJ89573.1 akaw|GAA90063.1 aluc|OJZ84083.1 anid|CBF81298.1 anig|EHA19199.1 aory|EIT72803.1 asyd|OJJ59348.1 ater|EAU36188.1 atub|OJI90453.1 aver|OJJ02926.1 awen|OJJ36721.1 azon|OJJ47480.1

Group2256: abra|OJJ70741.1 acar|OOF97002.1 acla|EAW11176.1 afis|EAW15907.1 afla|EED56461.1 afum|EAL88542.1 agla|OJJ78421.1 akaw|GAA90065.1 aluc|OJZ84086.1 anid|CBF81263.1 anig|EHA19202.1 aory|EIT72874.1 asyd|OJJ59332.1 ater|EAU36186.1 atub|OJI90457.1 aver|OJJ02942.1 awen|OJJ36723.1 azon|OJJ47482.1

Group2257: abra|OJJ70751.1 acar|OOF96994.1 acla|EAW11170.1 afis|EAW15901.1 afla|EED56470.1 afum|EAL88536.1 agla|OJJ89561.1 akaw|GAA90071.1 aluc|OJZ84095.1 anid|CBF81281.1 anig|EHA19208.1 aory|EIT72864.1 asyd|OJJ59338.1 ater|EAU36180.1 atub|OJI90468.1 aver|OJJ02936.1 awen|OJJ36730.1 azon|OJJ47467.1

Group2258: abra|OJJ70752.1 acar|OOF96992.1 acla|EAW11169.1 afis|EAW15900.1 afla|EED56471.1 afum|EAL88535.1 agla|OJJ89560.1 akaw|GAA90072.1 aluc|OJZ84097.1 anid|CBF81283.1 anig|EHA19209.1 aory|EIT72802.1 asyd|OJJ59340.1 ater|EAU36179.1 atub|OJI90470.1 aver|OJJ02935.1 awen|OJJ36731.1 azon|OJJ47466.1



Group2259: abra|OJJ70753.1 acar|OOF96991.1 acla|EAW11168.1 afis|EAW15899.1 afla|EED56472.1  
afum|EAL88534.1 agla|OJJ89553.1 akaw|GAA90073.1 aluc|OJZ84098.1 anid|CBF81285.1 anig|EHA19210.1  
aory|EIT72807.1 asyd|OJJ59341.1 ater|EAU36178.1 atub|OJI90471.1 aver|OJJ02934.1 awen|OJJ36732.1  
azon|OJJ47465.1

Group2260: abra|OJJ70754.1 acar|OOF96990.1 acla|EAW11167.1 afis|EAW15898.1 afla|EED56473.1  
afum|EAL88533.1 agla|OJJ89552.1 akaw|GAA90074.1 aluc|OJZ84099.1 anid|CBF81287.1 anig|EHA19211.1  
aory|EIT72796.1 asyd|OJJ59342.1 ater|EAU36177.1 atub|OJI90472.1 aver|OJJ02933.1 awen|OJJ36733.1  
azon|OJJ47464.1

Group2261: abra|OJJ70755.1 acar|OOF96989.1 acla|EAW11166.1 afis|EAW15897.1 afla|EED56474.1  
afum|EAL88532.1 agla|OJJ89551.1 akaw|GAA90075.1 aluc|OJZ84100.1 anid|CBF81288.1 anig|EHA19212.1  
aory|EIT72834.1 asyd|OJJ59343.1 ater|EAU36176.1 atub|OJI90473.1 aver|OJJ02931.1 awen|OJJ36734.1  
azon|OJJ47463.1

Group2262: abra|OJJ70756.1 acar|OOF96988.1 acla|EAW11165.1 afis|EAW15896.1 afla|EED56475.1  
afum|EAL88531.1 agla|OJJ89550.1 akaw|GAA90076.1 aluc|OJZ84101.1 anid|CBF81290.1 anig|EHA19213.1  
aory|EIT72841.1 asyd|OJJ59344.1 ater|EAU36175.1 atub|OJI90474.1 aver|OJJ02930.1 awen|OJJ36735.1  
azon|OJJ47462.1

Group2263: abra|OJJ70758.1 acar|OOF96986.1 acla|EAW11163.1 afis|EAW15894.1 afla|EED56477.1  
afum|EAL88529.1 agla|OJJ89548.1 akaw|GAA90078.1 aluc|OJZ84103.1 anid|CBF81294.1 anig|EHA19215.1  
aory|EIT72822.1 asyd|OJJ59346.1 ater|EAU36173.1 atub|OJI90476.1 aver|OJJ02928.1 awen|OJJ36737.1  
azon|OJJ47460.1

Group2264: abra|OJJ70760.1 acar|OOF96984.1 acla|EAW11161.1 afis|EAW15892.1 afla|EED56479.1  
afum|EAL88527.1 agla|OJJ89530.1 akaw|GAA90080.1 aluc|OJZ84105.1 anid|CBF81259.1 anig|EHA19217.1  
aory|EIT72795.1 asyd|OJJ59330.1 ater|EAU31714.1 atub|OJI90479.1 aver|OJJ02944.1 awen|OJJ36739.1  
azon|OJJ47459.1

Group2265: abra|OJJ70762.1 acar|OOF96982.1 acla|EAW11159.1 afis|EAW15890.1 afla|EED56482.1  
afum|EAL88525.2 agla|OJJ89532.1 akaw|GAA90082.1 aluc|OJZ84107.1 anid|CBF81256.1 anig|EHA19219.1  
aory|EIT72811.1 asyd|OJJ59328.1 ater|EAU31712.1 atub|OJI90481.1 aver|OJJ02946.1 awen|OJJ36740.1  
azon|OJJ47457.1

Group2266: abra|OJJ70766.1 acar|OOF96979.1 acla|EAW11156.1 afis|EAW15887.1 afla|EED56485.1  
afum|EAL88521.2 agla|OJJ89534.1 akaw|GAA90086.1 aluc|OJZ84112.1 anid|CBF81250.1 anig|EHA19222.1  
aory|EIT72797.1 asyd|OJJ59325.1 ater|EAU31709.1 atub|OJI90485.1 aver|OJJ02949.1 awen|OJJ36743.1  
azon|OJJ47454.1

Group2267: abra|OJJ70767.1 acar|OOF96977.1 acla|EAW11154.1 afis|EAW15885.1 afla|EED56487.1  
afum|EAL88519.1 agla|OJJ89536.1 akaw|GAA90087.1 aluc|OJZ84113.1 anid|CBF81243.1 anig|EHA19223.1  
aory|EIT72824.1 asyd|OJJ59321.1 ater|EAU31705.1 atub|OJI90486.1 aver|OJJ02952.1 awen|OJJ36746.1  
azon|OJJ47453.1

Group2268: abra|OJJ70768.1 acar|OOF96978.1 acla|EAW11153.1 afis|EAW15884.1 afla|EED56488.1  
afum|EAL88518.1 agla|OJJ89537.1 akaw|GAA90088.1 aluc|OJZ84114.1 anid|CBF81241.1 anig|EHA19224.1  
aory|EIT72873.1 asyd|OJJ59320.1 ater|EAU31704.1 atub|OJI90487.1 aver|OJJ02953.1 awen|OJJ36747.1  
azon|OJJ47452.1

Group2269: abra|OJJ70770.1 acar|OOF96976.1 acla|EAW11151.1 afis|EAW15882.1 afla|EED56489.1  
afum|EAL88516.1 agla|OJJ89539.1 akaw|GAA90090.1 aluc|OJZ84116.1 anid|CBF81237.1 anig|EHA19226.1  
aory|EIT72859.1 asyd|OJJ59319.1 ater|EAU31703.1 atub|OJI90489.1 aver|OJJ02954.1 awen|OJJ36749.1  
azon|OJJ47450.1

Group2270: abra|OJJ70774.1 acar|OOF96936.1 acla|EAW11147.1 afis|EAW15878.1 afla|EED56497.1  
afum|EAL88512.1 agla|OJJ87230.1 akaw|GAA90094.1 aluc|OJZ84121.1 anid|CBF81230.1 anig|EHA19229.1  
aory|EIT72868.1 asyd|OJJ59316.1 ater|EAU31699.1 atub|OJI90493.1 aver|OJJ02957.1 awen|OJJ36752.1  
azon|OJJ47447.1

Group2271: abra|OJJ70795.1 acar|OOF96950.1 acla|EAW11128.1 afis|EAW15857.1 afla|EED56515.1  
afum|EAL88493.1 agla|OJJ87250.1 akaw|GAA90111.1 aluc|OJZ84140.1 anid|CBF81189.1 anig|EHA19248.1  
aory|EIT72805.1 asyd|OJJ59299.1 ater|EAU31672.1 atub|OJI90514.1 aver|OJJ02976.1 awen|OJJ36770.1  
azon|OJJ47428.1

Group2272: abra|OJJ70809.1 acar|OOF98293.1 acla|EAW10418.1 afis|EAW25151.1 afla|EED55282.1  
afum|EAL89826.2 agla|OJJ89004.1 akaw|GAA91689.1 aluc|OJZ87705.1 anid|CBF81138.1 anig|EHA20888.1  
aory|EIT83553.1 asyd|OJJ56507.1 ater|EAU39430.1 atub|OJI80938.1 aver|OJJ06212.1 awen|OJJ40780.1  
azon|OJJ46872.1

Group2273: abra|OJJ70815.1 acar|OOF98285.1 acla|EAW10424.1 afis|EAW25145.1 afla|EED55294.1  
afum|EAL89818.1 agla|OJJ89008.1 akaw|GAA91695.1 aluc|OJZ87698.1 anid|CBF85679.1 anig|EHA20885.1

aory|EIT83533.1 asyd|OJJ64254.1 ater|EAU39423.1 atub|OJI80945.1 aver|OJI98344.1 awen|OJJ40770.1  
azon|OJJ46878.1

Group2274: abra|OJJ70833.1 acar|OOF98281.1 acla|EAW10427.1 afis|EAW25142.1 afla|EED55303.1  
afum|EAL89814.1 agla|OJJ89025.1 akaw|GAA91701.1 aluc|OJZ87689.1 anid|CBF85686.1 anig|EHA20878.1  
aory|EIT83517.1 asyd|OJJ64258.1 ater|EAU39411.1 atub|OJI80951.1 aver|OJI98350.1 awen|OJJ40766.1  
azon|OJJ44131.1

Group2275: abra|OJJ70834.1 acar|OOF98280.1 acla|EAW10428.1 afis|EAW25141.1 afla|EED55304.1  
afum|EAL89813.1 agla|OJJ89026.1 akaw|GAA91702.1 aluc|OJZ87688.1 anid|CBF86093.1 anig|EHA20877.1  
aory|EIT83571.1 asyd|OJJ64473.1 ater|EAU39410.1 atub|OJI80952.1 aver|OJI98577.1 awen|OJJ40765.1  
azon|OJJ44130.1

Group2276: abra|OJJ70837.1 acar|OOF98277.1 acla|EAW10432.1 afis|EAW25137.1 afla|EED55309.1  
afum|EAL89808.2 agla|OJJ89030.1 akaw|GAA91705.1 aluc|OJZ87684.1 anid|CBF85710.1 anig|EHA20874.1  
aory|EIT83613.1 asyd|OJJ64270.1 ater|EAU39407.1 atub|OJI80959.1 aver|OJI98362.1 awen|OJJ40761.1  
azon|OJJ44125.1

Group2277: abra|OJJ70839.1 acar|OOF98275.1 acla|EAW10433.1 afis|EAW25135.1 afla|EED55311.1  
afum|EAL89806.2 agla|OJJ89032.1 akaw|GAA91707.1 aluc|OJZ87682.1 anid|CBF85706.1 anig|EHA20872.1  
aory|EIT83546.1 asyd|OJJ64268.1 ater|EAU39406.1 atub|OJI80961.1 aver|OJI98360.1 awen|OJJ40759.1  
azon|OJJ44123.1

Group2278: abra|OJJ70843.1 acar|OOF98272.1 acla|EAW10434.1 afis|EAW25134.1 afla|EED55312.1  
afum|EAL89805.1 agla|OJJ89033.1 akaw|GAA91711.1 aluc|OJZ87678.1 anid|CBF85705.1 anig|EHA20868.1  
aory|EIT83614.1 asyd|OJJ64267.1 ater|EAU39405.1 atub|OJI80965.1 aver|OJI98359.1 awen|OJJ40758.1  
azon|OJJ44122.1

Group2279: abra|OJJ70848.1 acar|OOF98266.1 acla|EAW10439.1 afis|EAW25128.1 afla|EED55316.1  
afum|EAL89799.1 agla|OJJ89042.1 akaw|GAA91716.1 aluc|OJZ87672.1 anid|CBF85697.1 anig|EHA20863.1  
aory|EIT83568.1 asyd|OJJ64263.1 ater|EAU39401.1 atub|OJI80970.1 aver|OJI98355.1 awen|OJJ40753.1  
azon|OJJ44117.1

Group2280: abra|OJJ70851.1 acar|OOF98265.1 acla|EAW10441.1 afis|EAW25126.1 afla|EED55317.1  
afum|EAL89797.1 agla|OJJ89044.1 akaw|GAA91718.1 aluc|OJZ87670.1 anid|CBF85694.1 anig|EHA20861.1  
aory|EIT83542.1 asyd|OJJ64261.1 ater|EAU39399.1 atub|OJI80972.1 aver|OJI98353.1 awen|OJJ40750.1  
azon|OJJ44115.1

Group2281: abra|OJJ70854.1 acar|OOF98262.1 acla|EAW10447.1 afis|EAW25120.1 afla|EED55322.1  
afum|EAL89791.1 agla|OJJ89053.1 akaw|GAA91721.1 aluc|OJZ87667.1 anid|CBF86087.1 anig|EHA20858.1  
aory|EIT76263.1 asyd|OJJ64469.1 ater|EAU39392.1 atub|OJI80976.1 aver|OJI98573.1 awen|OJJ40739.1  
azon|OJJ44108.1

Group2282: abra|OJJ70855.1 acar|OOF98261.1 acla|EAW10446.1 afis|EAW25121.1 afla|EED55320.1  
afum|EAL89792.1 agla|OJJ89049.1 akaw|GAA91722.1 aluc|OJZ87665.1 anid|CBF86089.1 anig|EHA20857.1  
aory|EIT76239.1 asyd|OJJ64471.1 ater|EAU39393.1 atub|OJI80978.1 aver|OJI98575.1 awen|OJJ40740.1  
azon|OJJ44110.1

Group2283: abra|OJJ70856.1 acar|OOF98260.1 acla|EAW10445.1 afis|EAW25122.1 afla|EED55319.1  
afum|EAL89793.1 agla|OJJ89048.1 akaw|GAA91723.1 aluc|OJZ87664.1 anid|CBF86091.1 anig|EHA20856.1  
aory|EIT76220.1 asyd|OJJ64472.1 ater|EAU39394.1 atub|OJI80979.1 aver|OJI98576.1 awen|OJJ40741.1  
azon|OJJ44112.1

Group2284: abra|OJJ70857.1 acar|OOF98259.1 acla|EAW10449.1 afis|EAW25118.1 afla|EED55324.1  
afum|EAL89789.1 agla|OJJ89059.1 akaw|GAA91724.1 aluc|OJZ87663.1 anid|CBF86086.1 anig|EHA20855.1  
aory|EIT76226.1 asyd|OJJ64468.1 ater|EAU39386.1 atub|OJI80980.1 aver|OJI98572.1 awen|OJJ40737.1  
azon|OJJ44107.1

Group2285: abra|OJJ70858.1 acar|OOF98258.1 acla|EAW10450.1 afis|EAW25117.1 afla|EED55325.1  
afum|EAL89788.1 agla|OJJ89063.1 akaw|GAA91725.1 aluc|OJZ87662.1 anid|CBF86084.1 anig|EHA20854.1  
aory|EIT76188.1 asyd|OJJ64467.1 ater|EAU39387.1 atub|OJI80981.1 aver|OJI98571.1 awen|OJJ40734.1  
azon|OJJ44106.1

Group2286: abra|OJJ70859.1 acar|OOF98257.1 acla|EAW10451.1 afis|EAW25116.1 afla|EED55326.1  
afum|EAL89787.1 agla|OJJ89064.1 akaw|GAA91726.1 aluc|OJZ87661.1 anid|CBF86082.1 anig|EHA20853.1  
aory|EIT76238.1 asyd|OJJ64466.1 ater|EAU39388.1 atub|OJI80982.1 aver|OJI98570.1 awen|OJJ40733.1  
azon|OJJ44105.1

Group2287: abra|OJJ70860.1 acar|OOF98256.1 acla|EAW10452.1 afis|EAW25115.1 afla|EED55327.1  
afum|EAL89786.1 agla|OJJ89065.1 akaw|GAA91727.1 aluc|OJZ87660.1 anid|CBF86080.1 anig|EHA20852.1  
aory|EIT76212.1 asyd|OJJ64465.1 ater|EAU39389.1 atub|OJI80983.1 aver|OJI98569.1 awen|OJJ40732.1  
azon|OJJ44104.1

Group2288: abra|OJJ70861.1 acar|OOF98255.1 acla|EAW10453.1 afis|EAW25114.1 afla|EED55328.1 afum|EAL89785.1 agla|OJJ89066.1 akaw|GAA91728.1 aluc|OJZ87659.1 anid|CBF86079.1 anig|EHA20851.1 aory|EIT76255.1 asyd|OJJ64464.1 ater|EAU39390.1 atub|OJI80984.1 aver|OJI98568.1 awen|OJJ40731.1 azon|OJJ44103.1

Group2289: abra|OJJ70862.1 acar|OOF98254.1 acla|EAW10454.1 afis|EAW25113.1 afla|EED55329.1 afum|EAL89784.1 agla|OJJ89067.1 akaw|GAA91729.1 aluc|OJZ87658.1 anid|CBF86077.1 anig|EHA20850.1 aory|EIT76257.1 asyd|OJJ64463.1 ater|EAU39383.1 atub|OJI80985.1 aver|OJI98567.1 awen|OJJ40730.1 azon|OJJ44102.1

Group2290: abra|OJJ70864.1 acar|OOF98252.1 acla|EAW10456.1 afis|EAW25111.1 afla|EED55331.1 afum|EAL89782.2 agla|OJJ89070.1 akaw|GAA91731.1 aluc|OJZ87656.1 anid|CBF86073.1 anig|EHA20849.1 aory|EIT76253.1 asyd|OJJ64461.1 ater|EAU39381.1 atub|OJI80987.1 aver|OJI98564.1 awen|OJJ40728.1 azon|OJJ44100.1

Group2291: abra|OJJ70878.1 acar|OOF98242.1 acla|EAW10467.1 afis|EAW25100.1 afla|EED55345.1 afum|EAL89771.1 agla|OJJ85468.1 akaw|GAA91741.1 aluc|OJZ87644.1 anid|CBF86015.1 anig|EHA20837.1 aory|EIT80879.1 asyd|OJJ64450.1 ater|EAU39362.1 atub|OJI81001.1 aver|OJI98553.1 awen|OJJ40714.1 azon|OJJ44091.1

Group2292: abra|OJJ70880.1 acar|OOF98241.1 acla|EAW10468.1 afis|EAW25099.1 afla|EED55347.1 afum|EAL89770.1 agla|OJJ85472.1 akaw|GAA91742.1 aluc|OJZ87643.1 anid|CBF86013.1 anig|EHA20836.1 aory|EIT80895.1 asyd|OJJ64449.1 ater|EAU39361.1 atub|OJI81002.1 aver|OJI98552.1 awen|OJJ40713.1 azon|OJJ44090.1

Group2293: abra|OJJ70890.1 acar|OOF98227.1 acla|EAW10472.1 afis|EAW25095.1 afla|EED55353.1 afum|EAL89766.2 agla|OJJ89082.1 akaw|GAA87406.1 aluc|OJZ87634.1 anid|CBF86004.1 anig|EHA20829.1 aory|EIT80918.1 asyd|OJJ64445.1 ater|EAU39353.1 atub|OJI81015.1 aver|OJI98548.1 awen|OJJ40709.1 azon|OJJ44085.1

Group2294: abra|OJJ70892.1 acar|OOF90217.1 acla|EAW10474.1 afis|EAW25093.1 afla|EED55354.1 afum|EAL89764.1 agla|OJJ89084.1 akaw|GAA87408.1 aluc|OJZ87631.1 anid|CBF86001.1 anig|EHA20827.1 aory|EIT80886.1 asyd|OJJ64443.1 ater|EAU39351.1 atub|OJI81018.1 aver|OJI98545.1 awen|OJJ40707.1 azon|OJJ44083.1

Group2295: abra|OJJ70895.1 acar|OOF90219.1 acla|EAW10482.1 afis|EAW25085.1 afla|EED55362.1 afum|EAL89754.1 agla|OJJ89097.1 akaw|GAA87411.1 aluc|OJZ87628.1 anid|CBF85988.1 anig|EHA20824.1 aory|EIT80873.1 asyd|OJJ64434.1 ater|EAU39341.1 atub|OJI81022.1 aver|OJI98535.1 awen|OJJ40697.1 azon|OJJ44075.1

Group2296: abra|OJJ70897.1 acar|OOF90220.1 acla|EAW10481.1 afis|EAW25086.1 afla|EED55361.1 afum|EAL89755.1 agla|OJJ89096.1 akaw|GAA87412.1 aluc|OJZ87626.1 anid|CBF85990.1 anig|EHA20823.1 aory|EIT80880.1 asyd|OJJ64435.1 ater|EAU39342.1 atub|OJI81023.1 aver|OJI98536.1 awen|OJJ40698.1 azon|OJJ44076.1

Group2297: abra|OJJ70898.1 acar|OOF98228.1 acla|EAW10480.1 afis|EAW25087.1 afla|EED55360.1 afum|EAL89756.1 agla|OJJ89095.1 akaw|GAA87413.1 aluc|OJZ87625.1 anid|CBF85992.1 anig|EHA20822.1 aory|EIT80799.1 asyd|OJJ64436.1 ater|EAU39343.1 atub|OJI81024.1 aver|OJI98537.1 awen|OJJ40700.1 azon|OJJ44077.1

Group2298: abra|OJJ70899.1 acar|OOF98221.1 acla|EAW10479.1 afis|EAW25088.1 afla|EED55359.1 afum|EAL89757.1 agla|OJJ89094.1 akaw|GAA87414.1 aluc|OJZ87624.1 anid|CBF85994.1 anig|EHA20821.1 aory|EIT80835.1 asyd|OJJ64437.1 ater|EAU39344.1 atub|OJI81025.1 aver|OJI98538.1 awen|OJJ40701.1 azon|OJJ44078.1

Group2299: abra|OJJ70901.1 acar|OOF98218.1 acla|EAW10477.1 afis|EAW25090.1 afla|EED55357.1 afum|EAL89760.2 agla|OJJ89087.1 akaw|GAA87416.1 aluc|OJZ87622.1 anid|CBF85997.1 anig|EHA20819.1 aory|EIT80906.1 asyd|OJJ64440.1 ater|EAU39345.1 atub|OJI81027.1 aver|OJI98542.1 awen|OJJ40704.1 azon|OJJ44080.1

Group2300: abra|OJJ70906.1 acar|OOF98214.1 acla|EAW10484.1 afis|EAW25083.1 afla|EED55367.1 afum|EAL89752.1 agla|OJJ89102.1 akaw|GAA87420.1 aluc|OJZ87618.1 anid|CBF85985.1 anig|EHA20816.1 aory|EIT80861.1 asyd|OJJ64432.1 ater|EAU39339.1 atub|OJI81031.1 aver|OJI98533.1 awen|OJJ40695.1 azon|OJJ44072.1

Group2301: abra|OJJ70911.1 acar|OOF98211.1 acla|EAW10486.1 afis|EAW25081.1 afla|EED55369.1 afum|EAL89750.1 agla|OJJ89105.1 akaw|GAA87422.1 aluc|OJZ87614.1 anid|CBF85977.1 anig|EHA20811.1 aory|EIT80845.1 asyd|OJJ64429.1 ater|EAU39519.1 atub|OJI81035.1 aver|OJI98529.1 awen|OJJ40693.1 azon|OJJ44069.1

Group2302: abra|OJJ70912.1 acar|OOF98210.1 acla|EAW10487.1 afis|EAW25080.1 afla|EED55370.1 afum|EAL89749.1 agla|OJJ89106.1 akaw|GAA87423.1 aluc|OJZ87613.1 anid|CBF85975.1 anig|EHA20810.1

aory|EIT80866.1 asyd|OJJ64428.1 ater|EAU39539.1 atub|OJI81036.1 aver|OJI98528.1 awen|OJJ40692.1 azon|OJJ44068.1

Group2303: abra|OJJ70913.1 acar|OOF89971.1 acla|EAW10488.1 afis|EAW25079.1 afla|EED55371.1 afum|EAL89748.1 agla|OJJ89107.1 akaw|GAA87424.1 aluc|OJZ87612.1 anid|CBF85973.1 anig|EHA20809.1 aory|EIT80872.1 asyd|OJJ64427.1 ater|EAU39540.1 atub|OJI81037.1 aver|OJI98527.1 awen|OJJ40691.1 azon|OJJ44067.1

Group2304: abra|OJJ70915.1 acar|OOF98209.1 acla|EAW10489.1 afis|EAW25078.1 afla|EED55375.1 afum|EAL89747.1 agla|OJJ89115.1 akaw|GAA87425.1 aluc|OJZ87610.1 anid|CBF85970.1 anig|EHA20808.1 aory|EIT80925.1 asyd|OJJ64426.1 ater|EAU39545.1 atub|OJI81038.1 aver|OJI98526.1 awen|OJJ40689.1 azon|OJJ44066.1

Group2305: abra|OJJ70916.1 acar|OOF98208.1 acla|EAW10490.1 afis|EAW25077.1 afla|EED55376.1 afum|EAL89746.1 agla|OJJ89116.1 akaw|GAA87426.1 aluc|OJZ87609.1 anid|CBF85968.1 anig|EHA20807.1 aory|EIT80812.1 asyd|OJJ64425.1 ater|EAU39546.1 atub|OJI81039.1 aver|OJI98524.1 awen|OJJ40688.1 azon|OJJ44065.1

Group2306: abra|OJJ70918.1 acar|OOF98206.1 acla|EAW10492.1 afis|EAW25075.1 afla|EED55378.1 afum|EAL89744.1 agla|OJJ89117.1 akaw|GAA87428.1 aluc|OJZ87608.1 anid|CBF85964.1 anig|EHA20806.1 aory|EIT80830.1 asyd|OJJ64423.1 ater|EAU39550.1 atub|OJI81040.1 aver|OJI98522.1 awen|OJJ40686.1 azon|OJJ44063.1

Group2307: abra|OJJ70931.1 acar|OOF98195.1 acla|EAW10497.1 afis|EAW25070.1 afla|EED55384.1 afum|EAL89739.1 agla|OJJ89124.1 akaw|GAA83011.1 aluc|OJZ87596.1 anid|CBF85958.1 anig|EHA20796.1 aory|EIT80805.1 asyd|OJJ64418.1 ater|EAU39555.1 atub|OJI81051.1 aver|OJI98517.1 awen|OJJ40681.1 azon|OJJ44058.1

Group2308: abra|OJJ70933.1 acar|OOF89985.1 acla|EAW10499.1 afis|EAW25068.1 afla|EED55386.1 afum|EAL89737.2 agla|OJJ89126.1 akaw|GAA83009.1 aluc|OJZ87594.1 anid|CBF85954.1 anig|EHA20794.1 aory|EIT80870.1 asyd|OJJ64416.1 ater|EAU35815.1 atub|OJI81053.1 aver|OJI98515.1 awen|OJJ40675.1 azon|OJJ44056.1

Group2309: abra|OJJ70940.1 acar|OOF98192.1 acla|EAW10505.1 afis|EAW25062.1 afla|EED55391.1 afum|EAL89731.2 agla|OJJ89133.1 akaw|GAA83004.1 aluc|OJZ87588.1 anid|CBF85943.1 anig|EHA20789.1 aory|EIT80778.1 asyd|OJJ64412.1 ater|EAU35810.1 atub|OJI81060.1 aver|OJI98511.1 awen|OJJ40669.1 azon|OJJ44050.1

Group2310: abra|OJJ70941.1 acar|OOF98191.1 acla|EAW10506.1 afis|EAW25061.1 afla|EED55392.1 afum|EAL89729.1 agla|OJJ89134.1 akaw|GAA83003.1 aluc|OJZ87587.1 anid|CBF85941.1 anig|EHA20788.1 aory|EIT80784.1 asyd|OJJ64411.1 ater|EAU35809.1 atub|OJI81061.1 aver|OJI98510.1 awen|OJJ40668.1 azon|OJJ44049.1

Group2311: abra|OJJ70942.1 acar|OOF98190.1 acla|EAW10507.1 afis|EAW25060.1 afla|EED55393.1 afum|EAL89728.1 agla|OJJ89135.1 akaw|GAA83002.1 aluc|OJZ87586.1 anid|CBF85940.1 anig|EHA20787.1 aory|EIT80892.1 asyd|OJJ64410.1 ater|EAU35808.1 atub|OJI81062.1 aver|OJI98509.1 awen|OJJ40667.1 azon|OJJ44048.1

Group2312: abra|OJJ70944.1 acar|OOF98187.1 acla|EAW10512.1 afis|EAW25055.1 afla|EED55396.1 afum|EAL89723.2 agla|OJJ89137.1 akaw|GAA82999.1 aluc|OJZ87584.1 anid|CBF85933.1 anig|EHA20785.1 aory|EIT80802.1 asyd|OJJ64408.1 ater|EAU35805.1 atub|OJI81064.1 aver|OJI98506.1 awen|OJJ40665.1 azon|OJJ44044.1

Group2313: abra|OJJ70945.1 acar|OOF98186.1 acla|EAW10513.1 afis|EAW25054.1 afla|EED55397.1 afum|EAL89722.1 agla|OJJ89138.1 akaw|GAA82998.1 aluc|OJZ87583.1 anid|CBF85931.1 anig|EHA20784.1 aory|EIT80901.1 asyd|OJJ64407.1 ater|EAU35804.1 atub|OJI81065.1 aver|OJI98505.1 awen|OJJ40664.1 azon|OJJ44045.1

Group2314: abra|OJJ70946.1 acar|OOF98185.1 acla|EAW10514.1 afis|EAW25053.1 afla|EED55398.1 afum|EAL89721.1 agla|OJJ89139.1 akaw|GAA82997.1 aluc|OJZ87582.1 anid|CBF85929.1 anig|EHA20783.1 aory|EIT80773.1 asyd|OJJ64406.1 ater|EAU35803.1 atub|OJI81066.1 aver|OJI98504.1 awen|OJJ40663.1 azon|OJJ44043.1

Group2315: abra|OJJ70954.1 acar|OOF98176.1 acla|EAW10515.1 afis|EAW25051.1 afla|EED55400.1 afum|EAL89719.1 agla|OJJ89141.1 akaw|GAA82993.1 aluc|OJZ87578.1 anid|CBF85925.1 anig|EHA20780.1 aory|EIT80833.1 asyd|OJJ64405.1 ater|EAU35801.1 atub|OJI81071.1 aver|OJI98501.1 awen|OJJ40661.1 azon|OJJ44040.1

Group2316: abra|OJJ70955.1 acar|OOF98175.1 acla|EAW10516.1 afis|EAW25050.1 afla|EED55401.1 afum|EAL89718.1 agla|OJJ89142.1 akaw|GAA82992.1 aluc|OJZ87577.1 anid|CBF85923.1 anig|EHA20779.1 aory|EIT80841.1 asyd|OJJ64404.1 ater|EAU35800.1 atub|OJI81072.1 aver|OJI98500.1 awen|OJJ40660.1 azon|OJJ44039.1

Group2317: abra|OJJ70957.1 acar|OOF98173.1 acla|EAW10518.1 afis|EAW25048.1 afla|EED55403.1 afum|EAL89716.1 agla|OJJ89144.1 akaw|GAA82990.1 aluc|OJZ87575.1 anid|CBF85920.1 anig|EHA20777.1 aory|EIT80783.1 asyd|OJJ64402.1 ater|EAU35798.1 atub|OJI81074.1 aver|OJI98498.1 awen|OJJ40659.1 azon|OJJ44037.1

Group2318: abra|OJJ70958.1 acar|OOF98172.1 acla|EAW10519.1 afis|EAW25047.1 afla|EED55404.1 afum|EAL89715.1 agla|OJJ89145.1 akaw|GAA82989.1 aluc|OJZ87574.1 anid|CBF85918.1 anig|EHA20776.1 aory|EIT80839.1 asyd|OJJ64401.1 ater|EAU35797.1 atub|OJI81075.1 aver|OJI98497.1 awen|OJJ40658.1 azon|OJJ44036.1

Group2319: abra|OJJ70959.1 acar|OOF98171.1 acla|EAW10520.1 afis|EAW25046.1 afla|EED55405.1 afum|EAL89714.1 agla|OJJ89148.1 akaw|GAA82988.1 aluc|OJZ87573.1 anid|CBF85916.1 anig|EHA20775.1 aory|EIT80804.1 asyd|OJJ64400.1 ater|EAU35796.1 atub|OJI81076.1 aver|OJI98496.1 awen|OJJ40657.1 azon|OJJ44035.1

Group2320: abra|OJJ70963.1 acar|OOF98167.1 acla|EAW10524.1 afis|EAW25042.1 afla|EED55410.1 afum|EAL89710.1 agla|OJJ89152.1 akaw|GAA82984.1 aluc|OJZ87569.1 anid|CBF85908.1 anig|EHA20771.1 aory|EIT80900.1 asyd|OJJ64396.1 ater|EAU35792.1 atub|OJI81080.1 aver|OJI98492.1 awen|OJJ40647.1 azon|OJJ44032.1

Group2321: abra|OJJ70964.1 acar|OOF98166.1 acla|EAW10525.1 afis|EAW25041.1 afla|EED55411.1 afum|EAL89709.1 agla|OJJ89153.1 akaw|GAA82983.1 aluc|OJZ87568.1 anid|CBF85907.1 anig|EHA20770.1 aory|EIT80795.1 asyd|OJJ64395.1 ater|EAU35791.1 atub|OJI81081.1 aver|OJI98490.1 awen|OJJ40646.1 azon|OJJ44031.1

Group2322: abra|OJJ70968.1 acar|OOF98162.1 acla|EAW10528.1 afis|EAW25038.1 afla|EED55415.1 afum|EAL89706.1 agla|OJJ89155.1 akaw|GAA82980.1 aluc|OJZ87564.1 anid|CBF85901.1 anig|EHA20766.1 aory|EIT80889.1 asyd|OJJ64392.1 ater|EAU35788.1 atub|OJI81083.1 aver|OJI98487.1 awen|OJJ40644.1 azon|OJJ44028.1

Group2323: abra|OJJ70971.1 acar|OOF98159.1 acla|EAW10531.1 afis|EAW24998.1 afla|EED55418.1 afum|EAL89703.1 agla|OJJ89158.1 akaw|GAA82977.1 aluc|OJZ87561.1 anid|CBF85898.1 anig|EHA20763.1 aory|EIT80823.1 asyd|OJJ64390.1 ater|EAU35786.1 atub|OJI81086.1 aver|OJI98485.1 awen|OJJ40641.1 azon|OJJ44026.1

Group2324: abra|OJJ70973.1 acar|OOF98158.1 acla|EAW10532.1 afis|EAW24999.1 afla|EED55419.1 afum|EAL89699.1 agla|OJJ89161.1 akaw|GAA82976.1 aluc|OJZ87559.1 anid|CBF81499.1 anig|EHA20762.1 aory|EIT80834.1 asyd|OJJ59465.1 ater|EAU35785.1 atub|OJI81088.1 aver|OJJ02809.1 awen|OJJ40640.1 azon|OJJ44024.1

Group2325: abra|OJJ70976.1 acar|OOF98154.1 acla|EAW10535.1 afis|EAW25002.1 afla|EED55422.1 afum|EAL89696.1 agla|OJJ89165.1 akaw|GAA82973.1 aluc|OJZ87556.1 anid|CBF81486.1 anig|EHA20759.1 aory|EIT80883.1 ater|EAU35783.1 atub|OJI81091.1 awen|OJJ40637.1 azon|OJJ49046.1 asyd|OJJ59457.1 aver|OJJ02816.1

Group2326: abra|OJJ70977.1 acar|OOF98155.1 acla|EAW10536.1 afis|EAW25003.1 afla|EED55423.1 afum|EAL89695.1 agla|OJJ89166.1 akaw|GAA82972.1 aluc|OJZ87555.1 anid|CBF81484.1 anig|EHA20758.1 aory|EIT80840.1 asyd|OJJ59456.1 ater|EAU35782.1 atub|OJI81092.1 aver|OJJ02817.1 awen|OJJ40636.1 azon|OJJ49047.1

Group2327: abra|OJJ70979.1 acar|OOF98153.1 acla|EAW10538.1 afis|EAW25005.1 afla|EED55425.1 afum|EAL89693.1 agla|OJJ89168.1 akaw|GAA82970.1 aluc|OJZ87553.1 anid|CBF81481.1 anig|EHA20756.1 aory|EIT80871.1 asyd|OJJ59454.1 ater|EAU35780.1 atub|OJI81093.1 aver|OJJ02819.1 awen|OJJ40634.1 azon|OJJ49049.1

Group2328: abra|OJJ70980.1 acar|OOF98151.1 acla|EAW10539.1 afis|EAW25006.1 afla|EED55426.1 afum|EAL89691.2 agla|OJJ89169.1 akaw|GAA82969.1 aluc|OJZ87551.1 anid|CBF81512.1 anig|EHA20754.1 aory|EIT80772.1 asyd|OJJ59470.1 ater|EAU35779.1 atub|OJI81094.1 aver|OJJ02804.1 awen|OJJ40633.1 azon|OJJ49050.1

Group2329: abra|OJJ70981.1 acar|OOF98150.1 acla|EAW10540.1 afis|EAW25007.1 afla|EED55427.1 afum|EAL89690.1 agla|OJJ89170.1 akaw|GAA82968.1 aluc|OJZ87550.1 anid|CBF81514.1 anig|EHA20753.1 aory|EIT80826.1 asyd|OJJ59472.1 ater|EAU35778.1 atub|OJI81095.1 aver|OJJ02802.1 awen|OJJ40632.1 azon|OJJ49051.1

Group2330: abra|OJJ70982.1 acar|OOF98148.1 acla|EAW10541.1 afis|EAW25008.1 afla|EED55428.1 afum|EBA27387.1 agla|OJJ89173.1 akaw|GAA82967.1 aluc|OJZ87549.1 anid|CBF81516.1 anig|EHA20752.1 aory|EIT80794.1 asyd|OJJ59473.1 ater|EAU35777.1 atub|OJI81097.1 aver|OJJ02801.1 awen|OJJ40631.1 azon|OJJ49052.1

Group2331: abra|OJJ70983.1 acar|OOF98149.1 acla|EAW10542.1 afis|EAW25010.1 afla|EED55430.1 afum|EAL89686.1 agla|OJJ89174.1 akaw|GAA82966.1 aluc|OJZ87548.1 anid|CBF81518.1 anig|EHA20751.1

aory|EIT80803.1 asyd|OJJ59474.1 ater|EAU35776.1 atub|OJI81098.1 aver|OJJ02799.1 awen|OJJ40630.1  
azon|OJJ49053.1

Group2332: abra|OJJ70984.1 acar|OOF98147.1 acla|EAW10543.1 afis|EAW25011.1 afla|EED55431.1  
afum|EAL89685.1 agla|OJJ89175.1 akaw|GAA82965.1 aluc|OJZ87547.1 anid|CBF81519.1 anig|EHA20750.1  
aory|EIT80824.1 asyd|OJJ59475.1 ater|EAU35775.1 atub|OJI81099.1 aver|OJJ02798.1 awen|OJJ40629.1  
azon|OJJ49054.1

Group2333: abra|OJJ70989.1 acar|OOF98144.1 acla|EAW10547.1 afis|EAW25015.1 afla|EED55437.1  
afum|EAL89681.1 agla|OJJ89181.1 akaw|GAA82962.1 aluc|OJZ87543.1 anid|CBF81527.1 anig|EHA20747.1  
aory|EIT80927.1 asyd|OJJ59481.1 ater|EAU35771.1 atub|OJI81104.1 aver|OJJ02793.1 awen|OJJ40625.1  
azon|OJJ49058.1

Group2334: abra|OJJ70991.1 acar|OOF98143.1 acla|EAW10548.1 afis|EAW25016.1 afla|EED55439.1  
afum|EAL89680.1 agla|OJJ89182.1 akaw|GAA82960.1 aluc|OJZ87541.1 anid|CBF81529.1 anig|EHA20746.1  
aory|EIT80844.1 asyd|OJJ59483.1 ater|EAU35770.1 atub|OJI81106.1 aver|OJJ02791.1 awen|OJJ40624.1  
azon|OJJ49059.1

Group2335: abra|OJJ70996.1 acar|OOF90034.1 acla|EAW10552.1 afis|EAW25019.1 afla|EED55442.1  
afum|EAL89676.1 agla|OJJ89187.1 akaw|GAA82952.1 aluc|OJZ87532.1 anid|CBF81538.1 anig|EHA20741.1  
aory|EIT80858.1 asyd|OJJ59488.1 ater|EAU35767.1 atub|OJI81117.1 aver|OJJ02786.1 awen|OJJ40621.1  
azon|OJJ49469.1

Group2336: abra|OJJ70998.1 acar|OOF98142.1 acla|EAW10555.1 afis|EAW25022.1 afla|EED55444.1  
afum|EAL89673.1 agla|OJJ89190.1 akaw|GAA82950.1 aluc|OJZ87529.1 anid|CBF81541.1 anig|EHA20739.1  
aory|EIT80864.1 asyd|OJJ59490.1 ater|EAU35765.1 atub|OJI81119.1 aver|OJJ02784.1 awen|OJJ40618.1  
azon|OJJ49466.1

Group2337: abra|OJJ71001.1 acar|OOF98139.1 acla|EAW10558.1 afis|EAW25025.1 afla|EED55447.1  
afum|EAL89670.1 agla|OJJ79159.1 akaw|GAA82947.1 aluc|OJZ87525.1 anid|CBF81547.1 anig|EHA20736.1  
aory|EIT80809.1 asyd|OJJ59493.1 ater|EAU35762.1 atub|OJI81123.1 aver|OJJ02781.1 awen|OJJ40614.1  
azon|OJJ49463.1

Group2338: abra|OJJ71008.1 acar|OOF98134.1 acla|EAW10560.1 afis|EAW25027.1 afla|EED55449.1  
afum|EAL89668.1 agla|OJJ79157.1 akaw|GAA82945.1 aluc|OJZ87523.1 anid|CBF81551.1 anig|EHA20733.1  
aory|EIT80929.1 asyd|OJJ59495.1 ater|EAU35760.1 atub|OJI81125.1 aver|OJJ02779.1 awen|OJJ40612.1  
azon|OJJ49461.1

Group2339: abra|OJJ71013.1 acar|OOF98126.1 acla|EAW10564.1 afis|EAW25031.1 afla|EED55454.1  
afum|EAL89664.1 agla|OJJ82242.1 akaw|GAA82941.1 aluc|OJZ87518.1 anid|CBF81564.1 anig|EHA20729.1  
aory|EIT80774.1 asyd|OJJ59502.1 ater|EAU35756.1 atub|OJI81131.1 aver|OJJ02772.1 awen|OJJ40608.1  
azon|OJJ49458.1

Group2340: abra|OJJ71016.1 acar|OOF98124.1 acla|EAW10566.1 afis|EAW25032.1 afla|EED55457.1  
afum|EAL89662.1 agla|OJJ82244.1 akaw|GAA82939.1 aluc|OJZ87516.1 anid|CBF81567.1 anig|EHA20727.1  
aory|EIT80779.1 asyd|OJJ59504.1 ater|EAU35755.1 atub|OJI81134.1 aver|OJJ02770.1 awen|OJJ40607.1  
azon|OJJ49456.1

Group2341: abra|OJJ71019.1 acar|OOF98122.1 acla|EAW10568.1 afis|EAW25034.1 afla|EED55459.1  
afum|EAL89660.1 agla|OJJ82255.1 akaw|GAA82936.1 aluc|OJZ87513.1 anid|CBF81574.1 anig|EHA20725.1  
aory|EIT80788.1 asyd|OJJ59507.1 ater|EAU35751.1 atub|OJI81138.1 aver|OJJ02767.1 awen|OJJ40604.1  
azon|OJJ49454.1

Group2342: abra|OJJ71021.1 acar|OOF98119.1 acla|EAW10570.1 afis|EAW25036.1 afla|EED55462.1  
afum|EAL89658.1 agla|OJJ82257.1 akaw|GAA82934.1 aluc|OJZ87511.1 anid|CBF81583.1 anig|EHA20723.1  
aory|EIT80855.1 asyd|OJJ59510.1 ater|EAU35747.1 atub|OJI81140.1 aver|OJJ02764.1 awen|OJJ40602.1  
azon|OJJ49452.1

Group2343: abra|OJJ71022.1 acar|OOF98117.1 acla|EAW10571.1 afis|EAW25037.1 afla|EED55463.1  
afum|EAL89657.1 agla|OJJ82258.1 akaw|GAA82933.1 aluc|OJZ87510.1 anid|CBF81585.1 anig|EHA20722.1  
aory|EIT80922.1 asyd|OJJ59511.1 ater|EAU38720.1 atub|OJI81141.1 aver|OJJ02762.1 awen|OJJ40601.1  
azon|OJJ49451.1

Group2344: abra|OJJ71023.1 acar|OOF98118.1 acla|EAW10572.1 afis|EAW24995.1 afla|EED55464.1  
afum|EAL89656.1 agla|OJJ82259.1 akaw|GAA82932.1 aluc|OJZ87509.1 anid|CBF81586.1 anig|EHA20721.1  
aory|EIT80875.1 asyd|OJJ59512.1 ater|EAU35746.1 atub|OJI81142.1 aver|OJJ02761.1 awen|OJJ40600.1  
azon|OJJ49450.1

Group2345: abra|OJJ71028.1 acar|OOF98111.1 acla|EAW10579.1 afis|EAW24988.1 afla|EED55470.1  
afum|EAL89648.1 agla|OJJ82274.1 akaw|GAA82927.1 aluc|OJZ87502.1 anid|CBF81599.1 anig|EHA20717.1  
aory|EIT80811.1 asyd|OJJ59519.1 ater|EAU35739.1 atub|OJI81147.1 aver|OJJ02754.1 awen|OJJ40593.1  
azon|OJJ49443.1

Group2346: abra|OJJ71030.1 acar|OOF98109.1 acla|EAW10583.1 afis|EAW24986.1 afla|EED55472.1 afum|EAL89646.1 agla|OJJ82276.1 akaw|GAA82925.1 aluc|OJZ87498.1 anid|CBF81603.1 anig|EHA20715.1 aory|EIT80838.1 asyd|OJJ59521.1 ater|EAU35737.1 atub|OJI81149.1 aver|OJJ02752.1 awen|OJJ40582.1 azon|OJJ49441.1

Group2347: abra|OJJ71036.1 acar|OOF98101.1 acla|EAW10586.1 afis|EAW24982.1 afla|EED55477.1 afum|EAL89642.1 agla|OJJ82279.1 akaw|GAA82919.1 aluc|OJZ87491.1 anid|CBF81614.1 anig|EHA20711.1 aory|EIT80831.1 asyd|OJJ59526.1 ater|EAU35734.1 atub|OJI81157.1 aver|OJJ02746.1 awen|OJJ40579.1 azon|OJJ49430.1

Group2348: abra|OJJ71038.1 acar|OOF98100.1 acla|EAW10587.1 afis|EAW24981.1 afla|EED55478.1 afum|EAL89641.1 agla|OJJ79136.1 akaw|GAA82918.1 aluc|OJZ87490.1 anid|CBF81612.1 anig|EHA20710.1 aory|EIT80854.1 asyd|OJJ59525.1 ater|EAU35733.1 atub|OJI81158.1 aver|OJJ02747.1 awen|OJJ40578.1 azon|OJJ49431.1

Group2349: abra|OJJ71040.1 acar|OOF98098.1 acla|EAW10589.1 afis|EAW24979.1 afla|EED55480.1 afum|EAL89639.1 agla|OJJ79138.1 akaw|GAA82916.1 aluc|OJZ87488.1 anid|CBF81608.1 anig|EHA20708.1 aory|EIT80915.1 asyd|OJJ59523.1 ater|EAU35729.1 atub|OJI81160.1 aver|OJJ02749.1 awen|OJJ40576.1 azon|OJJ49434.1

Group2350: abra|OJJ71042.1 acar|OOF98097.1 acla|EAW10592.1 afis|EAW24976.1 afla|EED55484.1 afum|EAL89636.1 agla|OJJ79141.1 akaw|GAA82914.1 aluc|OJZ87486.1 anid|CBF81629.1 anig|EHA20707.1 aory|EIT80868.1 asyd|OJJ59530.1 ater|EAU35725.1 atub|OJI81162.1 aver|OJJ02740.1 awen|OJJ40573.1 azon|OJJ49438.1

Group2351: abra|OJJ71045.1 acar|OOF98094.1 acla|EAW10593.1 afis|EAW24975.1 afla|EED55485.1 afum|EAL89635.1 agla|OJJ82241.1 akaw|GAA82911.1 aluc|OJZ87481.1 anid|CBF81630.1 anig|EHA20703.1 aory|EIT80859.1 asyd|OJJ59531.1 ater|EAU35723.1 atub|OJI81167.1 aver|OJJ02739.1 awen|OJJ40572.1 azon|OJJ49429.1

Group2352: abra|OJJ71047.1 acar|OOF98092.1 acla|EAW10595.1 afis|EAW24973.1 afla|EED55486.1 afum|EAL89633.1 agla|OJJ82239.1 akaw|GAA82909.1 aluc|OJZ87479.1 anid|CBF81634.1 anig|EHA20701.1 aory|EIT80885.1 asyd|OJJ59533.1 ater|EAU35721.1 atub|OJI81169.1 aver|OJJ02737.1 awen|OJJ40570.1 azon|OJJ49427.1

Group2353: abra|OJJ71048.1 acar|OOF98091.1 acla|EAW10596.1 afis|EAW24972.1 afla|EED55487.1 afum|EBA27384.1 agla|OJJ82238.1 akaw|GAA82908.1 aluc|OJZ87478.1 anid|CBF81636.1 anig|EHA20700.1 aory|EIT80911.1 asyd|OJJ59534.1 ater|EAU35720.1 atub|OJI81170.1 aver|OJJ02736.1 awen|OJJ40569.1 azon|OJJ49426.1

Group2354: abra|OJJ71049.1 acar|OOF98090.1 acla|EAW10597.1 afis|EAW24971.1 afla|EED55490.1 afum|EAL89630.2 agla|OJJ82237.1 akaw|GAA82907.1 aluc|OJZ87477.1 anid|CBF81638.1 anig|EHA20699.1 aory|EIT80796.1 asyd|OJJ59535.1 ater|EAU35719.1 atub|OJI81171.1 aver|OJJ02735.1 awen|OJJ40568.1 azon|OJJ49425.1

Group2355: abra|OJJ71052.1 acar|OOF98087.1 acla|EAW10603.1 afis|EAW24965.1 afla|EED55495.1 afum|EAL89623.1 agla|OJJ82224.1 akaw|GAA82905.1 aluc|OJZ87475.1 anid|CBF81647.1 anig|EHA20695.1 aory|EIT80847.1 asyd|OJJ59541.1 ater|EAU35709.1 atub|OJI81173.1 aver|OJJ02727.1 awen|OJJ40558.1 azon|OJJ49419.1

Group2356: abra|OJJ71054.1 acar|OOF98085.1 acla|EAW14735.1 afis|EAW19536.1 afla|EED54353.1 afum|EAL86970.2 agla|OJJ85406.1 akaw|GAA82902.1 aluc|OJZ87473.1 anid|CBF76891.1 anig|EHA20693.1 aory|EIT78008.1 asyd|OJJ61335.1 ater|EAU31542.1 atub|OJI81175.1 aver|OJJ00659.1 awen|OJJ34757.1 aory|EIT75941.1

Group2357: abra|OJJ71061.1 acar|OOF98082.1 acla|EAW10598.1 afis|EAW24970.1 afla|EED55491.1 afum|EAL89629.1 agla|OJJ82236.1 akaw|GAA82898.1 aluc|OJZ87467.1 anid|CBF81640.1 anig|EHA20689.1 aory|EIT80891.1 asyd|OJJ59536.1 ater|EAU35715.1 atub|OJI81181.1 aver|OJJ02733.1 awen|OJJ40564.1 azon|OJJ49424.1

Group2358: abra|OJJ71075.1 acar|OOF98069.1 acla|EAW10604.1 afis|EAW24964.1 afla|EED55497.1 afum|EAL89622.1 agla|OJJ82226.1 akaw|GAA82887.1 aluc|OJZ87455.1 anid|CBF81649.1 anig|EHA20676.1 aory|EIT80869.1 asyd|OJJ59542.1 ater|EAU35707.1 atub|OJI81193.1 aver|OJJ02726.1 awen|OJJ40556.1 azon|OJJ49418.1

Group2359: abra|OJJ71103.1 acar|OOF90221.1 acla|EAW10388.1 afis|EAW25205.1 afla|EED53664.1 afum|EAL89866.2 agla|OJJ88951.1 akaw|GAA82865.1 aluc|OJZ87432.1 anid|CBF85221.1 anig|EHA20653.1 aory|EIT75288.1 asyd|OJJ62997.1 ater|EAU34349.1 atub|OJI81216.1 aver|OJI97970.1 awen|OJJ40840.1 azon|OJJ46822.1

Group2360: abra|OJJ71104.1 acar|OOF90222.1 acla|EAW10387.1 afis|EAW25206.1 afla|EED53662.1 afum|EAL89867.1 agla|OJJ88952.1 akaw|GAA82864.1 aluc|OJZ87431.1 anid|CBF85223.1 anig|EHA20652.1

aory|EIT75326.1 asyd|OJJ62996.1 ater|EAU34348.1 atub|OJI81217.1 aver|OJI97971.1 awen|OJJ40841.1 azon|OJJ46823.1

Group2361: abra|OJJ71105.1 acar|OOF90223.1 acla|EAW10386.1 afis|EAW25207.1 afla|EED53660.1 afum|EAL89868.1 agla|OJJ79791.1 akaw|GAA82863.1 aluc|OJZ87430.1 anid|CBF85225.1 anig|EHA20651.1 aory|EIT75316.1 asyd|OJJ62995.1 ater|EAU34347.1 atub|OJI81218.1 aver|OJI97972.1 awen|OJJ35846.1 azon|OJJ45132.1

Group2362: abra|OJJ71112.1 acar|OOF98038.1 acla|EAW10380.1 afis|EAW25213.1 afla|EED53667.1 afum|EAL89874.1 agla|OJJ88948.1 akaw|GAA82857.1 aluc|OJZ87422.1 anid|CBF85606.1 anig|EHA20645.1 aory|EIT75347.1 asyd|OJJ64197.1 ater|EAU34370.1 atub|OJI81226.1 aver|OJI98286.1 awen|OJJ40875.1 azon|OJJ46812.1

Group2363: abra|OJJ71117.1 acar|OOF98033.1 acla|EAW10378.1 afis|EAW25215.1 afla|EED53692.1 afum|EAL89876.1 agla|OJJ88944.1 akaw|GAA82853.1 aluc|OJZ87418.1 anid|CBF85254.1 anig|EHA20642.1 aory|EIT75323.1 asyd|OJJ62921.1 ater|EAU34372.1 atub|OJI81230.1 aver|OJI98068.1 awen|OJJ40878.1 azon|OJJ44506.1

Group2364: abra|OJJ71119.1 acar|OOF98031.1 acla|EAW10376.1 afis|EAW25217.1 afla|EED53690.1 afum|EAL89878.1 agla|OJJ79184.1 akaw|GAA82851.1 aluc|OJZ87417.1 anid|CBF85273.1 anig|EHA20641.1 aory|EIT75328.1 asyd|OJJ62920.1 ater|EAU34374.1 atub|OJI81231.1 aver|OJI98070.1 awen|OJJ40880.1 azon|OJJ44508.1

Group2365: abra|OJJ71125.1 acar|OOF98028.1 acla|EAW10374.1 afis|EAW25218.1 afla|EED53688.1 afum|EAL89879.1 agla|OJJ79186.1 akaw|GAA82850.1 aluc|OJZ87410.1 anid|CBF85299.1 anig|EHA20640.1 aory|EIT75354.1 asyd|OJJ62917.1 ater|EAU34377.1 atub|OJI81235.1 aver|OJI98073.1 awen|OJJ40883.1 azon|OJJ44512.1

Group2366: abra|OJJ71128.1 acar|OOF98024.1 acla|EAW10370.1 afis|EAW25222.1 afla|EED53684.1 afum|EAL89883.1 agla|OJJ79189.1 akaw|GAA82846.1 aluc|OJZ87407.1 anid|CBF85258.1 anig|EHA20637.1 aory|EIT75281.1 asyd|OJJ62911.1 ater|EAU34381.1 atub|OJI81239.1 aver|OJI98078.1 awen|OJJ40888.1 azon|OJJ44517.1

Group2367: abra|OJJ71132.1 acar|OOF98020.1 acla|EAW10365.1 afis|EAW25227.1 afla|EED53671.1 afum|EAL89888.1 agla|OJJ79181.1 akaw|GAA82842.1 aluc|OJZ87403.1 anid|CBF85269.1 anig|EHA20632.1 aory|EIT75290.1 asyd|OJJ62908.1 ater|EAU34385.1 atub|OJI81243.1 aver|OJI98080.1 awen|OJJ40892.1 azon|OJJ44521.1

Group2368: abra|OJJ71133.1 acar|OOF98019.1 acla|EAW10364.1 afis|EAW25228.1 afla|EED53672.1 afum|EAL89889.1 agla|OJJ79180.1 akaw|GAA82841.1 aluc|OJZ87402.1 anid|CBF85262.1 anig|EHA20631.1 aory|EIT75302.1 asyd|OJJ62905.1 ater|EAU34386.1 atub|OJI81244.1 aver|OJI98084.1 awen|OJJ40893.1 azon|OJJ44522.1

Group2369: abra|OJJ71142.1 acar|OOF98014.1 acla|EAW10359.1 afis|EAW25234.1 afla|EED53675.1 afum|EAL89895.1 agla|OJJ89203.1 akaw|GAA82835.1 aluc|OJZ87396.1 anid|CBF85334.1 anig|EHA20626.1 aory|EIT75320.1 asyd|OJJ64021.1 ater|EAU34389.1 atub|OJI81250.1 aver|OJI98107.1 awen|OJJ40946.1 azon|OJJ44527.1

Group2370: abra|OJJ71143.1 acar|OOF98013.1 acla|EAW10358.1 afis|EAW25235.1 afla|EED53676.1 afum|EAL89896.2 agla|OJJ89204.1 akaw|GAA82834.1 aluc|OJZ87395.1 anid|CBF85332.1 anig|EHA20625.1 aory|EIT75309.1 asyd|OJJ64020.1 ater|EAU34390.1 atub|OJI81251.1 aver|OJI98106.1 awen|OJJ40947.1 azon|OJJ44528.1

Group2371: abra|OJJ71145.1 acar|OOF98011.1 acla|EAW10361.1 afis|EAW25232.1 afla|EED53678.1 afum|EAL89893.1 agla|OJJ79175.1 akaw|GAA82832.1 aluc|OJZ87393.1 anid|CBF85329.1 anig|EHA20623.1 aory|EIT75284.1 asyd|OJJ64018.1 ater|EAU34391.1 atub|OJI81253.1 aver|OJI98104.1 awen|OJJ40898.1 azon|OJJ44525.1

Group2372: abra|OJJ71150.1 acar|OOF98007.1 acla|EAW10352.1 afis|EAW25242.1 afla|EED53702.1 afum|EAL89904.1 agla|OJJ89208.1 akaw|GAA82827.1 aluc|OJZ87388.1 anid|CBF85319.1 anig|EHA20617.1 aory|EIT75296.1 asyd|OJJ64011.1 ater|EAU34367.1 atub|OJI81259.1 aver|OJI98099.1 awen|OJJ40955.1 azon|OJJ44538.1

Group2373: abra|OJJ71151.1 acar|OOF98006.1 acla|EAW10346.1 afis|EAW25243.1 afla|EED53700.1 afum|EAL89905.1 agla|OJJ89209.1 akaw|GAA82826.1 aluc|OJZ87387.1 anid|CBF85321.1 anig|EHA20616.1 aory|EIT75325.1 asyd|OJJ64012.1 ater|EAU34360.1 atub|OJI81260.1 aver|OJI98100.1 awen|OJJ40956.1 azon|OJJ44537.1

Group2374: abra|OJJ71158.1 acar|OOF98000.1 acla|EAW10339.1 afis|EAW25248.1 afla|EED53716.1 afum|EAL89910.1 agla|OJJ89222.1 akaw|GAA82820.1 aluc|OJZ87381.1 anid|CBF85341.1 anig|EHA20612.1 aory|EIT75359.1 asyd|OJJ64025.1 ater|EAU34355.1 atub|OJI81265.1 aver|OJI98111.1 awen|OJJ40964.1 azon|OJJ44545.1



Group2375: abra|OJJ71167.1 acar|OOF97996.1 acla|EAW10336.1 afis|EAW25253.1 afla|EED53722.1 afum|EAL89916.1 agla|OJJ89227.1 akaw|GAA82814.1 aluc|OJZ87374.1 anid|CBF85349.1 anig|EHA20607.1 aory|EIT75275.1 asyd|OJJ64033.1 ater|EAU34398.1 atub|OJI81272.1 aver|OJI98117.1 awen|OJJ40967.1 azon|OJJ44551.1

Group2376: abra|OJJ71169.1 acar|OOF97994.1 acla|EAW10333.1 afis|EAW25259.1 afla|EED53724.1 afum|EAL89921.1 agla|OJJ89230.1 akaw|GAA82812.1 aluc|OJZ87372.1 anid|CBF85360.1 anig|EHA20605.1 aory|EIT75308.1 asyd|OJJ64039.1 ater|EAU34400.1 atub|OJI81274.1 aver|OJI98123.1 awen|OJJ40972.1 azon|OJJ44558.1

Group2377: abra|OJJ71170.1 acar|OOF97993.1 acla|EAW10332.1 afla|EED53725.1 agla|OJJ89231.1 akaw|GAA82811.1 aluc|OJZ87371.1 anid|CBF85362.1 anig|EHA20604.1 aory|EIT75319.1 asyd|OJJ64040.1 ater|EAU34401.1 atub|OJI81275.1 aver|OJI98124.1 awen|OJJ40973.1 afis|EAW25260.1 afum|EAL89922.1 azon|OJJ44559.1

Group2378: abra|OJJ71173.1 acar|OOF97992.1 acla|EAW10331.1 afis|EAW25263.1 afla|EED53727.1 afum|EAL89926.2 agla|OJJ89233.1 akaw|GAA82810.1 aluc|OJZ87369.1 anid|CBF85365.1 anig|EHA20603.1 aory|EIT75277.1 asyd|OJJ64043.1 ater|EAU34402.1 atub|OJI81276.1 aver|OJI98127.1 awen|OJJ40975.1 azon|OJJ47355.1

Group2379: abra|OJJ71174.1 acar|OOF97991.1 acla|EAW10330.1 afis|EAW25264.1 afla|EED53728.1 afum|EAL89927.1 agla|OJJ89234.1 akaw|GAA82809.1 aluc|OJZ87368.1 anid|CBF85367.1 anig|EHA20602.1 aory|EIT75295.1 asyd|OJJ64045.1 ater|EAU34403.1 atub|OJI81277.1 aver|OJI98128.1 awen|OJJ40976.1 azon|OJJ44563.1

Group2380: abra|OJJ71179.1 acar|OOF97987.1 acla|EAW10327.1 afis|EAW25267.1 afla|EED53731.1 afum|EAL89930.1 agla|OJJ89241.1 akaw|GAA82806.1 aluc|OJZ87364.1 anid|CBF85374.1 anig|EHA20599.1 aory|EIT75331.1 asyd|OJJ64048.1 ater|EAU34408.1 atub|OJI81280.1 aver|OJI98133.1 awen|OJJ40980.1 azon|OJJ44567.1

Group2381: abra|OJJ71182.1 acar|OOF97984.1 acla|EAW10322.1 afis|EAW25270.1 afla|EED53735.1 afum|EAL89933.1 agla|OJJ89243.1 akaw|GAA82803.1 aluc|OJZ87361.1 anid|CBF85382.1 anig|EHA20596.1 aory|EIT75338.1 asyd|OJJ64051.1 ater|EAU34413.1 atub|OJI81284.1 aver|OJI98137.1 awen|OJJ40984.1 azon|OJJ44570.1

Group2382: abra|OJJ71183.1 acar|OOF97983.1 acla|EAW10321.1 afis|EAW25271.1 afla|EED53736.1 afum|EAL89934.1 agla|OJJ89244.1 akaw|GAA82802.1 aluc|OJZ87360.1 anid|CBF85384.1 anig|EHA20595.1 aory|EIT75335.1 asyd|OJJ64053.1 ater|EAU34414.1 atub|OJI81285.1 aver|OJI98138.1 awen|OJJ40985.1 azon|OJJ44572.1

Group2383: abra|OJJ71184.1 acar|OOF97982.1 acla|EAW10320.1 afis|EAW25272.1 afla|EED53737.1 afum|EAL89935.1 agla|OJJ89245.1 akaw|GAA82801.1 aluc|OJZ87359.1 anid|CBF85385.1 anig|EHA20594.1 aory|EIT75311.1 asyd|OJJ64054.1 ater|EAU34415.1 atub|OJI81286.1 aver|OJI98139.1 awen|OJJ40986.1 azon|OJJ44573.1

Group2384: abra|OJJ71185.1 acar|OOF97981.1 acla|EAW10318.1 afis|EAW25274.1 afla|EED53739.1 afum|EAL89937.1 agla|OJJ89248.1 akaw|GAA82800.1 aluc|OJZ87358.1 anid|CBF85389.1 anig|EHA20593.1 aory|EIT75291.1 asyd|OJJ64056.1 ater|EAU34417.1 atub|OJI81287.1 aver|OJI98141.1 awen|OJJ40988.1 azon|OJJ44575.1

Group2385: abra|OJJ71187.1 acar|OOF97980.1 acla|EAW10316.1 afis|EAW25276.1 afla|EED53742.1 afum|EAL89939.1 agla|OJJ89250.1 akaw|GAA82798.1 aluc|OJZ87357.1 anid|CBF85392.1 anig|EHA20591.1 aory|EIT75317.1 asyd|OJJ64058.1 ater|EAU34419.1 atub|OJI81288.1 aver|OJI98143.1 awen|OJJ40990.1 azon|OJJ44578.1

Group2386: abra|OJJ71188.1 acar|OOF97979.1 acla|EAW10315.1 afis|EAW25277.1 afla|EED53744.1 afum|EAL89940.1 agla|OJJ89251.1 akaw|GAA82797.1 aluc|OJZ87356.1 anid|CBF85394.1 anig|EHA20590.1 aory|EIT75351.1 asyd|OJJ64059.1 ater|EAU34420.1 atub|OJI81289.1 aver|OJI98145.1 awen|OJJ40991.1 azon|OJJ44580.1

Group2387: abra|OJJ71189.1 acar|OOF97978.1 acla|EAW10314.1 afis|EAW25278.1 afla|EED53745.1 afum|EAL89941.1 agla|OJJ89252.1 akaw|GAA82796.1 aluc|OJZ87355.1 anid|CBF85396.1 anig|EHA20589.1 aory|EIT75313.1 asyd|OJJ64060.1 ater|EAU34421.1 atub|OJI81290.1 aver|OJI98146.1 awen|OJJ40992.1 azon|OJJ44581.1

Group2388: abra|OJJ71192.1 acar|OOF97975.1 acla|EAW10312.1 afis|EAW25281.1 afla|EED53747.1 afum|EAL89944.1 agla|OJJ89255.1 akaw|GAA82793.1 aluc|OJZ87352.1 anid|CBF85418.1 anig|EHA20586.1 aory|EIT75318.1 asyd|OJJ64073.1 ater|EAU34422.1 atub|OJI81293.1 aver|OJI98160.1 awen|OJJ40994.1 azon|OJJ44583.1

Group2389: abra|OJJ71198.1 acar|OOF97970.1 acla|EAW10305.1 afis|EAW25287.1 afla|EED53752.1 afum|EAL89950.1 agla|OJJ89260.1 akaw|GAA82785.1 aluc|OJZ87344.1 anid|CBF85429.1 anig|EHA20581.1

asyd|OJJ64083.1 ater|EAU34428.1 atub|OJI81300.1 aver|OJI98168.1 awen|OJJ40999.1 azon|OJJ44591.1  
aory|EIT78420.1

Group2390: abra|OJJ71203.1 acar|OOF97968.1 acla|EAW10304.1 afis|EAW25288.1 afla|EED53753.1  
afum|EAL89951.1 agla|OJJ89261.1 akaw|GAA82781.1 aluc|OJZ87340.1 anid|CBF85431.1 anig|EHA20577.1  
aory|EIT78400.1 asyd|OJJ64084.1 ater|EAU34429.1 atub|OJI81304.1 aver|OJI98169.1 awen|OJJ41000.1  
azon|OJJ44594.1

Group2391: abra|OJJ71204.1 acar|OOF97967.1 acla|EAW10303.1 afis|EAW25289.1 afla|EED53754.1  
afum|EAL89952.1 agla|OJJ89262.1 akaw|GAA82780.1 aluc|OJZ87339.1 anid|CBF85433.1 anig|EHA20576.1  
aory|EIT78451.1 asyd|OJJ64085.1 ater|EAU34430.1 atub|OJI81305.1 aver|OJI98170.1 awen|OJJ41001.1  
azon|OJJ44593.1

Group2392: abra|OJJ71205.1 acar|OOF97965.1 acla|EAW10302.1 afis|EAW25290.1 afla|EED53755.1  
afum|EAL89953.1 agla|OJJ89263.1 akaw|GAA82779.1 aluc|OJZ87338.1 anid|CBF85435.1 anig|EHA20575.1  
aory|EIT78386.1 asyd|OJJ64086.1 ater|EAU34431.1 atub|OJI81306.1 aver|OJI98171.1 awen|OJJ41002.1  
azon|OJJ44592.1

Group2393: abra|OJJ71206.1 acar|OOF97966.1 acla|EAW10301.1 afis|EAW25291.1 afla|EED53756.1  
afum|EAL89954.1 agla|OJJ89265.1 akaw|GAA82778.1 aluc|OJZ87337.1 anid|CBF85413.1 anig|EHA20574.1  
aory|EIT78379.1 asyd|OJJ64069.1 ater|EAU34432.1 atub|OJI81307.1 aver|OJI98156.1 awen|OJJ41003.1  
azon|OJJ44595.1

Group2394: abra|OJJ71210.1 acar|OOF97956.1 acla|EAW10300.1 afis|EAW25292.1 afla|EED53757.1  
afum|EAL89955.1 agla|OJJ89269.1 akaw|GAA82774.1 aluc|OJZ87333.1 anid|CBF85411.1 anig|EHA20569.1  
aory|EIT78389.1 asyd|OJJ64068.1 ater|EAU34433.1 atub|OJI81311.1 aver|OJI98155.1 awen|OJJ41006.1  
azon|OJJ44602.1

Group2395: abra|OJJ71211.1 acar|OOF97955.1 acla|EAW10298.1 afis|EAW25294.1 afla|EED53759.1  
afum|EAL89957.1 agla|OJJ89270.1 akaw|GAA82773.1 aluc|OJZ87332.1 anid|CBF85409.1 anig|EHA20568.1  
aory|EIT78363.1 asyd|OJJ64067.1 ater|EAU34434.1 atub|OJI81312.1 aver|OJI98154.1 awen|OJJ41008.1  
azon|OJJ44601.1

Group2396: abra|OJJ71227.1 acar|OOF97952.1 acla|EAW10295.1 afis|EAW25297.1 afla|EED53763.1  
afum|EAL89960.1 agla|OJJ89273.1 akaw|GAA82762.1 aluc|OJZ87320.1 anid|CBF85405.1 anig|EHA20554.1  
aory|EIT78455.1 asyd|OJJ64064.1 ater|EAU34438.1 atub|OJI81325.1 aver|OJI98151.1 awen|OJJ41011.1  
azon|OJJ44598.1

Group2397: abra|OJJ71241.1 acar|OOF97926.1 acla|EAW09108.1 afis|EAW25717.1 afla|EED53769.1  
afum|EAL84392.2 agla|OJJ85442.1 akaw|GAA82746.1 aluc|OJZ87301.1 anid|CBF77088.1 anig|EHA20541.1  
aory|EIT78470.1 asyd|OJJ56975.1 ater|EAU34440.1 atub|OJI81339.1 aver|OJJ03313.1 awen|OJJ33601.1  
azon|OJJ44472.1

Group2398: abra|OJJ71244.1 acar|OOF97924.1 acla|EAW10291.1 afis|EAW25300.1 afla|EED53774.1  
afum|EAL89963.2 agla|OJJ89280.1 akaw|GAA82743.1 aluc|OJZ87298.1 anid|CBF75193.1 anig|EHA20539.1  
aory|EIT78388.1 asyd|OJJ59938.1 ater|EAU34448.1 atub|OJI81342.1 aver|OJJ02349.1 awen|OJJ41015.1  
azon|OJJ44603.1

Group2399: abra|OJJ71245.1 acar|OOF97923.1 acla|EAW10290.1 afis|EAW25301.1 afla|EED53776.1  
afum|EAL89964.1 agla|OJJ89281.1 akaw|GAA82742.1 aluc|OJZ87297.1 anid|CBF75195.1 anig|EHA20538.1  
aory|EIT78454.1 asyd|OJJ59937.1 ater|EAU34449.1 atub|OJI81343.1 aver|OJJ02350.1 awen|OJJ41016.1  
azon|OJJ42625.1

Group2400: abra|OJJ71248.1 acar|OOF97920.1 acla|EAW10287.1 afis|EAW25305.1 afla|EED53783.1  
afum|EAL89968.2 agla|OJJ89284.1 akaw|GAA82739.1 aluc|OJZ87294.1 anid|CBF75296.1 anig|EHA20535.1  
aory|EIT78359.1 asyd|OJJ59884.1 ater|EAU34453.1 atub|OJI81346.1 aver|OJJ02402.1 awen|OJJ41019.1  
azon|OJJ44606.1

Group2401: abra|OJJ71255.1 acar|OOF97916.1 acla|EAW10281.1 afis|EAW25313.1 afla|EED53788.1  
afum|EAL89974.1 agla|OJJ83848.1 akaw|GAA82733.1 aluc|OJZ87288.1 anid|CBF75287.1 anig|EHA20529.1  
aory|EIT78401.1 asyd|OJJ59889.1 ater|EAU34458.1 atub|OJI81353.1 aver|OJJ02397.1 awen|OJJ41053.1  
azon|OJJ44614.1

Group2402: abra|OJJ71256.1 acar|OOF97915.1 acla|EAW10280.1 afis|EAW25314.1 afla|EED53789.1  
afum|EAL89975.1 agla|OJJ83849.1 akaw|GAA82732.1 aluc|OJZ87287.1 anid|CBF75285.1 anig|EHA20528.1  
aory|EIT78413.1 asyd|OJJ59890.1 ater|EAU34459.1 atub|OJI81354.1 aver|OJJ02396.1 awen|OJJ41050.1  
azon|OJJ44612.1

Group2403: abra|OJJ71258.1 acar|OOF97914.1 acla|EAW10278.1 afis|EAW25316.1 afla|EED53791.1  
afum|EAL89977.2 agla|OJJ83854.1 akaw|GAA82731.1 aluc|OJZ87285.1 anid|CBF75283.1 anig|EHA20527.1  
aory|EIT78447.1 asyd|OJJ59892.1 ater|EAU34460.1 atub|OJI81356.1 aver|OJJ02394.1 awen|OJJ41047.1  
azon|OJJ44616.1

Group2404: abra|OJJ71259.1 acar|OOF97913.1 acla|EAW10277.1 afis|EAW25317.1 afla|EED53792.1 afum|EAL89978.2 agla|OJJ83855.1 akaw|GAA82730.1 aluc|OJZ87284.1 anid|CBF75281.1 anig|EHA20526.1 aory|EIT78371.1 asyd|OJJ59893.1 ater|EAU34464.1 atub|OJI81357.1 aver|OJJ02393.1 awen|OJJ41046.1 azon|OJJ44617.1

Group2405: abra|OJJ71262.1 acar|OOF97912.1 acla|EAW10275.1 afis|EAW25319.1 afla|EED53794.1 afum|EAL89980.2 agla|OJJ83857.1 akaw|GAA82727.1 aluc|OJZ87281.1 anid|CBF75269.1 anig|EHA20523.1 aory|EIT78456.1 asyd|OJJ59895.1 ater|EAU34465.1 atub|OJI81360.1 aver|OJJ02391.1 awen|OJJ41044.1 azon|OJJ44619.1

Group2406: abra|OJJ71263.1 acar|OOF97911.1 acla|EAW10274.1 afis|EAW25320.1 afla|EED53795.1 afum|EAL89981.1 agla|OJJ83858.1 akaw|GAA82726.1 aluc|OJZ87280.1 anid|CBF75267.1 anig|EHA20522.1 aory|EIT78395.1 asyd|OJJ59896.1 ater|EAU34466.1 atub|OJI81361.1 aver|OJJ02390.1 awen|OJJ41043.1 azon|OJJ44620.1

Group2407: abra|OJJ71264.1 acar|OOF97910.1 acla|EAW10273.1 afis|EAW25321.1 afla|EED53796.1 afum|EAL89982.1 agla|OJJ83859.1 akaw|GAA82725.1 aluc|OJZ87279.1 anid|CBF75265.1 anig|EHA20521.1 aory|EIT78365.1 asyd|OJJ59897.1 ater|EAU34467.1 atub|OJI81362.1 aver|OJJ02389.1 awen|OJJ41042.1 azon|OJJ44621.1

Group2408: abra|OJJ71265.1 acar|OOF97909.1 acla|EAW10272.1 afis|EAW25322.1 afla|EED53797.1 afum|EAL89983.1 agla|OJJ83860.1 akaw|GAA82724.1 aluc|OJZ87278.1 anid|CBF75263.1 anig|EHA20520.1 aory|EIT78429.1 asyd|OJJ59898.1 ater|EAU34468.1 atub|OJI81363.1 aver|OJJ02388.1 awen|OJJ41041.1 azon|OJJ44624.1

Group2409: abra|OJJ71267.1 acar|OOF97908.1 acla|EAW10271.1 afis|EAW25323.1 afla|EED53798.1 afum|EAL89984.1 agla|OJJ83861.1 akaw|GAA82723.1 aluc|OJZ87277.1 anid|CBF75261.1 anig|EHA20519.1 aory|EIT78438.1 asyd|OJJ59899.1 ater|EAU34469.1 atub|OJI81364.1 aver|OJJ02387.1 awen|OJJ41040.1 azon|OJJ44626.1

Group2410: abra|OJJ71270.1 acar|OOF97902.1 acla|EAW10268.1 afis|EAW25326.1 afla|EED53803.1 afum|EAL89987.1 agla|OJJ83870.1 akaw|GAA82720.1 aluc|OJZ87274.1 anid|CBF75254.1 anig|EHA20515.1 aory|EIT78467.1 asyd|OJJ59904.1 ater|EAU34473.1 atub|OJI81368.1 aver|OJJ02381.1 awen|OJJ41031.1 azon|OJJ44634.1

Group2411: abra|OJJ71271.1 acar|OOF97903.1 acla|EAW10267.1 afis|EAW25327.1 afla|EED53804.1 afum|EAL89988.1 agla|OJJ83869.1 akaw|GAA82719.1 aluc|OJZ87273.1 anid|CBF75252.1 anig|EHA20514.1 aory|EIT78360.1 asyd|OJJ59905.1 ater|EAU34474.1 atub|OJI81369.1 aver|OJJ02380.1 awen|OJJ41032.1 azon|OJJ44633.1

Group2412: abra|OJJ71276.1 acar|OOF97897.1 acla|EAW10257.1 afis|EAW25336.1 afla|EED53810.1 afum|EAL89999.1 agla|OJJ83871.1 akaw|GAA82713.1 aluc|OJZ87267.1 anid|CBF75242.1 anig|EHA20509.1 aory|EIT78463.1 asyd|OJJ59910.1 atub|OJI81375.1 aver|OJJ02376.1 awen|OJJ41030.1 azon|OJJ44635.1 afla|EED53809.1

Group2413: abra|OJJ71277.1 acar|OOF97896.1 acla|EAW10258.1 afis|EAW25335.1 afla|EED53811.1 afum|EAL89998.1 agla|OJJ83872.1 akaw|GAA82712.1 aluc|OJZ87266.1 anid|CBF75240.1 anig|EHA20508.1 aory|EIT78414.1 asyd|OJJ59911.1 ater|EAU34478.1 atub|OJI81376.1 aver|OJJ02375.1 awen|OJJ41029.1 azon|OJJ44636.1

Group2414: abra|OJJ71279.1 acar|OOF97892.1 acla|EAW10261.1 afis|EAW25332.1 afla|EED53814.1 afum|EAL89994.1 agla|OJJ83875.1 akaw|GAA82709.1 aluc|OJZ87264.1 anid|CBF75236.1 anig|EHA20506.1 aory|EIT78424.1 asyd|OJJ59913.1 ater|EAU34480.1 atub|OJI81378.1 aver|OJJ02373.1 awen|OJJ41026.1 azon|OJJ44638.1

Group2415: abra|OJJ71280.1 acar|OOF97893.1 acla|EAW10262.1 afis|EAW25331.1 afla|EED53815.1 afum|EAL89993.1 agla|OJJ83877.1 akaw|GAA82708.1 aluc|OJZ87263.1 anid|CBF75234.1 anig|EHA20505.1 aory|EIT78448.1 asyd|OJJ59914.1 ater|EAU34481.1 atub|OJI81379.1 aver|OJJ02372.1 awen|OJJ41025.1 azon|OJJ44639.1

Group2416: abra|OJJ71286.1 acar|OOF97886.1 acla|EAW10251.1 afis|EAW25341.1 afla|EED53822.1 afum|EBA27392.1 agla|OJJ83884.1 akaw|GAA82703.1 aluc|OJZ87257.1 anid|CBF75213.1 anig|EHA20502.1 aory|EIT78427.1 asyd|OJJ59928.1 ater|EAU34487.1 atub|OJI81385.1 aver|OJJ02358.1 awen|OJJ41062.1 azon|OJJ44645.1

Group2417: abra|OJJ71287.1 acar|OOF97884.1 acla|EAW10250.1 afis|EAW25342.1 afla|EED53823.1 afum|EAL90005.2 agla|OJJ83885.1 akaw|GAA82702.1 aluc|OJZ87256.1 anid|CBF75211.1 anig|EHA20501.1 aory|EIT78440.1 asyd|OJJ59927.1 ater|EAU34488.1 atub|OJI81386.1 aver|OJJ02359.1 awen|OJJ41063.1 azon|OJJ44646.1

Group2418: abra|OJJ71288.1 acar|OOF97885.1 acla|EAW10249.1 afis|EAW25343.1 afla|EED53824.1 afum|EAL90006.1 agla|OJJ83886.1 akaw|GAA82701.1 aluc|OJZ87255.1 anid|CBF75209.1 anig|EHA20500.1

aory|EIT78410.1 asyd|OJJ59926.1 ater|EAU34489.1 atub|OJI81387.1 aver|OJJ02360.1 awen|OJJ41065.1 azon|OJJ44647.1

Group2419: abra|OJJ71289.1 acar|OOF97883.1 acla|EAW10248.1 afis|EAW25344.1 afla|EED53825.1 afum|EAL90007.1 agla|OJJ83887.1 akaw|GAA82700.1 aluc|OJZ87254.1 anid|CBF75207.1 anig|EHA20499.1 aory|EIT78419.1 asyd|OJJ59925.1 ater|EAU34490.1 atub|OJI81388.1 aver|OJJ02361.1 awen|OJJ41066.1 azon|OJJ44648.1

Group2420: abra|OJJ71290.1 acar|OOF97882.1 acla|EAW10247.1 afis|EAW25345.1 afla|EED53826.1 afum|EAL90008.2 agla|OJJ83891.1 akaw|GAA82699.1 aluc|OJZ87253.1 anid|CBF75205.1 anig|EHA20498.1 aory|EIT78441.1 asyd|OJJ59924.1 ater|EAU34491.1 atub|OJI81389.1 aver|OJJ02362.1 awen|OJJ41068.1 azon|OJJ44650.1

Group2421: abra|OJJ71291.1 acar|OOF97881.1 acla|EAW10246.1 afis|EAW25346.1 afla|EED53827.1 afum|EAL90009.1 agla|OJJ83892.1 akaw|GAA82698.1 aluc|OJZ87252.1 anid|CBF75203.1 anig|EHA20497.1 aory|EIT78374.1 asyd|OJJ59923.1 ater|EAU34492.1 atub|OJI81390.1 aver|OJJ02363.1 awen|OJJ41069.1 azon|OJJ44651.1

Group2422: abra|OJJ71293.1 acar|OOF97877.1 acla|EAW10245.1 afis|EAW25347.1 afla|EED53828.1 afum|EAL90010.2 agla|OJJ83893.1 akaw|GAA82696.1 aluc|OJZ87250.1 anid|CBF77426.1 anig|EHA20495.1 aory|EIT78392.1 asyd|OJJ53229.1 ater|EAU34495.1 atub|OJI81392.1 aver|OJJ03623.1 awen|OJJ41070.1 azon|OJJ44652.1

Group2423: abra|OJJ71294.1 acar|OOF97876.1 acla|EAW10244.1 afis|EAW25348.1 afla|EED53829.1 afum|EAL90011.1 agla|OJJ83894.1 akaw|GAA82695.1 aluc|OJZ87249.1 anid|CBF77428.1 anig|EHA20494.1 aory|EIT78450.1 asyd|OJJ53228.1 ater|EAU34496.1 atub|OJI81393.1 aver|OJJ03624.1 awen|OJJ41071.1 azon|OJJ44653.1

Group2424: abra|OJJ71295.1 acar|OOF97875.1 acla|EAW10243.1 afis|EAW25349.1 afla|EED53830.1 afum|EAL90012.1 agla|OJJ83895.1 akaw|GAA82694.1 aluc|OJZ87248.1 anid|CBF77430.1 anig|EHA20493.1 asyd|OJJ53227.1 ater|EAU34497.1 atub|OJI81394.1 aver|OJJ03625.1 awen|OJJ41072.1 azon|OJJ44654.1 aory|EIT78356.1

Group2425: abra|OJJ71296.1 acar|OOF97874.1 acla|EAW10242.1 afis|EAW25350.1 afla|EED53831.1 afum|EAL90013.1 agla|OJJ83896.1 akaw|GAA82693.1 aluc|OJZ87247.1 anid|CBF77432.1 anig|EHA20492.1 aory|EIT78425.1 asyd|OJJ53226.1 ater|EAU34498.1 atub|OJI81395.1 aver|OJJ03626.1 awen|OJJ41073.1 azon|OJJ44655.1

Group2426: abra|OJJ71297.1 acar|OOF97873.1 acla|EAW10241.1 afis|EAW25351.1 afla|EED53832.1 afum|EAL90014.1 agla|OJJ83897.1 akaw|GAA82692.1 aluc|OJZ87246.1 anid|CBF77434.1 anig|EHA20491.1 aory|EIT78366.1 asyd|OJJ53225.1 ater|EAU34499.1 atub|OJI81396.1 aver|OJJ03627.1 awen|OJJ41074.1 azon|OJJ44656.1

Group2427: abra|OJJ71300.1 acar|OOF97870.1 acla|EAW10238.1 afis|EAW25354.1 afla|EED53835.1 afum|EAL90016.1 agla|OJJ83902.1 akaw|GAA82689.1 aluc|OJZ87243.1 anid|CBF77471.1 anig|EHA20488.1 aory|EIT78370.1 asyd|OJJ53222.1 ater|EAU34502.1 atub|OJI81399.1 aver|OJJ03630.1 awen|OJJ41077.1 azon|OJJ44659.1

Group2428: abra|OJJ71302.1 acar|OOF97869.1 acla|EAW10237.1 afis|EAW25355.1 afla|EED53836.1 afum|EAL90017.1 agla|OJJ83903.1 akaw|GAA82688.1 aluc|OJZ87241.1 anid|CBF77469.1 anig|EHA20487.1 aory|EIT78369.1 asyd|OJJ53221.1 ater|EAU34503.1 atub|OJI81401.1 aver|OJJ03631.1 awen|OJJ41078.1 azon|OJJ44660.1

Group2429: abra|OJJ71303.1 acar|OOF97868.1 acla|EAW10236.1 afis|EAW25356.1 afla|EED53838.1 afum|EAL90018.1 agla|OJJ83905.1 akaw|GAA82687.1 aluc|OJZ87240.1 anid|CBF77467.1 anig|EHA20486.1 aory|EIT78449.1 asyd|OJJ53220.1 ater|EAU34504.1 atub|OJI81402.1 aver|OJJ03632.1 awen|OJJ41081.1 azon|OJJ44662.1

Group2430: abra|OJJ71304.1 acar|OOF97867.1 acla|EAW10235.1 afis|EAW25357.1 afla|EED53839.1 afum|EAL90019.1 agla|OJJ83906.1 akaw|GAA82686.1 aluc|OJZ87239.1 anid|CBF77465.1 anig|EHA20485.1 aory|EIT78442.1 asyd|OJJ53219.1 ater|EAU34505.1 atub|OJI81403.1 aver|OJJ03633.1 awen|OJJ41082.1 azon|OJJ44663.1

Group2431: abra|OJJ71308.1 acar|OOF97863.1 acla|EAW10232.1 afis|EAW25360.1 afum|EAL90022.1 agla|OJJ83910.1 akaw|GAA82683.1 aluc|OJZ87236.1 anid|CBF77459.1 anig|EHA20483.1 aory|EIT78368.1 asyd|OJJ53216.1 ater|EAU34508.1 atub|OJI81406.1 aver|OJJ03635.1 awen|OJJ41086.1 azon|OJJ44666.1 afla|EED53842.1

Group2432: abra|OJJ71310.1 acar|OOF97862.1 acla|EAW10230.1 afis|EAW25362.1 afla|EED53844.1 afum|EAL90024.1 agla|OJJ83912.1 akaw|GAA82681.1 aluc|OJZ87234.1 anid|CBF77455.1 anig|EHA20481.1 aory|EIT78471.1 asyd|OJJ53214.1 ater|EAU34509.1 atub|OJI81408.1 aver|OJJ03637.1 awen|OJJ41088.1 azon|OJJ44668.1

Group2433: abra|OJJ71311.1 acar|OOF97861.1 acla|EAW10229.1 afis|EAW25363.1 afla|EED53845.1 afum|EAL90025.1 agla|OJJ83913.1 akaw|GAA82680.1 aluc|OJZ87233.1 anid|CBF77453.1 anig|EHA20480.1 aory|EIT78383.1 asyd|OJJ53213.1 ater|EAU34510.1 atub|OJI81409.1 aver|OJJ03638.1 awen|OJJ41089.1 azon|OJJ44669.1

Group2434: abra|OJJ71312.1 acar|OOF97860.1 acla|EAW10228.1 afis|EAW25364.1 afla|EED53846.1 afum|EAL90026.1 agla|OJJ83752.1 akaw|GAA82679.1 aluc|OJZ87232.1 anid|CBF77452.1 anig|EHA20479.1 aory|EIT78459.1 asyd|OJJ53211.1 ater|EAU34511.1 atub|OJI81410.1 aver|OJJ03639.1 awen|OJJ41091.1 azon|OJJ44670.1

Group2435: abra|OJJ71315.1 acar|OOF97857.1 acla|EAW10224.1 afis|EAW25368.1 afla|EED53849.1 afum|EAL90028.2 agla|OJJ83755.1 akaw|GAA82676.1 aluc|OJZ87229.1 anid|CBF77446.1 anig|EHA20476.1 aory|EIT78461.1 asyd|OJJ53208.1 ater|EAU34513.1 atub|OJI81413.1 aver|OJJ03642.1 awen|OJJ41094.1 azon|OJJ44673.1

Group2436: abra|OJJ71316.1 acar|OOF97856.1 acla|EAW10223.1 afis|EAW25369.1 afla|EED53850.1 afum|EAL90029.2 agla|OJJ83756.1 akaw|GAA82675.1 aluc|OJZ87228.1 anid|CBF77444.1 anig|EHA20475.1 aory|EIT78384.1 asyd|OJJ53207.1 ater|EAU34514.1 atub|OJI81414.1 aver|OJJ03643.1 awen|OJJ41095.1 azon|OJJ44674.1

Group2437: abra|OJJ71317.1 acar|OOF97855.1 acla|EAW10222.1 afis|EAW25370.1 afla|EED53851.1 afum|EAL90030.1 agla|OJJ83757.1 akaw|GAA82674.1 aluc|OJZ87227.1 anid|CBF77442.1 anig|EHA20474.1 aory|EIT78393.1 asyd|OJJ53206.1 ater|EAU34515.1 atub|OJI81415.1 aver|OJJ03644.1 awen|OJJ41096.1 azon|OJJ44675.1

Group2438: abra|OJJ71320.1 acar|OOF97854.1 acla|EAW10219.1 afis|EAW25373.1 afla|EED53854.1 afum|EAL90033.1 agla|OJJ83760.1 akaw|GAA82671.1 aluc|OJZ87224.1 anid|CBF77475.1 anig|EHA20471.1 aory|EIT78376.1 asyd|OJJ53203.1 ater|EAU34518.1 atub|OJI81418.1 aver|OJJ03647.1 awen|OJJ41099.1 azon|OJJ44678.1

Group2439: abra|OJJ71321.1 acar|OOF97852.1 acla|EAW10218.1 afis|EAW25375.1 afla|EED53855.1 afum|EAL90034.1 agla|OJJ83761.1 akaw|GAA82670.1 aluc|OJZ87223.1 anid|CBF77477.1 anig|EHA20470.1 aory|EIT78390.1 asyd|OJJ53202.1 ater|EAU34519.1 atub|OJI81419.1 aver|OJJ03648.1 awen|OJJ41100.1 azon|OJJ44679.1

Group2440: abra|OJJ71322.1 acar|OOF97853.1 acla|EAW10217.1 afis|EAW25376.1 afla|EED53856.1 afum|EAL90035.1 agla|OJJ83765.1 akaw|GAA82669.1 aluc|OJZ87222.1 anid|CBF77479.1 anig|EHA20469.1 aory|EIT78453.1 asyd|OJJ53201.1 ater|EAU34520.1 atub|OJI81420.1 aver|OJJ03649.1 awen|OJJ41103.1 azon|OJJ44680.1

Group2441: abra|OJJ71324.1 acar|OOF97850.1 acla|EAW10215.1 afis|EAW25378.1 afla|EED53858.1 afum|EAL90037.1 agla|OJJ83767.1 akaw|GAA82667.1 aluc|OJZ87220.1 anid|CBF77483.1 anig|EHA20468.1 aory|EIT78426.1 asyd|OJJ53199.1 ater|EAU34522.1 atub|OJI81421.1 aver|OJJ03651.1 awen|OJJ41105.1 azon|OJJ44682.1

Group2442: abra|OJJ71325.1 acar|OOF97849.1 acla|EAW10214.1 afis|EAW25379.1 afla|EED53859.1 afum|EAL90038.1 agla|OJJ83772.1 akaw|GAA82666.1 aluc|OJZ87219.1 anid|CBF77485.1 anig|EHA20467.1 aory|EIT78378.1 asyd|OJJ53197.1 ater|EAU34527.1 atub|OJI81422.1 aver|OJJ03653.1 awen|OJJ41106.1 azon|OJJ44683.1

Group2443: abra|OJJ71329.1 acla|EAW10210.1 afis|EAW25384.1 afla|EED54692.1 afum|EAL90043.1 agla|OJJ83776.1 akaw|GAA82663.1 aluc|OJZ87213.1 anid|CBF77490.1 anig|EHA20464.1 asyd|OJJ53194.1 ater|EAU34530.1 atub|OJI81426.1 aver|OJJ03656.1 awen|OJJ41111.1 azon|OJJ44688.1 acar|OOF97845.1 afla|EED53861.1

Group2444: abra|OJJ71333.1 acar|OOF97842.1 acla|EAW10206.1 afis|EAW25389.1 afla|EED53866.1 afum|EAL90048.2 agla|OJJ83792.1 akaw|GAA82659.1 aluc|OJZ87209.1 anid|CBF77500.1 anig|EHA20461.1 aory|EIT78380.1 asyd|OJJ53190.1 ater|EAU34537.1 atub|OJI81430.1 aver|OJJ03660.1 awen|OJJ41116.1 azon|OJJ44692.1

Group2445: abra|OJJ71334.1 acar|OOF97838.1 acla|EAW10205.1 afis|EAW25390.1 afla|EED53867.1 afum|EAL90049.1 agla|OJJ87028.1 akaw|GAA82658.1 aluc|OJZ87208.1 anid|CBF77502.1 anig|EHA20459.1 aory|EIT78439.1 asyd|OJJ53189.1 ater|EAU34538.1 atub|OJI81431.1 aver|OJJ03661.1 awen|OJJ41117.1 azon|OJJ44693.1

Group2446: abra|OJJ71337.1 acar|OOF97835.1 acla|EAW10202.1 afis|EAW25393.1 afla|EED53870.1 afum|EAL90052.1 agla|OJJ87031.1 akaw|GAA82655.1 aluc|OJZ87205.1 anid|CBF77508.1 anig|EHA20458.1 aory|EIT78391.1 asyd|OJJ53186.1 ater|EAU34541.1 atub|OJI81435.1 aver|OJJ03665.1 awen|OJJ41119.1 azon|OJJ43212.1

Group2447: abra|OJJ71339.1 acar|OOF97833.1 acla|EAW10200.1 afis|EAW25395.1 afla|EED53872.1 afum|EAL90054.1 agla|OJJ87033.1 akaw|GAA82653.1 aluc|OJZ87203.1 anid|CBF77512.1 anig|EHA20456.1

aory|EIT78468.1 asyd|OJJ53185.1 ater|EAU34543.1 atub|OJI81437.1 aver|OJJ03666.1 awen|OJJ41121.1 azon|OJJ44696.1

Group2448: abra|OJJ71340.1 acar|OOF97832.1 acla|EAW10199.1 afis|EAW25396.1 afla|EED53873.1 afum|EAL90055.1 agla|OJJ87034.1 akaw|GAA82652.1 aluc|OJZ87202.1 anid|CBF77514.1 anig|EHA20455.1 aory|EIT78362.1 asyd|OJJ53184.1 ater|EAU34544.1 atub|OJI81438.1 aver|OJJ03667.1 awen|OJJ41122.1 azon|OJJ44697.1

Group2449: abra|OJJ71341.1 acar|OOF97831.1 acla|EAW10198.1 afis|EAW25397.1 afla|EED53874.1 afum|EAL90056.1 agla|OJJ87035.1 akaw|GAA82651.1 aluc|OJZ87201.1 anid|CBF77516.1 anig|EHA20454.1 aory|EIT78399.1 asyd|OJJ53183.1 ater|EAU34545.1 atub|OJI81439.1 aver|OJJ03668.1 awen|OJJ41123.1 azon|OJJ44698.1

Group2450: abra|OJJ71342.1 acar|OOF97830.1 acla|EAW10197.1 afis|EAW25398.1 afla|EED53875.1 afum|EAL90057.1 agla|OJJ87036.1 akaw|GAA82650.1 aluc|OJZ87200.1 anid|CBF77518.1 anig|EHA20453.1 aory|EIT78445.1 asyd|OJJ53182.1 ater|EAU34549.1 atub|OJI81440.1 aver|OJJ03669.1 awen|OJJ41124.1 azon|OJJ44699.1

Group2451: abra|OJJ71345.1 acar|OOF97827.1 acla|EAW10194.1 afis|EAW25401.1 afla|EED53879.1 afum|EAL90060.1 agla|OJJ87042.1 akaw|GAA82647.1 aluc|OJZ87196.1 anid|CBF77524.1 anig|EHA20451.1 aory|EIT78402.1 asyd|OJJ53180.1 ater|EAU34552.1 atub|OJI81443.1 aver|OJJ03671.1 awen|OJJ41128.1 azon|OJJ44702.1

Group2452: abra|OJJ71346.1 acar|OOF97824.1 acla|EAW10192.1 afis|EAW25403.1 afla|EED53882.1 afum|EAL90062.1 agla|OJJ87044.1 akaw|GAA82646.1 aluc|OJZ87193.1 anid|CBF77530.1 anig|EHA20450.1 aory|EIT78396.1 asyd|OJJ53177.1 ater|EAU34554.1 atub|OJI81445.1 aver|OJJ03675.1 awen|OJJ41130.1 azon|OJJ44704.1

Group2453: abra|OJJ71347.1 acar|OOF97823.1 acla|EAW10191.1 afis|EAW25404.1 afla|EED53883.1 afum|EAL90063.1 agla|OJJ87045.1 akaw|GAA82645.1 aluc|OJZ87192.1 anid|CBF77532.1 anig|EHA20449.1 aory|EIT78372.1 asyd|OJJ53176.1 ater|EAU34555.1 atub|OJI81446.1 aver|OJJ03676.1 awen|OJJ41131.1 azon|OJJ44705.1

Group2454: abra|OJJ71349.1 acar|OOF97821.1 acla|EAW10189.1 afis|EAW25406.1 afla|EED53885.1 afum|EAL90065.1 agla|OJJ87047.1 akaw|GAA82643.1 aluc|OJZ87190.1 anid|CBF77536.1 anig|EHA20447.1 aory|EIT78483.1 asyd|OJJ53174.1 ater|EAU34557.1 atub|OJI81448.1 aver|OJJ03678.1 awen|OJJ41133.1 azon|OJJ44707.1

Group2455: abra|OJJ71351.1 acar|OOF97818.1 acla|EAW10187.1 afis|EAW25408.1 afla|EED53887.1 afum|EAL90067.1 agla|OJJ87049.1 akaw|GAA82641.1 aluc|OJZ87188.1 anid|CBF77540.1 anig|EHA20445.1 aory|EIT78477.1 asyd|OJJ53172.1 ater|EAU34559.1 atub|OJI81450.1 aver|OJJ03680.1 awen|OJJ41135.1 azon|OJJ44709.1

Group2456: abra|OJJ71352.1 acar|OOF97819.1 acla|EAW10186.1 afis|EAW25409.1 afla|EED53888.1 afum|EAL90068.1 agla|OJJ87050.1 akaw|GAA82640.1 aluc|OJZ87187.1 anid|CBF77588.1 anig|EHA20444.1 aory|EIT78490.1 asyd|OJJ53171.1 ater|EAU34560.1 atub|OJI81451.1 aver|OJJ03681.1 awen|OJJ41136.1 azon|OJJ44715.1

Group2457: abra|OJJ71353.1 acar|OOF97817.1 acla|EAW10183.1 afis|EAW25411.1 afla|EED53890.1 afum|EAL90070.1 agla|OJJ87052.1 akaw|GAA82639.1 aluc|OJZ87186.1 anid|CBF77584.1 anig|EHA20443.1 aory|EIT78494.1 asyd|OJJ53169.1 ater|EAU34562.1 atub|OJI81452.1 aver|OJJ03683.1 awen|OJJ41138.1 azon|OJJ44717.1

Group2458: abra|OJJ71354.1 acar|OOF97816.1 acla|EAW10182.1 afis|EAW25412.1 afla|EED53891.1 afum|EAL90071.1 agla|OJJ87054.1 akaw|GAA82638.1 aluc|OJZ87185.1 anid|CBF77582.1 anig|EHA20442.1 aory|EIT78487.1 asyd|OJJ53168.1 ater|EAU34563.1 atub|OJI81453.1 aver|OJJ03684.1 awen|OJJ41139.1 azon|OJJ44719.1

Group2459: abra|OJJ71355.1 acar|OOF97815.1 acla|EAW10181.1 afis|EAW25413.1 afla|EED53892.1 afum|EAL90072.1 agla|OJJ87055.1 akaw|GAA82637.1 aluc|OJZ87184.1 anid|CBF77580.1 anig|EHA20441.1 aory|EIT78502.1 asyd|OJJ53167.1 ater|EAU34564.1 atub|OJI81455.1 aver|OJJ03685.1 awen|OJJ41140.1 azon|OJJ44720.1

Group2460: abra|OJJ71357.1 acar|OOF97813.1 acla|EAW10179.1 afis|EAW25415.1 afla|EED53894.1 afum|EAL90074.1 agla|OJJ87057.1 akaw|GAA82635.1 aluc|OJZ87182.1 anid|CBF77576.1 anig|EHA20440.1 aory|EIT78485.1 asyd|OJJ53165.1 ater|EAU34566.1 atub|OJI81457.1 aver|OJJ03687.1 awen|OJJ41142.1 azon|OJJ44722.1

Group2461: abra|OJJ71358.1 acar|OOF97812.1 acla|EAW10178.1 afis|EAW25416.1 afla|EED53895.1 afum|EAL90075.1 agla|OJJ87058.1 akaw|GAA82634.1 aluc|OJZ87181.1 anid|CBF77574.1 anig|EHA20439.1 aory|EIT78501.1 asyd|OJJ53164.1 ater|EAU34567.1 atub|OJI81458.1 aver|OJJ03688.1 awen|OJJ41144.1 azon|OJJ44723.1

Group2462: abra|OJJ71359.1 acar|OOF97811.1 acla|EAW10177.1 afis|EAW25417.1 afla|EED53896.1 afum|EAL90076.1 agla|OJJ87059.1 akaw|GAA82633.1 aluc|OJZ87180.1 anid|CBF77573.1 anig|EHA20438.1 aory|EIT78493.1 asyd|OJJ53163.1 ater|EAU34568.1 atub|OJI81459.1 aver|OJJ03689.1 awen|OJJ41145.1 azon|OJJ44724.1

Group2463: abra|OJJ71360.1 acar|OOF97810.1 acla|EAW10176.1 afis|EAW25418.1 afla|EED53897.1 afum|EAL90077.1 agla|OJJ87060.1 akaw|GAA82632.1 aluc|OJZ87179.1 anid|CBF77571.1 anig|EHA20437.1 aory|EIT78486.1 asyd|OJJ53162.1 ater|EAU34569.1 atub|OJI81460.1 aver|OJJ03690.1 awen|OJJ41146.1 azon|OJJ44725.1

Group2464: abra|OJJ71361.1 acar|OOF97809.1 acla|EAW10175.1 afis|EAW25419.1 afla|EED53898.1 afum|EAL90078.1 agla|OJJ87061.1 akaw|GAA82631.1 aluc|OJZ87178.1 anid|CBF77569.1 anig|EHA20436.1 aory|EIT78503.1 asyd|OJJ53161.1 ater|EAU34570.1 atub|OJI81461.1 aver|OJJ03691.1 awen|OJJ41147.1 azon|OJJ44726.1

Group2465: abra|OJJ71363.1 acar|OOF97808.1 acla|EAW10174.1 afis|EAW25420.1 afla|EED53899.1 afum|EAL90079.1 agla|OJJ87064.1 akaw|GAA82630.1 aluc|OJZ87177.1 anid|CBF77567.1 anig|EHA20435.1 aory|EIT78497.1 asyd|OJJ53160.1 ater|EAU34571.1 atub|OJI81462.1 aver|OJJ03692.1 awen|OJJ41148.1 azon|OJJ44727.1

Group2466: abra|OJJ71365.1 acar|OOF97807.1 acla|EAW10173.1 afis|EAW25421.1 afla|EED53900.1 afum|EAL90080.2 agla|OJJ87063.1 akaw|GAA82629.1 aluc|OJZ87175.1 anid|CBF77563.1 anig|EHA20433.1 aory|EIT78488.1 asyd|OJJ53158.1 ater|EAU34572.1 atub|OJI81463.1 aver|OJJ03693.1 awen|OJJ41149.1 azon|OJJ44728.1

Group2467: abra|OJJ71366.1 acar|OOF97806.1 acla|EAW10172.1 afis|EAW25422.1 afla|EED53901.1 afum|EAL90081.1 agla|OJJ87062.1 akaw|GAA82628.1 aluc|OJZ87174.1 anid|CBF77561.1 anig|EHA20432.1 aory|EIT78499.1 asyd|OJJ53157.1 ater|EAU34573.1 atub|OJI81464.1 aver|OJJ03694.1 awen|OJJ41150.1 azon|OJJ44729.1

Group2468: abra|OJJ71367.1 acar|OOF97805.1 acla|EAW10171.1 afis|EAW25423.1 afla|EED53902.1 afum|EAL90082.1 agla|OJJ87065.1 akaw|GAA82627.1 aluc|OJZ87173.1 anid|CBF77559.1 anig|EHA20431.1 aory|EIT78495.1 asyd|OJJ53156.1 ater|EAU34577.1 atub|OJI81465.1 aver|OJJ03695.1 awen|OJJ41151.1 azon|OJJ44730.1

Group2469: abra|OJJ71368.1 acar|OOF97804.1 acla|EAW10170.1 afis|EAW25424.1 afla|EED53903.1 afum|EAL90083.1 agla|OJJ87066.1 akaw|GAA82626.1 aluc|OJZ87172.1 anid|CBF77557.1 anig|EHA20430.1 aory|EIT78480.1 asyd|OJJ53155.1 ater|EAU34578.1 atub|OJI81466.1 aver|OJJ03696.1 awen|OJJ41152.1 azon|OJJ44731.1

Group2470: abra|OJJ71370.1 acar|OOF97798.1 acla|EAW10168.1 afis|EAW25426.1 afla|EED53914.1 afum|EAL90085.1 agla|OJJ87070.1 akaw|GAA82624.1 aluc|OJZ87170.1 anid|CBF77553.1 anig|EHA20428.1 aory|EIT78484.1 asyd|OJJ53153.1 ater|EAU34591.1 atub|OJI81469.1 aver|OJJ03698.1 awen|OJJ41155.1 azon|OJJ44733.1

Group2471: abra|OJJ71371.1 acar|OOF97797.1 acla|EAW10166.1 afis|EAW25428.1 afla|EED53916.1 afum|EAL90087.1 agla|OJJ87073.1 akaw|GAA82623.1 aluc|OJZ87169.1 anid|CBF77549.1 anig|EHA20427.1 aory|EIT78314.1 asyd|OJJ53151.1 ater|EAU34598.1 atub|OJI81470.1 aver|OJJ03700.1 awen|OJJ41157.1 azon|OJJ44735.1

Group2472: abra|OJJ71372.1 acar|OOF97796.1 acla|EAW10165.1 afis|EAW25429.1 afla|EED53917.1 afum|EAL90088.1 agla|OJJ87074.1 akaw|GAA82622.1 aluc|OJZ87168.1 anid|CBF77547.1 anig|EHA20426.1 aory|EIT78324.1 asyd|OJJ53150.1 ater|EAU34600.1 atub|OJI81471.1 aver|OJJ03701.1 awen|OJJ41158.1 azon|OJJ44736.1

Group2473: abra|OJJ71374.1 acar|OOF97794.1 acla|EAW10163.1 afis|EAW25431.1 afla|EED53919.1 afum|EAL90089.1 agla|OJJ87076.1 akaw|GAA82620.1 aluc|OJZ87166.1 anid|CBF77543.1 anig|EHA20425.1 aory|EIT78269.1 asyd|OJJ53148.1 ater|EAU34603.1 atub|OJI81473.1 aver|OJJ03703.1 awen|OJJ41160.1 azon|OJJ44738.1

Group2474: abra|OJJ71376.1 acar|OOF97792.1 acla|EAW10148.1 afis|EAW25445.1 afla|EED53931.1 afum|EAL90103.1 agla|OJJ87089.1 akaw|GAA82618.1 aluc|OJZ87164.1 anid|CBF77610.1 anig|EHA20423.1 aory|EIT78328.1 asyd|OJJ53135.1 ater|EAU34615.1 atub|OJI81475.1 aver|OJJ03717.1 awen|OJJ41174.1 azon|OJJ44750.1

Group2475: abra|OJJ71378.1 acar|OOF97791.1 acla|EAW10146.1 afis|EAW25447.1 afla|EED53929.1 afum|EAL90105.1 agla|OJJ87086.1 akaw|GAA82616.1 aluc|OJZ87162.1 anid|CBF77606.1 anig|EHA20421.1 aory|EIT78352.1 asyd|OJJ53138.1 ater|EAU34613.1 atub|OJI81477.1 aver|OJJ03714.1 awen|OJJ41169.1 azon|OJJ44747.1

Group2476: abra|OJJ71379.1 acar|OOF97790.1 acla|EAW10154.1 afis|EAW25440.1 afla|EED53928.1 afum|EAL90098.1 agla|OJJ87085.1 akaw|GAA82615.1 aluc|OJZ87161.1 anid|CBF77602.1 anig|EHA20420.1

aory|EIT78271.1 asyd|OJJ53139.1 ater|EAU34612.1 atub|OJI81478.1 aver|OJJ03713.1 awen|OJJ41168.1  
azon|OJJ44746.1

Group2477: abra|OJJ71380.1 acar|OOF97789.1 acla|EAW10155.1 afis|EAW25439.1 afla|EED53927.1  
afum|EAL90097.1 agla|OJJ87084.1 akaw|GAA82614.1 aluc|OJZ87160.1 anid|CBF77600.1 anig|EHA20419.1  
aory|EIT78298.1 asyd|OJJ53140.1 ater|EAU34611.1 atub|OJI81480.1 aver|OJJ03712.1 awen|OJJ41167.1  
azon|OJJ44745.1

Group2478: abra|OJJ71384.1 acar|OOF97785.1 acla|EAW10159.1 afis|EAW25435.1 afla|EED53923.1  
afum|EAL90093.1 agla|OJJ87080.1 akaw|GAA82610.1 aluc|OJZ87156.1 anid|CBF77592.1 anig|EHA20415.1  
aory|EIT78272.1 asyd|OJJ53144.1 ater|EAU34607.1 atub|OJI81484.1 aver|OJJ03708.1 awen|OJJ41164.1  
azon|OJJ44742.1

Group2479: abra|OJJ71386.1 acar|OOF97783.1 acla|EAW10161.1 afis|EAW25433.1 afla|EED53921.1  
afum|EAL90091.1 agla|OJJ87078.1 akaw|GAA82608.1 aluc|OJZ87154.1 anid|CBF77590.1 anig|EHA20413.1  
aory|EIT78302.1 asyd|OJJ53146.1 ater|EAU34605.1 atub|OJI81486.1 aver|OJJ03706.1 awen|OJJ41162.1  
azon|OJJ44740.1

Group2480: abra|OJJ71389.1 acar|OOF97779.1 acla|EAW10150.1 afis|EAW25443.1 afla|EED53933.1  
afum|EAL90101.1 agla|OJJ87092.1 akaw|GAA82605.1 aluc|OJZ87151.1 anid|CBF77614.1 anig|EHA20410.1  
aory|EIT78302.1 asyd|OJJ53133.1 ater|EAU34616.1 atub|OJI81489.1 aver|OJJ03719.1 awen|OJJ41176.1  
azon|OJJ44752.1

Group2481: abra|OJJ71390.1 acar|OOF97778.1 acla|EAW10151.1 afis|EAW25442.1 afla|EED53934.1  
afum|EAL90100.1 agla|OJJ87094.1 akaw|GAA82604.1 aluc|OJZ87150.1 anid|CBF77616.1 anig|EHA20409.1  
aory|EIT78339.1 asyd|OJJ53132.1 ater|EAU34617.1 atub|OJI81490.1 aver|OJJ03720.1 awen|OJJ41177.1  
azon|OJJ44753.1

Group2482: abra|OJJ71393.1 acar|OOF97775.1 acla|EAW10145.1 afis|EAW25448.1 afla|EED53935.1  
afum|EAL90106.1 agla|OJJ87095.1 akaw|GAA82603.1 aluc|OJZ87148.1 anid|CBF77624.1 anig|EHA20407.1  
aory|EIT78256.1 asyd|OJJ53131.1 ater|EAU34618.1 atub|OJI81492.1 aver|OJJ03723.1 awen|OJJ41179.1  
azon|OJJ44755.1

Group2483: abra|OJJ71395.1 acar|OOF97774.1 acla|EAW10144.1 afis|EAW25449.1 afla|EED53936.1  
afum|EAL90108.1 agla|OJJ87101.1 akaw|GAA82602.1 aluc|OJZ87147.1 anid|CBF77626.1 anig|EHA20406.1  
aory|EIT78279.1 asyd|OJJ53130.1 ater|EAU34619.1 atub|OJI81494.1 aver|OJJ03724.1 awen|OJJ41180.1  
azon|OJJ44756.1

Group2484: abra|OJJ71397.1 acar|OOF97772.1 acla|EAW10142.1 afis|EAW25451.1 afla|EED53938.1  
afum|EAL90110.1 agla|OJJ87103.1 akaw|GAA82600.1 aluc|OJZ87145.1 anid|CBF77629.1 anig|EHA20404.1  
aory|EIT78274.1 asyd|OJJ53128.1 ater|EAU34621.1 atub|OJI81496.1 aver|OJJ03726.1 awen|OJJ41182.1  
azon|OJJ44758.1

Group2485: abra|OJJ71399.1 acar|OOF97771.1 acla|EAW10135.1 afis|EAW25452.1 afla|EED53940.1  
afum|EAL90111.1 agla|OJJ87105.1 akaw|GAA82598.1 aluc|OJZ87143.1 anid|CBF77056.1 anig|EHA20403.1  
aory|EIT78282.1 asyd|OJJ56993.1 ater|EAU34622.1 atub|OJI81498.1 aver|OJJ03294.1 awen|OJJ41184.1  
azon|OJJ44760.1

Group2486: abra|OJJ71400.1 acar|OOF97770.1 acla|EAW10134.1 afis|EAW25453.1 afla|EED53941.1  
afum|EAL90112.1 agla|OJJ87106.1 akaw|GAA82597.1 aluc|OJZ87142.1 anid|CBF77633.1 anig|EHA20402.1  
aory|EIT78319.1 asyd|OJJ53126.1 ater|EAU34623.1 atub|OJI81500.1 aver|OJJ03728.1 awen|OJJ41185.1  
azon|OJJ44761.1

Group2487: abra|OJJ71402.1 acar|OOF97768.1 acla|EAW10132.1 afis|EAW25455.1 afla|EED53944.1  
afum|EAL90114.1 agla|OJJ87108.1 akaw|GAA82595.1 aluc|OJZ87139.1 anid|CBF77637.1 anig|EHA20398.1  
aory|EIT78284.1 asyd|OJJ53124.1 ater|EAU34625.1 atub|OJI81502.1 aver|OJJ03730.1 awen|OJJ41187.1  
azon|OJJ44763.1

Group2488: abra|OJJ71404.1 acar|OOF97767.1 acla|EAW10131.1 afis|EAW25456.1 afla|EED53945.1  
afum|EAL90115.2 agla|OJJ87109.1 akaw|GAA82594.1 aluc|OJZ87138.1 anid|CBF77639.1 anig|EHA20397.1  
aory|EIT78325.1 asyd|OJJ53123.1 ater|EAU34626.1 atub|OJI81503.1 aver|OJJ03731.1 awen|OJJ41188.1  
azon|OJJ44764.1

Group2489: abra|OJJ71405.1 acar|OOF97766.1 acla|EAW10130.1 afis|EAW25457.1 afla|EED53946.1  
afum|EAL90117.1 agla|OJJ87110.1 akaw|GAA82593.1 aluc|OJZ87137.1 anid|CBF77641.1 anig|EHA20396.1  
aory|EIT78306.1 asyd|OJJ53122.1 ater|EAU34627.1 atub|OJI81504.1 aver|OJJ03732.1 awen|OJJ41189.1  
azon|OJJ44767.1

Group2490: abra|OJJ71407.1 acar|OOF97764.1 acla|EAW10128.1 afis|EAW25459.1 afla|EED53948.1  
afum|EAL90119.1 agla|OJJ87112.1 akaw|GAA82592.1 aluc|OJZ87135.1 anid|CBF77645.1 anig|EHA20394.1  
aory|EIT78349.1 asyd|OJJ53120.1 ater|EAU34629.1 atub|OJI81507.1 aver|OJJ03734.1 awen|OJJ41191.1  
azon|OJJ44768.1



Group2491: abra|OJJ71409.1 acla|EAW10127.1 afis|EAW25460.1 afla|EED53949.1 afum|EAL90121.1  
agla|OJJ87113.1 akaw|GAA82591.1 aluc|OJZ87131.1 anid|CBF77647.1 anig|EHA20393.1 aory|EIT78304.1  
asyd|OJJ53119.1 ater|EAU34630.1 atub|OJI81509.1 aver|OJJ03735.1 awen|OJJ41195.1 azon|OJJ44769.1  
afum|EAL87795.1

Group2492: abra|OJJ71413.1 acar|OOF90159.1 acla|EAW10125.1 afis|EAW25463.1 afla|EED53955.1  
afum|EAL90126.1 agla|OJJ87115.1 akaw|GAA82588.1 aluc|OJZ87128.1 anid|CBF77653.1 anig|EHA20389.1  
aory|EIT78291.1 asyd|OJJ53114.1 ater|EAU34632.1 atub|OJI81512.1 aver|OJJ03741.1 awen|OJJ41200.1  
azon|OJJ44771.1

Group2493: abra|OJJ71416.1 acar|OOF90160.1 acla|EAW10123.1 afis|EAW25464.1 afla|EED53958.1  
afum|EAL90127.1 agla|OJJ87116.1 akaw|GAA82586.1 aluc|OJZ87124.1 anid|CBF77655.1 anig|EHA20387.1  
aory|EIT78307.1 asyd|OJJ53115.1 ater|EAU34634.1 atub|OJI81516.1 aver|OJJ03740.1 awen|OJJ41201.1  
azon|OJJ44774.1

Group2494: abra|OJJ71418.1 acar|OOF97758.1 acla|EAW10122.1 afis|EAW25465.1 afla|EED53960.1  
afum|EAL90128.2 agla|OJJ87117.1 akaw|GAA82585.1 aluc|OJZ87122.1 anid|CBF77651.1 anig|EHA20386.1  
aory|EIT78354.1 asyd|OJJ53117.1 ater|EAU34635.1 atub|OJI81519.1 aver|OJJ03737.1 awen|OJJ41205.1  
azon|OJJ44775.1

Group2495: abra|OJJ71420.1 acar|OOF97757.1 acla|EAW10120.1 afis|EAW25467.1 afla|EED53963.1  
afum|EAL90131.1 agla|OJJ87118.1 akaw|GAA82582.1 aluc|OJZ87118.1 anid|CBF77666.1 anig|EHA20384.1  
aory|EIT78330.1 asyd|OJJ53102.1 ater|EAU34636.1 atub|OJI81522.1 aver|OJJ03751.1 awen|OJJ41206.1  
azon|OJJ44777.1

Group2496: abra|OJJ71421.1 acar|OOF97756.1 acla|EAW10111.1 afis|EAW25476.1 afla|EED53964.1  
afum|EAL90139.1 agla|OJJ87120.1 akaw|GAA82581.1 aluc|OJZ87117.1 anid|CBF77674.1 anig|EHA20383.1  
aory|EIT78326.1 asyd|OJJ53091.1 ater|EAU34640.1 atub|OJI81523.1 aver|OJJ03755.1 awen|OJJ41207.1  
azon|OJJ44779.1

Group2497: abra|OJJ71423.1 acar|OOF97755.1 acla|EAW10116.1 afis|EAW25471.1 afla|EED53968.1  
afum|EAL90135.1 agla|OJJ87122.1 akaw|GAA82579.1 aluc|OJZ87115.1 anid|CBF77682.1 anig|EHA20381.1  
aory|EIT78300.1 asyd|OJJ53088.1 ater|EAU34644.1 atub|OJI81525.1 aver|OJJ03758.1 awen|OJJ41212.1  
azon|OJJ44793.1

Group2498: abra|OJJ71424.1 acar|OOF97754.1 acla|EAW10119.1 afis|EAW25470.1 afla|EED53969.1  
afum|EAL90134.1 agla|OJJ87123.1 akaw|GAA82578.1 aluc|OJZ87114.1 anid|CBF77684.1 anig|EHA20380.1  
aory|EIT78285.1 asyd|OJJ53087.1 ater|EAU34646.1 atub|OJI81526.1 aver|OJJ03759.1 awen|OJJ41213.1  
azon|OJJ44792.1

Group2499: abra|OJJ71425.1 acar|OOF97753.1 acla|EAW10118.1 afis|EAW25469.1 afla|EED53970.1  
afum|EAL90133.1 agla|OJJ87124.1 akaw|GAA82577.1 aluc|OJZ87113.1 anid|CBF77686.1 anig|EHA20379.1  
aory|EIT78275.1 asyd|OJJ53086.1 ater|EAU34647.1 atub|OJI81527.1 aver|OJJ03760.1 awen|OJJ41214.1  
azon|OJJ44791.1

Group2500: abra|OJJ71426.1 acar|OOF97752.1 acla|EAW10117.1 afis|EAW25468.1 afla|EED53971.1  
afum|EAL90132.1 agla|OJJ87125.1 akaw|GAA82576.1 aluc|OJZ87112.1 anid|CBF77688.1 anig|EHA20378.1  
aory|EIT78308.1 asyd|OJJ53085.1 ater|EAU34648.1 atub|OJI81528.1 aver|OJJ03761.1 awen|OJJ41215.1  
azon|OJJ44790.1

Group2501: abra|OJJ71428.1 acar|OOF97750.1 acla|EAW10110.1 afis|EAW25477.1 afla|EED53972.1  
afum|EAL90140.1 agla|OJJ87126.1 akaw|GAA82575.1 aluc|OJZ87110.1 anid|CBF77709.1 anig|EHA20377.1  
aory|EIT78305.1 asyd|OJJ53077.1 ater|EAU34649.1 atub|OJI81529.1 aver|OJJ03771.1 awen|OJJ41216.1  
azon|OJJ44789.1

Group2502: abra|OJJ71432.1 acar|OOF90401.1 acla|EAW10106.1 afis|EAW25481.1 afla|EED53979.1  
afum|EAL90146.1 agla|OJJ87129.1 akaw|GAA82571.1 aluc|OJZ87106.1 anid|CBF77701.1 anig|EHA20374.1  
aory|EIT78311.1 asyd|OJJ53072.1 ater|EAU34652.1 atub|OJI81532.1 aver|OJJ03773.1 awen|OJJ41222.1  
azon|OJJ44785.1

Group2503: abra|OJJ71435.1 acar|OOF90399.1 acla|EAW10104.1 afis|EAW25483.1 afla|EED53981.1  
afum|EAL90148.1 agla|OJJ87131.1 akaw|GAA82569.1 aluc|OJZ87103.1 anid|CBF77698.1 anig|EHA20372.1  
aory|EIT78335.1 asyd|OJJ53070.1 ater|EAU34654.1 atub|OJI81535.1 aver|OJJ03775.1 awen|OJJ41224.1  
azon|OJJ44783.1

Group2504: abra|OJJ71507.1 acar|OOF96261.1 acla|EAW15065.1 afis|EAW20037.1 afla|EED45343.1  
afum|EAL85158.1 agla|OJJ88926.1 akaw|GAA89406.1 aluc|OJZ86246.1 anid|CBF84775.1 anig|EHA21618.1  
aory|EIT73818.1 asyd|OJJ63238.1 ater|EAU38647.1 atub|OJI84296.1 aver|OJI97718.1 awen|OJJ31792.1  
azon|OJJ46326.1

Group2505: abra|OJJ71542.1 acar|OOF96289.1 acla|EAW15096.1 afis|EAW20068.1 afla|EED45311.1  
afum|EAL85186.1 agla|OJJ88892.1 akaw|GAA89380.1 aluc|OJZ86280.1 anid|CBF84825.1 anig|EHA21591.1

aory|EIT73564.1 asyd|OJJ63207.1 ater|EAU38674.1 atub|OJI84259.1 aver|OJI97748.1 awen|OJJ31827.1 azon|OJJ46297.1

Group2506: abra|OJJ71556.1 acar|OOF90418.1 acla|EAW15109.1 afis|EAW20080.1 afla|EED45295.1 afum|EAL85199.1 agla|OJJ88879.1 akaw|GAA89367.1 aluc|OJZ86293.1 anid|CBF84857.1 anig|EHA21578.1 aory|EIT73533.1 asyd|OJJ63194.1 ater|EAU38688.1 atub|OJI84243.1 aver|OJI97761.1 awen|OJJ31840.1 azon|OJJ46283.1

Group2507: abra|OJJ71560.1 acar|OOF90420.1 acla|EAW15112.1 afis|EAW20083.1 afla|EED45291.1 afum|EAL85202.1 agla|OJJ88875.1 akaw|GAA89364.1 aluc|OJZ86297.1 anid|CBF84871.1 anig|EHA21575.1 aory|EIT73626.1 asyd|OJJ63191.1 ater|EAU38691.1 atub|OJI84240.1 aver|OJI97765.1 awen|OJJ31843.1 azon|OJJ46280.1

Group2508: abra|OJJ71561.1 acar|OOF90421.1 acla|EAW15113.1 afis|EAW20084.1 afla|EED45290.1 afum|EAL85203.1 agla|OJJ88874.1 akaw|GAA89363.1 aluc|OJZ86298.1 anid|CBF84873.1 anig|EHA21574.1 aory|EIT73721.1 asyd|OJJ63190.1 ater|EAU38692.1 atub|OJI84239.1 aver|OJI97766.1 awen|OJJ31844.1 azon|OJJ46279.1

Group2509: abra|OJJ71562.1 acar|OOF96298.1 acla|EAW15114.1 afis|EAW20085.1 afla|EED45289.1 afum|EAL85204.1 agla|OJJ88873.1 akaw|GAA89362.1 aluc|OJZ86299.1 anid|CBF84875.1 anig|EHA21573.1 aory|EIT73546.1 asyd|OJJ63189.1 ater|EAU38693.1 atub|OJI84237.1 aver|OJI97767.1 awen|OJJ31845.1 azon|OJJ46278.1

Group2510: abra|OJJ71563.1 acar|OOF96299.1 acla|EAW15115.1 afis|EAW20086.1 afla|EED45288.1 afum|EAL85205.1 agla|OJJ88872.1 akaw|GAA89361.1 aluc|OJZ86300.1 anid|CBF84877.1 anig|EHA21572.1 aory|EIT73633.1 asyd|OJJ63188.1 ater|EAU38694.1 atub|OJI84236.1 aver|OJI97768.1 awen|OJJ31846.1 azon|OJJ46277.1

Group2511: abra|OJJ71568.1 acar|OOF96302.1 acla|EAW15118.1 afis|EAW20088.1 afla|EED45282.1 afum|EAL85207.1 agla|OJJ88868.1 akaw|GAA89356.1 aluc|OJZ86305.1 anid|CBF84880.1 anig|EHA21567.1 aory|EIT73561.1 asyd|OJJ63185.1 ater|EAU38697.1 atub|OJI84231.1 aver|OJI97770.1 awen|OJJ31849.1 azon|OJJ46274.1

Group2512: abra|OJJ71570.1 acar|OOF96303.1 acla|EAW15119.1 afis|EAW20089.1 afla|EED45281.1 afum|EAL85208.1 agla|OJJ88867.1 akaw|GAA89355.1 aluc|OJZ86307.1 anid|CBF84882.1 anig|EHA21566.1 aory|EIT73628.1 asyd|OJJ63184.1 ater|EAU38698.1 atub|OJI84229.1 aver|OJI97771.1 awen|OJJ31851.1 azon|OJJ46273.1

Group2513: abra|OJJ71573.1 acar|OOF96305.1 acla|EAW15122.1 afis|EAW20092.1 afla|EED45278.1 afum|EAL85211.1 agla|OJJ88862.1 akaw|GAA89351.1 aluc|OJZ86310.1 anid|CBF84897.1 anig|EHA21563.1 aory|EIT73632.1 asyd|OJJ63175.1 ater|EAU38701.1 atub|OJI84225.1 aver|OJI97779.1 awen|OJJ31855.1 azon|OJJ46270.1

Group2514: abra|OJJ71577.1 acar|OOF96306.1 acla|EAW15124.1 afis|EAW20094.1 afla|EED45276.1 afum|EAL85212.1 agla|OJJ88860.1 akaw|GAA89347.1 aluc|OJZ86314.1 anid|CBF84893.1 anig|EHA21561.1 aory|EIT73817.1 asyd|OJJ63177.1 ater|EAU38704.1 atub|OJI84221.1 aver|OJI97777.1 awen|OJJ31857.1 azon|OJJ46268.1

Group2515: abra|OJJ71580.1 acar|OOF96310.1 acla|EAW15127.1 afis|EAW20097.1 afla|EED45273.1 afum|EAL85215.1 agla|OJJ88857.1 akaw|GAA89344.1 aluc|OJZ86317.1 anid|CBF84888.1 anig|EHA21558.1 aory|EIT73668.1 asyd|OJJ63180.1 ater|EAU38705.1 atub|OJI84218.1 aver|OJI97774.1 awen|OJJ31860.1 azon|OJJ46265.1

Group2516: abra|OJJ71584.1 acar|OOF96314.1 acla|EAW15129.1 afis|EAW20101.1 afla|EED53372.1 afum|EAL85218.1 agla|OJJ88854.1 akaw|GAA89339.1 aluc|OJZ86324.1 anid|CBF84901.1 anig|EHA21554.1 aory|EIT74990.1 asyd|OJJ63172.1 ater|EAU38721.1 atub|OJI84210.1 aver|OJI97782.1 awen|OJJ31871.1 azon|OJJ46263.1

Group2517: abra|OJJ71585.1 acar|OOF96315.1 acla|EAW15130.1 afis|EAW20102.1 afla|EED53371.1 afum|EAL85219.1 agla|OJJ88853.1 akaw|GAA89338.1 aluc|OJZ86325.1 anid|CBF84903.1 anig|EHA21553.1 aory|EIT75070.1 asyd|OJJ63171.1 ater|EAU38722.1 atub|OJI84209.1 aver|OJI97783.1 awen|OJJ31872.1 azon|OJJ46262.1

Group2518: abra|OJJ71586.1 acar|OOF96316.1 acla|EAW15131.1 afis|EAW20103.1 afla|EED53370.1 afum|EAL85220.1 agla|OJJ88851.1 akaw|GAA89337.1 aluc|OJZ86326.1 anid|CBF84905.1 anig|EHA21552.1 aory|EIT75110.1 asyd|OJJ63170.1 ater|EAU38723.1 atub|OJI84208.1 aver|OJI97784.1 awen|OJJ31875.1 azon|OJJ46260.1

Group2519: abra|OJJ71593.1 acar|OOF96321.1 acla|EAW15138.1 afis|EAW20110.1 afla|EED53362.1 afum|EAL85227.1 agla|OJJ88842.1 akaw|GAA89330.1 aluc|OJZ86335.1 anid|CBF84919.1 anig|EHA21546.1 aory|EIT74851.1 asyd|OJJ63164.1 ater|EAU38728.1 atub|OJI84200.1 aver|OJI97791.1 awen|OJJ31881.1 azon|OJJ46253.1

Group2520: abra|OJJ71594.1 acar|OOF96322.1 acla|EAW15139.1 afis|EAW20111.1 afla|EED53361.1 afum|EAL85228.2 agla|OJJ88841.1 akaw|GAA89329.1 aluc|OJZ86336.1 anid|CBF84921.1 anig|EHA21545.1 aory|EIT75176.1 asyd|OJJ63163.1 ater|EAU38729.1 atub|OJI84199.1 aver|OJI97792.1 awen|OJJ31882.1 azon|OJJ46252.1

Group2521: abra|OJJ71595.1 acar|OOF96323.1 acla|EAW15140.1 afis|EAW20112.1 afla|EED53360.1 afum|EAL85229.1 agla|OJJ88840.1 akaw|GAA89328.1 aluc|OJZ86337.1 anid|CBF84923.1 anig|EHA21544.1 aory|EIT75201.1 asyd|OJJ63162.1 ater|EAU38730.1 atub|OJI84198.1 aver|OJI97793.1 awen|OJJ31883.1 azon|OJJ46251.1

Group2522: abra|OJJ71596.1 acar|OOF96324.1 acla|EAW15141.1 afis|EAW20113.1 afla|EED53357.1 afum|EAL85230.1 agla|OJJ82514.1 akaw|GAA89327.1 aluc|OJZ86338.1 anid|CBF84924.1 anig|EHA21543.1 aory|EIT75098.1 asyd|OJJ63161.1 ater|EAU38732.1 atub|OJI84197.1 aver|OJI97794.1 azon|OJJ46250.1 awen|OJJ31884.1

Group2523: abra|OJJ71615.1 acar|OOF96331.1 acla|EAW15157.1 afis|EAW20125.1 afla|EED57251.1 afum|EAL85243.1 agla|OJJ88822.1 akaw|GAA89312.1 aluc|OJZ86356.1 anid|CBF84949.1 anig|EHA21534.1 aory|EIT74081.1 asyd|OJJ63147.1 ater|EAU38741.1 atub|OJI84178.1 aver|OJI97807.1 awen|OJJ31894.1 azon|OJJ46242.1

Group2524: abra|OJJ71621.1 acar|OOF96338.1 acla|EAW15161.1 afis|EAW20130.1 afla|EED57222.1 afum|EAL85246.1 agla|OJJ88805.1 akaw|GAA89305.1 aluc|OJZ86364.1 anid|CBF84956.1 anig|EHA21528.1 aory|EIT74137.1 asyd|OJJ63143.1 ater|EAU38747.1 atub|OJI84170.1 aver|OJI97811.1 awen|OJJ31996.1 azon|OJJ46051.1

Group2525: abra|OJJ71623.1 acar|OOF96340.1 acla|EAW15164.1 afis|EAW20133.1 afla|EED57219.1 afum|EAL85249.1 agla|OJJ88802.1 akaw|GAA89302.1 aluc|OJZ86366.1 anid|CBF84962.1 anig|EHA21526.1 aory|EIT74020.1 asyd|OJJ63140.1 ater|EAU38749.1 atub|OJI84168.1 aver|OJI97814.1 awen|OJJ32001.1 azon|OJJ46054.1

Group2526: abra|OJJ71624.1 acar|OOF96341.1 acla|EAW15165.1 afis|EAW20134.1 afla|EED57218.1 afum|EAL85250.1 agla|OJJ88801.1 akaw|GAA89301.1 aluc|OJZ86367.1 anid|CBF84964.1 anig|EHA21525.1 aory|EIT74013.1 asyd|OJJ63139.1 ater|EAU38750.1 atub|OJI84167.1 aver|OJI97815.1 awen|OJJ32002.1 azon|OJJ46055.1

Group2527: abra|OJJ71626.1 acar|OOF96343.1 acla|EAW15166.1 afis|EAW20135.1 afla|EED57217.1 afum|EBA27225.1 agla|OJJ88799.1 akaw|GAA89300.1 aluc|OJZ86368.1 anid|CBF84965.1 anig|EHA21524.1 aory|EIT73997.1 asyd|OJJ63138.1 ater|EAU38758.1 atub|OJI84166.1 aver|OJI97816.1 awen|OJJ32003.1 azon|OJJ46056.1

Group2528: abra|OJJ71627.1 acar|OOF96345.1 acla|EAW15168.1 afis|EAW20137.1 afla|EED57212.1 afum|EAL85252.1 agla|OJJ88798.1 akaw|GAA89298.1 aluc|OJZ86369.1 anid|CBF84968.1 anig|EHA21523.1 aory|EIT74094.1 asyd|OJJ63136.1 ater|EAU38756.1 atub|OJI84165.1 aver|OJI97818.1 awen|OJJ32006.1 azon|OJJ46058.1

Group2529: abra|OJJ71628.1 acar|OOF96346.1 acla|EAW15169.1 afis|EAW20138.1 afla|EED57210.1 afum|EAL85253.1 agla|OJJ88797.1 akaw|GAA89297.1 aluc|OJZ86370.1 anid|CBF84970.1 anig|EHA21522.1 aory|EIT74150.1 asyd|OJJ63135.1 ater|EAU38755.1 atub|OJI84164.1 aver|OJI97819.1 awen|OJJ32007.1 azon|OJJ46063.1

Group2530: abra|OJJ71630.1 acar|OOF96347.1 acla|EAW15172.1 afis|EAW20141.1 afla|EED57209.1 afum|EAL85256.1 agla|OJJ88791.1 akaw|GAA89295.1 aluc|OJZ86372.1 anid|CBF84973.1 anig|EHA21520.1 aory|EIT74038.1 asyd|OJJ63133.1 ater|EAU38753.1 atub|OJI84162.1 aver|OJI97821.1 awen|OJJ32010.1 azon|OJJ46079.1

Group2531: abra|OJJ71633.1 acar|OOF96350.1 acla|EAW15174.1 afis|EAW20143.1 afla|EED57205.1 afum|EAL85258.1 agla|OJJ88789.1 akaw|GAA89293.1 aluc|OJZ86376.1 anid|CBF84978.1 anig|EHA21518.1 aory|EIT74107.1 asyd|OJJ63130.1 atub|OJI84158.1 aver|OJI97824.1 awen|OJJ32013.1 azon|OJJ46076.1 ater|EAU38760.1

Group2532: abra|OJJ71637.1 acar|OOF96354.1 acla|EAW15177.1 afis|EAW20147.1 afla|EED57202.1 afum|EAL85262.1 agla|OJJ88786.1 akaw|GAA89289.1 aluc|OJZ86380.1 anid|CBF84980.1 anig|EHA21513.1 aory|EIT73995.1 asyd|OJJ63127.1 ater|EAU38763.1 atub|OJI84153.1 aver|OJI97828.1 awen|OJJ32021.1 azon|OJJ46069.1

Group2533: abra|OJJ71643.1 acar|OOF96359.1 acla|EAW15183.1 afis|EAW20153.1 afla|EED57197.1 afum|EAL85268.1 agla|OJJ88781.1 akaw|GAA89283.1 aluc|OJZ86386.1 anid|CBF84993.1 anig|EHA21509.1 aory|EIT74014.1 asyd|OJJ63121.1 ater|EAU38767.1 atub|OJI84147.1 aver|OJI97837.1 awen|OJJ32026.1 azon|OJJ46080.1

Group2534: abra|OJJ71649.1 acar|OOF96363.1 acla|EAW15186.1 afis|EAW20156.1 afla|EED57194.1 afum|EAL85271.1 agla|OJJ88774.1 akaw|GAA89280.1 aluc|OJZ86393.1 anid|CBF84998.1 anig|EHA21505.1

aory|EIT74147.1 asyd|OJJ63118.1 ater|EAU38770.1 atub|OJI84140.1 aver|OJI97841.1 awen|OJJ32031.1 azon|OJJ46083.1

Group2535: abra|OJJ71655.1 acar|OOF96369.1 acla|EAW15192.1 afis|EAW20161.1 afla|EED57187.1 afum|EAL85279.1 agla|OJJ88769.1 akaw|GAA89274.1 aluc|OJZ86401.1 anid|CBF85009.1 anig|EHA21499.1 aory|EIT74084.1 asyd|OJJ63112.1 ater|EAU38778.1 atub|OJI84134.1 aver|OJI97847.1 awen|OJJ32056.1 azon|OJJ46090.1

Group2536: abra|OJJ71656.1 acar|OOF96370.1 acla|EAW15194.1 afis|EAW20163.1 afla|EED57186.1 afum|EAL85281.1 agla|OJJ88767.1 akaw|GAA89273.1 aluc|OJZ86402.1 anid|CBF85011.1 anig|EHA21498.1 aory|EIT74088.1 asyd|OJJ63111.1 ater|EAU38794.1 atub|OJI84133.1 aver|OJI97849.1 awen|OJJ32058.1 azon|OJJ46092.1

Group2537: abra|OJJ71663.1 acar|OOF96373.1 acla|EAW15199.1 afis|EAW20165.1 afla|EED57183.1 afum|EAL85283.1 agla|OJJ88764.1 akaw|GAA89270.1 aluc|OJZ86405.1 anid|CBF85022.1 anig|EHA21494.1 aory|EIT74158.1 asyd|OJJ63107.1 ater|EAU38797.1 atub|OJI84126.1 aver|OJI97854.1 awen|OJJ32062.1 azon|OJJ46095.1

Group2538: abra|OJJ71665.1 acar|OOF96375.1 acla|EAW15202.1 afis|EAW20167.1 afla|EED57181.1 afum|EAL85285.1 agla|OJJ88762.1 akaw|GAA89268.1 aluc|OJZ86407.1 anid|CBF85019.1 anig|EHA21492.1 aory|EIT74007.1 asyd|OJJ63105.1 ater|EAU38799.1 atub|OJI84124.1 aver|OJI97856.1 awen|OJJ32064.1 azon|OJJ46097.1

Group2539: abra|OJJ71668.1 acar|OOF96380.1 acla|EAW15208.1 afis|EAW20173.1 afla|EED57175.1 afum|EAL85291.1 agla|OJJ88757.1 akaw|GAA89263.1 aluc|OJZ86411.1 anid|CBF85031.1 anig|EHA21488.1 aory|EIT74021.1 asyd|OJJ63101.1 ater|EAU35209.1 atub|OJI84120.1 aver|OJI97861.1 awen|OJJ32068.1 azon|OJJ46101.1

Group2540: abra|OJJ71670.1 acar|OOF96382.1 acla|EAW15210.1 afis|EAW20175.1 afla|EED57173.1 afum|EAL85293.1 agla|OJJ84691.1 akaw|GAA89261.1 aluc|OJZ86413.1 anid|CBF85035.1 anig|EHA21486.1 aory|EIT73987.1 asyd|OJJ63099.1 ater|EAU35211.1 atub|OJI84118.1 aver|OJI97863.1 awen|OJJ31174.1 azon|OJJ46104.1

Group2541: abra|OJJ71671.1 acar|OOF96383.1 acla|EAW15211.1 afis|EAW20176.1 afla|EED57172.1 afum|EAL85294.1 agla|OJJ84690.1 akaw|GAA89260.1 aluc|OJZ86414.1 anid|CBF85037.1 anig|EHA21485.1 aory|EIT73964.1 asyd|OJJ63098.1 ater|EAU35212.1 atub|OJI84117.1 aver|OJI97864.1 awen|OJJ31175.1 azon|OJJ46105.1

Group2542: abra|OJJ71672.1 acar|OOF96384.1 acla|EAW15212.1 afis|EAW20177.1 afla|EED57171.1 afum|EAL85295.1 agla|OJJ84689.1 akaw|GAA89259.1 aluc|OJZ86415.1 anid|CBF85039.1 anig|EHA21484.1 aory|EIT74066.1 asyd|OJJ63097.1 ater|EAU35213.1 atub|OJI84116.1 aver|OJI97865.1 awen|OJJ31176.1 azon|OJJ46106.1

Group2543: abra|OJJ71675.1 acar|OOF96386.1 acla|EAW15214.1 afis|EAW20179.1 afla|EED57169.1 afum|EAL85297.1 agla|OJJ84687.1 akaw|GAA89257.1 aluc|OJZ86417.1 anid|CBF85042.1 anig|EHA21482.1 aory|EIT74151.1 asyd|OJJ63095.1 ater|EAU35215.1 atub|OJI84114.1 aver|OJI97867.1 awen|OJJ31178.1 azon|OJJ46109.1

Group2544: abra|OJJ71676.1 acar|OOF96387.1 acla|EAW15215.1 afis|EAW20180.1 afla|EED57168.1 afum|EAL85298.1 agla|OJJ84686.1 akaw|GAA89256.1 aluc|OJZ86418.1 anid|CBF85044.1 anig|EHA21481.1 aory|EIT73991.1 asyd|OJJ63094.1 ater|EAU35216.1 atub|OJI84113.1 aver|OJI97868.1 awen|OJJ31179.1 azon|OJJ46110.1

Group2545: abra|OJJ71677.1 acar|OOF96388.1 acla|EAW15216.1 afis|EAW20181.1 afla|EED57167.1 afum|EAL85299.1 agla|OJJ84685.1 akaw|GAA89255.1 aluc|OJZ86419.1 anid|CBF85046.1 anig|EHA21480.1 aory|EIT74127.1 asyd|OJJ63093.1 ater|EAU35217.1 atub|OJI84112.1 aver|OJI97869.1 awen|OJJ31180.1 azon|OJJ46111.1

Group2546: abra|OJJ71678.1 acar|OOF96389.1 acla|EAW15217.1 afis|EAW20182.1 afla|EED57166.1 afum|EAL85300.1 agla|OJJ84684.1 akaw|GAA89254.1 aluc|OJZ86420.1 anid|CBF85048.1 anig|EHA21479.1 aory|EIT74003.1 asyd|OJJ63092.1 ater|EAU35218.1 atub|OJI84111.1 aver|OJI97870.1 awen|OJJ31181.1 azon|OJJ46112.1

Group2547: abra|OJJ71679.1 acar|OOF96390.1 acla|EAW15218.1 afis|EAW20183.1 afla|EED57165.1 afum|EAL85301.1 agla|OJJ84683.1 akaw|GAA89253.1 aluc|OJZ86421.1 anid|CBF85050.1 anig|EHA21478.1 aory|EIT74002.1 asyd|OJJ63091.1 ater|EAU35219.1 atub|OJI84110.1 aver|OJI97871.1 awen|OJJ31182.1 azon|OJJ46113.1

Group2548: abra|OJJ71682.1 acar|OOF96393.1 acla|EAW15221.1 afis|EAW20186.1 afla|EED57164.1 afum|EAL85305.1 agla|OJJ84680.1 akaw|GAA89250.1 aluc|OJZ86424.1 anid|CBF85054.1 anig|EHA21474.1 aory|EIT74048.1 asyd|OJJ63088.1 ater|EAU35222.1 atub|OJI84107.1 aver|OJI97874.1 awen|OJJ31186.1 azon|OJJ46116.1

Group2549: abra|OJJ71685.1 acar|OOF96395.1 acla|EAW15223.1 afis|EAW20188.1 afla|EED57158.1 afum|EAL85307.1 agla|OJJ84678.1 akaw|GAA89248.1 aluc|OJZ86427.1 anid|CBF85058.1 anig|EHA21472.1 aory|EIT73974.1 asyd|OJJ63086.1 ater|EAU35223.1 atub|OJI84104.1 aver|OJI97876.1 awen|OJJ31188.1 azon|OJJ46118.1

Group2550: abra|OJJ71686.1 acar|OOF96396.1 acla|EAW15224.1 afis|EAW20189.1 afla|EED57157.1 afum|EAL85308.1 agla|OJJ84677.1 akaw|GAA89247.1 aluc|OJZ86428.1 anid|CBF85060.1 anig|EHA21471.1 aory|EIT74135.1 asyd|OJJ63085.1 ater|EAU35224.1 atub|OJI84103.1 aver|OJI97877.1 awen|OJJ31189.1 azon|OJJ46119.1

Group2551: abra|OJJ71687.1 acar|OOF96397.1 acla|EAW15225.1 afis|EAW20190.1 afla|EED57156.1 afum|EAL85309.1 agla|OJJ84676.1 akaw|GAA89246.1 aluc|OJZ86429.1 anid|CBF85062.1 anig|EHA21470.1 aory|EIT74033.1 asyd|OJJ63084.1 ater|EAU35225.1 atub|OJI84102.1 aver|OJI97879.1 awen|OJJ31190.1 azon|OJJ46124.1

Group2552: abra|OJJ71689.1 acar|OOF96398.1 acla|EAW15226.1 afis|EAW20191.1 afla|EED57155.1 afum|EAL85310.1 agla|OJJ84675.1 akaw|GAA89245.1 aluc|OJZ86431.1 anid|CBF85064.1 anig|EHA21469.1 aory|EIT74046.1 asyd|OJJ63083.1 ater|EAU35226.1 atub|OJI84100.1 aver|OJI97881.1 awen|OJJ31196.1 azon|OJJ46120.1

Group2553: abra|OJJ71691.1 acar|OOF96399.1 acla|EAW15228.1 afis|EAW20192.1 afla|EED57152.1 afum|EAL85312.2 agla|OJJ84673.1 akaw|GAA89244.1 aluc|OJZ86435.1 anid|CBF85065.1 anig|EHA21468.1 aory|EIT74165.1 asyd|OJJ63082.1 ater|EAU32000.1 atub|OJI84095.1 aver|OJI97882.1 awen|OJJ31197.1 azon|OJJ46125.1

Group2554: abra|OJJ71692.1 acar|OOF96400.1 acla|EAW15229.1 afis|EAW20193.1 afla|EED57151.1 afum|EAL85313.1 agla|OJJ84672.1 akaw|GAA89243.1 aluc|OJZ86436.1 anid|CBF85067.1 anig|EHA21467.1 aory|EIT74001.1 asyd|OJJ63081.1 ater|EAU32001.1 atub|OJI84094.1 aver|OJI97883.1 awen|OJJ31198.1 azon|OJJ46126.1

Group2555: abra|OJJ71693.1 acar|OOF96402.1 acla|EAW15230.1 afis|EAW20194.1 afla|EED57150.1 afum|EAL85314.1 agla|OJJ84671.1 akaw|GAA89242.1 aluc|OJZ86437.1 anid|CBF85069.1 anig|EHA21466.1 aory|EIT74019.1 asyd|OJJ63080.1 ater|EAU32002.1 atub|OJI84093.1 aver|OJI97884.1 awen|OJJ31199.1 azon|OJJ46127.1

Group2556: abra|OJJ71697.1 acar|OOF96405.1 acla|EAW15233.1 afis|EAW20197.1 afla|EED57147.1 afum|EAL85317.1 agla|OJJ84668.1 akaw|GAA89238.1 aluc|OJZ86440.1 anid|CBF85078.1 anig|EHA21461.1 aory|EIT74146.1 asyd|OJJ63076.1 ater|EAU32005.1 atub|OJI84088.1 aver|OJI97888.1 awen|OJJ31203.1 azon|OJJ46128.1

Group2557: abra|OJJ71699.1 acar|OOF96407.1 acla|EAW15235.1 afis|EAW20199.1 afla|EED57145.1 afum|EAL85319.1 agla|OJJ84666.1 akaw|GAA89236.1 aluc|OJZ86442.1 anid|CBF85082.1 anig|EHA21459.1 aory|EIT74005.1 asyd|OJJ63073.1 ater|EAU32007.1 atub|OJI84086.1 aver|OJI97890.1 awen|OJJ31205.1 azon|OJJ41971.1

Group2558: abra|OJJ71700.1 acar|OOF96408.1 acla|EAW15236.1 afis|EAW20200.1 afla|EED57144.1 afum|EAL85320.1 agla|OJJ84665.1 akaw|GAA89235.1 aluc|OJZ86443.1 anid|CBF85084.1 anig|EHA21458.1 aory|EIT74097.1 asyd|OJJ63072.1 ater|EAU32008.1 atub|OJI84085.1 aver|OJI97891.1 awen|OJJ31206.1 azon|OJJ46130.1

Group2559: abra|OJJ71701.1 acar|OOF96409.1 acla|EAW15237.1 afis|EAW20201.1 afla|EED57143.1 afum|EAL85321.1 agla|OJJ84663.1 akaw|GAA89234.1 aluc|OJZ86444.1 anid|CBF85085.1 anig|EHA21457.1 aory|EIT73998.1 asyd|OJJ63070.1 ater|EAU32009.1 atub|OJI84084.1 aver|OJI97892.1 awen|OJJ31207.1 azon|OJJ46131.1

Group2560: abra|OJJ71705.1 acar|OOF96415.1 afis|EAW20206.1 afla|EED57137.1 afum|EAL85324.1 agla|OJJ84661.1 akaw|GAA89232.1 aluc|OJZ86447.1 anig|EHA21454.1 aory|EIT74126.1 asyd|OJJ63064.1 ater|EAU32017.1 atub|OJI84081.1 aver|OJI97897.1 awen|OJJ31210.1 acla|EAW15239.1 anid|CBF85093.1 azon|OJJ46134.1

Group2561: abra|OJJ71714.1 acar|OOF96419.1 acla|EAW06442.1 afis|EAW18547.1 afla|EED52833.1 afum|EAL93247.1 agla|OJJ81584.1 akaw|GAA85175.1 aluc|OJZ86459.1 anid|CBF70177.1 anig|EHA21449.1 aory|EIT78161.1 asyd|OJJ58793.1 ater|EAU30022.1 atub|OJI84068.1 aver|OJJ01397.1 awen|OJJ31099.1 azon|OJJ46565.1

Group2562: abra|OJJ71715.1 acar|OOF96420.1 acla|EAW06441.1 afis|EAW18546.1 afla|EED52832.1 afum|EAL93246.1 agla|OJJ81587.1 akaw|GAA85174.1 aluc|OJZ86461.1 anid|CBF70265.1 anig|EHA21448.1 aory|EIT78207.1 asyd|OJJ58750.1 ater|EAU34832.1 atub|OJI84067.1 aver|OJJ01360.1 awen|OJJ31100.1 azon|OJJ46562.1

Group2563: abra|OJJ71716.1 acar|OOF96421.1 acla|EAW06440.1 afis|EAW18545.1 afla|EED52831.1 afum|EAL93245.1 agla|OJJ81589.1 akaw|GAA85173.1 aluc|OJZ86462.1 anid|CBF70267.1 anig|EHA21447.1

aory|EIT78194.1 asyd|OJJ58749.1 ater|EAU34833.1 atub|OJI84066.1 aver|OJJ01359.1 awen|OJJ31101.1 azon|OJJ46561.1

Group2564: abra|OJJ71719.1 acar|OOF96423.1 acla|EAW06439.1 afis|EAW18543.1 afla|EED52829.1 afum|EAL93243.1 agla|OJJ81591.1 akaw|GAA85171.1 aluc|OJZ86465.1 anid|CBF70269.1 anig|EHA21445.1 aory|EIT78205.1 asyd|OJJ58748.1 ater|EAU34834.1 atub|OJI84064.1 aver|OJJ01358.1 awen|OJJ31103.1 azon|OJJ46558.1

Group2565: abra|OJJ71720.1 acar|OOF96425.1 acla|EAW06444.1 afis|EAW18549.1 afla|EED52828.1 afum|EAL93249.1 agla|OJJ81592.1 akaw|GAA85170.1 aluc|OJZ86466.1 anid|CBF70271.1 anig|EHA21444.1 aory|EIT78197.1 asyd|OJJ58747.1 ater|EAU34836.1 atub|OJI84063.1 aver|OJJ01357.1 awen|OJJ31105.1 azon|OJJ46557.1

Group2566: abra|OJJ71742.1 acar|OOF96433.1 acla|EAW06446.1 afis|EAW18551.1 afla|EED52823.1 afum|EAL93251.1 agla|OJJ81605.1 akaw|GAA85156.1 aluc|OJZ86481.1 anid|CBF70277.1 anig|EHA22164.1 aory|EIT78237.1 asyd|OJJ58744.1 ater|EAU34839.1 atub|OJI84049.1 aver|OJJ01354.1 awen|OJJ31111.1 azon|OJJ46587.1

Group2567: abra|OJJ71745.1 acar|OOF96436.1 acla|EAW06449.1 afis|EAW18553.1 afla|EED52822.1 afum|EAL93253.1 agla|OJJ81603.1 akaw|GAA85159.1 aluc|OJZ86478.1 anid|CBF70280.1 anig|EHA22162.1 aory|EIT78230.1 asyd|OJJ58741.1 ater|EAU34841.1 atub|OJI84052.1 aver|OJJ01351.1 awen|OJJ31114.1 azon|OJJ46590.1

Group2568: abra|OJJ71803.1 acar|OOF96483.1 acla|EAW13844.1 afis|EAW18558.1 afla|EED52808.1 afum|EAL93258.1 agla|OJJ81601.1 akaw|GAA85107.1 aluc|OJZ86533.1 anid|CBF70286.1 anig|EHA22113.1 aory|EIT78195.1 asyd|OJJ58737.1 ater|EAU34847.1 atub|OJI83988.1 aver|OJJ01348.1 awen|OJJ31116.1 azon|OJJ46596.1

Group2569: abra|OJJ71806.1 acar|OOF96484.1 acla|EAW13845.1 afis|EAW18559.1 afla|EED52807.1 afum|EAL93259.1 agla|OJJ81600.1 akaw|GAA85106.1 aluc|OJZ86536.1 anid|CBF70288.1 anig|EHA22112.1 aory|EIT78169.1 asyd|OJJ58735.1 ater|EAU34848.1 atub|OJI83987.1 aver|OJJ01347.1 awen|OJJ31117.1 azon|OJJ46595.1

Group2570: abra|OJJ71809.1 acar|OOF96487.1 acla|EAW13848.1 afis|EAW18562.1 afla|EED52792.1 afum|EAL93263.1 agla|OJJ81609.1 akaw|GAA85103.1 aluc|OJZ86539.1 anid|CBF70294.1 anig|EHA22110.1 aory|EIT78177.1 asyd|OJJ58732.1 ater|EAU34850.1 atub|OJI83984.1 aver|OJJ01344.1 awen|OJJ31120.1 azon|OJJ46597.1

Group2571: abra|OJJ71810.1 acar|OOF96488.1 acla|EAW13849.1 afis|EAW18563.1 afla|EED52791.1 afum|EAL93265.2 agla|OJJ81612.1 akaw|GAA85102.1 aluc|OJZ86541.1 anid|CBF70298.1 anig|EHA22109.1 aory|EIT78239.1 asyd|OJJ58730.1 ater|EAU34851.1 atub|OJI83982.1 aver|OJJ01343.1 awen|OJJ31121.1 azon|OJJ46602.1

Group2572: abra|OJJ71811.1 acar|OOF96489.1 acla|EAW13850.1 afis|EAW18564.1 afla|EED52790.1 afum|EAL93266.1 agla|OJJ81613.1 akaw|GAA85101.1 aluc|OJZ86542.1 anid|CBF70300.1 anig|EHA22108.1 aory|EIT78209.1 asyd|OJJ58729.1 ater|EAU34852.1 atub|OJI83981.1 aver|OJJ01342.1 awen|OJJ31122.1 azon|OJJ46603.1

Group2573: abra|OJJ71813.1 acar|OOF96491.1 acla|EAW13853.1 afis|EAW18567.1 afla|EED52786.1 afum|EAL93269.2 agla|OJJ81616.1 akaw|GAA85097.1 aluc|OJZ86546.1 anid|CBF70305.1 anig|EHA22104.1 aory|EIT78200.1 asyd|OJJ58726.1 ater|EAU34854.1 atub|OJI83977.1 aver|OJJ01339.1 awen|OJJ31124.1 azon|OJJ46605.1

Group2574: abra|OJJ71816.1 acar|OOF96493.1 acla|EAW13856.1 afis|EAW18570.1 afla|EED52781.1 afum|EAL93273.1 agla|OJJ81621.1 akaw|GAA85094.1 aluc|OJZ86548.1 anid|CBF70311.1 anig|EHA22101.1 aory|EIT78224.1 asyd|OJJ58723.1 ater|EAU34855.1 atub|OJI83974.1 aver|OJJ01336.1 awen|OJJ31127.1 azon|OJJ46608.1

Group2575: abra|OJJ71817.1 acar|OOF96494.1 acla|EAW13857.1 afis|EAW18571.1 afla|EED52780.1 afum|EAL93274.1 agla|OJJ81622.1 akaw|GAA85093.1 aluc|OJZ86549.1 anid|CBF70313.1 anig|EHA22100.1 aory|EIT78222.1 asyd|OJJ58722.1 ater|EAU34856.1 atub|OJI83973.1 aver|OJJ01335.1 awen|OJJ31128.1 azon|OJJ46609.1

Group2576: abra|OJJ71818.1 acar|OOF96495.1 acla|EAW13860.1 afis|EAW18572.1 afla|EED52776.1 afum|EAL93275.1 agla|OJJ81623.1 akaw|GAA85092.1 aluc|OJZ86550.1 anid|CBF70315.1 anig|EHA22099.1 aory|EIT78170.1 asyd|OJJ58721.1 ater|EAU34857.1 atub|OJI83972.1 aver|OJJ01334.1 awen|OJJ31129.1 azon|OJJ46610.1

Group2577: abra|OJJ71819.1 acar|OOF96496.1 acla|EAW13861.1 afis|EAW18573.1 afla|EED52775.1 afum|EAL93276.1 agla|OJJ81624.1 akaw|GAA85091.1 aluc|OJZ86551.1 anid|CBF70317.1 anig|EHA22098.1 aory|EIT78219.1 asyd|OJJ58720.1 ater|EAU34858.1 atub|OJI83971.1 aver|OJJ01333.1 awen|OJJ31130.1 azon|OJJ46611.1

Group2578: abra|OJJ71820.1 acar|OOF96497.1 acla|EAW13862.1 afis|EAW18574.1 afla|EED52774.1 afum|EAL93277.1 agla|OJJ81625.1 akaw|GAA85090.1 aluc|OJZ86552.1 anid|CBF70319.1 anig|EHA22097.1 aory|EIT78236.1 asyd|OJJ58719.1 ater|EAU34869.1 atub|OJI83970.1 aver|OJJ01332.1 awen|OJJ31131.1 azon|OJJ46612.1

Group2579: abra|OJJ71821.1 acar|OOF96498.1 acla|EAW13863.1 afis|EAW18575.1 afla|EED52773.1 afum|EAL93278.1 agla|OJJ81626.1 akaw|GAA85089.1 aluc|OJZ86553.1 anid|CBF70320.1 anig|EHA22096.1 aory|EIT78159.1 asyd|OJJ58718.1 ater|EAU34868.1 atub|OJI83969.1 aver|OJJ01331.1 awen|OJJ31132.1 azon|OJJ46613.1

Group2580: abra|OJJ71823.1 acar|OOF96499.1 acla|EAW13864.1 afis|EAW18576.1 afla|EED52772.1 afum|EAL93279.1 agla|OJJ81627.1 akaw|GAA85087.1 aluc|OJZ86555.1 anid|CBF70322.1 anig|EHA22094.1 aory|EIT78160.1 asyd|OJJ58717.1 ater|EAU34867.1 atub|OJI83967.1 aver|OJJ01330.1 awen|OJJ31133.1 azon|OJJ46614.1

Group2581: abra|OJJ71824.1 acar|OOF96500.1 acla|EAW13865.1 afis|EAW18577.1 afla|EED52771.1 afum|EAL93280.1 agla|OJJ81628.1 akaw|GAA85086.1 aluc|OJZ86556.1 anid|CBF70324.1 anig|EHA22093.1 aory|EIT78235.1 asyd|OJJ58716.1 ater|EAU34866.1 atub|OJI83966.1 aver|OJJ01329.1 awen|OJJ31134.1 azon|OJJ46615.1

Group2582: abra|OJJ71829.1 acar|OOF96505.1 acla|EAW13866.1 afis|EAW18578.1 afla|EED52770.1 afum|EAL93281.1 agla|OJJ81629.1 akaw|GAA85082.1 aluc|OJZ86561.1 anid|CBF70354.1 anig|EHA22089.1 aory|EIT78184.1 asyd|OJJ58657.1 ater|EAU34861.1 atub|OJI83960.1 aver|OJJ01265.1 awen|OJJ31135.1 azon|OJJ46616.1

Group2583: abra|OJJ71837.1 acar|OOF90146.1 acla|EAW13868.1 afis|EAW18580.1 afla|EED52766.1 afum|EAL93284.1 agla|OJJ81631.1 akaw|GAA85078.1 aluc|OJZ86568.1 anid|CBF70360.1 anig|EHA22086.1 aory|EIT78154.1 asyd|OJJ58653.1 ater|EAU34873.1 atub|OJI83953.1 aver|OJJ01262.1 awen|OJJ31143.1 azon|OJJ46619.1

Group2584: abra|OJJ71840.1 acar|OOF90149.1 acla|EAW13871.1 afis|EAW18582.1 afla|EED52762.1 afum|EAL93286.1 agla|OJJ81634.1 akaw|GAA85077.1 aluc|OJZ86573.1 anid|CBF70362.1 anig|EHA22084.1 aory|EIT78249.1 asyd|OJJ58652.1 ater|EAU34876.1 atub|OJI83950.1 aver|OJJ01258.1 awen|OJJ31146.1 azon|OJJ46621.1

Group2585: abra|OJJ71842.1 acar|OOF96511.1 acla|EAW13873.1 afis|EAW18585.1 afla|EED52761.1 afum|EAL93289.1 agla|OJJ81636.1 akaw|GAA85075.1 aluc|OJZ86575.1 anid|CBF70366.1 anig|EHA22082.1 aory|EIT78178.1 asyd|OJJ58650.1 ater|EAU34878.1 atub|OJI83948.1 aver|OJJ01256.1 awen|OJJ31148.1 azon|OJJ46623.1

Group2586: abra|OJJ71843.1 acar|OOF96512.1 acla|EAW13874.1 afis|EAW18586.1 afla|EED52760.1 afum|EAL93290.1 agla|OJJ81637.1 akaw|GAA85074.1 aluc|OJZ86576.1 anid|CBF70370.1 anig|EHA22081.1 aory|EIT78214.1 asyd|OJJ58649.1 ater|EAU34879.1 atub|OJI83946.1 aver|OJJ01255.1 awen|OJJ31149.1 azon|OJJ46624.1

Group2587: abra|OJJ71844.1 acar|OOF96513.1 acla|EAW13875.1 afis|EAW18587.1 afla|EED52759.1 afum|EAL93294.2 agla|OJJ81638.1 akaw|GAA85073.1 aluc|OJZ86577.1 anid|CBF70372.1 anig|EHA22080.1 aory|EIT78199.1 asyd|OJJ58648.1 ater|EAU34880.1 atub|OJI83945.1 aver|OJJ01254.1 awen|OJJ31150.1 azon|OJJ46625.1

Group2588: abra|OJJ71845.1 acar|OOF96514.1 acla|EAW13876.1 afis|EAW18588.1 afla|EED52758.1 afum|EAL93295.2 agla|OJJ81640.1 akaw|GAA85072.1 aluc|OJZ86578.1 anid|CBF70374.1 anig|EHA22079.1 aory|EIT78218.1 asyd|OJJ58647.1 ater|EAU34881.1 atub|OJI83944.1 aver|OJJ01253.1 awen|OJJ31151.1 azon|OJJ46626.1

Group2589: abra|OJJ71846.1 acar|OOF96515.1 acla|EAW13877.1 afis|EAW18589.1 afla|EED52757.1 afum|EAL93296.2 agla|OJJ81641.1 akaw|GAA85071.1 aluc|OJZ86579.1 anid|CBF70375.1 anig|EHA22078.1 aory|EIT78231.1 asyd|OJJ58646.1 ater|EAU34882.1 atub|OJI83943.1 aver|OJJ01252.1 awen|OJJ31152.1 azon|OJJ46627.1

Group2590: abra|OJJ71851.1 acar|OOF96521.1 acla|EAW13883.1 afis|EAW18595.1 afla|EED52752.1 afum|EAL93303.1 agla|OJJ81647.1 akaw|GAA85066.1 aluc|OJZ86585.1 anid|CBF70391.1 anig|EHA22075.1 aory|EIT78172.1 asyd|OJJ58636.1 ater|EAU34889.1 atub|OJI83938.1 aver|OJJ01242.1 awen|OJJ31158.1 azon|OJJ46633.1

Group2591: abra|OJJ71854.1 acar|OOF96524.1 acla|EAW13886.1 afis|EAW18598.1 afla|EED52749.1 afum|EAL93306.1 agla|OJJ81651.1 akaw|GAA85063.1 aluc|OJZ86588.1 anid|CBF70397.1 anig|EHA22072.1 aory|EIT78201.1 asyd|OJJ58633.1 ater|EAU34892.1 atub|OJI83935.1 aver|OJJ01239.1 awen|OJJ31161.1 azon|OJJ46637.1

Group2592: abra|OJJ71855.1 acar|OOF96525.1 acla|EAW13887.1 afis|EAW18599.1 afla|EED52748.1 afum|EAL93307.1 agla|OJJ81652.1 akaw|GAA85062.1 aluc|OJZ86589.1 anid|CBF70399.1 anig|EHA22071.1

aory|EIT78171.1 asyd|OJJ58632.1 ater|EAU34893.1 atub|OJI83934.1 aver|OJJ01238.1 awen|OJJ31162.1 azon|OJJ46638.1

Group2593: abra|OJJ71857.1 acar|OOF96527.1 acla|EAW13889.1 afis|EAW18601.1 afla|EED52746.1 afum|EAL93309.1 agla|OJJ81653.1 akaw|GAA85060.1 aluc|OJZ86591.1 anid|CBF70403.1 anig|EHA22069.1 aory|EIT78188.1 asyd|OJJ58630.1 ater|EAU34895.1 atub|OJI83932.1 aver|OJJ01236.1 awen|OJJ31166.1 azon|OJJ46640.1

Group2594: abra|OJJ71858.1 acar|OOF96528.1 acla|EAW13890.1 afis|EAW18602.1 afla|EED52745.1 afum|EAL93310.1 agla|OJJ81654.1 akaw|GAA85059.1 aluc|OJZ86592.1 anid|CBF70405.1 anig|EHA22068.1 aory|EIT78217.1 asyd|OJJ58629.1 ater|EAU34896.1 atub|OJI83931.1 aver|OJJ01235.1 awen|OJJ31167.1 azon|OJJ46641.1

Group2595: abra|OJJ71861.1 acar|OOF96533.1 acla|EAW13892.1 afis|EAW18604.1 afla|EED52743.1 afum|EAL93312.1 agla|OJJ81656.1 akaw|GAA85054.1 aluc|OJZ86598.1 anid|CBF70409.1 anig|EHA22064.1 aory|EIT78243.1 asyd|OJJ58627.1 ater|EAU34899.1 atub|OJI83925.1 aver|OJJ01233.1 awen|OJJ31170.1 azon|OJJ46647.1

Group2596: abra|OJJ71864.1 acar|OOF96534.1 acla|EAW13894.1 afis|EAW18606.1 afla|EED52740.1 afum|EBA27488.1 agla|OJJ81660.1 akaw|GAA85052.1 aluc|OJZ86601.1 anig|EHA22062.1 aory|EIT78163.1 ater|EAU34901.1 atub|OJI83922.1 awen|OJJ31172.1 azon|OJJ46649.1 anid|CBF70412.1 asyd|OJJ58625.1 aver|OJJ01231.1

Group2597: abra|OJJ71865.1 acar|OOF96535.1 acla|EAW13895.1 afis|EAW18607.1 afla|EED52739.1 afum|EAL93317.1 agla|OJJ81666.1 akaw|GAA85051.1 aluc|OJZ86602.1 anid|CBF70414.1 anig|EHA22061.1 aory|EIT78220.1 asyd|OJJ58624.1 ater|EAU34902.1 atub|OJI83921.1 aver|OJJ01230.1 awen|OJJ31173.1 azon|OJJ46650.1

Group2598: abra|OJJ71866.1 acar|OOF96536.1 acla|EAW13896.1 afis|EAW18608.1 afla|EED52738.1 afum|EAL93318.1 agla|OJJ81665.1 akaw|GAA85049.1 aluc|OJZ86603.1 anid|CBF70416.1 anig|EHA22060.1 aory|EIT78223.1 asyd|OJJ58623.1 ater|EAU34903.1 atub|OJI83920.1 aver|OJJ01229.1 awen|OJJ32069.1 azon|OJJ46651.1

Group2599: abra|OJJ71869.1 acar|OOF96540.1 acla|EAW13899.1 afis|EAW18611.1 afla|EED52736.1 afum|EAL93321.1 agla|OJJ81234.1 akaw|GAA85046.1 aluc|OJZ86608.1 anid|CBF70420.1 anig|EHA22058.1 aory|EIT78190.1 asyd|OJJ58620.1 ater|EAU34908.1 atub|OJI83918.1 aver|OJJ01227.1 awen|OJJ32072.1 azon|OJJ46652.1

Group2600: abra|OJJ71873.1 acar|OOF96544.1 acla|EAW13903.1 afis|EAW18615.1 afla|EED48366.1 afum|EAL93325.1 agla|OJJ81229.1 akaw|GAA85042.1 aluc|OJZ86612.1 anid|CBF70428.1 anig|EHA22054.1 aory|EIT83110.1 asyd|OJJ58616.1 ater|EAU34912.1 atub|OJI83914.1 aver|OJJ01223.1 awen|OJJ32076.1 azon|OJJ46656.1

Group2601: abra|OJJ71874.1 acar|OOF96545.1 acla|EAW13904.1 afis|EAW18616.1 afla|EED52730.1 afum|EAL93326.1 agla|OJJ81228.1 akaw|GAA85041.1 aluc|OJZ86613.1 anid|CBF70426.1 anig|EHA22053.1 aory|EIT78192.1 asyd|OJJ58617.1 ater|EAU34913.1 atub|OJI83913.1 aver|OJJ01224.1 awen|OJJ32077.1 azon|OJJ46657.1

Group2602: abra|OJJ71876.1 acla|EAW13905.1 afis|EAW18617.1 afla|EED52728.1 afum|EAL93327.1 agla|OJJ81227.1 akaw|GAA85040.1 aluc|OJZ86614.1 anid|CBF70424.1 anig|EHA22052.1 aory|EIT78248.1 asyd|OJJ58618.1 ater|EAU34917.1 atub|OJI83912.1 aver|OJJ01225.1 awen|OJJ32078.1 azon|OJJ46658.1 afla|EED52729.1

Group2603: abra|OJJ71878.1 acar|OOF96546.1 acla|EAW13907.1 afis|EAW18619.1 afla|EED52726.1 afum|EAL93329.1 agla|OJJ81241.1 akaw|GAA85038.1 aluc|OJZ86616.1 anid|CBF70501.1 anig|EHA22050.1 aory|EIT78153.1 asyd|OJJ58579.1 ater|EAU34919.1 atub|OJI83910.1 aver|OJJ01183.1 awen|OJJ32081.1 azon|OJJ46660.1

Group2604: abra|OJJ71879.1 acar|OOF96547.1 acla|EAW13908.1 afis|EAW18620.1 afla|EED52725.1 afum|EAL93330.1 agla|OJJ81240.1 akaw|GAA85037.1 aluc|OJZ86617.1 anid|CBF70499.1 anig|EHA22049.1 aory|EIT78189.1 asyd|OJJ58580.1 ater|EAU34920.1 atub|OJI83909.1 aver|OJJ01184.1 awen|OJJ32082.1 azon|OJJ46661.1

Group2605: abra|OJJ71880.1 acar|OOF96548.1 acla|EAW13909.1 afis|EAW18621.1 afla|EED52724.1 afum|EAL93331.1 agla|OJJ81239.1 akaw|GAA85036.1 aluc|OJZ86618.1 anid|CBF70497.1 anig|EHA22048.1 aory|EIT78181.1 asyd|OJJ58581.1 ater|EAU34921.1 atub|OJI83908.1 aver|OJJ01185.1 awen|OJJ32084.1 azon|OJJ46663.1

Group2606: abra|OJJ71889.1 acar|OOF96551.1 acla|EAW09632.1 afis|EAW21508.1 afla|EED55945.1 afum|EAL92528.1 agla|OJJ85671.1 akaw|GAA85028.1 aluc|OJZ86626.1 anid|CBF76443.1 anig|EHA22039.1 aory|EIT76729.1 asyd|OJJ61102.1 ater|EAU35030.1 atub|OJI83899.1 aver|OJJ00419.1 awen|OJJ39187.1 azon|OJJ51504.1



Group2607: abra|OJJ71891.1 acar|OOF96552.1 acla|EAW09631.1 afis|EAW21509.1 afla|EED55947.1 afum|EAL92529.1 agla|OJJ85673.1 akaw|GAA85027.1 aluc|OJZ86630.1 anid|CBF76441.1 anig|EHA22038.1 aory|EIT76718.1 asyd|OJJ61101.1 ater|EAU35029.1 atub|OJI83898.1 aver|OJJ00416.1 awen|OJJ39185.1 azon|OJJ51503.1

Group2608: abra|OJJ71895.1 acar|OOF96556.1 acla|EAW09627.1 afis|EAW21513.1 afla|EED55951.1 afum|EAL92533.1 agla|OJJ85677.1 akaw|GAA85023.1 aluc|OJZ86634.1 anid|CBF76433.1 anig|EHA22035.1 aory|EIT76705.1 asyd|OJJ61096.1 ater|EAU35027.1 atub|OJI83894.1 aver|OJJ00411.1 awen|OJJ39181.1 azon|OJJ51512.1

Group2609: abra|OJJ71896.1 acar|OOF96557.1 acla|EAW09626.1 afis|EAW21514.1 afla|EED55952.1 afum|EAL92534.1 agla|OJJ85678.1 akaw|GAA85022.1 aluc|OJZ86635.1 anid|CBF76431.1 anig|EHA22034.1 aory|EIT76554.1 asyd|OJJ61095.1 ater|EAU35026.1 atub|OJI83893.1 aver|OJJ00410.1 awen|OJJ39180.1 azon|OJJ51513.1

Group2610: abra|OJJ71898.1 acar|OOF96559.1 acla|EAW09624.1 afis|EAW21516.1 afla|EED55954.1 afum|EAL92536.1 agla|OJJ85680.1 akaw|GAA85020.1 aluc|OJZ86637.1 anid|CBF76427.1 anig|EHA22032.1 aory|EIT76837.1 asyd|OJJ61093.1 ater|EAU35024.1 atub|OJI83891.1 aver|OJJ00408.1 awen|OJJ39178.1 azon|OJJ51516.1

Group2611: abra|OJJ71902.1 acar|OOF96560.1 acla|EAW09621.1 afis|EAW21518.1 afla|EED55956.1 afum|EAL92539.1 agla|OJJ85681.1 akaw|GAA85018.1 aluc|OJZ86639.1 anid|CBF76423.1 anig|EHA22030.1 aory|EIT76726.1 asyd|OJJ61091.1 ater|EAU35022.1 atub|OJI83888.1 aver|OJJ00406.1 awen|OJJ39175.1 azon|OJJ51515.1

Group2612: abra|OJJ71903.1 acar|OOF96561.1 acla|EAW09620.1 afis|EAW21519.1 afla|EED55957.1 afum|EAL92540.1 agla|OJJ85682.1 akaw|GAA85017.1 aluc|OJZ86640.1 anid|CBF76419.1 anig|EHA22029.1 aory|EIT76756.1 asyd|OJJ61090.1 ater|EAU35021.1 atub|OJI83887.1 aver|OJJ00405.1 awen|OJJ39174.1 azon|OJJ51514.1

Group2613: abra|OJJ71905.1 acar|OOF96562.1 acla|EAW09618.1 afis|EAW21521.1 afla|EED55959.1 afum|EAL92542.1 agla|OJJ85684.1 akaw|GAA85015.1 aluc|OJZ86642.1 anid|CBF76416.1 anig|EHA22027.1 aory|EIT76533.1 asyd|OJJ61088.1 ater|EAU35020.1 atub|OJI83885.1 aver|OJJ00403.1 awen|OJJ39172.1 azon|OJJ51501.1

Group2614: abra|OJJ71908.1 acar|OOF96568.1 acla|EAW09615.1 afis|EAW21524.1 afla|EED55962.1 afum|EAL92545.1 agla|OJJ85687.1 akaw|GAA85011.1 aluc|OJZ86646.1 anid|CBF76410.1 anig|EHA22024.1 aory|EIT76688.1 asyd|OJJ61085.1 ater|EAU35017.1 atub|OJI83881.1 aver|OJJ00400.1 awen|OJJ39169.1 azon|OJJ51498.1

Group2615: abra|OJJ71917.1 acar|OOF96574.1 acla|EAW09613.1 afis|EAW21526.1 afla|EED55965.1 afum|EAL92547.1 agla|OJJ85689.1 akaw|GAA85005.1 aluc|OJZ86654.1 anid|CBF76406.1 anig|EHA22017.1 aory|EIT76778.1 asyd|OJJ61082.1 ater|EAU35015.1 atub|OJI83873.1 aver|OJJ00398.1 awen|OJJ39167.1 azon|OJJ51496.1

Group2616: abra|OJJ71918.1 acar|OOF96575.1 acla|EAW09612.1 afis|EAW21527.1 afla|EED55966.1 afum|EAL92548.1 agla|OJJ85690.1 akaw|GAA85004.1 aluc|OJZ86655.1 anid|CBF76404.1 anig|EHA22016.1 aory|EIT76686.1 asyd|OJJ61081.1 ater|EAU35014.1 atub|OJI83872.1 aver|OJJ00397.1 awen|OJJ39166.1 azon|OJJ51495.1

Group2617: abra|OJJ71921.1 acar|OOF96578.1 acla|EAW09607.1 afis|EAW21530.1 afla|EED55979.1 afum|EAL92551.1 agla|OJJ85694.1 akaw|GAA85001.1 aluc|OJZ86658.1 anid|CBF76398.1 anig|EHA22013.1 aory|EIT76728.1 asyd|OJJ61078.1 ater|EAU35009.1 atub|OJI83869.1 aver|OJJ00394.1 awen|OJJ39162.1 azon|OJJ51492.1

Group2618: abra|OJJ71922.1 acar|OOF96579.1 acla|EAW09606.1 afis|EAW21531.1 afla|EED55980.1 afum|EAL92552.1 agla|OJJ85695.1 akaw|GAA85000.1 aluc|OJZ86659.1 anid|CBF76396.1 anig|EHA22012.1 aory|EIT76765.1 asyd|OJJ61077.1 ater|EAU35008.1 atub|OJI83868.1 aver|OJJ00393.1 awen|OJJ39161.1 azon|OJJ51491.1

Group2619: abra|OJJ71923.1 acar|OOF96580.1 acla|EAW09605.1 afis|EAW21532.1 afla|EED55981.1 afum|EAL92553.1 agla|OJJ85696.1 akaw|GAA84999.1 aluc|OJZ86660.1 anid|CBF76394.1 anig|EHA22011.1 aory|EIT76691.1 asyd|OJJ61076.1 ater|EAU35007.1 atub|OJI83867.1 aver|OJJ00392.1 awen|OJJ39160.1 azon|OJJ51490.1

Group2620: abra|OJJ71924.1 acar|OOF96581.1 acla|EAW09604.1 afis|EAW21533.1 afla|EED55982.1 afum|EAL92554.1 agla|OJJ85697.1 akaw|GAA84998.1 aluc|OJZ86661.1 anid|CBF76392.1 anig|EHA22010.1 aory|EIT76892.1 asyd|OJJ61073.1 ater|EAU35006.1 atub|OJI83864.1 aver|OJJ00390.1 awen|OJJ39159.1 azon|OJJ51489.1

Group2621: abra|OJJ71928.1 acar|OOF96585.1 afis|EAW21536.1 afla|EED55986.1 afum|EAL92556.2 agla|OJJ85700.1 anid|CBF76386.1 aory|EIT76707.1 aver|OJJ00386.1 acla|EAW09601.1 akaw|GAA84995.1

aluc|OJZ86665.1 anig|EHA22008.1 asyd|OJJ61070.1 ater|EAU35003.1 atub|OJI83861.1 awen|OJJ39155.1 azon|OJJ51486.1

Group2622: abra|OJJ71929.1 acar|OOF96586.1 acla|EAW09600.1 afis|EAW21537.1 afla|EED55989.1 afum|EAL92557.1 agla|OJJ85701.1 akaw|GAA84994.1 aluc|OJZ86666.1 anid|CBF76382.1 anig|EHA22007.1 aory|EIT76583.1 asyd|OJJ61068.1 ater|EAU35002.1 atub|OJI83860.1 aver|OJJ00384.1 awen|OJJ39154.1 azon|OJJ51485.1

Group2623: abra|OJJ71931.1 acar|OOF96588.1 acla|EAW09598.1 afis|EAW21539.1 afla|EED55991.1 afum|EAL92559.2 agla|OJJ85703.1 akaw|GAA84992.1 aluc|OJZ86668.1 anid|CBF76378.1 anig|EHA22005.1 aory|EIT76546.1 asyd|OJJ61066.1 ater|EAU35001.1 atub|OJI83859.1 aver|OJJ00382.1 awen|OJJ39152.1 azon|OJJ51478.1

Group2624: abra|OJJ71935.1 acar|OOF96591.1 acla|EAW09595.1 afis|EAW21542.1 afla|EED55993.1 afum|EAL92562.1 agla|OJJ85705.1 akaw|GAA84989.1 aluc|OJZ86672.1 anid|CBF76374.1 anig|EHA22002.1 aory|EIT76774.1 asyd|OJJ61064.1 ater|EAU34997.1 atub|OJI83856.1 aver|OJJ00381.1 awen|OJJ39148.1 azon|OJJ51482.1

Group2625: abra|OJJ71938.1 acar|OOF96596.1 acla|EAW09591.1 afis|EAW21547.1 afla|EED55999.1 afum|EAL92567.1 agla|OJJ85710.1 akaw|GAA84986.1 aluc|OJZ86675.1 anid|CBF76364.1 anig|EHA21998.1 aory|EIT76832.1 asyd|OJJ61060.1 ater|EAU34992.1 atub|OJI83853.1 aver|OJJ00377.1 awen|OJJ39143.1 azon|OJJ51464.1

Group2626: abra|OJJ71940.1 acar|OOF96598.1 acla|EAW09590.1 afis|EAW21548.1 afla|EED56001.1 afum|EAL92568.1 agla|OJJ85726.1 akaw|GAA84985.1 aluc|OJZ86676.1 anid|CBF76362.1 anig|EHA21997.1 aory|EIT76581.1 asyd|OJJ61059.1 ater|EAU34991.1 atub|OJI83852.1 aver|OJJ00376.1 awen|OJJ39142.1 azon|OJJ51465.1

Group2627: abra|OJJ71942.1 acar|OOF96599.1 acla|EAW09588.1 afis|EAW21550.1 afla|EED56002.1 afum|EAL92570.1 agla|OJJ85728.1 akaw|GAA84983.1 aluc|OJZ86678.1 anid|CBF76358.1 anig|EHA21995.1 aory|EIT76540.1 asyd|OJJ61057.1 ater|EAU34989.1 atub|OJI83849.1 aver|OJJ00374.1 awen|OJJ39140.1 azon|OJJ51467.1

Group2628: abra|OJJ71946.1 acar|OOF96600.1 acla|EAW09587.1 afis|EAW21551.1 afla|EED56003.1 afum|EAL92571.1 agla|OJJ85729.1 akaw|GAA84980.1 aluc|OJZ86682.1 anid|CBF76356.1 anig|EHA21992.1 aory|EIT76839.1 asyd|OJJ61056.1 ater|EAU34988.1 atub|OJI83845.1 aver|OJJ00373.1 awen|OJJ39139.1 azon|OJJ51470.1

Group2629: abra|OJJ71951.1 acar|OOF96602.1 acla|EAW09583.1 afis|EAW21554.1 afla|EED56006.1 afum|EAL92574.1 agla|OJJ85731.1 akaw|GAA84977.1 aluc|OJZ86685.1 anid|CBF76350.1 anig|EHA21988.1 aory|EIT76802.1 asyd|OJJ61053.1 ater|EAU34980.1 atub|OJI83841.1 aver|OJJ00370.1 awen|OJJ39136.1 azon|OJJ51474.1

Group2630: abra|OJJ71956.1 acar|OOF96615.1 acla|EAW09579.1 afis|EAW21558.1 afla|EED56010.1 afum|EAL92577.1 agla|OJJ85736.1 akaw|GAA84971.1 aluc|OJZ86691.1 anid|CBF76344.1 anig|EHA21982.1 aory|EIT76530.1 asyd|OJJ61049.1 ater|EAU34976.1 atub|OJI83833.1 aver|OJJ00365.1 awen|OJJ39132.1 azon|OJJ51460.1

Group2631: abra|OJJ71957.1 acar|OOF96613.1 acla|EAW09578.1 afis|EAW21559.1 afla|EED56011.1 afum|EAL92578.1 agla|OJJ85737.1 akaw|GAA84970.1 aluc|OJZ86692.1 anid|CBF76342.1 anig|EHA21981.1 aory|EIT76831.1 asyd|OJJ61048.1 ater|EAU34974.1 atub|OJI83832.1 aver|OJJ00364.1 awen|OJJ39131.1 azon|OJJ51459.1

Group2632: abra|OJJ71959.1 acar|OOF96611.1 acla|EAW09577.1 afis|EAW21560.1 afla|EED56012.1 afum|EAL92579.1 agla|OJJ85739.1 akaw|GAA84969.1 aluc|OJZ86693.1 anid|CBF76340.1 anig|EHA21980.1 aory|EIT76670.1 asyd|OJJ61046.1 atub|OJI83831.1 aver|OJJ00363.1 awen|OJJ39129.1 azon|OJJ51458.1 ater|EAU34973.1

Group2633: abra|OJJ71960.1 acar|OOF96610.1 acla|EAW09576.1 afis|EAW21561.1 afla|EED56014.1 afum|EAL92580.1 agla|OJJ85740.1 akaw|GAA84968.1 aluc|OJZ86694.1 anid|CBF76338.1 anig|EHA21979.1 aory|EIT76536.1 asyd|OJJ61045.1 ater|EAU34972.1 atub|OJI83830.1 aver|OJJ00362.1 awen|OJJ39128.1 azon|OJJ51456.1

Group2634: abra|OJJ71961.1 acar|OOF96609.1 acla|EAW09575.1 afis|EAW21562.1 afla|EED56015.1 afum|EAL92581.1 agla|OJJ85741.1 akaw|GAA84967.1 aluc|OJZ86696.1 anid|CBF76336.1 anig|EHA21978.1 aory|EIT76848.1 asyd|OJJ61044.1 ater|EAU34971.1 atub|OJI83829.1 aver|OJJ00361.1 awen|OJJ39127.1 azon|OJJ51455.1

Group2635: abra|OJJ71966.1 acar|OOF89890.1 acla|EAW09571.1 afis|EAW21565.1 afum|EAL92584.1 agla|OJJ85750.1 akaw|GAA84962.1 aluc|OJZ86702.1 anid|CBF76330.1 anig|EHA21974.1 aory|EIT76870.1 asyd|OJJ61038.1 ater|EAU34967.1 atub|OJI83824.1 aver|OJJ00356.1 awen|OJJ39120.1 azon|OJJ51450.1 afla|EED56022.1

Group2636: abra|OJJ71969.1 acar|OOF96604.1 acla|EAW09570.1 afis|EAW21566.1 afla|EED56031.1 afum|EAL92585.1 agla|OJJ85751.1 akaw|GAA84961.1 aluc|OJZ86704.1 anid|CBF76328.1 anig|EHA21972.1 aory|EIT76642.1 asyd|OJJ61016.1 ater|EAU34965.1 atub|OJI83823.1 aver|OJJ00336.1 awen|OJJ39115.1 azon|OJJ51449.1

Group2637: abra|OJJ71970.1 acar|OOF96621.1 acla|EAW09569.1 afis|EAW21567.1 afla|EED56034.1 afum|EAL92586.1 agla|OJJ85752.1 akaw|GAA84960.1 aluc|OJZ86705.1 anid|CBF76326.1 anig|EHA21971.1 aory|EIT76629.1 asyd|OJJ61015.1 ater|EAU34964.1 atub|OJI83822.1 aver|OJJ00334.1 awen|OJJ39113.1 azon|OJJ51448.1

Group2638: abra|OJJ71971.1 acar|OOF96622.1 acla|EAW09568.1 afis|EAW21568.1 afla|EED56035.1 afum|EAL92587.1 agla|OJJ85753.1 akaw|GAA84959.1 aluc|OJZ86706.1 anid|CBF76324.1 anig|EHA21970.1 aory|EIT76766.1 asyd|OJJ61014.1 ater|EAU34963.1 atub|OJI83821.1 aver|OJJ00333.1 awen|OJJ39112.1 azon|OJJ51447.1

Group2639: abra|OJJ71972.1 acar|OOF96623.1 acla|EAW09567.1 afis|EAW21569.1 afla|EED56036.1 afum|EBA27467.1 agla|OJJ85754.1 akaw|GAA84958.1 aluc|OJZ86707.1 anid|CBF76322.1 anig|EHA21969.1 aory|EIT76617.1 asyd|OJJ61013.1 ater|EAU34962.1 atub|OJI83820.1 aver|OJJ00332.1 awen|OJJ39111.1 azon|OJJ51446.1

Group2640: abra|OJJ71973.1 acar|OOF96625.1 acla|EAW09565.1 afis|EAW21571.1 afla|EED56037.1 afum|EAL92589.1 agla|OJJ85771.1 akaw|GAA84957.1 aluc|OJZ86708.1 anid|CBF76318.1 anig|EHA21968.1 aory|EIT76745.1 asyd|OJJ61011.1 ater|EAU34961.1 atub|OJI83819.1 aver|OJJ00330.1 awen|OJJ39110.1 azon|OJJ51445.1

Group2641: abra|OJJ71974.1 acar|OOF96624.1 acla|EAW09564.1 afis|EAW21572.1 afla|EED56038.1 afum|EAL92590.1 agla|OJJ85768.1 akaw|GAA84956.1 aluc|OJZ86709.1 anid|CBF76316.1 anig|EHA21967.1 aory|EIT76889.1 asyd|OJJ61010.1 ater|EAU34960.1 atub|OJI83818.1 aver|OJJ00329.1 awen|OJJ39109.1 azon|OJJ51444.1

Group2642: abra|OJJ71975.1 acar|OOF96626.1 acla|EAW09563.1 afis|EAW21573.1 afla|EED57792.1 afum|EAL92591.2 agla|OJJ85766.1 akaw|GAA84955.1 aluc|OJZ86710.1 anid|CBF76314.1 anig|EHA21966.1 aory|EIT81122.1 asyd|OJJ61009.1 ater|EAU34959.1 atub|OJI83817.1 aver|OJJ00328.1 awen|OJJ39108.1 azon|OJJ51443.1

Group2643: abra|OJJ71978.1 acar|OOF96628.1 acla|EAW09562.1 afis|EAW21575.1 afla|EED57793.1 afum|EAL92593.1 agla|OJJ85764.1 akaw|GAA84952.1 aluc|OJZ86715.1 anid|CBF76306.1 anig|EHA21963.1 aory|EIT81108.1 asyd|OJJ61006.1 ater|EAU34957.1 atub|OJI83814.1 aver|OJJ00324.1 awen|OJJ39105.1 azon|OJJ51438.1

Group2644: abra|OJJ71983.1 acar|OOF96634.1 acla|EAW09556.1 afis|EAW21581.1 afla|EED57799.1 afum|EAL92599.2 agla|OJJ85757.1 akaw|GAA84946.1 aluc|OJZ86720.1 anid|CBF76300.1 anig|EHA21959.1 aory|EIT81064.1 asyd|OJJ61001.1 ater|EAU34953.1 atub|OJI83809.1 aver|OJJ00319.1 awen|OJJ39100.1 azon|OJJ51434.1

Group2645: abra|OJJ71987.1 acar|OOF96642.1 acla|EAW09551.1 afis|EAW21585.1 afla|EED57806.1 afum|EAL92603.2 agla|OJJ85777.1 akaw|GAA84942.1 aluc|OJZ86724.1 anid|CBF76289.1 anig|EHA21955.1 aory|EIT81058.1 asyd|OJJ60995.1 ater|EAU34946.1 atub|OJI83804.1 aver|OJJ00315.1 awen|OJJ39096.1 azon|OJJ51429.1

Group2646: abra|OJJ71990.1 acar|OOF96644.1 acla|EAW09545.1 afis|EAW21588.1 afla|EED57809.1 afum|EAL92606.1 agla|OJJ85781.1 akaw|GAA84939.1 aluc|OJZ86727.1 anid|CBF76285.1 anig|EHA21952.1 aory|EIT81040.1 asyd|OJJ60992.1 ater|EAU34943.1 atub|OJI83801.1 aver|OJJ00312.1 awen|OJJ39093.1 azon|OJJ51426.1

Group2647: abra|OJJ71991.1 acar|OOF96645.1 acla|EAW09544.1 afis|EAW21589.1 afla|EED57811.1 afum|EAL92607.1 agla|OJJ85782.1 akaw|GAA84938.1 aluc|OJZ86728.1 anid|CBF76283.1 anig|EHA21951.1 aory|EIT81035.1 asyd|OJJ60991.1 ater|EAU34942.1 atub|OJI83800.1 aver|OJJ00311.1 awen|OJJ39092.1 azon|OJJ51425.1

Group2648: abra|OJJ71993.1 acar|OOF96647.1 acla|EAW09542.1 afis|EAW21591.1 afla|EED57813.1 afum|EAL92609.1 agla|OJJ85784.1 akaw|GAA84935.1 aluc|OJZ86731.1 anid|CBF83440.1 anig|EHA21948.1 aory|EIT81099.1 asyd|OJJ60668.1 ater|EAU34940.1 atub|OJI83797.1 aver|OJI99991.1 awen|OJJ39090.1 azon|OJJ51421.1

Group2649: abra|OJJ71995.1 acar|OOF96649.1 acla|EAW09540.1 afis|EAW21593.1 afla|EED57815.1 afum|EAL92611.1 agla|OJJ85788.1 akaw|GAA84933.1 aluc|OJZ86733.1 anid|CBF83444.1 anig|EHA21946.1 aory|EIT81101.1 asyd|OJJ60670.1 ater|EAU34931.1 atub|OJI83795.1 aver|OJI99993.1 awen|OJJ39088.1 azon|OJJ51419.1

Group2650: abra|OJJ71997.1 acar|OOF96651.1 acla|EAW09541.1 afis|EAW21592.1 afla|EED57814.1 afum|EAL92610.1 agla|OJJ85789.1 akaw|GAA84932.1 aluc|OJZ86735.1 anid|CBF83442.1 anig|EHA21944.1

aory|EIT81111.1 asyd|OJJ60669.1 ater|EAU34932.1 atub|OJI83793.1 aver|OJI99992.1 awen|OJJ39089.1 azon|OJJ51420.1

Group2651: abra|OJJ71998.1 acar|OOF96653.1 acla|EAW09536.1 afis|EAW21596.1 afla|EED57819.1 afum|EAL92614.1 agla|OJJ85790.1 akaw|GAA84931.1 aluc|OJZ86736.1 anid|CBF83453.1 anig|EHA21943.1 aory|EIT81091.1 asyd|OJJ60672.1 ater|EAU34928.1 atub|OJI83792.1 aver|OJI99995.1 awen|OJJ39086.1 azon|OJJ51417.1

Group2652: abra|OJJ72007.1 acar|OOF96657.1 acla|EAW09534.1 afis|EAW21599.1 afla|EED57824.1 afum|EAL92618.1 agla|OJJ85794.1 akaw|GAA84926.1 aluc|OJZ86743.1 anid|CBF83457.1 anig|EHA21936.1 aory|EIT81107.1 asyd|OJJ60679.1 ater|EAU38289.1 atub|OJI83784.1 aver|OJJ00004.1 awen|OJJ39083.1 azon|OJJ51415.1

Group2653: abra|OJJ72008.1 acla|EAW09533.1 anid|CBF83458.1 asyd|OJJ60682.1 ater|EAU38290.1 aver|OJJ00007.1 azon|OJJ51414.1 acla|EAW09532.1 afis|EAW21600.1 afla|EED57827.1 afum|EAL92619.1 agla|OJJ85795.1 akaw|GAA84925.1 aluc|OJZ86744.1 anig|EHA21935.1 aory|EIT81065.1 atub|OJI83783.1 awen|OJJ39082.1

Group2654: abra|OJJ72010.1 acar|OOF96658.1 acla|EAW09529.1 afis|EAW21603.1 afla|EED57829.1 afum|EAL92622.1 agla|OJJ85797.1 akaw|GAA84923.1 aluc|OJZ86746.1 anid|CBF83462.1 anig|EHA21933.1 aory|EIT81061.1 asyd|OJJ60684.1 ater|EAU38292.1 atub|OJI83781.1 aver|OJJ00009.1 awen|OJJ39080.1 azon|OJJ51412.1

Group2655: abra|OJJ72014.1 acar|OOF96663.1 acla|EAW09526.1 afis|EAW21606.1 afla|EED57833.1 afum|EAL92625.1 agla|OJJ85801.1 akaw|GAA84919.1 aluc|OJZ86750.1 anid|CBF83469.1 anig|EHA21929.1 aory|EIT81024.1 asyd|OJJ60688.1 ater|EAU38295.1 atub|OJI83777.1 aver|OJJ00013.1 awen|OJJ39076.1 azon|OJJ51408.1

Group2656: abra|OJJ72015.1 acar|OOF96664.1 acla|EAW09525.1 afis|EAW21607.1 afla|EED57834.1 afum|EAL92626.1 agla|OJJ85802.1 akaw|GAA84918.1 aluc|OJZ86751.1 anid|CBF83473.1 anig|EHA21928.1 aory|EIT81105.1 asyd|OJJ60690.1 ater|EAU38296.1 atub|OJI83775.1 aver|OJJ00015.1 awen|OJJ39075.1 azon|OJJ51407.1

Group2657: abra|OJJ72016.1 acar|OOF96666.1 acla|EAW09524.1 afis|EAW21608.1 afla|EED57837.1 afum|EAL92642.1 agla|OJJ85803.1 akaw|GAA84917.1 aluc|OJZ86752.1 anid|CBF83475.1 anig|EHA21927.1 aory|EIT81080.1 asyd|OJJ60691.1 ater|EAU38297.1 atub|OJI83774.1 aver|OJJ00016.1 awen|OJJ39074.1 azon|OJJ51406.1

Group2658: abra|OJJ72017.1 acar|OOF96665.1 acla|EAW09523.1 afis|EAW21609.1 afla|EED57838.1 afum|EAL92643.1 agla|OJJ85804.1 akaw|GAA84916.1 aluc|OJZ86753.1 anid|CBF83477.1 anig|EHA21926.1 aory|EIT81100.1 asyd|OJJ60692.1 ater|EAU38298.1 atub|OJI83773.1 aver|OJJ00017.1 awen|OJJ39073.1 azon|OJJ51405.1

Group2659: abra|OJJ72018.1 acar|OOF96667.1 acla|EAW09521.1 afis|EAW21611.1 afla|EED57840.1 afum|EAL92645.1 agla|OJJ78616.1 akaw|GAA84914.1 aluc|OJZ86755.1 anid|CBF83480.1 anig|EHA21924.1 aory|EIT81096.1 asyd|OJJ60694.1 ater|EAU38302.1 atub|OJI83772.1 aver|OJJ00020.1 awen|OJJ39071.1 azon|OJJ51402.1

Group2660: abra|OJJ72019.1 acar|OOF96669.1 acla|EAW09520.1 afis|EAW21612.1 afla|EED57841.1 afum|EAL92646.1 agla|OJJ78617.1 akaw|GAA84913.1 aluc|OJZ86756.1 anid|CBF83482.1 anig|EHA21923.1 aory|EIT81062.1 asyd|OJJ60695.1 ater|EAU38303.1 atub|OJI83771.1 aver|OJJ00021.1 awen|OJJ39070.1 azon|OJJ51401.1

Group2661: abra|OJJ72020.1 acar|OOF96668.1 acla|EAW09515.1 afis|EAW21617.1 afla|EED57842.1 afum|EAL92652.1 agla|OJJ78622.1 akaw|GAA84912.1 aluc|OJZ86757.1 anid|CBF83484.1 anig|EHA21922.1 aory|EIT81032.1 asyd|OJJ60696.1 ater|EAU38304.1 atub|OJI83770.1 aver|OJJ00022.1 awen|OJJ39069.1 azon|OJJ51400.1

Group2662: abra|OJJ72022.1 acar|OOF96671.1 acla|EAW09517.1 afis|EAW21615.1 afla|EED57844.1 afum|EAL92649.1 agla|OJJ78624.1 akaw|GAA84910.1 aluc|OJZ86759.1 anid|CBF83485.1 anig|EHA21920.1 aory|EIT81023.1 asyd|OJJ60698.1 ater|EAU38305.1 atub|OJI83768.1 aver|OJJ00024.1 awen|OJJ39067.1 azon|OJJ51398.1

Group2663: abra|OJJ72024.1 acar|OOF96673.1 acla|EAW09519.1 afis|EAW21613.1 afla|EED57846.1 afum|EAL92647.1 agla|OJJ78626.1 akaw|GAA84908.1 aluc|OJZ86761.1 anid|CBF83489.1 anig|EHA21918.1 aory|EIT81029.1 asyd|OJJ60700.1 ater|EAU38307.1 atub|OJI83766.1 aver|OJJ00026.1 awen|OJJ39065.1 azon|OJJ51396.1

Group2664: abra|OJJ72032.1 acar|OOF96682.1 acla|EAW09511.1 afis|EAW21621.1 afla|EED57850.1 afum|EAL92657.2 agla|OJJ82578.1 akaw|GAA84900.1 aluc|OJZ86770.1 anid|CBF83495.1 anig|EHA21910.1 aory|EIT81046.1 asyd|OJJ60704.1 ater|EAU38310.1 atub|OJI83757.1 aver|OJJ00029.1 awen|OJJ33873.1 azon|OJJ48677.1

Group2665: abra|OJJ72044.1 acar|OOF96702.1 acla|EAW09502.1 afis|EAW21634.1 afla|EED57876.1  
afum|EAL92667.1 agla|OJJ79699.1 akaw|GAA84890.1 aluc|OJZ86781.1 anid|CBF83500.1 anig|EHA21901.1  
aory|EIT83264.1 asyd|OJJ60711.1 ater|EAU38320.1 atub|OJI83739.1 aver|OJJ00038.1 awen|OJJ33883.1  
azon|OJJ48670.1

Group2666: abra|OJJ72046.1 acar|OOF96704.1 acla|EAW09500.1 afis|EAW21636.1 afla|EED57879.1  
afum|EAL92670.1 agla|OJJ79701.1 akaw|GAA84888.1 aluc|OJZ86783.1 anid|CBF83517.1 anig|EHA21899.1  
aory|EIT83275.1 asyd|OJJ60714.1 ater|EAU38322.1 atub|OJI83737.1 aver|OJJ00047.1 awen|OJJ33885.1  
azon|OJJ48668.1

Group2667: abra|OJJ72048.1 acar|OOF96706.1 acla|EAW09498.1 afis|EAW21638.1 afla|EED57881.1  
afum|EAL92672.2 agla|OJJ79703.1 akaw|GAA84886.1 aluc|OJZ86785.1 anid|CBF83521.1 anig|EHA21897.1  
aory|EIT83269.1 asyd|OJJ60716.1 ater|EAU38323.1 atub|OJI83735.1 aver|OJJ00049.1 awen|OJJ33887.1  
azon|OJJ48666.1

Group2668: abra|OJJ72052.1 acar|OOF96709.1 acla|EAW09495.1 afis|EAW21641.1 afla|EED57902.1  
afum|EAL92675.1 agla|OJJ79708.1 akaw|GAA84882.1 aluc|OJZ86789.1 anid|CBF83526.1 anig|EHA21894.1  
aory|EIT82320.1 asyd|OJJ60718.1 ater|EAU38326.1 atub|OJI83730.1 aver|OJJ00051.1 awen|OJJ33898.1  
azon|OJJ48662.1

Group2669: abra|OJJ72054.1 acar|OOF96711.1 acla|EAW09493.1 afis|EAW21643.1 afla|EED57900.1  
afum|EAL92677.1 agla|OJJ79710.1 akaw|GAA84880.1 aluc|OJZ86791.1 anid|CBF83528.1 anig|EHA21892.1  
aory|EIT82343.1 asyd|OJJ60720.1 ater|EAU38328.1 atub|OJI83728.1 aver|OJJ00053.1 awen|OJJ33900.1  
azon|OJJ48660.1

Group2670: abra|OJJ72056.1 acar|OOF96713.1 acla|EAW09492.1 afis|EAW21644.1 afla|EED57899.1  
afum|EAL92678.1 agla|OJJ79711.1 akaw|GAA84878.1 aluc|OJZ86793.1 anid|CBF83530.1 anig|EHA21890.1  
aory|EIT82331.1 asyd|OJJ60721.1 ater|EAU38329.1 atub|OJI83726.1 aver|OJJ00054.1 awen|OJJ33901.1  
azon|OJJ48658.1

Group2671: abra|OJJ72062.1 acar|OOF96716.1 acla|EAW09489.1 afis|EAW21647.1 afla|EED57896.1  
afum|EAL92681.1 agla|OJJ79718.1 akaw|GAA84873.1 aluc|OJZ86798.1 anid|CBF83537.1 anig|EHA21885.1  
aory|EIT82735.1 asyd|OJJ60725.1 ater|EAU38332.1 atub|OJI83720.1 aver|OJJ00058.1 awen|OJJ33907.1  
azon|OJJ48655.1

Group2672: abra|OJJ72063.1 acar|OOF96717.1 acla|EAW09479.1 afis|EAW21657.1 afla|EED57895.1  
afum|EAL92692.1 agla|OJJ79719.1 akaw|GAA84872.1 aluc|OJZ86799.1 anid|CBF83539.1 anig|EHA21884.1  
aory|EIT82741.1 asyd|OJJ60727.1 ater|EAU38333.1 atub|OJI83719.1 aver|OJJ00059.1 awen|OJJ33908.1  
azon|OJJ48653.1

Group2673: abra|OJJ72064.1 acar|OOF96718.1 acla|EAW09478.1 afis|EAW21658.1 afla|EED57894.1  
afum|EAL92693.1 agla|OJJ79720.1 akaw|GAA84871.1 aluc|OJZ86800.1 anid|CBF83541.1 anig|EHA21883.1  
aory|EIT82736.1 asyd|OJJ60728.1 ater|EAU38334.1 atub|OJI83718.1 aver|OJJ00060.1 awen|OJJ33909.1  
azon|OJJ48652.1

Group2674: abra|OJJ72065.1 acar|OOF96719.1 acla|EAW09477.1 afis|EAW21659.1 afla|EED57893.1  
afum|EAL92694.1 agla|OJJ79721.1 akaw|GAA84870.1 aluc|OJZ86801.1 anid|CBF83542.1 anig|EHA21882.1  
aory|EIT82740.1 asyd|OJJ60729.1 ater|EAU38335.1 atub|OJI83717.1 aver|OJJ00061.1 awen|OJJ33910.1  
azon|OJJ48651.1

Group2675: abra|OJJ72068.1 acar|OOF96724.1 acla|EAW09483.1 afis|EAW21653.1 afla|EED57886.1  
afum|EAL92688.1 agla|OJJ79724.1 akaw|GAA84867.1 aluc|OJZ86803.1 anid|CBF83550.1 anig|EHA21879.1  
aory|EIT83265.1 asyd|OJJ60733.1 ater|EAU38339.1 atub|OJI83715.1 aver|OJJ00065.1 awen|OJJ33914.1  
azon|OJJ48647.1

Group2676: abra|OJJ72075.1 acar|OOF96727.1 acla|EAW09485.1 afis|EAW21651.1 afla|EED57918.1  
afum|EAL92685.2 agla|OJJ79727.1 akaw|GAA84842.1 aluc|OJZ86829.1 anid|CBF83553.1 anig|EHA21806.1  
aory|EIT82364.1 asyd|OJJ60735.1 ater|EAU38343.1 atub|OJI83689.1 aver|OJJ00067.1 awen|OJJ33917.1  
azon|OJJ48643.1

Group2677: abra|OJJ72085.1 acar|OOF96730.1 acla|EAW09488.1 afis|EAW21648.1 afla|EED57923.1  
afum|EAL92682.2 agla|OJJ79730.1 akaw|GAA84835.1 aluc|OJZ86839.1 anid|CBF83559.1 anig|EHA21798.1  
aory|EIT82355.1 asyd|OJJ60738.1 ater|EAU38345.1 atub|OJI83679.1 aver|OJJ00070.1 awen|OJJ33919.1  
azon|OJJ48645.1

Group2678: abra|OJJ72086.1 acar|OOF96732.1 acla|EAW09467.1 afis|EAW21669.1 afla|EED57933.1  
afum|EAL92704.1 agla|OJJ79740.1 akaw|GAA84834.1 aluc|OJZ86840.1 anid|CBF83582.1 anig|EHA21797.1  
aory|EIT82344.1 asyd|OJJ60781.1 ater|EAU38353.1 atub|OJI83678.1 aver|OJJ00114.1 awen|OJJ33932.1  
azon|OJJ48640.1

Group2679: abra|OJJ72087.1 acar|OOF96731.1 acla|EAW09468.1 afis|EAW21668.1 afla|EED57932.1  
afum|EAL92703.1 agla|OJJ79739.1 akaw|GAA84833.1 aluc|OJZ86841.1 anid|CBF83580.1 anig|EHA21796.1

aory|EIT82317.1 asyd|OJJ60749.1 ater|EAU38352.1 atub|OJI83677.1 aver|OJJ00081.1 awen|OJJ33931.1 azon|OJJ48639.1

Group2680: abra|OJJ72089.1 acar|OOF96735.1 acla|EAW09470.1 afis|EAW21666.1 afla|EED57930.1 afum|EAL92701.1 agla|OJJ79737.1 akaw|GAA84831.1 aluc|OJZ86843.1 anid|CBF83569.1 anig|EHA21794.1 aory|EIT82323.1 asyd|OJJ60747.1 ater|EAU38351.1 atub|OJI83675.1 aver|OJJ00079.1 awen|OJJ33930.1 azon|OJJ48637.1

Group2681: abra|OJJ72090.1 acar|OOF96734.1 acla|EAW09471.1 afis|EAW21665.1 afla|EED57929.1 afum|EAL92700.1 agla|OJJ79736.1 akaw|GAA84830.1 aluc|OJZ86844.1 anid|CBF83568.1 anig|EHA21793.1 aory|EIT82319.1 asyd|OJJ60746.1 ater|EAU38350.1 atub|OJI83674.1 aver|OJJ00078.1 awen|OJJ33929.1 azon|OJJ48636.1

Group2682: abra|OJJ72092.1 acar|OOF96737.1 acla|EAW09473.1 afis|EAW21662.1 afla|EED57927.1 afum|EAL92697.1 agla|OJJ79734.1 akaw|GAA84828.1 aluc|OJZ86847.1 anid|CBF83564.1 anig|EHA21791.1 aory|EIT82328.1 asyd|OJJ60744.1 ater|EAU38348.1 atub|OJI83672.1 aver|OJJ00076.1 awen|OJJ33926.1 azon|OJJ48634.1

Group2683: abra|OJJ72094.1 acar|OOF96739.1 acla|EAW09475.1 afis|EAW21664.1 afla|EED57925.1 afum|EAL92699.1 agla|OJJ79732.1 akaw|GAA84826.1 aluc|OJZ86849.1 anid|CBF83562.1 anig|EHA21789.1 aory|EIT82328.1 asyd|OJJ60742.1 ater|EAU38347.1 atub|OJI83670.1 aver|OJJ00074.1 awen|OJJ33924.1 azon|OJJ48632.1

Group2684: abra|OJJ72095.1 acar|OOF96740.1 acla|EAW09476.1 afis|EAW21660.1 afla|EED57924.1 afum|EAL92695.1 agla|OJJ79731.1 akaw|GAA84825.1 aluc|OJZ86850.1 anid|CBF83560.1 anig|EHA21788.1 aory|EIT82356.1 asyd|OJJ60741.1 ater|EAU38346.1 atub|OJI83669.1 aver|OJJ00073.1 awen|OJJ33923.1 azon|OJJ48631.1

Group2685: abra|OJJ72096.1 acar|OOF96741.1 acla|EAW09391.1 afis|EAW21742.1 afla|EED58036.1 afum|EAL92775.1 agla|OJJ84431.1 akaw|GAA84824.1 aluc|OJZ86851.1 anid|CBF83748.1 anig|EHA21787.1 aory|EIT79774.1 asyd|OJJ60855.1 ater|EAU38446.1 atub|OJI83668.1 aver|OJJ00179.1 awen|OJJ34024.1 azon|OJJ48534.1

Group2686: abra|OJJ72099.1 acar|OOF96744.1 acla|EAW09390.1 afis|EAW21743.1 afla|EED58034.1 afum|EAL92776.1 agla|OJJ84427.1 akaw|GAA84822.1 aluc|OJZ86854.1 anid|CBF83738.1 anig|EHA21785.1 aory|EIT79762.1 asyd|OJJ60853.1 ater|EAU38445.1 atub|OJI83665.1 aver|OJJ00177.1 awen|OJJ34026.1 azon|OJJ48530.1

Group2687: abra|OJJ72101.1 acar|OOF96746.1 acla|EAW09388.1 afis|EAW21746.1 afla|EED58032.1 afum|EAL92778.1 agla|OJJ84430.1 akaw|GAA84820.1 aluc|OJZ86856.1 anid|CBF83662.1 anig|EHA21783.1 aory|EIT79789.1 asyd|OJJ60804.1 ater|EAU38443.1 atub|OJI83663.1 aver|OJJ00133.1 awen|OJJ34028.1 azon|OJJ48201.1

Group2688: abra|OJJ72105.1 acar|OOF96748.1 acla|EAW09386.1 afis|EAW21749.1 afla|EED58029.1 afum|EAL92780.2 agla|OJJ84425.1 akaw|GAA84817.1 aluc|OJZ86860.1 anid|CBF83665.1 anig|EHA21780.1 aory|EIT79704.1 asyd|OJJ60806.1 ater|EAU38441.1 atub|OJI83660.1 aver|OJJ00135.1 awen|OJJ34030.1 azon|OJJ48203.1

Group2689: abra|OJJ72110.1 acar|OOF90022.1 acla|EAW14910.1 afis|EAW24431.1 afla|EED55244.1 afum|EAL86099.1 agla|OJJ79245.1 akaw|GAA84812.1 aluc|OJZ86865.1 anid|CBF73773.1 anig|EHA21776.1 aory|EIT83529.1 asyd|OJJ56593.1 ater|EAU30014.1 atub|OJI83655.1 aver|OJJ06132.1 awen|OJJ32771.1 azon|OJJ44001.1

Group2690: abra|OJJ72112.1 acar|OOF96752.1 acla|EAW14912.1 afis|EAW24433.1 afla|EED55247.1 afum|EAL86101.1 agla|OJJ79248.1 akaw|GAA84810.1 aluc|OJZ86867.1 anid|CBF73767.1 anig|EHA21774.1 aory|EIT83512.1 asyd|OJJ56591.1 ater|EAU30012.1 atub|OJI83653.1 aver|OJJ06134.1 awen|OJJ32768.1 azon|OJJ43999.1

Group2691: abra|OJJ72115.1 acar|OOF96755.1 acla|EAW14916.1 afis|EAW24438.1 afla|EED55241.1 afum|EAL86106.1 agla|OJJ78777.1 akaw|GAA84807.1 aluc|OJZ86870.1 anid|CBF73762.1 anig|EHA21771.1 aory|EIT83515.1 asyd|OJJ56588.1 ater|EAU30009.1 atub|OJI83649.1 aver|OJJ06137.1 awen|OJJ32761.1 azon|OJJ43996.1

Group2692: abra|OJJ72116.1 acar|OOF96756.1 acla|EAW14917.1 afis|EAW24439.1 afla|EED55239.1 afum|EAL86107.1 agla|OJJ78778.1 akaw|GAA84806.1 aluc|OJZ86871.1 anid|CBF73760.1 anig|EHA21770.1 aory|EIT83598.1 asyd|OJJ56587.1 ater|EAU30008.1 atub|OJI83648.1 aver|OJJ06138.1 awen|OJJ32760.1 azon|OJJ43995.1

Group2693: abra|OJJ72117.1 acar|OOF96758.1 acla|EAW14918.1 afis|EAW24440.1 afla|EED55238.1 afum|EAL86108.1 agla|OJJ78779.1 akaw|GAA84805.1 aluc|OJZ86872.1 anid|CBF73758.1 anig|EHA21769.1 aory|EIT83628.1 asyd|OJJ56586.1 ater|EAU30007.1 atub|OJI83647.1 aver|OJJ06139.1 awen|OJJ32759.1 azon|OJJ43994.1

Group2694: abra|OJJ72118.1 acar|OOF96759.1 acla|EAW14919.1 afis|EAW24441.1 afla|EED55237.1 afum|EAL86109.1 agla|OJJ78780.1 akaw|GAA84804.1 aluc|OJZ86873.1 anid|CBF73756.1 anig|EHA21768.1 aory|EIT83564.1 asyd|OJJ56585.1 ater|EAU30006.1 atub|OJI83645.1 aver|OJJ06140.1 awen|OJJ32758.1 azon|OJJ43993.1

Group2695: abra|OJJ72119.1 acar|OOF96760.1 acla|EAW14920.1 afis|EAW24442.1 afla|EED55236.1 afum|EAL86110.1 agla|OJJ78783.1 akaw|GAA84803.1 aluc|OJZ86875.1 anid|CBF73754.1 anig|EHA21767.1 aory|EIT83587.1 asyd|OJJ56584.1 ater|EAU30005.1 atub|OJI83643.1 aver|OJJ06141.1 awen|OJJ32757.1 azon|OJJ43991.1

Group2696: abra|OJJ72123.1 acar|OOF96763.1 acla|EAW14923.1 afis|EAW24445.1 afla|EED55232.1 afum|EAL86114.1 agla|OJJ80290.1 akaw|GAA84800.1 aluc|OJZ86880.1 anid|CBF73749.1 anig|EHA21764.1 aory|EIT83556.1 asyd|OJJ56580.1 ater|EAU30002.1 atub|OJI83639.1 aver|OJJ06144.1 awen|OJJ32754.1 azon|OJJ43989.1

Group2697: abra|OJJ72124.1 acar|OOF96764.1 acla|EAW14930.1 afis|EAW24446.1 afla|EED55231.1 afum|EAL86115.1 agla|OJJ80291.1 akaw|GAA84799.1 aluc|OJZ86881.1 anid|CBF73806.1 anig|EHA21763.1 aory|EIT83582.1 asyd|OJJ56579.1 ater|EAU30001.1 atub|OJI83638.1 aver|OJJ06145.1 awen|OJJ32753.1 azon|OJJ43992.1

Group2698: abra|OJJ72129.1 acar|OOF93633.1 acla|EAW13225.1 afis|EAW17419.1 afla|EED53977.1 agla|OJJ86132.1 akaw|GAA84793.1 aluc|OJZ86887.1 anid|CBF71783.1 aory|EIT78268.1 atub|OJI83632.1 aver|OJI95842.1 awen|OJJ40006.1 azon|OJJ48326.1 asyd|OJJ53805.1 ater|EAU32275.1 afis|EAW19998.1 ater|EAU38678.1

Group2699: abra|OJJ72139.1 acar|OOF96777.1 acla|EAW14933.1 afis|EAW24448.1 afla|EED55225.1 afum|EAL86117.1 agla|OJJ80294.1 akaw|GAA84783.1 aluc|OJZ86897.1 anid|CBF73811.1 anig|EHA21746.1 aory|EIT83551.1 asyd|OJJ56576.1 ater|EAU29998.1 atub|OJI83622.1 aver|OJJ06147.1 awen|OJJ32749.1 azon|OJJ45300.1

Group2700: abra|OJJ72140.1 acar|OOF96778.1 acla|EAW14934.1 afis|EAW24449.1 afla|EED55224.1 afum|EAL86118.1 agla|OJJ80295.1 akaw|GAA84784.1 aluc|OJZ86896.1 anid|CBF73813.1 anig|EHA21745.1 aory|EIT83509.1 asyd|OJJ56575.1 ater|EAU29997.1 atub|OJI83623.1 aver|OJJ06148.1 awen|OJJ32748.1 azon|OJJ45301.1

Group2701: abra|OJJ72141.1 acar|OOF96779.1 acla|EAW14935.1 afis|EAW24450.1 afla|EED55223.1 afum|EAL86119.1 agla|OJJ80296.1 akaw|GAA84782.1 aluc|OJZ86898.1 anid|CBF73815.1 anig|EHA21744.1 aory|EIT83569.1 asyd|OJJ56574.1 ater|EAU29996.1 atub|OJI83621.1 aver|OJJ06149.1 awen|OJJ32747.1 azon|OJJ45299.1

Group2702: abra|OJJ72145.1 acar|OOF96782.1 acla|EAW14939.1 afis|EAW24454.1 afla|EED55220.1 afum|EAL86123.1 agla|OJJ80301.1 akaw|GAA84779.1 aluc|OJZ86902.1 anid|CBF73822.1 anig|EHA21741.1 aory|EIT83594.1 asyd|OJJ56567.1 ater|EAU29991.1 atub|OJI83618.1 aver|OJJ06154.1 awen|OJJ32743.1 azon|OJJ45293.1

Group2703: abra|OJJ72146.1 acar|OOF96783.1 acla|EAW14941.1 afis|EAW24456.1 afla|EED55218.1 afum|EAL86126.1 agla|OJJ80303.1 akaw|GAA84778.1 aluc|OJZ86903.1 anid|CBF73824.1 anig|EHA21740.1 aory|EIT83584.1 asyd|OJJ56566.1 ater|EAU29988.1 atub|OJI83617.1 aver|OJJ06155.1 awen|OJJ32741.1 azon|OJJ45291.1

Group2704: abra|OJJ72147.1 acar|OOF96784.1 acla|EAW14942.1 afis|EAW24457.1 afla|EED55217.1 afum|EAL86127.1 agla|OJJ80304.1 akaw|GAA84777.1 aluc|OJZ86904.1 anid|CBF73826.1 anig|EHA21739.1 aory|EIT83603.1 asyd|OJJ56564.1 ater|EAU29985.1 atub|OJI83616.1 aver|OJJ06157.1 awen|OJJ32740.1 azon|OJJ45290.1

Group2705: abra|OJJ72148.1 acar|OOF96785.1 acla|EAW14943.1 afis|EAW24458.1 afla|EED55216.1 afum|EAL86128.1 agla|OJJ80305.1 akaw|GAA84776.1 aluc|OJZ86905.1 anid|CBF73828.1 anig|EHA21738.1 aory|EIT83601.1 asyd|OJJ56563.1 ater|EAU29984.1 atub|OJI83615.1 aver|OJJ06158.1 awen|OJJ32739.1 azon|OJJ45289.1

Group2706: abra|OJJ72149.1 acar|OOF96786.1 acla|EAW14944.1 afis|EAW24459.1 afla|EED55215.1 afum|EAL86129.1 agla|OJJ80306.1 akaw|GAA84775.1 aluc|OJZ86906.1 anid|CBF73830.1 anig|EHA21737.1 aory|EIT83574.1 asyd|OJJ56562.1 ater|EAU29983.1 atub|OJI83614.1 aver|OJJ06159.1 awen|OJJ32738.1 azon|OJJ45288.1

Group2707: abra|OJJ72150.1 acar|OOF96787.1 acla|EAW14945.1 afis|EAW24460.1 afla|EED55214.1 afum|EAL86130.1 agla|OJJ80308.1 akaw|GAA84774.1 aluc|OJZ86909.1 anid|CBF73832.1 anig|EHA21736.1 aory|EIT83521.1 asyd|OJJ56561.1 ater|EAU29982.1 atub|OJI83613.1 aver|OJJ06160.1 awen|OJJ32736.1 azon|OJJ45287.1

Group2708: abra|OJJ72209.1 acar|OOF96830.1 acla|EAW14967.1 afis|EAW24490.1 afla|EED54675.1 afum|EAL86159.1 agla|OJJ81567.1 akaw|GAA84725.1 aluc|OJZ86961.1 anid|CBF89709.1 anig|EHA21687.1

aory|EIT78852.1 asyd|OJJ62250.1 ater|EAU29966.1 atub|OJI83562.1 aver|OJI96360.1 awen|OJJ32706.1 azon|OJJ45248.1

Group2709: abra|OJJ72241.1 acar|OOF96866.1 acla|EAW07579.1 afis|EAW22615.1 afla|EED47379.1 afum|EAL90583.1 akaw|GAA84698.1 aluc|OJZ86989.1 anid|CBF84548.1 anig|EHA21657.1 aory|EIT82884.1 asyd|OJJ53472.1 ater|EAU39426.1 atub|OJI83530.1 aver|OJJ08284.1 awen|OJJ36695.1 azon|OJJ47502.1 aver|OJJ03406.1

Group2710: abra|OJJ72282.1 acar|OOF94939.1 afis|EAW20798.1 afla|EED49549.1 afum|EAL84831.1 akaw|GAA86034.1 aluc|OJZ90261.1 anig|EHA23757.1 asyd|OJJ55079.1 ater|EAU30148.1 atub|OJI81687.1 aver|OJJ07129.1 awen|OJJ41910.1 azon|OJJ47366.1 acar|OOF97630.1 afla|EED56695.1 aory|EIT73901.1 asyd|OJJ57120.1

Group2711: abra|OJJ72290.1 acar|OOF94933.1 acla|EAW12012.1 afis|EAW19652.1 afla|EED57003.1 afum|EAL86870.1 agla|OJJ80798.1 akaw|GAA86042.1 aluc|OJZ90271.1 anid|CBF71361.1 anig|EHA23763.1 aory|EIT77490.1 asyd|OJJ55084.1 ater|EAU32876.1 atub|OJI81695.1 aver|OJJ07123.1 awen|OJJ41903.1 azon|OJJ42697.1

Group2712: abra|OJJ72296.1 acar|OOF94928.1 acla|EAW12007.1 afis|EAW19647.1 afla|EED56998.1 afum|EAL86875.1 agla|OJJ80789.1 akaw|GAA86047.1 aluc|OJZ90276.1 anid|CBF71354.1 anig|EHA23768.1 aory|EIT77515.1 asyd|OJJ55089.1 ater|EAU32881.1 atub|OJI81700.1 aver|OJJ07118.1 awen|OJJ41898.1 azon|OJJ42702.1

Group2713: abra|OJJ72298.1 acar|OOF94926.1 acla|EAW12006.1 afis|EAW19646.1 afla|EED56997.1 afum|EAL86876.1 agla|OJJ80788.1 akaw|GAA86049.1 aluc|OJZ90278.1 anid|CBF71352.1 anig|EHA23769.1 aory|EIT77535.1 asyd|OJJ55091.1 ater|EAU32883.1 atub|OJI81703.1 aver|OJJ07117.1 awen|OJJ41897.1 azon|OJJ42703.1

Group2714: abra|OJJ72299.1 acar|OOF94924.1 acla|EAW12005.1 afis|EAW19645.1 afla|EED56996.1 afum|EAL86877.1 agla|OJJ80787.1 akaw|GAA86050.1 aluc|OJZ90280.1 anid|CBF71350.1 anig|EHA23770.1 aory|EIT77477.1 asyd|OJJ55092.1 ater|EAU32884.1 atub|OJI81704.1 aver|OJJ07116.1 awen|OJJ41896.1 azon|OJJ42704.1

Group2715: abra|OJJ72318.1 acar|OOF94893.1 acla|EAW12000.1 afis|EAW19640.1 afla|EED56991.1 afum|EAL86882.1 agla|OJJ80782.1 akaw|GAA86067.1 aluc|OJZ90301.1 anid|CBF71343.1 anig|EHA23789.1 aory|EIT77491.1 asyd|OJJ55098.1 ater|EAU32889.1 atub|OJI81727.1 aver|OJJ07108.1 awen|OJJ41885.1 azon|OJJ42710.1

Group2716: abra|OJJ72324.1 acar|OOF89799.1 acla|EAW11999.1 afis|EAW19639.1 afla|EED56990.1 afum|EAL86883.1 agla|OJJ80781.1 akaw|GAA86074.1 aluc|OJZ90309.1 anid|CBF71341.1 anig|EHA23796.1 aory|EIT77478.1 asyd|OJJ55099.1 ater|EAU32890.1 atub|OJI81734.1 aver|OJJ07107.1 awen|OJJ41884.1 azon|OJJ42711.1

Group2717: abra|OJJ72327.1 acar|OOF94887.1 acla|EAW11996.1 afis|EAW19636.1 afla|EED56988.1 afum|EAL86886.1 agla|OJJ80778.1 akaw|GAA86077.1 aluc|OJZ90312.1 anid|CBF71335.1 anig|EHA23799.1 aory|EIT77538.1 asyd|OJJ55103.1 ater|EAU32892.1 atub|OJI81737.1 aver|OJJ07104.1 awen|OJJ41881.1 azon|OJJ47079.1

Group2718: abra|OJJ72328.1 acar|OOF94886.1 acla|EAW11995.1 afis|EAW19635.1 afla|EED56986.1 afum|EAL86887.1 agla|OJJ80777.1 akaw|GAA86078.1 aluc|OJZ90313.1 anid|CBF71333.1 anig|EHA23800.1 aory|EIT77532.1 asyd|OJJ55104.1 atub|OJI81738.1 aver|OJJ07103.1 awen|OJJ41880.1 azon|OJJ47078.1 ater|EAU32893.1

Group2719: abra|OJJ72338.1 acar|OOF94878.1 acla|EAW11985.1 afis|EAW19625.1 afla|EED56977.1 afum|EBA27293.1 agla|OJJ80768.1 akaw|GAA86089.1 aluc|OJZ90318.1 anid|CBF71315.1 anig|EHA23804.1 aory|EIT77446.1 asyd|OJJ55113.1 ater|EAU32903.1 atub|OJI81747.1 aver|OJJ07093.1 awen|OJJ41872.1 azon|OJJ47067.1

Group2720: abra|OJJ72339.1 acar|OOF94877.1 acla|EAW11984.1 afis|EAW19624.1 afla|EED56976.1 afum|EAL86898.1 agla|OJJ80767.1 akaw|GAA86090.1 aluc|OJZ90319.1 anid|CBF71313.1 anig|EHA23805.1 aory|EIT77523.1 asyd|OJJ55114.1 ater|EAU32902.1 atub|OJI81748.1 aver|OJJ07092.1 awen|OJJ41871.1 azon|OJJ47066.1

Group2721: abra|OJJ72343.1 acar|OOF94874.1 acla|EAW11983.1 afis|EAW19621.1 afla|EED56973.1 afum|EAL86900.1 agla|OJJ80766.1 akaw|GAA86092.1 aluc|OJZ90322.1 anid|CBF71293.1 anig|EHA23808.1 aory|EIT77575.1 asyd|OJJ55117.1 ater|EAU32905.1 atub|OJI81749.1 aver|OJJ07089.1 awen|OJJ41868.1 azon|OJJ47061.1

Group2722: abra|OJJ72344.1 acar|OOF94873.1 acla|EAW11982.1 afis|EAW19620.1 afla|EED56972.1 afum|EAL86902.1 agla|OJJ80765.1 akaw|GAA86093.1 aluc|OJZ90323.1 anid|CBF71296.1 anig|EHA23809.1 aory|EIT77533.1 asyd|OJJ55118.1 ater|EAU32906.1 atub|OJI81750.1 aver|OJJ07088.1 awen|OJJ41867.1 azon|OJJ47060.1



Group2723: abra|OJJ72345.1 acar|OOF94872.1 acla|EAW11981.1 afis|EAW19619.1 afla|EED56967.1 afum|EAL86903.1 agla|OJJ80764.1 akaw|GAA86094.1 aluc|OJZ90324.1 anid|CBF71298.1 anig|EHA23810.1 aory|EIT77589.1 asyd|OJJ55119.1 ater|EAU32907.1 atub|OJI81751.1 aver|OJJ07087.1 awen|OJJ41866.1 azon|OJJ47059.1

Group2724: abra|OJJ72346.1 acar|OOF94871.1 acla|EAW11980.1 afis|EAW19618.1 afla|EED56968.1 afum|EAL86904.1 agla|OJJ80763.1 akaw|GAA86095.1 aluc|OJZ90325.1 anid|CBF71300.1 anig|EHA23811.1 aory|EIT77479.1 asyd|OJJ55120.1 ater|EAU32908.1 atub|OJI81752.1 aver|OJJ07086.1 awen|OJJ41865.1 azon|OJJ47058.1

Group2725: abra|OJJ72349.1 acar|OOF94869.1 acla|EAW11977.1 afis|EAW19609.1 afla|EED56969.1 afum|EAL86913.1 agla|OJJ80761.1 akaw|GAA86096.1 aluc|OJZ90328.1 anid|CBF71302.1 anig|EHA23812.1 aory|EIT77540.1 asyd|OJJ55121.1 ater|EAU32910.1 atub|OJI81755.1 aver|OJJ07083.1 awen|OJJ41862.1 azon|OJJ47055.1

Group2726: abra|OJJ72351.1 acar|OOF94867.1 acla|EAW11975.1 afis|EAW19611.1 afla|EED56966.1 afum|EAL86911.1 agla|OJJ80759.1 akaw|GAA86098.1 aluc|OJZ90330.1 anid|CBF71306.1 anig|EHA23814.1 aory|EIT77494.1 asyd|OJJ55123.1 ater|EAU32921.1 atub|OJI81757.1 aver|OJJ07080.1 awen|OJJ41859.1 azon|OJJ47053.1

Group2727: abra|OJJ72352.1 acar|OOF94866.1 acla|EAW11973.1 afis|EAW19613.1 afla|EED56961.1 afum|EAL86909.1 agla|OJJ80758.1 akaw|GAA86099.1 aluc|OJZ90331.1 anid|CBF71308.1 anig|EHA23815.1 aory|EIT77512.1 asyd|OJJ55126.1 ater|EAU32914.1 atub|OJI81758.1 aver|OJJ07078.1 awen|OJJ41857.1 azon|OJJ47051.1

Group2728: abra|OJJ72353.1 acar|OOF94865.1 acla|EAW11972.1 afis|EAW19614.1 afla|EED56962.1 afum|EAL86908.1 agla|OJJ80757.1 akaw|GAA86100.1 aluc|OJZ90332.1 anid|CBF71310.1 anig|EHA23816.1 aory|EIT77559.1 asyd|OJJ55127.1 ater|EAU32915.1 atub|OJI81759.1 aver|OJJ07077.1 awen|OJJ41856.1 azon|OJJ47050.1

Group2729: abra|OJJ72355.1 acar|OOF94863.1 acla|EAW11961.1 afis|EAW19598.1 afla|EED56954.1 afum|EAL86920.1 agla|OJJ80740.1 akaw|GAA86102.1 aluc|OJZ90334.1 anid|CBF71287.1 anig|EHA23818.1 aory|EIT77544.1 asyd|OJJ55129.1 ater|EAU32927.1 atub|OJI81761.1 aver|OJJ07074.1 awen|OJJ41844.1 azon|OJJ44888.1

Group2730: abra|OJJ72368.1 acar|OOF94849.1 acla|EAW11964.1 afis|EAW19601.1 afla|EED56957.1 afum|EAL86917.1 agla|OJJ80743.1 akaw|GAA86118.1 aluc|OJZ90356.1 anid|CBF71281.1 anig|EHA23834.1 aory|EIT77555.1 asyd|OJJ55133.1 ater|EAU32924.1 atub|OJI81783.1 aver|OJJ07071.1 awen|OJJ41839.1 azon|OJJ47044.1

Group2731: abra|OJJ72370.1 acar|OOF94852.1 afis|EAW25546.1 afla|EED51182.1 agla|OJJ80811.1 akaw|GAA86120.1 aluc|OJZ90359.1 anid|CBF80641.1 anig|EHA23832.1 aory|EIT81311.1 asyd|OJJ65320.1 ater|EAU36020.1 atub|OJI81786.1 aver|OJI99465.1 anid|CBF82274.1 asyd|OJJ59966.1 anid|CBF86654.1 aver|OJJ02324.1

Group2732: abra|OJJ72373.1 acar|OOF94855.1 acla|EAW11967.1 afis|EAW19617.1 afla|EED56965.1 afum|EAL86905.1 agla|OJJ80746.1 akaw|GAA86123.1 aluc|OJZ90362.1 anid|CBF71277.1 anig|EHA23829.1 aory|EIT77547.1 asyd|OJJ55139.1 ater|EAU32917.1 atub|OJI81789.1 aver|OJJ07066.1 awen|OJJ41850.1 azon|OJJ47046.1

Group2733: abra|OJJ72377.1 acar|OOF94841.1 acla|EAW11958.1 afis|EAW19595.1 afla|EED56951.1 afum|EAL86923.1 agla|OJJ80736.1 akaw|GAA86125.1 aluc|OJZ90364.1 anid|CBF71262.1 anig|EHA23839.1 aory|EIT77501.1 asyd|OJJ55150.1 ater|EAU32929.1 atub|OJI81791.1 aver|OJJ07057.1 awen|OJJ41849.1 azon|OJJ47020.1

Group2734: abra|OJJ72379.1 acar|OOF94840.1 acla|EAW11957.1 afis|EAW19594.1 afla|EED56950.1 afum|EAL86924.1 agla|OJJ80735.1 akaw|GAA86127.1 aluc|OJZ90366.1 anid|CBF71275.1 anig|EHA23841.1 aory|EIT77449.1 asyd|OJJ55149.1 ater|EAU32930.1 atub|OJI81793.1 aver|OJJ07058.1 awen|OJJ41811.1 azon|OJJ47021.1

Group2735: abra|OJJ72381.1 acar|OOF94838.1 acla|EAW11955.1 afis|EAW19592.1 afla|EED56948.1 afum|EAL86926.1 agla|OJJ80733.1 akaw|GAA86128.1 aluc|OJZ90368.1 anid|CBF71268.1 anig|EHA23842.1 aory|EIT77465.1 asyd|OJJ55147.1 ater|EAU32933.1 atub|OJI81794.1 aver|OJJ07060.1 awen|OJJ41809.1 azon|OJJ47023.1

Group2736: abra|OJJ72388.1 acar|OOF94835.1 acla|EAW11949.1 afis|EAW19586.1 afla|EED56914.1 afum|EAL86932.1 agla|OJJ80723.1 akaw|GAA86136.1 aluc|OJZ90374.1 anid|CBF71254.1 anig|EHA23848.1 aory|EIT77498.1 asyd|OJJ55153.1 ater|EAU32962.1 atub|OJI81800.1 aver|OJJ07054.1 awen|OJJ41800.1 azon|OJJ47031.1

Group2737: abra|OJJ72389.1 acar|OOF94834.1 acla|EAW11948.1 afis|EAW19585.1 afla|EED56913.1 afum|EAL86933.1 agla|OJJ80722.1 akaw|GAA86137.1 aluc|OJZ90376.1 anid|CBF71253.1 anig|EHA23849.1

aory|EIT77525.1 asyd|OJJ55155.1 ater|EAU32963.1 atub|OJI81801.1 aver|OJJ07053.1 awen|OJJ41799.1  
azon|OJJ47032.1

Group2738: abra|OJJ72391.1 acar|OOF94833.1 acla|EAW11947.1 afis|EAW19584.1 afla|EED56912.1  
afum|EAL86934.1 agla|OJJ80712.1 akaw|GAA86138.1 aluc|OJZ90378.1 anid|CBF71251.1 anig|EHA23850.1  
aory|EIT77463.1 asyd|OJJ55156.1 ater|EAU32967.1 atub|OJI81803.1 aver|OJJ07052.1 awen|OJJ41798.1  
azon|OJJ47033.1

Group2739: abra|OJJ72394.1 acar|OOF94832.1 acla|EAW11946.1 afis|EAW19583.1 afla|EED56911.1  
afum|EAL86935.2 agla|OJJ80711.1 akaw|GAA86139.1 aluc|OJZ90379.1 anid|CBF71249.1 anig|EHA23851.1  
aory|EIT77567.1 asyd|OJJ55157.1 ater|EAU32968.1 atub|OJI81804.1 aver|OJJ07051.1 awen|OJJ41797.1  
azon|OJJ47034.1

Group2740: abra|OJJ72395.1 acar|OOF94831.1 acla|EAW11945.1 afis|EAW19581.1 afla|EED56910.1  
afum|EAL86937.1 agla|OJJ80710.1 akaw|GAA86140.1 aluc|OJZ90380.1 anid|CBF71245.1 anig|EHA23852.1  
aory|EIT77560.1 asyd|OJJ55159.1 ater|EAU32972.1 atub|OJI81806.1 aver|OJJ07049.1 awen|OJJ41795.1  
azon|OJJ47036.1

Group2741: abra|OJJ72396.1 acar|OOF94830.1 acla|EAW11944.1 afis|EAW19580.1 afla|EED56909.1  
afum|EAL86938.1 agla|OJJ80709.1 akaw|GAA86141.1 aluc|OJZ90381.1 anid|CBF71243.1 anig|EHA23853.1  
aory|EIT77483.1 asyd|OJJ55160.1 ater|EAU32973.1 atub|OJI81807.1 aver|OJJ07047.1 awen|OJJ41794.1  
azon|OJJ47037.1

Group2742: abra|OJJ72397.1 acar|OOF94829.1 acla|EAW11943.1 afis|EAW19579.1 afla|EED56804.1  
afum|EAL86939.1 agla|OJJ80708.1 akaw|GAA86142.1 aluc|OJZ90382.1 anid|CBF71239.1 anig|EHA23854.1  
aory|EIT73874.1 asyd|OJJ55163.1 ater|EAU32976.1 atub|OJI81808.1 aver|OJJ07044.1 awen|OJJ41792.1  
azon|OJJ47041.1

Group2743: abra|OJJ72399.1 acar|OOF94828.1 acla|EAW11941.1 afis|EAW19577.1 afla|EED56805.1  
afum|EAL86941.2 agla|OJJ80706.1 akaw|GAA86144.1 aluc|OJZ90384.1 anid|CBF71236.1 anig|EHA23856.1  
aory|EIT73858.1 asyd|OJJ55165.1 ater|EAU33003.1 atub|OJI81811.1 aver|OJJ07042.1 awen|OJJ41790.1  
azon|OJJ47039.1

Group2744: abra|OJJ72401.1 acar|OOF94827.1 acla|EAW11940.1 afis|EAW19575.1 afla|EED56808.1  
afum|EAL86942.1 agla|OJJ80704.1 akaw|GAA86145.1 aluc|OJZ90386.1 anid|CBF71234.1 anig|EHA23857.1  
aory|EIT73879.1 asyd|OJJ55166.1 ater|EAU33002.1 atub|OJI81814.1 aver|OJJ07040.1 awen|OJJ41788.1  
azon|OJJ44890.1

Group2745: abra|OJJ72402.1 acar|OOF94826.1 acla|EAW11939.1 afis|EAW19574.1 afla|EED56809.1  
afum|EAL86943.1 agla|OJJ80702.1 akaw|GAA86146.1 aluc|OJZ90387.1 anid|CBF71232.1 anig|EHA23858.1  
aory|EIT73889.1 asyd|OJJ55167.1 ater|EAU33001.1 atub|OJI81815.1 aver|OJJ07039.1 awen|OJJ41787.1  
azon|OJJ44891.1

Group2746: abra|OJJ72404.1 acar|OOF94824.1 acla|EAW11937.1 afis|EAW19572.1 afla|EED56811.1  
afum|EAL86945.1 agla|OJJ80700.1 akaw|GAA86148.1 aluc|OJZ90389.1 anid|CBF71228.1 anig|EHA23859.1  
aory|EIT73949.1 asyd|OJJ55170.1 ater|EAU32995.1 atub|OJI81818.1 aver|OJJ07037.1 awen|OJJ41785.1  
azon|OJJ44893.1

Group2747: abra|OJJ72405.1 acar|OOF94823.1 acla|EAW11936.1 afis|EAW19571.1 afla|EED56812.1  
afum|EAL86946.1 agla|OJJ80699.1 akaw|GAA86149.1 aluc|OJZ90390.1 anid|CBF71226.1 anig|EHA23860.1  
aory|EIT73876.1 asyd|OJJ55171.1 ater|EAU32994.1 atub|OJI81819.1 aver|OJJ07036.1 awen|OJJ41784.1  
azon|OJJ44894.1

Group2748: abra|OJJ72408.1 acar|OOF94821.1 acla|EAW11933.1 afis|EAW19569.1 afla|EED56814.1  
afum|EAL86947.1 agla|OJJ80697.1 akaw|GAA86151.1 aluc|OJZ90392.1 anid|CBF78033.1 anig|EHA23862.1  
aory|EIT73916.1 asyd|OJJ55227.1 ater|EAU32992.1 atub|OJI81821.1 aver|OJJ06994.1 awen|OJJ41782.1  
azon|OJJ44896.1

Group2749: abra|OJJ72412.1 acar|OOF94817.1 acla|EAW11929.1 afis|EAW19563.1 afla|EED56817.1  
afum|EAL86949.1 agla|OJJ80692.1 akaw|GAA86155.1 aluc|OJZ90396.1 anid|CBF78024.1 anig|EHA23866.1  
aory|EIT73850.1 asyd|OJJ55233.1 ater|EAU32986.1 atub|OJI81827.1 aver|OJJ06990.1 awen|OJJ41778.1  
azon|OJJ44899.1

Group2750: abra|OJJ72413.1 acar|OOF94816.1 acla|EAW12857.1 afis|EAW17821.1 afla|EED56818.1  
afum|EAL91631.1 agla|OJJ80690.1 akaw|GAA86156.1 aluc|OJZ90397.1 anid|CBF78026.1 anig|EHA23867.1  
aory|EIT73888.1 asyd|OJJ55232.1 ater|EAU32985.1 atub|OJI81828.1 aver|OJJ06991.1 awen|OJJ41777.1  
azon|OJJ44900.1

Group2751: abra|OJJ72414.1 acar|OOF94815.1 acla|EAW12858.1 afis|EAW17820.1 afla|EED56819.1  
afum|EAL91630.1 agla|OJJ80689.1 akaw|GAA86157.1 aluc|OJZ90398.1 anid|CBF78027.1 anig|EHA23868.1  
aory|EIT73947.1 asyd|OJJ55231.1 ater|EAU32984.1 atub|OJI81829.1 aver|OJJ06992.1 awen|OJJ41776.1  
azon|OJJ44901.1

Group2752: abra|OJJ72415.1 acar|OOF94814.1 acla|EAW12859.1 afis|EAW17808.1 afla|EED56820.1 afum|EAL91616.1 agla|OJJ80688.1 akaw|GAA86158.1 aluc|OJZ90399.1 anid|CBF78029.1 anig|EHA23869.1 aory|EIT73877.1 asyd|OJJ55230.1 ater|EAU32982.1 atub|OJI81830.1 aver|OJJ06993.1 awen|OJJ41775.1 azon|OJJ44902.1

Group2753: abra|OJJ72417.1 acar|OOF90199.1 acla|EAW13737.1 afis|EAW17067.1 afla|EED52009.1 afum|EAL87736.1 agla|OJJ83275.1 akaw|GAA86160.1 aluc|OJZ90401.1 aory|EIT81373.1 awen|OJJ36556.1 azon|OJJ46436.1 abra|OJJ73401.1 acar|OOF98722.1 anid|CBF84645.1 anig|EHA18326.1 ater|EAU36994.1 aver|OJJ04312.1

Group2754: abra|OJJ72421.1 acar|OOF90370.1 acla|EAW12862.1 afis|EAW17811.1 afla|EED46162.1 afum|EAL91619.1 agla|OJJ80655.1 akaw|GAA86163.1 aluc|OJZ90404.1 anid|CBF78013.1 anig|EHA23872.1 aory|EIT76383.1 asyd|OJJ55240.1 ater|EAU33017.1 atub|OJI81835.1 aver|OJJ06983.1 awen|OJJ41761.1 azon|OJJ44878.1

Group2755: abra|OJJ72422.1 acar|OOF90371.1 acla|EAW12861.1 afis|EAW17810.1 afla|EED46161.1 afum|EAL91618.1 agla|OJJ80654.1 akaw|GAA86164.1 aluc|OJZ90405.1 anid|CBF78014.1 anig|EHA23873.1 aory|EIT76437.1 asyd|OJJ55239.1 ater|EAU33016.1 atub|OJI81836.1 aver|OJJ06984.1 awen|OJJ41762.1 azon|OJJ44879.1

Group2756: abra|OJJ72424.1 acar|OOF90373.1 afis|EAW17822.1 afla|EED46167.1 agla|OJJ80652.1 akaw|GAA86166.1 aluc|OJZ90407.1 anid|CBF78011.1 anig|EHA23875.1 aory|EIT76519.1 asyd|OJJ63016.1 ater|EAU33023.1 atub|OJI81838.1 aver|OJI97948.1 awen|OJJ41760.1 azon|OJJ48452.1 acar|OOF98065.1 anid|CBF85197.1

Group2757: abra|OJJ72425.1 acar|OOF94810.1 acla|EAW12659.1 afis|EAW17823.1 afla|EED46166.1 afum|EAL91633.1 agla|OJJ80641.1 akaw|GAA86167.1 aluc|OJZ90408.1 anid|CBF78009.1 anig|EHA23876.1 aory|EIT76477.1 asyd|OJJ55242.1 ater|EAU33024.1 atub|OJI81840.1 aver|OJJ06982.1 awen|OJJ41751.1 azon|OJJ48443.1

Group2758: abra|OJJ72428.1 acar|OOF94804.1 acla|EAW12661.1 afis|EAW17825.1 afla|EED46163.1 afum|EAL91635.1 agla|OJJ80646.1 akaw|GAA86169.1 aluc|OJZ90412.1 anid|CBF78005.1 anig|EHA23878.1 aory|EIT76524.1 asyd|OJJ55245.1 ater|EAU33026.1 atub|OJI81843.1 aver|OJJ06979.1 awen|OJJ41755.1 azon|OJJ48445.1

Group2759: abra|OJJ72429.1 acar|OOF94805.1 acla|EAW12662.1 afis|EAW17826.1 afla|EED46168.1 afum|EAL91636.1 agla|OJJ80647.1 akaw|GAA86170.1 aluc|OJZ90413.1 anid|CBF78003.1 anig|EHA23879.1 aory|EIT76408.1 asyd|OJJ55246.1 ater|EAU33027.1 atub|OJI81845.1 aver|OJJ06978.1 awen|OJJ41756.1 azon|OJJ48446.1

Group2760: abra|OJJ72430.1 acar|OOF94803.1 acla|EAW12663.1 afis|EAW17827.1 afla|EED46169.1 afum|EAL91637.1 agla|OJJ80648.1 akaw|GAA86171.1 aluc|OJZ90414.1 anid|CBF78001.1 anig|EHA23880.1 aory|EIT76516.1 asyd|OJJ55247.1 ater|EAU33031.1 atub|OJI81846.1 aver|OJJ06977.1 awen|OJJ41757.1 azon|OJJ48447.1

Group2761: abra|OJJ72439.1 acar|OOF94798.1 acla|EAW12672.1 afis|EAW17835.1 afla|EED46180.1 afum|EAL91645.1 agla|OJJ83131.1 akaw|GAA86178.1 aluc|OJZ90423.1 anid|CBF77987.1 anig|EHA23892.1 aory|EIT76377.1 asyd|OJJ55256.1 ater|EAU33039.1 atub|OJI81855.1 aver|OJJ06968.1 awen|OJJ41741.1 azon|OJJ48437.1

Group2762: abra|OJJ72440.1 acar|OOF94797.1 acla|EAW12673.1 afis|EAW17836.1 afla|EED46181.1 afum|EAL91646.1 agla|OJJ83130.1 akaw|GAA86179.1 aluc|OJZ90424.1 anid|CBF77985.1 anig|EHA23893.1 aory|EIT76515.1 asyd|OJJ55257.1 ater|EAU33040.1 atub|OJI81856.1 aver|OJJ06967.1 awen|OJJ41740.1 azon|OJJ48436.1

Group2763: abra|OJJ72443.1 acar|OOF94793.1 acla|EAW12676.1 afis|EAW17839.1 afla|EED46184.1 afum|EAL91649.1 agla|OJJ83128.1 akaw|GAA86182.1 aluc|OJZ90427.1 anid|CBF77979.1 anig|EHA23897.1 aory|EIT76493.1 asyd|OJJ55260.1 ater|EAU33042.1 atub|OJI81859.1 aver|OJJ06965.1 awen|OJJ41737.1 azon|OJJ48434.1

Group2764: abra|OJJ72445.1 acar|OOF94791.1 acla|EAW12678.1 afis|EAW17841.1 afla|EED46186.1 afum|EAL91650.1 agla|OJJ83126.1 akaw|GAA86183.1 aluc|OJZ90429.1 anid|CBF77975.1 anig|EHA23898.1 aory|EIT76513.1 asyd|OJJ55262.1 ater|EAU33043.1 atub|OJI81861.1 aver|OJJ06963.1 awen|OJJ41735.1 azon|OJJ48432.1

Group2765: abra|OJJ72446.1 acar|OOF94790.1 acla|EAW12679.1 afis|EAW17842.1 afla|EED46187.1 afum|EAL91651.1 agla|OJJ83125.1 akaw|GAA86184.1 aluc|OJZ90430.1 anid|CBF77973.1 anig|EHA23899.1 aory|EIT76407.1 asyd|OJJ55263.1 ater|EAU33044.1 atub|OJI81862.1 aver|OJJ06962.1 awen|OJJ41734.1 azon|OJJ48431.1

Group2766: abra|OJJ72450.1 acar|OOF94786.1 acla|EAW12684.1 afis|EAW17847.1 afla|EED46201.1 afum|EAL91656.1 agla|OJJ83122.1 akaw|GAA86187.1 aluc|OJZ90435.1 anid|CBF77964.1 anig|EHA23902.1

aory|EIT76452.1 asyd|OJJ55269.1 ater|EAU33049.1 atub|OJI81866.1 aver|OJJ06958.1 awen|OJJ41726.1 azon|OJJ48425.1

Group2767: abra|OJJ72458.1 acar|OOF94779.1 acla|EAW12690.1 afis|EAW17854.1 afla|EED46208.1 afum|EAL91662.1 agla|OJJ83116.1 akaw|GAA86194.1 aluc|OJZ90445.1 anid|CBF77955.1 anig|EHA23908.1 aory|EIT76378.1 asyd|OJJ55275.1 ater|EAU33056.1 atub|OJI81873.1 aver|OJJ06952.1 awen|OJJ41719.1 azon|OJJ48416.1

Group2768: abra|OJJ72459.1 acar|OOF94780.1 acla|EAW12691.1 afis|EAW17855.1 afla|EED46209.1 afum|EAL91663.1 agla|OJJ83115.1 akaw|GAA86195.1 aluc|OJZ90446.1 anid|CBF77953.1 anig|EHA23909.1 aory|EIT76395.1 asyd|OJJ55276.1 ater|EAU33057.1 atub|OJI81874.1 aver|OJJ06951.1 awen|OJJ41718.1 azon|OJJ48415.1

Group2769: abra|OJJ72460.1 acar|OOF94778.1 acla|EAW12692.1 afis|EAW17856.1 afla|EED46210.1 afum|EAL91664.1 agla|OJJ83113.1 akaw|GAA86196.1 aluc|OJZ90447.1 anid|CBF77951.1 anig|EHA23910.1 aory|EIT76442.1 asyd|OJJ55277.1 ater|EAU33058.1 atub|OJI81875.1 aver|OJJ06950.1 awen|OJJ41716.1 azon|OJJ48411.1

Group2770: abra|OJJ72461.1 acar|OOF94777.1 acla|EAW12693.1 afis|EAW17857.1 afla|EED46212.1 afum|EAL91665.1 agla|OJJ83112.1 akaw|GAA86197.1 aluc|OJZ90448.1 anid|CBF77949.1 anig|EHA23911.1 aory|EIT76364.1 asyd|OJJ55278.1 ater|EAU33059.1 atub|OJI81876.1 aver|OJJ06949.1 awen|OJJ41715.1 azon|OJJ48410.1

Group2771: abra|OJJ72462.1 acar|OOF94775.1 acla|EAW12694.1 afis|EAW17858.1 afla|EED46213.1 afum|EAL91666.1 agla|OJJ83111.1 akaw|GAA86198.1 aluc|OJZ90449.1 anid|CBF77947.1 anig|EHA23912.1 aory|EIT76487.1 asyd|OJJ55279.1 ater|EAU33064.1 atub|OJI81877.1 aver|OJJ06948.1 awen|OJJ41714.1 azon|OJJ48409.1

Group2772: abra|OJJ72467.1 acar|OOF94773.1 acla|EAW12699.1 afis|EAW17862.1 afla|EED46225.1 afum|EAL91670.2 agla|OJJ83101.1 akaw|GAA86203.1 aluc|OJZ90454.1 anid|CBF88078.1 anig|EHA23916.1 aory|EIT76473.1 asyd|OJJ57087.1 ater|EAU33070.1 atub|OJI81881.1 aver|OJJ03214.1 awen|OJJ41709.1 azon|OJJ48404.1

Group2773: abra|OJJ72468.1 acar|OOF94772.1 acla|EAW12700.1 afis|EAW17863.1 afla|EED46226.1 afum|EAL91671.1 agla|OJJ83100.1 akaw|GAA86204.1 aluc|OJZ90455.1 anid|CBF84085.1 anig|EHA23917.1 aory|EIT76453.1 asyd|OJJ57088.1 ater|EAU33078.1 atub|OJI81882.1 aver|OJJ03213.1 awen|OJJ41707.1 azon|OJJ48403.1

Group2774: abra|OJJ72471.1 acar|OOF94764.1 acla|EAW12704.1 afis|EAW17867.1 afla|EED46236.1 afum|EAL91675.1 agla|OJJ83087.1 akaw|GAA86209.1 aluc|OJZ90458.1 anid|CBF89893.1 anig|EHA23920.1 aory|EIT76466.1 asyd|OJJ62139.1 ater|EAU33082.1 atub|OJI81885.1 aver|OJI96249.1 awen|OJJ41704.1 azon|OJJ48400.1

Group2775: abra|OJJ72476.1 acar|OOF94760.1 acla|EAW12707.1 afis|EAW17870.1 afla|EED46238.1 afum|EAL91678.1 agla|OJJ83090.1 akaw|GAA86212.1 aluc|OJZ90462.1 anid|CBF89899.1 anig|EHA23923.1 aory|EIT76429.1 asyd|OJJ62136.1 ater|EAU33088.1 atub|OJI81888.1 aver|OJI96246.1 awen|OJJ41700.1 azon|OJJ48397.1

Group2776: abra|OJJ72478.1 acar|OOF94756.1 acla|EAW12709.1 afis|EAW17872.1 afla|EED46239.1 afum|EAL91680.1 agla|OJJ83092.1 akaw|GAA86214.1 aluc|OJZ90465.1 anid|CBF89903.1 anig|EHA23925.1 aory|EIT76379.1 asyd|OJJ62134.1 ater|EAU33090.1 atub|OJI81890.1 aver|OJI96244.1 awen|OJJ41698.1 azon|OJJ48395.1

Group2777: abra|OJJ72482.1 acar|OOF94754.1 acla|EAW12712.1 afis|EAW17875.1 afla|EED46242.1 afum|EAL91683.1 agla|OJJ83071.1 akaw|GAA86217.1 aluc|OJZ90469.1 anid|CBF89904.1 anig|EHA23928.1 aory|EIT76495.1 asyd|OJJ59281.1 ater|EAU33095.1 atub|OJI81893.1 aver|OJJ01894.1 awen|OJJ41689.1 aver|OJI96243.1

Group2778: abra|OJJ72488.1 acar|OOF94747.1 acla|EAW12719.1 afis|EAW17882.1 afla|EED46269.1 afum|EAL91690.1 agla|OJJ83065.1 akaw|GAA86223.1 aluc|OJZ90475.1 anid|EHA23934.1 aory|EIT76427.1 asyd|OJJ57008.1 ater|EAU33102.1 atub|OJI81900.1 aver|OJJ03279.1 awen|OJJ41684.1 azon|OJJ48392.1 anid|CBF77035.1

Group2779: abra|OJJ72489.1 acar|OOF92642.1 acla|EAW12720.1 afis|EAW17883.1 afla|EED46270.1 afum|EAL91691.1 agla|OJJ83064.1 akaw|GAA86224.1 aluc|OJZ90476.1 anid|CBF77033.1 anig|EHA23935.1 aory|EIT76482.1 asyd|OJJ57009.1 ater|EAU33103.1 atub|OJI81901.1 aver|OJJ03278.1 awen|OJJ41682.1 azon|OJJ48391.1

Group2780: abra|OJJ72493.1 acar|OOF94745.1 acla|EAW12722.1 afis|EAW17885.1 afla|EED46272.1 afum|EAL91693.1 agla|OJJ83062.1 akaw|GAA86227.1 aluc|OJZ90479.1 anid|CBF77029.1 anig|EHA23938.1 aory|EIT76321.1 asyd|OJJ57011.1 ater|EAU33105.1 atub|OJI81904.1 aver|OJJ03276.1 awen|OJJ41674.1 azon|OJJ48389.1

Group2781: abra|OJJ72494.1 acar|OOF94744.1 acla|EAW12723.1 afis|EAW17886.1 afla|EED46273.1 afum|EAL91694.1 agla|OJJ83061.1 akaw|GAA86228.1 aluc|OJZ90480.1 anid|CBF77027.1 anig|EHA23939.1 aory|EIT76334.1 asyd|OJJ57012.1 ater|EAU33106.1 atub|OJI81905.1 aver|OJJ03275.1 awen|OJJ41673.1 azon|OJJ48388.1

Group2782: abra|OJJ72497.1 acar|OOF94742.1 acla|EAW12725.1 afis|EAW17888.1 afla|EED46275.1 afum|EAL91697.1 agla|OJJ83059.1 akaw|GAA86229.1 aluc|OJZ90481.1 anid|CBF77026.1 anig|EHA23940.1 aory|EIT76333.1 asyd|OJJ57013.1 ater|EAU33107.1 atub|OJI81906.1 aver|OJJ03274.1 awen|OJJ41671.1 azon|OJJ48386.1

Group2783: abra|OJJ72503.1 acar|OOF94738.1 acla|EAW12727.1 afis|EAW17890.1 afla|EED46282.1 afum|EAL91699.1 agla|OJJ83055.1 akaw|GAA86231.1 aluc|OJZ90485.1 anid|CBF77016.1 anig|EHA23943.1 aory|EIT76352.1 asyd|OJJ57017.1 ater|EAU33110.1 atub|OJI81910.1 aver|OJJ03272.1 awen|OJJ41667.1 azon|OJJ48384.1

Group2784: abra|OJJ72507.1 acar|OOF94735.1 acla|EAW12730.1 afis|EAW17893.1 afla|EED46286.1 afum|EAL91702.1 agla|OJJ83049.1 akaw|GAA86235.1 aluc|OJZ90490.1 anid|CBF77006.1 anig|EHA23948.1 aory|EIT76341.1 asyd|OJJ57021.1 ater|EAU33114.1 atub|OJI81914.1 aver|OJJ03268.1 awen|OJJ41659.1 azon|OJJ48379.1

Group2785: abra|OJJ72509.1 acar|OOF94733.1 acla|EAW12732.1 afis|EAW17895.1 afla|EED46267.1 afum|EAL91703.1 agla|OJJ83047.1 akaw|GAA86237.1 aluc|OJZ90492.1 anid|CBF77004.1 anig|EHA23950.1 aory|EIT76414.1 asyd|OJJ57023.1 ater|EAU33115.1 atub|OJI81916.1 aver|OJJ03266.1 awen|OJJ41657.1 azon|OJJ48377.1

Group2786: abra|OJJ72511.1 acar|OOF94732.1 acla|EAW12733.1 afis|EAW17896.1 afla|EED46266.1 afum|EAL91704.1 agla|OJJ83046.1 akaw|GAA86238.1 aluc|OJZ90493.1 anid|CBF77002.1 anig|EHA23951.1 aory|EIT76411.1 asyd|OJJ57025.1 ater|EAU33116.1 atub|OJI81917.1 aver|OJJ03265.1 awen|OJJ41655.1 azon|OJJ48375.1

Group2787: abra|OJJ72513.1 acar|OOF94730.1 acla|EAW12734.1 afis|EAW17897.1 afla|EED46265.1 afum|EAL91705.1 agla|OJJ83045.1 akaw|GAA86240.1 aluc|OJZ90495.1 anid|CBF76998.1 anig|EHA23954.1 aory|EIT76381.1 asyd|OJJ57027.1 ater|EAU33117.1 atub|OJI81920.1 aver|OJJ03263.1 awen|OJJ41654.1 azon|OJJ48374.1

Group2788: abra|OJJ72514.1 acar|OOF94729.1 acla|EAW12735.1 afis|EAW17898.1 afla|EED46264.1 afum|EAL91706.1 agla|OJJ83044.1 akaw|GAA86241.1 aluc|OJZ90496.1 anid|CBF76996.1 anig|EHA23955.1 aory|EIT76461.1 asyd|OJJ57028.1 ater|EAU33118.1 atub|OJI81921.1 aver|OJJ03262.1 awen|OJJ41653.1 azon|OJJ48373.1

Group2789: abra|OJJ72515.1 acar|OOF94728.1 afis|EAW17899.1 afla|EED46263.1 agla|OJJ83043.1 akaw|GAA86242.1 aluc|OJZ90497.1 anid|CBF76994.1 anig|EHA23956.1 aory|EIT76422.1 asyd|OJJ57029.1 atub|OJI81922.1 aver|OJJ03261.1 awen|OJJ41652.1 azon|OJJ48372.1 acla|EAW12736.1 afum|EAL91707.1 ater|EAU33119.1

Group2790: abra|OJJ72516.1 acar|OOF94727.1 acla|EAW12737.1 afis|EAW17900.1 afla|EED46262.1 afum|EAL91708.1 agla|OJJ83042.1 akaw|GAA86243.1 aluc|OJZ90498.1 anid|CBF76992.1 anig|EHA23957.1 aory|EIT76428.1 asyd|OJJ57030.1 ater|EAU33120.1 atub|OJI81923.1 aver|OJJ03260.1 awen|OJJ41651.1 azon|OJJ48371.1

Group2791: abra|OJJ72518.1 acar|OOF94726.1 acla|EAW12738.1 afis|EAW17901.1 afla|EED46261.1 afum|EAL91709.1 agla|OJJ83041.1 akaw|GAA86244.1 aluc|OJZ90499.1 anid|CBF76990.1 anig|EHA23958.1 aory|EIT76470.1 asyd|OJJ57032.1 ater|EAU33121.1 atub|OJI81924.1 aver|OJJ03259.1 awen|OJJ41648.1 azon|OJJ48370.1

Group2792: abra|OJJ72538.1 acar|OOF89947.1 acla|EAW12744.1 afis|EAW17907.1 afla|EED46301.1 afum|EAL91716.2 agla|OJJ83035.1 akaw|GAA86262.1 aluc|OJZ90520.1 anid|CBF76981.1 anig|EHA23974.1 aory|EIT76350.1 asyd|OJJ57037.1 ater|EAU33125.1 atub|OJI81944.1 aver|OJJ03255.1 awen|OJJ41643.1 azon|OJJ48364.1

Group2793: abra|OJJ72539.1 acar|OOF89942.1 acla|EAW12745.1 afis|EAW17908.1 afla|EED46302.1 afum|EAL91717.2 agla|OJJ83034.1 akaw|GAA86263.1 aluc|OJZ90522.1 anid|CBF76979.1 anig|EHA23975.1 aory|EIT76327.1 asyd|OJJ57038.1 ater|EAU33126.1 atub|OJI81945.1 aver|OJJ03253.1 awen|OJJ41641.1 azon|OJJ48363.1

Group2794: abra|OJJ72543.1 acar|OOF94712.1 acla|EAW12747.1 afis|EAW17911.1 afla|EED46313.1 afum|EAL91720.1 agla|OJJ83032.1 akaw|GAA86267.1 aluc|OJZ90527.1 anid|CBF76967.1 anig|EHA23979.1 aory|EIT76323.1 asyd|OJJ57041.1 ater|EAU33131.1 atub|OJI81949.1 aver|OJJ03252.1 awen|OJJ41638.1 azon|OJJ48360.1

Group2795: abra|OJJ72544.1 acar|OOF94711.1 acla|EAW12748.1 afis|EAW17912.1 afla|EED46314.1 afum|EAL91721.1 agla|OJJ83031.1 akaw|GAA86268.1 aluc|OJZ90528.1 anid|CBF76969.1 anig|EHA23980.1

aory|EIT76335.1 asyd|OJJ57042.1 ater|EAU33132.1 atub|OJI81950.1 aver|OJJ03251.1 awen|OJJ41637.1 azon|OJJ48359.1

Group2796: abra|OJJ72545.1 acar|OOF94710.1 acla|EAW12749.1 afis|EAW17913.1 afla|EED46315.1 afum|EAL91722.1 agla|OJJ83030.1 akaw|GAA86269.1 aluc|OJZ90529.1 anid|CBF76971.1 anig|EHA23981.1 aory|EIT76319.1 asyd|OJJ57043.1 ater|EAU33133.1 atub|OJI81951.1 aver|OJJ03250.1 awen|OJJ41636.1 azon|OJJ48356.1

Group2797: abra|OJJ72551.1 acar|OOF94702.1 acla|EAW12756.1 afis|EAW17919.1 afla|EED46322.1 afum|EAL91730.1 agla|OJJ83023.1 akaw|GAA85183.1 aluc|OJZ90538.1 anid|CBF76955.1 anig|EHA23986.1 aory|EIT81188.1 asyd|OJJ57054.1 ater|EAU33554.1 atub|OJI81959.1 aver|OJJ03243.1 awen|OJJ41627.1 azon|OJJ48350.1

Group2798: abra|OJJ72554.1 acar|OOF94700.1 acla|EAW12759.1 afis|EAW17921.1 afla|EED46324.1 afum|EAL91732.1 agla|OJJ83020.1 akaw|GAA85186.1 aluc|OJZ90541.1 anid|CBF76951.1 anig|EHA23989.1 aory|EIT81201.1 asyd|OJJ57057.1 ater|EAU33550.1 atub|OJI81963.1 aver|OJJ03241.1 awen|OJJ41624.1 azon|OJJ48347.1

Group2799: abra|OJJ72555.1 acar|OOF94698.1 acla|EAW12760.1 afis|EAW17922.1 afla|EED46325.1 afum|EAL91733.1 agla|OJJ83019.1 akaw|GAA85187.1 aluc|OJZ90542.1 anid|CBF76949.1 anig|EHA23990.1 aory|EIT81261.1 asyd|OJJ57058.1 ater|EAU33549.1 atub|OJI81964.1 aver|OJJ03240.1 awen|OJJ41623.1 azon|OJJ48346.1

Group2800: abra|OJJ72562.1 acar|OOF94694.1 acla|EAW11409.1 afis|EAW24012.1 afla|EED49148.1 afum|EAL87442.1 agla|OJJ86944.1 akaw|GAA85191.1 aluc|OJZ90546.1 anid|CBF77408.1 aory|EIT78554.1 asyd|OJJ53238.1 ater|EAU29735.1 atub|OJI81968.1 aver|OJJ03612.1 awen|OJJ35484.1 azon|OJJ51264.1 awen|OJJ37387.1

Group2801: abra|OJJ72564.1 acar|OOF94690.1 acla|EAW12764.1 afis|EAW17926.1 afla|EED46328.1 afum|EAL91737.1 agla|OJJ83013.1 akaw|GAA92409.1 aluc|OJZ83268.1 anid|CBF76942.1 anig|EHA21121.1 aory|EIT81217.1 asyd|OJJ57062.1 ater|EAU33545.1 atub|OJI87669.1 aver|OJJ03236.1 awen|OJJ41620.1 azon|OJJ48343.1

Group2802: abra|OJJ72565.1 acar|OOF94689.1 acla|EAW12765.1 afis|EAW17927.1 afla|EED58037.1 afum|EAL91738.1 agla|OJJ83007.1 akaw|GAA92406.1 aluc|OJZ83267.1 anid|CBF76940.1 anig|EHA21120.1 aory|EIT79801.1 asyd|OJJ57063.1 ater|EAU33544.1 atub|OJI87670.1 aver|OJJ03235.1 awen|OJJ41619.1 azon|OJJ48342.1

Group2803: abra|OJJ72567.1 acar|OOF94687.1 acla|EAW12767.1 afis|EAW17930.1 afla|EED49111.1 afum|EAL91741.1 agla|OJJ83003.1 akaw|GAA85194.1 aluc|OJZ90549.1 anid|CBF76936.1 anig|EHA23997.1 aory|EIT78530.1 asyd|OJJ57064.1 ater|EAU33540.1 atub|OJI81971.1 aver|OJJ03234.1 awen|OJJ41616.1 azon|OJJ48337.1

Group2804: abra|OJJ72568.1 acar|OOF97957.1 acla|EAW14929.1 afla|EED48920.1 afum|EAL85693.1 akaw|GAA85196.1 aluc|OJZ90551.1 anig|EHA23998.1 aory|EIT81168.1 ater|EAU36518.1 atub|OJI81973.1 aver|OJJ07138.1 afis|EAW22084.1 acla|EAW14284.1 afla|EED49819.1 aory|EIT77604.1 afla|EED55283.1 aory|EIT83580.1

Group2805: abra|OJJ72581.1 acar|OOF94671.1 acla|EAW12768.1 afis|EAW17931.1 afla|EED49110.1 afum|EAL91742.1 agla|OJJ83002.1 akaw|GAA85207.1 aluc|OJZ90562.1 anid|CBF76934.1 anig|EHA24008.1 aory|EIT78507.1 asyd|OJJ57065.1 ater|EAU33539.1 atub|OJI81985.1 aver|OJJ03233.1 awen|OJJ41615.1 azon|OJJ48336.1

Group2806: abra|OJJ72582.1 acar|OOF94670.1 acla|EAW12769.1 afis|EAW17932.1 afla|EED49109.1 afum|EAL91743.1 agla|OJJ83001.1 akaw|GAA85208.1 aluc|OJZ90563.1 anid|CBF76932.1 anig|EHA24009.1 aory|EIT78546.1 asyd|OJJ57066.1 ater|EAU33538.1 atub|OJI81986.1 aver|OJJ03232.1 awen|OJJ41614.1 azon|OJJ48335.1

Group2807: abra|OJJ72583.1 acar|OOF94669.1 acla|EAW12770.1 afis|EAW17933.1 afla|EED49108.1 afum|EAL91744.1 agla|OJJ83000.1 akaw|GAA85209.1 aluc|OJZ90564.1 anid|CBF76930.1 anig|EHA24010.1 aory|EIT78564.1 asyd|OJJ57067.1 ater|EAU33537.1 atub|OJI81987.1 aver|OJJ03231.1 awen|OJJ41613.1 azon|OJJ48333.1

Group2808: abra|OJJ72585.1 acar|OOF94667.1 acla|EAW12771.1 afis|EAW17934.1 afla|EED49107.1 afum|EAL91745.1 agla|OJJ82999.1 akaw|GAA85211.1 aluc|OJZ90566.1 anid|CBF77039.1 anig|EHA24012.1 aory|EIT78519.1 asyd|OJJ57002.1 ater|EAU33536.1 atub|OJI81989.1 aver|OJJ03285.1 awen|OJJ41612.1 azon|OJJ48331.1

Group2809: abra|OJJ72588.1 acar|OOF94662.1 acla|EAW12774.1 afis|EAW17937.1 afla|EED49105.1 afum|EAL91748.1 agla|OJJ82995.1 akaw|GAA85214.1 aluc|OJZ90569.1 anid|CBF77044.1 anig|EHA24014.1 aory|EIT78518.1 asyd|OJJ56999.1 ater|EAU33533.1 atub|OJI81992.1 aver|OJJ03288.1 awen|OJJ41609.1 azon|OJJ48328.1

Group2810: abra|OJJ72589.1 acar|OOF94661.1 acla|EAW12775.1 afis|EAW17938.1 afla|EED49103.1 afum|EAL91749.1 agla|OJJ82994.1 akaw|GAA85215.1 aluc|OJZ90570.1 anid|CBF77046.1 anig|EHA24015.1 aory|EIT82547.1 asyd|OJJ56998.1 ater|EAU33530.1 atub|OJI81993.1 aver|OJJ03289.1 awen|OJJ41607.1 azon|OJJ48325.1

Group2811: abra|OJJ72592.1 acar|OOF94658.1 acla|EAW12778.1 afis|EAW17941.1 afla|EED52574.1 afum|EAL91752.1 agla|OJJ82991.1 akaw|GAA85219.1 aluc|OJZ90573.1 anid|CBF77049.1 anig|EHA24018.1 aory|EIT74256.1 asyd|OJJ56996.1 ater|EAU33524.1 atub|OJI81997.1 aver|OJJ03291.1 awen|OJJ41602.1 azon|OJJ48320.1

Group2812: abra|OJJ72596.1 acar|OOF94657.1 acla|EAW11620.1 afla|EED52571.1 akaw|GAA85224.1 aluc|OJZ90577.1 anig|EHA24021.1 aory|EIT74280.1 ater|EAU33521.1 atub|OJI82002.1 azon|OJJ48744.1 afis|EAW23838.1 afum|EAL87269.1 asyd|OJJ56992.1 aver|OJJ03295.1 anid|CBF77058.1 agla|OJJ82497.1 awen|OJJ33801.1

Group2813: abra|OJJ72598.1 acar|OOF94656.1 acla|EAW11619.1 afis|EAW23853.1 afla|EED52570.1 afum|EAL87281.1 agla|OJJ82496.1 akaw|GAA85225.1 aluc|OJZ90579.1 anid|CBF77060.1 anig|EHA24022.1 aory|EIT74300.1 asyd|OJJ56991.1 ater|EAU33520.1 atub|OJI82004.1 aver|OJJ03296.1 awen|OJJ33802.1 azon|OJJ48743.1

Group2814: abra|OJJ72599.1 acar|OOF94655.1 acla|EAW11618.1 afis|EAW23852.1 afla|EED52569.1 afum|EAL87280.1 agla|OJJ82495.1 akaw|GAA85226.1 aluc|OJZ90580.1 anid|CBF77062.1 anig|EHA24023.1 aory|EIT74211.1 asyd|OJJ56990.1 ater|EAU33519.1 atub|OJI82005.1 aver|OJJ03297.1 awen|OJJ33803.1 azon|OJJ48742.1

Group2815: abra|OJJ72600.1 acar|OOF94653.1 acla|EAW11617.1 afis|EAW23851.1 afla|EED52568.1 afum|EAL87279.1 agla|OJJ82494.1 akaw|GAA85228.1 aluc|OJZ90583.1 anid|CBF77063.1 anig|EHA24024.1 aory|EIT74296.1 asyd|OJJ56989.1 ater|EAU33518.1 atub|OJI82006.1 aver|OJJ03298.1 awen|OJJ33804.1 azon|OJJ48740.1

Group2816: abra|OJJ72603.1 acar|OOF94650.1 acla|EAW11611.1 afis|EAW23844.1 afla|EED52553.1 afum|EAL87275.1 agla|OJJ82490.1 akaw|GAA85231.1 aluc|OJZ90586.1 anid|CBF77071.1 anig|EHA24026.1 aory|EIT74313.1 asyd|OJJ56986.1 ater|EAU33511.1 atub|OJI82009.1 aver|OJJ03301.1 awen|OJJ33807.1 azon|OJJ48737.1

Group2817: abra|OJJ72605.1 acar|OOF94649.1 afis|EAW23848.1 afla|EED52565.1 agla|OJJ82491.1 akaw|GAA85232.1 aluc|OJZ90588.1 anig|EHA24027.1 aory|EIT74169.1 atub|OJI82011.1 aver|OJJ03300.1 acla|EAW11614.1 afum|EAL87276.2 anid|CBF77067.1 asyd|OJJ56987.1 ater|EAU33515.1 awen|OJJ33806.1 azon|OJJ48727.1

Group2818: abra|OJJ72625.1 acar|OOF94639.1 acla|EAW11599.1 afis|EAW23858.1 afla|EED52583.1 afum|EAL87286.1 agla|OJJ82525.1 akaw|GAA85245.1 aluc|OJZ90602.1 anid|CBF77236.1 anig|EHA24039.1 aory|EIT74247.1 asyd|OJJ56814.1 ater|EAU33493.1 atub|OJI82026.1 aver|OJJ03521.1 awen|OJJ33819.1 azon|OJJ48716.1

Group2819: abra|OJJ72626.1 acar|OOF94638.1 acla|EAW11598.1 afis|EAW23859.1 afla|EED52584.1 afum|EAL87287.1 agla|OJJ82526.1 akaw|GAA85246.1 aluc|OJZ90603.1 anid|CBF77234.1 anig|EHA24040.1 aory|EIT74284.1 asyd|OJJ56815.1 ater|EAU33492.1 atub|OJI82027.1 aver|OJJ03520.1 awen|OJJ33820.1 azon|OJJ48715.1

Group2820: abra|OJJ72627.1 acar|OOF94637.1 acla|EAW11596.1 afis|EAW23860.1 afla|EED52585.1 afum|EAL87288.1 agla|OJJ82527.1 akaw|GAA85247.1 aluc|OJZ90604.1 anid|CBF77232.1 anig|EHA24041.1 aory|EIT74206.1 asyd|OJJ56816.1 ater|EAU33490.1 atub|OJI82028.1 awen|OJJ33821.1 azon|OJJ48714.1 aver|OJJ03519.1

Group2821: abra|OJJ72635.1 acar|OOF94633.1 acla|EAW11594.1 afis|EAW23862.1 afla|EED52586.1 agla|OJJ82528.1 akaw|GAA85256.1 aluc|OJZ90614.1 anid|CBF77230.1 anig|EHA24052.1 aory|EIT74306.1 asyd|OJJ56817.1 ater|EAU33489.1 atub|OJI82040.1 aver|OJJ03518.1 awen|OJJ33822.1 azon|OJJ48713.1 aluc|OJZ91238.1

Group2822: abra|OJJ72640.1 acar|OOF94631.1 acla|EAW11584.1 afis|EAW23869.1 afla|EED52597.1 afum|EAL87297.1 agla|OJJ82538.1 akaw|GAA85261.1 aluc|OJZ90619.1 anid|CBF77217.1 anig|EHA24056.1 aory|EIT74235.1 asyd|OJJ56823.1 ater|EAU33478.1 atub|OJI82045.1 aver|OJJ03512.1 awen|OJJ33845.1 azon|OJJ48702.1

Group2823: abra|OJJ72641.1 acar|OOF94630.1 acla|EAW11583.1 afis|EAW23870.1 afla|EED52598.1 afum|EAL87298.1 agla|OJJ82539.1 akaw|GAA85262.1 aluc|OJZ90620.1 anid|CBF77219.1 anig|EHA24057.1 aory|EIT74294.1 asyd|OJJ56822.1 ater|EAU33479.1 atub|OJI82046.1 aver|OJJ03513.1 awen|OJJ33846.1 azon|OJJ48701.1

Group2824: abra|OJJ72642.1 acar|OOF94629.1 acla|EAW11582.1 afis|EAW23871.1 afla|EED52599.1 afum|EAL87299.1 agla|OJJ82540.1 akaw|GAA85263.1 aluc|OJZ90621.1 anid|CBF77220.1 anig|EHA24058.1

aory|EIT74246.1 asyd|OJJ56821.1 ater|EAU33475.1 atub|OJI82047.1 aver|OJJ03514.1 awen|OJJ33847.1 azon|OJJ48700.1

Group2825: abra|OJJ72647.1 acar|OOF94623.1 acla|EAW11581.1 afis|EAW23872.1 afla|EED52600.1 afum|EAL87300.1 agla|OJJ82542.1 akaw|GAA85267.1 aluc|OJZ90625.1 anid|CBF84521.1 anig|EHA24062.1 aory|EIT74293.1 asyd|OJJ60278.1 ater|EAU33474.1 atub|OJI82052.1 aver|OJJ03978.1 awen|OJJ33848.1 azon|OJJ48699.1

Group2826: abra|OJJ72648.1 acar|OOF94622.1 acla|EAW11580.1 afis|EAW23874.1 afla|EED52602.1 afum|EAL87302.1 agla|OJJ82544.1 akaw|GAA85269.1 aluc|OJZ90627.1 anid|CBF77209.1 anig|EHA24063.1 aory|EIT74307.1 asyd|OJJ56829.1 ater|EAU33472.1 atub|OJI82053.1 aver|OJJ03507.1 awen|OJJ33850.1 azon|OJJ48698.1

Group2827: abra|OJJ72653.1 acar|OOF94620.1 afis|EAW23877.1 afla|EED52605.1 afum|EAL87305.1 agla|OJJ82547.1 akaw|GAA85272.1 aluc|OJZ90631.1 anid|CBF77201.1 anig|EHA24068.1 aory|EIT74181.1 asyd|OJJ56833.1 ater|EAU33469.1 atub|OJI82057.1 aver|OJJ03504.1 awen|OJJ33854.1 azon|OJJ48695.1 acla|EAW11577.1

Group2828: abra|OJJ72654.1 acar|OOF94619.1 acla|EAW11576.1 afis|EAW23878.1 afla|EED52606.1 afum|EAL87306.1 agla|OJJ82548.1 akaw|GAA85273.1 aluc|OJZ90632.1 anid|CBF77199.1 anig|EHA24069.1 aory|EIT74260.1 asyd|OJJ56834.1 ater|EAU33468.1 atub|OJI82059.1 aver|OJJ03503.1 awen|OJJ33858.1 azon|OJJ48694.1

Group2829: abra|OJJ72658.1 acar|OOF94615.1 acla|EAW11522.1 afis|EAW23931.1 afla|EED50587.1 afum|EAL87356.1 agla|OJJ79411.1 akaw|GAA85281.1 aluc|OJZ90639.1 anid|CBF77275.1 anig|EHA24074.1 aory|EIT82143.1 asyd|OJJ56796.1 ater|EAU32296.1 atub|OJI82067.1 aver|OJJ03538.1 awen|OJJ39023.1 azon|OJJ51349.1

Group2830: abra|OJJ72659.1 acar|OOF94614.1 acla|EAW11523.1 afis|EAW23930.1 afla|EED50588.1 afum|EAL87355.1 agla|OJJ79407.1 akaw|GAA85282.1 aluc|OJZ90640.1 anid|CBF77277.1 anig|EHA24075.1 aory|EIT82106.1 asyd|OJJ56795.1 ater|EAU32306.1 atub|OJI82068.1 aver|OJJ03539.1 awen|OJJ39024.1 azon|OJJ51350.1

Group2831: abra|OJJ72661.1 acar|OOF94612.1 acla|EAW11526.1 afis|EAW23928.1 afla|EED50590.1 afum|EAL87353.1 agla|OJJ79406.1 akaw|GAA85284.1 aluc|OJZ90642.1 anid|CBF77281.1 anig|EHA24077.1 aory|EIT82136.1 asyd|OJJ56793.1 ater|EAU32307.1 atub|OJI82070.1 aver|OJJ03541.1 awen|OJJ39026.1 azon|OJJ51352.1

Group2832: abra|OJJ72662.1 acar|OOF94611.1 acla|EAW11527.1 afis|EAW23927.1 afla|EED50591.1 afum|EAL87352.1 agla|OJJ79405.1 akaw|GAA85285.1 aluc|OJZ90643.1 anid|CBF77254.1 anig|EHA24078.1 aory|EIT82117.1 asyd|OJJ56807.1 ater|EAU32308.1 atub|OJI82071.1 aver|OJJ03527.1 awen|OJJ39027.1 azon|OJJ51353.1

Group2833: abra|OJJ72663.1 acar|OOF94610.1 acla|EAW11528.1 afis|EAW23926.1 afla|EED50594.1 afum|EAL87351.1 agla|OJJ79404.1 akaw|GAA85286.1 aluc|OJZ90644.1 anid|CBF77252.1 anig|EHA24079.1 aory|EIT82151.1 asyd|OJJ56808.1 ater|EAU32309.1 atub|OJI82072.1 aver|OJJ03526.1 awen|OJJ39028.1 azon|OJJ51354.1

Group2834: abra|OJJ72669.1 acar|OOF97389.1 acla|EAW11531.1 afis|EAW23923.1 afla|EED50599.1 afum|EAL87348.1 agla|OJJ79397.1 akaw|GAA85289.1 aluc|OJZ90647.1 anid|CBF77090.1 anig|EHA24082.1 aory|EIT78106.1 asyd|OJJ56959.1 ater|EAU32313.1 atub|OJI82077.1 aver|OJJ03326.1 awen|OJJ39032.1 azon|OJJ51360.1

Group2835: abra|OJJ72670.1 acar|OOF97388.1 acla|EAW11537.1 afis|EAW23919.1 afla|EED50608.1 afum|EAL87345.1 agla|OJJ79386.1 akaw|GAA85290.1 aluc|OJZ90648.1 anid|CBF77096.1 anig|EHA24083.1 aory|EIT78069.1 asyd|OJJ56955.1 ater|EAU32318.1 atub|OJI82078.1 aver|OJJ03330.1 awen|OJJ39036.1 azon|OJJ51364.1

Group2836: abra|OJJ72675.1 acar|OOF97380.1 acla|EAW11538.1 afis|EAW23913.1 afla|EED50618.1 afum|EAL87342.1 agla|OJJ79382.1 akaw|GAA85294.1 aluc|OJZ90653.1 anid|CBF77098.1 anig|EHA24088.1 aory|EIT78036.1 asyd|OJJ56954.1 ater|EAU32319.1 atub|OJI82082.1 aver|OJJ03331.1 awen|OJJ39038.1 azon|OJJ51365.1

Group2837: abra|OJJ72683.1 acar|OOF95932.1 acla|EAW13159.1 afis|EAW17487.1 afla|EED49329.1 afum|EAL91310.1 agla|OJJ81475.1 akaw|GAA85301.1 aluc|OJZ90661.1 anid|CBF71613.1 anig|EHA24096.1 aory|EIT79552.1 asyd|OJJ61862.1 ater|EAU36932.1 atub|OJI82090.1 aver|OJI95960.1 awen|OJJ37355.1 azon|OJJ51040.1

Group2838: abra|OJJ72684.1 acar|OOF95933.1 acla|EAW11540.1 afis|EAW23911.1 afla|EED52657.1 afum|EAL87340.1 agla|OJJ79380.1 akaw|GAA85302.1 aluc|OJZ90662.1 anid|CBF77104.1 anig|EHA24097.1 aory|EIT74175.1 asyd|OJJ56950.1 ater|EAU32321.1 atub|OJI82091.1 aver|OJJ03335.1 awen|OJJ39040.1 azon|OJJ51367.1



Group2839: abra|OJJ72685.1 acar|OOF95934.1 acla|EAW11541.1 afis|EAW23910.1 afla|EED52655.1 afum|EAL87339.1 agla|OJJ79379.1 akaw|GAA85303.1 aluc|OJZ90663.1 anid|CBF77106.1 anig|EHA24098.1 aory|EIT74315.1 asyd|OJJ56949.1 ater|EAU32322.1 atub|OJI82092.1 aver|OJJ03336.1 awen|OJJ39041.1 azon|OJJ51368.1

Group2840: abra|OJJ72687.1 acar|OOF95936.1 acla|EAW11542.1 afis|EAW23909.1 afla|EED52654.1 afum|EAL87337.1 agla|OJJ79378.1 akaw|GAA85305.1 aluc|OJZ90665.1 anid|CBF77108.1 anig|EHA24100.1 aory|EIT74231.1 asyd|OJJ56948.1 ater|EAU32324.1 atub|OJI82094.1 aver|OJJ03337.1 awen|OJJ39042.1 azon|OJJ51370.1

Group2841: abra|OJJ72706.1 acar|OOF95943.1 acla|EAW11546.1 afis|EAW23907.1 afla|EED52642.1 afum|EAL87335.1 agla|OJJ79369.1 akaw|GAA85310.1 aluc|OJZ90671.1 anid|CBF77127.1 anig|EHA24104.1 aory|EIT74245.1 asyd|OJJ56941.1 ater|EAU32331.1 atub|OJI82101.1 aver|OJJ03344.1 awen|OJJ39043.1 azon|OJJ51372.1

Group2842: abra|OJJ72707.1 acar|OOF95944.1 acla|EAW11548.1 afis|EAW23905.1 afla|EED52640.1 afum|EAL87333.1 agla|OJJ79370.1 akaw|GAA85311.1 aluc|OJZ90672.1 anid|CBF77125.1 anig|EHA24105.1 aory|EIT74243.1 asyd|OJJ56940.1 ater|EAU32332.1 atub|OJI82102.1 aver|OJJ03345.1 awen|OJJ39044.1 azon|OJJ51373.1

Group2843: abra|OJJ72714.1 acar|OOF95946.1 acla|EAW11550.1 afis|EAW23903.1 afla|EED52638.1 afum|EAL87331.1 agla|OJJ79372.1 akaw|GAA85322.1 aluc|OJZ90683.1 anid|CBF77139.1 anig|EHA24111.1 aory|EIT74295.1 asyd|OJJ56914.1 ater|EAU32335.1 atub|OJI82109.1 aver|OJJ03378.1 awen|OJJ39046.1 azon|OJJ51375.1

Group2844: abra|OJJ72715.1 acar|OOF95947.1 acla|EAW11551.1 afis|EAW23902.1 afla|EED52637.1 afum|EAL87329.1 agla|OJJ79373.1 akaw|GAA85323.1 aluc|OJZ90684.1 anid|CBF77141.1 anig|EHA24112.1 aory|EIT74272.1 asyd|OJJ56913.1 ater|EAU32336.1 atub|OJI82110.1 aver|OJJ03379.1 awen|OJJ39047.1 azon|OJJ51376.1

Group2845: abra|OJJ72719.1 acar|OOF95952.1 acla|EAW11555.1 afis|EAW23898.1 afla|EED52632.1 afum|EAL87325.1 agla|OJJ78640.1 akaw|GAA85326.1 aluc|OJZ90688.1 anid|CBF77148.1 anig|EHA24116.1 aory|EIT74173.1 asyd|OJJ56910.1 ater|EAU32339.1 atub|OJI82113.1 aver|OJJ03383.1 awen|OJJ39050.1 azon|OJJ51382.1

Group2846: abra|OJJ72721.1 acar|OOF95954.1 acla|EAW11557.1 afis|EAW23896.1 afla|EED52630.1 afum|EAL87324.1 agla|OJJ78637.1 akaw|GAA85327.1 aluc|OJZ90690.1 anid|CBF77152.1 anig|EHA24117.1 aory|EIT74255.1 asyd|OJJ56908.1 ater|EAU32340.1 atub|OJI82115.1 aver|OJJ03385.1 awen|OJJ39052.1 azon|OJJ51384.1

Group2847: abra|OJJ72722.1 acar|OOF95955.1 acla|EAW11558.1 afis|EAW23895.1 afla|EED52629.1 afum|EAL87323.1 agla|OJJ78636.1 akaw|GAA85328.1 aluc|OJZ90691.1 anid|CBF77154.1 anig|EHA24118.1 aory|EIT74200.1 asyd|OJJ56907.1 ater|EAU32341.1 atub|OJI82116.1 aver|OJJ03386.1 awen|OJJ39053.1 azon|OJJ51385.1

Group2848: abra|OJJ72725.1 acar|OOF95958.1 acla|EAW11562.1 afis|EAW23891.1 afla|EED52621.1 afum|EAL87319.1 agla|OJJ78631.1 akaw|GAA85331.1 aluc|OJZ90694.1 anid|CBF77171.1 anig|EHA24119.1 aory|EIT74302.1 asyd|OJJ56851.1 ater|EAU33451.1 atub|OJI82119.1 aver|OJJ03466.1 awen|OJJ39058.1 azon|OJJ51389.1

Group2849: abra|OJJ72727.1 acar|OOF95960.1 acla|EAW11564.1 afis|EAW23889.1 afla|EED52619.1 afum|EBA27309.1 agla|OJJ78629.1 akaw|GAA85333.1 aluc|OJZ90696.1 anid|CBF77175.1 anig|EHA24121.1 aory|EIT74266.1 asyd|OJJ56848.1 ater|EAU33454.1 atub|OJI82122.1 aver|OJJ03491.1 awen|OJJ39061.1 azon|OJJ51391.1

Group2850: abra|OJJ72729.1 acar|OOF95961.1 acla|EAW11565.1 afis|EAW23888.1 afla|EED52617.1 afum|EAL87315.1 agla|OJJ78628.1 akaw|GAA85334.1 aluc|OJZ90697.1 anid|CBF77177.1 anig|EHA24123.1 aory|EIT74304.1 asyd|OJJ56847.1 ater|EAU33456.1 atub|OJI82123.1 aver|OJJ03492.1 awen|OJJ39063.1 azon|OJJ51392.1

Group2851: abra|OJJ72733.1 acar|OOF95963.1 acla|EAW11568.1 afis|EAW23885.1 afla|EED52614.1 afum|EBA27307.1 agla|OJJ82572.1 akaw|GAA85339.1 aluc|OJZ90701.1 anid|CBF77183.1 anig|EHA24127.1 aory|EIT74261.1 asyd|OJJ56843.1 ater|EAU33461.1 atub|OJI82128.1 aver|OJJ03495.1 awen|OJJ33867.1 azon|OJJ48687.1

Group2852: abra|OJJ72736.1 acar|OOF95967.1 acla|EAW11572.1 afis|EAW23881.1 afla|EED52610.1 afum|EAL87309.1 agla|OJJ82558.1 akaw|GAA85342.1 aluc|OJZ90704.1 anid|CBF77191.1 anig|EHA24130.1 aory|EIT74269.1 asyd|OJJ56839.1 ater|EAU33465.1 atub|OJI82131.1 aver|OJJ03499.1 awen|OJJ33863.1 azon|OJJ48690.1

Group2853: abra|OJJ72748.1 acar|OOF95971.1 acla|EAW11515.1 afis|EAW23938.1 afla|EED50579.1 afum|EAL87363.1 agla|OJJ79426.1 akaw|GAA85360.1 aluc|OJZ90722.1 anid|CBF77265.1 anig|EHA24140.1

aory|EIT82037.1 asyd|OJJ56801.1 ater|EAU32295.1 atub|OJI82150.1 aver|OJJ03533.1 awen|OJJ39017.1 azon|OJJ51342.1

Group2854: abra|OJJ72749.1 acar|OOF95972.1 acla|EAW11514.1 afis|EAW23939.1 afla|EED50578.1 afum|EAL87364.1 agla|OJJ79427.1 akaw|GAA85361.1 aluc|OJZ90723.1 anid|CBF77263.1 anig|EHA24141.1 aory|EIT82108.1 asyd|OJJ56802.1 ater|EAU32294.1 atub|OJI82151.1 aver|OJJ03532.1 awen|OJJ39016.1 azon|OJJ51341.1

Group2855: abra|OJJ72750.1 acar|OOF95973.1 acla|EAW11513.1 afis|EAW23940.1 afla|EED50577.1 afum|EAL87365.1 agla|OJJ79428.1 akaw|GAA85362.1 aluc|OJZ90724.1 anid|CBF77262.1 anig|EHA24142.1 aory|EIT82017.1 asyd|OJJ56803.1 ater|EAU32293.1 atub|OJI82152.1 aver|OJJ03531.1 awen|OJJ39015.1 azon|OJJ51340.1

Group2856: abra|OJJ72755.1 acar|OOF95976.1 acla|EAW11512.1 afis|EAW23941.1 afla|EED50576.1 afum|EAL87366.1 agla|OJJ79429.1 akaw|GAA85365.1 aluc|OJZ90728.1 anid|CBF77260.1 anig|EHA24145.1 aory|EIT82066.1 asyd|OJJ56804.1 ater|EAU32292.1 atub|OJI82155.1 aver|OJJ03530.1 awen|OJJ39014.1 azon|OJJ51339.1

Group2857: abra|OJJ72756.1 acar|OOF95977.1 acla|EAW11508.1 afis|EAW23945.1 afla|EED50571.1 afum|EAL87370.1 agla|OJJ79436.1 akaw|GAA85366.1 aluc|OJZ90729.1 anid|CBF77290.1 anig|EHA24146.1 aory|EIT82165.1 asyd|OJJ56784.1 ater|EAU32289.1 atub|OJI82156.1 aver|OJJ03549.1 awen|OJJ39009.1 azon|OJJ51335.1

Group2858: abra|OJJ72761.1 acar|OOF95980.1 acla|EAW11503.1 afis|EAW23949.1 afla|EED50567.1 afum|EAL87375.1 agla|OJJ79442.1 akaw|GAA85371.1 aluc|OJZ90735.1 anid|CBF77283.1 anig|EHA24151.1 aory|EIT82002.1 asyd|OJJ56792.1 ater|EAU29803.1 atub|OJI82163.1 aver|OJJ03542.1 awen|OJJ39000.1 azon|OJJ51331.1

Group2859: abra|OJJ72763.1 acar|OOF95983.1 acla|EAW11501.1 afis|EAW23951.1 afla|EED50565.1 afum|EAL87379.1 agla|OJJ79444.1 akaw|GAA85373.1 aluc|OJZ90738.1 anid|CBF77296.1 anig|EHA24153.1 aory|EIT82176.1 asyd|OJJ56782.1 ater|EAU29801.1 atub|OJI82165.1 aver|OJJ03551.1 awen|OJJ38997.1 azon|OJJ51329.1

Group2860: abra|OJJ72764.1 acar|OOF95984.1 acla|EAW11500.1 afis|EAW23952.1 afla|EED50564.1 afum|EAL87380.1 agla|OJJ79445.1 akaw|GAA85374.1 aluc|OJZ90739.1 anid|CBF77298.1 anig|EHA24154.1 aory|EIT82174.1 asyd|OJJ56781.1 ater|EAU29800.1 atub|OJI82166.1 aver|OJJ03552.1 awen|OJJ38996.1 azon|OJJ51328.1

Group2861: abra|OJJ72765.1 acar|OOF95985.1 acla|EAW11499.1 afis|EAW23953.1 afla|EED50562.1 afum|EAL87381.1 agla|OJJ79446.1 akaw|GAA85375.1 aluc|OJZ90740.1 anid|CBF77300.1 anig|EHA24155.1 aory|EIT82008.1 asyd|OJJ56780.1 ater|EAU29799.1 atub|OJI82167.1 aver|OJJ03553.1 awen|OJJ38995.1 azon|OJJ51327.1

Group2862: abra|OJJ72767.1 acar|OOF95986.1 acla|EAW11498.1 afis|EAW23954.1 afla|EED50561.1 afum|EAL87382.1 agla|OJJ79447.1 akaw|GAA85376.1 aluc|OJZ90743.1 anid|CBF77302.1 anig|EHA24156.1 aory|EIT82091.1 asyd|OJJ56779.1 ater|EAU29798.1 atub|OJI82170.1 aver|OJJ03554.1 awen|OJJ38994.1 azon|OJJ51326.1

Group2863: abra|OJJ72768.1 acar|OOF95987.1 acla|EAW11497.1 afis|EAW23955.1 afla|EED50557.1 afum|EAL87383.1 agla|OJJ86878.1 akaw|GAA85377.1 aluc|OJZ90745.1 anid|CBF77304.1 anig|EHA24157.1 aory|EIT82133.1 asyd|OJJ56778.1 ater|EAU29797.1 atub|OJI82171.1 aver|OJJ03555.1 awen|OJJ38993.1 azon|OJJ51324.1

Group2864: abra|OJJ72769.1 acar|OOF95988.1 acla|EAW11496.1 afis|EAW23956.1 afla|EED50556.1 afum|EAL87384.1 agla|OJJ86879.1 akaw|GAA85378.1 aluc|OJZ90746.1 anid|CBF77306.1 anig|EHA24158.1 aory|EIT82152.1 asyd|OJJ56777.1 ater|EAU29796.1 atub|OJI82172.1 aver|OJJ03556.1 awen|OJJ38991.1 azon|OJJ51323.1

Group2865: abra|OJJ72770.1 acar|OOF95989.1 acla|EAW11495.1 afis|EAW23957.1 afla|EED50555.1 afum|EAL87385.1 agla|OJJ86880.1 akaw|GAA85379.1 aluc|OJZ90747.1 anid|CBF77308.1 anig|EHA24159.1 aory|EIT82065.1 asyd|OJJ56776.1 ater|EAU29795.1 atub|OJI82173.1 aver|OJJ03557.1 awen|OJJ38990.1 azon|OJJ51322.1

Group2866: abra|OJJ72773.1 acar|OOF95992.1 acla|EAW11493.1 afis|EAW23960.1 afla|EED50552.1 afum|EAL87389.1 agla|OJJ86885.1 akaw|GAA85382.1 aluc|OJZ90750.1 anid|CBF77314.1 anig|EHA24161.1 aory|EIT82096.1 asyd|OJJ56773.1 ater|EAU29792.1 atub|OJI82176.1 aver|OJJ03560.1 awen|OJJ38987.1 azon|OJJ51319.1

Group2867: abra|OJJ72775.1 acar|OOF95993.1 acla|EAW11491.1 afis|EAW23962.1 afla|EED50548.1 afum|EAL87391.2 agla|OJJ86887.1 akaw|GAA85384.1 anig|EHA24162.1 aory|EIT82083.1 ater|EAU29790.1 atub|OJI82177.1 awen|OJJ38985.1 azon|OJJ51317.1 anid|CBF83986.1 asyd|OJJ61403.1 aver|OJJ00731.1 aluc|OJZ90752.1

Group2868: abra|OJJ72776.1 acar|OOF95994.1 acla|EAW11490.1 afis|EAW23963.1 afla|EED50547.1 afum|EAL87393.1 agla|OJJ86888.1 akaw|GAA85385.1 aluc|OJZ90754.1 anid|CBF77316.1 anig|EHA24163.1 aory|EIT82035.1 asyd|OJJ56772.1 ater|EAU29789.1 atub|OJI82178.1 aver|OJJ03561.1 awen|OJJ38984.1 azon|OJJ51316.1

Group2869: abra|OJJ72779.1 acar|OOF95996.1 acla|EAW11488.1 afis|EAW23965.1 afla|EED50545.1 afum|EAL87395.1 agla|OJJ86894.1 akaw|GAA85387.1 aluc|OJZ83277.1 anid|CBF77322.1 anig|EHA24165.1 aory|EIT82007.1 asyd|OJJ56770.1 ater|EAU29787.1 atub|OJI82181.1 aver|OJJ03563.1 awen|OJJ38978.1 azon|OJJ51314.1

Group2870: abra|OJJ72780.1 acar|OOF95999.1 acla|EAW11487.1 afis|EAW23966.1 afla|EED50544.1 afum|EAL87396.1 agla|OJJ86895.1 akaw|GAA85388.1 aluc|OJZ83279.1 anid|CBF77324.1 anig|EHA24166.1 aory|EIT82088.1 asyd|OJJ56769.1 ater|EAU29786.1 atub|OJI82183.1 aver|OJJ03565.1 awen|OJJ38977.1 azon|OJJ51313.1

Group2871: abra|OJJ72781.1 acar|OOF96000.1 acla|EAW11486.1 afis|EAW23967.1 afla|EED50542.1 afum|EAL87397.1 agla|OJJ86896.1 akaw|GAA85389.1 aluc|OJZ83280.1 anid|CBF77326.1 anig|EHA24167.1 aory|EIT82086.1 asyd|OJJ56768.1 ater|EAU29785.1 atub|OJI82184.1 aver|OJJ03566.1 awen|OJJ38976.1 azon|OJJ51312.1

Group2872: abra|OJJ72782.1 acar|OOF96002.1 acla|EAW11485.1 afis|EAW23968.1 afla|EED50541.1 afum|EAL87398.2 agla|OJJ86897.1 akaw|GAA85390.1 aluc|OJZ83281.1 anid|CBF77328.1 anig|EHA24168.1 aory|EIT82024.1 asyd|OJJ56767.1 ater|EAU29784.1 atub|OJI82185.1 aver|OJJ03567.1 awen|OJJ38975.1 azon|OJJ51310.1

Group2873: abra|OJJ72792.1 acar|OOF90123.1 acla|EAW11480.1 afis|EAW23973.1 afla|EED50535.1 afum|EAL87403.1 agla|OJJ86902.1 akaw|GAA85395.1 aluc|OJZ83288.1 anid|CBF77339.1 anig|EHA24173.1 aory|EIT82084.1 asyd|OJJ53275.1 ater|EAU29779.1 atub|OJI82190.1 aver|OJJ03574.1 awen|OJJ35438.1 azon|OJJ51305.1

Group2874: abra|OJJ72797.1 acar|OOF96005.1 acla|EAW11475.1 afis|EAW23978.1 afla|EED49183.1 afum|EAL87408.1 agla|OJJ86908.1 akaw|GAA85400.1 aluc|OJZ83294.1 anid|CBF77349.1 anig|EHA24178.1 aory|EIT78581.1 asyd|OJJ53271.1 ater|EAU29772.1 atub|OJI82195.1 aver|OJJ03579.1 awen|OJJ35446.1 azon|OJJ51300.1

Group2875: abra|OJJ72798.1 acar|OOF96006.1 acla|EAW11474.1 afis|EAW23979.1 afla|EED49182.1 afum|EAL87409.1 agla|OJJ86910.1 akaw|GAA85401.1 aluc|OJZ83295.1 anid|CBF77351.1 anig|EHA24179.1 aory|EIT78531.1 asyd|OJJ53270.1 ater|EAU29771.1 atub|OJI82196.1 aver|OJJ03580.1 awen|OJJ35447.1 azon|OJJ51299.1

Group2876: abra|OJJ72800.1 acar|OOF96008.1 acla|EAW11444.1 afis|EAW23981.1 afla|EED49178.1 afum|EAL87411.1 agla|OJJ86914.1 akaw|GAA85403.1 aluc|OJZ83298.1 anid|CBF77356.1 anig|EHA24181.1 aory|EIT78527.1 asyd|OJJ53268.1 ater|EAU29770.1 atub|OJI82198.1 aver|OJJ03583.1 awen|OJJ35449.1 azon|OJJ51297.1

Group2877: abra|OJJ72801.1 acar|OOF96009.1 acla|EAW11443.1 afis|EAW23982.1 afla|EED49177.1 afum|EAL87412.1 agla|OJJ86916.1 akaw|GAA85404.1 aluc|OJZ83299.1 anid|CBF77358.1 anig|EHA24182.1 aory|EIT78537.1 asyd|OJJ53267.1 ater|EAU29769.1 atub|OJI82199.1 aver|OJJ03584.1 awen|OJJ35450.1 azon|OJJ51293.1

Group2878: abra|OJJ72803.1 acar|OOF96011.1 acla|EAW11441.1 afis|EAW23984.1 afla|EED49175.1 afum|EAL87413.1 agla|OJJ86918.1 akaw|GAA85406.1 aluc|OJZ83301.1 anid|CBF77362.1 anig|EHA24183.1 aory|EIT78558.1 asyd|OJJ53265.1 ater|EAU29767.1 atub|OJI82201.1 aver|OJJ03586.1 awen|OJJ35452.1 azon|OJJ51291.1

Group2879: abra|OJJ72804.1 acar|OOF96012.1 acla|EAW11440.1 afis|EAW23985.1 afla|EED49173.1 afum|EAL87414.1 agla|OJJ86919.1 akaw|GAA85407.1 aluc|OJZ83302.1 anid|CBF77364.1 anig|EHA24184.1 aory|EIT78557.1 asyd|OJJ53264.1 ater|EAU29766.1 atub|OJI82202.1 aver|OJJ03587.1 awen|OJJ35453.1 azon|OJJ51290.1

Group2880: abra|OJJ72808.1 acar|OOF96014.1 acla|EAW11433.1 afis|EAW23989.1 afla|EED49169.1 afum|EAL87419.1 agla|OJJ86923.1 akaw|GAA85411.1 aluc|OJZ83306.1 anid|CBF77367.1 anig|EHA24189.1 aory|EIT78567.1 asyd|OJJ53261.1 ater|EAU29761.1 atub|OJI82206.1 aver|OJJ03590.1 awen|OJJ35457.1 azon|OJJ51286.1

Group2881: abra|OJJ72810.1 acar|OOF96017.1 acla|EAW11430.1 afis|EAW23993.1 afla|EED49167.1 afum|EAL87423.1 agla|OJJ86926.1 akaw|GAA85413.1 aluc|OJZ83308.1 anid|CBF77373.1 anig|EHA24191.1 aory|EIT78512.1 asyd|OJJ53258.1 ater|EAU29758.1 atub|OJI82208.1 aver|OJJ03593.1 awen|OJJ35462.1 azon|OJJ51281.1

Group2882: abra|OJJ72811.1 acar|OOF96018.1 acla|EAW11429.1 afis|EAW23994.1 afla|EED49166.1 afum|EAL87424.1 agla|OJJ86927.1 akaw|GAA85414.1 aluc|OJZ83309.1 anid|CBF77375.1 anig|EHA24192.1

aory|EIT78551.1 asyd|OJJ53257.1 ater|EAU29757.1 atub|OJI82209.1 aver|OJJ03594.1 awen|OJJ35463.1 azon|OJJ51280.1

Group2883: abra|OJJ72814.1 acar|OOF96020.1 acla|EAW11428.1 afis|EAW23995.1 afla|EED49165.1 afum|EAL87425.1 agla|OJJ86928.1 akaw|GAA85415.1 aluc|OJZ83312.1 anid|CBF77378.1 anig|EHA24194.1 aory|EIT78566.1 asyd|OJJ53255.1 ater|EAU29756.1 atub|OJI82212.1 aver|OJJ03597.1 awen|OJJ35465.1 azon|OJJ51278.1

Group2884: abra|OJJ72815.1 acar|OOF96021.1 acla|EAW11427.1 afis|EAW23996.1 afla|EED49164.1 afum|EAL87426.1 agla|OJJ86929.1 akaw|GAA85416.1 aluc|OJZ83314.1 anid|CBF77379.1 anig|EHA24195.1 aory|EIT78572.1 asyd|OJJ53254.1 ater|EAU29755.1 atub|OJI82213.1 aver|OJJ03599.1 awen|OJJ35467.1 azon|OJJ51277.1

Group2885: abra|OJJ72818.1 acar|OOF96024.1 acla|EAW11422.1 afis|EAW23999.1 afla|EED49162.1 afum|EAL87429.1 agla|OJJ86933.1 akaw|GAA85419.1 aluc|OJZ83320.1 anid|CBF77385.1 anig|EHA24198.1 aory|EIT78542.1 asyd|OJJ53250.1 ater|EAU29750.1 atub|OJI82217.1 awen|OJJ35470.1 azon|OJJ51274.1 aver|OJJ03602.1

Group2886: abra|OJJ72820.1 acar|OOF96025.1 acla|EAW11419.1 afis|EAW24003.1 afla|EED49158.1 afum|EAL87433.1 agla|OJJ86935.1 akaw|GAA85421.1 aluc|OJZ83322.1 anid|CBF77390.1 anig|EHA24200.1 aory|EIT78547.1 asyd|OJJ53247.1 ater|EAU29748.1 atub|OJI82219.1 aver|OJJ03604.1 awen|OJJ35474.1 azon|OJJ51272.1

Group2887: abra|OJJ72822.1 acar|OOF96027.1 acla|EAW11417.1 afis|EAW24005.1 afla|EED49156.1 afum|EAL87435.1 agla|OJJ86936.1 akaw|GAA85423.1 aluc|OJZ83324.1 anid|CBF77394.1 anig|EHA24202.1 aory|EIT78532.1 asyd|OJJ53245.1 ater|EAU29746.1 atub|OJI82221.1 aver|OJJ03605.1 awen|OJJ35477.1 azon|OJJ51271.1

Group2888: abra|OJJ72824.1 acar|OOF96029.1 acla|EAW11414.1 afis|EAW24007.1 afla|EED49154.1 afum|EAL87437.1 agla|OJJ86938.1 akaw|GAA85425.1 aluc|OJZ83326.1 anid|CBF77398.1 anig|EHA24204.1 aory|EIT78570.1 asyd|OJJ53243.1 ater|EAU29744.1 atub|OJI82223.1 aver|OJJ03607.1 awen|OJJ35479.1 azon|OJJ51269.1

Group2889: abra|OJJ72825.1 acar|OOF96030.1 acla|EAW11413.1 afis|EAW24008.1 afla|EED49153.1 afum|EAL87438.1 agla|OJJ86939.1 akaw|GAA85426.1 aluc|OJZ83327.1 anid|CBF77400.1 anig|EHA24205.1 aory|EIT78506.1 asyd|OJJ53242.1 ater|EAU29743.1 atub|OJI82224.1 aver|OJJ03608.1 awen|OJJ35480.1 azon|OJJ51268.1

Group2890: abra|OJJ72826.1 acar|OOF96031.1 acla|EAW11412.1 afis|EAW24009.1 afla|EED49152.1 afum|EAL87439.1 agla|OJJ86940.1 akaw|GAA85427.1 aluc|OJZ83328.1 anid|CBF77402.1 anig|EHA24206.1 aory|EIT78555.1 asyd|OJJ53241.1 ater|EAU29742.1 atub|OJI82225.1 aver|OJJ03609.1 awen|OJJ35481.1 azon|OJJ51267.1

Group2891: abra|OJJ72827.1 acar|OOF96033.1 acla|EAW11410.1 afis|EAW24011.1 afla|EED49150.1 afum|EAL87441.1 agla|OJJ86943.1 akaw|GAA85428.1 aluc|OJZ83330.1 anid|CBF77406.1 anig|EHA24207.1 aory|EIT78559.1 asyd|OJJ53239.1 ater|EAU29740.1 atub|OJI82226.1 aver|OJJ03611.1 awen|OJJ35483.1 azon|OJJ51265.1

Group2892: abra|OJJ72831.1 acar|OOF96035.1 acla|EAW11408.1 afis|EAW24013.1 afla|EED49147.1 afum|EAL87443.1 agla|OJJ86945.1 akaw|GAA85430.1 aluc|OJZ83332.1 anid|CBF77410.1 anig|EHA24209.1 aory|EIT78522.1 asyd|OJJ53237.1 ater|EAU29734.1 atub|OJI82228.1 aver|OJJ03614.1 awen|OJJ35485.1 azon|OJJ51263.1

Group2893: abra|OJJ72833.1 acar|OOF96036.1 acla|EAW11406.1 afis|EAW24015.1 afla|EED49144.1 afum|EAL87445.1 agla|OJJ86949.1 akaw|GAA85431.1 aluc|OJZ83334.1 anid|CBF77414.1 anig|EHA24210.1 aory|EIT78508.1 asyd|OJJ53235.1 ater|EAU29731.1 atub|OJI82230.1 aver|OJJ03616.1 awen|OJJ35487.1 azon|OJJ47003.1

Group2894: abra|OJJ72835.1 acar|OOF96037.1 acla|EAW11405.1 afis|EAW24016.1 afla|EED49143.1 afum|EAL87446.1 agla|OJJ86950.1 akaw|GAA85432.1 aluc|OJZ83335.1 anid|CBF77416.1 anig|EHA24211.1 aory|EIT78565.1 asyd|OJJ53234.1 ater|EAU29730.1 atub|OJI82232.1 aver|OJJ03617.1 awen|OJJ35488.1 azon|OJJ47001.1

Group2895: abra|OJJ72837.1 acar|OOF96039.1 acla|EAW06923.1 afis|EAW16540.1 afla|EED53743.1 afum|EAL89137.1 agla|OJJ85576.1 akaw|GAA85434.1 aluc|OJZ83337.1 anid|CBF69989.1 anig|EHA24213.1 aory|EIT75293.1 asyd|OJJ58892.1 ater|EAU39054.1 atub|OJI82234.1 aver|OJJ01493.1 awen|OJJ40280.1 azon|OJJ49143.1

Group2896: abra|OJJ72840.1 acar|OOF96042.1 acla|EAW11402.1 afis|EAW24019.1 afla|EED49137.1 afum|EAL87449.1 agla|OJJ86952.1 akaw|GAA85442.1 aluc|OJZ83347.1 anid|CBF77420.1 anig|EHA24215.1 aory|EIT78560.1 asyd|OJJ53232.1 ater|EAU29727.1 atub|OJI82241.1 aver|OJJ03619.1 awen|OJJ35492.1 azon|OJJ46998.1

Group2897: abra|OJJ72844.1 acar|OOF96045.1 acla|EAW11399.1 afis|EAW24022.1 afla|EED49132.1 afum|EAL87453.1 agla|OJJ86955.1 akaw|GAA85445.1 aluc|OJZ83352.1 anid|CBF75300.1 anig|EHA24218.1 aory|EIT78561.1 asyd|OJJ59881.1 ater|EAU29724.1 atub|OJI82244.1 aver|OJJ02405.1 awen|OJJ35495.1 azon|OJJ46994.1

Group2898: abra|OJJ72847.1 acar|OOF96048.1 acla|EAW11396.1 afis|EAW24025.1 afla|EED49129.1 afum|EAL87456.1 agla|OJJ86958.1 akaw|GAA85448.1 aluc|OJZ83355.1 anid|CBF75305.1 anig|EHA24221.1 aory|EIT78574.1 asyd|OJJ59876.1 ater|EAU29719.1 atub|OJI82247.1 aver|OJJ02410.1 awen|OJJ35498.1 azon|OJJ46991.1

Group2899: abra|OJJ72850.1 acar|OOF96051.1 acla|EAW11393.1 afis|EAW24028.1 afla|EED49126.1 afum|EAL87459.1 agla|OJJ86961.1 akaw|GAA85451.1 aluc|OJZ83359.1 anid|CBF75310.1 anig|EHA24224.1 aory|EIT78543.1 asyd|OJJ59874.1 ater|EAU29716.1 atub|OJI82250.1 aver|OJJ02413.1 awen|OJJ35501.1 azon|OJJ46988.1

Group2900: abra|OJJ72853.1 acar|OOF96052.1 acla|EAW11391.1 afis|EAW24031.1 afla|EED49123.1 afum|EAL87462.1 agla|OJJ87001.1 akaw|GAA85454.1 aluc|OJZ83362.1 anid|CBF75316.1 anig|EHA24227.1 aory|EIT78584.1 asyd|OJJ59871.1 ater|EAU29713.1 atub|OJI82253.1 aver|OJJ02416.1 awen|OJJ35503.1 azon|OJJ46983.1

Group2901: abra|OJJ72854.1 acar|OOF96053.1 acla|EAW11390.1 afis|EAW24032.1 afla|EED49121.1 afum|EAL87463.1 agla|OJJ87000.1 akaw|GAA85455.1 aluc|OJZ83363.1 anid|CBF75318.1 anig|EHA24228.1 aory|EIT78515.1 asyd|OJJ59870.1 ater|EAU29712.1 atub|OJI82254.1 aver|OJJ02417.1 awen|OJJ35504.1 azon|OJJ46981.1

Group2902: abra|OJJ72858.1 acar|OOF96055.1 acla|EAW11388.1 afis|EAW24034.1 afla|EED49119.1 afum|EAL87465.1 agla|OJJ86998.1 akaw|GAA85457.1 aluc|OJZ83365.1 anid|CBF75324.1 anig|EHA24230.1 aory|EIT78541.1 asyd|OJJ59868.1 ater|EAU29710.1 atub|OJI82256.1 aver|OJJ02419.1 awen|OJJ35506.1 azon|OJJ46978.1

Group2903: abra|OJJ72860.1 acar|OOF96057.1 acla|EAW11386.1 afis|EAW18110.1 afla|EED49117.1 afum|EAL87467.1 agla|OJJ86996.1 akaw|GAA85459.1 aluc|OJZ83367.1 anid|CBF75328.1 anig|EHA24232.1 aory|EIT78582.1 asyd|OJJ59865.1 ater|EAU29708.1 atub|OJI82259.1 aver|OJJ02422.1 awen|OJJ35508.1 azon|OJJ47630.1

Group2904: abra|OJJ72861.1 acar|OOF96058.1 acla|EAW11385.1 afis|EAW18111.1 afla|EED49114.1 afum|EAL87468.1 agla|OJJ86995.1 akaw|GAA85460.1 aluc|OJZ83368.1 anid|CBF75330.1 anig|EHA24233.1 aory|EIT78525.1 asyd|OJJ59864.1 ater|EAU29707.1 atub|OJI82260.1 aver|OJJ02423.1 awen|OJJ35509.1 azon|OJJ46976.1

Group2905: abra|OJJ72862.1 acar|OOF96060.1 acla|EAW11384.1 afis|EAW18112.1 afla|EED49113.1 afum|EAL87469.1 agla|OJJ86994.1 akaw|GAA85461.1 aluc|OJZ83369.1 anid|CBF75332.1 anig|EHA24234.1 aory|EIT78586.1 asyd|OJJ59863.1 ater|EAU29706.1 atub|OJI82261.1 aver|OJJ02424.1 awen|OJJ35510.1 azon|OJJ46975.1

Group2906: abra|OJJ72863.1 acar|OOF96062.1 acla|EAW11379.1 afis|EAW18116.1 afla|EED58041.1 afum|EAL87473.1 agla|OJJ86980.1 akaw|GAA85462.1 aluc|OJZ83376.1 anid|CBF75340.1 anig|EHA24235.1 aory|EIT79770.1 asyd|OJJ59859.1 ater|EAU29701.1 atub|OJI82262.1 aver|OJJ02428.1 awen|OJJ35515.1 azon|OJJ46970.1

Group2907: abra|OJJ72865.1 acar|OOF96064.1 acla|EAW11382.1 afis|EAW18114.1 afla|EED58039.1 afum|EAL87471.1 agla|OJJ86982.1 akaw|GAA85464.1 aluc|OJZ83378.1 anid|CBF75336.1 anig|EHA24237.1 aory|EIT79795.1 asyd|OJJ59861.1 ater|EAU29703.1 atub|OJI82264.1 aver|OJJ02426.1 awen|OJJ35512.1 azon|OJJ46973.1

Group2908: abra|OJJ72866.1 acar|OOF96065.1 acla|EAW11383.1 afis|EAW18113.1 afla|EED58038.1 afum|EAL87470.1 agla|OJJ86991.1 akaw|GAA85465.1 aluc|OJZ83379.1 anid|CBF75334.1 anig|EHA24238.1 aory|EIT79794.1 asyd|OJJ59862.1 ater|EAU29705.1 atub|OJI82265.1 aver|OJJ02425.1 awen|OJJ35511.1 azon|OJJ46974.1

Group2909: abra|OJJ72869.1 acar|OOF96068.1 acla|EAW11376.1 afis|EAW18119.1 afla|EED58044.1 afum|EAL87477.1 agla|OJJ87011.1 akaw|GAA85468.1 aluc|OJZ83382.1 anid|CBF75346.1 anig|EHA24241.1 aory|EIT79722.1 asyd|OJJ59854.1 ater|EAU29698.1 atub|OJI82268.1 aver|OJJ02431.1 awen|OJJ35518.1 azon|OJJ46966.1

Group2910: abra|OJJ72871.1 acar|OOF96069.1 acla|EAW11375.1 afis|EAW18120.1 afla|EED58045.1 afum|EAL87478.1 agla|OJJ87014.1 akaw|GAA85469.1 aluc|OJZ83385.1 anid|CBF75348.1 anig|EHA24243.1 aory|EIT79798.1 asyd|OJJ59853.1 ater|EAU29697.1 atub|OJI82271.1 aver|OJJ02432.1 awen|OJJ35521.1 azon|OJJ46965.1

Group2911: abra|OJJ72874.1 acar|OOF96071.1 acla|EAW11374.1 afis|EAW18121.1 afla|EED58046.1 afum|EAL87479.1 agla|OJJ87015.1 akaw|GAA85470.1 aluc|OJZ83386.1 anid|CBF75352.1 anig|EHA24244.1

aory|EIT79741.1 asyd|OJJ59852.1 ater|EAU29695.1 atub|OJI82272.1 aver|OJJ02435.1 awen|OJJ35523.1 azon|OJJ46963.1

Group2912: abra|OJJ72880.1 acar|OOF96073.1 acla|EAW11366.1 afis|EAW18129.1 afla|EED58053.1 afum|EAL87486.1 agla|OJJ83795.1 akaw|GAA85472.1 aluc|OJZ83391.1 anid|CBF75366.1 anig|EHA24246.1 aory|EIT79707.1 asyd|OJJ59848.1 ater|EAU35448.1 atub|OJI82277.1 aver|OJJ02440.1 awen|OJJ35557.1 azon|OJJ46953.1

Group2913: abra|OJJ72886.1 acar|OOF96076.1 acla|EAW11364.1 afis|EAW18130.1 afla|EED58054.1 afum|EAL87487.1 agla|OJJ83802.1 akaw|GAA85473.1 aluc|OJZ83394.1 anid|CBF75370.1 anig|EHA24247.1 aory|EIT79721.1 asyd|OJJ59847.1 ater|EAU35452.1 atub|OJI82280.1 aver|OJJ02441.1 awen|OJJ35561.1 azon|OJJ46951.1

Group2914: abra|OJJ72887.1 acar|OOF96077.1 acla|EAW11363.1 afis|EAW18132.1 afla|EED58056.1 afum|EAL87489.1 agla|OJJ83814.1 akaw|GAA85474.1 aluc|OJZ83395.1 anid|CBF75372.1 anig|EHA24248.1 aory|EIT79771.1 asyd|OJJ59846.1 ater|EAU35454.1 atub|OJI82281.1 aver|OJJ02442.1 awen|OJJ35571.1 azon|OJJ46949.1

Group2915: abra|OJJ72890.1 acar|OOF96080.1 acla|EAW11360.1 afis|EAW18134.1 afla|EED58059.1 afum|EAL87491.1 agla|OJJ83818.1 akaw|GAA85477.1 aluc|OJZ83398.1 anid|CBF75380.1 anig|EHA24251.1 aory|EIT79745.1 asyd|OJJ59843.1 ater|EAU35457.1 atub|OJI82284.1 aver|OJJ02446.1 awen|OJJ35576.1 azon|OJJ46946.1

Group2916: abra|OJJ72892.1 acar|OOF96083.1 acla|EAW11358.1 afis|EAW18136.1 afla|EED58061.1 afum|EAL87493.1 agla|OJJ83819.1 akaw|GAA85479.1 aluc|OJZ83400.1 anid|CBF75376.1 anig|EHA24252.1 aory|EIT79756.1 asyd|OJJ59840.1 ater|EAU35459.1 atub|OJI82288.1 aver|OJJ02449.1 awen|OJJ35578.1 azon|OJJ46945.1

Group2917: abra|OJJ72894.1 acar|OOF96085.1 acla|EAW11357.1 afis|EAW18137.1 afla|EED58062.1 afum|EAL87494.1 agla|OJJ83820.1 akaw|GAA85481.1 aluc|OJZ83403.1 anid|CBF75384.1 anig|EHA24254.1 aory|EIT79803.1 asyd|OJJ59838.1 ater|EAU35460.1 atub|OJI82291.1 aver|OJJ02450.1 awen|OJJ35579.1 azon|OJJ46944.1

Group2918: abra|OJJ72898.1 acar|OOF96088.1 acla|EAW11353.1 afis|EAW18141.1 afla|EED58067.1 afum|EAL87498.1 agla|OJJ83826.1 akaw|GAA85485.1 aluc|OJZ83407.1 anid|CBF81129.1 anig|EHA24258.1 aory|EIT79748.1 asyd|OJJ56491.1 ater|EAU35464.1 atub|OJI82296.1 aver|OJJ06227.1 awen|OJJ35583.1 azon|OJJ46939.1

Group2919: abra|OJJ72904.1 acar|OOF89820.1 acla|EAW11350.1 afis|EAW18145.1 afla|EED58072.1 afum|EAL87502.1 agla|OJJ83828.1 akaw|GAA85489.1 aluc|OJZ83414.1 anid|CBF81120.1 anig|EHA24263.1 aory|EIT79155.1 asyd|OJJ56488.1 ater|EAU35468.1 atub|OJI82301.1 aver|OJJ06231.1 awen|OJJ35588.1 azon|OJJ46937.1

Group2920: abra|OJJ72906.1 acar|OOF96089.1 acla|EAW11348.1 afis|EAW18147.1 afla|EED58075.1 afum|EAL87505.1 agla|OJJ83832.1 akaw|GAA85491.1 aluc|OJZ83416.1 anid|CBF81116.1 anig|EHA24265.1 aory|EIT79152.1 asyd|OJJ56486.1 ater|EAU35446.1 atub|OJI82303.1 aver|OJJ06233.1 awen|OJJ35590.1 azon|OJJ46935.1

Group2921: abra|OJJ72909.1 acar|OOF96092.1 acla|EAW11344.1 afis|EAW18150.1 afla|EED58078.1 afum|EAL87508.1 agla|OJJ83835.1 akaw|GAA85494.1 aluc|OJZ83419.1 anid|CBF81110.1 anig|EHA24268.1 aory|EIT79111.1 asyd|OJJ56483.1 ater|EAU35472.1 atub|OJI82306.1 aver|OJJ06236.1 awen|OJJ35593.1 azon|OJJ46915.1

Group2922: abra|OJJ72910.1 acar|OOF96093.1 acla|EAW11343.1 afis|EAW18151.1 afla|EED58080.1 afum|EAL87509.1 agla|OJJ83836.1 akaw|GAA85495.1 aluc|OJZ83421.1 anid|CBF81108.1 anig|EHA24269.1 aory|EIT79142.1 asyd|OJJ56481.1 ater|EAU35473.1 atub|OJI82307.1 aver|OJJ06238.1 awen|OJJ35594.1 azon|OJJ46916.1

Group2923: abra|OJJ72912.1 acar|OOF96094.1 acla|EAW06479.1 afis|EAW15974.1 afla|EED58082.1 afum|EAL88606.1 agla|OJJ83838.1 akaw|GAA85496.1 aluc|OJZ83422.1 anid|CBF81105.1 anig|EHA24270.1 aory|EIT79133.1 asyd|OJJ56479.1 ater|EAU35474.1 atub|OJI82308.1 aver|OJJ06239.1 awen|OJJ35597.1 azon|OJJ46918.1

Group2924: abra|OJJ72913.1 acar|OOF96095.1 acla|EAW06478.1 afis|EAW15973.1 afla|EED58083.1 afum|EAL88605.1 agla|OJJ83842.1 akaw|GAA85497.1 aluc|OJZ83423.1 anid|CBF81101.1 anig|EHA24271.1 aory|EIT79117.1 asyd|OJJ56478.1 ater|EAU35475.1 atub|OJI82309.1 aver|OJJ06240.1 awen|OJJ35599.1 azon|OJJ46919.1

Group2925: abra|OJJ72914.1 acar|OOF96096.1 acla|EAW06476.1 afis|EAW15971.1 afla|EED58085.1 afum|EAL88603.1 agla|OJJ83844.1 akaw|GAA85498.1 aluc|OJZ83424.1 anid|CBF81098.1 anig|EHA24272.1 aory|EIT79112.1 asyd|OJJ56476.1 ater|EAU35477.1 atub|OJI82310.1 aver|OJJ06242.1 awen|OJJ35601.1 azon|OJJ46921.1

Group2926: abra|OJJ72917.1 acar|OOF96099.1 acla|EAW06474.1 afis|EAW15968.1 afla|EED58089.1 afum|EAL88601.1 agla|OJJ89290.1 akaw|GAA85500.1 aluc|OJZ83427.1 anid|CBF81094.1 anig|EHA24279.1 aory|EIT79146.1 asyd|OJJ56470.1 ater|EAU35480.1 atub|OJI82315.1 aver|OJJ06249.1 awen|OJJ35605.1 azon|OJJ46925.1

Group2927: abra|OJJ72920.1 acar|OOF96102.1 acla|EAW06471.1 afis|EAW15965.1 afla|EED58091.1 afum|EAL88598.1 agla|OJJ89346.1 akaw|GAA85503.1 aluc|OJZ83430.1 anid|CBF81089.1 anig|EHA24281.1 aory|EIT79110.1 asyd|OJJ56467.1 ater|EAU35487.1 atub|OJI82318.1 aver|OJJ06252.1 awen|OJJ35608.1 azon|OJJ46928.1

Group2928: abra|OJJ72922.1 acar|OOF96103.1 acla|EAW06469.1 afis|EAW15964.1 afla|EED58093.1 afum|EAL88597.1 agla|OJJ89348.1 akaw|GAA85504.1 aluc|OJZ83432.1 anid|CBF81085.1 anig|EHA24282.1 aory|EIT79125.1 asyd|OJJ56465.1 ater|EAU35488.1 atub|OJI82321.1 aver|OJJ06254.1 awen|OJJ35610.1 azon|OJJ46930.1

Group2929: abra|OJJ72930.1 acar|OOF96110.1 acla|EAW06460.1 afis|EAW15956.1 afla|EED58102.1 afum|EAL88589.1 agla|OJJ89357.1 akaw|GAA85512.1 aluc|OJZ83440.1 anid|CBF81067.1 anig|EHA24286.1 aory|EIT79135.1 asyd|OJJ56458.1 ater|EAU35501.1 atub|OJI82331.1 aver|OJJ06264.1 awen|OJJ35618.1 azon|OJJ46904.1

Group2930: abra|OJJ72931.1 acar|OOF96111.1 acla|EAW06459.1 afis|EAW15955.1 afla|EED58103.1 afum|EAL88588.1 agla|OJJ89358.1 akaw|GAA85513.1 aluc|OJZ83441.1 anid|CBF81065.1 anig|EHA24287.1 aory|EIT79109.1 asyd|OJJ56457.1 ater|EAU35502.1 atub|OJI82332.1 aver|OJJ06265.1 awen|OJJ35619.1 azon|OJJ46903.1

Group2931: abra|OJJ72935.1 acar|OOF96116.1 acla|EAW06456.1 afis|EAW15952.1 afla|EED58106.1 afum|EAL88585.1 agla|OJJ89362.1 akaw|GAA85516.1 aluc|OJZ83444.1 anid|CBF81059.1 anig|EHA24290.1 aory|EIT79114.1 asyd|OJJ56454.1 ater|EAU35505.1 atub|OJI82335.1 aver|OJJ06268.1 awen|OJJ35624.1 azon|OJJ46901.1

Group2932: abra|OJJ72936.1 acar|OOF96117.1 acla|EAW06455.1 afis|EAW15951.1 afla|EED58107.1 afum|EAL88584.1 agla|OJJ89363.1 akaw|GAA85517.1 aluc|OJZ83445.1 anid|CBF81057.1 anig|EHA24291.1 aory|EIT79166.1 asyd|OJJ56453.1 ater|EAU35506.1 atub|OJI82336.1 aver|OJJ06269.1 awen|OJJ35625.1 azon|OJJ46900.1

Group2933: abra|OJJ72937.1 acar|OOF96119.1 acla|EAW06454.1 afis|EAW15950.1 afla|EED58108.1 afum|EAL88583.1 agla|OJJ89364.1 akaw|GAA85518.1 aluc|OJZ83446.1 anid|CBF81056.1 anig|EHA24292.1 aory|EIT79143.1 asyd|OJJ56451.1 ater|EAU35507.1 atub|OJI82337.1 aver|OJJ06270.1 awen|OJJ35626.1 azon|OJJ46899.1

Group2934: abra|OJJ72942.1 acar|OOF96123.1 acla|EAW11209.1 afis|EAW15942.1 afla|EED58116.1 afum|EAL88576.1 agla|OJJ89368.1 akaw|GAA85524.1 aluc|OJZ83452.1 anid|CBF80959.1 anig|EHA24298.1 aory|EIT79144.1 asyd|OJJ56346.1 ater|EAU35514.1 atub|OJI82344.1 aver|OJJ06367.1 awen|OJJ35640.1 azon|OJJ46895.1

Group2935: abra|OJJ72945.1 acar|OOF96126.1 acla|EAW11205.1 afis|EAW15935.1 afla|EED58120.1 afum|EAL88571.1 agla|OJJ89371.1 akaw|GAA85527.1 aluc|OJZ83455.1 anid|CBF80966.1 anig|EHA24301.1 aory|EIT79156.1 asyd|OJJ56349.1 ater|EAU35517.1 atub|OJI82347.1 aver|OJJ06364.1 awen|OJJ35644.1 azon|OJJ46892.1

Group2936: abra|OJJ72949.1 acar|OOF96130.1 acla|EAW11195.1 afis|EAW15925.1 afla|EED54936.1 afum|EAL88561.1 agla|OJJ89380.1 akaw|GAA85530.1 aluc|OJZ83459.1 anid|CBF81019.1 anig|EHA24303.1 aory|EIT80380.1 asyd|OJJ56382.1 ater|EAU35530.1 atub|OJI82351.1 aver|OJJ06331.1 awen|OJJ35655.1 azon|OJJ46884.1

Group2937: abra|OJJ72956.1 acar|OOF96137.1 acla|EAW11201.1 afis|EAW15931.1 afla|EED54930.1 afum|EAL88567.1 agla|OJJ89375.1 akaw|GAA85537.1 aluc|OJZ83465.1 anid|CBF81029.1 anig|EHA24309.1 aory|EIT80323.1 asyd|OJJ56388.1 ater|EAU35521.1 atub|OJI82358.1 aver|OJJ06325.1 awen|OJJ35648.1 azon|OJJ46889.1

Group2938: abra|OJJ72960.1 acar|OOF96142.1 acla|EAW11192.1 afis|EAW15922.1 afla|EED54938.1 afum|EAL88559.1 agla|OJJ89386.1 akaw|GAA85540.1 aluc|OJZ83468.1 anid|CBF81013.1 anig|EHA24312.1 aory|EIT80338.1 asyd|OJJ56379.1 ater|EAU35533.1 atub|OJI82362.1 aver|OJJ06334.1 awen|OJJ35658.1 azon|OJJ46881.1

Group2939: abra|OJJ72967.1 acar|OOF96149.1 acla|EAW11187.1 afis|EAW15918.1 afla|EED54943.1 afum|EAL88554.1 agla|OJJ89393.1 akaw|GAA85546.1 aluc|OJZ83478.1 anid|CBF81002.1 anig|EHA24315.1 aory|EIT80355.1 asyd|OJJ56373.1 ater|EAU35538.1 atub|OJI82368.1 aver|OJJ06340.1 awen|OJJ35661.1 azon|OJJ44132.1

Group2940: abra|OJJ72971.1 acar|OOF96150.1 acla|EAW08037.1 afis|EAW23072.1 afla|EED54944.1 afum|EAL88407.1 agla|OJJ89394.1 akaw|GAA85547.1 aluc|OJZ83482.1 anid|CBF80992.1 anig|EHA24317.1

aory|EIT80389.1 asyd|OJJ56368.1 ater|EAU35539.1 atub|OJI82372.1 aver|OJJ06346.1 awen|OJJ35663.1 azon|OJJ44133.1

Group2941: abra|OJJ72972.1 acar|OOF96151.1 acla|EAW08036.1 afis|EAW23071.1 afla|EED54945.1 afum|EAL88408.1 agla|OJJ89395.1 akaw|GAA85548.1 aluc|OJZ83483.1 anid|CBF80994.1 anig|EHA24318.1 aory|EIT80359.1 asyd|OJJ56369.1 ater|EAU35540.1 atub|OJI82373.1 aver|OJJ06345.1 awen|OJJ35664.1 azon|OJJ44134.1

Group2942: abra|OJJ72973.1 acar|OOF96152.1 acla|EAW08035.1 afis|EAW23070.1 afla|EED54946.1 afum|EAL88409.1 agla|OJJ89396.1 akaw|GAA85549.1 aluc|OJZ83484.1 anid|CBF80996.1 anig|EHA24319.1 aory|EIT80382.1 asyd|OJJ56370.1 ater|EAU37593.1 atub|OJI82374.1 aver|OJJ06344.1 awen|OJJ35665.1 azon|OJJ44135.1

Group2943: abra|OJJ72975.1 acar|OOF96153.1 acla|EAW08034.1 afis|EAW23069.1 afla|EED54947.1 afum|EAL88410.1 agla|OJJ89397.1 akaw|GAA85550.1 aluc|OJZ83485.1 anid|CBF80998.1 anig|EHA24320.1 aory|EIT80368.1 asyd|OJJ56371.1 ater|EAU37596.1 atub|OJI82376.1 aver|OJJ06343.1 awen|OJJ35666.1 azon|OJJ44137.1

Group2944: abra|OJJ72976.1 acar|OOF96154.1 acla|EAW08033.1 afis|EAW23068.1 afla|EED54948.1 afum|EAL88411.1 agla|OJJ89398.1 akaw|GAA85551.1 aluc|OJZ83486.1 anid|CBF81000.1 anig|EHA24321.1 aory|EIT80295.1 asyd|OJJ56372.1 ater|EAU37597.1 atub|OJI82377.1 aver|OJJ06342.1 awen|OJJ35667.1 azon|OJJ44138.1

Group2945: abra|OJJ72979.1 acar|OOF96158.1 acla|EAW08031.1 afis|EAW23065.1 afla|EED54952.1 afum|EAL88414.1 agla|OJJ89409.1 akaw|GAA85554.1 aluc|OJZ83489.1 anid|CBF80981.1 anig|EHA24324.1 aory|EIT80321.1 asyd|OJJ56358.1 ater|EAU37601.1 atub|OJI82381.1 aver|OJJ06356.1 awen|OJJ35670.1 azon|OJJ44140.1

Group2946: abra|OJJ72980.1 acar|OOF96156.1 acla|EAW08030.1 afis|EAW23064.1 afla|EED54953.1 afum|EAL88415.1 agla|OJJ89410.1 akaw|GAA85555.1 aluc|OJZ83490.1 anid|CBF80979.1 anig|EHA24325.1 aory|EIT80361.1 asyd|OJJ56357.1 ater|EAU37602.1 atub|OJI82382.1 aver|OJJ06357.1 awen|OJJ35671.1 azon|OJJ44141.1

Group2947: abra|OJJ72982.1 acar|OOF96159.1 acla|EAW08028.1 afis|EAW23062.1 afla|EED54955.1 afum|EAL88417.1 agla|OJJ89412.1 akaw|GAA85557.1 aluc|OJZ83492.1 anid|CBF80975.1 anig|EHA24327.1 aory|EIT80363.1 asyd|OJJ56355.1 ater|EAU37603.1 atub|OJI82386.1 aver|OJJ06359.1 awen|OJJ35673.1 azon|OJJ44142.1

Group2948: abra|OJJ72983.1 acar|OOF96160.1 acla|EAW08027.1 afis|EAW23061.1 afla|EED54957.1 afum|EAL88418.1 agla|OJJ89414.1 akaw|GAA85558.1 aluc|OJZ83493.1 anid|CBF80973.1 anig|EHA24328.1 aory|EIT80353.1 asyd|OJJ56354.1 ater|EAU37604.1 atub|OJI82387.1 aver|OJJ06360.1 awen|OJJ35676.1 azon|OJJ44143.1

Group2949: abra|OJJ72984.1 acar|OOF96161.1 acla|EAW08026.1 afis|EAW23060.1 afla|EED54958.1 afum|EAL88419.1 agla|OJJ89415.1 akaw|GAA85559.1 aluc|OJZ83494.1 anid|CBF80972.1 anig|EHA24329.1 aory|EIT80387.1 asyd|OJJ56353.1 ater|EAU37605.1 atub|OJI82388.1 aver|OJJ06361.1 awen|OJJ35677.1 azon|OJJ44144.1

Group2950: abra|OJJ72985.1 acar|OOF96162.1 acla|EAW08025.1 afis|EAW23059.1 afla|EED54959.1 afum|EAL88420.1 agla|OJJ89417.1 akaw|GAA85560.1 aluc|OJZ83495.1 anid|CBF80970.1 anig|EHA24330.1 aory|EIT80388.1 asyd|OJJ56352.1 ater|EAU37606.1 atub|OJI82389.1 aver|OJJ06362.1 awen|OJJ35678.1 azon|OJJ44146.1

Group2951: abra|OJJ72989.1 acar|OOF96165.1 acla|EAW08022.1 afis|EAW23056.1 afla|EED54961.1 afum|EAL88424.1 agla|OJJ89419.1 akaw|GAA85563.1 aluc|OJZ83497.1 anid|CBF81039.1 anig|EHA24332.1 aory|EIT80362.1 asyd|OJJ56392.1 ater|EAU37608.1 atub|OJI82391.1 aver|OJJ06321.1 awen|OJJ35680.1 azon|OJJ44148.1

Group2952: abra|OJJ72990.1 acar|OOF96166.1 acla|EAW08021.1 afis|EAW23055.1 afla|EED54962.1 afum|EAL88425.1 agla|OJJ89420.1 akaw|GAA85564.1 aluc|OJZ83498.1 anid|CBF81041.1 anig|EHA24333.1 aory|EIT80303.1 asyd|OJJ56393.1 ater|EAU37609.1 atub|OJI82392.1 aver|OJJ06320.1 awen|OJJ35681.1 azon|OJJ44149.1

Group2953: abra|OJJ72991.1 acar|OOF96167.1 acla|EAW08020.1 afis|EAW23054.1 afla|EED54964.1 afum|EAL88426.1 agla|OJJ89422.1 akaw|GAA85565.1 aluc|OJZ83499.1 anid|CBF81043.1 anig|EHA24334.1 aory|EIT80378.1 asyd|OJJ56441.1 ater|EAU37610.1 atub|OJI82393.1 aver|OJJ06280.1 awen|OJJ35682.1 azon|OJJ44150.1

Group2954: abra|OJJ72997.1 acar|OOF96173.1 acla|EAW08016.1 afis|EAW23050.1 afla|EED54968.1 afum|EAL88430.1 agla|OJJ89429.1 akaw|GAA85571.1 aluc|OJZ83505.1 anid|CBF80953.1 anig|EHA24338.1 aory|EIT80340.1 asyd|OJJ56343.1 ater|EAU29602.1 atub|OJI82399.1 aver|OJJ06370.1 awen|OJJ35689.1 azon|OJJ44154.1



Group2955: abra|OJJ72998.1 acar|OOF89938.1 acla|EAW08015.1 afis|EAW23049.1 afla|EED54969.1 afum|EAL88431.1 agla|OJJ89430.1 akaw|GAA85572.1 aluc|OJZ83506.1 anid|CBF80951.1 anig|EHA24339.1 aory|EIT80346.1 asyd|OJJ56342.1 ater|EAU29601.1 atub|OJI82400.1 aver|OJJ06371.1 awen|OJJ35690.1 azon|OJJ44155.1

Group2956: abra|OJJ72999.1 acar|OOF89939.1 acla|EAW08014.1 afis|EAW23048.1 afla|EED54970.1 afum|EAL88432.1 agla|OJJ89431.1 akaw|GAA85573.1 aluc|OJZ83509.1 anid|CBF80949.1 anig|EHA24340.1 aory|EIT80379.1 asyd|OJJ56341.1 ater|EAU29600.1 atub|OJI82402.1 aver|OJJ06372.1 awen|OJJ35691.1 azon|OJJ44157.1

Group2957: abra|OJJ73002.1 acar|OOF96175.1 acla|EAW08011.1 afis|EAW23046.1 afla|EED54973.1 afum|EAL88435.1 agla|OJJ89432.1 akaw|GAA85580.1 aluc|OJZ83516.1 anid|CBF80946.1 anig|EHA24341.1 aory|EIT80343.1 asyd|OJJ56339.1 ater|EAU29614.1 atub|OJI82407.1 aver|OJJ06374.1 awen|OJJ35694.1 azon|OJJ44158.1

Group2958: abra|OJJ73003.1 acar|OOF96176.1 acla|EAW08010.1 afis|EAW23045.1 afla|EED54974.1 afum|EAL88436.1 agla|OJJ89433.1 akaw|GAA85581.1 aluc|OJZ83517.1 anid|CBF80944.1 anig|EHA24342.1 aory|EIT80339.1 asyd|OJJ56338.1 ater|EAU29613.1 atub|OJI82408.1 aver|OJJ06375.1 awen|OJJ35695.1 azon|OJJ44159.1

Group2959: abra|OJJ73006.1 acar|OOF96178.1 acla|EAW08007.1 afis|EAW23042.1 afla|EED54976.1 afum|EAL88439.1 agla|OJJ89436.1 akaw|GAA85584.1 aluc|OJZ83521.1 anid|CBF80938.1 anig|EHA24344.1 aory|EIT80316.1 asyd|OJJ56312.1 ater|EAU29617.1 atub|OJI82410.1 aver|OJJ06402.1 awen|OJJ35700.1 azon|OJJ44162.1

Group2960: abra|OJJ73008.1 acar|OOF96180.1 acla|EAW08005.1 afis|EAW23040.1 afla|EED54978.1 afum|EAL88441.1 agla|OJJ89438.1 akaw|GAA85586.1 aluc|OJZ83523.1 anid|CBF80935.1 anig|EHA24346.1 aory|EIT80392.1 asyd|OJJ56314.1 ater|EAU29603.1 atub|OJI82412.1 aver|OJJ06400.1 awen|OJJ35702.1 azon|OJJ44164.1

Group2961: abra|OJJ73016.1 acar|OOF96186.1 acla|EAW07997.1 afis|EAW23032.1 afla|EED54984.1 afum|EAL88450.1 agla|OJJ89445.1 akaw|GAA85594.1 aluc|OJZ83531.1 anid|CBF80910.1 anig|EHA24353.1 aory|EIT80327.1 asyd|OJJ56328.1 ater|EAU29625.1 atub|OJI82421.1 aver|OJJ06385.1 awen|OJJ35713.1 azon|OJJ44172.1

Group2962: abra|OJJ73022.1 acar|OOF96190.1 acla|EAW07993.1 afis|EAW23028.1 afla|EED54987.1 afum|EAL88453.2 agla|OJJ89451.1 akaw|GAA85597.1 aluc|OJZ83535.1 anid|CBF80920.1 anig|EHA24356.1 aory|EIT80371.1 asyd|OJJ56322.1 ater|EAU29630.1 atub|OJI82426.1 aver|OJJ06391.1 awen|OJJ35717.1 azon|OJJ44176.1

Group2963: abra|OJJ73023.1 acar|OOF96191.1 acla|EAW07992.1 afis|EAW23027.1 afla|EED54988.1 afum|EAL88455.1 agla|OJJ89452.1 akaw|GAA85598.1 aluc|OJZ83536.1 anid|CBF80918.1 anig|EHA24357.1 aory|EIT80332.1 asyd|OJJ56323.1 ater|EAU29629.1 atub|OJI82427.1 aver|OJJ06390.1 awen|OJJ35718.1 azon|OJJ44177.1

Group2964: abra|OJJ73025.1 acar|OOF96192.1 acla|EAW07991.1 afis|EAW23026.1 afla|EED54989.1 afum|EAL88456.1 agla|OJJ89453.1 akaw|GAA85599.1 aluc|OJZ83537.1 anid|CBF80916.1 anig|EHA24358.1 aory|EIT80337.1 asyd|OJJ56324.1 ater|EAU29628.1 atub|OJI82428.1 aver|OJJ06389.1 awen|OJJ35719.1 azon|OJJ44178.1

Group2965: abra|OJJ73029.1 acar|OOF96195.1 acla|EAW07988.1 afis|EAW23023.1 afla|EED54993.1 afum|EAL88459.1 agla|OJJ89456.1 akaw|GAA85602.1 aluc|OJZ83540.1 anid|CBF80905.1 anig|EHA24360.1 aory|EIT80347.1 asyd|OJJ56332.1 ater|EAU29651.1 atub|OJI82432.1 aver|OJJ06382.1 awen|OJJ30720.1 azon|OJJ44181.1

Group2966: abra|OJJ73030.1 acar|OOF96196.1 acla|EAW07987.1 afis|EAW23022.1 afla|EED54994.1 afum|EAL88460.1 agla|OJJ89457.1 akaw|GAA85603.1 aluc|OJZ83541.1 anid|CBF80903.1 anig|EHA24361.1 aory|EIT80374.1 asyd|OJJ56333.1 ater|EAU29253.1 atub|OJI82433.1 aver|OJJ06381.1 awen|OJJ30721.1 azon|OJJ44182.1

Group2967: abra|OJJ73031.1 acar|OOF96197.1 acla|EAW07986.1 afis|EAW23021.1 afla|EED54995.1 afum|EAL88461.1 agla|OJJ89458.1 akaw|GAA85604.1 aluc|OJZ83542.1 anid|CBF80901.1 anig|EHA24362.1 aory|EIT80385.1 asyd|OJJ56334.1 ater|EAU29652.1 atub|OJI82434.1 aver|OJJ06380.1 awen|OJJ30722.1 azon|OJJ44183.1

Group2968: abra|OJJ73032.1 acar|OOF96198.1 acla|EAW07985.1 afis|EAW23020.1 afla|EED54996.1 afum|EAL88462.1 agla|OJJ89459.1 akaw|GAA85605.1 aluc|OJZ83543.1 anid|CBF80900.1 anig|EHA24363.1 aory|EIT80298.1 asyd|OJJ56335.1 ater|EAU29653.1 atub|OJI82435.1 aver|OJJ06379.1 awen|OJJ30723.1 azon|OJJ44184.1

Group2969: abra|OJJ73037.1 acar|OOF96200.1 acla|EAW07982.1 afis|EAW23017.1 afla|EED54999.1 afum|EAL88464.1 agla|OJJ89463.1 akaw|GAA85608.1 aluc|OJZ83548.1 anig|EHA24366.1 aory|EIT80350.1

asyd|OJJ56309.1 ater|EAU29657.1 atub|OJI82439.1 aver|OJJ06405.1 awen|OJJ29535.1 azon|OJJ44187.1  
anid|CBF80894.1

Group2970: abra|OJJ73038.1 acar|OOF96201.1 acla|EAW07981.1 afis|EAW23016.1 afla|EED55000.1  
afum|EAL88465.1 agla|OJJ89464.1 akaw|GAA85609.1 aluc|OJZ83549.1 anid|CBF80896.1 anig|EHA24367.1  
aory|EIT80294.1 asyd|OJJ56310.1 ater|EAU29658.1 atub|OJI82440.1 aver|OJJ06404.1 awen|OJJ29534.1  
azon|OJJ44188.1

Group2971: abra|OJJ73039.1 acar|OOF96204.1 acla|EAW07980.1 afis|EAW23015.1 afla|EED55001.1  
afum|EAL88466.1 agla|OJJ89465.1 akaw|GAA85610.1 aluc|OJZ83550.1 anid|CBF80890.1 anig|EHA24368.1  
aory|EIT80296.1 asyd|OJJ56307.1 ater|EAU29659.1 atub|OJI82441.1 aver|OJJ06408.1 awen|OJJ30728.1  
azon|OJJ44189.1

Group2972: abra|OJJ73040.1 acar|OOF96203.1 acla|EAW07979.1 afis|EAW23014.1 afla|EED55002.1  
afum|EAL88467.2 agla|OJJ89466.1 akaw|GAA85611.1 aluc|OJZ83551.1 anid|CBF80888.1 anig|EHA24369.1  
aory|EIT80286.1 asyd|OJJ56306.1 ater|EAU29660.1 atub|OJI82442.1 aver|OJJ06409.1 awen|OJJ30729.1  
azon|OJJ44190.1

Group2973: abra|OJJ73041.1 acar|OOF96202.1 acla|EAW07978.1 afis|EAW23013.1 afla|EED55003.1  
afum|EAL88468.1 agla|OJJ89467.1 akaw|GAA85612.1 aluc|OJZ83552.1 anid|CBF80886.1 anig|EHA24370.1  
aory|EIT80391.1 asyd|OJJ56305.1 ater|EAU29661.1 atub|OJI82443.1 aver|OJJ06410.1 awen|OJJ30730.1  
azon|OJJ44191.1

Group2974: abra|OJJ73042.1 acar|OOF96205.1 acla|EAW07977.1 afis|EAW23012.1 afla|EED55004.1  
afum|EAL88469.1 agla|OJJ89468.1 akaw|GAA85613.1 aluc|OJZ83553.1 anid|CBF80885.1 anig|EHA24371.1  
aory|EIT80335.1 asyd|OJJ56304.1 ater|EAU29662.1 atub|OJI82444.1 aver|OJJ06411.1 awen|OJJ30731.1  
azon|OJJ44192.1

Group2975: abra|OJJ73046.1 acar|OOF96208.1 acla|EAW07973.1 afis|EAW23008.1 afla|EED55007.1  
afum|EAL88472.1 agla|OJJ89472.1 akaw|GAA85617.1 aluc|OJZ83557.1 anid|CBF80879.1 anig|EHA24375.1  
aory|EIT80310.1 asyd|OJJ56302.1 ater|EAU29665.1 atub|OJI82447.1 aver|OJJ06415.1 awen|OJJ30733.1  
azon|OJJ44196.1

Group2976: abra|OJJ73048.1 acar|OOF96211.1 acla|EAW07971.1 afis|EAW23006.1 afla|EED55009.1  
afum|EAL88474.1 agla|OJJ89473.1 akaw|GAA85619.1 aluc|OJZ83559.1 anid|CBF80875.1 anig|EHA24377.1  
aory|EIT80349.1 asyd|OJJ56300.1 ater|EAU29667.1 atub|OJI82449.1 aver|OJJ06417.1 awen|OJJ30735.1  
azon|OJJ44197.1

Group2977: abra|OJJ73049.1 acar|OOF96212.1 acla|EAW07970.1 afis|EAW23005.1 afla|EED55010.1  
afum|EAL88475.1 agla|OJJ89474.1 akaw|GAA85620.1 aluc|OJZ83560.1 anid|CBF80873.1 anig|EHA24378.1  
aory|EIT80326.1 asyd|OJJ56299.1 ater|EAU29668.1 atub|OJI82450.1 aver|OJJ06418.1 awen|OJJ30736.1  
azon|OJJ44198.1

Group2978: abra|OJJ73050.1 acar|OOF96213.1 acla|EAW07969.1 afis|EAW23004.1 afla|EED55011.1  
afum|EAL88476.2 agla|OJJ89475.1 akaw|GAA85621.1 aluc|OJZ83561.1 anid|CBF80871.1 anig|EHA24379.1  
aory|EIT80312.1 asyd|OJJ56298.1 ater|EAU29669.1 atub|OJI82451.1 aver|OJJ06419.1 awen|OJJ30737.1  
azon|OJJ44199.1

Group2979: abra|OJJ73051.1 acar|OOF96214.1 acla|EAW07968.1 afis|EAW23003.1 afla|EED55012.1  
afum|EAL88477.1 agla|OJJ89476.1 akaw|GAA85622.1 aluc|OJZ83562.1 anid|CBF80869.1 anig|EHA24380.1  
aory|EIT80369.1 asyd|OJJ56297.1 ater|EAU29670.1 atub|OJI82452.1 aver|OJJ06420.1 awen|OJJ30738.1  
azon|OJJ44200.1

Group2980: abra|OJJ73052.1 acar|OOF96215.1 acla|EAW07967.1 afis|EAW23002.1 afla|EED55013.1  
afum|EAL88478.1 agla|OJJ89477.1 akaw|GAA85623.1 aluc|OJZ83564.1 anid|CBF80868.1 anig|EHA24381.1  
aory|EIT80329.1 asyd|OJJ56296.1 ater|EAU29671.1 atub|OJI82454.1 aver|OJJ06421.1 awen|OJJ30739.1  
azon|OJJ44201.1

Group2981: abra|OJJ73056.1 acar|OOF96217.1 acla|EAW07965.1 afis|EAW23000.1 afla|EED55015.1  
afum|EAL88480.1 agla|OJJ89479.1 akaw|GAA85624.1 aluc|OJZ83567.1 anid|CBF80864.1 anig|EHA24383.1  
aory|EIT80314.1 asyd|OJJ56294.1 ater|EAU29673.1 atub|OJI82456.1 aver|OJJ06423.1 awen|OJJ30741.1  
azon|OJJ44204.1

Group2982: abra|OJJ73058.1 acar|OOF96218.1 acla|EAW07963.1 afis|EAW22998.1 afla|EED55017.1  
afum|EAL88482.1 agla|OJJ89481.1 akaw|GAA85626.1 aluc|OJZ83569.1 anid|CBF80860.1 anig|EHA24385.1  
aory|EIT80381.1 asyd|OJJ56292.1 ater|EAU29674.1 atub|OJI82458.1 aver|OJJ06425.1 awen|OJJ30743.1  
azon|OJJ44202.1

Group2983: abra|OJJ73059.1 acar|OOF96220.1 acla|EAW07962.1 afis|EAW22997.1 afla|EED55018.1  
afum|EAL88483.1 agla|OJJ89482.1 akaw|GAA85627.1 aluc|OJZ83570.1 anid|CBF80856.1 anig|EHA24386.1  
aory|EIT80291.1 asyd|OJJ56291.1 ater|EAU29675.1 atub|OJI82459.1 aver|OJJ06426.1 awen|OJJ30744.1  
azon|OJJ44205.1

Group2984: abra|OJJ73062.1 acar|OOG00286.1 afla|EED50225.1 agla|OJJ79957.1 akaw|GAA88097.1 aluc|OJZ81364.1 anid|CBF85609.1 anig|EHA18664.1 aory|EIT76192.1 asyd|OJJ64207.1 ater|EAU30207.1 atub|OJI91568.1 aver|OJI98295.1 awen|OJJ39951.1 afla|EED45252.1 aory|EIT73530.1 agla|OJJ80099.1 aory|EIT77256.1

Group2985: abra|OJJ73142.1 acar|OOG00354.1 acla|EAW07018.1 afis|EAW16644.1 afla|EED44956.1 afum|EAL89248.1 agla|OJJ82603.1 akaw|GAA88030.1 aluc|OJZ81289.1 anid|CBF82053.1 anig|EHA18588.1 aory|EIT73503.1 asyd|OJJ54235.1 ater|EAU39569.1 atub|OJI91497.1 aver|OJJ05187.1 awen|OJJ40070.1 azon|OJJ45554.1

Group2986: abra|OJJ73143.1 acar|OOG00355.1 acla|EAW07019.1 afis|EAW16645.1 afla|EED44955.1 afum|EAL89249.1 agla|OJJ82602.1 akaw|GAA88029.1 aluc|OJZ81288.1 anid|CBF82055.1 anig|EHA18587.1 aory|EIT73491.1 asyd|OJJ54236.1 ater|EAU39570.1 atub|OJI91496.1 aver|OJJ05188.1 awen|OJJ40069.1 azon|OJJ45555.1

Group2987: abra|OJJ73147.1 acar|OOG00358.1 acla|EAW07023.1 afis|EAW16649.1 afla|EED44951.1 afum|EAL89253.1 agla|OJJ78458.1 akaw|GAA88025.1 aluc|OJZ81284.1 anid|CBF82061.1 anig|EHA18583.1 aory|EIT73464.1 asyd|OJJ54240.1 ater|EAU39573.1 atub|OJI91491.1 aver|OJJ05192.1 awen|OJJ40065.1 azon|OJJ45561.1

Group2988: abra|OJJ73148.1 acar|OOG00360.1 acla|EAW07024.1 afis|EAW16650.1 afla|EED44950.1 afum|EAL89254.1 agla|OJJ78459.1 akaw|GAA88024.1 aluc|OJZ81282.1 anid|CBF82063.1 anig|EHA18582.1 aory|EIT73478.1 asyd|OJJ54241.1 ater|EAU39574.1 atub|OJI91490.1 aver|OJJ05193.1 awen|OJJ40064.1 azon|OJJ45562.1

Group2989: abra|OJJ73149.1 acar|OOG00361.1 acla|EAW07025.1 afis|EAW16651.1 afla|EED44949.1 afum|EAL89255.1 agla|OJJ78460.1 akaw|GAA88023.1 aluc|OJZ81281.1 anid|CBF82064.1 anig|EHA18581.1 aory|EIT73505.1 asyd|OJJ54242.1 ater|EAU39575.1 atub|OJI91489.1 aver|OJJ05194.1 awen|OJJ40063.1 azon|OJJ45563.1

Group2990: abra|OJJ73151.1 acar|OOG00363.1 acla|EAW07028.1 afis|EAW16654.1 afla|EED44946.1 afum|EAL89258.1 agla|OJJ78687.1 akaw|GAA88021.1 aluc|OJZ81279.1 anid|CBF82067.1 anig|EHA18579.1 aory|EIT73521.1 asyd|OJJ54244.1 ater|EAU39578.1 atub|OJI91487.1 aver|OJJ05196.1 awen|OJJ40060.1 azon|OJJ45567.1

Group2991: abra|OJJ73156.1 acar|OOG00371.1 acla|EAW07030.1 afis|EAW16656.1 afla|EED44941.1 afum|EAL89260.1 agla|OJJ78716.1 akaw|GAA88016.1 aluc|OJZ81274.1 anid|CBF82070.1 anig|EHA18574.1 aory|EIT73470.1 asyd|OJJ54246.1 ater|EAU39579.1 atub|OJI91481.1 aver|OJJ05199.1 awen|OJJ40058.1 azon|OJJ50081.1

Group2992: abra|OJJ73158.1 acar|OOG00369.1 acla|EAW07032.1 afis|EAW16658.1 afla|EED44944.1 afum|EAL89262.1 agla|OJJ78714.1 akaw|GAA88014.1 aluc|OJZ81272.1 anid|CBF82072.1 anig|EHA18572.1 aory|EIT73479.1 asyd|OJJ54248.1 ater|EAU39581.1 atub|OJI91479.1 aver|OJJ05202.1 awen|OJJ40056.1 azon|OJJ50105.1

Group2993: abra|OJJ73159.1 acar|OOG00368.1 acla|EAW07033.1 afis|EAW16659.1 afla|EED44936.1 afum|EAL89263.1 agla|OJJ78713.1 akaw|GAA88013.1 aluc|OJZ81271.1 anid|CBF82073.1 anig|EHA18571.1 aory|EIT73463.1 asyd|OJJ54249.1 ater|EAU39582.1 atub|OJI91478.1 aver|OJJ05203.1 awen|OJJ40055.1 azon|OJJ50106.1

Group2994: abra|OJJ73160.1 acar|OOG00405.1 acla|EAW06769.1 afis|EAW16319.1 afla|EED53562.1 afum|EAL88943.1 agla|OJJ88280.1 akaw|GAA88012.1 aluc|OJZ81270.1 anid|CBF89151.1 anig|EHA18570.1 aory|EIT74869.1 asyd|OJJ62566.1 ater|EAU34138.1 atub|OJI91477.1 aver|OJI96690.1 awen|OJJ37720.1 azon|OJJ44978.1

Group2995: abra|OJJ73168.1 acar|OOG00409.1 acla|EAW07130.1 afis|EAW22141.1 afla|EED53567.1 afum|EAL91049.1 agla|OJJ87934.1 akaw|GAA88003.1 aluc|OJZ81259.1 anid|CBF89137.1 anig|EHA18566.1 aory|EIT75049.1 asyd|OJJ62649.1 ater|EAU34143.1 atub|OJI91455.1 aver|OJI96749.1 awen|OJJ34715.1 azon|OJJ45847.1

Group2996: abra|OJJ73170.1 acar|OOG00410.1 acla|EAW10796.1 afis|EAW24780.1 afla|EED47205.1 afum|EAL89419.1 agla|OJJ82876.1 akaw|GAA88001.1 aluc|OJZ81257.1 anid|CBF81439.1 anig|EHA18564.1 aory|EIT79182.1 asyd|OJJ59428.1 ater|EAU36528.1 atub|OJI91453.1 aver|OJJ02843.1 awen|OJJ40366.1 azon|OJJ49215.1

Group2997: abra|OJJ73173.1 acar|OOG00413.1 acla|EAW06856.1 afis|EAW16473.1 afla|EED47208.1 afum|EAL89067.1 agla|OJJ82873.1 akaw|GAA87998.1 aluc|OJZ81254.1 anid|CBF81435.1 anig|EHA18562.1 aory|EIT79309.1 asyd|OJJ59424.1 ater|EAU36569.1 atub|OJI91450.1 aver|OJJ02846.1 awen|OJJ40363.1 azon|OJJ49211.1

Group2998: abra|OJJ73176.1 acar|OOG00416.1 acla|EAW06858.1 afis|EAW16475.1 afla|EED47210.1 afum|EAL89069.1 agla|OJJ82871.1 akaw|GAA87996.1 aluc|OJZ81251.1 anid|CBF81431.1 anig|EHA18560.1

aory|EIT79330.1 asyd|OJJ59422.1 ater|EAU36562.1 atub|OJI91448.1 aver|OJJ02848.1 awen|OJJ40361.1 azon|OJJ49209.1

Group2999: abra|OJJ73183.1 acar|OOG00420.1 acla|EAW06861.1 afis|EAW16478.1 afla|EED47215.1 afum|EAL89072.1 agla|OJJ82867.1 akaw|GAA87992.1 aluc|OJZ81246.1 anid|CBF75501.1 anig|EHA18555.1 aory|EIT79241.1 asyd|OJJ59747.1 ater|EAU36560.1 atub|OJI91442.1 aver|OJJ02541.1 awen|OJJ40357.1 azon|OJJ49206.1

Group3000: abra|OJJ73184.1 acar|OOG00421.1 acla|EAW06862.1 afis|EAW16479.1 afla|EED47216.1 afum|EAL89073.1 agla|OJJ82866.1 akaw|GAA87991.1 aluc|OJZ81245.1 anid|CBF75499.1 anig|EHA18554.1 aory|EIT79319.1 asyd|OJJ59748.1 ater|EAU36559.1 atub|OJI91441.1 aver|OJJ02540.1 awen|OJJ40356.1 azon|OJJ49205.1

Group3001: abra|OJJ73185.1 acar|OOG00422.1 acla|EAW06863.1 afis|EAW16480.1 afla|EED47217.1 afum|EAL89074.1 agla|OJJ82865.1 akaw|GAA87990.1 aluc|OJZ81244.1 anid|CBF75503.1 anig|EHA18553.1 aory|EIT79172.1 asyd|OJJ59746.1 ater|EAU36558.1 atub|OJI91440.1 aver|OJJ02542.1 awen|OJJ40354.1 azon|OJJ49204.1

Group3002: abra|OJJ73189.1 acar|OOG00425.1 acla|EAW06865.1 afis|EAW16482.1 afla|EED47222.1 afum|EAL89076.1 agla|OJJ82862.1 akaw|GAA87988.1 aluc|OJZ81241.1 anid|CBF75506.1 anig|EHA18551.1 aory|EIT79303.1 asyd|OJJ59744.1 ater|EAU36556.1 atub|OJI91438.1 aver|OJJ02544.1 awen|OJJ40350.1 azon|OJJ49202.1

Group3003: abra|OJJ73190.1 acar|OOG00426.1 acla|EAW06866.1 afis|EAW16483.1 afla|EED47223.1 afum|EAL89077.1 agla|OJJ82861.1 akaw|GAA87987.1 aluc|OJZ81240.1 anid|CBF75508.1 anig|EHA18550.1 aory|EIT79190.1 asyd|OJJ59743.1 ater|EAU36555.1 atub|OJI91437.1 aver|OJJ02545.1 awen|OJJ40348.1 azon|OJJ49201.1

Group3004: abra|OJJ73191.1 acar|OOG00428.1 acla|EAW06867.1 afis|EAW16484.1 afla|EED47224.1 afum|EAL89078.1 agla|OJJ82860.1 akaw|GAA87986.1 aluc|OJZ81239.1 anid|CBF75520.1 anig|EHA18549.1 aory|EIT79323.1 asyd|OJJ59736.1 ater|EAU36554.1 atub|OJI91436.1 aver|OJJ02551.1 awen|OJJ40343.1 azon|OJJ49200.1

Group3005: abra|OJJ73193.1 acar|OOG00429.1 acla|EAW06869.1 afis|EAW16486.1 afla|EED47226.1 afum|EAL89080.1 agla|OJJ82858.1 akaw|GAA87984.1 aluc|OJZ81236.1 anid|CBF75516.1 anig|EHA18547.1 aory|EIT79231.1 asyd|OJJ59738.1 ater|EAU36552.1 atub|OJI91434.1 aver|OJJ02549.1 awen|OJJ40345.1 azon|OJJ49198.1

Group3006: abra|OJJ73194.1 acar|OOG00431.1 acla|EAW06871.1 afis|EAW16488.1 afla|EED47229.1 afum|EAL89082.1 agla|OJJ82852.1 akaw|GAA87983.1 aluc|OJZ81235.1 anid|CBF75510.1 anig|EHA18546.1 aory|EIT79266.1 asyd|OJJ59742.1 ater|EAU36548.1 atub|OJI91432.1 aver|OJJ02546.1 awen|OJJ40342.1 azon|OJJ49196.1

Group3007: abra|OJJ73196.1 acar|OOG00434.1 acla|EAW06873.1 afis|EAW16490.1 afla|EED47231.1 afum|EAL89084.1 agla|OJJ82829.1 akaw|GAA87981.1 aluc|OJZ81233.1 anid|CBF75522.1 anig|EHA18544.1 aory|EIT79209.1 asyd|OJJ59735.1 ater|EAU36547.1 atub|OJI91430.1 aver|OJJ02552.1 awen|OJJ40339.1 azon|OJJ49193.1

Group3008: abra|OJJ73199.1 acar|OOG00438.1 acla|EAW06876.1 afis|EAW16493.1 afla|EED47237.1 afum|EAL89087.1 agla|OJJ82832.1 akaw|GAA87978.1 aluc|OJZ81230.1 anid|CBF75527.1 anig|EHA18541.1 aory|EIT79313.1 asyd|OJJ59732.1 ater|EAU36545.1 atub|OJI91427.1 aver|OJJ02555.1 awen|OJJ40336.1 azon|OJJ49190.1

Group3009: abra|OJJ73202.1 acar|OOG00441.1 acla|EAW06879.1 afis|EAW16496.1 afla|EED47251.1 afum|EAL89090.1 agla|OJJ82835.1 akaw|GAA87975.1 aluc|OJZ81227.1 anid|CBF75606.1 anig|EHA18538.1 aory|EIT79275.1 asyd|OJJ59727.1 ater|EAU36543.1 atub|OJI91424.1 aver|OJJ02559.1 awen|OJJ40333.1 azon|OJJ49187.1

Group3010: abra|OJJ73203.1 acar|OOG00442.1 acla|EAW06880.1 afis|EAW16497.1 afla|EED56182.1 afum|EBA27367.1 agla|OJJ82836.1 akaw|GAA87974.1 aluc|OJZ81224.1 anid|CBF75605.1 anig|EHA18537.1 aory|EIT73365.1 asyd|OJJ59726.1 ater|EAU36542.1 atub|OJI91422.1 aver|OJJ02560.1 awen|OJJ40332.1 azon|OJJ49186.1

Group3011: abra|OJJ73204.1 acar|OOG00443.1 acla|EAW06881.1 afis|EAW16498.1 afla|EED56181.1 afum|EAL89093.1 agla|OJJ82838.1 akaw|GAA87973.1 aluc|OJZ81222.1 anid|CBF75604.1 anig|EHA18536.1 aory|EIT73379.1 asyd|OJJ59725.1 ater|EAU36541.1 atub|OJI91420.1 aver|OJJ02561.1 awen|OJJ40331.1 azon|OJJ49185.1

Group3012: abra|OJJ73205.1 acar|OOG00444.1 acla|EAW06882.1 afis|EAW16499.1 afla|EED56180.1 afum|EAL89094.1 agla|OJJ82826.1 akaw|GAA87972.1 aluc|OJZ81221.1 anid|CBF75602.1 anig|EHA18535.1 aory|EIT76650.1 asyd|OJJ59724.1 ater|EAU36540.1 atub|OJI91419.1 aver|OJJ02562.1 awen|OJJ40330.1 azon|OJJ49184.1

Group3013: abra|OJJ73206.1 acar|OOG00445.1 acla|EAW06883.1 afis|EAW16500.1 afla|EED56179.1 afum|EAL89095.1 agla|OJJ82827.1 akaw|GAA87971.1 aluc|OJZ81220.1 anid|CBF75600.1 anig|EHA18534.1 aory|EIT76763.1 asyd|OJJ59723.1 ater|EAU36539.1 atub|OJI91418.1 aver|OJJ02563.1 awen|OJJ40328.1 azon|OJJ49183.1

Group3014: abra|OJJ73207.1 acar|OOG00446.1 acla|EAW06884.1 afis|EAW16501.1 afla|EED56178.1 afum|EAL89096.1 agla|OJJ82828.1 akaw|GAA87970.1 aluc|OJZ81219.1 anid|CBF75598.1 anig|EHA18533.1 aory|EIT76626.1 asyd|OJJ59722.1 ater|EAU36538.1 atub|OJI91417.1 aver|OJJ02564.1 awen|OJJ40327.1 azon|OJJ49182.1

Group3015: abra|OJJ73209.1 acar|OOG00447.1 acla|EAW06885.1 afis|EAW16502.1 afla|EED56177.1 afum|EAL89097.1 agla|OJJ82815.1 akaw|GAA87969.1 aluc|OJZ81218.1 anid|CBF75589.1 anig|EHA18532.1 aory|EIT76868.1 asyd|OJJ59721.1 ater|EAU36537.1 atub|OJI91416.1 aver|OJJ02565.1 awen|OJJ40326.1 azon|OJJ49181.1

Group3016: abra|OJJ73210.1 acar|OOG00449.1 acla|EAW06886.1 afis|EAW16503.1 afla|EED56175.1 afum|EAL89098.1 agla|OJJ82816.1 akaw|GAA87968.1 aluc|OJZ81217.1 anid|CBF75591.1 anig|EHA18531.1 aory|EIT76792.1 asyd|OJJ59720.1 ater|EAU36536.1 atub|OJI91415.1 aver|OJJ02566.1 awen|OJJ40324.1 azon|OJJ49180.1

Group3017: abra|OJJ73212.1 acar|OOG00448.1 acla|EAW06888.1 afis|EAW16505.1 afla|EED56173.1 afum|EAL89100.1 agla|OJJ82818.1 akaw|GAA87966.1 aluc|OJZ81215.1 anid|CBF75594.1 anig|EHA18529.1 aory|EIT76612.1 asyd|OJJ59718.1 ater|EAU36535.1 atub|OJI91412.1 aver|OJJ02568.1 awen|OJJ40321.1 azon|OJJ49178.1

Group3018: abra|OJJ73216.1 acar|OOG00453.1 acla|EAW06891.1 afis|EAW16508.1 afla|EED56170.1 afum|EAL89103.1 agla|OJJ82822.1 akaw|GAA87963.1 aluc|OJZ81212.1 anid|CBF75578.1 anig|EHA18526.1 aory|EIT76719.1 asyd|OJJ59714.1 ater|EAU36572.1 atub|OJI91407.1 aver|OJJ02572.1 awen|OJJ40317.1 azon|OJJ47186.1

Group3019: abra|OJJ73218.1 acar|OOG00455.1 acla|EAW06892.1 afis|EAW16509.1 afla|EED56164.1 afum|EAL89104.2 agla|OJJ82812.1 akaw|GAA87961.1 aluc|OJZ81210.1 anid|CBF75572.1 anig|EHA18524.1 aory|EIT76824.1 asyd|OJJ59711.1 ater|EAU36575.1 atub|OJI91405.1 aver|OJJ02575.1 awen|OJJ40315.1 azon|OJJ49175.1

Group3020: abra|OJJ73219.1 acar|OOG00457.1 acla|EAW06894.1 afis|EAW16511.1 afla|EED56162.1 afum|EAL89106.1 agla|OJJ82811.1 akaw|GAA87959.1 aluc|OJZ81208.1 anid|CBF75568.1 anig|EHA18523.1 aory|EIT76692.1 asyd|OJJ59709.1 ater|EAU36577.1 atub|OJI91404.1 aver|OJJ02576.1 awen|OJJ40313.1 azon|OJJ49173.1

Group3021: abra|OJJ73220.1 acar|OOG00458.1 acla|EAW06895.1 afis|EAW16512.1 afla|EED56161.1 afum|EAL89107.2 agla|OJJ82810.1 akaw|GAA87958.1 aluc|OJZ81207.1 anid|CBF75566.1 anig|EHA18522.1 aory|EIT76654.1 asyd|OJJ59708.1 ater|EAU36578.1 atub|OJI91403.1 aver|OJJ02577.1 awen|OJJ40312.1 azon|OJJ49172.1

Group3022: abra|OJJ73222.1 acar|OOG00460.1 acla|EAW06897.1 afis|EAW16514.1 afla|EED56159.1 afum|EAL89109.1 agla|OJJ82808.1 akaw|GAA87956.1 aluc|OJZ81205.1 anid|CBF75562.1 anig|EHA18520.1 aory|EIT76696.1 asyd|OJJ59706.1 ater|EAU36580.1 atub|OJI91401.1 aver|OJJ02579.1 awen|OJJ40309.1 azon|OJJ49170.1

Group3023: abra|OJJ73223.1 acar|OOG00461.1 acla|EAW06898.1 afis|EAW16515.1 afla|EED56158.1 afum|EAL89110.2 agla|OJJ82807.1 akaw|GAA87955.1 aluc|OJZ81204.1 anid|CBF75560.1 anig|EHA18519.1 aory|EIT76553.1 asyd|OJJ59705.1 ater|EAU36581.1 atub|OJI91400.1 aver|OJJ02580.1 awen|OJJ40308.1 azon|OJJ49169.1

Group3024: abra|OJJ73224.1 acar|OOG00462.1 acla|EAW06899.1 afis|EAW16516.1 afla|EED56157.1 afum|EAL89111.2 agla|OJJ82806.1 akaw|GAA87954.1 aluc|OJZ81203.1 anid|CBF75558.1 anig|EHA18518.1 aory|EIT76604.1 asyd|OJJ59704.1 ater|EAU36582.1 atub|OJI91398.1 aver|OJJ02582.1 awen|OJJ40307.1 azon|OJJ49168.1

Group3025: abra|OJJ73228.1 acar|OOG00466.1 acla|EAW06902.1 afis|EAW16519.1 afla|EED56152.1 afum|EAL89114.1 agla|OJJ82801.1 akaw|GAA87952.1 aluc|OJZ81200.1 anid|CBF75555.1 anig|EHA18515.1 aory|EIT76840.1 asyd|OJJ57431.1 ater|EAU36585.1 atub|OJI91395.1 aver|OJJ05749.1 awen|OJJ40303.1 azon|OJJ49165.1

Group3026: abra|OJJ73229.1 acar|OOG00468.1 acla|EAW06904.1 afis|EAW16521.1 afla|EED56150.1 afum|EAL89116.1 agla|OJJ82800.1 akaw|GAA87951.1 aluc|OJZ81199.1 anid|CBF75547.1 anig|EHA18514.1 aory|EIT76779.1 asyd|OJJ57441.1 ater|EAU36586.1 atub|OJI91394.1 aver|OJJ05737.1 awen|OJJ40302.1 azon|OJJ49164.1

Group3027: abra|OJJ73230.1 acar|OOG00469.1 acla|EAW06905.1 afis|EAW16522.1 afla|EED56149.1 afum|EAL89117.1 agla|OJJ82799.1 akaw|GAA87950.1 aluc|OJZ81198.1 anid|CBF75545.1 anig|EHA18513.1

aory|EIT76528.1 asyd|OJJ57442.1 ater|EAU36587.1 atub|OJI91393.1 aver|OJJ05736.1 awen|OJJ40301.1 azon|OJJ49163.1

Group3028: abra|OJJ73231.1 acar|OOG00470.1 acla|EAW06906.1 afis|EAW16523.1 afla|EED56148.1 afum|EAL89118.1 agla|OJJ82798.1 akaw|GAA87949.1 aluc|OJZ81197.1 anid|CBF75543.1 anig|EHA18512.1 aory|EIT76854.1 asyd|OJJ57443.1 ater|EAU36588.1 atub|OJI91392.1 aver|OJJ05735.1 awen|OJJ40300.1 azon|OJJ49162.1

Group3029: abra|OJJ73232.1 acar|OOG00471.1 acla|EAW06907.1 afis|EAW16524.1 afla|EED56147.1 afum|EAL89119.1 agla|OJJ82797.1 akaw|GAA87948.1 aluc|OJZ81196.1 anid|CBF75541.1 anig|EHA18511.1 aory|EIT76769.1 asyd|OJJ57446.1 ater|EAU36589.1 atub|OJI91391.1 aver|OJJ05734.1 awen|OJJ40299.1 azon|OJJ49161.1

Group3030: abra|OJJ73234.1 acar|OOG00472.1 acla|EAW06909.1 afis|EAW16526.1 afla|EED56145.1 afum|EAL89122.1 agla|OJJ82796.1 akaw|GAA87946.1 aluc|OJZ81194.1 anid|CBF75537.1 anig|EHA18509.1 aory|EIT76537.1 asyd|OJJ57447.1 ater|EAU36590.1 atub|OJI91389.1 aver|OJJ05732.1 awen|OJJ40297.1 azon|OJJ49159.1

Group3031: abra|OJJ73236.1 acar|OOG00473.1 acla|EAW06910.1 afis|EAW16527.1 afla|EED56144.1 afum|EAL89123.2 agla|OJJ82795.1 akaw|GAA87945.1 aluc|OJZ81193.1 anid|CBF75535.1 anig|EHA18508.1 aory|EIT76806.1 asyd|OJJ57448.1 ater|EAU36591.1 atub|OJI91388.1 aver|OJJ05731.1 awen|OJJ40296.1 azon|OJJ49158.1

Group3032: abra|OJJ73237.1 acar|OOG00474.1 acla|EAW06911.1 afis|EAW16528.1 afla|EED56143.1 afum|EAL89124.1 agla|OJJ82793.1 akaw|GAA87944.1 aluc|OJZ81191.1 anid|CBF75533.1 anig|EHA18507.1 aory|EIT76880.1 asyd|OJJ57449.1 ater|EAU36592.1 atub|OJI91387.1 aver|OJJ05730.1 awen|OJJ40295.1 azon|OJJ49157.1

Group3033: abra|OJJ73239.1 acar|OOG00476.1 acla|EAW06912.1 afis|EAW16529.1 afla|EED56141.1 afum|EAL89125.1 agla|OJJ82791.1 akaw|GAA87942.1 aluc|OJZ81189.1 anid|CBF75529.1 anig|EHA18505.1 aory|EIT76699.1 asyd|OJJ57450.1 ater|EAU36593.1 atub|OJI91385.1 aver|OJJ05728.1 awen|OJJ40293.1 azon|OJJ49154.1

Group3034: abra|OJJ73240.1 acar|OOG00477.1 acla|EAW06913.1 afis|EAW16530.1 afla|EED56138.1 afum|EAL89127.1 agla|OJJ82790.1 akaw|GAA87941.1 aluc|OJZ81188.1 anid|CBF81731.1 anig|EHA18504.1 aory|EIT76798.1 asyd|OJJ59592.1 ater|EAU36594.1 atub|OJI91384.1 aver|OJJ02677.1 awen|OJJ40291.1 azon|OJJ49153.1

Group3035: abra|OJJ73246.1 acar|OOG00485.1 acla|EAW06920.1 afis|EAW16537.1 afla|EED56132.1 afum|EAL89134.1 agla|OJJ82785.1 akaw|GAA87934.1 aluc|OJZ81181.1 anid|CBF81743.1 anig|EHA18499.1 aory|EIT76834.1 asyd|OJJ59598.1 ater|EAU36600.1 atub|OJI91378.1 aver|OJJ02670.1 awen|OJJ40285.1 azon|OJJ49146.1

Group3036: abra|OJJ73248.1 acar|OOG00488.1 acla|EAW06922.1 afis|EAW16539.1 afla|EED56130.1 afum|EAL89136.1 agla|OJJ82783.1 akaw|GAA87932.1 aluc|OJZ81179.1 anid|CBF81746.1 anig|EHA18497.1 aory|EIT76822.1 asyd|OJJ59600.1 ater|EAU36602.1 atub|OJI91375.1 aver|OJJ02668.1 awen|OJJ40282.1 azon|OJJ49144.1

Group3037: abra|OJJ73249.1 acar|OOG00491.1 acla|EAW06924.1 afis|EAW16541.1 afla|EED56127.1 afum|EAL89138.1 agla|OJJ82782.1 akaw|GAA87931.1 aluc|OJZ81178.1 anid|CBF81748.1 anig|EHA18496.1 aory|EIT76785.1 asyd|OJJ59601.1 ater|EAU36603.1 atub|OJI91374.1 aver|OJJ02667.1 awen|OJJ40279.1 azon|OJJ49142.1

Group3038: abra|OJJ73251.1 acar|OOG00495.1 acla|EAW06929.1 afis|EAW16544.1 afla|EED56121.1 afum|EAL89142.2 agla|OJJ82779.1 akaw|GAA87929.1 aluc|OJZ81176.1 anid|CBF81754.1 anig|EHA18494.1 aory|EIT76628.1 asyd|OJJ59604.1 ater|EAU36607.1 atub|OJI91372.1 aver|OJJ02665.1 awen|OJJ40276.1 azon|OJJ49139.1

Group3039: abra|OJJ73252.1 acar|OOG00494.1 acla|EAW06930.1 afis|EAW16545.1 afla|EED56120.1 afum|EAL89143.1 agla|OJJ82778.1 akaw|GAA87928.1 aluc|OJZ81175.1 anid|CBF81755.1 anig|EHA18493.1 aory|EIT76556.1 asyd|OJJ59605.1 ater|EAU36608.1 atub|OJI91371.1 aver|OJJ02664.1 awen|OJJ40275.1 azon|OJJ49138.1

Group3040: abra|OJJ73253.1 acar|OOG00496.1 acla|EAW06931.1 afis|EAW16546.1 afum|EAL89144.1 agla|OJJ82777.1 akaw|GAA87927.1 aluc|OJZ81174.1 anid|CBF81757.1 anig|EHA18492.1 aory|EIT76862.1 asyd|OJJ59606.1 ater|EAU36609.1 atub|OJI91370.1 aver|OJJ02663.1 awen|OJJ40271.1 azon|OJJ49137.1 afla|EED56118.1

Group3041: abra|OJJ73256.1 acar|OOG00499.1 acla|EAW06933.1 afis|EAW16548.1 afla|EED56116.1 afum|EAL89146.1 agla|OJJ82775.1 akaw|GAA87925.1 aluc|OJZ81172.1 anid|CBF81761.1 anig|EHA18490.1 aory|EIT76624.1 asyd|OJJ59607.1 ater|EAU36611.1 atub|OJI91367.1 aver|OJJ02662.1 awen|OJJ40269.1 azon|OJJ49133.1

Group3042: abra|OJJ73257.1 acar|OOG00498.1 acla|EAW06934.1 afis|EAW16549.1 afla|EED56115.1 afum|EAL89147.1 agla|OJJ82774.1 akaw|GAA87924.1 aluc|OJZ81171.1 anid|CBF81763.1 anig|EHA18489.1 aory|EIT76873.1 asyd|OJJ59608.1 ater|EAU36612.1 atub|OJI91366.1 aver|OJJ02661.1 awen|OJJ40268.1 azon|OJJ49132.1

Group3043: abra|OJJ73258.1 acar|OOG00500.1 acla|EAW06935.1 afis|EAW16550.1 afla|EED56112.1 afum|EAL89148.1 agla|OJJ82773.1 akaw|GAA87923.1 aluc|OJZ81170.1 anid|CBF81765.1 anig|EHA18488.1 aory|EIT76657.1 ater|EAU36613.1 atub|OJI91365.1 awen|OJJ40267.1 azon|OJJ49131.1 asyd|OJJ59609.1 aver|OJJ02660.1

Group3044: abra|OJJ73259.1 acar|OOG00501.1 acla|EAW06936.1 afis|EAW16551.1 afla|EED56111.1 afum|EAL89149.1 agla|OJJ82772.1 akaw|GAA87922.1 aluc|OJZ81169.1 anid|CBF81766.1 anig|EHA18487.1 aory|EIT76585.1 asyd|OJJ59610.1 ater|EAU36617.1 atub|OJI91364.1 aver|OJJ02659.1 awen|OJJ40266.1 azon|OJJ49130.1

Group3045: abra|OJJ73262.1 acar|OOG00502.1 acla|EAW06939.1 afis|EAW16554.1 afla|EED56108.1 afum|EAL89152.1 agla|OJJ82769.1 akaw|GAA87920.1 aluc|OJZ81167.1 anid|CBF81795.1 anig|EHA18484.1 aory|EIT76711.1 asyd|OJJ59637.1 ater|EAU36619.1 atub|OJI91362.1 aver|OJJ02644.1 awen|OJJ40264.1 azon|OJJ49127.1

Group3046: abra|OJJ73263.1 acar|OOG00503.1 acla|EAW06940.1 afis|EAW16555.1 afla|EED56107.1 afum|EAL89153.1 agla|OJJ82768.1 akaw|GAA87919.1 aluc|OJZ81166.1 anid|CBF81796.1 anig|EHA18483.1 aory|EIT76566.1 asyd|OJJ59638.1 ater|EAU36620.1 atub|OJI91361.1 aver|OJJ02643.1 awen|OJJ40263.1 azon|OJJ49126.1

Group3047: abra|OJJ73264.1 acar|OOG00504.1 acla|EAW06941.1 afis|EAW16556.1 afla|EED56106.1 afum|EAL89154.1 agla|OJJ82767.1 akaw|GAA87918.1 aluc|OJZ81165.1 anid|CBF81798.1 anig|EHA18482.1 aory|EIT76736.1 asyd|OJJ59639.1 ater|EAU36621.1 atub|OJI91360.1 aver|OJJ02642.1 awen|OJJ40262.1 azon|OJJ49125.1

Group3048: abra|OJJ73265.1 acar|OOG00505.1 acla|EAW06942.1 afis|EAW16557.1 afla|EED56105.1 afum|EAL89155.1 agla|OJJ82766.1 akaw|GAA87917.1 aluc|OJZ81164.1 anid|CBF81802.1 anig|EHA18481.1 aory|EIT76677.1 asyd|OJJ59642.1 ater|EAU36624.1 atub|OJI91359.1 aver|OJJ02640.1 awen|OJJ40260.1 azon|OJJ49122.1

Group3049: abra|OJJ73266.1 acar|OOG00506.1 acla|EAW06943.1 afis|EAW16558.1 afla|EED56104.1 afum|EAL89156.1 agla|OJJ82765.1 akaw|GAA87916.1 aluc|OJZ81163.1 anid|CBF81800.1 anig|EHA18480.1 aory|EIT76573.1 asyd|OJJ59640.1 ater|EAU36625.1 atub|OJI91358.1 aver|OJJ02641.1 awen|OJJ40259.1 azon|OJJ49123.1

Group3050: abra|OJJ73269.1 acar|OOG00509.1 acla|EAW06946.1 afis|EAW16561.1 afla|EED56101.1 afum|EAL89159.1 agla|OJJ82762.1 akaw|GAA87913.1 aluc|OJZ81160.1 anid|CBF81808.1 anig|EHA18477.1 aory|EIT76636.1 asyd|OJJ59645.1 ater|EAU36628.1 atub|OJI91355.1 aver|OJJ02637.1 awen|OJJ40256.1 azon|OJJ49120.1

Group3051: abra|OJJ73275.1 acar|OOG00514.1 acla|EAW06950.1 afis|EAW16565.1 afla|EED56098.1 afum|EAL89162.1 agla|OJJ82756.1 akaw|GAA92730.1 aluc|OJZ88774.1 anid|CBF81817.1 anig|EHA18468.1 aory|EIT76722.1 asyd|OJJ59651.1 ater|EAU36634.1 atub|OJI91345.1 aver|OJJ02631.1 awen|OJJ40253.1 azon|OJJ49115.1

Group3052: abra|OJJ73278.1 acar|OOG00515.1 acla|EAW06954.1 afis|EAW16569.1 afla|EED56095.1 afum|EAL89166.1 agla|OJJ82751.1 akaw|GAA92727.1 aluc|OJZ88771.1 anid|CBF81822.1 anig|EHA18467.1 aory|EIT82359.1 asyd|OJJ59654.1 ater|EAU36637.1 atub|OJI91344.1 aver|OJJ02628.1 awen|OJJ40250.1 azon|OJJ41980.1

Group3053: abra|OJJ73281.1 acar|OOG00517.1 acla|EAW06956.1 afis|EAW16571.1 afla|EED56093.1 afum|EAL89168.1 agla|OJJ82703.1 akaw|GAA92724.1 aluc|OJZ88768.1 anid|CBF81826.1 anig|EHA18464.1 aory|EIT76754.1 asyd|OJJ59657.1 ater|EAU36639.1 atub|OJI91341.1 aver|OJJ02625.1 awen|OJJ40247.1 azon|OJJ49108.1

Group3054: abra|OJJ73283.1 acar|OOG00519.1 acla|EAW06958.1 afis|EAW16573.1 afla|EED56091.1 afum|EAL89170.2 agla|OJJ82705.1 akaw|GAA92722.1 aluc|OJZ88766.1 anid|CBF81828.1 anig|EHA18462.1 aory|EIT76851.1 asyd|OJJ59659.1 ater|EAU36641.1 atub|OJI91339.1 aver|OJJ02623.1 awen|OJJ40245.1 azon|OJJ49106.1

Group3055: abra|OJJ73287.1 acar|OOG00522.1 acla|EAW06962.1 afis|EAW16577.1 afla|EED56087.1 afum|EAL89173.1 agla|OJJ82700.1 akaw|GAA92718.1 aluc|OJZ88763.1 anid|CBF81876.1 anig|EHA18459.1 aory|EIT76884.1 asyd|OJJ59665.1 ater|EAU36645.1 atub|OJI91335.1 aver|OJJ02618.1 awen|OJJ40240.1 azon|OJJ49103.1

Group3056: abra|OJJ73331.1 acar|OOF91495.1 agla|OJJ78824.1 anig|EHA18400.1 abra|OJJ78190.1 acar|OOF98667.1 acla|EAW12173.1 akaw|GAA85839.1 aluc|OJZ91261.1 anig|EHA19949.1 asyd|OJJ52476.1

ater|EAU36116.1 atub|OJI83250.1 aver|OJJ03936.1 awen|OJJ39598.1 azon|OJJ42251.1 afla|EED54616.1 aory|EIT78824.1

Group3057: abra|OJJ73338.1 acar|OOG00523.1 acla|EAW06963.1 afis|EAW16578.1 afla|EED56086.1 afum|EAL89174.1 agla|OJJ82699.1 akaw|GAA83146.1 aluc|OJZ88703.1 anid|CBF81878.1 anig|EHA18387.1 aory|EIT76746.1 asyd|OJJ59666.1 ater|EAU36646.1 atub|OJI91284.1 aver|OJJ02617.1 awen|OJJ40239.1 azon|OJJ49102.1

Group3058: abra|OJJ73339.1 acar|OOG00524.1 acla|EAW06964.1 afis|EAW16579.1 afla|EED56085.1 afum|EAL89175.1 agla|OJJ82698.1 akaw|GAA83145.1 aluc|OJZ88702.1 anid|CBF81880.1 anig|EHA18386.1 aory|EIT76894.1 asyd|OJJ59667.1 ater|EAU36647.1 atub|OJI91283.1 aver|OJJ02616.1 awen|OJJ40238.1 azon|OJJ49101.1

Group3059: abra|OJJ73340.1 acar|OOG00527.1 acla|EAW06965.1 afis|EAW16580.1 afla|EED56082.1 afum|EAL89176.1 agla|OJJ82695.1 akaw|GAA83142.1 aluc|OJZ88699.1 anid|CBF81883.1 anig|EHA18379.1 aory|EIT76744.1 asyd|OJJ59669.1 ater|EAU36649.1 atub|OJI91280.1 aver|OJJ02614.1 awen|OJJ40234.1 azon|OJJ49100.1

Group3060: abra|OJJ73343.1 acar|OOG00553.1 acla|EAW06970.1 afis|EAW16584.1 afla|EED56081.1 afum|EAL89179.1 agla|OJJ82694.1 akaw|GAA83139.1 aluc|OJZ88696.1 anid|CBF81885.1 anig|EHA18376.1 aory|EIT76749.1 asyd|OJJ59671.1 ater|EAU36661.1 atub|OJI91277.1 aver|OJJ02613.1 awen|OJJ40232.1 azon|OJJ49096.1

Group3061: abra|OJJ73344.1 acar|OOG00554.1 acla|EAW06971.1 afis|EAW16585.1 afla|EED56080.1 afum|EAL89180.1 agla|OJJ82693.1 akaw|GAA83138.1 aluc|OJZ88695.1 anid|CBF81887.1 anig|EHA18375.1 aory|EIT76713.1 asyd|OJJ59672.1 ater|EAU36662.1 atub|OJI91275.1 aver|OJJ02612.1 awen|OJJ40231.1 azon|OJJ49095.1

Group3062: abra|OJJ73345.1 acar|OOG00555.1 acla|EAW06972.1 afis|EAW16586.1 afla|EED56079.1 afum|EAL89181.2 agla|OJJ82692.1 akaw|GAA83137.1 aluc|OJZ88694.1 anid|CBF81889.1 anig|EHA18374.1 aory|EIT76590.1 asyd|OJJ59673.1 ater|EAU36663.1 atub|OJI91274.1 aver|OJJ02611.1 awen|OJJ40230.1 azon|OJJ49094.1

Group3063: abra|OJJ73359.1 acar|OOG00567.1 acla|EAW06979.1 afis|EAW16593.1 afla|EED45008.1 afum|EAL89189.1 agla|OJJ82660.1 akaw|GAA83125.1 aluc|OJZ88681.1 anid|CBF81897.1 anig|EHA18362.1 aory|EIT73639.1 asyd|OJJ59682.1 ater|EAU36673.1 atub|OJI91262.1 aver|OJJ02606.1 awen|OJJ40214.1 azon|OJJ49080.1

Group3064: abra|OJJ73361.1 acar|OOG00568.1 acla|EAW06981.1 afis|EAW16595.1 afla|EED45014.1 afum|EAL89191.1 agla|OJJ82659.1 akaw|GAA83123.1 aluc|OJZ88679.1 anid|CBF81901.1 anig|EHA18360.1 aory|EIT73637.1 asyd|OJJ59685.1 ater|EAU36674.1 atub|OJI91260.1 aver|OJJ02602.1 awen|OJJ40213.1 azon|OJJ49079.1

Group3065: abra|OJJ73362.1 acar|OOG00569.1 acla|EAW06982.1 afis|EAW16596.1 afla|EED45015.1 afum|EAL89192.1 agla|OJJ82658.1 akaw|GAA83122.1 aluc|OJZ88678.1 anid|CBF81902.1 anig|EHA18359.1 aory|EIT73689.1 asyd|OJJ59686.1 ater|EAU36675.1 atub|OJI91259.1 aver|OJJ02601.1 awen|OJJ40212.1 azon|OJJ49078.1

Group3066: abra|OJJ73365.1 acar|OOG00572.1 acla|EAW06985.1 afis|EAW16599.1 afla|EED45018.1 afum|EAL89195.1 agla|OJJ82655.1 akaw|GAA83119.1 aluc|OJZ88675.1 anid|CBF81905.1 anig|EHA18357.1 aory|EIT73617.1 asyd|OJJ59688.1 ater|EAU36680.1 atub|OJI91256.1 aver|OJJ02599.1 awen|OJJ40209.1 azon|OJJ49075.1

Group3067: abra|OJJ73368.1 acar|OOG00574.1 acla|EAW06988.1 afis|EAW16602.1 afla|EED45021.1 afum|EAL89198.1 agla|OJJ82650.1 akaw|GAA83116.1 aluc|OJZ88672.1 anid|CBF81909.1 anig|EHA18354.1 aory|EIT73783.1 asyd|OJJ59690.1 ater|EAU36683.1 atub|OJI91253.1 aver|OJJ02597.1 awen|OJJ40204.1 azon|OJJ49071.1

Group3068: abra|OJJ73378.1 acar|OOF90413.1 acla|EAW06994.1 afis|EAW16609.1 afla|EED45027.1 afum|EAL89205.1 agla|OJJ82638.1 akaw|GAA83111.1 aluc|OJZ88665.1 anid|CBF81965.1 anig|EHA18350.1 aory|EIT73642.1 asyd|OJJ57355.1 ater|EAU36693.1 atub|OJI91247.1 aver|OJJ05810.1 awen|OJJ40198.1 azon|OJJ49069.1

Group3069: abra|OJJ73382.1 acar|OOG00581.1 acla|EAW06997.1 afis|EAW16611.1 afla|EED45000.1 afum|EAL89207.1 agla|OJJ82634.1 akaw|GAA83107.1 aluc|OJZ88656.1 anid|CBF81963.1 anig|EHA18347.1 aory|EIT73611.1 asyd|OJJ57358.1 ater|EAU36696.1 atub|OJI91242.1 aver|OJJ05808.1 awen|OJJ40193.1 azon|OJJ49061.1

Group3070: abra|OJJ73383.1 acar|OOG00582.1 acla|EAW06998.1 afis|EAW16613.1 afla|EED44999.1 afum|EAL89223.1 agla|OJJ82633.1 akaw|GAA83106.1 aluc|OJZ88654.1 anid|CBF81961.1 anig|EHA18346.1 aory|EIT73720.1 asyd|OJJ57359.1 ater|EAU36697.1 atub|OJI91241.1 aver|OJJ05807.1 awen|OJJ40192.1 azon|OJJ49060.1



Group3071: abra|OJJ73402.1 acar|OOG00600.1 acla|EAW07005.1 afis|EAW16622.1 afla|EED44970.1 afum|EAL89215.1 agla|OJJ82622.1 akaw|GAA83088.1 aluc|OJZ88635.1 anid|CBF81987.1 anig|EHA18325.1 aory|EIT73499.1 asyd|OJJ56156.1 ater|EAU36736.1 atub|OJI91219.1 aver|OJJ05096.1 awen|OJJ40086.1 azon|OJJ49496.1

Group3072: abra|OJJ73424.1 acar|OOG00628.1 acla|EAW07034.1 afis|EAW16660.1 afla|EED44893.1 afum|EAL89264.1 agla|OJJ78709.1 akaw|GAA83068.1 aluc|OJZ88619.1 anid|CBF82075.1 anig|EHA18310.1 aory|EIT83240.1 asyd|OJJ54250.1 ater|EAU39583.1 atub|OJI91204.1 aver|OJJ05204.1 awen|OJJ40053.1 azon|OJJ50109.1

Group3073: abra|OJJ73425.1 acar|OOG00629.1 acla|EAW07035.1 afis|EAW16661.1 afla|EED44894.1 afum|EAL89265.1 agla|OJJ78708.1 akaw|GAA83067.1 aluc|OJZ88618.1 anid|CBF82076.1 anig|EHA18309.1 aory|EIT83251.1 asyd|OJJ54251.1 ater|EAU39584.1 atub|OJI91203.1 aver|OJJ05205.1 awen|OJJ40052.1 azon|OJJ50116.1

Group3074: abra|OJJ73432.1 acar|OOG00639.1 acla|EAW06771.1 afis|EAW16322.1 afla|EED53560.1 afum|EAL88945.1 agla|OJJ88284.1 akaw|GAA83060.1 aluc|OJZ88609.1 anid|CBF89157.1 anig|EHA18302.1 aory|EIT75216.1 asyd|OJJ62563.1 ater|EAU34135.1 atub|OJI91194.1 aver|OJI96687.1 awen|OJJ37722.1 azon|OJJ44981.1

Group3075: abra|OJJ73437.1 acar|OOG00643.1 acla|EAW06775.1 afis|EAW16326.1 afla|EED53555.1 afum|EAL88950.1 agla|OJJ88266.1 akaw|GAA83056.1 aluc|OJZ88604.1 anid|CBF89164.1 anig|EHA18297.1 aory|EIT75038.1 asyd|OJJ62546.1 ater|EAU34131.1 atub|OJI91188.1 aver|OJI96672.1 awen|OJJ37726.1 azon|OJJ44986.1

Group3076: abra|OJJ73440.1 acar|OOG00646.1 acla|EAW06772.1 afis|EAW16323.1 afla|EED53559.1 afum|EAL88946.1 agla|OJJ88285.1 akaw|GAA83053.1 aluc|OJZ88600.1 anid|CBF89158.1 anig|EHA18294.1 aory|EIT74917.1 asyd|OJJ62560.1 ater|EAU34134.1 atub|OJI91185.1 aver|OJI96685.1 awen|OJJ37723.1 azon|OJJ44982.1

Group3077: abra|OJJ73442.1 acar|OOG00648.1 acla|EAW06777.1 afis|EAW16328.1 afla|EED53553.1 afum|EAL88952.1 agla|OJJ88264.1 akaw|GAA83052.1 aluc|OJZ88598.1 anid|CBF89168.1 anig|EHA18292.1 aory|EIT74949.1 asyd|OJJ62543.1 ater|EAU34129.1 atub|OJI91183.1 aver|OJI96670.1 awen|OJJ37729.1 azon|OJJ44988.1

Group3078: abra|OJJ73451.1 acar|OOG00654.1 acla|EAW06782.1 afis|EAW16332.1 afla|EED53545.1 afum|EAL88957.1 agla|OJJ88260.1 akaw|GAA83045.1 aluc|OJZ88590.1 anid|CBF89183.1 anig|EHA18285.1 aory|EIT75091.1 asyd|OJJ62537.1 ater|EAU34126.1 atub|OJI91176.1 aver|OJI96663.1 awen|OJJ37733.1 azon|OJJ44990.1

Group3079: abra|OJJ73456.1 acar|OOG00656.1 acla|EAW06783.1 afis|EAW16333.1 afla|EED53543.1 afum|EAL88958.1 agla|OJJ88259.1 akaw|GAA83042.1 aluc|OJZ88587.1 anid|CBF89188.1 anig|EHA18281.1 aory|EIT75083.1 asyd|OJJ62536.1 ater|EAU34125.1 atub|OJI91173.1 aver|OJI96661.1 awen|OJJ37734.1 azon|OJJ44993.1

Group3080: abra|OJJ73458.1 acar|OOG00659.1 acla|EAW06785.1 afis|EAW16335.1 afla|EED53541.1 afum|EAL88960.1 agla|OJJ88251.1 akaw|GAA83040.1 aluc|OJZ88585.1 anid|CBF89192.1 anig|EHA18280.1 aory|EIT74882.1 asyd|OJJ62534.1 ater|EAU34123.1 atub|OJI91171.1 aver|OJI96659.1 awen|OJJ37737.1 azon|OJJ44997.1

Group3081: abra|OJJ73460.1 acar|OOG00661.1 acla|EAW06787.1 afis|EAW16336.1 afla|EED53539.1 afum|EAL88962.1 agla|OJJ88254.1 akaw|GAA83038.1 aluc|OJZ88583.1 anid|CBF89196.1 anig|EHA18278.1 aory|EIT75013.1 asyd|OJJ62532.1 ater|EAU34121.1 atub|OJI91169.1 aver|OJI96657.1 awen|OJJ37739.1 azon|OJJ45000.1

Group3082: abra|OJJ73463.1 acar|OOG00664.1 acla|EAW06789.1 afis|EAW16339.1 afla|EED53536.1 afum|EAL88964.1 agla|OJJ88256.1 akaw|GAA83035.1 aluc|OJZ88581.1 anid|CBF89199.1 anig|EHA18277.1 aory|EIT74845.1 asyd|OJJ62530.1 ater|EAU34119.1 atub|OJI91167.1 aver|OJI96655.1 awen|OJJ37741.1 azon|OJJ45002.1

Group3083: abra|OJJ73464.1 acar|OOG00665.1 acla|EAW06790.1 afis|EAW16340.1 afla|EED53535.1 afum|EAL88965.1 agla|OJJ88257.1 akaw|GAA83034.1 aluc|OJZ88580.1 anid|CBF89201.1 anig|EHA18276.1 aory|EIT75162.1 asyd|OJJ62529.1 ater|EAU34117.1 atub|OJI91166.1 aver|OJI96654.1 awen|OJJ37742.1 azon|OJJ45003.1

Group3084: abra|OJJ73465.1 acar|OOG00666.1 acla|EAW06792.1 afis|EAW16341.1 afla|EED53534.1 afum|EAL88966.1 agla|OJJ88247.1 akaw|GAA83033.1 aluc|OJZ88579.1 anid|CBF89203.1 anig|EHA18275.1 aory|EIT75067.1 asyd|OJJ62528.1 ater|EAU34116.1 atub|OJI91165.1 aver|OJI96651.1 awen|OJJ37743.1 azon|OJJ45004.1

Group3085: abra|OJJ73466.1 acar|OOG00667.1 acla|EAW06793.1 afis|EAW16342.1 afla|EED53533.1 afum|EAL88967.1 agla|OJJ88246.1 akaw|GAA83032.1 aluc|OJZ88578.1 anid|CBF89205.1 anig|EHA18274.1

aory|EIT75133.1 asyd|OJJ62527.1 ater|EAU34115.1 atub|OJI91164.1 aver|OJI96650.1 awen|OJJ37744.1 azon|OJJ45005.1

Group3086: abra|OJJ73467.1 acar|OOG00668.1 acla|EAW06794.1 afis|EAW16343.1 afla|EED53532.1 afum|EAL88968.1 agla|OJJ88245.1 akaw|GAA83031.1 aluc|OJZ88577.1 anid|CBF89206.1 anig|EHA18273.1 aory|EIT74961.1 asyd|OJJ62526.1 ater|EAU34114.1 atub|OJI91163.1 aver|OJI96649.1 awen|OJJ37745.1 azon|OJJ45006.1

Group3087: abra|OJJ73470.1 acar|OOG00669.1 acla|EAW06795.1 afis|EAW16344.1 afla|EED53526.1 afum|EAL88969.1 agla|OJJ88244.1 akaw|GAA83030.1 aluc|OJZ88576.1 anid|CBF89217.1 anig|EHA18272.1 aory|EIT74890.1 asyd|OJJ62524.1 ater|EAU34113.1 atub|OJI91162.1 aver|OJI96645.1 awen|OJJ37747.1 azon|OJJ45008.1

Group3088: abra|OJJ73474.1 acar|OOG00670.1 acla|EAW06799.1 afis|EAW16348.1 afla|EED53523.1 afum|EAL88973.1 agla|OJJ88239.1 akaw|GAA83027.1 aluc|OJZ88573.1 anid|CBF89210.1 anig|EHA18271.1 aory|EIT75044.1 asyd|OJJ62522.1 ater|EAU34111.1 atub|OJI91159.1 aver|OJI96641.1 awen|OJJ37751.1 azon|OJJ45010.1

Group3089: abra|OJJ73476.1 acar|OOG00673.1 acla|EAW06802.1 afis|EAW16351.1 afla|EED53521.1 afum|EAL88976.1 agla|OJJ88249.1 akaw|GAA83025.1 aluc|OJZ88571.1 anid|CBF89221.1 anig|EHA18269.1 aory|EIT75100.1 asyd|OJJ62520.1 ater|EAU34110.1 atub|OJI91157.1 aver|OJI96639.1 awen|OJJ37754.1 azon|OJJ45013.1

Group3090: abra|OJJ73484.1 acar|OOG00678.1 acla|EAW06808.1 afis|EAW16357.1 afla|EED53513.1 afum|EAL88982.1 agla|OJJ88236.1 akaw|GAA87433.1 aluc|OJZ88564.1 anid|CBF89232.1 anig|EHA18261.1 aory|EIT75027.1 asyd|OJJ62514.1 ater|EAU34102.1 atub|OJI91150.1 aver|OJI96633.1 awen|OJJ37761.1 azon|OJJ45061.1

Group3091: abra|OJJ73485.1 acar|OOG00680.1 acla|EAW06809.1 afis|EAW16358.1 afla|EED53512.1 afum|EAL88983.1 agla|OJJ88235.1 akaw|GAA87434.1 aluc|OJZ88563.1 anid|CBF89234.1 anig|EHA18260.1 aory|EIT75048.1 asyd|OJJ62513.1 ater|EAU34101.1 atub|OJI91149.1 aver|OJI96632.1 awen|OJJ37762.1 azon|OJJ45062.1

Group3092: abra|OJJ73486.1 acar|OOG00679.1 acla|EAW06810.1 afis|EAW16359.1 afla|EED53510.1 afum|EAL88984.1 agla|OJJ88233.1 akaw|GAA87435.1 aluc|OJZ88562.1 anid|CBF89236.1 anig|EHA18259.1 aory|EIT75112.1 asyd|OJJ62512.1 ater|EAU34100.1 atub|OJI91147.1 aver|OJI96631.1 awen|OJJ37763.1 azon|OJJ45063.1

Group3093: abra|OJJ73487.1 acar|OOG00681.1 acla|EAW06811.1 afis|EAW16360.1 afla|EED53508.1 afum|EAL88985.1 agla|OJJ88232.1 akaw|GAA87436.1 aluc|OJZ88561.1 anid|CBF89237.1 anig|EHA18258.1 aory|EIT75230.1 asyd|OJJ62510.1 ater|EAU34092.1 atub|OJI91146.1 aver|OJI96630.1 awen|OJJ37764.1 azon|OJJ45064.1

Group3094: abra|OJJ73488.1 acar|OOG00682.1 acla|EAW06812.1 afis|EAW16361.1 afla|EED53507.1 afum|EAL88986.1 agla|OJJ88231.1 akaw|GAA87437.1 aluc|OJZ88560.1 anid|CBF89239.1 anig|EHA18257.1 aory|EIT75024.1 asyd|OJJ62509.1 ater|EAU34091.1 atub|OJI91145.1 aver|OJI96629.1 awen|OJJ37765.1 azon|OJJ45065.1

Group3095: abra|OJJ73496.1 acar|OOG00694.1 acla|EAW07430.1 afis|EAW22456.1 afla|EED54488.1 afum|EAL90735.1 agla|OJJ87568.1 akaw|GAA87445.1 aluc|OJZ88552.1 anid|CBF88921.1 anig|EHA18250.1 aory|EIT78863.1 asyd|OJJ62846.1 ater|EAU39249.1 atub|OJI91137.1 aver|OJI96890.1 awen|OJJ35081.1 azon|OJJ50026.1

Group3096: abra|OJJ73497.1 acar|OOG00693.1 acla|EAW07431.1 afis|EAW22457.1 afla|EED54487.1 afum|EAL90734.1 agla|OJJ87567.1 akaw|GAA87446.1 aluc|OJZ88551.1 anid|CBF88920.1 anig|EHA18249.1 aory|EIT78747.1 asyd|OJJ62845.1 ater|EAU39248.1 atub|OJI91136.1 aver|OJI96889.1 awen|OJJ35082.1 azon|OJJ50025.1

Group3097: abra|OJJ73507.1 acar|OOG00697.1 acla|EAW07440.1 afis|EAW22467.1 afla|EED54499.1 afum|EAL90724.1 agla|OJJ87557.1 akaw|GAA87455.1 aluc|OJZ88540.1 anid|CBF88903.1 anig|EHA18241.1 aory|EIT78913.1 asyd|OJJ62837.1 ater|EAU39241.1 atub|OJI91125.1 aver|OJI96880.1 awen|OJJ35093.1 azon|OJJ50016.1

Group3098: abra|OJJ73508.1 acar|OOG00698.1 acla|EAW07441.1 afis|EAW22468.1 afla|EED54500.1 afum|EAL90723.1 agla|OJJ87556.1 akaw|GAA87456.1 aluc|OJZ88539.1 anid|CBF88902.1 anig|EHA18240.1 aory|EIT78810.1 asyd|OJJ62836.1 ater|EAU39240.1 atub|OJI91124.1 aver|OJI96879.1 awen|OJJ35094.1 azon|OJJ50015.1

Group3099: abra|OJJ73510.1 acar|OOG00699.1 acla|EAW07443.1 afis|EAW22470.1 afla|EED54502.1 afum|EAL90721.1 agla|OJJ87554.1 akaw|GAA87458.1 aluc|OJZ88537.1 anid|CBF88900.1 anig|EHA18238.1 aory|EIT78910.1 asyd|OJJ62834.1 ater|EAU39238.1 atub|OJI91122.1 aver|OJI96877.1 awen|OJJ35096.1 azon|OJJ50013.1

Group3100: abra|OJJ73512.1 acar|OOG00701.1 acla|EAW07445.1 afis|EAW22472.1 afla|EED54504.1 afum|EAL90719.1 agla|OJJ87552.1 akaw|GAA87460.1 aluc|OJZ88535.1 anid|CBF88896.1 anig|EHA18236.1 aory|EIT78949.1 asyd|OJJ62832.1 ater|EAU39236.1 atub|OJI91120.1 aver|OJI96875.1 awen|OJJ35098.1 azon|OJJ50011.1

Group3101: abra|OJJ73513.1 acar|OOG00700.1 acla|EAW07447.1 afis|EAW22474.1 afla|EED54506.1 afum|EAL90717.1 agla|OJJ87550.1 akaw|GAA87462.1 aluc|OJZ88534.1 anid|CBF88892.1 anig|EHA18235.1 aory|EIT78850.1 asyd|OJJ62831.1 ater|EAU39235.1 atub|OJI91119.1 aver|OJI96874.1 awen|OJJ35099.1 azon|OJJ50010.1

Group3102: abra|OJJ73516.1 acar|OOG00706.1 acla|EAW07451.1 afis|EAW22483.1 afla|EED54509.1 afum|EAL90711.1 agla|OJJ87543.1 akaw|GAA87465.1 aluc|OJZ88531.1 anid|CBF88887.1 anig|EHA18232.1 aory|EIT78939.1 asyd|OJJ62826.1 ater|EAU39232.1 atub|OJI91116.1 aver|OJI96871.1 awen|OJJ35102.1 azon|OJJ50006.1

Group3103: abra|OJJ73529.1 acar|OOG00710.1 acla|EAW07454.1 afis|EAW22486.1 afla|EED54512.1 afum|EAL90707.1 agla|OJJ80863.1 akaw|GAA88617.1 aluc|OJZ88526.1 anid|CBF88942.1 anig|EHA18228.1 aory|EIT78750.1 asyd|OJJ62815.1 ater|EAU39228.1 atub|OJI91111.1 aver|OJI96859.1 awen|OJJ35105.1 azon|OJJ49989.1

Group3104: abra|OJJ73534.1 acar|OOG00712.1 acla|EAW07456.1 afis|EAW22487.1 afla|EED54516.1 afum|EAL90706.1 agla|OJJ80860.1 akaw|GAA88616.1 aluc|OJZ88525.1 anid|CBF88944.1 anig|EHA18227.1 aory|EIT78867.1 asyd|OJJ62814.1 ater|EAU39227.1 atub|OJI91110.1 aver|OJI96858.1 awen|OJJ35108.1 azon|OJJ49986.1

Group3105: abra|OJJ73537.1 acar|OOG00713.1 acla|EAW07459.1 afis|EAW22490.1 afla|EED54519.1 afum|EAL90703.1 agla|OJJ80856.1 akaw|GAA88613.1 aluc|OJZ88522.1 anid|CBF88950.1 anig|EHA18225.1 aory|EIT78823.1 asyd|OJJ62811.1 ater|EAU39225.1 atub|OJI91107.1 aver|OJI96857.1 awen|OJJ35110.1 azon|OJJ49983.1

Group3106: abra|OJJ73539.1 acar|OOG00715.1 acla|EAW07460.1 afis|EAW22491.1 afla|EED54520.1 afum|EAL90702.1 agla|OJJ80854.1 akaw|GAA88612.1 aluc|OJZ88520.1 anid|CBF88951.1 anig|EHA18224.1 aory|EIT78935.1 asyd|OJJ62809.1 ater|EAU39224.1 atub|OJI91105.1 aver|OJI96855.1 awen|OJJ35112.1 azon|OJJ49981.1

Group3107: abra|OJJ73541.1 acar|OOG00716.1 acla|EAW07461.1 afis|EAW22492.1 afla|EED54521.1 afum|EAL90701.1 agla|OJJ80853.1 akaw|GAA88610.1 aluc|OJZ88518.1 anid|CBF88953.1 anig|EHA18223.1 aory|EIT78920.1 asyd|OJJ62808.1 ater|EAU39223.1 atub|OJI91103.1 aver|OJI96854.1 awen|OJJ35113.1 azon|OJJ49980.1

Group3108: abra|OJJ73547.1 acar|OOG00721.1 acla|EAW07466.1 afis|EAW22499.1 afla|EED54526.1 afum|EAL90694.1 agla|OJJ80847.1 akaw|GAA88605.1 aluc|OJZ88513.1 anid|CBF88960.1 anig|EHA18219.1 aory|EIT78800.1 asyd|OJJ62804.1 ater|EAU39219.1 atub|OJI91098.1 aver|OJI96850.1 awen|OJJ35122.1 azon|OJJ49976.1

Group3109: abra|OJJ73549.1 acar|OOG00723.1 acla|EAW07468.1 afis|EAW22501.1 afla|EED54529.1 afum|EAL90692.1 agla|OJJ80851.1 akaw|GAA88603.1 aluc|OJZ88511.1 anid|CBF88962.1 anig|EHA18217.1 aory|EIT78773.1 asyd|OJJ62799.1 ater|EAU39217.1 atub|OJI91096.1 aver|OJI96846.1 awen|OJJ35124.1 azon|OJJ49974.1

Group3110: abra|OJJ73550.1 acar|OOG00724.1 acla|EAW07469.1 afis|EAW22502.1 afla|EED54530.1 afum|EAL90691.1 agla|OJJ80852.1 akaw|GAA88602.1 aluc|OJZ88510.1 anid|CBF88965.1 anig|EHA18216.1 aory|EIT78738.1 asyd|OJJ62798.1 ater|EAU39216.1 atub|OJI91095.1 aver|OJI96845.1 awen|OJJ35125.1 azon|OJJ49973.1

Group3111: abra|OJJ73555.1 acar|OOG00726.1 acla|EAW07473.1 afis|EAW22505.1 afla|EED54533.1 afum|EAL90688.1 agla|OJJ87536.1 akaw|GAA88598.1 aluc|OJZ88506.1 anid|CBF88970.1 anig|EHA18213.1 aory|EIT78812.1 asyd|OJJ62795.1 ater|EAU39210.1 atub|OJI91092.1 aver|OJI96842.1 awen|OJJ35130.1 azon|OJJ49969.1

Group3112: abra|OJJ73556.1 acar|OOG00728.1 acla|EAW07474.1 afis|EAW22506.1 afla|EED54534.1 afum|EAL90687.1 agla|OJJ87537.1 akaw|GAA88597.1 aluc|OJZ88505.1 anid|CBF88972.1 anig|EHA18212.1 aory|EIT78875.1 asyd|OJJ62794.1 ater|EAU39209.1 atub|OJI91091.1 aver|OJI96841.1 awen|OJJ35131.1 azon|OJJ49968.1

Group3113: abra|OJJ73560.1 acar|OOG00731.1 acla|EAW07477.1 afis|EAW22509.1 afla|EED54537.1 afum|EAL90684.1 agla|OJJ80867.1 akaw|GAA88594.1 aluc|OJZ88502.1 anid|CBF88977.1 anig|EHA18210.1 aory|EIT78879.1 asyd|OJJ62791.1 ater|EAU39205.1 atub|OJI91088.1 aver|OJI96838.1 awen|OJJ35134.1 azon|OJJ49964.1

Group3114: abra|OJJ73563.1 acar|OOG00746.1 acla|EAW07480.1 afis|EAW22512.1 afla|EED54540.1 afum|EAL90681.1 agla|OJJ80875.1 akaw|GAA88591.1 aluc|OJZ88498.1 anid|CBF88983.1 anig|EHA18207.1

aory|EIT78924.1 asyd|OJJ62788.1 ater|EAU39197.1 atub|OJI91085.1 aver|OJI96835.1 awen|OJJ35138.1 azon|OJJ49961.1

Group3115: abra|OJJ73566.1 acar|OOG00748.1 acla|EAW07482.1 afis|EAW22514.1 afla|EED54544.1 afum|EAL90679.1 agla|OJJ80873.1 akaw|GAA88589.1 aluc|OJZ88496.1 anid|CBF88984.1 anig|EHA18205.1 aory|EIT78876.1 asyd|OJJ62786.1 ater|EAU39195.1 atub|OJI91083.1 aver|OJI96833.1 awen|OJJ35140.1 azon|OJJ49959.1

Group3116: abra|OJJ73567.1 acar|OOG00745.1 acla|EAW07483.1 afis|EAW22515.1 afla|EED54545.1 afum|EAL90678.1 agla|OJJ80872.1 akaw|GAA88588.1 aluc|OJZ88495.1 anid|CBF88986.1 anig|EHA18204.1 aory|EIT78884.1 asyd|OJJ62785.1 ater|EAU39194.1 atub|OJI91082.1 aver|OJI96831.1 awen|OJJ35141.1 azon|OJJ49958.1

Group3117: abra|OJJ73568.1 acar|OOG00749.1 acla|EAW07484.1 afis|EAW22516.1 afla|EED54546.1 afum|EAL90677.1 agla|OJJ80877.1 akaw|GAA88587.1 aluc|OJZ88494.1 anid|CBF88988.1 anig|EHA18203.1 aory|EIT78756.1 asyd|OJJ62784.1 ater|EAU39193.1 atub|OJI91081.1 aver|OJI96830.1 awen|OJJ35142.1 azon|OJJ49957.1

Group3118: abra|OJJ73573.1 acar|OOG00754.1 acla|EAW07490.1 afis|EAW22523.1 afla|EED54548.1 afum|EAL90671.1 agla|OJJ80884.1 akaw|GAA88577.1 aluc|OJZ88480.1 anid|CBF89007.1 anig|EHA18196.1 aory|EIT78743.1 asyd|OJJ62776.1 ater|EAU39187.1 atub|OJI91074.1 aver|OJI96821.1 awen|OJJ35150.1 azon|OJJ49951.1

Group3119: abra|OJJ73574.1 acar|OOG00755.1 acla|EAW07491.1 afis|EAW22524.1 afla|EED54549.1 afum|EAL90670.1 agla|OJJ80885.1 akaw|GAA88576.1 aluc|OJZ88479.1 anid|CBF89009.1 anig|EHA18195.1 aory|EIT78837.1 asyd|OJJ62775.1 ater|EAU39186.1 atub|OJI91073.1 aver|OJI96820.1 awen|OJJ35151.1 azon|OJJ49950.1

Group3120: abra|OJJ73575.1 acar|OOG00756.1 acla|EAW07492.1 afis|EAW22525.1 afla|EED54553.1 afum|EAL90669.1 agla|OJJ80886.1 akaw|GAA88575.1 aluc|OJZ88477.1 anid|CBF89011.1 anig|EHA18194.1 aory|EIT78752.1 asyd|OJJ62774.1 ater|EAU39185.1 atub|OJI91072.1 aver|OJI96819.1 awen|OJJ35152.1 azon|OJJ49949.1

Group3121: abra|OJJ73578.1 acar|OOG00759.1 acla|EAW07496.1 afis|EAW22529.1 afla|EED54557.1 afum|EAL90665.1 agla|OJJ80890.1 akaw|GAA88573.1 aluc|OJZ88474.1 anid|CBF89014.1 anig|EHA18191.1 aory|EIT78796.1 asyd|OJJ62772.1 ater|EAU39182.1 atub|OJI91069.1 aver|OJI96817.1 awen|OJJ35156.1 azon|OJJ49945.1

Group3122: abra|OJJ73580.1 acar|OOG00761.1 acla|EAW07498.1 afis|EAW22531.1 afla|EED54559.1 afum|EAL90663.1 agla|OJJ80892.1 akaw|GAA88571.1 aluc|OJZ88472.1 anid|CBF89018.1 anig|EHA18189.1 aory|EIT78759.1 asyd|OJJ62770.1 ater|EAU39178.1 atub|OJI91067.1 aver|OJI96815.1 awen|OJJ35158.1 azon|OJJ49944.1

Group3123: abra|OJJ73581.1 acar|OOG00762.1 acla|EAW07499.1 afis|EAW22532.1 afla|EED54560.1 afum|EAL90662.1 agla|OJJ80893.1 akaw|GAA88570.1 aluc|OJZ88471.1 anid|CBF89020.1 anig|EHA18188.1 aory|EIT78827.1 asyd|OJJ62769.1 ater|EAU39177.1 atub|OJI91066.1 aver|OJI96814.1 awen|OJJ35159.1 azon|OJJ49943.1

Group3124: abra|OJJ73582.1 acar|OOG00763.1 acla|EAW07500.1 afis|EAW22533.1 afla|EED54561.1 afum|EAL90661.1 agla|OJJ80894.1 akaw|GAA88569.1 aluc|OJZ88470.1 anid|CBF89023.1 anig|EHA18187.1 aory|EIT78937.1 asyd|OJJ62768.1 ater|EAU39176.1 atub|OJI91065.1 aver|OJI96813.1 awen|OJJ35160.1 azon|OJJ49942.1

Group3125: abra|OJJ73583.1 acar|OOG00764.1 acla|EAW07501.1 afis|EAW22534.1 afla|EED54562.1 afum|EAL90660.1 agla|OJJ80895.1 akaw|GAA88568.1 aluc|OJZ88469.1 anid|CBF89025.1 anig|EHA18186.1 aory|EIT78784.1 asyd|OJJ62767.1 ater|EAU39175.1 atub|OJI91064.1 aver|OJI96812.1 awen|OJJ35161.1 azon|OJJ49941.1

Group3126: abra|OJJ73585.1 acar|OOG00766.1 acla|EAW07503.1 afis|EAW22536.1 afla|EED54564.1 afum|EAL90658.1 agla|OJJ80897.1 akaw|GAA88566.1 aluc|OJZ88467.1 anid|CBF89029.1 anig|EHA18184.1 aory|EIT78903.1 asyd|OJJ62765.1 ater|EAU39173.1 atub|OJI91062.1 aver|OJI96810.1 awen|OJJ35163.1 azon|OJJ49940.1

Group3127: abra|OJJ73586.1 acar|OOG00767.1 acla|EAW07504.1 afis|EAW22537.1 afla|EED54565.1 afum|EAL90657.1 agla|OJJ80898.1 akaw|GAA88565.1 aluc|OJZ88466.1 anid|CBF89031.1 anig|EHA18183.1 aory|EIT78873.1 asyd|OJJ62764.1 ater|EAU39172.1 atub|OJI91061.1 aver|OJI96809.1 awen|OJJ35165.1 azon|OJJ49939.1

Group3128: abra|OJJ73589.1 acar|OOG00771.1 acla|EAW07507.1 afis|EAW22539.1 afla|EED54568.1 afum|EAL90655.1 agla|OJJ80899.1 akaw|GAA88563.1 aluc|OJZ88461.1 anid|CBF89036.1 anig|EHA18181.1 aory|EIT78782.1 asyd|OJJ62762.1 ater|EAU39170.1 atub|OJI91059.1 aver|OJI96805.1 awen|OJJ35168.1 azon|OJJ49938.1

Group3129: abra|OJJ73592.1 acar|OOG00777.1 acla|EAW07511.1 afis|EAW22542.1 afla|EED54573.1 afum|EAL90652.1 agla|OJJ80904.1 akaw|GAA88560.1 aluc|OJZ88458.1 anid|CBF89040.1 anig|EHA18178.1 aory|EIT78776.1 asyd|OJJ62760.1 ater|EAU39166.1 atub|OJI91056.1 aver|OJI96803.1 awen|OJJ35171.1 azon|OJJ49936.1

Group3130: abra|OJJ73596.1 acar|OOG00782.1 akaw|GAA88556.1 aluc|OJZ88454.1 anig|EHA18175.1 atub|OJI91052.1 abra|OJJ74453.1 acar|OOF95299.1 afla|EED49262.1 akaw|GAA87347.1 aluc|OJZ89667.1 anig|EHA26904.1 aory|EIT82192.1 asyd|OJJ62435.1 ater|EAU29288.1 atub|OJI85133.1 aver|OJI96571.1 aver|OJI98027.1

Group3131: abra|OJJ73598.1 acar|OOG00784.1 acla|EAW07516.1 afis|EAW22546.1 afla|EED54578.1 afum|EAL90649.1 agla|OJJ80908.1 akaw|GAA88554.1 aluc|OJZ88452.1 anid|CBF89049.1 anig|EHA18173.1 aory|EIT78955.1 asyd|OJJ62755.1 ater|EAU39159.1 atub|OJI91050.1 aver|OJI96797.1 awen|OJJ35177.1 azon|OJJ49931.1

Group3132: abra|OJJ73599.1 acar|OOG00785.1 acla|EAW07517.1 afis|EAW22547.1 afla|EED54579.1 afum|EAL90648.1 agla|OJJ80909.1 akaw|GAA88553.1 aluc|OJZ88451.1 anid|CBF89051.1 anig|EHA18172.1 aory|EIT78753.1 asyd|OJJ62754.1 ater|EAU39158.1 atub|OJI91049.1 aver|OJI96796.1 awen|OJJ35178.1 azon|OJJ49930.1

Group3133: abra|OJJ73601.1 acar|OOG00786.1 acla|EAW07519.1 afis|EAW22549.1 afla|EED54582.1 afum|EAL90646.1 agla|OJJ80911.1 akaw|GAA88551.1 aluc|OJZ88447.1 anid|CBF89057.1 anig|EHA18170.1 aory|EIT78932.1 asyd|OJJ62752.1 ater|EAU39155.1 atub|OJI91046.1 aver|OJI96794.1 awen|OJJ35180.1 azon|OJJ49927.1

Group3134: abra|OJJ73606.1 acar|OOG00790.1 acla|EAW07523.1 afis|EAW22553.1 afla|EED54585.1 afum|EAL90642.1 agla|OJJ80915.1 akaw|GAA88547.1 aluc|OJZ88443.1 anid|CBF89062.1 anig|EHA18167.1 aory|EIT78786.1 asyd|OJJ62748.1 ater|EAU39151.1 atub|OJI91041.1 aver|OJI96788.1 awen|OJJ35184.1 azon|OJJ49924.1

Group3135: abra|OJJ73607.1 acar|OOG00791.1 acla|EAW07524.1 afis|EAW22554.1 afla|EED54586.1 afum|EAL90641.1 agla|OJJ80916.1 akaw|GAA88546.1 aluc|OJZ88442.1 anid|CBF89063.1 anig|EHA18166.1 aory|EIT78927.1 asyd|OJJ62747.1 ater|EAU39150.1 atub|OJI91040.1 aver|OJI96787.1 awen|OJJ35185.1 azon|OJJ49923.1

Group3136: abra|OJJ73609.1 acar|OOG00793.1 acla|EAW07526.1 afis|EAW22556.1 afla|EED54587.1 afum|EAL90639.1 agla|OJJ80917.1 akaw|GAA88544.1 aluc|OJZ88440.1 anid|CBF89065.1 anig|EHA18164.1 aory|EIT78856.1 asyd|OJJ62745.1 ater|EAU39148.1 atub|OJI91038.1 aver|OJI96785.1 awen|OJJ35187.1 azon|OJJ49921.1

Group3137: abra|OJJ73611.1 acar|OOG00794.1 acla|EAW07528.1 afis|EAW22558.1 afla|EED54589.1 afum|EAL90637.1 agla|OJJ80918.1 akaw|GAA88542.1 aluc|OJZ88439.1 anid|CBF89071.1 anig|EHA18162.1 aory|EIT78846.1 asyd|OJJ62743.1 ater|EAU39146.1 atub|OJI91036.1 aver|OJI96784.1 awen|OJJ35188.1 azon|OJJ49918.1

Group3138: abra|OJJ73612.1 acar|OOG00795.1 acla|EAW07529.1 afis|EAW22559.1 afla|EED54590.1 afum|EAL90636.1 agla|OJJ80919.1 akaw|GAA88541.1 aluc|OJZ88437.1 anid|CBF88377.1 anig|EHA18161.1 aory|EIT78952.1 asyd|OJJ63734.1 ater|EAU39145.1 atub|OJI91034.1 aver|OJI97206.1 awen|OJJ35189.1 azon|OJJ49917.1

Group3139: abra|OJJ73616.1 acar|OOG00800.1 acla|EAW07531.1 afis|EAW22562.1 afla|EED54592.1 afum|EAL90633.1 agla|OJJ80921.1 akaw|GAA88537.1 aluc|OJZ88433.1 anid|CBF88314.1 anig|EHA18157.1 aory|EIT78915.1 asyd|OJJ63700.1 ater|EAU39142.1 atub|OJI91030.1 aver|OJI97239.1 awen|OJJ35191.1 azon|OJJ49915.1

Group3140: abra|OJJ73617.1 acar|OOG00799.1 acla|EAW07532.1 afis|EAW22561.1 afla|EED54596.1 afum|EAL90634.1 agla|OJJ80922.1 akaw|GAA88536.1 aluc|OJZ88432.1 anid|CBF88316.1 anig|EHA18156.1 aory|EIT78857.1 asyd|OJJ63701.1 ater|EAU39141.1 atub|OJI91029.1 aver|OJI97238.1 awen|OJJ35192.1 azon|OJJ49914.1

Group3141: abra|OJJ73618.1 acar|OOG00801.1 acla|EAW07533.1 afis|EAW22567.1 afla|EED54597.1 afum|EAL90631.1 agla|OJJ80923.1 akaw|GAA88535.1 aluc|OJZ88431.1 anid|CBF88318.1 anig|EHA18155.1 aory|EIT78761.1 asyd|OJJ63702.1 ater|EAU39140.1 atub|OJI91028.1 aver|OJI97237.1 awen|OJJ35193.1 azon|OJJ49913.1

Group3142: abra|OJJ73619.1 acar|OOG00802.1 acla|EAW07534.1 afis|EAW22568.1 afla|EED54598.1 afum|EAL90630.1 agla|OJJ80924.1 akaw|GAA88534.1 aluc|OJZ88430.1 anid|CBF88320.1 anig|EHA18154.1 aory|EIT78762.1 asyd|OJJ63703.1 ater|EAU39139.1 atub|OJI91027.1 aver|OJI97236.1 awen|OJJ35194.1 azon|OJJ49912.1

Group3143: abra|OJJ73621.1 acar|OOG00805.1 acla|EAW07536.1 afis|EAW22570.1 afla|EED54600.1 afum|EAL90628.1 agla|OJJ80926.1 akaw|GAA88532.1 aluc|OJZ88427.1 anid|CBF88323.1 anig|EHA18152.1

aory|EIT78841.1 asyd|OJJ63705.1 ater|EAU39137.1 atub|OJI91025.1 aver|OJI97234.1 awen|OJJ35196.1 azon|OJJ49911.1

Group3144: abra|OJJ73622.1 acar|OOG00804.1 acla|EAW07537.1 afis|EAW22571.1 afla|EED54601.1 afum|EAL90627.1 agla|OJJ80928.1 akaw|GAA88531.1 aluc|OJZ88426.1 anid|CBF88325.1 anig|EHA18151.1 aory|EIT78890.1 asyd|OJJ63706.1 ater|EAU39136.1 atub|OJI91024.1 aver|OJI97233.1 awen|OJJ35198.1 azon|OJJ49910.1

Group3145: abra|OJJ73624.1 acar|OOG00807.1 acla|EAW07539.1 afis|EAW22573.1 afla|EED54602.1 afum|EAL90625.1 agla|OJJ80930.1 akaw|GAA88529.1 aluc|OJZ88424.1 anid|CBF88328.1 anig|EHA18149.1 aory|EIT78905.1 asyd|OJJ63708.1 ater|EAU39134.1 atub|OJI91020.1 aver|OJI97230.1 awen|OJJ35200.1 azon|OJJ49907.1

Group3146: abra|OJJ73627.1 acar|OOG00809.1 acla|EAW07541.1 afis|EAW22575.1 afla|EED54604.1 afum|EAL90623.1 agla|OJJ80931.1 akaw|GAA88526.1 aluc|OJZ88422.1 anid|CBF88332.1 anig|EHA18147.1 aory|EIT78895.1 asyd|OJJ63711.1 ater|EAU39129.1 atub|OJI91018.1 aver|OJI97228.1 awen|OJJ35203.1 azon|OJJ49905.1

Group3147: abra|OJJ73632.1 acar|OOG00814.1 acla|EAW07546.1 afis|EAW22580.1 afla|EED54625.1 afum|EAL90619.2 agla|OJJ80940.1 akaw|GAA88521.1 aluc|OJZ88417.1 anid|CBF88341.1 anig|EHA18143.1 aory|EIT78840.1 asyd|OJJ63716.1 ater|EAU39124.1 atub|OJI91013.1 aver|OJI97224.1 awen|OJJ35208.1 azon|OJJ49901.1

Group3148: abra|OJJ73633.1 acar|OOG00815.1 acla|EAW07547.1 afis|EAW22581.1 afla|EED54626.1 afum|EAL90618.1 agla|OJJ80941.1 akaw|GAA88520.1 aluc|OJZ88416.1 anid|CBF88343.1 anig|EHA18142.1 aory|EIT78811.1 asyd|OJJ63717.1 ater|EAU39123.1 atub|OJI91012.1 aver|OJI97223.1 awen|OJJ35209.1 azon|OJJ49900.1

Group3149: abra|OJJ73637.1 acar|OOG00817.1 acla|EAW07549.1 afis|EAW22583.1 afla|EED54628.1 afum|EAL90616.1 agla|OJJ80943.1 akaw|GAA88518.1 aluc|OJZ88413.1 anid|CBF88349.1 anig|EHA18140.1 aory|EIT78801.1 asyd|OJJ63719.1 ater|EAU39121.1 atub|OJI91009.1 aver|OJI97221.1 awen|OJJ35211.1 azon|OJJ49898.1

Group3150: abra|OJJ73638.1 acar|OOG00818.1 acla|EAW07550.1 afis|EAW22584.1 afla|EED54629.1 afum|EAL90615.1 agla|OJJ80944.1 akaw|GAA88517.1 aluc|OJZ88412.1 anid|CBF88350.1 anig|EHA18139.1 aory|EIT78791.1 asyd|OJJ63720.1 ater|EAU39120.1 atub|OJI91007.1 aver|OJI97220.1 awen|OJJ35212.1 azon|OJJ49897.1

Group3151: abra|OJJ73640.1 acar|OOG00820.1 acla|EAW07553.1 afis|EAW22587.1 afla|EED54633.1 afum|EAL90612.1 agla|OJJ80947.1 akaw|GAA88515.1 aluc|OJZ88410.1 anid|CBF88356.1 anig|EHA18137.1 aory|EIT78894.1 asyd|OJJ63723.1 ater|EAU39113.1 atub|OJI91006.1 aver|OJI97217.1 awen|OJJ35215.1 azon|OJJ49894.1

Group3152: abra|OJJ73641.1 acar|OOG00822.1 acla|EAW07554.1 afis|EAW22588.1 afla|EED54634.1 afum|EAL90611.1 agla|OJJ80948.1 akaw|GAA88514.1 aluc|OJZ88409.1 anid|CBF88358.1 anig|EHA18136.1 aory|EIT78862.1 asyd|OJJ63724.1 ater|EAU39112.1 atub|OJI91005.1 aver|OJI97216.1 awen|OJJ35216.1 azon|OJJ49893.1

Group3153: abra|OJJ73643.1 acar|OOG00824.1 acla|EAW07556.1 afis|EAW22590.1 afla|EED54636.1 afum|EAL90609.1 agla|OJJ80950.1 akaw|GAA88512.1 aluc|OJZ88407.1 anid|CBF88360.1 anig|EHA18134.1 aory|EIT78889.1 asyd|OJJ63726.1 ater|EAU39119.1 atub|OJI91003.1 aver|OJI97214.1 awen|OJJ35218.1 azon|OJJ49890.1

Group3154: abra|OJJ73644.1 acar|OOG00825.1 acla|EAW07557.1 afis|EAW22591.1 afla|EED54641.1 afum|EAL90608.1 agla|OJJ80951.1 akaw|GAA88511.1 aluc|OJZ88406.1 anid|CBF88364.1 anig|EHA18133.1 aory|EIT78790.1 asyd|OJJ63727.1 ater|EAU39111.1 atub|OJI91002.1 aver|OJI97213.1 awen|OJJ35219.1 azon|OJJ49889.1

Group3155: abra|OJJ73645.1 acar|OOG00826.1 acla|EAW07558.1 afis|EAW22592.1 afla|EED54642.1 afum|EAL90607.1 agla|OJJ80952.1 akaw|GAA88510.1 aluc|OJZ88405.1 anid|CBF88365.1 anig|EHA18132.1 aory|EIT78880.1 asyd|OJJ63728.1 ater|EAU39110.1 atub|OJI91001.1 aver|OJI97212.1 awen|OJJ35220.1 azon|OJJ49888.1

Group3156: abra|OJJ73647.1 acar|OOG00829.1 acla|EAW07560.1 afis|EAW22594.1 afla|EED54644.1 afum|EAL90605.1 agla|OJJ80954.1 akaw|GAA88508.1 aluc|OJZ88403.1 anid|CBF88369.1 anig|EHA18131.1 aory|EIT78768.1 asyd|OJJ63730.1 ater|EAU39109.1 atub|OJI90999.1 aver|OJI97210.1 awen|OJJ35222.1 azon|OJJ49886.1

Group3157: abra|OJJ73654.1 acar|OOG00832.1 acla|EAW07564.1 afis|EAW22598.1 afla|EED54720.1 afum|EAL90600.1 agla|OJJ80966.1 akaw|GAA88504.1 aluc|OJZ88399.1 anid|CBF88312.1 anig|EHA18127.1 aory|EIT78821.1 asyd|OJJ63698.1 ater|EAU39105.1 atub|OJI90994.1 aver|OJI97241.1 awen|OJJ35226.1 azon|OJJ49884.1

Group3158: abra|OJJ73655.1 acar|OOG00833.1 acla|EAW07565.1 afis|EAW22599.1 afla|EED54719.1 afum|EAL90599.1 agla|OJJ80967.1 akaw|GAA88503.1 aluc|OJZ88398.1 anid|CBF88310.1 anig|EHA18126.1 aory|EIT78916.1 asyd|OJJ63697.1 ater|EAU39104.1 atub|OJI90993.1 aver|OJI97242.1 awen|OJJ35228.1 azon|OJJ49883.1

Group3159: abra|OJJ73656.1 acar|OOG00834.1 acla|EAW07566.1 afis|EAW22600.1 afla|EED54718.1 afum|EAL90598.1 agla|OJJ80968.1 akaw|GAA88502.1 aluc|OJZ88397.1 anid|CBF88308.1 anig|EHA18125.1 aory|EIT78770.1 asyd|OJJ63696.1 ater|EAU39103.1 atub|OJI90992.1 aver|OJI97243.1 awen|OJJ35229.1 azon|OJJ49882.1

Group3160: abra|OJJ73657.1 acar|OOG00835.1 acla|EAW07567.1 afis|EAW22601.1 afla|EED54717.1 afum|EAL90597.1 agla|OJJ80971.1 akaw|GAA88501.1 aluc|OJZ88396.1 anid|CBF88256.1 anig|EHA18124.1 aory|EIT78942.1 asyd|OJJ63672.1 ater|EAU39102.1 atub|OJI90991.1 aver|OJI97266.1 awen|OJJ35230.1 azon|OJJ49881.1

Group3161: abra|OJJ73658.1 acar|OOG00836.1 acla|EAW07568.1 afis|EAW22602.1 afla|EED54716.1 afum|EAL90596.1 agla|OJJ80972.1 akaw|GAA88500.1 aluc|OJZ88395.1 anid|CBF88257.1 anig|EHA18123.1 aory|EIT78742.1 asyd|OJJ63673.1 ater|EAU39101.1 atub|OJI90990.1 aver|OJI97265.1 awen|OJJ35231.1 azon|OJJ49880.1

Group3162: abra|OJJ73665.1 acar|OOG00843.1 acla|EAW07572.1 afis|EAW22606.1 afla|EED49514.1 afum|EAL90592.1 agla|OJJ80975.1 akaw|GAA88491.1 aluc|OJZ88387.1 anid|CBF88263.1 anig|EHA18114.1 aory|EIT82633.1 asyd|OJJ63677.1 ater|EAU39097.1 atub|OJI90982.1 aver|OJI97262.1 awen|OJJ35234.1 azon|OJJ49877.1

Group3163: abra|OJJ73667.1 acar|OOG00844.1 acla|EAW07573.1 afis|EAW22607.1 afla|EED49805.1 afum|EAL90591.1 agla|OJJ80977.1 akaw|GAA88490.1 aluc|OJZ88385.1 anid|CBF88265.1 anig|EHA18113.1 aory|EIT77683.1 asyd|OJJ63678.1 ater|EAU39096.1 atub|OJI90980.1 aver|OJI97261.1 awen|OJJ35235.1 azon|OJJ49876.1

Group3164: abra|OJJ73668.1 acar|OOG00845.1 acla|EAW07575.1 afis|EAW22609.1 afla|EED49807.1 afum|EAL90589.1 agla|OJJ81009.1 akaw|GAA88489.1 aluc|OJZ88384.1 anid|CBF88269.1 anig|EHA18112.1 aory|EIT77641.1 asyd|OJJ63680.1 ater|EAU39095.1 atub|OJI90979.1 aver|OJI97259.1 awen|OJJ35237.1 azon|OJJ49870.1

Group3165: abra|OJJ73671.1 acar|OOG00846.1 acla|EAW07583.1 afis|EAW22611.1 afla|EED49809.1 afum|EAL90587.1 agla|OJJ81005.1 akaw|GAA88486.1 aluc|OJZ88382.1 anid|CBF88281.1 anig|EHA18109.1 aory|EIT77633.1 asyd|OJJ63684.1 ater|EAU39092.1 atub|OJI90976.1 aver|OJI97255.1 awen|OJJ35239.1 azon|OJJ49868.1

Group3166: abra|OJJ73672.1 acar|OOG00847.1 acla|EAW07582.1 afis|EAW22612.1 afla|EED49810.1 afum|EAL90586.1 agla|OJJ81004.1 akaw|GAA88485.1 aluc|OJZ88381.1 anid|CBF88283.1 anig|EHA18108.1 aory|EIT77693.1 asyd|OJJ63685.1 ater|EAU39091.1 atub|OJI90975.1 aver|OJI97254.1 awen|OJJ35240.1 azon|OJJ49867.1

Group3167: abra|OJJ73673.1 acar|OOG00848.1 acla|EAW07581.1 afis|EAW22613.1 afla|EED49811.1 afum|EAL90585.1 agla|OJJ81003.1 akaw|GAA88484.1 aluc|OJZ88379.1 anid|CBF88287.1 anig|EHA18106.1 aory|EIT77666.1 asyd|OJJ63686.1 ater|EAU39090.1 atub|OJI90973.1 aver|OJI97253.1 awen|OJJ35241.1 azon|OJJ49866.1

Group3168: abra|OJJ73681.1 acar|OOG00853.1 acla|EAW07596.1 afis|EAW22627.1 afla|EED49827.1 afum|EAL90569.1 agla|OJJ80994.1 akaw|GAA88478.1 aluc|OJZ88368.1 anid|CBF88241.1 anig|EHA18101.1 aory|EIT77681.1 asyd|OJJ63662.1 ater|EAU39082.1 atub|OJI90966.1 aver|OJI97272.1 awen|OJJ35248.1 azon|OJJ49858.1

Group3169: abra|OJJ73684.1 acar|OOG00854.1 acla|EAW07599.1 afis|EAW22630.1 afla|EED49879.1 afum|EAL90565.1 agla|OJJ80990.1 akaw|GAA88475.1 aluc|OJZ88365.1 anid|CBF88236.1 anig|EHA18097.1 aory|EIT72464.1 asyd|OJJ63659.1 ater|EAU39078.1 atub|OJI90963.1 aver|OJI97275.1 awen|OJJ35251.1 azon|OJJ49855.1

Group3170: abra|OJJ73688.1 acar|OOG00860.1 acla|EAW07603.1 afis|EAW22634.1 afla|EED49884.1 afum|EAL90559.1 agla|OJJ80985.1 akaw|GAA88471.1 aluc|OJZ88361.1 anid|CBF88229.1 anig|EHA18093.1 aory|EIT72459.1 asyd|OJJ63655.1 ater|EAU39074.1 atub|OJI90957.1 aver|OJI97279.1 awen|OJJ35256.1 azon|OJJ49851.1

Group3171: abra|OJJ73689.1 acar|OOG00861.1 acla|EAW07604.1 afis|EAW22635.1 afum|EAL90558.2 akaw|GAA88470.1 aluc|OJZ88360.1 anid|CBF88227.1 anig|EHA18092.1 asyd|OJJ63654.1 ater|EAU39071.1 atub|OJI90956.1 aver|OJI97280.1 awen|OJJ35257.1 azon|OJJ49850.1 afla|EED49885.1 aory|EIT72467.1 agla|OJJ80984.1

Group3172: abra|OJJ73692.1 acar|OOG00863.1 acla|EAW07607.1 afis|EAW22637.1 afla|EED49888.1 afum|EAL90555.1 agla|OJJ80981.1 akaw|GAA88468.1 aluc|OJZ88357.1 anid|CBF88221.1 anig|EHA18090.1

aory|EIT72465.1 asyd|OJJ63652.1 ater|EAU39069.1 atub|OJI90952.1 aver|OJI97282.1 awen|OJJ35260.1 azon|OJJ49847.1

Group3173: abra|OJJ73724.1 acar|OOG00893.1 acla|EAW07613.1 afis|EAW22643.1 afla|EED49912.1 afum|EAL90549.2 agla|OJJ81025.1 akaw|GAA88438.1 aluc|OJZ88326.1 anid|CBF88175.1 anig|EHA18062.1 aory|EIT72277.1 asyd|OJJ63625.1 ater|EAU39064.1 atub|OJI90921.1 aver|OJI97311.1 awen|OJJ35281.1 azon|OJJ49845.1

Group3174: abra|OJJ73731.1 acar|OOG00897.1 acla|EAW07616.1 afis|EAW22645.1 afla|EED49914.1 afum|EAL90547.1 agla|OJJ81028.1 akaw|GAA88432.1 aluc|OJZ88319.1 anid|CBF88179.1 anig|EHA18055.1 aory|EIT72268.1 asyd|OJJ63627.1 ater|EAU39062.1 atub|OJI90914.1 aver|OJI97309.1 awen|OJJ35278.1 azon|OJJ49841.1

Group3175: abra|OJJ73733.1 acar|OOG00898.1 acla|EAW07617.1 afis|EAW22646.1 afla|EED49915.1 afum|EAL90546.1 agla|OJJ81029.1 akaw|GAA88431.1 aluc|OJZ88318.1 anid|CBF88180.1 anig|EHA18054.1 aory|EIT72267.1 asyd|OJJ63628.1 ater|EAU39061.1 atub|OJI90913.1 aver|OJI97308.1 awen|OJJ35277.1 azon|OJJ49840.1

Group3176: abra|OJJ73734.1 acar|OOG00899.1 acla|EAW07618.1 afis|EAW22647.1 afla|EED49916.1 afum|EAL90545.1 agla|OJJ81030.1 akaw|GAA88430.1 aluc|OJZ88317.1 anid|CBF88182.1 anig|EHA18053.1 aory|EIT72271.1 asyd|OJJ63629.1 ater|EAU39060.1 atub|OJI90912.1 aver|OJI97307.1 awen|OJJ35276.1 azon|OJJ49839.1

Group3177: abra|OJJ73735.1 acar|OOG00900.1 acla|EAW07619.1 afis|EAW22648.1 afla|EED49917.1 afum|EAL90544.1 agla|OJJ81031.1 akaw|GAA88429.1 aluc|OJZ88316.1 anid|CBF88184.1 anig|EHA18052.1 aory|EIT72269.1 asyd|OJJ63630.1 ater|EAU39059.1 atub|OJI90911.1 aver|OJI97306.1 awen|OJJ35275.1 azon|OJJ49832.1

Group3178: abra|OJJ73736.1 acar|OOG00901.1 acla|EAW07620.1 afis|EAW22649.1 afla|EED49918.1 afum|EAL90543.1 agla|OJJ81032.1 akaw|GAA88428.1 aluc|OJZ88315.1 anid|CBF88186.1 anig|EHA18051.1 aory|EIT72278.1 asyd|OJJ63631.1 ater|EAU39058.1 atub|OJI90910.1 aver|OJI97305.1 awen|OJJ35274.1 azon|OJJ49833.1

Group3179: abra|OJJ73739.1 acar|OOG00902.1 acla|EAW07633.1 afis|EAW22653.1 afla|EED49921.1 afum|EAL90539.1 agla|OJJ81036.1 akaw|GAA88425.1 aluc|OJZ88312.1 anid|CBF88197.1 anig|EHA18049.1 aory|EIT72265.1 asyd|OJJ63634.1 ater|EAU39053.1 atub|OJI90907.1 aver|OJI97302.1 awen|OJJ35270.1 azon|OJJ49837.1

Group3180: abra|OJJ73741.1 acar|OOG00904.1 acla|EAW07635.1 afis|EAW22655.1 afla|EED49923.1 afum|EAL90537.1 agla|OJJ81038.1 akaw|GAA88424.1 aluc|OJZ88311.1 anid|CBF88201.1 anig|EHA18048.1 aory|EIT72272.1 asyd|OJJ63637.1 ater|EAU39051.1 atub|OJI90906.1 aver|OJI97299.1 awen|OJJ35268.1 azon|OJJ49831.1

Group3181: abra|OJJ73744.1 acar|OOG00908.1 acla|EAW07640.1 afis|EAW22660.1 afla|EED49930.1 afum|EAL90532.1 agla|OJJ81041.1 akaw|GAA88421.1 aluc|OJZ88308.1 anid|CBF88218.1 anig|EHA18045.1 aory|EIT72279.1 asyd|OJJ63649.1 ater|EAU39048.1 atub|OJI90903.1 aver|OJI97284.1 awen|OJJ35265.1 azon|OJJ49828.1

Group3182: abra|OJJ73745.1 acar|OOG00909.1 acla|EAW07639.1 afis|EAW22659.1 afla|EED49931.1 afum|EAL90533.1 agla|OJJ81042.1 akaw|GAA88420.1 aluc|OJZ88307.1 anid|CBF88215.1 anig|EHA18044.1 aory|EIT72275.1 asyd|OJJ63648.1 ater|EAU39049.1 atub|OJI90902.1 aver|OJI97285.1 awen|OJJ35283.1 azon|OJJ49827.1

Group3183: abra|OJJ73751.1 acar|OOG00914.1 acla|EAW07642.1 afis|EAW22662.1 afla|EED49935.1 afum|EAL90530.1 agla|OJJ79062.1 akaw|GAA88416.1 aluc|OJZ88301.1 anid|CBF88168.1 anig|EHA18040.1 aory|EIT83423.1 asyd|OJJ63622.1 ater|EAU39046.1 atub|OJI90896.1 aver|OJI97315.1 awen|OJJ35287.1 azon|OJJ49826.1

Group3184: abra|OJJ73752.1 acar|OOG00915.1 acla|EAW07643.1 afis|EAW22663.1 afla|EED49937.1 afum|EAL90529.1 akaw|GAA88415.1 aluc|OJZ88300.1 anid|CBF88166.1 anig|EHA18039.1 aory|EIT83433.1 asyd|OJJ63621.1 ater|EAU39045.1 atub|OJI90894.1 aver|OJI97316.1 awen|OJJ35288.1 azon|OJJ49825.1 agla|OJJ79061.1

Group3185: abra|OJJ73753.1 acar|OOG00916.1 acla|EAW07644.1 afis|EAW22664.1 afla|EED49938.1 afum|EAL90528.1 agla|OJJ79060.1 akaw|GAA88414.1 aluc|OJZ88298.1 anid|CBF88164.1 anig|EHA18038.1 aory|EIT83434.1 asyd|OJJ63620.1 ater|EAU39044.1 atub|OJI90893.1 aver|OJI97318.1 awen|OJJ35290.1 azon|OJJ49824.1

Group3186: abra|OJJ73756.1 acar|OOG00918.1 acla|EAW07646.1 afis|EAW22666.1 afla|EED49940.1 afum|EAL90526.1 agla|OJJ79058.1 akaw|GAA88412.1 aluc|OJZ88296.1 anid|CBF88161.1 anig|EHA18036.1 aory|EIT83451.1 asyd|OJJ63619.1 ater|EAU39042.1 atub|OJI90892.1 aver|OJI97320.1 awen|OJJ35292.1 azon|OJJ49822.1



Group3187: abra|OJJ73757.1 acar|OOG00919.1 acla|EAW07647.1 afis|EAW22667.1 afla|EED49941.1 afum|EAL90525.1 agla|OJJ79057.1 akaw|GAA88411.1 aluc|OJZ88295.1 anid|CBF88159.1 anig|EHA18035.1 aory|EIT83456.1 asyd|OJJ63618.1 ater|EAU39041.1 atub|OJI90891.1 aver|OJI97321.1 awen|OJJ35293.1 azon|OJJ49821.1

Group3188: abra|OJJ73758.1 acar|OOG00920.1 acla|EAW07648.1 afis|EAW22668.1 afla|EED49942.1 afum|EAL90524.1 agla|OJJ79056.1 akaw|GAA88410.1 aluc|OJZ88294.1 anid|CBF88157.1 anig|EHA18034.1 aory|EIT83429.1 asyd|OJJ63617.1 ater|EAU39040.1 atub|OJI90890.1 aver|OJI97322.1 awen|OJJ35294.1 azon|OJJ49820.1

Group3189: abra|OJJ73766.1 acar|OOG00925.1 acla|EAW07652.1 afis|EAW22670.1 afla|EED49947.1 afum|EAL90522.1 agla|OJJ79049.1 akaw|GAA88408.1 aluc|OJZ88290.1 anid|CBF88155.1 anig|EHA18031.1 aory|EIT83455.1 asyd|OJJ63608.1 ater|EAU39038.1 atub|OJI90887.1 aver|OJI97329.1 awen|OJJ35298.1 azon|OJJ49817.1

Group3190: abra|OJJ73768.1 acar|OOG00927.1 acla|EAW07653.1 afis|EAW22671.1 afla|EED49949.1 afum|EAL90521.1 agla|OJJ79048.1 akaw|GAA88407.1 aluc|OJZ88289.1 anid|CBF88151.1 anig|EHA18030.1 aory|EIT83435.1 asyd|OJJ63607.1 ater|EAU39037.1 atub|OJI90886.1 aver|OJI97330.1 awen|OJJ35299.1 azon|OJJ49816.1

Group3191: abra|OJJ73769.1 acar|OOG00926.1 acla|EAW07654.1 afis|EAW22672.1 afla|EED49951.1 afum|EAL90520.1 agla|OJJ79046.1 akaw|GAA88406.1 aluc|OJZ88288.1 anid|CBF88145.1 anig|EHA18029.1 aory|EIT83454.1 asyd|OJJ63604.1 ater|EAU39036.1 atub|OJI90885.1 aver|OJI97332.1 awen|OJJ35300.1 azon|OJJ49815.1

Group3192: abra|OJJ73776.1 acar|OOG00933.1 acla|EAW07661.1 afis|EAW22678.1 afla|EED49959.1 afum|EAL90514.1 agla|OJJ79038.1 akaw|GAA88400.1 aluc|OJZ88278.1 anid|CBF88130.1 anig|EHA18023.1 aory|EIT83426.1 asyd|OJJ63588.1 ater|EAU39031.1 atub|OJI90878.1 aver|OJI97345.1 awen|OJJ35306.1 azon|OJJ49809.1

Group3193: abra|OJJ73778.1 acar|OOG00934.1 acla|EAW07662.1 afis|EAW22679.1 afla|EED49960.1 afum|EAL90513.1 agla|OJJ79037.1 akaw|GAA88399.1 aluc|OJZ88277.1 anid|CBF88128.1 anig|EHA18022.1 aory|EIT83445.1 asyd|OJJ63587.1 ater|EAU39030.1 atub|OJI90877.1 aver|OJI97347.1 awen|OJJ35307.1 azon|OJJ49806.1

Group3194: abra|OJJ73781.1 acar|OOG00937.1 acla|EAW07666.1 afis|EAW22683.1 afla|EED49967.1 afum|EAL90509.1 agla|OJJ79035.1 akaw|GAA88396.1 aluc|OJZ88274.1 anid|CBF88119.1 anig|EHA18019.1 aory|EIT83437.1 asyd|OJJ63583.1 ater|EAU39026.1 atub|OJI90874.1 aver|OJI97351.1 awen|OJJ35317.1 azon|OJJ49799.1

Group3195: abra|OJJ73783.1 acar|OOG00939.1 acla|EAW07668.1 afis|EAW22685.1 afla|EED49969.1 afum|EAL90508.1 agla|OJJ79032.1 akaw|GAA88394.1 aluc|OJZ88272.1 anid|CBF88111.1 anig|EHA18017.1 aory|EIT83432.1 asyd|OJJ63580.1 ater|EAU39019.1 atub|OJI90872.1 aver|OJI97356.1 awen|OJJ35318.1 azon|OJJ49798.1

Group3196: abra|OJJ73784.1 acar|OOG00940.1 acla|EAW07671.1 afis|EAW22686.1 afla|EED49971.1 afum|EAL90507.1 agla|OJJ79031.1 akaw|GAA88393.1 aluc|OJZ88271.1 anid|CBF88109.1 anig|EHA18016.1 aory|EIT74696.1 asyd|OJJ63578.1 ater|EAU39021.1 atub|OJI90871.1 aver|OJI97357.1 awen|OJJ35320.1 azon|OJJ49796.1

Group3197: abra|OJJ73785.1 acar|OOG00941.1 acla|EAW07672.1 afis|EAW22687.1 afla|EED49972.1 afum|EAL90506.1 agla|OJJ79029.1 akaw|GAA88392.1 aluc|OJZ88270.1 anid|CBF88107.1 anig|EHA18014.1 aory|EIT74698.1 asyd|OJJ63577.1 ater|EAU39022.1 atub|OJI90870.1 aver|OJI97359.1 awen|OJJ35321.1 azon|OJJ49794.1

Group3198: abra|OJJ73786.1 acar|OOG00942.1 acla|EAW07673.1 afis|EAW22688.1 afla|EED49973.1 afum|EAL90505.1 agla|OJJ79028.1 akaw|GAA88391.1 aluc|OJZ88269.1 anid|CBF88106.1 anig|EHA18013.1 aory|EIT74642.1 asyd|OJJ63576.1 ater|EAU39023.1 atub|OJI90869.1 aver|OJI97360.1 awen|OJJ35322.1 azon|OJJ49793.1

Group3199: abra|OJJ73787.1 acar|OOF90345.1 acla|EAW07674.1 afis|EAW22689.1 afla|EED49974.1 afum|EAL90504.1 agla|OJJ79024.1 akaw|GAA88390.1 aluc|OJZ88267.1 anid|CBF88104.1 anig|EHA18012.1 aory|EIT74677.1 asyd|OJJ63575.1 ater|EAU39024.1 atub|OJI90867.1 aver|OJI97361.1 awen|OJJ35323.1 azon|OJJ49792.1

Group3200: abra|OJJ73791.1 acar|OOF90347.1 acla|EAW07680.1 afis|EAW22695.1 afla|EED49977.1 afum|EAL90498.1 agla|OJJ79021.1 akaw|GAA89410.1 aluc|OJZ88263.1 anid|CBF88098.1 anig|EHA18009.1 aory|EIT74603.1 asyd|OJJ63570.1 ater|EAU39015.1 atub|OJI90862.1 aver|OJI97364.1 awen|OJJ35325.1 azon|OJJ49789.1

Group3201: abra|OJJ73801.1 acar|OOG00957.1 acla|EAW07683.1 afis|EAW22698.1 afla|EED49984.1 afum|EAL90494.1 agla|OJJ79012.1 akaw|GAA89421.1 aluc|OJZ88252.1 anid|CBF88087.1 anig|EHA17994.1

aory|EIT74667.1 asyd|OJJ63563.1 ater|EAU39008.1 atub|OJI90850.1 aver|OJI97370.1 awen|OJJ35334.1 azon|OJJ49783.1

Group3202: abra|OJJ73804.1 acar|OOG00959.1 acla|EAW07676.1 afis|EAW22691.1 afla|EED49982.1 afum|EAL90501.1 agla|OJJ79016.1 akaw|GAA89423.1 aluc|OJZ88249.1 anid|CBF88090.1 anig|EHA17992.1 aory|EIT74721.1 asyd|OJJ63565.1 ater|EAU39010.1 atub|OJI90848.1 aver|OJI97368.1 awen|OJJ35333.1 azon|OJJ49785.1

Group3203: abra|OJJ73805.1 acar|OOG00960.1 acla|EAW07677.1 afis|EAW22692.1 afla|EED49980.1 afum|EBA27409.1 agla|OJJ79018.1 akaw|GAA89425.1 aluc|OJZ88247.1 anid|CBF88095.1 anig|EHA17991.1 aory|EIT74734.1 asyd|OJJ63566.1 ater|EAU39012.1 atub|OJI90847.1 aver|OJI97367.1 awen|OJJ35332.1 azon|OJJ49786.1

Group3204: abra|OJJ73806.1 acar|OOG00961.1 acla|EAW07694.1 afis|EAW22709.1 afla|EED49996.1 afum|EAL90483.1 agla|OJJ79001.1 akaw|GAA89426.1 aluc|OJZ88246.1 anid|CBF88064.1 anig|EHA17990.1 aory|EIT74673.1 asyd|OJJ63549.1 ater|EAU38992.1 atub|OJI90846.1 aver|OJI97385.1 awen|OJJ35346.1 azon|OJJ49771.1

Group3205: abra|OJJ73807.1 acar|OOG00963.1 acla|EAW07695.1 afis|EAW22712.1 afla|EED49997.1 afum|EAL90482.1 agla|OJJ79000.1 akaw|GAA89427.1 aluc|OJZ88243.1 anid|CBF88062.1 anig|EHA17989.1 aory|EIT74610.1 asyd|OJJ63548.1 ater|EAU38993.1 atub|OJI90845.1 aver|OJI97386.1 awen|OJJ35347.1 azon|OJJ49770.1

Group3206: abra|OJJ73816.1 acar|OOG00970.1 acla|EAW07703.1 afis|EAW22721.1 afla|EED50006.1 afum|EAL90474.1 agla|OJJ83682.1 akaw|GAA89435.1 aluc|OJZ88234.1 anid|CBF88036.1 anig|EHA17980.1 aory|EIT74720.1 asyd|OJJ63535.1 ater|EAU38983.1 atub|OJI90836.1 aver|OJI97397.1 awen|OJJ35415.1 azon|OJJ49760.1

Group3207: abra|OJJ73821.1 acar|OOG00973.1 acla|EAW07710.1 afis|EAW22726.1 afla|EED50012.1 afum|EAL90469.1 agla|OJJ83676.1 akaw|GAA89440.1 aluc|OJZ88227.1 anid|CBF88028.1 anig|EHA17975.1 aory|EIT74707.1 asyd|OJJ63529.1 ater|EAU38978.1 atub|OJI90828.1 aver|OJI97402.1 awen|OJJ35421.1 azon|OJJ49755.1

Group3208: abra|OJJ73830.1 acar|OOG00981.1 acla|EAW07725.1 afis|EAW22757.1 afla|EED50018.1 afum|EAL90442.2 agla|OJJ83666.1 akaw|GAA89448.1 aluc|OJZ88219.1 anid|CBF88015.1 anig|EHA17966.1 aory|EIT74656.1 asyd|OJJ63519.1 ater|EAU38962.1 atub|OJI90819.1 aver|OJI97411.1 awen|OJJ35429.1 azon|OJJ49747.1

Group3209: abra|OJJ73831.1 acar|OOG00982.1 acla|EAW07726.1 afis|EAW22758.1 afla|EED50019.1 afum|EAL90441.1 agla|OJJ83662.1 akaw|GAA89449.1 aluc|OJZ88218.1 anig|EHA17965.1 aory|EIT74708.1 asyd|OJJ63518.1 ater|EAU38961.1 atub|OJI90818.1 aver|OJI97412.1 awen|OJJ35430.1 azon|OJJ49746.1 aory|EIT74649.1

Group3210: abra|OJJ73832.1 acar|OOG00983.1 acla|EAW07727.1 afis|EAW22759.1 afla|EED50020.1 afum|EAL90440.1 agla|OJJ83661.1 akaw|GAA89450.1 aluc|OJZ88217.1 anid|CBF88013.1 anig|EHA17964.1 aory|EIT74627.1 asyd|OJJ63517.1 ater|EAU38960.1 atub|OJI90817.1 aver|OJI97413.1 awen|OJJ35431.1 azon|OJJ49745.1

Group3211: abra|OJJ73833.1 acar|OOG00984.1 acla|EAW07728.1 afis|EAW22760.1 afla|EED50021.1 afum|EAL90439.1 agla|OJJ83660.1 akaw|GAA89451.1 aluc|OJZ88216.1 anid|CBF88011.1 anig|EHA17963.1 aory|EIT74690.1 asyd|OJJ63516.1 ater|EAU38959.1 atub|OJI90816.1 aver|OJI97414.1 awen|OJJ35433.1 azon|OJJ49744.1

Group3212: abra|OJJ73834.1 acar|OOG00985.1 acla|EAW07729.1 afis|EAW22761.1 afla|EED50022.1 afum|EAL90438.1 agla|OJJ83659.1 akaw|GAA89452.1 aluc|OJZ88215.1 anid|CBF88009.1 anig|EHA17962.1 aory|EIT74638.1 asyd|OJJ63515.1 ater|EAU38958.1 atub|OJI90815.1 aver|OJI97415.1 awen|OJJ35434.1 azon|OJJ49743.1

Group3213: abra|OJJ73836.1 acar|OOG00987.1 acla|EAW07731.1 afis|EAW22763.1 afla|EED50025.1 afum|EAL90436.2 agla|OJJ83657.1 akaw|GAA89454.1 aluc|OJZ88213.1 anid|CBF88005.1 anig|EHA17961.1 aory|EIT74679.1 asyd|OJJ63513.1 ater|EAU38956.1 atub|OJI90813.1 aver|OJI97417.1 awen|OJJ35436.1 azon|OJJ49741.1

Group3214: abra|OJJ73837.1 acar|OOG00988.1 acla|EAW07732.1 afis|EAW22764.1 afla|EED50026.1 afum|EAL90435.1 agla|OJJ83656.1 akaw|GAA89455.1 aluc|OJZ88212.1 anid|CBF88003.1 anig|EHA17960.1 aory|EIT74726.1 asyd|OJJ63509.1 ater|EAU38953.1 atub|OJI90812.1 aver|OJI97421.1 awen|OJJ38969.1 azon|OJJ49740.1

Group3215: abra|OJJ73838.1 acar|OOG00989.1 acla|EAW07733.1 afis|EAW22765.1 afla|EED50027.1 afum|EAL90434.1 agla|OJJ83655.1 akaw|GAA89456.1 aluc|OJZ88211.1 anid|CBF88001.1 anig|EHA17958.1 aory|EIT74637.1 asyd|OJJ63508.1 ater|EAU38952.1 atub|OJI90811.1 aver|OJI97422.1 awen|OJJ38968.1 azon|OJJ49738.1

Group3216: abra|OJJ73841.1 acar|OOG00992.1 acla|EAW07736.1 afis|EAW22772.1 afla|EED50031.1 afum|EAL90426.1 agla|OJJ83602.1 akaw|GAA89459.1 aluc|OJZ88207.1 anid|CBF87996.1 anig|EHA17955.1 aory|EIT74633.1 asyd|OJJ63505.1 ater|EAU38941.1 atub|OJI90808.1 aver|OJI97425.1 awen|OJJ38965.1 azon|OJJ49736.1

Group3217: abra|OJJ73842.1 acar|OOG00993.1 acla|EAW07737.1 afis|EAW22773.1 afla|EED50032.1 afum|EAL90425.1 agla|OJJ83603.1 akaw|GAA89460.1 aluc|OJZ88206.1 anid|CBF87994.1 anig|EHA17954.1 aory|EIT74732.1 asyd|OJJ63504.1 ater|EAU38940.1 atub|OJI90807.1 aver|OJI97426.1 awen|OJJ38964.1 azon|OJJ49735.1

Group3218: abra|OJJ73843.1 acar|OOG00994.1 acla|EAW07738.1 afis|EAW22774.1 afla|EED50033.1 afum|EAL90424.1 agla|OJJ83604.1 akaw|GAA89461.1 aluc|OJZ88205.1 anid|CBF87992.1 anig|EHA17953.1 aory|EIT74665.1 asyd|OJJ63503.1 ater|EAU38939.1 atub|OJI90806.1 aver|OJI97427.1 awen|OJJ38963.1 azon|OJJ49734.1

Group3219: abra|OJJ73844.1 acar|OOG00995.1 acla|EAW07739.1 afis|EAW22775.1 afla|EED50034.1 afum|EAL90423.1 agla|OJJ83605.1 akaw|GAA89462.1 aluc|OJZ88204.1 anid|CBF87991.1 anig|EHA17952.1 aory|EIT74686.1 asyd|OJJ63502.1 ater|EAU38938.1 atub|OJI90805.1 aver|OJI97428.1 awen|OJJ38962.1 azon|OJJ49733.1

Group3220: abra|OJJ73846.1 acar|OOG00997.1 acla|EAW07741.1 afis|EAW22777.1 afla|EED50037.1 afum|EAL90421.1 agla|OJJ83628.1 akaw|GAA89464.1 aluc|OJZ88202.1 anid|CBF87987.1 anig|EHA17950.1 aory|EIT74713.1 asyd|OJJ63500.1 ater|EAU38937.1 atub|OJI90802.1 aver|OJI97430.1 awen|OJJ38960.1 azon|OJJ49731.1

Group3221: abra|OJJ73848.1 acar|OOG00998.1 acla|EAW07742.1 afis|EAW22778.1 afla|EED50038.1 afum|EAL90420.1 agla|OJJ83632.1 akaw|GAA89465.1 aluc|OJZ88201.1 anid|CBF87983.1 anig|EHA17949.1 aory|EIT74616.1 asyd|OJJ63497.1 ater|EAU38936.1 atub|OJI90799.1 aver|OJI97432.1 awen|OJJ38959.1 azon|OJJ49730.1

Group3222: abra|OJJ73850.1 acar|OOG01000.1 acla|EAW07743.1 afis|EAW22780.1 afla|EED50041.1 afum|EAL90419.1 agla|OJJ83633.1 akaw|GAA89467.1 aluc|OJZ88199.1 anid|CBF87970.1 anig|EHA17947.1 aory|EIT74714.1 asyd|OJJ63494.1 ater|EAU38932.1 atub|OJI90797.1 aver|OJI97435.1 awen|OJJ38957.1 azon|OJJ49729.1

Group3223: abra|OJJ73851.1 acar|OOG01001.1 acla|EAW07745.1 afis|EAW22782.1 afla|EED50044.1 afum|EAL90417.1 agla|OJJ83644.1 akaw|GAA89468.1 aluc|OJZ88197.1 anid|CBF87972.1 anig|EHA17946.1 aory|EIT74643.1 asyd|OJJ63493.1 ater|EAU38930.1 atub|OJI90796.1 aver|OJI97436.1 awen|OJJ38955.1 azon|OJJ49727.1

Group3224: abra|OJJ73854.1 acar|OOG01002.1 acla|EAW07746.1 afis|EAW22783.1 afla|EED50045.1 afum|EAL90416.1 agla|OJJ83653.1 akaw|GAA89470.1 aluc|OJZ88194.1 anid|CBF87974.1 anig|EHA17945.1 aory|EIT74701.1 asyd|OJJ63492.1 ater|EAU38926.1 atub|OJI90793.1 aver|OJI97437.1 awen|OJJ38954.1 azon|OJJ49726.1

Group3225: abra|OJJ73861.1 acar|OOG01007.1 acla|EAW07751.1 afis|EAW22788.1 afla|EED50052.1 afum|EAL90411.1 agla|OJJ83588.1 akaw|GAA89481.1 aluc|OJZ88182.1 anid|CBF87963.1 anig|EHA17934.1 aory|EIT74670.1 asyd|OJJ63484.1 ater|EAU38922.1 atub|OJI90781.1 aver|OJI97445.1 awen|OJJ38946.1 azon|OJJ49718.1

Group3226: abra|OJJ73864.1 acar|OOF89914.1 acla|EAW07754.1 afis|EAW22791.1 afla|EED50058.1 afum|EAL90408.1 agla|OJJ83567.1 akaw|GAA89478.1 aluc|OJZ88185.1 anid|CBF87957.1 anig|EHA17936.1 aory|EIT74695.1 asyd|OJJ63481.1 ater|EAU38920.1 atub|OJI90784.1 aver|OJI97449.1 awen|OJJ38943.1 azon|OJJ49716.1

Group3227: abra|OJJ73867.1 acar|OOF89912.1 acla|EAW07755.1 afis|EAW22792.1 afla|EED50059.1 afum|EAL90407.2 agla|OJJ83568.1 akaw|GAA89475.1 aluc|OJZ88188.1 anid|CBF87955.1 anig|EHA17939.1 aory|EIT74728.1 asyd|OJJ63480.1 ater|EAU38919.1 atub|OJI90787.1 aver|OJI97450.1 awen|OJJ38941.1 azon|OJJ49715.1

Group3228: abra|OJJ73869.1 acar|OOG01012.1 acla|EAW07757.1 afis|EAW22794.1 afla|EED50062.1 afum|EAL90405.1 agla|OJJ83570.1 akaw|GAA89473.1 aluc|OJZ88190.1 anid|CBF87952.1 anig|EHA17941.1 aory|EIT74606.1 asyd|OJJ63478.1 ater|EAU38917.1 atub|OJI90789.1 aver|OJI97452.1 awen|OJJ38939.1 azon|OJJ49713.1

Group3229: abra|OJJ73874.1 acar|OOG01014.1 acla|EAW07759.1 afis|EAW22795.1 afla|EED50063.1 afum|EAL90404.1 agla|OJJ83571.1 akaw|GAA89486.1 aluc|OJZ88176.1 anid|CBF87950.1 anig|EHA17928.1 aory|EIT74699.1 asyd|OJJ63477.1 ater|EAU38915.1 atub|OJI90774.1 aver|OJI97453.1 awen|OJJ38938.1 azon|OJJ49712.1

Group3230: abra|OJJ73876.1 acar|OOG01016.1 acla|EAW07761.1 afis|EAW22797.1 afla|EED50066.1 afum|EAL90402.1 agla|OJJ83574.1 akaw|GAA89488.1 aluc|OJZ88173.1 anid|CBF87946.1 anig|EHA17926.1

aory|EIT74703.1 asyd|OJJ63475.1 ater|EAU38913.1 atub|OJI90771.1 aver|OJI97455.1 awen|OJJ38932.1 azon|OJJ49708.1

Group3231: abra|OJJ73881.1 acar|OOG01020.1 acla|EAW07763.1 afis|EAW22799.1 afla|EED50069.1 afum|EAL90400.1 agla|OJJ83576.1 akaw|GAA89492.1 aluc|OJZ88169.1 anid|CBF87936.1 anig|EHA17923.1 aory|EIT74640.1 asyd|OJJ63466.1 ater|EAU38910.1 atub|OJI90767.1 aver|OJI97466.1 awen|OJJ38930.1 azon|OJJ49706.1

Group3232: abra|OJJ73882.1 acar|OOG01021.1 acla|EAW07764.1 afis|EAW22800.1 afla|EED50070.1 afum|EAL90399.1 agla|OJJ83577.1 akaw|GAA89493.1 aluc|OJZ88168.1 anid|CBF87934.1 anig|EHA17922.1 aory|EIT74735.1 asyd|OJJ63465.1 ater|EAU38909.1 atub|OJI90766.1 aver|OJI97467.1 awen|OJJ38929.1 azon|OJJ49705.1

Group3233: abra|OJJ73883.1 acar|OOG01022.1 acla|EAW07765.1 afis|EAW22801.1 afla|EED50071.1 afum|EAL90398.1 agla|OJJ83578.1 akaw|GAA89494.1 aluc|OJZ88167.1 anid|CBF87932.1 anig|EHA17921.1 aory|EIT74619.1 asyd|OJJ63464.1 ater|EAU38908.1 atub|OJI90765.1 aver|OJI97468.1 awen|OJJ38928.1 azon|OJJ49704.1

Group3234: abra|OJJ73884.1 acar|OOG01023.1 acla|EAW07766.1 afis|EAW22802.1 afla|EED50072.1 afum|EAL90397.1 agla|OJJ83579.1 akaw|GAA89495.1 aluc|OJZ88166.1 anid|CBF87930.1 anig|EHA17920.1 aory|EIT74719.1 asyd|OJJ63463.1 ater|EAU38907.1 atub|OJI90764.1 aver|OJI97469.1 awen|OJJ38927.1 azon|OJJ49703.1

Group3235: abra|OJJ73886.1 acar|OOG01024.1 acla|EAW07768.1 afis|EAW22804.1 afla|EED50074.1 afum|EAL90395.1 agla|OJJ83581.1 akaw|GAA89497.1 aluc|OJZ88164.1 anid|CBF87926.1 anig|EHA17918.1 aory|EIT74660.1 asyd|OJJ63461.1 ater|EAU38905.1 atub|OJI90762.1 aver|OJI97471.1 awen|OJJ38924.1 azon|OJJ49701.1

Group3236: abra|OJJ73889.1 acar|OOG01027.1 acla|EAW07773.1 afis|EAW22809.1 afla|EED50078.1 afum|EAL90392.1 agla|OJJ83584.1 akaw|GAA89501.1 aluc|OJZ88160.1 anid|CBF87904.1 anig|EHA17915.1 aory|EIT74748.1 asyd|OJJ63457.1 ater|EAU38902.1 atub|OJI90759.1 aver|OJI97475.1 awen|OJJ38921.1 azon|OJJ49698.1

Group3237: abra|OJJ73890.1 acar|OOG01030.1 acla|EAW07774.1 afis|EAW22810.1 afla|EED50079.1 afum|EAL90391.1 agla|OJJ83585.1 akaw|GAA89502.1 aluc|OJZ88159.1 anid|CBF87906.1 anig|EHA17914.1 aory|EIT74744.1 asyd|OJJ63456.1 ater|EAU38901.1 atub|OJI90758.1 aver|OJI97476.1 awen|OJJ38920.1 azon|OJJ49697.1

Group3238: abra|OJJ73891.1 acar|OOG01029.1 acla|EAW07775.1 afis|EAW22811.1 afla|EED50080.1 afum|EAL90390.1 agla|OJJ83566.1 akaw|GAA89503.1 aluc|OJZ88158.1 anid|CBF87908.1 anig|EHA17913.1 aory|EIT74652.1 asyd|OJJ63455.1 ater|EAU38900.1 atub|OJI90757.1 aver|OJI97477.1 awen|OJJ38915.1 azon|OJJ49696.1

Group3239: abra|OJJ73897.1 acar|OOG01034.1 acla|EAW07778.1 afis|EAW22815.1 afla|EED50088.1 afum|EAL90386.1 agla|OJJ83527.1 akaw|GAA89507.1 aluc|OJZ88149.1 anid|CBF87915.1 anig|EHA17910.1 aory|EIT74671.1 asyd|OJJ63448.1 ater|EAU38896.1 atub|OJI90752.1 aver|OJI97486.1 awen|OJJ38913.1 azon|OJJ49693.1

Group3240: abra|OJJ73901.1 acar|OOG01036.1 acla|EAW07780.1 afis|EAW22816.1 afla|EED50089.1 afum|EAL90385.1 agla|OJJ83524.1 akaw|GAA89508.1 aluc|OJZ88145.1 anid|CBF87918.1 anig|EHA17908.1 aory|EIT74605.1 asyd|OJJ63447.1 ater|EAU38895.1 atub|OJI90749.1 aver|OJI97489.1 awen|OJJ38911.1 azon|OJJ49692.1

Group3241: abra|OJJ73902.1 acar|OOG01037.1 acla|EAW07781.1 afis|EAW22817.1 afla|EED50090.1 afum|EAL90384.1 agla|OJJ83521.1 akaw|GAA89509.1 aluc|OJZ88144.1 anid|CBF87920.1 anig|EHA17907.1 aory|EIT74746.1 asyd|OJJ63446.1 ater|EAU38894.1 atub|OJI90748.1 aver|OJI97490.1 awen|OJJ38910.1 azon|OJJ49691.1

Group3242: abra|OJJ73904.1 acar|OOG01038.1 acla|EAW07783.1 afis|EAW22819.1 afla|EED50092.1 afum|EAL90382.1 agla|OJJ83519.1 akaw|GAA89511.1 aluc|OJZ88142.1 anid|CBF87899.1 anig|EHA17905.1 aory|EIT74751.1 asyd|OJJ63444.1 ater|EAU38891.1 atub|OJI90746.1 aver|OJI97492.1 awen|OJJ38908.1 azon|OJJ49689.1

Group3243: abra|OJJ73908.1 acar|OOG01041.1 acla|EAW07786.1 afis|EAW22822.1 afla|EED50097.1 afum|EAL90378.2 agla|OJJ83516.1 akaw|GAA89515.1 aluc|OJZ88139.1 anid|CBF87894.1 anig|EHA17903.1 aory|EIT74681.1 asyd|OJJ63441.1 ater|EAU38888.1 atub|OJI90742.1 aver|OJI97495.1 awen|OJJ38905.1 azon|OJJ49686.1

Group3244: abra|OJJ73909.1 acar|OOG01042.1 acla|EAW07787.1 afis|EAW22823.1 afla|EED50098.1 afum|EAL90377.1 agla|OJJ83515.1 akaw|GAA89516.1 aluc|OJZ88138.1 anid|CBF87892.1 anig|EHA17902.1 aory|EIT74745.1 asyd|OJJ63440.1 ater|EAU38887.1 atub|OJI90741.1 aver|OJI97496.1 awen|OJJ38904.1 azon|OJJ49685.1

Group3245: abra|OJJ73910.1 acar|OOG01043.1 acla|EAW07788.1 afis|EAW22824.1 afla|EED50099.1 afum|EAL90376.1 agla|OJJ83514.1 akaw|GAA89517.1 aluc|OJZ88137.1 anid|CBF87890.1 anig|EHA17901.1 aory|EIT74620.1 asyd|OJJ63439.1 ater|EAU38886.1 atub|OJI90740.1 aver|OJI97497.1 awen|OJJ38903.1 azon|OJJ49684.1

Group3246: abra|OJJ73912.1 acar|OOG01044.1 acla|EAW07789.1 afis|EAW22825.1 afla|EED50100.1 afum|EAL90375.2 agla|OJJ83513.1 akaw|GAA89518.1 aluc|OJZ88136.1 anid|CBF87888.1 anig|EHA17899.1 aory|EIT74685.1 asyd|OJJ63438.1 ater|EAU38885.1 atub|OJI90739.1 aver|OJI97499.1 awen|OJJ38902.1 azon|OJJ49683.1

Group3247: abra|OJJ73915.1 acar|OOG01047.1 acla|EAW07791.1 afis|EAW22829.1 afla|EED50104.1 afum|EAL90373.2 agla|OJJ83510.1 akaw|GAA89521.1 aluc|OJZ88133.1 anid|CBF87886.1 anig|EHA17897.1 aory|EIT74692.1 asyd|OJJ63437.1 ater|EAU38882.1 atub|OJI90737.1 aver|OJI97500.1 awen|OJJ38899.1 azon|OJJ49680.1

Group3248: abra|OJJ73916.1 acar|OOG01048.1 acla|EAW07792.1 afis|EAW22830.1 afla|EED50105.1 afum|EAL90372.2 agla|OJJ83509.1 akaw|GAA89522.1 aluc|OJZ88131.1 anid|CBF87883.1 anig|EHA17896.1 aory|EIT74639.1 asyd|OJJ63435.1 ater|EAU38881.1 atub|OJI90736.1 aver|OJI97502.1 awen|OJJ38898.1 azon|OJJ49679.1

Group3249: abra|OJJ73920.1 acar|OOG01051.1 acla|EAW07797.1 afis|EAW22834.1 afla|EED50109.1 afum|EAL90368.1 agla|OJJ83505.1 akaw|GAA89527.1 aluc|OJZ88126.1 anid|CBF87876.1 anig|EHA17892.1 aory|EIT74609.1 asyd|OJJ63432.1 ater|EAU38875.1 atub|OJI90733.1 aver|OJI97505.1 awen|OJJ38890.1 azon|OJJ49676.1

Group3250: abra|OJJ73923.1 acar|OOG01056.1 acla|EAW07800.1 afis|EAW22837.1 afla|EED50112.1 afum|EAL90365.2 agla|OJJ83504.1 akaw|GAA89530.1 aluc|OJZ88120.1 anid|CBF87867.1 anig|EHA17889.1 aory|EIT74684.1 asyd|OJJ63428.1 ater|EAU38873.1 atub|OJI90730.1 aver|OJI97509.1 awen|OJJ38887.1 azon|OJJ49675.1

Group3251: abra|OJJ73924.1 acar|OOG01057.1 acla|EAW07801.1 afis|EAW22838.1 afla|EED50113.1 afum|EAL90364.2 agla|OJJ83503.1 akaw|GAA89531.1 aluc|OJZ88119.1 anid|CBF87865.1 anig|EHA17888.1 aory|EIT74621.1 asyd|OJJ63427.1 ater|EAU38872.1 atub|OJI90729.1 aver|OJI97510.1 awen|OJJ38885.1 azon|OJJ49674.1

Group3252: abra|OJJ73926.1 acar|OOG01058.1 acla|EAW07803.1 afis|EAW22840.1 afla|EED50115.1 afum|EAL90363.1 agla|OJJ83501.1 akaw|GAA89533.1 aluc|OJZ88117.1 anid|CBF87861.1 anig|EHA17887.1 aory|EIT74702.1 asyd|OJJ63425.1 ater|EAU38870.1 atub|OJI90727.1 aver|OJI97512.1 awen|OJJ38883.1 azon|OJJ49672.1

Group3253: abra|OJJ73927.1 acar|OOG01060.1 acla|EAW07804.1 afis|EAW22841.1 afla|EED50116.1 afum|EAL90362.2 agla|OJJ83500.1 akaw|GAA89534.1 aluc|OJZ88116.1 anid|CBF87860.1 anig|EHA17886.1 aory|EIT74608.1 asyd|OJJ63424.1 ater|EAU38869.1 atub|OJI90725.1 aver|OJI97513.1 awen|OJJ38882.1 azon|OJJ49671.1

Group3254: abra|OJJ73928.1 acar|OOG01061.1 acla|EAW07805.1 afis|EAW22842.1 afla|EED50117.1 afum|EAL90361.1 agla|OJJ83496.1 akaw|GAA89535.1 aluc|OJZ88115.1 anid|CBF87858.1 anig|EHA17885.1 aory|EIT74650.1 asyd|OJJ63423.1 ater|EAU38868.1 atub|OJI90724.1 aver|OJI97514.1 awen|OJJ38881.1 azon|OJJ49670.1

Group3255: abra|OJJ73930.1 acar|OOG01062.1 acla|EAW07808.1 afis|EAW22845.1 afla|EED50120.1 afum|EAL90357.1 agla|OJJ83492.1 akaw|GAA89538.1 aluc|OJZ88112.1 anid|CBF87846.1 anig|EHA17882.1 aory|EIT74689.1 asyd|OJJ63421.1 ater|EAU38865.1 atub|OJI90720.1 aver|OJI97517.1 awen|OJJ38878.1 azon|OJJ49667.1

Group3256: abra|OJJ73931.1 acar|OOG01063.1 acla|EAW07809.1 afis|EAW22846.1 afla|EED50121.1 afum|EAL90356.1 agla|OJJ83485.1 akaw|GAA89539.1 aluc|OJZ88111.1 anid|CBF87848.1 anig|EHA17881.1 aory|EIT74731.1 asyd|OJJ63420.1 ater|EAU38864.1 atub|OJI90719.1 aver|OJI97518.1 awen|OJJ38877.1 azon|OJJ49666.1

Group3257: abra|OJJ73938.1 acar|OOG01069.1 afis|EAW22850.1 afla|EED50125.1 afum|EAL90350.1 agla|OJJ83473.1 akaw|GAA89543.1 aluc|OJZ88106.1 anid|CBF87855.1 anig|EHA17875.1 aory|EIT74705.1 asyd|OJJ63416.1 ater|EAU38859.1 atub|OJI90714.1 aver|OJI97522.1 awen|OJJ38871.1 azon|OJJ49663.1 acla|EAW07814.1

Group3258: abra|OJJ73939.1 acar|OOG01068.1 acla|EAW07816.1 afis|EAW22851.1 afla|EED50126.1 afum|EAL90349.1 agla|OJJ83471.1 akaw|GAA89544.1 aluc|OJZ88105.1 anid|CBF87841.1 anig|EHA17874.1 aory|EIT74661.1 asyd|OJJ63414.1 ater|EAU38858.1 atub|OJI90713.1 aver|OJI97524.1 awen|OJJ38867.1 azon|OJJ49661.1

Group3259: abra|OJJ73944.1 acar|OOG01072.1 acla|EAW07817.1 afis|EAW22852.1 afla|EED50132.1 afum|EAL90348.1 agla|OJJ83469.1 akaw|GAA89549.1 aluc|OJZ88100.1 anid|CBF87839.1 anig|EHA17869.1

aory|EIT74662.1 asyd|OJJ63413.1 ater|EAU38857.1 atub|OJI90708.1 aver|OJI97525.1 awen|OJJ38866.1 azon|OJJ49660.1

Group3260: abra|OJJ73945.1 acar|OOG01073.1 acla|EAW07818.1 afis|EAW22853.1 afla|EED50133.1 afum|EAL90347.1 agla|OJJ83468.1 akaw|GAA89550.1 aluc|OJZ88099.1 anid|CBF87838.1 anig|EHA17868.1 aory|EIT74757.1 asyd|OJJ63412.1 ater|EAU38856.1 atub|OJI90707.1 aver|OJI97526.1 awen|OJJ38865.1 azon|OJJ49659.1

Group3261: abra|OJJ73946.1 acar|OOG01074.1 acla|EAW07819.1 afis|EAW22854.1 afla|EED50134.1 afum|EAL90346.1 agla|OJJ83467.1 akaw|GAA89551.1 aluc|OJZ88098.1 anid|CBF87836.1 anig|EHA17867.1 aory|EIT74630.1 asyd|OJJ63410.1 atub|OJI90706.1 aver|OJI97527.1 awen|OJJ38864.1 azon|OJJ49658.1 ater|EAU38807.1

Group3262: abra|OJJ73949.1 acar|OOG01077.1 acla|EAW07823.1 afis|EAW22859.1 afla|EED50137.1 afum|EAL90341.1 agla|OJJ83465.1 akaw|GAA89554.1 aluc|OJZ88095.1 anid|CBF87833.1 anig|EHA17865.1 aory|EIT74739.1 asyd|OJJ63408.1 ater|EAU38809.1 atub|OJI90703.1 aver|OJI97529.1 awen|OJJ38861.1 azon|OJJ49655.1

Group3263: abra|OJJ73952.1 acar|OOG01080.1 acla|EAW07826.1 afis|EAW22862.1 afla|EED50146.1 afum|EAL90338.1 agla|OJJ83462.1 akaw|GAA89557.1 aluc|OJZ88092.1 anid|CBF87832.1 anig|EHA17862.1 aory|EIT74749.1 asyd|OJJ63407.1 ater|EAU38816.1 atub|OJI90700.1 aver|OJI97530.1 awen|OJJ38858.1 azon|OJJ49656.1

Group3264: abra|OJJ73959.1 acar|OOG01086.1 acla|EAW07828.1 afis|EAW22864.1 afla|EED50148.1 afum|EAL90336.1 agla|OJJ83460.1 akaw|GAA89562.1 aluc|OJZ88086.1 anid|CBF87829.1 anig|EHA17857.1 aory|EIT74755.1 asyd|OJJ63405.1 ater|EAU38824.1 atub|OJI90695.1 aver|OJI97531.1 awen|OJJ38856.1 azon|OJJ49654.1

Group3265: abra|OJJ73961.1 acar|OOG01087.1 acla|EAW07830.1 afis|EAW22866.1 afla|EED50150.1 afum|EAL90333.1 agla|OJJ83458.1 akaw|GAA89564.1 aluc|OJZ88084.1 anid|CBF87827.1 anig|EHA17855.1 aory|EIT74659.1 asyd|OJJ63403.1 ater|EAU38827.1 atub|OJI90693.1 aver|OJI97533.1 awen|OJJ38854.1 azon|OJJ49652.1

Group3266: abra|OJJ73962.1 acar|OOG01089.1 acla|EAW07831.1 afis|EAW22867.1 afla|EED50151.1 afum|EAL90332.1 agla|OJJ83457.1 akaw|GAA89565.1 aluc|OJZ88083.1 anid|CBF87826.1 anig|EHA17854.1 aory|EIT74722.1 asyd|OJJ63402.1 ater|EAU38828.1 atub|OJI90692.1 aver|OJI97534.1 awen|OJJ38853.1 azon|OJJ49651.1

Group3267: abra|OJJ73964.1 acar|OOG01090.1 acla|EAW07834.1 afis|EAW22871.1 afla|EED50154.1 afum|EAL90327.1 agla|OJJ83452.1 akaw|GAA89567.1 aluc|OJZ88080.1 anid|CBF87822.1 anig|EHA17852.1 aory|EIT76938.1 asyd|OJJ63400.1 ater|EAU38835.1 atub|OJI90689.1 aver|OJI97537.1 awen|OJJ38851.1 azon|OJJ49647.1

Group3268: abra|OJJ73967.1 acar|OOG01093.1 acla|EAW07837.1 afis|EAW22874.1 afla|EED50157.1 afum|EAL90324.1 agla|OJJ83443.1 akaw|GAA89570.1 aluc|OJZ88077.1 anid|CBF87816.1 anig|EHA17849.1 aory|EIT76898.1 asyd|OJJ63395.1 ater|EAU38838.1 atub|OJI90686.1 aver|OJI97541.1 awen|OJJ38848.1 azon|OJJ49644.1

Group3269: abra|OJJ73971.1 acar|OOG01097.1 acla|EAW07842.1 afis|EAW22878.1 afla|EED50183.1 afum|EAL90321.1 agla|OJJ83446.1 akaw|GAA89574.1 aluc|OJZ88073.1 anid|CBF87811.1 anig|EHA17846.1 aory|EIT77380.1 asyd|OJJ63390.1 ater|EAU38842.1 atub|OJI90682.1 aver|OJI97545.1 awen|OJJ38844.1 azon|OJJ49641.1

Group3270: abra|OJJ73976.1 acar|OOG01103.1 acla|EAW07847.1 afis|EAW22883.1 afla|EED50176.1 afum|EAL90316.1 agla|OJJ83441.1 akaw|GAA89579.1 aluc|OJZ88068.1 anid|CBF87803.1 anig|EHA17841.1 aory|EIT72282.1 asyd|OJJ63384.1 ater|EAU38846.1 atub|OJI90677.1 aver|OJI97551.1 awen|OJJ38839.1 azon|OJJ49636.1

Group3271: abra|OJJ73978.1 acar|OOG01104.1 acla|EAW07849.1 afis|EAW22885.1 afla|EED50174.1 afum|EAL90313.1 agla|OJJ83438.1 akaw|GAA89581.1 aluc|OJZ88066.1 anid|CBF87801.1 anig|EHA17839.1 aory|EIT72285.1 asyd|OJJ63382.1 ater|EAU35978.1 atub|OJI90675.1 aver|OJI97553.1 awen|OJJ38837.1 azon|OJJ49634.1

Group3272: abra|OJJ73980.1 acar|OOG01107.1 acla|EAW07851.1 afis|EAW22887.1 afla|EED50172.1 afum|EAL90311.1 agla|OJJ83436.1 akaw|GAA89583.1 aluc|OJZ88064.1 anid|CBF87798.1 anig|EHA17837.1 aory|EIT72283.1 asyd|OJJ63380.1 ater|EAU35985.1 atub|OJI90673.1 aver|OJI97555.1 awen|OJJ38835.1 azon|OJJ49632.1

Group3273: abra|OJJ73982.1 acar|OOG01109.1 acla|EAW07854.1 afis|EAW22890.1 afla|EED54859.1 afum|EAL90308.1 agla|OJJ83420.1 akaw|GAA89586.1 aluc|OJZ88062.1 anid|CBF87791.1 anig|EHA17835.1 aory|EIT79448.1 asyd|OJJ63377.1 ater|EAU35982.1 atub|OJI90671.1 aver|OJI97569.1 awen|OJJ38831.1 azon|OJJ49630.1

Group3274: abra|OJJ73983.1 acar|OOG01110.1 acla|EAW07855.1 afis|EAW22891.1 afla|EED54860.1 afum|EAL90307.1 agla|OJJ83407.1 akaw|GAA89587.1 aluc|OJZ88061.1 anid|CBF87790.1 anig|EHA17834.1 aory|EIT79392.1 asyd|OJJ63376.1 ater|EAU36000.1 atub|OJI90670.1 aver|OJI97570.1 awen|OJJ38830.1 azon|OJJ49629.1

Group3275: abra|OJJ73986.1 acar|OOG01111.1 acla|EAW07857.1 afis|EAW22893.1 afla|EED54862.1 afum|EAL90305.2 agla|OJJ83410.1 akaw|GAA87469.1 aluc|OJZ88059.1 anid|CBF87783.1 anig|EHA17831.1 aory|EIT79335.1 asyd|OJJ63374.1 ater|EAU35990.1 atub|OJI90667.1 aver|OJI97572.1 awen|OJJ38827.1 azon|OJJ49627.1

Group3276: abra|OJJ73989.1 acar|OOG01115.1 acla|EAW07860.1 afis|EAW22895.1 afla|EED54864.1 afum|EAL90303.1 agla|OJJ83415.1 akaw|GAA87472.1 aluc|OJZ88056.1 anid|CBF74977.1 anig|EHA17828.1 aory|EIT79412.1 asyd|OJJ60090.1 ater|EAU35987.1 atub|OJI90664.1 aver|OJJ04177.1 awen|OJJ38823.1 azon|OJJ49622.1

Group3277: abra|OJJ73991.1 acar|OOG01117.1 acla|EAW07862.1 afis|EAW22897.1 afla|EED54868.1 afum|EAL90301.1 agla|OJJ83417.1 akaw|GAA87474.1 aluc|OJZ88054.1 anid|CBF87775.1 anig|EHA17826.1 aory|EIT79359.1 asyd|OJJ63369.1 ater|EAU35981.1 atub|OJI90662.1 aver|OJI97577.1 awen|OJJ38820.1 azon|OJJ49620.1

Group3278: abra|OJJ73992.1 acar|OOG01119.1 acla|EAW07863.1 afis|EAW22898.1 afla|EED54869.1 afum|EAL90299.1 agla|OJJ83393.1 akaw|GAA87475.1 aluc|OJZ88053.1 anid|CBF87773.1 anig|EHA17825.1 asyd|OJJ63368.1 ater|EAU36001.1 atub|OJI90661.1 aver|OJI97578.1 awen|OJJ38732.1 azon|OJJ49619.1 agla|OJJ81800.1

Group3279: abra|OJJ73993.1 acar|OOG01118.1 acla|EAW07864.1 afis|EAW22899.1 afla|EED54870.1 afum|EAL90298.1 agla|OJJ83392.1 akaw|GAA87476.1 aluc|OJZ88052.1 anid|CBF87771.1 anig|EHA17824.1 aory|EIT79377.1 asyd|OJJ63367.1 ater|EAU36002.1 atub|OJI90660.1 aver|OJI97579.1 awen|OJJ38731.1 azon|OJJ49618.1

Group3280: abra|OJJ74000.1 acar|OOG01121.1 acla|EAW07866.1 afis|EAW22901.1 afla|EED54872.1 afum|EAL90296.1 agla|OJJ83389.1 akaw|GAA87482.1 aluc|OJZ88043.1 anid|CBF87767.1 anig|EHA17816.1 aory|EIT79383.1 asyd|OJJ63365.1 ater|EAU36006.1 atub|OJI90650.1 aver|OJI97582.1 awen|OJJ38729.1 azon|OJJ49615.1

Group3281: abra|OJJ74002.1 acar|OOG01122.1 acla|EAW07867.1 afis|EAW22902.1 afla|EED54873.1 afum|EAL90295.1 agla|OJJ83388.1 akaw|GAA87483.1 aluc|OJZ88042.1 anid|CBF87766.1 anig|EHA17815.1 aory|EIT79350.1 asyd|OJJ63364.1 ater|EAU36007.1 atub|OJI90649.1 aver|OJI97583.1 awen|OJJ38728.1 azon|OJJ49614.1

Group3282: abra|OJJ74003.1 acar|OOG01124.1 acla|EAW07868.1 afis|EAW22903.1 afla|EED54874.1 afum|EAL90294.1 agla|OJJ83387.1 akaw|GAA87484.1 aluc|OJZ88041.1 anid|CBF87764.1 anig|EHA17814.1 aory|EIT79433.1 asyd|OJJ63363.1 ater|EAU36010.1 atub|OJI90648.1 aver|OJI97584.1 awen|OJJ38727.1 azon|OJJ49613.1

Group3283: abra|OJJ74016.1 acar|OOG01137.1 acla|EAW07870.1 afis|EAW22905.1 afla|EED54897.1 afum|EAL90292.1 agla|OJJ83384.1 akaw|GAA87498.1 aluc|OJZ88024.1 anid|CBF87713.1 anig|EHA17801.1 aory|EIT80309.1 asyd|OJJ63338.1 ater|EAU36034.1 atub|OJI90632.1 aver|OJI97623.1 awen|OJJ38725.1 azon|OJJ49609.1

Group3284: abra|OJJ74017.1 acar|OOG01138.1 acla|EAW07871.1 afis|EAW22906.1 afla|EED54898.1 afum|EAL90291.1 agla|OJJ83383.1 akaw|GAA87499.1 aluc|OJZ88022.1 anid|CBF87712.1 anig|EHA17800.1 aory|EIT80293.1 asyd|OJJ63337.1 ater|EAU36033.1 atub|OJI90631.1 aver|OJI97625.1 awen|OJJ38724.1 azon|OJJ49608.1

Group3285: abra|OJJ74020.1 acar|OOG01139.1 acla|EAW07874.1 afis|EAW22909.1 afla|EED54901.1 afum|EAL90288.1 agla|OJJ83380.1 akaw|GAA87502.1 aluc|OJZ88019.1 anid|CBF87705.1 anig|EHA17798.1 aory|EIT80370.1 asyd|OJJ63332.1 ater|EAU36030.1 atub|OJI90628.1 aver|OJI97630.1 awen|OJJ38656.1 azon|OJJ49605.1

Group3286: abra|OJJ74021.1 acar|OOG01140.1 acla|EAW07875.1 afis|EAW22910.1 afla|EED54902.1 afum|EAL90287.1 agla|OJJ83379.1 akaw|GAA87503.1 aluc|OJZ88018.1 anid|CBF87703.1 anig|EHA17797.1 aory|EIT80365.1 asyd|OJJ63331.1 ater|EAU36029.1 atub|OJI90627.1 aver|OJI97631.1 awen|OJJ38655.1 azon|OJJ49604.1

Group3287: abra|OJJ74022.1 acar|OOG01141.1 acla|EAW07876.1 afis|EAW22911.1 afla|EED54904.1 afum|EAL90286.1 agla|OJJ83378.1 akaw|GAA87505.1 aluc|OJZ88015.1 anid|CBF87694.1 anig|EHA17796.1 aory|EIT80313.1 asyd|OJJ63326.1 ater|EAU36028.1 atub|OJI90625.1 aver|OJI97636.1 awen|OJJ38654.1 azon|OJJ49603.1

Group3288: abra|OJJ74023.1 acar|OOG01142.1 acla|EAW07877.1 afis|EAW22912.1 afla|EED54905.1 afum|EAL90285.1 agla|OJJ83377.1 akaw|GAA87504.1 aluc|OJZ88017.1 anid|CBF87695.1 anig|EHA17795.1

aory|EIT80317.1 asyd|OJJ63327.1 ater|EAU36027.1 atub|OJI90626.1 aver|OJI97635.1 awen|OJJ38653.1 azon|OJJ49602.1

Group3289: abra|OJJ74024.1 acar|OOG01143.1 acla|EAW07878.1 afis|EAW22913.1 afla|EED54906.1 afum|EAL90284.1 agla|OJJ83376.1 akaw|GAA87506.1 aluc|OJZ88014.1 anid|CBF87699.1 anig|EHA17794.1 aory|EIT80324.1 asyd|OJJ63329.1 ater|EAU36026.1 atub|OJI90623.1 aver|OJI97633.1 awen|OJJ38652.1 azon|OJJ49601.1

Group3290: abra|OJJ74027.1 acar|OOG01146.1 acla|EAW07879.1 afis|EAW22914.1 afla|EED54907.1 afum|EAL90283.1 agla|OJJ83375.1 akaw|GAA87510.1 aluc|OJZ88010.1 anid|CBF87697.1 anig|EHA17790.1 aory|EIT80315.1 asyd|OJJ63328.1 ater|EAU30708.1 atub|OJI90619.1 aver|OJI97634.1 awen|OJJ38651.1 azon|OJJ49599.1

Group3291: abra|OJJ74029.1 acar|OOG01147.1 acla|EAW07880.1 afis|EAW22915.1 afla|EED54911.1 afum|EAL90282.1 agla|OJJ83373.1 akaw|GAA87512.1 aluc|OJZ88008.1 anid|CBF87690.1 anig|EHA17788.1 aory|EIT80322.1 asyd|OJJ63325.1 ater|EAU30707.1 atub|OJI90617.1 aver|OJI97637.1 awen|OJJ38649.1 azon|OJJ49595.1

Group3292: abra|OJJ74032.1 acar|OOG01151.1 acla|EAW07883.1 afis|EAW22918.1 afla|EED54915.1 afum|EAL90279.1 agla|OJJ83371.1 akaw|GAA87516.1 aluc|OJZ88005.1 anid|CBF87687.1 anig|EHA17786.1 aory|EIT80289.1 asyd|OJJ63320.1 ater|EAU30705.1 atub|OJI90613.1 aver|OJI97639.1 awen|OJJ38646.1 azon|OJJ49588.1

Group3293: abra|OJJ74033.1 acar|OOG01152.1 acla|EAW07884.1 afis|EAW22919.1 afla|EED54916.1 afum|EAL90278.1 agla|OJJ83369.1 akaw|GAA87517.1 aluc|OJZ88004.1 anid|CBF87685.1 anig|EHA17785.1 aory|EIT80336.1 asyd|OJJ63319.1 ater|EAU30704.1 atub|OJI90612.1 aver|OJI97640.1 awen|OJJ38645.1 azon|OJJ49587.1

Group3294: abra|OJJ74035.1 acla|EAW07885.1 afis|EAW22920.1 afla|EED54917.1 afum|EAL90277.1 agla|OJJ83368.1 akaw|GAA87518.1 anid|CBF87683.1 aory|EIT80285.1 asyd|OJJ63318.1 ater|EAU30703.1 aver|OJI97641.1 awen|OJJ38644.1 azon|OJJ49586.1 acar|OOG01153.1 aluc|OJZ88003.1 anig|EHA17784.1 atub|OJI90611.1

Group3295: abra|OJJ74036.1 acar|OOG01155.1 acla|EAW07886.1 afis|EAW22921.1 afla|EED54918.1 afum|EAL90276.1 agla|OJJ83367.1 akaw|GAA87519.1 aluc|OJZ88000.1 anid|CBF87681.1 anig|EHA17782.1 aory|EIT80300.1 asyd|OJJ63317.1 ater|EAU30702.1 atub|OJI90609.1 aver|OJI97642.1 awen|OJJ38643.1 azon|OJJ49585.1

Group3296: abra|OJJ74037.1 acar|OOG01156.1 acla|EAW07887.1 afis|EAW22922.1 afla|EED54919.1 afum|EAL90275.1 agla|OJJ83366.1 akaw|GAA87520.1 aluc|OJZ87999.1 anid|CBF87680.1 anig|EHA17781.1 aory|EIT80390.1 asyd|OJJ63316.1 ater|EAU30701.1 atub|OJI90608.1 aver|OJI97643.1 awen|OJJ38642.1 azon|OJJ49584.1

Group3297: abra|OJJ74038.1 acar|OOG01157.1 acla|EAW07888.1 afis|EAW22923.1 afla|EED54920.1 afum|EAL90274.1 agla|OJJ83365.1 akaw|GAA87521.1 aluc|OJZ87998.1 anid|CBF87678.1 anig|EHA17780.1 aory|EIT80297.1 asyd|OJJ63315.1 ater|EAU30700.1 atub|OJI90607.1 aver|OJI97644.1 awen|OJJ38641.1 azon|OJJ49583.1

Group3298: abra|OJJ74039.1 acar|OOG01158.1 acla|EAW07889.1 afis|EAW22924.1 afla|EED54921.1 afum|EAL90273.1 agla|OJJ83364.1 akaw|GAA87522.1 aluc|OJZ87997.1 anid|CBF87676.1 anig|EHA17779.1 aory|EIT80292.1 asyd|OJJ63314.1 ater|EAU30699.1 atub|OJI90606.1 aver|OJI97645.1 awen|OJJ38640.1 azon|OJJ49582.1

Group3299: abra|OJJ74040.1 acar|OOG01159.1 acla|EAW07890.1 afis|EAW22925.1 afla|EED54922.1 afum|EAL90272.1 agla|OJJ83363.1 akaw|GAA87523.1 aluc|OJZ87996.1 anid|CBF87674.1 anig|EHA17778.1 aory|EIT80341.1 asyd|OJJ63313.1 ater|EAU30698.1 atub|OJI90605.1 aver|OJI97646.1 awen|OJJ38639.1 azon|OJJ49581.1

Group3300: abra|OJJ74043.1 acar|OOG01161.1 acla|EAW07892.1 afis|EAW22927.1 afla|EED54924.1 afum|EAL90270.1 agla|OJJ83361.1 akaw|GAA87525.1 aluc|OJZ87994.1 anid|CBF87671.1 anig|EHA17776.1 aory|EIT80287.1 asyd|OJJ63311.1 ater|EAU30696.1 atub|OJI90603.1 aver|OJI97648.1 awen|OJJ38637.1 azon|OJJ49579.1

Group3301: abra|OJJ74045.1 acar|OOG01164.1 acla|EAW07895.1 afis|EAW22930.1 afla|EED58123.1 afum|EAL90267.1 agla|OJJ83358.1 akaw|GAA87528.1 aluc|OJZ87990.1 anid|CBF87667.1 anig|EHA17773.1 aory|EIT79163.1 asyd|OJJ63308.1 ater|EAU30694.1 atub|OJI90600.1 aver|OJI97651.1 awen|OJJ38634.1 azon|OJJ49576.1

Group3302: abra|OJJ74048.1 acar|OOG01164.1 acla|EAW07897.1 afis|EAW22932.1 afla|EED58126.1 afum|EAL90264.1 agla|OJJ83355.1 akaw|GAA87530.1 aluc|OJZ87987.1 anid|CBF87662.1 anig|EHA17770.1 aory|EIT79157.1 asyd|OJJ63305.1 ater|EAU30692.1 atub|OJI90597.1 aver|OJI97654.1 awen|OJJ38631.1 azon|OJJ49573.1



Group3303: abra|OJJ74049.1 acar|OOF89922.1 acla|EAW07898.1 afis|EAW22934.1 afla|EED58127.1 afum|EAL90262.1 agla|OJJ83354.1 akaw|GAA87531.1 aluc|OJZ87986.1 anid|CBF87661.1 anig|EHA17769.1 aory|EIT79153.1 asyd|OJJ63304.1 ater|EAU30691.1 atub|OJI90596.1 aver|OJI97655.1 awen|OJJ38630.1 azon|OJJ49572.1

Group3304: abra|OJJ74050.1 acar|OOF89923.1 acla|EAW07899.1 afis|EAW22935.1 afla|EED58128.1 afum|EAL90261.1 agla|OJJ83353.1 akaw|GAA87532.1 aluc|OJZ87985.1 anid|CBF87659.1 anig|EHA17768.1 aory|EIT79137.1 asyd|OJJ63303.1 ater|EAU30690.1 atub|OJI90595.1 aver|OJI97656.1 awen|OJJ38629.1 azon|OJJ49571.1

Group3305: abra|OJJ74053.1 acar|OOG01166.1 acla|EAW07901.1 afis|EAW22938.1 afla|EED58131.1 afum|EAL90258.1 agla|OJJ83351.1 akaw|GAA87535.1 aluc|OJZ87982.1 anid|CBF87654.1 anig|EHA17765.1 aory|EIT79120.1 asyd|OJJ63299.1 ater|EAU30687.1 atub|OJI90592.1 aver|OJI97659.1 awen|OJJ38626.1 azon|OJJ49568.1

Group3306: abra|OJJ74054.1 acar|OOG01167.1 acla|EAW07902.1 afis|EAW22939.1 afla|EED58133.1 afum|EAL90257.1 agla|OJJ83349.1 akaw|GAA87536.1 aluc|OJZ87981.1 anid|CBF87652.1 anig|EHA17764.1 aory|EIT79138.1 asyd|OJJ63298.1 ater|EAU30686.1 atub|OJI90591.1 aver|OJI97660.1 awen|OJJ38625.1 azon|OJJ49567.1

Group3307: abra|OJJ74056.1 acar|OOG01169.1 acla|EAW07903.1 afis|EAW22940.1 afla|EED58154.1 afum|EAL90256.1 agla|OJJ83348.1 akaw|GAA87538.1 aluc|OJZ87979.1 anid|CBF87650.1 anig|EHA17762.1 aory|EIT79084.1 asyd|OJJ63297.1 ater|EAU30684.1 atub|OJI90589.1 aver|OJI97661.1 awen|OJJ38624.1 azon|OJJ49565.1

Group3308: abra|OJJ74060.1 acar|OOG01172.1 acla|EAW07905.1 afis|EAW22943.1 afla|EED58153.1 afum|EAL90254.1 agla|OJJ83345.1 akaw|GAA87541.1 aluc|OJZ87976.1 anid|CBF87646.1 anig|EHA17760.1 aory|EIT79073.1 asyd|OJJ63295.1 ater|EAU30681.1 atub|OJI90586.1 aver|OJI97663.1 awen|OJJ38621.1 azon|OJJ49562.1

Group3309: abra|OJJ74061.1 acar|OOG01173.1 acla|EAW07906.1 afis|EAW22944.1 afla|EED58151.1 afum|EAL90253.1 agla|OJJ83344.1 akaw|GAA87542.1 aluc|OJZ87975.1 anid|CBF87644.1 anig|EHA17759.1 aory|EIT79080.1 asyd|OJJ63294.1 ater|EAU30680.1 atub|OJI90585.1 aver|OJI97664.1 awen|OJJ38620.1 azon|OJJ49561.1

Group3310: abra|OJJ74062.1 acar|OOG01175.1 acla|EAW07907.1 afis|EAW22945.1 afla|EED58150.1 afum|EAL90252.1 agla|OJJ83343.1 akaw|GAA87543.1 aluc|OJZ87974.1 anid|CBF87642.1 anig|EHA17758.1 aory|EIT79097.1 asyd|OJJ63293.1 ater|EAU30679.1 atub|OJI90584.1 aver|OJI97665.1 awen|OJJ38619.1 azon|OJJ49560.1

Group3311: abra|OJJ74063.1 acar|OOG01176.1 acla|EAW07908.1 afis|EAW22946.1 afla|EED58149.1 afum|EAL90251.1 agla|OJJ83342.1 akaw|GAA87544.1 aluc|OJZ87973.1 anid|CBF87640.1 anig|EHA17757.1 aory|EIT79094.1 asyd|OJJ63292.1 ater|EAU30678.1 atub|OJI90583.1 aver|OJI97666.1 awen|OJJ38618.1 azon|OJJ49559.1

Group3312: abra|OJJ74064.1 acar|OOG01174.1 acla|EAW07909.1 afis|EAW22947.1 afla|EED58148.1 afum|EAL90250.1 agla|OJJ83341.1 akaw|GAA87545.1 aluc|OJZ87972.1 anid|CBF87639.1 anig|EHA17756.1 aory|EIT79089.1 asyd|OJJ63291.1 ater|EAU30677.1 atub|OJI90582.1 aver|OJI97667.1 awen|OJJ38617.1 azon|OJJ49558.1

Group3313: abra|OJJ74065.1 acar|OOG01177.1 acla|EAW07910.1 afis|EAW22948.1 afla|EED58147.1 afum|EAL90249.1 agla|OJJ83339.1 akaw|GAA87546.1 aluc|OJZ87971.1 anid|CBF87637.1 anig|EHA17755.1 aory|EIT79088.1 asyd|OJJ63290.1 ater|EAU30676.1 atub|OJI90581.1 aver|OJI97668.1 awen|OJJ38616.1 azon|OJJ49557.1

Group3314: abra|OJJ74066.1 acar|OOG01179.1 acla|EAW07911.1 afis|EAW22949.1 afla|EED58146.1 afum|EAL90248.1 agla|OJJ83338.1 akaw|GAA87547.1 aluc|OJZ87970.1 anid|CBF87636.1 anig|EHA17754.1 aory|EIT79070.1 asyd|OJJ63289.1 ater|EAU30675.1 atub|OJI90580.1 aver|OJI97669.1 awen|OJJ38615.1 azon|OJJ49556.1

Group3315: abra|OJJ74067.1 acar|OOG01178.1 acla|EAW07912.1 afis|EAW22950.1 afla|EED58145.1 afum|EAL90247.1 agla|OJJ83337.1 akaw|GAA87548.1 aluc|OJZ87969.1 anid|CBF87634.1 anig|EHA17753.1 aory|EIT79067.1 asyd|OJJ63288.1 ater|EAU30674.1 atub|OJI90579.1 aver|OJI97670.1 awen|OJJ38614.1 azon|OJJ49555.1

Group3316: abra|OJJ74068.1 acar|OOG01180.1 acla|EAW07913.1 afis|EAW22951.1 afla|EED58144.1 afum|EAL90246.1 agla|OJJ83336.1 akaw|GAA87549.1 aluc|OJZ87968.1 anid|CBF87632.1 anig|EHA17752.1 aory|EIT79092.1 asyd|OJJ63287.1 ater|EAU30673.1 atub|OJI90578.1 aver|OJI97671.1 awen|OJJ38613.1 azon|OJJ49554.1

Group3317: abra|OJJ74069.1 acar|OOG01181.1 acla|EAW07914.1 afis|EAW22952.1 afla|EED58143.1 afum|EAL90245.1 agla|OJJ83335.1 akaw|GAA87550.1 aluc|OJZ87967.1 anid|CBF87630.1 anig|EHA17751.1

aory|EIT79082.1 asyd|OJJ63286.1 ater|EAU30672.1 atub|OJI90577.1 aver|OJI97672.1 awen|OJJ38612.1 azon|OJJ49553.1

Group3318: abra|OJJ74070.1 acar|OOG01182.1 acla|EAW07915.1 afis|EAW22953.1 afla|EED58142.1 afum|EAL90244.1 agla|OJJ83334.1 akaw|GAA87551.1 aluc|OJZ87966.1 anid|CBF87629.1 anig|EHA17750.1 aory|EIT79065.1 asyd|OJJ63285.1 ater|EAU30671.1 atub|OJI90576.1 aver|OJI97673.1 awen|OJJ38611.1 azon|OJJ49552.1

Group3319: abra|OJJ74071.1 acar|OOG01183.1 acla|EAW07916.1 afis|EAW22954.1 afla|EED58141.1 afum|EAL90243.1 agla|OJJ83333.1 akaw|GAA87552.1 aluc|OJZ87965.1 anid|CBF87627.1 anig|EHA17749.1 aory|EIT79103.1 asyd|OJJ63284.1 ater|EAU30670.1 atub|OJI90575.1 aver|OJI97674.1 awen|OJJ38610.1 azon|OJJ49551.1

Group3320: abra|OJJ74072.1 acar|OOG01184.1 acla|EAW07917.1 afis|EAW22955.1 afla|EED58140.1 afum|EAL90242.1 agla|OJJ83332.1 akaw|GAA87553.1 aluc|OJZ87964.1 anid|CBF87625.1 anig|EHA17748.1 aory|EIT79149.1 asyd|OJJ63283.1 ater|EAU30669.1 atub|OJI90574.1 aver|OJI97675.1 awen|OJJ38608.1 azon|OJJ49550.1

Group3321: abra|OJJ74075.1 acar|OOG01187.1 acla|EAW07920.1 afis|EAW22958.1 afla|EED58138.1 afum|EAL90239.1 agla|OJJ83330.1 akaw|GAA87556.1 aluc|OJZ87961.1 anid|CBF87624.1 anig|EHA17745.1 aory|EIT79160.1 asyd|OJJ63281.1 ater|EAU30667.1 atub|OJI90571.1 aver|OJI97677.1 awen|OJJ38605.1 azon|OJJ49547.1

Group3322: abra|OJJ74076.1 acar|OOG01188.1 acla|EAW07921.1 afis|EAW22959.1 afla|EED58137.1 afum|EAL90238.1 agla|OJJ83329.1 akaw|GAA87557.1 aluc|OJZ87960.1 anid|CBF87622.1 anig|EHA17744.1 aory|EIT79140.1 asyd|OJJ63280.1 ater|EAU30666.1 atub|OJI90570.1 aver|OJI97678.1 awen|OJJ38604.1 azon|OJJ49546.1

Group3323: abra|OJJ74078.1 acar|OOG01190.1 acla|EAW07923.1 afis|EAW22961.1 afla|EED58135.1 afum|EAL90236.1 agla|OJJ83327.1 akaw|GAA87559.1 aluc|OJZ87957.1 anid|CBF87621.1 anig|EHA17742.1 aory|EIT79121.1 asyd|OJJ63278.1 ater|EAU30664.1 atub|OJI90568.1 aver|OJI97680.1 awen|OJJ38602.1 azon|OJJ49544.1

Group3324: abra|OJJ74079.1 acar|OOG01191.1 acla|EAW07924.1 afis|EAW22962.1 afla|EED58155.1 afum|EAL90235.1 agla|OJJ83326.1 akaw|GAA87560.1 aluc|OJZ87956.1 anid|CBF87619.1 anig|EHA17741.1 aory|EIT79083.1 asyd|OJJ63277.1 ater|EAU30663.1 atub|OJI90567.1 aver|OJI97681.1 awen|OJJ38601.1 azon|OJJ49543.1

Group3325: abra|OJJ74080.1 acar|OOG01192.1 acla|EAW07925.1 afis|EAW22963.1 afla|EED58156.1 afum|EAL90234.1 agla|OJJ83324.1 akaw|GAA87561.1 aluc|OJZ87955.1 anid|CBF87617.1 anig|EHA17740.1 aory|EIT79101.1 asyd|OJJ63276.1 ater|EAU30662.1 atub|OJI90566.1 aver|OJI97682.1 awen|OJJ38600.1 azon|OJJ49542.1

Group3326: abra|OJJ74081.1 acar|OOG01193.1 acla|EAW07926.1 afis|EAW22964.1 afla|EED58157.1 afum|EAL90233.1 agla|OJJ83323.1 akaw|GAA87562.1 aluc|OJZ87954.1 anid|CBF87615.1 anig|EHA17739.1 aory|EIT79095.1 asyd|OJJ63275.1 ater|EAU30661.1 atub|OJI90565.1 aver|OJI97683.1 awen|OJJ38599.1 azon|OJJ49541.1

Group3327: abra|OJJ74082.1 acar|OOG01194.1 acla|EAW07927.1 afis|EAW22965.1 afla|EED58158.1 afum|EAL90232.1 agla|OJJ83322.1 akaw|GAA87563.1 aluc|OJZ87953.1 anid|CBF87613.1 anig|EHA17738.1 aory|EIT79104.1 asyd|OJJ63274.1 ater|EAU30653.1 atub|OJI90564.1 aver|OJI97684.1 awen|OJJ38598.1 azon|OJJ49540.1

Group3328: abra|OJJ74084.1 acar|OOG01196.1 acla|EAW07928.1 afis|EAW22966.1 afla|EED58160.1 afum|EAL90231.1 agla|OJJ83321.1 akaw|GAA87564.1 aluc|OJZ87951.1 anid|CBF87612.1 anig|EHA17737.1 aory|EIT79091.1 asyd|OJJ63272.1 ater|EAU30654.1 atub|OJI90563.1 aver|OJI97685.1 awen|OJJ38597.1 azon|OJJ49538.1

Group3329: abra|OJJ74086.1 acar|OOG01197.1 acla|EAW07930.1 afis|EAW22968.1 afla|EED58161.1 afum|EAL90229.1 agla|OJJ83319.1 akaw|GAA87566.1 aluc|OJZ87949.1 anid|CBF87609.1 anig|EHA17735.1 aory|EIT79100.1 asyd|OJJ63270.1 ater|EAU30659.1 atub|OJI90560.1 aver|OJI97687.1 awen|OJJ38595.1 azon|OJJ49537.1

Group3330: abra|OJJ74089.1 acar|OOG01198.1 acla|EAW07932.1 afis|EAW22970.1 afla|EED58163.1 afum|EAL90227.2 agla|OJJ83317.1 akaw|GAA87568.1 aluc|OJZ87947.1 anid|CBF74548.1 anig|EHA17733.1 aory|EIT79078.1 asyd|OJJ57686.1 ater|EAU30652.1 atub|OJI90558.1 aver|OJJ05492.1 awen|OJJ38593.1 azon|OJJ49536.1

Group3331: abra|OJJ74090.1 acar|OOG01199.1 acla|EAW07933.1 afis|EAW22971.1 afla|EED58164.1 afum|EAL90226.1 agla|OJJ83316.1 akaw|GAA87569.1 aluc|OJZ87946.1 anid|CBF87607.1 anig|EHA17732.1 aory|EIT79076.1 asyd|OJJ63269.1 ater|EAU30651.1 atub|OJI90557.1 aver|OJI97688.1 awen|OJJ38591.1 azon|OJJ49535.1

Group3332: abra|OJJ74091.1 acar|OOG01200.1 acla|EAW07934.1 afis|EAW22972.1 afla|EED58166.1 afum|EAL90225.1 agla|OJJ83315.1 akaw|GAA87570.1 aluc|OJZ87945.1 anid|CBF87606.1 anig|EHA17731.1 aory|EIT79075.1 asyd|OJJ63268.1 ater|EAU30650.1 atub|OJI90556.1 aver|OJI97689.1 awen|OJJ38590.1 azon|OJJ49533.1

Group3333: abra|OJJ74093.1 acar|OOG01202.1 acla|EAW07936.1 afis|EAW22974.1 afla|EED58168.1 afum|EAL90223.1 agla|OJJ83313.1 akaw|GAA87572.1 aluc|OJZ87943.1 anid|CBF87602.1 anig|EHA17730.1 aory|EIT79071.1 asyd|OJJ63266.1 ater|EAU30647.1 atub|OJI90554.1 aver|OJI97691.1 awen|OJJ38589.1 azon|OJJ49532.1

Group3334: abra|OJJ74094.1 acar|OOG01204.1 acla|EAW07937.1 afis|EAW22975.1 afla|EED58169.1 afum|EAL90222.1 agla|OJJ83312.1 akaw|GAA87573.1 aluc|OJZ87942.1 anid|CBF87600.1 anig|EHA17729.1 aory|EIT79096.1 asyd|OJJ63265.1 ater|EAU30646.1 atub|OJI90553.1 aver|OJI97692.1 awen|OJJ38588.1 azon|OJJ49531.1

Group3335: abra|OJJ74095.1 acar|OOG01203.1 acla|EAW07938.1 afis|EAW22976.1 afla|EED58170.1 afum|EAL90221.1 agla|OJJ83311.1 akaw|GAA87574.1 aluc|OJZ87941.1 anid|CBF87598.1 anig|EHA17728.1 aory|EIT79085.1 asyd|OJJ63264.1 ater|EAU30645.1 atub|OJI90552.1 aver|OJI97693.1 awen|OJJ38587.1 azon|OJJ49530.1

Group3336: abra|OJJ74096.1 acar|OOG01205.1 acla|EAW07940.1 afis|EAW22978.1 afla|EED58171.1 afum|EAL90219.1 agla|OJJ83310.1 akaw|GAA87575.1 aluc|OJZ87940.1 anid|CBF87596.1 anig|EHA17727.1 aory|EIT79081.1 asyd|OJJ63262.1 ater|EAU30644.1 atub|OJI90551.1 aver|OJI97695.1 awen|OJJ38586.1 azon|OJJ49528.1

Group3337: abra|OJJ74100.1 acar|OOG01209.1 acla|EAW07943.1 afis|EAW22981.1 afla|EED58174.1 afum|EAL90216.1 agla|OJJ83306.1 akaw|GAA87578.1 aluc|OJZ87936.1 anid|CBF87589.1 anig|EHA17724.1 aory|EIT79069.1 asyd|OJJ63258.1 ater|EAU30640.1 atub|OJI90548.1 aver|OJI97699.1 awen|OJJ38582.1 azon|OJJ49524.1

Group3338: abra|OJJ74102.1 acar|OOG01211.1 acla|EAW07945.1 afis|EAW22983.1 afla|EED58176.1 afum|EAL90215.1 agla|OJJ83304.1 akaw|GAA87580.1 aluc|OJZ87934.1 anid|CBF87597.1 anig|EHA17723.1 aory|EIT79086.1 asyd|OJJ63263.1 ater|EAU30638.1 atub|OJI90546.1 aver|OJI97694.1 awen|OJJ38580.1 azon|OJJ49522.1

Group3339: abra|OJJ74103.1 acar|OOG01213.1 acla|EAW07946.1 afis|EAW22985.1 afla|EED58177.1 afum|EAL90214.1 agla|OJJ83302.1 akaw|GAA87581.1 aluc|OJZ87933.1 anid|CBF87584.1 anig|EHA17721.1 aory|EIT79072.1 asyd|OJJ63255.1 ater|EAU30637.1 atub|OJI90545.1 aver|OJI97702.1 awen|OJJ38579.1 azon|OJJ49520.1

Group3340: abra|OJJ74109.1 acar|OOG01217.1 acla|EAW07953.1 afis|EAW22990.1 afla|EED58182.1 afum|EAL90210.1 agla|OJJ83296.1 akaw|GAA87585.1 aluc|OJZ87925.1 anid|CBF87579.1 anig|EHA17717.1 aory|EIT79105.1 asyd|OJJ63251.1 ater|EAU30632.1 atub|OJI90537.1 aver|OJI97707.1 awen|OJJ38574.1 azon|OJJ49515.1

Group3341: abra|OJJ74116.1 acar|OOG01220.1 acla|EAW07958.1 afis|EAW22993.1 afla|EED58186.1 afum|EAL90208.1 agla|OJJ83291.1 akaw|GAA87589.1 aluc|OJZ87918.1 anid|CBF87570.1 anig|EHA17712.1 aory|EIT79074.1 asyd|OJJ63244.1 ater|EAU30627.1 atub|OJI90529.1 aver|OJI97712.1 awen|OJJ38568.1 azon|OJJ44834.1

Group3342: abra|OJJ74118.1 acar|OOG01223.1 acla|EAW07960.1 afis|EAW22995.1 afla|EED58188.1 afum|EAL90204.1 agla|OJJ83289.1 akaw|GAA87591.1 aluc|OJZ87914.1 anid|CBF87567.1 anig|EHA17708.1 aory|EIT79079.1 asyd|OJJ63242.1 ater|EAU30623.1 atub|OJI90526.1 aver|OJI97714.1 awen|OJJ38566.1 azon|OJJ50435.1

Group3343: abra|OJJ74159.1 acar|OOF95567.1 afum|EAL91052.1 akaw|GAA89725.1 aluc|OJZ80658.1 anid|CBF80314.1 anig|EHA27174.1 asyd|OJJ58662.1 atub|OJI87513.1 aver|OJJ01268.1 azon|OJJ43927.1 acar|OOF96898.1 akaw|GAA89030.1 aluc|OJZ80574.1 anig|EHA25625.1 atub|OJI88358.1 afis|EAW22138.1 azon|OJJ42294.1

Group3344: abra|OJJ74170.1 acar|OOF95550.1 acla|EAW07066.1 afis|EAW19330.1 afla|EED56451.1 afum|EAL94047.1 agla|OJJ84974.1 akaw|GAA86846.1 aluc|OJZ89965.1 anid|CBF78050.1 anig|EHA27165.1 asyd|OJJ55213.1 ater|EAU36486.1 atub|OJI84840.1 aver|OJJ07002.1 awen|OJJ31742.1 azon|OJJ42370.1 asyd|OJJ57144.1

Group3345: abra|OJJ74188.1 acar|OOF95533.1 acla|EAW07238.1 afis|EAW22261.1 afla|EED57649.1 afum|EAL90919.1 agla|OJJ87796.1 akaw|GAA86829.1 aluc|OJZ89947.1 anid|CBF88508.1 anig|EHA27148.1 aory|EIT79898.1 asyd|OJJ63801.1 ater|EAU34268.1 atub|OJI84859.1 aver|OJI97138.1 awen|OJJ34833.1 azon|OJJ45713.1

Group3346: abra|OJJ74189.1 acar|OOF95532.1 acla|EAW07241.1 afis|EAW22262.1 afla|EED57651.1 afum|EAL90918.1 agla|OJJ87794.1 akaw|GAA86828.1 aluc|OJZ89946.1 anid|CBF88511.1 anig|EHA27145.1

aory|EIT79914.1 asyd|OJJ63803.1 ater|EAU34269.1 atub|OJI84860.1 aver|OJI97135.1 awen|OJJ34835.1 azon|OJJ45712.1

Group3347: abra|OJJ74190.1 acar|OOF95531.1 acla|EAW07242.1 afis|EAW22263.1 afla|EED57655.1 afum|EAL90917.1 agla|OJJ87792.1 akaw|GAA86827.1 aluc|OJZ89945.1 anid|CBF88513.1 anig|EHA27144.1 aory|EIT79925.1 asyd|OJJ63804.1 ater|EAU34273.1 atub|OJI84861.1 aver|OJI97134.1 awen|OJJ34836.1 azon|OJJ45711.1

Group3348: abra|OJJ74193.1 acar|OOF95529.1 acla|EAW07245.1 afis|EAW22266.1 afla|EED57658.1 afum|EAL90914.1 agla|OJJ87789.1 akaw|GAA86824.1 aluc|OJZ89942.1 anid|CBF88519.1 anig|EHA27141.1 aory|EIT79939.1 asyd|OJJ63807.1 ater|EAU34277.1 atub|OJI84864.1 aver|OJI97131.1 awen|OJJ34838.1 azon|OJJ45708.1

Group3349: abra|OJJ74194.1 acar|OOF95527.1 acla|EAW07247.1 afis|EAW22268.1 afla|EED57660.1 afum|EAL90912.1 agla|OJJ87787.1 akaw|GAA86823.1 aluc|OJZ89941.1 anid|CBF88523.1 anig|EHA27140.1 aory|EIT79938.1 asyd|OJJ63808.1 ater|EAU34279.1 atub|OJI84865.1 aver|OJI97129.1 awen|OJJ34841.1 azon|OJJ45706.1

Group3350: abra|OJJ74195.1 acar|OOF95526.1 acla|EAW07248.1 afis|EAW22269.1 afla|EED57661.1 afum|EAL90911.1 agla|OJJ87786.1 akaw|GAA86822.1 aluc|OJZ89939.1 anid|CBF88527.1 anig|EHA27139.1 aory|EIT79909.1 asyd|OJJ63810.1 ater|EAU34280.1 atub|OJI84866.1 aver|OJI97127.1 awen|OJJ34842.1 azon|OJJ45705.1

Group3351: abra|OJJ74196.1 acar|OOF95524.1 acla|EAW07249.1 afis|EAW22270.1 afla|EED57662.1 afum|EAL90910.1 agla|OJJ87785.1 akaw|GAA86821.1 aluc|OJZ89938.1 anid|CBF88528.1 anig|EHA27138.1 aory|EIT79867.1 asyd|OJJ63811.1 ater|EAU34281.1 atub|OJI84868.1 aver|OJI97126.1 awen|OJJ34843.1 azon|OJJ45704.1

Group3352: abra|OJJ74197.1 acar|OOF95523.1 acla|EAW07250.1 afis|EAW22271.1 afla|EED57663.1 afum|EAL90909.1 agla|OJJ87784.1 akaw|GAA86820.1 aluc|OJZ89937.1 anid|CBF88530.1 anig|EHA27137.1 aory|EIT79903.1 asyd|OJJ63812.1 ater|EAU34282.1 atub|OJI84869.1 aver|OJI97125.1 awen|OJJ34844.1 azon|OJJ45703.1

Group3353: abra|OJJ74198.1 acar|OOF95521.1 acla|EAW07252.1 afis|EAW22273.1 afla|EED57665.1 afum|EAL90908.1 agla|OJJ87781.1 akaw|GAA86819.1 aluc|OJZ89936.1 anid|CBF88536.1 anig|EHA27136.1 aory|EIT79943.1 asyd|OJJ63820.1 ater|EAU34283.1 atub|OJI84870.1 aver|OJI97118.1 awen|OJJ34846.1 azon|OJJ45702.1

Group3354: abra|OJJ74199.1 acar|OOF95520.1 acla|EAW07253.1 afis|EAW22274.1 afla|EED57666.1 afum|EAL90907.1 agla|OJJ87780.1 akaw|GAA86818.1 aluc|OJZ89935.1 anid|CBF88537.1 anig|EHA27135.1 aory|EIT79937.1 asyd|OJJ63821.1 ater|EAU34284.1 atub|OJI84871.1 aver|OJI97117.1 awen|OJJ34847.1 azon|OJJ45700.1

Group3355: abra|OJJ74201.1 acar|OOF95519.1 acla|EAW07254.1 afis|EAW22275.1 afla|EED57667.1 afum|EAL90906.1 agla|OJJ87779.1 akaw|GAA86817.1 aluc|OJZ89934.1 anid|CBF88539.1 anig|EHA27134.1 aory|EIT79875.1 asyd|OJJ63822.1 ater|EAU34285.1 atub|OJI84872.1 aver|OJI97116.1 awen|OJJ34848.1 azon|OJJ45699.1

Group3356: abra|OJJ74202.1 acar|OOF95518.1 afla|EED57668.1 afum|EAL90905.1 agla|OJJ87777.1 akaw|GAA86816.1 aluc|OJZ89933.1 anid|CBF88541.1 anig|EHA27133.1 aory|EIT79884.1 ater|EAU34286.1 atub|OJI84873.1 aver|OJI97115.1 azon|OJJ45698.1 acla|EAW07255.1 afis|EAW22276.1 asyd|OJJ63823.1 awen|OJJ34849.1

Group3357: abra|OJJ74203.1 acar|OOF95517.1 acla|EAW07256.1 afis|EAW22277.1 afla|EED57669.1 afum|EAL90904.1 agla|OJJ87776.1 akaw|GAA86815.1 aluc|OJZ89932.1 anid|CBF88543.1 anig|EHA27132.1 aory|EIT79926.1 asyd|OJJ63824.1 ater|EAU34287.1 atub|OJI84874.1 aver|OJI97114.1 awen|OJJ34850.1 azon|OJJ45697.1

Group3358: abra|OJJ74204.1 acar|OOF95516.1 acla|EAW07257.1 afis|EAW22278.1 afla|EED57671.1 afum|EAL90903.1 agla|OJJ87775.1 akaw|GAA86814.1 aluc|OJZ89931.1 anid|CBF88545.1 anig|EHA27131.1 aory|EIT79927.1 asyd|OJJ63825.1 ater|EAU34288.1 atub|OJI84875.1 aver|OJI97113.1 awen|OJJ34851.1 azon|OJJ45696.1

Group3359: abra|OJJ74206.1 acar|OOF95514.1 acla|EAW07259.1 afis|EAW22280.1 afla|EED57677.1 afum|EAL90901.1 agla|OJJ87773.1 akaw|GAA86812.1 aluc|OJZ89929.1 anid|CBF88548.1 anig|EHA27129.1 aory|EIT79874.1 asyd|OJJ63827.1 ater|EAU34290.1 atub|OJI84877.1 aver|OJI97111.1 awen|OJJ34853.1 azon|OJJ45677.1

Group3360: abra|OJJ74207.1 acar|OOF95513.1 acla|EAW07260.1 afis|EAW22281.1 afla|EED57678.1 afum|EAL90900.1 agla|OJJ87768.1 akaw|GAA86811.1 aluc|OJZ89928.1 anid|CBF88550.1 anig|EHA27128.1 aory|EIT79890.1 asyd|OJJ63828.1 ater|EAU34291.1 atub|OJI84878.1 aver|OJI97110.1 awen|OJJ34854.1 azon|OJJ45676.1

Group3361: abra|OJJ74208.1 acar|OOF95512.1 acla|EAW07261.1 afis|EAW22282.1 afla|EED57679.1  
afum|EAL90899.1 agla|OJJ87767.1 akaw|GAA86810.1 aluc|OJZ89926.1 anid|CBF88552.1 anig|EHA27127.1  
aory|EIT79907.1 asyd|OJJ63829.1 ater|EAU34292.1 atub|OJI84879.1 aver|OJI97109.1 awen|OJJ34855.1  
azon|OJJ45674.1

Group3362: abra|OJJ74209.1 acar|OOF95511.1 acla|EAW07262.1 afis|EAW22283.1 afla|EED57680.1  
afum|EAL90898.1 agla|OJJ87766.1 akaw|GAA86809.1 aluc|OJZ89925.1 anid|CBF88554.1 anig|EHA27126.1  
aory|EIT79921.1 asyd|OJJ63830.1 ater|EAU34293.1 atub|OJI84880.1 aver|OJI97108.1 awen|OJJ34856.1  
azon|OJJ45673.1

Group3363: abra|OJJ74210.1 acar|OOF95510.1 acla|EAW07263.1 afis|EAW22284.1 afla|EED57682.1  
afum|EAL90897.1 agla|OJJ87764.1 akaw|GAA86808.1 aluc|OJZ89924.1 anid|CBF88556.1 anig|EHA27124.1  
aory|EIT79901.1 asyd|OJJ63831.1 ater|EAU34296.1 atub|OJI84881.1 aver|OJI97107.1 awen|OJJ34857.1  
azon|OJJ45671.1

Group3364: abra|OJJ74211.1 acar|OOF95509.1 acla|EAW07264.1 afis|EAW22285.1 afla|EED57685.1  
afum|EAL90896.1 agla|OJJ87763.1 akaw|GAA86807.1 aluc|OJZ89923.1 anid|CBF88558.1 anig|EHA27123.1  
aory|EIT79887.1 asyd|OJJ63832.1 ater|EAU34297.1 atub|OJI84882.1 aver|OJI97106.1 awen|OJJ34858.1  
azon|OJJ45670.1

Group3365: abra|OJJ74218.1 acar|OOF95503.1 acla|EAW07273.1 afis|EAW22294.1 afla|EED57690.1  
afum|EAL90887.1 agla|OJJ87758.1 akaw|GAA86800.1 aluc|OJZ89916.1 anid|CBF88569.1 anig|EHA27116.1  
aory|EIT79904.1 asyd|OJJ63837.1 ater|EAU34303.1 atub|OJI84889.1 aver|OJI97100.1 awen|OJJ34864.1  
azon|OJJ45665.1

Group3366: abra|OJJ74220.1 acar|OOF90433.1 acla|EAW07284.1 afis|EAW22315.1 afla|EED57695.1  
afum|EAL90875.1 agla|OJJ87735.1 akaw|GAA86798.1 aluc|OJZ89914.1 anid|CBF88577.1 anig|EHA27114.1  
aory|EIT79936.1 asyd|OJJ63841.1 ater|EAU34308.1 atub|OJI84891.1 aver|OJI97096.1 awen|OJJ34868.1  
azon|OJJ50045.1

Group3367: abra|OJJ74223.1 acar|OOF90434.1 acla|EAW07282.1 afis|EAW22313.1 afla|EED57697.1  
afum|EAL90877.1 agla|OJJ87737.1 akaw|GAA86796.1 aluc|OJZ89911.1 anid|CBF88580.1 anig|EHA27111.1  
aory|EIT79934.1 asyd|OJJ63843.1 ater|EAU34310.1 atub|OJI84895.1 aver|OJI97094.1 awen|OJJ34872.1  
azon|OJJ50047.1

Group3368: abra|OJJ74224.1 acar|OOF90435.1 acla|EAW07281.1 afis|EAW22312.1 afla|EED57698.1  
afum|EAL90878.1 agla|OJJ87738.1 akaw|GAA86795.1 aluc|OJZ89910.1 anid|CBF88582.1 anig|EHA27110.1  
aory|EIT79916.1 asyd|OJJ63844.1 ater|EAU34311.1 atub|OJI84896.1 aver|OJI97093.1 awen|OJJ34873.1  
azon|OJJ50048.1

Group3369: abra|OJJ74225.1 acar|OOF95502.1 acla|EAW07280.1 afis|EAW22311.1 afla|EED57701.1  
afum|EAL90879.1 agla|OJJ87739.1 akaw|GAA86794.1 aluc|OJZ89908.1 anid|CBF88584.1 anig|EHA27108.1  
aory|EIT79931.1 asyd|OJJ63846.1 ater|EAU34313.1 atub|OJI84898.1 aver|OJI97090.1 awen|OJJ34876.1  
azon|OJJ50049.1

Group3370: abra|OJJ74228.1 acar|OOF95498.1 acla|EAW07276.1 afis|EAW22297.1 afla|EED57705.1  
afum|EAL90884.1 agla|OJJ87748.1 akaw|GAA86791.1 aluc|OJZ89905.1 anid|CBF88592.1 anig|EHA27105.1  
aory|EIT79881.1 asyd|OJJ63850.1 ater|EAU34317.1 atub|OJI84901.1 aver|OJI97087.1 awen|OJJ34881.1  
azon|OJJ50050.1

Group3371: abra|OJJ74231.1 acar|OOF95495.1 acla|EAW07286.1 afis|EAW22319.1 afla|EED57710.1  
afum|EAL90871.1 agla|OJJ87745.1 akaw|GAA86788.1 aluc|OJZ89902.1 anid|CBF88599.1 anig|EHA27102.1  
aory|EIT79923.1 asyd|OJJ63854.1 ater|EAU34320.1 atub|OJI84905.1 aver|OJI97084.1 awen|OJJ34885.1  
azon|OJJ50053.1

Group3372: abra|OJJ74237.1 acar|OOF95492.1 acla|EAW07288.1 afis|EAW22321.1 afla|EED57718.1  
afum|EAL90870.1 agla|OJJ87749.1 akaw|GAA86783.1 aluc|OJZ89895.1 anid|CBF88602.1 anig|EHA27094.1  
aory|EIT79929.1 asyd|OJJ63855.1 ater|EAU34321.1 atub|OJI84912.1 aver|OJI97083.1 awen|OJJ34888.1  
azon|OJJ50055.1

Group3373: abra|OJJ74242.1 acar|OOF95488.1 acla|EAW07291.1 afis|EAW22325.1 afla|EED57723.1  
afum|EAL90867.1 agla|OJJ87721.1 akaw|GAA86778.1 aluc|OJZ89890.1 anid|CBF88609.1 anig|EHA27089.1  
aory|EIT79878.1 asyd|OJJ63859.1 ater|EAU34324.1 atub|OJI84917.1 aver|OJI97080.1 awen|OJJ34896.1  
azon|OJJ50065.1

Group3374: abra|OJJ74246.1 acar|OOF95484.1 acla|EAW07298.1 afis|EAW22347.1 afla|EED57735.1  
afum|EAL90845.1 agla|OJJ87687.1 akaw|GAA86774.1 aluc|OJZ89886.1 anid|CBF88623.1 anig|EHA27085.1  
aory|EIT79913.1 asyd|OJJ63868.1 ater|EAU39483.1 atub|OJI84921.1 aver|OJI97071.1 awen|OJJ34928.1  
azon|OJJ50070.1

Group3375: abra|OJJ74249.1 acar|OOF95479.1 acla|EAW07293.1 afis|EAW22327.1 afla|EED57726.1  
afum|EAL90865.1 agla|OJJ87723.1 akaw|GAA86772.1 aluc|OJZ89883.1 anid|CBF88613.1 anig|EHA27082.1

aory|EIT79866.1 asyd|OJJ63861.1 ater|EAU34326.1 atub|OJI84924.1 aver|OJI97078.1 awen|OJJ34894.1 azon|OJJ50063.1

Group3376: abra|OJJ74250.1 acar|OOF95480.1 acla|EAW07294.1 afis|EAW22328.1 afla|EED57727.1 afum|EAL90864.1 agla|OJJ87724.1 akaw|GAA86771.1 aluc|OJZ89882.1 anid|CBF88615.1 anig|EHA27081.1 aory|EIT79906.1 asyd|OJJ63862.1 ater|EAU34327.1 atub|OJI84925.1 aver|OJI97077.1 awen|OJJ34893.1 azon|OJJ50062.1

Group3377: abra|OJJ74252.1 acar|OOF95477.1 acla|EAW07296.1 afis|EAW22330.1 afla|EED57729.1 afum|EAL90862.1 agla|OJJ87752.1 akaw|GAA86769.1 aluc|OJZ89880.1 anid|CBF88619.1 anig|EHA27079.1 aory|EIT79894.1 asyd|OJJ63864.1 ater|EAU34331.1 atub|OJI84927.1 aver|OJI97075.1 awen|OJJ34891.1 azon|OJJ50060.1

Group3378: abra|OJJ74256.1 acar|OOF95472.1 acla|EAW07302.1 afis|EAW22343.1 afla|EED57738.1 afum|EAL90848.1 agla|OJJ87691.1 akaw|GAA86765.1 aluc|OJZ89876.1 anid|CBF88627.1 anig|EHA27075.1 aory|EIT79915.1 asyd|OJJ63870.1 ater|EAU39481.1 atub|OJI84931.1 aver|OJI97069.1 awen|OJJ34922.1 azon|OJJ50072.1

Group3379: abra|OJJ74257.1 acar|OOF95471.1 acla|EAW07303.1 afis|EAW22342.1 afla|EED57739.1 afum|EAL90849.1 agla|OJJ87692.1 akaw|GAA86764.1 aluc|OJZ89875.1 anid|CBF88628.1 anig|EHA27074.1 aory|EIT79892.1 asyd|OJJ63871.1 ater|EAU39480.1 atub|OJI84932.1 aver|OJI97068.1 awen|OJJ34921.1 azon|OJJ50073.1

Group3380: abra|OJJ74260.1 acar|OOF89900.1 acla|EAW07305.1 afis|EAW22340.1 afla|EED57741.1 afum|EAL90852.1 agla|OJJ87698.1 akaw|GAA86761.1 aluc|OJZ89871.1 anid|CBF88632.1 anig|EHA27071.1 aory|EIT79893.1 asyd|OJJ63874.1 ater|EAU39478.1 atub|OJI84936.1 aver|OJI97064.1 awen|OJJ34919.1 azon|OJJ50075.1

Group3381: abra|OJJ74261.1 acar|OOF89901.1 acla|EAW07306.1 afis|EAW22339.1 afla|EED57742.1 afum|EAL90853.1 agla|OJJ87699.1 akaw|GAA86760.1 aluc|OJZ89870.1 anid|CBF88634.1 anig|EHA27070.1 aory|EIT79922.1 asyd|OJJ63875.1 ater|EAU39477.1 atub|OJI84937.1 aver|OJI97063.1 awen|OJJ34918.1 azon|OJJ50076.1

Group3382: abra|OJJ74264.1 acar|OOF95466.1 acla|EAW07308.1 afis|EAW22338.1 afla|EED57743.1 afum|EAL90854.1 agla|OJJ87700.1 akaw|GAA86759.1 aluc|OJZ89869.1 anid|CBF88636.1 anig|EHA27069.1 aory|EIT81083.1 asyd|OJJ63877.1 ater|EAU39475.1 atub|OJI84939.1 aver|OJI97062.1 awen|OJJ34916.1 azon|OJJ50079.1

Group3383: abra|OJJ74265.1 acar|OOF95465.1 acla|EAW07309.1 afis|EAW22337.1 afla|EED57744.1 afum|EAL90855.1 agla|OJJ87701.1 akaw|GAA86758.1 aluc|OJZ89868.1 anid|CBF88638.1 anig|EHA27068.1 aory|EIT81047.1 asyd|OJJ63878.1 ater|EAU39474.1 atub|OJI84940.1 aver|OJI97061.1 awen|OJJ34915.1 azon|OJJ45569.1

Group3384: abra|OJJ74266.1 acar|OOF95464.1 acla|EAW07310.1 afis|EAW22336.1 afla|EED57746.1 afum|EAL90856.1 agla|OJJ87702.1 akaw|GAA86757.1 aluc|OJZ89867.1 anid|CBF88640.1 anig|EHA27067.1 aory|EIT81092.1 asyd|OJJ63879.1 ater|EAU39473.1 atub|OJI84941.1 aver|OJI97060.1 awen|OJJ34914.1 azon|OJJ45570.1

Group3385: abra|OJJ74267.1 acar|OOF89814.1 acla|EAW07311.1 afis|EAW22335.1 afla|EED57747.1 afum|EAL90857.2 agla|OJJ87715.1 akaw|GAA86756.1 aluc|OJZ89866.1 anid|CBF88641.1 anig|EHA27066.1 aory|EIT81022.1 asyd|OJJ63880.1 ater|EAU39472.1 atub|OJI84942.1 aver|OJI97059.1 awen|OJJ34913.1 azon|OJJ45571.1

Group3386: abra|OJJ74270.1 acar|OOF95460.1 acla|EAW07314.1 afis|EAW22332.1 afla|EED57751.1 afum|EAL90860.1 agla|OJJ87712.1 akaw|GAA86753.1 aluc|OJZ89863.1 anid|CBF88647.1 anig|EHA27063.1 aory|EIT81116.1 asyd|OJJ63882.1 ater|EAU39461.1 atub|OJI84945.1 aver|OJI97057.1 awen|OJJ34910.1 azon|OJJ45575.1

Group3387: abra|OJJ74272.1 acar|OOF95458.1 acla|EAW07317.1 afis|EAW22349.1 afla|EED57753.1 afum|EAL90843.1 agla|OJJ87710.1 akaw|GAA86751.1 aluc|OJZ89861.1 anid|CBF88651.1 anig|EHA27061.1 aory|EIT81051.1 asyd|OJJ63885.1 ater|EAU39459.1 atub|OJI84947.1 aver|OJI97055.1 awen|OJJ34905.1 azon|OJJ45577.1

Group3388: abra|OJJ74276.1 acar|OOF95455.1 acla|EAW07320.1 afis|EAW22352.1 afla|EED57756.1 afum|EAL90840.1 agla|OJJ87707.1 akaw|GAA86748.1 aluc|OJZ89857.1 anid|CBF88661.1 anig|EHA27058.1 aory|EIT81039.1 asyd|OJJ63889.1 ater|EAU39488.1 atub|OJI84949.1 aver|OJI97050.1 awen|OJJ34903.1 azon|OJJ45579.1

Group3389: abra|OJJ74277.1 acar|OOF95454.1 acla|EAW07321.1 afis|EAW22353.1 afla|EED57759.1 afum|EAL90839.1 agla|OJJ87716.1 akaw|GAA86747.1 aluc|OJZ89856.1 anid|CBF88662.1 anig|EHA27057.1 aory|EIT81042.1 asyd|OJJ63890.1 ater|EAU39487.1 atub|OJI84950.1 aver|OJI97049.1 awen|OJJ34902.1 azon|OJJ45580.1

Group3390: abra|OJJ74278.1 acar|OOF95453.1 acla|EAW07322.1 afis|EAW22354.1 afla|EED57760.1 afum|EAL90838.1 agla|OJJ87717.1 akaw|GAA86746.1 aluc|OJZ89855.1 anid|CBF88664.1 anig|EHA27056.1 aory|EIT81028.1 asyd|OJJ63891.1 ater|EAU39486.1 atub|OJI84951.1 aver|OJI97048.1 awen|OJJ34901.1 azon|OJJ45581.1

Group3391: abra|OJJ74280.1 acar|OOF95451.1 acla|EAW07324.1 afis|EAW22356.1 afla|EED57762.1 afum|EAL90835.1 agla|OJJ87598.1 akaw|GAA86744.1 aluc|OJZ89853.1 anid|CBF88668.1 anig|EHA27054.1 aory|EIT81074.1 asyd|OJJ63893.1 ater|EAU39490.1 atub|OJI84953.1 aver|OJI97046.1 awen|OJJ34930.1 azon|OJJ45583.1

Group3392: abra|OJJ74281.1 acar|OOF95450.1 acla|EAW07325.1 afis|EAW22357.1 afla|EED57763.1 afum|EAL90834.1 agla|OJJ87682.1 akaw|GAA86743.1 aluc|OJZ89852.1 anid|CBF88672.1 anig|EHA27053.1 aory|EIT81043.1 asyd|OJJ63895.1 ater|EAU39491.1 atub|OJI84954.1 aver|OJI97044.1 awen|OJJ34931.1 azon|OJJ45584.1

Group3393: abra|OJJ74282.1 acar|OOF95449.1 acla|EAW07326.1 afis|EAW22358.1 afla|EED57764.1 afum|EAL90833.1 agla|OJJ87683.1 akaw|GAA86742.1 aluc|OJZ89851.1 anid|CBF88674.1 anig|EHA27052.1 aory|EIT81053.1 asyd|OJJ63896.1 ater|EAU39492.1 atub|OJI84955.1 aver|OJI97043.1 awen|OJJ34932.1 azon|OJJ45585.1

Group3394: abra|OJJ74283.1 acar|OOF95447.1 acla|EAW07327.1 afis|EAW22359.1 afla|EED57765.1 afum|EAL90832.1 agla|OJJ87684.1 akaw|GAA86741.1 aluc|OJZ89850.1 anid|CBF88676.1 anig|EHA27051.1 aory|EIT81093.1 asyd|OJJ63897.1 ater|EAU39493.1 atub|OJI84956.1 aver|OJI97042.1 awen|OJJ34933.1 azon|OJJ45586.1

Group3395: abra|OJJ74290.1 acar|OOF95441.1 acla|EAW07334.1 afis|EAW22366.1 afla|EED57774.1 afum|EBA27415.1 agla|OJJ87624.1 akaw|GAA86734.1 aluc|OJZ89844.1 anid|CBF88692.1 anig|EHA27045.1 aory|EIT81109.1 asyd|OJJ63910.1 ater|EAU39501.1 atub|OJI84964.1 aver|OJI97031.1 awen|OJJ34940.1 azon|OJJ45592.1

Group3396: abra|OJJ74291.1 acar|OOF95440.1 acla|EAW07335.1 afis|EAW22367.1 afla|EED57775.1 afum|EAL90825.1 agla|OJJ87622.1 akaw|GAA86733.1 aluc|OJZ89843.1 anid|CBF88694.1 anig|EHA27044.1 aory|EIT81063.1 asyd|OJJ63911.1 ater|EAU39502.1 atub|OJI84965.1 aver|OJI97030.1 awen|OJJ34941.1 azon|OJJ45593.1

Group3397: abra|OJJ74292.1 acar|OOF95439.1 acla|EAW07336.1 afis|EAW22368.1 afla|EED57776.1 afum|EAL90824.1 akaw|GAA86732.1 aluc|OJZ89842.1 anid|CBF88695.1 anig|EHA27043.1 aory|EIT81045.1 asyd|OJJ63913.1 ater|EAU39503.1 atub|OJI84966.1 aver|OJI97029.1 awen|OJJ34942.1 azon|OJJ45594.1 agla|OJJ87621.1

Group3398: abra|OJJ74293.1 acar|OOF95438.1 acla|EAW07337.1 afis|EAW22369.1 afla|EED57777.1 afum|EAL90823.1 agla|OJJ87620.1 akaw|GAA86731.1 aluc|OJZ89841.1 anid|CBF88697.1 anig|EHA27042.1 aory|EIT81034.1 asyd|OJJ63914.1 ater|EAU39504.1 atub|OJI84967.1 aver|OJI97028.1 awen|OJJ34944.1 azon|OJJ45595.1

Group3399: abra|OJJ74294.1 acar|OOF95437.1 acla|EAW07339.1 afis|EAW22370.1 afla|EED57778.1 afum|EAL90822.2 agla|OJJ87619.1 akaw|GAA86730.1 aluc|OJZ89840.1 anid|CBF88699.1 anig|EHA27041.1 aory|EIT81037.1 asyd|OJJ63915.1 ater|EAU39505.1 atub|OJI84968.1 aver|OJI97027.1 awen|OJJ34945.1 azon|OJJ45596.1

Group3400: abra|OJJ74295.1 acar|OOF95436.1 acla|EAW07340.1 afis|EAW22372.1 afla|EED57779.1 afum|EAL90820.2 agla|OJJ87617.1 akaw|GAA86729.1 aluc|OJZ89839.1 anid|CBF88703.1 anig|EHA27040.1 aory|EIT81082.1 asyd|OJJ63919.1 ater|EAU39506.1 atub|OJI84969.1 aver|OJI97024.1 awen|OJJ34947.1 azon|OJJ45597.1

Group3401: abra|OJJ74296.1 acar|OOF95435.1 acla|EAW07341.1 afis|EAW22373.1 afla|EED57780.1 afum|EAL90819.1 agla|OJJ87626.1 akaw|GAA86728.1 aluc|OJZ89838.1 anid|CBF88705.1 anig|EHA27039.1 aory|EIT81056.1 asyd|OJJ63920.1 ater|EAU39507.1 atub|OJI84970.1 aver|OJI97023.1 awen|OJJ34948.1 azon|OJJ45598.1

Group3402: abra|OJJ74297.1 acar|OOF95434.1 acla|EAW07342.1 afis|EAW22374.1 afla|EED57781.1 afum|EAL90818.1 agla|OJJ87627.1 akaw|GAA86727.1 aluc|OJZ89837.1 anid|CBF88706.1 anig|EHA27038.1 aory|EIT81052.1 asyd|OJJ63923.1 ater|EAU39508.1 atub|OJI84971.1 aver|OJI97022.1 awen|OJJ34949.1 azon|OJJ45599.1

Group3403: abra|OJJ74298.1 acar|OOF95433.1 acla|EAW07343.1 afis|EAW22375.1 afum|EAL90817.1 agla|OJJ87628.1 akaw|GAA86726.1 aluc|OJZ89835.1 anid|CBF88710.1 anig|EHA27037.1 aory|EIT81071.1 asyd|OJJ63924.1 ater|EAU39509.1 atub|OJI84972.1 aver|OJI97020.1 awen|OJJ34950.1 azon|OJJ45600.1 afla|EED57783.1

Group3404: abra|OJJ74299.1 acar|OOF95431.1 acla|EAW07344.1 afis|EAW22376.1 afla|EED57784.1 afum|EAL90816.1 agla|OJJ87629.1 akaw|GAA86725.1 aluc|OJZ89834.1 anid|CBF88712.1 anig|EHA27036.1

aory|EIT81070.1 asyd|OJJ63925.1 ater|EAU39510.1 atub|OJI84973.1 aver|OJI97019.1 awen|OJJ34951.1 azon|OJJ45601.1

Group3405: abra|OJJ74301.1 acar|OOF95429.1 acla|EAW07346.1 afis|EAW22378.1 afla|EED57786.1 afum|EAL90814.1 agla|OJJ87631.1 akaw|GAA86724.1 aluc|OJZ89832.1 anid|CBF88714.1 anig|EHA27034.1 aory|EIT81069.1 asyd|OJJ63926.1 ater|EAU39512.1 atub|OJI84974.1 aver|OJI97018.1 awen|OJJ34952.1 azon|OJJ45602.1

Group3406: abra|OJJ74302.1 acar|OOF95428.1 acla|EAW07349.1 afis|EAW22379.1 afla|EED57787.1 afum|EAL90812.1 agla|OJJ87635.1 akaw|GAA86723.1 aluc|OJZ89830.1 anid|CBF88716.1 anig|EHA27033.1 aory|EIT81084.1 asyd|OJJ63927.1 ater|EAU39513.1 atub|OJI84975.1 aver|OJI97017.1 awen|OJJ34953.1 azon|OJJ45603.1

Group3407: abra|OJJ74304.1 acar|OOF95424.1 acla|EAW07352.1 afis|EAW22381.1 afla|EED57790.1 afum|EAL90810.1 agla|OJJ87640.1 akaw|GAA86720.1 aluc|OJZ89824.1 anid|CBF88718.1 anig|EHA27031.1 aory|EIT81089.1 asyd|OJJ63928.1 ater|EAU39515.1 atub|OJI84982.1 aver|OJI97016.1 awen|OJJ34956.1 azon|OJJ45608.1

Group3408: abra|OJJ74305.1 acar|OOF95423.1 acla|EAW07353.1 afis|EAW22382.1 afla|EED56040.1 afum|EAL90809.1 agla|OJJ87641.1 akaw|GAA86719.1 aluc|OJZ89822.1 anid|CBF88721.1 anig|EHA27030.1 aory|EIT76582.1 asyd|OJJ63929.1 ater|EAU39516.1 atub|OJI84983.1 aver|OJI97014.1 awen|OJJ34957.1 azon|OJJ45609.1

Group3409: abra|OJJ74306.1 acar|OOF95422.1 acla|EAW07354.1 afis|EAW22383.1 afla|EED56041.1 afum|EAL90808.1 agla|OJJ87642.1 akaw|GAA86718.1 aluc|OJZ89821.1 anid|CBF88723.1 anig|EHA27029.1 aory|EIT76563.1 asyd|OJJ63930.1 ater|EAU39517.1 atub|OJI84984.1 aver|OJI97013.1 awen|OJJ34958.1 azon|OJJ45610.1

Group3410: abra|OJJ74307.1 acar|OOF95420.1 acla|EAW07355.1 afis|EAW22384.1 afla|EED56044.1 afum|EAL90806.1 agla|OJJ87644.1 akaw|GAA86717.1 aluc|OJZ89820.1 anid|CBF88725.1 anig|EHA27028.1 aory|EIT76594.1 asyd|OJJ63931.1 ater|EAU39337.1 atub|OJI84985.1 aver|OJI97012.1 awen|OJJ34959.1 azon|OJJ45611.1

Group3411: abra|OJJ74310.1 acar|OOF95419.1 acla|EAW07357.1 afis|EAW22386.1 afla|EED56046.1 afum|EAL90804.1 agla|OJJ87647.1 akaw|GAA86714.1 aluc|OJZ89816.1 anid|CBF88730.1 anig|EHA27025.1 aory|EIT76610.1 asyd|OJJ63934.1 ater|EAU39335.1 atub|OJI84989.1 aver|OJI97008.1 awen|OJJ34961.1 azon|OJJ45613.1

Group3412: abra|OJJ74311.1 acar|OOF95417.1 acla|EAW07358.1 afis|EAW22387.1 afla|EED56047.1 afum|EAL90803.1 agla|OJJ87648.1 akaw|GAA86713.1 aluc|OJZ89815.1 anid|CBF88732.1 anig|EHA27024.1 aory|EIT76591.1 asyd|OJJ63935.1 ater|EAU39334.1 atub|OJI84990.1 aver|OJI97007.1 awen|OJJ34962.1 azon|OJJ45614.1

Group3413: abra|OJJ74315.1 acar|OOF95412.1 acla|EAW07366.1 afis|EAW22393.1 afla|EED56056.1 afum|EAL90798.1 agla|OJJ87655.1 akaw|GAA86710.1 aluc|OJZ89811.1 anid|CBF88743.1 anig|EHA27021.1 aory|EIT76567.1 asyd|OJJ63954.1 ater|EAU39325.1 atub|OJI84994.1 aver|OJI96987.1 awen|OJJ34970.1 azon|OJJ45619.1

Group3414: abra|OJJ74316.1 acar|OOF95411.1 acla|EAW07367.1 afis|EAW22394.1 afla|EED56057.1 afum|EAL90797.1 agla|OJJ87657.1 akaw|GAA86709.1 aluc|OJZ89810.1 anid|CBF88745.1 anig|EHA27020.1 aory|EIT76865.1 asyd|OJJ63955.1 ater|EAU39324.1 atub|OJI84995.1 aver|OJI96986.1 awen|OJJ34971.1 azon|OJJ45620.1

Group3415: abra|OJJ74320.1 acar|OOF95409.1 acla|EAW07372.1 afis|EAW22397.1 afla|EED56061.1 afum|EAL90794.1 agla|OJJ87660.1 akaw|GAA86706.1 aluc|OJZ89808.1 anid|CBF88750.1 anig|EHA27018.1 aory|EIT76888.1 asyd|OJJ63958.1 ater|EAU39320.1 atub|OJI84998.1 aver|OJI96983.1 awen|OJJ34975.1 azon|OJJ45624.1

Group3416: abra|OJJ74325.1 acar|OOF95406.1 acla|EAW07377.1 afis|EAW22402.1 afla|EED56066.1 afum|EAL90789.1 agla|OJJ87665.1 akaw|GAA86701.1 aluc|OJZ89803.1 anid|CBF88765.1 anig|EHA27016.1 aory|EIT76819.1 asyd|OJJ63981.1 ater|EAU39306.1 atub|OJI85003.1 aver|OJI96972.1 awen|OJJ34981.1 azon|OJJ45629.1

Group3417: abra|OJJ74326.1 acar|OOF95405.1 acla|EAW07378.1 afis|EAW22403.1 afla|EED56067.1 afum|EAL90788.1 agla|OJJ87666.1 akaw|GAA86700.1 aluc|OJZ89802.1 anid|CBF88763.1 anig|EHA27015.1 aory|EIT76544.1 asyd|OJJ63982.1 ater|EAU39305.1 atub|OJI85004.1 aver|OJI96971.1 awen|OJJ34982.1 azon|OJJ45631.1

Group3418: abra|OJJ74329.1 acar|OOF95402.1 acla|EAW07379.1 afis|EAW22404.1 afla|EED56068.1 afum|EAL90787.1 agla|OJJ87667.1 akaw|GAA86699.1 aluc|OJZ89801.1 anid|CBF88785.1 anig|EHA27014.1 aory|EIT76781.1 asyd|OJJ62903.1 ater|EAU39304.1 atub|OJI85005.1 aver|OJI96957.1 awen|OJJ34983.1 azon|OJJ45633.1



Group3419: abra|OJJ74336.1 acar|OOF95391.1 acla|EAW07386.1 afis|EAW22411.1 afla|EED52491.1 afum|EAL90781.1 agla|OJJ87678.1 akaw|GAA86693.1 aluc|OJZ89794.1 anid|CBF88796.1 anig|EHA27007.1 aory|EIT82814.1 asyd|OJJ62897.1 ater|EAU39294.1 atub|OJI85012.1 aver|OJI96950.1 awen|OJJ34992.1 azon|OJJ45635.1

Group3420: abra|OJJ74340.1 acar|OOF89991.1 acla|EAW07391.1 afis|EAW22417.1 afla|EED52495.1 afum|EAL90775.1 agla|OJJ87599.1 akaw|GAA86690.1 aluc|OJZ89791.1 anid|CBF88802.1 anig|EHA27004.1 aory|EIT82790.1 asyd|OJJ62895.1 ater|EAU39289.1 atub|OJI85015.1 aver|OJI96947.1 awen|OJJ34996.1 azon|OJJ45639.1

Group3421: abra|OJJ74341.1 acar|OOF95389.1 acla|EAW07392.1 afis|EAW22418.1 afla|EED52496.1 afum|EAL90774.1 agla|OJJ87600.1 akaw|GAA86689.1 aluc|OJZ89790.1 anid|CBF88804.1 anig|EHA27003.1 aory|EIT82800.1 asyd|OJJ62894.1 ater|EAU39288.1 atub|OJI85016.1 aver|OJI96946.1 awen|OJJ34997.1 azon|OJJ45646.1

Group3422: abra|OJJ74343.1 acar|OOF95387.1 acla|EAW07397.1 afis|EAW22423.1 afla|EED52501.1 afum|EAL90768.2 agla|OJJ87605.1 akaw|GAA86687.1 aluc|OJZ89788.1 anid|CBF88813.1 anig|EHA27002.1 aory|EIT82762.1 asyd|OJJ62889.1 ater|EAU39284.1 atub|OJI85018.1 aver|OJI96941.1 awen|OJJ35002.1 azon|OJJ45642.1

Group3423: abra|OJJ74344.1 acar|OOF95386.1 acla|EAW07398.1 afis|EAW22424.1 afla|EED52502.1 afum|EAL90767.1 agla|OJJ87606.1 akaw|GAA86686.1 aluc|OJZ89787.1 anid|CBF75162.1 anig|EHA27001.1 aory|EIT82765.1 asyd|OJJ59961.1 ater|EAU39283.1 atub|OJI85019.1 aver|OJJ02329.1 awen|OJJ35003.1 azon|OJJ45641.1

Group3424: abra|OJJ74347.1 acar|OOF95382.1 acla|EAW07401.1 afis|EAW22427.1 afla|EED52505.1 afum|EAL90764.1 agla|OJJ87596.1 akaw|GAA86683.1 aluc|OJZ89783.1 anid|CBF88819.1 anig|EHA26998.1 aory|EIT82749.1 asyd|OJJ62886.1 ater|EAU39280.1 atub|OJI85022.1 aver|OJI96938.1 awen|OJJ35006.1 azon|OJJ45648.1

Group3425: abra|OJJ74348.1 acar|OOF95380.1 acla|EAW07402.1 afis|EAW22428.1 afla|EED52506.1 afum|EAL90763.1 agla|OJJ87595.1 akaw|GAA86682.1 aluc|OJZ89782.1 anid|CBF88822.1 anig|EHA26997.1 aory|EIT82757.1 asyd|OJJ62885.1 ater|EAU39279.1 atub|OJI85024.1 aver|OJI96937.1 awen|OJJ35007.1 azon|OJJ45649.1

Group3426: abra|OJJ74352.1 acar|OOF95378.1 acla|EAW07405.1 afis|EAW22431.1 afla|EED52510.1 afum|EAL90760.1 agla|OJJ87592.1 akaw|GAA86679.1 aluc|OJZ89776.1 anid|CBF88828.1 anig|EHA26994.1 aory|EIT82794.1 asyd|OJJ62882.1 ater|EAU39276.1 atub|OJI85027.1 aver|OJI96934.1 awen|OJJ35010.1 azon|OJJ45651.1

Group3427: abra|OJJ74353.1 acar|OOF95377.1 acla|EAW07406.1 afis|EAW22432.1 afla|EED52513.1 afum|EAL90759.1 agla|OJJ87590.1 akaw|GAA86678.1 aluc|OJZ89775.1 anid|CBF88832.1 anig|EHA26993.1 aory|EIT82776.1 asyd|OJJ62880.1 ater|EAU39275.1 atub|OJI85028.1 aver|OJI96932.1 awen|OJJ35011.1 azon|OJJ45652.1

Group3428: abra|OJJ74355.1 acar|OOF95375.1 acla|EAW07409.1 afis|EAW22435.1 afla|EED52515.1 afum|EAL90756.1 agla|OJJ87587.1 akaw|GAA86676.1 aluc|OJZ89773.1 anid|CBF88835.1 anig|EHA26991.1 aory|EIT82785.1 asyd|OJJ62878.1 ater|EAU39273.1 atub|OJI85030.1 aver|OJI96930.1 awen|OJJ35013.1 azon|OJJ45654.1

Group3429: abra|OJJ74359.1 acar|OOF95370.1 acla|EAW07410.1 afis|EAW22436.1 afla|EED54446.1 afum|EAL90755.1 agla|OJJ87586.1 akaw|GAA86672.1 aluc|OJZ89769.1 anid|CBF88882.1 anig|EHA26989.1 asyd|OJJ62877.1 ater|EAU39272.1 atub|OJI85034.1 aver|OJI96929.1 awen|OJJ35014.1 azon|OJJ45656.1 aory|EIT81137.1

Group3430: abra|OJJ74361.1 acar|OOF95368.1 acla|EAW07413.1 afis|EAW22439.1 afla|EED54449.1 afum|EAL90752.1 agla|OJJ87584.1 akaw|GAA86669.1 aluc|OJZ89766.1 anid|CBF88862.1 anig|EHA26986.1 aory|EIT81135.1 asyd|OJJ62874.1 ater|EAU39269.1 atub|OJI85036.1 aver|OJI96927.1 awen|OJJ35016.1 azon|OJJ45661.1

Group3431: abra|OJJ74364.1 acar|OOF95366.1 acla|EAW07414.1 afis|EAW22441.1 afla|EED54457.1 afum|EAL90750.1 agla|OJJ87583.1 akaw|GAA86666.1 aluc|OJZ89763.1 anid|CBF88845.1 anig|EHA26983.1 aory|EIT81148.1 asyd|OJJ62867.1 ater|EAU39263.1 atub|OJI85039.1 aver|OJI96920.1 awen|OJJ35018.1 azon|OJJ50043.1

Group3432: abra|OJJ74386.1 acar|OOF95352.1 acla|EAW07427.1 afis|EAW22453.1 afla|EED54469.1 afum|EAL90738.1 agla|OJJ87570.1 akaw|GAA87287.1 aluc|OJZ89732.1 anid|CBF88931.1 anig|EHA26958.1 aory|EIT81158.1 asyd|OJJ62850.1 ater|EAU39253.1 atub|OJI85069.1 aver|OJI96903.1 awen|OJJ35078.1 azon|OJJ50029.1

Group3433: abra|OJJ74395.1 acar|OOF95341.1 acla|EAW06819.1 afis|EAW16367.1 afla|EED53469.1 afum|EAL88992.2 agla|OJJ78588.1 akaw|GAA87293.1 aluc|OJZ89725.1 anid|CBF89350.1 anig|EHA26953.1

aory|EIT75003.1 asyd|OJJ62502.1 ater|EAU34081.1 atub|OJI85075.1 aver|OJI96623.1 awen|OJJ37772.1 azon|OJJ45083.1

Group3434: abra|OJJ74414.1 acar|OOF95329.1 acla|EAW06828.1 afis|EAW16378.1 afla|EED53458.1 afum|EAL89003.1 agla|OJJ78596.1 akaw|GAA87305.1 aluc|OJZ89712.1 anid|CBF88042.1 anig|EHA26943.1 aory|EIT75071.1 asyd|OJJ63543.1 ater|EAU34074.1 atub|OJI85090.1 aver|OJI97391.1 awen|OJJ37912.1 azon|OJJ45091.1

Group3435: abra|OJJ74417.1 acar|OOF95326.1 acla|EAW06832.1 afis|EAW16382.1 afla|EED53452.1 afum|EAL89007.1 agla|OJJ88205.1 akaw|GAA87308.1 aluc|OJZ89709.1 anid|CBF89369.1 anig|EHA26940.1 aory|EIT75129.1 asyd|OJJ62475.1 ater|EAU34070.1 atub|OJI85093.1 aver|OJI96611.1 awen|OJJ37915.1 azon|OJJ46177.1

Group3436: abra|OJJ74438.1 acar|OOF95308.1 acla|EAW12299.1 afis|EAW23841.1 afla|EED49145.1 afum|EAL87272.1 agla|OJJ79053.1 akaw|GAA87331.1 aluc|OJZ89683.1 anid|CBF89626.1 anig|EHA26919.1 aory|EIT78517.1 asyd|OJJ62298.1 ater|EAU29595.1 atub|OJI85117.1 aver|OJI96406.1 awen|OJJ35935.1 azon|OJJ49112.1

Group3437: abra|OJJ74456.1 acar|OOF95294.1 acla|EAW07237.1 afis|EAW22260.1 afla|EED57647.1 afum|EAL90920.1 agla|OJJ87795.1 akaw|GAA87350.1 aluc|OJZ89664.1 anid|CBF88509.1 anig|EHA26901.1 aory|EIT79886.1 asyd|OJJ63802.1 ater|EAU34263.1 atub|OJI85136.1 aver|OJI97136.1 awen|OJJ34832.1 azon|OJJ45714.1

Group3438: abra|OJJ74457.1 acar|OOF95293.1 acla|EAW07236.1 afis|EAW22259.1 afla|EED57646.1 afum|EAL90921.1 agla|OJJ87799.1 akaw|GAA87351.1 aluc|OJZ89663.1 anid|CBF88506.1 anig|EHA26900.1 aory|EIT79868.1 asyd|OJJ63799.1 ater|EAU34262.1 atub|OJI85137.1 aver|OJI97139.1 awen|OJJ34831.1 azon|OJJ45715.1

Group3439: abra|OJJ74463.1 acar|OOF95288.1 acla|EAW07235.1 afis|EAW22256.1 afla|EED57643.1 afum|EAL90922.1 agla|OJJ87800.1 akaw|GAA87355.1 aluc|OJZ89659.1 anid|CBF88504.1 anig|EHA26896.1 aory|EIT79873.1 asyd|OJJ63798.1 ater|EAU34257.1 atub|OJI85141.1 aver|OJI97140.1 awen|OJJ34828.1 azon|OJJ45720.1

Group3440: abra|OJJ74464.1 acar|OOF95286.1 acla|EAW07234.1 afis|EAW22255.1 afla|EED57641.1 afum|EAL90923.1 agla|OJJ87801.1 akaw|GAA87356.1 aluc|OJZ89658.1 anid|CBF88502.1 anig|EHA26895.1 aory|EIT82944.1 asyd|OJJ63796.1 ater|EAU34256.1 atub|OJI85143.1 aver|OJI97141.1 awen|OJJ34827.1 azon|OJJ45722.1

Group3441: abra|OJJ74466.1 acar|OOF95281.1 acla|EAW07231.1 afis|EAW22245.1 afla|EED57638.1 afum|EAL90948.1 agla|OJJ87805.1 akaw|GAA87359.1 aluc|OJZ89654.1 anid|CBF88496.1 anig|EHA26892.1 aory|EIT82948.1 asyd|OJJ63793.1 ater|EAU34253.1 atub|OJI85150.1 aver|OJI97144.1 awen|OJJ34823.1 azon|OJJ45727.1

Group3442: abra|OJJ74467.1 acar|OOF95280.1 acla|EAW07230.1 afis|EAW22244.1 afla|EED57637.1 afum|EAL90949.1 agla|OJJ87807.1 akaw|GAA87360.1 aluc|OJZ89653.1 anid|CBF88493.1 anig|EHA26891.1 aory|EIT82977.1 asyd|OJJ63792.1 ater|EAU34252.1 atub|OJI85151.1 aver|OJI97145.1 awen|OJJ34822.1 azon|OJJ45728.1

Group3443: abra|OJJ74468.1 acar|OOF95279.1 acla|EAW07229.1 afis|EAW22243.1 afla|EED57636.1 afum|EAL90950.1 agla|OJJ87808.1 akaw|GAA87361.1 aluc|OJZ89652.1 anid|CBF88491.1 anig|EHA26890.1 aory|EIT82978.1 asyd|OJJ63791.1 ater|EAU34251.1 atub|OJI85152.1 aver|OJI97146.1 awen|OJJ34821.1 azon|OJJ45729.1

Group3444: abra|OJJ74473.1 acar|OOF95271.1 acla|EAW07224.1 afis|EAW22238.1 afla|EED57627.1 afum|EAL90955.1 agla|OJJ87813.1 akaw|GAA87367.1 aluc|OJZ89645.1 anid|CBF88481.1 anig|EHA26884.1 aory|EIT82957.1 asyd|OJJ63785.1 ater|EAU34245.1 atub|OJI85158.1 aver|OJI97152.1 awen|OJJ34816.1 azon|OJJ45733.1

Group3445: abra|OJJ74477.1 acar|OOF95269.1 acla|EAW07223.1 afis|EAW22237.1 afla|EED57626.1 afum|EAL90956.1 agla|OJJ87814.1 akaw|GAA87370.1 aluc|OJZ89642.1 anid|CBF88479.1 anig|EHA26881.1 aory|EIT82989.1 asyd|OJJ63784.1 ater|EAU34244.1 atub|OJI85161.1 aver|OJI97153.1 awen|OJJ34815.1 azon|OJJ45734.1

Group3446: abra|OJJ74478.1 acar|OOF95268.1 acla|EAW07222.1 afis|EAW22236.1 afla|EED57625.1 afum|EAL90957.1 agla|OJJ87815.1 akaw|GAA87371.1 aluc|OJZ89641.1 anid|CBF88477.1 anig|EHA26880.1 aory|EIT82990.1 asyd|OJJ63783.1 ater|EAU34243.1 atub|OJI85162.1 aver|OJI97154.1 awen|OJJ34814.1 azon|OJJ45735.1

Group3447: abra|OJJ74481.1 acar|OOF95267.1 acla|EAW07220.1 afis|EAW22234.1 afla|EED57623.1 afum|EAL90959.1 agla|OJJ87817.1 akaw|GAA87374.1 aluc|OJZ89638.1 anid|CBF88474.1 anig|EHA26879.1 aory|EIT82951.1 asyd|OJJ63782.1 ater|EAU34237.1 atub|OJI85165.1 aver|OJI97155.1 awen|OJJ34813.1 azon|OJJ45736.1

Group3448: abra|OJJ74484.1 acar|OOF95266.1 acla|EAW07217.1 afis|EAW22231.1 afla|EED57620.1 afum|EAL90962.1 agla|OJJ87820.1 akaw|GAA87377.1 aluc|OJZ89635.1 anid|CBF88469.1 anig|EHA26877.1 aory|EIT82992.1 asyd|OJJ63780.1 ater|EAU34234.1 atub|OJI85168.1 aver|OJI97157.1 awen|OJJ34811.1 azon|OJJ45738.1

Group3449: abra|OJJ74489.1 acar|OOF95260.1 acla|EAW07206.1 afis|EAW22218.1 afla|EED57611.1 afum|EAL90976.1 agla|OJJ87826.1 akaw|GAA87383.1 aluc|OJZ89629.1 anid|CBF88456.1 anig|EHA26872.1 aory|EIT82939.1 asyd|OJJ63771.1 ater|EAU34228.1 atub|OJI85173.1 aver|OJI97167.1 awen|OJJ34804.1 azon|OJJ45749.1

Group3450: abra|OJJ74490.1 acar|OOF95259.1 acla|EAW07204.1 afis|EAW22216.1 afla|EED57610.1 afum|EAL90978.1 agla|OJJ87830.1 akaw|GAA87384.1 aluc|OJZ89628.1 anid|CBF88454.1 anig|EHA26871.1 aory|EIT82985.1 asyd|OJJ63770.1 ater|EAU34224.1 atub|OJI85174.1 aver|OJI97168.1 awen|OJJ34801.1 azon|OJJ45748.1

Group3451: abra|OJJ74491.1 acar|OOF95258.1 acla|EAW07203.1 afis|EAW22215.1 afla|EED57609.1 afum|EAL90979.1 agla|OJJ87829.1 akaw|GAA87385.1 aluc|OJZ89627.1 anid|CBF88452.1 anig|EHA26870.1 aory|EIT82971.1 asyd|OJJ63769.1 ater|EAU34223.1 atub|OJI85175.1 aver|OJI97169.1 awen|OJJ34800.1 azon|OJJ45747.1

Group3452: abra|OJJ74493.1 acar|OOF95256.1 acla|EAW07201.1 afis|EAW22213.1 afla|EED57607.1 afum|EAL90981.2 agla|OJJ87831.1 akaw|GAA87386.1 aluc|OJZ89625.1 anid|CBF88448.1 anig|EHA26869.1 aory|EIT82952.1 asyd|OJJ63768.1 ater|EAU34222.1 atub|OJI85177.1 aver|OJI97170.1 awen|OJJ34798.1 azon|OJJ45745.1

Group3453: abra|OJJ74494.1 acar|OOF95255.1 acla|EAW07200.1 afis|EAW22212.1 afla|EED57606.1 afum|EAL90982.1 agla|OJJ87832.1 akaw|GAA87387.1 aluc|OJZ89624.1 anid|CBF88446.1 anig|EHA26868.1 aory|EIT82953.1 asyd|OJJ63767.1 ater|EAU34221.1 atub|OJI85178.1 aver|OJI97171.1 awen|OJJ34797.1 azon|OJJ45744.1

Group3454: abra|OJJ74496.1 acar|OOF95254.1 acla|EAW07197.1 afis|EAW22209.1 afla|EED57603.1 afum|EAL90985.1 agla|OJJ87835.1 akaw|GAA87390.1 aluc|OJZ89622.1 anid|EHA26866.1 asyd|OJJ63765.1 ater|EAU34219.1 atub|OJI85180.1 aver|OJI97174.1 awen|OJJ34794.1 anid|CBF88442.1 aory|EIT82943.1 azon|OJJ45750.1

Group3455: abra|OJJ74497.1 acar|OOF95253.1 acla|EAW07195.1 afis|EAW22207.1 afla|EED57602.1 afum|EAL90986.2 agla|OJJ87837.1 akaw|GAA87392.1 aluc|OJZ89621.1 anid|CBF88439.1 anig|EHA26865.1 aory|EIT82955.1 asyd|OJJ63764.1 ater|EAU34218.1 atub|OJI85181.1 aver|OJI97176.1 awen|OJJ34793.1 azon|OJJ45753.1

Group3456: abra|OJJ74498.1 acar|OOF95252.1 acla|EAW13756.1 afis|EAW19810.1 afla|EED57601.1 afum|EAL85082.1 agla|OJJ87838.1 akaw|GAA87393.1 aluc|OJZ89620.1 anid|CBF88437.1 anig|EHA26864.1 aory|EIT82959.1 asyd|OJJ63763.1 ater|EAU34217.1 atub|OJI85182.1 aver|OJI97177.1 awen|OJJ34792.1 azon|OJJ45754.1

Group3457: abra|OJJ74503.1 acar|OOF95241.1 acla|EAW07189.1 afis|EAW22202.1 afla|EED57593.1 afum|EAL90990.1 agla|OJJ87842.1 akaw|GAA87397.1 aluc|OJZ89615.1 anid|CBF88430.1 anig|EHA26860.1 aory|EIT82963.1 asyd|OJJ63760.1 ater|EAU34212.1 atub|OJI85188.1 aver|OJI97180.1 awen|OJJ34787.1 azon|OJJ45771.1

Group3458: abra|OJJ74506.1 acar|OOF89839.1 acla|EAW07192.1 afis|EAW22205.1 afla|EED57588.1 afum|EAL90988.1 agla|OJJ87845.1 akaw|GAA88823.1 aluc|OJZ89611.1 anid|CBF88417.1 anig|EHA26856.1 aory|EIT82968.1 asyd|OJJ63756.1 ater|EAU34209.1 atub|OJI85192.1 aver|OJI97184.1 awen|OJJ34786.1 azon|OJJ45766.1

Group3459: abra|OJJ74508.1 acar|OOF95234.1 acla|EAW07184.1 afis|EAW22197.1 afla|EED57584.1 afum|EAL90994.1 agla|OJJ87848.1 akaw|GAA82091.1 aluc|OJZ92089.1 anid|CBF88409.1 anig|EHA26852.1 aory|EIT82932.1 asyd|OJJ63754.1 ater|EAU34207.1 atub|OJI86519.1 aver|OJI97187.1 awen|OJJ34780.1 azon|OJJ45761.1

Group3460: abra|OJJ74513.1 acar|OOF95230.1 acla|EAW07177.1 afis|EAW22191.1 afla|EED57575.1 afum|EAL91000.1 agla|OJJ87856.1 akaw|GAA82086.1 aluc|OJZ92094.1 anid|CBF88400.1 anig|EHA26847.1 aory|EIT82946.1 asyd|OJJ63748.1 ater|EAU34199.1 atub|OJI86527.1 aver|OJI97192.1 awen|OJJ34771.1 azon|OJJ45775.1

Group3461: abra|OJJ74519.1 acar|OOF95229.1 acla|EAW07174.1 afis|EAW22188.1 afla|EED57572.1 afum|EAL91002.1 agla|OJJ87861.1 akaw|GAA82081.1 aluc|OJZ92098.1 anid|CBF88395.1 anig|EHA26844.1 aory|EIT82984.1 asyd|OJJ63745.1 ater|EAU34195.1 atub|OJI86531.1 aver|OJI97195.1 awen|OJJ34768.1 azon|OJJ45778.1

Group3462: abra|OJJ74523.1 acar|OOF95226.1 acla|EAW07170.1 afis|EAW22185.1 afla|EED57563.1 afum|EAL91004.1 agla|OJJ87870.1 akaw|GAA82078.1 aluc|OJZ92102.1 anid|CBF88391.1 anig|EHA26841.1

aory|EIT81827.1 asyd|OJJ63742.1 ater|EAU34193.1 atub|OJI86536.1 aver|OJI97198.1 awen|OJJ34765.1 azon|OJJ45780.1

Group3463: abra|OJJ74524.1 acar|OOF95225.1 acla|EAW07169.1 afis|EAW22184.1 afla|EED57562.1 afum|EAL91005.1 agla|OJJ87869.1 akaw|GAA82077.1 aluc|OJZ92104.1 anid|CBF75419.1 anig|EHA26840.1 aory|EIT81846.1 asyd|OJJ59792.1 ater|EAU34188.1 atub|OJI86538.1 aver|OJJ02495.1 awen|OJJ34764.1 azon|OJJ45781.1

Group3464: abra|OJJ74527.1 acar|OOF95223.1 acla|EAW07164.1 afis|EAW22179.1 afla|EED57558.1 afum|EAL91010.1 agla|OJJ87876.1 akaw|GAA82074.1 aluc|OJZ92108.1 anid|CBF88384.1 anig|EHA26837.1 aory|EIT81836.1 asyd|OJJ63738.1 ater|EAU34184.1 atub|OJI86542.1 aver|OJI97202.1 awen|OJJ34760.1 azon|OJJ45791.1

Group3465: abra|OJJ74532.1 acar|OOF95220.1 acla|EAW07160.1 afis|EAW22175.1 afla|EED57554.1 afum|EAL91014.1 agla|OJJ87879.1 akaw|GAA82068.1 aluc|OJZ92114.1 anid|CBF89077.1 anig|EHA26831.1 aory|EIT81832.1 asyd|OJJ62739.1 ater|EAU34180.1 atub|OJI86547.1 aver|OJI96782.1 awen|OJJ39689.1 azon|OJJ45808.1

Group3466: abra|OJJ74533.1 acar|OOF95219.1 acla|EAW07159.1 afis|EAW22174.1 afla|EED57553.1 afum|EAL91015.1 agla|OJJ87880.1 akaw|GAA82067.1 aluc|OJZ92115.1 anid|CBF89079.1 anig|EHA26830.1 aory|EIT81853.1 asyd|OJJ62738.1 ater|EAU34179.1 atub|OJI86548.1 aver|OJI96781.1 awen|OJJ34749.1 azon|OJJ45810.1

Group3467: abra|OJJ74546.1 acar|OOF95210.1 acla|EAW07152.1 afis|EAW22166.1 afla|EED57536.1 afum|EAL91025.1 agla|OJJ87891.1 akaw|GAA82052.1 aluc|OJZ92128.1 anid|CBF89087.1 anig|EHA26820.1 aory|EIT81873.1 asyd|OJJ62734.1 ater|EAU34173.1 atub|OJI86560.1 aver|OJI96777.1 awen|OJJ34740.1 azon|OJJ45819.1

Group3468: abra|OJJ74548.1 acar|OOF95209.1 acla|EAW07150.1 afis|EAW22164.1 afla|EED57535.1 afum|EAL91027.1 agla|OJJ87893.1 akaw|GAA82050.1 aluc|OJZ92130.1 anid|CBF89090.1 anig|EHA26818.1 aory|EIT81851.1 asyd|OJJ62732.1 ater|EAU34171.1 atub|OJI86562.1 aver|OJI96775.1 awen|OJJ34738.1 azon|OJJ45821.1

Group3469: abra|OJJ74549.1 acar|OOF95208.1 acla|EAW07149.1 afis|EAW22163.1 afla|EED57534.1 afum|EAL91028.1 agla|OJJ87894.1 akaw|GAA82049.1 aluc|OJZ92131.1 anid|CBF89094.1 anig|EHA26817.1 aory|EIT81858.1 asyd|OJJ62731.1 ater|EAU34166.1 atub|OJI86563.1 aver|OJI96774.1 awen|OJJ34737.1 azon|OJJ45822.1

Group3470: abra|OJJ74553.1 acar|OOF95202.1 acla|EAW07145.1 afis|EAW22159.1 afla|EED57531.1 afum|EAL91031.1 agla|OJJ87905.1 akaw|GAA82044.1 aluc|OJZ92136.1 anid|CBF89101.1 anig|EHA26813.1 aory|EIT81829.1 asyd|OJJ62727.1 ater|EAU34162.1 atub|OJI86568.1 aver|OJI96770.1 awen|OJJ34733.1 azon|OJJ45826.1

Group3471: abra|OJJ74569.1 acar|OOF95192.1 acla|EAW07140.1 afis|EAW22153.1 afla|EED53614.1 afum|EAL91037.1 agla|OJJ87909.1 akaw|GAA82036.1 aluc|OJZ92147.1 anid|CBF89105.1 anig|EHA26802.1 aory|EIT75057.1 asyd|OJJ62725.1 ater|EAU34157.1 atub|OJI86575.1 aver|OJI96768.1 awen|OJJ34729.1 azon|OJJ45834.1

Group3472: abra|OJJ74571.1 acar|OOF95191.1 acla|EAW07138.1 afis|EAW22151.1 afla|EED53613.1 afum|EAL91039.1 agla|OJJ87911.1 akaw|GAA82034.1 aluc|OJZ92149.1 anid|CBF89108.1 anig|EHA26800.1 aory|EIT75195.1 asyd|OJJ62667.1 ater|EAU34156.1 atub|OJI86577.1 aver|OJI96765.1 awen|OJJ34727.1 azon|OJJ45835.1

Group3473: abra|OJJ74573.1 acar|OOF95189.1 acla|EAW07136.1 afis|EAW22149.1 afla|EED53610.1 afum|EAL91041.1 agla|OJJ87914.1 akaw|GAA82032.1 aluc|OJZ92151.1 anid|CBF89112.1 anig|EHA26798.1 aory|EIT74840.1 asyd|OJJ62665.1 ater|EAU34155.1 atub|OJI86579.1 aver|OJI96763.1 awen|OJJ34725.1 azon|OJJ45839.1

Group3474: abra|OJJ74577.1 acar|OOF95187.1 acla|EAW07133.1 afis|EAW22146.1 afla|EED45848.1 afum|EAL91044.1 agla|OJJ87922.1 akaw|GAA82028.1 aluc|OJZ92155.1 anid|CBF78365.1 anig|EHA26794.1 aory|EIT75625.1 asyd|OJJ57324.1 ater|EAU34149.1 atub|OJI86583.1 aver|OJJ05836.1 awen|OJJ34721.1 azon|OJJ46642.1

Group3475: abra|OJJ74578.1 acar|OOF95186.1 acla|EAW07132.1 afis|EAW22145.1 afla|EED45849.1 afum|EAL91045.1 agla|OJJ87923.1 akaw|GAA82027.1 aluc|OJZ92156.1 anid|CBF78367.1 anig|EHA26793.1 aory|EIT75756.1 asyd|OJJ57325.1 ater|EAU34148.1 atub|OJI86584.1 aver|OJJ05835.1 awen|OJJ34720.1 azon|OJJ46643.1

Group3476: abra|OJJ74581.1 acar|OOF95183.1 acla|EAW07131.1 afis|EAW22142.1 afla|EED53568.1 afum|EAL91048.2 agla|OJJ87932.1 akaw|GAA82024.1 aluc|OJZ92159.1 anid|CBF89555.1 anig|EHA26790.1 aory|EIT75148.1 asyd|OJJ62347.1 ater|EAU31752.1 atub|OJI86587.1 aver|OJI96453.1 awen|OJJ34717.1 azon|OJJ45846.1

Group3477: abra|OJJ74584.1 acar|OOF95182.1 acla|EAW10794.1 afis|EAW24782.1 afla|EED47203.1 afum|EAL89421.1 agla|OJJ82878.1 akaw|GAA82021.1 aluc|OJZ92162.1 anid|CBF81444.1 anig|EHA26787.1 aory|EIT79171.1 asyd|OJJ59430.1 ater|EAU36526.1 atub|OJI86590.1 aver|OJJ02841.1 awen|OJJ40368.1 azon|OJJ49217.1

Group3478: abra|OJJ74585.1 acar|OOF95181.1 acla|EAW10793.1 afis|EAW24783.1 afla|EED45489.1 afum|EAL89422.1 akaw|GAA82020.1 aluc|OJZ92163.1 anid|CBF81449.1 anig|EHA26786.1 aory|EIT79242.1 asyd|OJJ59432.1 atub|OJI86592.1 aver|OJJ02839.1 awen|OJJ36318.1 azon|OJJ43590.1 aory|EIT75730.1 afla|EED47202.1

Group3479: abra|OJJ74588.1 acar|OOF95178.1 acla|EAW10790.1 afis|EAW24786.1 afla|EED47199.1 afum|EAL89425.1 agla|OJJ82884.1 akaw|GAA82017.1 aluc|OJZ92165.1 anid|CBF81455.1 anig|EHA26784.1 aory|EIT79195.1 asyd|OJJ59435.1 ater|EAU36523.1 atub|OJI86595.1 aver|OJJ02836.1 awen|OJJ40370.1 azon|OJJ49220.1

Group3480: abra|OJJ74589.1 acar|OOF95177.1 acla|EAW10789.1 afis|EAW24787.1 afla|EED47197.1 afum|EAL89426.1 agla|OJJ82883.1 akaw|GAA82016.1 aluc|OJZ92167.1 anid|CBF81457.1 anig|EHA26782.1 aory|EIT79260.1 asyd|OJJ59437.1 ater|EAU36522.1 atub|OJI86598.1 aver|OJJ02834.1 awen|OJJ40371.1 azon|OJJ49221.1

Group3481: abra|OJJ74594.1 acar|OOF95175.1 acla|EAW10788.1 afis|EAW24791.1 afla|EED47195.1 afum|EAL89433.1 agla|OJJ82881.1 akaw|GAA82014.1 aluc|OJZ92169.1 anid|CBF81460.1 anig|EHA26780.1 aory|EIT79181.1 asyd|OJJ59439.1 ater|EAU36521.1 atub|OJI86601.1 aver|OJJ02833.1 awen|OJJ40372.1 azon|OJJ49223.1

Group3482: abra|OJJ74595.1 acar|OOF95174.1 acla|EAW10786.1 afis|EAW24792.1 afla|EED47194.1 afum|EAL89434.1 agla|OJJ82879.1 akaw|GAA82013.1 aluc|OJZ92170.1 anid|CBF81464.1 anig|EHA26779.1 aory|EIT79314.1 asyd|OJJ59442.1 ater|EAU36516.1 atub|OJI86602.1 aver|OJJ02831.1 awen|OJJ40373.1 azon|OJJ49224.1

Group3483: abra|OJJ74629.1 acla|EAW10752.1 afis|EAW24821.1 afla|EED47154.1 afum|EAL89465.1 agla|OJJ82919.1 akaw|GAA81979.1 aluc|OJZ92211.1 anid|CBF85870.1 anig|EHA26747.1 aory|EIT79196.1 asyd|OJJ64372.1 ater|EAU36484.1 atub|OJI86640.1 aver|OJI98468.1 awen|OJJ40407.1 azon|OJJ49256.1 afla|EED47155.1

Group3484: abra|OJJ74705.1 acar|OOF89903.1 acla|EAW10692.1 afis|EAW24878.1 afla|EED47088.1 afum|EAL89528.1 agla|OJJ82100.1 akaw|GAA81912.1 aluc|OJZ92285.1 anid|CBF75756.1 anig|EHA26683.1 aory|EIT72477.1 asyd|OJJ57526.1 ater|EAU36423.1 atub|OJI86716.1 aver|OJJ05652.1 awen|OJJ40468.1 azon|OJJ49332.1

Group3485: abra|OJJ74707.1 acar|OOF89905.1 acla|EAW10691.1 afis|EAW24879.1 afla|EED47087.1 afum|EAL89529.1 agla|OJJ82101.1 akaw|GAA81910.1 aluc|OJZ92288.1 anid|CBF75754.1 anig|EHA26681.1 aory|EIT72507.1 asyd|OJJ57525.1 ater|EAU36422.1 atub|OJI86718.1 aver|OJJ05653.1 awen|OJJ40469.1 azon|OJJ49333.1

Group3486: abra|OJJ74708.1 acar|OOF95718.1 acla|EAW10690.1 afis|EAW24880.1 afla|EED47086.1 afum|EAL89530.1 agla|OJJ82102.1 akaw|GAA81909.1 aluc|OJZ92289.1 anid|CBF75752.1 anig|EHA26680.1 aory|EIT72478.1 asyd|OJJ57524.1 ater|EAU36421.1 atub|OJI86719.1 aver|OJJ05654.1 awen|OJJ40470.1 azon|OJJ49334.1

Group3487: abra|OJJ74709.1 acar|OOF95719.1 acla|EAW10689.1 afis|EAW24881.1 afla|EED47085.1 afum|EAL89531.1 agla|OJJ82103.1 akaw|GAA81908.1 aluc|OJZ92290.1 anid|CBF75750.1 anig|EHA26679.1 aory|EIT72499.1 asyd|OJJ57523.1 ater|EAU36420.1 atub|OJI86720.1 aver|OJJ05655.1 awen|OJJ40471.1 azon|OJJ49335.1

Group3488: abra|OJJ74711.1 acar|OOF95722.1 acla|EAW10687.1 afis|EAW24883.1 afla|EED47083.1 afum|EAL89533.1 agla|OJJ82105.1 akaw|GAA81906.1 aluc|OJZ92292.1 anid|CBF75747.1 anig|EHA26677.1 aory|EIT72512.1 asyd|OJJ57521.1 ater|EAU36418.1 atub|OJI86722.1 aver|OJJ05657.1 awen|OJJ40473.1 azon|OJJ49337.1

Group3489: abra|OJJ74714.1 acar|OOF95723.1 acla|EAW10685.1 afis|EAW24885.1 afla|EED47081.1 afum|EAL89535.2 agla|OJJ82108.1 akaw|GAA81904.1 aluc|OJZ92294.1 anid|CBF75617.1 anig|EHA26675.1 aory|EIT72482.1 asyd|OJJ57452.1 ater|EAU36416.1 atub|OJI86724.1 aver|OJJ05726.1 awen|OJJ40475.1 azon|OJJ49339.1

Group3490: abra|OJJ74715.1 acar|OOF95724.1 acla|EAW10684.1 afis|EAW24886.1 afla|EED47080.1 afum|EAL89537.1 agla|OJJ82109.1 akaw|GAA81903.1 aluc|OJZ92295.1 anid|CBF75619.1 anig|EHA26674.1 aory|EIT72515.1 asyd|OJJ57453.1 ater|EAU36415.1 atub|OJI86725.1 aver|OJJ05725.1 awen|OJJ40476.1 azon|OJJ49340.1

Group3491: abra|OJJ74717.1 acar|OOF95728.1 acla|EAW10681.1 afis|EAW24889.1 afla|EED46965.1 afum|EAL89540.1 agla|OJJ82112.1 akaw|GAA81899.1 aluc|OJZ92299.1 anid|CBF75625.1 anig|EHA26672.1

aory|EIT72622.1 asyd|OJJ57456.1 ater|EAU36412.1 atub|OJI86728.1 aver|OJJ05723.1 awen|OJJ40479.1  
azon|OJJ49343.1

Group3492: abra|OJJ74722.1 acar|OOF95731.1 acla|EAW10675.1 afis|EAW24891.1 afla|EED46970.1  
afum|EAL89544.1 agla|OJJ82115.1 akaw|GAA81894.1 aluc|OJZ92306.1 anid|CBF75630.1 anig|EHA26662.1  
aory|EIT72703.1 asyd|OJJ57459.1 ater|EAU36407.1 atub|OJI86736.1 aver|OJJ05721.1 awen|OJJ40484.1  
azon|OJJ49346.1

Group3493: abra|OJJ74723.1 acar|OOF95732.1 acla|EAW10674.1 afis|EAW24892.1 afla|EED46971.1  
afum|EAL89545.1 agla|OJJ82116.1 akaw|GAA81893.1 aluc|OJZ92307.1 anid|CBF75632.1 anig|EHA26661.1  
aory|EIT72525.1 asyd|OJJ57460.1 ater|EAU36406.1 atub|OJI86737.1 aver|OJJ05720.1 awen|OJJ40485.1  
azon|OJJ49347.1

Group3494: abra|OJJ74724.1 acar|OOF95733.1 acla|EAW10673.1 afis|EAW24893.1 afla|EED46972.1  
afum|EAL89546.1 agla|OJJ82117.1 akaw|GAA81892.1 aluc|OJZ92308.1 anid|CBF75634.1 anig|EHA26660.1  
aory|EIT72626.1 asyd|OJJ57461.1 ater|EAU36405.1 atub|OJI86738.1 aver|OJJ05719.1 awen|OJJ40486.1  
azon|OJJ49348.1

Group3495: abra|OJJ74727.1 acar|OOF90030.1 acla|EAW10671.1 afis|EAW24895.1 afla|EED46975.1  
afum|EAL89549.1 agla|OJJ82119.1 akaw|GAA81890.1 aluc|OJZ92311.1 anid|CBF75657.1 anig|EHA26658.1  
aory|EIT72598.1 asyd|OJJ57463.1 ater|EAU36403.1 atub|OJI86740.1 aver|OJJ05717.1 awen|OJJ40488.1  
azon|OJJ49351.1

Group3496: abra|OJJ74735.1 acar|OOF95734.1 acla|EAW10667.1 afis|EAW24899.1 afla|EED46978.1  
afum|EAL89553.1 agla|OJJ82124.1 akaw|GAA83674.1 aluc|OJZ92317.1 anid|CBF75649.1 anig|EHA26654.1  
aory|EIT72632.1 asyd|OJJ57470.1 ater|EAU36400.1 atub|OJI86746.1 aver|OJJ05712.1 awen|OJJ40493.1  
azon|OJJ49355.1

Group3497: abra|OJJ74736.1 acar|OOF95735.1 acla|EAW10666.1 afis|EAW24900.1 afla|EED46980.1  
afum|EAL89554.1 agla|OJJ82125.1 akaw|GAA83673.1 aluc|OJZ92318.1 anid|CBF75648.1 anig|EHA26653.1  
aory|EIT72726.1 asyd|OJJ57472.1 ater|EAU36399.1 atub|OJI86747.1 aver|OJJ05711.1 awen|OJJ40494.1  
azon|OJJ49356.1

Group3498: abra|OJJ74738.1 acar|OOF95736.1 acla|EAW10665.1 afis|EAW24901.1 afla|EED46981.1  
afum|EAL89555.1 agla|OJJ82126.1 akaw|GAA83672.1 aluc|OJZ92319.1 anid|CBF75646.1 anig|EHA26651.1  
aory|EIT72528.1 asyd|OJJ57473.1 ater|EAU36398.1 atub|OJI86748.1 aver|OJJ05710.1 awen|OJJ40495.1  
azon|OJJ49357.1

Group3499: abra|OJJ74739.1 acar|OOF95737.1 acla|EAW10664.1 afis|EAW24902.1 afla|EED46982.1  
afum|EAL89556.1 agla|OJJ82127.1 akaw|GAA83671.1 aluc|OJZ92320.1 anid|CBF75644.1 anig|EHA26650.1  
aory|EIT72548.1 asyd|OJJ57474.1 ater|EAU36397.1 atub|OJI86749.1 aver|OJJ05707.1 awen|OJJ40496.1  
azon|OJJ49358.1

Group3500: abra|OJJ74749.1 acar|OOF95742.1 acla|EAW10661.1 afis|EAW24906.1 afla|EED46989.1  
afum|EAL89559.1 agla|OJJ82130.1 akaw|GAA83662.1 aluc|OJZ92330.1 anid|CBF75661.1 anig|EHA26641.1  
aory|EIT72764.1 asyd|OJJ57478.1 ater|EAU36392.1 atub|OJI86759.1 aver|OJJ05703.1 awen|OJJ40499.1  
azon|OJJ49361.1

Group3501: abra|OJJ74750.1 acar|OOF95743.1 acla|EAW10660.1 afis|EAW24907.1 afla|EED46991.1  
afum|EAL89560.1 agla|OJJ82131.1 akaw|GAA83661.1 aluc|OJZ92331.1 anid|CBF75665.1 anig|EHA26640.1  
aory|EIT72700.1 asyd|OJJ57479.1 ater|EAU36391.1 atub|OJI86760.1 aver|OJJ05702.1 awen|OJJ40500.1  
azon|OJJ49362.1

Group3502: abra|OJJ74751.1 acar|OOF95744.1 acla|EAW10659.1 afis|EAW24908.1 afla|EED46992.1  
afum|EAL89561.1 agla|OJJ82132.1 akaw|GAA83660.1 aluc|OJZ92332.1 anid|CBF75667.1 anig|EHA26639.1  
aory|EIT72681.1 asyd|OJJ57480.1 ater|EAU36390.1 atub|OJI86761.1 aver|OJJ05701.1 awen|OJJ40501.1  
azon|OJJ49363.1

Group3503: abra|OJJ74752.1 acar|OOF95745.1 acla|EAW10658.1 afis|EAW24909.1 afla|EED46994.1  
afum|EAL89562.1 agla|OJJ82133.1 akaw|GAA83659.1 aluc|OJZ92333.1 anid|CBF75669.1 anig|EHA26638.1  
aory|EIT72691.1 asyd|OJJ57481.1 ater|EAU36389.1 atub|OJI86762.1 aver|OJJ05700.1 awen|OJJ40503.1  
azon|OJJ49364.1

Group3504: abra|OJJ74754.1 acar|OOF95747.1 acla|EAW10656.1 afis|EAW24911.1 afla|EED46996.1  
afum|EAL89565.1 agla|OJJ82135.1 akaw|GAA83657.1 aluc|OJZ92335.1 anid|CBF75671.1 anig|EHA26636.1  
aory|EIT72517.1 asyd|OJJ57483.1 ater|EAU36387.1 atub|OJI86764.1 aver|OJJ05698.1 awen|OJJ40506.1  
azon|OJJ49366.1

Group3505: abra|OJJ74756.1 acar|OOF95749.1 acla|EAW10655.1 afis|EAW24912.1 afla|EED46997.1  
afum|EAL89566.2 agla|OJJ82141.1 akaw|GAA83655.1 aluc|OJZ92338.1 anid|CBF75673.1 anig|EHA26634.1  
aory|EIT72758.1 asyd|OJJ57484.1 ater|EAU36386.1 atub|OJI86766.1 aver|OJJ05697.1 awen|OJJ40508.1  
azon|OJJ49367.1

Group3506: abra|OJJ74758.1 acar|OOF95751.1 acla|EAW10653.1 afis|EAW24914.1 afla|EED46999.1  
afum|EAL89568.1 agla|OJJ82142.1 akaw|GAA83653.1 aluc|OJZ92342.1 anid|CBF75677.1 anig|EHA26632.1  
aory|EIT72541.1 asyd|OJJ57486.1 ater|EAU36384.1 atub|OJI86768.1 aver|OJJ05694.1 awen|OJJ40510.1  
azon|OJJ49369.1

Group3507: abra|OJJ74759.1 acar|OOF95752.1 acla|EAW10652.1 afis|EAW24915.1 afla|EED47000.1  
afum|EAL89569.1 agla|OJJ82143.1 akaw|GAA83652.1 aluc|OJZ92343.1 anid|CBF75679.1 anig|EHA26631.1  
aory|EIT72710.1 asyd|OJJ57487.1 ater|EAU36383.1 atub|OJI86769.1 aver|OJJ05693.1 awen|OJJ40511.1  
azon|OJJ49370.1

Group3508: abra|OJJ74760.1 acar|OOF95753.1 acla|EAW10651.1 afis|EAW24916.1 afla|EED47001.1  
afum|EAL89571.1 agla|OJJ82144.1 akaw|GAA83651.1 aluc|OJZ92344.1 anid|CBF75681.1 anig|EHA26630.1  
aory|EIT72621.1 asyd|OJJ57488.1 ater|EAU36382.1 atub|OJI86770.1 aver|OJJ05692.1 awen|OJJ40512.1  
azon|OJJ49371.1

Group3509: abra|OJJ74762.1 acar|OOF95755.1 acla|EAW10649.1 afis|EAW24918.1 afla|EED47003.1  
afum|EAL89573.1 agla|OJJ82147.1 akaw|GAA83649.1 aluc|OJZ92346.1 anid|CBF75687.1 anig|EHA26628.1  
aory|EIT72583.1 asyd|OJJ57490.1 ater|EAU36380.1 atub|OJI86773.1 aver|OJJ05690.1 awen|OJJ40515.1  
azon|OJJ49374.1

Group3510: abra|OJJ74763.1 acar|OOF95756.1 acla|EAW10647.1 afis|EAW24919.1 afla|EED47004.1  
afum|EAL89574.1 agla|OJJ82148.1 akaw|GAA83648.1 aluc|OJZ92347.1 anid|CBF75689.1 anig|EHA26627.1  
aory|EIT72654.1 asyd|OJJ57491.1 ater|EAU36379.1 atub|OJI86774.1 aver|OJJ05689.1 awen|OJJ40516.1  
azon|OJJ49375.1

Group3511: abra|OJJ74766.1 acar|OOF95758.1 acla|EAW10645.1 afis|EAW24921.1 afla|EED55552.1  
afum|EAL89576.1 agla|OJJ82150.1 akaw|GAA83646.1 aluc|OJZ92349.1 anid|CBF75693.1 anig|EHA26625.1  
aory|EIT82689.1 asyd|OJJ57493.1 ater|EAU35653.1 atub|OJI86777.1 aver|OJJ05687.1 awen|OJJ40518.1  
azon|OJJ49377.1

Group3512: abra|OJJ74767.1 acar|OOF95759.1 acla|EAW10644.1 afis|EAW24922.1 afla|EED55551.1  
afum|EAL89577.2 agla|OJJ82151.1 akaw|GAA83645.1 aluc|OJZ92350.1 anid|CBF75695.1 anig|EHA26624.1  
aory|EIT82687.1 asyd|OJJ57494.1 ater|EAU35654.1 atub|OJI86778.1 aver|OJJ05686.1 awen|OJJ40519.1  
azon|OJJ49378.1

Group3513: abra|OJJ74772.1 acar|OOF95762.1 acla|EAW10639.1 afis|EAW24927.1 afla|EED55546.1  
afum|EAL89583.1 agla|OJJ82155.1 akaw|GAA83640.1 aluc|OJZ92353.1 anid|CBF75704.1 anig|EHA26621.1  
aory|EIT82681.1 asyd|OJJ57497.1 ater|EAU35657.1 atub|OJI86783.1 aver|OJJ05681.1 awen|OJJ40523.1  
azon|OJJ49383.1

Group3514: abra|OJJ74774.1 acar|OOF95763.1 acla|EAW10637.1 afis|EAW24929.1 afla|EED55544.1  
afum|EAL89585.1 agla|OJJ82157.1 akaw|GAA83638.1 aluc|OJZ92355.1 anid|CBF75708.1 anig|EHA26619.1  
aory|EIT82710.1 asyd|OJJ57499.1 ater|EAU35659.1 atub|OJI86785.1 aver|OJJ05679.1 awen|OJJ40525.1  
azon|OJJ49385.1

Group3515: abra|OJJ74775.1 acar|OOF95764.1 acla|EAW10636.1 afis|EAW24930.1 afla|EED55543.1  
afum|EAL89586.1 agla|OJJ82158.1 akaw|GAA83637.1 aluc|OJZ92356.1 anid|CBF75710.1 anig|EHA26618.1  
aory|EIT82674.1 asyd|OJJ57500.1 ater|EAU35660.1 atub|OJI86786.1 aver|OJJ05678.1 awen|OJJ40526.1  
azon|OJJ49386.1

Group3516: abra|OJJ74776.1 acar|OOF95765.1 acla|EAW10635.1 afis|EAW24931.1 afla|EED55542.1  
afum|EAL89587.1 agla|OJJ82159.1 akaw|GAA83636.1 aluc|OJZ92357.1 anid|CBF75712.1 anig|EHA26617.1  
aory|EIT82695.1 asyd|OJJ57502.1 ater|EAU35661.1 atub|OJI86787.1 aver|OJJ05676.1 awen|OJJ40527.1  
azon|OJJ49387.1

Group3517: abra|OJJ74779.1 acar|OOF95769.1 acla|EAW10631.1 afis|EAW24936.1 afla|EED55536.1  
afum|EAL89593.1 agla|OJJ82163.1 akaw|GAA83633.1 aluc|OJZ92360.1 anid|CBF75723.1 anig|EHA26613.1  
aory|EIT80806.1 asyd|OJJ57506.1 ater|EAU35665.1 atub|OJI86790.1 aver|OJJ05672.1 awen|OJJ40531.1  
azon|OJJ49391.1

Group3518: abra|OJJ74780.1 acar|OOF95771.1 acla|EAW10630.1 afis|EAW24937.1 afla|EED55535.1  
afum|EAL89594.1 agla|OJJ82164.1 akaw|GAA83632.1 aluc|OJZ92361.1 anid|CBF75725.1 anig|EHA26612.1  
aory|EIT80813.1 asyd|OJJ57507.1 ater|EAU35666.1 atub|OJI86791.1 aver|OJJ05671.1 awen|OJJ40532.1  
azon|OJJ49392.1

Group3519: abra|OJJ74781.1 acar|OOF95772.1 acla|EAW10629.1 afis|EAW24938.1 afla|EED55534.1  
afum|EAL89595.1 agla|OJJ82165.1 akaw|GAA83631.1 aluc|OJZ92362.1 anid|CBF75727.1 anig|EHA26611.1  
aory|EIT80903.1 asyd|OJJ57508.1 ater|EAU35667.1 atub|OJI86792.1 aver|OJJ05670.1 awen|OJJ40533.1  
azon|OJJ49393.1

Group3520: abra|OJJ74784.1 acar|OOF95774.1 acla|EAW10627.1 afis|EAW24940.1 afla|EED55525.1  
afum|EAL89597.1 agla|OJJ82167.1 akaw|GAA83629.1 aluc|OJZ92364.1 anid|CBF75735.1 anig|EHA26609.1

aory|EIT80775.1 asyd|OJJ57512.1 ater|EAU35669.1 atub|OJI86794.1 aver|OJJ05667.1 awen|OJJ40536.1 azon|OJJ49395.1

Group3521: abra|OJJ74786.1 acar|OOF95776.1 acla|EAW10625.1 afis|EAW24942.1 afla|EED55523.1 afum|EAL89599.1 agla|OJJ82169.1 akaw|GAA83627.1 aluc|OJZ92366.1 anid|CBF75741.1 anig|EHA26607.1 aory|EIT80928.1 asyd|OJJ57517.1 ater|EAU35674.1 atub|OJI86796.1 aver|OJJ05662.1 awen|OJJ40537.1 azon|OJJ49397.1

Group3522: abra|OJJ74788.1 acar|OOF95777.1 acla|EAW10623.1 afis|EAW24944.1 afla|EED55521.1 afum|EAL89601.1 agla|OJJ82171.1 akaw|GAA83625.1 aluc|OJZ92368.1 anid|CBF75743.1 anig|EHA26605.1 aory|EIT80857.1 asyd|OJJ57519.1 ater|EAU35675.1 atub|OJI86798.1 aver|OJJ05659.1 awen|OJJ40539.1 azon|OJJ49399.1

Group3523: abra|OJJ74789.1 acar|OOF95779.1 acla|EAW10622.1 afis|EAW24945.1 afla|EED55520.1 afum|EAL89602.1 agla|OJJ82173.1 akaw|GAA83624.1 aluc|OJZ92369.1 anid|CBF75615.1 anig|EHA26604.1 aory|EIT80768.1 asyd|OJJ57451.1 ater|EAU35676.1 atub|OJI86799.1 aver|OJJ05727.1 awen|OJJ40540.1 azon|OJJ49400.1

Group3524: abra|OJJ74790.1 acar|OOF95780.1 acla|EAW10621.1 afis|EAW24946.1 afla|EED55519.1 afum|EAL89603.1 agla|OJJ82174.1 akaw|GAA83623.1 aluc|OJZ92370.1 anid|CBF81729.1 anig|EHA26603.1 aory|EIT80898.1 asyd|OJJ59591.1 ater|EAU35678.1 atub|OJI86800.1 aver|OJJ02678.1 awen|OJJ40541.1 azon|OJJ49401.1

Group3525: abra|OJJ74791.1 acar|OOF95781.1 acla|EAW10620.1 afis|EAW24947.1 afla|EED55518.1 afum|EAL89604.1 agla|OJJ82175.1 akaw|GAA83622.1 aluc|OJZ92371.1 anid|CBF81728.1 anig|EHA26602.1 aory|EIT80815.1 asyd|OJJ59590.1 ater|EAU35679.1 atub|OJI86801.1 aver|OJJ02679.1 awen|OJJ40542.1 azon|OJJ49402.1

Group3526: abra|OJJ74792.1 acar|OOF95782.1 acla|EAW10619.1 afis|EAW24948.1 afla|EED55517.1 afum|EAL89605.1 agla|OJJ82176.1 akaw|GAA83621.1 aluc|OJZ92372.1 anid|CBF81726.1 anig|EHA26601.1 aory|EIT80913.1 asyd|OJJ59589.1 ater|EAU35680.1 atub|OJI86802.1 aver|OJJ02680.1 awen|OJJ40543.1 azon|OJJ49403.1

Group3527: abra|OJJ74797.1 acar|OOF95789.1 acla|EAW10609.1 afis|EAW24958.1 afla|EED55505.1 afum|EAL89616.1 agla|OJJ82189.1 akaw|GAA83615.1 aluc|OJZ92378.1 anid|CBF81663.1 anig|EHA26595.1 aory|EIT80867.1 asyd|OJJ59551.1 ater|EAU35697.1 atub|OJI86808.1 aver|OJJ02717.1 awen|OJJ40552.1 azon|OJJ49411.1

Group3528: abra|OJJ74802.1 acar|OOF95795.1 acla|EAW10614.1 afis|EAW24953.1 afla|EED55511.1 afum|EAL89610.1 agla|OJJ82184.1 akaw|GAA83611.1 aluc|OJZ92383.1 anid|CBF81717.1 anig|EHA26592.1 aory|EIT80894.1 asyd|OJJ59584.1 ater|EAU35685.1 atub|OJI86812.1 aver|OJJ02686.1 awen|OJJ40548.1 azon|OJJ49408.1

Group3529: abra|OJJ74804.1 acar|OOF95796.1 acla|EAW10616.1 afis|EAW24951.1 afla|EED55513.1 afum|EAL89608.1 agla|OJJ82187.1 akaw|GAA83609.1 aluc|OJZ92385.1 anid|CBF81721.1 anig|EHA26590.1 aory|EIT80836.1 asyd|OJJ59586.1 atub|OJI86814.1 aver|OJJ02683.1 awen|OJJ40546.1 azon|OJJ49406.1 ater|EAU35683.1

Group3530: abra|OJJ74805.1 acar|OOF95797.1 acla|EAW10617.1 afis|EAW24950.1 afla|EED55514.1 afum|EAL89607.1 agla|OJJ82179.1 akaw|GAA83608.1 aluc|OJZ92386.1 anid|CBF81722.1 anig|EHA26589.1 aory|EIT80921.1 asyd|OJJ59587.1 ater|EAU35682.1 atub|OJI86815.1 aver|OJJ02682.1 awen|OJJ40545.1 azon|OJJ49405.1

Group3531: abra|OJJ74806.1 acar|OOF95798.1 acla|EAW10618.1 afis|EAW24949.1 afla|EED55516.1 afum|EAL89606.1 agla|OJJ82177.1 akaw|GAA83606.1 aluc|OJZ92387.1 anid|CBF81724.1 anig|EHA26588.1 aory|EIT80820.1 asyd|OJJ59588.1 ater|EAU35681.1 atub|OJI86817.1 aver|OJJ02681.1 awen|OJJ40544.1 azon|OJJ49404.1

Group3532: abra|OJJ74808.1 acar|OOF95800.1 acla|EAW10606.1 afis|EAW24961.1 afla|EED55501.1 afum|EAL89619.1 agla|OJJ82196.1 akaw|GAA83604.1 aluc|OJZ92389.1 anid|CBF81658.1 anig|EHA26585.1 aory|EIT80766.1 asyd|OJJ59548.1 ater|EAU35694.1 atub|OJI86819.1 aver|OJJ02720.1 awen|OJJ40554.1 azon|OJJ49416.1

Group3533: abra|OJJ74830.1 acar|OOF95817.1 acla|EAW11373.1 afis|EAW18122.1 afla|EED58048.1 afum|EAL87480.1 agla|OJJ87016.1 akaw|GAA83590.1 aluc|OJZ92407.1 anid|CBF75358.1 anig|EHA26558.1 aory|EIT79720.1 asyd|OJJ59851.1 ater|EAU29689.1 atub|OJI86835.1 aver|OJJ02436.1 awen|OJJ35524.1 azon|OJJ46961.1

Group3534: abra|OJJ74831.1 acar|OOF95819.1 acla|EAW11372.1 afis|EAW18123.1 afla|EED58049.1 afum|EAL87481.1 agla|OJJ87017.1 akaw|GAA83589.1 aluc|OJZ92408.1 anid|CBF80348.1 anig|EHA26557.1 aory|EIT79773.1 asyd|OJJ54832.1 ater|EAU29688.1 atub|OJI86836.1 aver|OJJ07329.1 awen|OJJ35525.1 azon|OJJ46959.1



Group3535: abra|OJJ74840.1 acar|OOF95843.1 acla|EAW09369.1 afis|EAW21766.1 afla|EED46332.1 afum|EAL92796.1 agla|OJJ84385.1 akaw|GAA83581.1 aluc|OJZ92416.1 anid|CBF83756.1 anig|EHA26550.1 aory|EIT81192.1 asyd|OJJ60860.1 ater|EAU38449.1 atub|OJI86846.1 aver|OJJ00185.1 awen|OJJ34049.1 azon|OJJ48182.1

Group3536: abra|OJJ74841.1 acar|OOF94168.1 acla|EAW08544.1 afis|EAW23581.1 afla|EED57489.1 afum|EAL87884.1 agla|OJJ86848.1 akaw|GAA83580.1 aluc|OJZ92417.1 anid|CBF89912.1 anig|EHA26549.1 aory|EIT81889.1 asyd|OJJ62129.1 ater|EAU35371.1 atub|OJI86847.1 aver|OJI96238.1 awen|OJJ39909.1 azon|OJJ45885.1

Group3537: abra|OJJ74847.1 acar|OOF95848.1 acla|EAW08541.1 afis|EAW23578.1 afla|EED57477.1 afum|EAL87887.1 agla|OJJ86843.1 akaw|GAA83575.1 aluc|OJZ92422.1 anid|CBF89598.1 anig|EHA26545.1 aory|EIT80110.1 asyd|OJJ62311.1 ater|EAU35366.1 atub|OJI86852.1 aver|OJI96419.1 awen|OJJ39906.1 azon|OJJ45883.1

Group3538: abra|OJJ74848.1 acar|OOF95849.1 acla|EAW08540.1 afis|EAW23577.1 afla|EED57476.1 afum|EAL87888.1 agla|OJJ86838.1 akaw|GAA83574.1 aluc|OJZ92423.1 anid|CBF89600.1 anig|EHA26544.1 aory|EIT80147.1 asyd|OJJ62310.1 ater|EAU35367.1 atub|OJI86853.1 aver|OJI96418.1 awen|OJJ39905.1 azon|OJJ45882.1

Group3539: abra|OJJ74852.1 acar|OOF95851.1 acla|EAW08535.1 afis|EAW23573.1 afla|EED50962.1 afum|EAL87892.2 agla|OJJ86833.1 akaw|GAA83570.1 aluc|OJZ92428.1 anid|CBF89610.1 anig|EHA26539.1 aory|EIT77015.1 asyd|OJJ62305.1 ater|EAU35343.1 atub|OJI86858.1 aver|OJI96413.1 awen|OJJ39901.1 azon|OJJ42316.1

Group3540: abra|OJJ74854.1 acar|OOF95854.1 acla|EAW08531.1 afis|EAW23570.1 afla|EED57463.1 afum|EAL87897.2 agla|OJJ86831.1 akaw|GAA83568.1 aluc|OJZ92430.1 anid|CBF89617.1 anig|EHA26536.1 aory|EIT80101.1 asyd|OJJ62302.1 ater|EAU35346.1 atub|OJI86860.1 aver|OJI96411.1 awen|OJJ39899.1 azon|OJJ45876.1

Group3541: abra|OJJ74856.1 acar|OOF95857.1 acla|EAW08528.1 afis|EAW23568.1 afla|EED57459.1 afum|EAL87899.1 agla|OJJ86829.1 akaw|GAA83566.1 aluc|OJZ92432.1 anid|CBF89621.1 anig|EHA26534.1 aory|EIT80063.1 asyd|OJJ62300.1 ater|EAU35349.1 atub|OJI86862.1 aver|OJI96408.1 awen|OJJ39896.1 azon|OJJ45874.1

Group3542: abra|OJJ74859.1 acar|OOF95859.1 acla|EAW08521.1 afis|EAW23559.1 afla|EED57454.1 afum|EAL87907.1 agla|OJJ86825.1 akaw|GAA83561.1 aluc|OJZ92437.1 anid|CBF89634.1 anig|EHA26531.1 aory|EIT80133.1 asyd|OJJ62295.1 ater|EAU35342.1 atub|OJI86866.1 aver|OJI96402.1 awen|OJJ39893.1 azon|OJJ43217.1

Group3543: abra|OJJ74860.1 acar|OOF95860.1 acla|EAW08520.1 afis|EAW23558.1 afla|EED57453.1 afum|EAL87908.1 agla|OJJ86826.1 akaw|GAA83560.1 aluc|OJZ92438.1 anid|CBF89636.1 anig|EHA26530.1 aory|EIT80071.1 asyd|OJJ62294.1 ater|EAU35341.1 atub|OJI86867.1 aver|OJI96401.1 awen|OJJ39891.1 azon|OJJ43218.1

Group3544: abra|OJJ74862.1 acar|OOF95862.1 acla|EAW08519.1 afis|EAW23557.1 afla|EED57452.1 afum|EAL87909.1 agla|OJJ86819.1 akaw|GAA83558.1 aluc|OJZ92440.1 anid|CBF89638.1 anig|EHA26527.1 aory|EIT80146.1 asyd|OJJ62292.1 ater|EAU35340.1 atub|OJI86869.1 aver|OJI96400.1 awen|OJJ39888.1 azon|OJJ43219.1

Group3545: abra|OJJ74867.1 acar|OOF95868.1 acla|EAW08513.1 afis|EAW23551.1 afla|EED57446.1 afum|EAL87915.1 agla|OJJ86807.1 akaw|GAA83553.1 aluc|OJZ92445.1 anid|CBF89646.1 anig|EHA26523.1 aory|EIT80111.1 asyd|OJJ62286.1 ater|EAU35335.1 atub|OJI86873.1 aver|OJI96394.1 awen|OJJ39882.1 azon|OJJ43223.1

Group3546: abra|OJJ74869.1 acar|OOF95870.1 acla|EAW08511.1 afis|EAW23549.1 afla|EED57444.1 afum|EAL87917.2 agla|OJJ86805.1 akaw|GAA83551.1 aluc|OJZ92447.1 anid|CBF89650.1 anig|EHA26521.1 aory|EIT80076.1 asyd|OJJ62284.1 ater|EAU35334.1 atub|OJI86875.1 aver|OJI96392.1 awen|OJJ39880.1 azon|OJJ43224.1

Group3547: abra|OJJ74872.1 acar|OOF95873.1 acla|EAW08508.1 afis|EAW23546.1 afla|EED57441.1 afum|EAL87920.1 agla|OJJ86800.1 akaw|GAA83548.1 aluc|OJZ92450.1 anid|CBF89654.1 anig|EHA26518.1 aory|EIT80061.1 asyd|OJJ62282.1 ater|EAU35331.1 atub|OJI86878.1 aver|OJI96390.1 awen|OJJ39877.1 azon|OJJ43226.1

Group3548: abra|OJJ74874.1 acar|OOF95875.1 acla|EAW08498.1 afis|EAW23543.1 afla|EED57440.1 afum|EAL87923.2 agla|OJJ86797.1 akaw|GAA83546.1 aluc|OJZ92452.1 anid|CBF89657.1 anig|EHA26516.1 aory|EIT80096.1 asyd|OJJ62279.1 ater|EAU35329.1 atub|OJI86880.1 aver|OJI96388.1 awen|OJJ39875.1 azon|OJJ43227.1

Group3549: abra|OJJ74877.1 acar|OOF95880.1 acla|EAW08493.1 afis|EAW23539.1 afla|EED57437.1 afum|EAL87927.1 agla|OJJ86794.1 akaw|GAA83543.1 aluc|OJZ92454.1 anid|CBF89665.1 anig|EHA26513.1

aory|EIT80117.1 asyd|OJJ62275.1 ater|EAU35325.1 atub|OJI86883.1 aver|OJI96384.1 awen|OJJ39870.1 azon|OJJ43231.1

Group3550: abra|OJJ74879.1 acar|OOF95882.1 acla|EAW08491.1 afis|EAW23537.1 afla|EED57435.1 afum|EAL87929.1 agla|OJJ86792.1 akaw|GAA83541.1 aluc|OJZ92456.1 anid|CBF89668.1 anig|EHA26511.1 aory|EIT80166.1 asyd|OJJ62273.1 ater|EAU35323.1 atub|OJI86885.1 aver|OJI96382.1 awen|OJJ39867.1 azon|OJJ43233.1

Group3551: abra|OJJ74881.1 acar|OOF95884.1 acla|EAW08489.1 afis|EAW23535.1 afla|EED57432.1 afum|EAL87931.1 agla|OJJ86790.1 akaw|GAA83539.1 aluc|OJZ92458.1 anid|CBF89672.1 anig|EHA26509.1 aory|EIT80162.1 asyd|OJJ62271.1 ater|EAU35321.1 atub|OJI86887.1 aver|OJI96380.1 awen|OJJ39865.1 azon|OJJ43235.1

Group3552: abra|OJJ74882.1 acar|OOF95886.1 acla|EAW08487.1 afis|EAW23533.1 afla|EED57430.1 afum|EAL87933.1 agla|OJJ86782.1 akaw|GAA83537.1 aluc|OJZ92459.1 anid|CBF89678.1 anig|EHA26508.1 aory|EIT80077.1 asyd|OJJ62269.1 ater|EAU35319.1 atub|OJI86888.1 aver|OJI96378.1 awen|OJJ39862.1 azon|OJJ43236.1

Group3553: abra|OJJ74884.1 akaw|GAA83535.1 aluc|OJZ92461.1 anig|EHA26506.1 atub|OJI86890.1 acar|OOF95889.1 acla|EAW08483.1 afis|EAW23529.1 afla|EED57428.1 afum|EAL87937.1 agla|OJJ86778.1 anid|CBF89683.1 asyd|OJJ62266.1 ater|EAU35317.1 aver|OJI96375.1 awen|OJJ39858.1 azon|OJJ43239.1 aory|EIT80152.1

Group3554: abra|OJJ74888.1 acar|OOF95893.1 acla|EAW08479.1 afis|EAW23525.1 afla|EED57424.1 afum|EAL87940.1 agla|OJJ86774.1 akaw|GAA83531.1 aluc|OJZ92465.1 anid|CBF89691.1 anig|EHA26502.1 aory|EIT80080.1 asyd|OJJ62262.1 ater|EAU35313.1 atub|OJI86894.1 aver|OJI96371.1 awen|OJJ39854.1 azon|OJJ43245.1

Group3555: abra|OJJ74889.1 acar|OOF95892.1 acla|EAW08478.1 afis|EAW23524.1 afla|EED50993.1 afum|EAL87941.1 agla|OJJ86773.1 akaw|GAA83530.1 aluc|OJZ92466.1 anid|CBF76066.1 anig|EHA26501.1 aory|EIT76998.1 asyd|OJJ60396.1 ater|EAU31002.1 atub|OJI86895.1 aver|OJI99725.1 awen|OJJ39853.1 azon|OJJ50688.1

Group3556: abra|OJJ74897.1 acar|OOF95897.1 acla|EAW08475.1 afis|EAW23521.1 afum|EAL87943.1 agla|OJJ86768.1 akaw|GAA83524.1 aluc|OJZ92471.1 anig|EHA26497.1 ater|EAU35309.1 atub|OJI86901.1 awen|OJJ39846.1 afla|EED57421.1 aory|EIT80149.1 aver|OJI96367.1 azon|OJJ43248.1 anid|CBF89696.1 asyd|OJJ62258.1

Group3557: abra|OJJ74901.1 acar|OOF95900.1 acla|EAW08472.1 afis|EAW23518.1 afla|EED57418.1 afum|EAL87946.1 agla|OJJ86765.1 akaw|GAA83521.1 aluc|OJZ92474.1 anid|CBF89702.1 anig|EHA26495.1 aory|EIT80062.1 asyd|OJJ62254.1 atub|OJI86905.1 aver|OJI96364.1 awen|OJJ39843.1 azon|OJJ43250.1 ater|EAU35306.1

Group3558: abra|OJJ74905.1 acar|OOF90301.1 acla|EAW08467.1 afis|EAW23514.1 afla|EED57413.1 afum|EAL87949.1 agla|OJJ86762.1 akaw|GAA83517.1 aluc|OJZ92478.1 anig|EHA26492.1 aory|EIT80167.1 asyd|OJJ59973.1 ater|EAU35303.1 atub|OJI86909.1 aver|OJJ02318.1 awen|OJJ39839.1 azon|OJJ43253.1 anid|CBF75148.1

Group3559: abra|OJJ74907.1 acar|OOF90299.1 acla|EAW08465.1 afis|EAW23510.1 afla|EED57410.1 afum|EAL87951.1 agla|OJJ86760.1 akaw|GAA83515.1 aluc|OJZ92480.1 anid|CBF89718.1 anig|EHA26490.1 aory|EIT80124.1 asyd|OJJ62245.1 ater|EAU35298.1 atub|OJI86911.1 aver|OJI96355.1 awen|OJJ39836.1 azon|OJJ43256.1

Group3560: abra|OJJ74909.1 acar|OOF90294.1 acla|EAW08463.1 afis|EAW23508.1 afla|EED57408.1 afum|EAL87953.1 agla|OJJ86758.1 akaw|GAA83513.1 aluc|OJZ92482.1 anid|CBF89714.1 anig|EHA26489.1 aory|EIT80104.1 asyd|OJJ62247.1 ater|EAU35296.1 atub|OJI86913.1 aver|OJI96357.1 awen|OJJ39834.1 azon|OJJ43258.1

Group3561: abra|OJJ74910.1 acar|OOF90297.1 acla|EAW08462.1 afis|EAW23507.1 afla|EED57407.1 afum|EAL87954.1 agla|OJJ86757.1 akaw|GAA83512.1 aluc|OJZ92483.1 anid|CBF89712.1 anig|EHA26488.1 aory|EIT80089.1 asyd|OJJ62248.1 ater|EAU35295.1 atub|OJI86914.1 aver|OJI96358.1 awen|OJJ39833.1 azon|OJJ43259.1

Group3562: abra|OJJ74916.1 acar|OOF95908.1 acla|EAW08454.1 afis|EAW23501.1 afla|EED57399.1 afum|EAL87961.1 agla|OJJ86746.1 akaw|GAA83506.1 aluc|OJZ92488.1 anid|CBF89733.1 anig|EHA26484.1 aory|EIT80085.1 asyd|OJJ62233.1 ater|EAU35288.1 atub|OJI86921.1 aver|OJI96342.1 awen|OJJ39824.1 azon|OJJ47948.1

Group3563: abra|OJJ74919.1 acar|OOF95910.1 afis|EAW23497.1 afla|EED57397.1 afum|EAL87966.1 agla|OJJ86744.1 akaw|GAA83504.1 aluc|OJZ92490.1 anid|CBF89737.1 anig|EHA26482.1 aory|EIT80105.1 asyd|OJJ62231.1 ater|EAU35286.1 atub|OJI86923.1 aver|OJI96340.1 awen|OJJ39822.1 azon|OJJ47946.1 acla|EAW08452.1

Group3564: abra|OJJ74922.1 acar|OOF95912.1 acla|EAW08449.1 afis|EAW23494.1 afla|EED57394.1 afum|EAL87969.1 agla|OJJ86741.1 akaw|GAA83501.1 aluc|OJZ92493.1 anid|CBF89742.1 anig|EHA26479.1 aory|EIT80159.1 asyd|OJJ62228.1 ater|EAU35283.1 atub|OJI86926.1 aver|OJI96337.1 awen|OJJ39819.1 azon|OJJ47943.1

Group3565: abra|OJJ74923.1 acar|OOF95914.1 acla|EAW08448.1 afis|EAW23493.1 afla|EED57393.1 afum|EAL87970.1 agla|OJJ86740.1 akaw|GAA83500.1 aluc|OJZ92494.1 anid|CBF89744.1 anig|EHA26478.1 aory|EIT80132.1 asyd|OJJ62227.1 ater|EAU35282.1 atub|OJI86927.1 aver|OJI96336.1 awen|OJJ39818.1 azon|OJJ47941.1

Group3566: abra|OJJ74924.1 acar|OOF95915.1 acla|EAW08447.1 afis|EAW23492.1 afla|EED57391.1 afum|EAL87971.1 agla|OJJ86737.1 akaw|GAA83499.1 aluc|OJZ92495.1 anid|CBF89746.1 anig|EHA26477.1 aory|EIT80165.1 asyd|OJJ62225.1 ater|EAU35279.1 atub|OJI86928.1 aver|OJI96334.1 awen|OJJ39816.1 azon|OJJ47939.1

Group3567: abra|OJJ74925.1 acar|OOF95916.1 acla|EAW08446.1 afis|EAW23491.1 afla|EED57390.1 afum|EAL87972.1 agla|OJJ86736.1 akaw|GAA83498.1 aluc|OJZ92496.1 anid|CBF89747.1 anig|EHA26476.1 aory|EIT80058.1 asyd|OJJ62224.1 ater|EAU35278.1 atub|OJI86929.1 aver|OJI96333.1 awen|OJJ39815.1 azon|OJJ47938.1

Group3568: abra|OJJ74928.1 acar|OOF95917.1 acla|EAW08442.1 afis|EAW23487.1 afla|EED57386.1 afum|EAL87976.1 agla|OJJ86732.1 akaw|GAA83494.1 aluc|OJZ92499.1 anid|CBF89755.1 anig|EHA26473.1 aory|EIT80123.1 asyd|OJJ62220.1 ater|EAU35274.1 atub|OJI86932.1 aver|OJI96330.1 awen|OJJ39810.1 azon|OJJ47934.1

Group3569: abra|OJJ74930.1 acar|OOF95920.1 acla|EAW08439.1 afis|EAW23484.1 afla|EED57379.1 afum|EAL87979.1 agla|OJJ86720.1 akaw|GAA83491.1 aluc|OJZ92502.1 anid|CBF89760.1 anig|EHA26471.1 aory|EIT80056.1 asyd|OJJ62217.1 ater|EAU35271.1 atub|OJI86934.1 aver|OJI96328.1 awen|OJJ39808.1 azon|OJJ47929.1

Group3570: abra|OJJ74931.1 acar|OOF95921.1 acla|EAW08438.1 afis|EAW23483.1 afla|EED57378.1 afum|EAL87980.1 agla|OJJ86719.1 akaw|GAA83490.1 aluc|OJZ92503.1 anid|CBF89762.1 anig|EHA26470.1 aory|EIT80160.1 asyd|OJJ62216.1 ater|EAU36899.1 atub|OJI86935.1 aver|OJI96327.1 awen|OJJ39807.1 azon|OJJ47928.1

Group3571: abra|OJJ74932.1 acar|OOF95922.1 acla|EAW08437.1 afis|EAW23482.1 afla|EED57377.1 afum|EAL87982.1 agla|OJJ86718.1 akaw|GAA83488.1 aluc|OJZ92505.1 anid|CBF89764.1 anig|EHA26468.1 aory|EIT80168.1 asyd|OJJ62215.1 ater|EAU36900.1 atub|OJI86937.1 aver|OJI96326.1 awen|OJJ39806.1 azon|OJJ47927.1

Group3572: abra|OJJ74935.1 acar|OOF97377.1 acla|EAW08436.1 afis|EAW23481.1 afla|EED57376.1 afum|EAL87983.1 agla|OJJ86717.1 akaw|GAA83485.1 aluc|OJZ92508.1 anid|CBF89766.1 anig|EHA26465.1 aory|EIT80075.1 asyd|OJJ62214.1 ater|EAU36901.1 atub|OJI86941.1 aver|OJI96325.1 awen|OJJ39805.1 azon|OJJ47926.1

Group3573: abra|OJJ74938.1 acar|OOF97376.1 acla|EAW08433.1 afis|EAW23476.1 afla|EED57372.1 afum|EAL87989.2 agla|OJJ86715.1 akaw|GAA83482.1 aluc|OJZ92513.1 anid|CBF89771.1 anig|EHA26462.1 aory|EIT80114.1 asyd|OJJ62212.1 ater|EAU36904.1 atub|OJI86944.1 aver|OJI96323.1 awen|OJJ39802.1 azon|OJJ47923.1

Group3574: abra|OJJ74939.1 acar|OOF97375.1 acla|EAW08431.1 afis|EAW23474.1 afla|EED57370.1 afum|EAL87991.2 agla|OJJ86713.1 akaw|GAA83481.1 aluc|OJZ92514.1 anid|CBF89775.1 anig|EHA26461.1 aory|EIT80156.1 asyd|OJJ62209.1 ater|EAU36906.1 atub|OJI86945.1 aver|OJI96321.1 awen|OJJ39800.1 azon|OJJ47922.1

Group3575: abra|OJJ74941.1 acar|OOF97374.1 acla|EAW08429.1 afis|EAW23473.1 afla|EED57369.1 afum|EAL87993.1 agla|OJJ86712.1 akaw|GAA83480.1 aluc|OJZ92515.1 anid|CBF89777.1 anig|EHA26460.1 aory|EIT80066.1 asyd|OJJ62208.1 ater|EAU36907.1 atub|OJI86948.1 aver|OJI96320.1 awen|OJJ39799.1 azon|OJJ47920.1

Group3576: abra|OJJ74943.1 acar|OOF97372.1 acla|EAW08427.1 afis|EAW23471.1 afla|EED57367.1 afum|EAL87995.1 agla|OJJ86710.1 akaw|GAA83478.1 aluc|OJZ92517.1 anid|CBF89782.1 anig|EHA26458.1 aory|EIT80170.1 asyd|OJJ62205.1 ater|EAU36909.1 atub|OJI86950.1 aver|OJI96317.1 awen|OJJ39796.1 azon|OJJ47918.1

Group3577: abra|OJJ74945.1 acar|OOF97371.1 acla|EAW08426.1 afis|EAW23442.1 afla|EED57366.1 afum|EAL88021.1 agla|OJJ86709.1 akaw|GAA83477.1 aluc|OJZ92518.1 anid|CBF89784.1 anig|EHA26457.1 aory|EIT80053.1 asyd|OJJ62204.1 ater|EAU36910.1 atub|OJI86952.1 aver|OJI96316.1 awen|OJJ39790.1 azon|OJJ47917.1

Group3578: abra|OJJ74946.1 acar|OOF97370.1 acla|EAW08425.1 afis|EAW23444.1 afla|EED57365.1 afum|EAL88020.1 agla|OJJ86707.1 akaw|GAA83476.1 aluc|OJZ92519.1 anid|CBF89786.1 anig|EHA26456.1

aory|EIT80115.1 asyd|OJJ62203.1 ater|EAU36911.1 atub|OJI86953.1 aver|OJI96315.1 awen|OJJ39786.1 azon|OJJ47916.1

Group3579: abra|OJJ74947.1 acar|OOF97369.1 acla|EAW08424.1 afis|EAW23445.1 afla|EED57364.1 afum|EAL88019.1 agla|OJJ86706.1 akaw|GAA83475.1 aluc|OJZ92520.1 anid|CBF89788.1 anig|EHA26455.1 aory|EIT80057.1 asyd|OJJ62202.1 ater|EAU36912.1 atub|OJI86954.1 aver|OJI96314.1 awen|OJJ39785.1 azon|OJJ47915.1

Group3580: abra|OJJ74949.1 acar|OOF97367.1 acla|EAW08422.1 afis|EAW23447.1 afla|EED57362.1 afum|EAL88018.1 agla|OJJ86702.1 akaw|GAA83473.1 aluc|OJZ92522.1 anid|CBF89791.1 anig|EHA26453.1 aory|EIT80100.1 asyd|OJJ62200.1 ater|EAU36913.1 atub|OJI86956.1 aver|OJI96312.1 awen|OJJ39782.1 azon|OJJ47913.1

Group3581: abra|OJJ74952.1 acar|OOF97362.1 acla|EAW08421.1 afis|EAW23448.1 afla|EED57359.1 afum|EAL88017.1 agla|OJJ86701.1 akaw|GAA83471.1 aluc|OJZ92524.1 anid|CBF89793.1 anig|EHA26450.1 aory|EIT80142.1 asyd|OJJ62199.1 ater|EAU36914.1 atub|OJI86959.1 aver|OJI96311.1 awen|OJJ39781.1 azon|OJJ47912.1

Group3582: abra|OJJ74953.1 acar|OOF97360.1 acla|EAW08420.1 afis|EAW23449.1 afla|EED57358.1 afum|EBA27332.1 agla|OJJ86700.1 akaw|GAA83470.1 aluc|OJZ92525.1 anid|CBF89795.1 anig|EHA26449.1 aory|EIT80082.1 asyd|OJJ62198.1 ater|EAU36916.1 atub|OJI86961.1 awen|OJJ39780.1 azon|OJJ47911.1 aver|OJI96310.1

Group3583: abra|OJJ74954.1 acar|OOF97359.1 acla|EAW08418.1 afis|EAW23451.1 afla|EED57352.1 afum|EAL88015.1 agla|OJJ86699.1 akaw|GAA83469.1 aluc|OJZ92526.1 anid|CBF89799.1 anig|EHA26448.1 aory|EIT80134.1 asyd|OJJ62196.1 ater|EAU36917.1 atub|OJI86962.1 aver|OJI96308.1 awen|OJJ39778.1 azon|OJJ47908.1

Group3584: abra|OJJ74956.1 acar|OOF97357.1 acla|EAW08416.1 afis|EAW23453.1 afla|EED57350.1 afum|EAL88013.1 agla|OJJ86697.1 akaw|GAA83467.1 aluc|OJZ92528.1 anid|CBF89802.1 anig|EHA26447.1 aory|EIT80106.1 asyd|OJJ62194.1 ater|EAU36919.1 atub|OJI86964.1 aver|OJI96306.1 awen|OJJ39776.1 azon|OJJ47906.1

Group3585: abra|OJJ74958.1 acar|OOF97355.1 acla|EAW08413.1 afis|EAW23456.1 afla|EED57345.1 afum|EBA27330.1 akaw|GAA83464.1 aluc|OJZ92530.1 anid|CBF89808.1 anig|EHA26444.1 aory|EIT80113.1 asyd|OJJ62191.1 ater|EAU36922.1 atub|OJI86967.1 aver|OJI96301.1 awen|OJJ39773.1 azon|OJJ47902.1 agla|OJJ86693.1

Group3586: abra|OJJ74959.1 acar|OOF97354.1 acla|EAW08412.1 afis|EAW23457.1 afla|EED57344.1 afum|EBA27329.1 agla|OJJ86692.1 akaw|GAA83463.1 aluc|OJZ92531.1 anid|CBF89810.1 anig|EHA26443.1 aory|EIT80054.1 asyd|OJJ62190.1 ater|EAU36923.1 atub|OJI86968.1 aver|OJI96300.1 awen|OJJ39772.1 azon|OJJ47903.1

Group3587: abra|OJJ74965.1 acar|OOF97349.1 acla|EAW08409.1 afis|EAW23460.1 afla|EED57340.1 afum|EAL88006.1 agla|OJJ86689.1 akaw|GAA83461.1 aluc|OJZ92535.1 anid|CBF89820.1 anig|EHA26440.1 aory|EIT74102.1 asyd|OJJ62187.1 ater|EAU37473.1 atub|OJI86971.1 aver|OJI96296.1 awen|OJJ39770.1 azon|OJJ47900.1

Group3588: abra|OJJ74966.1 acar|OOF97348.1 acla|EAW08408.1 afis|EAW23461.1 afla|EED57339.1 afum|EAL88005.1 agla|OJJ86688.1 akaw|GAA83460.1 aluc|OJZ92536.1 anid|CBF89850.1 anig|EHA26439.1 aory|EIT74042.1 asyd|OJJ62186.1 ater|EAU37474.1 atub|OJI86972.1 aver|OJI96295.1 awen|OJJ39769.1 azon|OJJ47899.1

Group3589: abra|OJJ74967.1 acar|OOF97346.1 acla|EAW08407.1 afis|EAW23462.1 afla|EED57338.1 afum|EAL88004.1 agla|OJJ86687.1 akaw|GAA83459.1 aluc|OJZ92537.1 anid|CBF89848.1 anig|EHA26438.1 aory|EIT74136.1 asyd|OJJ62185.1 ater|EAU37475.1 atub|OJI86973.1 aver|OJI96294.1 awen|OJJ39768.1 azon|OJJ47898.1

Group3590: abra|OJJ74969.1 acar|OOF97345.1 acla|EAW08405.1 afis|EAW23464.1 afla|EED57335.1 afum|EAL88002.1 agla|OJJ86685.1 akaw|GAA83457.1 aluc|OJZ92539.1 anid|CBF89843.1 anig|EHA26437.1 aory|EIT74036.1 asyd|OJJ62183.1 ater|EAU37480.1 atub|OJI86975.1 aver|OJI96292.1 awen|OJJ39766.1 azon|OJJ47896.1

Group3591: abra|OJJ74975.1 acar|OOF97344.1 acla|EAW08404.1 afis|EAW23465.1 afla|EED57334.1 afum|EAL88001.1 agla|OJJ86684.1 akaw|GAA83456.1 aluc|OJZ92540.1 anid|CBF89841.1 anig|EHA26436.1 aory|EIT73981.1 asyd|OJJ62182.1 ater|EAU37481.1 atub|OJI86976.1 aver|OJI96291.1 awen|OJJ39765.1 azon|OJJ47895.1

Group3592: abra|OJJ74976.1 acar|OOF97343.1 acla|EAW08403.1 afis|EAW23466.1 afla|EED57333.1 afum|EAL88000.1 agla|OJJ86683.1 akaw|GAA83455.1 aluc|OJZ92541.1 anid|CBF89839.1 anig|EHA26435.1 aory|EIT74149.1 asyd|OJJ62181.1 ater|EAU37482.1 atub|OJI86977.1 aver|OJI96290.1 awen|OJJ39764.1 azon|OJJ47894.1

Group3593: abra|OJJ74980.1 acar|OOF97340.1 acla|EAW08400.1 afis|EAW23469.1 afla|EED57331.1 afum|EAL87997.1 agla|OJJ86680.1 akaw|GAA83452.1 aluc|OJZ92544.1 anid|CBF89833.1 anig|EHA26432.1 aory|EIT74122.1 asyd|OJJ62178.1 ater|EAU37485.1 atub|OJI86980.1 aver|OJI96287.1 awen|OJJ39760.1 azon|OJJ47889.1

Group3594: abra|OJJ74981.1 acar|OOF97339.1 acla|EAW08399.1 afis|EAW23470.1 afla|EED57330.1 afum|EAL87996.1 agla|OJJ86679.1 akaw|GAA83451.1 aluc|OJZ92545.1 anid|CBF89831.1 anig|EHA26431.1 aory|EIT74162.1 asyd|OJJ62177.1 ater|EAU37486.1 atub|OJI86981.1 aver|OJI96286.1 awen|OJJ39759.1 azon|OJJ47888.1

Group3595: abra|OJJ74983.1 acar|OOF97338.1 acla|EAW08397.1 afis|EAW23440.1 afla|EED57329.1 afum|EAL88022.1 agla|OJJ86677.1 akaw|GAA83449.1 aluc|OJZ92547.1 anid|CBF89828.1 anig|EHA26429.1 asyd|OJJ62169.1 ater|EAU37487.1 atub|OJI86983.1 aver|OJI96281.1 awen|OJJ39757.1 azon|OJJ47885.1 anid|CBF89830.1

Group3596: abra|OJJ74988.1 acar|OOF97333.1 acla|EAW08394.1 afis|EAW23437.1 afla|EED57327.1 afum|EAL88025.1 agla|OJJ86674.1 akaw|GAA83446.1 aluc|OJZ92550.1 anid|CBF89852.1 anig|EHA26427.1 aory|EIT74016.1 asyd|OJJ62176.1 ater|EAU37489.1 atub|OJI86987.1 aver|OJI96285.1 awen|OJJ39754.1 azon|OJJ47881.1

Group3597: abra|OJJ74991.1 acar|OOF97329.1 acla|EAW08392.1 afis|EAW23423.1 afla|EED57322.1 afum|EAL88033.1 agla|OJJ86673.1 akaw|GAA83444.1 aluc|OJZ92555.1 anid|CBF89824.1 anig|EHA26424.1 aory|EIT74106.1 asyd|OJJ62171.1 ater|EAU37494.1 atub|OJI86991.1 aver|OJI96283.1 awen|OJJ39753.1 azon|OJJ47880.1

Group3598: abra|OJJ74993.1 acar|OOF97326.1 acla|EAW08390.1 afis|EAW23419.1 afla|EED57321.1 afum|EAL88050.1 agla|OJJ86644.1 akaw|GAA83442.1 aluc|OJZ92559.1 anid|CBF89854.1 anig|EHA26421.1 aory|EIT74073.1 asyd|OJJ62161.1 ater|EAU37503.1 atub|OJI86995.1 aver|OJI96271.1 awen|OJJ39752.1 azon|OJJ47878.1

Group3599: abra|OJJ74996.1 acar|OOF97324.1 acla|EAW08388.1 afis|EAW23417.1 afla|EED57318.1 afum|EAL88052.2 agla|OJJ86634.1 akaw|GAA88620.1 aluc|OJZ92562.1 anid|CBF89861.1 anig|EHA26419.1 aory|EIT73973.1 asyd|OJJ62158.1 ater|EAU37505.1 atub|OJI86998.1 aver|OJI96268.1 awen|OJJ39750.1 azon|OJJ47876.1

Group3600: abra|OJJ74997.1 acar|OOF97323.1 acla|EAW08387.1 afis|EAW23416.1 afla|EED57317.1 afum|EAL88053.2 agla|OJJ86633.1 akaw|GAA88621.1 aluc|OJZ92563.1 anid|CBF89862.1 anig|EHA26418.1 aory|EIT74065.1 asyd|OJJ62157.1 ater|EAU37506.1 atub|OJI86999.1 aver|OJI96267.1 awen|OJJ39749.1 azon|OJJ47875.1

Group3601: abra|OJJ74999.1 acar|OOF97322.1 acla|EAW08386.1 afis|EAW23415.1 afla|EED57316.1 afum|EAL88054.1 agla|OJJ86632.1 akaw|GAA88622.1 aluc|OJZ92564.1 anid|CBF89864.1 anig|EHA26417.1 aory|EIT73976.1 asyd|OJJ62156.1 ater|EAU37507.1 atub|OJI87000.1 aver|OJI96266.1 awen|OJJ39748.1 azon|OJJ47874.1

Group3602: abra|OJJ75000.1 acar|OOF97321.1 acla|EAW08385.1 afis|EAW23414.1 afla|EED57315.1 afum|EAL88055.1 agla|OJJ86631.1 akaw|GAA88623.1 aluc|OJZ92565.1 anid|CBF89865.1 anig|EHA26416.1 aory|EIT74071.1 asyd|OJJ62155.1 ater|EAU37508.1 atub|OJI87001.1 aver|OJI96265.1 awen|OJJ39747.1 azon|OJJ47873.1

Group3603: abra|OJJ75002.1 acar|OOF90037.1 acla|EAW08383.1 afis|EAW23412.1 afla|EED57313.1 afum|EAL88057.1 agla|OJJ86629.1 akaw|GAA88625.1 aluc|OJZ92567.1 anid|CBF89869.1 anig|EHA26414.1 aory|EIT74133.1 asyd|OJJ62153.1 ater|EAU37510.1 atub|OJI87003.1 aver|OJI96263.1 awen|OJJ39745.1 azon|OJJ47871.1

Group3604: abra|OJJ75003.1 acar|OOF90036.1 acla|EAW08382.1 afis|EAW23411.1 afla|EED57312.1 afum|EAL88058.1 agla|OJJ86628.1 akaw|GAA88626.1 aluc|OJZ92568.1 anid|CBF89871.1 anig|EHA26413.1 aory|EIT74029.1 asyd|OJJ62152.1 ater|EAU37511.1 atub|OJI87004.1 aver|OJI96262.1 awen|OJJ39744.1 azon|OJJ47870.1

Group3605: abra|OJJ75004.1 acar|OOF90035.1 acla|EAW08381.1 afis|EAW23410.1 afla|EED57310.1 afum|EAL88060.1 agla|OJJ86627.1 akaw|GAA88627.1 aluc|OJZ92569.1 anig|EHA26412.1 aory|EIT74104.1 asyd|OJJ62151.1 ater|EAU37516.1 atub|OJI87005.1 aver|OJI96261.1 awen|OJJ39743.1 azon|OJJ47869.1 agla|OJJ86626.1

Group3606: abra|OJJ75005.1 acar|OOF97320.1 acla|EAW08380.1 afis|EAW23409.1 afla|EED57309.1 afum|EAL88061.2 agla|OJJ86625.1 akaw|GAA88628.1 aluc|OJZ92570.1 anid|CBF89873.1 anig|EHA26411.1 aory|EIT74087.1 asyd|OJJ62150.1 ater|EAU37515.1 atub|OJI87006.1 aver|OJI96260.1 awen|OJJ39742.1 azon|OJJ47868.1

Group3607: abra|OJJ75006.1 acar|OOF97319.1 acla|EAW08379.1 afis|EAW23408.1 afla|EED57308.1 afum|EAL88062.1 agla|OJJ86624.1 akaw|GAA88629.1 aluc|OJZ92571.1 anid|CBF89874.1 anig|EHA26410.1

aory|EIT74117.1 asyd|OJJ62149.1 ater|EAU37512.1 atub|OJI87007.1 aver|OJI96259.1 awen|OJJ39735.1  
azon|OJJ47867.1

Group3608: abra|OJJ75007.1 acar|OOF97318.1 acla|EAW08378.1 afis|EAW23407.1 afla|EED57307.1  
afum|EAL88063.2 agla|OJJ86623.1 akaw|GAA88630.1 aluc|OJZ92572.1 anid|CBF89876.1 anig|EHA26409.1  
aory|EIT74022.1 asyd|OJJ62148.1 ater|EAU37513.1 atub|OJI87008.1 aver|OJI96258.1 awen|OJJ39734.1  
azon|OJJ47866.1

Group3609: abra|OJJ75009.1 acar|OOF97317.1 acla|EAW08204.1 afis|EAW23238.1 afla|EED55718.1  
afum|EAL88244.1 agla|OJJ86622.1 akaw|GAA88632.1 aluc|OJZ92574.1 anid|CBF89882.1 anig|EHA26407.1  
aory|EIT83207.1 asyd|OJJ62146.1 ater|EAU37519.1 atub|OJI87010.1 aver|OJI96256.1 awen|OJJ39732.1  
azon|OJJ47864.1

Group3610: abra|OJJ75010.1 acar|OOF97316.1 acla|EAW08205.1 afis|EAW23239.1 afla|EED55719.1  
afum|EAL88243.1 agla|OJJ86620.1 akaw|GAA88633.1 aluc|OJZ92575.1 anid|CBF89884.1 anig|EHA26406.1  
aory|EIT83209.1 asyd|OJJ62145.1 ater|EAU37520.1 atub|OJI87011.1 aver|OJI96255.1 awen|OJJ39731.1  
azon|OJJ47863.1

Group3611: abra|OJJ75011.1 acar|OOF97315.1 acla|EAW08206.1 afis|EAW23240.1 afla|EED55720.1  
afum|EAL88242.1 agla|OJJ86619.1 akaw|GAA88634.1 aluc|OJZ92576.1 anid|CBF89885.1 anig|EHA26405.1  
aory|EIT83217.1 asyd|OJJ62144.1 ater|EAU37521.1 atub|OJI87012.1 aver|OJI96254.1 awen|OJJ39730.1  
azon|OJJ47862.1

Group3612: abra|OJJ75012.1 acar|OOF97314.1 acla|EAW08207.1 afis|EAW23241.1 afla|EED55722.1  
afum|EAL88241.1 agla|OJJ86618.1 akaw|GAA88635.1 aluc|OJZ92577.1 anid|CBF89887.1 anig|EHA26404.1  
aory|EIT83231.1 asyd|OJJ62143.1 ater|EAU37522.1 atub|OJI87013.1 aver|OJI96253.1 awen|OJJ39729.1  
azon|OJJ47861.1

Group3613: abra|OJJ75014.1 acar|OOF97312.1 acla|EAW08209.1 afis|EAW23243.1 afla|EED55724.1  
afum|EAL88239.1 agla|OJJ86617.1 akaw|GAA88637.1 aluc|OJZ92579.1 anid|CBF89891.1 anig|EHA26402.1  
aory|EIT83225.1 asyd|OJJ62140.1 ater|EAU37524.1 atub|OJI87015.1 aver|OJI96250.1 awen|OJJ39727.1  
azon|OJJ47858.1

Group3614: abra|OJJ75022.1 acar|OOF89975.1 acla|EAW08214.1 afis|EAW23248.1 afla|EED55729.1  
afum|EAL88233.1 agla|OJJ86609.1 akaw|GAA88642.1 aluc|OJZ92589.1 anid|CBF84108.1 anig|EHA26397.1  
aory|EIT83221.1 asyd|OJJ57101.1 ater|EAU37530.1 atub|OJI87021.1 aver|OJJ03198.1 awen|OJJ39716.1  
azon|OJJ47847.1

Group3615: abra|OJJ75025.1 acar|OOF97307.1 acla|EAW08217.1 afis|EAW23251.1 afla|EED55732.1  
afum|EAL88230.1 agla|OJJ86603.1 akaw|GAA88645.1 aluc|OJZ92592.1 anid|CBF84103.1 anig|EHA26394.1  
aory|EIT83210.1 asyd|OJJ57097.1 ater|EAU37549.1 atub|OJI87025.1 aver|OJJ03202.1 awen|OJJ39713.1  
azon|OJJ47844.1

Group3616: abra|OJJ75026.1 acar|OOF97306.1 acla|EAW08218.1 afis|EAW23252.1 afla|EED55733.1  
afum|EAL88229.1 agla|OJJ86602.1 akaw|GAA88646.1 aluc|OJZ92593.1 anid|CBF84101.1 anig|EHA26393.1  
aory|EIT83216.1 asyd|OJJ57096.1 ater|EAU37548.1 atub|OJI87027.1 aver|OJJ03203.1 awen|OJJ39712.1  
azon|OJJ47843.1

Group3617: abra|OJJ75027.1 acar|OOF97305.1 acla|EAW08219.1 afis|EAW23253.1 afla|EED55734.1  
afum|EAL88228.1 agla|OJJ86601.1 akaw|GAA88647.1 aluc|OJZ92594.1 anid|CBF84100.1 anig|EHA26392.1  
aory|EIT83226.1 asyd|OJJ57095.1 ater|EAU37547.1 atub|OJI87028.1 aver|OJJ03204.1 awen|OJJ39711.1  
azon|OJJ47842.1

Group3618: abra|OJJ75030.1 acar|OOF97303.1 acla|EAW08221.1 afis|EAW23255.1 afla|EED55736.1  
afum|EAL88226.1 agla|OJJ86599.1 akaw|GAA88649.1 aluc|OJZ92597.1 anid|CBF84096.1 anig|EHA26390.1  
aory|EIT83204.1 asyd|OJJ57093.1 ater|EAU37544.1 atub|OJI87031.1 aver|OJJ03206.1 awen|OJJ39709.1  
azon|OJJ47840.1

Group3619: abra|OJJ75031.1 acar|OOF97302.1 acla|EAW08222.1 afis|EAW23256.1 afla|EED55737.1  
afum|EAL88225.1 agla|OJJ86598.1 akaw|GAA88650.1 aluc|OJZ92598.1 anid|CBF84092.1 anig|EHA26389.1  
aory|EIT83229.1 asyd|OJJ57092.1 ater|EAU37543.1 atub|OJI87032.1 aver|OJJ03208.1 awen|OJJ39708.1  
azon|OJJ47839.1

Group3620: abra|OJJ75032.1 acar|OOF97301.1 acla|EAW08223.1 afis|EAW23257.1 afla|EED55738.1  
afum|EAL88224.1 agla|OJJ86597.1 akaw|GAA88651.1 aluc|OJZ92599.1 anid|CBF84094.1 anig|EHA26388.1  
aory|EIT83202.1 asyd|OJJ57091.1 ater|EAU37542.1 atub|OJI87034.1 aver|OJJ03209.1 awen|OJJ39707.1  
azon|OJJ47838.1

Group3621: abra|OJJ75033.1 acar|OOF97300.1 acla|EAW08224.1 afis|EAW23258.1 afla|EED55739.1  
afum|EAL88223.1 agla|OJJ86596.1 akaw|GAA88652.1 aluc|OJZ92600.1 anid|CBF84116.1 anig|EHA26387.1  
aory|EIT83200.1 asyd|OJJ57105.1 ater|EAU37541.1 atub|OJI87035.1 aver|OJJ03194.1 awen|OJJ39706.1  
azon|OJJ47837.1

Group3622: abra|OJJ75034.1 acar|OOF97299.1 acla|EAW08225.1 afis|EAW23259.1 afla|EED55740.1 afum|EAL88222.1 agla|OJJ86595.1 akaw|GAA88653.1 aluc|OJZ92602.1 anid|CBF84117.1 anig|EHA26386.1 aory|EIT83218.1 asyd|OJJ57106.1 ater|EAU37540.1 atub|OJI87036.1 aver|OJJ03193.1 awen|OJJ39705.1 azon|OJJ47835.1

Group3623: abra|OJJ75035.1 acar|OOF97298.1 acla|EAW08226.1 afis|EAW23260.1 afla|EED55741.1 afum|EAL88221.1 agla|OJJ86594.1 akaw|GAA88654.1 aluc|OJZ92603.1 anid|CBF84119.1 anig|EHA26385.1 aory|EIT83223.1 asyd|OJJ57107.1 ater|EAU37539.1 atub|OJI87037.1 aver|OJJ03192.1 awen|OJJ39704.1 azon|OJJ47834.1

Group3624: abra|OJJ75036.1 acar|OOF97297.1 acla|EAW08231.1 afis|EAW23265.1 afla|EED55746.1 afum|EAL88215.1 agla|OJJ86587.1 akaw|GAA88655.1 aluc|OJZ92604.1 anid|CBF84128.1 anig|EHA26384.1 aory|EIT83198.1 asyd|OJJ57112.1 ater|EAU37536.1 atub|OJI87038.1 aver|OJJ03187.1 awen|OJJ39699.1 azon|OJJ47829.1

Group3625: abra|OJJ75038.1 acar|OOF97294.1 acla|EAW08229.1 afis|EAW23263.1 afla|EED55744.1 afum|EAL88217.1 agla|OJJ86589.1 akaw|GAA88657.1 aluc|OJZ92606.1 anid|CBF84124.1 anig|EHA26382.1 aory|EIT83214.1 asyd|OJJ57110.1 ater|EAU37534.1 atub|OJI87040.1 aver|OJJ03189.1 awen|OJJ39701.1 azon|OJJ47831.1

Group3626: abra|OJJ75039.1 acar|OOF97293.1 acla|EAW08227.1 afis|EAW23261.1 afla|EED55742.1 afum|EAL88219.1 agla|OJJ86591.1 akaw|GAA88658.1 aluc|OJZ92607.1 anid|CBF84123.1 anig|EHA26381.1 aory|EIT83212.1 asyd|OJJ57109.1 ater|EAU37538.1 atub|OJI87041.1 aver|OJJ03190.1 awen|OJJ39703.1 azon|OJJ47833.1

Group3627: abra|OJJ75040.1 acar|OOF97292.1 acla|EAW08228.1 afis|EAW23262.1 afla|EED55743.1 afum|EAL88218.1 agla|OJJ86590.1 akaw|GAA88659.1 aluc|OJZ92608.1 anid|CBF84121.1 anig|EHA26380.1 aory|EIT83233.1 asyd|OJJ57108.1 ater|EAU37537.1 atub|OJI87042.1 aver|OJJ03191.1 awen|OJJ39702.1 azon|OJJ47832.1

Group3628: abra|OJJ75046.1 acar|OOF89831.1 acla|EAW08235.1 afis|EAW23269.1 afla|EED55710.1 afum|EAL88210.2 agla|OJJ86583.1 akaw|GAA88663.1 aluc|OJZ92612.1 anid|CBF89550.1 anig|EHA26375.1 aory|EIT83205.1 asyd|OJJ62375.1 ater|EAU37553.1 atub|OJI87046.1 aver|OJI96509.1 awen|OJJ39692.1 azon|OJJ47825.1

Group3629: abra|OJJ75047.1 acar|OOF97288.1 acla|EAW08236.1 afis|EAW23270.1 afla|EED55709.1 afum|EAL88209.1 agla|OJJ86582.1 akaw|GAA88664.1 aluc|OJZ92613.1 anid|CBF89548.1 anig|EHA26374.1 aory|EIT83232.1 asyd|OJJ62376.1 ater|EAU37554.1 atub|OJI87047.1 aver|OJI96510.1 awen|OJJ39691.1 azon|OJJ47824.1

Group3630: abra|OJJ75048.1 acar|OOF97286.1 acla|EAW08237.1 afis|EAW23271.1 afla|EED55706.1 afum|EAL88208.1 agla|OJJ86578.1 akaw|GAA88665.1 aluc|OJZ92615.1 anid|CBF89546.1 anig|EHA26373.1 aory|EIT83206.1 asyd|OJJ62377.1 ater|EAU37556.1 atub|OJI87049.1 aver|OJI96511.1 awen|OJJ39687.1 azon|OJJ47823.1

Group3631: abra|OJJ75052.1 acar|OOF97284.1 acla|EAW08238.1 afis|EAW23272.1 afla|EED55705.1 afum|EAL88207.1 agla|OJJ86577.1 akaw|GAA88666.1 aluc|OJZ92618.1 anid|CBF89544.1 anig|EHA26370.1 aory|EIT77089.1 asyd|OJJ62379.1 ater|EAU37557.1 atub|OJI87052.1 aver|OJI96513.1 awen|OJJ39685.1 azon|OJJ47822.1

Group3632: abra|OJJ75056.1 acar|OOF97281.1 acla|EAW08241.1 afis|EAW23275.1 afla|EED55703.1 afum|EAL88204.1 agla|OJJ86573.1 akaw|GAA88669.1 aluc|OJZ92622.1 anid|CBF89539.1 anig|EHA26367.1 aory|EIT77072.1 asyd|OJJ62382.1 ater|EAU37560.1 atub|OJI87055.1 aver|OJI96516.1 awen|OJJ39682.1 azon|OJJ47819.1

Group3633: abra|OJJ75057.1 acar|OOF97279.1 acla|EAW08242.1 afis|EAW23276.1 afla|EED55701.1 afum|EAL88203.1 agla|OJJ86571.1 akaw|GAA88670.1 aluc|OJZ92626.1 anid|CBF89533.1 anig|EHA26364.1 aory|EIT77071.1 asyd|OJJ62384.1 ater|EAU37561.1 atub|OJI87056.1 aver|OJI96518.1 awen|OJJ39680.1 azon|OJJ47818.1

Group3634: abra|OJJ75064.1 acar|OOF97270.1 acla|EAW08245.1 afis|EAW23279.1 afla|EED55695.1 afum|EAL88200.1 agla|OJJ86566.1 akaw|GAA88676.1 aluc|OJZ92630.1 anid|CBF89527.1 anig|EHA26360.1 aory|EIT77073.1 asyd|OJJ62388.1 ater|EAU37592.1 atub|OJI87061.1 aver|OJI96521.1 awen|OJJ39676.1 azon|OJJ47816.1

Group3635: abra|OJJ75066.1 acar|OOF97268.1 acla|EAW08247.1 afis|EAW23281.1 afla|EED55694.1 afum|EAL88198.2 agla|OJJ86565.1 akaw|GAA88678.1 aluc|OJZ92632.1 anid|CBF89525.1 anig|EHA26359.1 aory|EIT77087.1 asyd|OJJ62389.1 ater|EAU37591.1 atub|OJI87063.1 aver|OJI96522.1 awen|OJJ39675.1 azon|OJJ47805.1

Group3636: abra|OJJ75069.1 acar|OOF97264.1 acla|EAW08250.1 afis|EAW23284.1 afla|EED55691.1 afum|EAL88195.1 agla|OJJ86562.1 akaw|GAA88681.1 aluc|OJZ92635.1 anid|CBF89520.1 anig|EHA26356.1

aory|EIT77082.1 asyd|OJJ62392.1 ater|EAU37588.1 atub|OJI87066.1 aver|OJI96525.1 awen|OJJ39672.1 azon|OJJ47802.1

Group3637: abra|OJJ75070.1 acar|OOF97265.1 acla|EAW08251.1 afis|EAW23285.1 afla|EED55690.1 afum|EAL88194.1 agla|OJJ86561.1 akaw|GAA88682.1 aluc|OJZ92636.1 anid|CBF89518.1 anig|EHA26355.1 aory|EIT77093.1 asyd|OJJ62393.1 ater|EAU37587.1 atub|OJI87067.1 aver|OJI96526.1 awen|OJJ39671.1 azon|OJJ47801.1

Group3638: abra|OJJ75077.1 acar|OOF97256.1 acla|EAW08287.1 afis|EAW23320.1 afla|EED55678.1 afum|EAL88156.2 agla|OJJ86545.1 akaw|GAA88690.1 aluc|OJZ92643.1 anid|CBF89504.1 anig|EHA26349.1 aory|EIT77070.1 asyd|OJJ62400.1 ater|EAU37581.1 atub|OJI87074.1 aver|OJI96533.1 awen|OJJ39665.1 azon|OJJ47793.1

Group3639: abra|OJJ75080.1 acar|OOF97253.1 acla|EAW08284.1 afis|EAW23317.1 afla|EED55676.1 afum|EBA27338.1 agla|OJJ86542.1 akaw|GAA88693.1 aluc|OJZ92646.1 anid|CBF89487.1 anig|EHA26346.1 aory|EIT77097.1 asyd|OJJ62404.1 ater|EAU35544.1 atub|OJI87077.1 aver|OJI96537.1 awen|OJJ39662.1 azon|OJJ47791.1

Group3640: abra|OJJ75081.1 acar|OOF97252.1 acla|EAW08283.1 afis|EAW23316.1 afla|EED55675.1 afum|EAL88161.2 agla|OJJ86541.1 akaw|GAA88694.1 aluc|OJZ92647.1 anid|CBF89489.1 anig|EHA26345.1 aory|EIT77095.1 asyd|OJJ62405.1 ater|EAU35545.1 atub|OJI87078.1 aver|OJI96538.1 awen|OJJ39661.1 azon|OJJ47789.1

Group3641: abra|OJJ75082.1 acar|OOF97251.1 acla|EAW08282.1 afis|EAW23315.1 afla|EED55674.1 afum|EAL88162.1 agla|OJJ86540.1 akaw|GAA88695.1 aluc|OJZ92648.1 anid|CBF89491.1 anig|EHA26344.1 aory|EIT77078.1 asyd|OJJ62406.1 ater|EAU35546.1 atub|OJI87079.1 aver|OJI96539.1 awen|OJJ39660.1 azon|OJJ47788.1

Group3642: abra|OJJ75084.1 acar|OOF97249.1 acla|EAW08280.1 afis|EAW23313.1 afla|EED55672.1 afum|EAL88164.1 agla|OJJ86538.1 akaw|GAA88697.1 aluc|OJZ92650.1 anid|CBF89495.1 anig|EHA26342.1 aory|EIT77083.1 asyd|OJJ62408.1 ater|EAU35548.1 atub|OJI87081.1 aver|OJI96541.1 awen|OJJ39658.1 azon|OJJ47786.1

Group3643: abra|OJJ75087.1 acar|OOF97246.1 acla|EAW08277.1 afis|EAW23310.1 afla|EED55665.1 afum|EAL88167.1 akaw|GAA88699.1 aluc|OJZ92653.1 anid|CBF89485.1 anig|EHA26341.1 asyd|OJJ62412.1 ater|EAU35551.1 atub|OJI87084.1 aver|OJI96546.1 awen|OJJ39655.1 azon|OJJ47783.1 agla|OJJ86535.1 aory|EIT81799.1

Group3644: abra|OJJ75089.1 acar|OOF97244.1 acla|EAW08275.1 afis|EAW23308.1 afla|EED55663.1 afum|EAL88169.1 agla|OJJ86533.1 akaw|GAA88701.1 aluc|OJZ92655.1 anid|CBF89482.1 anig|EHA26339.1 aory|EIT81804.1 asyd|OJJ62413.1 ater|EAU35553.1 atub|OJI87086.1 aver|OJI96548.1 awen|OJJ39653.1 azon|OJJ47781.1

Group3645: abra|OJJ75090.1 acar|OOF97243.1 acla|EAW08274.1 afis|EAW23307.1 afla|EED55662.1 afum|EAL88170.1 agla|OJJ86532.1 akaw|GAA88702.1 aluc|OJZ92656.1 anid|CBF89480.1 anig|EHA26338.1 aory|EIT81820.1 asyd|OJJ62414.1 ater|EAU35554.1 atub|OJI87087.1 aver|OJI96549.1 awen|OJJ39652.1 azon|OJJ47780.1

Group3646: abra|OJJ75091.1 acar|OOF97241.1 acla|EAW08273.1 afis|EAW23306.1 afla|EED55661.1 afum|EAL88171.1 agla|OJJ86531.1 akaw|GAA88703.1 aluc|OJZ92657.1 anid|CBF89478.1 anig|EHA26337.1 aory|EIT81795.1 asyd|OJJ62415.1 ater|EAU35569.1 atub|OJI87088.1 aver|OJI96550.1 awen|OJJ39590.1 azon|OJJ47779.1

Group3647: abra|OJJ75093.1 acar|OOF97239.1 acla|EAW08271.1 afis|EAW23304.1 afla|EED55659.1 afum|EAL88173.1 agla|OJJ86529.1 akaw|GAA88705.1 anid|CBF89474.1 anig|EHA26335.1 aory|EIT81791.1 asyd|OJJ62418.1 ater|EAU35568.1 atub|OJI87090.1 aver|OJI96553.1 awen|OJJ39586.1 azon|OJJ47766.1 aluc|OJZ92659.1

Group3648: abra|OJJ75094.1 acar|OOF97238.1 acla|EAW08270.1 afis|EAW23303.1 afla|EED55656.1 afum|EAL88175.1 agla|OJJ86528.1 akaw|GAA88706.1 aluc|OJZ92660.1 anid|CBF89472.1 anig|EHA26334.1 aory|EIT81787.1 asyd|OJJ62419.1 ater|EAU35567.1 atub|OJI87091.1 aver|OJI96555.1 awen|OJJ39585.1 azon|OJJ47767.1

Group3649: abra|OJJ75096.1 acar|OOF97236.1 acla|EAW08268.1 afis|EAW23301.1 afla|EED55653.1 afum|EAL88178.1 agla|OJJ86507.1 akaw|GAA88708.1 aluc|OJZ92662.1 anid|CBF89468.1 anig|EHA26332.1 aory|EIT81800.1 asyd|OJJ62421.1 ater|EAU35565.1 atub|OJI87093.1 aver|OJI96556.1 awen|OJJ39583.1 azon|OJJ47769.1

Group3650: abra|OJJ75102.1 acar|OOF97232.1 acla|EAW08266.1 afis|EAW23299.1 afla|EED55649.1 afum|EAL88180.1 agla|OJJ86511.1 akaw|GAA88711.1 aluc|OJZ92666.1 anid|CBF89465.1 anig|EHA26329.1 aory|EIT81776.1 asyd|OJJ62424.1 ater|EAU35561.1 atub|OJI87097.1 aver|OJI96561.1 awen|OJJ39581.1 azon|OJJ47771.1



Group3651: abra|OJJ75103.1 acar|OOF97231.1 acla|EAW08265.1 afis|EAW23298.1 afla|EED55648.1 afum|EAL88181.2 agla|OJJ86513.1 akaw|GAA88712.1 aluc|OJZ92668.1 anid|CBF89463.1 anig|EHA26328.1 aory|EIT81789.1 asyd|OJJ62425.1 ater|EAU35559.1 atub|OJI87098.1 aver|OJI96562.1 awen|OJJ39579.1 azon|OJJ47772.1

Group3652: abra|OJJ75106.1 acar|OOF97228.1 acla|EAW08262.1 afis|EAW23295.1 afla|EED55645.1 afum|EAL88183.1 agla|OJJ86516.1 akaw|GAA88715.1 aluc|OJZ92671.1 anid|CBF89459.1 anig|EHA26326.1 aory|EIT81783.1 asyd|OJJ62427.1 ater|EAU35558.1 atub|OJI87100.1 aver|OJI96564.1 awen|OJJ39576.1 azon|OJJ47775.1

Group3653: abra|OJJ75107.1 acar|OOF97227.1 acla|EAW08261.1 afis|EAW23294.1 afla|EED55644.1 afum|EAL88184.1 agla|OJJ86517.1 akaw|GAA88716.1 aluc|OJZ92672.1 anid|CBF89457.1 anig|EHA26325.1 aory|EIT81790.1 asyd|OJJ62428.1 ater|EAU35557.1 atub|OJI87101.1 aver|OJI96565.1 awen|OJJ39575.1 azon|OJJ47776.1

Group3654: abra|OJJ75109.1 acar|OOF97223.1 acla|EAW08315.1 afis|EAW23325.1 afla|EED55641.1 afum|EAL88154.1 agla|OJJ86520.1 akaw|GAA88718.1 aluc|OJZ92675.1 anid|CBF89453.1 anig|EHA26323.1 aory|EIT81818.1 asyd|OJJ62431.1 ater|EAU35573.1 atub|OJI87103.1 aver|OJI96567.1 awen|OJJ39569.1 azon|OJJ47762.1

Group3655: abra|OJJ75114.1 acar|OOF97217.1 acla|EAW08309.1 afis|EAW23330.1 afla|EED55637.1 afum|EAL88149.2 agla|OJJ86525.1 akaw|GAA88724.1 aluc|OJZ92681.1 anid|CBF89441.1 anig|EHA26318.1 aory|EIT81798.1 asyd|OJJ62439.1 ater|EAU35577.1 atub|OJI87109.1 aver|OJI96575.1 awen|OJJ39564.1 azon|OJJ47757.1

Group3656: abra|OJJ75115.1 acar|OOF97216.1 acla|EAW08308.1 afis|EAW23331.1 afla|EED55636.1 afum|EAL88148.1 agla|OJJ86503.1 akaw|GAA88725.1 aluc|OJZ92682.1 anid|CBF89439.1 anig|EHA26317.1 aory|EIT81819.1 asyd|OJJ62440.1 ater|EAU35578.1 atub|OJI87110.1 aver|OJI96576.1 awen|OJJ39563.1 azon|OJJ47756.1

Group3657: abra|OJJ75120.1 acar|OOF97213.1 acla|EAW08306.1 afis|EAW23332.1 afla|EED55634.1 afum|EAL88146.2 agla|OJJ86500.1 akaw|GAA88729.1 aluc|OJZ92687.1 anid|CBF89437.1 anig|EHA26313.1 aory|EIT81801.1 asyd|OJJ62442.1 ater|EAU35580.1 atub|OJI87115.1 aver|OJI96578.1 awen|OJJ39561.1 azon|OJJ47754.1

Group3658: abra|OJJ75122.1 acar|OOF97212.1 acla|EAW08305.1 afis|EAW23334.1 afla|EED55632.1 afum|EAL88144.1 agla|OJJ86499.1 akaw|GAA88730.1 aluc|OJZ92688.1 anid|CBF89435.1 anig|EHA26312.1 aory|EIT81824.1 asyd|OJJ62443.1 ater|EAU35581.1 atub|OJI87116.1 aver|OJI96579.1 awen|OJJ39560.1 azon|OJJ47753.1

Group3659: abra|OJJ75124.1 acar|OOF97210.1 acla|EAW08304.1 afis|EAW23336.1 afla|EED55630.1 afum|EAL88142.1 agla|OJJ86494.1 akaw|GAA88732.1 aluc|OJZ92690.1 anid|CBF89432.1 anig|EHA26310.1 aory|EIT81797.1 asyd|OJJ62444.1 ater|EAU35582.1 atub|OJI87118.1 aver|OJI96581.1 awen|OJJ39558.1 azon|OJJ47749.1

Group3660: abra|OJJ75126.1 acar|OOF97209.1 acla|EAW08303.1 afis|EAW23337.1 afla|EED55629.1 afum|EAL88141.1 agla|OJJ86493.1 akaw|GAA88733.1 aluc|OJZ92691.1 anid|CBF89430.1 anig|EHA26309.1 aory|EIT81788.1 asyd|OJJ62445.1 ater|EAU35583.1 atub|OJI87119.1 aver|OJI96582.1 awen|OJJ39557.1 azon|OJJ47750.1

Group3661: abra|OJJ75129.1 acar|OOF97207.1 acla|EAW08300.1 afis|EAW23340.1 afla|EED55626.1 afum|EAL88138.1 agla|OJJ86490.1 akaw|GAA88736.1 aluc|OJZ92694.1 anid|CBF89425.1 anig|EHA26306.1 aory|EIT81810.1 asyd|OJJ62448.1 ater|EAU35585.1 atub|OJI87122.1 aver|OJI96585.1 awen|OJJ39554.1 azon|OJJ47748.1

Group3662: abra|OJJ75130.1 acar|OOF97205.1 acla|EAW08298.1 afis|EAW23342.1 afla|EED55624.1 afum|EAL88136.2 agla|OJJ86486.1 akaw|GAA88737.1 aluc|OJZ92695.1 anid|CBF89422.1 anig|EHA26304.1 aory|EIT81811.1 asyd|OJJ62451.1 ater|EAU35586.1 atub|OJI87123.1 aver|OJI96586.1 awen|OJJ39552.1 azon|OJJ47747.1

Group3663: abra|OJJ75131.1 acar|OOF97204.1 acla|EAW08297.1 afis|EAW23343.1 afla|EED55623.1 afum|EAL88135.1 agla|OJJ86485.1 akaw|GAA88738.1 aluc|OJZ92696.1 anid|CBF89420.1 anig|EHA26302.1 aory|EIT81805.1 asyd|OJJ62452.1 ater|EAU35587.1 atub|OJI87124.1 aver|OJI96587.1 awen|OJJ39550.1 azon|OJJ47746.1

Group3664: abra|OJJ75133.1 acar|OOF97203.1 acla|EAW08294.1 afis|EAW23345.1 afla|EED55621.1 afum|EAL88132.1 agla|OJJ86482.1 akaw|GAA88740.1 aluc|OJZ92699.1 anid|CBF89412.1 anig|EHA26300.1 aory|EIT81825.1 asyd|OJJ62455.1 ater|EAU35589.1 atub|OJI87127.1 aver|OJI96590.1 awen|OJJ39547.1 azon|OJJ47744.1

Group3665: abra|OJJ75134.1 acar|OOF97202.1 acla|EAW08293.1 afis|EAW23346.1 afla|EED55620.1 afum|EAL88130.1 agla|OJJ86481.1 akaw|GAA88741.1 aluc|OJZ92700.1 anid|CBF74918.1 anig|EHA26299.1

aory|EIT81822.1 asyd|OJJ60098.1 ater|EAU35590.1 atub|OJI87128.1 aver|OJJ04164.1 awen|OJJ39545.1  
azon|OJJ47743.1

Group3666: abra|OJJ75136.1 acar|OOF97201.1 acla|EAW08292.1 afis|EAW23347.1 afla|EED55619.1  
afum|EAL88129.1 agla|OJJ86480.1 akaw|GAA88742.1 aluc|OJZ92702.1 anid|CBF74916.1 anig|EHA26298.1  
aory|EIT81794.1 asyd|OJJ60099.1 ater|EAU35591.1 atub|OJI87129.1 aver|OJJ04163.1 awen|OJJ39544.1  
azon|OJJ47742.1

Group3667: abra|OJJ75146.1 acar|OOF97192.1 acla|EAW08319.1 afis|EAW23354.1 afla|EED55604.1  
afum|EAL88122.2 agla|OJJ86471.1 akaw|GAA88751.1 aluc|OJZ92711.1 anid|CBF74886.1 anig|EHA26288.1  
aory|EIT82711.1 asyd|OJJ60107.1 ater|EAU35606.1 atub|OJI87137.1 aver|OJJ04155.1 awen|OJJ39532.1  
azon|OJJ47729.1

Group3668: abra|OJJ75149.1 acar|OOF97188.1 acla|EAW08323.1 afis|EAW23358.1 afla|EED55608.1  
afum|EAL88118.1 agla|OJJ86468.1 akaw|GAA88755.1 aluc|OJZ92715.1 anid|CBF74882.1 anig|EHA26285.1  
aory|EIT81782.1 asyd|OJJ60110.1 ater|EAU35609.1 atub|OJI87141.1 aver|OJJ04152.1 awen|OJJ39529.1  
azon|OJJ47725.1

Group3669: abra|OJJ75150.1 acar|OOF97187.1 acla|EAW08324.1 afis|EAW23359.1 afla|EED55610.1  
afum|EBA27336.1 agla|OJJ86467.1 akaw|GAA88756.1 aluc|OJZ92716.1 anid|CBF74880.1 anig|EHA26283.1  
aory|EIT81806.1 asyd|OJJ60111.1 ater|EAU35610.1 atub|OJI87142.1 aver|OJJ04151.1 awen|OJJ39528.1  
azon|OJJ47724.1

Group3670: abra|OJJ75152.1 acar|OOF97185.1 acla|EAW08327.1 afis|EAW23362.1 afla|EED55596.1  
afum|EAL88112.1 agla|OJJ86464.1 akaw|GAA88757.1 aluc|OJZ92720.1 anid|CBF74837.1 anig|EHA26280.1  
aory|EIT82684.1 asyd|OJJ60134.1 ater|EAU35613.1 atub|OJI87145.1 aver|OJJ04128.1 awen|OJJ39525.1  
azon|OJJ47721.1

Group3671: abra|OJJ75153.1 acar|OOF97184.1 acla|EAW08328.1 afis|EAW23363.1 afla|EED55595.1  
afum|EBA27334.1 agla|OJJ86463.1 akaw|GAA88758.1 aluc|OJZ92721.1 anid|CBF74835.1 anig|EHA26279.1  
aory|EIT82682.1 asyd|OJJ60135.1 ater|EAU35614.1 atub|OJI87146.1 aver|OJJ04127.1 awen|OJJ39524.1  
azon|OJJ47720.1

Group3672: abra|OJJ75157.1 acar|OOF97182.1 acla|EAW08332.1 afis|EAW23367.1 afla|EED55590.1  
afum|EAL88106.1 agla|OJJ86457.1 akaw|GAA88763.1 aluc|OJZ92727.1 anid|CBF74823.1 anig|EHA26274.1  
aory|EIT82667.1 asyd|OJJ60140.1 ater|EAU35618.1 atub|OJI87151.1 aver|OJJ04122.1 awen|OJJ39520.1  
azon|OJJ47716.1

Group3673: abra|OJJ75159.1 acar|OOF97179.1 acla|EAW08335.1 afis|EAW23370.1 afla|EED55587.1  
afum|EAL88103.2 agla|OJJ86453.1 akaw|GAA88770.1 aluc|OJZ92729.1 anid|CBF74817.1 anig|EHA26272.1  
aory|EIT82666.1 asyd|OJJ60143.1 ater|EAU35621.1 atub|OJI87153.1 aver|OJJ04120.1 awen|OJJ39513.1  
azon|OJJ47712.1

Group3674: abra|OJJ75160.1 acar|OOF97178.1 acla|EAW08336.1 afis|EAW23371.1 afla|EED55586.1  
afum|EAL88101.1 agla|OJJ86452.1 akaw|GAA88771.1 aluc|OJZ92730.1 anid|CBF74815.1 anig|EHA26271.1  
aory|EIT82693.1 asyd|OJJ60144.1 ater|EAU35622.1 atub|OJI87154.1 aver|OJJ04119.1 awen|OJJ39512.1  
azon|OJJ47711.1

Group3675: abra|OJJ75162.1 acar|OOF97176.1 acla|EAW08338.1 afis|EAW23373.1 afla|EED55585.1  
afum|EAL88099.1 agla|OJJ86450.1 akaw|GAA88773.1 aluc|OJZ92732.1 anid|CBF74811.1 anig|EHA26269.1  
aory|EIT82709.1 asyd|OJJ60146.1 ater|EAU35624.1 atub|OJI87156.1 aver|OJJ04117.1 awen|OJJ39510.1  
azon|OJJ47709.1

Group3676: abra|OJJ75165.1 acar|OOF97173.1 acla|EAW08339.1 afis|EAW23374.1 afla|EED55584.1  
afum|EAL88097.1 agla|OJJ86449.1 akaw|GAA88776.1 aluc|OJZ92736.1 anid|CBF74839.1 anig|EHA26266.1  
aory|EIT82678.1 asyd|OJJ60133.1 ater|EAU35628.1 atub|OJI87160.1 aver|OJJ04129.1 awen|OJJ39509.1  
azon|OJJ47708.1

Group3677: abra|OJJ75166.1 acar|OOF97172.1 acla|EAW08340.1 afis|EAW23375.1 afla|EED55583.1  
afum|EAL88096.1 agla|OJJ86448.1 akaw|GAA88777.1 aluc|OJZ92737.1 anid|CBF74841.1 anig|EHA26265.1  
aory|EIT82676.1 asyd|OJJ60132.1 ater|EAU35629.1 atub|OJI87161.1 aver|OJJ04130.1 awen|OJJ39508.1  
azon|OJJ47707.1

Group3678: abra|OJJ75168.1 acar|OOF94606.1 acla|EAW08132.1 afis|EAW23169.1 afla|EED46952.1  
afum|EAL88315.1 agla|OJJ89680.1 akaw|GAA88778.1 aluc|OJZ92738.1 anid|CBF74480.1 anig|EHA26264.1  
aory|EIT72535.1 asyd|OJJ57708.1 ater|EAU36298.1 atub|OJI87163.1 aver|OJJ05456.1 awen|OJJ36614.1  
azon|OJJ47599.1

Group3679: abra|OJJ75172.1 acar|OOF94604.1 acla|EAW13004.1 afis|EAW17664.1 afla|EED50493.1  
afum|EAL91478.1 agla|OJJ79537.1 akaw|GAA88779.1 aluc|OJZ92740.1 anid|CBF90052.1 anig|EHA26263.1  
aory|EIT82027.1 asyd|OJJ62053.1 ater|EAU31989.1 atub|OJI87165.1 aver|OJI96159.1 awen|OJJ37177.1  
azon|OJJ50877.1

Group3680: abra|OJJ75177.1 acar|OOF94602.1 acla|EAW13001.1 afis|EAW17667.1 afla|EED50488.1 afum|EAL91481.1 agla|OJJ79539.1 akaw|GAA88782.1 aluc|OJZ92743.1 anid|CBF90043.1 anig|EHA26260.1 aory|EIT82124.1 asyd|OJJ62058.1 ater|EAU31980.1 atub|OJI87168.1 aver|OJI96164.1 awen|OJJ37174.1 azon|OJJ50873.1

Group3681: abra|OJJ75178.1 acar|OOF94601.1 acla|EAW13000.1 afis|EAW17668.1 afla|EED50487.1 afum|EAL91482.1 agla|OJJ79540.1 akaw|GAA88783.1 aluc|OJZ92744.1 anid|CBF90041.1 anig|EHA26259.1 aory|EIT82171.1 asyd|OJJ62059.1 ater|EAU31979.1 atub|OJI87169.1 aver|OJI96165.1 awen|OJJ37173.1 azon|OJJ50872.1

Group3682: abra|OJJ75179.1 acar|OOF94600.1 acla|EAW12999.1 afis|EAW17669.1 afla|EED50486.1 afum|EAL91483.1 agla|OJJ79541.1 akaw|GAA88784.1 aluc|OJZ92745.1 anid|CBF90039.1 anig|EHA26258.1 aory|EIT82129.1 asyd|OJJ62060.1 ater|EAU31978.1 atub|OJI87170.1 aver|OJI96166.1 awen|OJJ37172.1 azon|OJJ50871.1

Group3683: abra|OJJ75182.1 acar|OOF94598.1 acla|EAW12995.1 afis|EAW17671.1 afla|EED50482.1 afum|EAL91485.1 agla|OJJ79543.1 akaw|GAA88786.1 aluc|OJZ92746.1 anid|CBF90036.1 anig|EHA26257.1 aory|EIT82081.1 asyd|OJJ62061.1 ater|EAU31976.1 atub|OJI87173.1 aver|OJI96167.1 awen|OJJ37171.1 azon|OJJ50867.1

Group3684: abra|OJJ75186.1 acar|OOF94596.1 acla|EAW12991.1 afis|EAW17674.1 afla|EED50477.1 afum|EAL91487.1 agla|OJJ79515.1 akaw|GAA88788.1 aluc|OJZ92749.1 anid|CBF90029.1 anig|EHA26254.1 aory|EIT82056.1 asyd|OJJ62064.1 ater|EAU31972.1 atub|OJI87175.1 aver|OJI96170.1 awen|OJJ37167.1 azon|OJJ50863.1

Group3685: abra|OJJ75189.1 acar|OOF94594.1 acla|EAW12990.1 afis|EAW17675.1 afla|EED50476.1 afum|EAL91488.1 agla|OJJ79514.1 akaw|GAA88790.1 aluc|OJZ92752.1 anid|CBF90024.1 anig|EHA26252.1 aory|EIT82044.1 asyd|OJJ62067.1 ater|EAU31971.1 atub|OJI87177.1 aver|OJI96173.1 awen|OJJ37165.1 azon|OJJ50862.1

Group3686: abra|OJJ75190.1 acar|OOF94593.1 acla|EAW12989.1 afis|EAW17676.1 afla|EED50475.1 afum|EAL91489.1 agla|OJJ79500.1 akaw|GAA88791.1 aluc|OJZ92754.1 anid|CBF90022.1 anig|EHA26251.1 aory|EIT82153.1 asyd|OJJ62068.1 ater|EAU31970.1 atub|OJI87179.1 aver|OJI96174.1 awen|OJJ37164.1 azon|OJJ50860.1

Group3687: abra|OJJ75198.1 acar|OOF94588.1 acla|EAW12983.1 afis|EAW17681.1 afla|EED50470.1 afum|EAL91495.1 agla|OJJ79499.1 akaw|GAA91750.1 aluc|OJZ92761.1 anid|CBF90009.1 anig|EHA26245.1 aory|EIT82018.1 asyd|OJJ62073.1 ater|EAU31944.1 atub|OJI87205.1 aver|OJI96180.1 awen|OJJ37158.1 azon|OJJ50856.1

Group3688: abra|OJJ75199.1 acar|OOF94589.1 acla|EAW12982.1 afis|EAW17682.1 afla|EED50469.1 afum|EAL91496.1 agla|OJJ79498.1 akaw|GAA91751.1 aluc|OJZ92762.1 anid|CBF90007.1 anig|EHA26244.1 aory|EIT82107.1 asyd|OJJ62074.1 ater|EAU31945.1 atub|OJI87206.1 aver|OJI96181.1 awen|OJJ37157.1 azon|OJJ50855.1

Group3689: abra|OJJ75201.1 acar|OOF94587.1 acla|EAW12981.1 afis|EAW17683.1 afla|EED50468.1 afum|EAL91497.1 agla|OJJ79496.1 akaw|GAA91752.1 aluc|OJZ92763.1 anid|CBF90005.1 anig|EHA26243.1 aory|EIT82022.1 asyd|OJJ62075.1 ater|EAU31946.1 atub|OJI87207.1 aver|OJI96182.1 awen|OJJ37156.1 azon|OJJ50854.1

Group3690: abra|OJJ75203.1 acar|OOF94585.1 acla|EAW12979.1 afis|EAW17685.1 afla|EED50466.1 afum|EAL91499.1 agla|OJJ79494.1 akaw|GAA91754.1 aluc|OJZ92766.1 anid|CBF90002.1 anig|EHA26241.1 aory|EIT82013.1 asyd|OJJ62078.1 ater|EAU31948.1 atub|OJI87210.1 aver|OJI96185.1 awen|OJJ37154.1 azon|OJJ50852.1

Group3691: abra|OJJ75206.1 acar|OOF94583.1 acla|EAW12977.1 afis|EAW17687.1 afla|EED50464.1 afum|EAL91501.1 agla|OJJ79492.1 akaw|GAA91756.1 aluc|OJZ92768.1 anid|CBF89987.1 anig|EHA26239.1 asyd|OJJ56120.1 ater|EAU31950.1 atub|OJI87212.1 aver|OJJ05061.1 awen|OJJ37152.1 asyd|OJJ62085.1 aver|OJI96192.1

Group3692: abra|OJJ75207.1 acar|OOF94582.1 acla|EAW12976.1 afis|EAW17688.1 afla|EED50463.1 afum|EAL91502.1 agla|OJJ79491.1 akaw|GAA91757.1 aluc|OJZ92769.1 anid|CBF89985.1 anig|EHA26238.1 aory|EIT82159.1 asyd|OJJ62086.1 ater|EAU31951.1 atub|OJI87213.1 aver|OJI96193.1 awen|OJJ37151.1 azon|OJJ50848.1

Group3693: abra|OJJ75208.1 acar|OOF94581.1 acla|EAW12975.1 afis|EAW17689.1 afla|EED50455.1 afum|EAL91503.1 agla|OJJ79490.1 akaw|GAA91758.1 aluc|OJZ92770.1 anid|CBF89984.1 anig|EHA26237.1 aory|EIT82021.1 asyd|OJJ62087.1 ater|EAU31952.1 atub|OJI87214.1 aver|OJI96194.1 awen|OJJ37147.1 azon|OJJ50847.1

Group3694: abra|OJJ75212.1 acar|OOF94572.1 acla|EAW13091.1 afis|EAW17572.1 afla|EED49249.1 afum|EAL91386.1 agla|OJJ81386.1 akaw|GAA91762.1 aluc|OJZ92776.1 anid|CBF90252.1 anig|EHA26234.1

aory|EIT82180.1 asyd|OJJ61946.1 ater|EAU37009.1 atub|OJI87218.1 aver|OJI96038.1 awen|OJJ37275.1 azon|OJJ50975.1

Group3695: abra|OJJ75213.1 acar|OOF94571.1 acla|EAW13092.1 afis|EAW17571.1 afla|EED49250.1 afum|EBA27432.1 agla|OJJ81387.1 akaw|GAA91763.1 aluc|OJZ92777.1 anid|CBF90254.1 anig|EHA26233.1 aory|EIT82196.1 asyd|OJJ61945.1 ater|EAU37008.1 atub|OJI87219.1 aver|OJI96037.1 awen|OJJ37278.1 azon|OJJ50976.1

Group3696: abra|OJJ75214.1 acar|OOF94570.1 acla|EAW13093.1 afis|EAW17570.1 afla|EED49251.1 afum|EAL91383.1 agla|OJJ81390.1 akaw|GAA91764.1 aluc|OJZ92778.1 anid|CBF90256.1 anig|EHA26232.1 aory|EIT82218.1 asyd|OJJ61944.1 ater|EAU37007.1 atub|OJI87220.1 aver|OJI96036.1 awen|OJJ37281.1 azon|OJJ50977.1

Group3697: abra|OJJ75215.1 acar|OOF94569.1 acla|EAW13094.1 afis|EAW17569.1 afla|EED49252.1 afum|EAL91382.1 agla|OJJ81395.1 akaw|GAA91765.1 aluc|OJZ92779.1 anid|CBF90258.1 anig|EHA26231.1 aory|EIT82201.1 asyd|OJJ61943.1 ater|EAU37006.1 atub|OJI87221.1 awen|OJJ37282.1 azon|OJJ50978.1 aver|OJI96035.1

Group3698: abra|OJJ75227.1 acar|OOF94562.1 acla|EAW12254.1 afis|EAW16982.1 afla|EED48301.1 afum|EAL86509.1 agla|OJJ79789.1 akaw|GAA91773.1 aluc|OJZ92788.1 anid|CBF86682.1 anig|EHA26219.1 aory|EIT76292.1 asyd|OJJ64757.1 ater|EAU31794.1 atub|OJI87231.1 aver|OJI98859.1 awen|OJJ35994.1 azon|OJJ50263.1

Group3699: abra|OJJ75272.1 acar|OOF94531.1 acla|EAW12236.1 afis|EAW16991.1 afla|EED48964.1 afum|EAL86515.1 agla|OJJ81058.1 akaw|GAA91810.1 aluc|OJZ92832.1 anid|CBF87436.1 anig|EHA26177.1 asyd|OJJ59098.1 ater|EAU31737.1 atub|OJI87289.1 aver|OJJ01689.1 awen|OJJ35979.1 azon|OJJ50286.1 aory|EIT80025.1

Group3700: abra|OJJ75274.1 acar|OOF94529.1 acla|EAW12235.1 afis|EAW16993.1 afla|EED48956.1 afum|EAL86517.1 agla|OJJ79819.1 akaw|GAA91812.1 aluc|OJZ92834.1 anid|CBF87472.1 anig|EHA26175.1 aory|EIT80048.1 asyd|OJJ52939.1 ater|EAU31735.1 atub|OJI87291.1 aver|OJJ08906.1 awen|OJJ35982.1 azon|OJJ50283.1

Group3701: abra|OJJ75279.1 afis|EAW25673.1 afla|EED49857.1 akaw|GAA91817.1 aluc|OJZ92840.1 anid|CBF82114.1 anig|EHA26171.1 aory|EIT83389.1 asyd|OJJ54289.1 ater|EAU31659.1 atub|OJI87296.1 aver|OJJ05243.1 awen|OJJ40812.1 afla|EED48617.1 ater|EAU33458.1 aory|EIT73274.1 ater|EAU35345.1 ater|EAU35445.1

Group3702: abra|OJJ75284.1 acar|OOF94523.1 acla|EAW12234.1 afis|EAW16994.1 afla|EED48957.1 afum|EAL86518.2 agla|OJJ79820.1 akaw|GAA91822.1 aluc|OJZ92845.1 anid|CBF87470.1 anig|EHA26165.1 aory|EIT79980.1 asyd|OJJ52938.1 ater|EAU31734.1 atub|OJI87301.1 aver|OJJ08905.1 awen|OJJ35983.1 azon|OJJ50282.1

Group3703: abra|OJJ75307.1 acar|OOF94522.1 acla|EAW12233.1 afis|EAW16995.1 afla|EED48958.1 afum|EAL86519.2 agla|OJJ79822.1 akaw|GAA91991.1 aluc|OJZ92861.1 anid|CBF87468.1 anig|EHA26104.1 aory|EIT79977.1 asyd|OJJ52937.1 ater|EAU31733.1 atub|OJI87319.1 aver|OJJ08904.1 awen|OJJ35984.1 azon|OJJ50281.1

Group3704: abra|OJJ75309.1 acar|OOF94520.1 acla|EAW12231.1 afis|EAW16997.1 afla|EED48962.1 afum|EAL86522.2 agla|OJJ79824.1 akaw|GAA91993.1 aluc|OJZ92863.1 anid|CBF87465.1 anig|EHA26102.1 aory|EIT79990.1 asyd|OJJ52935.1 ater|EAU31731.1 atub|OJI87321.1 aver|OJJ08902.1 awen|OJJ35986.1 azon|OJJ42560.1

Group3705: abra|OJJ75310.1 acar|OOF94519.1 acla|EAW12230.1 afis|EAW16998.1 afla|EED48952.1 afum|EAL86523.1 agla|OJJ79825.1 akaw|GAA91994.1 aluc|OJZ92864.1 anid|CBF87476.1 anig|EHA26101.1 aory|EIT79981.1 asyd|OJJ52941.1 ater|EAU31729.1 atub|OJI87322.1 aver|OJJ08908.1 awen|OJJ35987.1 azon|OJJ50276.1

Group3706: abra|OJJ75314.1 acar|OOF94515.1 acla|EAW10816.1 afis|EAW24758.1 afla|EED56728.1 afum|EAL89400.1 agla|OJJ78831.1 akaw|GAA91998.1 aluc|OJZ92868.1 anid|CBF89399.1 anig|EHA26097.1 aory|EIT73833.1 asyd|OJJ62458.1 ater|EAU34827.1 atub|OJI87326.1 aver|OJI96593.1 awen|OJJ33340.1 azon|OJJ42602.1

Group3707: abra|OJJ75322.1 acar|OOF94504.1 acla|EAW12347.1 afis|EAW16741.1 afla|EED48943.1 afum|EAL86316.1 akaw|GAA92017.1 aluc|OJZ92883.1 anid|CBF87481.1 anig|EHA26077.1 aory|EIT80047.1 asyd|OJJ64592.1 ater|EAU31723.1 atub|OJI87342.1 aver|OJI98689.1 awen|OJJ34684.1 azon|OJJ47373.1 anid|CBF75776.1

Group3708: abra|OJJ75342.1 acar|OOF89833.1 afla|EED48926.1 agla|OJJ81063.1 akaw|GAA92035.1 aluc|OJZ92905.1 anid|CBF87500.1 anig|EHA26058.1 atub|OJI87364.1 aver|OJJ08935.1 awen|OJJ35965.1 azon|OJJ50308.1 acla|EAW12182.1 afis|EAW17116.1 afum|EAL86578.1 asyd|OJJ52969.1 ater|EAU36171.1 aory|EIT80020.1

Group3709: abra|OJJ75368.1 acar|OOF94179.1 afla|EED48878.1 agla|OJJ83621.1 akaw|GAA92062.1 aluc|OJZ92937.1 anig|EHA26035.1 aory|EIT81224.1 asyd|OJJ57425.1 ater|EAU36149.1 atub|OJI87397.1 aver|OJJ04755.1 awen|OJJ31289.1 azon|OJJ50359.1 asyd|OJJ55807.1 awen|OJJ38783.1 azon|OJJ42402.1 awen|OJJ29661.1

Group3710: abra|OJJ75381.1 acar|OOF94466.1 acla|EAW12111.1 afis|EAW17274.1 afla|EED48845.1 afum|EAL86692.1 agla|OJJ81078.1 akaw|GAA92743.1 aluc|OJZ92951.1 anid|CBF87538.1 anig|EHA26024.1 aory|EIT81278.1 asyd|OJJ52990.1 ater|EAU34713.1 atub|OJI87410.1 aver|OJJ08959.1 awen|OJJ35760.1 azon|OJJ45524.1

Group3711: abra|OJJ75383.1 acar|OOF94464.1 acla|EAW12109.1 afis|EAW17276.1 afla|EED48843.1 afum|EAL86694.1 agla|OJJ81080.1 akaw|GAA92745.1 aluc|OJZ92953.1 anid|CBF87542.1 anig|EHA26022.1 aory|EIT81280.1 asyd|OJJ52992.1 ater|EAU34711.1 atub|OJI87412.1 aver|OJJ08961.1 awen|OJJ35758.1 azon|OJJ45526.1

Group3712: abra|OJJ75384.1 acar|OOF94463.1 acla|EAW12108.1 afis|EAW17277.1 afla|EED48842.1 afum|EAL86695.1 agla|OJJ81081.1 akaw|GAA92746.1 aluc|OJZ92954.1 anid|CBF87544.1 anig|EHA26021.1 aory|EIT81283.1 asyd|OJJ52993.1 ater|EAU34710.1 atub|OJI87413.1 aver|OJJ08962.1 awen|OJJ35757.1 azon|OJJ45527.1

Group3713: abra|OJJ75385.1 acar|OOF94461.1 acla|EAW12107.1 afis|EAW17278.1 afla|EED48841.1 afum|EAL86696.1 agla|OJJ81082.1 akaw|GAA92747.1 aluc|OJZ92955.1 anid|CBF87545.1 anig|EHA26020.1 aory|EIT81279.1 asyd|OJJ52994.1 ater|EAU34709.1 atub|OJI87414.1 aver|OJJ08963.1 awen|OJJ35756.1 azon|OJJ45528.1

Group3714: abra|OJJ75391.1 acar|OOF94456.1 acla|EAW12101.1 afis|EAW17287.1 afla|EED48833.1 afum|EAL86705.1 agla|OJJ81090.1 akaw|GAA92754.1 aluc|OJZ92962.1 anid|CBF87556.1 anig|EHA26013.1 aory|EIT81270.1 asyd|OJJ53001.1 ater|EAU34702.1 atub|OJI87420.1 aver|OJJ08970.1 awen|OJJ35750.1 azon|OJJ45536.1

Group3715: abra|OJJ75394.1 acar|OOF94455.1 acla|EAW12099.1 afis|EAW17285.1 afla|EED48831.1 afum|EAL86703.1 agla|OJJ81092.1 akaw|GAA92756.1 aluc|OJZ92965.1 anid|CBF87558.1 anig|EHA26010.1 aory|EIT81288.1 asyd|OJJ53003.1 ater|EAU34700.1 atub|OJI87423.1 aver|OJJ08971.1 awen|OJJ35749.1 azon|OJJ45542.1

Group3716: abra|OJJ75396.1 acar|OOF94453.1 acla|EAW12097.1 afis|EAW17289.1 afla|EED48829.1 afum|EAL86709.1 agla|OJJ81094.1 akaw|GAA92758.1 aluc|OJZ92968.1 anid|CBF81166.1 anig|EHA26008.1 aory|EIT81272.1 asyd|OJJ59287.1 ater|EAU34699.1 atub|OJI87425.1 aver|OJJ02988.1 awen|OJJ35747.1 azon|OJJ45540.1

Group3717: abra|OJJ75397.1 acar|OOF94451.1 acla|EAW12096.1 afis|EAW17290.1 afla|EED48828.1 afum|EAL86710.1 agla|OJJ81095.1 akaw|GAA92759.1 aluc|OJZ92969.1 anid|CBF74295.1 anig|EHA26007.1 aory|EIT81266.1 asyd|OJJ51909.1 ater|EAU34698.1 atub|OJI87426.1 aver|OJJ05350.1 awen|OJJ35746.1 azon|OJJ45539.1

Group3718: abra|OJJ75399.1 acar|OOF90746.1 acla|EAW13772.1 afis|EAW18360.1 afla|EED48826.1 afum|EAL87724.1 agla|OJJ88025.1 akaw|GAA84178.1 aluc|OJZ88851.1 anid|CBF79349.1 anig|EHA23652.1 aory|EIT72979.1 asyd|OJJ57798.1 ater|EAU34692.1 atub|OJI85939.1 aver|OJJ04589.1 awen|OJJ35744.1 azon|OJJ49497.1

Group3719: abra|OJJ75400.1 acar|OOF90747.1 acla|EAW13773.1 afis|EAW18359.1 afla|EED48825.1 afum|EAL87723.1 agla|OJJ88026.1 akaw|GAA84179.1 aluc|OJZ88852.1 anid|CBF79351.1 anig|EHA23651.1 aory|EIT73008.1 asyd|OJJ57799.1 ater|EAU34691.1 atub|OJI85938.1 aver|OJJ04588.1 awen|OJJ35743.1 azon|OJJ42023.1

Group3720: abra|OJJ75401.1 acar|OOF90748.1 acla|EAW08507.1 afis|EAW23545.1 afla|EED48824.1 afum|EAL87921.2 agla|OJJ79762.1 akaw|GAA84180.1 aluc|OJZ88853.1 anid|CBF78889.1 anig|EHA23650.1 aory|EIT73018.1 asyd|OJJ64596.1 ater|EAU31465.1 atub|OJI85937.1 aver|OJI98693.1 awen|OJJ36969.1 anig|EHA19941.1

Group3721: abra|OJJ75402.1 acar|OOF90749.1 acla|EAW13774.1 afis|EAW18358.1 afla|EED48823.1 afum|EAL87722.1 agla|OJJ88027.1 akaw|GAA84181.1 aluc|OJZ88854.1 anid|CBF79353.1 anig|EHA23649.1 aory|EIT72976.1 asyd|OJJ57800.1 ater|EAU34690.1 atub|OJI85936.1 aver|OJJ04587.1 awen|OJJ35742.1 azon|OJJ43326.1

Group3722: abra|OJJ75404.1 acar|OOF90751.1 acla|EAW13776.1 afis|EAW18356.1 afum|EAL87719.1 agla|OJJ88029.1 akaw|GAA84182.1 aluc|OJZ88856.1 anid|CBF79356.1 anig|EHA23647.1 aory|EIT72985.1 asyd|OJJ57802.1 ater|EAU34689.1 atub|OJI85934.1 aver|OJJ04585.1 awen|OJJ35740.1 azon|OJJ43323.1 afla|EED48821.1

Group3723: abra|OJJ75408.1 acar|OOF90754.1 acla|EAW13781.1 afis|EAW18351.1 afla|EED48816.1 afum|EAL87714.1 agla|OJJ88033.1 akaw|GAA84184.1 aluc|OJZ88859.1 anid|CBF79365.1 anig|EHA23644.1

aory|EIT72998.1 asyd|OJJ57807.1 ater|EAU34685.1 atub|OJI85931.1 aver|OJJ04581.1 awen|OJJ35735.1  
azon|OJJ43321.1

Group3724: abra|OJJ75409.1 acar|OOF90755.1 acla|EAW13780.1 afis|EAW18352.1 afla|EED48817.1  
afum|EAL87715.1 agla|OJJ88032.1 akaw|GAA84185.1 aluc|OJZ88860.1 anid|CBF79364.1 anig|EHA23643.1  
aory|EIT73011.1 asyd|OJJ57806.1 ater|EAU34686.1 atub|OJI85930.1 aver|OJJ04582.1 awen|OJJ35736.1  
azon|OJJ43322.1

Group3725: abra|OJJ75410.1 acar|OOF90756.1 acla|EAW13782.1 afis|EAW18350.1 afla|EED48815.1  
afum|EAL87713.1 agla|OJJ88034.1 akaw|GAA84186.1 aluc|OJZ88861.1 anid|CBF79367.1 anig|EHA23642.1  
aory|EIT73016.1 asyd|OJJ57808.1 ater|EAU34684.1 atub|OJI85929.1 aver|OJJ04580.1 awen|OJJ35734.1  
azon|OJJ43319.1

Group3726: abra|OJJ75413.1 acar|OOF90757.1 acla|EAW13785.1 afis|EAW18347.1 afla|EED48812.1  
afum|EAL87711.1 agla|OJJ88037.1 akaw|GAA84188.1 aluc|OJZ88864.1 anid|CBF79386.1 anig|EHA23639.1  
aory|EIT73027.1 asyd|OJJ57811.1 ater|EAU34682.1 atub|OJI85926.1 aver|OJJ04577.1 awen|OJJ35731.1  
azon|OJJ43318.1

Group3727: abra|OJJ75414.1 acar|OOF90760.1 acla|EAW13786.1 afis|EAW18346.1 afla|EED48811.1  
afum|EAL87710.1 agla|OJJ88038.1 akaw|GAA84189.1 aluc|OJZ88865.1 anid|CBF79384.1 anig|EHA23638.1  
aory|EIT73037.1 asyd|OJJ57812.1 ater|EAU34681.1 atub|OJI85925.1 aver|OJJ04576.1 awen|OJJ35730.1  
azon|OJJ43317.1

Group3728: abra|OJJ75415.1 acar|OOF90759.1 acla|EAW13787.1 afis|EAW18345.1 afla|EED48810.1  
afum|EAL87709.1 agla|OJJ88039.1 akaw|GAA84190.1 aluc|OJZ88866.1 anid|CBF79382.1 anig|EHA23637.1  
aory|EIT72992.1 asyd|OJJ57813.1 ater|EAU34680.1 atub|OJI85924.1 aver|OJJ04575.1 awen|OJJ35729.1  
azon|OJJ43316.1

Group3729: abra|OJJ75417.1 acar|OOF90762.1 acla|EAW13789.1 afis|EAW18343.1 afla|EED48808.1  
afum|EAL87706.1 agla|OJJ88041.1 akaw|GAA84192.1 aluc|OJZ88868.1 anid|CBF79378.1 anig|EHA23635.1  
aory|EIT73022.1 asyd|OJJ57815.1 ater|EAU34678.1 atub|OJI85922.1 aver|OJJ04573.1 awen|OJJ35727.1  
azon|OJJ43315.1

Group3730: abra|OJJ75421.1 acar|OOF90765.1 acla|EAW13793.1 afis|EAW18339.1 afla|EED48803.1  
afum|EAL87702.1 agla|OJJ88045.1 akaw|GAA84196.1 aluc|OJZ88873.1 anid|CBF79387.1 anig|EHA23632.1  
aory|EIT73019.1 asyd|OJJ57819.1 ater|EAU34674.1 atub|OJI85918.1 aver|OJJ04572.1 awen|OJJ35722.1  
azon|OJJ43312.1

Group3731: abra|OJJ75425.1 acar|OOF90770.1 acla|EAW13795.1 afis|EAW18337.1 afla|EED48801.1  
afum|EAL87701.1 agla|OJJ88047.1 akaw|GAA84200.1 aluc|OJZ88877.1 anid|CBF79391.1 anig|EHA23628.1  
aory|EIT73024.1 asyd|OJJ57821.1 ater|EAU33350.1 atub|OJI85914.1 aver|OJJ04570.1 awen|OJJ35720.1  
azon|OJJ43310.1

Group3732: abra|OJJ75426.1 acar|OOF90771.1 acla|EAW13796.1 afis|EAW18336.1 afla|EED48800.1  
afum|EAL87700.1 agla|OJJ88049.1 akaw|GAA84201.1 aluc|OJZ88878.1 anid|CBF79395.1 anig|EHA23627.1  
aory|EIT73005.1 asyd|OJJ57825.1 ater|EAU33349.1 atub|OJI85913.1 aver|OJJ04567.1 awen|OJJ30717.1  
azon|OJJ43309.1

Group3733: abra|OJJ75427.1 acar|OOF90773.1 acla|EAW13798.1 afis|EAW18334.1 afla|EED48798.1  
afum|EAL87699.1 agla|OJJ88051.1 akaw|GAA84203.1 aluc|OJZ88880.1 anid|CBF79393.1 anig|EHA23626.1  
aory|EIT73035.1 asyd|OJJ57822.1 ater|EAU33347.1 atub|OJI85912.1 aver|OJJ04569.1 awen|OJJ30715.1  
azon|OJJ43307.1

Group3734: abra|OJJ75428.1 acar|OOF90774.1 acla|EAW11898.1 afis|EAW19508.1 afla|EED56888.1  
afum|EAL86986.1 agla|OJJ88052.1 akaw|GAA84204.1 aluc|OJZ88881.1 anid|CBF82976.1 anig|EHA23625.1  
aory|EIT77571.1 asyd|OJJ61561.1 ater|EAU33346.1 atub|OJI85911.1 aver|OJJ00884.1 awen|OJJ30714.1  
azon|OJJ45886.1

Group3735: abra|OJJ75429.1 acar|OOF90775.1 acla|EAW13799.1 afis|EAW18333.1 afla|EED48797.1  
afum|EAL87698.1 agla|OJJ88053.1 akaw|GAA84205.1 aluc|OJZ88882.1 anid|CBF79397.1 anig|EHA23624.1  
aory|EIT73004.1 asyd|OJJ57826.1 ater|EAU33345.1 atub|OJI85910.1 aver|OJJ04566.1 awen|OJJ30713.1  
azon|OJJ43306.1

Group3736: abra|OJJ75432.1 acar|OOF90777.1 acla|EAW13804.1 afis|EAW18327.1 afla|EED48793.1  
afum|EAL87693.1 agla|OJJ88056.1 akaw|GAA84208.1 aluc|OJZ88885.1 anid|CBF79406.1 anig|EHA23621.1  
aory|EIT72996.1 asyd|OJJ57829.1 ater|EAU33336.1 atub|OJI85905.1 aver|OJJ04563.1 awen|OJJ30711.1  
azon|OJJ43303.1

Group3737: abra|OJJ75433.1 acar|OOF90778.1 acla|EAW13805.1 afis|EAW18325.1 afla|EED48792.1  
afum|EAL87691.1 agla|OJJ88066.1 akaw|GAA84209.1 aluc|OJZ88886.1 anid|CBF79408.1 anig|EHA23620.1  
aory|EIT72982.1 asyd|OJJ57830.1 ater|EAU33334.1 atub|OJI85904.1 aver|OJJ04562.1 awen|OJJ30707.1  
azon|OJJ43302.1

Group3738: abra|OJJ75435.1 acar|OOF90779.1 acla|EAW13827.1 afis|EAW18304.1 afla|EED48773.1 afum|EAL87670.1 agla|OJJ88119.1 akaw|GAA84210.1 aluc|OJZ88888.1 anid|CBF79447.1 anig|EHA23619.1 aory|EIT73020.1 asyd|OJJ57851.1 ater|EAU33311.1 atub|OJI85901.1 aver|OJJ04541.1 awen|OJJ30678.1 azon|OJJ43279.1

Group3739: abra|OJJ75436.1 acar|OOF90780.1 acla|EAW13826.1 afis|EAW18305.1 afla|EED48774.1 afum|EAL87671.1 agla|OJJ88118.1 akaw|GAA84211.1 aluc|OJZ88889.1 anid|CBF79445.1 anig|EHA23618.1 aory|EIT73030.1 asyd|OJJ57850.1 ater|EAU33312.1 atub|OJI85900.1 aver|OJJ04542.1 awen|OJJ30679.1 azon|OJJ43280.1

Group3740: abra|OJJ75438.1 acar|OOF90783.1 acla|EAW12400.1 afis|EAW16848.1 afla|EED51031.1 afum|EAL86394.1 agla|OJJ81486.1 akaw|GAA84213.1 aluc|OJZ88891.1 anid|CBF81652.1 anig|EHA23615.1 aory|EIT77036.1 asyd|OJJ59545.1 ater|EAU30241.1 atub|OJI85898.1 aver|OJJ02722.1 awen|OJJ30081.1 azon|OJJ44766.1

Group3741: abra|OJJ75442.1 acar|OOF90787.1 acla|EAW13821.1 afis|EAW18310.1 afla|EED48779.1 afum|EAL87676.1 agla|OJJ88079.1 akaw|GAA84217.1 aluc|OJZ88895.1 anid|CBF79434.1 anig|EHA23611.1 aory|EIT73023.1 asyd|OJJ57844.1 ater|EAU33320.1 atub|OJI85894.1 aver|OJJ04548.1 awen|OJJ30685.1 azon|OJJ43284.1

Group3742: abra|OJJ75443.1 acar|OOF90788.1 acla|EAW13820.1 afis|EAW18311.1 afla|EED48780.1 afum|EAL87677.1 agla|OJJ88080.1 akaw|GAA84218.1 aluc|OJZ88896.1 anid|CBF79432.1 anig|EHA23610.1 aory|EIT72999.1 asyd|OJJ57845.1 ater|EAU33321.1 atub|OJI85893.1 aver|OJJ04547.1 awen|OJJ30686.1 azon|OJJ43285.1

Group3743: abra|OJJ75445.1 acar|OOF90789.1 acla|EAW13818.1 afis|EAW18312.1 afla|EED48781.1 afum|EAL87679.1 agla|OJJ88081.1 akaw|GAA84220.1 aluc|OJZ88900.1 anid|CBF79430.1 anig|EHA23608.1 aory|EIT73002.1 asyd|OJJ57841.1 ater|EAU33322.1 atub|OJI85891.1 aver|OJJ04549.1 awen|OJJ30688.1 azon|OJJ43286.1

Group3744: abra|OJJ75446.1 acar|OOF90790.1 acla|EAW13817.1 afis|EAW18313.1 afla|EED48782.1 afum|EAL87680.1 agla|OJJ88082.1 akaw|GAA84221.1 aluc|OJZ88901.1 anid|CBF79428.1 anig|EHA23607.1 aory|EIT73015.1 asyd|OJJ57840.1 ater|EAU33323.1 atub|OJI85890.1 aver|OJJ04550.1 awen|OJJ30689.1 azon|OJJ43287.1

Group3745: abra|OJJ75447.1 acar|OOF90791.1 acla|EAW13816.1 afis|EAW18314.1 afla|EED48783.1 afum|EAL87681.1 agla|OJJ88083.1 akaw|GAA84222.1 aluc|OJZ88902.1 anid|CBF79427.1 anig|EHA23606.1 aory|EIT73014.1 asyd|OJJ57839.1 ater|EAU33324.1 atub|OJI85889.1 aver|OJJ04551.1 awen|OJJ30690.1 azon|OJJ43288.1

Group3746: abra|OJJ75448.1 acar|OOF90792.1 acla|EAW13815.1 afis|EAW18315.1 afla|EED48784.1 afum|EAL87682.1 agla|OJJ88084.1 akaw|GAA84223.1 aluc|OJZ88903.1 anid|CBF79423.1 anig|EHA23605.1 aory|EIT72980.1 asyd|OJJ57837.1 ater|EAU33325.1 atub|OJI85888.1 aver|OJJ04553.1 awen|OJJ30691.1 azon|OJJ43289.1

Group3747: abra|OJJ75450.1 acar|OOF90794.1 acla|EAW13813.1 afis|EAW18317.1 afla|EED48785.1 afum|EAL87684.1 agla|OJJ88101.1 akaw|GAA84225.1 aluc|OJZ88905.1 anid|CBF79421.1 anig|EHA23603.1 aory|EIT73000.1 asyd|OJJ57836.1 ater|EAU33326.1 atub|OJI85886.1 aver|OJJ04554.1 awen|OJJ30699.1 azon|OJJ43292.1

Group3748: abra|OJJ75452.1 acar|OOF90796.1 acla|EAW13811.1 afis|EAW18319.1 afla|EED48787.1 afum|EAL87686.1 agla|OJJ88073.1 akaw|GAA84227.1 aluc|OJZ88907.1 anid|CBF87726.1 anig|EHA23601.1 aory|EIT72981.1 asyd|OJJ63342.1 ater|EAU33329.1 atub|OJI85884.1 aver|OJI97619.1 awen|OJJ30701.1 azon|OJJ50771.1

Group3749: abra|OJJ75454.1 acar|OOF90798.1 acla|EAW13809.1 afis|EAW18321.1 afla|EED48789.1 afum|EAL87688.1 agla|OJJ88070.1 akaw|GAA84229.1 aluc|OJZ88909.1 anid|CBF79416.1 anig|EHA23599.1 aory|EIT73021.1 asyd|OJJ57833.1 ater|EAU33331.1 atub|OJI85882.1 aver|OJJ04557.1 awen|OJJ30703.1 azon|OJJ43296.1

Group3750: abra|OJJ75457.1 acar|OOF90802.1 acla|EAW13808.1 afis|EAW18322.1 afla|EED48790.1 afum|EAL87689.2 agla|OJJ88069.1 akaw|GAA84232.1 aluc|OJZ88913.1 anid|CBF79414.1 anig|EHA23597.1 aory|EIT73033.1 asyd|OJJ57832.1 ater|EAU33332.1 atub|OJI85878.1 aver|OJJ04558.1 awen|OJJ30704.1 azon|OJJ43297.1

Group3751: abra|OJJ75460.1 acar|OOF90279.1 acla|EAW13828.1 afis|EAW18303.1 afla|EED48772.1 afum|EAL87669.1 agla|OJJ88120.1 akaw|GAA84234.1 aluc|OJZ88917.1 anid|CBF79449.1 anig|EHA23595.1 aory|EIT72974.1 asyd|OJJ57852.1 ater|EAU33310.1 atub|OJI85875.1 aver|OJJ04540.1 awen|OJJ30677.1 azon|OJJ43278.1

Group3752: abra|OJJ75463.1 acar|OOF90277.1 acla|EAW13830.1 afis|EAW18301.1 afla|EED48770.1 afum|EAL87667.2 agla|OJJ88122.1 akaw|GAA84236.1 aluc|OJZ88919.1 anid|CBF79480.1 anig|EHA23593.1

aory|EIT72978.1 asyd|OJJ57871.1 ater|EAU33309.1 atub|OJI85873.1 aver|OJJ04523.1 awen|OJJ30676.1 azon|OJJ43276.1

Group3753: abra|OJJ75465.1 acar|OOF90275.1 acla|EAW13832.1 afis|EAW18299.1 afla|EED48768.1 afum|EAL87665.1 agla|OJJ88124.1 akaw|GAA84238.1 aluc|OJZ88921.1 anid|CBF79476.1 anig|EHA23591.1 aory|EIT73017.1 asyd|OJJ57869.1 ater|EAU33307.1 atub|OJI85871.1 aver|OJJ04525.1 awen|OJJ30673.1 azon|OJJ43274.1

Group3754: abra|OJJ75466.1 acar|OOF90803.1 acla|EAW13833.1 afis|EAW18298.1 afla|EED48767.1 afum|EAL87664.2 agla|OJJ88125.1 akaw|GAA84239.1 aluc|OJZ88922.1 anid|CBF79472.1 anig|EHA23590.1 aory|EIT73036.1 asyd|OJJ57867.1 ater|EAU33306.1 atub|OJI85870.1 aver|OJJ04526.1 awen|OJJ30672.1 azon|OJJ43272.1

Group3755: abra|OJJ75468.1 acar|OOF90805.1 acla|EAW13834.1 afis|EAW18297.1 afla|EED48763.1 afum|EAL87663.1 agla|OJJ88126.1 akaw|GAA84240.1 aluc|OJZ88925.1 anid|CBF79470.1 anig|EHA23588.1 aory|EIT73013.1 asyd|OJJ57865.1 ater|EAU33305.1 atub|OJI85867.1 aver|OJJ04528.1 awen|OJJ30671.1 azon|OJJ43271.1

Group3756: abra|OJJ75472.1 acar|OOF90809.1 acla|EAW13837.1 afis|EAW18294.1 afla|EED48761.1 afum|EAL87660.1 agla|OJJ88129.1 akaw|GAA84243.1 aluc|OJZ88931.1 anid|CBF79465.1 anig|EHA23585.1 aory|EIT73038.1 asyd|OJJ57861.1 ater|EAU33303.1 atub|OJI85861.1 aver|OJJ04531.1 awen|OJJ30669.1 azon|OJJ43268.1

Group3757: abra|OJJ75473.1 acar|OOF90810.1 acla|EAW13838.1 afis|EAW18293.1 afla|EED48760.1 afum|EAL87659.1 agla|OJJ88132.1 akaw|GAA84244.1 aluc|OJZ88932.1 anid|CBF79463.1 anig|EHA23584.1 aory|EIT72991.1 asyd|OJJ57860.1 ater|EAU33302.1 atub|OJI85860.1 aver|OJJ04532.1 awen|OJJ30668.1 azon|OJJ43267.1

Group3758: abra|OJJ75474.1 acar|OOF90811.1 acla|EAW13839.1 afis|EAW18292.1 afla|EED48759.1 afum|EAL87658.1 agla|OJJ88133.1 akaw|GAA84245.1 aluc|OJZ88933.1 anid|CBF79461.1 anig|EHA23583.1 aory|EIT72984.1 asyd|OJJ57859.1 ater|EAU33301.1 atub|OJI85859.1 aver|OJJ04534.1 awen|OJJ30667.1 azon|OJJ43265.1

Group3759: abra|OJJ75476.1 acar|OOF90812.1 acla|EAW13841.1 afis|EAW18291.1 afla|EED48758.1 afum|EAL87656.1 agla|OJJ88134.1 akaw|GAA84246.1 aluc|OJZ88935.1 anid|CBF79459.1 anig|EHA23582.1 aory|EIT73034.1 asyd|OJJ57858.1 ater|EAU33299.1 atub|OJI85857.1 aver|OJJ04535.1 awen|OJJ30666.1 azon|OJJ43263.1

Group3760: abra|OJJ75480.1 acar|OOF90816.1 acla|EAW11214.1 afis|EAW18288.1 afla|EED48756.1 afum|EAL87654.2 agla|OJJ88136.1 akaw|GAA84249.1 aluc|OJZ88939.1 anid|CBF79454.1 anig|EHA23579.1 aory|EIT73128.1 asyd|OJJ57856.1 ater|EAU33296.1 atub|OJI85851.1 aver|OJJ04538.1 awen|OJJ30661.1 azon|OJJ47954.1

Group3761: abra|OJJ75486.1 acar|OOF90818.1 acla|EAW11217.1 afis|EAW18286.1 afla|EED48753.1 afum|EAL87652.1 agla|OJJ88138.1 akaw|GAA84252.1 aluc|OJZ88945.1 anid|CBF79450.1 anig|EHA23576.1 aory|EIT73238.1 asyd|OJJ57853.1 ater|EAU33292.1 atub|OJI85844.1 aver|OJJ04539.1 awen|OJJ30658.1 azon|OJJ47956.1

Group3762: abra|OJJ75487.1 acar|OOF90820.1 acla|EAW11218.1 afis|EAW18285.1 afla|EED48752.1 afum|EAL87651.1 agla|OJJ88139.1 akaw|GAA84253.1 aluc|OJZ88946.1 anid|CBF79482.1 anig|EHA23575.1 aory|EIT73219.1 asyd|OJJ57872.1 ater|EAU33291.1 atub|OJI85843.1 aver|OJJ04522.1 awen|OJJ30657.1 azon|OJJ47957.1

Group3763: abra|OJJ75488.1 acar|OOF90819.1 acla|EAW11219.1 afis|EAW18284.1 afla|EED48751.1 afum|EAL87650.1 agla|OJJ88140.1 akaw|GAA84254.1 aluc|OJZ88947.1 anid|CBF79483.1 anig|EHA23574.1 aory|EIT73141.1 asyd|OJJ57873.1 ater|EAU33290.1 atub|OJI85842.1 aver|OJJ04521.1 awen|OJJ30655.1 azon|OJJ47959.1

Group3764: abra|OJJ75491.1 acar|OOF90823.1 acla|EAW11223.1 afis|EAW18280.1 afla|EED48747.1 afum|EAL87646.1 agla|OJJ88146.1 akaw|GAA84256.1 aluc|OJZ88950.1 anid|CBF79491.1 anig|EHA23571.1 aory|EIT73260.1 asyd|OJJ57876.1 ater|EAU33286.1 atub|OJI85839.1 aver|OJJ04518.1 awen|OJJ30652.1 azon|OJJ47963.1

Group3765: abra|OJJ75493.1 acar|OOF90826.1 acla|EAW11226.1 afis|EAW18277.1 afla|EED48744.1 afum|EAL87643.1 agla|OJJ88149.1 akaw|GAA84259.1 aluc|OJZ88952.1 anid|CBF79496.1 anig|EHA23568.1 aory|EIT73150.1 asyd|OJJ57878.1 ater|EAU33283.1 atub|OJI85837.1 aver|OJJ04516.1 awen|OJJ30650.1 azon|OJJ47965.1

Group3766: abra|OJJ75494.1 acar|OOF90827.1 acla|EAW09288.1 afis|EAW21859.1 afla|EED46451.1 afum|EAL92872.1 agla|OJJ84276.1 akaw|GAA84260.1 aluc|OJZ88953.1 anid|CBF76751.1 anig|EHA23567.1 aory|EIT72375.1 asyd|OJJ61260.1 ater|EAU30858.1 atub|OJI85836.1 aver|OJJ00583.1 awen|OJJ34143.1 azon|OJJ43483.1



Group3767: abra|OJJ75495.1 acar|OOF90828.1 acla|EAW09289.1 afis|EAW21858.1 afla|EED46452.1 afum|EAL92871.1 agla|OJJ84277.1 akaw|GAA84261.1 aluc|OJZ88954.1 anid|CBF76749.1 anig|EHA23566.1 aory|EIT72324.1 asyd|OJJ61259.1 ater|EAU30857.1 atub|OJI85835.1 aver|OJJ00582.1 awen|OJJ34142.1 azon|OJJ43484.1

Group3768: abra|OJJ75496.1 acar|OOF90829.1 acla|EAW09290.1 afis|EAW21857.1 afla|EED46453.1 afum|EAL92870.1 agla|OJJ84278.1 akaw|GAA84262.1 aluc|OJZ88955.1 anid|CBF76747.1 anig|EHA23565.1 aory|EIT72382.1 asyd|OJJ61258.1 ater|EAU30856.1 atub|OJI85834.1 aver|OJJ00581.1 awen|OJJ34141.1 azon|OJJ43485.1

Group3769: abra|OJJ75497.1 acar|OOF90830.1 acla|EAW09291.1 afis|EAW21856.1 afla|EED46454.1 afum|EAL92869.1 agla|OJJ84279.1 akaw|GAA84263.1 aluc|OJZ88956.1 anid|CBF76745.1 aory|EIT72446.1 asyd|OJJ61257.1 ater|EAU30855.1 atub|OJI85833.1 aver|OJJ00580.1 awen|OJJ34140.1 azon|OJJ43486.1 anig|EHA23564.1

Group3770: abra|OJJ75506.1 acar|OOF89956.1 acla|EAW09296.1 afis|EAW21851.1 afla|EED46459.1 afum|EAL92864.1 agla|OJJ84284.1 akaw|GAA84269.1 aluc|OJZ88962.1 anid|CBF76735.1 anig|EHA23559.1 aory|EIT72419.1 asyd|OJJ61252.1 ater|EAU30850.1 atub|OJI85828.1 aver|OJJ00576.1 awen|OJJ34134.1 azon|OJJ44210.1

Group3771: abra|OJJ75507.1 acar|OOF89955.1 acla|EAW09297.1 afis|EAW21850.1 afla|EED46460.1 afum|EAL92863.2 agla|OJJ84285.1 akaw|GAA84270.1 aluc|OJZ88963.1 anid|CBF76733.1 anig|EHA23558.1 aory|EIT72388.1 asyd|OJJ61251.1 ater|EAU30849.1 atub|OJI85827.1 aver|OJJ00575.1 awen|OJJ34133.1 azon|OJJ46409.1

Group3772: abra|OJJ75511.1 acar|OOF90837.1 acla|EAW09299.1 afis|EAW21848.1 afum|EAL92861.2 agla|OJJ84287.1 akaw|GAA84275.1 aluc|OJZ88968.1 anid|CBF76727.1 anig|EHA23555.1 asyd|OJJ61248.1 ater|EAU30847.1 atub|OJI85822.1 aver|OJJ00572.1 awen|OJJ34131.1 azon|OJJ44212.1 afla|EED46464.1 aory|EIT72335.1

Group3773: abra|OJJ75512.1 acar|OOF90839.1 acla|EAW09300.1 afis|EAW21847.1 afla|EED46468.1 afum|EAL92860.1 agla|OJJ84288.1 akaw|GAA84276.1 aluc|OJZ88969.1 anid|CBF76725.1 anig|EHA23554.1 aory|EIT72394.1 asyd|OJJ61246.1 ater|EAU30846.1 atub|OJI85821.1 aver|OJJ00570.1 awen|OJJ34130.1 azon|OJJ44213.1

Group3774: abra|OJJ75518.1 acar|OOF90845.1 acla|EAW09302.1 afis|EAW21844.1 afla|EED46526.1 afum|EAL92856.1 agla|OJJ84292.1 akaw|GAA84282.1 aluc|OJZ88975.1 anid|CBF76717.1 anig|EHA23550.1 aory|EIT72426.1 asyd|OJJ61242.1 ater|EAU38521.1 atub|OJI85814.1 aver|OJJ00565.1 awen|OJJ34128.1 azon|OJJ44215.1

Group3775: abra|OJJ75521.1 acar|OOF90848.1 acla|EAW09308.1 afis|EAW21837.1 afla|EED46538.1 afum|EAL92851.1 agla|OJJ84305.1 akaw|GAA84285.1 aluc|OJZ88978.1 anid|CBF76701.1 anig|EHA23547.1 aory|EIT72362.1 asyd|OJJ61233.1 ater|EAU38512.1 atub|OJI85811.1 aver|OJJ00556.1 awen|OJJ34113.1 azon|OJJ44227.1

Group3776: abra|OJJ75523.1 acar|OOF90850.1 acla|EAW09310.1 afis|EAW21835.1 afla|EED46540.1 afum|EAL92850.1 agla|OJJ84309.1 akaw|GAA84286.1 aluc|OJZ88980.1 anid|CBF76699.1 anig|EHA23546.1 aory|EIT72364.1 asyd|OJJ61232.1 ater|EAU38510.1 atub|OJI85809.1 aver|OJJ00555.1 awen|OJJ34109.1 azon|OJJ44232.1

Group3777: abra|OJJ75527.1 acar|OOF90854.1 acla|EAW09313.1 afis|EAW21832.1 afla|EED46544.1 afum|EAL92847.1 agla|OJJ84312.1 akaw|GAA84289.1 aluc|OJZ88983.1 anid|CBF76694.1 anig|EHA23543.1 aory|EIT77942.1 asyd|OJJ61229.1 ater|EAU38508.1 atub|OJI85806.1 aver|OJJ00552.1 awen|OJJ34105.1 azon|OJJ44236.1

Group3778: abra|OJJ75528.1 acar|OOF90855.1 acla|EAW09314.1 afis|EAW21831.1 afla|EED46545.1 afum|EAL92846.1 agla|OJJ84313.1 akaw|GAA84290.1 aluc|OJZ88984.1 anid|CBF76680.1 anig|EHA23542.1 aory|EIT77881.1 asyd|OJJ61223.1 ater|EAU38507.1 atub|OJI85804.1 aver|OJJ00546.1 awen|OJJ34104.1 azon|OJJ44238.1

Group3779: abra|OJJ75539.1 acar|OOF90858.1 acla|EAW09315.1 afis|EAW21830.1 afla|EED46546.1 afum|EAL92845.1 agla|OJJ84314.1 akaw|GAA84293.1 aluc|OJZ88987.1 anid|CBF76676.1 anig|EHA23539.1 aory|EIT77971.1 asyd|OJJ61221.1 ater|EAU38506.1 atub|OJI85801.1 aver|OJJ00545.1 awen|OJJ34103.1 azon|OJJ44239.1

Group3780: abra|OJJ75544.1 acar|OOF90864.1 acla|EAW09316.1 afis|EAW21829.1 afla|EED46547.1 afum|EAL92844.1 agla|OJJ84315.1 akaw|GAA84300.1 aluc|OJZ88994.1 anid|CBF76674.1 anig|EHA23533.1 aory|EIT77834.1 asyd|OJJ61220.1 ater|EAU38505.1 atub|OJI85794.1 aver|OJJ00544.1 awen|OJJ34102.1 azon|OJJ44242.1

Group3781: abra|OJJ75545.1 acar|OOF90866.1 acla|EAW09317.1 afis|EAW21828.1 afla|EED46548.1 afum|EAL92843.1 agla|OJJ84316.1 akaw|GAA84301.1 aluc|OJZ88996.1 anid|CBF76670.1 anig|EHA23532.1

aory|EIT77919.1 asyd|OJJ61219.1 ater|EAU38504.1 atub|OJI85793.1 aver|OJJ00543.1 awen|OJJ34101.1 azon|OJJ44243.1

Group3782: abra|OJJ75548.1 acar|OOF90868.1 acla|EAW09319.1 afis|EAW21826.1 afla|EED46553.1 afum|EAL92841.1 agla|OJJ84318.1 akaw|GAA84303.1 aluc|OJZ88998.1 anid|CBF76666.1 anig|EHA23530.1 aory|EIT77928.1 asyd|OJJ61217.1 ater|EAU38502.1 atub|OJI85791.1 aver|OJJ00541.1 awen|OJJ34099.1 azon|OJJ44245.1

Group3783: abra|OJJ75552.1 acar|OOF90870.1 acla|EAW09324.1 afis|EAW21821.1 afla|EED46558.1 afum|EAL92837.1 agla|OJJ84321.1 akaw|GAA84307.1 aluc|OJZ89002.1 anid|CBF76660.1 anig|EHA23526.1 aory|EIT77966.1 asyd|OJJ61212.1 ater|EAU38495.1 atub|OJI85787.1 aver|OJJ00537.1 awen|OJJ34095.1 azon|OJJ44249.1

Group3784: abra|OJJ75553.1 acar|OOF90872.1 acla|EAW09355.1 afis|EAW21820.1 afla|EED46559.1 afum|EAL92836.1 agla|OJJ84322.1 akaw|GAA84308.1 aluc|OJZ89003.1 anid|CBF76658.1 anig|EHA23525.1 aory|EIT77877.1 asyd|OJJ61211.1 ater|EAU38494.1 atub|OJI85786.1 aver|OJJ00535.1 awen|OJJ34094.1 azon|OJJ44252.1

Group3785: abra|OJJ75554.1 acar|OOF90873.1 acla|EAW09354.1 afis|EAW21819.1 afla|EED46564.1 afum|EAL92835.1 agla|OJJ84327.1 akaw|GAA84309.1 aluc|OJZ89004.1 anid|CBF76654.1 anig|EHA23524.1 aory|EIT77873.1 asyd|OJJ61210.1 ater|EAU38490.1 atub|OJI85785.1 aver|OJJ00534.1 awen|OJJ34093.1 azon|OJJ44253.1

Group3786: abra|OJJ75574.1 acar|OOF90890.1 acla|EAW09346.1 afis|EAW21799.1 afla|EED46590.1 afum|EAL92824.2 agla|OJJ84324.1 akaw|GAA84325.1 aluc|OJZ89022.1 anid|CBF76633.1 anig|EHA23509.1 aory|EIT77934.1 asyd|OJJ61197.1 ater|EAU38481.1 atub|OJI85767.1 aver|OJJ00521.1 awen|OJJ34086.1 azon|OJJ44256.1

Group3787: abra|OJJ75575.1 acar|OOF90893.1 acla|EAW09343.1 afis|EAW21797.1 afla|EED46598.1 afum|EAL92822.2 agla|OJJ84331.1 akaw|GAA84327.1 aluc|OJZ89024.1 anid|CBF76629.1 anig|EHA23508.1 aory|EIT77937.1 asyd|OJJ61196.1 ater|EAU38479.1 atub|OJI85766.1 aver|OJJ00520.1 awen|OJJ34082.1 azon|OJJ44260.1

Group3788: akaw|GAA84326.1 aluc|OJZ89023.1 acar|OOF90891.1 acla|EAW09345.1 afis|EAW21798.1 afla|EED46597.1 afum|EAL92823.2 agla|OJJ84323.1 aory|EIT77884.1 awen|OJJ34085.1 acar|OOF90892.1 acla|EAW09344.1 agla|OJJ84329.1 anid|CBF76631.1 aory|EIT77853.1 ater|EAU38480.1 awen|OJJ34084.1 azon|OJJ44257.1

Group3789: abra|OJJ75579.1 acar|OOF90896.1 acla|EAW09340.1 afis|EAW21795.1 afla|EED46600.1 afum|EAL92820.1 agla|OJJ84333.1 akaw|GAA84331.1 aluc|OJZ89030.1 anid|CBF76625.1 anig|EHA23504.1 aory|EIT77931.1 asyd|OJJ61194.1 ater|EAU38477.1 atub|OJI85761.1 aver|OJJ00518.1 azon|OJJ44262.1 awen|OJJ34079.1

Group3790: abra|OJJ75581.1 acar|OOF90899.1 acla|EAW09337.1 afis|EAW21791.1 afla|EED46604.1 afum|EAL92816.1 agla|OJJ88519.1 akaw|GAA84333.1 aluc|OJZ89032.1 anid|CBF76623.1 anig|EHA23502.1 aory|EIT77970.1 asyd|OJJ61193.1 ater|EAU38475.1 atub|OJI85758.1 aver|OJJ00517.1 awen|OJJ37963.1 azon|OJJ46824.1

Group3791: abra|OJJ75592.1 acar|OOG00236.1 acla|EAW09330.1 afis|EAW21786.1 afla|EED46610.1 afum|EAL92813.1 agla|OJJ84337.1 akaw|GAA84344.1 aluc|OJZ89044.1 anid|CBF76617.1 anig|EHA23491.1 aory|EIT77835.1 asyd|OJJ61189.1 ater|EAU38469.1 atub|OJI85743.1 aver|OJJ00513.1 awen|OJJ34072.1 azon|OJJ48155.1

Group3792: abra|OJJ75602.1 acar|OOG00235.1 acla|EAW09327.1 afis|EAW21784.1 afla|EED46611.1 afum|EAL92811.1 agla|OJJ84339.1 akaw|GAA84352.1 aluc|OJZ89052.1 anid|CBF76613.1 anig|EHA23486.1 aory|EIT77805.1 asyd|OJJ61188.1 ater|EAU38467.1 atub|OJI85735.1 aver|OJJ00511.1 awen|OJJ34071.1 azon|OJJ48157.1

Group3793: abra|OJJ75605.1 acar|OOG00232.1 acla|EAW09367.1 afis|EAW21770.1 afla|EED46330.1 afum|EAL92799.1 agla|OJJ84378.1 akaw|GAA84356.1 aluc|OJZ89058.1 anid|CBF83758.1 anig|EHA23484.1 aory|EIT81243.1 asyd|OJJ60861.1 ater|EAU38448.1 atub|OJI85728.1 aver|OJJ00187.1 awen|OJJ34057.1 azon|OJJ48175.1

Group3794: abra|OJJ75610.1 acar|OOG00228.1 acla|EAW09372.1 afis|EAW21763.1 afla|EED46336.1 afum|EAL92793.1 agla|OJJ84388.1 akaw|GAA84360.1 aluc|OJZ89062.1 anid|CBF83751.1 anig|EHA23476.1 aory|EIT81185.1 asyd|OJJ60857.1 ater|EAU38452.1 atub|OJI85724.1 aver|OJJ00181.1 awen|OJJ34046.1 azon|OJJ48185.1

Group3795: abra|OJJ75611.1 acar|OOG00227.1 acla|EAW09373.1 afis|EAW21762.1 afla|EED46337.1 afum|EAL92792.1 agla|OJJ84389.1 akaw|GAA84361.1 aluc|OJZ89063.1 anid|CBF83749.1 anig|EHA23475.1 aory|EIT81205.1 asyd|OJJ60856.1 ater|EAU38453.1 atub|OJI85723.1 aver|OJJ00180.1 awen|OJJ34045.1 azon|OJJ48186.1

Group3796: abra|OJJ75615.1 acar|OOG00215.1 acla|EAW09363.1 afis|EAW21774.1 afla|EED46340.1 afum|EAL92803.1 agla|OJJ84350.1 akaw|GAA84364.1 aluc|OJZ89068.1 anid|CBF76597.1 anig|EHA23468.1 aory|EIT81181.1 asyd|OJJ61178.1 ater|EAU38464.1 atub|OJI85720.1 aver|OJJ00504.1 awen|OJJ34062.1 azon|OJJ48170.1

Group3797: abra|OJJ75625.1 acar|OOG00211.1 acla|EAW09360.1 afis|EAW21777.1 afla|EED46344.1 afum|EAL92806.1 agla|OJJ84342.1 akaw|GAA84372.1 aluc|OJZ89076.1 anid|CBF76603.1 anig|EHA23461.1 aory|EIT81165.1 asyd|OJJ61182.1 ater|EAU38462.1 atub|OJI85709.1 aver|OJJ00507.1 awen|OJJ34066.1 azon|OJJ48165.1

Group3798: abra|OJJ75628.1 acar|OOG00210.1 acla|EAW09465.1 afis|EAW21671.1 afla|EED57935.1 afum|EAL92706.1 agla|OJJ79745.1 akaw|GAA84375.1 aluc|OJZ89079.1 anid|CBF83585.1 anig|EHA23458.1 aory|EIT82333.1 asyd|OJJ60779.1 ater|EAU38355.1 atub|OJI85706.1 aver|OJJ00112.1 awen|OJJ33935.1 azon|OJJ48642.1

Group3799: abra|OJJ75630.1 acar|OOG00205.1 acla|EAW09463.1 afis|EAW21674.1 afla|EED57936.1 afum|EAL92708.1 agla|OJJ79747.1 akaw|GAA84377.1 aluc|OJZ89081.1 anid|CBF83589.1 anig|EHA23456.1 aory|EIT82341.1 asyd|OJJ60776.1 ater|EAU38357.1 atub|OJI85703.1 aver|OJJ00110.1 awen|OJJ33940.1 azon|OJJ48629.1

Group3800: abra|OJJ75633.1 acar|OOG00202.1 acla|EAW09461.1 agla|OJJ79927.1 akaw|GAA84380.1 aluc|OJZ89084.1 anig|EHA23453.1 asyd|OJJ60773.1 ater|EAU38359.1 atub|OJI85700.1 aver|OJJ00107.1 awen|OJJ33943.1 afla|EED57941.1 anid|CBF83591.1 afis|EAW21676.1 afum|EAL92710.1 aory|EIT82327.1 azon|OJJ48627.1

Group3801: abra|OJJ75634.1 acar|OOG00201.1 acla|EAW09460.1 afis|EAW21677.1 afla|EED57942.1 afum|EAL92711.1 agla|OJJ79926.1 akaw|GAA84381.1 aluc|OJZ89085.1 anid|CBF83593.1 anig|EHA23452.1 aory|EIT82349.1 asyd|OJJ60772.1 ater|EAU38360.1 atub|OJI85699.1 aver|OJJ00106.1 awen|OJJ33944.1 azon|OJJ48626.1

Group3802: abra|OJJ75636.1 acar|OOG00200.1 acla|EAW09459.1 afis|EAW21678.1 afla|EED57943.1 afum|EAL92712.1 agla|OJJ79925.1 akaw|GAA84382.1 aluc|OJZ89086.1 anid|CBF83595.1 anig|EHA23451.1 aory|EIT82316.1 asyd|OJJ60771.1 ater|EAU38361.1 atub|OJI85698.1 aver|OJJ00105.1 awen|OJJ33945.1 azon|OJJ48625.1

Group3803: abra|OJJ75637.1 acar|OOG00199.1 acla|EAW09458.1 afis|EAW21679.1 afla|EED57944.1 afum|EAL92713.1 agla|OJJ79924.1 akaw|GAA84383.1 aluc|OJZ89087.1 anid|CBF83597.1 anig|EHA23450.1 aory|EIT82325.1 asyd|OJJ60770.1 ater|EAU38362.1 atub|OJI85697.1 aver|OJJ00104.1 awen|OJJ33946.1 azon|OJJ48624.1

Group3804: abra|OJJ75639.1 acar|OOG00198.1 acla|EAW09457.1 afis|EAW21680.1 afla|EED57945.1 afum|EAL92714.1 agla|OJJ79923.1 akaw|GAA84384.1 aluc|OJZ89088.1 anid|CBF83598.1 anig|EHA23449.1 aory|EIT82335.1 asyd|OJJ60769.1 ater|EAU38363.1 atub|OJI85694.1 aver|OJJ00103.1 awen|OJJ33947.1 azon|OJJ48623.1

Group3805: abra|OJJ75642.1 acar|OOG00196.1 acla|EAW09456.1 afis|EAW21681.1 afla|EED57946.1 afum|EAL92715.1 agla|OJJ79921.1 akaw|GAA84386.1 aluc|OJZ89091.1 anid|CBF83600.1 anig|EHA23447.1 aory|EIT82326.1 asyd|OJJ60768.1 ater|EAU38364.1 atub|OJI85692.1 aver|OJJ00102.1 awen|OJJ33948.1 azon|OJJ48622.1

Group3806: abra|OJJ75644.1 acar|OOG00195.1 acla|EAW09454.1 afis|EAW21683.1 afla|EED57950.1 afum|EAL92717.1 agla|OJJ79918.1 akaw|GAA84389.1 aluc|OJZ89093.1 anid|CBF83605.1 anig|EHA23444.1 aory|EIT82322.1 asyd|OJJ60766.1 ater|EAU38367.1 atub|OJI85688.1 aver|OJJ00100.1 awen|OJJ33950.1 azon|OJJ48620.1

Group3807: abra|OJJ75645.1 acar|OOG00194.1 acla|EAW09453.1 afis|EAW21684.1 afla|EED57951.1 afum|EAL92718.2 agla|OJJ79917.1 akaw|GAA84390.1 aluc|OJZ89094.1 anid|CBF83607.1 anig|EHA23443.1 aory|EIT82348.1 asyd|OJJ60765.1 ater|EAU38368.1 atub|OJI85687.1 aver|OJJ00099.1 awen|OJJ33951.1 azon|OJJ48619.1

Group3808: abra|OJJ75650.1 acar|OOG00190.1 acla|EAW09452.1 afis|EAW21685.1 afla|EED57956.1 afum|EAL92719.1 agla|OJJ79914.1 akaw|GAA84393.1 aluc|OJZ89098.1 anid|CBF83611.1 anig|EHA23440.1 aory|EIT79731.1 asyd|OJJ60762.1 ater|EAU38371.1 atub|OJI85683.1 aver|OJJ00096.1 awen|OJJ33955.1 azon|OJJ48615.1

Group3809: abra|OJJ75651.1 acar|OOG00189.1 acla|EAW09449.1 afis|EAW21687.1 afla|EED57957.1 afum|EAL92721.2 agla|OJJ79913.1 akaw|GAA84394.1 aluc|OJZ89099.1 anid|CBF83612.1 anig|EHA23439.1 aory|EIT79765.1 asyd|OJJ60761.1 ater|EAU38372.1 atub|OJI85682.1 aver|OJJ00095.1 awen|OJJ33956.1 azon|OJJ48612.1

Group3810: abra|OJJ75652.1 acar|OOG00188.1 acla|EAW09448.1 afis|EAW21688.1 afla|EED57958.1 afum|EAL92722.1 agla|OJJ79912.1 akaw|GAA84395.1 aluc|OJZ89100.1 anid|CBF83614.1 anig|EHA23438.1

aory|EIT79734.1 asyd|OJJ60760.1 ater|EAU38373.1 atub|OJI85681.1 aver|OJJ00094.1 awen|OJJ33957.1 azon|OJJ48611.1

Group3811: abra|OJJ75654.1 acar|OOG00187.1 acla|EAW09446.1 afis|EAW21690.1 afla|EED57960.1 afum|EAL92724.1 agla|OJJ79910.1 akaw|GAA84397.1 aluc|OJZ89103.1 anid|CBF83617.1 anig|EHA23436.1 aory|EIT79781.1 asyd|OJJ60758.1 ater|EAU38375.1 atub|OJI85678.1 aver|OJJ00092.1 awen|OJJ33959.1 azon|OJJ48609.1

Group3812: abra|OJJ75656.1 acar|OOG00186.1 acla|EAW09444.1 afis|EAW21692.1 afla|EED57962.1 afum|EAL92726.1 agla|OJJ79907.1 akaw|GAA84399.1 aluc|OJZ89106.1 anid|CBF83621.1 anig|EHA23434.1 aory|EIT79782.1 asyd|OJJ60756.1 ater|EAU38377.1 atub|OJI85676.1 aver|OJJ00090.1 awen|OJJ33961.1 azon|OJJ48607.1

Group3813: abra|OJJ75657.1 acar|OOG00185.1 acla|EAW09442.1 afis|EAW21694.1 afla|EED57963.1 afum|EAL92728.1 agla|OJJ79905.1 akaw|GAA84400.1 aluc|OJZ89107.1 anid|CBF83623.1 anig|EHA23433.1 aory|EIT79708.1 asyd|OJJ60755.1 ater|EAU38379.1 atub|OJI85675.1 aver|OJJ00089.1 awen|OJJ33963.1 azon|OJJ48605.1

Group3814: abra|OJJ75658.1 acar|OOG00184.1 acla|EAW09441.1 afis|EAW21695.1 afla|EED57964.1 afum|EAL92729.1 agla|OJJ79904.1 akaw|GAA84401.1 aluc|OJZ89109.1 anid|CBF83624.1 anig|EHA23432.1 aory|EIT79788.1 asyd|OJJ60754.1 ater|EAU38380.1 atub|OJI85674.1 aver|OJJ00088.1 awen|OJJ33964.1 azon|OJJ48603.1

Group3815: abra|OJJ75662.1 acar|OOG00181.1 acla|EAW09439.1 afis|EAW21697.1 afla|EED57966.1 afum|EAL92731.1 agla|OJJ79901.1 akaw|GAA84403.1 aluc|OJZ89113.1 anid|CBF83628.1 anig|EHA23430.1 aory|EIT79705.1 asyd|OJJ60752.1 ater|EAU38382.1 atub|OJI85671.1 aver|OJJ00085.1 awen|OJJ33966.1 azon|OJJ48600.1

Group3816: abra|OJJ75664.1 acar|OOG00180.1 acla|EAW09437.1 afis|EAW21699.1 afla|EED57968.1 afum|EAL92733.1 agla|OJJ79899.1 akaw|GAA84405.1 aluc|OJZ89115.1 anid|CBF83632.1 anig|EHA23428.1 aory|EIT79768.1 asyd|OJJ60750.1 ater|EAU38384.1 atub|OJI85669.1 aver|OJJ00083.1 awen|OJJ33968.1 azon|OJJ48598.1

Group3817: abra|OJJ75665.1 acar|OOG00179.1 acla|EAW09436.1 afis|EAW21700.1 afla|EED57969.1 afum|EAL92734.1 agla|OJJ79898.1 akaw|GAA84406.1 aluc|OJZ89116.1 anid|CBF83633.1 anig|EHA23427.1 aory|EIT79802.1 asyd|OJJ60782.1 ater|EAU38385.1 atub|OJI85668.1 aver|OJJ00115.1 awen|OJJ33970.1 azon|OJJ48589.1

Group3818: abra|OJJ75667.1 acar|OOG00177.1 acla|EAW09434.1 afis|EAW21702.1 afla|EED57971.1 afum|EAL92736.1 agla|OJJ79896.1 akaw|GAA84408.1 aluc|OJZ89118.1 anid|CBF83639.1 anig|EHA23425.1 aory|EIT79763.1 asyd|OJJ60785.1 ater|EAU38387.1 atub|OJI85666.1 aver|OJJ00118.1 awen|OJJ33972.1 azon|OJJ48587.1

Group3819: abra|OJJ75668.1 acar|OOG00176.1 acla|EAW09433.1 afis|EAW21703.1 afla|EED57972.1 afum|EAL92737.1 agla|OJJ84485.1 akaw|GAA84409.1 aluc|OJZ89119.1 anid|CBF83649.1 anig|EHA23424.1 aory|EIT79804.1 asyd|OJJ60792.1 ater|EAU38388.1 atub|OJI85665.1 aver|OJJ00125.1 awen|OJJ33973.1 azon|OJJ48586.1

Group3820: abra|OJJ75670.1 acar|OOG00175.1 acla|EAW09432.1 afis|EAW21704.1 afla|EED57973.1 afum|EAL92738.1 agla|OJJ79888.1 akaw|GAA84410.1 aluc|OJZ89120.1 anid|CBF83648.1 anig|EHA23423.1 aory|EIT79806.1 asyd|OJJ60791.1 ater|EAU38389.1 atub|OJI85664.1 aver|OJJ00124.1 awen|OJJ33975.1 azon|OJJ48581.1

Group3821: abra|OJJ75672.1 acar|OOG00173.1 acla|EAW09425.1 afis|EAW21711.1 afla|EED57975.1 afum|EAL92746.1 agla|OJJ79890.1 akaw|GAA84413.1 aluc|OJZ89122.1 anid|CBF83646.1 anig|EHA23421.1 aory|EIT79737.1 asyd|OJJ60789.1 ater|EAU38391.1 atub|OJI85662.1 aver|OJJ00122.1 awen|OJJ33977.1 azon|OJJ48583.1

Group3822: abra|OJJ75673.1 acar|OOG00172.1 acla|EAW09426.1 afis|EAW21710.1 afla|EED57976.1 afum|EAL92745.1 agla|OJJ79891.1 akaw|GAA84414.1 aluc|OJZ89123.1 anid|CBF83644.1 anig|EHA23420.1 aory|EIT79753.1 asyd|OJJ60788.1 ater|EAU38392.1 atub|OJI85661.1 aver|OJJ00121.1 awen|OJJ33980.1 azon|OJJ48575.1

Group3823: abra|OJJ75674.1 acar|OOG00171.1 acla|EAW09427.1 afis|EAW21709.1 afla|EED57977.1 afum|EAL92744.1 agla|OJJ79892.1 akaw|GAA84415.1 aluc|OJZ89124.1 anid|CBF83642.1 anig|EHA23419.1 aory|EIT79730.1 asyd|OJJ60787.1 ater|EAU38393.1 atub|OJI85660.1 aver|OJJ00120.1 awen|OJJ33981.1 azon|OJJ48574.1

Group3824: abra|OJJ75675.1 acar|OOG00170.1 acla|EAW09428.1 afis|EAW21708.1 afla|EED57978.1 afum|EAL92743.1 agla|OJJ79893.1 akaw|GAA84416.1 aluc|OJZ89125.1 anid|CBF83641.1 anig|EHA23418.1 aory|EIT79718.1 asyd|OJJ60786.1 ater|EAU38394.1 atub|OJI85659.1 aver|OJJ00119.1 awen|OJJ33982.1 azon|OJJ48573.1

Group3825: abra|OJJ75677.1 acar|OOG00169.1 acla|EAW09423.1 afis|EAW21712.1 afla|EED57980.1 afum|EAL92747.1 agla|OJJ79895.1 akaw|GAA84418.1 aluc|OJZ89127.1 anid|CBF83653.1 anig|EHA23416.1 aory|EIT79727.1 asyd|OJJ60794.1 ater|EAU38396.1 atub|OJI85657.1 aver|OJJ00127.1 awen|OJJ33984.1 azon|OJJ48570.1

Group3826: abra|OJJ75679.1 acar|OOG00168.1 acla|EAW09424.1 afis|EAW21713.1 afla|EED57981.1 afum|EAL92748.1 agla|OJJ79886.1 akaw|GAA84419.1 aluc|OJZ89129.1 anid|CBF83655.1 anig|EHA23415.1 aory|EIT79767.1 asyd|OJJ60795.1 ater|EAU38398.1 atub|OJI85656.1 aver|OJJ00128.1 awen|OJJ33985.1 azon|OJJ48568.1

Group3827: abra|OJJ75680.1 acar|OOG00166.1 acla|EAW09422.1 afis|EAW21714.1 afla|EED57984.1 afum|EAL92749.1 agla|OJJ79885.1 akaw|GAA84420.1 aluc|OJZ89130.1 anid|CBF83657.1 anig|EHA23414.1 aory|EIT79791.1 asyd|OJJ60796.1 ater|EAU38399.1 atub|OJI85655.1 aver|OJJ00129.1 awen|OJJ33986.1 azon|OJJ48567.1

Group3828: abra|OJJ75682.1 acla|EAW09420.1 afis|EAW21716.1 afla|EED57986.1 afum|EAL92750.1 agla|OJJ79882.1 agla|OJJ79883.1 akaw|GAA84422.1 aluc|OJZ89133.1 anid|CBF83658.1 anig|EHA23412.1 aory|EIT79755.1 asyd|OJJ60798.1 ater|EAU38401.1 atub|OJI85653.1 aver|OJJ00131.1 awen|OJJ33988.1 azon|OJJ48565.1

Group3829: abra|OJJ75686.1 acar|OOG00164.1 acla|EAW09419.1 afis|EAW21717.1 afla|EED57987.1 afum|EAL92751.1 agla|OJJ79880.1 akaw|GAA84424.1 aluc|OJZ89137.1 anid|CBF83708.1 anig|EHA23410.1 aory|EIT79780.1 asyd|OJJ60831.1 ater|EAU38402.1 atub|OJI85648.1 aver|OJJ00156.1 awen|OJJ33990.1 azon|OJJ48563.1

Group3830: abra|OJJ75687.1 acar|OOG00163.1 acla|EAW09417.1 afis|EAW21719.1 afla|EED57990.1 afum|EAL92752.1 agla|OJJ79865.1 akaw|GAA84425.1 aluc|OJZ89138.1 anid|CBF83710.1 anig|EHA23407.1 aory|EIT79712.1 asyd|OJJ60833.1 ater|EAU38403.1 atub|OJI85647.1 aver|OJJ00157.1 awen|OJJ33992.1 azon|OJJ48561.1

Group3831: abra|OJJ75688.1 acar|OOG00162.1 acla|EAW09416.1 afis|EAW21720.1 afla|EED57989.1 afum|EAL92753.1 agla|OJJ79864.1 akaw|GAA84426.1 aluc|OJZ89139.1 anid|CBF83711.1 anig|EHA23406.1 aory|EIT79747.1 asyd|OJJ60834.1 ater|EAU38404.1 atub|OJI85646.1 aver|OJJ00158.1 awen|OJJ33993.1 azon|OJJ48560.1

Group3832: abra|OJJ75689.1 acar|OOG00161.1 acla|EAW09415.1 afis|EAW21721.1 afla|EED57988.1 afum|EAL92754.1 agla|OJJ79863.1 akaw|GAA84427.1 aluc|OJZ89140.1 anid|CBF83713.1 anig|EHA23405.1 aory|EIT79743.1 asyd|OJJ60835.1 ater|EAU38405.1 atub|OJI85645.1 aver|OJJ00159.1 awen|OJJ33994.1 azon|OJJ48559.1

Group3833: abra|OJJ75692.1 acar|OOG00160.1 acla|EAW09414.1 afis|EAW21722.1 afla|EED57991.1 afum|EAL92755.1 agla|OJJ79862.1 akaw|GAA84429.1 aluc|OJZ89143.1 anid|CBF83715.1 anig|EHA23404.1 aory|EIT79797.1 asyd|OJJ60836.1 ater|EAU38406.1 atub|OJI85644.1 aver|OJJ00160.1 awen|OJJ33995.1 azon|OJJ48558.1

Group3834: abra|OJJ75696.1 acar|OOG00158.1 acla|EAW09412.1 afis|EAW21724.1 afla|EED57993.1 afum|EAL92757.1 agla|OJJ79860.1 akaw|GAA84432.1 aluc|OJZ89147.1 anid|CBF83718.1 anig|EHA23401.1 aory|EIT79706.1 asyd|OJJ60838.1 ater|EAU38408.1 atub|OJI85641.1 aver|OJJ00162.1 awen|OJJ33997.1 azon|OJJ48555.1

Group3835: abra|OJJ75698.1 acar|OOG00155.1 acla|EAW09410.1 afis|EAW21726.1 afla|EED57995.1 afum|EAL92759.1 agla|OJJ79858.1 akaw|GAA84434.1 aluc|OJZ89149.1 anid|CBF83722.1 anig|EHA23399.1 aory|EIT79805.1 asyd|OJJ60840.1 ater|EAU38410.1 atub|OJI85639.1 aver|OJJ00164.1 awen|OJJ33999.1 azon|OJJ48553.1

Group3836: abra|OJJ75701.1 acar|OOG00153.1 acla|EAW09407.1 afis|EAW21729.1 afla|EED57998.1 afum|EAL92762.1 agla|OJJ79855.1 akaw|GAA84437.1 aluc|OJZ89152.1 anid|CBF83727.1 anig|EHA23397.1 aory|EIT79787.1 asyd|OJJ60843.1 ater|EAU38413.1 atub|OJI85636.1 aver|OJJ00168.1 awen|OJJ34002.1 azon|OJJ48550.1

Group3837: abra|OJJ75707.1 acar|OOG00151.1 acla|EAW09404.1 afis|EAW21732.1 afla|EED58001.1 afum|EAL92765.1 agla|OJJ79853.1 akaw|GAA84442.1 aluc|OJZ89158.1 anid|CBF83732.1 anig|EHA23395.1 aory|EIT79716.1 asyd|OJJ60846.1 ater|EAU38415.1 atub|OJI85632.1 aver|OJJ00171.1 awen|OJJ34005.1 azon|OJJ48546.1

Group3838: abra|OJJ75709.1 acar|OOG00149.1 acla|EAW09403.1 afis|EAW21733.1 afla|EED58002.1 afum|EAL92766.1 agla|OJJ79850.1 akaw|GAA84443.1 aluc|OJZ89160.1 anid|CBF83734.1 anig|EHA23394.1 aory|EIT79783.1 asyd|OJJ60848.1 ater|EAU38416.1 atub|OJI85630.1 aver|OJJ00174.1 awen|OJJ34006.1 azon|OJJ48545.1

Group3839: abra|OJJ75710.1 acar|OOG00150.1 acla|EAW09402.1 afis|EAW21734.1 afla|EED58006.1 afum|EAL92767.1 agla|OJJ79849.1 akaw|GAA84444.1 aluc|OJZ89161.1 anid|CBF83736.1 anig|EHA23393.1

aory|EIT79710.1 asyd|OJJ60850.1 ater|EAU36017.1 atub|OJI85629.1 aver|OJJ00172.1 awen|OJJ34007.1 azon|OJJ48544.1

Group3840: abra|OJJ75716.1 acar|OOG00143.1 acla|EAW09397.1 afis|EAW21737.1 afla|EED58011.1 afum|EAL92771.1 agla|OJJ84451.1 akaw|GAA84450.1 aluc|OJZ89168.1 anid|CBF83703.1 anig|EHA23387.1 aory|EIT79723.1 asyd|OJJ60826.1 ater|EAU38419.1 atub|OJI85623.1 aver|OJJ00152.1 awen|OJJ34019.1 azon|OJJ48539.1

Group3841: abra|OJJ75719.1 acar|OOG00137.1 acla|EAW09375.1 afis|EAW21760.1 afla|EED58018.1 afum|EAL92790.2 agla|OJJ84390.1 akaw|GAA84455.1 aluc|OJZ89171.1 anid|CBF83695.1 anig|EHA23384.1 aory|EIT79793.1 asyd|OJJ60824.1 ater|EAU38430.1 atub|OJI85619.1 aver|OJJ00150.1 awen|OJJ34044.1 azon|OJJ48187.1

Group3842: abra|OJJ75722.1 acar|OOG00136.1 acla|EAW09378.1 afis|EAW21757.1 afla|EED58020.1 afum|EAL92787.1 agla|OJJ84393.1 akaw|GAA84458.1 aluc|OJZ89174.1 anid|CBF83682.1 anig|EHA23381.1 aory|EIT79724.1 asyd|OJJ60821.1 ater|EAU38433.1 atub|OJI85616.1 aver|OJJ00147.1 awen|OJJ34041.1 azon|OJJ48198.1

Group3843: abra|OJJ75723.1 acar|OOG00135.1 acla|EAW09379.1 afis|EAW21756.1 afla|EED58022.1 afum|EAL92786.1 agla|OJJ84394.1 akaw|GAA84459.1 aluc|OJZ89175.1 anid|CBF83684.1 anig|EHA23380.1 aory|OJJ60820.1 ater|EAU38434.1 atub|OJI85615.1 aver|OJJ00146.1 awen|OJJ34040.1 azon|OJJ48197.1 aory|EIT79736.1

Group3844: abra|OJJ75724.1 acar|OOG00134.1 acla|EAW09380.1 afis|EAW21755.1 afla|EED58023.1 afum|EAL92785.1 agla|OJJ84398.1 akaw|GAA84460.1 aluc|OJZ89176.1 anid|CBF83685.1 anig|EHA23379.1 aory|EIT79744.1 asyd|OJJ60819.1 ater|EAU38435.1 atub|OJI85613.1 aver|OJJ00145.1 awen|OJJ34039.1 azon|OJJ48196.1

Group3845: abra|OJJ75726.1 acar|OOG00132.1 acla|EAW09383.1 afis|EAW21752.1 afla|EED58026.1 afum|EAL92782.1 agla|OJJ84401.1 akaw|GAA84462.1 aluc|OJZ89178.1 anid|CBF83693.1 anig|EHA23377.1 aory|EIT79749.1 asyd|OJJ60816.1 ater|EAU38438.1 atub|OJI85611.1 aver|OJJ00142.1 awen|OJJ34035.1 azon|OJJ48207.1

Group3846: abra|OJJ75728.1 acar|OOF90230.1 acla|EAW08986.1 afis|EAW24686.1 afla|EED54452.1 afum|EAL89327.1 akaw|GAA84463.1 aluc|OJZ89180.1 anid|CBF83674.1 anig|EHA23375.1 aory|EIT76299.1 asyd|OJJ60813.1 ater|EAU39265.1 atub|OJI85609.1 aver|OJJ00140.1 awen|OJJ29740.1 afla|EED48344.1 ater|EAU31420.1

Group3847: abra|OJJ75732.1 acar|OOF89927.1 acla|EAW14909.1 afis|EAW24430.1 afla|EED55243.1 afum|EAL86098.1 agla|OJJ79244.1 akaw|GAA84465.1 aluc|OJZ89183.1 anid|CBF73775.1 anig|EHA23373.1 aory|EIT83557.1 asyd|OJJ56594.1 ater|EAU30015.1 atub|OJI85606.1 aver|OJJ06131.1 awen|OJJ32772.1 azon|OJJ44003.1

Group3848: abra|OJJ75734.1 acar|OOF89928.1 acla|EAW14908.1 afis|EAW24429.1 afla|EED55249.1 afum|EAL86097.1 agla|OJJ79242.1 akaw|GAA84467.1 aluc|OJZ89185.1 anid|CBF73777.1 anig|EHA23372.1 aory|EIT83561.1 asyd|OJJ56596.1 ater|EAU30016.1 atub|OJI85604.1 aver|OJJ06129.1 awen|OJJ32774.1 azon|OJJ44004.1

Group3849: abra|OJJ75735.1 acar|OOF89929.1 acla|EAW14907.1 afis|EAW24428.1 afla|EED55250.1 afum|EAL86096.1 agla|OJJ79241.1 akaw|GAA84468.1 aluc|OJZ89186.1 anid|CBF73778.1 anig|EHA23371.1 aory|EIT83631.1 asyd|OJJ56597.1 ater|EAU30017.1 atub|OJI85603.1 aver|OJJ06128.1 awen|OJJ32775.1 azon|OJJ44005.1

Group3850: abra|OJJ75737.1 acar|OOF89931.1 acla|EAW14904.1 afis|EAW24425.1 afla|EED55254.1 afum|EAL86093.1 agla|OJJ79239.1 akaw|GAA84470.1 aluc|OJZ89189.1 anid|CBF73782.1 anig|EHA23368.1 aory|EIT83565.1 asyd|OJJ56599.1 ater|EAU30020.1 atub|OJI85601.1 aver|OJJ06126.1 awen|OJJ32781.1 azon|OJJ44007.1

Group3851: abra|OJJ75738.1 acar|OOG00131.1 acla|EAW14903.1 afis|EAW24424.1 afla|EED55258.1 afum|EAL86092.1 agla|OJJ79238.1 akaw|GAA84471.1 aluc|OJZ89191.1 anid|CBF73784.1 anig|EHA23367.1 aory|EIT83539.1 asyd|OJJ56600.1 ater|EAU30021.1 atub|OJI85599.1 aver|OJJ06125.1 awen|OJJ32780.1 azon|OJJ44009.1

Group3852: abra|OJJ75784.1 acar|OOG00104.1 acla|EAW14898.1 afis|EAW24420.1 afla|EED47748.1 afum|EAL86089.1 agla|OJJ79224.1 akaw|GAA84500.1 aluc|OJZ89227.1 anid|CBF73792.1 anig|EHA23335.1 aory|EIT77177.1 asyd|OJJ56604.1 ater|EAU30307.1 atub|OJI85565.1 aver|OJJ06119.1 awen|OJJ32789.1 azon|OJJ44022.1

Group3853: abra|OJJ75785.1 acar|OOG00103.1 acla|EAW14897.1 afis|EAW24419.1 afla|EED47749.1 afum|EAL86088.1 agla|OJJ79226.1 akaw|GAA84501.1 aluc|OJZ89229.1 anid|CBF73795.1 anig|EHA23334.1 aory|EIT77122.1 asyd|OJJ56605.1 ater|EAU30308.1 atub|OJI85564.1 aver|OJJ06118.1 awen|OJJ32790.1 azon|OJJ44021.1

Group3854: abra|OJJ75786.1 acar|OOG00102.1 acla|EAW14896.1 afis|EAW24418.1 afla|EED47750.1 afum|EAL86087.1 agla|OJJ79227.1 akaw|GAA84502.1 aluc|OJZ89230.1 anid|CBF73797.1 anig|EHA23333.1 aory|EIT77133.1 asyd|OJJ56607.1 ater|EAU30309.1 atub|OJI85563.1 aver|OJJ06117.1 awen|OJJ32791.1 azon|OJJ44020.1

Group3855: abra|OJJ75787.1 acar|OOG00101.1 acla|EAW14895.1 afis|EAW24417.1 afla|EED47751.1 afum|EAL86086.1 agla|OJJ79228.1 akaw|GAA84503.1 aluc|OJZ89231.1 anid|CBF73799.1 anig|EHA23332.1 aory|EIT77182.1 asyd|OJJ56608.1 ater|EAU30310.1 atub|OJI85562.1 aver|OJJ06116.1 awen|OJJ32792.1 azon|OJJ44019.1

Group3856: abra|OJJ75788.1 acar|OOG00099.1 acla|EAW14893.1 afis|EAW24415.1 afla|EED47766.1 afum|EAL86084.1 agla|OJJ79218.1 akaw|GAA84504.1 aluc|OJZ89232.1 anid|CBF73803.1 anig|EHA23331.1 aory|EIT77193.1 asyd|OJJ56615.1 ater|EAU30314.1 atub|OJI85561.1 aver|OJJ06109.1 awen|OJJ32794.1 azon|OJJ49041.1

Group3857: abra|OJJ75789.1 acar|OOG00098.1 acla|EAW14892.1 afis|EAW24414.1 afla|EED47765.1 afum|EAL86083.1 agla|OJJ79217.1 akaw|GAA84505.1 aluc|OJZ89233.1 anid|CBF73747.1 anig|EHA23330.1 aory|EIT77149.1 asyd|OJJ56622.1 ater|EAU30315.1 atub|OJI85560.1 aver|OJJ06104.1 awen|OJJ32795.1 azon|OJJ49038.1

Group3858: abra|OJJ75792.1 acar|OOG00086.1 acla|EAW14889.1 afis|EAW24411.1 afum|EAL86080.1 agla|OJJ79214.1 akaw|GAA84511.1 aluc|OJZ89240.1 anid|CBF73741.1 anig|EHA23327.1 aory|EIT77168.1 asyd|OJJ56625.1 ater|EAU30318.1 atub|OJI85558.1 aver|OJJ06101.1 awen|OJJ32799.1 azon|OJJ49033.1 afla|EED47762.1

Group3859: abra|OJJ75796.1 acar|OOG00085.1 acla|EAW14888.1 afis|EAW24410.1 afla|EED47761.1 afum|EAL86079.1 agla|OJJ79213.1 akaw|GAA84514.1 aluc|OJZ89243.1 anid|CBF73739.1 anig|EHA23322.1 aory|EIT77110.1 asyd|OJJ56626.1 ater|EAU30319.1 atub|OJI85552.1 aver|OJJ06100.1 awen|OJJ32800.1 azon|OJJ49032.1

Group3860: abra|OJJ75804.1 acar|OOG00071.1 acla|EAW14879.1 afis|EAW24396.1 afla|EED47814.1 afum|EAL86068.1 agla|OJJ78876.1 akaw|GAA84520.1 aluc|OJZ89252.1 anid|CBF73724.1 anig|EHA23315.1 aory|EIT77191.1 asyd|OJJ56638.1 ater|EAU30339.1 atub|OJI85546.1 aver|OJJ06088.1 awen|OJJ32809.1 azon|OJJ49030.1

Group3861: abra|OJJ75805.1 acar|OOG00070.1 acla|EAW14878.1 afis|EAW24395.1 afla|EED47815.1 afum|EAL86067.1 agla|OJJ78875.1 akaw|GAA84521.1 aluc|OJZ89253.1 anid|CBF73720.1 anig|EHA23314.1 aory|EIT77139.1 asyd|OJJ56639.1 ater|EAU30340.1 atub|OJI85545.1 aver|OJJ06087.1 awen|OJJ32810.1 azon|OJJ49031.1

Group3862: abra|OJJ75808.1 acar|OOG00068.1 acla|EAW14864.1 afis|EAW24392.1 afla|EED47818.1 afum|EAL86064.1 agla|OJJ78872.1 akaw|GAA84523.1 aluc|OJZ89256.1 anid|CBF73713.1 anig|EHA23312.1 aory|EIT77112.1 asyd|OJJ56642.1 ater|EAU30342.1 atub|OJI85543.1 aver|OJJ06084.1 awen|OJJ32812.1 azon|OJJ49020.1

Group3863: abra|OJJ75810.1 acar|OOG00067.1 acla|EAW14863.1 afis|EAW24391.1 afla|EED47819.1 afum|EAL86063.1 agla|OJJ78871.1 akaw|GAA84524.1 aluc|OJZ89257.1 anid|CBF73711.1 anig|EHA23311.1 aory|EIT77158.1 asyd|OJJ56643.1 ater|EAU30343.1 atub|OJI85542.1 aver|OJJ06083.1 awen|OJJ32813.1 azon|OJJ49019.1

Group3864: abra|OJJ75813.1 acar|OOG00062.1 acla|EAW14860.1 afis|EAW24388.1 afla|EED47821.1 afum|EAL86060.1 agla|OJJ83284.1 akaw|GAA84527.1 aluc|OJZ89260.1 anid|CBF73705.1 anig|EHA23308.1 aory|EIT77124.1 asyd|OJJ56646.1 ater|EAU30346.1 atub|OJI85539.1 aver|OJJ06080.1 awen|OJJ32817.1 azon|OJJ49015.1

Group3865: abra|OJJ75814.1 acar|OOG00061.1 acla|EAW14859.1 afis|EAW24387.1 afla|EED47822.1 afum|EAL86059.1 agla|OJJ83283.1 akaw|GAA84528.1 aluc|OJZ89261.1 anid|CBF73703.1 anig|EHA23307.1 aory|EIT77142.1 asyd|OJJ56647.1 ater|EAU30347.1 atub|OJI85538.1 aver|OJJ06079.1 awen|OJJ32818.1 azon|OJJ49014.1

Group3866: abra|OJJ75817.1 acar|OOG00058.1 acla|EAW14858.1 afis|EAW24385.1 afla|EED47824.1 afum|EAL86057.1 agla|OJJ83281.1 akaw|GAA84531.1 aluc|OJZ89264.1 anid|CBF73697.1 anig|EHA23304.1 aory|EIT77137.1 asyd|OJJ56650.1 ater|EAU30350.1 atub|OJI85535.1 aver|OJJ06075.1 awen|OJJ32825.1 azon|OJJ49011.1

Group3867: abra|OJJ75821.1 acar|OOG00055.1 acla|EAW14854.1 afis|EAW24381.1 afla|EED47829.1 afum|EAL86053.1 agla|OJJ83269.1 akaw|GAA84534.1 aluc|OJZ89267.1 anid|CBF73667.1 anig|EHA23301.1 aory|EIT77192.1 asyd|OJJ56666.1 ater|EAU30354.1 atub|OJI85532.1 aver|OJJ06057.1 awen|OJJ32831.1 azon|OJJ49005.1

Group3868: abra|OJJ75822.1 acar|OOG00054.1 acla|EAW14853.1 afis|EAW24380.1 afla|EED47830.1 afum|EAL86052.1 agla|OJJ83268.1 akaw|GAA84535.1 aluc|OJZ89268.1 anid|CBF73669.1 anig|EHA23300.1

aory|EIT77144.1 asyd|OJJ56665.1 ater|EAU30355.1 atub|OJI85531.1 aver|OJJ06058.1 awen|OJJ32832.1 azon|OJJ49004.1

Group3869: abra|OJJ75828.1 acar|OOG00052.1 acla|EAW14850.1 afis|EAW24377.1 afla|EED47834.1 afum|EAL86049.1 agla|OJJ83263.1 akaw|GAA84538.1 aluc|OJZ89271.1 anid|CBF73674.1 anig|EHA23298.1 aory|EIT77135.1 asyd|OJJ56662.1 ater|EAU30359.1 atub|OJI85528.1 aver|OJJ06062.1 awen|OJJ32835.1 azon|OJJ49000.1

Group3870: abra|OJJ75829.1 acar|OOG00051.1 acla|EAW14849.1 afis|EAW24376.1 afla|EED47835.1 afum|EAL86048.1 agla|OJJ83262.1 akaw|GAA84539.1 aluc|OJZ89272.1 anid|CBF73680.1 anig|EHA23297.1 aory|EIT77202.1 asyd|OJJ56659.1 ater|EAU30360.1 atub|OJI85527.1 aver|OJJ06066.1 awen|OJJ32836.1 azon|OJJ48998.1

Group3871: abra|OJJ75831.1 acar|OOG00049.1 acla|EAW14847.1 afis|EAW24374.1 afla|EED47837.1 afum|EAL86046.1 agla|OJJ83260.1 akaw|GAA84541.1 aluc|OJZ89274.1 anid|CBF73682.1 anig|EHA23295.1 aory|EIT77185.1 asyd|OJJ56657.1 ater|EAU30362.1 atub|OJI85525.1 aver|OJJ06068.1 awen|OJJ32838.1 azon|OJJ48996.1

Group3872: abra|OJJ75832.1 acar|OOG00048.1 acla|EAW14846.1 afis|EAW24373.1 afla|EED47838.1 afum|EAL86045.1 agla|OJJ83259.1 akaw|GAA84542.1 aluc|OJZ89275.1 anid|CBF73684.1 anig|EHA23294.1 aory|EIT77136.1 asyd|OJJ56656.1 ater|EAU30363.1 atub|OJI85524.1 aver|OJJ06069.1 awen|OJJ32839.1 azon|OJJ48995.1

Group3873: abra|OJJ75843.1 acar|OOG00045.1 acla|EAW14844.1 afis|EAW24371.1 afla|EED47846.1 afum|EAL86043.1 agla|OJJ83256.1 akaw|GAA84553.1 aluc|OJZ89285.1 anid|CBF73688.1 anig|EHA23281.1 aory|EIT77207.1 asyd|OJJ56654.1 ater|EAU30368.1 atub|OJI85514.1 aver|OJJ06071.1 awen|OJJ32844.1 azon|OJJ46816.1

Group3874: abra|OJJ75851.1 acar|OOG00042.1 acla|EAW14835.1 afis|EAW24364.1 afla|EED47849.1 afum|EBA27254.1 agla|OJJ83249.1 akaw|GAA84556.1 aluc|OJZ89288.1 anid|CBF73935.1 anig|EHA23273.1 aory|EIT77237.1 asyd|OJJ53672.1 ater|EAU30373.1 atub|OJI85511.1 aver|OJJ07779.1 awen|OJJ32869.1 azon|OJJ48991.1

Group3875: abra|OJJ75854.1 acar|OOG00041.1 acla|EAW14833.1 afis|EAW24362.1 afla|EED47851.1 afum|EAL86032.1 agla|OJJ83247.1 akaw|GAA84559.1 aluc|OJZ89291.1 anid|CBF73928.1 anig|EHA23271.1 aory|EIT77246.1 asyd|OJJ53677.1 ater|EAU30376.1 atub|OJI85508.1 aver|OJJ07793.1 awen|OJJ32865.1 azon|OJJ48989.1

Group3876: abra|OJJ75855.1 acar|OOG00040.1 acla|EAW14832.1 afis|EAW24361.1 afla|EED47852.1 afum|EAL86031.1 agla|OJJ83246.1 akaw|GAA84560.1 aluc|OJZ89293.1 anid|CBF73926.1 anig|EHA23270.1 aory|EIT77210.1 asyd|OJJ53678.1 ater|EAU30377.1 atub|OJI85507.1 aver|OJJ07794.1 awen|OJJ32864.1 azon|OJJ48988.1

Group3877: abra|OJJ75856.1 acar|OOG00038.1 acla|EAW14831.1 afis|EAW24360.1 afla|EED47853.1 afum|EAL86030.1 agla|OJJ83245.1 akaw|GAA84561.1 aluc|OJZ89294.1 anid|CBF73924.1 anig|EHA23269.1 aory|EIT77236.1 asyd|OJJ53679.1 ater|EAU30378.1 atub|OJI85506.1 aver|OJJ07795.1 awen|OJJ32863.1 azon|OJJ48987.1

Group3878: abra|OJJ75858.1 acar|OOG00037.1 acla|EAW14829.1 afis|EAW24358.1 afla|EED47856.1 afum|EAL86028.1 agla|OJJ83242.1 akaw|GAA84563.1 aluc|OJZ89296.1 anid|CBF73921.1 anig|EHA23267.1 aory|EIT77221.1 asyd|OJJ53681.1 ater|EAU30381.1 atub|OJI85503.1 aver|OJJ07797.1 awen|OJJ32861.1 azon|OJJ48985.1

Group3879: abra|OJJ75864.1 acar|OOG00032.1 acla|EAW14824.1 afis|EAW24353.1 afla|EED47910.1 afum|EAL86024.2 agla|OJJ83233.1 akaw|GAA84570.1 aluc|OJZ89306.1 anid|CBF73944.1 anig|EHA23260.1 aory|EIT83380.1 asyd|OJJ53698.1 ater|EAU30386.1 atub|OJI85493.1 aver|OJJ07816.1 awen|OJJ32872.1 azon|OJJ48973.1

Group3880: abra|OJJ75865.1 acar|OOG00029.1 acla|EAW09926.1 afis|EAW21174.1 afla|EED54761.1 afum|EAL92194.1 agla|OJJ80004.1 akaw|GAA84571.1 aluc|OJZ89307.1 anid|CBF83297.1 anig|EHA23259.1 aory|EIT79426.1 asyd|OJJ60558.1 ater|EAU35841.1 atub|OJI85491.1 aver|OJI99884.1 awen|OJJ36513.1 azon|OJJ44389.1

Group3881: abra|OJJ75867.1 acar|OOG00027.1 acla|EAW09928.1 afis|EAW21176.1 afla|EED54763.1 afum|EAL92196.1 agla|OJJ80001.1 akaw|GAA84573.1 aluc|OJZ89309.1 anid|CBF83306.1 anig|EHA23257.1 aory|EIT79399.1 asyd|OJJ60555.1 ater|EAU35843.1 atub|OJI85490.1 aver|OJI99881.1 awen|OJJ36515.1 azon|OJJ44391.1

Group3882: abra|OJJ75873.1 acar|OOG00022.1 acla|EAW09932.1 afis|EAW21179.1 afla|EED54769.1 afum|EAL92199.1 agla|OJJ79993.1 akaw|GAA84576.1 aluc|OJZ89317.1 anid|CBF83303.1 anig|EHA23254.1 aory|EIT79449.1 asyd|OJJ60552.1 ater|EAU35845.1 atub|OJI85480.1 aver|OJI99878.1 awen|OJJ36518.1 azon|OJJ44393.1



Group3883: abra|OJJ75875.1 acar|OOG00020.1 acla|EAW09935.1 afis|EAW21180.1 afla|EED54785.1 afum|EAL92201.1 agla|OJJ79997.1 akaw|GAA84577.1 aluc|OJZ89319.1 anid|CBF83301.1 anig|EHA23253.1 aory|EIT79362.1 asyd|OJJ60551.1 ater|EAU35846.1 atub|OJI85479.1 aver|OJI99877.1 awen|OJJ36519.1 azon|OJJ44395.1

Group3884: abra|OJJ75876.1 acar|OOG00017.1 acla|EAW09938.1 afis|EAW21183.1 afla|EED54776.1 afum|EAL92204.1 agla|OJJ79987.1 akaw|GAA84578.1 aluc|OJZ89320.1 anid|CBF83312.1 anig|EHA23252.1 aory|EIT79349.1 asyd|OJJ60548.1 ater|EAU35849.1 atub|OJI85478.1 aver|OJI99874.1 awen|OJJ36522.1 azon|OJJ44398.1

Group3885: abra|OJJ75879.1 acar|OOG00014.1 acla|EAW09940.1 afis|EAW21185.1 afla|EED54774.1 afum|EAL92207.1 agla|OJJ79982.1 akaw|GAA84582.1 aluc|OJZ89325.1 anid|CBF83315.1 anig|EHA23249.1 aory|EIT79429.1 asyd|OJJ60547.1 ater|EAU35850.1 atub|OJI85474.1 aver|OJI99873.1 awen|OJJ36526.1 azon|OJJ44399.1

Group3886: abra|OJJ75880.1 acar|OOG00013.1 acla|EAW09942.1 afis|EAW21187.1 afla|EED54773.1 afum|EAL92209.1 agla|OJJ79979.1 akaw|GAA84583.1 aluc|OJZ89326.1 anid|CBF83319.1 anig|EHA23248.1 aory|EIT79437.1 asyd|OJJ60546.1 ater|EAU35851.1 atub|OJI85473.1 aver|OJI99872.1 awen|OJJ36529.1 azon|OJJ44401.1

Group3887: abra|OJJ75884.1 acar|OOF90248.1 acla|EAW09944.1 afis|EAW21222.1 afla|EED54784.1 afum|EBA27454.1 agla|OJJ78510.1 akaw|GAA84592.1 aluc|OJZ89337.1 anid|CBF83295.1 anig|EHA23244.1 aory|EIT79434.1 asyd|OJJ60560.1 ater|EAU35852.1 atub|OJI85462.1 aver|OJI99886.1 awen|OJJ36530.1 azon|OJJ44404.1

Group3888: abra|OJJ75886.1 acar|OOF90247.1 acla|EAW09945.1 afis|EAW21223.1 afla|EED54783.1 afum|EAL92236.1 agla|OJJ78507.1 akaw|GAA84593.1 aluc|OJZ89338.1 anid|CBF83293.1 anig|EHA23243.1 aory|EIT79443.1 asyd|OJJ60561.1 ater|EAU35853.1 atub|OJI85461.1 aver|OJI99887.1 awen|OJJ36531.1 azon|OJJ44405.1

Group3889: abra|OJJ75888.1 acar|OOF90245.1 acla|EAW09946.1 afis|EAW21224.1 afla|EED54782.1 afum|EAL92237.1 agla|OJJ78506.1 akaw|GAA84594.1 aluc|OJZ89340.1 anid|CBF83291.1 anig|EHA23242.1 aory|EIT79409.1 asyd|OJJ60562.1 ater|EAU35854.1 atub|OJI85459.1 aver|OJI99888.1 awen|OJJ36532.1 azon|OJJ44406.1

Group3890: abra|OJJ75889.1 acar|OOF90244.1 acla|EAW09948.1 afis|EAW21226.1 afla|EED54779.1 afum|EBA27456.1 agla|OJJ78504.1 akaw|GAA84596.1 aluc|OJZ89341.1 anid|CBF83289.1 anig|EHA23241.1 aory|EIT79431.1 asyd|OJJ60563.1 ater|EAU35857.1 atub|OJI85458.1 aver|OJI99890.1 awen|OJJ36534.1 azon|OJJ44408.1

Group3891: abra|OJJ75890.1 acar|OOG00012.1 acla|EAW09898.1 afis|EAW21228.1 afla|EED54786.1 afum|EAL92240.1 agla|OJJ78502.1 akaw|GAA84597.1 aluc|OJZ89342.1 anid|CBF83280.1 anig|EHA23240.1 aory|EIT79332.1 asyd|OJJ60568.1 ater|EAU35859.1 atub|OJI85457.1 aver|OJI99893.1 awen|OJJ36537.1 azon|OJJ44351.1

Group3892: abra|OJJ75891.1 acar|OOG00011.1 acla|EAW09897.1 afis|EAW21229.1 afla|EED54787.1 afum|EAL92241.2 agla|OJJ78501.1 akaw|GAA84598.1 aluc|OJZ89343.1 anid|CBF83278.1 anig|EHA23239.1 aory|EIT79422.1 asyd|OJJ60569.1 ater|EAU35860.1 atub|OJI85456.1 aver|OJI99894.1 awen|OJJ36538.1 azon|OJJ44349.1

Group3893: abra|OJJ75892.1 acar|OOG00010.1 acla|EAW09896.1 afis|EAW21230.1 afla|EED54788.1 afum|EAL92242.1 agla|OJJ78492.1 akaw|GAA84599.1 aluc|OJZ89344.1 anid|CBF83277.1 anig|EHA23238.1 aory|EIT79453.1 asyd|OJJ60570.1 ater|EAU35863.1 atub|OJI85455.1 aver|OJI99895.1 awen|OJJ36539.1 azon|OJJ44348.1

Group3894: abra|OJJ75897.1 acar|OOG00007.1 acla|EAW09894.1 afis|EAW21232.1 afla|EED54793.1 afum|EAL92244.1 agla|OJJ78494.1 akaw|GAA84603.1 aluc|OJZ89347.1 anid|CBF83273.1 anig|EHA23234.1 aory|EIT79342.1 asyd|OJJ60573.1 ater|EAU35865.1 atub|OJI85451.1 aver|OJI99898.1 awen|OJJ36542.1 azon|OJJ44346.1

Group3895: abra|OJJ75898.1 acar|OOG00006.1 acla|EAW09893.1 afis|EAW21233.1 afla|EED54794.1 afum|EAL92245.1 agla|OJJ78495.1 akaw|GAA84604.1 aluc|OJZ89348.1 anid|CBF83271.1 anig|EHA23233.1 aory|EIT79361.1 asyd|OJJ60574.1 ater|EAU35866.1 atub|OJI85450.1 aver|OJI99899.1 awen|OJJ36543.1 azon|OJJ44345.1

Group3896: abra|OJJ75899.1 acar|OOG00005.1 acla|EAW09892.1 afis|EAW21234.1 afla|EED54795.1 afum|EAL92246.1 agla|OJJ78496.1 akaw|GAA84605.1 aluc|OJZ89349.1 anid|CBF83270.1 anig|EHA23232.1 aory|EIT79442.1 asyd|OJJ60575.1 ater|EAU35867.1 atub|OJI85449.1 aver|OJI99900.1 awen|OJJ36544.1 azon|OJJ44344.1

Group3897: abra|OJJ75902.1 acar|OOG00002.1 acla|EAW09888.1 afis|EAW21238.1 afla|EED54798.1 afum|EAL92250.1 agla|OJJ78500.1 akaw|GAA84608.1 aluc|OJZ89352.1 anid|CBF83266.1 anig|EHA23229.1

aory|EIT79394.1 asyd|OJJ60579.1 ater|EAU35879.1 atub|OJI85446.1 aver|OJI99904.1 awen|OJJ36549.1 azon|OJJ44340.1

Group3898: abra|OJJ75903.1 acar|OOG00001.1 acla|EAW09887.1 afis|EAW21239.1 afla|EED54799.1 afum|EAL92252.1 agla|OJJ78491.1 akaw|GAA84609.1 aluc|OJZ89353.1 anid|CBF83264.1 anig|EHA23228.1 aory|EIT79376.1 asyd|OJJ60580.1 ater|EAU35880.1 atub|OJI85445.1 aver|OJI99905.1 awen|OJJ36550.1 azon|OJJ44339.1

Group3899: abra|OJJ75904.1 acar|OOF99999.1 acla|EAW09886.1 afis|EAW21240.1 afla|EED54800.1 afum|EAL92253.1 agla|OJJ78490.1 akaw|GAA84610.1 aluc|OJZ89354.1 anid|CBF83262.1 anig|EHA23227.1 aory|EIT79341.1 asyd|OJJ60581.1 ater|EAU35881.1 atub|OJI85444.1 aver|OJI99906.1 awen|OJJ36551.1 azon|OJJ44338.1

Group3900: abra|OJJ75905.1 acar|OOF99998.1 acla|EAW09885.1 afis|EAW21241.1 afla|EED54802.1 afum|EAL92254.1 agla|OJJ78489.1 akaw|GAA84611.1 aluc|OJZ89355.1 anid|CBF83259.1 anig|EHA23226.1 aory|EIT79395.1 asyd|OJJ60584.1 ater|EAU35882.1 atub|OJI85443.1 aver|OJI99907.1 awen|OJJ36552.1 azon|OJJ44337.1

Group3901: abra|OJJ75906.1 acar|OOF99997.1 acla|EAW09883.1 afis|EAW21243.1 afla|EED54803.1 afum|EAL92256.1 agla|OJJ78487.1 akaw|GAA84612.1 aluc|OJZ89356.1 anid|CBF83255.1 anig|EHA23225.1 aory|EIT79348.1 asyd|OJJ60587.1 ater|EAU35883.1 atub|OJI85442.1 aver|OJI99910.1 awen|OJJ36554.1 azon|OJJ44335.1

Group3902: abra|OJJ75910.1 acar|OOF99993.1 acla|EAW09879.1 afis|EAW21247.1 afla|EED54807.1 afum|EAL92260.1 agla|OJJ87509.1 akaw|GAA84616.1 aluc|OJZ89360.1 anid|CBF83240.1 anig|EHA23221.1 aory|EIT79440.1 asyd|OJJ60598.1 ater|EAU35887.1 atub|OJI85438.1 aver|OJI99921.1 awen|OJJ36560.1 azon|OJJ44331.1

Group3903: abra|OJJ75911.1 acar|OOF99992.1 acla|EAW09878.1 afis|EAW21248.1 afla|EED54808.1 afum|EAL92261.1 agla|OJJ87508.1 akaw|GAA84617.1 aluc|OJZ89361.1 anid|CBF83242.1 anig|EHA23220.1 aory|EIT79438.1 asyd|OJJ60597.1 ater|EAU35888.1 atub|OJI85437.1 aver|OJI99920.1 awen|OJJ36561.1 azon|OJJ44327.1

Group3904: abra|OJJ75914.1 acar|OOF99989.1 acla|EAW09876.1 afis|EAW21250.1 afla|EED54810.1 afum|EAL92263.1 agla|OJJ87501.1 akaw|GAA84619.1 aluc|OJZ89363.1 anid|CBF83245.1 anig|EHA23219.1 aory|EIT79398.1 asyd|OJJ60594.1 ater|EAU35890.1 atub|OJI85435.1 aver|OJI99918.1 awen|OJJ36564.1 azon|OJJ44324.1

Group3905: abra|OJJ75916.1 acar|OOF90029.1 acla|EAW09874.1 afis|EAW21252.1 afla|EED54812.1 afum|EAL92266.1 agla|OJJ87495.1 akaw|GAA84621.1 aluc|OJZ89365.1 anid|CBF83247.1 anig|EHA23217.1 aory|EIT79364.1 asyd|OJJ60592.1 ater|EAU35892.1 atub|OJI85433.1 aver|OJI99916.1 awen|OJJ36567.1 azon|OJJ44321.1

Group3906: abra|OJJ75919.1 acar|OOF90028.1 acla|EAW09873.1 afis|EAW21253.1 afla|EED54815.1 afum|EAL92268.1 agla|OJJ87497.1 akaw|GAA84622.1 aluc|OJZ89368.1 anid|CBF83249.1 anig|EHA23215.1 aory|EIT79356.1 asyd|OJJ60590.1 ater|EAU35893.1 atub|OJI85430.1 aver|OJI99913.1 awen|OJJ36568.1 azon|OJJ44319.1

Group3907: abra|OJJ75920.1 acar|OOF99987.1 acla|EAW09872.1 afis|EAW21254.1 afla|EED54816.1 afum|EAL92269.1 agla|OJJ87498.1 akaw|GAA84623.1 aluc|OJZ89369.1 anid|CBF83251.1 anig|EHA23214.1 aory|EIT79384.1 asyd|OJJ60589.1 ater|EAU35894.1 atub|OJI85429.1 aver|OJI99912.1 awen|OJJ36569.1 azon|OJJ44318.1

Group3908: abra|OJJ75922.1 acar|OOF99986.1 acla|EAW09866.1 afis|EAW21259.1 afla|EED54818.1 afum|EAL92274.1 agla|OJJ87491.1 akaw|GAA84626.1 aluc|OJZ89372.1 anid|CBF83325.1 anig|EHA23212.1 aory|EIT79360.1 asyd|OJJ60601.1 ater|EAU35896.1 atub|OJI85426.1 aver|OJI99924.1 awen|OJJ36574.1 azon|OJJ44315.1

Group3909: abra|OJJ75924.1 acar|OOF99984.1 acla|EAW09865.1 afis|EAW21260.1 afla|EED54819.1 afum|EAL92275.1 agla|OJJ87490.1 akaw|GAA84627.1 aluc|OJZ89373.1 anid|CBF83329.1 anig|EHA23210.1 aory|EIT79435.1 asyd|OJJ60605.1 ater|EAU35897.1 atub|OJI85425.1 aver|OJI99929.1 awen|OJJ36575.1 azon|OJJ44314.1

Group3910: abra|OJJ75931.1 acar|OOF99979.1 acla|EAW09862.1 afis|EAW21264.1 afla|EED54823.1 afum|EAL92279.1 agla|OJJ87471.1 akaw|GAA84632.1 aluc|OJZ89378.1 anid|CBF83340.1 anig|EHA23205.1 aory|EIT79396.1 asyd|OJJ60609.1 ater|EAU35901.1 atub|OJI85420.1 aver|OJI99933.1 awen|OJJ36581.1 azon|OJJ44309.1

Group3911: abra|OJJ75932.1 acar|OOF99978.1 acla|EAW09861.1 afis|EAW21265.1 afla|EED54824.1 afum|EAL92280.1 agla|OJJ87472.1 akaw|GAA84633.1 aluc|OJZ89379.1 anid|CBF83342.1 anig|EHA23204.1 aory|EIT79447.1 asyd|OJJ60610.1 ater|EAU35902.1 atub|OJI85419.1 aver|OJI99934.1 awen|OJJ36582.1 azon|OJJ44308.1

Group3912: abra|OJJ75934.1 acar|OOF99976.1 acla|EAW09859.1 afis|EAW21267.1 afla|EED54826.1 afum|EAL92282.1 agla|OJJ87474.1 akaw|GAA84635.1 aluc|OJZ89381.1 anid|CBF83345.1 anig|EHA23202.1 aory|EIT79337.1 asyd|OJJ60612.1 ater|EAU35903.1 atub|OJI85417.1 aver|OJI99936.1 awen|OJJ36584.1 azon|OJJ47371.1

Group3913: abra|OJJ75935.1 acar|OOF99975.1 acla|EAW09858.1 afis|EAW21268.1 afla|EED54827.1 afum|EAL92283.1 agla|OJJ87475.1 akaw|GAA84636.1 aluc|OJZ89382.1 anid|CBF83347.1 anig|EHA23201.1 aory|EIT79343.1 asyd|OJJ60613.1 ater|EAU35904.1 atub|OJI85416.1 aver|OJI99937.1 awen|OJJ39424.1 azon|OJJ44306.1

Group3914: abra|OJJ75936.1 acar|OOF99974.1 acla|EAW09857.1 afis|EAW21269.1 afla|EED54829.1 afum|EBA27457.1 agla|OJJ87476.1 akaw|GAA84637.1 aluc|OJZ89383.1 anid|CBF83349.1 anig|EHA23200.1 aory|EIT79419.1 asyd|OJJ60614.1 ater|EAU35905.1 atub|OJI85415.1 aver|OJI99938.1 awen|OJJ39423.1 azon|OJJ44305.1

Group3915: abra|OJJ75942.1 acar|OOF99968.1 acla|EAW09851.1 afis|EAW21284.1 afla|EED54835.1 afum|EAL92301.1 agla|OJJ87479.1 akaw|GAA84644.1 aluc|OJZ89389.1 anid|CBF83363.1 anig|EHA23195.1 aory|EIT79451.1 asyd|OJJ60620.1 ater|EAU35913.1 atub|OJI85408.1 aver|OJI99944.1 awen|OJJ39415.1 azon|OJJ44298.1

Group3916: abra|OJJ75944.1 acar|OOF99967.1 acla|EAW09849.1 afis|EAW21286.1 afla|EED54837.1 afum|EAL92303.1 agla|OJJ87468.1 akaw|GAA84646.1 aluc|OJZ89391.1 anid|CBF83367.1 anig|EHA23193.1 aory|EIT79347.1 asyd|OJJ60622.1 ater|EAU35918.1 atub|OJI85406.1 aver|OJI99946.1 awen|OJJ39413.1 azon|OJJ44296.1

Group3917: abra|OJJ75949.1 acar|OOF99964.1 acla|EAW09847.1 afis|EAW21288.1 afla|EED54839.1 afum|EAL92305.1 agla|OJJ87466.1 akaw|GAA84652.1 aluc|OJZ89398.1 anid|CBF83371.1 anig|EHA23189.1 aory|EIT79388.1 asyd|OJJ60624.1 ater|EAU35920.1 atub|OJI85399.1 aver|OJI99948.1 awen|OJJ39411.1 azon|OJJ44294.1

Group3918: abra|OJJ75950.1 acar|OOF99962.1 acla|EAW09846.1 afis|EAW21289.1 afla|EED54840.1 afum|EAL92306.1 agla|OJJ87464.1 akaw|GAA84653.1 aluc|OJZ89399.1 anid|CBF83372.1 anig|EHA23188.1 aory|EIT79351.1 asyd|OJJ60625.1 ater|EAU35921.1 atub|OJI85398.1 aver|OJI99949.1 awen|OJJ39410.1 azon|OJJ44293.1

Group3919: abra|OJJ75951.1 acar|OOF99961.1 acla|EAW09845.1 afis|EAW21290.1 afla|EED54842.1 afum|EAL92307.1 agla|OJJ87463.1 akaw|GAA84654.1 aluc|OJZ89400.1 anid|CBF85245.1 anig|EHA23187.1 aory|EIT79441.1 asyd|OJJ62975.1 ater|EAU35922.1 atub|OJI85397.1 aver|OJI97994.1 awen|OJJ35914.1 azon|OJJ44292.1

Group3920: abra|OJJ75952.1 acar|OOF99960.1 acla|EAW09844.1 afis|EAW21291.1 afla|EED54843.1 afum|EAL92308.1 agla|OJJ87462.1 akaw|GAA84655.1 aluc|OJZ89401.1 anid|CBF83374.1 anig|EHA23186.1 aory|EIT79331.1 asyd|OJJ60626.1 ater|EAU35923.1 atub|OJI85396.1 aver|OJI99950.1 awen|OJJ39408.1 azon|OJJ44291.1

Group3921: abra|OJJ75958.1 acar|OOF99956.1 acla|EAW09840.1 afis|EAW21295.1 afla|EED54846.1 afum|EAL92312.1 agla|OJJ87444.1 akaw|GAA84659.1 aluc|OJZ89406.1 anid|CBF83381.1 anig|EHA23181.1 aory|EIT79417.1 asyd|OJJ60629.1 ater|EAU35928.1 atub|OJI85391.1 aver|OJI99953.1 awen|OJJ39404.1 azon|OJJ44288.1

Group3922: abra|OJJ75959.1 acar|OOF99955.1 acla|EAW09839.1 afis|EAW21296.1 afla|EED54847.1 afum|EAL92313.1 agla|OJJ87443.1 akaw|GAA84660.1 aluc|OJZ89407.1 anid|CBF83383.1 anig|EHA23180.1 aory|EIT79405.1 asyd|OJJ60630.1 ater|EAU35929.1 atub|OJI85388.1 aver|OJI99954.1 awen|OJJ39403.1 azon|OJJ44287.1

Group3923: abra|OJJ75963.1 acar|OOF90049.1 acla|EAW09834.1 afis|EAW21299.1 afla|EED54851.1 afum|EAL92316.1 agla|OJJ87439.1 akaw|GAA84663.1 aluc|OJZ89411.1 anid|CBF83388.1 anig|EHA23176.1 aory|EIT79436.1 asyd|OJJ60634.1 ater|EAU35932.1 atub|OJI85385.1 aver|OJI99957.1 awen|OJJ39399.1 azon|OJJ44283.1

Group3924: abra|OJJ75965.1 acar|OOF90050.1 acla|EAW09833.1 afis|EAW21300.1 afla|EED54852.1 afum|EAL92317.1 agla|OJJ87438.1 akaw|GAA84664.1 aluc|OJZ89412.1 anid|CBF83392.1 anig|EHA23175.1 aory|EIT79390.1 asyd|OJJ60635.1 ater|EAU35933.1 atub|OJI85384.1 aver|OJI99958.1 awen|OJJ39398.1 azon|OJJ44282.1

Group3925: abra|OJJ75966.1 acar|OOF90052.1 acla|EAW09832.1 afis|EAW21301.1 afla|EED57261.1 afum|EAL92318.1 agla|OJJ87436.1 akaw|GAA84665.1 aluc|OJZ89413.1 anid|CBF83394.1 anig|EHA23174.1 aory|EIT73984.1 asyd|OJJ60636.1 ater|EAU35934.1 atub|OJI85382.1 aver|OJI99959.1 awen|OJJ39397.1 azon|OJJ44281.1

Group3926: abra|OJJ75973.1 acar|OOF99946.1 acla|EAW09823.1 afis|EAW21310.1 afla|EED57266.1 afum|EAL92326.1 agla|OJJ87432.1 akaw|GAA88983.1 aluc|OJZ89420.1 anid|CBF83404.1 anig|EHA23167.1

aory|EIT74110.1 asyd|OJJ60640.1 ater|EAU35940.1 atub|OJI85373.1 aver|OJI99961.1 awen|OJJ39390.1 azon|OJJ44278.1

Group3927: abra|OJJ75977.1 acar|OOF99943.1 acla|EAW09821.1 afis|EAW21313.1 afla|EED57270.1 afum|EAL92330.1 agla|OJJ87429.1 akaw|GAA88980.1 aluc|OJZ89423.1 anid|CBF83407.1 anig|EHA23164.1 aory|EIT74037.1 asyd|OJJ60647.1 ater|EAU35942.1 atub|OJI85370.1 aver|OJI99965.1 awen|OJJ39386.1 azon|OJJ44275.1

Group3928: abra|OJJ75978.1 acar|OOF99941.1 acla|EAW09820.1 afis|EAW21314.1 afla|EED57271.1 afum|EAL92331.1 agla|OJJ87426.1 akaw|GAA88979.1 aluc|OJZ89424.1 anid|CBF83408.1 anig|EHA23163.1 aory|EIT74076.1 asyd|OJJ60648.1 ater|EAU35943.1 atub|OJI85369.1 aver|OJI99968.1 awen|OJJ39383.1 azon|OJJ44273.1

Group3929: abra|OJJ75980.1 acar|OOF99939.1 acla|EAW09819.1 afis|EAW21315.1 afla|EED57273.1 afum|EAL92332.1 agla|OJJ87424.1 akaw|GAA88977.1 aluc|OJZ89426.1 anid|CBF83412.1 anig|EHA23160.1 aory|EIT74008.1 asyd|OJJ60650.1 ater|EAU35944.1 atub|OJI85367.1 aver|OJI99970.1 awen|OJJ39381.1 azon|OJJ44271.1

Group3930: abra|OJJ75982.1 acar|OOF99937.1 acla|EAW09817.1 afis|EAW21317.1 afla|EED57275.1 afum|EAL92334.1 agla|OJJ87422.1 akaw|GAA88975.1 aluc|OJZ89428.1 anid|CBF83416.1 anig|EHA23159.1 aory|EIT74079.1 asyd|OJJ60652.1 ater|EAU35945.1 atub|OJI85365.1 aver|OJI99972.1 awen|OJJ39379.1 azon|OJJ44269.1

Group3931: abra|OJJ75983.1 acar|OOF99936.1 acla|EAW09816.1 afis|EAW21318.1 afla|EED57276.1 afum|EAL92335.1 agla|OJJ87421.1 akaw|GAA88974.1 aluc|OJZ89429.1 anid|CBF83417.1 anig|EHA23158.1 aory|EIT74114.1 asyd|OJJ60653.1 ater|EAU35946.1 atub|OJI85364.1 aver|OJI99973.1 awen|OJJ39378.1 azon|OJJ44268.1

Group3932: abra|OJJ75984.1 acar|OOF99935.1 acla|EAW09815.1 afis|EAW21319.1 afla|EED57277.1 afum|EAL92336.1 agla|OJJ87420.1 akaw|GAA88973.1 aluc|OJZ89430.1 anid|CBF83419.1 anig|EHA23157.1 aory|EIT74055.1 asyd|OJJ60654.1 ater|EAU35947.1 atub|OJI85363.1 aver|OJI99974.1 awen|OJJ39377.1 azon|OJJ44267.1

Group3933: abra|OJJ75987.1 acar|OOF99934.1 acla|EAW09813.1 afis|EAW21321.1 afla|EED57279.1 afum|EAL92338.1 agla|OJJ87416.1 akaw|GAA88971.1 aluc|OJZ89432.1 anid|CBF83421.1 anig|EHA23155.1 aory|EIT74031.1 asyd|OJJ60655.1 ater|EAU35948.1 atub|OJI85361.1 aver|OJI99976.1 awen|OJJ39375.1 azon|OJJ44265.1

Group3934: abra|OJJ75988.1 acar|OOF99933.1 acla|EAW09812.1 afis|EAW21323.1 afla|EED57280.1 afum|EAL92340.1 agla|OJJ87415.1 akaw|GAA88970.1 aluc|OJZ89433.1 anid|CBF83423.1 anig|EHA23154.1 aory|EIT74009.1 asyd|OJJ60656.1 ater|EAU35949.1 atub|OJI85360.1 aver|OJI99977.1 awen|OJJ39374.1 azon|OJJ44264.1

Group3935: abra|OJJ75995.1 acar|OOF99930.1 acla|EAW09810.1 afis|EAW21325.1 afla|EED57283.1 afum|EAL92343.1 agla|OJJ87413.1 akaw|GAA88964.1 aluc|OJZ89441.1 anid|CBF83426.1 anig|EHA23145.1 aory|EIT74153.1 asyd|OJJ60658.1 ater|EAU35951.1 atub|OJI85352.1 aver|OJI99981.1 awen|OJJ39372.1 azon|OJJ51712.1

Group3936: abra|OJJ76003.1 acar|OOF99921.1 acla|EAW09802.1 afis|EAW21334.1 afla|EED57292.1 afum|EAL92352.1 agla|OJJ87399.1 akaw|GAA88957.1 aluc|OJZ89448.1 anid|CBF76279.1 anig|EHA23138.1 aory|EIT74027.1 asyd|OJJ60988.1 ater|EAU35959.1 atub|OJI85345.1 aver|OJJ00308.1 awen|OJJ39364.1 azon|OJJ51703.1

Group3937: abra|OJJ76004.1 acar|OOF99922.1 acla|EAW09801.1 afis|EAW21335.1 afla|EED57293.1 afum|EAL92353.1 agla|OJJ87398.1 akaw|GAA88956.1 aluc|OJZ89449.1 anid|CBF76277.1 anig|EHA23137.1 aory|EIT73971.1 asyd|OJJ60987.1 ater|EAU35960.1 atub|OJI85344.1 aver|OJJ00307.1 awen|OJJ39363.1 azon|OJJ51702.1

Group3938: abra|OJJ76005.1 acar|OOF99920.1 acla|EAW09800.1 afis|EAW21336.1 afla|EED57294.1 afum|EAL92354.1 agla|OJJ82541.1 akaw|GAA88955.1 aluc|OJZ89451.1 anid|CBF83881.1 anig|EHA23136.1 aory|EIT74083.1 asyd|OJJ60940.1 ater|EAU35961.1 atub|OJI85343.1 aver|OJJ00266.1 awen|OJJ39362.1 azon|OJJ51701.1

Group3939: abra|OJJ76007.1 acar|OOF99919.1 acla|EAW09798.1 afis|EAW21338.1 afla|EED57296.1 afum|EAL92356.1 agla|OJJ87396.1 akaw|GAA88953.1 aluc|OJZ89453.1 anid|CBF83884.1 anig|EHA23134.1 aory|EIT74155.1 asyd|OJJ60942.1 ater|EAU35963.1 atub|OJI85341.1 aver|OJJ00268.1 awen|OJJ39360.1 azon|OJJ51699.1

Group3940: abra|OJJ76008.1 acar|OOF99917.1 acla|EAW09797.1 afis|EAW21339.1 afla|EED55754.1 afum|EBA27459.1 agla|OJJ87395.1 akaw|GAA88952.1 aluc|OJZ89454.1 anid|CBF83886.1 anig|EHA23133.1 aory|EIT76828.1 asyd|OJJ60943.1 ater|EAU35964.1 atub|OJI85340.1 aver|OJJ00269.1 awen|OJJ39359.1 azon|OJJ51698.1

Group3941: abra|OJJ76010.1 acar|OOF99914.1 acla|EAW09795.1 afis|EAW21341.1 afla|EED55756.1  
afum|EAL92358.1 agla|OJJ87391.1 akaw|GAA88950.1 aluc|OJZ89456.1 anid|CBF76183.1 anig|EHA23131.1  
aory|EIT76602.1 asyd|OJJ60962.1 ater|EAU35965.1 atub|OJI85338.1 aver|OJJ00287.1 awen|OJJ39356.1  
azon|OJJ51697.1

Group3942: abra|OJJ76023.1 acar|OOF99901.1 acla|EAW09785.1 afis|EAW21353.1 afla|EED55768.1  
afum|EAL92368.1 agla|OJJ87381.1 akaw|GAA88934.1 aluc|OJZ89473.1 anid|CBF76255.1 anig|EHA23118.1  
aory|EIT76752.1 asyd|OJJ60965.1 ater|EAU35974.1 atub|OJI85325.1 aver|OJJ00290.1 awen|OJJ39347.1  
azon|OJJ51691.1

Group3943: abra|OJJ76025.1 acar|OOF99902.1 acla|EAW09784.1 afis|EAW21354.1 afla|EED55769.1  
afum|EAL92369.1 agla|OJJ87375.1 akaw|GAA88933.1 aluc|OJZ89475.1 anid|CBF76253.1 anig|EHA23117.1  
aory|EIT76709.1 asyd|OJJ60966.1 ater|EAU35204.1 atub|OJI85324.1 aver|OJJ00291.1 awen|OJJ39346.1  
azon|OJJ51690.1

Group3944: abra|OJJ76035.1 acar|OOF99893.1 acla|EAW09768.1 afis|EAW21370.1 afla|EED55788.1  
afum|EAL92387.1 agla|OJJ85492.1 akaw|GAA88929.1 aluc|OJZ89490.1 anid|CBF83869.1 anig|EHA23108.1  
aory|EIT76876.1 asyd|OJJ60933.1 ater|EAU35186.1 atub|OJI85313.1 aver|OJJ00259.1 awen|OJJ39327.1  
azon|OJJ51672.1

Group3945: abra|OJJ76037.1 acar|OOF99892.1 acla|EAW09769.1 afis|EAW21369.1 afla|EED55786.1  
afum|EAL92386.1 agla|OJJ85493.1 akaw|GAA88928.1 aluc|OJZ89492.1 anid|CBF83867.1 anig|EHA23107.1  
aory|EIT76715.1 asyd|OJJ60932.1 ater|EAU35187.1 atub|OJI85311.1 aver|OJJ00258.1 awen|OJJ39328.1  
azon|OJJ51673.1

Group3946: abra|OJJ76039.1 acar|OOF99890.1 acla|EAW09770.1 afis|EAW21368.1 afla|EED55782.1  
afum|EAL92385.2 agla|OJJ85494.1 akaw|GAA88926.1 aluc|OJZ89495.1 anid|CBF83874.1 anig|EHA23105.1  
aory|EIT76864.1 asyd|OJJ60937.1 ater|EAU35189.1 atub|OJI85308.1 aver|OJJ00263.1 awen|OJJ39329.1  
azon|OJJ51674.1

Group3947: abra|OJJ76040.1 acar|OOF99889.1 acla|EAW09771.1 afis|EAW21367.1 afla|EED55781.1  
afum|EAL92384.1 agla|OJJ85495.1 akaw|GAA88925.1 aluc|OJZ89496.1 anid|CBF83872.1 anig|EHA23104.1  
aory|EIT76541.1 asyd|OJJ60936.1 ater|EAU35190.1 atub|OJI85307.1 aver|OJJ00262.1 awen|OJJ39330.1  
azon|OJJ51675.1

Group3948: abra|OJJ76044.1 acar|OOF99886.1 acla|EAW09774.1 afis|EAW21364.1 afla|EED55778.1  
afum|EAL92380.1 agla|OJJ85485.1 akaw|GAA88921.1 aluc|OJZ89500.1 anid|CBF83875.1 anig|EHA23101.1  
aory|EIT76770.1 asyd|OJJ60938.1 ater|EAU35196.1 atub|OJI85303.1 aver|OJJ00264.1 awen|OJJ39334.1  
azon|OJJ51679.1

Group3949: abra|OJJ76046.1 acar|OOF99884.1 acla|EAW09777.1 afis|EAW21361.1 afla|EED55775.1  
afum|EAL92377.1 agla|OJJ85480.1 akaw|GAA88919.1 aluc|OJZ89502.1 anid|CBF76267.1 anig|EHA23098.1  
aory|EIT76605.1 asyd|OJJ60973.1 ater|EAU35199.1 atub|OJI85301.1 aver|OJJ00298.1 awen|OJJ39337.1  
azon|OJJ51682.1

Group3950: abra|OJJ76048.1 acar|OOF99882.1 acla|EAW09779.1 afis|EAW21359.1 afla|EED55774.1  
afum|EAL92375.1 agla|OJJ85478.1 akaw|GAA88917.1 aluc|OJZ89504.1 anid|CBF76265.1 anig|EHA23096.1  
aory|EIT76598.1 asyd|OJJ60972.1 ater|EAU35200.1 atub|OJI85299.1 aver|OJJ00297.1 awen|OJJ39339.1  
azon|OJJ51684.1

Group3951: abra|OJJ76056.1 acar|OOF99874.1 acla|EAW09762.1 afis|EAW21375.1 afla|EED55793.1  
afum|EAL92392.1 agla|OJJ85508.1 akaw|GAA88910.1 aluc|OJZ89511.1 anid|CBF83860.1 anig|EHA23088.1  
aory|EIT76584.1 asyd|OJJ60926.1 ater|EAU35182.1 atub|OJI85292.1 aver|OJJ00252.1 awen|OJJ39322.1  
azon|OJJ51667.1

Group3952: abra|OJJ76057.1 acar|OOF99873.1 acla|EAW09763.1 afis|EAW21374.1 afla|EED55792.1  
afum|EAL92391.1 agla|OJJ85500.1 akaw|GAA88909.1 aluc|OJZ89512.1 anid|CBF83862.1 anig|EHA23087.1  
aory|EIT76633.1 asyd|OJJ60927.1 ater|EAU35183.1 atub|OJI85291.1 aver|OJJ00253.1 awen|OJJ39323.1  
azon|OJJ51668.1

Group3953: abra|OJJ76058.1 acar|OOF99872.1 acla|EAW09760.1 afis|EAW21381.1 afla|EED55795.1  
afum|EAL92396.1 agla|OJJ85505.1 akaw|GAA88908.1 aluc|OJZ89513.1 anid|CBF83856.1 anig|EHA23086.1  
aory|EIT76717.1 asyd|OJJ60924.1 ater|EAU35180.1 atub|OJI85290.1 aver|OJJ00250.1 awen|OJJ39320.1  
azon|OJJ51665.1

Group3954: abra|OJJ76059.1 acar|OOF99871.1 acla|EAW09759.1 afis|EAW21382.1 afla|EED55796.1  
afum|EAL92397.1 agla|OJJ85504.1 akaw|GAA88907.1 aluc|OJZ89514.1 anid|CBF83854.1 anig|EHA23085.1  
aory|EIT76703.1 asyd|OJJ60923.1 ater|EAU35179.1 atub|OJI85289.1 aver|OJJ00249.1 awen|OJJ39319.1  
azon|OJJ51664.1

Group3955: abra|OJJ76061.1 acar|OOF99870.1 acla|EAW09757.1 afis|EAW21384.1 afla|EED55798.1  
afum|EAL92399.1 agla|OJJ85509.1 akaw|GAA88905.1 aluc|OJZ89516.1 anid|CBF83847.1 anig|EHA23083.1

aory|EIT76813.1 asyd|OJJ60919.1 ater|EAU35178.1 atub|OJI85287.1 aver|OJJ00245.1 awen|OJJ39317.1 azon|OJJ51530.1

Group3956: abra|OJJ76062.1 acar|OOF99869.1 acla|EAW09756.1 afis|EAW21385.1 afla|EED55799.1 afum|EAL92400.1 agla|OJJ85510.1 akaw|GAA88904.1 aluc|OJZ89517.1 anid|CBF83845.1 anig|EHA23082.1 aory|EIT76797.1 asyd|OJJ60918.1 ater|EAU35171.1 atub|OJI85286.1 aver|OJJ00244.1 awen|OJJ39316.1 azon|OJJ51531.1

Group3957: abra|OJJ76064.1 acar|OOF99865.1 acla|EAW09754.1 afis|EAW21387.1 afla|EED55801.1 afum|EAL92402.1 agla|OJJ85512.1 akaw|GAA88902.1 aluc|OJZ89519.1 anid|CBF83842.1 anig|EHA23081.1 aory|EIT76678.1 asyd|OJJ60916.1 ater|EAU35173.1 atub|OJI85284.1 aver|OJJ00243.1 awen|OJJ39314.1 azon|OJJ51532.1

Group3958: abra|OJJ76069.1 acar|OOF99862.1 acla|EAW09751.1 afis|EAW21391.1 afla|EED55805.1 afum|EAL92405.1 agla|OJJ85515.1 akaw|GAA88898.1 aluc|OJZ89523.1 anid|CBF83838.1 anig|EHA23078.1 aory|EIT76825.1 asyd|OJJ60913.1 ater|EAU35176.1 atub|OJI85280.1 aver|OJJ00240.1 awen|OJJ39312.1 azon|OJJ51538.1

Group3959: abra|OJJ76071.1 acar|OOF99857.1 acla|EAW09748.1 afis|EAW21394.1 afla|EED55811.1 afum|EAL92408.1 agla|OJJ85518.1 akaw|GAA88896.1 aluc|OJZ89525.1 anid|CBF83826.1 anig|EHA23076.1 aory|EIT76796.1 asyd|OJJ60904.1 ater|EAU35162.1 atub|OJI85278.1 aver|OJJ00230.1 awen|OJJ39310.1 azon|OJJ51542.1

Group3960: abra|OJJ76079.1 acar|OOF99846.1 acla|EAW09742.1 afis|EAW21400.1 afla|EED55821.1 afum|EAL92414.1 agla|OJJ85525.1 akaw|GAA88887.1 aluc|OJZ89536.1 anid|CBF83829.1 anig|EHA23068.1 aory|EIT76664.1 asyd|OJJ60906.1 ater|EAU35150.1 atub|OJI85270.1 aver|OJJ00232.1 awen|OJJ39303.1 azon|OJJ51549.1

Group3961: abra|OJJ76080.1 acar|OOF99845.1 acla|EAW09741.1 afis|EAW21401.1 afla|EED55822.1 afum|EAL92415.1 agla|OJJ85528.1 akaw|GAA88886.1 aluc|OJZ89538.1 anid|CBF83820.1 anig|EHA23067.1 aory|EIT76768.1 asyd|OJJ60901.1 ater|EAU35149.1 atub|OJI85269.1 aver|OJJ00227.1 awen|OJJ39302.1 azon|OJJ51550.1

Group3962: abra|OJJ76082.1 acar|OOF99844.1 acla|EAW09739.1 afis|EAW21402.1 afla|EED55824.1 afum|EAL92416.1 agla|OJJ85530.1 akaw|GAA88884.1 aluc|OJZ89540.1 anid|CBF83819.1 anig|EHA23066.1 aory|EIT76826.1 asyd|OJJ60900.1 ater|EAU29588.1 atub|OJI85267.1 aver|OJJ00225.1 awen|OJJ30539.1 azon|OJJ51552.1

Group3963: abra|OJJ76083.1 acar|OOF99843.1 acla|EAW09738.1 afis|EAW21403.1 afla|EED55825.1 afum|EAL92417.1 agla|OJJ85531.1 akaw|GAA88883.1 aluc|OJZ89541.1 anid|CBF83817.1 anig|EHA23065.1 aory|EIT76589.1 asyd|OJJ60899.1 ater|EAU35147.1 atub|OJI85266.1 aver|OJJ00224.1 awen|OJJ39300.1 azon|OJJ51553.1

Group3964: abra|OJJ76084.1 acar|OOF99842.1 acla|EAW09737.1 afis|EAW21404.1 afla|EED55826.1 afum|EAL92418.1 agla|OJJ85533.1 akaw|GAA88882.1 aluc|OJZ89542.1 anid|CBF83815.1 anig|EHA23064.1 aory|EIT76656.1 asyd|OJJ60898.1 ater|EAU35146.1 atub|OJI85265.1 aver|OJJ00223.1 awen|OJJ39299.1 azon|OJJ51554.1

Group3965: abra|OJJ76088.1 acar|OOF99837.1 acla|EAW09734.1 afis|EAW21407.1 afla|EED55829.1 afum|EAL92421.1 agla|OJJ85537.1 akaw|GAA88879.1 aluc|OJZ89545.1 anid|CBF83810.1 anig|EHA23061.1 aory|EIT76811.1 asyd|OJJ60895.1 ater|EAU35141.1 atub|OJI85261.1 aver|OJJ00220.1 awen|OJJ39294.1 azon|OJJ51560.1

Group3966: abra|OJJ76090.1 acar|OOF99835.1 acla|EAW09731.1 afla|EED55831.1 agla|OJJ85541.1 akaw|GAA88877.1 aluc|OJZ89547.1 anig|EHA23059.1 aory|EIT76755.1 atub|OJI85259.1 awen|OJJ39291.1 azon|OJJ51563.1 afis|EAW21410.1 afum|EAL92424.1 anid|CBF83805.1 asyd|OJJ60892.1 ater|EAU35136.1 aver|OJJ00216.1

Group3967: abra|OJJ76092.1 acar|OOF99833.1 acla|EAW09730.1 afis|EAW21411.1 afla|EED55834.1 afum|EAL92425.1 agla|OJJ85542.1 akaw|GAA88875.1 aluc|OJZ89548.1 anid|CBF83803.1 anig|EHA23058.1 aory|EIT76568.1 asyd|OJJ60891.1 ater|EAU35135.1 atub|OJI85258.1 aver|OJJ00215.1 awen|OJJ39290.1 azon|OJJ51564.1

Group3968: abra|OJJ76095.1 acar|OOF99829.1 acla|EAW09723.1 afis|EAW21418.1 afla|EED55843.1 afum|EAL92433.1 agla|OJJ85551.1 akaw|GAA88871.1 aluc|OJZ89551.1 anid|CBF83792.1 anig|EHA23055.1 aory|EIT76877.1 asyd|OJJ60881.1 ater|EAU35131.1 atub|OJI85254.1 aver|OJJ00207.1 awen|OJJ39285.1 azon|OJJ51569.1

Group3969: abra|OJJ76096.1 acar|OOF99828.1 acla|EAW09722.1 afis|EAW21419.1 afla|EED55844.1 afum|EAL92434.1 agla|OJJ85553.1 akaw|GAA88870.1 aluc|OJZ89552.1 anid|CBF83790.1 anig|EHA23054.1 aory|EIT76586.1 asyd|OJJ60880.1 ater|EAU35130.1 atub|OJI85253.1 aver|OJJ00206.1 awen|OJJ39284.1 azon|OJJ51570.1

Group3970: abra|OJJ76098.1 acar|OOF99827.1 acla|EAW09720.1 afis|EAW21421.1 afla|EED55846.1 afum|EAL92436.1 agla|OJJ85557.1 akaw|GAA88868.1 aluc|OJZ89554.1 anid|CBF83787.1 anig|EHA23052.1 aory|EIT76632.1 asyd|OJJ60878.1 ater|EAU35128.1 atub|OJI85251.1 aver|OJJ00203.1 awen|OJJ39280.1 azon|OJJ51572.1

Group3971: abra|OJJ76099.1 acar|OOF99825.1 acla|EAW09719.1 afis|EAW21422.1 afla|EED55847.1 afum|EAL92437.1 agla|OJJ85558.1 akaw|GAA88867.1 aluc|OJZ89555.1 anid|CBF83785.1 anig|EHA23051.1 aory|EIT76561.1 asyd|OJJ60877.1 ater|EAU35127.1 atub|OJI85249.1 aver|OJJ00202.1 awen|OJJ39279.1 azon|OJJ51573.1

Group3972: abra|OJJ76100.1 acar|OOF99824.1 acla|EAW09718.1 afis|EAW21423.1 afla|EED55848.1 afum|EAL92438.1 agla|OJJ85559.1 akaw|GAA88866.1 aluc|OJZ89556.1 anid|CBF83783.1 anig|EHA23050.1 aory|EIT76818.1 asyd|OJJ60876.1 ater|EAU35126.1 atub|OJI85248.1 aver|OJJ00201.1 awen|OJJ39278.1 azon|OJJ51574.1

Group3973: abra|OJJ76102.1 acar|OOF99823.1 acla|EAW09716.1 afis|EAW21425.1 afla|EED55850.1 afum|EAL92440.1 agla|OJJ85562.1 akaw|GAA88864.1 aluc|OJZ89558.1 anid|CBF83781.1 anig|EHA23048.1 aory|EIT76846.1 asyd|OJJ60874.1 ater|EAU35124.1 atub|OJI85246.1 aver|OJJ00199.1 awen|OJJ39276.1 azon|OJJ51576.1

Group3974: abra|OJJ76103.1 acar|OOF99822.1 acla|EAW09715.1 afis|EAW21426.1 afla|EED55853.1 afum|EAL92441.1 agla|OJJ85563.1 akaw|GAA88863.1 aluc|OJZ89559.1 anid|CBF83780.1 anig|EHA23047.1 aory|EIT76704.1 asyd|OJJ60873.1 ater|EAU35123.1 atub|OJI85245.1 aver|OJJ00198.1 awen|OJJ39275.1 azon|OJJ51577.1

Group3975: abra|OJJ76104.1 acar|OOF99821.1 acla|EAW09714.1 afis|EAW21427.1 afla|EED55854.1 afum|EAL92442.1 agla|OJJ85564.1 akaw|GAA88862.1 aluc|OJZ89560.1 anid|CBF83778.1 anig|EHA23046.1 aory|EIT76600.1 asyd|OJJ60871.1 ater|EAU35121.1 atub|OJI85244.1 aver|OJJ00197.1 awen|OJJ39274.1 azon|OJJ51579.1

Group3976: abra|OJJ76107.1 acar|OOF99819.1 acla|EAW09713.1 afis|EAW21428.1 afla|EED55855.1 afum|EAL92443.1 agla|OJJ85566.1 akaw|GAA88859.1 aluc|OJZ89563.1 anid|CBF83776.1 anig|EHA23043.1 aory|EIT76883.1 asyd|OJJ60870.1 ater|EAU35120.1 atub|OJI85241.1 aver|OJJ00195.1 awen|OJJ39273.1 azon|OJJ51582.1

Group3977: abra|OJJ76108.1 acar|OOF99818.1 acla|EAW09712.1 afis|EAW21429.1 afla|EED55856.1 afum|EAL92444.1 agla|OJJ85567.1 akaw|GAA88858.1 aluc|OJZ89564.1 anid|CBF83774.1 anig|EHA23042.1 aory|EIT76794.1 asyd|OJJ60869.1 ater|EAU35119.1 atub|OJI85240.1 aver|OJJ00194.1 awen|OJJ39271.1 azon|OJJ51583.1

Group3978: abra|OJJ76109.1 acar|OOF99817.1 acla|EAW09711.1 afis|EAW21430.1 afla|EED55857.1 afum|EAL92445.1 agla|OJJ85568.1 akaw|GAA88857.1 aluc|OJZ89565.1 anid|CBF83772.1 anig|EHA23041.1 aory|EIT76635.1 asyd|OJJ60868.1 ater|EAU35118.1 atub|OJI85239.1 aver|OJJ00193.1 awen|OJJ39270.1 azon|OJJ51584.1

Group3979: abra|OJJ76111.1 acar|OOF99815.1 acla|EAW09709.1 afis|EAW21431.1 afla|EED55859.1 afum|EAL92446.2 agla|OJJ85572.1 akaw|GAA88856.1 aluc|OJZ89567.1 anid|CBF83769.1 anig|EHA23040.1 aory|EIT76616.1 asyd|OJJ60865.1 ater|EAU35117.1 atub|OJI85237.1 aver|OJJ00191.1 awen|OJJ39269.1 azon|OJJ51587.1

Group3980: abra|OJJ76112.1 acar|OOF99813.1 acla|EAW09708.1 afis|EAW21432.1 afla|EED55860.1 afum|EAL92447.1 agla|OJJ85573.1 akaw|GAA88855.1 aluc|OJZ89568.1 anid|CBF83767.1 anig|EHA23039.1 aory|EIT76829.1 asyd|OJJ60864.1 ater|EAU35116.1 atub|OJI85236.1 aver|OJJ00190.1 awen|OJJ39267.1 azon|OJJ51588.1

Group3981: abra|OJJ76113.1 acar|OOF99812.1 acla|EAW09707.1 afis|EAW21433.1 afla|EED55862.1 afum|EAL92448.2 agla|OJJ85574.1 akaw|GAA88854.1 aluc|OJZ89569.1 anid|CBF83765.1 anig|EHA23037.1 aory|EIT76807.1 asyd|OJJ60863.1 ater|EAU35111.1 atub|OJI85234.1 aver|OJJ00189.1 awen|OJJ39266.1 azon|OJJ51589.1

Group3982: abra|OJJ76114.1 acar|OOF99811.1 acla|EAW09706.1 afis|EAW21434.1 afla|EED55863.1 afum|EAL92449.1 agla|OJJ85575.1 akaw|GAA88853.1 aluc|OJZ89571.1 anid|CBF76591.1 anig|EHA23036.1 aory|EIT76762.1 asyd|OJJ61175.1 ater|EAU35110.1 atub|OJI85233.1 aver|OJJ00501.1 awen|OJJ39265.1 azon|OJJ51590.1

Group3983: abra|OJJ76116.1 acar|OOF99810.1 acla|EAW09704.1 afis|EAW21436.1 afla|EED55864.1 afum|EAL92451.1 agla|OJJ85579.1 akaw|GAA88851.1 aluc|OJZ89573.1 anid|CBF76587.1 anig|EHA23034.1 aory|EIT76708.1 asyd|OJJ61173.1 ater|EAU35109.1 atub|OJI85231.1 aver|OJJ00499.1 awen|OJJ39263.1 azon|OJJ51592.1

Group3984: abra|OJJ76118.1 acar|OOF99807.1 acla|EAW09701.1 afis|EAW21438.1 afla|EED55866.1 afum|EAL92453.2 agla|OJJ85583.1 akaw|GAA88849.1 aluc|OJZ89575.1 anid|CBF76583.1 anig|EHA23032.1

aory|EIT76853.1 asyd|OJJ61171.1 ater|EAU35107.1 atub|OJI85229.1 aver|OJJ00496.1 awen|OJJ39260.1 azon|OJJ51595.1

Group3985: abra|OJJ76120.1 acar|OOF99805.1 acla|EAW09699.1 afis|EAW21440.1 afla|EED55868.1 afum|EAL92456.1 agla|OJJ85587.1 akaw|GAA88847.1 aluc|OJZ89577.1 anid|CBF76579.1 anig|EHA23031.1 aory|EIT76773.1 asyd|OJJ61169.1 ater|EAU35105.1 atub|OJI85227.1 aver|OJJ00494.1 awen|OJJ39258.1 azon|OJJ51598.1

Group3986: abra|OJJ76121.1 acar|OOF99804.1 acla|EAW09698.1 afis|EAW21441.1 afla|EED55869.1 afum|EAL92458.2 agla|OJJ85588.1 akaw|GAA88846.1 aluc|OJZ89578.1 anid|CBF76577.1 anig|EHA23030.1 aory|EIT76534.1 asyd|OJJ61168.1 ater|EAU35104.1 atub|OJI85226.1 aver|OJJ00493.1 awen|OJJ39257.1 azon|OJJ51599.1

Group3987: abra|OJJ76122.1 acar|OOF99803.1 acla|EAW09697.1 afis|EAW21442.1 afla|EED55870.1 afum|EAL92460.1 agla|OJJ85589.1 akaw|GAA88845.1 aluc|OJZ89579.1 anid|CBF76575.1 anig|EHA23029.1 aory|EIT76841.1 asyd|OJJ61167.1 ater|EAU35103.1 atub|OJI85225.1 aver|OJJ00492.1 awen|OJJ39256.1 azon|OJJ51600.1

Group3988: abra|OJJ76123.1 acar|OOF99802.1 acla|EAW09696.1 afis|EAW21443.1 afla|EED55871.1 afum|EAL92461.2 agla|OJJ85590.1 akaw|GAA88844.1 aluc|OJZ89580.1 anid|CBF76573.1 anig|EHA23028.1 aory|EIT76804.1 asyd|OJJ61166.1 ater|EAU35102.1 atub|OJI85224.1 aver|OJJ00491.1 awen|OJJ39255.1 azon|OJJ51601.1

Group3989: abra|OJJ76125.1 acar|OOF99800.1 acla|EAW09694.1 afis|EAW21445.1 afla|EED55873.1 afum|EAL92464.2 agla|OJJ85593.1 akaw|GAA88842.1 aluc|OJZ89583.1 anid|CBF76569.1 anig|EHA23026.1 aory|EIT76681.1 asyd|OJJ61164.1 ater|EAU35099.1 atub|OJI85220.1 aver|OJJ00488.1 awen|OJJ39253.1 azon|OJJ51602.1

Group3990: abra|OJJ76126.1 acar|OOF99798.1 acla|EAW09693.1 afis|EAW21446.1 afla|EED55874.1 afum|EAL92465.2 agla|OJJ85594.1 akaw|GAA88841.1 aluc|OJZ89587.1 anid|CBF76565.1 anig|EHA23024.1 aory|EIT76673.1 asyd|OJJ61162.1 ater|EAU35097.1 atub|OJI85216.1 aver|OJJ00486.1 awen|OJJ39252.1 azon|OJJ51603.1

Group3991: abra|OJJ76127.1 acar|OOF99796.1 acla|EAW09692.1 afis|EAW21447.1 afla|EED55876.1 afum|EAL92466.1 agla|OJJ85595.1 akaw|GAA88840.1 aluc|OJZ89588.1 anid|CBF76563.1 anig|EHA23023.1 aory|EIT76593.1 asyd|OJJ61161.1 ater|EAU35096.1 atub|OJI85214.1 aver|OJJ00483.1 awen|OJJ39251.1 azon|OJJ51604.1

Group3992: abra|OJJ76128.1 acar|OOF99795.1 acla|EAW09691.1 afis|EAW21448.1 afla|EED55877.1 afum|EAL92467.1 agla|OJJ85596.1 akaw|GAA88839.1 aluc|OJZ89589.1 anid|CBF76559.1 anig|EHA23022.1 aory|EIT76881.1 asyd|OJJ61159.1 ater|EAU35095.1 atub|OJI85213.1 aver|OJJ00481.1 awen|OJJ39250.1 azon|OJJ51605.1

Group3993: abra|OJJ76129.1 acar|OOF99794.1 acla|EAW09690.1 afis|EAW21449.1 afla|EED55878.1 afum|EAL92468.1 agla|OJJ85597.1 akaw|GAA88838.1 aluc|OJZ89590.1 anid|CBF76557.1 anig|EHA23021.1 aory|EIT76638.1 asyd|OJJ61158.1 ater|EAU35094.1 atub|OJI85212.1 aver|OJJ00480.1 awen|OJJ39249.1 azon|OJJ51606.1

Group3994: abra|OJJ76133.1 acar|OOF99790.1 acla|EAW09685.1 afis|EAW21454.1 afla|EED55884.1 afum|EAL92473.1 agla|OJJ85602.1 akaw|GAA88834.1 aluc|OJZ89594.1 anid|CBF76548.1 anig|EHA23017.1 aory|EIT76723.1 asyd|OJJ61155.1 ater|EAU35081.1 atub|OJI85208.1 aver|OJJ00477.1 awen|OJJ39246.1 azon|OJJ51609.1

Group3995: abra|OJJ76138.1 acar|OOF99786.1 acla|EAW09681.1 afis|EAW21458.1 afla|EED55888.1 afum|EAL92477.1 agla|OJJ85605.1 akaw|GAA88830.1 aluc|OJZ89601.1 anid|CBF76540.1 anig|EHA23014.1 aory|EIT76702.1 asyd|OJJ61151.1 ater|EAU35077.1 atub|OJI85203.1 aver|OJJ00473.1 awen|OJJ39242.1 azon|OJJ51613.1

Group3996: abra|OJJ76140.1 acar|OOF99785.1 acla|EAW09679.1 afis|EAW21460.1 afla|EED55891.1 afum|EAL92479.1 agla|OJJ85608.1 akaw|GAA88828.1 aluc|OJZ89603.1 anid|CBF76536.1 anig|EHA23012.1 aory|EIT76836.1 asyd|OJJ61149.1 ater|EAU35075.1 atub|OJI85201.1 aver|OJJ00471.1 awen|OJJ39239.1 azon|OJJ51615.1

Group3997: abra|OJJ76141.1 acar|OOF99784.1 acla|EAW09664.1 afis|EAW21473.1 afla|EED55908.1 afum|EAL92492.1 agla|OJJ85622.1 akaw|GAA88826.1 aluc|OJZ89605.1 anid|CBF76513.1 anig|EHA23011.1 aory|EIT76607.1 asyd|OJJ61136.1 ater|EAU35060.1 atub|OJI85198.1 aver|OJJ00458.1 awen|OJJ39224.1 azon|OJJ51630.1

Group3998: abra|OJJ76142.1 acar|OOF99783.1 acla|EAW09665.1 afis|EAW21472.1 afla|EED55902.1 afum|EAL92491.1 agla|OJJ85621.1 akaw|GAA88825.1 aluc|OJZ89606.1 anid|CBF76515.1 anig|EHA23010.1 aory|EIT76799.1 asyd|OJJ61137.1 ater|EAU35061.1 atub|OJI85197.1 aver|OJJ00459.1 awen|OJJ39225.1 azon|OJJ51629.1



Group3999: abra|OJJ76143.1 acar|OOF99782.1 acla|EAW09666.1 afis|EAW21471.1 afla|EED55904.1 afum|EAL92490.1 agla|OJJ85620.1 akaw|GAA88824.1 aluc|OJZ89607.1 anid|CBF76517.1 anig|EHA23009.1 aory|EIT76648.1 asyd|OJJ61138.1 ater|EAU35062.1 atub|OJI85196.1 aver|OJJ00460.1 awen|OJJ39227.1 azon|OJJ51628.1

Group4000: abra|OJJ76145.1 acar|OOF99781.1 acla|EAW09668.1 afis|EAW21469.1 afla|EED55907.1 afum|EAL92488.1 agla|OJJ85618.1 akaw|GAA82094.1 aluc|OJZ92086.1 anid|CBF76521.1 anig|EHA23008.1 aory|EIT76871.1 asyd|OJJ61140.1 ater|EAU35064.1 atub|OJI86515.1 aver|OJJ00462.1 awen|OJJ39229.1 azon|OJJ51626.1

Group4001: abra|OJJ76146.1 acar|OOF99780.1 acla|EAW09671.1 afis|EAW21467.1 afla|EED55900.1 afum|EAL92487.1 agla|OJJ85617.1 akaw|GAA82095.1 aluc|OJZ92084.1 anid|CBF76523.1 anig|EHA23007.1 aory|EIT76694.1 asyd|OJJ61141.1 ater|EAU35066.1 atub|OJI86514.1 aver|OJJ00463.1 awen|OJJ39230.1 azon|OJJ51625.1

Group4002: abra|OJJ76150.1 acar|OOF99777.1 acla|EAW09675.1 afis|EAW21464.1 afla|EED55896.1 afum|EAL92484.1 agla|OJJ85612.1 akaw|GAA82099.1 aluc|OJZ92079.1 anid|CBF76529.1 anig|EHA23005.1 aory|EIT76592.1 asyd|OJJ61145.1 ater|EAU35071.1 atub|OJI86509.1 aver|OJJ00467.1 awen|OJJ39235.1 azon|OJJ51620.1

Group4003: abra|OJJ76151.1 acar|OOF89898.1 acla|EAW09676.1 afis|EAW21463.1 afla|EED55895.1 afum|EAL92483.1 agla|OJJ85611.1 akaw|GAA82100.1 aluc|OJZ92078.1 anid|CBF76530.1 anig|EHA23004.1 aory|EIT76817.1 asyd|OJJ61146.1 ater|EAU35072.1 atub|OJI86508.1 aver|OJJ00468.1 awen|OJJ39236.1 azon|OJJ51619.1

Group4004: abra|OJJ76152.1 acar|OOF89899.1 acla|EAW09677.1 afis|EAW21462.1 afla|EED55894.1 afum|EAL92481.1 agla|OJJ85610.1 akaw|GAA82101.1 aluc|OJZ92077.1 anid|CBF76532.1 anig|EHA23003.1 aory|EIT76700.1 asyd|OJJ61147.1 ater|EAU35073.1 atub|OJI86507.1 aver|OJJ00469.1 awen|OJJ39237.1 azon|OJJ51618.1

Group4005: abra|OJJ76157.1 acar|OOF99775.1 acla|EAW09661.1 afis|EAW21478.1 afla|EED55910.1 afum|EAL92498.1 agla|OJJ85630.1 akaw|GAA82105.1 aluc|OJZ92071.1 anid|CBF76508.1 anig|EHA23000.1 aory|EIT76734.1 asyd|OJJ61133.1 ater|EAU35058.1 atub|OJI86503.1 aver|OJJ00454.1 awen|OJJ39221.1 azon|OJJ51635.1

Group4006: abra|OJJ76160.1 acar|OOF99772.1 acla|EAW09658.1 afis|EAW21481.1 afla|EED55913.1 afum|EAL92501.1 agla|OJJ85635.1 akaw|GAA82107.1 aluc|OJZ92069.1 anid|CBF76502.1 anig|EHA22997.1 aory|EIT76621.1 asyd|OJJ61130.1 ater|EAU35056.1 atub|OJI86500.1 aver|OJJ00451.1 awen|OJJ39216.1 azon|OJJ51638.1

Group4007: abra|OJJ76166.1 acar|OOF99771.1 acla|EAW09657.1 afis|EAW21482.1 afla|EED55914.1 afum|EAL92502.1 agla|OJJ85636.1 akaw|GAA82114.1 aluc|OJZ92062.1 anid|CBF76498.1 anig|EHA22991.1 aory|EIT76649.1 asyd|OJJ61128.1 ater|EAU35055.1 atub|OJI86494.1 aver|OJJ00449.1 awen|OJJ39215.1 azon|OJJ51640.1

Group4008: abra|OJJ76172.1 acar|OOF99767.1 acla|EAW09653.1 afis|EAW21486.1 afla|EED55919.1 afum|EAL92506.1 agla|OJJ85645.1 akaw|GAA82118.1 aluc|OJZ92058.1 anid|CBF76490.1 anig|EHA22987.1 aory|EIT76891.1 asyd|OJJ61124.1 ater|EAU35051.1 atub|OJI86490.1 aver|OJJ00445.1 awen|OJJ39211.1 azon|OJJ51643.1

Group4009: abra|OJJ76174.1 acar|OOF99766.1 acla|EAW09652.1 afis|EAW21488.1 afla|EED55923.1 afum|EAL92507.1 agla|OJJ85648.1 akaw|GAA82119.1 aluc|OJZ92056.1 anid|CBF76488.1 anig|EHA22985.1 aory|EIT76645.1 asyd|OJJ61123.1 ater|EAU35050.1 atub|OJI86487.1 aver|OJJ00441.1 awen|OJJ39207.1 azon|OJJ51645.1

Group4010: abra|OJJ76175.1 acar|OOF99765.1 acla|EAW09651.1 afis|EAW21489.1 afla|EED55924.1 afum|EAL92508.1 agla|OJJ85649.1 akaw|GAA82120.1 aluc|OJZ92055.1 anid|CBF76486.1 anig|EHA22984.1 aory|EIT76531.1 asyd|OJJ61122.1 ater|EAU35049.1 atub|OJI86486.1 aver|OJJ00440.1 awen|OJJ39206.1 azon|OJJ51646.1

Group4011: abra|OJJ76176.1 acar|OOF99764.1 acla|EAW09650.1 afis|EAW21490.1 afla|EED55925.1 afum|EAL92509.1 agla|OJJ85652.1 akaw|GAA82121.1 aluc|OJZ92054.1 anid|CBF76484.1 anig|EHA22983.1 aory|EIT76596.1 asyd|OJJ61121.1 ater|EAU35048.1 atub|OJI86485.1 aver|OJJ00439.1 awen|OJJ39205.1 azon|OJJ51647.1

Group4012: abra|OJJ76177.1 acar|OOF99762.1 acla|EAW09649.1 afis|EAW21491.1 afla|EED55926.1 afum|EAL92510.1 agla|OJJ85653.1 akaw|GAA82122.1 aluc|OJZ92053.1 anid|CBF76482.1 anig|EHA22982.1 aory|EIT76879.1 asyd|OJJ61120.1 ater|EAU35047.1 atub|OJI86484.1 aver|OJJ00438.1 awen|OJJ39204.1 azon|OJJ51648.1

Group4013: abra|OJJ76178.1 acar|OOF99763.1 acla|EAW09648.1 afis|EAW21492.1 afla|EED55927.1 afum|EAL92511.1 agla|OJJ85654.1 akaw|GAA82123.1 aluc|OJZ92052.1 anid|CBF76480.1 anig|EHA22981.1

aory|EIT76815.1 asyd|OJJ61119.1 ater|EAU35046.1 atub|OJI86483.1 aver|OJJ00437.1 awen|OJJ39203.1 azon|OJJ51649.1

Group4014: abra|OJJ76180.1 acar|OOF99760.1 acla|EAW09646.1 afis|EAW21494.1 afla|EED55929.1 afum|EAL92513.1 agla|OJJ85656.1 akaw|GAA82125.1 aluc|OJZ92049.1 anid|CBF76476.1 anig|EHA22979.1 aory|EIT76689.1 asyd|OJJ61117.1 ater|EAU35044.1 atub|OJI86481.1 aver|OJJ00435.1 awen|OJJ39201.1 azon|OJJ51526.1

Group4015: abra|OJJ76181.1 acar|OOF99759.1 acla|EAW09645.1 afis|EAW21495.1 afla|EED55930.1 afum|EAL92514.1 agla|OJJ85657.1 akaw|GAA82126.1 aluc|OJZ92048.1 anid|CBF76474.1 anig|EHA22978.1 aory|EIT76659.1 asyd|OJJ61116.1 ater|EAU35043.1 atub|OJI86480.1 aver|OJJ00434.1 awen|OJJ39200.1 azon|OJJ51525.1

Group4016: abra|OJJ76182.1 acar|OOF99758.1 acla|EAW09644.1 afis|EAW21496.1 afla|EED55931.1 afum|EAL92515.1 agla|OJJ85658.1 akaw|GAA82127.1 aluc|OJZ92047.1 anid|CBF76472.1 anig|EHA22977.1 aory|EIT76569.1 asyd|OJJ61115.1 ater|EAU35042.1 atub|OJI86479.1 aver|OJJ00433.1 awen|OJJ39199.1 azon|OJJ51524.1

Group4017: abra|OJJ76183.1 acar|OOF99757.1 acla|EAW09643.1 afis|EAW21497.1 afla|EED55933.1 afum|EAL92516.1 agla|OJJ85660.1 akaw|GAA82128.1 aluc|OJZ92046.1 anid|CBF76468.1 anig|EHA22976.1 aory|EIT76844.1 asyd|OJJ61114.1 ater|EAU35041.1 atub|OJI86478.1 aver|OJJ00430.1 awen|OJJ39198.1 azon|OJJ51523.1

Group4018: abra|OJJ76187.1 acar|OOF99755.1 acla|EAW09640.1 afis|EAW21500.1 afla|EED55936.1 afum|EAL92519.1 agla|OJJ85663.1 akaw|GAA82131.1 aluc|OJZ92042.1 anid|CBF76459.1 anig|EHA22974.1 aory|EIT76547.1 asyd|OJJ61111.1 ater|EAU35038.1 atub|OJI86475.1 aver|OJJ00427.1 awen|OJJ39195.1 azon|OJJ51522.1

Group4019: abra|OJJ76188.1 acar|OOF99754.1 acla|EAW09639.1 afis|EAW21501.1 afla|EED55937.1 afum|EAL92520.1 agla|OJJ85664.1 akaw|GAA82132.1 aluc|OJZ92041.1 anid|CBF76457.1 anig|EHA22973.1 aory|EIT76679.1 asyd|OJJ61110.1 ater|EAU35037.1 atub|OJI86474.1 aver|OJJ00426.1 awen|OJJ39194.1 azon|OJJ51519.1

Group4020: abra|OJJ76191.1 acar|OOF99751.1 acla|EAW13914.1 afis|EAW18625.1 afla|EED52717.1 afum|EAL93337.1 agla|OJJ81242.1 akaw|GAA82134.1 aluc|OJZ92038.1 anid|CBF70486.1 anig|EHA22970.1 aory|EIT78208.1 asyd|OJJ58585.1 ater|EAU34925.1 atub|OJI86472.1 aver|OJJ01189.1 awen|OJJ32090.1 azon|OJJ46667.1

Group4021: abra|OJJ76192.1 acar|OOF99752.1 acla|EAW13915.1 afis|EAW18626.1 afla|EED52716.1 afum|EAL93338.1 agla|OJJ81246.1 akaw|GAA82135.1 aluc|OJZ92037.1 anid|CBF70484.1 anig|EHA22969.1 aory|EIT78180.1 asyd|OJJ58586.1 ater|EAU34926.1 atub|OJI86470.1 aver|OJJ01190.1 awen|OJJ32092.1 azon|OJJ46669.1

Group4022: abra|OJJ76193.1 acar|OOF99750.1 acla|EAW13916.1 afis|EAW18627.1 afla|EED52715.1 afum|EAL93339.1 agla|OJJ81245.1 akaw|GAA82136.1 aluc|OJZ92036.1 anid|CBF70478.1 anig|EHA22968.1 aory|EIT78215.1 asyd|OJJ58587.1 ater|EAU38285.1 atub|OJI86469.1 aver|OJJ01191.1 awen|OJJ32093.1 azon|OJJ46670.1

Group4023: abra|OJJ76194.1 acar|OOF99749.1 acla|EAW13917.1 afis|EAW18628.1 afla|EED52714.1 afum|EAL93340.1 agla|OJJ81244.1 akaw|GAA82137.1 aluc|OJZ92035.1 anid|CBF70480.1 anig|EHA22967.1 aory|EIT78226.1 asyd|OJJ58588.1 ater|EAU38284.1 atub|OJI86468.1 aver|OJJ01192.1 awen|OJJ32094.1 azon|OJJ46671.1

Group4024: abra|OJJ76197.1 acar|OOF99747.1 acla|EAW13918.1 afis|EAW18629.1 afla|EED52712.1 afum|EAL93341.1 agla|OJJ81251.1 akaw|GAA82139.1 aluc|OJZ92032.1 anid|CBF70482.1 anig|EHA22965.1 aory|EIT78174.1 asyd|OJJ58592.1 ater|EAU38282.1 atub|OJI86465.1 aver|OJJ01194.1 awen|OJJ32096.1 azon|OJJ46675.1

Group4025: abra|OJJ76200.1 acar|OOF99744.1 acla|EAW13921.1 afis|EAW18632.1 afla|EED52709.1 afum|EAL93345.1 agla|OJJ82445.1 akaw|GAA82143.1 aluc|OJZ92028.1 anid|CBF70472.1 anig|EHA22962.1 aory|EIT74199.1 asyd|OJJ58595.1 ater|EAU38279.1 atub|OJI86462.1 aver|OJJ01197.1 awen|OJJ32099.1 azon|OJJ46681.1

Group4026: abra|OJJ76201.1 acar|OOF99743.1 acla|EAW13922.1 afis|EAW18633.1 afla|EED52708.1 afum|EAL93346.1 agla|OJJ82444.1 akaw|GAA82144.1 aluc|OJZ92027.1 anid|CBF70470.1 anig|EHA22961.1 aory|EIT74198.1 asyd|OJJ58596.1 ater|EAU38278.1 atub|OJI86461.1 aver|OJJ01198.1 awen|OJJ32100.1 azon|OJJ46682.1

Group4027: abra|OJJ76202.1 acar|OOF99742.1 acla|EAW13923.1 afis|EAW18634.1 afla|EED52707.1 afum|EAL93347.1 agla|OJJ82443.1 akaw|GAA82145.1 aluc|OJZ92026.1 anid|CBF70468.1 anig|EHA22960.1 aory|EIT74275.1 asyd|OJJ58597.1 ater|EAU38277.1 atub|OJI86460.1 aver|OJJ01199.1 awen|OJJ32101.1 azon|OJJ46683.1

Group4028: abra|OJJ76204.1 acar|OOF99741.1 acla|EAW13925.1 afis|EAW18636.1 afla|EED52705.1 afum|EAL93349.1 akaw|GAA82147.1 aluc|OJZ92024.1 anid|CBF70461.1 anig|EHA22958.1 aory|EIT74316.1 asyd|OJJ58600.1 atub|OJI86458.1 aver|OJJ01202.1 awen|OJJ32103.1 azon|OJJ46685.1 agla|OJJ82439.1 ater|EAU38275.1

Group4029: abra|OJJ76210.1 acar|OOF99739.1 acla|EAW13927.1 afis|EAW18638.1 afla|EED52702.1 afum|EAL93351.1 agla|OJJ82436.1 akaw|GAA82150.1 aluc|OJZ92018.1 anid|CBF70453.1 anig|EHA22956.1 aory|EIT74209.1 asyd|OJJ58604.1 ater|EAU38273.1 atub|OJI86453.1 aver|OJJ01207.1 awen|OJJ32106.1 azon|OJJ46687.1

Group4030: abra|OJJ76213.1 acar|OOF99737.1 acla|EAW13929.1 afis|EAW18640.1 afla|EED52700.1 afum|EAL93354.2 agla|OJJ82434.1 akaw|GAA82152.1 aluc|OJZ92016.1 anid|CBF70449.1 anig|EHA22955.1 aory|EIT74286.1 asyd|OJJ58606.1 ater|EAU38271.1 atub|OJI86451.1 aver|OJJ01210.1 awen|OJJ32108.1 azon|OJJ46689.1

Group4031: abra|OJJ76214.1 acar|OOF99736.1 acla|EAW13930.1 afis|EAW18641.1 afla|EED52699.1 afum|EAL93355.1 agla|OJJ82433.1 akaw|GAA82153.1 aluc|OJZ92015.1 anid|CBF70447.1 anig|EHA22954.1 aory|EIT74167.1 asyd|OJJ58607.1 ater|EAU38270.1 atub|OJI86450.1 aver|OJJ01211.1 awen|OJJ32109.1 azon|OJJ46690.1

Group4032: abra|OJJ76215.1 acar|OOF99735.1 acla|EAW13931.1 afis|EAW18642.1 afla|EED52698.1 afum|EAL93356.1 agla|OJJ82432.1 akaw|GAA82154.1 aluc|OJZ92014.1 anid|CBF70445.1 anig|EHA22953.1 aory|EIT74249.1 asyd|OJJ58608.1 ater|EAU38269.1 atub|OJI86449.1 aver|OJJ01212.1 awen|OJJ32110.1 azon|OJJ46691.1

Group4033: abra|OJJ76220.1 acar|OOF99731.1 acla|EAW13935.1 afis|EAW18646.1 afla|EED52696.1 afum|EAL93361.1 agla|OJJ82429.1 akaw|GAA82158.1 aluc|OJZ92010.1 anid|CBF70437.1 anig|EHA22950.1 aory|EIT74305.1 asyd|OJJ58611.1 ater|EAU38265.1 atub|OJI86445.1 aver|OJJ01217.1 awen|OJJ32114.1 azon|OJJ46695.1

Group4034: abra|OJJ76225.1 acar|OOF99472.1 acla|EAW14365.1 afis|EAW18915.1 afla|EED50899.1 afum|EBA27498.1 agla|OJJ81529.1 akaw|GAA82161.1 aluc|OJZ92006.1 anid|CBF69691.1 anig|EHA22946.1 aory|EIT78987.1 asyd|OJJ59055.1 ater|EAU38082.1 atub|OJI86441.1 aver|OJJ01649.1 awen|OJJ31508.1 azon|OJJ47227.1

Group4035: abra|OJJ76226.1 acar|OOF99473.1 acla|EAW14366.1 afis|EAW18916.1 afla|EED50900.1 afum|EAL93647.1 agla|OJJ81530.1 akaw|GAA82162.1 aluc|OJZ92005.1 anid|CBF69689.1 anig|EHA22945.1 aory|EIT79047.1 asyd|OJJ59056.1 ater|EAU38083.1 atub|OJI86440.1 aver|OJJ01650.1 awen|OJJ31509.1 azon|OJJ47228.1

Group4036: abra|OJJ76227.1 acar|OOF99474.1 acla|EAW14367.1 afis|EAW18917.1 afla|EED50901.1 afum|EAL93648.1 agla|OJJ81531.1 akaw|GAA82164.1 aluc|OJZ92002.1 anid|CBF69688.1 anig|EHA22943.1 aory|EIT79014.1 asyd|OJJ59057.1 ater|EAU38084.1 atub|OJI86438.1 aver|OJJ01651.1 awen|OJJ31510.1 azon|OJJ47229.1

Group4037: abra|OJJ76228.1 acar|OOF99475.1 acla|EAW14368.1 afis|EAW18918.1 afla|EED50902.1 afum|EAL93649.2 agla|OJJ81532.1 akaw|GAA82165.1 aluc|OJZ92001.1 anid|CBF69686.1 anig|EHA22942.1 aory|EIT78973.1 asyd|OJJ59058.1 ater|EAU38085.1 atub|OJI86437.1 aver|OJJ01652.1 awen|OJJ31511.1 azon|OJJ47230.1

Group4038: abra|OJJ76242.1 acar|OOF99487.1 acla|EAW14197.1 afis|EAW18925.1 afla|EED50914.1 afum|EBA27500.1 agla|OJJ85252.1 akaw|GAA82175.1 aluc|OJZ91989.1 anid|CBF81679.1 anig|EHA22936.1 aory|EIT79011.1 asyd|OJJ59560.1 ater|EAU38100.1 atub|OJI86424.1 aver|OJJ02708.1 awen|OJJ31519.1 azon|OJJ47235.1

Group4039: abra|OJJ76245.1 acar|OOF99491.1 acla|EAW14362.1 afis|EAW18927.1 afla|EED50920.1 afum|EAL93658.1 agla|OJJ85256.1 akaw|GAA82178.1 aluc|OJZ91986.1 anid|CBF69671.1 anig|EHA22932.1 aory|EIT78966.1 asyd|OJJ59063.1 ater|EAU38106.1 atub|OJI86421.1 aver|OJJ01657.1 awen|OJJ31521.1 azon|OJJ47237.1

Group4040: abra|OJJ76246.1 acar|OOF99492.1 acla|EAW14361.1 afis|EAW18928.1 afla|EED50921.1 afum|EAL93659.1 agla|OJJ85257.1 akaw|GAA82179.1 aluc|OJZ91985.1 anid|CBF69669.1 anig|EHA22931.1 aory|EIT79013.1 asyd|OJJ59062.1 ater|EAU38107.1 atub|OJI86420.1 aver|OJJ01656.1 awen|OJJ31522.1 azon|OJJ47238.1

Group4041: abra|OJJ76248.1 acar|OOF89844.1 acla|EAW14359.1 afis|EAW18931.1 afla|EED50936.1 afum|EAL93663.1 agla|OJJ85260.1 akaw|GAA82181.1 aluc|OJZ91982.1 anid|CBF86796.1 anig|EHA22929.1 aory|EIT78972.1 asyd|OJJ64670.1 ater|EAU38110.1 atub|OJI86418.1 aver|OJI98772.1 awen|OJJ31525.1 azon|OJJ47240.1

Group4042: abra|OJJ76250.1 acar|OOF99495.1 acla|EAW14357.1 afis|EAW18933.1 afla|EED50938.1 afum|EAL93666.2 agla|OJJ85262.1 akaw|GAA82183.1 aluc|OJZ91977.1 anid|CBF86800.1 anig|EHA22927.1

aory|EIT77014.1 asyd|OJJ64668.1 ater|EAU38112.1 atub|OJI86416.1 aver|OJI98770.1 awen|OJJ31527.1 azon|OJJ47242.1

Group4043: abra|OJJ76251.1 acar|OOF99496.1 acla|EAW14356.1 afis|EAW18934.1 afla|EED50939.1 afum|EAL93667.2 agla|OJJ85263.1 akaw|GAA82184.1 aluc|OJZ91976.1 anid|CBF86802.1 anig|EHA22926.1 aory|EIT77060.1 asyd|OJJ64667.1 ater|EAU38113.1 atub|OJI86415.1 aver|OJI98769.1 awen|OJJ31528.1 azon|OJJ47243.1

Group4044: abra|OJJ76252.1 acar|OOF99497.1 acla|EAW14355.1 afis|EAW18935.1 afla|EED50940.1 afum|EAL93668.2 agla|OJJ85264.1 akaw|GAA82185.1 aluc|OJZ91975.1 anid|CBF86804.1 anig|EHA22925.1 aory|EIT76996.1 asyd|OJJ64666.1 ater|EAU38114.1 atub|OJI86414.1 aver|OJI98768.1 awen|OJJ31529.1 azon|OJJ47244.1

Group4045: abra|OJJ76253.1 acar|OOF99498.1 acla|EAW14354.1 afis|EAW18936.1 afla|EED50941.1 afum|EAL93669.2 agla|OJJ85265.1 akaw|GAA82186.1 aluc|OJZ91974.1 anid|CBF86805.1 anig|EHA22924.1 aory|EIT77063.1 asyd|OJJ64665.1 ater|EAU38115.1 atub|OJI86413.1 aver|OJI98767.1 awen|OJJ31530.1 azon|OJJ47245.1

Group4046: abra|OJJ76254.1 acar|OOF99499.1 acla|EAW14353.1 afis|EAW18937.1 afla|EED50942.1 afum|EAL93670.1 agla|OJJ85270.1 akaw|GAA82188.1 aluc|OJZ91972.1 anid|CBF86807.1 anig|EHA22918.1 aory|EIT77016.1 asyd|OJJ64664.1 ater|EAU38116.1 atub|OJI86411.1 aver|OJI98766.1 awen|OJJ31532.1 azon|OJJ47246.1

Group4047: abra|OJJ76256.1 acar|OOF99501.1 acla|EAW14350.1 afis|EAW18940.1 afla|EED50966.1 afum|EAL93673.1 agla|OJJ85271.1 akaw|GAA82190.1 aluc|OJZ91970.1 anid|CBF86811.1 anig|EHA22920.1 aory|EIT76988.1 asyd|OJJ64661.1 ater|EAU38119.1 atub|OJI86409.1 aver|OJI98763.1 awen|OJJ31534.1 azon|OJJ47250.1

Group4048: abra|OJJ76259.1 acar|OOF99504.1 acla|EAW14351.1 afis|EAW18939.1 afla|EED50969.1 afum|EAL93672.1 agla|OJJ85268.1 akaw|GAA82192.1 aluc|OJZ91964.1 anid|CBF86815.1 anig|EHA22923.1 aory|EIT77055.1 asyd|OJJ64658.1 ater|EAU38120.1 atub|OJI86407.1 aver|OJI98761.1 awen|OJJ31535.1 azon|OJJ47249.1

Group4049: abra|OJJ76262.1 acar|OOF99506.1 acla|EAW14346.1 afis|EAW18944.1 afla|EED50978.1 afum|EAL93677.1 agla|OJJ85278.1 akaw|GAA82194.1 aluc|OJZ91960.1 anid|CBF86822.1 anig|EHA22916.1 aory|EIT77009.1 asyd|OJJ64655.1 ater|EAU38124.1 atub|OJI86404.1 aver|OJI98757.1 awen|OJJ31540.1 azon|OJJ47257.1

Group4050: abra|OJJ76266.1 afla|EED50981.1 afum|EAL93681.2 anid|CBF86829.1 aory|EIT76942.1 asyd|OJJ64651.1 atub|OJI86400.1 aver|OJI98752.1 acar|OOF99509.1 acla|EAW14343.1 afis|EAW18947.1 agla|OJJ85308.1 akaw|GAA82198.1 aluc|OJZ91954.1 anig|EHA22913.1 ater|EAU38127.1 awen|OJJ31543.1 azon|OJJ47260.1

Group4051: abra|OJJ76267.1 acar|OOF99511.1 acla|EAW14341.1 afis|EAW18949.1 afla|EED50985.1 afum|EAL93683.1 agla|OJJ85320.1 akaw|GAA82200.1 aluc|OJZ91953.1 anid|CBF86833.1 anig|EHA22912.1 aory|EIT77049.1 asyd|OJJ64649.1 ater|EAU38135.1 atub|OJI86398.1 aver|OJI98749.1 awen|OJJ31547.1 azon|OJJ47263.1

Group4052: abra|OJJ76269.1 acar|OOF99517.1 acla|EAW12851.1 afis|EAW18014.1 afla|EED51880.1 afum|EAL91826.1 agla|OJJ85368.1 akaw|GAA82202.1 aluc|OJZ91951.1 anid|CBF80042.1 anig|EHA22910.1 aory|EIT81710.1 asyd|OJJ58276.1 ater|EAU31530.1 atub|OJI86396.1 aver|OJJ02148.1 awen|OJJ41526.1 azon|OJJ48247.1

Group4053: abra|OJJ76288.1 acar|OOF99529.1 acla|EAW14328.1 afis|EAW18960.1 afla|EED51006.1 afum|EAL93693.1 agla|OJJ85342.1 akaw|GAA82217.1 aluc|OJZ91934.1 anid|CBF69600.1 anig|EHA22894.1 aory|EIT77056.1 asyd|OJJ59135.1 ater|EAU38143.1 atub|OJI86376.1 aver|OJJ01724.1 awen|OJJ31559.1 azon|OJJ47276.1

Group4054: abra|OJJ76290.1 acar|OOF99535.1 acla|EAW14325.1 afis|EAW18963.1 afla|EED51010.1 afum|EAL93695.1 agla|OJJ85344.1 akaw|GAA82219.1 aluc|OJZ91932.1 anid|CBF69605.1 anig|EHA22893.1 aory|EIT76961.1 asyd|OJJ59132.1 ater|EAU38148.1 atub|OJI86374.1 aver|OJJ01721.1 awen|OJJ31562.1 azon|OJJ47283.1

Group4055: abra|OJJ76292.1 acar|OOF99537.1 acla|EAW14324.1 afis|EAW18964.1 afla|EED51011.1 afum|EAL93696.1 agla|OJJ85346.1 akaw|GAA82220.1 aluc|OJZ91930.1 anid|CBF69607.1 anig|EHA22892.1 aory|EIT77048.1 asyd|OJJ59130.1 atub|OJI86373.1 aver|OJJ01720.1 awen|OJJ31564.1 azon|OJJ47282.1 ater|EAU38149.1

Group4056: abra|OJJ76296.1 acar|OOF99542.1 acla|EAW14322.1 afis|EAW18966.1 afla|EED51032.1 afum|EAL93698.2 agla|OJJ85352.1 akaw|GAA82223.1 aluc|OJZ91926.1 anid|CBF69611.1 anig|EHA22889.1 aory|EIT76971.1 asyd|OJJ59128.1 ater|EAU38151.1 atub|OJI86370.1 aver|OJJ01716.1 awen|OJJ31566.1 azon|OJJ47284.1

Group4057: abra|OJJ76297.1 acar|OOF99545.1 acla|EAW14321.1 afis|EAW18967.1 afla|EED51033.1 afum|EAL93699.1 agla|OJJ85353.1 akaw|GAA82224.1 aluc|OJZ91925.1 anid|CBF69613.1 anig|EHA22888.1 aory|EIT76951.1 asyd|OJJ59127.1 ater|EAU38153.1 atub|OJI86369.1 aver|OJJ01715.1 awen|OJJ31567.1 azon|OJJ47285.1

Group4058: abra|OJJ76299.1 acar|OOF99546.1 acla|EAW14319.1 afis|EAW18969.1 afla|EED51035.1 afum|EAL93702.1 agla|OJJ85355.1 akaw|GAA82226.1 aluc|OJZ91923.1 anid|CBF69617.1 anig|EHA22887.1 aory|EIT77006.1 asyd|OJJ59124.1 ater|EAU38155.1 atub|OJI86367.1 aver|OJJ01713.1 awen|OJJ31569.1 azon|OJJ47287.1

Group4059: abra|OJJ76300.1 acar|OOF99544.1 acla|EAW14318.1 afis|EAW18970.1 afla|EED51036.1 afum|EAL93703.1 agla|OJJ85356.1 akaw|GAA82227.1 aluc|OJZ91922.1 anid|CBF69619.1 anig|EHA22886.1 aory|EIT77012.1 asyd|OJJ59123.1 ater|EAU38156.1 atub|OJI86366.1 aver|OJJ01712.1 awen|OJJ31570.1 azon|OJJ47288.1

Group4060: abra|OJJ76301.1 acar|OOF99547.1 acla|EAW14317.1 afis|EAW18971.1 afla|EED51037.1 afum|EAL93704.1 agla|OJJ85357.1 akaw|GAA82228.1 aluc|OJZ91921.1 anid|CBF69621.1 anig|EHA22885.1 aory|EIT77040.1 asyd|OJJ59122.1 ater|EAU38157.1 atub|OJI86365.1 aver|OJJ01711.1 awen|OJJ31571.1 azon|OJJ47289.1

Group4061: abra|OJJ76302.1 acar|OOF99548.1 acla|EAW14316.1 afis|EAW18972.1 afla|EED51038.1 afum|EAL93705.1 agla|OJJ85360.1 akaw|GAA82232.1 aluc|OJZ91916.1 anid|CBF69627.1 anig|EHA22884.1 aory|EIT77044.1 asyd|OJJ59119.1 ater|EAU38158.1 atub|OJI86364.1 aver|OJJ01708.1 awen|OJJ31572.1 azon|OJJ47291.1

Group4062: abra|OJJ76303.1 acar|OOF99549.1 acla|EAW14315.1 afis|EAW18973.1 afla|EED51039.1 afum|EAL93706.1 agla|OJJ85361.1 akaw|GAA82233.1 aluc|OJZ91914.1 anid|CBF69629.1 anig|EHA22883.1 aory|EIT77038.1 asyd|OJJ59117.1 ater|EAU38159.1 atub|OJI86363.1 aver|OJJ01707.1 awen|OJJ31573.1 azon|OJJ47290.1

Group4063: abra|OJJ76307.1 acar|OOF99552.1 acla|EAW14108.1 afis|EAW18810.1 afla|EED50762.1 afum|EAL93546.1 agla|OJJ80543.1 akaw|GAA82238.1 aluc|OJZ91908.1 anid|CBF69793.1 anig|EHA22882.1 aory|EIT78035.1 asyd|OJJ58963.1 ater|EAU37962.1 atub|OJI86358.1 aver|OJJ01557.1 awen|OJJ32385.1 azon|OJJ47146.1

Group4064: abra|OJJ76314.1 acar|OOF99566.1 acla|EAW14101.1 afis|EAW18802.1 afla|EED50774.1 afum|EAL93538.1 agla|OJJ80532.1 akaw|GAA82245.1 aluc|OJZ91900.1 anid|CBF69784.1 anig|EHA22879.1 aory|EIT77990.1 asyd|OJJ58960.1 ater|EAU37940.1 atub|OJI86353.1 aver|OJJ01554.1 awen|OJJ32376.1 azon|OJJ47139.1

Group4065: abra|OJJ76323.1 acar|OOF99575.1 acla|EAW14092.1 afis|EAW18798.1 afla|EED50791.1 afum|EAL93534.1 agla|OJJ80527.1 akaw|GAA82252.1 aluc|OJZ91892.1 anid|CBF69777.1 anig|EHA22871.1 aory|EIT78043.1 asyd|OJJ58956.1 ater|EAU37930.1 atub|OJI86344.1 aver|OJJ01550.1 awen|OJJ32372.1 azon|OJJ47135.1

Group4066: abra|OJJ76325.1 acar|OOF99577.1 acla|EAW14090.1 afis|EAW18796.1 afla|EED50793.1 afum|EAL93532.1 agla|OJJ80525.1 akaw|GAA82254.1 aluc|OJZ91890.1 anid|CBF69773.1 anig|EHA22870.1 aory|EIT78128.1 asyd|OJJ58954.1 ater|EAU37927.1 atub|OJI86342.1 aver|OJJ01548.1 awen|OJJ32370.1 azon|OJJ47133.1

Group4067: abra|OJJ76326.1 acar|OOF99578.1 afis|EAW18795.1 afla|EED50794.1 afum|EAL93531.1 agla|OJJ80524.1 akaw|GAA82255.1 aluc|OJZ91889.1 anid|CBF69771.1 anig|EHA22869.1 aory|EIT78000.1 asyd|OJJ58953.1 ater|EAU37926.1 atub|OJI86341.1 aver|OJJ01547.1 awen|OJJ32369.1 azon|OJJ47132.1 acla|EAW14089.1

Group4068: abra|OJJ76327.1 acar|OOF99580.1 acla|EAW14088.1 afis|EAW18794.1 afla|EED50795.1 afum|EAL93530.1 agla|OJJ80523.1 akaw|GAA82256.1 aluc|OJZ91888.1 anid|CBF69769.1 anig|EHA22868.1 aory|EIT78079.1 asyd|OJJ58952.1 ater|EAU37925.1 atub|OJI86340.1 aver|OJJ01546.1 awen|OJJ32367.1 azon|OJJ47131.1

Group4069: abra|OJJ76332.1 acar|OOF99584.1 acla|EAW14083.1 afis|EAW18790.1 afla|EED50748.1 afum|EAL93525.1 agla|OJJ80519.1 akaw|GAA82260.1 aluc|OJZ91881.1 anid|CBF69761.1 anig|EHA22859.1 aory|EIT78056.1 asyd|OJJ58947.1 ater|EAU37921.1 atub|OJI86332.1 aver|OJJ01542.1 awen|OJJ32363.1 azon|OJJ47126.1

Group4070: abra|OJJ76334.1 acar|OOF99587.1 acla|EAW14079.1 afis|EAW18786.1 afla|EED50745.1 afum|EAL93519.1 agla|OJJ80509.1 akaw|GAA82262.1 aluc|OJZ91878.1 anid|CBF69752.1 anig|EHA22856.1 aory|EIT78009.1 asyd|OJJ58941.1 ater|EAU37918.1 atub|OJI86329.1 aver|OJJ01537.1 awen|OJJ32360.1 azon|OJJ47123.1

Group4071: abra|OJJ76336.1 acar|OOF99588.1 acla|EAW14078.1 afis|EAW18785.1 afla|EED50744.1 afum|EAL93517.2 agla|OJJ80507.1 akaw|GAA82264.1 aluc|OJZ91876.1 anid|CBF69748.1 anig|EHA22855.1

aory|EIT78137.1 asyd|OJJ58938.1 ater|EAU37917.1 atub|OJI86327.1 aver|OJJ01534.1 awen|OJJ32358.1 azon|OJJ47121.1

Group4072: abra|OJJ76337.1 acar|OOF99589.1 acla|EAW14077.1 afis|EAW18784.1 afla|EED50743.1 afum|EAL93516.2 agla|OJJ80506.1 akaw|GAA82265.1 aluc|OJZ91875.1 anid|CBF69746.1 anig|EHA22854.1 aory|EIT78027.1 asyd|OJJ58937.1 ater|EAU37916.1 atub|OJI86326.1 aver|OJJ01533.1 awen|OJJ32357.1 azon|OJJ47120.1

Group4073: abra|OJJ76338.1 acar|OOF99590.1 acla|EAW14076.1 afis|EAW18783.1 afla|EED50742.1 afum|EAL93515.1 agla|OJJ80504.1 akaw|GAA82266.1 aluc|OJZ91874.1 anid|CBF69744.1 anig|EHA22853.1 aory|EIT78012.1 asyd|OJJ58936.1 ater|EAU37915.1 atub|OJI86325.1 aver|OJJ01532.1 awen|OJJ32356.1 azon|OJJ47119.1

Group4074: abra|OJJ76340.1 acar|OOF99591.1 acla|EAW14075.1 afis|EAW18782.1 afla|EED50741.1 afum|EAL93514.1 agla|OJJ80502.1 akaw|GAA82267.1 aluc|OJZ91873.1 anid|CBF69742.1 anig|EHA22852.1 aory|EIT78041.1 asyd|OJJ58935.1 ater|EAU37914.1 atub|OJI86324.1 aver|OJJ01531.1 awen|OJJ32354.1 azon|OJJ47118.1

Group4075: abra|OJJ76342.1 acar|OOF99593.1 acla|EAW14073.1 afis|EAW18780.1 afla|EED50739.1 afum|EAL93512.1 agla|OJJ80500.1 akaw|GAA82269.1 aluc|OJZ91871.1 anid|CBF69738.1 anig|EHA22850.1 aory|EIT77981.1 asyd|OJJ58933.1 ater|EAU37912.1 atub|OJI86322.1 aver|OJJ01529.1 awen|OJJ32352.1 azon|OJJ47116.1

Group4076: abra|OJJ76344.1 acar|OOF99595.1 acla|EAW14071.1 afis|EAW18778.1 afla|EED50737.1 afum|EAL93510.1 agla|OJJ80495.1 akaw|GAA82271.1 aluc|OJZ91869.1 anid|CBF69734.1 anig|EHA22849.1 aory|EIT78123.1 asyd|OJJ58931.1 ater|EAU37910.1 atub|OJI86320.1 aver|OJJ01527.1 awen|OJJ32349.1 azon|OJJ47114.1

Group4077: abra|OJJ76345.1 acar|OOF99596.1 acla|EAW14070.1 afis|EAW18777.1 afla|EED50736.1 afum|EAL93509.1 agla|OJJ80494.1 akaw|GAA82272.1 aluc|OJZ91868.1 anid|CBF69732.1 anig|EHA22848.1 aory|EIT78071.1 asyd|OJJ58930.1 ater|EAU37909.1 atub|OJI86319.1 aver|OJJ01526.1 awen|OJJ32348.1 azon|OJJ47113.1

Group4078: abra|OJJ76346.1 acar|OOF99597.1 acla|EAW14069.1 afis|EAW18776.1 afla|EED50735.1 afum|EAL93508.1 agla|OJJ80493.1 akaw|GAA82273.1 aluc|OJZ91867.1 anid|CBF69730.1 anig|EHA22847.1 aory|EIT78130.1 asyd|OJJ58929.1 ater|EAU37908.1 atub|OJI86318.1 aver|OJJ01525.1 awen|OJJ32347.1 azon|OJJ47112.1

Group4079: abra|OJJ76347.1 acar|OOF99598.1 acla|EAW14068.1 afis|EAW18775.1 afla|EED50734.1 afum|EAL93507.1 agla|OJJ80491.1 akaw|GAA82274.1 aluc|OJZ91866.1 anid|CBF69728.1 anig|EHA22846.1 aory|EIT78021.1 asyd|OJJ58928.1 ater|EAU37906.1 atub|OJI86317.1 aver|OJJ01524.1 awen|OJJ32346.1 azon|OJJ47111.1

Group4080: abra|OJJ76349.1 acar|OOF99600.1 acla|EAW14066.1 afis|EAW18773.1 afla|EED50732.1 afum|EAL93505.1 agla|OJJ80489.1 akaw|GAA82276.1 aluc|OJZ91864.1 anid|CBF69724.1 anig|EHA22844.1 aory|EIT78029.1 asyd|OJJ58927.1 ater|EAU37904.1 atub|OJI86315.1 aver|OJJ01523.1 awen|OJJ32344.1 azon|OJJ47110.1

Group4081: abra|OJJ76351.1 acar|OOF99603.1 acla|EAW14064.1 afis|EAW18771.1 afla|EED50730.1 afum|EAL93502.1 agla|OJJ80467.1 akaw|GAA82278.1 aluc|OJZ91862.1 anid|CBF69934.1 anig|EHA22842.1 aory|EIT78074.1 asyd|OJJ58922.1 ater|EAU37902.1 atub|OJI86314.1 aver|OJJ01519.1 awen|OJJ32340.1 azon|OJJ47106.1

Group4082: abra|OJJ76353.1 acar|OOF99604.1 acla|EAW14062.1 afis|EAW18769.1 afla|EED50728.1 afum|EAL93500.2 agla|OJJ82285.1 akaw|GAA82279.1 aluc|OJZ91860.1 anid|CBF69938.1 anig|EHA22840.1 aory|EIT78133.1 asyd|OJJ58920.1 ater|EAU37900.1 atub|OJI86311.1 aver|OJJ01517.1 awen|OJJ32338.1 azon|OJJ47103.1

Group4083: abra|OJJ76354.1 acar|OOF99605.1 acla|EAW14061.1 afis|EAW18768.1 afla|EED50727.1 afum|EAL93499.1 agla|OJJ82284.1 akaw|GAA82280.1 aluc|OJZ91859.1 anid|CBF69940.1 anig|EHA22839.1 aory|EIT78038.1 asyd|OJJ58919.1 ater|EAU37899.1 atub|OJI86310.1 aver|OJJ01516.1 awen|OJJ32337.1 azon|OJJ47102.1

Group4084: abra|OJJ76356.1 acar|OOF99607.1 acla|EAW14059.1 afis|EAW18765.1 afla|EED50725.1 afum|EAL93497.1 agla|OJJ80456.1 akaw|GAA82282.1 aluc|OJZ91857.1 anid|CBF69944.1 anig|EHA22837.1 aory|EIT78144.1 asyd|OJJ58917.1 ater|EAU37895.1 atub|OJI86308.1 aver|OJJ01514.1 awen|OJJ32335.1 azon|OJJ47101.1

Group4085: abra|OJJ76358.1 acar|OOF99609.1 acla|EAW14058.1 afis|EAW18764.1 afla|EED50724.1 afum|EAL93496.2 agla|OJJ80457.1 akaw|GAA82284.1 aluc|OJZ91855.1 anid|CBF69945.1 anig|EHA22836.1 aory|EIT78031.1 asyd|OJJ58915.1 ater|EAU37894.1 atub|OJI86306.1 aver|OJJ01512.1 awen|OJJ32333.1 azon|OJJ47099.1

Group4086: abra|OJJ76359.1 acar|OOF99610.1 acla|EAW14057.1 afis|EAW18763.1 afla|EED50723.1 afum|EAL93495.1 agla|OJJ80458.1 akaw|GAA82285.1 aluc|OJZ91854.1 anid|CBF69947.1 anig|EHA22835.1 aory|EIT78108.1 asyd|OJJ58914.1 ater|EAU37893.1 atub|OJI86305.1 aver|OJJ01511.1 awen|OJJ32332.1 azon|OJJ47098.1

Group4087: abra|OJJ76362.1 acar|OOF99613.1 acla|EAW14054.1 afis|EAW18760.1 afla|EED50720.1 afum|EAL93491.1 agla|OJJ82333.1 akaw|GAA82288.1 aluc|OJZ91850.1 anid|CBF69953.1 anig|EHA22832.1 aory|EIT78011.1 asyd|OJJ58911.1 ater|EAU37891.1 atub|OJI86302.1 aver|OJJ01508.1 awen|OJJ32330.1 azon|OJJ47095.1

Group4088: abra|OJJ76363.1 acar|OOF99614.1 acla|EAW14053.1 afis|EAW18759.1 afla|EED50719.1 afum|EAL93489.1 agla|OJJ82332.1 akaw|GAA82289.1 aluc|OJZ91849.1 anid|CBF69955.1 anig|EHA22831.1 aory|EIT78126.1 asyd|OJJ58910.1 ater|EAU37928.1 atub|OJI86301.1 aver|OJJ01507.1 awen|OJJ32329.1 azon|OJJ47094.1

Group4089: abra|OJJ76364.1 acar|OOF99615.1 acla|EAW14052.1 afis|EAW18758.1 afla|EED50718.1 afum|EAL93488.2 agla|OJJ82331.1 akaw|GAA82290.1 aluc|OJZ91848.1 anid|CBF69957.1 anig|EHA22830.1 aory|EIT78109.1 asyd|OJJ58909.1 ater|EAU37890.1 atub|OJI86300.1 aver|OJJ01506.1 awen|OJJ32328.1 azon|OJJ47093.1

Group4090: abra|OJJ76366.1 acar|OOF89987.1 acla|EAW14050.1 afis|EAW18756.1 afla|EED50716.1 afum|EAL93484.1 agla|OJJ82324.1 akaw|GAA82292.1 aluc|OJZ91846.1 anid|CBF69963.1 anig|EHA22828.1 aory|EIT78115.1 asyd|OJJ58907.1 ater|EAU37887.1 atub|OJI86298.1 aver|OJJ01504.1 awen|OJJ32325.1 azon|OJJ47092.1

Group4091: abra|OJJ76368.1 acar|OOF99617.1 acla|EAW14048.1 afis|EAW18754.1 afla|EED50714.1 afum|EAL93481.1 agla|OJJ82322.1 akaw|GAA82294.1 aluc|OJZ91844.1 anid|CBF69971.1 anig|EHA22827.1 aory|EIT77980.1 asyd|OJJ58901.1 ater|EAU37885.1 atub|OJI86296.1 aver|OJJ01501.1 awen|OJJ32323.1 azon|OJJ47090.1

Group4092: abra|OJJ76370.1 acar|OOF99619.1 acla|EAW14047.1 afis|EAW18753.1 afla|EED50712.1 afum|EAL93480.1 agla|OJJ82321.1 akaw|GAA82296.1 aluc|OJZ91842.1 anid|CBF69973.1 anig|EHA22825.1 aory|EIT78076.1 asyd|OJJ58900.1 ater|EAU37884.1 atub|OJI86294.1 aver|OJJ01500.1 awen|OJJ32322.1 azon|OJJ47089.1

Group4093: abra|OJJ76378.1 acar|OOF99623.1 acla|EAW14044.1 afis|EAW18750.1 afla|EED50709.1 afum|EAL93477.1 agla|OJJ82317.1 akaw|GAA82299.1 aluc|OJZ91836.1 anid|CBF69979.1 anig|EHA22823.1 aory|EIT78032.1 asyd|OJJ58896.1 ater|EAU37879.1 atub|OJI86290.1 aver|OJJ01497.1 awen|OJJ32317.1 azon|OJJ47085.1

Group4094: abra|OJJ76379.1 acar|OOF99624.1 acla|EAW14043.1 afis|EAW18749.1 afla|EED50708.1 afum|EAL93475.1 agla|OJJ82316.1 akaw|GAA82300.1 aluc|OJZ91835.1 anid|CBF69983.1 anig|EHA22822.1 aory|EIT77996.1 asyd|OJJ58895.1 ater|EAU37878.1 atub|OJI86289.1 aver|OJJ01496.1 awen|OJJ32316.1 azon|OJJ47084.1

Group4095: abra|OJJ76381.1 acar|OOF89925.1 acla|EAW14041.1 afis|EAW18747.1 afla|EED50706.1 afum|EAL93473.1 agla|OJJ82314.1 akaw|GAA82302.1 aluc|OJZ91833.1 anid|CBF69987.1 anig|EHA22820.1 aory|EIT78116.1 asyd|OJJ58893.1 ater|EAU37876.1 atub|OJI86287.1 aver|OJJ01494.1 awen|OJJ32313.1 azon|OJJ47082.1

Group4096: abra|OJJ76382.1 acar|OOF89924.1 acla|EAW14040.1 afis|EAW18746.1 afla|EED50705.1 afum|EAL93472.1 agla|OJJ82313.1 akaw|GAA82303.1 aluc|OJZ91832.1 anid|CBF69992.1 anig|EHA22819.1 aory|EIT78094.1 asyd|OJJ58891.1 ater|EAU37875.1 atub|OJI86286.1 aver|OJJ01492.1 awen|OJJ32312.1 azon|OJJ42712.1

Group4097: abra|OJJ76387.1 acar|OOF99628.1 acla|EAW14036.1 afis|EAW18742.1 afla|EED50698.1 afum|EAL93468.1 agla|OJJ82308.1 akaw|GAA82307.1 aluc|OJZ91826.1 anid|CBF69998.1 anig|EHA22815.1 aory|EIT78061.1 asyd|OJJ58887.1 ater|EAU37869.1 atub|OJI86281.1 aver|OJJ01488.1 awen|OJJ32307.1 azon|OJJ42719.1

Group4098: abra|OJJ76389.1 acar|OOF99630.1 acla|EAW14035.1 afis|EAW18741.1 afla|EED50696.1 afum|EAL93467.1 agla|OJJ82307.1 akaw|GAA82308.1 aluc|OJZ91824.1 anid|CBF70000.1 anig|EHA22814.1 aory|EIT78051.1 asyd|OJJ58886.1 ater|EAU37864.1 atub|OJI86279.1 aver|OJJ01487.1 awen|OJJ32306.1 azon|OJJ42720.1

Group4099: abra|OJJ76390.1 acar|OOF99631.1 acla|EAW14034.1 afis|EAW18740.1 afla|EED50695.1 afum|EAL93466.1 agla|OJJ82306.1 akaw|GAA82309.1 aluc|OJZ91823.1 anid|CBF70002.1 anig|EHA22813.1 aory|EIT78073.1 asyd|OJJ58884.1 ater|EAU37863.1 atub|OJI86278.1 aver|OJJ01486.1 awen|OJJ32305.1 azon|OJJ42721.1

Group4100: abra|OJJ76392.1 acar|OOF99632.1 acla|EAW14032.1 afis|EAW18738.1 afla|EED50693.1 afum|EAL93464.1 agla|OJJ82304.1 akaw|GAA82311.1 aluc|OJZ91821.1 anid|CBF70006.1 anig|EHA22811.1

aory|EIT78112.1 asyd|OJJ58882.1 ater|EAU37861.1 atub|OJI86276.1 aver|OJJ01484.1 awen|OJJ32302.1 azon|OJJ42723.1

Group4101: abra|OJJ76393.1 acar|OOF99633.1 acla|EAW14031.1 afis|EAW18737.1 afla|EED50692.1 afum|EAL93462.1 agla|OJJ82303.1 akaw|GAA82312.1 aluc|OJZ91820.1 anid|CBF70008.1 anig|EHA22810.1 aory|EIT78068.1 asyd|OJJ58881.1 ater|EAU37860.1 atub|OJI86275.1 aver|OJJ01483.1 awen|OJJ32301.1 azon|OJJ42724.1

Group4102: abra|OJJ76395.1 acar|OOF99635.1 acla|EAW14029.1 afis|EAW18735.1 afla|EED50690.1 afum|EAL93460.1 agla|OJJ82301.1 akaw|GAA82314.1 aluc|OJZ91818.1 anid|CBF70012.1 anig|EHA22808.1 aory|EIT78132.1 asyd|OJJ58879.1 ater|EAU37858.1 atub|OJI86273.1 aver|OJJ01481.1 awen|OJJ32298.1 azon|OJJ42734.1

Group4103: abra|OJJ76396.1 acar|OOF99637.1 acla|EAW14027.1 afis|EAW18733.1 afla|EED50688.1 afum|EAL93458.1 agla|OJJ82299.1 akaw|GAA82316.1 aluc|OJZ91816.1 anid|CBF70014.1 anig|EHA22807.1 aory|EIT78099.1 asyd|OJJ58878.1 ater|EAU37848.1 atub|OJI86272.1 aver|OJJ01480.1 awen|OJJ32296.1 azon|OJJ42736.1

Group4104: abra|OJJ76404.1 acar|OOF99647.1 acla|EAW14017.1 afis|EAW18725.1 afla|EED50682.1 afum|EAL93450.1 agla|OJJ80475.1 akaw|GAA82324.1 aluc|OJZ91808.1 anid|CBF70021.1 anig|EHA22801.1 aory|EIT77978.1 asyd|OJJ58874.1 ater|EAU38179.1 atub|OJI86263.1 aver|OJJ01477.1 awen|OJJ32229.1 azon|OJJ46783.1

Group4105: abra|OJJ76406.1 acar|OOF99649.1 acla|EAW14019.1 afis|EAW18723.1 afla|EED50680.1 afum|EAL93448.1 agla|OJJ80477.1 akaw|GAA82326.1 aluc|OJZ91806.1 anid|CBF70688.1 anig|EHA22799.1 aory|EIT78149.1 asyd|OJJ58468.1 ater|EAU38180.1 atub|OJI86261.1 aver|OJJ01067.1 awen|OJJ32231.1 azon|OJJ46781.1

Group4106: abra|OJJ76409.1 acar|OOF99651.1 acla|EAW14015.1 afis|EAW18721.1 afla|EED50678.1 afum|EAL93445.1 agla|OJJ82334.1 akaw|GAA82328.1 aluc|OJZ91802.1 anid|CBF70681.1 anig|EHA22797.1 aory|EIT78078.1 asyd|OJJ58470.1 ater|EAU38183.1 atub|OJI86257.1 aver|OJJ01071.1 awen|OJJ32227.1 azon|OJJ46778.1

Group4107: abra|OJJ76411.1 acar|OOF99652.1 acla|EAW14014.1 afis|EAW18720.1 afla|EED50677.1 afum|EAL93444.1 agla|OJJ82335.1 akaw|GAA82329.1 aluc|OJZ91801.1 anid|CBF70679.1 anig|EHA22796.1 aory|EIT78134.1 asyd|OJJ58471.1 ater|EAU38184.1 atub|OJI86256.1 aver|OJJ01072.1 awen|OJJ32226.1 azon|OJJ46777.1

Group4108: abra|OJJ76417.1 acar|OOF99659.1 acla|EAW14009.1 afis|EAW18715.1 afla|EED50669.1 afum|EAL93440.1 agla|OJJ82344.1 akaw|GAA82332.1 aluc|OJZ91795.1 anid|CBF70670.1 anig|EHA22792.1 aory|EIT78070.1 asyd|OJJ58476.1 ater|EAU38192.1 atub|OJI86251.1 aver|OJJ01079.1 awen|OJJ32202.1 azon|OJJ46771.1

Group4109: abra|OJJ76418.1 acar|OOF99660.1 acla|EAW14008.1 afis|EAW18714.1 afla|EED50667.1 afum|EAL93439.1 agla|OJJ82345.1 akaw|GAA82333.1 aluc|OJZ91794.1 anid|CBF70668.1 anig|EHA22791.1 aory|EIT78037.1 asyd|OJJ58477.1 ater|EAU38193.1 atub|OJI86250.1 aver|OJJ01080.1 awen|OJJ32201.1 azon|OJJ46770.1

Group4110: abra|OJJ76419.1 acar|OOF99661.1 acla|EAW14007.1 afis|EAW18713.1 afla|EED50666.1 afum|EAL93438.1 agla|OJJ82346.1 akaw|GAA82334.1 aluc|OJZ91793.1 anid|CBF70666.1 anig|EHA22790.1 aory|EIT78088.1 asyd|OJJ58478.1 ater|EAU38194.1 atub|OJI86249.1 aver|OJJ01081.1 awen|OJJ32200.1 azon|OJJ46769.1

Group4111: abra|OJJ76420.1 acar|OOF99662.1 acla|EAW14006.1 afis|EAW18712.1 afla|EED50665.1 afum|EAL93437.1 agla|OJJ82347.1 akaw|GAA82335.1 aluc|OJZ91792.1 anid|CBF70665.1 anig|EHA22789.1 aory|EIT77998.1 asyd|OJJ58480.1 ater|EAU38195.1 atub|OJI86248.1 aver|OJJ01082.1 awen|OJJ32199.1 azon|OJJ46768.1

Group4112: abra|OJJ76422.1 acar|OOF99665.1 acla|EAW14003.1 afis|EAW18711.1 afla|EED50662.1 afum|EAL93434.1 agla|OJJ82348.1 akaw|GAA82337.1 aluc|OJZ91790.1 anid|CBF70661.1 anig|EHA22787.1 asyd|OJJ58481.1 ater|EAU38197.1 atub|OJI86246.1 aver|OJJ01083.1 awen|OJJ32197.1 azon|OJJ46766.1 aory|EIT77986.1

Group4113: abra|OJJ76423.1 acar|OOF99667.1 acla|EAW14002.1 afis|EAW18710.1 afla|EED50660.1 afum|EAL93433.1 agla|OJJ82349.1 akaw|GAA82338.1 aluc|OJZ91789.1 anid|CBF70657.1 anig|EHA22786.1 aory|EIT78084.1 asyd|OJJ58482.1 ater|EAU38198.1 atub|OJI86245.1 aver|OJJ01085.1 awen|OJJ32196.1 azon|OJJ46765.1

Group4114: abra|OJJ76429.1 acar|OOF99673.1 acla|EAW13996.1 afis|EAW18704.1 afla|EED50653.1 afum|EAL93427.2 agla|OJJ82354.1 akaw|GAA82344.1 aluc|OJZ91783.1 anid|CBF70646.1 anig|EHA22780.1 aory|EIT78100.1 asyd|OJJ58488.1 ater|EAU38202.1 atub|OJI86239.1 aver|OJJ01091.1 awen|OJJ32187.1 azon|OJJ46760.1



Group4115: abra|OJJ76430.1 acar|OOF99674.1 acla|EAW13995.1 afis|EAW18703.1 afla|EED50652.1  
afum|EAL93426.1 agla|OJJ82355.1 akaw|GAA82345.1 aluc|OJZ91782.1 anid|CBF70644.1 anig|EHA22779.1  
aory|EIT78020.1 asyd|OJJ58489.1 ater|EAU38203.1 atub|OJI86238.1 aver|OJJ01092.1 awen|OJJ32186.1  
azon|OJJ46761.1

Group4116: abra|OJJ76431.1 acar|OOF99675.1 acla|EAW13994.1 afis|EAW18702.1 afla|EED50651.1  
afum|EAL93425.1 agla|OJJ82359.1 akaw|GAA82346.1 aluc|OJZ91781.1 anid|CBF70642.1 anig|EHA22778.1  
aory|EIT78030.1 asyd|OJJ58490.1 ater|EAU38204.1 atub|OJI86237.1 aver|OJJ01093.1 awen|OJJ32185.1  
azon|OJJ46762.1

Group4117: abra|OJJ76433.1 acar|OOF99677.1 acla|EAW13991.1 afis|EAW18699.1 afla|EED50647.1  
afum|EAL93421.1 agla|OJJ82362.1 akaw|GAA82348.1 aluc|OJZ91779.1 anid|CBF70635.1 anig|EHA22776.1  
aory|EIT78093.1 asyd|OJJ58494.1 ater|EAU38207.1 atub|OJI86235.1 aver|OJJ01097.1 awen|OJJ32181.1  
azon|OJJ46756.1

Group4118: abra|OJJ76434.1 acar|OOF99679.1 acla|EAW13989.1 afis|EAW18697.1 afla|EED50645.1  
afum|EAL93419.1 agla|OJJ82371.1 akaw|GAA82349.1 aluc|OJZ91778.1 anid|CBF70631.1 anig|EHA22775.1  
aory|EIT78142.1 asyd|OJJ58496.1 ater|EAU38209.1 atub|OJI86234.1 aver|OJJ01099.1 awen|OJJ32168.1  
azon|OJJ46752.1

Group4119: abra|OJJ76440.1 acar|OOF99685.1 acla|EAW13984.1 afis|EAW18693.1 afla|EED50642.1  
afum|EAL93414.1 agla|OJJ82368.1 akaw|GAA82354.1 aluc|OJZ91769.1 anid|CBF70618.1 anig|EHA22769.1  
aory|EIT78025.1 asyd|OJJ58503.1 ater|EAU38215.1 atub|OJI86227.1 aver|OJJ01104.1 awen|OJJ32164.1  
azon|OJJ46745.1

Group4120: abra|OJJ76441.1 acar|OOF99686.1 acla|EAW13983.1 afis|EAW18692.1 afla|EED50641.1  
afum|EAL93413.2 agla|OJJ82366.1 akaw|GAA82355.1 aluc|OJZ91768.1 anid|CBF70620.1 anig|EHA22768.1  
aory|EIT78095.1 asyd|OJJ58502.1 ater|EAU38216.1 atub|OJI86226.1 aver|OJJ01103.1 awen|OJJ32163.1  
azon|OJJ46746.1

Group4121: abra|OJJ76446.1 acar|OOF99689.1 acla|EAW13982.1 afis|EAW18691.1 afla|EED50638.1  
afum|EAL93412.1 agla|OJJ82381.1 akaw|GAA82358.1 aluc|OJZ91764.1 anid|CBF70624.1 anig|EHA22765.1  
aory|EIT78085.1 asyd|OJJ58499.1 ater|EAU38217.1 atub|OJI86222.1 aver|OJJ01102.1 awen|OJJ32162.1  
azon|OJJ46748.1

Group4122: abra|OJJ76448.1 acar|OOF99690.1 acla|EAW13980.1 afis|EAW18689.1 afla|EED50637.1  
afum|EAL93410.1 agla|OJJ82383.1 akaw|GAA82360.1 aluc|OJZ91762.1 anid|CBF70616.1 anig|EHA22763.1  
aory|EIT78124.1 asyd|OJJ58506.1 ater|EAU38219.1 atub|OJI86220.1 aver|OJJ01107.1 awen|OJJ32160.1  
azon|OJJ46744.1

Group4123: abra|OJJ76449.1 acar|OOF99692.1 acla|EAW13979.1 afis|EAW18688.1 afla|EED50636.1  
afum|EAL93409.1 agla|OJJ82384.1 akaw|GAA82361.1 aluc|OJZ91761.1 anid|CBF70612.1 anig|EHA22762.1  
aory|EIT78146.1 asyd|OJJ58510.1 ater|EAU38220.1 atub|OJI86219.1 aver|OJJ01111.1 awen|OJJ32159.1  
azon|OJJ46743.1

Group4124: abra|OJJ76455.1 acar|OOF99696.1 acla|EAW13975.1 afis|EAW18684.1 afla|EED50622.1  
afum|EAL93405.1 agla|OJJ82387.1 akaw|GAA82367.1 aluc|OJZ91755.1 anid|CBF70607.1 anig|EHA22758.1  
aory|EIT78141.1 asyd|OJJ58514.1 ater|EAU38226.1 atub|OJI86213.1 aver|OJJ01115.1 awen|OJJ32155.1  
azon|OJJ46739.1

Group4125: abra|OJJ76456.1 acar|OOF99695.1 acla|EAW13974.1 afis|EAW18683.1 afla|EED50627.1  
afum|EAL93404.1 agla|OJJ82392.1 akaw|GAA82368.1 aluc|OJZ91754.1 anid|CBF70605.1 anig|EHA22757.1  
aory|EIT77985.1 asyd|OJJ58515.1 ater|EAU38227.1 atub|OJI86212.1 aver|OJJ01116.1 awen|OJJ32154.1  
azon|OJJ46738.1

Group4126: abra|OJJ76460.1 acar|OOF99699.1 acla|EAW13970.1 afis|EAW18679.1 afla|EED50631.1  
afum|EAL93399.1 agla|OJJ82396.1 akaw|GAA82373.1 aluc|OJZ91749.1 anid|CBF70596.1 anig|EHA22752.1  
aory|EIT78016.1 asyd|OJJ58519.1 ater|EAU38232.1 atub|OJI86207.1 aver|OJJ01120.1 awen|OJJ32151.1  
azon|OJJ46735.1

Group4127: abra|OJJ76464.1 acar|OOF99702.1 acla|EAW13967.1 afis|EAW18676.1 afla|EED50634.1  
afum|EAL93396.1 agla|OJJ82400.1 akaw|GAA82376.1 aluc|OJZ91746.1 anid|CBF70590.1 anig|EHA22749.1  
aory|EIT78033.1 asyd|OJJ58522.1 ater|EAU38234.1 atub|OJI86204.1 aver|OJJ01123.1 awen|OJJ32148.1  
azon|OJJ46732.1

Group4128: abra|OJJ76467.1 acar|OOF99705.1 acla|EAW13964.1 afis|EAW18673.1 afla|EED50626.1  
afum|EAL93393.2 agla|OJJ82402.1 akaw|GAA82378.1 aluc|OJZ91743.1 anid|CBF70584.1 anig|EHA22746.1  
aory|EIT78060.1 asyd|OJJ58525.1 ater|EAU38237.1 atub|OJI86201.1 aver|OJJ01126.1 awen|OJJ32145.1  
azon|OJJ46729.1

Group4129: abra|OJJ76468.1 acar|OOF99706.1 acla|EAW13963.1 afis|EAW18672.1 afla|EED50621.1  
afum|EAL93391.1 agla|OJJ82403.1 akaw|GAA82379.1 aluc|OJZ91742.1 anid|CBF70583.1 anig|EHA22745.1

aory|EIT78045.1 asyd|OJJ58526.1 ater|EAU38238.1 atub|OJI86200.1 aver|OJJ01127.1 awen|OJJ32144.1 azon|OJJ46728.1

Group4130: abra|OJJ76472.1 acar|OOF99709.1 acla|EAW13961.1 afis|EAW18670.1 afla|EED52658.1 afum|EAL93388.1 agla|OJJ82405.1 akaw|GAA82384.1 aluc|OJZ91737.1 anid|CBF70579.1 anig|EHA22743.1 aory|EIT74274.1 asyd|OJJ58528.1 ater|EAU38241.1 atub|OJI86195.1 aver|OJJ01130.1 awen|OJJ32142.1 azon|OJJ46723.1

Group4131: abra|OJJ76479.1 acar|OOF90192.1 acla|EAW13956.1 afis|EAW18666.1 afla|EED52663.1 afum|EAL93384.1 agla|OJJ82411.1 akaw|GAA82392.1 aluc|OJZ91728.1 anid|CBF70569.1 anig|EHA22735.1 aory|EIT74303.1 asyd|OJJ58533.1 ater|EAU38246.1 atub|OJI86186.1 aver|OJJ01135.1 awen|OJJ32134.1 azon|OJJ46717.1

Group4132: acar|OOF90191.1 aluc|OJZ91727.1 anig|EHA22734.1 atub|OJI86185.1 abra|OJJ76481.1 acla|EAW13954.1 afis|EAW18664.1 afla|EED52665.1 afum|EAL93382.1 agla|OJJ82412.1 akaw|GAA82394.1 anid|CBF70567.1 aory|EIT74310.1 asyd|OJJ58535.1 ater|EAU38248.1 aver|OJJ01136.1 awen|OJJ32132.1 azon|OJJ46715.1

Group4133: abra|OJJ76482.1 acar|OOF90190.1 acla|EAW13953.1 afis|EAW18663.1 afla|EED52666.1 afum|EBA27491.1 agla|OJJ82413.1 akaw|GAA82395.1 aluc|OJZ91726.1 anid|CBF70565.1 anig|EHA22733.1 aory|EIT74219.1 asyd|OJJ58536.1 ater|EAU38249.1 atub|OJI86184.1 aver|OJJ01137.1 awen|OJJ32131.1 azon|OJJ46714.1

Group4134: abra|OJJ76483.1 acar|OOF99714.1 acla|EAW13951.1 afis|EAW18661.1 afla|EED52669.1 afum|EAL93380.1 agla|OJJ82416.1 akaw|GAA82397.1 aluc|OJZ91725.1 anid|CBF70557.1 anig|EHA22732.1 aory|EIT74184.1 asyd|OJJ58538.1 ater|EAU38251.1 atub|OJI86182.1 aver|OJJ01138.1 awen|OJJ32128.1 azon|OJJ46711.1

Group4135: abra|OJJ76484.1 acar|OOF99715.1 acla|EAW13950.1 afis|EAW18659.1 afla|EED52670.1 afum|EAL93377.1 agla|OJJ82417.1 akaw|GAA82398.1 aluc|OJZ91724.1 anid|CBF70556.1 anig|EHA22731.1 aory|EIT74290.1 asyd|OJJ58539.1 ater|EAU38252.1 atub|OJI86181.1 aver|OJJ01139.1 awen|OJJ32127.1 azon|OJJ46710.1

Group4136: abra|OJJ76485.1 acar|OOF99718.1 acla|EAW13948.1 afis|EAW18658.1 afla|EED52672.1 afum|EAL93375.1 agla|OJJ82418.1 akaw|GAA82401.1 aluc|OJZ91721.1 anid|CBF70552.1 anig|EHA22728.1 aory|EIT74194.1 asyd|OJJ58540.1 ater|EAU38254.1 atub|OJI86178.1 aver|OJJ01141.1 awen|OJJ32125.1 azon|OJJ46709.1

Group4137: abra|OJJ76487.1 acar|OOF99720.1 acla|EAW13946.1 afis|EAW18656.1 afla|EED52674.1 afum|EAL93372.1 agla|OJJ82419.1 akaw|GAA82403.1 aluc|OJZ91718.1 anid|CBF70546.1 anig|EHA22726.1 aory|EIT74203.1 asyd|OJJ58543.1 ater|EAU38256.1 atub|OJI86175.1 aver|OJJ01143.1 awen|OJJ32123.1 azon|OJJ46708.1

Group4138: abra|OJJ76501.1 acar|OOF99466.1 acla|EAW14195.1 afis|EAW18911.1 afla|EED50838.1 afum|EAL93642.1 agla|OJJ81515.1 akaw|GAA82417.1 aluc|OJZ91701.1 anid|CBF69699.1 anig|EHA22715.1 aory|EIT79018.1 asyd|OJJ59050.1 ater|EAU38078.1 atub|OJI86160.1 aver|OJJ01646.1 awen|OJJ31504.1 azon|OJJ47224.1

Group4139: abra|OJJ76513.1 acar|OOF99459.1 acla|EAW14187.1 afis|EAW18902.1 afla|EED50846.1 afum|EAL93634.1 agla|OJJ81507.1 akaw|GAA82426.1 aluc|OJZ91692.1 anid|CBF69923.1 anig|EHA22705.1 aory|EIT79043.1 asyd|OJJ59039.1 ater|EAU38072.1 atub|OJI86145.1 aver|OJJ01634.1 awen|OJJ32459.1 azon|OJJ47217.1

Group4140: abra|OJJ76516.1 acar|OOF99457.1 acla|EAW14186.1 afis|EAW18901.1 afla|EED50847.1 afum|EAL93633.1 agla|OJJ81506.1 akaw|GAA82428.1 aluc|OJZ91690.1 anid|CBF69921.1 anig|EHA22703.1 aory|EIT79032.1 asyd|OJJ58987.1 ater|EAU38069.1 atub|OJI86143.1 aver|OJJ01629.1 awen|OJJ32458.1 azon|OJJ47216.1

Group4141: abra|OJJ76520.1 acar|OOF99453.1 acla|EAW14181.1 afis|EAW18896.1 afla|EED50867.1 afum|EAL93628.1 agla|OJJ81502.1 akaw|GAA82433.1 aluc|OJZ91688.1 anid|CBF69913.1 anig|EHA22700.1 aory|EIT79004.1 asyd|OJJ58992.1 ater|EAU38066.1 atub|OJI86139.1 aver|OJJ01623.1 awen|OJJ32454.1 azon|OJJ47211.1

Group4142: abra|OJJ76524.1 acar|OOF99445.1 acla|EAW14173.1 afis|EAW18887.1 afla|EED50878.1 afum|EAL93620.1 agla|OJJ81493.1 akaw|GAA82437.1 aluc|OJZ91684.1 anid|CBF69898.1 anig|EHA22696.1 aory|EIT79044.1 asyd|OJJ59000.1 ater|EAU38059.1 atub|OJI86136.1 aver|OJJ01615.1 awen|OJJ32445.1 azon|OJJ47203.1

Group4143: abra|OJJ76528.1 acar|OOF99447.1 acla|EAW14175.1 afis|EAW18889.1 afla|EED50874.1 afum|EAL93622.1 agla|OJJ81495.1 akaw|GAA82439.1 aluc|OJZ91677.1 anid|CBF69902.1 anig|EHA22694.1 aory|EIT78988.1 asyd|OJJ58998.1 ater|EAU38061.1 atub|OJI86132.1 aver|OJJ01617.1 awen|OJJ32448.1 azon|OJJ47206.1

Group4144: abra|OJJ76530.1 acar|OOF99443.1 acla|EAW14171.1 afis|EAW18885.1 afla|EED50880.1 afum|EAL93618.1 agla|OJJ80620.1 akaw|GAA82442.1 aluc|OJZ91674.1 anid|CBF69894.1 anig|EHA22692.1 aory|EIT78957.1 asyd|OJJ59002.1 ater|EAU38057.1 atub|OJI86129.1 aver|OJJ01613.1 awen|OJJ32443.1 azon|OJJ47201.1

Group4145: abra|OJJ76534.1 acar|OOF99440.1 acla|EAW14169.1 afis|EAW18883.1 afla|EED50882.1 afum|EAL93616.1 agla|OJJ80618.1 akaw|GAA82445.1 aluc|OJZ91671.1 anid|CBF69892.1 anig|EHA22689.1 aory|EIT79022.1 asyd|OJJ59005.1 ater|EAU38055.1 atub|OJI86126.1 aver|OJJ01611.1 awen|OJJ32440.1 azon|OJJ47199.1

Group4146: abra|OJJ76535.1 acar|OOF99439.1 acla|EAW14168.1 afis|EAW18882.1 afla|EED50883.1 afum|EAL93614.1 agla|OJJ80617.1 akaw|GAA82446.1 aluc|OJZ91670.1 anid|CBF70466.1 anig|EHA22688.1 aory|EIT78979.1 asyd|OJJ58598.1 ater|EAU38054.1 atub|OJI86125.1 aver|OJJ01200.1 awen|OJJ32441.1 azon|OJJ47198.1

Group4147: abra|OJJ76536.1 acar|OOF99432.1 acla|EAW14162.1 afis|EAW18875.1 afla|EED50892.1 afum|EAL93607.1 agla|OJJ80612.1 akaw|GAA82447.1 aluc|OJZ91669.1 anid|CBF69869.1 anig|EHA22687.1 aory|EIT79035.1 asyd|OJJ59019.1 ater|EAU38040.1 atub|OJI86124.1 aver|OJJ01597.1 awen|OJJ32434.1 azon|OJJ47192.1

Group4148: abra|OJJ76537.1 acar|OOF99433.1 acla|EAW14163.1 afis|EAW18876.1 afla|EED50891.1 afum|EAL93608.1 agla|OJJ80613.1 akaw|GAA82448.1 aluc|OJZ91667.1 anid|CBF69873.1 anig|EHA22686.1 aory|EIT79049.1 asyd|OJJ59018.1 ater|EAU38041.1 atub|OJI86122.1 aver|OJJ01598.1 awen|OJJ32435.1 azon|OJJ47191.1

Group4149: abra|OJJ76540.1 acar|OOF99435.1 acla|EAW14165.1 afis|EAW18878.1 afla|EED50888.1 afum|EAL93610.1 agla|OJJ80615.1 akaw|GAA82450.1 aluc|OJZ91663.1 anid|CBF69877.1 anig|EHA22683.1 aory|EIT79008.1 asyd|OJJ59015.1 ater|EAU38043.1 atub|OJI86120.1 aver|OJJ01600.1 awen|OJJ32437.1 azon|OJJ47196.1

Group4150: abra|OJJ76542.1 acar|OOF99437.1 acla|EAW12334.1 afis|EAW16888.1 afla|EED49676.1 afum|EAL86426.1 agla|OJJ79936.1 akaw|GAA82451.1 aluc|OJZ91661.1 anid|CBF84569.1 anig|EHA22681.1 aory|EIT80968.1 asyd|OJJ53441.1 ater|EAU39143.1 atub|OJI86117.1 aver|OJJ08310.1 awen|OJJ29756.1 azon|OJJ43187.1

Group4151: abra|OJJ76543.1 acar|OOF99431.1 acla|EAW14161.1 afis|EAW18874.1 afla|EED50893.1 afum|EAL93606.1 agla|OJJ80611.1 akaw|GAA82452.1 aluc|OJZ91660.1 anid|CBF69867.1 anig|EHA22680.1 aory|EIT79007.1 asyd|OJJ59020.1 ater|EAU38039.1 atub|OJI86116.1 aver|OJJ01596.1 awen|OJJ32433.1 azon|OJJ47193.1

Group4152: abra|OJJ76545.1 acar|OOF99429.1 acla|EAW14159.1 afis|EAW18872.1 afla|EED50895.1 afum|EAL93604.1 agla|OJJ80609.1 akaw|GAA82454.1 aluc|OJZ91658.1 anid|CBF69863.1 anig|EHA22678.1 aory|EIT79057.1 asyd|OJJ59023.1 ater|EAU38036.1 atub|OJI86114.1 aver|OJJ01594.1 awen|OJJ32431.1 azon|OJJ47188.1

Group4153: abra|OJJ76546.1 acar|OOF99428.1 acla|EAW14158.1 afis|EAW18871.1 afla|EED50831.1 afum|EAL93603.1 agla|OJJ80595.1 akaw|GAA82455.1 aluc|OJZ91657.1 anid|CBF69852.1 anig|EHA22677.1 aory|EIT79042.1 asyd|OJJ59028.1 ater|EAU38035.1 atub|OJI86112.1 aver|OJJ01588.1 awen|OJJ32430.1 azon|OJJ47185.1

Group4154: abra|OJJ76547.1 acar|OOF99427.1 acla|EAW14157.1 afis|EAW18870.1 afla|EED50832.1 afum|EAL93602.1 agla|OJJ80596.1 akaw|GAA82456.1 aluc|OJZ91656.1 anid|CBF69854.1 anig|EHA22676.1 aory|EIT79054.1 asyd|OJJ59027.1 ater|EAU38034.1 atub|OJI86111.1 aver|OJJ01589.1 awen|OJJ32429.1 azon|OJJ47184.1

Group4155: abra|OJJ76549.1 acar|OOF99426.1 acla|EAW14156.1 afis|EAW18869.1 afla|EED50833.1 afum|EAL93601.1 agla|OJJ80600.1 akaw|GAA82457.1 aluc|OJZ91654.1 anid|CBF69856.1 anig|EHA22675.1 aory|EIT78961.1 asyd|OJJ59026.1 ater|EAU38033.1 atub|OJI86108.1 aver|OJJ01591.1 awen|OJJ32428.1 azon|OJJ47183.1

Group4156: abra|OJJ76550.1 acar|OOF89946.1 acla|EAW14155.1 afis|EAW18868.1 afla|EED50834.1 afum|EAL93600.1 agla|OJJ80601.1 akaw|GAA82458.1 aluc|OJZ91653.1 anid|CBF69857.1 anig|EHA22674.1 aory|EIT78982.1 asyd|OJJ59025.1 ater|EAU38032.1 atub|OJI86107.1 aver|OJJ01592.1 awen|OJJ32427.1 azon|OJJ47182.1

Group4157: abra|OJJ76551.1 acar|OOF89945.1 acla|EAW14153.1 afis|EAW18866.1 afla|EED50897.1 afum|EAL93598.1 agla|OJJ80603.1 akaw|GAA82459.1 aluc|OJZ91652.1 anid|CBF69861.1 anig|EHA22673.1 aory|EIT79016.1 asyd|OJJ59024.1 ater|EAU38030.1 atub|OJI86106.1 aver|OJJ01593.1 awen|OJJ32425.1 azon|OJJ47180.1

Group4158: abra|OJJ76554.1 acar|OOF99424.1 acla|EAW14150.1 afis|EAW18863.1 afla|EED50830.1 afum|EAL93595.1 agla|OJJ80586.1 akaw|GAA82461.1 aluc|OJZ91650.1 anid|CBF69848.1 anig|EHA22671.1

aory|EIT79053.1 asyd|OJJ59030.1 ater|EAU38025.1 atub|OJI86104.1 aver|OJJ01586.1 awen|OJJ32419.1 azon|OJJ47176.1

Group4159: abra|OJJ76558.1 acar|OOF99421.1 acla|EAW14147.1 afis|EAW18860.1 afla|EED50827.1 afum|EAL93592.1 agla|OJJ80583.1 akaw|GAA82464.1 aluc|OJZ91647.1 anid|CBF69842.1 anig|EHA22668.1 aory|EIT78975.1 asyd|OJJ59033.1 ater|EAU38023.1 atub|OJI86101.1 aver|OJJ01583.1 awen|OJJ32416.1 azon|OJJ47173.1

Group4160: abra|OJJ76563.1 acar|OOF99419.1 acla|EAW14144.1 afis|EAW18857.1 afla|EED50824.1 afum|EAL93589.2 agla|OJJ80579.1 akaw|GAA82467.1 aluc|OJZ91643.1 anid|CBF69834.1 anig|EHA22665.1 aory|EIT78963.1 asyd|OJJ58985.1 ater|EAU38020.1 atub|OJI86097.1 aver|OJJ01580.1 awen|OJJ32413.1 azon|OJJ47170.1

Group4161: abra|OJJ76565.1 acar|OOF99418.1 acla|EAW14143.1 afis|EAW18856.1 afla|EED50823.1 afum|EAL93587.1 akaw|GAA82469.1 aluc|OJZ91641.1 anid|CBF69831.1 anig|EHA22664.1 aory|EIT79024.1 asyd|OJJ58983.1 ater|EAU38019.1 atub|OJI86095.1 aver|OJJ01578.1 awen|OJJ32411.1 azon|OJJ47168.1 agla|OJJ80577.1

Group4162: abra|OJJ76566.1 acar|OOF99355.1 acla|EAW14142.1 afis|EAW18855.1 afla|EED50822.1 afum|EAL93586.1 agla|OJJ80574.1 akaw|GAA82470.1 aluc|OJZ91640.1 anid|CBF69829.1 anig|EHA22663.1 aory|EIT78993.1 asyd|OJJ58981.1 ater|EAU38013.1 atub|OJI86094.1 aver|OJJ01576.1 awen|OJJ32410.1 azon|OJJ47167.1

Group4163: abra|OJJ76567.1 acar|OOF99417.1 acla|EAW14141.1 afis|EAW18854.1 afla|EED50821.1 afum|EAL93585.1 agla|OJJ80573.1 akaw|GAA82471.1 aluc|OJZ91639.1 anid|CBF69827.1 anig|EHA22662.1 aory|EIT78968.1 asyd|OJJ58980.1 ater|EAU38012.1 atub|OJI86093.1 aver|OJJ01575.1 awen|OJJ32409.1 azon|OJJ47166.1

Group4164: abra|OJJ76569.1 acar|OOF99416.1 acla|EAW14139.1 afis|EAW18852.1 afla|EED50819.1 afum|EAL93583.1 agla|OJJ80571.1 akaw|GAA82473.1 aluc|OJZ91636.1 anid|CBF89917.1 anig|EHA22660.1 aory|EIT79009.1 asyd|OJJ62126.1 ater|EAU38005.1 atub|OJI86089.1 aver|OJI96234.1 awen|OJJ32406.1 azon|OJJ47164.1

Group4165: abra|OJJ76570.1 acar|OOF99415.1 acla|EAW14138.1 afis|EAW18851.1 afla|EED50818.1 afum|EAL93582.1 agla|OJJ80570.1 akaw|GAA82474.1 aluc|OJZ91635.1 anid|CBF69823.1 anig|EHA22659.1 aory|EIT78969.1 asyd|OJJ58978.1 ater|EAU38004.1 atub|OJI86088.1 aver|OJJ01573.1 awen|OJJ32405.1 azon|OJJ47163.1

Group4166: abra|OJJ76571.1 acar|OOF99414.1 acla|EAW14137.1 afis|EAW18850.1 afla|EED50817.1 afum|EAL93581.1 agla|OJJ80569.1 akaw|GAA82475.1 aluc|OJZ91634.1 anid|CBF69821.1 anig|EHA22658.1 aory|EIT79031.1 asyd|OJJ58977.1 ater|EAU38003.1 atub|OJI86087.1 aver|OJJ01572.1 awen|OJJ32404.1 azon|OJJ47162.1

Group4167: abra|OJJ76572.1 acar|OOF99413.1 acla|EAW14136.1 afis|EAW18849.1 afla|EED50816.1 afum|EAL93580.1 agla|OJJ80568.1 akaw|GAA82476.1 aluc|OJZ91633.1 anid|CBF69819.1 anig|EHA22657.1 aory|EIT78989.1 asyd|OJJ58976.1 ater|EAU38002.1 atub|OJI86086.1 aver|OJJ01571.1 awen|OJJ32403.1 azon|OJJ47161.1

Group4168: abra|OJJ76573.1 acar|OOF99412.1 acla|EAW14134.1 afis|EAW18847.1 afla|EED50814.1 afum|EAL93579.1 agla|OJJ80567.1 akaw|GAA82478.1 aluc|OJZ91632.1 anid|CBF69817.1 anig|EHA22656.1 aory|EIT79029.1 asyd|OJJ58975.1 ater|EAU38001.1 atub|OJI86085.1 aver|OJJ01570.1 awen|OJJ32402.1 azon|OJJ47160.1

Group4169: abra|OJJ76576.1 acar|OOF99408.1 acla|EAW14117.1 afis|EAW18819.1 afla|EED50808.1 afum|EAL93555.1 agla|OJJ80554.1 akaw|GAA82481.1 aluc|OJZ91629.1 anid|CBF69809.1 anig|EHA22653.1 aory|EIT78964.1 asyd|OJJ58971.1 ater|EAU37998.1 atub|OJI86082.1 aver|OJJ01566.1 awen|OJJ32395.1 azon|OJJ47157.1

Group4170: abra|OJJ76577.1 acar|OOF99407.1 acla|EAW14116.1 afis|EAW18818.1 afla|EED50809.1 afum|EAL93554.1 agla|OJJ80552.1 akaw|GAA82482.1 aluc|OJZ91628.1 anid|CBF69811.1 anig|EHA22652.1 aory|EIT78995.1 asyd|OJJ58972.1 ater|EAU37997.1 atub|OJI86081.1 aver|OJJ01567.1 awen|OJJ32394.1 azon|OJJ47156.1

Group4171: abra|OJJ76579.1 acar|OOF99405.1 acla|EAW14114.1 afis|EAW18816.1 afla|EED50804.1 afum|EAL93552.1 agla|OJJ80549.1 akaw|GAA82484.1 aluc|OJZ91626.1 anid|CBF69815.1 anig|EHA22650.1 aory|EIT78104.1 asyd|OJJ58974.1 ater|EAU37991.1 atub|OJI86079.1 aver|OJJ01569.1 awen|OJJ32392.1 azon|OJJ47153.1

Group4172: abra|OJJ76581.1 acar|OOF99404.1 acla|EAW14113.1 afis|EAW18815.1 afla|EED50802.1 afum|EAL93551.1 agla|OJJ80548.1 akaw|GAA82485.1 aluc|OJZ91624.1 anid|CBF69803.1 anig|EHA22649.1 aory|EIT77988.1 asyd|OJJ58968.1 ater|EAU37982.1 atub|OJI86077.1 aver|OJJ01563.1 awen|OJJ32391.1 azon|OJJ47152.1

Group4173: abra|OJJ76582.1 acar|OOF99403.1 acla|EAW14112.1 afis|EAW18814.1 afla|EED50800.1  
afum|EAL93550.2 agla|OJJ80547.1 akaw|GAA82486.1 aluc|OJZ91623.1 anid|CBF69801.1 anig|EHA22648.1  
aory|EIT78081.1 asyd|OJJ58967.1 ater|EAU37981.1 atub|OJI86076.1 aver|OJJ01562.1 awen|OJJ32390.1  
azon|OJJ47151.1

Group4174: abra|OJJ76588.1 acar|OOF99398.1 acla|EAW14313.1 afis|EAW18974.1 afla|EED53230.1  
afum|EAL93708.1 agla|OJJ82930.1 akaw|GAA82492.1 aluc|OJZ91618.1 anid|CBF69639.1 anig|EHA22645.1  
aory|EIT74874.1 asyd|OJJ59084.1 ater|EAU38166.1 atub|OJI86071.1 aver|OJJ01677.1 awen|OJJ31576.1  
azon|OJJ47293.1

Group4175: abra|OJJ76590.1 acar|OOF99397.1 acla|EAW14311.1 afis|EAW18975.1 afla|EED53222.1  
afum|EAL93710.1 agla|OJJ82932.1 akaw|GAA82494.1 aluc|OJZ91616.1 anid|CBF69642.1 anig|EHA22644.1  
aory|EIT74886.1 asyd|OJJ59081.1 ater|EAU38164.1 atub|OJI86069.1 aver|OJJ01674.1 awen|OJJ31580.1  
azon|OJJ47295.1

Group4176: abra|OJJ76591.1 acar|OOF99396.1 acla|EAW14310.1 afis|EAW18976.1 afla|EED53221.1  
afum|EAL93711.2 agla|OJJ82933.1 akaw|GAA82495.1 aluc|OJZ91615.1 anid|CBF69644.1 anig|EHA22643.1  
aory|EIT74842.1 asyd|OJJ59080.1 ater|EAU38163.1 atub|OJI86068.1 aver|OJJ01673.1 awen|OJJ31581.1  
azon|OJJ47296.1

Group4177: abra|OJJ76594.1 acar|OOF99393.1 acla|EAW14307.1 afis|EAW18978.1 afla|EED53192.1  
afum|EAL93714.1 agla|OJJ82936.1 akaw|GAA82498.1 aluc|OJZ91612.1 anid|CBF69649.1 anig|EHA22641.1  
aory|EIT75152.1 asyd|OJJ59077.1 ater|EAU38169.1 atub|OJI86065.1 aver|OJJ01670.1 awen|OJJ31584.1  
azon|OJJ47299.1

Group4178: abra|OJJ76601.1 acar|OOF99390.1 acla|EAW14305.1 afis|EAW18979.1 afla|EED53188.1  
afum|EAL93715.1 agla|OJJ82941.1 akaw|GAA82504.1 aluc|OJZ91607.1 anid|CBF69652.1 anig|EHA22636.1  
aory|EIT74907.1 asyd|OJJ59076.1 ater|EAU37838.1 atub|OJI86059.1 aver|OJJ01669.1 awen|OJJ31587.1  
azon|OJJ47303.1

Group4179: abra|OJJ76605.1 acar|OOF99386.1 acla|EAW14301.1 afis|EAW18983.1 afla|EED53161.1  
afum|EAL93719.1 agla|OJJ82958.1 akaw|GAA82509.1 aluc|OJZ91603.1 anid|CBF69659.1 anig|EHA22632.1  
aory|EIT74944.1 asyd|OJJ59072.1 ater|EAU37822.1 atub|OJI86055.1 aver|OJJ01665.1 awen|OJJ31600.1  
azon|OJJ47307.1

Group4180: abra|OJJ76606.1 acar|OOF99384.1 acla|EAW14300.1 afis|EAW18984.1 afla|EED53162.1  
afum|EAL93720.1 agla|OJJ82959.1 akaw|GAA82510.1 aluc|OJZ91602.1 anid|CBF69661.1 anig|EHA22631.1  
aory|EIT74985.1 asyd|OJJ59071.1 ater|EAU37821.1 atub|OJI86054.1 aver|OJJ01664.1 awen|OJJ31604.1  
azon|OJJ47308.1

Group4181: abra|OJJ76609.1 acar|OOF99383.1 acla|EAW14297.1 afis|EAW18986.1 afla|EED53164.1  
afum|EAL93722.1 agla|OJJ82964.1 akaw|GAA82512.1 aluc|OJZ91599.1 anid|CBF69665.1 anig|EHA22629.1  
aory|EIT75120.1 asyd|OJJ59069.1 ater|EAU37819.1 atub|OJI86050.1 aver|OJJ01662.1 awen|OJJ31606.1  
azon|OJJ47310.1

Group4182: abra|OJJ76624.1 acar|OOF99374.1 acla|EAW14295.1 afis|EAW18988.1 afla|EED53173.1  
afum|EAL93724.1 agla|OJJ82975.1 akaw|GAA92833.1 aluc|OJZ91588.1 anid|CBF86791.1 anig|EHA22612.1  
aory|EIT75118.1 asyd|OJJ64674.1 ater|EAU37816.1 atub|OJI86037.1 aver|OJI98775.1 awen|OJJ31609.1  
azon|OJJ47312.1

Group4183: abra|OJJ76631.1 acar|OOF99366.1 acla|EAW08624.1 afis|EAW15808.1 afla|EED53158.1  
afum|EAL85543.1 agla|OJJ81974.1 akaw|GAA92825.1 aluc|OJZ91580.1 anid|CBF86787.1 anig|EHA22607.1  
aory|EIT75169.1 asyd|OJJ64676.1 ater|EAU37812.1 atub|OJI86029.1 aver|OJI98777.1 awen|OJJ38519.1  
azon|OJJ50132.1

Group4184: abra|OJJ76632.1 acar|OOF99365.1 acla|EAW14288.1 afis|EAW18995.1 afla|EED53157.1  
afum|EAL93730.1 agla|OJJ83149.1 akaw|GAA92824.1 aluc|OJZ91578.1 anid|CBF86656.1 anig|EHA22605.1  
aory|EIT74972.1 asyd|OJJ64788.1 atub|OJI86028.1 aver|OJJ07926.1 awen|OJJ29936.1 aver|OJI98879.1  
aver|OJI98900.1

Group4185: abra|OJJ76658.1 acar|OOF99343.1 acla|EAW14620.1 afis|EAW19358.1 afla|EED52157.1  
afum|EAL94078.1 akaw|GAA92998.1 aluc|OJZ91547.1 anid|CBF73438.1 anig|EHA22582.1 aory|EIT74377.1  
asyd|OJJ52447.1 ater|EAU36409.1 atub|OJI86000.1 aver|OJJ08112.1 azon|OJJ42907.1 azon|OJJ42486.1  
aver|OJJ03969.1

Group4186: abra|OJJ76671.1 acar|OOF99339.1 acla|EAW09095.1 afis|EAW25689.1 afum|EAL84358.1  
agla|OJJ78884.1 akaw|GAA92521.1 aluc|OJZ91535.1 anig|EHA22572.1 asyd|OJJ55501.1 atub|OJI85989.1  
aver|OJJ06579.1 awen|OJJ38060.1 azon|OJJ45319.1 acar|OOG00611.1 anid|CBF80316.1 asyd|OJJ57586.1  
aver|OJJ05596.1

Group4187: abra|OJJ76753.1 acar|OOF91249.1 acla|EAW13307.1 afis|EAW20421.1 afla|EED44850.1  
afum|EAL84629.1 agla|OJJ84904.1 akaw|GAA87271.1 aluc|OJZ84156.1 anid|CBF79342.1 anig|EHA27518.1

aory|EIT77742.1 asyd|OJJ55796.1 ater|EAU37735.1 atub|OJI89928.1 aver|OJJ06885.1 awen|OJJ33114.1 azon|OJJ46330.1

Group4188: abra|OJJ76756.1 acar|OOF91251.1 acla|EAW13310.1 afis|EAW20424.1 afla|EED44846.1 afum|EAL84624.2 agla|OJJ84901.1 akaw|GAA87269.1 aluc|OJZ84159.1 anid|CBF79340.1 anig|EHA27521.1 aory|EIT77736.1 asyd|OJJ55792.1 ater|EAU37733.1 atub|OJI89925.1 aver|OJJ06882.1 awen|OJJ33117.1 azon|OJJ46333.1

Group4189: abra|OJJ76758.1 acar|OOF91253.1 acla|EAW13312.1 afis|EAW20426.1 afla|EED44842.1 afum|EAL84623.1 agla|OJJ84899.1 akaw|GAA87268.1 aluc|OJZ84161.1 anid|CBF79338.1 anig|EHA27522.1 aory|EIT77746.1 asyd|OJJ55790.1 ater|EAU37731.1 atub|OJI89923.1 aver|OJJ06880.1 awen|OJJ33119.1 azon|OJJ46335.1

Group4190: abra|OJJ76760.1 acar|OOF91255.1 acla|EAW13314.1 afis|EAW20428.1 afla|EED44840.1 afum|EAL84622.1 agla|OJJ84897.1 akaw|GAA87266.1 aluc|OJZ84163.1 anid|CBF79334.1 anig|EHA27524.1 aory|EIT77728.1 asyd|OJJ55788.1 ater|EAU37729.1 atub|OJI89921.1 aver|OJJ06878.1 awen|OJJ33121.1 azon|OJJ46337.1

Group4191: abra|OJJ76761.1 acar|OOF91256.1 acla|EAW13315.1 afis|EAW20429.1 afla|EED44839.1 afum|EAL84621.1 agla|OJJ84896.1 akaw|GAA87265.1 aluc|OJZ84164.1 anid|CBF79332.1 anig|EHA27525.1 aory|EIT77744.1 asyd|OJJ55787.1 ater|EAU37728.1 atub|OJI89920.1 aver|OJJ06877.1 awen|OJJ33122.1 azon|OJJ46338.1

Group4192: abra|OJJ76762.1 acar|OOF91257.1 acla|EAW13316.1 afis|EAW20430.1 afla|EED44838.1 afum|EAL84620.1 agla|OJJ84895.1 akaw|GAA87264.1 aluc|OJZ84165.1 anid|CBF79330.1 anig|EHA27526.1 aory|EIT77755.1 asyd|OJJ55786.1 ater|EAU37727.1 atub|OJI89919.1 aver|OJJ06876.1 awen|OJJ33123.1 azon|OJJ46339.1

Group4193: abra|OJJ76764.1 acar|OOF91259.1 acla|EAW13318.1 afis|EAW20432.1 afla|EED44836.1 afum|EAL84619.1 agla|OJJ84893.1 akaw|GAA87262.1 aluc|OJZ84168.1 anid|CBF79325.1 anig|EHA27528.1 aory|EIT77720.1 asyd|OJJ55784.1 ater|EAU37725.1 atub|OJI89916.1 aver|OJJ06874.1 awen|OJJ33125.1 azon|OJJ46341.1

Group4194: abra|OJJ76766.1 acar|OOF91260.1 acla|EAW13320.1 afis|EAW20435.1 afla|EED44835.1 afum|EAL84617.1 agla|OJJ84891.1 akaw|GAA87260.1 aluc|OJZ84169.1 anid|CBF79321.1 anig|EHA27530.1 aory|EIT77727.1 asyd|OJJ55783.1 ater|EAU37723.1 atub|OJI89915.1 aver|OJJ06872.1 awen|OJJ33126.1 azon|OJJ46342.1

Group4195: abra|OJJ76768.1 acar|OOF91262.1 acla|EAW13322.1 afis|EAW20437.1 afla|EED44833.1 afum|EAL84615.1 agla|OJJ84886.1 akaw|GAA87258.1 aluc|OJZ84171.1 anid|CBF79317.1 anig|EHA27532.1 aory|EIT77715.1 asyd|OJJ55781.1 ater|EAU37721.1 atub|OJI89913.1 aver|OJJ06870.1 awen|OJJ33128.1 azon|OJJ46344.1

Group4196: abra|OJJ76769.1 acar|OOF91263.1 acla|EAW13323.1 afis|EAW20438.1 afla|EED44832.1 afum|EAL84614.1 agla|OJJ84885.1 akaw|GAA87257.1 aluc|OJZ84172.1 anid|CBF79312.1 anig|EHA27533.1 aory|EIT77757.1 asyd|OJJ55780.1 ater|EAU37720.1 atub|OJI89912.1 aver|OJJ06869.1 awen|OJJ33129.1 azon|OJJ46345.1

Group4197: abra|OJJ76774.1 acar|OOF91269.1 acla|EAW13331.1 afis|EAW20446.1 afla|EED44824.1 afum|EAL84607.1 agla|OJJ84875.1 akaw|GAA87250.1 aluc|OJZ84178.1 anid|CBF79292.1 anig|EHA27537.1 aory|EIT77756.1 asyd|OJJ55775.1 ater|EAU37713.1 atub|OJI89905.1 aver|OJJ06864.1 awen|OJJ33136.1 azon|OJJ46349.1

Group4198: abra|OJJ76776.1 acar|OOF91271.1 acla|EAW13335.1 afis|EAW20450.1 afla|EED44818.1 afum|EAL84603.1 agla|OJJ84872.1 akaw|GAA87248.1 aluc|OJZ84180.1 anid|CBF79297.1 anig|EHA27540.1 aory|EIT77719.1 asyd|OJJ55773.1 ater|EAU37709.1 atub|OJI89903.1 aver|OJJ06860.1 awen|OJJ33140.1 azon|OJJ46351.1

Group4199: abra|OJJ76779.1 acar|OOF91275.1 acla|EAW13338.1 afis|EAW20453.1 afla|EED44815.1 afum|EAL84600.1 agla|OJJ84869.1 akaw|GAA87245.1 aluc|OJZ84183.1 anid|CBF79284.1 anig|EHA27543.1 aory|EIT77717.1 asyd|OJJ55770.1 ater|EAU37706.1 atub|OJI89900.1 aver|OJJ06856.1 awen|OJJ33143.1 azon|OJJ46354.1

Group4200: abra|OJJ76780.1 acar|OOF91276.1 acla|EAW13339.1 afis|EAW20454.1 afla|EED44814.1 afum|EAL84599.1 agla|OJJ84868.1 akaw|GAA87244.1 aluc|OJZ84184.1 anid|CBF79286.1 anig|EHA27544.1 aory|EIT77725.1 asyd|OJJ55769.1 ater|EAU37705.1 atub|OJI89899.1 aver|OJJ06855.1 awen|OJJ33144.1 azon|OJJ46355.1

Group4201: abra|OJJ76784.1 acar|OOF91279.1 acla|EAW13342.1 afis|EAW20457.1 afla|EED44810.1 afum|EAL84595.1 agla|OJJ84862.1 akaw|GAA87241.1 aluc|OJZ84187.1 anid|CBF79283.1 anig|EHA27547.1 aory|EIT77730.1 asyd|OJJ55766.1 ater|EAU37703.1 atub|OJI89896.1 aver|OJJ06852.1 awen|OJJ33149.1 azon|OJJ46359.1

Group4202: abra|OJJ76787.1 acar|OOF91281.1 acla|EAW13345.1 afis|EAW20460.1 afla|EED44808.1 afum|EAL84593.1 agla|OJJ84858.1 akaw|GAA87238.1 aluc|OJZ84189.1 anid|CBF79277.1 anig|EHA27549.1 aory|EIT77754.1 asyd|OJJ55763.1 ater|EAU37700.1 atub|OJI89893.1 aver|OJJ06849.1 awen|OJJ33153.1 azon|OJJ46362.1

Group4203: abra|OJJ76790.1 acar|OOF91284.1 acla|EAW13348.1 afis|EAW20463.1 afla|EED44805.1 afum|EAL84590.1 agla|OJJ84854.1 akaw|GAA87235.1 aluc|OJZ84193.1 anid|CBF79267.1 anig|EHA27552.1 aory|EIT77734.1 asyd|OJJ55760.1 ater|EAU37738.1 atub|OJI89890.1 aver|OJJ06845.1 awen|OJJ33157.1 azon|OJJ46366.1

Group4204: abra|OJJ76792.1 acar|OOF91283.1 acla|EAW13351.1 afis|EAW20465.1 afla|EED44802.1 afum|EAL84588.1 agla|OJJ84852.1 akaw|GAA87233.1 aluc|OJZ84196.1 anid|CBF79269.1 anig|EHA27553.1 aory|EIT77749.1 asyd|OJJ55759.1 ater|EAU37698.1 atub|OJI89888.1 aver|OJJ06844.1 awen|OJJ33159.1 azon|OJJ46367.1

Group4205: abra|OJJ76793.1 acar|OOF91286.1 acla|EAW13352.1 afis|EAW20466.1 afla|EED44801.1 afum|EAL84586.2 agla|OJJ84851.1 akaw|GAA87232.1 aluc|OJZ84197.1 anid|CBF79271.1 anig|EHA27554.1 aory|EIT77739.1 asyd|OJJ55758.1 ater|EAU37697.1 atub|OJI89887.1 aver|OJJ06843.1 awen|OJJ33160.1 azon|OJJ46368.1

Group4206: abra|OJJ76796.1 acar|OOF91289.1 acla|EAW13355.1 afis|EAW20469.1 afla|EED44799.1 afum|EAL84583.1 agla|OJJ84849.1 akaw|GAA87227.1 aluc|OJZ84203.1 anid|CBF79257.1 anig|EHA27557.1 aory|EIT77745.1 asyd|OJJ55748.1 ater|EAU37694.1 atub|OJI89881.1 aver|OJJ06835.1 awen|OJJ33163.1 azon|OJJ46370.1

Group4207: abra|OJJ76798.1 acar|OOF91291.1 acla|EAW13357.1 afis|EAW20471.1 afla|EED44797.1 afum|EAL84582.1 agla|OJJ84847.1 akaw|GAA87225.1 aluc|OJZ84205.1 anid|CBF79258.1 anig|EHA27558.1 aory|EIT77743.1 asyd|OJJ55750.1 ater|EAU37691.1 atub|OJI89879.1 aver|OJJ06837.1 awen|OJJ33165.1 azon|OJJ46372.1

Group4208: abra|OJJ76799.1 acar|OOF91292.1 acla|EAW13358.1 afis|EAW20472.1 afla|EED44796.1 afum|EAL84580.2 agla|OJJ84846.1 akaw|GAA87224.1 aluc|OJZ84206.1 anid|CBF79260.1 anig|EHA27559.1 aory|EIT77751.1 asyd|OJJ55751.1 ater|EAU37690.1 atub|OJI89878.1 aver|OJJ06838.1 awen|OJJ33166.1 azon|OJJ46373.1

Group4209: abra|OJJ76800.1 acar|OOF91294.1 acla|EAW13359.1 afis|EAW20473.1 afla|EED44794.1 afum|EAL84579.1 agla|OJJ84845.1 akaw|GAA87223.1 aluc|OJZ84207.1 anid|CBF79262.1 anig|EHA27561.1 aory|EIT77790.1 asyd|OJJ55754.1 ater|EAU37689.1 atub|OJI89877.1 aver|OJJ06839.1 awen|OJJ33167.1 azon|OJJ46375.1

Group4210: abra|OJJ76802.1 acar|OOF91296.1 acla|EAW13361.1 afis|EAW20475.1 afla|EED44793.1 afum|EAL84578.1 agla|OJJ84842.1 akaw|GAA87221.1 aluc|OJZ84209.1 anid|CBF79255.1 anig|EHA27563.1 aory|EIT77775.1 asyd|OJJ55747.1 ater|EAU37687.1 atub|OJI89874.1 aver|OJJ06834.1 awen|OJJ33170.1 azon|OJJ46377.1

Group4211: abra|OJJ76806.1 acar|OOF91300.1 acla|EAW13365.1 afis|EAW20479.1 afla|EED44789.1 afum|EAL84575.1 agla|OJJ84831.1 akaw|GAA87217.1 aluc|OJZ84213.1 anid|CBF79213.1 anig|EHA27566.1 aory|EIT77792.1 asyd|OJJ55738.1 ater|EAU29558.1 atub|OJI89870.1 aver|OJJ06824.1 awen|OJJ33174.1 azon|OJJ46381.1

Group4212: abra|OJJ76809.1 acar|OOF91305.1 acla|EAW13370.1 afis|EAW20484.1 afla|EED44784.1 afum|EAL84571.1 agla|OJJ84813.1 akaw|GAA87212.1 aluc|OJZ84218.1 anid|CBF79235.1 anig|EHA27569.1 aory|EIT77759.1 asyd|OJJ55742.1 ater|EAU29562.1 atub|OJI89866.1 aver|OJJ06829.1 awen|OJJ33185.1 azon|OJJ46384.1

Group4213: abra|OJJ76810.1 acar|OOF91306.1 acla|EAW13371.1 afis|EAW20485.1 afla|EED44782.1 afum|EAL84570.1 agla|OJJ84822.1 akaw|GAA87211.1 aluc|OJZ84221.1 anid|CBF79237.1 anig|EHA27570.1 aory|EIT77768.1 asyd|OJJ55743.1 ater|EAU29563.1 atub|OJI89865.1 aver|OJJ06830.1 awen|OJJ33186.1 azon|OJJ46388.1

Group4214: abra|OJJ76811.1 acar|OOF91307.1 acla|EAW13372.1 afis|EAW20486.1 afla|EED44781.1 afum|EAL84569.1 agla|OJJ84825.1 akaw|GAA87210.1 aluc|OJZ84222.1 anid|CBF79215.1 anig|EHA27571.1 aory|EIT77774.1 asyd|OJJ55737.1 ater|EAU29564.1 atub|OJI89864.1 aver|OJJ06823.1 awen|OJJ33187.1 azon|OJJ46389.1

Group4215: abra|OJJ76813.1 acar|OOF91309.1 acla|EAW13374.1 afis|EAW20488.1 afla|EED44776.1 afum|EAL84567.1 agla|OJJ84826.1 akaw|GAA87208.1 aluc|OJZ84224.1 anid|CBF79219.1 anig|EHA27573.1 aory|EIT77760.1 asyd|OJJ55736.1 ater|EAU29566.1 atub|OJI89861.1 aver|OJJ06822.1 awen|OJJ33188.1 azon|OJJ46390.1

Group4216: abra|OJJ76819.1 acar|OOF91315.1 acla|EAW13379.1 afis|EAW20493.1 afla|EED44737.1 afum|EAL84561.1 agla|OJJ84833.1 akaw|GAA87203.1 aluc|OJZ84229.1 anid|CBF79226.1 anig|EHA27578.1

aory|EIT77797.1 asyd|OJJ55732.1 ater|EAU29569.1 atub|OJI89855.1 aver|OJJ06818.1 awen|OJJ33193.1 azon|OJJ46403.1

Group4217: abra|OJJ76821.1 acar|OOF91316.1 acla|EAW13381.1 afis|EAW20495.1 afla|EED44771.1 afum|EAL84559.1 agla|OJJ84807.1 akaw|GAA87201.1 aluc|OJZ84232.1 anid|CBF79222.1 anig|EHA27579.1 aory|EIT77762.1 asyd|OJJ55734.1 ater|EAU37189.1 atub|OJI89853.1 aver|OJJ06820.1 awen|OJJ33195.1 azon|OJJ46401.1

Group4218: abra|OJJ76823.1 acar|OOF91319.1 acla|EAW13383.1 afis|EAW20497.1 afla|EED44739.1 afum|EAL84557.1 agla|OJJ84805.1 akaw|GAA87199.1 aluc|OJZ84234.1 anid|CBF79208.1 anig|EHA27581.1 aory|EIT77796.1 asyd|OJJ55729.1 ater|EAU37191.1 atub|OJI89851.1 aver|OJJ06815.1 awen|OJJ33197.1 azon|OJJ46399.1

Group4219: abra|OJJ76827.1 acar|OOF91321.1 acla|EAW13387.1 afis|EAW20501.1 afla|EED44744.1 afum|EAL84554.1 agla|OJJ84797.1 akaw|GAA87195.1 aluc|OJZ84239.1 anid|CBF79200.1 anig|EHA27586.1 aory|EIT77773.1 asyd|OJJ55725.1 ater|EAU37195.1 atub|OJI89844.1 aver|OJJ06811.1 awen|OJJ33202.1 azon|OJJ46396.1

Group4220: abra|OJJ76830.1 acar|OOF91324.1 acla|EAW13392.1 afis|EAW20504.1 afla|EED44747.1 afum|EAL84552.1 agla|OJJ84800.1 akaw|GAA87192.1 aluc|OJZ84242.1 anid|CBF79195.1 anig|EHA27587.1 aory|EIT77784.1 asyd|OJJ55722.1 ater|EAU37199.1 atub|OJI89841.1 aver|OJJ06808.1 awen|OJJ33205.1 azon|OJJ46478.1

Group4221: abra|OJJ76832.1 acar|OOF91326.1 afis|EAW20506.1 afum|EAL84550.1 akaw|GAA87190.1 aluc|OJZ84244.1 anig|EHA27589.1 asyd|OJJ55720.1 ater|EAU37200.1 atub|OJI89839.1 aver|OJJ06806.1 awen|OJJ33207.1 acla|EAW13395.1 afla|EED52484.1 aory|EIT82804.1 afla|EED52486.1 anid|CBF79191.1 aory|EIT82815.1

Group4222: abra|OJJ76834.1 acar|OOF91327.1 acla|EAW13396.1 afis|EAW20507.1 afla|EED52448.1 afum|EAL84549.1 agla|OJJ84784.1 akaw|GAA87189.1 aluc|OJZ84245.1 anid|CBF79193.1 anig|EHA27590.1 aory|EIT82772.1 asyd|OJJ55719.1 ater|EAU37201.1 atub|OJI89838.1 aver|OJJ06805.1 awen|OJJ33208.1 azon|OJJ46481.1

Group4223: abra|OJJ76835.1 acar|OOF91328.1 acla|EAW13397.1 afis|EAW20508.1 afla|EED52449.1 afum|EAL84548.1 agla|OJJ84785.1 akaw|GAA87188.1 aluc|OJZ84246.1 anid|CBF79190.1 anig|EHA27591.1 aory|EIT82778.1 asyd|OJJ55718.1 ater|EAU37202.1 atub|OJI89837.1 aver|OJJ06804.1 awen|OJJ33209.1 azon|OJJ46482.1

Group4224: abra|OJJ76836.1 acar|OOF90072.1 acla|EAW13398.1 afis|EAW20509.1 afla|EED52450.1 afum|EAL84547.1 agla|OJJ84786.1 akaw|GAA87187.1 aluc|OJZ84247.1 anid|CBF79189.1 anig|EHA27592.1 aory|EIT82759.1 asyd|OJJ55717.1 ater|EAU37203.1 atub|OJI89836.1 aver|OJJ06803.1 awen|OJJ33210.1 azon|OJJ46483.1

Group4225: abra|OJJ76838.1 acar|OOF91330.1 acla|EAW13400.1 afis|EAW20511.1 afla|EED52452.1 afum|EAL84545.2 agla|OJJ84788.1 akaw|GAA87185.1 aluc|OJZ84249.1 anid|CBF79186.1 anig|EHA27594.1 aory|EIT82799.1 asyd|OJJ55715.1 ater|EAU37205.1 atub|OJI89834.1 aver|OJJ06801.1 awen|OJJ33213.1 azon|OJJ46485.1

Group4226: abra|OJJ76839.1 acar|OOF91331.1 acla|EAW13401.1 afis|EAW20512.1 afla|EED52453.1 afum|EBA27192.1 agla|OJJ84789.1 akaw|GAA87184.1 aluc|OJZ84250.1 anid|CBF79184.1 anig|EHA27595.1 aory|EIT82753.1 asyd|OJJ55714.1 ater|EAU37208.1 atub|OJI89833.1 aver|OJJ06800.1 awen|OJJ33214.1 azon|OJJ46486.1

Group4227: abra|OJJ76840.1 acar|OOF91333.1 acla|EAW13403.1 afis|EAW20514.1 afla|EED52468.1 afum|EAL84543.2 agla|OJJ84776.1 akaw|GAA87182.1 aluc|OJZ84251.1 anid|CBF79055.1 anig|EHA27596.1 aory|EIT82784.1 asyd|OJJ55710.1 ater|EAU37187.1 atub|OJI89832.1 aver|OJJ06796.1 awen|OJJ33220.1 azon|OJJ46488.1

Group4228: abra|OJJ76843.1 acar|OOF89969.1 acla|EAW13406.1 afis|EAW20517.1 afla|EED52458.1 afum|EAL84540.1 agla|OJJ84769.1 akaw|GAA87179.1 aluc|OJZ84254.1 anid|CBF88058.1 anig|EHA27599.1 aory|EIT82793.1 asyd|OJJ63541.1 ater|EAU37184.1 atub|OJI89829.1 aver|OJI97392.1 awen|OJJ33223.1 azon|OJJ46553.1

Group4229: abra|OJJ76844.1 acar|OOF89968.1 acla|EAW13407.1 afis|EAW20518.1 afla|EED52457.1 afum|EAL84539.1 agla|OJJ84768.1 akaw|GAA87177.1 aluc|OJZ84256.1 anid|CBF79061.1 anig|EHA27600.1 aory|EIT82769.1 asyd|OJJ55707.1 ater|EAU37183.1 atub|OJI89827.1 aver|OJJ06793.1 awen|OJJ33224.1 azon|OJJ46581.1

Group4230: abra|OJJ76845.1 acar|OOF91335.1 acla|EAW13408.1 afis|EAW20519.1 afla|EED52455.1 afum|EAL84538.1 agla|OJJ84767.1 akaw|GAA87176.1 aluc|OJZ84257.1 anid|CBF79067.1 anig|EHA27601.1 aory|EIT82798.1 asyd|OJJ55706.1 ater|EAU37182.1 atub|OJI89826.1 aver|OJJ06792.1 awen|OJJ33225.1 azon|OJJ46580.1



Group4231: abra|OJJ76847.1 acar|OOF91337.1 acla|EAW13410.1 afis|EAW20521.1 afla|EED52470.1  
afum|EAL84536.1 agla|OJJ84765.1 akaw|GAA87174.1 aluc|OJZ84259.1 anid|CBF79070.1 anig|EHA27602.1  
aory|EIT82770.1 asyd|OJJ55704.1 ater|EAU37167.1 atub|OJI89824.1 aver|OJJ06790.1 awen|OJJ33227.1  
azon|OJJ46577.1

Group4232: abra|OJJ76849.1 acar|OOF91338.1 acla|EAW13412.1 afis|EAW20523.1 afla|EED52472.1  
afum|EAL84534.1 agla|OJJ84740.1 akaw|GAA87172.1 aluc|OJZ84261.1 anid|CBF79074.1 anig|EHA27604.1  
aory|EIT82821.1 asyd|OJJ55702.1 ater|EAU37165.1 atub|OJI89822.1 aver|OJJ06787.1 awen|OJJ33229.1  
azon|OJJ46575.1

Group4233: abra|OJJ76851.1 acar|OOF91339.1 acla|EAW13413.1 afis|EAW20524.1 afla|EED52473.1  
afum|EAL84533.1 agla|OJJ84742.1 akaw|GAA87171.1 aluc|OJZ84262.1 anid|CBF79076.1 anig|EHA27605.1  
aory|EIT82758.1 asyd|OJJ55701.1 ater|EAU37164.1 atub|OJI89821.1 aver|OJJ06786.1 awen|OJJ33230.1  
azon|OJJ46574.1

Group4234: abra|OJJ76852.1 acar|OOF91340.1 acla|EAW13414.1 afis|EAW20525.1 afla|EED52474.1  
afum|EAL84532.1 agla|OJJ84743.1 akaw|GAA87170.1 aluc|OJZ84264.1 anid|CBF79078.1 anig|EHA27606.1  
aory|EIT82817.1 asyd|OJJ55699.1 ater|EAU37163.1 atub|OJI89819.1 aver|OJJ06784.1 awen|OJJ33231.1  
azon|OJJ46573.1

Group4235: abra|OJJ76855.1 acar|OOF91341.1 acla|EAW13416.1 afis|EAW20527.1 afla|EED52476.1  
afum|EAL84530.1 agla|OJJ84745.1 akaw|GAA87167.1 aluc|OJZ84267.1 anid|CBF79081.1 anig|EHA27609.1  
aory|EIT82771.1 asyd|OJJ55696.1 ater|EAU37161.1 atub|OJI89816.1 aver|OJJ06781.1 awen|OJJ33234.1  
azon|OJJ46570.1

Group4236: abra|OJJ76857.1 acar|OOF91343.1 acla|EAW13418.1 afis|EAW20529.1 afla|EED52478.1  
afum|EAL84528.1 agla|OJJ84706.1 akaw|GAA87165.1 aluc|OJZ84269.1 anid|CBF79006.1 anig|EHA27611.1  
aory|EIT82803.1 asyd|OJJ55691.1 ater|EAU37159.1 atub|OJI89814.1 aver|OJJ06776.1 awen|OJJ33236.1  
azon|OJJ50608.1

Group4237: abra|OJJ76903.1 acar|OOF91351.1 acla|EAW13425.1 afis|EAW20536.1 afla|EED52442.1  
afum|EAL84522.1 agla|OJJ84695.1 akaw|GAA87135.1 aluc|OJZ84302.1 anid|CBF78995.1 anig|EHA27638.1  
aory|EIT82797.1 asyd|OJJ55685.1 ater|EAU37143.1 atub|OJI89766.1 aver|OJJ06769.1 awen|OJJ33243.1  
azon|OJJ50622.1

Group4238: abra|OJJ76916.1 acar|OOF91363.1 acla|EAW13428.1 afis|EAW20544.1 afla|EED52424.1  
afum|EAL84514.1 agla|OJJ88753.1 akaw|GAA87122.1 aluc|OJZ84316.1 anid|CBF78988.1 anig|EHA27651.1  
aory|EIT83288.1 asyd|OJJ55682.1 ater|EAU37137.1 atub|OJI89752.1 aver|OJJ06766.1 awen|OJJ33252.1  
azon|OJJ50638.1

Group4239: abra|OJJ76917.1 acar|OOF91364.1 acla|EAW13429.1 afis|EAW20545.1 afla|EED52423.1  
afum|EBA27188.1 agla|OJJ88752.1 akaw|GAA87121.1 aluc|OJZ84317.1 anid|CBF78986.1 anig|EHA27652.1  
aory|EIT83281.1 asyd|OJJ55681.1 ater|EAU37136.1 atub|OJI89751.1 aver|OJJ06765.1 awen|OJJ33253.1  
azon|OJJ50637.1

Group4240: abra|OJJ76918.1 acar|OOF91365.1 acla|EAW13430.1 afis|EAW20546.1 afla|EED52422.1  
afum|EAL84513.1 agla|OJJ88751.1 akaw|GAA87120.1 aluc|OJZ84318.1 anid|CBF78985.1 anig|EHA27653.1  
aory|EIT83315.1 asyd|OJJ55680.1 ater|EAU37135.1 atub|OJI89750.1 aver|OJJ06763.1 awen|OJJ33254.1  
azon|OJJ50636.1

Group4241: abra|OJJ76919.1 acar|OOF91366.1 acla|EAW13431.1 afis|EAW20547.1 afla|EED52421.1  
afum|EAL84512.1 agla|OJJ88750.1 akaw|GAA87119.1 aluc|OJZ84319.1 anid|CBF78983.1 anig|EHA27654.1  
aory|EIT83284.1 asyd|OJJ55679.1 ater|EAU37134.1 atub|OJI89749.1 aver|OJJ06762.1 awen|OJJ33255.1  
azon|OJJ50635.1

Group4242: abra|OJJ76923.1 acar|OOF91370.1 acla|EAW13432.1 afis|EAW20548.1 afla|EED52408.1  
afum|EAL84511.1 agla|OJJ88739.1 akaw|GAA87115.1 aluc|OJZ84323.1 anid|CBF78977.1 anig|EHA27658.1  
aory|EIT83309.1 asyd|OJJ55675.1 ater|EAU37129.1 atub|OJI89745.1 aver|OJJ06758.1 awen|OJJ33260.1  
aver|OJJ07651.1

Group4243: abra|OJJ76937.1 acar|OOF91386.1 acla|EAW12145.1 afis|EAW17130.1 afla|EED55089.1  
afum|EAL86590.1 agla|OJJ82232.1 akaw|GAA87102.1 aluc|OJZ84336.1 anid|CBF80327.1 anig|EHA27670.1  
aory|EIT81595.1 asyd|OJJ54844.1 ater|EAU31746.1 atub|OJI89732.1 aver|OJJ07318.1 awen|OJJ31282.1  
awen|OJJ38657.1

Group4244: abra|OJJ76950.1 acar|OOF91396.1 acla|EAW13470.1 afis|EAW20582.1 afla|EED52277.1  
afum|EAL84482.1 agla|OJJ88700.1 akaw|GAA87091.1 aluc|OJZ84347.1 anid|CBF78946.1 anig|EHA27683.1  
aory|EIT74415.1 asyd|OJJ55651.1 ater|EAU37100.1 atub|OJI89721.1 aver|OJJ06736.1 awen|OJJ33287.1  
azon|OJJ50663.1

Group4245: abra|OJJ76954.1 acar|OOF91398.1 acla|EAW13476.1 afis|EAW20583.1 afla|EED52245.1  
afum|EBA27180.1 agla|OJJ88686.1 akaw|GAA87088.1 aluc|OJZ84350.1 anid|CBF78930.1 anig|EHA27687.1

aory|EIT74502.1 asyd|OJJ55642.1 ater|EAU37097.1 atub|OJI89717.1 aver|OJJ06725.1 awen|OJJ33300.1 azon|OJJ50671.1

Group4246: abra|OJJ76970.1 acar|OOF91415.1 acla|EAW13495.1 afis|EAW20595.1 afla|EED52229.1 afum|EAL84466.1 agla|OJJ88661.1 akaw|GAA87074.1 aluc|OJZ84366.1 anid|CBF78911.1 anig|EHA27701.1 aory|EIT74324.1 asyd|OJJ55615.1 ater|EAU35241.1 atub|OJI89702.1 aver|OJJ06690.1 awen|OJJ33385.1 azon|OJJ50691.1

Group4247: abra|OJJ76971.1 acar|OOF91416.1 acla|EAW13496.1 afis|EAW20596.1 afla|EED52228.1 afum|EAL84465.1 agla|OJJ88660.1 akaw|GAA87073.1 aluc|OJZ84367.1 anid|CBF78909.1 anig|EHA27702.1 aory|EIT74434.1 asyd|OJJ55614.1 ater|EAU35242.1 atub|OJI89701.1 aver|OJJ06689.1 awen|OJJ33388.1 azon|OJJ50692.1

Group4248: abra|OJJ76972.1 acar|OOF91417.1 acla|EAW13498.1 afis|EAW20597.1 afla|EED52213.1 afum|EAL84464.1 agla|OJJ88659.1 akaw|GAA87072.1 aluc|OJZ84368.1 anid|CBF78908.1 anig|EHA27703.1 aory|EIT74430.1 asyd|OJJ55612.1 ater|EAU35243.1 atub|OJI89700.1 aver|OJJ06687.1 awen|OJJ33389.1 azon|OJJ50693.1

Group4249: abra|OJJ76976.1 acar|OOF91419.1 acla|EAW13502.1 afis|EAW20601.1 afla|EED47729.1 afum|EAL84460.1 agla|OJJ88650.1 akaw|GAA87069.1 aluc|OJZ84372.1 anid|CBF75136.1 anig|EHA27707.1 aory|EIT77171.1 asyd|OJJ59976.1 ater|EAU35246.1 atub|OJI89695.1 aver|OJJ02315.1 awen|OJJ33393.1 azon|OJJ50697.1

Group4250: abra|OJJ76977.1 acar|OOF91422.1 acla|EAW13504.1 afis|EAW20603.1 afla|EED47732.1 afum|EAL84458.1 agla|OJJ88646.1 akaw|GAA87068.1 aluc|OJZ84374.1 anid|CBF86930.1 anig|EHA27708.1 aory|EIT77153.1 asyd|OJJ55600.1 ater|EAU35248.1 atub|OJI89694.1 aver|OJJ06680.1 awen|OJJ33395.1 azon|OJJ50698.1

Group4251: abra|OJJ76978.1 acar|OOF91424.1 acla|EAW13505.1 afis|EAW20604.1 afla|EED47733.1 afum|EAL84457.1 agla|OJJ88645.1 akaw|GAA87067.1 aluc|OJZ84376.1 anid|CBF86928.1 anig|EHA27709.1 aory|EIT77125.1 asyd|OJJ55601.1 ater|EAU35250.1 atub|OJI89693.1 aver|OJJ06681.1 awen|OJJ33396.1 azon|OJJ50394.1

Group4252: abra|OJJ76981.1 acar|OOF91427.1 acla|EAW12964.1 afis|EAW17699.1 afla|EED45692.1 afum|EAL91514.1 agla|OJJ79475.1 akaw|GAA87064.1 aluc|OJZ84381.1 anid|CBF89963.1 anig|EHA27712.1 aory|EIT75518.1 asyd|OJJ62104.1 ater|EAU31915.1 atub|OJI89690.1 aver|OJI96210.1 awen|OJJ37134.1 azon|OJJ50834.1

Group4253: abra|OJJ76984.1 acar|OOF91429.1 acla|EAW12966.1 afis|EAW17697.1 afla|EED50445.1 afum|EAL91511.1 agla|OJJ79478.1 akaw|GAA87062.1 aluc|OJZ84383.1 anid|CBF89965.1 anig|EHA27714.1 aory|EIT82014.1 asyd|OJJ62100.1 ater|EAU31918.1 atub|OJI89688.1 aver|OJI96206.1 awen|OJJ37137.1 azon|OJJ50836.1

Group4254: abra|OJJ76985.1 acar|OOF91430.1 acla|EAW12967.1 afis|EAW17696.1 afla|EED50446.1 afum|EAL91510.1 agla|OJJ79479.1 akaw|GAA87061.1 aluc|OJZ84384.1 anid|CBF89966.1 anig|EHA27715.1 aory|EIT82098.1 asyd|OJJ62099.1 ater|EAU31919.1 atub|OJI89687.1 aver|OJI96205.1 awen|OJJ37139.1 azon|OJJ50839.1

Group4255: abra|OJJ76986.1 acar|OOF92639.1 acla|EAW12968.1 afis|EAW17695.1 afla|EED50447.1 afum|EAL91509.1 agla|OJJ79483.1 akaw|GAA87060.1 aluc|OJZ84385.1 anid|CBF89968.1 anig|EHA27716.1 aory|EIT82034.1 asyd|OJJ62098.1 ater|EAU31920.1 atub|OJI89686.1 aver|OJI96204.1 awen|OJJ37140.1 azon|OJJ50840.1

Group4256: abra|OJJ76987.1 acar|OOF91431.1 acla|EAW12969.1 afis|EAW17694.1 afla|EED50448.1 afum|EAL91508.1 agla|OJJ79485.1 akaw|GAA87059.1 aluc|OJZ84386.1 anid|CBF89970.1 anig|EHA27717.1 aory|EIT82134.1 asyd|OJJ62097.1 ater|EAU31961.1 atub|OJI89685.1 aver|OJI96203.1 awen|OJJ37141.1 azon|OJJ50841.1

Group4257: abra|OJJ76993.1 acar|OOF91438.1 acla|EAW13455.1 afis|EAW20563.1 afum|EAL84498.1 agla|OJJ88728.1 akaw|GAA87053.1 aluc|OJZ84393.1 anid|CBF78959.1 anig|EHA27722.1 aory|EIT74501.1 asyd|OJJ55658.1 ater|EAU37112.1 atub|OJI89678.1 aver|OJJ06742.1 awen|OJJ33269.1 azon|OJJ50641.1 afla|EED52341.1

Group4258: abra|OJJ76996.1 acar|OOF91443.1 acla|EAW13460.1 afis|EAW20566.1 afla|EED52324.1 afum|EAL84495.1 agla|OJJ88727.1 akaw|GAA87050.1 aluc|OJZ84396.1 anid|CBF78935.1 anig|EHA27726.1 aory|EIT74477.1 asyd|OJJ55644.1 ater|EAU37111.1 atub|OJI89676.1 aver|OJJ06728.1 awen|OJJ33271.1 azon|OJJ50646.1

Group4259: abra|OJJ77016.1 acar|OOF95265.1 acla|EAW07210.1 afis|EAW22222.1 afla|EED57616.1 afum|EAL90972.1 agla|OJJ87822.1 akaw|GAA87034.1 aluc|OJZ84418.1 anid|CBF88465.1 anig|EHA27740.1 aory|EIT82988.1 asyd|OJJ63777.1 ater|EAU34232.1 atub|OJI89656.1 aver|OJI97160.1 awen|OJJ34809.1 azon|OJJ45741.1

Group4260: abra|OJJ77024.1 acar|OOF91461.1 acla|EAW12057.1 afis|EAW19698.1 afla|EED54134.1  
afum|EAL86829.1 agla|OJJ80810.1 akaw|GAA87028.1 aluc|OJZ84424.1 anid|CBF81131.1 anig|EHA27746.1  
aory|EIT76042.1 asyd|OJJ56500.1 ater|EAU32171.1 atub|OJI89649.1 aver|OJJ06219.1 awen|OJJ41934.1  
azon|OJJ48232.1

Group4261: abra|OJJ77043.1 acar|OOF90273.1 acla|EAW13554.1 afis|EAW20631.1 afla|EED49762.1  
afum|EAL84436.1 agla|OJJ80447.1 akaw|GAA87010.1 aluc|OJZ84445.1 anid|CBF83219.1 anig|EHA27763.1  
aory|EIT77598.1 asyd|OJJ55568.1 ater|EAU32166.1 atub|OJI89629.1 aver|OJJ06647.1 awen|OJJ33600.1  
azon|OJJ50722.1

Group4262: abra|OJJ77049.1 acar|OOF92938.1 acla|EAW13549.1 afis|EAW20628.1 afla|EED49778.1  
afum|EAL84442.1 agla|OJJ88595.1 akaw|GAA87004.1 aluc|OJZ84453.1 anid|CBF83230.1 anig|EHA27768.1  
aory|EIT77696.1 asyd|OJJ55582.1 ater|EAU32163.1 atub|OJI89623.1 aver|OJJ06661.1 awen|OJJ33461.1  
azon|OJJ50717.1

Group4263: abra|OJJ77050.1 acar|OOF92939.1 acla|EAW13544.1 afis|EAW20616.1 afla|EED54198.1  
afum|EAL84445.1 agla|OJJ88594.1 akaw|GAA87003.1 aluc|OJZ84454.1 anid|CBF86935.1 anig|EHA27769.1  
aory|EIT75987.1 asyd|OJJ55584.1 ater|EAU35262.1 atub|OJI89621.1 aver|OJJ06663.1 awen|OJJ33460.1  
azon|OJJ50716.1

Group4264: abra|OJJ77064.1 acar|OOF92948.1 acla|EAW13511.1 afis|EAW20609.1 afla|EED54207.1  
afum|EAL84451.1 agla|OJJ88630.1 akaw|GAA86988.1 aluc|OJZ84472.1 anid|CBF86951.1 anig|EHA27781.1  
aory|EIT76020.1 asyd|OJJ55594.1 ater|EAU35257.1 atub|OJI89606.1 aver|OJJ06673.1 awen|OJJ33452.1  
azon|OJJ50709.1

Group4265: abra|OJJ77068.1 acar|OOF92951.1 acla|EAW13508.1 afis|EAW20606.1 afla|EED47725.1  
afum|EAL84454.1 agla|OJJ88635.1 akaw|GAA86985.1 aluc|OJZ84476.1 anid|CBF86946.1 anig|EHA27784.1  
aory|EIT77120.1 asyd|OJJ55591.1 ater|EAU35260.1 atub|OJI89603.1 aver|OJJ06670.1 awen|OJJ33449.1  
azon|OJJ50706.1

Group4266: abra|OJJ77076.1 acar|OOF92958.1 acla|EAW11204.1 afis|EAW15934.1 afla|EED54927.1  
afum|EAL88570.1 agla|OJJ89373.1 akaw|GAA86977.1 aluc|OJZ84486.1 anid|CBF86351.1 anig|EHA27790.1  
aory|EIT80330.1 asyd|OJJ64980.1 ater|EAU35519.1 atub|OJI89594.1 aver|OJJ99102.1 awen|OJJ35645.1  
azon|OJJ46891.1

Group4267: abra|OJJ77079.1 acar|OOF92961.1 acla|EAW12041.1 afis|EAW19690.1 afla|EED57010.1  
afum|EAL86836.1 agla|OJJ80804.1 akaw|GAA86974.1 aluc|OJZ84489.1 anid|CBF75140.1 anig|EHA27793.1  
aory|EIT82303.1 asyd|OJJ59969.1 atub|OJI89591.1 aver|OJJ02322.1 awen|OJJ41917.1 azon|OJJ42689.1  
ater|EAU32856.1

Group4268: abra|OJJ77090.1 acar|OOF92974.1 acla|EAW08632.1 afis|EAW15799.1 afla|EED51246.1  
afum|EAL85551.1 agla|OJJ81963.1 akaw|GAA86965.1 aluc|OJZ84499.1 anid|CBF70921.1 anig|EHA27799.1  
aory|EIT83184.1 asyd|OJJ52607.1 ater|EAU32343.1 atub|OJI89581.1 aver|OJJ04634.1 awen|OJJ38507.1  
azon|OJJ43744.1

Group4269: abra|OJJ77091.1 acar|OOF92976.1 acla|EAW10011.1 afis|EAW21045.1 afla|EED51625.1  
afum|EAL92081.1 agla|OJJ82363.1 akaw|GAA86964.1 aluc|OJZ84500.1 anid|CBF87097.1 anig|EHA27800.1  
aory|EIT80549.1 asyd|OJJ60392.1 ater|EAU36817.1 atub|OJI89580.1 aver|OJJ99721.1 awen|OJJ32179.1  
azon|OJJ46755.1

Group4270: abra|OJJ77094.1 acar|OOF92977.1 acla|EAW10918.1 afis|EAW20940.1 afla|EED50295.1  
afum|EAL84694.1 agla|OJJ83947.1 akaw|GAA86961.1 aluc|OJZ84503.1 anid|CBF82521.1 anig|EHA27803.1  
aory|EIT77252.1 asyd|OJJ54070.1 ater|EAU38585.1 atub|OJI89577.1 aver|OJJ08672.1 awen|OJJ34377.1  
azon|OJJ48111.1

Group4271: abra|OJJ77095.1 acar|OOF92978.1 acla|EAW10919.1 afis|EAW20939.1 afla|EED50294.1  
afum|EAL84695.1 agla|OJJ83948.1 akaw|GAA86960.1 aluc|OJZ84504.1 anid|CBF82523.1 anig|EHA27804.1  
aory|EIT77268.1 asyd|OJJ54071.1 ater|EAU38584.1 atub|OJI89576.1 aver|OJJ08671.1 awen|OJJ34378.1  
azon|OJJ48112.1

Group4272: abra|OJJ77106.1 acar|OOF92991.1 acla|EAW11608.1 afis|EAW23840.1 afla|EED52551.1  
afum|EAL87271.1 agla|OJJ82489.1 akaw|GAA86950.1 aluc|OJZ84515.1 anid|CBF77077.1 anig|EHA27813.1  
aory|EIT74221.1 asyd|OJJ56983.1 ater|EAU33507.1 atub|OJI89566.1 aver|OJJ03304.1 awen|OJJ33810.1  
azon|OJJ48724.1

Group4273: abra|OJJ77111.1 acar|OOF93001.1 acla|EAW07270.1 afis|EAW22291.1 afla|EED57693.1  
afum|EAL90890.1 agla|OJJ87755.1 akaw|GAA90817.1 aluc|OJZ84520.1 anid|CBF88575.1 anig|EHA27818.1  
aory|EIT79896.1 asyd|OJJ63840.1 ater|EAU34306.1 atub|OJI89560.1 aver|OJI97097.1 awen|OJJ34867.1  
azon|OJJ50044.1

Group4274: abra|OJJ77116.1 acar|OOF93005.1 acla|EAW12952.1 afis|EAW17704.1 afla|EED45696.1  
afum|EAL91519.2 agla|OJJ81740.1 akaw|GAA90813.1 aluc|OJZ84526.1 anid|CBF89929.1 anig|EHA27823.1

aory|EIT75367.1 asyd|OJJ62119.1 ater|EAU31912.1 atub|OJI89554.1 aver|OJI96226.1 awen|OJJ37131.1 azon|OJJ50830.1

Group4275: abra|OJJ77120.1 acar|OOF93007.1 acla|EAW12932.1 afis|EAW17709.1 afla|EED45711.1 afum|EAL91524.2 agla|OJJ81738.1 akaw|GAA90809.1 aluc|OJZ84530.1 anid|CBF89906.1 anig|EHA27827.1 aory|EIT75650.1 asyd|OJJ62132.1 ater|EAU31903.1 atub|OJI89550.1 aver|OJI96241.1 awen|OJJ37127.1 azon|OJJ50826.1

Group4276: abra|OJJ77123.1 acar|OOF93009.1 acla|EAW12936.1 afis|EAW17712.1 afla|EED45714.1 afum|EAL91527.1 agla|OJJ81736.1 akaw|GAA90805.1 aluc|OJZ84533.1 anid|CBF76920.1 anig|EHA27831.1 aory|EIT75661.1 asyd|OJJ57072.1 ater|EAU31891.1 atub|OJI89547.1 aver|OJJ03226.1 awen|OJJ37124.1 azon|OJJ50823.1

Group4277: abra|OJJ77125.1 acar|OOF93011.1 acla|EAW12938.1 afis|EAW17714.1 afla|EED45716.1 afum|EAL91529.1 agla|OJJ81734.1 akaw|GAA90803.1 aluc|OJZ84535.1 anid|CBF76916.1 anig|EHA27833.1 aory|EIT75429.1 asyd|OJJ57079.1 ater|EAU31892.1 atub|OJI89545.1 aver|OJJ03224.1 awen|OJJ37122.1 azon|OJJ50821.1

Group4278: abra|OJJ77126.1 acar|OOF93012.1 acla|EAW12939.1 afis|EAW17715.1 afla|EED45717.1 afum|EAL91530.1 agla|OJJ81733.1 akaw|GAA90802.1 aluc|OJZ84536.1 anid|CBF76914.1 anig|EHA27834.1 aory|EIT75816.1 asyd|OJJ57080.1 ater|EAU31893.1 atub|OJI89544.1 aver|OJJ03223.1 awen|OJJ37121.1 azon|OJJ50820.1

Group4279: abra|OJJ77130.1 acar|OOF93018.1 acla|EAW12941.1 afis|EAW17717.1 afla|EED45719.1 afum|EAL91532.1 agla|OJJ81731.1 akaw|GAA90798.1 aluc|OJZ84540.1 anid|CBF84088.1 anig|EHA27838.1 aory|EIT75412.1 asyd|OJJ57082.1 ater|EAU31895.1 atub|OJI89540.1 aver|OJJ03220.1 awen|OJJ37119.1 azon|OJJ50818.1

Group4280: abra|OJJ77131.1 acar|OOF93019.1 acla|EAW12942.1 afis|EAW17718.1 afla|EED45720.1 afum|EAL91533.1 agla|OJJ81728.1 akaw|GAA90797.1 aluc|OJZ84541.1 anid|CBF76908.1 anig|EHA27839.1 aory|EIT75617.1 asyd|OJJ57083.1 ater|EAU31896.1 atub|OJI89539.1 aver|OJJ03219.1 awen|OJJ37118.1 azon|OJJ50817.1

Group4281: abra|OJJ77133.1 acar|OOF93021.1 acla|EAW12944.1 afis|EAW17720.1 afla|EED45722.1 afum|EAL91535.2 agla|OJJ81730.1 akaw|GAA90795.1 aluc|OJZ84543.1 anid|CBF76904.1 anig|EHA27841.1 aory|EIT75737.1 asyd|OJJ57085.1 ater|EAU31898.1 atub|OJI89537.1 aver|OJJ03217.1 awen|OJJ37116.1 azon|OJJ50815.1

Group4282: abra|OJJ77138.1 acar|OOF90283.1 acla|EAW12948.1 afis|EAW17723.1 afla|EED45725.1 afum|EAL91538.1 agla|OJJ81727.1 akaw|GAA90791.1 aluc|OJZ84549.1 anid|CBF86584.1 anig|EHA27845.1 aory|EIT75656.1 asyd|OJJ64839.1 ater|EAU31901.1 atub|OJI89531.1 aver|OJI98950.1 awen|OJJ37115.1 azon|OJJ50813.1

Group4283: abra|OJJ77139.1 acar|OOF90282.1 acla|EAW12950.1 afis|EAW17725.1 afla|EED45726.1 afum|EAL91540.1 agla|OJJ81726.1 akaw|GAA90790.1 aluc|OJZ84552.1 anid|CBF86583.1 anig|EHA27846.1 aory|EIT75496.1 asyd|OJJ64840.1 ater|EAU31881.1 atub|OJI89530.1 aver|OJI98951.1 awen|OJJ37113.1 azon|OJJ50812.1

Group4284: abra|OJJ77141.1 acar|OOF93027.1 acla|EAW12927.1 afis|EAW17728.1 afla|EED45728.1 afum|EAL91543.1 agla|OJJ81723.1 akaw|GAA90788.1 aluc|OJZ84555.1 anid|CBF86577.1 anig|EHA27849.1 aory|EIT75836.1 asyd|OJJ64842.1 ater|EAU31879.1 atub|OJI89527.1 aver|OJI98953.1 awen|OJJ37110.1 azon|OJJ50809.1

Group4285: abra|OJJ77142.1 acar|OOF93028.1 acla|EAW12926.1 afis|EAW17729.1 afla|EED45729.1 afum|EAL91544.1 agla|OJJ81722.1 akaw|GAA90787.1 aluc|OJZ84556.1 anid|CBF86575.1 anig|EHA27850.1 aory|EIT75504.1 asyd|OJJ64843.1 ater|EAU31878.1 atub|OJI89526.1 aver|OJI98954.1 awen|OJJ37109.1 azon|OJJ50808.1

Group4286: abra|OJJ77143.1 acar|OOF93029.1 acla|EAW12925.1 afis|EAW17730.1 afla|EED45730.1 afum|EAL91545.1 agla|OJJ81721.1 akaw|GAA90786.1 aluc|OJZ84558.1 anid|CBF86573.1 anig|EHA27851.1 aory|EIT75486.1 asyd|OJJ64844.1 ater|EAU31877.1 atub|OJI89525.1 aver|OJI98955.1 awen|OJJ37108.1 azon|OJJ50807.1

Group4287: abra|OJJ77144.1 acar|OOF93030.1 acla|EAW12924.1 afis|EAW17731.1 afla|EED45731.1 afum|EAL91546.1 agla|OJJ81720.1 akaw|GAA90785.1 aluc|OJZ84559.1 anid|CBF86588.1 anig|EHA27852.1 aory|EIT75623.1 asyd|OJJ64838.1 ater|EAU31876.1 atub|OJI89524.1 aver|OJI98948.1 awen|OJJ37107.1 azon|OJJ50806.1

Group4288: abra|OJJ77145.1 acar|OOF93031.1 acla|EAW12923.1 afis|EAW17732.1 afla|EED45732.1 afum|EAL91547.1 agla|OJJ81719.1 akaw|GAA90784.1 aluc|OJZ84560.1 anid|CBF86586.1 anig|EHA27853.1 aory|EIT75469.1 asyd|OJJ64837.1 ater|EAU31875.1 atub|OJI89523.1 aver|OJI98947.1 awen|OJJ37105.1 azon|OJJ50805.1

Group4289: abra|OJJ77146.1 acar|OOF93032.1 acla|EAW12922.1 afis|EAW17733.1 afla|EED45734.1 afum|EAL91548.1 agla|OJJ81718.1 akaw|GAA90783.1 aluc|OJZ84561.1 anid|CBF86597.1 anig|EHA27855.1 aory|EIT75719.1 asyd|OJJ64833.1 ater|EAU31874.1 atub|OJI89521.1 aver|OJI98946.1 awen|OJJ37104.1 azon|OJJ50804.1

Group4290: abra|OJJ77148.1 acar|OOF93034.1 acla|EAW12921.1 afis|EAW17734.1 afla|EED45735.1 afum|EAL91549.1 agla|OJJ81716.1 akaw|GAA90782.1 aluc|OJZ84562.1 anid|CBF86595.1 anig|EHA27856.1 aory|EIT75759.1 asyd|OJJ64832.1 ater|EAU31873.1 atub|OJI89520.1 aver|OJI98945.1 azon|OJJ50802.1 awen|OJJ37101.1

Group4291: abra|OJJ77149.1 acar|OOF93035.1 acla|EAW12920.1 afis|EAW17735.1 afla|EED45736.1 afum|EAL91550.1 agla|OJJ81715.1 akaw|GAA90781.1 aluc|OJZ84563.1 anid|CBF86593.1 anig|EHA27857.1 aory|EIT75423.1 asyd|OJJ64831.1 ater|EAU31872.1 atub|OJI89519.1 aver|OJI98944.1 awen|OJJ37100.1 azon|OJJ50801.1

Group4292: abra|OJJ77157.1 acar|OOF93044.1 acla|EAW12915.1 afis|EAW17745.1 afla|EED45745.1 afum|EAL91557.1 agla|OJJ81708.1 akaw|GAA90773.1 aluc|OJZ84571.1 anid|CBF86614.1 anig|EHA27866.1 aory|EIT75582.1 asyd|OJJ64818.1 ater|EAU31862.1 atub|OJI89511.1 aver|OJI98931.1 awen|OJJ37092.1 azon|OJJ50796.1

Group4293: abra|OJJ77164.1 acar|OOF93050.1 acla|EAW12910.1 afis|EAW17754.1 afla|EED45758.1 afum|EAL91567.1 agla|OJJ81699.1 akaw|GAA90768.1 aluc|OJZ84577.1 anid|CBF86624.1 anig|EHA27870.1 aory|EIT75538.1 asyd|OJJ64811.1 ater|EAU31854.1 atub|OJI89504.1 aver|OJI98924.1 awen|OJJ37082.1 azon|OJJ50787.1

Group4294: abra|OJJ77165.1 acar|OOF93054.1 acla|EAW12901.1 afis|EAW17764.1 afla|EED45766.1 afum|EAL91574.1 agla|OJJ81698.1 akaw|GAA90767.1 aluc|OJZ84578.1 anid|CBF86628.1 anig|EHA27871.1 aory|EIT75559.1 asyd|OJJ64809.1 ater|EAU31853.1 atub|OJI89503.1 aver|OJI98922.1 awen|OJJ37081.1 azon|OJJ50784.1

Group4295: abra|OJJ77166.1 acar|OOF93055.1 acla|EAW12900.1 afis|EAW17765.1 afla|EED45767.1 afum|EAL91575.1 agla|OJJ81697.1 akaw|GAA90766.1 aluc|OJZ84579.1 anid|CBF86630.1 anig|EHA27872.1 aory|EIT75709.1 asyd|OJJ64808.1 ater|EAU31852.1 atub|OJI89502.1 aver|OJI98921.1 awen|OJJ37080.1 azon|OJJ50783.1

Group4296: abra|OJJ77176.1 acar|OOF93064.1 acla|EAW13174.1 afis|EAW17464.1 afla|EED49356.1 afum|EAL91293.1 agla|OJJ80340.1 akaw|GAA90759.1 aluc|OJZ84587.1 anid|CBF71650.1 anig|EHA27880.1 aory|EIT79568.1 asyd|OJJ61840.1 ater|EAU33949.1 atub|OJI89491.1 aver|OJI95939.1 awen|OJJ37381.1 azon|OJJ51055.1

Group4297: abra|OJJ77177.1 acar|OOF93065.1 acla|EAW13175.1 afis|EAW17463.1 afla|EED49357.1 afum|EAL91292.1 agla|OJJ80342.1 akaw|GAA90758.1 aluc|OJZ84589.1 anid|CBF71651.1 anig|EHA27881.1 aory|EIT79484.1 asyd|OJJ61839.1 ater|EAU33948.1 atub|OJI89490.1 aver|OJI95938.1 awen|OJJ37382.1 azon|OJJ51056.1

Group4298: abra|OJJ77186.1 acar|OOF93074.1 acla|EAW13176.1 afis|EAW17462.1 afla|EED49360.1 afum|EAL91291.1 agla|OJJ80343.1 akaw|GAA90753.1 aluc|OJZ84595.1 anid|CBF71661.1 anig|EHA27884.1 aory|EIT79468.1 asyd|OJJ61834.1 ater|EAU33947.1 atub|OJI89484.1 aver|OJI95933.1 awen|OJJ37384.1 azon|OJJ51059.1

Group4299: abra|OJJ77188.1 acar|OOF92641.1 acla|EAW13178.1 afis|EAW17461.1 afla|EED49361.1 afum|EAL91289.1 agla|OJJ80344.1 akaw|GAA90752.1 aluc|OJZ84596.1 anid|CBF71663.1 anig|EHA27885.1 aory|EIT79490.1 asyd|OJJ61833.1 ater|EAU33946.1 atub|OJI89483.1 aver|OJI95932.1 awen|OJJ37385.1 azon|OJJ51060.1

Group4300: abra|OJJ77190.1 acar|OOF93076.1 acla|EAW13179.1 afis|EAW17460.1 afla|EED49362.1 afum|EAL91288.1 agla|OJJ80345.1 akaw|GAA90750.1 aluc|OJZ84598.1 anid|CBF71665.1 anig|EHA27887.1 aory|EIT79506.1 asyd|OJJ61832.1 ater|EAU33945.1 atub|OJI89481.1 aver|OJI95931.1 awen|OJJ37386.1 azon|OJJ51061.1

Group4301: abra|OJJ77193.1 acar|OOF93078.1 acla|EAW13183.1 afis|EAW17457.1 afla|EED49365.1 afum|EAL91285.1 agla|OJJ80354.1 akaw|GAA90748.1 aluc|OJZ84600.1 anid|CBF71668.1 anig|EHA27890.1 aory|EIT79576.1 asyd|OJJ61829.1 ater|EAU33944.1 atub|OJI89479.1 aver|OJI95929.1 awen|OJJ37390.1 azon|OJJ51063.1

Group4302: abra|OJJ77194.1 acar|OOF93079.1 acla|EAW13184.1 afis|EAW17456.1 afla|EED49366.1 afum|EAL91284.1 agla|OJJ80353.1 akaw|GAA90747.1 aluc|OJZ84601.1 anid|CBF71670.1 anig|EHA27891.1 aory|EIT79508.1 asyd|OJJ61828.1 ater|EAU33936.1 atub|OJI89478.1 aver|OJI95928.1 awen|OJJ37391.1 azon|OJJ51064.1

Group4303: abra|OJJ77195.1 acar|OOF93080.1 acla|EAW13186.1 afis|EAW17455.1 afla|EED49367.1 afum|EAL91283.1 agla|OJJ80352.1 akaw|GAA90746.1 aluc|OJZ84602.1 anid|CBF71671.1 anig|EHA27892.1

aory|EIT79573.1 asyd|OJJ61827.1 ater|EAU33935.1 atub|OJI89477.1 aver|OJI95927.1 awen|OJJ37392.1 azon|OJJ51065.1

Group4304: abra|OJJ77198.1 acar|OOF93081.1 acla|EAW13187.1 afis|EAW17454.1 afla|EED49368.1 afum|EAL91282.1 agla|OJJ80351.1 akaw|GAA90743.1 aluc|OJZ84605.1 anid|CBF71673.1 anig|EHA27894.1 aory|EIT79544.1 asyd|OJJ61826.1 ater|EAU33934.1 atub|OJI89474.1 aver|OJI95926.1 awen|OJJ37393.1 azon|OJJ51066.1

Group4305: abra|OJJ77201.1 acar|OOF93089.1 acla|EAW13192.1 afis|EAW17449.1 afla|EED49373.1 afum|EBA27429.1 akaw|GAA90737.1 aluc|OJZ84611.1 anid|CBF71685.1 anig|EHA27900.1 aory|EIT79520.1 asyd|OJJ61821.1 ater|EAU33929.1 atub|OJI89470.1 aver|OJI95921.1 awen|OJJ37397.1 azon|OJJ51070.1 agla|OJJ80368.1

Group4306: abra|OJJ77202.1 acar|OOF93090.1 acla|EAW13193.1 afis|EAW17448.1 afla|EED49374.1 afum|EAL91275.2 agla|OJJ80369.1 akaw|GAA90736.1 aluc|OJZ84612.1 anid|CBF71687.1 anig|EHA27901.1 aory|EIT79525.1 asyd|OJJ61820.1 ater|EAU33928.1 atub|OJI89469.1 aver|OJI95920.1 awen|OJJ37398.1 azon|OJJ51071.1

Group4307: abra|OJJ77204.1 acar|OOF93092.1 acla|EAW13196.1 akaw|GAA90734.1 aluc|OJZ84615.1 anid|CBF71688.1 anig|EHA27903.1 aory|EIT79511.1 asyd|OJJ61819.1 ater|EAU33925.1 atub|OJI89466.1 aver|OJI95919.1 awen|OJJ37400.1 afis|EAW17446.1 afla|EED49381.1 afum|EAL91272.1 agla|OJJ80371.1 azon|OJJ51074.1

Group4308: abra|OJJ77205.1 acar|OOF93094.1 acla|EAW13197.1 afis|EAW17445.1 afla|EED49382.1 afum|EAL91271.1 agla|OJJ80372.1 akaw|GAA90733.1 aluc|OJZ84616.1 anid|CBF71690.1 anig|EHA27904.1 aory|EIT79527.1 asyd|OJJ61818.1 ater|EAU33924.1 atub|OJI89465.1 aver|OJI95918.1 awen|OJJ37401.1 azon|OJJ51075.1

Group4309: abra|OJJ77206.1 acar|OOF93093.1 acla|EAW13198.1 afis|EAW17444.1 afla|EED49383.1 afum|EAL91270.1 agla|OJJ80373.1 akaw|GAA90732.1 aluc|OJZ84617.1 anid|CBF71692.1 anig|EHA27905.1 aory|EIT79499.1 asyd|OJJ61817.1 ater|EAU33923.1 atub|OJI89464.1 aver|OJI95917.1 awen|OJJ37402.1 azon|OJJ51076.1

Group4310: abra|OJJ77207.1 acar|OOF93095.1 acla|EAW13199.1 afis|EAW17443.1 afla|EED49384.1 afum|EAL91269.1 agla|OJJ80374.1 akaw|GAA90731.1 aluc|OJZ84618.1 anid|CBF71694.1 anig|EHA27906.1 aory|EIT79562.1 asyd|OJJ61816.1 ater|EAU33922.1 atub|OJI89463.1 aver|OJI95916.1 awen|OJJ37403.1 azon|OJJ51077.1

Group4311: abra|OJJ77209.1 acar|OOF93096.1 acla|EAW13201.1 afis|EAW17441.1 afla|EED49386.1 afum|EAL91267.1 agla|OJJ80376.1 akaw|GAA90729.1 aluc|OJZ84620.1 anid|CBF71698.1 anig|EHA27908.1 aory|EIT79558.1 asyd|OJJ61814.1 ater|EAU33920.1 atub|OJI89461.1 aver|OJI95913.1 awen|OJJ37405.1 azon|OJJ51079.1

Group4312: abra|OJJ77210.1 acar|OOF93098.1 acla|EAW13202.1 afis|EAW17440.1 afla|EED49387.1 afum|EAL91266.1 agla|OJJ80377.1 akaw|GAA90728.1 aluc|OJZ84621.1 anid|CBF71700.1 anig|EHA27909.1 aory|EIT79563.1 asyd|OJJ61813.1 ater|EAU33919.1 atub|OJI89460.1 aver|OJI95912.1 awen|OJJ37406.1 azon|OJJ51080.1

Group4313: abra|OJJ77211.1 acar|OOF93097.1 acla|EAW13203.1 afis|EAW17439.1 afla|EED49388.1 afum|EAL91265.1 agla|OJJ80378.1 akaw|GAA90727.1 aluc|OJZ84622.1 anid|CBF71702.1 anig|EHA27910.1 aory|EIT79503.1 asyd|OJJ61812.1 ater|EAU33918.1 atub|OJI89459.1 aver|OJI95911.1 awen|OJJ37407.1 azon|OJJ51081.1

Group4314: abra|OJJ77213.1 acar|OOF93099.1 acla|EAW13205.1 afis|EAW17437.1 afla|EED49390.1 afla|EED49391.1 afum|EAL91264.1 agla|OJJ80380.1 akaw|GAA90725.1 aluc|OJZ84624.1 anig|EHA27911.1 aory|EIT79569.1 asyd|OJJ61810.1 ater|EAU33916.1 atub|OJI89457.1 aver|OJI95909.1 awen|OJJ37409.1 azon|OJJ51083.1

Group4315: abra|OJJ77214.1 acar|OOF93101.1 acla|EAW13206.1 afis|EAW17436.1 afla|EED49392.1 afum|EAL91263.1 agla|OJJ80381.1 akaw|GAA90724.1 aluc|OJZ84625.1 anid|CBF71706.1 anig|EHA27912.1 aory|EIT79513.1 asyd|OJJ61809.1 ater|EAU33915.1 atub|OJI89456.1 aver|OJI95908.1 awen|OJJ37410.1 azon|OJJ51084.1

Group4316: abra|OJJ77215.1 acar|OOF93102.1 acla|EAW13207.1 afis|EAW17435.1 afla|EED49409.1 afum|EAL91262.1 agla|OJJ80383.1 akaw|GAA90723.1 aluc|OJZ84626.1 anid|CBF71708.1 anig|EHA27913.1 aory|EIT79458.1 asyd|OJJ61808.1 ater|EAU33914.1 atub|OJI89455.1 aver|OJI95907.1 awen|OJJ37411.1 azon|OJJ51085.1

Group4317: abra|OJJ77216.1 acar|OOF93103.1 acla|EAW13209.1 afis|EAW17432.1 afla|EED49408.1 afum|EAL91260.1 agla|OJJ80384.1 akaw|GAA90722.1 aluc|OJZ84627.1 anid|CBF71710.1 anig|EHA27914.1 aory|EIT79545.1 asyd|OJJ61807.1 ater|EAU33913.1 atub|OJI89452.1 aver|OJI95906.1 awen|OJJ37412.1 azon|OJJ51086.1

Group4318: abra|OJJ77220.1 acar|OOF93105.1 acla|EAW13210.1 afis|EAW17431.1 afla|EED49407.1 afum|EAL91259.1 agla|OJJ80387.1 akaw|GAA90719.1 aluc|OJZ84630.1 anid|CBF71712.1 anig|EHA27918.1 aory|EIT79560.1 asyd|OJJ61806.1 ater|EAU33912.1 atub|OJI89449.1 aver|OJI95905.1 awen|OJJ37413.1 azon|OJJ51087.1

Group4319: abra|OJJ77223.1 acar|OOF93108.1 acla|EAW13214.1 afis|EAW17428.1 afla|EED49402.1 afum|EAL91256.1 agla|OJJ80396.1 akaw|GAA90716.1 aluc|OJZ84633.1 anid|CBF71716.1 anig|EHA27921.1 aory|EIT79534.1 asyd|OJJ61804.1 ater|EAU33909.1 atub|OJI89446.1 aver|OJI95903.1 awen|OJJ37415.1 azon|OJJ51089.1

Group4320: abra|OJJ77225.1 acar|OOF93110.1 acla|EAW13216.1 afis|EAW17426.1 afla|EED49400.1 afum|EAL91254.1 agla|OJJ80398.1 akaw|GAA90714.1 aluc|OJZ84635.1 anid|CBF71720.1 anig|EHA27923.1 aory|EIT79524.1 asyd|OJJ61802.1 ater|EAU33908.1 atub|OJI89444.1 aver|OJI95901.1 awen|OJJ37417.1 azon|OJJ51091.1

Group4321: abra|OJJ77226.1 acar|OOF93111.1 acla|EAW13217.1 afis|EAW17425.1 afla|EED49399.1 afum|EAL91253.1 agla|OJJ80399.1 akaw|GAA90713.1 aluc|OJZ84636.1 anid|CBF71722.1 anig|EHA27924.1 aory|EIT79475.1 asyd|OJJ61801.1 ater|EAU33907.1 atub|OJI89443.1 aver|OJI95900.1 awen|OJJ37418.1 azon|OJJ51092.1

Group4322: abra|OJJ77230.1 acar|OOF93113.1 acla|EAW13219.1 afis|EAW17423.1 afla|EED49397.1 afum|EAL91251.1 agla|OJJ80401.1 akaw|GAA90711.1 aluc|OJZ84640.1 anid|CBF71729.1 anig|EHA27926.1 aory|EIT79564.1 asyd|OJJ61799.1 ater|EAU33905.1 atub|OJI89440.1 aver|OJI95898.1 awen|OJJ37421.1 azon|OJJ51094.1

Group4323: abra|OJJ77238.1 acar|OOF93119.1 acla|EAW13245.1 afis|EAW17391.1 afla|EED49477.1 afum|EAL91228.1 agla|OJJ80406.1 akaw|GAA90705.1 aluc|OJZ84648.1 anid|CBF71739.1 anig|EHA27932.1 aory|EIT79509.1 asyd|OJJ61792.1 ater|EAU33896.1 atub|OJI89432.1 aver|OJI95892.1 awen|OJJ37424.1 azon|OJJ51104.1

Group4324: abra|OJJ77240.1 acar|OOF93121.1 acla|EAW13247.1 afis|EAW17389.1 afla|EED49481.1 afum|EAL91225.1 agla|OJJ80408.1 akaw|GAA90703.1 aluc|OJZ84650.1 anid|CBF71743.1 anig|EHA27933.1 aory|EIT79553.1 asyd|OJJ61790.1 ater|EAU33894.1 atub|OJI89430.1 aver|OJI95890.1 awen|OJJ37426.1 azon|OJJ51102.1

Group4325: abra|OJJ77242.1 acar|OOF93123.1 acla|EAW14606.1 afis|EAW19335.1 afla|EED56869.1 afum|EAL94052.1 agla|OJJ79421.1 akaw|GAA90701.1 aluc|OJZ84652.1 anid|CBF82394.1 anig|EHA27935.1 aory|EIT77502.1 asyd|OJJ54156.1 atub|OJI89428.1 aver|OJJ08579.1 awen|OJJ38873.1 asyd|OJJ59232.1 aver|OJJ01842.1

Group4326: abra|OJJ77244.1 acar|OOF93125.1 acla|EAW13248.1 afis|EAW17388.1 afla|EED49482.1 afum|EAL91224.1 agla|OJJ80409.1 akaw|GAA90699.1 aluc|OJZ84654.1 anid|CBF71787.1 anig|EHA27937.1 aory|EIT79464.1 asyd|OJJ61746.1 ater|EAU33893.1 atub|OJI89426.1 aver|OJI95843.1 awen|OJJ37427.1 azon|OJJ51101.1

Group4327: abra|OJJ77247.1 acar|OOF90006.1 acla|EAW13252.1 afis|EAW17384.1 afla|EED49501.1 afum|EAL91219.1 agla|OJJ80419.1 akaw|GAA90695.1 aluc|OJZ84658.1 anid|CBF84196.1 anig|EHA27940.1 aory|EIT82601.1 asyd|OJJ57160.1 ater|EAU33890.1 atub|OJI89422.1 aver|OJJ03153.1 awen|OJJ33371.1 azon|OJJ51109.1

Group4328: abra|OJJ77250.1 acar|OOF90005.1 acla|EAW13253.1 afis|EAW17383.1 afla|EED49504.1 afum|EAL91218.1 agla|OJJ80420.1 akaw|GAA90693.1 aluc|OJZ84661.1 anid|CBF84198.1 anig|EHA27943.1 aory|EIT82610.1 asyd|OJJ57161.1 ater|EAU33880.1 atub|OJI89419.1 aver|OJJ03152.1 awen|OJJ37433.1 azon|OJJ51112.1

Group4329: abra|OJJ77260.1 acar|OOF93128.1 afla|EED49508.1 akaw|GAA90687.1 aluc|OJZ84667.1 anig|EHA27946.1 aory|EIT82587.1 asyd|OJJ57166.1 ater|EAU33878.1 atub|OJI89413.1 awen|OJJ37439.1 azon|OJJ51115.1 acla|EAW13256.1 afis|EAW17380.1 afum|EAL91215.1 agla|OJJ80422.1 anid|CBF84207.1 aver|OJJ03148.1

Group4330: abra|OJJ77261.1 acar|OOF93130.1 acla|EAW13257.1 afis|EAW17379.1 afla|EED49509.1 afum|EAL91214.1 agla|OJJ80423.1 akaw|GAA90686.1 aluc|OJZ84668.1 anid|CBF84209.1 anig|EHA27947.1 aory|EIT82656.1 asyd|OJJ57167.1 ater|EAU33877.1 atub|OJI89412.1 aver|OJJ03147.1 awen|OJJ37441.1 azon|OJJ51117.1

Group4331: abra|OJJ77262.1 acar|OOF93132.1 acla|EAW13258.1 afis|EAW17378.1 afla|EED49510.1 afum|EAL91213.1 agla|OJJ80424.1 akaw|GAA90685.1 aluc|OJZ84669.1 anid|CBF84210.1 anig|EHA27948.1 aory|EIT82657.1 asyd|OJJ57168.1 ater|EAU33876.1 atub|OJI89411.1 aver|OJJ03146.1 awen|OJJ37442.1 azon|OJJ51120.1

Group4332: abra|OJJ77263.1 acar|OOF93131.1 acla|EAW13259.1 afis|EAW17377.1 afla|EED49511.1 afum|EAL91212.1 agla|OJJ80425.1 akaw|GAA90684.1 aluc|OJZ84671.1 anid|CBF84212.1 anig|EHA27949.1

aory|EIT82654.1 asyd|OJJ57169.1 ater|EAU33875.1 atub|OJI89409.1 aver|OJJ03145.1 awen|OJJ37443.1 azon|OJJ51121.1

Group4333: abra|OJJ77275.1 acar|OOF93150.1 acla|EAW13275.1 afis|EAW17342.1 afla|EED49781.1 afum|EBA27424.1 agla|OJJ79342.1 akaw|GAA90674.1 aluc|OJZ84684.1 anid|CBF84217.1 anig|EHA27960.1 aory|EIT77695.1 asyd|OJJ57179.1 ater|EAU33855.1 atub|OJI89397.1 aver|OJJ03135.1 awen|OJJ29675.1 azon|OJJ45994.1

Group4334: abra|OJJ77289.1 acar|OOF93167.1 acla|EAW13173.1 afis|EAW17465.1 afla|EED49355.1 afum|EAL91294.1 agla|OJJ80339.1 akaw|GAA90660.1 aluc|OJZ84700.1 anid|CBF71646.1 anig|EHA27975.1 aory|EIT79489.1 asyd|OJJ61841.1 ater|EAU33950.1 atub|OJI89382.1 aver|OJI95941.1 awen|OJJ37380.1 azon|OJJ51054.1

Group4335: abra|OJJ77290.1 acar|OOF93168.1 acla|EAW13172.1 afis|EAW17466.1 afla|EED49354.1 afum|EAL91295.1 agla|OJJ80338.1 akaw|GAA90659.1 aluc|OJZ84701.1 anid|CBF71638.1 anig|EHA27976.1 aory|EIT79580.1 asyd|OJJ61844.1 ater|EAU33951.1 atub|OJI89381.1 aver|OJI95944.1 awen|OJJ37379.1 azon|OJJ51053.1

Group4336: abra|OJJ77291.1 acar|OOF93169.1 acla|EAW13171.1 afis|EAW17468.1 afla|EED49353.1 afum|EAL91297.1 agla|OJJ80336.1 akaw|GAA90658.1 aluc|OJZ84702.1 anid|CBF71640.1 anig|EHA27977.1 aory|EIT79590.1 asyd|OJJ61843.1 ater|EAU33952.1 atub|OJI89380.1 aver|OJI95943.1 awen|OJJ37378.1 azon|OJJ51052.1

Group4337: abra|OJJ77295.1 acar|OOF93172.1 acla|EAW13169.1 afis|EAW17470.1 afla|EED49348.1 afum|EAL91299.1 agla|OJJ78440.1 akaw|GAA91456.1 aluc|OJZ84707.1 anid|CBF71630.1 anig|EHA27981.1 aory|EIT79461.1 asyd|OJJ61849.1 ater|EAU33954.1 atub|OJI89376.1 aver|OJI95948.1 awen|OJJ37372.1 azon|OJJ51050.1

Group4338: abra|OJJ77297.1 acar|OOF93177.1 acla|EAW13167.1 afis|EAW17472.1 afla|EED49343.1 akaw|GAA91454.1 aluc|OJZ84709.1 anid|CBF71626.1 anig|EHA27983.1 asyd|OJJ61851.1 ater|EAU33956.1 atub|OJI89374.1 aver|OJI95950.1 afum|EAL91301.1 agla|OJJ81490.1 aory|EIT79471.1 awen|OJJ37370.1 azon|OJJ51049.1

Group4339: abra|OJJ77300.1 acar|OOF93179.1 acla|EAW13165.1 afis|EAW17474.1 afla|EED49340.1 afum|EAL91303.1 agla|OJJ81488.1 akaw|GAA91452.1 aluc|OJZ84712.1 anid|CBF71622.1 anig|EHA27985.1 aory|EIT79516.1 asyd|OJJ61854.1 ater|EAU33958.1 atub|OJI89371.1 aver|OJI95953.1 awen|OJJ37368.1 azon|OJJ51047.1

Group4340: abra|OJJ77301.1 acar|OOF93180.1 acla|EAW13164.1 afis|EAW17475.1 afla|EED49339.1 afum|EAL91304.1 agla|OJJ81487.1 akaw|GAA91451.1 aluc|OJZ84713.1 anid|CBF71620.1 anig|EHA27986.1 aory|EIT79565.1 asyd|OJJ61855.1 ater|EAU33959.1 atub|OJI89370.1 aver|OJI95954.1 awen|OJJ37367.1 azon|OJJ51046.1

Group4341: abra|OJJ77303.1 acar|OOF93183.1 acla|EAW13163.1 afis|EAW17477.1 afla|EED49337.1 afum|EAL91306.1 agla|OJJ81480.1 akaw|GAA91448.1 aluc|OJZ84716.1 anid|CBF71603.1 anig|EHA27988.1 aory|EIT79497.1 asyd|OJJ61857.1 ater|EAU33693.1 atub|OJI89367.1 aver|OJI95956.1 awen|OJJ37365.1 azon|OJJ51045.1

Group4342: abra|OJJ77304.1 acar|OOF93182.1 acla|EAW13162.1 afis|EAW17478.1 afla|EED49336.1 afum|EAL91307.1 agla|OJJ81479.1 akaw|GAA91447.1 aluc|OJZ84717.1 anid|CBF71605.1 anig|EHA27989.1 aory|EIT79535.1 asyd|OJJ61858.1 ater|EAU33694.1 atub|OJI89366.1 aver|OJI95957.1 awen|OJJ37364.1 azon|OJJ51044.1

Group4343: abra|OJJ77305.1 acar|OOF93184.1 acla|EAW13161.1 afis|EAW17479.1 afla|EED49335.1 afum|EAL91308.1 agla|OJJ81478.1 akaw|GAA91446.1 aluc|OJZ84718.1 anid|CBF71607.1 anig|EHA27990.1 aory|EIT79462.1 asyd|OJJ61859.1 ater|EAU33695.1 atub|OJI89365.1 aver|OJI95958.1 awen|OJJ37362.1 azon|OJJ51043.1

Group4344: abra|OJJ77306.1 acar|OOF93185.1 acla|EAW13160.1 afis|EAW17481.1 afla|EED49334.1 afum|EAL91309.1 agla|OJJ81477.1 akaw|GAA91445.1 aluc|OJZ84720.1 anid|CBF71609.1 anig|EHA27991.1 aory|EIT79526.1 asyd|OJJ61860.1 ater|EAU36927.1 atub|OJI89363.1 aver|OJI95959.1 awen|OJJ37357.1 azon|OJJ51041.1

Group4345: abra|OJJ77315.1 acar|OOF93191.1 acla|EAW13157.1 afis|EAW17489.1 afla|EED49327.1 afum|EAL91311.1 agla|OJJ81467.1 akaw|GAA91440.1 aluc|OJZ84725.1 anid|CBF71617.1 anig|EHA27999.1 aory|EIT79549.1 asyd|OJJ61864.1 ater|EAU36934.1 atub|OJI89357.1 aver|OJI95962.1 awen|OJJ37352.1 azon|OJJ51038.1

Group4346: abra|OJJ77318.1 acar|OOF93194.1 acla|EAW13154.1 afis|EAW17492.1 afla|EED49324.1 afum|EAL91314.1 agla|OJJ81464.1 akaw|GAA91438.1 aluc|OJZ84728.1 anid|CBF71599.1 anig|EHA28001.1 aory|EIT79543.1 asyd|OJJ61866.1 ater|EAU36936.1 atub|OJI89354.1 aver|OJI95964.1 awen|OJJ37349.1 azon|OJJ51035.1



Group4347: abra|OJJ77319.1 acar|OOF93195.1 acla|EAW13153.1 afis|EAW17493.1 afla|EED49323.1 afum|EAL91315.1 agla|OJJ81463.1 akaw|GAA91437.1 aluc|OJZ84729.1 anid|CBF71595.1 anig|EHA28002.1 aory|EIT79479.1 asyd|OJJ61868.1 ater|EAU36937.1 atub|OJI89353.1 aver|OJI95966.1 awen|OJJ37348.1 azon|OJJ51034.1

Group4348: abra|OJJ77320.1 acar|OOF93196.1 acla|EAW13152.1 afis|EAW17494.1 afla|EED49322.1 afum|EAL91316.1 agla|OJJ81460.1 akaw|GAA91436.1 aluc|OJZ84730.1 anid|CBF71589.1 anig|EHA28003.1 aory|EIT79493.1 asyd|OJJ61870.1 ater|EAU36938.1 atub|OJI89352.1 aver|OJI95968.1 awen|OJJ37347.1 azon|OJJ51033.1

Group4349: abra|OJJ77326.1 acar|OOF93202.1 acla|EAW13146.1 afis|EAW17518.1 afla|EED49315.1 afum|EAL91336.1 agla|OJJ81452.1 akaw|GAA91430.1 aluc|OJZ84736.1 anid|CBF71576.1 anig|EHA28009.1 aory|EIT82190.1 asyd|OJJ61877.1 ater|EAU36948.1 atub|OJI89345.1 aver|OJI95975.1 awen|OJJ37339.1 azon|OJJ51025.1

Group4350: abra|OJJ77328.1 acar|OOF93203.1 acla|EAW13145.1 afis|EAW17517.1 afla|EED49314.1 afum|EAL91335.1 agla|OJJ81451.1 akaw|GAA91429.1 aluc|OJZ84737.1 anid|CBF71574.1 anig|EHA28010.1 aory|EIT82219.1 asyd|OJJ61878.1 ater|EAU36949.1 atub|OJI89344.1 aver|OJI95976.1 awen|OJJ37338.1 azon|OJJ51024.1

Group4351: abra|OJJ77329.1 acar|OOF93204.1 acla|EAW13144.1 afis|EAW17516.1 afla|EED49313.1 afum|EAL91334.1 agla|OJJ81450.1 akaw|GAA91428.1 aluc|OJZ84738.1 anid|CBF71572.1 anig|EHA28011.1 aory|EIT82242.1 asyd|OJJ61879.1 ater|EAU36950.1 atub|OJI89343.1 aver|OJI95977.1 awen|OJJ37337.1 azon|OJJ51023.1

Group4352: abra|OJJ77334.1 acar|OOF89885.1 acla|EAW13138.1 afis|EAW17507.1 afla|EED49308.1 afum|EAL91329.1 agla|OJJ81445.1 akaw|GAA91424.1 aluc|OJZ84742.1 anid|CBF71533.1 anig|EHA28016.1 aory|EIT82210.1 asyd|OJJ61892.1 ater|EAU36953.1 atub|OJI89339.1 aver|OJI95988.1 awen|OJJ37332.1 azon|OJJ51019.1

Group4353: abra|OJJ77338.1 acar|OOF93209.1 acla|EAW13137.1 afis|EAW17506.1 afla|EED49306.1 afum|EAL91328.2 agla|OJJ81444.1 akaw|GAA91423.1 aluc|OJZ84747.1 anid|CBF71535.1 anig|EHA28017.1 aory|EIT82204.1 asyd|OJJ61889.1 ater|EAU36955.1 atub|OJI89335.1 aver|OJI95986.1 awen|OJJ37329.1 azon|OJJ51018.1

Group4354: abra|OJJ77339.1 acar|OOF93210.1 acla|EAW13136.1 afis|EAW17505.1 afla|EED49305.1 afum|EAL91327.1 agla|OJJ81443.1 akaw|GAA91422.1 aluc|OJZ84748.1 anid|CBF71537.1 anig|EHA28018.1 aory|EIT82207.1 asyd|OJJ61894.1 ater|EAU36956.1 atub|OJI89334.1 aver|OJI95990.1 awen|OJJ37328.1 azon|OJJ51017.1

Group4355: abra|OJJ77341.1 acar|OOF93211.1 acla|EAW13134.1 afis|EAW17503.1 afla|EED49301.1 afum|EBA27430.1 agla|OJJ81441.1 akaw|GAA91420.1 aluc|OJZ84750.1 anid|CBF71541.1 anig|EHA28020.1 aory|EIT82193.1 asyd|OJJ61896.1 ater|EAU36958.1 atub|OJI89332.1 aver|OJI95992.1 awen|OJJ37326.1 azon|OJJ51015.1

Group4356: abra|OJJ77342.1 acar|OOF93212.1 acla|EAW13133.1 afis|EAW17502.1 afla|EED49300.1 afum|EAL91325.1 agla|OJJ81440.1 akaw|GAA91419.1 aluc|OJZ84751.1 anid|CBF71543.1 anig|EHA28021.1 aory|EIT82195.1 asyd|OJJ61897.1 ater|EAU36959.1 atub|OJI89331.1 aver|OJI95993.1 awen|OJJ37325.1 azon|OJJ51014.1

Group4357: abra|OJJ77343.1 acar|OOF93213.1 acla|EAW13132.1 afis|EAW17501.1 afla|EED49299.1 afum|EAL91324.1 agla|OJJ81439.1 akaw|GAA91418.1 aluc|OJZ84753.1 anid|CBF85589.1 anig|EHA28022.1 aory|EIT82233.1 asyd|OJJ64171.1 ater|EAU36960.1 atub|OJI89330.1 aver|OJI98246.1 awen|OJJ37324.1 azon|OJJ51013.1

Group4358: abra|OJJ77344.1 acar|OOF93214.1 acla|EAW13131.1 afis|EAW17532.1 afla|EED49298.1 afum|EAL91346.1 agla|OJJ81438.1 akaw|GAA91417.1 aluc|OJZ84754.1 anid|CBF90335.1 anig|EHA28023.1 aory|EIT82183.1 asyd|OJJ61898.1 ater|EAU36961.1 atub|OJI89329.1 aver|OJI95994.1 awen|OJJ37320.1 azon|OJJ51012.1

Group4359: abra|OJJ77346.1 acar|OOF93216.1 acla|EAW13128.1 afis|EAW17535.1 afla|EED49294.1 afum|EAL91349.1 agla|OJJ81436.1 akaw|GAA91414.1 aluc|OJZ84757.1 anid|CBF90326.1 anig|EHA28026.1 aory|EIT82178.1 asyd|OJJ61907.1 ater|EAU36964.1 atub|OJI89327.1 aver|OJI96000.1 awen|OJJ37318.1 azon|OJJ51010.1

Group4360: abra|OJJ77347.1 acar|OOF93217.1 acla|EAW13127.1 afis|EAW17536.1 afla|EED49293.1 afum|EAL91350.1 agla|OJJ81433.1 akaw|GAA91413.1 aluc|OJZ84758.1 anid|CBF90324.1 anig|EHA28027.1 aory|EIT82228.1 asyd|OJJ61908.1 ater|EAU36965.1 atub|OJI89326.1 aver|OJI96001.1 awen|OJJ37317.1 azon|OJJ51009.1

Group4361: abra|OJJ77348.1 acar|OOF93218.1 acla|EAW13126.1 afis|EAW17537.1 afla|EED49290.1 afum|EAL91351.1 agla|OJJ81432.1 akaw|GAA91412.1 aluc|OJZ84759.1 anid|CBF90322.1 anig|EHA28028.1

aory|EIT82241.1 asyd|OJJ61909.1 ater|EAU36967.1 atub|OJI89325.1 aver|OJI96002.1 awen|OJJ37315.1 azon|OJJ51007.1

Group4362: abra|OJJ77350.1 acar|OOF93220.1 acla|EAW13125.1 afis|EAW17539.1 afla|EED49288.1 afum|EAL91353.1 agla|OJJ81430.1 akaw|GAA91411.1 aluc|OJZ84761.1 anid|CBF90317.1 anig|EHA28030.1 aory|EIT82231.1 asyd|OJJ61911.1 ater|EAU36969.1 atub|OJI89323.1 aver|OJI96004.1 awen|OJJ37314.1 azon|OJJ51006.1

Group4363: abra|OJJ77353.1 acar|OOF93223.1 acla|EAW13121.1 afis|EAW17543.1 afla|EED49284.1 afum|EAL91357.1 agla|OJJ81426.1 akaw|GAA91408.1 aluc|OJZ84764.1 anid|CBF90308.1 anig|EHA28033.1 aory|EIT82220.1 asyd|OJJ61932.1 ater|EAU36973.1 atub|OJI89320.1 aver|OJI96024.1 awen|OJJ37310.1 azon|OJJ51002.1

Group4364: abra|OJJ77355.1 acar|OOF93225.1 acla|EAW13119.1 afis|EAW17545.1 afla|EED49282.1 afum|EAL91359.1 agla|OJJ81424.1 akaw|GAA91406.1 aluc|OJZ84765.1 anid|CBF90305.1 anig|EHA28034.1 aory|EIT82244.1 asyd|OJJ61930.1 ater|EAU36975.1 atub|OJI89319.1 aver|OJI96022.1 awen|OJJ37309.1 azon|OJJ51001.1

Group4365: abra|OJJ77356.1 acar|OOF93226.1 acla|EAW13118.1 afis|EAW17546.1 afla|EED49281.1 afum|EAL91360.1 agla|OJJ81423.1 akaw|GAA91405.1 aluc|OJZ84766.1 anid|CBF90303.1 anig|EHA28035.1 aory|EIT82243.1 asyd|OJJ61929.1 ater|EAU36976.1 atub|OJI89318.1 aver|OJI96021.1 awen|OJJ37308.1 azon|OJJ51000.1

Group4366: abra|OJJ77359.1 acar|OOF93228.1 acla|EAW13117.1 afis|EAW17547.1 afla|EED49278.1 afum|EAL91361.1 agla|OJJ81421.1 akaw|GAA91404.1 aluc|OJZ84767.1 anid|CBF90290.1 anig|EHA28037.1 aory|EIT82197.1 asyd|OJJ61921.1 ater|EAU36977.1 atub|OJI89315.1 aver|OJI96013.1 awen|OJJ37307.1 azon|OJJ50999.1

Group4367: abra|OJJ77361.1 acar|OOF93230.1 acla|EAW13115.1 afis|EAW17549.1 afla|EED49276.1 afum|EAL91363.1 agla|OJJ81419.1 akaw|GAA91402.1 aluc|OJZ84769.1 anid|CBF90294.1 anig|EHA28038.1 aory|EIT82240.1 asyd|OJJ61923.1 ater|EAU36985.1 atub|OJI89312.1 aver|OJI96015.1 awen|OJJ37305.1 azon|OJJ50997.1

Group4368: abra|OJJ77362.1 acar|OOF93231.1 acla|EAW13114.1 afis|EAW17550.1 afla|EED49275.1 afum|EAL91364.1 agla|OJJ81418.1 akaw|GAA91400.1 aluc|OJZ84771.1 anid|CBF90296.1 anig|EHA28039.1 aory|EIT82229.1 asyd|OJJ61924.1 ater|EAU36984.1 atub|OJI89310.1 aver|OJI96016.1 awen|OJJ37303.1 azon|OJJ50996.1

Group4369: abra|OJJ77365.1 acar|OOF93235.1 acla|EAW13111.1 afis|EAW17553.1 afla|EED49272.1 afum|EAL91367.1 agla|OJJ81415.1 akaw|GAA91397.1 aluc|OJZ84774.1 anid|CBF90299.1 anig|EHA28042.1 aory|EIT82208.1 asyd|OJJ61926.1 ater|EAU36981.1 atub|OJI89307.1 aver|OJI96018.1 awen|OJJ37300.1 azon|OJJ50993.1

Group4370: abra|OJJ77366.1 acar|OOF93236.1 acla|EAW13110.1 afis|EAW17554.1 afla|EED49271.1 afum|EAL91368.1 agla|OJJ81414.1 akaw|GAA91396.1 aluc|OJZ84775.1 anid|CBF90301.1 anig|EHA28043.1 aory|EIT82221.1 asyd|OJJ61927.1 ater|EAU36980.1 atub|OJI89306.1 aver|OJI96019.1 awen|OJJ37299.1 azon|OJJ50992.1

Group4371: abra|OJJ77368.1 acar|OOF93238.1 acla|EAW13108.1 afis|EAW17556.1 afla|EED49268.1 afum|EAL91370.1 agla|OJJ81412.1 akaw|GAA91394.1 aluc|OJZ84777.1 anid|CBF90282.1 anig|EHA28045.1 aory|EIT82203.1 asyd|OJJ61918.1 ater|EAU36988.1 atub|OJI89304.1 aver|OJI96010.1 awen|OJJ37297.1 azon|OJJ50990.1

Group4372: abra|OJJ77370.1 acar|OOF93241.1 acla|EAW13105.1 afis|EAW17559.1 afla|EED49265.1 afum|EAL91373.1 agla|OJJ81409.1 akaw|GAA91391.1 aluc|OJZ84780.1 anid|CBF90277.1 anig|EHA28047.1 aory|EIT82185.1 asyd|OJJ61933.1 ater|EAU36990.1 atub|OJI89302.1 aver|OJI96025.1 awen|OJJ37295.1 azon|OJJ50988.1

Group4373: abra|OJJ77371.1 acar|OOF93240.1 acla|EAW13104.1 afis|EAW17560.1 afla|EED49264.1 afum|EAL91374.1 agla|OJJ81408.1 akaw|GAA91390.1 aluc|OJZ84781.1 anid|CBF90275.1 anig|EHA28048.1 aory|EIT82187.1 asyd|OJJ61934.1 ater|EAU36991.1 atub|OJI89301.1 aver|OJI96026.1 awen|OJJ37294.1 azon|OJJ50987.1

Group4374: abra|OJJ77372.1 acar|OOF93242.1 acla|EAW13103.1 afis|EAW17561.1 afla|EED49263.1 afum|EAL91375.1 agla|OJJ81407.1 akaw|GAA91389.1 aluc|OJZ84782.1 anid|CBF90273.1 anig|EHA28049.1 aory|EIT82191.1 asyd|OJJ61935.1 ater|EAU36992.1 atub|OJI89300.1 aver|OJI96027.1 awen|OJJ37293.1 azon|OJJ50986.1

Group4375: abra|OJJ77373.1 acar|OOF93244.1 acla|EAW13102.1 afis|EAW17562.1 afla|EED49259.1 afum|EAL91376.1 agla|OJJ81406.1 akaw|GAA91387.1 aluc|OJZ84783.1 anid|CBF90271.1 anig|EHA28050.1 aory|EIT82238.1 asyd|OJJ61936.1 ater|EAU37000.1 atub|OJI89299.1 aver|OJI96028.1 awen|OJJ37292.1 azon|OJJ50985.1

Group4376: abra|OJJ77374.1 acar|OOF93243.1 acla|EAW13101.1 afis|EAW17563.1 afla|EED49258.1 afum|EAL91377.1 agla|OJJ81405.1 akaw|GAA91386.1 aluc|OJZ84784.1 anid|CBF90269.1 anig|EHA28051.1 aory|EIT82186.1 asyd|OJJ61937.1 ater|EAU37001.1 atub|OJI89298.1 aver|OJI96029.1 awen|OJJ37291.1 azon|OJJ50984.1

Group4377: abra|OJJ77375.1 acar|OOF93245.1 acla|EAW13100.1 afis|EAW17564.1 afla|EED49257.1 afum|EAL91378.1 agla|OJJ81402.1 akaw|GAA91385.1 aluc|OJZ84785.1 anid|CBF90267.1 anig|EHA28052.1 aory|EIT82246.1 asyd|OJJ61938.1 ater|EAU37002.1 atub|OJI89297.1 aver|OJI96030.1 awen|OJJ37290.1 azon|OJJ50983.1

Group4378: abra|OJJ77376.1 acar|OOF93246.1 acla|EAW13098.1 afis|EAW17565.1 afla|EED49256.1 afum|EAL91379.1 agla|OJJ81401.1 akaw|GAA91384.1 aluc|OJZ84786.1 anid|CBF90266.1 anig|EHA28053.1 aory|EIT82227.1 asyd|OJJ61939.1 ater|EAU37003.1 atub|OJI89296.1 aver|OJI96031.1 awen|OJJ37288.1 azon|OJJ50982.1

Group4379: abra|OJJ77378.1 acar|OOF93247.1 acla|EAW13096.1 afis|EAW17567.1 afla|EED49254.1 afum|EAL91381.1 agla|OJJ81398.1 akaw|GAA91382.1 aluc|OJZ84787.1 anid|CBF90262.1 anig|EHA28055.1 aory|EIT82184.1 asyd|OJJ61941.1 ater|EAU37004.1 atub|OJI89295.1 aver|OJI96033.1 awen|OJJ37286.1 azon|OJJ50980.1

Group4380: abra|OJJ77476.1 acar|OOF99249.1 acla|EAW06738.1 afis|EAW16288.1 afla|EED53265.1 afum|EAL88910.1 agla|OJJ88310.1 akaw|GAA84142.1 aluc|OJZ81062.1 anid|CBF86860.1 anig|EHA19306.1 aory|EIT75107.1 asyd|OJJ64634.1 ater|EAU37333.1 atub|OJI82523.1 aver|OJI98733.1 awen|OJJ37692.1 azon|OJJ44952.1

Group4381: abra|OJJ77477.1 acar|OOF99248.1 acla|EAW06739.1 afis|EAW16289.1 afla|EED53264.1 afum|EAL88911.1 agla|OJJ88311.1 akaw|GAA84141.1 aluc|OJZ81061.1 anid|CBF86858.1 anig|EHA19307.1 aory|EIT74825.1 asyd|OJJ64635.1 ater|EAU37334.1 atub|OJI82524.1 aver|OJI98734.1 awen|OJJ37691.1 azon|OJJ44951.1

Group4382: abra|OJJ77478.1 acar|OOF99247.1 acla|EAW06740.1 afis|EAW16290.1 afla|EED53263.1 afum|EAL88912.1 agla|OJJ88312.1 akaw|GAA84140.1 aluc|OJZ81060.1 anid|CBF86856.1 anig|EHA19308.1 aory|EIT75015.1 asyd|OJJ64636.1 ater|EAU37335.1 atub|OJI82525.1 aver|OJI98735.1 awen|OJJ37690.1 azon|OJJ44950.1

Group4383: abra|OJJ77479.1 acar|OOF99246.1 acla|EAW06741.1 afis|EAW16291.1 afla|EED53262.1 afum|EAL88913.1 agla|OJJ88313.1 akaw|GAA84139.1 aluc|OJZ81059.1 anid|CBF86854.1 anig|EHA19309.1 aory|EIT74947.1 asyd|OJJ64637.1 ater|EAU37336.1 atub|OJI82526.1 aver|OJI98736.1 awen|OJJ37689.1 azon|OJJ44949.1

Group4384: abra|OJJ77485.1 acar|OOF99240.1 acla|EAW06746.1 afis|EAW16296.1 afla|EED53258.1 afum|EAL88918.1 agla|OJJ88303.1 akaw|GAA84133.1 aluc|OJZ81051.1 anid|CBF86847.1 anig|EHA19316.1 aory|EIT75226.1 asyd|OJJ64642.1 ater|EAU29340.1 atub|OJI82533.1 aver|OJI98742.1 awen|OJJ37695.1 azon|OJJ44956.1

Group4385: abra|OJJ77489.1 acar|OOF99236.1 acla|EAW06751.1 afis|EAW16301.1 afla|EED53253.1 afum|EAL88923.1 agla|OJJ88293.1 akaw|GAA84130.1 aluc|OJZ81047.1 anid|CBF86841.1 anig|EHA19320.1 aory|EIT74998.1 asyd|OJJ64646.1 ater|EAU37346.1 atub|OJI82537.1 aver|OJI98746.1 awen|OJJ37700.1 azon|OJJ44961.1

Group4386: abra|OJJ77490.1 acar|OOF99235.1 acla|EAW06752.1 afis|EAW16302.1 afla|EED53252.1 afum|EAL88924.1 agla|OJJ88292.1 akaw|GAA84129.1 aluc|OJZ81046.1 anid|CBF86839.1 anig|EHA19321.1 aory|EIT75063.1 asyd|OJJ64647.1 ater|EAU37345.1 atub|OJI82538.1 aver|OJI98747.1 awen|OJJ37701.1 azon|OJJ44962.1

Group4387: abra|OJJ77493.1 acar|OOF99233.1 acla|EAW06754.1 afis|EAW16304.1 afla|EED53250.1 afum|EAL88926.1 agla|OJJ88290.1 akaw|GAA84127.1 aluc|OJZ81044.1 anid|CBF69582.1 anig|EHA19323.1 aory|EIT75043.1 asyd|OJJ59144.1 ater|EAU29332.1 atub|OJI82540.1 aver|OJJ01734.1 awen|OJJ37704.1 azon|OJJ44964.1

Group4388: abra|OJJ77494.1 acar|OOF99232.1 acla|EAW06755.1 afis|EAW16305.1 afla|EED53249.1 afum|EAL88927.1 agla|OJJ88267.1 akaw|GAA84126.1 aluc|OJZ81043.1 anid|CBF69583.1 anig|EHA19324.1 aory|EIT75153.1 asyd|OJJ59145.1 ater|EAU29333.1 atub|OJI82541.1 aver|OJJ01735.1 awen|OJJ37705.1 azon|OJJ44965.1

Group4389: abra|OJJ77495.1 acla|EAW06756.1 afis|EAW16306.1 afla|EED53248.1 afum|EAL88928.1 agla|OJJ88268.1 akaw|GAA84125.1 aluc|OJZ81042.1 anid|CBF69575.1 anig|EHA19325.1 aory|EIT75004.1 asyd|OJJ59149.1 ater|EAU29334.1 atub|OJI82542.1 aver|OJJ01739.1 awen|OJJ37706.1 azon|OJJ44966.1 aver|OJJ05343.1

Group4390: abra|OJJ77499.1 acar|OOF99227.1 acla|EAW06736.1 afis|EAW16287.1 afla|EED53269.1 afum|EAL88909.1 agla|OJJ88309.1 akaw|GAA84122.1 aluc|OJZ81039.1 anid|CBF86861.1 anig|EHA19328.1

aory|EIT74855.1 asyd|OJJ64633.1 ater|EAU37332.1 atub|OJI82545.1 aver|OJI98732.1 awen|OJJ37682.1 azon|OJJ44954.1

Group4391: abra|OJJ77502.1 acar|OOF99225.1 acla|EAW06734.1 afis|EAW16285.1 afla|EED53271.1 afum|EAL88906.1 agla|OJJ88306.1 akaw|GAA84119.1 aluc|OJZ81035.1 anid|CBF86869.1 anig|EHA19331.1 aory|EIT75236.1 asyd|OJJ64631.1 ater|EAU37329.1 atub|OJI82548.1 aver|OJI98729.1 awen|OJJ37679.1 azon|OJJ44945.1

Group4392: abra|OJJ77503.1 acar|OOF99224.1 acla|EAW06732.1 afis|EAW16284.1 afla|EED53272.1 afum|EAL88905.1 agla|OJJ88305.1 akaw|GAA84118.1 aluc|OJZ81034.1 anid|CBF86871.1 anig|EHA19332.1 aory|EIT75050.1 asyd|OJJ64630.1 ater|EAU37328.1 atub|OJI82549.1 aver|OJI98728.1 awen|OJJ37677.1 azon|OJJ44942.1

Group4393: abra|OJJ77504.1 acar|OOF99222.1 acla|EAW06730.1 afis|EAW16283.1 afla|EED53273.1 afum|EAL88904.1 agla|OJJ88318.1 akaw|GAA84116.1 aluc|OJZ81032.1 anid|CBF86876.1 anig|EHA19333.1 aory|EIT75123.1 asyd|OJJ64627.1 ater|EAU37327.1 atub|OJI82551.1 aver|OJI98725.1 awen|OJJ37675.1 azon|OJJ44940.1

Group4394: abra|OJJ77507.1 acar|OOF99219.1 acla|EAW06727.1 afis|EAW16280.1 afla|EED53276.1 afum|EAL88901.1 agla|OJJ88324.1 akaw|GAA84113.1 aluc|OJZ81029.1 anid|CBF86880.1 anig|EHA19336.1 aory|EIT74958.1 asyd|OJJ64626.1 ater|EAU37325.1 atub|OJI82554.1 aver|OJI98722.1 awen|OJJ37672.1 azon|OJJ44937.1

Group4395: abra|OJJ77508.1 acar|OOF99218.1 acla|EAW06726.1 afis|EAW16279.1 afla|EED53277.1 afum|EAL88900.1 agla|OJJ88323.1 akaw|GAA84112.1 aluc|OJZ81028.1 anid|CBF86882.1 anig|EHA19337.1 aory|EIT74848.1 asyd|OJJ64625.1 ater|EAU37324.1 atub|OJI82555.1 aver|OJI98721.1 awen|OJJ37671.1 azon|OJJ44936.1

Group4396: abra|OJJ77509.1 acar|OOF99217.1 acla|EAW06725.1 afis|EAW16278.1 afla|EED53279.1 afum|EAL88899.1 agla|OJJ88321.1 akaw|GAA84111.1 aluc|OJZ81027.1 anid|CBF86883.1 anig|EHA19338.1 aory|EIT74824.1 asyd|OJJ64624.1 ater|EAU37323.1 atub|OJI82556.1 aver|OJI98720.1 awen|OJJ37670.1 azon|OJJ44935.1

Group4397: abra|OJJ77510.1 acar|OOF99216.1 acla|EAW06724.1 afis|EAW16277.1 afla|EED53280.1 afum|EAL88898.1 agla|OJJ88328.1 akaw|GAA84110.1 aluc|OJZ81026.1 anid|CBF86885.1 anig|EHA19339.1 aory|EIT75207.1 asyd|OJJ64623.1 ater|EAU37322.1 atub|OJI82557.1 aver|OJI98719.1 awen|OJJ37669.1 azon|OJJ44934.1

Group4398: abra|OJJ77511.1 acar|OOF99214.1 acla|EAW06723.1 afis|EAW16276.1 afla|EED53281.1 afum|EAL88897.1 agla|OJJ88329.1 akaw|GAA84109.1 aluc|OJZ81025.1 anid|CBF86892.1 anig|EHA18669.1 aory|EIT75064.1 asyd|OJJ64622.1 ater|EAU37321.1 atub|OJI82558.1 aver|OJI98718.1 awen|OJJ37668.1 azon|OJJ44933.1

Group4399: abra|OJJ77513.1 acar|OOF99211.1 acla|EAW06722.1 afis|EAW16265.1 afla|EED53285.1 afum|EAL88886.1 agla|OJJ88330.1 akaw|GAA84107.1 aluc|OJZ81022.1 anid|CBF86894.1 anig|EHA19341.1 aory|EIT74876.1 asyd|OJJ64621.1 ater|EAU37438.1 atub|OJI82561.1 aver|OJI98717.1 awen|OJJ37667.1 azon|OJJ44930.1

Group4400: abra|OJJ77514.1 acar|OOF99210.1 acla|EAW06721.1 afis|EAW16266.1 afla|EED53284.1 afum|EAL88887.1 agla|OJJ88331.1 akaw|GAA84106.1 aluc|OJZ81021.1 anid|CBF86895.1 anig|EHA19342.1 aory|EIT75173.1 asyd|OJJ64620.1 ater|EAU37439.1 atub|OJI82562.1 aver|OJI98716.1 awen|OJJ37666.1 azon|OJJ44931.1

Group4401: abra|OJJ77516.1 acar|OOF99207.1 acla|EAW06720.1 afis|EAW16267.1 afla|EED53282.1 afum|EAL88888.1 agla|OJJ88333.1 akaw|GAA84104.1 aluc|OJZ81019.1 anid|CBF86897.1 anig|EHA19343.1 aory|EIT75090.1 asyd|OJJ64618.1 ater|EAU37440.1 atub|OJI82564.1 aver|OJI98714.1 awen|OJJ37664.1 azon|OJJ44923.1

Group4402: abra|OJJ77517.1 acar|OOF99208.1 acla|EAW06719.1 afis|EAW16268.1 afla|EED53288.1 afum|EAL88889.1 agla|OJJ88337.1 akaw|GAA84103.1 aluc|OJZ81018.1 anid|CBF86899.1 anig|EHA19344.1 aory|EIT74865.1 asyd|OJJ64617.1 ater|EAU37443.1 atub|OJI82565.1 aver|OJI98713.1 awen|OJJ37663.1 azon|OJJ44924.1

Group4403: abra|OJJ77520.1 acar|OOF99203.1 acla|EAW06715.1 afla|EED53293.1 afum|EAL88893.1 akaw|GAA84100.1 aluc|OJZ81016.1 anid|CBF86904.1 anig|EHA19346.1 aory|EIT74861.1 asyd|OJJ64613.1 atub|OJI82568.1 aver|OJI98709.1 awen|OJJ37656.1 azon|OJJ44929.1 afis|EAW16272.1 agla|OJJ88342.1 ater|EAU37447.1

Group4404: abra|OJJ77522.1 acar|OOF99202.1 acla|EAW06717.1 afis|EAW16270.1 afla|EED53295.1 afum|EAL88891.1 agla|OJJ88339.1 akaw|GAA84098.1 aluc|OJZ81014.1 anid|CBF86903.1 anig|EHA19347.1 aory|EIT74914.1 asyd|OJJ64615.1 ater|EAU37445.1 atub|OJI82570.1 aver|OJI98711.1 awen|OJJ37660.1 azon|OJJ44927.1

Group4405: abra|OJJ77524.1 acar|OOF99200.1 acla|EAW06718.1 afis|EAW16269.1 afla|EED53289.1 afum|EAL88890.1 agla|OJJ88338.1 akaw|GAA84095.1 aluc|OJZ81011.1 anid|CBF86901.1 anig|EHA19350.1 aory|EIT74922.1 asyd|OJJ64616.1 ater|EAU37444.1 atub|OJI82573.1 aver|OJI98712.1 awen|OJJ37661.1 azon|OJJ44926.1

Group4406: abra|OJJ77526.1 acar|OOF99198.1 acla|EAW06712.1 afis|EAW16275.1 afla|EED53297.1 afum|EAL88896.1 agla|OJJ88345.1 akaw|GAA84094.1 aluc|OJZ81009.1 anid|CBF86909.1 anig|EHA19351.1 aory|EIT75079.1 asyd|OJJ64610.1 ater|EAU37450.1 atub|OJI82575.1 aver|OJI98706.1 awen|OJJ37658.1 azon|OJJ44920.1

Group4407: abra|OJJ77535.1 acar|OOF99189.1 acla|EAW06704.1 afis|EAW16249.1 afla|EED53313.1 afum|EAL88877.1 agla|OJJ86260.1 akaw|GAA84085.1 aluc|OJZ81000.1 anid|CBF78891.1 anig|EHA19359.1 aory|EIT74965.1 asyd|OJJ64597.1 ater|EAU37466.1 atub|OJI82585.1 aver|OJI98694.1 awen|OJJ30206.1 azon|OJJ43931.1

Group4408: abra|OJJ77554.1 acar|OOF99173.1 acla|EAW06523.1 afis|EAW16239.1 afla|EED53338.1 afum|EAL88860.1 agla|OJJ86246.1 akaw|GAA84069.1 aluc|OJZ80983.1 anid|CBF78863.1 anig|EHA19377.1 aory|EIT75140.1 asyd|OJJ64574.1 ater|EAU33704.1 atub|OJI82603.1 aver|OJI98671.1 awen|OJJ30218.1 azon|OJJ43940.1

Group4409: abra|OJJ77557.1 acar|OOG00298.1 afis|EAW16398.1 afla|EED45629.1 afum|EAL89029.2 agla|OJJ82194.1 anid|CBF85652.1 anig|EHA19380.1 aory|EIT75689.1 asyd|OJJ54151.1 ater|EAU33011.1 aver|OJJ08588.1 awen|OJJ38072.1 aory|EIT76357.1 azon|OJJ46582.1 asyd|OJJ56065.1 aver|OJJ05008.1 awen|OJJ31109.1

Group4410: abra|OJJ77561.1 acar|OOF99169.1 acla|EAW06694.1 afis|EAW16072.1 afla|EED48591.1 afum|EAL88704.1 agla|OJJ86096.1 akaw|GAA84064.1 aluc|OJZ80977.1 anid|CBF75113.1 anig|EHA19382.1 aory|EIT73146.1 asyd|OJJ59998.1 ater|EAU33559.1 atub|OJI82608.1 aver|OJJ02293.1 awen|OJJ30362.1 azon|OJJ45381.1

Group4411: abra|OJJ77566.1 acar|OOF99164.1 acla|EAW06531.1 afis|EAW16064.1 afla|EED48578.1 afum|EAL88696.1 agla|OJJ86101.1 akaw|GAA84060.1 aluc|OJZ80972.1 anid|CBF75092.1 anig|EHA19387.1 aory|EIT73042.1 asyd|OJJ60011.1 ater|EAU33571.1 atub|OJI82613.1 aver|OJJ02274.1 awen|OJJ30375.1 azon|OJJ45391.1

Group4412: abra|OJJ77567.1 acar|OOF99162.1 acla|EAW06532.1 afis|EAW16063.1 afla|EED48577.1 afum|EAL88695.1 agla|OJJ86102.1 akaw|GAA84059.1 aluc|OJZ80971.1 anid|CBF75090.1 anig|EHA19388.1 aory|EIT73179.1 asyd|OJJ60012.1 ater|EAU33572.1 atub|OJI82614.1 aver|OJJ02273.1 awen|OJJ30376.1 azon|OJJ45392.1

Group4413: abra|OJJ77568.1 acar|OOF99163.1 acla|EAW06533.1 afis|EAW16062.1 afla|EED48576.1 afum|EAL88694.1 agla|OJJ86103.1 akaw|GAA84058.1 aluc|OJZ80970.1 anid|CBF75088.1 anig|EHA19389.1 aory|EIT73163.1 asyd|OJJ60013.1 ater|EAU33573.1 atub|OJI82615.1 aver|OJJ02272.1 awen|OJJ30377.1 azon|OJJ45393.1

Group4414: abra|OJJ77572.1 acar|OOF99157.1 acla|EAW06539.1 afis|EAW16056.1 afla|EED56442.1 afum|EAL88688.1 agla|OJJ86089.1 akaw|GAA84054.1 aluc|OJZ80966.1 anid|CBF75076.1 anig|EHA19392.1 aory|EIT72786.1 asyd|OJJ60016.1 ater|EAU33578.1 atub|OJI82620.1 aver|OJJ02269.1 awen|OJJ30383.1 azon|OJJ45400.1

Group4415: abra|OJJ77573.1 acar|OOF99156.1 acla|EAW06538.1 afis|EAW16057.1 afla|EED56441.1 afum|EAL88689.1 agla|OJJ86090.1 akaw|GAA84053.1 aluc|OJZ80965.1 anid|CBF75078.1 anig|EHA19393.1 aory|EIT72787.1 asyd|OJJ60017.1 ater|EAU33577.1 atub|OJI82621.1 aver|OJJ02268.1 awen|OJJ30382.1 azon|OJJ45399.1

Group4416: abra|OJJ77574.1 acar|OOF99155.1 acla|EAW06537.1 afis|EAW16058.1 afla|EED48572.1 afum|EAL88690.2 agla|OJJ86107.1 akaw|GAA84051.1 aluc|OJZ80963.1 anid|CBF75080.1 anig|EHA19394.1 aory|EIT73249.1 asyd|OJJ60018.1 ater|EAU33576.1 atub|OJI82623.1 aver|OJJ02267.1 awen|OJJ30381.1 azon|OJJ45398.1

Group4417: abra|OJJ77577.1 acar|OOF99150.1 acla|EAW06543.1 afis|EAW16052.1 afla|EED56446.1 afum|EAL88684.1 agla|OJJ86086.1 akaw|GAA84048.1 aluc|OJZ80959.1 anid|CBF75068.1 anig|EHA19397.1 aory|EIT72800.1 asyd|OJJ60022.1 ater|EAU33581.1 atub|OJI82626.1 aver|OJJ02262.1 awen|OJJ30390.1 azon|OJJ45402.1

Group4418: abra|OJJ77579.1 acar|OOF99148.1 acla|EAW06545.1 afis|EAW16049.1 afla|EED56438.1 afum|EAL88682.1 agla|OJJ86083.1 akaw|GAA84046.1 aluc|OJZ80956.1 anid|CBF75064.1 anig|EHA19399.1 aory|EIT72808.1 asyd|OJJ60024.1 ater|EAU33587.1 atub|OJI82628.1 aver|OJJ02260.1 awen|OJJ30394.1 azon|OJJ45404.1

Group4419: abra|OJJ77580.1 acar|OOF99147.1 acla|EAW06546.1 afis|EAW16048.1 afla|EED56437.1 afum|EAL88681.1 agla|OJJ86082.1 akaw|GAA84045.1 aluc|OJZ80955.1 anid|CBF75062.1 anig|EHA19400.1

aory|EIT72865.1 asyd|OJJ60025.1 ater|EAU33588.1 atub|OJI82629.1 aver|OJJ02259.1 awen|OJJ30396.1 azon|OJJ45405.1

Group4420: abra|OJJ77581.1 acar|OOF99146.1 acla|EAW06547.1 afis|EAW16047.1 afla|EED56436.1 afum|EAL88680.1 agla|OJJ86081.1 akaw|GAA84044.1 aluc|OJZ80954.1 anid|CBF75060.1 anig|EHA19401.1 aory|EIT72831.1 asyd|OJJ60026.1 ater|EAU33590.1 atub|OJI82630.1 aver|OJJ02258.1 awen|OJJ30398.1 azon|OJJ45406.1

Group4421: abra|OJJ77585.1 acar|OOF92640.1 acla|EAW06551.1 afis|EAW16044.1 afla|EED56433.1 afum|EAL88676.1 agla|OJJ86077.1 akaw|GAA84041.1 aluc|OJZ80950.1 anid|CBF75054.1 anig|EHA19404.1 aory|EIT72801.1 asyd|OJJ60029.1 ater|EAU33593.1 atub|OJI82633.1 aver|OJJ02255.1 awen|OJJ30402.1 azon|OJJ45410.1

Group4422: abra|OJJ77586.1 acar|OOF99144.1 acla|EAW06552.1 afis|EAW16043.1 afla|EED56432.1 afum|EAL88675.1 agla|OJJ86076.1 akaw|GAA84040.1 aluc|OJZ80949.1 anid|CBF75052.1 anig|EHA19405.1 aory|EIT72860.1 asyd|OJJ60030.1 ater|EAU33594.1 atub|OJI82634.1 aver|OJJ02254.1 awen|OJJ30403.1 azon|OJJ45411.1

Group4423: abra|OJJ77588.1 acar|OOF99143.1 acla|EAW06554.1 afis|EAW16041.1 afla|EED56430.1 afum|EAL88673.1 agla|OJJ86074.1 akaw|GAA84038.1 aluc|OJZ80947.1 anid|CBF75050.1 anig|EHA19407.1 aory|EIT72854.1 asyd|OJJ60032.1 ater|EAU33596.1 atub|OJI82636.1 aver|OJJ02252.1 awen|OJJ30405.1 azon|OJJ45413.1

Group4424: abra|OJJ77590.1 acar|OOF99141.1 acla|EAW06556.1 afis|EAW16039.1 afla|EED56427.1 afum|EAL88671.1 agla|OJJ86072.1 akaw|GAA84036.1 aluc|OJZ80945.1 anid|CBF75046.1 anig|EHA19409.1 aory|EIT72877.1 asyd|OJJ60034.1 ater|EAU33599.1 atub|OJI82638.1 aver|OJJ02250.1 awen|OJJ30407.1 azon|OJJ45415.1

Group4425: abra|OJJ77598.1 acar|OOF99128.1 acla|EAW06562.1 afis|EAW16034.1 afla|EED56420.1 afum|EAL88665.1 agla|OJJ86066.1 akaw|GAA84030.1 aluc|OJZ80935.1 anid|CBF75036.1 anig|EHA19415.1 aory|EIT72883.1 asyd|OJJ60049.1 ater|EAU33606.1 atub|OJI82645.1 aver|OJJ02240.1 awen|OJJ30413.1 azon|OJJ45421.1

Group4426: abra|OJJ77601.1 acar|OOF99126.1 acla|EAW06565.1 afis|EAW16031.1 afla|EED56413.1 afum|EAL88662.1 agla|OJJ86059.1 akaw|GAA84027.1 aluc|OJZ80932.1 anid|CBF75030.1 anig|EHA19418.1 aory|EIT72887.1 asyd|OJJ60052.1 ater|EAU33610.1 atub|OJI82648.1 aver|OJJ02237.1 awen|OJJ30417.1 azon|OJJ45424.1

Group4427: abra|OJJ77602.1 acar|OOF99124.1 acla|EAW06567.1 afis|EAW16029.1 afla|EED56412.1 afum|EAL88660.1 agla|OJJ86057.1 akaw|GAA84026.1 aluc|OJZ80931.1 anid|CBF75016.1 anig|EHA19419.1 aory|EIT72882.1 asyd|OJJ60070.1 ater|EAU33611.1 atub|OJI82649.1 aver|OJJ04192.1 awen|OJJ30419.1 azon|OJJ45426.1

Group4428: abra|OJJ77603.1 acar|OOF99123.1 acla|EAW06568.1 afis|EAW16028.1 afla|EED56411.1 afum|EAL88658.1 agla|OJJ86056.1 akaw|GAA84025.1 aluc|OJZ80930.1 anid|CBF75018.1 anig|EHA19420.1 aory|EIT72881.1 asyd|OJJ60069.1 ater|EAU33612.1 atub|OJI82650.1 aver|OJJ02226.1 awen|OJJ30420.1 azon|OJJ45427.1

Group4429: abra|OJJ77605.1 acar|OOF99122.1 acla|EAW06569.1 afis|EAW16027.1 afla|EED56410.1 afum|EAL88657.1 agla|OJJ86055.1 akaw|GAA84024.1 aluc|OJZ80928.1 anid|CBF75020.1 anig|EHA19421.1 aory|EIT83014.1 asyd|OJJ60068.1 ater|EAU33613.1 atub|OJI82651.1 aver|OJJ02227.1 awen|OJJ30421.1 azon|OJJ45428.1

Group4430: abra|OJJ77613.1 acar|OOF99115.1 acla|EAW06571.1 afis|EAW16025.1 afla|EED56406.1 afum|EAL88654.1 agla|OJJ86053.1 akaw|GAA84018.1 aluc|OJZ80921.1 anid|CBF75014.1 anig|EHA19426.1 aory|EIT83006.1 asyd|OJJ60057.1 ater|EAU33616.1 atub|OJI82659.1 aver|OJJ02232.1 awen|OJJ30432.1 azon|OJJ45431.1

Group4431: abra|OJJ77614.1 acar|OOF90324.1 acla|EAW11334.1 afis|EAW18161.1 afla|EED56332.1 afum|EAL87521.1 agla|OJJ85965.1 akaw|GAA84017.1 aluc|OJZ80920.1 anid|CBF85769.1 anig|EHA19427.1 aory|EIT73455.1 asyd|OJJ64306.1 ater|EAU33688.1 atub|OJI82660.1 aver|OJI98399.1 awen|OJJ30506.1 azon|OJJ45495.1

Group4432: abra|OJJ77615.1 acar|OOF90323.1 acla|EAW11335.1 afis|EAW18160.1 afla|EED56333.1 afum|EBA27314.1 agla|OJJ85966.1 akaw|GAA84016.1 aluc|OJZ80919.1 anid|CBF85772.1 anig|EHA19428.1 aory|EIT73306.1 asyd|OJJ64308.1 ater|EAU33687.1 atub|OJI82661.1 aver|OJI98400.1 awen|OJJ30505.1 azon|OJJ45494.1

Group4433: abra|OJJ77616.1 acar|OOF90325.1 acla|EAW11336.1 afis|EAW18159.1 afla|EED56335.1 afum|EAL87518.1 agla|OJJ85968.1 akaw|GAA84015.1 aluc|OJZ80918.1 anid|CBF85776.1 anig|EHA19429.1 aory|EIT73326.1 asyd|OJJ64310.1 ater|EAU33686.1 atub|OJI82662.1 aver|OJI98403.1 awen|OJJ30504.1 azon|OJJ45493.1

Group4434: abra|OJJ77617.1 acar|OOF90326.1 acla|EAW11337.1 afis|EAW18158.1 afla|EED56336.1 afum|EAL87517.1 agla|OJJ85969.1 akaw|GAA84014.1 aluc|OJZ80917.1 anid|CBF85777.1 anig|EHA19430.1 aory|EIT73425.1 asyd|OJJ64311.1 ater|EAU33685.1 atub|OJI82663.1 aver|OJI98404.1 awen|OJJ30503.1 azon|OJJ45492.1

Group4435: abra|OJJ77618.1 acar|OOF90327.1 acla|EAW11338.1 afis|EAW18157.1 afla|EED56337.1 afum|EAL87516.1 agla|OJJ85970.1 akaw|GAA84013.1 aluc|OJZ80916.1 anid|CBF85779.1 anig|EHA19431.1 aory|EIT73376.1 asyd|OJJ64312.1 ater|EAU33684.1 atub|OJI82664.1 aver|OJI98405.1 awen|OJJ30502.1 azon|OJJ45491.1

Group4436: abra|OJJ77619.1 acar|OOF90328.1 acla|EAW11339.1 afis|EAW18156.1 afla|EED56338.1 afum|EAL87515.1 agla|OJJ85971.1 akaw|GAA84012.1 aluc|OJZ80915.1 anid|CBF85781.1 anig|EHA19432.1 aory|EIT73330.1 asyd|OJJ64313.1 ater|EAU33683.1 atub|OJI82665.1 aver|OJI98406.1 awen|OJJ30500.1 azon|OJJ45490.1

Group4437: abra|OJJ77620.1 acar|OOF90329.1 acla|EAW11340.1 afis|EAW18155.1 afla|EED56339.1 afum|EAL87514.1 agla|OJJ85972.1 akaw|GAA84011.1 aluc|OJZ80914.1 anid|CBF85783.1 anig|EHA19433.1 aory|EIT73446.1 asyd|OJJ64314.1 ater|EAU33682.1 atub|OJI82666.1 aver|OJI98407.1 awen|OJJ30499.1 azon|OJJ45489.1

Group4438: abra|OJJ77621.1 acar|OOF99114.1 acla|EAW11341.1 afis|EAW18154.1 afla|EED56340.1 afum|EAL87513.1 agla|OJJ85973.1 akaw|GAA84010.1 aluc|OJZ80913.1 anid|CBF85784.1 anig|EHA19434.1 aory|EIT73328.1 asyd|OJJ64316.1 ater|EAU33681.1 atub|OJI82667.1 aver|OJI98409.1 awen|OJJ30498.1 azon|OJJ45488.1

Group4439: abra|OJJ77626.1 acar|OOF99112.1 acla|EAW11342.1 afis|EAW18152.1 afla|EED56342.1 afum|EAL87511.1 agla|OJJ85975.1 akaw|GAA84007.1 aluc|OJZ80905.1 anid|CBF85790.1 anig|EHA19436.1 aory|EIT73287.1 asyd|OJJ64325.1 ater|EAU33677.1 atub|OJI82672.1 aver|OJI98419.1 awen|OJJ30495.1 azon|OJJ45487.1

Group4440: abra|OJJ77629.1 acar|OOF99097.1 acla|EAW06480.1 afis|EAW15975.1 afla|EED56345.1 afum|EAL88607.1 agla|OJJ85980.1 akaw|GAA84005.1 aluc|OJZ80901.1 anid|CBF85795.1 anig|EHA19438.1 aory|EIT73353.1 asyd|OJJ64330.1 ater|EAU33676.1 atub|OJI82678.1 aver|OJI98423.1 awen|OJJ30494.1 azon|OJJ45485.1

Group4441: abra|OJJ77630.1 acar|OOF99098.1 acla|EAW06481.1 afis|EAW15976.1 afla|EED56346.1 afum|EAL88608.1 agla|OJJ85981.1 akaw|GAA84004.1 aluc|OJZ80900.1 anid|CBF85797.1 anig|EHA19439.1 aory|EIT73314.1 asyd|OJJ64331.1 ater|EAU33675.1 atub|OJI82679.1 aver|OJI98424.1 awen|OJJ30493.1 azon|OJJ45484.1

Group4442: abra|OJJ77631.1 acar|OOF99099.1 acla|EAW06482.1 afis|EAW15977.1 afla|EED56347.1 afum|EAL88609.1 agla|OJJ85982.1 akaw|GAA84003.1 aluc|OJZ80898.1 anid|CBF85799.1 anig|EHA19440.1 aory|EIT73397.1 asyd|OJJ64332.1 ater|EAU33674.1 atub|OJI82680.1 aver|OJI98425.1 awen|OJJ30492.1 azon|OJJ45483.1

Group4443: abra|OJJ77632.1 acar|OOF99100.1 acla|EAW06484.1 afis|EAW15979.1 afla|EED56349.1 afum|EAL88611.1 agla|OJJ85984.1 akaw|GAA84001.1 aluc|OJZ80897.1 anid|CBF85803.1 anig|EHA19442.1 aory|EIT73329.1 asyd|OJJ64334.1 ater|EAU33672.1 atub|OJI82681.1 aver|OJI98427.1 awen|OJJ30491.1 azon|OJJ45482.1

Group4444: abra|OJJ77637.1 acar|OOF99105.1 acla|EAW06487.1 afis|EAW15982.1 afla|EED56352.1 afum|EAL88614.1 agla|OJJ85985.1 akaw|GAA83997.1 aluc|OJZ80893.1 anid|CBF85806.1 anig|EHA19445.1 aory|EIT73461.1 asyd|OJJ64337.1 ater|EAU33670.1 atub|OJI82685.1 aver|OJI98430.1 awen|OJJ30488.1 azon|OJJ45479.1

Group4445: abra|OJJ77638.1 acar|OOF99106.1 acla|EAW06488.1 afis|EAW15983.1 afla|EED56353.1 afum|EAL88615.1 agla|OJJ85986.1 akaw|GAA83996.1 aluc|OJZ80892.1 anid|CBF85808.1 anig|EHA19446.1 aory|EIT73319.1 asyd|OJJ64339.1 ater|EAU33669.1 atub|OJI82686.1 aver|OJI98432.1 awen|OJJ30487.1 azon|OJJ45478.1

Group4446: abra|OJJ77640.1 acar|OOF99108.1 acla|EAW06490.1 afis|EAW15985.1 afla|EED56355.1 afum|EAL88617.1 agla|OJJ85988.1 akaw|GAA83994.1 aluc|OJZ80890.1 anid|CBF85812.1 anig|EHA19448.1 aory|EIT73389.1 asyd|OJJ64341.1 ater|EAU33667.1 atub|OJI82688.1 aver|OJI98434.1 awen|OJJ30485.1 azon|OJJ45476.1

Group4447: abra|OJJ77642.1 acar|OOF99094.1 acla|EAW06492.1 afis|EAW15988.1 afla|EED56360.1 afum|EAL88620.1 agla|OJJ85990.1 akaw|GAA83992.1 aluc|OJZ80888.1 anid|CBF85815.1 anig|EHA19450.1 aory|EIT73300.1 asyd|OJJ64342.1 ater|EAU33661.1 atub|OJI82690.1 aver|OJI98435.1 awen|OJJ30482.1 azon|OJJ45473.1

Group4448: abra|OJJ77644.1 acar|OOF99091.1 acla|EAW07074.1 afis|EAW20698.1 afla|EED46367.1 afum|EAL84873.1 akaw|GAA83990.1 aluc|OJZ80885.1 anid|CBF86210.1 anig|EHA19452.1 aory|EIT81200.1

asyd|OJJ64550.1 atub|OJI82692.1 aver|OJI98646.1 awen|OJJ36028.1 acar|OOF98893.1 afis|EAW20291.1 afum|EAL85423.1

Group4449: abra|OJJ77652.1 acar|OOF99084.1 acla|EAW06494.1 afis|EAW15990.1 afla|EED56362.1 afum|EAL88622.1 agla|OJJ85992.1 akaw|GAA83983.1 aluc|OJZ80877.1 anid|CBF85819.1 anig|EHA19459.1 aory|EIT73339.1 asyd|OJJ64343.1 ater|EAU33658.1 atub|OJI82700.1 aver|OJI98440.1 awen|OJJ30480.1 azon|OJJ45471.1

Group4450: abra|OJJ77654.1 acar|OOF99083.1 acla|EAW06496.1 afis|EAW15992.1 afla|EED56364.1 afum|EAL88624.2 agla|OJJ86003.1 akaw|GAA83981.1 aluc|OJZ80875.1 anid|CBF85823.1 anig|EHA19460.1 aory|EIT73404.1 asyd|OJJ64344.1 ater|EAU33657.1 atub|OJI82702.1 aver|OJI98442.1 awen|OJJ30478.1 azon|OJJ45470.1

Group4451: abra|OJJ77655.1 acar|OOF99081.1 acla|EAW06497.1 afis|EAW15993.1 afla|EED56365.1 afum|EAL88625.1 agla|OJJ86004.1 akaw|GAA83980.1 aluc|OJZ80874.1 anid|CBF85824.1 anig|EHA19462.1 aory|EIT73307.1 asyd|OJJ64345.1 ater|EAU33656.1 atub|OJI82704.1 aver|OJI98443.1 awen|OJJ30477.1 azon|OJJ45469.1

Group4452: abra|OJJ77656.1 acar|OOF99080.1 acla|EAW06498.1 afis|EAW15994.1 afla|EED56367.1 afum|EAL88626.1 agla|OJJ86008.1 akaw|GAA83979.1 aluc|OJZ80872.1 anid|CBF85828.1 anig|EHA19463.1 asyd|OJJ64348.1 ater|EAU33654.1 atub|OJI82705.1 aver|OJI98445.1 awen|OJJ30475.1 azon|OJJ45467.1 aory|EIT73315.1

Group4453: abra|OJJ77657.1 acar|OOF99079.1 acla|EAW06499.1 afis|EAW15995.1 afla|EED56369.1 afum|EAL88627.1 agla|OJJ86009.1 akaw|GAA83978.1 aluc|OJZ80871.1 anid|CBF85830.1 anig|EHA19464.1 aory|EIT73436.1 asyd|OJJ64349.1 ater|EAU33652.1 atub|OJI82706.1 aver|OJI98446.1 awen|OJJ30474.1 azon|OJJ45466.1

Group4454: abra|OJJ77659.1 acar|OOF99076.1 acla|EAW06501.1 afis|EAW15997.1 afla|EED56371.1 afum|EAL88629.1 agla|OJJ86017.1 akaw|GAA83976.1 aluc|OJZ80869.1 anid|CBF85832.1 anig|EHA19466.1 aory|EIT73442.1 asyd|OJJ64350.1 ater|EAU33649.1 atub|OJI82708.1 aver|OJI98447.1 awen|OJJ30472.1 azon|OJJ45464.1

Group4455: abra|OJJ77660.1 acar|OOF99075.1 acla|EAW06504.1 afis|EAW15998.1 afla|EED56372.1 afum|EAL88630.1 agla|OJJ86013.1 akaw|GAA83975.1 aluc|OJZ80868.1 anid|CBF85834.1 anig|EHA19467.1 aory|EIT73360.1 asyd|OJJ64351.1 ater|EAU33648.1 atub|OJI82709.1 aver|OJI98448.1 awen|OJJ30471.1 azon|OJJ45463.1

Group4456: abra|OJJ77661.1 acar|OOF99073.1 acla|EAW06598.1 afis|EAW16006.1 afla|EED56380.1 afum|EAL88638.2 agla|OJJ86025.1 akaw|GAA83974.1 aluc|OJZ80867.1 anid|CBF85868.1 anig|EHA19468.1 aory|EIT73448.1 asyd|OJJ64371.1 ater|EAU33637.1 atub|OJI82710.1 aver|OJI98467.1 awen|OJJ30461.1 azon|OJJ45451.1

Group4457: abra|OJJ77665.1 acar|OOF99070.1 acla|EAW06507.1 afis|EAW16002.1 afla|EED56376.1 afum|EAL88634.1 agla|OJJ86024.1 akaw|GAA83970.1 aluc|OJZ80863.1 anid|CBF85844.1 anig|EHA19472.1 aory|EIT73423.1 asyd|OJJ64356.1 ater|EAU33643.1 atub|OJI82714.1 aver|OJI98452.1 awen|OJJ30466.1 azon|OJJ45457.1

Group4458: abra|OJJ77667.1 acar|OOF99068.1 acla|EAW06506.1 afis|EAW16000.1 afla|EED56375.1 afum|EAL88633.1 agla|OJJ86020.1 akaw|GAA83962.1 aluc|OJZ80850.1 anid|CBF85840.1 anig|EHA19474.1 aory|EIT73310.1 asyd|OJJ64354.1 ater|EAU33645.1 atub|OJI82718.1 aver|OJI98450.1 awen|OJJ30469.1 azon|OJJ45461.1

Group4459: abra|OJJ77671.1 acar|OOF99066.1 acla|EAW06505.1 afis|EAW15999.1 afla|EED56374.1 afum|EAL88631.1 agla|OJJ86019.1 akaw|GAA83961.1 aluc|OJZ80848.1 anid|CBF85835.1 anig|EHA19475.1 aory|EIT73377.1 asyd|OJJ64352.1 ater|EAU33647.1 atub|OJI82719.1 aver|OJI98449.1 awen|OJJ30470.1 azon|OJJ45462.1

Group4460: abra|OJJ77680.1 acar|OOF99060.1 acla|EAW06591.1 afis|EAW16014.1 afla|EED56391.1 afum|EAL88643.1 agla|OJJ86040.1 akaw|GAA83954.1 aluc|OJZ80838.1 anid|CBF74562.1 anig|EHA19482.1 aory|EIT83009.1 asyd|OJJ57647.1 ater|EAU33630.1 atub|OJI82730.1 aver|OJJ05504.1 awen|OJJ30450.1 azon|OJJ45442.1

Group4461: abra|OJJ77681.1 acar|OOF99058.1 acla|EAW06592.1 afis|EAW16015.1 afla|EED56392.1 afum|EAL88644.1 agla|OJJ86041.1 akaw|GAA83952.1 aluc|OJZ80836.1 anid|CBF74560.1 anig|EHA19483.1 aory|EIT83002.1 asyd|OJJ57646.1 ater|EAU33629.1 atub|OJI82732.1 aver|OJJ05503.1 awen|OJJ30449.1 azon|OJJ45441.1

Group4462: abra|OJJ77682.1 acar|OOF99059.1 acla|EAW06594.1 afis|EAW16017.1 afla|EED56393.1 afum|EAL88646.1 agla|OJJ86042.1 akaw|GAA83951.1 aluc|OJZ80835.1 anid|CBF74558.1 anig|EHA19484.1 aory|EIT83003.1 asyd|OJJ57645.1 ater|EAU33628.1 atub|OJI82733.1 aver|OJJ05502.1 awen|OJJ30447.1 azon|OJJ45439.1



Group4463: abra|OJJ77683.1 acar|OOF99057.1 acla|EAW06595.1 afis|EAW16018.1 afla|EED56394.1 afum|EAL88647.1 agla|OJJ86045.1 akaw|GAA83950.1 aluc|OJZ80834.1 anid|CBF74555.1 anig|EHA19485.1 aory|EIT83010.1 asyd|OJJ57644.1 ater|EAU33627.1 atub|OJI82734.1 aver|OJJ05501.1 awen|OJJ30446.1 azon|OJJ45438.1

Group4464: abra|OJJ77684.1 acar|OOF99056.1 acla|EAW06596.1 afis|EAW16019.1 afla|EED56396.1 afum|EAL88648.1 agla|OJJ86046.1 akaw|GAA83949.1 aluc|OJZ80833.1 anid|CBF74553.1 anig|EHA19486.1 aory|EIT83017.1 asyd|OJJ57642.1 ater|EAU33626.1 atub|OJI82735.1 aver|OJJ05499.1 awen|OJJ30445.1 azon|OJJ45437.1

Group4465: abra|OJJ77690.1 acar|OOF99049.1 acla|EAW06575.1 afis|EAW16021.1 afla|EED56399.1 afum|EAL88650.1 agla|OJJ86048.1 akaw|GAA83944.1 aluc|OJZ80825.1 anid|CBF74538.1 anig|EHA19490.1 aory|EIT83016.1 asyd|OJJ57695.1 ater|EAU33619.1 atub|OJI82740.1 aver|OJJ05471.1 awen|OJJ30443.1 azon|OJJ45435.1

Group4466: abra|OJJ77691.1 acar|OOF99048.1 acla|EAW06574.1 afis|EAW16022.1 afla|EED56401.1 afum|EAL88651.1 agla|OJJ86051.1 akaw|GAA83939.1 aluc|OJZ80821.1 anid|CBF74540.1 anig|EHA19491.1 aory|EIT83005.1 asyd|OJJ57694.1 ater|EAU33618.1 atub|OJI82741.1 aver|OJJ05472.1 awen|OJJ30439.1 azon|OJJ45434.1

Group4467: abra|OJJ77695.1 acar|OOF99044.1 acla|EAW11326.1 afis|EAW18169.1 afla|EED56325.1 afum|EBA27315.1 agla|OJJ85948.1 akaw|GAA83935.1 aluc|OJZ90758.1 anid|CBF85744.1 anig|EHA19495.1 aory|EIT73371.1 asyd|OJJ64290.1 ater|EAU33835.1 atub|OJI82745.1 aver|OJI98383.1 awen|OJJ30516.1 azon|OJJ50197.1

Group4468: abra|OJJ77697.1 acar|OOF99043.1 acla|EAW11327.1 afis|EAW18168.1 afla|EED56326.1 afum|EAL87529.2 agla|OJJ85949.1 akaw|GAA83934.1 aluc|OJZ90761.1 anid|CBF85746.1 anig|EHA19496.1 aory|EIT73447.1 asyd|OJJ64291.1 ater|EAU33836.1 atub|OJI82748.1 aver|OJI98384.1 awen|OJJ30514.1 azon|OJJ50195.1

Group4469: abra|OJJ77699.1 acar|OOF99040.1 acla|EAW11324.1 afis|EAW18171.1 afla|EED56322.1 afum|EAL87533.1 agla|OJJ85935.1 akaw|GAA83931.1 aluc|OJZ90764.1 anid|CBF85742.1 anig|EHA19498.1 aory|EIT73405.1 asyd|OJJ64289.1 ater|EAU33833.1 atub|OJI82752.1 aver|OJI98382.1 awen|OJJ30518.1 azon|OJJ50199.1

Group4470: abra|OJJ77704.1 acar|OOF99036.1 acla|EAW11315.1 afis|EAW18183.1 afla|EED56304.1 afum|EAL87545.1 agla|OJJ85903.1 akaw|GAA83926.1 aluc|OJZ90769.1 anid|CBF85723.1 anig|EHA19504.1 aory|EIT73331.1 asyd|OJJ64277.1 ater|EAU33819.1 atub|OJI82757.1 aver|OJI98369.1 awen|OJJ30531.1 azon|OJJ50212.1

Group4471: abra|OJJ77708.1 acar|OOF99032.1 acla|EAW11317.1 afis|EAW18179.1 afla|EED56307.1 afum|EAL87540.1 agla|OJJ85910.1 akaw|GAA83922.1 aluc|OJZ90773.1 anid|CBF85729.1 anig|EHA19507.1 aory|EIT73380.1 asyd|OJJ64280.1 ater|EAU33821.1 atub|OJI82760.1 aver|OJI98372.1 awen|OJJ30527.1 azon|OJJ50208.1

Group4472: abra|OJJ77709.1 acar|OOF99031.1 acla|EAW11318.1 afis|EAW18178.1 afla|EED56306.1 afum|EAL87539.1 agla|OJJ85912.1 akaw|GAA83921.1 aluc|OJZ90775.1 anid|CBF85732.1 anig|EHA19508.1 aory|EIT73415.1 asyd|OJJ64283.1 ater|EAU33827.1 atub|OJI82761.1 aver|OJI98375.1 awen|OJJ30526.1 azon|OJJ50207.1

Group4473: abra|OJJ77710.1 acar|OOF99030.1 acla|EAW11319.1 afis|EAW18177.1 afla|EED56312.1 afum|EAL87538.1 agla|OJJ85913.1 akaw|GAA83920.1 aluc|OJZ90776.1 anid|CBF85733.1 anig|EHA19509.1 aory|EIT73345.1 asyd|OJJ64284.1 ater|EAU33828.1 atub|OJI82762.1 aver|OJI98376.1 awen|OJJ30525.1 azon|OJJ50206.1

Group4474: abra|OJJ77717.1 acar|OOF99022.1 acla|EAW11320.1 afis|EAW18176.1 afla|EED56313.1 afum|EAL87537.1 agla|OJJ85914.1 akaw|GAA83915.1 aluc|OJZ90782.1 anid|CBF85735.1 anig|EHA19515.1 aory|EIT73299.1 asyd|OJJ64285.1 ater|EAU33829.1 atub|OJI82769.1 aver|OJI98377.1 awen|OJJ30524.1 azon|OJJ50205.1

Group4475: abra|OJJ77718.1 acar|OOF99019.1 acla|EAW11321.1 afis|EAW18175.1 afla|EED56314.1 afum|EAL87536.1 agla|OJJ85915.1 akaw|GAA83914.1 aluc|OJZ90783.1 anid|CBF85737.1 anig|EHA19516.1 aory|EIT73381.1 asyd|OJJ64286.1 ater|EAU33830.1 atub|OJI82770.1 aver|OJI98378.1 awen|OJJ30523.1 azon|OJJ50204.1

Group4476: abra|OJJ77810.1 acar|OOF98957.1 acla|EAW11307.1 afis|EAW18194.1 afla|EED56284.1 afum|EBA27318.1 agla|OJJ85895.1 akaw|GAA83839.1 aluc|OJZ90877.1 anid|CBF86104.1 anig|EHA19597.1 aory|EIT73433.1 asyd|OJJ64482.1 ater|EAU33799.1 atub|OJI82874.1 aver|OJI98583.1 awen|OJJ30558.1 azon|OJJ45509.1

Group4477: abra|OJJ77811.1 acar|OOF98956.1 acla|EAW11306.1 afis|EAW18193.1 afla|EED56283.1 afum|EAL87559.1 agla|OJJ85893.1 akaw|GAA83838.1 aluc|OJZ90878.1 anid|CBF86108.1 anig|EHA19599.1

aory|EIT73325.1 asyd|OJJ64487.1 ater|EAU33798.1 atub|OJI82875.1 aver|OJI98588.1 awen|OJJ30559.1 azon|OJJ45508.1

Group4478: abra|OJJ77819.1 acar|OOF98949.1 acla|EAW11304.1 afis|EAW18191.1 afla|EED56281.1 afum|EAL87562.2 agla|OJJ85884.1 akaw|GAA83827.1 aluc|OJZ90891.1 anid|CBF86111.1 anig|EHA19610.1 aory|EIT73396.1 asyd|OJJ64489.1 ater|EAU33796.1 atub|OJI82885.1 aver|OJI98590.1 awen|OJJ30565.1 azon|OJJ45506.1

Group4479: abra|OJJ77821.1 acar|OOF98945.1 acla|EAW11303.1 afis|EAW18199.1 afla|EED56279.1 afum|EAL87564.1 agla|OJJ85883.1 akaw|GAA83824.1 aluc|OJZ90894.1 anid|CBF86115.1 anig|EHA19613.1 aory|EIT73401.1 asyd|OJJ64491.1 ater|EAU33795.1 atub|OJI82887.1 aver|OJI98593.1 awen|OJJ30567.1 azon|OJJ45505.1

Group4480: abra|OJJ77824.1 acar|OOF98944.1 acla|EAW11301.1 afis|EAW18201.1 afla|EED56277.1 afum|EAL87566.1 agla|OJJ85881.1 akaw|GAA83822.1 aluc|OJZ90897.1 anid|CBF86122.1 anig|EHA19615.1 aory|EIT73449.1 asyd|OJJ64496.1 ater|EAU33793.1 atub|OJI82889.1 aver|OJI98598.1 awen|OJJ30569.1 azon|OJJ45503.1

Group4481: abra|OJJ77826.1 acar|OOF98942.1 acla|EAW11299.1 afis|EAW18203.1 afla|EED56269.1 afum|EAL87568.1 agla|OJJ85879.1 akaw|GAA83820.1 aluc|OJZ90900.1 anid|CBF86119.1 anig|EHA19616.1 aory|EIT73413.1 asyd|OJJ64494.1 ater|EAU33786.1 atub|OJI82893.1 aver|OJI98596.1 awen|OJJ30571.1 azon|OJJ45501.1

Group4482: abra|OJJ77827.1 acar|OOF98941.1 acla|EAW11298.1 afis|EAW18204.1 afla|EED56268.1 afum|EAL87569.1 agla|OJJ85878.1 akaw|GAA83819.1 aluc|OJZ90901.1 anid|CBF86124.1 anig|EHA19617.1 aory|EIT73341.1 asyd|OJJ64497.1 ater|EAU33785.1 atub|OJI82894.1 aver|OJI98599.1 awen|OJJ30572.1 azon|OJJ45500.1

Group4483: abra|OJJ77830.1 acar|OOF98940.1 acla|EAW11296.1 afis|EAW18206.1 afla|EED56265.1 afum|EAL87571.1 agla|OJJ85876.1 akaw|GAA83817.1 aluc|OJZ90904.1 anid|CBF86132.1 anig|EHA19619.1 aory|EIT73429.1 asyd|OJJ64502.1 ater|EAU33783.1 atub|OJI82897.1 aver|OJI98601.1 awen|OJJ30578.1 azon|OJJ45498.1

Group4484: abra|OJJ77834.1 acar|OOF98937.1 acla|EAW11289.1 afis|EAW18210.1 afla|EED56260.1 afum|EAL87576.2 agla|OJJ85872.1 akaw|GAA83813.1 aluc|OJZ90908.1 anid|CBF86139.1 anig|EHA19623.1 aory|EIT73444.1 asyd|OJJ64506.1 ater|EAU33778.1 atub|OJI82901.1 aver|OJI98605.1 awen|OJJ30588.1 azon|OJJ50189.1

Group4485: abra|OJJ77841.1 acar|OOF98930.1 acla|EAW11282.1 afis|EAW18218.1 afla|EED56252.1 afum|EAL87584.1 agla|OJJ85864.1 akaw|GAA83806.1 aluc|OJZ90916.1 anid|CBF86148.1 anig|EHA19628.1 aory|EIT73348.1 asyd|OJJ64512.1 ater|EAU33773.1 atub|OJI82908.1 aver|OJI98610.1 awen|OJJ30596.1 azon|OJJ50172.1

Group4486: abra|OJJ77844.1 acar|OOF98928.1 acla|EAW11279.1 afis|EAW18221.1 afla|EED56249.1 afum|EAL87587.1 agla|OJJ85861.1 akaw|GAA83803.1 aluc|OJZ90919.1 anid|CBF86155.1 anig|EHA19631.1 aory|EIT73362.1 asyd|OJJ64515.1 ater|EAU33770.1 atub|OJI82911.1 aver|OJI98613.1 awen|OJJ30599.1 azon|OJJ50169.1

Group4487: abra|OJJ77845.1 acar|OOF98927.1 acla|EAW11278.1 afis|EAW18222.1 afla|EED56247.1 afum|EAL87588.1 agla|OJJ85860.1 akaw|GAA83802.1 aluc|OJZ90920.1 anid|CBF86153.1 anig|EHA19632.1 aory|EIT73414.1 asyd|OJJ64516.1 ater|EAU33769.1 atub|OJI82912.1 aver|OJI98614.1 awen|OJJ30600.1 azon|OJJ50168.1

Group4488: abra|OJJ77847.1 acar|OOF98925.1 acla|EAW11276.1 afis|EAW18224.1 afla|EED56245.1 afum|EAL87590.1 agla|OJJ85858.1 akaw|GAA83800.1 aluc|OJZ90922.1 anid|CBF86159.1 anig|EHA19634.1 aory|EIT73297.1 asyd|OJJ64518.1 ater|EAU33767.1 atub|OJI82914.1 aver|OJI98616.1 awen|OJJ30602.1 azon|OJJ50166.1

Group4489: abra|OJJ77851.1 acar|OOF98922.1 acla|EAW11275.1 afis|EAW18225.1 afla|EED56244.1 afum|EAL87591.1 agla|OJJ85857.1 akaw|GAA83797.1 aluc|OJZ90925.1 anid|CBF86161.1 anig|EHA19637.1 aory|EIT73369.1 asyd|OJJ64519.1 ater|EAU33766.1 atub|OJI82917.1 aver|OJI98617.1 awen|OJJ30603.1 azon|OJJ50165.1

Group4490: abra|OJJ77852.1 acar|OOF98921.1 acla|EAW11274.1 afis|EAW18226.1 afla|EED56243.1 afum|EAL87593.2 agla|OJJ85856.1 akaw|GAA83796.1 aluc|OJZ90926.1 anid|CBF86162.1 anig|EHA19638.1 aory|EIT73293.1 asyd|OJJ64520.1 ater|EAU33765.1 atub|OJI82918.1 aver|OJI98618.1 awen|OJJ30604.1 azon|OJJ50164.1

Group4491: abra|OJJ77853.1 acar|OOF98920.1 acla|EAW11273.1 afis|EAW18227.1 afla|EED56242.1 afum|EAL87594.1 agla|OJJ85855.1 akaw|GAA83795.1 aluc|OJZ90927.1 anid|CBF86164.1 anig|EHA19639.1 aory|EIT73313.1 asyd|OJJ64521.1 ater|EAU33764.1 atub|OJI82919.1 aver|OJI98619.1 awen|OJJ30605.1 azon|OJJ50163.1

Group4492: abra|OJJ77854.1 acar|OOF98919.1 acla|EAW11272.1 afis|EAW18228.1 afla|EED56241.1 afum|EAL87595.1 agla|OJJ85854.1 akaw|GAA83794.1 aluc|OJZ90928.1 anid|CBF86166.1 anig|EHA19640.1 aory|EIT73375.1 asyd|OJJ64522.1 ater|EAU33763.1 atub|OJI82920.1 aver|OJI98620.1 awen|OJJ30606.1 azon|OJJ50162.1

Group4493: abra|OJJ77857.1 acar|OOF98917.1 acla|EAW11269.1 afis|EAW18230.1 afla|EED56238.1 afum|EAL87597.1 agla|OJJ85844.1 akaw|GAA83792.1 aluc|OJZ90931.1 anid|CBF86172.1 anig|EHA19642.1 aory|EIT73450.1 asyd|OJJ64525.1 ater|EAU33761.1 atub|OJI82923.1 aver|OJI98623.1 awen|OJJ30609.1 azon|OJJ50159.1

Group4494: abra|OJJ77862.1 acar|OOF98911.1 acla|EAW11264.1 afis|EAW18234.1 afla|EED56232.1 afum|EBA27319.1 agla|OJJ85850.1 akaw|GAA83787.1 aluc|OJZ90937.1 anid|CBF86182.1 anig|EHA19645.1 aory|EIT73318.1 asyd|OJJ64530.1 ater|EAU33752.1 atub|OJI82928.1 aver|OJI98628.1 awen|OJJ30614.1 azon|OJJ48003.1

Group4495: abra|OJJ77864.1 acar|OOF98909.1 acla|EAW11262.1 afis|EAW18236.1 afla|EED56230.1 afum|EAL87603.1 agla|OJJ85838.1 akaw|GAA83785.1 aluc|OJZ90939.1 anid|CBF86185.1 anig|EHA19647.1 aory|EIT73458.1 asyd|OJJ64532.1 ater|EAU33749.1 atub|OJI82930.1 aver|OJI98630.1 awen|OJJ30616.1 azon|OJJ48001.1

Group4496: abra|OJJ77865.1 acar|OOF98907.1 acla|EAW11261.1 afis|EAW18237.1 afla|EED56229.1 afum|EAL87604.2 agla|OJJ85837.1 akaw|GAA83784.1 aluc|OJZ90940.1 anid|CBF86187.1 anig|EHA19648.1 aory|EIT73322.1 asyd|OJJ64534.1 ater|EAU33748.1 atub|OJI82931.1 aver|OJI98631.1 awen|OJJ30617.1 azon|OJJ48000.1

Group4497: abra|OJJ77866.1 acar|OOF98906.1 acla|EAW11259.1 afis|EAW18239.1 afla|EED56227.1 afum|EBA27321.1 agla|OJJ85831.1 akaw|GAA83782.1 aluc|OJZ90942.1 anid|CBF86191.1 anig|EHA19650.1 aory|EIT73427.1 asyd|OJJ64536.1 ater|EAU33744.1 atub|OJI82933.1 aver|OJI98633.1 awen|OJJ30619.1 azon|OJJ47998.1

Group4498: abra|OJJ77876.1 acar|OOF98895.1 acla|EAW06509.1 afis|EAW16222.1 afla|EED50188.1 afum|EAL88850.1 agla|OJJ86234.1 akaw|GAA83776.1 aluc|OJZ90951.1 anid|CBF86216.1 anig|EHA19657.1 aory|EIT77385.1 asyd|OJJ64558.1 ater|EAU33719.1 atub|OJI82942.1 aver|OJI98655.1 awen|OJJ30248.1 azon|OJJ43951.1

Group4499: abra|OJJ77878.1 acar|OOF98894.1 acla|EAW06602.1 afis|EAW16221.1 afla|EED50189.1 afum|EAL88849.1 agla|OJJ86233.1 akaw|GAA83775.1 aluc|OJZ90952.1 anid|CBF86215.1 anig|EHA19658.1 aory|EIT77381.1 asyd|OJJ64557.1 ater|EAU33720.1 atub|OJI82943.1 aver|OJI98654.1 awen|OJJ30250.1 azon|OJJ43952.1

Group4500: abra|OJJ77888.1 acar|OOF90363.1 afis|EAW17356.1 afla|EED49463.1 agla|OJJ82473.1 akaw|GAA82231.1 aluc|OJZ91917.1 anig|EHA19663.1 aory|EIT79554.1 asyd|OJJ56937.1 ater|EAU32565.1 aver|OJJ05741.1 awen|OJJ32672.1 aory|EIT75760.1 asyd|OJJ57437.1 awen|OJJ31967.1 afla|EED45648.1 asyd|OJJ57600.1

Group4501: abra|OJJ77890.1 acar|OOF98890.1 acla|EAW11245.1 afis|EAW18255.1 afla|EED56196.1 afum|EAL87618.1 agla|OJJ88189.1 akaw|GAA83768.1 aluc|OJZ90960.1 anid|CBF86206.1 anig|EHA19665.1 aory|EIT73437.1 asyd|OJJ64546.1 ater|EAU33727.1 atub|OJI82951.1 aver|OJI98642.1 awen|OJJ30629.1 azon|OJJ46567.1

Group4502: abra|OJJ77893.1 acar|OOF98889.1 acla|EAW11246.1 afis|EAW18254.1 afla|EED56198.1 afum|EAL87617.1 agla|OJJ88190.1 akaw|GAA83767.1 aluc|OJZ90963.1 anid|CBF86205.1 anig|EHA19667.1 aory|EIT73303.1 asyd|OJJ64545.1 ater|EAU33726.1 atub|OJI82954.1 aver|OJI98641.1 awen|OJJ30628.1 azon|OJJ47987.1

Group4503: abra|OJJ77897.1 acar|OOF98887.1 acla|EAW11248.1 afis|EAW18249.1 afla|EED56215.1 afum|EAL87614.1 agla|OJJ85821.1 akaw|GAA83765.1 aluc|OJZ90967.1 anid|CBF86200.1 anig|EHA19669.1 aory|EIT73361.1 asyd|OJJ64542.1 ater|EAU33731.1 atub|OJI82957.1 aver|OJI98638.1 awen|OJJ30625.1 azon|OJJ47993.1

Group4504: abra|OJJ77898.1 acar|OOF98886.1 acla|EAW11249.1 afis|EAW18248.1 afla|EED56216.1 afum|EAL87613.1 agla|OJJ85822.1 akaw|GAA83764.1 aluc|OJZ90968.1 anid|CBF86198.1 anig|EHA19670.1 aory|EIT73459.1 asyd|OJJ64541.1 ater|EAU33732.1 atub|OJI82958.1 aver|OJI98637.1 awen|OJJ30624.1 azon|OJJ47994.1

Group4505: abra|OJJ77902.1 acar|OOF98881.1 acla|EAW06512.1 afis|EAW16230.1 afla|EED53351.1 afum|EAL88853.1 agla|OJJ86245.1 akaw|GAA83760.1 aluc|OJZ90971.1 anid|CBF86223.1 anig|EHA19673.1 aory|EIT75232.1 asyd|OJJ64563.1 ater|EAU33714.1 atub|OJI82962.1 aver|OJI98660.1 awen|OJJ30232.1 azon|OJJ43949.1

Group4506: abra|OJJ77903.1 acar|OOF98879.1 acla|EAW06513.1 afis|EAW16231.1 afla|EED53350.1 afum|EAL88854.1 agla|OJJ86244.1 akaw|GAA83759.1 aluc|OJZ90972.1 anid|CBF86224.1 anig|EHA19674.1

aory|EIT74926.1 asyd|OJJ64564.1 ater|EAU33713.1 atub|OJI82963.1 aver|OJI98661.1 awen|OJJ30231.1 azon|OJJ43948.1

Group4507: abra|OJJ77910.1 acar|OOF98875.1 acla|EAW06518.1 afis|EAW16236.1 afla|EED53345.1 afum|EAL88857.1 agla|OJJ86239.1 akaw|GAA83749.1 aluc|OJZ90982.1 anid|CBF86232.1 anig|EHA19687.1 aory|EIT74884.1 asyd|OJJ64566.1 ater|EAU33708.1 atub|OJI82973.1 aver|OJI98663.1 awen|OJJ30224.1 azon|OJJ43944.1

Group4508: anig|EHA19693.1 abra|OJJ77921.1 acar|OOF98864.1 acla|EAW06687.1 afis|EAW16078.1 afla|EED48598.1 afum|EAL88710.1 agla|OJJ86111.1 akaw|GAA83742.1 aluc|OJZ90989.1 anid|CBF75119.1 aory|EIT73211.1 asyd|OJJ59993.1 ater|EAU33144.1 atub|OJI82980.1 aver|OJJ02298.1 awen|OJJ30355.1 azon|OJJ45377.1

Group4509: abra|OJJ77936.1 acar|OOF98872.1 acla|EAW06678.1 afis|EAW16087.1 afla|EED48608.1 afum|EAL88719.1 agla|OJJ86119.1 akaw|GAA83727.1 aluc|OJZ91004.1 anid|CBF75125.1 anig|EHA19709.1 aory|EIT73213.1 asyd|OJJ59984.1 ater|EAU33157.1 atub|OJI82995.1 aver|OJJ02307.1 awen|OJJ30344.1 azon|OJJ45369.1

Group4510: abra|OJJ77937.1 acar|OOF98873.1 acla|EAW06677.1 afis|EAW16088.1 afla|EED48609.1 afum|EAL88720.1 agla|OJJ86120.1 akaw|GAA83726.1 aluc|OJZ91005.1 anid|CBF75127.1 anig|EHA19710.1 aory|EIT73207.1 asyd|OJJ59983.1 ater|EAU33159.1 atub|OJI82996.1 aver|OJJ02308.1 awen|OJJ30343.1 azon|OJJ45368.1

Group4511: abra|OJJ77968.1 acar|OOF98847.1 acla|EAW06672.1 afis|EAW16093.1 afla|EED48629.1 afum|EAL88725.1 akaw|GAA83694.1 aluc|OJZ91038.1 anid|CBF85460.1 anig|EHA19737.1 aory|EIT73172.1 asyd|OJJ64101.1 ater|EAU33165.1 atub|OJI83034.1 aver|OJI98184.1 awen|OJJ30337.1 azon|OJJ45367.1 agla|OJJ86128.1

Group4512: abra|OJJ77971.1 acar|OOF98843.1 acla|EAW06670.1 afis|EAW16095.1 afla|EED48631.1 afum|EAL88727.1 agla|OJJ86126.1 akaw|GAA83691.1 aluc|OJZ91041.1 anid|CBF85455.1 anig|EHA19740.1 aory|EIT73094.1 asyd|OJJ64098.1 ater|EAU33171.1 atub|OJI83037.1 aver|OJI98181.1 awen|OJJ30335.1 azon|OJJ45363.1

Group4513: abra|OJJ77972.1 acar|OOF98842.1 acla|EAW06667.1 afis|EAW16098.1 afla|EED48633.1 afum|EAL88730.1 agla|OJJ86124.1 akaw|GAA83689.1 aluc|OJZ91043.1 anid|CBF85451.1 anig|EHA19742.1 aory|EIT73279.1 asyd|OJJ64096.1 ater|EAU33173.1 atub|OJI83039.1 aver|OJI98179.1 awen|OJJ30333.1 azon|OJJ45362.1

Group4514: abra|OJJ77973.1 acar|OOF98841.1 acla|EAW06665.1 afis|EAW16100.1 afla|EED48635.1 afum|EAL88732.1 agla|OJJ86122.1 anid|CBF85447.1 anig|EHA19743.1 aory|EIT73131.1 asyd|OJJ64095.1 ater|EAU33174.1 aver|OJI98177.1 awen|OJJ30332.1 azon|OJJ45360.1 akaw|GAA83687.1 aluc|OJZ91045.1 atub|OJI83041.1

Group4515: abra|OJJ77988.1 acar|OOF98835.1 acla|EAW06661.1 afis|EAW16104.1 afla|EED48640.1 afum|EAL88736.1 agla|OJJ86133.1 akaw|GAA85992.1 aluc|OJZ91063.1 anid|CBF85480.1 anig|EHA19767.1 aory|EIT73283.1 asyd|OJJ64108.1 ater|EAU33183.1 atub|OJI83059.1 aver|OJI98190.1 awen|OJJ30328.1 azon|OJJ45345.1

Group4516: abra|OJJ77989.1 acar|OOF98834.1 acla|EAW06660.1 afis|EAW16105.1 afla|EED48641.1 afum|EAL88737.1 agla|OJJ86134.1 akaw|GAA85991.1 aluc|OJZ91064.1 anid|CBF85482.1 anig|EHA19768.1 aory|EIT73197.1 asyd|OJJ64109.1 ater|EAU33184.1 atub|OJI83060.1 aver|OJI98191.1 awen|OJJ30327.1 azon|OJJ45344.1

Group4517: abra|OJJ77990.1 acar|OOF98833.1 acla|EAW06659.1 afis|EAW16106.1 afla|EED48642.1 afum|EAL88738.1 agla|OJJ86135.1 akaw|GAA85990.1 aluc|OJZ91066.1 anid|CBF85484.1 anig|EHA19769.1 aory|EIT73122.1 asyd|OJJ64110.1 ater|EAU33185.1 atub|OJI83061.1 aver|OJI98192.1 awen|OJJ30325.1 azon|OJJ45343.1

Group4518: abra|OJJ77991.1 acar|OOF98831.1 acla|EAW06658.1 afis|EAW16107.1 afla|EED48643.1 afum|EAL88739.2 agla|OJJ86136.1 akaw|GAA85989.1 aluc|OJZ91067.1 anid|CBF85486.1 anig|EHA19770.1 aory|EIT73085.1 asyd|OJJ64111.1 ater|EAU33190.1 atub|OJI83062.1 aver|OJI98193.1 awen|OJJ30324.1 azon|OJJ45342.1

Group4519: abra|OJJ77992.1 acar|OOF98830.1 acla|EAW06657.1 afis|EAW16108.1 afla|EED48644.1 afum|EAL88740.1 agla|OJJ86137.1 akaw|GAA85988.1 aluc|OJZ91068.1 anid|CBF85487.1 anig|EHA19771.1 aory|EIT73264.1 asyd|OJJ64112.1 ater|EAU33191.1 atub|OJI83063.1 aver|OJI98194.1 awen|OJJ30323.1 azon|OJJ45341.1

Group4520: abra|OJJ77993.1 acar|OOF98829.1 acla|EAW06655.1 afis|EAW16110.1 afla|EED48650.1 afum|EAL88741.1 agla|OJJ86145.1 akaw|GAA85987.1 aluc|OJZ91069.1 anid|CBF85492.1 anig|EHA19772.1 aory|EIT73074.1 asyd|OJJ64113.1 ater|EAU33193.1 atub|OJI83064.1 aver|OJI98196.1 awen|OJJ30320.1 azon|OJJ45339.1

Group4521: abra|OJJ77994.1 acar|OOF98828.1 acla|EAW06654.1 afis|EAW16111.1 afla|EED48651.1 afum|EAL88742.1 agla|OJJ86146.1 akaw|GAA85986.1 aluc|OJZ91070.1 anid|CBF85494.1 anig|EHA19773.1 aory|EIT73265.1 asyd|OJJ64114.1 ater|EAU33194.1 atub|OJI83065.1 aver|OJI98197.1 awen|OJJ30319.1 azon|OJJ45338.1

Group4522: abra|OJJ77995.1 acar|OOF98827.1 acla|EAW06653.1 afis|EAW16112.1 afla|EED48652.1 afum|EAL88743.1 agla|OJJ86151.1 akaw|GAA85985.1 aluc|OJZ91071.1 anid|CBF85496.1 anig|EHA19774.1 aory|EIT73201.1 asyd|OJJ64115.1 ater|EAU33195.1 atub|OJI83066.1 aver|OJI98198.1 awen|OJJ30318.1 azon|OJJ45337.1

Group4523: abra|OJJ78001.1 acar|OOF98821.1 acla|EAW06649.1 afis|EAW16116.1 afla|EED48657.1 afum|EAL88747.1 agla|OJJ86155.1 akaw|GAA85982.1 aluc|OJZ91077.1 anid|CBF85505.1 anig|EHA19778.1 aory|EIT73053.1 asyd|OJJ64119.1 ater|EAU33199.1 atub|OJI83072.1 aver|OJI98202.1 awen|OJJ30314.1 azon|OJJ45331.1

Group4524: abra|OJJ78004.1 acar|OOF98819.1 acla|EAW06646.1 afis|EAW16119.1 afla|EED48660.1 afum|EAL88750.1 agla|OJJ86160.1 akaw|GAA85979.1 aluc|OJZ91080.1 anid|CBF85543.1 anig|EHA19781.1 aory|EIT73098.1 asyd|OJJ64143.1 ater|EAU33202.1 atub|OJI83075.1 aver|OJI98224.1 awen|OJJ30311.1 azon|OJJ45328.1

Group4525: abra|OJJ78005.1 acar|OOF98818.1 acla|EAW06645.1 afis|EAW16120.1 afla|EED48661.1 afum|EAL88751.1 agla|OJJ86161.1 akaw|GAA85978.1 aluc|OJZ91081.1 anid|CBF85541.1 anig|EHA19782.1 aory|EIT73067.1 asyd|OJJ64142.1 ater|EAU33203.1 atub|OJI83077.1 aver|OJI98223.1 awen|OJJ30310.1 azon|OJJ45327.1

Group4526: abra|OJJ78008.1 acar|OOF98815.1 acla|EAW06642.1 afis|EAW16123.1 afla|EED48663.1 afum|EAL88753.1 agla|OJJ86164.1 akaw|GAA85975.1 aluc|OJZ91084.1 anid|CBF85534.1 anig|EHA19785.1 aory|EIT73192.1 asyd|OJJ64136.1 ater|EAU33206.1 atub|OJI83080.1 aver|OJI98219.1 awen|OJJ30307.1 azon|OJJ45310.1

Group4527: abra|OJJ78010.1 acar|OOF98813.1 acla|EAW06639.1 afis|EAW16126.1 afla|EED48666.1 afum|EAL88756.1 agla|OJJ86168.1 akaw|GAA85973.1 aluc|OJZ91086.1 anid|CBF85529.1 anig|EHA19787.1 aory|EIT73204.1 asyd|OJJ64133.1 ater|EAU33209.1 atub|OJI83082.1 aver|OJI98216.1 awen|OJJ30303.1 azon|OJJ45304.1

Group4528: abra|OJJ78011.1 acar|OOF98812.1 acla|EAW06638.1 afis|EAW16127.1 afla|EED48667.1 afum|EAL88757.1 agla|OJJ86169.1 akaw|GAA85972.1 aluc|OJZ91087.1 anid|CBF85527.1 anig|EHA19788.1 aory|EIT73187.1 asyd|OJJ64132.1 ater|EAU33210.1 atub|OJI83083.1 aver|OJI98215.1 awen|OJJ30302.1 azon|OJJ45303.1

Group4529: abra|OJJ78012.1 acar|OOF98811.1 acla|EAW06637.1 afis|EAW16128.1 afla|EED48668.1 afum|EAL88758.1 agla|OJJ86174.1 akaw|GAA85971.1 aluc|OJZ91088.1 anid|CBF85525.1 anig|EHA19789.1 aory|EIT73230.1 asyd|OJJ64131.1 ater|EAU33211.1 atub|OJI83085.1 aver|OJI98214.1 awen|OJJ30301.1 azon|OJJ45302.1

Group4530: abra|OJJ78013.1 acar|OOF98810.1 acla|EAW06635.1 afis|EAW16130.1 afla|EED48670.1 afum|EAL88760.1 agla|OJJ86175.1 akaw|GAA85970.1 aluc|OJZ91089.1 anid|CBF85523.1 anig|EHA19790.1 aory|EIT73154.1 asyd|OJJ64130.1 ater|EAU33212.1 atub|OJI83086.1 aver|OJI98213.1 awen|OJJ30299.1 azon|OJJ43987.1

Group4531: abra|OJJ78014.1 acar|OOF98809.1 acla|EAW06634.1 afis|EAW16131.1 afla|EED48669.1 afum|EAL88761.1 agla|OJJ86176.1 akaw|GAA85969.1 aluc|OJZ91090.1 anid|CBF85521.1 anig|EHA19791.1 aory|EIT73222.1 asyd|OJJ64128.1 ater|EAU33213.1 atub|OJI83087.1 aver|OJI98211.1 awen|OJJ30298.1 azon|OJJ43986.1

Group4532: abra|OJJ78018.1 acar|OOF98805.1 acla|EAW06629.1 afis|EAW16136.1 afla|EED48676.1 afum|EAL88766.2 agla|OJJ86181.1 akaw|GAA85965.1 aluc|OJZ91094.1 anid|CBF85512.1 anig|EHA19795.1 aory|EIT73051.1 asyd|OJJ64123.1 ater|EAU33218.1 atub|OJI83091.1 aver|OJI98206.1 awen|OJJ30292.1 azon|OJJ43981.1

Group4533: abra|OJJ78021.1 acar|OOF98803.1 acla|EAW06627.1 afis|EAW16138.1 afla|EED48678.1 afum|EAL88767.1 agla|OJJ86183.1 akaw|GAA85964.1 aluc|OJZ91096.1 anid|CBF85545.1 anig|EHA19797.1 aory|EIT73188.1 asyd|OJJ64144.1 ater|EAU33219.1 atub|OJI83094.1 aver|OJI98225.1 awen|OJJ30290.1 azon|OJJ43979.1

Group4534: abra|OJJ78023.1 acar|OOF98802.1 acla|EAW06626.1 afis|EAW16139.1 afla|EED48679.1 afum|EAL88768.1 agla|OJJ86185.1 akaw|GAA85963.1 aluc|OJZ91098.1 anid|CBF85546.1 anig|EHA19798.1 aory|EIT73152.1 asyd|OJJ64148.1 ater|EAU33220.1 atub|OJI83095.1 aver|OJI98228.1 awen|OJJ30289.1 azon|OJJ43978.1

Group4535: abra|OJJ78024.1 acar|OOF98801.1 acla|EAW06625.1 afis|EAW16140.1 afla|EED48681.1 afum|EAL88769.2 agla|OJJ86189.1 akaw|GAA85962.1 aluc|OJZ91099.1 anid|CBF85548.1 anig|EHA19799.1

aory|EIT73077.1 asyd|OJJ64149.1 ater|EAU33225.1 atub|OJI83096.1 aver|OJI98229.1 awen|OJJ30288.1 azon|OJJ43977.1

Group4536: abra|OJJ78026.1 acar|OOF98799.1 acla|EAW06623.1 afis|EAW16142.1 aflag|EED48683.1 afum|EAL88771.1 agla|OJJ86190.1 akaw|GAA85960.1 aluc|OJZ91101.1 anid|CBF85551.1 anig|EHA19801.1 aory|EIT73175.1 asyd|OJJ64151.1 ater|EAU33227.1 atub|OJI83098.1 aver|OJI98231.1 awen|OJJ30286.1 azon|OJJ43975.1

Group4537: abra|OJJ78027.1 acar|OOF98796.1 acla|EAW06622.1 afis|EAW16143.1 aflag|EED48684.1 afum|EAL88772.1 agla|OJJ86191.1 akaw|GAA85959.1 aluc|OJZ91102.1 anid|CBF79592.1 anig|EHA19802.1 aory|EIT73194.1 asyd|OJJ57983.1 ater|EAU33228.1 atub|OJI83099.1 aver|OJJ04418.1 awen|OJJ30285.1 azon|OJJ43974.1

Group4538: abra|OJJ78060.1 acar|OOF98793.1 acla|EAW13353.1 afis|EAW20467.1 aflag|EED47863.1 afum|EAL84585.1 akaw|GAA85932.1 aluc|OJZ91131.1 anid|CBF79265.1 anig|EHA19830.1 aory|EIT77212.1 asyd|OJJ55757.1 atub|OJI83142.1 aver|OJJ06842.1 awen|OJJ33161.1 azon|OJJ51457.1 acar|OOF91287.1 awen|OJJ32661.1

Group4539: abra|OJJ78062.1 acar|OOF98792.1 acla|EAW06621.1 afis|EAW16144.1 aflag|EED48686.1 afum|EAL88773.1 agla|OJJ86192.1 akaw|GAA85931.1 aluc|OJZ91133.1 anid|CBF79590.1 anig|EHA19832.1 aory|EIT73255.1 asyd|OJJ57981.1 ater|EAU33229.1 atub|OJI83143.1 aver|OJJ04419.1 awen|OJJ30283.1 azon|OJJ43973.1

Group4540: abra|OJJ78073.1 acar|OOF98790.1 acla|EAW15356.1 afis|EAW20356.1 aflag|EED46131.1 afum|EAL85473.1 agla|OJJ81763.1 akaw|GAA85921.1 aluc|OJZ91146.1 anid|CBF74973.1 anig|EHA19844.1 aory|EIT76365.1 asyd|OJJ60088.1 ater|EAU34035.1 atub|OJI83160.1 aver|OJJ04175.1 awen|OJJ38942.1 azon|OJJ45059.1

Group4541: abra|OJJ78074.1 acar|OOF98789.1 afis|EAW16145.1 aflag|EED48687.1 agla|OJJ86198.1 akaw|GAA85920.1 aluc|OJZ91147.1 anid|CBF79583.1 anig|EHA19845.1 aory|EIT73058.1 asyd|OJJ57977.1 ater|EAU33230.1 atub|OJI83161.1 aver|OJJ04423.1 awen|OJJ30281.1 azon|OJJ43972.1 acla|EAW06620.1 afum|EAL88774.1

Group4542: abra|OJJ78078.1 acar|OOF98786.1 acla|EAW06611.1 afis|EAW16204.1 aflag|EED48697.1 afum|EAL88832.1 agla|OJJ86215.1 akaw|GAA85916.1 aluc|OJZ91150.1 anid|CBF79563.1 anig|EHA19848.1 aory|EIT73216.1 asyd|OJJ57913.1 ater|EAU33246.1 atub|OJI83164.1 aver|OJJ04480.1 awen|OJJ30268.1 azon|OJJ43964.1

Group4543: abra|OJJ78083.1 acar|OOF98783.1 acla|EAW06613.1 afis|EAW16177.1 aflag|EED54377.1 afum|EAL88810.1 agla|OJJ86213.1 akaw|GAA85909.1 aluc|OJZ91157.1 anid|CBF79566.1 anig|EHA19853.1 aory|EIT75854.1 asyd|OJJ57917.1 ater|EAU33243.1 atub|OJI83172.1 aver|OJJ04474.1 awen|OJJ30272.1 azon|OJJ43966.1

Group4544: abra|OJJ78105.1 acar|OOF98760.1 acla|EAW06617.1 afis|EAW16148.1 aflag|EED48691.1 afum|EBA27357.1 agla|OJJ86200.1 akaw|GAA85900.1 aluc|OJZ91169.1 anig|EHA19864.1 aory|EIT73263.1 ater|EAU33231.1 atub|OJI83184.1 awen|OJJ30276.1 asyd|OJJ57971.1 aver|OJJ04431.1 anig|EHA19863.1 aver|OJJ04432.1

Group4545: abra|OJJ78110.1 acar|OOF98756.1 acla|EAW06606.1 afis|EAW16217.1 aflag|EED48711.1 afum|EAL88844.1 agla|OJJ86227.1 akaw|GAA85896.1 aluc|OJZ91175.1 anid|CBF79538.1 anig|EHA19867.1 aory|EIT73084.1 asyd|OJJ57899.1 ater|EAU33261.1 atub|OJI83188.1 aver|OJJ04496.1 awen|OJJ30255.1 azon|OJJ43955.1

Group4546: abra|OJJ78112.1 acar|OOF98755.1 acla|EAW06605.1 afis|EAW16218.1 aflag|EED48712.1 afum|EAL88846.1 agla|OJJ86225.1 akaw|GAA85895.1 aluc|OJZ91177.1 anid|CBF79536.1 anig|EHA19868.1 aory|EIT73123.1 asyd|OJJ57898.1 ater|EAU33262.1 atub|OJI83189.1 aver|OJJ04497.1 awen|OJJ30254.1 azon|OJJ43957.1

Group4547: abra|OJJ78113.1 acar|OOF98753.1 acla|EAW07002.1 afis|EAW16619.1 aflag|EED48441.1 afum|EAL89218.1 akaw|GAA85894.1 aluc|OJZ91178.1 anig|EHA19869.1 aory|EIT81677.1 asyd|OJJ60003.1 ater|EAU30738.1 atub|OJI83190.1 aver|OJJ02288.1 awen|OJJ30079.1 azon|OJJ42185.1 aory|EIT74880.1 awen|OJJ37785.1

Group4548: abra|OJJ78189.1 acar|OOF98670.1 acla|EAW06798.1 afis|EAW16347.1 aflag|EED51752.1 afum|EAL88972.1 agla|OJJ88241.1 akaw|GAA85840.1 aluc|OJZ91260.1 anid|CBF89212.1 anig|EHA19948.1 aory|EIT80660.1 asyd|OJJ62523.1 ater|EAU36051.1 atub|OJI83249.1 aver|OJI96642.1 awen|OJJ37750.1 azon|OJJ47558.1

Group4549: abra|OJJ78192.1 acar|OOF98665.1 afum|EAL85073.2 akaw|GAA85837.1 aluc|OJZ91263.1 anid|CBF87346.1 asyd|OJJ56202.1 atub|OJI83252.1 aver|OJJ06457.1 acar|OOF90595.1 afis|EAW19818.1 aflag|EED53224.1 aory|EIT75036.1 aver|OJJ05129.1 azon|OJJ42171.1 aflag|EED53225.1 anig|EHA19951.1 anid|CBF75950.1

Group4550: abra|OJJ78206.1 acar|OOF98648.1 acla|EAW11242.1 afis|EAW18261.1 afla|EED48720.1 afum|EAL87625.1 agla|OJJ88165.1 akaw|GAA85820.1 aluc|OJZ91279.1 anid|CBF79529.1 anig|EHA19964.1 aory|EIT73088.1 asyd|OJJ57894.1 ater|EAU33269.1 atub|OJI83269.1 aver|OJJ04501.1 awen|OJJ30635.1 azon|OJJ47983.1

Group4551: abra|OJJ78213.1 acar|OOF98642.1 acla|EAW11237.1 afis|EAW18268.1 afla|EED48733.1 afum|EAL87633.1 agla|OJJ88159.1 akaw|GAA85814.1 aluc|OJZ91285.1 anid|CBF79516.1 anig|EHA19970.1 aory|EIT73048.1 asyd|OJJ57888.1 ater|EAU33275.1 atub|OJI83275.1 aver|OJJ04506.1 awen|OJJ30642.1 azon|OJJ47973.1

Group4552: abra|OJJ78216.1 acar|OOF98640.1 acla|EAW11234.1 afis|EAW18271.1 afla|EED48737.1 afum|EAL87636.1 agla|OJJ88156.1 akaw|GAA85811.1 aluc|OJZ91288.1 anid|CBF79510.1 anig|EHA19973.1 aory|EIT73125.1 asyd|OJJ57885.1 ater|EAU33277.1 atub|OJI83278.1 aver|OJJ04509.1 awen|OJJ30644.1 azon|OJJ47971.1

Group4553: abra|OJJ78217.1 acar|OOF98639.1 acla|EAW11232.1 afis|EAW18272.1 afla|EED48738.1 afum|EAL87637.1 agla|OJJ88155.1 akaw|GAA85807.1 aluc|OJZ91291.1 anid|CBF79508.1 anig|EHA19974.1 aory|EIT73235.1 asyd|OJJ57884.1 ater|EAU33278.1 atub|OJI83282.1 aver|OJJ04510.1 awen|OJJ30645.1 azon|OJJ47970.1

Group4554: abra|OJJ78218.1 acar|OOF98638.1 acla|EAW11231.1 afis|EAW18273.1 afla|EED48739.1 afum|EAL87638.1 agla|OJJ88154.1 akaw|GAA85806.1 aluc|OJZ91292.1 anid|CBF79507.1 anig|EHA19975.1 aory|EIT73224.1 asyd|OJJ57883.1 ater|EAU33279.1 atub|OJI83283.1 aver|OJJ04511.1 awen|OJJ30646.1 azon|OJJ47969.1

Group4555: abra|OJJ78220.1 acar|OOF98636.1 acla|EAW11229.1 afis|EAW18274.1 afla|EED48741.1 afum|EAL87640.1 agla|OJJ88152.1 akaw|GAA85805.1 aluc|OJZ91294.1 anid|CBF79503.1 anig|EHA19977.1 aory|EIT73281.1 asyd|OJJ57881.1 ater|EAU33280.1 atub|OJI83285.1 aver|OJJ04513.1 awen|OJJ30647.1 azon|OJJ47968.1

Group4556: abra|OJJ78221.1 acar|OOF98635.1 acla|EAW11228.1 afis|EAW18275.1 afla|EED48742.1 afum|EAL87641.1 agla|OJJ88151.1 akaw|GAA85804.1 aluc|OJZ91296.1 anid|CBF79499.1 anig|EHA19978.1 aory|EIT73223.1 asyd|OJJ57880.1 ater|EAU33281.1 atub|OJI83286.1 aver|OJJ04514.1 awen|OJJ30648.1 azon|OJJ47967.1

Group4557: abra|OJJ78226.1 acar|OOF98632.1 acla|EAW09284.1 afis|EAW21863.1 afla|EED46448.1 afum|EAL92877.2 agla|OJJ84270.1 akaw|GAA85799.1 aluc|OJZ91301.1 anid|CBF76755.1 anig|EHA19983.1 aory|EIT72377.1 asyd|OJJ61262.1 ater|EAU30861.1 atub|OJI83292.1 aver|OJJ00588.1 awen|OJJ34153.1 azon|OJJ43475.1

Group4558: abra|OJJ78229.1 acar|OOF98630.1 acla|EAW09280.1 afis|EAW21867.1 afla|EED46442.1 afum|EAL92881.1 agla|OJJ84268.1 akaw|GAA85795.1 aluc|OJZ91304.1 anid|CBF76763.1 anig|EHA19986.1 aory|EIT72329.1 asyd|OJJ61265.1 ater|EAU30864.1 atub|OJI83295.1 aver|OJJ00592.1 awen|OJJ34156.1 azon|OJJ43473.1

Group4559: abra|OJJ78230.1 acar|OOF98629.1 acla|EAW09279.1 afis|EAW21868.1 afla|EED46441.1 afum|EAL92882.1 agla|OJJ84267.1 akaw|GAA85794.1 aluc|OJZ91305.1 anid|CBF76765.1 anig|EHA19987.1 aory|EIT72366.1 asyd|OJJ61266.1 ater|EAU30866.1 atub|OJI83296.1 aver|OJJ00593.1 awen|OJJ34157.1 azon|OJJ43472.1

Group4560: abra|OJJ78231.1 acar|OOF98628.1 acla|EAW09278.1 afis|EAW21869.1 afla|EED46440.1 afum|EAL92883.1 agla|OJJ84264.1 akaw|GAA85793.1 aluc|OJZ91306.1 anid|CBF76767.1 anig|EHA19988.1 aory|EIT72428.1 asyd|OJJ61267.1 ater|EAU30867.1 atub|OJI83297.1 aver|OJJ00594.1 awen|OJJ34158.1 azon|OJJ43471.1

Group4561: abra|OJJ78233.1 acar|OOF98627.1 acla|EAW09277.1 afis|EAW21870.1 afla|EED46438.1 afum|EAL92884.1 agla|OJJ84262.1 akaw|GAA85792.1 aluc|OJZ91307.1 anid|CBF76769.1 anig|EHA19991.1 aory|EIT72393.1 asyd|OJJ61268.1 ater|EAU30868.1 atub|OJI83300.1 aver|OJJ00597.1 awen|OJJ34159.1 azon|OJJ43470.1

Group4562: abra|OJJ78234.1 acar|OOF98626.1 acla|EAW09276.1 afis|EAW21871.1 afla|EED46437.1 afum|EAL92885.1 agla|OJJ84261.1 akaw|GAA85791.1 aluc|OJZ91308.1 anid|CBF76771.1 anig|EHA19992.1 aory|EIT72319.1 asyd|OJJ61269.1 ater|EAU30869.1 atub|OJI83301.1 aver|OJJ00598.1 awen|OJJ34160.1 azon|OJJ43469.1

Group4563: abra|OJJ78237.1 acar|OOF98623.1 acla|EAW09273.1 afis|EAW21875.1 afla|EED46433.1 afum|EAL92889.2 agla|OJJ84257.1 akaw|GAA85788.1 aluc|OJZ91311.1 anid|CBF76776.1 anig|EHA19995.1 aory|EIT72389.1 asyd|OJJ61273.1 ater|EAU30874.1 atub|OJI83304.1 aver|OJJ00601.1 awen|OJJ34164.1 azon|OJJ43466.1

Group4564: abra|OJJ78238.1 acar|OOF98622.1 acla|EAW09272.1 afis|EAW21876.1 afla|EED46432.1 afum|EAL92890.1 agla|OJJ84256.1 akaw|GAA85787.1 aluc|OJZ91312.1 anid|CBF76778.1 anig|EHA19996.1

aory|EIT72368.1 asyd|OJJ61274.1 ater|EAU30875.1 atub|OJI83305.1 aver|OJJ00602.1 awen|OJJ34165.1  
azon|OJJ43465.1

Group4565: abra|OJJ78239.1 acar|OOF98621.1 acla|EAW09271.1 afis|EAW21877.1 afla|EED46431.1  
afum|EAL92891.2 agla|OJJ84255.1 akaw|GAA85786.1 aluc|OJZ91313.1 anid|CBF76780.1 anig|EHA19997.1  
aory|EIT72420.1 asyd|OJJ61275.1 ater|EAU30876.1 atub|OJI83306.1 aver|OJJ00603.1 awen|OJJ34166.1  
azon|OJJ43464.1

Group4566: abra|OJJ78241.1 acar|OOF98619.1 acla|EAW09269.1 afis|EAW21879.1 afla|EED46429.1  
afum|EAL92893.1 agla|OJJ84253.1 akaw|GAA85783.1 aluc|OJZ91315.1 anid|CBF76784.1 anig|EHA19998.1  
aory|EIT72355.1 asyd|OJJ61277.1 ater|EAU30877.1 atub|OJI83309.1 aver|OJJ00605.1 awen|OJJ34168.1  
azon|OJJ43462.1

Group4567: abra|OJJ78242.1 acar|OOF98618.1 acla|EAW09268.1 afis|EAW21880.1 afla|EED46428.1  
afum|EAL92894.2 agla|OJJ84252.1 akaw|GAA85782.1 aluc|OJZ91316.1 anid|CBF76786.1 anig|EHA19999.1  
aory|EIT72330.1 asyd|OJJ61278.1 ater|EAU30878.1 atub|OJI83310.1 aver|OJJ00606.1 awen|OJJ34169.1  
azon|OJJ43461.1

Group4568: abra|OJJ78244.1 acar|OOF98616.1 acla|EAW09265.1 afis|EAW21883.1 afla|EED46424.1  
afum|EAL92897.1 agla|OJJ84251.1 akaw|GAA85780.1 aluc|OJZ91318.1 anid|CBF76788.1 anig|EHA20001.1  
aory|EIT72383.1 asyd|OJJ61280.1 ater|EAU30881.1 atub|OJI83312.1 aver|OJJ00607.1 awen|OJJ34172.1  
azon|OJJ43460.1

Group4569: abra|OJJ78247.1 acar|OOF98615.1 acla|EAW09263.1 afis|EAW21884.1 afla|EED46423.1  
afum|EAL92898.1 agla|OJJ84249.1 akaw|GAA85779.1 aluc|OJZ91321.1 anid|CBF76790.1 anig|EHA20003.1  
aory|EIT72443.1 asyd|OJJ61281.1 ater|EAU30882.1 atub|OJI83314.1 aver|OJJ00608.1 awen|OJJ34173.1  
azon|OJJ43459.1

Group4570: abra|OJJ78249.1 acar|OOF98614.1 acla|EAW09262.1 afis|EAW21885.1 afla|EED46422.1  
afum|EAL92899.1 agla|OJJ84248.1 akaw|GAA85778.1 aluc|OJZ91322.1 anid|CBF76792.1 anig|EHA20004.1  
aory|EIT72353.1 asyd|OJJ61282.1 ater|EAU30883.1 atub|OJI83315.1 aver|OJJ00609.1 awen|OJJ34174.1  
azon|OJJ43458.1

Group4571: abra|OJJ78250.1 acar|OOF98612.1 acla|EAW09261.1 afis|EAW21886.1 afla|EED46421.1  
afum|EAL92900.1 agla|OJJ84247.1 akaw|GAA85777.1 aluc|OJZ91323.1 anid|CBF76794.1 anig|EHA20005.1  
aory|EIT72442.1 asyd|OJJ61283.1 ater|EAU30884.1 atub|OJI83316.1 aver|OJJ00610.1 awen|OJJ34175.1  
azon|OJJ43457.1

Group4572: abra|OJJ78252.1 acar|OOF98611.1 acla|EAW09259.1 afis|EAW21888.1 afla|EED46419.1  
afum|EAL92902.1 agla|OJJ84245.1 akaw|GAA85775.1 aluc|OJZ91325.1 anid|CBF76798.1 anig|EHA20007.1  
aory|EIT72406.1 asyd|OJJ61285.1 ater|EAU30885.1 atub|OJI83318.1 aver|OJJ00611.1 awen|OJJ34177.1  
azon|OJJ43455.1

Group4573: abra|OJJ78253.1 acar|OOF98610.1 acla|EAW09258.1 afis|EAW21889.1 afla|EED46418.1  
afum|EAL92903.1 agla|OJJ84244.1 akaw|GAA85774.1 aluc|OJZ91326.1 anid|CBF76800.1 anig|EHA20008.1  
aory|EIT72432.1 asyd|OJJ61286.1 ater|EAU30886.1 atub|OJI83319.1 aver|OJJ00612.1 awen|OJJ34178.1  
azon|OJJ43454.1

Group4574: abra|OJJ78255.1 acar|OOF98607.1 acla|EAW09254.1 afis|EAW21893.1 afla|EED46415.1  
afum|EAL92907.1 agla|OJJ84239.1 akaw|GAA85771.1 aluc|OJZ91329.1 anid|CBF76806.1 anig|EHA20011.1  
aory|EIT72313.1 asyd|OJJ61289.1 ater|EAU30889.1 atub|OJI83322.1 aver|OJJ00615.1 awen|OJJ34182.1  
azon|OJJ43450.1

Group4575: abra|OJJ78256.1 acar|OOF98606.1 acla|EAW09253.1 afis|EAW21894.1 afla|EED46414.1  
afum|EAL92908.1 agla|OJJ84238.1 akaw|GAA85770.1 aluc|OJZ91330.1 anid|CBF76808.1 anig|EHA20012.1  
aory|EIT72378.1 asyd|OJJ61290.1 ater|EAU30890.1 atub|OJI83323.1 aver|OJJ00616.1 awen|OJJ34183.1  
azon|OJJ43449.1

Group4576: abra|OJJ78260.1 acar|OOF98600.1 acla|EAW09250.1 afis|EAW21897.1 afla|EED46411.1  
afum|EAL92910.1 agla|OJJ84227.1 akaw|GAA85765.1 aluc|OJZ91335.1 anid|CBF76814.1 anig|EHA20016.1  
aory|EIT72440.1 asyd|OJJ61293.1 ater|EAU30892.1 atub|OJI83327.1 aver|OJJ00619.1 awen|OJJ34186.1  
azon|OJJ43447.1

Group4577: abra|OJJ78261.1 acar|OOF98599.1 acla|EAW09249.1 afis|EAW21898.1 afla|EED46408.1  
afum|EAL92911.2 agla|OJJ84228.1 akaw|GAA85764.1 aluc|OJZ91336.1 anid|CBF76816.1 anig|EHA20017.1  
aory|EIT72346.1 asyd|OJJ61294.1 ater|EAU30893.1 atub|OJI83328.1 aver|OJJ00620.1 awen|OJJ34187.1  
azon|OJJ43446.1

Group4578: abra|OJJ78263.1 acar|OOF98598.1 acla|EAW09248.1 afis|EAW21899.1 afla|EED46407.1  
afum|EAL92912.1 agla|OJJ84229.1 akaw|GAA85762.1 aluc|OJZ91338.1 anid|CBF76818.1 anig|EHA20018.1  
aory|EIT72328.1 asyd|OJJ61295.1 ater|EAU30894.1 atub|OJI83330.1 aver|OJJ00621.1 awen|OJJ34188.1  
azon|OJJ43445.1



Group4579: abra|OJJ78264.1 acar|OOF98597.1 acla|EAW09247.1 afis|EAW21900.1 afla|EED46406.1 afum|EAL92913.1 agla|OJJ84230.1 akaw|GAA85761.1 aluc|OJZ91339.1 anid|CBF76820.1 anig|EHA20019.1 aory|EIT72352.1 asyd|OJJ61296.1 ater|EAU30895.1 atub|OJI83331.1 aver|OJJ00622.1 awen|OJJ34189.1 azon|OJJ43444.1

Group4580: abra|OJJ78266.1 acar|OOF98596.1 acla|EAW09246.1 afis|EAW21901.1 afla|EED46405.1 afum|EAL92914.1 agla|OJJ84231.1 akaw|GAA85760.1 aluc|OJZ91340.1 anid|CBF76822.1 anig|EHA20020.1 aory|EIT72444.1 asyd|OJJ61297.1 ater|EAU30896.1 atub|OJI83332.1 aver|OJJ00623.1 awen|OJJ34190.1 azon|OJJ43443.1

Group4581: abra|OJJ78267.1 acar|OOF98595.1 acla|EAW09245.1 afis|EAW21902.1 afla|EED46403.1 afum|EAL92915.1 agla|OJJ84232.1 akaw|GAA85759.1 aluc|OJZ91341.1 anid|CBF76824.1 anig|EHA20021.1 aory|EIT72339.1 asyd|OJJ61298.1 ater|EAU30897.1 atub|OJI83333.1 aver|OJJ00624.1 awen|OJJ34191.1 azon|OJJ43442.1

Group4582: abra|OJJ78268.1 acar|OOF98594.1 acla|EAW09244.1 afis|EAW21903.1 afla|EED46402.1 afum|EAL92916.1 agla|OJJ84233.1 akaw|GAA85758.1 aluc|OJZ91342.1 anid|CBF76826.1 anig|EHA20022.1 aory|EIT72439.1 asyd|OJJ61299.1 ater|EAU30898.1 atub|OJI83334.1 aver|OJJ00625.1 awen|OJJ34192.1 azon|OJJ43441.1

Group4583: abra|OJJ78275.1 acar|OOF98592.1 acla|EAW09239.1 afis|EAW21909.1 afla|EED46641.1 afum|EAL92921.1 agla|OJJ84222.1 akaw|GAA85751.1 aluc|OJZ91350.1 anid|CBF76837.1 anig|EHA20028.1 aory|EIT77855.1 asyd|OJJ61305.1 ater|EAU30909.1 atub|OJI83342.1 aver|OJJ00630.1 awen|OJJ34199.1 azon|OJJ43435.1

Group4584: abra|OJJ78277.1 acar|OOF98590.1 acla|EAW09237.1 afis|EAW21911.1 afla|EED46639.1 afum|EAL92923.1 agla|OJJ84220.1 akaw|GAA85749.1 aluc|OJZ91352.1 anid|CBF76842.1 anig|EHA20030.1 aory|EIT77915.1 asyd|OJJ61307.1 ater|EAU30911.1 atub|OJI83344.1 aver|OJJ00632.1 awen|OJJ34201.1 azon|OJJ43433.1

Group4585: abra|OJJ78278.1 acar|OOF98588.1 acla|EAW09236.1 afis|EAW21912.1 afla|EED46638.1 afum|EAL92924.1 agla|OJJ84219.1 akaw|GAA85748.1 aluc|OJZ91353.1 anid|CBF76844.1 anig|EHA20031.1 aory|EIT77829.1 asyd|OJJ61308.1 ater|EAU30912.1 atub|OJI83345.1 aver|OJJ00633.1 awen|OJJ34202.1 azon|OJJ43432.1

Group4586: abra|OJJ78280.1 acar|OOF98589.1 acla|EAW09235.1 afis|EAW21913.1 afla|EED46637.1 afum|EAL92925.1 agla|OJJ84210.1 akaw|GAA85747.1 aluc|OJZ91354.1 anid|CBF76846.1 anig|EHA20032.1 aory|EIT77951.1 asyd|OJJ61309.1 ater|EAU30914.1 atub|OJI83347.1 aver|OJJ00634.1 awen|OJJ34203.1 azon|OJJ43431.1

Group4587: abra|OJJ78282.1 acar|OOF98586.1 acla|EAW09233.1 afis|EAW21915.1 afla|EED46634.1 afum|EAL92927.1 agla|OJJ84208.1 akaw|GAA85745.1 aluc|OJZ91356.1 anid|CBF76850.1 anig|EHA20034.1 aory|EIT77867.1 asyd|OJJ61311.1 ater|EAU30916.1 atub|OJI83349.1 aver|OJJ00636.1 awen|OJJ34205.1 azon|OJJ43429.1

Group4588: abra|OJJ78284.1 acar|OOF98584.1 acla|EAW09231.1 afis|EAW21917.1 afla|EED46632.1 afum|EAL92929.1 agla|OJJ84206.1 akaw|GAA85743.1 aluc|OJZ91358.1 anid|CBF76854.1 anig|EHA20036.1 aory|EIT77843.1 asyd|OJJ61313.1 ater|EAU30919.1 atub|OJI83351.1 aver|OJJ00638.1 awen|OJJ34207.1 azon|OJJ43427.1

Group4589: abra|OJJ78285.1 acar|OOF98583.1 acla|EAW09230.1 afis|EAW21918.1 afum|EAL92930.1 agla|OJJ84205.1 akaw|GAA85742.1 aluc|OJZ91359.1 anid|CBF76856.1 anig|EHA20037.1 asyd|OJJ61314.1 ater|EAU30920.1 atub|OJI83352.1 aver|OJJ00639.1 awen|OJJ34208.1 azon|OJJ43426.1 afla|EED46631.1 aory|EIT77816.1

Group4590: abra|OJJ78287.1 acar|OOF98581.1 acla|EAW09228.1 afis|EAW21920.1 afla|EED46630.1 afum|EAL92932.1 agla|OJJ84203.1 akaw|GAA85740.1 aluc|OJZ91361.1 anid|CBF76860.1 anig|EHA20039.1 aory|EIT77823.1 asyd|OJJ61316.1 ater|EAU30925.1 atub|OJI83354.1 aver|OJJ00641.1 awen|OJJ34210.1 azon|OJJ43424.1

Group4591: abra|OJJ78288.1 acar|OOF98579.1 acla|EAW09227.1 afis|EAW21921.1 afla|EED46629.1 afum|EAL92934.1 agla|OJJ84202.1 akaw|GAA85739.1 aluc|OJZ91362.1 anid|CBF76862.1 anig|EHA20040.1 aory|EIT77918.1 asyd|OJJ61317.1 ater|EAU30926.1 atub|OJI83355.1 aver|OJJ00642.1 awen|OJJ34211.1 azon|OJJ43423.1

Group4592: abra|OJJ78289.1 acar|OOF98580.1 acla|EAW09226.1 afis|EAW21922.1 afla|EED46628.1 afum|EAL92935.1 agla|OJJ84201.1 akaw|GAA85738.1 aluc|OJZ91363.1 anid|CBF76864.1 anig|EHA20041.1 aory|EIT77831.1 asyd|OJJ61318.1 ater|EAU30927.1 atub|OJI83356.1 aver|OJJ00643.1 awen|OJJ34212.1 azon|OJJ43422.1

Group4593: abra|OJJ78290.1 acar|OOF98578.1 acla|EAW09225.1 afis|EAW21923.1 afla|EED46627.1 afum|EAL92936.1 agla|OJJ84200.1 akaw|GAA85737.1 aluc|OJZ91364.1 anid|CBF76866.1 anig|EHA20042.1

aory|EIT77896.1 asyd|OJJ61319.1 ater|EAU30928.1 atub|OJI83357.1 aver|OJJ00644.1 awen|OJJ34213.1 azon|OJJ43421.1

Group4594: abra|OJJ78292.1 acar|OOF98576.1 afis|EAW21924.1 afla|EED46615.1 afum|EAL92937.1 akaw|GAA85735.1 aluc|OJZ91366.1 anig|EHA20044.1 aory|EIT77890.1 ater|EAU30929.1 atub|OJI83359.1 aver|OJJ00647.1 azon|OJJ43420.1 acla|EAW09224.1 agla|OJJ84199.1 anid|CBF76872.1 asyd|OJJ61322.1 awen|OJJ34214.1

Group4595: abra|OJJ78293.1 acar|OOF98575.1 acla|EAW09223.1 afis|EAW21925.1 afla|EED46616.1 afum|EAL92938.1 agla|OJJ84198.1 akaw|GAA85734.1 aluc|OJZ91367.1 anid|CBF76882.1 anig|EHA20045.1 aory|EIT77869.1 asyd|OJJ61327.1 ater|EAU30930.1 atub|OJI83360.1 aver|OJJ00652.1 awen|OJJ34215.1 azon|OJJ43419.1

Group4596: abra|OJJ78298.1 acar|OOF98571.1 acla|EAW09218.1 afis|EAW21930.1 afla|EED46623.1 afum|EAL92942.1 agla|OJJ84191.1 akaw|GAA85729.1 aluc|OJZ91372.1 anid|CBF76884.1 anig|EHA20050.1 aory|EIT77852.1 asyd|OJJ61328.1 ater|EAU30936.1 atub|OJI83365.1 aver|OJJ00654.1 awen|OJJ34220.1 azon|OJJ43414.1

Group4597: abra|OJJ78299.1 acar|OOF98567.1 acla|EAW09216.1 afis|EAW21931.1 afla|EED46626.1 afum|EAL92943.2 agla|OJJ84190.1 akaw|GAA85727.1 aluc|OJZ91376.1 anid|CBF76885.1 anig|EHA20051.1 aory|EIT77815.1 asyd|OJJ61330.1 ater|EAU30937.1 atub|OJI83366.1 aver|OJJ00655.1 awen|OJJ34222.1 azon|OJJ43413.1

Group4598: abra|OJJ78301.1 acar|OOF98565.1 acla|EAW09214.1 afis|EAW21933.1 afla|EED46353.1 afum|EAL92946.1 agla|OJJ84187.1 akaw|GAA85725.1 aluc|OJZ91378.1 anid|CBF76887.1 anig|EHA20053.1 aory|EIT81186.1 asyd|OJJ61333.1 ater|EAU30938.1 atub|OJI83371.1 aver|OJJ00657.1 awen|OJJ34224.1 azon|OJJ43411.1

Group4599: abra|OJJ78302.1 acar|OOF98564.1 acla|EAW09213.1 afis|EAW21934.1 afla|EED46354.1 afum|EAL92947.1 agla|OJJ84186.1 akaw|GAA85724.1 aluc|OJZ91379.1 anid|CBF76889.1 anig|EHA20054.1 aory|EIT81211.1 asyd|OJJ61334.1 ater|EAU30939.1 atub|OJI83372.1 aver|OJJ00658.1 awen|OJJ34225.1 azon|OJJ43410.1

Group4600: abra|OJJ78308.1 acar|OOF98558.1 acla|EAW09212.1 afis|EAW21935.1 afla|EED46652.1 afum|EAL92948.2 agla|OJJ84185.1 akaw|GAA85721.1 aluc|OJZ91383.1 anid|CBF76899.1 anig|EHA20060.1 aory|EIT77952.1 asyd|OJJ61338.1 ater|EAU30941.1 atub|OJI83376.1 aver|OJJ00662.1 awen|OJJ34226.1 azon|OJJ43409.1

Group4601: abra|OJJ78319.1 acar|OOF98556.1 acla|EAW09206.1 afis|EAW21941.1 afla|EED46658.1 afum|EAL92955.1 agla|OJJ84182.1 akaw|GAA85711.1 aluc|OJZ91392.1 anid|CBF84078.1 anig|EHA20070.1 aory|EIT77820.1 asyd|OJJ61342.1 ater|EAU30946.1 atub|OJI83385.1 aver|OJJ00666.1 awen|OJJ34232.1 azon|OJJ43403.1

Group4602: abra|OJJ78323.1 acar|OOF98551.1 acla|EAW09202.1 afis|EAW21945.1 afla|EED46662.1 afum|EAL92959.1 agla|OJJ84179.1 akaw|GAA85705.1 aluc|OJZ91398.1 anid|CBF84050.1 anig|EHA20075.1 aory|EIT77962.1 asyd|OJJ61343.1 ater|EAU30993.1 atub|OJI83390.1 aver|OJJ00667.1 awen|OJJ34236.1 azon|OJJ43400.1

Group4603: abra|OJJ78325.1 acar|OOF98550.1 acla|EAW09201.1 afis|EAW21946.1 afla|EED46663.1 afum|EAL92960.1 agla|OJJ84174.1 akaw|GAA85704.1 aluc|OJZ91399.1 anid|CBF84059.1 anig|EHA20076.1 aory|EIT77808.1 asyd|OJJ61345.1 ater|EAU30994.1 atub|OJI83391.1 aver|OJJ00670.1 awen|OJJ34237.1 azon|OJJ43399.1

Group4604: abra|OJJ78327.1 acar|OOF98548.1 acla|EAW09199.1 afis|EAW21948.1 afla|EED46666.1 afum|EAL92962.1 agla|OJJ84172.1 akaw|GAA85702.1 aluc|OJZ91401.1 anid|CBF84062.1 anig|EHA20078.1 aory|EIT77953.1 asyd|OJJ61347.1 ater|EAU30996.1 atub|OJI83393.1 aver|OJJ00674.1 awen|OJJ34240.1 azon|OJJ43397.1

Group4605: abra|OJJ78328.1 acar|OOF98547.1 acla|EAW09198.1 afis|EAW21949.1 afum|EAL92963.1 agla|OJJ84171.1 akaw|GAA85701.1 aluc|OJZ91402.1 anid|CBF84064.1 anig|EHA20079.1 aory|EIT77849.1 asyd|OJJ61348.1 ater|EAU30997.1 atub|OJI83395.1 aver|OJJ00675.1 awen|OJJ34241.1 azon|OJJ43396.1 afla|EED46667.1

Group4606: abra|OJJ78329.1 acar|OOF98546.1 acla|EAW09197.1 afis|EAW21950.1 afla|EED46668.1 afum|EAL92964.1 agla|OJJ84170.1 akaw|GAA85700.1 aluc|OJZ91403.1 anid|CBF84066.1 anig|EHA20080.1 aory|EIT77926.1 asyd|OJJ61349.1 ater|EAU30998.1 atub|OJI83396.1 aver|OJJ00676.1 awen|OJJ34242.1 azon|OJJ43395.1

Group4607: abra|OJJ78334.1 acar|OOF98544.1 acla|EAW09194.1 afis|EAW21952.1 afla|EED46669.1 afum|EAL92966.1 agla|OJJ84159.1 akaw|GAA85696.1 aluc|OJZ91407.1 anid|CBF84069.1 anig|EHA20083.1 aory|EIT77916.1 asyd|OJJ61351.1 ater|EAU31000.1 atub|OJI83400.1 aver|OJJ00678.1 awen|OJJ34244.1 azon|OJJ43394.1

Group4608: abra|OJJ78337.1 acar|OOF98543.1 acla|EAW09193.1 afis|EAW21953.1 afla|EED46671.1 afum|EAL92967.1 agla|OJJ84160.1 akaw|GAA85695.1 aluc|OJZ91409.1 anid|CBF84070.1 anig|EHA20084.1 aory|EIT77807.1 asyd|OJJ61352.1 ater|EAU31001.1 atub|OJI83403.1 aver|OJJ00679.1 awen|OJJ34245.1 azon|OJJ43393.1

Group4609: abra|OJJ78339.1 acar|OOF98541.1 acla|EAW09192.1 afis|EAW21954.1 afla|EED46672.1 afum|EAL92968.1 agla|OJJ84161.1 akaw|GAA85694.1 aluc|OJZ91411.1 anid|CBF84074.1 anig|EHA20085.1 aory|EIT77806.1 asyd|OJJ61353.1 ater|EAU31060.1 atub|OJI83404.1 aver|OJJ00680.1 awen|OJJ34246.1 azon|OJJ43392.1

Group4610: abra|OJJ78345.1 acar|OOF90269.1 acla|EAW09189.1 afis|EAW21957.1 afla|EED46676.1 afum|EAL92971.1 agla|OJJ84164.1 akaw|GAA85688.1 aluc|OJZ91418.1 anid|CBF84037.1 anig|EHA20090.1 aory|EIT77863.1 asyd|OJJ61362.1 ater|EAU31063.1 atub|OJI83412.1 aver|OJJ00689.1 awen|OJJ34249.1 azon|OJJ43389.1

Group4611: abra|OJJ78346.1 acar|OOF90268.1 acla|EAW09188.1 afis|EAW21958.1 afla|EED46678.1 afum|EAL92972.1 agla|OJJ84158.1 akaw|GAA85687.1 aluc|OJZ91420.1 anid|CBF84041.1 anig|EHA20091.1 aory|EIT77880.1 asyd|OJJ61360.1 ater|EAU31078.1 atub|OJI83413.1 aver|OJJ00687.1 awen|OJJ34251.1 azon|OJJ43387.1

Group4612: abra|OJJ78347.1 acar|OOF90267.1 acla|EAW09187.1 afis|EAW21959.1 afla|EED46679.1 afum|EAL92973.1 agla|OJJ84157.1 akaw|GAA85686.1 aluc|OJZ91421.1 anid|CBF84043.1 anig|EHA20092.1 aory|EIT77956.1 asyd|OJJ61359.1 ater|EAU31079.1 atub|OJI83414.1 aver|OJJ00686.1 awen|OJJ34252.1 azon|OJJ43386.1

Group4613: abra|OJJ78351.1 acar|OOF98536.1 acla|EAW09184.1 afis|EAW21962.1 afla|EED46683.1 afum|EAL92976.1 agla|OJJ84141.1 akaw|GAA85683.1 aluc|OJZ91425.1 anid|CBF82742.1 anig|EHA20095.1 aory|EIT77876.1 asyd|OJJ61622.1 ater|EAU31082.1 atub|OJI83418.1 aver|OJJ00946.1 awen|OJJ34256.1 azon|OJJ43383.1

Group4614: abra|OJJ78353.1 acar|OOF98535.1 acla|EAW09182.1 afis|EAW21964.1 afla|EED46685.1 afum|EAL92978.2 agla|OJJ84139.1 akaw|GAA85681.1 aluc|OJZ91428.1 anid|CBF82738.1 anig|EHA20097.1 aory|EIT77960.1 asyd|OJJ61624.1 ater|EAU31084.1 atub|OJI83421.1 aver|OJJ00949.1 awen|OJJ34258.1 azon|OJJ43381.1

Group4615: abra|OJJ78354.1 acar|OOF98534.1 acla|EAW09181.1 afis|EAW21965.1 afla|EED46686.1 afum|EAL92979.1 agla|OJJ84138.1 akaw|GAA85680.1 aluc|OJZ91429.1 anid|CBF82736.1 anig|EHA20098.1 aory|EIT77854.1 asyd|OJJ61625.1 ater|EAU31085.1 atub|OJI83422.1 aver|OJJ00950.1 awen|OJJ34259.1 azon|OJJ43378.1

Group4616: abra|OJJ78356.1 acar|OOF98533.1 acla|EAW09178.1 afis|EAW21968.1 afla|EED46689.1 afum|EAL92982.1 agla|OJJ84131.1 akaw|GAA85677.1 aluc|OJZ91431.1 anid|CBF82731.1 anig|EHA20100.1 aory|EIT77885.1 asyd|OJJ61628.1 ater|EAU31088.1 atub|OJI83424.1 aver|OJJ00952.1 awen|OJJ34261.1 azon|OJJ43376.1

Group4617: abra|OJJ78363.1 acar|OOF98524.1 acla|EAW09172.1 afis|EAW21974.1 afla|EED46697.1 afum|EAL92989.1 agla|OJJ84128.1 akaw|GAA85670.1 aluc|OJZ91438.1 anid|CBF82716.1 anig|EHA20103.1 aory|EIT77925.1 asyd|OJJ61637.1 ater|EAU31092.1 atub|OJI83432.1 aver|OJJ00960.1 awen|OJJ34267.1 azon|OJJ43369.1

Group4618: abra|OJJ78365.1 acar|OOF98521.1 acla|EAW09170.1 afis|EAW21976.1 afla|EED46699.1 afum|EAL92991.1 agla|OJJ84125.1 akaw|GAA85668.1 aluc|OJZ91442.1 anid|CBF82720.1 anig|EHA20106.1 aory|EIT77848.1 asyd|OJJ61635.1 ater|EAU31094.1 atub|OJI83436.1 aver|OJJ00958.1 awen|OJJ34269.1 azon|OJJ43368.1

Group4619: abra|OJJ78366.1 acar|OOF98520.1 acla|EAW09169.1 afis|EAW21977.1 afla|EED46700.1 afum|EAL92992.1 agla|OJJ84124.1 akaw|GAA85667.1 aluc|OJZ91443.1 anid|CBF82722.1 anig|EHA20107.1 aory|EIT77809.1 asyd|OJJ61634.1 ater|EAU31095.1 atub|OJI83437.1 aver|OJJ00957.1 awen|OJJ34270.1 azon|OJJ43366.1

Group4620: abra|OJJ78368.1 acar|OOF98518.1 acla|EAW09167.1 afis|EAW21979.1 afla|EED46702.1 afum|EAL92994.1 agla|OJJ84120.1 akaw|GAA85665.1 aluc|OJZ91445.1 anid|CBF82711.1 anig|EHA20109.1 aory|EIT77847.1 asyd|OJJ61640.1 ater|EAU31097.1 atub|OJI83439.1 aver|OJJ00963.1 awen|OJJ34272.1 azon|OJJ43364.1

Group4621: abra|OJJ78369.1 acar|OOF90130.1 acla|EAW09166.1 afis|EAW21980.1 afla|EED46704.1 afum|EAL92995.1 agla|OJJ84119.1 akaw|GAA85664.1 aluc|OJZ91446.1 anid|CBF82709.1 anig|EHA20110.1 aory|EIT77845.1 asyd|OJJ61641.1 ater|EAU31100.1 atub|OJI83440.1 aver|OJJ00964.1 awen|OJJ34274.1 azon|OJJ43363.1

Group4622: abra|OJJ78371.1 acar|OOF90128.1 acla|EAW09164.1 afis|EAW21982.1 afla|EED46706.1 afum|EAL92997.1 agla|OJJ84118.1 akaw|GAA85662.1 aluc|OJZ91448.1 anid|CBF82705.1 anig|EHA20112.1

aory|EIT77874.1 asyd|OJJ61643.1 ater|EAU31101.1 atub|OJI83441.1 aver|OJJ00965.1 awen|OJJ34276.1 azon|OJJ43361.1

Group4623: abra|OJJ78372.1 acar|OOF90125.1 acla|EAW09163.1 afis|EAW21983.1 afla|EED46707.1 afum|EAL92998.1 agla|OJJ84115.1 akaw|GAA85661.1 aluc|OJZ91449.1 anid|CBF82703.1 anig|EHA20113.1 aory|EIT77859.1 asyd|OJJ61644.1 ater|EAU31102.1 atub|OJI83442.1 aver|OJJ00966.1 awen|OJJ34280.1 azon|OJJ43360.1

Group4624: abra|OJJ78374.1 acar|OOF98515.1 acla|EAW09161.1 afis|EAW21985.1 afla|EED46709.1 afum|EAL93000.1 agla|OJJ84113.1 akaw|GAA85659.1 aluc|OJZ91451.1 anid|CBF82698.1 anig|EHA20115.1 aory|EIT77948.1 asyd|OJJ61646.1 ater|EAU31104.1 atub|OJI83444.1 aver|OJJ00968.1 awen|OJJ34282.1 azon|OJJ43358.1

Group4625: abra|OJJ78375.1 acar|OOF98514.1 acla|EAW09160.1 afis|EAW21986.1 afla|EED46710.1 afum|EAL93002.1 agla|OJJ84112.1 akaw|GAA85658.1 aluc|OJZ91452.1 anid|CBF82696.1 anig|EHA20116.1 aory|EIT77888.1 asyd|OJJ61647.1 ater|EAU31106.1 atub|OJI83445.1 aver|OJJ00969.1 awen|OJJ34283.1 azon|OJJ43357.1

Group4626: abra|OJJ78378.1 acar|OOF98510.1 acla|EAW09155.1 afis|EAW21991.1 afla|EED46715.1 afum|EAL93006.2 agla|OJJ84107.1 akaw|GAA85654.1 aluc|OJZ91457.1 anid|CBF82687.1 anig|EHA20120.1 aory|EIT77887.1 asyd|OJJ61652.1 ater|EAU31110.1 atub|OJI83450.1 aver|OJJ00973.1 awen|OJJ34287.1 azon|OJJ43351.1

Group4627: abra|OJJ78380.1 acar|OOF98508.1 acla|EAW09153.1 afis|EAW21993.1 afla|EED46717.1 afum|EAL93008.1 agla|OJJ84104.1 akaw|GAA85652.1 aluc|OJZ91459.1 anid|CBF82683.1 anig|EHA20122.1 aory|EIT77842.1 asyd|OJJ61655.1 ater|EAU31112.1 atub|OJI83452.1 aver|OJJ00976.1 awen|OJJ34289.1 azon|OJJ43349.1

Group4628: abra|OJJ78381.1 acar|OOF98507.1 acla|EAW09152.1 afis|EAW21994.1 afla|EED46718.1 afum|EAL93009.1 agla|OJJ84103.1 akaw|GAA85651.1 aluc|OJZ91460.1 anid|CBF82681.1 anig|EHA20123.1 aory|EIT77902.1 asyd|OJJ61656.1 ater|EAU31113.1 atub|OJI83453.1 aver|OJJ00977.1 awen|OJJ34290.1 azon|OJJ43348.1

Group4629: abra|OJJ78382.1 acar|OOF98506.1 acla|EAW09151.1 afis|EAW21995.1 afla|EED46719.1 afum|EAL93010.1 agla|OJJ84102.1 akaw|GAA85650.1 aluc|OJZ91461.1 anid|CBF82679.1 anig|EHA20124.1 aory|EIT77906.1 asyd|OJJ61657.1 ater|EAU31114.1 atub|OJI83454.1 aver|OJJ00978.1 awen|OJJ34291.1 azon|OJJ43347.1

Group4630: abra|OJJ78383.1 acar|OOF98505.1 acla|EAW09150.1 afis|EAW21996.1 afla|EED46720.1 afum|EAL93011.1 agla|OJJ84101.1 akaw|GAA85649.1 aluc|OJZ91462.1 anid|CBF82677.1 anig|EHA20125.1 aory|EIT77812.1 asyd|OJJ61658.1 ater|EAU31115.1 atub|OJI83455.1 aver|OJJ00979.1 awen|OJJ34292.1 azon|OJJ43346.1

Group4631: abra|OJJ78384.1 acar|OOF98504.1 acla|EAW09149.1 afis|EAW21997.1 afla|EED46721.1 afum|EAL93012.1 agla|OJJ84100.1 akaw|GAA85648.1 aluc|OJZ91463.1 anid|CBF82675.1 anig|EHA20126.1 aory|EIT77875.1 asyd|OJJ61659.1 ater|EAU31116.1 atub|OJI83456.1 aver|OJJ00980.1 awen|OJJ34293.1 azon|OJJ43345.1

Group4632: abra|OJJ78385.1 acar|OOF98503.1 acla|EAW09148.1 afis|EAW21998.1 afla|EED46722.1 afum|EAL93013.1 agla|OJJ84099.1 akaw|GAA85647.1 aluc|OJZ91464.1 anid|CBF82674.1 anig|EHA20127.1 aory|EIT77891.1 asyd|OJJ61660.1 ater|EAU31117.1 atub|OJI83457.1 aver|OJJ00981.1 awen|OJJ34294.1 azon|OJJ43344.1

Group4633: abra|OJJ78386.1 acar|OOF98502.1 acla|EAW09147.1 afis|EAW21999.1 afla|EED46723.1 afum|EAL93014.1 agla|OJJ84098.1 akaw|GAA85646.1 aluc|OJZ91465.1 anid|CBF82672.1 anig|EHA20128.1 aory|EIT77907.1 asyd|OJJ61661.1 ater|EAU31118.1 atub|OJI83458.1 aver|OJJ00982.1 awen|OJJ34295.1 azon|OJJ43343.1

Group4634: abra|OJJ78388.1 acar|OOF98500.1 acla|EAW09145.1 afis|EAW22002.1 afla|EED46727.1 afum|EAL93017.1 agla|OJJ84096.1 akaw|GAA85644.1 aluc|OJZ91467.1 anid|CBF82666.1 anig|EHA20129.1 aory|EIT77844.1 asyd|OJJ61664.1 ater|EAU31121.1 atub|OJI83460.1 aver|OJJ00985.1 awen|OJJ34297.1 azon|OJJ43341.1

Group4635: acar|OOG00510.1 afis|EAW25745.1 akaw|GAA87910.1 aluc|OJZ88780.1 anid|CBF84274.1 anig|EHA18474.1 aory|EIT75519.1 asyd|OJJ57228.1 ater|EAU32770.1 atub|OJI91352.1 aver|OJI97599.1 awen|OJJ32621.1 afis|EAW24516.1 afla|EED47665.1 aver|OJJ03061.1 aluc|OJZ85622.1 aory|EIT80232.1 atub|OJI79415.1

Group4636: acla|EAW13541.1 afis|EAW20614.1 afla|EED54203.1 afum|EAL84447.1 agla|OJJ88592.1 akaw|GAA87001.1 aluc|OJZ84456.1 anid|CBF86940.1 anig|EHA27771.1 aory|EIT75953.1 asyd|OJJ55587.1 atub|OJI89619.1 aver|OJJ06666.1 awen|OJJ33458.1 azon|OJJ50714.1 ater|EAU35253.1 asyd|OJJ55586.1 aver|OJJ06665.1

Group4637: abra|OJJ65435.1 abra|OJJ65508.1 abra|OJJ65821.1 asyd|OJJ51932.1 asyd|OJJ52321.1 asyd|OJJ51963.1 asyd|OJJ51982.1 awen|OJJ29548.1 awen|OJJ29621.1 akaw|GAA93288.1 afis|EAW20669.1 agla|OJJ83544.1 aluc|OJZ79579.1 anig|EHA17693.1 ater|EAU30109.1 akaw|GAA93088.1 aluc|OJZ80408.1

Group4638: abra|OJJ65486.1 abra|OJJ65539.1 akaw|GAA92968.1 anig|EHA20201.1 afla|EED53240.1 agla|OJJ82729.1 anid|CBF82095.1 aory|EIT74878.1 aver|OJJ05216.1 awen|OJJ30575.1 abra|OJJ75529.1 acar|OOF90856.1 akaw|GAA84291.1 aluc|OJZ88985.1 anig|EHA23541.1 atub|OJI85803.1 ater|EAU39592.1

Group4639: abra|OJJ65671.1 abra|OJJ69720.1 acar|OOF92570.1 acar|OOG00879.1 afla|EED52525.1 afla|EED53603.1 akaw|GAA90173.1 akaw|GAA93196.1 aory|EIT74948.1 aory|EIT82807.1 acla|EAW11895.1 afum|EAL84364.1 aluc|OJZ83177.1 anig|EHA28251.1 atub|OJI87760.1 awen|OJJ36063.1 azon|OJJ42163.1

Group4640: abra|OJJ68069.1 abra|OJJ68262.1 akaw|GAA83203.1 aluc|OJZ83704.1 anig|EHA18854.1 atub|OJI90076.1 acar|OOF97541.1 afla|EED45998.1 agla|OJJ80130.1 anid|CBF90047.1 aory|EIT75615.1 asyd|OJJ62055.1 ater|EAU38008.1 aver|OJI96161.1 awen|OJJ30952.1 anid|CBF79559.1 awen|OJJ36502.1

Group4641: acar|OOF90194.1 acar|OOF90196.1 abra|OJJ67673.1 afis|EAW24512.1 afum|EBA27260.1 akaw|GAA89189.1 aluc|OJZ81642.1 anid|CBF75855.1 asyd|OJJ62592.1 ater|EAU37120.1 atub|OJI88540.1 aver|OJJ04434.1 awen|OJJ36101.1 afis|EAW15651.1 aluc|OJZ79951.1 aluc|OJZ80155.1 asyd|OJJ57969.1

Group4642: acar|OOF90453.1 acar|OOF90460.1 abra|OJJ71883.1 acla|EAW09638.1 afis|EAW21502.1 afla|EED55938.1 afum|EAL92521.1 agla|OJJ85665.1 akaw|GAA85033.1 aluc|OJZ86621.1 anig|EHA22045.1 asyd|OJJ61108.1 ater|EAU35036.1 atub|OJI83904.1 aver|OJJ00425.1 awen|OJJ39193.1 azon|OJJ51518.1

Group4643: acar|OOF92292.1 acar|OOF92333.1 abra|OJJ67509.1 acla|EAW06263.1 afis|EAW18369.1 afum|EAL93044.1 agla|OJJ84934.1 akaw|GAA86330.1 aluc|OJZ84855.1 anid|CBF70810.1 anig|EHA25088.1 aory|EIT77442.1 asyd|OJJ58407.1 atub|OJI80741.1 aver|OJJ01008.1 awen|OJJ31780.1 azon|OJJ42022.1

Group4644: acar|OOF92294.1 acar|OOF92335.1 abra|OJJ67506.1 acla|EAW06265.1 afis|EAW18371.1 afla|EED53035.1 afum|EAL93046.1 akaw|GAA86332.1 aluc|OJZ84857.1 anid|CBF70806.1 anig|EHA25090.1 aory|EIT77400.1 asyd|OJJ58409.1 ater|EAU32241.1 atub|OJI80739.1 aver|OJJ01011.1 azon|OJJ50444.1

Group4645: acar|OOF92315.1 acar|OOF92357.1 abra|OJJ67484.1 acla|EAW06290.1 afis|EAW18396.1 afla|EED53012.1 afum|EAL93072.1 agla|OJJ84967.1 akaw|GAA86355.1 aluc|OJZ84884.1 anid|CBF70760.1 anig|EHA25113.1 aory|EIT77413.1 asyd|OJJ58432.1 atub|OJI80716.1 aver|OJJ01033.1 azon|OJJ50471.1

Group4646: acar|OOF93666.1 acar|OOF93750.1 abra|OJJ66646.1 acla|EAW11789.1 afis|EAW19399.1 afum|EAL87095.1 agla|OJJ81110.1 akaw|GAA89599.1 aluc|OJZ80803.1 anid|CBF74334.1 anig|EHA27231.1 aory|EIT83139.1 asyd|OJJ51907.1 ater|EAU36125.1 atub|OJI87651.1 awen|OJJ36794.1 azon|OJJ43005.1

Group4647: acar|OOF93683.1 acar|OOF93768.1 abra|OJJ66668.1 acla|EAW11809.1 afis|EAW19419.1 afla|EED50376.1 afum|EAL87075.1 akaw|GAA89617.1 aluc|OJZ80779.1 anid|CBF74367.1 anig|EHA27250.1 aory|EIT83147.1 ater|EAU34725.1 atub|OJI87631.1 aver|OJJ05381.1 awen|OJJ36817.1 azon|OJJ42985.1

Group4648: acar|OOF93688.1 acar|OOF93773.1 abra|OJJ66674.1 acla|EAW11814.1 afis|EAW19424.1 afla|EED50382.1 afum|EAL87070.1 agla|OJJ81136.1 akaw|GAA89622.1 aluc|OJZ80774.1 anig|EHA27256.1 aory|EIT83125.1 asyd|OJJ57779.1 ater|EAU34728.1 atub|OJI87626.1 aver|OJJ05386.1 awen|OJJ36822.1

Group4649: acar|OOF93689.1 acar|OOF93774.1 abra|OJJ66676.1 acla|EAW11815.1 afis|EAW19426.1 afum|EAL87068.1 agla|OJJ81138.1 akaw|GAA89624.1 aluc|OJZ80772.1 anig|EHA27258.1 aory|EIT83128.1 asyd|OJJ57777.1 ater|EAU34730.1 atub|OJI87624.1 aver|OJJ05388.1 awen|OJJ36824.1 azon|OJJ42491.1

Group4650: acar|OOF93695.1 acar|OOF93780.1 abra|OJJ66686.1 acla|EAW11821.1 afis|EAW19432.1 afla|EED56637.1 agla|OJJ81144.1 akaw|GAA89630.1 aluc|OJZ80763.1 anig|EHA27264.1 aory|EIT79667.1 asyd|OJJ59390.1 atub|OJI87617.1 aver|OJJ02882.1 awen|OJJ36830.1 azon|OJJ42973.1 anid|CBF81378.1

Group4651: acar|OOF93698.1 acar|OOF93783.1 abra|OJJ66689.1 acla|EAW11824.1 afis|EAW19435.1 afla|EED56640.1 afum|EAL87060.1 agla|OJJ81147.1 akaw|GAA89633.1 aluc|OJZ80760.1 anig|EHA27267.1 aory|EIT79665.1 asyd|OJJ59394.1 ater|EAU34737.1 atub|OJI87614.1 aver|OJJ02878.1 azon|OJJ42970.1

Group4652: acar|OOF93704.1 acar|OOF93789.1 abra|OJJ66696.1 afla|EED56650.1 afum|EAL87053.1 agla|OJJ81156.1 akaw|GAA89640.1 aluc|OJZ80749.1 anid|CBF81397.1 anig|EHA27273.1 aory|EIT79652.1 asyd|OJJ59402.1 ater|EAU34744.1 atub|OJI87606.1 aver|OJJ02871.1 awen|OJJ36843.1 azon|OJJ42957.1

Group4653: acar|OOF93713.1 acar|OOF93799.1 abra|OJJ66711.1 acla|EAW11842.1 afis|EAW19453.1 afla|EED56661.1 afum|EAL87043.1 agla|OJJ81168.1 akaw|GAA89653.1 aluc|OJZ80736.1 anid|CBF81418.1 asyd|OJJ59413.1 ater|EAU34755.1 atub|OJI87593.1 aver|OJJ02860.1 awen|OJJ36854.1 azon|OJJ42946.1

Group4654: acar|OOF93722.1 acar|OOF93809.1 abra|OJJ66720.1 acla|EAW11851.1 afis|EAW19462.1 afla|EED56673.1 afum|EAL87034.1 agla|OJJ81179.1 akaw|GAA89662.1 aluc|OJZ80727.1 anid|CBF75493.1 asyd|OJJ59751.1 ater|EAU34765.1 atub|OJI87583.1 aver|OJJ02536.1 awen|OJJ36864.1 azon|OJJ42937.1

Group4655: acar|OOF94041.1 acar|OOF94111.1 abra|OJJ66400.1 afla|EED49553.1 akaw|GAA90268.1 aluc|OJZ83073.1 anig|EHA28137.1 aory|EIT82620.1 asyd|OJJ61454.1 atub|OJI87873.1 aver|OJJ00790.1 awen|OJJ39517.1 abra|OJJ69534.1 agla|OJJ79509.1 akaw|GAA88384.1 anig|EHA28392.1 acar|OOF92662.1

Group4656: acar|OOF94050.1 acar|OOF94120.1 abra|OJJ66395.1 acla|EAW12087.1 afla|EED49519.1 akaw|GAA90260.1 aluc|OJZ83080.1 anid|CBF73558.1 anig|EHA28143.1 aory|EIT82588.1 asyd|OJJ56699.1 atub|OJI87865.1 aver|OJJ06026.1 awen|OJJ40206.1 azon|OJJ47473.1 awen|OJJ35025.1 afis|EAW19730.1

Group4657: acar|OOF94052.1 acar|OOF94122.1 abra|OJJ66392.1 acla|EAW13709.1 afis|EAW19881.1 afla|EED46102.1 afum|EAL85017.1 akaw|GAA90258.1 aluc|OJZ83082.1 anid|CBF75188.1 anig|EHA28145.1 aory|EIT76369.1 asyd|OJJ59947.1 ater|EAU35603.1 atub|OJI87863.1 aver|OJJ02342.1 azon|OJJ51816.1

Group4658: acar|OOF94076.1 acar|OOF94146.1 abra|OJJ66026.1 acla|EAW07129.1 afis|EAW22139.1 anid|CBF89247.1 atub|OJI87440.1 awen|OJJ40945.1 azon|OJJ42435.1 abra|OJJ67016.1 afum|EAL91051.1 aver|OJJ03311.1 abra|OJJ67290.1 akaw|GAA86523.1 aluc|OJZ85069.1 anig|EHA25283.1 atub|OJI80529.1

Group4659: acar|OOF95088.1 acar|OOF95154.1 abra|OJJ74616.1 acla|EAW10766.1 afis|EAW24810.1 afla|EED47173.1 afum|EAL89453.2 agla|OJJ82905.1 akaw|GAA81990.1 aluc|OJZ92199.1 anig|EHA26758.1 aory|EIT79174.1 asyd|OJJ64383.1 atub|OJI86626.1 aver|OJI98479.1 awen|OJJ40394.1 azon|OJJ49247.1

Group4660: acar|OOF95105.1 acar|OOF95171.1 abra|OJJ74599.1 acla|EAW10780.1 afis|EAW24794.1 afla|EED46333.1 afum|EAL89436.1 agla|OJJ79801.1 akaw|GAA82009.1 aluc|OJZ92178.1 anig|EHA26775.1 aory|EIT81232.1 asyd|OJJ59471.1 ater|EAU36511.1 atub|OJI86606.1 awen|OJJ40379.1 aver|OJJ02803.1

Group4661: acar|OOF96237.1 acar|OOF96274.1 afum|EAL85171.1 afum|EAL87775.1 abra|OJJ71521.1 afis|EAW20050.1 afla|EED45330.1 agla|OJJ88910.1 akaw|GAA89396.1 aluc|OJZ86260.1 anid|CBF84802.1 anig|EHA21606.1 aory|EIT73757.1 ater|EAU38660.1 atub|OJI84283.1 awen|OJJ31808.1 azon|OJJ46314.1

Group4662: acar|OOF96905.1 acar|OOF96940.1 abra|OJJ70805.1 acla|EAW11119.1 afis|EAW15849.1 afum|EBA27349.1 agla|OJJ87260.1 akaw|GAA90120.1 aluc|OJZ84151.1 anid|CBF81170.1 anig|EHA19255.1 asyd|OJJ59289.1 ater|EAU31664.1 atub|OJI90523.1 aver|OJJ02986.1 awen|OJJ36779.1 azon|OJJ43020.1

Group4663: acar|OOF96910.1 acar|OOF96944.1 abra|OJJ70800.1 acla|EAW11124.1 afis|EAW15853.1 afla|EED56520.1 afum|EAL88489.1 agla|OJJ87255.1 akaw|GAA90116.1 aluc|OJZ84145.1 anid|CBF81179.1 asyd|OJJ59294.1 ater|EAU31667.1 atub|OJI90519.1 aver|OJJ02981.1 awen|OJJ36775.1 azon|OJJ47423.1

Group4664: acar|OOF96925.1 acar|OOF96960.1 abra|OJJ70784.1 acla|EAW11136.1 afis|EAW15868.1 afum|EAL88502.1 agla|OJJ87240.1 akaw|GAA90102.1 aluc|OJZ84130.1 anid|CBF81207.1 anig|EHA19238.1 asyd|OJJ59308.1 ater|EAU31683.1 atub|OJI90504.1 aver|OJJ02967.1 awen|OJJ29537.1 azon|OJJ47437.1

Group4665: acar|OOF96926.1 acar|OOF96961.1 abra|OJJ70782.1 afla|EED56506.1 agla|OJJ87239.1 akaw|GAA90101.1 aluc|OJZ84129.1 anid|CBF81209.1 anig|EHA19237.1 aory|EIT72792.1 asyd|OJJ59309.1 atub|OJI90503.1 aver|OJJ02966.1 awen|OJJ36761.1 azon|OJJ47438.1 acla|EAW11137.1 awen|OJJ29536.1

Group4666: acar|OOF97656.1 acar|OOF97703.1 abra|OJJ71501.1 acla|EAW10047.1 afla|EED44713.1 afum|EBA27399.1 agla|OJJ81159.1 akaw|GAA82519.1 aluc|OJZ87046.1 anig|EHA20319.1 aory|EIT83457.1 asyd|OJJ53008.1 ater|EAU33378.1 atub|OJI81589.1 aver|OJJ03835.1 awen|OJJ41279.1 azon|OJJ49502.1

Group4667: acar|OOF98479.1 acar|OOF98492.1 abra|OJJ78395.1 acla|EAW09137.1 afis|EAW22010.1 afla|EED46734.1 afum|EAL93025.1 agla|OJJ84088.1 akaw|GAA85636.1 aluc|OJZ91474.1 anig|EHA20136.1 asyd|OJJ61672.1 atub|OJI83467.1 awen|OJJ34305.1 azon|OJJ43332.1 anid|CBF82651.1 aver|OJJ00993.1

Group4668: acar|OOF99310.1 acar|OOF99311.1 acla|EAW09382.1 afis|EAW21753.1 afla|EED58025.1 afum|EAL92783.1 agla|OJJ84400.1 anid|CBF87161.1 aory|EIT79777.1 asyd|OJJ58846.1 ater|EAU38437.1 aver|OJJ01447.1 awen|OJJ34037.1 azon|OJJ45317.1 anid|CBF83691.1 asyd|OJJ60817.1 aver|OJJ00143.1

Group4669: acar|OOG00248.1 acar|OOG00266.1 abra|OJJ67542.1 acla|EAW13608.1 afis|EAW20002.1 afla|EED45812.1 afum|EAL84917.1 akaw|GAA88117.1 aluc|OJZ81390.1 anid|CBF78636.1 anig|EHA18683.1 aory|EIT75677.1 asyd|OJJ65124.1 ater|EAU37945.1 atub|OJI91595.1 aver|OJI99252.1 azon|OJJ47329.1

Group4670: afla|EED49436.1 afla|EED53000.1 aory|EIT77416.1 aory|EIT79505.1 abra|OJJ67468.1 acar|OOF92366.1 afis|EAW18409.1 afum|EAL93089.1 agla|OJJ84976.1 akaw|GAA86369.1 aluc|OJZ84898.1 anid|CBF70739.1 anig|EHA25125.1 asyd|OJJ58440.1 atub|OJI80700.1 aver|OJJ01040.1 awen|OJJ31740.1

Group4671: agla|OJJ81704.1 agla|OJJ85950.1 anig|EHA24273.1 anig|EHA24275.1 asyd|OJJ53801.1 asyd|OJJ63907.1 awen|OJJ37085.1 awen|OJJ39694.1 acla|EAW12912.1 afis|EAW17749.1 afla|EED55100.1 afum|EAL91563.1 anid|CBF80577.1 ater|EAU31857.1 aver|OJI97034.1 azon|OJJ44442.1 aory|EIT81664.1

Group4672: agla|OJJ84696.1 agla|OJJ88299.1 abra|OJJ65609.1 afla|EED54385.1 aory|EIT75847.1 abra|OJJ76926.1 acar|OOF91371.1 afla|EED46863.1 akaw|GAA87114.1 aluc|OJZ84324.1 anid|CBF74601.1 anig|EHA27659.1 aory|EIT72704.1 asyd|OJJ61216.1 atub|OJI89744.1 aver|OJJ00540.1 anig|EHA18441.1

Group4673: akaw|GAA82959.1 akaw|GAA85567.1 aluc|OJZ83501.1 aluc|OJZ87540.1 anig|EHA18316.1  
anig|EHA24335.1 atub|OJI81107.1 atub|OJI82395.1 abra|OJJ72993.1 acar|OOF96169.1 afla|EED49853.1  
agla|OJJ88852.1 anid|CBF73514.1 aory|EIT83415.1 asyd|OJJ61476.1 aver|OJJ00818.1 awen|OJJ31873.1

Group4674: akaw|GAA87889.1 akaw|GAA92892.1 asyd|OJJ52060.1 asyd|OJJ56757.1 abra|OJJ66170.1  
afla|EED52364.1 afum|EAL88779.1 agla|OJJ83554.1 anid|CBF75918.1 anig|EHA26110.1 asyd|OJJ52025.1  
azon|OJJ42071.1 acla|EAW11462.1 agla|OJJ81341.1 aluc|OJZ79991.1 acla|EAW11473.1 afis|EAW17037.1

Group4675: anid|CBF79042.1 anid|CBF89822.1 abra|OJJ74989.1 acar|OOF97331.1 acla|EAW08393.1  
afis|EAW23436.1 afla|EED57325.1 afum|EAL88026.1 akaw|GAA83445.1 aluc|OJZ92551.1 anig|EHA26426.1  
aory|EIT74067.1 asyd|OJJ62175.1 ater|EAU37490.1 atub|OJI86989.1 aver|OJI96284.1 azon|OJJ44145.1

Group4676: anid|CBF83201.1 anid|CBF86907.1 asyd|OJJ55555.1 asyd|OJJ58381.1 asyd|OJJ64611.1  
ater|EAU29240.1 ater|EAU35231.1 ater|EAU39358.1 aver|OJI98707.1 aver|OJJ06635.1 aver|OJJ06637.1  
azon|OJJ46028.1 afis|EAW17327.1 afla|EED54401.1 afum|EAL91164.1 agla|OJJ79869.1 aory|EIT75849.1

Group4677: asyd|OJJ53784.1 asyd|OJJ56688.1 abra|OJJ67840.1 acar|OOF92016.1 acla|EAW12885.1  
afis|EAW17792.1 afla|EED53092.1 agla|OJJ85532.1 akaw|GAA91846.1 aluc|OJZ82052.1 anid|CBF73574.1  
anig|EHA22207.1 aory|EIT74818.1 ater|EAU38815.1 atub|OJI84610.1 aver|OJJ06035.1 awen|OJJ35973.1

Group4678: asyd|OJJ54404.1 asyd|OJJ54753.1 asyd|OJJ64139.1 abra|OJJ65870.1 afla|EED51457.1  
agla|OJJ85481.1 akaw|GAA92276.1 aluc|OJZ90170.1 aory|EIT80565.1 ater|EAU33973.1 atub|OJI81598.1  
aver|OJI99607.1 awen|OJJ36266.1 asyd|OJJ58123.1 aver|OJJ08845.1 anid|CBF71445.1 asyd|OJJ56514.1

Group4679: asyd|OJJ54407.1 asyd|OJJ56037.1 abra|OJJ69897.1 acar|OOF93416.1 acla|EAW08923.1  
afis|EAW15470.1 agla|OJJ80150.1 akaw|GAA87753.1 aluc|OJZ85386.1 anid|CBF78232.1 anig|EHA25570.1  
aory|EIT72697.1 ater|EAU32658.1 atub|OJI80184.1 aver|OJJ04983.1 awen|OJJ38120.1 afum|EAL85852.1

Group4680: asyd|OJJ54582.1 asyd|OJJ59187.1 awen|OJJ38449.1 awen|OJJ38819.1 abra|OJJ67702.1  
akaw|GAA92941.1 abra|OJJ77957.1 afis|EAW20204.1 afla|EED45854.1 aluc|OJZ83508.1 anig|EHA19712.1  
aory|EIT75426.1 ater|EAU35724.1 atub|OJI91308.1 azon|OJJ45690.1 ater|EAU31781.1 agla|OJJ83813.1

Group4681: asyd|OJJ58287.1 asyd|OJJ62495.1 abra|OJJ68999.1 acar|OOF92711.1 afis|EAW18027.1  
afla|EED51868.1 afum|EAL91838.1 agla|OJJ85400.1 akaw|GAA90518.1 aluc|OJZ85983.1 anid|CBF80061.1  
anig|EHA24623.1 ater|EAU31541.1 atub|OJI79773.1 aver|OJJ02137.1 awen|OJJ41512.1 azon|OJJ48928.1

Group4682: ater|EAU30451.1 ater|EAU31200.1 abra|OJJ68616.1 acar|OOF92127.1 acla|EAW12608.1  
afis|EAW18076.1 afla|EED51468.1 afum|EAL91888.1 akaw|GAA92905.1 aluc|OJZ81938.1 anid|CBF86402.1  
anig|EHA22310.1 aory|EIT80658.1 asyd|OJJ64950.1 atub|OJI84491.1 aver|OJI99072.1 awen|OJJ41465.1

Group4683: ater|EAU30817.1 ater|EAU34589.1 abra|OJJ67750.1 acar|OOF90955.1 acla|EAW10989.1  
afis|EAW20871.1 afla|EED45553.1 afum|EAL84763.1 akaw|GAA92441.1 aluc|OJZ81579.1 anid|CBF82846.1  
anig|EHA25860.1 asyd|OJJ61591.1 atub|OJI88602.1 aver|OJJ00913.1 awen|OJJ34490.1 azon|OJJ51767.1

Group4684: atub|OJI81487.1 atub|OJI81722.1 abra|OJJ71387.1 acar|OOF97781.1 afis|EAW25058.1  
afum|EAL89726.1 agla|OJJ79169.1 akaw|GAA82607.1 aluc|OJZ87153.1 anig|EHA20412.1 aver|OJJ05909.1  
awen|OJJ33722.1 azon|OJJ46843.1 acar|OOF98188.1 aluc|OJZ90300.1 anig|EHA23788.1 akaw|GAA86066.1

Group4685: awen|OJJ30759.1 awen|OJJ31722.1 abra|OJJ67450.1 acar|OOF90340.1 acla|EAW06314.1  
afla|EED52985.1 agla|OJJ84993.1 akaw|GAA86380.1 aluc|OJZ84914.1 anid|CBF70692.1 anig|EHA25135.1  
aory|EIT78708.1 asyd|OJJ58465.1 ater|EAU29844.1 atub|OJI80684.1 aver|OJJ01064.1 azon|OJJ50485.1

Group4686: awen|OJJ30765.1 awen|OJJ31716.1 abra|OJJ67445.1 acar|OOF92382.1 acla|EAW06318.1  
afis|EAW18432.1 afum|EAL93113.1 agla|OJJ84998.1 akaw|GAA86384.1 aluc|OJZ84918.1 anid|CBF70027.1  
anig|EHA25138.1 asyd|OJJ58871.1 ater|EAU29848.1 atub|OJI80680.1 aver|OJJ01473.1 azon|OJJ50480.1

Group4687: awen|OJJ30766.1 awen|OJJ31715.1 abra|OJJ67444.1 acar|OOF92383.1 acla|EAW06319.1  
afis|EAW18433.1 afum|EAL93114.1 agla|OJJ84999.1 akaw|GAA86385.1 aluc|OJZ84920.1 anid|CBF70029.1  
anig|EHA25139.1 asyd|OJJ58870.1 ater|EAU29849.1 atub|OJI80679.1 aver|OJJ01472.1 azon|OJJ50479.1

Group4688: azon|OJJ42401.1 azon|OJJ48129.1 abra|OJJ68278.1 acar|OOG00615.1 afla|EED57500.1  
akaw|GAA85996.1 aluc|OJZ83693.1 anig|EHA19762.1 aory|EIT81886.1 asyd|OJJ62122.1 ater|EAU34294.1  
atub|OJI90065.1 aver|OJI96230.1 acar|OOF96457.1 aluc|OJZ91059.1 atub|OJI83055.1 azon|OJJ47352.1

Group4689: azon|OJJ47108.1 azon|OJJ47396.1 abra|OJJ67013.1 acar|OOF93607.1 acla|EAW15355.1  
afis|EAW20357.1 afum|EAL85474.1 agla|OJJ80638.1 akaw|GAA92160.1 aluc|OJZ85567.1 anig|EHA24951.1  
aory|EIT76052.1 asyd|OJJ64186.1 ater|EAU31045.1 atub|OJI79362.1 aver|OJI98263.1 awen|OJJ33014.1

Group4690: azon|OJJ50112.1 azon|OJJ50416.1 abra|OJJ68033.1 acar|OOF91810.1 acla|EAW06966.1  
afla|EED55046.1 afum|EAL86259.2 agla|OJJ83082.1 akaw|GAA90919.1 aluc|OJZ82907.1 anig|EHA21330.1  
aory|EIT81961.1 asyd|OJJ53715.1 ater|EAU36650.1 atub|OJI89133.1 aver|OJJ07841.1 awen|OJJ33892.1

Group4691: azon|OJJ50963.1 azon|OJJ51217.1 abra|OJJ67715.1 afis|EAW16634.1 anig|EHA27628.1 asyd|OJJ65143.1 aver|OJI99311.1 abra|OJJ68588.1 afis|EAW25637.1 afum|EBA27174.1 aver|OJJ02989.1 awen|OJJ33493.1 akaw|GAA85860.1 aluc|OJZ91219.1 ater|EAU36712.1 aver|OJJ06469.1 ater|EAU33968.1

Group4692: acla|EAW12782.1 awen|OJJ36316.1 acar|OOF94301.1 afis|EAW24051.1 afla|EED49757.1 afum|EAL87858.1 agla|OJJ80393.1 akaw|GAA87492.1 aluc|OJZ88032.1 anig|EHA17806.1 aory|EIT77642.1 asyd|OJJ56970.1 atub|OJI90638.1 aver|OJJ03318.1 afis|EAW23607.1 awen|OJJ41819.1 asyd|OJJ51929.1

Group4693: abra|OJJ65584.1 acar|OOF94381.1 acla|EAW15324.1 afis|EAW24551.1 afla|EED49772.1 afum|EAL91136.1 anid|CBF84508.1 aory|EIT77709.1 asyd|OJJ53518.1 ater|EAU38754.1 aver|OJJ08233.1 awen|OJJ37782.1 azon|OJJ42493.1 aver|OJJ07928.1 awen|OJJ31444.1 acla|EAW15019.1 afum|EAL86216.1

Group4694: abra|OJJ65640.1 afla|EED47428.1 aluc|OJZ91197.1 anid|CBF82230.1 aory|EIT81901.1 ater|EAU35410.1 awen|OJJ40835.1 abra|OJJ65888.1 acar|OOF94950.1 acla|EAW12250.1 agla|OJJ79071.1 akaw|GAA86016.1 aluc|OJZ90244.1 anig|EHA23739.1 asyd|OJJ57337.1 atub|OJI81672.1 aver|OJJ05825.1

Group4695: abra|OJJ65778.1 agla|OJJ79806.1 aluc|OJZ82947.1 atub|OJI89179.1 aver|OJJ07886.1 awen|OJJ35386.1 abra|OJJ69436.1 acla|EAW11436.1 afis|EAW23987.1 afla|EED52190.1 afum|EAL87416.1 aluc|OJZ82272.1 anid|CBF82043.1 asyd|OJJ54224.1 atub|OJI88167.1 aver|OJJ05177.1 afla|EED57914.1

Group4696: abra|OJJ65915.1 acar|OOF94966.1 afis|EAW19972.1 afla|EED50462.1 afum|EAL84938.1 agla|OJJ80064.1 akaw|GAA92317.1 aluc|OJZ90215.1 anid|CBF84460.1 anig|EHA23713.1 aory|EIT82029.1 asyd|OJJ53547.1 ater|EAU31470.1 atub|OJI81646.1 aver|OJJ08206.1 awen|OJJ36012.1 azon|OJJ46810.1

Group4697: abra|OJJ65924.1 acar|OOF94985.1 afis|EAW19706.1 afla|EED57047.1 afum|EAL86820.1 agla|OJJ78913.1 akaw|GAA92309.1 aluc|OJZ90207.1 anid|CBF90284.1 anig|EHA23704.1 aory|EIT82250.1 asyd|OJJ61919.1 ater|EAU32843.1 atub|OJI81636.1 aver|OJI96011.1 awen|OJJ29912.1 acla|EAW12063.1

Group4698: abra|OJJ65938.1 acar|OOF91905.1 acla|EAW12331.1 afis|EAW16891.1 afla|EED46396.1 afum|EAL86429.1 agla|OJJ79945.1 akaw|GAA92298.1 aluc|OJZ90195.1 anid|CBF78493.1 anig|EHA23694.1 aory|EIT72430.1 asyd|OJJ65325.1 ater|EAU30223.1 atub|OJI81622.1 aver|OJI99470.1 awen|OJJ29747.1

Group4699: abra|OJJ65941.1 acar|OOF95011.1 acla|EAW09018.1 afis|EAW19837.1 afla|EED47289.1 afum|EAL85104.1 akaw|GAA92294.1 aluc|OJZ90191.1 anid|CBF84686.1 anig|EHA23690.1 aory|EIT79198.1 asyd|OJJ53334.1 atub|OJI81618.1 aver|OJJ08249.1 aver|OJJ08410.1 acla|EAW13741.1 asyd|OJJ53496.1

Group4700: abra|OJJ65962.1 acar|OOF92912.1 acla|EAW13581.1 afis|EAW20020.1 afla|EED46028.1 afum|EAL84897.1 agla|OJJ88014.1 akaw|GAA90837.1 aluc|OJZ82996.1 anig|EHA21411.1 aory|EIT75634.1 asyd|OJJ53300.1 ater|EAU29382.1 atub|OJI89231.1 aver|OJJ08441.1 awen|OJJ30050.1 azon|OJJ43697.1

Group4701: abra|OJJ65966.1 acar|OOF92909.1 acla|EAW13585.1 afla|EED46023.1 afum|EAL84901.1 agla|OJJ87990.1 akaw|GAA90841.1 aluc|OJZ82992.1 anid|CBF84726.1 anig|EHA21406.1 aory|EIT75803.1 asyd|OJJ53306.1 ater|EAU29377.1 atub|OJI89226.1 aver|OJJ08435.1 awen|OJJ30034.1 azon|OJJ43683.1

Group4702: abra|OJJ65974.1 acar|OOF92898.1 acla|EAW13595.1 afis|EAW20009.1 afla|EED46015.1 afum|EAL84909.1 agla|OJJ87974.1 akaw|GAA90848.1 aluc|OJZ82985.1 anid|CBF84710.1 anig|EHA21399.1 aory|EIT75417.1 asyd|OJJ53323.1 ater|EAU29351.1 atub|OJI89219.1 aver|OJJ08420.1 awen|OJJ30022.1

Group4703: abra|OJJ65975.1 acar|OOF92897.1 acla|EAW13596.1 afis|EAW20008.1 afla|EED46014.1 afum|EAL84910.1 agla|OJJ87973.1 akaw|GAA90849.1 aluc|OJZ82984.1 anid|CBF84708.1 anig|EHA21398.1 aory|EIT75605.1 asyd|OJJ53322.1 ater|EAU29350.1 atub|OJI89218.1 aver|OJJ08421.1 awen|OJJ30021.1

Group4704: abra|OJJ65988.1 acar|OOF92882.1 afis|EAW19525.1 afla|EED49677.1 agla|OJJ87965.1 akaw|GAA90862.1 aluc|OJZ82971.1 anid|CBF78949.1 anig|EHA21387.1 aory|EIT80940.1 asyd|OJJ55654.1 ater|EAU29343.1 atub|OJI89204.1 aver|OJJ06738.1 awen|OJJ30015.1 azon|OJJ43645.1 anig|EHA21388.1

Group4705: abra|OJJ66002.1 acar|OOF92096.1 acla|EAW13639.1 afis|EAW19989.1 afla|EED45931.1 afum|EAL84926.1 agla|OJJ78858.1 akaw|GAA90874.1 aluc|OJZ82958.1 anid|CBF84689.1 anig|EHA21373.1 aory|EIT75732.1 asyd|OJJ53331.1 atub|OJI89190.1 aver|OJJ08413.1 awen|OJJ30007.1 azon|OJJ43636.1

Group4706: abra|OJJ66003.1 acar|OOF92095.1 acla|EAW13640.1 afis|EAW19990.1 afla|EED45930.1 afum|EAL84925.1 agla|OJJ79320.1 akaw|GAA90875.1 aluc|OJZ82957.1 anid|CBF82047.1 anig|EHA21372.1 aory|EIT75591.1 ater|EAU32162.1 atub|OJI89189.1 awen|OJJ30006.1 asyd|OJJ54230.1 aver|OJJ05183.1

Group4707: abra|OJJ66126.1 afis|EAW15452.1 afla|EED45675.1 anid|CBF89338.1 aory|EIT75361.1 abra|OJJ77946.1 akaw|GAA83717.1 aluc|OJZ91016.1 anid|CBF71846.1 asyd|OJJ59800.1 ater|EAU29638.1 atub|OJI83007.1 afum|EAL84194.2 anid|CBF80232.1 afis|EAW22090.1 aver|OJJ02490.1 azon|OJJ46524.1

Group4708: abra|OJJ66193.1 akaw|GAA89095.1 anig|EHA25697.1 atub|OJI88434.1 abra|OJJ77442.1 acla|EAW11799.1 afis|EAW19409.1 afla|EED54078.1 afum|EAL87085.1 agla|OJJ81123.1 anid|CBF74355.1 aory|EIT76033.1 asyd|OJJ57792.1 ater|EAU35399.1 aver|OJJ05372.1 awen|OJJ36805.1 ater|EAU34716.1



Group4709: abra|OJJ66245.1 acar|OOF91971.1 acla|EAW08549.1 afis|EAW23590.1 afla|EED51817.1 afum|EAL87876.1 agla|OJJ79051.1 akaw|GAA89046.1 aluc|OJZ80550.1 anid|CBF74981.1 anig|EHA25646.1 aory|EIT81750.1 asyd|OJJ54563.1 ater|EAU37769.1 atub|OJI88381.1 aver|OJJ07593.1 awen|OJJ35894.1

Group4710: abra|OJJ66282.1 acla|EAW10347.1 afis|EAW20261.1 anig|EHA23662.1 ater|EAU32983.1 atub|OJI89941.1 abra|OJJ70126.1 afla|EED49622.1 akaw|GAA86644.1 aluc|OJZ85201.1 anig|EHA25407.1 asyd|OJJ54176.1 atub|OJI80400.1 aver|OJJ08563.1 azon|OJJ42583.1 afla|EED54705.1 aory|EIT78877.1

Group4711: abra|OJJ66374.1 acla|EAW12222.1 afis|EAW20296.1 afla|EED51865.1 agla|OJJ84731.1 akaw|GAA90242.1 aluc|OJZ83098.1 anig|EHA28162.1 aory|EIT81762.1 asyd|OJJ64162.1 ater|EAU31056.1 atub|OJI87838.1 aver|OJI98239.1 awen|OJJ35379.1 anig|EHA25212.1 aluc|OJZ87036.1 atub|OJI83479.1

Group4712: abra|OJJ66475.1 afla|EED46093.1 akaw|GAA92461.1 aluc|OJZ81556.1 anid|CBF82161.1 anig|EHA25878.1 aory|EIT74924.1 asyd|OJJ54339.1 ater|EAU37565.1 atub|OJI88629.1 aver|OJJ05291.1 awen|OJJ39935.1 aory|EIT76371.1 afla|EED53488.1 asyd|OJJ56980.1 ater|EAU30836.1 aver|OJJ03307.1

Group4713: abra|OJJ66482.1 acar|OOF90959.1 acla|EAW10987.1 afis|EAW20873.1 afla|EED45555.1 afum|EAL84761.1 agla|OJJ83980.1 akaw|GAA92467.1 aluc|OJZ81552.1 anid|CBF82849.1 anig|EHA25882.1 aory|EIT75793.1 asyd|OJJ61593.1 atub|OJI88633.1 aver|OJJ00915.1 awen|OJJ34487.1 azon|OJJ51764.1

Group4714: abra|OJJ66487.1 acar|OOF90963.1 acla|EAW10982.1 afis|EAW20877.1 afla|EED45560.1 afum|EAL84755.1 agla|OJJ83987.1 akaw|GAA92470.1 aluc|OJZ81548.1 anid|CBF82859.1 anig|EHA25887.1 asyd|OJJ61596.1 ater|EAU30812.1 atub|OJI88636.1 aver|OJJ00920.1 awen|OJJ34482.1 azon|OJJ51759.1

Group4715: abra|OJJ66520.1 acar|OOF90974.1 acla|EAW10970.1 afis|EAW20890.1 afla|EED45585.1 afum|EAL84743.1 agla|OJJ83998.1 akaw|GAA91192.1 aluc|OJZ81511.1 anig|EHA25909.1 aory|EIT75393.1 asyd|OJJ61611.1 ater|EAU30829.1 atub|OJI88660.1 aver|OJJ00934.1 awen|OJJ34457.1 azon|OJJ51744.1

Group4716: abra|OJJ66521.1 acar|OOF90975.1 acla|EAW10969.1 afis|EAW20891.1 afla|EED45586.1 afum|EAL84742.1 agla|OJJ83999.1 akaw|GAA91191.1 aluc|OJZ81512.1 anig|EHA25910.1 aory|EIT75451.1 asyd|OJJ61612.1 ater|EAU30830.1 atub|OJI88661.1 aver|OJJ00935.1 awen|OJJ34456.1 azon|OJJ51743.1

Group4717: abra|OJJ66526.1 acar|OOF90979.1 acla|EAW10964.1 afis|EAW20896.1 afla|EED50245.1 afum|EAL84737.2 agla|OJJ84003.1 akaw|GAA91187.1 aluc|OJZ81516.1 anid|CBF82464.1 anig|EHA25914.1 asyd|OJJ54117.1 ater|EAU38530.1 atub|OJI88665.1 aver|OJJ08619.1 awen|OJJ34452.1 azon|OJJ51740.1

Group4718: abra|OJJ66547.1 acar|OOF89822.1 acla|EAW10944.1 afis|EAW20914.1 afla|EED50271.1 afum|EAL84720.1 agla|OJJ84038.1 akaw|GAA91172.1 aluc|OJZ81500.1 anid|CBF82481.1 anig|EHA25930.1 aory|EIT77321.1 asyd|OJJ54102.1 atub|OJI88681.1 aver|OJJ08633.1 awen|OJJ34407.1 azon|OJJ48149.1

Group4719: asyd|OJJ54108.1 abra|OJJ66555.1 acar|OOF91000.1 acla|EAW10939.1 afis|EAW20922.1 afla|EED50276.1 afum|EAL84712.1 agla|OJJ83967.1 akaw|GAA91160.1 aluc|OJZ81488.1 anid|CBF82447.1 aory|EIT77271.1 ater|EAU38569.1 atub|OJI88692.1 aver|OJJ08626.1 awen|OJJ34398.1 azon|OJJ48134.1

Group4720: abra|OJJ66561.1 acar|OOF91002.1 acla|EAW10936.1 afis|EAW20925.1 afla|EED50280.1 afum|EAL84709.1 agla|OJJ83962.1 akaw|GAA91156.1 aluc|OJZ81484.1 anid|CBF82499.1 anig|EHA25943.1 aory|EIT77329.1 asyd|OJJ54089.1 atub|OJI88697.1 aver|OJJ08649.1 awen|OJJ34393.1 azon|OJJ48124.1

Group4721: abra|OJJ66567.1 acar|OOF91008.1 acla|EAW10928.1 afis|EAW20933.1 afla|EED50287.1 afum|EAL84701.1 akaw|GAA91150.1 aluc|OJZ81477.1 anid|CBF82506.1 anig|EHA25949.1 aory|EIT77334.1 asyd|OJJ54079.1 ater|EAU38578.1 atub|OJI88702.1 aver|OJJ08659.1 awen|OJJ34385.1 azon|OJJ48116.1

Group4722: abra|OJJ66575.1 acar|OOF91016.1 acla|EAW10915.1 afis|EAW20943.1 afla|EED50297.1 afum|EAL84691.2 agla|OJJ83944.1 akaw|GAA91143.1 aluc|OJZ81469.1 anid|CBF82538.1 anig|EHA25958.1 asyd|OJJ54067.1 ater|EAU38587.1 atub|OJI88709.1 aver|OJJ08675.1 awen|OJJ34373.1 azon|OJJ48109.1

Group4723: abra|OJJ66586.1 acar|OOF91023.1 acla|EAW10905.1 afis|EAW20953.1 afla|EED50309.1 afum|EAL84681.2 agla|OJJ83927.1 akaw|GAA91131.1 aluc|OJZ81460.1 anid|CBF82556.1 anig|EHA25969.1 asyd|OJJ54057.1 ater|EAU38604.1 atub|OJI88719.1 aver|OJJ08684.1 awen|OJJ34363.1 azon|OJJ48099.1

Group4724: abra|OJJ66599.1 acla|EAW10893.1 afis|EAW20965.1 afla|EED50319.1 afum|EAL84668.1 agla|OJJ84042.1 akaw|GAA91120.1 aluc|OJZ81448.1 anid|CBF82576.1 anig|EHA25978.1 aory|EIT77287.1 asyd|OJJ54044.1 ater|EAU38615.1 atub|OJI88731.1 aver|OJJ08698.1 awen|OJJ34350.1 azon|OJJ48087.1

Group4725: abra|OJJ66611.1 acar|OOF91037.1 acla|EAW10885.1 afis|EAW20973.1 afla|EED50328.1 afum|EAL84660.1 agla|OJJ84051.1 akaw|GAA91112.1 aluc|OJZ81438.1 anid|CBF82591.1 anig|EHA25986.1 asyd|OJJ54034.1 ater|EAU38623.1 atub|OJI88743.1 aver|OJJ08706.1 awen|OJJ34340.1 azon|OJJ48080.1

Group4726: abra|OJJ66614.1 acla|EAW10882.1 afis|EAW20976.1 afla|EED50331.1 afum|EAL84657.1 agla|OJJ84054.1 akaw|GAA91109.1 aluc|OJZ81435.1 anid|CBF82596.1 anig|EHA25989.1 aory|EIT77310.1 asyd|OJJ54031.1 ater|EAU38626.1 atub|OJI88746.1 aver|OJJ08709.1 awen|OJJ34336.1 azon|OJJ48077.1

Group4727: abra|OJJ66618.1 acar|OOF91041.1 acla|EAW10879.1 afis|EAW20979.1 afla|EED50334.1 afum|EAL84654.1 agla|OJJ84056.1 akaw|GAA91107.1 aluc|OJZ81431.1 anid|CBF82600.1 anig|EHA25991.1 aory|EIT77351.1 asyd|OJJ54029.1 atub|OJI88749.1 aver|OJJ08711.1 awen|OJJ34333.1 azon|OJJ48075.1

Group4728: abra|OJJ66620.1 acar|OOF91043.1 acla|EAW10877.1 afis|EAW20981.1 afla|EED50336.1 afum|EAL84649.2 agla|OJJ84058.1 akaw|GAA91105.1 aluc|OJZ81429.1 anid|CBF82602.1 anig|EHA25993.1 aory|EIT77328.1 asyd|OJJ54028.1 ater|EAU38629.1 atub|OJI88751.1 aver|OJJ08712.1 awen|OJJ34331.1

Group4729: abra|OJJ66625.1 acar|OOF91049.1 acla|EAW10871.1 afis|EAW20987.1 afla|EED50342.1 afum|EAL84643.1 agla|OJJ84066.1 akaw|GAA91100.1 aluc|OJZ81423.1 anid|CBF82609.1 anig|EHA25998.1 aory|EIT77368.1 asyd|OJJ54024.1 ater|EAU38636.1 atub|OJI88758.1 aver|OJJ08716.1 awen|OJJ34323.1

Group4730: abra|OJJ66659.1 acla|EAW11801.1 afis|EAW19411.1 afla|EED50366.1 afum|EAL87083.1 agla|OJJ81125.1 akaw|GAA89609.1 aluc|OJZ80789.1 anid|CBF74351.1 anig|EHA27241.1 aory|EIT83143.1 asyd|OJJ57790.1 ater|EAU34717.1 atub|OJI87640.1 aver|OJJ05374.1 awen|OJJ36807.1 azon|OJJ42993.1

Group4731: abra|OJJ66692.1 acla|EAW11827.1 afis|EAW19439.1 afla|EED56646.1 afum|EAL87057.1 agla|OJJ81151.1 akaw|GAA89636.1 aluc|OJZ80754.1 anid|CBF81391.1 anig|EHA27270.1 aory|EIT79642.1 asyd|OJJ59398.1 ater|EAU34740.1 atub|OJI87610.1 aver|OJJ02874.1 awen|OJJ36836.1 azon|OJJ42962.1

Group4732: abra|OJJ66705.1 acla|EAW11836.1 afis|EAW19447.1 afla|EED56655.1 afum|EAL87048.1 agla|OJJ81162.1 akaw|GAA89647.1 aluc|OJZ80742.1 anid|CBF81407.1 anig|EHA27280.1 aory|EIT79638.1 asyd|OJJ59407.1 ater|EAU34749.1 atub|OJI87599.1 aver|OJJ02866.1 awen|OJJ36848.1 azon|OJJ42952.1

Group4733: abra|OJJ66707.1 acla|EAW11838.1 afis|EAW19449.1 afla|EED56657.1 afum|EAL87047.1 akaw|GAA89649.1 aluc|OJZ80740.1 anid|CBF81410.1 anig|EHA27282.1 aory|EIT79686.1 asyd|OJJ59409.1 ater|EAU34751.1 atub|OJI87597.1 aver|OJJ02864.1 awen|OJJ36850.1 azon|OJJ42950.1 agla|OJJ81164.1

Group4734: abra|OJJ66724.1 acar|OOF93812.1 acla|EAW11854.1 afis|EAW19465.1 afla|EED56676.1 afum|EAL87031.2 agla|OJJ81183.1 akaw|GAA89665.1 aluc|OJZ80724.1 anid|CBF75488.1 anig|EHA27296.1 asyd|OJJ59755.1 ater|EAU34775.1 atub|OJI87580.1 aver|OJJ02533.1 awen|OJJ36868.1 azon|OJJ42934.1

Group4735: abra|OJJ66756.1 acar|OOF93837.1 acla|EAW11882.1 afis|EAW19493.1 afla|EED56712.1 afum|EAL87001.1 agla|OJJ81223.1 akaw|GAA89690.1 aluc|OJZ80695.1 anid|CBF75448.1 anig|EHA27321.1 aory|EIT73873.1 asyd|OJJ59776.1 atub|OJI87554.1 aver|OJJ02510.1 awen|OJJ36909.1 azon|OJJ42906.1

Group4736: abra|OJJ66763.1 acar|OOF93844.1 acla|EAW11889.1 afis|EAW19501.1 afla|EED56721.1 afum|EAL86992.2 agla|OJJ81672.1 akaw|GAA89699.1 aluc|OJZ80686.1 anid|CBF75440.1 anig|EHA27328.1 asyd|OJJ59782.1 ater|EAU34816.1 atub|OJI87544.1 aver|OJJ02506.1 awen|OJJ36916.1 azon|OJJ42901.1

Group4737: abra|OJJ66766.1 acar|OOF93847.1 acla|EAW11892.1 afis|EAW19503.1 afla|EED56726.1 afum|EAL86990.1 akaw|GAA89703.1 aluc|OJZ80681.1 anid|CBF75427.1 anig|EHA27331.1 aory|EIT73853.1 asyd|OJJ59788.1 ater|EAU34818.1 atub|OJI87540.1 aver|OJJ02500.1 awen|OJJ36922.1 azon|OJJ43879.1

Group4738: abra|OJJ66797.1 acar|OOF93875.1 acla|EAW14976.1 afis|EAW24501.1 afla|EED45009.1 afum|EAL86171.1 akaw|GAA86862.1 aluc|OJZ89986.1 anid|CBF82363.1 anig|EHA27357.1 aory|EIT73712.1 asyd|OJJ53691.1 ater|EAU36993.1 atub|OJI84824.1 aver|OJJ03933.1 awen|OJJ33356.1 azon|OJJ42743.1

Group4739: abra|OJJ66827.1 acar|OOF91605.1 acla|EAW14410.1 afis|EAW19118.1 afla|EED54296.1 afum|EAL93850.1 agla|OJJ80433.1 akaw|GAA90463.1 aluc|OJZ85760.1 anid|CBF79726.1 anig|EHA24796.1 aory|EIT76076.1 asyd|OJJ58074.1 atub|OJI79545.1 aver|OJJ04333.1 awen|OJJ37449.1 azon|OJJ51126.1

Group4740: abra|OJJ66837.1 acar|OOF91615.1 acla|EAW14421.1 afis|EAW19128.1 afla|EED54286.1 afum|EAL93860.1 agla|OJJ88598.1 akaw|GAA90474.1 aluc|OJZ85750.1 anid|CBF79741.1 anig|EHA24806.1 aory|EIT76040.1 asyd|OJJ58085.1 ater|EAU37395.1 aver|OJJ04323.1 awen|OJJ37461.1 azon|OJJ51139.1

Group4741: abra|OJJ66867.1 acar|OOF91645.1 acla|EAW14443.1 afis|EAW19151.1 afla|EED54254.1 afum|EAL93882.1 agla|OJJ88571.1 akaw|GAA91541.1 aluc|OJZ85715.1 anid|CBF86303.1 anig|EHA24829.1 aory|EIT76113.1 asyd|OJJ65007.1 atub|OJI79505.1 aver|OJI99126.1 awen|OJJ37504.1 azon|OJJ51169.1

Group4742: abra|OJJ66868.1 acar|OOF91644.1 acla|EAW14444.1 afis|EAW19152.1 afla|EED54253.1 afum|EAL93883.1 agla|OJJ88570.1 akaw|GAA91540.1 aluc|OJZ85714.1 anid|CBF86301.1 anig|EHA24830.1 aory|EIT76066.1 asyd|OJJ65008.1 atub|OJI79504.1 aver|OJI99127.1 awen|OJJ37505.1 azon|OJJ51171.1

Group4743: abra|OJJ66882.1 acar|OOF91656.1 acla|EAW14456.1 afis|EAW19164.1 afla|EED54233.1 afum|EAL93894.1 agla|OJJ88560.1 akaw|GAA91528.1 aluc|OJZ85701.1 anig|EHA24842.1 aory|EIT75922.1 asyd|OJJ65019.1 ater|EAU37309.1 atub|OJI79491.1 aver|OJI99137.1 awen|OJJ37517.1 azon|OJJ51184.1

Group4744: abra|OJJ66892.1 acla|EAW14464.1 afis|EAW19172.1 afla|EED54223.1 afum|EAL93902.1 agla|OJJ88552.1 akaw|GAA91520.1 aluc|OJZ85690.1 anid|CBF86268.1 anig|EHA24851.1 aory|EIT76131.1 asyd|OJJ65027.1 ater|EAU37301.1 atub|OJI79480.1 aver|OJI99146.1 awen|OJJ37525.1 azon|OJJ51191.1

Group4745: abra|OJJ66901.1 acla|EAW14472.1 afis|EAW19181.1 afla|EED54214.1 afum|EAL93911.1  
agla|OJJ88542.1 akaw|GAA91511.1 aluc|OJZ85681.1 anid|CBF86255.1 anig|EHA24860.1 aory|EIT76103.1  
asyd|OJJ65037.1 ater|EAU37292.1 atub|OJI79471.1 aver|OJI99156.1 awen|OJJ37535.1 azon|OJJ51201.1

Group4746: abra|OJJ66922.1 acar|OOF91689.1 acla|EAW14488.1 afis|EAW19202.1 afla|EED47710.1  
afum|EAL93932.1 agla|OJJ88510.1 akaw|GAA91497.1 aluc|OJZ85658.1 anid|CBF78552.1 anig|EHA24875.1  
asyd|OJJ65058.1 ater|EAU37278.1 atub|OJI79450.1 aver|OJI99183.1 awen|OJJ37555.1 azon|OJJ51216.1

Group4747: abra|OJJ66925.1 acar|OOF91693.1 acla|EAW14491.1 afis|EAW19205.1 afla|EED47707.1  
afum|EAL93935.1 agla|OJJ88506.1 akaw|GAA91492.1 aluc|OJZ85653.1 anid|CBF78559.1 anig|EHA24879.1  
aory|EIT80229.1 asyd|OJJ65062.1 ater|EAU37267.1 atub|OJI79445.1 aver|OJI99186.1 awen|OJJ37558.1

Group4748: abra|OJJ66941.1 acar|OOF91707.1 acla|EAW14499.1 afis|EAW19213.1 afla|EED47687.1  
afum|EAL93946.1 agla|OJJ88483.1 akaw|GAA91480.1 aluc|OJZ85641.1 anid|CBF78587.1 anig|EHA24893.1  
aory|EIT80252.1 asyd|OJJ65082.1 atub|OJI79432.1 aver|OJI99207.1 awen|OJJ37570.1 azon|OJJ51230.1

Group4749: abra|OJJ66943.1 acar|OOF91709.1 acla|EAW14502.1 afis|EAW19216.1 afla|EED47684.1  
afum|EAL93949.1 agla|OJJ88481.1 akaw|GAA91477.1 aluc|OJZ85639.1 anid|CBF78593.1 anig|EHA24895.1  
asyd|OJJ65085.1 ater|EAU37252.1 atub|OJI79430.1 aver|OJI99210.1 awen|OJJ37573.1 azon|OJJ51232.1

Group4750: acla|EAW15049.1 afis|EAW24612.1 afla|EED56125.1 afum|EAL86242.1 aory|EIT75528.1  
asyd|OJJ61495.1 ater|EAU36605.1 aver|OJJ07466.1 awen|OJJ35562.1 acar|OOF93879.1 akaw|GAA86866.1  
aluc|OJZ89989.1 anig|EHA27359.1 atub|OJI84820.1 afis|EAW22020.1 afla|EED45483.1 awen|OJJ30949.1

Group4751: ater|EAU37911.1 abra|OJJ76343.1 acar|OOF99594.1 acla|EAW14072.1 afis|EAW18779.1  
afla|EED50738.1 afum|EAL93511.1 agla|OJJ80499.1 akaw|GAA82270.1 aluc|OJZ91870.1 anid|CBF69736.1  
aory|EIT78057.1 asyd|OJJ58932.1 atub|OJI86321.1 aver|OJJ01528.1 awen|OJJ32350.1 azon|OJJ47115.1

Group4752: abra|OJJ67071.1 acla|EAW06987.1 afis|EAW16601.1 afla|EED45020.1 afum|EAL89197.1  
agla|OJJ82651.1 akaw|GAA91084.1 aluc|OJZ87901.1 anid|CBF84000.1 anig|EHA20197.1 aory|EIT73543.1  
asyd|OJJ64729.1 ater|EAU36681.1 atub|OJI80750.1 aver|OJI98833.1 awen|OJJ40205.1 azon|OJJ49072.1

Group4753: abra|OJJ67141.1 acar|OOF98415.1 afis|EAW15396.1 afla|EED47554.1 agla|OJJ83078.1  
akaw|GAA91028.1 aluc|OJZ87831.1 anid|CBF80436.1 anig|EHA20310.1 aory|EIT74522.1 asyd|OJJ54780.1  
ater|EAU29457.1 atub|OJI80810.1 aver|OJJ07385.1 awen|OJJ38130.1 agla|OJJ86276.1 aver|OJJ05913.1

Group4754: abra|OJJ67165.1 acar|OOF98396.1 acla|EAW14563.1 afis|EAW19276.1 afum|EAL94002.1  
agla|OJJ88397.1 akaw|GAA91009.1 aluc|OJZ87810.1 anid|CBF80662.1 anig|EHA20292.1 aory|EIT80262.1  
asyd|OJJ54608.1 ater|EAU38851.1 atub|OJI80835.1 aver|OJJ07548.1 awen|OJJ37636.1 azon|OJJ44884.1

Group4755: abra|OJJ67166.1 acar|OOF98395.1 acla|EAW14562.1 afis|EAW19275.1 afum|EAL94001.1  
agla|OJJ88398.1 akaw|GAA91008.1 aluc|OJZ87809.1 anid|CBF78749.1 anig|EHA20291.1 aory|EIT80174.1  
asyd|OJJ65226.1 ater|EAU29489.1 atub|OJI80836.1 aver|OJI99376.1 awen|OJJ37635.1 azon|OJJ44885.1

Group4756: abra|OJJ67170.1 acar|OOF98393.1 acla|EAW14559.1 afis|EAW19272.1 afla|EED47604.1  
afum|EAL93998.1 agla|OJJ88411.1 akaw|GAA91004.1 aluc|OJZ87805.1 anid|CBF78725.1 anig|EHA20287.1  
aory|EIT80192.1 asyd|OJJ65224.1 ater|EAU29492.1 atub|OJI80840.1 aver|OJI99373.1 awen|OJJ37633.1

Group4757: abra|OJJ67184.1 acla|EAW14539.1 afis|EAW19257.1 afla|EED47619.1 afum|EAL93984.1  
agla|OJJ88438.1 akaw|GAA90992.1 aluc|OJZ87791.1 anid|CBF78675.1 anig|EHA20272.1 aory|EIT80266.1  
asyd|OJJ65207.1 ater|EAU29518.1 atub|OJI80856.1 aver|OJI99356.1 awen|OJJ37618.1 azon|OJJ47007.1

Group4758: abra|OJJ67185.1 acar|OOF98378.1 acla|EAW14538.1 afis|EAW19254.1 afla|EED47620.1  
afum|EAL93983.1 agla|OJJ88441.1 akaw|GAA90991.1 aluc|OJZ87789.1 anid|CBF78673.1 anig|EHA20271.1  
asyd|OJJ65206.1 ater|EAU29513.1 atub|OJI80857.1 aver|OJI99355.1 awen|OJJ37617.1 azon|OJJ47006.1

Group4759: abra|OJJ67194.1 acar|OOF98370.1 acla|EAW14530.1 afis|EAW19248.1 afla|EED47630.1  
afum|EAL93977.1 agla|OJJ88449.1 akaw|GAA90984.1 aluc|OJZ87781.1 anid|CBF78660.1 aory|EIT80194.1  
asyd|OJJ65198.1 ater|EAU29502.1 atub|OJI80866.1 aver|OJI99347.1 awen|OJJ37605.1 azon|OJJ51258.1

Group4760: abra|OJJ67196.1 acar|OOF98368.1 acla|EAW14528.1 afis|EAW19246.1 afla|EED47632.1  
afum|EAL93975.1 agla|OJJ88451.1 akaw|GAA90982.1 aluc|OJZ87779.1 anid|CBF78656.1 anig|EHA20261.1  
aory|EIT80195.1 asyd|OJJ65196.1 atub|OJI80868.1 aver|OJI99345.1 awen|OJJ37603.1 azon|OJJ51256.1

Group4761: abra|OJJ67198.1 acar|OOF98367.1 acla|EAW14527.1 afis|EAW19245.1 afum|EAL93974.1  
agla|OJJ88452.1 akaw|GAA90981.1 aluc|OJZ87776.1 anid|CBF85414.1 anig|EHA20260.1 aory|EIT80249.1  
asyd|OJJ64070.1 ater|EAU36216.1 atub|OJI80869.1 aver|OJI98157.1 awen|OJJ37602.1 azon|OJJ50356.1

Group4762: abra|OJJ67214.1 acar|OOF98344.1 acla|EAW14514.1 afis|EAW19232.1 afla|EED47656.1  
afum|EAL93961.1 agla|OJJ88474.1 akaw|GAA90963.1 aluc|OJZ87759.1 anid|CBF78621.1 anig|EHA20244.1  
asyd|OJJ65162.1 ater|EAU37231.1 atub|OJI80885.1 aver|OJI99313.1 awen|OJJ37589.1 azon|OJJ51243.1

Group4763: agla|OJJ81007.1 abra|OJJ73670.1 acla|EAW07584.1 afis|EAW22610.1 afla|EED49808.1  
afum|EAL90588.1 akaw|GAA88487.1 aluc|OJZ88383.1 anid|CBF88276.1 anig|EHA18110.1 aory|EIT77703.1  
asyd|OJJ63682.1 ater|EAU39094.1 atub|OJI90977.1 awen|OJJ35238.1 azon|OJJ49869.1 aver|OJI97256.1

Group4764: abra|OJJ67253.1 acar|OOF98308.1 acla|EAW10399.1 afis|EAW25178.1 afla|EED53636.1  
afum|EAL89852.1 agla|OJJ81059.1 akaw|GAA91670.1 aluc|OJZ87725.1 anid|CBF85243.1 aory|EIT75074.1  
asyd|OJJ62971.1 ater|EAU34337.1 atub|OJI80918.1 aver|OJI97996.1 awen|OJJ33660.1 azon|OJJ42611.1

Group4765: abra|OJJ67256.1 acar|OOF98307.1 acla|EAW10397.1 afis|EAW25180.1 afla|EED48197.1  
afum|EAL89854.1 agla|OJJ84746.1 akaw|GAA91671.1 aluc|OJZ87723.1 anig|EHA20217.1 aory|EIT74879.1  
asyd|OJJ62969.1 atub|OJI80919.1 aver|OJI97998.1 azon|OJJ47985.1 aluc|OJZ87724.1 aory|EIT72909.1

Group4766: abra|OJJ67270.1 acar|OOF98295.1 acla|EAW10415.1 afis|EAW25154.1 afla|EED55279.1  
afum|EAL89829.2 akaw|GAA91685.1 aluc|OJZ87709.1 anid|CBF85640.1 anig|EHA20891.1 aory|EIT83616.1  
asyd|OJJ64240.1 ater|EAU39433.1 atub|OJI80933.1 aver|OJI98333.1 awen|OJJ40784.1 azon|OJJ46869.1

Group4767: abra|OJJ67317.1 acar|OOF89802.1 acla|EAW06419.1 afis|EAW18523.1 afum|EAL93218.1  
agla|OJJ85135.1 akaw|GAA86501.1 aluc|OJZ85043.1 anid|CBF70217.1 anig|EHA25261.1 aory|EIT78635.1  
asyd|OJJ58776.1 ater|EAU30045.1 atub|OJI80554.1 aver|OJJ01385.1 awen|OJJ31075.1 azon|OJJ50584.1

Group4768: abra|OJJ67318.1 acar|OOF92497.1 acla|EAW06418.1 afis|EAW18522.1 afum|EAL93217.1  
agla|OJJ85134.1 akaw|GAA86500.1 aluc|OJZ85042.1 anid|CBF70221.1 anig|EHA25260.1 aory|EIT78625.1  
asyd|OJJ58775.1 ater|EAU30046.1 atub|OJI80555.1 aver|OJJ01384.1 awen|OJJ31074.1 azon|OJJ50583.1

Group4769: abra|OJJ67348.1 acar|OOF92467.1 acla|EAW06388.1 afis|EAW18494.1 afla|EED52910.1  
afum|EAL93184.2 agla|OJJ85089.1 akaw|GAA86470.1 aluc|OJZ85011.1 anid|CBF70166.1 anig|EHA25232.1  
asyd|OJJ58798.1 ater|EAU29920.1 atub|OJI80586.1 aver|OJJ01402.1 awen|OJJ31047.1 azon|OJJ50558.1

Group4770: abra|OJJ67349.1 acla|EAW06387.1 afis|EAW18493.1 afla|EED52911.1 afum|EAL93183.1  
agla|OJJ85088.1 akaw|GAA86469.1 aluc|OJZ85010.1 anid|CBF70164.1 anig|EHA25231.1 aory|EIT78601.1  
asyd|OJJ58799.1 ater|EAU29919.1 atub|OJI80587.1 aver|OJJ01403.1 awen|OJJ31046.1 azon|OJJ50557.1

Group4771: abra|OJJ67361.1 acar|OOF92461.1 acla|EAW06382.1 afis|EAW18488.1 afla|EED52919.1  
afum|EAL93178.1 agla|OJJ85084.1 akaw|GAA86459.1 aluc|OJZ85002.1 anid|CBF70153.1 anig|EHA25219.1  
aory|EIT78648.1 asyd|OJJ58805.1 ater|EAU29913.1 atub|OJI80597.1 aver|OJJ01408.1 awen|OJJ31042.1

Group4772: abra|OJJ67384.1 acar|OOF92429.1 acla|EAW06375.1 afis|EAW18481.1 afla|EED52928.1  
afum|EAL93170.1 agla|OJJ85064.1 akaw|GAA86440.1 aluc|OJZ84982.1 anig|EHA25195.1 aory|EIT78719.1  
asyd|OJJ58811.1 ater|EAU29904.1 atub|OJI80619.1 aver|OJJ01414.1 awen|OJJ31039.1 azon|OJJ50546.1

Group4773: abra|OJJ67390.1 acla|EAW06371.1 afis|EAW18477.1 afla|EED52933.1 afum|EAL93165.1  
agla|OJJ85069.1 akaw|GAA86435.1 aluc|OJZ84977.1 anid|CBF70134.1 anig|EHA25190.1 aory|EIT78710.1  
asyd|OJJ58815.1 ater|EAU29894.1 atub|OJI80624.1 aver|OJJ01418.1 awen|OJJ31030.1 azon|OJJ50543.1

Group4774: abra|OJJ67402.1 acar|OOF92414.1 acla|EAW06356.1 afis|EAW18467.1 afla|EED52943.1  
afum|EAL93153.1 agla|OJJ85052.1 akaw|GAA86425.1 aluc|OJZ84966.1 anid|CBF70098.1 anig|EHA25179.1  
asyd|OJJ58833.1 ater|EAU29884.1 atub|OJI80634.1 aver|OJJ01436.1 awen|OJJ31019.1 azon|OJJ50533.1

Group4775: abra|OJJ67407.1 acar|OOF92409.1 acla|EAW06351.1 afis|EAW18463.1 afla|EED52946.1  
afum|EAL93149.1 agla|OJJ85047.1 akaw|GAA86420.1 aluc|OJZ84961.1 anig|EHA25175.1 aory|EIT78711.1  
asyd|OJJ58839.1 ater|EAU29881.1 atub|OJI80639.1 aver|OJJ01441.1 awen|OJJ31015.1 azon|OJJ50528.1

Group4776: abra|OJJ67408.1 acar|OOF92408.1 acla|EAW06350.1 afis|EAW18462.1 afum|EAL93148.2  
agla|OJJ85046.1 akaw|GAA86419.1 aluc|OJZ84960.1 anid|CBF70091.1 anig|EHA25174.1 aory|EIT78697.1  
asyd|OJJ58840.1 ater|EAU29880.1 atub|OJI80640.1 aver|OJJ01442.1 awen|OJJ31014.1 azon|OJJ50527.1

Group4777: abra|OJJ67427.1 acla|EAW06337.1 afis|EAW18449.1 afla|EED52959.1 afum|EAL93134.1  
agla|OJJ85027.1 akaw|GAA86403.1 aluc|OJZ84940.1 anid|CBF70066.1 anig|EHA25157.1 aory|EIT78716.1  
asyd|OJJ58849.1 ater|EAU29867.1 atub|OJI80660.1 aver|OJJ01450.1 awen|OJJ31001.1 azon|OJJ50515.1

Group4778: abra|OJJ67430.1 acar|OOF92396.1 acla|EAW06334.1 afis|EAW18446.1 afla|EED52965.1  
afum|EAL93131.1 agla|OJJ85023.1 akaw|GAA86400.1 aluc|OJZ84936.1 anig|EHA25154.1 aory|EIT78687.1  
asyd|OJJ56611.1 ater|EAU29865.1 atub|OJI80663.1 aver|OJJ06112.1 awen|OJJ30998.1 azon|OJJ50512.1

Group4779: abra|OJJ67436.1 acar|OOF92392.1 acla|EAW06326.1 afis|EAW18440.1 afla|EED52973.1  
afum|EAL93122.1 agla|OJJ85005.1 akaw|GAA86394.1 aluc|OJZ84928.1 anid|CBF70051.1 anig|EHA25147.1  
aory|EIT78715.1 asyd|OJJ58860.1 ater|EAU36110.1 atub|OJI80671.1 aver|OJJ01461.1 awen|OJJ30988.1

Group4780: abra|OJJ67464.1 acar|OOF92368.1 acla|EAW06304.1 afis|EAW18413.1 afum|EAL93093.2  
agla|OJJ84980.1 akaw|GAA86372.1 aluc|OJZ84901.1 anid|CBF70733.1 anig|EHA25127.1 aory|EIT77394.1  
asyd|OJJ58443.1 ater|EAU29828.1 atub|OJI80697.1 aver|OJJ01043.1 awen|OJJ31737.1 azon|OJJ50496.1

Group4781: abra|OJJ67573.1 acar|OOF91947.1 acla|EAW14347.1 afis|EAW18943.1 afla|EED50976.1 afum|EAL93676.1 agla|OJJ83697.1 akaw|GAA89102.1 anid|CBF79785.1 anig|EHA25704.1 aory|EIT77067.1 asyd|OJJ58115.1 ater|EAU33169.1 atub|OJJ88441.1 aver|OJJ04290.1 awen|OJJ30692.1 azon|OJJ47252.1

Group4782: abra|OJJ67611.1 acar|OOF91958.1 afla|EED45464.1 akaw|GAA89128.1 aluc|OJZ81710.1 anid|CBF87139.1 anig|EHA19582.1 aory|EIT82377.1 asyd|OJJ60382.1 ater|EAU30789.1 atub|OJJ88474.1 aver|OJJ99711.1 awen|OJJ41962.1 azon|OJJ48033.1 anid|CBF87137.1 ater|EAU29990.1 azon|OJJ46093.1

Group4783: abra|OJJ67612.1 acar|OOF91957.1 acla|EAW11005.1 afis|EAW20848.1 afum|EAL84785.1 agla|OJJ83719.1 akaw|GAA89129.1 aluc|OJZ81709.1 anid|CBF82870.1 anig|EHA25729.1 aory|EIT82455.1 asyd|OJJ61571.1 ater|EAU30790.1 atub|OJJ88475.1 aver|OJJ00891.1 awen|OJJ34515.1 azon|OJJ51801.1

Group4784: abra|OJJ67727.1 acar|OOF89959.1 acla|EAW11003.1 afis|EAW20853.1 afum|EAL84779.1 agla|OJJ83722.1 akaw|GAA89221.1 aluc|OJZ81607.1 anid|CBF82773.1 anig|EHA25838.1 aory|EIT82434.1 asyd|OJJ61572.1 ater|EAU30792.1 atub|OJJ88578.1 aver|OJJ00892.1 awen|OJJ34520.1 azon|OJJ51799.1

Group4785: abra|OJJ67740.1 acar|OOF90939.1 acla|EAW11002.1 afis|EAW20858.1 afla|EED45450.1 afum|EAL84777.1 agla|OJJ83739.1 akaw|GAA92431.1 aluc|OJZ81591.1 anid|CBF82824.1 anig|EHA25850.1 aory|EIT82442.1 asyd|OJJ61579.1 ater|EAU30801.1 atub|OJJ88592.1 aver|OJJ00901.1 awen|OJJ34524.1

Group4786: abra|OJJ67741.1 acar|OOF90942.1 acla|EAW11001.1 afis|EAW20860.1 afla|EED45446.1 afum|EAL84775.2 agla|OJJ83746.1 akaw|GAA92432.1 aluc|OJZ81589.1 anid|CBF84701.1 anig|EHA25851.1 aory|EIT82460.1 asyd|OJJ53318.1 ater|EAU30803.1 atub|OJJ88593.1 aver|OJJ08425.1 awen|OJJ34510.1

Group4787: abra|OJJ67745.1 acar|OOF90946.1 acla|EAW10994.1 afis|EAW20866.1 afla|EED45545.1 afum|EAL84768.1 agla|OJJ83974.1 akaw|GAA92436.1 aluc|OJZ81584.1 anid|CBF82836.1 anig|EHA25855.1 aory|EIT75798.1 asyd|OJJ61586.1 ater|EAU30822.1 atub|OJJ88597.1 aver|OJJ00908.1 azon|OJJ51775.1

Group4788: abra|OJJ67856.1 acar|OOF92835.1 acla|EAW11744.1 afis|EAW23777.1 afla|EED51577.1 afum|EAL87211.1 agla|OJJ78928.1 akaw|GAA91862.1 aluc|OJZ82036.1 anid|CBF79830.1 anig|EHA22220.1 aory|EIT80612.1 asyd|OJJ58143.1 atub|OJJ84591.1 aver|OJJ04260.1 awen|OJJ33700.1 azon|OJJ42841.1

Group4789: abra|OJJ67858.1 acar|OOF92838.1 acla|EAW11740.1 afis|EAW23773.1 afum|EAL87207.1 agla|OJJ78925.1 akaw|GAA91865.1 aluc|OJZ82034.1 anid|CBF79824.1 anig|EHA22222.1 aory|EIT80706.1 asyd|OJJ58142.1 ater|EAU31317.1 atub|OJJ84589.1 aver|OJJ04262.1 awen|OJJ33702.1 azon|OJJ42839.1

Group4790: abra|OJJ67862.1 acar|OOF92842.1 acla|EAW11736.1 afis|EAW23769.1 afla|EED51570.1 afum|EAL87203.1 agla|OJJ78951.1 akaw|GAA91869.1 aluc|OJZ82030.1 anid|CBF79819.1 anig|EHA22226.1 asyd|OJJ58139.1 ater|EAU31313.1 atub|OJJ84584.1 aver|OJJ04266.1 awen|OJJ33706.1 azon|OJJ42834.1

Group4791: abra|OJJ67868.1 acar|OOF92850.1 acla|EAW11729.1 afis|EAW23761.1 afla|EED51548.1 afum|EBA27305.1 agla|OJJ78961.1 akaw|GAA91875.1 aluc|OJZ82024.1 anid|CBF79789.1 anig|EHA22231.1 aory|EIT80682.1 asyd|OJJ58124.1 atub|OJJ84577.1 aver|OJJ04282.1 awen|OJJ33686.1 azon|OJJ42828.1

Group4792: acar|OOF90067.1 abra|OJJ73116.1 acla|EAW15001.1 afla|EED51114.1 agla|OJJ82961.1 akaw|GAA88053.1 aluc|OJZ81315.1 anid|CBF80452.1 anig|EHA18619.1 aory|EIT81295.1 asyd|OJJ54765.1 atub|OJJ91518.1 aver|OJJ07402.1 awen|OJJ40911.1 afla|EED45581.1 agla|OJJ78689.1 aory|EIT75557.1

Group4793: abra|OJJ67907.1 acar|OOF92871.1 acla|EAW11701.1 afis|EAW23722.1 afla|EED51506.1 afum|EAL87162.1 agla|OJJ78977.1 akaw|GAA91912.1 aluc|OJZ81980.1 anid|CBF85571.1 anig|EHA22274.1 aory|EIT80734.1 asyd|OJJ58128.1 atub|OJJ84532.1 aver|OJJ04277.1 afis|EAW24685.1 afum|EAL89325.1

Group4794: abra|OJJ67912.1 acar|OOF92764.1 acla|EAW12797.1 afis|EAW17960.1 afla|EED51947.1 afum|EAL91771.1 agla|OJJ80208.1 akaw|GAA91284.1 aluc|OJZ82785.1 anid|CBF79952.1 aory|EIT81471.1 asyd|OJJ58217.1 ater|EAU31449.1 atub|OJJ89017.1 aver|OJJ02205.1 awen|OJJ41581.1 azon|OJJ48294.1

Group4795: abra|OJJ67914.1 acar|OOF92765.1 acla|EAW12795.1 afis|EAW17958.1 afum|EAL91769.1 agla|OJJ80206.1 akaw|GAA91282.1 aluc|OJZ82787.1 anid|CBF79949.1 anig|EHA21228.1 aory|EIT81485.1 asyd|OJJ58215.1 ater|EAU31447.1 atub|OJJ89019.1 aver|OJJ02207.1 awen|OJJ41584.1 azon|OJJ48296.1

Group4796: abra|OJJ67916.1 acar|OOF92768.1 acla|EAW12793.1 afis|EAW17956.1 afla|EED51951.1 afum|EAL91767.1 agla|OJJ80203.1 akaw|GAA91280.1 aluc|OJZ82789.1 anid|CBF79945.1 anig|EHA21230.1 aory|EIT81421.1 asyd|OJJ58213.1 ater|EAU31444.1 aver|OJJ02209.1 awen|OJJ41586.1 azon|OJJ48301.1

Group4797: abra|OJJ67924.1 acla|EAW12786.1 afis|EAW17949.1 afla|EED51958.1 afum|EAL91759.1 agla|OJJ80196.1 akaw|GAA91273.1 aluc|OJZ82796.1 anid|CBF79927.1 anig|EHA21237.1 aory|EIT81486.1 asyd|OJJ58203.1 ater|EAU31432.1 atub|OJJ89027.1 aver|OJJ04203.1 awen|OJJ41594.1 azon|OJJ48309.1

Group4798: abra|OJJ67932.1 acar|OOF92782.1 afis|EAW23834.1 afla|EED53910.1 afum|EAL87265.1 agla|OJJ82500.1 akaw|GAA91265.1 aluc|OJZ82804.1 anid|CBF79896.1 anig|EHA21245.1 aory|EIT78489.1 asyd|OJJ58183.1 ater|EAU31393.1 atub|OJJ89035.1 aver|OJJ04222.1 awen|OJJ33792.1 azon|OJJ48752.1

Group4799: abra|OJJ67933.1 acar|OOF92783.1 afis|EAW20400.1 afla|EED51970.1 afum|EAL85499.2  
agla|OJJ82479.1 akaw|GAA91264.1 aluc|OJZ82805.1 anid|CBF79898.1 anig|EHA21246.1 aory|EIT81412.1  
asyd|OJJ58184.1 ater|EAU31392.1 atub|OJI89036.1 aver|OJJ04221.1 awen|OJJ33791.1 azon|OJJ48751.1

Group4800: abra|OJJ67935.1 acar|OOF92784.1 afis|EAW23832.1 afla|EED51973.1 akaw|GAA91261.1  
aluc|OJZ82807.1 aory|EIT81418.1 asyd|OJJ58186.1 ater|EAU31390.1 atub|OJI89038.1 awen|OJJ33790.1  
azon|OJJ48756.1 acla|EAW11624.1 afum|EAL87264.2 agla|OJJ82480.1 aver|OJJ04219.1 anid|CBF79902.1

Group4801: abra|OJJ67941.1 acar|OOF92790.1 acla|EAW11631.1 afis|EAW23825.1 afla|EED51981.1  
agla|OJJ82487.1 akaw|GAA91255.1 aluc|OJZ82813.1 anig|EHA21253.1 aory|EIT81429.1 asyd|OJJ57257.1  
ater|EAU31380.1 atub|OJI89044.1 aver|OJJ05344.1 awen|OJJ33783.1 azon|OJJ42885.1 ater|EAU29233.1

Group4802: abra|OJJ67948.1 acar|OOF92797.1 acla|EAW11638.1 afis|EAW23819.1 afla|EED51986.1  
afum|EAL87254.1 agla|OJJ82465.1 akaw|GAA91249.1 aluc|OJZ82821.1 anid|CBF79892.1 anig|EHA21260.1  
asyd|OJJ58178.1 ater|EAU31374.1 atub|OJI89050.1 aver|OJJ04226.1 awen|OJJ33776.1 azon|OJJ42881.1

Group4803: abra|OJJ67949.1 acar|OOF92796.1 acla|EAW11639.1 afis|EAW23818.1 afla|EED51987.1  
afum|EAL87253.1 agla|OJJ82466.1 akaw|GAA91248.1 aluc|OJZ82822.1 anid|CBF79891.1 aory|EIT81399.1  
asyd|OJJ58177.1 ater|EAU31375.1 atub|OJI89051.1 aver|OJJ04227.1 awen|OJJ33775.1 azon|OJJ42880.1

Group4804: abra|OJJ67950.1 acla|EAW11640.1 afla|EED51988.1 afum|EAL87252.1 agla|OJJ82463.1  
akaw|GAA91247.1 aluc|OJZ82823.1 anid|CBF79889.1 anig|EHA21261.1 asyd|OJJ58176.1 ater|EAU31372.1  
atub|OJI89052.1 aver|OJJ04228.1 awen|OJJ33774.1 azon|OJJ42878.1 afis|EAW23817.1 aory|EIT81468.1

Group4805: abra|OJJ67953.1 acla|EAW11642.1 afis|EAW23815.1 afla|EED51990.1 afum|EAL87250.1  
agla|OJJ82456.1 akaw|GAA91244.1 aluc|OJZ82826.1 anid|CBF79885.1 anig|EHA21263.1 aory|EIT81442.1  
asyd|OJJ58174.1 ater|EAU31370.1 atub|OJI89056.1 aver|OJJ04230.1 awen|OJJ33772.1 azon|OJJ42875.1

Group4806: abra|OJJ67956.1 acar|OOF92801.1 acla|EAW11645.1 afis|EAW23811.1 afla|EED52004.1  
afum|EAL87246.1 agla|OJJ82451.1 akaw|GAA91240.1 aluc|OJZ82829.1 anid|CBF79877.1 anig|EHA21267.1  
asyd|OJJ58170.1 ater|EAU31364.1 atub|OJI89059.1 aver|OJJ04233.1 awen|OJJ33767.1 azon|OJJ42871.1

Group4807: abra|OJJ67959.1 acar|OOF92805.1 acla|EAW11649.1 afis|EAW23807.1 afla|EED52008.1  
afum|EAL87241.1 agla|OJJ82447.1 akaw|GAA91237.1 aluc|OJZ82832.1 anid|CBF79870.1 anig|EHA21271.1  
asyd|OJJ58166.1 ater|EAU31359.1 atub|OJI89062.1 aver|OJJ04236.1 awen|OJJ33764.1 azon|OJJ42867.1

Group4808: abra|OJJ67965.1 acar|OOF92811.1 acla|EAW11655.1 afis|EAW23798.1 afum|EAL87233.1  
agla|OJJ78846.1 akaw|GAA91232.1 aluc|OJZ82838.1 anid|CBF79861.1 anig|EHA21275.1 aory|EIT80592.1  
asyd|OJJ58161.1 ater|EAU31336.1 atub|OJI89068.1 aver|OJJ04241.1 awen|OJJ33757.1 azon|OJJ42863.1

Group4809: abra|OJJ67967.1 acar|OOF92812.1 acla|EAW11656.1 afis|EAW23797.1 afla|EED51616.1  
afum|EAL87231.2 agla|OJJ78845.1 akaw|GAA91231.1 aluc|OJZ82839.1 anid|CBF79860.1 anig|EHA21276.1  
asyd|OJJ58160.1 ater|EAU31335.1 atub|OJI89069.1 aver|OJJ04242.1 awen|OJJ33755.1 azon|OJJ42862.1

Group4810: abra|OJJ67987.1 acar|OOF92029.1 acla|EAW12429.1 afis|EAW16736.1 afla|EED47284.1  
afum|EAL86311.1 akaw|GAA91215.1 aluc|OJZ82856.1 anid|CBF73583.1 anig|EHA21291.1 aory|EIT79240.1  
asyd|OJJ56684.1 ater|EAU29285.1 atub|OJI89086.1 aver|OJJ06039.1 awen|OJJ39986.1 azon|OJJ43671.1

Group4811: abra|OJJ68043.1 acar|OOF90405.1 acla|EAW13685.1 afis|EAW19921.1 afla|EED45891.1  
afum|EAL84988.1 akaw|GAA90910.1 aluc|OJZ82916.1 anig|EHA21339.1 aory|EIT75607.1 atub|OJI89142.1  
aver|OJJ07332.1 awen|OJJ29957.1 agla|OJJ79335.1 anig|EHA23723.1 atub|OJI82465.1 azon|OJJ42323.1

Group4812: abra|OJJ68119.1 acar|OOF93913.1 acla|EAW09088.1 afis|EAW25680.1 afla|EED51102.1  
afum|EAL84350.1 agla|OJJ78750.1 akaw|GAA86900.1 aluc|OJZ90023.1 anid|CBF83938.1 anig|EHA27399.1  
aory|EIT81294.1 asyd|OJJ61451.1 ater|EAU29935.1 atub|OJI84784.1 aver|OJJ00786.1 awen|OJJ35396.1

Group4813: abra|OJJ68122.1 acar|OOF93916.1 acla|EAW12863.1 afis|EAW17812.1 afla|EED45597.1  
afum|EAL91621.1 agla|OJJ81684.1 akaw|GAA86903.1 aluc|OJZ90026.1 anid|CBF80724.1 anig|EHA27402.1  
aory|EIT75545.1 asyd|OJJ54569.1 ater|EAU30289.1 atub|OJI84781.1 aver|OJJ07585.1 awen|OJJ36929.1

Group4814: abra|OJJ68124.1 acar|OOF93918.1 acla|EAW12868.1 afis|EAW17816.1 afla|EED45600.1  
afum|EAL91626.1 agla|OJJ81688.1 akaw|GAA86905.1 aluc|OJZ90028.1 anid|CBF80746.1 anig|EHA27404.1  
aory|EIT75820.1 asyd|OJJ54540.1 ater|EAU30286.1 atub|OJI84779.1 aver|OJJ07641.1 awen|OJJ36933.1

Group4815: abra|OJJ68159.1 acla|EAW08944.1 akaw|GAA83283.1 aluc|OJZ83793.1 anig|EHA18929.1  
atub|OJI90161.1 awen|OJJ34623.1 abra|OJJ68167.1 acar|OOF93405.1 akaw|GAA83276.1 aluc|OJZ83782.1  
anig|EHA22297.1 aory|EIT74145.1 asyd|OJJ63613.1 ater|EAU35823.1 atub|OJI90152.1 afum|EAL91589.1

Group4816: abra|OJJ68187.1 acar|OOF97480.1 acla|EAW13068.1 afis|EAW17596.1 afla|EED49224.1  
afum|EAL91409.1 agla|OJJ81334.1 akaw|GAA83258.1 aluc|OJZ83764.1 anid|CBF90205.1 anig|EHA18905.1  
aory|EIT83157.1 asyd|OJJ61975.1 ater|EAU37034.1 atub|OJI90135.1 aver|OJI96068.1 awen|OJJ37250.1

Group4817: abra|OJJ68191.1 acar|OOF97487.1 acla|EAW13073.1 afis|EAW17591.1 afla|EED49231.1 afum|EAL91404.1 agla|OJJ81358.1 akaw|GAA83254.1 aluc|OJZ83755.1 anid|CBF90214.1 anig|EHA18902.1 aory|EIT83155.1 ater|EAU37028.1 atub|OJI90130.1 aver|OJI96061.1 awen|OJJ37255.1 azon|OJJ50950.1

Group4818: abra|OJJ68192.1 acla|EAW13074.1 afis|EAW17590.1 afla|EED49232.1 afum|EAL91403.1 agla|OJJ81359.1 akaw|GAA83253.1 aluc|OJZ83754.1 anid|CBF90216.1 anig|EHA18901.1 aory|EIT83156.1 asyd|OJJ61968.1 ater|EAU37027.1 atub|OJI90129.1 aver|OJI96060.1 awen|OJJ37256.1 azon|OJJ50951.1

Group4819: abra|OJJ68195.1 acla|EAW13078.1 afis|EAW17586.1 afla|EED49236.1 afum|EAL91399.1 agla|OJJ81366.1 akaw|GAA83250.1 aluc|OJZ83751.1 anid|CBF90223.1 anig|EHA18898.1 aory|EIT83150.1 asyd|OJJ61964.1 ater|EAU37021.1 atub|OJI90126.1 aver|OJI96056.1 awen|OJJ37260.1 azon|OJJ50955.1

Group4820: abra|OJJ68214.1 acar|OOF97497.1 acla|EAW12971.1 afis|EAW17693.1 afla|EED50451.1 afum|EAL91507.1 agla|OJJ79486.1 akaw|GAA83232.1 aluc|OJZ83732.1 anid|CBF89976.1 anig|EHA18881.1 asyd|OJJ62092.1 ater|EAU31959.1 atub|OJI90109.1 aver|OJI96198.1 awen|OJJ37143.1 azon|OJJ50843.1

Group4821: abra|OJJ68216.1 acar|OOF97500.1 acla|EAW12280.1 afis|EAW16960.1 afum|EAL86488.2 agla|OJJ85938.1 akaw|GAA83230.1 aluc|OJZ83730.1 anid|CBF78343.1 anig|EHA18879.1 aory|EIT77597.1 asyd|OJJ56130.1 ater|EAU34038.1 atub|OJI90107.1 aver|OJJ05071.1 awen|OJJ35391.1 azon|OJJ49853.1

Group4822: abra|OJJ68225.1 acar|OOF97522.1 afis|EAW23333.1 afum|EAL88145.1 akaw|GAA83218.1 aluc|OJZ83720.1 anid|CBF84160.1 anig|EHA18869.1 asyd|OJJ57124.1 ater|EAU33402.1 atub|OJI90094.1 aver|OJJ03180.1 awen|OJJ38697.1 azon|OJJ47302.1 anid|CBF78048.1 atub|OJI86339.1 awen|OJJ40872.1

Group4823: abra|OJJ68270.1 acar|OOF97549.1 acla|EAW07692.1 afis|EAW22707.1 afla|EED49993.1 afum|EAL90485.1 agla|OJJ79003.1 akaw|GAA83199.1 aluc|OJZ83700.1 anid|CBF88067.1 anig|EHA18851.1 aory|EIT74717.1 asyd|OJJ63551.1 atub|OJI90072.1 aver|OJI97383.1 awen|OJJ35344.1 azon|OJJ49773.1

Group4824: abra|OJJ68273.1 acar|OOF97553.1 acla|EAW09070.1 afis|EAW25638.1 afla|EED55165.1 afum|EAL84325.1 agla|OJJ78891.1 akaw|GAA83196.1 aluc|OJZ83698.1 anid|CBF83138.1 anig|EHA18849.1 aory|EIT81612.1 asyd|OJJ55426.1 ater|EAU32709.1 atub|OJI90069.1 aver|OJJ06505.1 awen|OJJ36108.1

Group4825: abra|OJJ68286.1 acar|OOF90109.1 afis|EAW22105.1 afla|EED55143.1 afum|EAL91086.1 agla|OJJ82697.1 akaw|GAA83186.1 aluc|OJZ83685.1 anid|CBF84478.1 anig|EHA18839.1 aory|EIT81640.1 asyd|OJJ53529.1 ater|EAU32729.1 atub|OJI90056.1 aver|OJJ08221.1 awen|OJJ40237.1 azon|OJJ48799.1

Group4826: abra|OJJ68304.1 acar|OOF96684.1 acla|EAW12949.1 afis|EAW17724.1 afla|EED55147.1 afum|EAL91539.1 agla|OJJ81577.1 akaw|GAA83170.1 aluc|OJZ83669.1 anid|CBF83920.1 anig|EHA18824.1 aory|EIT81584.1 asyd|OJJ55430.1 ater|EAU32724.1 atub|OJI90040.1 aver|OJJ06509.1 awen|OJJ31293.1

Group4827: abra|OJJ68343.1 acar|OOF97641.1 acla|EAW08568.1 afis|EAW23614.1 afla|EED49585.1 afum|EAL87848.1 akaw|GAA92110.1 aluc|OJZ83615.1 anid|CBF76101.1 anig|EHA18772.1 asyd|OJJ59936.1 ater|EAU33073.1 atub|OJI89988.1 aver|OJJ02351.1 awen|OJJ39632.1 azon|OJJ50314.1 anid|CBF75197.1

Group4828: abra|OJJ68358.1 acar|OOF99377.1 afla|EED48863.1 akaw|GAA92838.1 aluc|OJZ91595.1 anig|EHA22625.1 asyd|OJJ53448.1 aver|OJJ08304.1 abra|OJJ78138.1 afla|EED53385.1 aluc|OJZ82076.1 aory|EIT75247.1 awen|OJJ29928.1 anig|EHA21837.1 aory|EIT81210.1 awen|OJJ31481.1 awen|OJJ29599.1

Group4829: abra|OJJ68384.1 acla|EAW12359.1 afis|EAW16783.1 afla|EED47253.1 afum|EAL86354.1 akaw|GAA92561.1 aluc|OJZ90107.1 anid|CBF80601.1 anig|EHA20963.1 aory|EIT79232.1 ater|EAU30268.1 atub|OJI84695.1 awen|OJJ29849.1 azon|OJJ43199.1 agla|OJJ79765.1 asyd|OJJ54699.1 aver|OJJ07475.1

Group4830: abra|OJJ68411.1 acar|OOF93966.1 acla|EAW13740.1 afis|EAW19836.1 afum|EAL85056.1 agla|OJJ86861.1 akaw|GAA92539.1 aluc|OJZ90087.1 anid|CBF81579.1 anig|EHA20987.1 aory|EIT79584.1 asyd|OJJ57609.1 atub|OJI84719.1 aver|OJJ05575.1 awen|OJJ31663.1 azon|OJJ45931.1 awen|OJJ39923.1

Group4831: abra|OJJ68416.1 acar|OOF93924.1 acla|EAW13751.1 afis|EAW19814.1 afla|EED45417.1 afum|EAL85077.1 agla|OJJ83693.1 akaw|GAA92532.1 aluc|OJZ90081.1 anid|CBF82421.1 anig|EHA20992.1 aory|EIT82441.1 asyd|OJJ54129.1 ater|EAU30780.1 atub|OJI84725.1 aver|OJJ08607.1 awen|OJJ34554.1

Group4832: abra|OJJ68446.1 acar|OOF93949.1 acla|EAW13754.1 afis|EAW19812.1 afla|EED45411.1 afum|EAL85079.1 agla|OJJ83694.1 akaw|GAA86928.1 aluc|OJZ90052.1 anid|CBF82391.1 anig|EHA21018.1 aory|EIT82394.1 asyd|OJJ54153.1 ater|EAU30741.1 atub|OJI84755.1 aver|OJJ08587.1 awen|OJJ34559.1

Group4833: abra|OJJ68461.1 acar|OOF95945.1 acla|EAW11549.1 afis|EAW23904.1 afla|EED52639.1 agla|OJJ79371.1 akaw|GAA92383.1 aluc|OJZ83242.1 anid|CBF77137.1 anig|EHA21097.1 asyd|OJJ56915.1 ater|EAU32333.1 atub|OJI87694.1 aver|OJJ03377.1 awen|OJJ39045.1 afum|EAL87332.1 azon|OJJ51374.1

Group4834: abra|OJJ68469.1 acar|OOF90193.1 acla|EAW13957.1 afis|EAW18667.1 afla|EED52662.1 afum|EAL93385.1 agla|OJJ82410.1 akaw|GAA92390.1 aluc|OJZ83250.1 anid|CBF70571.1 anig|EHA21103.1 asyd|OJJ58532.1 ater|EAU38245.1 atub|OJI87687.1 aver|OJJ01134.1 awen|OJJ32135.1 azon|OJJ46718.1

Group4835: abra|OJJ68473.1 acar|OOF94210.1 acla|EAW14616.1 afis|EAW19354.1 afla|EED46571.1 afum|EAL85102.1 akaw|GAA92394.1 aluc|OJZ83254.1 anid|CBF76650.1 anig|EHA21108.1 aory|EIT77929.1 asyd|OJJ61207.1 ater|EAU38488.1 atub|OJI87683.1 aver|OJJ00531.1 ater|EAU36160.1 afum|EAL94074.2

Group4836: abra|OJJ68481.1 acar|OOF91471.1 acla|EAW13584.1 afis|EAW20017.1 afla|EED46025.1 afum|EAL84900.1 agla|OJJ87994.1 akaw|GAA92405.1 aluc|OJZ83266.1 anid|CBF84729.1 anig|EHA21119.1 aory|EIT75379.1 asyd|OJJ53304.1 atub|OJI87671.1 aver|OJJ08437.1 awen|OJJ30036.1 azon|OJJ43680.1

Group4837: abra|OJJ68488.1 acar|OOF95813.1 acla|EAW13752.1 afis|EAW19815.1 afla|EED45414.1 afum|EAL85076.1 agla|OJJ83692.1 akaw|GAA92783.1 aluc|OJZ82700.1 anid|CBF82393.1 anig|EHA21156.1 aory|EIT82424.1 asyd|OJJ54157.1 ater|EAU30740.1 atub|OJI88932.1 aver|OJJ08580.1 awen|OJJ36130.1

Group4838: abra|OJJ68489.1 acar|OOF99836.1 acla|EAW09732.1 afis|EAW21409.1 afum|EAL92423.1 agla|OJJ85539.1 akaw|GAA92781.1 aluc|OJZ82702.1 anid|CBF83806.1 anig|EHA21157.1 aory|EIT76599.1 asyd|OJJ60893.1 ater|EAU35137.1 atub|OJI88935.1 aver|OJJ00217.1 awen|OJJ39292.1 azon|OJJ51562.1

Group4839: abra|OJJ68491.1 acar|OOF92638.1 acla|EAW08749.1 afis|EAW15687.1 afla|EED51367.1 afum|EAL85661.1 agla|OJJ81835.1 akaw|GAA92779.1 aluc|OJZ82704.1 anid|CBF71140.1 anig|EHA21159.1 aory|EIT80679.1 asyd|OJJ55835.1 atub|OJI88937.1 aver|OJJ04777.1 awen|OJJ38378.1 azon|OJJ43862.1

Group4840: abra|OJJ68506.1 acar|OOF95814.1 acla|EAW12116.1 afis|EAW17267.1 afla|EED48852.1 afum|EAL86684.1 agla|OJJ81072.1 akaw|GAA92767.1 aluc|OJZ82718.1 anid|EHA21172.1 aory|EIT81274.1 asyd|OJJ59981.1 atub|OJI88952.1 aver|OJJ02310.1 awen|OJJ35766.1 azon|OJJ45516.1 ater|EAU36132.1

Group4841: abra|OJJ68509.1 acar|OOF92671.1 acla|EAW07689.1 afis|EAW22704.1 afla|EED49990.1 afum|EAL90488.1 agla|OJJ79005.1 akaw|GAA92762.1 aluc|OJZ82723.1 anid|CBF88072.1 anig|EHA21177.1 aory|EIT74747.1 asyd|OJJ63554.1 atub|OJI88957.1 aver|OJI97380.1 awen|OJJ35341.1 azon|OJJ49777.1

Group4842: abra|OJJ68513.1 acar|OOF95416.1 acla|EAW07359.1 afis|EAW22388.1 afla|EED56048.1 afum|EAL90802.1 akaw|GAA91333.1 aluc|OJZ82728.1 anid|CBF88736.1 anig|EHA21181.1 aory|EIT76661.1 asyd|OJJ63936.1 ater|EAU39333.1 atub|OJI88961.1 aver|OJI97006.1 awen|OJJ34963.1 azon|OJJ45615.1

Group4843: abra|OJJ68520.1 acar|OOF92725.1 acla|EAW12844.1 afis|EAW18007.1 afla|EED51888.1 afum|EAL91819.1 agla|OJJ80267.1 akaw|GAA91329.1 aluc|OJZ82734.1 anid|CBF80028.1 anig|EHA21185.1 asyd|OJJ58268.1 ater|EAU31523.1 atub|OJI88967.1 aver|OJJ02156.1 awen|OJJ41534.1 azon|OJJ48253.1

Group4844: abra|OJJ68523.1 acar|OOF92728.1 acla|EAW12842.1 afis|EAW18005.1 afla|EED51890.1 afum|EAL91817.1 agla|OJJ80271.1 akaw|GAA91326.1 aluc|OJZ82737.1 anid|CBF81140.1 anig|EHA21188.1 aory|EIT82920.1 asyd|OJJ56508.1 ater|EAU31517.1 atub|OJI88972.1 aver|OJJ06211.1 awen|OJJ41537.1

Group4845: abra|OJJ68534.1 acla|EAW12824.1 afis|EAW17989.1 afla|EED51914.1 afum|EAL91798.1 agla|OJJ80249.1 akaw|GAA91317.1 aluc|OJZ82747.1 anid|CBF79981.1 anig|EHA21197.1 aory|EIT81368.1 asyd|OJJ58246.1 ater|EAU31499.1 atub|OJI88981.1 aver|OJJ02180.1 awen|OJJ41557.1 azon|OJJ48272.1

Group4846: abra|OJJ68543.1 acar|OOF92741.1 acla|EAW12831.1 afis|EAW17996.1 afla|EED51905.1 afum|EAL91806.2 akaw|GAA91310.1 aluc|OJZ82757.1 anid|CBF80013.1 anig|EHA21204.1 aory|EIT76178.1 asyd|OJJ58258.1 ater|EAU31508.1 atub|OJI88992.1 aver|OJJ02165.1 awen|OJJ41547.1 azon|OJJ48265.1

Group4847: abra|OJJ68550.1 acar|OOF92746.1 acla|EAW12817.1 afis|EAW17982.1 afla|EED51923.1 afum|EAL91791.1 agla|OJJ80239.1 akaw|GAA91303.1 aluc|OJZ82767.1 anid|CBF79994.1 anig|EHA21210.1 aory|EIT81466.1 asyd|OJJ58237.1 ater|EAU31492.1 aver|OJJ02188.1 awen|OJJ41563.1 azon|OJJ48278.1

Group4848: abra|OJJ68553.1 acar|OOF92748.1 acla|EAW12814.1 afis|EAW17979.1 afla|EED51926.1 afum|EAL91788.1 agla|OJJ80236.1 akaw|GAA91300.1 aluc|OJZ82770.1 anid|CBF79978.1 anig|EHA21212.1 aory|EIT81426.1 asyd|OJJ58233.1 atub|OJI89001.1 aver|OJJ02191.1 awen|OJJ41566.1 azon|OJJ44835.1

Group4849: abra|OJJ68558.1 acar|OOF92753.1 acla|EAW12807.1 afis|EAW17973.1 afla|EED51931.1 afum|EAL91782.1 agla|OJJ80231.1 akaw|GAA91295.1 anid|CBF79970.1 anig|EHA21217.1 aory|EIT81474.1 asyd|OJJ58228.1 ater|EAU31485.1 atub|OJI89006.1 aver|OJJ02196.1 awen|OJJ41571.1 azon|OJJ48284.1

Group4850: abra|OJJ68563.1 acar|OOF92756.1 acla|EAW12803.1 afis|EAW17969.1 afla|EED51936.1 afum|EAL91778.1 agla|OJJ80227.1 akaw|GAA91291.1 aluc|OJZ82778.1 anid|CBF79966.1 anig|EHA21221.1 aory|EIT81395.1 asyd|OJJ58226.1 ater|EAU31479.1 atub|OJI89011.1 awen|OJJ41575.1 azon|OJJ48288.1

Group4851: abra|OJJ68566.1 acar|OOF92762.1 acla|EAW12799.1 afis|EAW17965.1 afla|EED51945.1 afum|EBA27440.1 agla|OJJ80210.1 akaw|GAA91287.1 aluc|OJZ82781.1 anid|CBF79956.1 anig|EHA21224.1 aory|EIT81435.1 asyd|OJJ58219.1 atub|OJI89014.1 aver|OJJ02203.1 awen|OJJ41579.1 azon|OJJ48292.1

Group4852: abra|OJJ68569.1 acar|OOF98183.1 afla|EED57921.1 afum|EAL86294.1 agla|OJJ78785.1 aluc|OJZ81967.1 anid|CBF90243.1 anig|EHA22280.1 aory|EIT82365.1 asyd|OJJ61952.1 atub|OJI84518.1 aver|OJI96043.1 awen|OJJ35925.1 azon|OJJ42130.1 azon|OJJ47732.1 acar|OOF91241.1 aver|OJI99323.1



Group4853: abra|OJJ68600.1 acar|OOF92110.1 acla|EAW12639.1 afis|EAW18046.1 afla|EED51500.1 afum|EAL91858.1 agla|OJJ85417.1 akaw|GAA91924.1 aluc|OJZ81956.1 anid|CBF79777.1 anig|EHA22291.1 asyd|OJJ58120.1 ater|EAU31277.1 atub|OJI84507.1 aver|OJJ04285.1 awen|OJJ41488.1 azon|OJJ48218.1

Group4854: abra|OJJ68635.1 acar|OOF92139.1 acla|EAW12617.1 afis|EAW18067.1 afla|EED51451.1 afum|EBA27444.1 agla|OJJ87355.1 akaw|GAA89774.1 aluc|OJZ81920.1 anid|CBF86418.1 aory|EIT80649.1 asyd|OJJ64940.1 ater|EAU30461.1 atub|OJI84472.1 aver|OJI99062.1 awen|OJJ41454.1 azon|OJJ48912.1

Group4855: abra|OJJ68651.1 acla|EAW12627.1 afis|EAW18057.1 afla|EED51425.1 afum|EBA27441.1 agla|OJJ87329.1 akaw|GAA89791.1 aluc|OJZ81900.1 anid|CBF86437.1 anig|EHA22343.1 aory|EIT80763.1 asyd|OJJ64930.1 ater|EAU30477.1 atub|OJI84453.1 aver|OJI99049.1 awen|OJJ41440.1 azon|OJJ48902.1

Group4856: abra|OJJ68674.1 acar|OOF92175.1 acla|EAW12574.1 afis|EAW24074.1 afla|EED51399.1 afum|EAL91930.2 agla|OJJ87143.1 akaw|GAA89827.1 aluc|OJZ81861.1 anid|CBF86469.1 aory|EIT80583.1 asyd|OJJ64907.1 ater|EAU30496.1 atub|OJI84428.1 aver|OJI99029.1 awen|OJJ41411.1 azon|OJJ48881.1

Group4857: abra|OJJ68675.1 acar|OOF92176.1 acla|EAW12573.1 afis|EAW24075.1 afla|EED51398.1 afum|EBA27446.1 agla|OJJ87144.1 akaw|GAA89828.1 aluc|OJZ81860.1 anid|CBF86471.1 anig|EHA22365.1 aory|EIT80528.1 asyd|OJJ64906.1 atub|OJI84427.1 aver|OJI99028.1 awen|OJJ41412.1 azon|OJJ48880.1

Group4858: abra|OJJ68683.1 acar|OOF92185.1 acla|EAW12564.1 afis|EAW24086.1 afla|EED51387.1 afum|EAL91941.1 agla|OJJ87156.1 akaw|GAA89836.1 aluc|OJZ81850.1 anid|CBF86487.1 anig|EHA22372.1 asyd|OJJ64897.1 ater|EAU30509.1 atub|OJI84419.1 aver|OJI99018.1 awen|OJJ41403.1 azon|OJJ48869.1

Group4859: abra|OJJ68688.1 acar|OOF92191.1 acla|EAW12557.1 afis|EAW24093.1 afum|EAL91948.1 agla|OJJ87167.1 akaw|GAA89843.1 aluc|OJZ81845.1 anid|CBF86496.1 anig|EHA22377.1 aory|EIT72686.1 asyd|OJJ64892.1 ater|EAU30518.1 atub|OJI84414.1 aver|OJI99013.1 awen|OJJ41396.1 azon|OJJ48864.1

Group4860: abra|OJJ68699.1 acar|OOF92203.1 acla|EAW12545.1 afis|EAW24105.1 afla|EED46828.1 afum|EAL91959.1 agla|OJJ87180.1 akaw|GAA89854.1 aluc|OJZ81832.1 anid|CBF86515.1 anig|EHA22389.1 asyd|OJJ64879.1 ater|EAU30533.1 atub|OJI84401.1 aver|OJI98993.1 awen|OJJ41383.1 azon|OJJ48852.1

Group4861: abra|OJJ68700.1 acar|OOF92204.1 acla|EAW12544.1 afis|EAW24106.1 afla|EED46827.1 afum|EAL91960.1 akaw|GAA89855.1 aluc|OJZ81831.1 anid|CBF86516.1 anig|EHA22390.1 aory|EIT72643.1 asyd|OJJ64878.1 ater|EAU30534.1 atub|OJI84400.1 aver|OJI98992.1 awen|OJJ41382.1 azon|OJJ48851.1

Group4862: abra|OJJ68705.1 acar|OOF92207.1 acla|EAW12540.1 afis|EAW24109.1 afla|EED46823.1 afum|EAL91963.1 agla|OJJ87184.1 akaw|GAA89859.1 aluc|OJZ81825.1 anid|CBF86522.1 anig|EHA22393.1 asyd|OJJ64875.1 ater|EAU30537.1 atub|OJI84395.1 aver|OJI98988.1 awen|OJJ41379.1 azon|OJJ48847.1

Group4863: abra|OJJ68711.1 acla|EAW12534.1 afis|EAW24115.1 afla|EED46818.1 afum|EAL91969.1 agla|OJJ87192.1 akaw|GAA89865.1 aluc|OJZ81816.1 anid|CBF86533.1 anig|EHA22399.1 aory|EIT72744.1 asyd|OJJ64869.1 ater|EAU30543.1 atub|OJI84389.1 aver|OJI98981.1 awen|OJJ41373.1 azon|OJJ48841.1

Group4864: abra|OJJ68720.1 acar|OOF92219.1 acla|EAW12527.1 afis|EAW24122.1 afum|EAL91978.1 agla|OJJ87197.1 akaw|GAA89871.1 aluc|OJZ81809.1 anid|CBF86548.1 anig|EHA22408.1 aory|EIT72689.1 asyd|OJJ64859.1 ater|EAU30550.1 atub|OJI84381.1 aver|OJI98971.1 awen|OJJ41367.1 azon|OJJ48834.1

Group4865: abra|OJJ68740.1 acla|EAW12507.1 afis|EAW24139.1 afla|EED46795.1 afum|EAL91994.1 agla|OJJ87217.1 akaw|GAA89888.1 aluc|OJZ81787.1 anid|CBF77940.1 anig|EHA22428.1 aory|EIT72678.1 asyd|OJJ55284.1 ater|EAU30568.1 atub|OJI84361.1 aver|OJJ06944.1 awen|OJJ41350.1 azon|OJJ48813.1

Group4866: abra|OJJ68754.1 acar|OOF92241.1 acla|EAW12496.1 afis|EAW24149.1 afla|EED46782.1 afum|EAL92004.1 agla|OJJ87229.1 akaw|GAA89899.1 aluc|OJZ81772.1 anid|CBF77917.1 anig|EHA22444.1 aory|EIT72767.1 asyd|OJJ55296.1 ater|EAU30581.1 atub|OJI84345.1 aver|OJJ06930.1 awen|OJJ41329.1

Group4867: abra|OJJ68760.1 acar|OOF92247.1 acla|EAW12491.1 afis|EAW24154.1 afum|EAL92009.1 agla|OJJ89529.1 akaw|GAA89904.1 aluc|OJZ81766.1 anid|CBF77906.1 anig|EHA22448.1 aory|EIT72713.1 asyd|OJJ55300.1 ater|EAU30586.1 atub|OJI84338.1 aver|OJJ06925.1 awen|OJJ41323.1 azon|OJJ48796.1

Group4868: abra|OJJ68771.1 acar|OOF92256.1 acla|EAW12481.1 afis|EAW24164.1 afla|EED46769.1 afum|EAL92021.1 agla|OJJ89516.1 akaw|GAA89914.1 aluc|OJZ81755.1 anid|CBF77886.1 anig|EHA22457.1 asyd|OJJ55310.1 ater|EAU30595.1 atub|OJI84326.1 aver|OJJ06916.1 awen|OJJ41313.1 azon|OJJ48787.1

Group4869: abra|OJJ68772.1 acar|OOF92257.1 acla|EAW12480.1 afis|EAW24165.1 afla|EED46768.1 afum|EAL92022.1 agla|OJJ89515.1 akaw|GAA89915.1 aluc|OJZ81754.1 anid|CBF77885.1 anig|EHA22458.1 asyd|OJJ55311.1 ater|EAU30596.1 atub|OJI84325.1 aver|OJJ06915.1 awen|OJJ41312.1 azon|OJJ48786.1

Group4870: abra|OJJ68773.1 acar|OOF92258.1 acla|EAW12479.1 afis|EAW24166.1 afla|EED46767.1 afum|EAL92023.1 agla|OJJ89514.1 akaw|GAA89916.1 aluc|OJZ81753.1 anid|CBF77883.1 anig|EHA22459.1 asyd|OJJ55312.1 ater|EAU30597.1 atub|OJI84324.1 aver|OJJ06914.1 awen|OJJ41311.1 azon|OJJ48785.1

Group4871: abra|OJJ68775.1 acar|OOF92262.1 acla|EAW12476.1 afis|EAW24167.1 afla|EED46765.1 afum|EAL92025.1 agla|OJJ89511.1 akaw|GAA89919.1 aluc|OJZ81751.1 anid|CBF77876.1 anig|EHA22461.1 asyd|OJJ55314.1 ater|EAU30600.1 atub|OJI84322.1 aver|OJJ06912.1 awen|OJJ41309.1 azon|OJJ48782.1

Group4872: abra|OJJ68776.1 acar|OOF92260.1 acla|EAW12475.1 afis|EAW24168.1 afla|EED46764.1 afum|EAL92026.1 agla|OJJ89510.1 akaw|GAA89920.1 aluc|OJZ81750.1 anid|CBF77874.1 anig|EHA22462.1 asyd|OJJ55315.1 ater|EAU30601.1 atub|OJI84321.1 aver|OJJ06911.1 awen|OJJ41308.1 azon|OJJ48781.1

Group4873: abra|OJJ68779.1 acar|OOF92265.1 acla|EAW12472.1 afis|EAW24169.1 afla|EED46761.1 afum|EAL92031.1 agla|OJJ89507.1 akaw|GAA89923.1 aluc|OJZ81747.1 anid|CBF77869.1 anig|EHA22465.1 asyd|OJJ55319.1 ater|EAU30604.1 atub|OJI84318.1 aver|OJJ06909.1 awen|OJJ41304.1 azon|OJJ48778.1

Group4874: abra|OJJ68782.1 acar|OOF92267.1 acla|EAW12470.1 afis|EAW24171.1 afla|EED46758.1 afum|EAL92033.1 agla|OJJ89504.1 akaw|GAA89926.1 aluc|OJZ81744.1 anid|CBF77863.1 anig|EHA22468.1 asyd|OJJ55322.1 ater|EAU30606.1 atub|OJI84315.1 aver|OJJ06906.1 awen|OJJ41301.1 azon|OJJ48775.1

Group4875: abra|OJJ68786.1 acar|OOF92270.1 acla|EAW12468.1 afis|EAW24173.1 afla|EED46755.1 afum|EAL92035.1 agla|OJJ89501.1 akaw|GAA89928.1 aluc|OJZ81742.1 anid|CBF77859.1 anig|EHA22470.1 asyd|OJJ55324.1 ater|EAU30608.1 atub|OJI84313.1 aver|OJJ06904.1 awen|OJJ41297.1 azon|OJJ48773.1

Group4876: abra|OJJ68789.1 acla|EAW12464.1 afis|EAW24177.1 afla|EED46752.1 afum|EAL92039.1 agla|OJJ89497.1 akaw|GAA89931.1 aluc|OJZ81738.1 anid|CBF77851.1 anig|EHA22474.1 aory|EIT72262.1 asyd|OJJ55328.1 ater|EAU30612.1 atub|OJI84309.1 aver|OJJ06900.1 awen|OJJ41292.1 azon|OJJ48766.1

Group4877: abra|OJJ68792.1 acar|OOF92276.1 acla|EAW12461.1 afis|EAW24180.1 afla|EED46750.1 afum|EAL92041.1 agla|OJJ89494.1 aluc|OJZ81735.1 anid|CBF77846.1 anig|EHA22477.1 aory|EIT72256.1 asyd|OJJ55331.1 ater|EAU30614.1 atub|OJI84306.1 aver|OJJ06897.1 awen|OJJ41289.1 azon|OJJ48763.1

Group4878: abra|OJJ68795.1 acar|OOF92279.1 acla|EAW14659.1 afis|EAW24184.1 afla|EED46747.1 afum|EAL92044.1 agla|OJJ89491.1 aluc|OJZ81732.1 anid|CBF77840.1 anig|EHA22480.1 aory|EIT72264.1 asyd|OJJ55334.1 ater|EAU30617.1 atub|OJI84303.1 aver|OJJ06894.1 awen|OJJ41286.1 azon|OJJ42002.1

Group4879: abra|OJJ68799.1 acar|OOF92283.1 acla|EAW14654.1 afis|EAW24187.1 afla|EED46744.1 afum|EAL92047.1 agla|OJJ89487.1 akaw|GAA89938.1 aluc|OJZ81728.1 anid|CBF77833.1 aory|EIT72263.1 asyd|OJJ55338.1 ater|EAU30621.1 atub|OJI84299.1 aver|OJJ06889.1 awen|OJJ41282.1 azon|OJJ43706.1

Group4880: abra|OJJ68803.1 acar|OOF91597.1 acla|EAW14402.1 afis|EAW19109.1 afla|EED54306.1 afum|EAL93840.1 agla|OJJ84497.1 akaw|GAA90450.1 aluc|OJZ85774.1 anid|CBF79695.1 aory|EIT76105.1 asyd|OJJ58049.1 ater|EAU37367.1 atub|OJI79559.1 aver|OJJ04354.1 awen|OJJ32506.1 azon|OJJ46032.1

Group4881: abra|OJJ68849.1 acar|OOF90540.1 acla|EAW15272.1 afis|EAW20242.1 afla|EED57103.1 afum|EAL85359.1 agla|OJJ84630.1 akaw|GAA90400.1 aluc|OJZ85829.1 anid|CBF85142.1 anig|EHA24732.1 asyd|OJJ63037.1 ater|EAU32034.1 atub|OJI79617.1 aver|OJI97930.1 awen|OJJ31237.1 azon|OJJ46159.1

Group4882: abra|OJJ68857.1 acar|OOF90531.1 acla|EAW15254.1 afis|EAW20228.1 afla|EED57126.1 afum|EAL85345.2 agla|OJJ84634.1 akaw|GAA90396.1 aluc|OJZ85835.1 anid|CBF86775.1 anig|EHA24728.1 aory|EIT74040.1 asyd|OJJ64690.1 ater|EAU32030.1 atub|OJI79623.1 aver|OJI98793.1 awen|OJJ31231.1

Group4883: abra|OJJ68858.1 acla|EAW15251.1 afis|EAW20224.1 afla|EED57127.1 afum|EAL85339.1 agla|OJJ84637.1 akaw|GAA90395.1 aluc|OJZ85836.1 anid|CBF85118.1 anig|EHA24727.1 aory|EIT74129.1 asyd|OJJ63046.1 ater|EAU32029.1 atub|OJI79624.1 aver|OJI97917.1 awen|OJJ31230.1 azon|OJJ46153.1

Group4884: abra|OJJ68873.1 acar|OOF89966.1 acla|EAW15247.1 afis|EAW20213.1 afla|EED57131.1 afum|EAL85330.1 agla|OJJ84641.1 akaw|GAA90382.1 aluc|OJZ85849.1 anid|CBF85109.1 anig|EHA28097.1 aory|EIT74159.1 asyd|OJJ63052.1 ater|EAU32023.1 aver|OJI97911.1 awen|OJJ31219.1 azon|OJJ46138.1

Group4885: abra|OJJ68875.1 acla|EAW15245.1 afis|EAW20212.1 afla|EED57132.1 afum|EAL85329.1 agla|OJJ84642.1 akaw|GAA90380.1 aluc|OJZ85851.1 anid|CBF85107.1 anig|EHA28096.1 aory|EIT73979.1 asyd|OJJ63054.1 ater|EAU32021.1 atub|OJI79638.1 aver|OJI97909.1 awen|OJJ31217.1 azon|OJJ46140.1

Group4886: acar|OOF92273.1 acla|EAW12465.1 afis|EAW24176.1 afla|EED46753.1 afum|EAL92038.1 agla|OJJ89498.1 akaw|GAA89930.1 aluc|OJZ81739.1 anid|CBF77853.1 anig|EHA22473.1 aory|EIT72253.1 asyd|OJJ55327.1 ater|EAU30611.1 atub|OJI84310.1 aver|OJJ06901.1 awen|OJJ41294.1 azon|OJJ48770.1

Group4887: abra|OJJ68877.1 acar|OOF90522.1 acla|EAW15243.1 afis|EAW20210.1 afla|EED57133.1 afum|EAL85327.1 agla|OJJ84654.1 akaw|GAA90378.1 aluc|OJZ85853.1 anid|CBF85102.1 aory|EIT73969.1 asyd|OJJ63056.1 ater|EAU32020.1 atub|OJI79640.1 aver|OJI97906.1 awen|OJJ31215.1 azon|OJJ46145.1

Group4888: abra|OJJ68878.1 acar|OOF97048.1 acla|EAW07071.1 afis|EAW25746.1 afum|EBA27245.1 asyd|OJJ52302.1 ater|EAU38964.1 azon|OJJ44440.1 abra|OJJ69169.1 acla|EAW08352.1 akaw|GAA86294.1 aluc|OJZ86156.1 anid|CBF89377.1 anig|EHA24469.1 atub|OJI79948.1 awen|OJJ37486.1 acla|EAW12600.1

Group4889: abra|OJJ68916.1 acar|OOF91504.1 acla|EAW14257.1 afis|EAW19023.1 afla|EED56625.1 afum|EAL93754.1 agla|OJJ84609.1 akaw|GAA90333.1 aluc|OJZ85899.1 anid|CBF85582.1 anig|EHA24693.1 aory|EIT79644.1 asyd|OJJ64175.1 ater|EAU32065.1 atub|OJI79684.1 aver|OJI98250.1 awen|OJJ31398.1

Group4890: abra|OJJ68924.1 acar|OOF91510.1 acla|EAW13235.1 afis|EAW16374.1 afla|EED45428.1 afum|EAL88998.1 akaw|GAA90324.1 aluc|OJZ85909.1 anid|CBF83908.1 anig|EHA24683.1 aory|EIT82385.1 asyd|OJJ55419.1 atub|OJI79693.1 aver|OJJ06496.1 awen|OJJ31350.1 azon|OJJ46550.1 acar|OOF92458.1

Group4891: abra|OJJ68934.1 acar|OOF91517.1 acla|EAW14244.1 afis|EAW19036.1 afla|EED50390.1 afum|EAL93765.2 agla|OJJ84585.1 akaw|GAA90315.1 aluc|OJZ85919.1 anid|CBF79603.1 anig|EHA24673.1 asyd|OJJ57992.1 ater|EAU32075.1 atub|OJI79711.1 aver|OJJ04410.1 awen|OJJ31465.1 azon|OJJ46167.1

Group4892: abra|OJJ68955.1 acar|OOF91533.1 acla|EAW14231.1 afis|EAW19050.1 afla|EED54442.1 afum|EAL93779.1 agla|OJJ84556.1 akaw|GAA90483.1 aluc|OJZ85941.1 anid|EHA24658.1 aory|EIT81131.1 asyd|OJJ58006.1 ater|EAU32088.1 atub|OJI79729.1 aver|OJJ04394.1 awen|OJJ31479.1 azon|OJJ46192.1

Group4893: abra|OJJ68977.1 acar|OOF91552.1 acla|EAW14211.1 afis|EAW19070.1 afla|EED54435.1 afum|EAL93798.1 agla|OJJ84535.1 akaw|GAA90502.1 aluc|OJZ85965.1 anid|CBF79660.1 anig|EHA24639.1 asyd|OJJ58026.1 ater|EAU32118.1 atub|OJI79753.1 aver|OJJ04372.1 awen|OJJ31502.1 azon|OJJ46217.1

Group4894: abra|OJJ68983.1 acla|EAW14208.1 afis|EAW19073.1 afla|EED54438.1 afum|EAL93801.1 agla|OJJ84530.1 akaw|GAA90505.1 aluc|OJZ85969.1 anid|CBF79665.1 anig|EHA24636.1 aory|EIT75855.1 asyd|OJJ58030.1 ater|EAU32123.1 atub|OJI79757.1 aver|OJJ04369.1 awen|OJJ32467.1 azon|OJJ46239.1

Group4895: abra|OJJ68988.1 acar|OOF91559.1 acla|EAW14203.1 afis|EAW19079.1 afla|EED54337.1 afum|EAL93807.1 agla|OJJ84527.1 akaw|GAA90509.1 aluc|OJZ85974.1 anid|CBF79668.1 aory|EIT76081.1 asyd|OJJ58033.1 ater|EAU32125.1 atub|OJI79763.1 aver|OJJ04366.1 awen|OJJ32471.1 azon|OJJ46235.1

Group4896: abra|OJJ69001.1 acar|OOF92713.1 acla|EAW12656.1 afis|EAW18024.1 afla|EED51870.1 afum|EAL91836.1 agla|OJJ85376.1 akaw|GAA90520.1 aluc|OJZ85985.1 anid|CBF80058.1 aory|EIT81751.1 asyd|OJJ58285.1 ater|EAU31538.1 atub|OJI79775.1 aver|OJJ02139.1 awen|OJJ41516.1 azon|OJJ48239.1

Group4897: abra|OJJ69003.1 acar|OOF92716.1 acla|EAW12856.1 afis|EAW18019.1 afla|EED51872.1 afum|EAL91831.1 agla|OJJ85373.1 akaw|GAA90521.1 aluc|OJZ85989.1 anid|CBF80054.1 anig|EHA24621.1 asyd|OJJ58281.1 ater|EAU31535.1 atub|OJI79778.1 aver|OJJ02142.1 awen|OJJ41520.1 azon|OJJ48242.1

Group4898: abra|OJJ69007.1 acla|EAW12852.1 afis|EAW18015.1 afla|EED51879.1 afum|EAL91827.1 agla|OJJ85367.1 akaw|GAA90524.1 aluc|OJZ85992.1 anid|CBF80046.1 anig|EHA24618.1 aory|EIT81690.1 asyd|OJJ58277.1 ater|EAU31531.1 atub|OJI79781.1 aver|OJJ02147.1 awen|OJJ41525.1 azon|OJJ48246.1

Group4899: abra|OJJ69009.1 acar|OOF92720.1 acla|EAW12849.1 afis|EAW18012.1 afla|EED51884.1 afum|EAL91824.1 agla|OJJ80284.1 akaw|GAA90526.1 aluc|OJZ85995.1 anid|CBF80039.1 anig|EHA24615.1 asyd|OJJ58274.1 ater|EAU31528.1 atub|OJI79783.1 aver|OJJ02150.1 awen|OJJ41529.1 azon|OJJ48249.1

Group4900: abra|OJJ69033.1 acar|OOF92651.1 acla|EAW08890.1 afis|EAW15499.1 afla|EED49014.1 afum|EAL85824.1 agla|OJJ80177.1 akaw|GAA90548.1 aluc|OJZ86018.1 anid|EHA24593.1 aory|EIT82509.1 asyd|OJJ56012.1 ater|EAU32620.1 atub|OJI79807.1 aver|OJJ04957.1 awen|OJJ38158.1 azon|OJJ43131.1

Group4901: abra|OJJ69035.1 acar|OOF92650.1 acla|EAW14479.1 afis|EAW19188.1 afla|EED47723.1 afum|EAL93919.1 agla|OJJ88533.1 akaw|GAA90550.1 aluc|OJZ86020.1 anid|CBF86244.1 anig|EHA24591.1 aory|EIT77180.1 asyd|OJJ65045.1 atub|OJI79809.1 aver|OJI99166.1 awen|OJJ37546.1 azon|OJJ51209.1

Group4902: abra|OJJ69040.1 acar|OOF92967.1 acla|EAW11878.1 afis|EAW19489.1 afla|EED56707.1 afum|EAL87005.1 agla|OJJ81219.1 akaw|GAA90555.1 aluc|OJZ86025.1 anid|CBF75454.1 anig|EHA24586.1 aory|EIT73897.1 asyd|OJJ59773.1 atub|OJI79814.1 aver|OJJ02513.1 awen|OJJ36905.1 azon|OJJ42910.1

Group4903: abra|OJJ69056.1 acar|OOF91227.1 acla|EAW08758.1 afis|EAW15675.1 afla|EED46855.1 afum|EAL85672.1 agla|OJJ81822.1 akaw|GAA90586.1 aluc|OJZ86044.1 anid|CBF71159.1 anig|EHA24567.1 asyd|OJJ55843.1 ater|EAU32485.1 atub|OJI79841.1 aver|OJJ04786.1 awen|OJJ38353.1 azon|OJJ43867.1

Group4904: abra|OJJ69073.1 acar|OOF91233.1 acla|EAW08769.1 afis|EAW15661.1 afla|EED46884.1 afum|EAL85687.1 agla|OJJ81783.1 akaw|GAA90604.1 aluc|OJZ86062.1 anid|CBF71184.1 anig|EHA24551.1 aory|EIT72716.1 asyd|OJJ55860.1 atub|OJI79859.1 aver|OJJ04801.1 awen|OJJ38289.1 azon|OJJ43026.1

Group4905: abra|OJJ69086.1 acar|OOF91207.1 acla|EAW08746.1 afis|EAW15690.1 afum|EAL85658.1 agla|OJJ81837.1 akaw|GAA90615.1 aluc|OJZ86074.1 anid|CBF71135.1 anig|EHA24541.1 aory|EIT80497.1 asyd|OJJ55832.1 ater|EAU32464.1 atub|OJI79871.1 aver|OJJ04774.1 awen|OJJ38381.1 azon|OJJ43856.1

Group4906: abra|OJJ69087.1 acar|OOF91206.1 acla|EAW08745.1 afis|EAW15691.1 afla|EED51363.1 afum|EAL85657.1 agla|OJJ81838.1 akaw|GAA90616.1 aluc|OJZ86075.1 anid|CBF71133.1 anig|EHA24540.1 aory|EIT80567.1 asyd|OJJ55831.1 atub|OJI79872.1 aver|OJJ04773.1 awen|OJJ38382.1 azon|OJJ43855.1

Group4907: abra|OJJ69088.1 acar|OOF91205.1 acla|EAW08744.1 afis|EAW15692.1 afla|EED51362.1 afum|EAL85656.1 agla|OJJ81839.1 akaw|GAA90617.1 aluc|OJZ86076.1 anid|CBF71131.1 anig|EHA24539.1 asyd|OJJ55830.1 ater|EAU32463.1 atub|OJI79873.1 aver|OJJ04772.1 awen|OJJ38383.1 azon|OJJ43854.1

Group4908: abra|OJJ69095.1 acar|OOF91199.1 acla|EAW08736.1 afis|EAW15700.1 afla|EED51351.1 afum|EAL85648.1 agla|OJJ81848.1 akaw|GAA90623.1 aluc|OJZ86085.1 anid|CBF71125.1 anig|EHA24531.1 asyd|OJJ55824.1 ater|EAU32448.1 atub|OJI79881.1 aver|OJJ04766.1 awen|OJJ38392.1 azon|OJJ43846.1

Group4909: abra|OJJ69103.1 acla|EAW08730.1 afis|EAW15704.1 afla|EED51346.1 afum|EAL85643.1 agla|OJJ81854.1 akaw|GAA90628.1 aluc|OJZ86091.1 anid|CBF71102.1 anig|EHA24526.1 aory|EIT80416.1 asyd|OJJ52708.1 ater|EAU32439.1 atub|OJI79887.1 aver|OJJ04737.1 awen|OJJ38401.1 azon|OJJ43842.1

Group4910: abra|OJJ69105.1 acar|OOF91179.1 acla|EAW08727.1 afis|EAW15735.1 afla|EED51344.1 afum|EBA27236.1 akaw|GAA90630.1 aluc|OJZ86093.1 anid|CBF83999.1 anig|EHA24524.1 aory|EIT80417.1 asyd|OJJ61395.1 ater|EAU32437.1 atub|OJI79889.1 aver|OJJ00724.1 awen|OJJ38403.1 azon|OJJ43840.1

Group4911: abra|OJJ69106.1 acar|OOF91180.1 acla|EAW08726.1 afis|EAW15734.1 afla|EED51343.1 afum|EBA27237.1 agla|OJJ81859.1 akaw|GAA90631.1 aluc|OJZ86094.1 anid|CBF71098.1 aory|EIT81543.1 asyd|OJJ52706.1 ater|EAU32436.1 atub|OJI79890.1 aver|OJJ04735.1 awen|OJJ38404.1 azon|OJJ43838.1

Group4912: abra|OJJ69107.1 acla|EAW08725.1 afis|EAW15733.1 afla|EED51342.1 afum|EAL85614.1 agla|OJJ81860.1 akaw|GAA90632.1 aluc|OJZ86095.1 anid|CBF71096.1 anig|EHA24523.1 aory|EIT81551.1 asyd|OJJ52705.1 ater|EAU32435.1 atub|OJI79891.1 aver|OJJ04734.1 awen|OJJ38405.1 azon|OJJ43837.1

Group4913: abra|OJJ69109.1 acar|OOF91182.1 acla|EAW08723.1 afis|EAW15731.1 afla|EED51340.1 afum|EAL85616.1 agla|OJJ81862.1 akaw|GAA90634.1 aluc|OJZ86097.1 anid|CBF71092.1 anig|EHA24521.1 asyd|OJJ52702.1 ater|EAU32433.1 atub|OJI79893.1 aver|OJJ04730.1 awen|OJJ38407.1 azon|OJJ43835.1

Group4914: abra|OJJ69114.1 acar|OOF91187.1 acla|EAW08718.1 afis|EAW15729.1 afla|EED51334.1 afum|EAL85618.1 agla|OJJ81868.1 akaw|GAA90639.1 aluc|OJZ86103.1 anid|CBF71083.1 anig|EHA24516.1 asyd|OJJ52697.1 ater|EAU32429.1 atub|OJI79898.1 aver|OJJ04725.1 awen|OJJ38413.1 azon|OJJ43829.1

Group4915: abra|OJJ69118.1 acar|OOF91190.1 acla|EAW08714.1 afis|EAW15722.1 afla|EED51330.1 afum|EAL85625.2 agla|OJJ81872.1 akaw|GAA90643.1 aluc|OJZ86107.1 anid|CBF71077.1 anig|EHA23837.1 asyd|OJJ52693.1 ater|EAU32425.1 atub|OJI79902.1 aver|OJJ04721.1 awen|OJJ38417.1 azon|OJJ43825.1

Group4916: abra|OJJ69124.1 acar|OOF91176.1 acla|EAW08708.1 afis|EAW15716.1 afla|EED51324.1 afum|EAL85632.1 agla|OJJ81880.1 akaw|GAA90649.1 aluc|OJZ86113.1 anid|CBF71066.1 anig|EHA24508.1 aory|EIT81491.1 asyd|OJJ52686.1 atub|OJI79908.1 aver|OJJ04714.1 awen|OJJ38424.1 azon|OJJ43819.1

Group4917: abra|OJJ69146.1 acar|OOF91157.1 acla|EAW08668.1 afis|EAW15756.1 afla|EED51301.1 afum|EAL85593.1 agla|OJJ81907.1 akaw|GAA86312.1 aluc|OJZ86132.1 anid|CBF71029.1 anig|EHA24489.1 aory|EIT81548.1 asyd|OJJ52662.1 ater|EAU32399.1 atub|OJI79928.1 aver|OJJ04689.1 awen|OJJ38448.1

Group4918: abra|OJJ69153.1 acar|OOF91150.1 acla|EAW08670.1 afis|EAW15755.1 afla|EED51299.1 afum|EAL85594.1 agla|OJJ81908.1 akaw|GAA86309.1 aluc|OJZ86140.1 anid|CBF71031.1 anig|EHA24484.1 asyd|OJJ52663.1 ater|EAU32398.1 atub|OJI79932.1 aver|OJJ04690.1 awen|OJJ38452.1 azon|OJJ43752.1

Group4919: abra|OJJ69160.1 acar|OOF91143.1 acla|EAW08677.1 afis|EAW15747.1 afla|EED51292.1 agla|OJJ81916.1 akaw|GAA86302.1 aluc|OJZ86147.1 anid|CBF71011.1 anig|EHA24477.1 aory|EIT81495.1 asyd|OJJ52652.1 ater|EAU32391.1 atub|OJI79939.1 aver|OJJ04681.1 awen|OJJ38459.1 azon|OJJ43760.1

Group4920: abra|OJJ69185.1 acar|OOF91127.1 acla|EAW08661.1 afis|EAW15770.1 afla|EED51277.1 afum|EAL85578.1 agla|OJJ81934.1 akaw|GAA86280.1 aluc|OJZ86171.1 anid|CBF70981.1 anig|EHA24454.1 asyd|OJJ52635.1 ater|EAU32371.1 atub|OJI79963.1 aver|OJJ04663.1 awen|OJJ38478.1 azon|OJJ43778.1

Group4921: abra|OJJ69190.1 acar|OOF91123.1 acla|EAW08655.1 afis|EAW15776.1 afla|EED51270.1 afum|EAL85573.1 agla|OJJ81939.1 akaw|GAA86274.1 aluc|OJZ86176.1 anig|EHA24448.1 aory|EIT81527.1 asyd|OJJ52630.1 ater|EAU32365.1 atub|OJI79968.1 aver|OJJ04658.1 awen|OJJ38483.1 azon|OJJ43784.1

Group4922: abra|OJJ69202.1 acar|OOF91114.1 acla|EAW08645.1 afis|EAW15786.1 afum|EAL85564.1 agla|OJJ81949.1 akaw|GAA92214.1 aluc|OJZ86186.1 anid|CBF70956.1 anig|EHA24438.1 aory|EIT81494.1 asyd|OJJ52620.1 ater|EAU32355.1 atub|OJI79978.1 aver|OJJ04647.1 awen|OJJ38493.1 azon|OJJ43795.1

Group4923: abra|OJJ69203.1 acar|OOF91113.1 acla|EAW08644.1 afis|EAW15787.1 afla|EED51258.1 afum|EAL85563.1 agla|OJJ81950.1 akaw|GAA92215.1 aluc|OJZ86187.1 anid|CBF70958.1 anig|EHA24437.1 asyd|OJJ52619.1 ater|EAU32354.1 atub|OJI79979.1 aver|OJJ04646.1 awen|OJJ38495.1 azon|OJJ43796.1

Group4924: abra|OJJ69223.1 acar|OOF91097.1 acla|EAW08623.1 afis|EAW15809.1 afum|EAL85542.1 agla|OJJ81975.1 akaw|GAA92231.1 aluc|OJZ86203.1 anid|CBF70907.1 anig|EHA24419.1 aory|EIT83175.1 asyd|OJJ52598.1 ater|EAU33439.1 atub|OJI79997.1 aver|OJJ04625.1 awen|OJJ38520.1 azon|OJJ43735.1

Group4925: abra|OJJ69225.1 acar|OOF91095.1 afis|EAW15811.1 afum|EAL85540.1 agla|OJJ81977.1 akaw|GAA92233.1 aluc|OJZ86205.1 anid|CBF75271.1 aory|EIT83193.1 asyd|OJJ55915.1 ater|EAU33621.1 atub|OJI79999.1 aver|OJJ04855.1 awen|OJJ38522.1 abra|OJJ70041.1 anig|EHA18723.1 afla|EED51236.1

Group4926: abra|OJJ69233.1 acar|OOF91087.1 acla|EAW08616.1 afis|EAW15818.1 afla|EED51229.1 afum|EAL85533.1 agla|OJJ81982.1 akaw|GAA92241.1 aluc|OJZ86213.1 anid|CBF70893.1 anig|EHA24413.1 asyd|OJJ52592.1 ater|EAU33430.1 atub|OJI80008.1 aver|OJJ04619.1 awen|OJJ38532.1 azon|OJJ43730.1

Group4927: abra|OJJ69245.1 acar|OOF91075.1 acla|EAW08604.1 afis|EAW15829.1 afla|EED51216.1 afum|EAL85522.2 agla|OJJ81993.1 akaw|GAA92253.1 aluc|OJZ86226.1 anid|CBF70867.1 anig|EHA24402.1 aory|EIT80404.1 asyd|OJJ52579.1 atub|OJI80019.1 aver|OJJ04607.1 awen|OJJ38543.1 azon|OJJ43720.1

Group4928: abra|OJJ69266.1 acar|OOF89860.1 acla|EAW14656.1 afis|EAW24190.1 afum|EAL85863.1 agla|OJJ79689.1 akaw|GAA88142.1 aluc|OJZ82095.1 anid|CBF80855.1 anig|EHA28634.1 aory|EIT82483.1 asyd|OJJ56290.1 ater|EAU31141.1 atub|OJI88342.1 aver|OJJ06427.1 awen|OJJ33109.1 azon|OJJ44840.1

Group4929: abra|OJJ69272.1 acar|OOF94449.1 acla|EAW14661.1 afis|EAW24192.1 afla|EED48079.1 agla|OJJ79687.1 akaw|GAA88146.1 aluc|OJZ82099.1 anid|CBF74310.1 anig|EHA28630.1 aory|EIT82480.1 asyd|OJJ54006.1 ater|EAU31143.1 atub|OJI88338.1 aver|OJJ08101.1 awen|OJJ33107.1 azon|OJJ44841.1

Group4930: abra|OJJ69303.1 acla|EAW14689.1 afis|EAW24220.1 afla|EED48051.1 afum|EAL85889.1 agla|OJJ79650.1 akaw|GAA88172.1 aluc|OJZ82131.1 anid|CBF74246.1 anig|EHA28600.1 aory|EIT83327.1 asyd|OJJ53974.1 ater|EAU31170.1 atub|OJI88305.1 aver|OJJ08073.1 awen|OJJ33076.1 azon|OJJ44870.1

Group4931: abra|OJJ69304.1 acar|OOF94422.1 acla|EAW14690.1 afis|EAW24221.1 afum|EAL85890.1 agla|OJJ79649.1 akaw|GAA88173.1 aluc|OJZ82132.1 anid|CBF74244.1 anig|EHA28599.1 aory|EIT83331.1 asyd|OJJ53973.1 ater|EAU31171.1 atub|OJI88304.1 aver|OJJ08072.1 awen|OJJ33075.1 azon|OJJ44871.1

Group4932: abra|OJJ69317.1 acar|OOF90304.1 acla|EAW14731.1 afis|EAW24264.1 afla|EED48013.1 afum|EAL85932.1 agla|OJJ79608.1 akaw|GAA88186.1 aluc|OJZ82146.1 anid|CBF74177.1 anig|EHA28584.1 aory|EIT82900.1 asyd|OJJ53942.1 atub|OJI88290.1 aver|OJJ08039.1 awen|OJJ33037.1 azon|OJJ44882.1

Group4933: abra|OJJ69320.1 acar|OOF94410.1 acla|EAW14725.1 afis|EAW24261.1 afla|EED48017.1 afum|EAL85929.1 agla|OJJ79611.1 akaw|GAA88189.1 aluc|OJZ82149.1 anid|CBF74187.1 anig|EHA28581.1 asyd|OJJ53948.1 ater|EAU31206.1 atub|OJI88286.1 aver|OJJ08044.1 awen|OJJ33041.1 azon|OJJ44859.1

Group4934: abra|OJJ69324.1 acar|OOF94403.1 acla|EAW14716.1 afis|EAW24251.1 afla|EED48022.1 afum|EAL85920.2 agla|OJJ79622.1 akaw|GAA88195.1 aluc|OJZ82156.1 anid|CBF74197.1 anig|EHA28576.1 asyd|OJJ53951.1 ater|EAU31192.1 atub|OJI88281.1 aver|OJJ08047.1 awen|OJJ33048.1 azon|OJJ44871.1

Group4935: abra|OJJ69325.1 acar|OOF94402.1 acla|EAW14715.1 afis|EAW24250.1 afla|EED48023.1 afum|EAL85919.1 agla|OJJ79623.1 akaw|GAA88196.1 aluc|OJZ82157.1 anid|CBF74199.1 anig|EHA28575.1 asyd|OJJ53952.1 ater|EAU31191.1 atub|OJI88280.1 aver|OJJ08048.1 awen|OJJ33062.1 azon|OJJ44870.1

Group4936: abra|OJJ69326.1 acar|OOF94400.1 acla|EAW14714.1 afis|EAW24249.1 afla|EED48024.1 afum|EAL85917.2 agla|OJJ79624.1 akaw|GAA88197.1 aluc|OJZ82158.1 anid|CBF74201.1 anig|EHA28574.1 asyd|OJJ53953.1 ater|EAU31190.1 atub|OJI88279.1 aver|OJJ08049.1 awen|OJJ33061.1 azon|OJJ44869.1

Group4937: abra|OJJ69339.1 acla|EAW14707.1 afis|EAW24238.1 afla|EED48033.1 afum|EAL85906.1 agla|OJJ79633.1 akaw|GAA88208.1 aluc|OJZ82171.1 anid|CBF74215.1 anig|EHA28562.1 aory|EIT83347.1 asyd|OJJ53959.1 ater|EAU31184.1 atub|OJI88266.1 aver|OJJ08055.1 awen|OJJ33052.1 azon|OJJ44863.1

Group4938: abra|OJJ69347.1 acar|OOF94377.1 acla|EAW14699.1 afis|EAW24230.1 afla|EED48041.1 afum|EAL85899.2 agla|OJJ79641.1 akaw|GAA88216.1 aluc|OJZ82179.1 anid|CBF74226.1 anig|EHA28555.1 aory|EIT83348.1 asyd|OJJ53966.1 atub|OJI88258.1 aver|OJJ08062.1 awen|OJJ33067.1 azon|OJJ44856.1

Group4939: abra|OJJ69356.1 acar|OOF94368.1 acla|EAW14747.1 afis|EAW24278.1 afla|EED47998.1 afum|EAL85947.1 agla|OJJ79584.1 akaw|GAA88226.1 aluc|OJZ82188.1 anid|CBF74153.1 anig|EHA28547.1 aory|EIT82913.1 asyd|OJJ53924.1 atub|OJI88247.1 aver|OJJ08022.1 awen|OJJ33019.1 azon|OJJ44898.1

Group4940: abra|OJJ69358.1 acar|OOF94366.1 acla|EAW14749.1 afis|EAW24280.1 afla|EED47996.1 afum|EAL85949.1 agla|OJJ80634.1 akaw|GAA88228.1 aluc|OJZ82190.1 anid|CBF74149.1 anig|EHA28545.1 aory|EIT82910.1 asyd|OJJ53922.1 atub|OJI88245.1 aver|OJJ08020.1 awen|OJJ33017.1 azon|OJJ448500.1

Group4941: abra|OJJ69364.1 acar|OOF94361.1 acla|EAW14754.1 afis|EAW24285.1 afla|EED47991.1 afum|EAL85954.1 agla|OJJ83147.1 akaw|GAA88233.1 aluc|OJZ82198.1 anid|CBF74133.1 aory|EIT79826.1 asyd|OJJ53914.1 ater|EAU31236.1 atub|OJI88238.1 aver|OJJ08012.1 awen|OJJ33011.1 azon|OJJ448504.1

Group4942: abra|OJJ69365.1 acar|OOF94360.1 acla|EAW14755.1 afis|EAW24286.1 afla|EED47990.1 afum|EAL85955.1 agla|OJJ83150.1 akaw|GAA88234.1 aluc|OJZ82199.1 anig|EHA28540.1 aory|EIT79821.1 asyd|OJJ53913.1 ater|EAU31237.1 atub|OJI88237.1 aver|OJJ08011.1 awen|OJJ33010.1 azon|OJJ448505.1

Group4943: abra|OJJ69372.1 acar|OOF94356.1 acla|EAW14762.1 afis|EAW24293.1 afum|EAL85961.1  
agla|OJJ83158.1 akaw|GAA88241.1 aluc|OJZ82206.1 anid|CBF74120.1 anig|EHA28533.1 aory|EIT79846.1  
asyd|OJJ53906.1 ater|EAU31243.1 atub|OJI88230.1 aver|OJJ08004.1 awen|OJJ33003.1 azon|OJJ48512.1

Group4944: abra|OJJ69379.1 acar|OOF94346.1 acla|EAW14767.1 afis|EAW24298.1 afla|EED47974.1  
afum|EAL85966.1 agla|OJJ83165.1 akaw|GAA88247.1 aluc|OJZ82214.1 anid|CBF74112.1 anig|EHA28526.1  
asyd|OJJ53902.1 ater|EAU31249.1 atub|OJI88221.1 aver|OJJ07999.1 awen|OJJ32994.1 azon|OJJ48521.1

Group4945: abra|OJJ69392.1 acla|EAW14777.1 afis|EAW24308.1 afum|EAL85976.1 agla|OJJ83177.1  
akaw|GAA88260.1 aluc|OJZ82229.1 anid|CBF74089.1 anig|EHA28510.1 aory|EIT79815.1 asyd|OJJ53886.1  
ater|EAU31261.1 atub|OJI88208.1 aver|OJJ07984.1 awen|OJJ32984.1 azon|OJJ48933.1 afla|EED47961.1

Group4946: abra|OJJ69395.1 acar|OOF94334.1 afis|EAW24310.1 afla|EED47957.1 akaw|GAA88262.1  
aluc|OJZ82231.1 anig|EHA28508.1 aory|EIT79855.1 asyd|OJJ53884.1 ater|EAU31263.1 atub|OJI88206.1  
aver|OJJ07982.1 awen|OJJ32982.1 azon|OJJ48935.1 acla|EAW14779.1 afum|EBA27252.1 anid|CBF74085.1

Group4947: abra|OJJ69399.1 acar|OOF94331.1 acla|EAW14781.1 afis|EAW24312.1 afla|EED47955.1  
afum|EAL85980.1 agla|OJJ83180.1 akaw|GAA88265.1 aluc|OJZ82235.1 anig|EHA28506.1 aory|EIT79818.1  
asyd|OJJ53881.1 ater|EAU31265.1 atub|OJI88203.1 aver|OJJ07979.1 awen|OJJ32980.1 azon|OJJ48937.1

Group4948: abra|OJJ69403.1 acar|OOF94328.1 acla|EAW14785.1 afis|EAW24316.1 afla|EED47951.1  
afum|EAL85984.1 agla|OJJ83184.1 akaw|GAA88268.1 aluc|OJZ82239.1 anid|CBF74076.1 anig|EHA28502.1  
asyd|OJJ53877.1 ater|EAU31268.1 atub|OJI88199.1 aver|OJJ07975.1 awen|OJJ32976.1 azon|OJJ48941.1

Group4949: abra|OJJ69406.1 acla|EAW14788.1 afis|EAW24319.1 afla|EED47948.1 afum|EAL85989.1  
agla|OJJ83187.1 akaw|GAA88271.1 aluc|OJZ82243.1 anig|EHA28499.1 ater|EAU31272.1 atub|OJI88195.1  
aver|OJJ07972.1 awen|OJJ32973.1 anid|CBF74071.1 asyd|OJJ53874.1 azon|OJJ48944.1 aory|EIT79838.1

Group4950: abra|OJJ69416.1 acar|OOF94316.1 acla|EAW14797.1 afis|EAW24328.1 afla|EED47938.1  
afum|EAL85998.1 agla|OJJ83195.1 akaw|GAA88284.1 aluc|OJZ82253.1 anig|EHA28488.1 aory|EIT79811.1  
asyd|OJJ53866.1 ater|EAU30425.1 atub|OJI88184.1 aver|OJJ07964.1 awen|OJJ32966.1 azon|OJJ48951.1

Group4951: abra|OJJ69438.1 acar|OOF94302.1 acla|EAW14810.1 afis|EAW24339.1 afla|EED47924.1  
afum|EAL86010.1 agla|OJJ83227.1 aluc|OJZ82274.1 anid|CBF74023.1 anig|EHA28471.1 aory|EIT83369.1  
asyd|OJJ53843.1 ater|EAU30409.1 atub|OJI88165.1 aver|OJJ07946.1 awen|OJJ32883.1 azon|OJJ48972.1

Group4952: abra|OJJ69444.1 acar|OOF94295.1 acla|EAW11741.1 afis|EAW23774.1 afla|EED57694.1  
afum|EAL87208.1 akaw|GAA88374.1 aluc|OJZ82280.1 anid|CBF69507.1 anig|EHA28466.1 aory|EIT79917.1  
asyd|OJJ59220.1 ater|EAU31469.1 atub|OJI88159.1 aver|OJJ01831.1 awen|OJJ40003.1 azon|OJJ49871.1

Group4953: abra|OJJ69454.1 acar|OOF94287.1 acla|EAW14818.1 afis|EAW24348.1 afla|EED47915.1  
afum|EAL86018.1 agla|OJJ83236.1 akaw|GAA88358.1 aluc|OJZ82297.1 anid|CBF74015.1 anig|EHA28458.1  
aory|EIT83377.1 asyd|OJJ53839.1 atub|OJI88142.1 aver|OJJ07942.1 awen|OJJ32876.1 ater|EAU32154.1

Group4954: abra|OJJ69461.1 acar|OOF94279.1 acla|EAW09923.1 afis|EAW21171.1 afla|EED54736.1  
afum|EBA27452.1 agla|OJJ80009.1 akaw|GAA88351.1 aluc|OJZ82305.1 anid|CBF83234.1 anig|EHA28451.1  
asyd|OJJ60542.1 ater|EAU35838.1 atub|OJI88133.1 aver|OJI99869.1 awen|OJJ36509.1 azon|OJJ44380.1

Group4955: abra|OJJ69466.1 acar|OOF94276.1 acla|EAW09921.1 afis|EAW21169.1 afla|EED54734.1  
afum|EAL92188.2 agla|OJJ80011.1 akaw|GAA88347.1 aluc|OJZ82309.1 anig|EHA28448.1 aory|EIT78858.1  
asyd|OJJ60540.1 ater|EAU35836.1 atub|OJI88130.1 aver|OJI99867.1 awen|OJJ36506.1 azon|OJJ44378.1

Group4956: abra|OJJ69479.1 acla|EAW09910.1 afis|EAW21159.1 afla|EED54650.1 afum|EAL92177.1  
agla|OJJ80029.1 akaw|GAA88337.1 aluc|OJZ82321.1 anid|CBF86979.1 anig|EHA28437.1 aory|EIT78788.1  
asyd|OJJ60526.1 ater|EAU35821.1 atub|OJI88119.1 aver|OJI99854.1 awen|OJJ36491.1 azon|OJJ44357.1

Group4957: abra|OJJ69480.1 acar|OOF94264.1 acla|EAW09909.1 afis|EAW21158.1 afum|EAL92176.1  
agla|OJJ80030.1 akaw|GAA88336.1 aluc|OJZ82322.1 anid|CBF86981.1 anig|EHA28436.1 aory|EIT78777.1  
asyd|OJJ60525.1 ater|EAU35820.1 atub|OJI88118.1 aver|OJI99853.1 awen|OJJ36490.1 azon|OJJ44358.1

Group4958: abra|OJJ69493.1 acar|OOF94252.1 acla|EAW09901.1 afis|EAW21149.1 afla|EED54663.1  
afum|EAL92168.1 agla|OJJ80052.1 akaw|GAA88327.1 aluc|OJZ82333.1 anid|CBF75142.1 anig|EHA28427.1  
aory|EIT78868.1 asyd|OJJ59970.1 ater|EAU36737.1 atub|OJI88107.1 aver|OJJ02321.1 awen|OJJ36476.1

Group4959: abra|OJJ69503.1 acar|OOF94248.1 afla|EED54665.1 akaw|GAA88320.1 aluc|OJZ82342.1  
anig|EHA28418.1 aory|EIT78849.1 atub|OJI88098.1 awen|OJJ36473.1 acla|EAW09899.1 afis|EAW21147.1  
afum|EAL92166.1 agla|OJJ80054.1 anid|CBF83168.1 asyd|OJJ55503.1 aver|OJJ06583.1 ater|EAU39451.1

Group4960: abra|OJJ69504.1 acla|EAW09963.1 afis|EAW21132.1 afla|EED51810.1 afum|EAL92150.1  
agla|OJJ80085.1 akaw|GAA88319.1 aluc|OJZ82343.1 anig|EHA28417.1 aory|EIT81769.1 asyd|OJJ60462.1  
ater|EAU36775.1 atub|OJI88097.1 aver|OJI99782.1 awen|OJJ36455.1 anid|CBF87017.1 azon|OJJ44421.1

Group4961: abra|OJJ69512.1 acar|OOF94241.1 acla|EAW09956.1 afis|EAW21140.1 afla|EED46143.1 afum|EAL92159.1 agla|OJJ80067.1 akaw|GAA88312.1 aluc|OJZ82350.1 anid|CBF87005.1 anig|EHA28410.1 aory|EIT76500.1 asyd|OJJ60469.1 atub|OJI88090.1 aver|OJI99789.1 awen|OJJ36464.1 azon|OJJ44414.1

Group4962: abra|OJJ69530.1 acar|OOF92669.1 acla|EAW07395.1 afis|EAW22421.1 afla|EED52499.1 afum|EAL90771.1 agla|OJJ87603.1 akaw|GAA88381.1 aluc|OJZ82369.1 anid|CBF88809.1 anig|EHA28396.1 aory|EIT82809.1 asyd|OJJ62891.1 atub|OJI88073.1 aver|OJI96942.1 awen|OJJ35000.1 azon|OJJ45643.1

Group4963: abra|OJJ69551.1 acar|OOF95793.1 acla|EAW10612.1 afis|EAW24955.1 afla|EED55509.1 afum|EAL89613.1 agla|OJJ82182.1 akaw|GAA91563.1 aluc|OJZ82381.1 anid|CBF81670.1 anig|EHA28384.1 aory|EIT80837.1 asyd|OJJ59554.1 ater|EAU35702.1 atub|OJI88060.1 aver|OJJ02714.1 awen|OJJ40550.1

Group4964: abra|OJJ69578.1 acar|OOF91577.1 acla|EAW14392.1 afis|EAW19099.1 afla|EED54333.1 afum|EAL93831.1 agla|OJJ84502.1 akaw|GAA91574.1 aluc|OJZ82396.1 anid|CBF79698.1 aory|EIT75935.1 asyd|OJJ58052.1 ater|EAU32146.1 atub|OJI88046.1 aver|OJJ04352.1 awen|OJJ32492.1 azon|OJJ46039.1

Group4965: abra|OJJ69579.1 acar|OOF91575.1 acla|EAW14389.1 afis|EAW19096.1 afla|EED54329.1 afum|EBA27504.1 agla|OJJ84505.1 akaw|GAA91575.1 aluc|OJZ82397.1 anid|CBF79704.1 asyd|OJJ58054.1 ater|EAU32144.1 atub|OJI88045.1 aver|OJJ04349.1 awen|OJJ32489.1 azon|OJJ46042.1 aory|EIT76045.1

Group4966: abra|OJJ69596.1 acar|OOF91563.1 acla|EAW14374.1 afis|EAW19082.1 afla|EED54314.1 afum|EAL93811.1 agla|OJJ84524.1 akaw|GAA91588.1 aluc|OJZ82411.1 anid|CBF79670.1 anig|EHA28356.1 aory|EIT75963.1 asyd|OJJ58035.1 ater|EAU32129.1 atub|OJI88030.1 aver|OJJ04364.1 awen|OJJ32477.1

Group4967: abra|OJJ69613.1 acar|OOF92693.1 acla|EAW11766.1 afis|EAW23684.1 afla|EED51826.1 afum|EAL87129.1 agla|OJJ86862.1 akaw|GAA91597.1 aluc|OJZ82421.1 anid|CBF80086.1 anig|EHA28348.1 aory|EIT81697.1 asyd|OJJ58305.1 ater|EAU31583.1 atub|OJI88020.1 aver|OJJ02107.1 azon|OJJ45792.1

Group4968: abra|OJJ69651.1 acar|OOG00403.1 acla|EAW06766.1 afis|EAW16316.1 afla|EED53565.1 afum|EAL88939.1 agla|OJJ88277.1 akaw|GAA91628.1 aluc|OJZ82455.1 anid|CBF89144.1 anig|EHA28320.1 aory|EIT75184.1 asyd|OJJ62570.1 ater|EAU34141.1 atub|OJI87983.1 aver|OJI96694.1 awen|OJJ37714.1

Group4969: abra|OJJ69653.1 acar|OOF93647.1 acla|EAW14511.1 afis|EAW19229.1 afla|EED47661.1 agla|OJJ88470.1 akaw|GAA91632.1 aluc|OJZ82459.1 anid|CBF78612.1 anig|EHA28316.1 asyd|OJJ65179.1 ater|EAU37234.1 atub|OJI87979.1 aver|OJI99332.1 awen|OJJ37587.1 azon|OJJ51241.1 aory|EIT80209.1

Group4970: abra|OJJ69678.1 acar|OOF93500.1 acla|EAW08823.1 afis|EAW15574.1 afla|EED49083.1 afum|EAL85760.1 agla|OJJ85178.1 akaw|GAA88803.1 aluc|OJZ82486.1 anid|CBF78103.1 anig|EHA28288.1 aory|EIT82543.1 asyd|OJJ55894.1 ater|EAU32557.1 atub|OJI87946.1 aver|OJJ04839.1 awen|OJJ38234.1

Group4971: abra|OJJ69700.1 acar|OOF90941.1 afis|EAW20859.1 afla|EED45448.1 afum|EAL84776.1 agla|OJJ83745.1 akaw|GAA88817.1 aluc|OJZ82501.1 anid|CBF84702.1 anig|EHA28268.1 aory|EIT82427.1 asyd|OJJ53319.1 ater|EAU30802.1 atub|OJI87930.1 aver|OJJ08424.1 awen|OJJ34514.1 azon|OJJ45199.1

Group4972: abra|OJJ69708.1 acar|OOF94202.1 acla|EAW09975.1 afis|EAW21114.1 afla|EED51765.1 afum|EAL92137.1 agla|OJJ80097.1 akaw|GAA90157.1 aluc|OJZ83190.1 anid|CBF87034.1 anig|EHA28260.1 aory|EIT80039.1 asyd|OJJ60453.1 ater|EAU36785.1 atub|OJI87749.1 aver|OJI99771.1 awen|OJJ36444.1

Group4973: abra|OJJ69711.1 acar|OOF94201.1 acla|EAW09974.1 afis|EAW21115.1 afla|EED51766.1 afum|EAL92138.1 agla|OJJ80096.1 akaw|GAA90161.1 aluc|OJZ83186.1 anid|CBF87032.1 anig|EHA28258.1 asyd|OJJ60454.1 ater|EAU36784.1 atub|OJI87753.1 aver|OJI99772.1 awen|OJJ36445.1 azon|OJJ44431.1

Group4974: abra|OJJ69731.1 acar|OOF94190.1 acla|EAW11683.1 afla|EED51759.1 agla|OJJ86787.1 akaw|GAA90184.1 aluc|OJZ83165.1 anid|CBF73433.1 anig|EHA28229.1 aory|EIT80571.1 atub|OJI87772.1 aver|OJJ08109.1 awen|OJJ38074.1 azon|OJJ42488.1 acar|OOF93383.1 afum|EAL86339.2 afis|EAW16771.1

Group4975: abra|OJJ69741.1 acar|OOF94180.1 acla|EAW09983.1 afis|EAW21109.1 afla|EED51713.1 afum|EAL92131.1 akaw|GAA90193.1 aluc|OJZ83155.1 anid|CBF80441.1 anig|EHA28221.1 aory|EIT80457.1 asyd|OJJ54783.1 ater|EAU36790.1 atub|OJI87782.1 aver|OJJ07383.1 awen|OJJ36437.1 azon|OJJ45175.1

Group4976: abra|OJJ69743.1 acar|OOG00883.1 acla|EAW07453.1 afis|EAW22485.1 afla|EED56932.1 afum|EAL89359.2 akaw|GAA90196.1 aluc|OJZ83152.1 anig|EHA28218.1 aory|EIT77590.1 ater|EAU39229.1 atub|OJI87785.1 awen|OJJ35104.1 afla|EED47459.1 afum|EAL90708.1 aory|EIT79961.1 afla|EED56933.1

Group4977: abra|OJJ69747.1 acar|OOF94175.1 acla|EAW09986.1 afis|EAW21107.1 afla|EED51688.1 afum|EAL92128.1 agla|OJJ80109.1 akaw|GAA90199.1 aluc|OJZ83149.1 anig|EHA28215.1 aory|EIT80537.1 asyd|OJJ60447.1 ater|EAU36793.1 atub|OJI87788.1 aver|OJI99765.1 awen|OJJ36368.1 azon|OJJ51535.1

Group4978: abra|OJJ69772.1 agla|OJJ89535.1 akaw|GAA87882.1 aluc|OJZ85527.1 anig|EHA25058.1 asyd|OJJ59178.1 atub|OJI80041.1 aver|OJJ01798.1 abra|OJJ76053.1 afla|EED48186.1 akaw|GAA88912.1 aluc|OJZ89509.1 anig|EHA23091.1 aory|EIT72940.1 ater|EAU37178.1 atub|OJI85294.1 awen|OJJ39948.1

Group4979: acar|OOF93589.1 anig|EHA25040.1 atub|OJI80057.1 abra|OJJ69791.1 acla|EAW11764.1 afis|EAW23687.1 afla|EED57653.1 afum|EAL87132.1 agla|OJJ78642.1 akaw|GAA87867.1 aluc|OJZ85508.1 anid|CBF84203.1 aory|EIT79945.1 asyd|OJJ57163.1 ater|EAU34272.1 aver|OJJ03150.1 awen|OJJ33314.1

Group4980: abra|OJJ69803.1 acar|OOF93573.1 acla|EAW11066.1 afis|EAW20808.1 afla|EED51436.1 afum|EAL84820.1 akaw|GAA87856.1 aluc|OJZ85498.1 anid|CBF80564.1 anig|EHA25031.1 aory|EIT80626.1 asyd|OJJ54681.1 ater|EAU30269.1 atub|OJI80067.1 aver|OJJ07487.1 awen|OJJ31034.1 azon|OJJ42532.1

Group4981: abra|OJJ69845.1 acar|OOF93368.1 acla|EAW08980.1 afis|EAW15429.1 afla|EED55190.1 afum|EAL84214.1 agla|OJJ80141.1 akaw|GAA87814.1 aluc|OJZ85449.1 anid|CBF78299.1 anig|EHA24992.1 aory|EIT83595.1 asyd|OJJ56101.1 ater|EAU32702.1 atub|OJI80118.1 aver|OJJ05044.1 awen|OJJ38049.1

Group4982: anid|CBF87945.1 abra|OJJ77908.1 acla|EAW13240.1 afis|EAW17394.1 afla|EED55526.1 afum|EAL91232.1 agla|OJJ86275.1 akaw|GAA83751.1 aluc|OJZ90980.1 anig|EHA19685.1 aory|EIT80850.1 asyd|OJJ63474.1 ater|EAU38912.1 atub|OJI82971.1 aver|OJI97456.1 awen|OJJ32549.1 azon|OJJ47335.1

Group4983: abra|OJJ69868.1 acar|OOF90336.1 acla|EAW15316.1 afis|EAW20318.1 afla|EED57091.1 afum|EAL85446.1 akaw|GAA87788.1 aluc|OJZ85423.1 anig|EHA25602.1 aory|EIT82311.1 asyd|OJJ56070.1 ater|EAU32680.1 atub|OJI80152.1 aver|OJJ05013.1 awen|OJJ31345.1 asyd|OJJ52769.1 aver|OJJ08752.1

Group4984: abra|OJJ69874.1 acar|OOF93387.1 acla|EAW08929.1 afis|EAW15467.1 afla|EED46919.1 afum|EAL85855.1 agla|OJJ80148.1 akaw|GAA87783.1 aluc|OJZ85418.1 anid|CBF78284.1 anig|EHA25597.1 aory|EIT72664.1 asyd|OJJ56069.1 ater|EAU32661.1 atub|OJI80158.1 aver|OJJ05012.1 awen|OJJ38113.1

Group4985: abra|OJJ69904.1 acar|OOF97941.1 acla|EAW08919.1 afis|EAW15475.1 afla|EED47464.1 afum|EAL85846.1 agla|OJJ89051.1 akaw|GAA87748.1 aluc|OJZ85381.1 anid|CBF86603.1 anig|EHA25564.1 aory|EIT79959.1 asyd|OJJ64826.1 ater|EAU32653.1 atub|OJI80189.1 aver|OJI98939.1 awen|OJJ36394.1

Group4986: abra|OJJ69912.1 acar|OOF90389.1 acla|EAW08916.1 afis|EAW15478.1 afum|EAL85843.1 agla|OJJ78432.1 akaw|GAA87745.1 aluc|OJZ85376.1 anid|CBF78223.1 anig|EHA25559.1 aory|EIT72649.1 asyd|OJJ56031.1 ater|EAU32649.1 atub|OJI80193.1 aver|OJJ04978.1 awen|OJJ38135.1 azon|OJJ43156.1

Group4987: abra|OJJ69915.1 acar|OOF93427.1 acla|EAW08913.1 afis|EAW15482.1 afla|EED46931.1 afum|EAL85840.1 agla|OJJ80161.1 akaw|GAA87741.1 aluc|OJZ85373.1 anid|CBF78219.1 anig|EHA25557.1 aory|EIT72658.1 asyd|OJJ56027.1 atub|OJI80197.1 aver|OJJ04974.1 awen|OJJ38141.1 azon|OJJ43149.1

Group4988: abra|OJJ69919.1 acar|OOF93431.1 acla|EAW08910.1 afis|EAW15486.1 afla|EED46941.1 afum|EAL85837.1 agla|OJJ80164.1 akaw|GAA87737.1 aluc|OJZ85369.1 anig|EHA25552.1 aory|EIT72770.1 asyd|OJJ56024.1 ater|EAU32646.1 atub|OJI80201.1 aver|OJJ04971.1 awen|OJJ38143.1 azon|OJJ43145.1

Group4989: abra|OJJ69924.1 acar|OOF93435.1 acla|EAW08906.1 afis|EAW15490.1 afla|EED49004.1 afum|EAL85833.1 agla|OJJ80167.1 akaw|GAA87733.1 aluc|OJZ85364.1 anig|EHA25547.1 aory|EIT82535.1 asyd|OJJ56021.1 ater|EAU32629.1 atub|OJI80206.1 aver|OJJ04968.1 awen|OJJ38146.1 azon|OJJ43141.1

Group4990: abra|OJJ69926.1 acar|OOF93437.1 acla|EAW08904.1 afis|EAW15492.1 afla|EED49007.1 afum|EAL85831.1 agla|OJJ80169.1 akaw|GAA87731.1 aluc|OJZ85362.1 anig|EHA25545.1 aory|EIT82513.1 asyd|OJJ56019.1 ater|EAU32627.1 atub|OJI80209.1 aver|OJJ04966.1 awen|OJJ38148.1 azon|OJJ43139.1

Group4991: abra|OJJ69927.1 acar|OOF93438.1 acla|EAW08903.1 afis|EAW15493.1 afla|EED49008.1 afum|EAL85830.1 agla|OJJ80170.1 akaw|GAA87730.1 aluc|OJZ85361.1 anig|EHA25544.1 aory|EIT82514.1 asyd|OJJ56018.1 ater|EAU32626.1 atub|OJI80210.1 aver|OJJ04964.1 awen|OJJ38149.1 azon|OJJ43138.1

Group4992: abra|OJJ69928.1 acar|OOF93439.1 acla|EAW08902.1 afis|EAW15494.1 afla|EED49009.1 afum|EAL85829.1 agla|OJJ80171.1 akaw|GAA87729.1 aluc|OJZ85359.1 anig|EHA25543.1 aory|EIT82523.1 asyd|OJJ56017.1 ater|EAU32625.1 atub|OJI80212.1 aver|OJJ04963.1 awen|OJJ38150.1 azon|OJJ43137.1

Group4993: abra|OJJ69929.1 acar|OOF93440.1 acla|EAW08901.1 afis|EAW15495.1 afla|EED49010.1 afum|EAL85828.1 agla|OJJ80173.1 akaw|GAA87728.1 aluc|OJZ85358.1 anig|EHA25542.1 aory|EIT82519.1 asyd|OJJ56016.1 ater|EAU32624.1 atub|OJI80213.1 aver|OJJ04962.1 awen|OJJ38151.1 azon|OJJ43136.1

Group4994: abra|OJJ69930.1 acar|OOF93441.1 acla|EAW08893.1 afis|EAW15496.1 afla|EED49011.1 afum|EAL85827.1 agla|OJJ80175.1 akaw|GAA87727.1 aluc|OJZ85357.1 anig|EHA25541.1 aory|EIT82520.1 asyd|OJJ56015.1 ater|EAU32623.1 atub|OJI80214.1 aver|OJJ04961.1 awen|OJJ38154.1 azon|OJJ43135.1

Group4995: abra|OJJ69934.1 acar|OOF93443.1 acla|EAW08892.1 afis|EAW15497.1 afla|EED49012.1 afum|EAL85826.1 agla|OJJ80176.1 akaw|GAA87725.1 aluc|OJZ85353.1 anig|EHA25539.1 aory|EIT82506.1 asyd|OJJ56014.1 ater|EAU32622.1 atub|OJI80217.1 aver|OJJ04959.1 awen|OJJ38156.1 azon|OJJ43134.1

Group4996: abra|OJJ69937.1 acar|OOF93446.1 acla|EAW08886.1 afis|EAW15503.1 afla|EED49016.1 afum|EAL85821.1 agla|OJJ80180.1 akaw|GAA87722.1 aluc|OJZ85350.1 anig|EHA25537.1 aory|EIT82554.1 asyd|OJJ56008.1 ater|EAU32615.1 atub|OJI80220.1 aver|OJJ04953.1 awen|OJJ38163.1 azon|OJJ43124.1



Group4997: abra|OJJ69938.1 acar|OOF93447.1 acla|EAW08885.1 afis|EAW15504.1 afla|EED49017.1 afum|EAL85820.1 agla|OJJ80181.1 akaw|GAA87721.1 aluc|OJZ85349.1 anig|EHA25536.1 aory|EIT82559.1 asyd|OJJ56007.1 ater|EAU32614.1 atub|OJI80221.1 aver|OJJ04952.1 awen|OJJ38164.1 azon|OJJ43125.1

Group4998: abra|OJJ69939.1 acar|OOF93448.1 acla|EAW08884.1 afis|EAW15505.1 afla|EED49018.1 afum|EAL85819.1 agla|OJJ80182.1 akaw|GAA87720.1 aluc|OJZ85348.1 anig|EHA25535.1 aory|EIT82495.1 asyd|OJJ56006.1 ater|EAU32613.1 atub|OJI80222.1 aver|OJJ04951.1 awen|OJJ38165.1 azon|OJJ43126.1

Group4999: abra|OJJ69944.1 acar|OOF93453.1 acla|EAW08879.1 afis|EAW15516.1 afla|EED49022.1 afum|EAL85813.1 agla|OJJ80187.1 akaw|GAA87716.1 aluc|OJZ85343.1 anig|EHA25531.1 aory|EIT82503.1 asyd|OJJ56002.1 ater|EAU32608.1 atub|OJI80228.1 aver|OJJ04948.1 awen|OJJ38177.1 azon|OJJ43120.1

Group5000: abra|OJJ69945.1 acar|OOF93454.1 acla|EAW08878.1 afis|EAW15517.1 afla|EED49023.1 afum|EAL85812.1 agla|OJJ85228.1 akaw|GAA87715.1 aluc|OJZ85342.1 anig|EHA25530.1 aory|EIT82489.1 asyd|OJJ56001.1 ater|EAU32607.1 atub|OJI80229.1 aver|OJJ04947.1 awen|OJJ38178.1 azon|OJJ43119.1

Group5001: abra|OJJ69946.1 acar|OOF93455.1 acla|EAW08877.1 afis|EAW15518.1 afla|EED49025.1 afum|EAL85811.1 agla|OJJ85227.1 akaw|GAA87714.1 aluc|OJZ85341.1 anig|EHA25529.1 aory|EIT82492.1 asyd|OJJ56000.1 ater|EAU32606.1 atub|OJI80230.1 aver|OJJ04946.1 awen|OJJ38179.1 azon|OJJ43118.1

Group5002: abra|OJJ69949.1 acar|OOF93457.1 acla|EAW08875.1 afis|EAW15520.1 afla|EED49027.1 afum|EAL85809.1 agla|OJJ85226.1 akaw|GAA87711.1 aluc|OJZ85338.1 anig|EHA25526.1 aory|EIT82544.1 asyd|OJJ55997.1 ater|EAU32604.1 atub|OJI80233.1 aver|OJJ04944.1 awen|OJJ38181.1 azon|OJJ43112.1

Group5003: abra|OJJ69957.1 acar|OOF93467.1 acla|EAW08865.1 afis|EAW15529.1 afla|EED49040.1 afum|EAL85799.1 akaw|GAA87703.1 aluc|OJZ85325.1 anid|CBF78208.1 anig|EHA25515.1 aory|EIT82500.1 asyd|OJJ55987.1 ater|EAU32596.1 atub|OJI80247.1 aver|OJJ04935.1 awen|OJJ38193.1 azon|OJJ43101.1

Group5004: abra|OJJ69966.1 acla|EAW08838.1 afis|EAW15562.1 afla|EED49068.1 afum|EAL85770.1 agla|OJJ85189.1 akaw|GAA87693.1 aluc|OJZ85316.1 anid|CBF78123.1 anig|EHA25509.1 aory|EIT82555.1 asyd|OJJ55904.1 ater|EAU32570.1 atub|OJI80256.1 aver|OJJ04849.1 awen|OJJ38222.1 azon|OJJ43073.1

Group5005: abra|OJJ69969.1 acar|OOF93474.1 acla|EAW08840.1 afis|EAW15561.1 afla|EED49065.1 afum|EAL85771.1 agla|OJJ85193.1 akaw|GAA87692.1 aluc|OJZ85313.1 anig|EHA25508.1 aory|EIT82526.1 asyd|OJJ55911.1 ater|EAU32571.1 atub|OJI80258.1 aver|OJJ04851.1 awen|OJJ38219.1 azon|OJJ43074.1

Group5006: abra|OJJ69970.1 acar|OOF93476.1 acla|EAW08841.1 afis|EAW15560.1 afla|EED49064.1 afum|EAL85772.1 agla|OJJ85194.1 akaw|GAA87691.1 aluc|OJZ85312.1 anig|EHA25507.1 aory|EIT82521.1 asyd|OJJ55912.1 ater|EAU32572.1 atub|OJI80259.1 aver|OJJ04852.1 awen|OJJ38218.1 azon|OJJ43075.1

Group5007: abra|OJJ69972.1 acar|OOF93477.1 acla|EAW08843.1 afis|EAW15558.1 afla|EED49062.1 afum|EAL85774.1 agla|OJJ85196.1 akaw|GAA87689.1 aluc|OJZ85310.1 anid|CBF78161.1 anig|EHA25505.1 asyd|OJJ55962.1 ater|EAU32576.1 atub|OJI80261.1 aver|OJJ04907.1 awen|OJJ38216.1 azon|OJJ43079.1

Group5008: abra|OJJ69980.1 acla|EAW08850.1 afis|EAW15546.1 afum|EAL85786.1 agla|OJJ85206.1 akaw|GAA87681.1 aluc|OJZ85300.1 anid|CBF78178.1 anig|EHA25497.1 aory|EIT82561.1 asyd|OJJ55971.1 ater|EAU32581.1 atub|OJI80270.1 aver|OJJ04918.1 awen|OJJ38207.1 azon|OJJ43088.1 afla|EED49053.1

Group5009: abra|OJJ69988.1 acar|OOF93493.1 acla|EAW08859.1 afis|EAW15535.1 afla|EED49045.1 afum|EAL85793.1 agla|OJJ85212.1 akaw|GAA87673.1 aluc|OJZ85291.1 anid|CBF78195.1 anig|EHA25489.1 aory|EIT82566.1 asyd|OJJ55980.1 ater|EAU32590.1 atub|OJI80279.1 aver|OJJ04928.1 awen|OJJ38199.1

Group5010: abra|OJJ69998.1 acar|OOF93505.1 acla|EAW08821.1 afis|EAW15576.1 afla|EED49085.1 afum|EAL85758.1 agla|OJJ85176.1 akaw|GAA87663.1 aluc|OJZ85281.1 anig|EHA25478.1 aory|EIT82569.1 asyd|OJJ55892.1 ater|EAU32555.1 atub|OJI80289.1 aver|OJJ04837.1 awen|OJJ38236.1 azon|OJJ46061.1

Group5011: abra|OJJ70002.1 acar|OOF93508.1 acla|EAW08817.1 afis|EAW15580.1 afla|EED49092.1 afum|EAL85754.1 agla|OJJ85172.1 akaw|GAA87659.1 aluc|OJZ85277.1 anid|CBF78098.1 anig|EHA25474.1 asyd|OJJ55888.1 ater|EAU32550.1 atub|OJI80293.1 aver|OJJ04832.1 awen|OJJ38242.1 azon|OJJ43056.1

Group5012: abra|OJJ70005.1 acar|OOF93510.1 acla|EAW07277.1 afis|EAW22308.1 afla|EED57704.1 afum|EAL90882.1 agla|OJJ87742.1 akaw|GAA87656.1 aluc|OJZ85274.1 anid|CBF88590.1 anig|EHA25472.1 aory|EIT79905.1 asyd|OJJ63849.1 ater|EAU34316.1 atub|OJI80296.1 aver|OJI97088.1 awen|OJJ34879.1

Group5013: abra|OJJ70010.1 acar|OOF93516.1 acla|EAW08814.1 afis|EAW15583.1 afla|EED49087.1 afum|EAL85751.1 agla|OJJ85168.1 akaw|GAA87652.1 aluc|OJZ85269.1 anid|CBF78058.1 anig|EHA25468.1 aory|EIT82488.1 ater|EAU32546.1 atub|OJI80302.1 aver|OJJ04812.1 awen|OJJ38248.1 azon|OJJ43028.1

Group5014: abra|OJJ70012.1 acar|OOF93518.1 acla|EAW08812.1 afis|EAW15585.1 afla|EED54444.1 afum|EAL85747.1 agla|OJJ85164.1 akaw|GAA87650.1 aluc|OJZ85266.1 anid|CBF78061.1 anig|EHA25465.1 asyd|OJJ55869.1 ater|EAU32544.1 atub|OJI80304.1 aver|OJJ04814.1 awen|OJJ38251.1 azon|OJJ43031.1

Group5015: abra|OJJ70137.1 acar|OOF93594.1 acla|EAW13744.1 afis|EAW19842.1 afla|EED46533.1 afum|EAL85053.1 akaw|GAA86628.1 aluc|OJZ85183.1 anid|CBF76707.1 anig|EHA25395.1 aory|EIT72392.1 asyd|OJJ61237.1 ater|EAU38516.1 atub|OJI80414.1 aver|OJJ00560.1 awen|OJJ34118.1 azon|OJJ49476.1

Group5016: abra|OJJ70140.1 acar|OOF93597.1 acla|EAW13733.1 afis|EAW19843.1 afla|EED46534.1 afum|EAL85052.1 akaw|GAA86625.1 aluc|OJZ85180.1 anid|CBF76705.1 anig|EHA25392.1 aory|EIT72326.1 asyd|OJJ61236.1 ater|EAU38515.1 atub|OJI80417.1 aver|OJJ00559.1 awen|OJJ34117.1 azon|OJJ49477.1

Group5017: abra|OJJ70193.1 acar|OOF92582.1 acla|EAW06999.1 afis|EAW16614.1 afla|EED49260.1 afum|EAL89222.2 agla|OJJ82625.1 akaw|GAA86582.1 aluc|OJZ85133.1 anid|CBF86355.1 anig|EHA25352.1 asyd|OJJ57360.1 ater|EAU36698.1 atub|OJI80460.1 aver|OJJ05806.1 awen|OJJ40191.1 afla|EED44998.1

Group5018: abra|OJJ70232.1 acar|OOF93866.1 afla|EED56154.1 afum|EAL90745.1 agla|OJJ88092.1 akaw|GAA86552.1 aluc|OJZ85100.1 anig|EHA26109.1 asyd|OJJ59762.1 ater|EAU37896.1 aver|OJJ02526.1 awen|OJJ39210.1 azon|OJJ50036.1 anig|EHA25322.1 acla|EAW07420.1 afis|EAW22446.1 awen|OJJ35071.1

Group5019: abra|OJJ70304.1 acar|OOF91757.1 acla|EAW12288.1 afis|EAW25658.1 afla|EED45243.1 afum|EAL86477.2 agla|OJJ79117.1 akaw|GAA93018.1 aluc|OJZ82567.1 anid|CBF80474.1 anig|EHA27507.1 aory|EIT73558.1 asyd|OJJ54715.1 ater|EAU30190.1 atub|OJI88811.1 aver|OJJ07452.1 afis|EAW16950.1

Group5020: abra|OJJ70306.1 acar|OOF91761.1 acla|EAW12289.1 afis|EAW16947.1 afla|EED45244.1 afum|EAL86474.1 agla|OJJ79960.1 akaw|GAA93016.1 aluc|OJZ82569.1 anid|CBF80495.1 anig|EHA27505.1 aory|EIT73662.1 asyd|OJJ54729.1 ater|EAU30192.1 atub|OJI88813.1 aver|OJJ07439.1 awen|OJJ29711.1

Group5021: abra|OJJ70329.1 acar|OOF91784.1 acla|EAW12320.1 afis|EAW16901.1 afla|EED45272.1 afum|EAL86436.1 agla|OJJ79952.1 akaw|GAA92584.1 aluc|OJZ82598.1 anid|CBF80772.1 anig|EHA27479.1 aory|EIT73781.1 asyd|OJJ54500.1 ater|EAU30216.1 atub|OJI88834.1 aver|OJJ07680.1 awen|OJJ29730.1

Group5022: abra|OJJ70366.1 acar|OOF91906.1 acla|EAW12330.1 afis|EAW16893.1 afum|EAL86431.1 agla|OJJ79946.1 akaw|GAA91985.1 aluc|OJZ82628.1 anid|CBF80796.1 anig|EHA27449.1 aory|EIT75240.1 asyd|OJJ54490.1 ater|EAU30222.1 atub|OJI88861.1 aver|OJJ07689.1 awen|OJJ29744.1 azon|OJJ42525.1

Group5023: abra|OJJ70382.1 acar|OOF91889.1 afis|EAW16883.1 afla|EED47346.1 afum|EAL86419.1 agla|OJJ79750.1 akaw|GAA91974.1 aluc|OJZ82641.1 anid|CBF80677.1 anig|EHA27429.1 aory|EIT82848.1 asyd|OJJ54589.1 ater|EAU30232.1 atub|OJI88874.1 aver|OJJ07564.1 awen|OJJ29766.1 azon|OJJ50379.1

Group5024: abra|OJJ70471.1 acar|OOF97454.1 acla|EAW13043.1 afis|EAW17624.1 afla|EED49193.1 afum|EAL91438.1 agla|OJJ81279.1 akaw|GAA83320.1 aluc|OJZ83815.1 anid|CBF90154.1 anig|EHA18960.1 asyd|OJJ61999.1 ater|EAU37058.1 atub|OJI90182.1 aver|OJI96091.1 awen|OJJ37220.1 azon|OJJ50923.1

Group5025: abra|OJJ70486.1 acar|OOF97440.1 acla|EAW13030.1 afis|EAW17637.1 afla|EED50527.1 afum|EAL91452.1 agla|OJJ81257.1 akaw|GAA83334.1 aluc|OJZ83830.1 anid|CBF90130.1 anig|EHA18973.1 asyd|OJJ62016.1 ater|EAU37073.1 atub|OJI90197.1 aver|OJI96107.1 awen|OJJ37207.1 azon|OJJ50906.1

Group5026: abra|OJJ70494.1 acar|OOF97433.1 acla|EAW13023.1 afis|EAW17644.1 afla|EED50516.1 agla|OJJ79560.1 akaw|GAA83342.1 aluc|OJZ83838.1 anid|CBF90116.1 anig|EHA18981.1 aory|EIT82026.1 asyd|OJJ62023.1 ater|EAU37080.1 atub|OJI90205.1 aver|OJI96114.1 awen|OJJ37201.1 azon|OJJ50900.1

Group5027: abra|OJJ70501.1 acar|OOF97426.1 acla|EAW08173.1 afis|EAW23209.1 afla|EED47042.1 afum|EAL88275.1 agla|OJJ78736.1 akaw|GAA83349.1 aluc|OJZ83846.1 anig|EHA18988.1 aory|EIT72737.1 asyd|OJJ60187.1 ater|EAU36337.1 atub|OJI90212.1 aver|OJJ04077.1 awen|OJJ39442.1 azon|OJJ47644.1

Group5028: abra|OJJ70503.1 acar|OOF97423.1 acla|EAW08172.1 afis|EAW23208.1 afla|EED47046.1 afum|EBA27341.1 agla|OJJ78738.1 akaw|GAA83351.1 aluc|OJZ83848.1 anig|EHA18990.1 aory|EIT72619.1 asyd|OJJ60188.1 ater|EAU36333.1 atub|OJI90214.1 aver|OJJ04076.1 awen|OJJ39441.1 azon|OJJ47642.1

Group5029: abra|OJJ70511.1 acar|OOF97418.1 acla|EAW08164.1 afis|EAW23202.1 afla|EED47052.1 afum|EAL88281.1 agla|OJJ78746.1 akaw|GAA83358.1 aluc|OJZ83856.1 anid|CBF74726.1 anig|EHA18997.1 asyd|OJJ60196.1 ater|EAU36330.1 atub|OJI90223.1 aver|OJJ04069.1 awen|OJJ39432.1 azon|OJJ47636.1

Group5030: abra|OJJ70523.1 acla|EAW08152.1 afis|EAW23187.1 afla|EED47066.1 afum|EAL88296.1 agla|OJJ86362.1 akaw|GAA83370.1 aluc|OJZ83868.1 anid|CBF74683.1 anig|EHA19009.1 aory|EIT72474.1 asyd|OJJ60221.1 ater|EAU36318.1 atub|OJI90236.1 aver|OJJ04047.1 awen|OJJ36589.1 azon|OJJ47617.1

Group5031: abra|OJJ70527.1 acar|OOF97404.1 acla|EAW08140.1 afis|EAW23176.1 afla|EED46943.1 afum|EAL88307.2 agla|OJJ89688.1 akaw|GAA83372.1 aluc|OJZ83870.1 anid|CBF74500.1 anig|EHA19011.1 aory|EIT72572.1 asyd|OJJ57721.1 atub|OJI90238.1 aver|OJJ05447.1 awen|OJJ36602.1 azon|OJJ47606.1

Group5032: abra|OJJ70533.1 acar|OOF97399.1 afis|EAW16751.1 afla|EED47075.1 agla|OJJ86369.1 akaw|GAA83378.1 aluc|OJZ83876.1 anig|EHA19016.1 aory|EIT72481.1 atub|OJI90244.1 awen|OJJ36596.1 azon|OJJ50257.1 afis|EAW23182.1 acla|EAW12439.1 acla|EAW12440.1 afum|EBA27268.1 afum|EAL88300.1

Group5033: abra|OJJ70547.1 acla|EAW08134.1 afis|EAW23170.1 afla|EED46951.1 afum|EAL88314.1  
agla|OJJ89681.1 akaw|GAA83391.1 aluc|OJZ83891.1 anid|CBF74482.1 anig|EHA19027.1 asyd|OJJ57710.1  
ater|EAU36299.1 atub|OJI90258.1 aver|OJJ05455.1 awen|OJJ36613.1 azon|OJJ47600.1 agla|OJJ89682.1

Group5034: abra|OJJ70551.1 acar|OOF97169.1 acla|EAW08343.1 afis|EAW23378.1 afla|EED55579.1  
afum|EAL88093.1 agla|OJJ86445.1 akaw|GAA83395.1 aluc|OJZ83894.1 anid|CBF74847.1 anig|EHA19030.1  
asyd|OJJ60129.1 atub|OJI90262.1 aver|OJJ04132.1 awen|OJJ39506.1 azon|OJJ47705.1 ater|EAU35632.1

Group5035: abra|OJJ70553.1 acar|OOF97166.1 acla|EAW08348.1 afis|EAW23382.1 afla|EED55569.1  
afum|EAL88090.1 agla|OJJ86441.1 akaw|GAA83398.1 aluc|OJZ83896.1 anig|EHA19032.1 aory|EIT82669.1  
ater|EAU35635.1 atub|OJI90265.1 awen|OJJ39502.1 azon|OJJ47702.1 afum|EAL88089.1 anig|EHA19033.1

Group5036: abra|OJJ70562.1 acar|OOF97157.1 acla|EAW08361.1 afis|EAW23392.1 afla|EED55565.1  
afum|EAL88078.1 agla|OJJ86425.1 akaw|GAA83407.1 aluc|OJZ83906.1 anid|CBF74862.1 anig|EHA19041.1  
asyd|OJJ60122.1 ater|EAU35645.1 atub|OJI90277.1 aver|OJJ04140.1 awen|OJJ39487.1 azon|OJJ47690.1

Group5037: abra|OJJ70586.1 acar|OOF97134.1 acla|EAW08195.1 afis|EAW23229.1 afla|EED47021.1  
afum|EAL88254.1 agla|OJJ86386.1 akaw|GAA83429.1 aluc|OJZ83930.1 anid|CBF74773.1 anig|EHA19062.1  
asyd|OJJ60166.1 ater|EAU36358.1 atub|OJI90302.1 aver|OJJ04098.1 awen|OJJ39464.1 azon|OJJ47664.1

Group5038: abra|OJJ70587.1 acar|OOF97133.1 acla|EAW08194.1 afis|EAW23228.1 afla|EED47022.1  
afum|EAL88255.1 agla|OJJ86385.1 akaw|GAA83430.1 aluc|OJZ83931.1 anid|CBF74771.1 anig|EHA19063.1  
asyd|OJJ60167.1 ater|EAU36357.1 atub|OJI90303.1 aver|OJJ04097.1 awen|OJJ39463.1 azon|OJJ47663.1

Group5039: abra|OJJ70590.1 acar|OOF97129.1 acla|EAW08191.1 afis|EAW23225.1 afla|EED47025.1  
afum|EAL88258.1 agla|OJJ86382.1 akaw|GAA83434.1 aluc|OJZ83935.1 anid|CBF74765.1 anig|EHA19066.1  
aory|EIT72720.1 asyd|OJJ60170.1 atub|OJI90307.1 aver|OJJ04094.1 awen|OJJ39460.1 azon|OJJ47659.1

Group5040: abra|OJJ70591.1 afla|EED47026.1 afum|EAL88260.1 agla|OJJ86381.1 akaw|GAA83435.1  
aluc|OJZ83937.1 anid|CBF74763.1 aory|EIT72526.1 azon|OJJ47658.1 awen|OJJ39459.1 acla|EAW08190.1  
afis|EAW23224.1 anig|EHA19067.1 asyd|OJJ60171.1 ater|EAU36355.1 atub|OJI90309.1 aver|OJJ04093.1

Group5041: abra|OJJ70597.1 acar|OOF97122.1 afis|EAW23218.1 afla|EED47033.1 afum|EAL88266.1  
agla|OJJ86374.1 akaw|GAA83441.1 aluc|OJZ83943.1 anid|CBF74754.1 anig|EHA19072.1 aory|EIT72711.1  
asyd|OJJ60177.1 ater|EAU36349.1 atub|OJI90315.1 aver|OJJ04087.1 awen|OJJ39452.1 azon|OJJ47652.1

Group5042: abra|OJJ70601.1 acar|OOF97119.1 acla|EAW08181.1 afis|EAW23216.1 afum|EAL88268.1  
agla|OJJ86372.1 akaw|GAA89941.1 aluc|OJZ83946.1 anid|CBF74747.1 anig|EHA19075.1 aory|EIT72596.1  
asyd|OJJ60179.1 ater|EAU36346.1 atub|OJI90317.1 aver|OJJ04083.1 awen|OJJ39450.1 azon|OJJ47650.1

Group5043: abra|OJJ70614.1 acar|OOF97107.1 acla|EAW13013.1 afis|EAW17654.1 afla|EED50504.1  
afum|EAL91469.1 agla|OJJ79550.1 akaw|GAA89953.1 aluc|OJZ83960.1 anig|EHA19088.1 aory|EIT82141.1  
atub|OJI90332.1 aver|OJI96149.1 awen|OJJ37191.1 azon|OJJ50890.1 anid|CBF90070.1 asyd|OJJ62043.1

Group5044: abra|OJJ70615.1 acar|OOF97106.1 acla|EAW13012.1 afis|EAW17655.1 afla|EED50503.1  
afum|EAL91470.1 akaw|GAA89954.1 aluc|OJZ83961.1 anid|CBF90068.1 anig|EHA19089.1 aory|EIT82061.1  
asyd|OJJ62044.1 ater|EAU31998.1 atub|OJI90333.1 aver|OJI96150.1 awen|OJJ37190.1 azon|OJJ48749.1

Group5045: abra|OJJ70631.1 acar|OOF97092.1 acla|EAW08125.1 afis|EAW23162.1 afla|EED46959.1  
afum|EAL88321.1 agla|OJJ89673.1 akaw|GAA89970.1 aluc|OJZ83979.1 anid|CBF74465.1 anig|EHA19106.1  
aory|EIT72687.1 asyd|OJJ57699.1 atub|OJI90352.1 aver|OJJ05465.1 awen|OJJ36621.1 azon|OJJ47592.1

Group5046: abra|OJJ70636.1 acar|OOF97078.1 acla|EAW08120.1 afis|EAW23131.1 afla|EED48997.1  
afum|EAL88350.2 agla|OJJ89668.1 akaw|GAA89974.1 aluc|OJZ83984.1 anid|CBF74460.1 aory|EIT80038.1  
asyd|OJJ57680.1 ater|EAU36284.1 atub|OJI90355.1 aver|OJJ05485.1 awen|OJJ36629.1 azon|OJJ47588.1

Group5047: abra|OJJ70638.1 acar|OOF97079.1 acla|EAW08119.1 afis|EAW23132.1 afla|EED48996.1  
afum|EAL88349.1 agla|OJJ89667.1 aluc|OJZ83985.1 anid|CBF74458.1 anig|EHA19111.1 aory|EIT80017.1  
asyd|OJJ57678.1 ater|EAU36285.1 atub|OJI90356.1 aver|OJJ05484.1 awen|OJJ36628.1 azon|OJJ47587.1

Group5048: abra|OJJ70652.1 acla|EAW08107.1 afis|EAW23144.1 afla|EED48507.1 afum|EAL88337.2  
agla|OJJ89658.1 akaw|GAA89988.1 aluc|OJZ84002.1 anid|CBF74437.1 anig|EHA19124.1 aory|EIT73158.1  
asyd|OJJ57746.1 ater|EAU36267.1 atub|OJI90371.1 aver|OJJ05421.1 awen|OJJ36639.1 azon|OJJ47576.1

Group5049: abra|OJJ70655.1 acla|EAW08104.1 afis|EAW23147.1 afla|EED48510.1 afum|EAL88334.1  
agla|OJJ89655.1 akaw|GAA89991.1 aluc|OJZ84005.1 anid|CBF74432.1 anig|EHA19127.1 aory|EIT73217.1  
asyd|OJJ57749.1 ater|EAU36264.1 atub|OJI90374.1 aver|OJJ05418.1 awen|OJJ36642.1 azon|OJJ47572.1

Group5050: abra|OJJ70658.1 acar|OOF97064.1 acla|EAW08101.1 afis|EAW23150.1 afla|EED48513.1  
afum|EAL88331.1 agla|OJJ89652.1 akaw|GAA89994.1 aluc|OJZ84008.1 anid|CBF74426.1 anig|EHA19130.1  
asyd|OJJ57752.1 ater|EAU36262.1 atub|OJI90377.1 aver|OJJ05415.1 awen|OJJ36646.1 azon|OJJ47569.1

Group5051: abra|OJJ70687.1 acar|OOF97040.1 afis|EAW23113.1 afla|EED53331.1 afum|EAL88366.1  
agla|OJJ89627.1 akaw|GAA90019.1 aluc|OJZ84035.1 anid|CBF76022.1 anig|EHA19156.1 aory|EIT75261.1  
asyd|OJJ52449.1 ater|EAU36241.1 atub|OJI90407.1 aver|OJJ03967.1 awen|OJJ36668.1 azon|OJJ47531.1

Group5052: abra|OJJ70688.1 acar|OOF97039.1 afis|EAW23112.1 afla|EED53332.1 afum|EAL88367.1  
agla|OJJ89629.1 akaw|GAA90020.1 aluc|OJZ84036.1 anid|CBF76020.1 anig|EHA19157.1 aory|EIT75265.1  
asyd|OJJ52448.1 ater|EAU36240.1 atub|OJI90408.1 aver|OJJ03968.1 awen|OJJ36669.1 azon|OJJ47530.1

Group5053: abra|OJJ70690.1 acla|EAW08074.1 afis|EAW23110.1 afla|EED48538.1 afum|EAL88369.1  
agla|OJJ89631.1 akaw|GAA90022.1 aluc|OJZ84038.1 anid|CBF74387.1 anig|EHA19159.1 aory|EIT73045.1  
asyd|OJJ57772.1 ater|EAU36238.1 atub|OJI90410.1 aver|OJJ05394.1 awen|OJJ36671.1 azon|OJJ47528.1

Group5054: abra|OJJ70692.1 acla|EAW08072.1 afis|EAW23108.1 afla|EED48540.1 afum|EAL88371.1  
agla|OJJ89633.1 akaw|GAA90023.1 aluc|OJZ84039.1 anid|CBF81372.1 anig|EHA19161.1 aory|EIT73071.1  
asyd|OJJ59387.1 ater|EAU36236.1 atub|OJI90411.1 aver|OJJ02886.1 awen|OJJ36673.1 azon|OJJ47526.1

Group5055: abra|OJJ70695.1 acar|OOF97034.1 acla|EAW08070.1 afis|EAW23106.1 afla|EED48542.1  
afum|EAL88373.1 agla|OJJ89637.1 akaw|GAA90026.1 aluc|OJZ84042.1 anid|CBF81369.1 anig|EHA19164.1  
asyd|OJJ59385.1 ater|EAU36234.1 atub|OJI90414.1 aver|OJJ02888.1 awen|OJJ36675.1 azon|OJJ47523.1

Group5056: abra|OJJ70703.1 acla|EAW08062.1 afis|EAW23098.1 afla|EED48546.1 afum|EAL88380.2  
agla|OJJ89610.1 akaw|GAA90034.1 aluc|OJZ84050.1 anid|CBF81354.1 anig|EHA19170.1 aory|EIT73119.1  
asyd|OJJ59378.1 ater|EAU36231.1 atub|OJI90421.1 aver|OJJ02895.1 awen|OJJ36683.1 azon|OJJ47514.1

Group5057: abra|OJJ70712.1 acar|OOF97024.1 acla|EAW08052.1 afis|EAW23088.1 afla|EED48560.1  
afum|EAL88391.1 agla|OJJ89598.1 akaw|GAA90043.1 aluc|OJZ84059.1 anid|CBF81137.1 anig|EHA19179.1  
aory|EIT73115.1 asyd|OJJ56502.1 atub|OJI90430.1 aver|OJJ06217.1 awen|OJJ36696.1 azon|OJJ47501.1

Group5058: abra|OJJ70713.1 acar|OOF97023.1 acla|EAW08050.1 afis|EAW23086.1 afla|EED48562.1  
afum|EAL88393.1 agla|OJJ89596.1 akaw|GAA90044.1 aluc|OJZ84060.1 anid|CBF81341.1 anig|EHA19180.1  
asyd|OJJ59370.1 ater|EAU36210.1 atub|OJI90431.1 aver|OJJ02904.1 awen|OJJ36698.1 azon|OJJ47499.1

Group5059: abra|OJJ70724.1 acar|OOF97014.1 acla|EAW08041.1 afis|EAW23076.1 afum|EAL88403.1  
agla|OJJ89583.1 akaw|GAA90053.1 aluc|OJZ84069.1 anid|CBF81322.1 anig|EHA19189.1 aory|EIT73284.1  
asyd|OJJ59360.1 ater|EAU36200.1 atub|OJI90442.1 aver|OJJ02914.1 awen|OJJ36708.1 azon|OJJ47491.1

Group5060: abra|OJJ70732.1 acar|OOF97006.1 acla|EAW11181.1 afis|EAW15912.1 afla|EED56456.1  
afum|EAL88547.2 agla|OJJ89576.1 akaw|GAA90060.1 aluc|OJZ84077.1 anid|CBF81303.1 anig|EHA19196.1  
aory|EIT72846.1 asyd|OJJ59351.1 atub|OJI90449.1 aver|OJJ02923.1 awen|OJJ36718.1 azon|OJJ47477.1

Group5061: abra|OJJ70739.1 acla|EAW11177.1 afis|EAW15908.1 afla|EED56460.1 afum|EAL88543.1  
agla|OJJ89572.1 akaw|GAA90064.1 aluc|OJZ84084.1 anid|CBF81261.1 anig|EHA19200.1 aory|EIT72862.1  
asyd|OJJ59331.1 ater|EAU36187.1 atub|OJI90454.1 aver|OJJ02943.1 awen|OJJ36722.1 azon|OJJ47481.1

Group5062: abra|OJJ70749.1 acar|OOF96996.1 acla|EAW11172.1 afis|EAW15903.1 afla|EED56467.1  
afum|EAL88538.1 agla|OJJ89563.1 akaw|GAA90069.1 aluc|OJZ84093.1 anid|CBF81278.1 anig|EHA19206.1  
aory|EIT72833.1 asyd|OJJ59336.1 atub|OJI90465.1 aver|OJJ02938.1 awen|OJJ36728.1 azon|OJJ47469.1

Group5063: abra|OJJ70750.1 acar|OOF96995.1 acla|EAW11171.1 afis|EAW15902.1 afla|EED56468.1  
afum|EAL88537.1 agla|OJJ89562.1 akaw|GAA90070.1 aluc|OJZ84094.1 anid|CBF81279.1 anig|EHA19207.1  
aory|EIT72855.1 asyd|OJJ59337.1 atub|OJI90466.1 aver|OJJ02937.1 awen|OJJ36729.1 azon|OJJ47468.1

Group5064: abra|OJJ70757.1 acar|OOF96987.1 acla|EAW11164.1 afis|EAW15895.1 afum|EAL88530.1  
agla|OJJ89549.1 akaw|GAA90077.1 aluc|OJZ84102.1 anid|CBF81292.1 anig|EHA19214.1 aory|EIT72812.1  
asyd|OJJ59345.1 ater|EAU36174.1 atub|OJI90475.1 aver|OJJ02929.1 awen|OJJ36736.1 azon|OJJ47461.1

Group5065: abra|OJJ70761.1 acar|OOF96983.1 acla|EAW11160.1 afis|EAW15891.1 afla|EED56481.1  
afum|EAL88526.2 agla|OJJ89531.1 akaw|GAA90081.1 aluc|OJZ84106.1 anid|CBF81258.1 anig|EHA19218.1  
aory|EIT72809.1 asyd|OJJ59329.1 ater|EAU31713.1 atub|OJI90480.1 aver|OJJ02945.1 azon|OJJ47458.1

Group5066: abra|OJJ70763.1 afis|EAW15889.1 afla|EED56483.1 akaw|GAA90083.1 aluc|OJZ84108.1  
anid|CBF81254.1 anig|EHA19220.1 aory|EIT72840.1 asyd|OJJ59327.1 atub|OJI90482.1 aver|OJJ02947.1  
awen|OJJ36741.1 azon|OJJ47456.1 acla|EAW11158.1 afum|EAL88523.1 agla|OJJ89533.1 ater|EAU31711.1

Group5067: abra|OJJ70764.1 acar|OOF96981.1 acla|EAW11157.1 afis|EAW15888.1 afla|EED56484.1  
afum|EAL88522.2 akaw|GAA90084.1 aluc|OJZ84109.1 anid|CBF81252.1 anig|EHA19221.1 aory|EIT72836.1  
asyd|OJJ59326.1 ater|EAU31710.1 atub|OJI90483.1 aver|OJJ02948.1 awen|OJJ36742.1 azon|OJJ47455.1

Group5068: abra|OJJ70772.1 acar|OOF96974.1 acla|EAW11150.1 afis|EAW15881.1 afla|EED56491.1  
afum|EAL88515.1 agla|OJJ89540.1 akaw|GAA90091.1 aluc|OJZ84118.1 anid|CBF81236.1 anig|EHA19227.1  
asyd|OJJ59318.1 ater|EAU31701.1 atub|OJI90491.1 aver|OJJ02955.1 awen|OJJ36750.1 azon|OJJ47449.1

Group5069: abra|OJJ70810.1 acar|OOF98292.1 acla|EAW10419.1 afis|EAW25150.1 afla|EED55285.1 afum|EAL89825.1 agla|OJJ89005.1 akaw|GAA91690.1 aluc|OJZ87704.1 anid|CBF85670.1 anig|EHA20887.1 asyd|OJJ64248.1 ater|EAU39418.1 atub|OJI80939.1 aver|OJI98339.1 awen|OJJ40779.1 azon|OJJ46873.1

Group5070: abra|OJJ70813.1 acar|OOF98289.1 acla|EAW10422.1 afis|EAW25147.1 afla|EED55291.1 afum|EAL89822.1 agla|OJJ89010.1 akaw|GAA91693.1 aluc|OJZ87701.1 anid|CBF85675.1 aory|EIT83562.1 asyd|OJJ64252.1 ater|EAU39421.1 atub|OJI80942.1 aver|OJI98342.1 awen|OJJ40772.1 azon|OJJ46876.1

Group5071: abra|OJJ70814.1 acar|OOF98288.1 acla|EAW10423.1 afis|EAW25146.1 afla|EED55292.1 afum|EAL89821.1 agla|OJJ89009.1 akaw|GAA91694.1 aluc|OJZ87700.1 anid|CBF85677.1 aory|EIT83581.1 asyd|OJJ64253.1 ater|EAU39422.1 atub|OJI80943.1 aver|OJI98343.1 awen|OJJ40771.1 azon|OJJ46877.1

Group5072: abra|OJJ70835.1 acar|OOF98279.1 acla|EAW10430.1 afis|EAW25139.1 afla|EED55306.1 afum|EAL89811.1 agla|OJJ89028.1 akaw|GAA91703.1 aluc|OJZ87687.1 anid|CBF86097.1 anig|EHA20876.1 aory|EIT83522.1 asyd|OJJ64475.1 atub|OJI80953.1 aver|OJI98579.1 awen|OJJ40763.1 azon|OJJ44128.1

Group5073: abra|OJJ70847.1 acar|OOF98268.1 acla|EAW10438.1 afis|EAW25129.1 afla|EED55315.1 afum|EAL89800.1 agla|OJJ89037.1 akaw|GAA91715.1 aluc|OJZ87674.1 anid|CBF85699.1 anig|EHA20864.1 asyd|OJJ64264.1 ater|EAU39402.1 atub|OJI80969.1 aver|OJI98356.1 awen|OJJ40754.1 azon|OJJ44118.1

Group5074: abra|OJJ70849.1 acar|OOF98267.1 acla|EAW10440.1 afis|EAW25127.1 afum|EAL89798.1 agla|OJJ89043.1 akaw|GAA91717.1 aluc|OJZ87671.1 anid|CBF85695.1 anig|EHA20862.1 aory|EIT83507.1 asyd|OJJ64262.1 ater|EAU39400.1 atub|OJI80971.1 aver|OJI98354.1 awen|OJJ40752.1 azon|OJJ44116.1

Group5075: abra|OJJ70863.1 acar|OOF98253.1 acla|EAW10455.1 afis|EAW25112.1 afla|EED55330.1 afum|EAL89783.2 agla|OJJ89069.1 akaw|GAA91730.1 aluc|OJZ87657.1 anid|CBF86075.1 aory|EIT76201.1 asyd|OJJ64462.1 ater|EAU39382.1 atub|OJI80986.1 aver|OJI98565.1 awen|OJJ40729.1 azon|OJJ44101.1

Group5076: abra|OJJ70868.1 acar|OOF90122.1 acla|EAW10460.1 afis|EAW25107.1 afum|EAL89778.1 agla|OJJ89080.1 akaw|GAA91735.1 aluc|OJZ87651.1 anid|CBF86066.1 anig|EHA20845.1 aory|EIT76240.1 asyd|OJJ64457.1 ater|EAU39375.1 atub|OJI80992.1 aver|OJI98560.1 awen|OJJ40725.1 azon|OJJ44097.1

Group5077: abra|OJJ70870.1 acar|OOF98249.1 acla|EAW10461.1 afis|EAW25106.1 afla|EED55338.1 afum|EAL89777.1 agla|OJJ89073.1 akaw|GAA91736.1 aluc|OJZ87650.1 anid|CBF86025.1 anig|EHA20844.1 asyd|OJJ64455.1 ater|EAU39374.1 atub|OJI80993.1 aver|OJI98558.1 awen|OJJ40719.1 azon|OJJ44094.1

Group5078: abra|OJJ70877.1 acar|OOF98243.1 acla|EAW10466.1 afis|EAW25101.1 afla|EED55344.1 afum|EAL89772.1 agla|OJJ85449.1 akaw|GAA91740.1 aluc|OJZ87645.1 anid|CBF86017.1 anig|EHA20838.1 asyd|OJJ64451.1 ater|EAU39368.1 atub|OJI81000.1 aver|OJI98554.1 awen|OJJ40715.1 azon|OJJ44092.1

Group5079: abra|OJJ70881.1 acar|OOF98240.1 acla|EAW10469.1 afis|EAW25098.1 afla|EED55348.1 afum|EAL89769.1 akaw|GAA91743.1 aluc|OJZ87642.1 anid|CBF86012.1 anig|EHA20835.1 aory|EIT80829.1 asyd|OJJ64448.1 ater|EAU39356.1 atub|OJI81003.1 aver|OJI98551.1 awen|OJJ40712.1 azon|OJJ44089.1

Group5080: abra|OJJ70891.1 acar|OOF90216.1 acla|EAW10473.1 afis|EAW25094.1 afum|EAL89765.2 agla|OJJ89083.1 akaw|GAA87407.1 aluc|OJZ87632.1 anid|CBF86003.1 anig|EHA20828.1 aory|EIT80821.1 asyd|OJJ64444.1 ater|EAU39352.1 atub|OJI81017.1 aver|OJI98546.1 awen|OJJ40708.1 azon|OJJ44084.1

Group5081: abra|OJJ70893.1 acla|EAW10475.1 afis|EAW25092.1 afla|EED55355.1 afum|EAL89762.2 agla|OJJ89085.1 akaw|GAA87409.1 aluc|OJZ87630.1 anid|CBF85999.1 anig|EHA20826.1 aory|EIT80902.1 asyd|OJJ64442.1 ater|EAU39350.1 atub|OJI81019.1 aver|OJI98544.1 awen|OJJ40706.1 azon|OJJ44082.1

Group5082: abra|OJJ70905.1 acar|OOF98215.1 acla|EAW10483.1 afis|EAW25084.1 afla|EED55366.1 afum|EAL89753.1 agla|OJJ89101.1 akaw|GAA87419.1 aluc|OJZ87619.1 anid|CBF85986.1 anig|EHA20817.1 aory|EIT80910.1 asyd|OJJ64433.1 ater|EAU39340.1 atub|OJI81030.1 aver|OJI98534.1 awen|OJJ40696.1

Group5083: abra|OJJ70907.1 acar|OOF98213.1 acla|EAW10485.1 afis|EAW25082.1 afla|EED55368.1 afum|EAL89751.1 agla|OJJ89103.1 akaw|GAA87421.1 aluc|OJZ87617.1 anid|CBF85983.1 anig|EHA20815.1 aory|EIT80932.1 asyd|OJJ64431.1 atub|OJI81032.1 aver|OJI98532.1 awen|OJJ40694.1 azon|OJJ44071.1

Group5084: abra|OJJ70919.1 acar|OOF98205.1 acla|EAW10493.1 afis|EAW25074.1 afla|EED55379.1 afum|EAL89743.1 agla|OJJ89118.1 akaw|GAA83021.1 aluc|OJZ87607.1 anig|EHA20805.1 aory|EIT80877.1 asyd|OJJ64422.1 ater|EAU39551.1 atub|OJI81041.1 aver|OJI98521.1 awen|OJJ40685.1 azon|OJJ44062.1

Group5085: abra|OJJ70924.1 acla|EAW13722.1 afis|EAW21022.1 afla|EED51437.1 afum|EAL92061.1 akaw|GAA83016.1 aluc|OJZ87602.1 anid|CBF87343.1 anig|EHA20801.1 asyd|OJJ52825.1 ater|EAU33971.1 atub|OJI81046.1 aver|OJJ08801.1 ater|EAU36221.1 aver|OJJ04859.1 aory|EIT80432.1 ater|EAU31577.1

Group5086: abra|OJJ70932.1 acla|EAW10498.1 afis|EAW25069.1 afla|EED55385.1 afum|EAL89738.1 agla|OJJ89125.1 akaw|GAA83010.1 aluc|OJZ87595.1 anid|CBF85956.1 anig|EHA20795.1 aory|EIT80780.1 asyd|OJJ64417.1 ater|EAU35816.1 atub|OJI81052.1 aver|OJI98516.1 awen|OJJ40676.1 azon|OJJ44057.1

Group5087: abra|OJJ70935.1 acar|OOF89983.1 acla|EAW10501.1 afis|EAW25066.1 afla|EED55388.1 afum|EAL89735.2 agla|OJJ89127.1 aluc|OJZ87592.1 anid|CBF85951.1 anig|EHA20793.1 aory|EIT80771.1 asyd|OJJ64415.1 ater|EAU35813.1 atub|OJI81055.1 aver|OJI98514.1 awen|OJJ40674.1 azon|OJJ44055.1

Group5088: abra|OJJ70938.1 acla|EAW10503.1 afis|EAW25064.1 afla|EED55390.1 afum|EAL89733.1 agla|OJJ89129.1 akaw|GAA83006.1 aluc|OJZ87590.1 anid|CBF85945.1 anig|EHA20791.1 aory|EIT80842.1 asyd|OJJ64413.1 ater|EAU35811.1 atub|OJI81058.1 aver|OJI98512.1 awen|OJJ40671.1 azon|OJJ44052.1

Group5089: abra|OJJ70943.1 acar|OOF98189.1 acla|EAW10508.1 afis|EAW25059.1 afla|EED55394.1 afum|EAL89727.1 agla|OJJ89136.1 akaw|GAA83001.1 aluc|OJZ87585.1 anid|CBF85938.1 anig|EHA20786.1 asyd|OJJ64409.1 ater|EAU35807.1 atub|OJI81063.1 aver|OJI98507.1 awen|OJJ40666.1 azon|OJJ44047.1

Group5090: abra|OJJ70956.1 acar|OOF98174.1 acla|EAW10517.1 afis|EAW25049.1 afla|EED55402.1 afum|EAL89717.1 agla|OJJ89143.1 akaw|GAA82991.1 aluc|OJZ87576.1 anid|CBF85921.1 anig|EHA20778.1 aory|EIT80931.1 asyd|OJJ64403.1 ater|EAU35799.1 atub|OJI81073.1 aver|OJI98499.1 azon|OJJ44038.1

Group5091: abra|OJJ70962.1 acla|EAW10523.1 afis|EAW25043.1 afla|EED55409.1 afum|EAL89711.1 agla|OJJ89151.1 akaw|GAA82985.1 aluc|OJZ87570.1 anig|EHA20772.1 aory|EIT80767.1 asyd|OJJ64397.1 ater|EAU35793.1 atub|OJI81079.1 aver|OJI98493.1 awen|OJJ40648.1 azon|OJJ44033.1 anid|CBF85910.1

Group5092: abra|OJJ70970.1 acar|OOF98160.1 acla|EAW10530.1 afis|EAW24997.1 akaw|GAA82978.1 aluc|OJZ87562.1 anid|CBF85899.1 anig|EHA20764.1 asyd|OJJ64391.1 ater|EAU35787.1 atub|OJI81085.1 awen|OJJ40642.1 azon|OJJ44027.1 afla|EED55417.1 afum|EAL89704.1 aory|EIT80790.1 aver|OJI98486.1

Group5093: abra|OJJ70994.1 acar|OOF90032.1 acla|EAW10549.1 afis|EAW25017.1 afla|EED55440.1 afum|EAL89678.1 agla|OJJ89185.1 akaw|GAA82954.1 aluc|OJZ87534.1 anid|CBF81534.1 anig|EHA20743.1 asyd|OJJ59484.1 ater|EAU35769.1 atub|OJI81115.1 aver|OJJ02790.1 awen|OJJ40623.1 azon|OJJ49471.1

Group5094: abra|OJJ70995.1 acar|OOF90033.1 acla|EAW10551.1 afis|EAW25018.1 afla|EED55441.1 afum|EAL89677.1 agla|OJJ89186.1 akaw|GAA82953.1 aluc|OJZ87533.1 anid|CBF81536.1 anig|EHA20742.1 asyd|OJJ59487.1 ater|EAU35768.1 atub|OJI81116.1 aver|OJJ02787.1 awen|OJJ40622.1 azon|OJJ49470.1

Group5095: abra|OJJ70997.1 acla|EAW10553.1 afis|EAW25020.1 afla|EED55443.1 afum|EAL89675.1 agla|OJJ89188.1 akaw|GAA82951.1 aluc|OJZ87530.1 anid|CBF81540.1 anig|EHA20740.1 aory|EIT80782.1 asyd|OJJ59489.1 ater|EAU35766.1 atub|OJI81118.1 aver|OJJ02785.1 awen|OJJ40620.1 azon|OJJ49468.1

Group5096: abra|OJJ71012.1 acar|OOF98131.1 acla|EAW10563.1 afis|EAW25030.1 afla|EED55453.1 afum|EAL89665.1 agla|OJJ79154.1 akaw|GAA82942.1 aluc|OJZ87519.1 anid|CBF81562.1 anig|EHA20730.1 aory|EIT80874.1 asyd|OJJ59501.1 ater|EAU35757.1 atub|OJI81130.1 aver|OJJ02773.1 awen|OJJ40609.1

Group5097: abra|OJJ71020.1 acar|OOF98120.1 acla|EAW10569.1 afis|EAW25035.1 afla|EED55461.1 afum|EAL89659.2 agla|OJJ82256.1 akaw|GAA82935.1 aluc|OJZ87512.1 anid|CBF81576.1 anig|EHA20724.1 asyd|OJJ59508.1 ater|EAU35748.1 atub|OJI81139.1 aver|OJJ02766.1 awen|OJJ40603.1 azon|OJJ49453.1

Group5098: abra|OJJ71026.1 acar|OOF98115.1 acla|EAW10576.1 afis|EAW24991.1 afla|EED55468.1 afum|EAL89651.1 akaw|GAA82929.1 aluc|OJZ87505.1 anid|CBF81594.1 anig|EHA20718.1 aory|EIT80848.1 asyd|OJJ59516.1 ater|EAU35742.1 atub|OJI81145.1 aver|OJJ02757.1 awen|OJJ40596.1 azon|OJJ49447.1

Group5099: abra|OJJ71039.1 acar|OOF98099.1 acla|EAW10588.1 afis|EAW24980.1 afla|EED55479.1 afum|EAL89640.1 agla|OJJ79137.1 akaw|GAA82917.1 aluc|OJZ87489.1 anid|CBF81610.1 anig|EHA20709.1 asyd|OJJ59524.1 ater|EAU35732.1 atub|OJI81159.1 aver|OJJ02748.1 awen|OJJ40577.1 azon|OJJ49432.1

Group5100: abra|OJJ71046.1 acar|OOF98093.1 acla|EAW10594.1 afis|EAW24974.1 afum|EAL89634.1 agla|OJJ82240.1 akaw|GAA82910.1 aluc|OJZ87480.1 anid|CBF81632.1 anig|EHA20702.1 aory|EIT80851.1 asyd|OJJ59532.1 ater|EAU35722.1 atub|OJI81168.1 aver|OJJ02738.1 awen|OJJ40571.1 azon|OJJ49428.1

Group5101: abra|OJJ71058.1 acla|EAW10601.1 afis|EAW24967.1 afla|EED55493.1 afum|EAL89625.2 agla|OJJ82221.1 akaw|GAA82901.1 aluc|OJZ87470.1 anid|CBF81645.1 anig|EHA20692.1 aory|EIT80912.1 asyd|OJJ59539.1 ater|EAU35710.1 atub|OJI81178.1 aver|OJJ02729.1 awen|OJJ40560.1 azon|OJJ49421.1

Group5102: abra|OJJ71060.1 acar|OOF98081.1 acla|EAW10599.1 afis|EAW24969.1 afla|EED55492.1 afum|EAL89628.1 agla|OJJ82235.1 akaw|GAA82899.1 aluc|OJZ87468.1 anid|CBF81641.1 anig|EHA20690.1 asyd|OJJ59537.1 ater|EAU35714.1 atub|OJI81180.1 aver|OJJ02732.1 awen|OJJ40563.1 azon|OJJ49423.1

Group5103: abra|OJJ71065.1 acar|OOF98080.1 afis|EAW17397.1 afla|EED54883.1 afum|EAL91235.1 agla|OJJ83972.1 akaw|GAA82897.1 aluc|OJZ87466.1 anid|CBF88997.1 anig|EHA20688.1 aory|EIT79374.1 asyd|OJJ62782.1 ater|EAU29507.1 atub|OJI81182.1 aver|OJI96827.1 awen|OJJ36326.1 acla|EAW13233.1

Group5104: abra|OJJ71068.1 acar|OOF98077.1 acla|EAW13231.1 afis|EAW17399.1 afla|EED54882.1 afum|EAL91237.1 agla|OJJ83970.1 akaw|GAA82894.1 aluc|OJZ87463.1 anid|CBF83002.1 anig|EHA20685.1 aory|EIT79368.1 asyd|OJJ61518.1 ater|EAU29509.1 atub|OJI81185.1 aver|OJJ00854.1 awen|OJJ36327.1

Group5105: abra|OJJ71113.1 acar|OOF98037.1 acla|EAW10379.1 afis|EAW25214.1 afla|EED53668.1 afum|EAL89875.1 akaw|GAA82856.1 aluc|OJZ87421.1 anid|CBF85252.1 aory|EIT75344.1 asyd|OJJ62922.1 atub|OJI81227.1 aver|OJI98067.1 awen|OJJ40876.1 azon|OJJ46811.1 agla|OJJ88947.1 ater|EAU34371.1

Group5106: abra|OJJ71127.1 acla|EAW10371.1 afis|EAW25221.1 afla|EED53685.1 afum|EAL89882.1 agla|OJJ79188.1 akaw|GAA82847.1 aluc|OJZ87408.1 anid|CBF85260.1 anig|EHA20638.1 aory|EIT75267.1 asyd|OJJ62912.1 ater|EAU34380.1 atub|OJI81238.1 aver|OJI98077.1 awen|OJJ40887.1 azon|OJJ44516.1

Group5107: abra|OJJ71131.1 acar|OOF98021.1 acla|EAW10366.1 afis|EAW25226.1 afla|EED53670.1 afum|EAL89887.1 agla|OJJ79182.1 akaw|GAA82843.1 aluc|OJZ87404.1 anid|CBF85267.1 anig|EHA20633.1 aory|EIT75270.1 asyd|OJJ62907.1 atub|OJI81242.1 aver|OJI98081.1 awen|OJJ40891.1 azon|OJJ44520.1

Group5108: abra|OJJ71144.1 acar|OOF98012.1 acla|EAW10362.1 afis|EAW25231.1 afla|EED53677.1 afum|EAL89892.1 agla|OJJ79176.1 akaw|GAA82833.1 aluc|OJZ87394.1 anid|CBF85331.1 anig|EHA20624.1 aory|EIT75332.1 asyd|OJJ64019.1 atub|OJI81252.1 aver|OJI98105.1 awen|OJJ40897.1 azon|OJJ44524.1

Group5109: abra|OJJ71149.1 acla|EAW10353.1 afis|EAW25241.1 afla|EED53703.1 afum|EAL89903.1 agla|OJJ89207.1 akaw|GAA82828.1 aluc|OJZ87389.1 anid|CBF85318.1 anig|EHA20618.1 aory|EIT75342.1 asyd|OJJ64010.1 ater|EAU34366.1 atub|OJI81258.1 aver|OJI98098.1 awen|OJJ40954.1 azon|OJJ44539.1

Group5110: abra|OJJ71152.1 acar|OOF98005.1 acla|EAW10345.1 afis|EAW25244.1 afla|EED53699.1 afum|EAL89906.1 agla|OJJ89212.1 akaw|GAA82825.1 aluc|OJZ87386.1 anig|EHA20615.1 aory|EIT75333.1 asyd|OJJ64013.1 ater|EAU34359.1 atub|OJI81261.1 aver|OJI98101.1 awen|OJJ40957.1 azon|OJJ44536.1

Group5111: abra|OJJ71168.1 acla|EAW10334.1 afis|EAW25258.1 afla|EED53723.1 afum|EAL89919.1 agla|OJJ89229.1 akaw|GAA82813.1 aluc|OJZ87373.1 anid|CBF85358.1 anig|EHA20606.1 aory|EIT75289.1 asyd|OJJ64038.1 ater|EAU34399.1 atub|OJI81273.1 aver|OJI98122.1 awen|OJJ40971.1 azon|OJJ44557.1

Group5112: abra|OJJ71176.1 acar|OOF97990.1 acla|EAW10329.1 afis|EAW25265.1 afla|EED53729.1 afum|EAL89928.1 akaw|GAA82808.1 aluc|OJZ87367.1 anid|CBF85371.1 anig|EHA20601.1 aory|EIT75310.1 asyd|OJJ64046.1 ater|EAU34405.1 atub|OJI81278.1 aver|OJI98131.1 awen|OJJ40977.1 azon|OJJ44565.1

Group5113: abra|OJJ71191.1 acar|OOF97976.1 acla|EAW10313.1 afis|EAW25279.1 afla|EED53746.1 afum|EAL89942.1 agla|OJJ89253.1 akaw|GAA82794.1 aluc|OJZ87353.1 anid|CBF85416.1 anig|EHA20587.1 aory|EIT75305.1 asyd|OJJ64071.1 atub|OJI81292.1 aver|OJI98158.1 awen|OJJ40993.1 azon|OJJ44582.1

Group5114: abra|OJJ71196.1 acar|OOF97971.1 acla|EAW10306.1 afis|EAW25286.1 afum|EAL89949.1 agla|OJJ89259.1 akaw|GAA82787.1 aluc|OJZ87346.1 anid|CBF85427.1 anig|EHA20583.1 aory|EIT78443.1 asyd|OJJ64081.1 ater|EAU34427.1 atub|OJI81298.1 aver|OJI98167.1 awen|OJJ40998.1 azon|OJJ44588.1

Group5115: abra|OJJ71219.1 akaw|GAA82767.1 aluc|OJZ87326.1 anig|EHA20563.1 atub|OJI81319.1 abra|OJJ75210.1 acar|OOF94578.1 acla|EAW15349.1 afla|EED53880.1 aory|EIT80547.1 asyd|OJJ52896.1 aver|OJJ08867.1 awen|OJJ32543.1 aluc|OJZ90682.1 afla|EED51735.1 akaw|GAA85321.1 aory|EIT78423.1

Group5116: abra|OJJ71225.1 acar|OOF97954.1 acla|EAW10297.1 afis|EAW25295.1 afum|EAL89958.1 agla|OJJ89271.1 akaw|GAA82764.1 aluc|OJZ87322.1 anig|EHA20556.1 ater|EAU34436.1 atub|OJI81323.1 aver|OJI98153.1 azon|OJJ44600.1 afla|EED53761.1 anid|CBF85407.1 asyd|OJJ64066.1 awen|OJJ41009.1

Group5117: abra|OJJ71226.1 acar|OOF97953.1 acla|EAW10296.1 afis|EAW25296.1 afla|EED53762.1 afum|EAL89959.2 agla|OJJ89272.1 akaw|GAA82763.1 aluc|OJZ87321.1 anig|EHA20555.1 aory|EIT78357.1 asyd|OJJ64065.1 ater|EAU34437.1 atub|OJI81324.1 aver|OJI98152.1 awen|OJJ41010.1 azon|OJJ44599.1

Group5118: abra|OJJ71232.1 acla|EAW13299.1 afis|EAW17306.1 afla|EED54153.1 afum|EAL91142.1 agla|OJJ82653.1 akaw|GAA82756.1 aluc|OJZ87313.1 anid|CBF78484.1 anig|EHA20549.1 aory|EIT76008.1 asyd|OJJ65333.1 ater|EAU33840.1 atub|OJI81332.1 aver|OJI99478.1 awen|OJJ34703.1 azon|OJJ50430.1

Group5119: abra|OJJ71249.1 acla|EAW10286.1 afis|EAW25306.1 afla|EED53784.1 afum|EAL89969.1 agla|OJJ89285.1 akaw|GAA82738.1 aluc|OJZ87293.1 anid|CBF75294.1 anig|EHA20534.1 aory|EIT78475.1 asyd|OJJ59885.1 ater|EAU34454.1 atub|OJI81347.1 aver|OJJ02401.1 awen|OJJ41020.1 azon|OJJ44607.1

Group5120: abra|OJJ71260.1 afla|EED53793.1 acla|EAW10276.1 afis|EAW25318.1 afum|EAL89979.1 aory|EIT78464.1 asyd|OJJ59894.1 ater|EAU34463.1 awen|OJJ41045.1 azon|OJJ44618.1 agla|OJJ83856.1 akaw|GAA82729.1 aluc|OJZ87283.1 anid|CBF75279.1 anig|EHA20525.1 atub|OJI81358.1 aver|OJJ02392.1

Group5121: abra|OJJ71282.1 acar|OOF97890.1 acla|EAW10265.1 afis|EAW25329.1 afla|EED53817.1 afum|EAL89990.1 agla|OJJ83879.1 akaw|GAA82706.1 aluc|OJZ87261.1 anid|CBF75230.1 anig|EHA20504.1 asyd|OJJ59916.1 ater|EAU34482.1 atub|OJI81381.1 aver|OJJ02370.1 awen|OJJ41024.1 azon|OJJ44641.1

Group5122: abra|OJJ71283.1 acar|OOF97889.1 acla|EAW10266.1 afis|EAW25328.1 afla|EED53818.1 afum|EAL89989.1 agla|OJJ83880.1 akaw|GAA82705.1 aluc|OJZ87260.1 anid|CBF75228.1 aory|EIT78476.1 asyd|OJJ59918.1 ater|EAU34484.1 atub|OJI81382.1 aver|OJJ02368.1 awen|OJJ41023.1 azon|OJJ44642.1

Group5123: abra|OJJ71284.1 acar|OOF97888.1 acla|EAW10252.1 afis|EAW25340.1 afla|EED53821.1 afum|EAL90003.1 agla|OJJ83882.1 akaw|GAA82704.1 aluc|OJZ87259.1 anid|CBF75215.1 anig|EHA20503.1 asyd|OJJ59930.1 ater|EAU34486.1 atub|OJI81383.1 aver|OJJ02356.1 awen|OJJ41059.1 azon|OJJ44643.1

Group5124: abra|OJJ71298.1 acar|OOF97872.1 acla|EAW10240.1 afis|EAW25352.1 afla|EED53833.1 agla|OJJ83900.1 akaw|GAA82691.1 aluc|OJZ87245.1 anid|CBF77436.1 anig|EHA20490.1 aory|EIT78382.1 asyd|OJJ53224.1 ater|EAU34500.1 atub|OJI81397.1 aver|OJJ03628.1 awen|OJJ41075.1 azon|OJJ44657.1

Group5125: abra|OJJ71314.1 acar|OOF97858.1 acla|EAW10225.1 afis|EAW25367.1 afla|EED53848.1 afum|EAL90027.1 agla|OJJ83754.1 akaw|GAA82677.1 aluc|OJZ87230.1 anid|CBF77448.1 anig|EHA20477.1 asyd|OJJ53209.1 ater|EAU34512.1 atub|OJI81412.1 aver|OJJ03641.1 awen|OJJ41093.1 azon|OJJ44672.1

Group5126: abra|OJJ71318.1 acla|EAW10221.1 afis|EAW25371.1 afla|EED53852.1 afum|EAL90031.1 agla|OJJ83758.1 akaw|GAA82673.1 aluc|OJZ87226.1 anid|CBF77440.1 anig|EHA20473.1 aory|EIT78361.1 asyd|OJJ53205.1 ater|EAU34516.1 atub|OJI81416.1 aver|OJJ03645.1 awen|OJJ41097.1 azon|OJJ44676.1

Group5127: abra|OJJ71319.1 acla|EAW10220.1 afis|EAW25372.1 afla|EED53853.1 afum|EAL90032.1 agla|OJJ83759.1 akaw|GAA82672.1 aluc|OJZ87225.1 anid|CBF77473.1 anig|EHA20472.1 aory|EIT78430.1 asyd|OJJ53204.1 ater|EAU34517.1 atub|OJI81417.1 aver|OJJ03646.1 awen|OJJ41098.1 azon|OJJ44677.1

Group5128: abra|OJJ71331.1 acar|OOF97844.1 acla|EAW10209.1 afis|EAW25386.1 afla|EED53863.1 afum|EAL90045.1 agla|OJJ83787.1 akaw|GAA82661.1 aluc|OJZ87211.1 anid|CBF77494.1 anig|EHA20462.1 asyd|OJJ53193.1 ater|EAU34533.1 atub|OJI81428.1 aver|OJJ03657.1 awen|OJJ41113.1 azon|OJJ44689.1

Group5129: abra|OJJ71332.1 acar|OOF97843.1 acla|EAW10208.1 afis|EAW25387.1 afla|EED53864.1 afum|EAL90046.2 agla|OJJ83788.1 akaw|GAA82660.1 aluc|OJZ87210.1 anid|CBF77496.1 aory|EIT78422.1 asyd|OJJ53192.1 ater|EAU34534.1 atub|OJI81429.1 aver|OJJ03658.1 awen|OJJ41114.1 azon|OJJ44690.1

Group5130: abra|OJJ71335.1 acar|OOF97837.1 acla|EAW10204.1 afis|EAW25391.1 afla|EED53868.1 afum|EAL90050.1 agla|OJJ87029.1 akaw|GAA82657.1 aluc|OJZ87207.1 anid|CBF77504.1 aory|EIT78375.1 asyd|OJJ53188.1 ater|EAU34539.1 atub|OJI81432.1 aver|OJJ03662.1 awen|OJJ41118.1 azon|OJJ44694.1

Group5131: abra|OJJ71348.1 acar|OOF97822.1 acla|EAW10190.1 afis|EAW25405.1 afla|EED53884.1 afum|EAL90064.1 agla|OJJ87046.1 akaw|GAA82644.1 aluc|OJZ87191.1 anid|CBF77534.1 anig|EHA20448.1 asyd|OJJ53175.1 ater|EAU34556.1 atub|OJI81447.1 aver|OJJ03677.1 awen|OJJ41132.1 azon|OJJ44706.1

Group5132: abra|OJJ71350.1 acar|OOF97820.1 acla|EAW10188.1 afis|EAW25407.1 afla|EED53886.1 afum|EAL90066.1 agla|OJJ87048.1 akaw|GAA82642.1 aluc|OJZ87189.1 anid|CBF77538.1 anig|EHA20446.1 asyd|OJJ53173.1 ater|EAU34558.1 atub|OJI81449.1 aver|OJJ03679.1 awen|OJJ41134.1 azon|OJJ44708.1

Group5133: abra|OJJ71369.1 acar|OOF97803.1 acla|EAW10169.1 afis|EAW25425.1 afum|EAL90084.1 agla|OJJ87067.1 akaw|GAA82625.1 aluc|OJZ87171.1 anid|CBF77555.1 anig|EHA20429.1 aory|EIT78498.1 asyd|OJJ53154.1 ater|EAU34579.1 atub|OJI81467.1 aver|OJJ03697.1 awen|OJJ41153.1 azon|OJJ44732.1

Group5134: abra|OJJ71375.1 acar|OOF97793.1 afis|EAW25432.1 afum|EAL90090.1 agla|OJJ87077.1 akaw|GAA82619.1 aluc|OJZ87165.1 anig|EHA20424.1 aory|EIT78287.1 atub|OJI81474.1 aver|OJJ03704.1 awen|OJJ41161.1 azon|OJJ44739.1 acla|EAW10162.1 afla|EED53920.1 asyd|OJJ53147.1 anid|CBF77542.1

Group5135: abra|OJJ71377.1 acla|EAW10147.1 afis|EAW25446.1 afla|EED53930.1 afum|EAL90104.1 agla|OJJ87088.1 akaw|GAA82617.1 aluc|OJZ87163.1 anid|CBF77608.1 anig|EHA20422.1 aory|EIT78346.1 asyd|OJJ53136.1 ater|EAU34614.1 atub|OJI81476.1 aver|OJJ03716.1 awen|OJJ41170.1 azon|OJJ44749.1

Group5136: abra|OJJ71381.1 acar|OOF97788.1 acla|EAW10156.1 afis|EAW25438.1 afla|EED53926.1 afum|EAL90096.1 agla|OJJ87083.1 akaw|GAA82613.1 aluc|OJZ87159.1 anid|CBF77598.1 anig|EHA20418.1 asyd|OJJ53141.1 ater|EAU34610.1 atub|OJI81481.1 aver|OJJ03711.1 awen|OJJ41166.1 azon|OJJ44744.1

Group5137: abra|OJJ71385.1 acar|OOF97784.1 acla|EAW10160.1 afis|EAW25434.1 afla|EED53922.1 afum|EAL90092.1 agla|OJJ87079.1 akaw|GAA82609.1 aluc|OJZ87155.1 anig|EHA20414.1 aory|EIT78289.1 asyd|OJJ53145.1 ater|EAU34606.1 atub|OJI81485.1 aver|OJJ03707.1 awen|OJJ41163.1 azon|OJJ44741.1

Group5138: abra|OJJ71388.1 acar|OOF97780.1 acla|EAW10149.1 afis|EAW25444.1 afla|EED53932.1 afum|EAL90102.1 agla|OJJ87091.1 akaw|GAA82606.1 aluc|OJZ87152.1 anid|CBF77612.1 anig|EHA20411.1 aory|EIT78343.1 asyd|OJJ53134.1 atub|OJI81488.1 aver|OJJ03718.1 awen|OJJ41175.1 azon|OJJ44751.1

Group5139: abra|OJJ71396.1 acar|OOF97773.1 acla|EAW10143.1 afis|EAW25450.1 afla|EED53937.1 afum|EAL90109.2 agla|OJJ87102.1 akaw|GAA82601.1 aluc|OJZ87146.1 anid|CBF77627.1 anig|EHA20405.1 asyd|OJJ53129.1 ater|EAU34620.1 atub|OJI81495.1 aver|OJJ03725.1 awen|OJJ41181.1 azon|OJJ44757.1

Group5140: abra|OJJ71422.1 acla|EAW10112.1 afis|EAW25473.1 afla|EED53965.1 afum|EAL90136.2 agla|OJJ87121.1 akaw|GAA82580.1 aluc|OJZ87116.1 anid|CBF77676.1 anig|EHA20382.1 aory|EIT78353.1 asyd|OJJ53090.1 ater|EAU34642.1 atub|OJI81524.1 aver|OJJ03756.1 awen|OJJ41208.1 azon|OJJ44794.1



Group5141: abra|OJJ71433.1 acar|OOF90400.1 acla|EAW10105.1 afis|EAW25482.1 afla|EED53980.1 afum|EAL90147.1 agla|OJJ87130.1 akaw|GAA82570.1 aluc|OJZ87105.1 anid|CBF77699.1 anig|EHA20373.1 asyd|OJJ53071.1 ater|EAU34653.1 atub|OJI81533.1 aver|OJJ03774.1 awen|OJJ41223.1 azon|OJJ44784.1

Group5142: abra|OJJ71445.1 acla|EAW10101.1 afis|EAW25486.1 afla|EED53984.1 afum|EAL90151.1 agla|OJJ87134.1 akaw|GAA82564.1 aluc|OJZ87096.1 anid|CBF77715.1 anig|EHA20367.1 aory|EIT78340.1 asyd|OJJ53066.1 ater|EAU34657.1 atub|OJI81542.1 aver|OJJ03779.1 awen|OJJ41227.1 azon|OJJ44780.1

Group5143: abra|OJJ71457.1 acla|EAW10092.1 afis|EAW25495.1 afla|EED53995.1 afum|EAL90161.1 agla|OJJ87310.1 akaw|GAA82554.1 aluc|OJZ87086.1 anid|CBF77747.1 anig|EHA20356.1 aory|EIT78281.1 asyd|OJJ53048.1 ater|EAU34666.1 atub|OJI81552.1 aver|OJJ03797.1 awen|OJJ41237.1 azon|OJJ44803.1

Group5144: abra|OJJ71482.1 acla|EAW10067.1 afis|EAW25518.1 afla|EED54019.1 afum|EAL90183.1 agla|OJJ87285.1 akaw|GAA82537.1 aluc|OJZ87064.1 anid|CBF77790.1 anig|EHA20337.1 aory|EIT78295.1 asyd|OJJ53027.1 ater|EAU33364.1 atub|OJI81571.1 aver|OJJ03817.1 awen|OJJ41261.1 azon|OJJ44826.1

Group5145: abra|OJJ71539.1 acla|EAW15094.1 afis|EAW20063.1 afla|EED45314.1 afum|EAL85183.1 agla|OJJ88896.1 akaw|GAA89382.1 aluc|OJZ86277.1 anid|CBF84830.1 anig|EHA21594.1 aory|EIT73621.1 asyd|OJJ63210.1 ater|EAU38672.1 atub|OJI84262.1 aver|OJI97745.1 awen|OJJ31824.1 azon|OJJ46301.1

Group5146: abra|OJJ71546.1 acla|EAW15100.1 afis|EAW20072.1 afla|EED45307.1 afum|EAL85190.1 agla|OJJ88888.1 akaw|GAA89376.1 aluc|OJZ86284.1 anid|CBF84847.1 anig|EHA21587.1 aory|EIT73619.1 asyd|OJJ63203.1 ater|EAU38679.1 atub|OJI84254.1 aver|OJI97752.1 awen|OJJ31831.1 azon|OJJ46293.1

Group5147: abra|OJJ71547.1 acla|EAW15101.1 afis|EAW20073.1 afla|EED45306.1 afum|EAL85191.1 agla|OJJ88887.1 akaw|GAA89375.1 aluc|OJZ86285.1 anid|CBF84849.1 anig|EHA21586.1 aory|EIT73795.1 asyd|OJJ63202.1 ater|EAU38681.1 atub|OJI84253.1 aver|OJI97753.1 awen|OJJ31832.1 azon|OJJ46292.1

Group5148: abra|OJJ71552.1 acla|EAW15106.1 afis|EAW20078.1 afla|EED45297.1 afum|EAL85196.1 agla|OJJ88882.1 akaw|GAA89370.1 aluc|OJZ86290.1 anid|CBF84862.1 anig|EHA21581.1 aory|EIT73726.1 asyd|OJJ63197.1 ater|EAU38686.1 atub|OJI84248.1 aver|OJI97758.1 awen|OJJ31837.1 azon|OJJ46286.1

Group5149: abra|OJJ71557.1 acla|EAW15110.1 afis|EAW20081.1 afla|EED45293.1 afum|EAL85200.1 agla|OJJ88878.1 akaw|GAA89366.1 aluc|OJZ86295.1 anid|CBF84868.1 anig|EHA21577.1 aory|EIT73574.1 asyd|OJJ63193.1 ater|EAU38689.1 atub|OJI84242.1 aver|OJI97762.1 awen|OJJ31841.1 azon|OJJ46282.1

Group5150: abra|OJJ71559.1 acar|OOF90419.1 acla|EAW15111.1 afis|EAW20082.1 afla|EED45292.1 afum|EAL85201.1 agla|OJJ88876.1 akaw|GAA89365.1 aluc|OJZ86296.1 anid|CBF84870.1 anig|EHA21576.1 asyd|OJJ63192.1 ater|EAU38690.1 atub|OJI84241.1 aver|OJI97764.1 awen|OJJ31842.1 azon|OJJ46281.1

Group5151: abra|OJJ71564.1 acar|OOF96300.1 acla|EAW15116.1 afis|EAW20087.1 afla|EED45286.1 afum|EAL85206.1 akaw|GAA89360.1 aluc|OJZ86301.1 anid|CBF84879.1 anig|EHA21571.1 aory|EIT73732.1 asyd|OJJ63187.1 ater|EAU38696.1 atub|OJI84235.1 aver|OJI97769.1 awen|OJJ31847.1 azon|OJJ46276.1

Group5152: abra|OJJ71571.1 acla|EAW15120.1 afis|EAW20090.1 afla|EED45280.1 afum|EAL85209.1 agla|OJJ88866.1 akaw|GAA89354.1 aluc|OJZ86308.1 anid|CBF84884.1 anig|EHA21565.1 aory|EIT73541.1 asyd|OJJ63183.1 ater|EAU38699.1 atub|OJI84228.1 aver|OJI97772.1 awen|OJJ31852.1 azon|OJJ46272.1

Group5153: abra|OJJ71572.1 acar|OOF96304.1 acla|EAW15121.1 afis|EAW20091.1 afla|EED45279.1 afum|EAL85210.1 agla|OJJ88863.1 akaw|GAA89352.1 aluc|OJZ86309.1 anid|CBF84886.1 anig|EHA21564.1 asyd|OJJ63181.1 ater|EAU38700.1 atub|OJI84226.1 aver|OJI97773.1 awen|OJJ31854.1 azon|OJJ46271.1

Group5154: abra|OJJ71578.1 acar|OOF96308.1 acla|EAW15125.1 afis|EAW20095.1 afla|EED45275.1 afum|EAL85213.1 agla|OJJ88859.1 akaw|GAA89346.1 aluc|OJZ86315.1 anid|CBF84891.1 anig|EHA21560.1 aory|EIT73717.1 asyd|OJJ63178.1 atub|OJI84220.1 aver|OJI97776.1 awen|OJJ31858.1 azon|OJJ46267.1

Group5155: abra|OJJ71583.1 acar|OOF96312.1 acla|EAW15128.1 afis|EAW20098.1 afla|EED53373.1 afum|EAL85216.1 agla|OJJ88856.1 akaw|GAA89340.1 aluc|OJZ86323.1 anid|CBF84899.1 anig|EHA21555.1 aory|EIT74942.1 asyd|OJJ63174.1 atub|OJI84211.1 aver|OJI97780.1 awen|OJJ31866.1 azon|OJJ46264.1

Group5156: abra|OJJ71589.1 acar|OOF96318.1 acla|EAW15134.1 afis|EAW20106.1 afum|EAL85223.1 agla|OJJ88847.1 akaw|GAA89334.1 aluc|OJZ86331.1 anid|CBF84912.1 anig|EHA21549.1 aory|EIT74895.1 asyd|OJJ63167.1 ater|EAU38725.1 atub|OJI84205.1 aver|OJI97787.1 awen|OJJ31878.1 azon|OJJ46256.1

Group5157: abra|OJJ71591.1 acla|EAW15137.1 afis|EAW20109.1 afla|EED53363.1 afum|EAL85226.1 akaw|GAA89331.1 aluc|OJZ86334.1 anid|CBF84917.1 anig|EHA21547.1 aory|EIT75266.1 asyd|OJJ63165.1 ater|EAU38727.1 atub|OJI84201.1 aver|OJI97790.1 awen|OJJ31880.1 azon|OJJ46254.1 agla|OJJ88843.1

Group5158: abra|OJJ71598.1 acar|OOF96325.1 acla|EAW15146.1 afis|EAW20114.1 afla|EED53359.1 afum|EAL85231.1 agla|OJJ88837.1 akaw|GAA89326.1 aluc|OJZ86339.1 anid|CBF84928.1 anig|EHA21542.1 aory|EIT74994.1 asyd|OJJ63160.1 ater|EAU38731.1 atub|OJI84196.1 aver|OJI97797.1 awen|OJJ31886.1

Group5159: abra|OJJ71607.1 acla|EAW15149.1 afis|EAW20117.1 afla|EED53354.1 afum|EAL85234.1  
agla|OJJ88832.1 akaw|GAA89321.1 aluc|OJZ86349.1 anid|CBF84936.1 anig|EHA21537.1 aory|EIT75234.1  
asyd|OJJ63157.1 ater|EAU38735.1 atub|OJI84185.1 aver|OJI97799.1 awen|OJJ31887.1 azon|OJJ46247.1

Group5160: abra|OJJ71616.1 acar|OOF96332.1 acla|EAW15158.1 afis|EAW20126.1 afla|EED57250.1  
afum|EAL85244.1 agla|OJJ88821.1 akaw|GAA89311.1 aluc|OJZ86357.1 anid|CBF84950.1 anig|EHA21533.1  
aory|EIT74017.1 asyd|OJJ63146.1 atub|OJI84177.1 aver|OJI97808.1 awen|OJJ31895.1 azon|OJJ46241.1

Group5161: abra|OJJ71634.1 acar|OOF91865.1 afis|EAW20144.1 afla|EED57204.1 afum|EAL85259.1  
agla|OJJ88788.1 akaw|GAA89292.1 aluc|OJZ86377.1 anid|CBF78474.1 anig|EHA21517.1 aory|EIT74128.1  
asyd|OJJ58349.1 ater|EAU38761.1 atub|OJI84157.1 aver|OJJ02058.1 awen|OJJ32015.1 azon|OJJ46072.1

Group5162: abra|OJJ71636.1 acar|OOF96353.1 acla|EAW15176.1 afis|EAW20146.1 afla|EED57203.1  
afum|EAL85261.1 agla|OJJ88787.1 akaw|GAA89290.1 aluc|OJZ86379.1 anig|EHA21515.1 aory|EIT74050.1  
asyd|OJJ63129.1 ater|EAU38762.1 atub|OJI84155.1 aver|OJI97826.1 awen|OJJ32020.1 azon|OJJ46070.1

Group5163: abra|OJJ71638.1 acar|OOF96355.1 acla|EAW15178.1 afis|EAW20148.1 afla|EED57201.1  
afum|EAL85263.1 agla|OJJ88785.1 akaw|GAA89288.1 aluc|OJZ86381.1 anid|CBF84982.1 aory|EIT74108.1  
asyd|OJJ63126.1 ater|EAU38764.1 atub|OJI84152.1 aver|OJI97829.1 awen|OJJ32022.1 azon|OJJ46068.1

Group5164: abra|OJJ71650.1 acla|EAW15187.1 afis|EAW20157.1 afla|EED57193.1 afum|EAL85273.1  
agla|OJJ88773.1 akaw|GAA89279.1 aluc|OJZ86394.1 anid|CBF85000.1 anig|EHA21504.1 aory|EIT74099.1  
asyd|OJJ63117.1 ater|EAU38771.1 atub|OJI84139.1 aver|OJI97842.1 awen|OJJ32051.1 azon|OJJ46084.1

Group5165: abra|OJJ71651.1 acar|OOF96364.1 acla|EAW15188.1 afla|EED57190.1 afum|EAL85274.1  
agla|OJJ88772.1 akaw|GAA89278.1 aluc|OJZ86395.1 anid|CBF85002.1 anig|EHA21503.1 asyd|OJJ63116.1  
ater|EAU38772.1 atub|OJI84138.1 aver|OJI97843.1 awen|OJJ32052.1 azon|OJJ46085.1 agla|OJJ79968.1

Group5166: abra|OJJ71652.1 acar|OOF96365.1 acla|EAW15189.1 afis|EAW20159.1 afla|EED57189.1  
afum|EAL85276.1 akaw|GAA89277.1 aluc|OJZ86398.1 anid|CBF85004.1 anig|EHA21502.1 aory|EIT74024.1  
asyd|OJJ63115.1 ater|EAU38775.1 atub|OJI84137.1 aver|OJI97844.1 awen|OJJ32053.1 azon|OJJ46086.1

Group5167: abra|OJJ71653.1 akaw|GAA89276.1 aluc|OJZ86399.1 anig|EHA21501.1 ater|EAU38776.1  
atub|OJI84136.1 awen|OJJ32054.1 acar|OOF96367.1 acla|EAW15191.1 afis|EAW20160.1 afla|EED57188.1  
afum|EAL85277.1 anid|CBF85006.1 asyd|OJJ63114.1 aver|OJI97845.1 agla|OJJ88771.1 azon|OJJ46087.1

Group5168: abra|OJJ71658.1 acar|OOF96371.1 acla|EAW15195.1 afis|EAW20164.1 afla|EED57185.1  
afum|EAL85282.1 agla|OJJ88766.1 akaw|GAA89272.1 aluc|OJZ86403.1 anid|CBF85013.1 anig|EHA21497.1  
aory|EIT74112.1 asyd|OJJ63110.1 ater|EAU38795.1 atub|OJI84132.1 aver|OJI97850.1 awen|OJJ32059.1

Group5169: abra|OJJ71664.1 acar|OOF96374.1 acla|EAW15200.1 afis|EAW20166.1 afla|EED57182.1  
afum|EAL85284.1 agla|OJJ88763.1 akaw|GAA89269.1 aluc|OJZ86406.1 anid|CBF85020.1 anig|EHA21493.1  
asyd|OJJ63106.1 ater|EAU38798.1 atub|OJI84125.1 aver|OJI97855.1 awen|OJJ32063.1 azon|OJJ46096.1

Group5170: abra|OJJ71680.1 acar|OOF96391.1 acla|EAW15219.1 afis|EAW20184.1 afla|EED57162.1  
afum|EAL85302.2 agla|OJJ84682.1 akaw|GAA89252.1 aluc|OJZ86422.1 anig|EHA21477.1 aory|EIT74012.1  
asyd|OJJ63090.1 ater|EAU35220.1 atub|OJI84109.1 aver|OJI97872.1 awen|OJJ31183.1 azon|OJJ46114.1

Group5171: abra|OJJ71681.1 acar|OOF96392.1 acla|EAW15220.1 afis|EAW20185.1 afla|EED57163.1  
afum|EAL85304.2 agla|OJJ84681.1 akaw|GAA89251.1 aluc|OJZ86423.1 anid|CBF85052.1 anig|EHA21475.1  
asyd|OJJ63089.1 ater|EAU35221.1 atub|OJI84108.1 aver|OJI97873.1 awen|OJJ31185.1 azon|OJJ46115.1

Group5172: abra|OJJ71694.1 acar|OOF96401.1 acla|EAW15231.1 afis|EAW20195.1 afla|EED57149.1  
afum|EAL85315.1 agla|OJJ84670.1 akaw|GAA89241.1 aluc|OJZ86438.1 anid|CBF85071.1 anig|EHA21465.1  
aory|EIT73968.1 asyd|OJJ63079.1 ater|EAU32003.1 atub|OJI84092.1 aver|OJI97885.1 awen|OJJ31201.1

Group5173: abra|OJJ71695.1 acar|OOF96403.1 acla|EAW15232.1 afis|EAW20196.1 afla|EED57148.1  
afum|EAL85316.1 agla|OJJ84669.1 akaw|GAA89240.1 aluc|OJZ86439.1 anid|CBF85073.1 anig|EHA21464.1  
aory|EIT74078.1 asyd|OJJ63078.1 ater|EAU32004.1 atub|OJI84090.1 aver|OJI97886.1 awen|OJJ31202.1

Group5174: abra|OJJ71698.1 acar|OOF96406.1 acla|EAW15234.1 afis|EAW20198.1 afla|EED57146.1  
afum|EAL85318.1 agla|OJJ84667.1 akaw|GAA89237.1 aluc|OJZ86441.1 anid|CBF85080.1 anig|EHA21460.1  
aory|EIT74082.1 asyd|OJJ63075.1 atub|OJI84087.1 aver|OJI97889.1 awen|OJJ31204.1 azon|OJJ46129.1

Group5175: abra|OJJ71712.1 acar|OOF96417.1 acla|EAW06436.1 afis|EAW18541.1 afla|EED52854.1  
afum|EAL93241.1 agla|OJJ81573.1 akaw|GAA85177.1 aluc|OJZ86456.1 anid|CBF70194.1 anig|EHA21451.1  
aory|EIT78642.1 asyd|OJJ58789.1 ater|EAU30024.1 atub|OJI84071.1 aver|OJJ01396.1 awen|OJJ31097.1

Group5176: abra|OJJ71724.1 acar|OOF96428.1 acla|EAW10028.1 afla|EED54155.1 akaw|GAA85166.1  
aluc|OJZ86470.1 anig|EHA21440.1 aory|EIT81946.1 asyd|OJJ53835.1 ater|EAU30727.1 atub|OJI84059.1  
aver|OJI98821.1 awen|OJJ38368.1 azon|OJJ45250.1 afla|EED55034.1 asyd|OJJ64718.1 ater|EAU37147.1

Group5177: acla|EAW09043.1 afis|EAW25210.1 aory|EIT73738.1 akaw|GAA86660.1 aluc|OJZ89756.1 atub|OJJ85045.1 awen|OJJ36425.1 azon|OJJ48013.1 acla|EAW09045.1 afla|EED45079.1 anid|CBF79126.1 asyd|OJJ53761.1 ater|EAU35542.1 afum|EAL89871.1 asyd|OJJ57939.1 aory|EIT73659.1 agla|OJJ78860.1

Group5178: abra|OJJ71744.1 acar|OOF96435.1 acla|EAW06448.1 afis|EAW18552.1 afum|EAL93252.1 agla|OJJ81604.1 akaw|GAA85158.1 aluc|OJZ86479.1 anid|CBF70279.1 anig|EHA22163.1 aory|EIT78165.1 asyd|OJJ58742.1 ater|EAU34840.1 atub|OJJ84051.1 aver|OJJ01352.1 awen|OJJ31113.1 azon|OJJ46589.1

Group5179: abra|OJJ71802.1 acar|OOF96482.1 acla|EAW13843.1 afis|EAW18557.1 afla|EED52809.1 afum|EAL93257.1 agla|OJJ81602.1 akaw|GAA85108.1 aluc|OJZ86532.1 anid|CBF70284.1 anig|EHA22114.1 aory|EIT78228.1 asyd|OJJ58738.1 ater|EAU34846.1 atub|OJJ83989.1 aver|OJJ01349.1 awen|OJJ31115.1

Group5180: abra|OJJ71807.1 acar|OOF96485.1 acla|EAW13846.1 afis|EAW18560.1 afla|EED52800.1 afum|EAL93260.1 agla|OJJ81599.1 akaw|GAA85105.1 aluc|OJZ86537.1 anid|CBF70290.1 anig|EHA22111.1 aory|EIT78240.1 asyd|OJJ58734.1 atub|OJJ83986.1 aver|OJJ01346.1 awen|OJJ31118.1 azon|OJJ46591.1

Group5181: abra|OJJ71832.1 acar|OOF96508.1 acla|EAW13867.1 afis|EAW18579.1 afla|EED52769.1 afum|EAL93282.1 akaw|GAA85079.1 aluc|OJZ86564.1 anid|CBF70356.1 anig|EHA22087.1 aory|EIT78246.1 asyd|OJJ58656.1 ater|EAU34872.1 atub|OJJ83957.1 aver|OJJ01264.1 awen|OJJ31138.1 azon|OJJ46618.1

Group5182: abra|OJJ71847.1 acar|OOF96516.1 acla|EAW13878.1 afis|EAW18590.1 afla|EED52756.1 afum|EAL93297.1 agla|OJJ81642.1 akaw|GAA85070.1 aluc|OJZ86580.1 anid|CBF70377.1 aory|EIT78203.1 asyd|OJJ58645.1 ater|EAU34883.1 atub|OJJ83942.1 aver|OJJ01251.1 awen|OJJ31153.1 azon|OJJ46628.1

Group5183: abra|OJJ71848.1 acar|OOF96517.1 acla|EAW13879.1 afis|EAW18591.1 afum|EAL93298.1 agla|OJJ81643.1 akaw|GAA85069.1 aluc|OJZ86581.1 anid|CBF70379.1 anig|EHA22077.1 aory|EIT78204.1 asyd|OJJ58644.1 ater|EAU34884.1 atub|OJJ83941.1 aver|OJJ01250.1 awen|OJJ31154.1 azon|OJJ46629.1

Group5184: abra|OJJ71852.1 acar|OOF96522.1 acla|EAW13884.1 afis|EAW18596.1 afla|EED52751.1 afum|EAL93304.2 agla|OJJ81649.1 akaw|GAA85065.1 aluc|OJZ86586.1 anid|CBF70393.1 anig|EHA22074.1 asyd|OJJ58635.1 ater|EAU34890.1 atub|OJJ83937.1 aver|OJJ01241.1 awen|OJJ31159.1 azon|OJJ46635.1

Group5185: abra|OJJ71863.1 acla|EAW13893.1 afis|EAW18605.1 afla|EED52741.1 afum|EAL93314.1 agla|OJJ81657.1 akaw|GAA85053.1 aluc|OJZ86600.1 anid|CBF70410.1 anig|EHA22063.1 aory|EIT78173.1 asyd|OJJ58626.1 ater|EAU34900.1 atub|OJJ83923.1 aver|OJJ01232.1 awen|OJJ31171.1 azon|OJJ46648.1

Group5186: abra|OJJ71867.1 acar|OOF96537.1 acla|EAW13897.1 afis|EAW18609.1 afla|EED52737.1 afum|EAL93319.1 agla|OJJ81664.1 akaw|GAA85048.1 aluc|OJZ86604.1 anid|CBF70418.1 anig|EHA22059.1 aory|EIT78182.1 asyd|OJJ58621.1 ater|EAU34907.1 atub|OJJ83919.1 aver|OJJ01228.1 awen|OJJ32070.1

Group5187: abra|OJJ71872.1 acar|OOF96543.1 acla|EAW13902.1 afis|EAW18614.1 afla|EED52732.1 afum|EAL93324.1 agla|OJJ81230.1 akaw|GAA85043.1 aluc|OJZ86611.1 anid|CBF70430.1 anig|EHA22055.1 asyd|OJJ58615.1 ater|EAU34911.1 atub|OJJ83915.1 aver|OJJ01222.1 awen|OJJ32075.1 azon|OJJ46655.1

Group5188: abra|OJJ71877.1 aluc|OJZ86615.1 atub|OJJ83911.1 acla|EAW13906.1 afla|EED52727.1 afis|EAW18618.1 anig|EHA22051.1 afum|EAL93328.1 anid|CBF70503.1 aory|EIT78247.1 agla|OJJ81226.1 akaw|GAA85039.1 asyd|OJJ58578.1 ater|EAU34918.1 aver|OJJ01182.1 awen|OJJ32080.1 azon|OJJ46659.1

Group5189: abra|OJJ71893.1 acar|OOF96553.1 acla|EAW09629.1 afis|EAW21511.1 afla|EED55949.1 afum|EAL92531.1 agla|OJJ85675.1 akaw|GAA85025.1 aluc|OJZ86632.1 anid|CBF76437.1 anig|EHA22037.1 aory|EIT76814.1 asyd|OJJ61099.1 atub|OJJ83896.1 aver|OJJ00414.1 awen|OJJ39183.1 azon|OJJ51510.1

Group5190: abra|OJJ71894.1 acar|OOF96555.1 acla|EAW09628.1 afis|EAW21512.1 afla|EED55950.1 afum|EAL92532.1 agla|OJJ85676.1 akaw|GAA85024.1 aluc|OJZ86633.1 anid|CBF76435.1 anig|EHA22036.1 asyd|OJJ61097.1 ater|EAU35028.1 atub|OJJ83895.1 aver|OJJ00412.1 awen|OJJ39182.1 azon|OJJ51511.1

Group5191: abra|OJJ71897.1 acar|OOF96558.1 acla|EAW09625.1 afis|EAW21515.1 afla|EED55953.1 afum|EAL92535.1 agla|OJJ85679.1 akaw|GAA85021.1 aluc|OJZ86636.1 anid|CBF76429.1 anig|EHA22033.1 asyd|OJJ61094.1 ater|EAU35025.1 atub|OJJ83892.1 aver|OJJ00409.1 awen|OJJ39179.1 azon|OJJ51517.1

Group5192: abra|OJJ71904.1 acar|OOF96563.1 acla|EAW09619.1 afis|EAW21520.1 afla|EED55958.1 afum|EAL92541.1 agla|OJJ85683.1 akaw|GAA85016.1 aluc|OJZ86641.1 anid|CBF76417.1 anig|EHA22028.1 aory|EIT76716.1 asyd|OJJ61089.1 atub|OJJ83886.1 aver|OJJ00404.1 awen|OJJ39173.1 azon|OJJ51500.1

Group5193: abra|OJJ71906.1 acla|EAW09617.1 afis|EAW21522.1 afla|EED55960.1 afum|EAL92543.1 agla|OJJ85685.1 akaw|GAA85014.1 aluc|OJZ86643.1 anid|CBF76414.1 anig|EHA22026.1 aory|EIT76548.1 asyd|OJJ61087.1 ater|EAU35019.1 atub|OJJ83884.1 aver|OJJ00402.1 awen|OJJ39171.1 azon|OJJ51502.1

Group5194: abra|OJJ71910.1 afis|EAW21525.1 afla|EED55963.1 afum|EAL92546.1 agla|OJJ85688.1 akaw|GAA85010.1 aluc|OJZ86647.1 anid|CBF76408.1 anig|EHA22023.1 aory|EIT76627.1 asyd|OJJ61084.1 ater|EAU35016.1 atub|OJJ83880.1 aver|OJJ00399.1 awen|OJJ39168.1 azon|OJJ51497.1 acla|EAW09614.1

Group5195: abra|OJJ71919.1 acar|OOF96576.1 acla|EAW09611.1 afis|EAW21528.1 afla|EED55976.1 afum|EAL92549.1 agla|OJJ85692.1 akaw|GAA85003.1 aluc|OJZ86656.1 anid|CBF76402.1 anig|EHA22015.1 asyd|OJJ61080.1 ater|EAU35013.1 atub|OJI83871.1 aver|OJJ00396.1 awen|OJJ39165.1 azon|OJJ51494.1

Group5196: abra|OJJ71925.1 acar|OOF96582.1 acla|EAW09603.1 afis|EAW21534.1 afla|EED55984.1 afum|EBA27462.1 akaw|GAA84997.1 aluc|OJZ86662.1 anid|CBF76390.1 anig|EHA22009.1 aory|EIT76780.1 asyd|OJJ61072.1 ater|EAU35005.1 atub|OJI83863.1 aver|OJJ00389.1 awen|OJJ39158.1 azon|OJJ51488.1

Group5197: abra|OJJ71941.1 acar|OOF96597.1 acla|EAW09589.1 afis|EAW21549.1 afum|EAL92569.1 agla|OJJ85727.1 akaw|GAA84984.1 aluc|OJZ86677.1 anid|CBF76360.1 anig|EHA21996.1 aory|EIT76795.1 asyd|OJJ61058.1 ater|EAU34990.1 atub|OJI83850.1 aver|OJJ00375.1 awen|OJJ39141.1 azon|OJJ51466.1

Group5198: abra|OJJ71948.1 acla|EAW09586.1 afis|EAW21552.1 afla|EED56004.1 afum|EAL92572.2 agla|OJJ85730.1 akaw|GAA84979.1 aluc|OJZ86683.1 anid|CBF76354.1 anig|EHA21990.1 aory|EIT76847.1 asyd|OJJ61055.1 ater|EAU34986.1 atub|OJI83844.1 aver|OJJ00372.1 awen|OJJ39138.1 azon|OJJ51471.1

Group5199: abra|OJJ71949.1 acla|EAW09585.1 afis|EAW21553.1 afla|EED56005.1 afum|EAL92573.1 agla|OJJ85733.1 akaw|GAA84978.1 aluc|OJZ86684.1 anid|CBF76352.1 anig|EHA21989.1 aory|EIT76552.1 asyd|OJJ61054.1 ater|EAU34981.1 atub|OJI83843.1 aver|OJJ00371.1 awen|OJJ39137.1 azon|OJJ51472.1

Group5200: abra|OJJ71954.1 acla|EAW09582.1 afis|EAW21555.1 afla|EED56007.1 afum|EBA27465.1 agla|OJJ85734.1 akaw|GAA84974.1 aluc|OJZ86688.1 anid|CBF76348.1 aory|EIT76671.1 asyd|OJJ61052.1 ater|EAU34979.1 atub|OJI83837.1 aver|OJJ00368.1 awen|OJJ39135.1 azon|OJJ51463.1 anig|EHA21985.1

Group5201: abra|OJJ71955.1 acar|OOF96617.1 acla|EAW09580.1 afis|EAW21557.1 afla|EED56009.1 afum|EAL92576.1 agla|OJJ85735.1 akaw|GAA84972.1 aluc|OJZ86690.1 anig|EHA21983.1 aory|EIT76882.1 asyd|OJJ61050.1 ater|EAU34977.1 atub|OJI83834.1 aver|OJJ00366.1 awen|OJJ39133.1 azon|OJJ51461.1

Group5202: abra|OJJ71964.1 acar|OOF89892.1 acla|EAW09572.1 afis|EAW21564.1 afla|EED56020.1 afum|EAL92583.1 agla|OJJ85749.1 akaw|GAA84964.1 aluc|OJZ86700.1 anid|CBF76332.1 anig|EHA21976.1 asyd|OJJ61037.1 ater|EAU34968.1 atub|OJI83826.1 aver|OJJ00355.1 awen|OJJ39122.1 azon|OJJ51452.1

Group5203: abra|OJJ71981.1 acar|OOF96632.1 acla|EAW09558.1 afis|EAW21579.1 afla|EED57796.1 afum|EAL92597.1 agla|OJJ85760.1 akaw|GAA84948.1 aluc|OJZ86718.1 anid|CBF76296.1 anig|EHA21961.1 aory|EIT81066.1 asyd|OJJ61003.1 atub|OJI83811.1 aver|OJJ00321.1 awen|OJJ39102.1 azon|OJJ51432.1

Group5204: abra|OJJ71982.1 acar|OOF96633.1 acla|EAW09557.1 afis|EAW21580.1 afla|EED57797.1 afum|EAL92598.1 agla|OJJ85759.1 akaw|GAA84947.1 aluc|OJZ86719.1 anid|CBF76298.1 anig|EHA21960.1 asyd|OJJ61002.1 ater|EAU34954.1 atub|OJI83810.1 awen|OJJ39101.1 azon|OJJ51433.1 aver|OJJ00320.1

Group5205: abra|OJJ71984.1 acar|OOF96636.1 acla|EAW09554.1 afis|EAW21582.1 afla|EED57802.1 afum|EAL92600.1 agla|OJJ85755.1 akaw|GAA84945.1 aluc|OJZ86721.1 anig|EHA21958.1 aory|EIT81095.1 asyd|OJJ60998.1 ater|EAU34951.1 atub|OJI83807.1 aver|OJJ00318.1 awen|OJJ39099.1 azon|OJJ51435.1

Group5206: abra|OJJ71985.1 acar|OOF96639.1 acla|EAW09553.1 afis|EAW21583.1 afla|EED57804.1 afum|EAL92601.2 agla|OJJ85773.1 akaw|GAA84944.1 aluc|OJZ86722.1 anid|CBF76291.1 anig|EHA21957.1 asyd|OJJ60997.1 ater|EAU34948.1 atub|OJI83806.1 aver|OJJ00317.1 awen|OJJ39098.1 azon|OJJ51436.1

Group5207: abra|OJJ71986.1 acar|OOF96640.1 acla|EAW09552.1 afis|EAW21584.1 afla|EED57805.1 afum|EAL92602.1 agla|OJJ85776.1 akaw|GAA84943.1 aluc|OJZ86723.1 anig|EHA21956.1 aory|EIT81057.1 asyd|OJJ60996.1 ater|EAU34947.1 atub|OJI83805.1 aver|OJJ00316.1 awen|OJJ39097.1 azon|OJJ51430.1

Group5208: abra|OJJ71989.1 acar|OOF96643.1 acla|EAW09546.1 afis|EAW21587.1 afla|EED57808.1 afum|EAL92605.1 agla|OJJ85780.1 akaw|GAA84940.1 aluc|OJZ86726.1 anig|EHA21953.1 aory|EIT81079.1 asyd|OJJ60993.1 ater|EAU34944.1 atub|OJI83802.1 aver|OJJ00313.1 awen|OJJ39094.1 azon|OJJ51427.1

Group5209: abra|OJJ72011.1 acla|EAW09530.1 afis|EAW21602.1 afla|EED57830.1 afum|EAL92621.1 agla|OJJ85798.1 akaw|GAA84922.1 aluc|OJZ86747.1 anid|CBF83464.1 anig|EHA21932.1 aory|EIT81055.1 asyd|OJJ60685.1 ater|EAU38293.1 atub|OJI83780.1 aver|OJJ00010.1 awen|OJJ39079.1 azon|OJJ51411.1

Group5210: abra|OJJ72013.1 acar|OOF96662.1 acla|EAW09527.1 afis|EAW21605.1 afla|EED57832.1 afum|EAL92624.1 agla|OJJ85800.1 akaw|GAA84920.1 aluc|OJZ86749.1 anid|CBF83467.1 anig|EHA21930.1 asyd|OJJ60687.1 ater|EAU38294.1 atub|OJI83778.1 aver|OJJ00012.1 awen|OJJ39077.1 azon|OJJ51409.1

Group5211: abra|OJJ72023.1 acar|OOF96672.1 acla|EAW09518.1 afis|EAW21614.1 afla|EED57845.1 afum|EAL92648.1 agla|OJJ78625.1 akaw|GAA84909.1 aluc|OJZ86760.1 anid|CBF83487.1 anig|EHA21919.1 asyd|OJJ60699.1 ater|EAU38306.1 atub|OJI83767.1 aver|OJJ00025.1 awen|OJJ39066.1 azon|OJJ51397.1

Group5212: abra|OJJ72025.1 acar|OOF96674.1 acla|EAW09514.1 afis|EAW21618.1 afla|EED57847.1 afum|EAL92654.1 agla|OJJ78627.1 akaw|GAA84907.1 aluc|OJZ86762.1 anid|CBF83491.1 anig|EHA21917.1 asyd|OJJ60701.1 ater|EAU38308.1 atub|OJI83765.1 aver|OJJ00027.1 awen|OJJ39064.1 azon|OJJ51395.1

Group5213: abra|OJJ72051.1 acar|OOF96708.1 acla|EAW09496.1 afis|EAW21640.1 afla|EED57903.1 afum|EAL92674.1 agla|OJJ79707.1 akaw|GAA84883.1 aluc|OJZ86788.1 anid|CBF83525.1 aory|EIT82339.1 asyd|OJJ60717.1 ater|EAU38325.1 atub|OJI83731.1 aver|OJJ00050.1 awen|OJJ33897.1 azon|OJJ48663.1

Group5214: abra|OJJ72053.1 acar|OOF96710.1 acla|EAW09494.1 afis|EAW21642.1 afla|EED57901.1 afum|EAL92676.1 agla|OJJ79709.1 akaw|GAA84881.1 aluc|OJZ86790.1 anig|EHA21893.1 aory|EIT82345.1 asyd|OJJ60719.1 ater|EAU38327.1 atub|OJI83729.1 aver|OJJ00052.1 awen|OJJ33899.1 azon|OJJ48661.1

Group5215: abra|OJJ72059.1 acar|OOF89883.1 acla|EAW09490.1 afis|EAW21646.1 afla|EED48456.1 afum|EAL92680.1 agla|OJJ79714.1 akaw|GAA84876.1 aluc|OJZ86795.1 anid|CBF83533.1 anig|EHA21888.1 asyd|OJJ60723.1 ater|EAU32953.1 atub|OJI83723.1 aver|OJJ00056.1 awen|OJJ33904.1 azon|OJJ48657.1

Group5216: abra|OJJ72080.1 acar|OOF96728.1 acla|EAW09487.1 afis|EAW21649.1 afla|EED57920.1 afum|EAL92683.1 agla|OJJ79729.1 aluc|OJZ86834.1 anid|CBF83557.1 anig|EHA21801.1 aory|EIT82340.1 asyd|OJJ60737.1 ater|EAU38344.1 atub|OJI83684.1 aver|OJJ00069.1 awen|OJJ33918.1 azon|OJJ48644.1

Group5217: abra|OJJ72107.1 acar|OOF96750.1 acla|EAW09384.1 afis|EAW21751.1 afla|EED58027.1 afum|EBA27473.1 agla|OJJ84423.1 akaw|GAA84815.1 aluc|OJZ86862.1 anid|CBF83669.1 aory|EIT79785.1 asyd|OJJ60809.1 ater|EAU38439.1 atub|OJI83658.1 aver|OJJ00137.1 awen|OJJ34032.1 azon|OJJ48205.1

Group5218: abra|OJJ72114.1 acar|OOF96754.1 acla|EAW14915.1 afis|EAW24437.1 afla|EED55242.1 afum|EAL86105.1 agla|OJJ78776.1 akaw|GAA84808.1 aluc|OJZ86869.1 anid|CBF73764.1 anig|EHA21772.1 aory|EIT83629.1 asyd|OJJ56589.1 atub|OJI83650.1 aver|OJJ06136.1 awen|OJJ32762.1 azon|OJJ43997.1

Group5219: abra|OJJ72122.1 acar|OOF96762.1 acla|EAW14922.1 afis|EAW24444.1 afla|EED55233.1 afum|EAL86113.1 agla|OJJ80289.1 akaw|GAA84801.1 aluc|OJZ86879.1 anid|CBF73751.1 anig|EHA21765.1 aory|EIT83604.1 asyd|OJJ56581.1 ater|EAU30003.1 atub|OJI83640.1 aver|OJJ06143.1 awen|OJJ32755.1

Group5220: abra|OJJ72142.1 acar|OOF96780.1 acla|EAW14936.1 afis|EAW24451.1 afum|EAL86120.1 agla|OJJ80297.1 akaw|GAA84781.1 aluc|OJZ86899.1 anid|CBF73817.1 anig|EHA21743.1 aory|EIT83518.1 asyd|OJJ56573.1 ater|EAU29995.1 atub|OJI83620.1 aver|OJJ06150.1 awen|OJJ32746.1 azon|OJJ45298.1

Group5221: abra|OJJ72151.1 afis|EAW24461.1 afla|EED55212.1 agla|OJJ80309.1 akaw|GAA84773.1 aluc|OJZ86910.1 anid|CBF73833.1 anig|EHA21735.1 asyd|OJJ56559.1 atub|OJI83612.1 awen|OJJ32735.1 azon|OJJ45286.1 acla|EAW14946.1 afla|EED55213.1 afum|EAL86131.1 aory|EIT83597.1 ater|EAU29981.1

Group5222: abra|OJJ72192.1 afis|EAW21198.1 afum|EAL90047.1 akaw|GAA84741.1 aluc|OJZ86943.1 anig|EHA21701.1 aory|EIT78387.1 asyd|OJJ53191.1 atub|OJI83579.1 aver|OJI97565.1 awen|OJJ41115.1 azon|OJJ44691.1 acla|EAW10207.1 afis|EAW25388.1 afla|EED53865.1 ater|EAU34535.1 aver|OJJ03659.1

Group5223: abra|OJJ72201.1 acar|OOF96821.1 acla|EAW14948.1 afis|EAW24463.1 afla|EED55203.1 afum|EAL86134.1 agla|OJJ80321.1 akaw|GAA84735.1 aluc|OJZ86951.1 anid|CBF73839.1 anig|EHA21696.1 aory|EIT83590.1 asyd|OJJ56556.1 ater|EAU29977.1 atub|OJI83572.1 aver|OJJ06164.1 awen|OJJ32728.1

Group5224: abra|OJJ72208.1 acar|OOF96829.1 acla|EAW14968.1 afis|EAW24491.1 afum|EAL86160.1 agla|OJJ80328.1 akaw|GAA84726.1 aluc|OJZ86960.1 anid|CBF73841.1 anig|EHA21688.1 aory|EIT78779.1 asyd|OJJ56555.1 ater|EAU29943.1 atub|OJI83563.1 aver|OJJ06165.1 awen|OJJ32704.1 azon|OJJ45096.1

Group5225: abra|OJJ72253.1 acar|OOF96884.1 acla|EAW12203.1 afis|EAW17077.1 afla|EED52139.1 agla|OJJ81367.1 akaw|GAA84684.1 aluc|OJZ87004.1 anid|CBF79753.1 anig|EHA21642.1 aory|EIT74390.1 asyd|OJJ58098.1 ater|EAU30779.1 atub|OJI83515.1 aver|OJJ04306.1 awen|OJJ36962.1 azon|OJJ45322.1

Group5226: abra|OJJ72287.1 acar|OOF94936.1 acla|EAW12015.1 afis|EAW19654.1 afla|EED57006.1 afum|EAL86868.1 agla|OJJ80800.1 akaw|GAA86039.1 aluc|OJZ90266.1 anid|CBF71365.1 anig|EHA23761.1 asyd|OJJ55082.1 ater|EAU32874.1 atub|OJI81691.1 aver|OJJ07125.1 awen|OJJ41906.1 azon|OJJ42696.1

Group5227: abra|OJJ72289.1 acar|OOF94934.1 acla|EAW12013.1 afis|EAW19653.1 afla|EED57004.1 afum|EAL86869.1 agla|OJJ80799.1 akaw|GAA86041.1 aluc|OJZ90269.1 anid|CBF71363.1 anig|EHA23762.1 asyd|OJJ55083.1 ater|EAU32875.1 atub|OJI81694.1 aver|OJJ07124.1 awen|OJJ41904.1 azon|OJJ42693.1

Group5228: abra|OJJ72291.1 acar|OOF94929.1 acla|EAW12011.1 afis|EAW19651.1 afla|EED57002.1 afum|EAL86871.1 agla|OJJ80797.1 akaw|GAA86043.1 aluc|OJZ90272.1 anid|CBF71359.1 anig|EHA23764.1 asyd|OJJ55085.1 ater|EAU32877.1 atub|OJI81696.1 aver|OJJ07122.1 awen|OJJ41902.1 azon|OJJ42698.1

Group5229: abra|OJJ72292.1 acar|OOF94932.1 acla|EAW12010.1 afis|EAW19650.1 afla|EED57001.1 agla|OJJ80796.1 akaw|GAA86044.1 aluc|OJZ90273.1 anid|CBF71357.1 anig|EHA23765.1 aory|EIT77584.1 asyd|OJJ55086.1 ater|EAU32878.1 atub|OJI81697.1 aver|OJJ07121.1 awen|OJJ41901.1 azon|OJJ42699.1

Group5230: abra|OJJ72293.1 acar|OOF94930.1 acla|EAW12009.1 afis|EAW19649.1 afla|EED57000.1 afum|EAL86873.1 agla|OJJ80791.1 akaw|GAA86045.1 aluc|OJZ90274.1 anig|EHA23766.1 aory|EIT77489.1 asyd|OJJ55087.1 ater|EAU32879.1 atub|OJI81698.1 aver|OJJ07120.1 awen|OJJ41900.1 azon|OJJ42700.1

Group5231: abra|OJJ72294.1 acar|OOF94931.1 acla|EAW12008.1 afis|EAW19648.1 afla|EED56999.1 afum|EAL86874.1 agla|OJJ80790.1 akaw|GAA86046.1 aluc|OJZ90275.1 anid|CBF71356.1 anig|EHA23767.1 asyd|OJJ55088.1 ater|EAU32880.1 atub|OJI81699.1 aver|OJJ07119.1 awen|OJJ41899.1 azon|OJJ42701.1

Group5232: abra|OJJ72300.1 acar|OOF94925.1 acla|EAW12004.1 afis|EAW19644.1 afla|EED56995.1 afum|EAL86878.1 agla|OJJ80786.1 akaw|GAA86051.1 aluc|OJZ90281.1 anid|CBF71348.1 anig|EHA23771.1 aory|EIT77548.1 asyd|OJJ55093.1 atub|OJI81705.1 aver|OJJ07115.1 awen|OJJ41895.1 azon|OJJ42705.1

Group5233: abra|OJJ72308.1 acar|OOF94905.1 acla|EAW13442.1 afis|EAW20849.1 afum|EAL84784.1 aluc|OJZ90289.1 anid|CBF89941.1 anig|EHA23779.1 asyd|OJJ61203.1 ater|EAU29955.1 atub|OJI81713.1 aver|OJJ00527.1 awen|OJJ41681.1 azon|OJJ50849.1 anig|EHA21820.1 asyd|OJJ61389.1 aver|OJJ00717.1

Group5234: abra|OJJ72315.1 acar|OOF94895.1 afis|EAW19532.1 afla|EED48961.1 afum|EAL86974.1 akaw|GAA86062.1 aluc|OJZ90296.1 anig|EHA23785.1 aory|EIT79991.1 ater|EAU31962.1 atub|OJI81720.1 awen|OJJ35408.1 azon|OJJ49084.1 afla|EED56029.1 aory|EIT76743.1 atub|OJI89169.1 awen|OJJ35688.1

Group5235: abra|OJJ72326.1 acar|OOF94888.1 acla|EAW11997.1 afis|EAW19637.1 afla|EED56989.1 afum|EAL86885.1 agla|OJJ80779.1 akaw|GAA86076.1 aluc|OJZ90311.1 anid|CBF71337.1 anig|EHA23798.1 asyd|OJJ55102.1 ater|EAU32891.1 atub|OJI81736.1 aver|OJJ07105.1 awen|OJJ41882.1 azon|OJJ47080.1

Group5236: abra|OJJ72329.1 acar|OOF94885.1 acla|EAW11994.1 afis|EAW19634.1 afla|EED56985.1 afum|EAL86888.1 agla|OJJ86606.1 akaw|GAA86079.1 aluc|OJZ90314.1 anid|CBF71331.1 anig|EHA23801.1 aory|EIT77448.1 asyd|OJJ55105.1 ater|EAU32894.1 atub|OJI81739.1 aver|OJJ07102.1 awen|OJJ41879.1

Group5237: abra|OJJ72350.1 acar|OOF94868.1 acla|EAW11976.1 afis|EAW19610.1 afla|EED56970.1 afum|EAL86912.1 agla|OJJ80760.1 akaw|GAA86097.1 aluc|OJZ90329.1 anid|CBF71304.1 anig|EHA23813.1 asyd|OJJ55122.1 ater|EAU32911.1 atub|OJI81756.1 aver|OJJ07081.1 awen|OJJ41860.1 azon|OJJ47054.1

Group5238: abra|OJJ72357.1 acar|OOF94861.1 acla|EAW11962.1 afis|EAW19599.1 afla|EED56955.1 afum|EAL86919.1 agla|OJJ80741.1 akaw|GAA86104.1 aluc|OJZ90336.1 anid|CBF71289.1 anig|EHA23820.1 aory|EIT77466.1 ater|EAU32926.1 atub|OJI81763.1 aver|OJJ07075.1 awen|OJJ41842.1 azon|OJJ44889.1

Group5239: abra|OJJ72378.1 acar|OOF94839.1 acla|EAW11956.1 afis|EAW19593.1 afla|EED56949.1 afum|EAL86925.1 akaw|GAA86126.1 aluc|OJZ90365.1 anid|CBF71271.1 anig|EHA23840.1 aory|EIT77564.1 asyd|OJJ55148.1 ater|EAU32931.1 atub|OJI81792.1 aver|OJJ07059.1 awen|OJJ41810.1 azon|OJJ47022.1

Group5240: abra|OJJ72383.1 acar|OOF90287.1 acla|EAW11952.1 afis|EAW19589.1 afla|EED56943.1 afum|EAL86929.1 agla|OJJ80729.1 akaw|GAA86132.1 aluc|OJZ90370.1 anig|EHA23845.1 aory|EIT77526.1 asyd|OJJ55143.1 ater|EAU32937.1 atub|OJI81796.1 aver|OJJ07064.1 awen|OJJ41804.1 azon|OJJ47027.1

Group5241: abra|OJJ72386.1 acar|OOF90292.1 acla|EAW11950.1 afis|EAW19587.1 afla|EED56915.1 afum|EAL86931.1 agla|OJJ80724.1 akaw|GAA86135.1 aluc|OJZ90373.1 anig|EHA23847.1 aory|EIT77573.1 asyd|OJJ55152.1 ater|EAU32961.1 atub|OJI81799.1 aver|OJJ07055.1 awen|OJJ41801.1 azon|OJJ47030.1

Group5242: abra|OJJ72398.1 acla|EAW11942.1 afis|EAW19578.1 afla|EED56803.1 afum|EAL86940.2 agla|OJJ80707.1 akaw|GAA86143.1 aluc|OJZ90383.1 anid|CBF71237.1 anig|EHA23855.1 aory|EIT73849.1 asyd|OJJ55164.1 ater|EAU32977.1 atub|OJI81809.1 aver|OJJ07043.1 awen|OJJ41791.1 azon|OJJ47042.1

Group5243: abra|OJJ72407.1 acar|OOF94822.1 acla|EAW11935.1 afis|EAW19570.1 afla|EED56813.1 agla|OJJ80698.1 akaw|GAA86150.1 aluc|OJZ90391.1 anid|CBF71224.1 anig|EHA23861.1 aory|EIT73940.1 asyd|OJJ55172.1 ater|EAU32993.1 atub|OJI81820.1 aver|OJJ07035.1 awen|OJJ41783.1 azon|OJJ44895.1

Group5244: abra|OJJ72432.1 acla|EAW12664.1 afis|EAW17828.1 afla|EED46170.1 afum|EAL91638.1 agla|OJJ80649.1 akaw|GAA86172.1 aluc|OJZ90415.1 anid|CBF77999.1 anig|EHA23881.1 aory|EIT76464.1 asyd|OJJ55248.1 ater|EAU33032.1 atub|OJI81848.1 aver|OJJ06975.1 awen|OJJ41758.1 azon|OJJ48449.1

Group5245: abra|OJJ72433.1 acar|OOF94802.1 acla|EAW12665.1 afis|EAW17829.1 afla|EED46171.1 afum|EAL91639.1 agla|OJJ80650.1 akaw|GAA86173.1 aluc|OJZ90416.1 anid|CBF77998.1 anig|EHA23884.1 aory|EIT76389.1 asyd|OJJ55249.1 ater|EAU33033.1 atub|OJI81849.1 aver|OJJ06974.1 azon|OJJ48450.1

Group5246: abra|OJJ72436.1 acar|OOF94799.1 acla|EAW12669.1 afis|EAW17833.1 afla|EED46175.1 afum|EAL91643.1 akaw|GAA86176.1 aluc|OJZ90420.1 anid|CBF77990.1 anig|EHA23890.1 aory|EIT76472.1 asyd|OJJ55254.1 ater|EAU33036.1 atub|OJI81852.1 aver|OJJ06970.1 awen|OJJ41748.1 azon|OJJ48441.1

Group5247: abra|OJJ72438.1 acla|EAW12671.1 afis|EAW17834.1 afla|EED46179.1 afum|EAL91644.1 agla|OJJ83132.1 akaw|GAA86177.1 aluc|OJZ90422.1 anid|CBF77988.1 anig|EHA23891.1 aory|EIT76441.1 asyd|OJJ55255.1 ater|EAU33038.1 atub|OJI81854.1 aver|OJJ06969.1 awen|OJJ41742.1 azon|OJJ48438.1

Group5248: abra|OJJ72441.1 acar|OOF94796.1 acla|EAW12674.1 afis|EAW17837.1 afla|EED46182.1 afum|EAL91647.1 agla|OJJ83129.1 akaw|GAA86180.1 aluc|OJZ90425.1 anid|CBF77983.1 anig|EHA23894.1 aory|EIT76412.1 asyd|OJJ55258.1 ater|EAU33041.1 atub|OJI81857.1 awen|OJJ41739.1 azon|OJJ48435.1

Group5249: abra|OJJ72447.1 acar|OOF94789.1 acla|EAW12680.1 afis|EAW17843.1 afla|EED46188.1 afum|EAL91652.1 agla|OJJ83124.1 akaw|GAA86185.1 aluc|OJZ90431.1 anid|CBF77971.1 anig|EHA23900.1 aory|EIT76400.1 asyd|OJJ55264.1 ater|EAU33045.1 atub|OJI81863.1 awen|OJJ41733.1 azon|OJJ48430.1

Group5250: abra|OJJ72452.1 acar|OOF94784.1 acla|EAW12686.1 afis|EAW17849.1 afla|EED46202.1 afum|EAL91658.1 agla|OJJ83120.1 akaw|GAA86189.1 aluc|OJZ90437.1 anid|EHA23904.1 aory|EIT76465.1 asyd|OJJ55271.1 ater|EAU33051.1 atub|OJI81868.1 aver|OJJ06956.1 awen|OJJ41724.1 azon|OJJ48422.1

Group5251: abra|OJJ72463.1 acar|OOF94776.1 acla|EAW12695.1 afis|EAW17859.1 afla|EED46214.1 afum|EAL91667.1 agla|OJJ83110.1 akaw|GAA86199.1 aluc|OJZ90450.1 anid|CBF77945.1 anig|EHA23913.1 aory|EIT76391.1 asyd|OJJ55280.1 atub|OJI81878.1 aver|OJJ06947.1 awen|OJJ41713.1 azon|OJJ48408.1

Group5252: abra|OJJ72472.1 acar|OOF94763.1 acla|EAW12705.1 afis|EAW17868.1 afum|EAL91676.1 agla|OJJ83088.1 akaw|GAA86210.1 aluc|OJZ90459.1 anid|CBF89895.1 anig|EHA23921.1 aory|EIT76489.1 asyd|OJJ62138.1 ater|EAU33086.1 atub|OJI81886.1 aver|OJI96248.1 awen|OJJ41703.1 azon|OJJ48399.1

Group5253: abra|OJJ72473.1 acar|OOF94762.1 acla|EAW12706.1 afis|EAW17869.1 afla|EED46237.1 afum|EAL91677.1 agla|OJJ83089.1 akaw|GAA86211.1 aluc|OJZ90460.1 anid|CBF89897.1 anig|EHA23922.1 asyd|OJJ62137.1 ater|EAU33087.1 atub|OJI81887.1 aver|OJI96247.1 awen|OJJ41702.1 azon|OJJ48398.1

Group5254: abra|OJJ72477.1 acar|OOF94759.1 acla|EAW12708.1 afis|EAW17871.1 afum|EAL91679.1 agla|OJJ83091.1 akaw|GAA86213.1 aluc|OJZ90463.1 anid|CBF89900.1 anig|EHA23924.1 aory|EIT76455.1 asyd|OJJ62135.1 ater|EAU33089.1 atub|OJI81889.1 aver|OJI96245.1 awen|OJJ41699.1 azon|OJJ48396.1

Group5255: abra|OJJ72479.1 acar|OOF94757.1 acla|EAW12710.1 afis|EAW17873.1 afla|EED46240.1 afum|EAL91681.1 agla|OJJ83075.1 akaw|GAA86215.1 aluc|OJZ90467.1 anid|CBF89932.1 anig|EHA23926.1 aory|EIT76355.1 asyd|OJJ62115.1 ater|EAU33091.1 atub|OJI81891.1 aver|OJI96222.1 awen|OJJ41695.1

Group5256: abra|OJJ72486.1 acar|OOF94749.1 afis|EAW17880.1 afla|EED51757.1 afum|EAL91688.1 akaw|GAA86221.1 aluc|OJZ90473.1 anid|CBF88138.1 anig|EHA23932.1 aory|EIT80744.1 asyd|OJJ63602.1 ater|EAU33100.1 atub|OJI81897.1 aver|OJJ05546.1 awen|OJJ36319.1 ater|EAU29427.1 aver|OJI97334.1

Group5257: abra|OJJ72491.1 acar|OOF94746.1 acla|EAW12721.1 afis|EAW17884.1 afla|EED46271.1 afum|EAL91692.1 agla|OJJ83063.1 akaw|GAA86225.1 aluc|OJZ90477.1 anid|CBF77031.1 anig|EHA23936.1 asyd|OJJ57010.1 ater|EAU33104.1 atub|OJI81902.1 aver|OJJ03277.1 awen|OJJ41675.1 azon|OJJ48390.1

Group5258: abra|OJJ72504.1 acla|EAW12728.1 afis|EAW17891.1 afla|EED46283.1 afum|EAL91700.1 agla|OJJ83052.1 akaw|GAA86232.1 aluc|OJZ90487.1 anid|CBF77012.1 anig|EHA23945.1 aory|EIT76351.1 asyd|OJJ57018.1 ater|EAU33111.1 atub|OJI81911.1 aver|OJJ03271.1 awen|OJJ41662.1 azon|OJJ48381.1

Group5259: abra|OJJ72506.1 acar|OOF94736.1 acla|EAW12729.1 afis|EAW17892.1 afla|EED46285.1 afum|EAL91701.1 agla|OJJ83050.1 akaw|GAA86234.1 aluc|OJZ90489.1 anid|CBF77008.1 anig|EHA23947.1 asyd|OJJ57020.1 ater|EAU33113.1 atub|OJI81913.1 aver|OJJ03269.1 awen|OJJ41660.1 azon|OJJ48380.1

Group5260: abra|OJJ72533.1 acar|OOF94720.1 acla|EAW12740.1 afis|EAW17903.1 afla|EED46295.1 afum|EAL91711.1 agla|OJJ83040.1 akaw|GAA86255.1 aluc|OJZ90512.1 anid|CBF76988.1 aory|EIT76329.1 ater|EAU33122.1 atub|OJI81937.1 aver|OJJ03258.1 awen|OJJ41647.1 asyd|OJJ57034.1 azon|OJJ48369.1

Group5261: abra|OJJ72536.1 acla|EAW12743.1 afis|EAW17906.1 afla|EED46300.1 afum|EAL91715.1 agla|OJJ83036.1 akaw|GAA86259.1 aluc|OJZ90517.1 anid|CBF76983.1 anig|EHA23971.1 aory|EIT76325.1 asyd|OJJ57036.1 ater|EAU33124.1 atub|OJI81941.1 aver|OJJ03256.1 awen|OJJ41644.1 azon|OJJ48365.1

Group5262: abra|OJJ72546.1 acar|OOF94707.1 acla|EAW12750.1 afis|EAW17914.1 afla|EED46317.1 afum|EAL91724.1 agla|OJJ83029.1 akaw|GAA85179.1 aluc|OJZ90533.1 anid|CBF76973.1 anig|EHA23982.1 asyd|OJJ57046.1 ater|EAU33135.1 atub|OJI81954.1 aver|OJJ03249.1 awen|OJJ41633.1 azon|OJJ48358.1

Group5263: abra|OJJ72563.1 acar|OOF94691.1 acla|EAW12763.1 afis|EAW17925.1 afum|EAL91736.1 agla|OJJ83017.1 akaw|GAA85192.1 aluc|OJZ90547.1 anid|CBF76944.1 anig|EHA23995.1 aory|EIT81166.1 asyd|OJJ57061.1 ater|EAU33547.1 atub|OJI81969.1 aver|OJJ03237.1 awen|OJJ41621.1 azon|OJJ48344.1

Group5264: abra|OJJ72572.1 acar|OOF99282.1 akaw|GAA85198.1 aluc|OJZ90553.1 anig|EHA24000.1 asyd|OJJ56262.1 atub|OJI81976.1 abra|OJJ78185.1 acla|EAW08831.1 anig|EHA19946.1 ater|EAU38338.1 aver|OJJ08473.1 acar|OOF96678.1 afla|EED51444.1 agla|OJJ88347.1 aory|EIT80756.1 ater|EAU37977.1

Group5265: abra|OJJ72579.1 acar|OOF94673.1 afla|EED56580.1 agla|OJJ88581.1 akaw|GAA85205.1 aluc|OJZ90560.1 anig|EHA24006.1 aory|EIT79653.1 asyd|OJJ60421.1 ater|EAU30076.1 atub|OJI81983.1 aver|OJJ01323.1 awen|OJJ33716.1 azon|OJJ42313.1 asyd|OJJ58710.1 awen|OJJ40585.1 akaw|GAA87620.1

Group5266: abra|OJJ72586.1 acar|OOF94663.1 acla|EAW12772.1 afis|EAW17935.1 afum|EAL91746.1 agla|OJJ82997.1 akaw|GAA85212.1 aluc|OJZ90567.1 anid|CBF77040.1 anig|EHA24013.1 aory|EIT78504.1 asyd|OJJ57001.1 ater|EAU33535.1 atub|OJI81990.1 aver|OJJ03286.1 awen|OJJ41611.1 azon|OJJ48330.1

Group5267: abra|OJJ72587.1 acar|OOF94664.1 acla|EAW12773.1 afis|EAW17936.1 afla|EED49106.1  
agla|OJJ82996.1 akaw|GAA85213.1 aluc|OJZ90568.1 anid|CBF77042.1 aory|EIT78510.1 asyd|OJJ57000.1  
ater|EAU33534.1 atub|OJI81991.1 aver|OJJ03287.1 awen|OJJ41610.1 azon|OJJ48329.1 afum|EAL91747.1

Group5268: abra|OJJ72590.1 acar|OOF94660.1 acla|EAW12776.1 afis|EAW17939.1 afla|EED49102.1  
afum|EAL91750.1 agla|OJJ82993.1 akaw|GAA85216.1 aluc|OJZ90571.1 anid|CBF77047.1 anig|EHA24016.1  
asyd|OJJ56997.1 ater|EAU33529.1 atub|OJI81994.1 aver|OJJ03290.1 awen|OJJ41606.1 azon|OJJ48324.1

Group5269: abra|OJJ72615.1 acla|EAW07008.1 afis|EAW16624.1 afla|EED44980.1 afum|EAL89213.1  
agla|OJJ82624.1 akaw|GAA85240.1 aluc|OJZ90597.1 anid|CBF83188.1 anig|EHA24036.1 aory|EIT73566.1  
asyd|OJJ55547.1 ater|EAU36728.1 atub|OJI82021.1 aver|OJJ06624.1 awen|OJJ36245.1 azon|OJJ42444.1

Group5270: abra|OJJ72621.1 acar|OOF90202.1 acla|EAW11603.1 afis|EAW23855.1 afla|EED49096.1  
afum|EAL87283.1 agla|OJJ82506.1 akaw|GAA85242.1 aluc|OJZ90599.1 anid|CBF77246.1 aory|EIT82505.1  
asyd|OJJ56811.1 ater|EAU33500.1 atub|OJI82023.1 aver|OJJ03524.1 awen|OJJ33816.1 azon|OJJ48722.1

Group5271: abra|OJJ72624.1 acar|OOF94640.1 acla|EAW11600.1 afis|EAW23857.1 afla|EED52582.1  
afum|EAL87285.1 agla|OJJ82511.1 akaw|GAA85244.1 aluc|OJZ90601.1 anid|CBF77238.1 aory|EIT74177.1  
asyd|OJJ56813.1 ater|EAU33494.1 atub|OJI82025.1 aver|OJJ03522.1 awen|OJJ33818.1 azon|OJJ48717.1

Group5272: abra|OJJ72631.1 acar|OOF94634.1 afis|EAW23863.1 afla|EED52587.1 afum|EAL87291.1  
agla|OJJ82529.1 akaw|GAA85251.1 aluc|OJZ90608.1 anid|CBF77226.1 anig|EHA24046.1 aory|EIT74239.1  
asyd|OJJ56818.1 ater|EAU33488.1 atub|OJI82032.1 aver|OJJ03517.1 awen|OJJ33823.1 azon|OJJ48712.1

Group5273: abra|OJJ72634.1 acar|OOF93305.1 afis|EAW18838.1 afla|EED47562.1 afum|EAL93572.1  
akaw|GAA85255.1 aluc|OJZ90613.1 anid|CBF74711.1 anig|EHA24051.1 aory|EIT74513.1 asyd|OJJ59476.1  
ater|EAU38813.1 atub|OJI82039.1 aver|OJJ02797.1 aver|OJJ08238.1 awen|OJJ32594.1 asyd|OJJ53508.1

Group5274: abra|OJJ72637.1 acla|EAW11587.1 afis|EAW23866.1 afla|EED52594.1 afum|EAL87294.1  
agla|OJJ82535.1 akaw|GAA85258.1 aluc|OJZ90616.1 anid|CBF77211.1 anig|EHA24053.1 aory|EIT74298.1  
asyd|OJJ56826.1 ater|EAU33476.1 atub|OJI82042.1 aver|OJJ03509.1 awen|OJJ33842.1 azon|OJJ48707.1

Group5275: abra|OJJ72638.1 acla|EAW11586.1 afis|EAW23867.1 afla|EED52595.1 afum|EAL87295.1  
agla|OJJ82536.1 akaw|GAA85259.1 aluc|OJZ90617.1 anid|CBF77213.1 anig|EHA24054.1 aory|EIT74234.1  
asyd|OJJ56825.1 ater|EAU33477.1 atub|OJI82043.1 aver|OJJ03510.1 awen|OJJ33843.1 azon|OJJ48704.1

Group5276: abra|OJJ72639.1 acar|OOF94632.1 acla|EAW11585.1 afis|EAW23868.1 afla|EED52596.1  
afum|EAL87296.1 agla|OJJ82537.1 akaw|GAA85260.1 aluc|OJZ90618.1 anid|CBF77215.1 anig|EHA24055.1  
aory|EIT74172.1 asyd|OJJ56824.1 atub|OJI82044.1 aver|OJJ03511.1 awen|OJJ33844.1 azon|OJJ48703.1

Group5277: abra|OJJ72649.1 acar|OOF94621.1 acla|EAW11579.1 afis|EAW23875.1 afla|EED52603.1  
afum|EAL87303.1 agla|OJJ82545.1 akaw|GAA85270.1 aluc|OJZ90628.1 anid|CBF77207.1 anig|EHA24064.1  
asyd|OJJ56830.1 ater|EAU33471.1 atub|OJI82054.1 aver|OJJ03506.1 awen|OJJ33851.1 azon|OJJ48697.1

Group5278: abra|OJJ72651.1 acla|EAW11578.1 afis|EAW23876.1 afla|EED52604.1 afum|EAL87304.1  
agla|OJJ82546.1 akaw|GAA85271.1 aluc|OJZ90629.1 anid|CBF77205.1 anig|EHA24065.1 aory|EIT74232.1  
asyd|OJJ56831.1 ater|EAU33470.1 atub|OJI82055.1 aver|OJJ03505.1 awen|OJJ33852.1 azon|OJJ48696.1

Group5279: abra|OJJ72656.1 acar|OOF94618.1 acla|EAW11519.1 afis|EAW23934.1 afla|EED50584.1  
afum|EAL87359.1 agla|OJJ79414.1 akaw|GAA85278.1 aluc|OJZ90637.1 anid|CBF77271.1 anig|EHA24072.1  
asyd|OJJ56798.1 ater|EAU32303.1 atub|OJI82065.1 aver|OJJ03536.1 awen|OJJ39021.1 azon|OJJ51346.1

Group5280: abra|OJJ72660.1 acar|OOF94613.1 acla|EAW11524.1 afis|EAW23929.1 afla|EED50589.1  
afum|EAL87354.1 agla|OJJ79408.1 akaw|GAA85283.1 aluc|OJZ90641.1 anid|CBF77279.1 anig|EHA24076.1  
aory|EIT82068.1 asyd|OJJ56794.1 atub|OJI82069.1 aver|OJJ03540.1 awen|OJJ39025.1 azon|OJJ51351.1

Group5281: abra|OJJ72674.1 acar|OOF97383.1 acla|EAW11536.1 afis|EAW23918.1 afla|EED50607.1  
afum|EAL87344.1 agla|OJJ79387.1 akaw|GAA85293.1 aluc|OJZ90652.1 anid|CBF77094.1 anig|EHA24087.1  
asyd|OJJ56956.1 ater|EAU32317.1 atub|OJI82081.1 aver|OJJ03329.1 awen|OJJ39035.1 azon|OJJ51363.1

Group5282: abra|OJJ72718.1 acar|OOF95950.1 acla|EAW11554.1 afis|EAW23899.1 afla|EED52633.1  
afum|EAL87326.1 agla|OJJ78641.1 aluc|OJZ90687.1 anid|CBF77146.1 anig|EHA24115.1 aory|EIT74241.1  
asyd|OJJ56911.1 ater|EAU32338.1 atub|OJI82112.1 aver|OJJ03382.1 awen|OJJ39049.1 azon|OJJ51381.1

Group5283: abra|OJJ72724.1 acar|OOF95957.1 acla|EAW11561.1 afis|EAW23892.1 afla|EED52622.1  
afum|EAL87320.1 agla|OJJ78632.1 akaw|GAA85330.1 aluc|OJZ90693.1 anid|CBF77169.1 aory|EIT74282.1  
asyd|OJJ56852.1 ater|EAU33450.1 atub|OJI82118.1 aver|OJJ03467.1 awen|OJJ39057.1 azon|OJJ51388.1

Group5284: abra|OJJ72726.1 acar|OOF95959.1 acla|EAW11563.1 afis|EAW23890.1 afla|EED52620.1  
afum|EAL87318.1 agla|OJJ78630.1 akaw|GAA85332.1 aluc|OJZ90695.1 anid|CBF77173.1 anig|EHA24120.1  
asyd|OJJ56849.1 ater|EAU33453.1 atub|OJI82121.1 aver|OJJ03490.1 awen|OJJ39059.1 azon|OJJ51390.1



Group5285: abra|OJJ72731.1 acla|EAW11566.1 afis|EAW23887.1 afla|EED52616.1 afum|EAL87314.2  
agla|OJJ82574.1 akaw|GAA85337.1 aluc|OJZ90700.1 anid|CBF77179.1 anig|EHA24126.1 aory|EIT74278.1  
asyd|OJJ56845.1 ater|EAU33459.1 atub|OJI82126.1 aver|OJJ03493.1 awen|OJJ33869.1 azon|OJJ48685.1

Group5286: abra|OJJ72734.1 acar|OOF95964.1 acla|EAW11569.1 afis|EAW23884.1 afla|EED52613.1  
afum|EAL87312.1 agla|OJJ82571.1 akaw|GAA85340.1 aluc|OJZ90702.1 anid|CBF77185.1 anig|EHA24128.1  
aory|EIT74192.1 asyd|OJJ56842.1 ater|EAU33462.1 atub|OJI82129.1 aver|OJJ03496.1 awen|OJJ33866.1

Group5287: abra|OJJ72740.1 acar|OOF95968.1 acla|EAW11575.1 afis|EAW23879.1 afla|EED52609.1  
afum|EAL87307.1 agla|OJJ82569.1 akaw|GAA85350.1 aluc|OJZ90712.1 anig|EHA24132.1 aory|EIT74197.1  
asyd|OJJ56837.1 ater|EAU33466.1 atub|OJI82139.1 aver|OJJ03500.1 awen|OJJ33860.1 azon|OJJ48692.1

Group5288: abra|OJJ72752.1 acar|OOF95975.1 acla|EAW11511.1 afis|EAW23942.1 afla|EED50574.1  
afum|EAL87367.1 agla|OJJ79430.1 akaw|GAA85364.1 aluc|OJZ90726.1 anid|CBF77258.1 anig|EHA24144.1  
asyd|OJJ56805.1 ater|EAU32291.1 atub|OJI82154.1 aver|OJJ03529.1 awen|OJJ39013.1 azon|OJJ51338.1

Group5289: abra|OJJ72758.1 acar|OOF95979.1 acla|EAW11506.1 afis|EAW23946.1 afum|EAL87372.1  
agla|OJJ79439.1 akaw|GAA85368.1 aluc|OJZ90732.1 anid|CBF77288.1 anig|EHA24148.1 aory|EIT82036.1  
asyd|OJJ56789.1 ater|EAU32288.1 atub|OJI82158.1 aver|OJJ03547.1 awen|OJJ39005.1 azon|OJJ51334.1

Group5290: abra|OJJ72759.1 acla|EAW11505.1 afis|EAW23947.1 afla|EED50569.1 afum|EAL87373.1  
agla|OJJ79440.1 akaw|GAA85369.1 aluc|OJZ90733.1 anid|CBF77286.1 anig|EHA24149.1 aory|EIT82150.1  
asyd|OJJ56790.1 ater|EAU32287.1 atub|OJI82159.1 aver|OJJ03546.1 awen|OJJ39004.1 azon|OJJ51333.1

Group5291: abra|OJJ72760.1 acla|EAW11504.1 afis|EAW23948.1 afla|EED50568.1 afum|EAL87374.1  
agla|OJJ79441.1 akaw|GAA85370.1 aluc|OJZ90734.1 anid|CBF77285.1 anig|EHA24150.1 aory|EIT82140.1  
asyd|OJJ56791.1 ater|EAU29804.1 atub|OJI82161.1 aver|OJJ03543.1 awen|OJJ39002.1 azon|OJJ51332.1

Group5292: abra|OJJ72771.1 acar|OOF95990.1 acla|EAW11494.1 afis|EAW23958.1 afla|EED50554.1  
afum|EAL87386.1 agla|OJJ86881.1 akaw|GAA85380.1 aluc|OJZ90748.1 anid|CBF77310.1 aory|EIT82130.1  
asyd|OJJ56775.1 ater|EAU29794.1 atub|OJI82174.1 aver|OJJ03558.1 awen|OJJ38989.1 azon|OJJ51321.1

Group5293: abra|OJJ72777.1 acar|OOF95995.1 acla|EAW11489.1 afis|EAW23964.1 afla|EED50546.1  
afum|EAL87394.1 agla|OJJ86893.1 akaw|GAA85386.1 aluc|OJZ90755.1 anid|CBF77318.1 aory|EIT82079.1  
asyd|OJJ56771.1 ater|EAU29788.1 atub|OJI82179.1 aver|OJJ03562.1 awen|OJJ38981.1 azon|OJJ51315.1

Group5294: abra|OJJ72787.1 acar|OOF96004.1 acla|EAW11482.1 afis|EAW23971.1 afla|EED50537.1  
afum|EAL87401.1 agla|OJJ86900.1 akaw|GAA85394.1 aluc|OJZ83285.1 anid|CBF77333.1 anig|EHA24171.1  
asyd|OJJ53277.1 ater|EAU29781.1 atub|OJI82188.1 aver|OJJ03571.1 awen|OJJ38972.1 azon|OJJ51307.1

Group5295: abra|OJJ72790.1 acar|OOF90124.1 acla|EAW11481.1 afis|EAW23972.1 afla|EED50536.1  
afum|EAL87402.1 aluc|OJZ83287.1 anid|CBF77337.1 anig|EHA24172.1 aory|EIT82163.1 ater|EAU29780.1  
atub|OJI82189.1 aver|OJJ03573.1 awen|OJJ38971.1 azon|OJJ51306.1 agla|OJJ86901.1 asyd|OJJ53276.1

Group5296: abra|OJJ72793.1 acla|EAW11479.1 afis|EAW23974.1 afla|EED50534.1 afum|EAL87404.1  
agla|OJJ86903.1 akaw|GAA85396.1 aluc|OJZ83289.1 anid|CBF77341.1 anig|EHA24174.1 aory|EIT82105.1  
asyd|OJJ53274.1 ater|EAU29778.1 atub|OJI82191.1 aver|OJJ03575.1 awen|OJJ35439.1 azon|OJJ51304.1

Group5297: abra|OJJ72799.1 acar|OOF96007.1 acla|EAW11445.1 afis|EAW23980.1 afla|EED49179.1  
afum|EAL87410.1 agla|OJJ86912.1 akaw|GAA85402.1 aluc|OJZ83297.1 anid|CBF77354.1 anig|EHA24180.1  
aory|EIT78569.1 asyd|OJJ53269.1 atub|OJI82197.1 awen|OJJ35448.1 azon|OJJ51298.1 aver|OJJ03582.1

Group5298: abra|OJJ72802.1 acar|OOF96010.1 acla|EAW11442.1 afis|EAW23983.1 afla|EED49176.1  
afum|EBA27313.1 agla|OJJ86917.1 akaw|GAA85405.1 aluc|OJZ83300.1 anid|CBF77360.1 aory|EIT78516.1  
asyd|OJJ53266.1 ater|EAU29768.1 atub|OJI82200.1 aver|OJJ03585.1 awen|OJJ35451.1 azon|OJJ51292.1

Group5299: abra|OJJ72806.1 afla|EED49171.1 akaw|GAA85409.1 aluc|OJZ83304.1 anig|EHA24187.1  
aory|EIT78556.1 ater|EAU29763.1 atub|OJI82204.1 awen|OJJ35455.1 acla|EAW11435.1 afis|EAW23988.1  
afum|EAL87417.2 agla|OJJ86921.1 anid|CBF77366.1 asyd|OJJ53263.1 aver|OJJ03588.1 azon|OJJ51288.1

Group5300: abra|OJJ72816.1 acar|OOF96022.1 acla|EAW11424.1 afis|EAW23997.1 agla|OJJ86931.1  
akaw|GAA85417.1 aluc|OJZ83318.1 anid|CBF77381.1 anig|EHA24196.1 aory|EIT78578.1 asyd|OJJ53252.1  
ater|EAU29752.1 atub|OJI82214.1 aver|OJJ03600.1 awen|OJJ35468.1 azon|OJJ51276.1 afum|EAL87427.1

Group5301: abra|OJJ72845.1 acar|OOF96046.1 acla|EAW11398.1 afis|EAW24023.1 afla|EED49131.1  
afum|EAL87454.1 agla|OJJ86956.1 akaw|GAA85446.1 aluc|OJZ83353.1 anid|CBF75302.1 anig|EHA24219.1  
asyd|OJJ59880.1 ater|EAU29723.1 atub|OJI82245.1 aver|OJJ02406.1 awen|OJJ35496.1 azon|OJJ46993.1

Group5302: abra|OJJ72846.1 acar|OOF96047.1 acla|EAW11397.1 afis|EAW24024.1 afla|EED49130.1  
afum|EAL87455.1 agla|OJJ86957.1 akaw|GAA85447.1 aluc|OJZ83354.1 anid|CBF75304.1 anig|EHA24220.1  
asyd|OJJ59879.1 ater|EAU29722.1 atub|OJI82246.1 aver|OJJ02407.1 awen|OJJ35497.1 azon|OJJ46992.1

Group5303: abra|OJJ72849.1 acar|OOF96050.1 acla|EAW11394.1 afis|EAW24027.1 afla|EED49127.1 afum|EAL87458.1 agla|OJJ86960.1 akaw|GAA85450.1 aluc|OJZ83358.1 anid|CBF75308.1 anig|EHA24223.1 asyd|OJJ59875.1 ater|EAU29717.1 atub|OJI82249.1 aver|OJJ02411.1 awen|OJJ35500.1 azon|OJJ46989.1

Group5304: abra|OJJ72851.1 acla|EAW11392.1 afis|EAW24029.1 afla|EED49125.1 afum|EAL87460.1 agla|OJJ86963.1 akaw|GAA85452.1 aluc|OJZ83360.1 anid|CBF75312.1 anig|EHA24225.1 aory|EIT78520.1 asyd|OJJ59873.1 ater|EAU29715.1 atub|OJI82251.1 aver|OJJ02414.1 awen|OJJ35502.1 azon|OJJ46987.1

Group5305: abra|OJJ72864.1 acar|OOF96063.1 acla|EAW11381.1 afis|EAW18115.1 afla|EED58040.1 afum|EAL87472.1 agla|OJJ86981.1 akaw|GAA85463.1 aluc|OJZ83377.1 anid|CBF75338.1 anig|EHA24236.1 asyd|OJJ59860.1 ater|EAU29702.1 atub|OJI82263.1 aver|OJJ02427.1 awen|OJJ35514.1 azon|OJJ46969.1

Group5306: abra|OJJ72867.1 acar|OOF96066.1 acla|EAW11378.1 afis|EAW18117.1 afla|EED58042.1 afum|EAL87475.1 agla|OJJ86979.1 akaw|GAA85466.1 aluc|OJZ83380.1 anid|CBF75342.1 anig|EHA24239.1 asyd|OJJ59858.1 ater|EAU29700.1 atub|OJI82266.1 aver|OJJ02429.1 awen|OJJ35516.1 azon|OJJ46968.1

Group5307: abra|OJJ72868.1 acar|OOF96067.1 acla|EAW11377.1 afis|EAW18118.1 afla|EED58043.1 afum|EAL87476.1 agla|OJJ86978.1 akaw|GAA85467.1 aluc|OJZ83381.1 anid|CBF75344.1 anig|EHA24240.1 aory|EIT79729.1 asyd|OJJ59857.1 ater|EAU29699.1 atub|OJI82267.1 aver|OJJ02430.1 awen|OJJ35517.1

Group5308: abra|OJJ72897.1 acla|EAW11354.1 afis|EAW18140.1 afla|EED58066.1 afum|EAL87497.1 agla|OJJ83825.1 akaw|GAA85484.1 aluc|OJZ83406.1 anid|CBF75390.1 anig|EHA24257.1 aory|EIT79738.1 asyd|OJJ59835.1 ater|EAU35463.1 atub|OJI82295.1 aver|OJJ02453.1 awen|OJJ35582.1 azon|OJJ46940.1

Group5309: abra|OJJ72908.1 acar|OOF96091.1 acla|EAW11345.1 afis|EAW18149.1 afla|EED58077.1 afum|EAL87507.1 agla|OJJ83834.1 akaw|GAA85493.1 aluc|OJZ83418.1 anid|CBF81112.1 anig|EHA24267.1 asyd|OJJ56484.1 ater|EAU35471.1 atub|OJI82305.1 aver|OJJ06235.1 awen|OJJ35592.1 azon|OJJ46914.1

Group5310: abra|OJJ72925.1 acar|OOF96106.1 acla|EAW06464.1 afis|EAW15959.1 afla|EED58099.1 afum|EAL88592.1 agla|OJJ89353.1 akaw|GAA85508.1 aluc|OJZ83435.1 aory|EIT79128.1 ater|EAU35497.1 atub|OJI82326.1 aver|OJJ06259.1 awen|OJJ35614.1 azon|OJJ46909.1 anid|CBF81076.1 asyd|OJJ56462.1

Group5311: abra|OJJ72926.1 acar|OOF96107.1 acla|EAW06463.1 afis|EAW15958.1 afla|EED58100.1 afum|EAL88591.1 agla|OJJ89354.1 akaw|GAA85509.1 aluc|OJZ83436.1 anid|CBF81074.1 anig|EHA24284.1 aory|EIT79118.1 asyd|OJJ56461.1 atub|OJI82327.1 aver|OJJ06260.1 awen|OJJ35615.1 azon|OJJ46908.1

Group5312: abra|OJJ72943.1 acla|EAW11208.1 afis|EAW15941.1 afla|EED58117.1 afum|EAL88575.1 agla|OJJ89369.1 akaw|GAA85525.1 aluc|OJZ83453.1 anig|EHA24299.1 aory|EIT79113.1 asyd|OJJ56347.1 ater|EAU35515.1 atub|OJI82345.1 aver|OJJ06366.1 azon|OJJ46894.1 anid|CBF80960.1 awen|OJJ35641.1

Group5313: abra|OJJ72944.1 acar|OOF96125.1 acla|EAW11207.1 afis|EAW15937.1 afla|EED58118.1 afum|EAL88573.1 agla|OJJ89370.1 akaw|GAA85526.1 aluc|OJZ83454.1 anid|CBF80962.1 anig|EHA24300.1 aory|EIT79136.1 asyd|OJJ56348.1 atub|OJI82346.1 aver|OJJ06365.1 awen|OJJ35642.1 azon|OJJ46893.1

Group5314: abra|OJJ72951.1 acar|OOF96133.1 acla|EAW11197.1 afis|EAW15927.1 afla|EED54934.1 afum|EAL88563.1 agla|OJJ89378.1 akaw|GAA85532.1 aluc|OJZ83461.1 anid|CBF81022.1 aory|EIT80375.1 asyd|OJJ56384.1 ater|EAU35528.1 atub|OJI82353.1 aver|OJJ06328.1 awen|OJJ35653.1 azon|OJJ46885.1

Group5315: abra|OJJ72955.1 acar|OOF96136.1 acla|EAW11200.1 afis|EAW15930.1 afla|EED54931.1 afum|EAL88566.1 agla|OJJ89376.1 akaw|GAA85536.1 aluc|OJZ83464.1 anid|CBF81028.1 anig|EHA24308.1 asyd|OJJ56387.1 ater|EAU35522.1 atub|OJI82357.1 aver|OJJ06326.1 awen|OJJ35650.1 azon|OJJ46888.1

Group5316: abra|OJJ72964.1 acar|OOF96146.1 acla|EAW11190.1 afis|EAW15921.1 afla|EED54940.1 afum|EAL88557.2 agla|OJJ89389.1 akaw|GAA85542.1 aluc|OJZ83473.1 anid|CBF81005.1 aory|EIT80301.1 asyd|OJJ56378.1 ater|EAU35535.1 atub|OJI82363.1 aver|OJJ06335.1 awen|OJJ35660.1 azon|OJJ46880.1

Group5317: abra|OJJ72995.1 acar|OOF96172.1 acla|EAW08017.1 afis|EAW23051.1 afum|EAL88429.1 agla|OJJ89428.1 akaw|GAA85569.1 aluc|OJZ83503.1 anid|CBF89694.1 anig|EHA24337.1 aory|EIT80308.1 asyd|OJJ56447.1 ater|EAU29597.1 atub|OJI82397.1 aver|OJJ06275.1 awen|OJJ35687.1 azon|OJJ50729.1

Group5318: abra|OJJ73005.1 acla|EAW08008.1 afis|EAW23043.1 afla|EED54975.1 afum|EAL88438.1 agla|OJJ89435.1 akaw|GAA85583.1 aluc|OJZ83520.1 anid|CBF80940.1 anig|EHA24343.1 aory|EIT80357.1 asyd|OJJ56336.1 ater|EAU29604.1 atub|OJI82409.1 aver|OJJ06377.1 awen|OJJ35697.1 azon|OJJ44161.1

Group5319: abra|OJJ73007.1 acar|OOF96179.1 acla|EAW08006.1 afis|EAW23041.1 afla|EED54977.1 afum|EAL88440.1 agla|OJJ89437.1 akaw|GAA85585.1 aluc|OJZ83522.1 anid|CBF80937.1 anig|EHA24345.1 aory|EIT80307.1 asyd|OJJ56313.1 atub|OJI82411.1 aver|OJJ06401.1 awen|OJJ35701.1 azon|OJJ44163.1

Group5320: abra|OJJ73011.1 acar|OOF96184.1 acla|EAW08001.1 afis|EAW23036.1 afla|EED54981.1 afum|EAL88445.1 agla|OJJ89441.1 akaw|GAA85590.1 aluc|OJZ83526.1 anid|CBF80927.1 anig|EHA24349.1 asyd|OJJ56317.1 ater|EAU29622.1 atub|OJI82415.1 aver|OJJ06397.1 awen|OJJ35705.1 azon|OJJ44167.1

Group5321: abra|OJJ73015.1 acla|EAW07998.1 afis|EAW23033.1 afla|EED54983.1 afum|EAL88448.1 akaw|GAA85593.1 aluc|OJZ83530.1 anid|CBF80922.1 anig|EHA24352.1 aory|EIT80306.1 asyd|OJJ56321.1 ater|EAU29624.1 atub|OJI82420.1 awen|OJJ35712.1 azon|OJJ44170.1 aver|OJJ06392.1 agla|OJJ89444.1

Group5322: abra|OJJ73017.1 acar|OOF96187.1 acla|EAW07996.1 afis|EAW23031.1 afum|EAL88451.2 agla|OJJ89446.1 akaw|GAA85595.1 aluc|OJZ83532.1 anid|CBF80912.1 anig|EHA24354.1 asyd|OJJ56327.1 ater|EAU29626.1 atub|OJI82422.1 awen|OJJ35714.1 afla|EED54985.1 aory|EIT80319.1 aver|OJJ06386.1

Group5323: abra|OJJ73026.1 acar|OOF96193.1 acla|EAW07990.1 afis|EAW23025.1 afla|EED54990.1 afum|EAL88457.1 agla|OJJ89454.1 akaw|GAA85600.1 aluc|OJZ83538.1 anid|CBF80909.1 anig|EHA24359.1 aory|EIT80325.1 asyd|OJJ56330.1 ater|EAU29650.1 atub|OJI82429.1 awen|OJJ30718.1 azon|OJJ44179.1

Group5324: abra|OJJ73047.1 acla|EAW07972.1 afis|EAW23007.1 afla|EED48101.1 afum|EAL88473.1 agla|OJJ80223.1 akaw|GAA85618.1 aluc|OJZ83558.1 anid|CBF80877.1 anig|EHA24376.1 aory|EIT76233.1 asyd|OJJ56301.1 ater|EAU29666.1 atub|OJI82448.1 aver|OJJ06416.1 awen|OJJ31316.1 azon|OJJ50668.1

Group5325: abra|OJJ73054.1 acar|OOF96216.1 acla|EAW07966.1 afis|EAW23001.1 afla|EED55014.1 afum|EAL88479.2 agla|OJJ89478.1 aluc|OJZ83565.1 anid|CBF80866.1 anig|EHA24382.1 aory|EIT80356.1 asyd|OJJ56295.1 ater|EAU29672.1 atub|OJI82455.1 aver|OJJ06422.1 awen|OJJ30740.1 azon|OJJ44206.1

Group5326: abra|OJJ73057.1 acar|OOF96219.1 acla|EAW07964.1 afis|EAW22999.1 afla|EED55016.1 afum|EAL88481.1 agla|OJJ89480.1 akaw|GAA85625.1 aluc|OJZ83568.1 anid|CBF80862.1 anig|EHA24384.1 aory|EIT80386.1 asyd|OJJ56293.1 atub|OJI82457.1 aver|OJJ06424.1 awen|OJJ30742.1 azon|OJJ44203.1

Group5327: abra|OJJ73083.1 acar|OOG00317.1 acla|EAW12281.1 afis|EAW19608.1 afla|EED57664.1 afum|EAL89356.1 akaw|GAA88077.1 aluc|OJZ81340.1 anid|CBF88728.1 anig|EHA18646.1 aory|EIT79918.1 asyd|OJJ63933.1 ater|EAU35193.1 atub|OJI91545.1 aver|OJI97009.1 awen|OJJ31943.1 azon|OJJ50754.1

Group5328: abra|OJJ73108.1 acar|OOG00341.1 acla|EAW07041.1 afis|EAW16668.1 afla|EED44908.1 afum|EAL89272.1 agla|OJJ78701.1 akaw|GAA88058.1 aluc|OJZ81320.1 anid|CBF82081.1 anig|EHA18626.1 aory|EIT73518.1 asyd|OJJ54255.1 atub|OJI91523.1 aver|OJJ05208.1 awen|OJJ40045.1 azon|OJJ50124.1

Group5329: abra|OJJ73144.1 acar|OOG00356.1 acla|EAW07020.1 afis|EAW16646.1 afla|EED44954.1 afum|EAL89250.1 agla|OJJ82597.1 akaw|GAA88028.1 aluc|OJZ81287.1 anid|CBF82056.1 anig|EHA18586.1 asyd|OJJ54237.1 ater|EAU39571.1 atub|OJI91494.1 aver|OJJ05189.1 awen|OJJ40068.1 azon|OJJ45556.1

Group5330: abra|OJJ73150.1 acar|OOG00362.1 acla|EAW07027.1 afis|EAW16653.1 afla|EED44947.1 afum|EAL89257.1 agla|OJJ78686.1 akaw|GAA88022.1 aluc|OJZ81280.1 anig|EHA18580.1 aory|EIT73514.1 asyd|OJJ54243.1 ater|EAU39577.1 atub|OJI91488.1 aver|OJJ05195.1 awen|OJJ40061.1 azon|OJJ45566.1

Group5331: abra|OJJ73157.1 acar|OOG00370.1 acla|EAW07031.1 afis|EAW16657.1 afla|EED44942.1 afum|EAL89261.1 agla|OJJ78715.1 akaw|GAA88015.1 aluc|OJZ81273.1 anig|EHA18573.1 aory|EIT73488.1 asyd|OJJ54247.1 ater|EAU39580.1 atub|OJI91480.1 aver|OJJ05201.1 awen|OJJ40057.1 azon|OJJ50085.1

Group5332: abra|OJJ73169.1 acla|EAW10795.1 afis|EAW24781.1 afla|EED47204.1 afum|EAL89420.1 agla|OJJ82877.1 akaw|GAA88002.1 aluc|OJZ81258.1 anid|CBF81440.1 anig|EHA18565.1 aory|EIT79259.1 asyd|OJJ59429.1 atub|OJI91454.1 aver|OJJ02842.1 awen|OJJ40367.1 azon|OJJ49216.1 ater|EAU36527.1

Group5333: abra|OJJ73174.1 acar|OOG00414.1 acla|EAW06857.1 afis|EAW16474.1 afla|EED47209.1 afum|EAL89068.1 agla|OJJ82872.1 akaw|GAA87997.1 aluc|OJZ81253.1 anid|CBF81433.1 anig|EHA18561.1 asyd|OJJ59423.1 ater|EAU36568.1 atub|OJI91449.1 aver|OJJ02847.1 awen|OJJ40362.1 azon|OJJ49210.1

Group5334: abra|OJJ73182.1 acar|OOG00419.1 acla|EAW06860.1 afis|EAW16477.1 afla|EED47214.1 afum|EAL89071.1 agla|OJJ82868.1 akaw|GAA87993.1 aluc|OJZ81247.1 anid|CBF75497.1 anig|EHA18556.1 aory|EIT79205.1 asyd|OJJ59749.1 atub|OJI91443.1 aver|OJJ02539.1 awen|OJJ40358.1 azon|OJJ49207.1

Group5335: abra|OJJ73188.1 acar|OOG00423.1 acla|EAW06864.1 afis|EAW16481.1 afla|EED47218.1 afum|EAL89075.1 agla|OJJ82864.1 akaw|GAA87989.1 aluc|OJZ81243.1 anig|EHA18552.1 aory|EIT79179.1 asyd|OJJ59745.1 ater|EAU36557.1 atub|OJI91439.1 aver|OJJ02543.1 awen|OJJ40353.1 azon|OJJ49203.1

Group5336: abra|OJJ73192.1 acar|OOG00427.1 acla|EAW06868.1 afis|EAW16485.1 afla|EED47225.1 afum|EAL89079.1 agla|OJJ82859.1 akaw|GAA87985.1 aluc|OJZ81237.1 anid|CBF75518.1 anig|EHA18548.1 asyd|OJJ59737.1 ater|EAU36553.1 atub|OJI91435.1 aver|OJJ02550.1 awen|OJJ40344.1 azon|OJJ49199.1

Group5337: abra|OJJ73197.1 acar|OOG00436.1 acla|EAW06874.1 afis|EAW16491.1 afla|EED47232.1 afum|EAL89085.1 agla|OJJ82830.1 akaw|GAA87980.1 aluc|OJZ81232.1 anid|CBF75524.1 anig|EHA18543.1 asyd|OJJ59734.1 ater|EAU36546.1 atub|OJI91429.1 aver|OJJ02553.1 awen|OJJ40338.1 azon|OJJ49192.1

Group5338: abra|OJJ73198.1 acar|OOG00437.1 acla|EAW06875.1 afis|EAW16492.1 afla|EED47233.1 afum|EAL89086.1 agla|OJJ82831.1 akaw|GAA87979.1 aluc|OJZ81231.1 anid|CBF75525.1 anig|EHA18542.1 aory|EIT79252.1 asyd|OJJ59733.1 atub|OJI91428.1 aver|OJJ02554.1 awen|OJJ40337.1 azon|OJJ49191.1

Group5339: abra|OJJ73201.1 acar|OOG00440.1 acla|EAW06878.1 afis|EAW16495.1 afum|EAL89089.1  
agla|OJJ82834.1 akaw|GAA87976.1 aluc|OJZ81228.1 anid|CBF75608.1 anig|EHA18539.1 aory|EIT79203.1  
asyd|OJJ59728.1 ater|EAU36544.1 atub|OJI91425.1 aver|OJJ02558.1 awen|OJJ40334.1 azon|OJJ49188.1

Group5340: abra|OJJ73214.1 acar|OOG00451.1 acla|EAW06889.1 afis|EAW16506.1 afla|EED56172.1  
afum|EAL89101.1 agla|OJJ82819.1 akaw|GAA87965.1 aluc|OJZ81214.1 anid|CBF75596.1 anig|EHA18528.1  
aory|EIT76809.1 asyd|OJJ59717.1 atub|OJI91409.1 aver|OJJ02569.1 awen|OJJ40319.1 azon|OJJ49177.1

Group5341: abra|OJJ73221.1 acar|OOG00459.1 acla|EAW06896.1 afis|EAW16513.1 afla|EED56160.1  
afum|EAL89108.1 agla|OJJ82809.1 akaw|GAA87957.1 aluc|OJZ81206.1 anid|CBF75564.1 anig|EHA18521.1  
asyd|OJJ59707.1 ater|EAU36579.1 atub|OJI91402.1 aver|OJJ02578.1 awen|OJJ40311.1 azon|OJJ49171.1

Group5342: abra|OJJ73243.1 acar|OOG00482.1 acla|EAW06917.1 afis|EAW16534.1 afla|EED56135.1  
afum|EAL89131.1 akaw|GAA87937.1 aluc|OJZ81185.1 anid|CBF81738.1 anig|EHA18502.1 aory|EIT76790.1  
asyd|OJJ59595.1 ater|EAU36597.1 atub|OJI91381.1 aver|OJJ02673.1 awen|OJJ40288.1 azon|OJJ49149.1

Group5343: abra|OJJ73267.1 acar|OOG00507.1 acla|EAW06944.1 afis|EAW16560.1 afla|EED56103.1  
afum|EAL89158.1 agla|OJJ82764.1 akaw|GAA87915.1 aluc|OJZ81162.1 anid|CBF81804.1 anig|EHA18479.1  
aory|EIT76866.1 asyd|OJJ59643.1 ater|EAU36626.1 atub|OJI91357.1 aver|OJJ02639.1 awen|OJJ40258.1

Group5344: abra|OJJ73272.1 acar|OOG00512.1 acla|EAW06949.1 afis|EAW16564.1 afla|EED56099.1  
afum|EAL89161.1 agla|OJJ82757.1 akaw|GAA87908.1 aluc|OJZ88777.1 anid|CBF81811.1 anig|EHA18471.1  
aory|EIT76849.1 asyd|OJJ59647.1 atub|OJI91349.1 aver|OJJ02635.1 awen|OJJ40254.1 azon|OJJ49116.1

Group5345: abra|OJJ73282.1 acar|OOG00518.1 acla|EAW06957.1 afis|EAW16572.1 afla|EED56092.1  
afum|EAL89169.2 agla|OJJ82704.1 akaw|GAA92723.1 aluc|OJZ88767.1 anig|EHA18463.1 aory|EIT76859.1  
asyd|OJJ59658.1 ater|EAU36640.1 atub|OJI91340.1 aver|OJJ02624.1 awen|OJJ40246.1 azon|OJJ49107.1

Group5346: abra|OJJ73285.1 acar|OOG00521.1 acla|EAW06960.1 afis|EAW16575.1 afla|EED56089.1  
afum|EBA27368.1 agla|OJJ82702.1 akaw|GAA92720.1 aluc|OJZ88764.1 anig|EHA18460.1 aory|EIT76647.1  
asyd|OJJ59661.1 atub|OJI91337.1 aver|OJJ02621.1 awen|OJJ40243.1 azon|OJJ49104.1 anid|CBF81831.1

Group5347: abra|OJJ73298.1 afis|EAW19827.1 afla|EED51781.1 afum|EAL85065.1 akaw|GAA92708.1  
aluc|OJZ88750.1 anig|EHA18452.1 asyd|OJJ59177.1 atub|OJI91321.1 aver|OJJ01796.1 awen|OJJ34692.1  
azon|OJJ49039.1 agla|OJJ79503.1 acar|OOF93317.1 asyd|OJJ62364.1 aver|OJI96498.1 awen|OJJ30127.1

Group5348: abra|OJJ73323.1 acla|EAW15335.1 afis|EAW18094.1 afla|EED54259.1 afum|EAL91902.1  
agla|OJJ78550.1 akaw|GAA86996.1 aluc|OJZ84463.1 anid|CBF75962.1 anig|EHA18708.1 aory|EIT76021.1  
ater|EAU36995.1 atub|OJI89614.1 aver|OJJ00568.1 awen|OJJ32938.1 azon|OJJ42340.1 anid|CBF75964.1

Group5349: abra|OJJ73354.1 acla|EAW15249.1 afis|EAW20217.1 afla|EED44916.1 afum|EAL85332.1  
agla|OJJ84639.1 akaw|GAA83130.1 aluc|OJZ88686.1 anid|CBF78511.1 anig|EHA18366.1 aory|EIT73493.1  
asyd|OJJ65310.1 atub|OJI91266.1 aver|OJI99450.1 awen|OJJ31229.1 afla|EED57128.1 aory|EIT74120.1

Group5350: acla|EAW13469.1 agla|OJJ88694.1 abra|OJJ76945.1 acar|OOF91395.1 afla|EED52278.1  
afum|EAL86634.1 akaw|GAA87095.1 aluc|OJZ84343.1 anid|CBF71790.1 anig|EHA27679.1 aory|EIT74372.1  
asyd|OJJ61714.1 ater|EAU37102.1 atub|OJI89725.1 aver|OJI95809.1 awen|OJJ33286.1 azon|OJJ50664.1

Group5351: abra|OJJ73356.1 afla|EED45197.1 agla|OJJ82670.1 akaw|GAA83128.1 aluc|OJZ88684.1  
anid|CBF81892.1 aory|EIT73648.1 asyd|OJJ59679.1 ater|EAU36665.1 atub|OJI91264.1 aver|OJJ02609.1  
awen|OJJ40226.1 azon|OJJ49091.1 acla|EAW06975.1 afis|EAW16589.1 afum|EAL89184.1 anig|EHA18364.1

Group5352: abra|OJJ73363.1 acar|OOG00570.1 acla|EAW06983.1 afis|EAW16597.1 afla|EED45016.1  
afum|EAL89193.1 agla|OJJ82657.1 akaw|GAA83121.1 aluc|OJZ88677.1 anid|CBF81904.1 aory|EIT73770.1  
asyd|OJJ59687.1 ater|EAU36676.1 atub|OJI91258.1 aver|OJJ02600.1 awen|OJJ40211.1 azon|OJJ49077.1

Group5353: abra|OJJ73373.1 acar|OOG00578.1 acla|EAW06991.1 afis|EAW16605.1 afla|EED45024.1  
afum|EAL89202.2 agla|OJJ82648.1 akaw|GAA83113.1 aluc|OJZ88668.1 anid|CBF81912.1 aory|EIT73735.1  
asyd|OJJ59693.1 ater|EAU36687.1 atub|OJI91250.1 aver|OJJ02594.1 awen|OJJ40201.1 azon|OJJ49066.1

Group5354: abra|OJJ73377.1 acar|OOG00580.1 acla|EAW06990.1 afis|EAW16604.1 afla|EED45023.1  
afum|EAL89200.1 akaw|GAA83112.1 aluc|OJZ88666.1 anid|CBF81911.1 anig|EHA18351.1 aory|EIT73764.1  
asyd|OJJ59692.1 ater|EAU36686.1 atub|OJI91249.1 aver|OJJ02595.1 awen|OJJ40202.1 azon|OJJ49070.1

Group5355: abra|OJJ73379.1 acla|EAW06993.1 afis|EAW16608.1 afla|EED45026.1 afum|EAL89204.1  
agla|OJJ82645.1 akaw|GAA83110.1 aluc|OJZ88664.1 anid|CBF81966.1 anig|EHA18349.1 aory|EIT73734.1  
asyd|OJJ57354.1 ater|EAU36692.1 atub|OJI91246.1 aver|OJJ05811.1 awen|OJJ40199.1 azon|OJJ49068.1

Group5356: abra|OJJ73380.1 acar|OOF90416.1 acla|EAW06996.1 afis|EAW16610.1 afla|EED45002.1  
afum|EAL89206.1 agla|OJJ82636.1 akaw|GAA83109.1 aluc|OJZ88663.1 anid|CBF81964.1 aory|EIT73646.1  
asyd|OJJ57357.1 ater|EAU36695.1 atub|OJI91244.1 aver|OJJ05809.1 awen|OJJ40196.1 azon|OJJ49063.1

Group5357: abra|OJJ73386.1 acar|OOG00588.1 acla|EAW07010.1 afis|EAW16629.1 afla|EED44985.1 afum|EAL89224.2 agla|OJJ82614.1 akaw|GAA83103.1 aluc|OJZ88651.1 anid|CBF81970.1 anig|EHA18342.1 aory|EIT73790.1 asyd|OJJ57346.1 ater|EAU36722.1 atub|OJI91238.1 aver|OJJ05819.1 azon|OJJ44014.1

Group5358: abra|OJJ73387.1 acar|OOG00589.1 acla|EAW07001.1 afis|EAW16616.1 afla|EED44988.1 afum|EAL89220.1 agla|OJJ82631.1 akaw|GAA83102.1 aluc|OJZ88650.1 anid|CBF81968.1 anig|EHA18341.1 aory|EIT73725.1 asyd|OJJ57348.1 ater|EAU36704.1 atub|OJI91237.1 aver|OJJ05817.1 awen|OJJ40182.1

Group5359: abra|OJJ73404.1 acar|OOG00602.1 acla|EAW07011.1 afis|EAW16631.1 afla|EED44967.1 afum|EAL89227.1 agla|OJJ82618.1 akaw|GAA83086.1 aluc|OJZ88633.1 anid|CBF82012.1 anig|EHA18323.1 aory|EIT73524.1 asyd|OJJ56189.1 atub|OJI91217.1 aver|OJJ05117.1 awen|OJJ40078.1 azon|OJJ49493.1

Group5360: abra|OJJ73441.1 acar|OOG00647.1 acla|EAW06776.1 afis|EAW16327.1 afla|EED53554.1 afum|EAL88951.1 agla|OJJ88265.1 aluc|OJZ88599.1 anid|CBF89166.1 anig|EHA18293.1 aory|EIT74850.1 asyd|OJJ62544.1 ater|EAU34130.1 atub|OJI91184.1 aver|OJI96671.1 awen|OJJ37728.1 azon|OJJ44987.1

Group5361: abra|OJJ73444.1 acla|EAW06779.1 afis|EAW16330.1 afla|EED53548.1 afum|EAL88954.1 agla|OJJ88262.1 akaw|GAA83050.1 aluc|OJZ88596.1 anid|CBF89171.1 anig|EHA18290.1 aory|EIT75161.1 asyd|OJJ62541.1 ater|EAU34128.1 atub|OJI91181.1 aver|OJI96668.1 awen|OJJ37731.1 azon|OJJ44989.1

Group5362: abra|OJJ73457.1 acar|OOG00658.1 acla|EAW06784.1 afis|EAW16334.1 afla|EED53542.1 afum|EAL88959.1 agla|OJJ88258.1 akaw|GAA83041.1 aluc|OJZ88586.1 anid|CBF89190.1 aory|EIT75196.1 asyd|OJJ62535.1 ater|EAU34124.1 atub|OJI91172.1 aver|OJI96660.1 awen|OJJ37735.1 azon|OJJ44994.1

Group5363: abra|OJJ73459.1 acar|OOG00660.1 acla|EAW06786.1 afla|EED53540.1 afum|EAL88961.1 agla|OJJ88253.1 akaw|GAA83039.1 aluc|OJZ88584.1 anid|CBF89194.1 anig|EHA18279.1 aory|EIT74903.1 asyd|OJJ62533.1 ater|EAU34122.1 atub|OJI91170.1 aver|OJI96658.1 awen|OJJ37738.1 azon|OJJ44999.1

Group5364: abra|OJJ73461.1 acar|OOG00662.1 acla|EAW06788.1 afis|EAW16337.1 afla|EED53538.1 afum|EAL88963.1 agla|OJJ88255.1 akaw|GAA83037.1 aluc|OJZ88582.1 anid|CBF89197.1 aory|EIT75002.1 asyd|OJJ62531.1 ater|EAU34120.1 atub|OJI91168.1 aver|OJI96656.1 awen|OJJ37740.1 azon|OJJ45001.1

Group5365: abra|OJJ73499.1 acar|OOG00691.1 acla|EAW07433.1 afis|EAW22459.1 afla|EED54485.1 afum|EAL90733.1 agla|OJJ87564.1 akaw|GAA87448.1 aluc|OJZ88549.1 anid|CBF88916.1 anig|EHA18247.1 asyd|OJJ62843.1 ater|EAU39246.1 atub|OJI91134.1 aver|OJI96887.1 awen|OJJ35084.1 azon|OJJ50023.1

Group5366: abra|OJJ73501.1 acar|OOG00689.1 acla|EAW07434.1 afis|EAW22460.1 afla|EED54484.1 afum|EAL90731.1 agla|OJJ87562.1 akaw|GAA87449.1 aluc|OJZ88546.1 anid|CBF88914.1 anig|EHA18246.1 asyd|OJJ62842.1 ater|EAU39245.1 atub|OJI91131.1 aver|OJI96886.1 awen|OJJ35086.1 azon|OJJ50021.1

Group5367: abra|OJJ73504.1 acar|OOG00687.1 acla|EAW07437.1 afis|EAW22463.1 afla|EED54481.1 afum|EAL90728.1 agla|OJJ87560.1 aluc|OJZ88544.1 anid|CBF88909.1 anig|EHA18244.1 aory|EIT81141.1 asyd|OJJ62840.1 ater|EAU39243.1 atub|OJI91129.1 aver|OJI96883.1 awen|OJJ35089.1 azon|OJJ50019.1

Group5368: abra|OJJ73505.1 acla|EAW07438.1 afis|EAW22465.1 afla|EED54496.1 afum|EAL90726.1 agla|OJJ87559.1 akaw|GAA87452.1 aluc|OJZ88543.1 anid|CBF88907.1 anig|EHA18243.1 aory|EIT78760.1 asyd|OJJ62839.1 ater|EAU39242.1 atub|OJI91128.1 aver|OJI96882.1 awen|OJJ35090.1 azon|OJJ50018.1

Group5369: abra|OJJ73511.1 acla|EAW07444.1 afis|EAW22471.1 afla|EED54503.1 afum|EAL90720.1 agla|OJJ87553.1 akaw|GAA87459.1 aluc|OJZ88536.1 anid|CBF88898.1 anig|EHA18237.1 aory|EIT78805.1 asyd|OJJ62833.1 atub|OJI91121.1 aver|OJI96876.1 awen|OJJ35097.1 azon|OJJ50012.1 ater|EAU39237.1

Group5370: abra|OJJ73514.1 acar|OOG00702.1 acla|EAW07448.1 afis|EAW22475.1 afla|EED54507.1 afum|EAL90716.1 agla|OJJ87549.1 akaw|GAA87463.1 aluc|OJZ88533.1 anid|CBF88890.1 anig|EHA18234.1 asyd|OJJ62830.1 ater|EAU39234.1 atub|OJI91118.1 aver|OJI96873.1 awen|OJJ35100.1 azon|OJJ50008.1

Group5371: abra|OJJ73517.1 acar|OOG00707.1 acla|EAW07452.1 afis|EAW22484.1 afla|EED54510.1 afum|EAL90710.1 agla|OJJ87542.1 akaw|GAA87466.1 aluc|OJZ88530.1 anid|CBF88885.1 anig|EHA18231.1 asyd|OJJ62825.1 ater|EAU39233.1 atub|OJI91115.1 aver|OJI96870.1 awen|OJJ35103.1 azon|OJJ50004.1

Group5372: abra|OJJ73553.1 acar|OOG00725.1 acla|EAW07471.1 afis|EAW22504.1 afla|EED54531.1 afum|EAL90689.1 agla|OJJ80845.1 akaw|GAA88600.1 aluc|OJZ88508.1 anid|CBF88968.1 anig|EHA18215.1 asyd|OJJ62796.1 ater|EAU39214.1 atub|OJI91094.1 aver|OJI96843.1 awen|OJJ35128.1 azon|OJJ49972.1

Group5373: abra|OJJ73558.1 acar|OOG00729.1 acla|EAW07475.1 afis|EAW22507.1 afla|EED54535.1 afum|EAL90686.1 agla|OJJ87538.1 akaw|GAA88596.1 aluc|OJZ88504.1 anid|CBF88973.1 anig|EHA18211.1 asyd|OJJ62793.1 ater|EAU39206.1 atub|OJI91090.1 aver|OJI96840.1 awen|OJJ35132.1 azon|OJJ49966.1

Group5374: abra|OJJ73569.1 acar|OOG00751.1 acla|EAW07486.1 afis|EAW22519.1 afum|EAL90674.1 agla|OJJ80879.1 akaw|GAA88586.1 aluc|OJZ88491.1 anid|CBF89002.1 anig|EHA18200.1 aory|EIT78853.1 asyd|OJJ62780.1 ater|EAU39190.1 atub|OJI91078.1 aver|OJI96825.1 awen|OJJ35146.1 azon|OJJ49954.1

Group5375: abra|OJJ73577.1 acar|OOG00758.1 acla|EAW07495.1 afis|EAW22528.1 afla|EED54556.1 afum|EAL90666.2 agla|OJJ80888.1 aluc|OJZ88475.1 anid|CBF89012.1 anig|EHA18192.1 aory|EIT78898.1 asyd|OJJ62773.1 ater|EAU39183.1 atub|OJI91070.1 aver|OJI96818.1 awen|OJJ35155.1 azon|OJJ49946.1

Group5376: abra|OJJ73579.1 acar|OOG00760.1 acla|EAW07497.1 afis|EAW22530.1 afla|EED54558.1 afum|EAL90664.1 agla|OJJ80891.1 akaw|GAA88572.1 aluc|OJZ88473.1 anid|CBF89016.1 anig|EHA18190.1 aory|EIT81483.1 asyd|OJJ62771.1 ater|EAU39179.1 atub|OJI91068.1 aver|OJI96816.1 awen|OJJ35157.1

Group5377: abra|OJJ73584.1 acar|OOG00765.1 acla|EAW07502.1 afis|EAW22535.1 afla|EED54563.1 afum|EAL90659.1 agla|OJJ80896.1 akaw|GAA88567.1 aluc|OJZ88468.1 anid|CBF89027.1 anig|EHA18185.1 aory|EIT78861.1 asyd|OJJ62766.1 ater|EAU39174.1 atub|OJI91063.1 aver|OJI96811.1 awen|OJJ35162.1

Group5378: abra|OJJ73595.1 acar|OOG00780.1 acla|EAW07514.1 afis|EAW22545.1 afla|EED54576.1 afum|EAL90650.1 agla|OJJ80907.1 akaw|GAA88557.1 aluc|OJZ88455.1 anid|CBF89045.1 anig|EHA18176.1 asyd|OJJ62757.1 ater|EAU39163.1 atub|OJI91053.1 aver|OJI96799.1 awen|OJJ35174.1 azon|OJJ49933.1

Group5379: abra|OJJ73600.1 acla|EAW07518.1 afis|EAW22548.1 afla|EED54580.1 afum|EAL90647.1 agla|OJJ80910.1 akaw|GAA88552.1 aluc|OJZ88450.1 anid|CBF89053.1 anig|EHA18171.1 aory|EIT78826.1 asyd|OJJ62753.1 ater|EAU39157.1 atub|OJI91048.1 aver|OJI96795.1 awen|OJJ35179.1 azon|OJJ49929.1

Group5380: abra|OJJ73613.1 acar|OOG00796.1 afla|EED54591.1 agla|OJJ80920.1 akaw|GAA88540.1 aluc|OJZ88436.1 anid|CBF88375.1 anig|EHA18160.1 aory|EIT78809.1 atub|OJI91033.1 aver|OJI97207.1 azon|OJJ49916.1 afis|EAW22560.1 afum|EAL90635.1 awen|OJJ35190.1 acla|EAW07530.1 ater|EAU39144.1

Group5381: abra|OJJ73620.1 acar|OOG00803.1 acla|EAW07535.1 afis|EAW22569.1 afla|EED54599.1 afum|EAL90629.1 agla|OJJ80925.1 akaw|GAA88533.1 aluc|OJZ88429.1 anid|CBF88321.1 anig|EHA18153.1 aory|EIT78845.1 asyd|OJJ63704.1 ater|EAU39138.1 atub|OJI91026.1 aver|OJI97235.1 awen|OJJ35195.1

Group5382: abra|OJJ73623.1 acar|OOG00806.1 acla|EAW07538.1 afis|EAW22572.1 afum|EAL90626.1 agla|OJJ80929.1 akaw|GAA88530.1 aluc|OJZ88425.1 anid|CBF88327.1 anig|EHA18150.1 aory|EIT78792.1 asyd|OJJ63707.1 ater|EAU39135.1 atub|OJI91023.1 aver|OJI97232.1 awen|OJJ35199.1 azon|OJJ49909.1

Group5383: abra|OJJ73626.1 acar|OOG00808.1 acla|EAW07540.1 afis|EAW22574.1 afla|EED54603.1 afum|EAL90624.2 akaw|GAA88527.1 aluc|OJZ88423.1 anid|CBF88330.1 anig|EHA18148.1 aory|EIT78769.1 asyd|OJJ63710.1 ater|EAU39130.1 atub|OJI91019.1 aver|OJI97229.1 awen|OJJ35202.1 azon|OJJ49906.1

Group5384: abra|OJJ73628.1 acla|EAW07542.1 afis|EAW22576.1 afla|EED54615.1 afum|EAL90622.2 agla|OJJ80936.1 akaw|GAA88525.1 aluc|OJZ88421.1 anid|CBF88334.1 anig|EHA18146.1 aory|EIT78740.1 asyd|OJJ63712.1 ater|EAU39128.1 atub|OJI91017.1 aver|OJI97227.1 awen|OJJ35204.1 azon|OJJ49904.1

Group5385: abra|OJJ73630.1 acar|OOG00812.1 acla|EAW07544.1 afis|EAW22578.1 afla|EED54621.1 afum|EAL90620.2 agla|OJJ80938.1 akaw|GAA88523.1 aluc|OJZ88419.1 anid|CBF88337.1 anig|EHA18145.1 aory|EIT78944.1 asyd|OJJ63714.1 ater|EAU39126.1 atub|OJI91015.1 awen|OJJ35206.1 azon|OJJ49902.1

Group5386: abra|OJJ73642.1 acar|OOG00823.1 acla|EAW07555.1 afis|EAW22589.1 afla|EED54635.1 afum|EAL90610.1 agla|OJJ80949.1 akaw|GAA88513.1 aluc|OJZ88408.1 anid|CBF88362.1 anig|EHA18135.1 asyd|OJJ63725.1 ater|EAU39118.1 atub|OJI91004.1 aver|OJI97215.1 awen|OJJ35217.1 azon|OJJ49892.1

Group5387: abra|OJJ73664.1 acla|EAW07571.1 afis|EAW22605.1 afla|EED49515.1 afum|EAL90593.1 agla|OJJ80973.1 akaw|GAA88492.1 aluc|OJZ88388.1 anid|CBF88261.1 anig|EHA18115.1 aory|EIT82604.1 asyd|OJJ63675.1 ater|EAU39099.1 atub|OJI90983.1 aver|OJI97263.1 awen|OJJ35233.1 azon|OJJ49878.1

Group5388: abra|OJJ73677.1 acla|EAW07578.1 afis|EAW22616.1 afla|EED49824.1 afum|EAL90581.1 agla|OJJ80998.1 akaw|GAA88482.1 aluc|OJZ88372.1 anid|CBF88249.1 anig|EHA18105.1 aory|EIT77667.1 asyd|OJJ63668.1 ater|EAU39085.1 atub|OJI90970.1 aver|OJI97269.1 awen|OJJ35243.1 azon|OJJ49862.1

Group5389: abra|OJJ73679.1 acar|OOG00850.1 acla|EAW07594.1 afis|EAW22625.1 afla|EED49826.1 afum|EAL90571.1 agla|OJJ80996.1 akaw|GAA88480.1 aluc|OJZ88370.1 anid|CBF88245.1 anig|EHA18103.1 aory|EIT77671.1 asyd|OJJ63665.1 ater|EAU39084.1 atub|OJI90968.1 aver|OJI97270.1 awen|OJJ35245.1

Group5390: abra|OJJ73682.1 acar|OOG00852.1 acla|EAW07597.1 afis|EAW22628.1 afla|EED49877.1 afum|EAL90568.1 agla|OJJ80993.1 akaw|GAA88477.1 aluc|OJZ88367.1 anid|CBF88239.1 anig|EHA18100.1 asyd|OJJ63661.1 ater|EAU39080.1 atub|OJI90965.1 aver|OJI97273.1 awen|OJJ35249.1 azon|OJJ49857.1

Group5391: abra|OJJ73683.1 afis|EAW22629.1 afla|EED49878.1 afum|EAL90566.1 agla|OJJ80991.1 akaw|GAA88476.1 aluc|OJZ88366.1 anid|CBF88238.1 aory|EIT72447.1 asyd|OJJ63660.1 ater|EAU39079.1 atub|OJI90964.1 aver|OJI97274.1 awen|OJJ35250.1 azon|OJJ49856.1 acla|EAW07598.1 anig|EHA18098.1

Group5392: abra|OJJ73687.1 acar|OOG00859.1 afis|EAW22633.1 afla|EED49883.1 afum|EAL90560.1 agla|OJJ80986.1 akaw|GAA88472.1 aluc|OJZ88362.1 anid|CBF88230.1 anig|EHA18094.1 aory|EIT72448.1 asyd|OJJ63656.1 ater|EAU39075.1 atub|OJI90958.1 aver|OJI97278.1 awen|OJJ35255.1 acla|EAW07602.1

Group5393: abra|OJJ73691.1 acla|EAW07606.1 afis|EAW22636.1 afla|EED49887.1 afum|EAL90556.2  
agla|OJJ80982.1 akaw|GAA88469.1 aluc|OJZ88358.1 anid|CBF88223.1 anig|EHA18091.1 aory|EIT72468.1  
asyd|OJJ63653.1 ater|EAU39070.1 atub|OJI90953.1 aver|OJI97281.1 awen|OJJ35259.1 azon|OJJ49848.1

Group5394: abra|OJJ73721.1 acar|OOG00887.1 acla|EAW12122.1 afis|EAW17258.1 afla|EED45960.1  
afum|EAL86675.1 agla|OJJ83737.1 akaw|GAA88441.1 aluc|OJZ88329.1 anid|CBF88172.1 anig|EHA18064.1  
aory|EIT75555.1 asyd|OJJ63623.1 ater|EAU32152.1 atub|OJI90924.1 aver|OJI97313.1 awen|OJJ37054.1

Group5395: abra|OJJ73730.1 acar|OOG00895.1 acla|EAW07614.1 afis|EAW22644.1 afla|EED49913.1  
afum|EAL90548.1 agla|OJJ81026.1 aluc|OJZ88320.1 anid|CBF88177.1 anig|EHA18056.1 aory|EIT72270.1  
asyd|OJJ63626.1 ater|EAU39063.1 atub|OJI90915.1 aver|OJI97310.1 awen|OJJ35280.1 azon|OJJ49844.1

Group5396: abra|OJJ73738.1 acar|OOG00903.1 acla|EAW07622.1 afis|EAW22651.1 afla|EED49920.1  
afum|EAL90541.1 agla|OJJ81034.1 akaw|GAA88426.1 aluc|OJZ88313.1 anid|CBF88192.1 anig|EHA18050.1  
asyd|OJJ63633.1 ater|EAU39056.1 atub|OJI90908.1 aver|OJI97303.1 awen|OJJ35272.1 azon|OJJ49835.1

Group5397: abra|OJJ73765.1 acla|EAW07651.1 afis|EAW22669.1 afla|EED49946.1 afum|EAL90523.1  
agla|OJJ79052.1 akaw|GAA88409.1 aluc|OJZ88291.1 anid|CBF88153.1 anig|EHA18032.1 aory|EIT83448.1  
asyd|OJJ63614.1 ater|EAU39039.1 atub|OJI90888.1 aver|OJI97324.1 awen|OJJ35297.1 azon|OJJ49819.1

Group5398: abra|OJJ73772.1 acar|OOG00930.1 acla|EAW07656.1 afis|EAW22674.1 afla|EED49955.1  
afum|EAL90518.1 agla|OJJ79043.1 akaw|GAA88404.1 aluc|OJZ88284.1 anid|CBF88144.1 anig|EHA18027.1  
aory|EIT83450.1 asyd|OJJ63600.1 atub|OJI90882.1 aver|OJI97337.1 awen|OJJ35303.1 azon|OJJ49813.1

Group5399: abra|OJJ73780.1 acar|OOG00936.1 acla|EAW07664.1 afis|EAW22681.1 afla|EED49962.1  
afum|EAL90511.1 akaw|GAA88397.1 aluc|OJZ88275.1 anid|CBF88122.1 anig|EHA18020.1 aory|EIT83441.1  
asyd|OJJ63586.1 ater|EAU39028.1 atub|OJI90875.1 aver|OJI97348.1 awen|OJJ35309.1 azon|OJJ49802.1

Group5400: abra|OJJ73796.1 acar|OOG00951.1 acla|EAW07687.1 afis|EAW22702.1 afum|EAL90490.1  
agla|OJJ79007.1 akaw|GAA89414.1 aluc|OJZ88259.1 anid|CBF88076.1 anig|EHA18004.1 aory|EIT74750.1  
asyd|OJJ63556.1 ater|EAU39000.1 atub|OJI90858.1 aver|OJI97378.1 awen|OJJ35339.1 azon|OJJ49779.1

Group5401: abra|OJJ73799.1 acar|OOG00948.1 acla|EAW07693.1 afis|EAW22708.1 afla|EED49994.1  
afum|EAL90484.1 agla|OJJ79002.1 akaw|GAA89417.1 aluc|OJZ88256.1 anid|CBF88066.1 aory|EIT74634.1  
asyd|OJJ63550.1 ater|EAU38994.1 atub|OJI90854.1 aver|OJI97384.1 awen|OJJ35345.1 azon|OJJ49772.1

Group5402: abra|OJJ73814.1 acla|EAW07701.1 afis|EAW22718.1 afla|EED50004.1 afum|EAL90476.1  
agla|OJJ83685.1 akaw|GAA89433.1 aluc|OJZ88236.1 anid|CBF88048.1 anig|EHA17983.1 aory|EIT74712.1  
asyd|OJJ63538.1 ater|EAU38985.1 atub|OJI90838.1 aver|OJI97395.1 awen|OJJ35412.1 azon|OJJ49764.1

Group5403: abra|OJJ73815.1 acar|OOG00969.1 acla|EAW07702.1 afis|EAW22719.1 afla|EED50005.1  
afum|EAL90475.1 agla|OJJ83684.1 akaw|GAA89434.1 aluc|OJZ88235.1 anid|CBF88040.1 anig|EHA17982.1  
asyd|OJJ63537.1 ater|EAU38984.1 atub|OJI90837.1 aver|OJI97396.1 awen|OJJ35413.1 azon|OJJ49763.1

Group5404: abra|OJJ73817.1 acar|OOG00971.1 acla|EAW07706.1 afis|EAW22723.1 afla|EED50008.1  
afum|EAL90473.1 agla|OJJ83680.1 akaw|GAA89436.1 aluc|OJZ88233.1 anid|CBF88032.1 anig|EHA17979.1  
aory|EIT74623.1 asyd|OJJ63533.1 ater|EAU38982.1 atub|OJI90834.1 aver|OJI97399.1 awen|OJJ35417.1

Group5405: abra|OJJ73818.1 acla|EAW07707.1 afis|EAW22724.1 afla|EED50009.1 afum|EAL90472.1  
agla|OJJ83679.1 akaw|GAA89437.1 aluc|OJZ88232.1 anid|CBF88031.1 anig|EHA17978.1 aory|EIT74693.1  
ater|EAU38981.1 atub|OJI90833.1 awen|OJJ35418.1 azon|OJJ49759.1 asyd|OJJ63532.1 aver|OJI97400.1

Group5406: abra|OJJ73820.1 acla|EAW07709.1 afis|EAW22725.1 afla|EED50011.1 afum|EAL90471.1  
agla|OJJ83677.1 akaw|GAA89439.1 aluc|OJZ88229.1 anid|CBF88029.1 anig|EHA17976.1 aory|EIT74724.1  
asyd|OJJ63531.1 ater|EAU38979.1 atub|OJI90831.1 aver|OJI97401.1 awen|OJJ35420.1 azon|OJJ49757.1

Group5407: abra|OJJ73826.1 acar|OOG00978.1 acla|EAW07721.1 afis|EAW22753.1 afum|EAL90446.2  
agla|OJJ83672.1 akaw|GAA89444.1 aluc|OJZ88223.1 anid|CBF88020.1 anig|EHA17970.1 aory|EIT74674.1  
asyd|OJJ63523.1 ater|EAU38967.1 atub|OJI90823.1 aver|OJI97407.1 awen|OJJ35425.1 azon|OJJ49751.1

Group5408: abra|OJJ73828.1 acar|OOG00980.1 acla|EAW07723.1 afis|EAW22755.1 afla|EED50016.1  
afum|EAL90444.2 agla|OJJ83670.1 akaw|GAA89446.1 aluc|OJZ88221.1 anig|EHA17968.1 aory|EIT74646.1  
asyd|OJJ63521.1 ater|EAU38965.1 atub|OJI90821.1 aver|OJI97409.1 awen|OJJ35427.1 azon|OJJ49749.1

Group5409: abra|OJJ73829.1 acla|EAW07724.1 afis|EAW22756.1 afla|EED50017.1 afum|EAL90443.1  
agla|OJJ83667.1 akaw|GAA89447.1 aluc|OJZ88220.1 anid|CBF88017.1 aory|EIT74727.1 asyd|OJJ63520.1  
ater|EAU38963.1 atub|OJI90820.1 aver|OJI97410.1 awen|OJJ35428.1 azon|OJJ49748.1 anig|EHA17967.1

Group5410: abra|OJJ73845.1 acar|OOG00996.1 acla|EAW07740.1 afis|EAW22776.1 afla|EED50036.1  
afum|EAL90422.1 agla|OJJ83612.1 akaw|GAA89463.1 aluc|OJZ88203.1 anid|CBF87989.1 anig|EHA17951.1  
aory|EIT74654.1 asyd|OJJ63501.1 atub|OJI90803.1 aver|OJI97429.1 awen|OJJ38961.1 azon|OJJ49732.1

Group5411: abra|OJJ73858.1 acla|EAW07749.1 afis|EAW22786.1 afla|EED50049.1 afum|EAL90413.1  
agla|OJJ83591.1 akaw|GAA89483.1 aluc|OJZ88179.1 anid|CBF87967.1 anig|EHA17931.1 aory|EIT74754.1  
asyd|OJJ63487.1 ater|EAU38924.1 atub|OJI90778.1 aver|OJI97442.1 awen|OJJ38949.1 azon|OJJ49721.1

Group5412: abra|OJJ73860.1 acar|OOG01008.1 acla|EAW07750.1 afis|EAW22787.1 afla|EED50051.1  
afum|EAL90412.1 agla|OJJ83589.1 akaw|GAA89482.1 aluc|OJZ88181.1 anid|CBF87965.1 anig|EHA17933.1  
asyd|OJJ63485.1 ater|EAU38923.1 atub|OJI90780.1 aver|OJI97444.1 awen|OJJ38947.1 azon|OJJ49719.1

Group5413: abra|OJJ73863.1 acar|OOF89915.1 acla|EAW07753.1 afis|EAW22790.1 afla|EED50057.1  
afum|EAL90409.1 agla|OJJ83586.1 akaw|GAA89479.1 aluc|OJZ88184.1 anid|CBF87959.1 anig|EHA17935.1  
aory|EIT74648.1 asyd|OJJ63482.1 atub|OJI90783.1 aver|OJI97448.1 awen|OJJ38944.1 azon|OJJ49717.1

Group5414: abra|OJJ73875.1 acla|EAW07760.1 afis|EAW22796.1 afla|EED50065.1 afum|EAL90403.1  
agla|OJJ83573.1 akaw|GAA89487.1 aluc|OJZ88174.1 anid|CBF87948.1 anig|EHA17927.1 aory|EIT74629.1  
asyd|OJJ63476.1 ater|EAU38914.1 atub|OJI90772.1 aver|OJI97454.1 awen|OJJ38933.1 azon|OJJ49709.1

Group5415: abra|OJJ73879.1 acar|OOG01019.1 acla|EAW07762.1 afis|EAW22798.1 afla|EED50068.1  
afum|EAL90401.1 agla|OJJ83575.1 akaw|GAA89491.1 aluc|OJZ88170.1 anid|CBF87937.1 anig|EHA17924.1  
aory|EIT74758.1 asyd|OJJ63467.1 atub|OJI90768.1 aver|OJI97465.1 awen|OJJ38931.1 azon|OJJ49707.1

Group5416: abra|OJJ73885.1 acla|EAW07767.1 afis|EAW22803.1 afla|EED50073.1 afum|EAL90396.1  
agla|OJJ83580.1 akaw|GAA89496.1 aluc|OJZ88165.1 anid|CBF87928.1 anig|EHA17919.1 aory|EIT74628.1  
asyd|OJJ63462.1 ater|EAU38906.1 atub|OJI90763.1 aver|OJI97470.1 awen|OJJ38925.1 azon|OJJ49702.1

Group5417: abra|OJJ73895.1 acla|EAW07777.1 afis|EAW22813.1 afla|EED50086.1 afum|EAL90388.2  
agla|OJJ83556.1 akaw|GAA89505.1 aluc|OJZ88152.1 anid|CBF87911.1 anig|EHA17912.1 aory|EIT74666.1  
asyd|OJJ63450.1 ater|EAU38897.1 atub|OJI90754.1 aver|OJI97484.1 awen|OJJ38918.1 azon|OJJ49695.1

Group5418: abra|OJJ73903.1 acla|EAW07782.1 afis|EAW22818.1 afla|EED50091.1 afum|EAL90383.1  
akaw|GAA89510.1 aluc|OJZ88143.1 anig|EHA17906.1 aory|EIT74676.1 ater|EAU38892.1 atub|OJI90747.1  
awen|OJJ38909.1 azon|OJJ49690.1 anid|CBF87900.1 asyd|OJJ63445.1 aver|OJI97491.1 agla|OJJ83520.1

Group5419: abra|OJJ73914.1 acar|OOG01046.1 acla|EAW07790.1 afis|EAW22826.1 afla|EED50102.1  
afum|EAL90374.2 agla|OJJ83511.1 akaw|GAA89520.1 aluc|OJZ88134.1 anid|CBF87885.1 anig|EHA17898.1  
aory|EIT74725.1 asyd|OJJ63436.1 ater|EAU38883.1 aver|OJI97501.1 awen|OJJ38900.1 azon|OJJ49681.1

Group5420: abra|OJJ73929.1 acla|EAW07806.1 afis|EAW22843.1 afla|EED50118.1 afum|EAL90360.1  
agla|OJJ83495.1 akaw|GAA89536.1 aluc|OJZ88114.1 anid|CBF87856.1 anig|EHA17884.1 aory|EIT74743.1  
asyd|OJJ63422.1 ater|EAU38867.1 atub|OJI90723.1 aver|OJI97515.1 awen|OJJ38880.1 azon|OJJ49669.1

Group5421: abra|OJJ73950.1 acar|OOG01078.1 acla|EAW07825.1 afis|EAW22861.1 afla|EED50144.1  
afum|EAL90339.1 agla|OJJ83463.1 akaw|GAA89555.1 aluc|OJZ88094.1 anid|CBF84626.1 anig|EHA17864.1  
aory|EIT74618.1 asyd|OJJ60002.1 atub|OJI90702.1 aver|OJJ02289.1 awen|OJJ38859.1 agla|OJJ78756.1

Group5422: abra|OJJ73951.1 acar|OOG01079.1 acla|EAW07824.1 afis|EAW22860.1 afla|EED50141.1  
afum|EAL90340.1 agla|OJJ83464.1 akaw|GAA89556.1 aluc|OJZ88093.1 anid|CBF84628.1 anig|EHA17863.1  
aory|EIT74753.1 asyd|OJJ60001.1 atub|OJI90701.1 aver|OJJ02290.1 awen|OJJ38860.1 agla|OJJ78752.1

Group5423: abra|OJJ73955.1 acar|OOG01082.1 acla|EAW14167.1 afis|EAW18881.1 afla|EED50885.1  
afum|EAL93613.1 agla|OJJ88981.1 akaw|GAA89560.1 aluc|OJZ88088.1 anid|CBF80630.1 anig|EHA17859.1  
aory|EIT77121.1 asyd|OJJ54635.1 ater|EAU38049.1 atub|OJI90697.1 aver|OJJ07521.1 afla|EED47797.1

Group5424: abra|OJJ73958.1 acar|OOG01085.1 acla|EAW07827.1 afis|EAW22863.1 afla|EED50147.1  
afum|EAL90337.1 agla|OJJ83461.1 akaw|GAA89561.1 aluc|OJZ88087.1 anid|CBF87830.1 anig|EHA17858.1  
aory|EIT74683.1 asyd|OJJ63406.1 ater|EAU38823.1 atub|OJI90696.1 awen|OJJ38857.1 azon|OJJ49657.1

Group5425: abra|OJJ73960.1 acar|OOG01088.1 acla|EAW07829.1 afis|EAW22865.1 afla|EED50149.1  
afum|EAL90334.1 agla|OJJ83459.1 akaw|GAA89563.1 aluc|OJZ88085.1 anig|EHA17856.1 aory|EIT74687.1  
asyd|OJJ63404.1 ater|EAU38825.1 atub|OJI90694.1 aver|OJI97532.1 awen|OJJ38855.1 azon|OJJ49653.1

Group5426: abra|OJJ73965.1 acar|OOG01091.1 acla|EAW07835.1 afis|EAW22872.1 afla|EED50155.1  
afum|EAL90326.1 agla|OJJ83451.1 akaw|GAA89568.1 aluc|OJZ88079.1 anid|CBF87819.1 anig|EHA17851.1  
asyd|OJJ63398.1 ater|EAU38836.1 atub|OJI90688.1 aver|OJI97538.1 awen|OJJ38850.1 azon|OJJ49646.1

Group5427: abra|OJJ73966.1 acar|OOG01092.1 acla|EAW07836.1 afis|EAW22873.1 afla|EED50156.1  
afum|EAL90325.2 agla|OJJ83450.1 akaw|GAA89569.1 aluc|OJZ88078.1 anid|CBF87817.1 anig|EHA17850.1  
asyd|OJJ63396.1 ater|EAU38837.1 atub|OJI90687.1 aver|OJI97540.1 awen|OJJ38849.1 azon|OJJ49645.1

Group5428: abra|OJJ73981.1 acar|OOG01108.1 acla|EAW07853.1 afis|EAW22889.1 afla|EED50170.1  
afum|EAL90309.1 agla|OJJ83421.1 akaw|GAA89585.1 aluc|OJZ88063.1 anid|CBF87794.1 anig|EHA17836.1  
asyd|OJJ63379.1 ater|EAU35984.1 atub|OJI90672.1 aver|OJI97556.1 awen|OJJ38833.1 azon|OJJ49631.1



Group5429: abra|OJJ73984.1 acla|EAW07856.1 afis|EAW22892.1 afla|EED54861.1 afum|EAL90306.1  
agla|OJJ83409.1 akaw|GAA89588.1 aluc|OJZ88060.1 anid|CBF87788.1 anig|EHA17833.1 aory|EIT79389.1  
asyd|OJJ63375.1 ater|EAU35991.1 atub|OJI90668.1 aver|OJI97571.1 awen|OJJ38828.1 azon|OJJ49626.1

Group5430: abra|OJJ74014.1 acla|EAW07869.1 afis|EAW22904.1 afla|EED54896.1 afum|EAL90293.1  
agla|OJJ83386.1 akaw|GAA87497.1 aluc|OJZ88025.1 anid|CBF87715.1 anig|EHA17802.1 aory|EIT79432.1  
asyd|OJJ63339.1 ater|EAU36035.1 atub|OJI90633.1 aver|OJI97622.1 awen|OJJ38726.1 azon|OJJ49612.1

Group5431: abra|OJJ74042.1 acar|OOG01160.1 acla|EAW07891.1 afis|EAW22926.1 afla|EED54923.1  
afum|EAL90271.1 agla|OJJ83362.1 akaw|GAA87524.1 aluc|OJZ87995.1 anid|CBF87673.1 anig|EHA17777.1  
asyd|OJJ63312.1 ater|EAU30697.1 atub|OJI90604.1 aver|OJI97647.1 awen|OJJ38638.1 azon|OJJ49580.1

Group5432: abra|OJJ74046.1 acar|OOG01163.1 acla|EAW07896.1 afis|EAW22931.1 afla|EED58124.1  
afum|EAL90266.1 agla|OJJ83357.1 akaw|GAA87529.1 aluc|OJZ87989.1 anid|CBF87666.1 anig|EHA17772.1  
asyd|OJJ63307.1 ater|EAU30693.1 atub|OJI90599.1 aver|OJI97652.1 awen|OJJ38633.1 azon|OJJ49575.1

Group5433: abra|OJJ74051.1 acar|OOF89807.1 acla|EAW07900.1 afis|EAW22936.1 afla|EED58129.1  
afum|EAL90260.1 agla|OJJ83352.1 akaw|GAA87533.1 aluc|OJZ87984.1 anid|CBF87657.1 anig|EHA17767.1  
aory|EIT79148.1 asyd|OJJ63302.1 atub|OJI90594.1 aver|OJI97657.1 awen|OJJ38628.1 azon|OJJ49570.1

Group5434: abra|OJJ74074.1 acar|OOG01186.1 acla|EAW07919.1 afis|EAW22957.1 afla|EED58139.1  
afum|EAL90240.1 agla|OJJ83331.1 akaw|GAA87555.1 aluc|OJZ87962.1 anig|EHA17746.1 aory|EIT79129.1  
asyd|OJJ63282.1 ater|EAU30668.1 atub|OJI90572.1 aver|OJI97676.1 awen|OJJ38606.1 azon|OJJ49548.1

Group5435: abra|OJJ74077.1 acar|OOG01189.1 acla|EAW07922.1 afis|EAW22960.1 afla|EED58136.1  
afum|EAL90237.1 agla|OJJ83328.1 akaw|GAA87558.1 aluc|OJZ87959.1 anig|EHA17743.1 aory|EIT79122.1  
asyd|OJJ63279.1 ater|EAU30665.1 atub|OJI90569.1 aver|OJI97679.1 awen|OJJ38603.1 azon|OJJ49545.1

Group5436: abra|OJJ74098.1 acar|OOG01207.1 acla|EAW07941.1 afis|EAW22979.1 afla|EED58172.1  
agla|OJJ83308.1 akaw|GAA87576.1 aluc|OJZ87938.1 anid|CBF87592.1 anig|EHA17726.1 aory|EIT79098.1  
asyd|OJJ63260.1 ater|EAU30642.1 atub|OJI90550.1 aver|OJI97697.1 awen|OJJ38584.1 azon|OJJ49526.1

Group5437: abra|OJJ74099.1 acar|OOG01208.1 acla|EAW07942.1 afis|EAW22980.1 afla|EED58173.1  
afum|EAL90217.1 agla|OJJ83307.1 akaw|GAA87577.1 aluc|OJZ87937.1 anid|CBF87590.1 anig|EHA17725.1  
asyd|OJJ63259.1 ater|EAU30641.1 atub|OJI90549.1 aver|OJI97698.1 awen|OJJ38583.1 azon|OJJ49525.1

Group5438: abra|OJJ74105.1 acla|EAW07950.1 afis|EAW22987.1 afla|EED58179.1 afum|EAL90212.1  
agla|OJJ83300.1 akaw|GAA87583.1 aluc|OJZ87931.1 anid|CBF87581.1 anig|EHA17720.1 aory|EIT79066.1  
asyd|OJJ63253.1 ater|EAU30636.1 atub|OJI90543.1 aver|OJI97705.1 awen|OJJ38577.1 azon|OJJ49519.1

Group5439: abra|OJJ74106.1 acar|OOG01215.1 acla|EAW07951.1 afis|EAW22988.1 afla|EED58180.1  
afum|EAL90211.1 agla|OJJ83298.1 aluc|OJZ87930.1 anid|CBF75423.1 anig|EHA17719.1 aory|EIT79102.1  
asyd|OJJ59794.1 ater|EAU30635.1 atub|OJI90542.1 aver|OJJ02493.1 awen|OJJ38576.1 azon|OJJ49518.1

Group5440: abra|OJJ74111.1 acar|OOF89999.1 acla|EAW07954.1 afis|EAW22991.1 afla|EED58183.1  
afum|EAL90209.1 agla|OJJ83295.1 akaw|GAA87586.1 aluc|OJZ87924.1 anid|CBF87578.1 anig|EHA17716.1  
aory|EIT79107.1 asyd|OJJ63249.1 ater|EAU30631.1 atub|OJI90536.1 aver|OJI97708.1 awen|OJJ38573.1

Group5441: abra|OJJ74114.1 acar|OOG01219.1 acla|EAW07956.1 afis|EAW22992.1 afla|EED58184.1  
afum|EBA27400.1 agla|OJJ83293.1 akaw|GAA87588.1 aluc|OJZ87920.1 anid|CBF87574.1 anig|EHA17714.1  
asyd|OJJ63246.1 ater|EAU30628.1 atub|OJI90531.1 aver|OJI97710.1 awen|OJJ38570.1 azon|OJJ42000.1

Group5442: abra|OJJ74131.1 acar|OOF95603.1 acla|EAW11690.1 afis|EAW23706.1 afla|EED56137.1  
afum|EAL87150.1 agla|OJJ78978.1 akaw|GAA89755.1 aluc|OJZ80628.1 anid|CBF84383.1 anig|EHA27203.1  
aory|EIT76571.1 asyd|OJJ58682.1 ater|EAU36843.1 atub|OJI87484.1 aver|OJJ01294.1 awen|OJJ30914.1

Group5443: abra|OJJ74154.1 acar|OOF95571.1 acla|EAW12278.1 afis|EAW16962.1 afla|EED54137.1  
afum|EAL86489.1 agla|OJJ88175.1 akaw|GAA89729.1 aluc|OJZ80654.1 anid|CBF89392.1 anig|EHA27178.1  
aory|EIT75949.1 asyd|OJJ62463.1 ater|EAU34050.1 atub|OJI87509.1 aver|OJI96598.1 awen|OJJ40679.1

Group5444: abra|OJJ74174.1 acar|OOF95554.1 acla|EAW10815.1 afis|EAW24759.1 afla|EED48096.1  
afum|EAL89401.1 agla|OJJ79193.1 akaw|GAA86842.1 aluc|OJZ89961.1 anid|CBF89394.1 anig|EHA27161.1  
aory|EIT76187.1 asyd|OJJ62462.1 ater|EAU34013.1 atub|OJI84844.1 aver|OJI96597.1 awen|OJJ30980.1

Group5445: abra|OJJ74205.1 acar|OOF95515.1 acla|EAW07258.1 afis|EAW22279.1 afla|EED57672.1  
afum|EAL90902.1 agla|OJJ87774.1 akaw|GAA86813.1 aluc|OJZ89930.1 anid|CBF88546.1 anig|EHA27130.1  
asyd|OJJ63826.1 ater|EAU34289.1 atub|OJI84876.1 aver|OJI97112.1 awen|OJJ34852.1 azon|OJJ45695.1

Group5446: abra|OJJ74216.1 acar|OOF95505.1 acla|EAW07268.1 afis|EAW22289.1 afla|EED57688.1  
afum|EAL90892.1 agla|OJJ87760.1 akaw|GAA86802.1 aluc|OJZ89918.1 anid|CBF88566.1 anig|EHA27118.1  
asyd|OJJ63836.1 ater|EAU34301.1 atub|OJI84887.1 aver|OJI97101.1 awen|OJJ34862.1 azon|OJJ45666.1

Group5447: abra|OJJ74219.1 acar|OOF90432.1 acla|EAW07272.1 afis|EAW22293.1 afla|EED57691.1 afum|EAL90888.1 agla|OJJ87757.1 akaw|GAA86799.1 aluc|OJZ89915.1 anid|CBF88571.1 anig|EHA27115.1 asyd|OJJ63838.1 ater|EAU34304.1 atub|OJI84890.1 aver|OJI97099.1 awen|OJJ34865.1 azon|OJJ45664.1

Group5448: abra|OJJ74222.1 acla|EAW07283.1 afis|EAW22314.1 afla|EED57696.1 afum|EAL90876.1 agla|OJJ87736.1 akaw|GAA86797.1 aluc|OJZ89912.1 anid|CBF88579.1 anig|EHA27112.1 aory|EIT79872.1 asyd|OJJ63842.1 ater|EAU34309.1 atub|OJI84893.1 aver|OJI97095.1 awen|OJJ34870.1 azon|OJJ50046.1

Group5449: abra|OJJ74227.1 acar|OOF95499.1 acla|EAW07278.1 afis|EAW22309.1 afla|EED57703.1 afum|EAL90881.1 agla|OJJ87741.1 akaw|GAA86792.1 aluc|OJZ89906.1 anid|CBF88588.1 anig|EHA27106.1 aory|EIT79911.1 asyd|OJJ63847.1 ater|EAU34315.1 atub|OJI84900.1 aver|OJI97089.1 awen|OJJ34878.1

Group5450: abra|OJJ74230.1 acar|OOF95496.1 acla|EAW07274.1 afis|EAW22295.1 afla|EED57708.1 afum|EAL90886.1 agla|OJJ87747.1 akaw|GAA86789.1 aluc|OJZ89903.1 anid|CBF88596.1 anig|EHA27103.1 asyd|OJJ63852.1 ater|EAU34319.1 atub|OJI84903.1 aver|OJI97085.1 awen|OJJ34883.1 azon|OJJ50051.1

Group5451: abra|OJJ74238.1 acar|OOF95493.1 acla|EAW07289.1 afis|EAW22322.1 afla|EED57719.1 afum|EAL90869.1 agla|OJJ87750.1 akaw|GAA86782.1 aluc|OJZ89894.1 anid|CBF88603.1 anig|EHA27093.1 aory|EIT79885.1 asyd|OJJ63856.1 atub|OJI84913.1 aver|OJI97082.1 awen|OJJ34889.1 azon|OJJ50056.1

Group5452: abra|OJJ74243.1 acar|OOF95487.1 acla|EAW07292.1 afis|EAW22326.1 afla|EED57725.1 afum|EAL90866.1 agla|OJJ87722.1 akaw|GAA86777.1 aluc|OJZ89889.1 anid|CBF88611.1 anig|EHA27088.1 aory|EIT79882.1 asyd|OJJ63860.1 ater|EAU34325.1 atub|OJI84918.1 aver|OJI97079.1 awen|OJJ34895.1

Group5453: abra|OJJ74247.1 acar|OOF95482.1 acla|EAW07301.1 afis|EAW22344.1 afla|EED57737.1 afum|EAL90847.1 agla|OJJ87690.1 aluc|OJZ89885.1 anid|CBF88625.1 anig|EHA27084.1 aory|EIT79933.1 asyd|OJJ63869.1 ater|EAU39482.1 atub|OJI84922.1 aver|OJI97070.1 awen|OJJ34923.1 azon|OJJ50071.1

Group5454: abra|OJJ74251.1 acar|OOF95478.1 acla|EAW07295.1 afis|EAW22329.1 afla|EED57728.1 afum|EAL90863.1 agla|OJJ87754.1 akaw|GAA86770.1 aluc|OJZ89881.1 anid|CBF88617.1 anig|EHA27080.1 aory|EIT79902.1 asyd|OJJ63863.1 atub|OJI84926.1 aver|OJI97076.1 awen|OJJ34892.1 azon|OJJ50061.1

Group5455: abra|OJJ74253.1 acar|OOF95476.1 acla|EAW07297.1 afis|EAW22348.1 afla|EED57730.1 afum|EAL90844.1 agla|OJJ87751.1 akaw|GAA86768.1 aluc|OJZ89879.1 anid|CBF88621.1 anig|EHA27078.1 aory|EIT79888.1 asyd|OJJ63865.1 ater|EAU39456.1 atub|OJI84928.1 aver|OJI97074.1 azon|OJJ50059.1

Group5456: abra|OJJ74259.1 acla|EAW07304.1 afis|EAW22341.1 afla|EED57740.1 afum|EAL90851.1 agla|OJJ87694.1 akaw|GAA86762.1 aluc|OJZ89872.1 anid|CBF88630.1 anig|EHA27072.1 aory|EIT79897.1 asyd|OJJ63873.1 ater|EAU39479.1 atub|OJI84935.1 aver|OJI97065.1 awen|OJJ34920.1 azon|OJJ50074.1

Group5457: abra|OJJ74287.1 acar|OOF95444.1 acla|EAW07331.1 afis|EAW22363.1 afla|EED57771.1 afum|EAL90828.1 agla|OJJ87612.1 akaw|GAA86737.1 aluc|OJZ89846.1 anig|EHA27047.1 aory|EIT81068.1 asyd|OJJ63905.1 ater|EAU39497.1 atub|OJI84960.1 aver|OJI97036.1 awen|OJJ34937.1 azon|OJJ45589.1

Group5458: abra|OJJ74288.1 acar|OOF95443.1 acla|EAW07332.1 afis|EAW22364.1 afla|EED57772.1 afum|EAL90827.1 akaw|GAA86735.1 aluc|OJZ89845.1 anid|CBF88688.1 anig|EHA27046.1 aory|EIT81112.1 asyd|OJJ63906.1 ater|EAU39498.1 atub|OJI84961.1 aver|OJI97035.1 awen|OJJ34938.1 azon|OJJ45590.1

Group5459: abra|OJJ74308.1 acla|EAW07356.1 afis|EAW22385.1 afla|EED56045.1 afum|EAL90805.1 agla|OJJ87646.1 akaw|GAA86716.1 aluc|OJZ89819.1 anid|CBF88727.1 anig|EHA27027.1 aory|EIT76587.1 asyd|OJJ63932.1 ater|EAU39336.1 atub|OJI84987.1 aver|OJI97011.1 awen|OJJ34960.1 azon|OJJ45612.1

Group5460: abra|OJJ74313.1 acar|OOF95415.1 acla|EAW07364.1 afis|EAW22391.1 afla|EED56054.1 afum|EBA27413.1 agla|OJJ87653.1 aluc|OJZ89813.1 anid|CBF88739.1 anig|EHA27023.1 aory|EIT76735.1 asyd|OJJ63952.1 ater|EAU39327.1 atub|OJI84992.1 aver|OJI96989.1 awen|OJJ34968.1 azon|OJJ45617.1

Group5461: abra|OJJ74321.1 acla|EAW07373.1 afis|EAW22398.1 afla|EED56062.1 afum|EAL90793.1 agla|OJJ87661.1 akaw|GAA86705.1 aluc|OJZ89807.1 anid|CBF88752.1 anig|EHA27017.1 aory|EIT76767.1 asyd|OJJ63959.1 ater|EAU39315.1 atub|OJI84999.1 aver|OJI96982.1 awen|OJJ34976.1 azon|OJJ45625.1

Group5462: abra|OJJ74323.1 acar|OOF95407.1 acla|EAW07375.1 afis|EAW22400.1 afla|EED56064.1 afum|EAL90791.1 agla|OJJ87663.1 akaw|GAA86703.1 aluc|OJZ89805.1 anid|CBF88768.1 aory|EIT76742.1 asyd|OJJ63979.1 ater|EAU39307.1 atub|OJI85001.1 aver|OJI96974.1 awen|OJJ34979.1 azon|OJJ45627.1

Group5463: abra|OJJ74330.1 acar|OOF95401.1 acla|EAW07381.1 afis|EAW22406.1 afla|EED56070.1 afum|EAL90786.1 agla|OJJ87669.1 akaw|GAA86698.1 aluc|OJZ89799.1 anid|CBF88789.1 anig|EHA27012.1 asyd|OJJ62901.1 ater|EAU39303.1 atub|OJI85006.1 aver|OJI96955.1 awen|OJJ34985.1 azon|OJJ42755.1

Group5464: abra|OJJ74334.1 acar|OOF95398.1 acla|EAW07384.1 afis|EAW22409.1 afla|EED52489.1 afum|EAL90783.1 agla|OJJ87677.1 akaw|GAA86695.1 aluc|OJZ89795.1 anid|CBF82129.1 anig|EHA27009.1 aory|EIT82766.1 asyd|OJJ54297.1 ater|EAU39299.1 atub|OJI85010.1 aver|OJJ05252.1 awen|OJJ34989.1

Group5465: abra|OJJ74350.1 acar|OOF95379.1 acla|EAW07404.1 afis|EAW22430.1 afla|EED52508.1  
agla|OJJ87593.1 akaw|GAA86680.1 aluc|OJZ89780.1 anid|CBF88826.1 anig|EHA26995.1 asyd|OJJ62883.1  
ater|EAU39277.1 atub|OJI85026.1 aver|OJI96935.1 awen|OJJ35009.1 azon|OJJ45650.1 afum|EAL90761.1

Group5466: abra|OJJ74354.1 acar|OOF95376.1 acla|EAW07407.1 afis|EAW22433.1 afla|EED52514.1  
afum|EAL90758.1 agla|OJJ87588.1 akaw|GAA86677.1 aluc|OJZ89774.1 anid|CBF88834.1 anig|EHA26992.1  
asyd|OJJ62879.1 ater|EAU39274.1 atub|OJI85029.1 aver|OJI96931.1 awen|OJJ35012.1 azon|OJJ45653.1

Group5467: abra|OJJ74360.1 acla|EAW07411.1 afis|EAW22437.1 afla|EED54447.1 afum|EAL90754.1  
agla|OJJ87585.1 akaw|GAA86671.1 aluc|OJZ89768.1 anid|CBF88866.1 anig|EHA26988.1 aory|EIT81146.1  
asyd|OJJ62876.1 ater|EAU39271.1 atub|OJI85035.1 aver|OJI96928.1 awen|OJJ35015.1 azon|OJJ45660.1

Group5468: abra|OJJ74380.1 acar|OOF95357.1 acla|EAW07421.1 afis|EAW22447.1 afla|EED54461.1  
afum|EAL90744.1 agla|OJJ87577.1 akaw|GAA87280.1 aluc|OJZ89740.1 anid|CBF88852.1 anig|EHA26964.1  
asyd|OJJ62863.1 ater|EAU39260.1 atub|OJI85061.1 aver|OJI96916.1 awen|OJJ35072.1 azon|OJJ50035.1

Group5469: abra|OJJ74381.1 acar|OOF95356.1 acla|EAW07422.1 afis|EAW22448.1 afla|EED54463.1  
afum|EAL90743.1 agla|OJJ87576.1 akaw|GAA87281.1 aluc|OJZ89739.1 anid|CBF88854.1 anig|EHA26963.1  
asyd|OJJ62862.1 ater|EAU39259.1 atub|OJI85062.1 aver|OJI96915.1 awen|OJJ35073.1 azon|OJJ50034.1

Group5470: abra|OJJ74382.1 acar|OOF95355.1 acla|EAW07425.1 afis|EAW22451.1 afla|EED54464.1  
afum|EAL90740.1 akaw|GAA87283.1 aluc|OJZ89736.1 anid|CBF88856.1 anig|EHA26962.1 aory|EIT81161.1  
asyd|OJJ62870.1 ater|EAU39258.1 atub|OJI85065.1 aver|OJI96923.1 awen|OJJ35074.1 azon|OJJ50033.1

Group5471: abra|OJJ74385.1 afis|EAW22452.1 agla|OJJ87571.1 akaw|GAA87286.1 aluc|OJZ89733.1  
anid|CBF88929.1 anig|EHA26959.1 ater|EAU39254.1 atub|OJI85068.1 aver|OJI96904.1 awen|OJJ35077.1  
azon|OJJ50030.1 acla|EAW07426.1 afum|EAL90739.1 asyd|OJJ62851.1 afla|EED54468.1 aory|EIT81152.1

Group5472: abra|OJJ74390.1 acar|OOF95346.1 acla|EAW06816.1 afis|EAW16365.1 afum|EAL88990.1  
agla|OJJ78586.1 akaw|GAA87290.1 aluc|OJZ89729.1 anid|CBF89345.1 anig|EHA26956.1 aory|EIT78416.1  
asyd|OJJ62506.1 ater|EAU34087.1 atub|OJI85072.1 aver|OJI96626.1 awen|OJJ37769.1 afla|EED53778.1

Group5473: abra|OJJ74394.1 acla|EAW06818.1 afis|EAW16366.1 afla|EED53470.1 afum|EAL88991.1  
agla|OJJ78587.1 akaw|GAA87292.1 aluc|OJZ89726.1 anid|CBF89348.1 anig|EHA26954.1 aory|EIT75141.1  
asyd|OJJ62503.1 ater|EAU34082.1 atub|OJI85074.1 aver|OJI96624.1 awen|OJJ37771.1 azon|OJJ45082.1

Group5474: abra|OJJ74398.1 acar|OOF95339.1 acla|EAW06821.1 afis|EAW16369.1 afla|EED53466.1  
afum|EAL88994.1 agla|OJJ78590.1 akaw|GAA87296.1 aluc|OJZ89722.1 anid|CBF89353.1 anig|EHA26950.1  
aory|EIT74909.1 atub|OJI85078.1 aver|OJJ03881.1 awen|OJJ37906.1 azon|OJJ45084.1 aver|OJI96621.1

Group5475: abra|OJJ74409.1 acar|OOF95333.1 acla|EAW06823.1 afis|EAW16371.1 afla|EED53464.1  
afum|EAL88996.1 agla|OJJ78592.1 akaw|GAA87302.1 aluc|OJZ89716.1 anid|CBF89355.1 aory|EIT75209.1  
asyd|OJJ62500.1 ater|EAU34078.1 atub|OJI85086.1 aver|OJI96620.1 awen|OJJ37908.1 azon|OJJ45086.1

Group5476: abra|OJJ74413.1 acar|OOF95330.1 acla|EAW06825.1 afis|EAW16376.1 afla|EED53461.1  
afum|EAL89001.1 agla|OJJ78594.1 akaw|GAA87304.1 aluc|OJZ89713.1 anid|CBF84606.1 anig|EHA26944.1  
aory|EIT74960.1 asyd|OJJ53373.1 ater|EAU34076.1 atub|OJI85089.1 aver|OJJ08371.1 awen|OJJ37910.1

Group5477: abra|OJJ74419.1 acar|OOF95321.1 acla|EAW06835.1 afis|EAW16383.1 afla|EED53449.1  
afum|EAL89011.1 agla|OJJ88210.1 akaw|GAA87313.1 aluc|OJZ89704.1 anid|CBF69425.1 anig|EHA26938.1  
aory|EIT75059.1 asyd|OJJ54913.1 ater|EAU34063.1 atub|OJI85095.1 aver|OJJ07290.1 awen|OJJ37921.1

Group5478: abra|OJJ74424.1 acar|OOF95316.1 acla|EAW06836.1 afis|EAW16384.1 afla|EED54095.1  
afum|EAL89012.1 akaw|GAA87317.1 aluc|OJZ89700.1 anid|CBF74710.1 anig|EHA26934.1 aory|EIT75993.1  
asyd|OJJ60207.1 ater|EAU39463.1 atub|OJI85101.1 aver|OJJ04060.1 awen|OJJ37924.1 azon|OJJ45093.1

Group5479: abra|OJJ74470.1 acar|OOF95277.1 acla|EAW07227.1 afis|EAW22241.1 afla|EED57634.1  
afum|EAL90952.1 agla|OJJ87810.1 akaw|GAA87363.1 aluc|OJZ89650.1 anid|CBF88487.1 anig|EHA26888.1  
aory|EIT82970.1 asyd|OJJ63789.1 ater|EAU34248.1 atub|OJI85154.1 aver|OJI97149.1 awen|OJJ34819.1

Group5480: abra|OJJ74483.1 acla|EAW07218.1 afis|EAW22232.1 afla|EED57621.1 afum|EAL90961.1  
agla|OJJ87819.1 akaw|GAA87376.1 aluc|OJZ89636.1 anid|CBF88470.1 anig|EHA26878.1 aory|EIT82969.1  
asyd|OJJ63781.1 ater|EAU34235.1 atub|OJI85167.1 aver|OJI97156.1 awen|OJJ34812.1 azon|OJJ45737.1

Group5481: abra|OJJ74485.1 acar|OOF95264.1 acla|EAW09107.1 afis|EAW25711.1 afla|EED54262.1  
afum|EAL84384.1 agla|OJJ84991.1 akaw|GAA87378.1 aluc|OJZ89634.1 anid|CBF88463.1 anig|EHA26876.1  
aory|EIT76037.1 asyd|OJJ63776.1 ater|EAU37423.1 atub|OJI85169.1 aver|OJI97161.1 awen|OJJ38524.1

Group5482: abra|OJJ74501.1 acar|OOF95243.1 acla|EAW07185.1 afis|EAW22198.1 afla|EED57599.1  
afum|EBA27419.1 akaw|GAA87395.1 aluc|OJZ89617.1 anid|CBF88433.1 anig|EHA26862.1 aory|EIT82949.1  
asyd|OJJ63761.1 ater|EAU34216.1 atub|OJI85186.1 aver|OJI97179.1 awen|OJJ34791.1 azon|OJJ45755.1

Group5483: abra|OJJ74504.1 acar|OOF95240.1 acla|EAW07190.1 afis|EAW22203.1 afla|EED57592.1 afum|EAL90989.1 agla|OJJ87843.1 akaw|GAA87399.1 aluc|OJZ89613.1 anig|EHA26859.1 aory|EIT82935.1 asyd|OJJ63759.1 ater|EAU34211.1 atub|OJI85189.1 aver|OJI97181.1 awen|OJJ32000.1 azon|OJJ50253.1

Group5484: abra|OJJ74507.1 acla|EAW07194.1 afis|EAW22206.1 afla|EED57585.1 afum|EAL90987.2 agla|OJJ87847.1 akaw|GAA82092.1 aluc|OJZ92088.1 anid|CBF88411.1 anig|EHA26853.1 aory|EIT82967.1 asyd|OJJ63755.1 ater|EAU34208.1 atub|OJI86517.1 aver|OJI97186.1 awen|OJJ34781.1 azon|OJJ45763.1

Group5485: abra|OJJ74515.1 acla|EAW07176.1 afis|EAW22190.1 afla|EED57574.1 afum|EAL91001.1 agla|OJJ87857.1 akaw|GAA82084.1 aluc|OJZ92096.1 anid|CBF88398.1 anig|EHA26845.1 aory|EIT82936.1 asyd|OJJ63747.1 ater|EAU34198.1 atub|OJI86529.1 aver|OJI97193.1 awen|OJJ34770.1 azon|OJJ45776.1

Group5486: abra|OJJ74525.1 acla|EAW07166.1 afis|EAW22181.1 afla|EED57560.1 afum|EAL91008.1 agla|OJJ87874.1 akaw|GAA82076.1 aluc|OJZ92105.1 anid|CBF88387.1 anig|EHA26839.1 aory|EIT81854.1 asyd|OJJ63740.1 ater|EAU34186.1 atub|OJI86539.1 aver|OJI97200.1 awen|OJJ34762.1 azon|OJJ45788.1

Group5487: abra|OJJ74526.1 acla|EAW07165.1 afis|EAW22180.1 afla|EED57559.1 afum|EAL91009.1 agla|OJJ87875.1 akaw|GAA82075.1 aluc|OJZ92107.1 anid|CBF88385.1 anig|EHA26838.1 aory|EIT81828.1 asyd|OJJ63739.1 ater|EAU34185.1 atub|OJI86541.1 aver|OJI97201.1 awen|OJJ34761.1 azon|OJJ45789.1

Group5488: abra|OJJ74550.1 acla|EAW07148.1 afis|EAW22162.1 afla|EED57533.1 afum|EAL91029.1 agla|OJJ87902.1 akaw|GAA82047.1 aluc|OJZ92133.1 anid|CBF89096.1 anig|EHA26816.1 aory|EIT81833.1 asyd|OJJ62730.1 ater|EAU34164.1 atub|OJI86565.1 aver|OJI96773.1 awen|OJJ34736.1 azon|OJJ45823.1

Group5489: abra|OJJ74551.1 acar|OOF95204.1 acla|EAW07147.1 afis|EAW22161.1 afla|EED57532.1 afum|EAL91030.1 agla|OJJ87903.1 akaw|GAA82046.1 aluc|OJZ92134.1 anid|CBF89097.1 anig|EHA26815.1 aory|EIT81868.1 asyd|OJJ62729.1 atub|OJI86566.1 aver|OJI96772.1 awen|OJJ34735.1 azon|OJJ45824.1

Group5490: abra|OJJ74572.1 acar|OOF95190.1 acla|EAW07137.1 afis|EAW22150.1 afla|EED53612.1 afum|EAL91040.1 agla|OJJ87912.1 akaw|GAA82033.1 aluc|OJZ92150.1 anid|CBF89110.1 anig|EHA26799.1 aory|EIT75168.1 asyd|OJJ62666.1 atub|OJI86578.1 aver|OJI96764.1 awen|OJJ34726.1 azon|OJJ45836.1

Group5491: abra|OJJ74574.1 acar|OOF95188.1 acla|EAW07135.1 afis|EAW22148.1 afla|EED53609.1 afum|EAL91042.1 agla|OJJ87913.1 akaw|GAA82031.1 aluc|OJZ92152.1 anid|CBF87368.1 anig|EHA26797.1 aory|EIT74984.1 asyd|OJJ52838.1 ater|EAU34154.1 atub|OJI86580.1 aver|OJJ08809.1 awen|OJJ34724.1

Group5492: abra|OJJ74580.1 acar|OOF95184.1 afis|EAW22143.1 afla|EED53569.1 afum|EAL91047.1 agla|OJJ87931.1 akaw|GAA82025.1 aluc|OJZ92158.1 anid|CBF78371.1 anig|EHA26791.1 aory|EIT75000.1 asyd|OJJ57327.1 ater|EAU34146.1 atub|OJI86586.1 aver|OJJ05833.1 awen|OJJ34718.1 azon|OJJ46644.1

Group5493: abra|OJJ74625.1 acla|EAW10757.1 afis|EAW24817.1 afla|EED47165.1 afum|EAL89461.1 agla|OJJ82916.1 akaw|GAA81983.1 aluc|OJZ92207.1 anid|CBF85877.1 anig|EHA26751.1 aory|EIT79320.1 asyd|OJJ64376.1 ater|EAU36489.1 atub|OJI86636.1 aver|OJI98472.1 awen|OJJ40403.1 azon|OJJ49252.1

Group5494: abra|OJJ74638.1 acla|EAW10750.1 afis|EAW24824.1 afla|EED47151.1 afum|EAL89468.1 agla|OJJ82012.1 akaw|GAA81973.1 aluc|OJZ92217.1 anid|CBF85855.1 anig|EHA26741.1 aory|EIT79315.1 asyd|OJJ64365.1 ater|EAU36481.1 atub|OJI86648.1 aver|OJI98460.1 awen|OJJ40410.1 azon|OJJ49259.1

Group5495: abra|OJJ74642.1 acla|EAW10746.1 afis|EAW24828.1 afla|EED47147.1 agla|OJJ82018.1 akaw|GAA81969.1 aluc|OJZ92222.1 anid|CBF85863.1 anig|EHA26736.1 aory|EIT79265.1 asyd|OJJ64369.1 ater|EAU36477.1 atub|OJI86652.1 aver|OJI98465.1 awen|OJJ40414.1 afum|EAL89473.1 azon|OJJ49264.1

Group5496: abra|OJJ74710.1 acar|OOF95720.1 acla|EAW10688.1 afis|EAW24882.1 afla|EED47084.1 afum|EAL89532.1 agla|OJJ82104.1 akaw|GAA81907.1 aluc|OJZ92291.1 anid|CBF75748.1 anig|EHA26678.1 asyd|OJJ57522.1 ater|EAU36419.1 atub|OJI86721.1 aver|OJJ05656.1 awen|OJJ40472.1 azon|OJJ49336.1

Group5497: abra|OJJ74716.1 acar|OOF95725.1 acla|EAW10683.1 afis|EAW24887.1 afum|EAL89538.2 agla|OJJ82110.1 akaw|GAA81902.1 aluc|OJZ92296.1 anid|CBF75621.1 anig|EHA26673.1 aory|EIT72493.1 asyd|OJJ57454.1 ater|EAU36413.1 atub|OJI86727.1 aver|OJJ05724.1 awen|OJJ40477.1 azon|OJJ49341.1

Group5498: abra|OJJ74728.1 acar|OOF90031.1 acla|EAW10670.1 afis|EAW24896.1 afum|EAL89550.1 agla|OJJ82120.1 akaw|GAA81889.1 aluc|OJZ92312.1 anid|CBF75655.1 anig|EHA26657.1 aory|EIT72662.1 asyd|OJJ57464.1 ater|EAU36402.1 atub|OJI86741.1 aver|OJJ05716.1 awen|OJJ40489.1 azon|OJJ49352.1

Group5499: abra|OJJ74748.1 acla|EAW10662.1 afis|EAW24905.1 afla|EED46988.1 afum|EAL89558.1 agla|OJJ82129.1 akaw|GAA83663.1 aluc|OJZ92329.1 anid|CBF75659.1 anig|EHA26642.1 asyd|OJJ57477.1 ater|EAU36393.1 atub|OJI86758.1 aver|OJJ05704.1 awen|OJJ40498.1 azon|OJJ49360.1 aory|EIT72554.1

Group5500: abra|OJJ74753.1 acar|OOF95746.1 acla|EAW10657.1 afis|EAW24910.1 afla|EED46995.1 afum|EAL89564.1 agla|OJJ82134.1 akaw|GAA83658.1 aluc|OJZ92334.1 anig|EHA26637.1 aory|EIT72538.1 asyd|OJJ57482.1 ater|EAU36388.1 atub|OJI86763.1 aver|OJJ05699.1 awen|OJJ40505.1 azon|OJJ49365.1

Group5501: akaw|GAA83616.1 aluc|OJZ92377.1 acar|OOF95790.1 acla|EAW10610.1 afis|EAW24957.1  
afla|EED55506.1 afum|EAL89615.2 agla|OJJ82188.1 anid|CBF81665.1 anig|EHA26596.1 aory|EIT80801.1  
asyd|OJJ59552.1 ater|EAU35698.1 atub|OJI86807.1 aver|OJJ02716.1 awen|OJJ40551.1 azon|OJJ49410.1

Group5502: abra|OJJ74801.1 acar|OOF95794.1 acla|EAW10613.1 afis|EAW24954.1 afla|EED55510.1  
afum|EAL89611.1 agla|OJJ82183.1 akaw|GAA83612.1 aluc|OJZ92382.1 anid|CBF81715.1 anig|EHA26593.1  
aory|EIT80800.1 asyd|OJJ59583.1 ater|EAU35704.1 atub|OJI86811.1 awen|OJJ40549.1 azon|OJJ49409.1

Group5503: abra|OJJ74803.1 acla|EAW10615.1 afis|EAW24952.1 afla|EED55512.1 afum|EAL89609.1  
agla|OJJ82185.1 akaw|GAA83610.1 aluc|OJZ92384.1 anid|CBF81719.1 anig|EHA26591.1 aory|EIT80787.1  
asyd|OJJ59585.1 ater|EAU35684.1 atub|OJI86813.1 aver|OJJ02685.1 awen|OJJ40547.1 azon|OJJ49407.1

Group5504: abra|OJJ74832.1 acar|OOF95820.1 acla|EAW11371.1 afis|EAW18124.1 afla|EED58050.1  
afum|EAL87482.1 akaw|GAA83588.1 aluc|OJZ92409.1 anid|CBF75360.1 anig|EHA26556.1 aory|EIT79713.1  
asyd|OJJ59850.1 atub|OJI86837.1 aver|OJJ02437.1 awen|OJJ35526.1 azon|OJJ46958.1 agla|OJJ87018.1

Group5505: abra|OJJ74845.1 acar|OOF95846.1 acla|EAW08543.1 afis|EAW23580.1 afla|EED57485.1  
afum|EAL87885.1 agla|OJJ86846.1 akaw|GAA83577.1 aluc|OJZ92420.1 anig|EHA26546.1 aory|EIT81877.1  
asyd|OJJ62315.1 ater|EAU35364.1 atub|OJI86850.1 aver|OJI96422.1 awen|OJJ39908.1 azon|OJJ50702.1

Group5506: abra|OJJ74846.1 acar|OOF95847.1 acla|EAW08542.1 afis|EAW23579.1 afla|EED57478.1  
afum|EAL87886.1 agla|OJJ86844.1 akaw|GAA83576.1 aluc|OJZ92421.1 anid|CBF89596.1 aory|EIT80108.1  
asyd|OJJ62312.1 ater|EAU35365.1 atub|OJI86851.1 aver|OJI96420.1 awen|OJJ39907.1 azon|OJJ45884.1

Group5507: abra|OJJ74851.1 acar|OOF95852.1 acla|EAW08536.1 afis|EAW23574.1 afla|EED57465.1  
afum|EAL87891.1 agla|OJJ86834.1 akaw|GAA83571.1 aluc|OJZ92427.1 anid|CBF89608.1 anig|EHA26540.1  
aory|EIT80065.1 asyd|OJJ62306.1 atub|OJI86857.1 aver|OJI96414.1 awen|OJJ39902.1 azon|OJJ45878.1

Group5508: abra|OJJ74871.1 acar|OOF95872.1 acla|EAW08509.1 afis|EAW23547.1 afla|EED57442.1  
afum|EAL87919.1 akaw|GAA83549.1 aluc|OJZ92449.1 anid|CBF89652.1 anig|EHA26519.1 aory|EIT80070.1  
asyd|OJJ62283.1 ater|EAU35332.1 atub|OJI86877.1 aver|OJI96391.1 awen|OJJ39878.1 azon|OJJ43225.1

Group5509: abra|OJJ74878.1 acar|OOF95881.1 acla|EAW08492.1 afis|EAW23538.1 afla|EED57436.1  
afum|EAL87928.1 agla|OJJ86793.1 akaw|GAA83542.1 aluc|OJZ92455.1 anid|CBF89666.1 anig|EHA26512.1  
asyd|OJJ62274.1 ater|EAU35324.1 atub|OJI86884.1 aver|OJI96383.1 awen|OJJ39869.1 azon|OJJ43232.1

Group5510: abra|OJJ74885.1 acar|OOF95890.1 acla|EAW08482.1 afis|EAW23528.1 afla|EED57427.1  
afum|EBA27327.1 akaw|GAA83534.1 aluc|OJZ92462.1 anig|EHA26505.1 aory|EIT80107.1 asyd|OJJ62265.1  
ater|EAU35316.1 atub|OJI86891.1 aver|OJI96374.1 awen|OJJ39857.1 azon|OJJ43241.1 agla|OJJ86777.1

Group5511: abra|OJJ74887.1 acar|OOF95891.1 acla|EAW08480.1 afis|EAW23526.1 afla|EED57425.1  
afum|EAL87939.1 agla|OJJ86775.1 akaw|GAA83532.1 aluc|OJZ92464.1 anid|CBF89689.1 anig|EHA26503.1  
asyd|OJJ62263.1 ater|EAU35314.1 atub|OJI86893.1 aver|OJI96372.1 awen|OJJ39855.1 azon|OJJ43246.1

Group5512: abra|OJJ74899.1 acar|OOF95899.1 acla|EAW08473.1 afis|EAW23519.1 afla|EED57419.1  
afum|EAL87945.2 agla|OJJ86766.1 akaw|GAA83522.1 aluc|OJZ92473.1 anid|CBF89700.1 anig|EHA26496.1  
aory|EIT80138.1 asyd|OJJ62256.1 ater|EAU35307.1 atub|OJI86904.1 aver|OJI96365.1 awen|OJJ39844.1

Group5513: abra|OJJ74906.1 acar|OOF90300.1 acla|EAW08466.1 afis|EAW23513.1 afla|EED57411.1  
afum|EAL87950.1 agla|OJJ86761.1 akaw|GAA83516.1 aluc|OJZ92479.1 anid|CBF89707.1 anig|EHA26491.1  
asyd|OJJ62251.1 ater|EAU35302.1 atub|OJI86910.1 aver|OJI96361.1 awen|OJJ39837.1 azon|OJJ43254.1

Group5514: abra|OJJ74908.1 acar|OOF90298.1 acla|EAW08464.1 afis|EAW23509.1 afla|EED57409.1  
afum|EAL87952.1 agla|OJJ86759.1 akaw|GAA83514.1 aluc|OJZ92481.1 aory|EIT80131.1 asyd|OJJ62246.1  
ater|EAU35297.1 atub|OJI86912.1 aver|OJI96356.1 awen|OJJ39835.1 azon|OJJ43257.1 anid|CBF89716.1

Group5515: abra|OJJ74911.1 acar|OOF90295.1 acla|EAW08461.1 afis|EAW23506.1 afla|EED57406.1  
afum|EAL87955.1 agla|OJJ86756.1 akaw|GAA83511.1 aluc|OJZ92484.1 anid|CBF89710.1 aory|EIT80118.1  
asyd|OJJ62249.1 ater|EAU35294.1 atub|OJI86915.1 aver|OJI96359.1 awen|OJJ39832.1 azon|OJJ43260.1

Group5516: abra|OJJ74912.1 acar|OOF90296.1 acla|EAW08460.1 afis|EAW23505.1 afla|EED57405.1  
afum|EAL87956.1 agla|OJJ86752.1 akaw|GAA83510.1 aluc|OJZ92485.1 anid|CBF89721.1 aory|EIT80097.1  
asyd|OJJ62237.1 ater|EAU35293.1 atub|OJI86916.1 aver|OJI96346.1 awen|OJJ39831.1 azon|OJJ46407.1

Group5517: abra|OJJ74921.1 acar|OOF95913.1 acla|EAW08450.1 afis|EAW23495.1 afla|EED57395.1  
afum|EAL87968.1 agla|OJJ86742.1 akaw|GAA83502.1 aluc|OJZ92492.1 anid|CBF89740.1 anig|EHA26480.1  
asyd|OJJ62229.1 ater|EAU35284.1 atub|OJI86925.1 aver|OJI96338.1 awen|OJJ39820.1 azon|OJJ47944.1

Group5518: abra|OJJ74926.1 acla|EAW08443.1 afis|EAW23488.1 afla|EED57389.1 afum|EAL87975.1  
agla|OJJ86735.1 akaw|GAA83497.1 aluc|OJZ92497.1 anid|CBF89749.1 anig|EHA26475.1 aory|EIT80081.1  
asyd|OJJ62222.1 ater|EAU35277.1 atub|OJI86930.1 aver|OJI96332.1 awen|OJJ39811.1 azon|OJJ47937.1

Group5519: abra|OJJ74929.1 acar|OOF95919.1 acla|EAW08440.1 afis|EAW23485.1 afla|EED57384.1 afum|EAL87978.2 akaw|GAA83492.1 aluc|OJZ92500.1 anid|CBF89759.1 anig|EHA26472.1 aory|EIT80161.1 asyd|OJJ62219.1 ater|EAU35273.1 atub|OJI86933.1 aver|OJI96329.1 awen|OJJ39809.1 azon|OJJ47931.1

Group5520: abra|OJJ74937.1 acla|EAW08434.1 afis|EAW23477.1 afla|EED57374.1 afum|EAL87988.1 agla|OJJ86716.1 akaw|GAA83483.1 aluc|OJZ92512.1 anid|CBF89769.1 anig|EHA26463.1 aory|EIT80086.1 asyd|OJJ62213.1 ater|EAU36903.1 atub|OJI86943.1 aver|OJI96324.1 awen|OJJ39803.1 azon|OJJ47924.1

Group5521: abra|OJJ74968.1 acar|OOF97347.1 acla|EAW08406.1 afis|EAW23463.1 afla|EED57337.1 afum|EAL88003.1 agla|OJJ86686.1 akaw|GAA83458.1 aluc|OJZ92538.1 anid|CBF89845.1 aory|EIT74160.1 asyd|OJJ62184.1 ater|EAU37478.1 atub|OJI86974.1 aver|OJI96293.1 awen|OJJ39767.1 azon|OJJ47897.1

Group5522: abra|OJJ74978.1 acar|OOF97342.1 acla|EAW08402.1 afis|EAW23467.1 afum|EAL87999.1 agla|OJJ86681.1 akaw|GAA83454.1 aluc|OJZ92542.1 anid|CBF89837.1 anig|EHA26434.1 aory|EIT74085.1 asyd|OJJ62180.1 ater|EAU37483.1 atub|OJI86978.1 aver|OJI96289.1 awen|OJJ39762.1 azon|OJJ47891.1

Group5523: abra|OJJ75001.1 acar|OOF90038.1 acla|EAW08384.1 afis|EAW23413.1 afla|EED57314.1 afum|EAL88056.1 agla|OJJ86630.1 akaw|GAA88624.1 aluc|OJZ92566.1 anid|CBF89867.1 anig|EHA26415.1 asyd|OJJ62154.1 ater|EAU37509.1 atub|OJI87002.1 aver|OJI96264.1 awen|OJJ39746.1 azon|OJJ47872.1

Group5524: abra|OJJ75013.1 acar|OOF97313.1 acla|EAW08208.1 afis|EAW23242.1 afla|EED55723.1 afum|EAL88240.1 akaw|GAA88636.1 aluc|OJZ92578.1 anid|CBF89889.1 anig|EHA26403.1 aory|EIT83219.1 asyd|OJJ62141.1 ater|EAU37523.1 atub|OJI87014.1 aver|OJI96251.1 awen|OJJ39728.1 azon|OJJ47859.1

Group5525: abra|OJJ75016.1 acar|OOF97310.1 acla|EAW08211.1 afis|EAW23245.1 afla|EED55726.1 afum|EAL88237.1 agla|OJJ86615.1 akaw|GAA88639.1 aluc|OJZ92582.1 anid|CBF84114.1 anig|EHA26400.1 aory|EIT83230.1 asyd|OJJ57104.1 ater|EAU37526.1 atub|OJI87017.1 aver|OJJ03195.1 awen|OJJ39725.1

Group5526: abra|OJJ75021.1 acar|OOF89973.1 acla|EAW08213.1 afis|EAW23247.1 afla|EED55728.1 afum|EAL88234.2 akaw|GAA88641.1 aluc|OJZ92588.1 anid|CBF84110.1 anig|EHA26398.1 aory|EIT83211.1 asyd|OJJ57102.1 ater|EAU37529.1 atub|OJI87020.1 aver|OJJ03197.1 awen|OJJ39722.1 azon|OJJ47848.1

Group5527: abra|OJJ75023.1 acar|OOF97309.1 acla|EAW08215.1 afis|EAW23249.1 afla|EED55730.1 afum|EAL88232.2 agla|OJJ86607.1 akaw|GAA88643.1 aluc|OJZ92590.1 anid|CBF84107.1 anig|EHA26396.1 asyd|OJJ57099.1 ater|EAU37551.1 atub|OJI87022.1 aver|OJJ03200.1 awen|OJJ39715.1 azon|OJJ47846.1

Group5528: abra|OJJ75024.1 acla|EAW08216.1 afis|EAW23250.1 afla|EED55731.1 afum|EAL88231.2 agla|OJJ86604.1 akaw|GAA88644.1 aluc|OJZ92591.1 anid|CBF84105.1 anig|EHA26395.1 aory|EIT83234.1 asyd|OJJ57098.1 ater|EAU37550.1 atub|OJI87024.1 aver|OJJ03201.1 awen|OJJ39714.1 azon|OJJ47845.1

Group5529: abra|OJJ75029.1 acar|OOF97304.1 acla|EAW08220.1 afis|EAW23254.1 afla|EED55735.1 afum|EAL88227.1 agla|OJJ86600.1 akaw|GAA88648.1 aluc|OJZ92596.1 anid|CBF84098.1 anig|EHA26391.1 asyd|OJJ57094.1 ater|EAU37545.1 atub|OJI87030.1 aver|OJJ03205.1 awen|OJJ39710.1 azon|OJJ47841.1

Group5530: abra|OJJ75037.1 acar|OOF97295.1 acla|EAW08230.1 afis|EAW23264.1 afla|EED55745.1 afum|EAL88216.1 agla|OJJ86588.1 akaw|GAA88656.1 aluc|OJZ92605.1 anid|EHA26383.1 aory|EIT83208.1 asyd|OJJ57111.1 ater|EAU37535.1 atub|OJI87039.1 aver|OJJ03188.1 awen|OJJ39700.1 azon|OJJ47830.1

Group5531: abra|OJJ75045.1 acar|OOF89832.1 acla|EAW08234.1 afis|EAW23268.1 afla|EED55714.1 afum|EAL88211.1 agla|OJJ86584.1 akaw|GAA88662.1 aluc|OJZ92611.1 anid|CBF89552.1 anig|EHA26376.1 asyd|OJJ62374.1 ater|EAU37531.1 atub|OJI87045.1 aver|OJI96508.1 awen|OJJ39693.1 azon|OJJ47826.1

Group5532: abra|OJJ75055.1 acar|OOF97282.1 acla|EAW08240.1 afis|EAW23274.1 afla|EED55704.1 afum|EAL88205.1 agla|OJJ86574.1 akaw|GAA88668.1 aluc|OJZ92620.1 anid|CBF89540.1 anig|EHA26368.1 asyd|OJJ62381.1 ater|EAU37559.1 atub|OJI87054.1 aver|OJI96515.1 awen|OJJ39683.1 azon|OJJ47820.1

Group5533: abra|OJJ75058.1 acar|OOF97276.1 acla|EAW08243.1 afis|EAW23277.1 afla|EED55699.1 afum|EAL88202.1 agla|OJJ86569.1 akaw|GAA88671.1 aluc|OJZ92627.1 anid|CBF89532.1 anig|EHA26363.1 asyd|OJJ62385.1 ater|EAU37562.1 atub|OJI87057.1 aver|OJI96519.1 awen|OJJ39679.1 azon|OJJ47817.1

Group5534: abra|OJJ75067.1 acar|OOF97267.1 acla|EAW08248.1 afis|EAW23282.1 afla|EED55693.1 afum|EAL88197.2 agla|OJJ86564.1 akaw|GAA88679.1 aluc|OJZ92633.1 anid|CBF89523.1 anig|EHA26358.1 asyd|OJJ62390.1 ater|EAU37590.1 atub|OJI87064.1 aver|OJI96523.1 awen|OJJ39674.1 azon|OJJ47804.1

Group5535: abra|OJJ75068.1 acar|OOF97266.1 acla|EAW08249.1 afis|EAW23283.1 afla|EED55692.1 afum|EAL88196.2 agla|OJJ86563.1 akaw|GAA88680.1 aluc|OJZ92634.1 anid|CBF89522.1 anig|EHA26357.1 asyd|OJJ62391.1 ater|EAU37589.1 atub|OJI87065.1 aver|OJI96524.1 awen|OJJ39673.1 azon|OJJ47803.1

Group5536: abra|OJJ75073.1 acar|OOF97260.1 acla|EAW08255.1 afis|EAW23289.1 afla|EED55685.1 afum|EAL88190.1 agla|OJJ86556.1 akaw|GAA88686.1 aluc|OJZ92639.1 anid|CBF89511.1 anig|EHA26352.1 aory|EIT77081.1 asyd|OJJ62396.1 ater|EAU37584.1 atub|OJI87070.1 aver|OJI96530.1 awen|OJJ39668.1

Group5537: abra|OJJ75078.1 acar|OOF97255.1 acla|EAW08286.1 afis|EAW23319.1 afla|EED55677.1 afum|EAL88157.1 agla|OJJ86544.1 akaw|GAA88691.1 aluc|OJZ92644.1 anid|CBF89502.1 anig|EHA26348.1 asyd|OJJ62401.1 ater|EAU37580.1 atub|OJI87075.1 aver|OJI96534.1 awen|OJJ39664.1 azon|OJJ47794.1

Group5538: abra|OJJ75079.1 acar|OOF97254.1 acla|EAW08285.1 afis|EAW23318.1 afum|EAL88158.1 agla|OJJ86543.1 akaw|GAA88692.1 aluc|OJZ92645.1 anid|CBF89500.1 anig|EHA26347.1 aory|EIT77080.1 asyd|OJJ62402.1 ater|EAU37579.1 atub|OJI87076.1 aver|OJI96535.1 awen|OJJ39663.1 azon|OJJ47795.1

Group5539: abra|OJJ75083.1 acar|OOF97250.1 acla|EAW08281.1 afis|EAW23314.1 afla|EED55673.1 afum|EAL88163.1 agla|OJJ86539.1 akaw|GAA88696.1 aluc|OJZ92649.1 anid|CBF89493.1 anig|EHA26343.1 asyd|OJJ62407.1 ater|EAU35547.1 atub|OJI87080.1 aver|OJI96540.1 awen|OJJ39659.1 azon|OJJ47787.1

Group5540: abra|OJJ75088.1 acar|OOF97245.1 acla|EAW08276.1 afis|EAW23309.1 afla|EED55664.1 afum|EAL88168.1 agla|OJJ86534.1 akaw|GAA88700.1 aluc|OJZ92654.1 anid|CBF89483.1 anig|EHA26340.1 aory|EIT81812.1 ater|EAU35552.1 atub|OJI87085.1 aver|OJI96547.1 awen|OJJ39654.1 azon|OJJ47782.1

Group5541: abra|OJJ75092.1 acar|OOF97240.1 acla|EAW08272.1 afis|EAW23305.1 afla|EED55660.1 afum|EAL88172.1 agla|OJJ86530.1 akaw|GAA88704.1 aluc|OJZ92658.1 anid|CBF89476.1 anig|EHA26336.1 aory|EIT81785.1 asyd|OJJ62417.1 atub|OJI87089.1 aver|OJI96552.1 awen|OJJ39587.1 azon|OJJ47778.1

Group5542: abra|OJJ75095.1 acar|OOF97237.1 acla|EAW08269.1 afis|EAW23302.1 afla|EED55654.1 afum|EAL88177.1 agla|OJJ86527.1 akaw|GAA88707.1 aluc|OJZ92661.1 anid|CBF89470.1 anig|EHA26333.1 aory|EIT81821.1 asyd|OJJ62420.1 ater|EAU35566.1 atub|OJI87092.1 awen|OJJ39584.1 azon|OJJ47768.1

Group5543: abra|OJJ75100.1 acar|OOF97234.1 acla|EAW08267.1 afis|EAW23300.1 afla|EED55652.1 afum|EAL88179.1 agla|OJJ86509.1 akaw|GAA88709.1 aluc|OJZ92664.1 anid|CBF89467.1 anig|EHA26330.1 asyd|OJJ62422.1 ater|EAU35563.1 atub|OJI87095.1 aver|OJI96559.1 awen|OJJ39582.1 azon|OJJ47770.1

Group5544: abra|OJJ75105.1 acar|OOF97229.1 acla|EAW08263.1 afis|EAW23296.1 afla|EED55646.1 afum|EAL88182.1 agla|OJJ86515.1 akaw|GAA88714.1 aluc|OJZ92670.1 anid|CBF89461.1 anig|EHA26327.1 aory|EIT81781.1 asyd|OJJ62426.1 atub|OJI87099.1 aver|OJI96563.1 awen|OJJ39577.1 azon|OJJ47774.1

Group5545: abra|OJJ75108.1 acar|OOF97225.1 acla|EAW08260.1 afis|EAW23293.1 afla|EED55643.1 afum|EAL88186.1 agla|OJJ86518.1 akaw|GAA88717.1 aluc|OJZ92674.1 anid|CBF89455.1 anig|EHA26324.1 asyd|OJJ62430.1 ater|EAU35556.1 atub|OJI87102.1 aver|OJI96566.1 awen|OJJ39574.1 azon|OJJ47764.1

Group5546: abra|OJJ75112.1 acar|OOF97219.1 acla|EAW08312.1 afis|EAW23328.1 afla|EED55639.1 afum|EAL88151.1 agla|OJJ86523.1 akaw|GAA88722.1 aluc|OJZ92679.1 anid|CBF89444.1 anig|EHA26320.1 asyd|OJJ62437.1 ater|EAU35575.1 atub|OJI87107.1 aver|OJI96573.1 awen|OJJ39566.1 azon|OJJ47759.1

Group5547: abra|OJJ75113.1 acar|OOF97218.1 acla|EAW08311.1 afis|EAW23329.1 afla|EED55638.1 afum|EAL88150.1 agla|OJJ86524.1 akaw|GAA88723.1 aluc|OJZ92680.1 anid|CBF89443.1 anig|EHA26319.1 asyd|OJJ62438.1 ater|EAU35576.1 atub|OJI87108.1 awen|OJJ39565.1 azon|OJJ47758.1 aver|OJI96574.1

Group5548: abra|OJJ75128.1 akaw|GAA88735.1 anig|EHA26307.1 atub|OJI87121.1 asyd|OJJ62447.1 aver|OJI96584.1 acla|EAW08301.1 afla|EED55627.1 afum|EAL88139.1 aory|EIT81809.1 afis|EAW23339.1 anid|CBF89427.1 ater|EAU35584.1 agla|OJJ86491.1 awen|OJJ39555.1 azon|OJJ47752.1 aluc|OJZ92693.1

Group5549: abra|OJJ75132.1 acla|EAW08295.1 afis|EAW23344.1 afla|EED55622.1 afum|EAL88133.1 agla|OJJ86483.1 akaw|GAA88739.1 aluc|OJZ92698.1 anid|CBF89414.1 anig|EHA26301.1 aory|EIT81796.1 asyd|OJJ62454.1 ater|EAU35588.1 atub|OJI87126.1 aver|OJI96589.1 awen|OJJ39548.1 azon|OJJ47745.1

Group5550: abra|OJJ75151.1 acar|OOF97186.1 acla|EAW08326.1 afis|EAW23361.1 afla|EED55597.1 afum|EAL88113.1 agla|OJJ86465.1 aluc|OJZ92719.1 anid|CBF74877.1 anig|EHA26281.1 aory|EIT82694.1 asyd|OJJ60113.1 ater|EAU35612.1 atub|OJI87144.1 aver|OJJ04149.1 awen|OJJ39526.1 azon|OJJ47722.1

Group5551: abra|OJJ75154.1 acla|EAW08329.1 afis|EAW23364.1 afla|EED55594.1 afum|EAL88109.1 agla|OJJ86462.1 akaw|GAA88759.1 aluc|OJZ92722.1 anid|CBF74833.1 anig|EHA26278.1 aory|EIT82699.1 asyd|OJJ60136.1 ater|EAU35615.1 atub|OJI87147.1 aver|OJJ04126.1 awen|OJJ39523.1 azon|OJJ47719.1

Group5552: abra|OJJ75176.1 acar|OOF94603.1 acla|EAW13002.1 afis|EAW17666.1 afla|EED50489.1 afum|EAL91480.2 akaw|GAA88781.1 aluc|OJZ92742.1 anid|CBF90045.1 anig|EHA26261.1 aory|EIT82041.1 asyd|OJJ62057.1 ater|EAU31987.1 atub|OJI87167.1 aver|OJI96163.1 awen|OJJ37175.1 azon|OJJ50874.1

Group5553: abra|OJJ75191.1 acar|OOF94592.1 acla|EAW12988.1 afis|EAW17677.1 afla|EED50474.1 afum|EAL91490.1 agla|OJJ79501.1 akaw|GAA88792.1 aluc|OJZ92755.1 anid|CBF90020.1 anig|EHA26250.1 asyd|OJJ62069.1 ater|EAU31969.1 atub|OJI87181.1 aver|OJI96175.1 awen|OJJ37163.1 azon|OJJ50859.1

Group5554: abra|OJJ75192.1 acar|OOF94591.1 acla|EAW12987.1 afis|EAW17678.1 afla|EED50472.1 afum|EAL91491.1 agla|OJJ79502.1 akaw|GAA91745.1 aluc|OJZ92756.1 anid|CBF90017.1 anig|EHA26249.1 asyd|OJJ62071.1 ater|EAU31968.1 atub|OJI87183.1 aver|OJI96176.1 awen|OJJ37161.1 azon|OJJ50858.1

Group5555: abra|OJJ75202.1 acar|OOF94586.1 acla|EAW12980.1 afis|EAW17684.1 afla|EED50467.1 afum|EAL91498.1 agla|OJJ79495.1 akaw|GAA91753.1 aluc|OJZ92765.1 anid|CBF90004.1 anig|EHA26242.1 asyd|OJJ62077.1 ater|EAU31947.1 atub|OJI87209.1 aver|OJI96184.1 awen|OJJ37155.1 azon|OJJ50853.1

Group5556: abra|OJJ75204.1 acar|OOF94584.1 acla|EAW12978.1 afis|EAW17686.1 afla|EED50465.1 afum|EAL91500.1 agla|OJJ79493.1 akaw|GAA91755.1 aluc|OJZ92767.1 anid|CBF89989.1 anig|EHA26240.1 asyd|OJJ62084.1 ater|EAU31949.1 atub|OJI87211.1 aver|OJI96191.1 awen|OJJ37153.1 azon|OJJ50851.1

Group5557: abra|OJJ75216.1 acar|OOF94568.1 acla|EAW13095.1 afis|EAW17568.1 afla|EED49253.1 afum|EBA27431.1 agla|OJJ81397.1 akaw|GAA91766.1 aluc|OJZ92780.1 anid|CBF90260.1 anig|EHA26230.1 asyd|OJJ61942.1 ater|EAU37005.1 atub|OJI87222.1 aver|OJI96034.1 awen|OJJ37283.1 azon|OJJ50979.1

Group5558: abra|OJJ75243.1 acar|OOF94550.1 acla|EAW13700.1 afis|EAW19906.1 afla|EED45982.1 afum|EAL85001.1 akaw|GAA91786.1 aluc|OJZ92805.1 anid|CBF78482.1 anig|EHA26204.1 aory|EIT75561.1 asyd|OJJ65334.1 ater|EAU31595.1 atub|OJI87248.1 aver|OJI99479.1 awen|OJJ30802.1 azon|OJJ47379.1

Group5559: awen|OJJ30208.1 abra|OJJ77534.1 acar|OOF99192.1 afis|EAW16248.1 afla|EED53312.1 afum|EAL88876.1 agla|OJJ86258.1 akaw|GAA84087.1 aluc|OJZ81002.1 anid|CBF78877.1 anig|EHA19358.1 aory|EIT74927.1 asyd|OJJ64593.1 ater|EAU37458.1 atub|OJI82583.1 aver|OJI98690.1 azon|OJJ43932.1

Group5560: abra|OJJ75273.1 acar|OOF94530.1 afis|EAW16992.1 afla|EED48963.1 afum|EAL86516.1 akaw|GAA91811.1 aluc|OJZ92833.1 anid|CBF77694.1 anig|EHA26176.1 aory|EIT80034.1 asyd|OJJ53081.1 ater|EAU31736.1 atub|OJI87290.1 aver|OJJ03766.1 awen|OJJ35980.1 azon|OJJ50285.1 agla|OJJ80492.1

Group5561: abra|OJJ75340.1 acar|OOF89855.1 acla|EAW07715.1 afum|EAL86289.1 akaw|GAA92033.1 aluc|OJZ92903.1 anid|CBF81870.1 anig|EHA26060.1 asyd|OJJ53488.1 atub|OJI87362.1 aver|OJJ00349.1 awen|OJJ40854.1 azon|OJJ43191.1 azon|OJJ50965.1 ater|EAU31350.1 azon|OJJ42649.1 azon|OJJ45030.1

Group5562: abra|OJJ75378.1 acar|OOF94469.1 acla|EAW12114.1 afis|EAW17271.1 afla|EED48848.1 afum|EAL86688.1 agla|OJJ81075.1 akaw|GAA92740.1 aluc|OJZ92948.1 anid|CBF87533.1 aory|EIT81268.1 asyd|OJJ52987.1 ater|EAU36135.1 atub|OJI87407.1 aver|OJJ08956.1 awen|OJJ35763.1 azon|OJJ45521.1

Group5563: abra|OJJ75379.1 acar|OOF94468.1 acla|EAW12113.1 afis|EAW17272.1 afla|EED48847.1 afum|EAL86689.1 agla|OJJ81076.1 akaw|GAA92741.1 aluc|OJZ92949.1 anid|CBF87535.1 aory|EIT81287.1 asyd|OJJ52988.1 ater|EAU36136.1 atub|OJI87408.1 aver|OJJ08957.1 awen|OJJ35762.1 azon|OJJ45522.1

Group5564: abra|OJJ75380.1 acar|OOF94467.1 acla|EAW12112.1 afis|EAW17273.1 afla|EED48846.1 afum|EAL86691.1 agla|OJJ81077.1 akaw|GAA92742.1 aluc|OJZ92950.1 anid|CBF87537.1 aory|EIT81267.1 asyd|OJJ52989.1 ater|EAU34714.1 atub|OJI87409.1 aver|OJJ08958.1 awen|OJJ35761.1 azon|OJJ45523.1

Group5565: abra|OJJ75386.1 acar|OOF94462.1 acla|EAW12106.1 afis|EAW17279.1 afla|EED48840.1 afum|EAL86697.1 agla|OJJ81083.1 akaw|GAA92748.1 aluc|OJZ92956.1 anid|CBF87547.1 anig|EHA26019.1 asyd|OJJ52995.1 ater|EAU34708.1 atub|OJI87415.1 aver|OJJ08964.1 awen|OJJ35755.1 azon|OJJ45529.1

Group5566: abra|OJJ75387.1 acar|OOF94459.1 acla|EAW12105.1 afis|EAW17281.1 afla|EED48838.1 afum|EAL86699.1 agla|OJJ81084.1 akaw|GAA92750.1 aluc|OJZ92958.1 anid|CBF87551.1 anig|EHA26017.1 asyd|OJJ52997.1 ater|EAU34707.1 atub|OJI87416.1 aver|OJJ08966.1 awen|OJJ35754.1 azon|OJJ45530.1

Group5567: abra|OJJ75403.1 acar|OOF90750.1 acla|EAW13775.1 afis|EAW18357.1 afla|EED48822.1 afum|EAL87721.1 agla|OJJ88028.1 aluc|OJZ88855.1 anid|CBF79354.1 anig|EHA23648.1 aory|EIT73028.1 asyd|OJJ57801.1 atub|OJI85935.1 aver|OJJ04586.1 awen|OJJ35741.1 azon|OJJ43325.1 afum|EAL87720.1

Group5568: abra|OJJ75407.1 acar|OOF90752.1 acla|EAW13779.1 afis|EAW18353.1 afla|EED48818.1 afum|EAL87716.1 agla|OJJ88031.1 aluc|OJZ88858.1 anid|CBF79362.1 anig|EHA23645.1 aory|EIT73012.1 asyd|OJJ57805.1 ater|EAU34687.1 atub|OJI85932.1 aver|OJJ04583.1 awen|OJJ35737.1 azon|OJJ50439.1

Group5569: abra|OJJ75416.1 acar|OOF90761.1 acla|EAW13788.1 afis|EAW18344.1 afla|EED48809.1 afum|EAL87708.1 agla|OJJ88040.1 akaw|GAA84191.1 aluc|OJZ88867.1 anid|CBF79380.1 anig|EHA23636.1 aory|EIT73003.1 asyd|OJJ57814.1 ater|EAU34679.1 atub|OJI85923.1 aver|OJJ04574.1 awen|OJJ35728.1

Group5570: abra|OJJ75418.1 acar|OOF90763.1 acla|EAW13790.1 afis|EAW18342.1 afla|EED48807.1 afum|EAL87705.1 agla|OJJ88042.1 akaw|GAA84193.1 aluc|OJZ88869.1 anid|CBF79376.1 anig|EHA23634.1 aory|EIT73006.1 asyd|OJJ57816.1 ater|EAU34677.1 atub|OJI85921.1 awen|OJJ35726.1 azon|OJJ43314.1

Group5571: abra|OJJ75422.1 acar|OOF90767.1 acla|EAW13794.1 afis|EAW18338.1 afla|EED48802.1 agla|OJJ88046.1 akaw|GAA84197.1 aluc|OJZ88874.1 anid|CBF79389.1 anig|EHA23631.1 aory|EIT72987.1 asyd|OJJ57820.1 ater|EAU34673.1 atub|OJI85917.1 aver|OJJ04571.1 awen|OJJ35721.1 azon|OJJ43311.1

Group5572: abra|OJJ75437.1 acar|OOF90781.1 acla|EAW13825.1 afis|EAW18306.1 afla|EED48775.1 afum|EAL87672.1 agla|OJJ88117.1 akaw|GAA84212.1 aluc|OJZ88890.1 anid|CBF79443.1 anig|EHA23617.1 aory|EIT72975.1 asyd|OJJ57849.1 ater|EAU33316.1 atub|OJI85899.1 aver|OJJ04543.1 awen|OJJ30680.1



Group5573: abra|OJJ75440.1 acar|OOF90784.1 acla|EAW13823.1 afis|EAW18308.1 afum|EAL87674.1  
agla|OJJ88074.1 akaw|GAA84215.1 aluc|OJZ88893.1 anid|CBF79440.1 anig|EHA23613.1 aory|EIT72977.1  
asyd|OJJ57847.1 ater|EAU33318.1 atub|OJI85896.1 aver|OJJ04545.1 awen|OJJ30682.1 azon|OJJ43282.1

Group5574: abra|OJJ75451.1 acar|OOF90795.1 acla|EAW13812.1 afis|EAW18318.1 afla|EED48786.1  
afum|EAL87685.1 agla|OJJ88100.1 akaw|GAA84226.1 aluc|OJZ88906.1 anid|CBF79419.1 anig|EHA23602.1  
asyd|OJJ57835.1 ater|EAU33328.1 atub|OJI85885.1 aver|OJJ04555.1 awen|OJJ30700.1 azon|OJJ43293.1

Group5575: abra|OJJ75453.1 acar|OOF90797.1 acla|EAW13810.1 afis|EAW18320.1 afla|EED48788.1  
agla|OJJ88071.1 akaw|GAA84228.1 aluc|OJZ88908.1 anid|CBF79417.1 anig|EHA23600.1 aory|EIT73031.1  
asyd|OJJ57834.1 ater|EAU33330.1 atub|OJI85883.1 aver|OJJ04556.1 awen|OJJ30702.1 azon|OJJ43294.1

Group5576: abra|OJJ75458.1 acar|OOF90280.1 acla|EAW13807.1 afis|EAW18323.1 afla|EED48791.1  
afum|EAL87690.2 agla|OJJ88068.1 akaw|GAA84233.1 aluc|OJZ88915.1 anid|CBF79412.1 anig|EHA23596.1  
asyd|OJJ57831.1 ater|EAU33333.1 atub|OJI85877.1 aver|OJJ04559.1 awen|OJJ30705.1 azon|OJJ43299.1

Group5577: abra|OJJ75469.1 acar|OOF90804.1 acla|EAW13835.1 afis|EAW18296.1 afla|EED48762.1  
afum|EAL87662.1 agla|OJJ88127.1 akaw|GAA84241.1 aluc|OJZ88926.1 anid|CBF79468.1 anig|EHA23587.1  
asyd|OJJ57864.1 ater|EAU33304.1 atub|OJI85866.1 aver|OJJ04529.1 awen|OJJ30670.1 azon|OJJ43270.1

Group5578: abra|OJJ75489.1 acar|OOF90821.1 acla|EAW11220.1 afis|EAW18283.1 afla|EED48750.1  
afum|EAL87649.1 agla|OJJ88144.1 aluc|OJZ88948.1 anid|CBF79485.1 anig|EHA23573.1 aory|EIT73079.1  
asyd|OJJ57874.1 ater|EAU33289.1 atub|OJI85841.1 aver|OJJ04520.1 awen|OJJ30654.1 azon|OJJ47960.1

Group5579: abra|OJJ75524.1 acar|OOF90851.1 acla|EAW09311.1 afis|EAW21834.1 afla|EED46541.1  
afum|EAL92849.1 agla|OJJ84310.1 akaw|GAA84287.1 aluc|OJZ88981.1 anig|EHA23545.1 aory|EIT77894.1  
asyd|OJJ61231.1 ater|EAU38509.1 atub|OJI85808.1 aver|OJJ00554.1 awen|OJJ34107.1 azon|OJJ44234.1

Group5580: abra|OJJ75547.1 acar|OOF90867.1 acla|EAW09318.1 afis|EAW21827.1 afla|EED46549.1  
afum|EAL92842.1 agla|OJJ84317.1 akaw|GAA84302.1 aluc|OJZ88997.1 anid|CBF76668.1 anig|EHA23531.1  
asyd|OJJ61218.1 ater|EAU38503.1 atub|OJI85792.1 aver|OJJ00542.1 awen|OJJ34100.1 azon|OJJ44244.1

Group5581: abra|OJJ75550.1 acar|OOF90869.1 afis|EAW21823.1 afla|EED46555.1 afum|EAL92839.1  
agla|OJJ84319.1 akaw|GAA84305.1 aluc|OJZ89000.1 anid|CBF86661.1 anig|EHA23528.1 aory|EIT77858.1  
asyd|OJJ61620.1 ater|EAU38497.1 atub|OJI85789.1 aver|OJJ00944.1 awen|OJJ34097.1 azon|OJJ44247.1

Group5582: abra|OJJ75551.1 acar|OOF90871.1 acla|EAW09323.1 afis|EAW21822.1 afla|EED46557.1  
afum|EAL92838.1 agla|OJJ84320.1 akaw|GAA84306.1 aluc|OJZ89001.1 anid|CBF76662.1 anig|EHA23527.1  
asyd|OJJ61214.1 ater|EAU38496.1 atub|OJI85788.1 aver|OJJ00538.1 awen|OJJ34096.1 azon|OJJ44248.1

Group5583: abra|OJJ75580.1 acar|OOF90898.1 acla|EAW09338.1 afis|EAW21793.1 afla|EED46606.1  
afum|EAL92818.1 agla|OJJ83098.1 akaw|GAA84332.1 aluc|OJZ89031.1 anid|CBF76621.1 anig|EHA23503.1  
aory|EIT77822.1 asyd|OJJ61191.1 ater|EAU38472.1 atub|OJI85760.1 aver|OJJ00515.1 awen|OJJ34077.1

Group5584: abra|OJJ75591.1 acar|OOG00237.1 acla|EAW09331.1 afis|EAW21787.1 afla|EED46609.1  
afum|EAL92814.1 agla|OJJ84336.1 akaw|GAA84343.1 aluc|OJZ89043.1 anid|CBF76619.1 anig|EHA23492.1  
asyd|OJJ61190.1 ater|EAU38470.1 atub|OJI85744.1 aver|OJJ00514.1 awen|OJJ34073.1 azon|OJJ48156.1

Group5585: abra|OJJ75604.1 acar|OOG00233.1 acla|EAW09366.1 afis|EAW21771.1 afla|EED46329.1  
afum|EAL92800.1 agla|OJJ84379.1 akaw|GAA84355.1 aluc|OJZ89056.1 anid|CBF83760.1 anig|EHA23485.1  
asyd|OJJ60862.1 ater|EAU38447.1 atub|OJI85731.1 aver|OJJ00188.1 awen|OJJ34058.1 azon|OJJ48174.1

Group5586: abra|OJJ75613.1 acar|OOG00223.1 acla|EAW09365.1 afis|EAW21772.1 afla|EED46338.1  
afum|EAL92801.1 agla|OJJ84352.1 akaw|GAA84362.1 aluc|OJZ89066.1 anid|CBF76593.1 anig|EHA23470.1  
aory|EIT81227.1 asyd|OJJ61176.1 atub|OJI85722.1 aver|OJJ00502.1 awen|OJJ34059.1 azon|OJJ48173.1

Group5587: abra|OJJ75617.1 acla|EAW09361.1 afis|EAW21776.1 afla|EED46342.1 afum|EAL92805.1  
agla|OJJ84348.1 akaw|GAA84366.1 aluc|OJZ89070.1 anid|CBF76601.1 anig|EHA23466.1 aory|EIT81196.1  
asyd|OJJ61181.1 ater|EAU38463.1 atub|OJI85718.1 aver|OJJ00506.1 awen|OJJ34064.1 azon|OJJ48168.1

Group5588: abra|OJJ75623.1 acar|OOG00219.1 acla|EAW09358.1 afis|EAW21779.1 afla|EED46346.1  
afum|EAL92808.1 akaw|GAA84370.1 aluc|OJZ89075.1 anid|CBF76605.1 anig|EHA23463.1 aory|EIT81237.1  
asyd|OJJ61184.1 ater|EAU38461.1 atub|OJI85711.1 aver|OJJ00508.1 awen|OJJ34068.1 azon|OJJ48161.1

Group5589: abra|OJJ75627.1 acla|EAW09466.1 afis|EAW21670.1 afla|EED57934.1 afum|EAL92705.1  
agla|OJJ79744.1 akaw|GAA84374.1 aluc|OJZ89078.1 anid|CBF83584.1 anig|EHA23459.1 aory|EIT82346.1  
asyd|OJJ60780.1 ater|EAU38354.1 atub|OJI85707.1 aver|OJJ00113.1 awen|OJJ33934.1 azon|OJJ48641.1

Group5590: abra|OJJ75629.1 acar|OOG00206.1 acla|EAW09464.1 afis|EAW21672.1 afum|EAL92707.1  
agla|OJJ79746.1 akaw|GAA84376.1 aluc|OJZ89080.1 anid|CBF83587.1 anig|EHA23457.1 aory|EIT82330.1  
asyd|OJJ60778.1 ater|EAU38356.1 atub|OJI85705.1 aver|OJJ00111.1 awen|OJJ33937.1 azon|OJJ48630.1

Group5591: abra|OJJ75643.1 acla|EAW09455.1 afis|EAW21682.1 afla|EED57949.1 afum|EAL92716.2  
agla|OJJ79919.1 akaw|GAA84388.1 aluc|OJZ89092.1 anid|CBF83604.1 anig|EHA23445.1 aory|EIT82329.1  
asyd|OJJ60767.1 ater|EAU38366.1 atub|OJI85689.1 aver|OJJ00101.1 awen|OJJ33949.1 azon|OJJ48621.1

Group5592: abra|OJJ75653.1 acla|EAW09447.1 afis|EAW21689.1 afla|EED57959.1 afum|EAL92723.2  
agla|OJJ79911.1 akaw|GAA84396.1 aluc|OJZ89102.1 anid|CBF83616.1 anig|EHA23437.1 aory|EIT79725.1  
asyd|OJJ60759.1 ater|EAU38374.1 atub|OJI85679.1 aver|OJJ00093.1 awen|OJJ33958.1 azon|OJJ48610.1

Group5593: abra|OJJ75655.1 acla|EAW09445.1 afis|EAW21691.1 afla|EED57961.1 afum|EAL92725.1  
agla|OJJ79909.1 akaw|GAA84398.1 aluc|OJZ89104.1 anid|CBF83619.1 anig|EHA23435.1 aory|EIT79711.1  
asyd|OJJ60757.1 ater|EAU38376.1 atub|OJI85677.1 aver|OJJ00091.1 awen|OJJ33960.1 azon|OJJ48608.1

Group5594: abra|OJJ75660.1 acar|OOG00183.1 acla|EAW09440.1 afis|EAW21696.1 afla|EED57965.1  
afum|EAL92730.1 agla|OJJ79903.1 akaw|GAA84402.1 aluc|OJZ89110.1 anid|CBF83626.1 anig|EHA23431.1  
asyd|OJJ60753.1 ater|EAU38381.1 atub|OJI85673.1 aver|OJJ00087.1 awen|OJJ33965.1 azon|OJJ48604.1

Group5595: abra|OJJ75663.1 acar|OOG00182.1 acla|EAW09438.1 afis|EAW21698.1 afla|EED57967.1  
afum|EAL92732.1 agla|OJJ79900.1 akaw|GAA84404.1 aluc|OJZ89114.1 anid|CBF83630.1 anig|EHA23429.1  
asyd|OJJ60751.1 ater|EAU38383.1 atub|OJI85670.1 aver|OJJ00084.1 awen|OJJ33967.1 azon|OJJ48599.1

Group5596: abra|OJJ75666.1 acar|OOG00178.1 acla|EAW09435.1 afis|EAW21701.1 afla|EED57970.1  
afum|EAL92735.1 agla|OJJ79897.1 akaw|GAA84407.1 aluc|OJZ89117.1 anid|CBF83635.1 anig|EHA23426.1  
asyd|OJJ60783.1 ater|EAU38386.1 atub|OJI85667.1 aver|OJJ00116.1 awen|OJJ33971.1 azon|OJJ48588.1

Group5597: abra|OJJ75676.1 acla|EAW09429.1 afis|EAW21707.1 afla|EED57979.1 afum|EAL92742.1  
agla|OJJ79894.1 akaw|GAA84417.1 aluc|OJZ89126.1 anid|CBF83651.1 anig|EHA23417.1 aory|EIT79779.1  
asyd|OJJ60793.1 ater|EAU38395.1 atub|OJI85658.1 aver|OJJ00126.1 awen|OJJ33983.1 azon|OJJ48576.1

Group5598: abra|OJJ75681.1 acar|OOG00167.1 acla|EAW09421.1 afis|EAW21715.1 afla|EED57985.1  
afum|EBA27470.1 agla|OJJ79884.1 akaw|GAA84421.1 aluc|OJZ89132.1 anig|EHA23413.1 aory|EIT79799.1  
asyd|OJJ60797.1 ater|EAU38400.1 atub|OJI85654.1 aver|OJJ00130.1 awen|OJJ33987.1 azon|OJJ48566.1

Group5599: abra|OJJ75693.1 acar|OOG00159.1 acla|EAW07961.1 afis|EAW22996.1 afla|EED49502.1  
agla|OJJ83288.1 akaw|GAA84430.1 aluc|OJZ89145.1 anid|CBF80648.1 anig|EHA23403.1 aory|EIT82603.1  
asyd|OJJ54616.1 ater|EAU29307.1 atub|OJI85643.1 aver|OJJ07543.1 awen|OJJ38565.1 azon|OJJ43626.1

Group5600: abra|OJJ75725.1 acar|OOG00133.1 acla|EAW09381.1 afis|EAW21754.1 afla|EED58024.1  
afum|EAL92784.1 agla|OJJ84399.1 akaw|GAA84461.1 aluc|OJZ89177.1 anid|CBF83689.1 anig|EHA23378.1  
asyd|OJJ60818.1 ater|EAU38436.1 atub|OJI85612.1 aver|OJJ00144.1 awen|OJJ34038.1 azon|OJJ48208.1

Group5601: abra|OJJ75782.1 acla|EAW14900.1 afis|EAW24422.1 afla|EED47746.1 afum|EAL86090.1  
agla|OJJ79222.1 akaw|GAA84499.1 aluc|OJZ89224.1 anid|CBF73788.1 anig|EHA23337.1 aory|EIT77143.1  
asyd|OJJ56602.1 ater|EAU30306.1 atub|OJI85567.1 aver|OJJ06122.1 awen|OJJ32787.1 azon|OJJ49043.1

Group5602: abra|OJJ75803.1 acar|OOG00073.1 acla|EAW14880.1 afis|EAW24398.1 afla|EED47813.1  
afum|EAL86069.1 agla|OJJ78879.1 akaw|GAA84519.1 aluc|OJZ89251.1 anid|CBF73726.1 anig|EHA23316.1  
aory|EIT77134.1 asyd|OJJ56635.1 atub|OJI85547.1 aver|OJJ06091.1 awen|OJJ32807.1 azon|OJJ49029.1

Group5603: abra|OJJ75818.1 acar|OOG00057.1 acla|EAW14857.1 afis|EAW24384.1 afla|EED47825.1  
afum|EAL86056.1 akaw|GAA84532.1 aluc|OJZ89265.1 anid|CBF73699.1 anig|EHA23303.1 aory|EIT77173.1  
asyd|OJJ56649.1 ater|EAU30351.1 atub|OJI85534.1 aver|OJJ06077.1 awen|OJJ32827.1 azon|OJJ49010.1

Group5604: abra|OJJ75826.1 acar|OOG00053.1 acla|EAW14851.1 afis|EAW24378.1 afla|EED47833.1  
afum|EAL86050.1 agla|OJJ83264.1 akaw|GAA84537.1 aluc|OJZ89270.1 anid|CBF73672.1 anig|EHA23299.1  
aory|EIT77204.1 asyd|OJJ56663.1 atub|OJI85529.1 aver|OJJ06061.1 awen|OJJ32834.1 azon|OJJ49001.1

Group5605: abra|OJJ75830.1 acar|OOG00050.1 acla|EAW14848.1 afis|EAW24375.1 afla|EED47836.1  
afum|EAL86047.1 agla|OJJ83261.1 akaw|GAA84540.1 aluc|OJZ89273.1 anig|EHA23296.1 aory|EIT77176.1  
asyd|OJJ56658.1 ater|EAU30361.1 atub|OJI85526.1 aver|OJJ06067.1 awen|OJJ32837.1 azon|OJJ48997.1

Group5606: abra|OJJ75842.1 acar|OOG00046.1 acla|EAW14845.1 afis|EAW24372.1 afla|EED47842.1  
afum|EAL86044.1 agla|OJJ83257.1 akaw|GAA84552.1 aluc|OJZ89284.1 anid|CBF73686.1 anig|EHA23282.1  
aory|EIT77226.1 asyd|OJJ56655.1 ater|EAU30365.1 atub|OJI85515.1 aver|OJJ06070.1 awen|OJJ32842.1

Group5607: abra|OJJ75853.1 acla|EAW14834.1 afis|EAW24363.1 afla|EED47850.1 afum|EAL86034.1  
agla|OJJ83248.1 akaw|GAA84558.1 aluc|OJZ89290.1 anid|CBF73930.1 anig|EHA23272.1 aory|EIT77222.1  
asyd|OJJ53676.1 ater|EAU30375.1 atub|OJI85509.1 aver|OJJ07792.1 awen|OJJ32868.1 azon|OJJ48990.1

Group5608: abra|OJJ75857.1 acar|OOG00039.1 acla|EAW14830.1 afis|EAW24359.1 afla|EED47854.1  
afum|EAL86029.1 agla|OJJ83244.1 akaw|GAA84562.1 aluc|OJZ89295.1 anid|CBF73923.1 anig|EHA23268.1  
asyd|OJJ53680.1 ater|EAU30379.1 atub|OJI85505.1 aver|OJJ07796.1 awen|OJJ32862.1 azon|OJJ48986.1

Group5609: abra|OJJ75861.1 acar|OOG00035.1 acla|EAW14828.1 afis|EAW24357.1 afla|EED47857.1 afum|EAL86027.1 agla|OJJ83239.1 akaw|GAA84566.1 aluc|OJZ89299.1 anid|CBF73919.1 anig|EHA23264.1 aory|EIT77243.1 asyd|OJJ53682.1 ater|EAU30382.1 atub|OJI85499.1 aver|OJJ07799.1 awen|OJJ32860.1

Group5610: abra|OJJ75862.1 acar|OOG00034.1 acla|EAW14827.1 afis|EAW24356.1 afla|EED47906.1 afum|EAL86026.2 akaw|GAA84568.1 aluc|OJZ89303.1 anid|CBF73945.1 anig|EHA23263.1 aory|EIT83365.1 asyd|OJJ53697.1 ater|EAU30390.1 atub|OJI85496.1 aver|OJJ07813.1 awen|OJJ32870.1 azon|OJJ48983.1

Group5611: abra|OJJ75868.1 acar|OOG00026.1 acla|EAW09929.1 afis|EAW21177.1 afla|EED54764.1 afum|EAL92197.1 agla|OJJ80000.1 akaw|GAA84574.1 aluc|OJZ89310.1 anid|CBF83304.1 anig|EHA23256.1 aory|EIT79450.1 asyd|OJJ60554.1 atub|OJI85489.1 aver|OJI99880.1 awen|OJJ36516.1 azon|OJJ44392.1

Group5612: abra|OJJ75894.1 acar|OOG00009.1 acla|EAW09895.1 afis|EAW21231.1 afum|EAL92243.1 agla|OJJ78493.1 akaw|GAA84600.1 aluc|OJZ89345.1 anid|CBF83275.1 anig|EHA23237.1 aory|EIT79428.1 asyd|OJJ60571.1 ater|EAU35864.1 atub|OJI85454.1 aver|OJI99896.1 awen|OJJ36541.1 azon|OJJ44347.1

Group5613: abra|OJJ75901.1 acar|OOG00004.1 acla|EAW09889.1 afis|EAW21237.1 afla|EED54797.1 afum|EAL92249.1 agla|OJJ78499.1 akaw|GAA84607.1 aluc|OJZ89351.1 anid|CBF83268.1 anig|EHA23230.1 asyd|OJJ60577.1 ater|EAU35878.1 atub|OJI85447.1 aver|OJI99903.1 awen|OJJ36548.1 azon|OJJ44341.1

Group5614: abra|OJJ75913.1 acar|OOF99991.1 afla|EED54809.1 akaw|GAA84618.1 aluc|OJZ89362.1 aory|EIT79401.1 ater|EAU35889.1 atub|OJI85436.1 awen|OJJ36562.1 azon|OJJ44326.1 acla|EAW09877.1 afis|EAW21249.1 agla|OJJ87507.1 anid|CBF83244.1 asyd|OJJ60596.1 aver|OJI99919.1 afum|EAL92262.1

Group5615: abra|OJJ75930.1 acar|OOF99980.1 acla|EAW09863.1 afis|EAW21263.1 afla|EED54822.1 afum|EAL92278.1 akaw|GAA84631.1 aluc|OJZ89377.1 anid|CBF83338.1 anig|EHA23206.1 aory|EIT79385.1 asyd|OJJ60608.1 ater|EAU35900.1 atub|OJI85421.1 aver|OJI99932.1 awen|OJJ36580.1 azon|OJJ44310.1

Group5616: abra|OJJ75943.1 acla|EAW09850.1 afis|EAW21285.1 afla|EED54836.1 afum|EAL92302.1 agla|OJJ87469.1 akaw|GAA84645.1 aluc|OJZ89390.1 anid|CBF83365.1 anig|EHA23194.1 aory|EIT79369.1 asyd|OJJ60621.1 ater|EAU35917.1 atub|OJI85407.1 aver|OJI99945.1 awen|OJJ39414.1 azon|OJJ44297.1

Group5617: abra|OJJ75999.1 acar|OOF99925.1 acla|EAW09805.1 afis|EAW21331.1 afla|EED57289.1 afum|EAL92349.1 agla|OJJ87408.1 akaw|GAA88960.1 aluc|OJZ89445.1 anid|CBF83433.1 anig|EHA23141.1 asyd|OJJ60663.1 ater|EAU35957.1 atub|OJI85348.1 aver|OJI99986.1 awen|OJJ39367.1 azon|OJJ51707.1

Group5618: abra|OJJ76002.1 acar|OOF99923.1 acla|EAW09803.1 afis|EAW21333.1 afla|EED57291.1 afum|EAL92351.1 agla|OJJ87401.1 akaw|GAA88958.1 aluc|OJZ89447.1 anid|CBF83437.1 anig|EHA23139.1 aory|EIT73967.1 asyd|OJJ60665.1 atub|OJI85346.1 aver|OJI99988.1 awen|OJJ39365.1 azon|OJJ51704.1

Group5619: abra|OJJ76006.1 acar|OOF99918.1 acla|EAW09799.1 afis|EAW21337.1 afla|EED57295.1 afum|EAL92355.2 agla|OJJ87397.1 akaw|GAA88954.1 aluc|OJZ89452.1 anid|CBF83883.1 anig|EHA23135.1 asyd|OJJ60941.1 ater|EAU35962.1 atub|OJI85342.1 aver|OJJ00267.1 awen|OJJ39361.1 azon|OJJ51700.1

Group5620: abra|OJJ76050.1 acar|OOF99881.1 acla|EAW09781.1 afis|EAW21357.1 afla|EED55772.1 afum|EAL92372.1 agla|OJJ87379.1 akaw|GAA88915.1 aluc|OJZ89506.1 anid|CBF76261.1 anig|EHA23094.1 aory|EIT76646.1 asyd|OJJ60970.1 atub|OJI85297.1 aver|OJJ00295.1 awen|OJJ39341.1 azon|OJJ51687.1

Group5621: abra|OJJ76052.1 acar|OOF99875.1 acla|EAW09765.1 afis|EAW21372.1 afla|EED55790.1 afum|EAL92389.1 agla|OJJ85497.1 akaw|GAA88913.1 aluc|OJZ89508.1 anid|CBF83865.1 anig|EHA23092.1 aory|EIT76543.1 asyd|OJJ60931.1 atub|OJI85295.1 aver|OJJ00257.1 awen|OJJ39325.1 azon|OJJ51670.1

Group5622: abra|OJJ76054.1 acla|EAW09764.1 afis|EAW21373.1 afla|EED55791.1 afum|EAL92390.1 agla|OJJ85498.1 akaw|GAA88911.1 aluc|OJZ89510.1 anid|CBF83863.1 anig|EHA23090.1 aory|EIT76741.1 asyd|OJJ60929.1 ater|EAU35184.1 atub|OJI85293.1 aver|OJJ00255.1 awen|OJJ39324.1 azon|OJJ51669.1

Group5623: abra|OJJ76075.1 acar|OOF99850.1 acla|EAW09746.1 afis|EAW21396.1 afla|EED55815.1 afum|EAL92410.1 agla|OJJ85521.1 akaw|GAA88892.1 aluc|OJZ89531.1 anid|CBF83835.1 anig|EHA23071.1 aory|EIT76634.1 asyd|OJJ60911.1 atub|OJI85274.1 aver|OJJ00238.1 awen|OJJ39307.1 azon|OJJ51547.1

Group5624: abra|OJJ76085.1 acar|OOF99840.1 acla|EAW09736.1 afis|EAW21405.1 afla|EED55827.1 afum|EAL92419.1 agla|OJJ85534.1 akaw|GAA88881.1 aluc|OJZ89543.1 anid|CBF83813.1 anig|EHA23063.1 asyd|OJJ60897.1 ater|EAU35145.1 atub|OJI85264.1 aver|OJJ00222.1 awen|OJJ39298.1 azon|OJJ51555.1

Group5625: abra|OJJ76086.1 acar|OOF99838.1 acla|EAW09735.1 afis|EAW21406.1 afla|EED55828.1 afum|EAL92420.1 agla|OJJ85535.1 akaw|GAA88880.1 aluc|OJZ89544.1 anid|CBF83812.1 anig|EHA23062.1 asyd|OJJ60896.1 ater|EAU35142.1 atub|OJI85262.1 aver|OJJ00221.1 awen|OJJ39297.1 azon|OJJ51558.1

Group5626: abra|OJJ76089.1 acla|EAW09733.1 afis|EAW21408.1 afla|EED55830.1 afum|EAL92422.1 agla|OJJ85538.1 akaw|GAA88878.1 aluc|OJZ89546.1 anid|CBF83808.1 anig|EHA23060.1 aory|EIT76672.1 asyd|OJJ60894.1 ater|EAU35140.1 atub|OJI85260.1 aver|OJJ00219.1 awen|OJJ39293.1 azon|OJJ51561.1

Group5627: abra|OJJ76093.1 acar|OOF99832.1 acla|EAW09726.1 afis|EAW21412.1 afla|EED55837.1 afum|EAL92426.1 agla|OJJ85545.1 akaw|GAA88874.1 aluc|OJZ89549.1 anid|CBF83796.1 anig|EHA23057.1 aory|EIT76701.1 asyd|OJJ60886.1 atub|OJI85257.1 aver|OJJ00210.1 awen|OJJ39287.1 azon|OJJ51567.1

Group5628: abra|OJJ76097.1 acla|EAW09721.1 afis|EAW21420.1 afla|EED55845.1 afum|EAL92435.1 agla|OJJ85554.1 akaw|GAA88869.1 aluc|OJZ89553.1 anid|CBF83789.1 anig|EHA23053.1 aory|EIT76872.1 asyd|OJJ60879.1 ater|EAU35129.1 atub|OJI85252.1 aver|OJJ00205.1 awen|OJJ39283.1 azon|OJJ51571.1

Group5629: abra|OJJ76101.1 acar|OOF99826.1 acla|EAW09717.1 afis|EAW21424.1 afla|EED55849.1 afum|EAL92439.1 agla|OJJ85561.1 akaw|GAA88865.1 aluc|OJZ89557.1 anig|EHA23049.1 aory|EIT76560.1 asyd|OJJ60875.1 ater|EAU35125.1 atub|OJI85247.1 aver|OJJ00200.1 awen|OJJ39277.1 azon|OJJ51575.1

Group5630: abra|OJJ76119.1 acar|OOF99806.1 acla|EAW09700.1 afis|EAW21439.1 afla|EED55867.1 afum|EAL92455.1 agla|OJJ85584.1 akaw|GAA88848.1 aluc|OJZ89576.1 anid|CBF76581.1 aory|EIT76843.1 asyd|OJJ61170.1 ater|EAU35106.1 atub|OJI85228.1 aver|OJJ00495.1 awen|OJJ39259.1 azon|OJJ51596.1

Group5631: abra|OJJ76135.1 acar|OOF99788.1 acla|EAW09683.1 afis|EAW21456.1 afla|EED55886.1 afum|EAL92475.1 agla|OJJ85604.1 akaw|GAA88832.1 aluc|OJZ89598.1 anid|CBF76544.1 anig|EHA23015.1 asyd|OJJ61153.1 ater|EAU35079.1 atub|OJI85206.1 aver|OJJ00475.1 awen|OJJ39244.1 azon|OJJ51611.1

Group5632: abra|OJJ76139.1 acla|EAW09680.1 afis|EAW21459.1 afla|EED55890.1 afum|EAL92478.1 agla|OJJ85607.1 akaw|GAA88829.1 aluc|OJZ89602.1 anid|CBF76538.1 anig|EHA23013.1 aory|EIT76890.1 asyd|OJJ61150.1 ater|EAU35076.1 atub|OJI85202.1 aver|OJJ00472.1 awen|OJJ39240.1 azon|OJJ51614.1

Group5633: abra|OJJ76147.1 acar|OOF99779.1 acla|EAW09672.1 afis|EAW21466.1 afla|EED55899.1 afum|EAL92486.1 agla|OJJ85616.1 akaw|GAA82097.1 aluc|OJZ92082.1 anid|CBF76525.1 aory|EIT76748.1 asyd|OJJ61142.1 atub|OJI86512.1 aver|OJJ00464.1 awen|OJJ39231.1 ater|EAU35067.1 azon|OJJ51624.1

Group5634: abra|OJJ76159.1 acar|OOF99773.1 acla|EAW09659.1 afis|EAW21480.1 afla|EED55912.1 afum|EAL92500.1 agla|OJJ85634.1 akaw|GAA92403.1 aluc|OJZ83264.1 anid|CBF76504.1 anig|EHA21117.1 asyd|OJJ61131.1 ater|EAU35057.1 atub|OJI87673.1 aver|OJJ00452.1 awen|OJJ39217.1 azon|OJJ51637.1

Group5635: abra|OJJ76184.1 acla|EAW09642.1 afis|EAW21498.1 afla|EED55934.1 afum|EAL92517.1 agla|OJJ85661.1 akaw|GAA82129.1 aluc|OJZ92045.1 anid|CBF76464.1 anig|EHA22975.1 aory|EIT76682.1 asyd|OJJ61113.1 ater|EAU35040.1 atub|OJI86477.1 aver|OJJ00429.1 awen|OJJ39197.1 azon|OJJ51520.1

Group5636: abra|OJJ76186.1 acar|OOF99756.1 acla|EAW09641.1 afis|EAW21499.1 afla|EED55935.1 afum|EAL92518.1 agla|OJJ85662.1 akaw|GAA82130.1 aluc|OJZ92043.1 anid|CBF76460.1 aory|EIT76668.1 asyd|OJJ61112.1 ater|EAU35039.1 atub|OJI86476.1 aver|OJJ00428.1 awen|OJJ39196.1 azon|OJJ51521.1

Group5637: abra|OJJ76198.1 acar|OOF99746.1 acla|EAW13919.1 afis|EAW18630.1 afla|EED52710.1 afum|EAL93342.1 agla|OJJ81255.1 akaw|GAA82140.1 aluc|OJZ92031.1 anid|CBF70476.1 anig|EHA22964.1 asyd|OJJ58593.1 ater|EAU38281.1 atub|OJI86464.1 aver|OJJ01195.1 awen|OJJ32097.1 azon|OJJ46676.1

Group5638: abra|OJJ76199.1 acar|OOF99745.1 acla|EAW13920.1 afis|EAW18631.1 afla|EED52711.1 afum|EAL93343.2 agla|OJJ82446.1 akaw|GAA82142.1 aluc|OJZ92029.1 anid|CBF70475.1 anig|EHA22963.1 asyd|OJJ58594.1 ater|EAU38280.1 atub|OJI86463.1 aver|OJJ01196.1 awen|OJJ32098.1 azon|OJJ46678.1

Group5639: abra|OJJ76203.1 acla|EAW13924.1 afis|EAW18635.1 afla|EED52706.1 afum|EAL93348.2 agla|OJJ82441.1 akaw|GAA82146.1 aluc|OJZ92025.1 anid|CBF70464.1 anig|EHA22959.1 aory|EIT74268.1 asyd|OJJ58599.1 ater|EAU38276.1 atub|OJI86459.1 aver|OJJ01201.1 awen|OJJ32102.1 azon|OJJ46684.1

Group5640: abra|OJJ76205.1 acla|EAW13926.1 afis|EAW18637.1 afla|EED52704.1 afum|EAL93350.1 agla|OJJ82438.1 akaw|GAA82148.1 aluc|OJZ92023.1 anid|CBF70459.1 anig|EHA22957.1 aory|EIT74180.1 asyd|OJJ58601.1 ater|EAU38274.1 atub|OJI86456.1 aver|OJJ01203.1 awen|OJJ32105.1 azon|OJJ46686.1

Group5641: abra|OJJ76216.1 acar|OOF99734.1 acla|EAW13932.1 afis|EAW18643.1 afla|EED52693.1 afum|EAL93357.1 agla|OJJ82431.1 akaw|GAA82155.1 aluc|OJZ92013.1 anid|CBF70443.1 anig|EHA22952.1 asyd|OJJ58609.1 ater|EAU38268.1 atub|OJI86448.1 aver|OJJ01214.1 awen|OJJ32111.1 azon|OJJ46692.1

Group5642: abra|OJJ76218.1 acar|OOF99733.1 acla|EAW13933.1 afis|EAW18644.1 afla|EED52694.1 afum|EAL93359.1 agla|OJJ82430.1 akaw|GAA82156.1 aluc|OJZ92012.1 anid|CBF70441.1 anig|EHA22951.1 asyd|OJJ58610.1 ater|EAU38267.1 atub|OJI86447.1 aver|OJJ01215.1 awen|OJJ32112.1 azon|OJJ46693.1

Group5643: abra|OJJ76224.1 acar|OOF99471.1 acla|EAW14364.1 afis|EAW18914.1 afla|EED50898.1 afum|EBA27497.1 agla|OJJ81518.1 akaw|GAA82160.1 aluc|OJZ92007.1 anid|CBF69693.1 aory|EIT79056.1 asyd|OJJ59054.1 ater|EAU38081.1 atub|OJI86442.1 aver|OJJ01648.1 awen|OJJ31507.1 azon|OJJ47226.1

Group5644: abra|OJJ76235.1 acla|EAW14372.1 afis|EAW18921.1 afla|EED50907.1 afum|EAL93652.1 agla|OJJ81522.1 akaw|GAA82170.1 aluc|OJZ91995.1 anid|CBF69680.1 anig|EHA22940.1 aory|EIT78977.1 asyd|OJJ59061.1 ater|EAU38094.1 atub|OJI86430.1 aver|OJJ01655.1 awen|OJJ31514.1 azon|OJJ47232.1

Group5645: abra|OJJ76236.1 acar|OOF99480.1 acla|EAW14373.1 afis|EAW18922.1 afla|EED50908.1 afum|EAL93653.1 agla|OJJ81521.1 akaw|GAA82171.1 aluc|OJZ91994.1 anid|CBF69678.1 anig|EHA22939.1 asyd|OJJ59066.1 ater|EAU38095.1 atub|OJI86429.1 aver|OJJ01660.1 awen|OJJ31515.1 azon|OJJ47233.1

Group5646: abra|OJJ76247.1 acar|OOF99493.1 acla|EAW14360.1 afis|EAW18930.1 afla|EED50923.1 afum|EAL93661.1 agla|OJJ85259.1 akaw|GAA82180.1 aluc|OJZ91984.1 anid|EHA22930.1 aory|EIT78976.1 asyd|OJJ64673.1 atub|OJI86419.1 aver|OJI98774.1 awen|OJJ31524.1 azon|OJJ47239.1 anid|CBF86792.1

Group5647: abra|OJJ76249.1 acar|OOF99494.1 acla|EAW14358.1 afis|EAW18932.1 afla|EED50937.1 afum|EAL93664.1 agla|OJJ85261.1 akaw|GAA82182.1 aluc|OJZ91981.1 anid|CBF86798.1 anig|EHA22928.1 asyd|OJJ64669.1 ater|EAU38111.1 atub|OJI86417.1 aver|OJI98771.1 awen|OJJ31526.1 azon|OJJ47241.1

Group5648: abra|OJJ76255.1 acar|OOF99500.1 acla|EAW14352.1 afis|EAW18938.1 afla|EED50943.1 afum|EAL93671.1 agla|OJJ85269.1 akaw|GAA82189.1 aluc|OJZ91971.1 anid|CBF86809.1 anig|EHA22919.1 asyd|OJJ64663.1 ater|EAU38117.1 atub|OJI86410.1 aver|OJI98765.1 awen|OJJ31533.1 azon|OJJ47247.1

Group5649: abra|OJJ76261.1 acar|OOF99505.1 afis|EAW18942.1 afla|EED50975.1 afum|EAL93675.1 akaw|GAA82193.1 aluc|OJZ91961.1 anid|CBF86818.1 anig|EHA22917.1 aory|EIT76997.1 asyd|OJJ64656.1 ater|EAU38123.1 atub|OJI86405.1 aver|OJI98759.1 awen|OJJ31539.1 azon|OJJ47251.1 acla|EAW14349.1

Group5650: abra|OJJ76263.1 acar|OOF99507.1 acla|EAW14345.1 afis|EAW18945.1 afla|EED50979.1 afum|EAL93678.1 agla|OJJ85272.1 akaw|GAA82195.1 aluc|OJZ91959.1 anid|CBF86824.1 anig|EHA22915.1 aory|EIT76970.1 asyd|OJJ64653.1 ater|EAU38125.1 atub|OJI86402.1 aver|OJI98755.1 awen|OJJ31541.1

Group5651: abra|OJJ76265.1 acar|OOF99508.1 acla|EAW14344.1 afis|EAW18946.1 afla|EED50982.1 afum|EAL93680.1 akaw|GAA82197.1 aluc|OJZ91956.1 anid|CBF86827.1 anig|EHA22914.1 aory|EIT77065.1 asyd|OJJ64652.1 ater|EAU38128.1 atub|OJI86401.1 aver|OJI98753.1 awen|OJJ31544.1 azon|OJJ47261.1

Group5652: abra|OJJ76273.1 acar|OOF99521.1 acla|EAW14339.1 afis|EAW18951.1 afla|EED50988.1 afum|EAL93686.1 agla|OJJ85322.1 akaw|GAA82206.1 aluc|OJZ91947.1 anid|CBF69580.1 anig|EHA22906.1 aory|EIT77062.1 asyd|OJJ59143.1 ater|EAU38130.1 atub|OJI86392.1 aver|OJJ01733.1 azon|OJJ47265.1

Group5653: abra|OJJ76280.1 acar|OOF99525.1 acla|EAW14335.1 afis|EAW18954.1 afla|EED51001.1 agla|OJJ85329.1 akaw|GAA82212.1 aluc|OJZ91940.1 anid|CBF69592.1 anig|EHA22899.1 aory|EIT77031.1 asyd|OJJ59140.1 ater|EAU38138.1 atub|OJI86382.1 aver|OJJ01729.1 awen|OJJ31552.1 azon|OJJ47269.1

Group5654: abra|OJJ76284.1 acar|OOF99526.1 acla|EAW14332.1 afis|EAW18956.1 afla|EED51003.1 agla|OJJ85334.1 akaw|GAA82213.1 aluc|OJZ91937.1 anid|CBF69594.1 anig|EHA22897.1 asyd|OJJ59139.1 ater|EAU38139.1 atub|OJI86379.1 aver|OJJ01728.1 awen|OJJ31555.1 azon|OJJ47272.1 afum|EAL93690.1

Group5655: abra|OJJ76285.1 acar|OOF99528.1 acla|EAW14331.1 afis|EAW18957.1 afla|EED51004.1 agla|OJJ85335.1 akaw|GAA82214.1 aluc|OJZ91936.1 anid|CBF69596.1 anig|EHA22896.1 aory|EIT77061.1 asyd|OJJ59137.1 ater|EAU38140.1 atub|OJI86378.1 aver|OJJ01727.1 awen|OJJ31556.1 azon|OJJ47273.1

Group5656: abra|OJJ76315.1 acla|EAW14100.1 afis|EAW18801.1 afla|EED50775.1 agla|OJJ80531.1 akaw|GAA82246.1 aluc|OJZ91899.1 anid|CBF69782.1 anig|EHA22878.1 aory|EIT78048.1 asyd|OJJ58959.1 ater|EAU37933.1 atub|OJI86352.1 aver|OJJ01553.1 awen|OJJ32375.1 afum|EAL93537.1 azon|OJJ47138.1

Group5657: abra|OJJ76319.1 acar|OOF99572.1 acla|EAW14098.1 afis|EAW18800.1 afla|EED50776.1 afum|EAL93536.1 agla|OJJ80529.1 akaw|GAA82249.1 aluc|OJZ91895.1 anid|CBF69780.1 anig|EHA22874.1 asyd|OJJ58958.1 ater|EAU37932.1 atub|OJI86348.1 aver|OJJ01552.1 awen|OJJ32374.1 azon|OJJ47137.1

Group5658: abra|OJJ76321.1 acar|OOF99574.1 acla|EAW14093.1 afis|EAW18799.1 afla|EED50790.1 afum|EAL93535.1 akaw|GAA82250.1 aluc|OJZ91894.1 anid|CBF69778.1 anig|EHA22873.1 aory|EIT78129.1 asyd|OJJ58957.1 ater|EAU37931.1 atub|OJI86346.1 aver|OJJ01551.1 awen|OJJ32373.1 azon|OJJ47136.1

Group5659: abra|OJJ76324.1 acar|OOF99576.1 acla|EAW14091.1 afis|EAW18797.1 afla|EED50792.1 afum|EAL93533.1 agla|OJJ80526.1 akaw|GAA82253.1 aluc|OJZ91891.1 anid|CBF69775.1 aory|EIT78127.1 asyd|OJJ58955.1 ater|EAU37929.1 atub|OJI86343.1 aver|OJJ01549.1 awen|OJJ32371.1 azon|OJJ47134.1

Group5660: abra|OJJ76330.1 acar|OOF99582.1 acla|EAW14085.1 afis|EAW18792.1 afla|EED50750.1 afum|EAL93527.1 agla|OJJ80521.1 aluc|OJZ91883.1 anid|CBF69765.1 anig|EHA22861.1 aory|EIT77994.1 asyd|OJJ58949.1 ater|EAU37923.1 atub|OJI86334.1 aver|OJJ01544.1 awen|OJJ32365.1 azon|OJJ47129.1

Group5661: abra|OJJ76331.1 acar|OOF99583.1 acla|EAW14084.1 afis|EAW18791.1 afla|EED50749.1 afum|EAL93526.1 agla|OJJ80520.1 akaw|GAA82259.1 aluc|OJZ91882.1 anid|CBF69763.1 anig|EHA22860.1 asyd|OJJ58948.1 ater|EAU37922.1 atub|OJI86333.1 aver|OJJ01543.1 awen|OJJ32364.1 azon|OJJ47127.1

Group5662: abra|OJJ76333.1 acar|OOF99585.1 acla|EAW14082.1 afis|EAW18789.1 afla|EED50747.1 afum|EAL93523.1 agla|OJJ80518.1 aluc|OJZ91880.1 anid|CBF69759.1 anig|EHA22858.1 aory|EIT78001.1 asyd|OJJ58945.1 ater|EAU37920.1 atub|OJI86331.1 aver|OJJ01541.1 awen|OJJ32362.1 azon|OJJ47125.1

Group5663: abra|OJJ76341.1 acar|OOF99592.1 acla|EAW14074.1 afis|EAW18781.1 afla|EED50740.1 afum|EAL93513.1 agla|OJJ80501.1 akaw|GAA82268.1 aluc|OJZ91872.1 anid|CBF69740.1 anig|EHA22851.1 asyd|OJJ58934.1 ater|EAU37913.1 atub|OJI86323.1 aver|OJJ01530.1 awen|OJJ32353.1 azon|OJJ47117.1

Group5664: abra|OJJ76352.1 acar|OOF99602.1 acla|EAW14063.1 afis|EAW18770.1 afum|EAL93501.2 agla|OJJ80472.1 aluc|OJZ91861.1 anid|CBF69936.1 anig|EHA22841.1 aory|EIT78053.1 asyd|OJJ58921.1 ater|EAU37901.1 atub|OJI86312.1 aver|OJJ01518.1 awen|OJJ32339.1 azon|OJJ47105.1 afla|EED50729.1

Group5665: abra|OJJ76361.1 acar|OOF99612.1 acla|EAW14055.1 afis|EAW18761.1 afla|EED50721.1 afum|EAL93492.2 agla|OJJ80460.1 akaw|GAA82287.1 aluc|OJZ91851.1 anid|CBF69951.1 anig|EHA22833.1 asyd|OJJ58912.1 ater|EAU37892.1 atub|OJI86303.1 aver|OJJ01509.1 awen|OJJ32331.1 azon|OJJ47096.1

Group5666: abra|OJJ76365.1 acar|OOF99616.1 acla|EAW14051.1 afis|EAW18757.1 afla|EED50717.1 afum|EAL93486.1 agla|OJJ82325.1 akaw|GAA82291.1 aluc|OJZ91847.1 anid|CBF69959.1 anig|EHA22829.1 aory|EIT78006.1 asyd|OJJ58908.1 ater|EAU37889.1 atub|OJI86299.1 aver|OJJ01505.1 awen|OJJ32327.1

Group5667: abra|OJJ76367.1 acar|OOF89986.1 acla|EAW14049.1 afis|EAW18755.1 afla|EED50715.1 afum|EAL93482.1 akaw|GAA82293.1 aluc|OJZ91845.1 aory|EIT78024.1 asyd|OJJ58906.1 atub|OJI86297.1 aver|OJJ01503.1 awen|OJJ32324.1 azon|OJJ47091.1 anid|CBF69965.1 ater|EAU37886.1 agla|OJJ82323.1

Group5668: abra|OJJ76372.1 acar|OOF99620.1 acla|EAW14046.1 afis|EAW18752.1 afla|EED50711.1 afum|EAL93479.1 agla|OJJ82320.1 akaw|GAA82297.1 aluc|OJZ91841.1 anid|CBF69975.1 aory|EIT77974.1 asyd|OJJ58899.1 ater|EAU37883.1 atub|OJI86293.1 aver|OJJ01499.1 awen|OJJ32321.1 azon|OJJ47088.1

Group5669: abra|OJJ76373.1 acar|OOF99621.1 acla|EAW14045.1 afis|EAW18751.1 afla|EED50710.1 afum|EAL93478.1 agla|OJJ82319.1 akaw|GAA82298.1 aluc|OJZ91840.1 anig|EHA22824.1 aory|EIT78136.1 asyd|OJJ58898.1 ater|EAU37882.1 atub|OJI86292.1 aver|OJJ01498.1 awen|OJJ32320.1 azon|OJJ47087.1

Group5670: abra|OJJ76380.1 acar|OOF89926.1 acla|EAW14042.1 afis|EAW18748.1 afla|EED50707.1 afum|EAL93474.1 agla|OJJ82315.1 akaw|GAA82301.1 aluc|OJZ91834.1 anid|CBF69985.1 anig|EHA22821.1 asyd|OJJ58894.1 ater|EAU37877.1 atub|OJI86288.1 aver|OJJ01495.1 awen|OJJ32315.1 azon|OJJ47083.1

Group5671: abra|OJJ76385.1 acar|OOF99626.1 acla|EAW14039.1 afis|EAW18745.1 afla|EED50701.1 afum|EAL93471.1 agla|OJJ82310.1 akaw|GAA82304.1 aluc|OJZ91830.1 anid|CBF69991.1 anig|EHA22817.1 aory|EIT78013.1 asyd|OJJ58890.1 atub|OJI86284.1 aver|OJJ01490.1 awen|OJJ32310.1 azon|OJJ42714.1

Group5672: abra|OJJ76391.1 acla|EAW14033.1 afis|EAW18739.1 afla|EED50694.1 afum|EAL93465.1 agla|OJJ82305.1 akaw|GAA82310.1 aluc|OJZ91822.1 anid|CBF70004.1 anig|EHA22812.1 aory|EIT78125.1 asyd|OJJ58883.1 ater|EAU37862.1 atub|OJI86277.1 aver|OJJ01485.1 awen|OJJ32304.1 azon|OJJ42722.1

Group5673: abra|OJJ76394.1 acar|OOF99634.1 acla|EAW14030.1 afis|EAW18736.1 afla|EED50691.1 afum|EAL93461.1 agla|OJJ82302.1 akaw|GAA82313.1 aluc|OJZ91819.1 anid|CBF70010.1 anig|EHA22809.1 asyd|OJJ58880.1 ater|EAU37859.1 atub|OJI86274.1 aver|OJJ01482.1 awen|OJJ32300.1 azon|OJJ42733.1

Group5674: abra|OJJ76403.1 acar|OOF99646.1 acla|EAW14016.1 afis|EAW18726.1 afla|EED50683.1 afum|EAL93451.1 agla|OJJ80473.1 akaw|GAA82323.1 aluc|OJZ91809.1 anid|CBF70019.1 anig|EHA22802.1 asyd|OJJ58876.1 ater|EAU38178.1 atub|OJI86264.1 aver|OJJ01478.1 awen|OJJ32228.1 azon|OJJ46784.1

Group5675: abra|OJJ76405.1 acar|OOF99648.1 acla|EAW14018.1 afis|EAW18724.1 afla|EED50681.1 afum|EAL93449.1 agla|OJJ80476.1 akaw|GAA82325.1 aluc|OJZ91807.1 anid|CBF70686.1 anig|EHA22800.1 aory|EIT78066.1 asyd|OJJ58467.1 atub|OJI86262.1 aver|OJJ01066.1 awen|OJJ32230.1 azon|OJJ46782.1

Group5676: abra|OJJ76416.1 acar|OOF99656.1 acla|EAW14011.1 afis|EAW18717.1 afla|EED50671.1 afum|EBA27493.1 agla|OJJ82342.1 akaw|GAA82331.1 aluc|OJZ91797.1 anid|CBF70674.1 anig|EHA22793.1 asyd|OJJ58474.1 ater|EAU38188.1 atub|OJI86253.1 aver|OJJ01076.1 awen|OJJ32211.1 azon|OJJ46772.1

Group5677: abra|OJJ76425.1 acar|OOF99669.1 acla|EAW14000.1 afis|EAW18708.1 afla|EED50657.1 afum|EAL93431.1 agla|OJJ82350.1 akaw|GAA82340.1 aluc|OJZ91787.1 anid|CBF70652.1 anig|EHA22784.1 aory|EIT78022.1 asyd|OJJ58484.1 ater|EAU38200.1 atub|OJI86243.1 aver|OJJ01087.1 awen|OJJ32191.1

Group5678: abra|OJJ76426.1 acar|OOF99670.1 acla|EAW13999.1 afis|EAW18707.1 afla|EED50656.1 afum|EAL93430.1 agla|OJJ82351.1 akaw|GAA82341.1 aluc|OJZ91786.1 anid|CBF70650.1 anig|EHA22783.1 aory|EIT78121.1 asyd|OJJ58485.1 ater|EAU38201.1 atub|OJI86242.1 aver|OJJ01088.1 awen|OJJ32190.1

Group5679: abra|OJJ76427.1 acar|OOF99672.1 acla|EAW13998.1 afis|EAW18706.1 afla|EED50655.1 afum|EAL93429.1 agla|OJJ82352.1 akaw|GAA82342.1 aluc|OJZ91785.1 anid|CBF70649.1 anig|EHA22782.1 aory|EIT78135.1 asyd|OJJ58486.1 atub|OJI86241.1 aver|OJJ01089.1 awen|OJJ32189.1 azon|OJJ46758.1

Group5680: abra|OJJ76437.1 acla|EAW13986.1 afis|EAW18694.1 afla|EED50643.1 afum|EAL93416.1 agla|OJJ82369.1 akaw|GAA82352.1 aluc|OJZ91773.1 anid|CBF70626.1 anig|EHA22773.1 aory|EIT78019.1 asyd|OJJ58498.1 ater|EAU38212.1 atub|OJI86230.1 aver|OJJ01101.1 awen|OJJ32165.1 azon|OJJ46750.1

Group5681: abra|OJJ76450.1 acar|OOF99693.1 acla|EAW13978.1 afis|EAW18687.1 afla|EED50635.1 afum|EAL93408.2 agla|OJJ82385.1 akaw|GAA82362.1 aluc|OJZ91760.1 anid|CBF70611.1 aory|EIT78005.1 asyd|OJJ58511.1 ater|EAU38221.1 atub|OJI86218.1 aver|OJJ01112.1 awen|OJJ32158.1 azon|OJJ46742.1

Group5682: abra|OJJ76454.1 acla|EAW13976.1 afis|EAW18685.1 afla|EED50623.1 afum|EAL93406.1 agla|OJJ82386.1 akaw|GAA82366.1 aluc|OJZ91756.1 anid|CBF70609.1 anig|EHA22759.1 aory|EIT78050.1 asyd|OJJ58513.1 ater|EAU38223.1 atub|OJI86214.1 aver|OJJ01114.1 awen|OJJ32156.1 azon|OJJ46740.1

Group5683: abra|OJJ76458.1 acar|OOF99698.1 acla|EAW13971.1 afis|EAW18680.1 afla|EED50630.1 afum|EAL93401.1 agla|OJJ82395.1 akaw|GAA82371.1 aluc|OJZ91751.1 anid|CBF70599.1 anig|EHA22754.1 asyd|OJJ58518.1 ater|EAU38229.1 atub|OJI86209.1 aver|OJJ01119.1 awen|OJJ32152.1 azon|OJJ46736.1

Group5684: abra|OJJ76461.1 acar|OOF99700.1 acla|EAW13969.1 afis|EAW18678.1 afla|EED50632.1 agla|OJJ82398.1 akaw|GAA82374.1 aluc|OJZ91748.1 anid|CBF70594.1 anig|EHA22751.1 aory|EIT78090.1 asyd|OJJ58520.1 ater|EAU38233.1 atub|OJI86206.1 aver|OJJ01121.1 awen|OJJ32150.1 azon|OJJ46734.1

Group5685: abra|OJJ76463.1 acar|OOF99701.1 acla|EAW13968.1 afis|EAW18677.1 afla|EED50633.1 afum|EAL93397.1 agla|OJJ82399.1 akaw|GAA82375.1 aluc|OJZ91747.1 anid|CBF70592.1 anig|EHA22750.1 aory|EIT78096.1 asyd|OJJ58521.1 atub|OJI86205.1 aver|OJJ01122.1 awen|OJJ32149.1 azon|OJJ46733.1

Group5686: abra|OJJ76473.1 acar|OOF99710.1 acla|EAW13960.1 afis|EAW18669.1 afla|EED52659.1 afum|EAL93387.1 agla|OJJ82406.1 akaw|GAA82385.1 aluc|OJZ91736.1 anid|CBF70577.1 anig|EHA22742.1 asyd|OJJ58529.1 ater|EAU38242.1 atub|OJI86194.1 aver|OJJ01131.1 awen|OJJ32141.1 azon|OJJ46722.1

Group5687: abra|OJJ76490.1 acla|EAW13945.1 afis|EAW18654.1 afla|EED52682.1 afum|EAL93370.1 agla|OJJ82421.1 akaw|GAA82405.1 aluc|OJZ91715.1 anid|CBF70542.1 anig|EHA22725.1 aory|EIT74201.1 asyd|OJJ58548.1 ater|EAU38258.1 atub|OJI86173.1 aver|OJJ01146.1 awen|OJJ32121.1 azon|OJJ46707.1

Group5688: abra|OJJ76492.1 acar|OOF99724.1 acla|EAW13940.1 afis|EAW18651.1 afla|EED52688.1 afum|EAL93367.1 agla|OJJ82423.1 akaw|GAA82408.1 aluc|OJZ91712.1 anid|CBF70537.1 anig|EHA22723.1 asyd|OJJ58550.1 ater|EAU38261.1 atub|OJI86171.1 aver|OJJ01148.1 awen|OJJ32119.1 azon|OJJ46705.1

Group5689: abra|OJJ76494.1 acar|OOF99726.1 acla|EAW13938.1 afis|EAW18649.1 afla|EED52690.1 afum|EAL93365.1 agla|OJJ82425.1 akaw|GAA82410.1 aluc|OJZ91710.1 anid|CBF70535.1 anig|EHA22721.1 aory|EIT74193.1 asyd|OJJ58552.1 atub|OJI86169.1 aver|OJJ01150.1 awen|OJJ32117.1 azon|OJJ46703.1

Group5690: azon|OJJ47218.1 abra|OJJ76512.1 acar|OOF99460.1 acla|EAW14188.1 afis|EAW18903.1 afla|EED50845.1 afum|EAL93635.1 agla|OJJ81508.1 akaw|GAA82425.1 aluc|OJZ91693.1 anid|CBF69928.1 anig|EHA22706.1 asyd|OJJ59040.1 ater|EAU38071.1 atub|OJI86147.1 aver|OJJ01635.1 awen|OJJ32460.1

Group5691: abra|OJJ76522.1 acar|OOF99451.1 acla|EAW14179.1 afis|EAW18894.1 afla|EED50869.1 afum|EAL93626.1 agla|OJJ81500.1 akaw|GAA82435.1 aluc|OJZ91686.1 anid|CBF69910.1 anig|EHA22698.1 aory|EIT78965.1 asyd|OJJ58994.1 ater|EAU38065.1 atub|OJI86138.1 awen|OJJ32452.1 azon|OJJ47210.1

Group5692: abra|OJJ76532.1 acar|OOF99441.1 acla|EAW14170.1 afis|EAW18884.1 afla|EED50881.1 afum|EAL93617.1 agla|OJJ80619.1 akaw|GAA82444.1 aluc|OJZ91672.1 anig|EHA22690.1 aory|EIT78974.1 asyd|OJJ59003.1 ater|EAU38056.1 atub|OJI86127.1 aver|OJJ01612.1 azon|OJJ47200.1 awen|OJJ32439.1

Group5693: abra|OJJ76544.1 acar|OOF99430.1 acla|EAW14160.1 afis|EAW18873.1 afla|EED50894.1 afum|EAL93605.1 agla|OJJ80610.1 akaw|GAA82453.1 aluc|OJZ91659.1 anig|EHA22679.1 aory|EIT78984.1 asyd|OJJ59022.1 ater|EAU38037.1 atub|OJI86115.1 aver|OJJ01595.1 awen|OJJ32432.1 azon|OJJ47190.1

Group5694: abra|OJJ76553.1 acar|OOF89944.1 acla|EAW14152.1 afis|EAW18865.1 afla|EED50896.1 afum|EAL93597.1 agla|OJJ80587.1 akaw|GAA82460.1 aluc|OJZ91651.1 anid|CBF69850.1 anig|EHA22672.1 aory|EIT79012.1 asyd|OJJ59029.1 atub|OJI86105.1 aver|OJJ01587.1 awen|OJJ32424.1 azon|OJJ47179.1

Group5695: abra|OJJ76556.1 acar|OOF99423.1 acla|EAW14149.1 afis|EAW18862.1 afla|EED50829.1 afum|EAL93594.1 agla|OJJ80585.1 akaw|GAA82462.1 aluc|OJZ91649.1 anid|CBF69846.1 anig|EHA22670.1 asyd|OJJ59031.1 ater|EAU38024.1 atub|OJI86103.1 aver|OJJ01585.1 awen|OJJ32418.1 azon|OJJ47175.1

Group5696: abra|OJJ76559.1 acla|EAW14146.1 afis|EAW18859.1 afla|EED50826.1 afum|EAL93591.1 agla|OJJ80582.1 akaw|GAA82465.1 aluc|OJZ91646.1 anid|CBF69840.1 anig|EHA22667.1 aory|EIT78992.1 asyd|OJJ59034.1 ater|EAU38022.1 atub|OJI86100.1 aver|OJJ01582.1 awen|OJJ32415.1 azon|OJJ47172.1

Group5697: abra|OJJ76560.1 acla|EAW14145.1 afis|EAW18858.1 afla|EED50825.1 afum|EAL93590.2 agla|OJJ80580.1 akaw|GAA82466.1 aluc|OJZ91644.1 anid|CBF69838.1 anig|EHA22666.1 aory|EIT78960.1 asyd|OJJ59035.1 ater|EAU38021.1 atub|OJI86099.1 aver|OJJ01581.1 awen|OJJ32414.1 azon|OJJ47171.1

Group5698: abra|OJJ76568.1 afis|EAW18853.1 afum|EAL93584.1 agla|OJJ80572.1 akaw|GAA82472.1 aluc|OJZ91638.1 anid|CBF69825.1 anig|EHA22661.1 asyd|OJJ58979.1 atub|OJI86091.1 aver|OJJ01574.1 awen|OJJ32407.1 azon|OJJ47165.1 acla|EAW14140.1 afla|EED50820.1 aory|EIT79040.1 ater|EAU38009.1

Group5699: abra|OJJ76574.1 acar|OOF99410.1 afis|EAW18821.1 afla|EED50805.1 afum|EAL93558.1  
agla|OJJ80565.1 akaw|GAA82479.1 aluc|OJZ91631.1 anid|CBF82810.1 anig|EHA22654.1 aory|EIT78039.1  
asyd|OJJ60269.1 ater|EAU38000.1 atub|OJI86084.1 aver|OJJ03985.1 awen|OJJ32399.1 azon|OJJ47159.1

Group5700: abra|OJJ76575.1 acar|OOF99409.1 acla|EAW14118.1 afis|EAW18820.1 afla|EED50807.1  
afum|EAL93557.1 agla|OJJ80555.1 akaw|GAA82480.1 aluc|OJZ91630.1 anid|CBF69807.1 aory|EIT79005.1  
asyd|OJJ58970.1 ater|EAU37999.1 atub|OJI86083.1 aver|OJJ01565.1 awen|OJJ32396.1 azon|OJJ47158.1

Group5701: abra|OJJ76578.1 acar|OOF99406.1 acla|EAW14115.1 afis|EAW18817.1 afla|EED50803.1  
afum|EAL93553.1 agla|OJJ80550.1 akaw|GAA82483.1 aluc|OJZ91627.1 anid|CBF69813.1 anig|EHA22651.1  
asyd|OJJ58973.1 ater|EAU37992.1 atub|OJI86080.1 aver|OJJ01568.1 awen|OJJ32393.1 azon|OJJ47154.1

Group5702: abra|OJJ76602.1 acar|OOF99389.1 acla|EAW14302.1 afis|EAW18982.1 afla|EED52436.1  
afum|EAL93718.1 agla|OJJ82953.1 akaw|GAA82505.1 aluc|OJZ91606.1 anid|CBF69657.1 anig|EHA22635.1  
asyd|OJJ59073.1 ater|EAU37829.1 atub|OJI86058.1 aver|OJJ01666.1 awen|OJJ31597.1 azon|OJJ47306.1

Group5703: abra|OJJ76607.1 acla|EAW14299.1 afis|EAW18985.1 afla|EED53163.1 afum|EAL93721.1  
agla|OJJ82960.1 akaw|GAA82511.1 aluc|OJZ91600.1 anid|CBF69663.1 anig|EHA22630.1 aory|EIT75021.1  
asyd|OJJ59070.1 ater|EAU37820.1 atub|OJI86051.1 aver|OJJ01663.1 awen|OJJ31605.1 azon|OJJ47309.1

Group5704: abra|OJJ76610.1 agla|OJJ82965.1 akaw|GAA82513.1 aluc|OJZ91598.1 anig|EHA22628.1  
atub|OJI86049.1 acla|EAW14296.1 afis|EAW18987.1 afla|EED53166.1 afum|EAL93723.1 anid|CBF69667.1  
aory|EIT75116.1 asyd|OJJ59068.1 ater|EAU37818.1 aver|OJJ01661.1 awen|OJJ31607.1 azon|OJJ47311.1

Group5705: abra|OJJ76625.1 acar|OOF99373.1 acla|EAW14294.1 afis|EAW18989.1 afla|EED53174.1  
afum|EAL93725.1 agla|OJJ82976.1 akaw|GAA92832.1 aluc|OJZ91587.1 anid|CBF75890.1 anig|EHA22611.1  
aory|EIT75047.1 asyd|OJJ60261.1 atub|OJI86036.1 aver|OJJ03992.1 awen|OJJ31610.1 anid|CBF82973.1

Group5706: abra|OJJ76683.1 acar|OOF99328.1 acla|EAW12908.1 afis|EAW17784.1 afla|EED57245.1  
afum|EAL91592.1 agla|OJJ78673.1 akaw|GAA92511.1 aluc|OJZ91524.1 anid|CBF82109.1 aory|EIT74118.1  
asyd|OJJ54283.1 ater|EAU37365.1 atub|OJI85979.1 aver|OJJ05237.1 awen|OJJ33522.1 azon|OJJ50362.1

Group5707: abra|OJJ76685.1 acar|OOF99326.1 acla|EAW07047.1 afis|EAW16672.1 afla|EED52488.1  
afum|EAL89277.1 agla|OJJ78694.1 akaw|GAA92509.1 aluc|OJZ91522.1 anig|EHA22559.1 aory|EIT82788.1  
asyd|OJJ56612.1 ater|EAU33886.1 atub|OJI85977.1 aver|OJJ06111.1 awen|OJJ40037.1 azon|OJJ45870.1

Group5708: abra|OJJ76694.1 acla|EAW11086.1 afis|EAW20772.1 afla|EED45937.1 afum|EAL84847.1  
akaw|GAA92502.1 aluc|OJZ91515.1 anid|CBF71393.1 anig|EHA22553.1 aory|EIT75761.1 asyd|OJJ55030.1  
ater|EAU36978.1 atub|OJI85967.1 aver|OJJ07173.1 awen|OJJ29779.1 anid|CBF69396.1 awen|OJJ41548.1

Group5709: abra|OJJ76751.1 acar|OOF91247.1 acla|EAW13770.1 afis|EAW20419.1 afum|EAL84630.1  
agla|OJJ84906.1 akaw|GAA87273.1 aluc|OJZ84154.1 anid|CBF79344.1 aory|EIT77737.1 asyd|OJJ55798.1  
ater|EAU37737.1 atub|OJI89930.1 aver|OJI98814.1 awen|OJJ33112.1 azon|OJJ45537.1 agla|OJJ83727.1

Group5710: abra|OJJ76754.1 acar|OOF91250.1 acla|EAW13308.1 afis|EAW20422.1 afla|EED44849.1  
afum|EAL84628.1 agla|OJJ84903.1 akaw|GAA87270.1 aluc|OJZ84157.1 anig|EHA27519.1 aory|EIT77733.1  
asyd|OJJ55795.1 ater|EAU37734.1 atub|OJI89927.1 aver|OJJ06884.1 awen|OJJ33115.1 azon|OJJ46331.1

Group5711: abra|OJJ76763.1 acar|OOF91258.1 acla|EAW13317.1 afis|EAW20431.1 afla|EED44837.1  
agla|OJJ84894.1 akaw|GAA87263.1 aluc|OJZ84166.1 anid|CBF79329.1 anig|EHA27527.1 aory|EIT77758.1  
asyd|OJJ55785.1 atub|OJI89918.1 aver|OJJ06875.1 awen|OJJ33124.1 azon|OJJ46340.1 ater|EAU37726.1

Group5712: abra|OJJ76770.1 acar|OOF91265.1 acla|EAW13324.1 afis|EAW20439.1 afla|EED44831.1  
afum|EAL84613.1 agla|OJJ84884.1 akaw|GAA87256.1 aluc|OJZ84174.1 anid|CBF79313.1 anig|EHA27534.1  
aory|EIT77752.1 asyd|OJJ55779.1 ater|EAU37719.1 atub|OJI89911.1 aver|OJJ06867.1 awen|OJJ33130.1

Group5713: abra|OJJ76773.1 acar|OOF91268.1 acla|EAW13330.1 afis|EAW20445.1 afla|EED44825.1  
afum|EBA27197.1 agla|OJJ84876.1 akaw|GAA87251.1 aluc|OJZ84177.1 anid|CBF79305.1 anig|EHA27536.1  
aory|EIT77731.1 ater|EAU37714.1 atub|OJI89906.1 aver|OJJ06865.1 awen|OJJ33135.1 azon|OJJ46348.1

Group5714: abra|OJJ76777.1 acar|OOF91273.1 acla|EAW13336.1 afis|EAW20451.1 afla|EED44817.1  
afum|EAL84602.1 agla|OJJ84871.1 akaw|GAA87247.1 aluc|OJZ84181.1 anig|EHA27541.1 aory|EIT77722.1  
asyd|OJJ52097.1 ater|EAU37708.1 atub|OJI89902.1 aver|OJJ03020.1 awen|OJJ33141.1 azon|OJJ46352.1

Group5715: abra|OJJ76782.1 acla|EAW13340.1 afis|EAW20455.1 afla|EED44813.1 afum|EBA27196.1  
agla|OJJ84867.1 akaw|GAA87243.1 aluc|OJZ84185.1 anid|CBF79288.1 anig|EHA27545.1 aory|EIT77735.1  
asyd|OJJ55768.1 ater|EAU37704.1 atub|OJI89898.1 aver|OJJ06854.1 awen|OJJ33145.1 azon|OJJ46357.1

Group5716: abra|OJJ76783.1 acar|OOF91277.1 acla|EAW13341.1 afis|EAW20456.1 afla|EED44812.1  
afum|EAL84596.1 agla|OJJ84866.1 akaw|GAA87242.1 aluc|OJZ84186.1 anid|CBF79290.1 anig|EHA27546.1  
aory|EIT77713.1 asyd|OJJ55767.1 atub|OJI89897.1 aver|OJJ06853.1 awen|OJJ33146.1 azon|OJJ46358.1



Group5717: abra|OJJ76788.1 acla|EAW13346.1 afis|EAW20461.1 afla|EED44807.1 afum|EAL84592.1  
agla|OJJ84856.1 akaw|GAA87237.1 aluc|OJZ84190.1 anid|CBF79275.1 anig|EHA27550.1 aory|EIT77750.1  
asyd|OJJ55762.1 ater|EAU37699.1 atub|OJI89892.1 aver|OJJ06847.1 awen|OJJ33154.1 azon|OJJ46363.1

Group5718: abra|OJJ76789.1 acar|OOF91282.1 acla|EAW13347.1 afis|EAW20462.1 afla|EED44806.1  
afum|EAL84591.1 agla|OJJ84855.1 akaw|GAA87236.1 aluc|OJZ84191.1 anid|CBF79273.1 anig|EHA27551.1  
aory|EIT77738.1 asyd|OJJ55761.1 atub|OJI89891.1 aver|OJJ06846.1 awen|OJJ33155.1 azon|OJJ46364.1

Group5719: abra|OJJ76805.1 acla|EAW13364.1 afis|EAW20478.1 afla|EED44790.1 afum|EAL84576.1  
agla|OJJ84839.1 akaw|GAA87218.1 aluc|OJZ84212.1 anid|CBF79250.1 anig|EHA27565.1 aory|EIT77766.1  
asyd|OJJ55744.1 ater|EAU29556.1 atub|OJI89871.1 aver|OJJ06831.1 awen|OJJ33173.1 azon|OJJ46380.1

Group5720: abra|OJJ76820.1 acar|OOF91314.1 acla|EAW13380.1 afis|EAW20494.1 afla|EED44770.1  
afum|EAL84560.2 agla|OJJ84808.1 akaw|GAA87202.1 aluc|OJZ84230.1 anid|CBF79224.1 aory|EIT77791.1  
asyd|OJJ55733.1 ater|EAU29570.1 atub|OJI89854.1 aver|OJJ06819.1 awen|OJJ33194.1 azon|OJJ46402.1

Group5721: abra|OJJ76841.1 acar|OOF91334.1 acla|EAW13404.1 afis|EAW20515.1 afla|EED52467.1  
afum|EAL84542.1 agla|OJJ84775.1 akaw|GAA87181.1 aluc|OJZ84252.1 anid|CBF79057.1 anig|EHA27597.1  
aory|EIT82760.1 asyd|OJJ55709.1 ater|EAU37186.1 atub|OJI89831.1 aver|OJJ06795.1 awen|OJJ33221.1

Group5722: abra|OJJ76846.1 acar|OOF91336.1 acla|EAW13409.1 afis|EAW20520.1 afla|EED52469.1  
afum|EAL84537.1 agla|OJJ84766.1 akaw|GAA87175.1 aluc|OJZ84258.1 anid|CBF79069.1 aory|EIT82811.1  
asyd|OJJ55705.1 ater|EAU37168.1 atub|OJI89825.1 aver|OJJ06791.1 awen|OJJ33226.1 azon|OJJ46578.1

Group5723: abra|OJJ76848.1 acla|EAW13411.1 afis|EAW20522.1 afla|EED52471.1 afum|EAL84535.1  
agla|OJJ84739.1 akaw|GAA87173.1 aluc|OJZ84260.1 anid|CBF79072.1 anig|EHA27603.1 aory|EIT82780.1  
asyd|OJJ55703.1 ater|EAU37166.1 atub|OJI89823.1 aver|OJJ06789.1 awen|OJJ33228.1 azon|OJJ46576.1

Group5724: abra|OJJ76853.1 acla|EAW13415.1 afis|EAW20526.1 afla|EED52475.1 afum|EAL84531.1  
agla|OJJ84744.1 akaw|GAA87169.1 aluc|OJZ84265.1 anid|CBF79080.1 anig|EHA27607.1 aory|EIT82795.1  
asyd|OJJ55698.1 ater|EAU37162.1 atub|OJI89818.1 aver|OJJ06783.1 awen|OJJ33232.1 azon|OJJ46572.1

Group5725: abra|OJJ76858.1 acar|OOF91346.1 acla|EAW13419.1 afis|EAW20530.1 afla|EED52480.1  
afum|EAL84527.1 agla|OJJ84704.1 akaw|GAA87164.1 aluc|OJZ84270.1 anid|CBF79004.1 anig|EHA27612.1  
aory|EIT82752.1 asyd|OJJ55690.1 ater|EAU37155.1 atub|OJI89813.1 aver|OJJ06774.1 awen|OJJ33237.1

Group5726: abra|OJJ76902.1 acar|OOF91350.1 acla|EAW13423.1 afis|EAW20535.1 afla|EED54118.1  
afum|EAL84523.1 akaw|GAA87136.1 aluc|OJZ84301.1 anid|CBF78997.1 anig|EHA27637.1 aory|EIT76011.1  
asyd|OJJ55686.1 ater|EAU37148.1 atub|OJI89767.1 aver|OJJ06770.1 awen|OJJ33242.1 azon|OJJ50621.1

Group5727: abra|OJJ76915.1 acar|OOF91362.1 afis|EAW20543.1 afla|EED52430.1 afum|EAL84515.1  
agla|OJJ88755.1 akaw|GAA87123.1 aluc|OJZ84315.1 anid|CBF78989.1 anig|EHA27650.1 aory|EIT83314.1  
asyd|OJJ55683.1 ater|EAU37138.1 atub|OJI89753.1 aver|OJJ06767.1 awen|OJJ33250.1 azon|OJJ42414.1

Group5728: abra|OJJ76974.1 acar|OOF91418.1 acla|EAW13500.1 afis|EAW20599.1 afla|EED52205.1  
afum|EAL84462.1 agla|OJJ88656.1 akaw|GAA87071.1 aluc|OJZ84370.1 anid|CBF78906.1 anig|EHA27705.1  
asyd|OJJ55610.1 ater|EAU35244.1 atub|OJI89697.1 aver|OJJ06685.1 awen|OJJ33391.1 azon|OJJ50695.1

Group5729: abra|OJJ76975.1 acar|OOF91420.1 acla|EAW13501.1 afis|EAW20600.1 afla|EED47728.1  
afum|EAL84461.1 agla|OJJ88657.1 akaw|GAA87070.1 aluc|OJZ84371.1 anid|CBF86933.1 anig|EHA27706.1  
aory|EIT77127.1 asyd|OJJ55598.1 atub|OJI89696.1 aver|OJJ06678.1 awen|OJJ33392.1 azon|OJJ50696.1

Group5730: abra|OJJ76999.1 acar|OOF91445.1 acla|EAW13462.1 afis|EAW20568.1 afla|EED52322.1  
afum|EAL84494.1 agla|OJJ88725.1 akaw|GAA87049.1 aluc|OJZ84397.1 anid|CBF87400.1 anig|EHA27728.1  
aory|EIT74352.1 asyd|OJJ52861.1 ater|EAU37115.1 atub|OJI89675.1 aver|OJJ08839.1 awen|OJJ33272.1

Group5731: abra|OJJ77006.1 acar|OOF91451.1 afis|EAW25624.1 afla|EED54122.1 afum|EAL84312.1  
agla|OJJ78904.1 akaw|GAA87042.1 aluc|OJZ84405.1 anid|CBF83175.1 anig|EHA27735.1 aory|EIT76161.1  
asyd|OJJ55524.1 ater|EAU32184.1 atub|OJI89667.1 aver|OJJ06602.1 awen|OJJ36043.1 azon|OJJ42823.1

Group5732: abra|OJJ77035.1 acla|EAW06829.1 afis|EAW16379.1 afla|EED54135.1 afum|EAL89004.1  
agla|OJJ88206.1 akaw|GAA87016.1 aluc|OJZ84438.1 anid|CBF81133.1 anig|EHA27757.1 aory|EIT76057.1  
asyd|OJJ56501.1 ater|EAU32642.1 atub|OJI89635.1 aver|OJJ06218.1 awen|OJJ37913.1 azon|OJJ45092.1

Group5733: abra|OJJ77047.1 acar|OOF92936.1 acla|EAW13551.1 afis|EAW20626.1 afla|EED49776.1  
afum|EAL84440.1 agla|OJJ80442.1 akaw|GAA87006.1 aluc|OJZ84451.1 anid|CBF83226.1 anig|EHA27766.1  
aory|EIT77694.1 asyd|OJJ55580.1 atub|OJI89625.1 aver|OJJ06659.1 awen|OJJ33463.1 azon|OJJ50719.1

Group5734: abra|OJJ77051.1 acar|OOF92940.1 acla|EAW13542.1 afis|EAW20615.1 afla|EED54202.1  
afum|EAL84446.1 agla|OJJ88593.1 akaw|GAA87002.1 aluc|OJZ84455.1 anid|CBF86938.1 anig|EHA27770.1  
asyd|OJJ55588.1 ater|EAU35252.1 atub|OJI89620.1 aver|OJJ06667.1 awen|OJJ33459.1 azon|OJJ45125.1

Group5735: abra|OJJ77052.1 acar|OOF92941.1 acla|EAW13540.1 afis|EAW20613.1 afum|EAL84448.1  
agla|OJJ88622.1 akaw|GAA87000.1 aluc|OJZ84457.1 anid|CBF86943.1 anig|EHA27772.1 aory|EIT76152.1  
asyd|OJJ55585.1 ater|EAU35254.1 atub|OJI89618.1 aver|OJJ06664.1 awen|OJJ33457.1 azon|OJJ50713.1

Group5736: abra|OJJ77062.1 acla|EAW13513.1 afis|EAW20611.1 afla|EED54206.1 afum|EAL84450.1  
agla|OJJ88628.1 akaw|GAA86990.1 aluc|OJZ84470.1 anid|CBF86957.1 anig|EHA27780.1 aory|EIT75918.1  
asyd|OJJ55596.1 ater|EAU35256.1 atub|OJI89608.1 aver|OJJ06675.1 awen|OJJ33454.1 azon|OJJ50711.1

Group5737: abra|OJJ77066.1 acar|OOF92950.1 acla|EAW13509.1 afis|EAW20607.1 afla|EED54208.1  
afum|EAL84453.1 agla|OJJ88632.1 akaw|GAA86986.1 aluc|OJZ84475.1 anid|CBF86948.1 anig|EHA27783.1  
asyd|OJJ55592.1 ater|EAU35259.1 atub|OJI89604.1 aver|OJJ06671.1 awen|OJJ33450.1 azon|OJJ50707.1

Group5738: abra|OJJ77070.1 acla|EAW09727.1 afis|EAW21413.1 afla|EED55836.1 afum|EAL92427.1  
agla|OJJ85544.1 akaw|GAA86983.1 aluc|OJZ84478.1 anid|CBF83797.1 anig|EHA27786.1 aory|EIT76757.1  
asyd|OJJ60887.1 ater|EAU35133.1 atub|OJI89601.1 aver|OJJ00211.1 awen|OJJ39288.1 azon|OJJ51566.1

Group5739: abra|OJJ77071.1 acar|OOF92953.1 acla|EAW09728.1 afis|EAW21414.1 afla|EED55835.1  
afum|EAL92428.1 agla|OJJ85543.1 akaw|GAA86982.1 aluc|OJZ84479.1 anig|EHA27787.1 aory|EIT76805.1  
asyd|OJJ60888.1 ater|EAU35134.1 atub|OJI89600.1 aver|OJJ00212.1 awen|OJJ39289.1 azon|OJJ51565.1

Group5740: abra|OJJ77074.1 acar|OOF92955.1 acla|EAW12062.1 afis|EAW19705.1 afla|EED57046.1  
afum|EAL86821.1 agla|OJJ78914.1 akaw|GAA86979.1 aluc|OJZ84484.1 anid|CBF71407.1 anig|EHA27788.1  
aory|EIT82262.1 asyd|OJJ55014.1 ater|EAU32844.1 atub|OJI89596.1 aver|OJJ07197.1 awen|OJJ29913.1

Group5741: abra|OJJ77080.1 acar|OOF92963.1 acla|EAW06701.1 afis|EAW16246.1 afla|EED53307.1  
afum|EAL88874.1 agla|OJJ86255.1 akaw|GAA86973.1 aluc|OJZ84490.1 anid|CBF78902.1 anig|EHA27794.1  
aory|EIT75199.1 asyd|OJJ64604.1 ater|EAU37456.1 atub|OJI89589.1 aver|OJI98701.1 awen|OJJ30210.1

Group5742: abra|OJJ77087.1 acar|OOF92971.1 afis|EAW21842.1 afla|EED46528.1 afum|EAL92854.1  
agla|OJJ84295.1 akaw|GAA86968.1 aluc|OJZ84496.1 anid|CBF76713.1 anig|EHA27798.1 aory|EIT72340.1  
asyd|OJJ61240.1 ater|EAU38519.1 atub|OJI89584.1 aver|OJJ00563.1 awen|OJJ34126.1 azon|OJJ44217.1

Group5743: abra|OJJ77088.1 acar|OOF92972.1 acla|EAW10185.1 afis|EAW25410.1 afla|EED53889.1  
afum|EAL90069.1 agla|OJJ87051.1 akaw|GAA86967.1 aluc|OJZ84497.1 anid|CBF77586.1 aory|EIT78478.1  
asyd|OJJ53170.1 ater|EAU34561.1 atub|OJI89583.1 aver|OJJ03682.1 awen|OJJ41137.1 azon|OJJ44716.1

Group5744: abra|OJJ77089.1 acar|OOF92973.1 acla|EAW08631.1 afis|EAW15800.1 afla|EED51245.1  
afum|EAL85550.2 agla|OJJ81967.1 akaw|GAA86966.1 aluc|OJZ84498.1 anid|CBF70920.1 aory|EIT83182.1  
asyd|OJJ52606.1 ater|EAU32342.1 atub|OJI89582.1 aver|OJJ04633.1 awen|OJJ38509.1 azon|OJJ43743.1

Group5745: abra|OJJ77099.1 acar|OOF92981.1 afis|EAW16895.1 afla|EED53380.1 afum|EAL86432.1  
agla|OJJ79067.1 akaw|GAA86957.1 aluc|OJZ84507.1 anid|CBF80785.1 anig|EHA27806.1 aory|EIT75077.1  
asyd|OJJ54496.1 ater|EAU30219.1 atub|OJI89573.1 aver|OJJ07684.1 awen|OJJ29738.1 azon|OJJ79950.1

Group5746: abra|OJJ77115.1 acar|OOF93004.1 acla|EAW12953.1 afis|EAW17703.1 afla|EED45697.1  
afum|EAL91518.1 agla|OJJ79466.1 akaw|GAA90814.1 aluc|OJZ84525.1 anid|CBF89930.1 anig|EHA27822.1  
aory|EIT75749.1 asyd|OJJ62118.1 ater|EAU31911.1 atub|OJI89555.1 aver|OJI96225.1 awen|OJJ37132.1

Group5747: abra|OJJ77117.1 acar|OOF93234.1 acla|EAW12934.1 afis|EAW17706.1 afla|EED45708.1  
afum|EAL91520.2 akaw|GAA90812.1 aluc|OJZ84527.1 anig|EHA27824.1 aory|EIT75608.1 asyd|OJJ62133.1  
ater|EAU31913.1 atub|OJI89553.1 aver|OJI96242.1 awen|OJJ37130.1 azon|OJJ50829.1 afis|EAW17705.1

Group5748: abra|OJJ77119.1 acla|EAW12931.1 afis|EAW17708.1 afla|EED45710.1 afum|EAL91522.2  
agla|OJJ81739.1 akaw|GAA90810.1 aluc|OJZ84529.1 anid|CBF89908.1 anig|EHA27826.1 aory|EIT75384.1  
asyd|OJJ62131.1 ater|EAU31904.1 atub|OJI89551.1 aver|OJI96240.1 awen|OJJ37128.1 azon|OJJ50827.1

Group5749: abra|OJJ77124.1 acar|OOF93010.1 acla|EAW12937.1 afis|EAW17713.1 afla|EED45715.1  
afum|EAL91528.1 agla|OJJ81735.1 akaw|GAA90804.1 aluc|OJZ84534.1 anid|CBF76918.1 anig|EHA27832.1  
aory|EIT75535.1 asyd|OJJ57073.1 atub|OJI89546.1 aver|OJJ03225.1 awen|OJJ37123.1 azon|OJJ50822.1

Group5750: abra|OJJ77129.1 acla|EAW12940.1 afis|EAW17716.1 afla|EED45718.1 afum|EAL91531.1  
agla|OJJ81732.1 akaw|GAA90799.1 aluc|OJZ84539.1 anid|CBF84090.1 anig|EHA27837.1 aory|EIT75537.1  
asyd|OJJ57081.1 ater|EAU31894.1 atub|OJI89541.1 aver|OJJ03221.1 awen|OJJ37120.1 azon|OJJ50819.1

Group5751: abra|OJJ77132.1 acar|OOF93020.1 acla|EAW12943.1 afis|EAW17719.1 afla|EED45721.1  
afum|EAL91534.2 agla|OJJ81729.1 akaw|GAA90796.1 aluc|OJZ84542.1 anid|CBF76906.1 anig|EHA27840.1  
asyd|OJJ57084.1 ater|EAU31897.1 atub|OJI89538.1 aver|OJJ03218.1 awen|OJJ37117.1 azon|OJJ50816.1

Group5752: abra|OJJ77137.1 acar|OOF90284.1 afis|EAW16801.1 afla|EED47170.1 afum|EAL84245.1  
agla|OJJ88968.1 akaw|GAA90792.1 aluc|OJZ84548.1 anid|CBF78601.1 anig|EHA27844.1 asyd|OJJ59267.1  
atub|OJI89532.1 aver|OJJ01879.1 awen|OJJ32033.1 acla|EAW12954.1 afis|EAW15402.1 aory|EIT79292.1

Group5753: abra|OJJ77151.1 acar|OOF93037.1 acla|EAW12918.1 afis|EAW17737.1 afla|EED45738.1 afum|EAL91552.1 akaw|GAA90779.1 aluc|OJZ84565.1 anid|CBF86590.1 anig|EHA27859.1 aory|EIT75449.1 asyd|OJJ64829.1 ater|EAU31870.1 atub|OJI89517.1 aver|OJI98942.1 awen|OJJ37098.1 azon|OJJ50799.1

Group5754: abra|OJJ77169.1 acar|OOF93060.1 acla|EAW12897.1 afis|EAW17772.1 afla|EED45786.1 afum|EAL91581.1 agla|OJJ81695.1 akaw|GAA90764.1 aluc|OJZ84582.1 anid|EHA27875.1 aory|EIT75547.1 ater|EAU31841.1 atub|OJI89498.1 awen|OJJ37074.1 acla|EAW15270.1 afis|EAW20239.1 afum|EAL85357.1

Group5755: abra|OJJ77208.1 acla|EAW13200.1 afis|EAW17442.1 afla|EED49385.1 afum|EAL91268.1 agla|OJJ80375.1 akaw|GAA90730.1 aluc|OJZ84619.1 anid|CBF71696.1 anig|EHA27907.1 aory|EIT79456.1 asyd|OJJ61815.1 ater|EAU33921.1 atub|OJI89462.1 aver|OJI95914.1 awen|OJJ37404.1 azon|OJJ51078.1

Group5756: abra|OJJ77224.1 acar|OOF93109.1 acla|EAW13215.1 afis|EAW17427.1 afla|EED49401.1 afum|EAL91255.1 agla|OJJ80397.1 akaw|GAA90715.1 aluc|OJZ84634.1 anid|CBF71718.1 anig|EHA27922.1 aory|EIT79578.1 asyd|OJJ61803.1 atub|OJI89445.1 aver|OJI95902.1 awen|OJJ37416.1 azon|OJJ51090.1

Group5757: abra|OJJ77227.1 acar|OOF93112.1 acla|EAW13218.1 afis|EAW17424.1 afla|EED49398.1 afum|EAL91252.1 agla|OJJ80400.1 akaw|GAA90712.1 aluc|OJZ84637.1 anid|CBF71724.1 anig|EHA27925.1 asyd|OJJ61800.1 ater|EAU33906.1 atub|OJI89442.1 aver|OJI95899.1 awen|OJJ37419.1 azon|OJJ51093.1

Group5758: abra|OJJ77237.1 acar|OOF93118.1 acla|EAW13244.1 afis|EAW17392.1 afla|EED49476.1 afum|EAL91230.1 agla|OJJ80402.1 akaw|GAA90706.1 aluc|OJZ84647.1 anid|CBF71737.1 anig|EHA27931.1 asyd|OJJ61793.1 ater|EAU33897.1 atub|OJI89433.1 aver|OJI95893.1 awen|OJJ37423.1 azon|OJJ51106.1

Group5759: abra|OJJ77239.1 acar|OOF93120.1 acla|EAW13246.1 afis|EAW17390.1 afla|EED49478.1 afum|EAL91226.1 agla|OJJ80407.1 akaw|GAA90704.1 aluc|OJZ84649.1 anid|CBF71741.1 aory|EIT79473.1 asyd|OJJ61791.1 ater|EAU33895.1 atub|OJI89431.1 aver|OJI95891.1 awen|OJJ37425.1 azon|OJJ51103.1

Group5760: abra|OJJ77245.1 acla|EAW13249.1 afis|EAW17387.1 afla|EED49496.1 afum|EAL91221.2 agla|OJJ80412.1 akaw|GAA90697.1 aluc|OJZ84656.1 anid|CBF84185.1 anig|EHA27938.1 aory|EIT82598.1 asyd|OJJ57142.1 ater|EAU33892.1 atub|OJI89424.1 aver|OJJ03162.1 awen|OJJ37429.1 azon|OJJ51100.1

Group5761: abra|OJJ77246.1 acar|OOF93127.1 acla|EAW13250.1 afis|EAW17386.1 afla|EED49497.1 afum|EBA27427.1 agla|OJJ80416.1 akaw|GAA90696.1 aluc|OJZ84657.1 anid|CBF84181.1 anig|EHA27939.1 aory|EIT82594.1 asyd|OJJ57158.1 atub|OJI89423.1 aver|OJJ03155.1 awen|OJJ37430.1 azon|OJJ51107.1

Group5762: abra|OJJ77251.1 acar|OOF90004.1 acla|EAW13254.1 afis|EAW17382.1 afla|EED49505.1 afum|EAL91217.1 akaw|GAA90692.1 aluc|OJZ84662.1 anid|CBF84200.1 anig|EHA27944.1 aory|EIT82574.1 asyd|OJJ57162.1 ater|EAU33879.1 atub|OJI89418.1 aver|OJJ03151.1 awen|OJJ37435.1 azon|OJJ51113.1

Group5763: abra|OJJ77259.1 acar|OOF90003.1 acla|EAW13255.1 afis|EAW17381.1 afla|EED49507.1 afum|EAL91216.1 agla|OJJ80421.1 akaw|GAA90688.1 aluc|OJZ84666.1 anid|CBF84205.1 anig|EHA27945.1 aory|EIT82652.1 asyd|OJJ57165.1 atub|OJI89415.1 aver|OJJ03149.1 awen|OJJ37437.1 azon|OJJ51114.1

Group5764: abra|OJJ77276.1 acar|OOF93151.1 acla|EAW13276.1 afis|EAW17341.1 afla|EED49780.1 afum|EAL91186.1 agla|OJJ79343.1 akaw|GAA90673.1 aluc|OJZ84686.1 anid|CBF84219.1 anig|EHA27961.1 aory|EIT77670.1 asyd|OJJ57177.1 atub|OJI89396.1 aver|OJJ03137.1 awen|OJJ36045.1 azon|OJJ45995.1

Group5765: abra|OJJ77280.1 acar|OOF93154.1 acla|EAW13279.1 afis|EAW17338.1 afla|EED51043.1 afum|EAL91182.1 agla|OJJ79348.1 akaw|GAA90669.1 aluc|OJZ84690.1 anig|EHA27965.1 aory|EIT76982.1 asyd|OJJ57176.1 ater|EAU33848.1 atub|OJI89392.1 aver|OJJ03138.1 awen|OJJ40817.1 azon|OJJ50225.1

Group5766: abra|OJJ77294.1 acar|OOF93171.1 acla|EAW13170.1 afis|EAW17469.1 afla|EED49347.1 afum|EAL91298.1 agla|OJJ78441.1 akaw|GAA91457.1 aluc|OJZ84706.1 anid|CBF71628.1 anig|EHA27980.1 aory|EIT79559.1 asyd|OJJ61848.1 ater|EAU33953.1 atub|OJI89377.1 aver|OJI95947.1 awen|OJJ37373.1

Group5767: abra|OJJ77296.1 acar|OOF93173.1 acla|EAW13168.1 afis|EAW17471.1 afla|EED49349.1 afum|EAL91300.1 agla|OJJ81491.1 akaw|GAA91455.1 aluc|OJZ84708.1 anid|CBF71632.1 anig|EHA27982.1 aory|EIT79572.1 asyd|OJJ61850.1 ater|EAU33955.1 atub|OJI89375.1 aver|OJI95949.1 awen|OJJ37371.1

Group5768: abra|OJJ77299.1 acar|OOF93178.1 acla|EAW13166.1 afis|EAW17473.1 afla|EED49342.1 afum|EAL91302.1 agla|OJJ81489.1 akaw|GAA91453.1 aluc|OJZ84711.1 anid|CBF71624.1 anig|EHA27984.1 asyd|OJJ61852.1 ater|EAU33957.1 atub|OJI89372.1 aver|OJI95952.1 awen|OJJ37369.1 azon|OJJ51048.1

Group5769: abra|OJJ77302.1 acar|OOF93181.1 afis|EAW17476.1 afla|EED49338.1 afum|EAL91305.1 agla|OJJ81485.1 akaw|GAA91449.1 aluc|OJZ84715.1 anid|CBF71601.1 anig|EHA27987.1 aory|EIT79492.1 asyd|OJJ61856.1 ater|EAU33692.1 atub|OJI89368.1 aver|OJI95955.1 awen|OJJ37366.1 azon|OJJ45454.1

Group5770: abra|OJJ77316.1 acar|OOF93192.1 acla|EAW13156.1 afis|EAW17490.1 afla|EED49326.1 afum|EAL91312.1 agla|OJJ81466.1 aluc|OJZ84726.1 anid|CBF71619.1 anig|EHA28000.1 aory|EIT79591.1 asyd|OJJ61865.1 ater|EAU36935.1 atub|OJI89356.1 aver|OJI95963.1 awen|OJJ37351.1 azon|OJJ51037.1

Group5771: abra|OJJ77323.1 acar|OOF93199.1 afis|EAW17497.1 afla|EED49319.1 afum|EAL91320.1  
agla|OJJ81458.1 akaw|GAA91433.1 aluc|OJZ84733.1 anid|CBF71584.1 anig|EHA28006.1 asyd|OJJ61873.1  
ater|EAU36941.1 atub|OJI89348.1 aver|OJI95971.1 awen|OJJ37344.1 azon|OJJ51030.1 ater|EAU38793.1

Group5772: abra|OJJ77324.1 acar|OOF93200.1 acla|EAW13148.1 afis|EAW17499.1 afla|EED49317.1  
afum|EAL91322.1 agla|OJJ81454.1 akaw|GAA91432.1 aluc|OJZ84734.1 anid|CBF71580.1 anig|EHA28007.1  
asyd|OJJ61875.1 ater|EAU36944.1 atub|OJI89347.1 aver|OJI95973.1 awen|OJJ37342.1 azon|OJJ51027.1

Group5773: abra|OJJ77330.1 acar|OOF93205.1 acla|EAW13143.1 afis|EAW17515.1 afla|EED49312.1  
afum|EAL91333.1 agla|OJJ81449.1 akaw|GAA91427.1 aluc|OJZ84739.1 anid|CBF71570.1 anig|EHA28012.1  
aory|EIT82234.1 asyd|OJJ61880.1 atub|OJI89342.1 aver|OJI95978.1 awen|OJJ37336.1 azon|OJJ51022.1

Group5774: abra|OJJ77332.1 acar|OOF93206.1 acla|EAW13142.1 afis|EAW17514.1 afla|EED49311.1  
afum|EAL91332.1 agla|OJJ81448.1 akaw|GAA91426.1 aluc|OJZ84740.1 anid|CBF73599.1 anig|EHA28013.1  
aory|EIT82247.1 asyd|OJJ56681.1 ater|EAU36951.1 atub|OJI89341.1 aver|OJJ06042.1 awen|OJJ37335.1

Group5775: abra|OJJ77340.1 acla|EAW13135.1 afis|EAW17504.1 afla|EED49304.1 afum|EAL91326.1  
agla|OJJ81442.1 akaw|GAA91421.1 aluc|OJZ84749.1 anid|CBF71539.1 anig|EHA28019.1 aory|EIT82224.1  
asyd|OJJ61895.1 ater|EAU36957.1 atub|OJI89333.1 aver|OJI95991.1 awen|OJJ37327.1 azon|OJJ51016.1

Group5776: abra|OJJ77360.1 acar|OOF93229.1 acla|EAW13116.1 afis|EAW17548.1 afla|EED49277.1  
afum|EAL91362.1 agla|OJJ81420.1 akaw|GAA91403.1 aluc|OJZ84768.1 anid|CBF90292.1 aory|EIT82223.1  
asyd|OJJ61922.1 ater|EAU36987.1 atub|OJI89314.1 aver|OJI96014.1 awen|OJJ37306.1 azon|OJJ50998.1

Group5777: abra|OJJ77389.1 acar|OOF93258.1 acla|EAW08796.1 afis|EAW15599.1 afla|EED45975.1  
afum|EAL85733.1 akaw|GAA91372.1 aluc|OJZ84797.1 anid|CBF78871.1 anig|EHA28064.1 aory|EIT75420.1  
asyd|OJJ64587.1 ater|EAU30348.1 atub|OJI89285.1 aver|OJI98684.1 awen|OJJ37986.1 azon|OJJ43887.1

Group5778: abra|OJJ77395.1 acar|OOF93263.1 afis|EAW17805.1 afla|EED45800.1 afum|EAL91613.1  
agla|OJJ78527.1 akaw|GAA91367.1 aluc|OJZ84803.1 anid|CBF86646.1 anig|EHA28068.1 aory|EIT75621.1  
asyd|OJJ64799.1 ater|EAU31836.1 atub|OJI89280.1 aver|OJI98913.1 awen|OJJ41514.1 agla|OJJ80100.1

Group5779: abra|OJJ77466.1 acar|OOF99268.1 acla|EAW07126.1 afis|EAW22136.1 afla|EED54175.1  
afum|EAL91054.1 akaw|GAA84151.1 aluc|OJZ81072.1 anid|CBF69552.1 anig|EHA19297.1 aory|EIT75896.1  
asyd|OJJ59166.1 ater|EAU29320.1 atub|OJI82514.1 aver|OJJ01756.1 awen|OJJ34713.1 aory|EIT76090.1

Group5780: abra|OJJ77469.1 acar|OOF99255.1 acla|EAW06765.1 afis|EAW16315.1 afla|EED54179.1  
afum|EAL88938.1 agla|OJJ88273.1 akaw|GAA84148.1 aluc|OJZ81069.1 anid|CBF69555.1 anig|EHA19300.1  
aory|EIT75912.1 asyd|OJJ59164.1 ater|EAU29325.1 atub|OJI82517.1 aver|OJJ01754.1 awen|OJJ37713.1

Group5781: abra|OJJ77470.1 acar|OOF99254.1 acla|EAW06762.1 afis|EAW16312.1 afla|EED54183.1  
afum|EAL88934.1 agla|OJJ88271.1 akaw|GAA84147.1 aluc|OJZ81068.1 anig|EHA19301.1 aory|EIT76029.1  
asyd|OJJ59157.1 ater|EAU29330.1 atub|OJI82518.1 aver|OJJ01747.1 awen|OJJ37712.1 azon|OJJ44971.1

Group5782: abra|OJJ77472.1 acar|OOF99252.1 acla|EAW06759.1 afis|EAW16309.1 afla|EED54185.1  
afum|EAL88931.1 agla|OJJ86289.1 akaw|GAA84145.1 aluc|OJZ81065.1 anid|CBF69562.1 anig|EHA19303.1  
aory|EIT75996.1 asyd|OJJ59155.1 ater|EAU29338.1 atub|OJI82520.1 aver|OJJ01745.1 awen|OJJ37708.1

Group5783: abra|OJJ77473.1 acar|OOF99251.1 acla|EAW06758.1 afis|EAW16308.1 afla|EED53241.1  
afum|EAL88930.1 agla|OJJ86288.1 akaw|GAA84144.1 aluc|OJZ81064.1 anid|CBF69564.1 anig|EHA19304.1  
aory|EIT75223.1 asyd|OJJ59154.1 ater|EAU29337.1 atub|OJI82521.1 aver|OJJ01744.1 awen|OJJ37707.1

Group5784: abra|OJJ77481.1 acar|OOF99244.1 acla|EAW06743.1 afis|EAW16293.1 afum|EAL88915.1  
agla|OJJ88315.1 akaw|GAA84137.1 aluc|OJZ81056.1 anid|CBF86850.1 anig|EHA19311.1 aory|EIT75158.1  
asyd|OJJ64639.1 ater|EAU37337.1 atub|OJI82528.1 aver|OJI98738.1 awen|OJJ37687.1 azon|OJJ44947.1

Group5785: abra|OJJ77483.1 acar|OOF99243.1 acla|EAW06744.1 afis|EAW16294.1 afla|EED53260.1  
afum|EAL88916.1 agla|OJJ88316.1 akaw|GAA84136.1 aluc|OJZ81054.1 anid|CBF86848.1 anig|EHA19313.1  
aory|EIT74888.1 asyd|OJJ64640.1 atub|OJI82530.1 aver|OJI98740.1 awen|OJJ37685.1 azon|OJJ44946.1

Group5786: abra|OJJ77484.1 acar|OOF99241.1 acla|EAW06747.1 afis|EAW16297.1 afla|EED53257.1  
afum|EAL88919.1 agla|OJJ88298.1 akaw|GAA84134.1 aluc|OJZ81052.1 anid|CBF86845.1 anig|EHA19315.1  
asyd|OJJ64643.1 ater|EAU29339.1 atub|OJI82532.1 aver|OJI98743.1 awen|OJJ37696.1 azon|OJJ44957.1

Group5787: abra|OJJ77487.1 acar|OOF99238.1 acla|EAW06749.1 afis|EAW16299.1 afla|EED53255.1  
afum|EAL88921.1 agla|OJJ88296.1 akaw|GAA84132.1 aluc|OJZ81049.1 anig|EHA19318.1 aory|EIT75108.1  
asyd|OJJ64645.1 ater|EAU37341.1 atub|OJI82535.1 aver|OJI98745.1 awen|OJJ37698.1 azon|OJJ44959.1

Group5788: abra|OJJ77519.1 acar|OOF99205.1 acla|EAW06713.1 afis|EAW16274.1 afla|EED53296.1  
afum|EAL88895.1 agla|OJJ78577.1 akaw|GAA84102.1 aluc|OJZ81017.1 anid|CBF78275.1 anig|EHA19345.1  
aory|EIT75252.1 asyd|OJJ56075.1 ater|EAU37449.1 atub|OJI82566.1 aver|OJJ05018.1 azon|OJJ50409.1

Group5789: abra|OJJ77531.1 acla|EAW06706.1 afis|EAW16263.1 afla|EED53301.1 afum|EAL88884.1  
agla|OJJ88379.1 akaw|GAA84089.1 aluc|OJZ81004.1 anid|CBF86916.1 anig|EHA19356.1 aory|EIT75165.1  
asyd|OJJ64606.1 ater|EAU37452.1 atub|OJI82581.1 aver|OJI98703.1 awen|OJJ37653.1 azon|OJJ44917.1

Group5790: abra|OJJ77536.1 acar|OOF99190.1 acla|EAW06711.1 afis|EAW16257.1 afla|EED53323.1  
afum|EAL88878.1 akaw|GAA84084.1 aluc|OJZ80998.1 anid|CBF78893.1 anig|EHA19362.1 aory|EIT75253.1  
asyd|OJJ64598.1 ater|EAU37468.1 atub|OJI82586.1 aver|OJI98695.1 awen|OJJ30202.1 azon|OJJ50681.1

Group5791: abra|OJJ77546.1 acar|OOF99177.1 acla|EAW06708.1 afis|EAW16261.1 afla|EED53325.1  
afum|EAL88882.1 agla|OJJ88382.1 akaw|GAA84077.1 aluc|OJZ80991.1 anid|CBF78870.1 anig|EHA19371.1  
asyd|OJJ64588.1 ater|EAU33700.1 atub|OJI82594.1 aver|OJI98685.1 awen|OJJ37651.1 azon|OJJ44915.1

Group5792: abra|OJJ77547.1 acar|OOF99176.1 acla|EAW06707.1 afis|EAW16262.1 afla|EED53326.1  
afum|EAL88883.1 agla|OJJ88381.1 akaw|GAA84076.1 aluc|OJZ80990.1 anid|CBF78868.1 aory|EIT74871.1  
asyd|OJJ64589.1 ater|EAU33701.1 atub|OJI82595.1 aver|OJI98686.1 awen|OJJ37652.1 azon|OJJ44916.1

Group5793: abra|OJJ77549.1 acar|OOF95414.1 acla|EAW08956.1 afla|EED49536.1 afum|EAL88030.1  
agla|OJJ78723.1 akaw|GAA84074.1 aluc|OJZ80988.1 anid|CBF70524.1 anig|EHA19372.1 asyd|OJJ57565.1  
atub|OJI82598.1 aver|OJJ05614.1 awen|OJJ32036.1 azon|OJJ46060.1 asyd|OJJ56222.1 aver|OJJ05154.1

Group5794: abra|OJJ77558.1 acar|OOG00297.1 afis|EAW16397.1 afla|EED51760.1 afum|EAL89030.2  
agla|OJJ88351.1 akaw|GAA84066.1 aluc|OJZ80980.1 anid|CBF85653.1 anig|EHA19381.1 aory|EIT80739.1  
asyd|OJJ62365.1 ater|EAU33012.1 atub|OJI82606.1 aver|OJI96499.1 awen|OJJ30119.1 agla|OJJ82192.1

Group5795: abra|OJJ77562.1 acla|EAW06695.1 afis|EAW16071.1 afla|EED48590.1 afum|EAL88703.2  
agla|OJJ86097.1 akaw|GAA84063.1 aluc|OJZ80976.1 anid|CBF75105.1 anig|EHA19383.1 aory|EIT73151.1  
asyd|OJJ59999.1 ater|EAU33560.1 atub|OJI82609.1 aver|OJJ02292.1 awen|OJJ30363.1 azon|OJJ45382.1

Group5796: abra|OJJ77565.1 acar|OOF99165.1 acla|EAW06530.1 afis|EAW16065.1 afla|EED48586.1  
afum|EAL88697.1 agla|OJJ86100.1 akaw|GAA84061.1 aluc|OJZ80973.1 anid|CBF75096.1 anig|EHA19386.1  
asyd|OJJ60008.1 ater|EAU33568.1 atub|OJI82612.1 aver|OJJ02277.1 awen|OJJ30370.1 azon|OJJ45390.1

Group5797: abra|OJJ77570.1 acla|EAW06535.1 afis|EAW16060.1 afla|EED48574.1 afum|EAL88693.1  
akaw|GAA84056.1 aluc|OJZ80968.1 anid|CBF75084.1 anig|EHA19390.1 aory|EIT73112.1 asyd|OJJ60015.1  
atub|OJI82618.1 aver|OJJ02270.1 awen|OJJ30379.1 azon|OJJ45395.1 agla|OJJ86105.1 ater|EAU33574.1

Group5798: abra|OJJ77571.1 acar|OOF99158.1 acla|EAW06540.1 afis|EAW16055.1 afla|EED56443.1  
afum|EAL88687.1 agla|OJJ86088.1 akaw|GAA84055.1 aluc|OJZ80967.1 anid|CBF75074.1 anig|EHA19391.1  
aory|EIT72848.1 asyd|OJJ60020.1 ater|EAU33579.1 atub|OJI82619.1 aver|OJJ02265.1 awen|OJJ30384.1

Group5799: abra|OJJ77578.1 acar|OOF99149.1 acla|EAW06544.1 afis|EAW16050.1 afla|EED56439.1  
afum|EAL88683.1 agla|OJJ86084.1 akaw|GAA84047.1 aluc|OJZ80957.1 anid|CBF75066.1 anig|EHA19398.1  
asyd|OJJ60023.1 atub|OJI82627.1 aver|OJJ02261.1 awen|OJJ30393.1 azon|OJJ45403.1 ater|EAU33586.1

Group5800: abra|OJJ77594.1 acla|EAW06558.1 afis|EAW16038.1 afla|EED56426.1 afum|EAL88669.1  
agla|OJJ86062.1 akaw|GAA84034.1 aluc|OJZ80941.1 anid|CBF75038.1 anig|EHA19412.1 aory|EIT72878.1  
asyd|OJJ60036.1 ater|EAU33602.1 atub|OJI82641.1 aver|OJJ02249.1 awen|OJJ30408.1 azon|OJJ45416.1

Group5801: abra|OJJ77595.1 acar|OOF99132.1 acla|EAW06559.1 afis|EAW16037.1 afla|EED56425.1  
afum|EBA27355.1 agla|OJJ86063.1 akaw|GAA84033.1 aluc|OJZ80940.1 anid|CBF75042.1 aory|EIT72875.1  
asyd|OJJ60037.1 ater|EAU33603.1 atub|OJI82642.1 aver|OJJ02248.1 awen|OJJ30409.1 azon|OJJ45417.1

Group5802: abra|OJJ77596.1 acar|OOF99130.1 acla|EAW06560.1 afis|EAW16036.1 afla|EED56424.1  
afum|EBA27354.1 agla|OJJ86064.1 akaw|GAA84032.1 aluc|OJZ80939.1 anid|CBF75040.1 anig|EHA19413.1  
asyd|OJJ60038.1 ater|EAU33604.1 atub|OJI82643.1 aver|OJJ02247.1 awen|OJJ30410.1 azon|OJJ45419.1

Group5803: abra|OJJ77600.1 acar|OOF99125.1 acla|EAW06564.1 afis|EAW16032.1 afla|EED56414.1  
afum|EAL88663.1 agla|OJJ86060.1 akaw|GAA84028.1 aluc|OJZ80933.1 anid|CBF75032.1 anig|EHA19417.1  
asyd|OJJ60051.1 ater|EAU33609.1 atub|OJI82647.1 aver|OJJ02238.1 awen|OJJ30415.1 azon|OJJ45423.1

Group5804: abra|OJJ77647.1 acar|OOF99089.1 acla|EAW06493.1 afis|EAW15989.1 afla|EED56361.1  
afum|EAL88621.1 agla|OJJ85991.1 akaw|GAA83988.1 aluc|OJZ80882.1 anid|CBF85817.1 anig|EHA19454.1  
aory|EIT73312.1 ater|EAU33660.1 atub|OJI82695.1 aver|OJI98436.1 awen|OJJ30481.1 azon|OJJ45472.1

Group5805: abra|OJJ77649.1 acar|OOF99087.1 akaw|GAA83986.1 aluc|OJZ80880.1 anig|EHA19456.1  
atub|OJI82697.1 aver|OJI98438.1 abra|OJJ78132.1 afis|EAW20412.1 afla|EED52849.1 afum|EAL89232.1  
aluc|OJZ91194.1 aory|EIT78655.1 ater|EAU29526.1 atub|OJI83213.1 awen|OJJ38076.1 anid|CBF87263.1

Group5806: abra|OJJ77662.1 acar|OOF99072.1 acla|EAW06599.1 afis|EAW16005.1 afla|EED56379.1  
afum|EAL88637.2 agla|OJJ86029.1 akaw|GAA83973.1 aluc|OJZ80866.1 anid|CBF85850.1 anig|EHA19469.1  
asyd|OJJ64361.1 ater|EAU33638.1 atub|OJI82711.1 aver|OJI98457.1 awen|OJJ30462.1 azon|OJJ45452.1

Group5807: abra|OJJ77663.1 acla|EAW06600.1 afis|EAW16004.1 afum|EAL88636.1 agla|OJJ86028.1 akaw|GAA83972.1 aluc|OJZ80865.1 anid|CBF85848.1 anig|EHA19470.1 aory|EIT73333.1 asyd|OJJ64358.1 ater|EAU33639.1 atub|OJI82712.1 aver|OJI98454.1 awen|OJJ30463.1 azon|OJJ45453.1 afla|EED56378.1

Group5808: abra|OJJ77676.1 acla|EAW06588.1 afis|EAW16011.1 afla|EED56388.1 afum|EAL88641.1 agla|OJJ86036.1 akaw|GAA83956.1 aluc|OJZ80843.1 anid|CBF74567.1 anig|EHA19480.1 aory|EIT83019.1 asyd|OJJ57650.1 ater|EAU33632.1 atub|OJI82724.1 aver|OJJ05509.1 awen|OJJ30454.1 azon|OJJ45445.1

Group5809: abra|OJJ77677.1 acla|EAW06589.1 afis|EAW16012.1 afla|EED56389.1 afum|EAL88642.1 agla|OJJ86037.1 akaw|GAA83955.1 aluc|OJZ80842.1 anid|CBF74566.1 anig|EHA19481.1 aory|EIT83001.1 asyd|OJJ57649.1 ater|EAU33631.1 atub|OJI82725.1 aver|OJJ05508.1 awen|OJJ30453.1 azon|OJJ45444.1

Group5810: abra|OJJ77692.1 acar|OOF99047.1 acla|EAW06573.1 afis|EAW16023.1 afla|EED56402.1 afum|EAL88652.1 agla|OJJ86052.1 akaw|GAA83938.1 aluc|OJZ80820.1 anid|CBF75011.1 anig|EHA19492.1 aory|EIT82997.1 asyd|OJJ60055.1 atub|OJI82742.1 aver|OJJ02234.1 awen|OJJ30438.1 azon|OJJ45433.1

Group5811: abra|OJJ77698.1 acar|OOF99042.1 acla|EAW11328.1 afis|EAW18167.1 afla|EED56328.1 afum|EAL87527.2 agla|OJJ85954.1 akaw|GAA83932.1 aluc|OJZ90763.1 anid|CBF85748.1 anig|EHA19497.1 aory|EIT73301.1 asyd|OJJ64294.1 ater|EAU33837.1 atub|OJI82751.1 aver|OJI98386.1 awen|OJJ30513.1

Group5812: abra|OJJ77705.1 acar|OOF99035.1 acla|EAW11316.1 afis|EAW18180.1 afla|EED56308.1 afum|EAL87541.1 akaw|GAA83925.1 aluc|OJZ90770.1 anid|CBF85727.1 anig|EHA19505.1 aory|EIT73291.1 asyd|OJJ64279.1 ater|EAU33820.1 atub|OJI82758.1 aver|OJI98371.1 awen|OJJ30528.1 azon|OJJ50210.1

Group5813: abra|OJJ77739.1 acar|OOF98987.1 afis|EAW21097.1 afla|EED49614.1 afum|EAL92120.1 agla|OJJ80115.1 akaw|GAA83890.1 aluc|OJZ90805.1 anid|CBF84486.1 anig|EHA19532.1 aory|EIT80984.1 asyd|OJJ53525.1 ater|EAU37778.1 atub|OJI82794.1 aver|OJJ08225.1 awen|OJJ36023.1 acla|EAW09993.1

Group5814: abra|OJJ77772.1 acar|OOF98962.1 acla|EAW11312.1 afis|EAW18186.1 afla|EED56292.1 afum|EAL87549.1 agla|OJJ85898.1 akaw|GAA83874.1 aluc|OJZ90822.1 anid|CBF85717.1 anig|EHA19548.1 aory|EIT73285.1 asyd|OJJ64274.1 ater|EAU33808.1 atub|OJI82810.1 aver|OJI98366.1 awen|OJJ30541.1

Group5815: abra|OJJ77773.1 acar|OOF98964.1 acla|EAW08571.1 afis|EAW23629.1 afla|EED46113.1 afum|EAL87831.1 akaw|GAA83873.1 aluc|OJZ90825.1 anid|CBF84280.1 anig|EHA19549.1 aory|EIT76433.1 asyd|OJJ57232.1 ater|EAU38029.1 atub|OJI82812.1 aver|OJJ03057.1 awen|OJJ36003.1 azon|OJJ51529.1

Group5816: abra|OJJ77774.1 acar|OOF98965.1 acla|EAW08572.1 afis|EAW23630.1 afla|EED46115.1 afum|EBA27325.1 akaw|GAA83872.1 aluc|OJZ90826.1 anid|CBF84282.1 anig|EHA19550.1 aory|EIT76372.1 asyd|OJJ57233.1 ater|EAU38028.1 atub|OJI82813.1 aver|OJJ03056.1 awen|OJJ36002.1 azon|OJJ51527.1

Group5817: abra|OJJ77776.1 acar|OOF98966.1 acla|EAW11313.1 afis|EAW18184.1 afla|EED56301.1 afum|EBA27317.1 agla|OJJ85900.1 akaw|GAA83871.1 aluc|OJZ90829.1 anid|CBF85715.1 anig|EHA19552.1 aory|EIT73399.1 asyd|OJJ64273.1 ater|EAU33816.1 atub|OJI82815.1 aver|OJI98365.1 awen|OJJ30532.1

Group5818: abra|OJJ77780.1 acar|OOF98970.1 afla|EED53399.1 akaw|GAA83867.1 aluc|OJZ90833.1 anid|CBF80617.1 anig|EHA19556.1 aory|EIT74939.1 asyd|OJJ54627.1 atub|OJI82819.1 aver|OJJ07529.1 awen|OJJ34502.1 afla|EED44856.1 aory|EIT82733.1 aver|OJI99413.1 anid|CBF78813.1 asyd|OJJ65262.1

Group5819: abra|OJJ77823.1 acar|OOF98946.1 acla|EAW11302.1 afis|EAW18200.1 afla|EED56278.1 afum|EAL87565.1 agla|OJJ85882.1 akaw|GAA83823.1 aluc|OJZ90895.1 anid|CBF86117.1 anig|EHA19614.1 aory|EIT73354.1 ater|EAU33794.1 atub|OJI82888.1 aver|OJI98595.1 awen|OJJ30568.1 azon|OJJ45504.1

Group5820: abra|OJJ77829.1 acla|EAW11297.1 afis|EAW18205.1 afla|EED56267.1 afum|EAL87570.1 agla|OJJ85877.1 akaw|GAA83818.1 aluc|OJZ90903.1 anid|CBF86130.1 anig|EHA19618.1 aory|EIT73457.1 asyd|OJJ64500.1 ater|EAU33784.1 atub|OJI82896.1 aver|OJI98600.1 awen|OJJ30576.1 azon|OJJ45499.1

Group5821: abra|OJJ77832.1 acar|OOF98938.1 acla|EAW11294.1 afis|EAW18208.1 afla|EED56262.1 afum|EAL87574.1 agla|OJJ85874.1 akaw|GAA83815.1 aluc|OJZ90906.1 anid|CBF86135.1 anig|EHA19621.1 asyd|OJJ64504.1 ater|EAU33780.1 atub|OJI82899.1 aver|OJI98603.1 awen|OJJ30580.1 azon|OJJ50191.1

Group5822: abra|OJJ77833.1 acla|EAW11293.1 afis|EAW18209.1 afla|EED56261.1 afum|EAL87575.2 agla|OJJ85873.1 akaw|GAA83814.1 aluc|OJZ90907.1 anid|CBF86137.1 anig|EHA19622.1 aory|EIT73295.1 asyd|OJJ64505.1 ater|EAU33779.1 atub|OJI82900.1 aver|OJI98604.1 awen|OJJ30581.1 azon|OJJ50190.1

Group5823: abra|OJJ77835.1 acar|OOF98936.1 acla|EAW11288.1 afis|EAW18211.1 afum|EAL87577.1 agla|OJJ85871.1 akaw|GAA83812.1 aluc|OJZ90909.1 anid|CBF86140.1 anig|EHA19624.1 aory|EIT73309.1 asyd|OJJ64507.1 ater|EAU33777.1 atub|OJI82902.1 aver|OJI98606.1 awen|OJJ30589.1 azon|OJJ50187.1

Group5824: abra|OJJ77842.1 acla|EAW11281.1 afis|EAW18219.1 afla|EED56251.1 afum|EAL87585.1 agla|OJJ85863.1 akaw|GAA83805.1 aluc|OJZ90917.1 anid|CBF86150.1 anig|EHA19629.1 aory|EIT73410.1 asyd|OJJ64513.1 ater|EAU33772.1 atub|OJI82909.1 aver|OJI98611.1 awen|OJJ30597.1 azon|OJJ50171.1

Group5825: abra|OJJ77843.1 acar|OOF98929.1 acla|EAW11280.1 afis|EAW18220.1 afla|EED56250.1 afum|EAL87586.1 agla|OJJ85862.1 akaw|GAA83804.1 aluc|OJZ90918.1 anid|CBF86157.1 anig|EHA19630.1 asyd|OJJ64514.1 ater|EAU33771.1 atub|OJI82910.1 aver|OJI98612.1 awen|OJJ30598.1 azon|OJJ50170.1

Group5826: abra|OJJ77856.1 acar|OOF98918.1 acla|EAW11270.1 afis|EAW18229.1 afla|EED56239.1 afum|EAL87596.1 agla|OJJ85852.1 akaw|GAA83793.1 aluc|OJZ90930.1 anid|CBF86170.1 anig|EHA19641.1 asyd|OJJ64524.1 ater|EAU33762.1 atub|OJI82922.1 aver|OJI98622.1 awen|OJJ30608.1 azon|OJJ50160.1

Group5827: abra|OJJ77863.1 acar|OOF98910.1 acla|EAW11263.1 afis|EAW18235.1 afla|EED56231.1 afum|EAL87602.2 agla|OJJ85839.1 akaw|GAA83786.1 aluc|OJZ90938.1 anid|CBF86184.1 anig|EHA19646.1 asyd|OJJ64531.1 ater|EAU33750.1 atub|OJI82929.1 aver|OJI98629.1 awen|OJJ30615.1 azon|OJJ48002.1

Group5828: abra|OJJ77909.1 acar|OOF98876.1 acla|EAW06517.1 afis|EAW16235.1 afla|EED53346.1 agla|OJJ86240.1 akaw|GAA83750.1 aluc|OJZ90981.1 anid|CBF86229.1 anig|EHA19686.1 aory|EIT75244.1 asyd|OJJ64565.1 ater|EAU33709.1 atub|OJI82972.1 aver|OJI98662.1 awen|OJJ30225.1 azon|OJJ43945.1

Group5829: abra|OJJ77922.1 acla|EAW06686.1 afis|EAW16079.1 afla|EED48599.1 afum|EAL88711.1 agla|OJJ86112.1 akaw|GAA83741.1 aluc|OJZ90990.1 anid|CBF75121.1 anig|EHA19694.1 aory|EIT73245.1 asyd|OJJ59992.1 ater|EAU33145.1 atub|OJI82981.1 aver|OJJ02299.1 awen|OJJ30354.1 azon|OJJ45376.1

Group5830: abra|OJJ77927.1 acar|OOF98865.1 acla|EAW06685.1 afis|EAW16080.1 afla|EED48600.1 afum|EAL88712.1 agla|OJJ86113.1 akaw|GAA83737.1 aluc|OJZ90995.1 anig|EHA19702.1 aory|EIT73241.1 asyd|OJJ59991.1 ater|EAU33146.1 atub|OJI82985.1 aver|OJJ02300.1 awen|OJJ30353.1 azon|OJJ45375.1

Group5831: abra|OJJ77928.1 acar|OOF98866.1 acla|EAW06684.1 afis|EAW16081.1 afla|EED48601.1 afum|EAL88713.1 agla|OJJ86114.1 akaw|GAA83736.1 aluc|OJZ90996.1 anig|EHA19703.1 aory|EIT73043.1 asyd|OJJ59990.1 ater|EAU33147.1 atub|OJI82986.1 aver|OJJ02301.1 awen|OJJ30352.1 azon|OJJ45374.1

Group5832: abra|OJJ77931.1 acar|OOF98868.1 acla|EAW06683.1 afis|EAW16082.1 afla|EED48602.1 afum|EAL88714.1 agla|OJJ86116.1 akaw|GAA83732.1 aluc|OJZ90999.1 anig|EHA19706.1 aory|EIT73073.1 asyd|OJJ59989.1 ater|EAU33148.1 atub|OJI82989.1 aver|OJJ02302.1 awen|OJJ30351.1 azon|OJJ45373.1

Group5833: abra|OJJ77932.1 acar|OOF98869.1 acla|EAW06682.1 afis|EAW16083.1 afla|EED48603.1 afum|EAL88715.1 agla|OJJ86115.1 akaw|GAA83731.1 aluc|OJZ91000.1 anig|EHA19707.1 aory|EIT73153.1 asyd|OJJ59988.1 ater|EAU33149.1 atub|OJI82990.1 aver|OJJ02303.1 awen|OJJ30350.1 azon|OJJ45372.1

Group5834: abra|OJJ77934.1 acla|EAW06680.1 afis|EAW16085.1 afla|EED48605.1 afum|EAL88717.1 agla|OJJ86117.1 akaw|GAA83729.1 aluc|OJZ91002.1 anid|CBF75123.1 anig|EHA19708.1 aory|EIT73254.1 asyd|OJJ59986.1 ater|EAU33151.1 atub|OJI82992.1 aver|OJJ02305.1 awen|OJJ30347.1 azon|OJJ45371.1

Group5835: abra|OJJ77953.1 afla|EED49771.1 agla|OJJ89120.1 akaw|GAA83710.1 aluc|OJZ91024.1 anid|CBF87975.1 anig|EHA19724.1 aory|EIT77708.1 asyd|OJJ63489.1 ater|EAU33503.1 atub|OJI83016.1 aver|OJI97440.1 awen|OJJ30074.1 azon|OJJ42166.1 atub|OJI83019.1 agla|OJJ84720.1 agla|OJJ88987.1

Group5836: abra|OJJ77986.1 acar|OOF98837.1 acla|EAW06662.1 afis|EAW16103.1 afla|EED48638.1 afum|EAL88735.1 akaw|GAA85994.1 aluc|OJZ91061.1 anid|CBF85479.1 anig|EHA19764.1 aory|EIT73148.1 asyd|OJJ64107.1 ater|EAU33180.1 atub|OJI83057.1 aver|OJI98189.1 awen|OJJ30329.1 azon|OJJ45346.1

Group5837: abra|OJJ77996.1 acar|OOF98825.1 acla|EAW06652.1 afis|EAW16113.1 afla|EED48653.1 afum|EAL88744.1 agla|OJJ86152.1 akaw|GAA85984.1 aluc|OJZ91072.1 anid|CBF85498.1 anig|EHA19775.1 aory|EIT73209.1 asyd|OJJ64116.1 ater|EAU33196.1 atub|OJI83067.1 aver|OJI98199.1 awen|OJJ30317.1

Group5838: abra|OJJ78002.1 acla|EAW06648.1 afis|EAW16117.1 afla|EED48658.1 afum|EAL88748.1 agla|OJJ86156.1 akaw|GAA85981.1 aluc|OJZ91078.1 anid|CBF85507.1 anig|EHA19779.1 aory|EIT73114.1 asyd|OJJ64120.1 ater|EAU33200.1 atub|OJI83073.1 aver|OJI98203.1 awen|OJJ30313.1 azon|OJJ45330.1

Group5839: abra|OJJ78003.1 acar|OOF98820.1 acla|EAW06647.1 afis|EAW16118.1 afla|EED48659.1 afum|EAL88749.1 agla|OJJ86159.1 akaw|GAA85980.1 aluc|OJZ91079.1 anid|CBF85509.1 anig|EHA19780.1 asyd|OJJ64121.1 ater|EAU33201.1 atub|OJI83074.1 aver|OJI98204.1 awen|OJJ30312.1 azon|OJJ45329.1

Group5840: abra|OJJ78006.1 acar|OOF98816.1 acla|EAW06644.1 afis|EAW16121.1 afum|EAL88752.1 agla|OJJ86162.1 akaw|GAA85977.1 aluc|OJZ91082.1 anid|CBF85539.1 anig|EHA19783.1 aory|EIT73243.1 asyd|OJJ64141.1 ater|EAU33204.1 atub|OJI83078.1 aver|OJI98222.1 awen|OJJ30309.1 azon|OJJ45312.1

Group5841: abra|OJJ78009.1 acar|OOF98814.1 acla|EAW06640.1 afis|EAW16125.1 afla|EED48665.1 afum|EAL88755.1 agla|OJJ86167.1 akaw|GAA85974.1 aluc|OJZ91085.1 anid|CBF85530.1 anig|EHA19786.1 asyd|OJJ64134.1 ater|EAU33208.1 atub|OJI83081.1 aver|OJI98217.1 awen|OJJ30304.1 azon|OJJ45305.1

Group5842: abra|OJJ78016.1 acar|OOF98808.1 acla|EAW06632.1 afis|EAW16133.1 afla|EED48672.1 afum|EAL88763.1 agla|OJJ86178.1 akaw|GAA85967.1 aluc|OJZ91092.1 anid|CBF85518.1 anig|EHA19793.1 asyd|OJJ64126.1 ater|EAU33215.1 atub|OJI83089.1 aver|OJI98209.1 awen|OJJ30295.1 azon|OJJ43985.1

Group5843: abra|OJJ78017.1 acar|OOF98806.1 acla|EAW06630.1 afis|EAW16135.1 afla|EED48674.1 afum|EAL88765.1 agla|OJJ86180.1 akaw|GAA85966.1 aluc|OJZ91093.1 anid|CBF85514.1 anig|EHA19794.1 asyd|OJJ64124.1 ater|EAU33217.1 atub|OJI83090.1 aver|OJI98207.1 awen|OJJ30293.1 azon|OJJ43982.1

Group5844: abra|OJJ78025.1 acar|OOF98800.1 acla|EAW06624.1 afis|EAW16141.1 afla|EED48682.1 afum|EAL88770.2 akaw|GAA85961.1 aluc|OJZ91100.1 anid|CBF85550.1 anig|EHA19800.1 aory|EIT73246.1 asyd|OJJ64150.1 ater|EAU33226.1 atub|OJI83097.1 aver|OJI98230.1 awen|OJJ30287.1 azon|OJJ43976.1

Group5845: abra|OJJ78056.1 afis|EAW20703.1 afla|EED51737.1 afum|EAL84878.1 agla|OJJ85717.1 akaw|GAA85936.1 aluc|OJZ91126.1 anid|CBF70385.1 anig|EHA19827.1 aory|EIT80428.1 asyd|OJJ58639.1 atub|OJI83137.1 aver|OJJ01246.1 asyd|OJJ56271.1 aver|OJJ08494.1 anid|CBF79145.1 atub|OJI79837.1

Group5846: afla|EED48481.1 ater|EAU29541.1 acar|OOF98852.1 acla|EAW09008.1 akaw|GAA93107.1 aluc|OJZ80597.1 anig|EHA22185.1 asyd|OJJ64213.1 awen|OJJ29864.1 anid|CBF80392.1 aory|EIT73087.1 asyd|OJJ54790.1 aver|OJJ07373.1 azon|OJJ43202.1 afis|EAW17320.1 aver|OJJ06502.1 anid|CBF89303.1

Group5847: abra|OJJ78077.1 acla|EAW06610.1 afis|EAW16205.1 afla|EED48698.1 agla|OJJ86216.1 akaw|GAA85917.1 aluc|OJZ91149.1 anid|CBF79565.1 anig|EHA19847.1 aory|EIT73041.1 asyd|OJJ57914.1 ater|EAU33247.1 atub|OJI83163.1 aver|OJJ04479.1 awen|OJJ30267.1 azon|OJJ43963.1 afum|EAL88833.1

Group5848: abra|OJJ78095.1 acar|OOF98778.1 acla|EAW11017.1 afis|EAW20831.1 afla|EED57883.1 afum|EAL84801.1 akaw|GAA85903.1 aluc|OJZ91164.1 anid|CBF69443.1 anig|EHA19859.1 aory|EIT83273.1 asyd|OJJ52396.1 ater|EAU34241.1 atub|OJI83180.1 aver|OJJ01927.1 azon|OJJ48593.1 azon|OJJ42147.1

Group5849: abra|OJJ78102.1 acar|OOF90265.1 acla|EAW06615.1 afis|EAW16152.1 afla|EED48694.1 agla|OJJ86204.1 akaw|GAA85901.1 aluc|OJZ91167.1 anid|CBF79575.1 anig|EHA19860.1 aory|EIT73256.1 asyd|OJJ57908.1 ater|EAU33236.1 atub|OJI83182.1 aver|OJJ04484.1 awen|OJJ30273.1 azon|OJJ43967.1

Group5850: abra|OJJ78123.1 acar|OOF97938.1 acla|EAW13664.1 afis|EAW24511.1 afla|EED51090.1 afum|EBA27259.1 akaw|GAA85885.1 aluc|OJZ91185.1 anid|CBF83112.1 anig|EHA19879.1 asyd|OJJ54499.1 ater|EAU31566.1 atub|OJI83204.1 aver|OJJ07681.1 awen|OJJ38687.1 acar|OOF98765.1 anid|CBF80779.1

Group5851: abra|OJJ78208.1 acar|OOF98646.1 afis|EAW18263.1 afla|EED48722.1 afum|EAL87627.1 agla|OJJ88163.1 akaw|GAA85818.1 aluc|OJZ91281.1 anid|CBF79532.1 anig|EHA19966.1 aory|EIT73066.1 asyd|OJJ57896.1 ater|EAU29421.1 atub|OJI83271.1 aver|OJJ04499.1 awen|OJJ30637.1 azon|OJJ47979.1

Group5852: abra|OJJ78222.1 acar|OOF98634.1 acla|EAW11227.1 afis|EAW18276.1 afla|EED48743.1 afum|EAL87642.1 agla|OJJ88150.1 akaw|GAA85803.1 aluc|OJZ91297.1 anid|CBF79497.1 anig|EHA19979.1 asyd|OJJ57879.1 ater|EAU33282.1 atub|OJI83287.1 aver|OJJ04515.1 awen|OJJ30649.1 azon|OJJ47966.1

Group5853: abra|OJJ78227.1 acla|EAW09282.1 afis|EAW21865.1 afla|EED46446.1 afum|EAL92879.1 agla|OJJ84272.1 akaw|GAA85797.1 aluc|OJZ91302.1 anid|CBF76757.1 anig|EHA19984.1 aory|EIT72438.1 asyd|OJJ61263.1 ater|EAU30862.1 atub|OJI83293.1 aver|OJJ00589.1 awen|OJJ34151.1 azon|OJJ43478.1

Group5854: abra|OJJ78271.1 acar|OOF98593.1 acla|EAW09242.1 afis|EAW21905.1 afla|EED46646.1 afum|EBA27480.1 agla|OJJ84225.1 akaw|GAA85755.1 aluc|OJZ91345.1 anid|CBF76830.1 anig|EHA20024.1 asyd|OJJ61301.1 ater|EAU30900.1 atub|OJI83337.1 aver|OJJ00627.1 awen|OJJ34195.1 azon|OJJ43439.1

Group5855: abra|OJJ78273.1 acla|EAW09241.1 afis|EAW21907.1 afum|EAL92919.2 akaw|GAA85753.1 aluc|OJZ91347.1 anig|EHA20026.1 asyd|OJJ61303.1 ater|EAU30901.1 atub|OJI83339.1 aver|OJJ00628.1 awen|OJJ34197.1 afla|EED46644.1 agla|OJJ84224.1 aory|EIT77882.1 anid|CBF76833.1 azon|OJJ43437.1

Group5856: abra|OJJ78274.1 acla|EAW09240.1 afis|EAW21908.1 afla|EED46643.1 afum|EAL92920.1 agla|OJJ84223.1 akaw|GAA85752.1 aluc|OJZ91349.1 anid|CBF76835.1 anig|EHA20027.1 aory|EIT77824.1 asyd|OJJ61304.1 ater|EAU30908.1 atub|OJI83340.1 aver|OJJ00629.1 awen|OJJ34198.1 azon|OJJ43436.1

Group5857: abra|OJJ78276.1 acar|OOF98591.1 acla|EAW09238.1 afis|EAW21910.1 afla|EED46640.1 afum|EAL92922.2 agla|OJJ84221.1 akaw|GAA85750.1 aluc|OJZ91351.1 anid|CBF76839.1 anig|EHA20029.1 asyd|OJJ61306.1 ater|EAU30910.1 atub|OJI83343.1 aver|OJJ00631.1 awen|OJJ34200.1 azon|OJJ43434.1

Group5858: abra|OJJ78281.1 acar|OOF98587.1 acla|EAW09234.1 afis|EAW21914.1 afla|EED46636.1 afum|EBA27482.1 agla|OJJ84209.1 akaw|GAA85746.1 aluc|OJZ91355.1 anid|CBF76848.1 anig|EHA20033.1 asyd|OJJ61310.1 ater|EAU30915.1 atub|OJI83348.1 aver|OJJ00635.1 awen|OJJ34204.1 azon|OJJ43430.1

Group5859: abra|OJJ78286.1 acar|OOF98582.1 acla|EAW09229.1 afis|EAW21919.1 afum|EAL92931.1 agla|OJJ84204.1 akaw|GAA85741.1 aluc|OJZ91360.1 anid|CBF76858.1 anig|EHA20038.1 aory|EIT77872.1 asyd|OJJ61315.1 ater|EAU30924.1 atub|OJI83353.1 aver|OJJ00640.1 awen|OJJ34209.1 azon|OJJ43425.1

Group5860: abra|OJJ78295.1 acla|EAW09221.1 afis|EAW21927.1 afla|EED46620.1 afum|EAL92940.1 agla|OJJ84194.1 akaw|GAA85732.1 aluc|OJZ91369.1 anid|CBF76878.1 anig|EHA20047.1 aory|EIT77851.1 asyd|OJJ61325.1 ater|EAU30933.1 atub|OJI83362.1 aver|OJJ00650.1 awen|OJJ34217.1 azon|OJJ43417.1



Group5861: abra|OJJ78296.1 acar|OOF98572.1 acla|EAW09220.1 afis|EAW21928.1 afla|EED46621.1 afum|EAL92941.1 agla|OJJ84193.1 akaw|GAA85731.1 aluc|OJZ91370.1 anid|CBF76876.1 anig|EHA20048.1 asyd|OJJ61324.1 ater|EAU30934.1 atub|OJI83363.1 aver|OJJ00649.1 awen|OJJ34218.1 azon|OJJ43416.1

Group5862: abra|OJJ78306.1 acar|OOF98560.1 acla|EAW09210.1 afis|EAW21937.1 afla|EED46654.1 afum|EAL92950.2 akaw|GAA85719.1 aluc|OJZ91385.1 anid|CBF76897.1 anig|EHA20058.1 aory|EIT77879.1 asyd|OJJ61337.1 ater|EAU30943.1 atub|OJI83378.1 aver|OJJ00661.1 awen|OJJ34228.1 azon|OJJ43407.1

Group5863: abra|OJJ78315.1 acar|OOF90168.1 acla|EAW12152.1 afis|EAW17176.1 afla|EED54162.1 afum|EAL86606.1 akaw|GAA85715.1 aluc|OJZ91388.1 anid|CBF76640.1 anig|EHA20066.1 aory|EIT76137.1 asyd|OJJ61201.1 ater|EAU35069.1 atub|OJI83381.1 aver|OJJ00526.1 awen|OJJ37819.1 azon|OJJ42628.1

Group5864: abra|OJJ78318.1 acla|EAW09207.1 afis|EAW21940.1 afla|EED46657.1 afum|EAL92953.1 agla|OJJ84183.1 akaw|GAA85712.1 aluc|OJZ91391.1 anid|CBF84079.1 anig|EHA20069.1 aory|EIT77958.1 asyd|OJJ61341.1 ater|EAU30945.1 atub|OJI83384.1 aver|OJJ00665.1 awen|OJJ34231.1 azon|OJJ43404.1

Group5865: abra|OJJ78322.1 acar|OOF98552.1 acla|EAW09203.1 afis|EAW21944.1 afla|EED46661.1 afum|EAL92958.1 agla|OJJ84180.1 akaw|GAA85706.1 aluc|OJZ91397.1 anid|CBF84051.1 anig|EHA20074.1 aory|EIT77927.1 ater|EAU30992.1 atub|OJI83389.1 aver|OJJ00668.1 awen|OJJ34235.1 azon|OJJ43401.1

Group5866: abra|OJJ78326.1 afla|EED46664.1 acar|OOF98549.1 akaw|GAA85703.1 aluc|OJZ91400.1 anid|CBF84060.1 anig|EHA20077.1 asyd|OJJ61346.1 atub|OJI83392.1 aver|OJJ00671.1 azon|OJJ43398.1 acla|EAW09200.1 afis|EAW21947.1 afum|EAL92961.1 ater|EAU30995.1 agla|OJJ84173.1 awen|OJJ34238.1

Group5867: abra|OJJ78344.1 acar|OOF90270.1 acla|EAW09190.1 afis|EAW21956.1 afla|EED46675.1 afum|EAL92970.2 agla|OJJ84163.1 akaw|GAA85689.1 aluc|OJZ91417.1 anid|CBF84036.1 anig|EHA20089.1 aory|EIT77945.1 asyd|OJJ61363.1 atub|OJI83411.1 aver|OJJ00690.1 awen|OJJ34248.1 azon|OJJ43390.1

Group5868: abra|OJJ78349.1 afis|EAW21961.1 afla|EED46682.1 afum|EAL92975.1 agla|OJJ84155.1 akaw|GAA85684.1 aluc|OJZ91424.1 anid|CBF84046.1 anig|EHA20094.1 aory|EIT77949.1 asyd|OJJ61357.1 ater|EAU31081.1 atub|OJI83417.1 aver|OJJ00684.1 awen|OJJ34255.1 acla|EAW09185.1 azon|OJJ43384.1

Group5869: abra|OJJ78352.1 acla|EAW09183.1 afis|EAW21963.1 afla|EED46684.1 afum|EAL92977.1 agla|OJJ84140.1 akaw|GAA85682.1 aluc|OJZ91427.1 anid|CBF82740.1 anig|EHA20096.1 aory|EIT77811.1 asyd|OJJ61623.1 ater|EAU31083.1 atub|OJI83420.1 aver|OJJ00948.1 awen|OJJ34257.1 azon|OJJ43382.1

Group5870: aver|OJJ00953.1 abra|OJJ78358.1 acar|OOF98528.1 acla|EAW09176.1 afis|EAW21970.1 afla|EED46692.1 afum|EAL92984.1 agla|OJJ84133.1 akaw|GAA85675.1 aluc|OJZ91433.1 anid|CBF82727.1 aory|EIT77959.1 asyd|OJJ61630.1 ater|EAU31090.1 atub|OJI83426.1 awen|OJJ34263.1 azon|OJJ43374.1

Group5871: abra|OJJ78367.1 acla|EAW09168.1 afis|EAW21978.1 afla|EED46701.1 afum|EAL92993.1 agla|OJJ84122.1 akaw|GAA85666.1 aluc|OJZ91444.1 anid|CBF82712.1 anig|EHA20108.1 aory|EIT77893.1 asyd|OJJ61639.1 ater|EAU31096.1 atub|OJI83438.1 aver|OJJ00962.1 awen|OJJ34271.1 azon|OJJ43365.1

Group5872: abra|OJJ78373.1 acar|OOF98516.1 acla|EAW09162.1 afis|EAW21984.1 afla|EED46708.1 afum|EAL92999.1 agla|OJJ84114.1 akaw|GAA85660.1 aluc|OJZ91450.1 anid|CBF82701.1 anig|EHA20114.1 asyd|OJJ61645.1 ater|EAU31103.1 atub|OJI83443.1 aver|OJJ00967.1 awen|OJJ34281.1 azon|OJJ43359.1

Group5873: abra|OJJ78376.1 acar|OOF98512.1 acla|EAW09158.1 afis|EAW21988.1 afla|EED46712.1 afum|EAL93004.1 agla|OJJ84110.1 akaw|GAA85657.1 aluc|OJZ91454.1 anid|CBF82692.1 anig|EHA20117.1 aory|EIT77910.1 asyd|OJJ61649.1 atub|OJI83447.1 aver|OJJ00970.1 awen|OJJ34284.1 azon|OJJ43354.1

Group5874: abra|OJJ78377.1 acla|EAW09157.1 afis|EAW21989.1 afla|EED46713.1 afum|EAL93005.2 agla|OJJ84109.1 akaw|GAA85656.1 aluc|OJZ91455.1 anid|CBF82690.1 anig|EHA20118.1 aory|EIT77905.1 asyd|OJJ61650.1 ater|EAU31108.1 atub|OJI83448.1 aver|OJJ00971.1 awen|OJJ34285.1 azon|OJJ43353.1

Group5875: abra|OJJ78379.1 acar|OOF98509.1 acla|EAW09154.1 afis|EAW21992.1 afla|EED46716.1 afum|EAL93007.1 agla|OJJ84105.1 akaw|GAA85653.1 aluc|OJZ91458.1 anid|CBF82685.1 anig|EHA20121.1 asyd|OJJ61654.1 ater|EAU31111.1 atub|OJI83451.1 aver|OJJ00975.1 awen|OJJ34288.1 azon|OJJ43350.1

Group5876: abra|OJJ78389.1 acar|OOF98499.1 acla|EAW09144.1 afis|EAW22003.1 afla|EED46728.1 afum|EAL93018.1 agla|OJJ84095.1 akaw|GAA85643.1 aluc|OJZ91468.1 anid|CBF82664.1 anig|EHA20130.1 asyd|OJJ61665.1 ater|EAU31122.1 atub|OJI83461.1 aver|OJJ00986.1 awen|OJJ34298.1 azon|OJJ43340.1

Group5877: acar|OOF90682.1 acla|EAW14843.1 afis|EAW24370.1 afla|EED49848.1 afum|EAL86042.1 anid|CBF87190.1 awen|OJJ30943.1 acar|OOG00289.1 acla|EAW12454.1 afla|EED51634.1 anid|CBF84176.1 aory|EIT80587.1 asyd|OJJ57129.1 aver|OJJ03175.1 azon|OJJ46526.1 awen|OJJ32845.1 awen|OJJ36074.1

Group5878: acar|OOF91612.1 acla|EAW14418.1 afis|EAW19125.1 afla|EED54289.1 afum|EAL93857.1 agla|OJJ80440.1 akaw|GAA90471.1 aluc|OJZ85753.1 anid|CBF79735.1 anig|EHA24803.1 aory|EIT76095.1 asyd|OJJ58082.1 ater|EAU37392.1 atub|OJI79537.1 aver|OJJ04326.1 awen|OJJ37456.1 azon|OJJ51135.1

Group5879: acar|OOF93414.1 acla|EAW08926.1 afis|EAW15468.1 afla|EED46920.1 afum|EAL85854.1  
agla|OJJ80149.1 akaw|GAA87755.1 aluc|OJZ85388.1 anid|CBF78258.1 anig|EHA25572.1 aory|EIT72527.1  
asyd|OJJ56063.1 ater|EAU32660.1 atub|OJI80182.1 aver|OJJ05006.1 awen|OJJ38118.1 azon|OJJ51809.1

Group5880: acar|OOF98511.1 acla|EAW09156.1 afis|EAW21990.1 afla|EED46714.1 afum|EBA27484.1  
agla|OJJ84108.1 akaw|GAA85655.1 aluc|OJZ91456.1 anid|CBF82688.1 anig|EHA20119.1 aory|EIT77857.1  
asyd|OJJ61651.1 ater|EAU31109.1 atub|OJI83449.1 aver|OJJ00972.1 awen|OJJ34286.1 azon|OJJ43352.1

Group5881: acar|OOG01162.1 acla|EAW07893.1 afis|EAW22928.1 afla|EED58121.1 afum|EAL90269.1  
agla|OJJ83360.1 akaw|GAA87526.1 aluc|OJZ87993.1 anid|CBF87669.1 anig|EHA17775.1 aory|EIT79165.1  
asyd|OJJ63310.1 ater|EAU30695.1 atub|OJI90602.1 aver|OJI97649.1 awen|OJJ38636.1 azon|OJJ49578.1

Group5882: acar|EAW09522.1 afis|EAW21610.1 afla|EED57839.1 afum|EAL92644.1 agla|OJJ85805.1  
akaw|GAA84915.1 aluc|OJZ86754.1 anid|CBF83478.1 anig|EHA21925.1 aory|EIT81104.1 asyd|OJJ60693.1  
ater|EAU38299.1 aver|OJJ00018.1 awen|OJJ39072.1 azon|OJJ51403.1 azon|OJJ51404.1 aver|OJJ00019.1

Group5883: acar|EAW14913.1 afis|EAW24434.1 afla|EED45083.1 afum|EAL86102.1 akaw|GAA88070.1  
aluc|OJZ81335.1 aory|EIT73616.1 asyd|OJJ56673.1 ater|EAU29576.1 atub|OJI91538.1 aver|OJJ06051.1  
awen|OJJ38123.1 azon|OJJ48557.1 agla|OJJ87162.1 ater|EAU29898.1 awen|OJJ30898.1 aory|EIT74968.1

Group5884: abra|OJJ66154.1 abra|OJJ75559.1 asyd|OJJ58905.1 asyd|OJJ59701.1 aver|OJJ01502.1  
aver|OJJ02586.1 atub|OJI85780.1 awen|OJJ38282.1 acar|OOF90877.1 agla|OJJ88520.1 akaw|GAA84314.1  
aluc|OJZ89009.1 anid|CBF69967.1 anig|EHA23519.1 aory|EIT75405.1 ater|EAU30290.1

Group5885: abra|OJJ67080.1 abra|OJJ68912.1 acar|OOF91499.1 afis|EAW20326.1 afla|EED57092.1  
agla|OJJ78923.1 akaw|GAA90337.1 aluc|OJZ85895.1 anid|CBF81708.1 anig|EHA24697.1 aory|EIT82304.1  
asyd|OJJ59577.1 ater|EAU32053.1 atub|OJI79680.1 aver|OJJ02692.1 awen|OJJ38052.1

Group5886: acar|OOF91513.1 acar|OOF98315.1 abra|OJJ67236.1 afis|EAW24732.1 afla|EED46087.1  
afum|EAL89379.1 agla|OJJ86786.1 akaw|GAA91660.1 aluc|OJZ87739.1 anid|CBF69482.1 anig|EHA20231.1  
aory|EIT76445.1 asyd|OJJ59273.1 atub|OJI80901.1 aver|OJJ01886.1 awen|OJJ40220.1

Group5887: acar|OOF92290.1 acar|OOF92331.1 abra|OJJ67511.1 acla|EAW06261.1 afla|EED57038.1  
afum|EAL93042.1 agla|OJJ84932.1 aluc|OJZ84853.1 anid|CBF70812.1 aory|EIT77427.1 asyd|OJJ58406.1  
ater|EAU32237.1 atub|OJI80743.1 aver|OJJ01007.1 awen|OJJ31782.1 asyd|OJJ61026.1

Group5888: acar|OOF92605.1 acar|OOF92626.1 abra|OJJ69658.1 acla|EAW13777.1 afis|EAW18355.1  
afla|EED48820.1 akaw|GAA91637.1 aluc|OJZ82464.1 anid|CBF79358.1 anig|EHA28311.1 aory|EIT73001.1  
asyd|OJJ57803.1 ater|EAU34688.1 atub|OJI87974.1 awen|OJJ35739.1 azon|OJJ43324.1

Group5889: acar|OOF92826.1 acar|OOF98200.1 acla|EAW12158.1 acla|EAW13719.1 afis|EAW17190.1  
afis|EAW21021.1 afum|EAL86616.2 afum|EAL92059.1 ater|EAU31621.1 ater|EAU36218.1 abra|OJJ70923.1  
akaw|GAA83017.1 aluc|OJZ87603.1 anig|EHA20802.1 atub|OJI81045.1 aver|OJJ05979.1

Group5890: acar|OOF93694.1 acar|OOF93779.1 abra|OJJ66685.1 acla|EAW09000.1 afla|EED45351.1  
agla|OJJ85436.1 akaw|GAA89629.1 aluc|OJZ80764.1 anid|CBF81376.1 anig|EHA27263.1 aory|EIT82467.1  
asyd|OJJ59389.1 atub|OJI87618.1 aver|OJJ02883.1 awen|OJJ39926.1 azon|OJJ50230.1

Group5891: acar|OOF94035.1 acar|OOF94105.1 abra|OJJ66415.1 afis|EAW20234.1 afla|EED55132.1  
afum|EAL85351.1 akaw|GAA90282.1 aluc|OJZ83058.1 anid|CBF73520.1 anig|EHA28124.1 aory|EIT81578.1  
asyd|OJJ56746.1 ater|EAU37765.1 atub|OJI87888.1 aver|OJJ05984.1 azon|OJJ47372.1

Group5892: acar|OOF94043.1 acar|OOF94113.1 abra|OJJ66398.1 afis|EAW16735.1 afla|EED49556.1  
afum|EAL86309.1 agla|OJJ79510.1 akaw|GAA90266.1 aluc|OJZ83075.1 anig|EHA28139.1 asyd|OJJ61452.1  
atub|OJI87871.1 aver|OJJ00787.1 awen|OJJ39514.1 azon|OJJ51715.1 anid|CBF83128.1

Group5893: acar|OOF94086.1 acar|OOF94156.1 abra|OJJ66352.1 afis|EAW17344.1 afla|EED46461.1  
afum|EAL91188.1 agla|OJJ88648.1 akaw|GAA90225.1 aluc|OJZ83116.1 anid|CBF82993.1 anig|EHA28179.1  
aory|EIT72314.1 asyd|OJJ54261.1 atub|OJI87818.1 aver|OJJ05214.1 awen|OJJ40134.1

Group5894: acar|OOF94093.1 acar|OOF94163.1 abra|OJJ66344.1 acla|EAW09990.1 afis|EAW21102.1  
afla|EED51684.1 afum|EAL92123.1 akaw|GAA90218.1 aluc|OJZ83123.1 anid|CBF86612.1 anig|EHA28187.1  
aory|EIT80601.1 asyd|OJJ64820.1 ater|EAU36797.1 atub|OJI87809.1 aver|OJI98933.1

Group5895: acar|OOF94752.1 acar|OOF95317.1 abra|OJJ72483.1 acla|EAW12714.1 afis|EAW17876.1  
afla|EED46294.1 afum|EAL91684.1 agla|OJJ83070.1 akaw|GAA86218.1 aluc|OJZ90470.1 anig|EHA23929.1  
asyd|OJJ52333.1 ater|EAU33096.1 atub|OJI81894.1 aver|OJJ05550.1 awen|OJJ41688.1

Group5896: acar|OOF95617.1 acar|OOF95669.1 abra|OJJ67062.1 acla|EAW12224.1 afla|EED54494.1  
agla|OJJ85767.1 akaw|GAA82365.1 aluc|OJZ91758.1 anid|CBF81941.1 anig|EHA18944.1 aory|EIT78917.1  
asyd|OJJ56618.1 ater|EAU31797.1 atub|OJI86216.1 aver|OJJ04440.1 anig|EHA26144.1

Group5897: acar|OOF96227.1 acar|OOF96265.1 abra|OJJ71512.1 acla|EAW15069.1 afis|EAW20041.1 afum|EAL85161.2 agla|OJJ88921.1 aluc|OJZ86250.1 anid|CBF84782.1 anig|EHA21615.1 aory|EIT73556.1 asyd|OJJ63233.1 atub|OJI84292.1 aver|OJI97723.1 awen|OJJ31797.1 azon|OJJ41993.1

Group5898: acar|OOF96911.1 acar|OOF96946.1 abra|OJJ70799.1 afla|EED56519.1 agla|OJJ87254.1 akaw|GAA90115.1 aluc|OJZ84144.1 anid|CBF81181.1 anig|EHA19252.1 aory|EIT72828.1 asyd|OJJ59295.1 ater|EAU31668.1 atub|OJI90518.1 aver|OJJ02980.1 awen|OJJ36774.1 azon|OJJ47424.1

Group5899: acar|OOF97665.1 acar|OOF97712.1 abra|OJJ71492.1 acla|EAW10058.1 afis|EAW25526.1 afum|EAL90191.2 agla|OJJ87276.1 akaw|GAA82528.1 aluc|OJZ87055.1 anid|CBF77803.1 anig|EHA20328.1 aory|EIT78255.1 asyd|OJJ53018.1 atub|OJI81580.1 aver|OJJ03825.1 azon|OJJ49512.1

Group5900: acar|OOF98477.1 acar|OOF98490.1 abra|OJJ78397.1 acla|EAW09135.1 afla|EED46736.1 agla|OJJ84086.1 akaw|GAA85634.1 aluc|OJZ91476.1 anid|CBF82648.1 anig|EHA20138.1 asyd|OJJ61674.1 ater|EAU31133.1 atub|OJI83469.1 aver|OJJ00995.1 awen|OJJ34307.1 azon|OJJ43334.1

Group5901: acar|OOG00239.1 acar|OOG00258.1 abra|OJJ67535.1 acla|EAW11018.1 afis|EAW20832.1 afla|EED45130.1 afum|EAL84800.1 akaw|GAA88124.1 aluc|OJZ81397.1 anid|CBF80709.1 anig|EHA18689.1 aory|EIT73782.1 asyd|OJJ62619.1 atub|OJI91602.1 aver|OJI96745.1 azon|OJJ42683.1

Group5902: acar|OOG00251.1 acar|OOG00269.1 abra|OJJ67545.1 acla|EAW12867.1 afla|EED45590.1 agla|OJJ81687.1 akaw|GAA88115.1 aluc|OJZ81387.1 anid|CBF82370.1 anig|EHA18680.1 aory|EIT75758.1 asyd|OJJ54193.1 ater|EAU37669.1 atub|OJI91592.1 aver|OJJ08533.1 awen|OJJ35116.1

Group5903: afis|EAW17151.1 afis|EAW18536.1 agla|OJJ85246.1 agla|OJJ86248.1 abra|OJJ71801.1 afla|EED49211.1 akaw|GAA85109.1 aluc|OJZ86531.1 anid|CBF80198.1 anig|EHA22115.1 aory|EIT83151.1 asyd|OJJ62941.1 ater|EAU39447.1 atub|OJI83990.1 aver|OJI98049.1 awen|OJJ30934.1

Group5904: afis|EAW22768.1 afis|EAW24693.1 abra|OJJ73447.1 afla|EED45075.1 afum|EAL89335.1 agla|OJJ81339.1 akaw|GAA89025.1 aluc|OJZ80579.1 anid|CBF76030.1 anig|EHA25619.1 aory|EIT73722.1 asyd|OJJ52452.1 ater|EAU33314.1 atub|OJI88351.1 aver|OJJ03964.1 awen|OJJ38020.1

Group5905: afla|EED45997.1 afla|EED55181.1 aory|EIT75482.1 aory|EIT81589.1 asyd|OJJ55511.1 asyd|OJJ55533.1 asyd|OJJ57370.1 aver|OJJ05798.1 aver|OJJ06588.1 acla|EAW09058.1 afis|EAW25631.1 afum|EAL84319.1 anid|CBF83157.1 ater|EAU32719.1 awen|OJJ36051.1 aver|OJJ06611.1

Group5906: afla|EED49561.1 afla|EED49753.1 abra|OJJ67096.1 acar|OOF98458.1 acla|EAW08935.1 afis|EAW15463.1 afum|EAL85858.1 akaw|GAA91065.1 aluc|OJZ87878.1 anid|CBF74671.1 anig|EHA20182.1 aory|EIT82641.1 ater|EAU39081.1 atub|OJI80772.1 awen|OJJ37034.1 azon|OJJ44465.1

Group5907: afum|EAL86255.1 afum|EAL89177.1 abra|OJJ68037.1 acar|OOF91806.1 acla|EAW06968.1 afis|EAW16582.1 afla|EED55050.1 akaw|GAA90915.1 aluc|OJZ82911.1 anig|EHA21334.1 aory|EIT81979.1 asyd|OJJ53719.1 ater|EAU36654.1 atub|OJI89137.1 aver|OJJ07845.1 awen|OJJ33891.1

Group5908: agla|OJJ78990.1 agla|OJJ83688.1 abra|OJJ73812.1 acar|OOG00967.1 acla|EAW07699.1 afis|EAW22716.1 afla|EED50000.1 afum|EAL90478.1 akaw|GAA89431.1 aluc|OJZ88238.1 anid|CBF88051.1 anig|EHA17985.1 aory|EIT74675.1 atub|OJI90840.1 awen|OJJ35410.1 azon|OJJ49766.1

Group5909: agla|OJJ83138.1 agla|OJJ86319.1 abra|OJJ68823.1 afum|EAL86208.1 akaw|GAA90430.1 aluc|OJZ85799.1 anid|CBF78855.1 anig|EHA24758.1 asyd|OJJ55033.1 atub|OJI79584.1 aver|OJJ07170.1 awen|OJJ30830.1 afla|EED50787.1 aory|EIT77976.1 afla|EED57506.1 aory|EIT81869.1

Group5910: agla|OJJ85816.1 agla|OJJ85832.1 agla|OJJ85818.1 acar|OOF98908.1 acla|EAW11260.1 akaw|GAA83783.1 aluc|OJZ90941.1 anid|CBF86189.1 anig|EHA19649.1 asyd|OJJ64535.1 ater|EAU33747.1 atub|OJI82932.1 aver|OJI98632.1 awen|OJJ30618.1 azon|OJJ47999.1 afla|EED56228.1

Group5911: agla|OJJ86769.1 agla|OJJ86770.1 abra|OJJ74895.1 acar|OOF95896.1 acla|EAW08476.1 afis|EAW23522.1 afla|EED57422.1 akaw|GAA83525.1 aluc|OJZ92470.1 anig|EHA26498.1 aory|EIT80073.1 asyd|OJJ62259.1 atub|OJI86900.1 aver|OJI96368.1 awen|OJJ39847.1 afum|EAL87942.1

Group5912: anid|CBF71552.1 anid|CBF84169.1 acla|EAW08561.1 afis|EAW23603.1 afla|EED55065.1 afum|EAL87863.2 aory|EIT77141.1 asyd|OJJ56282.1 ater|EAU35362.1 aver|OJJ08479.1 awen|OJJ32575.1 acla|EAW13726.1 afla|EED50166.1 aory|EIT76902.1 afla|EED47738.1 anid|CBF71809.1

Group5913: aory|EIT75268.1 aory|EIT75646.1 abra|OJJ66105.1 acar|OOF93992.1 afis|EAW16816.1 afla|EED53712.1 afum|EAL86367.1 akaw|GAA92674.1 aluc|OJZ90129.1 anid|CBF78556.1 anig|EHA20942.1 asyd|OJJ65060.1 atub|OJI84667.1 azon|OJJ46860.1 acar|OOF91691.1 aory|EIT80433.1

Group5914: asyd|OJJ54204.1 asyd|OJJ54927.1 aver|OJJ01905.1 aver|OJJ07268.1 awen|OJJ35311.1 awen|OJJ36432.1 acla|EAW07665.1 afis|EAW22682.1 afla|EED49966.1 afum|EAL90510.1 agla|OJJ79757.1 anid|CBF88120.1 aory|EIT83446.1 asyd|OJJ63584.1 ater|EAU39027.1 aver|OJI97350.1

Group5915: asyd|OJJ54824.1 asyd|OJJ57889.1 ater|EAU33274.1 ater|EAU38853.1 acar|OOF98643.1  
acla|EAW11238.1 afis|EAW18267.1 afum|EAL87632.1 anid|CBF79518.1 aory|EIT73252.1 atub|OJI88770.1  
aver|OJJ04505.1 awen|OJJ30641.1 azon|OJJ47974.1 ater|EAU34238.1 aver|OJJ07336.1

Group5916: asyd|OJJ56712.1 asyd|OJJ57429.1 aver|OJJ05750.1 aver|OJJ06013.1 abra|OJJ67120.1  
acar|OOF98431.1 acla|EAW11078.1 afla|EED52028.1 agla|OJJ86869.1 akaw|GAA91045.1 aluc|OJZ87855.1  
anig|EHA20160.1 aory|EIT81420.1 atub|OJI80792.1 awen|OJJ33344.1 ater|EAU37270.1

Group5917: asyd|OJJ57667.1 asyd|OJJ64961.1 atub|OJI90353.1 abra|OJJ70633.1 acar|OOF97091.1  
afis|EAW23159.1 afla|EED46961.1 afum|EAL88324.1 akaw|GAA89972.1 aluc|OJZ83981.1 anid|CBF86381.1  
anig|EHA19108.1 aory|EIT72519.1 ater|EAU36292.1 aver|OJI99083.1 awen|OJJ36624.1

Group5918: asyd|OJJ60004.1 asyd|OJJ62600.1 awen|OJJ32651.1 awen|OJJ37094.1 abra|OJJ77155.1  
acar|OOF93042.1 afla|EED45743.1 agla|OJJ81794.1 akaw|GAA90775.1 aluc|OJZ84569.1 anid|CBF79863.1  
anig|EHA27864.1 aory|EIT75727.1 ater|EAU31865.1 atub|OJI89513.1 aver|OJJ02282.1

Group5919: asyd|OJJ60338.1 asyd|OJJ65170.1 abra|OJJ69828.1 acar|OOF93353.1 afum|EAL86293.1  
agla|OJJ79198.1 akaw|GAA87832.1 aluc|OJZ85468.1 anid|CBF87111.1 anig|EHA25009.1 ater|EAU37987.1  
atub|OJI80095.1 aver|OJI99322.1 awen|OJJ32858.1 azon|OJJ47733.1 azon|OJJ45214.1

Group5920: ater|EAU32685.1 ater|EAU32837.1 abra|OJJ69617.1 acar|OOF92689.1 akaw|GAA91601.1  
aluc|OJZ82425.1 anid|CBF82164.1 anig|EHA28344.1 asyd|OJJ54340.1 atub|OJI88015.1 aver|OJJ05292.1  
awen|OJJ36838.1 azon|OJJ43517.1 anig|EHA28204.1 akaw|GAA92799.1 aluc|OJZ88721.1

Group5921: awen|OJJ29955.1 awen|OJJ35055.1 afla|EED47573.1 abra|OJJ72994.1 acar|OOF96171.1  
afis|EAW16182.1 afla|EED52079.1 akaw|GAA85568.1 aluc|OJZ83502.1 anig|EHA24336.1 aory|EIT76901.1  
atub|OJI82396.1 awen|OJJ30004.1 afum|EAL88813.1 ater|EAU29301.1 aluc|OJZ80354.1

Group5922: awen|OJJ30767.1 awen|OJJ31714.1 abra|OJJ67443.1 acar|OOF92384.1 afis|EAW18434.1  
afila|EED52981.1 afum|EAL93115.1 agla|OJJ85001.1 akaw|GAA86386.1 aluc|OJZ84921.1 anid|CBF70031.1  
aory|EIT78703.1 asyd|OJJ58869.1 ater|EAU29850.1 atub|OJI80678.1 aver|OJJ01471.1

Group5923: awen|OJJ30908.1 awen|OJJ38004.1 abra|OJJ73700.1 acar|OOF90210.1 akaw|GAA88464.1  
aluc|OJZ88353.1 anig|EHA18085.1 aory|EIT81772.1 atub|OJI90948.1 abra|OJJ75777.1 acar|OOF91917.1  
acla|EAW07822.1 afis|EAW22858.1 afum|EAL90342.1 akaw|GAA87320.1 afla|EED51804.1

Group5924: awen|OJJ30944.1 awen|OJJ32848.1 abra|OJJ75187.1 acar|OOF94595.1 acla|EAW14838.1  
afis|EAW24366.1 afla|EED46591.1 afum|EAL86038.2 agla|OJJ82520.1 akaw|GAA88789.1 aluc|OJZ92750.1  
anid|CBF87187.1 anig|EHA26253.1 aory|EIT77903.1 atub|OJI87176.1 acar|OOF90681.1

Group5925: awen|OJJ32657.1 awen|OJJ33840.1 abra|OJJ66139.1 acar|OOF95826.1 acla|EAW11590.1  
afila|EED52591.1 agla|OJJ88404.1 akaw|GAA92695.1 aluc|OJZ90153.1 anid|CBF83901.1 anig|EHA20916.1  
aory|EIT73374.1 ater|EAU33482.1 atub|OJI84646.1 agla|OJJ82534.1 aory|EIT74204.1

Group5926: awen|OJJ33832.1 awen|OJJ36387.1 abra|OJJ72946.1 acar|OOF96127.1 afla|EED48176.1  
akaw|GAA85528.1 aluc|OJZ83456.1 anid|CBF83118.1 anig|EHA24302.1 aory|EIT83024.1 asyd|OJJ53474.1  
ater|EAU31957.1 atub|OJI82348.1 aver|OJJ03999.1 azon|OJJ42763.1 asyd|OJJ60256.1

Group5927: azon|OJJ42111.1 azon|OJJ45189.1 azon|OJJ44136.1 azon|OJJ49610.1 abra|OJJ73127.1  
acar|OOG00350.1 afla|EED48144.1 akaw|GAA88037.1 aluc|OJZ81296.1 anig|EHA18604.1 aory|EIT76194.1  
asyd|OJJ56200.1 ater|EAU39558.1 atub|OJI91505.1 aver|OJJ05127.1 awen|OJJ36253.1

Group5928: azon|OJJ44493.1 azon|OJJ50272.1 abra|OJJ71252.1 acar|OOF97918.1 acla|EAW10283.1  
afis|EAW25309.1 akaw|GAA82735.1 aluc|OJZ87290.1 anig|EHA20531.1 atub|OJI81351.1 awen|OJJ41057.1  
acar|OOG00279.1 akaw|GAA88103.1 aluc|OJZ81370.1 anig|EHA18670.1 atub|OJI91575.1

Group5929: acla|EAW11715.1 agla|OJJ78979.1 acar|OOF97633.1 akaw|GAA92095.1 aluc|OJZ83630.1  
anig|EHA18783.1 aory|EIT80453.1 atub|OJI89999.1 afis|EAW23734.1 afla|EED51512.1 afum|EAL87172.1  
anid|CBF87375.1 asyd|OJJ52839.1 ater|EAU31294.1 aver|OJJ08808.1 awen|OJJ33670.1

Group5930: abra|OJJ65588.1 acla|EAW13295.1 afis|EAW17315.1 asyd|OJJ60476.1 abra|OJJ68806.1  
acar|OOF91595.1 afum|EAL91135.2 akaw|GAA90447.1 aluc|OJZ85778.1 anid|CBF74648.1 anig|EHA24776.1  
ater|EAU39376.1 atub|OJI79563.1 aver|OJI99796.1 awen|OJJ35960.1 afum|EAL91151.1

Group5931: abra|OJJ65608.1 acar|OOF92455.1 acla|EAW12305.1 afla|EED51167.1 anid|CBF81654.1  
aory|EIT81330.1 asyd|OJJ54344.1 ater|EAU31008.1 aver|OJJ05296.1 abra|OJJ77464.1 anig|EHA19296.1  
asyd|OJJ56405.1 ater|EAU39560.1 aver|OJJ06307.1 anid|CBF80165.1 aver|OJI99520.1

Group5932: abra|OJJ65769.1 afum|EAL87801.2 anig|EHA21875.1 aver|OJI99576.1 awen|OJJ29597.1  
acar|OOF90907.1 acla|EAW09702.1 agla|OJJ85451.1 anig|EHA21874.1 asyd|OJJ52319.1 acla|EAW12595.1  
acla|EAW12596.1 aory|EIT75343.1 afis|EAW16225.1 afum|EAL87819.1 aory|EIT79546.1

Group5933: afis|EAW19924.1 acar|OOF93587.1 acla|EAW13682.1 abra|OJJ75101.1 acar|OOF97233.1  
afla|EED55651.1 afum|EBA27214.1 agla|OJJ86510.1 akaw|GAA88710.1 aluc|OJZ92665.1 aory|EIT81813.1  
asyd|OJJ62423.1 atub|OJI87096.1 aver|OJI96560.1 awen|OJJ39580.1 azon|OJJ50107.1

Group5934: afla|EED49755.1 afum|EAL84309.2 acar|OOF98690.1 acla|EAW13141.1 afis|EAW25621.1  
agla|OJJ86173.1 aluc|OJZ88033.1 aory|EIT77706.1 asyd|OJJ56973.1 atub|OJI90639.1 aver|OJJ03316.1  
awen|OJJ36298.1 afis|EAW17513.1 afla|EED52201.1 aluc|OJZ79945.1 aory|EIT74476.1

Group5935: abra|OJJ65917.1 acar|OOF94967.1 afla|EED50458.1 afum|EAL84940.1 agla|OJJ80059.1  
akaw|GAA92315.1 aluc|OJZ90213.1 anid|CBF84461.1 anig|EHA23711.1 aory|EIT82170.1 asyd|OJJ53548.1  
ater|EAU31471.1 atub|OJI81644.1 aver|OJJ08205.1 awen|OJJ31371.1 asyd|OJJ54265.1

Group5936: abra|OJJ65943.1 acar|OOF92930.1 acla|EAW13568.1 afis|EAW20034.1 afum|EAL84882.1  
agla|OJJ88020.1 akaw|GAA90821.1 aluc|OJZ83014.1 anid|CBF84767.1 anig|EHA21429.1 asyd|OJJ53283.1  
ater|EAU29400.1 atub|OJI89249.1 aver|OJJ08459.1 awen|OJJ30057.1 azon|OJJ46328.1

Group5937: abra|OJJ65947.1 acar|OOF92926.1 afla|EED46040.1 afum|EAL84886.1 agla|OJJ88017.1  
akaw|GAA90825.1 aluc|OJZ83010.1 anid|CBF84758.1 anig|EHA21425.1 aory|EIT75670.1 asyd|OJJ53287.1  
ater|EAU29394.1 atub|OJI89245.1 aver|OJJ08454.1 awen|OJJ30053.1 azon|OJJ43699.1

Group5938: abra|OJJ65955.1 acar|OOF92917.1 acla|EAW13576.1 afis|EAW20025.1 afla|EED46033.1  
afum|EAL84892.1 agla|OJJ88005.1 akaw|GAA90832.1 aluc|OJZ83002.1 anid|CBF84747.1 anig|EHA21418.1  
asyd|OJJ53294.1 ater|EAU29387.1 atub|OJI89236.1 aver|OJJ08446.1 azon|OJJ43692.1

Group5939: abra|OJJ65970.1 acar|OOF92903.1 acla|EAW13591.1 afla|EED46019.1 agla|OJJ87977.1  
akaw|GAA90845.1 aluc|OJZ82988.1 anid|CBF87092.1 anig|EHA21403.1 aory|EIT75531.1 asyd|OJJ60402.1  
atub|OJI89222.1 aver|OJI99731.1 awen|OJJ30026.1 afla|EED54119.1 awen|OJJ36029.1

Group5940: abra|OJJ66005.1 acar|OOF92092.1 acla|EAW13642.1 afis|EAW19993.1 afla|EED45929.1  
afum|EAL84924.1 akaw|GAA90878.1 aluc|OJZ82955.1 anid|CBF84688.1 anig|EHA21370.1 aory|EIT75499.1  
asyd|OJJ53332.1 ater|EAU35263.1 atub|OJI89187.1 aver|OJJ08412.1 azon|OJJ43627.1

Group5941: afis|EAW17530.1 agla|OJJ79940.1 anid|CBF76169.1 abra|OJJ69571.1 afla|EED57484.1  
akaw|GAA92494.1 aluc|OJZ91506.1 anig|EHA28383.1 aory|EIT80112.1 asyd|OJJ64206.1 ater|EAU32458.1  
atub|OJI82869.1 aver|OJI98294.1 awen|OJJ29896.1 agla|OJJ82855.1 agla|OJJ86642.1

Group5942: abra|OJJ66098.1 acar|OOF90927.1 acla|EAW14985.1 afis|EAW24507.1 afla|EED45890.1  
afum|EAL86175.1 akaw|GAA93286.1 aluc|OJZ90158.1 anid|CBF89388.1 anig|EHA20914.1 aory|EIT75697.1  
asyd|OJJ56086.1 ater|EAU35712.1 atub|OJI84641.1 aver|OJJ05029.1 awen|OJJ38109.1

Group5943: abra|OJJ66100.1 akaw|GAA92666.1 aluc|OJZ90120.1 anig|EHA20949.1 atub|OJI84675.1  
abra|OJJ66420.1 acar|OOG00283.1 afla|EED54053.1 afum|EAL87184.1 anid|CBF86035.1 anig|EHA28120.1  
aory|EIT76094.1 aver|OJJ07930.1 azon|OJJ48538.1 ater|EAU37533.1 awen|OJJ41204.1

Group5944: abra|OJJ66195.1 acar|OOF91936.1 acla|EAW12300.1 afis|EAW16934.1 afla|EED53214.1  
afum|EAL86459.1 agla|OJJ86546.1 akaw|GAA89093.1 anid|CBF82438.1 anig|EHA25695.1 aory|EIT74921.1  
asyd|OJJ54125.1 ater|EAU37364.1 atub|OJI88432.1 aver|OJJ08611.1 awen|OJJ30070.1

Group5945: abra|OJJ66233.1 acar|OOF90691.1 afla|EED47090.1 agla|OJJ84413.1 akaw|GAA89056.1  
aluc|OJZ80538.1 anid|CBF85759.1 anig|EHA25657.1 aory|EIT72497.1 asyd|OJJ64301.1 atub|OJI88393.1  
aver|OJJ07894.1 awen|OJJ31375.1 agla|OJJ80120.1 aver|OJI98394.1 awen|OJJ36365.1

Group5946: abra|OJJ66246.1 acar|OOF90704.1 afis|EAW24436.1 afla|EED55245.1 afum|EAL86104.1  
agla|OJJ79251.1 akaw|GAA89044.1 aluc|OJZ80552.1 anid|CBF86218.1 anig|EHA25645.1 asyd|OJJ64561.1  
ater|EAU30010.1 atub|OJI88379.1 aver|OJI98658.1 awen|OJJ32763.1 azon|OJJ42168.1

Group5947: abra|OJJ66261.1 acar|OOF90732.1 acla|EAW09306.1 afis|EAW21840.1 afla|EED46532.1  
aluc|OJZ80569.1 anig|EHA25629.1 aory|EIT72369.1 asyd|OJJ59252.1 ater|EAU38517.1 atub|OJI88362.1  
aver|OJJ01861.1 awen|OJJ34122.1 azon|OJJ48038.1 aory|EIT82363.1 afla|EED57910.1

Group5948: abra|OJJ66429.1 acar|OOF92895.1 afla|EED53122.1 akaw|GAA90297.1 aluc|OJZ83040.1  
anid|CBF88837.1 anig|EHA28111.1 aory|EIT72885.1 asyd|OJJ62821.1 atub|OJI87909.1 azon|OJJ51632.1  
akaw|GAA84751.1 aluc|OJZ86932.1 anig|EHA21714.1 atub|OJI83589.1 afla|EED56423.1

Group5949: abra|OJJ66471.1 afis|EAW16806.1 afla|EED53911.1 agla|OJJ89421.1 akaw|GAA92130.1  
aluc|OJZ83592.1 anid|CBF80483.1 asyd|OJJ55016.1 ater|EAU31818.1 atub|OJI89964.1 aver|OJI99385.1  
awen|OJJ37491.1 acar|OOF94407.1 awen|OJJ36143.1 anid|CBF78765.1 asyd|OJJ65236.1

Group5950: abra|OJJ66505.1 acar|OOF90969.1 acla|EAW10976.1 afis|EAW20883.1 afla|EED57731.1  
afum|EAL84749.1 agla|OJJ85833.1 akaw|GAA91205.1 aluc|OJZ81540.1 anid|CBF85489.1 anig|EHA25896.1  
aory|EIT79869.1 asyd|OJJ54961.1 atub|OJI88646.1 aver|OJJ07230.1 awen|OJJ34477.1

Group5951: abra|OJJ66533.1 acar|OOF90984.1 acla|EAW10959.1 afis|EAW20900.1 afla|EED50250.1 afum|EBA27203.1 agla|OJJ84013.1 akaw|GAA91182.1 aluc|OJZ81521.1 anig|EHA25919.1 asyd|OJJ54113.1 ater|EAU38533.1 atub|OJI88670.1 aver|OJJ08622.1 awen|OJJ34448.1 azon|OJJ51734.1

Group5952: abra|OJJ66537.1 acar|OOF90988.1 acla|EAW10954.1 afis|EAW20907.1 afla|EED50255.1 afum|EAL84726.1 agla|OJJ84023.1 akaw|GAA91178.1 aluc|OJZ81510.1 anig|EHA25923.1 aory|EIT77300.1 asyd|OJJ54099.1 ater|EAU38537.1 atub|OJI88674.1 aver|OJJ08639.1 awen|OJJ34444.1

Group5953: abra|OJJ66539.1 acar|OOF90992.1 acla|EAW10951.1 afis|EAW20910.1 afla|EED50258.1 afum|EAL84724.2 agla|OJJ84026.1 akaw|GAA91176.1 aluc|OJZ81505.1 anid|CBF82479.1 anig|EHA25925.1 aory|EIT77280.1 ater|EAU38540.1 atub|OJI88676.1 awen|OJJ34436.1 azon|OJJ51718.1

Group5954: abra|OJJ66549.1 acar|OOF89953.1 acla|EAW10943.1 afis|EAW20915.1 afla|EED48929.1 afum|EAL84719.1 agla|OJJ78905.1 akaw|GAA91174.1 aluc|OJZ81502.1 anid|CBF87874.1 anig|EHA25928.1 aory|EIT80003.1 asyd|OJJ65183.1 atub|OJI88679.1 aver|OJI99336.1 awen|OJJ30158.1

Group5955: abra|OJJ66560.1 acla|EAW10935.1 afis|EAW20926.1 afla|EED50279.1 afum|EAL84708.1 agla|OJJ83963.1 akaw|GAA91157.1 aluc|OJZ81485.1 anid|CBF82501.1 anig|EHA25942.1 aory|EIT77314.1 ater|EAU38572.1 atub|OJI88696.1 aver|OJJ08648.1 awen|OJJ34394.1 azon|OJJ48125.1

Group5956: abra|OJJ66571.1 acar|OOF91011.1 acla|EAW10922.1 afis|EAW20936.1 afum|EAL84698.1 agla|OJJ83950.1 akaw|GAA91147.1 aluc|OJZ81473.1 anid|CBF82528.1 anig|EHA25953.1 asyd|OJJ54074.1 ater|EAU38582.1 atub|OJI88705.1 aver|OJJ08665.1 awen|OJJ34381.1 azon|OJJ48113.1

Group5957: abra|OJJ66603.1 acar|OOF90115.1 acla|EAW10890.1 afis|EAW20968.1 afla|EED50322.1 afum|EBA27201.1 agla|OJJ84045.1 akaw|GAA91117.1 aluc|OJZ81443.1 anid|CBF82582.1 anig|EHA25981.1 aory|EIT77258.1 asyd|OJJ54040.1 ater|EAU38618.1 atub|OJI88735.1 awen|OJJ34347.1

Group5958: abra|OJJ66605.1 acar|OOF90113.1 acla|EAW10888.1 afis|EAW20970.1 afla|EED50324.1 afum|EAL84664.1 agla|OJJ84047.1 akaw|GAA91115.1 aluc|OJZ81441.1 anig|EHA25983.1 aory|EIT77253.1 asyd|OJJ54038.1 atub|OJI88737.1 aver|OJJ08702.1 awen|OJJ34345.1 azon|OJJ48082.1

Group5959: abra|OJJ66658.1 acar|OOF93675.1 acla|EAW11800.1 afis|EAW19410.1 afla|EED50365.1 afum|EAL87084.2 agla|OJJ81124.1 akaw|GAA89608.1 aluc|OJZ80790.1 anid|CBF74353.1 aory|EIT83118.1 asyd|OJJ57791.1 atub|OJI87641.1 aver|OJJ05373.1 awen|OJJ36806.1 acar|OOF93760.1

Group5960: abra|OJJ66762.1 acla|EAW11888.1 afis|EAW19500.1 afla|EED56719.1 afum|EBA27297.1 agla|OJJ81669.1 akaw|GAA89698.1 aluc|OJZ80687.1 anid|CBF75438.1 anig|EHA27327.1 asyd|OJJ59784.1 ater|EAU34815.1 atub|OJI87546.1 aver|OJJ02504.1 awen|OJJ36915.1 azon|OJJ42900.1

Group5961: abra|OJJ66768.1 acar|OOF93849.1 acla|EAW11605.1 afla|EED49852.1 agla|OJJ83400.1 akaw|GAA89705.1 aluc|OJZ80679.1 anid|CBF82408.1 anig|EHA27333.1 aory|EIT83408.1 asyd|OJJ54169.1 atub|OJI87538.1 aver|OJJ08570.1 awen|OJJ40864.1 azon|OJJ49073.1 awen|OJJ40207.1

Group5962: abra|OJJ66778.1 acar|OOF93857.1 afis|EAW16744.1 afla|EED45880.1 afum|EAL86319.2 agla|OJJ80280.1 akaw|GAA89713.1 aluc|OJZ80671.1 anid|CBF75770.1 anig|EHA27340.1 asyd|OJJ62106.1 ater|EAU36169.1 atub|OJI87525.1 aver|OJI96212.1 awen|OJJ29904.1 azon|OJJ42471.1

Group5963: abra|OJJ66785.1 acar|OOF96742.1 acla|EAW12028.1 afis|EAW19677.1 afum|EAL86845.1 akaw|GAA89719.1 aluc|OJZ80665.1 anid|CBF81955.1 anig|EHA27345.1 asyd|OJJ52953.1 atub|OJI87520.1 aver|OJJ08919.1 awen|OJJ37896.1 afla|EED47776.1 agla|OJJ81344.1 aory|EIT77196.1

Group5964: abra|OJJ66826.1 acla|EAW14408.1 afis|EAW19116.1 afla|EED54298.1 afum|EAL93848.2 agla|OJJ80431.1 akaw|GAA90462.1 aluc|OJZ85761.1 anid|CBF79730.1 anig|EHA24795.1 asyd|OJJ58072.1 ater|EAU37378.1 atub|OJI79546.1 aver|OJJ04335.1 awen|OJJ37446.1 azon|OJJ51124.1

Group5965: abra|OJJ66841.1 acar|OOF91618.1 acla|EAW14422.1 afis|EAW19129.1 afla|EED54285.1 afum|EAL93861.1 agla|OJJ88601.1 akaw|GAA90477.1 aluc|OJZ85743.1 anid|CBF79747.1 anig|EHA24809.1 asyd|OJJ58089.1 atub|OJI79528.1 aver|OJJ04311.1 awen|OJJ37462.1 azon|OJJ51140.1

Group5966: abra|OJJ66872.1 acar|OOF91648.1 acla|EAW14447.1 afis|EAW19155.1 afla|EED54247.1 afum|EAL93886.1 akaw|GAA91537.1 aluc|OJZ85709.1 anid|CBF86296.1 anig|EHA24833.1 aory|EIT76022.1 asyd|OJJ65011.1 ater|EAU37428.1 atub|OJI79500.1 aver|OJI99130.1 awen|OJJ37508.1

Group5967: abra|OJJ66877.1 acar|OOF91652.1 acla|EAW14452.1 afis|EAW19160.1 afla|EED54242.1 afum|EAL93890.2 akaw|GAA91532.1 aluc|OJZ85705.1 anid|CBF86287.1 anig|EHA24837.1 aory|EIT76015.1 asyd|OJJ65016.1 ater|EAU37433.1 atub|OJI79495.1 aver|OJI99134.1 awen|OJJ37513.1

Group5968: abra|OJJ66878.1 acar|OOF91653.1 acla|EAW14453.1 afis|EAW19161.1 afla|EED54241.1 afum|EAL93891.1 agla|OJJ88563.1 akaw|GAA91531.1 aluc|OJZ85704.1 anid|CBF75184.1 anig|EHA24838.1 aory|EIT76132.1 ater|EAU37319.1 atub|OJI79494.1 awen|OJJ37514.1 azon|OJJ51177.1

Group5969: abra|OJJ66959.1 acar|OOF93649.1 acla|EAW14961.1 afis|EAW24484.1 afla|EED52058.1 afum|EAL86153.1 agla|OJJ88957.1 akaw|GAA92202.1 aluc|OJZ85617.1 anig|EHA24909.1 aory|EIT81432.1 asyd|OJJ55928.1 ater|EAU37957.1 atub|OJI79410.1 aver|OJJ04878.1 azon|OJJ51805.1

Group5970: abra|OJJ66989.1 acar|OOF93623.1 acla|EAW12086.1 afis|EAW19729.1 afla|EED52168.1 afum|EAL86798.1 akaw|GAA92174.1 aluc|OJZ85584.1 anid|CBF87096.1 anig|EHA24937.1 aory|EIT74461.1 asyd|OJJ60395.1 atub|OJI79379.1 aver|OJI99724.1 awen|OJJ29795.1 azon|OJJ50255.1

Group5971: abra|OJJ67092.1 acar|OOF97365.1 acla|EAW12323.1 afis|EAW25701.1 afum|EAL84374.1 agla|OJJ86316.1 akaw|GAA91069.1 aluc|OJZ87883.1 anid|CBF82025.1 anig|EHA20186.1 asyd|OJJ58346.1 ater|EAU39413.1 atub|OJI80768.1 aver|OJJ02067.1 afis|EAW23748.1 anid|CBF80131.1

Group5972: abra|OJJ67100.1 acar|OOF98452.1 acla|EAW13713.1 afis|EAW20273.1 afla|EED48132.1 afum|EAL85407.1 agla|OJJ87505.1 akaw|GAA91061.1 aluc|OJZ87873.1 anid|CBF78240.1 anig|EHA20179.1 aory|EIT76216.1 ater|EAU31788.1 atub|OJI80776.1 awen|OJJ35880.1 afis|EAW23647.1

Group5973: abra|OJJ67109.1 acar|OOF98443.1 afis|EAW24483.1 afla|EED52545.1 afum|EAL86152.1 agla|OJJ85836.1 akaw|GAA91055.1 aluc|OJZ87866.1 anig|EHA20172.1 aory|EIT74263.1 ater|EAU30095.1 atub|OJI80782.1 awen|OJJ30838.1 ater|EAU33502.1 afum|EAL92050.2 asyd|OJJ52467.1

Group5974: abra|OJJ67132.1 acar|OOF99014.1 afla|EED53374.1 anid|CBF81678.1 aory|EIT74911.1 asyd|OJJ59559.1 aver|OJI98274.1 awen|OJJ38788.1 azon|OJJ42559.1 abra|OJJ70398.1 acar|OOF91875.1 akaw|GAA91960.1 aluc|OJZ82657.1 anig|EHA27416.1 atub|OJI88889.1 aver|OJJ02709.1

Group5975: abra|OJJ67156.1 acar|OOF98403.1 acla|EAW14569.1 afis|EAW19282.1 afla|EED47595.1 agla|OJJ88394.1 akaw|GAA91016.1 aluc|OJZ87817.1 anid|CBF78761.1 anig|EHA20298.1 aory|EIT80196.1 asyd|OJJ65234.1 atub|OJI80827.1 aver|OJI99383.1 awen|OJJ37643.1 azon|OJJ44907.1

Group5976: abra|OJJ67161.1 acar|OOF98399.1 afis|EAW19279.1 afla|EED47599.1 akaw|GAA91012.1 aluc|OJZ87813.1 anid|CBF78754.1 aory|EIT80238.1 asyd|OJJ65230.1 ater|EAU29484.1 atub|OJI80831.1 aver|OJI99379.1 awen|OJJ37639.1 acla|EAW14566.1 afum|EAL94005.1 azon|OJJ44880.1

Group5977: abra|OJJ67167.1 acar|OOF98394.1 acla|EAW14561.1 afis|EAW19274.1 afum|EAL94000.1 akaw|GAA91007.1 aluc|OJZ87808.1 anid|CBF78747.1 anig|EHA20290.1 asyd|OJJ65225.1 ater|EAU29490.1 atub|OJI80837.1 aver|OJI99375.1 afla|EED47602.1 agla|OJJ88399.1 aory|EIT80191.1

Group5978: abra|OJJ67230.1 acar|OOF98323.1 acla|EAW10403.1 afis|EAW25169.1 afla|EED57527.1 afum|EAL89842.1 agla|OJJ88986.1 akaw|GAA91655.1 aluc|OJZ87744.1 anid|CBF85618.1 asyd|OJJ64203.1 ater|EAU39453.1 atub|OJI80897.1 aver|OJI98292.1 awen|OJJ40820.1 azon|OJJ46864.1

Group5979: abra|OJJ67233.1 asyd|OJJ53601.1 aver|OJJ08147.1 awen|OJJ35947.1 azon|OJJ42412.1 abra|OJJ77556.1 acar|OOF99171.1 afla|EED46976.1 akaw|GAA84067.1 aluc|OJZ80981.1 anig|EHA19379.1 aory|EIT72531.1 ater|EAU33717.1 atub|OJI82605.1 ater|EAU31461.1 awen|OJJ34676.1

Group5980: abra|OJJ67269.1 acar|OOF98297.1 afis|EAW17110.1 afla|EED55274.1 afum|EAL86574.1 agla|OJJ88999.1 akaw|GAA91684.1 aluc|OJZ87710.1 anid|CBF85646.1 anig|EHA20204.1 aory|EIT83570.1 asyd|OJJ64237.1 ater|EAU39436.1 atub|OJI80932.1 aver|OJI98330.1 awen|OJJ40797.1

Group5981: abra|OJJ67271.1 acla|EAW10416.1 afis|EAW25153.1 afla|EED55280.1 afum|EAL89828.1 akaw|GAA91686.1 aluc|OJZ87708.1 anid|CBF85639.1 anig|EHA20890.1 aory|EIT83511.1 asyd|OJJ64241.1 atub|OJI80934.1 aver|OJI98334.1 awen|OJJ40782.1 azon|OJJ46870.1 agla|OJJ89001.1

Group5982: akaw|GAA86510.1 aluc|OJZ85054.1 anig|EHA25270.1 acar|OOF92509.1 acla|EAW06428.1 afis|EAW18532.1 afla|EED52868.1 agla|OJJ85145.1 anid|CBF70202.1 asyd|OJJ58785.1 ater|EAU30038.1 aver|OJJ01393.1 awen|OJJ31090.1 azon|OJJ50596.1 afum|EAL93230.1 aory|EIT78632.1

Group5983: abra|OJJ67307.1 acar|OOF92506.1 acla|EAW06426.1 afis|EAW18530.1 afla|EED52871.1 afum|EAL93227.1 agla|OJJ85143.1 akaw|GAA86508.1 aluc|OJZ85051.1 anid|CBF70206.1 anig|EHA25268.1 asyd|OJJ58783.1 atub|OJI80547.1 aver|OJJ01391.1 awen|OJJ31088.1 azon|OJJ50593.1

Group5984: abra|OJJ67312.1 acla|EAW06420.1 afis|EAW18524.1 afum|EAL93219.1 agla|OJJ85136.1 akaw|GAA86503.1 aluc|OJZ85046.1 anid|CBF70215.1 anig|EHA25263.1 aory|EIT78618.1 asyd|OJJ58777.1 ater|EAU30048.1 atub|OJI80552.1 aver|OJJ01386.1 awen|OJJ31078.1 azon|OJJ50586.1

Group5985: abra|OJJ67320.1 acar|OOF92494.1 acla|EAW06416.1 afis|EAW18520.1 afla|EED52878.1 afum|EAL93215.1 agla|OJJ85132.1 akaw|GAA86498.1 aluc|OJZ85040.1 anid|CBF70224.1 anig|EHA25258.1 aory|EIT78617.1 ater|EAU30050.1 atub|OJI80557.1 awen|OJJ31072.1 azon|OJJ50582.1

Group5986: abra|OJJ67333.1 acar|OOF92480.1 acla|EAW06401.1 afis|EAW18505.1 afla|EED52896.1 afum|EAL93199.1 agla|OJJ85117.1 akaw|GAA86483.1 aluc|OJZ85024.1 anid|CBF87122.1 anig|EHA25245.1 aory|EIT78621.1 asyd|OJJ60361.1 ater|EAU30066.1 atub|OJI80573.1 aver|OJI99698.1

Group5987: afla|EED54124.1 aory|EIT76004.1 abra|OJJ77008.1 afis|EAW25620.1 agla|OJJ78907.1  
akaw|GAA87040.1 aluc|OJZ84407.1 anig|EHA27737.1 asyd|OJJ55522.1 ater|EAU32182.1 atub|OJI89665.1  
aver|OJJ06600.1 awen|OJJ36039.1 azon|OJJ45113.1 acar|OOF91454.1 anid|CBF83171.1

Group5988: abra|OJJ67397.1 acar|OOF92420.1 acla|EAW06363.1 afis|EAW18472.1 afla|EED52938.1  
afum|EAL93159.2 agla|OJJ85059.1 akaw|GAA86430.1 aluc|OJZ84972.1 anig|EHA25184.1 asyd|OJJ58828.1  
ater|EAU29889.1 atub|OJI80629.1 aver|OJJ01431.1 awen|OJJ31024.1 azon|OJJ50538.1

Group5989: abra|OJJ67406.1 acar|OOF92410.1 acla|EAW06352.1 afis|EAW18464.1 afum|EAL93151.2  
agla|OJJ85048.1 akaw|GAA86421.1 aluc|OJZ84962.1 anid|CBF70093.1 aory|EIT78734.1 asyd|OJJ58838.1  
ater|EAU29882.1 atub|OJI80638.1 aver|OJJ01440.1 awen|OJJ31016.1 azon|OJJ50529.1

Group5990: abra|OJJ67428.1 acar|OOF92398.1 acla|EAW06336.1 afis|EAW18448.1 afla|EED52960.1  
afum|EAL93133.2 agla|OJJ85025.1 akaw|GAA86402.1 aluc|OJZ84938.1 anid|CBF70068.1 anig|EHA25156.1  
asyd|OJJ58848.1 atub|OJI80661.1 aver|OJJ01449.1 awen|OJJ31000.1 azon|OJJ50514.1

Group5991: abra|OJJ67532.1 acar|OOG01225.1 acla|EAW14583.1 afis|EAW20812.1 afla|EED55975.1  
afum|EAL84816.1 akaw|GAA88126.1 anid|CBF77711.1 anig|EHA18691.1 asyd|OJJ53078.1 ater|EAU32035.1  
atub|OJI91604.1 aver|OJJ03769.1 awen|OJJ32225.1 acla|EAW11063.1 awen|OJJ30947.1

Group5992: abra|OJJ67550.1 acar|OOF90250.1 acla|EAW13271.1 afis|EAW17346.1 afla|EED45503.1  
afum|EAL91190.1 akaw|GAA88110.1 aluc|OJZ81380.1 anig|EHA18675.1 aory|EIT75626.1 asyd|OJJ56676.1  
ater|EAU29418.1 atub|OJI91586.1 aver|OJJ06048.1 acar|OOF94391.1 ater|EAU35969.1

Group5993: abra|OJJ67617.1 afla|EED45202.1 akaw|GAA89134.1 aluc|OJZ81702.1 anig|EHA19895.1  
aory|EIT73724.1 atub|OJI81348.1 abra|OJJ73693.1 acar|OOG00866.1 agla|OJJ78660.1 akaw|GAA88467.1  
aluc|OJZ88356.1 anig|EHA18089.1 ater|EAU39318.1 atub|OJI90951.1 awen|OJJ33717.1

Group5994: abra|OJJ67624.1 acar|OOF91972.1 afis|EAW20775.1 afla|EED45948.1 afum|EAL84845.1  
agla|OJJ79050.1 akaw|GAA89144.1 aluc|OJZ81692.1 anid|CBF74983.1 anig|EHA25752.1 aory|EIT75387.1  
asyd|OJJ54562.1 atub|OJI88488.1 aver|OJJ07594.1 awen|OJJ35893.1 azon|OJJ42145.1

Group5995: abra|OJJ67669.1 acar|OOF90912.1 acla|EAW12248.1 afis|EAW16768.1 akaw|GAA89185.1  
aluc|OJZ81646.1 anid|CBF84388.1 anig|EHA25797.1 asyd|OJJ54909.1 ater|EAU34859.1 atub|OJI88536.1  
aver|OJJ07293.1 azon|OJJ43892.1 anid|CBF78140.1 asyd|OJJ53585.1 aver|OJJ08163.1

Group5996: abra|OJJ67692.1 acar|OOF97519.1 acla|EAW14628.1 afis|EAW17251.1 afla|EED53073.1  
afum|EAL86670.1 akaw|GAA89201.1 aluc|OJZ81629.1 anid|CBF88038.1 anig|EHA25814.1 aory|EIT74791.1  
asyd|OJJ58695.1 ater|EAU30968.1 atub|OJI88551.1 aver|OJJ01307.1 awen|OJJ32905.1

Group5997: abra|OJJ67729.1 acar|OOF90931.1 afis|EAW20573.1 afla|EED52328.1 afum|EAL84492.1  
agla|OJJ88971.1 akaw|GAA89223.1 aluc|OJZ81605.1 anid|CBF74531.1 anig|EHA25840.1 aory|EIT74343.1  
atub|OJI88580.1 aver|OJJ06519.1 awen|OJJ29984.1 asyd|OJJ55446.1 awen|OJJ36164.1

Group5998: abra|OJJ67829.1 acar|OOG00541.1 acla|EAW09505.1 afum|EAL84476.1 akaw|GAA91840.1  
aluc|OJZ82058.1 anid|CBF78144.1 anig|EHA22199.1 ater|EAU32305.1 atub|OJI84617.1 aver|OJI99602.1  
awen|OJJ31459.1 azon|OJJ43641.1 acar|OOF92586.1 azon|OJJ44381.1 aver|OJI99600.1

Group5999: abra|OJJ67857.1 acar|OOF92837.1 acla|EAW11743.1 afis|EAW23776.1 afla|EED51576.1  
afum|EAL87210.1 agla|OJJ78927.1 akaw|GAA91863.1 aluc|OJZ82035.1 anid|CBF79828.1 anig|EHA22221.1  
aory|EIT80538.1 atub|OJI84590.1 aver|OJJ04261.1 awen|OJJ33701.1 azon|OJJ42840.1

Group6000: abra|OJJ67860.1 acar|OOF92841.1 acla|EAW11738.1 afis|EAW23771.1 afla|EED51572.1  
afum|EAL87205.1 agla|OJJ78948.1 akaw|GAA91867.1 aluc|OJZ82032.1 anig|EHA22224.1 aory|EIT80473.1  
asyd|OJJ58140.1 ater|EAU31315.1 atub|OJI84587.1 aver|OJJ04265.1 awen|OJJ33704.1

Group6001: abra|OJJ67864.1 acar|OOF92844.1 afis|EAW23767.1 afla|EED51553.1 afum|EAL87201.1  
agla|OJJ78955.1 akaw|GAA91871.1 aluc|OJZ82028.1 anid|CBF84704.1 anig|EHA22228.1 aory|EIT80560.1  
asyd|OJJ53320.1 atub|OJI84582.1 aver|OJJ08423.1 awen|OJJ33696.1 azon|OJJ42545.1

Group6002: abra|OJJ67880.1 acar|OOF92856.1 acla|EAW11723.1 afis|EAW23746.1 afla|EED51538.1  
afum|EAL87181.1 akaw|GAA91887.1 aluc|OJZ82010.1 anid|CBF87336.1 anig|EHA22247.1 aory|EIT80493.1  
asyd|OJJ56363.1 atub|OJI84559.1 aver|OJJ06351.1 awen|OJJ33681.1 azon|OJJ44710.1

Group6003: abra|OJJ67882.1 acar|OOF92863.1 acla|EAW11720.1 afis|EAW23741.1 afla|EED51535.1  
afum|EAL87178.1 agla|OJJ78964.1 akaw|GAA91889.1 aluc|OJZ82008.1 anid|CBF79813.1 anig|EHA22249.1  
aory|EIT80693.1 ater|EAU31298.1 atub|OJI84557.1 awen|OJJ33678.1 azon|OJJ42819.1

Group6004: abra|OJJ67888.1 acla|EAW11717.1 afis|EAW23736.1 afla|EED51513.1 afum|EAL87174.1  
agla|OJJ78970.1 akaw|GAA91894.1 aluc|OJZ82002.1 anid|CBF84245.1 anig|EHA22254.1 asyd|OJJ57198.1  
ater|EAU31295.1 atub|OJI84552.1 aver|OJJ03093.1 awen|OJJ33671.1 azon|OJJ42814.1



Group6005: abra|OJJ67889.1 acar|OOF92859.1 afis|EAW23738.1 afla|EED51514.1 afum|EAL87175.1  
agla|OJJ78967.1 akaw|GAA91895.1 aluc|OJZ82001.1 anid|CBF79809.1 anig|EHA22255.1 aory|EIT80532.1  
asyd|OJJ58130.1 ater|EAU31296.1 atub|OJI84551.1 aver|OJJ04275.1 awen|OJJ33674.1

Group6006: abra|OJJ67890.1 acar|OOF92858.1 acla|EAW11060.1 afis|EAW20814.1 afla|EED47512.1  
afum|EAL84814.1 akaw|GAA91896.1 aluc|OJZ82000.1 anid|CBF78358.1 anig|EHA22256.1 aory|EIT74562.1  
asyd|OJJ56145.1 ater|EAU30844.1 atub|OJI84550.1 aver|OJJ05086.1 awen|OJJ35834.1

Group6007: ater|EAU35708.1 anid|CBF69522.1 afis|EAW21018.1 afla|EED56839.1 afum|EAL92056.1  
agla|OJJ80564.1 aory|EIT77488.1 asyd|OJJ59206.1 aver|OJJ01817.1 awen|OJJ37826.1 afum|EAL85152.1  
agla|OJJ88496.1 atub|OJI81729.1 akaw|GAA86070.1 aluc|OJZ90305.1 awen|OJJ31968.1

Group6008: acla|EAW12904.1 abra|OJJ78317.1 acar|OOF90170.1 akaw|GAA85713.1 aluc|OJZ91390.1  
anid|CBF75868.1 anig|EHA20068.1 asyd|OJJ60241.1 atub|OJI83383.1 aver|OJJ04025.1 afis|EAW17776.1  
afla|EED56744.1 afum|EAL91584.2 aory|EIT73880.1 ater|EAU31816.1 asyd|OJJ52432.1

Group6009: abra|OJJ67939.1 acar|OOF92788.1 acla|EAW11629.1 afis|EAW23827.1 afla|EED51979.1  
afum|EAL87259.1 agla|OJJ82485.1 akaw|GAA91257.1 aluc|OJZ82811.1 anid|CBF79909.1 anig|EHA21250.1  
aory|EIT81475.1 ater|EAU31382.1 atub|OJI89041.1 awen|OJJ33785.1 azon|OJJ42887.1

Group6010: abra|OJJ67972.1 acar|OOF92813.1 acla|EAW11762.1 afis|EAW23795.1 afla|EED51602.1  
afum|EAL87229.2 agla|OJJ78844.1 akaw|GAA91230.1 aluc|OJZ82840.1 anid|CBF79856.1 anig|EHA21277.1  
aory|EIT80530.1 atub|OJI89070.1 aver|OJJ04244.1 awen|OJJ33751.1 azon|OJJ42860.1

Group6011: abra|OJJ67984.1 acar|OOF92026.1 afis|EAW25692.1 afla|EED46905.1 afum|EAL84362.1  
akaw|GAA91218.1 aluc|OJZ82852.1 anid|CBF78965.1 anig|EHA21288.1 aory|EIT72639.1 asyd|OJJ55667.1  
ater|EAU35088.1 atub|OJI89082.1 aver|OJJ06748.1 awen|OJJ36205.1 azon|OJJ50743.1

Group6012: abra|OJJ68114.1 acar|OOF93908.1 afis|EAW15405.1 afla|EED44866.1 afum|EAL84241.1  
agla|OJJ86207.1 akaw|GAA86895.1 aluc|OJZ90018.1 anid|CBF86936.1 anig|EHA27394.1 aory|EIT82714.1  
asyd|OJJ55589.1 atub|OJI84789.1 aver|OJJ06668.1 awen|OJJ41765.1 agla|OJJ83696.1

Group6013: abra|OJJ68115.1 acar|OOF93909.1 afis|EAW16723.1 afla|EED45933.1 afum|EAL86297.2  
agla|OJJ88975.1 akaw|GAA86896.1 aluc|OJZ90019.1 anig|EHA27395.1 aory|EIT75655.1 asyd|OJJ56047.1  
atub|OJI84788.1 aver|OJJ04990.1 awen|OJJ36020.1 azon|OJJ45077.1 anid|CBF78249.1

Group6014: abra|OJJ68116.1 acar|OOF93910.1 afis|EAW16724.1 afla|EED45934.1 afum|EAL86298.1  
agla|OJJ88976.1 akaw|GAA86897.1 aluc|OJZ90020.1 anid|CBF78251.1 anig|EHA27396.1 aory|EIT75493.1  
asyd|OJJ56049.1 atub|OJI84787.1 aver|OJJ04992.1 acla|EAW13226.1 acar|OOF94484.1

Group6015: agla|OJJ87804.1 abra|OJJ74465.1 acla|EAW07232.1 afis|EAW22246.1 afum|EAL90947.1  
akaw|GAA87358.1 aluc|OJZ89655.1 anid|CBF88498.1 anig|EHA26893.1 asyd|OJJ63794.1 ater|EAU34254.1  
atub|OJI85149.1 aver|OJI97143.1 awen|OJJ34824.1 afla|EED57639.1 aory|EIT82987.1

Group6016: abra|OJJ68174.1 acar|OOF97472.1 acla|EAW13059.1 afis|EAW17606.1 afla|EED49216.1  
afum|EAL91419.1 agla|OJJ81353.1 akaw|GAA83270.1 aluc|OJZ83776.1 anid|CBF90185.1 anig|EHA18915.1  
asyd|OJJ61984.1 atub|OJI90146.1 aver|OJI96076.1 awen|OJJ37236.1 azon|OJJ50938.1

Group6017: abra|OJJ68180.1 acar|OOF97475.1 acla|EAW13062.1 afis|EAW17602.1 afla|EED49219.1  
afum|EAL91415.1 akaw|GAA83266.1 aluc|OJZ83772.1 anig|EHA18912.1 aory|EIT83164.1 asyd|OJJ60509.1  
ater|EAU37039.1 atub|OJI90143.1 aver|OJI99834.1 awen|OJJ37243.1 azon|OJJ50941.1

Group6018: abra|OJJ68188.1 acar|OOF97482.1 acla|EAW13070.1 afis|EAW17594.1 afla|EED49226.1  
afum|EAL91407.1 akaw|GAA83257.1 aluc|OJZ83760.1 anid|CBF90208.1 anig|EHA18904.1 asyd|OJJ61971.1  
ater|EAU37032.1 atub|OJI90133.1 aver|OJI96064.1 awen|OJJ37252.1 azon|OJJ50947.1

Group6019: abra|OJJ68189.1 acar|OOF97485.1 acla|EAW13071.1 afis|EAW17593.1 afla|EED49228.1  
afum|EAL91406.1 agla|OJJ81332.1 akaw|GAA83256.1 aluc|OJZ83759.1 asyd|OJJ61970.1 ater|EAU37030.1  
atub|OJI90132.1 aver|OJI96063.1 awen|OJJ37253.1 azon|OJJ50948.1 anid|CBF90210.1

Group6020: abra|OJJ68210.1 acar|OOF97494.1 acla|EAW12974.1 afis|EAW17690.1 afla|EED50454.1  
afum|EAL91504.1 agla|OJJ79489.1 akaw|GAA83236.1 aluc|OJZ83735.1 anid|CBF89982.1 anig|EHA18884.1  
asyd|OJJ62089.1 atub|OJI90113.1 aver|OJI96195.1 awen|OJJ37146.1 azon|OJJ50846.1

Group6021: abra|OJJ68215.1 acla|EAW12970.1 afla|EED50449.1 akaw|GAA83231.1 aluc|OJZ83731.1  
anid|CBF89974.1 anig|EHA18880.1 aory|EIT82144.1 asyd|OJJ58334.1 ater|EAU29907.1 atub|OJI90108.1  
aver|OJJ02076.1 awen|OJJ37142.1 agla|OJJ80592.1 asyd|OJJ62093.1 aver|OJI96199.1

Group6022: abra|OJJ68236.1 acla|EAW12223.1 afla|EED56299.1 anid|CBF87461.1 anig|EHA18314.1  
aory|EIT73296.1 asyd|OJJ52778.1 ater|EAU35485.1 atub|OJI89935.1 aver|OJJ08340.1 awen|OJJ36976.1  
anid|CBF87418.1 aver|OJJ03445.1 afla|EED56300.1 asyd|OJJ53411.1 aver|OJJ03428.1

Group6023: abra|OJJ68253.1 acar|OOF97532.1 afis|EAW24691.1 afla|EED46562.1 afum|EAL89332.1 akaw|GAA83208.1 aluc|OJZ83710.1 anid|CBF70720.1 anig|EHA18861.1 aory|EIT77828.1 asyd|OJJ61535.1 ater|EAU29994.1 atub|OJI90082.1 aver|OJJ00863.1 aver|OJJ07656.1 asyd|OJJ54532.1

Group6024: abra|OJJ68295.1 acar|OOF97562.1 acla|EAW08965.1 afis|EAW15446.1 afla|EED46465.1 afum|EAL84200.1 akaw|GAA83178.1 aluc|OJZ83677.1 anig|EHA18833.1 aory|EIT72318.1 atub|OJI90048.1 ater|EAU36715.1 asyd|OJJ53380.1 aver|OJJ08363.1 anid|CBF73480.1 anid|CBF87739.1

Group6025: abra|OJJ68325.1 acar|OOF97617.1 afla|EED57063.1 agla|OJJ78511.1 akaw|GAA92076.1 aluc|OJZ83648.1 anig|EHA18800.1 aory|EIT83411.1 asyd|OJJ56739.1 atub|OJI90017.1 awen|OJJ38714.1 asyd|OJJ52101.1 afla|EED49837.1 akaw|GAA93219.1 anid|CBF89124.1 anig|EHA22004.1

Group6026: abra|OJJ68348.1 acar|OOF94844.1 afis|EAW17519.1 afla|EED45478.1 afum|EAL91337.1 agla|OJJ78830.1 akaw|GAA92115.1 aluc|OJZ83610.1 anid|CBF80533.1 anig|EHA18769.1 aory|EIT75491.1 asyd|OJJ54654.1 ater|EAU36947.1 atub|OJI89983.1 aver|OJJ07507.1 awen|OJJ37340.1

Group6027: abra|OJJ68355.1 afla|EED53490.1 agla|OJJ82739.1 akaw|GAA92127.1 aluc|OJZ83595.1 anig|EHA18755.1 aory|EIT72952.1 asyd|OJJ56978.1 ater|EAU39005.1 atub|OJI89967.1 aver|OJJ03309.1 awen|OJJ36414.1 acar|OOF91796.1 afla|EED48206.1 ater|EAU30833.1 awen|OJJ37862.1

Group6028: abra|OJJ68383.1 acar|OOF93985.1 afis|EAW16782.1 afla|EED56189.1 afum|EAL86353.1 agla|OJJ79766.1 akaw|GAA92562.1 aluc|OJZ90109.1 anig|EHA20962.1 aory|EIT73337.1 asyd|OJJ59099.1 ater|EAU30270.1 atub|OJI84694.1 aver|OJJ01690.1 awen|OJJ29848.1 azon|OJJ50360.1

Group6029: abra|OJJ68391.1 afis|EAW19987.1 afum|EAL84928.1 akaw|GAA92556.1 aluc|OJZ90103.1 anig|EHA20967.1 aory|EIT82613.1 atub|OJI84702.1 acla|EAW13638.1 akaw|GAA92555.1 anid|CBF73971.1 anig|EHA20968.1 asyd|OJJ62368.1 aver|OJI96502.1 afla|EED53131.1 aory|EIT74881.1

Group6030: abra|OJJ68402.1 acar|OOF93970.1 afis|EAW17326.1 afla|EED54080.1 afum|EAL91163.1 akaw|GAA92545.1 aluc|OJZ90094.1 anid|CBF82407.1 anig|EHA20982.1 aory|EIT75924.1 asyd|OJJ54167.1 ater|EAU29239.1 atub|OJI84712.1 aver|OJJ08575.1 awen|OJJ29674.1 azon|OJJ46027.1

Group6031: abra|OJJ68447.1 acar|OOF93948.1 acla|EAW15354.1 afis|EAW20359.1 afla|EED47313.1 afum|EAL85476.1 akaw|GAA86927.1 aluc|OJZ90051.1 anid|CBF71653.1 anig|EHA21019.1 aory|EIT82832.1 asyd|OJJ61838.1 ater|EAU30275.1 atub|OJI84756.1 aver|OJI95937.1 azon|OJJ50770.1

Group6032: abra|OJJ68454.1 afla|EED56946.1 agla|OJJ87926.1 akaw|GAA86920.1 aluc|OJZ90044.1 anid|CBF70196.1 anig|EHA21027.1 aory|EIT77506.1 asyd|OJJ58788.1 ater|EAU30025.1 atub|OJI84763.1 aver|OJJ01395.1 awen|OJJ37051.1 azon|OJJ46448.1 afla|EED48364.1 agla|OJJ81574.1

Group6033: abra|OJJ68480.1 acar|OOF91469.1 acla|EAW06709.1 afis|EAW16259.1 afla|EED48914.1 afum|EAL88880.1 akaw|GAA92404.1 aluc|OJZ83265.1 anid|CBF80822.1 anig|EHA21118.1 asyd|OJJ54455.1 ater|EAU32190.1 atub|OJI87672.1 aver|OJJ07700.1 awen|OJJ38053.1 azon|OJJ43162.1

Group6034: abra|OJJ68493.1 acar|OOF90054.1 acla|EAW12143.1 afis|EAW17193.1 afum|EAL86621.1 agla|OJJ86661.1 akaw|GAA92777.1 aluc|OJZ82706.1 anid|CBF69881.1 anig|EHA21161.1 aory|EIT73563.1 asyd|OJJ59013.1 ater|EAU37674.1 atub|OJI88939.1 aver|OJJ01602.1 azon|OJJ42624.1

Group6035: abra|OJJ68547.1 afis|EAW17986.1 afla|EED51918.1 afum|EAL91795.1 akaw|GAA91307.1 aluc|OJZ82763.1 anid|CBF80002.1 anig|EHA21207.1 aory|EIT81366.1 asyd|OJJ58249.1 ater|EAU31496.1 atub|OJI88996.1 aver|OJJ02175.1 azon|OJJ48275.1 acla|EAW12821.1 awen|OJJ41560.1

Group6036: abra|OJJ68579.1 afla|EED56440.1 anid|CBF75415.1 aory|EIT72799.1 asyd|OJJ56522.1 atub|OJI91463.1 aver|OJJ06200.1 awen|OJJ37869.1 abra|OJJ68930.1 acar|OOF90673.1 afis|EAW19226.1 afum|EAL93957.1 akaw|GAA90321.1 aluc|OJZ85912.1 anig|EHA24676.1 atub|OJI79702.1

Group6037: anid|CBF78851.1 abra|OJJ74275.1 acar|OOF95456.1 acla|EAW07319.1 afis|EAW22351.1 afla|EED57755.1 afum|EAL90841.1 agla|OJJ87708.1 akaw|GAA86749.1 aluc|OJZ89858.1 anig|EHA27059.1 aory|EIT81036.1 asyd|OJJ63888.1 atub|OJI84948.1 aver|OJI97051.1 anid|CBF88659.1

Group6038: abra|OJJ68644.1 acar|OOF92147.1 acla|EAW07072.1 afis|EAW24963.1 afum|EAL89621.1 akaw|GAA89784.1 aluc|OJZ81907.1 anig|EHA22336.1 asyd|OJJ55374.1 ater|EAU30793.1 atub|OJI84460.1 aver|OJJ06453.1 awen|OJJ33779.1 azon|OJJ50607.1 anid|CBF82913.1 ater|EAU34596.1

Group6039: abra|OJJ68669.1 acar|OOF92169.1 acla|EAW12578.1 afis|EAW24070.1 afla|EED51405.1 afum|EAL91926.1 agla|OJJ87313.1 akaw|GAA89810.1 aluc|OJZ81880.1 anid|CBF86460.1 asyd|OJJ64913.1 ater|EAU30491.1 atub|OJI84434.1 aver|OJI99034.1 awen|OJJ41420.1 azon|OJJ48885.1

Group6040: abra|OJJ68671.1 acar|OOF92172.1 acla|EAW12576.1 afis|EAW24072.1 afum|EAL91928.1 agla|OJJ87141.1 akaw|GAA89824.1 aluc|OJZ81866.1 anid|CBF86464.1 anig|EHA22361.1 aory|EIT80514.1 asyd|OJJ64911.1 ater|EAU30493.1 atub|OJI84432.1 aver|OJI99032.1 awen|OJJ41408.1

Group6041: abra|OJJ68680.1 acar|OOF92182.1 acla|EAW12567.1 afis|EAW24083.1 afla|EED51390.1 afum|EAL91938.1 agla|OJJ87153.1 akaw|GAA89833.1 aluc|OJZ81853.1 anid|CBF86482.1 asyd|OJJ64900.1 ater|EAU30506.1 atub|OJI84422.1 aver|OJI99021.1 awen|OJJ41406.1 azon|OJJ48872.1

Group6042: abra|OJJ68737.1 acar|OOF92233.1 acla|EAW12510.1 afis|EAW24136.1 afum|EAL91991.1 agla|OJJ87213.1 akaw|GAA89885.1 aluc|OJZ81791.1 anid|CBF86571.1 anig|EHA22424.1 asyd|OJJ64846.1 ater|EAU30565.1 atub|OJI84364.1 aver|OJI98958.1 awen|OJJ41353.1 azon|OJJ48816.1

Group6043: abra|OJJ68764.1 acar|OOF92250.1 acla|EAW12487.1 afis|EAW24158.1 afum|EAL92014.2 agla|OJJ89523.1 akaw|GAA89908.1 aluc|OJZ81761.1 anid|CBF77898.1 anig|EHA22452.1 asyd|OJJ55304.1 ater|EAU30589.1 atub|OJI84333.1 aver|OJJ06922.1 awen|OJJ41320.1 azon|OJJ48793.1

Group6044: abra|OJJ68765.1 acar|OOF92251.1 acla|EAW12486.1 afis|EAW24159.1 afla|EED46774.1 afum|EAL92015.1 agla|OJJ89522.1 akaw|GAA89909.1 aluc|OJZ81760.1 anid|CBF77896.1 aory|EIT72588.1 asyd|OJJ55305.1 atub|OJI84332.1 aver|OJJ06921.1 awen|OJJ41319.1 azon|OJJ48792.1

Group6045: abra|OJJ68778.1 acar|OOF92264.1 acla|EAW12473.1 afla|EED46762.1 afum|EAL92028.1 agla|OJJ89508.1 akaw|GAA89922.1 aluc|OJZ81748.1 anid|CBF77870.1 anig|EHA22464.1 asyd|OJJ55318.1 ater|EAU30603.1 atub|OJI84319.1 aver|OJJ06910.1 awen|OJJ41305.1 azon|OJJ48779.1

Group6046: abra|OJJ68781.1 acar|OOF92268.1 acla|EAW12471.1 afla|EED46759.1 afum|EAL92032.1 agla|OJJ89505.1 akaw|GAA89925.1 aluc|OJZ81745.1 anid|CBF77865.1 anig|EHA22467.1 asyd|OJJ55321.1 ater|EAU30605.1 atub|OJI84316.1 aver|OJJ06907.1 awen|OJJ41302.1 azon|OJJ48776.1

Group6047: abra|OJJ68787.1 acar|OOF92271.1 acla|EAW12467.1 afis|EAW24174.1 afum|EAL92036.2 agla|OJJ89500.1 aluc|OJZ81741.1 anid|CBF77857.1 anig|EHA22471.1 aory|EIT72261.1 asyd|OJJ55325.1 ater|EAU30609.1 atub|OJI84312.1 aver|OJJ06903.1 awen|OJJ41296.1 azon|OJJ48772.1

Group6048: abra|OJJ68796.1 acar|OOF92280.1 acla|EAW14658.1 afis|EAW24185.1 afum|EAL92045.1 agla|OJJ89490.1 akaw|GAA89935.1 aluc|OJZ81731.1 anid|CBF77838.1 anig|EHA22481.1 asyd|OJJ55335.1 ater|EAU30618.1 atub|OJI84302.1 aver|OJJ06892.1 awen|OJJ41285.1 azon|OJJ48768.1

Group6049: acar|OOF97439.1 acla|EAW13029.1 afis|EAW17638.1 afum|EAL91453.1 agla|OJJ81258.1 anid|CBF90127.1 aory|EIT82094.1 asyd|OJJ62017.1 ater|EAU37074.1 aver|OJI96108.1 azon|OJJ50907.1 afla|EED50525.1 akaw|GAA83335.1 aluc|OJZ83831.1 anig|EHA18974.1 atub|OJI90198.1

Group6050: acla|EAW15285.1 afum|EAL85363.2 agla|OJJ84627.1 acar|OOF90548.1 afis|EAW20280.1 afla|EED57098.1 akaw|GAA90407.1 aluc|OJZ85821.1 anid|CBF85204.1 asyd|OJJ63028.1 atub|OJI79608.1 aver|OJI97940.1 awen|OJJ31242.1 azon|OJJ50674.1 acla|EAW15275.1 afis|EAW20245.1

Group6051: abra|OJJ68843.1 acar|OOF90546.1 acla|EAW11068.1 afis|EAW20806.1 afla|EED47530.1 afum|EAL84822.1 akaw|GAA90405.1 aluc|OJZ85823.1 anid|CBF85130.1 anig|EHA24738.1 aory|EIT74519.1 asyd|OJJ63043.1 ater|EAU37215.1 atub|OJI79610.1 aver|OJI97921.1 azon|OJJ44328.1

Group6052: abra|OJJ68845.1 acar|OOF90544.1 acla|EAW15280.1 afis|EAW20249.1 afla|EED57096.1 afum|EAL85367.1 akaw|GAA90403.1 aluc|OJZ85825.1 anid|CBF85206.1 anig|EHA24736.1 aory|EIT82292.1 asyd|OJJ63030.1 ater|EAU32040.1 atub|OJI79613.1 aver|OJI97938.1 azon|OJJ50397.1

Group6053: abra|OJJ68847.1 acla|EAW15274.1 afis|EAW20244.1 afla|EED57100.1 afum|EAL85361.1 agla|OJJ84629.1 aluc|OJZ85827.1 anid|CBF85138.1 anig|EHA24734.1 aory|EIT82275.1 asyd|OJJ63035.1 ater|EAU30255.1 atub|OJI79615.1 aver|OJI97932.1 awen|OJJ31241.1 akaw|GAA92649.1

Group6054: abra|OJJ68925.1 acar|OOF91511.1 acla|EAW14249.1 afis|EAW19031.1 afla|EED50384.1 afum|EAL93760.2 agla|OJJ84591.1 akaw|GAA90323.1 aluc|OJZ85910.1 anid|CBF79594.1 anig|EHA24682.1 asyd|OJJ57984.1 ater|EAU32070.1 atub|OJI79699.1 aver|OJJ04417.1 awen|OJJ31460.1

Group6055: abra|OJJ68928.1 afis|EAW16673.1 afum|EAL89278.1 akaw|GAA90319.1 aluc|OJZ85914.1 anig|EHA24678.1 atub|OJI79704.1 afla|EED48203.1 acar|OOF90674.1 agla|OJJ79205.1 anid|CBF83970.1 aory|EIT72893.1 asyd|OJJ61414.1 aver|OJJ00750.1 ater|EAU34353.1 awen|OJJ31870.1

Group6056: abra|OJJ68986.1 acar|OOF91557.1 afis|EAW19076.1 afla|EED54441.1 agla|OJJ83213.1 akaw|GAA90507.1 aluc|OJZ85972.1 anig|EHA24633.1 aory|EIT81163.1 asyd|OJJ58661.1 ater|EAU32124.1 atub|OJI79760.1 aver|OJJ01267.1 awen|OJJ32470.1 azon|OJJ46236.1 acar|OOF91848.1

Group6057: abra|OJJ69019.1 acar|OOF98449.1 afis|EAW20276.1 afla|EED53202.1 afum|EAL85410.1 agla|OJJ87502.1 akaw|GAA90536.1 aluc|OJZ86005.1 anid|CBF78245.1 anig|EHA24605.1 aory|EIT75242.1 asyd|OJJ56192.1 ater|EAU31765.1 atub|OJI79794.1 aver|OJJ05121.1 awen|OJJ35878.1

Group6058: acla|EAW14513.1 azon|OJJ44015.1 acar|OOF98345.1 afis|EAW19231.1 afla|EED47657.1 afum|EAL93960.1 akaw|GAA88443.1 aluc|OJZ88331.1 anid|CBF78616.1 anig|EHA18066.1 aory|EIT80280.1 asyd|OJJ65166.1 ater|EAU37232.1 atub|OJI90926.1 aver|OJI99318.1 afis|EAW25599.1

Group6059: abra|OJJ69042.1 acar|OOF89866.1 acla|EAW11011.1 afis|EAW16707.1 afla|EED53056.1 afum|EAL89298.1 akaw|GAA90571.1 aluc|OJZ86027.1 anid|CBF85134.1 anig|EHA24585.1 aory|EIT74798.1 asyd|OJJ63344.1 ater|EAU32201.1 atub|OJI79816.1 aver|OJI97617.1 azon|OJJ45979.1

Group6060: abra|OJJ69085.1 acla|EAW08747.1 afis|EAW15689.1 afla|EED51364.1 afum|EAL85659.1 akaw|GAA90614.1 aluc|OJZ86073.1 anid|CBF86339.1 anig|EHA24542.1 aory|EIT80722.1 asyd|OJJ64986.1 ater|EAU32465.1 atub|OJI79870.1 aver|OJI99106.1 awen|OJJ38380.1 azon|OJJ43864.1

Group6061: abra|OJJ69101.1 acar|OOF91195.1 acla|EAW08731.1 afis|EAW15705.1 afla|EED51347.1 afum|EAL85642.1 akaw|GAA90627.1 aluc|OJZ86090.1 anid|CBF71104.1 anig|EHA24527.1 asyd|OJJ52709.1 ater|EAU32440.1 atub|OJI79886.1 aver|OJJ04738.1 azon|OJJ43843.1 agla|OJJ81853.1

Group6062: abra|OJJ69112.1 acla|EAW08720.1 afum|EAL85620.1 agla|OJJ81866.1 akaw|GAA90637.1 aluc|OJZ86101.1 anid|CBF71087.1 anig|EHA24518.1 asyd|OJJ52699.1 aver|OJJ04727.1 awen|OJJ38411.1 azon|OJJ43831.1 acar|OOF91186.1 atub|OJI79896.1 afis|EAW15727.1 afla|EED51336.1

Group6063: abra|OJJ69117.1 acar|OOF91189.1 acla|EAW08715.1 afis|EAW15723.1 afla|EED51331.1 afum|EAL85624.1 agla|OJJ81871.1 akaw|GAA90642.1 aluc|OJZ86106.1 anig|EHA24514.1 asyd|OJJ52694.1 ater|EAU32426.1 atub|OJI79901.1 aver|OJJ04722.1 awen|OJJ38416.1 azon|OJJ43826.1

Group6064: abra|OJJ69129.1 acar|OOF91171.1 acla|EAW08703.1 afis|EAW15711.1 afla|EED51319.1 akaw|GAA90654.1 aluc|OJZ86118.1 anid|CBF71055.1 anig|EHA24503.1 aory|EIT81518.1 asyd|OJJ52677.1 ater|EAU32415.1 atub|OJI79914.1 aver|OJJ04703.1 awen|OJJ38429.1 azon|OJJ43814.1

Group6065: abra|OJJ69139.1 acla|EAW08695.1 afis|EAW15740.1 afla|EED51312.1 afum|EAL85608.1 agla|OJJ81901.1 akaw|GAA86318.1 aluc|OJZ86126.1 anig|EHA24495.1 aory|EIT81512.1 atub|OJI79922.1 awen|OJJ38439.1 azon|OJJ43806.1 anid|CBF71043.1 asyd|OJJ52670.1 aver|OJJ04696.1

Group6066: abra|OJJ69227.1 acar|OOF91093.1 acla|EAW08621.1 afis|EAW15812.1 afla|EED51234.1 afum|EAL85539.1 agla|OJJ81978.1 akaw|GAA92235.1 aluc|OJZ86207.1 anid|CBF75275.1 aory|EIT83185.1 asyd|OJJ55913.1 ater|EAU33442.1 atub|OJI80001.1 aver|OJJ04853.1 awen|OJJ38525.1

Group6067: abra|OJJ69258.1 acar|OOF91062.1 acla|EAW08591.1 afis|EAW15843.1 afla|EED51206.1 afum|EAL85508.1 agla|OJJ84914.1 akaw|GAA92264.1 aluc|OJZ86238.1 anid|CBF70841.1 asyd|OJJ52566.1 ater|EAU33392.1 atub|OJI80030.1 aver|OJJ04595.1 awen|OJJ38557.1 azon|OJJ43709.1

Group6068: abra|OJJ69270.1 acar|OOF94450.1 acla|EAW14660.1 afis|EAW24191.1 afum|EAL85864.1 agla|OJJ79688.1 akaw|GAA88145.1 aluc|OJZ82098.1 anid|CBF74308.1 anig|EHA28631.1 asyd|OJJ54007.1 ater|EAU31142.1 atub|OJI88339.1 aver|OJJ08102.1 awen|OJJ33108.1 azon|OJJ44839.1

Group6069: abra|OJJ69287.1 acar|OOF94435.1 acla|EAW14676.1 afis|EAW24207.1 afla|EED48064.1 afum|EAL85877.1 agla|OJJ79670.1 akaw|GAA88159.1 aluc|OJZ82116.1 anig|EHA28615.1 aory|EIT83334.1 asyd|OJJ53988.1 atub|OJI88321.1 aver|OJJ08086.1 awen|OJJ33091.1 azon|OJJ44857.1

Group6070: abra|OJJ69290.1 acar|OOF94432.1 acla|EAW14679.1 afis|EAW24210.1 afla|EED48061.1 agla|OJJ79656.1 akaw|GAA88162.1 aluc|OJZ82120.1 anid|CBF74265.1 anig|EHA28612.1 asyd|OJJ53985.1 ater|EAU31160.1 atub|OJI88318.1 aver|OJJ08083.1 awen|OJJ33086.1 azon|OJJ44860.1

Group6071: abra|OJJ69323.1 acar|OOF94405.1 acla|EAW14721.1 afis|EAW24257.1 afum|EAL85925.1 agla|OJJ79616.1 akaw|GAA88192.1 aluc|OJZ82153.1 anid|CBF74191.1 anig|EHA28578.1 asyd|OJJ53950.1 ater|EAU31203.1 atub|OJI88283.1 aver|OJJ08046.1 awen|OJJ33043.1 azon|OJJ44876.1

Group6072: abra|OJJ69327.1 acar|OOF94401.1 acla|EAW14713.1 afis|EAW24248.1 afla|EED48025.1 afum|EAL85916.1 agla|OJJ79625.1 akaw|GAA88198.1 aluc|OJZ82159.1 anig|EHA28573.1 asyd|OJJ53954.1 ater|EAU31189.1 atub|OJI88278.1 aver|OJJ08050.1 awen|OJJ33060.1 azon|OJJ44868.1

Group6073: abra|OJJ69344.1 acar|OOF94384.1 acla|EAW14702.1 afis|EAW24233.1 afla|EED48038.1 afum|EAL85902.1 agla|OJJ79638.1 akaw|GAA88213.1 aluc|OJZ82176.1 anig|EHA28558.1 aory|EIT83330.1 asyd|OJJ53963.1 ater|EAU31181.1 atub|OJI88261.1 aver|OJJ08059.1 azon|OJJ44859.1

Group6074: abra|OJJ69354.1 acar|OOF94371.1 acla|EAW14744.1 afis|EAW24275.1 afla|EED48001.1 afum|EAL85943.1 agla|OJJ79586.1 akaw|GAA88223.1 anig|EHA28549.1 aory|EIT82906.1 asyd|OJJ53926.1 ater|EAU31220.1 atub|OJI88250.1 aver|OJJ08025.1 awen|OJJ33022.1 azon|OJJ44895.1

Group6075: abra|OJJ69388.1 acar|OOF94338.1 acla|EAW14775.1 afis|EAW24306.1 afla|EED47964.1 afum|EAL85974.1 agla|OJJ83174.1 akaw|GAA88256.1 aluc|OJZ82222.1 anid|CBF74097.1 anig|EHA28518.1 asyd|OJJ53895.1 ater|EAU31259.1 atub|OJI88213.1 aver|OJJ07992.1 awen|OJJ32986.1

Group6076: abra|OJJ69431.1 acar|OOF94305.1 acla|EAW14807.1 afis|EAW24336.1 afla|EED47928.1 afum|EAL86006.1 akaw|GAA88296.1 aluc|OJZ82268.1 anid|CBF74032.1 anig|EHA28475.1 aory|EIT79835.1 asyd|OJJ53850.1 ater|EAU30412.1 atub|OJI88170.1 aver|OJJ07951.1 azon|OJJ44896.1

Group6077: abra|OJJ69451.1 acar|OOF94290.1 acla|EAW14815.1 afis|EAW24345.1 afla|EED47918.1  
agla|OJJ83208.1 akaw|GAA88368.1 aluc|OJZ82287.1 anid|CBF74021.1 anig|EHA28461.1 aory|EIT83361.1  
asyd|OJJ53842.1 ater|EAU30401.1 atub|OJI88152.1 aver|OJJ07945.1 awen|OJJ32954.1

Group6078: abra|OJJ69455.1 acar|OOF94286.1 acla|EAW07408.1 afis|EAW22434.1 afla|EED53608.1  
afum|EAL90757.1 akaw|GAA88357.1 aluc|OJZ82298.1 anig|EHA28457.1 aory|EIT75075.1 asyd|OJJ57319.1  
ater|EAU34153.1 atub|OJI88141.1 aver|OJJ05842.1 awen|OJJ36494.1 azon|OJJ44369.1

Group6079: abra|OJJ69500.1 aluc|OJZ82340.1 anig|EHA28420.1 atub|OJI88100.1 awen|OJJ30574.1  
azon|OJJ45335.1 abra|OJJ78072.1 acar|OOF91543.1 acla|EAW15328.1 afum|EAL85362.2 aory|EIT73816.1  
asyd|OJJ63986.1 aver|OJI96967.1 awen|OJJ40088.1 azon|OJJ46957.1 afis|EAW21468.1

Group6080: abra|OJJ69531.1 acar|OOF92664.1 afis|EAW18043.1 afla|EED51503.1 akaw|GAA88382.1  
aluc|OJZ82370.1 anid|CBF75024.1 anig|EHA28394.1 asyd|OJJ60073.1 ater|EAU31283.1 atub|OJI88072.1  
aver|OJJ04188.1 awen|OJJ41491.1 azon|OJJ48222.1 afum|EAL91854.1 aory|EIT80430.1

Group6081: akaw|GAA82187.1 abra|OJJ71154.1 acar|OOF93867.1 acla|EAW11932.1 afum|EAL92066.1  
agla|OJJ88460.1 aluc|OJZ84300.1 asyd|OJJ52830.1 ater|EAU33249.1 atub|OJI89769.1 ater|EAU31455.1  
acar|OOF98994.1 afis|EAW21129.1 aluc|OJZ91973.1 atub|OJI86412.1 akaw|GAA87137.1

Group6082: abra|OJJ69576.1 acar|OOF91579.1 acla|EAW14393.1 afis|EAW19101.1 afum|EAL93833.1  
agla|OJJ84501.1 akaw|GAA91573.1 aluc|OJZ82394.1 anid|CBF79700.1 anig|EHA28371.1 aory|EIT75927.1  
ater|EAU32147.1 atub|OJI88048.1 awen|OJJ32494.1 azon|OJJ46037.1 afla|EED54334.1

Group6083: abra|OJJ69597.1 acar|OOF91562.1 acla|EAW14201.1 afis|EAW19081.1 afla|EED54313.1  
afum|EAL93810.1 akaw|GAA91589.1 aluc|OJZ82412.1 anid|CBF75163.1 anig|EHA28355.1 aory|EIT76019.1  
asyd|OJJ59960.1 ater|EAU32128.1 atub|OJI88029.1 aver|OJJ02330.1 awen|OJJ32476.1

Group6084: abra|OJJ69674.1 afla|EED49568.1 anid|CBF90241.1 anig|EHA28292.1 aory|EIT82591.1  
abra|OJJ69681.1 acar|OOF93865.1 afis|EAW19351.1 afum|EAL94070.1 akaw|GAA88806.1 aluc|OJZ82489.1  
anig|EHA28285.1 ater|EAU37356.1 atub|OJI87943.1 awen|OJJ41942.1 atub|OJI85778.1

Group6085: abra|OJJ69689.1 acar|OOF93402.1 acla|EAW11116.1 afla|EED56732.1 agla|OJJ88353.1  
akaw|GAA88813.1 aluc|OJZ82496.1 anid|CBF69500.1 anig|EHA28276.1 aory|EIT73912.1 asyd|OJJ59234.1  
ater|EAU33166.1 atub|OJI87935.1 aver|OJJ01844.1 awen|OJJ29946.1 azon|OJJ50326.1

Group6086: abra|OJJ69739.1 acar|OOF94181.1 acla|EAW09980.1 afis|EAW21110.1 afla|EED51761.1  
afum|EAL92132.1 akaw|GAA90192.1 aluc|OJZ83157.1 anid|CBF87039.1 anig|EHA28222.1 aory|EIT80519.1  
asyd|OJJ60449.1 ater|EAU36788.1 atub|OJI87780.1 aver|OJI99767.1 azon|OJJ44437.1

Group6087: abra|OJJ69810.1 acar|OOF93567.1 afis|EAW25601.1 afla|EED57247.1 afum|EBA27172.1  
akaw|GAA87850.1 aluc|OJZ85490.1 anid|CBF81957.1 anig|EHA25026.1 aory|EIT74113.1 asyd|OJJ54537.1  
ater|EAU34250.1 atub|OJI80075.1 aver|OJJ07644.1 awen|OJJ35936.1 azon|OJJ43522.1

Group6088: abra|OJJ69818.1 acar|OOF93345.1 acla|EAW12083.1 afis|EAW19726.1 afla|EED51052.1  
agla|OJJ78576.1 akaw|GAA87842.1 aluc|OJZ85478.1 anid|CBF78377.1 anig|EHA25019.1 aory|EIT76968.1  
asyd|OJJ57329.1 ater|EAU33553.1 atub|OJI80085.1 aver|OJJ05832.1 awen|OJJ40132.1

Group6089: abra|OJJ69861.1 afis|EAW15433.1 afla|EED45625.1 afum|EAL84211.1 agla|OJJ86265.1  
akaw|GAA87795.1 aluc|OJZ85430.1 anig|EHA25609.1 aory|EIT75726.1 asyd|OJJ64001.1 ater|EAU31307.1  
atub|OJI80145.1 aver|OJI98090.1 awen|OJJ32639.1 aluc|OJZ83144.1 anig|EHA23287.1

Group6090: abra|OJJ69871.1 acar|OOF93385.1 acla|EAW08953.1 afis|EAW20571.1 afla|EED54199.1  
afum|EBA27182.1 agla|OJJ80145.1 akaw|GAA87785.1 aluc|OJZ85420.1 anid|CBF78263.1 anig|EHA25599.1  
asyd|OJJ56066.1 ater|EAU32669.1 atub|OJI80155.1 aver|OJJ05009.1 awen|OJJ38089.1

Group6091: abra|OJJ69922.1 acar|OOF93434.1 acla|EAW08907.1 afis|EAW15489.1 afla|EED49003.1  
afum|EAL85834.1 akaw|GAA87734.1 aluc|OJZ85366.1 anig|EHA25548.1 asyd|OJJ56022.1 ater|EAU32631.1  
atub|OJI80205.1 aver|OJJ04969.1 azon|OJJ43142.1 awen|OJJ38145.1 agla|OJJ80166.1

Group6092: abra|OJJ69936.1 acar|OOF93445.1 acla|EAW08889.1 afis|EAW15500.1 afum|EAL85823.1  
agla|OJJ80178.1 akaw|GAA87723.1 aluc|OJZ85351.1 anig|EHA25538.1 aory|EIT82557.1 asyd|OJJ56011.1  
ater|EAU32619.1 atub|OJI80219.1 aver|OJJ04956.1 awen|OJJ38159.1 azon|OJJ43130.1

Group6093: abra|OJJ69942.1 acar|OOF93452.1 acla|EAW08880.1 afis|EAW15515.1 afum|EAL85816.1  
agla|OJJ80186.1 akaw|GAA87717.1 aluc|OJZ85344.1 anig|EHA25532.1 aory|EIT82510.1 asyd|OJJ56004.1  
ater|EAU32609.1 atub|OJI80226.1 aver|OJJ04949.1 awen|OJJ38176.1 azon|OJJ43121.1

Group6094: abra|OJJ69950.1 acla|EAW08874.1 afis|EAW15522.1 afla|EED49028.1 afum|EBA27244.1  
agla|OJJ85224.1 akaw|GAA87710.1 aluc|OJZ85336.1 anig|EHA25525.1 aory|EIT82532.1 asyd|OJJ55995.1  
ater|EAU32603.1 atub|OJI80234.1 aver|OJJ04943.1 awen|OJJ38182.1 azon|OJJ43111.1

Group6095: abra|OJJ69954.1 acar|OOF93464.1 acla|EAW08868.1 afis|EAW15526.1 afla|EED49037.1 afum|EAL85802.1 agla|OJJ85220.1 akaw|GAA87705.1 aluc|OJZ85328.1 anid|CBF78213.1 aory|EIT82546.1 asyd|OJJ55990.1 atub|OJI80244.1 aver|OJJ04938.1 awen|OJJ38190.1 azon|OJJ43105.1

Group6096: abra|OJJ69956.1 acar|OOF93466.1 acla|EAW08866.1 afis|EAW15528.1 afla|EED49039.1 afum|EAL85800.1 agla|OJJ85218.1 aluc|OJZ85326.1 anid|CBF78210.1 anig|EHA25516.1 aory|EIT82502.1 asyd|OJJ55988.1 atub|OJI80246.1 aver|OJJ04936.1 awen|OJJ38192.1 azon|OJJ43102.1

Group6097: abra|OJJ69965.1 acar|OOF93473.1 acla|EAW08837.1 afis|EAW15563.1 afum|EAL85769.1 agla|OJJ85188.1 akaw|GAA87694.1 aluc|OJZ85318.1 anid|CBF78122.1 aory|EIT82485.1 asyd|OJJ55903.1 ater|EAU32569.1 atub|OJI80255.1 aver|OJJ04848.1 awen|OJJ38223.1 azon|OJJ43072.1

Group6098: abra|OJJ69977.1 acla|EAW08845.1 afis|EAW15555.1 afla|EED49059.1 afum|EAL85777.1 agla|OJJ85199.1 akaw|GAA87684.1 aluc|OJZ85303.1 anid|CBF78170.1 anig|EHA25500.1 aory|EIT82563.1 asyd|OJJ55966.1 ater|EAU32578.1 atub|OJI80267.1 aver|OJJ04913.1 awen|OJJ38213.1

Group6099: abra|OJJ69992.1 acar|OOF93498.1 acla|EAW08828.1 afis|EAW15569.1 afla|EED49079.1 afum|EAL85764.1 agla|OJJ85183.1 akaw|GAA87669.1 aluc|OJZ85287.1 anig|EHA25484.1 asyd|OJJ55898.1 ater|EAU32561.1 atub|OJI80283.1 aver|OJJ04843.1 awen|OJJ38228.1 azon|OJJ43067.1

Group6100: abra|OJJ69993.1 acar|OOF93499.1 acla|EAW08826.1 afis|EAW15571.1 afla|EED49080.1 afum|EAL85762.1 agla|OJJ85181.1 akaw|GAA87668.1 aluc|OJZ85286.1 anid|CBF74534.1 anig|EHA25483.1 aory|EIT82491.1 ater|EAU32560.1 atub|OJI80284.1 awen|OJJ38230.1 azon|OJJ43066.1

Group6101: abra|OJJ69994.1 acar|OOF93501.1 acla|EAW08825.1 afis|EAW15572.1 afla|EED49081.1 agla|OJJ85180.1 akaw|GAA87667.1 aluc|OJZ85285.1 anid|CBF78107.1 anig|EHA25482.1 aory|EIT82508.1 asyd|OJJ55896.1 ater|EAU32559.1 atub|OJI80285.1 aver|OJJ04841.1 awen|OJJ38231.1

Group6102: abra|OJJ69996.1 acar|OOF93503.1 acla|EAW08822.1 afis|EAW15575.1 afla|EED49084.1 afum|EAL85759.1 agla|OJJ85177.1 akaw|GAA87665.1 aluc|OJZ85283.1 anig|EHA25480.1 aory|EIT82540.1 asyd|OJJ55893.1 ater|EAU32556.1 atub|OJI80287.1 aver|OJJ04838.1 awen|OJJ38235.1

Group6103: abra|OJJ69999.1 acar|OOF93506.1 acla|EAW08820.1 afis|EAW15577.1 afla|EED49086.1 afum|EAL85757.1 agla|OJJ85175.1 akaw|GAA87662.1 aluc|OJZ85280.1 anig|EHA25477.1 aory|EIT82487.1 asyd|OJJ55891.1 ater|EAU32554.1 atub|OJI80290.1 aver|OJJ04836.1 awen|OJJ38238.1

Group6104: abra|OJJ70000.1 acla|EAW08819.1 afis|EAW15578.1 afla|EED49094.1 afum|EAL85756.1 agla|OJJ85174.1 akaw|GAA87661.1 aluc|OJZ85279.1 anid|CBF78102.1 anig|EHA25476.1 aory|EIT82512.1 asyd|OJJ55890.1 atub|OJI80291.1 aver|OJJ04835.1 awen|OJJ38240.1 azon|OJJ43059.1

Group6105: abra|OJJ70017.1 acar|OOF93523.1 acla|EAW08806.1 afis|EAW15590.1 afla|EED50413.1 afum|EAL85742.1 agla|OJJ85158.1 akaw|GAA87644.1 aluc|OJZ85259.1 anid|CBF78074.1 anig|EHA25460.1 asyd|OJJ55875.1 atub|OJI80309.1 aver|OJJ04820.1 awen|OJJ38263.1 azon|OJJ43022.1

Group6106: abra|OJJ70019.1 acar|OOF93525.1 afis|EAW15592.1 afla|EED50415.1 afum|EAL85740.1 akaw|GAA87642.1 aluc|OJZ85257.1 anid|CBF78078.1 anig|EHA25458.1 aory|EIT82135.1 asyd|OJJ55877.1 ater|EAU32536.1 atub|OJI80311.1 aver|OJJ04822.1 awen|OJJ38265.1 azon|OJJ43913.1

Group6107: abra|OJJ70033.1 afis|EAW17103.1 anig|EHA18718.1 atub|OJI79322.1 awen|OJJ29677.1 abra|OJJ72237.1 acar|OOF96859.1 afla|EED54714.1 akaw|GAA84702.1 aluc|OJZ86985.1 anid|CBF76384.1 anig|EHA21662.1 asyd|OJJ61069.1 ater|EAU29940.1 atub|OJI83534.1 aver|OJJ00385.1

Group6108: abra|OJJ70131.1 acar|OOF93325.1 acla|EAW09068.1 afis|EAW25640.1 afla|EED55189.1 afum|EAL84327.2 agla|OJJ80957.1 akaw|GAA86633.1 aluc|OJZ85190.1 anid|CBF86061.1 anig|EHA25404.1 aory|EIT83514.1 ater|EAU32713.1 atub|OJI80407.1 awen|OJJ36096.1 agla|OJJ78893.1

Group6109: abra|OJJ70178.1 acar|OOF91400.1 acla|EAW13479.1 afis|EAW20586.1 afum|EAL84479.1 agla|OJJ80828.1 akaw|GAA86595.1 aluc|OJZ85142.1 anig|EHA25358.1 asyd|OJJ55630.1 ater|EAU37093.1 atub|OJI80450.1 aver|OJJ03121.1 awen|OJJ33297.1 anig|EHA27684.1 aver|OJJ06707.1

Group6110: abra|OJJ70197.1 acar|OOF90057.1 acla|EAW14580.1 afis|EAW19314.1 afla|EED47568.1 afum|EAL94030.1 akaw|GAA86579.1 aluc|OJZ85130.1 anid|CBF78805.1 anig|EHA25349.1 aory|EIT74569.1 asyd|OJJ65257.1 ater|EAU29461.1 atub|OJI80463.1 aver|OJJ99408.1 awen|OJJ35850.1

Group6111: abra|OJJ70293.1 acar|OOF91747.1 afis|EAW22073.1 afum|EAL91097.1 akaw|GAA92855.1 aluc|OJZ82558.1 anid|CBF82784.1 anig|EHA22520.1 aory|EIT73943.1 asyd|OJJ57122.1 ater|EAU30151.1 atub|OJI88800.1 aver|OJJ02365.1 awen|OJJ35472.1 azon|OJJ47361.1 awen|OJJ33482.1

Group6112: abra|OJJ70368.1 acar|OOF91902.1 afis|EAW16892.1 afla|EED48420.1 afum|EAL86430.2 agla|OJJ79761.1 akaw|GAA91983.1 aluc|OJZ82630.1 anig|EHA27447.1 aory|EIT83082.1 atub|OJI88863.1 awen|OJJ31356.1 azon|OJJ49611.1 afla|EED51051.1 aory|EIT77047.1 awen|OJJ35872.1

Group6113: abra|OJJ70384.1 acar|OOF91887.1 acla|EAW12345.1 afis|EAW16882.1 afum|EAL86418.1  
agla|OJJ79752.1 akaw|GAA91973.1 aluc|OJZ82642.1 anid|CBF80675.1 anig|EHA27428.1 asyd|OJJ54588.1  
ater|EAU30233.1 atub|OJI88875.1 aver|OJJ07566.1 awen|OJJ29769.1 azon|OJJ50378.1

Group6114: abra|OJJ70385.1 acar|OOF91886.1 acla|EAW12343.1 afis|EAW16879.1 afla|EED47344.1  
afum|EAL86416.1 akaw|GAA91972.1 aluc|OJZ82643.1 anid|CBF80671.1 anig|EHA27427.1 aory|EIT82869.1  
asyd|OJJ54586.1 ater|EAU30234.1 atub|OJI88876.1 aver|OJJ07568.1 awen|OJJ29771.1

Group6115: abra|OJJ70391.1 acar|OOF90062.1 acla|EAW12389.1 afis|EAW16836.1 afla|EED47326.1  
afum|EAL86384.1 agla|OJJ89425.1 akaw|GAA91968.1 aluc|OJZ82648.1 anid|CBF74685.1 anig|EHA27424.1  
asyd|OJJ60209.1 ater|EAU30243.1 atub|OJI88880.1 aver|OJJ04059.1 awen|OJJ35684.1

Group6116: abra|OJJ70472.1 acla|EAW13042.1 afis|EAW17625.1 afum|EAL91439.1 agla|OJJ81278.1  
akaw|GAA83321.1 aluc|OJZ83816.1 anid|CBF90152.1 anig|EHA18961.1 aory|EIT78528.1 asyd|OJJ62000.1  
ater|EAU37059.1 atub|OJI90183.1 aver|OJI96092.1 awen|OJJ37219.1 azon|OJJ50922.1

Group6117: abra|OJJ70506.1 afis|EAW19833.1 afla|EED46252.1 agla|OJJ88103.1 akaw|GAA83355.1  
aluc|OJZ83851.1 anig|EHA18993.1 aory|EIT76504.1 asyd|OJJ56258.1 atub|OJI90217.1 aver|OJJ08506.1  
awen|OJJ32240.1 afla|EED57615.1 afum|EAL85059.1 aory|EIT82986.1 ater|EAU31581.1

Group6118: abra|OJJ70520.1 acar|OOF97408.1 acla|EAW08155.1 afis|EAW23184.1 afla|EED47061.1  
afum|EAL88299.1 akaw|GAA83367.1 aluc|OJZ83865.1 anid|CBF74700.1 anig|EHA19006.1 aory|EIT72501.1  
asyd|OJJ60216.1 atub|OJI90233.1 aver|OJJ04052.1 awen|OJJ36586.1 azon|OJJ47621.1

Group6119: abra|OJJ70538.1 acar|OOF97395.1 acla|EAW08150.1 afis|EAW23189.1 afla|EED47068.1  
afum|EAL88294.2 agla|OJJ86364.1 akaw|GAA83383.1 aluc|OJZ83882.1 anid|CBF74525.1 anig|EHA19020.1  
asyd|OJJ57735.1 atub|OJI90250.1 aver|OJJ05432.1 awen|OJJ36591.1 azon|OJJ47615.1

Group6120: abra|OJJ70542.1 acar|OOF97391.1 acla|EAW08136.1 afis|EAW23172.1 afla|EED46947.1  
afum|EAL88311.2 agla|OJJ89684.1 akaw|GAA83388.1 aluc|OJZ83887.1 anid|CBF74493.1 anig|EHA19024.1  
aory|EIT72523.1 asyd|OJJ57717.1 atub|OJI90254.1 aver|OJJ05450.1 awen|OJJ36605.1

Group6121: abra|OJJ70573.1 acar|OOF97148.1 acla|EAW08372.1 afis|EAW23401.1 afla|EED47008.1  
afum|EAL88069.1 akaw|GAA83417.1 aluc|OJZ83917.1 anid|CBF74797.1 anig|EHA19050.1 aory|EIT72568.1  
asyd|OJJ60154.1 atub|OJI90287.1 aver|OJJ04110.1 awen|OJJ39477.1 azon|OJJ47680.1

Group6122: abra|OJJ70588.1 acar|OOF97132.1 acla|EAW08193.1 afis|EAW23227.1 afla|EED47023.1  
afum|EAL88256.1 agla|OJJ86384.1 akaw|GAA83431.1 aluc|OJZ83932.1 anid|CBF74769.1 anig|EHA19064.1  
asyd|OJJ60168.1 atub|OJI90304.1 aver|OJJ04096.1 awen|OJJ39462.1 azon|OJJ47662.1

Group6123: abra|OJJ70624.1 acla|EAW13006.1 afis|EAW17662.1 afla|EED50496.1 afum|EAL91476.2  
agla|OJJ79531.1 akaw|GAA89962.1 aluc|OJZ83969.1 anid|CBF90058.1 anig|EHA19098.1 aory|EIT82078.1  
ater|EAU31991.1 atub|OJI90342.1 aver|OJI96157.1 awen|OJJ37180.1 azon|OJJ50882.1

Group6124: abra|OJJ70645.1 acar|OOF97076.1 acla|EAW08115.1 afis|EAW23136.1 afla|EED48499.1  
afum|EAL88345.2 agla|OJJ89664.1 akaw|GAA89981.1 aluc|OJZ83995.1 anid|CBF74452.1 asyd|OJJ57739.1  
ater|EAU36281.1 atub|OJI90364.1 aver|OJJ05428.1 awen|OJJ36632.1 azon|OJJ47583.1

Group6125: abra|OJJ70649.1 acar|OOF97071.1 acla|EAW08110.1 afis|EAW23141.1 afum|EAL88340.1  
agla|OJJ89660.1 akaw|GAA89985.1 aluc|OJZ83999.1 anid|CBF74442.1 aory|EIT73199.1 asyd|OJJ57743.1  
ater|EAU36276.1 atub|OJI90368.1 aver|OJJ05424.1 awen|OJJ36637.1 azon|OJJ47579.1

Group6126: abra|OJJ70651.1 acar|OOF97069.1 acla|EAW08108.1 afis|EAW23143.1 afla|EED48506.1  
afum|EAL88338.1 akaw|GAA89987.1 aluc|OJZ84001.1 anid|CBF74438.1 anig|EHA19123.1 aory|EIT73205.1  
asyd|OJJ57745.1 ater|EAU36268.1 atub|OJI90370.1 aver|OJJ05422.1 azon|OJJ47577.1

Group6127: abra|OJJ70682.1 acar|OOF97045.1 acla|EAW13290.1 afis|EAW17319.1 afum|EAL91155.1  
agla|OJJ89622.1 akaw|GAA90014.1 aluc|OJZ84030.1 anid|CBF86689.1 anig|EHA19151.1 asyd|OJJ64751.1  
ater|EAU36247.1 atub|OJI90402.1 aver|OJI98852.1 awen|OJJ36663.1 acla|EAW08082.1

Group6128: abra|OJJ70683.1 acar|OOF97044.1 acla|EAW08079.1 afis|EAW23118.1 afum|EAL88362.1  
agla|OJJ89623.1 akaw|GAA90015.1 aluc|OJZ84031.1 anid|CBF74395.1 anig|EHA19152.1 asyd|OJJ57768.1  
ater|EAU36246.1 atub|OJI90403.1 aver|OJJ05398.1 awen|OJJ36664.1 azon|OJJ47535.1

Group6129: abra|OJJ70707.1 acar|OOF97030.1 acla|EAW08057.1 afis|EAW23093.1 afla|EED48555.1  
afum|EAL88385.1 agla|OJJ89605.1 akaw|GAA90038.1 aluc|OJZ84054.1 anig|EHA19174.1 asyd|OJJ59375.1  
ater|EAU36217.1 atub|OJI90425.1 aver|OJJ02898.1 awen|OJJ36689.1 azon|OJJ47508.1

Group6130: abra|OJJ70709.1 acar|OOF97027.1 acla|EAW08055.1 afis|EAW23091.1 afla|EED48557.1  
afum|EAL88388.1 agla|OJJ89603.1 akaw|GAA90040.1 aluc|OJZ84056.1 anid|CBF81347.1 asyd|OJJ59373.1  
ater|EAU36214.1 atub|OJI90427.1 aver|OJJ02901.1 awen|OJJ36691.1 azon|OJJ47505.1

Group6131: abra|OJJ70759.1 acar|OOF96985.1 acla|EAW11162.1 afis|EAW15893.1 afla|EED56478.1 afum|EAL88528.1 akaw|GAA90079.1 aluc|OJZ84104.1 anid|CBF81296.1 anig|EHA19216.1 aory|EIT72872.1 asyd|OJJ59347.1 ater|EAU36172.1 atub|OJI90478.1 aver|OJJ02927.1 awen|OJJ36738.1

Group6132: abra|OJJ70808.1 acar|OOF98294.1 acla|EAW10417.1 afis|EAW25152.1 afla|EED55281.1 afum|EAL89827.1 agla|OJJ89002.1 akaw|GAA91688.1 aluc|OJZ87706.1 anid|CBF89561.1 aory|EIT83566.1 ater|EAU39431.1 atub|OJI80937.1 aver|OJI96448.1 awen|OJJ40781.1 azon|OJJ46871.1

Group6133: abra|OJJ70811.1 acar|OOF98290.1 acla|EAW10420.1 afis|EAW25149.1 afla|EED55287.1 afum|EAL89824.1 agla|OJJ89006.1 akaw|GAA91691.1 aluc|OJZ87703.1 anid|CBF85672.1 anig|EHA20886.1 asyd|OJJ64249.1 atub|OJI80940.1 aver|OJI98340.1 awen|OJJ40777.1 azon|OJJ46874.1

Group6134: abra|OJJ70812.1 acar|OOF98286.1 acla|EAW10421.1 afis|EAW25148.1 afla|EED55288.1 afum|EAL89823.1 agla|OJJ89007.1 akaw|GAA91692.1 aluc|OJZ87702.1 anid|CBF85673.1 asyd|OJJ64251.1 ater|EAU39420.1 atub|OJI80941.1 aver|OJI98341.1 awen|OJJ40773.1 azon|OJJ46875.1

Group6135: abra|OJJ70819.1 acar|OOF98283.1 acla|EAW10426.1 afis|EAW25143.1 afla|EED55302.1 afum|EAL89815.2 agla|OJJ89024.1 akaw|GAA91698.1 aluc|OJZ87692.1 anid|CBF85685.1 anig|EHA20881.1 aory|EIT83611.1 ater|EAU39412.1 atub|OJI80948.1 aver|OJI98348.1 awen|OJJ40767.1

Group6136: abra|OJJ70836.1 acar|OOF98278.1 acla|EAW10431.1 afis|EAW25138.1 afla|EED55308.1 afum|EAL89809.2 akaw|GAA91704.1 aluc|OJZ87685.1 anid|CBF85712.1 anig|EHA20875.1 asyd|OJJ64271.1 ater|EAU39408.1 atub|OJI80958.1 aver|OJI98363.1 awen|OJJ40762.1 azon|OJJ44127.1

Group6137: abra|OJJ70838.1 acar|OOF98276.1 afis|EAW25136.1 afla|EED55310.1 afum|EAL89807.2 agla|OJJ89031.1 akaw|GAA91706.1 aluc|OJZ87683.1 anid|CBF85708.1 anig|EHA20873.1 aory|EIT83586.1 asyd|OJJ64269.1 atub|OJI80960.1 aver|OJI98361.1 awen|OJJ40760.1 azon|OJJ44124.1

Group6138: abra|OJJ70841.1 acar|OOF98273.1 acla|EAW13282.1 afis|EAW17335.1 afla|EED46106.1 afum|EAL91178.1 akaw|GAA91709.1 aluc|OJZ87680.1 anig|EHA20870.1 aory|EIT76506.1 asyd|OJJ56055.1 ater|EAU33889.1 atub|OJI80963.1 aver|OJJ04997.1 awen|OJJ33505.1 azon|OJJ50299.1

Group6139: acar|OOF98702.1 afis|EAW20762.1 afum|EAL84857.1 anid|CBF85637.1 aver|OJJ01161.1 azon|OJJ46003.1 acla|EAW11101.1 afla|EED53201.1 agla|OJJ86968.1 akaw|GAA92918.1 anig|EHA23722.1 aory|EIT75034.1 asyd|OJJ58562.1 ater|EAU29736.1 atub|OJI82462.1 awen|OJJ37494.1

Group6140: abra|OJJ70852.1 acar|OOF98264.1 acla|EAW10442.1 afis|EAW25125.1 afum|EAL89796.1 agla|OJJ89045.1 akaw|GAA91719.1 aluc|OJZ87669.1 anid|CBF85690.1 anig|EHA20860.1 asyd|OJJ64260.1 ater|EAU39398.1 atub|OJI80973.1 aver|OJI98352.1 awen|OJJ40743.1 azon|OJJ44114.1

Group6141: abra|OJJ70894.1 acar|OOF90218.1 acla|EAW10476.1 afis|EAW25091.1 afla|EED55356.1 afum|EAL89761.2 agla|OJJ89086.1 akaw|GAA87410.1 aluc|OJZ87629.1 anig|EHA20825.1 aory|EIT80828.1 asyd|OJJ64441.1 atub|OJI81020.1 aver|OJI98543.1 awen|OJJ40705.1 azon|OJJ44081.1

Group6142: abra|OJJ70900.1 acar|OOF98220.1 acla|EAW10478.1 afis|EAW25089.1 afla|EED55358.1 afum|EAL89758.2 agla|OJJ89088.1 akaw|GAA87415.1 aluc|OJZ87623.1 anid|CBF85995.1 anig|EHA20820.1 asyd|OJJ64439.1 atub|OJI81026.1 aver|OJI98540.1 awen|OJJ40702.1 azon|OJJ44079.1

Group6143: abra|OJJ70930.1 acar|OOF98197.1 acla|EAW10496.1 afis|EAW25071.1 afla|EED55383.1 afum|EAL89740.1 agla|OJJ89123.1 akaw|GAA83012.1 aluc|OJZ87597.1 anig|EHA20797.1 asyd|OJJ64419.1 ater|EAU39554.1 atub|OJI81050.1 aver|OJI98518.1 awen|OJJ40682.1 azon|OJJ44059.1

Group6144: abra|OJJ70936.1 acla|EAW10502.1 afis|EAW25065.1 afla|EED55389.1 afum|EAL89734.1 agla|OJJ89128.1 akaw|GAA83007.1 anid|CBF85947.1 anig|EHA20792.1 aory|EIT80920.1 asyd|OJJ64414.1 ater|EAU35812.1 atub|OJI81056.1 aver|OJI98513.1 awen|OJJ40673.1 azon|OJJ44053.1

Group6145: abra|OJJ70974.1 acar|OOF98157.1 acla|EAW10533.1 afis|EAW25000.1 afla|EED55420.1 afum|EAL89698.1 agla|OJJ89162.1 akaw|GAA82975.1 aluc|OJZ87558.1 anid|CBF81497.1 anig|EHA20761.1 asyd|OJJ59464.1 atub|OJI81089.1 aver|OJJ02810.1 awen|OJJ40639.1 azon|OJJ44023.1

Group6146: abra|OJJ70978.1 acar|OOF98152.1 afis|EAW25004.1 afla|EED55424.1 afum|EAL89694.1 agla|OJJ89167.1 akaw|GAA82971.1 aluc|OJZ87554.1 anid|CBF81483.1 anig|EHA20757.1 asyd|OJJ59455.1 ater|EAU35781.1 aver|OJJ02818.1 awen|OJJ40635.1 azon|OJJ49048.1 acla|EAW10537.1

Group6147: abra|OJJ71000.1 acar|OOF98140.1 afla|EED55446.1 akaw|GAA82948.1 aluc|OJZ87527.1 anig|EHA20737.1 aory|EIT80919.1 asyd|OJJ59492.1 atub|OJI81121.1 aver|OJJ02782.1 awen|OJJ40616.1 acla|EAW10557.1 afis|EAW25024.1 afum|EAL89671.1 anid|CBF81545.1 ater|EAU35763.1

Group6148: abra|OJJ71024.1 acar|OOF98116.1 acla|EAW10574.1 afis|EAW24993.1 afum|EAL89653.1 agla|OJJ82262.1 akaw|GAA82931.1 aluc|OJZ87507.1 anid|CBF81590.1 anig|EHA20720.1 asyd|OJJ59514.1 ater|EAU35744.1 atub|OJI81143.1 aver|OJJ02759.1 awen|OJJ40598.1 azon|OJJ49448.1



Group6149: abra|OJJ71025.1 acla|EAW10575.1 afis|EAW24992.1 afla|EED55467.1 afum|EAL89652.1  
agla|OJJ82263.1 akaw|GAA82930.1 aluc|OJZ87506.1 anid|CBF81592.1 anig|EHA20719.1 aory|EIT80781.1  
asyd|OJJ59515.1 ater|EAU35743.1 atub|OJI81144.1 awen|OJJ40597.1 aver|OJJ02758.1

Group6150: abra|OJJ71076.1 acar|OOF98068.1 acla|EAW11904.1 afis|EAW19816.1 afla|EED46069.1  
afum|EAL85075.1 akaw|GAA82886.1 aluc|OJZ87454.1 anig|EHA20675.1 aory|EIT83499.1 atub|OJI81194.1  
awen|OJJ34557.1 afis|EAW25580.1 afla|EED52141.1 afum|EAL84291.1 ater|EAU36155.1

Group6151: abra|OJJ71095.1 afla|EED48308.1 akaw|GAA90277.1 aluc|OJZ83064.1 anig|EHA28129.1  
aory|EIT76315.1 atub|OJI87881.1 abra|OJJ71758.1 afis|EAW17369.1 afum|EAL91206.2 agla|OJJ79798.1  
aluc|OJZ84837.1 anig|EHA25747.1 asyd|OJJ61751.1 aver|OJI95848.1 awen|OJJ37888.1

Group6152: abra|OJJ71098.1 acla|EAW14582.1 afis|EAW19316.1 afla|EED48318.1 afum|EAL94033.1  
akaw|GAA83836.1 aluc|OJZ90881.1 anig|EHA28512.1 aory|EIT76307.1 atub|OJI83754.1 azon|OJJ46593.1  
afis|EAW17411.1 afla|EED55973.1 aory|EIT76588.1 aver|OJJ06557.1 acla|EAW15051.1

Group6153: abra|OJJ71101.1 acar|OOF98042.1 afis|EAW25201.1 afum|EAL89864.1 akaw|GAA82867.1  
aluc|OJZ87434.1 anig|EHA20656.1 atub|OJI81214.1 afla|EED53648.1 anid|CBF85217.1 aory|EIT75339.1  
aver|OJI97967.1 awen|OJJ40836.1 acla|EAW10390.1 agla|OJJ88974.1 asyd|OJJ62999.1

Group6154: abra|OJJ71153.1 acar|OOF98004.1 acla|EAW10344.1 afis|EAW25245.1 afum|EAL89907.2  
akaw|GAA82824.1 aluc|OJZ87385.1 anid|CBF85325.1 anig|EHA20614.1 asyd|OJJ64014.1 ater|EAU34358.1  
atub|OJI81262.1 aver|OJI98102.1 awen|OJJ40958.1 azon|OJJ43036.1 anid|CBF82000.1

Group6155: abra|OJJ71159.1 acar|OOF98001.1 acla|EAW10340.1 afis|EAW25249.1 afla|EED53715.1  
afum|EAL89911.1 agla|OJJ89221.1 akaw|GAA82819.1 aluc|OJZ87380.1 anid|CBF85303.1 anig|EHA20611.1  
asyd|OJJ63997.1 atub|OJI81266.1 aver|OJI98086.1 awen|OJJ40963.1 azon|OJJ44544.1

Group6156: abra|OJJ71199.1 acar|OOF97969.1 afis|EAW20331.1 afla|EED48992.1 afum|EAL85457.1  
agla|OJJ88970.1 akaw|GAA82784.1 aluc|OJZ87343.1 anid|CBF82369.1 anig|EHA20580.1 asyd|OJJ54197.1  
ater|EAU37619.1 atub|OJI81301.1 aver|OJJ08527.1 awen|OJJ31947.1 akaw|GAA90166.1

Group6157: abra|OJJ71228.1 acar|OOF97951.1 acla|EAW10294.1 afis|EAW25298.1 afla|EED53764.1  
afum|EAL89961.1 agla|OJJ89277.1 akaw|GAA82761.1 aluc|OJZ87319.1 anig|EHA20553.1 aory|EIT78432.1  
ater|EAU34439.1 atub|OJI81326.1 aver|OJI98150.1 awen|OJJ41012.1 azon|OJJ44597.1

Group6158: abra|OJJ71247.1 acar|OOF97921.1 acla|EAW10288.1 afis|EAW25304.1 afum|EAL89967.2  
agla|OJJ89283.1 akaw|GAA82740.1 aluc|OJZ87295.1 anid|CBF75298.1 anig|EHA20536.1 asyd|OJJ59883.1  
ater|EAU34452.1 atub|OJI81345.1 aver|OJJ02403.1 awen|OJJ41018.1 azon|OJJ44605.1

Group6159: abra|OJJ71250.1 acla|EAW10285.1 afis|EAW25307.1 afum|EAL89970.1 agla|OJJ89286.1  
akaw|GAA82737.1 aluc|OJZ87292.1 anid|CBF75293.1 anig|EHA20533.1 aory|EIT78358.1 asyd|OJJ59886.1  
ater|EAU34455.1 atub|OJI81349.1 aver|OJJ02400.1 awen|OJJ41021.1 azon|OJJ44608.1

Group6160: abra|OJJ71313.1 acar|OOF97859.1 acla|EAW10226.1 afis|EAW25366.1 afla|EED53847.1  
afum|EBA27393.1 akaw|GAA82678.1 aluc|OJZ87231.1 anid|CBF77450.1 aory|EIT78418.1 asyd|OJJ53210.1  
atub|OJI81411.1 aver|OJJ03640.1 awen|OJJ41092.1 agla|OJJ83753.1 azon|OJJ44671.1

Group6161: abra|OJJ71323.1 acar|OOF97851.1 acla|EAW10216.1 afis|EAW25377.1 afla|EED53857.1  
afum|EAL90036.1 agla|OJJ83766.1 akaw|GAA82668.1 aluc|OJZ87221.1 anid|CBF77481.1 aory|EIT78408.1  
asyd|OJJ53200.1 ater|EAU34521.1 aver|OJJ03650.1 awen|OJJ41104.1 azon|OJJ44681.1

Group6162: abra|OJJ71338.1 acar|OOF97834.1 acla|EAW10201.1 afis|EAW25394.1 afla|EED53871.1  
afum|EAL90053.1 agla|OJJ87032.1 akaw|GAA82654.1 aluc|OJZ87204.1 anid|CBF77510.1 anig|EHA20457.1  
aory|EIT78385.1 ater|EAU34542.1 atub|OJI81436.1 awen|OJJ41120.1 azon|OJJ44695.1

Group6163: abra|OJJ71356.1 acar|OOF97814.1 acla|EAW10180.1 afis|EAW25414.1 afla|EED53893.1  
afum|EAL90073.1 agla|OJJ87056.1 akaw|GAA82636.1 aluc|OJZ87183.1 asyd|OJJ53166.1 ater|EAU34565.1  
atub|OJI81456.1 aver|OJJ03686.1 awen|OJJ41141.1 azon|OJJ44721.1 anid|CBF77578.1

Group6164: abra|OJJ71473.1 acla|EAW10077.1 afis|EAW25509.1 afla|EED54010.1 afum|EAL90175.2  
agla|OJJ87296.1 akaw|GAA82543.1 aluc|OJZ87073.1 aory|EIT78294.1 asyd|OJJ53035.1 ater|EAU33356.1  
atub|OJI81564.1 aver|OJJ03809.1 awen|OJJ41251.1 azon|OJJ44818.1 anid|CBF77773.1

Group6165: abra|OJJ71590.1 acar|OOF96319.1 acla|EAW15136.1 afis|EAW20108.1 afum|EAL85225.1  
agla|OJJ88846.1 akaw|GAA89332.1 aluc|OJZ86333.1 anid|CBF84915.1 anig|EHA21548.1 asyd|OJJ63166.1  
ater|EAU38726.1 atub|OJI84202.1 aver|OJI97789.1 awen|OJJ31879.1 azon|OJJ46255.1

Group6166: abra|OJJ71632.1 acar|OOF96349.1 acla|EAW15173.1 afis|EAW20142.1 afla|EED57207.1  
afum|EAL85257.1 aluc|OJZ86375.1 anid|CBF84976.1 anig|EHA21519.1 aory|EIT74096.1 asyd|OJJ63131.1  
ater|EAU38759.1 atub|OJI84159.1 aver|OJI97823.1 awen|OJJ32012.1 azon|OJJ46077.1

Group6167: abra|OJJ71642.1 acar|OOF96358.1 acla|EAW15182.1 afis|EAW20152.1 afum|EAL85267.1  
agla|OJJ88782.1 akaw|GAA89284.1 aluc|OJZ86385.1 anid|CBF84989.1 anig|EHA21510.1 aory|EIT74139.1  
asyd|OJJ63122.1 atub|OJI84148.1 aver|OJI97832.1 awen|OJJ32025.1 azon|OJJ46065.1

Group6168: abra|OJJ71703.1 acar|OOF96414.1 acla|EAW15238.1 afis|EAW20203.1 afla|EED57138.1  
afum|EAL85323.1 agla|OJJ84662.1 aluc|OJZ86446.1 anid|CBF85089.1 anig|EHA21455.1 aory|EIT74000.1  
asyd|OJJ63068.1 atub|OJI84082.1 aver|OJI97894.1 awen|OJJ31209.1 azon|OJJ46132.1

Group6169: abra|OJJ71814.1 acla|EAW13854.1 afis|EAW18568.1 afla|EED52783.1 afum|EAL93270.1  
agla|OJJ81619.1 akaw|GAA85096.1 aluc|OJZ86547.1 anid|CBF70307.1 anig|EHA22103.1 aory|EIT78241.1  
asyd|OJJ58725.1 atub|OJI83976.1 aver|OJJ01338.1 awen|OJJ31125.1 azon|OJJ46606.1

Group6170: abra|OJJ71841.1 acar|OOF96510.1 acla|EAW13872.1 afis|EAW18583.1 afum|EAL93288.1  
agla|OJJ81635.1 akaw|GAA85076.1 aluc|OJZ86574.1 anid|CBF70364.1 anig|EHA22083.1 asyd|OJJ58651.1  
ater|EAU34877.1 atub|OJI83949.1 aver|OJJ01257.1 awen|OJJ31147.1 azon|OJJ46622.1

Group6171: abra|OJJ71871.1 acar|OOF96542.1 acla|EAW13901.1 afis|EAW18613.1 afla|EED52731.1  
afum|EAL93323.1 akaw|GAA85044.1 aluc|OJZ86610.1 anid|CBF70432.1 anig|EHA22056.1 aory|EIT78245.1  
asyd|OJJ58614.1 ater|EAU34910.1 atub|OJI83916.1 aver|OJJ01221.1 awen|OJJ32074.1

Group6172: abra|OJJ71916.1 acar|OOF96573.1 afis|EAW20251.1 afla|EED46917.1 afum|EAL85369.1  
agla|OJJ80821.1 akaw|GAA85006.1 aluc|OJZ86652.1 anid|CBF80720.1 anig|EHA22018.1 aory|EIT72602.1  
asyd|OJJ54567.1 ater|EAU31463.1 atub|OJI83875.1 aver|OJJ07587.1 awen|OJJ33373.1

Group6173: abra|OJJ71926.1 acar|OOF96583.1 acla|EAW09602.1 afis|EAW21535.1 afla|EED55985.1  
afum|EBA27463.1 agla|OJJ85698.1 akaw|GAA84996.1 aluc|OJZ86663.1 anid|CBF76388.1 asyd|OJJ61071.1  
ater|EAU35004.1 atub|OJI83862.1 aver|OJJ00388.1 awen|OJJ39157.1 azon|OJJ51487.1

Group6174: abra|OJJ71930.1 acar|OOF96587.1 acla|EAW09599.1 afis|EAW21538.1 afla|EED55990.1  
afum|EAL92558.2 agla|OJJ85702.1 akaw|GAA84993.1 aluc|OJZ86667.1 anid|CBF76380.1 anig|EHA22006.1  
aory|EIT76800.1 asyd|OJJ61067.1 aver|OJJ00383.1 awen|OJJ39153.1 azon|OJJ51484.1

Group6175: abra|OJJ71936.1 acar|OOF96592.1 acla|EAW09594.1 afis|EAW21543.1 afla|EED55994.1  
afum|EAL92563.1 agla|OJJ85706.1 akaw|GAA84988.1 aluc|OJZ86673.1 anid|CBF76372.1 anig|EHA22001.1  
aory|EIT76857.1 ater|EAU34996.1 atub|OJI83855.1 awen|OJJ39147.1 azon|OJJ51483.1

Group6176: acar|OOF96616.1 anig|EHA21984.1 atub|OJI83835.1 acla|EAW09581.1 afis|EAW21556.1  
afla|EED56008.1 afum|EBA27466.1 akaw|GAA84973.1 aluc|OJZ86689.1 anid|CBF76346.1 aory|EIT76788.1  
asyd|OJJ61051.1 ater|EAU34978.1 aver|OJJ00367.1 awen|OJJ39134.1 azon|OJJ51462.1

Group6177: abra|OJJ72004.1 acla|EAW09535.1 afis|EAW21598.1 afla|EED57822.1 afum|EAL92617.1  
agla|OJJ85793.1 akaw|GAA84928.1 aluc|OJZ86740.1 anid|CBF83455.1 anig|EHA21939.1 asyd|OJJ60678.1  
ater|EAU38287.1 atub|OJI83788.1 aver|OJJ00001.1 awen|OJJ39084.1 azon|OJJ51416.1

Group6178: abra|OJJ72006.1 acar|OOF96656.1 afis|EAW17213.1 afla|EED56213.1 afum|EAL86640.1  
akaw|GAA84927.1 aluc|OJZ86742.1 anid|CBF83257.1 anig|EHA21937.1 aory|EIT73317.1 asyd|OJJ60586.1  
ater|EAU38288.1 atub|OJI83785.1 aver|OJI99909.1 awen|OJJ41450.1 azon|OJJ50967.1

Group6179: abra|OJJ72012.1 acar|OOF96661.1 acla|EAW09528.1 afis|EAW21604.1 afla|EED57831.1  
afum|EAL92623.1 agla|OJJ85799.1 akaw|GAA84921.1 aluc|OJZ86748.1 anid|CBF83465.1 anig|EHA21931.1  
asyd|OJJ60686.1 atub|OJI83779.1 aver|OJJ00011.1 awen|OJJ39078.1 azon|OJJ51410.1

Group6180: abra|OJJ72021.1 acar|OOF96670.1 acla|EAW09516.1 afis|EAW21616.1 afum|EAL92650.1  
agla|OJJ78623.1 akaw|GAA84911.1 aluc|OJZ86758.1 anig|EHA21921.1 asyd|OJJ60697.1 atub|OJI83769.1  
aver|OJJ00023.1 awen|OJJ39068.1 azon|OJJ51399.1 afla|EED57843.1 aory|EIT81106.1

Group6181: abra|OJJ72041.1 acar|OOF96700.1 afis|EAW21632.1 afla|EED57860.1 afum|EAL92665.1  
akaw|GAA84892.1 aluc|OJZ86779.1 anig|EHA21903.1 aory|EIT81090.1 asyd|OJJ54353.1 ater|EAU38318.1  
atub|OJI83741.1 aver|OJJ05307.1 awen|OJJ33881.1 azon|OJJ42153.1 afis|EAW19761.1

Group6182: abra|OJJ72047.1 acar|OOF96705.1 acla|EAW09499.1 afis|EAW21637.1 afla|EED57880.1  
afum|EAL92671.1 agla|OJJ79702.1 akaw|GAA84887.1 aluc|OJZ86784.1 anid|CBF83519.1 anig|EHA21898.1  
asyd|OJJ60715.1 atub|OJI83736.1 aver|OJJ00048.1 awen|OJJ33886.1 azon|OJJ48667.1

Group6183: abra|OJJ72066.1 acar|OOF96720.1 acla|EAW09481.1 afis|EAW21655.1 afla|EED57890.1  
afum|EAL92690.1 akaw|GAA84868.1 aluc|OJZ86802.1 anid|CBF83546.1 anig|EHA21881.1 aory|EIT82739.1  
asyd|OJJ60731.1 atub|OJI83716.1 aver|OJJ00063.1 awen|OJJ33912.1 azon|OJJ48649.1

Group6184: abra|OJJ72069.1 acar|OOF96725.1 acla|EAW09484.1 afis|EAW21652.1 afla|EED57885.1  
afum|EBA27469.1 agla|OJJ79725.1 akaw|GAA84866.1 aluc|OJZ86804.1 anid|CBF83552.1 anig|EHA21878.1  
aory|EIT83276.1 asyd|OJJ60734.1 atub|OJI83714.1 aver|OJJ00066.1 awen|OJJ33916.1

Group6185: abra|OJJ72088.1 acar|OOF96733.1 acla|EAW09469.1 afis|EAW21667.1 afla|EED57931.1 afum|EAL92702.1 agla|OJJ79738.1 akaw|GAA84832.1 aluc|OJZ86842.1 anid|CBF83571.1 anig|EHA21795.1 aory|EIT82338.1 asyd|OJJ60748.1 atub|OJI83676.1 aver|OJJ00080.1 azon|OJJ48638.1

Group6186: abra|OJJ72093.1 acar|OOF96738.1 acla|EAW09474.1 afis|EAW21663.1 afla|EED57926.1 afum|EAL92698.1 agla|OJJ79733.1 akaw|GAA84827.1 aluc|OJZ86848.1 anig|EHA21790.1 aory|EIT82353.1 asyd|OJJ60743.1 atub|OJI83671.1 aver|OJJ00075.1 awen|OJJ33925.1 azon|OJJ48633.1

Group6187: abra|OJJ72103.1 acar|OOF96747.1 acla|EAW09387.1 afis|EAW21747.1 afla|EED58031.1 afum|EBA27471.1 agla|OJJ84426.1 aluc|OJZ86858.1 anid|CBF83664.1 anig|EHA21781.1 aory|EIT79746.1 asyd|OJJ60805.1 atub|OJI83661.1 aver|OJJ00134.1 awen|OJJ34029.1 azon|OJJ48202.1

Group6188: abra|OJJ72121.1 acar|OOF96761.1 afla|EED55235.1 akaw|GAA84802.1 aluc|OJZ86878.1 anig|EHA21766.1 aory|EIT83535.1 asyd|OJJ52924.1 ater|EAU30004.1 atub|OJI83641.1 afis|EAW24443.1 afum|EAL86112.1 agla|OJJ80288.1 aver|OJJ06142.1 awen|OJJ32756.1 asyd|OJJ56582.1

Group6189: abra|OJJ72164.1 afis|EAW19708.1 afla|EED48321.1 afum|EBA27290.1 akaw|GAA84764.1 aluc|OJZ86919.1 anig|EHA21725.1 aory|EIT76289.1 asyd|OJJ52893.1 atub|OJI83602.1 aver|OJJ08864.1 awen|OJJ29680.1 azon|OJJ46785.1 acla|EAW07716.1 afum|EBA27266.1 awen|OJJ32267.1

Group6190: abra|OJJ72167.1 acar|OOF96800.1 acla|EAW12227.1 afis|EAW25720.1 afla|EED49350.1 afum|EBA27175.1 akaw|GAA84761.1 aluc|OJZ86922.1 anid|CBF79751.1 anig|EHA21722.1 asyd|OJJ58090.1 atub|OJI83599.1 aver|OJJ04310.1 awen|OJJ33494.1 azon|OJJ45920.1 ater|EAU38134.1

Group6191: abra|OJJ72170.1 acla|EAW10000.1 afis|EAW19663.1 afla|EED47278.1 afum|EAL86859.2 akaw|GAA84758.1 aluc|OJZ86925.1 anig|EHA21719.1 aory|EIT79218.1 ater|EAU37567.1 atub|OJI83596.1 aver|OJI99279.1 awen|OJJ30665.1 azon|OJJ49273.1 azon|OJJ46500.1 acla|EAW13620.1

Group6192: abra|OJJ72205.1 acar|OOF96825.1 afis|EAW17755.1 afla|EED47380.1 afum|EAL91568.1 agla|OJJ84453.1 akaw|GAA84729.1 aluc|OJZ86957.1 anid|CBF87748.1 anig|EHA21691.1 aory|EIT82863.1 asyd|OJJ53603.1 ater|EAU32573.1 atub|OJI83566.1 aver|OJJ08145.1 awen|OJJ40504.1

Group6193: abra|OJJ72214.1 acar|OOF96835.1 acla|EAW14971.1 afis|EAW24496.1 afla|EED51682.1 afum|EAL86166.1 akaw|GAA84720.1 aluc|OJZ86966.1 anid|CBF70528.1 anig|EHA21683.1 aory|EIT80642.1 asyd|OJJ65163.1 atub|OJI83556.1 aver|OJI99315.1 awen|OJJ32646.1 azon|OJJ47043.1

Group6194: abra|OJJ72226.1 acar|OOF96849.1 afis|EAW17406.1 afla|EED47644.1 afum|EAL91241.1 agla|OJJ81617.1 akaw|GAA84711.1 aluc|OJZ86976.1 anid|CBF78379.1 anig|EHA21672.1 aory|EIT80206.1 asyd|OJJ57330.1 ater|EAU30398.1 atub|OJI83544.1 aver|OJJ05831.1 awen|OJJ40137.1

Group6195: abra|OJJ72268.1 acar|OOF90352.1 afis|EAW19946.1 afla|EED46129.1 afum|EAL84969.1 agla|OJJ85570.1 akaw|GAA86023.1 aluc|OJZ90250.1 anid|CBF84247.1 anig|EHA23746.1 aory|EIT76403.1 asyd|OJJ57201.1 ater|EAU30028.1 atub|OJI81676.1 aver|OJJ03089.1 awen|OJJ31249.1

Group6196: abra|OJJ72330.1 acar|OOF94884.1 acla|EAW11993.1 afis|EAW19633.1 afla|EED56984.1 afum|EAL86889.1 akaw|GAA86080.1 aluc|OJZ90315.1 anid|CBF71329.1 anig|EHA23802.1 aory|EIT77577.1 asyd|OJJ55106.1 atub|OJI81740.1 aver|OJJ07100.1 awen|OJJ41877.1 azon|OJJ47076.1

Group6197: abra|OJJ72466.1 acla|EAW12698.1 afis|EAW17861.1 afla|EED46223.1 afum|EAL91669.2 agla|OJJ83105.1 akaw|GAA86202.1 aluc|OJZ90453.1 anid|CBF76903.1 anig|EHA23915.1 aory|EIT76388.1 ater|EAU33066.1 atub|OJI81880.1 aver|OJJ03216.1 awen|OJJ41710.1 azon|OJJ48406.1

Group6198: abra|OJJ72508.1 acar|OOF94734.1 acla|EAW12731.1 afis|EAW17894.1 afla|EED46268.1 afum|EBA27438.1 agla|OJJ83048.1 akaw|GAA86236.1 aluc|OJZ90491.1 anig|EHA23949.1 aory|EIT76520.1 asyd|OJJ57022.1 atub|OJI81915.1 aver|OJJ03267.1 awen|OJJ41658.1 azon|OJJ48378.1

Group6199: abra|OJJ72540.1 acar|OOF94713.1 acla|EAW14602.1 afis|EAW17909.1 afla|EED46311.1 afum|EAL91718.1 agla|OJJ80664.1 akaw|GAA86264.1 aluc|OJZ90524.1 anig|EHA23976.1 aory|EIT76346.1 ater|EAU33129.1 atub|OJI81946.1 aver|OJJ07237.1 awen|OJJ41640.1 azon|OJJ48362.1

Group6200: abra|OJJ72547.1 acar|OOF94705.1 acla|EAW12752.1 afis|EAW17915.1 afum|EAL91725.2 agla|OJJ83028.1 akaw|GAA85180.1 aluc|OJZ90535.1 anid|CBF76977.1 anig|EHA23983.1 ater|EAU33137.1 atub|OJI81956.1 aver|OJJ03246.1 awen|OJJ41630.1 azon|OJJ48355.1 asyd|OJJ57050.1

Group6201: abra|OJJ72552.1 acar|OOF94701.1 acla|EAW12757.1 afis|EAW17920.1 afum|EAL91731.1 agla|OJJ83022.1 akaw|GAA85184.1 aluc|OJZ90539.1 anid|CBF76953.1 anig|EHA23987.1 aory|EIT81208.1 asyd|OJJ57055.1 atub|OJI81961.1 aver|OJJ03242.1 awen|OJJ41626.1 azon|OJJ48349.1

Group6202: abra|OJJ72601.1 acar|OOF94652.1 acla|EAW11616.1 afis|EAW23850.1 afla|EED52567.1 afum|EAL87278.2 agla|OJJ82493.1 akaw|GAA85229.1 aluc|OJZ90584.1 anid|CBF77065.1 aory|EIT74171.1 asyd|OJJ56988.1 ater|EAU33517.1 atub|OJI82007.1 aver|OJJ03299.1 azon|OJJ48739.1

Group6203: abra|OJJ72602.1 acar|OOF94651.1 acla|EAW11606.1 afis|EAW23854.1 afla|EED52554.1 afum|EAL87282.1 akaw|GAA85230.1 aluc|OJZ90585.1 anid|CBF77073.1 anig|EHA24025.1 aory|EIT74267.1 asyd|OJJ56985.1 atub|OJI82008.1 aver|OJJ03302.1 awen|OJJ33808.1 azon|OJJ48738.1

Group6204: abra|OJJ72628.1 acar|OOF94636.1 acla|EAW12131.1 afis|EAW17256.1 afla|EED49528.1 afum|EAL86674.1 akaw|GAA85248.1 aluc|OJZ90605.1 anid|CBF75430.1 anig|EHA24042.1 aory|EIT82589.1 asyd|OJJ59786.1 ater|EAU39597.1 atub|OJI82029.1 aver|OJJ02502.1 azon|OJJ50767.1

Group6205: abra|OJJ72645.1 acar|OOF94624.1 afis|EAW23873.1 afla|EED52601.1 afum|EAL87301.1 agla|OJJ82543.1 akaw|GAA85266.1 aluc|OJZ90624.1 anid|CBF84519.1 anig|EHA24061.1 aory|EIT74214.1 asyd|OJJ60279.1 ater|EAU33473.1 atub|OJI82050.1 aver|OJJ03977.1 awen|OJJ33849.1

Group6206: abra|OJJ72681.1 acar|OOF95930.1 akaw|GAA85299.1 aluc|OJZ90659.1 anig|EHA24094.1 atub|OJI82088.1 agla|OJJ82475.1 awen|OJJ36222.1 acar|OOG00299.1 aluc|OJZ82670.1 anig|EHA22183.1 aory|EIT79504.1 asyd|OJJ64226.1 atub|OJI88905.1 aver|OJI98319.1 akaw|GAA91948.1

Group6207: abra|OJJ72723.1 acar|OOF95956.1 acla|EAW11560.1 afis|EAW23893.1 afla|EED52627.1 afum|EAL87321.1 agla|OJJ78633.1 akaw|GAA85329.1 aluc|OJZ90692.1 aory|EIT74264.1 asyd|OJJ56853.1 ater|EAU33449.1 atub|OJI82117.1 aver|OJJ03468.1 awen|OJJ39056.1 azon|OJJ51387.1

Group6208: abra|OJJ72732.1 acar|OOF95962.1 acla|EAW11567.1 afis|EAW23886.1 afla|EED52615.1 afum|EBA27308.1 agla|OJJ82573.1 akaw|GAA85338.1 anid|CBF77181.1 aory|EIT74191.1 asyd|OJJ56844.1 ater|EAU33460.1 atub|OJI82127.1 aver|OJJ03494.1 awen|OJJ33868.1 azon|OJJ48686.1

Group6209: abra|OJJ72762.1 acar|OOF95981.1 acla|EAW11502.1 afis|EAW23950.1 afla|EED50566.1 afum|EAL87376.1 akaw|GAA85372.1 aluc|OJZ90737.1 anid|CBF77294.1 anig|EHA24152.1 aory|EIT82082.1 ater|EAU29802.1 atub|OJI82164.1 aver|OJJ03550.1 awen|OJJ38998.1 azon|OJJ51330.1

Group6210: abra|OJJ72796.1 acar|OOF89881.1 acla|EAW11476.1 afis|EAW23977.1 afla|EED49184.1 afum|EAL87407.1 agla|OJJ86907.1 akaw|GAA85399.1 aluc|OJZ83293.1 anid|CBF77347.1 anig|EHA24177.1 aory|EIT78540.1 ater|EAU29775.1 atub|OJI82194.1 aver|OJJ03578.1 awen|OJJ35444.1

Group6211: abra|OJJ72809.1 acar|OOF96016.1 acla|EAW11431.1 afis|EAW23992.1 afum|EAL87422.1 agla|OJJ86925.1 akaw|GAA85412.1 aluc|OJZ83307.1 anid|CBF77371.1 anig|EHA24190.1 asyd|OJJ53259.1 ater|EAU29759.1 atub|OJI82207.1 aver|OJJ03592.1 awen|OJJ35461.1 azon|OJJ51282.1

Group6212: abra|OJJ72817.1 acla|EAW11423.1 afis|EAW23998.1 afla|EED49163.1 afum|EAL87428.1 akaw|GAA85418.1 aluc|OJZ83319.1 anig|EHA24197.1 aory|EIT78511.1 asyd|OJJ53251.1 ater|EAU29751.1 atub|OJI82216.1 aver|OJJ03601.1 awen|OJJ35469.1 agla|OJJ86932.1 anid|CBF77383.1

Group6213: abra|OJJ72819.1 afla|EED49161.1 akaw|GAA85420.1 aluc|OJZ83321.1 anig|EHA24199.1 asyd|OJJ53249.1 ater|EAU29749.1 atub|OJI82218.1 awen|OJJ35473.1 azon|OJJ51273.1 acla|EAW11420.1 afis|EAW24002.1 afum|EAL87432.1 agla|OJJ86934.1 aver|OJJ03603.1 anid|CBF77388.1

Group6214: abra|OJJ72888.1 acar|OOF96078.1 acla|EAW11362.1 afla|EED58057.1 agla|OJJ83816.1 akaw|GAA85475.1 aluc|OJZ83396.1 anid|CBF75374.1 anig|EHA24249.1 aory|EIT79739.1 asyd|OJJ59845.1 ater|EAU35455.1 atub|OJI82282.1 aver|OJJ02444.1 awen|OJJ35573.1 azon|OJJ46948.1

Group6215: abra|OJJ72899.1 afis|EAW18142.1 agla|OJJ83827.1 akaw|GAA85486.1 aluc|OJZ83408.1 anig|EHA24259.1 aver|OJJ06228.1 awen|OJJ35584.1 acla|EAW11352.1 afum|EAL87499.1 afla|EED58068.1 aory|EIT79790.1 anid|CBF81127.1 asyd|OJJ56490.1 ater|EAU35465.1 azon|OJJ46938.1

Group6216: abra|OJJ72916.1 acar|OOF96098.1 afis|EAW15969.1 afla|EED58088.1 afum|EAL88602.1 akaw|GAA85499.1 aluc|OJZ83426.1 anid|CBF81096.1 anig|EHA24278.1 aory|EIT79150.1 asyd|OJJ56473.1 atub|OJI82312.1 aver|OJJ06245.1 awen|OJJ35604.1 acla|EAW06475.1 ater|EAU35479.1

Group6217: abra|OJJ72918.1 acar|OOF96100.1 acla|EAW06473.1 afis|EAW15967.1 afla|EED58090.1 afum|EAL88600.1 akaw|GAA85501.1 aluc|OJZ83428.1 anid|CBF81092.1 anig|EHA24280.1 asyd|OJJ56469.1 atub|OJI82316.1 aver|OJJ06250.1 awen|OJJ35606.1 azon|OJJ46926.1 ater|EAU35481.1

Group6218: abra|OJJ72919.1 acar|OOF96101.1 acla|EAW06472.1 afis|EAW15966.1 afum|EAL88599.1 agla|OJJ89345.1 akaw|GAA85502.1 aluc|OJZ83429.1 anid|CBF81091.1 aory|EIT79159.1 asyd|OJJ56468.1 ater|EAU35482.1 atub|OJI82317.1 aver|OJJ06251.1 awen|OJJ35607.1 azon|OJJ46927.1

Group6219: abra|OJJ72924.1 acar|OOF96105.1 acla|EAW13672.1 afis|EAW17353.1 afum|EAL91195.1 akaw|GAA85507.1 aluc|OJZ83434.1 anid|CBF80731.1 anig|EHA24283.1 asyd|OJJ55183.1 ater|EAU32472.1 atub|OJI82325.1 aver|OJJ07572.1 awen|OJJ32564.1 acar|OOF94912.1 aver|OJJ07024.1

Group6220: abra|OJJ72928.1 acar|OOF96109.1 acla|EAW06461.1 afis|EAW15957.1 afum|EAL88590.1 agla|OJJ89356.1 akaw|GAA85510.1 aluc|OJZ83438.1 anid|CBF81070.1 anig|EHA24285.1 asyd|OJJ56459.1 ater|EAU35499.1 atub|OJI82329.1 aver|OJJ06263.1 awen|OJJ35617.1 azon|OJJ46906.1

Group6221: abra|OJJ72939.1 acar|OOF96124.1 afis|EAW15944.1 afla|EED58114.1 afum|EAL88578.2  
akaw|GAA85522.1 aluc|OJZ83450.1 anid|CBF80955.1 anig|EHA24297.1 aory|EIT79115.1 asyd|OJJ56344.1  
ater|EAU35512.1 atub|OJI82342.1 aver|OJJ06369.1 awen|OJJ35638.1 azon|OJJ46897.1

Group6222: abra|OJJ72941.1 acla|EAW11210.1 afis|EAW15943.1 afla|EED58115.1 afum|EAL88577.1  
agla|OJJ89367.1 akaw|GAA85523.1 aluc|OJZ83451.1 anid|CBF80957.1 aory|EIT79131.1 asyd|OJJ56345.1  
ater|EAU35513.1 atub|OJI82343.1 aver|OJJ06368.1 awen|OJJ35639.1 azon|OJJ46896.1

Group6223: abra|OJJ72957.1 acar|OOF96139.1 acla|EAW11202.1 afis|EAW15932.1 afla|EED54929.1  
afum|EAL88568.1 akaw|GAA85538.1 aluc|OJZ83466.1 anid|CBF81031.1 anig|EHA24310.1 aory|EIT80333.1  
asyd|OJJ56389.1 ater|EAU35520.1 atub|OJI82359.1 aver|OJJ06324.1 awen|OJJ35647.1

Group6224: abra|OJJ72977.1 acar|OOF96155.1 acla|EAW08032.1 afis|EAW23067.1 afla|EED54950.1  
afum|EAL88412.1 agla|OJJ89402.1 akaw|GAA85552.1 aluc|OJZ83487.1 anid|CBF80983.1 anig|EHA24322.1  
aory|EIT80376.1 ater|EAU37598.1 atub|OJI82379.1 awen|OJJ35668.1 azon|OJJ44139.1

Group6225: abra|OJJ73033.1 acla|EAW07984.1 afis|EAW23019.1 afla|EED54997.1 afum|EBA27346.1  
agla|OJJ89460.1 akaw|GAA85606.1 aluc|OJZ83544.1 anid|CBF80898.1 anig|EHA24364.1 aory|EIT80344.1  
asyd|OJJ56311.1 atub|OJI82436.1 aver|OJJ06403.1 awen|OJJ30724.1 azon|OJJ44185.1

Group6226: abra|OJJ73034.1 acar|OOF96199.1 acla|EAW07983.1 afis|EAW23018.1 afum|EBA27347.1  
agla|OJJ89461.1 akaw|GAA85607.1 aluc|OJZ83545.1 anig|EHA24365.1 ater|EAU29656.1 atub|OJI82437.1  
awen|OJJ30725.1 azon|OJJ44186.1 anid|CBF86993.1 aver|OJJ06407.1 asyd|OJJ56308.1

Group6227: abra|OJJ73043.1 acar|OOF96206.1 acla|EAW07976.1 afis|EAW23011.1 afla|EED55005.1  
afum|EAL88470.1 agla|OJJ89469.1 akaw|GAA85614.1 aluc|OJZ83554.1 anid|CBF80883.1 anig|EHA24372.1  
aory|EIT80373.1 asyd|OJJ56303.1 atub|OJI82445.1 aver|OJJ06412.1 azon|OJJ44193.1

Group6228: abra|OJJ73067.1 acar|OOG00301.1 afis|EAW16938.1 afla|EED57086.1 afum|EAL86463.1  
agla|OJJ83600.1 akaw|GAA88093.1 aluc|OJZ81359.1 anid|CBF82093.1 anig|EHA18659.1 aory|EIT82299.1  
asyd|OJJ54263.1 ater|EAU33842.1 atub|OJI91563.1 aver|OJJ05217.1 awen|OJJ32504.1

Group6229: abra|OJJ73109.1 acar|OOG00340.1 acla|EAW07040.1 afis|EAW16667.1 afla|EED44909.1  
afum|EAL89271.2 agla|OJJ78702.1 akaw|GAA88057.1 aluc|OJZ81319.1 anig|EHA18625.1 aory|EIT73517.1  
asyd|OJJ54658.1 ater|EAU39588.1 atub|OJI91522.1 awen|OJJ40046.1 azon|OJJ50125.1

Group6230: abra|OJJ73138.1 acar|OOG00351.1 acla|EAW11917.1 afis|EAW19544.1 afla|EED55716.1  
afum|EAL86965.1 akaw|GAA88034.1 aluc|OJZ81293.1 anid|CBF86680.1 anig|EHA18592.1 aory|EIT83197.1  
asyd|OJJ64777.1 ater|EAU30840.1 atub|OJI91502.1 aver|OJI98877.1 azon|OJJ42603.1

Group6231: abra|OJJ73200.1 acar|OOG00439.1 acla|EAW06877.1 afis|EAW16494.1 afla|EED47238.1  
afum|EAL89088.1 agla|OJJ82833.1 akaw|GAA87977.1 aluc|OJZ81229.1 anid|CBF75613.1 anig|EHA18540.1  
asyd|OJJ59731.1 atub|OJI91426.1 aver|OJJ02556.1 awen|OJJ40335.1 azon|OJJ49189.1

Group6232: abra|OJJ73211.1 acar|OOG00450.1 acla|EAW06887.1 afis|EAW16504.1 afla|EED56174.1  
agla|OJJ82817.1 akaw|GAA87967.1 aluc|OJZ81216.1 anid|CBF75593.1 anig|EHA18530.1 aory|EIT76644.1  
asyd|OJJ59719.1 atub|OJI91413.1 aver|OJJ02567.1 awen|OJJ40322.1 azon|OJJ49179.1

Group6233: abra|OJJ73215.1 acar|OOG00452.1 acla|EAW06890.1 afis|EAW16507.1 afla|EED56171.1  
afum|EAL89102.1 agla|OJJ82821.1 akaw|GAA87964.1 aluc|OJZ81213.1 anig|EHA18527.1 asyd|OJJ59715.1  
ater|EAU36533.1 atub|OJI91408.1 aver|OJJ02571.1 awen|OJJ40318.1 azon|OJJ49176.1

Group6234: abra|OJJ73217.1 acar|OOG00454.1 afis|EAW19888.1 afla|EED56169.1 afum|EAL85010.1  
agla|OJJ82813.1 akaw|GAA87962.1 aluc|OJZ81211.1 anid|CBF75574.1 anig|EHA18525.1 aory|EIT76660.1  
asyd|OJJ59712.1 ater|EAU36574.1 atub|OJI91406.1 aver|OJJ02574.1 awen|OJJ40316.1

Group6235: abra|OJJ73244.1 acar|OOG00483.1 acla|EAW06918.1 afis|EAW16535.1 afum|EAL89132.1  
agla|OJJ82787.1 akaw|GAA87936.1 aluc|OJZ81184.1 anid|CBF81739.1 anig|EHA18501.1 asyd|OJJ59596.1  
ater|EAU36598.1 atub|OJI91380.1 aver|OJJ02672.1 awen|OJJ40287.1 azon|OJJ49148.1

Group6236: abra|OJJ73250.1 acar|OOG00492.1 acla|EAW06927.1 afis|EAW16542.1 afla|EED56126.1  
afum|EAL89139.1 agla|OJJ82781.1 akaw|GAA87930.1 aluc|OJZ81177.1 anid|CBF81750.1 asyd|OJJ59602.1  
ater|EAU36604.1 atub|OJI91373.1 aver|OJJ02666.1 awen|OJJ40278.1 azon|OJJ49140.1

Group6237: abra|OJJ73255.1 acar|OOG00497.1 acla|EAW06932.1 afis|EAW16547.1 afla|EED56117.1  
afum|EAL89145.1 agla|OJJ82776.1 akaw|GAA87926.1 aluc|OJZ81173.1 anid|CBF81759.1 anig|EHA18491.1  
aory|EIT76577.1 ater|EAU36610.1 atub|OJI91368.1 awen|OJJ40270.1 azon|OJJ49134.1

Group6238: abra|OJJ73271.1 acar|OOG00511.1 acla|EAW06947.1 afis|EAW16562.1 afla|EED56100.1  
akaw|GAA87909.1 aluc|OJZ88778.1 anid|CBF81809.1 anig|EHA18472.1 aory|EIT76542.1 asyd|OJJ59646.1  
ater|EAU36629.1 atub|OJI91350.1 aver|OJJ02636.1 awen|OJJ40255.1 azon|OJJ49118.1

Group6239: abra|OJJ73384.1 acar|OOG00585.1 acar|OOG00586.1 afla|EED51029.1 akaw|GAA83104.1 aluc|OJZ88652.1 anid|CBF84515.1 anig|EHA18343.1 anig|EHA18344.1 asyd|OJJ53501.1 ater|EAU33844.1 atub|OJI91239.1 aver|OJJ08244.1 awen|OJJ35851.1 azon|OJJ50133.1 afla|EED46379.1

Group6240: abra|OJJ73391.1 acar|OOG00593.1 acla|EAW14262.1 afla|EED45223.1 agla|OJJ86281.1 akaw|GAA83098.1 aluc|OJZ88645.1 anid|CBF84157.1 anig|EHA18336.1 aory|EIT73559.1 asyd|OJJ57115.1 ater|EAU30181.1 atub|OJI91232.1 aver|OJJ03185.1 awen|OJJ35938.1 azon|OJJ50415.1

Group6241: abra|OJJ73431.1 acar|OOG00638.1 acla|EAW06770.1 afis|EAW16321.1 afum|EBA27364.1 agla|OJJ88283.1 akaw|GAA83061.1 aluc|OJZ88610.1 anid|CBF89155.1 anig|EHA18303.1 asyd|OJJ62564.1 ater|EAU34136.1 atub|OJI91195.1 aver|OJI96688.1 awen|OJJ37721.1 azon|OJJ44980.1

Group6242: abra|OJJ73443.1 acar|OOG00649.1 acla|EAW06778.1 afis|EAW16329.1 afla|EED53549.1 afum|EAL88953.1 agla|OJJ88263.1 akaw|GAA83051.1 aluc|OJZ88597.1 anid|CBF89169.1 anig|EHA18291.1 aory|EIT74883.1 asyd|OJJ62542.1 atub|OJI91182.1 aver|OJI96667.1 awen|OJJ37730.1

Group6243: abra|OJJ73480.1 acla|EAW06804.1 afis|EAW16353.1 afum|EAL88978.1 agla|OJJ88250.1 akaw|GAA87430.1 aluc|OJZ88567.1 anid|CBF88378.1 anig|EHA18264.1 aory|EIT75259.1 asyd|OJJ63735.1 ater|EAU34108.1 atub|OJI91153.1 aver|OJI97205.1 awen|OJJ37757.1 azon|OJJ45017.1

Group6244: abra|OJJ73483.1 acar|OOG00677.1 acla|EAW06806.1 afis|EAW16355.1 afum|EAL88980.1 agla|OJJ88238.1 akaw|GAA87432.1 aluc|OJZ88565.1 anid|CBF89228.1 anig|EHA18262.1 asyd|OJJ62516.1 ater|EAU34105.1 atub|OJI91151.1 aver|OJI96635.1 awen|OJJ37759.1 azon|OJJ45057.1

Group6245: abra|OJJ73498.1 acar|OOG00692.1 acla|EAW07432.1 afis|EAW22458.1 afla|EED54486.1 agla|OJJ87566.1 akaw|GAA87447.1 aluc|OJZ88550.1 anid|CBF88918.1 anig|EHA18248.1 asyd|OJJ62844.1 ater|EAU39247.1 atub|OJI91135.1 aver|OJI96888.1 awen|OJJ35083.1 azon|OJJ50024.1

Group6246: abra|OJJ73509.1 acla|EAW07442.1 afis|EAW22469.1 afla|EED54501.1 afum|EAL90722.1 agla|OJJ87555.1 akaw|GAA87457.1 aluc|OJZ88538.1 anig|EHA18239.1 aory|EIT78948.1 asyd|OJJ62835.1 ater|EAU39239.1 atub|OJI91123.1 aver|OJI96878.1 awen|OJJ35095.1 azon|OJJ50014.1

Group6247: abra|OJJ73559.1 acar|OOG00730.1 acla|EAW07476.1 afis|EAW22508.1 afla|EED54536.1 afum|EAL90685.1 agla|OJJ87539.1 akaw|GAA88595.1 aluc|OJZ88503.1 anid|CBF88975.1 aory|EIT78907.1 asyd|OJJ62792.1 atub|OJI91089.1 aver|OJI96839.1 awen|OJJ35133.1 azon|OJJ49965.1

Group6248: abra|OJJ73565.1 acar|OOG00747.1 acla|EAW07481.1 afis|EAW22513.1 afla|EED54543.1 afum|EAL90680.1 agla|OJJ80874.1 akaw|GAA88590.1 aluc|OJZ88497.1 anig|EHA18206.1 asyd|OJJ62787.1 ater|EAU39196.1 atub|OJI91084.1 aver|OJI96834.1 awen|OJJ35139.1 azon|OJJ49960.1

Group6249: abra|OJJ73571.1 acar|OOG00753.1 acla|EAW07489.1 afis|EAW22522.1 afum|EAL90672.1 agla|OJJ80883.1 akaw|GAA88584.1 aluc|OJZ88489.1 anid|CBF89006.1 anig|EHA18198.1 asyd|OJJ62777.1 ater|EAU39188.1 atub|OJI91076.1 aver|OJI96822.1 awen|OJJ35149.1 azon|OJJ49952.1

Group6250: abra|OJJ73593.1 acar|OOG00778.1 acla|EAW07512.1 afis|EAW22543.1 afla|EED54574.1 afum|EBA27412.1 agla|OJJ80905.1 akaw|GAA88559.1 aluc|OJZ88457.1 anid|CBF89042.1 asyd|OJJ62759.1 ater|EAU39165.1 atub|OJI91055.1 aver|OJI96802.1 awen|OJJ35172.1 azon|OJJ49935.1

Group6251: abra|OJJ73594.1 acar|OOG00779.1 acla|EAW07513.1 afis|EAW22544.1 afum|EAL90651.1 agla|OJJ80906.1 akaw|GAA88558.1 aluc|OJZ88456.1 anid|CBF89044.1 anig|EHA18177.1 asyd|OJJ62758.1 ater|EAU39164.1 atub|OJI91054.1 aver|OJI96800.1 awen|OJJ35173.1 azon|OJJ49934.1

Group6252: abra|OJJ73603.1 acar|OOG00787.1 afis|EAW22550.1 afum|EAL90645.1 agla|OJJ80912.1 akaw|GAA88550.1 aluc|OJZ88446.1 anid|CBF89058.1 anig|EHA18169.1 asyd|OJJ62751.1 ater|EAU39154.1 atub|OJI91044.1 aver|OJI96793.1 awen|OJJ35181.1 azon|OJJ49926.1 acla|EAW07520.1

Group6253: abra|OJJ73629.1 acar|OOG00811.1 acla|EAW07543.1 afis|EAW22577.1 afla|EED54618.1 afum|EAL90621.1 agla|OJJ80937.1 akaw|GAA88524.1 aluc|OJZ88420.1 anid|CBF88336.1 asyd|OJJ63713.1 ater|EAU39127.1 atub|OJI91016.1 aver|OJI97226.1 awen|OJJ35205.1 azon|OJJ49903.1

Group6254: abra|OJJ73631.1 acar|OOG00813.1 acla|EAW07545.1 afis|EAW22579.1 afla|EED54624.1 afum|EBA27411.1 agla|OJJ80939.1 akaw|GAA88522.1 aluc|OJZ88418.1 anid|CBF88339.1 anig|EHA18144.1 asyd|OJJ63715.1 ater|EAU39125.1 atub|OJI91014.1 aver|OJI97225.1 awen|OJJ35207.1

Group6255: abra|OJJ73639.1 acar|OOG00821.1 acla|EAW07552.1 afis|EAW22586.1 afla|EED54631.1 afum|EAL90613.1 agla|OJJ80946.1 akaw|GAA88516.1 aluc|OJZ88411.1 anid|CBF88354.1 anig|EHA18138.1 asyd|OJJ63722.1 aver|OJI97218.1 awen|OJJ35214.1 azon|OJJ49895.1 afla|EED54632.1

Group6256: abra|OJJ73648.1 acar|OOG00828.1 acla|EAW07561.1 afis|EAW22595.1 afla|EED54645.1 afum|EAL90604.1 akaw|GAA88507.1 aluc|OJZ88402.1 anid|CBF88371.1 anig|EHA18130.1 aory|EIT78751.1 asyd|OJJ63731.1 ater|EAU39108.1 atub|OJI90998.1 aver|OJI97209.1 awen|OJJ35223.1

Group6257: abra|OJJ73659.1 acar|OOG00837.1 acla|EAW07569.1 afis|EAW22603.1 afla|EED49516.1 afum|EAL90595.1 akaw|GAA88499.1 aluc|OJZ88394.1 anid|CBF88259.1 anig|EHA18122.1 aory|EIT82614.1 ater|EAU39100.1 atub|OJI90989.1 aver|OJI97264.1 awen|OJJ35232.1 azon|OJJ49879.1

Group6258: abra|OJJ73678.1 acar|OOG00851.1 acla|EAW07577.1 afis|EAW22617.1 afla|EED49825.1 afum|EAL90580.1 agla|OJJ80997.1 akaw|GAA88481.1 aluc|OJZ88371.1 anid|CBF88247.1 anig|EHA18104.1 aory|EIT77617.1 asyd|OJJ63666.1 atub|OJI90969.1 awen|OJJ35244.1 azon|OJJ49860.1

Group6259: abra|OJJ73680.1 acla|EAW07595.1 afis|EAW22626.1 afum|EAL90570.1 akaw|GAA88479.1 aluc|OJZ88369.1 anig|EHA18102.1 aory|EIT77592.1 ater|EAU39083.1 atub|OJI90967.1 awen|OJJ35247.1 azon|OJJ49859.1 agla|OJJ80995.1 anid|CBF88243.1 asyd|OJJ63663.1 aver|OJI97271.1

Group6260: abra|OJJ73742.1 acar|OOG00905.1 acla|EAW07636.1 afis|EAW22656.1 afla|EED49924.1 afum|EAL90536.1 agla|OJJ81039.1 akaw|GAA88423.1 aluc|OJZ88310.1 anid|CBF88203.1 anig|EHA18047.1 asyd|OJJ63638.1 atub|OJI90905.1 aver|OJI97298.1 awen|OJJ35267.1 azon|OJJ49830.1

Group6261: abra|OJJ73782.1 acar|OOG00938.1 acla|EAW07667.1 afis|EAW22684.1 afla|EED49968.1 agla|OJJ79034.1 akaw|GAA88395.1 aluc|OJZ88273.1 anid|CBF88115.1 anig|EHA18018.1 asyd|OJJ63581.1 ater|EAU39018.1 atub|OJI90873.1 aver|OJI97355.1 awen|OJJ35312.1 azon|OJJ49801.1

Group6262: abra|OJJ73789.1 acar|OOF90346.1 acla|EAW07682.1 afis|EAW22697.1 afla|EED49975.1 afum|EAL90495.1 agla|OJJ79023.1 akaw|GAA89408.1 aluc|OJZ88265.1 anid|CBF88102.1 anig|EHA18011.1 asyd|OJJ63574.1 ater|EAU39025.1 atub|OJI90864.1 aver|OJI97362.1 azon|OJJ49791.1

Group6263: abra|OJJ73819.1 acar|OOG00972.1 acla|EAW07708.1 afla|EED50010.1 agla|OJJ83678.1 akaw|GAA89438.1 aluc|OJZ88230.1 anid|CBF78043.1 anig|EHA17977.1 aory|EIT74631.1 asyd|OJJ55216.1 ater|EAU38980.1 atub|OJI90832.1 aver|OJJ07000.1 awen|OJJ35419.1 azon|OJJ49758.1

Group6264: abra|OJJ73825.1 acar|OOG00977.1 acla|EAW07720.1 afis|EAW22752.1 afum|EAL90447.1 agla|OJJ83673.1 akaw|GAA89443.1 aluc|OJZ88224.1 anid|CBF88022.1 anig|EHA17971.1 asyd|OJJ63524.1 ater|EAU38968.1 atub|OJI90824.1 aver|OJI97406.1 awen|OJJ35424.1 azon|OJJ49752.1

Group6265: abra|OJJ73839.1 acar|OOG00990.1 acla|EAW07734.1 afis|EAW22766.1 afla|EED50028.1 afum|EAL90433.1 agla|OJJ83654.1 akaw|GAA89457.1 aluc|OJZ88210.1 anid|CBF87999.1 anig|EHA17957.1 asyd|OJJ63507.1 ater|EAU38951.1 aver|OJI97423.1 awen|OJJ38967.1 azon|OJJ49737.1

Group6266: abra|OJJ73862.1 acar|OOG01010.1 acla|EAW07752.1 afis|EAW22789.1 afla|EED50054.1 afum|EAL90410.2 agla|OJJ83587.1 akaw|GAA89480.1 aluc|OJZ88183.1 anid|CBF87961.1 aory|EIT74718.1 asyd|OJJ63483.1 ater|EAU38921.1 atub|OJI90782.1 aver|OJI97447.1 awen|OJJ38945.1

Group6267: abra|OJJ73888.1 acar|OOG01028.1 afis|EAW22808.1 afla|EED50077.1 afum|EBA27406.1 agla|OJJ83583.1 akaw|GAA89500.1 aluc|OJZ88161.1 anid|CBF87902.1 aory|EIT74657.1 asyd|OJJ63458.1 atub|OJI90760.1 aver|OJI97474.1 awen|OJJ38922.1 azon|OJJ49699.1 acla|EAW07772.1

Group6268: abra|OJJ73892.1 acar|OOG01031.1 acla|EAW07776.1 afis|EAW22812.1 afla|EED50081.1 agla|OJJ83560.1 akaw|GAA89504.1 aluc|OJZ88157.1 anid|CBF87909.1 aory|EIT74614.1 asyd|OJJ63454.1 ater|EAU38899.1 atub|OJI90756.1 aver|OJI97478.1 awen|OJJ38916.1 afum|EAL90389.1

Group6269: abra|OJJ73907.1 acar|OOG01040.1 acla|EAW07785.1 afis|EAW22821.1 afla|EED50096.1 afum|EAL90379.2 agla|OJJ83517.1 akaw|GAA89514.1 aluc|OJZ88140.1 anid|CBF87895.1 asyd|OJJ63442.1 ater|EAU38889.1 atub|OJI90743.1 aver|OJI97494.1 awen|OJJ38906.1 azon|OJJ49687.1

Group6270: abra|OJJ73919.1 acar|OOG01050.1 acla|EAW07795.1 afis|EAW22832.1 afum|EAL90370.1 agla|OJJ83507.1 akaw|GAA89525.1 aluc|OJZ88127.1 anid|CBF87879.1 anig|EHA17893.1 asyd|OJJ63433.1 ater|EAU38877.1 atub|OJI90734.1 aver|OJI97504.1 awen|OJJ38892.1 azon|OJJ49677.1

Group6271: abra|OJJ73925.1 acar|OOG01059.1 acla|EAW07802.1 afis|EAW22839.1 afla|EED50114.1 afum|EBA27404.1 agla|OJJ83502.1 akaw|GAA89532.1 aluc|OJZ88118.1 anid|CBF87863.1 asyd|OJJ63426.1 ater|EAU38871.1 atub|OJI90728.1 aver|OJI97511.1 awen|OJJ38884.1 azon|OJJ49673.1

Group6272: abra|OJJ73933.1 acar|OOG01065.1 acla|EAW07811.1 afla|EED50123.1 akaw|GAA89541.1 aluc|OJZ88109.1 anid|CBF87849.1 anig|EHA17879.1 ater|EAU38862.1 atub|OJI90717.1 aver|OJI97519.1 awen|OJJ38875.1 afis|EAW22848.1 afum|EAL90354.1 asyd|OJJ63419.1 azon|OJJ49664.1

Group6273: abra|OJJ73969.1 acar|OOG01095.1 acla|EAW07840.1 afis|EAW22876.1 afla|EED50162.1 afum|EAL90323.1 agla|OJJ83444.1 akaw|GAA89572.1 aluc|OJZ88075.1 aory|EIT76932.1 asyd|OJJ63392.1 ater|EAU38840.1 atub|OJI90684.1 aver|OJI97544.1 awen|OJJ38845.1 azon|OJJ49642.1

Group6274: abra|OJJ73973.1 acar|OOG01100.1 acla|EAW07844.1 afis|EAW22880.1 afla|EED50180.1 afum|EAL90319.1 akaw|GAA89576.1 aluc|OJZ88071.1 anid|CBF87808.1 anig|EHA17844.1 asyd|OJJ63388.1 ater|EAU38844.1 atub|OJI90680.1 aver|OJI97547.1 awen|OJJ38842.1 azon|OJJ49639.1

Group6275: abra|OJJ73975.1 acar|OOG01102.1 acla|EAW07846.1 afis|EAW22882.1 afla|EED50178.1 afum|EAL90317.1 akaw|GAA89578.1 aluc|OJZ88069.1 anid|CBF87805.1 anig|EHA17842.1 aory|EIT77389.1 atub|OJI90678.1 aver|OJI97550.1 awen|OJJ38840.1 agla|OJJ83442.1 azon|OJJ49637.1

Group6276: abra|OJJ73977.1 acar|OOG01105.1 acla|EAW07848.1 afis|EAW22884.1 afla|EED50175.1 afum|EAL90314.1 agla|OJJ83439.1 akaw|GAA89580.1 aluc|OJZ88067.1 anid|EHA17840.1 asyd|OJJ63383.1 ater|EAU35977.1 atub|OJI90676.1 aver|OJI97552.1 awen|OJJ38838.1 azon|OJJ49635.1

Group6277: abra|OJJ73987.1 acar|OOG01112.1 acla|EAW07858.1 afla|EED54863.1 afum|EBA27402.1 agla|OJJ83411.1 akaw|GAA87470.1 aluc|OJZ88058.1 anid|CBF87780.1 anig|EHA17830.1 asyd|OJJ63372.1 ater|EAU35989.1 atub|OJI90666.1 aver|OJI97574.1 awen|OJJ38826.1 azon|OJJ49628.1

Group6278: abra|OJJ73988.1 acar|OOG01113.1 acla|EAW07859.1 afis|EAW22894.1 afum|EBA27401.1 agla|OJJ83412.1 akaw|GAA87471.1 aluc|OJZ88057.1 anid|CBF87778.1 anig|EHA17829.1 asyd|OJJ63371.1 ater|EAU35988.1 atub|OJI90665.1 aver|OJI97575.1 awen|OJJ38825.1 azon|OJJ49624.1

Group6279: abra|OJJ73997.1 acar|OOG01120.1 acla|EAW07865.1 afis|EAW22900.1 afla|EED54871.1 afum|EAL90297.2 agla|OJJ83391.1 akaw|GAA87481.1 aluc|OJZ88045.1 anid|CBF87769.1 anig|EHA17817.1 asyd|OJJ63366.1 atub|OJI90653.1 aver|OJI97580.1 awen|OJJ38730.1 azon|OJJ49617.1

Group6280: abra|OJJ74018.1 acla|EAW07872.1 afis|EAW22907.1 afla|EED54899.1 afum|EAL90290.1 agla|OJJ83382.1 akaw|GAA87500.1 aluc|OJZ88021.1 anid|CBF87710.1 aory|EIT80302.1 asyd|OJJ63336.1 ater|EAU36031.1 atub|OJI90630.1 aver|OJI97626.1 awen|OJJ38723.1 azon|OJJ49607.1

Group6281: abra|OJJ74019.1 acla|EAW07873.1 afis|EAW22908.1 afla|EED54900.1 afum|EAL90289.1 agla|OJJ83381.1 akaw|GAA87501.1 aluc|OJZ88020.1 anid|CBF87708.1 anig|EHA17799.1 aory|EIT80354.1 asyd|OJJ63335.1 atub|OJI90629.1 aver|OJI97627.1 awen|OJJ38722.1 azon|OJJ49606.1

Group6282: abra|OJJ74052.1 acar|OOG01165.1 afis|EAW22937.1 afla|EED58130.1 afum|EAL90259.1 akaw|GAA87534.1 aluc|OJZ87983.1 anid|CBF87656.1 anig|EHA17766.1 aory|EIT79132.1 asyd|OJJ63300.1 ater|EAU30688.1 atub|OJI90593.1 aver|OJI97658.1 awen|OJJ38627.1 azon|OJJ49569.1

Group6283: abra|OJJ74073.1 acar|OOG01185.1 acla|EAW07918.1 afis|EAW22956.1 afla|EED52146.1 afum|EAL90241.1 akaw|GAA87554.1 aluc|OJZ87963.1 anid|CBF74656.1 anig|EHA17747.1 aory|EIT74328.1 asyd|OJJ56119.1 atub|OJI90573.1 aver|OJJ05060.1 azon|OJJ49549.1 asyd|OJJ54385.1

Group6284: abra|OJJ74092.1 acar|OOG01201.1 acla|EAW07935.1 afis|EAW22973.1 afla|EED58167.1 afum|EAL90224.1 agla|OJJ83314.1 akaw|GAA87571.1 aluc|OJZ87944.1 anid|CBF87604.1 aory|EIT79099.1 asyd|OJJ63267.1 ater|EAU30649.1 atub|OJI90555.1 aver|OJI97690.1 azon|OJJ49534.1

Group6285: abra|OJJ74101.1 acar|OOG01210.1 acla|EAW07944.1 afis|EAW22982.1 afla|EED58175.1 agla|OJJ83305.1 akaw|GAA87579.1 aluc|OJZ87935.1 anid|CBF87587.1 aory|EIT79087.1 asyd|OJJ63257.1 ater|EAU30639.1 atub|OJI90547.1 aver|OJI97700.1 awen|OJJ38581.1 azon|OJJ49523.1

Group6286: abra|OJJ74158.1 acar|OOF95568.1 acla|EAW11004.1 afla|EED49739.1 agla|OJJ83720.1 akaw|GAA89726.1 aluc|OJZ80657.1 anid|CBF89386.1 anig|EHA27175.1 aory|EIT77622.1 asyd|OJJ62471.1 ater|EAU34048.1 atub|OJI87512.1 aver|OJI96606.1 awen|OJJ34519.1 azon|OJJ51800.1

Group6287: abra|OJJ74171.1 acar|OOF95551.1 acla|EAW14600.1 afis|EAW19331.1 afla|EED56724.1 afum|EAL94048.2 agla|OJJ81675.1 akaw|GAA86845.1 aluc|OJZ89964.1 anig|EHA27164.1 ater|EAU34817.1 atub|OJI84841.1 awen|OJJ36921.1 acla|EAW11891.1 afis|EAW19502.1 afum|EAL86991.2

Group6288: abra|OJJ74183.1 acar|OOF95539.1 acla|EAW14230.1 afis|EAW19051.1 afla|EED52862.1 afum|EAL93780.1 akaw|GAA86834.1 aluc|OJZ89953.1 anid|CBF81033.1 anig|EHA27154.1 aory|EIT75883.1 asyd|OJJ58008.1 atub|OJI84853.1 aver|OJJ04392.1 awen|OJJ31480.1 afla|EED54405.1

Group6289: abra|OJJ74229.1 acar|OOF95497.1 acla|EAW07275.1 afis|EAW22296.1 afla|EED57706.1 afum|EAL90885.1 akaw|GAA86790.1 aluc|OJZ89904.1 anid|CBF88594.1 anig|EHA27104.1 aory|EIT79877.1 asyd|OJJ63851.1 ater|EAU34318.1 atub|OJI84902.1 aver|OJI97086.1 awen|OJJ34882.1

Group6290: abra|OJJ74241.1 acar|OOF95489.1 acla|EAW07290.1 afis|EAW22324.1 afla|EED57722.1 afum|EAL90868.1 agla|OJJ87720.1 akaw|GAA86779.1 aluc|OJZ89891.1 anid|CBF88607.1 anig|EHA27090.1 asyd|OJJ63858.1 atub|OJI84916.1 aver|OJI97081.1 awen|OJJ34899.1 azon|OJJ50066.1

Group6291: abra|OJJ74255.1 acar|OOF95473.1 acla|EAW07157.1 afis|EAW22172.1 afla|EED57544.1 afum|EAL91017.1 akaw|GAA86766.1 aluc|OJZ89877.1 anid|CBF89083.1 anig|EHA27076.1 aory|EIT81850.1 asyd|OJJ62736.1 ater|EAU34177.1 atub|OJI84930.1 aver|OJI96779.1 azon|OJJ45812.1

Group6292: abra|OJJ74286.1 acar|OOF95445.1 acla|EAW07330.1 afis|EAW22362.1 afla|EED57770.1 afum|EAL90829.1 agla|OJJ87611.1 akaw|GAA86738.1 aluc|OJZ89847.1 anig|EHA27048.1 asyd|OJJ63903.1 ater|EAU39496.1 atub|OJI84959.1 aver|OJI97037.1 awen|OJJ34936.1 azon|OJJ45588.1



Group6293: abra|OJJ74312.1 acla|EAW07363.1 afis|EAW22390.1 afla|EED56053.1 afum|EBA27414.1  
agla|OJJ87652.1 akaw|GAA86712.1 aluc|OJZ89814.1 ater|EAU39328.1 atub|OJI84991.1 awen|OJJ34967.1  
azon|OJJ45616.1 acla|EAW07362.1 afla|EED56052.1 aory|EIT76640.1 awen|OJJ34966.1

Group6294: abra|OJJ74322.1 acla|EAW07374.1 afis|EAW22399.1 afla|EED56063.1 afum|EAL90792.1  
agla|OJJ87662.1 akaw|GAA86704.1 aluc|OJZ89806.1 anid|CBF88754.1 aory|EIT76775.1 asyd|OJJ63960.1  
ater|EAU39314.1 atub|OJI85000.1 aver|OJI96981.1 awen|OJJ34978.1 azon|OJJ45626.1

Group6295: abra|OJJ74331.1 acar|OOF95400.1 acla|EAW07382.1 afis|EAW22407.1 afla|EED56071.1  
afum|EAL90785.1 agla|OJJ87670.1 akaw|GAA86697.1 aluc|OJZ89798.1 anid|CBF88791.1 anig|EHA27011.1  
asyd|OJJ62899.1 ater|EAU39301.1 atub|OJI85007.1 aver|OJI96953.1 awen|OJJ34987.1

Group6296: abra|OJJ74342.1 acar|OOF95388.1 acla|EAW07393.1 afis|EAW22419.1 afla|EED52497.1  
afum|EAL90773.1 agla|OJJ87601.1 akaw|GAA86688.1 aluc|OJZ89789.1 anid|CBF88806.1 asyd|OJJ62893.1  
ater|EAU39287.1 atub|OJI85017.1 aver|OJI96945.1 awen|OJJ34998.1 azon|OJJ45645.1

Group6297: abra|OJJ74387.1 acla|EAW07428.1 afis|EAW22454.1 afla|EED54476.1 afum|EAL90737.1  
akaw|GAA87288.1 aluc|OJZ89731.1 anid|CBF88933.1 anig|EHA26957.1 aory|EIT81126.1 asyd|OJJ62849.1  
ater|EAU39252.1 atub|OJI85070.1 aver|OJI96902.1 awen|OJJ35079.1 azon|OJJ50028.1

Group6298: abra|OJJ74446.1 akaw|GAA87338.1 aluc|OJZ89676.1 anig|EHA26911.1 asyd|OJJ62990.1  
ater|EAU30284.1 atub|OJI85124.1 aver|OJI97978.1 awen|OJJ30984.1 abra|OJJ76869.1 afis|EAW16916.1  
afla|EED51653.1 aluc|OJZ84280.1 anig|EHA27625.1 aory|EIT80516.1 atub|OJI89801.1

Group6299: abra|OJJ74449.1 acar|OOF95302.1 afis|EAW17050.1 afla|EED54125.1 agla|OJJ78792.1  
akaw|GAA87340.1 aluc|OJZ89674.1 anid|CBF78431.1 anig|EHA26909.1 aory|EIT76080.1 asyd|OJJ52557.1  
ater|EAU32136.1 atub|OJI85126.1 aver|OJJ03843.1 awen|OJJ39931.1 azon|OJJ42221.1

Group6300: abra|OJJ74510.1 acla|EAW07181.1 afis|EAW22194.1 afum|EAL90997.1 agla|OJJ87854.1  
akaw|GAA82089.1 aluc|OJZ92091.1 anid|CBF88406.1 anig|EHA26850.1 aory|EIT82934.1 asyd|OJJ63751.1  
ater|EAU34203.1 atub|OJI86522.1 aver|OJI97189.1 awen|OJJ34775.1 azon|OJJ45759.1

Group6301: abra|OJJ74545.1 acla|EAW07153.1 afis|EAW22167.1 afla|EED57537.1 afum|EAL91024.1  
agla|OJJ87890.1 akaw|GAA82053.1 aluc|OJZ92127.1 anid|CBF89085.1 anig|EHA26821.1 asyd|OJJ62735.1  
ater|EAU34174.1 atub|OJI86559.1 aver|OJI96778.1 awen|OJJ34741.1 azon|OJJ45818.1

Group6302: abra|OJJ74547.1 acar|OOF95211.1 acla|EAW07151.1 afis|EAW22165.1 afum|EAL91026.1  
agla|OJJ87892.1 akaw|GAA82051.1 aluc|OJZ92129.1 anid|CBF89088.1 anig|EHA26819.1 asyd|OJJ62733.1  
ater|EAU34172.1 atub|OJI86561.1 aver|OJI96776.1 awen|OJJ34739.1 azon|OJJ45820.1

Group6303: abra|OJJ74558.1 acar|OOF95198.1 acla|EAW07144.1 afis|EAW22156.1 afla|EED53616.1  
afum|EAL91034.1 akaw|GAA82039.1 aluc|OJZ92140.1 anid|CBF89103.1 anig|EHA26809.1 aory|EIT74954.1  
asyd|OJJ62726.1 atub|OJI86572.1 aver|OJI96769.1 awen|OJJ34730.1 azon|OJJ45829.1

Group6304: abra|OJJ74579.1 acar|OOF95185.1 afis|EAW22144.1 afla|EED45850.1 afum|EAL91046.1  
agla|OJJ87930.1 akaw|GAA82026.1 aluc|OJZ92157.1 anid|CBF78369.1 anig|EHA26792.1 asyd|OJJ57326.1  
ater|EAU34147.1 atub|OJI86585.1 aver|OJJ05834.1 awen|OJJ34719.1 azon|OJJ46645.1

Group6305: abra|OJJ74656.1 afla|EED47426.1 afla|EED51743.1 agla|OJJ78810.1 akaw|GAA81954.1  
aluc|OJZ92234.1 anig|EHA26720.1 anig|EHA26721.1 aory|EIT80436.1 aory|EIT81913.1 asyd|OJJ62822.1  
atub|OJI86667.1 aver|OJI96866.1 azon|OJJ43656.1 asyd|OJJ62824.1 aver|OJI96868.1

Group6306: abra|OJJ74726.1 afum|EAL89548.1 akaw|GAA81891.1 aluc|OJZ92310.1 anig|EHA26659.1  
atub|OJI86739.1 azon|OJJ49350.1 acla|EAW10672.1 afis|EAW24894.1 afla|EED46974.1 agla|OJJ82118.1  
aory|EIT72672.1 ater|EAU36404.1 anid|CBF75636.1 asyd|OJJ57462.1 aver|OJJ05718.1

Group6307: abra|OJJ74741.1 acla|EAW10663.1 afis|EAW24904.1 afla|EED46984.1 afum|EAL89557.1  
akaw|GAA83669.1 aluc|OJZ92322.1 anid|CBF75640.1 anig|EHA26647.1 aory|EIT72733.1 asyd|OJJ57476.1  
ater|EAU36395.1 atub|OJI86751.1 aver|OJJ05705.1 awen|OJJ40497.1 azon|OJJ49359.1

Group6308: abra|OJJ74773.1 acla|EAW10638.1 afis|EAW24928.1 afla|EED55545.1 afum|EAL89584.2  
agla|OJJ82156.1 akaw|GAA83639.1 aluc|OJZ92354.1 anid|CBF75706.1 anig|EHA26620.1 asyd|OJJ57498.1  
ater|EAU35658.1 atub|OJI86784.1 aver|OJJ05680.1 awen|OJJ40524.1 azon|OJJ49384.1

Group6309: abra|OJJ74782.1 acar|OOF95773.1 acla|EAW10628.1 afis|EAW24939.1 afla|EED55533.1  
afum|EAL89596.1 agla|OJJ82166.1 akaw|GAA83630.1 aluc|OJZ92363.1 anid|CBF75729.1 anig|EHA26610.1  
asyd|OJJ57509.1 atub|OJI86793.1 aver|OJJ05669.1 awen|OJJ40534.1 azon|OJJ49394.1

Group6310: abra|OJJ74798.1 acar|OOF95788.1 acla|EAW10608.1 afis|EAW24959.1 afla|EED55504.1  
afum|EAL89617.2 agla|OJJ82190.1 akaw|GAA83614.1 aluc|OJZ92379.1 anid|CBF81662.1 aory|EIT80863.1  
asyd|OJJ59550.1 ater|EAU35696.1 atub|OJI86809.1 aver|OJJ02718.1 azon|OJJ49412.1

Group6311: abra|OJJ74843.1 acar|OOF95844.1 acla|EAW08547.1 afis|EAW23584.1 afla|EED57491.1 afum|EAL87880.1 akaw|GAA83579.1 aluc|OJZ92418.1 anid|CBF89589.1 anig|EHA26548.1 aory|EIT81885.1 asyd|OJJ62316.1 ater|EAU35370.1 atub|OJI86848.1 aver|OJI96424.1 awen|OJJ39911.1

Group6312: abra|OJJ74853.1 acar|OOF95853.1 acla|EAW08534.1 afis|EAW23572.1 afla|EED57464.1 afum|EAL87894.1 agla|OJJ86832.1 akaw|GAA83569.1 aluc|OJZ92429.1 anid|CBF89616.1 anig|EHA26537.1 aory|EIT80120.1 asyd|OJJ62303.1 atub|OJI86859.1 awen|OJJ39900.1 azon|OJJ45877.1

Group6313: asyd|OJJ62301.1 ater|EAU35348.1 afla|EED57460.1 agla|OJJ79115.1 akaw|GAA84856.1 aluc|OJZ86815.1 anid|CBF89623.1 aory|EIT80095.1 ater|EAU33845.1 atub|OJI83702.1 aver|OJI96409.1 aver|OJJ08705.1 awen|OJJ33633.1 asyd|OJJ55383.1 anid|CBF82589.1 asyd|OJJ54035.1

Group6314: abra|OJJ74857.1 acla|EAW08527.1 afis|EAW23567.1 afla|EED57458.1 afum|EAL87900.1 agla|OJJ86828.1 akaw|GAA83565.1 aluc|OJZ92433.1 anid|CBF89625.1 anig|EHA26533.1 aory|EIT80060.1 asyd|OJJ62299.1 ater|EAU35350.1 atub|OJI86863.1 aver|OJI96407.1 awen|OJJ39895.1

Group6315: abra|OJJ74858.1 acar|OOF95858.1 acla|EAW08525.1 afis|EAW23565.1 afla|EED57457.1 afum|EAL87903.1 agla|OJJ86827.1 akaw|GAA83562.1 aluc|OJZ92436.1 anid|CBF89630.1 anig|EHA26532.1 asyd|OJJ62297.1 ater|EAU35351.1 atub|OJI86865.1 aver|OJI96405.1 awen|OJJ39894.1

Group6316: abra|OJJ74865.1 acar|OOF95867.1 acla|EAW08514.1 afis|EAW23552.1 afla|EED57447.1 afum|EAL87914.2 agla|OJJ86808.1 aluc|OJZ92443.1 anid|CBF89645.1 anig|EHA26524.1 aory|EIT80099.1 asyd|OJJ62287.1 atub|OJI86872.1 aver|OJI96395.1 awen|OJJ39883.1 azon|OJJ43222.1

Group6317: abra|OJJ74883.1 acar|OOF95887.1 acla|EAW08486.1 afis|EAW23532.1 afla|EED57429.1 agla|OJJ86781.1 akaw|GAA83536.1 aluc|OJZ92460.1 anid|CBF89680.1 anig|EHA26507.1 aory|EIT80137.1 asyd|OJJ62268.1 atub|OJI86889.1 aver|OJI96377.1 awen|OJJ39861.1 azon|OJJ43237.1

Group6318: abra|OJJ74898.1 acar|OOF95898.1 acla|EAW08474.1 afis|EAW23520.1 afla|EED57420.1 afum|EAL87944.1 akaw|GAA83523.1 aluc|OJZ92472.1 aory|EIT80084.1 asyd|OJJ62257.1 ater|EAU35308.1 atub|OJI86903.1 awen|OJJ39845.1 aver|OJI96366.1 azon|OJJ43249.1 agla|OJJ86767.1

Group6319: abra|OJJ74927.1 acar|OOF95918.1 acla|EAW08444.1 afis|EAW23489.1 afla|EED57388.1 afum|EAL87974.1 agla|OJJ86734.1 akaw|GAA83496.1 aluc|OJZ92498.1 anid|CBF89751.1 anig|EHA26474.1 asyd|OJJ62221.1 ater|EAU35276.1 atub|OJI86931.1 aver|OJI96331.1 azon|OJJ47936.1

Group6320: abra|OJJ74955.1 acar|OOF97358.1 acla|EAW08417.1 afis|EAW23452.1 afla|EED57351.1 afum|EAL88014.1 agla|OJJ86698.1 akaw|GAA83468.1 aluc|OJZ92527.1 anid|CBF89801.1 asyd|OJJ62195.1 ater|EAU36918.1 atub|OJI86963.1 aver|OJI96307.1 awen|OJJ39777.1 azon|OJJ47907.1

Group6321: abra|OJJ74995.1 acar|OOF97325.1 acla|EAW08389.1 afis|EAW23418.1 afla|EED57319.1 afum|EAL88051.2 agla|OJJ86635.1 akaw|GAA88619.1 aluc|OJZ92561.1 anid|CBF89859.1 asyd|OJJ62159.1 ater|EAU37504.1 atub|OJI86997.1 aver|OJI96269.1 awen|OJJ39751.1 azon|OJJ47877.1

Group6322: abra|OJJ75044.1 acar|OOF97289.1 acla|EAW08233.1 afis|EAW23267.1 afla|EED55715.1 afum|EAL88212.1 akaw|GAA88661.1 aluc|OJZ92610.1 anid|CBF87389.1 anig|EHA26377.1 aory|EIT83222.1 asyd|OJJ52845.1 atub|OJI87044.1 aver|OJJ08822.1 awen|OJJ39695.1 azon|OJJ47827.1

Group6323: abra|OJJ75072.1 acar|OOF97262.1 acla|EAW08253.1 afis|EAW23287.1 afla|EED55687.1 afum|EAL88192.1 agla|OJJ86560.1 akaw|GAA88684.1 aluc|OJZ92638.1 anig|EHA26353.1 asyd|OJJ62395.1 atub|OJI87069.1 aver|OJI96528.1 awen|OJJ39669.1 azon|OJJ47799.1 anid|CBF89514.1

Group6324: abra|OJJ75076.1 acar|OOF97257.1 acla|EAW08259.1 afis|EAW23292.1 afla|EED55679.1 afum|EAL88187.1 agla|OJJ86547.1 akaw|GAA88689.1 aluc|OJZ92642.1 anid|CBF89506.1 anig|EHA26350.1 asyd|OJJ62399.1 atub|OJI87073.1 aver|OJI96532.1 awen|OJJ39666.1 azon|OJJ47792.1

Group6325: abra|OJJ75155.1 acla|EAW08330.1 afis|EAW23365.1 afla|EED55593.1 afum|EAL88108.1 agla|OJJ86459.1 akaw|GAA88760.1 aluc|OJZ92723.1 anid|CBF74831.1 anig|EHA26277.1 asyd|OJJ60137.1 ater|EAU35616.1 atub|OJI87148.1 aver|OJJ04125.1 awen|OJJ39522.1 azon|OJJ47718.1

Group6326: abra|OJJ75183.1 acar|OOF94597.1 afis|EAW17673.1 afla|EED50480.1 afum|EBA27437.1 agla|OJJ79519.1 akaw|GAA88787.1 aluc|OJZ92747.1 anid|CBF90032.1 anig|EHA26256.1 aory|EIT82045.1 asyd|OJJ62062.1 ater|EAU31974.1 atub|OJI87174.1 aver|OJI96168.1 awen|OJJ37169.1

Group6327: abra|OJJ75231.1 acar|OOF94561.1 acla|EAW12435.1 afis|EAW16745.1 afla|EED48386.1 afum|EAL86320.1 agla|OJJ81565.1 akaw|GAA91775.1 aluc|OJZ92790.1 anig|EHA26215.1 aory|EIT83073.1 asyd|OJJ58458.1 atub|OJI87234.1 aver|OJJ01058.1 awen|OJJ31577.1 azon|OJJ50252.1

Group6328: abra|OJJ75239.1 acla|EAW13711.1 afis|EAW19879.1 afum|EAL85019.1 akaw|GAA91782.1 aluc|OJZ92801.1 anid|CBF76173.1 anig|EHA26208.1 asyd|OJJ63077.1 ater|EAU35155.1 atub|OJI87244.1 aver|OJI97887.1 azon|OJJ42808.1 afis|EAW19980.1 afum|EAL84935.1 anid|CBF85075.1

Group6329: abra|OJJ75282.1 acar|OOF94526.1 acla|EAW09348.1 afis|EAW21803.1 afla|EED46584.1 afum|EAL92829.2 akaw|GAA91820.1 aluc|OJZ92843.1 anid|CBF73984.1 anig|EHA26168.1 aory|EIT77871.1 asyd|OJJ52386.1 ater|EAU31475.1 atub|OJI87299.1 aver|OJJ01937.1 azon|OJJ42848.1

Group6330: abra|OJJ75311.1 acar|OOF94518.1 acla|EAW12229.1 afis|EAW16999.1 afla|EED48951.1 afum|EAL86524.1 agla|OJJ79826.1 akaw|GAA91995.1 aluc|OJZ92865.1 anig|EHA26100.1 aory|EIT80050.1 asyd|OJJ52942.1 atub|OJI87323.1 aver|OJJ08909.1 awen|OJJ35988.1 azon|OJJ50275.1

Group6331: abra|OJJ75369.1 acar|OOF89961.1 acla|EAW12121.1 afis|EAW17259.1 afla|EED48877.1 afum|EAL86676.1 agla|OJJ81068.1 akaw|GAA92063.1 aluc|OJZ92938.1 anig|EHA26034.1 aory|EIT81198.1 asyd|OJJ54367.1 ater|EAU36150.1 atub|OJI87398.1 aver|OJJ05320.1 awen|OJJ35774.1

Group6332: abra|OJJ75376.1 afis|EAW17268.1 afla|EED48851.1 afum|EAL86685.1 agla|OJJ81073.1 akaw|GAA92738.1 aluc|OJZ92946.1 anid|CBF87529.1 anig|EHA26026.1 aory|EIT81264.1 asyd|OJJ52985.1 ater|EAU36133.1 atub|OJI87405.1 aver|OJJ08954.1 awen|OJJ35765.1 azon|OJJ45517.1

Group6333: abra|OJJ75377.1 afis|EAW17269.1 afla|EED48849.1 afum|EAL86686.1 agla|OJJ81074.1 akaw|GAA92739.1 aluc|OJZ92947.1 anid|CBF87531.1 anig|EHA26025.1 aory|EIT81289.1 asyd|OJJ52986.1 ater|EAU36134.1 atub|OJI87406.1 aver|OJJ08955.1 awen|OJJ35764.1 azon|OJJ45518.1

Group6334: abra|OJJ75382.1 acar|OOF94465.1 acla|EAW12110.1 afis|EAW17275.1 afla|EED48844.1 afum|EAL86693.1 agla|OJJ81079.1 akaw|GAA92744.1 aluc|OJZ92952.1 anid|CBF87540.1 anig|EHA26023.1 asyd|OJJ52991.1 atub|OJI87411.1 aver|OJJ08960.1 awen|OJJ35759.1 azon|OJJ45525.1

Group6335: abra|OJJ75390.1 acla|EAW12102.1 afis|EAW17284.1 afla|EED48835.1 afum|EAL86702.1 agla|OJJ81087.1 akaw|GAA92753.1 aluc|OJZ92961.1 anig|EHA26014.1 aory|EIT81290.1 asyd|OJJ53000.1 ater|EAU34704.1 atub|OJI87419.1 aver|OJJ08969.1 awen|OJJ35751.1 azon|OJJ45533.1

Group6336: abra|OJJ75398.1 acar|OOF94452.1 afis|EAW17291.1 afla|EED48827.1 agla|OJJ81096.1 akaw|GAA92760.1 aluc|OJZ92970.1 anid|CBF74293.1 anig|EHA26006.1 aory|EIT81276.1 asyd|OJJ51910.1 ater|EAU34697.1 atub|OJI87427.1 aver|OJJ05351.1 awen|OJJ35745.1 azon|OJJ45538.1

Group6337: abra|OJJ75405.1 acar|OOF90753.1 acla|EAW13778.1 afis|EAW18354.1 agla|OJJ88030.1 akaw|GAA84183.1 aluc|OJZ88857.1 anid|CBF79360.1 anig|EHA23646.1 aory|EIT72997.1 asyd|OJJ57804.1 atub|OJI85933.1 aver|OJJ04584.1 awen|OJJ35738.1 azon|OJJ50440.1 afla|EED48819.1

Group6338: abra|OJJ75420.1 acar|OOF90766.1 acla|EAW13792.1 afis|EAW18340.1 afla|EED48805.1 afum|EAL87703.1 agla|OJJ88044.1 akaw|GAA84195.1 aluc|OJZ88872.1 anid|CBF79373.1 aory|EIT72983.1 asyd|OJJ57818.1 ater|EAU34675.1 atub|OJI85919.1 awen|OJJ35724.1 azon|OJJ43313.1

Group6339: abra|OJJ75490.1 acar|OOF90822.1 afis|EAW18282.1 afla|EED48749.1 afum|EAL87648.1 agla|OJJ88145.1 aluc|OJZ88949.1 anid|CBF79487.1 anig|EHA23572.1 aory|EIT73144.1 asyd|OJJ57875.1 atub|OJI85840.1 aver|OJJ04519.1 awen|OJJ30653.1 azon|OJJ47962.1 acla|EAW11221.1

Group6340: abra|OJJ75498.1 acar|OOF90831.1 acla|EAW09292.1 afis|EAW21855.1 afum|EAL92868.1 agla|OJJ84280.1 akaw|GAA84264.1 aluc|OJZ88957.1 anid|CBF76743.1 anig|EHA23563.1 asyd|OJJ61256.1 ater|EAU30854.1 atub|OJI85832.1 aver|OJJ00579.1 awen|OJJ34139.1 azon|OJJ43487.1

Group6341: abra|OJJ75499.1 acar|OOF90832.1 acla|EAW09293.1 afla|EED46455.1 agla|OJJ84281.1 akaw|GAA84265.1 aluc|OJZ88958.1 anid|CBF76741.1 anig|EHA23562.1 aory|EIT72343.1 asyd|OJJ61255.1 ater|EAU30853.1 atub|OJI85831.1 aver|OJJ00578.1 awen|OJJ34138.1 afis|EAW21854.1

Group6342: abra|OJJ75525.1 acar|OOF90852.1 acla|EAW09312.1 afis|EAW21833.1 afla|EED46542.1 afum|EAL92848.1 agla|OJJ84311.1 akaw|GAA84288.1 aluc|OJZ88982.1 anid|CBF76696.1 anig|EHA23544.1 asyd|OJJ61230.1 atub|OJI85807.1 aver|OJJ00553.1 awen|OJJ34106.1 azon|OJJ44235.1

Group6343: abra|OJJ75555.1 acar|OOF90874.1 acla|EAW09353.1 afis|EAW21818.1 afla|EED46565.1 afum|EAL92834.1 agla|OJJ84326.1 akaw|GAA84310.1 aluc|OJZ89005.1 anid|CBF76656.1 anig|EHA23523.1 aory|EIT77933.1 asyd|OJJ61209.1 atub|OJI85784.1 aver|OJJ00533.1 awen|OJJ34092.1

Group6344: abra|OJJ75606.1 acar|OOG00231.1 acla|EAW09368.1 afis|EAW21769.1 afla|EED46331.1 afum|EAL92798.1 akaw|GAA84357.1 aluc|OJZ89059.1 anid|CBF69640.1 anig|EHA23483.1 aory|EIT81239.1 asyd|OJJ59082.1 atub|OJI85727.1 aver|OJJ01675.1 awen|OJJ30662.1 azon|OJJ48176.1

Group6345: abra|OJJ75614.1 afla|EED46339.1 agla|OJJ84351.1 akaw|GAA84363.1 aluc|OJZ89067.1 anig|EHA23469.1 aory|EIT81226.1 asyd|OJJ61177.1 atub|OJI85721.1 aver|OJJ00503.1 awen|OJJ34060.1 azon|OJJ48172.1 acla|EAW09364.1 afis|EAW21773.1 afum|EAL92802.1 anid|CBF76595.1

Group6346: abra|OJJ75616.1 acar|OOG00216.1 acla|EAW09362.1 afis|EAW21775.1 afla|EED46341.1 afum|EAL92804.1 agla|OJJ84349.1 akaw|GAA84365.1 aluc|OJZ89069.1 anid|CBF76599.1 anig|EHA23467.1 asyd|OJJ61180.1 atub|OJI85719.1 aver|OJJ00505.1 awen|OJJ34063.1 azon|OJJ48169.1

Group6347: abra|OJJ75626.1 acla|EAW12341.1 afis|EAW16873.1 afla|EED53975.1 afum|EAL86411.1 akaw|GAA84373.1 aluc|OJZ89077.1 anid|CBF78447.1 anig|EHA23460.1 aory|EIT78316.1 asyd|OJJ59237.1 atub|OJI85708.1 aver|OJJ01847.1 awen|OJJ38677.1 azon|OJJ45244.1 azon|OJJ45813.1

Group6348: abra|OJJ75671.1 acar|OOG00174.1 acla|EAW09431.1 afis|EAW21705.1 afla|EED57974.1 afum|EAL92739.1 agla|OJJ79889.1 akaw|GAA84411.1 aluc|OJZ89121.1 anig|EHA23422.1 aory|EIT79776.1 asyd|OJJ60790.1 atub|OJI85663.1 aver|OJJ00123.1 awen|OJJ33976.1 azon|OJJ48582.1

Group6349: abra|OJJ75697.1 acar|OOG00156.1 acla|EAW09411.1 afis|EAW21725.1 afla|EED57994.1 afum|EAL92758.1 agla|OJJ79859.1 akaw|GAA84433.1 aluc|OJZ89148.1 anid|CBF83720.1 anig|EHA23400.1 asyd|OJJ60839.1 atub|OJI85640.1 aver|OJJ00163.1 awen|OJJ33998.1 azon|OJJ48554.1

Group6350: abra|OJJ75797.1 acar|OOG00077.1 acla|EAW08955.1 afis|EAW15456.1 afla|EED48146.1 afum|EAL84189.1 akaw|GAA84515.1 aluc|OJZ89246.1 anid|CBF73694.1 anig|EHA23320.1 aory|EIT76198.1 asyd|OJJ56653.1 ater|EAU35490.1 atub|OJI85551.1 aver|OJJ06072.1 awen|OJJ32596.1

Group6351: abra|OJJ75802.1 acar|OOG00074.1 acla|EAW14883.1 afis|EAW24402.1 afla|EED47811.1 afum|EAL86073.1 akaw|GAA84518.1 aluc|OJZ89250.1 anid|CBF73733.1 anig|EHA23317.1 aory|EIT77114.1 asyd|OJJ56631.1 ater|EAU30337.1 atub|OJI85548.1 aver|OJJ06095.1 azon|OJJ43213.1

Group6352: abra|OJJ75806.1 acar|OOG00069.1 acla|EAW14877.1 afis|EAW24394.1 afla|EED47816.1 afum|EAL86066.1 akaw|GAA84522.1 aluc|OJZ89254.1 anid|CBF73719.1 anig|EHA23313.1 aory|EIT77200.1 asyd|OJJ56640.1 ater|EAU30341.1 atub|OJI85544.1 aver|OJJ06086.1 awen|OJJ32811.1

Group6353: abra|OJJ75820.1 acar|OOG00056.1 acla|EAW14855.1 afis|EAW24382.1 afla|EED47828.1 afum|EAL86054.1 agla|OJJ83270.1 akaw|GAA84533.1 aluc|OJZ89266.1 anid|CBF73665.1 anig|EHA23302.1 asyd|OJJ56667.1 atub|OJI85533.1 aver|OJJ06056.1 awen|OJJ32830.1 azon|OJJ49006.1

Group6354: abra|OJJ75866.1 acar|OOG00028.1 acla|EAW09927.1 afis|EAW21175.1 afla|EED54762.1 afum|EAL92195.1 agla|OJJ80002.1 akaw|GAA84572.1 aluc|OJZ89308.1 anid|CBF83299.1 anig|EHA23258.1 asyd|OJJ60557.1 ater|EAU35842.1 aver|OJI99883.1 awen|OJJ36514.1 azon|OJJ44390.1

Group6355: abra|OJJ75929.1 afis|EAW21262.1 afla|EED54821.1 agla|OJJ87470.1 akaw|GAA84630.1 aluc|OJZ89376.1 anig|EHA23207.1 aory|EIT79410.1 asyd|OJJ60607.1 ater|EAU35899.1 atub|OJI85422.1 afum|EAL92277.1 anid|CBF83336.1 aver|OJI99927.1 awen|OJJ36579.1 azon|OJJ44311.1

Group6356: abra|OJJ75941.1 acar|OOF99969.1 acla|EAW09852.1 afis|EAW21283.1 afla|EED54834.1 afum|EAL92300.2 akaw|GAA84643.1 aluc|OJZ89388.1 anid|CBF83361.1 anig|EHA23196.1 asyd|OJJ60619.1 ater|EAU35912.1 atub|OJI85409.1 aver|OJI99943.1 awen|OJJ39416.1 azon|OJJ44299.1

Group6357: abra|OJJ76017.1 acar|OOF99909.1 acla|EAW09789.1 afis|EAW21347.1 afla|EED55762.1 afum|EAL92364.1 agla|OJJ87382.1 akaw|GAA88943.1 aluc|OJZ89464.1 anid|CBF76197.1 anig|EHA23124.1 asyd|OJJ60959.1 ater|EAU35970.1 atub|OJI85331.1 aver|OJJ00284.1 azon|OJJ51692.1

Group6358: abra|OJJ76021.1 acar|OOF99904.1 acla|EAW08988.1 afis|EAW15423.1 afla|EED55766.1 afum|EAL84221.1 akaw|GAA88939.1 aluc|OJZ89468.1 anid|CBF76201.1 anig|EHA23120.1 aory|EIT76861.1 asyd|OJJ60956.1 ater|EAU35972.1 atub|OJI85327.1 aver|OJJ00283.1 azon|OJJ45285.1

Group6359: abra|OJJ76022.1 acar|OOF99903.1 acla|EAW09786.1 afis|EAW21352.1 afla|EED55767.1 afum|EAL92367.1 akaw|GAA88935.1 aluc|OJZ89472.1 anid|CBF76203.1 anig|EHA23119.1 aory|EIT76835.1 asyd|OJJ60952.1 ater|EAU35973.1 atub|OJI85326.1 aver|OJJ00279.1 awen|OJJ39348.1

Group6360: abra|OJJ76045.1 acar|OOF99885.1 acla|EAW09776.1 afis|EAW21362.1 afla|EED55776.1 afum|EAL92378.1 akaw|GAA88920.1 aluc|OJZ89501.1 anid|CBF83879.1 anig|EHA23099.1 asyd|OJJ60939.1 ater|EAU35198.1 atub|OJI85302.1 aver|OJJ00265.1 awen|OJJ39336.1 azon|OJJ51681.1

Group6361: abra|OJJ76047.1 acar|OOF99883.1 acla|EAW09778.1 afis|EAW21360.1 afla|EED46576.1 afum|EAL92376.1 agla|OJJ85479.1 akaw|GAA88918.1 aluc|OJZ89503.1 anid|CBF86925.1 anig|EHA23097.1 asyd|OJJ52230.1 ater|EAU34094.1 atub|OJI85300.1 azon|OJJ51683.1 acla|EAW09086.1

Group6362: abra|OJJ76051.1 acar|OOF99877.1 acla|EAW09767.1 afis|EAW21371.1 afla|EED55789.1 afum|EAL92388.1 agla|OJJ85491.1 akaw|GAA88914.1 aluc|OJZ89507.1 anid|CBF83870.1 anig|EHA23093.1 asyd|OJJ60934.1 atub|OJI85296.1 aver|OJJ00260.1 awen|OJJ39326.1 azon|OJJ51671.1

Group6363: abra|OJJ76074.1 acla|EAW09747.1 afis|EAW21395.1 afla|EED55814.1 afum|EAL92409.1 agla|OJJ85520.1 akaw|GAA88893.1 aluc|OJZ89530.1 anid|CBF83837.1 anig|EHA23072.1 asyd|OJJ60912.1 atub|OJI85275.1 aver|OJJ00239.1 azon|OJJ51545.1 aory|EIT76625.1 ater|EAU35161.1

Group6364: abra|OJJ76105.1 acar|OOF99820.1 acla|EAW06763.1 afis|EAW16313.1 afla|EED54182.1 afum|EAL88935.1 akaw|GAA88861.1 aluc|OJZ89561.1 anid|CBF69558.1 anig|EHA23045.1 aory|EIT76112.1 asyd|OJJ59162.1 ater|EAU29329.1 atub|OJI85243.1 aver|OJJ01752.1 awen|OJJ36250.1

Group6365: abra|OJJ76137.1 acar|OOF99787.1 acla|EAW09682.1 afis|EAW21457.1 afla|EED55887.1 afum|EAL92476.1 akaw|GAA88831.1 aluc|OJZ89600.1 anid|CBF76542.1 aory|EIT76595.1 asyd|OJJ61152.1 ater|EAU35078.1 atub|OJI85204.1 aver|OJJ00474.1 awen|OJJ39243.1 azon|OJJ51612.1

Group6366: abra|OJJ76144.1 acla|EAW09667.1 afis|EAW21470.1 afla|EED55906.1 afum|EAL92489.1 agla|OJJ85619.1 akaw|GAA82093.1 aluc|OJZ92087.1 anid|CBF76519.1 aory|EIT76732.1 asyd|OJJ61139.1 ater|EAU35063.1 atub|OJI86516.1 aver|OJJ00461.1 awen|OJJ39228.1 azon|OJJ51627.1

Group6367: aory|EIT76874.1 abra|OJJ76156.1 acla|EAW09662.1 afis|EAW21477.1 afla|EED55909.1 afum|EAL92497.1 agla|OJJ85626.1 akaw|GAA82104.1 aluc|OJZ92072.1 anid|CBF76509.1 aory|EIT76651.1 asyd|OJJ61134.1 atub|OJI86504.1 aver|OJJ00455.1 azon|OJJ51634.1 agla|OJJ85625.1

Group6368: abra|OJJ76233.1 acar|OOF99479.1 acla|EAW14369.1 afis|EAW18919.1 afla|EED50903.1 afum|EAL93650.2 akaw|GAA82168.1 aluc|OJZ91998.1 anid|CBF69684.1 anig|EHA22941.1 aory|EIT79023.1 asyd|OJJ59059.1 ater|EAU38086.1 atub|OJI86433.1 aver|OJJ01653.1 awen|OJJ31512.1

Group6369: abra|OJJ76268.1 acla|EAW14340.1 afis|EAW18950.1 afum|EAL93684.1 agla|OJJ85321.1 akaw|GAA82201.1 aluc|OJZ91952.1 anid|CBF86831.1 anig|EHA22911.1 aory|EIT77032.1 asyd|OJJ64650.1 ater|EAU38136.1 atub|OJI86397.1 aver|OJI98750.1 awen|OJJ31548.1 azon|OJJ47264.1

Group6370: abra|OJJ76275.1 acar|OOF99523.1 acla|EAW14337.1 afis|EAW18952.1 afla|EED50990.1 afum|EAL93688.1 agla|OJJ85323.1 aluc|OJZ91945.1 anid|CBF69589.1 anig|EHA22904.1 aory|EIT76952.1 asyd|OJJ59141.1 ater|EAU38137.1 atub|OJI86390.1 aver|OJJ01731.1 azon|OJJ47268.1

Group6371: abra|OJJ76298.1 acar|OOF99543.1 acla|EAW14320.1 afis|EAW18968.1 afla|EED51034.1 afum|EAL93700.2 agla|OJJ85354.1 akaw|GAA82225.1 aluc|OJZ91924.1 anid|CBF69615.1 asyd|OJJ59126.1 ater|EAU38154.1 atub|OJI86368.1 aver|OJJ01714.1 awen|OJJ31568.1 azon|OJJ47286.1

Group6372: abra|OJJ76350.1 acar|OOF99601.1 acla|EAW14065.1 afis|EAW18772.1 afla|EED50731.1 afum|EAL93504.1 agla|OJJ80488.1 akaw|GAA82277.1 aluc|OJZ91863.1 anid|CBF69932.1 anig|EHA22843.1 aory|EIT78147.1 asyd|OJJ58923.1 ater|EAU37903.1 awen|OJJ32341.1 azon|OJJ47109.1

Group6373: abra|OJJ76360.1 acar|OOF99611.1 acla|EAW14056.1 afis|EAW18762.1 afla|EED50722.1 afum|EAL93494.1 agla|OJJ80459.1 akaw|GAA82286.1 aluc|OJZ91853.1 anid|CBF69949.1 anig|EHA22834.1 aory|EIT78002.1 asyd|OJJ58913.1 atub|OJI86304.1 aver|OJJ01510.1 azon|OJJ47097.1

Group6374: abra|OJJ76414.1 acar|OOF99654.1 acla|EAW14012.1 afis|EAW18718.1 afla|EED50672.1 afum|EAL93442.2 agla|OJJ82340.1 anid|CBF70675.1 anig|EHA22794.1 aory|EIT77982.1 asyd|OJJ58473.1 atub|OJI86254.1 aver|OJJ01074.1 awen|OJJ32222.1 azon|OJJ46774.1 afla|EED50673.1

Group6375: abra|OJJ76428.1 acar|OOF99671.1 acla|EAW13997.1 afis|EAW18705.1 afla|EED50654.1 afum|EAL93428.1 agla|OJJ82353.1 akaw|GAA82343.1 aluc|OJZ91784.1 anid|CBF70647.1 anig|EHA22781.1 asyd|OJJ58487.1 atub|OJI86240.1 aver|OJJ01090.1 awen|OJJ32188.1 azon|OJJ46759.1

Group6376: abra|OJJ76435.1 acar|OOF99680.1 acla|EAW13988.1 afis|EAW18696.1 afla|EED50644.1 afum|EAL93418.1 agla|OJJ82370.1 akaw|GAA82350.1 aluc|OJZ91777.1 anid|CBF70629.1 asyd|OJJ58497.1 ater|EAU38210.1 atub|OJI86233.1 aver|OJJ01100.1 awen|OJJ32167.1 azon|OJJ46751.1

Group6377: abra|OJJ76478.1 acar|OOF99713.1 afum|EAL94102.1 agla|OJJ82409.1 akaw|GAA82391.1 aluc|OJZ91729.1 anid|CBF70573.1 anig|EHA22736.1 aory|EIT74210.1 asyd|OJJ58531.1 ater|EAU38244.1 atub|OJI86187.1 aver|OJJ01133.1 awen|OJJ32136.1 azon|OJJ46719.1 acar|OOF91475.1

Group6378: abra|OJJ76486.1 acar|OOF99719.1 acla|EAW13947.1 afis|EAW18657.1 afla|EED52673.1 afum|EAL93374.1 akaw|GAA82402.1 aluc|OJZ91720.1 anid|CBF70550.1 anig|EHA22727.1 aory|EIT74222.1 asyd|OJJ58541.1 ater|EAU38255.1 atub|OJI86177.1 aver|OJJ01142.1 awen|OJJ32124.1

Group6379: abra|OJJ76493.1 acar|OOF99725.1 acla|EAW13939.1 afis|EAW18650.1 afla|EED52689.1 afum|EAL93366.1 agla|OJJ82424.1 akaw|GAA82409.1 aluc|OJZ91711.1 anig|EHA22722.1 asyd|OJJ58551.1 ater|EAU38262.1 atub|OJI86170.1 aver|OJJ01149.1 awen|OJJ32118.1 azon|OJJ46704.1

Group6380: abra|OJJ76511.1 acla|EAW14189.1 afis|EAW18904.1 afla|EED50844.1 afum|EAL93636.1 agla|OJJ81509.1 akaw|GAA82424.1 aluc|OJZ91694.1 anid|CBF69717.1 anig|EHA22707.1 aory|EIT79060.1 asyd|OJJ59045.1 ater|EAU38074.1 atub|OJI86148.1 aver|OJJ01641.1 awen|OJJ32461.1

Group6381: abra|OJJ76527.1 acar|OOF99448.1 acla|EAW14174.1 afis|EAW18888.1 afla|EED50875.1 afum|EAL93621.1 agla|OJJ81494.1 aluc|OJZ91678.1 anid|CBF69900.1 anig|EHA22695.1 aory|EIT78967.1 asyd|OJJ58999.1 ater|EAU38060.1 atub|OJI86133.1 awen|OJJ32446.1 azon|OJJ47205.1

Group6382: abra|OJJ76539.1 acar|OOF99434.1 acla|EAW14164.1 afis|EAW18877.1 afla|EED50889.1 afum|EAL93609.1 agla|OJJ80614.1 akaw|GAA82449.1 aluc|OJZ91664.1 anig|EHA22684.1 asyd|OJJ59016.1 ater|EAU38042.1 atub|OJI86121.1 aver|OJJ01599.1 awen|OJJ32436.1 azon|OJJ47194.1

Group6383: abra|OJJ76541.1 acar|OOF99436.1 acla|EAW14166.1 afis|EAW18879.1 afla|EED50887.1 afum|EAL93611.1 agla|OJJ80616.1 aluc|OJZ91662.1 anid|CBF69879.1 anig|EHA22682.1 aory|EIT78990.1 asyd|OJJ59014.1 atub|OJI86119.1 aver|OJJ01601.1 awen|OJJ32438.1 azon|OJJ47197.1

Group6384: abra|OJJ76557.1 acar|OOF99422.1 acla|EAW14148.1 afis|EAW18861.1 afla|EED50828.1 afum|EAL93593.2 agla|OJJ80584.1 akaw|GAA82463.1 aluc|OJZ91648.1 anid|CBF69844.1 asyd|OJJ59032.1 atub|OJI86102.1 aver|OJJ01584.1 awen|OJJ32417.1 azon|OJJ47174.1 anig|EHA22669.1

Group6385: abra|OJJ76585.1 acar|OOF99401.1 acla|EAW14110.1 afis|EAW18812.1 afla|EED50797.1 afum|EAL93548.1 agla|OJJ80545.1 akaw|GAA82488.1 aluc|OJZ91621.1 anid|CBF69797.1 asyd|OJJ58965.1 ater|EAU37979.1 atub|OJI86074.1 aver|OJJ01559.1 awen|OJJ32388.1 azon|OJJ47148.1

Group6386: abra|OJJ76626.1 acar|OOF99372.1 afis|EAW18990.1 afla|EED53175.1 afum|EAL93726.1 agla|OJJ85977.1 akaw|GAA92831.1 aluc|OJZ91586.1 anig|EHA22610.1 aory|EIT75103.1 asyd|OJJ53667.1 ater|EAU37640.1 atub|OJI86035.1 awen|OJJ31611.1 asyd|OJJ57923.1 aver|OJJ04469.1

Group6387: abra|OJJ76628.1 acar|OOF99370.1 acla|EAW07509.1 afla|EED47282.1 agla|OJJ86876.1 akaw|GAA92829.1 aluc|OJZ91584.1 anig|EHA22609.1 aory|EIT79279.1 asyd|OJJ56229.1 ater|EAU33542.1 atub|OJI86033.1 aver|OJJ05164.1 awen|OJJ37547.1 azon|OJJ42292.1 agla|OJJ81403.1

Group6388: abra|OJJ76633.1 acla|EAW14286.1 afis|EAW18996.1 afla|EED53146.1 afum|EAL93731.1 agla|OJJ82984.1 akaw|GAA92823.1 aluc|OJZ91577.1 anid|CBF86736.1 anig|EHA22604.1 aory|EIT75154.1 asyd|OJJ64693.1 atub|OJI86026.1 aver|OJJ98797.1 awen|OJJ31617.1 azon|OJJ47319.1

Group6389: abra|OJJ76642.1 acar|OOF99354.1 afis|EAW19003.1 afla|EED53118.1 afum|EAL93737.1 agla|OJJ85231.1 akaw|GAA92816.1 aluc|OJZ91567.1 anid|CBF83913.1 anig|EHA22596.1 asyd|OJJ55494.1 ater|EAU37794.1 atub|OJI86017.1 aver|OJJ06572.1 awen|OJJ31632.1 azon|OJJ47332.1

Group6390: abra|OJJ76651.1 acar|OOF99351.1 afis|EAW19013.1 afla|EED53115.1 afum|EAL93747.2 agla|OJJ81764.1 akaw|GAA92991.1 aluc|OJZ91556.1 anid|CBF86756.1 anig|EHA22590.1 aory|EIT74783.1 asyd|OJJ64709.1 ater|EAU37788.1 atub|OJI86008.1 aver|OJJ98811.1 awen|OJJ31650.1

Group6391: abra|OJJ76661.1 acar|OOF99342.1 acla|EAW11020.1 afis|EAW20833.1 afla|EED50430.1 afum|EAL84799.1 agla|OJJ80142.1 akaw|GAA93002.1 aluc|OJZ91541.1 anig|EHA22578.1 aory|EIT81448.1 atub|OJI85995.1 awen|OJJ36031.1 azon|OJJ45265.1 afla|EED52050.1 aory|EIT82047.1

Group6392: abra|OJJ76759.1 acar|OOF91254.1 acla|EAW13313.1 afis|EAW20427.1 afum|EBA27200.1 agla|OJJ84898.1 akaw|GAA87267.1 aluc|OJZ84162.1 anid|CBF79336.1 anig|EHA27523.1 asyd|OJJ55789.1 ater|EAU37730.1 atub|OJI89922.1 aver|OJJ06879.1 awen|OJJ33120.1 azon|OJJ46336.1

Group6393: abra|OJJ76775.1 acar|OOF91272.1 acla|EAW13334.1 afis|EAW20449.1 afla|EED44819.1 agla|OJJ84873.1 akaw|GAA87249.1 aluc|OJZ84179.1 anid|CBF79299.1 anig|EHA27539.1 asyd|OJJ55774.1 ater|EAU37710.1 atub|OJI89904.1 aver|OJJ06861.1 awen|OJJ33139.1 azon|OJJ46350.1

Group6394: abra|OJJ76778.1 acar|OOF91274.1 acla|EAW13337.1 afis|EAW20452.1 afum|EAL84601.1 agla|OJJ84870.1 akaw|GAA87246.1 aluc|OJZ84182.1 anid|CBF79303.1 anig|EHA27542.1 asyd|OJJ55771.1 ater|EAU37707.1 atub|OJI89901.1 aver|OJJ06857.1 awen|OJJ33142.1 azon|OJJ46353.1

Group6395: abra|OJJ76785.1 acar|OOF91278.1 acla|EAW13343.1 afis|EAW20458.1 afum|EBA27195.1 agla|OJJ84861.1 akaw|GAA87240.1 aluc|OJZ84188.1 anid|CBF79281.1 anig|EHA27548.1 asyd|OJJ55765.1 ater|EAU37702.1 atub|OJI89895.1 aver|OJJ06851.1 awen|OJJ33150.1 azon|OJJ46360.1

Group6396: abra|OJJ76786.1 acar|OOF91280.1 acla|EAW13344.1 afis|EAW20459.1 afla|EED44809.1 afum|EAL84594.2 agla|OJJ84860.1 akaw|GAA87239.1 anid|CBF79279.1 aory|EIT77712.1 asyd|OJJ55764.1 ater|EAU37701.1 atub|OJI89894.1 aver|OJJ06850.1 awen|OJJ33151.1 azon|OJJ46361.1

Group6397: abra|OJJ76801.1 acar|OOF91295.1 acla|EAW13360.1 afis|EAW20474.1 afum|EBA27193.1 agla|OJJ84844.1 akaw|GAA87222.1 aluc|OJZ84208.1 anid|CBF79264.1 anig|EHA27562.1 asyd|OJJ55755.1 ater|EAU37688.1 atub|OJI89876.1 aver|OJJ06840.1 awen|OJJ33168.1 azon|OJJ46376.1

Group6398: abra|OJJ76803.1 acar|OOF91297.1 acla|EAW13362.1 afis|EAW20476.1 afum|EAL84577.1 agla|OJJ84841.1 akaw|GAA87220.1 aluc|OJZ84210.1 anid|CBF79253.1 anig|EHA27564.1 asyd|OJJ55746.1 ater|EAU29554.1 atub|OJI89873.1 aver|OJJ06833.1 awen|OJJ33171.1 azon|OJJ46378.1

Group6399: abra|OJJ76829.1 acar|OOF91323.1 acla|EAW13390.1 afis|EAW20503.1 afla|EED44746.1 afum|EAL84553.1 agla|OJJ84799.1 akaw|GAA87193.1 aluc|OJZ84241.1 anid|CBF79197.1 aory|EIT77770.1 asyd|OJJ55723.1 atub|OJI89842.1 aver|OJJ06809.1 awen|OJJ33204.1 azon|OJJ46394.1

Group6400: abra|OJJ76920.1 acar|OOF91367.1 akaw|GAA87118.1 aluc|OJZ84320.1 anig|EHA27655.1 atub|OJI89748.1 awen|OJJ33256.1 afis|EAW20100.1 afum|EAL85217.1 ater|EAU39419.1 azon|OJJ45280.1 afla|EED55286.1 aory|EIT83559.1 asyd|OJJ53769.1 aver|OJJ07877.1 awen|OJJ40778.1

Group6401: abra|OJJ76933.1 acar|OOF91382.1 acla|EAW12082.1 afis|EAW19723.1 afla|EED52289.1 afum|EAL86803.1 agla|OJJ79589.1 akaw|GAA87106.1 aluc|OJZ84332.1 anid|CBF78536.1 anig|EHA27666.1 asyd|OJJ65296.1 ater|EAU33142.1 atub|OJI89737.1 aver|OJI99436.1 awen|OJJ31939.1

Group6402: abra|OJJ77065.1 acar|OOF92949.1 acla|EAW13510.1 afis|EAW20608.1 afum|EAL84452.1 agla|OJJ88631.1 akaw|GAA86987.1 aluc|OJZ84473.1 anid|CBF86949.1 anig|EHA27782.1 asyd|OJJ55593.1 ater|EAU35258.1 atub|OJI89605.1 aver|OJJ06672.1 awen|OJJ33451.1 azon|OJJ50708.1

Group6403: abra|OJJ77073.1 acar|OOF96453.1 acla|EAW11108.1 afla|EED48433.1 afum|EAL85153.1 agla|OJJ81759.1 akaw|GAA86980.1 aluc|OJZ84483.1 aory|EIT77054.1 asyd|OJJ62356.1 atub|OJI89597.1 aver|OJI99662.1 awen|OJJ40115.1 awen|OJJ32899.1 afla|EED51078.1 agla|OJJ80487.1

Group6404: abra|OJJ77075.1 acar|OOF92956.1 acla|EAW11000.1 afis|EAW20861.1 afla|EED45445.1 afum|EAL84774.1 agla|OJJ83748.1 akaw|GAA86978.1 aluc|OJZ84485.1 anid|CBF82829.1 anig|EHA27789.1 asyd|OJJ61581.1 ater|EAU30804.1 atub|OJI89595.1 aver|OJJ00903.1 awen|OJJ34509.1

Group6405: abra|OJJ77081.1 acar|OOF92965.1 afis|EAW23835.1 afla|EED51967.1 afum|EAL87266.1 agla|OJJ82499.1 akaw|GAA86972.1 aluc|OJZ84491.1 anid|CBF74533.1 anig|EHA27795.1 aory|EIT81457.1 asyd|OJJ57683.1 atub|OJI89588.1 aver|OJJ05489.1 awen|OJJ33795.1 azon|OJJ48747.1

Group6406: abra|OJJ77140.1 acar|OOF90281.1 acla|EAW12951.1 afis|EAW17726.1 afla|EED45727.1 afum|EAL91541.1 agla|OJJ81725.1 akaw|GAA90789.1 aluc|OJZ84553.1 anid|CBF86581.1 anig|EHA27847.1 aory|EIT75454.1 ater|EAU31880.1 atub|OJI89529.1 awen|OJJ37112.1 azon|OJJ50811.1

Group6407: abra|OJJ77156.1 acar|OOF93043.1 acla|EAW12916.1 afis|EAW17744.1 afla|EED45744.1 afum|EAL91556.1 agla|OJJ81709.1 akaw|GAA90774.1 aluc|OJZ84570.1 anig|EHA27865.1 asyd|OJJ64819.1 ater|EAU31864.1 atub|OJI89512.1 aver|OJI98932.1 awen|OJJ37093.1 azon|OJJ50797.1

Group6408: abra|OJJ77189.1 acar|OOF93075.1 afis|EAW20801.1 afla|EED49544.1 afum|EAL84828.1 akaw|GAA90751.1 aluc|OJZ84597.1 anid|CBF71376.1 anig|EHA27886.1 aory|EIT82575.1 asyd|OJJ55076.1 ater|EAU32871.1 atub|OJI89482.1 aver|OJJ07132.1 awen|OJJ41913.1 azon|OJJ47357.1

Group6409: abra|OJJ77212.1 acar|OOF93100.1 acla|EAW13204.1 afis|EAW17438.1 afla|EED49389.1 agla|OJJ80379.1 akaw|GAA90726.1 aluc|OJZ84623.1 anid|CBF71703.1 aory|EIT79556.1 asyd|OJJ61811.1 ater|EAU33917.1 atub|OJI89458.1 aver|OJI95910.1 awen|OJJ37408.1 azon|OJJ51082.1

Group6410: abra|OJJ77222.1 acar|OOF93107.1 acla|EAW13213.1 afis|EAW17429.1 afum|EAL91257.1 agla|OJJ80389.1 akaw|GAA90717.1 aluc|OJZ84632.1 anid|CBF71714.1 anig|EHA27920.1 asyd|OJJ61805.1 ater|EAU33910.1 atub|OJI89447.1 aver|OJI95904.1 awen|OJJ37414.1 azon|OJJ51088.1

Group6411: abra|OJJ77267.1 acar|OOF93136.1 acla|EAW13261.1 afis|EAW17364.1 afla|EED49803.1 afum|EAL91201.1 akaw|GAA90681.1 aluc|OJZ84674.1 anid|CBF78904.1 anig|EHA27952.1 aory|EIT77591.1 asyd|OJJ64605.1 ater|EAU33870.1 atub|OJI89406.1 aver|OJI98702.1 awen|OJJ38423.1

Group6412: abra|OJJ77269.1 acar|OOF93138.1 afis|EAW17307.1 afla|EED49712.1 agla|OJJ88114.1 akaw|GAA90679.1 aluc|OJZ84676.1 anid|CBF76018.1 anig|EHA27954.1 asyd|OJJ52446.1 ater|EAU34226.1 atub|OJI89404.1 aver|OJJ03970.1 awen|OJJ29857.1 azon|OJJ43039.1 atub|OJI83508.1

Group6413: abra|OJJ77317.1 acar|OOF93193.1 acla|EAW13155.1 afis|EAW17491.1 afla|EED49325.1 afum|EAL91313.1 agla|OJJ81465.1 akaw|GAA91439.1 aluc|OJZ84727.1 anid|CBF71597.1 aory|EIT79496.1 asyd|OJJ61867.1 atub|OJI89355.1 aver|OJI95965.1 awen|OJJ37350.1 azon|OJJ51036.1

Group6414: abra|OJJ77321.1 acar|OOF93197.1 acla|EAW13151.1 afis|EAW17495.1 afum|EAL91317.1 agla|OJJ81461.1 akaw|GAA91435.1 aluc|OJZ84731.1 anid|CBF71587.1 anig|EHA28004.1 asyd|OJJ61871.1 ater|EAU36939.1 atub|OJI89351.1 aver|OJI95969.1 awen|OJJ37346.1 azon|OJJ51032.1

Group6415: abra|OJJ77351.1 acar|OOF95303.1 acla|EAW07415.1 afis|EAW19197.1 afum|EAL93929.2 akaw|GAA91410.1 aluc|OJZ84762.1 anig|EHA28031.1 asyd|OJJ57245.1 ater|EAU35862.1 atub|OJI89322.1 aver|OJJ02853.1 azon|OJJ42365.1 aver|OJJ02229.1 afis|EAW15631.1 asyd|OJJ60061.1

Group6416: abra|OJJ77367.1 acar|OOF93237.1 acla|EAW13109.1 afis|EAW17555.1 afum|EAL91369.1 agla|OJJ81413.1 akaw|GAA91395.1 aluc|OJZ84776.1 anig|EHA28044.1 aory|EIT82194.1 asyd|OJJ61928.1 ater|EAU36979.1 atub|OJI89305.1 aver|OJI96020.1 awen|OJJ37298.1 azon|OJJ50991.1

Group6417: abra|OJJ77396.1 acar|OOF93292.1 afis|EAW17804.1 afla|EED45798.1 afum|EAL91612.1 agla|OJJ80101.1 akaw|GAA91366.1 aluc|OJZ84804.1 anid|CBF86648.1 anig|EHA28069.1 aory|EIT75488.1 asyd|OJJ64800.1 ater|EAU31835.1 atub|OJI89279.1 aver|OJI98914.1 awen|OJJ31649.1

Group6418: abra|OJJ77407.1 acar|OOF93273.1 acla|EAW15350.1 afis|EAW20363.1 afla|EED48150.1 afum|EAL85479.1 akaw|GAA91358.1 aluc|OJZ84814.1 anid|CBF82412.1 anig|EHA28078.1 aory|EIT76248.1 asyd|OJJ54171.1 ater|EAU30296.1 atub|OJI89271.1 aver|OJJ08568.1 awen|OJJ33329.1

Group6419: abra|OJJ77409.1 acar|OOF93276.1 afla|EED54609.1 agla|OJJ87938.1 akaw|GAA91355.1  
aluc|OJZ84817.1 aory|EIT80035.1 atub|OJI89268.1 aver|OJI98815.1 awen|OJJ36312.1 asyd|OJJ64712.1  
aver|OJJ08404.1 ater|EAU39115.1 afla|EED48935.1 awen|OJJ34699.1 asyd|OJJ53341.1

Group6420: abra|OJJ77454.1 acar|OOF99272.1 acla|EAW07123.1 afis|EAW22133.1 afum|EAL91057.2  
agla|OJJ87941.1 akaw|GAA84154.1 aluc|OJZ81075.1 anid|CBF69544.1 anig|EHA19287.1 asyd|OJJ59170.1  
ater|EAU29319.1 atub|OJI82510.1 aver|OJJ01760.1 awen|OJJ34708.1 azon|OJJ45856.1

Group6421: abra|OJJ77505.1 acar|OOF99221.1 acla|EAW06729.1 afis|EAW16282.1 afla|EED53274.1  
afum|EAL88903.1 agla|OJJ88319.1 akaw|GAA84115.1 aluc|OJZ81031.1 anig|EHA19334.1 aory|EIT75058.1  
ater|EAU37326.1 atub|OJI82552.1 aver|OJI98724.1 awen|OJJ37674.1 azon|OJJ44939.1

Group6422: abra|OJJ77506.1 acar|OOF99220.1 acla|EAW06728.1 afis|EAW16281.1 afla|EED53275.1  
afum|EAL88902.1 agla|OJJ88320.1 akaw|GAA84114.1 aluc|OJZ81030.1 anid|CBF86878.1 anig|EHA19335.1  
aory|EIT75011.1 atub|OJI82553.1 aver|OJI98723.1 awen|OJJ37673.1 azon|OJJ44938.1

Group6423: abra|OJJ77537.1 agla|OJJ86263.1 akaw|GAA84083.1 aluc|OJZ80997.1 anig|EHA19363.1  
ater|EAU37470.1 atub|OJI82587.1 awen|OJJ30196.1 acla|EAW06710.1 afis|EAW16258.1 afum|EAL88879.1  
aory|EIT75045.1 asyd|OJJ64599.1 aver|OJI98696.1 azon|OJJ43930.1 anid|CBF78895.1

Group6424: abra|OJJ77538.1 acar|OOF99191.1 afis|EAW16260.1 afla|EED53324.1 afum|EAL88881.1  
agla|OJJ86264.1 akaw|GAA91934.1 aluc|OJZ82688.1 anid|CBF78897.1 anig|EHA19364.1 aory|EIT75144.1  
asyd|OJJ64601.1 ater|EAU33702.1 atub|OJI88920.1 aver|OJI98698.1 awen|OJJ30188.1

Group6425: abra|OJJ77553.1 acar|OOF99174.1 afis|EAW15596.1 afum|EBA27240.1 agla|OJJ81010.1  
akaw|GAA84070.1 aluc|OJZ80984.1 anid|CBF85308.1 anig|EHA19376.1 asyd|OJJ64002.1 atub|OJI82602.1  
aver|OJI98091.1 awen|OJJ30880.1 azon|OJJ44352.1 acla|EAW08801.1 afla|EED54704.1

Group6426: abra|OJJ77583.1 acla|EAW06550.1 afis|EAW16045.1 afla|EED56434.1 afum|EAL88677.1  
akaw|GAA84042.1 aluc|OJZ80951.1 anid|CBF75056.1 anig|EHA19403.1 aory|EIT72842.1 asyd|OJJ60028.1  
ater|EAU33592.1 atub|OJI82632.1 aver|OJJ02256.1 awen|OJJ30401.1 azon|OJJ45409.1

Group6427: abra|OJJ77587.1 acla|EAW06553.1 afis|EAW16042.1 afla|EED56431.1 afum|EAL88674.1  
agla|OJJ86075.1 akaw|GAA84039.1 aluc|OJZ80948.1 anig|EHA19406.1 aory|EIT72832.1 asyd|OJJ60031.1  
ater|EAU33595.1 atub|OJI82635.1 aver|OJJ02253.1 awen|OJJ30404.1 azon|OJJ45412.1

Group6428: abra|OJJ77589.1 acar|OOF99142.1 acla|EAW06555.1 afis|EAW16040.1 afla|EED56429.1  
afum|EAL88672.1 agla|OJJ86071.1 akaw|GAA84037.1 aluc|OJZ80946.1 anid|CBF75048.1 anig|EHA19408.1  
asyd|OJJ60033.1 atub|OJI82637.1 aver|OJJ02251.1 awen|OJJ30406.1 azon|OJJ45414.1

Group6429: abra|OJJ77628.1 acar|OOF99096.1 afis|EAW22624.1 afla|EED53780.1 afum|EAL90572.1  
agla|OJJ86605.1 akaw|GAA84006.1 aluc|OJZ80902.1 anid|CBF84273.1 anig|EHA19437.1 aory|EIT78403.1  
asyd|OJJ57224.1 ater|EAU30257.1 atub|OJI82677.1 aver|OJJ03063.1 awen|OJJ35803.1

Group6430: abra|OJJ77633.1 acar|OOF99101.1 acla|EAW06485.1 afis|EAW15980.1 afla|EED56350.1  
afum|EAL88612.1 agla|OJJ85983.1 akaw|GAA84000.1 aluc|OJZ80896.1 anid|CBF85805.1 anig|EHA19443.1  
asyd|OJJ64335.1 atub|OJI82682.1 aver|OJI98428.1 awen|OJJ30490.1 azon|OJJ45481.1

Group6431: abra|OJJ77723.1 acar|OOF99017.1 acla|EAW11323.1 afis|EAW18172.1 afla|EED56320.1  
afum|EAL87534.1 agla|OJJ85934.1 akaw|GAA83912.1 aluc|OJZ90785.1 anid|CBF85741.1 anig|EHA19518.1  
aory|EIT73350.1 ater|EAU33832.1 atub|OJI82772.1 awen|OJJ30519.1 azon|OJJ50200.1

Group6432: abra|OJJ77820.1 acar|OOF98948.1 afis|EAW18198.1 afla|EED56280.1 afum|EAL87563.1  
akaw|GAA83826.1 aluc|OJZ90892.1 anid|CBF73614.1 anig|EHA19611.1 aory|EIT73308.1 asyd|OJJ61700.1  
atub|OJI82886.1 aver|OJI95786.1 awen|OJJ30566.1 azon|OJJ42707.1 acar|OOF97585.1

Group6433: abra|OJJ77825.1 acar|OOF98943.1 acla|EAW11300.1 afis|EAW18202.1 afla|EED56276.1  
afum|EAL87567.1 agla|OJJ85880.1 akaw|GAA83821.1 aluc|OJZ90899.1 anid|CBF86120.1 asyd|OJJ64495.1  
ater|EAU33792.1 atub|OJI82892.1 aver|OJI98597.1 awen|OJJ30570.1 azon|OJJ45502.1

Group6434: abra|OJJ77836.1 acar|OOF98935.1 acla|EAW11287.1 afis|EAW18212.1 afla|EED56259.1  
afum|EAL87578.1 agla|OJJ85870.1 akaw|GAA83811.1 aluc|OJZ90910.1 anid|CBF86142.1 anig|EHA19625.1  
aory|EIT73408.1 asyd|OJJ64508.1 atub|OJI82903.1 awen|OJJ30590.1 azon|OJJ50186.1

Group6435: abra|OJJ77837.1 acar|OOF98934.1 afis|EAW18214.1 afla|EED56257.1 agla|OJJ85868.1  
akaw|GAA83810.1 anig|EHA19626.1 aory|EIT73324.1 asyd|OJJ64509.1 ater|EAU33775.1 atub|OJI82904.1  
aver|OJI98607.1 awen|OJJ30592.1 acla|EAW11285.1 afum|EAL87580.1 aluc|OJZ90911.1

Group6436: abra|OJJ77860.1 acar|OOF98913.1 acla|EAW11266.1 afis|EAW18232.1 afla|EED56234.1  
afum|EAL87600.1 agla|OJJ85848.1 akaw|GAA83789.1 aluc|OJZ90934.1 anid|CBF86178.1 anig|EHA19644.1  
asyd|OJJ64528.1 ater|EAU33754.1 atub|OJI82926.1 aver|OJI98626.1 awen|OJJ30612.1



Group6437: azon|OJJ48004.1 abra|OJJ77861.1 acla|EAW11265.1 afis|EAW18233.1 afla|EED56233.1 afum|EAL87601.2 agla|OJJ85849.1 akaw|GAA83788.1 aluc|OJZ90936.1 anid|CBF86180.1 aory|EIT73454.1 ater|EAU33753.1 atub|OJI82927.1 awen|OJJ30613.1 asyd|OJJ64529.1 aver|OJI98627.1

Group6438: abra|OJJ77894.1 acla|EAW10030.1 afis|EAW18250.1 afla|EED56211.1 afum|EAL87615.1 agla|OJJ85820.1 akaw|GAA83766.1 aluc|OJZ90964.1 anid|CBF86201.1 anig|EHA19668.1 aory|EIT73417.1 asyd|OJJ64543.1 atub|OJI82955.1 aver|OJI98639.1 awen|OJJ30626.1 azon|OJJ47992.1

Group6439: abra|OJJ77899.1 acar|OOF98885.1 acla|EAW11250.1 afis|EAW18247.1 afla|EED56219.1 afum|EAL87612.1 agla|OJJ85823.1 akaw|GAA83763.1 anid|CBF86196.1 aory|EIT73320.1 asyd|OJJ64540.1 ater|EAU33740.1 atub|OJI82959.1 aver|OJI98636.1 awen|OJJ30622.1 azon|OJJ47995.1

Group6440: abra|OJJ77911.1 acla|EAW06519.1 afis|EAW16237.1 afla|EED53343.1 afum|EAL88858.1 agla|OJJ86238.1 akaw|GAA83748.1 aluc|OJZ90983.1 anid|CBF81925.1 anig|EHA19688.1 asyd|OJJ57424.1 atub|OJI82974.1 aver|OJJ05753.1 awen|OJJ30223.1 azon|OJJ43943.1 ater|EAU37269.1

Group6441: abra|OJJ77920.1 acla|EAW06688.1 afis|EAW16077.1 afla|EED48597.1 afum|EAL88709.1 agla|OJJ86110.1 akaw|GAA83743.1 aluc|OJZ90988.1 anid|CBF75117.1 aory|EIT73124.1 asyd|OJJ59994.1 ater|EAU33143.1 atub|OJI82979.1 aver|OJJ02297.1 awen|OJJ30356.1 azon|OJJ45378.1

Group6442: abra|OJJ77925.1 afla|EED48702.1 akaw|GAA83739.1 aluc|OJZ90992.1 anid|CBF75954.1 anig|EHA19700.1 aory|EIT73185.1 asyd|OJJ59612.1 atub|OJI82983.1 aver|OJJ02657.1 awen|OJJ32885.1 azon|OJJ46805.1 acar|OOG00945.1 anid|CBF78736.1 asyd|OJJ59810.1 aver|OJJ02478.1

Group6443: abra|OJJ77997.1 acar|OOF98826.1 acla|EAW06651.1 afis|EAW16114.1 afla|EED48654.1 akaw|GAA85983.1 aluc|OJZ91073.1 anid|CBF85499.1 anig|EHA19776.1 aory|EIT73269.1 asyd|OJJ64117.1 ater|EAU33197.1 atub|OJI83068.1 aver|OJI98200.1 awen|OJJ30316.1 azon|OJJ45334.1

Group6444: abra|OJJ78007.1 acar|OOF98817.1 acla|EAW06643.1 afis|EAW16122.1 afla|EED48662.1 agla|OJJ86163.1 akaw|GAA85976.1 aluc|OJZ91083.1 anid|CBF73662.1 anig|EHA19784.1 asyd|OJJ56669.1 ater|EAU33205.1 atub|OJI83079.1 aver|OJJ06053.1 awen|OJJ30308.1 azon|OJJ45311.1

Group6445: abra|OJJ78020.1 acar|OOF98804.1 acla|EAW06628.1 afis|EAW16137.1 afla|EED48677.1 afum|EBA27356.1 agla|OJJ86182.1 aluc|OJZ91095.1 anid|CBF85511.1 anig|EHA19796.1 aory|EIT73251.1 asyd|OJJ64122.1 atub|OJI83093.1 aver|OJI98205.1 awen|OJJ30291.1 azon|OJJ43980.1

Group6446: abra|OJJ78084.1 acar|OOF98782.1 afis|EAW16178.1 afla|EED48695.1 afum|EAL88811.1 agla|OJJ86212.1 akaw|GAA85908.1 aluc|OJZ91158.1 anid|CBF79572.1 anig|EHA19854.1 aory|EIT73135.1 asyd|OJJ57911.1 ater|EAU33238.1 atub|OJI83173.1 aver|OJJ04481.1 awen|OJJ30271.1

Group6447: abra|OJJ78107.1 acar|OOF98758.1 afis|EAW16214.1 afla|EED48708.1 afum|EAL88841.1 agla|OJJ86221.1 akaw|GAA85899.1 aluc|OJZ91172.1 anid|CBF86724.1 anig|EHA19865.1 aory|EIT73189.1 asyd|OJJ64714.1 ater|EAU33254.1 atub|OJI83186.1 aver|OJI98817.1 awen|OJJ30263.1

Group6448: abra|OJJ78243.1 acar|OOF98617.1 acla|EAW09267.1 afis|EAW21881.1 afla|EED46427.1 afum|EAL92895.1 akaw|GAA85781.1 aluc|OJZ91317.1 anid|CBF80463.1 anig|EHA20000.1 aory|EIT72327.1 asyd|OJJ52555.1 ater|EAU30879.1 atub|OJI83311.1 aver|OJJ03846.1 awen|OJJ34170.1

Group6449: abra|OJJ78251.1 acar|OOF98613.1 acla|EAW09260.1 afis|EAW21887.1 afla|EED46420.1 afum|EAL92901.1 agla|OJJ84246.1 akaw|GAA85776.1 aluc|OJZ91324.1 anid|CBF76796.1 anig|EHA20006.1 aory|EIT72399.1 asyd|OJJ61284.1 atub|OJI83317.1 awen|OJJ34176.1 azon|OJJ43456.1

Group6450: abra|OJJ78269.1 acla|EAW09243.1 afis|EAW21904.1 afla|EED46648.1 afum|EAL92917.1 agla|OJJ84226.1 akaw|GAA85757.1 aluc|OJZ91343.1 anid|CBF76828.1 anig|EHA20023.1 aory|EIT77920.1 asyd|OJJ61300.1 atub|OJI83335.1 aver|OJJ00626.1 awen|OJJ34193.1 azon|OJJ43440.1

Group6451: abra|OJJ78297.1 acar|OOF98570.1 acla|EAW09219.1 afis|EAW21929.1 afla|EED46622.1 agla|OJJ84192.1 akaw|GAA85730.1 aluc|OJZ91371.1 anid|CBF76874.1 anig|EHA20049.1 asyd|OJJ61323.1 ater|EAU30935.1 atub|OJI83364.1 aver|OJJ00648.1 awen|OJJ34219.1 azon|OJJ43415.1

Group6452: abra|OJJ78331.1 acar|OOF98545.1 acla|EAW09196.1 afis|EAW21951.1 afum|EAL92965.1 agla|OJJ84169.1 akaw|GAA85699.1 aluc|OJZ91404.1 anid|CBF84067.1 anig|EHA20081.1 aory|EIT77813.1 asyd|OJJ61350.1 ater|EAU30999.1 atub|OJI83397.1 aver|OJJ00677.1 awen|OJJ34243.1

Group6453: abra|OJJ78348.1 acla|EAW09186.1 afis|EAW21960.1 afla|EED46680.1 afum|EAL92974.1 agla|OJJ84156.1 akaw|GAA85685.1 aluc|OJZ91422.1 anid|CBF84045.1 anig|EHA20093.1 aory|EIT77833.1 asyd|OJJ61358.1 atub|OJI83415.1 aver|OJJ00685.1 awen|OJJ34253.1 azon|OJJ43385.1

Group6454: abra|OJJ78357.1 acla|EAW09177.1 afis|EAW21969.1 afla|EED46691.1 afum|EAL92983.1 agla|OJJ84132.1 akaw|GAA85676.1 aluc|OJZ91432.1 anid|CBF82729.1 anig|EHA20101.1 aory|EIT77810.1 asyd|OJJ61629.1 ater|EAU31089.1 atub|OJI83425.1 awen|OJJ34262.1 azon|OJJ43375.1

Group6455: acar|OOF99242.1 acla|EAW06748.1 afis|EAW16298.1 afla|EED53256.1 afum|EAL88920.1  
agla|OJJ88297.1 akaw|GAA84135.1 aluc|OJZ81053.1 anid|CBF86843.1 anig|EHA19314.1 asyd|OJJ64644.1  
ater|EAU37342.1 atub|OJI82531.1 aver|OJI98744.1 awen|OJJ37697.1 azon|OJJ44958.1

Group6456: acar|OOF99586.1 acla|EAW14080.1 afis|EAW18787.1 afla|EED50746.1 afum|EAL93520.1  
agla|OJJ80517.1 akaw|GAA82261.1 aluc|OJZ91879.1 anid|CBF69758.1 anig|EHA22857.1 asyd|OJJ58944.1  
ater|EAU37919.1 atub|OJI86330.1 aver|OJJ01540.1 awen|OJJ32361.1 azon|OJJ47124.1

Group6457: acar|OOF99738.1 acla|EAW13928.1 afis|EAW18639.1 afla|EED52701.1 afum|EBA27489.1  
agla|OJJ82435.1 akaw|GAA82151.1 aluc|OJZ92017.1 anid|CBF70451.1 aory|EIT74270.1 asyd|OJJ58605.1  
ater|EAU38272.1 atub|OJI86452.1 aver|OJJ01209.1 awen|OJJ32107.1 azon|OJJ46688.1

Group6458: acar|OOG01106.1 acla|EAW07850.1 afis|EAW22886.1 afla|EED50173.1 afum|EAL90312.1  
agla|OJJ83437.1 akaw|GAA89582.1 aluc|OJZ88065.1 anid|CBF87800.1 anig|EHA17838.1 aory|EIT72281.1  
asyd|OJJ63381.1 ater|EAU35979.1 aver|OJI97554.1 awen|OJJ38836.1 azon|OJJ49633.1

Group6459: acla|EAW06283.1 afis|EAW18389.1 afla|EED53018.1 afum|EAL93064.1 agla|OJJ84952.1  
akaw|GAA86349.1 aluc|OJZ84876.1 anid|CBF70774.1 aory|EIT77404.1 asyd|OJJ58426.1 ater|EAU32262.1  
atub|OJI80722.1 aver|OJJ01027.1 awen|OJJ31762.1 azon|OJJ50462.1 azon|OJJ50463.1

Group6460: acla|EAW12582.1 afis|EAW24066.1 afla|EED51408.1 afum|EAL91921.1 agla|OJJ87348.1  
akaw|GAA89808.1 aluc|OJZ81883.1 anid|CBF86455.1 anig|EHA22357.1 aory|EIT80581.1 asyd|OJJ64916.1  
ater|EAU30489.1 atub|OJI84436.1 aver|OJI99036.1 awen|OJJ41423.1 azon|OJJ48888.1

Group6461: acla|EAW13089.1 afis|EAW17575.1 afla|EED49246.1 afum|EAL91388.1 agla|OJJ81382.1  
akaw|GAA83238.1 aluc|OJZ83737.1 anid|CBF90248.1 anig|EHA18886.1 aory|EIT82188.1 asyd|OJJ61949.1  
ater|EAU37011.1 atub|OJI90115.1 awen|OJJ37272.1 azon|OJJ50972.1 agla|OJJ81383.1

Group6462: abra|OJJ65466.1 abra|OJJ65661.1 abra|OJJ65708.1 akaw|GAA92342.1 akaw|GAA93087.1  
aluc|OJZ79597.1 aluc|OJZ80086.1 aluc|OJZ80127.1 akaw|GAA92648.1 afis|EAW16765.1 asyd|OJJ52281.1  
anig|EHA17694.1 afis|EAW22033.1 afum|EAL87734.1 aluc|OJZ80411.1

Group6463: abra|OJJ66441.1 abra|OJJ73349.1 acar|OOF91488.1 acar|OOG00561.1 aver|OJJ00756.1  
aver|OJJ01680.1 acla|EAW08966.1 afla|EED56166.1 agla|OJJ89199.1 aluc|OJZ88690.1 anig|EHA18371.1  
aory|EIT76753.1 asyd|OJJ59090.1 atub|OJI91270.1 ater|EAU31722.1

Group6464: abra|OJJ68104.1 abra|OJJ72188.1 akaw|GAA84745.1 akaw|GAA86888.1 aluc|OJZ86939.1  
aluc|OJZ90012.1 atub|OJI83583.1 atub|OJI84795.1 acar|OOF96814.1 afla|EED48887.1 anig|EHA21705.1  
anig|EHA27387.1 aory|EIT81215.1 awen|OJJ34661.1 anid|CBF79549.1

Group6465: abra|OJJ68870.1 abra|OJJ74824.1 afis|EAW17098.1 afla|EED49690.1 afum|EAL86572.1  
akaw|GAA90384.1 aluc|OJZ85847.1 anig|EHA18384.1 aory|EIT80999.1 ater|EAU34158.1 atub|OJI79635.1  
aver|OJJ03074.1 awen|OJJ38320.1 azon|OJJ43674.1 anid|CBF84320.1

Group6466: abra|OJJ69717.1 abra|OJJ74254.1 aluc|OJZ83180.1 aluc|OJZ89878.1 anig|EHA27077.1  
anig|EHA28254.1 atub|OJI84929.1 atub|OJI87757.1 acar|OOF95474.1 afis|EAW17024.1 akaw|GAA86767.1  
akaw|GAA90170.1 anid|CBF76231.1 asyd|OJJ53104.1 aver|OJJ03748.1

Group6467: abra|OJJ71057.1 abra|OJJ75794.1 awen|OJJ29799.1 awen|OJJ30198.1 awen|OJJ33368.1  
awen|OJJ34646.1 acar|OOG00490.1 acla|EAW09127.1 afla|EED46258.1 agla|OJJ88373.1 anig|EHA23324.1  
aory|EIT76517.1 ater|EAU29446.1 atub|OJI85555.1 acla|EAW13548.1

Group6468: acar|OOF90492.1 acar|OOF90500.1 abra|OJJ65600.1 abra|OJJ72519.1 afum|EAL85383.2  
agla|OJJ80044.1 akaw|GAA92639.1 aluc|OJZ90500.1 abra|OJJ77804.1 agla|OJJ87320.1 ater|EAU37954.1  
atub|OJI84682.1 awen|OJJ39106.1 acar|OOF98428.1 agla|OJJ79450.1

Group6469: acar|OOF92285.1 acar|OOF92326.1 abra|OJJ67517.1 acla|EAW06256.1 afis|EAW18363.1  
afla|EED53042.1 afum|EAL93036.1 akaw|GAA86323.1 aluc|OJZ84847.1 anid|CBF70823.1 aory|EIT77435.1  
asyd|OJJ58400.1 ater|EAU32231.1 aver|OJJ01001.1 azon|OJJ50436.1

Group6470: acar|OOF92321.1 acar|OOF92363.1 abra|OJJ67477.1 acla|EAW06295.1 afis|EAW18401.1  
afla|EED53005.1 afum|EAL93079.1 agla|OJJ84972.1 akaw|GAA86361.1 anid|CBF70747.1 aory|EIT77410.1  
ater|EAU29817.1 atub|OJI80710.1 awen|OJJ31748.1 azon|OJJ50506.1

Group6471: acar|OOF93680.1 acar|OOF93766.1 abra|OJJ66665.1 acla|EAW11806.1 afis|EAW19416.1  
afla|EED50372.1 afum|EAL87078.1 akaw|GAA89614.1 aluc|OJZ80782.1 anig|EHA27247.1 aory|EIT83137.1  
ater|EAU34722.1 atub|OJI87634.1 awen|OJJ36813.1 azon|OJJ42988.1

Group6472: acar|OOF93740.1 acar|OOF93830.1 abra|OJJ66745.1 acla|EAW11873.1 afis|EAW19484.1  
afla|EED56700.1 afum|EAL87011.1 agla|OJJ81209.1 akaw|GAA89682.1 aluc|OJZ80703.1 anid|CBF75462.1  
aory|EIT73938.1 ater|EAU34797.1 aver|OJJ02519.1 awen|OJJ36896.1

Group6473: acar|OOF93973.1 acar|OOF94546.1 akaw|GAA91790.1 akaw|GAA92547.1 aluc|OJZ90096.1 aluc|OJZ92810.1 abra|OJJ68400.1 afla|EED51092.1 anig|EHA20980.1 anig|EHA26198.1 aory|EIT81996.1 atub|OJI84710.1 atub|OJI87267.1 abra|OJJ75251.1 azon|OJJ42265.1

Group6474: acar|OOF94044.1 acar|OOF94114.1 abra|OJJ66397.1 acla|EAW13678.1 afis|EAW19927.1 afum|EAL84982.2 akaw|GAA90265.1 aluc|OJZ83076.1 anid|CBF88380.1 anig|EHA28140.1 asyd|OJJ63736.1 ater|EAU32192.1 atub|OJI87870.1 aver|OJI97204.1 awen|OJJ32244.1

Group6475: acar|OOF95659.1 acar|OOF95710.1 abra|OJJ74700.1 acla|EAW10699.1 afis|EAW24871.1 afla|EED47111.1 afum|EAL89521.1 agla|OJJ82092.1 akaw|GAA81918.1 aluc|OJZ92278.1 anid|CBF75796.1 anig|EHA26686.1 aory|EIT79276.1 atub|OJI86711.1 awen|OJJ40462.1

Group6476: acar|OOF96225.1 acar|OOF96263.1 abra|OJJ71510.1 acla|EAW15068.1 afis|EAW20040.1 afla|EED45340.1 afum|EAL85160.1 agla|OJJ88923.1 aluc|OJZ86248.1 anid|CBF84780.1 anig|EHA21616.1 asyd|OJJ63235.1 atub|OJI84294.1 aver|OJI97721.1 awen|OJJ31795.1

Group6477: acar|OOF96230.1 acar|OOF96268.1 abra|OJJ71514.1 acla|EAW15071.1 afis|EAW20043.1 afum|EAL85163.1 agla|OJJ88919.1 akaw|GAA89402.1 aluc|OJZ86252.1 anid|CBF84788.1 anig|EHA21613.1 asyd|OJJ63231.1 aver|OJI97725.1 awen|OJJ31799.1 azon|OJJ46320.1

Group6478: acar|OOF96238.1 acar|OOF96275.1 abra|OJJ71522.1 acla|EAW15079.1 afis|EAW20051.1 afla|EED45329.1 agla|OJJ88909.1 akaw|GAA89395.1 aluc|OJZ86261.1 anid|CBF84804.1 asyd|OJJ63223.1 atub|OJI84282.1 aver|OJI97732.1 awen|OJJ31809.1 azon|OJJ46313.1

Group6479: acar|OOF96258.1 acar|OOF96297.1 abra|OJJ71553.1 acla|EAW15107.1 afum|EAL85197.1 agla|OJJ88881.1 akaw|GAA89369.1 aluc|OJZ86291.1 anid|CBF84860.1 anig|EHA21580.1 asyd|OJJ63196.1 atub|OJI84247.1 aver|OJI97759.1 awen|OJJ31838.1 azon|OJJ46285.1

Group6480: acar|OOF96904.1 acar|OOF96939.1 abra|OJJ70806.1 acla|EAW11118.1 afis|EAW15848.1 afum|EAL88484.1 agla|OJJ87261.1 aluc|OJZ84152.1 anid|CBF81168.1 anig|EHA19256.1 asyd|OJJ59288.1 atub|OJI90524.1 aver|OJJ02987.1 awen|OJJ36780.1 azon|OJJ43019.1

Group6481: acar|OOF96907.1 acar|OOF96941.1 abra|OJJ70804.1 acla|EAW11120.1 afum|EAL88485.1 agla|OJJ87259.1 aluc|OJZ84150.1 anid|CBF81172.1 anig|EHA19254.1 aory|EIT72856.1 asyd|OJJ59290.1 atub|OJI90522.1 aver|OJJ02985.1 awen|OJJ36778.1 azon|OJJ47420.1

Group6482: acar|OOG00256.1 acar|OOG01224.1 abra|OJJ67533.1 afis|EAW16788.1 afla|EED52192.1 afum|EAL86358.1 agla|OJJ84235.1 akaw|GAA88125.1 aluc|OJZ81398.1 anig|EHA18690.1 aory|EIT74382.1 ater|EAU37169.1 atub|OJI91603.1 aver|OJJ05093.1 awen|OJJ31292.1

Group6483: afla|EED46070.1 afla|EED48411.1 agla|OJJ79282.1 agla|OJJ86339.1 aory|EIT83061.1 aory|EIT83495.1 ater|EAU32179.1 ater|EAU38631.1 awen|OJJ36035.1 awen|OJJ38326.1 afis|EAW20219.1 afum|EAL85334.1 anid|CBF82403.1 asyd|OJJ54162.1 aver|OJJ08586.1

Group6484: afla|EED46467.1 afla|EED50409.1 abra|OJJ68297.1 acar|OOF97564.1 acla|EAW08963.1 afis|EAW15444.1 afum|EAL84203.1 akaw|GAA83176.1 aluc|OJZ83675.1 anig|EHA18831.1 aory|EIT72404.1 atub|OJI90046.1 awen|OJJ37059.1 azon|OJJ50216.1 aory|EIT82156.1

Group6485: afla|EED49603.1 ater|EAU30205.1 awen|OJJ41173.1 abra|OJJ68053.1 afis|EAW20390.1 akaw|GAA90902.1 aluc|OJZ82924.1 anig|EHA21347.1 atub|OJI89153.1 afis|EAW20394.1 atub|OJI84686.1 agla|OJJ84018.1 anid|CBF76038.1 asyd|OJJ52457.1 aver|OJJ03956.1

Group6486: afla|EED52142.1 afla|EED54470.1 akaw|GAA85879.1 akaw|GAA91949.1 aory|EIT74353.1 aory|EIT81140.1 awen|OJJ31330.1 awen|OJJ35028.1 abra|OJJ78128.1 afis|EAW17305.1 agla|OJJ82856.1 aluc|OJZ91190.1 anig|EHA19886.1 ater|EAU30276.1 atub|OJI83209.1

Group6487: agla|OJJ78553.1 agla|OJJ79588.1 aory|EIT75808.1 aory|EIT77002.1 abra|OJJ69870.1 acar|OOF90338.1 afla|EED50977.1 akaw|GAA87786.1 aluc|OJZ85421.1 anig|EHA25600.1 atub|OJI80154.1 awen|OJJ34596.1 asyd|OJJ52487.1 afla|EED45617.1 aver|OJJ03917.1

Group6488: agla|OJJ80656.1 agla|OJJ88730.1 abra|OJJ76929.1 acar|OOF91375.1 afis|EAW20552.1 afla|EED52399.1 afum|EBA27185.1 akaw|GAA87111.1 aluc|OJZ84327.1 anid|CBF78979.1 aory|EIT83293.1 asyd|OJJ55676.1 atub|OJI89741.1 aver|OJJ06759.1 azon|OJJ50639.1

Group6489: agla|OJJ86274.1 agla|OJJ86315.1 abra|OJJ66362.1 acar|OOF91802.1 acla|EAW09126.1 afis|EAW19349.1 afla|EED54384.1 afum|EAL94069.1 akaw|GAA90235.1 aluc|OJZ83106.1 anig|EHA28169.1 aory|EIT75885.1 ater|EAU34937.1 atub|OJI87828.1 awen|OJJ41007.1

Group6490: agla|OJJ87321.1 agla|OJJ88357.1 ater|EAU31741.1 ater|EAU34065.1 abra|OJJ67564.1 acar|OOG00282.1 afla|EED46126.1 akaw|GAA88101.1 aluc|OJZ81368.1 anig|EHA18667.1 aory|EIT76425.1 asyd|OJJ62818.1 atub|OJI91573.1 aver|OJI96862.1 awen|OJJ32677.1

Group6491: akaw|GAA86876.1 akaw|GAA91587.1 aluc|OJZ82410.1 aluc|OJZ90000.1 abra|OJJ68091.1 acar|OOF94969.1 anig|EHA27375.1 asyd|OJJ56861.1 ater|EAU37871.1 atub|OJI84808.1 aver|OJJ01691.1 afla|EED47244.1 anid|CBF77165.1 atub|OJI88031.1 asyd|OJJ59100.1

Group6492: akaw|GAA89006.1 akaw|GAA92332.1 akaw|GAA93318.1 akaw|GAA93178.1 aluc|OJZ79789.1 aluc|OJZ80052.1 aluc|OJZ80373.1 aluc|OJZ80417.1 aluc|OJZ80292.1 acla|EAW11465.1 agla|OJJ88685.1 anig|EHA17704.1 ater|EAU30126.1 agla|OJJ78803.1 akaw|GAA93248.1

Group6493: akaw|GAA91886.1 akaw|GAA92573.1 aluc|OJZ79607.1 aluc|OJZ82011.1 aluc|OJZ82584.1 anig|EHA22246.1 anig|EHA27489.1 azon|OJJ42325.1 azon|OJJ43504.1 azon|OJJ47559.1 abra|OJJ67879.1 acar|OOF92855.1 agla|OJJ81435.1 atub|OJI84560.1 awen|OJJ39344.1

Group6494: anig|EHA20955.1 ater|EAU32742.1 aver|OJJ08257.1 awen|OJJ32580.1 aluc|OJZ92195.1 acar|OOF93601.1 awen|OJJ33281.1 afis|EAW19749.1 afis|EAW17510.1 afla|EED47902.1 akaw|GAA81994.1 aory|EIT77215.1 asyd|OJJ61760.1 atub|OJI87954.1 afum|EAL85149.1

Group6495: anig|EHA21432.1 anig|EHA24295.1 abra|OJJ70060.1 agla|OJJ82971.1 anid|CBF88858.1 asyd|OJJ58687.1 ater|EAU39309.1 aver|OJJ01298.1 azon|OJJ43584.1 abra|OJJ71728.1 akaw|GAA85165.1 aluc|OJZ86471.1 atub|OJI84058.1 awen|OJJ36417.1 asyd|OJJ52531.1

Group6496: anig|EHA22579.1 anig|EHA26969.1 aver|OJI95836.1 aver|OJJ07608.1 acla|EAW07588.1 afis|EAW24582.1 afum|EAL91344.1 agla|OJJ84347.1 akaw|GAA93001.1 aluc|OJZ91542.1 anid|CBF71545.1 asyd|OJJ61739.1 ater|EAU37849.1 atub|OJI85996.1 azon|OJJ42379.1

Group6497: asyd|OJJ51930.1 asyd|OJJ54851.1 asyd|OJJ59010.1 aver|OJJ01605.1 aver|OJJ01789.1 abra|OJJ77438.1 acla|EAW13587.1 afis|EAW20015.1 afum|EAL84903.1 anid|CBF82909.1 anig|EHA26145.1 aory|EIT80686.1 ater|EAU29375.1 awen|OJJ30140.1 afla|EED51517.1

Group6498: asyd|OJJ55952.1 asyd|OJJ56682.1 abra|OJJ66112.1 acar|OOF94007.1 afis|EAW20771.1 afla|EED51742.1 afum|EAL84848.1 akaw|GAA92676.1 aluc|OJZ90131.1 anid|CBF78155.1 anig|EHA20940.1 aory|EIT80531.1 ater|EAU30761.1 atub|OJI84665.1 aver|OJJ04898.1

Group6499: asyd|OJJ58820.1 asyd|OJJ65390.1 abra|OJJ76257.1 acar|OOF99502.1 afla|EED50967.1 agla|OJJ85266.1 akaw|GAA82191.1 aluc|OJZ91969.1 anid|CBF70114.1 anig|EHA22921.1 aory|EIT76962.1 ater|EAU39425.1 atub|OJI86408.1 aver|OJJ01424.1 awen|OJJ31537.1

Group6500: aver|OJJ07741.1 aver|OJJ07747.1 abra|OJJ75456.1 acar|OOF90801.1 acla|EAW14623.1 afla|EED51516.1 afum|EAL91245.1 akaw|GAA84231.1 aluc|OJZ88912.1 anid|CBF78441.1 anig|EHA23598.1 aory|EIT80439.1 ater|EAU30772.1 atub|OJI85879.1 awen|OJJ35595.1

Group6501: awen|OJJ30745.1 awen|OJJ31736.1 abra|OJJ67463.1 acar|OOF92369.1 acla|EAW06305.1 afis|EAW18414.1 afla|EED52995.1 afum|EAL93095.1 aluc|OJZ84902.1 anid|CBF70732.1 aory|EIT77392.1 asyd|OJJ58444.1 atub|OJI80696.1 aver|OJJ01044.1 azon|OJJ50495.1

Group6502: awen|OJJ30746.1 awen|OJJ31735.1 abra|OJJ67462.1 acar|OOF92370.1 acla|EAW06306.1 afis|EAW18415.1 afla|EED52994.1 afum|EAL93097.1 akaw|GAA86373.1 aluc|OJZ84903.1 anig|EHA25128.1 ater|EAU29829.1 atub|OJI80695.1 agla|OJJ84981.1 aory|EIT77412.1

Group6503: awen|OJJ30780.1 awen|OJJ31701.1 abra|OJJ74544.1 acar|OOF95214.1 afis|EAW18924.1 afum|EBA27499.1 agla|OJJ86350.1 akaw|GAA82054.1 aluc|OJZ92126.1 anig|EHA26822.1 aory|EIT79041.1 atub|OJI86558.1 agla|OJJ85251.1 afla|EED50911.1 ater|EAU38099.1

Group6504: awen|OJJ32533.1 awen|OJJ36341.1 abra|OJJ65873.1 acar|OOF92851.1 acla|EAW08930.1 afla|EED51543.1 akaw|GAA92671.1 aluc|OJZ90126.1 anig|EHA20945.1 aory|EIT80758.1 ater|EAU31302.1 atub|OJI84670.1 azon|OJJ42135.1 acla|EAW09998.1 ater|EAU36341.1

Group6505: awen|OJJ33603.1 awen|OJJ38321.1 abra|OJJ65909.1 acar|OOF90094.1 afis|EAW16174.1 afum|EAL88806.1 akaw|GAA92323.1 aluc|OJZ90221.1 anid|CBF70181.1 anig|EHA23719.1 ater|EAU32517.1 atub|OJI81653.1 aver|OJJ03072.1 afla|EED53604.1 aory|EIT75012.1

Group6506: awen|OJJ36041.1 awen|OJJ37946.1 abra|OJJ74165.1 acar|OOF95557.1 afla|EED49699.1 agla|OJJ88220.1 akaw|GAA86851.1 aluc|OJZ89971.1 anid|CBF82398.1 anig|EHA27169.1 aory|EIT77647.1 asyd|OJJ54159.1 ater|EAU34030.1 atub|OJI84836.1 aver|OJJ08583.1

Group6507: awen|OJJ36383.1 awen|OJJ37566.1 abra|OJJ69745.1 acar|OOF94177.1 acla|EAW09984.1 afis|EAW20374.1 afla|EED51712.1 afum|EAL85488.1 agla|OJJ79481.1 akaw|GAA90197.1 aluc|OJZ83151.1 anig|EHA28217.1 aory|EIT80472.1 ater|EAU36791.1 atub|OJI87786.1

Group6508: azon|OJJ43178.1 azon|OJJ45073.1 azon|OJJ50086.1 azon|OJJ48050.1 azon|OJJ45124.1 anid|CBF87498.1 afla|EED47862.1 aory|EIT77241.1 asyd|OJJ52968.1 aver|OJJ08934.1 awen|OJJ36411.1 aluc|OJZ87024.1 atub|OJI83494.1 ater|EAU34445.1 aver|OJI98277.1

Group6509: azon|OJJ43505.1 azon|OJJ43545.1 acar|OOF90108.1 acla|EAW11253.1 afis|EAW18244.1  
afla|EED55184.1 anid|CBF84910.1 aory|EIT81586.1 asyd|OJJ52868.1 aver|OJJ01275.1 afum|EAL87609.1  
anid|CBF85151.1 asyd|OJJ65141.1 aver|OJJ08849.1 asyd|OJJ58666.1

Group6510: azon|OJJ45159.1 azon|OJJ47882.1 abra|OJJ71798.1 acar|OOF96478.1 afis|EAW18326.1  
afla|EED51024.1 afum|EAL87692.1 agla|OJJ87481.1 akaw|GAA85112.1 aluc|OJZ86528.1 anig|EHA22118.1  
aory|EIT77030.1 ater|EAU33335.1 atub|OJI83993.1 awen|OJJ36577.1

Group6511: abra|OJJ65517.1 afla|EED56699.1 abra|OJJ66119.1 acar|OOF94011.1 afis|EAW22074.1  
afum|EAL91096.1 akaw|GAA92681.1 aluc|OJZ90136.1 anid|CBF82786.1 anig|EHA20930.1 asyd|OJJ57365.1  
ater|EAU30144.1 atub|OJI84660.1 aver|OJJ05802.1 azon|OJJ47362.1

Group6512: abra|OJJ65776.1 akaw|GAA90886.1 aluc|OJZ82945.1 anig|EHA21363.1 atub|OJI89177.1  
abra|OJJ66450.1 afis|EAW15392.1 anid|CBF76217.1 abra|OJJ72699.1 afla|EED45915.1 agla|OJJ79095.1  
aory|EIT75728.1 asyd|OJJ54672.1 aver|OJJ07498.1 awen|OJJ30437.1

Group6513: abra|OJJ65905.1 acar|OOF90096.1 afis|EAW24555.1 afla|EED53606.1 afum|EAL89025.2  
agla|OJJ88982.1 akaw|GAA92326.1 aluc|OJZ90224.1 anid|CBF86676.1 anig|EHA23725.1 aory|EIT75186.1  
ater|EAU29646.1 atub|OJI81657.1 aver|OJJ01776.1 aver|OJJ03073.1

Group6514: abra|OJJ65923.1 acar|OOF94984.1 afis|EAW21278.1 afla|EED53912.1 afum|EAL92293.2  
agla|OJJ79460.1 akaw|GAA92310.1 aluc|OJZ90208.1 anig|EHA23705.1 aory|EIT78500.1 ater|EAU32848.1  
atub|OJI81638.1 awen|OJJ41848.1 agla|OJJ82035.1 ater|EAU31598.1

Group6515: abra|OJJ65973.1 acar|OOF92899.1 afis|EAW20010.1 afla|EED46016.1 afum|EAL84908.1  
agla|OJJ87975.1 akaw|GAA90847.1 aluc|OJZ82986.1 anid|CBF84711.1 anig|EHA21400.1 asyd|OJJ53324.1  
ater|EAU36307.1 atub|OJI89220.1 aver|OJJ08419.1 awen|OJJ30023.1

Group6516: abra|OJJ66055.1 acla|EAW09050.1 afla|EED54364.1 agla|OJJ85926.1 akaw|GAA93125.1  
aluc|OJZ81109.1 anid|CBF80067.1 anig|EHA19260.1 aory|EIT75951.1 asyd|OJJ52547.1 ater|EAU29733.1  
atub|OJI82470.1 aver|OJJ03857.1 awen|OJJ35036.1 awen|OJJ41945.1

Group6517: abra|OJJ66076.1 acar|OOF99298.1 afis|EAW19550.1 afum|EAL86959.1 akaw|GAA84170.1  
aluc|OJZ81095.1 anig|EHA19276.1 ater|EAU31596.1 atub|OJI82487.1 abra|OJJ74744.1 afla|EED45803.1  
agla|OJJ84420.1 anig|EHA26644.1 aory|EIT75509.1 awen|OJJ37997.1

Group6518: abra|OJJ66152.1 aory|EIT75964.1 ater|EAU35158.1 abra|OJJ69079.1 acar|OOF91212.1  
afis|EAW15681.1 afum|EAL85667.1 akaw|GAA90608.1 aluc|OJZ86067.1 anig|EHA24547.1 asyd|OJJ59217.1  
ater|EAU32481.1 atub|OJI79863.1 aver|OJJ01827.1 awen|OJJ38371.1

Group6519: abra|OJJ66216.1 acar|OOF90654.1 afis|EAW17334.1 afla|EED44865.1 afum|EAL91177.1  
agla|OJJ81057.1 akaw|GAA89070.1 aluc|OJZ80522.1 anid|CBF87474.1 anig|EHA25673.1 aory|EIT82732.1  
asyd|OJJ52940.1 atub|OJI88408.1 aver|OJJ08907.1 awen|OJJ35981.1

Group6520: abra|OJJ66232.1 acar|OOF90690.1 afis|EAW19974.1 afla|EED48919.1 agla|OJJ84412.1  
akaw|GAA89057.1 aluc|OJZ80537.1 anig|EHA25658.1 aory|EIT81204.1 asyd|OJJ64302.1 atub|OJI88394.1  
aver|OJI98395.1 awen|OJJ40795.1 azon|OJJ51819.1 agla|OJJ88997.1

Group6521: abra|OJJ66371.1 acar|OOF90878.1 acla|EAW12441.1 afis|EAW16752.1 afum|EAL86324.1  
akaw|GAA90240.1 aluc|OJZ83100.1 anig|EHA28164.1 asyd|OJJ52537.1 ater|EAU35858.1 atub|OJI87835.1  
aver|OJJ03866.1 awen|OJJ40150.1 awen|OJJ36212.1 ater|EAU35156.1

Group6522: abra|OJJ66401.1 acla|EAW11050.1 afis|EAW17509.1 afla|EED49633.1 afum|EAL88818.2  
akaw|GAA90269.1 aluc|OJZ83072.1 anig|EHA28136.1 aory|EIT81977.1 ater|EAU36748.1 atub|OJI87874.1  
azon|OJJ45944.1 aory|EIT80973.1 afis|EAW16187.1 afla|EED55032.1

Group6523: afis|EAW24579.1 acar|OOF93376.1 acla|EAW11104.1 afum|EBA27360.1 agla|OJJ80466.1  
akaw|GAA91092.1 aluc|OJZ87912.1 anid|CBF87522.1 asyd|OJJ54643.1 ater|EAU33006.1 aver|OJJ07515.1  
acla|EAW07585.1 aory|EIT79515.1 ater|EAU37171.1 anid|CBF80610.1

Group6524: abra|OJJ66411.1 afis|EAW19775.1 afla|EED45892.1 afum|EAL85120.1 agla|OJJ89264.1  
akaw|GAA90276.1 aluc|OJZ83065.1 anid|CBF83011.1 anig|EHA28130.1 aory|EIT75647.1 asyd|OJJ56089.1  
ater|EAU36326.1 aver|OJJ05032.1 azon|OJJ48537.1 aory|EIT75470.1

Group6525: abra|OJJ66535.1 acar|OOF90985.1 acla|EAW10956.1 afis|EAW20902.1 afum|EAL84729.2  
agla|OJJ84019.1 akaw|GAA91180.1 aluc|OJZ81523.1 anid|CBF82466.1 anig|EHA25921.1 asyd|OJJ54097.1  
ater|EAU38535.1 atub|OJI88672.1 aver|OJJ08642.1 awen|OJJ34446.1

Group6526: afis|EAW25736.1 agla|OJJ84593.1 awen|OJJ40855.1 agla|OJJ80566.1 acla|EAW07659.1  
afla|EED45769.1 akaw|GAA84843.1 aluc|OJZ86828.1 anig|EHA21809.1 aory|EIT75398.1 asyd|OJJ57996.1  
atub|OJI83690.1 aver|OJJ04406.1 azon|OJJ44444.1 aory|EIT75446.1

Group6527: abra|OJJ66574.1 acar|OOF91015.1 acla|EAW10916.1 afis|EAW20942.1 afum|EAL84692.1  
agla|OJJ83945.1 akaw|GAA91144.1 aluc|OJZ81470.1 anid|CBF82536.1 anig|EHA25957.1 asyd|OJJ54068.1  
atub|OJI88708.1 aver|OJJ08674.1 awen|OJJ34374.1 azon|OJJ48110.1

Group6528: abra|OJJ66631.1 acar|OOF91055.1 acla|EAW10865.1 afis|EAW20993.1 afum|EAL84635.1  
agla|OJJ84071.1 aluc|OJZ81418.1 anid|CBF82613.1 anig|EHA26003.1 asyd|OJJ54016.1 ater|EAU38642.1  
atub|OJI88763.1 aver|OJJ08725.1 awen|OJJ34317.1 azon|OJJ43331.1

Group6529: abra|OJJ66638.1 akaw|GAA89591.1 aluc|OJZ80811.1 anig|EHA27223.1 atub|OJI87659.1  
acla|EAW11781.1 afis|EAW19391.1 afla|EED50349.1 afum|EAL87103.1 agla|OJJ81102.1 anid|CBF74287.1  
ater|EAU36054.1 aver|OJJ05355.1 azon|OJJ43014.1 awen|OJJ36784.1

Group6530: abra|OJJ66670.1 acla|EAW11811.1 afis|EAW19421.1 afla|EED50378.1 afum|EAL87073.1  
agla|OJJ81133.1 akaw|GAA89619.1 aluc|OJZ80777.1 anid|CBF74371.1 anig|EHA27252.1 asyd|OJJ57782.1  
atub|OJI87629.1 aver|OJJ05383.1 awen|OJJ36819.1 azon|OJJ42983.1

Group6531: abra|OJJ66677.1 acla|EAW11816.1 afis|EAW19427.1 afla|EED54172.1 afum|EAL87067.1  
agla|OJJ81139.1 aluc|OJZ80771.1 anid|CBF74380.1 aory|EIT76134.1 asyd|OJJ57776.1 atub|OJI87623.1  
aver|OJJ05389.1 awen|OJJ36825.1 azon|OJJ42978.1 afis|EAW20339.1

Group6532: abra|OJJ66738.1 acar|OOF93824.1 afis|EAW19476.1 afum|EAL87020.1 agla|OJJ81199.1  
akaw|GAA89676.1 aluc|OJZ80710.1 anig|EHA27307.1 ater|EAU34788.1 atub|OJI87568.1 acla|EAW11865.1  
afla|EED56684.1 asyd|OJJ58316.1 aver|OJJ02095.1 awen|OJJ36881.1

Group6533: abra|OJJ66808.1 afla|EED53419.1 agla|OJJ85967.1 anid|CBF75004.1 anig|EHA24972.1  
aory|EIT73383.1 asyd|OJJ57602.1 ater|EAU33737.1 atub|OJI79334.1 aver|OJJ05582.1 awen|OJJ32727.1  
aory|EIT75066.1 afla|EED56295.1 atub|OJI89931.1 aver|OJJ03885.1

Group6534: abra|OJJ66863.1 acar|OOF91639.1 acla|EAW14439.1 afis|EAW19147.1 afla|EED54266.1  
afum|EAL93878.1 agla|OJJ88577.1 akaw|GAA91545.1 aluc|OJZ85720.1 anig|EHA24825.1 asyd|OJJ65003.1  
atub|OJI79509.1 aver|OJI99122.1 awen|OJJ37500.1 azon|OJJ51165.1

Group6535: abra|OJJ66898.1 acar|OOF91670.1 afis|EAW19178.1 afum|EAL93908.1 agla|OJJ88545.1  
akaw|GAA91514.1 aluc|OJZ85684.1 anig|EHA24857.1 aory|EIT75923.1 asyd|OJJ65034.1 ater|EAU37295.1  
atub|OJI79474.1 aver|OJI99153.1 awen|OJJ37532.1 azon|OJJ51198.1

Group6536: abra|OJJ66936.1 acar|OOF91702.1 acla|EAW15006.1 afla|EED47701.1 akaw|GAA91484.1  
aluc|OJZ85646.1 anid|CBF78584.1 anig|EHA24889.1 asyd|OJJ65080.1 ater|EAU37257.1 atub|OJI79437.1  
aver|OJI99205.1 awen|OJJ38054.1 azon|OJJ50617.1 agla|OJJ86875.1

Group6537: abra|OJJ66949.1 acar|OOF91715.1 akaw|GAA91471.1 aluc|OJZ85631.1 anig|EHA24900.1  
atub|OJI79421.1 abra|OJJ68287.1 afla|EED57470.1 akaw|GAA83185.1 aluc|OJZ83684.1 anig|EHA18838.1  
aory|EIT80135.1 ater|EAU37317.1 atub|OJI90055.1 azon|OJJ45779.1

Group6538: abra|OJJ66981.1 acar|OOF93630.1 acla|EAW15027.1 afis|EAW24557.1 afla|EED52331.1  
afum|EAL84825.1 akaw|GAA92183.1 aluc|OJZ85593.1 anid|CBF89361.1 anig|EHA24929.1 aory|EIT74464.1  
asyd|OJJ54577.1 atub|OJI79389.1 aver|OJJ07577.1 afis|EAW20803.1

Group6539: abra|OJJ66982.1 acla|EAW14291.1 afis|EAW24717.1 afla|EED52778.1 agla|OJJ82980.1  
akaw|GAA92182.1 aluc|OJZ85592.1 anid|CBF78277.1 asyd|OJJ52419.1 atub|OJI79388.1 aver|OJJ03364.1  
awen|OJJ40136.1 azon|OJJ47314.1 afis|EAW18992.1 awen|OJJ31614.1

Group6540: abra|OJJ66983.1 acar|OOF93629.1 acla|EAW06325.1 afis|EAW18439.1 afla|EED52974.1  
afum|EAL93121.2 akaw|GAA92181.1 aluc|OJZ85591.1 anid|CBF71469.1 anig|EHA24930.1 aory|EIT78681.1  
asyd|OJJ54946.1 ater|EAU37196.1 atub|OJI79387.1 aver|OJJ07249.1

Group6541: abra|OJJ66984.1 acar|OOF93628.1 afis|EAW15610.1 afla|EED44877.1 afum|EAL85724.1  
agla|OJJ89447.1 akaw|GAA92180.1 aluc|OJZ85590.1 anid|CBF79935.1 anig|EHA24931.1 aory|EIT83254.1  
asyd|OJJ58208.1 atub|OJI79385.1 aver|OJJ02214.1 awen|OJJ35715.1

Group6542: abra|OJJ67004.1 acar|OOF93610.1 acla|EAW12184.1 afis|EAW17119.1 afla|EED48925.1  
afum|EAL86581.1 akaw|GAA92163.1 aluc|OJZ85570.1 anid|CBF79544.1 anig|EHA24948.1 aory|EIT80049.1  
ater|EAU38948.1 atub|OJI79365.1 awen|OJJ36385.1 azon|OJJ42810.1

Group6543: acla|EAW14794.1 afla|EED52852.1 afum|EAL85995.1 anig|EHA18938.1 asyd|OJJ53869.1  
acar|OOF94319.1 afis|EAW24325.1 afla|EED47941.1 agla|OJJ83192.1 anid|CBF74058.1 aory|EIT79825.1  
ater|EAU30428.1 aver|OJJ07967.1 awen|OJJ32969.1 azon|OJJ48948.1

Group6544: abra|OJJ67102.1 acar|OOF98450.1 afis|EAW20275.1 afla|EED48127.1 afum|EAL85409.1  
agla|OJJ87506.1 akaw|GAA91059.1 aluc|OJZ87871.1 anid|CBF78244.1 anig|EHA20177.1 aory|EIT76225.1  
asyd|OJJ56195.1 ater|EAU31784.1 atub|OJI80778.1 aver|OJJ05122.1

Group6545: abra|OJJ67106.1 acar|OOF98445.1 acla|EAW14949.1 afis|EAW24466.1 afla|EED55055.1 afum|EAL86137.2 agla|OJJ84375.1 akaw|GAA91057.1 aluc|OJZ87868.1 anid|CBF78857.1 anig|EHA20174.1 aory|EIT81943.1 asyd|OJJ64569.1 atub|OJI80780.1 aver|OJI98666.1

Group6546: abra|OJJ67113.1 acar|OOF98439.1 afis|EAW20325.1 afla|EED47501.1 afum|EAL85450.1 akaw|GAA91051.1 aluc|OJZ87862.1 anid|CBF82806.1 anig|EHA20168.1 aory|EIT74564.1 asyd|OJJ65274.1 atub|OJI80786.1 aver|OJI99426.1 awen|OJJ38373.1 azon|OJJ47727.1

Group6547: abra|OJJ67117.1 acar|OOF98435.1 afla|EED57082.1 agla|OJJ86026.1 akaw|GAA91048.1 aluc|OJZ87858.1 anid|CBF84004.1 anig|EHA20164.1 aory|EIT82248.1 asyd|OJJ63809.1 ater|EAU31388.1 atub|OJI80789.1 aver|OJI97128.1 awen|OJJ31653.1 azon|OJJ42556.1

Group6548: abra|OJJ67125.1 acar|OOF98427.1 acla|EAW13223.1 afum|EAL92064.1 akaw|GAA91042.1 aluc|OJZ87852.1 anig|EHA20155.1 aory|EIT78866.1 ater|EAU39256.1 atub|OJI80796.1 awen|OJJ33217.1 azon|OJJ50336.1 afis|EAW19498.1 afla|EED54513.1 agla|OJJ84619.1

Group6549: abra|OJJ67127.1 acar|OOF98426.1 afis|EAW19342.1 afla|EED47538.1 agla|OJJ79330.1 akaw|GAA91041.1 aluc|OJZ87851.1 anid|CBF80125.1 anig|EHA20154.1 aory|EIT74588.1 asyd|OJJ58343.1 ater|EAU29444.1 atub|OJI80797.1 awen|OJJ35789.1 azon|OJJ42318.1

Group6550: afis|EAW20743.1 acar|OOF95023.1 afla|EED53084.1 akaw|GAA88129.1 aluc|OJZ81401.1 anig|EHA18694.1 aory|EIT74814.1 asyd|OJJ52801.1 atub|OJI91607.1 aver|OJJ08778.1 azon|OJJ42879.1 afla|EED47484.1 asyd|OJJ61688.1 afla|EED48103.1 aory|EIT76221.1

Group6551: abra|OJJ67146.1 acar|OOF98409.1 afis|EAW19303.1 afla|EED47579.1 afum|EAL94021.1 akaw|GAA91024.1 aluc|OJZ87827.1 anid|CBF83911.1 anig|EHA20306.1 aory|EIT74541.1 asyd|OJJ55496.1 ater|EAU29465.1 atub|OJI80814.1 aver|OJJ06574.1 awen|OJJ30170.1

Group6552: abra|OJJ67171.1 acla|EAW14553.1 afis|EAW19270.1 afum|EBA27510.1 agla|OJJ88428.1 akaw|GAA91003.1 aluc|OJZ87804.1 anid|CBF78701.1 anig|EHA20286.1 asyd|OJJ65221.1 ater|EAU29550.1 atub|OJI80843.1 aver|OJI99370.1 awen|OJJ37630.1 azon|OJJ47018.1

Group6553: abra|OJJ67174.1 acar|OOF98389.1 acla|EAW14549.1 afis|EAW19266.1 akaw|GAA91000.1 aluc|OJZ87801.1 anid|CBF78693.1 anig|EHA20282.1 asyd|OJJ65217.1 ater|EAU29547.1 atub|OJI80846.1 aver|OJI99367.1 awen|OJJ37627.1 azon|OJJ50093.1 afum|EAL93993.1

Group6554: abra|OJJ67177.1 acar|OOF98387.1 acla|EAW14546.1 afla|EED47611.1 agla|OJJ88422.1 aluc|OJZ87798.1 anid|CBF78686.1 anig|EHA20279.1 aory|EIT80173.1 asyd|OJJ65213.1 ater|EAU29544.1 atub|OJI80849.1 aver|OJI99363.1 awen|OJJ37624.1 azon|OJJ47013.1

Group6555: abra|OJJ67210.1 acar|OOF98349.1 acla|EAW08556.1 afis|EAW23598.1 afla|EED55270.1 afum|EAL87868.1 agla|OJJ86857.1 akaw|GAA90967.1 aluc|OJZ87763.1 anig|EHA20248.1 aory|EIT83544.1 ater|EAU35358.1 atub|OJI80881.1 awen|OJJ39920.1 azon|OJJ45894.1

Group6556: abra|OJJ67227.1 acar|OOF98325.1 acla|EAW10407.1 afis|EAW25161.1 afla|EED53621.1 afum|EAL89836.1 agla|OJJ86387.1 akaw|GAA91653.1 aluc|OJZ87747.1 anig|EHA20236.1 aory|EIT75179.1 ater|EAU34332.1 atub|OJI80895.1 awen|OJJ36214.1 azon|OJJ43928.1

Group6557: abra|OJJ67259.1 acar|OOF98304.1 acla|EAW10394.1 afis|EAW25183.1 afla|EED53641.1 afum|EAL89857.1 akaw|GAA91674.1 aluc|OJZ87720.1 anid|CBF73876.1 anig|EHA20214.1 aory|EIT75349.1 asyd|OJJ54775.1 ater|EAU34340.1 atub|OJI80922.1 aver|OJJ07391.1

Group6558: abra|OJJ67285.1 acar|OOF93926.1 afla|EED51076.1 afum|EAL91134.1 akaw|GAA86945.1 aluc|OJZ90070.1 anid|CBF87380.1 anig|EHA25286.1 aory|EIT77018.1 asyd|OJJ56243.1 atub|OJI84737.1 aver|OJJ05166.1 anig|EHA21003.1 afla|EED53132.1 aory|EIT74829.1

Group6559: abra|OJJ67302.1 acar|OOF92512.1 acla|EAW06435.1 afis|EAW20289.1 afla|EED52855.1 afum|EAL85420.1 akaw|GAA86514.1 aluc|OJZ85059.1 anid|CBF70198.1 anig|EHA25274.1 aory|EIT78646.1 asyd|OJJ58787.1 ater|EAU30034.1 atub|OJI80539.1 aver|OJJ01394.1

Group6560: abra|OJJ67309.1 acar|OOF92503.1 acla|EAW06423.1 afis|EAW18527.1 afla|EED52874.1 afum|EBA27487.1 akaw|GAA86506.1 aluc|OJZ85049.1 anid|CBF70209.1 anig|EHA25266.1 aory|EIT78614.1 asyd|OJJ58780.1 ater|EAU30042.1 atub|OJI80549.1 azon|OJJ50141.1

Group6561: abra|OJJ67338.1 acar|OOF92475.1 acla|EAW06396.1 afis|EAW18500.1 afum|EAL93191.2 agla|OJJ85127.1 akaw|GAA86478.1 aluc|OJZ85019.1 anid|CBF70255.1 anig|EHA25240.1 asyd|OJJ58756.1 atub|OJI80578.1 aver|OJJ01364.1 awen|OJJ31054.1 azon|OJJ50562.1

Group6562: abra|OJJ67447.1 acar|OOF90342.1 acla|EAW06316.1 afis|EAW18430.1 afla|EED52983.1 afum|EAL93110.2 agla|OJJ84996.1 akaw|GAA86382.1 aluc|OJZ84916.1 anid|CBF70023.1 asyd|OJJ58873.1 ater|EAU29846.1 atub|OJI80682.1 aver|OJJ01476.1 awen|OJJ30763.1

Group6563: abra|OJJ67466.1 acar|OOF92367.1 afis|EAW18411.1 afla|EED53001.1 afum|EAL93091.1  
agla|OJJ84977.1 akaw|GAA86370.1 aluc|OJZ84899.1 anid|CBF70737.1 anig|EHA25126.1 aory|EIT77393.1  
asyd|OJJ58441.1 atub|OJI80699.1 aver|OJJ01041.1 awen|OJJ31739.1

Group6564: abra|OJJ67473.1 afis|EAW18406.1 afla|EED53002.1 afum|EAL93086.1 agla|OJJ84957.1  
aluc|OJZ84892.1 anid|CBF69756.1 aory|EIT77429.1 atub|OJI80706.1 aver|OJJ01539.1 awen|OJJ31744.1  
azon|OJJ50504.1 acla|EAW06299.1 akaw|GAA86364.1 asyd|OJJ58943.1

Group6565: anid|CBF80146.1 aory|EIT81308.1 acla|EAW14607.1 afis|EAW19336.1 afla|EED51165.1  
afum|EAL94053.1 agla|OJJ79422.1 anid|CBF90105.1 asyd|OJJ59231.1 aver|OJJ01841.1 afis|EAW24674.1  
asyd|OJJ57397.1 aver|OJI96118.1 asyd|OJJ62027.1 aver|OJI99534.1

Group6566: afis|EAW15462.1 azon|OJJ42091.1 acar|OOF90313.1 afla|EED51800.1 aluc|OJZ83718.1  
anid|CBF83023.1 anig|EHA25927.1 asyd|OJJ61031.1 ater|EAU33407.1 awen|OJJ30427.1 akaw|GAA83216.1  
aory|EIT81712.1 asyd|OJJ57906.1 awen|OJJ29893.1 agla|OJJ84402.1

Group6567: abra|OJJ67599.1 acar|OOF91951.1 acla|EAW12420.1 afla|EED49737.1 agla|OJJ86654.1  
akaw|GAA89118.1 aluc|OJZ81721.1 anid|CBF83048.1 anig|EHA25718.1 aory|EIT77628.1 asyd|OJJ64554.1  
ater|EAU34047.1 atub|OJI88460.1 aver|OJI98651.1 ater|EAU36466.1

Group6568: abra|OJJ67693.1 acar|OOF97520.1 acla|EAW14630.1 afis|EAW17253.1 afla|EED53071.1  
afum|EAL86672.2 akaw|GAA89202.1 aluc|OJZ81628.1 anig|EHA25815.1 asyd|OJJ55210.1 ater|EAU30970.1  
atub|OJI88552.1 aver|OJJ07007.1 awen|OJJ32906.1 anid|CBF78046.1

Group6569: abra|OJJ67903.1 acar|OOF92875.1 acla|EAW11718.1 afis|EAW23739.1 afla|EED51515.1  
afum|EAL87176.1 akaw|GAA91908.1 aluc|OJZ81985.1 anid|CBF79811.1 anig|EHA22270.1 asyd|OJJ58131.1  
ater|EAU31297.1 atub|OJI84536.1 aver|OJJ04274.1 awen|OJJ33675.1

Group6570: abra|OJJ67905.1 acar|OOF92873.1 afis|EAW23709.1 afum|EAL87153.1 akaw|GAA91910.1  
aluc|OJZ81982.1 anig|EHA22272.1 asyd|OJJ54985.1 ater|EAU31291.1 atub|OJI84534.1 aver|OJJ07216.1  
awen|OJJ35904.1 afla|EED45764.1 afum|EBA27287.1 aory|EIT75534.1

Group6571: abra|OJJ67906.1 acar|OOF92872.1 acla|EAW11693.1 afis|EAW23710.1 afla|EED45765.1  
afum|EBA27286.1 akaw|GAA91911.1 aluc|OJZ81981.1 anig|EHA22273.1 aory|EIT75397.1 asyd|OJJ54986.1  
atub|OJI84533.1 aver|OJJ07215.1 awen|OJJ35905.1 ater|EAU31290.1

Group6572: abra|OJJ67927.1 acar|OOF92778.1 acla|EAW12783.1 afis|EAW17945.1 afla|EED51960.1  
afum|EAL91756.1 agla|OJJ82988.1 akaw|GAA91270.1 aluc|OJZ82799.1 aory|EIT81460.1 ater|EAU31430.1  
atub|OJI89030.1 aver|OJJ04204.1 awen|OJJ41597.1 azon|OJJ48313.1

Group6573: abra|OJJ67937.1 acar|OOF92786.1 acla|EAW11626.1 afis|EAW23830.1 afla|EED51975.1  
afum|EAL87262.1 agla|OJJ82482.1 akaw|GAA91259.1 aluc|OJZ82809.1 anid|CBF79906.1 aory|EIT81481.1  
asyd|OJJ58188.1 aver|OJJ04217.1 awen|OJJ33788.1 azon|OJJ48758.1

Group6574: abra|OJJ67961.1 acar|OOF92807.1 afis|EAW23804.1 afla|EED52025.1 afum|EAL87238.1  
agla|OJJ81899.1 akaw|GAA91236.1 aluc|OJZ82834.1 anig|EHA21272.1 aory|EIT81419.1 asyd|OJJ55237.1  
ater|EAU31357.1 atub|OJI89064.1 aver|OJJ06986.1 awen|OJJ33761.1

Group6575: abra|OJJ67963.1 acar|OOF92809.1 acla|EAW11653.1 afla|EED51618.1 akaw|GAA91234.1  
aluc|OJZ82836.1 anid|CBF79867.1 anig|EHA21274.1 aory|EIT80710.1 asyd|OJJ58165.1 ater|EAU31352.1  
atub|OJI89066.1 aver|OJJ04237.1 awen|OJJ33759.1 azon|OJJ42865.1

Group6576: abra|OJJ67964.1 acar|OOF92810.1 acla|EAW11654.1 afis|EAW23799.1 afla|EED51617.1  
afum|EAL87234.2 agla|OJJ78847.1 akaw|GAA91233.1 aluc|OJZ82837.1 anid|CBF79865.1 asyd|OJJ58164.1  
ater|EAU31351.1 atub|OJI89067.1 aver|OJJ04238.1 awen|OJJ33758.1

Group6577: abra|OJJ67999.1 acar|OOF92042.1 afla|EED47248.1 agla|OJJ88174.1 akaw|GAA90951.1  
aluc|OJZ82873.1 anid|CBF85192.1 anig|EHA21299.1 aory|EIT79211.1 asyd|OJJ64571.1 atub|OJI89097.1  
aver|OJJ04298.1 awen|OJJ39963.1 azon|OJJ46818.1 azon|OJJ46410.1

Group6578: abra|OJJ68031.1 acar|OOF92076.1 acla|EAW11089.1 afla|EED56027.1 agla|OJJ79962.1  
akaw|GAA90921.1 aluc|OJZ82905.1 anig|EHA21328.1 aory|EIT76559.1 asyd|OJJ53443.1 ater|EAU36890.1  
atub|OJI89131.1 aver|OJJ08308.1 awen|OJJ33579.1 azon|OJJ43620.1

Group6579: abra|OJJ68032.1 acar|OOF92077.1 acla|EAW11090.1 afla|EED45881.1 agla|OJJ79961.1  
akaw|GAA90920.1 aluc|OJZ82906.1 anig|EHA21329.1 aory|EIT75827.1 asyd|OJJ53444.1 ater|EAU36889.1  
atub|OJI89132.1 aver|OJJ08307.1 awen|OJJ33580.1 azon|OJJ43619.1

Group6580: afis|EAW19754.1 afum|EAL85143.1 acla|EAW13626.1 afis|EAW21093.1 ater|EAU29533.1  
afum|EAL92116.1 agla|OJJ78720.1 aluc|OJZ85485.1 anid|CBF87240.1 anig|EHA26573.1 asyd|OJJ53804.1  
atub|OJI80079.1 aver|OJJ07432.1 afis|EAW25734.1 anid|CBF82281.1



Group6581: abra|OJJ68107.1 acar|OOF93907.1 acla|EAW12450.1 afis|EAW16754.1 afla|EED55088.1 afum|EAL86326.1 akaw|GAA86889.1 aluc|OJZ90013.1 anid|CBF73885.1 anig|EHA27388.1 asyd|OJJ53657.1 ater|EAU33724.1 atub|OJI84794.1 aver|OJJ07765.1 akaw|GAA86890.1

Group6582: abra|OJJ68147.1 acar|OOF90644.1 acla|EAW12084.1 afis|EAW25676.1 afla|EED47641.1 agla|OJJ79768.1 akaw|GAA92372.1 aluc|OJZ83230.1 anid|CBF78373.1 anig|EHA21088.1 aory|EIT80233.1 asyd|OJJ57328.1 atub|OJI87706.1 afum|EAL84346.1 agla|OJJ87493.1

Group6583: abra|OJJ68282.1 acar|OOF97556.1 afla|EED56846.1 agla|OJJ86179.1 akaw|GAA83190.1 aluc|OJZ83689.1 anid|CBF89594.1 anig|EHA18843.1 aory|EIT77522.1 asyd|OJJ62314.1 ater|EAU39319.1 atub|OJI90061.1 aver|OJI96421.1 awen|OJJ38769.1 azon|OJJ49590.1

Group6584: abra|OJJ68335.1 acar|OOF97602.1 afla|EED57057.1 agla|OJJ89061.1 akaw|GAA92088.1 aluc|OJZ83635.1 anid|CBF71747.1 anig|EHA18788.1 aory|EIT82312.1 asyd|OJJ55947.1 atub|OJI90004.1 aver|OJI98883.1 awen|OJJ41747.1 aver|OJI95777.1 agla|OJJ80132.1

Group6585: abra|OJJ68340.1 acar|OOF89851.1 acla|EAW14396.1 afis|EAW19103.1 afla|EED55063.1 akaw|GAA92107.1 aluc|OJZ83618.1 anid|CBF84412.1 anig|EHA18776.1 aory|EIT81966.1 asyd|OJJ53561.1 atub|OJI89991.1 aver|OJJ08191.1 afum|EAL93835.1 aory|EIT81968.1

Group6586: abra|OJJ68352.1 acar|OOF90073.1 acla|EAW12404.1 afis|EAW16863.1 afla|EED56821.1 afum|EBA27272.1 agla|OJJ85254.1 aluc|OJZ83602.1 anid|CBF88782.1 aory|EIT73928.1 asyd|OJJ63993.1 ater|EAU33019.1 atub|OJI89974.1 awen|OJJ35930.1 azon|OJJ45220.1

Group6587: abra|OJJ68382.1 acar|OOF93986.1 acla|EAW12358.1 afis|EAW16781.1 afum|EAL86352.1 agla|OJJ79769.1 akaw|GAA92565.1 aluc|OJZ90113.1 anig|EHA20961.1 ater|EAU30271.1 atub|OJI84693.1 awen|OJJ38253.1 acla|EAW08810.1 agla|OJJ85167.1 ater|EAU32542.1

Group6588: abra|OJJ68410.1 acar|OOF93967.1 afla|EED55615.1 agla|OJJ88415.1 akaw|GAA92540.1 aluc|OJZ90088.1 anig|EHA20986.1 aory|EIT81814.1 asyd|OJJ58699.1 ater|EAU32552.1 atub|OJI84718.1 aver|OJJ01311.1 awen|OJJ33712.1 anig|EHA20906.1 awen|OJJ40592.1

Group6589: abra|OJJ68412.1 acar|OOF93965.1 afla|EED45887.1 agla|OJJ80674.1 akaw|GAA92538.1 aluc|OJZ90086.1 anig|EHA20988.1 aory|EIT75567.1 atub|OJI84720.1 awen|OJJ31664.1 azon|OJJ45178.1 anid|CBF75880.1 asyd|OJJ60249.1 aver|OJJ04008.1 awen|OJJ35875.1

Group6590: abra|OJJ68424.1 acar|OOF93929.1 acla|EAW09508.1 afis|EAW21625.1 afum|EAL92661.1 agla|OJJ79692.1 akaw|GAA86948.1 aluc|OJZ90073.1 anid|CBF82427.1 anig|EHA21000.1 asyd|OJJ54127.1 ater|EAU30754.1 atub|OJI84733.1 aver|OJJ08609.1 awen|OJJ33875.1

Group6591: abra|OJJ68425.1 acar|OOF93928.1 afis|EAW23752.1 akaw|GAA86947.1 aluc|OJZ90072.1 anig|EHA21001.1 aory|EIT82579.1 atub|OJI84734.1 awen|OJJ38776.1 azon|OJJ45873.1 afla|EED49559.1 afum|EAL87189.1 anid|CBF85105.1 asyd|OJJ63055.1 aver|OJI97908.1

Group6592: abra|OJJ68441.1 acar|OOF93954.1 afis|EAW19802.1 afla|EED52096.1 agla|OJJ87951.1 akaw|GAA86931.1 aluc|OJZ90056.1 anid|CBF82420.1 anig|EHA21015.1 aory|EIT76908.1 asyd|OJJ54149.1 ater|EAU30747.1 atub|OJI84751.1 aver|OJJ08592.1 awen|OJJ29693.1

Group6593: abra|OJJ68470.1 acar|OOF90640.1 acla|EAW07154.1 afis|EAW22168.1 afla|EED54171.1 afum|EAL91023.1 agla|OJJ87886.1 akaw|GAA92391.1 aluc|OJZ83251.1 anid|CBF73660.1 anig|EHA21104.1 asyd|OJJ56670.1 ater|EAU30397.1 atub|OJI87686.1 aver|OJJ06052.1

Group6594: abra|OJJ68495.1 acar|OOF98750.1 acla|EAW12141.1 afis|EAW17195.1 afla|EED45177.1 afum|EAL86623.1 agla|OJJ86659.1 akaw|GAA92775.1 aluc|OJZ82708.1 anig|EHA21163.1 aory|EIT73805.1 asyd|OJJ59008.1 atub|OJI88941.1 anid|CBF69889.1 aver|OJJ01607.1

Group6595: abra|OJJ68661.1 acar|OOF92163.1 acla|EAW12592.1 afis|EAW24061.1 afla|EED51413.1 afum|EAL91916.1 agla|OJJ87343.1 akaw|GAA89801.1 aluc|OJZ81890.1 anid|CBF86447.1 aory|EIT80456.1 asyd|OJJ64921.1 atub|OJI84443.1 awen|OJJ41429.1 azon|OJJ43871.1

Group6596: abra|OJJ68676.1 acar|OOF92178.1 afis|EAW24077.1 afla|EED51396.1 akaw|GAA89829.1 aluc|OJZ81858.1 anid|CBF86474.1 anig|EHA22366.1 aory|EIT80737.1 asyd|OJJ64904.1 atub|OJI84426.1 aver|OJI99026.1 awen|OJJ41415.1 afum|EAL91932.1 ater|EAU30498.1

Group6597: abra|OJJ68694.1 acar|OOF92198.1 acla|EAW12550.1 agla|OJJ87175.1 akaw|GAA89849.1 aluc|OJZ81837.1 anig|EHA22384.1 asyd|OJJ64884.1 ater|EAU30528.1 atub|OJI84406.1 aver|OJI98998.1 awen|OJJ41388.1 azon|OJJ48857.1 afla|EED46833.1 aory|EIT72625.1

Group6598: abra|OJJ68721.1 acar|OOF92220.1 acla|EAW12525.1 afis|EAW24123.1 afla|EED46811.1 afum|EAL91979.1 agla|OJJ87198.1 aluc|OJZ81808.1 anid|CBF86549.1 anig|EHA22409.1 asyd|OJJ64858.1 atub|OJI84380.1 aver|OJI98970.1 awen|OJJ41366.1 azon|OJJ48833.1

Group6599: abra|OJJ68741.1 acar|OOF90305.1 afis|EAW24140.1 afla|EED46794.1 afum|EAL91995.1  
agla|OJJ87219.1 aluc|OJZ81785.1 anid|CBF77938.1 anig|EHA22430.1 asyd|OJJ55285.1 ater|EAU30569.1  
atub|OJI84359.1 aver|OJJ06943.1 awen|OJJ41348.1 azon|OJJ48812.1

Group6600: abra|OJJ68798.1 acar|OOF92282.1 acla|EAW14655.1 afla|EED46745.1 agla|OJJ89488.1  
akaw|GAA89937.1 aluc|OJZ81729.1 anid|CBF77835.1 anig|EHA22483.1 asyd|OJJ55337.1 ater|EAU30620.1  
atub|OJI84300.1 aver|OJJ06890.1 awen|OJJ41283.1 azon|OJJ43705.1

Group6601: abra|OJJ68804.1 acar|OOF91596.1 acla|EAW14400.1 afis|EAW19107.1 afla|EED54303.1  
afum|EAL93838.1 akaw|GAA90449.1 aluc|OJZ85775.1 anig|EHA24779.1 aory|EIT75984.1 asyd|OJJ58067.1  
ater|EAU29824.1 atub|OJI79560.1 aver|OJJ04340.1 awen|OJJ32508.1

Group6602: abra|OJJ68867.1 akaw|GAA90386.1 aluc|OJZ85845.1 anig|EHA24719.1 ater|EAU29643.1  
atub|OJI79633.1 awen|OJJ32556.1 azon|OJJ50747.1 acla|EAW13300.1 afis|EAW16173.1 afla|EED45260.1  
afum|EAL88805.1 aory|EIT73657.1 ater|EAU34150.1 awen|OJJ36062.1

Group6603: abra|OJJ68920.1 acar|OOF90184.1 acla|EAW14255.1 afis|EAW19025.1 afla|EED56630.1  
afum|EAL93756.1 akaw|GAA90329.1 aluc|OJZ85904.1 anid|CBF85588.1 anig|EHA24689.1 aory|EIT79677.1  
asyd|OJJ64172.1 atub|OJI79689.1 aver|OJI98247.1 azon|OJJ44373.1

Group6604: abra|OJJ68921.1 acar|OOF90182.1 akaw|GAA90328.1 aluc|OJZ85905.1 anig|EHA24688.1  
atub|OJI79690.1 abra|OJJ76678.1 acar|OOF99330.1 anid|CBF74091.1 anig|EHA22563.1 asyd|OJJ53891.1  
atub|OJI87198.1 aver|OJJ07989.1 awen|OJJ33629.1 awen|OJJ36547.1

Group6605: abra|OJJ68958.1 acar|OOF91536.1 acla|EAW14227.1 afis|EAW19054.1 afla|EED54412.1  
afum|EAL93783.1 agla|OJJ84553.1 akaw|GAA90486.1 aluc|OJZ85944.1 anig|EHA24655.1 asyd|OJJ58011.1  
atub|OJI79732.1 aver|OJJ04389.1 awen|OJJ31485.1 azon|OJJ46195.1

Group6606: abra|OJJ68985.1 acar|OOF91556.1 acla|EAW14206.1 afis|EAW19075.1 afla|EED54440.1  
afum|EAL93803.1 agla|OJJ84528.1 aluc|OJZ85971.1 anig|EHA24634.1 asyd|OJJ58032.1 ater|EAU32121.1  
atub|OJI79759.1 aver|OJJ04367.1 awen|OJJ32469.1 azon|OJJ46237.1

Group6607: abra|OJJ69055.1 acar|OOF91235.1 acla|EAW08771.1 afis|EAW15652.1 afla|EED46894.1  
afum|EAL85698.2 agla|OJJ81781.1 akaw|GAA90585.1 aluc|OJZ86043.1 anid|CBF71188.1 asyd|OJJ55858.1  
atub|OJI79839.1 aver|OJJ04799.1 awen|OJJ38288.1 azon|OJJ47472.1

Group6608: abra|OJJ69070.1 acar|OOF95825.1 afis|EAW21326.1 akaw|GAA90601.1 aluc|OJZ86059.1  
atub|OJI79856.1 azon|OJJ46525.1 acla|EAW11918.1 agla|OJJ82478.1 anig|EHA21144.1 akaw|GAA89042.1  
azon|OJJ45151.1 afum|EAL92344.1 azon|OJJ47740.1 azon|OJJ50420.1

Group6609: abra|OJJ69115.1 afla|EED51333.1 afum|EAL85622.1 agla|OJJ81869.1 akaw|GAA90640.1  
aluc|OJZ86104.1 anid|CBF71081.1 asyd|OJJ52696.1 ater|EAU32428.1 atub|OJI79899.1 aver|OJJ04724.1  
awen|OJJ38414.1 azon|OJJ43828.1 acla|EAW08717.1 afis|EAW15725.1

Group6610: abra|OJJ69130.1 acar|OOF91170.1 acla|EAW08702.1 afis|EAW15710.1 afla|EED51318.1  
afum|EAL85637.1 agla|OJJ81891.1 akaw|GAA90655.1 aluc|OJZ86119.1 anig|EHA24502.1 asyd|OJJ52676.1  
atub|OJI79915.1 aver|OJJ04702.1 awen|OJJ38430.1 azon|OJJ43813.1

Group6611: abra|OJJ69140.1 acla|EAW08694.1 afis|EAW15741.1 afla|EED51311.1 afum|EAL85607.1  
agla|OJJ81902.1 akaw|GAA86317.1 anid|CBF71041.1 anig|EHA24494.1 aory|EIT81509.1 asyd|OJJ52669.1  
ater|EAU32404.1 aver|OJJ04695.1 awen|OJJ38440.1 azon|OJJ43805.1

Group6612: abra|OJJ69253.1 acar|OOF91068.1 acla|EAW08596.1 afis|EAW15837.1 afla|EED51209.1  
afum|EAL85514.1 agla|OJJ82001.1 anid|CBF70852.1 anig|EHA24396.1 asyd|OJJ52572.1 ater|EAU33411.1  
atub|OJI80027.1 aver|OJJ04601.1 awen|OJJ38549.1 azon|OJJ43712.1

Group6613: abra|OJJ69254.1 acar|OOF91067.1 acla|EAW08595.1 afis|EAW15838.1 afum|EAL85513.1  
agla|OJJ82002.1 akaw|GAA92260.1 aluc|OJZ86233.1 anid|CBF70850.1 anig|EHA24395.1 aory|EIT80407.1  
asyd|OJJ52571.1 ater|EAU33397.1 aver|OJJ04600.1 awen|OJJ38551.1

Group6614: abra|OJJ69255.1 acar|OOF91066.1 acla|EAW08594.1 afis|EAW15840.1 afum|EAL85511.2  
agla|OJJ84919.1 akaw|GAA92261.1 aluc|OJZ86234.1 anid|CBF70846.1 anig|EHA24393.1 aory|EIT80411.1  
asyd|OJJ52569.1 ater|EAU33395.1 aver|OJJ04598.1 awen|OJJ38553.1

Group6615: abra|OJJ69273.1 acar|OOF94448.1 acla|EAW14662.1 afis|EAW24193.1 agla|OJJ79686.1  
akaw|GAA88147.1 aluc|OJZ82101.1 anid|CBF74311.1 anig|EHA28629.1 asyd|OJJ54005.1 ater|EAU31144.1  
atub|OJI88335.1 aver|OJJ08100.1 awen|OJJ33106.1 azon|OJJ44842.1

Group6616: abra|OJJ69280.1 acar|OOF94442.1 acla|EAW14669.1 afis|EAW24200.1 afum|EBA27247.1  
agla|OJJ79677.1 aluc|OJZ82108.1 anid|CBF74325.1 anig|EHA28622.1 asyd|OJJ53995.1 ater|EAU31151.1  
atub|OJI88328.1 aver|OJJ08093.1 awen|OJJ33098.1 azon|OJJ44849.1

Group6617: abra|OJJ69306.1 acar|OOF94421.1 acla|EAW14692.1 afis|EAW24223.1 afla|EED48049.1 afum|EBA27249.1 akaw|GAA88175.1 aluc|OJZ82135.1 anid|CBF74237.1 anig|EHA28596.1 aory|EIT83337.1 atub|OJI88302.1 aver|OJJ08069.1 awen|OJJ33073.1 azon|OJJ44874.1

Group6618: abra|OJJ69309.1 acar|OOF94417.1 acla|EAW14696.1 afis|EAW24227.1 afla|EED48044.1 afum|EAL85896.1 agla|OJJ79644.1 akaw|GAA88178.1 aluc|OJZ82138.1 anig|EHA28593.1 ater|EAU31176.1 atub|OJI88299.1 aver|OJJ08065.1 awen|OJJ33069.1 azon|OJJ48453.1

Group6619: abra|OJJ69318.1 afis|EAW24263.1 afla|EED48014.1 afum|EAL85931.1 agla|OJJ79609.1 akaw|GAA88187.1 aluc|OJZ82147.1 anig|EHA28583.1 aory|EIT82899.1 atub|OJI88289.1 awen|OJJ33038.1 acla|EAW14730.1 anid|CBF74178.1 ater|EAU31208.1 azon|OJJ48481.1

Group6620: abra|OJJ69321.1 acar|OOF94409.1 acla|EAW14724.1 afis|EAW24260.1 afum|EAL85928.1 agla|OJJ79612.1 akaw|GAA88190.1 aluc|OJZ82150.1 anid|CBF74189.1 anig|EHA28580.1 asyd|OJJ53949.1 atub|OJI88285.1 aver|OJJ08045.1 awen|OJJ33042.1 azon|OJJ48596.1

Group6621: abra|OJJ69322.1 acar|OOF99033.1 afis|EAW22828.1 afla|EED45971.1 agla|OJJ81579.1 akaw|GAA88191.1 aluc|OJZ82152.1 anid|CBF69421.1 anig|EHA28579.1 aory|EIT75572.1 asyd|OJJ60158.1 ater|EAU32277.1 atub|OJI88284.1 awen|OJJ29835.1 aluc|OJZ79516.1

Group6622: aory|EIT82917.1 acar|OOF94404.1 acla|EAW14717.1 afis|EAW24252.1 afla|EED48021.1 afum|EAL85921.2 agla|OJJ79621.1 akaw|GAA88194.1 aluc|OJZ82155.1 anid|CBF74195.1 anig|EHA28577.1 ater|EAU31195.1 atub|OJI88282.1 awen|OJJ33047.1 azon|OJJ48472.1

Group6623: abra|OJJ69340.1 acar|OOF94388.1 acla|EAW14706.1 afis|EAW24237.1 afla|EED48034.1 agla|OJJ79635.1 akaw|GAA88209.1 aluc|OJZ82172.1 anid|CBF74217.1 anig|EHA28561.1 asyd|OJJ53960.1 atub|OJI88265.1 aver|OJJ08056.1 awen|OJJ33051.1 azon|OJJ48462.1

Group6624: abra|OJJ69352.1 acar|OOF94374.1 acla|EAW14741.1 afis|EAW24272.1 afla|EED48005.1 afum|EAL85940.2 agla|OJJ79593.1 aluc|OJZ82184.1 anid|CBF74162.1 anig|EHA28551.1 aory|EIT82911.1 asyd|OJJ53932.1 ater|EAU31217.1 aver|OJJ08030.1 awen|OJJ33027.1

Group6625: abra|OJJ69368.1 acar|OOF89838.1 acla|EAW14758.1 afis|EAW24289.1 afla|EED47987.1 afum|EBA27251.1 agla|OJJ83154.1 akaw|GAA88237.1 aluc|OJZ82202.1 anig|EHA28537.1 asyd|OJJ53910.1 atub|OJI88234.1 aver|OJJ08008.1 awen|OJJ33007.1 azon|OJJ48508.1

Group6626: abra|OJJ69389.1 acar|OOF94337.1 acla|EAW14776.1 afis|EAW24307.1 afla|EED47963.1 afum|EAL85975.1 agla|OJJ83175.1 akaw|GAA88257.1 aluc|OJZ82224.1 anid|CBF74095.1 anig|EHA28516.1 asyd|OJJ53893.1 atub|OJI88211.1 aver|OJJ07991.1 awen|OJJ32985.1

Group6627: abra|OJJ69393.1 acar|OOF94335.1 acla|EAW14778.1 afis|EAW24309.1 afum|EAL85977.2 akaw|GAA88261.1 aluc|OJZ82230.1 anid|CBF74087.1 anig|EHA28509.1 asyd|OJJ53885.1 ater|EAU31262.1 atub|OJI88207.1 aver|OJJ07983.1 awen|OJJ32983.1 azon|OJJ48934.1

Group6628: abra|OJJ69430.1 acar|OOF94307.1 acla|EAW14806.1 afis|EAW24335.1 afla|EED47929.1 afum|EAL86005.1 agla|OJJ83204.1 anid|CBF74034.1 anig|EHA28476.1 aory|EIT79858.1 ater|EAU30413.1 atub|OJI88171.1 aver|OJJ07952.1 awen|OJJ32959.1 azon|OJJ48956.1

Group6629: abra|OJJ69443.1 acar|OOF94296.1 afis|EAW17312.1 afum|EAL91147.1 akaw|GAA88375.1 aluc|OJZ82279.1 anid|CBF84390.1 anig|EHA28467.1 asyd|OJJ53584.1 atub|OJI88160.1 aver|OJJ08164.1 azon|OJJ43891.1 asyd|OJJ64146.1 aver|OJI98227.1 azon|OJJ42534.1

Group6630: abra|OJJ69509.1 afis|EAW21139.1 afla|EED46137.1 afum|EAL92158.2 agla|OJJ80079.1 akaw|GAA88315.1 aluc|OJZ82347.1 anid|CBF86998.1 anig|EHA28413.1 aory|EIT76469.1 asyd|OJJ60466.1 atub|OJI88093.1 aver|OJI99786.1 awen|OJJ36460.1 azon|OJJ44417.1

Group6631: abra|OJJ69550.1 acar|OOF95792.1 acla|EAW10611.1 afis|EAW24956.1 afla|EED55508.1 afum|EAL89614.2 akaw|GAA91562.1 aluc|OJZ82380.1 anid|CBF81669.1 anig|EHA28385.1 aory|EIT80914.1 asyd|OJJ59553.1 ater|EAU35701.1 atub|OJI88061.1 aver|OJJ02715.1

Group6632: abra|OJJ69611.1 acar|OOF92696.1 agla|OJJ83949.1 akaw|GAA91595.1 aluc|OJZ82419.1 anid|CBF82527.1 anig|EHA28350.1 asyd|OJJ54073.1 atub|OJI88022.1 aver|OJJ08666.1 awen|OJJ34380.1 acar|OOF91012.1 acla|EAW10921.1 afis|EAW20937.1 afum|EAL84697.1

Group6633: abra|OJJ69661.1 afis|EAW23620.1 afla|EED47586.1 afum|EAL87842.1 akaw|GAA91629.1 aluc|OJZ82456.1 anid|CBF78710.1 anig|EHA28319.1 aory|EIT74583.1 asyd|OJJ55361.1 ater|EAU35232.1 atub|OJI87982.1 aver|OJJ08471.1 awen|OJJ30195.1 azon|OJJ42645.1

Group6634: abra|OJJ69673.1 acar|OOF95528.1 acla|EAW07246.1 afis|EAW22267.1 afla|EED57659.1 afum|EAL90913.1 agla|OJJ87788.1 akaw|GAA88797.1 aluc|OJZ82480.1 anig|EHA28295.1 aory|EIT79924.1 atub|OJI87958.1 awen|OJJ34840.1 azon|OJJ45707.1 ater|EAU34278.1

Group6635: abra|OJJ69725.1 afis|EAW20757.1 afla|EED47461.1 afla|EED57110.1 afum|EAL84862.1  
agla|OJJ82213.1 akaw|GAA90178.1 aluc|OJZ83172.1 anig|EHA28246.1 aory|EIT74047.1 ater|EAU34036.1  
atub|OJI87766.1 awen|OJJ35686.1 azon|OJJ47342.1 aory|EIT79962.1

Group6636: afla|EED45788.1 aory|EIT75775.1 abra|OJJ77174.1 acar|OOF93062.1 akaw|GAA90760.1  
aluc|OJZ84586.1 anig|EHA27879.1 atub|OJI89494.1 afis|EAW17778.1 ater|EAU31838.1 acar|OOF90557.1  
agla|OJJ88651.1 asyd|OJJ63643.1 aver|OJI97293.1 afum|EAL91587.1

Group6637: abra|OJJ69787.1 acar|OOF93591.1 akaw|GAA87870.1 aluc|OJZ85511.1 anig|EHA25043.1  
atub|OJI80055.1 awen|OJJ37150.1 abra|OJJ78040.1 acla|EAW10012.1 afis|EAW20263.1 afla|EED51626.1  
aory|EIT80659.1 ater|EAU36816.1 afis|EAW21044.1 afum|EBA27447.1

Group6638: abra|OJJ69811.1 acar|OOF93566.1 afis|EAW23600.1 afla|EED53575.1 afum|EAL87867.1  
agla|OJJ86859.1 akaw|GAA87846.1 aluc|OJZ85484.1 anig|EHA25023.1 aory|EIT74887.1 asyd|OJJ64227.1  
ater|EAU35359.1 atub|OJI80080.1 aver|OJI98320.1 awen|OJJ39925.1

Group6639: abra|OJJ69890.1 acar|OOF93411.1 acla|EAW10351.1 akaw|GAA87760.1 aluc|OJZ85394.1  
anid|CBF88252.1 anig|EHA25578.1 asyd|OJJ54130.1 ater|EAU38931.1 atub|OJI80177.1 aver|OJJ08605.1  
aory|EIT83383.1 asyd|OJJ63670.1 aver|OJI97267.1 anid|CBF81833.1

Group6640: abra|OJJ69896.1 acar|OOF93415.1 acla|EAW08924.1 afis|EAW15469.1 afla|EED46921.1  
afum|EAL85853.1 akaw|GAA87754.1 aluc|OJZ85387.1 anid|CBF85148.1 anig|EHA25571.1 asyd|OJJ56064.1  
ater|EAU32659.1 atub|OJI80183.1 aver|OJJ05007.1 awen|OJJ38119.1

Group6641: abra|OJJ69907.1 acar|OOF93424.1 acla|EAW08917.1 afis|EAW15477.1 afla|EED46938.1  
afum|EAL85844.1 agla|OJJ80156.1 akaw|GAA87746.1 aluc|OJZ85379.1 anig|EHA25562.1 aory|EIT72647.1  
ater|EAU32650.1 atub|OJI80191.1 awen|OJJ38134.1 azon|OJJ43158.1

Group6642: abra|OJJ69920.1 acar|OOF93432.1 acla|EAW08911.1 afis|EAW15484.1 afla|EED46940.1  
afum|EAL85838.1 agla|OJJ80163.1 akaw|GAA87736.1 aluc|OJZ85368.1 anig|EHA25551.1 aory|EIT72589.1  
asyd|OJJ56025.1 atub|OJI80202.1 aver|OJJ04972.1 azon|OJJ43144.1

Group6643: abra|OJJ69935.1 acar|OOF93444.1 acla|EAW08891.1 afis|EAW15498.1 afla|EED49013.1  
afum|EAL85825.1 akaw|GAA87724.1 aluc|OJZ85352.1 aory|EIT82542.1 asyd|OJJ56013.1 ater|EAU32621.1  
atub|OJI80218.1 aver|OJJ04958.1 awen|OJJ38157.1 azon|OJJ43132.1

Group6644: abra|OJJ69948.1 acla|EAW08876.1 afis|EAW15519.1 afla|EED49026.1 agla|OJJ78534.1  
akaw|GAA87712.1 aluc|OJZ85339.1 anig|EHA25527.1 aory|EIT82538.1 asyd|OJJ55999.1 ater|EAU32605.1  
atub|OJI80232.1 aver|OJJ04945.1 awen|OJJ38180.1 azon|OJJ42826.1

Group6645: abra|OJJ69964.1 acar|OOF93472.1 acla|EAW08836.1 afis|EAW15564.1 afla|EED49073.1  
afum|EBA27241.1 agla|OJJ85187.1 akaw|GAA87695.1 aluc|OJZ85319.1 anid|CBF78120.1 asyd|OJJ55902.1  
atub|OJI80254.1 aver|OJJ04847.1 awen|OJJ38224.1 azon|OJJ43071.1

Group6646: abra|OJJ69976.1 acar|OOF93482.1 afla|EED49058.1 afum|EAL85778.1 agla|OJJ85200.1  
akaw|GAA87685.1 aluc|OJZ85305.1 anid|CBF78169.1 anig|EHA25501.1 asyd|OJJ55967.1 ater|EAU32579.1  
atub|OJI80266.1 aver|OJJ04914.1 awen|OJJ38211.1 azon|OJJ43085.1

Group6647: abra|OJJ69986.1 acar|OOF93492.1 acla|EAW08857.1 afis|EAW15539.1 afla|EED57487.1  
afum|EAL85791.1 akaw|GAA87675.1 aluc|OJZ85293.1 anig|EHA25491.1 aory|EIT81876.1 asyd|OJJ55978.1  
ater|EAU32588.1 atub|OJI80277.1 aver|OJJ04926.1 acla|EAW10022.1

Group6648: abra|OJJ70043.1 acar|OOF93538.1 acla|EAW09891.1 agla|OJJ78497.1 akaw|GAA87632.1  
aluc|OJZ85248.1 anig|EHA25448.1 ater|EAU35868.1 atub|OJI80321.1 afis|EAW21235.1 afla|EED54796.1  
afum|EAL92247.1 aory|EIT79408.1 awen|OJJ36546.1 azon|OJJ44343.1

Group6649: abra|OJJ70076.1 acar|OOF93555.1 acla|EAW08783.1 afla|EED48901.1 agla|OJJ81676.1  
akaw|GAA87607.1 aluc|OJZ85227.1 anid|CBF79625.1 anig|EHA25431.1 aory|EIT81256.1 asyd|OJJ58007.1  
ater|EAU38523.1 atub|OJI80353.1 aver|OJJ04393.1 awen|OJJ37011.1

Group6650: abra|OJJ70082.1 acar|OOF94970.1 acla|EAW11425.1 afis|EAW20383.1 afla|EED45579.1  
agla|OJJ83251.1 akaw|GAA87605.1 aluc|OJZ85225.1 anig|EHA25429.1 aory|EIT75740.1 asyd|OJJ54468.1  
ater|EAU32964.1 atub|OJI80356.1 aver|OJJ07781.1 awen|OJJ30094.1

Group6651: abra|OJJ70087.1 acla|EAW12309.1 afis|EAW21036.1 afum|EAL92075.1 abra|OJJ74144.1  
acar|OOF95585.1 afla|EED51068.1 akaw|GAA89740.1 aluc|OJZ80644.1 anig|EHA27188.1 aory|EIT77034.1  
atub|OJI87499.1 awen|OJJ30201.1 azon|OJJ45080.1 atub|OJI89254.1

Group6652: abra|OJJ70139.1 acar|OOF90638.1 acla|EAW14614.1 afis|EAW19344.1 afla|EED56898.1  
afum|EAL94063.1 agla|OJJ79571.1 akaw|GAA86626.1 aluc|OJZ85181.1 anid|CBF80127.1 anig|EHA25393.1  
aory|EIT77543.1 asyd|OJJ55351.1 atub|OJI80416.1 awen|OJJ30884.1

Group6653: abra|OJJ70142.1 acar|OOF90637.1 acla|EAW13599.1 afis|EAW20006.1 afla|EED46483.1 afum|EAL84912.1 akaw|GAA86623.1 aluc|OJZ85178.1 anid|CBF87145.1 anig|EHA25390.1 aory|EIT72437.1 asyd|OJJ60300.1 atub|OJI80419.1 aver|OJI99640.1 azon|OJJ49479.1

Group6654: abra|OJJ70146.1 afla|EED52391.1 akaw|GAA90562.1 aory|EIT83299.1 awen|OJJ35566.1 abra|OJJ71760.1 acar|OOF90583.1 akaw|GAA92836.1 aluc|OJZ84840.1 aluc|OJZ91593.1 anig|EHA22617.1 anig|EHA25750.1 asyd|OJJ53405.1 atub|OJI86044.1 aver|OJJ04196.1

Group6655: abra|OJJ70203.1 acar|OOF92505.1 acla|EAW06425.1 afis|EAW18529.1 afla|EED52872.1 afum|EAL93226.1 akaw|GAA86574.1 aluc|OJZ85124.1 anig|EHA25343.1 aory|EIT78674.1 asyd|OJJ58782.1 ater|EAU30040.1 atub|OJI80469.1 aver|OJJ01390.1 awen|OJJ31087.1

Group6656: abra|OJJ70217.1 acar|OOF92563.1 agla|OJJ80299.1 akaw|GAA86560.1 aluc|OJZ85109.1 anid|CBF71762.1 anig|EHA25330.1 aory|EIT79760.1 asyd|OJJ61725.1 atub|OJI80484.1 aver|OJI95823.1 awen|OJJ32745.1 afla|EED53095.1 awen|OJJ36310.1 afla|EED57954.1

Group6657: abra|OJJ70234.1 acar|OOF93308.1 afla|EED54309.1 agla|OJJ84752.1 akaw|GAA86550.1 aluc|OJZ85098.1 anid|CBF90396.1 anig|EHA26106.1 asyd|OJJ56223.1 ater|EAU35998.1 atub|OJI80500.1 aver|OJJ05155.1 awen|OJJ37024.1 azon|OJJ42474.1 azon|OJJ43935.1

Group6658: abra|OJJ70323.1 acar|OOF91779.1 acla|EAW12317.1 afis|EAW16905.1 afla|EED45263.1 akaw|GAA92579.1 aluc|OJZ82592.1 anid|CBF80776.1 anig|EHA27483.1 asyd|OJJ54504.1 ater|EAU30212.1 atub|OJI88827.1 aver|OJJ07678.1 awen|OJJ29715.1 aory|EIT73794.1

Group6659: abra|OJJ70363.1 acla|EAW12635.1 afis|EAW24543.1 afla|EED46220.1 afum|EAL86205.2 akaw|GAA91988.1 aluc|OJZ82625.1 anig|EHA27451.1 aory|EIT76522.1 asyd|OJJ61035.1 atub|OJI88859.1 aver|OJJ00353.1 acla|EAW12634.1 afum|EAL86203.1 akaw|GAA91989.1

Group6660: abra|OJJ70369.1 acar|OOF91903.1 afla|EED47349.1 agla|OJJ79929.1 akaw|GAA91982.1 aluc|OJZ82631.1 anid|CBF80680.1 anig|EHA27446.1 aory|EIT82890.1 asyd|OJJ54591.1 ater|EAU30231.1 atub|OJI88864.1 aver|OJJ07561.1 awen|OJJ29764.1 azon|OJJ50383.1

Group6661: abra|OJJ70421.1 acar|OOF91767.1 afla|EED46000.1 agla|OJJ85947.1 akaw|GAA91936.1 aluc|OJZ82686.1 anid|CBF78384.1 anig|EHA21054.1 aory|EIT75811.1 asyd|OJJ62599.1 ater|EAU35269.1 atub|OJI88918.1 aver|OJI96744.1 awen|OJJ29995.1 ater|EAU32499.1

Group6662: abra|OJJ70436.1 acar|OOF91846.1 acla|EAW12327.1 afis|EAW18106.1 afla|EED49485.1 afum|EBA27494.1 akaw|GAA90144.1 aluc|OJZ83203.1 anid|CBF90397.1 anig|EHA21065.1 asyd|OJJ56616.1 ater|EAU35997.1 atub|OJI87734.1 aver|OJJ06108.1 awen|OJJ38309.1

Group6663: abra|OJJ70439.1 acar|OOF91840.1 acla|EAW12226.1 afla|EED45473.1 akaw|GAA90141.1 aluc|OJZ83206.1 anid|CBF82356.1 anig|EHA21067.1 aory|EIT75713.1 asyd|OJJ54211.1 ater|EAU39363.1 atub|OJI87731.1 aver|OJJ08520.1 awen|OJJ30577.1 azon|OJJ49489.1

Group6664: abra|OJJ70460.1 acar|OOF98860.1 afis|EAW24540.1 afla|EED52291.1 agla|OJJ88705.1 akaw|GAA83306.1 aluc|OJZ83802.1 anig|EHA18950.1 aory|EIT82851.1 asyd|OJJ52928.1 atub|OJI90170.1 aver|OJJ08896.1 awen|OJJ41936.1 afla|EED47306.1 aory|EIT74327.1

Group6665: abra|OJJ70474.1 acar|OOF97451.1 acla|EAW13040.1 afis|EAW17627.1 afla|EED49191.1 afum|EAL91441.1 akaw|GAA83323.1 aluc|OJZ83818.1 anid|CBF90148.1 anig|EHA18963.1 aory|EIT78538.1 ater|EAU37061.1 atub|OJI90185.1 awen|OJJ37217.1 azon|OJJ50920.1

Group6666: abra|OJJ70496.1 acar|OOF97430.1 acla|EAW13021.1 afum|EAL91461.1 akaw|GAA83344.1 aluc|OJZ83841.1 anig|EHA18983.1 asyd|OJJ62025.1 ater|EAU37082.1 atub|OJI90207.1 awen|OJJ37199.1 azon|OJJ50898.1 afis|EAW17646.1 anid|CBF90112.1 aver|OJI96116.1

Group6667: abra|OJJ70505.1 acla|EAW08169.1 afis|EAW23205.1 afla|EED47048.1 afum|EAL88278.1 agla|OJJ78740.1 akaw|GAA83354.1 aluc|OJZ83850.1 anig|EHA18992.1 aory|EIT73768.1 asyd|OJJ60190.1 ater|EAU36335.1 atub|OJI90216.1 aver|OJJ04074.1 awen|OJJ39437.1

Group6668: abra|OJJ70517.1 acar|OOF97411.1 acla|EAW08158.1 afis|EAW23196.1 afla|EED47058.1 afum|EAL88287.1 agla|OJJ86333.1 akaw|GAA83364.1 aluc|OJZ83862.1 anid|CBF74708.1 asyd|OJJ60220.1 atub|OJI90230.1 aver|OJJ04048.1 awen|OJJ39426.1 azon|OJJ47627.1

Group6669: abra|OJJ70535.1 acla|EAW08147.1 afis|EAW23192.1 afla|EED47071.1 afum|EAL88291.1 akaw|GAA83380.1 aluc|OJZ83879.1 anid|CBF74520.1 anig|EHA19017.1 aory|EIT72510.1 atub|OJI90246.1 aver|OJJ05435.1 azon|OJJ47613.1 ater|EAU36316.1 awen|OJJ36594.1

Group6670: abra|OJJ70558.1 acla|EAW08356.1 afis|EAW23387.1 afla|EED55575.1 afum|EAL88084.1 agla|OJJ86431.1 akaw|GAA83403.1 aluc|OJZ83901.1 anid|CBF74871.1 asyd|OJJ60116.1 ater|EAU35641.1 atub|OJI90271.1 aver|OJJ04146.1 awen|OJJ39494.1 azon|OJJ47695.1

Group6671: abra|OJJ70565.1 acla|EAW08363.1 afis|EAW23394.1 afla|EED55563.1 afum|EAL88076.1  
agla|OJJ86421.1 akaw|GAA83409.1 aluc|OJZ83908.1 anid|CBF74858.1 asyd|OJJ60124.1 ater|EAU35647.1  
atub|OJI90279.1 aver|OJJ04138.1 awen|OJJ39485.1 azon|OJJ47688.1

Group6672: abra|OJJ70603.1 acar|OOF97118.1 acla|EAW08179.1 afis|EAW23214.1 afum|EBA27339.1  
agla|OJJ78730.1 akaw|GAA89943.1 aluc|OJZ83948.1 anid|CBF74743.1 anig|EHA19077.1 aory|EIT72723.1  
asyd|OJJ60181.1 ater|EAU36344.1 atub|OJI90319.1 awen|OJJ39448.1

Group6673: abra|OJJ70610.1 acar|OOF97112.1 acla|EAW13017.1 afis|EAW17650.1 agla|OJJ79554.1  
akaw|GAA89949.1 aluc|OJZ83956.1 anig|EHA19083.1 aory|EIT82154.1 asyd|OJJ62038.1 ater|EAU37086.1  
atub|OJI90326.1 aver|OJI96144.1 awen|OJJ37195.1 azon|OJJ50894.1

Group6674: abra|OJJ70632.1 acla|EAW08124.1 afis|EAW23161.1 afla|EED46960.1 afum|EAL88322.1  
agla|OJJ89672.1 akaw|GAA89971.1 aluc|OJZ83980.1 anid|CBF74463.1 anig|EHA19107.1 aory|EIT72750.1  
asyd|OJJ57698.1 aver|OJJ05466.1 awen|OJJ36622.1 azon|OJJ47591.1

Group6675: abra|OJJ70676.1 acar|OOF97051.1 afla|EED48529.1 agla|OJJ89615.1 akaw|GAA90008.1  
aluc|OJZ84024.1 anid|CBF89219.1 anig|EHA19145.1 aory|EIT73177.1 asyd|OJJ62525.1 ater|EAU30325.1  
atub|OJI90396.1 aver|OJI96648.1 awen|OJJ36657.1 azon|OJJ47541.1

Group6676: abra|OJJ70699.1 acar|OOF90047.1 acla|EAW08066.1 afis|EAW23102.1 afla|EED48550.1  
agla|OJJ89614.1 akaw|GAA90030.1 aluc|OJZ84045.1 anid|CBF81361.1 asyd|OJJ59382.1 ater|EAU36226.1  
atub|OJI90417.1 aver|OJJ02891.1 awen|OJJ36679.1 azon|OJJ47518.1

Group6677: abra|OJJ70730.1 acar|OOF97008.1 acla|EAW11183.1 afis|EAW15914.1 afum|EAL88549.1  
agla|OJJ89578.1 akaw|GAA90058.1 aluc|OJZ84075.1 anid|CBF81307.1 anig|EHA19194.1 asyd|OJJ59353.1  
atub|OJI90447.1 aver|OJJ02921.1 awen|OJJ36716.1 azon|OJJ47475.1

Group6678: abra|OJJ70765.1 acar|OOF96980.1 acla|EAW13067.1 afis|EAW17597.1 afla|EED49891.1  
afum|EBA27433.1 agla|OJJ86461.1 akaw|GAA90085.1 aluc|OJZ84111.1 aory|EIT72454.1 ater|EAU36530.1  
atub|OJI90484.1 awen|OJJ35909.1 acla|EAW13492.1 agla|OJJ84144.1

Group6679: awen|OJJ34621.1 abra|OJJ75538.1 acla|EAW08949.1 afum|EAL91102.1 akaw|GAA91958.1  
aluc|OJZ82660.1 anig|EHA27434.1 asyd|OJJ60065.1 ater|EAU29412.1 atub|OJI88892.1 aver|OJI99005.1  
acla|EAW07628.1 akaw|GAA83289.1 anig|EHA18934.1 acla|EAW13518.1

Group6680: abra|OJJ70846.1 acar|OOF98269.1 acla|EAW10437.1 afis|EAW25130.1 afum|EAL89801.1  
agla|OJJ89036.1 akaw|GAA91714.1 aluc|OJZ87675.1 anid|CBF85701.1 anig|EHA20865.1 asyd|OJJ64265.1  
atub|OJI80968.1 aver|OJI98357.1 awen|OJJ40755.1 azon|OJJ44119.1

Group6681: abra|OJJ70866.1 acar|OOF98250.1 acla|EAW10458.1 afis|EAW25109.1 afla|EED55333.1  
afum|EAL89780.2 akaw|GAA91733.1 aluc|OJZ87653.1 anid|CBF86070.1 anig|EHA20847.1 asyd|OJJ64459.1  
ater|EAU39379.1 atub|OJI80989.1 aver|OJI98562.1 azon|OJJ45099.1

Group6682: abra|OJJ70965.1 acar|OOF98165.1 acla|EAW10526.1 afis|EAW25040.1 afla|EED55412.1  
afum|EAL89708.1 akaw|GAA82982.1 aluc|OJZ87567.1 anid|CBF85905.1 anig|EHA20769.1 aory|EIT80904.1  
asyd|OJJ64394.1 ater|EAU35790.1 aver|OJI98489.1 azon|OJJ44030.1

Group6683: abra|OJJ71015.1 acar|OOF98125.1 acla|EAW10565.1 afla|EED55456.1 afum|EAL89663.1  
agla|OJJ82243.1 akaw|GAA82940.1 aluc|OJZ87517.1 anig|EHA20728.1 aory|EIT80924.1 asyd|OJJ59503.1  
ater|EAU33531.1 atub|OJI81133.1 aver|OJJ02771.1 azon|OJJ49457.1

Group6684: abra|OJJ71027.1 acar|OOF98112.1 acla|EAW10578.1 afis|EAW24989.1 afum|EAL89649.1  
akaw|GAA82928.1 aluc|OJZ87503.1 anid|CBF81597.1 asyd|OJJ59518.1 ater|EAU35740.1 atub|OJI81146.1  
aver|OJJ02755.1 awen|OJJ40594.1 azon|OJJ49445.1 agla|OJJ82268.1

Group6685: abra|OJJ71066.1 acar|OOF98079.1 acla|EAW13232.1 afis|EAW17398.1 afla|EED54884.1  
afum|EAL91236.1 agla|OJJ83971.1 akaw|GAA82896.1 aluc|OJZ87465.1 anid|CBF89000.1 anig|EHA20687.1  
aory|EIT79355.1 ater|EAU29508.1 atub|OJI81183.1 azon|OJJ47028.1

Group6686: abra|OJJ71081.1 acar|OOF98058.1 acla|EAW10411.1 afis|EAW25157.1 afla|EED57496.1  
afum|EAL89832.2 akaw|GAA82880.1 aluc|OJZ87448.1 anid|CBF85655.1 anig|EHA20671.1 aory|EIT81882.1  
asyd|OJJ64231.1 atub|OJI81201.1 awen|OJJ36557.1 azon|OJJ50305.1

Group6687: abra|OJJ71096.1 atub|OJI83751.1 aver|OJJ02223.1 abra|OJJ71756.1 afla|EED48306.1  
aluc|OJZ84835.1 anig|EHA25745.1 awen|OJJ37891.1 abra|OJJ75283.1 acar|OOF94524.1 akaw|GAA91821.1  
aluc|OJZ92844.1 anig|EHA26166.1 atub|OJI87300.1 azon|OJJ43899.1

Group6688: abra|OJJ71138.1 afis|EAW25230.1 afla|EED53674.1 afum|EAL89891.1 agla|OJJ79178.1  
akaw|GAA82836.1 aluc|OJZ87397.1 anig|EHA20627.1 aory|EIT75330.1 atub|OJI81249.1 aver|OJI98108.1  
anid|CBF85336.1 asyd|OJJ64022.1 ater|EAU34388.1 awen|OJJ40895.1

Group6689: abra|OJJ71160.1 acla|EAW10338.1 afis|EAW25251.1 afla|EED53718.1 afum|EAL89913.1 akaw|GAA82818.1 aluc|OJZ87379.1 anid|CBF85343.1 asyd|OJJ64026.1 ater|EAU34354.1 atub|OJI81267.1 aver|OJI98112.1 azon|OJJ44549.1 agla|OJJ89224.1 awen|OJJ40965.1

Group6690: abra|OJJ71180.1 acar|OOF97985.1 acla|EAW10324.1 afis|EAW25268.1 afla|EED53733.1 afum|EAL89931.1 agla|OJJ89238.1 akaw|GAA82805.1 aluc|OJZ87363.1 anid|CBF85378.1 anig|EHA20598.1 aory|EIT75272.1 ater|EAU34411.1 atub|OJI81282.1 awen|OJJ40982.1

Group6691: abra|OJJ71186.1 acla|EAW10317.1 afis|EAW25275.1 afla|EED53740.1 afum|EAL89938.1 agla|OJJ89249.1 akaw|GAA82799.1 anid|CBF85391.1 anig|EHA20592.1 aory|EIT75341.1 asyd|OJJ64057.1 ater|EAU34418.1 aver|OJI98142.1 awen|OJJ40989.1 azon|OJJ44576.1

Group6692: ater|EAU36088.1 abra|OJJ74682.1 akaw|GAA81932.1 aluc|OJZ92259.1 atub|OJI86693.1 anid|CBF82907.1 afis|EAW19769.1 afla|EED49601.1 afum|EBA27220.1 akaw|GAA82112.1 aluc|OJZ92064.1 anig|EHA22525.1 aver|OJJ03005.1 azon|OJJ50039.1 aory|EIT80948.1

Group6693: acar|OOF97935.1 abra|OJJ74828.1 afla|EED51414.1 akaw|GAA83591.1 anig|EHA26560.1 ater|EAU38714.1 atub|OJI86833.1 abra|OJJ74829.1 acla|EAW09105.1 aluc|OJZ92406.1 anig|EHA26559.1 acar|OOF95816.1 agla|OJJ89327.1 asyd|OJJ52422.1 anig|EHA26216.1

Group6694: abra|OJJ71254.1 acar|OOF97917.1 afla|EED53786.1 agla|OJJ83847.1 akaw|GAA82734.1 aluc|OJZ87289.1 anid|CBF75289.1 anig|EHA20530.1 aory|EIT78457.1 asyd|OJJ59888.1 ater|EAU34457.1 atub|OJI81352.1 aver|OJJ02398.1 awen|OJJ41056.1 azon|OJJ44615.1

Group6695: abra|OJJ71309.1 acla|EAW10231.1 afis|EAW25361.1 afla|EED53843.1 afum|EAL90023.1 agla|OJJ83911.1 akaw|GAA82682.1 aluc|OJZ87235.1 anid|CBF77457.1 anig|EHA20482.1 asyd|OJJ53215.1 atub|OJI81407.1 aver|OJJ03636.1 awen|OJJ41087.1 azon|OJJ44667.1

Group6696: abra|OJJ71344.1 acar|OOF97828.1 acla|EAW10195.1 afis|EAW25400.1 afla|EED53878.1 afum|EAL90059.1 agla|OJJ87040.1 akaw|GAA82648.1 aluc|OJZ87197.1 anid|CBF77522.1 aory|EIT78462.1 ater|EAU34551.1 atub|OJI81442.1 awen|OJJ41127.1 azon|OJJ44701.1

Group6697: abra|OJJ71406.1 acla|EAW10129.1 afis|EAW25458.1 afum|EAL90118.2 aluc|OJZ87136.1 anig|EHA20395.1 asyd|OJJ53121.1 atub|OJI81506.1 afla|EED53947.1 agla|OJJ87111.1 anid|CBF77643.1 aory|EIT78342.1 ater|EAU34628.1 aver|OJJ03733.1 awen|OJJ41190.1

Group6698: abra|OJJ71484.1 acla|EAW10066.1 afis|EAW25519.1 afla|EED54021.1 afum|EAL90184.1 agla|OJJ87283.1 akaw|GAA82536.1 aluc|OJZ87063.1 anid|CBF77792.1 anig|EHA20336.1 asyd|OJJ53026.1 ater|EAU33365.1 atub|OJI81572.1 awen|OJJ41262.1 azon|OJJ44827.1

Group6699: abra|OJJ71579.1 acar|OOF96309.1 acla|EAW15126.1 afis|EAW20096.1 afla|EED45274.1 agla|OJJ88858.1 akaw|GAA89345.1 aluc|OJZ86316.1 anid|CBF84890.1 anig|EHA21559.1 asyd|OJJ63179.1 atub|OJI84219.1 aver|OJI97775.1 awen|OJJ31859.1 azon|OJJ46266.1

Group6700: acar|OOF90408.1 acla|EAW15147.1 afla|EED53356.1 akaw|GAA89323.1 aluc|OJZ86347.1 anig|EHA21539.1 aory|EIT74898.1 ater|EAU38733.1 atub|OJI84187.1 afis|EAW20115.1 afum|EAL85232.1 agla|OJJ88834.1 anid|CBF84932.1 asyd|OJJ63159.1 azon|OJJ46249.1

Group6701: abra|OJJ71648.1 acar|OOF96362.1 afla|EED55106.1 agla|OJJ88187.1 akaw|GAA89281.1 aluc|OJZ86392.1 anig|EHA21506.1 ater|EAU31825.1 atub|OJI84141.1 awen|OJJ33397.1 azon|OJJ46081.1 abra|OJJ75690.1 asyd|OJJ52523.1 aver|OJJ06741.1 aory|EIT81590.1

Group6702: abra|OJJ71660.1 acar|OOF96372.1 acla|EAW15197.1 afla|EED57184.1 agla|OJJ88765.1 akaw|GAA89271.1 aluc|OJZ86404.1 anig|EHA21496.1 asyd|OJJ63108.1 ater|EAU38796.1 atub|OJI84129.1 aver|OJI97853.1 awen|OJJ32060.1 azon|OJJ46094.1 aory|EIT73999.1

Group6703: abra|OJJ71684.1 acar|OOF96394.1 acla|EAW15222.1 afis|EAW20187.1 afla|EED57159.1 afum|EAL85306.1 agla|OJJ84679.1 akaw|GAA89249.1 aluc|OJZ86426.1 anig|EHA21473.1 asyd|OJJ63087.1 atub|OJI84105.1 aver|OJI97875.1 awen|OJJ31187.1 azon|OJJ46117.1

Group6704: abra|OJJ71704.1 acar|OOF90838.1 acla|EAW11767.1 afis|EAW23682.1 akaw|GAA92698.1 aluc|OJZ90156.1 anig|EHA24839.1 aory|EIT78101.1 asyd|OJJ52062.1 ater|EAU29953.1 aver|OJI99826.1 awen|OJJ29989.1 azon|OJJ42782.1 asyd|OJJ60502.1 afla|EED50753.1

Group6705: abra|OJJ71721.1 acar|OOF96426.1 acla|EAW06443.1 afla|EED52827.1 afum|EAL93248.1 agla|OJJ81593.1 akaw|GAA85169.1 aluc|OJZ86467.1 anig|EHA21443.1 aory|EIT78233.1 ater|EAU34837.1 atub|OJI84062.1 awen|OJJ31106.1 azon|OJJ46555.1 afis|EAW18548.1

Group6706: abra|OJJ71731.1 acar|OOF97589.1 afis|EAW22619.1 afla|EED54115.1 afum|EAL90577.1 agla|OJJ78574.1 anid|CBF82374.1 aory|EIT76007.1 asyd|OJJ57664.1 ater|EAU34345.1 aver|OJJ05526.1 awen|OJJ31955.1 aory|EIT72769.1 afla|EED46969.1 agla|OJJ78787.1

Group6707: abra|OJJ71767.1 acar|OOF90207.1 afla|EED45608.1 akaw|GAA85140.1 aluc|OJZ86497.1  
anig|EHA22147.1 aory|EIT75590.1 asyd|OJJ53487.1 atub|OJI84029.1 aver|OJJ01718.1 aluc|OJZ80178.1  
acar|OOF94848.1 akaw|GAA93285.1 aluc|OJZ90159.1 asyd|OJJ65407.1

Group6708: abra|OJJ71790.1 acar|OOF96470.1 afla|EED56596.1 agla|OJJ83771.1 akaw|GAA85120.1  
aluc|OJZ86520.1 anid|CBF82149.1 anig|EHA22126.1 aory|EIT77664.1 asyd|OJJ54326.1 atub|OJI84002.1  
aver|OJJ05280.1 awen|OJJ30240.1 afla|EED49716.1 awen|OJJ29855.1

Group6709: abra|OJJ71796.1 acar|OOF96476.1 acla|EAW12078.1 afis|EAW19719.1 afla|EED52814.1  
afum|EAL86807.2 akaw|GAA85114.1 aluc|OJZ86526.1 anid|CBF78803.1 anig|EHA22120.1 aory|EIT78244.1  
asyd|OJJ55182.1 ater|EAU34845.1 atub|OJI83996.1 aver|OJJ07025.1

Group6710: abra|OJJ71808.1 acar|OOF96486.1 acla|EAW13847.1 afis|EAW18561.1 afla|EED52799.1  
afum|EAL93262.1 agla|OJJ81598.1 akaw|GAA85104.1 aluc|OJZ86538.1 anid|CBF70292.1 aory|EIT78167.1  
asyd|OJJ58733.1 atub|OJI83985.1 aver|OJJ01345.1 awen|OJJ31119.1

Group6711: abra|OJJ71815.1 acla|EAW13855.1 afis|EAW18569.1 afla|EED52782.1 afum|EAL93271.1  
agla|OJJ81620.1 akaw|GAA85095.1 anid|CBF70309.1 anig|EHA22102.1 aory|EIT78229.1 asyd|OJJ58724.1  
atub|OJI83975.1 aver|OJJ01337.1 awen|OJJ31126.1 azon|OJJ46607.1

Group6712: abra|OJJ71856.1 acar|OOF96526.1 acla|EAW13888.1 afis|EAW18600.1 afum|EAL93308.1  
akaw|GAA85061.1 aluc|OJZ86590.1 anid|CBF70401.1 anig|EHA22070.1 asyd|OJJ58631.1 ater|EAU34894.1  
atub|OJI83933.1 aver|OJJ01237.1 awen|OJJ31165.1 azon|OJJ46639.1

Group6713: abra|OJJ71892.1 acar|OOF96554.1 acla|EAW09630.1 afis|EAW21510.1 afla|EED55948.1  
afum|EAL92530.1 agla|OJJ85674.1 akaw|GAA85026.1 aluc|OJZ86631.1 anid|CBF76439.1 asyd|OJJ61100.1  
atub|OJI83897.1 aver|OJJ00415.1 awen|OJJ39184.1 azon|OJJ51509.1

Group6714: abra|OJJ71962.1 afis|EAW21563.1 afla|EED56017.1 afum|EAL92582.1 agla|OJJ85743.1  
akaw|GAA84965.1 anid|CBF76334.1 anig|EHA21977.1 aory|EIT76724.1 asyd|OJJ61043.1 ater|EAU34970.1  
aver|OJJ00359.1 awen|OJJ39124.1 azon|OJJ51454.1 acla|EAW09574.1

Group6715: akaw|GAA84877.1 abra|OJJ72058.1 acar|OOF89882.1 aluc|OJZ86794.1 atub|OJI83724.1  
acar|OOF89761.1 afla|EED57898.1 anig|EHA21889.1 asyd|OJJ60722.1 acla|EAW09491.1 afis|EAW21645.1  
afum|EAL92679.1 ater|EAU38330.1 agla|OJJ84562.1 anid|CBF83532.1

Group6716: abra|OJJ72060.1 acar|OOF89884.1 afla|EED57897.1 agla|OJJ79717.1 akaw|GAA84875.1  
anid|CBF83535.1 anig|EHA21887.1 aory|EIT82737.1 asyd|OJJ60724.1 ater|EAU38331.1 atub|OJI83722.1  
aver|OJJ00057.1 awen|OJJ33905.1 azon|OJJ48656.1 aluc|OJZ86796.1

Group6717: abra|OJJ72128.1 acar|OOF96772.1 afla|EED46870.1 afum|EAL90429.1 agla|OJJ86322.1  
akaw|GAA84795.1 aluc|OJZ86885.1 anid|CBF77734.1 anig|EHA21759.1 aory|EIT72614.1 asyd|OJJ53056.1  
ater|EAU33000.1 atub|OJI83634.1 aver|OJJ03788.1 awen|OJJ32568.1

Group6718: abra|OJJ72191.1 acar|OOF96817.1 afla|EED48888.1 agla|OJJ85283.1 akaw|GAA84742.1  
aluc|OJZ86942.1 anig|EHA21702.1 aory|EIT81212.1 asyd|OJJ57933.1 atub|OJI83580.1 aver|OJJ04464.1  
awen|OJJ34665.1 azon|OJJ50423.1 anid|CBF79551.1 awen|OJJ36918.1

Group6719: abra|OJJ72202.1 acar|OOF96822.1 afis|EAW24464.1 afla|EED55202.1 afum|EAL86135.1  
agla|OJJ80322.1 akaw|GAA84734.1 aluc|OJZ86952.1 anig|EHA21695.1 aory|EIT83510.1 asyd|OJJ57432.1  
ater|EAU29970.1 atub|OJI83571.1 aver|OJJ05748.1 awen|OJJ32726.1

Group6720: abra|OJJ72210.1 acla|EAW09560.1 afis|EAW21188.1 afla|EED53237.1 afum|EAL92210.1  
akaw|GAA84724.1 aluc|OJZ86962.1 anig|EHA21686.1 aory|EIT75124.1 asyd|OJJ56246.1 ater|EAU34395.1  
atub|OJI83561.1 aver|OJJ05169.1 azon|OJJ49087.1 anid|CBF82034.1

Group6721: abra|OJJ72250.1 acar|OOF96881.1 acla|EAW14644.1 afis|EAW24569.1 afla|EED50216.1  
agla|OJJ79377.1 akaw|GAA84687.1 aluc|OJZ87001.1 anid|CBF71507.1 anig|EHA21645.1 aory|EIT77275.1  
asyd|OJJ54920.1 ater|EAU36842.1 atub|OJI83518.1 afla|EED50215.1

Group6722: abra|OJJ72325.1 acar|OOF94889.1 acla|EAW11998.1 afis|EAW19638.1 afum|EAL86884.1  
agla|OJJ80780.1 akaw|GAA86075.1 aluc|OJZ90310.1 anid|CBF71339.1 anig|EHA23797.1 asyd|OJJ55100.1  
atub|OJI81735.1 aver|OJJ07106.1 awen|OJJ41883.1 azon|OJJ47081.1

Group6723: abra|OJJ72356.1 acar|OOF97624.1 acla|EAW11960.1 afis|EAW19597.1 afla|EED56953.1  
afum|EAL86921.1 agla|OJJ80739.1 akaw|GAA86103.1 aluc|OJZ90335.1 anig|EHA23819.1 asyd|OJJ54506.1  
ater|EAU32928.1 atub|OJI81762.1 aver|OJJ07676.1 awen|OJJ41845.1

Group6724: abra|OJJ72358.1 acar|OOF94860.1 agla|OJJ81678.1 akaw|GAA86105.1 aluc|OJZ90337.1  
anid|CBF87127.1 anig|EHA23821.1 asyd|OJJ60367.1 ater|EAU31885.1 atub|OJI81764.1 aver|OJJ01794.1  
awen|OJJ33424.1 aver|OJI99704.1 acla|EAW15010.1 anid|CBF85560.1



Group6725: abra|OJJ72364.1 acar|OOF94858.1 afis|EAW19111.1 afla|EED52118.1 afum|EAL93842.2  
agla|OJJ84490.1 akaw|GAA86115.1 aluc|OJZ90351.1 anid|CBF89579.1 anig|EHA23835.1 asyd|OJJ52177.1  
ater|EAU37369.1 atub|OJI81778.1 aver|OJI95854.1 awen|OJJ32509.1

Group6726: abra|OJJ72385.1 acar|OOF90291.1 acla|EAW11951.1 afis|EAW19588.1 afum|EAL86930.1  
agla|OJJ80725.1 akaw|GAA86134.1 aluc|OJZ90372.1 anig|EHA23846.1 asyd|OJJ55151.1 ater|EAU32960.1  
atub|OJI81798.1 aver|OJJ07056.1 awen|OJJ41802.1 azon|OJJ47029.1

Group6727: abra|OJJ72403.1 acar|OOF94825.1 acla|EAW11938.1 afis|EAW19573.1 afla|EED56810.1  
afum|EAL86944.1 agla|OJJ80701.1 akaw|GAA86147.1 aluc|OJZ90388.1 anid|CBF71230.1 asyd|OJJ55168.1  
atub|OJI81816.1 aver|OJJ07038.1 awen|OJJ41786.1 azon|OJJ44892.1

Group6728: abra|OJJ72411.1 acar|OOF94818.1 acla|EAW11930.1 afis|EAW19564.1 afum|EAL86948.1  
akaw|GAA86154.1 aluc|OJZ90395.1 anid|CBF78022.1 anig|EHA23864.1 asyd|OJJ55234.1 ater|EAU32990.1  
atub|OJI81825.1 aver|OJJ06989.1 awen|OJJ41779.1 azon|OJJ44898.1

Group6729: abra|OJJ72416.1 acar|OOF94813.1 acla|EAW12249.1 afis|EAW17524.1 afla|EED45961.1  
afum|EAL91339.2 akaw|GAA86159.1 aluc|OJZ90400.1 anid|CBF73870.1 anig|EHA23870.1 asyd|OJJ55449.1  
atub|OJI81831.1 aver|OJJ06522.1 awen|OJJ41196.1 azon|OJJ46820.1

Group6730: abra|OJJ72420.1 acar|OOF90369.1 acla|EAW09083.1 afis|EAW25670.1 afla|EED46155.1  
afum|EAL84342.1 akaw|GAA86162.1 aluc|OJZ90403.1 anid|CBF69527.1 anig|EHA23871.1 aory|EIT76456.1  
asyd|OJJ59184.1 ater|EAU33005.1 atub|OJI81834.1 ater|EAU31774.1

Group6731: abra|OJJ72442.1 acar|OOF94794.1 acla|EAW12675.1 afis|EAW17838.1 afla|EED46183.1  
afum|EAL91648.1 akaw|GAA86181.1 aluc|OJZ90426.1 anid|CBF77981.1 anig|EHA23896.1 aory|EIT76436.1  
asyd|OJJ55259.1 atub|OJI81858.1 aver|OJJ06966.1 awen|OJJ41738.1

Group6732: abra|OJJ72464.1 acar|OOF94774.1 acla|EAW12697.1 afis|EAW17860.1 afla|EED54666.1  
afum|EAL91668.1 agla|OJJ83107.1 akaw|GAA86201.1 aluc|OJZ90452.1 anig|EHA23914.1 aory|EIT78803.1  
ater|EAU33065.1 atub|OJI81879.1 awen|OJJ41712.1 azon|OJJ48407.1

Group6733: abra|OJJ72485.1 acar|OOF94750.1 acla|EAW12716.1 afis|EAW17878.1 afum|EAL91686.1  
agla|OJJ83068.1 akaw|GAA86220.1 aluc|OJZ90472.1 anid|CBF82881.1 anig|EHA23931.1 asyd|OJJ55065.1  
atub|OJI81896.1 aver|OJJ05548.1 awen|OJJ41686.1 aver|OJJ07146.1

Group6734: abra|OJJ72534.1 acar|OOF94718.1 acla|EAW12741.1 afis|EAW17904.1 afla|EED46296.1  
afum|EAL91712.1 agla|OJJ83038.1 akaw|GAA86256.1 aluc|OJZ90513.1 anid|CBF76987.1 anig|EHA23969.1  
aory|EIT76331.1 atub|OJI81938.1 awen|OJJ41646.1 azon|OJJ45694.1

Group6735: abra|OJJ72541.1 acla|EAW12746.1 afis|EAW17910.1 afla|EED46312.1 afum|EAL91719.2  
agla|OJJ83033.1 akaw|GAA86265.1 aluc|OJZ90525.1 anid|CBF76965.1 anig|EHA23977.1 aory|EIT76322.1  
asyd|OJJ57039.1 atub|OJI81947.1 awen|OJJ41639.1 azon|OJJ48361.1

Group6736: abra|OJJ72548.1 afla|EED46318.1 agla|OJJ83027.1 aluc|OJZ90536.1 anig|EHA23984.1  
aory|EIT81238.1 atub|OJI81957.1 awen|OJJ41629.1 azon|OJJ48354.1 acla|EAW12753.1 afis|EAW17916.1  
afum|EAL91726.1 anid|CBF76975.1 asyd|OJJ57049.1 aver|OJJ03247.1

Group6737: abra|OJJ72553.1 acar|OOF94699.1 acla|EAW12758.1 agla|OJJ83021.1 akaw|GAA85185.1  
aluc|OJZ90540.1 anig|EHA23988.1 aory|EIT81219.1 asyd|OJJ57056.1 ater|EAU33551.1 atub|OJI81962.1  
awen|OJJ41625.1 azon|OJJ48348.1 afla|EED46323.1 ater|EAU30195.1

Group6738: abra|OJJ72594.1 acla|EAW12779.1 afis|EAW17942.1 afum|EAL91753.1 agla|OJJ82990.1  
akaw|GAA85222.1 aluc|OJZ90576.1 anid|CBF77051.1 anig|EHA24020.1 asyd|OJJ56995.1 ater|EAU33522.1  
atub|OJI82000.1 aver|OJJ03292.1 awen|OJJ41601.1 azon|OJJ48321.1

Group6739: abra|OJJ72807.1 acar|OOF96013.1 acla|EAW11434.1 afla|EED49170.1 afum|EAL87418.1  
agla|OJJ86922.1 akaw|GAA85410.1 aluc|OJZ83305.1 anig|EHA24188.1 asyd|OJJ53262.1 ater|EAU29762.1  
atub|OJI82205.1 aver|OJJ03589.1 awen|OJJ35456.1 azon|OJJ51287.1

Group6740: abra|OJJ72821.1 acar|OOF96026.1 acla|EAW11418.1 afis|EAW24004.1 afla|EED49157.1  
afum|EAL87434.1 akaw|GAA85422.1 aluc|OJZ83323.1 anid|CBF77392.1 anig|EHA24201.1 aory|EIT78585.1  
asyd|OJJ53246.1 ater|EAU29747.1 atub|OJI82220.1 awen|OJJ35475.1

Group6741: abra|OJJ72889.1 acar|OOF96079.1 afla|EED58058.1 agla|OJJ83817.1 akaw|GAA85476.1  
aluc|OJZ83397.1 anid|CBF75382.1 anig|EHA24250.1 aory|EIT79702.1 asyd|OJJ59844.1 ater|EAU35456.1  
atub|OJI82283.1 aver|OJJ02445.1 awen|OJJ35574.1 azon|OJJ46947.1

Group6742: abra|OJJ72981.1 acla|EAW08029.1 afis|EAW23063.1 afla|EED54954.1 afum|EAL88416.1  
agla|OJJ89411.1 akaw|GAA85556.1 aluc|OJZ83491.1 anid|CBF80977.1 anig|EHA24326.1 aory|EIT80367.1  
asyd|OJJ56356.1 atub|OJI82384.1 aver|OJJ06358.1 awen|OJJ35672.1

Group6743: abra|OJJ73000.1 acar|OOF89940.1 acla|EAW08013.1 afis|EAW23047.1 afla|EED54971.1 afum|EAL88433.1 akaw|GAA85574.1 aluc|OJZ83510.1 anid|CBF80947.1 aory|EIT80393.1 asyd|OJJ56340.1 ater|EAU29599.1 atub|OJI82403.1 aver|OJJ06373.1 awen|OJJ35692.1

Group6744: abra|OJJ73027.1 acar|OOF96194.1 acla|EAW07989.1 afis|EAW23024.1 afum|EAL88458.1 agla|OJJ89455.1 akaw|GAA85601.1 aluc|OJZ83539.1 anid|CBF80907.1 asyd|OJJ56331.1 atub|OJI82430.1 aver|OJJ06383.1 awen|OJJ30719.1 azon|OJJ44180.1 afla|EED54992.1

Group6745: abra|OJJ73073.1 acar|OOG00306.1 acla|EAW13615.1 afis|EAW19976.1 afla|EED45377.1 afum|EBA27213.1 akaw|GAA88088.1 aluc|OJZ81352.1 anig|EHA18654.1 aory|EIT82383.1 ater|EAU31775.1 atub|OJI91556.1 aver|OJJ02016.1 awen|OJJ29807.1 azon|OJJ42869.1

Group6746: abra|OJJ73141.1 acar|OOF92575.1 afis|EAW24505.1 afla|EED48167.1 afum|EAL86173.1 akaw|GAA88031.1 aluc|OJZ81290.1 anid|CBF76012.1 anig|EHA18589.1 aory|EIT83029.1 asyd|OJJ52436.1 atub|OJI91498.1 aver|OJJ03974.1 awen|OJJ31247.1 azon|OJJ47356.1

Group6747: abra|OJJ73146.1 acar|OOG00359.1 acla|EAW07022.1 afis|EAW16648.1 afum|EAL89252.1 agla|OJJ82594.1 akaw|GAA88026.1 aluc|OJZ81285.1 anid|CBF82059.1 anig|EHA18584.1 asyd|OJJ54239.1 atub|OJI91492.1 aver|OJJ05191.1 awen|OJJ40066.1 azon|OJJ45867.1

Group6748: abra|OJJ73155.1 acar|OOG00372.1 acla|EAW07029.1 afis|EAW16655.1 afla|EED44939.1 afum|EAL89259.1 akaw|GAA88017.1 aluc|OJZ81275.1 anid|CBF82069.1 anig|EHA18575.1 aory|EIT73497.1 asyd|OJJ54245.1 atub|OJI91483.1 aver|OJJ05197.1 awen|OJJ40059.1

Group6749: abra|OJJ73277.1 acla|EAW06952.1 afis|EAW16567.1 afla|EED56096.1 afum|EAL89164.1 agla|OJJ82754.1 akaw|GAA92728.1 aluc|OJZ88772.1 anid|CBF81820.1 aory|EIT76655.1 asyd|OJJ59653.1 ater|EAU36636.1 aver|OJJ02629.1 awen|OJJ40252.1 azon|OJJ49113.1

Group6750: abra|OJJ73327.1 acar|OOF97930.1 acla|EAW09072.1 afis|EAW25645.1 afla|EED52302.1 afum|EAL84331.1 akaw|GAA92791.1 aluc|OJZ88709.1 anid|CBF71476.1 anig|EHA18410.1 aory|EIT74506.1 asyd|OJJ54944.1 atub|OJI91295.1 aver|OJJ07251.1 azon|OJJ48164.1

Group6751: abra|OJJ73348.1 acar|OOG00562.1 acla|EAW12349.1 afis|EAW16770.1 afla|EED45246.1 afum|EAL86338.1 akaw|GAA83134.1 aluc|OJZ88691.1 anid|CBF87373.1 anig|EHA18372.1 aory|EIT73754.1 asyd|OJJ61421.1 atub|OJI91271.1 aver|OJJ00757.1 azon|OJJ43652.1

Group6752: abra|OJJ73364.1 acar|OOG00571.1 acla|EAW06984.1 afis|EAW16598.1 afla|EED45017.1 afum|EAL89194.1 agla|OJJ82656.1 akaw|GAA83120.1 aluc|OJZ88676.1 anig|EHA18358.1 aory|EIT73536.1 ater|EAU36677.1 atub|OJI91257.1 awen|OJJ40210.1 azon|OJJ49076.1

Group6753: abra|OJJ73430.1 acar|OOG00637.1 afis|EAW16320.1 afla|EED53561.1 agla|OJJ88281.1 akaw|GAA83062.1 aluc|OJZ88611.1 anid|CBF89153.1 anig|EHA18304.1 aory|EIT75018.1 asyd|OJJ62565.1 ater|EAU34137.1 atub|OJI91196.1 aver|OJI96689.1 azon|OJJ44979.1

Group6754: abra|OJJ73475.1 acar|OOG00672.1 acla|EAW06800.1 afis|EAW16350.1 afla|EED53522.1 afum|EAL88975.1 akaw|GAA83026.1 aluc|OJZ88572.1 anid|CBF89208.1 anig|EHA18270.1 asyd|OJJ62521.1 atub|OJI91158.1 aver|OJI96640.1 awen|OJJ37752.1 azon|OJJ45012.1

Group6755: abra|OJJ73506.1 acla|EAW07439.1 afis|EAW22466.1 afla|EED54498.1 afum|EAL90725.1 agla|OJJ87558.1 akaw|GAA87453.1 aluc|OJZ88542.1 anid|CBF88905.1 anig|EHA18242.1 asyd|OJJ62838.1 atub|OJI91127.1 aver|OJI96881.1 awen|OJJ35092.1 azon|OJJ50017.1

Group6756: abra|OJJ73536.1 acla|EAW07458.1 afis|EAW22489.1 afla|EED54518.1 afum|EAL90704.1 agla|OJJ80858.1 akaw|GAA88614.1 aluc|OJZ88524.1 anid|CBF88948.1 anig|EHA18226.1 aory|EIT78914.1 asyd|OJJ62812.1 atub|OJI91109.1 awen|OJJ35109.1 azon|OJJ49984.1

Group6757: abra|OJJ73546.1 acar|OOG00720.1 acla|EAW07465.1 afis|EAW22498.1 afla|EED54525.1 afum|EAL90695.1 akaw|GAA88606.1 aluc|OJZ88514.1 anid|CBF88958.1 anig|EHA18220.1 asyd|OJJ62806.1 ater|EAU39220.1 atub|OJI91099.1 aver|OJI96852.1 awen|OJJ35120.1

Group6758: abra|OJJ73570.1 afis|EAW22521.1 akaw|GAA88585.1 aluc|OJZ88490.1 anid|CBF89004.1 anig|EHA18199.1 asyd|OJJ62778.1 ater|EAU39189.1 atub|OJI91077.1 awen|OJJ35148.1 azon|OJJ49953.1 acla|EAW07488.1 agla|OJJ80882.1 aory|EIT78870.1 aver|OJI96823.1

Group6759: abra|OJJ73588.1 acar|OOG00770.1 acla|EAW07506.1 afis|EAW22538.1 afum|EAL90656.2 akaw|GAA88564.1 aluc|OJZ88462.1 anid|CBF89034.1 anig|EHA18182.1 aory|EIT78956.1 asyd|OJJ62763.1 ater|EAU39171.1 atub|OJI91060.1 aver|OJI96806.1 awen|OJJ35167.1

Group6760: abra|OJJ73674.1 afis|EAW22614.1 afla|EED49812.1 afum|EAL90584.1 akaw|GAA88483.1 aluc|OJZ88377.1 anid|CBF88254.1 aory|EIT77600.1 asyd|OJJ63671.1 ater|EAU39088.1 atub|OJI90972.1 acla|EAW07580.1 aluc|OJZ88378.1 awen|OJJ35242.1 azon|OJJ49865.1

Group6761: abra|OJJ73718.1 acar|OOG00880.1 acla|EAW07610.1 afis|EAW22640.1 afla|EED53497.1 afum|EAL90552.2 akaw|GAA88445.1 atub|OJI90928.1 aver|OJI99806.1 acla|EAW07609.1 afis|EAW22639.1 afla|EED53496.1 afum|EAL90553.2 anig|EHA18068.1 aory|EIT75156.1

Group6762: abra|OJJ73754.1 acar|OOG00917.1 acla|EAW07645.1 afis|EAW22665.1 afla|EED49939.1 afum|EAL90527.1 agla|OJJ79059.1 akaw|GAA88413.1 aluc|OJZ88297.1 anid|CBF88163.1 anig|EHA18037.1 aory|EIT83449.1 aver|OJI97319.1 awen|OJJ35291.1 azon|OJJ49823.1

Group6763: abra|OJJ73790.1 acla|EAW07681.1 akaw|GAA89409.1 aluc|OJZ88264.1 anig|EHA18010.1 ater|EAU39016.1 atub|OJI90863.1 aver|OJI97363.1 afis|EAW22696.1 afum|EAL90496.1 afla|EED49976.1 agla|OJJ79022.1 anid|CBF88100.1 aory|EIT74741.1 asyd|OJJ63571.1

Group6764: abra|OJJ73800.1 acar|OOG00943.1 acla|EAW07678.1 afis|EAW22693.1 agla|OJJ79019.1 akaw|GAA89420.1 aluc|OJZ88253.1 anig|EHA17995.1 asyd|OJJ63568.1 ater|EAU39013.1 atub|OJI90851.1 aver|OJI97366.1 awen|OJJ35331.1 afum|EBA27408.1 azon|OJJ50247.1

Group6765: abra|OJJ73808.1 acar|OOG00964.1 acla|EAW07696.1 afis|EAW22713.1 afla|EED49998.1 afum|EAL90481.1 agla|OJJ78999.1 akaw|GAA89428.1 aluc|OJZ88242.1 anig|EHA17988.1 asyd|OJJ63547.1 atub|OJI90844.1 aver|OJI97387.1 awen|OJJ35348.1 azon|OJJ49769.1

Group6766: abra|OJJ73835.1 afis|EAW22762.1 afla|EED50024.1 afum|EAL90437.1 agla|OJJ83658.1 akaw|GAA89453.1 aluc|OJZ88214.1 aory|EIT74697.1 asyd|OJJ63514.1 atub|OJI90814.1 aver|OJI97416.1 awen|OJJ35435.1 acar|OOG00986.1 azon|OJJ49742.1 anid|CBF88007.1

Group6767: abra|OJJ73917.1 acar|OOG01049.1 acla|EAW07793.1 afis|EAW22831.1 afla|EED50106.1 afum|EAL90371.2 agla|OJJ83508.1 akaw|GAA89523.1 aluc|OJZ88129.1 anid|CBF87881.1 anig|EHA17895.1 ater|EAU38880.1 atub|OJI90735.1 awen|OJJ38897.1 azon|OJJ49678.1

Group6768: abra|OJJ73932.1 acar|OOG01064.1 acla|EAW07810.1 afis|EAW22847.1 afla|EED50122.1 afum|EAL90355.1 agla|OJJ83477.1 akaw|GAA89540.1 aluc|OJZ88110.1 anig|EHA17880.1 aory|EIT74658.1 ater|EAU38863.1 atub|OJI90718.1 awen|OJJ38876.1 azon|OJJ49665.1

Group6769: abra|OJJ73947.1 acar|OOG01075.1 afis|EAW22855.1 afum|EAL90345.1 agla|OJJ83466.1 akaw|GAA89552.1 aluc|OJZ88097.1 anid|CBF87835.1 anig|EHA17866.1 aory|EIT74691.1 asyd|OJJ63409.1 ater|EAU38808.1 atub|OJI90705.1 aver|OJI97528.1 awen|OJJ38863.1

Group6770: abra|OJJ73968.1 acar|OOG01094.1 acla|EAW07839.1 afis|EAW22875.1 afla|EED50160.1 akaw|GAA89571.1 aluc|OJZ88076.1 anid|CBF87814.1 anig|EHA17848.1 aory|EIT76936.1 asyd|OJJ63393.1 ater|EAU38839.1 atub|OJI90685.1 aver|OJI97542.1 awen|OJJ38847.1

Group6771: abra|OJJ73970.1 acar|OOG01096.1 acla|EAW07841.1 afis|EAW22877.1 afla|EED50163.1 afum|EAL90322.1 agla|OJJ83445.1 akaw|GAA89573.1 aluc|OJZ88074.1 anid|CBF87813.1 anig|EHA17847.1 aory|EIT76903.1 asyd|OJJ63391.1 ater|EAU38841.1 atub|OJI90683.1

Group6772: abra|OJJ74113.1 acar|OOG01218.1 acla|EAW07955.1 agla|OJJ83294.1 akaw|GAA87587.1 aluc|OJZ87921.1 anid|CBF87576.1 anig|EHA17715.1 aory|EIT79068.1 asyd|OJJ63247.1 ater|EAU30629.1 atub|OJI90532.1 aver|OJI97709.1 awen|OJJ38571.1 azon|OJJ50433.1

Group6773: abra|OJJ74132.1 acla|EAW14127.1 afis|EAW18828.1 afla|EED55161.1 afum|EAL93562.1 agla|OJJ80864.1 akaw|GAA89754.1 aluc|OJZ80629.1 anig|EHA27202.1 aory|EIT81622.1 ater|EAU33514.1 atub|OJI87485.1 awen|OJJ41929.1 acar|OOF91236.1 agla|OJJ89620.1

Group6774: abra|OJJ74135.1 acar|OOF95596.1 afis|EAW21379.1 afla|EED45561.1 afum|EAL92394.1 akaw|GAA89751.1 aluc|OJZ80633.1 anid|CBF82348.1 anig|EHA27199.1 aory|EIT75532.1 asyd|OJJ55145.1 atub|OJI87488.1 aver|OJJ07062.1 awen|OJJ36399.1 awen|OJJ36158.1

Group6775: abra|OJJ74164.1 acar|OOF95558.1 acla|EAW06847.1 afis|EAW16468.1 afla|EED49700.1 akaw|GAA86852.1 aluc|OJZ89972.1 asyd|OJJ62459.1 ater|EAU34008.1 atub|OJI84835.1 aver|OJI96594.1 awen|OJJ33441.1 azon|OJJ45095.1 anid|CBF89397.1 agla|OJJ85937.1

Group6776: abra|OJJ74192.1 afla|EED57657.1 agla|OJJ87790.1 akaw|GAA86825.1 aluc|OJZ89943.1 anid|CBF88517.1 anig|EHA27142.1 aory|EIT79910.1 asyd|OJJ63806.1 ater|EAU34276.1 atub|OJI84863.1 aver|OJI97132.1 acla|EAW07244.1 afis|EAW22265.1 afum|EAL90915.1

Group6777: abra|OJJ74226.1 acar|OOF95500.1 acla|EAW07279.1 afis|EAW22310.1 afla|EED57702.1 afum|EAL90880.1 agla|OJJ87740.1 akaw|GAA86793.1 aluc|OJZ89907.1 anid|CBF88586.1 anig|EHA27107.1 aory|EIT79928.1 ater|EAU34314.1 atub|OJI84899.1 awen|OJJ34877.1

Group6778: abra|OJJ74324.1 acar|OOF95408.1 acla|EAW07376.1 afis|EAW22401.1 afla|EED56065.1 afum|EAL90790.1 agla|OJJ87664.1 akaw|GAA86702.1 aluc|OJZ89804.1 anid|CBF88767.1 asyd|OJJ63980.1 atub|OJI85002.1 aver|OJI96973.1 awen|OJJ34980.1 azon|OJJ45628.1

Group6779: abra|OJJ74428.1 acar|OOF95312.1 afla|EED54042.1 akaw|GAA87323.1 aluc|OJZ89692.1  
anig|EHA26931.1 aory|EIT76115.1 asyd|OJJ54921.1 ater|EAU36078.1 atub|OJI85109.1 aver|OJJ07274.1  
awen|OJJ32611.1 azon|OJJ49314.1 afla|EED54043.1 awen|OJJ32610.1

Group6780: abra|OJJ74432.1 acar|OOF95314.1 acla|EAW11099.1 afis|EAW20764.1 afla|EED55080.1  
afum|EAL84855.1 agla|OJJ87704.1 akaw|GAA87326.1 aluc|OJZ89689.1 anid|CBF69548.1 anig|EHA26927.1  
aory|EIT81650.1 asyd|OJJ59167.1 atub|OJI85112.1 aver|OJJ01757.1

Group6781: abra|OJJ74450.1 acar|OOF95301.1 afla|EED54126.1 agla|OJJ78793.1 akaw|GAA87341.1  
aluc|OJZ89673.1 anid|CBF78429.1 anig|EHA26908.1 aory|EIT75911.1 asyd|OJJ52558.1 ater|EAU32137.1  
atub|OJI85127.1 aver|OJJ03842.1 awen|OJJ39930.1 azon|OJJ42222.1

Group6782: abra|OJJ74471.1 acar|OOF95274.1 acla|EAW12406.1 afis|EAW16865.1 afla|EED51094.1  
afum|EAL86404.1 agla|OJJ84377.1 akaw|GAA87364.1 aluc|OJZ89649.1 anig|EHA26887.1 aory|EIT81999.1  
ater|EAU32022.1 atub|OJI85155.1 aver|OJJ07275.1 awen|OJJ38926.1

Group6783: abra|OJJ74511.1 acar|OOF95232.1 acla|EAW07180.1 afis|EAW22193.1 afum|EAL90998.1  
akaw|GAA82088.1 aluc|OJZ92092.1 anig|EHA26849.1 asyd|OJJ63750.1 ater|EAU34201.1 atub|OJI86525.1  
aver|OJI97190.1 awen|OJJ34774.1 azon|OJJ42148.1 awen|OJJ34608.1

Group6784: abra|OJJ74521.1 acar|OOF95227.1 acla|EAW07171.1 afis|EAW22186.1 afla|EED57565.1  
agla|OJJ87864.1 akaw|GAA82079.1 aluc|OJZ92100.1 anid|CBF88393.1 anig|EHA26842.1 asyd|OJJ63743.1  
ater|EAU34194.1 atub|OJI86533.1 aver|OJI97196.1 awen|OJJ34766.1

Group6785: abra|OJJ74537.1 acar|OOF95218.1 acla|EAW07156.1 afis|EAW22171.1 afla|EED57543.1  
afum|EAL91018.1 agla|OJJ87884.1 akaw|GAA82064.1 aluc|OJZ92118.1 anig|EHA26826.1 ater|EAU34176.1  
atub|OJI86551.1 awen|OJJ34747.1 azon|OJJ45815.1 aory|EIT81866.1

Group6786: abra|OJJ74570.1 acar|OOF95193.1 acla|EAW07139.1 afis|EAW22152.1 afum|EAL91038.1  
agla|OJJ87910.1 akaw|GAA82035.1 aluc|OJZ92148.1 anid|CBF89106.1 anig|EHA26801.1 asyd|OJJ62724.1  
atub|OJI86576.1 aver|OJI96767.1 awen|OJJ34728.1 azon|OJJ43283.1

Group6787: abra|OJJ74587.1 acar|OOF95179.1 acla|EAW10791.1 agla|OJJ82885.1 akaw|GAA82018.1  
asyd|OJJ59434.1 atub|OJI86594.1 aver|OJJ02837.1 azon|OJJ49219.1 afla|EED47200.1 aory|EIT79256.1  
ater|EAU36524.1 afis|EAW24785.1 afum|EAL89424.1 anid|CBF81453.1

Group6788: abra|OJJ74771.1 acar|OOF95761.1 acla|EAW10640.1 afis|EAW24926.1 afla|EED55547.1  
afum|EAL89582.1 agla|OJJ82154.1 akaw|GAA83641.1 anid|CBF75703.1 aory|EIT82675.1 ater|EAU35656.1  
atub|OJI86782.1 aver|OJJ05682.1 awen|OJJ40522.1 azon|OJJ49382.1

Group6789: abra|OJJ74778.1 acar|OOF95767.1 acla|EAW10633.1 afis|EAW24934.1 afla|EED55540.1  
afum|EAL87766.1 agla|OJJ82161.1 akaw|GAA83634.1 aluc|OJZ92359.1 anig|EHA26614.1 aory|EIT80846.1  
ater|EAU35663.1 atub|OJI86789.1 awen|OJJ40529.1 afum|EAL89591.1

Group6790: abra|OJJ74787.1 acar|OOF95778.1 acla|EAW10624.1 afis|EAW24943.1 afla|EED55522.1  
afum|EAL89600.1 agla|OJJ82170.1 akaw|GAA83626.1 aluc|OJZ92367.1 anig|EHA26606.1 asyd|OJJ57518.1  
atub|OJI86797.1 aver|OJJ05661.1 awen|OJJ40538.1 azon|OJJ49398.1

Group6791: abra|OJJ74807.1 acar|OOF95799.1 acla|EAW10857.1 afis|EAW20256.1 afla|EED53758.1  
agla|OJJ85792.1 akaw|GAA83605.1 aluc|OJZ92388.1 anig|EHA26587.1 aory|EIT78405.1 asyd|OJJ53596.1  
ater|EAU30254.1 atub|OJI86818.1 aver|OJJ08152.1 awen|OJJ40023.1

Group6792: abra|OJJ74849.1 acar|OOF95850.1 afla|EED57862.1 agla|OJJ87005.1 akaw|GAA83573.1  
aluc|OJZ92425.1 anid|CBF89602.1 anig|EHA26542.1 aory|EIT81073.1 asyd|OJJ62309.1 ater|EAU33980.1  
atub|OJI86855.1 aver|OJI96417.1 azon|OJJ45216.1 aver|OJJ03882.1

Group6793: abra|OJJ74855.1 acar|OOF95855.1 acla|EAW08529.1 afis|EAW23569.1 afla|EED57461.1  
agla|OJJ86830.1 akaw|GAA83567.1 aluc|OJZ92431.1 anid|CBF89619.1 anig|EHA26535.1 atub|OJI86861.1  
aver|OJI96410.1 awen|OJJ39897.1 azon|OJJ45875.1 afum|EAL87898.2

Group6794: abra|OJJ74948.1 acar|OOF97368.1 acla|EAW08423.1 afis|EAW23446.1 afla|EED57363.1  
agla|OJJ86703.1 akaw|GAA83474.1 aluc|OJZ92521.1 anid|CBF89790.1 anig|EHA26454.1 asyd|OJJ62201.1  
atub|OJI86955.1 aver|OJI96313.1 awen|OJJ39783.1 azon|OJJ47914.1

Group6795: abra|OJJ74985.1 acar|OOF97336.1 acla|EAW08396.1 afis|EAW23439.1 afla|EED57328.1  
afum|EAL88023.1 agla|OJJ86676.1 akaw|GAA83448.1 aluc|OJZ92548.1 anid|CBF89826.1 asyd|OJJ62170.1  
atub|OJI86985.1 aver|OJI96282.1 awen|OJJ39756.1 azon|OJJ47884.1

Group6796: abra|OJJ75015.1 acar|OOF97311.1 acla|EAW08210.1 afis|EAW23244.1 afla|EED55725.1  
afum|EAL88238.1 agla|OJJ86616.1 akaw|GAA88638.1 aluc|OJZ92581.1 anig|EHA26401.1 aory|EIT83203.1  
ater|EAU37525.1 atub|OJI87016.1 awen|OJJ39726.1 azon|OJJ47851.1

Group6797: abra|OJJ75111.1 acla|EAW08314.1 afis|EAW23326.1 afla|EED55640.1 afum|EAL88153.1  
agla|OJJ86521.1 akaw|GAA88721.1 aluc|OJZ92678.1 anid|CBF89449.1 anig|EHA26321.1 aory|EIT81784.1  
ater|EAU35574.1 atub|OJI87105.1 awen|OJJ39568.1 azon|OJJ47761.1

Group6798: abra|OJJ75141.1 acar|OOF97195.1 afis|EAW18092.1 afum|EAL91901.1 agla|OJJ79755.1  
akaw|GAA88748.1 aluc|OJZ92708.1 asyd|OJJ62669.1 ater|EAU34821.1 atub|OJI87134.1 azon|OJJ42596.1  
acla|EAW11029.1 anig|EHA26292.1 anid|CBF81859.1 ater|EAU29635.1

Group6799: abra|OJJ75147.1 acar|OOF97191.1 acla|EAW08320.1 afis|EAW23355.1 afla|EED55605.1  
afum|EAL88121.1 agla|OJJ86470.1 akaw|GAA88752.1 aluc|OJZ92712.1 anig|EHA26287.1 atub|OJI87138.1  
aver|OJJ04154.1 awen|OJJ39531.1 anid|CBF80815.1 asyd|OJJ51974.1

Group6800: abra|OJJ75161.1 acar|OOF97177.1 acla|EAW08337.1 afis|EAW23372.1 afum|EAL88100.1  
akaw|GAA88772.1 aluc|OJZ92731.1 anid|CBF74813.1 anig|EHA26270.1 asyd|OJJ60145.1 ater|EAU35623.1  
atub|OJI87155.1 aver|OJJ04118.1 awen|OJJ39511.1 azon|OJJ47710.1

Group6801: abra|OJJ75197.1 acar|OOF94590.1 acla|EAW12984.1 afis|EAW17680.1 afum|EAL91494.1  
akaw|GAA91749.1 aluc|OJZ92760.1 anid|CBF90011.1 anig|EHA26246.1 aory|EIT82116.1 asyd|OJJ62072.1  
ater|EAU31966.1 atub|OJI87204.1 aver|OJI96179.1 awen|OJJ37159.1

Group6802: abra|OJJ75223.1 acar|OOF94564.1 acla|EAW12257.1 afis|EAW16980.1 afla|EED48289.1  
afum|EAL86507.1 akaw|GAA91771.1 aluc|OJZ92786.1 anid|CBF80361.1 anig|EHA26222.1 asyd|OJJ54822.1  
ater|EAU37125.1 atub|OJI87229.1 aver|OJJ07339.1 awen|OJJ37844.1

Group6803: abra|OJJ75229.1 afis|EAW23610.1 afla|EED50212.1 afum|EAL87854.1 agla|OJJ78559.1  
akaw|GAA91774.1 aluc|OJZ92789.1 anig|EHA26218.1 aory|EIT77297.1 asyd|OJJ53110.1 atub|OJI87233.1  
aver|OJJ02078.1 awen|OJJ37793.1 agla|OJJ80608.1 agla|OJJ89254.1

Group6804: abra|OJJ75238.1 acar|OOF94554.1 acla|EAW15276.1 afis|EAW20246.1 afla|EED55538.1  
afum|EAL87764.1 akaw|GAA91781.1 aluc|OJZ92800.1 anid|CBF78386.1 anig|EHA26209.1 aory|EIT80807.1  
asyd|OJJ54698.1 atub|OJI87243.1 aver|OJJ07477.1 afum|EAL85364.1

Group6805: abra|OJJ75247.1 afis|EAW25208.1 afla|EED53658.1 afum|EAL89869.1 agla|OJJ88953.1  
akaw|GAA91788.1 aluc|OJZ92807.1 anid|CBF89950.1 anig|EHA26201.1 aory|EIT75346.1 asyd|OJJ62107.1  
ater|EAU34350.1 atub|OJI87257.1 aver|OJI96213.1 awen|OJJ40842.1

Group6806: abra|OJJ75281.1 acar|OOF94527.1 afis|EAW17073.1 afla|EED56842.1 afum|EAL86561.1  
akaw|GAA91819.1 aluc|OJZ92842.1 anid|CBF83438.1 anig|EHA26169.1 aory|EIT77563.1 asyd|OJJ60666.1  
ater|EAU31476.1 atub|OJI87298.1 aver|OJI99989.1 azon|OJJ42849.1

Group6807: abra|OJJ75291.1 afis|EAW23628.1 afum|EAL87832.1 akaw|GAA91829.1 aluc|OJZ92852.1  
anid|CBF90359.1 anig|EHA26157.1 asyd|OJJ55367.1 ater|EAU36701.1 atub|OJI87308.1 aver|OJJ06446.1  
azon|OJJ43549.1 afis|EAW15548.1 afum|EAL85784.1 agla|OJJ85203.1

Group6808: abra|OJJ75338.1 acar|OOF94493.1 afla|EED45104.1 agla|OJJ78434.1 akaw|GAA92031.1  
aluc|OJZ92901.1 anid|CBF78846.1 anig|EHA26062.1 aory|EIT73740.1 asyd|OJJ65279.1 atub|OJI87359.1  
aver|OJI99429.1 awen|OJJ32699.1 aory|EIT80021.1 awen|OJJ36391.1

Group6809: abra|OJJ75361.1 acar|OOF94477.1 acla|EAW08779.1 afis|EAW15622.1 afla|EED47178.1  
afum|EAL85712.1 akaw|GAA92057.1 aluc|OJZ92929.1 anig|EHA26042.1 aory|EIT79311.1 asyd|OJJ61699.1  
ater|EAU36501.1 atub|OJI87389.1 aver|OJI95785.1 awen|OJJ30946.1

Group6810: abra|OJJ75395.1 acar|OOF94454.1 acla|EAW12098.1 afis|EAW17288.1 afla|EED48830.1  
agla|OJJ81093.1 akaw|GAA92757.1 aluc|OJZ92966.1 anid|CBF87565.1 anig|EHA26009.1 asyd|OJJ63241.1  
atub|OJI87424.1 aver|OJI97715.1 awen|OJJ35748.1 azon|OJJ45541.1

Group6811: abra|OJJ75412.1 acla|EAW13784.1 afis|EAW18348.1 afla|EED48813.1 afum|EAL87712.2  
agla|OJJ88036.1 akaw|GAA84187.1 aluc|OJZ88863.1 anid|CBF79371.1 anig|EHA23640.1 aory|EIT73007.1  
asyd|OJJ57810.1 atub|OJI85927.1 aver|OJJ04578.1 awen|OJJ35732.1

Group6812: abra|OJJ75439.1 acla|EAW12403.1 afis|EAW16851.1 afla|EED45355.1 afum|EAL86398.1  
agla|OJJ79793.1 akaw|GAA84214.1 aluc|OJZ88892.1 anig|EHA23614.1 ater|EAU34051.1 atub|OJI85897.1  
awen|OJJ35814.1 azon|OJJ43496.1 anid|CBF73884.1 agla|OJJ88633.1

Group6813: abra|OJJ75485.1 acla|EAW11216.1 afis|EAW18287.1 afla|EED48754.1 afum|EAL87653.1  
agla|OJJ88137.1 akaw|GAA84251.1 aluc|OJZ88943.1 anig|EHA23577.1 aory|EIT73136.1 asyd|OJJ57854.1  
ater|EAU33293.1 atub|OJI85846.1 awen|OJJ30659.1 anid|CBF79452.1

Group6814: abra|OJJ75515.1 acar|OOF90842.1 acla|EAW08968.1 afis|EAW15447.1 afum|EAL84199.2  
agla|OJJ86217.1 akaw|GAA84279.1 aluc|OJZ88972.1 anid|CBF76721.1 aory|EIT74529.1 asyd|OJJ61244.1  
ater|EAU29468.1 atub|OJI85818.1 aver|OJJ00567.1 azon|OJJ43618.1

Group6815: abra|OJJ75564.1 acar|OOF90881.1 afis|EAW19373.1 afla|EED45373.1 afum|EAL94091.1 akaw|GAA84316.1 aluc|OJZ89012.1 anid|CBF80781.1 anig|EHA23518.1 aory|EIT82375.1 asyd|OJJ60289.1 ater|EAU30172.1 atub|OJI85777.1 aver|OJI99621.1 awen|OJJ36565.1

Group6816: abra|OJJ75589.1 acar|OOF90906.1 acla|EAW12146.1 afis|EAW20643.1 agla|OJJ89292.1 akaw|GAA84340.1 aluc|OJZ89040.1 anid|CBF83009.1 anig|EHA23495.1 aory|EIT76318.1 asyd|OJJ61506.1 atub|OJI85750.1 aver|OJJ00843.1 awen|OJJ39950.1 azon|OJJ45222.1

Group6817: acla|EAW12175.1 afla|EED47415.1 akaw|GAA87847.1 anid|CBF87351.1 anig|EHA25024.1 aory|EIT81919.1 asyd|OJJ60268.1 atub|OJI80077.1 aver|OJJ04868.1 acla|EAW14872.1 afis|EAW23641.1 aver|OJJ03986.1 asyd|OJJ55204.1 aver|OJJ07012.1 aluc|OJZ85487.1

Group6818: abra|OJJ75700.1 acar|OOG00154.1 afum|EAL92761.1 akaw|GAA84436.1 aluc|OJZ89151.1 aory|EIT79728.1 ater|EAU38412.1 atub|OJI85637.1 awen|OJJ34001.1 acla|EAW09408.1 afis|EAW21728.1 afla|EED57997.1 agla|OJJ79856.1 azon|OJJ48551.1 aory|EIT79784.1

Group6819: abra|OJJ75711.1 acar|OOG00148.1 acla|EAW09401.1 afis|EAW21735.1 afla|EED58007.1 afum|EAL92768.1 agla|OJJ79848.1 akaw|GAA84445.1 aluc|OJZ89162.1 anig|EHA23392.1 asyd|OJJ60849.1 atub|OJI85628.1 aver|OJJ00173.1 awen|OJJ34008.1 azon|OJJ48543.1

Group6820: abra|OJJ75739.1 acar|OOG00130.1 acla|EAW14901.1 afis|EAW24423.1 afla|EED55259.1 afum|EAL86091.1 akaw|GAA84472.1 aluc|OJZ89192.1 anid|CBF79768.1 anig|EHA23366.1 aory|EIT83547.1 asyd|OJJ58107.1 atub|OJI85598.1 aver|OJJ04297.1 awen|OJJ32785.1

Group6821: abra|OJJ75753.1 acar|OOG00962.1 afla|EED46568.1 afum|EAL86494.1 agla|OJJ83640.1 akaw|GAA84486.1 aluc|OJZ89207.1 anig|EHA23352.1 aory|EIT77923.1 asyd|OJJ54710.1 atub|OJI85585.1 aver|OJJ07456.1 awen|OJJ36177.1 afla|EED52361.1 awen|OJJ34573.1

Group6822: abra|OJJ75816.1 acar|OOG00059.1 afis|EAW24386.1 afla|EED47823.1 afum|EAL86058.1 agla|OJJ83282.1 akaw|GAA84530.1 aluc|OJZ89263.1 anig|EHA23305.1 aory|EIT77111.1 asyd|OJJ56648.1 atub|OJI85536.1 aver|OJJ06078.1 awen|OJJ32824.1 azon|OJJ49013.1

Group6823: abra|OJJ75915.1 acar|OOF99988.1 acla|EAW09875.1 afis|EAW21251.1 afla|EED54811.1 afum|EAL92264.1 agla|OJJ87494.1 akaw|GAA84620.1 aluc|OJZ89364.1 anig|EHA23218.1 aory|EIT79427.1 ater|EAU35891.1 atub|OJI85434.1 awen|OJJ36566.1 azon|OJJ44323.1

Group6824: abra|OJJ75981.1 acar|OOF99938.1 acla|EAW09818.1 afis|EAW21316.1 afla|EED57274.1 afum|EAL92333.1 agla|OJJ87423.1 akaw|GAA88976.1 aluc|OJZ89427.1 anid|CBF83414.1 asyd|OJJ60651.1 atub|OJI85366.1 aver|OJI99971.1 awen|OJJ39380.1 azon|OJJ44270.1

Group6825: abra|OJJ76016.1 acar|OOF99907.1 acla|EAW09788.1 afis|EAW21348.1 afla|EED55760.1 afum|EAL92365.1 akaw|GAA88944.1 aluc|OJZ89463.1 anid|CBF76195.1 anig|EHA23125.1 aory|EIT76680.1 asyd|OJJ60960.1 atub|OJI85332.1 aver|OJJ00285.1 awen|OJJ39351.1

Group6826: abra|OJJ76026.1 acar|OOF93547.1 afis|EAW17185.1 afla|EED57111.1 afum|EBA27281.1 agla|OJJ82967.1 akaw|GAA88932.1 aluc|OJZ89477.1 anid|CBF84193.1 anig|EHA23116.1 aory|EIT74116.1 asyd|OJJ54805.1 atub|OJI85323.1 aver|OJJ07356.1 awen|OJJ31334.1

Group6827: abra|OJJ76029.1 acar|OOF93544.1 afis|EAW17187.1 afla|EED45760.1 afum|EAL86613.2 agla|OJJ82966.1 aluc|OJZ89480.1 anig|EHA23113.1 aory|EIT75754.1 asyd|OJJ54804.1 atub|OJI85320.1 aver|OJJ07357.1 awen|OJJ40015.1 azon|OJJ47385.1 anid|CBF84194.1

Group6828: abra|OJJ76148.1 afis|EAW21465.1 afla|EED55898.1 akaw|GAA82098.1 aluc|OJZ92081.1 anig|EHA23006.1 aory|EIT76852.1 atub|OJI86511.1 awen|OJJ39233.1 acla|EAW09674.1 afum|EAL92485.1 ater|EAU35070.1 azon|OJJ51623.1 aver|OJJ00465.1 asyd|OJJ61144.1

Group6829: abra|OJJ76167.1 acar|OOF99770.1 acla|EAW09656.1 afis|EAW21483.1 afla|EED55915.1 afum|EAL92503.1 agla|OJJ85637.1 akaw|GAA82115.1 aluc|OJZ92061.1 anid|CBF76496.1 anig|EHA22990.1 asyd|OJJ61127.1 atub|OJI86493.1 aver|OJJ00448.1 awen|OJJ39214.1

Group6830: abra|OJJ76219.1 acar|OOF99732.1 acla|EAW13934.1 afis|EAW18645.1 afla|EED52695.1 afum|EAL93360.1 akaw|GAA82157.1 aluc|OJZ92011.1 anid|CBF70439.1 aory|EIT74225.1 ater|EAU38266.1 atub|OJI86446.1 aver|OJJ01216.1 awen|OJJ32113.1 azon|OJJ46694.1

Group6831: abra|OJJ76222.1 acar|OOF99729.1 acla|EAW13936.1 afis|EAW18647.1 afla|EED52697.1 afum|EAL93362.1 agla|OJJ82428.1 akaw|GAA82159.1 aluc|OJZ92009.1 anig|EHA22948.1 ater|EAU38264.1 atub|OJI86444.1 awen|OJJ32115.1 azon|OJJ46696.1 awen|OJJ33655.1

Group6832: abra|OJJ76234.1 acar|OOF99478.1 acla|EAW14370.1 afis|EAW18920.1 agla|OJJ81523.1 akaw|GAA82169.1 aluc|OJZ91997.1 anid|CBF69682.1 asyd|OJJ59060.1 ater|EAU38087.1 atub|OJI86432.1 aver|OJJ01654.1 awen|OJJ31513.1 azon|OJJ47231.1 afum|EAL93651.2

Group6833: abra|OJJ76317.1 acar|OOF99568.1 acla|EAW06524.1 afis|EAW16240.1 afla|EED48909.1 afum|EAL88861.1 akaw|GAA82247.1 aluc|OJZ91897.1 anig|EHA22876.1 aory|EIT81245.1 asyd|OJJ56319.1 atub|OJI86350.1 awen|OJJ30217.1 azon|OJJ50001.1 acar|OOF92999.1

Group6834: abra|OJJ76328.1 acar|OOF99581.1 acla|EAW14087.1 afis|EAW18793.1 afum|EAL93529.1 agla|OJJ80522.1 akaw|GAA82258.1 aluc|OJZ91886.1 anig|EHA22862.1 asyd|OJJ58951.1 atub|OJI86336.1 aver|OJJ01545.1 awen|OJJ32366.1 azon|OJJ47130.1 ater|EAU37924.1

Group6835: abra|OJJ76348.1 acar|OOF99599.1 acla|EAW14067.1 afis|EAW18774.1 afla|EED50733.1 afum|EAL93506.1 agla|OJJ80490.1 akaw|GAA82275.1 aluc|OJZ91865.1 anid|CBF69726.1 anig|EHA22845.1 aory|EIT77977.1 ater|EAU37905.1 atub|OJI86316.1 awen|OJJ32345.1

Group6836: abra|OJJ76355.1 acar|OOF99606.1 acla|EAW14060.1 afla|EED50726.1 akaw|GAA82281.1 aluc|OJZ91858.1 anid|CBF69942.1 anig|EHA22838.1 aory|EIT78007.1 asyd|OJJ58918.1 ater|EAU37897.1 atub|OJI86309.1 aver|OJJ01515.1 awen|OJJ35974.1 azon|OJJ45258.1

Group6837: abra|OJJ76413.1 acar|OOF99653.1 agla|OJJ82338.1 akaw|GAA82330.1 aluc|OJZ91799.1 anid|CBF73518.1 anig|EHA22795.1 aory|EIT78040.1 asyd|OJJ56747.1 atub|OJI86255.1 aver|OJJ05983.1 awen|OJJ36284.1 azon|OJJ42090.1 asyd|OJJ54494.1 aver|OJJ07686.1

Group6838: abra|OJJ76421.1 acar|OOF99663.1 acla|EAW14005.1 afla|EED50663.1 akaw|GAA82336.1 aluc|OJZ91791.1 anid|CBF78486.1 anig|EHA22788.1 aory|EIT78010.1 asyd|OJJ65332.1 ater|EAU38196.1 atub|OJI86247.1 aver|OJI99477.1 awen|OJJ32198.1 azon|OJJ42546.1

Group6839: abra|OJJ76502.1 acla|EAW14193.1 afis|EAW18908.1 afla|EED50839.1 afum|EAL93640.1 agla|OJJ81514.1 akaw|GAA82418.1 aluc|OJZ91700.1 anid|CBF69703.1 anig|EHA22714.1 asyd|OJJ59048.1 ater|EAU38077.1 atub|OJI86159.1 aver|OJJ01644.1 azon|OJJ47225.1

Group6840: abra|OJJ76518.1 acar|OOF99455.1 acla|EAW14183.1 afis|EAW18898.1 afla|EED50865.1 afum|EAL93630.1 agla|OJJ81504.1 akaw|GAA82431.1 anid|CBF69915.1 aory|EIT78985.1 asyd|OJJ58990.1 atub|OJI86141.1 aver|OJJ01625.1 awen|OJJ32456.1 azon|OJJ47213.1

Group6841: abra|OJJ76519.1 acar|OOF99454.1 acla|EAW14182.1 afis|EAW18897.1 afla|EED50866.1 afum|EAL93629.1 agla|OJJ81503.1 akaw|GAA82432.1 anig|EHA22701.1 aory|EIT78962.1 asyd|OJJ58991.1 atub|OJI86140.1 aver|OJJ01624.1 awen|OJJ32455.1 azon|OJJ47212.1

Group6842: abra|OJJ76521.1 acar|OOF99452.1 acla|EAW14180.1 afis|EAW18895.1 afla|EED50868.1 afum|EAL93627.1 agla|OJJ81501.1 akaw|GAA82434.1 aluc|OJZ91687.1 anid|CBF69911.1 anig|EHA22699.1 aory|EIT78971.1 asyd|OJJ58993.1 aver|OJJ01622.1 awen|OJJ32453.1

Group6843: abra|OJJ76599.1 acar|OOF99391.1 afla|EED53190.1 akaw|GAA82502.1 aluc|OJZ91609.1 anig|EHA22638.1 aory|EIT74987.1 asyd|OJJ54120.1 ater|EAU38170.1 atub|OJI86061.1 aver|OJI99295.1 awen|OJJ31585.1 afla|EED50956.1 aory|EIT77024.1 anid|CBF82431.1

Group6844: aory|EIT75135.1 acla|EAW14303.1 afis|EAW18981.1 afla|EED53184.1 afum|EAL93717.1 akaw|GAA82506.1 anid|CBF69655.1 anig|EHA22634.1 asyd|OJJ59074.1 ater|EAU37831.1 aver|OJJ01667.1 awen|OJJ31593.1 azon|OJJ47305.1 afla|EED48362.1 aory|EIT83093.1

Group6845: abra|OJJ76630.1 acar|OOF99367.1 acla|EAW14289.1 afis|EAW18994.1 afla|EED53159.1 afum|EAL93729.1 agla|OJJ80084.1 akaw|GAA92826.1 aluc|OJZ91581.1 anid|CBF86789.1 anig|EHA22608.1 ater|EAU37814.1 atub|OJI86030.1 awen|OJJ31616.1 aory|EIT74857.1

Group6846: abra|OJJ76637.1 acar|OOF99363.1 acla|EAW14278.1 afla|EED53143.1 akaw|GAA92821.1 aluc|OJZ91573.1 anid|CBF86762.1 anig|EHA22602.1 aory|EIT75028.1 asyd|OJJ64685.1 ater|EAU37807.1 atub|OJI86024.1 aver|OJI98787.1 awen|OJJ31624.1 azon|OJJ47322.1

Group6847: abra|OJJ76640.1 acar|OOF99357.1 afla|EED53120.1 agla|OJJ85229.1 akaw|GAA92818.1 aluc|OJZ91569.1 anid|CBF86738.1 anig|EHA22598.1 aory|EIT75177.1 asyd|OJJ64695.1 ater|EAU37797.1 atub|OJI86019.1 aver|OJI98800.1 awen|OJJ31630.1 azon|OJJ42456.1

Group6848: abra|OJJ76641.1 acar|OOF99356.1 acla|EAW14270.1 afla|EED53119.1 agla|OJJ85230.1 akaw|GAA92817.1 aluc|OJZ91568.1 anid|CBF86739.1 anig|EHA22597.1 aory|EIT75210.1 asyd|OJJ64696.1 ater|EAU37796.1 atub|OJI86018.1 aver|OJI98801.1 awen|OJJ31631.1

Group6849: abra|OJJ76691.1 acar|OOF99320.1 afis|EAW19661.1 afla|EED57014.1 afum|EAL86861.1 akaw|GAA92503.1 aluc|OJZ91516.1 anid|CBF71388.1 anig|EHA22554.1 aory|EIT82285.1 asyd|OJJ55068.1 ater|EAU32850.1 atub|OJI85971.1 aver|OJJ07143.1 awen|OJJ41920.1

Group6850: abra|OJJ76712.1 acar|OOF92524.1 acla|EAW14556.1 afis|EAW16941.1 afum|EBA27273.1 akaw|GAA83772.1 aluc|OJZ90956.1 anid|CBF84647.1 asyd|OJJ53357.1 ater|EAU33241.1 atub|OJI82946.1 aver|OJJ08384.1 azon|OJJ43514.1 aluc|OJZ80182.1 awen|OJJ36418.1

Group6851: abra|OJJ76715.1 acla|EAW07081.1 afis|EAW19676.1 afla|EED53626.1 afum|EAL86846.1 akaw|GAA92485.1 aluc|OJZ91497.1 anid|CBF86669.1 anig|EHA22537.1 aory|EIT74953.1 asyd|OJJ64775.1 ater|EAU38555.1 atub|OJI85950.1 aver|OJI98875.1 awen|OJJ30166.1

Group6852: abra|OJJ76825.1 acar|OOF91320.1 acla|EAW13385.1 afis|EAW20499.1 afla|EED44742.1 akaw|GAA87197.1 aluc|OJZ84236.1 anid|CBF79204.1 anig|EHA27583.1 aory|EIT77800.1 asyd|OJJ55727.1 ater|EAU37193.1 atub|OJI89849.1 aver|OJJ06813.1 awen|OJJ33200.1

Group6853: abra|OJJ76905.1 acar|OOF91353.1 afis|EAW20538.1 afla|EED52441.1 afum|EBA27189.1 akaw|GAA87133.1 aluc|OJZ84304.1 anig|EHA27640.1 aory|EIT82801.1 asyd|OJJ56118.1 ater|EAU37139.1 atub|OJI89764.1 aver|OJJ05059.1 awen|OJJ33245.1 azon|OJJ50624.1

Group6854: abra|OJJ76908.1 acar|OOF91359.1 afis|EAW20541.1 afla|EED52432.1 afum|EAL84517.2 akaw|GAA87130.1 aluc|OJZ84307.1 anig|EHA27643.1 aory|EIT83289.1 asyd|OJJ56121.1 ater|EAU37141.1 atub|OJI89761.1 aver|OJJ05062.1 awen|OJJ33248.1 azon|OJJ50627.1

Group6855: abra|OJJ76935.1 acar|OOF91384.1 afis|EAW20554.1 afla|EED53209.1 afum|EBA27184.1 akaw|GAA87104.1 aluc|OJZ84334.1 anid|CBF78972.1 anig|EHA27668.1 aory|EIT74844.1 asyd|OJJ55673.1 ater|EAU37122.1 atub|OJI89734.1 aver|OJJ06756.1 awen|OJJ33267.1

Group6856: abra|OJJ76953.1 acla|EAW13477.1 afis|EAW20584.1 afla|EED52254.1 akaw|GAA87089.1 aluc|OJZ84349.1 anig|EHA27686.1 aory|EIT74496.1 atub|OJI89719.1 afum|EBA27179.1 agla|OJJ88678.1 anid|CBF78923.1 ater|EAU37098.1 aver|OJJ06702.1 asyd|OJJ51988.1

Group6857: abra|OJJ76957.1 acar|OOF93291.1 afis|EAW19845.1 afla|EED54456.1 afum|EAL85049.1 agla|OJJ83721.1 akaw|GAA87086.1 aluc|OJZ84352.1 anid|CBF80472.1 anig|EHA27690.1 aory|EIT81149.1 asyd|OJJ54743.1 atub|OJI89714.1 aver|OJJ07421.1 awen|OJJ32032.1

Group6858: abra|OJJ76959.1 acar|OOF91404.1 acla|EAW11699.1 afis|EAW23715.1 afla|EED52264.1 afum|EAL87160.2 akaw|GAA87084.1 aluc|OJZ84354.1 anid|CBF82105.1 anig|EHA27692.1 asyd|OJJ54272.1 ater|EAU37092.1 atub|OJI89713.1 aver|OJJ05228.1 ater|EAU35157.1

Group6859: abra|OJJ76991.1 acar|OOF91435.1 acla|EAW13465.1 afis|EAW20577.1 afla|EED52312.1 afum|EAL84488.2 akaw|GAA87055.1 aluc|OJZ84391.1 anid|CBF78938.1 anig|EHA27720.1 aory|EIT74375.1 ater|EAU37108.1 atub|OJI89680.1 awen|OJJ33277.1 azon|OJJ50651.1

Group6860: abra|OJJ77014.1 acar|OOF91457.1 acla|EAW09004.1 afis|EAW25544.1 agla|OJJ78911.1 akaw|GAA87036.1 aluc|OJZ84414.1 anid|CBF83190.1 aory|EIT75992.1 asyd|OJJ55535.1 ater|EAU32180.1 atub|OJI89659.1 aver|OJJ06613.1 awen|OJJ36037.1 afla|EED54131.1

Group6861: abra|OJJ77046.1 acar|OOF89824.1 afla|EED45584.1 afum|EAL86588.1 agla|OJJ85383.1 akaw|GAA87007.1 aluc|OJZ84449.1 anig|EHA27765.1 aory|EIT75525.1 atub|OJI89626.1 awen|OJJ35839.1 afis|EAW17128.1 afla|EED47800.1 aory|EIT77186.1 awen|OJJ41963.1

Group6862: abra|OJJ77057.1 afis|EAW20755.1 afla|EED51084.1 afum|EAL84863.1 akaw|GAA86995.1 aluc|OJZ84464.1 anid|CBF87301.1 anig|EHA27776.1 asyd|OJJ55871.1 ater|EAU30141.1 atub|OJI89612.1 aver|OJJ04816.1 aory|EIT76985.1 awen|OJJ40179.1 anid|CBF78065.1

Group6863: abra|OJJ77082.1 acar|OOF92966.1 afla|EED51963.1 agla|OJJ88141.1 akaw|GAA86971.1 aluc|OJZ84492.1 anig|EHA27796.1 aory|EIT81436.1 asyd|OJJ61412.1 ater|EAU30963.1 atub|OJI89587.1 aver|OJJ00742.1 awen|OJJ33796.1 azon|OJJ48746.1 aory|EIT81482.1

Group6864: abra|OJJ77107.1 acar|OOF92992.1 acla|EAW13566.1 afis|EAW20035.1 agla|OJJ78423.1 aluc|OJZ84516.1 anid|CBF89780.1 anig|EHA27814.1 aory|EIT83237.1 asyd|OJJ62206.1 ater|EAU29401.1 atub|OJI89564.1 aver|OJI96318.1 awen|OJJ30058.1 azon|OJJ42029.1

Group6865: abra|OJJ77160.1 acar|OOF93046.1 afis|EAW24602.1 afla|EED56878.1 afum|EAL88037.1 aluc|OJZ84573.1 anig|EHA27867.1 aory|EIT77536.1 asyd|OJJ54816.1 atub|OJI89509.1 aver|OJJ07345.1 awen|OJJ37088.1 azon|OJJ50793.1 aver|OJI96492.1 anid|CBF80367.1

Group6866: abra|OJJ77161.1 acar|OOF93047.1 afis|EAW17748.1 afla|EED45754.1 afum|EAL91562.1 agla|OJJ81705.1 akaw|GAA90771.1 aluc|OJZ84574.1 anid|CBF86619.1 asyd|OJJ64814.1 ater|EAU31859.1 atub|OJI89508.1 aver|OJI98927.1 awen|OJJ37087.1 azon|OJJ50792.1

Group6867: abra|OJJ77268.1 acar|OOF93137.1 acla|EAW13270.1 afis|EAW17351.1 afum|EAL91194.1 akaw|GAA90680.1 aluc|OJZ84675.1 anid|CBF80095.1 anig|EHA27953.1 aory|EIT77668.1 asyd|OJJ58300.1 ater|EAU33857.1 atub|OJI89405.1 aver|OJJ02124.1 awen|OJJ33645.1

Group6868: abra|OJJ77322.1 acar|OOF93198.1 acla|EAW13150.1 afis|EAW17496.1 afla|EED49320.1 afum|EAL91319.1 agla|OJJ81462.1 akaw|GAA91434.1 aluc|OJZ84732.1 anig|EHA28005.1 aory|EIT79567.1 ater|EAU36940.1 atub|OJI89349.1 awen|OJJ37345.1 azon|OJJ51031.1



Group6869: abra|OJJ77349.1 acar|OOF93219.1 afla|EED49289.1 agla|OJJ81431.1 aluc|OJZ84760.1  
anid|CBF90320.1 anig|EHA28029.1 asyd|OJJ61910.1 ater|EAU36968.1 atub|OJI89324.1 aver|OJI96003.1  
awen|OJJ37316.1 azon|OJJ51008.1 afis|EAW17538.1 afum|EAL91352.1

Group6870: abra|OJJ77385.1 acar|OOF93254.1 acla|EAW11087.1 afis|EAW20768.1 afla|EED50190.1  
afum|EAL84850.1 akaw|GAA91376.1 aluc|OJZ84793.1 anid|CBF73860.1 anig|EHA28061.1 asyd|OJJ56519.1  
ater|EAU31813.1 atub|OJI89289.1 aver|OJJ06203.1 aory|EIT77383.1

Group6871: abra|OJJ77397.1 acar|OOF89919.1 acla|EAW12873.1 afis|EAW17803.1 afla|EED45797.1  
afum|EAL91611.1 akaw|GAA91365.1 aluc|OJZ84805.1 anid|CBF86650.1 anig|EHA28070.1 aory|EIT75543.1  
asyd|OJJ64801.1 ater|EAU31834.1 atub|OJI89278.1 aver|OJI98915.1

Group6872: abra|OJJ77411.1 acar|OOF93278.1 afis|EAW22076.1 afla|EED56696.1 afum|EAL91094.1  
agla|OJJ81293.1 akaw|GAA91353.1 aluc|OJZ84820.1 anid|CBF84146.1 anig|EHA28082.1 aory|EIT73893.1  
asyd|OJJ59789.1 atub|OJI89266.1 aver|OJJ02499.1 azon|OJJ47365.1

Group6873: abra|OJJ77429.1 afis|EAW24666.1 afla|EED51151.1 afum|EAL89343.1 agla|OJJ85716.1  
akaw|GAA88066.1 aluc|OJZ81329.1 anid|CBF90090.1 anig|EHA18633.1 asyd|OJJ57398.1 ater|EAU31628.1  
atub|OJI91532.1 afis|EAW24701.1 anid|CBF80153.1 aver|OJI99512.1

Group6874: abra|OJJ77480.1 acar|OOF99245.1 acla|EAW06742.1 afis|EAW16292.1 afla|EED53261.1  
agla|OJJ88314.1 akaw|GAA84138.1 aluc|OJZ81058.1 anid|CBF86852.1 anig|EHA19310.1 asyd|OJJ64638.1  
atub|OJI82527.1 aver|OJI98737.1 awen|OJJ37688.1 azon|OJJ44948.1

Group6875: abra|OJJ77486.1 acar|OOF99239.1 acla|EAW06745.1 afis|EAW16295.1 afla|EED53259.1  
afum|EAL88917.1 agla|OJJ88304.1 aluc|OJZ81050.1 anig|EHA19317.1 aory|EIT75026.1 asyd|OJJ64641.1  
atub|OJI82534.1 aver|OJI98741.1 awen|OJJ37694.1 azon|OJJ44955.1

Group6876: abra|OJJ77529.1 afis|EAW16243.1 afla|EED53304.1 afum|EAL88865.1 agla|OJJ86253.1  
akaw|GAA84091.1 aluc|OJZ81006.1 anid|CBF78898.1 anig|EHA19354.1 asyd|OJJ64602.1 ater|EAU37453.1  
atub|OJI82579.1 awen|OJJ30213.1 acla|EAW06698.1 aver|OJI98699.1

Group6877: abra|OJJ77530.1 acar|OOF99196.1 acla|EAW06699.1 afis|EAW16244.1 afla|EED53305.1  
afum|EAL88872.1 akaw|GAA84090.1 aluc|OJZ81005.1 anid|CBF71516.1 anig|EHA19355.1 aory|EIT75076.1  
atub|OJI82580.1 aver|OJJ07277.1 awen|OJJ30212.1 azon|OJJ43937.1

Group6878: abra|OJJ77545.1 acar|OOF99179.1 afla|EED56789.1 akaw|GAA84078.1 aluc|OJZ80992.1  
anid|CBF71424.1 anig|EHA19369.1 aory|EIT73871.1 asyd|OJJ54994.1 ater|EAU38454.1 atub|OJI82593.1  
aver|OJJ07207.1 awen|OJJ31995.1 azon|OJJ46050.1 ater|EAU32726.1

Group6879: abra|OJJ77559.1 acar|OOF99170.1 acla|EAW06692.1 afis|EAW16073.1 afla|EED48592.1  
afum|EAL88705.1 agla|OJJ86095.1 akaw|GAA84065.1 aluc|OJZ80979.1 anid|CBF75111.1 asyd|OJJ59997.1  
ater|EAU33558.1 atub|OJI82607.1 aver|OJJ02294.1 awen|OJJ30361.1

Group6880: abra|OJJ77575.1 acar|OOF99152.1 acla|EAW08860.1 afis|EAW15534.1 afla|EED54856.1  
afum|EAL85794.1 agla|OJJ85213.1 aluc|OJZ80962.1 anid|CBF78197.1 asyd|OJJ55982.1 ater|EAU32591.1  
atub|OJI82624.1 aver|OJJ04929.1 awen|OJJ38198.1 azon|OJJ45418.1

Group6881: abra|OJJ77673.1 acar|OOF99063.1 acla|EAW06582.1 afis|EAW16008.1 afla|EED56384.1  
afum|EBA27353.1 akaw|GAA83959.1 aluc|OJZ80846.1 anid|CBF85865.1 anig|EHA19477.1 asyd|OJJ64370.1  
ater|EAU33635.1 atub|OJI82721.1 aver|OJI98466.1 aory|EIT73411.1

Group6882: abra|OJJ77716.1 acar|OOF99023.1 afla|EED47308.1 agla|OJJ83229.1 akaw|GAA83916.1  
aluc|OJZ90781.1 anid|CBF81696.1 anig|EHA19514.1 aory|EIT82843.1 asyd|OJJ59567.1 ater|EAU36653.1  
atub|OJI82768.1 aver|OJJ02702.1 awen|OJJ29820.1 acar|OOF98222.1

Group6883: abra|OJJ77721.1 acar|OOF99018.1 afis|EAW18174.1 afla|EED56318.1 afum|EAL87535.1  
agla|OJJ85916.1 akaw|GAA83913.1 aluc|OJZ90784.1 anig|EHA19517.1 aory|EIT73323.1 ater|EAU33831.1  
atub|OJI82771.1 awen|OJJ30522.1 azon|OJJ50202.1 acla|EAW11322.1

Group6884: abra|OJJ77725.1 acar|OOF99015.1 afla|EED47524.1 akaw|GAA83910.1 aluc|OJZ90787.1  
anid|CBF80342.1 anig|EHA19520.1 aory|EIT74520.1 asyd|OJJ54835.1 ater|EAU30843.1 atub|OJI82774.1  
aver|OJJ07326.1 awen|OJJ30011.1 azon|OJJ43640.1 agla|OJJ79033.1

Group6885: abra|OJJ77727.1 acar|OOF99011.1 acla|EAW10005.1 afis|EAW21051.1 afla|EED46595.1  
afum|EAL92087.1 akaw|GAA83909.1 aluc|OJZ90788.1 anig|EHA19521.1 aory|EIT77870.1 asyd|OJJ56448.1  
atub|OJI82775.1 aver|OJJ06274.1 awen|OJJ36351.1 azon|OJJ49321.1

Group6886: abra|OJJ77777.1 acar|OOF98967.1 agla|OJJ85901.1 akaw|GAA83870.1 aluc|OJZ90830.1  
anig|EHA19553.1 aory|EIT73292.1 atub|OJI82816.1 afla|EED56302.1 afum|EBA27316.1 acla|EAW11314.1  
anid|CBF85714.1 asyd|OJJ64272.1 aver|OJI98364.1 azon|OJJ50213.1

Group6887: abra|OJJ77782.1 acar|OOF98971.1 afis|EAW24714.1 afla|EED54614.1 agla|OJJ87530.1 akaw|GAA83865.1 aluc|OJZ90835.1 anig|EHA19558.1 aory|EIT78767.1 asyd|OJJ53083.1 atub|OJI82821.1 aver|OJJ03763.1 awen|OJJ36610.1 anig|EHA26134.1 atub|OJI87458.1

Group6888: abra|OJJ77807.1 acar|OOF98960.1 afis|EAW18197.1 afla|EED56287.1 afum|EAL87554.1 agla|OJJ86043.1 akaw|GAA83842.1 aluc|OJZ90874.1 anig|EHA19594.1 aory|EIT73344.1 asyd|OJJ61784.1 ater|EAU33803.1 aver|OJI95884.1 awen|OJJ30554.1 azon|OJJ45512.1

Group6889: abra|OJJ77808.1 acar|OOF98959.1 acla|EAW11309.1 afis|EAW18196.1 afla|EED56289.1 afum|EAL87555.1 agla|OJJ85897.1 akaw|GAA83841.1 aluc|OJZ90875.1 anig|EHA19595.1 aory|EIT73382.1 asyd|OJJ64480.1 ater|EAU33802.1 awen|OJJ30556.1 azon|OJJ45511.1

Group6890: abra|OJJ77904.1 acar|OOF98880.1 acla|EAW06514.1 afis|EAW16232.1 afla|EED53349.1 afum|EAL88855.1 agla|OJJ86243.1 akaw|GAA83758.1 aluc|OJZ90973.1 anig|EHA19675.1 aory|EIT75117.1 ater|EAU33712.1 atub|OJI82964.1 awen|OJJ30228.1 azon|OJJ43947.1

Group6891: abra|OJJ77906.1 acar|OOF98877.1 acla|EAW06516.1 afis|EAW16234.1 afla|EED53347.1 agla|OJJ86241.1 akaw|GAA83756.1 aluc|OJZ90975.1 anid|CBF86227.1 anig|EHA19677.1 aory|EIT74992.1 ater|EAU33710.1 atub|OJI82966.1 awen|OJJ30226.1 azon|OJJ43946.1

Group6892: abra|OJJ77918.1 afla|EED51606.1 agla|OJJ82628.1 akaw|GAA92604.1 aluc|OJZ82623.1 anid|CBF73911.1 anig|EHA18403.1 aory|EIT80624.1 asyd|OJJ53670.1 atub|OJI88857.1 aver|OJJ07777.1 awen|OJJ40188.1 anig|EHA27455.1 asyd|OJJ53437.1 aver|OJJ08312.1

Group6893: abra|OJJ77955.1 afis|EAW19554.1 afla|EED45670.1 afum|EAL91021.2 anid|CBF80597.1 aory|EIT74504.1 asyd|OJJ53429.1 aver|OJJ05783.1 acla|EAW11909.1 afis|EAW16191.1 afla|EED52216.1 afum|EAL88822.1 azon|OJJ49842.1 aory|EIT75438.1 aver|OJJ08316.1

Group6894: abra|OJJ78000.1 acla|EAW06650.1 afis|EAW16115.1 afla|EED48656.1 afum|EAL88746.1 agla|OJJ86154.1 aluc|OJZ91076.1 anid|CBF85503.1 anig|EHA19777.1 asyd|OJJ64118.1 ater|EAU33198.1 atub|OJI83071.1 aver|OJI98201.1 awen|OJJ30315.1 azon|OJJ45332.1

Group6895: agla|OJJ81797.1 anid|CBF75762.1 ater|EAU29690.1 atub|OJI83003.1 azon|OJJ48592.1 acar|OOF91976.1 aluc|OJZ91012.1 anig|EHA19714.1 asyd|OJJ64671.1 aver|OJI98773.1 awen|OJJ33537.1 afla|EED52320.1 akaw|GAA91343.1 aluc|OJZ84830.1 anig|EHA25739.1

Group6896: abra|OJJ78307.1 acar|OOF98559.1 acla|EAW09211.1 afis|EAW21936.1 afla|EED46653.1 afum|EAL92949.2 agla|OJJ84184.1 akaw|GAA85720.1 aluc|OJZ91384.1 anid|CBF76895.1 anig|EHA20059.1 ater|EAU30942.1 atub|OJI83377.1 awen|OJJ34227.1 azon|OJJ43408.1

Group6897: abra|OJJ78359.1 acar|OOF98530.1 acla|EAW09175.1 afis|EAW21971.1 afla|EED46693.1 afum|EAL92986.1 agla|OJJ84134.1 akaw|GAA85674.1 aluc|OJZ91434.1 anid|CBF74905.1 aory|EIT77961.1 asyd|OJJ61631.1 atub|OJI83427.1 aver|OJJ00954.1 azon|OJJ43373.1

Group6898: abra|OJJ78360.1 acar|OOF98529.1 acla|EAW06848.1 afis|EAW16469.1 afla|EED46694.1 afum|EAL89063.1 agla|OJJ84135.1 akaw|GAA85673.1 aluc|OJZ91435.1 anid|CBF82725.1 aory|EIT77825.1 asyd|OJJ61632.1 atub|OJI83428.1 aver|OJJ00955.1 azon|OJJ43372.1

Group6899: abra|OJJ78361.1 acar|OOF98526.1 acla|EAW09174.1 afis|EAW21972.1 afla|EED46695.1 afum|EAL92987.1 agla|OJJ84136.1 akaw|GAA85672.1 anid|CBF82723.1 aory|EIT77939.1 asyd|OJJ61633.1 atub|OJI83429.1 aver|OJJ00956.1 awen|OJJ34264.1 azon|OJJ43371.1

Group6900: acar|OOF90135.1 acla|EAW14633.1 afis|EAW23651.1 afla|EED52134.1 afum|EAL86791.1 agla|OJJ79804.1 aory|EIT74500.1 asyd|OJJ62551.1 ater|EAU32804.1 aver|OJJ07303.1 awen|OJJ40924.1 afis|EAW19738.1 afla|EED56525.1 aory|EIT82924.1 aver|OJI96674.1

Group6901: acar|OOF90407.1 acla|EAW15148.1 afis|EAW20116.1 afla|EED53355.1 afum|EAL85233.1 agla|OJJ88833.1 akaw|GAA89322.1 aluc|OJZ86348.1 anid|CBF84934.1 anig|EHA21538.1 aory|EIT74950.1 asyd|OJJ63158.1 ater|EAU38734.1 atub|OJI84186.1 azon|OJJ46248.1

Group6902: acar|OOF91304.1 acla|EAW13369.1 afis|EAW20483.1 afla|EED44785.1 agla|OJJ84812.1 akaw|GAA87213.1 aluc|OJZ84217.1 anid|CBF79233.1 aory|EIT77785.1 asyd|OJJ55741.1 ater|EAU29561.1 atub|OJI89867.1 aver|OJJ06827.1 awen|OJJ33181.1 azon|OJJ46387.1

Group6903: acar|OOF91572.1 acla|EAW14387.1 afis|EAW19093.1 afum|EAL93824.1 agla|OJJ84508.1 akaw|GAA91577.1 aluc|OJZ82399.1 anid|CBF79707.1 anig|EHA28366.1 asyd|OJJ58056.1 ater|EAU32142.1 atub|OJI88042.1 aver|OJJ04347.1 awen|OJJ32487.1 azon|OJJ46044.1

Group6904: acar|OOF91787.1 afis|EAW20744.1 afla|EED47485.1 akaw|GAA88128.1 aluc|OJZ81400.1 anig|EHA18693.1 aory|EIT79969.1 asyd|OJJ64559.1 atub|OJI91606.1 aver|OJI98656.1 azon|OJJ45978.1 afis|EAW17202.1 afum|EAL86286.2 anig|EHA21846.1 aver|OJJ03938.1

Group6905: acar|OOF94697.1 acla|EAW12761.1 afis|EAW17923.1 afum|EAL91734.1 akaw|GAA85188.1 aluc|OJZ90543.1 anid|CBF76947.1 anig|EHA23991.1 aory|EIT81229.1 asyd|OJJ57059.1 ater|EAU33548.1 atub|OJI81965.1 aver|OJJ03239.1 awen|OJJ41622.1 azon|OJJ48345.1

Group6906: acar|OOF94883.1 acla|EAW11991.1 afis|EAW19631.1 afla|EED56983.1 afum|EAL86891.1 agla|OJJ80776.1 akaw|GAA86083.1 anid|CBF71327.1 aory|EIT77443.1 asyd|OJJ55107.1 ater|EAU32895.1 atub|OJI81743.1 aver|OJJ07099.1 awen|OJJ41875.1 azon|OJJ47074.1

Group6907: acar|OOF95360.1 acla|EAW07419.1 afis|EAW22444.1 afla|EED54460.1 afum|EAL90747.1 akaw|GAA87277.1 aluc|OJZ89744.1 anid|CBF88850.1 anig|EHA26966.1 aory|EIT81138.1 atub|OJI85058.1 awen|OJJ35070.1 asyd|OJJ62864.1 aver|OJI96917.1 azon|OJJ50037.1

Group6908: acar|OOF98609.1 acla|EAW09257.1 afis|EAW21890.1 afum|EAL92904.1 agla|OJJ84243.1 akaw|GAA85773.1 aluc|OJZ91327.1 anid|CBF76802.1 anig|EHA20009.1 asyd|OJJ61287.1 ater|EAU30887.1 atub|OJI83320.1 aver|OJJ00613.1 awen|OJJ34179.1 azon|OJJ43453.1

Group6909: acar|OOF99563.1 acla|EAW14103.1 afis|EAW18804.1 afla|EED50772.1 afum|EAL93540.1 agla|OJJ80534.1 akaw|GAA82242.1 aluc|OJZ91903.1 anid|CBF88046.1 aory|EIT78114.1 asyd|OJJ63544.1 ater|EAU37944.1 aver|OJI97390.1 awen|OJJ32379.1 azon|OJJ47141.1

Group6910: acar|OOG00396.1 afla|EED47341.1 agla|OJJ88112.1 akaw|GAA84671.1 aluc|OJZ87018.1 aory|EIT82882.1 asyd|OJJ58096.1 atub|OJI83500.1 aver|OJJ08161.1 awen|OJJ29859.1 afla|EED49710.1 aory|EIT77634.1 asyd|OJJ53587.1 afla|EED51663.1 aory|EIT80543.1

Group6911: acla|EAW07807.1 afis|EAW22844.1 afla|EED50119.1 afum|EAL90359.1 agla|OJJ83494.1 akaw|GAA89537.1 aluc|OJZ88113.1 anid|CBF87844.1 anig|EHA17883.1 aory|EIT74663.1 ater|EAU38866.1 atub|OJI90722.1 aver|OJI97516.1 awen|OJJ38879.1 azon|OJJ49668.1

Group6912: acla|EAW12228.1 afis|EAW17000.1 afum|EAL86525.1 agla|OJJ84724.1 anid|CBF77120.1 anig|EHA25714.1 asyd|OJJ62718.1 ater|EAU38945.1 aver|OJI99732.1 awen|OJJ30973.1 afis|EAW20298.1 afum|EAL91117.1 agla|OJJ88388.1 afum|EAL85427.1 asyd|OJJ60403.1

Group6913: acla|EAW12410.1 afis|EAW16763.1 afum|EAL86334.1 agla|OJJ84649.1 akaw|GAA81985.1 aluc|OJZ92205.1 anid|CBF80579.1 aory|EIT73906.1 asyd|OJJ54683.1 ater|EAU29565.1 atub|OJI86634.1 aver|OJJ07486.1 awen|OJJ33303.1 asyd|OJJ54682.1 azon|OJJ46848.1

Group6914: acar|OOF90424.1 acar|OOF90428.1 afis|EAW16794.1 afum|EAL86363.1 asyd|OJJ61718.1 aver|OJI95812.1 awen|OJJ41828.1 afla|EED45973.1 agla|OJJ79963.1 aory|EIT75831.1 awen|OJJ33625.1 afla|EED49828.1 aory|EIT77643.1 anid|CBF71775.1

Group6915: acar|OOF90491.1 acar|OOF90501.1 abra|OJJ71085.1 afis|EAW25755.1 afla|EED49652.1 akaw|GAA82876.1 aluc|OJZ87443.1 anid|CBF75199.1 aory|EIT80942.1 asyd|OJJ51843.1 ater|EAU29905.1 atub|OJI81205.1 awen|OJJ38992.1 awen|OJJ29745.1

Group6916: acar|OOF92316.1 acar|OOF92358.1 abra|OJJ67483.1 afla|EED53011.1 akaw|GAA86356.1 aluc|OJZ84885.1 anid|CBF70758.1 anig|EHA25114.1 aory|EIT77440.1 asyd|OJJ58433.1 ater|EAU32283.1 atub|OJI80715.1 aver|OJJ01034.1 awen|OJJ31755.1

Group6917: acar|OOF93700.1 acar|OOF93786.1 abra|OJJ66691.1 afis|EAW19438.1 afum|EAL87058.1 akaw|GAA89635.1 aluc|OJZ80755.1 anid|CBF81389.1 anig|EHA27269.1 asyd|OJJ59397.1 ater|EAU34739.1 atub|OJI87611.1 aver|OJJ02875.1 awen|OJJ36835.1

Group6918: acar|OOF93725.1 acar|OOF93813.1 abra|OJJ66725.1 acla|EAW11855.1 afis|EAW19466.1 afum|EAL87030.1 agla|OJJ81184.1 akaw|GAA89666.1 aluc|OJZ80723.1 anig|EHA27297.1 ater|EAU34776.1 atub|OJI87579.1 awen|OJJ36870.1 azon|OJJ42933.1

Group6919: acar|OOF94033.1 acar|OOF94103.1 abra|OJJ66418.1 acla|EAW15257.1 afis|EAW20232.1 afla|EED55129.1 afum|EAL85349.1 akaw|GAA90284.1 aluc|OJZ83056.1 anig|EHA28122.1 aory|EIT81653.1 ater|EAU37763.1 atub|OJI87891.1 azon|OJJ47375.1

Group6920: acar|OOF94042.1 acar|OOF94112.1 abra|OJJ66399.1 afla|EED49555.1 agla|OJJ79508.1 akaw|GAA90267.1 aluc|OJZ83074.1 anig|EHA28138.1 aory|EIT82623.1 asyd|OJJ61453.1 atub|OJI87872.1 aver|OJJ00788.1 awen|OJJ39515.1 azon|OJJ45872.1

Group6921: acar|OOF94069.1 acar|OOF94139.1 abra|OJJ66353.1 acla|EAW10818.1 afis|EAW24755.1 afum|EAL89398.1 akaw|GAA90227.1 aluc|OJZ83114.1 anig|EHA28177.1 asyd|OJJ63866.1 ater|EAU33501.1 atub|OJI87820.1 aver|OJI97073.1 awen|OJJ33617.1

Group6922: acar|OOF94092.1 acar|OOF94162.1 abra|OJJ66345.1 afla|EED47093.1 agla|OJJ80117.1 akaw|GAA90219.1 aluc|OJZ83122.1 anid|CBF86770.1 anig|EHA28186.1 aory|EIT72479.1 atub|OJI87811.1 aver|OJI98790.1 awen|OJJ36362.1 asyd|OJJ64688.1

Group6923: acar|OOF95049.1 acar|OOF95116.1 abra|OJJ70453.1 afla|EED45438.1 akaw|GAA90130.1 aluc|OJZ83219.1 anid|CBF84672.1 anig|EHA21077.1 aory|EIT82469.1 asyd|OJJ53348.1 ater|EAU37647.1 atub|OJI87718.1 aver|OJJ08396.1 awen|OJJ38302.1

Group6924: acar|OOF95635.1 acar|OOF95686.1 abra|OJJ74672.1 akaw|GAA81941.1 aluc|OJZ92249.1 anid|CBF71781.1 anig|EHA26707.1 asyd|OJJ61744.1 atub|OJI86682.1 aver|OJI95841.1 acar|OOF91477.1 azon|OJJ50316.1 afla|EED55300.1 aory|EIT83599.1

Group6925: acar|OOF96226.1 acar|OOF96264.1 abra|OJJ71511.1 afla|EED45339.1 agla|OJJ88922.1 akaw|GAA89404.1 aluc|OJZ86249.1 aory|EIT73804.1 asyd|OJJ63234.1 ater|EAU38650.1 atub|OJI84293.1 aver|OJI97722.1 awen|OJJ31796.1 azon|OJJ45990.1

Group6926: acar|OOF96909.1 acar|OOF96945.1 abra|OJJ70801.1 acla|EAW11123.1 afis|EAW15852.1 afla|EED56521.1 afum|EAL88488.1 agla|OJJ87256.1 akaw|GAA90117.1 aluc|OJZ84146.1 anid|CBF81178.1 aory|EIT72788.1 asyd|OJJ59293.1 aver|OJJ02982.1

Group6927: acar|OOF96929.1 acar|OOF96964.1 abra|OJJ70779.1 acla|EAW11140.1 afis|EAW15871.1 afum|EAL88505.1 akaw|GAA90098.1 aluc|OJZ84126.1 anid|CBF81215.1 anig|EHA19234.1 aory|EIT72839.1 ater|EAU31688.1 atub|OJI90500.1 azon|OJJ47441.1

Group6928: acar|OOF97668.1 acar|OOF97716.1 abra|OJJ71488.1 acla|EAW10062.1 afum|EBA27396.1 agla|OJJ87279.1 akaw|GAA82532.1 aluc|OJZ87059.1 anig|EHA20332.1 asyd|OJJ53022.1 atub|OJI81576.1 aver|OJJ03821.1 awen|OJJ41266.1 azon|OJJ44831.1

Group6929: afis|EAW24052.1 afis|EAW25623.1 aluc|OJZ79946.1 aluc|OJZ85403.1 acar|OOF98689.1 afla|EED49756.1 afum|EAL84311.1 agla|OJJ86172.1 akaw|GAA87768.1 aory|EIT77610.1 asyd|OJJ56972.1 ater|EAU37499.1 atub|OJI80170.1 aver|OJJ03317.1

Group6930: afla|EED45951.1 afla|EED57818.1 aory|EIT75362.1 aory|EIT81086.1 acla|EAW09537.1 afis|EAW21595.1 afum|EAL92613.1 aluc|OJZ85107.1 ater|EAU34929.1 awen|OJJ36083.1 afla|EED45851.1 anig|EHA25328.1 afla|EED57817.1 akaw|GAA86559.1

Group6931: afla|EED48216.1 afla|EED52152.1 aory|EIT72949.1 aory|EIT74498.1 abra|OJJ75217.1 acar|OOF94567.1 acla|EAW15362.1 afis|EAW20350.1 afum|EAL85468.1 akaw|GAA91767.1 aluc|OJZ92781.1 anig|EHA26229.1 ater|EAU31806.1 atub|OJI87223.1

Group6932: afla|EED52305.1 afla|EED56023.1 aory|EIT74399.1 aory|EIT76551.1 acar|OOF91585.1 afis|EAW19560.1 afum|EAL86951.1 agla|OJJ86282.1 anid|CBF73581.1 asyd|OJJ56685.1 ater|EAU39598.1 aver|OJJ06038.1 awen|OJJ30876.1 azon|OJJ47317.1

Group6933: afum|EAL85412.1 afum|EAL91515.2 acar|OOG00333.1 acla|EAW12963.1 afis|EAW17700.1 asyd|OJJ57237.1 aver|OJJ03048.1 asyd|OJJ61526.1 ater|EAU36789.1 azon|OJJ49085.1 afum|EAL91513.1 anid|CBF80589.1 awen|OJJ36014.1 aver|OJJ00859.1

Group6934: agla|OJJ82009.1 agla|OJJ85461.1 acar|OOF93839.1 afla|EED50687.1 akaw|GAA89693.1 aluc|OJZ80691.1 anig|EHA27324.1 aory|EIT73601.1 atub|OJI87551.1 aver|OJJ03883.1 azon|OJJ46763.1 afla|EED45096.1 asyd|OJJ60303.1 awen|OJJ32713.1

Group6935: akaw|GAA92844.1 akaw|GAA92891.1 akaw|GAA93037.1 akaw|GAA93105.1 aluc|OJZ79646.1 aluc|OJZ80468.1 abra|OJJ65835.1 acar|OOF97962.1 afla|EED46520.1 aory|EIT72396.1 asyd|OJJ56740.1 ater|EAU34462.1 awen|OJJ36064.1 azon|OJJ45266.1

Group6936: aluc|OJZ80069.1 aluc|OJZ81388.1 abra|OJJ67544.1 acla|EAW12261.1 afla|EED48219.1 agla|OJJ82716.1 akaw|GAA88116.1 anid|CBF86667.1 anig|EHA18681.1 asyd|OJJ64774.1 ater|EAU31805.1 atub|OJI91593.1 aver|OJI98874.1 awen|OJJ30122.1

Group6937: aluc|OJZ80266.1 aluc|OJZ87735.1 anig|EHA17697.1 anig|EHA20226.1 abra|OJJ67240.1 acar|OOF89888.1 acla|EAW08784.1 afis|EAW25600.1 afum|EAL84305.1 agla|OJJ79165.1 akaw|GAA91665.1 aory|EIT81930.1 ater|EAU34041.1 atub|OJI80905.1

Group6938: anid|CBF77156.1 anid|CBF86820.1 asyd|OJJ56906.1 asyd|OJJ56933.1 aver|OJI95763.1 aver|OJJ03387.1 awen|OJJ36091.1 awen|OJJ39054.1 agla|OJJ78635.1 afla|EED48930.1 aory|EIT80041.1 ater|EAU36115.1 anig|EHA20661.1 azon|OJJ48055.1

Group6939: anid|CBF78784.1 anid|CBF86372.1 abra|OJJ67144.1 acar|OOF98410.1 afla|EED47581.1 afum|EAL84948.1 akaw|GAA91025.1 aluc|OJZ87828.1 anig|EHA20307.1 aory|EIT74572.1 asyd|OJJ65244.1 ater|EAU29469.1 atub|OJI80813.1 aver|OJI99396.1

Group6940: anid|CBF88140.1 anid|CBF90391.1 acar|OOF90187.1 afis|EAW20751.1 afla|EED52306.1 agla|OJJ83899.1 akaw|GAA91990.1 aluc|OJZ92860.1 anig|EHA26140.1 asyd|OJJ63603.1 ater|EAU29428.1 atub|OJI87318.1 aver|OJI97333.1 awen|OJJ29676.1

Group6941: asyd|OJJ52095.1 asyd|OJJ52431.1 abra|OJJ75939.1 acar|OOF99971.1 afla|EED45996.1  
agla|OJJ81767.1 akaw|GAA84641.1 aluc|OJZ89386.1 anid|CBF86225.1 anig|EHA23198.1 aory|EIT75400.1  
ater|EAU35909.1 atub|OJI85411.1 awen|OJJ39419.1

Group6942: asyd|OJJ52254.1 asyd|OJJ62108.1 abra|OJJ75248.1 afis|EAW25209.1 afum|EAL89870.1  
agla|OJJ88954.1 akaw|GAA91789.1 aluc|OJZ92808.1 anid|CBF89952.1 anig|EHA26200.1 ater|EAU34351.1  
atub|OJI87258.1 aver|OJI96214.1 awen|OJJ40843.1

Group6943: asyd|OJJ61017.1 asyd|OJJ61682.1 awen|OJJ32648.1 awen|OJJ37015.1 acar|OOF90107.1  
acla|EAW10851.1 afis|EAW19664.1 afla|EED49410.1 anid|CBF84685.1 anig|EHA18841.1 aory|EIT79536.1  
ater|EAU29364.1 atub|OJI90058.1 afla|EED49411.1

Group6944: ater|EAU29345.1 ater|EAU29346.1 abra|OJJ65751.1 afis|EAW17418.1 afum|EAL86499.2  
akaw|GAA92847.1 aluc|OJZ88790.1 anid|CBF73627.1 anig|EHA26111.1 asyd|OJJ62709.1 aver|OJJ03130.1  
awen|OJJ29578.1 anig|EHA18443.1 aluc|OJZ79962.1

Group6945: ater|EAU30324.1 ater|EAU34792.1 abra|OJJ66348.1 acar|OOF89957.1 afis|EAW17257.1  
afla|EED47566.1 akaw|GAA90222.1 aluc|OJZ83119.1 anig|EHA28183.1 aory|EIT74539.1 asyd|OJJ56686.1  
atub|OJI87814.1 aver|OJJ06037.1 awen|OJJ38070.1

Group6946: ater|EAU31648.1 ater|EAU32789.1 abra|OJJ74153.1 acar|OOF95572.1 afla|EED56734.1  
agla|OJJ84116.1 akaw|GAA89730.1 aluc|OJZ80653.1 anig|EHA27179.1 aory|EIT73918.1 asyd|OJJ61411.1  
atub|OJI87508.1 aver|OJJ00741.1 awen|OJJ34278.1

Group6947: atub|OJI81113.1 atub|OJI88409.1 abra|OJJ70992.1 afis|EAW21012.1 afla|EED53337.1  
agla|OJJ82530.1 akaw|GAA89071.1 aluc|OJZ80521.1 anig|EHA20745.1 aory|EIT75239.1 ater|EAU30432.1  
awen|OJJ35895.1 anig|EHA25674.1 aluc|OJZ87536.1

Group6948: aver|OJJ03412.1 aver|OJJ04807.1 abra|OJJ66799.1 acar|OOF93876.1 afla|EED55091.1  
agla|OJJ78901.1 akaw|GAA86863.1 aluc|OJZ89987.1 anig|EHA27358.1 aory|EIT81582.1 ater|EAU29930.1  
atub|OJI84823.1 awen|OJJ36049.1 azon|OJJ50226.1

Group6949: awen|OJJ29806.1 awen|OJJ37388.1 abra|OJJ68900.1 acar|OOF90515.1 acla|EAW12124.1  
afis|EAW16876.1 akaw|GAA90351.1 aluc|OJZ85881.1 anig|EHA24705.1 atub|OJI79667.1 azon|OJJ45041.1  
agla|OJJ78940.1 afum|EAL86413.1 asyd|OJJ54557.1

Group6950: awen|OJJ29925.1 awen|OJJ36429.1 abra|OJJ77388.1 acar|OOF93257.1 afla|EED51018.1  
akaw|GAA91373.1 aluc|OJZ84796.1 anig|EHA28063.1 aory|EIT76995.1 asyd|OJJ57005.1 ater|EAU31809.1  
atub|OJI89286.1 aver|OJJ03282.1 afla|EED48974.1

Group6951: awen|OJJ30251.1 awen|OJJ33419.1 azon|OJJ45688.1 azon|OJJ50381.1 acla|EAW15282.1  
agla|OJJ81596.1 abra|OJJ77686.1 aluc|OJZ80830.1 aory|EIT76243.1 ater|EAU39391.1 atub|OJI82736.1  
acla|EAW10823.1 afis|EAW19958.1 afla|EED55323.1

Group6952: awen|OJJ30777.1 awen|OJJ31704.1 abra|OJJ67680.1 acar|OOF90430.1 afis|EAW17170.1  
afla|EED56039.1 afum|EAL86602.1 agla|OJJ87459.1 akaw|GAA89193.1 aluc|OJZ81638.1 anig|EHA25806.1  
aory|EIT76820.1 atub|OJI88542.1 aver|OJJ03941.1

Group6953: awen|OJJ33374.1 awen|OJJ35476.1 awen|OJJ35903.1 acar|OOF90256.1 acla|EAW08587.1  
akaw|GAA83752.1 aluc|OJZ90979.1 anid|CBF80129.1 anig|EHA19684.1 asyd|OJJ58345.1 atub|OJI83135.1  
aver|OJJ02068.1 azon|OJJ45079.1 atub|OJI82970.1

Group6954: awen|OJJ36940.1 awen|OJJ40858.1 abra|OJJ68430.1 acar|OOF93960.1 afla|EED49405.1  
agla|OJJ78444.1 akaw|GAA86941.1 aluc|OJZ90066.1 anid|CBF77083.1 anig|EHA21008.1 aory|EIT79528.1  
asyd|OJJ56963.1 atub|OJI84741.1 aver|OJJ03323.1

Group6955: azon|OJJ42576.1 azon|OJJ45716.1 azon|OJJ45074.1 azon|OJJ43555.1 abra|OJJ66011.1  
acar|OOF91994.1 acla|EAW11547.1 afis|EAW19001.1 afum|EAL87334.1 agla|OJJ84824.1 asyd|OJJ60039.1  
aver|OJJ02246.1 awen|OJJ31270.1 afis|EAW23906.1

Group6956: azon|OJJ42644.1 azon|OJJ48760.1 azon|OJJ50425.1 azon|OJJ42305.1 abra|OJJ77949.1  
agla|OJJ88431.1 akaw|GAA83715.1 aluc|OJZ91018.1 anig|EHA19720.1 atub|OJI88499.1 aluc|OJZ81682.1  
afla|EED51049.1 awen|OJJ31287.1 afum|EAL86479.2

Group6957: azon|OJJ44233.1 azon|OJJ46858.1 abra|OJJ76476.1 afla|EED54050.1 akaw|GAA82388.1  
aluc|OJZ91732.1 anig|EHA22739.1 aory|EIT76013.1 asyd|OJJ52398.1 ater|EAU29590.1 atub|OJI86191.1  
aver|OJJ01925.1 afla|EED50664.1 aory|EIT78105.1

Group6958: azon|OJJ50342.1 azon|OJJ51822.1 abra|OJJ76238.1 acar|OOF99483.1 acla|EAW12382.1  
afis|EAW22751.1 afla|EED50909.1 akaw|GAA82172.1 aluc|OJZ91993.1 anig|EHA22938.1 aory|EIT79036.1  
ater|EAU38096.1 atub|OJI86428.1 awen|OJJ38781.1

Group6959: abra|OJJ65599.1 afla|EED45684.1 akaw|GAA92638.1 aluc|OJZ90501.1 aory|EIT75419.1 atub|OJI84074.1 azon|OJJ49035.1 abra|OJJ68604.1 acar|OOF94949.1 agla|OJJ80045.1 abra|OJJ68910.1 acar|OOF98557.1 ater|EAU35052.1 azon|OJJ50354.1

Group6960: abra|OJJ65686.1 acar|OOF93614.1 acla|EAW12339.1 afis|EAW15634.1 afla|EED44879.1 afum|EAL85703.1 anid|CBF82090.1 aory|EIT83252.1 asyd|OJJ54264.1 ater|EAU32954.1 atub|OJI83488.1 aver|OJJ05218.1 awen|OJJ31358.1 acla|EAW08773.1

Group6961: abra|OJJ65695.1 afla|EED56834.1 afum|EAL84264.1 aory|EIT73846.1 azon|OJJ47368.1 abra|OJJ68911.1 acar|OOF91496.1 acla|EAW12302.1 agla|OJJ88168.1 akaw|GAA90339.1 aluc|OJZ85893.1 anig|EHA24698.1 atub|OJI79678.1 awen|OJJ30630.1

Group6962: abra|OJJ65700.1 afla|EED56832.1 afum|EAL84270.1 agla|OJJ84578.1 anid|CBF84427.1 anig|EHA18819.1 aory|EIT73851.1 asyd|OJJ62606.1 ater|EAU33258.1 aver|OJJ07759.1 awen|OJJ30258.1 asyd|OJJ53640.1 aver|OJJ01166.1 anig|EHA23479.1

Group6963: abra|OJJ65812.1 acar|OOF94171.1 akaw|GAA92877.1 aluc|OJZ82532.1 anig|EHA22498.1 atub|OJI88777.1 abra|OJJ66511.1 afla|EED46594.1 aory|EIT77965.1 ater|EAU32617.1 abra|OJJ78186.1 acla|EAW13446.1 agla|OJJ79275.1 azon|OJJ45475.1

Group6964: abra|OJJ65859.1 acar|OOF95020.1 acla|EAW14586.1 afla|EED49636.1 agla|OJJ81812.1 akaw|GAA92286.1 aluc|OJZ90183.1 anid|CBF74599.1 anig|EHA23682.1 aory|EIT80958.1 ater|EAU32492.1 atub|OJI81610.1 azon|OJJ43053.1 acla|EAW11034.1

Group6965: abra|OJJ65880.1 acar|OOF95295.1 akaw|GAA88079.1 aluc|OJZ81342.1 anig|EHA18710.1 atub|OJI91547.1 azon|OJJ42627.1 aory|EIT74600.1 ater|EAU33327.1 anid|CBF88770.1 asyd|OJJ63983.1 aver|OJI96970.1 awen|OJJ35859.1 awen|OJJ30904.1

Group6966: abra|OJJ65892.1 afla|EED46587.1 agla|OJJ85291.1 akaw|GAA86013.1 aluc|OJZ90240.1 anig|EHA23737.1 aory|EIT77889.1 atub|OJI81669.1 awen|OJJ31278.1 akaw|GAA86638.1 aluc|OJZ85195.1 atub|OJI85130.1 akaw|GAA87344.1 aluc|OJZ89670.1

Group6967: abra|OJJ65894.1 acar|OOF94955.1 afla|EED53410.1 akaw|GAA86011.1 aluc|OJZ90238.1 aory|EIT74977.1 ater|EAU30301.1 atub|OJI81667.1 aver|OJJ06586.1 awen|OJJ32203.1 akaw|GAA85849.1 aluc|OJZ91250.1 ater|EAU29841.1 awen|OJJ37897.1

Group6968: abra|OJJ65918.1 afla|EED50457.1 afum|EAL84941.1 agla|OJJ80058.1 akaw|GAA92314.1 aluc|OJZ90212.1 anid|CBF84463.1 anig|EHA23710.1 aory|EIT82057.1 asyd|OJJ53549.1 ater|EAU31472.1 atub|OJI81643.1 aver|OJJ08204.1 awen|OJJ29952.1

Group6969: abra|OJJ65920.1 acar|OOF94981.1 afis|EAW22856.1 afum|EAL90344.1 akaw|GAA92312.1 aluc|OJZ90210.1 anig|EHA23708.1 atub|OJI81641.1 awen|OJJ30825.1 azon|OJJ43901.1 acar|OOF90237.1 anig|EHA19271.1 acla|EAW07820.1 azon|OJJ42247.1

Group6970: abra|OJJ65925.1 acar|OOF94986.1 acla|EAW12065.1 afla|EED57048.1 agla|OJJ78912.1 aluc|OJZ90206.1 anid|CBF71409.1 anig|EHA23703.1 asyd|OJJ55013.1 atub|OJI81635.1 aver|OJJ07198.1 awen|OJJ29906.1 acar|OOF94208.1 ater|EAU32841.1

Group6971: acla|EAW08976.1 afis|EAW15455.1 afla|EED54388.1 afum|EAL84190.1 aory|EIT75844.1 abra|OJJ68368.1 awen|OJJ40831.1 acar|OOF95006.1 akaw|GAA92295.1 aluc|OJZ90192.1 anig|EHA23691.1 ater|EAU37834.1 atub|OJI81619.1 azon|OJJ42817.1

Group6972: abra|OJJ65953.1 acar|OOF92919.1 afla|EED46035.1 agla|OJJ88003.1 akaw|GAA90830.1 aluc|OJZ83004.1 anig|EHA21420.1 aory|EIT75813.1 asyd|OJJ53292.1 ater|EAU29389.1 atub|OJI89238.1 aver|OJJ08448.1 awen|OJJ30044.1 azon|OJJ43690.1

Group6973: abra|OJJ65985.1 acar|OOF98728.1 afla|EED45376.1 agla|OJJ87971.1 akaw|GAA90858.1 aluc|OJZ82975.1 anid|CBF78951.1 anig|EHA21391.1 aory|EIT82468.1 asyd|OJJ55656.1 ater|EAU37435.1 atub|OJI89208.1 aver|OJJ06740.1 awen|OJJ30018.1

Group6974: abra|OJJ65989.1 acar|OOF92884.1 afis|EAW19526.1 afla|EED49679.1 agla|OJJ87964.1 akaw|GAA90863.1 aluc|OJZ82970.1 anig|EHA21386.1 aory|EIT81017.1 asyd|OJJ55655.1 atub|OJI89203.1 aver|OJJ06739.1 awen|OJJ30014.1 azon|OJJ43644.1

Group6975: abra|OJJ66004.1 acar|OOF92094.1 afla|EED50226.1 akaw|GAA90877.1 aluc|OJZ82956.1 anid|CBF80408.1 anig|EHA21371.1 aory|EIT76439.1 ater|EAU30955.1 atub|OJI89188.1 awen|OJJ34468.1 azon|OJJ45184.1 afla|EED46243.1 azon|OJJ45166.1

Group6976: abra|OJJ66113.1 acar|OOF94006.1 afis|EAW20770.1 afla|EED51741.1 afum|EAL84849.1 akaw|GAA92677.1 aluc|OJZ90132.1 anid|CBF78153.1 anig|EHA20939.1 aory|EIT80598.1 asyd|OJJ55951.1 ater|EAU30762.1 atub|OJI84664.1 aver|OJJ04897.1

Group6977: abra|OJJ66123.1 acar|OOF94013.1 acla|EAW12395.1 afis|EAW16843.1 akaw|GAA92684.1 aluc|OJZ90142.1 anid|CBF82118.1 anig|EHA20927.1 aory|EIT78834.1 asyd|OJJ54291.1 atub|OJI84657.1 aver|OJJ05247.1 awen|OJJ41473.1 afla|EED54594.1

Group6978: abra|OJJ66149.1 afis|EAW17097.1 afla|EED51083.1 agla|OJJ79833.1 akaw|GAA88362.1 aluc|OJZ82293.1 anig|EHA18736.1 aory|EIT77058.1 asyd|OJJ61752.1 ater|EAU38712.1 atub|OJI88146.1 aver|OJI95850.1 awen|OJJ29778.1 ater|EAU33991.1

Group6979: abra|OJJ66189.1 acar|OOF98736.1 afla|EED52248.1 aory|EIT74383.1 asyd|OJJ65286.1 awen|OJJ38315.1 abra|OJJ76496.1 afis|EAW16417.1 akaw|GAA82412.1 aluc|OJZ91707.1 anid|CBF80658.1 anig|EHA22719.1 atub|OJI86166.1 aver|OJJ08324.1

Group6980: abra|OJJ66252.1 acar|OOF90724.1 acla|EAW13652.1 afis|EAW19953.1 afla|EED57854.1 afum|EAL84962.1 akaw|GAA89035.1 aluc|OJZ80560.1 anig|EHA25637.1 aory|EIT81119.1 ater|EAU36872.1 atub|OJI88371.1 afla|EED45865.1 aory|EIT75804.1

Group6981: abra|OJJ66263.1 acar|OOF90737.1 afla|EED52626.1 agla|OJJ80715.1 akaw|GAA89032.1 aluc|OJZ80571.1 anid|CBF83203.1 anig|EHA25627.1 asyd|OJJ55553.1 ater|EAU29936.1 atub|OJI88360.1 aver|OJJ06630.1 awen|OJJ40108.1 azon|OJJ43920.1

Group6982: abra|OJJ66357.1 acla|EAW10007.1 afis|EAW21049.1 afla|EED51621.1 afum|EAL92085.1 akaw|GAA90231.1 aluc|OJZ83110.1 anid|CBF87102.1 anig|EHA28173.1 aory|EIT80670.1 asyd|OJJ60389.1 ater|EAU36821.1 atub|OJI87824.1 aver|OJI99718.1

Group6983: abra|OJJ66433.1 afla|EED49899.1 agla|OJJ84659.1 anid|CBF71844.1 aory|EIT72456.1 awen|OJJ35942.1 abra|OJJ70251.1 acar|OOF90243.1 akaw|GAA86540.1 aluc|OJZ85088.1 anig|EHA25307.1 atub|OJI80511.1 asyd|OJJ61490.1 aver|OJJ00831.1

Group6984: abra|OJJ66442.1 afla|EED53319.1 agla|OJJ85806.1 aory|EIT75251.1 asyd|OJJ59091.1 ater|EAU34526.1 aver|OJJ01681.1 abra|OJJ68019.1 acar|OOF92062.1 akaw|GAA90932.1 aluc|OJZ82893.1 anig|EHA21317.1 atub|OJI89117.1 asyd|OJJ56921.1

Group6985: abra|OJJ66457.1 akaw|GAA84342.1 aluc|OJZ89042.1 anid|CBF84580.1 atub|OJI85747.1 abra|OJJ70525.1 acar|OOF93024.1 aver|OJJ07638.1 awen|OJJ38692.1 azon|OJJ46468.1 abra|OJJ78045.1 asyd|OJJ54520.1 aver|OJJ05321.1 aver|OJJ04477.1

Group6986: abra|OJJ66484.1 acar|OOF90961.1 acla|EAW10985.1 afis|EAW20875.1 afla|EED45557.1 afum|EAL84759.1 agla|OJJ83982.1 anid|CBF82853.1 anig|EHA25884.1 aory|EIT75810.1 ater|EAU30814.1 aver|OJJ00917.1 awen|OJJ34485.1 azon|OJJ51762.1

Group6987: abra|OJJ66527.1 acla|EAW10963.1 afla|EED50246.1 afum|EAL84736.1 agla|OJJ84004.1 akaw|GAA91186.1 aluc|OJZ81517.1 anid|CBF82462.1 anig|EHA25915.1 aory|EIT72398.1 asyd|OJJ54116.1 atub|OJI88666.1 awen|OJJ34451.1 afla|EED46511.1

Group6988: abra|OJJ66623.1 acar|OOF91047.1 acla|EAW10873.1 afis|EAW20985.1 afum|EAL84645.1 agla|OJJ84064.1 anid|CBF82624.1 anig|EHA25996.1 aory|EIT77261.1 asyd|OJJ54021.1 ater|EAU38634.1 atub|OJI88755.1 aver|OJJ08719.1 azon|OJJ48070.1

Group6989: abra|OJJ66699.1 acar|OOF94909.1 acla|EAW10031.1 afis|EAW19514.1 afla|EED45381.1 afum|EAL86982.1 akaw|GAA89642.1 aluc|OJZ80747.1 anid|CBF87985.1 anig|EHA27275.1 aory|EIT82412.1 ater|EAU32110.1 atub|OJI79834.1 atub|OJI87604.1

Group6990: abra|OJJ66701.1 acar|OOF94910.1 acla|EAW10033.1 afis|EAW19513.1 afla|EED45382.1 afum|EAL86983.1 akaw|GAA89643.1 aluc|OJZ80746.1 anig|EHA27276.1 aory|EIT82444.1 asyd|OJJ65086.1 ater|EAU32109.1 atub|OJI87603.1 aver|OJI99212.1

Group6991: abra|OJJ66792.1 acar|OOF93869.1 acla|EAW12437.1 afis|EAW16746.1 afla|EED54713.1 afum|EAL86321.1 akaw|GAA86857.1 aluc|OJZ89980.1 anig|EHA27352.1 aory|EIT78785.1 asyd|OJJ52903.1 ater|EAU31716.1 atub|OJI84830.1 aver|OJJ08872.1

Group6992: abra|OJJ66844.1 acar|OOF91621.1 acla|EAW14423.1 afis|EAW19131.1 afla|EED54283.1 afum|EAL93863.1 agla|OJJ88603.1 akaw|GAA90480.1 aluc|OJZ85739.1 anig|EHA24812.1 aory|EIT76101.1 atub|OJI79524.1 awen|OJJ37466.1 azon|OJJ51144.1

Group6993: abra|OJJ66908.1 acar|OOF91678.1 afis|EAW19186.1 afum|EAL93917.1 akaw|GAA91506.1 aluc|OJZ85672.1 anig|EHA24867.1 atub|OJI79464.1 awen|OJJ37544.1 azon|OJJ51208.1 acla|EAW14477.1 afla|EED54209.1 aory|EIT75928.1 aver|OJI99164.1

Group6994: abra|OJJ66929.1 acar|OOF91697.1 afla|EED47704.1 agla|OJJ88503.1 akaw|GAA91488.1 aluc|OJZ85650.1 anid|CBF78565.1 anig|EHA24883.1 aory|EIT80210.1 asyd|OJJ65065.1 atub|OJI79441.1 aver|OJI99189.1 awen|OJJ37561.1 azon|OJJ51223.1

Group6995: abra|OJJ66963.1 acar|OOF93644.1 afla|EED55269.1 agla|OJJ86858.1 akaw|GAA92198.1  
aluc|OJZ85613.1 anid|CBF76561.1 anig|EHA24913.1 aory|EIT83605.1 asyd|OJJ61160.1 ater|EAU39596.1  
atub|OJI79406.1 aver|OJJ00482.1 awen|OJJ39921.1

Group6996: abra|OJJ66986.1 acar|OOF93626.1 afla|EED55059.1 afum|EAL87117.1 agla|OJJ78983.1  
akaw|GAA92178.1 aluc|OJZ85588.1 anid|CBF90363.1 anig|EHA24933.1 aory|EIT81956.1 asyd|OJJ54789.1  
atub|OJI79383.1 aver|OJJ07375.1 azon|OJJ42303.1

Group6997: abra|OJJ66995.1 acar|OOF93620.1 afla|EED52138.1 agla|OJJ81674.1 akaw|GAA92169.1  
aluc|OJZ85577.1 anid|CBF80571.1 anig|EHA24942.1 aory|EIT74495.1 asyd|OJJ52851.1 atub|OJI79373.1  
aver|OJJ08829.1 awen|OJJ36920.1 azon|OJJ42894.1

Group6998: abra|OJJ67035.1 afla|EED49393.1 akaw|GAA93115.1 aory|EIT79467.1 abra|OJJ67037.1  
agla|OJJ80958.1 akaw|GAA93113.1 anig|EHA25076.1 abra|OJJ72134.1 akaw|GAA84788.1 aluc|OJZ86892.1  
anig|EHA21751.1 atub|OJI83627.1 azon|OJJ42321.1

Group6999: abra|OJJ67099.1 acar|OOF98453.1 agla|OJJ81046.1 akaw|GAA91062.1 aluc|OJZ87874.1  
anig|EHA20180.1 atub|OJI80775.1 awen|OJJ35991.1 abra|OJJ70413.1 afla|EED53421.1 akaw|GAA91943.1  
aluc|OJZ82677.1 anig|EHA21046.1 aory|EIT75149.1

Group7000: abra|OJJ67114.1 acar|OOF98438.1 afis|EAW20324.1 afla|EED47500.1 afum|EAL85449.1  
akaw|GAA91050.1 aluc|OJZ87860.1 anid|CBF82804.1 anig|EHA20167.1 aory|EIT74548.1 asyd|OJJ65273.1  
atub|OJI80787.1 aver|OJI99425.1 awen|OJJ38372.1

Group7001: abra|OJJ67158.1 acar|OOF98401.1 afla|EED47597.1 agla|OJJ88392.1 akaw|GAA91014.1  
aluc|OJZ87815.1 anid|CBF78758.1 anig|EHA20296.1 aory|EIT80282.1 asyd|OJJ65232.1 atub|OJI80829.1  
aver|OJI99381.1 awen|OJJ37641.1 azon|OJJ44905.1

Group7002: abra|OJJ67228.1 acar|OOF98324.1 acla|EAW10404.1 afis|EAW25167.1 afum|EAL89840.1  
akaw|GAA91654.1 aluc|OJZ87745.1 anid|CBF89142.1 anig|EHA20235.1 asyd|OJJ62573.1 ater|EAU39454.1  
atub|OJI80896.1 aver|OJI96695.1 awen|OJJ40819.1

Group7003: abra|OJJ67237.1 acar|OOF98314.1 afis|EAW24733.1 afla|EED46088.1 afum|EAL89380.1  
agla|OJJ86785.1 akaw|GAA91662.1 aluc|OJZ87738.1 anid|CBF69480.1 anig|EHA20230.1 asyd|OJJ59272.1  
atub|OJI80902.1 aver|OJJ01885.1 awen|OJJ40221.1

Group7004: abra|OJJ67252.1 acla|EAW10398.1 afis|EAW25179.1 afla|EED53633.1 afum|EAL89853.2  
agla|OJJ88988.1 akaw|GAA91669.1 aluc|OJZ87726.1 aory|EIT75085.1 asyd|OJJ62970.1 atub|OJI80917.1  
aver|OJI97997.1 awen|OJJ40783.1 azon|OJJ48454.1

Group7005: abra|OJJ67261.1 afis|EAW21084.1 afum|EAL92106.1 agla|OJJ79289.1 akaw|GAA91676.1  
aluc|OJZ87718.1 anid|CBF87308.1 anig|EHA20212.1 aory|EIT73510.1 asyd|OJJ61440.1 ater|EAU31935.1  
atub|OJI80924.1 aver|OJJ00774.1 awen|OJJ35786.1

Group7006: abra|OJJ67264.1 afis|EAW21083.1 afla|EED44921.1 afum|EAL92104.2 agla|OJJ79285.1  
akaw|GAA91680.1 aluc|OJZ87714.1 anig|EHA20208.1 aory|EIT73466.1 asyd|OJJ61441.1 ater|EAU31938.1  
atub|OJI80928.1 aver|OJJ00776.1 awen|OJJ35783.1

Group7007: abra|OJJ67283.1 afum|EAL87109.1 agla|OJJ82023.1 akaw|GAA86526.1 aluc|OJZ85074.1  
anid|CBF71657.1 anig|EHA25288.1 aory|EIT75950.1 asyd|OJJ61836.1 ater|EAU32861.1 atub|OJI80524.1  
aver|OJI95935.1 awen|OJJ36118.1 afla|EED54339.1

Group7008: abra|OJJ67386.1 acla|EAW06373.1 afis|EAW18479.1 afla|EED52930.1 afum|EAL93168.1  
agla|OJJ85067.1 akaw|GAA86438.1 anid|CBF70138.1 anig|EHA25193.1 aory|EIT78689.1 asyd|OJJ58813.1  
atub|OJI80621.1 aver|OJJ01416.1 awen|OJJ31032.1

Group7009: abra|OJJ67465.1 acla|EAW06303.1 afis|EAW18412.1 afum|EAL93092.1 agla|OJJ84979.1  
akaw|GAA86371.1 aluc|OJZ84900.1 anid|CBF70735.1 aory|EIT77434.1 asyd|OJJ58442.1 ater|EAU29827.1  
atub|OJI80698.1 awen|OJJ31738.1 azon|OJJ50497.1

Group7010: abra|OJJ67567.1 acar|OOG00285.1 afla|EED48141.1 afum|EAL86219.1 agla|OJJ79350.1  
akaw|GAA88098.1 aluc|OJZ81365.1 anig|EHA18665.1 aory|EIT76241.1 ater|EAU33061.1 atub|OJI91569.1  
aver|OJJ07627.1 awen|OJJ39953.1 afis|EAW24554.1

Group7011: abra|OJJ67586.1 afla|EED46507.1 agla|OJJ80469.1 aory|EIT72341.1 abra|OJJ68809.1  
acar|OOF90612.1 acla|EAW15298.1 afis|EAW25743.1 akaw|GAA90445.1 aluc|OJZ85781.1 anig|EHA24774.1  
atub|OJI79566.1 awen|OJJ40650.1 azon|OJJ42396.1

Group7012: abra|OJJ67597.1 afis|EAW16583.1 afla|EED57872.1 afum|EAL89178.1 akaw|GAA89116.1  
aluc|OJZ81723.1 anid|CBF69623.1 anig|EHA25716.1 aory|EIT83271.1 asyd|OJJ59121.1 ater|EAU36660.1  
atub|OJI88458.1 aver|OJJ01710.1 awen|OJJ40233.1



Group7013: abra|OJJ67695.1 acla|EAW12035.1 afla|EED46151.1 akaw|GAA89205.1 aluc|OJZ81625.1  
anid|CBF84623.1 anig|EHA25818.1 aory|EIT76443.1 ater|EAU32264.1 atub|OJI88555.1 awen|OJJ29707.1  
azon|OJJ48894.1 asyd|OJJ56446.1 aver|OJJ06276.1

Group7014: abra|OJJ67700.1 acar|OOF99866.1 afla|EED48149.1 agla|OJJ78988.1 akaw|GAA89209.1  
aluc|OJZ81620.1 anid|CBF81674.1 anig|EHA25823.1 aory|EIT76264.1 asyd|OJJ59556.1 atub|OJI88560.1  
aver|OJJ02712.1 awen|OJJ33677.1 azon|OJJ43895.1

Group7015: abra|OJJ67726.1 acar|OOF89958.1 acla|EAW11900.1 afis|EAW19510.1 afla|EED54084.1  
afum|EAL86985.1 akaw|GAA89220.1 aluc|OJZ81609.1 anid|CBF73808.1 anig|EHA25837.1 aory|EIT76030.1  
asyd|OJJ56578.1 atub|OJI88577.1 azon|OJJ50137.1

Group7016: abra|OJJ67730.1 acar|OOF93977.1 afis|EAW25604.1 afla|EED55496.1 akaw|GAA89225.1  
aluc|OJZ81601.1 anig|EHA25841.1 aory|EIT80776.1 ater|EAU31033.1 atub|OJI88581.1 awen|OJJ40146.1  
acar|OOG00064.1 anid|CBF82319.1 ater|EAU32207.1

Group7017: abra|OJJ67737.1 acar|OOF90936.1 acla|EAW07080.1 afla|EED45455.1 akaw|GAA92428.1  
aluc|OJZ81594.1 anid|CBF82819.1 anig|EHA25847.1 aory|EIT82388.1 asyd|OJJ61576.1 ater|EAU30798.1  
atub|OJI88589.1 aver|OJJ00897.1 anid|CBF73492.1

Group7018: abra|OJJ67756.1 ater|EAU37754.1 atub|OJI84566.1 awen|OJJ36302.1 abra|OJJ68832.1  
acar|OOF91920.1 afla|EED49279.1 agla|OJJ78834.1 akaw|GAA90420.1 aluc|OJZ85810.1 aory|EIT82230.1  
asyd|OJJ52481.1 atub|OJI79596.1 aver|OJJ03926.1

Group7019: abra|OJJ67806.1 acar|OOF97083.1 acla|EAW08938.1 afis|EAW24383.1 afla|EED47826.1  
afum|EAL86055.1 agla|OJJ83271.1 aluc|OJZ90851.1 aory|EIT77203.1 asyd|OJJ60975.1 aver|OJJ00299.1  
awen|OJJ32829.1 azon|OJJ49007.1 acar|OOF93187.1

Group7020: abra|OJJ67838.1 acar|OOF92012.1 afla|EED47865.1 akaw|GAA91844.1 aluc|OJZ82054.1  
anid|CBF82519.1 anig|EHA22206.1 asyd|OJJ54086.1 atub|OJI84612.1 aver|OJJ08652.1 awen|OJJ34679.1  
aory|EIT77225.1 agla|OJJ79694.1 aver|OJJ05932.1

Group7021: abra|OJJ67883.1 acar|OOF89797.1 acla|EAW11692.1 afis|EAW23708.1 afla|EED51508.1  
afum|EAL87152.1 agla|OJJ83691.1 akaw|GAA91890.1 aluc|OJZ82007.1 anig|EHA22250.1 aory|EIT80464.1  
ater|EAU30421.1 atub|OJI84556.1 awen|OJJ33667.1

Group7022: abra|OJJ67894.1 afla|EED50788.1 afum|EAL86207.1 agla|OJJ83137.1 akaw|GAA91899.1  
aluc|OJZ81996.1 anid|CBF74829.1 anig|EHA22260.1 aory|EIT78072.1 asyd|OJJ55031.1 atub|OJI84546.1  
aver|OJJ07172.1 awen|OJJ32933.1 anid|CBF78470.1

Group7023: abra|OJJ67901.1 acar|OOF90069.1 afla|EED47043.1 afum|EAL84243.1 agla|OJJ88180.1  
akaw|GAA91905.1 aluc|OJZ81989.1 anid|CBF80370.1 anig|EHA22267.1 asyd|OJJ54814.1 atub|OJI84540.1  
aver|OJJ07347.1 awen|OJJ35403.1 aory|EIT72724.1

Group7024: abra|OJJ68010.1 acar|OOF92052.1 acla|EAW12060.1 afis|EAW19701.1 afum|EAL86826.1  
akaw|GAA90940.1 aluc|OJZ82884.1 anid|CBF83221.1 anig|EHA21310.1 asyd|OJJ55583.1 atub|OJI89109.1  
aver|OJJ06662.1 awen|OJJ40821.1 azon|OJJ45544.1

Group7025: abra|OJJ68027.1 acar|OOF92070.1 acla|EAW13766.1 afis|EAW19792.1 afla|EED48126.1  
afum|EAL85099.1 akaw|GAA90926.1 aluc|OJZ82900.1 anid|CBF80565.1 anig|EHA21325.1 aory|EIT76265.1  
atub|OJI89126.1 awen|OJJ35357.1 azon|OJJ43533.1

Group7026: abra|OJJ68036.1 acar|OOF91807.1 acla|EAW06967.1 afla|EED55049.1 akaw|GAA90916.1  
aluc|OJZ82910.1 anig|EHA21333.1 aory|EIT81960.1 asyd|OJJ53718.1 ater|EAU36652.1 atub|OJI89136.1  
aver|OJJ07844.1 awen|OJJ33895.1 azon|OJJ45202.1

Group7027: abra|OJJ68057.1 acar|OOF92078.1 acla|EAW13674.1 afis|EAW19933.1 afla|EED45899.1  
afum|EAL84976.2 agla|OJJ78944.1 akaw|GAA90899.1 aluc|OJZ82929.1 anig|EHA21349.1 asyd|OJJ53382.1  
atub|OJI89158.1 aver|OJJ08361.1 awen|OJJ29750.1

Group7028: abra|OJJ68058.1 acar|OOF92079.1 afla|EED45900.1 akaw|GAA90898.1 aluc|OJZ82930.1  
anig|EHA21350.1 aory|EIT75411.1 asyd|OJJ54997.1 atub|OJI89159.1 aver|OJJ07717.1 abra|OJJ68906.1  
afis|EAW23720.1 anig|EHA21439.1 awen|OJJ38152.1

Group7029: abra|OJJ68059.1 acar|OOF92080.1 afla|EED45901.1 akaw|GAA90897.1 aluc|OJZ82931.1  
anig|EHA21351.1 aory|EIT75786.1 atub|OJI89160.1 abra|OJJ68908.1 afis|EAW23717.1 agla|OJJ83729.1  
anig|EHA21437.1 asyd|OJJ54998.1 aver|OJJ07718.1

Group7030: abra|OJJ68118.1 acar|OOF93912.1 akaw|GAA86899.1 aluc|OJZ90022.1 anig|EHA27398.1  
atub|OJI84785.1 acla|EAW15013.1 afis|EAW20621.1 agla|OJJ83066.1 anid|CBF86716.1 asyd|OJJ64725.1  
ater|EAU34581.1 aver|OJI98826.1 azon|OJJ42452.1

Group7031: abra|OJJ68121.1 acar|OOF93915.1 acla|EAW10812.1 afis|EAW24761.1 afum|EAL89403.2  
agla|OJJ81683.1 akaw|GAA86902.1 aluc|OJZ90025.1 anig|EHA27401.1 asyd|OJJ53604.1 ater|EAU30291.1  
atub|OJI84782.1 aver|OJJ08144.1 awen|OJJ36928.1

Group7032: abra|OJJ68134.1 acar|OOF93922.1 afis|EAW15619.1 afla|EED57117.1 afum|EAL85716.1  
akaw|GAA86914.1 aluc|OJZ90037.1 anig|EHA27412.1 aory|EIT73963.1 asyd|OJJ54936.1 ater|EAU39396.1  
atub|OJI84769.1 aver|OJJ07260.1 azon|OJJ45726.1

Group7033: abra|OJJ68164.1 acar|OOG00542.1 afis|EAW19094.1 afla|EED55028.1 afum|EAL93825.1  
agla|OJJ84507.1 akaw|GAA83279.1 aluc|OJZ83789.1 anid|CBF81973.1 anig|EHA18926.1 aory|EIT81948.1  
asyd|OJJ56411.1 atub|OJI90156.1 aver|OJJ06304.1

Group7034: abra|OJJ68166.1 acar|OOF95535.1 afum|EAL91588.1 akaw|GAA83277.1 aluc|OJZ83784.1  
anig|EHA27152.1 aory|EIT81861.1 ater|EAU35824.1 atub|OJI90154.1 aluc|OJZ89951.1 atub|OJI84855.1  
anig|EHA22298.1 akaw|GAA86832.1 aluc|OJZ83783.1

Group7035: acla|EAW12135.1 agla|OJJ78883.1 abra|OJJ68522.1 acar|OOF92727.1 afla|EED53957.1  
akaw|GAA91327.1 aluc|OJZ82736.1 anig|EHA21187.1 aory|EIT78312.1 ater|EAU38557.1 atub|OJI88971.1  
awen|OJJ32685.1 aver|OJJ01922.1 asyd|OJJ52399.1

Group7036: abra|OJJ68280.1 acar|OOF97554.1 afis|EAW19873.1 afla|EED57867.1 akaw|GAA83192.1  
aluc|OJZ83691.1 anid|CBF83973.1 anig|EHA18845.1 asyd|OJJ61407.1 atub|OJI90063.1 aver|OJJ00737.1  
awen|OJJ36018.1 acar|OOF98334.1 aory|EIT81088.1

Group7037: abra|OJJ68307.1 acar|OOF96680.1 afla|EED52176.1 agla|OJJ87681.1 akaw|GAA83167.1  
aluc|OJZ83666.1 anig|EHA18822.1 aory|EIT74411.1 asyd|OJJ60085.1 ater|EAU34118.1 atub|OJI90037.1  
aver|OJJ04171.1 awen|OJJ38013.1 anid|CBF78265.1

Group7038: abra|OJJ68336.1 acar|OOF97601.1 afla|EED57056.1 agla|OJJ79513.1 akaw|GAA92089.1  
aluc|OJZ83634.1 anig|EHA18787.1 aory|EIT82279.1 asyd|OJJ55948.1 ater|EAU36072.1 atub|OJI90003.1  
aver|OJI98882.1 awen|OJJ38045.1 azon|OJJ42407.1

Group7039: abra|OJJ68353.1 afla|EED45350.1 agla|OJJ88058.1 akaw|GAA92124.1 aluc|OJZ83598.1  
anig|EHA18757.1 aory|EIT82458.1 asyd|OJJ56537.1 atub|OJI89970.1 aver|OJJ06185.1 awen|OJJ41255.1  
agla|OJJ87293.1 asyd|OJJ56265.1 aver|OJJ08501.1

Group7040: abra|OJJ68379.1 acar|OOF93988.1 acla|EAW12354.1 afla|EED56191.1 afum|EAL86349.1  
agla|OJJ79784.1 aluc|OJZ90111.1 anid|CBF80567.1 anig|EHA20959.1 asyd|OJJ54686.1 atub|OJI84691.1  
aver|OJJ07483.1 awen|OJJ29950.1 azon|OJJ45007.1

Group7041: abra|OJJ68414.1 acar|OOF93964.1 afis|EAW16785.1 afla|EED54700.1 afum|EAL86355.1  
akaw|GAA92534.1 aluc|OJZ90083.1 anig|EHA20990.1 aory|EIT78774.1 atub|OJI84723.1 aver|OJJ03097.1  
awen|OJJ41510.1 asyd|OJJ57194.1 azon|OJJ43632.1

Group7042: abra|OJJ68450.1 acar|OOF93945.1 agla|OJJ80809.1 akaw|GAA86923.1 aluc|OJZ90047.1  
anid|CBF87391.1 anig|EHA21023.1 aory|EIT76168.1 asyd|OJJ52856.1 atub|OJI84759.1 aver|OJJ08833.1  
awen|OJJ35054.1 afla|EED51909.1 afla|EED51910.1

Group7043: agla|OJJ88993.1 awen|OJJ40800.1 azon|OJJ46866.1 acar|OOF98330.1 acla|EAW10410.1  
afis|EAW25158.1 afla|EED57497.1 afum|EAL89833.1 anid|CBF85657.1 anig|EHA21109.1 aory|EIT81888.1  
asyd|OJJ64230.1 ater|EAU39442.1 aver|OJI98323.1

Group7044: abra|OJJ68638.1 acar|OOF92142.1 afis|EAW17026.1 afla|EED55113.1 akaw|GAA89777.1  
aluc|OJZ81917.1 anig|EHA22330.1 asyd|OJJ53597.1 atub|OJI84469.1 aver|OJJ08151.1 awen|OJJ33828.1  
asyd|OJJ58568.1 aver|OJJ07899.1 awen|OJJ40156.1

Group7045: abra|OJJ68731.1 acar|OOF92229.1 acla|EAW12517.1 afis|EAW24130.1 afla|EED46802.1  
afum|EAL91986.1 agla|OJJ87206.1 akaw|GAA89880.1 aluc|OJZ81799.1 anig|EHA22417.1 ater|EAU30560.1  
atub|OJI84370.1 awen|OJJ41359.1 azon|OJJ48823.1

Group7046: abra|OJJ68751.1 acar|OOF92240.1 acla|EAW12500.1 agla|OJJ87225.1 akaw|GAA89895.1  
aluc|OJZ81776.1 anid|CBF77925.1 anig|EHA22440.1 asyd|OJJ55293.1 ater|EAU30577.1 atub|OJI84349.1  
aver|OJJ06933.1 awen|OJJ41334.1 azon|OJJ48805.1

Group7047: abra|OJJ68777.1 acar|OOF92263.1 afla|EED46763.1 afum|EAL92027.1 agla|OJJ89509.1  
akaw|GAA89921.1 aluc|OJZ81749.1 anid|CBF77872.1 anig|EHA22463.1 asyd|OJJ55317.1 ater|EAU30602.1  
atub|OJI84320.1 awen|OJJ41306.1 azon|OJJ48780.1

Group7048: abra|OJJ68780.1 acar|OOF92266.1 afis|EAW24170.1 afla|EED46760.1 agla|OJJ89506.1  
akaw|GAA89924.1 aluc|OJZ81746.1 anid|CBF77867.1 anig|EHA22466.1 asyd|OJJ55320.1 atub|OJI84317.1  
aver|OJJ06908.1 awen|OJJ41303.1 azon|OJJ48777.1

Group7049: abra|OJJ68834.1 afla|EED57089.1 afum|EAL85444.1 akaw|GAA90417.1 aluc|OJZ85813.1 anid|CBF85202.1 aory|EIT82267.1 asyd|OJJ63025.1 ater|EAU32052.1 atub|OJI79599.1 aver|OJI97943.1 acla|EAW15312.1 afis|EAW20316.1 anig|EHA24746.1

Group7050: acla|EAW11543.1 abra|OJJ72704.1 acar|OOF95938.1 afla|EED52653.1 afum|EAL87336.1 agla|OJJ84625.1 akaw|GAA85308.1 aluc|OJZ90668.1 anig|EHA24102.1 aory|EIT74238.1 asyd|OJJ56945.1 ater|EAU32326.1 atub|OJI82098.1 afis|EAW23908.1

Group7051: abra|OJJ68862.1 acar|OOF90527.1 akaw|GAA90391.1 aluc|OJZ85840.1 anig|EHA24724.1 asyd|OJJ59626.1 ater|EAU32026.1 atub|OJI79628.1 awen|OJJ31225.1 azon|OJJ44218.1 abra|OJJ75059.1 acar|OOF91774.1 agla|OJJ79767.1 akaw|GAA88672.1

Group7052: abra|OJJ68876.1 acar|OOF90524.1 acla|EAW15244.1 afis|EAW20211.1 afum|EAL85328.1 akaw|GAA90379.1 aluc|OJZ85852.1 anid|CBF85104.1 aory|EIT74109.1 atub|OJI79639.1 aver|OJI97907.1 awen|OJJ31216.1 azon|OJJ46144.1 agla|OJJ84653.1

Group7053: abra|OJJ68879.1 acar|OOF90520.1 akaw|GAA90377.1 aluc|OJZ85855.1 anig|EHA28095.1 aory|EIT73528.1 atub|OJI79641.1 awen|OJJ35628.1 azon|OJJ46809.1 afla|EED55102.1 afla|EED45285.1 akaw|GAA91034.1 aluc|OJZ87844.1 atub|OJI80804.1

Group7054: abra|OJJ68897.1 acar|OOF91485.1 afla|EED56747.1 akaw|GAA90354.1 aluc|OJZ85878.1 anid|CBF73541.1 anig|EHA24708.1 aory|EIT73948.1 asyd|OJJ56708.1 ater|EAU34585.1 atub|OJI79664.1 aver|OJJ06017.1 awen|OJJ34052.1 azon|OJJ48179.1

Group7055: abra|OJJ68898.1 afla|EED56746.1 agla|OJJ84383.1 aluc|OJZ85879.1 anid|CBF84142.1 anig|EHA24707.1 aory|EIT73921.1 asyd|OJJ56707.1 ater|EAU34586.1 atub|OJI79665.1 aver|OJJ06018.1 awen|OJJ34051.1 azon|OJJ48180.1 asyd|OJJ60979.1

Group7056: abra|OJJ68902.1 acar|OOF91490.1 afla|EED47316.1 agla|OJJ84016.1 akaw|GAA90349.1 aluc|OJZ85883.1 anid|CBF75663.1 anig|EHA24703.1 aory|EIT82838.1 asyd|OJJ63348.1 atub|OJI79669.1 aver|OJI97612.1 awen|OJJ29919.1 azon|OJJ44010.1

Group7057: abra|OJJ68904.1 acla|EAW12183.1 afis|EAW17117.1 akaw|GAA90347.1 aluc|OJZ85885.1 anig|EHA24701.1 asyd|OJJ52513.1 ater|EAU36170.1 atub|OJI79671.1 aver|OJJ05885.1 anid|CBF87502.1 asyd|OJJ52970.1 aver|OJJ08936.1 afum|EAL86579.1

Group7058: abra|OJJ68998.1 acar|OOF92710.1 acla|EAW12653.1 afla|EED51867.1 akaw|GAA90517.1 aluc|OJZ85982.1 anid|CBF81942.1 anig|EHA24624.1 aory|EIT81688.1 asyd|OJJ58288.1 ater|EAU31547.1 atub|OJI79772.1 aver|OJJ02136.1 azon|OJJ48231.1

Group7059: abra|OJJ69013.1 acla|EAW12344.1 afis|EAW16880.1 afla|EED47343.1 afum|EAL86417.1 akaw|GAA90530.1 aluc|OJZ85999.1 anid|CBF80673.1 anig|EHA24611.1 asyd|OJJ54587.1 atub|OJI79786.1 aver|OJJ07567.1 awen|OJJ29770.1 azon|OJJ46799.1

Group7060: abra|OJJ69015.1 acar|OOG00871.1 afis|EAW23588.1 afla|EED47660.1 akaw|GAA90532.1 aluc|OJZ86001.1 anid|CBF74928.1 anig|EHA24609.1 aory|EIT80264.1 asyd|OJJ63611.1 atub|OJI79788.1 aver|OJI97326.1 awen|OJJ37280.1 azon|OJJ42349.1

Group7061: abra|OJJ69016.1 acar|OOG00870.1 afis|EAW23587.1 afum|EAL87877.1 akaw|GAA90533.1 aluc|OJZ86002.1 anid|CBF74930.1 anig|EHA24608.1 aory|EIT80247.1 asyd|OJJ63612.1 atub|OJI79789.1 aver|OJI97325.1 awen|OJJ37279.1 azon|OJJ42350.1

Group7062: abra|OJJ69097.1 acar|OOF91198.1 afla|EED51350.1 afum|EAL85646.2 akaw|GAA90624.1 aluc|OJZ86087.1 anid|CBF71110.1 aory|EIT80714.1 asyd|OJJ52713.1 ater|EAU32444.1 atub|OJI79883.1 aver|OJJ04742.1 awen|OJJ38395.1 azon|OJJ43194.1

Group7063: abra|OJJ69207.1 acar|OOF91110.1 acla|EAW08640.1 afis|EAW15791.1 afla|EED51254.1 afum|EAL85559.1 agla|OJJ81954.1 anid|CBF70966.1 anig|EHA24432.1 aory|EIT81549.1 asyd|OJJ52615.1 aver|OJJ04642.1 awen|OJJ38499.1 azon|OJJ43800.1

Group7064: abra|OJJ69251.1 acar|OOF91070.1 acla|EAW08598.1 afis|EAW15835.1 afla|EED51211.1 afum|EAL85517.1 agla|OJJ81999.1 akaw|GAA92258.1 anid|CBF70856.1 aory|EIT80406.1 ater|EAU33413.1 atub|OJI80025.1 awen|OJJ38548.1 azon|OJJ43714.1

Group7065: abra|OJJ69267.1 acar|OOF89862.1 acla|EAW14652.1 afis|EAW24189.1 afla|EED48080.1 afum|EAL85862.1 agla|OJJ79690.1 aluc|OJZ82096.1 anig|EHA28633.1 asyd|OJJ54009.1 atub|OJI88341.1 aver|OJJ08104.1 awen|OJJ33110.1 azon|OJJ41998.1

Group7066: abra|OJJ69310.1 acar|OOF94416.1 acla|EAW14697.1 afis|EAW24228.1 afla|EED48043.1 afum|EAL85897.1 agla|OJJ79643.1 akaw|GAA88179.1 aluc|OJZ82139.1 anid|CBF74230.1 aory|EIT83344.1 ater|EAU31177.1 atub|OJI88298.1 aver|OJJ08064.1

Group7067: abra|OJJ69374.1 acar|OOF94353.1 acla|EAW14764.1 afis|EAW24295.1 afla|EED47981.1 afum|EAL85963.1 agla|OJJ83160.1 akaw|GAA88243.1 aluc|OJZ82209.1 anig|EHA28531.1 aory|EIT79813.1 ater|EAU31245.1 atub|OJI88227.1 aver|OJJ08002.1

Group7068: abra|OJJ69407.1 acar|OOF90930.1 acla|EAW07670.1 afis|EAW19533.1 afum|EAL92130.1 akaw|GAA88272.1 aluc|OJZ82244.1 anid|CBF78092.1 anig|EHA28498.1 asyd|OJJ56571.1 ater|EAU39311.1 atub|OJI88194.1 awen|OJJ35862.1 afum|EAL86973.1

Group7069: abra|OJJ69450.1 acar|OOF94291.1 acla|EAW14814.1 afis|EAW24344.1 afum|EAL86015.1 agla|OJJ83209.1 akaw|GAA88369.1 aluc|OJZ82286.1 anig|EHA28462.1 aory|EIT83368.1 asyd|OJJ53848.1 atub|OJI88153.1 awen|OJJ32953.1 azon|OJJ48967.1

Group7070: abra|OJJ69476.1 acla|EAW09912.1 afla|EED54648.1 afum|EBA27451.1 agla|OJJ80025.1 akaw|GAA88339.1 aluc|OJZ82319.1 anig|EHA28439.1 asyd|OJJ60529.1 atub|OJI88122.1 aver|OJI99856.1 awen|OJJ36493.1 azon|OJJ44368.1 aory|EIT78848.1

Group7071: abra|OJJ69494.1 acar|OOF94253.1 acla|EAW09900.1 afis|EAW21148.1 afla|EED54664.1 afum|EAL92167.1 agla|OJJ80053.1 akaw|GAA88326.1 aluc|OJZ82334.1 anig|EHA28426.1 aory|EIT78744.1 atub|OJI88106.1 awen|OJJ36475.1 asyd|OJJ55504.1

Group7072: abra|OJJ69521.1 acar|OOF94235.1 acla|EAW09967.1 afis|EAW21121.1 afla|EED51794.1 afum|EAL92144.1 agla|OJJ80090.1 aluc|OJZ82361.1 anid|CBF87023.1 asyd|OJJ60458.1 atub|OJI88081.1 aver|OJI99778.1 awen|OJJ36451.1 azon|OJJ44426.1

Group7073: afum|EAL90772.1 aory|EIT82768.1 acar|OOF92668.1 acla|EAW07394.1 afis|EAW22420.1 afla|EED52498.1 agla|OJJ87602.1 anid|CBF88808.1 anig|EHA28395.1 asyd|OJJ62892.1 ater|EAU39286.1 aver|OJI96943.1 awen|OJJ34999.1 azon|OJJ45644.1

Group7074: abra|OJJ69539.1 acar|OOF90591.1 afla|EED54770.1 agla|OJJ86497.1 akaw|GAA88387.1 aluc|OJZ82375.1 anid|CBF79837.1 anig|EHA28389.1 aory|EIT79393.1 asyd|OJJ58147.1 ater|EAU29309.1 atub|OJI88067.1 aver|OJJ04257.1 awen|OJJ29884.1

Group7075: abra|OJJ69559.1 acar|OOF91591.1 afla|EED54879.1 agla|OJJ83840.1 akaw|GAA91568.1 aluc|OJZ82386.1 anig|EHA28377.1 aory|EIT79415.1 asyd|OJJ64200.1 atub|OJI88054.1 aver|OJI98289.1 awen|OJJ40805.1 afis|EAW16972.1 azon|OJJ42646.1

Group7076: abra|OJJ69572.1 acar|OOG00214.1 afla|EED46072.1 agla|OJJ82290.1 akaw|GAA91569.1 aluc|OJZ82389.1 anig|EHA28374.1 asyd|OJJ53775.1 atub|OJI88052.1 aver|OJJ01985.1 acar|OOF94544.1 aory|EIT83492.1 asyd|OJJ55184.1 aver|OJJ07023.1

Group7077: abra|OJJ69625.1 acla|EAW12186.1 afis|EAW17122.1 afla|EED54750.1 afum|EAL86583.1 akaw|GAA91605.1 aluc|OJZ82430.1 anid|CBF75576.1 anig|EHA28341.1 asyd|OJJ59713.1 atub|OJI88011.1 aver|OJJ02573.1 awen|OJJ31950.1 azon|OJJ45909.1

Group7078: abra|OJJ69649.1 acar|OOF96862.1 afla|EED54712.1 agla|OJJ81815.1 akaw|GAA91626.1 aluc|OJZ82453.1 anid|CBF89149.1 anig|EHA28322.1 aory|EIT78933.1 asyd|OJJ62567.1 atub|OJI87985.1 aver|OJI96691.1 awen|OJJ36244.1 azon|OJJ49988.1

Group7079: abra|OJJ69715.1 acar|OOF96659.1 afis|EAW16198.1 afla|EED51070.1 anid|CBF84544.1 anig|EHA19586.1 aory|EIT76955.1 asyd|OJJ53470.1 ater|EAU37852.1 atub|OJI89167.1 aver|OJJ07493.1 azon|OJJ42561.1 aver|OJJ08286.1 asyd|OJJ61691.1

Group7080: abra|OJJ69738.1 acar|OOF94185.1 acla|EAW09979.1 afla|EED51762.1 afum|EAL92133.1 agla|OJJ80103.1 akaw|GAA90191.1 aluc|OJZ83158.1 anig|EHA28223.1 asyd|OJJ60450.1 atub|OJI87779.1 aver|OJI99768.1 awen|OJJ36439.1 azon|OJJ44434.1

Group7081: abra|OJJ69766.1 afla|EED45128.1 agla|OJJ87486.1 akaw|GAA87887.1 aluc|OJZ85532.1 anid|CBF74489.1 anig|EHA25063.1 aory|EIT73677.1 asyd|OJJ57715.1 atub|OJI80036.1 aver|OJJ05452.1 awen|OJJ37832.1 asyd|OJJ58686.1 aver|OJJ01297.1

Group7082: abra|OJJ69786.1 acar|OOF93251.1 afum|EAL89021.1 akaw|GAA87871.1 aluc|OJZ85512.1 anid|CBF74932.1 anig|EHA25044.1 asyd|OJJ57349.1 atub|OJI80054.1 aver|OJJ05816.1 awen|OJJ35828.1 afla|EED47405.1 aory|EIT81921.1 aver|OJJ08581.1

Group7083: abra|OJJ69792.1 acar|OOF93588.1 acla|EAW11765.1 afis|EAW23686.1 afum|EAL87131.1 agla|OJJ84604.1 akaw|GAA87866.1 aluc|OJZ85507.1 anig|EHA25039.1 aory|EIT79940.1 asyd|OJJ55413.1 atub|OJI80058.1 aver|OJJ06491.1 awen|OJJ33313.1

Group7084: abra|OJJ69830.1 acar|OOF93355.1 afla|EED52425.1 agla|OJJ79195.1 akaw|GAA87830.1 aluc|OJZ85466.1 anid|CBF85157.1 anig|EHA25007.1 asyd|OJJ54543.1 atub|OJI80097.1 awen|OJJ32854.1 azon|OJJ45921.1 aory|EIT83307.1 aver|OJJ07634.1

Group7085: abra|OJJ69852.1 acar|OOF95291.1 afla|EED55820.1 agla|OJJ88215.1 akaw|GAA83677.1  
aluc|OJZ85441.1 anid|CBF71171.1 anig|EHA24764.1 aory|EIT76535.1 asyd|OJJ55851.1 atub|OJI80126.1  
aver|OJJ04794.1 awen|OJJ29733.1 akaw|GAA87806.1

Group7086: abra|OJJ69886.1 acar|OOF93404.1 afla|EED49654.1 agla|OJJ79812.1 akaw|GAA87772.1  
aluc|OJZ85407.1 anig|EHA25586.1 aory|EIT81008.1 asyd|OJJ59146.1 atub|OJI80169.1 aver|OJJ01736.1  
awen|OJJ29886.1 azon|OJJ42186.1 anid|CBF69585.1

Group7087: abra|OJJ69921.1 acar|OOF93433.1 acla|EAW08908.1 afis|EAW15488.1 afla|EED49002.1  
afum|EAL85835.1 akaw|GAA87735.1 aluc|OJZ85367.1 anig|EHA25549.1 asyd|OJJ56023.1 atub|OJI80204.1  
awen|OJJ38144.1 azon|OJJ43143.1 agla|OJJ80165.1

Group7088: abra|OJJ70047.1 acar|OOF93539.1 afla|EED47674.1 agla|OJJ79818.1 akaw|GAA87628.1  
aluc|OJZ85244.1 anid|CBF84436.1 anig|EHA25444.1 aory|EIT80186.1 ater|EAU34190.1 atub|OJI80327.1  
aver|OJJ05338.1 asyd|OJJ53634.1 ater|EAU37246.1

Group7089: abra|OJJ70057.1 acar|OOG00094.1 afla|EED45413.1 agla|OJJ79846.1 akaw|GAA87617.1  
aluc|OJZ85238.1 anid|CBF79014.1 anig|EHA25440.1 aory|EIT82433.1 ater|EAU29573.1 atub|OJI80337.1  
aver|OJI98312.1 awen|OJJ38040.1 azon|OJJ50753.1

Group7090: abra|OJJ70077.1 acar|OOF93556.1 acla|EAW12089.1 afis|EAW19732.1 afla|EED50184.1  
afum|EAL86796.1 akaw|GAA87606.1 aluc|OJZ85226.1 anid|CBF80340.1 anig|EHA25430.1 aory|EIT77387.1  
asyd|OJJ54837.1 atub|OJI80354.1 aver|OJJ07324.1

Group7091: abra|OJJ70116.1 acar|OOF90680.1 afla|EED54140.1 agla|OJJ80717.1 akaw|GAA87594.1  
aluc|OJZ85214.1 anid|CBF85149.1 anig|EHA25417.1 aory|EIT82640.1 asyd|OJJ58394.1 ater|EAU37768.1  
atub|OJI80371.1 awen|OJJ29837.1 aory|EIT76075.1

Group7092: abra|OJJ70119.1 acar|OOF89936.1 acla|EAW12301.1 afis|EAW16936.1 afum|EAL86461.1  
agla|OJJ79583.1 akaw|GAA87592.1 aluc|OJZ85212.1 anid|CBF80372.1 anig|EHA25415.1 asyd|OJJ54812.1  
ater|EAU33526.1 atub|OJI80375.1 aver|OJJ07349.1

Group7093: abra|OJJ70129.1 acar|OOF90316.1 afla|EED49770.1 akaw|GAA86641.1 aluc|OJZ85198.1  
anid|CBF87977.1 anig|EHA25405.1 aory|EIT77648.1 asyd|OJJ63490.1 ater|EAU30788.1 atub|OJI80403.1  
aver|OJI97439.1 azon|OJJ42745.1 azon|OJJ42167.1

Group7094: abra|OJJ70188.1 acar|OOF93289.1 afla|EED57382.1 akaw|GAA86587.1 aluc|OJZ85134.1  
anid|CBF74946.1 anig|EHA22865.1 asyd|OJJ63940.1 atub|OJI80458.1 aver|OJI97002.1 awen|OJJ40813.1  
azon|OJJ47392.1 azon|OJJ42320.1 aory|EIT80088.1

Group7095: abra|OJJ70213.1 acar|OOF92567.1 acla|EAW13610.1 afis|EAW19996.1 afla|EED47541.1  
afum|EAL84920.1 agla|OJJ80415.1 akaw|GAA86563.1 aluc|OJZ85113.1 anid|CBF84002.1 anig|EHA25333.1  
asyd|OJJ64736.1 atub|OJI80481.1 aver|OJI98842.1

Group7096: abra|OJJ70279.1 acar|OOF91728.1 afla|EED45364.1 agla|OJJ84429.1 akaw|GAA92869.1  
aluc|OJZ85242.1 anid|CBF85097.1 anig|EHA22510.1 aory|EIT82423.1 asyd|OJJ63060.1 ater|EAU36830.1  
atub|OJI88786.1 aver|OJI97903.1 azon|OJJ42219.1

Group7097: abra|OJJ70335.1 acla|EAW11925.1 afla|EED48233.1 agla|OJJ83801.1 akaw|GAA92589.1  
aluc|OJZ82605.1 anig|EHA27475.1 aory|EIT72899.1 asyd|OJJ65322.1 atub|OJI88840.1 aver|OJI98020.1  
awen|OJJ36208.1 azon|OJJ42550.1 aver|OJI99467.1

Group7098: abra|OJJ70381.1 acar|OOF91890.1 afla|EED47347.1 agla|OJJ79748.1 akaw|GAA91975.1  
aluc|OJZ82640.1 anid|CBF80678.1 anig|EHA27430.1 aory|EIT82858.1 asyd|OJJ54590.1 atub|OJI88873.1  
aver|OJJ07563.1 awen|OJJ29765.1 azon|OJJ50380.1

Group7099: abra|OJJ70387.1 acar|OOF90064.1 acla|EAW12391.1 afis|EAW16838.1 afla|EED47315.1  
agla|OJJ81677.1 akaw|GAA91970.1 aluc|OJZ82645.1 anid|CBF80643.1 asyd|OJJ54620.1 atub|OJI88878.1  
aver|OJJ07538.1 awen|OJJ32207.1 azon|OJJ43044.1

Group7100: abra|OJJ70423.1 acar|OOF91769.1 afla|EED46003.1 agla|OJJ86987.1 akaw|GAA90154.1  
aluc|OJZ83193.1 anid|CBF84634.1 aory|EIT75521.1 asyd|OJJ62597.1 ater|EAU35268.1 atub|OJI87745.1  
aver|OJI96742.1 awen|OJJ29998.1 anig|EHA21057.1

Group7101: abra|OJJ70445.1 acar|OOF91811.1 asyd|OJJ62580.1 atub|OJI84005.1 aver|OJI96700.1  
azon|OJJ45154.1 abra|OJJ73417.1 acar|OOF90624.1 akaw|GAA83074.1 aluc|OJZ85790.1 anig|EHA24770.1  
atub|OJI79575.1 awen|OJJ32707.1 akaw|GAA90437.1

Group7102: abra|OJJ70497.1 acar|OOF97429.1 acla|EAW08177.1 afla|EED47038.1 agla|OJJ78732.1  
akaw|GAA83345.1 aluc|OJZ83842.1 anig|EHA18984.1 aory|EIT72611.1 asyd|OJJ60183.1 atub|OJI90208.1  
aver|OJJ04081.1 awen|OJJ39446.1 azon|OJJ47648.1

Group7103: abra|OJJ70516.1 acar|OOF97413.1 acla|EAW08159.1 afis|EAW23197.1 afla|EED47057.1 afum|EAL88286.1 akaw|GAA83363.1 aluc|OJZ83861.1 anig|EHA19002.1 aory|EIT72472.1 ater|EAU36324.1 atub|OJI90229.1 awen|OJJ39427.1 azon|OJJ47631.1

Group7104: abra|OJJ70528.1 acar|OOF97403.1 acla|EAW08141.1 afis|EAW23177.1 afum|EAL88306.1 agla|OJJ89689.1 akaw|GAA83373.1 aluc|OJZ83871.1 anid|CBF74511.1 anig|EHA19012.1 asyd|OJJ57729.1 ater|EAU36305.1 atub|OJI90239.1 aver|OJJ05440.1

Group7105: abra|OJJ70530.1 agla|OJJ89692.1 aluc|OJZ83873.1 acla|EAW08143.1 afis|EAW23179.1 afum|EAL88304.1 anid|CBF74514.1 anig|EHA19014.1 asyd|OJJ57731.1 atub|OJI90241.1 aver|OJJ05438.1 akaw|GAA83375.1 ater|EAU36313.1 awen|OJJ36599.1

Group7106: acar|OOF97127.1 acla|EAW08189.1 afis|EAW23223.1 afla|EED47027.1 afum|EAL88261.1 agla|OJJ86380.1 akaw|GAA83436.1 anid|CBF74761.1 aory|EIT72739.1 asyd|OJJ60172.1 ater|EAU36354.1 atub|OJI90310.1 aver|OJJ04092.1 azon|OJJ47657.1

Group7107: akaw|GAA89968.1 aluc|OJZ83977.1 atub|OJI90350.1 acar|OOF97094.1 acla|EAW08127.1 afis|EAW23164.1 afum|EBA27344.1 agla|OJJ89675.1 anig|EHA19104.1 aory|EIT72677.1 asyd|OJJ57703.1 aver|OJJ05461.1 awen|OJJ36619.1 azon|OJJ47594.1

Group7108: abra|OJJ70673.1 acla|EAW08091.1 afis|EAW23126.1 afla|EED48524.1 afum|EAL88354.1 agla|OJJ89642.1 akaw|GAA90005.1 aluc|OJZ84021.1 anig|EHA19142.1 asyd|OJJ57760.1 atub|OJI90392.1 aver|OJJ05406.1 awen|OJJ36654.1 azon|OJJ47550.1

Group7109: abra|OJJ70769.1 acar|OOF96975.1 acla|EAW11152.1 afis|EAW15883.1 afum|EAL88517.1 agla|OJJ89538.1 akaw|GAA90089.1 aluc|OJZ84115.1 anig|EHA19225.1 aory|EIT72829.1 atub|OJI90488.1 awen|OJJ36748.1 azon|OJJ47451.1 anid|CBF81239.1

Group7110: abra|OJJ70874.1 acar|OOF98246.1 acla|EAW10462.1 afis|EAW25105.1 afla|EED55341.1 afum|EAL89776.1 akaw|GAA91737.1 aluc|OJZ87648.1 anig|EHA20841.1 aory|EIT76196.1 ater|EAU39371.1 atub|OJI80997.1 awen|OJJ40720.1 azon|OJJ44096.1

Group7111: abra|OJJ70917.1 acar|OOF98207.1 acla|EAW10491.1 afis|EAW25076.1 afla|EED55377.1 afum|EAL89745.1 akaw|GAA87427.1 anid|CBF85966.1 aory|EIT80793.1 asyd|OJJ64424.1 ater|EAU39547.1 aver|OJI98523.1 awen|OJJ40687.1 azon|OJJ44064.1

Group7112: abra|OJJ70947.1 acar|OOF98184.1 afis|EAW25052.1 afla|EED55399.1 afum|EAL89720.1 akaw|GAA82996.1 aluc|OJZ87581.1 anid|CBF85927.1 anig|EHA20782.1 aory|EIT80860.1 ater|EAU35802.1 atub|OJI81067.1 aver|OJI98503.1 awen|OJJ40662.1

Group7113: abra|OJJ71004.1 afis|EAW19703.1 afla|EED48153.1 afum|EAL86823.1 agla|OJJ83778.1 akaw|GAA92514.1 aluc|OJZ91527.1 anig|EHA22564.1 aory|EIT76246.1 asyd|OJJ61200.1 ater|EAU32849.1 atub|OJI85981.1 aver|OJJ00525.1 awen|OJJ30441.1

Group7114: abra|OJJ71053.1 acar|OOF98086.1 acla|EAW10602.1 afis|EAW24966.1 afum|EAL89624.2 agla|OJJ82222.1 akaw|GAA82904.1 aluc|OJZ87474.1 anig|EHA20694.1 asyd|OJJ59540.1 atub|OJI81174.1 aver|OJJ02728.1 awen|OJJ40559.1 azon|OJJ49420.1

Group7115: abra|OJJ71079.1 acar|OOF98062.1 agla|OJJ79303.1 akaw|GAA82883.1 aluc|OJZ87451.1 anig|EHA20673.1 ater|EAU34335.1 atub|OJI81197.1 awen|OJJ35534.1 acar|OOF93359.1 atub|OJI85145.1 acar|OOF97611.1 aluc|OJZ80193.1 atub|OJI80137.1

Group7116: abra|OJJ71110.1 acar|OOF98039.1 afla|EED53100.1 agla|OJJ88955.1 akaw|GAA82859.1 aluc|OJZ87425.1 anid|CBF85602.1 anig|EHA20647.1 aory|EIT74809.1 asyd|OJJ64195.1 atub|OJI81224.1 aver|OJI98272.1 awen|OJJ32252.1 azon|OJJ50351.1

Group7117: abra|OJJ71193.1 acar|OOF97974.1 acla|EAW10311.1 afis|EAW25282.1 afla|EED53748.1 afum|EAL89945.1 agla|OJJ89256.1 akaw|GAA82790.1 aluc|OJZ87349.1 anig|EHA20585.1 ater|EAU34423.1 atub|OJI81294.1 awen|OJJ40995.1 azon|OJJ44585.1

Group7118: abra|OJJ71243.1 acar|OOF97925.1 acla|EAW14272.1 afis|EAW19002.1 afla|EED53771.1 afum|EAL93736.1 akaw|GAA82744.1 aluc|OJZ87299.1 anid|CBF85402.1 anig|EHA20540.1 aory|EIT78404.1 asyd|OJJ64062.1 atub|OJI81341.1 aver|OJI98148.1

Group7119: abra|OJJ71246.1 acar|OOF97922.1 afis|EAW25303.1 agla|OJJ89282.1 akaw|GAA82741.1 aluc|OJZ87296.1 anig|EHA20537.1 aory|EIT78446.1 asyd|OJJ59882.1 ater|EAU34451.1 atub|OJI81344.1 aver|OJJ02404.1 awen|OJJ41017.1 azon|OJJ44604.1

Group7120: abra|OJJ71275.1 acar|OOF97899.1 acla|EAW10255.1 afla|EED53808.1 agla|OJJ83866.1 akaw|GAA82715.1 aluc|OJZ87269.1 anid|CBF75244.1 aory|EIT78433.1 asyd|OJJ59909.1 atub|OJI81373.1 aver|OJJ02377.1 awen|OJJ41036.1 azon|OJJ44630.1

Group7121: abra|OJJ71336.1 acar|OOF97836.1 acla|EAW10203.1 afis|EAW25392.1 afla|EED53869.1 afum|EAL90051.1 akaw|GAA82656.1 aluc|OJZ87206.1 anid|CBF77506.1 asyd|OJJ53187.1 ater|EAU34540.1 atub|OJI81433.1 aver|OJJ03663.1 agla|OJJ87030.1

Group7122: abra|OJJ71462.1 acar|OOF97738.1 acla|EAW10089.1 afis|EAW25498.1 afla|EED53998.1 afum|EAL90164.1 agla|OJJ87306.1 aluc|OJZ87082.1 anid|CBF77753.1 anig|EHA20353.1 aory|EIT78313.1 asyd|OJJ53045.1 atub|OJI81555.1 azon|OJJ44806.1

Group7123: abra|OJJ71574.1 acla|EAW15308.1 agla|OJJ87100.1 akaw|GAA89350.1 aluc|OJZ86311.1 anid|CBF87247.1 anig|EHA21562.1 asyd|OJJ64556.1 ater|EAU34641.1 atub|OJI84224.1 aver|OJI98653.1 awen|OJJ38026.1 azon|OJJ42335.1 asyd|OJJ60372.1

Group7124: abra|OJJ71576.1 acar|OOF96307.1 acla|EAW15123.1 afis|EAW20093.1 afla|EED45277.1 agla|OJJ88861.1 akaw|GAA89348.1 aluc|OJZ86313.1 anid|CBF84895.1 asyd|OJJ63176.1 atub|OJI84222.1 aver|OJI97778.1 awen|OJJ31856.1 azon|OJJ46269.1

Group7125: abra|OJJ71654.1 acar|OOF96368.1 afum|EAL85278.1 agla|OJJ88770.1 akaw|GAA89275.1 aluc|OJZ86400.1 anid|CBF85007.1 anig|EHA21500.1 asyd|OJJ63113.1 ater|EAU38777.1 atub|OJI84135.1 aver|OJI97846.1 awen|OJJ32055.1 azon|OJJ46088.1

Group7126: abra|OJJ71738.1 afla|EED55107.1 agla|OJJ86611.1 akaw|GAA85151.1 aluc|OJZ86486.1 anig|EHA22179.1 aory|EIT81608.1 asyd|OJJ52525.1 ater|EAU37390.1 atub|OJI84043.1 aver|OJJ08763.1 awen|OJJ32705.1 atub|OJI89783.1 ater|EAU30096.1

Group7127: abra|OJJ71794.1 acar|OOF96474.1 afla|EED56589.1 agla|OJJ83768.1 akaw|GAA85116.1 aluc|OJZ86524.1 anig|EHA22122.1 aory|EIT79634.1 asyd|OJJ54321.1 atub|OJI83998.1 aver|OJJ05275.1 awen|OJJ30247.1 acar|OOF90387.1 asyd|OJJ58094.1

Group7128: abra|OJJ71831.1 acar|OOF96507.1 afla|EED51272.1 akaw|GAA85080.1 aluc|OJZ86563.1 anid|CBF89177.1 anig|EHA22088.1 aory|EIT81564.1 asyd|OJJ62538.1 ater|EAU34871.1 atub|OJI83958.1 aver|OJI96664.1 awen|OJJ31137.1 azon|OJJ46617.1

Group7129: abra|OJJ71849.1 acar|OOF96518.1 afis|EAW18592.1 afum|EAL93299.2 agla|OJJ81644.1 akaw|GAA85068.1 aluc|OJZ86582.1 asyd|OJJ58643.1 ater|EAU34886.1 atub|OJI83940.1 aver|OJJ01249.1 awen|OJJ31155.1 azon|OJJ46630.1 acla|EAW13880.1

Group7130: abra|OJJ71934.1 acla|EAW09596.1 afis|EAW21541.1 afla|EED55992.1 afum|EAL92561.1 akaw|GAA84990.1 aluc|OJZ86671.1 anid|CBF76376.1 aory|EIT76667.1 asyd|OJJ61065.1 ater|EAU34998.1 atub|OJI83857.1 awen|OJJ39150.1 azon|OJJ51480.1

Group7131: abra|OJJ71977.1 acar|OOF96629.1 afis|EAW21574.1 agla|OJJ85765.1 akaw|GAA84953.1 aluc|OJZ86714.1 anid|CBF76310.1 anig|EHA21964.1 aory|EIT81098.1 asyd|OJJ61008.1 ater|EAU34958.1 atub|OJI83815.1 aver|OJJ00326.1 awen|OJJ39107.1

Group7132: abra|OJJ72067.1 acla|EAW09482.1 afis|EAW21656.1 afla|EED57887.1 afum|EAL92691.1 agla|OJJ79723.1 anid|CBF83548.1 anig|EHA21880.1 aory|EIT83277.1 asyd|OJJ60732.1 ater|EAU38337.1 aver|OJJ00064.1 awen|OJJ33913.1 azon|OJJ48648.1

Group7133: abra|OJJ72079.1 acla|EAW09486.1 afis|EAW21650.1 afla|EED57919.1 afum|EAL92684.1 agla|OJJ79728.1 akaw|GAA84840.1 aluc|OJZ86833.1 anid|CBF83555.1 anig|EHA21802.1 aory|EIT82324.1 asyd|OJJ60736.1 atub|OJI83685.1 aver|OJJ00068.1

Group7134: abra|OJJ72102.1 acar|OOF97361.1 afla|EED49736.1 akaw|GAA84819.1 aluc|OJZ86857.1 anig|EHA21804.1 aory|EIT77704.1 asyd|OJJ58041.1 ater|EAU30969.1 atub|OJI83662.1 aver|OJJ05862.1 awen|OJJ40097.1 awen|OJJ35799.1 aver|OJJ04360.1

Group7135: abra|OJJ72133.1 acar|OOF96769.1 afla|EED46874.1 afum|EAL90427.1 agla|OJJ86320.1 akaw|GAA84789.1 aluc|OJZ86891.1 anid|CBF77739.1 anig|EHA21752.1 aory|EIT72613.1 asyd|OJJ53053.1 atub|OJI83628.1 aver|OJJ03791.1 awen|OJJ32566.1

Group7136: abra|OJJ72189.1 acar|OOF96815.1 acla|EAW14722.1 afis|EAW24258.1 afla|EED48885.1 afum|EAL85926.2 akaw|GAA84744.1 aluc|OJZ86940.1 anig|EHA21704.1 ater|EAU31204.1 atub|OJI83582.1 awen|OJJ34659.1 azon|OJJ48477.1 afla|EED48019.1

Group7137: abra|OJJ72224.1 acar|OOF96847.1 afla|EED52265.1 agla|OJJ82580.1 akaw|GAA84713.1 aluc|OJZ86974.1 anig|EHA21674.1 aory|EIT74358.1 asyd|OJJ56431.1 atub|OJI83547.1 aver|OJJ06289.1 awen|OJJ31658.1 azon|OJJ45108.1 awen|OJJ35906.1

Group7138: abra|OJJ72238.1 acar|OOF96860.1 akaw|GAA84701.1 aluc|OJZ86986.1 anid|CBF73875.1 anig|EHA21661.1 aory|EIT80235.1 asyd|OJJ56550.1 atub|OJI83533.1 aver|OJJ06172.1 awen|OJJ34533.1 azon|OJJ43185.1 asyd|OJJ57935.1 aver|OJJ04459.1

Group7139: abra|OJJ72251.1 acar|OOF96882.1 afis|EAW24570.1 afla|EED45430.1 afum|EAL86233.1  
agla|OJJ79374.1 akaw|GAA84686.1 aluc|OJZ87002.1 anid|CBF71505.1 anig|EHA21644.1 aory|EIT82437.1  
ater|EAU30385.1 atub|OJI83517.1 awen|OJJ36198.1

Group7140: abra|OJJ72260.1 acar|OOF94178.1 acla|EAW11896.1 afis|EAW25664.1 afla|EED46456.1  
akaw|GAA84670.1 aluc|OJZ87019.1 anig|EHA21636.1 aory|EIT74483.1 asyd|OJJ55671.1 atub|OJI83499.1  
aver|OJJ06751.1 azon|OJJ42663.1 aory|EIT72349.1

Group7141: abra|OJJ72272.1 acla|EAW12458.1 afis|EAW20690.1 afum|EAL86236.1 agla|OJJ85124.1  
akaw|GAA86027.1 aluc|OJZ90254.1 anig|EHA23749.1 aory|EIT81681.1 ater|EAU30625.1 atub|OJI81680.1  
aver|OJJ00345.1 awen|OJJ35811.1 awen|OJJ30155.1

Group7142: abra|OJJ72281.1 acar|OOF94940.1 afis|EAW20799.1 afla|EED49546.1 agla|OJJ85013.1  
akaw|GAA86033.1 aluc|OJZ90260.1 anid|CBF71373.1 anig|EHA23756.1 asyd|OJJ55078.1 atub|OJI81686.1  
aver|OJJ07130.1 awen|OJJ41911.1 azon|OJJ47359.1

Group7143: abra|OJJ72354.1 acar|OOF94864.1 acla|EAW11971.1 afis|EAW19615.1 afla|EED55110.1  
afum|EAL86907.1 akaw|GAA86101.1 aluc|OJZ90333.1 anig|EHA23817.1 aory|EIT81605.1 asyd|OJJ55818.1  
atub|OJI81760.1 aver|OJJ01422.1 agla|OJJ80756.1

Group7144: abra|OJJ72409.1 acar|OOF94820.1 acla|EAW11931.1 afis|EAW19568.1 afla|EED56815.1  
agla|OJJ80693.1 akaw|GAA86152.1 aluc|OJZ90393.1 anid|CBF78031.1 asyd|OJJ55226.1 atub|OJI81822.1  
aver|OJJ06995.1 awen|OJJ41781.1 azon|OJJ44897.1

Group7145: abra|OJJ72444.1 acar|OOF94792.1 acla|EAW12677.1 afis|EAW17840.1 afla|EED46185.1  
agla|OJJ83127.1 aluc|OJZ90428.1 anid|CBF77977.1 aory|EIT76356.1 asyd|OJJ55261.1 atub|OJI81860.1  
aver|OJJ06964.1 awen|OJJ41736.1 azon|OJJ48433.1

Group7146: abra|OJJ72453.1 acar|OOF94783.1 acla|EAW12688.1 afla|EED46205.1 akaw|GAA86190.1  
aluc|OJZ90438.1 anig|EHA23905.1 ater|EAU33053.1 atub|OJI81869.1 awen|OJJ41722.1 azon|OJJ48420.1  
agla|OJJ83118.1 aory|EIT76525.1 afis|EAW17851.1

Group7147: abra|OJJ72487.1 acar|OOF94748.1 afla|EED46287.1 akaw|GAA86222.1 aluc|OJZ90474.1  
anig|EHA23933.1 ater|EAU33101.1 atub|OJI81899.1 anid|CBF77037.1 asyd|OJJ57004.1 acla|EAW12718.1  
afis|EAW17881.1 afum|EAL91689.2 aory|EIT76320.1

Group7148: abra|OJJ72505.1 acar|OOF94737.1 afla|EED46284.1 agla|OJJ83051.1 akaw|GAA86233.1  
aluc|OJZ90488.1 anid|CBF77010.1 anig|EHA23946.1 aory|EIT76344.1 asyd|OJJ57019.1 ater|EAU33112.1  
atub|OJI81912.1 aver|OJJ03270.1 awen|OJJ41661.1

Group7149: abra|OJJ72530.1 acar|OOF94723.1 afla|EED53072.1 akaw|GAA86252.1 aluc|OJZ90509.1  
anig|EHA23966.1 aory|EIT74797.1 asyd|OJJ64691.1 atub|OJI81934.1 aver|OJI98796.1 awen|OJJ38084.1  
acar|OOF96878.1 awen|OJJ29969.1 azon|OJJ43170.1

Group7150: abra|OJJ72576.1 acar|OOF94683.1 afla|EED56584.1 agla|OJJ88579.1 akaw|GAA85202.1  
aluc|OJZ90557.1 anig|EHA24004.1 aory|EIT79670.1 asyd|OJJ58700.1 ater|EAU30078.1 atub|OJI81980.1  
aver|OJJ01312.1 awen|OJJ40589.1 azon|OJJ42311.1

Group7151: abra|OJJ72580.1 acar|OOF94672.1 afla|EED56581.1 agla|OJJ79967.1 akaw|GAA85206.1  
aluc|OJZ90561.1 anid|CBF70336.1 anig|EHA24007.1 aory|EIT79650.1 ater|EAU37872.1 atub|OJI81984.1  
aver|OJJ01322.1 awen|OJJ40586.1 azon|OJJ42307.1

Group7152: abra|OJJ72591.1 acar|OOF94659.1 afis|EAW17940.1 afla|EED49101.1 afum|EAL91751.1  
agla|OJJ82992.1 akaw|GAA85217.1 aluc|OJZ90572.1 anig|EHA24017.1 aory|EIT82515.1 atub|OJI81995.1  
awen|OJJ41605.1 acla|EAW12777.1 azon|OJJ48319.1

Group7153: abra|OJJ72606.1 acla|EAW11607.1 afis|EAW23839.1 afla|EED52552.1 afum|EAL87270.1  
akaw|GAA85233.1 aluc|OJZ90589.1 anid|CBF77075.1 anig|EHA24028.1 atub|OJI82012.1 azon|OJJ48725.1  
asyd|OJJ56984.1 aver|OJJ03303.1 awen|OJJ33809.1

Group7154: abra|OJJ72632.1 acla|EAW15264.1 afis|EAW20533.1 afla|EED49494.1 agla|OJJ83528.1  
akaw|GAA85252.1 aluc|OJZ90609.1 ater|EAU30517.1 atub|OJI82034.1 aver|OJI99707.1 awen|OJJ40340.1  
ater|EAU38189.1 aory|EIT82593.1 ater|EAU30522.1

Group7155: abra|OJJ72686.1 acar|OOF95935.1 afis|EAW24408.1 afum|EAL86077.1 akaw|GAA85304.1  
aluc|OJZ90664.1 anig|EHA24099.1 aory|EIT79027.1 asyd|OJJ53367.1 ater|EAU31789.1 atub|OJI82093.1  
aver|OJJ08380.1 afla|EED50925.1 anid|CBF80323.1

Group7156: abra|OJJ72713.1 acar|OOF93166.1 afis|EAW20784.1 afla|EED44940.1 agla|OJJ85770.1  
akaw|GAA85314.1 aluc|OJZ90675.1 anig|EHA24110.1 aory|EIT73511.1 asyd|OJJ60270.1 ater|EAU39593.1  
atub|OJI82108.1 aver|OJJ03981.1 awen|OJJ30824.1



Group7157: abra|OJJ72720.1 acar|OOF95953.1 acla|EAW11556.1 afis|EAW23897.1 afla|EED52631.1 afum|EBA27310.1 agla|OJJ78639.1 aluc|OJZ90689.1 anid|CBF77150.1 asyd|OJJ56909.1 atub|OJI82114.1 aver|OJJ03384.1 awen|OJJ39051.1 azon|OJJ51383.1

Group7158: abra|OJJ72878.1 acar|OOF96072.1 acla|EAW11367.1 afis|EAW18128.1 afla|EED58052.1 agla|OJJ87020.1 aluc|OJZ83389.1 anid|CBF75364.1 asyd|OJJ59849.1 ater|EAU35449.1 atub|OJI82275.1 aver|OJJ02439.1 awen|OJJ35556.1 azon|OJJ46954.1

Group7159: abra|OJJ72948.1 acar|OOF96128.1 acla|EAW11194.1 afis|EAW15924.1 afum|EBA27352.1 agla|OJJ89381.1 akaw|GAA85529.1 aluc|OJZ83458.1 anid|CBF81017.1 asyd|OJJ56381.1 atub|OJI82350.1 aver|OJJ06332.1 awen|OJJ35656.1 azon|OJJ46883.1

Group7160: abra|OJJ73044.1 acar|OOF96207.1 acla|EAW07975.1 afis|EAW23010.1 afum|EBA27348.1 agla|OJJ89470.1 akaw|GAA85615.1 aluc|OJZ83555.1 anig|EHA24373.1 ater|EAU29663.1 atub|OJI82446.1 aver|OJJ06413.1 awen|OJJ30732.1 azon|OJJ44194.1

Group7161: abra|OJJ73063.1 acar|OOG00287.1 acla|EAW13236.1 afis|EAW17395.1 afla|EED56758.1 afum|EAL91233.1 akaw|GAA88096.1 aluc|OJZ81363.1 anig|EHA18663.1 aory|EIT73957.1 asyd|OJJ55047.1 ater|EAU34829.1 atub|OJI91567.1 aver|OJJ07157.1

Group7162: abra|OJJ73103.1 acar|OOG00343.1 acla|EAW07042.1 afis|EAW16669.1 afum|EAL89273.1 akaw|GAA88062.1 aluc|OJZ81325.1 anid|CBF82087.1 anig|EHA18630.1 asyd|OJJ54258.1 ater|EAU39590.1 atub|OJI91527.1 aver|OJJ05211.1 awen|OJJ40040.1

Group7163: ater|EAU34264.1 abra|OJJ74172.1 acar|OOF95552.1 afla|EED45879.1 akaw|GAA86844.1 aluc|OJZ89963.1 anig|EHA27163.1 aory|EIT76254.1 asyd|OJJ56505.1 atub|OJI84842.1 aver|OJJ06214.1 awen|OJJ33199.1 aory|EIT75447.1 afla|EED48137.1

Group7164: abra|OJJ73195.1 acar|OOG00432.1 acla|EAW06872.1 afis|EAW16489.1 afla|EED47230.1 afum|EAL89083.1 agla|OJJ82845.1 akaw|GAA87982.1 aluc|OJZ81234.1 anig|EHA18545.1 aory|EIT79329.1 atub|OJI91431.1 awen|OJJ40341.1 azon|OJJ49195.1

Group7165: abra|OJJ73225.1 acar|OOG00463.1 acla|EAW06900.1 afis|EAW16517.1 afla|EED56156.1 afum|EAL89112.1 agla|OJJ82804.1 aluc|OJZ81202.1 anid|CBF75556.1 asyd|OJJ59703.1 atub|OJI91397.1 aver|OJJ02584.1 awen|OJJ40306.1 azon|OJJ49167.1

Group7166: abra|OJJ73233.1 acla|EAW06908.1 afis|EAW16525.1 afla|EED56146.1 afum|EAL89120.1 akaw|GAA87947.1 aluc|OJZ81195.1 anid|CBF75539.1 anig|EHA18510.1 aory|EIT76683.1 atub|OJI91390.1 aver|OJJ05733.1 awen|OJJ40298.1 azon|OJJ49160.1

Group7167: abra|OJJ73260.1 acla|EAW06937.1 afis|EAW16552.1 afla|EED56110.1 afum|EAL89150.1 agla|OJJ82771.1 aluc|OJZ81168.1 anig|EHA18486.1 aory|EIT76885.1 asyd|OJJ59614.1 atub|OJI91363.1 aver|OJJ02655.1 awen|OJJ40265.1 azon|OJJ49129.1

Group7168: abra|OJJ73279.1 acla|EAW13748.1 afis|EAW19822.1 afla|EED46509.1 afum|EBA27218.1 akaw|GAA92726.1 aluc|OJZ88770.1 anid|CBF87169.1 anig|EHA18466.1 asyd|OJJ60291.1 atub|OJI91343.1 aver|OJI99631.1 azon|OJJ43888.1 aory|EIT72336.1

Group7169: abra|OJJ73286.1 acla|EAW06961.1 afis|EAW16576.1 afla|EED56088.1 afum|EBA27369.1 agla|OJJ82701.1 akaw|GAA92719.1 anid|CBF81874.1 aory|EIT76789.1 asyd|OJJ59664.1 ater|EAU36644.1 atub|OJI91336.1 aver|OJJ02619.1 awen|OJJ40242.1

Group7170: afum|EAL93420.1 ater|EAU38208.1 azon|OJJ43129.1 acar|OOF94198.1 acla|EAW13990.1 afis|EAW18698.1 afla|EED50646.1 agla|OJJ82379.1 aluc|OJZ80605.1 anid|CBF70633.1 aory|EIT78017.1 asyd|OJJ58495.1 aver|OJJ01098.1 awen|OJJ32172.1

Group7171: abra|OJJ73335.1 afis|EAW18089.1 afum|EAL92289.2 agla|OJJ85996.1 akaw|GAA83150.1 aluc|OJZ88706.1 anid|CBF76810.1 anig|EHA18392.1 ater|EAU31602.1 atub|OJI91288.1 awen|OJJ41847.1 azon|OJJ45143.1 afis|EAW21274.1 azon|OJJ42731.1

Group7172: abra|OJJ73403.1 acar|OOG00601.1 afis|EAW16630.1 afum|EAL89226.2 akaw|GAA83087.1 aluc|OJZ88634.1 anig|EHA18324.1 asyd|OJJ52757.1 asyd|OJJ56187.1 ater|EAU36753.1 atub|OJI91218.1 aver|OJJ05114.1 aver|OJJ08739.1 awen|OJJ40079.1

Group7173: abra|OJJ73448.1 afis|EAW24694.1 afla|EED45074.1 afum|EAL89336.1 agla|OJJ81337.1 akaw|GAA89026.1 aluc|OJZ80578.1 anid|CBF76026.1 anig|EHA25620.1 asyd|OJJ52451.1 ater|EAU33315.1 atub|OJI88352.1 aver|OJJ03965.1 awen|OJJ38021.1

Group7174: abra|OJJ73454.1 acar|OOG00655.1 acla|EAW15267.1 afis|EAW20387.1 afla|EED55194.1 afum|EAL89010.1 akaw|GAA83043.1 aluc|OJZ88588.1 anig|EHA18283.1 aory|EIT83592.1 asyd|OJJ60076.1 atub|OJI91174.1 awen|OJJ37580.1 azon|OJJ45162.1

Group7175: abra|OJJ73495.1 acar|OOG00695.1 acla|EAW07429.1 afis|EAW22455.1 afla|EED54489.1 afum|EAL90736.1 agla|OJJ87569.1 akaw|GAA87444.1 aluc|OJZ88553.1 anig|EHA18251.1 ater|EAU39250.1 atub|OJI91138.1 awen|OJJ35080.1 azon|OJJ50027.1

Group7176: abra|OJJ73532.1 acar|OOF99639.1 agla|OJJ87024.1 akaw|GAA83969.1 aluc|OJZ80861.1 anig|EHA21807.1 atub|OJI82716.1 abra|OJJ75769.1 afla|EED54892.1 aory|EIT79386.1 asyd|OJJ58675.1 atub|OJI87189.1 aver|OJJ01287.1 awen|OJJ30923.1

Group7177: abra|OJJ73543.1 acar|OOG00718.1 acla|EAW07463.1 afis|EAW22494.1 afla|EED54523.1 afum|EAL90699.1 akaw|GAA88608.1 aluc|OJZ88516.1 anid|CBF88957.1 anig|EHA18222.1 ater|EAU39221.1 atub|OJI91101.1 awen|OJJ35118.1 azon|OJJ49977.1

Group7178: abra|OJJ73551.1 acla|EAW07470.1 afis|EAW22503.1 afum|EAL90690.1 akaw|GAA88601.1 anid|CBF88967.1 aory|EIT78772.1 asyd|OJJ62797.1 ater|EAU39215.1 aver|OJI96844.1 awen|OJJ35127.1 azon|OJJ49971.1 abra|OJJ73552.1 aluc|OJZ88509.1

Group7179: abra|OJJ73604.1 acar|OOG00788.1 acla|EAW07521.1 afis|EAW22551.1 afla|EED54583.1 agla|OJJ80913.1 akaw|GAA88549.1 aluc|OJZ88445.1 aory|EIT78825.1 atub|OJI91043.1 aver|OJI96792.1 awen|OJJ35182.1 azon|OJJ49925.1 ater|EAU39153.1

Group7180: abra|OJJ73608.1 acar|OOG00792.1 acla|EAW07525.1 afis|EAW22555.1 afum|EAL90640.1 akaw|GAA88545.1 aluc|OJZ88441.1 anig|EHA18165.1 asyd|OJJ62746.1 ater|EAU39149.1 atub|OJI91039.1 aver|OJI96786.1 awen|OJJ35186.1 azon|OJJ49922.1

Group7181: abra|OJJ73646.1 acar|OOG00827.1 acla|EAW07559.1 afis|EAW22593.1 afla|EED54643.1 afum|EAL90606.1 agla|OJJ80953.1 akaw|GAA88509.1 aluc|OJZ88404.1 asyd|OJJ63729.1 atub|OJI91000.1 aver|OJI97211.1 awen|OJJ35221.1 azon|OJJ49887.1

Group7182: abra|OJJ73727.1 acla|EAW07612.1 afis|EAW22642.1 afla|EED49911.1 afum|EAL90550.2 agla|OJJ81014.1 akaw|GAA88436.1 aluc|OJZ88324.1 anid|CBF88174.1 anig|EHA18060.1 ater|EAU39065.1 atub|OJI90919.1 awen|OJJ35282.1 azon|OJJ49846.1

Group7183: abra|OJJ73750.1 acar|OOG00912.1 acla|EAW07638.1 afis|EAW22658.1 afla|EED49932.1 afum|EAL90534.1 akaw|GAA88417.1 aluc|OJZ88302.1 anig|EHA18041.1 aory|EIT83439.1 asyd|OJJ63624.1 atub|OJI90897.1 aver|OJI97312.1 awen|OJJ35286.1

Group7184: abra|OJJ73865.1 acar|OOF89913.1 acla|EAW13618.1 afis|EAW19962.1 afum|EAL84943.1 agla|OJJ78582.1 akaw|GAA89477.1 aluc|OJZ88186.1 anid|CBF76002.1 anig|EHA17937.1 asyd|OJJ60264.1 atub|OJI90785.1 azon|OJJ50331.1 aver|OJJ03989.1

Group7185: abra|OJJ73896.1 acar|OOG01033.1 afis|EAW22814.1 afla|EED50087.1 afum|EAL90387.1 akaw|GAA89506.1 aluc|OJZ88150.1 anid|CBF87913.1 anig|EHA17911.1 aory|EIT74635.1 asyd|OJJ63449.1 atub|OJI90753.1 aver|OJI97485.1 awen|OJJ38914.1

Group7186: abra|OJJ73996.1 acar|OOF94226.1 afis|EAW25671.1 afla|EED54637.1 akaw|GAA87478.1 aluc|OJZ88048.1 anid|CBF82311.1 anig|EHA17820.1 aory|EIT76476.1 atub|OJI90656.1 afum|EAL84343.1 ater|EAU36071.1 afla|EED46248.1 aory|EIT78781.1

Group7187: abra|OJJ74005.1 acar|OOG01126.1 afis|EAW16956.1 afum|EAL86483.2 agla|OJJ83456.1 akaw|GAA87486.1 aluc|OJZ88039.1 anig|EHA17812.1 asyd|OJJ52815.1 ater|EAU31916.1 atub|OJI90646.1 aver|OJJ08794.1 awen|OJJ30845.1 azon|OJJ44441.1

Group7188: abra|OJJ74044.1 acla|EAW07894.1 afis|EAW22929.1 afum|EAL90268.1 agla|OJJ83359.1 aluc|OJZ87991.1 aory|EIT79123.1 asyd|OJJ63309.1 atub|OJI90601.1 aver|OJI97650.1 awen|OJJ38635.1 azon|OJJ49577.1 anig|EHA17774.1 akaw|GAA87527.1

Group7189: abra|OJJ74059.1 acar|OOG01171.1 acla|EAW07904.1 afis|EAW22942.1 agla|OJJ83346.1 akaw|GAA87540.1 aluc|OJZ87977.1 anid|CBF87647.1 asyd|OJJ63296.1 ater|EAU30682.1 atub|OJI90587.1 aver|OJI97662.1 awen|OJJ38622.1 azon|OJJ49563.1

Group7190: abra|OJJ74088.1 acla|EAW07931.1 afis|EAW22969.1 afla|EED58162.1 afum|EAL90228.1 agla|OJJ83318.1 akaw|GAA87567.1 aluc|OJZ87948.1 anid|CBF74907.1 anig|EHA17734.1 aory|EIT79093.1 ater|EAU30660.1 atub|OJI90559.1 awen|OJJ38594.1

Group7191: abra|OJJ74104.1 acar|OOG01214.1 acla|EAW07947.1 afis|EAW22986.1 afla|EED58178.1 afum|EAL90213.1 agla|OJJ83301.1 akaw|GAA87582.1 aluc|OJZ87932.1 anid|CBF87583.1 asyd|OJJ63254.1 atub|OJI90544.1 aver|OJI97703.1 awen|OJJ38578.1

Group7192: abra|OJJ74139.1 acar|OOF95591.1 afla|EED47376.1 agla|OJJ78697.1 akaw|GAA89746.1 aluc|OJZ80638.1 anid|CBF85351.1 anig|EHA27195.1 aory|EIT82868.1 asyd|OJJ64034.1 ater|EAU32379.1 atub|OJI87493.1 aver|OJI98119.1 awen|OJJ40039.1

Group7193: abra|OJJ74142.1 acar|OOF95588.1 afla|EED47374.1 agla|OJJ78695.1 akaw|GAA89743.1  
aluc|OJZ80641.1 anid|CBF85353.1 anig|EHA27191.1 aory|EIT82855.1 asyd|OJJ64035.1 ater|EAU32381.1  
atub|OJI87496.1 aver|OJI98120.1 awen|OJJ40038.1

Group7194: abra|OJJ74150.1 acar|OOF95579.1 afla|EED51809.1 agla|OJJ84495.1 akaw|GAA89733.1  
aluc|OJZ80650.1 anid|CBF81689.1 anig|EHA27182.1 aory|EIT81747.1 asyd|OJJ52210.1 atub|OJI87505.1  
awen|OJJ35888.1 azon|OJJ51659.1 acar|OOF98447.1

Group7195: abra|OJJ74166.1 acar|OOF89849.1 acla|EAW06846.1 afis|EAW16466.1 afla|EED49697.1  
afum|EAL89062.1 akaw|GAA86849.1 aluc|OJZ89970.1 anig|EHA27168.1 aory|EIT77629.1 asyd|OJJ52107.1  
ater|EAU34012.1 atub|OJI84837.1 aver|OJI95751.1

Group7196: abra|OJJ74177.1 acar|OOF95547.1 afla|EED45245.1 akaw|GAA86839.1 aluc|OJZ89958.1  
anid|CBF85438.1 anig|EHA27158.1 aory|EIT73807.1 asyd|OJJ64089.1 ater|EAU34330.1 atub|OJI84848.1  
aver|OJI98173.1 awen|OJJ38749.1 acar|OOF95244.1

Group7197: abra|OJJ74309.1 acar|OOF95418.1 afla|EED46915.1 akaw|GAA86715.1 aluc|OJZ89817.1  
anid|CBF80697.1 anig|EHA27026.1 aory|EIT72567.1 asyd|OJJ54566.1 ater|EAU36826.1 atub|OJI84988.1  
aver|OJJ07588.1 awen|OJJ33372.1 ater|EAU35085.1

Group7198: abra|OJJ74362.1 afis|EAW22440.1 afla|EED54450.1 afum|EAL90751.1 akaw|GAA86668.1  
aluc|OJZ89765.1 anid|CBF88841.1 anig|EHA26985.1 aory|EIT81159.1 asyd|OJJ62869.1 ater|EAU39268.1  
atub|OJI85037.1 aver|OJI96922.1 awen|OJJ35017.1

Group7199: abra|OJJ74420.1 acar|OOF95320.1 afla|EED53450.1 agla|OJJ88212.1 akaw|GAA87314.1  
aluc|OJZ89703.1 anid|CBF69427.1 anig|EHA26937.1 aory|EIT74891.1 asyd|OJJ54914.1 ater|EAU34062.1  
atub|OJI85096.1 aver|OJJ07289.1 awen|OJJ37923.1

Group7200: abra|OJJ74426.1 acar|OOF95315.1 acla|EAW10813.1 afis|EAW24760.1 afla|EED53441.1  
afum|EAL89402.1 agla|OJJ88213.1 akaw|GAA87322.1 aluc|OJZ89694.1 anig|EHA26932.1 aory|EIT75145.1  
ater|EAU34060.1 atub|OJI85108.1 awen|OJJ37926.1

Group7201: abra|OJJ74434.1 acar|OOF95310.1 acla|EAW08987.1 afis|EAW15425.1 afum|EAL84219.1  
agla|OJJ82707.1 akaw|GAA87328.1 aluc|OJZ89687.1 anid|CBF85295.1 anig|EHA26925.1 asyd|OJJ54705.1  
atub|OJI85114.1 aver|OJJ07467.1 awen|OJJ37917.1

Group7202: abra|OJJ74495.1 acla|EAW07199.1 afis|EAW22211.1 afla|EED57605.1 afum|EAL90983.2  
agla|OJJ87833.1 akaw|GAA87388.1 aluc|OJZ89623.1 aory|EIT82941.1 asyd|OJJ63766.1 atub|OJI85179.1  
aver|OJI97172.1 awen|OJJ34796.1 azon|OJJ45752.1

Group7203: abra|OJJ74502.1 acar|OOF95242.1 acla|EAW07187.1 afis|EAW22200.1 afla|EED57596.1  
afum|EAL90992.1 agla|OJJ87841.1 akaw|GAA87396.1 aluc|OJZ89616.1 anig|EHA26861.1 aory|EIT82965.1  
ater|EAU34214.1 atub|OJI85187.1 awen|OJJ34789.1

Group7204: abra|OJJ74505.1 acar|OOF95239.1 acla|EAW07191.1 afis|EAW22204.1 afla|EED57590.1  
agla|OJJ83744.1 akaw|GAA87400.1 aluc|OJZ89612.1 anid|CBF88424.1 anig|EHA26858.1 aory|EIT82947.1  
asyd|OJJ63758.1 atub|OJI85190.1 aver|OJI97182.1

Group7205: abra|OJJ74552.1 acar|OOF95203.1 acla|EAW07146.1 afis|EAW22160.1 agla|OJJ87904.1  
akaw|GAA82045.1 aluc|OJZ92135.1 anid|CBF89099.1 anig|EHA26814.1 asyd|OJJ62728.1 atub|OJI86567.1  
aver|OJI96771.1 awen|OJJ34734.1 azon|OJJ45825.1

Group7206: abra|OJJ74554.1 acar|OOF95201.1 afis|EAW22158.1 afla|EED57530.1 afum|EAL91032.1  
agla|OJJ87906.1 akaw|GAA82043.1 aluc|OJZ92137.1 anig|EHA26812.1 aory|EIT81838.1 ater|EAU34161.1  
atub|OJI86569.1 awen|OJJ34732.1 azon|OJJ45827.1

Group7207: abra|OJJ74555.1 acar|OOF95200.1 afis|EAW22157.1 afla|EED57529.1 afum|EAL91033.1  
agla|OJJ87907.1 akaw|GAA82041.1 aluc|OJZ92138.1 anig|EHA26811.1 aory|EIT81843.1 ater|EAU34160.1  
atub|OJI86570.1 awen|OJJ34731.1 azon|OJJ45828.1

Group7208: abra|OJJ74576.1 acla|EAW07134.1 afis|EAW22147.1 afum|EAL91043.1 akaw|GAA82029.1  
aluc|OJZ92154.1 anig|EHA26795.1 asyd|OJJ52409.1 atub|OJI86582.1 aver|OJI98308.1 awen|OJJ34723.1  
azon|OJJ45255.1 aver|OJJ08301.1 asyd|OJJ62652.1

Group7209: abra|OJJ74655.1 acla|EAW10734.1 afis|EAW24841.1 afla|EED47136.1 afum|EAL89487.1  
agla|OJJ82031.1 akaw|GAA81955.1 anid|CBF74632.1 aory|EIT79284.1 asyd|OJJ57582.1 ater|EAU36463.1  
atub|OJI86666.1 awen|OJJ40426.1 azon|OJJ49286.1

Group7210: abra|OJJ74676.1 acla|EAW10721.1 afis|EAW24852.1 afla|EED47119.1 afum|EAL89499.1  
aluc|OJZ92253.1 anid|CBF75833.1 aory|EIT79237.1 asyd|OJJ57554.1 ater|EAU36451.1 atub|OJI86686.1  
aver|OJJ05624.1 azon|OJJ49298.1 awen|OJJ40437.1

Group7211: abra|OJJ74718.1 akaw|GAA81898.1 aluc|OJZ92301.1 anig|EHA26670.1 ater|EAU36411.1  
atub|OJI86730.1 awen|OJJ40480.1 azon|OJJ49344.1 acla|EAW10680.1 afis|EAW24890.1 afla|EED46967.1  
afum|EAL89541.2 agla|OJJ82113.1 aory|EIT72699.1

Group7212: abra|OJJ74768.1 acla|EAW10643.1 afis|EAW24923.1 afla|EED55550.1 afum|EAL89578.2  
agla|OJJ82152.1 akaw|GAA83644.1 aluc|OJZ92351.1 anig|EHA26623.1 aory|EIT82697.1 asyd|OJJ57495.1  
atub|OJI86779.1 aver|OJJ05685.1 azon|OJJ49379.1

Group7213: abra|OJJ74844.1 acar|OOF95845.1 acla|EAW08545.1 afis|EAW23582.1 afum|EAL87882.1  
agla|OJJ86849.1 akaw|GAA83578.1 aluc|OJZ92419.1 anid|CBF89591.1 anig|EHA26547.1 atub|OJI86849.1  
aver|OJI96423.1 azon|OJJ45887.1 awen|OJJ39910.1

Group7214: abra|OJJ74868.1 acla|EAW08512.1 afis|EAW23550.1 afla|EED57445.1 afum|EAL87916.1  
agla|OJJ86806.1 akaw|GAA83552.1 aluc|OJZ92446.1 anid|CBF89648.1 anig|EHA26522.1 asyd|OJJ62285.1  
atub|OJI86874.1 aver|OJI96393.1 awen|OJJ39881.1

Group7215: abra|OJJ74870.1 acar|OOF95871.1 acla|EAW08510.1 afis|EAW23548.1 afla|EED57443.1  
afum|EAL87918.2 agla|OJJ86801.1 akaw|GAA83550.1 aluc|OJZ92448.1 anig|EHA26520.1 aory|EIT80059.1  
ater|EAU35333.1 atub|OJI86876.1 awen|OJJ39879.1

Group7216: abra|OJJ74894.1 acar|OOF95895.1 acla|EAW08477.1 agla|OJJ86771.1 akaw|GAA83526.1  
aluc|OJZ92469.1 anid|CBF89693.1 anig|EHA26499.1 asyd|OJJ62260.1 ater|EAU35310.1 atub|OJI86899.1  
aver|OJI96369.1 awen|OJJ39848.1 azon|OJJ43242.1

Group7217: abra|OJJ74936.1 acar|OOF97378.1 acla|EAW08435.1 afis|EAW23480.1 afla|EED57375.1  
afum|EAL87984.1 akaw|GAA83484.1 aluc|OJZ92509.1 anig|EHA26464.1 aory|EIT80103.1 ater|EAU36902.1  
atub|OJI86942.1 awen|OJJ39804.1 azon|OJJ47925.1

Group7218: abra|OJJ74987.1 acar|OOF97334.1 acla|EAW08395.1 afis|EAW23438.1 afum|EAL88024.1  
agla|OJJ86675.1 akaw|GAA83447.1 aluc|OJZ92549.1 anig|EHA26428.1 aory|EIT74111.1 ater|EAU37488.1  
atub|OJI86986.1 awen|OJJ39755.1 azon|OJJ47883.1

Group7219: abra|OJJ75085.1 acar|OOF97248.1 acla|EAW08279.1 afis|EAW23312.1 afla|EED55667.1  
afum|EAL88165.1 agla|OJJ86537.1 aluc|OJZ92651.1 anid|CBF89496.1 asyd|OJJ62409.1 atub|OJI87082.1  
aver|OJI96542.1 awen|OJJ39657.1 azon|OJJ47785.1

Group7220: abra|OJJ75123.1 acar|OOF97211.1 afis|EAW23335.1 afla|EED55631.1 afum|EAL88143.1  
agla|OJJ86498.1 akaw|GAA88731.1 aluc|OJZ92689.1 anid|CBF89433.1 anig|EHA26311.1 aory|EIT81777.1  
atub|OJI87117.1 aver|OJI96580.1 awen|OJJ39559.1

Group7221: abra|OJJ75233.1 acar|OOF94559.1 afla|EED54622.1 agla|OJJ88701.1 akaw|GAA91776.1  
aluc|OJZ92793.1 anid|CBF71788.1 anig|EHA26214.1 aory|EIT78816.1 asyd|OJJ61716.1 ater|EAU36016.1  
atub|OJI87236.1 aver|OJI95810.1 awen|OJJ33290.1

Group7222: abra|OJJ75268.1 acar|OOF94535.1 afla|EED48989.1 agla|OJJ81047.1 akaw|GAA91806.1  
aluc|OJZ92828.1 anid|CBF71428.1 anig|EHA26181.1 aory|EIT80042.1 asyd|OJJ54996.1 ater|EAU31740.1  
atub|OJI87285.1 aver|OJJ07205.1 awen|OJJ35992.1

Group7223: abra|OJJ75275.1 acar|OOF97939.1 acla|EAW15333.1 afis|EAW20371.1 afla|EED53113.1  
afum|EAL85485.1 akaw|GAA91815.1 aluc|OJZ92835.1 anig|EHA26172.1 aory|EIT74765.1 asyd|OJJ56415.1  
atub|OJI87293.1 aver|OJJ06300.1 awen|OJJ36523.1

Group7224: abra|OJJ75323.1 acar|OOF94501.1 afla|EED56848.1 agla|OJJ83738.1 akaw|GAA92018.1  
aluc|OJZ92884.1 anid|CBF81531.1 anig|EHA26076.1 aory|EIT77520.1 asyd|OJJ59486.1 ater|EAU33512.1  
atub|OJI87343.1 aver|OJJ02788.1 awen|OJJ38739.1

Group7225: abra|OJJ75334.1 acar|OOF94499.1 afis|EAW24598.1 agla|OJJ80218.1 akaw|GAA92028.1  
aluc|OJZ92898.1 anid|CBF71503.1 anig|EHA26065.1 ater|EAU33062.1 atub|OJI87356.1 aver|OJJ07276.1  
awen|OJJ33328.1 agla|OJJ84487.1 aver|OJI96489.1

Group7226: abra|OJJ75339.1 acar|OOF94492.1 acla|EAW12073.1 afis|EAW19714.1 afla|EED56203.1  
afum|EAL86813.1 akaw|GAA92032.1 aluc|OJZ92902.1 anig|EHA26061.1 aory|EIT73373.1 asyd|OJJ55950.1  
awen|OJJ29967.1 azon|OJJ42680.1 aver|OJJ04895.1

Group7227: abra|OJJ75350.1 acar|OOF94481.1 acla|EAW12386.1 afla|EED47329.1 agla|OJJ80355.1  
akaw|GAA92042.1 aluc|OJZ92912.1 anid|CBF80633.1 anig|EHA26053.1 aory|EIT82840.1 asyd|OJJ54622.1  
ater|EAU30238.1 atub|OJI87372.1 aver|OJJ07536.1

Group7228: abra|OJJ75372.1 acar|OOF89963.1 acla|EAW08075.1 afis|EAW20377.1 akaw|GAA92065.1  
aluc|OJZ92940.1 anid|CBF82140.1 anig|EHA26032.1 asyd|OJJ54320.1 atub|OJI87400.1 aver|OJJ05274.1  
awen|OJJ31303.1 afum|EAL85491.1 ater|EAU29315.1

Group7229: azon|OJJ43281.1 acar|OOF90782.1 acla|EAW13824.1 afis|EAW18307.1 afla|EED48776.1 afum|EAL87673.1 agla|OJJ88116.1 anid|CBF79442.1 anig|EHA23616.1 aory|EIT72990.1 asyd|OJJ57848.1 ater|EAU33317.1 aver|OJJ04544.1 awen|OJJ30681.1

Group7230: abra|OJJ75514.1 acar|OOF90841.1 afis|EAW25707.1 afla|EED46469.1 afum|EAL84380.1 agla|OJJ79319.1 akaw|GAA84278.1 aluc|OJZ88971.1 anid|CBF71220.1 anig|EHA23553.1 asyd|OJJ58670.1 atub|OJI85819.1 aver|OJJ01281.1 awen|OJJ30879.1

Group7231: abra|OJJ75569.1 acar|OOF90887.1 afla|EED45967.1 agla|OJJ80728.1 akaw|GAA84320.1 aluc|OJZ89017.1 anid|CBF88701.1 anig|EHA23513.1 aory|EIT75698.1 asyd|OJJ63916.1 atub|OJI85772.1 aver|OJI97026.1 awen|OJJ35840.1 azon|OJJ42079.1

Group7232: abra|OJJ75624.1 acar|OOG00212.1 acla|EAW09359.1 afis|EAW21778.1 afla|EED46345.1 afum|EAL92807.1 agla|OJJ84343.1 akaw|GAA84371.1 anig|EHA23462.1 aory|EIT81182.1 asyd|OJJ61183.1 atub|OJI85710.1 awen|OJJ34067.1 azon|OJJ48160.1

Group7233: acar|OOF93294.1 acla|EAW08080.1 afis|EAW20391.1 akaw|GAA85129.1 aluc|OJZ86511.1 anig|EHA20898.1 asyd|OJJ56867.1 atub|OJI84016.1 aver|OJJ03459.1 awen|OJJ35976.1 afla|EED52282.1 anig|EHA22136.1 aory|EIT74357.1 awen|OJJ36061.1

Group7234: abra|OJJ75699.1 acla|EAW09409.1 afis|EAW21727.1 afla|EED57996.1 afum|EAL92760.1 akaw|GAA84435.1 aluc|OJZ89150.1 anid|CBF83723.1 anig|EHA23398.1 aory|EIT79751.1 ater|EAU38411.1 atub|OJI85638.1 awen|OJJ34000.1 azon|OJJ48552.1

Group7235: abra|OJJ75705.1 agla|OJJ79854.1 aluc|OJZ89156.1 anig|EHA23396.1 ater|EAU38414.1 atub|OJI85635.1 acla|EAW09405.1 afis|EAW21731.1 afum|EAL92764.1 aver|OJJ00170.1 awen|OJJ34004.1 azon|OJJ48548.1 akaw|GAA84440.1 asyd|OJJ60845.1

Group7236: abra|OJJ75783.1 acar|OOG00105.1 acla|EAW14899.1 afis|EAW24421.1 afla|EED47747.1 agla|OJJ79223.1 aluc|OJZ89226.1 anid|CBF73790.1 anig|EHA23336.1 asyd|OJJ56603.1 atub|OJI85566.1 aver|OJJ06120.1 awen|OJJ32788.1 azon|OJJ49044.1

Group7237: abra|OJJ75833.1 acar|OOG00047.1 agla|OJJ83258.1 akaw|GAA84543.1 aluc|OJZ89276.1 anig|EHA23293.1 ater|EAU29962.1 atub|OJI85523.1 afla|EED53211.1 aory|EIT74885.1 asyd|OJJ64552.1 aver|OJJ06998.1 awen|OJJ31383.1 asyd|OJJ55222.1

Group7238: abra|OJJ75845.1 acla|EAW14839.1 afla|EED47848.1 afum|EBA27255.1 akaw|GAA84554.1 aluc|OJZ89286.1 anig|EHA23280.1 aory|EIT77214.1 asyd|OJJ53663.1 atub|OJI85513.1 aver|OJJ07770.1 awen|OJJ32847.1 afis|EAW24367.1 anid|CBF73890.1

Group7239: abra|OJJ75900.1 acar|OOG00003.1 acla|EAW09890.1 afis|EAW21236.1 afum|EAL92248.1 agla|OJJ78498.1 akaw|GAA84606.1 aluc|OJZ89350.1 anig|EHA23231.1 asyd|OJJ60576.1 ater|EAU35877.1 atub|OJI85448.1 aver|OJI99902.1 azon|OJJ44342.1

Group7240: abra|OJJ75998.1 acar|OOF99926.1 acla|EAW09806.1 afis|EAW21330.1 afla|EED57288.1 afum|EAL92348.1 agla|OJJ87409.1 aluc|OJZ89444.1 asyd|OJJ60662.1 ater|EAU35956.1 atub|OJI85349.1 aver|OJI99985.1 awen|OJJ39368.1 azon|OJJ51708.1

Group7241: abra|OJJ76043.1 acar|OOF99887.1 acla|EAW09773.1 afis|EAW21365.1 afla|EED55779.1 afum|EAL92381.1 akaw|GAA88923.1 aluc|OJZ89498.1 anig|EHA23102.1 aory|EIT76574.1 ater|EAU35192.1 atub|OJI85305.1 awen|OJJ39332.1 azon|OJJ51677.1

Group7242: abra|OJJ76063.1 acar|OOF99868.1 acla|EAW09755.1 afis|EAW21386.1 afla|EED55800.1 afum|EAL92401.1 agla|OJJ85511.1 akaw|GAA88903.1 aluc|OJZ89518.1 anid|CBF83844.1 asyd|OJJ60917.1 ater|EAU35172.1 atub|OJI85285.1 awen|OJJ39315.1

Group7243: abra|OJJ76115.1 afis|EAW21435.1 afum|EAL92450.1 agla|OJJ85577.1 akaw|GAA88852.1 aluc|OJZ89572.1 anig|EHA23035.1 asyd|OJJ61174.1 atub|OJI85232.1 aver|OJJ00500.1 awen|OJJ39264.1 azon|OJJ51591.1 acla|EAW09705.1 anid|CBF76589.1

Group7244: abra|OJJ76439.1 acar|OOF99684.1 acla|EAW13985.1 afis|EAW24719.1 afum|EAL89368.2 aluc|OJZ91770.1 anid|CBF87159.1 anig|EHA22770.1 aory|EIT77975.1 asyd|OJJ58845.1 ater|EAU38214.1 atub|OJI86228.1 aver|OJJ01446.1 azon|OJJ45350.1

Group7245: abra|OJJ76447.1 acar|OOF99691.1 acla|EAW13981.1 afis|EAW18690.1 afum|EAL93411.2 agla|OJJ82382.1 akaw|GAA82359.1 aluc|OJZ91763.1 anig|EHA22764.1 asyd|OJJ58505.1 atub|OJI86221.1 aver|OJJ01106.1 awen|OJJ32161.1 azon|OJJ46747.1

Group7246: abra|OJJ76489.1 acar|OOF99721.1 afis|EAW18655.1 afla|EED52676.1 afum|EAL93371.1 akaw|GAA82404.1 aluc|OJZ91716.1 anid|CBF70544.1 aory|EIT74257.1 asyd|OJJ58547.1 ater|EAU38257.1 atub|OJI86174.1 aver|OJJ01145.1 awen|OJJ32122.1

Group7247: abra|OJJ76648.1 acar|OOF99353.1 afis|EAW19011.1 afla|EED56274.1 afum|EAL93745.2  
akaw|GAA92989.1 aluc|OJZ91560.1 anid|CBF86743.1 anig|EHA22592.1 ater|EAU37791.1 atub|OJI86012.1  
aver|OJI96703.1 asyd|OJJ64698.1 aver|OJI98803.1

Group7248: abra|OJJ76724.1 acla|EAW11290.1 afla|EED45040.1 afum|EAL86531.2 akaw|GAA92477.1  
aluc|OJZ91487.1 anid|CBF78525.1 anig|EHA22531.1 aory|EIT73672.1 ater|EAU32966.1 atub|OJI85942.1  
aver|OJI99446.1 awen|OJJ40910.1 azon|OJJ42296.1

Group7249: abra|OJJ76752.1 acar|OOF91248.1 acla|EAW13771.1 afis|EAW20420.1 agla|OJJ84905.1  
akaw|GAA87272.1 aluc|OJZ84155.1 anig|EHA27517.1 aory|EIT77740.1 asyd|OJJ55797.1 ater|EAU37736.1  
atub|OJI89929.1 aver|OJJ06886.1 awen|OJJ33113.1

Group7250: abra|OJJ76771.1 acla|EAW13325.1 afis|EAW20440.1 afla|EED44830.1 afum|EAL84612.1  
akaw|GAA87255.1 aluc|OJZ84175.1 anid|CBF79315.1 aory|EIT77724.1 asyd|OJJ55778.1 ater|EAU37718.1  
atub|OJI89910.1 awen|OJJ33131.1 azon|OJJ46346.1

Group7251: abra|OJJ76797.1 acar|OOF91290.1 acla|EAW13356.1 afis|EAW20470.1 afla|EED44798.1  
afum|EBA27194.1 agla|OJJ84848.1 akaw|GAA87226.1 aluc|OJZ84204.1 asyd|OJJ55749.1 atub|OJI89880.1  
aver|OJJ06836.1 awen|OJJ33164.1 azon|OJJ46371.1

Group7252: abra|OJJ76828.1 acar|OOF91322.1 acla|EAW13389.1 afis|EAW20502.1 afla|EED44745.1  
agla|OJJ84798.1 akaw|GAA87194.1 aluc|OJZ84240.1 anid|CBF79199.1 asyd|OJJ55724.1 atub|OJI89843.1  
aver|OJJ06810.1 awen|OJJ33203.1 azon|OJJ46395.1

Group7253: abra|OJJ76904.1 acar|OOF91352.1 acla|EAW13426.1 afis|EAW20537.1 afum|EBA27190.1  
agla|OJJ84694.1 akaw|GAA87134.1 aluc|OJZ84303.1 anid|CBF78993.1 anig|EHA27639.1 ater|EAU37142.1  
atub|OJI89765.1 awen|OJJ33244.1 azon|OJJ50623.1

Group7254: abra|OJJ76909.1 acar|OOF91358.1 afis|EAW20542.1 afla|EED52431.1 afum|EAL84516.1  
akaw|GAA87129.1 aluc|OJZ84308.1 anig|EHA27644.1 aory|EIT83301.1 asyd|OJJ56122.1 atub|OJI89760.1  
aver|OJJ05063.1 awen|OJJ33249.1 azon|OJJ50628.1

Group7255: abra|OJJ76910.1 acar|OOF91360.1 afis|EAW24763.1 afla|EED56327.1 agla|OJJ82591.1  
akaw|GAA87128.1 aluc|OJZ84309.1 anig|EHA27645.1 aory|EIT73407.1 asyd|OJJ54749.1 ater|EAU39055.1  
atub|OJI89759.1 aver|OJJ07418.1 awen|OJJ33554.1

Group7256: abra|OJJ76928.1 acar|OOF91374.1 afis|EAW16739.1 agla|OJJ82711.1 akaw|GAA87112.1  
aluc|OJZ84326.1 anid|CBF78016.1 anig|EHA27661.1 asyd|OJJ55236.1 ater|EAU30321.1 atub|OJI89742.1  
aver|OJJ06987.1 awen|OJJ30974.1 azon|OJJ51732.1

Group7257: abra|OJJ77000.1 acar|OOF98680.1 acla|EAW13452.1 afis|EAW16435.1 afla|EED47786.1  
agla|OJJ89569.1 akaw|GAA87048.1 aluc|OJZ84398.1 anig|EHA27729.1 aory|EIT77178.1 ater|EAU38162.1  
atub|OJI89674.1 awen|OJJ32553.1 acar|OOF90078.1

Group7258: abra|OJJ77112.1 acar|OOF93002.1 acla|EAW07059.1 afis|EAW16683.1 afla|EED45706.1  
afum|EAL89287.1 akaw|GAA90816.1 aluc|OJZ84521.1 anig|EHA27819.1 aory|EIT75620.1 ater|EAU31914.1  
atub|OJI89558.1 azon|OJJ48992.1 ater|EAU31030.1

Group7259: abra|OJJ77153.1 acar|OOF93039.1 afla|EED45740.1 agla|OJJ80497.1 akaw|GAA90777.1  
aluc|OJZ84567.1 anid|CBF86599.1 anig|EHA27861.1 aory|EIT75632.1 asyd|OJJ64828.1 atub|OJI89515.1  
aver|OJI98941.1 awen|OJJ33824.1 azon|OJJ44402.1

Group7260: abra|OJJ77171.1 afis|EAW15676.1 afla|EED51771.1 afum|EAL85671.1 akaw|GAA90762.1  
aluc|OJZ84584.1 anig|EHA27877.1 aory|EIT81698.1 ater|EAU34097.1 atub|OJI89496.1 asyd|OJJ63636.1  
aver|OJI97300.1 azon|OJJ43868.1 anid|CBF69536.1

Group7261: abra|OJJ77266.1 acar|OOF93134.1 acla|EAW13260.1 afis|EAW17366.1 afla|EED49804.1  
aluc|OJZ84673.1 anid|CBF84213.1 anig|EHA27951.1 asyd|OJJ57171.1 ater|EAU33871.1 atub|OJI89407.1  
aver|OJJ03144.1 awen|OJJ37444.1 azon|OJJ51123.1

Group7262: abra|OJJ77382.1 acar|OOF93250.1 afla|EED55717.1 afum|EAL87849.1 agla|OJJ87591.1  
akaw|GAA91379.1 aluc|OJZ84790.1 anig|EHA28058.1 aory|EIT83227.1 asyd|OJJ59183.1 atub|OJI89292.1  
aver|OJJ01804.1 awen|OJJ30872.1 acar|OOF95534.1

Group7263: abra|OJJ77444.1 acla|EAW15000.1 afis|EAW24524.1 afla|EED54711.1 afum|EAL86189.1  
agla|OJJ79087.1 anid|CBF80443.1 asyd|OJJ54784.1 ater|EAU29961.1 aver|OJJ04453.1 awen|OJJ36201.1  
asyd|OJJ57943.1 asyd|OJJ60276.1 aver|OJJ07382.1

Group7264: abra|OJJ77488.1 acar|OOF99237.1 acla|EAW06750.1 afis|EAW16300.1 afla|EED53254.1  
afum|EAL88922.1 akaw|GAA84131.1 aluc|OJZ81048.1 anig|EHA19319.1 aory|EIT75243.1 ater|EAU37343.1  
atub|OJI82536.1 awen|OJJ37699.1 azon|OJJ44960.1

Group7265: abra|OJJ77501.1 agla|OJJ88307.1 akaw|GAA84120.1 aluc|OJZ81036.1 anid|CBF86867.1  
anig|EHA19330.1 asyd|OJJ64632.1 atub|OJI82547.1 aver|OJI98730.1 acla|EAW06735.1 afis|EAW16286.1  
afum|EAL88908.1 awen|OJJ37680.1 azon|OJJ44944.1

Group7266: abra|OJJ77521.1 afum|EAL88892.1 akaw|GAA84099.1 aluc|OJZ81015.1 ater|EAU37446.1  
atub|OJI82569.1 awen|OJJ37659.1 azon|OJJ44928.1 acla|EAW06716.1 afis|EAW16271.1 afla|EED53294.1  
asyd|OJJ64614.1 aver|OJI98710.1 agla|OJJ88340.1

Group7267: abra|OJJ77569.1 acar|OOF99161.1 acla|EAW06534.1 afis|EAW16061.1 afla|EED48575.1  
agla|OJJ86104.1 akaw|GAA84057.1 aluc|OJZ80969.1 anid|CBF75086.1 asyd|OJJ60014.1 atub|OJI82617.1  
aver|OJJ02271.1 awen|OJJ30378.1 azon|OJJ45394.1

Group7268: abra|OJJ77635.1 acar|OOF99102.1 afla|EED51641.1 akaw|GAA83999.1 aluc|OJZ80895.1  
anid|CBF89719.1 anig|EHA19444.1 asyd|OJJ62244.1 ater|EAU37813.1 atub|OJI82683.1 aver|OJJ01807.1  
awen|OJJ31252.1 aver|OJI96354.1 asyd|OJJ59190.1

Group7269: abra|OJJ77666.1 acar|OOF99069.1 aluc|OJZ80862.1 ater|EAU33644.1 atub|OJI82715.1  
aver|OJI98451.1 awen|OJJ30468.1 azon|OJJ45459.1 agla|OJJ86021.1 anid|CBF85842.1 aory|EIT73356.1  
asyd|OJJ64355.1 afis|EAW16001.1 azon|OJJ45460.1

Group7270: abra|OJJ77688.1 acar|OOF99055.1 acla|EAW06576.1 afis|EAW16020.1 afum|EAL88649.1  
agla|OJJ86047.1 akaw|GAA83948.1 aluc|OJZ80829.1 anid|CBF74536.1 anig|EHA19487.1 ater|EAU33624.1  
atub|OJI82737.1 awen|OJJ30444.1 azon|OJJ45436.1

Group7271: abra|OJJ77700.1 acar|OOF99041.1 afla|EED53096.1 agla|OJJ84143.1 akaw|GAA83930.1  
aluc|OJZ90765.1 anig|EHA19499.1 aory|EIT74802.1 atub|OJI82753.1 aver|OJI99804.1 awen|OJJ33497.1  
azon|OJJ42269.1 afla|EED46279.1 aory|EIT76324.1

Group7272: abra|OJJ77786.1 afla|EED55125.1 afum|EAL84256.1 agla|OJJ83665.1 akaw|GAA83861.1  
aluc|OJZ90841.1 anid|CBF84135.1 anig|EHA19562.1 aory|EIT81666.1 asyd|OJJ55632.1 ater|EAU39626.1  
atub|OJI82828.1 aver|OJJ06709.1 awen|OJJ40274.1

Group7273: abra|OJJ77787.1 afla|EED55126.1 afum|EAL84255.1 agla|OJJ83664.1 akaw|GAA83860.1  
aluc|OJZ90842.1 anid|CBF84137.1 anig|EHA19563.1 aory|EIT81624.1 asyd|OJJ55631.1 ater|EAU39625.1  
atub|OJI82829.1 aver|OJJ06708.1 awen|OJJ40273.1

Group7274: abra|OJJ77816.1 acar|OOF98954.1 afis|EAW23617.1 afla|EED53805.1 afum|EAL87845.1  
akaw|GAA83830.1 aluc|OJZ90888.1 anid|CBF75250.1 anig|EHA19607.1 aory|EIT78460.1 ater|EAU34476.1  
atub|OJI82882.1 aver|OJJ04189.1 awen|OJJ39947.1

Group7275: abra|OJJ77858.1 acar|OOF98916.1 acla|EAW11268.1 afla|EED56237.1 afum|EAL87598.1  
agla|OJJ85845.1 akaw|GAA83791.1 aluc|OJZ90932.1 anid|CBF86175.1 asyd|OJJ64526.1 atub|OJI82924.1  
aver|OJI98624.1 awen|OJJ30610.1 azon|OJJ50158.1

Group7276: abra|OJJ77867.1 acar|OOF98905.1 afis|EAW18240.1 afla|EED56226.1 agla|OJJ85826.1  
akaw|GAA83781.1 aluc|OJZ90943.1 anig|EHA19651.1 asyd|OJJ64537.1 ater|EAU33743.1 atub|OJI82934.1  
aver|OJI98634.1 awen|OJJ30620.1 azon|OJJ47997.1

Group7277: abra|OJJ77939.1 afla|EED54357.1 aluc|OJZ90948.1 anig|EHA20678.1 aory|EIT75969.1  
asyd|OJJ54282.1 atub|OJI82949.1 aver|OJJ05236.1 awen|OJJ40815.1 azon|OJJ42433.1 atub|OJI81191.1  
agla|OJJ83742.1 aory|EIT77972.1 anig|EHA19718.1

Group7278: akaw|GAA83690.1 aluc|OJZ91042.1 anig|EHA19741.1 atub|OJI83038.1 acar|OOF98844.1  
acla|EAW06668.1 afis|EAW16097.1 afla|EED48632.1 afum|EAL88729.1 agla|OJJ86125.1 anid|CBF85453.1  
asyd|OJJ64097.1 aver|OJI98180.1 awen|OJJ30334.1

Group7279: abra|OJJ77975.1 acar|OOF91245.1 acla|EAW12898.1 afla|EED49851.1 akaw|GAA83685.1  
aluc|OJZ91049.1 anid|CBF80320.1 anig|EHA19745.1 aory|EIT83397.1 asyd|OJJ52366.1 atub|OJI83044.1  
aver|OJJ01981.1 awen|OJJ37000.1 acar|OOF97583.1

Group7280: abra|OJJ78076.1 acar|OOF98787.1 afla|EED48706.1 agla|OJJ86228.1 akaw|GAA85918.1  
anid|CBF79570.1 asyd|OJJ57915.1 ater|EAU33251.1 aver|OJJ04476.1 awen|OJJ30266.1 azon|OJJ43961.1  
acla|EAW06609.1 afis|EAW16206.1 afum|EAL88834.1

Group7281: abra|OJJ78104.1 acar|OOF98761.1 acla|EAW06616.1 afis|EAW16149.1 afla|EED48692.1  
agla|OJJ86202.1 aluc|OJZ91168.1 anid|CBF79579.1 anig|EHA19862.1 asyd|OJJ57970.1 atub|OJI83183.1  
aver|OJJ04433.1 awen|OJJ30274.1 azon|OJJ43968.1

Group7282: abra|OJJ78124.1 acar|OOF97937.1 acla|EAW12352.1 afis|EAW16777.1 afla|EED49599.1  
afum|EAL86346.1 akaw|GAA85884.1 aluc|OJZ91186.1 anid|CBF73562.1 anig|EHA19880.1 aory|EIT79312.1  
ater|EAU31567.1 atub|OJI83205.1 azon|OJJ45860.1

Group7283: abra|OJJ78126.1 acar|OOF94027.1 afla|EED51361.1 akaw|GAA85882.1 aluc|OJZ91188.1  
anid|CBF75425.1 anig|EHA19884.1 aory|EIT80444.1 asyd|OJJ59790.1 ater|EAU30521.1 atub|OJI83207.1  
aver|OJJ02498.1 awen|OJJ33364.1 azon|OJJ42494.1

Group7284: abra|OJJ78144.1 afis|EAW19675.1 afla|EED55112.1 akaw|GAA92008.1 aluc|OJZ92873.1  
anid|CBF79033.1 anig|EHA28256.1 aory|EIT81601.1 ater|EAU33098.1 atub|OJI87331.1 awen|OJJ30818.1  
acar|OOF90918.1 aluc|OJZ83576.1 atub|OJI89250.1

Group7285: abra|OJJ78219.1 acar|OOF98637.1 acla|EAW11230.1 afla|EED48740.1 afum|EAL87639.1  
agla|OJJ88153.1 aluc|OJZ91293.1 anid|CBF79505.1 anig|EHA19976.1 aory|EIT73180.1 asyd|OJJ57882.1  
atub|OJI83284.1 aver|OJJ04512.1 azon|OJJ47961.1

Group7286: abra|OJJ78240.1 acar|OOF98620.1 acla|EAW09270.1 afis|EAW21878.1 afla|EED46430.1  
afum|EAL92892.1 agla|OJJ84254.1 akaw|GAA85785.1 aluc|OJZ91314.1 asyd|OJJ61276.1 atub|OJI83308.1  
aver|OJJ00604.1 awen|OJJ34167.1 azon|OJJ43463.1

Group7287: abra|OJJ78333.1 acar|OOF98231.1 acla|EAW06320.1 afis|EAW16713.1 afla|EED53311.1  
afum|EAL85780.1 akaw|GAA85698.1 aluc|OJZ91405.1 anid|CBF79053.1 anig|EHA20082.1 aory|EIT75151.1  
ater|EAU34393.1 atub|OJI83399.1 awen|OJJ34746.1

Group7288: abra|OJJ78340.1 acar|OOF98540.1 acla|EAW09191.1 afis|EAW21955.1 afla|EED46673.1  
afum|EAL92969.1 agla|OJJ84162.1 akaw|GAA85693.1 aluc|OJZ91412.1 anid|CBF84076.1 ater|EAU31061.1  
atub|OJI83406.1 awen|OJJ34247.1 azon|OJJ43391.1

Group7289: abra|OJJ78370.1 acar|OOF90129.1 acla|EAW09165.1 afis|EAW21981.1 afum|EAL92996.1  
akaw|GAA85663.1 aluc|OJZ91447.1 anid|CBF82707.1 anig|EHA20111.1 aory|EIT77895.1 asyd|OJJ61642.1  
awen|OJJ34275.1 azon|OJJ43362.1 afla|EED46705.1

Group7290: acar|OOF90254.1 acla|EAW12853.1 afis|EAW18016.1 afla|EED51878.1 afum|EAL91828.1  
agla|OJJ85370.1 anid|CBF80048.1 anig|EHA27366.1 aory|EIT81738.1 asyd|OJJ58278.1 ater|EAU31532.1  
aver|OJJ02145.1 awen|OJJ41523.1 azon|OJJ48245.1

Group7291: acar|OOF90348.1 acla|EAW07679.1 afis|EAW22694.1 afla|EED49978.1 afum|EAL90499.1  
agla|OJJ79020.1 anid|CBF88096.1 anig|EHA18008.1 aory|EIT74752.1 asyd|OJJ63569.1 ater|EAU39014.1  
aver|OJI97365.1 awen|OJJ35326.1 azon|OJJ49788.1

Group7292: acar|OOF93126.1 acla|EAW11421.1 afis|EAW24001.1 afla|EED49483.1 afum|EAL87431.1  
agla|OJJ88142.1 akaw|GAA90698.1 aluc|OJZ84655.1 anid|CBF71785.1 aory|EIT79531.1 asyd|OJJ61745.1  
ater|EAU34696.1 awen|OJJ40502.1 azon|OJJ50776.1

Group7293: acar|OOF93495.1 anig|EHA25487.1 azon|OJJ43097.1 acla|EAW08862.1 afis|EAW15532.1  
afla|EED49043.1 afum|EAL85796.2 agla|OJJ85215.1 anid|CBF78200.1 asyd|OJJ55984.1 ater|EAU32593.1  
aver|OJJ04931.1 awen|OJJ38196.1 aory|EIT82545.1

Group7294: acar|OOF95324.1 acla|EAW09283.1 afis|EAW21864.1 afla|EED46447.1 afum|EAL92878.2  
agla|OJJ84271.1 akaw|GAA87310.1 aluc|OJZ89707.1 anid|CBF77195.1 asyd|OJJ56835.1 ater|EAU32981.1  
aver|OJJ03502.1 awen|OJJ34152.1 azon|OJJ43476.1

Group7295: acar|OOF96104.1 acla|EAW06468.1 afis|EAW15963.1 afla|EED58094.1 afum|EAL88596.1  
agla|OJJ89349.1 akaw|GAA85505.1 anid|CBF81083.1 aory|EIT79119.1 ater|EAU35491.1 atub|OJI82322.1  
aver|OJJ06255.1 awen|OJJ35611.1 azon|OJJ46933.1

Group7296: acar|OOF96168.1 acla|EAW08019.1 afis|EAW23053.1 afla|EED54965.1 afum|EAL88427.1  
agla|OJJ89423.1 akaw|GAA85566.1 aluc|OJZ83500.1 anid|CBF81045.1 aory|EIT80366.1 asyd|OJJ56440.1  
ater|EAU37611.1 atub|OJI82394.1 azon|OJJ44151.1

Group7297: acar|OOF96379.1 acla|EAW15207.1 afis|EAW20172.1 afla|EED57176.1 afum|EAL85290.1  
agla|OJJ88758.1 aluc|OJZ86410.1 anid|CBF85030.1 anig|EHA21489.1 asyd|OJJ63102.1 ater|EAU35208.1  
atub|OJI84121.1 aver|OJI97860.1 azon|OJJ46100.1

Group7298: afis|EAW20697.1 agla|OJJ86296.1 azon|OJJ47338.1 afla|EED45521.1 asyd|OJJ61710.1  
afum|EAL84871.1 aluc|OJZ83608.1 anig|EHA18767.1 aory|EIT75681.1 atub|OJI89981.1 aver|OJI95806.1  
awen|OJJ33573.1 akaw|GAA92117.1 awen|OJJ31973.1

Group7299: acla|EAW09761.1 afis|EAW21376.1 afla|EED55794.1 afum|EAL92393.1 agla|OJJ78767.1  
akaw|GAA83966.1 aluc|OJZ80855.1 anid|CBF83858.1 aory|EIT76823.1 asyd|OJJ60925.1 ater|EAU35181.1  
aver|OJJ00251.1 awen|OJJ39321.1 azon|OJJ51666.1

Group7300: acla|EAW12193.1 afis|EAW17089.1 afla|EED53701.1 afum|EAL86567.1 akaw|GAA84584.1  
anid|CBF78067.1 aory|EIT75279.1 atub|OJI84548.1 awen|OJJ33470.1 anig|EHA23247.1 aluc|OJZ81998.1  
awen|OJJ30116.1 asyd|OJJ52156.1 ater|EAU35602.1



Group7301: acla|EAW12242.1 afla|EED52536.1 afis|EAW21476.1 afis|EAW23696.1 agla|OJJ87419.1  
aluc|OJZ80170.1 aory|EIT74591.1 ater|EAU33757.1 awen|OJJ30150.1 afla|EED47559.1 afum|EAL92496.1  
aluc|OJZ90162.1 anig|EHA21660.1 atub|OJI84639.1

Group7302: acla|EAW15159.1 afis|EAW20127.1 afla|EED57224.1 afum|EAL85245.1 akaw|GAA90165.1  
aluc|OJZ83182.1 anid|CBF84954.1 anig|EHA18394.1 aory|EIT74093.1 asyd|OJJ63144.1 ater|EAU38746.1  
aver|OJI97810.1 awen|OJJ37487.1 azon|OJJ46221.1

Group7303: afis|EAW18365.1 afum|EAL93039.1 agla|OJJ84928.1 akaw|GAA86328.1 aluc|OJZ84852.1  
anid|CBF70819.1 anig|EHA25086.1 aory|EIT77425.1 asyd|OJJ58402.1 ater|EAU32233.1 atub|OJI80744.1  
aver|OJJ01003.1 awen|OJJ31786.1 azon|OJJ50441.1

Group7304: abra|OJJ65625.1 abra|OJJ65711.1 aluc|OJZ79679.1 aluc|OJZ81150.1 acla|EAW15091.1  
agla|OJJ85723.1 akaw|GAA92894.1 afis|EAW21070.1 afla|EED46368.1 anig|EHA20203.1 atub|OJI80392.1  
akaw|GAA93306.1 aluc|OJZ88793.1

Group7305: abra|OJJ66410.1 abra|OJJ67969.1 agla|OJJ86641.1 agla|OJJ87771.1 ater|EAU32456.1  
ater|EAU32813.1 acla|EAW15054.1 afis|EAW17011.1 aver|OJJ06537.1 azon|OJJ42141.1 afla|EED55206.1  
aory|EIT83552.1 awen|OJJ37013.1

Group7306: abra|OJJ74542.1 abra|OJJ77038.1 aluc|OJZ90093.1 aluc|OJZ92122.1 atub|OJI84713.1  
atub|OJI86555.1 awen|OJJ30779.1 awen|OJJ31702.1 acar|OOF95216.1 akaw|GAA82060.1 ater|EAU31041.1  
azon|OJJ45316.1 anid|CBF73564.1

Group7307: acar|OOF90466.1 acar|OOG00946.1 abra|OJJ70070.1 acla|EAW12442.1 afla|EED47625.1  
akaw|GAA87881.1 aluc|OJZ85523.1 aory|EIT74251.1 ater|EAU38526.1 anig|EHA25055.1 aory|EIT80234.1  
atub|OJI80044.1 afla|EED52535.1

Group7308: acar|OOF94032.1 acar|OOF94102.1 abra|OJJ66421.1 acla|EAW08781.1 afis|EAW15620.1  
afum|EAL85715.1 akaw|GAA90286.1 aluc|OJZ83054.1 anig|EHA28119.1 asyd|OJJ56692.1 atub|OJI87893.1  
aver|OJJ06032.1 azon|OJJ51149.1

Group7309: acar|OOF94036.1 acar|OOF94106.1 abra|OJJ66414.1 afis|EAW20231.1 afla|EED55133.1  
afum|EAL85348.1 akaw|GAA90281.1 aluc|OJZ83059.1 anid|CBF73522.1 anig|EHA28125.1 aory|EIT81631.1  
atub|OJI87887.1 azon|OJJ47377.1

Group7310: acar|OOF94084.1 acar|OOF94154.1 abra|OJJ71261.1 acla|EAW12246.1 afla|EED53196.1  
akaw|GAA82728.1 aluc|OJZ87282.1 anig|EHA20524.1 aory|EIT74916.1 ater|EAU30957.1 atub|OJI81359.1  
azon|OJJ45974.1 anid|CBF80413.1

Group7311: acar|OOF94085.1 acar|OOF94155.1 abra|OJJ69769.1 afis|EAW23675.1 afla|EED49539.1  
afum|EAL87118.1 akaw|GAA87884.1 aluc|OJZ85529.1 anid|CBF80787.1 anig|EHA25060.1 aory|EIT82650.1  
asyd|OJJ65400.1 atub|OJI80039.1

Group7312: acar|OOF95050.1 acar|OOF95117.1 abra|OJJ68392.1 afla|EED46845.1 agla|OJJ89056.1  
anig|EHA20969.1 aory|EIT72552.1 asyd|OJJ52726.1 aver|OJJ04488.1 awen|OJJ34415.1 asyd|OJJ62241.1  
aver|OJJ07602.1 aver|OJI96350.1

Group7313: acar|OOF95071.1 acar|OOF95137.1 abra|OJJ74644.1 acla|EAW10744.1 afis|EAW24830.1  
afla|EED47145.1 afum|EAL89475.1 akaw|GAA81967.1 anid|CBF74574.1 anig|EHA26734.1 ater|EAU36475.1  
awen|OJJ40417.1 azon|OJJ49275.1

Group7314: acar|OOF95072.1 acar|OOF95138.1 abra|OJJ74643.1 acla|EAW10745.1 afis|EAW24829.1  
afla|EED47146.1 afum|EAL89474.1 akaw|GAA81968.1 anid|CBF74572.1 anig|EHA26735.1 ater|EAU36476.1  
awen|OJJ40415.1 azon|OJJ49270.1

Group7315: acar|OOF95082.1 acar|OOF95147.1 abra|OJJ74627.1 acla|EAW10755.1 afis|EAW24819.1  
afum|EAL89463.1 akaw|GAA81981.1 aluc|OJZ92209.1 anig|EHA26749.1 ater|EAU36487.1 atub|OJI86638.1  
awen|OJJ40405.1 azon|OJJ49254.1

Group7316: acar|OOF95623.1 acar|OOF95675.1 awen|OJJ31312.1 awen|OJJ34512.1 asyd|OJJ63066.1  
aver|OJI97896.1 acla|EAW10139.1 agla|OJJ82667.1 aory|EIT75881.1 azon|OJJ47348.1 afla|EED54390.1  
anid|CBF85091.1 aory|EIT73682.1

Group7317: acar|OOF96410.1 acar|OOF96792.1 acar|OOF99159.1 afla|EED45799.1 afla|EED54109.1  
abra|OJJ72157.1 afis|EAW20301.1 agla|OJJ79843.1 akaw|GAA84769.1 aluc|OJZ86914.1 anig|EHA21730.1  
atub|OJI83607.1 azon|OJJ51777.1

Group7318: acar|OOF97653.1 acar|OOF97700.1 abra|OJJ71504.1 afla|EED44717.1 akaw|GAA82516.1  
aluc|OJZ87043.1 anig|EHA20316.1 aory|EIT83460.1 asyd|OJJ53005.1 ater|EAU33381.1 atub|OJI81592.1  
aver|OJJ03838.1 azon|OJJ49498.1

Group7319: acar|OOF98697.1 acar|OOG00709.1 aory|EIT76303.1 aory|EIT81949.1 abra|OJJ65604.1  
afla|EED55021.1 anig|EHA19920.1 atub|OJI83232.1 akaw|GAA85865.1 aluc|OJZ91214.1 agla|OJJ82283.1  
afla|EED48305.1 aory|EIT81992.1

Group7320: acar|OOG00238.1 acar|OOG00255.1 abra|OJJ70094.1 acla|EAW13718.1 afis|EAW17168.1  
akaw|GAA87601.1 aluc|OJZ85221.1 anig|EHA25425.1 ater|EAU34027.1 atub|OJI80362.1 aver|OJJ05978.1  
acar|OOF92822.1 ater|EAU36219.1

Group7321: acar|OOG00240.1 acar|OOG00259.1 abra|OJJ75763.1 afis|EAW16465.1 afum|EAL89061.1  
akaw|GAA86037.1 aluc|OJZ90264.1 anig|EHA23760.1 asyd|OJJ54942.1 ater|EAU31651.1 atub|OJI81690.1  
aver|OJJ07253.1 awen|OJJ32194.1

Group7322: afis|EAW16721.1 afis|EAW19720.1 abra|OJJ71190.1 acar|OOF97977.1 acla|EAW12079.1  
afla|EED52128.1 afum|EAL86806.1 akaw|GAA82795.1 aluc|OJZ87354.1 anig|EHA20588.1 aory|EIT74423.1  
atub|OJI81291.1 acar|OOF95351.1

Group7323: afla|EED49302.1 afla|EED51803.1 abra|OJJ73154.1 acar|OOG00366.1 afis|EAW23609.1  
afum|EAL87855.2 akaw|GAA88018.1 aluc|OJZ81276.1 anig|EHA18576.1 aory|EIT81692.1 ater|EAU31012.1  
atub|OJI91484.1 aory|EIT82217.1

Group7324: afla|EED52443.1 afla|EED55159.1 aory|EIT81613.1 aory|EIT82756.1 anid|CBF78247.1  
abra|OJJ66501.1 afis|EAW19736.1 afum|EAL86793.1 agla|OJJ89295.1 asyd|OJJ64194.1 ater|EAU29805.1  
aver|OJI98271.1 awen|OJJ36110.1

Group7325: afum|EAL87804.2 afum|EBA27481.1 abra|OJJ65723.1 acla|EAW15117.1 akaw|GAA92609.1  
aluc|OJZ80248.1 anid|CBF77053.1 anig|EHA21829.1 azon|OJJ50041.1 atub|OJI79447.1 acar|OOF90669.1  
akaw|GAA93131.1 aluc|OJZ85655.1

Group7326: afum|EAL90932.1 afum|EAL91125.1 abra|OJJ66324.1 afis|EAW20675.1 afla|EED52353.1  
akaw|GAA87893.1 anid|CBF84441.1 anig|EHA21855.1 asyd|OJJ52040.1 aver|OJJ03116.1 azon|OJJ42061.1  
afis|EAW20715.1 afum|EAL87749.2

Group7327: agla|OJJ78572.1 agla|OJJ83839.1 abra|OJJ72314.1 acar|OOF94896.1 akaw|GAA86061.1  
aluc|OJZ90295.1 anig|EHA23784.1 asyd|OJJ52860.1 ater|EAU38830.1 atub|OJI81719.1 azon|OJJ46699.1  
aver|OJJ08838.1 awen|OJJ33752.1

Group7328: agla|OJJ86078.1 agla|OJJ83488.1 agla|OJJ83489.1 agla|OJJ83490.1 agla|OJJ87769.1  
agla|OJJ86007.1 agla|OJJ79776.1 agla|OJJ79777.1 agla|OJJ83486.1 agla|OJJ79778.1 agla|OJJ82186.1  
agla|OJJ83487.1 agla|OJJ87770.1

Group7329: agla|OJJ81016.1 agla|OJJ82741.1 awen|OJJ36089.1 awen|OJJ37947.1 abra|OJJ75237.1  
acar|OOF94555.1 afla|EED47785.1 akaw|GAA91780.1 aluc|OJZ92798.1 anig|EHA26210.1 aory|EIT77101.1  
ater|EAU37358.1 atub|OJI87242.1

Group7330: agla|OJJ81590.1 agla|OJJ85374.1 acla|EAW12658.1 afis|EAW18021.1 afla|EED51871.1  
afum|EAL91833.1 anid|CBF80056.1 aory|EIT81742.1 asyd|OJJ58282.1 ater|EAU31536.1 aver|OJJ02141.1  
awen|OJJ41519.1 azon|OJJ48241.1

Group7331: agla|OJJ83535.1 agla|OJJ86812.1 abra|OJJ68865.1 akaw|GAA90388.1 aluc|OJZ85843.1  
anig|EHA24721.1 asyd|OJJ56360.1 atub|OJI79631.1 aver|OJJ06354.1 abra|OJJ70353.1 aver|OJJ03414.1  
awen|OJJ41927.1 aluc|OJZ80609.1

Group7332: agla|OJJ83636.1 agla|OJJ88102.1 anid|CBF69578.1 anid|CBF70072.1 anid|CBF78172.1  
anid|CBF89925.1 afla|EED52413.1 akaw|GAA92412.1 aluc|OJZ83270.1 aory|EIT83305.1 aver|OJJ02701.1  
awen|OJJ33609.1 agla|OJJ79698.1

Group7333: agla|OJJ83706.1 agla|OJJ85925.1 awen|OJJ29699.1 awen|OJJ41943.1 acla|EAW13758.1  
afis|EAW19809.1 afla|EED53501.1 afum|EAL85083.1 anid|CBF84506.1 aory|EIT74925.1 asyd|OJJ53519.1  
ater|EAU29283.1 aver|OJJ08231.1

Group7334: agla|OJJ86205.1 agla|OJJ86206.1 abra|OJJ67776.1 afis|EAW15655.1 afla|EED53126.1  
afum|EAL86481.2 aory|EIT75150.1 asyd|OJJ59174.1 ater|EAU32443.1 aver|OJJ01763.1 awen|OJJ33264.1  
azon|OJJ44220.1 afis|EAW16954.1

Group7335: agla|OJJ89526.1 agla|OJJ89527.1 agla|OJJ89528.1 aver|OJI97616.1 aver|OJJ07740.1  
acla|EAW07124.1 afis|EAW22134.1 afum|EAL91056.1 ater|EAU31467.1 awen|OJJ38813.1 asyd|OJJ54663.1  
azon|OJJ47921.1 aver|OJJ07501.1

Group7336: akaw|GAA93154.1 akaw|GAA93176.1 akaw|GAA93247.1 aluc|OJZ79787.1 aluc|OJZ80418.1  
acla|EAW11464.1 afis|EAW20659.1 anig|EHA17702.1 anid|CBF87230.1 asyd|OJJ52330.1 aluc|OJZ79978.1  
anig|EHA21850.1 asyd|OJJ52139.1

Group7337: aluc|OJZ80039.1 aluc|OJZ88966.1 abra|OJJ75510.1 acar|OOF90836.1 afla|EED49953.1  
agla|OJJ82554.1 akaw|GAA84273.1 anig|EHA23556.1 aory|EIT83425.1 asyd|OJJ56398.1 ater|EAU39565.1  
atub|OJI85824.1 aver|OJJ06314.1

Group7338: aluc|OJZ89236.1 aluc|OJZ91106.1 abra|OJJ78029.1 acar|OOG00096.1 afis|EAW15604.1  
afla|EED45424.1 afum|EAL85729.1 akaw|GAA85956.1 anig|EHA19804.1 aory|EIT82389.1 atub|OJI83103.1  
aver|OJI99882.1 akaw|GAA84507.1

Group7339: anid|CBF69416.1 anid|CBF87272.1 abra|OJJ69759.1 afla|EED52105.1 afum|EAL88029.1  
aory|EIT76922.1 asyd|OJJ55659.1 ater|EAU29407.1 awen|OJJ35887.1 afis|EAW17758.1 aver|OJJ06743.1  
anid|CBF78961.1 ater|EAU31006.1

Group7340: aory|EIT73388.1 aory|EIT77973.1 acar|OOF99554.1 acla|EAW14107.1 afis|EAW18808.1  
afla|EED50769.1 afla|EED56309.1 afum|EAL93544.1 asyd|OJJ63757.1 ater|EAU37959.1 aver|OJI97183.1  
awen|OJJ32383.1 anid|CBF88422.1

Group7341: asyd|OJJ53576.1 asyd|OJJ62638.1 aver|OJI99291.1 aver|OJJ08181.1 abra|OJJ69683.1  
acar|OOF93998.1 afla|EED52270.1 akaw|GAA88807.1 aluc|OJZ82490.1 anig|EHA28283.1 aory|EIT74510.1  
atub|OJI87942.1 awen|OJJ38314.1

Group7342: asyd|OJJ54571.1 asyd|OJJ55108.1 aver|OJJ07098.1 aver|OJJ07583.1 acla|EAW14964.1  
afis|EAW24487.1 afla|EED52186.1 afum|EAL86156.1 agla|OJJ83084.1 anid|CBF71325.1 aory|EIT74354.1  
ater|EAU31591.1 awen|OJJ31454.1

Group7343: asyd|OJJ56962.1 asyd|OJJ64221.1 aver|OJJ03324.1 aver|OJJ07424.1 aver|OJJ05559.1  
aver|OJJ06598.1 acar|OOF90702.1 afla|EED56542.1 anid|CBF77081.1 aory|EIT79693.1 ater|EAU32038.1  
awen|OJJ34782.1 asyd|OJJ55520.1

Group7344: ater|EAU29369.1 ater|EAU32785.1 ater|EAU30091.1 ater|EAU32227.1 ater|EAU30716.1  
ater|EAU36853.1 ater|EAU36854.1 ater|EAU32787.1 agla|OJJ79772.1 agla|OJJ86298.1 akaw|GAA93358.1  
aluc|OJZ88799.1 anid|CBF80312.1

Group7345: ater|EAU29454.1 ater|EAU37672.1 abra|OJJ67139.1 acar|OOF98416.1 afla|EED47552.1  
agla|OJJ78797.1 akaw|GAA91030.1 aluc|OJZ87833.1 anig|EHA20312.1 atub|OJI80808.1 awen|OJJ30096.1  
azon|OJJ45318.1 aory|EIT74563.1

Group7346: atub|OJI80394.1 atub|OJI81725.1 abra|OJJ72317.1 acar|OOF95833.1 agla|OJJ79170.1  
akaw|GAA86652.1 aluc|OJZ85210.1 anig|EHA25413.1 asyd|OJJ60280.1 aver|OJJ05907.1 awen|OJJ32563.1  
afla|EED48202.1 aory|EIT72944.1

Group7347: aver|OJJ05171.1 aver|OJJ07902.1 abra|OJJ75300.1 afla|EED48251.1 agla|OJJ87358.1  
akaw|GAA91833.1 aluc|OJZ92855.1 anid|CBF82036.1 anig|EHA26151.1 aory|EIT72920.1 asyd|OJJ54219.1  
ater|EAU29252.1 atub|OJI87312.1

Group7348: awen|OJJ30458.1 awen|OJJ31969.1 awen|OJJ40902.1 awen|OJJ34825.1 abra|OJJ70664.1  
akaw|GAA90000.1 aluc|OJZ84014.1 anig|EHA19137.1 atub|OJI90385.1 aver|OJJ06098.1 asyd|OJJ56628.1  
acla|EAW12208.1 asyd|OJJ62336.1

Group7349: awen|OJJ30752.1 awen|OJJ31729.1 acla|EAW06309.1 afis|EAW18418.1 afla|EED45520.1  
afum|EAL93102.1 agla|OJJ84986.1 anid|CBF70712.1 aory|EIT75484.1 asyd|OJJ58450.1 ater|EAU29834.1  
aver|OJJ01051.1 azon|OJJ42190.1

Group7350: awen|OJJ30792.1 awen|OJJ31689.1 abra|OJJ66774.1 acar|OOF93852.1 afla|EED47254.1  
akaw|GAA89709.1 aluc|OJZ80675.1 anig|EHA27338.1 aory|EIT79327.1 ater|EAU31717.1 atub|OJI87534.1  
aver|OJI99829.1 agla|OJJ84418.1

Group7351: awen|OJJ31094.1 awen|OJJ32622.1 abra|OJJ77287.1 akaw|GAA90662.1 aluc|OJZ84698.1  
anig|EHA27973.1 asyd|OJJ57282.1 ater|EAU31772.1 atub|OJI89384.1 aver|OJJ05874.1 afla|EED45792.1  
aory|EIT75819.1 ater|EAU31829.1

Group7352: awen|OJJ38691.1 awen|OJJ38773.1 abra|OJJ77880.1 acar|OOF96530.1 afis|EAW22770.1  
afum|EAL89320.2 agla|OJJ87882.1 akaw|GAA83773.1 aluc|OJZ90955.1 anig|EHA19660.1 asyd|OJJ57693.1  
ater|EAU31721.1 atub|OJI82945.1

Group7353: azon|OJJ42557.1 azon|OJJ47248.1 abra|OJJ70067.1 agla|OJJ83497.1 akaw|GAA90340.1  
aluc|OJZ85892.1 anig|EHA25435.1 asyd|OJJ63451.1 ater|EAU37388.1 atub|OJI9677.1 aver|OJJ03764.1  
awen|OJJ34783.1 asyd|OJJ60829.1

Group7354: azon|OJJ46490.1 azon|OJJ47685.1 abra|OJJ67091.1 akaw|GAA91070.1 aluc|OJZ87884.1  
anig|EHA20187.1 atub|OJI80767.1 abra|OJJ68144.1 acar|OOF89989.1 akaw|GAA92374.1 aluc|OJZ83232.1  
anig|EHA21090.1 atub|OJI87704.1

Group7355: afis|EAW22095.1 abra|OJJ66781.1 afla|EED49683.1 agla|OJJ89077.1 akaw|GAA89716.1  
aluc|OJZ80668.1 anig|EHA27343.1 aory|EIT80939.1 ater|EAU32526.1 awen|OJJ32823.1 azon|OJJ46503.1  
aver|OJJ03199.1 acar|OOF96366.1

Group7356: abra|OJJ65645.1 acla|EAW06925.1 afum|EAL89009.2 agla|OJJ85284.1 awen|OJJ35901.1  
abra|OJJ67674.1 afis|EAW15380.1 akaw|GAA83879.1 aluc|OJZ90817.1 anig|EHA25871.1 awen|OJJ31453.1  
acar|OOF89911.1 afis|EAW20386.1

Group7357: abra|OJJ65698.1 afla|EED56837.1 afum|EAL84268.1 agla|OJJ84577.1 aluc|OJZ88718.1  
anid|CBF85277.1 anig|EHA18817.1 aory|EIT74597.1 ater|EAU33257.1 aver|OJJ07758.1 awen|OJJ30260.1  
asyd|OJJ61767.1 anig|EHA28201.1

Group7358: afis|EAW15627.1 afla|EED45354.1 aory|EIT82475.1 abra|OJJ70088.1 acla|EAW12308.1  
afis|EAW21035.1 anig|EHA22484.1 atub|OJI89253.1 awen|OJJ30200.1 afum|EAL85707.1 akaw|GAA92131.1  
anig|EHA26723.1 atub|OJI89962.1

Group7359: abra|OJJ65850.1 afis|EAW19899.1 asyd|OJJ52738.1 ater|EAU30137.1 aver|OJJ02994.1  
abra|OJJ69836.1 acar|OOF89897.1 afla|EED50801.1 akaw|GAA87824.1 aluc|OJZ85460.1 anig|EHA25002.1  
aory|EIT78046.1 atub|OJI80103.1

Group7360: abra|OJJ65851.1 acar|OOF95012.1 acla|EAW12070.1 afla|EED49952.1 agla|OJJ82555.1  
akaw|GAA92293.1 aluc|OJZ90190.1 anig|EHA23689.1 aory|EIT83442.1 asyd|OJJ56407.1 atub|OJI81617.1  
aver|OJJ06305.1 azon|OJJ46786.1

Group7361: abra|OJJ65862.1 acar|OOF95033.1 afla|EED46490.1 agla|OJJ78843.1 akaw|GAA92283.1  
aluc|OJZ90180.1 anig|EHA23679.1 aory|EIT72435.1 asyd|OJJ56860.1 ater|EAU32957.1 atub|OJI81607.1  
aver|OJJ03489.1 awen|OJJ34662.1

Group7362: abra|OJJ65916.1 afla|EED50461.1 afum|EAL84939.1 agla|OJJ80063.1 akaw|GAA92316.1  
aluc|OJZ90214.1 anid|CBF86991.1 anig|EHA23712.1 aory|EIT82100.1 atub|OJI81645.1 aver|OJJ05232.1  
awen|OJJ29951.1 asyd|OJJ54279.1

Group7363: abra|OJJ65932.1 acar|OOF94997.1 afla|EED54753.1 akaw|GAA92303.1 aluc|OJZ90200.1  
anid|CBF75866.1 anig|EHA23697.1 aory|EIT78794.1 asyd|OJJ60224.1 ater|EAU34019.1 atub|OJI81628.1  
aver|OJJ04043.1 awen|OJJ36434.1

Group7364: abra|OJJ65965.1 acar|OOF92908.1 afla|EED46024.1 agla|OJJ87992.1 akaw|GAA90840.1  
aluc|OJZ82993.1 anig|EHA21407.1 aory|EIT75431.1 asyd|OJJ53305.1 atub|OJI89227.1 aver|OJJ08436.1  
awen|OJJ30035.1 azon|OJJ43682.1

Group7365: abra|OJJ66010.1 afis|EAW16373.1 afla|EED57913.1 afum|EAL88997.1 agla|OJJ79810.1  
aluc|OJZ82951.1 anig|EHA21366.1 aory|EIT82362.1 asyd|OJJ53105.1 atub|OJI89183.1 aver|OJJ03747.1  
awen|OJJ35383.1 ater|EAU36730.1

Group7366: abra|OJJ66064.1 ater|EAU36630.1 abra|OJJ69774.1 acar|OOF91483.1 acla|EAW13724.1  
afis|EAW19867.1 akaw|GAA87879.1 aluc|OJZ85520.1 anig|EHA25053.1 asyd|OJJ58291.1 atub|OJI80046.1  
aver|OJJ02133.1 azon|OJJ45966.1

Group7367: abra|OJJ66081.1 acar|OOF99288.1 afla|EED46900.1 agla|OJJ79338.1 akaw|GAA84165.1  
aluc|OJZ81090.1 anid|CBF70514.1 anig|EHA19280.1 aory|EIT72730.1 asyd|OJJ64106.1 atub|OJI82494.1  
aver|OJI98188.1 awen|OJJ33665.1

Group7368: abra|OJJ66161.1 acla|EAW09047.1 afla|EED49666.1 aory|EIT81013.1 asyd|OJJ61205.1  
aver|OJJ00529.1 awen|OJJ32034.1 abra|OJJ68395.1 akaw|GAA92553.1 aluc|OJZ90101.1 anig|EHA20971.1  
atub|OJI84705.1 aver|OJJ04319.1

Group7369: abra|OJJ66162.1 afla|EED52446.1 agla|OJJ82380.1 akaw|GAA92448.1 aluc|OJZ81570.1  
aory|EIT82786.1 asyd|OJJ54191.1 ater|EAU32218.1 atub|OJI88615.1 aver|OJJ01809.1 awen|OJJ30882.1  
aver|OJJ03360.1 asyd|OJJ59193.1

Group7370: abra|OJJ66212.1 acar|OOF90648.1 afis|EAW16638.1 afla|EED55072.1 afum|EAL89240.1  
akaw|GAA89075.1 aluc|OJZ80516.1 anig|EHA25677.1 aory|EIT81974.1 asyd|OJJ52112.1 ater|EAU37747.1  
atub|OJI88414.1 azon|OJJ51721.1

Group7371: abra|OJJ66214.1 acar|OOF90647.1 afis|EAW16637.1 afla|EED55073.1 afum|EAL89239.1  
akaw|GAA89074.1 aluc|OJZ80517.1 anig|EHA25676.1 aory|EIT81988.1 asyd|OJJ52113.1 ater|EAU37746.1  
atub|OJI88413.1 azon|OJJ51722.1

Group7372: abra|OJJ66215.1 acar|OOF89826.1 afis|EAW16636.1 afla|EED55074.1 afum|EAL89238.1  
akaw|GAA89073.1 aluc|OJZ80518.1 anig|EHA25675.1 aory|EIT81954.1 asyd|OJJ52114.1 ater|EAU37745.1  
atub|OJI88412.1 azon|OJJ51723.1

Group7373: abra|OJJ66218.1 acar|OOF91502.1 afla|EED53203.1 agla|OJJ79257.1 akaw|GAA89068.1 aluc|OJZ80524.1 anid|CBF80522.1 aory|EIT75054.1 asyd|OJJ64214.1 atub|OJI88406.1 aver|OJI99460.1 awen|OJJ36184.1 aver|OJJ05265.1

Group7374: abra|OJJ66235.1 acar|OOF90693.1 agla|OJJ84415.1 akaw|GAA89054.1 aluc|OJZ80540.1 anid|CBF85755.1 anig|EHA25655.1 aory|EIT81171.1 asyd|OJJ64298.1 atub|OJI88391.1 aver|OJJ07892.1 awen|OJJ31374.1 aver|OJI98391.1

Group7375: abra|OJJ66249.1 acar|OOF90707.1 acla|EAW07084.1 afis|EAW20351.1 afla|EED49660.1 afum|EAL85469.1 akaw|GAA89039.1 aluc|OJZ80556.1 anid|CBF83083.1 anig|EHA25641.1 aory|EIT80972.1 atub|OJI88375.1 azon|OJJ43479.1

Group7376: abra|OJJ66250.1 acar|OOF90721.1 afis|EAW19305.1 afla|EED47578.1 afum|EAL94023.1 akaw|GAA89037.1 aluc|OJZ80558.1 anid|CBF78788.1 anig|EHA25639.1 aory|EIT74579.1 asyd|OJJ65245.1 atub|OJI88373.1 aver|OJI99397.1

Group7377: azon|OJJ42793.1 abra|OJJ70220.1 akaw|GAA92418.1 aluc|OJZ81490.1 anig|EHA25329.1 ater|EAU32956.1 atub|OJI80486.1 awen|OJJ36220.1 abra|OJJ74462.1 agla|OJJ86653.1 atub|OJI88690.1 akaw|GAA91162.1 anig|EHA25939.1

Group7378: abra|OJJ66438.1 acar|OOF90289.1 acla|EAW12207.1 afis|EAW17055.1 afla|EED56939.1 afum|EAL86552.2 agla|OJJ84864.1 akaw|GAA90300.1 aluc|OJZ83037.1 asyd|OJJ55135.1 ater|EAU32959.1 aver|OJJ07068.1 awen|OJJ37361.1

Group7379: akaw|GAA88006.1 aluc|OJZ81264.1 afis|EAW20651.1 afla|EED50436.1 afum|EAL84421.1 agla|OJJ88364.1 aory|EIT82011.1 asyd|OJJ53617.1 atub|OJI91464.1 aver|OJJ05937.1 awen|OJJ33663.1 ater|EAU33965.1 awen|OJJ30582.1

Group7380: acla|EAW11663.1 abra|OJJ76866.1 afla|EED51650.1 akaw|GAA87157.1 aluc|OJZ84277.1 anig|EHA27622.1 aory|EIT80664.1 asyd|OJJ62987.1 ater|EAU30283.1 atub|OJI89804.1 aver|OJI97981.1 awen|OJJ30983.1 awen|OJJ38752.1

Group7381: abra|OJJ66470.1 afis|EAW22767.1 afla|EED52194.1 anid|CBF74556.1 aory|EIT74441.1 asyd|OJJ57640.1 ater|EAU37828.1 aver|OJJ05498.1 awen|OJJ37843.1 azon|OJJ45252.1 anid|CBF87339.1 asyd|OJJ52804.1 aver|OJJ08784.1

Group7382: abra|OJJ66572.1 acar|OOF91013.1 acla|EAW10920.1 afis|EAW20938.1 afla|EED50293.1 afum|EAL84696.1 akaw|GAA91146.1 aluc|OJZ81472.1 anid|CBF82525.1 anig|EHA25955.1 aory|EIT77251.1 ater|EAU38583.1 atub|OJI88706.1

Group7383: abra|OJJ66578.1 afla|EED50300.1 akaw|GAA91140.1 aluc|OJZ81466.1 anig|EHA25961.1 atub|OJI88712.1 azon|OJJ48106.1 acla|EAW10912.1 afis|EAW20946.1 afum|EAL84688.1 aory|EIT77333.1 awen|OJJ34370.1 agla|OJJ83940.1

Group7384: abra|OJJ66633.1 acar|OOF91056.1 acla|EAW10862.1 afis|EAW20996.1 afum|EAL84632.1 agla|OJJ84074.1 aluc|OJZ81415.1 anid|CBF82635.1 asyd|OJJ54014.1 atub|OJI88765.1 aver|OJJ08727.1 awen|OJJ34314.1 azon|OJJ48059.1

Group7385: abra|OJJ66761.1 akaw|GAA89697.1 aluc|OJZ80688.1 atub|OJI87547.1 acar|OOF93843.1 afis|EAW19499.1 afla|EED56718.1 agla|OJJ81668.1 anid|CBF75436.1 ater|EAU34814.1 azon|OJJ42899.1 acla|EAW11887.1 afum|EBA27298.1

Group7386: abra|OJJ66769.1 acar|OOF93850.1 akaw|GAA89706.1 aluc|OJZ80678.1 anig|EHA27334.1 ater|EAU35185.1 atub|OJI87537.1 anid|CBF82286.1 abra|OJJ70434.1 afla|EED55096.1 aory|EIT81580.1 asyd|OJJ62603.1 afis|EAW20378.1

Group7387: abra|OJJ66777.1 acar|OOF93856.1 acla|EAW10822.1 afis|EAW24750.1 afla|EED55054.1 afum|EAL89395.2 akaw|GAA89712.1 aluc|OJZ80672.1 anig|EHA27339.1 aory|EIT81989.1 atub|OJI87526.1 aver|OJI95888.1 awen|OJJ33476.1

Group7388: abra|OJJ66845.1 acar|OOF91623.1 acla|EAW14424.1 afla|EED54282.1 agla|OJJ88606.1 akaw|GAA91560.1 aluc|OJZ85738.1 aory|EIT75991.1 asyd|OJJ64987.1 atub|OJI79523.1 aver|OJI99107.1 awen|OJJ37467.1 azon|OJJ51145.1

Group7389: abra|OJJ66852.1 acar|OOF91628.1 acla|EAW14430.1 afis|EAW19137.1 afum|EAL93869.1 agla|OJJ88616.1 akaw|GAA91554.1 aluc|OJZ85732.1 anid|CBF86325.1 aory|EIT76124.1 atub|OJI79517.1 awen|OJJ37474.1 azon|OJJ51153.1

Group7390: abra|OJJ66916.1 acar|OOF91683.1 acla|EAW14483.1 afis|EAW19192.1 afum|EAL93923.2 agla|OJJ88517.1 akaw|GAA91502.1 aluc|OJZ85663.1 anid|CBF86237.1 aory|EIT80237.1 ater|EAU37283.1 atub|OJI79457.1 aver|OJI99172.1

Group7391: abra|OJJ66917.1 acar|OOF91684.1 acla|EAW14484.1 afis|EAW19193.1 afum|EAL93924.1  
agla|OJJ88516.1 akaw|GAA91501.1 aluc|OJZ85662.1 anid|CBF86236.1 anig|EHA24871.1 ater|EAU37282.1  
atub|OJI79456.1 aver|OJI99173.1

Group7392: abra|OJJ66967.1 acar|OOF93642.1 acla|EAW08557.1 afla|EED55267.1 agla|OJJ86860.1  
akaw|GAA92196.1 aluc|OJZ85611.1 anig|EHA24915.1 aory|EIT83620.1 ater|EAU35360.1 atub|OJI79404.1  
awen|OJJ39924.1 azon|OJJ45896.1

Group7393: abra|OJJ66974.1 acar|OOF93639.1 acla|EAW12274.1 afis|EAW16448.1 afla|EED54345.1  
agla|OJJ80869.1 akaw|GAA92191.1 aluc|OJZ85603.1 anig|EHA24921.1 aory|EIT75903.1 ater|EAU32187.1  
atub|OJI79399.1 afla|EED52036.1

Group7394: abra|OJJ66993.1 acar|OOF93621.1 acla|EAW10840.1 afis|EAW24725.1 afla|EED45253.1  
afum|EBA27376.1 akaw|GAA92171.1 aluc|OJZ85579.1 anid|CBF78503.1 anig|EHA24940.1 aory|EIT73778.1  
atub|OJI79375.1 aver|OJI99472.1

Group7395: abra|OJJ67027.1 acar|OOF94678.1 afis|EAW17090.1 afum|EAL86568.1 akaw|GAA92147.1  
aluc|OJZ85552.1 anig|EHA24961.1 asyd|OJJ53614.1 atub|OJI79353.1 aver|OJJ08323.1 awen|OJJ37029.1  
akaw|GAA83299.1 asyd|OJJ53423.1

Group7396: abra|OJJ67068.1 acar|OOF90569.1 afis|EAW22303.1 agla|OJJ82727.1 anid|CBF85188.1  
aory|EIT78616.1 atub|OJI83264.1 aver|OJJ05782.1 awen|OJJ31408.1 anig|EHA19961.1 akaw|GAA85826.1  
aluc|OJZ91275.1 awen|OJJ39637.1

Group7397: afis|EAW16375.1 abra|OJJ69960.1 acar|OOF99006.1 akaw|GAA87699.1 aluc|OJZ85323.1  
anig|EHA25513.1 atub|OJI80250.1 azon|OJJ45136.1 acla|EAW06824.1 afum|EAL88999.1 agla|OJJ78593.1  
awen|OJJ37909.1 azon|OJJ45089.1

Group7398: abra|OJJ67134.1 acar|OOF95941.1 akaw|GAA91035.1 aluc|OJZ87845.1 atub|OJI80803.1  
azon|OJJ46808.1 abra|OJJ68592.1 anid|CBF80418.1 asyd|OJJ59279.1 ater|EAU35716.1 aver|OJJ07407.1  
anid|CBF69456.1 ater|EAU35440.1

Group7399: abra|OJJ67181.1 acar|OOF98381.1 acla|EAW14542.1 afis|EAW19260.1 afla|EED47615.1  
afum|EAL93987.1 agla|OJJ88435.1 akaw|GAA90995.1 aluc|OJZ87794.1 anig|EHA20275.1 ater|EAU29515.1  
atub|OJI80853.1 aver|OJI99359.1

Group7400: abra|OJJ67206.1 acar|OOF98355.1 afis|EAW19234.1 akaw|GAA90971.1 aluc|OJZ87768.1  
anid|CBF78627.1 anig|EHA20252.1 asyd|OJJ65184.1 ater|EAU37229.1 atub|OJI80877.1 aver|OJI99337.1  
awen|OJJ37591.1 acla|EAW14516.1

Group7401: abra|OJJ67248.1 acar|OOG00373.1 acla|EAW14979.1 afum|EAL92019.1 aluc|OJZ87729.1  
anig|EHA20221.1 asyd|OJJ61733.1 ater|EAU34169.1 atub|OJI80911.1 aver|OJI95827.1 awen|OJJ29626.1  
azon|OJJ45147.1 acla|EAW13306.1

Group7402: abra|OJJ67260.1 afis|EAW21086.1 afum|EAL92109.1 agla|OJJ79283.1 akaw|GAA91675.1  
aluc|OJZ87719.1 anig|EHA20213.1 aory|EIT73486.1 asyd|OJJ61438.1 ater|EAU31934.1 atub|OJI80923.1  
aver|OJJ00772.1 awen|OJJ35787.1

Group7403: abra|OJJ67344.1 acar|OOF92470.1 acla|EAW12129.1 afis|EAW17250.1 afum|EAL86669.1  
akaw|GAA86473.1 aluc|OJZ85014.1 anid|CBF76006.1 anig|EHA25235.1 asyd|OJJ60262.1 ater|EAU36012.1  
atub|OJI80583.1 aver|OJJ03991.1

Group7404: abra|OJJ67356.1 acar|OOF92465.1 afla|EED53299.1 agla|OJJ87954.1 akaw|GAA86465.1  
aluc|OJZ85006.1 anid|CBF70183.1 anig|EHA25224.1 aory|EIT74866.1 asyd|OJJ55012.1 atub|OJI80592.1  
aver|OJJ07200.1 awen|OJJ33477.1

Group7405: abra|OJJ67425.1 acar|OOF89875.1 acla|EAW06339.1 afis|EAW18451.1 afla|EED52957.1  
afum|EAL93136.1 agla|OJJ85029.1 aluc|OJZ84942.1 anig|EHA25159.1 asyd|OJJ58851.1 atub|OJI80658.1  
aver|OJJ01452.1 awen|OJJ31003.1

Group7406: azon|OJJ50368.1 afis|EAW24609.1 afla|EED56494.1 afum|EAL86239.1 akaw|GAA90756.1  
anid|CBF81501.1 anig|EHA25067.1 ater|EAU39132.1 atub|OJI89487.1 akaw|GAA89017.1 aluc|OJZ84591.1  
asyd|OJJ56397.1 aver|OJJ06316.1

Group7407: abra|OJJ67577.1 akaw|GAA89106.1 atub|OJI88445.1 abra|OJJ73994.1 acar|OOF96468.1  
acla|EAW07117.1 akaw|GAA87477.1 aluc|OJZ88050.1 anig|EHA17822.1 asyd|OJJ59175.1 atub|OJI90658.1  
awen|OJJ38785.1 azon|OJJ45128.1

Group7408: abra|OJJ67621.1 acar|OOF91969.1 afla|EED47432.1 akaw|GAA89141.1 aluc|OJZ81695.1  
anid|CBF82186.1 anig|EHA25736.1 aory|EIT81905.1 asyd|OJJ52189.1 ater|EAU29296.1 atub|OJI88485.1  
aver|OJJ05957.1 awen|OJJ36974.1

Group7409: abra|OJJ67623.1 acar|OOF98678.1 afla|EED47424.1 akaw|GAA89143.1 aluc|OJZ81693.1  
anid|CBF82192.1 anig|EHA25738.1 aory|EIT81894.1 asyd|OJJ52187.1 ater|EAU29298.1 atub|OJI88487.1  
aver|OJJ05958.1 awen|OJJ36972.1

Group7410: abra|OJJ67649.1 acar|OOF91984.1 afla|EED52575.1 agla|OJJ84703.1 akaw|GAA89165.1  
aluc|OJZ81668.1 anig|EHA25775.1 aory|EIT74170.1 asyd|OJJ53747.1 atub|OJI88515.1 aver|OJJ07862.1  
awen|OJJ39959.1 agla|OJJ84647.1

Group7411: abra|OJJ67653.1 acar|OOF91985.1 afla|EED57547.1 agla|OJJ83873.1 akaw|GAA89169.1  
aluc|OJZ81664.1 anid|CBF80430.1 anig|EHA25779.1 asyd|OJJ52823.1 ater|EAU29530.1 atub|OJI88519.1  
aver|OJJ08799.1 aver|OJJ07624.1

Group7412: abra|OJJ67794.1 acar|OOF95393.1 afis|EAW17791.1 afla|EED47240.1 afum|EAL91600.1  
agla|OJJ84168.1 anid|CBF75217.1 asyd|OJJ53463.1 aver|OJJ08292.1 awen|OJJ32923.1 anig|EHA18418.1  
aory|EIT78082.1 ater|EAU29258.1

Group7413: abra|OJJ67849.1 acar|OOF92830.1 acla|EAW11750.1 afis|EAW23783.1 afla|EED51592.1  
afum|EAL87217.2 agla|OJJ78935.1 aluc|OJZ82042.1 asyd|OJJ58151.1 atub|OJI84601.1 awen|OJJ33728.1  
azon|OJJ42854.1 aver|OJJ04253.1

Group7414: abra|OJJ67884.1 acar|OOF92862.1 acla|EAW11691.1 afis|EAW23707.1 afla|EED51510.1  
afum|EAL87151.1 akaw|GAA91891.1 aluc|OJZ82005.1 anig|EHA22251.1 aory|EIT80627.1 ater|EAU30420.1  
atub|OJI84555.1 awen|OJJ33668.1

Group7415: abra|OJJ67887.1 acar|OOF92860.1 acla|EAW11714.1 afis|EAW23733.1 afla|EED51511.1  
afum|EAL87171.1 akaw|GAA91893.1 aluc|OJZ82003.1 anig|EHA22253.1 aory|EIT80635.1 ater|EAU31293.1  
atub|OJI84553.1 awen|OJJ33669.1

Group7416: abra|OJJ67898.1 acar|OOF90066.1 afis|EAW22155.1 afla|EED52135.1 afum|EAL91035.1  
agla|OJJ88704.1 akaw|GAA91902.1 aluc|OJZ81992.1 anig|EHA22264.1 aory|EIT74401.1 ater|EAU38340.1  
aver|OJJ03874.1 awen|OJJ29943.1

Group7417: abra|OJJ67900.1 acar|OOF90068.1 afla|EED47044.1 afum|EAL84242.1 agla|OJJ88179.1  
akaw|GAA91904.1 aluc|OJZ81990.1 anid|CBF80368.1 anig|EHA22266.1 aory|EIT72634.1 asyd|OJJ54815.1  
atub|OJI84541.1 aver|OJJ07346.1

Group7418: abra|OJJ67910.1 acar|OOF98178.1 afla|EED46477.1 akaw|GAA91913.1 aluc|OJZ81979.1  
anid|CBF90240.1 anig|EHA22275.1 aory|EIT72386.1 asyd|OJJ61956.1 atub|OJI84531.1 aver|OJI96048.1  
awen|OJJ35928.1 azon|OJJ42126.1

Group7419: abra|OJJ67930.1 acar|OOF92780.1 akaw|GAA91267.1 aluc|OJZ82802.1 anig|EHA21243.1  
aory|EIT73390.1 asyd|OJJ61413.1 ater|EAU30954.1 atub|OJI89033.1 aver|OJJ00743.1 awen|OJJ33794.1  
azon|OJJ48748.1 afla|EED56214.1

Group7420: abra|OJJ67945.1 acar|OOF92794.1 acla|EAW11635.1 afis|EAW23822.1 afla|EED51984.1  
agla|OJJ80056.1 akaw|GAA91251.1 aluc|OJZ82817.1 anig|EHA21257.1 aory|EIT81424.1 ater|EAU31377.1  
atub|OJI89048.1 azon|OJJ42246.1

Group7421: abra|OJJ67985.1 acar|OOF92027.1 afis|EAW25693.1 afla|EED46904.1 afum|EAL84363.1  
akaw|GAA91217.1 aluc|OJZ82853.1 anig|EHA21289.1 aory|EIT72721.1 asyd|OJJ55668.1 ater|EAU35089.1  
atub|OJI89083.1 aver|OJJ06749.1

Group7422: abra|OJJ68000.1 acar|OOF92043.1 akaw|GAA90950.1 aluc|OJZ82874.1 anid|CBF81948.1  
anig|EHA21300.1 asyd|OJJ57368.1 atub|OJI89098.1 aver|OJJ05800.1 awen|OJJ40803.1 acar|OOF90715.1  
afla|EED45646.1 aory|EIT75683.1

Group7423: abra|OJJ68011.1 acar|OOF92053.1 acla|EAW13750.1 afis|EAW19813.1 afla|EED47561.1  
afum|EAL85078.1 akaw|GAA90939.1 aluc|OJZ82885.1 anig|EHA21311.1 aory|EIT79581.1 atub|OJI89110.1  
awen|OJJ35921.1 azon|OJJ50657.1

Group7424: abra|OJJ68035.1 acar|OOF91808.1 afla|EED55048.1 afum|EAL86258.1 akaw|GAA90917.1  
aluc|OJZ82909.1 anig|EHA21332.1 aory|EIT81969.1 asyd|OJJ53717.1 atub|OJI89135.1 aver|OJJ07843.1  
awen|OJJ33894.1 azon|OJJ42784.1

Group7425: abra|OJJ68063.1 acar|OOF92084.1 acla|EAW13646.1 afis|EAW19959.1 afla|EED45907.1  
afum|EAL84956.1 agla|OJJ79326.1 akaw|GAA90895.1 aluc|OJZ82934.1 anig|EHA21354.1 atub|OJI89163.1  
awen|OJJ29990.1 azon|OJJ43625.1

Group7426: abra|OJJ68085.1 acar|OOF93883.1 acla|EAW09009.1 afis|EAW25588.1 afla|EED48864.1  
afum|EAL84295.2 akaw|GAA86870.1 aluc|OJZ89994.1 aory|EIT81170.1 asyd|OJJ61551.1 atub|OJI84814.1  
aver|OJJ00876.1 anid|CBF82996.1

Group7427: abra|OJJ68090.1 acar|OOF93894.1 agla|OJJ81061.1 akaw|GAA86875.1 aluc|OJZ89999.1  
anid|CBF85662.1 anig|EHA27374.1 ater|EAU29581.1 atub|OJI84809.1 awen|OJJ29840.1 agla|OJJ88676.1  
asyd|OJJ64243.1 aver|OJI98335.1

Group7428: abra|OJJ68094.1 acar|OOF93897.1 afla|EED45939.1 akaw|GAA86878.1 aluc|OJZ90002.1  
anid|CBF79119.1 anig|EHA27377.1 aory|EIT75636.1 atub|OJI84806.1 aver|OJI96964.1 anid|CBF73549.1  
asyd|OJJ63990.1 atub|OJI85466.1

Group7429: abra|OJJ68112.1 afis|EAW19856.1 afla|EED57112.1 afum|EAL85039.1 akaw|GAA86894.1  
aluc|OJZ90017.1 anid|CBF78829.1 anig|EHA27393.1 aory|EIT83382.1 asyd|OJJ54898.1 atub|OJI84790.1  
aver|OJJ03939.1 aory|EIT73989.1

Group7430: abra|OJJ68148.1 acar|OOF93943.1 afis|EAW22414.1 afla|EED54477.1 afum|EAL90778.1  
aluc|OJZ83583.1 anid|CBF88923.1 aory|EIT81162.1 asyd|OJJ62847.1 ater|EAU39251.1 atub|OJI89957.1  
aver|OJI96891.1 anig|EHA27993.1

Group7431: afum|EAL91395.1 acar|OOF90118.1 acla|EAW13082.1 afis|EAW17582.1 agla|OJJ81371.1  
akaw|GAA83246.1 anid|CBF90231.1 anig|EHA18894.1 aory|EIT82200.1 asyd|OJJ61960.1 ater|EAU37017.1  
aver|OJI96052.1 awen|OJJ37266.1

Group7432: abra|OJJ68206.1 afis|EAW17573.1 afla|EED49248.1 agla|OJJ81385.1 akaw|GAA83240.1  
aluc|OJZ83739.1 anig|EHA18888.1 asyd|OJJ61947.1 atub|OJI90117.1 aver|OJI96039.1 awen|OJJ37274.1  
azon|OJJ50974.1 acar|OOF97492.1

Group7433: abra|OJJ68258.1 acar|OOF97535.1 acla|EAW09080.1 akaw|GAA83204.1 aluc|OJZ83706.1  
anig|EHA18857.1 ater|EAU29580.1 atub|OJI90078.1 awen|OJJ37962.1 azon|OJJ51745.1 afis|EAW16406.1  
afla|EED45131.1 aory|EIT73565.1

Group7434: abra|OJJ68316.1 acar|OOF97576.1 afla|EED55061.1 akaw|GAA83157.1 aluc|OJZ83657.1  
anid|CBF78294.1 anig|EHA18809.1 aory|EIT81958.1 asyd|OJJ56107.1 ater|EAU32200.1 atub|OJI90027.1  
aver|OJJ05050.1 azon|OJJ46804.1

Group7435: abra|OJJ68342.1 acar|OOF97640.1 afla|EED46510.1 agla|OJJ78917.1 akaw|GAA92109.1  
aluc|OJZ83616.1 anid|CBF83851.1 anig|EHA18773.1 aory|EIT72415.1 asyd|OJJ60921.1 atub|OJI89989.1  
aver|OJJ00247.1 awen|OJJ33611.1

Group7436: abra|OJJ68344.1 acar|OOF97642.1 afla|EED45993.1 akaw|GAA92111.1 aluc|OJZ83614.1  
anid|CBF88055.1 anig|EHA18771.1 aory|EIT75448.1 ater|EAU31718.1 atub|OJI89987.1 awen|OJJ40161.1  
azon|OJJ47958.1 awen|OJJ30656.1

Group7437: aory|EIT75783.1 acar|OOF90738.1 acla|EAW09089.1 afis|EAW25681.1 afla|EED45592.1  
afum|EAL84351.1 agla|OJJ85285.1 anid|CBF82743.1 asyd|OJJ61619.1 atub|OJI91328.1 aver|OJJ00943.1  
awen|OJJ35900.1 azon|OJJ42101.1

Group7438: abra|OJJ68438.1 acar|OOF93956.1 afla|EED52097.1 akaw|GAA86934.1 aluc|OJZ90059.1  
anid|CBF82381.1 anig|EHA21012.1 aory|EIT76912.1 asyd|OJJ54137.1 ater|EAU30749.1 atub|OJI84748.1  
aver|OJJ08599.1 awen|OJJ29692.1

Group7439: abra|OJJ68442.1 acar|OOF93952.1 acla|EAW13760.1 afis|EAW19804.1 afla|EED45407.1  
afum|EAL85089.1 agla|OJJ83221.1 akaw|GAA86930.1 aluc|OJZ90055.1 anig|EHA21016.1 aory|EIT82409.1  
ater|EAU30745.1 atub|OJI84752.1

Group7440: abra|OJJ68448.1 acla|EAW13158.1 afis|EAW17488.1 afla|EED55784.1 agla|OJJ81468.1  
akaw|GAA86926.1 aluc|OJZ90050.1 anig|EHA21020.1 awen|OJJ37354.1 azon|OJJ51039.1 anid|CBF71615.1  
asyd|OJJ61863.1 aver|OJI95961.1

Group7441: abra|OJJ68603.1 acla|EAW12589.1 afis|EAW18088.1 afum|EAL91900.1 akaw|GAA92917.1  
anid|CBF79766.1 anig|EHA22296.1 aory|EIT80666.1 asyd|OJJ58104.1 ater|EAU30434.1 atub|OJI84504.1  
aver|OJJ04300.1 azon|OJJ48215.1

Group7442: abra|OJJ68646.1 acar|OOF92148.1 afla|EED51431.1 agla|OJJ87324.1 akaw|GAA89786.1  
aluc|OJZ81905.1 anid|CBF86428.1 anig|EHA22338.1 asyd|OJJ64935.1 ater|EAU30469.1 atub|OJI84458.1  
aver|OJI99056.1 awen|OJJ41448.1

Group7443: abra|OJJ68791.1 acar|OOF92275.1 acla|EAW12462.1 afis|EAW24179.1 agla|OJJ89495.1  
aluc|OJZ81737.1 anid|CBF77847.1 anig|EHA22476.1 asyd|OJJ55330.1 atub|OJI84307.1 aver|OJJ06898.1  
awen|OJJ41290.1 azon|OJJ48764.1

Group7444: abra|OJJ68805.1 afis|EAW17767.1 afla|EED44891.1 afum|EAL91576.1 akaw|GAA90448.1  
aluc|OJZ85777.1 anid|CBF74647.1 anig|EHA24777.1 aory|EIT83241.1 asyd|OJJ54533.1 atub|OJI79562.1  
aver|OJJ07655.1 awen|OJJ30892.1



Group7445: abra|OJJ68850.1 acar|OOF90538.1 acla|EAW15261.1 agla|OJJ87632.1 aluc|OJZ85830.1 anid|CBF74588.1 asyd|OJJ54708.1 atub|OJI79618.1 aver|OJJ07458.1 awen|OJJ31236.1 azon|OJJ46158.1 acar|OOF90618.1 agla|OJJ79329.1

Group7446: abra|OJJ68893.1 afis|EAW20640.1 afla|EED47502.1 agla|OJJ82459.1 akaw|GAA90358.1 aluc|OJZ85874.1 anid|CBF82442.1 anig|EHA24714.1 asyd|OJJ54122.1 atub|OJI79660.1 aver|OJJ08615.1 awen|OJJ37240.1 anig|EHA18313.1

Group7447: abra|OJJ68894.1 afla|EED56749.1 akaw|GAA90356.1 aluc|OJZ85876.1 anid|CBF73545.1 anig|EHA24711.1 aory|EIT73862.1 asyd|OJJ56710.1 ater|EAU34583.1 atub|OJI79662.1 aver|OJJ06015.1 awen|OJJ34055.1 azon|OJJ48177.1

Group7448: abra|OJJ68895.1 afla|EED56748.1 akaw|GAA90355.1 aluc|OJZ85877.1 anid|CBF73543.1 anig|EHA24710.1 aory|EIT73900.1 asyd|OJJ56709.1 ater|EAU34584.1 atub|OJI79663.1 aver|OJJ06016.1 awen|OJJ34054.1 azon|OJJ48178.1

Group7449: abra|OJJ69060.1 acar|OOF91223.1 afla|EED46858.1 akaw|GAA90590.1 aluc|OJZ86048.1 anid|CBF71167.1 anig|EHA24563.1 aory|EIT72620.1 asyd|OJJ55847.1 ater|EAU32488.1 atub|OJI79845.1 aver|OJJ04790.1 awen|OJJ38349.1

Group7450: abra|OJJ69077.1 acar|OOF91214.1 afis|EAW15679.1 afum|EAL85669.1 akaw|GAA90606.1 aluc|OJZ86065.1 anig|EHA24549.1 asyd|OJJ59219.1 ater|EAU32483.1 atub|OJI79861.1 aver|OJJ01829.1 awen|OJJ38356.1 azon|OJJ48602.1

Group7451: abra|OJJ69170.1 acar|OOF91134.1 afla|EED55555.1 akaw|GAA86293.1 aluc|OJZ86157.1 anig|EHA24467.1 aory|EIT82688.1 asyd|OJJ61354.1 ater|EAU32678.1 atub|OJI79949.1 aver|OJJ00681.1 awen|OJJ38094.1 azon|OJJ42538.1

Group7452: abra|OJJ69172.1 acar|OOF91132.1 afla|EED55557.1 akaw|GAA86291.1 aluc|OJZ86159.1 anig|EHA24465.1 aory|EIT82661.1 asyd|OJJ61356.1 ater|EAU32676.1 atub|OJI79951.1 aver|OJJ00683.1 awen|OJJ38096.1 azon|OJJ42540.1

Group7453: abra|OJJ69265.1 acar|OOF91058.1 acla|EAW13565.1 afla|EED51202.1 agla|OJJ84910.1 aluc|OJZ86243.1 anid|CBF70831.1 aory|EIT80408.1 asyd|OJJ52562.1 atub|OJI80035.1 aver|OJJ04590.1 awen|OJJ38563.1 azon|OJJ48767.1

Group7454: aory|EIT82901.1 acar|OOF94369.1 acla|EAW14746.1 afis|EAW24277.1 afla|EED47999.1 afum|EAL85946.1 akaw|GAA88225.1 anid|CBF74155.1 ater|EAU31227.1 atub|OJI88248.1 aver|OJJ08023.1 awen|OJJ33020.1 azon|OJJ48497.1

Group7455: abra|OJJ69382.1 akaw|GAA88250.1 asyd|OJJ53900.1 awen|OJJ32992.1 azon|OJJ48524.1 acla|EAW14769.1 afis|EAW24300.1 afum|EAL85968.1 aver|OJJ07997.1 ater|EAU31251.1 afla|EED47972.1 agla|OJJ83168.1 anid|CBF74106.1

Group7456: abra|OJJ69391.1 acar|OOF94336.1 afla|EED47867.1 akaw|GAA88259.1 aluc|OJZ82228.1 anig|EHA28511.1 aory|EIT77240.1 ater|EAU31260.1 atub|OJI88209.1 aver|OJJ07919.1 awen|OJJ36230.1 asyd|OJJ53819.1 awen|OJJ34075.1

Group7457: abra|OJJ69401.1 acla|EAW14783.1 afis|EAW24314.1 afla|EED47953.1 afum|EAL85982.1 agla|OJJ83182.1 aluc|OJZ82237.1 anig|EHA28504.1 asyd|OJJ53879.1 atub|OJI88201.1 aver|OJJ07977.1 awen|OJJ32978.1 azon|OJJ48939.1

Group7458: abra|OJJ69465.1 acar|OOF94277.1 acla|EAW07122.1 afis|EAW22132.1 afum|EAL91058.1 akaw|GAA88348.1 aluc|OJZ82308.1 anig|EHA28449.1 ater|EAU34982.1 atub|OJI88131.1 afla|EED51690.1 aory|EIT80487.1 awen|OJJ32637.1

Group7459: abra|OJJ69491.1 acar|OOF94250.1 akaw|GAA88329.1 aluc|OJZ82331.1 anig|EHA28429.1 atub|OJI88109.1 abra|OJJ71732.1 afis|EAW20342.1 afum|EAL85462.1 asyd|OJJ53414.1 aver|OJJ08337.1 awen|OJJ38124.1 azon|OJJ43050.1

Group7460: abra|OJJ69499.1 acar|OOF94258.1 acla|EAW09953.1 afis|EAW21143.1 afla|EED54671.1 afum|EAL92162.2 agla|OJJ80073.1 akaw|GAA88322.1 aluc|OJZ82339.1 anig|EHA28421.1 aory|EIT78899.1 atub|OJI88101.1 awen|OJJ36472.1

Group7461: abra|OJJ69515.1 acar|OOF95345.1 afla|EED56902.1 akaw|GAA88309.1 aluc|OJZ82353.1 anig|EHA28407.1 aory|EIT77545.1 asyd|OJJ60238.1 ater|EAU38102.1 atub|OJI88087.1 aver|OJJ04027.1 azon|OJJ51783.1 acar|OOG00884.1

Group7462: acla|EAW11726.1 abra|OJJ74800.1 afis|EAW23751.1 afla|EED50581.1 afum|EAL87188.1 akaw|GAA83613.1 aluc|OJZ92381.1 anid|CBF85466.1 asyd|OJJ64103.1 atub|OJI86810.1 aver|OJI98186.1 agla|OJJ87545.1 azon|OJJ47330.1

Group7463: abra|OJJ69609.1 acar|OOF92698.1 acla|EAW11684.1 agla|OJJ84464.1 akaw|GAA91594.1 aluc|OJZ82417.1 anig|EHA28351.1 aory|EIT81722.1 asyd|OJJ60324.1 ater|EAU31564.1 atub|OJI88024.1 aver|OJI99672.1 awen|OJJ33649.1

Group7464: abra|OJJ69612.1 acar|OOF92694.1 afis|EAW20306.1 afla|EED56731.1 akaw|GAA91596.1 aluc|OJZ82420.1 anid|CBF71186.1 anig|EHA28349.1 aory|EIT73861.1 asyd|OJJ55859.1 atub|OJI88021.1 aver|OJJ04800.1 azon|OJJ45630.1

Group7465: abra|OJJ69680.1 acar|OOG00315.1 acla|EAW14998.1 afla|EED44880.1 afum|EAL86187.1 agla|OJJ85918.1 akaw|GAA88805.1 aluc|OJZ82488.1 anig|EHA28286.1 ater|EAU39594.1 atub|OJI87944.1 afis|EAW24522.1 asyd|OJJ56165.1

Group7466: abra|OJJ69733.1 acar|OOF94188.1 acla|EAW11686.1 afla|EED48937.1 akaw|GAA90186.1 aluc|OJZ83163.1 anig|EHA28227.1 aory|EIT80012.1 asyd|OJJ65340.1 ater|EAU39367.1 atub|OJI87774.1 aver|OJI99484.1 azon|OJJ47813.1

Group7467: abra|OJJ69751.1 acar|OOF97950.1 afis|EAW20379.1 agla|OJJ82717.1 akaw|GAA90202.1 aluc|OJZ83146.1 anig|EHA28210.1 asyd|OJJ56934.1 atub|OJI87791.1 aver|OJJ03350.1 awen|OJJ31442.1 azon|OJJ43563.1 awen|OJJ36135.1

Group7468: abra|OJJ69768.1 acar|OOF90889.1 afla|EED45806.1 agla|OJJ78514.1 akaw|GAA87885.1 aluc|OJZ85530.1 anig|EHA25061.1 aory|EIT75772.1 asyd|OJJ60227.1 atub|OJI80038.1 aver|OJJ04040.1 awen|OJJ33640.1 azon|OJJ47399.1

Group7469: abra|OJJ69831.1 acar|OOF93356.1 acla|EAW12369.1 agla|OJJ79196.1 akaw|GAA87829.1 aluc|OJZ85465.1 anig|EHA25006.1 asyd|OJJ57216.1 ater|EAU31943.1 atub|OJI80098.1 aver|OJI98298.1 awen|OJJ32853.1 anid|CBF77164.1

Group7470: abra|OJJ69894.1 acar|OOG00773.1 afla|EED54570.1 agla|OJJ83056.1 anid|CBF71733.1 aory|EIT78739.1 asyd|OJJ61797.1 ater|EAU39169.1 aver|OJI95896.1 awen|OJJ41668.1 azon|OJJ43876.1 acla|EAW08580.1 aory|EIT78892.1

Group7471: abra|OJJ69917.1 acar|OOF93429.1 acla|EAW08909.1 afis|EAW15487.1 afla|EED49001.1 afum|EAL85836.1 akaw|GAA87739.1 aluc|OJZ85371.1 anig|EHA25555.1 asyd|OJJ52102.1 ater|EAU32634.1 atub|OJI80199.1 aver|OJI97592.1

Group7472: abra|OJJ69981.1 acar|OOF93485.1 acla|EAW08851.1 afis|EAW15545.1 afla|EED49052.1 afum|EBA27242.1 aluc|OJZ85299.1 anid|CBF78180.1 asyd|OJJ55972.1 atub|OJI80271.1 aver|OJJ04919.1 awen|OJJ38206.1 azon|OJJ43089.1

Group7473: abra|OJJ70009.1 acar|OOF93515.1 afis|EAW25679.1 afla|EED46059.1 akaw|GAA87653.1 aluc|OJZ85270.1 anig|EHA25469.1 aory|EIT83484.1 ater|EAU37660.1 atub|OJI80301.1 awen|OJJ39964.1 afum|EAL84349.1 aver|OJI99713.1

Group7474: abra|OJJ70021.1 acar|OOF93527.1 acla|EAW08797.1 afis|EAW15600.1 afla|EED50424.1 agla|OJJ81556.1 akaw|GAA87640.1 aluc|OJZ85255.1 anig|EHA25456.1 aory|EIT82104.1 atub|OJI80313.1 awen|OJJ38277.1 azon|OJJ43047.1

Group7475: abra|OJJ70114.1 afla|EED55193.1 aory|EIT83589.1 asyd|OJJ58806.1 aver|OJJ05475.1 azon|OJJ45163.1 abra|OJJ73453.1 akaw|GAA83044.1 aluc|OJZ88589.1 anig|EHA18284.1 atub|OJI91175.1 aver|OJJ01409.1 awen|OJJ37581.1

Group7476: abra|OJJ70158.1 acar|OOF93318.1 afla|EED45634.1 afum|EAL91080.1 akaw|GAA86605.1 aluc|OJZ85155.1 anid|CBF80294.1 anig|EHA25371.1 aory|EIT75694.1 asyd|OJJ60439.1 atub|OJI80432.1 aver|OJJ02283.1 awen|OJJ29853.1

Group7477: abra|OJJ70179.1 acla|EAW13224.1 afis|EAW16396.1 afla|EED47676.1 agla|OJJ86670.1 akaw|GAA86593.1 aluc|OJZ85140.1 anig|EHA25356.1 aory|EIT80220.1 asyd|OJJ54662.1 ater|EAU38225.1 atub|OJI80452.1 aver|OJJ03122.1

Group7478: abra|OJJ70233.1 acar|OOF93309.1 afla|EED54310.1 agla|OJJ84751.1 akaw|GAA86551.1 aluc|OJZ85099.1 anig|EHA25321.1 aory|EIT76032.1 asyd|OJJ56224.1 ater|EAU35999.1 atub|OJI80499.1 aver|OJJ05156.1 azon|OJJ45165.1

Group7479: abra|OJJ70244.1 acar|OOF92521.1 akaw|GAA86543.1 aluc|OJZ85092.1 anid|CBF79134.1 anig|EHA25312.1 asyd|OJJ65410.1 atub|OJI80507.1 aver|OJJ07739.1 azon|OJJ45127.1 aver|OJJ01719.1 awen|OJJ40032.1 asyd|OJJ61775.1

Group7480: afum|EAL86040.1 acla|EAW14841.1 afis|EAW24368.1 afla|EED51156.1 anid|CBF82288.1 aory|EIT81291.1 ater|EAU32941.1 aver|OJJ08259.1 azon|OJJ45963.1 afla|EED45148.1 aory|EIT73814.1 afla|EED45171.1 ater|EAU37757.1

Group7481: abra|OJJ70269.1 acla|EAW06604.1 afis|EAW25674.1 afla|EED56544.1 afum|EAL88847.1  
agla|OJJ86231.1 anid|CBF82350.1 aory|EIT79694.1 asyd|OJJ52249.1 ater|EAU34095.1 awen|OJJ30253.1  
azon|OJJ43959.1 afis|EAW16219.1

Group7482: abra|OJJ70274.1 acar|OOF98672.1 agla|OJJ82824.1 akaw|GAA92875.1 aluc|OJZ82536.1  
anid|CBF78791.1 anig|EHA22504.1 aory|EIT79189.1 asyd|OJJ55020.1 atub|OJI88780.1 aver|OJJ07185.1  
awen|OJJ32615.1 afla|EED47288.1

Group7483: abra|OJJ70294.1 acar|OOF91748.1 afis|EAW22072.1 afla|EED56698.1 afum|EAL91098.2  
akaw|GAA93025.1 aluc|OJZ82559.1 anid|CBF82782.1 aory|EIT73867.1 asyd|OJJ52973.1 ater|EAU30150.1  
atub|OJI88801.1 awen|OJJ35471.1

Group7484: abra|OJJ70296.1 acar|OOF91750.1 acla|EAW06429.1 afis|EAW18534.1 afla|EED52865.1  
afum|EAL93232.1 agla|OJJ81549.1 akaw|GAA93024.1 aluc|OJZ82561.1 anig|EHA22522.1 atub|OJI88803.1  
awen|OJJ31092.1 azon|OJJ50601.1

Group7485: abra|OJJ70339.1 acar|OOF92847.1 afla|EED48270.1 agla|OJJ88108.1 akaw|GAA92592.1  
aluc|OJZ82609.1 anid|CBF89179.1 anig|EHA27473.1 aory|EIT72938.1 asyd|OJJ65382.1 atub|OJI88844.1  
aver|OJI99552.1 awen|OJJ37855.1

Group7486: awen|OJJ33342.1 abra|OJJ77817.1 acar|OOF98951.1 acla|EAW10282.1 afis|EAW25312.1  
agla|OJJ78832.1 akaw|GAA83829.1 aluc|OJZ90889.1 anig|EHA19608.1 atub|OJI82883.1 awen|OJJ33341.1  
afum|EAL89973.1 agla|OJJ78833.1

Group7487: abra|OJJ70424.1 acar|OOF91770.1 afla|EED46005.1 agla|OJJ86984.1 akaw|GAA90153.1  
aluc|OJZ83194.1 anig|EHA21058.1 asyd|OJJ62596.1 ater|EAU35267.1 atub|OJI87744.1 aver|OJI96741.1  
awen|OJJ29999.1 afla|EED46004.1

Group7488: abra|OJJ70430.1 afis|EAW16965.1 afum|EAL86492.1 akaw|GAA90150.1 aluc|OJZ83198.1  
anig|EHA21061.1 atub|OJI87740.1 aver|OJJ05858.1 abra|OJJ76669.1 afla|EED53956.1 agla|OJJ80055.1  
aory|EIT78323.1 acar|OOF95783.1

Group7489: abra|OJJ70548.1 acar|OOF95010.1 afis|EAW22097.1 afum|EAL89915.1 akaw|GAA83392.1  
aluc|OJZ83892.1 anig|EHA19028.1 asyd|OJJ61427.1 ater|EAU29365.1 atub|OJI90259.1 aver|OJJ00763.1  
azon|OJJ45988.1 afis|EAW16226.1

Group7490: abra|OJJ70623.1 acar|OOF97100.1 afis|EAW17661.1 afum|EBA27435.1 agla|OJJ79530.1  
akaw|GAA89961.1 aluc|OJZ83968.1 anig|EHA19097.1 asyd|OJJ62051.1 atub|OJI90341.1 aver|OJI96156.1  
awen|OJJ37181.1 azon|OJJ50883.1

Group7491: abra|OJJ70634.1 acar|OOF97090.1 afis|EAW23158.1 afla|EED46962.1 afum|EAL88325.1  
akaw|GAA89973.1 aluc|OJZ83982.1 anig|EHA19109.1 aory|EIT72715.1 asyd|OJJ56067.1 atub|OJI90354.1  
aver|OJJ05010.1 awen|OJJ36625.1

Group7492: abra|OJJ70643.1 acar|OOF97077.1 acla|EAW08116.1 afis|EAW23135.1 afla|EED48498.1  
afum|EAL88346.1 akaw|GAA89980.1 aluc|OJZ83994.1 anid|CBF74453.1 anig|EHA19118.1 asyd|OJJ57675.1  
atub|OJI90363.1 awen|OJJ36631.1

Group7493: abra|OJJ70925.1 acar|OOF98199.1 acla|EAW12449.1 afis|EAW21019.1 afum|EAL92057.1  
akaw|GAA83015.1 aluc|OJZ87601.1 anig|EHA20800.1 aory|EIT74202.1 atub|OJI81047.1 asyd|OJJ55695.1  
aver|OJJ06780.1 afla|EED52543.1

Group7494: abra|OJJ70969.1 acar|OOF98161.1 acla|EAW10529.1 afis|EAW24996.1 afla|EED55416.1  
afum|EAL89705.1 agla|OJJ89156.1 akaw|GAA82979.1 aluc|OJZ87563.1 anig|EHA20765.1 aory|EIT80769.1  
atub|OJI81084.1 awen|OJJ40643.1

Group7495: abra|OJJ71005.1 afis|EAW19704.1 afla|EED48154.1 afum|EAL86822.1 akaw|GAA92515.1  
aluc|OJZ91528.1 anig|EHA22565.1 aory|EIT76190.1 asyd|OJJ61199.1 ater|EAU32845.1 atub|OJI85982.1  
aver|OJJ00524.1 awen|OJJ30442.1

Group7496: ater|EAU29316.1 abra|OJJ73238.1 acar|OOG00475.1 afla|EED56142.1 akaw|GAA87943.1  
aluc|OJZ81190.1 anid|CBF75531.1 anig|EHA18506.1 aory|EIT76793.1 atub|OJI91386.1 aver|OJJ05729.1  
awen|OJJ40294.1 azon|OJJ49156.1

Group7497: abra|OJJ71155.1 acar|OOF98003.1 acla|EAW10343.1 afis|EAW25246.1 afla|EED53709.1  
afum|EAL89908.1 agla|OJJ89213.1 akaw|GAA82823.1 aluc|OJZ87384.1 aory|EIT75300.1 ater|EAU34357.1  
awen|OJJ40960.1 azon|OJJ44530.1

Group7498: abra|OJJ71229.1 acar|OOF97942.1 afla|EED46060.1 agla|OJJ82198.1 akaw|GAA82759.1  
aluc|OJZ87318.1 anig|EHA20552.1 aory|EIT83482.1 atub|OJI81327.1 awen|OJJ36263.1 azon|OJJ46516.1  
anig|EHA19259.1 atub|OJI82512.1

Group7499: abra|OJJ71230.1 acar|OOF97943.1 afla|EED56275.1 agla|OJJ81775.1 akaw|GAA82758.1  
aluc|OJZ87317.1 anig|EHA20551.1 aory|EIT73346.1 asyd|OJJ62583.1 ater|EAU33790.1 atub|OJI81328.1  
aver|OJI96702.1 awen|OJJ31637.1

Group7500: abra|OJJ71236.1 acar|OOF97947.1 afla|EED56271.1 agla|OJJ81771.1 akaw|GAA82752.1  
aluc|OJZ87309.1 anig|EHA20545.1 aory|EIT73402.1 asyd|OJJ56498.1 ater|EAU33787.1 atub|OJI81336.1  
aver|OJJ06221.1 awen|OJJ31643.1

Group7501: abra|OJJ71281.1 acla|EAW10264.1 afum|EAL89991.1 agla|OJJ83878.1 akaw|GAA82707.1  
aluc|OJZ87262.1 anid|CBF75232.1 asyd|OJJ59915.1 atub|OJI81380.1 azon|OJJ44640.1 afla|EED53816.1  
aory|EIT78417.1 aver|OJJ02371.1

Group7502: abra|OJJ71326.1 acar|OOF97848.1 acla|EAW10213.1 afis|EAW25380.1 afum|EBA27394.1  
agla|OJJ83773.1 akaw|GAA82665.1 aluc|OJZ87217.1 anig|EHA20466.1 atub|OJI81423.1 awen|OJJ41107.1  
azon|OJJ44684.1 afla|EED49572.1

Group7503: abra|OJJ71373.1 acar|OOF97795.1 acla|EAW10164.1 agla|OJJ87075.1 akaw|GAA82621.1  
aluc|OJZ87167.1 anid|CBF77545.1 asyd|OJJ53149.1 atub|OJI81472.1 aver|OJJ03702.1 awen|OJJ41159.1  
ater|EAU34601.1 azon|OJJ44737.1

Group7504: afla|EED55188.1 acla|EAW08982.1 afis|EAW15426.1 afum|EAL84218.1 agla|OJJ80139.1  
anid|CBF75421.1 aory|EIT83577.1 asyd|OJJ59793.1 ater|EAU32703.1 aver|OJJ02494.1 awen|OJJ33347.1  
aver|OJI98309.1 asyd|OJJ52408.1

Group7505: abra|OJJ71544.1 acla|EAW15098.1 afis|EAW20070.1 afum|EAL85188.1 agla|OJJ88890.1  
akaw|GAA89378.1 aluc|OJZ86282.1 anig|EHA21589.1 atub|OJI84256.1 awen|OJJ31829.1 azon|OJJ46295.1  
afla|EED45309.1 aory|EIT73730.1

Group7506: abra|OJJ71610.1 acla|EAW15154.1 afis|EAW20122.1 afla|EED57254.1 afum|EAL85240.1  
aluc|OJZ86354.1 atub|OJI84183.1 azon|OJJ46245.1 agla|OJJ88827.1 anid|CBF84943.1 asyd|OJJ63150.1  
aver|OJI97804.1 awen|OJJ31891.1

Group7507: abra|OJJ71702.1 afis|EAW20202.1 afla|EED57142.1 afum|EAL85322.1 akaw|GAA89233.1  
aluc|OJZ86445.1 anid|CBF85087.1 anig|EHA21456.1 aory|EIT74074.1 asyd|OJJ63069.1 atub|OJI84083.1  
aver|OJI97893.1 awen|OJJ31208.1

Group7508: abra|OJJ71740.1 acar|OOF96431.1 afla|EED56963.1 agla|OJJ80108.1 akaw|GAA85154.1  
aluc|OJZ86483.1 anid|CBF78820.1 anig|EHA22176.1 aory|EIT77505.1 ater|EAU36025.1 atub|OJI84046.1  
aver|OJI99417.1 azon|OJJ46020.1

Group7509: abra|OJJ71757.1 acar|OOF98108.1 afis|EAW17370.1 afla|EED53905.1 afum|EAL91207.2  
agla|OJJ79799.1 aluc|OJZ84836.1 anig|EHA25746.1 aory|EIT78481.1 asyd|OJJ61750.1 ater|EAU32672.1  
aver|OJI95847.1 awen|OJJ37892.1

Group7510: abra|OJJ71771.1 acar|OOF96444.1 afla|EED47495.1 akaw|GAA85136.1 aluc|OJZ86501.1  
anid|CBF70338.1 anig|EHA22143.1 aory|EIT74589.1 asyd|OJJ58708.1 ater|EAU33072.1 atub|OJI84025.1  
aver|OJJ01321.1 awen|OJJ31942.1

Group7511: abra|OJJ72082.1 afla|EED56585.1 agla|OJJ82914.1 akaw|GAA84838.1 aluc|OJZ86836.1  
anid|CBF70326.1 aory|EIT79601.1 asyd|OJJ58715.1 ater|EAU30077.1 atub|OJI83682.1 aver|OJJ01328.1  
awen|OJJ40591.1 azon|OJJ42312.1

Group7512: abra|OJJ72132.1 acar|OOF96770.1 afla|EED46872.1 afum|EAL90428.1 agla|OJJ86321.1  
akaw|GAA84790.1 aluc|OJZ86890.1 anig|EHA21753.1 aory|EIT72539.1 asyd|OJJ53055.1 atub|OJI83629.1  
aver|OJJ03789.1 awen|OJJ32567.1

Group7513: afis|EAW19362.1 afum|EAL94082.1 anid|CBF69511.1 asyd|OJJ59215.1 aver|OJJ01825.1  
acla|EAW14624.1 afla|EED49733.1 aory|EIT77677.1 ater|EAU29441.1 awen|OJJ30083.1 azon|OJJ48994.1  
afla|EED47546.1 aory|EIT74554.1

Group7514: abra|OJJ72193.1 acar|OOF94917.1 afla|EED45443.1 agla|OJJ79307.1 akaw|GAA84740.1  
aluc|OJZ86944.1 anig|EHA21700.1 aory|EIT82473.1 asyd|OJJ59729.1 atub|OJI83578.1 aver|OJI97567.1  
awen|OJJ36157.1 aver|OJJ02557.1

Group7515: abra|OJJ72203.1 acar|OOF96823.1 afis|EAW24465.1 afla|EED55201.1 afum|EAL86136.1  
agla|OJJ80323.1 akaw|GAA84733.1 aluc|OJZ86953.1 anig|EHA21694.1 aory|EIT83578.1 ater|EAU29969.1  
atub|OJI83570.1 awen|OJJ32725.1

Group7516: abra|OJJ72213.1 acar|OOF96834.1 afis|EAW23666.1 afla|EED54474.1 afum|EAL87111.1  
akaw|GAA84721.1 aluc|OJZ86965.1 anid|CBF75940.1 anig|EHA21684.1 aory|EIT81139.1 asyd|OJJ59159.1  
atub|OJI83557.1 aver|OJJ01749.1

Group7517: abra|OJJ72255.1 acar|OOF96886.1 acla|EAW13649.1 afis|EAW19957.1 afla|EED55750.1  
akaw|GAA84682.1 aluc|OJZ87006.1 anig|EHA21640.1 aory|EIT78227.1 atub|OJI83513.1 awen|OJJ39613.1  
aory|EIT76733.1 afla|EED52821.1

Group7518: abra|OJJ72304.1 acar|OOF94914.1 afis|EAW17159.1 afum|EAL86596.1 agla|OJJ82674.1  
akaw|GAA86055.1 aluc|OJZ90285.1 anid|CBF81939.1 anig|EHA23775.1 asyd|OJJ57378.1 atub|OJI81709.1  
aver|OJJ05780.1 awen|OJJ32539.1

Group7519: abra|OJJ72334.1 acar|OOF94881.1 acla|EAW11988.1 afis|EAW19628.1 afla|EED56980.1  
afum|EBA27292.1 agla|OJJ80774.1 akaw|GAA86086.1 aory|EIT77534.1 asyd|OJJ55110.1 ater|EAU32898.1  
aver|OJJ07096.1 azon|OJJ47070.1

Group7520: abra|OJJ72341.1 acar|OOF94876.1 afis|EAW19623.1 afla|EED56975.1 afum|EBA27294.1  
akaw|GAA86091.1 aluc|OJZ90320.1 anig|EHA23806.1 asyd|OJJ55115.1 ater|EAU32901.1 aver|OJJ07091.1  
awen|OJJ41870.1 azon|OJJ47063.1

Group7521: abra|OJJ72342.1 acar|OOF94875.1 afis|EAW19622.1 afla|EED56974.1 afum|EAL86899.2  
aluc|OJZ90321.1 anid|CBF71312.1 anig|EHA23807.1 asyd|OJJ55116.1 ater|EAU32904.1 aver|OJJ07090.1  
awen|OJJ41869.1 azon|OJJ47062.1

Group7522: abra|OJJ72359.1 acar|OOF94859.1 akaw|GAA86106.1 aluc|OJZ90338.1 anid|CBF87130.1  
anig|EHA23822.1 asyd|OJJ60366.1 ater|EAU31884.1 atub|OJI81765.1 aver|OJI99703.1 awen|OJJ33425.1  
azon|OJJ45034.1 aory|EIT77542.1

Group7523: abra|OJJ72451.1 acar|OOF94785.1 afla|EED46200.1 akaw|GAA86188.1 aluc|OJZ90436.1  
anig|EHA23903.1 asyd|OJJ55270.1 ater|EAU33050.1 atub|OJI81867.1 aver|OJJ06957.1 agla|OJJ83121.1  
aory|EIT76366.1 anid|CBF77962.1

Group7524: abra|OJJ72557.1 acar|OOF94696.1 acla|EAW12762.1 afis|EAW17924.1 afla|EED46326.1  
afum|EAL91735.2 agla|OJJ83018.1 akaw|GAA85190.1 aluc|OJZ90545.1 anid|CBF76945.1 asyd|OJJ57060.1  
atub|OJI81967.1 aver|OJJ03238.1

Group7525: abra|OJJ72717.1 acar|OOF95951.1 acla|EAW11553.1 afis|EAW23900.1 afla|EED52634.1  
afum|EAL87327.1 akaw|GAA85325.1 aluc|OJZ90686.1 anid|CBF77144.1 anig|EHA24114.1 aory|EIT74229.1  
aver|OJJ03381.1 azon|OJJ51379.1

Group7526: abra|OJJ72923.1 acla|EAW06465.1 afis|EAW15960.1 afla|EED58098.1 afum|EAL88593.1  
agla|OJJ89352.1 akaw|GAA85506.1 aluc|OJZ83433.1 anid|CBF81077.1 aory|EIT79151.1 ater|EAU35496.1  
atub|OJI82323.1 azon|OJJ46910.1

Group7527: acla|EAW06450.1 agla|OJJ89366.1 anig|EHA24296.1 acar|OOF96122.1 afis|EAW15947.1  
afla|EED58112.1 afum|EAL88580.1 anid|CBF81050.1 aory|EIT79145.1 asyd|OJJ56449.1 ater|EAU35511.1  
aver|OJJ06273.1 awen|OJJ35637.1

Group7528: abra|OJJ72965.1 acar|OOF96147.1 afla|EED54941.1 akaw|GAA85544.1 aluc|OJZ83475.1  
aory|EIT80320.1 asyd|OJJ56377.1 ater|EAU35536.1 aver|OJJ06336.1 agla|OJJ89390.1 anig|EHA24313.1  
atub|OJI82365.1 afis|EAW15920.1

Group7529: abra|OJJ73004.1 acar|OOF96177.1 acla|EAW08009.1 afis|EAW23044.1 afum|EAL88437.1  
agla|OJJ89434.1 akaw|GAA85582.1 aluc|OJZ83518.1 anid|CBF80942.1 asyd|OJJ56337.1 aver|OJJ06376.1  
awen|OJJ35696.1 azon|OJJ44160.1

Group7530: abra|OJJ73079.1 acar|OOG00314.1 acla|EAW12286.1 afis|EAW16952.1 afum|EAL86480.1  
akaw|GAA88083.1 aluc|OJZ81347.1 anid|CBF82879.1 anig|EHA18650.1 asyd|OJJ62954.1 atub|OJI91551.1  
aver|OJI98030.1 azon|OJJ46840.1

Group7531: abra|OJJ73133.1 acar|OOF98128.1 acla|EAW13624.1 afis|EAW21095.1 afum|EAL92118.1  
akaw|GAA92663.1 aluc|OJZ90117.1 anig|EHA19697.1 ater|EAU31342.1 atub|OJI84680.1 awen|OJJ30105.1  
acar|OOF98459.1 acla|EAW08506.1

Group7532: abra|OJJ73140.1 acar|OOF92576.1 afis|EAW25132.1 afla|EED48164.1 afum|EAL89803.1  
agla|OJJ82671.1 akaw|GAA88032.1 aluc|OJZ81291.1 anid|CBF76014.1 anig|EHA18590.1 asyd|OJJ52435.1  
atub|OJI91499.1 aver|OJJ03975.1

Group7533: abra|OJJ73171.1 acar|OOG00412.1 acla|EAW10797.1 afla|EED47206.1 agla|OJJ82875.1  
akaw|GAA88000.1 aluc|OJZ81256.1 aory|EIT79227.1 asyd|OJJ59427.1 atub|OJI91452.1 aver|OJJ02844.1  
awen|OJJ40365.1 azon|OJJ49214.1

Group7534: abra|OJJ73241.1 acar|OOG00480.1 acla|EAW06914.1 afis|EAW16531.1 afla|EED56139.1  
afum|EAL89128.1 agla|OJJ82789.1 akaw|GAA87940.1 anid|CBF81733.1 asyd|OJJ59593.1 aver|OJJ02675.1  
awen|OJJ40290.1 azon|OJJ49152.1

Group7535: abra|OJJ73261.1 acla|EAW06938.1 afis|EAW16553.1 afla|EED56109.1 afum|EAL89151.2  
agla|OJJ82770.1 akaw|GAA87921.1 anid|CBF81793.1 anig|EHA18485.1 aory|EIT76758.1 ater|EAU36618.1  
aver|OJJ02645.1 azon|OJJ49128.1

Group7536: abra|OJJ73276.1 acla|EAW06951.1 afis|EAW16566.1 afla|EED56097.1 afum|EAL89163.1  
agla|OJJ82755.1 akaw|GAA92729.1 aluc|OJZ88773.1 anid|CBF81819.1 asyd|OJJ59652.1 ater|EAU36635.1  
aver|OJJ02630.1 azon|OJJ49114.1

Group7537: abra|OJJ73336.1 aluc|OJZ88704.1 atub|OJI91285.1 akaw|GAA83147.1 ater|EAU39536.1  
abra|OJJ78151.1 acar|OOF98715.1 afis|EAW16455.1 afla|EED56916.1 afum|EAL89050.1 aluc|OJZ91203.1  
anig|EHA19908.1 aory|EIT77472.1

Group7538: abra|OJJ73389.1 acar|OOG00591.1 akaw|GAA83100.1 aluc|OJZ88648.1 anig|EHA18339.1  
aory|EIT76038.1 asyd|OJJ54922.1 ater|EAU36079.1 atub|OJI91235.1 aver|OJJ07273.1 awen|OJJ32623.1  
azon|OJJ49315.1 afla|EED54040.1

Group7539: abra|OJJ73411.1 acar|OOG00608.1 acla|EAW12385.1 afis|EAW16832.1 afum|EAL86380.1  
akaw|GAA83080.1 aluc|OJZ88626.1 anid|CBF87378.1 anig|EHA18318.1 asyd|OJJ52841.1 atub|OJI91211.1  
aver|OJJ08812.1 azon|OJJ48153.1

Group7540: abra|OJJ73416.1 acar|OOG00620.1 acla|EAW07038.1 afis|EAW16664.1 afla|EED44897.1  
afum|EAL89268.1 agla|OJJ78705.1 akaw|GAA83075.1 anid|CBF82080.1 aory|EIT83244.1 ater|EAU39586.1  
awen|OJJ40049.1 azon|OJJ50119.1

Group7541: abra|OJJ73433.1 acar|OOG00640.1 aluc|OJZ88608.1 anig|EHA18301.1 aory|EIT74830.1  
ater|EAU31397.1 atub|OJI91192.1 aver|OJI99557.1 awen|OJJ33326.1 afla|EED53596.1 afla|EED53597.1  
anid|CBF77720.1 ater|EAU36690.1

Group7542: abra|OJJ73436.1 acar|OOG00375.1 afis|EAW24840.1 afum|EAL89486.1 akaw|GAA83057.1  
aluc|OJZ88605.1 anid|CBF83578.1 anig|EHA18298.1 asyd|OJJ56751.1 ater|EAU32493.1 atub|OJI91189.1  
aver|OJJ05974.1 azon|OJJ45683.1

Group7543: abra|OJJ73809.1 acar|OOG00966.1 acla|EAW07698.1 afis|EAW22715.1 afla|EED49999.1  
afum|EAL90479.1 akaw|GAA89429.1 aluc|OJZ88241.1 aory|EIT74738.1 ater|EAU38990.1 atub|OJI90843.1  
awen|OJJ35409.1 azon|OJJ49767.1

Group7544: abra|OJJ73810.1 acla|EAW09052.1 afis|EAW25628.1 afla|EED56730.1 afum|EAL84316.1  
aluc|OJZ88240.1 anig|EHA17987.1 asyd|OJJ59451.1 ater|EAU33004.1 atub|OJI90842.1 aver|OJJ02821.1  
awen|OJJ30199.1 azon|OJJ50244.1

Group7545: abra|OJJ73956.1 acar|OOG01083.1 acla|EAW13229.1 afla|EED57673.1 aory|EIT79891.1  
awen|OJJ30246.1 abra|OJJ74367.1 agla|OJJ80513.1 akaw|GAA82002.1 aluc|OJZ92185.1 atub|OJI86614.1  
atub|OJI83979.1 agla|OJJ79591.1

Group7546: abra|OJJ74047.1 acar|OOF89920.1 afla|EED58125.1 afum|EAL90265.1 agla|OJJ83356.1  
aluc|OJZ87988.1 anid|CBF87664.1 anig|EHA17771.1 asyd|OJJ63306.1 atub|OJI90598.1 aver|OJI97653.1  
awen|OJJ38632.1 azon|OJJ49574.1

Group7547: abra|OJJ74058.1 acar|OOG01170.1 afis|EAW22941.1 afum|EAL90255.1 agla|OJJ83347.1  
akaw|GAA87539.1 aluc|OJZ87978.1 anid|CBF87649.1 anig|EHA17761.1 ater|EAU30683.1 atub|OJI90588.1  
awen|OJJ38623.1 azon|OJJ49564.1

Group7548: abra|OJJ74127.1 acar|OOF95609.1 afla|EED45392.1 agla|OJJ88369.1 akaw|GAA89757.1  
aluc|OJZ80626.1 anig|EHA27206.1 aory|EIT82418.1 asyd|OJJ57318.1 ater|EAU33964.1 atub|OJI87481.1  
aver|OJJ05843.1 azon|OJJ51096.1

Group7549: abra|OJJ74186.1 afla|EED46892.1 agla|OJJ81679.1 akaw|GAA86830.1 aluc|OJZ89949.1  
anig|EHA27150.1 aory|EIT72565.1 asyd|OJJ65128.1 ater|EAU38482.1 atub|OJI84858.1 aver|OJI99256.1  
awen|OJJ33921.1 anig|EHA22243.1

Group7550: acla|EAW13277.1 afum|EAL91185.1 anid|CBF80804.1 abra|OJJ77277.1 afis|EAW17340.1  
afla|EED54195.1 akaw|GAA90672.1 aluc|OJZ84687.1 anig|EHA27962.1 asyd|OJJ54486.1 atub|OJI89395.1  
aver|OJJ07693.1 agla|OJJ84306.1

Group7551: abra|OJJ74217.1 acar|OOF95504.1 acla|EAW07269.1 afis|EAW22290.1 afla|EED57689.1  
agla|OJJ87759.1 akaw|GAA86801.1 aluc|OJZ89917.1 anid|CBF88567.1 anig|EHA27117.1 ater|EAU34302.1  
atub|OJI84888.1 awen|OJJ34863.1

Group7552: abra|OJJ74431.1 acar|OOF95313.1 acla|EAW12293.1 afla|EED56193.1 akaw|GAA87325.1  
aluc|OJZ89690.1 anid|CBF74694.1 anig|EHA26928.1 aory|EIT73441.1 asyd|OJJ60213.1 atub|OJI85111.1  
aver|OJJ04055.1 azon|OJJ50250.1

Group7553: abra|OJJ74435.1 acar|OOF95309.1 afis|EAW20279.1 afla|EED48229.1 afum|EAL85414.1 akaw|GAA87329.1 aluc|OJZ89686.1 anig|EHA26924.1 ater|EAU36999.1 atub|OJI85115.1 aver|OJJ07464.1 awen|OJJ35547.1 ater|EAU34774.1

Group7554: abra|OJJ74460.1 acar|OOF95290.1 afis|EAW22258.1 afla|EED57645.1 akaw|GAA87353.1 aluc|OJZ89661.1 anig|EHA26898.1 aory|EIT79876.1 asyd|OJJ55350.1 ater|EAU36273.1 atub|OJI85139.1 awen|OJJ34830.1 azon|OJJ45717.1

Group7555: abra|OJJ74461.1 acar|OOF95289.1 afla|EED57644.1 akaw|GAA87354.1 aluc|OJZ89660.1 anig|EHA26897.1 aory|EIT79870.1 asyd|OJJ55349.1 ater|EAU36274.1 atub|OJI85140.1 awen|OJJ34829.1 azon|OJJ45719.1 afis|EAW22257.1

Group7556: abra|OJJ74492.1 acar|OOF95257.1 acla|EAW07202.1 afis|EAW22214.1 afla|EED57608.1 afum|EAL90980.2 agla|OJJ87828.1 aluc|OJZ89626.1 anid|CBF88450.1 aory|EIT82974.1 atub|OJI85176.1 awen|OJJ34799.1 azon|OJJ45746.1

Group7557: aory|EIT82929.1 azon|OJJ45751.1 acla|EAW07198.1 afis|EAW22210.1 afla|EED57604.1 afum|EAL90984.2 agla|OJJ87834.1 akaw|GAA87389.1 anid|CBF88444.1 anig|EHA26867.1 ater|EAU34220.1 aver|OJI97173.1 awen|OJJ34795.1

Group7558: abra|OJJ74530.1 acla|EAW07162.1 afis|EAW22177.1 afla|EED57556.1 afum|EAL91012.1 akaw|GAA82070.1 aluc|OJZ92112.1 anid|CBF89073.1 asyd|OJJ62741.1 ater|EAU34182.1 atub|OJI86545.1 awen|OJJ34754.1 azon|OJJ45804.1

Group7559: abra|OJJ74743.1 acar|OOF95739.1 afis|EAW19551.1 afla|EED45805.1 afum|EAL86958.1 agla|OJJ84419.1 akaw|GAA83667.1 aluc|OJZ92325.1 anig|EHA26645.1 aory|EIT75693.1 atub|OJI86753.1 awen|OJJ37996.1 azon|OJJ46002.1

Group7560: abra|OJJ74822.1 acar|OOF92577.1 afis|EAW16433.1 afla|EED53098.1 agla|OJJ80040.1 akaw|GAA86590.1 aluc|OJZ85137.1 anig|EHA18382.1 ater|EAU29269.1 atub|OJI80455.1 aver|OJJ01774.1 awen|OJJ34672.1 anig|EHA25369.1

Group7561: abra|OJJ75138.1 acar|OOF97198.1 afis|EAW23351.1 afla|EED55612.1 afum|EAL88125.2 agla|OJJ86475.1 akaw|GAA88744.1 aluc|OJZ92704.1 anig|EHA26295.1 asyd|OJJ60101.1 atub|OJI87131.1 awen|OJJ39538.1 azon|OJJ47735.1

Group7562: acla|EAW13657.1 afis|EAW19940.1 afum|EAL84972.1 anid|CBF84259.1 anid|CBF71413.1 agla|OJJ80510.1 asyd|OJJ57205.1 atub|OJI87195.1 aver|OJJ03084.1 awen|OJJ29828.1 azon|OJJ44623.1 asyd|OJJ58059.1 aver|OJJ04344.1

Group7563: abra|OJJ75254.1 acar|OOF89846.1 afla|EED57153.1 akaw|GAA91794.1 aluc|OJZ92813.1 anid|CBF69546.1 anig|EHA26196.1 aory|EIT74141.1 asyd|OJJ59173.1 ater|EAU31999.1 atub|OJI87270.1 aver|OJJ01762.1 azon|OJJ45568.1

Group7564: abra|OJJ75258.1 acar|OOF93396.1 afla|EED47370.1 agla|OJJ87649.1 akaw|GAA92056.1 aluc|OJZ92928.1 anig|EHA26192.1 aory|EIT82871.1 atub|OJI87388.1 azon|OJJ46464.1 aluc|OJZ92815.1 atub|OJI87273.1 akaw|GAA91796.1

Group7565: abra|OJJ75262.1 acar|OOF94540.1 afla|EED56573.1 akaw|GAA91800.1 aluc|OJZ92820.1 anid|CBF80336.1 anig|EHA26188.1 aory|EIT79623.1 asyd|OJJ54840.1 atub|OJI87278.1 aver|OJJ07321.1 awen|OJJ33405.1 azon|OJJ46004.1

Group7566: asyd|OJJ63976.1 abra|OJJ75356.1 afis|EAW23649.1 afla|EED48391.1 akaw|GAA92052.1 aluc|OJZ92922.1 anig|EHA26047.1 aory|EIT83060.1 atub|OJI87383.1 aver|OJJ05182.1 afum|EAL87725.1 aver|OJI96978.1 asyd|OJJ54229.1

Group7567: abra|OJJ75346.1 acar|OOF94490.1 afis|EAW17118.1 afla|EED55671.1 afum|EAL86580.1 akaw|GAA92039.1 aluc|OJZ92908.1 anig|EHA26056.1 aory|EIT77096.1 asyd|OJJ52959.1 ater|EAU35549.1 atub|OJI87368.1 awen|OJJ38032.1

Group7568: abra|OJJ75375.1 acar|OOF91864.1 afla|EED48856.1 akaw|GAA92737.1 aluc|OJZ92945.1 anid|CBF78476.1 anig|EHA26027.1 aory|EIT81275.1 asyd|OJJ58350.1 ater|EAU36129.1 atub|OJI87404.1 aver|OJJ02057.1 awen|OJJ35768.1

Group7569: abra|OJJ75411.1 acar|OOF90758.1 acla|EAW13783.1 afis|EAW18349.1 afla|EED48814.1 aluc|OJZ88862.1 anid|CBF79369.1 anig|EHA23641.1 asyd|OJJ57809.1 ater|EAU34683.1 aver|OJJ04579.1 awen|OJJ35733.1 atub|OJI85928.1

Group7570: abra|OJJ75431.1 acla|EAW13803.1 afis|EAW18328.1 afum|EAL87694.1 agla|OJJ88055.1 anid|CBF79404.1 anig|EHA23622.1 asyd|OJJ57828.1 ater|EAU33337.1 atub|OJI85906.1 aver|OJJ04564.1 azon|OJJ43304.1 afis|EAW18329.1

Group7571: abra|OJJ75631.1 acar|OOG00203.1 acla|EAW09462.1 afis|EAW21675.1 afla|EED57938.1 afum|EAL92709.1 akaw|GAA84378.1 aluc|OJZ89082.1 anig|EHA23455.1 aory|EIT82351.1 ater|EAU38358.1 atub|OJI85702.1 awen|OJJ33941.1

Group7572: abra|OJJ75646.1 acar|OOG00193.1 afla|EED57952.1 agla|OJJ79916.1 akaw|GAA84391.1 aluc|OJZ89095.1 anid|CBF83609.1 anig|EHA23442.1 atub|OJI85686.1 awen|OJJ33952.1 asyd|OJJ60764.1 aver|OJJ00098.1 azon|OJJ48618.1

Group7573: abra|OJJ75702.1 acar|OOG00152.1 acla|EAW09406.1 afis|EAW21730.1 afla|EED57999.1 afum|EAL92763.1 akaw|GAA84438.1 aluc|OJZ89153.1 anid|CBF83728.1 asyd|OJJ60844.1 aver|OJJ00169.1 awen|OJJ34003.1 azon|OJJ48549.1

Group7574: abra|OJJ75754.1 acar|OOG00108.1 afla|EED51163.1 akaw|GAA84488.1 aluc|OJZ89209.1 anid|CBF81244.1 anig|EHA23350.1 aory|EIT81300.1 asyd|OJJ59322.1 atub|OJI85583.1 aver|OJJ02951.1 aver|OJI99531.1 anid|CBF80149.1

Group7575: abra|OJJ75801.1 acar|OOG00075.1 acla|EAW14884.1 afis|EAW24403.1 afla|EED47810.1 afum|EAL86074.1 akaw|GAA84517.1 aluc|OJZ89249.1 anig|EHA23318.1 aory|EIT77119.1 asyd|OJJ54139.1 atub|OJI85549.1 aver|OJJ08597.1

Group7576: abra|OJJ75815.1 acar|OOG00060.1 afis|EAW20376.1 afla|EED47802.1 afum|EAL85490.1 akaw|GAA84529.1 aluc|OJZ89262.1 anid|CBF83573.1 anig|EHA23306.1 asyd|OJJ52178.1 atub|OJI85537.1 aver|OJJ05967.1 awen|OJJ32819.1

Group7577: abra|OJJ75850.1 acar|OOG00043.1 afis|EAW19556.1 afum|EAL86955.2 akaw|GAA84555.1 aluc|OJZ89287.1 anid|CBF73904.1 anig|EHA23274.1 asyd|OJJ53665.1 ater|EAU30372.1 atub|OJI85512.1 aver|OJJ07772.1 awen|OJJ32850.1

Group7578: abra|OJJ75921.1 afis|EAW21258.1 afla|EED54817.1 afum|EAL92273.1 akaw|GAA84625.1 aluc|OJZ89371.1 anig|EHA23213.1 aory|EIT79444.1 ater|EAU35895.1 atub|OJI85428.1 acla|EAW09867.1 aver|OJI99926.1 anid|CBF83327.1

Group7579: acla|EAW15320.1 afis|EAW16157.1 afla|EED46084.1 agla|OJJ81262.1 anid|CBF81446.1 aory|EIT76480.1 asyd|OJJ59431.1 ater|EAU32998.1 aver|OJJ02840.1 awen|OJJ39814.1 afla|EED45361.1 aory|EIT82435.1 awen|OJJ39864.1

Group7580: abra|OJJ75946.1 acar|OOF99966.1 acla|EAW12303.1 afis|EAW16937.1 afla|EED45589.1 afum|EAL86462.1 agla|OJJ78888.1 akaw|GAA84648.1 aluc|OJZ89394.1 anig|EHA23191.1 aory|EIT75565.1 atub|OJI85403.1 awen|OJJ36295.1

Group7581: abra|OJJ75974.1 acar|OOF99945.1 afis|EAW21311.1 afum|EAL92327.1 agla|OJJ87431.1 akaw|GAA88982.1 aluc|OJZ89421.1 anid|CBF83402.1 anig|EHA23166.1 asyd|OJJ60641.1 atub|OJI85372.1 awen|OJJ39389.1 azon|OJJ44277.1

Group7582: abra|OJJ75986.1 acla|EAW09814.1 afis|EAW21320.1 afla|EED57278.1 afum|EAL92337.1 akaw|GAA88972.1 aluc|OJZ89431.1 anig|EHA23156.1 aory|EIT74148.1 atub|OJI85362.1 aver|OJI99975.1 awen|OJJ39376.1 azon|OJJ44266.1

Group7583: abra|OJJ76018.1 acar|OOF99908.1 afla|EED46077.1 akaw|GAA88942.1 aluc|OJZ89465.1 anid|CBF73507.1 anig|EHA23123.1 aory|EIT76501.1 asyd|OJJ55811.1 atub|OJI85330.1 aver|OJJ04759.1 awen|OJJ32715.1 azon|OJJ50219.1

Group7584: abra|OJJ76042.1 acar|OOF99888.1 acla|EAW09772.1 afis|EAW21366.1 afla|EED55780.1 afum|EAL92382.2 akaw|GAA88924.1 aluc|OJZ89497.1 anig|EHA23103.1 aory|EIT76663.1 atub|OJI85306.1 awen|OJJ39331.1 azon|OJJ51676.1

Group7585: abra|OJJ76239.1 acar|OOF99484.1 acla|EAW14199.1 afum|EAL93654.1 agla|OJJ81520.1 akaw|GAA82173.1 aluc|OJZ91992.1 anid|CBF69672.1 ater|EAU38097.1 atub|OJI86427.1 aver|OJJ01659.1 awen|OJJ31516.1 afla|EED46399.1

Group7586: abra|OJJ76276.1 acar|OOF99524.1 acla|EAW14336.1 afis|EAW18953.1 afum|EAL93689.2 akaw|GAA82208.1 aluc|OJZ91944.1 atub|OJI86387.1 awen|OJJ31550.1 agla|OJJ85328.1 afla|EED50991.1 aory|EIT76990.1 azon|OJJ47266.1

Group7587: abra|OJJ76278.1 acla|EAW07089.1 afum|EAL89047.1 akaw|GAA82210.1 aluc|OJZ91942.1 anig|EHA22901.1 atub|OJI86385.1 aver|OJJ03910.1 aory|EIT75549.1 acla|EAW07088.1 ater|EAU35312.1 afis|EAW16447.1 afla|EED45668.1

Group7588: abra|OJJ76311.1 acar|OOF99553.1 afla|EED50765.1 agla|OJJ80542.1 akaw|GAA82239.1 aluc|OJZ91907.1 aory|EIT77995.1 ater|EAU37960.1 atub|OJI86356.1 awen|OJJ32384.1 azon|OJJ47144.1 afis|EAW18809.1 afum|EAL93545.1



Group7589: acar|OOF99564.1 afum|EAL93539.1 akaw|GAA82244.1 aluc|OJZ91901.1 awen|OJJ32378.1  
acla|EAW14102.1 afis|EAW18803.1 afla|EED50773.1 agla|OJJ80533.1 anid|CBF69786.1 aory|EIT78059.1  
ater|EAU37941.1 azon|OJJ47140.1

Group7590: abra|OJJ76436.1 acar|OOF99681.1 acla|EAW13987.1 afis|EAW18695.1 afum|EAL93417.1  
akaw|GAA82351.1 aluc|OJZ91776.1 anid|CBF70628.1 anig|EHA22774.1 aory|EIT78143.1 ater|EAU38211.1  
atub|OJI86232.1 awen|OJJ32166.1

Group7591: abra|OJJ76459.1 acla|EAW12026.1 afis|EAW20067.1 afum|EAL88796.1 akaw|GAA82372.1  
aluc|OJZ91750.1 anig|EHA22753.1 asyd|OJJ54642.1 atub|OJI86208.1 aver|OJJ07516.1 awen|OJJ38106.1  
afis|EAW20719.1 afum|EAL85185.1

Group7592: abra|OJJ76477.1 acar|OOF99712.1 acla|EAW10942.1 afis|EAW20918.1 afla|EED52661.1  
agla|OJJ82408.1 akaw|GAA82389.1 aluc|OJZ91731.1 anig|EHA22738.1 asyd|OJJ54405.1 atub|OJI86188.1  
awen|OJJ32137.1 awen|OJJ34403.1

Group7593: akaw|GAA82400.1 aluc|OJZ91722.1 anig|EHA22729.1 atub|OJI86179.1 acar|OOF99717.1  
acla|EAW13949.1 afis|EAW18660.1 afla|EED52671.1 afum|EAL93376.1 anid|CBF70554.1 aory|EIT74287.1  
aver|OJJ01140.1 awen|OJJ32126.1

Group7594: abra|OJJ76508.1 acar|OOF99463.1 acla|EAW14190.1 afis|EAW18905.1 afum|EAL93637.1  
agla|OJJ81510.1 akaw|GAA82421.1 aluc|OJZ91696.1 anig|EHA22709.1 atub|OJI86151.1 aver|OJJ01640.1  
awen|OJJ32462.1 azon|OJJ47219.1

Group7595: abra|OJJ76620.1 acar|OOF92933.1 afis|EAW19772.1 afum|EAL85128.1 agla|OJJ81606.1  
akaw|GAA85576.1 aluc|OJZ83512.1 anid|CBF75779.1 ater|EAU35166.1 atub|OJI85467.1 aver|OJJ07924.1  
afis|EAW23639.1 anid|CBF79117.1

Group7596: abra|OJJ76638.1 acar|OOF99361.1 acla|EAW14274.1 afis|EAW19000.1 afla|EED53125.1  
afum|EAL93735.1 agla|OJJ85234.1 akaw|GAA92820.1 aluc|OJZ91571.1 anig|EHA22600.1 aory|EIT75061.1  
ater|EAU37804.1 atub|OJI86021.1

Group7597: abra|OJJ76689.1 acar|OOF99322.1 agla|OJJ87953.1 akaw|GAA92505.1 aluc|OJZ91518.1  
anid|CBF84585.1 anig|EHA22556.1 asyd|OJJ63694.1 atub|OJI85973.1 aver|OJI97245.1 awen|OJJ33478.1  
asyd|OJJ55011.1 aver|OJJ07201.1

Group7598: abra|OJJ76699.1 acar|OOF96791.1 afla|EED53493.1 akaw|GAA92500.1 aluc|OJZ91513.1  
anig|EHA22552.1 aory|EIT78829.1 atub|OJI85965.1 azon|OJJ42675.1 akaw|GAA89228.1 aluc|OJZ86452.1  
atub|OJI84078.1 aory|EIT75025.1

Group7599: abra|OJJ76733.1 afis|EAW17071.1 afla|EED49616.1 afum|EAL86559.2 agla|OJJ79086.1  
aluc|OJZ80163.1 aory|EIT83018.1 asyd|OJJ58392.1 aver|OJJ07901.1 awen|OJJ32614.1 asyd|OJJ60948.1  
aver|OJJ00275.1 aory|EIT80981.1

Group7600: abra|OJJ76757.1 acar|OOF91252.1 acla|EAW13311.1 afis|EAW20425.1 afla|EED44843.1  
agla|OJJ84900.1 aluc|OJZ84160.1 aory|EIT77741.1 asyd|OJJ55791.1 atub|OJI89924.1 aver|OJJ06881.1  
awen|OJJ33118.1 azon|OJJ46334.1

Group7601: asyd|OJJ55776.1 acar|OOF91267.1 acla|EAW13328.1 afis|EAW20443.1 afla|EED44827.1  
afum|EBA27199.1 agla|OJJ84882.1 akaw|GAA87252.1 anid|CBF79306.1 aory|EIT77753.1 ater|EAU37716.1  
atub|OJI89907.1 awen|OJJ33133.1

Group7602: abra|OJJ76804.1 acar|OOF91298.1 acla|EAW13363.1 afis|EAW20477.1 agla|OJJ84840.1  
akaw|GAA87219.1 aluc|OJZ84211.1 anid|CBF79251.1 asyd|OJJ55745.1 atub|OJI89872.1 aver|OJJ06832.1  
awen|OJJ33172.1 azon|OJJ46379.1

Group7603: abra|OJJ76826.1 akaw|GAA87196.1 aluc|OJZ84238.1 anig|EHA27585.1 atub|OJI89845.1  
acla|EAW13386.1 ater|EAU37194.1 aver|OJJ06812.1 azon|OJJ46397.1 afis|EAW20500.1 afla|EED44743.1  
afum|EAL84555.1 awen|OJJ33201.1

Group7604: anid|CBF80489.1 acla|EAW11604.1 afis|EAW17175.1 afum|EAL86605.1 agla|OJJ89217.1  
aluc|OJZ83018.1 azon|OJJ50115.1 acar|OOF89864.1 azon|OJJ45906.1 afis|EAW16802.1 anid|CBF74922.1  
asyd|OJJ60080.1 aver|OJJ04167.1

Group7605: abra|OJJ76932.1 acar|OOF91376.1 acla|EAW09285.1 afis|EAW21862.1 afla|EED57684.1  
afum|EBA27477.1 agla|OJJ84273.1 akaw|GAA87107.1 aluc|OJZ84331.1 anig|EHA27665.1 aory|EIT79941.1  
atub|OJI89738.1 awen|OJJ34147.1

Group7606: abra|OJJ76958.1 acar|OOF91403.1 acla|EAW13480.1 afis|EAW20588.1 afla|EED52262.1  
afum|EAL84473.1 akaw|GAA87085.1 aluc|OJZ84353.1 anig|EHA27691.1 ater|EAU37091.1 awen|OJJ33296.1  
afila|EED52261.1 azon|OJJ50676.1

Group7607: abra|OJJ76973.1 acla|EAW13499.1 afis|EAW20598.1 afla|EED52206.1 afum|EAL84463.1  
agla|OJJ88655.1 aluc|OJZ84369.1 anig|EHA27704.1 asyd|OJJ55611.1 atub|OJI89699.1 aver|OJJ06686.1  
awen|OJJ33390.1 azon|OJJ50694.1

Group7608: abra|OJJ77003.1 acar|OOF91449.1 acla|EAW09012.1 afis|EAW25625.1 afla|EED54120.1  
afum|EAL84313.2 akaw|GAA87045.1 aluc|OJZ84402.1 anig|EHA27732.1 aory|EIT75973.1 ater|EAU32186.1  
atub|OJI89670.1 awen|OJJ36358.1

Group7609: abra|OJJ77063.1 acar|OOF92947.1 acla|EAW13512.1 afis|EAW20610.1 agla|OJJ88629.1  
akaw|GAA86989.1 aluc|OJZ84471.1 anid|CBF86955.1 asyd|OJJ55595.1 atub|OJI89607.1 aver|OJJ06674.1  
awen|OJJ33453.1 azon|OJJ50710.1

Group7610: abra|OJJ77108.1 acar|OOF92993.1 afis|EAW21597.1 afla|EED57821.1 afum|EAL92616.1  
agla|OJJ85791.1 akaw|GAA90820.1 aluc|OJZ84517.1 anig|EHA27815.1 aory|EIT81081.1 ater|EAU38286.1  
atub|OJI89563.1 awen|OJJ39085.1

Group7611: abra|OJJ77135.1 acar|OOF93026.1 acla|EAW12946.1 afis|EAW17721.1 afla|EED45723.1  
akaw|GAA90794.1 aluc|OJZ84545.1 anig|EHA27842.1 aory|EIT75556.1 ater|EAU31899.1 atub|OJI89535.1  
afum|EAL91536.1 awen|OJJ35791.1

Group7612: abra|OJJ77241.1 acar|OOF93122.1 afla|EED49532.1 agla|OJJ88644.1 akaw|GAA90702.1  
aluc|OJZ84651.1 anid|CBF74979.1 anig|EHA27934.1 aory|EIT82638.1 asyd|OJJ56620.1 atub|OJI89429.1  
aver|OJJ06106.1 awen|OJJ33583.1

Group7613: abra|OJJ77311.1 aluc|OJZ84723.1 anig|EHA27997.1 atub|OJI89360.1 acar|OOF91476.1  
afis|EAW17113.1 afla|EED51657.1 akaw|GAA91442.1 aluc|OJZ88724.1 acar|OOG00671.1 anig|EHA18429.1  
ater|EAU37965.1 akaw|GAA86060.1

Group7614: abra|OJJ77377.1 acla|EAW13097.1 afis|EAW17566.1 afla|EED49255.1 agla|OJJ81400.1  
akaw|GAA91383.1 anid|CBF90264.1 anig|EHA28054.1 aory|EIT82177.1 asyd|OJJ61940.1 aver|OJI96032.1  
awen|OJJ37287.1 azon|OJJ50981.1

Group7615: abra|OJJ77394.1 acar|OOF93262.1 afla|EED47334.1 akaw|GAA91368.1 aluc|OJZ84802.1  
anid|CBF81560.1 anig|EHA28067.1 aory|EIT82889.1 asyd|OJJ59500.1 ater|EAU38091.1 atub|OJI89281.1  
aver|OJJ02774.1 awen|OJJ32599.1

Group7616: afis|EAW16273.1 agla|OJJ88343.1 ater|EAU37448.1 acar|OOF99204.1 acla|EAW06714.1  
afila|EED53292.1 afum|EAL88894.1 akaw|GAA84101.1 anid|CBF86906.1 aory|EIT74828.1 asyd|OJJ64612.1  
atub|OJI82567.1 aver|OJI98708.1

Group7617: ater|EAU34098.1 acla|EAW11545.1 afis|EAW16825.1 afum|EAL86534.1 agla|OJJ84964.1  
akaw|GAA85253.1 aluc|OJZ90611.1 anig|EHA24049.1 awen|OJJ34434.1 azon|OJJ51296.1 afla|EED52804.1  
atub|OJI82033.1 aver|OJJ03112.1

Group7618: abra|OJJ77582.1 acar|OOF99145.1 afis|EAW16046.1 afla|EED56435.1 agla|OJJ86079.1  
akaw|GAA84043.1 anid|CBF75058.1 aory|EIT72830.1 asyd|OJJ60027.1 ater|EAU33591.1 aver|OJJ02257.1  
awen|OJJ30399.1 azon|OJJ45407.1

Group7619: abra|OJJ77609.1 acar|OOF99120.1 afla|EED45043.1 agla|OJJ88528.1 akaw|GAA84020.1  
aluc|OJZ80924.1 anid|CBF83741.1 aory|EIT73540.1 atub|OJI82654.1 aver|OJJ08840.1 awen|OJJ38696.1  
azon|OJJ47380.1 aluc|OJZ79623.1

Group7620: abra|OJJ77653.1 afis|EAW15991.1 afla|EED56363.1 afum|EAL88623.1 agla|OJJ86002.1  
akaw|GAA83982.1 aluc|OJZ80876.1 anid|CBF85821.1 aory|EIT73432.1 atub|OJI82701.1 aver|OJI98441.1  
awen|OJJ30479.1 acla|EAW06495.1

Group7621: abra|OJJ77678.1 acar|OOF90214.1 acla|EAW06590.1 afis|EAW16013.1 afla|EED56390.1  
agla|OJJ86038.1 aluc|OJZ80841.1 anid|CBF74564.1 asyd|OJJ57648.1 atub|OJI82726.1 aver|OJJ05507.1  
awen|OJJ30452.1 azon|OJJ45443.1

Group7622: abra|OJJ77746.1 afis|EAW25749.1 afla|EED56205.1 agla|OJJ78981.1 akaw|GAA83888.1  
aluc|OJZ90807.1 anig|EHA19535.1 aory|EIT73302.1 asyd|OJJ52526.1 atub|OJI82796.1 aver|OJJ03446.1  
afis|EAW16451.1 afla|EED56206.1

Group7623: abra|OJJ77788.1 afla|EED55127.1 afum|EAL84254.1 akaw|GAA83859.1 aluc|OJZ90843.1  
anig|EHA19564.1 aory|EIT81611.1 asyd|OJJ55633.1 ater|EAU39624.1 atub|OJI82830.1 aver|OJJ06710.1  
awen|OJJ40272.1 anid|CBF84133.1

Group7624: abra|OJJ77884.1 acar|OOF89934.1 acla|EAW12221.1 afla|EED55364.1 agla|OJJ80663.1  
akaw|GAA83770.1 aluc|OJZ90958.1 anig|EHA19661.1 aory|EIT80852.1 ater|EAU30465.1 atub|OJI82948.1  
awen|OJJ38337.1 azon|OJJ45939.1

Group7625: abra|OJJ77956.1 afis|EAW17321.1 anid|CBF80599.1 aory|EIT74761.1 asyd|OJJ61777.1  
ater|EAU35011.1 aver|OJJ06501.1 afla|EED48336.1 afla|EED56881.1 afum|EAL91157.1 anid|CBF84289.1  
aory|EIT77553.1 aver|OJJ05784.1

Group7626: abra|OJJ77966.1 afla|EED48626.1 akaw|GAA83697.1 aluc|OJZ91036.1 anig|EHA19735.1  
aory|EIT73214.1 ater|EAU33162.1 atub|OJI83032.1 acla|EAW15160.1 agla|OJJ80060.1 awen|OJJ31982.1  
afis|EAW20129.1 azon|OJJ45558.1

Group7627: abra|OJJ77985.1 acar|OOF96458.1 acla|EAW14397.1 afla|EED57498.1 akaw|GAA85995.1  
aluc|OJZ91060.1 anig|EHA19763.1 aory|EIT81880.1 asyd|OJJ62123.1 ater|EAU34295.1 atub|OJI83056.1  
aver|OJI96231.1 azon|OJJ50091.1

Group7628: abra|OJJ78183.1 acar|OOF90019.1 afla|EED52129.1 agla|OJJ80837.1 akaw|GAA85852.1  
aluc|OJZ91247.1 anid|CBF78478.1 anig|EHA19945.1 aory|EIT74481.1 asyd|OJJ65351.1 atub|OJI83244.1  
aver|OJI99499.1 awen|OJJ36155.1

Group7629: abra|OJJ78225.1 acar|OOF98633.1 afis|EAW21861.1 afla|EED46449.1 afum|EAL92874.1  
akaw|GAA85800.1 aluc|OJZ91300.1 anig|EHA19982.1 aory|EIT72436.1 ater|EAU30860.1 atub|OJI83291.1  
azon|OJJ43480.1 acla|EAW09286.1

Group7630: ater|EAU31107.1 acar|OOF98513.1 acla|EAW09159.1 afis|EAW21987.1 afla|EED46711.1  
afum|EAL93003.1 agla|OJJ84111.1 aluc|OJZ91453.1 anid|CBF82694.1 aory|EIT77827.1 asyd|OJJ61648.1  
atub|OJI83446.1 azon|OJJ43356.1

Group7631: aory|EIT82553.1 acla|EAW08882.1 afis|EAW15513.1 afla|EED49020.1 afum|EBA27246.1  
agla|OJJ80184.1 aluc|OJZ85346.1 asyd|OJJ56005.1 ater|EAU32611.1 atub|OJI80224.1 aver|OJJ04950.1  
awen|OJJ38167.1 azon|OJJ43127.1

Group7632: acar|OOF91385.1 akaw|GAA87103.1 aluc|OJZ84335.1 anig|EHA27669.1 atub|OJI89733.1  
afila|EED51040.1 agla|OJJ89266.1 aory|EIT77026.1 ater|EAU38160.1 aver|OJJ07298.1 awen|OJJ35815.1  
aory|EIT77224.1 ater|EAU29251.1

Group7633: acar|OOF92448.1 afla|EED52678.1 agla|OJJ89361.1 akaw|GAA87160.1 aluc|OJZ84274.1  
anid|CBF74993.1 anig|EHA27618.1 aory|EIT74189.1 asyd|OJJ52340.1 atub|OJI89807.1 aver|OJJ07183.1  
awen|OJJ32627.1 asyd|OJJ55023.1

Group7634: acar|OOF93488.1 acla|EAW08854.1 afis|EAW15542.1 afum|EBA27243.1 akaw|GAA87678.1  
aluc|OJZ85296.1 anid|CBF78185.1 anig|EHA25494.1 asyd|OJJ55975.1 atub|OJI80274.1 aver|OJJ04923.1  
awen|OJJ38203.1 azon|OJJ43092.1

Group7635: acar|OOF93828.1 acla|EAW11871.1 afis|EAW19482.1 afla|EED56692.1 afum|EAL87013.2  
akaw|GAA89680.1 anid|CBF75466.1 aory|EIT73954.1 asyd|OJJ59766.1 ater|EAU34794.1 atub|OJI87563.1  
awen|OJJ36889.1 aver|OJJ02521.1

Group7636: acar|OOF93947.1 acla|EAW10402.1 afis|EAW25172.1 afum|EAL89846.1 agla|OJJ85939.1  
akaw|GAA86925.1 aluc|OJZ90049.1 anid|CBF80114.1 anig|EHA21021.1 asyd|OJJ58328.1 ater|EAU32737.1  
atub|OJI84757.1 aver|OJJ02083.1

Group7637: acar|OOF93976.1 acla|EAW15056.1 afis|EAW20267.1 afla|EED46404.1 afum|EAL87186.2  
anid|CBF80632.1 aory|EIT72320.1 asyd|OJJ54649.1 ater|EAU36376.1 aver|OJJ07513.1 awen|OJJ33496.1  
azon|OJJ45798.1 agla|OJJ88715.1

Group7638: acar|OOF96492.1 acla|EAW13852.1 afis|EAW18566.1 afla|EED52787.1 afum|EAL93268.1  
agla|OJJ81615.1 akaw|GAA85098.1 anid|CBF70303.1 anig|EHA22105.1 aory|EIT78212.1 asyd|OJJ58727.1  
aver|OJJ01340.1 afla|EED52788.1

Group7639: acar|OOF96721.1 acla|EAW09480.1 afla|EED57891.1 akaw|GAA84869.1 aory|EIT82734.1  
aver|OJJ00062.1 afis|EAW21654.1 agla|OJJ79722.1 asyd|OJJ60730.1 ater|EAU38336.1 awen|OJJ33911.1  
anid|CBF83544.1 azon|OJJ48650.1

Group7640: acar|OOF97569.1 acla|EAW08582.1 afla|EED45084.1 agla|OJJ85248.1 akaw|GAA93165.1  
aluc|OJZ83024.1 anid|CBF80424.1 asyd|OJJ60255.1 ater|EAU32189.1 aver|OJI96217.1 awen|OJJ38283.1  
ater|EAU30502.1 aver|OJJ04002.1

Group7641: acar|OOF98032.1 acla|EAW10377.1 afis|EAW25216.1 afla|EED53691.1 afum|EAL89877.1  
agla|OJJ79191.1 akaw|GAA82852.1 anid|CBF85256.1 aory|EIT75334.1 ater|EAU34373.1 aver|OJI98069.1  
awen|OJJ40879.1 azon|OJJ44507.1

Group7642: acar|OOF99981.1 acla|EAW09864.1 afis|EAW21261.1 afla|EED54820.1 afum|EAL92276.1  
anid|CBF83335.1 aory|EIT79334.1 asyd|OJJ60606.1 ater|EAU35898.1 aver|OJI99928.1 awen|OJJ36578.1  
azon|OJJ44312.1 agla|OJJ87480.1

Group7643: acar|OOG00100.1 afis|EAW17241.1 afla|EED53344.1 agla|OJJ87208.1 anid|CBF81011.1  
anig|EHA18742.1 aory|EIT75023.1 ater|EAU30922.1 atub|OJI86839.1 aver|OJI95797.1 awen|OJJ40918.1  
azon|OJJ42282.1 azon|OJJ42283.1

Group7644: acar|OOG00456.1 acla|EAW06893.1 afis|EAW16510.1 afla|EED56163.1 afum|EAL89105.1  
akaw|GAA87960.1 aluc|OJZ81209.1 anid|CBF75570.1 aory|EIT76557.1 asyd|OJJ59710.1 ater|EAU36576.1  
awen|OJJ40314.1 azon|OJJ49174.1

Group7645: acar|OOG00632.1 aluc|OJZ88347.1 atub|OJI90943.1 acla|EAW13661.1 afla|EED53471.1  
acla|EAW13662.1 afis|EAW20293.1 afla|EED53472.1 aory|EIT75166.1 aver|OJI98795.1 asyd|OJJ57227.1  
anig|EHA18080.1 asyd|OJJ60232.1

Group7646: acla|EAW10694.1 afis|EAW24876.1 afla|EED47116.1 afum|EAL89526.1 agla|OJJ82097.1  
akaw|GAA81915.1 aluc|OJZ92283.1 anid|CBF75760.1 aory|EIT79321.1 asyd|OJJ57535.1 ater|EAU36425.1  
atub|OJI86714.1 azon|OJJ49329.1

Group7647: acla|EAW10856.1 afla|EED55753.1 agla|OJJ88738.1 akaw|GAA86558.1 aluc|OJZ85106.1  
aory|EIT77602.1 asyd|OJJ60982.1 ater|EAU29511.1 awen|OJJ36084.1 afla|EED45950.1 afla|EED49752.1  
aory|EIT76787.1 awen|OJJ30847.1

Group7648: acla|EAW11041.1 afis|EAW16184.1 afla|EED49624.1 afum|EAL88815.1 akaw|GAA89230.1  
aluc|OJZ86450.1 anid|CBF74597.1 aory|EIT80992.1 atub|OJI84076.1 azon|OJJ45953.1 azon|OJJ45948.1  
afla|EED53494.1 aory|EIT75178.1

Group7649: acla|EAW12225.1 afis|EAW15409.1 afla|EED45427.1 afum|EAL84237.1 agla|OJJ85886.1  
anid|CBF82111.1 aory|EIT82438.1 asyd|OJJ54285.1 ater|EAU36066.1 atub|OJI89934.1 aver|OJJ05239.1  
afla|EED56298.1 aory|EIT73343.1

Group7650: acla|EAW15253.1 afis|EAW20226.1 afla|EED51673.1 afum|EAL86331.1 agla|OJJ79162.1  
aory|EIT80656.1 asyd|OJJ53352.1 ater|EAU29654.1 aver|OJJ08391.1 awen|OJJ30859.1 azon|OJJ42818.1  
afis|EAW16759.1 ater|EAU36806.1

Group7651: agla|OJJ80803.1 asyd|OJJ53436.1 aver|OJJ08313.1 awen|OJJ41916.1 afis|EAW19695.1  
afla|EED57009.1 afum|EAL86832.1 anid|CBF80586.1 aory|EIT82270.1 aver|OJJ07164.1 anid|CBF71380.1  
ater|EAU32858.1 asyd|OJJ55043.1

Group7652: afis|EAW16829.1 afla|EED45150.1 afum|EAL86377.1 aory|EIT73769.1 asyd|OJJ57563.1  
aver|OJJ05615.1 awen|OJJ40310.1 agla|OJJ84439.1 anid|CBF77116.1 asyd|OJJ53724.1 ater|EAU32940.1  
awen|OJJ33485.1 aver|OJI98279.1

Group7653: afla|EED52180.1 anid|CBF80450.1 aory|EIT74338.1 ater|EAU32198.1 afla|EED57326.1  
anid|CBF79044.1 aory|EIT74098.1 asyd|OJJ54776.1 aver|OJJ07390.1 azon|OJJ42451.1 ater|EAU37845.1  
azon|OJJ45999.1 ater|EAU39619.1

Group7654: abra|OJJ65689.1 abra|OJJ75757.1 acar|OOF96842.1 afla|EED53478.1 akaw|GAA84489.1  
aluc|OJZ89210.1 anig|EHA23348.1 aory|EIT75235.1 asyd|OJJ58455.1 atub|OJI85582.1 aver|OJJ01055.1  
awen|OJJ30911.1

Group7655: abra|OJJ67660.1 abra|OJJ69554.1 afla|EED52538.1 akaw|GAA89175.1 aluc|OJZ81658.1  
anig|EHA25787.1 asyd|OJJ62553.1 ater|EAU37830.1 atub|OJI88525.1 awen|OJJ31283.1 aver|OJI96679.1  
awen|OJJ38789.1

Group7656: abra|OJJ67877.1 abra|OJJ74185.1 aluc|OJZ82012.1 aluc|OJZ89950.1 afis|EAW21800.1  
afum|EAL92825.2 akaw|GAA91885.1 anid|CBF78714.1 atub|OJI84561.1 akaw|GAA86831.1 anig|EHA27151.1  
atub|OJI84856.1

Group7657: acar|OOF90155.1 acar|OOF90156.1 abra|OJJ68813.1 akaw|GAA90441.1 aluc|OJZ85786.1  
anig|EHA24772.1 asyd|OJJ56211.1 atub|OJI79570.1 aver|OJJ05140.1 afla|EED46079.1 aory|EIT76405.1  
awen|OJJ31260.1

Group7658: acar|OOF94056.1 acar|OOF94126.1 abra|OJJ66387.1 afla|EED55698.1 akaw|GAA90253.1  
aluc|OJZ83087.1 anig|EHA28149.1 aory|EIT77086.1 ater|EAU36287.1 atub|OJI87857.1 awen|OJJ33623.1  
azon|OJJ50003.1

Group7659: acar|OOF94071.1 acar|OOF94141.1 afla|EED52544.1 agla|OJJ79026.1 anid|CBF89913.1  
awen|OJJ30839.1 akaw|GAA90226.1 aluc|OJZ83115.1 anig|EHA28178.1 asyd|OJJ62128.1 atub|OJI87819.1  
aver|OJI96236.1

Group7660: acar|OOF94091.1 acar|OOF94161.1 abra|OJJ66346.1 afla|EED47091.1 agla|OJJ80119.1  
akaw|GAA90220.1 aluc|OJZ83121.1 anid|CBF86771.1 anig|EHA28185.1 atub|OJI87812.1 awen|OJJ36364.1  
asyd|OJJ64687.1

Group7661: acar|OOF95047.1 acar|OOF95114.1 abra|OJJ68050.1 afla|EED47436.1 akaw|GAA90905.1 aluc|OJZ82921.1 anid|CBF76686.1 anig|EHA21344.1 aory|EIT81904.1 asyd|OJJ61225.1 aver|OJJ00548.1 awen|OJJ33879.1

Group7662: acar|OOF95094.1 acar|OOF95160.1 abra|OJJ74609.1 afla|EED47182.1 agla|OJJ82898.1 akaw|GAA81999.1 aluc|OJZ92189.1 asyd|OJJ59462.1 atub|OJI86618.1 aver|OJJ02812.1 awen|OJJ40387.1 azon|OJJ49237.1

Group7663: acar|OOF95624.1 acar|OOF95676.1 afis|EAW22113.1 afla|EED49706.1 afum|EAL91072.1 agla|OJJ78653.1 anid|CBF79167.1 anig|EHA26949.1 asyd|OJJ54536.1 aver|OJJ07297.1 awen|OJJ38661.1 azon|OJJ44489.1

Group7664: acar|OOF95642.1 acar|OOF95693.1 abra|OJJ74680.1 acla|EAW10715.1 agla|OJJ82070.1 akaw|GAA81934.1 aluc|OJZ92257.1 asyd|OJJ57551.1 atub|OJI86691.1 aver|OJJ05627.1 awen|OJJ40444.1 azon|OJJ44350.1

Group7665: acar|OOF95664.1 acar|OOF95715.1 abra|OJJ76653.1 afla|EED51631.1 akaw|GAA92993.1 aluc|OJZ91552.1 anig|EHA22587.1 asyd|OJJ53928.1 ater|EAU35677.1 atub|OJI86005.1 aver|OJJ08027.1 awen|OJJ34602.1

Group7666: acar|OOF96221.1 acar|OOF96259.1 abra|OJJ71505.1 afum|EBA27222.1 agla|OJJ78424.1 aluc|OJZ86244.1 anid|CBF84771.1 asyd|OJJ63240.1 atub|OJI84298.1 aver|OJI97716.1 awen|OJJ31790.1 azon|OJJ46324.1

Group7667: acar|OOF96920.1 acar|OOF96955.1 abra|OJJ70790.1 afis|EAW15864.1 agla|OJJ87245.1 akaw|GAA90106.1 aluc|OJZ84135.1 anid|CBF81198.1 anig|EHA19243.1 ater|EAU31677.1 atub|OJI90509.1 azon|OJJ47432.1

Group7668: acar|OOF96923.1 acar|OOF96958.1 abra|OJJ70787.1 agla|OJJ87242.1 aluc|OJZ84132.1 anid|CBF81204.1 anig|EHA19240.1 asyd|OJJ59306.1 atub|OJI90506.1 aver|OJJ02969.1 awen|OJJ36763.1 azon|OJJ47435.1

Group7669: acar|OOF97676.1 acar|OOF97724.1 anig|EHA20341.1 acla|EAW10074.1 afis|EAW25512.1 afla|EED54013.1 afum|EBA27395.1 aory|EIT78283.1 asyd|OJJ53032.1 aver|OJJ03812.1 awen|OJJ41254.1 azon|OJJ49623.1

Group7670: acar|OOG00249.1 acar|OOG00267.1 abra|OJJ67543.1 afla|EED44855.1 aluc|OJZ81389.1 anid|CBF78816.1 anig|EHA18682.1 aory|EIT82716.1 asyd|OJJ65264.1 atub|OJI91594.1 aver|OJI99415.1 awen|OJJ34504.1

Group7671: afis|EAW17068.1 afis|EAW18107.1 afis|EAW22051.1 afis|EAW24035.1 afis|EAW25562.1 afis|EAW22070.1 afis|EAW22021.1 afis|EAW22711.1 afis|EAW25561.1 afis|EAW22022.1 anid|CBF71258.1 anid|CBF84328.1

Group7672: afla|EED44759.1 afla|EED52734.1 aory|EIT77776.1 aory|EIT78252.1 abra|OJJ65869.1 afis|EAW20794.1 akaw|GAA92277.1 aluc|OJZ90171.1 anid|CBF80606.1 asyd|OJJ54706.1 atub|OJI81599.1 aver|OJJ07463.1

Group7673: afla|EED45192.1 afla|EED56934.1 afum|EAL89358.1 afum|EAL91840.1 aory|EIT73583.1 aory|EIT77457.1 afis|EAW18029.1 agla|OJJ79482.1 agla|OJJ86419.1 asyd|OJJ60254.1 ater|EAU31810.1 aver|OJJ04003.1

Group7674: afla|EED52293.1 afla|EED55253.1 aory|EIT74395.1 acar|OOF92107.1 akaw|GAA82888.1 anig|EHA20677.1 ater|EAU34227.1 atub|OJI81192.1 awen|OJJ36197.1 aory|EIT83537.1 ater|EAU30380.1 ater|EAU39011.1

Group7675: agla|OJJ78541.1 agla|OJJ79072.1 agla|OJJ85470.1 agla|OJJ80123.1 agla|OJJ84570.1 aluc|OJZ79503.1 aluc|OJZ79504.1 aluc|OJZ79505.1 aluc|OJZ79506.1 aluc|OJZ80207.1 anid|CBF81124.1 anid|CBF80690.1

Group7676: agla|OJJ78953.1 agla|OJJ86170.1 aver|OJJ01157.1 aver|OJJ02588.1 acar|OOF93635.1 asyd|OJJ59699.1 ater|EAU29902.1 awen|OJJ33469.1 azon|OJJ44552.1 agla|OJJ79879.1 asyd|OJJ58558.1 awen|OJJ39793.1

Group7677: agla|OJJ83762.1 agla|OJJ88099.1 afla|EED45943.1 anid|CBF76181.1 aory|EIT75503.1 asyd|OJJ54376.1 aver|OJJ05330.1 afla|EED53128.1 aory|EIT75245.1 ater|EAU38147.1 awen|OJJ35602.1 azon|OJJ46533.1

Group7678: agla|OJJ85586.1 agla|OJJ87986.1 agla|OJJ87987.1 abra|OJJ65967.1 acar|OOF92907.1 acla|EAW13588.1 akaw|GAA90842.1 aluc|OJZ82991.1 asyd|OJJ53311.1 atub|OJI89225.1 aver|OJJ08432.1 awen|OJJ30030.1

Group7679: agla|OJJ87968.1 agla|OJJ87970.1 acla|EAW06333.1 aory|EIT73259.1 aver|OJJ03126.1  
awen|OJJ40054.1 acar|OOF96480.1 aluc|OJZ80027.1 asyd|OJJ61373.1 azon|OJJ42338.1 azon|OJJ44456.1  
aver|OJJ00700.1

Group7680: agla|OJJ88217.1 abra|OJJ66972.1 akaw|GAA92192.1 aluc|OJZ85607.1 anig|EHA24919.1  
atub|OJI79400.1 acar|OOF89937.1 acla|EAW15004.1 asyd|OJJ53754.1 aver|OJJ04037.1 agla|OJJ80331.1  
ater|EAU29897.1

Group7681: akaw|GAA86475.1 akaw|GAA88273.1 aluc|OJZ82245.1 aluc|OJZ85016.1 anig|EHA25237.1  
anig|EHA28497.1 abra|OJJ69408.1 acar|OOF94324.1 atub|OJI88193.1 azon|OJJ45519.1 acar|OOF92472.1  
atub|OJI80581.1

Group7682: akaw|GAA92631.1 akaw|GAA93217.1 akaw|GAA93206.1 acla|EAW11094.1 afla|EED47301.1  
aluc|OJZ79896.1 aory|EIT82879.1 acar|OOF98664.1 agla|OJJ87887.1 atub|OJI86643.1 anig|EHA20977.1  
aluc|OJZ79813.1

Group7683: akaw|GAA93035.1 akaw|GAA93188.1 acla|EAW08081.1 anid|CBF76131.1 acla|EAW13564.1  
aory|EIT74602.1 afla|EED44723.1 agla|OJJ83536.1 aory|EIT74601.1 asyd|OJJ54400.1 ater|EAU29677.1  
agla|OJJ79573.1

Group7684: aluc|OJZ79517.1 aluc|OJZ82151.1 abra|OJJ77707.1 afis|EAW22827.1 agla|OJJ81580.1  
akaw|GAA83923.1 awen|OJJ29836.1 azon|OJJ49065.1 ater|EAU39006.1 agla|OJJ80694.1 anid|CBF69419.1  
aluc|OJZ90772.1

Group7685: anid|CBF74471.1 anid|CBF83141.1 acar|OOF90730.1 acla|EAW11661.1 agla|OJJ80959.1  
aluc|OJZ80568.1 anid|CBF69458.1 anig|EHA25630.1 asyd|OJJ57702.1 atub|OJI88363.1 aver|OJJ05462.1  
ater|EAU32818.1

Group7686: anig|EHA25380.1 anig|EHA27101.1 atub|OJI80429.1 atub|OJI84906.1 abra|OJJ73396.1  
acar|OOF95494.1 afla|EED48296.1 aory|EIT76312.1 ater|EAU37658.1 abra|OJJ74232.1 akaw|GAA86787.1  
aluc|OJZ89901.1

Group7687: aory|EIT75329.1 aory|EIT81312.1 acla|EAW10356.1 afis|EAW25238.1 afla|EED51106.1  
afum|EAL89899.1 anid|CBF71827.1 asyd|OJJ54971.1 ater|EAU34363.1 aver|OJJ07220.1 awen|OJJ40951.1  
afla|EED53705.1

Group7688: asyd|OJJ52874.1 asyd|OJJ56093.1 aver|OJJ05036.1 aver|OJJ05544.1 acla|EAW06675.1  
afis|EAW16090.1 afla|EED56822.1 afum|EAL88722.1 agla|OJJ89210.1 anid|CBF78311.1 aory|EIT73863.1  
ater|EAU32515.1

Group7689: asyd|OJJ53582.1 asyd|OJJ53655.1 ater|EAU29680.1 ater|EAU38473.1 abra|OJJ70110.1  
afla|EED52397.1 anid|CBF89322.1 anig|EHA24974.1 aory|EIT83285.1 atub|OJI87919.1 awen|OJJ30809.1  
ater|EAU30258.1

Group7690: asyd|OJJ56530.1 asyd|OJJ59832.1 aver|OJJ02456.1 aver|OJJ06193.1 abra|OJJ67083.1  
afis|EAW17161.1 afla|EED45643.1 afum|EAL86598.1 akaw|GAA91076.1 aluc|OJZ87891.1 aory|EIT75802.1  
atub|OJI80761.1

Group7691: ater|EAU34014.1 ater|EAU37263.1 abra|OJJ68840.1 acar|OOF90550.1 afla|EED48419.1  
afum|EAL89284.1 akaw|GAA90409.1 aluc|OJZ85819.1 anig|EHA24741.1 aory|EIT83107.1 atub|OJI79605.1  
awen|OJJ31448.1

Group7692: ater|EAU35408.1 ater|EAU37500.1 abra|OJJ66201.1 afis|EAW19378.1 afla|EED45776.1  
afum|EAL94092.1 akaw|GAA89083.1 aluc|OJZ80507.1 anid|CBF84662.1 anig|EHA25686.1 aory|EIT75685.1  
atub|OJI88423.1

Group7693: aver|OJI98033.1 aver|OJI98035.1 abra|OJJ73322.1 anig|EHA18329.1 asyd|OJJ62081.1  
atub|OJI88678.1 awen|OJJ38257.1 atub|OJI85498.1 akaw|GAA84567.1 aluc|OJZ89300.1 asyd|OJJ65301.1  
aver|OJI96189.1

Group7694: aver|OJJ06494.1 aver|OJJ07722.1 abra|OJJ68455.1 acar|OOF93942.1 acla|EAW14590.1  
akaw|GAA86919.1 aluc|OJZ90042.1 anid|CBF83906.1 anig|EHA21028.1 asyd|OJJ55417.1 atub|OJI84764.1  
aluc|OJZ92924.1

Group7695: awen|OJJ30775.1 awen|OJJ31706.1 acla|EAW12283.1 afla|EED45674.1 afum|EAL84398.1  
akaw|GAA92930.1 aluc|OJZ82523.1 aory|EIT75753.1 afis|EAW25725.1 anid|CBF83904.1 asyd|OJJ55415.1  
aver|OJJ06492.1

Group7696: awen|OJJ30786.1 awen|OJJ31695.1 abra|OJJ68903.1 afla|EED51119.1 akaw|GAA90348.1  
aluc|OJZ85884.1 anig|EHA24702.1 aory|EIT81361.1 asyd|OJJ57238.1 atub|OJI79670.1 aver|OJJ07748.1  
azon|OJJ42366.1

Group7697: awen|OJJ33531.1 awen|OJJ38755.1 abra|OJJ67826.1 acla|EAW11667.1 afla|EED44780.1  
agla|OJJ83419.1 anig|EHA22196.1 aory|EIT77765.1 asyd|OJJ60486.1 ater|EAU32819.1 aver|OJI99812.1  
azon|OJJ45348.1

Group7698: awen|OJJ34695.1 awen|OJJ35397.1 abra|OJJ76901.1 acar|OOF94976.1 afla|EED57113.1  
akaw|GAA87138.1 aluc|OJZ84299.1 anid|CBF73949.1 anig|EHA27636.1 aory|EIT73972.1 ater|EAU30247.1  
atub|OJI89770.1

Group7699: azon|OJJ42584.1 azon|OJJ45682.1 azon|OJJ50353.1 abra|OJJ68641.1 akaw|GAA89779.1  
aluc|OJZ81913.1 anig|EHA22332.1 atub|OJI84465.1 afis|EAW15860.1 abra|OJJ77938.1 acar|OOF95217.1  
azon|OJJ45691.1

Group7700: azon|OJJ44016.1 azon|OJJ44483.1 afis|EAW16698.1 afum|EAL89295.1 anig|EHA21621.1  
aory|EIT82617.1 asyd|OJJ61736.1 ater|EAU35154.1 afla|EED49533.1 aver|OJI95829.1 afla|EED54073.1  
aory|EIT75934.1

Group7701: azon|OJJ45223.1 azon|OJJ50375.1 azon|OJJ48030.1 afis|EAW20692.1 afum|EAL86274.1  
afis|EAW24588.1 agla|OJJ82377.1 asyd|OJJ59621.1 aver|OJI96482.1 awen|OJJ38307.1 awen|OJJ33829.1  
agla|OJJ86208.1

Group7702: ater|EAU29224.1 ater|EAU39627.1 ater|EAU37739.1 ater|EAU29404.1 ater|EAU36851.1  
ater|EAU32783.1 ater|EAU36852.1 ater|EAU34004.1 ater|EAU34003.1 ater|EAU34001.1 ater|EAU31662.1  
ater|EAU32784.1

Group7703: abra|OJJ65456.1 acla|EAW12622.1 afis|EAW18062.1 afla|EED51430.1 afum|EAL91873.1  
akaw|GAA92603.1 aluc|OJZ82621.1 anid|CBF70082.1 aory|EIT80753.1 atub|OJI84571.1 aver|OJI99055.1  
awen|OJJ39990.1

Group7704: abra|OJJ65521.1 acar|OOG00382.1 acla|EAW11461.1 afla|EED47679.1 akaw|GAA92935.1  
awen|OJJ32784.1 abra|OJJ75276.1 akaw|GAA91816.1 aluc|OJZ92838.1 aory|EIT80248.1 atub|OJI87294.1  
acla|EAW11448.1

Group7705: abra|OJJ65591.1 acla|EAW15024.1 afum|EAL91140.1 aluc|OJZ87727.1 anid|CBF70726.1  
anig|EHA20219.1 asyd|OJJ55956.1 ater|EAU37181.1 atub|OJI80916.1 aver|OJJ04902.1 awen|OJJ30889.1  
atub|OJI80915.1

Group7706: abra|OJJ65632.1 asyd|OJJ64077.1 ater|EAU35401.1 aver|OJI98165.1 abra|OJJ74155.1  
acar|OOF98984.1 akaw|GAA89728.1 aluc|OJZ80655.1 anig|EHA27177.1 ater|EAU34546.1 atub|OJI87510.1  
awen|OJJ35908.1

Group7707: abra|OJJ65685.1 afla|EED44898.1 akaw|GAA85808.1 aory|EIT83245.1 atub|OJI83487.1  
abra|OJJ66513.1 acla|EAW08894.1 akaw|GAA91198.1 aluc|OJZ81533.1 anig|EHA25903.1 atub|OJI88654.1  
atub|OJI83281.1

Group7708: abra|OJJ65696.1 afla|EED56835.1 afum|EAL84265.1 agla|OJJ84576.1 anig|EHA18816.1  
aory|EIT73898.1 ater|EAU33255.1 aver|OJJ07756.1 awen|OJJ30262.1 azon|OJJ43501.1 afla|EED54691.1  
aory|EIT78815.1

Group7709: abra|OJJ65740.1 acar|OOF98411.1 acla|EAW14577.1 agla|OJJ86269.1 akaw|GAA91461.1  
aluc|OJZ81130.1 anid|CBF78778.1 asyd|OJJ65242.1 awen|OJJ30186.1 azon|OJJ44976.1 atub|OJI84622.1  
aver|OJI99393.1

Group7710: abra|OJJ65744.1 afis|EAW25302.1 afla|EED53781.1 akaw|GAA93269.1 aory|EIT78412.1  
asyd|OJJ53534.1 ater|EAU30712.1 aver|OJJ07518.1 awen|OJJ31268.1 azon|OJJ43189.1 acar|OOF92061.1  
asyd|OJJ54638.1

Group7711: abra|OJJ65774.1 acla|EAW15144.1 afis|EAW22742.1 afum|EAL84238.1 akaw|GAA82879.1  
aluc|OJZ87447.1 anig|EHA20670.1 ater|EAU36809.1 atub|OJI81202.1 aver|OJI99435.1 azon|OJJ50701.1  
afum|EAL90453.1

Group7712: abra|OJJ65779.1 afis|EAW17148.1 afla|EED51030.1 agla|OJJ79807.1 akaw|GAA90884.1  
aluc|OJZ82948.1 anig|EHA21365.1 aory|EIT77069.1 asyd|OJJ53779.1 atub|OJI89180.1 aver|OJJ07887.1  
awen|OJJ35385.1

Group7713: abra|OJJ65797.1 acar|OOF89998.1 afla|EED46363.1 agla|OJJ88225.1 anig|EHA22244.1  
aory|EIT81235.1 abra|OJJ70155.1 akaw|GAA85143.1 aluc|OJZ86494.1 anig|EHA22150.1 atub|OJI84032.1  
anid|CBF74180.1

Group7714: abra|OJJ65810.1 acar|OOF96445.1 afla|EED47494.1 akaw|GAA92878.1 aluc|OJZ82530.1  
anid|CBF70340.1 anig|EHA22496.1 aory|EIT74547.1 asyd|OJJ58707.1 ater|EAU33071.1 atub|OJI88775.1  
aver|OJJ01320.1

Group7715: abra|OJJ65898.1 acar|OOF97277.1 akaw|GAA86006.1 aluc|OJZ90232.1 anig|EHA23733.1 atub|OJI81662.1 abra|OJJ66271.1 afla|EED52054.1 aory|EIT81394.1 ater|EAU30259.1 agla|OJJ80348.1 agla|OJJ80349.1

Group7716: abra|OJJ65904.1 acar|OOF93264.1 afla|EED56024.1 afum|EAL84406.1 akaw|GAA92327.1 aluc|OJZ90225.1 anid|CBF74692.1 anig|EHA23726.1 asyd|OJJ60212.1 atub|OJI81658.1 aver|OJJ04056.1 awen|OJJ30875.1

Group7717: abra|OJJ65921.1 acar|OOF94982.1 afla|EED46586.1 agla|OJJ85290.1 akaw|GAA87345.1 aluc|OJZ89669.1 anig|EHA23707.1 aory|EIT77838.1 atub|OJI81640.1 awen|OJJ31277.1 akaw|GAA92311.1 atub|OJI85131.1

Group7718: abra|OJJ65929.1 acar|OOF94990.1 afla|EED50955.1 agla|OJJ86022.1 akaw|GAA92307.1 aluc|OJZ90203.1 anig|EHA23700.1 aory|EIT76963.1 asyd|OJJ62113.1 atub|OJI81632.1 aver|OJI99296.1 awen|OJJ30467.1

Group7719: abra|OJJ65933.1 acar|OOF94998.1 afla|EED54754.1 akaw|GAA92302.1 aluc|OJZ90199.1 anid|CBF75864.1 aory|EIT78874.1 asyd|OJJ60226.1 ater|EAU34018.1 atub|OJI81627.1 aver|OJJ04041.1 awen|OJJ36435.1

Group7720: agla|OJJ88524.1 awen|OJJ30076.1 abra|OJJ75971.1 acar|OOF99949.1 afla|EED54790.1 akaw|GAA88985.1 aluc|OJZ89418.1 anig|EHA23170.1 aory|EIT79391.1 asyd|OJJ52192.1 atub|OJI85376.1 aver|OJJ05954.1

Group7721: abra|OJJ66060.1 afla|EED49908.1 akaw|GAA93130.1 aluc|OJZ81103.1 anid|CBF84615.1 anig|EHA19266.1 aory|EIT72451.1 asyd|OJJ55638.1 ater|EAU30987.1 atub|OJI82476.1 aver|OJJ06721.1 awen|OJJ33567.1

Group7722: afla|EED52065.1 azon|OJJ51778.1 abra|OJJ71647.1 acar|OOF96361.1 akaw|GAA89282.1 aluc|OJZ86391.1 anig|EHA21507.1 asyd|OJJ63120.1 ater|EAU36529.1 atub|OJI84142.1 aver|OJI97838.1 awen|OJJ32029.1

Group7723: abra|OJJ66253.1 acar|OOF90723.1 acla|EAW13651.1 afis|EAW19954.1 afla|EED45864.1 afum|EAL84961.1 akaw|GAA89034.1 aluc|OJZ80561.1 anig|EHA25636.1 aory|EIT75666.1 ater|EAU36873.1 atub|OJI88370.1

Group7724: abra|OJJ66265.1 acar|OOF97513.1 afla|EED48579.1 agla|OJJ82945.1 akaw|GAA89029.1 aluc|OJZ80575.1 anig|EHA25623.1 aory|EIT73107.1 asyd|OJJ58036.1 atub|OJI88356.1 aver|OJJ04363.1 awen|OJJ32355.1

Group7725: afla|EED49619.1 afum|EAL89790.1 aory|EIT78191.1 afis|EAW25119.1 awen|OJJ40738.1 acla|EAW11037.1 aory|EIT80982.1 akaw|GAA84863.1 aluc|OJZ86808.1 atub|OJI83709.1 awen|OJJ33430.1 afla|EED52806.1

Group7726: abra|OJJ66293.1 afis|EAW15415.1 abra|OJJ68852.1 acar|OOF98662.1 aluc|OJZ91912.1 anid|CBF75772.1 asyd|OJJ62871.1 aver|OJI96924.1 azon|OJJ48282.1 azon|OJJ50411.1 akaw|GAA82235.1 atub|OJI86362.1

Group7727: abra|OJJ66363.1 afum|EAL84456.1 agla|OJJ85514.1 aluc|OJZ83105.1 anig|EHA28168.1 asyd|OJJ62939.1 atub|OJI87829.1 aver|OJI98052.1 awen|OJJ37289.1 azon|OJJ42066.1 agla|OJJ81972.1 atub|OJI87830.1

Group7728: abra|OJJ66439.1 acar|OOF90290.1 afis|EAW17056.1 afla|EED56940.1 afum|EBA27278.1 agla|OJJ84863.1 akaw|GAA90301.1 aluc|OJZ83036.1 asyd|OJJ55134.1 aver|OJJ07070.1 awen|OJJ37360.1 aver|OJJ07069.1

Group7729: abra|OJJ66480.1 afla|EED46095.1 akaw|GAA92463.1 aluc|OJZ81554.1 anid|CBF82153.1 anig|EHA25880.1 aory|EIT76478.1 asyd|OJJ54330.1 ater|EAU37662.1 atub|OJI88631.1 aver|OJJ05284.1 awen|OJJ41955.1

Group7730: abra|OJJ66498.1 acla|EAW11079.1 afla|EED48918.1 agla|OJJ78855.1 aory|EIT81209.1 asyd|OJJ61762.1 ater|EAU32698.1 aver|OJI95861.1 azon|OJJ44219.1 anid|CBF85162.1 asyd|OJJ54546.1 aver|OJJ07631.1

Group7731: abra|OJJ66565.1 acla|EAW10931.1 afis|EAW20930.1 afla|EED50284.1 afum|EAL84704.1 agla|OJJ83958.1 aluc|OJZ81480.1 anid|CBF82512.1 asyd|OJJ54082.1 aver|OJJ08656.1 awen|OJJ34388.1 azon|OJJ48120.1

Group7732: abra|OJJ66626.1 acar|OOF91050.1 akaw|GAA91099.1 aluc|OJZ81422.1 anig|EHA25999.1 asyd|OJJ54025.1 ater|EAU38637.1 atub|OJI88759.1 awen|OJJ34322.1 azon|OJJ48068.1 anid|CBF82607.1 aver|OJJ08715.1



Group7733: abra|OJJ66634.1 acar|OOF91057.1 acla|EAW10861.1 afis|EAW20997.1 afum|EAL84631.1 akaw|GAA91094.1 aluc|OJZ81413.1 anid|CBF82631.1 anig|EHA26005.1 ater|EAU38645.1 atub|OJI88766.1 aver|OJJ08729.1

Group7734: ater|EAU39538.1 acla|EAW12270.1 akaw|GAA93168.1 aluc|OJZ83027.1 asyd|OJJ54186.1 afla|EED51446.1 agla|OJJ78762.1 aory|EIT80520.1 asyd|OJJ56240.1 aver|OJJ07428.1 aory|EIT81292.1 aory|EIT74777.1

Group7735: abra|OJJ66800.1 acar|OOF89950.1 afla|EED50558.1 agla|OJJ86487.1 akaw|GAA86864.1 aluc|OJZ89988.1 aory|EIT82148.1 ater|EAU38752.1 atub|OJI84822.1 awen|OJJ33316.1 azon|OJJ42587.1 awen|OJJ35519.1

Group7736: abra|OJJ66807.1 acar|OOF89865.1 afla|EED45504.1 afum|EAL86260.1 anid|CBF74948.1 anig|EHA22864.1 asyd|OJJ63939.1 atub|OJI79335.1 aver|OJI97003.1 awen|OJJ31669.1 azon|OJJ47393.1 aory|EIT75746.1

Group7737: abra|OJJ66823.1 akaw|GAA90458.1 aluc|OJZ85766.1 anig|EHA24790.1 ater|EAU31569.1 atub|OJI79550.1 azon|OJJ45133.1 aory|EIT74723.1 afla|EED50055.1 afla|EED50056.1 awen|OJJ31438.1 awen|OJJ40138.1

Group7738: abra|OJJ66848.1 acla|EAW14427.1 afis|EAW19134.1 afum|EAL93866.1 agla|OJJ88609.1 akaw|GAA91557.1 aluc|OJZ85735.1 anid|CBF86334.1 anig|EHA24815.1 atub|OJI79520.1 awen|OJJ37470.1 azon|OJJ51148.1

Group7739: abra|OJJ66884.1 acar|OOF91658.1 afla|EED54231.1 akaw|GAA91526.1 aluc|OJZ85698.1 anig|EHA24844.1 asyd|OJJ65021.1 ater|EAU37307.1 atub|OJI79488.1 aver|OJI99140.1 awen|OJJ37519.1 anid|CBF86278.1

Group7740: abra|OJJ66947.1 akaw|GAA91473.1 aluc|OJZ85633.1 anig|EHA24898.1 asyd|OJJ63595.1 atub|OJI79423.1 aver|OJI97341.1 azon|OJJ50918.1 abra|OJJ76875.1 afla|EED49864.1 aory|EIT83407.1 ater|EAU38550.1

Group7741: azon|OJJ46492.1 abra|OJJ72303.1 acar|OOF94916.1 afla|EED44929.1 akaw|GAA86054.1 aluc|OJZ90284.1 anid|CBF81770.1 anig|EHA23774.1 asyd|OJJ59613.1 atub|OJI81708.1 aver|OJJ02656.1 aory|EIT73476.1

Group7742: abra|OJJ67079.1 afis|EAW17160.1 afla|EED45644.1 afum|EAL86597.1 akaw|GAA91077.1 aluc|OJZ87892.1 aory|EIT75452.1 asyd|OJJ59830.1 atub|OJI80760.1 aver|OJJ02457.1 asyd|OJJ56531.1 aver|OJJ06192.1

Group7743: abra|OJJ67085.1 afis|EAW17162.1 afla|EED45642.1 afum|EAL86599.1 akaw|GAA91074.1 aluc|OJZ87889.1 aory|EIT75477.1 asyd|OJJ59824.1 atub|OJI80763.1 aver|OJJ02463.1 asyd|OJJ56529.1 aver|OJJ06194.1

Group7744: abra|OJJ67088.1 acar|OOF98739.1 afla|EED52556.1 akaw|GAA91073.1 aluc|OJZ87887.1 anig|EHA20190.1 aory|EIT74195.1 atub|OJI80764.1 aver|OJJ02171.1 awen|OJJ39932.1 akaw|GAA93120.1 agla|OJJ80749.1

Group7745: abra|OJJ67121.1 acar|OOF98430.1 afla|EED49575.1 akaw|GAA91044.1 aluc|OJZ87854.1 anid|CBF75960.1 anig|EHA20159.1 aory|EIT82634.1 ater|EAU35486.1 atub|OJI80793.1 aver|OJI98019.1 azon|OJJ42389.1

Group7746: abra|OJJ67122.1 acar|OOF98429.1 afla|EED52834.1 akaw|GAA91043.1 aluc|OJZ87853.1 anig|EHA20158.1 aory|EIT78628.1 ater|EAU30047.1 atub|OJI80794.1 aver|OJJ05221.1 aory|EIT78659.1 aver|OJJ05222.1

Group7747: abra|OJJ67216.1 acar|OOF98342.1 afla|EED48099.1 aluc|OJZ87756.1 anid|CBF73467.1 anig|EHA20242.1 aory|EIT76260.1 asyd|OJJ59932.1 atub|OJI80887.1 aver|OJJ02355.1 akaw|GAA90961.1 anid|CBF75223.1

Group7748: abra|OJJ67235.1 acar|OOF98317.1 acla|EAW14733.1 akaw|GAA91659.1 aluc|OJZ87740.1 anig|EHA20232.1 atub|OJI80900.1 ater|EAU32758.1 agla|OJJ80474.1 anid|CBF87447.1 aory|EIT82827.1 ater|EAU33881.1

Group7749: abra|OJJ67262.1 afla|EED44923.1 agla|OJJ79287.1 akaw|GAA91678.1 aluc|OJZ87716.1 anig|EHA20210.1 aory|EIT73516.1 ater|EAU31936.1 atub|OJI80926.1 aver|OJJ00775.1 awen|OJJ35785.1 afum|EAL92105.1

Group7750: abra|OJJ67288.1 acla|EAW11926.1 asyd|OJJ65353.1 aver|OJJ08392.1 abra|OJJ67574.1 acar|OOF91948.1 afla|EED49682.1 akaw|GAA89103.1 anig|EHA25705.1 aory|EIT81004.1 atub|OJI88442.1 aver|OJJ05142.1

Group7751: abra|OJJ67292.1 acar|OOF92519.1 afla|EED45659.1 agla|OJJ79146.1 akaw|GAA86521.1 aluc|OJZ85067.1 anid|CBF81706.1 anig|EHA25281.1 aory|EIT75796.1 asyd|OJJ59568.1 atub|OJI80531.1 aver|OJJ02699.1

Group7752: abra|OJJ67295.1 acar|OOF92517.1 afla|EED45655.1 agla|OJJ79149.1 akaw|GAA86518.1 aluc|OJZ85064.1 anid|CBF81700.1 anig|EHA25278.1 aory|EIT75769.1 asyd|OJJ59571.1 atub|OJI80534.1 aver|OJJ02696.1

Group7753: abra|OJJ67469.1 acar|OOF92365.1 afis|EAW18408.1 afla|EED52999.1 afum|EAL93088.1 agla|OJJ84975.1 akaw|GAA86367.1 aluc|OJZ84896.1 anig|EHA25124.1 aory|EIT77441.1 atub|OJI80702.1 awen|OJJ31741.1

Group7754: abra|OJJ67527.1 afla|EED45121.1 akaw|GAA88135.1 aluc|OJZ81406.1 anig|EHA18700.1 aory|EIT73612.1 ater|EAU38026.1 atub|OJI91613.1 azon|OJJ46856.1 abra|OJJ71709.1 afis|EAW16733.1 aluc|OJZ82080.1

Group7755: abra|OJJ67547.1 akaw|GAA88113.1 aluc|OJZ81385.1 anig|EHA18678.1 atub|OJI91590.1 awen|OJJ30837.1 acar|OOF91839.1 afum|EAL86145.1 afis|EAW24472.1 afla|EED51419.1 aory|EIT80675.1 azon|OJJ46868.1

Group7756: abra|OJJ67600.1 acar|OOF91953.1 afla|EED57077.1 akaw|GAA89119.1 aluc|OJZ81720.1 anig|EHA25719.1 ater|EAU36925.1 atub|OJI88461.1 awen|OJJ41650.1 acar|OOF99338.1 aory|EIT82257.1 atub|OJI85988.1

Group7757: abra|OJJ67610.1 akaw|GAA89127.1 aluc|OJZ81711.1 anig|EHA25728.1 atub|OJI88473.1 abra|OJJ77181.1 acar|OOF91800.1 afla|EED47268.1 agla|OJJ84568.1 aory|EIT79210.1 asyd|OJJ64972.1 aver|OJI99096.1

Group7758: abra|OJJ67628.1 afis|EAW22230.1 afla|EED48945.1 afum|EAL90963.1 agla|OJJ86822.1 akaw|GAA89148.1 aluc|OJZ81688.1 anig|EHA25755.1 aory|EIT80023.1 ater|EAU30273.1 atub|OJI88491.1 awen|OJJ33560.1

Group7759: abra|OJJ67668.1 acla|EAW12018.1 afis|EAW19659.1 afum|EAL86864.1 akaw|GAA89184.1 aluc|OJZ81647.1 anig|EHA25796.1 asyd|OJJ56442.1 atub|OJI88535.1 aver|OJJ06279.1 awen|OJJ40941.1 azon|OJJ47339.1

Group7760: abra|OJJ67689.1 acar|OOF97598.1 akaw|GAA89200.1 aluc|OJZ81630.1 anig|EHA25813.1 aory|EIT72450.1 asyd|OJJ62817.1 ater|EAU33823.1 atub|OJI88550.1 aver|OJI96861.1 awen|OJJ35797.1 afla|EED49893.1

Group7761: asyd|OJJ56367.1 abra|OJJ74235.1 akaw|GAA86785.1 aluc|OJZ89896.1 anig|EHA27095.1 ater|EAU37996.1 atub|OJI84911.1 azon|OJJ43210.1 afla|EED56906.1 aory|EIT77585.1 ater|EAU37207.1 aver|OJJ06347.1

Group7762: abra|OJJ67736.1 acar|OOF90933.1 afla|EED45459.1 akaw|GAA92426.1 aluc|OJZ81596.1 anid|CBF82814.1 anig|EHA25845.1 aory|EIT82392.1 ater|EAU30795.1 atub|OJI88586.1 aver|OJJ00894.1 acla|EAW15012.1

Group7763: abra|OJJ67778.1 anig|EHA26129.1 awen|OJJ36195.1 abra|OJJ74149.1 acar|OOF95576.1 agla|OJJ78610.1 akaw|GAA89734.1 aluc|OJZ80649.1 anig|EHA27183.1 asyd|OJJ61973.1 atub|OJI87504.1 aver|OJI96066.1

Group7764: abra|OJJ67832.1 acar|OOG00391.1 afis|EAW16691.1 afla|EED54749.1 akaw|GAA91841.1 aluc|OJZ82057.1 anig|EHA22202.1 atub|OJI84616.1 azon|OJJ42293.1 acar|OOG00607.1 acla|EAW07057.1 ater|EAU38378.1

Group7765: abra|OJJ67837.1 acar|OOF92011.1 afla|EED45645.1 akaw|GAA91842.1 aluc|OJZ82055.1 anid|CBF82517.1 anig|EHA22205.1 aory|EIT75527.1 asyd|OJJ54085.1 atub|OJI84614.1 aver|OJJ08653.1 awen|OJJ34680.1

Group7766: aory|EIT80699.1 acla|EAW11754.1 afis|EAW23787.1 afla|EED51596.1 afum|EAL87221.1 agla|OJJ78814.1 akaw|GAA91852.1 anid|CBF79849.1 awen|OJJ40590.1 azon|OJJ42846.1 asyd|OJJ58714.1 aver|OJJ01327.1

Group7767: abra|OJJ67875.1 acla|EAW09035.1 afis|EAW22733.1 afum|EAL90462.1 agla|OJJ78521.1 akaw|GAA91883.1 aluc|OJZ82014.1 anid|CBF84340.1 anig|EHA22242.1 ater|EAU38784.1 atub|OJI84563.1 ater|EAU39160.1

Group7768: abra|OJJ67893.1 acar|OOF92867.1 afla|EED51694.1 akaw|GAA91898.1 aluc|OJZ81997.1 anid|CBF84531.1 anig|EHA22259.1 aory|EIT80449.1 atub|OJI84547.1 awen|OJJ36322.1 asyd|OJJ53499.1 aver|OJJ08246.1

Group7769: abra|OJJ67947.1 acar|OOF92795.1 acla|EAW11634.1 afis|EAW23823.1 afla|EED51985.1 akaw|GAA91250.1 aluc|OJZ82819.1 anig|EHA21259.1 aory|EIT81415.1 ater|EAU31378.1 atub|OJI89049.1 awen|OJJ31423.1

Group7770: abra|OJJ68013.1 acar|OOF92055.1 akaw|GAA90938.1 aluc|OJZ82886.1 anid|CBF87409.1 anig|EHA21312.1 asyd|OJJ55062.1 atub|OJI89111.1 awen|OJJ31349.1 azon|OJJ50427.1 aver|OJJ07149.1 anid|CBF82887.1

Group7771: abra|OJJ68034.1 acar|OOF91809.1 afla|EED55047.1 afum|EAL86257.1 akaw|GAA90918.1 aluc|OJZ82908.1 anig|EHA21331.1 asyd|OJJ53716.1 ater|EAU36651.1 atub|OJI89134.1 aver|OJJ07842.1 awen|OJJ33893.1

Group7772: abra|OJJ68044.1 acar|OOF90406.1 acla|EAW13675.1 afis|EAW19932.1 afla|EED52285.1 afum|EAL84977.2 akaw|GAA90909.1 aluc|OJZ82917.1 anig|EHA21340.1 aory|EIT74359.1 atub|OJI89143.1 awen|OJJ31365.1

Group7773: abra|OJJ68082.1 acar|OOF93881.1 afla|EED51805.1 akaw|GAA86868.1 aluc|OJZ89992.1 anid|CBF71451.1 anig|EHA27363.1 aory|EIT81765.1 asyd|OJJ54952.1 atub|OJI84817.1 aver|OJJ07244.1 azon|OJJ45036.1

Group7774: abra|OJJ68097.1 acar|OOF93900.1 akaw|GAA86882.1 aluc|OJZ90005.1 anid|CBF78037.1 anig|EHA27380.1 asyd|OJJ55223.1 ater|EAU39549.1 atub|OJI84803.1 akaw|GAA86881.1 anid|CBF78039.1 atub|OJI84802.1

Group7775: abra|OJJ68130.1 acar|OOF90084.1 afla|EED45616.1 agla|OJJ85560.1 akaw|GAA86910.1 aluc|OJZ90033.1 anid|CBF80537.1 anig|EHA27409.1 asyd|OJJ54656.1 atub|OJI84773.1 aver|OJJ07506.1 awen|OJJ36982.1

Group7776: abra|OJJ68183.1 acar|OOF97478.1 afum|EAL91413.1 agla|OJJ81346.1 akaw|GAA83263.1 aluc|OJZ83769.1 anig|EHA18909.1 asyd|OJJ61979.1 atub|OJI90140.1 aver|OJI96071.1 awen|OJJ37246.1 azon|OJJ50944.1

Group7777: abra|OJJ68226.1 acar|OOF97523.1 acla|EAW14601.1 afla|EED46365.1 agla|OJJ79978.1 akaw|GAA83217.1 aluc|OJZ83719.1 anig|EHA18868.1 aory|EIT81222.1 asyd|OJJ57588.1 atub|OJI90093.1 aver|OJJ05594.1

Group7778: abra|OJJ68252.1 acar|OOF97531.1 afla|EED44935.1 afum|EAL91141.1 akaw|GAA83209.1 aluc|OJZ83711.1 anid|CBF74645.1 anig|EHA18862.1 aory|EIT73520.1 asyd|OJJ55958.1 atub|OJI90084.1 aver|OJJ04904.1

Group7779: abra|OJJ68255.1 acla|EAW08789.1 agla|OJJ84445.1 akaw|GAA83206.1 aluc|OJZ83708.1 anid|CBF71209.1 anig|EHA18859.1 asyd|OJJ54941.1 atub|OJI90080.1 awen|OJJ32016.1 azon|OJJ51812.1 agla|OJJ84446.1

Group7780: abra|OJJ68271.1 acar|OOF97550.1 akaw|GAA83198.1 awen|OJJ30297.1 abra|OJJ78223.1 acla|EAW12024.1 akaw|GAA85802.1 aluc|OJZ91298.1 anig|EHA19980.1 asyd|OJJ53516.1 atub|OJI83288.1 aver|OJJ08235.1

Group7781: ater|EAU30250.1 abra|OJJ74423.1 afla|EED53650.1 agla|OJJ88972.1 akaw|GAA87316.1 aluc|OJZ89701.1 anig|EHA26935.1 aory|EIT75315.1 atub|OJI85100.1 awen|OJJ40838.1 atub|OJI80442.1 aver|OJI95754.1

Group7782: abra|OJJ68319.1 acar|OOF93891.1 afla|EED52687.1 agla|OJJ85435.1 akaw|GAA83154.1 aluc|OJZ83654.1 anig|EHA18805.1 aory|EIT74301.1 asyd|OJJ63047.1 atub|OJI90023.1 aver|OJI97916.1 awen|OJJ39602.1

Group7783: abra|OJJ68321.1 acar|OOF97580.1 afla|EED52685.1 agla|OJJ85434.1 akaw|GAA83152.1 aluc|OJZ83652.1 anig|EHA18803.1 aory|EIT74311.1 atub|OJI90021.1 awen|OJJ39604.1 aver|OJJ04463.1 azon|OJJ50222.1

Group7784: abra|OJJ68354.1 acar|OOF96867.1 afla|EED53489.1 aluc|OJZ83596.1 anig|EHA18756.1 aory|EIT74860.1 asyd|OJJ56979.1 ater|EAU32939.1 atub|OJI89968.1 aver|OJJ03308.1 awen|OJJ36413.1 akaw|GAA92126.1

Group7785: abra|OJJ68356.1 afla|EED49517.1 akaw|GAA92128.1 aluc|OJZ83594.1 anig|EHA18754.1 aory|EIT75080.1 asyd|OJJ56977.1 ater|EAU39004.1 atub|OJI89966.1 aver|OJJ03310.1 awen|OJJ36415.1 afla|EED53491.1

Group7786: abra|OJJ68420.1 afla|EED50221.1 akaw|GAA92528.1 aluc|OJZ90077.1 anig|EHA20996.1 aory|EIT77318.1 ater|EAU34260.1 atub|OJI84729.1 agla|OJJ78584.1 asyd|OJJ59203.1 awen|OJJ36121.1 aver|OJJ01815.1

Group7787: abra|OJJ68498.1 acla|EAW14276.1 afis|EAW18998.1 afum|EAL93733.1 agla|OJJ81777.1 aluc|OJZ82711.1 anig|EHA21166.1 asyd|OJJ64683.1 atub|OJI88944.1 aver|OJI98785.1 awen|OJJ38286.1 azon|OJJ50677.1

Group7788: ater|EAU34701.1 acla|EAW12100.1 afis|EAW17286.1 afla|EED48832.1 afum|EAL86704.1 agla|OJJ81091.1 akaw|GAA92755.1 aluc|OJZ92964.1 anig|EHA26011.1 aory|EIT81284.1 atub|OJI87422.1 azon|OJJ45535.1

Group7789: abra|OJJ68733.1 acla|EAW12515.1 afis|EAW24132.1 agla|OJJ87209.1 aluc|OJZ81797.1 anid|CBF86564.1 anig|EHA22419.1 asyd|OJJ64850.1 atub|OJI84368.1 aver|OJI98962.1 awen|OJJ41357.1 azon|OJJ48821.1

Group7790: acar|OOF92243.1 akaw|GAA89898.1 anig|EHA22443.1 acla|EAW12497.1 afis|EAW24148.1 afla|EED46785.1 afum|EAL92003.1 agla|OJJ87228.1 anid|CBF77919.1 aory|EIT72557.1 ater|EAU30580.1 awen|OJJ41331.1

Group7791: abra|OJJ68836.1 acar|OOF90554.1 acla|EAW15291.1 afis|EAW20302.1 afum|EAL85432.1 akaw|GAA90415.1 aluc|OJZ85815.1 anid|CBF85210.1 asyd|OJJ63032.1 ater|EAU32048.1 atub|OJI79601.1 aver|OJI97936.1

Group7792: abra|OJJ68846.1 acar|OOF90543.1 afis|EAW20250.1 afla|EED57095.1 afum|EAL85368.1 akaw|GAA90402.1 aluc|OJZ85826.1 anig|EHA24735.1 aory|EIT82289.1 ater|EAU32041.1 atub|OJI79614.1 awen|OJJ31254.1

Group7793: abra|OJJ68899.1 afla|EED56741.1 akaw|GAA90352.1 aluc|OJZ85880.1 anig|EHA24706.1 aory|EIT73870.1 asyd|OJJ56704.1 ater|EAU34587.1 atub|OJI79666.1 aver|OJJ06021.1 awen|OJJ34050.1 azon|OJJ48181.1

Group7794: abra|OJJ68922.1 acar|OOF90181.1 agla|OJJ87041.1 akaw|GAA90326.1 aluc|OJZ85907.1 anig|EHA24685.1 asyd|OJJ65138.1 ater|EAU36408.1 atub|OJI79691.1 aver|OJJ03960.1 awen|OJJ37940.1 anig|EHA24687.1

Group7795: abra|OJJ69096.1 acla|EAW08735.1 afis|EAW15701.1 afum|EAL85647.2 aluc|OJZ86086.1 anid|CBF71112.1 anig|EHA24530.1 asyd|OJJ52714.1 atub|OJI79882.1 aver|OJJ04743.1 azon|OJJ43193.1 awen|OJJ38394.1

Group7796: abra|OJJ69141.1 acar|OOF91161.1 agla|OJJ81903.1 akaw|GAA86316.1 aluc|OJZ86127.1 anid|CBF71040.1 anig|EHA24493.1 asyd|OJJ52668.1 atub|OJI79923.1 aver|OJJ04694.1 awen|OJJ38441.1 azon|OJJ43804.1

Group7797: abra|OJJ69221.1 acla|EAW08625.1 afis|EAW15807.1 afla|EED51239.1 afum|EAL85544.1 akaw|GAA92229.1 asyd|OJJ52600.1 ater|EAU33437.1 atub|OJI79995.1 awen|OJJ38517.1 anig|EHA24421.1 aory|EIT83183.1

Group7798: abra|OJJ69226.1 acar|OOF91094.1 afla|EED51235.1 akaw|GAA92234.1 aluc|OJZ86206.1 anid|CBF75273.1 aory|EIT83173.1 asyd|OJJ55914.1 ater|EAU33441.1 atub|OJI80000.1 aver|OJJ04854.1 awen|OJJ38523.1

Group7799: abra|OJJ69261.1 acar|OOF91061.1 afis|EAW15845.1 afum|EAL85506.2 akaw|GAA92266.1 aluc|OJZ86240.1 anid|CBF70837.1 anig|EHA24389.1 aory|EIT80402.1 aver|OJJ04593.1 awen|OJJ38560.1 azon|OJJ43707.1

Group7800: abra|OJJ69331.1 acar|OOF94396.1 acla|EAW14709.1 afis|EAW24244.1 afum|EAL85912.1 akaw|GAA88202.1 aluc|OJZ82163.1 anid|CBF74212.1 anig|EHA28569.1 atub|OJI88274.1 awen|OJJ33055.1 afla|EED48030.1

Group7801: abra|OJJ69390.1 acar|OOF98420.1 afla|EED47296.1 agla|OJJ87839.1 akaw|GAA88258.1 aluc|OJZ82225.1 anig|EHA20735.1 aory|EIT79184.1 atub|OJI88210.1 awen|OJJ38322.1 azon|OJJ46846.1 acar|OOF98138.1

Group7802: akaw|GAA88303.1 acar|OOF94232.1 acla|EAW09970.1 afis|EAW21118.1 afla|EED51791.1 afum|EAL92142.2 agla|OJJ80093.1 anid|CBF87027.1 aory|EIT81687.1 ater|EAU36781.1 aver|OJI99775.1 awen|OJJ36448.1

Group7803: abra|OJJ69540.1 acar|OOF90592.1 afla|EED54771.1 agla|OJJ86495.1 akaw|GAA88388.1 aluc|OJZ82376.1 anid|CBF79835.1 anig|EHA28388.1 asyd|OJJ58146.1 atub|OJI88066.1 aver|OJJ04258.1 awen|OJJ29883.1

Group7804: abra|OJJ69556.1 afla|EED56588.1 agla|OJJ83853.1 akaw|GAA91565.1 aluc|OJZ82383.1 anig|EHA28380.1 aory|EIT79666.1 asyd|OJJ53860.1 atub|OJI88057.1 aver|OJJ07960.1 awen|OJJ39006.1 acar|OOF92424.1

Group7805: abra|OJJ69558.1 acar|OOF91592.1 afla|EED54880.1 akaw|GAA91567.1 aluc|OJZ82385.1  
anid|CBF85622.1 anig|EHA28378.1 aory|EIT79358.1 asyd|OJJ64201.1 atub|OJI88055.1 aver|OJI98290.1  
awen|OJJ40806.1

Group7806: abra|OJJ69608.1 acar|OOF92699.1 afis|EAW23703.1 afla|EED51841.1 agla|OJJ88173.1  
akaw|GAA91593.1 aluc|OJZ82416.1 anig|EHA28352.1 aory|EIT81731.1 ater|EAU31563.1 atub|OJI88025.1  
awen|OJJ33654.1

Group7807: abra|OJJ69643.1 acar|OOF95564.1 acla|EAW10801.1 afis|EAW24776.1 afum|EBA27382.1  
agla|OJJ88224.1 akaw|GAA91621.1 aluc|OJZ82447.1 anig|EHA28326.1 atub|OJI87992.1 awen|OJJ37936.1  
azon|OJJ51806.1

Group7808: abra|OJJ69644.1 acar|OOF95563.1 acla|EAW10804.1 afis|EAW24774.1 afla|EED51027.1  
akaw|GAA91622.1 aluc|OJZ82448.1 anid|CBF89919.1 anig|EHA28325.1 aory|EIT77043.1 atub|OJI87991.1  
afum|EAL89415.1

Group7809: abra|OJJ69645.1 acar|OOF96863.1 agla|OJJ83837.1 akaw|GAA91623.1 aluc|OJZ82449.1  
anid|CBF70110.1 anig|EHA28323.1 asyd|OJJ58822.1 atub|OJI87990.1 aver|OJJ01426.1 awen|OJJ35596.1  
azon|OJJ46917.1

Group7810: abra|OJJ69685.1 acar|OOF93997.1 afis|EAW20308.1 agla|OJJ86261.1 akaw|GAA88809.1  
aluc|OJZ82492.1 anig|EHA28280.1 aory|EIT79333.1 asyd|OJJ53574.1 atub|OJI87940.1 aver|OJJ08183.1  
awen|OJJ31264.1

Group7811: abra|OJJ69800.1 acar|OOF93577.1 afis|EAW24740.1 afum|EBA27380.1 akaw|GAA87859.1  
aluc|OJZ85500.1 anid|CBF80398.1 anig|EHA25033.1 asyd|OJJ54760.1 atub|OJI80065.1 aver|OJJ07410.1  
azon|OJJ45020.1

Group7812: abra|OJJ69813.1 acar|OOF93564.1 afla|EED53287.1 akaw|GAA87844.1 aluc|OJZ85482.1  
anig|EHA25022.1 aory|EIT74928.1 atub|OJI80082.1 abra|OJJ72703.1 asyd|OJJ54670.1 aver|OJJ07500.1  
azon|OJJ44532.1

Group7813: abra|OJJ69858.1 acar|OOF90331.1 afla|EED56644.1 akaw|GAA87798.1 aluc|OJZ85433.1  
anig|EHA24978.1 aory|EIT81635.1 asyd|OJJ57658.1 atub|OJI80135.1 aver|OJJ05519.1 afla|EED55141.1  
anid|CBF83114.1

Group7814: abra|OJJ69866.1 acar|OOF90334.1 acla|EAW15314.1 akaw|GAA87790.1 aluc|OJZ85425.1  
anid|CBF89416.1 anig|EHA25604.1 asyd|OJJ52768.1 atub|OJI80150.1 aver|OJJ08751.1 awen|OJJ38713.1  
awen|OJJ31346.1

Group7815: abra|OJJ69893.1 acar|OOF93413.1 acla|EAW09497.1 afis|EAW21639.1 afum|EAL92673.1  
akaw|GAA87757.1 aluc|OJZ85390.1 anid|CBF83523.1 anig|EHA25574.1 ater|EAU37628.1 atub|OJI80180.1  
ater|EAU38324.1

Group7816: abra|OJJ69900.1 acar|OOF93418.1 afis|EAW15472.1 akaw|GAA87751.1 aluc|OJZ85384.1  
anid|CBF78230.1 anig|EHA25568.1 asyd|OJJ56035.1 atub|OJI80186.1 aver|OJJ04981.1 azon|OJJ43161.1  
afum|EAL85849.1

Group7817: abra|OJJ69973.1 acar|OOF93478.1 afis|EAW15557.1 agla|OJJ85197.1 akaw|GAA87688.1  
aluc|OJZ85308.1 anig|EHA25504.1 asyd|OJJ55963.1 atub|OJI80263.1 aver|OJJ04909.1 awen|OJJ38215.1  
azon|OJJ43080.1

Group7818: abra|OJJ69997.1 acar|OOF93504.1 agla|OJJ81896.1 akaw|GAA87664.1 aluc|OJZ85282.1  
anid|CBF75974.1 anig|EHA25479.1 aory|EIT80225.1 atub|OJI80288.1 aver|OJJ05474.1 awen|OJJ37818.1  
asyd|OJJ57690.1

Group7819: abra|OJJ70108.1 acar|OOG00113.1 afis|EAW25649.1 agla|OJJ81746.1 akaw|GAA92808.1  
aluc|OJZ79628.1 aluc|OJZ88731.1 anig|EHA26920.1 aory|EIT75909.1 azon|OJJ50376.1 afla|EED54160.1  
anig|EHA19939.1

Group7820: abra|OJJ70120.1 acar|OOF89935.1 afla|EED46964.1 akaw|GAA86653.1 aluc|OJZ85211.1  
anid|CBF86364.1 anig|EHA25414.1 aory|EIT72580.1 asyd|OJJ64968.1 atub|OJI80393.1 aver|OJI99092.1  
awen|OJJ35043.1

Group7821: abra|OJJ70171.1 acla|EAW13458.1 afis|EAW19015.1 afla|EED53215.1 afum|EBA27502.1  
anid|CBF82209.1 anig|EHA25802.1 aory|EIT75022.1 asyd|OJJ57406.1 ater|EAU31285.1 aver|OJI99546.1  
awen|OJJ32946.1

Group7822: abra|OJJ70172.1 acla|EAW13459.1 afis|EAW19016.1 afla|EED53216.1 afum|EAL93749.1  
anid|CBF83507.1 anig|EHA25803.1 aory|EIT75109.1 asyd|OJJ52785.1 ater|EAU31286.1 aver|OJI99547.1  
awen|OJJ32945.1

Group7823: abra|OJJ70226.1 acla|EAW15360.1 afis|EAW17375.1 afum|EAL91211.1 akaw|GAA86556.1  
aluc|OJZ85104.1 anid|CBF84300.1 anig|EHA25325.1 asyd|OJJ58561.1 atub|OJI80493.1 aver|OJJ01160.1  
azon|OJJ46423.1

Group7824: abra|OJJ70250.1 acar|OOF92547.1 acla|EAW08787.1 afis|EAW15616.1 afum|EAL85719.1  
akaw|GAA86541.1 aluc|OJZ85089.1 anid|CBF78513.1 anig|EHA25309.1 ater|EAU31808.1 atub|OJI80510.1  
awen|OJJ33723.1

Group7825: abra|OJJ70286.1 acar|OOF91739.1 acla|EAW09934.1 afla|EED50211.1 akaw|GAA92862.1  
aluc|OJZ82551.1 anig|EHA22515.1 aory|EIT77364.1 ater|EAU30374.1 atub|OJI88792.1 awen|OJJ38796.1  
azon|OJJ45868.1

Group7826: abra|OJJ70290.1 acar|OOF91743.1 afla|EED46566.1 akaw|GAA92858.1 aluc|OJZ82555.1  
anig|EHA22519.1 aory|EIT77917.1 asyd|OJJ54711.1 atub|OJI88797.1 afis|EAW17781.1 aver|OJJ07455.1  
afla|EED46567.1

Group7827: acla|EAW14390.1 acar|OOF91576.1 afis|EAW19097.1 afla|EED54331.1 afum|EAL93829.1  
agla|OJJ84504.1 aory|EIT76031.1 asyd|OJJ58053.1 ater|EAU32145.1 aver|OJJ04350.1 awen|OJJ32490.1  
anid|CBF79702.1

Group7828: abra|OJJ70309.1 acar|OOF91764.1 akaw|GAA93013.1 aluc|OJZ82572.1 anid|CBF80500.1  
anig|EHA27502.1 asyd|OJJ61524.1 ater|EAU30199.1 atub|OJI88816.1 aver|OJJ00856.1 awen|OJJ36272.1  
azon|OJJ50648.1

Group7829: abra|OJJ70320.1 acar|OOF91766.1 afla|EED56893.1 akaw|GAA92576.1 aluc|OJZ82589.1  
anid|CBF73568.1 anig|EHA27486.1 asyd|OJJ56696.1 atub|OJI88824.1 aver|OJJ06028.1 awen|OJJ34442.1  
aory|EIT77499.1

Group7830: abra|OJJ70327.1 acar|OOF91782.1 acla|EAW12321.1 afis|EAW25727.1 afum|EBA27177.1  
agla|OJJ89276.1 akaw|GAA92582.1 aluc|OJZ82596.1 anid|CBF86212.1 atub|OJI88831.1 awen|OJJ37148.1  
azon|OJJ42554.1

Group7831: abra|OJJ70351.1 afla|EED52083.1 afum|EAL91020.1 agla|OJJ79299.1 akaw|GAA83851.1  
aluc|OJZ90864.1 anig|EHA19577.1 aory|EIT76900.1 atub|OJI82862.1 aver|OJJ03454.1 awen|OJJ40164.1  
azon|OJJ42391.1

Group7832: abra|OJJ70371.1 acar|OOF91899.1 afis|EAW19877.1 afla|EED45164.1 afum|EAL85020.1  
akaw|GAA91979.1 aluc|OJZ82635.1 anig|EHA27444.1 aory|EIT73622.1 ater|EAU29244.1 atub|OJI88866.1  
azon|OJJ42477.1

Group7833: abra|OJJ70412.1 acar|OOF91861.1 akaw|GAA91944.1 aluc|OJZ82676.1 anig|EHA21044.1  
anig|EHA21045.1 atub|OJI88911.1 acar|OOF91860.1 atub|OJI88912.1 ater|EAU31053.1 anid|CBF87094.1  
aver|OJJ03744.1

Group7834: abra|OJJ70417.1 acar|OOF91854.1 afla|EED54715.1 agla|OJJ79104.1 akaw|GAA91940.1  
aluc|OJZ82682.1 anig|EHA21050.1 aory|EIT78950.1 asyd|OJJ60504.1 atub|OJI88914.1 aver|OJI99828.1  
awen|OJJ32604.1

Group7835: abra|OJJ70420.1 acar|OOF91849.1 afis|EAW19696.1 afla|EED47623.1 afum|EAL86831.1  
akaw|GAA91937.1 aluc|OJZ82685.1 anid|CBF86383.1 anig|EHA21053.1 aory|EIT80179.1 ater|EAU32952.1  
atub|OJI88917.1

Group7836: abra|OJJ70422.1 acar|OOF91768.1 afla|EED46001.1 akaw|GAA91935.1 aluc|OJZ82687.1  
anig|EHA21055.1 aory|EIT75442.1 asyd|OJJ62598.1 atub|OJI88919.1 aver|OJI96743.1 awen|OJJ29996.1  
azon|OJJ45158.1

Group7837: abra|OJJ70425.1 acar|OOF91771.1 afla|EED46006.1 agla|OJJ86983.1 akaw|GAA90152.1  
aluc|OJZ83196.1 anig|EHA21059.1 asyd|OJJ62595.1 ater|EAU35266.1 atub|OJI87743.1 aver|OJI96740.1  
awen|OJJ30000.1

Group7838: abra|OJJ70442.1 acar|OOF93068.1 afla|EED46067.1 akaw|GAA90138.1 aluc|OJZ83208.1  
anig|EHA21069.1 aory|EIT83478.1 asyd|OJJ62584.1 ater|EAU31776.1 atub|OJI87729.1 aver|OJI96706.1  
awen|OJJ39649.1

Group7839: abra|OJJ70842.1 acla|EAW13283.1 afla|EED48191.1 agla|OJJ82047.1 akaw|GAA91710.1  
aluc|OJZ87679.1 anig|EHA20869.1 aory|EIT72946.1 asyd|OJJ52438.1 ater|EAU34819.1 atub|OJI80964.1  
awen|OJJ36923.1

Group7840: abra|OJJ70887.1 acar|OOF98226.1 acla|EAW10810.1 afla|EED55841.1 akaw|GAA87405.1  
aluc|OJZ87635.1 anig|EHA20832.1 aory|EIT76887.1 atub|OJI81013.1 agla|OJJ86415.1 awen|OJJ37992.1  
azon|OJJ51825.1

Group7841: abra|OJJ70904.1 acar|OOF98216.1 afla|EED45869.1 akaw|GAA87418.1 aluc|OJZ87620.1  
anid|CBF84155.1 anig|EHA20818.1 asyd|OJJ57116.1 atub|OJI81029.1 aver|OJJ03184.1 awen|OJJ35402.1  
azon|OJJ43192.1

Group7842: abra|OJJ70939.1 acar|OOF98194.1 acla|EAW10504.1 afis|EAW25063.1 afum|EAL89732.1  
agla|OJJ89132.1 akaw|GAA83005.1 aluc|OJZ87589.1 anig|EHA20790.1 atub|OJI81059.1 awen|OJJ40670.1  
azon|OJJ44051.1

Group7843: abra|OJJ70993.1 afis|EAW23803.1 afum|EAL87237.1 agla|OJJ84592.1 akaw|GAA82955.1  
aluc|OJZ87535.1 anig|EHA20744.1 atub|OJI81114.1 awen|OJJ33418.1 akaw|GAA89072.1 aluc|OJZ80520.1  
atub|OJI88410.1

Group7844: abra|OJJ71094.1 afla|EED46486.1 agla|OJJ79797.1 abra|OJJ76614.1 afis|EAW17368.1  
afum|EAL91205.2 aluc|OJZ84838.1 anig|EHA22619.1 asyd|OJJ53392.1 ater|EAU32673.1 aver|OJI95849.1  
awen|OJJ33526.1

Group7845: abra|OJJ71116.1 acar|OOF98034.1 acla|EAW13262.1 agla|OJJ80844.1 akaw|GAA82854.1  
aluc|OJZ87419.1 anig|EHA20643.1 ater|EAU31348.1 atub|OJI81229.1 awen|OJJ34859.1 azon|OJJ45669.1  
ater|EAU37564.1

Group7846: afis|EAW21014.1 afum|EAL92052.1 azon|OJJ49135.1 afla|EED56757.1 akaw|GAA84860.1  
aluc|OJZ86811.1 anid|CBF86706.1 aory|EIT73891.1 asyd|OJJ64739.1 atub|OJI83706.1 aver|OJI98843.1  
anig|EHA21811.1

Group7847: abra|OJJ71164.1 afla|EED57983.1 akaw|GAA82815.1 aluc|OJZ87376.1 anid|CBF82377.1  
anig|EHA20608.1 aory|EIT79735.1 asyd|OJJ54196.1 ater|EAU39203.1 atub|OJI81270.1 aver|OJJ08530.1  
aluc|OJZ82082.1

Group7848: abra|OJJ71195.1 acar|OOF97973.1 afla|EED53750.1 akaw|GAA82788.1 aluc|OJZ87347.1  
aory|EIT78458.1 atub|OJI81296.1 ater|EAU34426.1 afis|EAW25284.1 awen|OJJ40997.1 azon|OJJ44587.1  
agla|OJJ89258.1

Group7849: abra|OJJ71330.1 afis|EAW25385.1 afla|EED53862.1 afum|EAL90044.1 agla|OJJ83781.1  
akaw|GAA82662.1 aluc|OJZ87212.1 anig|EHA20463.1 aory|EIT78452.1 ater|EAU34532.1 atub|OJI81427.1  
awen|OJJ41112.1

Group7850: abra|OJJ71581.1 akaw|GAA89343.1 aluc|OJZ86318.1 anid|CBF71811.1 anig|EHA21557.1  
aory|EIT73902.1 asyd|OJJ53778.1 ater|EAU38707.1 atub|OJI84217.1 aver|OJJ07883.1 awen|OJJ31863.1  
azon|OJJ45160.1

Group7851: acla|EAW12315.1 agla|OJJ80335.1 azon|OJJ51051.1 afis|EAW16906.1 afla|EED56571.1  
afum|EAL86443.2 aory|EIT79619.1 asyd|OJJ54823.1 aver|OJJ07338.1 awen|OJJ37376.1 anid|CBF80359.1  
agla|OJJ79458.1

Group7852: acar|OOF96344.1 akaw|GAA89299.1 acla|EAW15167.1 afis|EAW20136.1 afla|EED57216.1  
afum|EBA27226.1 anid|CBF84967.1 aory|EIT74069.1 asyd|OJJ63137.1 ater|EAU38757.1 aver|OJI97817.1  
awen|OJJ32005.1

Group7853: abra|OJJ71713.1 acar|OOF96418.1 acla|EAW06437.1 afla|EED52843.1 agla|OJJ81583.1  
akaw|GAA85176.1 aluc|OJZ86457.1 anig|EHA21450.1 aory|EIT78624.1 ater|EAU30023.1 atub|OJI84070.1  
awen|OJJ31098.1

Group7854: abra|OJJ71737.1 agla|OJJ86803.1 akaw|GAA85152.1 aluc|OJZ86485.1 anig|EHA22178.1  
aory|EIT77234.1 asyd|OJJ52527.1 ater|EAU30949.1 atub|OJI84044.1 aver|OJJ08764.1 aluc|OJZ85544.1  
aver|OJI99258.1

Group7855: abra|OJJ71777.1 acar|OOF96451.1 afla|EED52267.1 akaw|GAA85131.1 aluc|OJZ86507.1  
anig|EHA22138.1 aory|EIT74460.1 asyd|OJJ65341.1 ater|EAU37665.1 atub|OJI84020.1 aver|OJI99487.1  
awen|OJJ31285.1

Group7856: afum|EAL86238.1 afis|EAW24608.1 afla|EED56495.1 agla|OJJ80104.1 akaw|GAA89018.1  
aluc|OJZ80586.1 anig|EHA25066.1 aory|EIT72853.1 asyd|OJJ55480.1 ater|EAU39133.1 aver|OJJ06559.1  
awen|OJJ35866.1

Group7857: abra|OJJ71913.1 acar|OOF96571.1 agla|OJJ82336.1 akaw|GAA85008.1 aluc|OJZ86650.1  
anid|CBF73516.1 anig|EHA22020.1 asyd|OJJ54492.1 atub|OJI83877.1 aver|OJJ07687.1 awen|OJJ36285.1  
anid|CBF80792.1

Group7858: abra|OJJ71963.1 acar|OOF96608.1 acla|EAW09573.1 afla|EED56018.1 agla|OJJ85744.1  
aluc|OJZ86699.1 asyd|OJJ61042.1 ater|EAU34969.1 atub|OJI83827.1 aver|OJJ00358.1 awen|OJJ39123.1  
azon|OJJ51453.1

Group7859: abra|OJJ72026.1 acar|OOF96675.1 afla|EED45205.1 akaw|GAA84906.1 aluc|OJZ86763.1  
anid|CBF75720.1 anig|EHA21916.1 aory|EIT73679.1 asyd|OJJ57504.1 atub|OJI83764.1 aver|OJJ05674.1  
awen|OJJ37803.1

Group7860: abra|OJJ72027.1 acar|OOF96676.1 afla|EED45204.1 akaw|GAA84905.1 aluc|OJZ86764.1  
anid|CBF75722.1 anig|EHA21915.1 aory|EIT73567.1 asyd|OJJ57505.1 atub|OJI83763.1 aver|OJJ05673.1  
awen|OJJ37804.1

Group7861: abra|OJJ72070.1 acar|OOF90293.1 afis|EAW17757.1 afum|EAL85397.1 akaw|GAA84864.1  
aluc|OJZ86807.1 anid|CBF82213.1 anig|EHA21876.1 asyd|OJJ54441.1 ater|EAU30971.1 atub|OJI83710.1  
acla|EAW13297.1

Group7862: abra|OJJ72127.1 acar|OOF96767.1 afis|EAW21627.1 afum|EAL92662.1 akaw|GAA84796.1  
aluc|OJZ86884.1 anid|CBF76682.1 anig|EHA21760.1 asyd|OJJ61224.1 atub|OJI83635.1 aver|OJJ00547.1  
awen|OJJ33878.1

Group7863: abra|OJJ72177.1 acar|OOF99533.1 afla|EED54144.1 aory|EIT76039.1 asyd|OJJ61371.1  
aver|OJI99825.1 abra|OJJ76995.1 agla|OJJ86188.1 akaw|GAA87051.1 anig|EHA27725.1 awen|OJJ34432.1  
aver|OJJ00698.1

Group7864: abra|OJJ72190.1 acar|OOF96816.1 afla|EED48889.1 agla|OJJ85282.1 akaw|GAA84743.1  
aluc|OJZ86941.1 anig|EHA21703.1 aory|EIT81228.1 asyd|OJJ57932.1 atub|OJI83581.1 aver|OJJ04465.1  
awen|OJJ34658.1

Group7865: abra|OJJ72228.1 acar|OOF96851.1 afla|EED48168.1 akaw|GAA84709.1 aluc|OJZ86978.1  
anid|CBF76010.1 aory|EIT83028.1 asyd|OJJ52437.1 atub|OJI83542.1 aver|OJJ03973.1 awen|OJJ31248.1  
azon|OJJ43481.1

Group7866: abra|OJJ72231.1 acar|OOF96854.1 afla|EED50944.1 akaw|GAA84706.1 aluc|OJZ86981.1  
anid|CBF74713.1 anig|EHA21668.1 aory|EIT76980.1 asyd|OJJ60206.1 atub|OJI83539.1 aver|OJJ04061.1  
awen|OJJ35937.1

Group7867: abra|OJJ72242.1 acar|OOF96868.1 afla|EED50952.1 akaw|GAA84697.1 aluc|OJZ86990.1  
anig|EHA21655.1 aory|EIT76950.1 asyd|OJJ62640.1 ater|EAU39427.1 atub|OJI83529.1 aver|OJI99288.1  
awen|OJJ34409.1

Group7868: abra|OJJ72243.1 acar|OOF96869.1 afla|EED50953.1 akaw|GAA84696.1 aluc|OJZ86991.1  
anig|EHA21654.1 aory|EIT76992.1 asyd|OJJ62641.1 atub|OJI83528.1 aver|OJI99287.1 awen|OJJ34410.1  
azon|OJJ50347.1

Group7869: abra|OJJ72263.1 acar|OOF96895.1 acla|EAW12115.1 afis|EAW17270.1 afla|EED56563.1  
afum|EAL86687.1 akaw|GAA84668.1 aluc|OJZ87021.1 aory|EIT79621.1 ater|EAU37128.1 atub|OJI83497.1  
azon|OJJ45520.1

Group7870: abra|OJJ72270.1 afis|EAW19948.1 afum|EAL84967.1 akaw|GAA86025.1 aluc|OJZ90252.1  
anid|CBF84251.1 anig|EHA23748.1 asyd|OJJ57199.1 ater|EAU30030.1 atub|OJI81678.1 aver|OJJ03091.1  
awen|OJJ31253.1

Group7871: abra|OJJ72274.1 acar|OOF94944.1 agla|OJJ80826.1 akaw|GAA86029.1 aluc|OJZ90256.1  
anid|CBF71384.1 anig|EHA23751.1 asyd|OJJ55066.1 atub|OJI81682.1 aver|OJJ07145.1 azon|OJJ48317.1  
agla|OJJ78691.1

Group7872: abra|OJJ72286.1 acla|EAW12016.1 afis|EAW19655.1 afla|EED57007.1 afum|EAL86867.1  
agla|OJJ80801.1 akaw|GAA86038.1 anid|CBF71367.1 aory|EIT82254.1 ater|EAU32865.1 awen|OJJ41907.1  
azon|OJJ42692.1

Group7873: abra|OJJ72569.1 afla|EED57598.1 agla|OJJ88512.1 anid|CBF83005.1 aory|EIT82930.1  
asyd|OJJ61505.1 aver|OJJ00842.1 awen|OJJ34790.1 acla|EAW07186.1 afis|EAW22199.1 afum|EBA27418.1  
ater|EAU34215.1

Group7874: abra|OJJ72921.1 acla|EAW06470.1 afla|EED58092.1 agla|OJJ89347.1 aluc|OJZ83431.1  
anid|CBF81087.1 aory|EIT79162.1 asyd|OJJ56466.1 atub|OJI82319.1 aver|OJJ06253.1 awen|OJJ35609.1  
azon|OJJ46929.1

Group7875: abra|OJJ73092.1 acar|OOF92447.1 acla|EAW13486.1 afla|EED52090.1 afum|EAL92097.1  
agla|OJJ81318.1 akaw|GAA88068.1 aluc|OJZ81333.1 anid|CBF78401.1 anig|EHA18637.1 ater|EAU32753.1  
atub|OJI91536.1

Group7876: anig|EHA18495.1 aory|EIT76893.1 acar|OOG00493.1 acla|EAW06928.1 afis|EAW16543.1  
afla|EED56122.1 afum|EAL89141.1 agla|OJJ82780.1 anid|CBF81752.1 asyd|OJJ59603.1 ater|EAU36606.1  
awen|OJJ40277.1



Group7877: abra|OJJ73329.1 afla|EED48232.1 aluc|OJZ91199.1 anig|EHA19899.1 aory|EIT72888.1  
asyd|OJJ57942.1 ater|EAU37460.1 atub|OJI83216.1 aver|OJJ04454.1 afis|EAW25728.1 aver|OJJ01758.1  
awen|OJJ30936.1

Group7878: abra|OJJ73413.1 acar|OOG00610.1 afis|EAW19923.1 afla|EED51718.1 akaw|GAA83078.1  
aluc|OJZ88624.1 aory|EIT80668.1 atub|OJI91209.1 aver|OJJ01286.1 azon|OJJ49481.1 acla|EAW13683.1  
afum|EBA27215.1

Group7879: abra|OJJ73472.1 acla|EAW06796.1 akaw|GAA83029.1 aluc|OJZ88575.1 atub|OJI91161.1  
azon|OJJ45009.1 afis|EAW16345.1 afla|EED53525.1 afum|EAL88970.1 agla|OJJ88243.1 aver|OJI96644.1  
awen|OJJ37748.1

Group7880: abra|OJJ73478.1 acar|OOG00278.1 afis|EAW17177.1 afla|EED54490.1 akaw|GAA83023.1  
aluc|OJZ88569.1 anid|CBF73633.1 anig|EHA18266.1 aory|EIT72967.1 atub|OJI91155.1 awen|OJJ29932.1  
aory|EIT78797.1

Group7881: abra|OJJ73490.1 acla|EAW06815.1 afis|EAW16364.1 afla|EED53505.1 afum|EAL88989.1  
akaw|GAA87439.1 aluc|OJZ88558.1 anid|CBF89243.1 aory|EIT75052.1 atub|OJI91143.1 awen|OJJ37767.1  
azon|OJJ45659.1

Group7882: abra|OJJ73492.1 acar|OOF96693.1 akaw|GAA87441.1 aluc|OJZ88556.1 anig|EHA18254.1  
asyd|OJJ61392.1 atub|OJI91141.1 aver|OJJ00722.1 azon|OJJ51393.1 aory|EIT73591.1 asyd|OJJ56722.1  
aver|OJJ06003.1

Group7883: abra|OJJ73590.1 acar|OOG00772.1 acla|EAW07508.1 afis|EAW22540.1 afla|EED54569.1  
afum|EAL90654.2 akaw|GAA88562.1 aluc|OJZ88460.1 anig|EHA18180.1 aory|EIT78746.1 atub|OJI91058.1  
awen|OJJ35169.1

Group7884: abra|OJJ73610.1 acla|EAW07527.1 afis|EAW22557.1 afla|EED54588.1 afum|EAL90638.1  
akaw|GAA88543.1 anid|CBF89067.1 anig|EHA18163.1 aory|EIT78831.1 ater|EAU39147.1 azon|OJJ49920.1  
atub|OJI91037.1

Group7885: abra|OJJ73694.1 acar|OOG00559.1 acla|EAW12597.1 akaw|GAA88466.1 aluc|OJZ88355.1  
anig|EHA21867.1 ater|EAU30061.1 atub|OJI90950.1 awen|OJJ32890.1 azon|OJJ42142.1 akaw|GAA93227.1  
azon|OJJ49026.1

Group7886: abra|OJJ73707.1 acla|EAW14997.1 afla|EED48402.1 agla|OJJ84463.1 akaw|GAA88456.1  
aluc|OJZ88344.1 anig|EHA18077.1 aory|EIT83053.1 asyd|OJJ60325.1 atub|OJI90940.1 aver|OJI99673.1  
awen|OJJ33650.1

Group7887: abra|OJJ73708.1 acla|EAW14996.1 afla|EED48403.1 agla|OJJ84462.1 akaw|GAA88455.1  
aluc|OJZ88343.1 anig|EHA18076.1 aory|EIT83112.1 asyd|OJJ60326.1 atub|OJI90939.1 aver|OJI99674.1  
awen|OJJ33651.1

Group7888: awen|OJJ41209.1 acla|EAW10113.1 afis|EAW25474.1 afla|EED53966.1 afum|EAL90137.1  
agla|OJJ78864.1 anid|CBF77662.1 aory|EIT78351.1 asyd|OJJ53101.1 ater|EAU34645.1 aver|OJJ03752.1  
azon|OJJ42088.1

Group7889: abra|OJJ73770.1 acar|OOG00928.1 aluc|OJZ88286.1 anig|EHA18028.1 atub|OJI90884.1  
abra|OJJ73771.1 akaw|GAA88405.1 atub|OJI90883.1 afla|EED49954.1 aory|EIT83424.1 anid|CBF88142.1  
awen|OJJ35301.1

Group7890: abra|OJJ73779.1 acar|OOG00935.1 acla|EAW07663.1 afis|EAW22680.1 afla|EED49961.1  
agla|OJJ79036.1 akaw|GAA88398.1 aluc|OJZ88276.1 anig|EHA18021.1 ater|EAU39029.1 atub|OJI90876.1  
awen|OJJ35308.1

Group7891: anid|CBF69705.1 aory|EIT74413.1 aver|OJJ01642.1 abra|OJJ78198.1 acar|OOF98657.1  
afla|EED52184.1 akaw|GAA85832.1 aluc|OJZ91269.1 anig|EHA19957.1 asyd|OJJ59046.1 atub|OJI83258.1  
acar|OOF93983.1

Group7892: abra|OJJ74025.1 acar|OOF99121.1 akaw|GAA87507.1 aluc|OJZ88013.1 anig|EHA17793.1  
ater|EAU38038.1 atub|OJI90622.1 aver|OJJ04441.1 afla|EED57597.1 aory|EIT82950.1 agla|OJJ87362.1  
ater|EAU35731.1

Group7893: abra|OJJ74030.1 acar|OOG01149.1 afla|EED54913.1 agla|OJJ83372.1 akaw|GAA87514.1  
aluc|OJZ88007.1 anig|EHA17787.1 aory|EIT80377.1 ater|EAU30706.1 atub|OJI90615.1 awen|OJJ38647.1  
azon|OJJ49593.1

Group7894: abra|OJJ74031.1 akaw|GAA87515.1 aluc|OJZ88006.1 atub|OJI90614.1 acar|OOG01150.1  
afis|EAW22917.1 acla|EAW07882.1 afum|EAL90280.1 asyd|OJJ63323.1 azon|OJJ49592.1 aver|OJI97638.1  
anid|CBF87688.1

Group7895: abra|OJJ74115.1 acar|OOG01221.1 acla|EAW07957.1 afla|EED58185.1 agla|OJJ83292.1  
aluc|OJZ87919.1 anig|EHA17713.1 aory|EIT79077.1 atub|OJI90530.1 aver|OJI97711.1 awen|OJJ38569.1  
azon|OJJ44833.1

Group7896: abra|OJJ74140.1 acar|OOF95590.1 afla|EED47375.1 akaw|GAA89745.1 aluc|OJZ80639.1  
anid|EHA27194.1 aory|EIT82875.1 ater|EAU32380.1 atub|OJI87494.1 awen|OJJ29701.1 aver|OJJ06010.1  
asyd|OJJ56715.1

Group7897: abra|OJJ74145.1 acar|OOF95583.1 afla|EED51486.1 akaw|GAA89739.1 aluc|OJZ80645.1  
anid|CBF78620.1 anig|EHA27187.1 asyd|OJJ65164.1 atub|OJI87500.1 aver|OJI99316.1 awen|OJJ31240.1  
azon|OJJ43380.1

Group7898: abra|OJJ74147.1 acar|OOF95581.1 afla|EED51487.1 akaw|GAA89738.1 aluc|OJZ80646.1  
anid|CBF78618.1 aory|EIT80636.1 asyd|OJJ65165.1 atub|OJI87501.1 aver|OJI99317.1 awen|OJJ31239.1  
azon|OJJ43379.1

Group7899: akaw|GAA86670.1 anig|EHA26987.1 acar|OOF95369.1 acla|EAW07412.1 afis|EAW22438.1  
afla|EED54448.1 afum|EAL90753.1 aluc|OJZ89767.1 anid|CBF88864.1 aory|EIT81124.1 asyd|OJJ62875.1  
ater|EAU39270.1

Group7900: abra|OJJ74415.1 acar|OOF95328.1 acla|EAW06830.1 afis|EAW19937.1 afum|EAL89005.1  
akaw|GAA87306.1 aluc|OJZ89711.1 anid|CBF87793.1 anig|EHA26942.1 ater|EAU34072.1 atub|OJI85091.1  
afis|EAW16380.1

Group7901: abra|OJJ74421.1 acar|OOF95319.1 acla|EAW12039.1 afis|EAW19688.1 afum|EAL86838.1  
akaw|GAA87315.1 aluc|OJZ89702.1 asyd|OJJ65223.1 atub|OJI85097.1 aver|OJI99371.1 awen|OJJ34664.1  
afis|EAW19686.1

Group7902: abra|OJJ74429.1 afis|EAW20220.1 afla|EED46887.1 akaw|GAA87324.1 aluc|OJZ89691.1  
anig|EHA26930.1 aory|EIT72563.1 asyd|OJJ56971.1 ater|EAU29632.1 atub|OJI85110.1 aver|OJJ05883.1  
awen|OJJ33420.1

Group7903: abra|OJJ74436.1 agla|OJJ85389.1 akaw|GAA87330.1 aluc|OJZ89685.1 anig|EHA26923.1  
asyd|OJJ52854.1 ater|EAU32806.1 atub|OJI85116.1 aver|OJI95983.1 awen|OJJ40908.1 aluc|OJZ79624.1  
asyd|OJJ61885.1

Group7904: abra|OJJ74482.1 acla|EAW07219.1 afis|EAW22233.1 afla|EED57622.1 afum|EAL90960.1  
agla|OJJ87818.1 akaw|GAA87375.1 aluc|OJZ89637.1 anid|CBF88472.1 aory|EIT82961.1 ater|EAU34236.1  
atub|OJI85166.1

Group7905: abra|OJJ74695.1 acla|EAW10703.1 afis|EAW24867.1 afum|EAL89517.2 agla|OJJ82085.1  
aluc|OJZ92272.1 asyd|OJJ57538.1 ater|EAU36433.1 atub|OJI86707.1 aver|OJJ05640.1 awen|OJJ40458.1  
azon|OJJ49317.1

Group7906: abra|OJJ74740.1 afla|EED46983.1 agla|OJJ82128.1 akaw|GAA83670.1 aluc|OJZ92321.1  
anid|CBF75642.1 anig|EHA26648.1 aory|EIT72629.1 asyd|OJJ57475.1 ater|EAU36396.1 atub|OJI86750.1  
aver|OJJ05706.1

Group7907: anig|EHA26586.1 awen|OJJ40553.1 acla|EAW10607.1 afis|EAW24960.1 afla|EED55503.1  
afum|EAL89618.1 agla|OJJ82191.1 anid|CBF81660.1 asyd|OJJ59549.1 ater|EAU35695.1 aver|OJJ02719.1  
azon|OJJ49413.1

Group7908: abra|OJJ74836.1 acar|OOF95827.1 afis|EAW23586.1 afla|EED55273.1 afum|EAL87878.1  
agla|OJJ86850.1 akaw|GAA83584.1 aluc|OJZ92413.1 anig|EHA26552.1 aory|EIT83520.1 atub|OJI86843.1  
awen|OJJ39913.1

Group7909: abra|OJJ74875.1 acar|OOF95876.1 acla|EAW08496.1 afis|EAW23542.1 afum|EAL87924.1  
agla|OJJ86796.1 anid|CBF89659.1 asyd|OJJ62278.1 ater|EAU35328.1 aver|OJI96387.1 awen|OJJ39873.1  
azon|OJJ43228.1

Group7910: azon|OJJ47798.1 acar|OOF97261.1 acla|EAW08254.1 afis|EAW23288.1 afla|EED55686.1  
afum|EAL88191.1 agla|OJJ86559.1 akaw|GAA88685.1 anid|CBF89513.1 aory|EIT77077.1 ater|EAU37585.1  
aver|OJI96529.1

Group7911: abra|OJJ75180.1 acar|OOF94599.1 acla|EAW12996.1 afis|EAW17670.1 afla|EED50484.1  
afum|EAL91484.1 agla|OJJ79542.1 akaw|GAA88785.1 anid|CBF90038.1 ater|EAU31977.1 atub|OJI87171.1  
azon|OJJ50868.1

Group7912: abra|OJJ75245.1 acar|OOF90093.1 acla|EAW14871.1 afis|EAW23642.1 akaw|GAA85578.1  
aluc|OJZ83514.1 anig|EHA26202.1 aory|EIT76993.1 ater|EAU35168.1 atub|OJI82405.1 awen|OJJ34614.1  
azon|OJJ43969.1

Group7913: abra|OJJ75287.1 afis|EAW23626.1 afla|EED48184.1 afum|EAL87834.1 akaw|GAA91825.1 aluc|OJZ92848.1 anid|CBF76056.1 anig|EHA26161.1 asyd|OJJ55369.1 atub|OJI87304.1 aver|OJJ06448.1 aory|EIT72928.1

Group7914: anid|CBF80524.1 azon|OJJ46018.1 afis|EAW19545.1 afla|EED52109.1 afum|EAL86964.1 aory|EIT76933.1 asyd|OJJ53786.1 aver|OJI99284.1 asyd|OJJ65287.1 aver|OJJ01919.1 afla|EED56861.1 aory|EIT77556.1

Group7915: abra|OJJ75315.1 acar|OOF94513.1 afis|EAW19846.1 afla|EED48944.1 akaw|GAA91999.1 aluc|OJZ92869.1 anid|CBF82998.1 anig|EHA26096.1 aory|EIT80043.1 asyd|OJJ61547.1 atub|OJI87327.1 aver|OJJ00874.1

Group7916: abra|OJJ75345.1 afis|EAW19992.1 afla|EED51077.1 agla|OJJ86027.1 akaw|GAA92038.1 aluc|OJZ92907.1 asyd|OJJ58162.1 atub|OJI87367.1 aver|OJJ04240.1 awen|OJJ30003.1 azon|OJJ43628.1 aluc|OJZ88788.1

Group7917: aory|EIT81269.1 acar|OOF94460.1 afis|EAW17280.1 afla|EED48839.1 afum|EAL86698.1 agla|OJJ78405.1 akaw|GAA92749.1 aluc|OJZ92957.1 anid|CBF87549.1 anig|EHA26018.1 asyd|OJJ52996.1 aver|OJJ08965.1

Group7918: abra|OJJ75423.1 acar|OOF90768.1 agla|OJJ83093.1 akaw|GAA84198.1 aluc|OJZ88875.1 anig|EHA23630.1 ater|EAU33729.1 atub|OJI85916.1 aver|OJI98829.1 awen|OJJ41696.1 azon|OJJ48394.1 ater|EAU32644.1

Group7919: abra|OJJ75461.1 acar|OOF90278.1 acla|EAW13829.1 afis|EAW18302.1 afla|EED48771.1 afum|EAL87668.2 akaw|GAA84235.1 aluc|OJZ88918.1 anig|EHA23594.1 aory|EIT72986.1 atub|OJI85874.1 azon|OJJ43277.1

Group7920: abra|OJJ75715.1 acar|OOG00144.1 afla|EED58010.1 agla|OJJ84452.1 akaw|GAA84449.1 aluc|OJZ89166.1 anig|EHA23388.1 asyd|OJJ62645.1 ater|EAU38418.1 atub|OJI85624.1 awen|OJJ34018.1 azon|OJJ48540.1

Group7921: abra|OJJ75749.1 afla|EED52149.1 akaw|GAA84481.1 aluc|OJZ89201.1 anig|EHA23356.1 atub|OJI85589.1 awen|OJJ32797.1 azon|OJJ48883.1 acar|OOF90579.1 afis|EAW25381.1 aory|EIT74322.1 ater|EAU38539.1

Group7922: abra|OJJ75759.1 acar|OOF93580.1 acla|EAW08560.1 afis|EAW23602.1 afla|EED52608.1 afum|EAL87865.1 anid|CBF81651.1 aory|EIT74254.1 asyd|OJJ59543.1 ater|EAU30757.1 aver|OJJ02725.1 azon|OJJ42334.1

Group7923: abra|OJJ75766.1 asyd|OJJ58683.1 ater|EAU29471.1 atub|OJI87192.1 aver|OJJ01295.1 awen|OJJ30927.1 abra|OJJ76680.1 afla|EED48159.1 anig|EHA22561.1 aory|EIT83026.1 asyd|OJJ53890.1 aver|OJJ07988.1

Group7924: abra|OJJ75780.1 acar|OOF93583.1 afis|EAW17231.1 afla|EED54397.1 agla|OJJ86976.1 akaw|GAA84497.1 aluc|OJZ89222.1 anig|EHA23340.1 aory|EIT75880.1 asyd|OJJ53739.1 atub|OJI85570.1 aver|OJJ07898.1

Group7925: abra|OJJ75877.1 acar|OOG00016.1 acla|EAW07593.1 afis|EAW20265.1 afla|EED52337.1 afum|EAL85373.1 akaw|GAA84579.1 aluc|OJZ89321.1 anig|EHA23251.1 aory|EIT74435.1 atub|OJI85477.1 azon|OJJ42382.1

Group7926: abra|OJJ75968.1 acar|OOF99951.1 acla|EAW09830.1 afis|EAW21303.1 afla|EED57263.1 afum|EAL92320.1 akaw|GAA88988.1 aluc|OJZ89415.1 anig|EHA23172.1 aory|EIT73970.1 atub|OJI85380.1 awen|OJJ39395.1

Group7927: abra|OJJ75989.1 afla|EED52372.1 afum|EAL85021.1 akaw|GAA88969.1 aluc|OJZ89434.1 anid|CBF80378.1 anig|EHA23153.1 aory|EIT83634.1 asyd|OJJ54809.1 ater|EAU32113.1 atub|OJI85359.1 aver|OJJ07352.1

Group7928: abra|OJJ75991.1 afla|EED52368.1 afum|EAL85023.1 akaw|GAA88966.1 aluc|OJZ89437.1 anig|EHA23151.1 aory|EIT82368.1 asyd|OJJ54806.1 ater|EAU32111.1 atub|OJI85356.1 aver|OJJ07355.1 asyd|OJJ61705.1

Group7929: abra|OJJ76230.1 afis|EAW24532.1 afla|EED47409.1 afum|EAL86198.1 agla|OJJ86404.1 anig|EHA22167.1 asyd|OJJ54668.1 aver|OJJ02021.1 abra|OJJ77428.1 afla|EED53645.1 aory|EIT75298.1 awen|OJJ29985.1

Group7930: abra|OJJ76274.1 acar|OOF99522.1 acla|EAW14338.1 afla|EED50989.1 akaw|GAA82207.1 aluc|OJZ91946.1 anig|EHA22905.1 aory|EIT76975.1 asyd|OJJ59142.1 atub|OJI86391.1 aver|OJJ01732.1 awen|OJJ31549.1

Group7931: abra|OJJ76295.1 acar|OOF99539.1 afis|EAW19942.1 afla|EED53217.1 afum|EAL84971.1 akaw|GAA82222.1 aluc|OJZ91927.1 anid|CBF77661.1 anig|EHA22890.1 aory|EIT75072.1 atub|OJI86371.1 awen|OJJ40850.1

Group7932: abra|OJJ76312.1 acar|OOF99560.1 acla|EAW08993.1 afis|EAW15412.1 afla|EED46401.1 afum|EAL84234.1 akaw|GAA82240.1 aluc|OJZ91905.1 anig|EHA22881.1 aory|EIT72391.1 ater|EAU31771.1 atub|OJI86355.1

Group7933: aory|EIT77993.1 acar|OOF99657.1 acla|EAW14010.1 afis|EAW18716.1 afum|EBA27492.1 agla|OJJ82343.1 anid|CBF70672.1 asyd|OJJ58475.1 ater|EAU38191.1 aver|OJJ01077.1 awen|OJJ32210.1 afla|EED50670.1

Group7934: abra|OJJ76564.1 acar|OOF99420.1 afum|EAL93588.1 agla|OJJ80578.1 akaw|GAA82468.1 aluc|OJZ91642.1 anid|CBF69832.1 asyd|OJJ58984.1 atub|OJI86096.1 aver|OJJ01579.1 azon|OJJ47169.1 awen|OJJ32412.1

Group7935: abra|OJJ76622.1 acar|OOF92931.1 afla|EED52230.1 anid|CBF69490.1 aory|EIT74471.1 asyd|OJJ59239.1 ater|EAU37442.1 aver|OJJ01849.1 acar|OOG00740.1 afis|EAW23428.1 ater|EAU30841.1 azon|OJJ49327.1

Group7936: abra|OJJ76639.1 acar|OOF99358.1 afla|EED53121.1 agla|OJJ80190.1 akaw|GAA92819.1 aluc|OJZ91570.1 anid|CBF84681.1 anig|EHA22599.1 aory|EIT74934.1 atub|OJI86020.1 awen|OJJ31626.1 ater|EAU37855.1

Group7937: abra|OJJ76656.1 acar|OOF99346.1 afla|EED53112.1 akaw|GAA92996.1 aluc|OJZ91549.1 anid|CBF86727.1 anig|EHA22584.1 aory|EIT74803.1 ater|EAU37782.1 atub|OJI86002.1 awen|OJJ38069.1 azon|OJJ43903.1

Group7938: abra|OJJ76701.1 acar|OOF99317.1 afla|EED51717.1 agla|OJJ85387.1 akaw|GAA92498.1 aluc|OJZ91510.1 anid|CBF80099.1 anig|EHA22549.1 asyd|OJJ58298.1 ater|EAU34017.1 atub|OJI85962.1 aver|OJJ02126.1

Group7939: abra|OJJ76722.1 acar|OOG00872.1 afla|EED51531.1 agla|OJJ89413.1 akaw|GAA92479.1 aluc|OJZ91489.1 anig|EHA22533.1 aory|EIT80628.1 asyd|OJJ56396.1 atub|OJI85944.1 aver|OJJ06317.1 awen|OJJ35675.1

Group7940: afis|EAW20448.1 anig|EHA27538.1 acar|OOF91270.1 acla|EAW13333.1 afla|EED44822.1 afum|EAL84604.1 agla|OJJ84874.1 anid|CBF79301.1 aory|EIT77747.1 ater|EAU37711.1 aver|OJJ06862.1 awen|OJJ33138.1

Group7941: abra|OJJ76812.1 acar|OOF91308.1 acla|EAW13373.1 afis|EAW20487.1 afla|EED44777.1 afum|EAL84568.1 akaw|GAA87209.1 aluc|OJZ84223.1 anid|CBF79217.1 anig|EHA27572.1 aory|EIT77789.1 atub|OJI89863.1

Group7942: abra|OJJ76887.1 afla|EED47433.1 agla|OJJ84734.1 akaw|GAA91072.1 aluc|OJZ87886.1 anid|CBF71511.1 anig|EHA26975.1 aory|EIT81892.1 asyd|OJJ54924.1 atub|OJI80765.1 aver|OJJ07271.1 awen|OJJ32682.1

Group7943: afum|EAL85122.1 ater|EAU37570.1 anid|CBF90348.1 afla|EED51127.1 agla|OJJ81313.1 aory|EIT81315.1 asyd|OJJ55577.1 aver|OJJ06656.1 afla|EED52426.1 aory|EIT83303.1 azon|OJJ42156.1 anid|CBF76191.1

Group7944: abra|OJJ76930.1 acla|EAW13435.1 afis|EAW20551.1 afum|EBA27186.1 akaw|GAA87110.1 aluc|OJZ84328.1 anig|EHA27662.1 aory|EIT83280.1 atub|OJI89740.1 awen|OJJ33266.1 azon|OJJ50630.1 ater|EAU31069.1

Group7945: abra|OJJ76961.1 acar|OOF91406.1 afla|EED48151.1 akaw|GAA87082.1 aluc|OJZ84356.1 aory|EIT76227.1 asyd|OJJ55022.1 ater|EAU33244.1 atub|OJI89711.1 aver|OJJ07184.1 awen|OJJ37978.1 azon|OJJ42641.1

Group7946: abra|OJJ77058.1 acar|OOF95835.1 acla|EAW14557.1 akaw|GAA86994.1 aluc|OJZ84465.1 anid|CBF70126.1 anig|EHA27777.1 asyd|OJJ59808.1 ater|EAU32470.1 atub|OJI89611.1 awen|OJJ30216.1 aory|EIT77220.1

Group7947: abra|OJJ77182.1 acar|OOF91801.1 afla|EED47269.1 agla|OJJ84566.1 aory|EIT79233.1 asyd|OJJ64975.1 aver|OJI99097.1 awen|OJJ37796.1 azon|OJJ45194.1 acar|OOG00110.1 afla|EED47897.1 aory|EIT77231.1

Group7948: abra|OJJ77203.1 acar|OOF93091.1 acla|EAW13195.1 afis|EAW17447.1 afum|EAL91274.1 agla|OJJ80370.1 akaw|GAA90735.1 aluc|OJZ84613.1 anig|EHA27902.1 atub|OJI89468.1 awen|OJJ37399.1 azon|OJJ51072.1

Group7949: abra|OJJ77243.1 acar|OOF93124.1 acla|EAW14605.1 afis|EAW19334.1 afum|EAL94051.2  
agla|OJJ79420.1 akaw|GAA90700.1 aluc|OJZ84653.1 anig|EHA27936.1 asyd|OJJ59233.1 atub|OJI89427.1  
aver|OJJ01843.1

Group7950: abra|OJJ77354.1 acar|OOF93224.1 acla|EAW13120.1 afis|EAW17544.1 afla|EED49283.1  
afum|EAL91358.1 agla|OJJ81425.1 akaw|GAA91407.1 anid|CBF90306.1 asyd|OJJ61931.1 ater|EAU36974.1  
aver|OJI96023.1

Group7951: abra|OJJ77437.1 acar|OOF92528.1 afla|EED54491.1 agla|OJJ82053.1 anig|EHA26146.1  
aory|EIT78832.1 ater|EAU39533.1 aver|OJJ01790.1 awen|OJJ31427.1 aory|EIT76911.1 afla|EED52077.1  
awen|OJJ30426.1

Group7952: abra|OJJ77460.1 acar|OOF97635.1 afla|EED49592.1 akaw|GAA92097.1 aluc|OJZ83628.1  
anig|EHA19293.1 aory|EIT82658.1 asyd|OJJ56400.1 ater|EAU39564.1 atub|OJI89997.1 aver|OJJ06312.1  
anig|EHA18781.1

Group7953: abra|OJJ77497.1 acar|OOF99229.1 afis|EAW25461.1 afla|EED53950.1 afum|EAL90124.1  
akaw|GAA84124.1 aluc|OJZ81041.1 anig|EHA19326.1 aory|EIT78317.1 atub|OJI82543.1 awen|OJJ41197.1  
azon|OJJ42903.1

Group7954: abra|OJJ77515.1 acar|OOF99209.1 afla|EED53283.1 agla|OJJ88332.1 akaw|GAA84105.1  
aluc|OJZ81020.1 aory|EIT75185.1 asyd|OJJ64619.1 atub|OJI82563.1 aver|OJI98715.1 awen|OJJ37665.1  
azon|OJJ44932.1

Group7955: abra|OJJ77713.1 acar|OOF99027.1 agla|OJJ85978.1 akaw|GAA83919.1 aluc|OJZ90778.1  
anid|CBF81695.1 anig|EHA19511.1 asyd|OJJ59564.1 atub|OJI82765.1 aver|OJJ02705.1 awen|OJJ41676.1  
aory|EIT83272.1

Group7956: abra|OJJ77756.1 acar|OOF98694.1 akaw|GAA83883.1 aluc|OJZ90813.1 anig|EHA19541.1  
asyd|OJJ61417.1 ater|EAU31760.1 atub|OJI82803.1 awen|OJJ32585.1 azon|OJJ46428.1 asyd|OJJ53798.1  
aver|OJI96898.1

Group7957: abra|OJJ77758.1 acar|OOF98977.1 akaw|GAA83881.1 aluc|OJZ90815.1 anig|EHA19543.1  
asyd|OJJ62928.1 atub|OJI82805.1 aver|OJI98062.1 awen|OJJ39984.1 acar|OOG00864.1 anid|CBF80410.1  
ater|EAU30956.1

Group7958: abra|OJJ77759.1 acar|OOF98978.1 acla|EAW12027.1 afis|EAW15413.1 afla|EED45861.1  
afum|EAL84233.1 akaw|GAA83880.1 aluc|OJZ90816.1 anig|EHA19544.1 aory|EIT75386.1 atub|OJI82806.1  
azon|OJJ50242.1

Group7959: abra|OJJ77799.1 afla|EED54466.1 akaw|GAA83849.1 aluc|OJZ90866.1 anid|CBF88117.1  
anig|EHA19583.1 aory|EIT81145.1 atub|OJI82864.1 aver|OJJ02027.1 afla|EED48243.1 aory|EIT72921.1  
aver|OJI97353.1

Group7960: abra|OJJ77855.1 acla|EAW11271.1 afla|EED56240.1 agla|OJJ85853.1 aluc|OJZ90929.1  
anid|CBF86168.1 aory|EIT73289.1 asyd|OJJ64523.1 atub|OJI82921.1 aver|OJI98621.1 awen|OJJ30607.1  
azon|OJJ50161.1

Group7961: abra|OJJ77964.1 acar|OOF95818.1 afis|EAW24661.1 afla|EED47737.1 afum|EAL87778.1  
akaw|GAA83701.1 aluc|OJZ91031.1 anig|EHA19732.1 asyd|OJJ52847.1 ater|EAU38131.1 atub|OJI83027.1  
aver|OJJ08825.1

Group7962: akaw|GAA83688.1 aluc|OJZ91044.1 atub|OJI83040.1 acla|EAW06666.1 afis|EAW16099.1  
afla|EED48634.1 afum|EAL88731.1 agla|OJJ86123.1 anid|CBF85449.1 aory|EIT73226.1 aver|OJI98178.1  
azon|OJJ45361.1

Group7963: abra|OJJ78057.1 afis|EAW20701.1 afum|EAL84876.1 akaw|GAA85935.1 aluc|OJZ91127.1  
anid|CBF70383.1 anig|EHA19828.1 asyd|OJJ56273.1 atub|OJI83138.1 aver|OJJ08492.1 asyd|OJJ58640.1  
aver|OJJ01247.1

Group7964: abra|OJJ78075.1 acar|OOF98788.1 afis|EAW16208.1 afla|EED48707.1 afum|EAL88835.1  
agla|OJJ86223.1 akaw|GAA85919.1 aluc|OJZ91148.1 anig|EHA19846.1 ater|EAU33252.1 atub|OJI83162.1  
awen|OJJ30265.1

Group7965: abra|OJJ78082.1 acar|OOF98784.1 afla|EED55363.1 akaw|GAA85910.1 aluc|OJZ91156.1  
anid|CBF73594.1 anig|EHA19852.1 aory|EIT80908.1 asyd|OJJ56690.1 atub|OJI83171.1 aver|OJJ06033.1  
aver|OJJ06041.1

Group7966: abra|OJJ78115.1 acla|EAW09077.1 afla|EED45412.1 akaw|GAA85892.1 aluc|OJZ91180.1  
anid|CBF73728.1 anig|EHA19871.1 aory|EIT82408.1 asyd|OJJ56636.1 atub|OJI83193.1 aver|OJJ06090.1  
aver|OJJ01921.1

Group7967: abra|OJJ78199.1 acar|OOF98656.1 afum|EAL87798.1 akaw|GAA85831.1 aluc|OJZ91270.1  
ater|EAU33020.1 atub|OJI83259.1 awen|OJJ37932.1 azon|OJJ41995.1 akaw|GAA85830.1 agla|OJJ86067.1  
ater|EAU32286.1

Group7968: abra|OJJ78272.1 afis|EAW21906.1 afla|EED46645.1 afum|EAL92918.2 akaw|GAA85754.1  
aluc|OJZ91346.1 anid|CBF76832.1 anig|EHA20025.1 asyd|OJJ61302.1 atub|OJI83338.1 awen|OJJ34196.1  
azon|OJJ43438.1

Group7969: abra|OJJ78303.1 acar|OOF98563.1 afla|EED46355.1 akaw|GAA85723.1 aluc|OJZ91380.1  
anid|CBF82931.1 anig|EHA20055.1 asyd|OJJ52921.1 ater|EAU30948.1 atub|OJI83373.1 aver|OJJ08890.1  
azon|OJJ45182.1

Group7970: abra|OJJ78305.1 acar|OOF98561.1 afis|EAW22060.1 afum|EAL92951.2 agla|OJJ78429.1  
akaw|GAA85718.1 anid|CBF76901.1 asyd|OJJ61339.1 aver|OJJ00663.1 awen|OJJ34229.1 azon|OJJ43406.1  
acla|EAW09209.1

Group7971: acar|OOF89791.1 acla|EAW13952.1 afis|EAW18662.1 afla|EED52667.1 afum|EBA27490.1  
akaw|GAA82396.1 anid|CBF70563.1 aory|EIT74292.1 ater|EAU38250.1 atub|OJI86183.1 awen|OJJ32129.1  
azon|OJJ46713.1

Group7972: acar|OOF89948.1 acla|EAW11544.1 afla|EED52802.1 akaw|GAA89086.1 aluc|OJZ80505.1  
anig|EHA25688.1 aory|EIT78187.1 ater|EAU30248.1 atub|OJI88425.1 aver|OJJ07309.1 awen|OJJ35833.1  
ater|EAU34435.1

Group7973: acla|EAW14252.1 afis|EAW19029.1 afla|EED52649.1 afum|EAL93759.1 agla|OJJ85922.1  
anid|CBF71834.1 aory|EIT74276.1 asyd|OJJ59935.1 aver|OJJ02352.1 awen|OJJ37063.1 azon|OJJ48237.1  
anid|CBF85566.1

Group7974: acar|OOF90772.1 acla|EAW13797.1 afis|EAW18335.1 afla|EED48799.1 agla|OJJ88050.1  
akaw|GAA84202.1 aluc|OJZ88879.1 asyd|OJJ57824.1 ater|EAU33348.1 aver|OJJ04568.1 awen|OJJ30716.1  
azon|OJJ43308.1

Group7975: acar|OOF90991.1 acla|EAW10952.1 afla|EED50257.1 afum|EBA27202.1 agla|OJJ84025.1  
aluc|OJZ81507.1 anid|CBF82473.1 asyd|OJJ54101.1 aver|OJJ08637.1 awen|OJJ34437.1 azon|OJJ51719.1  
afis|EAW20909.1

Group7976: acar|OOF91836.1 afla|EED54607.1 akaw|GAA86592.1 aluc|OJZ85139.1 anig|EHA25355.1  
aory|EIT78758.1 asyd|OJJ57415.1 ater|EAU35411.1 atub|OJI80453.1 aver|OJJ03415.1 awen|OJJ32893.1  
aver|OJJ05762.1

Group7977: ater|EAU32979.1 acla|EAW14129.1 afis|EAW18824.1 afla|EED47307.1 akaw|GAA91939.1  
aluc|OJZ82683.1 anid|CBF86781.1 anig|EHA21051.1 aory|EIT82866.1 atub|OJI88915.1 afla|EED52171.1  
aory|EIT74365.1

Group7978: acar|OOF92154.1 acla|EAW12629.1 afis|EAW18055.1 afla|EED51422.1 afum|EAL91866.1  
agla|OJJ87331.1 akaw|GAA89793.1 aluc|OJZ81898.1 anid|CBF86442.1 aory|EIT80614.1 atub|OJI84451.1  
awen|OJJ41438.1

Group7979: acar|OOF92760.1 afis|EAW17966.1 afla|EED51943.1 awen|OJJ41578.1 acla|EAW12800.1  
afum|EAL91775.1 aory|EIT81377.1 azon|OJJ48291.1 asyd|OJJ58220.1 aver|OJJ02202.1 agla|OJJ80212.1  
anid|CBF79958.1

Group7980: acar|OOF93461.1 acla|EAW08871.1 afis|EAW15523.1 afla|EED49032.1 afum|EAL85805.1  
agla|OJJ85223.1 aory|EIT82496.1 asyd|OJJ55994.1 ater|EAU32600.1 aver|OJJ04941.1 awen|OJJ38187.1  
azon|OJJ43108.1

Group7981: acar|OOF94545.1 acla|EAW07361.1 afla|EED56050.1 afum|EAL86532.1 agla|OJJ82292.1  
aory|EIT76842.1 asyd|OJJ52087.1 ater|EAU39329.1 aver|OJJ03477.1 awen|OJJ35551.1 asyd|OJJ63951.1  
aver|OJI96990.1

Group7982: afla|EED57687.1 anid|CBF88564.1 awen|OJJ34861.1 acla|EAW07267.1 afis|EAW22288.1  
afum|EAL90893.1 agla|OJJ87761.1 aory|EIT79935.1 asyd|OJJ63835.1 ater|EAU34300.1 aver|OJI97102.1  
azon|OJJ45667.1

Group7983: acar|OOF95561.1 acla|EAW10799.1 afis|EAW24778.1 afla|EED49723.1 afum|EAL89418.1  
agla|OJJ88222.1 anid|CBF73605.1 aory|EIT77687.1 asyd|OJJ56677.1 ater|EAU34010.1 aver|OJJ06045.1  
anid|CBF82799.1

Group7984: acar|OOF95562.1 acla|EAW10800.1 afis|EAW24777.1 afla|EED49724.1 afum|EBA27383.1  
agla|OJJ88223.1 anid|CBF73603.1 aory|EIT77625.1 asyd|OJJ56679.1 ater|EAU34011.1 aver|OJJ06044.1  
afla|EED45748.1

Group7985: acar|OOF95838.1 acla|EAW10413.1 afis|EAW25156.1 afla|EED57495.1 afum|EAL89831.1  
agla|OJJ88995.1 anid|CBF85650.1 aory|EIT81875.1 ater|EAU39439.1 awen|OJJ40799.1 asyd|OJJ64233.1  
aver|OJI98325.1

Group7986: acar|OOF95865.1 acla|EAW08516.1 afis|EAW23554.1 afla|EED57449.1 afum|EAL87912.2  
agla|OJJ86814.1 akaw|GAA83555.1 aory|EIT80121.1 asyd|OJJ62289.1 ater|EAU35337.1 aver|OJI96397.1  
awen|OJJ39885.1

Group7987: acar|OOF96832.1 afla|EED54673.1 agla|OJJ80327.1 aory|EIT78946.1 ater|EAU29967.1  
awen|OJJ31988.1 azon|OJJ45264.1 anid|CBF80727.1 asyd|OJJ54769.1 aver|OJJ07398.1 ater|EAU33083.1  
ater|EAU37146.1

Group7988: acar|OOF97167.1 acla|EAW08345.1 afis|EAW23380.1 afla|EED55577.1 afum|EAL88091.1  
akaw|GAA83397.1 anid|CBF74851.1 aory|EIT82700.1 ater|EAU35634.1 atub|OJI90264.1 aver|OJJ04134.1  
azon|OJJ47703.1

Group7989: acar|OOF97593.1 acla|EAW14960.1 afis|EAW24480.1 afla|EED56129.1 afum|EAL86151.2  
anid|CBF86922.1 aory|EIT76863.1 asyd|OJJ58105.1 aver|OJJ04299.1 awen|OJJ33343.1 aory|EIT76601.1  
azon|OJJ43602.1

Group7990: acar|OOF98901.1 afis|EAW24712.1 afla|EED45533.1 agla|OJJ78671.1 anig|EHA28381.1  
atub|OJI88058.1 awen|OJJ32909.1 azon|OJJ42264.1 afla|EED44881.1 aory|EIT75725.1 awen|OJJ29789.1  
aory|EIT83255.1

Group7991: acar|OOF99636.1 acla|EAW14028.1 afis|EAW18734.1 afla|EED50689.1 afum|EAL93459.1  
agla|OJJ82300.1 akaw|GAA82315.1 aluc|OJZ91817.1 aory|EIT78042.1 ater|EAU37857.1 awen|OJJ32297.1  
azon|OJJ42735.1

Group7992: acar|OOG00142.1 acla|EAW09395.1 afis|EAW21738.1 afla|EED58013.1 afum|EAL92772.1  
agla|OJJ84450.1 akaw|GAA84451.1 anid|CBF83701.1 aory|EIT79800.1 atub|OJI85622.1 awen|OJJ34020.1  
azon|OJJ48536.1

Group7993: acar|OOG01216.1 acla|EAW07952.1 afis|EAW22989.1 afla|EED58181.1 akaw|GAA87584.1  
aluc|OJZ87927.1 asyd|OJJ63252.1 ater|EAU30634.1 atub|OJI90539.1 aver|OJI97706.1 azon|OJJ49517.1  
agla|OJJ83297.1

Group7994: acla|EAW07158.1 afis|EAW22173.1 afla|EED57552.1 afum|EAL91016.1 agla|OJJ87881.1  
anid|CBF89081.1 aory|EIT81826.1 asyd|OJJ62737.1 ater|EAU34178.1 awen|OJJ34748.1 azon|OJJ45811.1  
aver|OJI96780.1

Group7995: acla|EAW07360.1 afis|EAW22389.1 afla|EED56049.1 afum|EAL90801.1 agla|OJJ87651.1  
anid|CBF88738.1 aory|EIT76759.1 asyd|OJJ63950.1 ater|EAU39330.1 aver|OJI96991.1 awen|OJJ34964.1  
azon|OJJ50264.1

Group7996: acla|EAW08122.1 afis|EAW23157.1 afla|EED47076.1 afum|EAL88326.1 agla|OJJ85093.1  
anid|CBF74461.1 aory|EIT72513.1 asyd|OJJ57697.1 ater|EAU36291.1 aver|OJJ05467.1 awen|OJJ36626.1  
azon|OJJ47585.1

Group7997: acla|EAW08748.1 afis|EAW15688.1 afla|EED51365.1 afum|EAL85660.1 agla|OJJ81836.1  
aluc|OJZ86072.1 anid|CBF71138.1 asyd|OJJ55834.1 atub|OJI79869.1 aver|OJJ04776.1 awen|OJJ38379.1  
azon|OJJ43863.1

Group7998: acla|EAW08996.1 afis|EAW22252.1 anid|CBF81866.1 asyd|OJJ65275.1 ater|EAU32670.1  
aver|OJI99427.1 acla|EAW12059.1 afis|EAW19700.1 afla|EED51442.1 aory|EIT80577.1 ater|EAU31759.1  
anid|CBF70179.1

Group7999: acla|EAW09011.1 afis|EAW25590.1 afla|EED54127.1 afum|EAL84298.2 agla|OJJ84434.1  
anid|CBF69467.1 aory|EIT78941.1 asyd|OJJ55527.1 ater|EAU31693.1 aver|OJJ06605.1 awen|OJJ36339.1  
afla|EED54744.1

Group8000: acla|EAW09811.1 afis|EAW21324.1 afla|EED57282.1 afum|EAL92341.1 agla|OJJ87414.1  
anid|CBF83425.1 aory|EIT74105.1 asyd|OJJ60657.1 ater|EAU35950.1 aver|OJI99980.1 awen|OJJ39373.1  
azon|OJJ51714.1

Group8001: acla|EAW10049.1 afis|EAW25535.1 afla|EED44711.1 afum|EAL90199.1 agla|OJJ87268.1  
anid|CBF75629.1 aory|EIT83459.1 asyd|OJJ57458.1 ater|EAU31795.1 aver|OJJ05722.1 awen|OJJ41277.1  
azon|OJJ49500.1

Group8002: acla|EAW10841.1 afis|EAW24724.1 afla|EED45494.1 afum|EAL89373.1 agla|OJJ89011.1  
anid|CBF78354.1 aory|EIT75594.1 asyd|OJJ56144.1 ater|EAU37770.1 aver|OJJ05084.1 awen|OJJ37709.1  
azon|OJJ44968.1

Group8003: acla|EAW10847.1 afis|EAW20281.1 afla|EED45816.1 afum|EAL85415.1 agla|OJJ80880.1 aory|EIT75459.1 asyd|OJJ54574.1 ater|EAU34007.1 aver|OJJ07580.1 awen|OJJ30005.1 afis|EAW16940.1 afum|EAL86467.1

Group8004: acla|EAW10948.1 afis|EAW20912.1 afla|EED50260.1 afum|EAL84722.1 agla|OJJ84030.1 anid|CBF82197.1 aory|EIT77315.1 asyd|OJJ52184.1 ater|EAU38560.1 aver|OJJ05961.1 awen|OJJ34426.1 ater|EAU29294.1

Group8005: acla|EAW11333.1 afis|EAW18162.1 afla|EED56331.1 afum|EAL87522.1 agla|OJJ85964.1 anid|CBF85767.1 aory|EIT73363.1 asyd|OJJ64305.1 ater|EAU33689.1 aver|OJJ98398.1 awen|OJJ30507.1 azon|OJJ45496.1

Group8006: acla|EAW11518.1 afis|EAW23935.1 afla|EED50582.1 afum|EAL87360.1 agla|OJJ79415.1 anid|CBF77269.1 asyd|OJJ56799.1 ater|EAU32302.1 aver|OJJ03535.1 awen|OJJ39020.1 azon|OJJ50744.1 azon|OJJ51345.1

Group8007: acla|EAW12899.1 afis|EAW17751.1 afla|EED45756.1 afum|EAL91564.1 agla|OJJ81703.1 anid|CBF86620.1 aory|EIT75826.1 asyd|OJJ64813.1 ater|EAU31856.1 aver|OJJ98926.1 awen|OJJ37084.1 azon|OJJ43544.1

Group8008: acla|EAW14594.1 afis|EAW19323.1 afla|EED47556.1 afum|EAL94041.1 aory|EIT74540.1 asyd|OJJ54476.1 ater|EAU29459.1 aver|OJJ01973.1 azon|OJJ45105.1 afla|EED57235.1 aory|EIT74026.1 asyd|OJJ52376.1

Group8009: acla|EAW14894.1 afis|EAW24416.1 afla|EED47752.1 afum|EAL86085.2 agla|OJJ79229.1 anid|CBF73801.1 aory|EIT77104.1 asyd|OJJ56609.1 ater|EAU30313.1 aver|OJJ06115.1 awen|OJJ32793.1 azon|OJJ49042.1

Group8010: acla|EAW14994.1 afis|EAW24520.1 afla|EED54710.1 agla|OJJ80334.1 anid|CBF73856.1 aory|EIT78838.1 asyd|OJJ58690.1 ater|EAU34602.1 aver|OJJ01302.1 awen|OJJ32601.1 asyd|OJJ56518.1 aver|OJJ06204.1

Group8011: aluc|OJJ86495.1 anig|EHA22149.1 afla|EED46109.1 aory|EIT76485.1 asyd|OJJ61904.1 atub|OJJ84031.1 akaw|GAA85142.1 anid|CBF85129.1 asyd|OJJ63354.1 aver|OJJ97607.1 aver|OJJ95997.1 azon|OJJ44491.1

Group8012: afis|EAW22248.1 afum|EAL90926.1 agla|OJJ84408.1 aver|OJJ02486.1 awen|OJJ33386.1 azon|OJJ50364.1 afla|EED53653.1 asyd|OJJ54692.1 awen|OJJ38675.1 azon|OJJ50078.1 agla|OJJ85930.1 asyd|OJJ59839.1

Group8013: afis|EAW24610.1 afla|EED56493.1 afum|EAL86240.1 agla|OJJ80105.1 akaw|GAA89016.1 aluc|OJJ80587.1 anig|EHA25068.1 aory|EIT72798.1 asyd|OJJ55481.1 ater|EAU39131.1 aver|OJJ06560.1 awen|OJJ35865.1

Group8014: afis|EAW25609.1 afla|EED53586.1 agla|OJJ85463.1 aory|EIT75042.1 asyd|OJJ55479.1 awen|OJJ36072.1 azon|OJJ49484.1 asyd|OJJ64006.1 anid|CBF78314.1 aory|EIT75715.1 agla|OJJ85466.1 awen|OJJ33321.1

Group8015: afla|EED54685.1 afum|EAL86542.1 agla|OJJ79565.1 akaw|GAA92700.1 aluc|OJJ88739.1 anig|EHA25057.1 aory|EIT78918.1 asyd|OJJ62354.1 atub|OJJ80042.1 azon|OJJ42250.1 aluc|OJJ85526.1 awen|OJJ30177.1

Group8016: abra|OJJ65592.1 abra|OJJ67250.1 acla|EAW15023.1 anid|CBF70728.1 asyd|OJJ55955.1 afum|EAL91139.1 anig|EHA20220.1 ater|EAU37180.1 atub|OJJ80914.1 aver|OJJ04901.1 awen|OJJ30891.1

Group8017: acar|OOF92309.1 acar|OOF92350.1 anig|EHA25105.1 acla|EAW06280.1 afis|EAW18386.1 afum|EAL93061.1 asyd|OJJ58428.1 ater|EAU32255.1 aver|OJJ01030.1 awen|OJJ31765.1 azon|OJJ50459.1

Group8018: acar|OOF94057.1 acar|OOF94127.1 abra|OJJ66385.1 afla|EED45638.1 akaw|GAA90251.1 aluc|OJJ83089.1 anig|EHA28151.1 aory|EIT75777.1 atub|OJJ87855.1 awen|OJJ39958.1 azon|OJJ42768.1

Group8019: acar|OOF94070.1 acar|OOF94140.1 abra|OJJ66354.1 afla|EED46178.1 agla|OJJ83133.1 akaw|GAA90228.1 aluc|OJJ83113.1 anig|EHA28176.1 aory|EIT76384.1 atub|OJJ87821.1 awen|OJJ41743.1

Group8020: acar|OOF94073.1 acar|OOF94143.1 abra|OJJ75211.1 afis|EAW20315.1 afum|EAL85441.1 atub|OJJ83214.1 awen|OJJ36678.1 aluc|OJJ82088.1 anig|EHA19893.1 ater|EAU35396.1 azon|OJJ46792.1

Group8021: acar|OOF95046.1 acar|OOF95113.1 abra|OJJ68048.1 akaw|GAA90908.1 aluc|OJJ82918.1 anig|EHA21342.1 aory|EIT81634.1 asyd|OJJ60513.1 atub|OJJ89144.1 aver|OJJ99838.1 afla|EED55168.1

Group8022: acar|OOF95621.1 acar|OOF95673.1 acar|OOF93549.1 afis|EAW17184.1 afum|EBA27280.1 awen|OJJ38774.1 azon|OJJ48414.1 akaw|GAA92706.1 aluc|OJJ88746.1 anig|EHA18450.1 atub|OJJ91318.1



Group8023: afis|EAW15399.1 afis|EAW23606.1 awen|OJJ38137.1 awen|OJJ39933.1 awen|OJJ41505.1  
acla|EAW08564.1 afla|EED52204.1 afum|EAL87859.1 aory|EIT73522.1 acla|EAW14639.1 afla|EED44903.1

Group8024: afla|EED51189.1 afla|EED52082.1 abra|OJJ66811.1 atub|OJI79331.1 awen|OJJ36115.1  
aory|EIT76913.1 aver|OJI96134.1 anid|CBF79164.1 asyd|OJJ62635.1 agla|OJJ80814.1 ater|EAU33810.1

Group8025: agla|OJJ78650.1 agla|OJJ80358.1 abra|OJJ75947.1 acar|OOF99965.1 akaw|GAA84649.1  
aluc|OJZ89395.1 asyd|OJJ63512.1 atub|OJI85402.1 aver|OJI97418.1 azon|OJJ42102.1 aory|EIT77229.1

Group8026: agla|OJJ78651.1 agla|OJJ80356.1 acar|OOF99963.1 akaw|GAA84650.1 aluc|OJZ89396.1  
anid|CBF73405.1 asyd|OJJ63511.1 aver|OJI97419.1 azon|OJJ42103.1 anig|EHA23190.1 atub|OJI85401.1

Group8027: agla|OJJ78657.1 agla|OJJ87534.1 abra|OJJ77783.1 acar|OOF98972.1 akaw|GAA83864.1  
aluc|OJZ90836.1 anig|EHA19559.1 ater|EAU37643.1 atub|OJI82822.1 aver|OJJ06546.1 awen|OJJ36608.1

Group8028: agla|OJJ78722.1 agla|OJJ83804.1 acla|EAW09078.1 afla|EED49822.1 akaw|GAA93232.1  
aluc|OJZ79644.1 aory|EIT77660.1 asyd|OJJ62958.1 ater|EAU37158.1 aver|OJI98009.1 awen|OJJ38685.1

Group8029: agla|OJJ79874.1 agla|OJJ86310.1 agla|OJJ85501.1 agla|OJJ89554.1 agla|OJJ85929.1  
acar|OOF93326.1 acla|EAW11906.1 afla|EED48385.1 aory|EIT83083.1 awen|OJJ37791.1 awen|OJJ32674.1

Group8030: akaw|GAA86109.1 akaw|GAA88997.1 aluc|OJZ79582.1 aluc|OJZ80398.1 aluc|OJZ90341.1  
abra|OJJ72360.1 anig|EHA23824.1 aory|EIT82048.1 ater|EAU31484.1 atub|OJI81768.1 afla|EED50485.1

Group8031: akaw|GAA89003.1 akaw|GAA93082.1 akaw|GAA93160.1 akaw|GAA93259.1 aluc|OJZ79724.1  
aluc|OJZ79865.1 aluc|OJZ80228.1 aluc|OJZ80385.1 aluc|OJZ79934.1 aluc|OJZ80214.1 asyd|OJJ51955.1

Group8032: anid|CBF70122.1 anid|CBF76213.1 abra|OJJ66449.1 afis|EAW15394.1 afla|EED47388.1  
agla|OJJ79143.1 aory|EIT82877.1 asyd|OJJ56277.1 aver|OJJ05920.1 awen|OJJ29900.1 aver|OJJ08487.1

Group8033: anid|CBF74934.1 anid|CBF79106.1 asyd|OJJ53787.1 asyd|OJJ57613.1 aver|OJI99285.1  
aver|OJJ05572.1 afis|EAW19546.1 afla|EED56860.1 afum|EAL86963.1 aory|EIT77497.1 azon|OJJ46017.1

Group8034: anid|CBF75968.1 anid|CBF80729.1 asyd|OJJ52926.1 asyd|OJJ63977.1 aver|OJI96976.1  
aver|OJJ08894.1 afla|EED49562.1 aory|EIT76523.1 ater|EAU37179.1 awen|OJJ35537.1 ater|EAU39437.1

Group8035: asyd|OJJ51879.1 asyd|OJJ57331.1 acla|EAW06840.1 afis|EAW16461.1 afum|EAL89057.2  
anid|CBF78381.1 ater|EAU30974.1 aver|OJJ05830.1 afis|EAW20328.1 atub|OJI84624.1 aluc|OJZ80015.1

Group8036: asyd|OJJ52429.1 asyd|OJJ57204.1 aver|OJJ03085.1 aver|OJJ03899.1 aver|OJJ05542.1  
acla|EAW11074.1 anid|CBF84256.1 aory|EIT73975.1 ater|EAU33926.1 azon|OJJ43046.1 afla|EED57248.1

Group8037: asyd|OJJ53788.1 asyd|OJJ57624.1 anid|CBF74936.1 azon|OJJ46019.1 afis|EAW19547.1  
afla|EED52110.1 afum|EAL86962.1 aory|EIT77454.1 aver|OJJ05562.1 aver|OJI99286.1 afla|EED56862.1

Group8038: asyd|OJJ56931.1 asyd|OJJ62711.1 abra|OJJ74539.1 afum|EAL86341.1 akaw|GAA82063.1  
aluc|OJZ92119.1 anig|EHA26825.1 atub|OJI86552.1 awen|OJJ40807.1 afla|EED49332.1 aluc|OJZ79685.1

Group8039: asyd|OJJ58567.1 asyd|OJJ59622.1 awen|OJJ33825.1 awen|OJJ40155.1 abra|OJJ69773.1  
acar|OOF91484.1 afis|EAW17033.1 akaw|GAA87880.1 aluc|OJZ85522.1 atub|OJI80045.1 aver|OJJ04806.1

Group8040: asyd|OJJ59816.1 asyd|OJJ61416.1 aver|OJJ00752.1 aver|OJJ02474.1 abra|OJJ77757.1  
agla|OJJ79448.1 akaw|GAA83882.1 aluc|OJZ90814.1 anig|EHA19542.1 atub|OJI82804.1 awen|OJJ32586.1

Group8041: ater|EAU29577.1 ater|EAU34057.1 acar|OOF94502.1 afis|EAW17046.1 afla|EED53439.1  
anid|CBF69407.1 aory|EIT75055.1 asyd|OJJ62008.1 aver|OJI96100.1 aver|OJJ06555.1 awen|OJJ29783.1

Group8042: awen|OJJ29560.1 awen|OJJ31897.1 abra|OJJ67105.1 acar|OOF93562.1 afis|EAW21629.1  
afla|EED54261.1 akaw|GAA86631.1 aluc|OJZ85186.1 aory|EIT76082.1 atub|OJI80409.1 azon|OJJ43599.1

Group8043: awen|OJJ29962.1 awen|OJJ39646.1 afis|EAW19737.1 afum|EAL86792.1 aory|EIT75574.1  
afla|EED45894.1 agla|OJJ79333.1 anid|CBF85600.1 asyd|OJJ64193.1 ater|EAU36894.1 aver|OJI98270.1

Group8044: awen|OJJ29988.1 awen|OJJ35841.1 abra|OJJ68829.1 acar|OOF94025.1 akaw|GAA90423.1  
aluc|OJZ85806.1 anig|EHA24749.1 asyd|OJJ54678.1 atub|OJI79592.1 aver|OJJ07489.1 aory|EIT77344.1

Group8045: awen|OJJ30092.1 awen|OJJ30120.1 awen|OJJ30095.1 abra|OJJ71734.1 acar|OOF90208.1  
akaw|GAA85148.1 aluc|OJZ86489.1 anig|EHA22182.1 agla|OJJ83273.1 atub|OJI84040.1 azon|OJJ44998.1

Group8046: awen|OJJ30282.1 awen|OJJ31244.1 awen|OJJ31538.1 abra|OJJ77948.1 acla|EAW13702.1  
agla|OJJ88430.1 akaw|GAA83716.1 aluc|OJZ91017.1 anig|EHA19719.1 ater|EAU35598.1 atub|OJI83008.1

Group8047: awen|OJJ30387.1 awen|OJJ37881.1 abra|OJJ66211.1 acar|OOF90649.1 afla|EED47533.1  
akaw|GAA89076.1 aluc|OJZ80515.1 anig|EHA25678.1 aory|EIT74542.1 atub|OJI88415.1 azon|OJJ45139.1

Group8048: awen|OJJ30794.1 awen|OJJ31687.1 afis|EAW20856.1 afla|EED45802.1 afum|EAL84778.1 aluc|OJZ90879.1 anig|EHA19600.1 aory|EIT75421.1 atub|OJI82876.1 awen|OJJ40932.1 azon|OJJ42352.1

Group8049: awen|OJJ31392.1 awen|OJJ37043.1 abra|OJJ78202.1 acar|OOF98652.1 afla|EED55373.1 akaw|GAA85827.1 aluc|OJZ91273.1 anig|EHA19960.1 aory|EIT80865.1 ater|EAU31198.1 atub|OJI83262.1

Group8050: awen|OJJ31446.1 awen|OJJ35962.1 abra|OJJ76659.1 afis|EAW16761.1 afum|EAL86332.1 akaw|GAA92999.1 aluc|OJZ91544.1 anig|EHA22581.1 asyd|OJJ53611.1 atub|OJI85998.1 aver|OJJ08138.1

Group8051: awen|OJJ32912.1 awen|OJJ37496.1 awen|OJJ35377.1 azon|OJJ43561.1 azon|OJJ46698.1 azon|OJJ46168.1 awen|OJJ30279.1 azon|OJJ42825.1 ater|EAU36022.1 ater|EAU32855.1 awen|OJJ33312.1

Group8052: awen|OJJ35361.1 awen|OJJ36277.1 afla|EED51192.1 agla|OJJ82229.1 anid|CBF86353.1 asyd|OJJ60252.1 ater|EAU32101.1 aver|OJJ04005.1 afla|EED54550.1 aory|EIT78943.1 asyd|OJJ55219.1

Group8053: awen|OJJ41678.1 awen|OJJ41680.1 acar|OOF94904.1 acla|EAW13441.1 afis|EAW16680.1 agla|OJJ83769.1 asyd|OJJ61388.1 atub|OJI81715.1 aver|OJJ00716.1 acla|EAW07054.1 azon|OJJ46174.1

Group8054: azon|OJJ42012.1 azon|OJJ47279.1 acla|EAW14327.1 afis|EAW18961.1 afla|EED51007.1 anid|CBF69602.1 aory|EIT76960.1 asyd|OJJ59134.1 aver|OJJ01723.1 awen|OJJ31560.1 ater|EAU38144.1

Group8055: azon|OJJ45098.1 azon|OJJ50418.1 abra|OJJ67372.1 acar|OOF92439.1 akaw|GAA86450.1 aluc|OJZ84993.1 anig|EHA25205.1 asyd|OJJ64319.1 ater|EAU32175.1 atub|OJI80607.1 aver|OJI98412.1

Group8056: azon|OJJ45957.1 azon|OJJ45961.1 acla|EAW13611.1 afla|EED53482.1 akaw|GAA81993.1 aluc|OJZ92196.1 anig|EHA20151.1 aory|EIT75106.1 asyd|OJJ61761.1 atub|OJI87951.1 agla|OJJ80452.1

Group8057: abra|OJJ65488.1 acar|OOF90656.1 afla|EED47478.1 afum|EAL85424.1 akaw|GAA88140.1 anig|EHA18428.1 aory|EIT79975.1 atub|OJI91618.1 aver|OJJ06578.1 asyd|OJJ55500.1 azon|OJJ42390.1

Group8058: abra|OJJ65684.1 acar|OOF90739.1 acla|EAW11008.1 afis|EAW20846.1 afla|EED55713.1 afum|EAL84787.1 akaw|GAA92270.1 aluc|OJZ90164.1 anid|CBF80207.1 aory|EIT83199.1 ater|EAU37552.1

Group8059: abra|OJJ65762.1 acar|OOF93287.1 afis|EAW15656.1 afla|EED45011.1 afum|EAL86262.1 aluc|OJZ80174.1 anig|EHA22866.1 aory|EIT73797.1 asyd|OJJ63942.1 aver|OJI97000.1 azon|OJJ47390.1

Group8060: abra|OJJ65780.1 afis|EAW16372.1 agla|OJJ79808.1 akaw|GAA90883.1 aluc|OJZ82949.1 anid|CBF77672.1 asyd|OJJ53107.1 atub|OJI89181.1 aver|OJJ03745.1 awen|OJJ35384.1 awen|OJJ37007.1

Group8061: abra|OJJ65791.1 acla|EAW07096.1 afis|EAW22107.1 afla|EED47860.1 afum|EAL91077.1 anid|CBF73938.1 anig|EHA18730.1 aory|EIT77219.1 asyd|OJJ53809.1 ater|EAU29312.1 aver|OJJ07909.1

Group8062: abra|OJJ65792.1 acla|EAW07097.1 afis|EAW22108.1 afla|EED54169.1 afum|EAL91076.2 anid|CBF73940.1 anig|EHA18731.1 aory|EIT76083.1 asyd|OJJ53808.1 ater|EAU29313.1 aver|OJJ07908.1

Group8063: acla|EAW06486.1 afis|EAW15981.1 afum|EAL88613.1 awen|OJJ30489.1 azon|OJJ45480.1 acar|OOF99104.1 afla|EED56351.1 aory|EIT73357.1 asyd|OJJ64336.1 ater|EAU33671.1 aver|OJI98429.1

Group8064: abra|OJJ65834.1 acar|OOF97961.1 afla|EED52116.1 agla|OJJ84459.1 akaw|GAA92845.1 aluc|OJZ88787.1 anid|CBF81710.1 asyd|OJJ52026.1 ater|EAU31337.1 aver|OJJ03366.1 awen|OJJ32285.1

Group8065: abra|OJJ65844.1 acla|EAW11454.1 afis|EAW16227.1 afla|EED53064.1 agla|OJJ79219.1 akaw|GAA92840.1 aluc|OJZ88786.1 anig|EHA22172.1 aory|EIT74759.1 aver|OJJ03132.1 akaw|GAA93198.1

Group8066: abra|OJJ65856.1 acar|OOF95016.1 akaw|GAA92289.1 aluc|OJZ90186.1 anig|EHA23685.1 atub|OJI81613.1 abra|OJJ66187.1 afis|EAW16418.1 asyd|OJJ65285.1 aver|OJI99510.1 asyd|OJJ65361.1

Group8067: abra|OJJ65860.1 acar|OOF95025.1 afla|EED46398.1 akaw|GAA92285.1 aluc|OJZ90182.1 anig|EHA23681.1 aory|EIT72358.1 atub|OJI81609.1 awen|OJJ37988.1 azon|OJJ47980.1 ater|EAU31822.1

Group8068: abra|OJJ65881.1 acar|OOF98858.1 afla|EED49468.1 akaw|GAA83746.1 aluc|OJZ90985.1 anid|CBF71213.1 anig|EHA19690.1 asyd|OJJ55198.1 atub|OJI82976.1 aver|OJJ07016.1 awen|OJJ35945.1

Group8069: abra|OJJ65996.1 afla|EED53500.1 agla|OJJ85432.1 akaw|GAA90868.1 aluc|OJZ82965.1 anig|EHA21381.1 aory|EIT74951.1 ater|EAU29732.1 atub|OJI89197.1 awen|OJJ41944.1 awen|OJJ37715.1

Group8070: abra|OJJ66079.1 acar|OOF99289.1 afla|EED46899.1 agla|OJJ79339.1 akaw|GAA84166.1 aluc|OJZ81091.1 anid|CBF70516.1 anig|EHA19279.1 aory|EIT72524.1 atub|OJI82493.1 awen|OJJ33666.1

Group8071: abra|OJJ66083.1 acar|OOF99285.1 akaw|GAA84162.1 aluc|OJZ81087.1 anig|EHA19283.1 asyd|OJJ56886.1 atub|OJI82497.1 awen|OJJ30430.1 azon|OJJ44589.1 acar|OOF94971.1 atub|OJI89657.1

Group8072: acar|OOF99278.1 asyd|OJJ59182.1 aver|OJJ01803.1 abra|OJJ76647.1 akaw|GAA92988.1 aluc|OJZ91562.1 anig|EHA22593.1 atub|OJI86013.1 anid|CBF69529.1 azon|OJJ43247.1 awen|OJJ29873.1

Group8073: abra|OJJ66131.1 acar|OOF94019.1 afla|EED50864.1 akaw|GAA92688.1 aluc|OJZ90146.1  
anid|CBF71758.1 anig|EHA20924.1 aory|EIT78958.1 asyd|OJJ61737.1 atub|OJI84653.1 aver|OJI95830.1

Group8074: abra|OJJ66133.1 acar|OOF94020.1 afis|EAW15420.1 afla|EED51825.1 afum|EBA27170.1  
akaw|GAA92690.1 aluc|OJZ90148.1 anig|EHA20922.1 aory|EIT81711.1 ater|EAU36667.1 atub|OJI84651.1

Group8075: abra|OJJ66136.1 acar|OOF94024.1 afla|EED45757.1 akaw|GAA92693.1 aluc|OJZ90151.1  
anig|EHA20919.1 aory|EIT75460.1 atub|OJI84648.1 acla|EAW12911.1 afis|EAW17753.1 afum|EAL91566.1

Group8076: abra|OJJ66157.1 asyd|OJJ54351.1 atub|OJI83132.1 aver|OJJ05304.1 awen|OJJ34587.1  
abra|OJJ68081.1 acar|OOF93880.1 akaw|GAA86867.1 aluc|OJZ89990.1 anig|EHA27360.1 atub|OJI84819.1

Group8077: afis|EAW24547.1 abra|OJJ77744.1 acla|EAW12412.1 afis|EAW20266.1 afla|EED47769.1  
afum|EAL86211.1 anig|EHA25377.1 aory|EIT77164.1 asyd|OJJ64794.1 aver|OJI98908.1 ater|EAU29413.1

Group8078: acla|EAW11746.1 agla|OJJ78930.1 anid|CBF79834.1 asyd|OJJ58145.1 awen|OJJ33698.1  
acar|OOF92833.1 afis|EAW23779.1 afla|EED51581.1 afum|EAL87213.1 aory|EIT80483.1 ater|EAU31320.1

Group8079: abra|OJJ66202.1 afla|EED51058.1 akaw|GAA87479.1 aluc|OJZ88047.1 anig|EHA17819.1  
ater|EAU29612.1 atub|OJI90655.1 aver|OJJ05901.1 awen|OJJ36099.1 azon|OJJ43914.1 aory|EIT76948.1

Group8080: abra|OJJ66234.1 acar|OOF90692.1 agla|OJJ84414.1 akaw|GAA89055.1 aluc|OJZ80539.1  
anid|CBF85757.1 anig|EHA25656.1 asyd|OJJ64299.1 atub|OJI88392.1 aver|OJJ07893.1 awen|OJJ34688.1

Group8081: abra|OJJ66238.1 acar|OOF90700.1 afis|EAW16784.1 akaw|GAA89051.1 aluc|OJZ80543.1  
anig|EHA25652.1 asyd|OJJ57311.1 atub|OJI88388.1 aver|OJJ05851.1 awen|OJJ29850.1 azon|OJJ45022.1

Group8082: azon|OJJ42357.1 abra|OJJ68265.1 acar|OOF97544.1 agla|OJJ88624.1 akaw|GAA83200.1  
aluc|OJZ83701.1 anid|CBF87287.1 anig|EHA18852.1 asyd|OJJ56366.1 atub|OJI90073.1 aver|OJJ06348.1

Group8083: abra|OJJ66268.1 afis|EAW15637.1 afla|EED54380.1 afum|EAL85702.1 agla|OJJ88682.1  
anig|EHA18763.1 aory|EIT75861.1 asyd|OJJ52551.1 aver|OJI98881.1 awen|OJJ32688.1 aver|OJJ03849.1

Group8084: abra|OJJ66269.1 afis|EAW15638.1 afum|EAL85701.2 anig|EHA18762.1 aver|OJI98880.1  
abra|OJJ76725.1 acar|OOF91357.1 akaw|GAA92476.1 aluc|OJZ91486.1 anig|EHA22530.1 atub|OJI85940.1

Group8085: abra|OJJ66297.1 acar|OOG00129.1 afis|EAW24606.1 akaw|GAA89856.1 aluc|OJZ81830.1  
asyd|OJJ52051.1 ater|EAU33800.1 atub|OJI84399.1 aver|OJJ04478.1 awen|OJJ31949.1 azon|OJJ42430.1

Group8086: abra|OJJ66473.1 afis|EAW17243.1 afum|EAL86663.2 akaw|GAA92459.1 aluc|OJZ81558.1  
anid|CBF75986.1 anig|EHA25876.1 asyd|OJJ53456.1 atub|OJI88627.1 aver|OJJ08299.1 asyd|OJJ53457.1

Group8087: abra|OJJ66479.1 afla|EED46094.1 akaw|GAA92462.1 aluc|OJZ81555.1 anid|CBF82152.1  
anig|EHA25879.1 aory|EIT76390.1 asyd|OJJ54329.1 atub|OJI88630.1 aver|OJJ05283.1 awen|OJJ41956.1

Group8088: abra|OJJ66486.1 acla|EAW10983.1 afla|EED45559.1 afum|EAL84756.1 agla|OJJ83984.1  
aluc|OJZ81549.1 anid|CBF82857.1 anig|EHA25886.1 aver|OJJ00919.1 awen|OJJ34483.1 azon|OJJ51760.1

Group8089: abra|OJJ66545.1 acar|OOF90997.1 afla|EED50269.1 akaw|GAA91170.1 aluc|OJZ81498.1  
anig|EHA25932.1 aory|EIT77367.1 ater|EAU38565.1 atub|OJI88683.1 aluc|OJZ80365.1 anig|EHA20400.1

Group8090: afla|EED50292.1 aory|EIT77326.1 acla|EAW10923.1 afis|EAW20935.1 afum|EAL84699.1  
anid|CBF82530.1 anig|EHA25952.1 asyd|OJJ54075.1 ater|EAU38581.1 aver|OJJ08664.1 azon|OJJ50774.1

Group8091: abra|OJJ66758.1 acar|OOF93840.1 agla|OJJ85834.1 akaw|GAA89694.1 aluc|OJZ80690.1  
anig|EHA27325.1 aory|EIT75473.1 asyd|OJJ54962.1 ater|EAU30488.1 atub|OJI87550.1 aver|OJJ07229.1

Group8092: abra|OJJ66764.1 acar|OOF93845.1 afla|EED56723.1 akaw|GAA89700.1 aluc|OJZ80685.1  
anid|CBF69518.1 anig|EHA27329.1 aory|EIT73881.1 asyd|OJJ59211.1 atub|OJI87543.1 aver|OJJ01821.1

Group8093: abra|OJJ66770.1 acar|OOF93851.1 afis|EAW15609.1 afla|EED56864.1 akaw|GAA89707.1  
aluc|OJZ80677.1 anig|EHA27335.1 aory|EIT77549.1 atub|OJI87536.1 awen|OJJ35552.1 acar|OOF93886.1

Group8094: abra|OJJ66779.1 acar|OOF93858.1 afla|EED49902.1 agla|OJJ81856.1 akaw|GAA89714.1  
aluc|OJZ80670.1 anig|EHA27341.1 aory|EIT72458.1 ater|EAU32527.1 atub|OJI87524.1 awen|OJJ32044.1

Group8095: abra|OJJ66786.1 acar|OOF93860.1 afla|EED50228.1 akaw|GAA89720.1 aluc|OJZ80664.1  
anig|EHA27346.1 aory|EIT77264.1 asyd|OJJ58370.1 atub|OJI87519.1 aver|OJJ02036.1 awen|OJJ31989.1

Group8096: abra|OJJ66787.1 acar|OOF93861.1 afla|EED50229.1 akaw|GAA89721.1 aluc|OJZ80663.1  
anig|EHA27347.1 aory|EIT77320.1 asyd|OJJ58369.1 atub|OJI87518.1 aver|OJJ02037.1 awen|OJJ31990.1

Group8097: acar|OOF91635.1 afla|EED54270.1 akaw|GAA91549.1 aory|EIT76006.1 acla|EAW14435.1  
afis|EAW19143.1 afum|EAL93874.1 anid|CBF86316.1 asyd|OJJ64998.1 ater|EAU37415.1 aver|OJI99118.1

Group8098: abra|OJJ66954.1 acar|OOF93654.1 agla|OJJ79211.1 akaw|GAA92207.1 aluc|OJZ85624.1 anig|EHA24904.1 asyd|OJJ65095.1 ater|EAU37244.1 atub|OJI79417.1 aver|OJI99219.1 awen|OJJ30185.1

Group8099: abra|OJJ66968.1 acar|OOF93636.1 afla|EED47522.1 akaw|GAA92195.1 aluc|OJZ85610.1 anig|EHA24916.1 aory|EIT74560.1 asyd|OJJ62820.1 ater|EAU31758.1 atub|OJI79403.1 aver|OJI96865.1

Group8100: abra|OJJ66971.1 acar|OOG00221.1 afla|EED56781.1 akaw|GAA92193.1 aluc|OJZ85608.1 anig|EHA24918.1 aory|EIT73837.1 atub|OJI79401.1 asyd|OJJ57306.1 aver|OJI99612.1 aory|EIT79995.1

Group8101: abra|OJJ67001.1 acar|OOF93613.1 afla|EED45809.1 akaw|GAA92164.1 aluc|OJZ85571.1 anid|CBF83990.1 anig|EHA24947.1 aory|EIT75678.1 atub|OJI79367.1 aver|OJI96468.1 awen|OJJ37853.1

Group8102: abra|OJJ67005.1 acar|OOF93609.1 afla|EED49662.1 akaw|GAA92162.1 aluc|OJZ85569.1 anid|CBF87113.1 anig|EHA24949.1 asyd|OJJ60328.1 atub|OJI79364.1 aver|OJI99676.1 awen|OJJ37893.1

Group8103: afla|EED51775.1 awen|OJJ35033.1 abra|OJJ74169.1 acar|OOF95556.1 akaw|GAA86847.1 aluc|OJZ89968.1 anid|CBF77079.1 anig|EHA27166.1 asyd|OJJ56967.1 atub|OJI84839.1 aver|OJJ03320.1

Group8104: abra|OJJ67211.1 acar|OOF98348.1 akaw|GAA90966.1 aluc|OJZ87762.1 anid|CBF89581.1 anig|EHA20247.1 asyd|OJJ62332.1 atub|OJI80882.1 aver|OJI96438.1 awen|OJJ39919.1 ater|EAU35357.1

Group8105: abra|OJJ67232.1 acar|OOF98319.1 afla|EED45990.1 agla|OJJ89178.1 akaw|GAA91657.1 aluc|OJZ87742.1 anig|EHA20234.1 aory|EIT75662.1 asyd|OJJ64982.1 atub|OJI80899.1 awen|OJJ33648.1

Group8106: abra|OJJ67263.1 afis|EAW21082.1 afla|EED44922.1 afum|EAL92103.1 agla|OJJ79286.1 akaw|GAA91679.1 aluc|OJZ87715.1 anig|EHA20209.1 atub|OJI80927.1 aver|OJJ00777.1 awen|OJJ35784.1

Group8107: abra|OJJ67291.1 acar|OOF92522.1 akaw|GAA86522.1 aluc|OJZ85068.1 anid|CBF81693.1 anig|EHA25282.1 aory|EIT75508.1 atub|OJI80530.1 afla|EED45685.1 asyd|OJJ59563.1 agla|OJJ79145.1

Group8108: abra|OJJ67293.1 acar|OOF92518.1 afla|EED45658.1 agla|OJJ79147.1 akaw|GAA86520.1 aluc|OJZ85066.1 anid|CBF81704.1 anig|EHA25280.1 asyd|OJJ59569.1 atub|OJI80532.1 aver|OJJ02698.1

Group8109: abra|OJJ67294.1 acar|OOF92516.1 agla|OJJ79148.1 akaw|GAA86519.1 aluc|OJZ85065.1 anid|CBF81702.1 anig|EHA25279.1 aory|EIT75593.1 asyd|OJJ59572.1 atub|OJI80533.1 aver|OJJ02695.1

Group8110: abra|OJJ67314.1 afla|EED46371.1 aory|EIT81658.1 asyd|OJJ59224.1 ater|EAU32714.1 aver|OJJ01834.1 awen|OJJ36094.1 azon|OJJ50751.1 acar|OOF91718.1 atub|OJI89682.1 afla|EED55175.1

Group8111: abra|OJJ67383.1 acar|OOF92430.1 afla|EED52927.1 agla|OJJ84468.1 akaw|GAA86441.1 aluc|OJZ84983.1 anig|EHA25196.1 aory|EIT78683.1 ater|EAU29906.1 atub|OJI80617.1 awen|OJJ31909.1

Group8112: aluc|OJZ89562.1 anid|CBF69557.1 awen|OJJ36249.1 acla|EAW06764.1 ater|EAU29328.1 atub|OJI85242.1 afla|EED54180.1 akaw|GAA88860.1 anig|EHA23044.1 asyd|OJJ59163.1 aver|OJJ01753.1

Group8113: abra|OJJ67493.1 acla|EAW06277.1 afis|EAW18383.1 afla|EED53023.1 afum|EAL93058.1 agla|OJJ84947.1 akaw|GAA86345.1 aluc|OJZ84871.1 anig|EHA25102.1 aory|EIT77432.1 ater|EAU32252.1

Group8114: abra|OJJ67555.1 acar|OOF90044.1 afla|EED45512.1 akaw|GAA88109.1 aluc|OJZ81379.1 anig|EHA18674.1 aory|EIT75413.1 atub|OJI91585.1 azon|OJJ45314.1 acar|OOF94222.1 agla|OJJ86352.1

Group8115: abra|OJJ67559.1 acar|OOG00273.1 afla|EED53442.1 akaw|GAA88107.1 aluc|OJZ81374.1 anig|EHA18672.1 aory|EIT74821.1 asyd|OJJ53831.1 ater|EAU37629.1 atub|OJI91580.1 aver|OJJ07935.1

Group8116: abra|OJJ67570.1 acar|OOF91942.1 afla|EED45401.1 agla|OJJ83699.1 akaw|GAA89100.1 anig|EHA25702.1 aory|EIT82457.1 asyd|OJJ58150.1 atub|OJI88438.1 aver|OJJ04254.1 awen|OJJ30694.1

Group8117: abra|OJJ67598.1 acar|OOF91949.1 afla|EED47298.1 akaw|GAA89117.1 aluc|OJZ81722.1 anig|EHA25717.1 aory|EIT82872.1 asyd|OJJ63585.1 atub|OJI88459.1 aver|OJI97349.1 awen|OJJ33436.1

Group8118: abra|OJJ67638.1 afla|EED46470.1 afum|EAL86600.1 akaw|GAA89156.1 aluc|OJZ81678.1 anig|EHA25763.1 ater|EAU35976.1 atub|OJI88503.1 awen|OJJ40906.1 aory|EIT72325.1 azon|OJJ48532.1

Group8119: abra|OJJ67675.1 afis|EAW15381.1 afla|EED48117.1 akaw|GAA83878.1 aluc|OJZ90818.1 anid|CBF83147.1 anig|EHA25870.1 aory|EIT76237.1 asyd|OJJ55490.1 aver|OJJ06568.1 awen|OJJ31452.1

Group8120: abra|OJJ67766.1 acar|OOF98574.1 afla|EED47855.1 agla|OJJ84197.1 akaw|GAA89764.1 aluc|OJZ80619.1 anig|EHA27213.1 ater|EAU30931.1 atub|OJI87473.1 afla|EED46617.1 anig|EHA27212.1

Group8121: abra|OJJ67777.1 afla|EED51686.1 agla|OJJ78473.1 ater|EAU39528.1 azon|OJJ42638.1 abra|OJJ68156.1 afla|EED47515.1 akaw|GAA90125.1 aluc|OJZ83225.1 anig|EHA21082.1 atub|OJI87711.1

Group8122: awen|OJJ32655.1 abra|OJJ77418.1 afla|EED53244.1 akaw|GAA91337.1 aluc|OJZ84842.1 asyd|OJJ54864.1 atub|OJI89256.1 aver|OJJ07914.1 aory|EIT75212.1 atub|OJI89978.1 asyd|OJJ53813.1

Group8123: abra|OJJ67897.1 agla|OJJ84454.1 akaw|GAA91901.1 aluc|OJZ81993.1 anig|EHA22263.1 asyd|OJJ64966.1 atub|OJI84543.1 ater|EAU29594.1 afis|EAW20706.1 awen|OJJ34083.1 aver|OJI99089.1

Group8124: abra|OJJ67911.1 afis|EAW16401.1 afum|EAL89026.1 agla|OJJ83731.1 aluc|OJZ81975.1 anid|CBF86678.1 anig|EHA22278.1 atub|OJI84526.1 aver|OJJ05880.1 awen|OJJ29891.1 aver|OJJ01777.1

Group8125: abra|OJJ67931.1 acar|OOF92781.1 afis|EAW20401.1 afum|EAL85500.2 akaw|GAA91266.1 aluc|OJZ82803.1 anig|EHA21244.1 ater|EAU31394.1 atub|OJI89034.1 awen|OJJ33793.1 azon|OJJ48753.1

Group8126: awen|OJJ31422.1 anig|EHA19747.1 atub|OJI85733.1 acar|OOF91999.1 acla|EAW13942.1 akaw|GAA83683.1 anid|CBF76229.1 acla|EAW13943.1 atub|OJI83046.1 akaw|GAA84353.1 aluc|OJZ89054.1

Group8127: abra|OJJ68038.1 acar|OOF91805.1 afis|EAW24633.1 afla|EED55051.1 akaw|GAA90914.1 aluc|OJZ82912.1 anig|EHA21335.1 aory|EIT81965.1 asyd|OJJ53720.1 ater|EAU36658.1 atub|OJI89138.1

Group8128: abra|OJJ68108.1 afla|EED53403.1 akaw|GAA86891.1 aluc|OJZ90014.1 anid|CBF80624.1 anig|EHA27389.1 aory|EIT75164.1 asyd|OJJ54633.1 atub|OJI84793.1 aver|OJJ07523.1 awen|OJJ33178.1

Group8129: abra|OJJ68109.1 afla|EED53402.1 akaw|GAA86892.1 aluc|OJZ90015.1 anid|CBF80626.1 anig|EHA27390.1 aory|EIT75119.1 asyd|OJJ54632.1 atub|OJI84792.1 aver|OJJ07524.1 awen|OJJ33177.1

Group8130: abra|OJJ68160.1 akaw|GAA83282.1 aluc|OJZ83791.1 anig|EHA18928.1 atub|OJI90159.1 azon|OJJ43666.1 abra|OJJ78087.1 ater|EAU37599.1 acar|OOF96465.1 anid|CBF86357.1 akaw|GAA83281.1

Group8131: abra|OJJ68288.1 acla|EAW12903.1 afis|EAW17775.1 afla|EED56743.1 afum|EAL91583.1 akaw|GAA83183.1 aluc|OJZ83683.1 anig|EHA18837.1 aory|EIT73838.1 atub|OJI90054.1 aver|OJI99931.1

Group8132: abra|OJJ68296.1 acar|OOF97563.1 acla|EAW08964.1 afis|EAW15445.1 afla|EED46466.1 afum|EAL84202.1 akaw|GAA83177.1 aluc|OJZ83676.1 anig|EHA18832.1 aory|EIT72322.1 atub|OJI90047.1

Group8133: abra|OJJ68298.1 acar|OOF97573.1 aluc|OJZ83674.1 anig|EHA18830.1 atub|OJI90045.1 abra|OJJ77761.1 acla|EAW12360.1 afum|EAL91922.1 azon|OJJ49864.1 afla|EED51123.1 aory|EIT81326.1

Group8134: abra|OJJ68320.1 acar|OOF97581.1 afla|EED52686.1 akaw|GAA83153.1 aluc|OJZ83653.1 anig|EHA18804.1 aory|EIT74233.1 asyd|OJJ59949.1 atub|OJI90022.1 aver|OJJ02340.1 awen|OJJ39603.1

Group8135: abra|OJJ68323.1 afla|EED49521.1 akaw|GAA92074.1 aluc|OJZ83650.1 anid|CBF78523.1 anig|EHA18801.1 aory|EIT82597.1 atub|OJI90019.1 aver|OJI99447.1 awen|OJJ39149.1 azon|OJJ51481.1

Group8136: abra|OJJ68332.1 acar|OOF97607.1 afis|EAW25713.1 afla|EED46086.1 afum|EAL84385.1 agla|OJJ84491.1 akaw|GAA92084.1 aluc|OJZ83640.1 anig|EHA18793.1 aory|EIT76410.1 atub|OJI90009.1

Group8137: acla|EAW08804.1 afis|EAW15593.1 afum|EAL85739.2 ater|EAU32534.1 afla|EED54741.1 agla|OJJ85154.1 anid|CBF78081.1 aory|EIT78817.1 asyd|OJJ55879.1 aver|OJJ04824.1 awen|OJJ38269.1

Group8138: abra|OJJ68378.1 acar|OOF93989.1 acla|EAW14618.1 afis|EAW19356.1 afum|EAL94076.1 akaw|GAA92566.1 aluc|OJZ90114.1 anig|EHA20954.1 atub|OJI84685.1 azon|OJJ43675.1 azon|OJJ51821.1

Group8139: abra|OJJ68427.1 acar|OOF93936.1 agla|OJJ86941.1 akaw|GAA86944.1 aluc|OJZ90069.1 anig|EHA21005.1 atub|OJI84738.1 awen|OJJ33587.1 acar|OOF93935.1 anig|EHA21004.1 awen|OJJ37600.1

Group8140: abra|OJJ68457.1 acar|OOF93940.1 acla|EAW11092.1 afis|EAW20765.1 afla|EED50227.1 afum|EAL84854.1 akaw|GAA86917.1 aluc|OJZ90040.1 anig|EHA21031.1 ater|EAU32754.1 atub|OJI84766.1

Group8141: abra|OJJ68516.1 acar|OOF95565.1 afis|EAW24773.1 afla|EED49729.1 aluc|OJZ82730.1 anid|CBF89921.1 asyd|OJJ62124.1 atub|OJI88963.1 aver|OJI96232.1 awen|OJJ37933.1 azon|OJJ43610.1

Group8142: abra|OJJ68577.1 acar|OOF92103.1 afla|EED49944.1 akaw|GAA91916.1 aluc|OJZ81964.1 anid|CBF71749.1 anig|EHA22283.1 aory|EIT83427.1 asyd|OJJ61731.1 atub|OJI84515.1 aver|OJI95825.1

Group8143: anid|CBF73475.1 acar|OOF91851.1 afis|EAW25678.1 afla|EED52546.1 afum|EAL84348.1 agla|OJJ86553.1 aory|EIT74174.1 asyd|OJJ54791.1 aver|OJJ07372.1 awen|OJJ29895.1 azon|OJJ43601.1

Group8144: abra|OJJ68822.1 acar|OOF99136.1 agla|OJJ82564.1 anig|EHA24759.1 aory|EIT74227.1 atub|OJI79583.1 awen|OJJ36433.1 afis|EAW20257.1 acla|EAW12444.1 asyd|OJJ55238.1 aver|OJJ06985.1

Group8145: abra|OJJ68826.1 akaw|GAA90427.1 aluc|OJZ85802.1 anig|EHA24754.1 asyd|OJJ55693.1 ater|EAU37617.1 atub|OJI79587.1 aver|OJJ06778.1 abra|OJJ71062.1 acla|EAW11659.1 azon|OJJ45881.1

Group8146: abra|OJJ68853.1 acar|OOF98661.1 anid|CBF75774.1 asyd|OJJ62872.1 aver|OJI96925.1 azon|OJJ48281.1 abra|OJJ75195.1 akaw|GAA91747.1 aluc|OJZ92758.1 anig|EHA26248.1 atub|OJI87202.1

Group8147: abra|OJJ68861.1 acar|OOF90528.1 afla|EED56733.1 agla|OJJ81558.1 akaw|GAA90392.1 aluc|OJZ85839.1 anig|EHA24725.1 aory|EIT73860.1 atub|OJI79627.1 awen|OJJ31227.1 azon|OJJ46150.1

Group8148: abra|OJJ69011.1 acar|OOF92722.1 acla|EAW12847.1 afis|EAW18010.1 afum|EAL91822.1  
agla|OJJ80276.1 akaw|GAA90528.1 aluc|OJZ85997.1 anig|EHA24613.1 aory|EIT81701.1 ater|EAU31526.1

Group8149: abra|OJJ69022.1 acar|OOF89908.1 aluc|OJZ86008.1 anid|CBF88670.1 anig|EHA24602.1  
aory|EIT76676.1 asyd|OJJ63894.1 atub|OJI79797.1 aver|OJI97045.1 awen|OJJ30870.1 azon|OJJ42016.1

Group8150: abra|OJJ69023.1 acar|OOF91421.1 afis|EAW23608.1 afla|EED51808.1 afum|EAL87857.1  
akaw|GAA90540.1 aluc|OJZ86010.1 aory|EIT81716.1 atub|OJI79799.1 anig|EHA22502.1 acla|EAW08565.1

Group8151: abra|OJJ69044.1 acar|OOF98654.1 afla|EED46057.1 akaw|GAA90573.1 aluc|OJZ86029.1  
anig|EHA24583.1 aory|EIT83476.1 asyd|OJJ53816.1 atub|OJI79818.1 aver|OJJ06538.1 awen|OJJ38012.1

Group8152: abra|OJJ69246.1 acar|OOF91074.1 acla|EAW08603.1 afis|EAW15830.1 afum|EBA27234.1  
agla|OJJ81994.1 aluc|OJZ86227.1 anid|CBF70865.1 asyd|OJJ52578.1 atub|OJI80020.1 azon|OJJ43719.1

Group8153: abra|OJJ69333.1 anig|EHA28567.1 abra|OJJ72542.1 acar|OOG00675.1 afla|EED53624.1  
akaw|GAA86266.1 aluc|OJZ90526.1 aory|EIT74957.1 atub|OJI81948.1 awen|OJJ31579.1 agla|OJJ89571.1

Group8154: abra|OJJ69335.1 acar|OOF94394.1 afla|EED45505.1 akaw|GAA88205.1 aluc|OJZ82167.1  
anig|EHA28565.1 aory|EIT75585.1 ater|EAU29420.1 atub|OJI88270.1 acar|OOF90008.1 awen|OJJ35535.1

Group8155: abra|OJJ69341.1 acar|OOF94387.1 acla|EAW14705.1 afis|EAW24236.1 afla|EED48035.1  
afum|EAL85905.1 akaw|GAA88210.1 aluc|OJZ82173.1 aory|EIT83333.1 atub|OJI88264.1 awen|OJJ33050.1

Group8156: abra|OJJ69433.1 acar|OOF94304.1 afis|EAW23589.1 afla|EED49524.1 akaw|GAA88297.1  
aluc|OJZ82269.1 anig|EHA28474.1 aory|EIT82611.1 atub|OJI88169.1 afla|EED48207.1 aory|EIT72964.1

Group8157: ater|EAU33216.1 azon|OJJ43984.1 acla|EAW06631.1 afis|EAW16134.1 afla|EED48673.1  
afum|EAL88764.1 anid|CBF85516.1 aory|EIT73100.1 asyd|OJJ64125.1 aver|OJI98208.1 awen|OJJ30294.1

Group8158: abra|OJJ69561.1 afis|EAW24399.1 afum|EAL86070.1 agla|OJJ78881.1 anid|CBF73731.1  
anig|EHA28376.1 asyd|OJJ56632.1 ater|EAU30338.1 aver|OJJ06094.1 awen|OJJ32806.1 azon|OJJ49028.1

Group8159: abra|OJJ69574.1 acar|OOF91582.1 acla|EAW14399.1 afla|EED45439.1 akaw|GAA91571.1  
aluc|OJZ82391.1 aory|EIT82459.1 ater|EAU32011.1 atub|OJI88050.1 awen|OJJ32499.1 azon|OJJ46033.1

Group8160: abra|OJJ69599.1 acar|OOF93069.1 atub|OJI83025.1 awen|OJJ38317.1 abra|OJJ71063.1  
acla|EAW11660.1 anid|CBF71513.1 asyd|OJJ57389.1 ater|EAU36458.1 aver|OJJ07279.1 acar|OOF97615.1

Group8161: abra|OJJ69662.1 acar|OOF90603.1 afla|EED54757.1 agla|OJJ85393.1 akaw|GAA91630.1  
aluc|OJZ82457.1 anig|EHA28318.1 aory|EIT79455.1 atub|OJI87981.1 awen|OJJ40351.1 ater|EAU32696.1

Group8162: abra|OJJ69692.1 afla|EED48235.1 agla|OJJ86810.1 aluc|OJZ80602.1 anid|CBF84032.1  
aory|EIT80596.1 asyd|OJJ61368.1 aver|OJJ00695.1 awen|OJJ38793.1 afla|EED51647.1 agla|OJJ83217.1

Group8163: abra|OJJ69693.1 afla|EED48234.1 agla|OJJ86809.1 agla|OJJ88731.1 aluc|OJZ80606.1  
anid|CBF84034.1 aory|EIT72897.1 asyd|OJJ61369.1 aver|OJJ00696.1 awen|OJJ41926.1 agla|OJJ87453.1

Group8164: abra|OJJ69697.1 afla|EED48379.1 akaw|GAA88937.1 aluc|OJZ89470.1 anig|EHA28272.1  
aory|EIT80938.1 asyd|OJJ63605.1 atub|OJI88346.1 aver|OJI97331.1 aory|EIT83092.1 agla|OJJ86353.1

Group8165: abra|OJJ69704.1 acar|OOF90537.1 afis|EAW19198.1 afum|EAL93930.1 anid|CBF88879.1  
anig|EHA28262.1 asyd|OJJ57244.1 ater|EAU35861.1 aver|OJJ02855.1 azon|OJJ42364.1 acla|EAW07626.1

Group8166: acar|OOF99053.1 azon|OJJ49414.1 acla|EAW09549.1 akaw|GAA83945.1 aluc|OJZ80826.1  
anig|EHA19489.1 asyd|OJJ58668.1 atub|OJI82739.1 aver|OJJ07956.1 asyd|OJJ53316.1 agla|OJJ88733.1

Group8167: abra|OJJ69790.1 acla|EAW11672.1 afis|EAW23688.1 afla|EED57654.1 afum|EAL87134.1  
agla|OJJ79366.1 akaw|GAA87868.1 aluc|OJZ85509.1 anid|CBF84202.1 aory|EIT79864.1 awen|OJJ33315.1

Group8168: abra|OJJ69812.1 acar|OOF93565.1 akaw|GAA87845.1 aluc|OJZ85483.1 anid|CBF71117.1  
asyd|OJJ52715.1 atub|OJI80081.1 aver|OJJ04744.1 afla|EED50974.1 aory|EIT77027.1 ater|EAU38133.1

Group8169: abra|OJJ69832.1 acar|OOF93357.1 afla|EED52428.1 agla|OJJ79199.1 akaw|GAA87828.1  
aluc|OJZ85464.1 aory|EIT81265.1 atub|OJI80099.1 awen|OJJ32852.1 afla|EED48859.1 aory|EIT83300.1

Group8170: abra|OJJ69838.1 acar|OOF89869.1 afla|EED51496.1 akaw|GAA87822.1 aluc|OJZ85458.1  
anig|EHA25000.1 aory|EIT80655.1 asyd|OJJ56208.1 ater|EAU30100.1 atub|OJI80105.1 aver|OJJ04864.1

Group8171: abra|OJJ69865.1 acar|OOF90333.1 acla|EAW15318.1 akaw|GAA87791.1 aluc|OJZ85426.1  
anig|EHA25605.1 asyd|OJJ52771.1 ater|EAU32683.1 atub|OJI80149.1 aver|OJJ08754.1 awen|OJJ31348.1

Group8172: abra|OJJ69867.1 acar|OOF90335.1 acla|EAW15315.1 akaw|GAA87789.1 aluc|OJZ85424.1  
anig|EHA25603.1 asyd|OJJ52770.1 ater|EAU32681.1 atub|OJI80151.1 aver|OJJ08753.1 awen|OJJ31344.1

Group8173: abra|OJJ69881.1 acar|OOF93394.1 acla|EAW08288.1 afis|EAW19380.1 akaw|GAA87777.1 aluc|OJZ85412.1 anid|CBF84571.1 anig|EHA25591.1 asyd|OJJ53387.1 atub|OJI80165.1 aver|OJJ08356.1

Group8174: abra|OJJ69885.1 acar|OOF93403.1 agla|OJJ79811.1 akaw|GAA87773.1 aluc|OJZ85408.1 anid|CBF69587.1 anig|EHA25587.1 asyd|OJJ59147.1 atub|OJI80168.1 aver|OJJ01737.1 awen|OJJ29887.1

Group8175: asyd|OJJ52395.1 aver|OJJ01928.1 afla|EED53341.1 agla|OJJ87119.1 akaw|GAA92123.1 aluc|OJZ83599.1 anig|EHA18758.1 aory|EIT75010.1 atub|OJI89971.1 awen|OJJ35024.1 awen|OJJ31259.1

Group8176: agla|OJJ88720.1 anig|EHA27459.1 akaw|GAA92601.1 aluc|OJZ82618.1 anid|CBF86707.1 asyd|OJJ54372.1 atub|OJI88853.1 aver|OJJ08239.1 awen|OJJ40863.1 azon|OJJ43553.1 asyd|OJJ53507.1

Group8177: abra|OJJ69895.1 acar|OOG00774.1 afla|EED54571.1 agla|OJJ83057.1 anid|CBF71735.1 aory|EIT78904.1 asyd|OJJ61796.1 ater|EAU39168.1 aver|OJI95895.1 awen|OJJ41669.1 azon|OJJ43877.1

Group8178: aory|EIT77582.1 acla|EAW12037.1 anid|CBF71549.1 asyd|OJJ62469.1 ater|EAU29265.1 aver|OJI96604.1 awen|OJJ32576.1 azon|OJJ50293.1 afla|EED56859.1 asyd|OJJ58382.1 aver|OJJ08477.1

Group8179: afla|EED49439.1 afis|EAW24663.1 anid|CBF80281.1 aory|EIT79585.1 asyd|OJJ62362.1 ater|EAU35138.1 aver|OJI96496.1 awen|OJJ33814.1 asyd|OJJ55554.1 aver|OJJ00802.1 ater|EAU33898.1

Group8180: abra|OJJ70020.1 acar|OOF93526.1 akaw|GAA87641.1 aluc|OJZ85256.1 anig|EHA25457.1 aory|EIT79606.1 asyd|OJJ64929.1 atub|OJI80312.1 aver|OJI99048.1 awen|OJJ37945.1 afla|EED56645.1

Group8181: abra|OJJ70049.1 afla|EED49529.1 akaw|GAA87626.1 aluc|OJZ85242.1 anid|CBF87406.1 anig|EHA25442.1 aory|EIT82586.1 asyd|OJJ52889.1 atub|OJI80329.1 aver|OJJ08859.1 awen|OJJ35375.1

Group8182: afis|EAW17081.1 afum|EBA27279.1 abra|OJJ70068.1 acar|OOG00526.1 afla|EED57140.1 akaw|GAA90341.1 aluc|OJZ85891.1 aory|EIT73992.1 ater|EAU37389.1 atub|OJI79676.1 aver|OJI98349.1

Group8183: abra|OJJ70115.1 acar|OOF91821.1 afis|EAW24597.1 afla|EED47458.1 akaw|GAA89324.1 aluc|OJZ86344.1 atub|OJI84190.1 aver|OJI96488.1 abra|OJJ70245.1 agla|OJJ84792.1 awen|OJJ34669.1

Group8184: abra|OJJ70174.1 afis|EAW18190.1 afla|EED45821.1 akaw|GAA86596.1 aluc|OJZ85143.1 aory|EIT75436.1 asyd|OJJ55822.1 atub|OJI80448.1 ater|EAU33791.1 aver|OJJ04764.1 ater|EAU29322.1

Group8185: abra|OJJ70177.1 afis|EAW16395.1 afla|EED48109.1 agla|OJJ86671.1 akaw|GAA86594.1 aluc|OJZ85141.1 anig|EHA25357.1 aory|EIT76191.1 asyd|OJJ57218.1 atub|OJI80451.1 aver|OJJ03123.1

Group8186: abra|OJJ70215.1 aluc|OJZ85111.1 azon|OJJ51439.1 abra|OJJ78119.1 acar|OOF90504.1 agla|OJJ80751.1 akaw|GAA85889.1 anig|EHA19875.1 asyd|OJJ61549.1 atub|OJI83200.1 aver|OJJ06187.1

Group8187: abra|OJJ70228.1 acla|EAW12153.1 afis|EAW17178.1 afla|EED49680.1 afum|EAL86608.1 akaw|GAA93010.1 aluc|OJZ82575.1 anid|CBF78875.1 aory|EIT80947.1 ater|EAU29536.1 awen|OJJ31952.1

Group8188: abra|OJJ70257.1 acar|OOF90565.1 acla|EAW13529.1 afla|EED44860.1 agla|OJJ89546.1 akaw|GAA89224.1 aluc|OJZ81604.1 anig|EHA25306.1 aory|EIT82728.1 aver|OJJ08166.1 acar|OOF95349.1

Group8189: abra|OJJ70283.1 acar|OOF91735.1 afla|EED45375.1 akaw|GAA92866.1 aluc|OJZ82548.1 anig|EHA22512.1 aory|EIT82391.1 atub|OJI88789.1 afis|EAW19537.1 afum|EAL86969.2 azon|OJJ45081.1

Group8190: abra|OJJ70308.1 acar|OOF91763.1 akaw|GAA93014.1 aluc|OJZ82571.1 anid|CBF80499.1 anig|EHA27503.1 asyd|OJJ61522.1 ater|EAU30198.1 atub|OJI88815.1 awen|OJJ36271.1 azon|OJJ50649.1

Group8191: abra|OJJ70316.1 acar|OOF91908.1 afla|EED54367.1 agla|OJJ84148.1 akaw|GAA92571.1 aluc|OJZ82582.1 anid|CBF71562.1 aory|EIT75696.1 asyd|OJJ54215.1 aver|OJJ08516.1 afla|EED45496.1

Group8192: abra|OJJ70332.1 acar|OOF91792.1 afla|EED45228.1 akaw|GAA92587.1 aluc|OJZ82602.1 anig|EHA27477.1 aory|EIT73736.1 asyd|OJJ56051.1 atub|OJI88838.1 awen|OJJ32249.1 acla|EAW08765.1

Group8193: abra|OJJ70333.1 acar|OOF91795.1 afla|EED51848.1 agla|OJJ78674.1 akaw|GAA92588.1 aluc|OJZ82603.1 aory|EIT81682.1 asyd|OJJ52960.1 ater|EAU29425.1 atub|OJI88839.1 awen|OJJ33656.1

Group8194: abra|OJJ70343.1 acar|OOF91923.1 acla|EAW08792.1 agla|OJJ79972.1 akaw|GAA92765.1 aluc|OJZ82720.1 anig|EHA21174.1 aory|EIT83363.1 atub|OJI88954.1 awen|OJJ35056.1 acar|OOF96900.1

Group8195: abra|OJJ70364.1 acla|EAW12636.1 afis|EAW24544.1 afla|EED46221.1 akaw|GAA91987.1 aluc|OJZ82626.1 aory|EIT76430.1 asyd|OJJ61036.1 aver|OJJ00354.1 awen|OJJ35634.1 azon|OJJ42138.1

Group8196: abra|OJJ70365.1 acar|OOF92537.1 acla|EAW07832.1 afis|EAW22869.1 afum|EAL90330.2 akaw|GAA91986.1 aluc|OJZ82627.1 anig|EHA27450.1 atub|OJI88860.1 awen|OJJ31366.1 azon|OJJ49480.1

Group8197: abra|OJJ70375.1 acar|OOF91894.1 acla|EAW12335.1 afis|EAW16887.1 afla|EED47355.1 afum|EAL86425.2 agla|OJJ79934.1 anig|EHA27433.1 ater|EAU30226.1 awen|OJJ29757.1 azon|OJJ42519.1

Group8198: abra|OJJ70502.1 acar|OOF97424.1 afla|EED47045.1 agla|OJJ78737.1 akaw|GAA83350.1 aluc|OJZ83847.1 anig|EHA18989.1 aory|EIT72605.1 ater|EAU36336.1 atub|OJI90213.1 azon|OJJ47643.1

Group8199: abra|OJJ70641.1 acar|OOF97086.1 akaw|GAA89977.1 aluc|OJZ83988.1 anid|CBF86684.1 anig|EHA19114.1 asyd|OJJ64755.1 ater|EAU36164.1 atub|OJI90360.1 aver|OJI98857.1 afla|EED52060.1

Group8200: abra|OJJ70820.1 acar|OOF98282.1 afla|EED56895.1 akaw|GAA91699.1 aluc|OJZ87691.1 anig|EHA20880.1 aory|EIT77507.1 ater|EAU33221.1 atub|OJI80949.1 awen|OJJ41833.1 azon|OJJ50734.1

Group8201: afis|EAW16807.1 afla|EED49870.1 abra|OJJ77980.1 akaw|GAA86000.1 aluc|OJZ91055.1 anig|EHA19758.1 asyd|OJJ54859.1 atub|OJI83051.1 acar|OOF94408.1 anid|CBF80481.1 aory|EIT83410.1

Group8202: abra|OJJ71108.1 acar|OOF90225.1 afis|EAW16704.1 afla|EED54349.1 akaw|GAA82861.1 aluc|OJZ87427.1 anig|EHA20649.1 aory|EIT76100.1 asyd|OJJ53361.1 atub|OJI81222.1 aver|OJJ07647.1

Group8203: abra|OJJ71223.1 acar|OOF96454.1 afla|EED48464.1 akaw|GAA82770.1 aluc|OJZ87329.1 anig|EHA20567.1 aory|EIT76276.1 atub|OJI81315.1 awen|OJJ35993.1 agla|OJJ81048.1 azon|OJJ50273.1

Group8204: abra|OJJ71327.1 acar|OOF97847.1 acla|EAW10212.1 afis|EAW25382.1 agla|OJJ83774.1 aluc|OJZ87216.1 asyd|OJJ53196.1 ater|EAU34528.1 aver|OJJ03654.1 awen|OJJ41108.1 azon|OJJ44686.1

Group8205: abra|OJJ71398.1 acla|EAW10136.1 afla|EED53939.1 agla|OJJ87104.1 akaw|GAA82599.1 aluc|OJZ87144.1 asyd|OJJ53127.1 atub|OJI81497.1 awen|OJJ41183.1 azon|OJJ44759.1 aver|OJJ03727.1

Group8206: abra|OJJ71541.1 acar|OOF96288.1 afla|EED45312.1 aluc|OJZ86279.1 anid|CBF84827.1 anig|EHA21592.1 asyd|OJJ63208.1 atub|OJI84260.1 aver|OJI97747.1 awen|OJJ31826.1 azon|OJJ46298.1

Group8207: abra|OJJ71582.1 afla|EED56708.1 akaw|GAA89342.1 aluc|OJZ86319.1 anig|EHA21556.1 asyd|OJJ53777.1 ater|EAU38708.1 atub|OJI84216.1 aver|OJJ07882.1 awen|OJJ31864.1 aory|EIT73841.1

Group8208: akaw|GAA89304.1 acla|EAW15162.1 afis|EAW20131.1 afla|EED57221.1 afum|EAL85247.1 anid|CBF84958.1 aory|EIT74080.1 asyd|OJJ63142.1 aver|OJI97812.1 awen|OJJ31997.1 azon|OJJ46052.1

Group8209: abra|OJJ71783.1 acar|OOF96462.1 afla|EED45772.1 afla|EED56598.1 akaw|GAA85127.1 aluc|OJZ86513.1 aory|EIT75471.1 aory|EIT79648.1 ater|EAU37978.1 atub|OJI84011.1 awen|OJJ35890.1

Group8210: abra|OJJ71791.1 acar|OOF96471.1 afla|EED56593.1 akaw|GAA85119.1 aluc|OJZ86521.1 anid|CBF82145.1 anig|EHA22125.1 asyd|OJJ54324.1 atub|OJI84001.1 aver|OJJ05278.1 awen|OJJ30243.1

Group8211: abra|OJJ71979.1 acar|OOF96630.1 agla|OJJ85763.1 akaw|GAA84951.1 aluc|OJZ86716.1 anid|CBF76308.1 asyd|OJJ61007.1 atub|OJI83813.1 aver|OJJ00325.1 awen|OJJ39104.1 azon|OJJ51437.1

Group8212: abra|OJJ72055.1 acar|OOF96712.1 akaw|GAA84879.1 aluc|OJZ86792.1 anig|EHA21891.1 asyd|OJJ62344.1 atub|OJI83727.1 aver|OJI96449.1 azon|OJJ44925.1 aory|EIT81929.1 afla|EED52243.1

Group8213: abra|OJJ72135.1 acar|OOF96774.1 afis|EAW18427.1 afla|EED55067.1 afum|EAL93108.1 akaw|GAA84787.1 aluc|OJZ86893.1 anig|EHA21750.1 aory|EIT81983.1 atub|OJI83626.1 awen|OJJ34806.1

Group8214: abra|OJJ72137.1 acar|OOF96775.1 afis|EAW18423.1 agla|OJJ82205.1 akaw|GAA84785.1 aluc|OJZ86895.1 anid|CBF77131.1 anig|EHA21748.1 asyd|OJJ56942.1 atub|OJI83624.1 aver|OJJ03342.1

Group8215: abra|OJJ72162.1 acar|OOF96797.1 akaw|GAA84766.1 aluc|OJZ86917.1 anid|CBF87753.1 anig|EHA21727.1 asyd|OJJ56864.1 atub|OJI83604.1 aver|OJJ06179.1 akaw|GAA89021.1 aluc|OJZ80583.1

Group8216: abra|OJJ72168.1 acar|OOF96802.1 agla|OJJ81392.1 akaw|GAA84760.1 aluc|OJZ86923.1 anig|EHA21721.1 asyd|OJJ64156.1 atub|OJI83598.1 aver|OJI98234.1 awen|OJJ41507.1 azon|OJJ43660.1

Group8217: abra|OJJ72173.1 acar|OOF96138.1 afis|EAW17528.1 afla|EED53696.1 akaw|GAA84755.1 aluc|OJZ86928.1 aory|EIT75271.1 atub|OJI83593.1 acar|OOF90362.1 akaw|GAA90582.1 aluc|OJZ86040.1

Group8218: abra|OJJ72206.1 acar|OOF96826.1 agla|OJJ79955.1 akaw|GAA84728.1 aluc|OJZ86958.1 anig|EHA21690.1 aory|EIT81912.1 atub|OJI83565.1 awen|OJJ32668.1 afla|EED47449.1 asyd|OJJ52212.1

Group8219: afis|EAW18893.1 afla|EED50870.1 afum|EAL93625.1 agla|OJJ81499.1 anid|CBF69908.1 aory|EIT78999.1 awen|OJJ32451.1 aver|OJJ01621.1 acla|EAW14178.1 asyd|OJJ58995.1 ater|EAU38064.1

Group8220: abra|OJJ72227.1 acar|OOF96850.1 afla|EED56073.1 agla|OJJ78578.1 akaw|GAA84710.1 aluc|OJZ86977.1 anid|CBF75000.1 anig|EHA21671.1 aory|EIT76545.1 ater|EAU36082.1 atub|OJI83543.1

Group8221: abra|OJJ72273.1 acar|OOF94945.1 agla|OJJ80824.1 akaw|GAA86028.1 aluc|OJZ90255.1 anid|CBF71386.1 anig|EHA23750.1 asyd|OJJ55067.1 atub|OJI81681.1 aver|OJJ07144.1 azon|OJJ46419.1

Group8222: abra|OJJ72492.1 acar|OOF94980.1 agla|OJJ86015.1 akaw|GAA86226.1 aluc|OJZ90478.1 anig|EHA23937.1 ater|EAU31292.1 atub|OJI81903.1 awen|OJJ29973.1 azon|OJJ42026.1 azon|OJJ49012.1



Group8223: abra|OJJ72566.1 acar|OOF94688.1 afis|EAW17929.1 agla|OJJ83004.1 akaw|GAA85193.1 aluc|OJZ90548.1 anig|EHA23996.1 ater|EAU33541.1 atub|OJI81970.1 awen|OJJ41617.1 afum|EAL91740.1

Group8224: abra|OJJ72611.1 acla|EAW09029.1 afis|EAW22738.1 afla|EED49794.1 afum|EAL90457.1 agla|OJJ78515.1 akaw|GAA85237.1 aluc|OJZ90593.1 anig|EHA24032.1 aory|EIT77614.1 atub|OJI82016.1

Group8225: abra|OJJ72633.1 acar|OOF93306.1 afis|EAW20380.1 afla|EED53181.1 afum|EAL85493.1 akaw|GAA85254.1 aluc|OJZ90612.1 anig|EHA24050.1 aory|EIT74849.1 ater|EAU30709.1 atub|OJI82038.1

Group8226: abra|OJJ72744.1 aory|EIT82466.1 azon|OJJ45796.1 afla|EED45368.1 acar|OOG00576.1 afis|EAW21380.1 ater|EAU30220.1 atub|OJI86518.1 awen|OJJ35063.1 awen|OJJ41701.1 agla|OJJ82531.1

Group8227: abra|OJJ72774.1 acla|EAW11492.1 afis|EAW23961.1 afla|EED50549.1 afum|EAL87390.1 agla|OJJ86886.1 akaw|GAA85383.1 aluc|OJZ90751.1 ater|EAU29791.1 awen|OJJ38986.1 azon|OJJ51318.1

Group8228: abra|OJJ72829.1 afla|EED44984.1 aory|EIT73701.1 ater|EAU31052.1 awen|OJJ40615.1 azon|OJJ42824.1 atub|OJI82790.1 azon|OJJ42226.1 atub|OJI81974.1 akaw|GAA83894.1 aluc|OJZ90801.1

Group8229: abra|OJJ72875.1 acla|EAW11368.1 afis|EAW18127.1 afum|EAL87485.1 akaw|GAA85471.1 aluc|OJZ83387.1 anid|CBF75362.1 aory|EIT79714.1 ater|EAU35450.1 atub|OJI82273.1 afla|EED58051.1

Group8230: azon|OJJ50214.1 acla|EAW11062.1 afis|EAW20813.1 afla|EED57085.1 afum|EAL84815.1 anid|CBF84024.1 aory|EIT82273.1 asyd|OJJ61374.1 ater|EAU32258.1 aver|OJJ00701.1 awen|OJJ32660.1

Group8231: afum|EAL88569.1 agla|OJJ89374.1 acla|EAW11203.1 afis|EAW15933.1 afla|EED54928.1 anid|CBF86349.1 aory|EIT80384.1 aver|OJI99101.1 awen|OJJ35646.1 azon|OJJ46890.1 asyd|OJJ64979.1

Group8232: abra|OJJ72966.1 acar|OOF96148.1 afis|EAW15919.1 afla|EED54942.1 akaw|GAA85545.1 aluc|OJZ83477.1 anig|EHA24314.1 aory|EIT80351.1 asyd|OJJ56375.1 atub|OJI82366.1 aver|OJJ06337.1

Group8233: abra|OJJ72978.1 acar|OOF96157.1 afis|EAW23066.1 afla|EED54951.1 agla|OJJ89408.1 akaw|GAA85553.1 aluc|OJZ83488.1 anig|EHA24323.1 atub|OJI82380.1 awen|OJJ35669.1 afum|EAL88413.1

Group8234: abra|OJJ73072.1 acar|OOG00305.1 afis|EAW19681.1 afla|EED52420.1 afum|EAL86841.1 agla|OJJ85236.1 akaw|GAA88089.1 aluc|OJZ81353.1 aory|EIT83313.1 ater|EAU29957.1 atub|OJI91557.1

Group8235: abra|OJJ73093.1 acar|OOG00325.1 akaw|GAA88067.1 aluc|OJZ81332.1 anid|CBF78568.1 anig|EHA18636.1 aory|EIT82629.1 asyd|OJJ65068.1 atub|OJI91535.1 aver|OJI99192.1 afla|EED49586.1

Group8236: abra|OJJ73120.1 afla|EED47382.1 akaw|GAA88046.1 aluc|OJZ81307.1 anid|CBF76271.1 anig|EHA18614.1 aory|EIT82854.1 asyd|OJJ60977.1 atub|OJI91515.1 aver|OJJ00301.1 awen|OJJ40827.1

Group8237: abra|OJJ73178.1 acla|EAW08985.1 afis|EAW24687.1 afla|EED48345.1 afum|EAL89328.1 aory|EIT76280.1 asyd|OJJ55424.1 ater|EAU31418.1 aver|OJJ06503.1 awen|OJJ35368.1 anid|CBF83132.1

Group8238: abra|OJJ73317.1 acar|OOF98708.1 afla|EED48338.1 akaw|GAA92803.1 aluc|OJZ88727.1 anig|EHA18432.1 asyd|OJJ52013.1 atub|OJI91305.1 aver|OJJ07818.1 azon|OJJ50290.1 aory|EIT76306.1

Group8239: akaw|GAA91200.1 anid|CBF85440.1 afla|EED54857.1 agla|OJJ88276.1 aluc|OJZ81535.1 anig|EHA25901.1 aory|EIT79406.1 asyd|OJJ64090.1 ater|EAU36997.1 atub|OJI88652.1 aver|OJI98174.1

Group8240: abra|OJJ73350.1 acar|OOG00560.1 afla|EED46514.1 akaw|GAA83133.1 aluc|OJZ88689.1 anig|EHA18370.1 aory|EIT72405.1 asyd|OJJ61420.1 atub|OJI91269.1 aver|OJJ00755.1 awen|OJJ31683.1

Group8241: azon|OJJ45838.1 afla|EED56851.1 agla|OJJ80512.1 akaw|GAA83095.1 aluc|OJZ90880.1 aory|EIT77511.1 atub|OJI83753.1 awen|OJJ32547.1 aluc|OJZ88642.1 atub|OJI91227.1 agla|OJJ81564.1

Group8242: abra|OJJ73434.1 acar|OOG00641.1 afla|EED53595.1 akaw|GAA83059.1 aluc|OJZ88607.1 anid|CBF77718.1 anig|EHA18300.1 aory|EIT75104.1 ater|EAU36689.1 atub|OJI91191.1 aver|OJI99558.1

Group8243: ater|EAU39218.1 acla|EAW07467.1 afis|EAW22500.1 afla|EED54528.1 afum|EAL90693.1 agla|OJJ80850.1 aory|EIT78819.1 asyd|OJJ62801.1 aver|OJI96848.1 awen|OJJ35123.1 anid|CBF88963.1

Group8244: abra|OJJ73720.1 acar|OOF95372.1 agla|OJJ81470.1 akaw|GAA88442.1 aluc|OJZ88330.1 anid|CBF86465.1 anig|EHA18065.1 asyd|OJJ64909.1 ater|EAU37936.1 atub|OJI90925.1 aver|OJI99031.1

Group8245: abra|OJJ73729.1 acar|OOG00896.1 acla|EAW11756.1 afis|EAW23789.1 afla|EED53093.1 afum|EAL87223.2 aluc|OJZ88321.1 anig|EHA18057.1 atub|OJI90916.1 awen|OJJ29816.1 azon|OJJ42845.1

Group8246: abra|OJJ73859.1 acar|OOG01006.1 afla|EED50050.1 agla|OJJ83590.1 aluc|OJZ88180.1 anig|EHA17932.1 asyd|OJJ63486.1 atub|OJI90779.1 aver|OJI97443.1 awen|OJJ38948.1 azon|OJJ49720.1

Group8247: abra|OJJ74006.1 acar|OOG01128.1 afla|EED47788.1 agla|OJJ79634.1 akaw|GAA87487.1 aluc|OJZ88038.1 anig|EHA17811.1 aory|EIT77140.1 asyd|OJJ56545.1 atub|OJI90645.1 aory|EIT78695.1

Group8248: abra|OJJ74167.1 acar|OOF89850.1 afla|EED55901.1 agla|OJJ87090.1 akaw|GAA86848.1  
aluc|OJZ89969.1 anig|EHA27167.1 aory|EIT76783.1 atub|OJI84838.1 awen|OJJ36033.1 azon|OJJ48006.1

Group8249: abra|OJJ74300.1 acar|OOF95430.1 acla|EAW07345.1 afis|EAW22377.1 afum|EAL90815.1  
agla|OJJ87630.1 aluc|OJZ89833.1 anid|CBF89405.1 anig|EHA27035.1 ater|EAU39511.1 azon|OJJ42609.1

Group8250: abra|OJJ74370.1 afla|EED45946.1 akaw|GAA86661.1 aluc|OJZ89758.1 anid|CBF84510.1  
anig|EHA26978.1 aory|EIT75597.1 asyd|OJJ53515.1 atub|OJI85042.1 aver|OJJ08236.1 awen|OJJ40866.1

Group8251: abra|OJJ74410.1 acar|OOF95332.1 afla|EED53463.1 agla|OJJ85405.1 anid|CBF89357.1  
anig|EHA26945.1 aory|EIT75147.1 asyd|OJJ62499.1 ater|EAU34077.1 aver|OJI96619.1 azon|OJJ46508.1

Group8252: abra|OJJ74447.1 acar|OOF95548.1 acla|EAW10184.1 akaw|GAA87339.1 aluc|OJZ89675.1  
anig|EHA26910.1 aory|EIT82309.1 ater|EAU34842.1 atub|OJI85125.1 acar|OOF98747.1 afla|EED57083.1

Group8253: abra|OJJ74479.1 acla|EAW07221.1 afis|EAW22235.1 afla|EED57624.1 afum|EAL90958.1  
agla|OJJ87816.1 akaw|GAA87372.1 aluc|OJZ89640.1 anid|CBF88475.1 aory|EIT82938.1 atub|OJI85163.1

Group8254: abra|OJJ74561.1 afla|EED48714.1 agla|OJJ82643.1 aluc|OJZ92143.1 anid|CBF84656.1  
anig|EHA26806.1 aory|EIT73078.1 asyd|OJJ54383.1 ater|EAU33265.1 atub|OJI86157.1 awen|OJJ36280.1

Group8255: abra|OJJ74562.1 afla|EED48715.1 agla|OJJ82642.1 aluc|OJZ92142.1 anid|CBF84658.1  
anig|EHA26807.1 aory|EIT73277.1 asyd|OJJ54382.1 ater|EAU33266.1 atub|OJI86156.1 awen|OJJ36281.1

Group8256: abra|OJJ74583.1 acar|OOF90134.1 afla|EED45976.1 akaw|GAA82022.1 aluc|OJZ92161.1  
anig|EHA26788.1 aory|EIT75498.1 ater|EAU38427.1 atub|OJI86589.1 azon|OJJ50619.1 aory|EIT75794.1

Group8257: abra|OJJ74821.1 afla|EED45370.1 agla|OJJ80041.1 akaw|GAA88360.1 aluc|OJZ82295.1  
anig|EHA18381.1 aory|EIT82386.1 ater|EAU29268.1 atub|OJI88144.1 aver|OJJ01773.1 awen|OJJ30072.1

Group8258: abra|OJJ74827.1 acar|OOF95812.1 afla|EED50886.1 akaw|GAA83594.1 aluc|OJZ92402.1  
anig|EHA26564.1 aory|EIT79033.1 ater|EAU32477.1 atub|OJI86830.1 awen|OJJ35400.1 azon|OJJ50135.1

Group8259: abra|OJJ74838.1 acar|OOF95842.1 afla|EED50992.1 agla|OJJ84176.1 akaw|GAA83582.1  
aluc|OJZ92415.1 aory|EIT77064.1 ater|EAU37156.1 atub|OJI86845.1 awen|OJJ33797.1 azon|OJJ50128.1

Group8260: abra|OJJ75104.1 acar|OOF97230.1 acla|EAW08264.1 afis|EAW23297.1 afla|EED55647.1  
agla|OJJ86514.1 akaw|GAA88713.1 aluc|OJZ92669.1 aory|EIT81817.1 awen|OJJ39578.1 azon|OJJ47773.1

Group8261: abra|OJJ75116.1 akaw|GAA88726.1 aluc|OJZ92683.1 atub|OJI87111.1 acla|EAW08307.1  
asyd|OJJ62441.1 aver|OJI96577.1 awen|OJJ39562.1 agla|OJJ86501.1 ater|EAU35579.1 anid|CBF89438.1

Group8262: abra|OJJ75164.1 acar|OOF97174.1 akaw|GAA88775.1 aluc|OJZ92735.1 anid|CBF71797.1  
anig|EHA26267.1 ater|EAU35627.1 atub|OJI87159.1 agla|OJJ78945.1 asyd|OJJ64766.1 aver|OJI98866.1

Group8263: abra|OJJ75286.1 acar|OOF90101.1 afla|EED45609.1 akaw|GAA91824.1 aluc|OJZ92847.1  
anig|EHA26163.1 aory|EIT75599.1 atub|OJI87303.1 asyd|OJJ55353.1 aver|OJJ06442.1 anig|EHA26162.1

Group8264: abra|OJJ75288.1 afis|EAW23622.1 afla|EED48180.1 afum|EAL87838.2 akaw|GAA91826.1  
aluc|OJZ92849.1 anig|EHA26160.1 aory|EIT83036.1 asyd|OJJ55365.1 atub|OJI87305.1 aver|OJJ08468.1

Group8265: abra|OJJ75289.1 afis|EAW23623.1 afla|EED48179.1 afum|EAL87837.1 akaw|GAA91827.1  
aluc|OJZ92850.1 anig|EHA26159.1 aory|EIT83030.1 asyd|OJJ55366.1 atub|OJI87306.1 aver|OJJ08467.1

Group8266: abra|OJJ75290.1 afis|EAW23624.1 afla|EED48178.1 afum|EAL87836.1 akaw|GAA91828.1  
aluc|OJZ92851.1 anig|EHA26158.1 aory|EIT83027.1 asyd|OJJ55364.1 atub|OJI87307.1 aver|OJJ08469.1

Group8267: abra|OJJ75306.1 acar|OOF99290.1 acla|EAW09100.1 akaw|GAA91470.1 aluc|OJZ85630.1  
anig|EHA21435.1 asyd|OJJ57294.1 atub|OJI79425.1 aver|OJJ05861.1 awen|OJJ35050.1 azon|OJJ44457.1

Group8268: abra|OJJ75313.1 acar|OOF94516.1 afla|EED46217.1 agla|OJJ88346.1 akaw|GAA91997.1  
aluc|OJZ92867.1 anig|EHA26098.1 aory|EIT76449.1 asyd|OJJ56261.1 atub|OJI87325.1 awen|OJJ32218.1

Group8269: abra|OJJ75357.1 acar|OOF94480.1 afis|EAW15481.1 akaw|GAA92053.1 aluc|OJZ92923.1  
anig|EHA26046.1 atub|OJI87384.1 azon|OJJ43150.1 afum|EAL85841.1 agla|OJJ80160.1 awen|OJJ38139.1

Group8270: abra|OJJ75455.1 acar|OOF90800.1 acla|EAW14622.1 afum|EBA27428.1 akaw|GAA84230.1  
aluc|OJZ88911.1 anid|CBF78443.1 ater|EAU30773.1 atub|OJI85880.1 aver|OJI99496.1 afis|EAW17413.1

Group8271: akaw|GAA84242.1 aluc|OJZ88927.1 aory|EIT72988.1 acar|OOF90806.1 acla|EAW13836.1  
afis|EAW18295.1 afum|EAL87661.2 agla|OJJ88128.1 anig|EHA23586.1 asyd|OJJ57863.1 azon|OJJ43269.1

Group8272: abra|OJJ75477.1 acar|OOF90813.1 afis|EAW18290.1 afum|EAL87655.1 akaw|GAA84247.1  
aluc|OJZ88936.1 anig|EHA23581.1 atub|OJI85856.1 awen|OJJ30663.1 azon|OJJ43262.1 anid|CBF79458.1

Group8273: abra|OJJ75508.1 acla|EAW09298.1 afis|EAW21849.1 afla|EED46463.1 afum|EAL92862.1 akaw|GAA84271.1 aluc|OJZ88964.1 anig|EHA23557.1 aory|EIT72403.1 ater|EAU29685.1 atub|OJI85825.1

Group8274: abra|OJJ75513.1 acar|OOF90840.1 acla|EAW09301.1 afis|EAW21846.1 afum|EAL92858.1 agla|OJJ84289.1 akaw|GAA84277.1 aluc|OJZ88970.1 atub|OJI85820.1 awen|OJJ34129.1 azon|OJJ44214.1

Group8275: abra|OJJ75517.1 acar|OOF90844.1 afla|EED46524.1 akaw|GAA84281.1 aluc|OJZ88974.1 anid|CBF76719.1 anig|EHA23551.1 aory|EIT72337.1 asyd|OJJ61243.1 atub|OJI85816.1 aver|OJJ00566.1

Group8276: abra|OJJ75549.1 acla|EAW09320.1 afis|EAW21825.1 afla|EED46554.1 akaw|GAA84304.1 aluc|OJZ88999.1 anig|EHA23529.1 ater|EAU30086.1 atub|OJI85790.1 awen|OJJ34098.1 azon|OJJ44246.1

Group8277: acla|EAW06528.1 afis|EAW16067.1 afum|EAL88699.1 acar|OOF99167.1 afla|EED48588.1 anid|CBF75100.1 asyd|OJJ60006.1 ater|EAU33562.1 aver|OJJ02280.1 awen|OJJ30368.1 azon|OJJ45387.1

Group8278: abra|OJJ75684.1 acar|OOG00165.1 agla|OJJ88407.1 akaw|GAA84423.1 aluc|OJZ89134.1 anig|EHA23411.1 asyd|OJJ55072.1 atub|OJI85651.1 awen|OJJ33989.1 agla|OJJ79455.1 awen|OJJ32650.1

Group8279: abra|OJJ75718.1 acar|OOG00138.1 acla|EAW09374.1 afla|EED58017.1 akaw|GAA84454.1 aluc|OJZ89170.1 anig|EHA23385.1 aory|EIT79703.1 atub|OJI85620.1 afis|EAW21761.1 afum|EAL92791.1

Group8280: abra|OJJ75740.1 acar|OOG00121.1 akaw|GAA84473.1 aluc|OJZ89193.1 anid|CBF84717.1 anig|EHA23365.1 asyd|OJJ57258.1 ater|EAU31798.1 atub|OJI85597.1 awen|OJJ32786.1 aory|EIT83626.1

Group8281: abra|OJJ75748.1 acar|OOG00552.1 afla|EED49480.1 agla|OJJ86504.1 akaw|GAA84008.1 aluc|OJZ80908.1 aory|EIT79477.1 atub|OJI82670.1 awen|OJJ38033.1 azon|OJJ43113.1 awen|OJJ35327.1

Group8282: akaw|GAA84581.1 aluc|OJZ89324.1 acla|EAW09939.1 afis|EAW21184.1 afla|EED54775.1 afum|EAL92205.1 agla|OJJ79985.1 anid|CBF83314.1 aory|EIT79372.1 atub|OJI85475.1 awen|OJJ36525.1

Group8283: akaw|GAA84595.1 acar|OOF90246.1 acla|EAW09947.1 afis|EAW21225.1 afla|EED54781.1 afum|EBA27455.1 agla|OJJ78505.1 ater|EAU35855.1 aver|OJI99889.1 awen|OJJ36533.1 azon|OJJ44407.1

Group8284: abra|OJJ75895.1 afla|EED54792.1 agla|OJJ85404.1 akaw|GAA84601.1 anig|EHA23236.1 aory|EIT79367.1 asyd|OJJ60572.1 atub|OJI85453.1 awen|OJJ36126.1 acar|OOF90505.1 agla|OJJ80750.1

Group8285: abra|OJJ76009.1 acar|OOF99916.1 acla|EAW09796.1 afis|EAW21340.1 afla|EED55755.1 afum|EBA27460.1 akaw|GAA88951.1 aluc|OJZ89455.1 anig|EHA23132.1 aory|EIT76666.1 atub|OJI85339.1

Group8286: abra|OJJ76011.1 acar|OOF99912.1 afis|EAW21350.1 afla|EED55757.1 akaw|GAA88949.1 aluc|OJZ89457.1 anig|EHA23130.1 asyd|OJJ54361.1 atub|OJI85337.1 aver|OJJ05314.1 awen|OJJ36188.1

Group8287: abra|OJJ76012.1 afis|EAW21349.1 afla|EED55758.1 akaw|GAA88948.1 aluc|OJZ89458.1 anig|EHA23129.1 aory|EIT76833.1 asyd|OJJ54360.1 atub|OJI85336.1 aver|OJJ05313.1 awen|OJJ36189.1

Group8288: abra|OJJ76028.1 acar|OOF93546.1 afla|EED45762.1 aluc|OJZ89479.1 anig|EHA23114.1 atub|OJI85321.1 azon|OJJ47387.1 aory|EIT75395.1 agla|OJJ82968.1 akaw|GAA88930.1 aory|EIT75791.1

Group8289: abra|OJJ76078.1 acar|OOF99847.1 afla|EED54036.1 akaw|GAA88888.1 aluc|OJZ89534.1 anig|EHA23069.1 asyd|OJJ62433.1 ater|EAU35152.1 atub|OJI85271.1 aver|OJI96569.1 awen|OJJ33339.1

Group8290: abra|OJJ76081.1 acla|EAW09740.1 afla|EED55823.1 agla|OJJ85529.1 akaw|GAA88885.1 aluc|OJZ89539.1 ater|EAU35148.1 atub|OJI85268.1 aver|OJJ00226.1 awen|OJJ39301.1 azon|OJJ51551.1

Group8291: acar|OOF99510.1 akaw|GAA82199.1 atub|OJI86399.1 acla|EAW14342.1 afis|EAW18948.1 afla|EED50980.1 afum|EAL93682.1 agla|OJJ85307.1 anid|CBF86835.1 aory|EIT77021.1 awen|OJJ31542.1

Group8292: awen|OJJ31561.1 afum|EAL93694.1 acla|EAW14326.1 afis|EAW18962.1 afla|EED51009.1 anid|CBF69604.1 aory|EIT77037.1 asyd|OJJ59133.1 ater|EAU38145.1 aver|OJJ01722.1 azon|OJJ47280.1

Group8293: abra|OJJ76480.1 acla|EAW13955.1 afis|EAW18665.1 afla|EED52664.1 afum|EAL93383.1 akaw|GAA82393.1 aory|EIT74237.1 asyd|OJJ58534.1 ater|EAU38247.1 awen|OJJ32133.1 azon|OJJ46716.1

Group8294: abra|OJJ76679.1 acar|OOF99329.1 afla|EED48158.1 akaw|GAA92513.1 aluc|OJZ91526.1 anid|CBF78397.1 anig|EHA22562.1 aory|EIT83025.1 atub|OJI85980.1 aver|OJJ05531.1 aver|OJJ05532.1

Group8295: abra|OJJ76684.1 acar|OOF99327.1 afla|EED52487.1 akaw|GAA92510.1 aluc|OJZ91523.1 anig|EHA22560.1 aory|EIT82751.1 asyd|OJJ56613.1 ater|EAU33885.1 atub|OJI85978.1 aver|OJJ06110.1

Group8296: agla|OJJ79332.1 acla|EAW13679.1 afis|EAW19926.1 afla|EED45895.1 afum|EAL84983.1 anid|CBF84574.1 aory|EIT75374.1 asyd|OJJ53385.1 ater|EAU36895.1 aver|OJJ08357.1 awen|OJJ29968.1

Group8297: abra|OJJ76690.1 acar|OOF99321.1 acla|EAW15334.1 agla|OJJ80666.1 akaw|GAA92504.1 aluc|OJZ91517.1 anid|CBF84583.1 anig|EHA22555.1 asyd|OJJ63695.1 atub|OJI85972.1 aver|OJI97244.1

Group8298: abra|OJJ76714.1 acar|OOF97649.1 afis|EAW20852.1 akaw|GAA92486.1 aluc|OJZ91498.1  
anid|CBF87489.1 ater|EAU30419.1 atub|OJI85951.1 awen|OJJ38285.1 acar|OOF98045.1 ater|EAU30791.1

Group8299: abra|OJJ76765.1 acla|EAW13319.1 afis|EAW20433.1 afum|EAL84618.1 agla|OJJ84892.1  
akaw|GAA87261.1 anid|CBF79323.1 anig|EHA27529.1 aory|EIT77721.1 ater|EAU37724.1 aver|OJJ06873.1

Group8300: abra|OJJ76791.1 acar|OOF91285.1 acla|EAW13350.1 afis|EAW20464.1 afla|EED44803.1  
afum|EAL84589.1 akaw|GAA87234.1 aluc|OJZ84195.1 atub|OJI89889.1 awen|OJJ33158.1 azon|OJJ46365.1

Group8301: abra|OJJ76868.1 afla|EED51652.1 akaw|GAA87155.1 aluc|OJZ84279.1 anig|EHA27624.1  
aory|EIT80421.1 asyd|OJJ62989.1 ater|EAU30282.1 atub|OJI89802.1 aver|OJI97979.1 awen|OJJ30985.1

Group8302: abra|OJJ76898.1 afla|EED44884.1 agla|OJJ86439.1 aluc|OJZ84291.1 anig|EHA27631.1  
aory|EIT83263.1 atub|OJI89778.1 aver|OJJ05827.1 awen|OJJ40828.1 asyd|OJJ57334.1 akaw|GAA87146.1

Group8303: abra|OJJ76899.1 agla|OJJ86438.1 akaw|GAA87145.1 aluc|OJZ84292.1 anig|EHA27632.1  
asyd|OJJ57333.1 atub|OJI89777.1 aver|OJJ05828.1 awen|OJJ40830.1 afla|EED44883.1 aory|EIT83257.1

Group8304: abra|OJJ76906.1 acar|OOF91354.1 afis|EAW20539.1 afla|EED52440.1 afum|EAL84519.2  
akaw|GAA87132.1 aluc|OJZ84305.1 anig|EHA27641.1 aory|EIT82775.1 atub|OJI89763.1 azon|OJJ50625.1

Group8305: ater|EAU30470.1 acla|EAW14578.1 afis|EAW19304.1 afla|EED50043.1 afum|EAL94022.1  
aory|EIT74632.1 asyd|OJJ57611.1 aver|OJJ05574.1 awen|OJJ39678.1 azon|OJJ50361.1 agla|OJJ80391.1

Group8306: abra|OJJ77030.1 acar|OOF91468.1 afla|EED49751.1 akaw|GAA87021.1 aluc|OJZ84433.1  
anid|CBF83217.1 anig|EHA27752.1 aory|EIT77601.1 atub|OJI89640.1 awen|OJJ33607.1 azon|OJJ50728.1

Group8307: acar|OOF97159.1 acla|EAW08359.1 afis|EAW23390.1 afla|EED55567.1 afum|EAL88081.1  
anid|CBF74866.1 aory|EIT82701.1 asyd|OJJ60120.1 ater|EAU35643.1 awen|OJJ39490.1 azon|OJJ47692.1

Group8308: abra|OJJ77248.1 acar|OOF92495.1 akaw|GAA90694.1 aluc|OJZ84659.1 anig|EHA27941.1  
asyd|OJJ52058.1 atub|OJI89421.1 aver|OJJ06036.1 azon|OJJ47624.1 acla|EAW11446.1 asyd|OJJ56687.1

Group8309: abra|OJJ77285.1 acar|OOF93162.1 agla|OJJ82983.1 akaw|GAA90664.1 aluc|OJZ84695.1  
anid|CBF84517.1 anig|EHA27971.1 asyd|OJJ64780.1 atub|OJI89387.1 aver|OJI98888.1 azon|OJJ44996.1

Group8310: abra|OJJ77408.1 akaw|GAA91357.1 aluc|OJZ84815.1 anig|EHA28079.1 aory|EIT78902.1  
asyd|OJJ54172.1 ater|EAU37354.1 atub|OJI89270.1 aver|OJJ08567.1 awen|OJJ39965.1 acar|OOF93274.1

Group8311: abra|OJJ77457.1 acar|OOF97634.1 afla|EED49593.1 akaw|GAA92096.1 aluc|OJZ83629.1  
anig|EHA18782.1 aory|EIT82624.1 asyd|OJJ56403.1 ater|EAU39562.1 atub|OJI89998.1 aver|OJJ06309.1

Group8312: afis|EAW17047.1 afla|EED53437.1 aory|EIT74988.1 asyd|OJJ62007.1 aver|OJJ06553.1  
awen|OJJ29782.1 acar|OOF90140.1 anid|CBF69408.1 ater|EAU34055.1 aver|OJI96099.1 ater|EAU29578.1

Group8313: abra|OJJ77636.1 acar|OOF99103.1 afla|EED51640.1 akaw|GAA83998.1 aluc|OJZ80894.1  
aory|EIT80550.1 asyd|OJJ59189.1 atub|OJI82684.1 aver|OJJ01806.1 awen|OJJ32278.1 azon|OJJ50432.1

Group8314: abra|OJJ77734.1 akaw|GAA83898.1 aluc|OJZ90797.1 anig|EHA19529.1 atub|OJI82786.1  
abra|OJJ78097.1 acar|OOF98316.1 aluc|OJZ81971.1 atub|OJI79697.1 awen|OJJ36261.1 azon|OJJ51725.1

Group8315: abra|OJJ77751.1 agla|OJJ83614.1 akaw|GAA85927.1 aluc|OJZ91138.1 ater|EAU32665.1  
atub|OJI82801.1 azon|OJJ46415.1 acla|EAW08896.1 atub|OJI83149.1 agla|OJJ86354.1 azon|OJJ48579.1

Group8316: atub|OJI84529.1 abra|OJJ77962.1 afla|EED56643.1 aluc|OJZ91030.1 anig|EHA19729.1  
awen|OJJ35884.1 azon|OJJ46497.1 acar|OOF97936.1 aory|EIT74808.1 atub|OJI83023.1 aluc|OJZ81976.1

Group8317: abra|OJJ77778.1 acar|OOF98968.1 afla|EED53401.1 akaw|GAA83869.1 aluc|OJZ90831.1  
anid|CBF80622.1 anig|EHA19554.1 aory|EIT74913.1 asyd|OJJ54630.1 atub|OJI82817.1 aver|OJJ07526.1

Group8318: abra|OJJ77779.1 acar|OOF98969.1 afla|EED53400.1 akaw|GAA83868.1 aluc|OJZ90832.1  
anid|CBF80619.1 anig|EHA19555.1 aory|EIT75211.1 asyd|OJJ54628.1 atub|OJI82818.1 aver|OJJ07528.1

Group8319: abra|OJJ77838.1 acar|OOF98933.1 afis|EAW18215.1 afla|EED56256.1 afum|EAL87581.1  
agla|OJJ85867.1 akaw|GAA83809.1 aluc|OJZ90912.1 atub|OJI82905.1 awen|OJJ30593.1 azon|OJJ50173.1

Group8320: abra|OJJ77913.1 afla|EED51612.1 agla|OJJ82630.1 anid|CBF73910.1 anig|EHA18405.1  
aory|EIT80557.1 asyd|OJJ53669.1 ater|EAU37638.1 aver|OJJ07776.1 awen|OJJ40186.1 akaw|GAA92003.1

Group8321: abra|OJJ77959.1 acla|EAW14094.1 afis|EAW21811.1 afum|EBA27363.1 agla|OJJ86302.1  
akaw|GAA83703.1 aluc|OJZ91028.1 anig|EHA19725.1 aory|EIT73767.1 ater|EAU30721.1 atub|OJI83021.1

Group8322: afla|EED45124.1 agla|OJJ86301.1 ater|EAU30312.1 acar|OOF99948.1 afis|EAW18020.1  
akaw|GAA88984.1 aluc|OJZ89419.1 anig|EHA23169.1 aory|EIT73544.1 atub|OJI85375.1 afum|EAL91832.1

Group8323: abra|OJJ78051.1 afla|EED53546.1 akaw|GAA85940.1 aluc|OJZ91122.1 anid|CBF76245.1  
anig|EHA19822.1 aory|EIT75016.1 asyd|OJJ65129.1 atub|OJI83127.1 aver|OJI99257.1 awen|OJJ31402.1

Group8324: abra|OJJ78059.1 acla|EAW06393.1 afis|EAW20702.1 afum|EAL84877.1 akaw|GAA85933.1  
aluc|OJZ91129.1 anig|EHA19829.1 asyd|OJJ56272.1 atub|OJI83140.1 aver|OJJ08493.1 azon|OJJ46854.1

Group8325: acla|EAW11747.1 afum|EAL87214.1 agla|OJJ78931.1 ater|EAU31321.1 awen|OJJ33697.1  
acar|OOF98955.1 afis|EAW23780.1 afla|EED51584.1 aory|EIT80450.1 asyd|OJJ54457.1 aver|OJJ07699.1

Group8326: anid|CBF87734.1 acar|OOF90599.1 akaw|GAA91564.1 aluc|OJZ82382.1 anig|EHA28382.1  
asyd|OJJ52703.1 atub|OJI88059.1 aver|OJJ04732.1 azon|OJJ42290.1 afla|EED57160.1 aory|EIT74157.1

Group8327: abra|OJJ78174.1 acar|OOF90378.1 afla|EED45140.1 akaw|GAA85858.1 aluc|OJZ91223.1  
anig|EHA19929.1 aory|EIT73743.1 asyd|OJJ58338.1 ater|EAU30391.1 atub|OJI83237.1 aver|OJJ02073.1

Group8328: afla|EED47360.1 aory|EIT82857.1 acar|OOF97636.1 akaw|GAA92098.1 aluc|OJZ83627.1  
anig|EHA18780.1 asyd|OJJ53730.1 atub|OJI89996.1 aver|OJI99816.1 awen|OJJ33530.1 asyd|OJJ60490.1

Group8329: azon|OJJ49722.1 acla|EAW07748.1 afis|EAW22785.1 afla|EED45210.1 afum|EAL90414.1  
agla|OJJ83592.1 anid|CBF69506.1 aory|EIT73745.1 asyd|OJJ59222.1 aver|OJJ01832.1 awen|OJJ30113.1

Group8330: acar|OOF89777.1 acla|EAW12928.1 agla|OJJ81724.1 aluc|OJZ84554.1 anid|CBF86579.1  
anig|EHA27848.1 asyd|OJJ64841.1 atub|OJI89528.1 aver|OJI98952.1 awen|OJJ37111.1 azon|OJJ50810.1

Group8331: acar|OOF91032.1 acla|EAW10894.1 afis|EAW20964.1 afum|EAL84669.1 agla|OJJ84041.1  
anid|CBF82574.1 asyd|OJJ54045.1 ater|EAU38614.1 aver|OJJ08697.1 awen|OJJ34351.1 azon|OJJ48088.1

Group8332: afla|EED52198.1 aory|EIT77473.1 aver|OJJ08834.1 azon|OJJ43562.1 anid|CBF87393.1  
awen|OJJ31363.1 aory|EIT74499.1 ater|EAU33233.1 awen|OJJ30836.1 afla|EED56918.1 asyd|OJJ52857.1

Group8333: anid|CBF86967.1 asyd|OJJ60533.1 acla|EAW10016.1 afis|EAW21038.1 afla|EED52178.1  
afum|EAL92077.2 agla|OJJ88274.1 aory|EIT74334.1 ater|EAU31077.1 awen|OJJ37569.1 aver|OJI99860.1

Group8334: acar|OOF91788.1 acla|EAW12355.1 afis|EAW16779.1 afum|EAL86350.1 akaw|GAA92920.1  
anig|EHA23721.1 asyd|OJJ52440.1 ater|EAU29739.1 atub|OJI82463.1 azon|OJJ42771.1 asyd|OJJ54744.1

Group8335: acar|OOF91924.1 afis|EAW23806.1 afla|EED52017.1 afum|EAL87239.1 agla|OJJ78849.1  
aory|EIT81443.1 asyd|OJJ52831.1 ater|EAU31358.1 aver|OJJ08806.1 awen|OJJ33763.1 azon|OJJ50679.1

Group8336: afis|EAW22729.1 afum|EAL90466.1 acla|EAW15033.1 agla|OJJ83540.1 akaw|GAA91348.1  
aluc|OJZ84826.1 anig|EHA28084.1 asyd|OJJ59208.1 ater|EAU32746.1 atub|OJI89261.1 aver|OJJ01819.1

Group8337: acar|OOF92531.1 acla|EAW10014.1 afla|EED45877.1 anid|CBF84190.1 aory|EIT75644.1  
asyd|OJJ57134.1 ater|EAU39449.1 aver|OJJ00721.1 awen|OJJ30878.1 azon|OJJ42801.1 aver|OJJ03169.1

Group8338: acar|OOF92815.1 afla|EED48582.1 afum|EAL87228.2 anig|EHA21279.1 asyd|OJJ62860.1  
aver|OJI96913.1 awen|OJJ38043.1 akaw|GAA92524.1 aluc|OJZ91538.1 anig|EHA22575.1 atub|OJI85992.1

Group8339: acar|OOF94008.1 afis|EAW19783.1 afla|EED44763.1 aory|EIT78409.1 asyd|OJJ52912.1  
ater|EAU36519.1 aver|OJJ08881.1 awen|OJJ33437.1 afis|EAW17062.1 aory|EIT83012.1 aory|EIT77779.1

Group8340: acar|OOF94668.1 asyd|OJJ53759.1 ater|EAU37276.1 aver|OJJ07870.1 azon|OJJ48021.1  
afla|EED53078.1 agla|OJJ80576.1 atub|OJI88869.1 anid|CBF87274.1 asyd|OJJ64167.1 aver|OJJ08275.1

Group8341: acar|OOF95273.1 akaw|GAA87365.1 aluc|OJZ89648.1 anid|CBF88485.1 anig|EHA26886.1  
asyd|OJJ63788.1 ater|EAU34247.1 atub|OJI85156.1 aver|OJI97150.1 awen|OJJ34818.1 azon|OJJ45731.1

Group8342: acar|OOF95727.1 acla|EAW10682.1 afis|EAW24888.1 afum|EAL89539.2 agla|OJJ82111.1  
akaw|GAA81900.1 aluc|OJZ92298.1 anid|CBF75623.1 asyd|OJJ57455.1 awen|OJJ40478.1 azon|OJJ49342.1

Group8343: acar|OOF95805.1 acla|EAW08505.1 afis|EAW21090.1 afla|EED54674.1 akaw|GAA83598.1  
aluc|OJZ92396.1 anig|EHA26570.1 aory|EIT78919.1 atub|OJI86826.1 awen|OJJ30106.1 acla|EAW13629.1

Group8344: afla|EED54299.1 acla|EAW14407.1 afis|EAW19115.1 afum|EAL93847.2 agla|OJJ80430.1  
aluc|OJZ85762.1 anid|CBF79732.1 anig|EHA24794.1 asyd|OJJ58071.1 aver|OJJ04336.1 awen|OJJ37445.1

Group8345: acar|OOF97206.1 acla|EAW08299.1 afis|EAW23341.1 afla|EED55625.1 afum|EAL88137.2  
agla|OJJ86489.1 anid|CBF89423.1 anig|EHA26305.1 aory|EIT81815.1 asyd|OJJ62450.1 awen|OJJ39553.1

Group8346: acar|OOF97220.1 acla|EAW08313.1 afis|EAW23327.1 afum|EAL88152.1 agla|OJJ86522.1  
atub|OJI87106.1 awen|OJJ39567.1 azon|OJJ47760.1 asyd|OJJ62436.1 aver|OJI96572.1 anid|CBF89448.1

Group8347: acar|OOF98466.1 afis|EAW16909.1 afla|EED46359.1 afum|EAL86445.1 anig|EHA25226.1  
aory|EIT81189.1 ater|EAU33597.1 atub|OJI82375.1 awen|OJJ39792.1 awen|OJJ35924.1 awen|OJJ38690.1

Group8348: acar|OOF98603.1 acla|EAW06636.1 afis|EAW16129.1 afla|EED45888.1 afum|EAL88759.1  
anid|CBF80467.1 aory|EIT75433.1 asyd|OJJ54773.1 ater|EAU33904.1 aver|OJJ07393.1 awen|OJJ30300.1

Group8349: awen|OJJ39409.1 acla|EAW12397.1 afis|EAW16845.1 afla|EED53680.1 afum|EAL86391.1  
agla|OJJ87798.1 anid|CBF73978.1 aory|EIT75322.1 ater|EAU30295.1 asyd|OJJ53745.1 aver|OJJ07859.1

Group8350: acla|EAW06378.1 afis|EAW18484.1 afla|EED52924.1 afum|EBA27485.1 agla|OJJ85073.1  
anid|CBF70143.1 aory|EIT78661.1 asyd|OJJ58810.1 aver|OJJ01413.1 awen|OJJ31036.1 azon|OJJ50549.1

Group8351: acla|EAW06430.1 afis|EAW18535.1 afla|EED55531.1 afum|EAL93233.1 agla|OJJ81548.1  
anid|CBF82130.1 aory|EIT80923.1 asyd|OJJ54310.1 aver|OJJ05258.1 awen|OJJ31093.1 azon|OJJ46171.1

Group8352: acla|EAW08558.1 afis|EAW23601.1 afla|EED47740.1 afum|EAL87866.1 agla|OJJ86868.1  
anid|CBF89576.1 aory|EIT77169.1 asyd|OJJ62334.1 ater|EAU35361.1 aver|OJJ96440.1 awen|OJJ39927.1

Group8353: acla|EAW09916.1 afis|EAW21164.1 afla|EED54728.1 afum|EAL92183.1 agla|OJJ78619.1  
anid|CBF86965.1 aory|EIT78741.1 asyd|OJJ60534.1 ater|EAU35831.1 aver|OJJ99861.1 awen|OJJ36498.1

Group8354: acla|EAW10114.1 afis|EAW25475.1 afla|EED53967.1 afum|EAL90138.2 agla|OJJ78866.1  
anid|CBF77680.1 asyd|OJJ53089.1 ater|EAU34643.1 aver|OJJ03757.1 awen|OJJ41211.1 azon|OJJ42087.1

Group8355: acla|EAW10193.1 afis|EAW25402.1 afla|EED53881.1 afum|EAL90061.1 agla|OJJ87043.1  
aory|EIT78364.1 asyd|OJJ53178.1 ater|EAU34553.1 aver|OJJ03674.1 awen|OJJ41129.1 azon|OJJ44703.1

Group8356: acla|EAW10414.1 afis|EAW25155.1 afla|EED57494.1 afum|EAL89830.1 agla|OJJ82513.1  
anid|CBF85648.1 aory|EIT81887.1 asyd|OJJ64235.1 ater|EAU39438.1 aver|OJJ98327.1 awen|OJJ40798.1

Group8357: acla|EAW10866.1 afis|EAW20992.1 afla|EED50346.1 afum|EAL84637.1 agla|OJJ84070.1  
anid|CBF82615.1 aory|EIT77358.1 asyd|OJJ54017.1 ater|EAU38641.1 aver|OJJ08724.1 awen|OJJ34318.1

Group8358: acla|EAW10947.1 afla|EED52376.1 aluc|OJZ88751.1 anig|EHA18453.1 atub|OJI91322.1  
aver|OJJ06237.1 awen|OJJ40913.1 asyd|OJJ58113.1 aver|OJJ04292.1 anid|CBF83892.1 asyd|OJJ53372.1

Group8359: acla|EAW11687.1 afis|EAW23704.1 afla|EED53411.1 afum|EAL87148.1 anid|CBF78352.1  
aory|EIT74993.1 asyd|OJJ56143.1 ater|EAU30088.1 aver|OJJ05083.1 afis|EAW16210.1 afum|EAL88837.1

Group8360: acla|EAW11707.1 afis|EAW23724.1 afla|EED50513.1 akaw|GAA85949.1 aluc|OJZ91113.1  
anig|EHA19811.1 aory|EIT82001.1 asyd|OJJ55358.1 ater|EAU31558.1 atub|OJI83111.1 aory|EIT82067.1

Group8361: acla|EAW12296.1 afis|EAW16927.1 afum|EAL86453.1 anid|CBF82135.1 anig|EHA21632.1  
asyd|OJJ54314.1 ater|EAU32987.1 aver|OJJ05268.1 azon|OJJ42780.1 aluc|OJZ87026.1 atub|OJI83492.1

Group8362: acla|EAW13190.1 afis|EAW17451.1 afla|EED49371.1 afum|EAL91279.1 agla|OJJ80361.1  
akaw|GAA90741.1 aluc|OJZ84607.1 anid|CBF71681.1 aory|EIT79502.1 ater|EAU33931.1 awen|OJJ37395.1

Group8363: acla|EAW13643.1 afis|EAW19994.1 afla|EED45928.1 afum|EAL84923.1 agla|OJJ88076.1  
anid|CBF84677.1 aory|EIT75618.1 asyd|OJJ53343.1 ater|EAU35264.1 aver|OJJ08402.1 awen|OJJ30002.1

Group8364: acla|EAW13656.1 afis|EAW19936.1 afla|EED45905.1 afum|EAL84974.1 aory|EIT75425.1  
asyd|OJJ53376.1 ater|EAU30903.1 aver|OJJ08367.1 awen|OJJ29979.1 anid|CBF70076.1 aory|EIT75908.1

Group8365: acla|EAW13696.1 afis|EAW19908.1 afum|EAL84998.1 akaw|GAA91346.1 aluc|OJZ84827.1  
anid|CBF83988.1 anig|EHA28085.1 asyd|OJJ61405.1 atub|OJI89260.1 aver|OJJ00735.1 akaw|GAA91347.1

Group8366: acla|EAW14275.1 afis|EAW18999.1 afla|EED53127.1 afum|EAL93734.1 anid|CBF86777.1  
aory|EIT75125.1 asyd|OJJ64684.1 ater|EAU37805.1 aver|OJI98786.1 awen|OJJ29914.1 azon|OJJ47177.1

Group8367: acla|EAW14596.1 afis|EAW19325.1 afla|EED57234.1 afum|EAL94043.1 aory|EIT74546.1  
asyd|OJJ52375.1 ater|EAU29458.1 aver|OJJ01974.1 azon|OJJ45104.1 aory|EIT74049.1 afla|EED47555.1

Group8368: acla|EAW14597.1 afis|EAW19326.1 afla|EED52550.1 afum|EBA27512.1 aory|EIT74035.1  
asyd|OJJ52374.1 ater|EAU33506.1 aver|OJJ01975.1 awen|OJJ30098.1 azon|OJJ45103.1 afla|EED57233.1

Group8369: acla|EAW14974.1 afis|EAW22748.1 afla|EED54370.1 agla|OJJ79726.1 akaw|GAA91089.1  
aluc|OJZ87906.1 aory|EIT76018.1 asyd|OJJ55933.1 aver|OJJ04882.1 awen|OJJ36946.1 aory|EIT80427.1

Group8370: acla|EAW15067.1 afis|EAW20039.1 afla|EED45341.1 afum|EBA27223.1 agla|OJJ88924.1  
anid|CBF84779.1 aory|EIT73728.1 asyd|OJJ63236.1 ater|EAU38652.1 aver|OJI97720.1 awen|OJJ31794.1

Group8371: afis|EAW15647.1 afum|EAL87785.1 anid|CBF85170.1 asyd|OJJ60246.1 ater|EAU30252.1  
aver|OJJ04015.1 afis|EAW21202.1 afum|EAL92212.1 ater|EAU31233.1 awen|OJJ32937.1 azon|OJJ45229.1

Group8372: afis|EAW17266.1 afum|EAL86683.1 agla|OJJ81071.1 anid|CBF87526.1 aory|EIT81263.1  
asyd|OJJ52983.1 ater|EAU36130.1 aver|OJJ08952.1 azon|OJJ45515.1 afla|EED48854.1 awen|OJJ35767.1

Group8373: afis|EAW18533.1 afla|EED52867.1 afum|EAL93231.1 agla|OJJ85147.1 anid|CBF75405.1 aory|EIT78596.1 asyd|OJJ59813.1 ater|EAU30035.1 aver|OJJ02475.1 awen|OJJ31091.1 azon|OJJ50597.1

Group8374: afla|EED56626.1 aver|OJJ07661.1 afla|EED52559.1 akaw|GAA88922.1 aluc|OJJ89499.1 anid|CBF86953.1 aory|EIT74185.1 atub|OJI85304.1 agla|OJJ82849.1 asyd|OJJ63468.1 aver|OJI97464.1

Group8375: afis|EAW24571.1 afla|EED53136.1 afum|EAL86234.1 anid|CBF83980.1 aory|EIT75246.1 asyd|OJJ57973.1 ater|EAU31428.1 aver|OJJ04428.1 azon|OJJ42716.1 asyd|OJJ61404.1 aver|OJJ00734.1

Group8376: afla|EED56549.1 agla|OJJ78761.1 anid|CBF84227.1 aory|EIT79610.1 asyd|OJJ63008.1 ater|EAU33859.1 aver|OJI97952.1 awen|OJJ34569.1 asyd|OJJ62574.1 asyd|OJJ57181.1 aver|OJJ03109.1

Group8377: abra|OJJ65483.1 abra|OJJ65634.1 afla|EED55265.1 agla|OJJ79068.1 anid|CBF82221.1 aory|EIT83579.1 asyd|OJJ55371.1 ater|EAU35403.1 aver|OJJ06450.1 awen|OJJ36001.1

Group8378: abra|OJJ65628.1 abra|OJJ65709.1 aluc|OJZ80119.1 aluc|OJZ88802.1 asyd|OJJ51944.1 asyd|OJJ52124.1 akaw|GAA93005.1 abra|OJJ66180.1 afis|EAW20677.1 acla|EAW11466.1

Group8379: abra|OJJ65666.1 abra|OJJ70428.1 anid|CBF81161.1 anid|CBF82242.1 anid|CBF87226.1 akaw|GAA93194.1 aluc|OJZ81153.1 atub|OJI88768.1 asyd|OJJ57260.1 aver|OJJ03036.1

Group8380: acar|OOF91916.1 acar|OOF98336.1 abra|OJJ70254.1 afla|EED44862.1 anig|EHA25303.1 aory|EIT82731.1 asyd|OJJ55178.1 aver|OJJ07029.1 awen|OJJ35530.1 asyd|OJJ62626.1

Group8381: acar|OOF92322.1 acar|OOF92364.1 abra|OJJ67476.1 afis|EAW18403.1 afum|EAL93081.1 asyd|OJJ58697.1 ater|EAU29820.1 atub|OJI80709.1 aver|OJJ01309.1 awen|OJJ31747.1

Group8382: acar|OOF94055.1 acar|OOF94125.1 abra|OJJ66389.1 afla|EED52182.1 akaw|GAA90255.1 aluc|OJZ83085.1 aory|EIT74406.1 ater|EAU31726.1 atub|OJI87859.1 azon|OJJ45262.1

Group8383: acar|OOF94067.1 acar|OOF94137.1 awen|OJJ31275.1 abra|OJJ66355.1 afla|EED47477.1 akaw|GAA90229.1 aluc|OJZ83112.1 anig|EHA28175.1 aory|EIT79963.1 atub|OJI87822.1

Group8384: acar|OOF95040.1 acar|OOF95107.1 acar|OOF90589.1 azon|OJJ45969.1 acla|EAW11067.1 afla|EED54161.1 anig|EHA19940.1 aory|EIT75957.1 atub|OJI79304.1 asyd|OJJ57430.1

Group8385: acar|OOF95078.1 acar|OOF95143.1 abra|OJJ74634.1 akaw|GAA81975.1 aluc|OJZ92214.1 anig|EHA26743.1 asyd|OJJ62239.1 atub|OJI86645.1 aver|OJI96348.1 awen|OJJ37607.1

Group8386: acar|OOF95096.1 acar|OOF95161.1 abra|OJJ74607.1 afla|EED49964.1 akaw|GAA82001.1 aluc|OJZ92187.1 anig|EHA26766.1 aory|EIT83447.1 atub|OJI86616.1 azon|OJJ47334.1

Group8387: acar|OOF95097.1 acar|OOF95163.1 abra|OJJ74606.1 afla|EED49963.1 aluc|OJZ92186.1 anig|EHA26767.1 aory|EIT83431.1 atub|OJI86615.1 azon|OJJ47333.1 azon|OJJ47301.1

Group8388: acar|OOF95620.1 acar|OOF95672.1 afla|EED56570.1 aluc|OJZ88747.1 anig|EHA18451.1 aory|EIT79617.1 asyd|OJJ61712.1 ater|EAU29928.1 atub|OJI91319.1 aver|OJI95807.1

Group8389: acar|OOF95652.1 acar|OOF95703.1 abra|OJJ74692.1 afla|EED47157.1 aluc|OJZ92269.1 aory|EIT79192.1 ater|EAU38044.1 atub|OJI86703.1 agla|OJJ78428.1 aluc|OJZ83217.1

Group8390: acar|OOF95655.1 acar|OOF95706.1 abra|OJJ76469.1 afla|EED46484.1 agla|OJJ87727.1 akaw|GAA82381.1 aluc|OJZ91740.1 atub|OJI86198.1 awen|OJJ31394.1 aory|EIT72384.1

Group8391: acar|OOF96446.1 acar|OOG00865.1 abra|OJJ70058.1 afla|EED54159.1 akaw|GAA87616.1 aluc|OJZ85237.1 aory|EIT76003.1 asyd|OJJ54511.1 atub|OJI80338.1 aver|OJJ07672.1

Group8392: acar|OOG00241.1 acar|OOG00260.1 abra|OJJ67536.1 akaw|GAA88123.1 aluc|OJZ81396.1 anig|EHA18688.1 asyd|OJJ53704.1 atub|OJI91601.1 aver|OJJ07828.1 azon|OJJ43560.1

Group8393: afla|EED45918.1 afla|EED45920.1 abra|OJJ69032.1 acar|OOF92652.1 afis|EAW19901.1 akaw|GAA90547.1 aluc|OJZ86017.1 anig|EHA24594.1 atub|OJI79806.1 abra|OJJ74401.1

Group8394: afum|EAL86719.2 afum|EAL92228.1 akaw|GAA92886.1 akaw|GAA92946.1 acla|EAW11456.1 aluc|OJZ87839.1 anid|CBF87743.1 ater|EAU32044.1 awen|OJJ40122.1 azon|OJJ45924.1

Group8395: agla|OJJ78529.1 agla|OJJ84460.1 afis|EAW19320.1 afla|EED48990.1 afum|EAL94038.1 aory|EIT80001.1 asyd|OJJ64749.1 ater|EAU31743.1 aver|OJI98850.1 awen|OJJ31889.1

Group8396: agla|OJJ86080.1 agla|OJJ78838.1 abra|OJJ72688.1 acar|OOF95937.1 akaw|GAA85306.1 aluc|OJZ90666.1 anig|EHA24101.1 atub|OJI82095.1 awen|OJJ31985.1 afum|EAL86718.1

Group8397: agla|OJJ79716.1 agla|OJJ88991.1 agla|OJJ82731.1 azon|OJJ47655.1 afis|EAW20587.1 afis|EAW21873.1 afum|EAL88434.1 ater|EAU34446.1 atub|OJI86118.1 anid|CBF83577.1

Group8398: agla|OJJ81519.1 agla|OJJ81528.1 abra|OJJ70448.1 afla|EED51815.1 akaw|GAA90133.1 aluc|OJZ83214.1 anid|CBF73692.1 anig|EHA21074.1 aory|EIT81708.1 atub|OJI87722.1

Group8399: agla|OJJ82390.1 agla|OJJ88105.1 awen|OJJ29753.1 awen|OJJ38325.1 acla|EAW15022.1 afla|EED48979.1 agla|OJJ87354.1 aory|EIT79986.1 aver|OJJ04712.1 awen|OJJ29941.1

Group8400: agla|OJJ84307.1 agla|OJJ84308.1 abra|OJJ75522.1 acar|OOF90849.1 acla|EAW09309.1 afis|EAW21836.1 afla|EED46539.1 atub|OJI85810.1 awen|OJJ34112.1 azon|OJJ44231.1

Group8401: agla|OJJ87455.1 agla|OJJ89093.1 abra|OJJ76700.1 acar|OOF99318.1 afla|EED48317.1 akaw|GAA92499.1 aluc|OJZ91512.1 anig|EHA22550.1 aory|EIT76304.1 atub|OJI85964.1

Group8402: akaw|GAA83188.1 akaw|GAA90127.1 aluc|OJZ83222.1 aluc|OJZ83687.1 atub|OJI87714.1 atub|OJI90059.1 abra|OJJ68284.1 acar|OOF94475.1 anig|EHA21080.1 azon|OJJ45238.1

Group8403: akaw|GAA88991.1 akaw|GAA93233.1 abra|OJJ65743.1 acar|OOG00878.1 acla|EAW11894.1 afla|EED52522.1 aluc|OJZ79643.1 aver|OJI98825.1 awen|OJJ36066.1 azon|OJJ47413.1

Group8404: akaw|GAA92025.1 akaw|GAA92119.1 aluc|OJZ83604.1 aluc|OJZ92893.1 atub|OJI87351.1 atub|OJI89976.1 abra|OJJ68351.1 acar|OOF90144.1 anig|EHA18764.1 anig|EHA26070.1

Group8405: aluc|OJZ79988.1 aluc|OJZ84722.1 abra|OJJ77310.1 akaw|GAA91443.1 anig|EHA27996.1 atub|OJI89361.1 acar|OOF91981.1 afis|EAW17114.1 afla|EED51656.1 acar|OOF99569.1

Group8406: anid|CBF89276.1 anid|CBF89323.1 awen|OJJ36372.1 acar|OOF93282.1 anig|EHA24975.1 ater|EAU34904.1 atub|OJI80323.1 awen|OJJ30808.1 agla|OJJ82139.1 aver|OJJ03024.1

Group8407: anig|EHA21148.1 anig|EHA28208.1 abra|OJJ69753.1 acar|OOG00377.1 acla|EAW13607.1 akaw|GAA90204.1 atub|OJI87793.1 awen|OJJ37499.1 acar|OOF95027.1 asyd|OJJ58374.1

Group8408: asyd|OJJ52165.1 asyd|OJJ53371.1 asyd|OJJ61758.1 aver|OJI95856.1 aver|OJI99567.1 aver|OJJ08373.1 agla|OJJ87524.1 anid|CBF84630.1 anig|EHA21030.1 anid|CBF88873.1

Group8409: asyd|OJJ56881.1 asyd|OJJ59210.1 abra|OJJ66476.1 afis|EAW17352.1 afla|EED51997.1 akaw|GAA91463.1 aluc|OJZ82068.1 aory|EIT81417.1 ater|EAU33008.1 atub|OJI84625.1

Group8410: asyd|OJJ57202.1 asyd|OJJ60345.1 aver|OJI99686.1 aver|OJJ03087.1 afis|EAW17363.1 afla|EED49455.1 afum|EAL91200.1 anid|CBF84252.1 aory|EIT76139.1 ater|EAU33868.1

Group8411: ater|EAU29225.1 ater|EAU29370.1 ater|EAU31354.1 afis|EAW22028.1 agla|OJJ79773.1 aluc|OJZ81912.1 anid|CBF80838.1 anig|EHA21043.1 awen|OJJ38846.1 agla|OJJ79276.1

Group8412: ater|EAU29238.1 ater|EAU31399.1 acar|OOF99900.1 acla|EAW07173.1 afla|EED57571.1 agla|OJJ87862.1 anid|CBF84514.1 aory|EIT82976.1 asyd|OJJ53502.1 aver|OJJ08243.1

Group8413: ater|EAU29963.1 ater|EAU36059.1 afis|EAW18832.1 afla|EED53422.1 afum|EAL93566.1 anid|CBF79052.1 asyd|OJJ64204.1 aver|OJI98293.1 awen|OJJ41494.1 anid|CBF85615.1

Group8414: ater|EAU30556.1 ater|EAU35249.1 afis|EAW24045.1 abra|OJJ73943.1 afum|EBA27445.1 akaw|GAA89548.1 aluc|OJZ88101.1 anig|EHA17870.1 atub|OJI90709.1 azon|OJJ43062.1

Group8415: ater|EAU31622.1 ater|EAU34595.1 aver|OJI99627.1 aver|OJJ07368.1 abra|OJJ68596.1 acar|OOF92450.1 afis|EAW24695.1 afum|EAL89337.1 anid|CBF69453.1 ater|EAU32761.1

Group8416: ater|EAU31627.1 ater|EAU34593.1 azon|OJJ45985.1 anig|EHA23409.1 awen|OJJ31932.1 acar|OOF99005.1 afis|EAW24700.1 afla|EED53388.1 afum|EAL89342.1 aory|EIT75160.1

Group8417: aver|OJJ03450.1 aver|OJJ06658.1 afla|EED51125.1 agla|OJJ81315.1 anid|CBF90344.1 aory|EIT81329.1 asyd|OJJ55579.1 ater|EAU37571.1 asyd|OJJ62613.1 asyd|OJJ62615.1

Group8418: awen|OJJ30159.1 awen|OJJ36055.1 abra|OJJ68149.1 acar|OOF95997.1 afla|EED45662.1 akaw|GAA92371.1 aluc|OJZ83229.1 anig|EHA21086.1 ater|EAU36032.1 atub|OJI87707.1

Group8419: awen|OJJ30762.1 awen|OJJ31719.1 abra|OJJ69691.1 afla|EED48236.1 agla|OJJ84995.1 aluc|OJZ80608.1 anid|CBF84030.1 aory|EIT72891.1 asyd|OJJ61367.1 aver|OJJ00694.1

Group8420: awen|OJJ30776.1 awen|OJJ31705.1 afis|EAW17200.1 afum|EAL86627.2 ater|EAU37835.1 afla|EED45211.1 anid|CBF78548.1 aory|EIT73675.1 asyd|OJJ65056.1 aver|OJI99179.1

Group8421: awen|OJJ30959.1 awen|OJJ36540.1 awen|OJJ39737.1 awen|OJJ33713.1 acla|EAW11064.1 afis|EAW20810.1 afum|EAL84818.1 anid|CBF87080.1 asyd|OJJ60416.1 azon|OJJ42504.1

Group8422: awen|OJJ30979.1 awen|OJJ35555.1 abra|OJJ76316.1 acar|OOF99567.1 aluc|OJZ91898.1 anig|EHA22877.1 asyd|OJJ63041.1 atub|OJI86351.1 aver|OJI97927.1 afis|EAW16162.1



Group8423: awen|OJJ32041.1 awen|OJJ33427.1 abra|OJJ72830.1 acar|OOF96034.1 akaw|GAA85429.1 aluc|OJZ83331.1 anig|EHA24208.1 atub|OJI82227.1 afis|EAW19852.1 agla|OJJ79014.1

Group8424: azon|OJJ42161.1 abra|OJJ66115.1 afis|EAW21210.1 afla|EED50949.1 afum|EAL92221.1 aory|EIT77051.1 asyd|OJJ57281.1 ater|EAU36270.1 aver|OJJ05875.1 awen|OJJ37951.1

Group8425: azon|OJJ44008.1 azon|OJJ48147.1 agla|OJJ82609.1 awen|OJJ40073.1 afla|EED57859.1 aluc|OJZ80321.1 aory|EIT81094.1 asyd|OJJ60285.1 aver|OJI99617.1 asyd|OJJ54869.1

Group8426: aluc|OJZ79479.1 aluc|OJZ80339.1 aluc|OJZ80254.1 aluc|OJZ79612.1 aluc|OJZ79697.1 aluc|OJZ79554.1 aluc|OJZ80167.1 aluc|OJZ79747.1 aluc|OJZ79877.1 aluc|OJZ79901.1

Group8427: abra|OJJ65437.1 akaw|GAA92646.1 abra|OJJ66323.1 afla|EED47879.1 afum|EAL85394.1 anid|CBF82965.1 asyd|OJJ62692.1 ater|EAU30107.1 awen|OJJ29581.1 akaw|GAA87900.1

Group8428: abra|OJJ65515.1 acla|EAW07045.1 afla|EED44910.1 aory|EIT73468.1 atub|OJI82843.1 awen|OJJ32271.1 afla|EED44911.1 azon|OJJ50129.1 awen|OJJ35039.1 azon|OJJ42748.1

Group8429: abra|OJJ65697.1 afla|EED56836.1 afum|EAL84267.1 agla|OJJ84575.1 anig|EHA18815.1 aory|EIT73939.1 asyd|OJJ62604.1 ater|EAU33256.1 aver|OJJ07757.1 awen|OJJ30261.1

Group8430: abra|OJJ65701.1 afla|EED56831.1 afum|EAL84271.2 anid|CBF83516.1 anig|EHA18820.1 aory|EIT73884.1 asyd|OJJ60706.1 ater|EAU38173.1 aver|OJJ00032.1 ater|EAU38313.1

Group8431: afum|EAL88787.1 anig|EHA26113.1 asyd|OJJ52039.1 afum|EAL88783.1 azon|OJJ42060.1 aluc|OJZ80012.1 atub|OJI87462.1 aluc|OJZ79617.1 anig|EHA26116.1 aluc|OJZ80024.1

Group8432: afla|EED52381.1 abra|OJJ67028.1 acar|OOF91717.1 akaw|GAA83905.1 aluc|OJZ92124.1 anig|EHA24970.1 atub|OJI82779.1 atub|OJI86556.1 akaw|GAA82056.1 aver|OJJ04874.1

Group8433: abra|OJJ65861.1 afla|EED51768.1 akaw|GAA92284.1 aluc|OJZ90181.1 anig|EHA23680.1 aory|EIT80033.1 asyd|OJJ54550.1 atub|OJI81608.1 aver|OJJ07598.1 awen|OJJ29824.1

Group8434: abra|OJJ65895.1 afla|EED56889.1 akaw|GAA86010.1 aluc|OJZ90236.1 anig|EHA23736.1 aory|EIT77462.1 ater|EAU30299.1 atub|OJI81666.1 aver|OJJ06587.1 awen|OJJ35825.1

Group8435: abra|OJJ65968.1 acar|OOF92906.1 akaw|GAA90843.1 aluc|OJZ82990.1 anig|EHA21405.1 asyd|OJJ53325.1 ater|EAU29362.1 atub|OJI89224.1 aver|OJJ08418.1 awen|OJJ29772.1

Group8436: abra|OJJ66059.1 afla|EED49906.1 akaw|GAA93129.1 aluc|OJZ81104.1 anig|EHA19265.1 aory|EIT72470.1 asyd|OJJ55639.1 atub|OJI82475.1 aver|OJJ06722.1 awen|OJJ33566.1

Group8437: abra|OJJ66063.1 acar|OOF89827.1 afla|EED56764.1 akaw|GAA84175.1 aluc|OJZ81100.1 aory|EIT73917.1 atub|OJI82480.1 abra|OJJ71214.1 anig|EHA20557.1 acar|OOF93979.1

Group8438: abra|OJJ66070.1 acla|EAW12247.1 akaw|GAA84174.1 aluc|OJZ81099.1 anig|EHA19272.1 atub|OJI82481.1 abra|OJJ74890.1 akaw|GAA83529.1 aluc|OJZ92467.1 atub|OJI86896.1

Group8439: abra|OJJ66104.1 afis|EAW16817.1 afla|EED45840.1 afum|EAL86368.2 akaw|GAA92673.1 aluc|OJZ90128.1 anig|EHA20943.1 aory|EIT75700.1 atub|OJI84668.1 afla|EED45839.1

Group8440: abra|OJJ66114.1 afis|EAW21211.1 afla|EED50948.1 afum|EAL92222.1 aory|EIT77000.1 asyd|OJJ57280.1 ater|EAU36269.1 aver|OJJ05876.1 awen|OJJ37952.1 azon|OJJ42160.1

Group8441: abra|OJJ66120.1 acar|OOF94012.1 akaw|GAA92682.1 aluc|OJZ90137.1 anid|CBF82787.1 anig|EHA20929.1 asyd|OJJ57366.1 ater|EAU30145.1 atub|OJI84659.1 azon|OJJ47363.1

Group8442: abra|OJJ66166.1 afis|EAW18034.1 afum|EAL91845.1 anid|CBF84528.1 aory|EIT76120.1 acla|EAW12651.1 afla|EED54072.1 asyd|OJJ62164.1 aver|OJI96275.1 awen|OJJ40173.1

Group8443: awen|OJJ37693.1 acar|OOF91998.1 afis|EAW23726.1 afla|EED53317.1 agla|OJJ86824.1 aory|EIT75193.1 ater|EAU36803.1 awen|OJJ33348.1 azon|OJJ45552.1 awen|OJJ39890.1

Group8444: abra|OJJ66204.1 acar|OOF91929.1 afla|EED50169.1 akaw|GAA89081.1 aluc|OJZ80510.1 anig|EHA25683.1 aory|EIT72280.1 asyd|OJJ61320.1 atub|OJI88420.1 aver|OJJ00645.1

Group8445: abra|OJJ66231.1 acar|OOF90689.1 agla|OJJ84411.1 akaw|GAA89058.1 aluc|OJZ80536.1 anig|EHA25659.1 asyd|OJJ64300.1 atub|OJI88395.1 aver|OJI98393.1 awen|OJJ34687.1

Group8446: abra|OJJ66236.1 acar|OOF90697.1 agla|OJJ84417.1 akaw|GAA89053.1 aluc|OJZ80541.1 anig|EHA25654.1 asyd|OJJ53791.1 atub|OJI88390.1 aver|OJJ07889.1 awen|OJJ31377.1

Group8447: abra|OJJ66262.1 acar|OOF90733.1 acla|EAW09305.1 aluc|OJZ80570.1 anig|EHA25628.1 asyd|OJJ59251.1 atub|OJI88361.1 aver|OJJ01860.1 awen|OJJ34123.1 azon|OJJ48039.1

Group8448: acla|EAW14333.1 awen|OJJ31553.1 afis|EAW18955.1 agla|OJJ88792.1 anig|EHA18744.1 ater|EAU30923.1 aver|OJI95799.1 azon|OJJ47271.1 aory|EIT74943.1 agla|OJJ85332.1

Group8449: abra|OJJ66286.1 acla|EAW07167.1 afis|EAW22182.1 afla|EED57561.1 afum|EAL91007.1 anig|EHA23666.1 aory|EIT81852.1 ater|EAU34187.1 atub|OJI89937.1 awen|OJJ34763.1

Group8450: abra|OJJ66333.1 acar|OOF96844.1 agla|OJJ83531.1 akaw|GAA90210.1 aluc|OJZ83135.1 anig|EHA28194.1 aory|EIT77484.1 atub|OJI87799.1 azon|OJJ47327.1 asyd|OJJ56279.1

Group8451: abra|OJJ66339.1 afla|EED53167.1 akaw|GAA90213.1 aluc|OJZ83130.1 anig|EHA28190.1 aory|EIT75194.1 atub|OJI87805.1 awen|OJJ35030.1 aver|OJJ01854.1 anid|CBF69485.1

Group8452: abra|OJJ66375.1 afla|EED54381.1 akaw|GAA90243.1 aluc|OJZ83097.1 anig|EHA28161.1 aory|EIT75879.1 asyd|OJJ61448.1 ater|EAU38988.1 atub|OJI87839.1 awen|OJJ32931.1

Group8453: abra|OJJ66377.1 acar|OOF98137.1 afum|EAL94060.1 akaw|GAA90245.1 aluc|OJZ83095.1 anig|EHA28159.1 aory|EIT78381.1 atub|OJI87841.1 azon|OJJ42527.1 agla|OJJ86818.1

Group8454: afis|EAW19341.1 abra|OJJ67128.1 acar|OOF98425.1 acla|EAW14612.1 afla|EED47545.1 akaw|GAA91040.1 aluc|OJZ87850.1 anig|EHA20153.1 atub|OJI80798.1 aory|EIT74552.1

Group8455: abra|OJJ66386.1 afla|EED45823.1 akaw|GAA90252.1 aluc|OJZ83088.1 anig|EHA28150.1 aory|EIT75601.1 asyd|OJJ55225.1 ater|EAU36363.1 atub|OJI87856.1 aver|OJJ06996.1

Group8456: abra|OJJ66474.1 afis|EAW17242.1 afum|EBA27283.1 akaw|GAA92460.1 aluc|OJZ81557.1 anid|CBF75984.1 anig|EHA25877.1 asyd|OJJ53455.1 atub|OJI88628.1 aver|OJJ08300.1

Group8457: abra|OJJ66524.1 acar|OOF90977.1 akaw|GAA91189.1 aluc|OJZ81514.1 anig|EHA25912.1 atub|OJI88663.1 anid|CBF87384.1 afla|EED53133.1 afum|EAL91114.2 aory|EIT75039.1

Group8458: abra|OJJ66791.1 afis|EAW20403.1 akaw|GAA86856.1 aluc|OJZ89978.1 anig|EHA27351.1 asyd|OJJ52424.1 atub|OJI84831.1 aver|OJJ08460.1 awen|OJJ35381.1 aver|OJI96708.1

Group8459: abra|OJJ66794.1 acar|OOF93871.1 afla|EED44982.1 akaw|GAA86859.1 aluc|OJZ89982.1 anig|EHA27354.1 aory|EIT73545.1 atub|OJI84828.1 azon|OJJ50414.1 aver|OJJ05859.1

Group8460: abra|OJJ66818.1 acar|OOF91601.1 akaw|GAA90456.1 aluc|OJZ85768.1 anig|EHA24785.1 aory|EIT76062.1 asyd|OJJ58068.1 ater|EAU37371.1 atub|OJI79553.1 aver|OJJ04339.1

Group8461: afla|EED48048.1 ater|EAU31173.1 agla|OJJ79647.1 asyd|OJJ53970.1 anid|CBF74235.1 awen|OJJ33072.1 acla|EAW14693.1 afis|EAW24224.1 afum|EBA27250.1 aver|OJJ08068.1

Group8462: abra|OJJ66996.1 acar|OOF93619.1 afla|EED52137.1 agla|OJJ81673.1 akaw|GAA92168.1 aluc|OJZ85576.1 anig|EHA24943.1 aory|EIT74409.1 atub|OJI79372.1 awen|OJJ36919.1

Group8463: agla|OJJ89337.1 abra|OJJ67011.1 afla|EED53268.1 akaw|GAA85914.1 aluc|OJZ91152.1 aory|EIT74894.1 atub|OJI83166.1 aluc|OJZ87778.1 awen|OJJ33695.1 anig|EHA22294.1

Group8464: abra|OJJ67012.1 acar|OOF93608.1 akaw|GAA92161.1 aluc|OJZ85568.1 anig|EHA24950.1 asyd|OJJ53490.1 ater|EAU31044.1 atub|OJI79363.1 aver|OJJ03352.1 azon|OJJ47107.1

Group8465: abra|OJJ67015.1 afla|EED52172.1 akaw|GAA92158.1 aluc|OJZ85565.1 anid|CBF82918.1 anig|EHA24953.1 aory|EIT74453.1 asyd|OJJ57303.1 atub|OJI79359.1 aver|OJJ05856.1

Group8466: abra|OJJ67115.1 acar|OOF98437.1 acla|EAW11657.1 agla|OJJ83143.1 anid|CBF89632.1 anig|EHA20166.1 asyd|OJJ61474.1 ater|EAU31281.1 aver|OJJ00815.1 awen|OJJ36970.1

Group8467: abra|OJJ67168.1 afla|EED47603.1 akaw|GAA91006.1 aluc|OJZ87807.1 anig|EHA20289.1 atub|OJI80838.1 aory|EIT80219.1 azon|OJJ41965.1 azon|OJJ44887.1 aver|OJI99374.1

Group8468: abra|OJJ67224.1 acar|OOF98328.1 akaw|GAA91651.1 aluc|OJZ87750.1 anig|EHA20238.1 asyd|OJJ60284.1 ater|EAU39445.1 atub|OJI80893.1 aver|OJI99616.1 afum|EAL86282.1

Group8469: abra|OJJ67266.1 acar|OOF98300.1 agla|OJJ81020.1 akaw|GAA91682.1 aluc|OJZ87712.1 ater|EAU37170.1 atub|OJI80930.1 afla|EED45389.1 aory|EIT82395.1 ater|EAU36037.1

Group8470: abra|OJJ67281.1 afla|EED49573.1 akaw|GAA86528.1 aluc|OJZ85076.1 anid|CBF83018.1 anig|EHA25291.1 aory|EIT82642.1 asyd|OJJ61509.1 atub|OJI80522.1 aver|OJJ00846.1

Group8471: abra|OJJ67351.1 acar|OOF93557.1 akaw|GAA86467.1 aluc|OJZ85008.1 anig|EHA25229.1 atub|OJI80589.1 awen|OJJ32046.1 azon|OJJ43962.1 acar|OOF98888.1 azon|OJJ50778.1

Group8472: agla|OJJ82649.1 azon|OJJ50009.1 acla|EAW06989.1 afis|EAW16603.1 afla|EED45022.1 afum|EAL89199.1 anid|CBF78453.1 aory|EIT73688.1 ater|EAU36684.1 awen|OJJ40203.1

Group8473: abra|OJJ67370.1 afla|EED49792.1 akaw|GAA93172.1 aluc|OJZ83031.1 anig|EHA28107.1 aory|EIT77626.1 asyd|OJJ56702.1 ater|EAU31039.1 atub|OJI87917.1 aver|OJJ06023.1

Group8474: abra|OJJ67413.1 acla|EAW07113.1 akaw|GAA86414.1 aluc|OJZ84955.1 asyd|OJJ65312.1 ater|EAU33566.1 atub|OJI80645.1 aver|OJI99394.1 acar|OOF94725.1 ater|EAU31127.1

Group8475: abra|OJJ67528.1 acar|OOF99206.1 afla|EED50912.1 akaw|GAA88134.1 aluc|OJZ81405.1 anig|EHA18699.1 aory|EIT79025.1 asyd|OJJ54793.1 atub|OJI91612.1 aver|OJJ02014.1

Group8476: ater|EAU34364.1 awen|OJJ40952.1 acla|EAW10355.1 afis|EAW25240.1 afla|EED53706.1 afum|EAL89901.1 aory|EIT75314.1 asyd|OJJ64007.1 aver|OJI98094.1 azon|OJJ44542.1

Group8477: abra|OJJ67560.1 acar|OOG00274.1 afla|EED53443.1 akaw|GAA88106.1 aluc|OJZ81373.1 asyd|OJJ53830.1 atub|OJI91579.1 aver|OJJ07934.1 azon|OJJ50340.1 aory|EIT75217.1

Group8478: abra|OJJ67580.1 acla|EAW13490.1 afla|EED49873.1 akaw|GAA85343.1 aluc|OJZ90705.1 anig|EHA24578.1 aory|EIT83405.1 asyd|OJJ57242.1 atub|OJI82132.1 azon|OJJ42362.1

Group8479: abra|OJJ67631.1 acar|OOF91978.1 akaw|GAA89151.1 aluc|OJZ81685.1 anig|EHA25758.1 aory|EIT77909.1 atub|OJI88496.1 azon|OJJ45916.1 acla|EAW09333.1 afla|EED46608.1

Group8480: abra|OJJ67636.1 acar|OOG00390.1 afis|EAW21768.1 akaw|GAA89155.1 aluc|OJZ81680.1 anig|EHA25762.1 asyd|OJJ57934.1 atub|OJI88501.1 azon|OJJ42789.1 awen|OJJ38051.1

Group8481: abra|OJJ67654.1 acar|OOF91986.1 akaw|GAA89170.1 aluc|OJZ81663.1 anid|CBF82092.1 anig|EHA25780.1 asyd|OJJ54268.1 atub|OJI88520.1 aver|OJJ05220.1 azon|OJJ51658.1

Group8482: abra|OJJ67664.1 afla|EED45195.1 akaw|GAA89180.1 aluc|OJZ81653.1 anid|CBF83091.1 aory|EIT73614.1 atub|OJI88529.1 abra|OJJ73455.1 acar|OOG00657.1 anig|EHA18282.1

Group8483: abra|OJJ67684.1 acar|OOG00732.1 akaw|GAA89196.1 aluc|OJZ81634.1 anid|CBF73535.1 anig|EHA25809.1 asyd|OJJ56720.1 ater|EAU30905.1 atub|OJI88546.1 aver|OJJ06005.1

Group8484: abra|OJJ67688.1 afis|EAW18096.1 agla|OJJ79878.1 akaw|GAA89199.1 aluc|OJZ81631.1 anig|EHA25812.1 asyd|OJJ53374.1 ater|EAU33707.1 atub|OJI88549.1 aver|OJJ08370.1

Group8485: abra|OJJ67701.1 akaw|GAA89210.1 anig|EHA25824.1 atub|OJI88561.1 afla|EED49815.1 abra|OJJ68462.1 acar|OOF90074.1 aory|EIT77612.1 awen|OJJ32891.1 aluc|OJZ81619.1

Group8486: afum|EAL89281.1 abra|OJJ68146.1 acar|OOF91873.1 afis|EAW16676.1 afum|EAL91340.1 agla|OJJ89194.1 anig|EHA21124.1 awen|OJJ32336.1 acar|OOF95856.1 afis|EAW17525.1

Group8487: abra|OJJ67708.1 acla|EAW12291.1 afis|EAW16946.1 afum|EAL86473.1 akaw|GAA89217.1 aluc|OJZ81612.1 anid|CBF82181.1 anig|EHA25828.1 ater|EAU31755.1 atub|OJI88573.1

Group8488: abra|OJJ67731.1 acla|EAW13296.1 afis|EAW17314.1 afla|EED51565.1 afum|EBA27288.1 anid|CBF70701.1 asyd|OJJ58459.1 aver|OJJ01059.1 azon|OJJ43027.1 afum|EAL91150.1

Group8489: abra|OJJ67734.1 acar|OOF98896.1 agla|OJJ78426.1 ater|EAU39365.1 aver|OJJ05244.1 awen|OJJ35802.1 agla|OJJ85936.1 asyd|OJJ56536.1 aver|OJJ07603.1 aver|OJJ06186.1

Group8490: acla|EAW07641.1 afis|EAW22661.1 afum|EAL90531.1 anid|CBF88219.1 asyd|OJJ63651.1 aver|OJI97283.1 acar|OOG00907.1 afla|EED49926.1 aory|EIT72276.1 ater|EAU39047.1

Group8491: abra|OJJ67818.1 afis|EAW20294.1 afum|EAL86773.1 anid|CBF82005.1 anig|EHA20932.1 ater|EAU38015.1 aver|OJJ07617.1 abra|OJJ72559.1 anid|CBF79160.1 awen|OJJ36345.1

Group8492: abra|OJJ67823.1 acar|OOG00540.1 acla|EAW09506.1 akaw|GAA91838.1 aluc|OJZ82060.1 anig|EHA22192.1 atub|OJI84619.1 aver|OJI99601.1 anid|CBF78142.1 asyd|OJJ55556.1

Group8493: abra|OJJ67830.1 anig|EHA22200.1 abra|OJJ68154.1 acla|EAW11666.1 afla|EED47517.1 aory|EIT74525.1 ater|EAU32820.1 awen|OJJ38754.1 afla|EED53909.1 aory|EIT78479.1

Group8494: akaw|GAA91864.1 ater|EAU31318.1 acar|OOF92836.1 acla|EAW11742.1 afis|EAW23775.1 afla|EED51575.1 afum|EAL87209.1 agla|OJJ78926.1 anid|CBF79826.1 aory|EIT80582.1

Group8495: abra|OJJ67952.1 afla|EED52892.1 agla|OJJ83937.1 akaw|GAA91245.1 aluc|OJZ82825.1 aory|EIT78643.1 asyd|OJJ54510.1 atub|OJI89054.1 aver|OJJ07673.1 awen|OJJ33890.1

Group8496: ater|EAU32068.1 acar|OOF95577.1 afla|EED48704.1 akaw|GAA86621.1 aluc|OJZ85176.1 anid|CBF78739.1 anig|EHA23743.1 aory|EIT73057.1 acar|OOF98774.1 atub|OJI79791.1

Group8497: abra|OJJ67996.1 acar|OOF92039.1 afis|EAW16855.1 afla|EED48418.1 akaw|GAA90953.1 aluc|OJZ82871.1 aory|EIT83059.1 atub|OJI89094.1 awen|OJJ31329.1 azon|OJJ42617.1

Group8498: ater|EAU33696.1 abra|OJJ77550.1 afla|EED45583.1 akaw|GAA84073.1 aluc|OJZ80987.1  
anig|EHA19373.1 aory|EIT75671.1 atub|OJI82599.1 aver|OJI98668.1 awen|OJJ30215.1

Group8499: abra|OJJ68095.1 acar|OOF93898.1 afla|EED45837.1 akaw|GAA86879.1 aluc|OJZ90003.1  
anid|CBF86409.1 anig|EHA27378.1 asyd|OJJ64945.1 atub|OJI84805.1 aver|OJI99067.1

Group8500: abra|OJJ68100.1 acar|OOF93903.1 afla|EED47252.1 akaw|GAA86885.1 aluc|OJZ90008.1  
anig|EHA27383.1 aory|EIT79239.1 atub|OJI84799.1 azon|OJJ44487.1 awen|OJJ35121.1

Group8501: acar|OOF95726.1 afis|EAW16737.1 afum|EAL86312.1 anid|CBF75876.1 acla|EAW12430.1  
agla|OJJ82712.1 akaw|GAA81901.1 aluc|OJZ92297.1 asyd|OJJ60231.1 aver|OJJ04035.1

Group8502: abra|OJJ68135.1 acar|OOG00330.1 afla|EED45836.1 akaw|GAA86915.1 aluc|OJZ90038.1  
anig|EHA27413.1 aory|EIT75832.1 ater|EAU38812.1 atub|OJI84768.1 aver|OJJ07591.1

Group8503: abra|OJJ68157.1 acla|EAW11669.1 afla|EED47514.1 akaw|GAA90126.1 aluc|OJZ83224.1  
anig|EHA21081.1 aory|EIT74585.1 atub|OJI87712.1 awen|OJJ38758.1 azon|OJJ42175.1

Group8504: abra|OJJ68163.1 acar|OOF90232.1 afla|EED54707.1 afum|EAL84366.1 aory|EIT78936.1  
asyd|OJJ52027.1 ater|EAU29956.1 aver|OJJ06576.1 azon|OJJ43611.1 asyd|OJJ55498.1

Group8505: abra|OJJ68256.1 acar|OOF92459.1 afla|EED57066.1 agla|OJJ80955.1 akaw|GAA92929.1  
aluc|OJZ82522.1 aory|EIT82301.1 ater|EAU32759.1 atub|OJI88771.1 ater|EAU31618.1

Group8506: abra|OJJ68263.1 acar|OOF97540.1 afla|EED56315.1 akaw|GAA83202.1 aluc|OJZ83703.1  
aory|EIT73351.1 asyd|OJJ52858.1 atub|OJI90075.1 aver|OJJ08835.1 ater|EAU38457.1

Group8507: afis|EAW19797.1 afla|EED55700.1 afum|EAL85093.1 acar|OOF99879.1 acla|EAW13763.1  
agla|OJJ80903.1 aory|EIT77079.1 awen|OJJ32634.1 azon|OJJ45126.1 anig|EHA18746.1

Group8508: abra|OJJ68283.1 acar|OOF97557.1 afla|EED56847.1 akaw|GAA83189.1 aluc|OJZ83688.1  
anig|EHA18842.1 aory|EIT77513.1 atub|OJI90060.1 awen|OJJ40736.1 ater|EAU39316.1

Group8509: abra|OJJ68303.1 afla|EED48106.1 akaw|GAA83171.1 aluc|OJZ83670.1 anig|EHA18825.1  
aory|EIT76195.1 asyd|OJJ56506.1 atub|OJI90041.1 aver|OJJ06213.1 aory|EIT76252.1

Group8510: acla|EAW15043.1 afis|EAW24566.1 afum|EAL86229.1 anid|CBF82903.1 aory|EIT72962.1  
asyd|OJJ63345.1 afla|EED48256.1 aluc|OJZ81377.1 atub|OJI91583.1 aver|OJI97615.1

Group8511: abra|OJJ68326.1 acar|OOF90097.1 akaw|GAA92077.1 aluc|OJZ83647.1 anig|EHA18799.1  
aory|EIT83111.1 ater|EAU35876.1 atub|OJI90016.1 awen|OJJ29972.1 azon|OJJ50258.1

Group8512: abra|OJJ68333.1 acar|OOF97605.1 akaw|GAA92085.1 aluc|OJZ83638.1 anid|CBF87144.1  
anig|EHA18790.1 atub|OJI90007.1 azon|OJJ50659.1 asyd|OJJ60298.1 aver|OJI99639.1

Group8513: afla|EED49557.1 abra|OJJ77650.1 acar|OOF99086.1 acla|EAW12090.1 akaw|GAA83985.1  
aluc|OJZ80879.1 anig|EHA19457.1 atub|OJI82698.1 aver|OJI98439.1 aory|EIT82606.1

Group8514: acla|EAW14966.1 afis|EAW24489.1 afum|EAL86158.1 afla|EED52188.1 agla|OJJ83083.1  
aory|EIT74403.1 asyd|OJJ54573.1 ater|EAU31589.1 aver|OJJ07581.1 awen|OJJ31458.1

Group8515: abra|OJJ68437.1 acar|OOF94352.1 acla|EAW06852.1 afum|EAL89861.2 agla|OJJ82172.1  
asyd|OJJ52065.1 ater|EAU32989.1 atub|OJI84747.1 azon|OJJ48405.1 aluc|OJZ90060.1

Group8516: acar|OOF97878.1 agla|OJJ79108.1 awen|OJJ32534.1 acla|EAW14865.1 afla|EED45241.1  
aory|EIT73666.1 asyd|OJJ65108.1 aver|OJI99235.1 asyd|OJJ55396.1 aver|OJJ08261.1

Group8517: abra|OJJ68585.1 acar|OOF91918.1 afla|EED46153.1 afum|EAL85013.1 agla|OJJ79202.1  
aory|EIT76463.1 atub|OJI91457.1 awen|OJJ29959.1 aver|OJJ07751.1 ater|EAU34352.1

Group8518: abra|OJJ68597.1 afis|EAW16795.1 afla|EED51091.1 afum|EAL86364.1 agla|OJJ84441.1  
akaw|GAA91921.1 aluc|OJZ81959.1 anig|EHA22288.1 aory|EIT81998.1 atub|OJI84510.1

Group8519: abra|OJJ68645.1 acar|OOF90075.1 afla|EED54068.1 akaw|GAA89785.1 aluc|OJZ81906.1  
anig|EHA22337.1 aory|EIT75989.1 atub|OJI84459.1 azon|OJJ50287.1 azon|OJJ50765.1

Group8520: agla|OJJ87145.1 afis|EAW24076.1 afla|EED51397.1 afum|EAL91931.2 aory|EIT80467.1  
awen|OJJ41414.1 azon|OJJ48878.1 anid|CBF86472.1 ater|EAU30497.1 aver|OJI99027.1

Group8521: abra|OJJ68830.1 afla|EED57507.1 afum|EAL86206.2 agla|OJJ83139.1 aluc|OJZ85808.1  
anid|CBF78853.1 asyd|OJJ55032.1 atub|OJI79594.1 aver|OJJ07171.1 awen|OJJ30829.1

Group8522: agla|OJJ81776.1 acla|EAW14268.1 afis|EAW19010.1 afum|EAL93744.1 anid|CBF86741.1  
aory|EIT74782.1 asyd|OJJ64697.1 ater|EAU37792.1 aver|OJI98802.1 awen|OJJ31636.1

Group8523: abra|OJJ68890.1 afla|EED46933.1 agla|OJJ83414.1 akaw|GAA90366.1 aluc|OJZ85866.1 aory|EIT72536.1 asyd|OJJ52059.1 ater|EAU33158.1 atub|OJI79652.1 aver|OJI99473.1

Group8524: abra|OJJ69017.1 acar|OOF91642.1 afla|EED51547.1 akaw|GAA90534.1 aluc|OJZ86003.1 anig|EHA24607.1 aory|EIT80625.1 asyd|OJJ60637.1 ater|EAU38822.1 atub|OJI79790.1

Group8525: abra|OJJ69142.1 acar|OOF91160.1 afis|EAW15742.1 afum|EAL85606.1 akaw|GAA86315.1 aluc|OJZ86128.1 asyd|OJJ52667.1 ater|EAU32403.1 atub|OJI79924.1 awen|OJJ38442.1

Group8526: abra|OJJ69541.1 acar|OOF90593.1 afla|EED45994.1 akaw|GAA88389.1 aluc|OJZ82377.1 anig|EHA28387.1 aory|EIT75564.1 atub|OJI88065.1 awen|OJJ30869.1 azon|OJJ42099.1

Group8527: abra|OJJ69567.1 afum|EAL86533.1 asyd|OJJ53776.1 aver|OJJ07192.1 afla|EED49428.1 agla|OJJ82291.1 afla|EED49427.1 aver|OJJ03476.1 aory|EIT79583.1 asyd|OJJ52086.1

Group8528: abra|OJJ69606.1 akaw|GAA87142.1 aluc|OJZ84295.1 aory|EIT81683.1 asyd|OJJ65403.1 atub|OJI89774.1 aver|OJI95768.1 awen|OJJ30863.1 afla|EED51836.1 awen|OJJ38681.1

Group8529: abra|OJJ69614.1 acar|OOF92692.1 afla|EED51844.1 akaw|GAA91598.1 aluc|OJZ82422.1 anig|EHA28347.1 aory|EIT81748.1 ater|EAU36721.1 atub|OJI88019.1 awen|OJJ33375.1

Group8530: abra|OJJ69618.1 acar|OOF92688.1 afis|EAW19835.1 afum|EAL85057.1 akaw|GAA91602.1 aluc|OJZ82427.1 atub|OJI88014.1 azon|OJJ43516.1 awen|OJJ38281.1 ater|EAU37434.1

Group8531: abra|OJJ69619.1 acar|OOF92687.1 akaw|GAA91603.1 aluc|OJZ82428.1 anig|EHA28343.1 asyd|OJJ54527.1 atub|OJI88013.1 aver|OJJ03006.1 awen|OJJ36839.1 azon|OJJ43515.1

Group8532: abra|OJJ69624.1 akaw|GAA92927.1 aluc|OJZ82518.1 anid|CBF81979.1 asyd|OJJ56153.1 atub|OJI88774.1 aver|OJJ05092.1 afla|EED56560.1 anig|EHA20901.1 awen|OJJ33377.1

Group8533: abra|OJJ69633.1 agla|OJJ89114.1 akaw|GAA91613.1 aory|EIT79306.1 asyd|OJJ54598.1 ater|EAU30447.1 atub|OJI88001.1 aver|OJJ07554.1 azon|OJJ50114.1 afla|EED47295.1

Group8534: abra|OJJ69660.1 acar|OOF99512.1 afis|EAW20409.1 afum|EAL94101.1 akaw|GAA91640.1 aluc|OJZ82467.1 anig|EHA28308.1 atub|OJI87971.1 awen|OJJ32178.1 afum|EAL89235.1

Group8535: abra|OJJ69679.1 acar|OOF92106.1 afla|EED56765.1 akaw|GAA88804.1 aluc|OJZ82487.1 anig|EHA28287.1 ater|EAU32563.1 atub|OJI87945.1 aver|OJI96617.1 ater|EAU33068.1

Group8536: abra|OJJ69684.1 acar|OOF93995.1 afla|EED52268.1 akaw|GAA88808.1 aluc|OJZ82491.1 anig|EHA28281.1 asyd|OJJ62639.1 atub|OJI87941.1 aver|OJI99290.1 awen|OJJ38313.1

Group8537: abra|OJJ69709.1 acar|OOF94203.1 akaw|GAA90158.1 aluc|OJZ83189.1 anig|EHA28259.1 atub|OJI87750.1 aver|OJJ07620.1 awen|OJJ36347.1 acar|OOF91992.1 anig|EHA20935.1

Group8538: anid|CBF84263.1 asyd|OJJ57213.1 aver|OJJ03076.1 azon|OJJ45849.1 agla|OJJ78889.1 acla|EAW09099.1 afis|EAW25695.1 afum|EAL84369.1 ater|EAU31571.1 awen|OJJ29700.1

Group8539: abra|OJJ69749.1 acar|OOF99050.1 afis|EAW19964.1 afum|EAL84945.2 akaw|GAA90200.1 aluc|OJZ83148.1 anig|EHA28213.1 asyd|OJJ52906.1 atub|OJI87789.1 awen|OJJ35861.1

Group8540: abra|OJJ69797.1 acar|OOF92534.1 akaw|GAA87862.1 aluc|OJZ85503.1 atub|OJI80062.1 aver|OJJ02051.1 ater|EAU33076.1 anid|CBF82435.1 asyd|OJJ58356.1 azon|OJJ42230.1

Group8541: abra|OJJ69802.1 acar|OOF93575.1 afis|EAW24738.1 afum|EAL89385.1 akaw|GAA87857.1 aluc|OJZ85499.1 anig|EHA25032.1 atub|OJI80066.1 asyd|OJJ55919.1 aver|OJJ04872.1

Group8542: abra|OJJ69842.1 acar|OOF93365.1 akaw|GAA87818.1 aluc|OJZ85452.1 anig|EHA24996.1 atub|OJI80112.1 akaw|GAA87817.1 atub|OJI80114.1 anig|EHA24995.1 aver|OJI95871.1

Group8543: abra|OJJ69844.1 acar|OOF93367.1 akaw|GAA87815.1 aluc|OJZ85450.1 anig|EHA24993.1 asyd|OJJ61770.1 ater|EAU31226.1 atub|OJI80117.1 aver|OJI95872.1 anid|CBF84353.1

Group8544: afla|EED53085.1 aory|EIT74813.1 ater|EAU38424.1 awen|OJJ32258.1 acla|EAW09120.1 atub|OJI80560.1 aver|OJJ05803.1 asyd|OJJ57364.1 anid|CBF82277.1 asyd|OJJ54899.1

Group8545: afum|EAL90594.1 acla|EAW07570.1 afis|EAW22604.1 afla|EED53103.1 anid|CBF73873.1 aory|EIT74774.1 asyd|OJJ56549.1 ater|EAU31548.1 aver|OJJ06173.1 azon|OJJ44953.1

Group8546: acla|EAW15171.1 afis|EAW20140.1 afla|EED47645.1 afum|EAL85255.1 asyd|OJJ52227.1 acar|OOG00545.1 agla|OJJ88796.1 anid|CBF78273.1 aory|EIT80255.1 awen|OJJ32009.1

Group8547: abra|OJJ70095.1 acar|OOF97934.1 afis|EAW17169.1 akaw|GAA87600.1 aluc|OJZ85220.1 anig|EHA25424.1 asyd|OJJ61499.1 ater|EAU34028.1 atub|OJI80363.1 aver|OJJ00836.1

Group8548: abra|OJJ70109.1 acar|OOF92006.1 afis|EAW25650.1 afla|EED46124.1 agla|OJJ81747.1 akaw|GAA92807.1 aluc|OJZ88730.1 anig|EHA18434.1 aver|OJJ05888.1 azon|OJJ50374.1

Group8549: aory|EIT80953.1 asyd|OJJ52682.1 akaw|GAA92001.1 aluc|OJZ92872.1 atub|OJI87330.1 acar|OOF98683.1 acla|EAW08794.1 aver|OJJ08668.1 azon|OJJ45038.1 acla|EAW11039.1

Group8550: asyd|OJJ56560.1 abra|OJJ77608.1 acar|OOF91822.1 afla|EED52319.1 akaw|GAA84021.1 aluc|OJZ80925.1 anig|EHA19422.1 atub|OJI82653.1 azon|OJJ44042.1 aver|OJJ06161.1

Group8551: abra|OJJ70205.1 acar|OOF92574.1 akaw|GAA86572.1 aluc|OJZ85122.1 anig|EHA25342.1 atub|OJI80471.1 awen|OJJ36218.1 abra|OJJ76882.1 agla|OJJ83401.1 asyd|OJJ56898.1

Group8552: abra|OJJ70225.1 acar|OOF95982.1 afla|EED48241.1 akaw|GAA92567.1 aluc|OJZ82577.1 anig|EHA25326.1 atub|OJI80492.1 azon|OJJ42530.1 azon|OJJ42788.1 anid|CBF88083.1

Group8553: abra|OJJ70238.1 acar|OOF92556.1 akaw|GAA86547.1 aluc|OJZ85095.1 anig|EHA25317.1 atub|OJI80503.1 aver|OJI96728.1 abra|OJJ71438.1 agla|OJJ82297.1 awen|OJJ41773.1

Group8554: abra|OJJ70239.1 acar|OOF92555.1 afla|EED47781.1 akaw|GAA86546.1 aluc|OJZ85094.1 anig|EHA25316.1 aory|EIT77105.1 asyd|OJJ55212.1 atub|OJI80504.1 aver|OJJ07003.1

Group8555: abra|OJJ70260.1 acar|OOF90564.1 afis|EAW15398.1 afum|EAL84250.1 agla|OJJ89320.1 akaw|GAA86537.1 aluc|OJZ85084.1 anig|EHA25299.1 ater|EAU32205.1 atub|OJI80514.1

Group8556: abra|OJJ70313.1 afis|EAW17105.1 afla|EED47134.1 akaw|GAA92569.1 aluc|OJZ82579.1 anig|EHA27492.1 ater|EAU29939.1 atub|OJI88820.1 awen|OJJ37982.1 aory|EIT79243.1

Group8557: abra|OJJ70340.1 afla|EED48271.1 agla|OJJ88107.1 akaw|GAA92593.1 aluc|OJZ82610.1 anig|EHA27472.1 aory|EIT72917.1 asyd|OJJ65381.1 atub|OJI88845.1 aver|OJI99551.1

Group8558: abra|OJJ70348.1 afla|EED48623.1 akaw|GAA92600.1 aluc|OJZ82617.1 anig|EHA27460.1 aory|EIT73276.1 asyd|OJJ60739.1 atub|OJI88852.1 aver|OJJ00071.1 awen|OJJ33353.1

Group8559: abra|OJJ70349.1 afla|EED51524.1 agla|OJJ88978.1 akaw|GAA83850.1 aluc|OJZ90865.1 anig|EHA19578.1 aory|EIT80574.1 atub|OJI82863.1 aver|OJJ03457.1 awen|OJJ38030.1

Group8560: abra|OJJ70372.1 acar|OOF91897.1 afla|EED47359.1 akaw|GAA91978.1 aluc|OJZ82636.1 anig|EHA27443.1 ater|EAU30229.1 atub|OJI88867.1 awen|OJJ29760.1 agla|OJJ79931.1

Group8561: abra|OJJ70386.1 acar|OOF91885.1 akaw|GAA91971.1 aluc|OJZ82644.1 anig|EHA27426.1 asyd|OJJ56716.1 atub|OJI88877.1 aver|OJJ06009.1 awen|OJJ29702.1 azon|OJJ50134.1

Group8562: abra|OJJ70401.1 acar|OOF98650.1 acla|EAW07591.1 afum|EAL91131.1 akaw|GAA87027.1 aluc|OJZ80469.1 ater|EAU34897.1 atub|OJI89648.1 azon|OJJ43571.1 aluc|OJZ84425.1

Group8563: abra|OJJ70414.1 acar|OOF91858.1 afla|EED57576.1 akaw|GAA91942.1 aluc|OJZ82678.1 anig|EHA21047.1 aory|EIT82964.1 asyd|OJJ65358.1 aver|OJI99507.1 awen|OJJ40094.1

Group8564: abra|OJJ70426.1 afis|EAW20641.1 afum|EAL84429.1 agla|OJJ84763.1 akaw|GAA90151.1 aluc|OJZ83197.1 anig|EHA21060.1 ater|EAU32980.1 atub|OJI87741.1 aver|OJI99688.1

Group8565: abra|OJJ70437.1 acar|OOF91845.1 afla|EED45396.1 agla|OJJ78985.1 akaw|GAA90143.1 aluc|OJZ83204.1 anig|EHA21066.1 aory|EIT82379.1 atub|OJI87733.1 azon|OJJ48044.1

Group8566: abra|OJJ70457.1 acar|OOF95615.1 acla|EAW12032.1 afla|EED56210.1 akaw|GAA83303.1 aluc|OJZ83798.1 anig|EHA18946.1 aory|EIT73342.1 atub|OJI90167.1 azon|OJJ43168.1

Group8567: abra|OJJ70461.1 akaw|GAA83307.1 aluc|OJZ83804.1 anig|EHA18951.1 atub|OJI90171.1 abra|OJJ77762.1 afis|EAW16209.1 afum|EAL88836.1 asyd|OJJ57955.1 ater|EAU38498.1

Group8568: abra|OJJ70480.1 afis|EAW16858.1 afla|EED48435.1 afum|EAL86401.1 aory|EIT81680.1 asyd|OJJ55447.1 aver|OJJ06520.1 awen|OJJ35635.1 asyd|OJJ61385.1 aver|OJJ00713.1

Group8569: abra|OJJ70691.1 acar|OOF97037.1 acla|EAW08073.1 afis|EAW23109.1 afla|EED48539.1 afum|EAL88370.1 agla|OJJ89632.1 anig|EHA19160.1 ater|EAU36237.1 awen|OJJ36672.1

Group8570: abra|OJJ70934.1 acla|EAW10500.1 afis|EAW25067.1 afla|EED55387.1 afum|EAL89736.1 akaw|GAA83008.1 aluc|OJZ87593.1 anid|CBF85953.1 ater|EAU35814.1 atub|OJI81054.1

Group8571: abra|OJJ71003.1 afis|EAW25683.1 afla|EED55158.1 agla|OJJ78887.1 anid|CBF83931.1 anig|EHA18440.1 aory|EIT81575.1 asyd|OJJ55436.1 ater|EAU32720.1 aver|OJI96710.1

Group8572: abra|OJJ71234.1 acar|OOF97945.1 afla|EED45827.1 akaw|GAA82753.1 aluc|OJZ87310.1 anig|EHA20546.1 aory|EIT75462.1 atub|OJI81335.1 awen|OJJ40448.1 azon|OJJ45934.1

Group8573: abra|OJJ71235.1 acar|OOG00345.1 acla|EAW13487.1 afla|EED45437.1 akaw|GAA88047.1 aluc|OJZ81306.1 aory|EIT82398.1 atub|OJI91513.1 azon|OJJ47990.1 atub|OJI91514.1

Group8574: abra|OJJ71612.1 acar|OOF96328.1 afla|EED53953.1 agla|OJJ85548.1 akaw|GAA89315.1 anid|CBF87163.1 aory|EIT78260.1 atub|OJI84181.1 awen|OJJ29931.1 anid|CBF79656.1

Group8575: abra|OJJ71613.1 acar|OOF96329.1 afis|EAW19672.1 afla|EED46495.1 akaw|GAA89314.1 aory|EIT72331.1 atub|OJI84180.1 aory|EIT72401.1 afis|EAW19673.1 afla|EED46496.1

Group8576: abra|OJJ71635.1 acar|OOF96352.1 afla|EED54063.1 akaw|GAA89291.1 aluc|OJZ86378.1 anig|EHA21516.1 aory|EIT76025.1 atub|OJI84156.1 azon|OJJ50320.1 acar|OOF92013.1

Group8577: abra|OJJ71707.1 afis|EAW24690.1 afla|EED49331.1 afum|EAL89331.1 anig|EHA22157.1 aory|EIT79538.1 awen|OJJ35380.1 azon|OJJ50279.1 afla|EED52321.1 aory|EIT74480.1

Group8578: abra|OJJ71743.1 acar|OOF96434.1 akaw|GAA85157.1 aluc|OJZ86480.1 asyd|OJJ58743.1 atub|OJI84050.1 aver|OJJ01353.1 awen|OJJ31112.1 azon|OJJ46588.1 acla|EAW06447.1

Group8579: abra|OJJ71747.1 afla|EED48442.1 agla|OJJ79876.1 akaw|GAA85161.1 aluc|OJZ86475.1 anig|EHA22160.1 aory|EIT81672.1 ater|EAU35870.1 atub|OJI84054.1 awen|OJJ37784.1

Group8580: abra|OJJ71779.1 acar|OOF90183.1 afis|EAW17531.1 afum|EAL93576.2 agla|OJJ80575.1 akaw|GAA85130.1 aluc|OJZ86510.1 anig|EHA22137.1 awen|OJJ34616.1 azon|OJJ49597.1

Group8581: abra|OJJ71792.1 acar|OOF96472.1 afla|EED56592.1 akaw|GAA85118.1 aluc|OJZ86522.1 anig|EHA22124.1 asyd|OJJ54323.1 atub|OJI84000.1 aver|OJJ05277.1 awen|OJJ30244.1

Group8582: abra|OJJ71826.1 acar|OOF96503.1 akaw|GAA85084.1 aluc|OJZ86558.1 anid|CBF85400.1 anig|EHA22091.1 asyd|OJJ64061.1 ater|EAU39384.1 atub|OJI83964.1 aver|OJI98147.1

Group8583: abra|OJJ71839.1 acar|OOF90147.1 acla|EAW13870.1 afla|EED52765.1 afum|EAL93285.1 agla|OJJ81633.1 aluc|OJZ86572.1 atub|OJI83951.1 awen|OJJ31145.1 azon|OJJ46620.1

Group8584: abra|OJJ71914.1 acar|OOF96572.1 agla|OJJ82337.1 akaw|GAA85007.1 aluc|OJZ86651.1 anig|EHA22019.1 asyd|OJJ54493.1 ater|EAU33699.1 atub|OJI83876.1 anid|CBF80791.1

Group8585: abra|OJJ71932.1 acar|OOF96589.1 acla|EAW07948.1 afis|EAW19524.1 akaw|GAA84991.1 aluc|OJZ86669.1 ater|EAU39264.1 atub|OJI83858.1 awen|OJJ29589.1 azon|OJJ45027.1

Group8586: abra|OJJ71965.1 acar|OOF89891.1 afla|EED56021.1 akaw|GAA84963.1 aluc|OJZ86701.1 anig|EHA21975.1 aory|EIT76827.1 atub|OJI83825.1 awen|OJJ39121.1 azon|OJJ51451.1

Group8587: abra|OJJ72076.1 akaw|GAA84841.1 aluc|OJZ86830.1 anig|EHA21805.1 atub|OJI83688.1 abra|OJJ76924.1 acar|OOF91616.1 afla|EED50450.1 aory|EIT82050.1 aver|OJI98301.1

Group8588: abra|OJJ72084.1 acar|OOF96729.1 akaw|GAA84836.1 aluc|OJZ86838.1 anid|CBF69410.1 anig|EHA21799.1 asyd|OJJ63819.1 atub|OJI83680.1 aver|OJI97119.1 azon|OJJ51797.1

Group8589: agla|OJJ84829.1 ater|EAU38680.1 afla|EED53378.1 aory|EIT75163.1 awen|OJJ37899.1 afla|EED55748.1 aory|EIT83201.1 asyd|OJJ52198.1 aver|OJI98022.1 ater|EAU37793.1

Group8590: abra|OJJ72109.1 acar|OOF90021.1 akaw|GAA84813.1 aluc|OJZ86864.1 anig|EHA21777.1 aory|EIT75415.1 atub|OJI83656.1 awen|OJJ37056.1 afla|EED45957.1 afla|EED45958.1

Group8591: abra|OJJ72136.1 afis|EAW18424.1 agla|OJJ82206.1 akaw|GAA84786.1 aluc|OJZ86894.1 anid|CBF77133.1 anig|EHA21749.1 asyd|OJJ56944.1 atub|OJI83625.1 aver|OJJ03340.1

Group8592: abra|OJJ72153.1 acar|OOF93888.1 acla|EAW06696.1 akaw|GAA83563.1 aluc|OJZ92435.1 asyd|OJJ57413.1 ater|EAU37618.1 afla|EED49526.1 atub|OJI86864.1 awen|OJJ40937.1

Group8593: abra|OJJ72179.1 afis|EAW15945.1 afum|EAL88579.1 abra|OJJ72619.1 acar|OOF90209.1 akaw|GAA92011.1 aluc|OJZ92876.1 anig|EHA26083.1 atub|OJI87336.1 azon|OJJ43898.1

Group8594: agla|OJJ82503.1 asyd|OJJ52341.1 azon|OJJ42372.1 acar|OOF93295.1 aluc|OJZ84275.1 anig|EHA27619.1 asyd|OJJ65289.1 atub|OJI89806.1 akaw|GAA90169.1 asyd|OJJ57146.1

Group8595: abra|OJJ72215.1 acar|OOF96836.1 afis|EAW23701.1 afum|EAL87142.1 agla|OJJ79039.1 akaw|GAA84719.1 aluc|OJZ86967.1 atub|OJI83555.1 acla|EAW06801.1 awen|OJJ37753.1

Group8596: abra|OJJ72216.1 acar|OOF96838.1 agla|OJJ89329.1 aluc|OJZ86968.1 anig|EHA21682.1 asyd|OJJ54158.1 atub|OJI83554.1 aver|OJJ08582.1 awen|OJJ29881.1 acar|OOG00379.1

Group8597: abra|OJJ72248.1 acar|OOF96877.1 afla|EED48185.1 agla|OJJ84382.1 akaw|GAA84690.1 aluc|OJZ86998.1 anig|EHA21648.1 atub|OJI83521.1 awen|OJJ32733.1 azon|OJJ46152.1

Group8598: aory|EIT75256.1 akaw|GAA88127.1 asyd|OJJ62937.1 aver|OJI98054.1 asyd|OJJ61690.1 afis|EAW15654.1 anig|EHA18692.1 atub|OJI91605.1 awen|OJJ31668.1 aluc|OJZ81399.1

Group8599: abra|OJJ72371.1 acar|OOF94853.1 afis|EAW19750.1 afla|EED56959.1 afum|EAL85147.2 akaw|GAA86121.1 aluc|OJZ90360.1 anig|EHA23831.1 aory|EIT77558.1 atub|OJI81787.1

Group8600: aver|OJJ06961.1 acla|EAW12681.1 afis|EAW17844.1 afla|EED46191.1 afum|EAL91653.1 anid|CBF77969.1 aory|EIT76376.1 asyd|OJJ55265.1 ater|EAU33046.1 azon|OJJ48429.1

Group8601: abra|OJJ72529.1 acar|OOF94724.1 afla|EED49525.1 agla|OJJ86479.1 akaw|GAA86251.1 aluc|OJZ90508.1 anig|EHA23965.1 aory|EIT82605.1 asyd|OJJ54907.1 atub|OJI81932.1

Group8602: abra|OJJ72630.1 afla|EED52588.1 anig|EHA24045.1 aory|EIT74244.1 asyd|OJJ56819.1 aver|OJJ03516.1 akaw|GAA85250.1 aluc|OJZ90607.1 atub|OJI82031.1 anid|CBF77224.1

Group8603: abra|OJJ72692.1 acar|OOF95537.1 afis|EAW19896.1 afla|EED51786.1 afum|EAL85005.1 agla|OJJ86286.1 aory|EIT81709.1 asyd|OJJ52354.1 aver|OJI98306.1 aory|EIT81770.1

Group8604: abra|OJJ72852.1 acar|OOF98952.1 afla|EED47911.1 akaw|GAA85453.1 aluc|OJZ83361.1 anig|EHA24226.1 aory|EIT83379.1 atub|OJI82252.1 azon|OJJ42496.1 afum|EAL85699.2

Group8605: abra|OJJ72901.1 acar|OOF89982.1 afis|EAW18144.1 afum|EAL87501.1 akaw|GAA85488.1 aluc|OJZ83410.1 anig|EHA24261.1 ater|EAU35466.1 atub|OJI82298.1 awen|OJJ29667.1

Group8606: abra|OJJ73021.1 acar|OOF96189.1 acla|EAW07994.1 afis|EAW23029.1 agla|OJJ89450.1 aluc|OJZ83534.1 asyd|OJJ56325.1 atub|OJI82425.1 aver|OJJ06388.1 azon|OJJ44175.1

Group8607: abra|OJJ73075.1 acar|OOG00310.1 agla|OJJ83255.1 akaw|GAA88086.1 aluc|OJZ81350.1 anig|EHA18652.1 atub|OJI91554.1 awen|OJJ40004.1 azon|OJJ50412.1 awen|OJJ37994.1

Group8608: abra|OJJ73086.1 acar|OOG00319.1 afla|EED57717.1 akaw|GAA88074.1 anig|EHA18643.1 atub|OJI91542.1 aver|OJJ06545.1 awen|OJJ34511.1 aory|EIT79944.1 agla|OJJ80281.1

Group8609: abra|OJJ73115.1 afla|EED47395.1 akaw|GAA88054.1 aluc|OJZ81316.1 anig|EHA18620.1 aory|EIT77357.1 ater|EAU38561.1 atub|OJI91519.1 acla|EAW13710.1 ater|EAU34083.1

Group8610: abra|OJJ73300.1 acar|OOF91872.1 afis|EAW20652.1 akaw|GAA92705.1 aluc|OJZ88745.1 anig|EHA18449.1 asyd|OJJ60305.1 atub|OJI91317.1 aver|OJI99646.1 awen|OJJ34595.1

Group8611: abra|OJJ73351.1 acar|OOF98071.1 afla|EED55527.1 agla|OJJ85523.1 akaw|GAA83132.1 aluc|OJZ88688.1 anig|EHA18368.1 aory|EIT80909.1 atub|OJI91268.1 awen|OJJ40292.1

Group8612: abra|OJJ73360.1 acar|OOF96593.1 acla|EAW09766.1 akaw|GAA83124.1 aluc|OJZ88680.1 anig|EHA18361.1 aory|EIT76747.1 atub|OJI91261.1 awen|OJJ34492.1 azon|OJJ43956.1

Group8613: abra|OJJ73390.1 acar|OOG00592.1 afla|EED45860.1 agla|OJJ87868.1 akaw|GAA83099.1 aluc|OJZ88646.1 anig|EHA18337.1 aory|EIT75773.1 ater|EAU35441.1 atub|OJI91233.1

Group8614: abra|OJJ73426.1 acar|OOG00630.1 agla|OJJ78773.1 akaw|GAA83066.1 aluc|OJZ88617.1 anig|EHA18308.1 atub|OJI91202.1 awen|OJJ34076.1 azon|OJJ42202.1 atub|OJI84004.1

Group8615: abra|OJJ73428.1 acar|OOG00634.1 afis|EAW24000.1 afum|EAL87430.1 akaw|GAA83064.1 aluc|OJZ88615.1 anid|CBF89126.1 anig|EHA18306.1 ater|EAU37866.1 atub|OJI91200.1

Group8616: abra|OJJ73661.1 acar|OOG00841.1 afla|EED48352.1 akaw|GAA88495.1 aluc|OJZ88391.1 anig|EHA18118.1 atub|OJI90986.1 awen|OJJ38333.1 acla|EAW07714.1 afum|EAL86290.2

Group8617: abra|OJJ73666.1 afla|EED52813.1 agla|OJJ81786.1 aluc|OJZ88386.1 aory|EIT78202.1 asyd|OJJ60492.1 ater|EAU34949.1 atub|OJI90981.1 afla|EED51528.1 agla|OJJ85745.1

Group8618: abra|OJJ73690.1 acar|OOG00862.1 acla|EAW07605.1 afla|EED49886.1 agla|OJJ80983.1 aluc|OJZ88359.1 anid|CBF88225.1 atub|OJI90955.1 awen|OJJ35258.1 azon|OJJ49849.1

Group8619: abra|OJJ73726.1 acar|OOF93330.1 afla|EED56886.1 akaw|GAA88437.1 aluc|OJZ88325.1 anig|EHA18061.1 aory|EIT77470.1 ater|EAU34163.1 atub|OJI90920.1 azon|OJJ49300.1

Group8620: acar|OOG01154.1 aluc|OJZ88002.1 anig|EHA17783.1 atub|OJI90610.1 anid|CBF73534.1 asyd|OJJ62477.1 aver|OJI96614.1 afla|EED50986.1 aory|EIT76966.1 aver|OJJ03878.1

Group8621: abra|OJJ74148.1 acar|OOF95580.1 agla|OJJ78612.1 akaw|GAA89735.1 aluc|OJZ80648.1 anig|EHA27184.1 asyd|OJJ61972.1 atub|OJI87503.1 aver|OJI96065.1 awen|OJJ31296.1

Group8622: abra|OJJ74213.1 acar|OOF95507.1 akaw|GAA86805.1 aluc|OJZ89921.1 anig|EHA27121.1 asyd|OJJ54348.1 atub|OJI84884.1 aver|OJJ05300.1 afla|EED52429.1 aory|EIT83291.1



Group8623: abra|OJJ74233.1 acla|EAW07287.1 afis|EAW22320.1 agla|OJJ87744.1 akaw|GAA86786.1 aluc|OJZ89900.1 anig|EHA27100.1 atub|OJI84907.1 awen|OJJ34886.1 azon|OJJ50054.1

Group8624: agla|OJJ87659.1 acla|EAW07371.1 afis|EAW22396.1 afum|EAL90795.1 awen|OJJ34974.1 afla|EED56060.1 aory|EIT76623.1 asyd|OJJ63957.1 anid|CBF88748.1 aver|OJI96984.1

Group8625: acla|EAW07418.1 afis|EAW22443.1 afla|EED54459.1 aory|EIT81156.1 ater|EAU39261.1 azon|OJJ50038.1 aver|OJI96918.1 awen|OJJ35069.1 asyd|OJJ62865.1 anid|CBF88848.1

Group8626: afla|EED52294.1 afla|EED48293.1 aory|EIT76302.1 aluc|OJZ85149.1 anig|EHA25386.1 aory|EIT74332.1 ater|EAU37316.1 atub|OJI80423.1 akaw|GAA86601.1 aory|EIT74450.1

Group8627: abra|OJJ74459.1 acar|OOF95292.1 afla|EED44901.1 akaw|GAA87352.1 aluc|OJZ89662.1 anig|EHA26899.1 asyd|OJJ59445.1 atub|OJI85138.1 aver|OJJ02827.1 aory|EIT73487.1

Group8628: abra|OJJ74557.1 acar|OOF98302.1 acla|EAW12252.1 afis|EAW16984.1 afla|EED54813.1 afum|EBA27275.1 agla|OJJ82691.1 aory|EIT79339.1 ater|EAU32971.1 azon|OJJ44320.1

Group8629: abra|OJJ75060.1 acar|OOF97273.1 acla|EAW08244.1 afis|EAW23278.1 afum|EAL88201.1 agla|OJJ86568.1 akaw|GAA88673.1 aory|EIT77076.1 asyd|OJJ62386.1 ater|EAU37563.1

Group8630: abra|OJJ75143.1 akaw|GAA88749.1 aluc|OJZ92709.1 anid|CBF74888.1 anig|EHA26290.1 asyd|OJJ60106.1 ater|EAU35605.1 atub|OJI87135.1 aver|OJJ04156.1 awen|OJJ39533.1

Group8631: abra|OJJ75163.1 acar|OOF97175.1 akaw|GAA88774.1 anig|EHA26268.1 atub|OJI87157.1 agla|OJJ78946.1 ater|EAU35626.1 aluc|OJZ92733.1 aluc|OJZ92734.1 atub|OJI87158.1

Group8632: abra|OJJ75271.1 afla|EED48967.1 agla|OJJ84613.1 akaw|GAA91809.1 aluc|OJZ92831.1 anig|EHA26178.1 asyd|OJJ52915.1 atub|OJI87288.1 aver|OJJ08885.1 awen|OJJ35978.1

Group8633: abra|OJJ75349.1 acar|OOF94487.1 afis|EAW24559.1 akaw|GAA92041.1 aluc|OJZ92911.1 anig|EHA26054.1 asyd|OJJ55939.1 atub|OJI87371.1 aver|OJJ04888.1 azon|OJJ43548.1

Group8634: abra|OJJ75355.1 acar|OOF94486.1 akaw|GAA92051.1 aluc|OJZ92921.1 anid|CBF80201.1 anig|EHA26048.1 asyd|OJJ57901.1 atub|OJI87382.1 aver|OJJ04493.1 ater|EAU29641.1

Group8635: abra|OJJ75367.1 afla|EED55374.1 agla|OJJ87991.1 akaw|GAA92060.1 aluc|OJZ92936.1 anig|EHA26036.1 aory|EIT80789.1 ater|EAU29840.1 atub|OJI87396.1 aluc|OJZ92933.1

Group8636: abra|OJJ75557.1 acar|OOF90875.1 agla|OJJ88523.1 akaw|GAA84312.1 aluc|OJZ89007.1 anig|EHA23521.1 aory|EIT75455.1 asyd|OJJ59698.1 atub|OJI85782.1 aver|OJJ02589.1

Group8637: abra|OJJ75566.1 acar|OOF90883.1 afla|EED45935.1 akaw|GAA84318.1 aluc|OJZ89014.1 anig|EHA23516.1 aory|EIT75515.1 atub|OJI85775.1 awen|OJJ35902.1 azon|OJJ42467.1

Group8638: abra|OJJ75596.1 acar|OOF93959.1 acla|EAW11912.1 afla|EED52181.1 agla|OJJ79875.1 akaw|GAA84346.1 aluc|OJZ89047.1 anig|EHA23489.1 aory|EIT74345.1 atub|OJI85740.1

Group8639: abra|OJJ75603.1 acar|OOG00234.1 acla|EAW09326.1 afis|EAW21783.1 afla|EED46612.1 afum|EBA27474.1 akaw|GAA84354.1 aluc|OJZ89055.1 aory|EIT77866.1 atub|OJI85732.1

Group8640: abra|OJJ75727.1 acar|OOF90229.1 aluc|OJZ89179.1 anid|CBF83676.1 anig|EHA23376.1 aory|EIT81144.1 asyd|OJJ60814.1 atub|OJI85610.1 aver|OJJ00141.1 awen|OJJ29739.1

Group8641: abra|OJJ75742.1 acar|OOF91837.1 afla|EED48726.1 akaw|GAA84475.1 aluc|OJZ89195.1 anig|EHA23363.1 asyd|OJJ56157.1 atub|OJI85595.1 aver|OJJ05097.1 awen|OJJ40001.1

Group8642: abra|OJJ75979.1 acar|OOF99940.1 akaw|GAA88978.1 aluc|OJZ89425.1 anig|EHA23161.1 asyd|OJJ60649.1 atub|OJI85368.1 aver|OJI99969.1 awen|OJJ39382.1 anid|CBF83410.1

Group8643: abra|OJJ75990.1 afla|EED52371.1 akaw|GAA88967.1 aluc|OJZ89436.1 anid|CBF84666.1 aory|EIT82366.1 asyd|OJJ54807.1 ater|EAU32112.1 atub|OJI85357.1 aver|OJJ07354.1

Group8644: abra|OJJ76013.1 afla|EED55759.1 akaw|GAA88947.1 aluc|OJZ89459.1 anig|EHA23128.1 aory|EIT76777.1 asyd|OJJ54358.1 atub|OJI85335.1 aver|OJJ05312.1 awen|OJJ36190.1

Group8645: abra|OJJ76027.1 acar|OOF93545.1 afis|EAW17186.1 afum|EAL86612.1 akaw|GAA88931.1 aluc|OJZ89478.1 anig|EHA23115.1 atub|OJI85322.1 awen|OJJ31339.1 azon|OJJ42796.1

Group8646: abra|OJJ76034.1 acar|OOF99895.1 agla|OJJ87634.1 anig|EHA23109.1 asyd|OJJ58373.1 atub|OJI85316.1 aver|OJJ05952.1 afla|EED51787.1 aory|EIT81775.1 aluc|OJZ89486.1

Group8647: abra|OJJ76060.1 afla|EED55797.1 akaw|GAA88906.1 aluc|OJZ89515.1 anig|EHA23084.1 atub|OJI85288.1 agla|OJJ85503.1 aory|EIT76562.1 awen|OJJ39318.1 aver|OJJ00248.1

Group8648: abra|OJJ76065.1 acar|OOF99864.1 afis|EAW21389.1 agla|OJJ87676.1 akaw|GAA88901.1 aluc|OJZ89520.1 asyd|OJJ60915.1 atub|OJI85283.1 aver|OJJ00242.1 awen|OJJ39313.1

Group8649: abra|OJJ76244.1 acar|OOF99490.1 agla|OJJ89206.1 akaw|GAA82177.1 aluc|OJZ91987.1 anig|EHA22933.1 atub|OJI86422.1 azon|OJJ42359.1 anig|EHA18806.1 atub|OJI90024.1

Group8650: abra|OJJ76335.1 agla|OJJ80508.1 akaw|GAA82263.1 aluc|OJZ91877.1 anid|CBF69750.1 asyd|OJJ58939.1 atub|OJI86328.1 aver|OJJ01535.1 awen|OJJ32359.1 azon|OJJ47122.1

Group8651: abra|OJJ76398.1 acar|OOF99641.1 afla|EED50686.1 agla|OJJ82293.1 akaw|GAA82318.1 aluc|OJZ91814.1 anig|EHA22805.1 aory|EIT78087.1 atub|OJI86270.1 awen|OJJ32275.1

Group8652: agla|OJJ85516.1 acla|EAW09750.1 afis|EAW21392.1 afum|EAL92406.1 anid|CBF83827.1 asyd|OJJ60905.1 ater|EAU35175.1 aver|OJJ00231.1 azon|OJJ51539.1 afla|EED55807.1

Group8653: abra|OJJ76514.1 acar|OOF99458.1 afla|EED48156.1 agla|OJJ84830.1 akaw|GAA82427.1 aluc|OJZ91691.1 anig|EHA22704.1 atub|OJI86144.1 awen|OJJ36353.1 azon|OJJ44584.1

Group8654: abra|OJJ76603.1 acar|OOF99388.1 afla|EED46909.1 akaw|GAA82507.1 aluc|OJZ91605.1 anig|EHA22633.1 aory|EIT72679.1 ater|EAU34984.1 atub|OJI86057.1 azon|OJJ42097.1

Group8655: abra|OJJ76627.1 acar|OOF99371.1 acla|EAW14293.1 agla|OJJ82978.1 aluc|OJZ91585.1 asyd|OJJ64675.1 atub|OJI86034.1 aver|OJI98776.1 awen|OJJ31612.1 azon|OJJ43048.1

Group8656: abra|OJJ76695.1 acar|OOF99119.1 afis|EAW22868.1 afum|EAL90331.1 anid|CBF83074.1 asyd|OJJ65378.1 atub|OJI85966.1 aver|OJI99548.1 acar|OOF96679.1 awen|OJJ32261.1

Group8657: abra|OJJ76719.1 acar|OOF97650.1 afla|EED47261.1 agla|OJJ86864.1 akaw|GAA92481.1 aluc|OJZ91493.1 anig|EHA22535.1 aory|EIT79288.1 atub|OJI85948.1 awen|OJJ38036.1

Group8658: abra|OJJ76795.1 afis|EAW21126.1 afla|EED48222.1 akaw|GAA87230.1 aluc|OJZ84199.1 anig|EHA27556.1 aory|EIT72926.1 asyd|OJJ52878.1 ater|EAU37153.1 atub|OJI89885.1

Group8659: abra|OJJ76867.1 afla|EED51651.1 akaw|GAA87156.1 aluc|OJZ84278.1 anig|EHA27623.1 aory|EIT80683.1 asyd|OJJ62988.1 atub|OJI89803.1 aver|OJI97980.1 awen|OJJ30981.1

Group8660: abra|OJJ76877.1 afis|EAW16808.1 afla|EED49867.1 agla|OJJ85994.1 anid|CBF80479.1 asyd|OJJ65373.1 ater|EAU38552.1 aver|OJI99540.1 ater|EAU35087.1 aory|EIT83392.1

Group8661: abra|OJJ76896.1 afla|EED52108.1 akaw|GAA87148.1 aluc|OJZ84289.1 anig|EHA27629.1 aory|EIT76926.1 asyd|OJJ54792.1 aver|OJJ02013.1 azon|OJJ46450.1 agla|OJJ78807.1

Group8662: abra|OJJ76900.1 acar|OOF98423.1 afis|EAW24058.1 akaw|GAA87140.1 aluc|OJZ84297.1 anig|EHA27633.1 atub|OJI89772.1 akaw|GAA88827.1 aluc|OJZ89604.1 atub|OJI85199.1

Group8663: abra|OJJ76938.1 acla|EAW13467.1 afum|EAL84485.2 akaw|GAA87101.1 aluc|OJZ84337.1 anig|EHA27671.1 atub|OJI89731.1 acar|OOF91388.1 afis|EAW20579.1 azon|OJJ50655.1

Group8664: aver|OJJ01956.1 abra|OJJ77104.1 acar|OOF92989.1 afla|EED45184.1 akaw|GAA86952.1 aluc|OJZ84513.1 anig|EHA27811.1 aory|EIT73680.1 atub|OJI89568.1 azon|OJJ42742.1

Group8665: abra|OJJ76967.1 acar|OOF91411.1 afla|EED52237.1 agla|OJJ88667.1 akaw|GAA87077.1 aluc|OJZ84363.1 anig|EHA27698.1 aory|EIT74351.1 atub|OJI89705.1 awen|OJJ33309.1

Group8666: abra|OJJ77004.1 acar|OOF91452.1 akaw|GAA87044.1 aluc|OJZ84403.1 anid|CBF83173.1 anig|EHA27733.1 asyd|OJJ55525.1 atub|OJI89669.1 aver|OJJ06603.1 awen|OJJ36046.1

Group8667: abra|OJJ77021.1 acar|OOF91459.1 akaw|GAA87031.1 aluc|OJZ84421.1 anig|EHA27743.1 asyd|OJJ64322.1 ater|EAU32174.1 atub|OJI89652.1 aver|OJI98415.1 azon|OJJ50419.1

Group8668: abra|OJJ77093.1 acar|OOG00597.1 akaw|GAA86962.1 aluc|OJZ84502.1 anig|EHA27802.1 atub|OJI89578.1 abra|OJJ78139.1 afla|EED47404.1 aluc|OJZ82075.1 aory|EIT81902.1

Group8669: acla|EAW11185.1 afis|EAW15916.1 afum|EAL88551.2 afla|EED56452.1 anid|CBF81311.1 aory|EIT72826.1 asyd|OJJ59355.1 ater|EAU36194.1 aver|OJJ02919.1 awen|OJJ36714.1

Group8670: ater|EAU33891.1 acla|EAW13251.1 afis|EAW17385.1 afla|EED49498.1 afum|EBA27426.1 agla|OJJ80417.1 aory|EIT82619.1 asyd|OJJ52535.1 aver|OJJ03868.1 awen|OJJ37431.1

Group8671: abra|OJJ77264.1 acar|OOF93133.1 afla|EED52247.1 agla|OJJ83705.1 akaw|GAA90683.1 aluc|OJZ84672.1 anig|EHA27950.1 aory|EIT74408.1 asyd|OJJ60410.1 atub|OJI89408.1

Group8672: abra|OJJ77274.1 acar|OOF93142.1 acla|EAW13263.1 afla|EED49798.1 akaw|GAA90677.1 aluc|OJZ84680.1 anid|CBF84234.1 anig|EHA27958.1 aory|EIT77679.1 atub|OJI89400.1

Group8673: abra|OJJ77284.1 acar|OOF93161.1 akaw|GAA90665.1 aluc|OJZ84694.1 anig|EHA27970.1 asyd|OJJ64781.1 atub|OJI89388.1 aver|OJI98889.1 anid|CBF80818.1 agla|OJJ82982.1

Group8674: abra|OJJ77312.1 acar|OOF99913.1 agla|OJJ80696.1 akaw|GAA91441.1 aluc|OJZ84724.1 anig|EHA27998.1 asyd|OJJ55558.1 atub|OJI89359.1 aver|OJJ06639.1 azon|OJJ45680.1

Group8675: abra|OJJ77414.1 acar|OOF93280.1 afla|EED45194.1 agla|OJJ84823.1 akaw|GAA91351.1 aluc|OJZ84822.1 aory|EIT73534.1 atub|OJI89264.1 awen|OJJ31927.1 azon|OJJ50738.1

Group8676: abra|OJJ77451.1 acar|OOF99275.1 afla|EED54168.1 akaw|GAA84157.1 aluc|OJZ81078.1 aory|EIT75983.1 asyd|OJJ59171.1 atub|OJI82506.1 aver|OJJ01761.1 awen|OJJ37964.1

Group8677: abra|OJJ77491.1 acar|OOF99234.1 afla|EED53251.1 akaw|GAA84128.1 aluc|OJZ81045.1 anig|EHA19322.1 aory|EIT74841.1 atub|OJI82539.1 awen|OJJ37702.1 agla|OJJ88291.1

Group8678: afis|EAW17045.1 afla|EED53440.1 anid|CBF69405.1 asyd|OJJ62010.1 aver|OJJ06554.1 awen|OJJ29786.1 acar|OOF94503.1 aory|EIT75180.1 ater|EAU34058.1 aver|OJI96102.1

Group8679: anig|EHA19441.1 acla|EAW06483.1 afis|EAW15978.1 afum|EAL88610.1 akaw|GAA84002.1 anid|CBF85801.1 aory|EIT73421.1 asyd|OJJ64333.1 ater|EAU33673.1 aver|OJI98426.1

Group8680: abra|OJJ77735.1 agla|OJJ79109.1 akaw|GAA83897.1 aluc|OJZ90798.1 anig|EHA19530.1 atub|OJI82787.1 awen|OJJ36260.1 azon|OJJ51724.1 aver|OJJ08264.1 asyd|OJJ55393.1

Group8681: abra|OJJ77768.1 asyd|OJJ58669.1 abra|OJJ78086.1 acar|OOF99707.1 afla|EED47274.1 atub|OJI86197.1 aver|OJJ01280.1 awen|OJJ38935.1 agla|OJJ79396.1 anig|EHA27634.1

Group8682: abra|OJJ77784.1 acar|OOF98975.1 akaw|GAA83863.1 aluc|OJZ90837.1 anig|EHA19560.1 asyd|OJJ56882.1 atub|OJI82824.1 aory|EIT77282.1 afla|EED50218.1 awen|OJJ33550.1

Group8683: abra|OJJ77875.1 afla|EED45771.1 akaw|GAA83777.1 aluc|OJZ90950.1 aory|EIT75664.1 asyd|OJJ63559.1 atub|OJI82941.1 aver|OJI97373.1 awen|OJJ40359.1 agla|OJJ79938.1

Group8684: abra|OJJ77917.1 afla|EED51607.1 agla|OJJ82627.1 anid|CBF73913.1 anig|EHA18402.1 aory|EIT80700.1 asyd|OJJ53671.1 ater|EAU37636.1 aver|OJJ07778.1 awen|OJJ40189.1

Group8685: abra|OJJ77945.1 acar|OOF91772.1 akaw|GAA83718.1 aluc|OJZ91015.1 anid|CBF71854.1 anig|EHA19717.1 asyd|OJJ59801.1 atub|OJI83006.1 aver|OJJ02489.1 asyd|OJJ53758.1

Group8686: abra|OJJ77952.1 afla|EED55614.1 agla|OJJ89121.1 akaw|GAA83711.1 aluc|OJZ91023.1 anid|CBF90342.1 anig|EHA19723.1 aory|EIT81816.1 atub|OJI83015.1 awen|OJJ30075.1

Group8687: abra|OJJ78050.1 acar|OOF95285.1 akaw|GAA85941.1 aluc|OJZ91121.1 anid|CBF86028.1 anig|EHA19821.1 asyd|OJJ56423.1 atub|OJI83126.1 awen|OJJ40096.1 azon|OJJ42792.1

Group8688: abra|OJJ78052.1 acar|OOF93015.1 afla|EED56742.1 anid|CBF87750.1 anig|EHA19823.1 aory|EIT73934.1 asyd|OJJ64215.1 ater|EAU35699.1 awen|OJJ40180.1 anig|EHA23883.1

Group8689: abra|OJJ78064.1 acar|OOF98791.1 akaw|GAA85930.1 aluc|OJZ91135.1 anid|CBF79585.1 anig|EHA19833.1 asyd|OJJ57978.1 atub|OJI83145.1 aver|OJJ04422.1 azon|OJJ45148.1

Group8690: abra|OJJ78117.1 acar|OOF94026.1 afis|EAW20619.1 akaw|GAA85890.1 aluc|OJZ91182.1 anig|EHA19873.1 asyd|OJJ56225.1 atub|OJI83195.1 aver|OJJ05157.1 azon|OJJ42619.1

Group8691: abra|OJJ78125.1 acar|OOF90392.1 acla|EAW12156.1 afis|EAW17188.1 afum|EAL86614.1 akaw|GAA85883.1 aluc|OJZ91187.1 anig|EHA19883.1 atub|OJI83206.1 azon|OJJ50182.1

Group8692: abra|OJJ78127.1 acla|EAW07051.1 akaw|GAA85881.1 aluc|OJZ91189.1 anid|CBF74942.1 atub|OJI83208.1 azon|OJJ50040.1 akaw|GAA85880.1 azon|OJJ42019.1 azon|OJJ42018.1

Group8693: abra|OJJ78130.1 acar|OOF92539.1 afis|EAW20650.1 afla|EED50437.1 afum|EAL84423.1 akaw|GAA85877.1 aluc|OJZ91192.1 anig|EHA19888.1 aory|EIT82127.1 atub|OJI83211.1

Group8694: abra|OJJ78152.1 acar|OOF98714.1 afla|EED45419.1 akaw|GAA85874.1 aluc|OJZ91204.1 anig|EHA19909.1 aory|EIT82384.1 atub|OJI83221.1 aver|OJJ03359.1 anig|EHA25893.1

Group8695: abra|OJJ78164.1 acar|OOF92532.1 afla|EED56896.1 agla|OJJ82607.1 akaw|GAA85861.1 aluc|OJZ91218.1 anig|EHA19924.1 ater|EAU36290.1 atub|OJI83236.1 awen|OJJ39943.1

Group8696: aory|EIT72935.1 abra|OJJ78224.1 acla|EAW12025.1 agla|OJJ81172.1 akaw|GAA85801.1 aluc|OJZ91299.1 anig|EHA19981.1 asyd|OJJ53517.1 atub|OJI83289.1 aver|OJJ08234.1

Group8697: abra|OJJ78188.1 acar|OOF98671.1 afla|EED45661.1 akaw|GAA85841.1 aluc|OJZ91259.1 anig|EHA19947.1 aory|EIT75485.1 ater|EAU30768.1 atub|OJI83248.1 awen|OJJ37792.1

Group8698: abra|OJJ78262.1 acar|OOF93149.1 akaw|GAA85763.1 aluc|OJZ91337.1 atub|OJI83329.1 awen|OJJ29559.1 azon|OJJ51295.1 asyd|OJJ52299.1 agla|OJJ83668.1 awen|OJJ34751.1

Group8699: abra|OJJ78304.1 acar|OOF98562.1 afis|EAW22061.1 afum|EAL92952.2 agla|OJJ81051.1 akaw|GAA85717.1 asyd|OJJ61340.1 aver|OJJ00664.1 awen|OJJ34230.1 azon|OJJ43405.1

Group8700: asyd|OJJ61336.1 aver|OJJ00660.1 acla|EAW12155.1 afis|EAW17179.1 afla|EED47299.1 afum|EAL86609.1 anid|CBF76893.1 aory|EIT82830.1 awen|OJJ33780.1 azon|OJJ45040.1

Group8701: acar|OOF90205.1 afis|EAW19850.1 afum|EAL85043.1 agla|OJJ81560.1 anig|EHA26561.1 asyd|OJJ54751.1 aver|OJJ07416.1 awen|OJJ33517.1 aver|OJJ07191.1 azon|OJJ42417.1

Group8702: aver|OJJ02169.1 acar|OOF94543.1 akaw|GAA91797.1 aluc|OJZ92817.1 anig|EHA26191.1 atub|OJI87275.1 afla|EED51755.1 aory|EIT80500.1 agla|OJJ82987.1 asyd|OJJ58254.1

Group8703: acar|OOF90534.1 afla|EED57937.1 agla|OJJ84631.1 anid|CBF85124.1 aory|EIT82350.1 ater|EAU32033.1 aver|OJI97920.1 awen|OJJ31234.1 azon|OJJ46157.1 awen|OJJ33711.1

Group8704: acar|OOF90645.1 acla|EAW12240.1 afis|EAW16987.1 afum|EBA27277.1 agla|OJJ79129.1 awen|OJJ34463.1 azon|OJJ51753.1 afla|EED53772.1 aory|EIT78465.1 awen|OJJ35911.1

Group8705: anid|CBF80416.1 afla|EED46245.1 akaw|GAA85952.1 aluc|OJZ91110.1 aory|EIT76424.1 ater|EAU30959.1 atub|OJI83749.1 azon|OJJ42267.1 anig|EHA19807.1 atub|OJI83107.1

Group8706: acar|OOF90940.1 acla|EAW12081.1 afis|EAW19722.1 afum|EAL86804.2 akaw|GAA88819.1 aluc|OJZ82503.1 anig|EHA28267.1 atub|OJI87928.1 awen|OJJ34530.1 azon|OJJ45114.1

Group8707: acar|OOF91332.1 acla|EAW13402.1 afis|EAW20513.1 afla|EED52454.1 afum|EBA27191.1 akaw|GAA87183.1 anid|CBF79182.1 aory|EIT82743.1 ater|EAU37209.1 awen|OJJ33215.1

Group8708: acar|OOF91786.1 afis|EAW20741.1 akaw|GAA88131.1 aluc|OJZ81403.1 anig|EHA18696.1 aory|EIT79960.1 asyd|OJJ64560.1 atub|OJI91609.1 aver|OJI98657.1 asyd|OJJ61686.1

Group8709: acar|OOF92587.1 afla|EED45910.1 agla|OJJ88075.1 anid|CBF84632.1 aory|EIT75466.1 ater|EAU35265.1 aver|OJJ08374.1 awen|OJJ30001.1 azon|OJJ45970.1 asyd|OJJ53370.1

Group8710: acar|OOF92804.1 acla|EAW11648.1 afis|EAW23808.1 afla|EED52007.1 afum|EAL87242.1 anid|CBF79872.1 anig|EHA21270.1 aory|EIT81430.1 asyd|OJJ58167.1 ater|EAU31361.1

Group8711: acar|OOF93611.1 acla|EAW10001.1 ater|EAU37568.1 aver|OJJ06315.1 awen|OJJ32924.1 azon|OJJ46499.1 acar|OOF99541.1 afis|EAW20618.1 ater|EAU33869.1 aory|EIT77091.1

Group8712: acar|OOF93841.1 acla|EAW11884.1 afis|EAW19496.1 afla|EED56715.1 afum|EAL86998.1 agla|OJJ81662.1 akaw|GAA89695.1 anid|CBF75432.1 ater|EAU34808.1 awen|OJJ36913.1

Group8713: acar|OOF93874.1 afla|EED45884.1 aory|EIT75492.1 asyd|OJJ54701.1 aver|OJJ07472.1 acla|EAW12125.1 afis|EAW17223.1 afum|EAL86645.1 agla|OJJ81066.1 awen|OJJ35778.1

Group8714: acar|OOF93938.1 acla|EAW07102.1 afis|EAW22117.1 afla|EED45472.1 afum|EAL91069.1 aory|EIT75606.1 asyd|OJJ54719.1 aver|OJJ07449.1 awen|OJJ34553.1 azon|OJJ50399.1

Group8715: acar|OOF94234.1 acla|EAW09969.1 afis|EAW21119.1 afla|EED51792.1 afum|EAL92143.1 agla|OJJ80092.1 akaw|GAA88304.1 aory|EIT81684.1 aver|OJI99776.1 awen|OJJ36449.1

Group8716: awen|OJJ35852.1 agla|OJJ82563.1 akaw|GAA91338.1 aluc|OJZ84841.1 anig|EHA18765.1 ater|EAU37118.1 atub|OJI89257.1 azon|OJJ42300.1 aluc|OJZ83606.1 atub|OJI89979.1

Group8717: acar|OOF95373.1 agla|OJJ85923.1 akaw|GAA92957.1 asyd|OJJ57074.1 afis|EAW24593.1 anid|CBF80221.1 akaw|GAA93201.1 aluc|OJZ79704.1 aver|OJJ07710.1 anid|CBF81144.1

Group8718: acar|OOF95885.1 acla|EAW08488.1 afis|EAW23534.1 afla|EED57431.1 afum|EAL87932.1 agla|OJJ86783.1 akaw|GAA83538.1 anid|CBF89676.1 aory|EIT80079.1 ater|EAU35320.1

Group8719: acar|OOF96231.1 acla|EAW15073.1 afum|EAL85165.1 agla|OJJ88917.1 aluc|OJZ86254.1 anid|CBF84791.1 asyd|OJJ63229.1 atub|OJI84289.1 awen|OJJ31801.1 azon|OJJ46322.1

Group8720: acar|OOF96801.1 afis|EAW15657.1 afla|EED45409.1 afum|EAL85689.1 agla|OJJ81801.1 aory|EIT82452.1 asyd|OJJ54185.1 awen|OJJ33737.1 anid|CBF84452.1 asyd|OJJ64256.1

Group8721: acar|OOF96972.1 acla|EAW11148.1 afis|EAW15879.1 afla|EED56496.1 afum|EAL88513.1 akaw|GAA90093.1 aluc|OJZ84120.1 anid|CBF81232.1 aory|EIT72850.1 ater|EAU31700.1

Group8722: acar|OOF97384.1 afla|EED48121.1 akaw|GAA85866.1 aluc|OJZ91213.1 anid|CBF80007.1 anig|EHA19919.1 asyd|OJJ58252.1 atub|OJI83231.1 aver|OJJ02172.1 awen|OJJ31654.1

Group8723: afis|EAW20839.1 afum|EAL84794.2 acla|EAW11025.1 afla|EED51814.1 agla|OJJ80752.1 anid|CBF84523.1 asyd|OJJ62168.1 aver|OJI96280.1 awen|OJJ40169.1 ater|EAU31956.1

Group8724: acar|OOF98730.1 akaw|GAA87770.1 aluc|OJZ85405.1 anig|EHA25584.1 aory|EIT81183.1 asyd|OJJ65052.1 aver|OJI98891.1 awen|OJJ37890.1 afla|EED48912.1 aver|OJI99175.1

Group8725: acar|OOF98764.1 afis|EAW19773.1 afla|EED46883.1 afum|EAL85127.1 agla|OJJ83933.1 anig|EHA19874.1 aory|EIT72745.1 asyd|OJJ52082.1 ater|EAU29584.1 aver|OJJ03021.1

Group8726: acar|OOF99188.1 agla|OJJ86259.1 anid|CBF78881.1 asyd|OJJ64595.1 ater|EAU31457.1 atub|OJI80365.1 aver|OJI98692.1 awen|OJJ30207.1 azon|OJJ50373.1 aver|OJJ05528.1

Group8727: acar|OOF99223.1 acla|EAW06731.1 akaw|GAA84117.1 aluc|OJZ81033.1 anid|CBF86874.1 asyd|OJJ64628.1 atub|OJI82550.1 aver|OJI98726.1 awen|OJJ37676.1 azon|OJJ44941.1

Group8728: acar|OOF99348.1 afla|EED53111.1 agla|OJJ88749.1 aory|EIT74779.1 awen|OJJ36022.1 afla|EED49457.1 aory|EIT79530.1 ater|EAU31594.1 asyd|OJJ55202.1 aver|OJJ07014.1

Group8729: acar|OOF99513.1 afis|EAW23668.1 afla|EED50426.1 afum|EAL87113.1 anid|CBF75936.1 aory|EIT82003.1 awen|OJJ39942.1 azon|OJJ42345.1 afla|EED54472.1 aory|EIT81132.1

Group8730: acar|OOG01148.1 acla|EAW07881.1 afis|EAW22916.1 afla|EED54912.1 afum|EAL90281.1 akaw|GAA87513.1 anid|CBF87692.1 aory|EIT80372.1 atub|OJI90616.1 awen|OJJ38648.1

Group8731: acla|EAW06293.1 afis|EAW18399.1 afum|EAL93076.2 ater|EAU29815.1 awen|OJJ31751.1 agla|OJJ84970.1 azon|OJJ50473.1 anid|CBF70753.1 asyd|OJJ58437.1 aver|OJJ01037.1

Group8732: acla|EAW06854.1 afis|EAW16471.1 afla|EED49701.1 afum|EAL89065.1 anid|CBF89396.1 aory|EIT77699.1 asyd|OJJ62460.1 ater|EAU34009.1 aver|OJI96595.1 awen|OJJ34632.1

Group8733: acla|EAW06986.1 afis|EAW16600.1 afla|EED45019.1 afum|EAL89196.1 agla|OJJ82652.1 asyd|OJJ59689.1 aver|OJJ02598.1 awen|OJJ40208.1 azon|OJJ49074.1 anid|CBF81907.1

Group8734: acla|EAW07380.1 afis|EAW22405.1 afla|EED56069.1 agla|OJJ87668.1 aluc|OJZ89800.1 anid|CBF88787.1 asyd|OJJ62902.1 aver|OJI96956.1 awen|OJJ34984.1 azon|OJJ42756.1

Group8735: acla|EAW07974.1 afis|EAW23009.1 afla|EED55006.1 afum|EAL88471.1 agla|OJJ89471.1 akaw|GAA85616.1 anid|CBF80881.1 aory|EIT80305.1 ater|EAU29664.1 azon|OJJ44195.1

Group8736: acla|EAW08445.1 afis|EAW23490.1 afla|EED57387.1 afum|EAL87973.2 agla|OJJ86733.1 akaw|GAA83495.1 anid|CBF89753.1 aory|EIT80140.1 ater|EAU35275.1 azon|OJJ47935.1

Group8737: acla|EAW08887.1 afis|EAW15502.1 afla|EED49015.1 afum|EAL85822.1 aory|EIT82541.1 asyd|OJJ56009.1 ater|EAU32616.1 aver|OJJ04954.1 awen|OJJ38162.1 azon|OJJ43123.1

Group8738: acla|EAW08972.1 afis|EAW15451.1 afla|EED54387.1 afum|EAL84195.2 agla|OJJ87010.1 anid|CBF86652.1 aory|EIT75869.1 asyd|OJJ64798.1 ater|EAU31837.1 aver|OJI98912.1

Group8739: acla|EAW09111.1 afis|EAW23756.1 afla|EED52087.1 afum|EAL87192.1 anid|CBF78719.1 aory|EIT76934.1 asyd|OJJ55648.1 ater|EAU29642.1 aver|OJJ06733.1 ater|EAU33187.1

Group8740: acla|EAW10097.1 afis|EAW25490.1 afum|EAL90155.1 akaw|GAA82560.1 anid|CBF77730.1 anig|EHA20363.1 asyd|OJJ53058.1 ater|EAU34661.1 aver|OJJ03786.1 awen|OJJ41231.1

Group8741: acla|EAW10292.1 afis|EAW25299.1 afla|EED53773.1 afum|EAL89962.2 agla|OJJ89279.1 anid|CBF75191.1 asyd|OJJ59939.1 ater|EAU34447.1 aver|OJJ02348.1 awen|OJJ41014.1

Group8742: acla|EAW10544.1 afis|EAW25012.1 afum|EAL89684.1 agla|OJJ89176.1 anid|CBF81521.1 asyd|OJJ59477.1 ater|EAU35774.1 aver|OJJ02796.1 awen|OJJ40628.1 azon|OJJ49055.1

Group8743: acla|EAW10900.1 afis|EAW20958.1 afla|EED50314.1 afum|EAL84675.1 agla|OJJ83919.1 akaw|GAA91126.1 anid|CBF82565.1 ater|EAU38609.1 aver|OJJ08691.1 azon|OJJ48094.1

Group8744: acla|EAW10967.1 afis|EAW20893.1 afla|EED45588.1 afum|EAL84740.1 anid|CBF82749.1 aory|EIT75638.1 asyd|OJJ61614.1 ater|EAU30832.1 aver|OJJ00937.1 awen|OJJ32625.1

Group8745: acla|EAW11075.1 afis|EAW20792.1 afla|EED47369.1 afum|EAL84834.1 aory|EIT82870.1 asyd|OJJ57140.1 aver|OJJ03165.1 anid|CBF84183.1 anid|CBF90380.1 ater|EAU31730.1

Group8746: acla|EAW11186.1 afis|EAW15917.1 afum|EAL88552.1 anid|CBF81313.1 aory|EIT72813.1 asyd|OJJ59356.1 ater|EAU36195.1 aver|OJJ02918.1 awen|OJJ36713.1 azon|OJJ47486.1

Group8747: acla|EAW12353.1 afis|EAW16778.1 afla|EED56192.1 afum|EAL86348.2 anid|CBF80569.1 aory|EIT73352.1 asyd|OJJ54685.1 ater|EAU30274.1 aver|OJJ07484.1 awen|OJJ29949.1

Group8748: acla|EAW12379.1 afis|EAW16827.1 afla|EED57472.1 afum|EAL86376.1 anid|CBF87493.1 aory|EIT80051.1 asyd|OJJ52965.1 ater|EAU31804.1 aver|OJJ08931.1 afis|EAW16725.1

Group8749: acla|EAW12914.1 afis|EAW17746.1 afla|EED45746.1 afum|EAL91558.1 aory|EIT75371.1 asyd|OJJ64817.1 ater|EAU31861.1 aver|OJJ98930.1 awen|OJJ37091.1 azon|OJJ50795.1

Group8750: acla|EAW12985.1 afis|EAW17679.1 afla|EED50471.1 afum|EAL91493.1 anid|CBF90013.1 aory|EIT82122.1 ater|EAU31967.1 aver|OJJ96178.1 awen|OJJ37160.1 azon|OJJ50857.1

Group8751: acla|EAW13483.1 afis|EAW20591.1 afla|EED52236.1 afum|EAL84470.1 anid|CBF86917.1 aory|EIT74432.1 asyd|OJJ55622.1 ater|EAU35230.1 aver|OJJ06697.1 awen|OJJ33310.1

Group8752: acla|EAW13598.1 afla|EED50431.1 anid|CBF84555.1 aory|EIT82020.1 asyd|OJJ53465.1 aver|OJJ08290.1 awen|OJJ30897.1 azon|OJJ43647.1 agla|OJJ84354.1 anid|CBF84554.1

Group8753: acla|EAW13736.1 afis|EAW19834.1 afla|EED52179.1 afum|EAL85058.1 anid|CBF80447.1 aory|EIT74473.1 asyd|OJJ54757.1 ater|EAU32197.1 aver|OJJ07413.1 azon|OJJ47556.1

Group8754: acla|EAW14245.1 afis|EAW19035.1 afla|EED57302.1 afum|EAL93764.2 agla|OJJ89326.1 aory|EIT78186.1 ater|EAU35143.1 awen|OJJ30855.1 aory|EIT74123.1 afla|EED52797.1

Group8755: acla|EAW14579.1 afis|EAW19313.1 afla|EED53657.1 afum|EAL94029.1 anid|CBF79587.1 aory|EIT75352.1 asyd|OJJ57979.1 ater|EAU32519.1 aver|OJJ04421.1 awen|OJJ40846.1

Group8756: acla|EAW14604.1 afis|EAW19333.1 afum|EAL94050.2 agla|OJJ79419.1 aory|EIT79822.1 asyd|OJJ59228.1 aver|OJJ01838.1 awen|OJJ32996.1 azon|OJJ48518.1 afla|EED47976.1

Group8757: acla|EAW14720.1 afis|EAW24256.1 afla|EED48020.1 afum|EAL85924.1 akaw|GAA88193.1 anid|CBF74193.1 aory|EIT82908.1 ater|EAU31197.1 awen|OJJ33044.1 azon|OJJ48475.1

Group8758: acla|EAW14970.1 afis|EAW24493.1 afla|EED54699.1 afum|EAL86162.1 agla|OJJ84580.1 anid|CBF73845.1 asyd|OJJ56554.1 ater|EAU29946.1 aver|OJJ06167.1 awen|OJJ32702.1

Group8759: acla|EAW15153.1 afis|EAW20121.1 afla|EED57255.1 afum|EAL85239.1 anid|CBF84941.1 aory|EIT74015.1 asyd|OJJ63151.1 ater|EAU38739.1 aver|OJJ97803.1 awen|OJJ31890.1

Group8760: acla|EAW15170.1 afis|EAW20139.1 afla|EED47779.1 afum|EAL85254.1 anid|CBF84971.1 aory|EIT77146.1 asyd|OJJ63134.1 aver|OJJ97820.1 awen|OJJ32008.1 azon|OJJ42033.1

Group8761: afis|EAW15432.1 afla|EED45624.1 agla|OJJ86266.1 aluc|OJJ83141.1 anig|EHA23289.1 aory|EIT75551.1 asyd|OJJ64000.1 ater|EAU31306.1 aver|OJJ98089.1 awen|OJJ32640.1

Group8762: afis|EAW16966.1 agla|OJJ83931.1 anid|CBF85598.1 aory|EIT72785.1 asyd|OJJ65318.1 atub|OJJ87260.1 aver|OJJ99463.1 awen|OJJ36296.1 afum|EAL91082.1 anid|CBF80298.1

Group8763: afis|EAW17042.1 afla|EED44725.1 asyd|OJJ54278.1 aver|OJJ99266.1 awen|OJJ40175.1 azon|OJJ42360.1 akaw|GAA92656.1 anid|CBF69573.1 anig|EHA19539.1 aluc|OJJ81155.1

Group8764: afis|EAW18182.1 afum|EAL87544.1 anid|CBF85725.1 asyd|OJJ64278.1 aver|OJJ98370.1 awen|OJJ30530.1 aory|EIT82861.1 asyd|OJJ52193.1 afla|EED47321.1 aver|OJJ05953.1

Group8765: afis|EAW18188.1 afla|EED55528.1 afum|EAL87551.1 anid|CBF86098.1 aory|EIT80825.1 asyd|OJJ64478.1 ater|EAU33806.1 aver|OJJ98580.1 awen|OJJ30551.1 azon|OJJ45514.1

Group8766: afis|EAW21085.1 afla|EED44924.1 afum|EAL92107.2 akaw|GAA91677.1 aluc|OJJ87717.1 anig|EHA20211.1 aory|EIT73525.1 asyd|OJJ61439.1 atub|OJJ80925.1 aver|OJJ00773.1

Group8767: afis|EAW25641.1 afla|EED51109.1 afum|EAL84328.2 akaw|GAA92605.1 aluc|OJJ82624.1 aory|EIT81346.1 asyd|OJJ54684.1 ater|EAU31799.1 atub|OJJ88858.1 aver|OJJ07485.1

Group8768: afla|EED48329.1 agla|OJJ78800.1 akaw|GAA83720.1 aluc|OJJ91013.1 anig|EHA19715.1 asyd|OJJ55448.1 ater|EAU32774.1 atub|OJJ83004.1 aver|OJJ06521.1 awen|OJJ33538.1

Group8769: afla|EED51054.1 agla|OJJ85437.1 anid|CBF84153.1 aory|EIT76946.1 asyd|OJJ58763.1 ater|EAU38829.1 aver|OJJ01373.1 awen|OJJ37828.1 asyd|OJJ61432.1 aver|OJJ00767.1

Group8770: afla|EED57392.1 agla|OJJ86738.1 aory|EIT80083.1 asyd|OJJ62243.1 ater|EAU35281.1 aver|OJJ96353.1 azon|OJJ47940.1 anid|CBF81868.1 ater|EAU32329.1 azon|OJJ45101.1

Group8771: abra|OJJ65451.1 abra|OJJ65502.1 abra|OJJ65814.1 awen|OJJ29571.1 awen|OJJ29595.1 awen|OJJ29635.1 awen|OJJ29618.1 akaw|GAA93238.1 ater|EAU30120.1

Group8772: abra|OJJ65548.1 abra|OJJ65554.1 afis|EAW24053.1 afum|EAL91907.2 akaw|GAA93142.1 asyd|OJJ56982.1 aver|OJJ03305.1 anid|CBF82344.1 akaw|GAA93186.1

Group8773: abra|OJJ65560.1 abra|OJJ65734.1 akaw|GAA93244.1 akaw|GAA93292.1 awen|OJJ29572.1 awen|OJJ29636.1 awen|OJJ29617.1 awen|OJJ29594.1 ater|EAU30121.1

Group8774: abra|OJJ65830.1 abra|OJJ68080.1 anig|EHA21142.1 anig|EHA21847.1 aluc|OJZ79866.1 aory|EIT74448.1 afla|EED52212.1 akaw|GAA93352.1 ater|EAU37381.1

Group8775: abra|OJJ67069.1 abra|OJJ72180.1 abra|OJJ72620.1 anig|EHA18937.1 anig|EHA26082.1 agla|OJJ82519.1 akaw|GAA92012.1 aluc|OJZ92877.1 atub|OJI87337.1

Group8776: acar|OOF90251.1 acar|OOF94223.1 abra|OJJ67549.1 afla|EED45499.1 akaw|GAA88111.1 aluc|OJZ81381.1 anig|EHA18676.1 atub|OJI91587.1 azon|OJJ45315.1

Group8777: acar|OOF90262.1 acar|OOF90263.1 abra|OJJ68046.1 acar|OOF98217.1 aluc|OJZ83950.1 anig|EHA19079.1 abra|OJJ78103.1 anig|EHA19861.1 awen|OJJ29577.1

Group8778: acar|OOF90382.1 acar|OOF90384.1 abra|OJJ66512.1 akaw|GAA91199.1 aluc|OJZ81534.1 anig|EHA25902.1 ater|EAU37133.1 atub|OJI88653.1 awen|OJJ31634.1

Group8779: acar|OOF93360.1 acar|OOF97612.1 agla|OJJ79302.1 agla|OJJ83534.1 atub|OJI80136.1 atub|OJI85146.1 abra|OJJ70356.1 aluc|OJZ80196.1 awen|OJJ35533.1

Group8780: acar|OOF94039.1 acar|OOF94109.1 abra|OJJ66412.1 akaw|GAA90278.1 aluc|OJZ83063.1 anig|EHA28128.1 atub|OJI87882.1 aver|OJJ07280.1 azon|OJJ43651.1

Group8781: acar|OOF94053.1 acar|OOF94123.1 azon|OJJ43612.1 azon|OJJ49265.1 abra|OJJ66391.1 akaw|GAA90257.1 aluc|OJZ83083.1 anig|EHA28146.1 atub|OJI87862.1

Group8782: acar|OOF94077.1 acar|OOF94147.1 afis|EAW16983.1 afum|EAL86510.1 anid|CBF88830.1 asyd|OJJ62881.1 aver|OJI96933.1 afla|EED48302.1 aory|EIT76296.1

Group8783: acar|OOF95051.1 acar|OOF95118.1 abra|OJJ68393.1 afla|EED46846.1 afum|EAL92231.1 anig|EHA20970.1 aory|EIT72743.1 aver|OJJ04487.1 awen|OJJ34413.1

Group8784: acar|OOF95348.1 acar|OOG00095.1 abra|OJJ70253.1 afla|EED44863.1 akaw|GAA86538.1 aluc|OJZ85086.1 anig|EHA25302.1 aory|EIT82718.1 atub|OJI80513.1

Group8785: acar|OOF99307.1 acar|OOF99312.1 akaw|GAA92346.1 akaw|GAA93056.1 abra|OJJ71069.1 acla|EAW13473.1 anid|CBF73463.1 azon|OJJ44546.1 abra|OJJ72523.1

Group8786: acar|OOG00247.1 acar|OOG00265.1 abra|OJJ67541.1 akaw|GAA88118.1 aluc|OJZ81391.1 anig|EHA18684.1 asyd|OJJ64470.1 atub|OJI91596.1 aver|OJI98574.1

Group8787: acla|EAW12164.1 acla|EAW14981.1 abra|OJJ67663.1 akaw|GAA89178.1 aluc|OJZ81655.1 anig|EHA25790.1 asyd|OJJ59826.1 atub|OJI88528.1 aver|OJJ02461.1

Group8788: afis|EAW23659.1 afis|EAW25762.1 asyd|OJJ52423.1 asyd|OJJ60340.1 aver|OJI99683.1 afum|EAL89841.1 anid|CBF89329.1 afis|EAW25168.1 aory|EIT74325.1

Group8789: afla|EED50425.1 afla|EED54473.1 aory|EIT81160.1 aory|EIT82025.1 azon|OJJ42343.1 acar|OOF99515.1 afis|EAW23667.1 afum|EAL87112.1 anid|CBF75938.1

Group8790: afum|EAL90934.1 afum|EAL91122.1 afis|EAW20714.1 afla|EED52356.1 agla|OJJ78986.1 akaw|GAA87891.1 anig|EHA21853.1 asyd|OJJ52038.1 azon|OJJ42064.1

Group8791: afum|EAL90946.1 afum|EAL91115.2 agla|OJJ79315.1 agla|OJJ83717.1 asyd|OJJ62706.1 asyd|OJJ62717.1 afis|EAW15512.1 aluc|OJZ80028.1 anig|EHA20894.1

Group8792: agla|OJJ79258.1 agla|OJJ83426.1 agla|OJJ81210.1 anid|CBF83975.1 anid|CBF83977.1 abra|OJJ69175.1 aluc|OJZ86162.1 anig|EHA24462.1 atub|OJI79954.1

Group8793: agla|OJJ79506.1 agla|OJJ85828.1 agla|OJJ83718.1 awen|OJJ36133.1 abra|OJJ72502.1 akaw|GAA92424.1 aluc|OJZ81598.1 anig|EHA25843.1 atub|OJI88584.1

Group8794: akaw|GAA83148.1 akaw|GAA92140.1 atub|OJI79312.1 atub|OJI91286.1 aluc|OJZ88705.1 anid|CBF87325.1 asyd|OJJ59111.1 aver|OJJ01703.1 anig|EHA18389.1

Group8795: akaw|GAA83292.1 akaw|GAA85869.1 aluc|OJZ83794.1 aluc|OJZ91210.1 atub|OJI83228.1 atub|OJI90164.1 abra|OJJ67070.1 acar|OOF96438.1 anig|EHA18936.1

Group8796: aluc|OJZ79493.1 aluc|OJZ80465.1 aluc|OJZ79841.1 aluc|OJZ79687.1 aluc|OJZ80286.1 aluc|OJZ79880.1 agla|OJJ78477.1 asyd|OJJ52216.1 aver|OJJ07337.1

Group8797: aluc|OJZ79785.1 aluc|OJZ80377.1 aluc|OJZ80035.1 aluc|OJZ80422.1 aluc|OJZ79853.1 aluc|OJZ79976.1 asyd|OJJ51957.1 asyd|OJJ52282.1 asyd|OJJ52136.1

Group8798: aluc|OJZ80106.1 aluc|OJZ86035.1 abra|OJJ67578.1 afla|EED56236.1 akaw|GAA90577.1  
anig|EHA24580.1 aory|EIT73434.1 atub|OJI79822.1 aver|OJI98015.1

Group8799: aluc|OJZ80144.1 aluc|OJZ89697.1 afis|EAW25568.1 acar|OOF90908.1 agla|OJJ87888.1  
anig|EHA26933.1 asyd|OJJ55925.1 atub|OJI85106.1 awen|OJJ41481.1

Group8800: aluc|OJZ80441.1 aluc|OJZ90711.1 abra|OJJ72739.1 acar|OOG00406.1 agla|OJJ85079.1  
akaw|GAA85349.1 anig|EHA24131.1 atub|OJI82138.1 awen|OJJ33532.1

Group8801: anid|CBF74938.1 anid|CBF79108.1 asyd|OJJ53785.1 asyd|OJJ57623.1 aver|OJI99283.1  
aver|OJJ05563.1 afis|EAW19548.1 afum|EAL86961.1 azon|OJJ46016.1

Group8802: anid|CBF76143.1 anid|CBF80990.1 agla|OJJ84359.1 akaw|GAA81951.1 aluc|OJZ92237.1  
anig|EHA26717.1 asyd|OJJ54883.1 atub|OJI86671.1 awen|OJJ32017.1

Group8803: anig|EHA21625.1 anig|EHA27497.1 abra|OJJ70050.1 akaw|GAA85317.1 aluc|OJZ90678.1  
azon|OJJ42543.1 anid|CBF88936.1 asyd|OJJ62856.1 aver|OJI96908.1

Group8804: aory|EIT82280.1 aory|EIT83563.1 abra|OJJ65852.1 acar|OOF95013.1 afla|EED57052.1  
akaw|GAA92292.1 aluc|OJZ90189.1 anig|EHA23688.1 atub|OJI81616.1

Group8805: asyd|OJJ52061.1 asyd|OJJ57195.1 acla|EAW14822.1 afla|EED48428.1 afum|EAL90942.1  
aory|EIT81675.1 ater|EAU37469.1 aver|OJJ03096.1 awen|OJJ32279.1

Group8806: asyd|OJJ52779.1 asyd|OJJ53480.1 asyd|OJJ54408.1 afis|EAW19800.1 afum|EAL85090.1  
ater|EAU33009.1 aver|OJJ08758.1 awen|OJJ33979.1 azon|OJJ48572.1

Group8807: asyd|OJJ54218.1 asyd|OJJ57155.1 asyd|OJJ62487.1 aver|OJJ03157.1 aver|OJJ05170.1  
ater|EAU33942.1 afla|EED57475.1 aory|EIT80078.1 awen|OJJ40016.1

Group8808: asyd|OJJ54422.1 asyd|OJJ55849.1 aver|OJI96304.1 aver|OJJ04792.1 ater|EAU32489.1  
afla|EED46861.1 anid|CBF76241.1 aory|EIT72566.1 awen|OJJ36354.1

Group8809: asyd|OJJ54727.1 asyd|OJJ58679.1 asyd|OJJ55034.1 abra|OJJ66493.1 afla|EED44961.1  
aver|OJJ05224.1 afis|EAW24634.1 ater|EAU35914.1 ater|EAU32225.1

Group8810: asyd|OJJ54886.1 asyd|OJJ54987.1 asyd|OJJ55459.1 aver|OJJ05933.1 aver|OJJ07214.1  
afla|EED50434.1 anid|CBF71415.1 aory|EIT82120.1 ater|EAU32832.1

Group8811: asyd|OJJ55385.1 asyd|OJJ60334.1 asyd|OJJ59628.1 agla|OJJ79113.1 afis|EAW17031.1  
aluc|OJZ79600.1 aver|OJI99679.1 awen|OJJ36175.1 aver|OJJ08272.1

Group8812: asyd|OJJ59241.1 asyd|OJJ60243.1 acla|EAW07120.1 afla|EED45694.1 agla|OJJ85747.1  
aory|EIT75416.1 azon|OJJ44490.1 aver|OJJ04022.1 azon|OJJ45725.1

Group8813: ater|EAU30364.1 ater|EAU31308.1 awen|OJJ32840.1 awen|OJJ36219.1 agla|OJJ89215.1  
anid|CBF79787.1 aory|EIT80645.1 asyd|OJJ58108.1 aver|OJJ04296.1

Group8814: ater|EAU31139.1 ater|EAU36855.1 afis|EAW16718.1 afis|EAW20349.1 afis|EAW22038.1  
akaw|GAA87762.1 anid|CBF74296.1 atub|OJI80175.1 anig|EHA24807.1

Group8815: ater|EAU38677.1 ater|EAU39213.1 afis|EAW25163.1 afum|EAL89837.1 anid|CBF85826.1  
asyd|OJJ64346.1 aver|OJI98444.1 awen|OJJ33748.1 afla|EED53476.1

Group8816: aver|OJI99583.1 aver|OJI99593.1 abra|OJJ69735.1 acar|OOF94186.1 akaw|GAA90188.1  
aluc|OJZ83161.1 anig|EHA28225.1 atub|OJI87776.1 ater|EAU34770.1

Group8817: aver|OJJ01780.1 aver|OJJ01786.1 acla|EAW07213.1 afis|EAW22226.1 afla|EED49534.1  
afum|EAL90968.1 aory|EIT82651.1 afis|EAW16699.1 afum|EAL89296.1

Group8818: awen|OJJ29775.1 awen|OJJ31332.1 afis|EAW23426.1 akaw|GAA92715.1 aluc|OJZ88761.1  
anig|EHA18457.1 ater|EAU36827.1 atub|OJI91331.1 azon|OJJ48299.1

Group8819: awen|OJJ30862.1 awen|OJJ38682.1 afla|EED51835.1 akaw|GAA87144.1 aluc|OJZ84293.1  
aory|EIT81768.1 atub|OJI89776.1 aver|OJI95767.1 aver|OJI95765.1

Group8820: awen|OJJ33516.1 awen|OJJ39640.1 awen|OJJ39595.1 abra|OJJ72040.1 acar|OOF99380.1  
afis|EAW16612.1 akaw|GAA84894.1 aluc|OJZ86777.1 atub|OJI83743.1

Group8821: awen|OJJ34552.1 awen|OJJ36961.1 acla|EAW11716.1 afis|EAW23735.1 afla|EED51561.1  
afum|EAL87173.1 aory|EIT80459.1 afla|EED51560.1 aory|EIT80688.1

Group8822: azon|OJJ42004.1 azon|OJJ45156.1 abra|OJJ77523.1 acar|OOF99201.1 acla|EAW06693.1  
afis|EAW16922.1 akaw|GAA84097.1 aluc|OJZ81013.1 anig|EHA19348.1



Group8823: azon|OJJ45307.1 azon|OJJ49529.1 acla|EAW07939.1 afis|EAW22977.1 afum|EAL90220.2 anid|CBF82133.1 asyd|OJJ54313.1 ater|EAU32988.1 aver|OJJ05267.1

Group8824: azon|OJJ47349.1 azon|OJJ50598.1 acla|EAW14194.1 afis|EAW18909.1 afum|EAL93641.1 anid|CBF69701.1 asyd|OJJ59049.1 aver|OJJ01645.1 awen|OJJ32465.1

Group8825: azon|OJJ48993.1 azon|OJJ50417.1 azon|OJJ50113.1 abra|OJJ66237.1 acar|OOF90699.1 akaw|GAA89052.1 aluc|OJZ80542.1 anig|EHA25653.1 atub|OJI88389.1

Group8826: agla|OJJ78461.1 agla|OJJ81492.1 agla|OJJ83286.1 agla|OJJ83546.1 agla|OJJ89323.1 agla|OJJ88335.1 agla|OJJ86194.1 agla|OJJ83142.1 agla|OJJ89324.1

Group8827: abra|OJJ65540.1 afla|EED54088.1 akaw|GAA92411.1 anig|EHA21122.1 aory|EIT75899.1 asyd|OJJ58564.1 aver|OJJ01164.1 azon|OJJ42799.1 acar|OOG00222.1

Group8828: abra|OJJ65636.1 afla|EED55263.1 agla|OJJ79070.1 anid|CBF82224.1 aory|EIT83528.1 asyd|OJJ55372.1 ater|EAU35405.1 aver|OJJ06451.1 awen|OJJ35999.1

Group8829: abra|OJJ65637.1 agla|OJJ79069.1 aluc|OJZ91198.1 anid|CBF82226.1 asyd|OJJ55370.1 ater|EAU35406.1 aver|OJJ05826.1 awen|OJJ36000.1 asyd|OJJ57336.1

Group8830: abra|OJJ65651.1 ater|EAU36882.1 anid|CBF85860.1 afla|EED47059.1 agla|OJJ88059.1 aory|EIT72485.1 asyd|OJJ56267.1 aver|OJJ08500.1 awen|OJJ30710.1

Group8831: abra|OJJ65775.1 acar|OOF92087.1 afla|EED54748.1 akaw|GAA90887.1 aluc|OJZ82944.1 anig|EHA21362.1 aory|EIT78754.1 atub|OJI89176.1 azon|OJJ45774.1

Group8832: abra|OJJ65802.1 afum|EAL85708.1 akaw|GAA92132.1 aluc|OJZ83591.1 anig|EHA26724.1 atub|OJI89961.1 afla|EED45353.1 aory|EIT82378.1 afis|EAW15626.1

Group8833: abra|OJJ65803.1 afis|EAW15625.1 afla|EED45352.1 afum|EAL85709.1 akaw|GAA92133.1 aluc|OJZ83590.1 anig|EHA26725.1 aory|EIT82463.1 atub|OJI89960.1

Group8834: abra|OJJ65806.1 afis|EAW20221.1 afla|EED53057.1 afum|EAL85335.1 akaw|GAA92934.1 aluc|OJZ82527.1 anig|EHA22493.1 aory|EIT74775.1 awen|OJJ30065.1

Group8835: abra|OJJ65809.1 afla|EED47456.1 akaw|GAA89023.1 aluc|OJZ80581.1 anig|EHA18752.1 aory|EIT79972.1 atub|OJI88349.1 awen|OJJ37830.1 azon|OJJ50431.1

Group8836: abra|OJJ65868.1 afla|EED52735.1 akaw|GAA92278.1 aluc|OJZ90172.1 anid|CBF80608.1 anig|EHA23671.1 asyd|OJJ54707.1 atub|OJI81600.1 aver|OJJ07462.1

Group8837: abra|OJJ65871.1 acar|OOF99185.1 afla|EED50203.1 akaw|GAA92272.1 aluc|OJZ90166.1 anig|EHA23670.1 aory|EIT77365.1 atub|OJI81594.1 aory|EIT77269.1

Group8838: abra|OJJ65872.1 acla|EAW08931.1 anig|EHA20944.1 ater|EAU36342.1 atub|OJI84669.1 aluc|OJZ90127.1 awen|OJJ36342.1 afla|EED51542.1 akaw|GAA92672.1

Group8839: abra|OJJ65884.1 acar|OOF94539.1 afis|EAW20560.1 afla|EED54350.1 afum|EAL84501.1 anid|CBF84309.1 aory|EIT75919.1 ater|EAU37622.1 azon|OJJ50732.1

Group8840: abra|OJJ65885.1 agla|OJJ82870.1 akaw|GAA89040.1 aluc|OJZ80555.1 anig|EHA25642.1 asyd|OJJ55009.1 atub|OJI88376.1 aver|OJI99608.1 awen|OJJ36097.1

Group8841: abra|OJJ65899.1 agla|OJJ85281.1 akaw|GAA86005.1 aluc|OJZ90231.1 anig|EHA23732.1 aory|EIT81180.1 atub|OJI81661.1 awen|OJJ41745.1 azon|OJJ45155.1

Group8842: abra|OJJ65901.1 akaw|GAA92329.1 aluc|OJZ90227.1 anig|EHA23728.1 atub|OJI81660.1 aver|OJJ05777.1 awen|OJJ38787.1 azon|OJJ50184.1 asyd|OJJ57381.1

Group8843: abra|OJJ65902.1 acar|OOF93266.1 afum|EAL84408.1 akaw|GAA92328.1 aluc|OJZ90226.1 anig|EHA23727.1 aory|EIT76803.1 atub|OJI81659.1 awen|OJJ30873.1

Group8844: abra|OJJ65934.1 acar|OOF95000.1 afla|EED48874.1 akaw|GAA92301.1 aluc|OJZ90198.1 anig|EHA23696.1 aory|EIT77788.1 atub|OJI81626.1 aver|OJJ05898.1

Group8845: agla|OJJ82750.1 acla|EAW11255.1 afla|EED56223.1 aory|EIT73393.1 asyd|OJJ63640.1 ater|EAU33741.1 aver|OJI97296.1 awen|OJJ39937.1 azon|OJJ44919.1

Group8846: awen|OJJ32624.1 acar|OOF92097.1 afla|EED47378.1 agla|OJJ88252.1 anig|EHA21374.1 aory|EIT82894.1 asyd|OJJ57558.1 ater|EAU36897.1 aver|OJJ05620.1

Group8847: abra|OJJ66022.1 afis|EAW17084.1 afla|EED56776.1 akaw|GAA83857.1 anid|CBF88194.1 aory|EIT73959.1 asyd|OJJ61423.1 atub|OJI82846.1 aver|OJJ05745.1

Group8848: abra|OJJ66023.1 afis|EAW17083.1 afla|EED56775.1 anid|CBF88196.1 aory|EIT73910.1 asyd|OJJ61422.1 atub|OJI82847.1 aver|OJJ05746.1 akaw|GAA83856.1

Group8849: abra|OJJ66028.1 acar|OOF90023.1 afla|EED46902.1 anig|EHA22566.1 aory|EIT72748.1 asyd|OJJ52492.1 atub|OJI87438.1 aver|OJJ02991.1 aver|OJJ03418.1

Group8850: abra|OJJ66085.1 acar|OOF99279.1 agla|OJJ84602.1 akaw|GAA84160.1 aluc|OJZ81083.1 asyd|OJJ62094.1 atub|OJI82501.1 aver|OJI96200.1 awen|OJJ33594.1

Group8851: abra|OJJ66087.1 acar|OOF99277.1 afla|EED51470.1 agla|OJJ84709.1 asyd|OJJ59181.1 atub|OJI82503.1 aver|OJJ01802.1 awen|OJJ37966.1 aory|EIT80465.1

Group8852: abra|OJJ66093.1 aluc|OJZ81265.1 anid|CBF78286.1 asyd|OJJ55817.1 atub|OJI91465.1 afla|EED50997.1 akaw|GAA88007.1 asyd|OJJ53628.1 aver|OJJ05945.1

Group8853: abra|OJJ66103.1 acar|OOF90360.1 acla|EAW15357.1 afis|EAW20355.1 afum|EAL85472.1 akaw|GAA92670.1 aluc|OJZ90125.1 anig|EHA20946.1 atub|OJI84671.1

Group8854: abra|OJJ66106.1 afla|EED56755.1 akaw|GAA92675.1 aluc|OJZ90130.1 anig|EHA20941.1 aory|EIT73895.1 asyd|OJJ57251.1 atub|OJI84666.1 aver|OJJ03043.1

Group8855: abra|OJJ66118.1 acar|OOF94010.1 afla|EED52122.1 akaw|GAA92680.1 aluc|OJZ90135.1 anig|EHA20931.1 aory|EIT74381.1 atub|OJI84661.1 aver|OJI96544.1

Group8856: abra|OJJ66127.1 afis|EAW24043.1 afla|EED54372.1 afum|EAL84419.1 akaw|GAA92686.1 aluc|OJZ90144.1 aory|EIT76043.1 ater|EAU31255.1 atub|OJI84655.1

Group8857: abra|OJJ66155.1 acar|OOF92445.1 afla|EED52224.1 awen|OJJ31085.1 akaw|GAA86454.1 aluc|OJZ84996.1 anig|EHA25209.1 atub|OJI80602.1 aory|EIT74340.1

Group8858: afis|EAW20704.1 aluc|OJZ79614.1 aory|EIT83020.1 afum|EAL89354.1 agla|OJJ84888.1 akaw|GAA92657.1 afla|EED52365.1 agla|OJJ88573.1 asyd|OJJ52005.1

Group8859: abra|OJJ66190.1 acar|OOF90355.1 afis|EAW25757.1 afla|EED45251.1 anig|EHA25699.1 aory|EIT73746.1 ater|EAU33160.1 atub|OJI88436.1 azon|OJJ51136.1

Group8860: abra|OJJ66220.1 acar|OOF90663.1 acla|EAW14125.1 afum|EAL93564.1 akaw|GAA89066.1 aluc|OJZ80526.1 anig|EHA25669.1 atub|OJI88404.1 afis|EAW18830.1

Group8861: abra|OJJ66229.1 acar|OOF90687.1 akaw|GAA89060.1 aluc|OJZ80534.1 anig|EHA25661.1 asyd|OJJ64303.1 atub|OJI88397.1 aver|OJI98396.1 awen|OJJ31376.1

Group8862: abra|OJJ66270.1 acla|EAW12150.1 afis|EAW19364.1 akaw|GAA84341.1 aluc|OJZ89041.1 atub|OJI85749.1 awen|OJJ31987.1 azon|OJJ45320.1 afum|EAL94083.1

Group8863: abra|OJJ66330.1 afla|EED47462.1 akaw|GAA90207.1 aluc|OJZ83138.1 anid|CBF74204.1 anig|EHA28197.1 aory|EIT79966.1 atub|OJI87796.1 awen|OJJ31027.1

Group8864: abra|OJJ66340.1 acar|OOF98712.1 afla|EED54087.1 akaw|GAA90214.1 aluc|OJZ83124.1 anig|EHA28189.1 atub|OJI87808.1 agla|OJJ87383.1 aluc|OJZ83129.1

Group8865: awen|OJJ36570.1 acla|EAW09871.1 afis|EAW21255.1 afla|EED53205.1 afum|EAL92270.1 anid|CBF87366.1 aory|EIT75204.1 asyd|OJJ52837.1 aver|OJJ08810.1

Group8866: abra|OJJ66419.1 acla|EAW08780.1 afis|EAW15621.1 afum|EAL85713.2 akaw|GAA90285.1 aluc|OJZ83055.1 anig|EHA28121.1 atub|OJI87892.1 azon|OJJ51150.1

Group8867: abra|OJJ66431.1 acar|OOF93322.1 akaw|GAA90298.1 aluc|OJZ83039.1 atub|OJI87910.1 asyd|OJJ53812.1 aver|OJJ07913.1 acar|OOF93086.1 agla|OJJ84363.1

Group8868: abra|OJJ66440.1 acar|OOF91486.1 afla|EED47532.1 agla|OJJ85807.1 aory|EIT74584.1 asyd|OJJ59093.1 ater|EAU32970.1 aver|OJJ01683.1 awen|OJJ41964.1

Group8869: aver|OJJ08488.1 abra|OJJ66453.1 afis|EAW15393.1 afla|EED47384.1 agla|OJJ79142.1 anid|CBF76215.1 aory|EIT82853.1 asyd|OJJ56276.1 aver|OJJ05915.1

Group8870: abra|OJJ66464.1 afla|EED53775.1 aory|EIT78428.1 abra|OJJ75242.1 acar|OOF94551.1 akaw|GAA91785.1 aluc|OJZ92804.1 anig|EHA26205.1 atub|OJI87247.1

Group8871: abra|OJJ66541.1 afla|EED46585.1 agla|OJJ85289.1 akaw|GAA91166.1 aluc|OJZ81494.1 anig|EHA25936.1 aory|EIT77950.1 atub|OJI88687.1 awen|OJJ31276.1

Group8872: abra|OJJ66747.1 acar|OOF93831.1 afla|EED56702.1 akaw|GAA89683.1 aluc|OJZ80702.1 anig|EHA27314.1 aory|EIT73908.1 atub|OJI87561.1 azon|OJJ42916.1

Group8873: abra|OJJ66748.1 acla|EAW13730.1 akaw|GAA89684.1 aluc|OJZ80701.1 anig|EHA27315.1 atub|OJI87560.1 afla|EED56703.1 ater|EAU37677.1 awen|OJJ36900.1

Group8874: afla|EED51157.1 aory|EIT81303.1 abra|OJJ72182.1 azon|OJJ44533.1 akaw|GAA92010.1 aluc|OJZ92875.1 anig|EHA26084.1 atub|OJI87335.1 aver|OJI99513.1

Group8875: abra|OJJ66950.1 akaw|GAA89085.1 aluc|OJZ80506.1 anid|CBF85596.1 anig|EHA25687.1 asyd|OJJ61738.1 atub|OJI88424.1 aver|OJI95835.1 akaw|GAA89084.1

Group8876: abra|OJJ66979.1 acar|OOF93632.1 akaw|GAA92185.1 aluc|OJZ85595.1 anig|EHA24927.1 atub|OJI79391.1 awen|OJJ33815.1 afla|EED52199.1 aory|EIT74405.1

Group8877: abra|OJJ66985.1 acar|OOF93627.1 afla|EED53106.1 akaw|GAA92179.1 aluc|OJZ85589.1 anig|EHA24932.1 aory|EIT74805.1 atub|OJI79384.1 awen|OJJ33628.1

Group8878: abra|OJJ67043.1 acar|OOF91820.1 anig|EHA18600.1 abra|OJJ67565.1 akaw|GAA88100.1 aluc|OJZ81367.1 anig|EHA18666.1 atub|OJI91571.1 afla|EED51381.1

Group8879: abra|OJJ67089.1 acar|OOF97130.1 acla|EAW06853.1 agla|OJJ84328.1 abra|OJJ67529.1 akaw|GAA88133.1 aluc|OJZ81404.1 atub|OJI91611.1 aver|OJI99294.1

Group8880: abra|OJJ67111.1 acar|OOF98441.1 akaw|GAA91053.1 aluc|OJZ87864.1 anig|EHA20170.1 asyd|OJJ54576.1 atub|OJI80784.1 aver|OJJ07578.1 azon|OJJ45866.1

Group8881: abra|OJJ67143.1 acar|OOF98412.1 afis|EAW18022.1 afum|EAL91834.1 akaw|GAA91026.1 aluc|OJZ87829.1 anig|EHA20308.1 atub|OJI80812.1 awen|OJJ32548.1

Group8882: abra|OJJ67249.1 acla|EAW10029.1 afis|EAW20707.1 afum|EAL86558.1 agla|OJJ79456.1 akaw|GAA91668.1 aluc|OJZ87728.1 atub|OJI80912.1 awen|OJJ36438.1

Group8883: abra|OJJ67275.1 acar|OOF95205.1 afla|EED55153.1 agla|OJJ79074.1 akaw|GAA92071.1 aluc|OJZ81158.1 anid|CBF81933.1 aory|EIT81614.1 aver|OJJ01872.1

Group8884: abra|OJJ67305.1 acar|OOF92508.1 afla|EED45063.1 akaw|GAA86511.1 aluc|OJZ85056.1 anig|EHA25272.1 aory|EIT73803.1 ater|EAU36095.1 atub|OJI80544.1

Group8885: abra|OJJ67371.1 acar|OOF92440.1 akaw|GAA86451.1 aluc|OJZ84994.1 asyd|OJJ64318.1 ater|EAU32176.1 atub|OJI80606.1 aver|OJI98411.1 azon|OJJ50421.1

Group8886: abra|OJJ67373.1 acar|OOF92438.1 afla|EED46879.1 akaw|GAA86449.1 aluc|OJZ84992.1 anig|EHA25204.1 aory|EIT72545.1 atub|OJI80608.1 azon|OJJ42630.1

Group8887: abra|OJJ67389.1 acar|OOF92426.1 akaw|GAA86436.1 aluc|OJZ84979.1 anig|EHA25191.1 atub|OJI80623.1 aver|OJJ00924.1 afis|EAW15660.1 afis|EAW18259.1

Group8888: aory|EIT78684.1 asyd|OJJ58835.1 aver|OJJ01438.1 acar|OOF92411.1 awen|OJJ31017.1 azon|OJJ50530.1 acla|EAW06353.1 agla|OJJ85049.1 asyd|OJJ58837.1

Group8889: asyd|OJJ52824.1 aver|OJJ08800.1 abra|OJJ77425.1 afla|EED48705.1 akaw|GAA86622.1 aluc|OJZ85177.1 anid|CBF78741.1 aory|EIT73120.1 ater|EAU33969.1

Group8890: aluc|OJZ87017.1 afla|EED49711.1 agla|OJJ88115.1 akaw|GAA84672.1 anid|CBF84384.1 asyd|OJJ53588.1 atub|OJI83501.1 aver|OJJ08160.1 awen|OJJ29858.1

Group8891: agla|OJJ80602.1 awen|OJJ32426.1 acla|EAW14154.1 afis|EAW18867.1 afla|EED54191.1 afum|EAL93599.1 asyd|OJJ53475.1 ater|EAU38031.1 aver|OJJ08282.1

Group8892: abra|OJJ67639.1 afum|EAL86601.1 akaw|GAA89157.1 aluc|OJZ81677.1 anig|EHA25764.1 asyd|OJJ56417.1 ater|EAU35975.1 atub|OJI88504.1 awen|OJJ40907.1

Group8893: abra|OJJ67642.1 acar|OOG00328.1 acla|EAW11927.1 agla|OJJ80933.1 akaw|GAA89162.1 aluc|OJZ81672.1 anig|EHA25768.1 atub|OJI88509.1 ater|EAU32792.1

Group8894: abra|OJJ67655.1 acar|OOF91987.1 agla|OJJ86443.1 akaw|GAA89171.1 aluc|OJZ81662.1 anig|EHA25781.1 asyd|OJJ62557.1 atub|OJI88521.1 aver|OJI96682.1

Group8895: abra|OJJ67661.1 afla|EED45941.1 akaw|GAA89176.1 aluc|OJZ81657.1 anig|EHA25788.1 ater|EAU36101.1 atub|OJI88526.1 awen|OJJ40653.1 aory|EIT75369.1

Group8896: abra|OJJ67681.1 acla|EAW10034.1 afis|EAW19874.1 afum|EAL85025.1 aluc|OJZ81637.1 anig|EHA25807.1 ater|EAU30906.1 atub|OJI88543.1 akaw|GAA89194.1

Group8897: abra|OJJ67696.1 acar|OOF90176.1 afla|EED54114.1 akaw|GAA89206.1 aluc|OJZ81624.1 anig|EHA25819.1 aory|EIT76104.1 atub|OJI88556.1 awen|OJJ37736.1

Group8898: afla|EED56802.1 aluc|OJZ81576.1 azon|OJJ43211.1 aory|EIT73865.1 asyd|OJJ56359.1  
ater|EAU37206.1 atub|OJI88605.1 aver|OJJ06355.1 akaw|GAA92443.1

Group8899: abra|OJJ67719.1 acar|OOF92594.1 anig|EHA25832.1 atub|OJI88570.1 abra|OJJ70189.1  
akaw|GAA86586.1 anid|CBF81815.1 azon|OJJ43538.1 aver|OJI95867.1

Group8900: abra|OJJ67770.1 acla|EAW09030.1 akaw|GAA92456.1 aluc|OJZ81561.1 anig|EHA25872.1  
atub|OJI88623.1 acar|OOF98687.1 ater|EAU37843.1 afum|EAL84353.1

Group8901: abra|OJJ67773.1 agla|OJJ85341.1 akaw|GAA82754.1 aluc|OJZ87311.1 anid|CBF76237.1  
asyd|OJJ61546.1 atub|OJI81334.1 aver|OJJ00873.1 awen|OJJ32606.1

Group8902: abra|OJJ67814.1 afla|EED49432.1 agla|OJJ85427.1 akaw|GAA91086.1 aluc|OJZ87903.1  
aver|OJJ00270.1 awen|OJJ29686.1 agla|OJJ84211.1 asyd|OJJ60944.1

Group8903: anid|CBF78806.1 acla|EAW14611.1 afis|EAW19340.1 afla|EED47548.1 afum|EAL94059.1  
aory|EIT74531.1 asyd|OJJ65258.1 ater|EAU29442.1 aver|OJI99409.1

Group8904: abra|OJJ67878.1 akaw|GAA83771.1 aluc|OJZ90957.1 anig|EHA22245.1 asyd|OJJ55666.1  
ater|EAU37359.1 atub|OJI82947.1 afla|EED44755.1 aory|EIT77771.1

Group8905: abra|OJJ67992.1 acar|OOF92034.1 afla|EED45378.1 akaw|GAA90956.1 aluc|OJZ82866.1  
anig|EHA21296.1 aory|EIT82449.1 atub|OJI89091.1 awen|OJJ36168.1

Group8906: abra|OJJ68003.1 acar|OOF92045.1 akaw|GAA90947.1 aluc|OJZ82877.1 anig|EHA21303.1  
ater|EAU31764.1 atub|OJI89101.1 azon|OJJ48316.1 agla|OJJ78692.1

Group8907: abra|OJJ68049.1 acar|OOF98060.1 afla|EED53913.1 akaw|GAA90907.1 aluc|OJZ82919.1  
anig|EHA21343.1 ater|EAU33484.1 atub|OJI89145.1 azon|OJJ50310.1

Group8908: abra|OJJ68093.1 acar|OOF93895.1 akaw|GAA86877.1 aluc|OJZ90001.1 anid|CBF77160.1  
anig|EHA27376.1 asyd|OJJ64792.1 atub|OJI84807.1 aver|OJI98904.1

Group8909: abra|OJJ68098.1 acar|OOF93901.1 akaw|GAA86883.1 aluc|OJZ90006.1 anig|EHA27381.1  
ater|EAU31284.1 atub|OJI84801.1 awen|OJJ34742.1 azon|OJJ45817.1

Group8910: abra|OJJ68101.1 acar|OOF93904.1 agla|OJJ79459.1 aluc|OJZ90009.1 anid|CBF84395.1  
anig|EHA27384.1 atub|OJI84798.1 azon|OJJ43872.1 agla|OJJ82036.1

Group8911: abra|OJJ68102.1 acar|OOF93905.1 akaw|GAA86886.1 aluc|OJZ90010.1 anig|EHA27385.1  
atub|OJI84797.1 awen|OJJ36287.1 agla|OJJ82040.1 azon|OJJ43873.1

Group8912: abra|OJJ68127.1 afla|EED46561.1 agla|OJJ79758.1 akaw|GAA86908.1 aluc|OJZ90031.1  
anig|EHA27407.1 ater|EAU32450.1 atub|OJI84776.1 aory|EIT77840.1

Group8913: ater|EAU37042.1 afis|EAW17607.1 afum|EAL91420.1 agla|OJJ81354.1 anid|CBF90183.1  
anig|EHA18916.1 asyd|OJJ61985.1 aver|OJI96077.1 awen|OJJ37235.1

Group8914: afis|EAW19918.1 afum|EAL84990.1 ater|EAU32636.1 afla|EED46192.1 agla|OJJ82676.1  
akaw|GAA90167.1 aory|EIT76440.1 awen|OJJ36109.1 azon|OJJ50724.1

Group8915: abra|OJJ68232.1 afla|EED46472.1 agla|OJJ86621.1 aluc|OJZ85539.1 aory|EIT73944.1  
asyd|OJJ55531.1 aver|OJJ06606.1 aory|EIT72409.1 afla|EED56760.1

Group8916: abra|OJJ68261.1 ater|EAU38186.1 abra|OJJ71565.1 acla|EAW08364.1 afis|EAW20354.1  
akaw|GAA89359.1 aluc|OJZ86302.1 anig|EHA21570.1 atub|OJI84234.1

Group8917: abra|OJJ68300.1 acar|OOF89816.1 akaw|GAA83174.1 anid|CBF78847.1 anig|EHA18828.1  
asyd|OJJ56504.1 aver|OJJ06215.1 asyd|OJJ64567.1 aver|OJI98664.1

Group8918: abra|OJJ68308.1 acar|OOF94000.1 akaw|GAA83166.1 aluc|OJZ83665.1 anig|EHA18821.1  
asyd|OJJ57949.1 atub|OJI90036.1 azon|OJJ42302.1 azon|OJJ42657.1

Group8919: abra|OJJ68331.1 acar|OOF97608.1 acla|EAW11059.1 agla|OJJ82217.1 akaw|GAA92083.1  
aluc|OJZ83641.1 anig|EHA18794.1 atub|OJI90010.1 awen|OJJ30930.1

Group8920: abra|OJJ68349.1 acar|OOF94843.1 afla|EED45477.1 akaw|GAA92116.1 aluc|OJZ83609.1  
anid|CBF80535.1 anig|EHA18768.1 asyd|OJJ54655.1 atub|OJI89982.1

Group8921: abra|OJJ68436.1 afla|EED56857.1 akaw|GAA86935.1 aluc|OJZ90061.1 anig|EHA19937.1  
aory|EIT77557.1 asyd|OJJ55051.1 atub|OJI84746.1 aver|OJI99561.1

Group8922: abra|OJJ68443.1 afis|EAW20783.1 afla|EED47899.1 afum|EAL84839.2 akaw|GAA85957.1  
aluc|OJZ91104.1 atub|OJI83102.1 awen|OJJ29871.1 aluc|OJZ91105.1

Group8923: abra|OJJ68560.1 awen|OJJ41573.1 acla|EAW12805.1 afum|EAL91780.1 akaw|GAA91293.1 aluc|OJZ82776.1 anig|EHA21219.1 atub|OJI89008.1 azon|OJJ48286.1

Group8924: abra|OJJ68584.1 acla|EAW14987.1 atub|OJI91458.1 abra|OJJ76613.1 afla|EED48309.1 anig|EHA22622.1 aory|EIT76294.1 asyd|OJJ53394.1 aver|OJJ02224.1

Group8925: abra|OJJ68810.1 acar|OOF90613.1 afla|EED51121.1 akaw|GAA90444.1 aluc|OJZ85782.1 anid|CBF71803.1 anig|EHA24773.1 aory|EIT81320.1 atub|OJI79567.1

Group8926: abra|OJJ68812.1 akaw|GAA90442.1 aluc|OJZ85785.1 anid|CBF87323.1 ater|EAU30074.1 atub|OJI79569.1 awen|OJJ40584.1 akaw|GAA92139.1 atub|OJI79311.1

Group8927: abra|OJJ68824.1 akaw|GAA90428.1 aluc|OJZ85801.1 anid|CBF76151.1 anig|EHA24756.1 asyd|OJJ55694.1 ater|EAU37616.1 atub|OJI79586.1 aver|OJJ06779.1

Group8928: abra|OJJ68825.1 acar|OOF97565.1 acla|EAW12169.1 afis|EAW25751.1 anig|EHA24755.1 asyd|OJJ53428.1 ater|EAU36731.1 aver|OJJ03483.1 aver|OJJ08317.1

Group8929: abra|OJJ68874.1 acar|OOF89967.1 acla|EAW15246.1 akaw|GAA90381.1 aluc|OJZ85850.1 asyd|OJJ63053.1 awen|OJJ31218.1 azon|OJJ46139.1 aver|OJI97910.1

Group8930: abra|OJJ68880.1 agla|OJJ80106.1 akaw|GAA90376.1 aluc|OJZ85856.1 anig|EHA28094.1 asyd|OJJ54912.1 ater|EAU31014.1 atub|OJI79642.1 aver|OJJ07291.1

Group8931: abra|OJJ68901.1 acar|OOF90516.1 agla|OJJ85340.1 akaw|GAA90350.1 aluc|OJZ85882.1 anig|EHA24704.1 atub|OJI79668.1 azon|OJJ45042.1 afis|EAW17222.1

Group8932: abra|OJJ69018.1 acar|OOF94255.1 afla|EED45435.1 akaw|GAA90535.1 aluc|OJZ86004.1 anig|EHA24606.1 aory|EIT82428.1 atub|OJI79793.1 azon|OJJ49774.1

Group8933: abra|OJJ69041.1 acar|OOF90577.1 akaw|GAA90570.1 aluc|OJZ86026.1 asyd|OJJ59199.1 ater|EAU31579.1 atub|OJI79815.1 aver|OJI98873.1 asyd|OJJ64773.1

Group8934: abra|OJJ69050.1 acla|EAW09006.1 afis|EAW25586.1 anid|CBF80548.1 asyd|OJJ61364.1 ater|EAU37357.1 atub|OJI79827.1 aver|OJJ00691.1 asyd|OJJ54680.1

Group8935: abra|OJJ69334.1 acar|OOF94393.1 acla|EAW13648.1 akaw|GAA88204.1 aluc|OJZ82166.1 anig|EHA28566.1 atub|OJI88271.1 afum|EAL84835.1 afis|EAW15537.1

Group8936: afum|EBA27265.1 agla|OJJ83228.1 aory|EIT74428.1 ater|EAU30410.1 awen|OJJ32881.1 afum|EAL86734.1 aluc|OJZ79925.1 afum|EAL87784.1 anig|EHA21823.1

Group8937: abra|OJJ69445.1 akaw|GAA88373.1 aluc|OJZ82281.1 atub|OJI88158.1 azon|OJJ49268.1 acar|OOG00594.1 awen|OJJ33653.1 agla|OJJ84838.1 ater|EAU36550.1

Group8938: abra|OJJ69538.1 acla|EAW13735.1 afla|EED53088.1 agla|OJJ85439.1 akaw|GAA88386.1 aluc|OJZ82374.1 anig|EHA28390.1 atub|OJI88068.1 aory|EIT74780.1

Group8939: abra|OJJ69623.1 afis|EAW16749.1 akaw|GAA92928.1 aluc|OJZ82519.1 anid|CBF81981.1 asyd|OJJ56152.1 atub|OJI88773.1 aver|OJJ05091.1 azon|OJJ46546.1

Group8940: abra|OJJ69719.1 afla|EED55123.1 akaw|GAA90172.1 aluc|OJZ83178.1 anid|CBF84456.1 anig|EHA28252.1 aory|EIT81596.1 ater|EAU34461.1 atub|OJI87759.1

Group8941: abra|OJJ69723.1 acar|OOF94193.1 akaw|GAA90176.1 aluc|OJZ83174.1 anig|EHA28248.1 aory|EIT74486.1 atub|OJI87763.1 azon|OJJ42480.1 afla|EED52161.1

Group8942: abra|OJJ69742.1 acar|OOF98455.1 akaw|GAA90195.1 aluc|OJZ83153.1 anig|EHA28219.1 atub|OJI87784.1 azon|OJJ50964.1 agla|OJJ84791.1 aory|EIT82297.1

Group8943: acla|EAW09548.1 aver|OJJ01277.1 awen|OJJ35779.1 azon|OJJ49415.1 asyd|OJJ58667.1 acar|OOF99052.1 akaw|GAA83946.1 aluc|OJZ80827.1 anig|EHA19488.1

Group8944: abra|OJJ69754.1 acar|OOG00378.1 agla|OJJ78965.1 akaw|GAA90205.1 aluc|OJZ83140.1 anig|EHA21149.1 asyd|OJJ56043.1 atub|OJI87794.1 anig|EHA28207.1

Group8945: abra|OJJ69770.1 afis|EAW19884.1 afla|EED49540.1 afum|EAL85015.1 akaw|GAA87883.1 aluc|OJZ85528.1 anig|EHA25059.1 aory|EIT82582.1 atub|OJI80040.1

Group8946: abra|OJJ69783.1 afis|EAW20781.1 afla|EED47442.1 akaw|GAA87873.1 aluc|OJZ85514.1 anig|EHA25047.1 aory|EIT81907.1 ater|EAU36877.1 atub|OJI80052.1

Group8947: abra|OJJ69825.1 acar|OOF93350.1 afla|EED45808.1 akaw|GAA87835.1 aluc|OJZ85471.1 anig|EHA25012.1 aory|EIT75743.1 atub|OJI80092.1 abra|OJJ78054.1

Group8948: afis|EAW17801.1 afum|EAL91609.1 acla|EAW12875.1 afla|EED45793.1 aory|EIT75679.1  
ater|EAU31830.1 asyd|OJJ62341.1 awen|OJJ35263.1 azon|OJJ46433.1

Group8949: abra|OJJ69855.1 acar|OOF97521.1 akaw|GAA87801.1 aluc|OJZ85436.1 anig|EHA24982.1  
asyd|OJJ52920.1 atub|OJI80132.1 aver|OJJ08889.1 awen|OJJ38306.1

Group8950: abra|OJJ69875.1 acar|OOF93389.1 akaw|GAA87781.1 aluc|OJZ85416.1 anig|EHA25595.1  
asyd|OJJ52367.1 ater|EAU36015.1 atub|OJI80160.1 aver|OJJ01980.1

Group8951: abra|OJJ69878.1 acar|OOF93393.1 agla|OJJ86558.1 akaw|GAA87779.1 aluc|OJZ85414.1  
anig|EHA25593.1 asyd|OJJ61435.1 atub|OJI80163.1 aver|OJJ00769.1

Group8952: abra|OJJ70030.1 afis|EAW17108.1 aluc|OJZ80263.1 anig|EHA18715.1 asyd|OJJ54267.1  
ater|EAU29704.1 atub|OJI79319.1 aver|OJJ05219.1 awen|OJJ31369.1

Group8953: afis|EAW16686.1 afla|EED45678.1 afis|EAW19302.1 agla|OJJ87730.1 asyd|OJJ57614.1  
aver|OJJ05571.1 awen|OJJ32519.1 akaw|GAA85268.1 aluc|OJZ90626.1

Group8954: acar|OOF90922.1 abra|OJJ74950.1 agla|OJJ88326.1 akaw|GAA83472.1 aluc|OJZ92523.1  
anig|EHA26452.1 atub|OJI86957.1 awen|OJJ39641.1 acar|OOF95614.1

Group8955: abra|OJJ70097.1 afis|EAW23566.1 afla|EED56882.1 afum|EAL87902.1 anid|CBF71436.1  
aory|EIT77475.1 asyd|OJJ57197.1 aver|OJJ03094.1 acar|OOF95926.1

Group8956: abra|OJJ70152.1 afla|EED52836.1 anid|CBF90331.1 aory|EIT78651.1 asyd|OJJ60244.1  
aver|OJJ04017.1 awen|OJJ40936.1 asyd|OJJ61905.1 aver|OJI95998.1

Group8957: abra|OJJ70162.1 acar|OOF94978.1 akaw|GAA86609.1 aluc|OJZ85160.1 ater|EAU37188.1  
atub|OJI80436.1 awen|OJJ40818.1 azon|OJJ43906.1 awen|OJJ38140.1

Group8958: abra|OJJ70168.1 acar|OOF92520.1 akaw|GAA86616.1 aluc|OJZ85168.1 anid|CBF81950.1  
anig|EHA25365.1 ater|EAU31386.1 atub|OJI80445.1 awen|OJJ32777.1

Group8959: agla|OJJ83231.1 acla|EAW10881.1 afis|EAW20977.1 afla|EED57501.1 afum|EAL84656.1  
aory|EIT81862.1 asyd|OJJ52800.1 aver|OJJ08777.1 awen|OJJ34383.1

Group8960: afum|EAL93660.1 awen|OJJ31523.1 afis|EAW18929.1 ater|EAU38108.1 aver|OJJ07470.1  
afla|EED50922.1 agla|OJJ85258.1 aory|EIT79050.1 asyd|OJJ54703.1

Group8961: abra|OJJ70240.1 agla|OJJ79705.1 akaw|GAA89191.1 aluc|OJZ81640.1 anig|EHA25315.1  
asyd|OJJ54752.1 atub|OJI84631.1 awen|OJJ37884.1 awen|OJJ37480.1

Group8962: abra|OJJ70270.1 afis|EAW22229.1 anig|EHA22501.1 asyd|OJJ57193.1 ater|EAU37173.1  
atub|OJI88778.1 aver|OJJ04287.1 aver|OJJ03098.1 asyd|OJJ58118.1

Group8963: abra|OJJ70276.1 acar|OOF98674.1 akaw|GAA92873.1 aluc|OJZ82538.1 anig|EHA22506.1  
asyd|OJJ55018.1 atub|OJI88782.1 aver|OJJ07187.1 awen|OJJ32618.1

Group8964: abra|OJJ70288.1 acar|OOF91740.1 afla|EED48872.1 akaw|GAA92860.1 aluc|OJZ82553.1  
anig|EHA22516.1 aory|EIT81240.1 atub|OJI88794.1 awen|OJJ38798.1

Group8965: abra|OJJ70305.1 acar|OOF91758.1 acla|EAW15279.1 afla|EED56373.1 akaw|GAA93017.1  
aluc|OJZ82568.1 anig|EHA27506.1 aory|EIT73336.1 atub|OJI88812.1

Group8966: abra|OJJ70307.1 acar|OOF91762.1 akaw|GAA93015.1 aluc|OJZ82570.1 anid|CBF80497.1  
anig|EHA27504.1 ater|EAU30197.1 atub|OJI88814.1 awen|OJJ36273.1

Group8967: abra|OJJ70337.1 agla|OJJ81765.1 akaw|GAA92590.1 aluc|OJZ82607.1 atub|OJI88842.1  
anid|CBF73505.1 aver|OJJ04761.1 asyd|OJJ55813.1 azon|OJJ45029.1

Group8968: abra|OJJ70360.1 acar|OOF90575.1 acla|EAW11010.1 afis|EAW20624.1 agla|OJJ78535.1  
akaw|GAA87152.1 aluc|OJZ84283.1 anid|CBF71200.1 atub|OJI89798.1

Group8969: abra|OJJ70410.1 afis|EAW17944.1 afum|EAL91755.1 agla|OJJ80394.1 aluc|OJZ82674.1  
anig|EHA21040.1 asyd|OJJ57668.1 atub|OJI88909.1 awen|OJJ41817.1

Group8970: abra|OJJ70419.1 acar|OOF91850.1 akaw|GAA91938.1 aluc|OJZ82684.1 anig|EHA21052.1  
atub|OJI88916.1 aver|OJJ04011.1 azon|OJJ43523.1 azon|OJJ42214.1

Group8971: abra|OJJ70435.1 afla|EED49380.1 akaw|GAA90145.1 aluc|OJZ83202.1 anig|EHA21064.1  
atub|OJI87735.1 aver|OJI97289.1 awen|OJJ41820.1 asyd|OJJ63645.1

Group8972: abra|OJJ70605.1 acar|OOG01013.1 akaw|GAA89945.1 aluc|OJZ83951.1 aory|EIT74963.1  
atub|OJI90322.1 awen|OJJ40125.1 abra|OJJ73870.1 ater|EAU36764.1

Group8973: anid|CBF79805.1 asyd|OJJ58127.1 aver|OJJ04278.1 acla|EAW11700.1 afis|EAW23721.1  
afla|EED51507.1 afum|EAL87161.1 ater|EAU31289.1 agla|OJJ79866.1

Group8974: abra|OJJ70921.1 acar|OOF98202.1 afis|EAW21023.1 afum|EAL92062.1 akaw|GAA83019.1  
aluc|OJZ87605.1 anig|EHA20804.1 atub|OJI81043.1 ater|EAU31617.1

Group8975: abra|OJJ70949.1 acar|OOF98181.1 afla|EED47498.1 agla|OJJ79400.1 akaw|GAA82995.1  
aluc|OJZ87580.1 aory|EIT74595.1 atub|OJI81068.1 awen|OJJ35926.1

Group8976: abra|OJJ71055.1 agla|OJJ80677.1 awen|OJJ30197.1 abra|OJJ75795.1 acla|EAW09128.1  
anig|EHA23323.1 ater|EAU39612.1 atub|OJI85554.1 awen|OJJ29800.1

Group8977: abra|OJJ71067.1 acar|OOF98078.1 akaw|GAA82895.1 aluc|OJZ87464.1 anig|EHA20686.1  
atub|OJI81184.1 azon|OJJ50343.1 acla|EAW13536.1 afis|EAW16450.1

Group8978: abra|OJJ71072.1 acar|OOF98074.1 afla|EED52241.1 akaw|GAA82890.1 aluc|OJZ87459.1  
anig|EHA20681.1 aory|EIT74433.1 atub|OJI81189.1 awen|OJJ30451.1

Group8979: abra|OJJ71086.1 acar|OOF98051.1 afla|EED55098.1 akaw|GAA82875.1 aluc|OJZ87442.1  
anig|EHA20667.1 aory|EIT81606.1 atub|OJI81206.1 azon|OJJ42080.1

Group8980: abra|OJJ71171.1 afla|EED53726.1 afum|EBA27390.1 agla|OJJ89232.1 aluc|OJZ87370.1  
anid|CBF85364.1 asyd|OJJ64041.1 azon|OJJ44561.1 afis|EAW25261.1

Group8981: abra|OJJ71200.1 akaw|GAA82783.1 aluc|OJZ87342.1 anig|EHA20579.1 asyd|OJJ60978.1  
ater|EAU38955.1 atub|OJI81302.1 aver|OJI99490.1 afis|EAW16709.1

Group8982: abra|OJJ71209.1 acar|OOF97958.1 afla|EED54680.1 akaw|GAA82775.1 aluc|OJZ87334.1  
anig|EHA20570.1 asyd|OJJ65152.1 ater|EAU36929.1 atub|OJI81310.1

Group8983: abra|OJJ71218.1 akaw|GAA82766.1 aluc|OJZ87325.1 anid|CBF87231.1 anig|EHA20562.1  
asyd|OJJ60478.1 ater|EAU39529.1 atub|OJI81320.1 aver|OJI99798.1

Group8984: abra|OJJ71239.1 afis|EAW16931.1 afum|EAL90573.1 aluc|OJZ87306.1 awen|OJJ31868.1  
azon|OJJ44471.1 awen|OJJ31396.1 afis|EAW22622.1 azon|OJJ46440.1

Group8985: abra|OJJ71292.1 acar|OOF97879.1 akaw|GAA82697.1 aluc|OJZ87251.1 anig|EHA20496.1  
asyd|OJJ53542.1 ater|EAU38010.1 atub|OJI81391.1 aver|OJJ08211.1

Group8986: abra|OJJ71471.1 acla|EAW10079.1 afis|EAW25507.1 afla|EED54007.1 afum|EAL90173.2  
anid|CBF77770.1 anig|EHA20344.1 aory|EIT78341.1 atub|OJI81562.1

Group8987: abra|OJJ71620.1 acar|OOF96336.1 akaw|GAA89308.1 aluc|OJZ86361.1 anig|EHA21530.1  
asyd|OJJ52377.1 atub|OJI84173.1 aver|OJJ01970.1 azon|OJJ46014.1

Group8988: abra|OJJ71718.1 acar|OOF96424.1 afis|EAW18544.1 afum|EAL93244.1 akaw|GAA85172.1  
aluc|OJZ86464.1 anig|EHA21446.1 atub|OJI84065.1 awen|OJJ31102.1

Group8989: aluc|OJZ84831.1 acar|OOF90314.1 afis|EAW22621.1 afla|EED47487.1 afum|EAL90575.1  
anig|EHA25740.1 ater|EAU34167.1 asyd|OJJ54194.1 aver|OJJ08532.1

Group8990: abra|OJJ71733.1 afla|EED57064.1 afum|EAL85781.1 aory|EIT78315.1 atub|OJI90938.1  
awen|OJJ29930.1 afla|EED53954.1 akaw|GAA88454.1 aluc|OJZ88342.1

Group8991: abra|OJJ71748.1 acar|OOF90203.1 akaw|GAA85162.1 aluc|OJZ86474.1 anig|EHA22159.1  
atub|OJI84055.1 acar|OOG00119.1 ater|EAU34843.1 awen|OJJ33439.1

Group8992: abra|OJJ71759.1 afla|EED52387.1 akaw|GAA90559.1 aluc|OJZ84839.1 anid|CBF78497.1  
anig|EHA25749.1 aory|EIT83296.1 asyd|OJJ53404.1 aver|OJJ04197.1

Group8993: abra|OJJ71763.1 acar|OOF93296.1 agla|OJJ82502.1 akaw|GAA85145.1 aluc|OJZ86492.1  
anig|EHA22156.1 asyd|OJJ65290.1 atub|OJI84035.1 awen|OJJ33417.1

Group8994: abra|OJJ71786.1 acar|OOF96463.1 afla|EED47808.1 akaw|GAA85125.1 aluc|OJZ86516.1  
aory|EIT77128.1 atub|OJI84008.1 awen|OJJ29872.1 azon|OJJ45183.1

Group8995: abra|OJJ71907.1 acar|OOF96567.1 afla|EED55961.1 akaw|GAA85013.1 aluc|OJZ86644.1  
anig|EHA22025.1 aory|EIT76850.1 ater|EAU35018.1 atub|OJI83883.1

Group8996: abra|OJJ71996.1 afla|EED51564.1 akaw|GAA83855.1 aluc|OJZ86734.1 anig|EHA21945.1  
aory|EIT80511.1 atub|OJI83794.1 acla|EAW11233.1 aver|OJI96463.1

Group8997: abra|OJJ72034.1 ater|EAU38314.1 afla|EED57852.1 aory|EIT81102.1 awen|OJJ33876.1  
akaw|GAA84898.1 aluc|OJZ86773.1 anig|EHA21908.1 atub|OJI83750.1

Group8998: anid|CBF85629.1 afla|EED49842.1 aluc|OJZ91052.1 aory|EIT83399.1 asyd|OJJ55532.1 atub|OJI83048.1 aver|OJJ02120.1 akaw|GAA83681.1 aver|OJJ06607.1

Group8999: abra|OJJ72074.1 afis|EAW16881.1 afla|EED47936.1 akaw|GAA90490.1 aluc|OJZ85948.1 anig|EHA24651.1 aory|EIT79857.1 ater|EAU37967.1 atub|OJI79737.1

Group9000: abra|OJJ72159.1 acar|OOF96793.1 akaw|GAA84768.1 aluc|OJZ86915.1 anid|CBF87087.1 anig|EHA21729.1 atub|OJI83606.1 aver|OJI99727.1 azon|OJJ45233.1

Group9001: abra|OJJ72169.1 afla|EED47276.1 akaw|GAA84759.1 aluc|OJZ86924.1 anig|EHA21720.1 aory|EIT79221.1 atub|OJI83597.1 aver|OJI99280.1 azon|OJJ49272.1

Group9002: abra|OJJ72171.1 afla|EED47279.1 akaw|GAA84757.1 aluc|OJZ86926.1 anig|EHA21718.1 aory|EIT79188.1 atub|OJI83595.1 aver|OJI99281.1 azon|OJJ49274.1

Group9003: abra|OJJ72211.1 acar|OOF96831.1 akaw|GAA84723.1 aluc|OJZ86963.1 anig|EHA21685.1 asyd|OJJ62585.1 ater|EAU39313.1 atub|OJI83560.1 awen|OJJ32710.1

Group9004: abra|OJJ72222.1 acar|OOF96845.1 afum|EAL89019.1 agla|OJJ84645.1 akaw|GAA84715.1 aluc|OJZ86972.1 anig|EHA21676.1 atub|OJI83549.1 aver|OJI99824.1

Group9005: abra|OJJ72247.1 acar|OOF96875.1 afla|EED45525.1 akaw|GAA84691.1 aluc|OJZ86996.1 anig|EHA21649.1 aory|EIT75809.1 atub|OJI83523.1 awen|OJJ38801.1

Group9006: abra|OJJ72249.1 acar|OOF96880.1 afis|EAW17082.1 akaw|GAA84688.1 aluc|OJZ87000.1 anig|EHA21646.1 ater|EAU32328.1 atub|OJI83519.1 awen|OJJ37062.1

Group9007: abra|OJJ72254.1 acar|OOF96885.1 afis|EAW25585.1 afla|EED51556.1 akaw|GAA84683.1 aluc|OJZ87005.1 anig|EHA21641.1 atub|OJI83514.1 anid|CBF73951.1

Group9008: abra|OJJ72259.1 acar|OOF96892.1 afis|EAW25190.1 afla|EED52816.1 akaw|GAA84679.1 aluc|OJZ87010.1 anig|EHA21637.1 aory|EIT78151.1 atub|OJI83509.1

Group9009: abra|OJJ72305.1 acar|OOF94913.1 agla|OJJ82675.1 akaw|GAA86056.1 aluc|OJZ90286.1 anid|CBF81930.1 anig|EHA23776.1 atub|OJI81710.1 awen|OJJ32540.1

Group9010: abra|OJJ72312.1 acar|OOF94898.1 afla|EED53607.1 aluc|OJZ90294.1 anig|EHA23783.1 aory|EIT75130.1 ater|EAU30388.1 atub|OJI81718.1 azon|OJJ42687.1

Group9011: abra|OJJ72556.1 afla|EED52281.1 akaw|GAA85189.1 aluc|OJZ90544.1 anig|EHA23992.1 aory|EIT74482.1 asyd|OJJ55179.1 atub|OJI81966.1 aver|OJJ07028.1

Group9012: abra|OJJ72614.1 akaw|GAA85239.1 aluc|OJZ90596.1 anid|CBF83186.1 anig|EHA24035.1 asyd|OJJ55548.1 atub|OJI82020.1 aver|OJJ06625.1 awen|OJJ36246.1

Group9013: abra|OJJ72636.1 afis|EAW20564.1 afla|EED49091.1 akaw|GAA85257.1 aluc|OJZ90615.1 aory|EIT82551.1 atub|OJI82041.1 awen|OJJ41931.1 afum|EAL84497.1

Group9014: abra|OJJ72702.1 acar|OOF92091.1 agla|OJJ79098.1 aluc|OJZ82954.1 asyd|OJJ54674.1 atub|OJI89186.1 aver|OJJ07495.1 awen|OJJ30434.1 akaw|GAA90879.1

Group9015: abra|OJJ72959.1 acar|OOF96141.1 afla|EED48496.1 akaw|GAA85539.1 aluc|OJZ83467.1 anig|EHA24311.1 aory|EIT73273.1 atub|OJI82361.1 aory|EIT73240.1

Group9016: abra|OJJ73001.1 acar|OOF96174.1 afla|EED54972.1 akaw|GAA85579.1 aluc|OJZ83515.1 aory|EIT80334.1 ater|EAU29598.1 atub|OJI82406.1 awen|OJJ35693.1

Group9017: abra|OJJ73066.1 acar|OOG00300.1 afla|EED46118.1 akaw|GAA88094.1 aluc|OJZ81360.1 anig|EHA18660.1 asyd|OJJ52257.1 atub|OJI91564.1 anig|EHA19258.1

Group9018: abra|OJJ73084.1 acar|OOG00318.1 agla|OJJ83103.1 akaw|GAA88076.1 aluc|OJZ81339.1 anid|CBF84304.1 anig|EHA18645.1 asyd|OJJ52229.1 atub|OJI91544.1

Group9019: abra|OJJ73090.1 acar|OOG00324.1 afla|EED48399.1 akaw|GAA88069.1 aluc|OJZ81334.1 anig|EHA18638.1 aory|EIT83056.1 atub|OJI91537.1 awen|OJJ37776.1

Group9020: azon|OJJ42284.1 abra|OJJ74440.1 acar|OOF95306.1 akaw|GAA87333.1 aluc|OJZ89681.1 anid|CBF90361.1 anig|EHA26917.1 atub|OJI85119.1 awen|OJJ34148.1

Group9021: abra|OJJ73136.1 afla|EED52276.1 akaw|GAA88036.1 aluc|OJZ81295.1 anig|EHA18593.1 aory|EIT74346.1 asyd|OJJ53764.1 atub|OJI91504.1 aver|OJJ07871.1

Group9022: abra|OJJ73162.1 acar|OOF93999.1 acla|EAW09982.1 afla|EED47463.1 akaw|GAA92475.1 aluc|OJZ91485.1 aory|EIT79946.1 awen|OJJ37807.1 azon|OJJ51118.1



Group9023: abra|OJJ73180.1 acar|OOG01004.1 aory|EIT81927.1 asyd|OJJ58379.1 aver|OJI95996.1 awen|OJJ29660.1 afla|EED47400.1 asyd|OJJ65394.1 asyd|OJJ61903.1

Group9024: abra|OJJ73273.1 acar|OOG00513.1 akaw|GAA92733.1 aluc|OJZ88776.1 anig|EHA18470.1 atub|OJI91348.1 agla|OJJ82552.1 afla|EED48991.1 awen|OJJ30164.1

Group9025: ater|EAU34865.1 acar|OOG00742.1 acla|EAW12163.1 afis|EAW24631.1 anid|CBF76034.1 asyd|OJJ52455.1 aver|OJJ03958.1 azon|OJJ46552.1 aory|EIT75408.1

Group9026: abra|OJJ73334.1 acla|EAW14727.1 afis|EAW18090.1 agla|OJJ85993.1 akaw|GAA83151.1 aluc|OJZ88707.1 anig|EHA18393.1 atub|OJI91289.1 azon|OJJ45141.1

Group9027: abra|OJJ73369.1 anig|EHA18353.1 abra|OJJ73370.1 acar|OOG00575.1 akaw|GAA83115.1 aluc|OJZ88670.1 atub|OJI91252.1 ater|EAU37399.1 awen|OJJ29987.1

Group9028: abra|OJJ73406.1 acar|OOG00603.1 afla|EED48700.1 akaw|GAA83085.1 aluc|OJZ88632.1 anid|CBF78732.1 anig|EHA18322.1 aory|EIT73282.1 atub|OJI91216.1

Group9029: abra|OJJ73538.1 acar|OOG00714.1 agla|OJJ80855.1 aluc|OJZ88521.1 asyd|OJJ62810.1 atub|OJI91106.1 aver|OJI96856.1 awen|OJJ35111.1 azon|OJJ49982.1

Group9030: abra|OJJ73554.1 acar|OOG00727.1 afis|EAW22445.1 afla|EED51935.1 afum|EAL90746.1 akaw|GAA88599.1 aluc|OJZ88507.1 anig|EHA18214.1 atub|OJI91093.1

Group9031: abra|OJJ73614.1 acar|OOG00797.1 acla|EAW14617.1 akaw|GAA88539.1 aluc|OJZ88435.1 anid|CBF85631.1 anig|EHA18159.1 ater|EAU33513.1 atub|OJI91032.1

Group9032: abra|OJJ73698.1 acar|OOF90621.1 afis|EAW17756.1 afla|EED46199.1 agla|OJJ87338.1 akaw|GAA93226.1 anig|EHA21868.1 azon|OJJ42143.1 azon|OJJ45205.1

Group9033: abra|OJJ73855.1 acar|OOF98203.1 afla|EED47131.1 agla|OJJ80857.1 akaw|GAA89471.1 aluc|OJZ88193.1 anig|EHA17944.1 aory|EIT79268.1 atub|OJI90791.1

Group9034: abra|OJJ73940.1 afis|EAW24046.1 akaw|GAA89545.1 aluc|OJZ88104.1 anig|EHA17873.1 ater|EAU30555.1 atub|OJI90712.1 afum|EAL91906.2 azon|OJJ43061.1

Group9035: afla|EED45229.1 aory|EIT73829.1 acar|OOF90596.1 afis|EAW24743.1 afum|EAL89389.1 anid|CBF84284.1 asyd|OJJ58313.1 aver|OJJ02098.1 azon|OJJ42092.1

Group9036: abra|OJJ74009.1 acar|OOG01132.1 akaw|GAA87490.1 aluc|OJZ88035.1 anig|EHA17808.1 asyd|OJJ59920.1 atub|OJI90641.1 aver|OJJ02366.1 anid|CBF75201.1

Group9037: abra|OJJ74097.1 acar|OOG01206.1 agla|OJJ83309.1 aluc|OJZ87939.1 asyd|OJJ63261.1 ater|EAU30643.1 aver|OJI97696.1 awen|OJJ38585.1 azon|OJJ49527.1

Group9038: abra|OJJ74130.1 acar|OOF95607.1 acla|EAW09987.1 afis|EAW21106.1 afum|EAL92127.1 akaw|GAA89756.1 aluc|OJZ80627.1 anig|EHA27204.1 atub|OJI87483.1

Group9039: abra|OJJ74162.1 acar|OOF95560.1 afla|EED49721.1 akaw|GAA86854.1 aluc|OJZ89974.1 anig|EHA27171.1 aory|EIT77653.1 atub|OJI84833.1 awen|OJJ30124.1

Group9040: abra|OJJ74239.1 acar|OOF95491.1 akaw|GAA86781.1 aluc|OJZ89893.1 anig|EHA27092.1 ater|EAU34322.1 atub|OJI84914.1 awen|OJJ34890.1 azon|OJJ50058.1

Group9041: abra|OJJ74244.1 afla|EED48142.1 akaw|GAA86776.1 aluc|OJZ89888.1 anig|EHA27087.1 aory|EIT76205.1 ater|EAU34831.1 atub|OJI84919.1 awen|OJJ39954.1

Group9042: abra|OJJ74248.1 acar|OOF95481.1 acla|EAW14927.1 afla|EED49821.1 akaw|GAA86773.1 aluc|OJZ89884.1 anig|EHA27083.1 aory|EIT77603.1 atub|OJI84923.1

Group9043: abra|OJJ74391.1 acar|OOF95344.1 afla|EED55060.1 agla|OJJ79760.1 aluc|OJZ89728.1 anig|EHA26955.1 aory|EIT81947.1 awen|OJJ33582.1 afis|EAW16388.1

Group9044: abra|OJJ74433.1 acar|OOF91974.1 akaw|GAA87327.1 aluc|OJZ89688.1 anig|EHA26926.1 atub|OJI85113.1 aory|EIT78644.1 acla|EAW09079.1 afla|EED52860.1

Group9045: abra|OJJ74443.1 akaw|GAA87336.1 aluc|OJZ89678.1 anig|EHA26914.1 atub|OJI85122.1 acla|EAW09670.1 azon|OJJ44353.1 afla|EED47742.1 aory|EIT77103.1

Group9046: abra|OJJ74455.1 acar|OOF95296.1 acla|EAW08566.1 afis|EAW23611.1 afla|EED44886.1 akaw|GAA87349.1 aluc|OJZ89665.1 anig|EHA26902.1 atub|OJI85135.1

Group9047: abra|OJJ74499.1 acar|OOF95251.1 afis|EAW21104.1 afum|EAL92125.1 akaw|GAA87394.1 aluc|OJZ89619.1 anid|CBF81975.1 anig|EHA26863.1 atub|OJI85183.1

Group9048: abra|OJJ74535.1 afla|EED49212.1 agla|OJJ79416.1 akaw|GAA82073.1 aluc|OJZ92109.1  
anig|EHA26835.1 aory|EIT83158.1 aver|OJJ07284.1 atub|OJI86543.1

Group9049: abra|OJJ74563.1 afla|EED48717.1 agla|OJJ82641.1 aluc|OJZ92141.1 anid|CBF84660.1  
asyd|OJJ54381.1 ater|EAU33267.1 atub|OJI86155.1 awen|OJJ36282.1

Group9050: abra|OJJ74590.1 acar|OOF95176.1 akaw|GAA82015.1 aluc|OJZ92168.1 anig|EHA26781.1  
asyd|OJJ56081.1 ater|EAU38774.1 atub|OJI86599.1 aver|OJJ05024.1

Group9051: abra|OJJ74658.1 afla|EED47427.1 agla|OJJ78809.1 akaw|GAA81953.1 aluc|OJZ92235.1  
anig|EHA26719.1 asyd|OJJ62823.1 atub|OJI86668.1 aver|OJI96867.1

Group9052: abra|OJJ74742.1 acar|OOF95738.1 akaw|GAA83668.1 aluc|OJZ92324.1 anig|EHA26646.1  
atub|OJI86752.1 awen|OJJ35536.1 agla|OJJ80541.1 asyd|OJJ55949.1

Group9053: abra|OJJ74820.1 agla|OJJ82231.1 akaw|GAA83595.1 aluc|OJZ92399.1 anig|EHA26566.1  
asyd|OJJ51849.1 awen|OJJ40025.1 azon|OJJ50369.1 awen|OJJ29651.1

Group9054: ater|EAU37514.1 azon|OJJ47865.1 acla|EAW08377.1 afis|EAW23406.1 afum|EAL88064.1  
aver|OJI96257.1 awen|OJJ39733.1 anid|CBF89878.1 asyd|OJJ62147.1

Group9055: abra|OJJ75209.1 acar|OOF94580.1 akaw|GAA91759.1 aluc|OJZ92772.1 anid|CBF87348.1  
anig|EHA26236.1 asyd|OJJ52817.1 atub|OJI87215.1 aver|OJJ08796.1

Group9056: abra|OJJ75240.1 acar|OOF94553.1 afla|EED56785.1 akaw|GAA91783.1 aluc|OJZ92802.1  
anig|EHA26207.1 aory|EIT73960.1 atub|OJI87245.1 awen|OJJ35798.1

Group9057: abra|OJJ75257.1 acar|OOF93397.1 akaw|GAA91795.1 aluc|OJZ92814.1 anig|EHA26193.1  
atub|OJI87272.1 azon|OJJ46463.1 ater|EAU34344.1 atub|OJI81733.1

Group9058: abra|OJJ75292.1 afis|EAW23627.1 afum|EAL87833.1 akaw|GAA91830.1 aluc|OJZ92853.1  
anig|EHA26156.1 asyd|OJJ55368.1 atub|OJI87309.1 aver|OJJ06447.1

Group9059: abra|OJJ75293.1 afis|EAW23757.1 afla|EED45465.1 atub|OJI87310.1 acla|EAW12136.1  
afla|EED47778.1 akaw|GAA91831.1 anid|CBF80310.1 anig|EHA26155.1

Group9060: abra|OJJ75317.1 acar|OOF94511.1 afis|EAW19724.1 akaw|GAA92013.1 aluc|OJZ92878.1  
anid|CBF73560.1 anig|EHA26081.1 atub|OJI87338.1 azon|OJJ42858.1

Group9061: abra|OJJ75329.1 acar|OOF90143.1 afis|EAW16697.1 akaw|GAA92024.1 aluc|OJZ92892.1  
anig|EHA26071.1 aory|EIT83095.1 atub|OJI87350.1 afum|EAL89294.1

Group9062: abra|OJJ75582.1 acar|OOF90900.1 afis|EAW21790.1 akaw|GAA84334.1 aluc|OJZ89033.1  
anig|EHA23501.1 atub|OJI85757.1 aver|OJJ07240.1 acla|EAW09336.1

Group9063: abra|OJJ75632.1 acar|OOG00204.1 akaw|GAA84379.1 aluc|OJZ89083.1 anig|EHA23454.1  
atub|OJI85701.1 agla|OJJ79928.1 awen|OJJ33942.1 azon|OJJ48628.1

Group9064: abra|OJJ75641.1 acar|OOG00197.1 afis|EAW21626.1 akaw|GAA84385.1 aluc|OJZ89090.1  
anig|EHA23448.1 asyd|OJJ59505.1 atub|OJI85693.1 aver|OJJ02769.1

Group9065: abra|OJJ75714.1 acar|OOG00145.1 agla|OJJ88779.1 akaw|GAA84448.1 aluc|OJZ89165.1  
anig|EHA23389.1 asyd|OJJ54601.1 atub|OJI85625.1 azon|OJJ48542.1

Group9066: abra|OJJ75743.1 acar|OOF91838.1 afla|EED48727.1 akaw|GAA84476.1 aluc|OJZ89196.1  
anig|EHA23362.1 asyd|OJJ56158.1 atub|OJI85594.1 awen|OJJ40000.1

Group9067: abra|OJJ75744.1 akaw|GAA84477.1 aluc|OJZ89197.1 anig|EHA23361.1 aory|EIT73164.1  
asyd|OJJ56159.1 atub|OJI85593.1 aver|OJJ05098.1 awen|OJJ39999.1

Group9068: abra|OJJ75878.1 acar|OOG00015.1 acla|EAW07592.1 afum|EAL85374.1 akaw|GAA84580.1  
aluc|OJZ89322.1 anig|EHA23250.1 atub|OJI85476.1 azon|OJJ42381.1

Group9069: abra|OJJ75933.1 acar|OOF99977.1 afla|EED54825.1 akaw|GAA84634.1 aluc|OJZ89380.1  
anig|EHA23203.1 aory|EIT79423.1 atub|OJI85418.1 agla|OJJ87473.1

Group9070: abra|OJJ76076.1 akaw|GAA88891.1 aluc|OJZ89532.1 atub|OJI85273.1 awen|OJJ39305.1  
acla|EAW09745.1 afis|EAW21397.1 afum|EAL92411.1 agla|OJJ85522.1

Group9071: abra|OJJ76272.1 acar|OOF99520.1 akaw|GAA82205.1 aluc|OJZ91948.1 anig|EHA22907.1  
asyd|OJJ58290.1 atub|OJI86393.1 aver|OJJ02134.1 azon|OJJ48315.1

Group9072: abra|OJJ76318.1 acar|OOF99570.1 afum|EAL84306.1 agla|OJJ84929.1 akaw|GAA82248.1  
aluc|OJZ91896.1 anig|EHA22875.1 ater|EAU32234.1 atub|OJI86349.1

Group9073: abra|OJJ76604.1 acar|OOF97932.1 afla|EED46907.1 akaw|GAA82508.1 aluc|OJZ91604.1  
ater|EAU34983.1 atub|OJI86056.1 azon|OJJ42096.1 acar|OOF99387.1

Group9074: abra|OJJ76871.1 afis|EAW16920.1 afla|EED51655.1 aluc|OJZ84282.1 anig|EHA27627.1  
asyd|OJJ62994.1 atub|OJI89799.1 aver|OJI97974.1 awen|OJJ30987.1

Group9075: abra|OJJ76889.1 afis|EAW20742.1 afla|EED47483.1 akaw|GAA88130.1 aluc|OJZ81402.1  
anig|EHA18695.1 aory|EIT79974.1 asyd|OJJ61687.1 atub|OJI91608.1

Group9076: asyd|OJJ55376.1 abra|OJJ76927.1 acar|OOF91373.1 akaw|GAA87113.1 aluc|OJZ84325.1  
anig|EHA27660.1 atub|OJI89743.1 aver|OJJ06467.1 anid|CBF73479.1

Group9077: abra|OJJ76911.1 akaw|GAA87127.1 aluc|OJZ84311.1 anig|EHA27646.1 ater|EAU36008.1  
atub|OJI89757.1 aver|OJJ05996.1 awen|OJJ37020.1 azon|OJJ42552.1

Group9078: abra|OJJ76914.1 acar|OOF91361.1 akaw|GAA87124.1 aluc|OJZ84314.1 anig|EHA27649.1  
atub|OJI89754.1 awen|OJJ38290.1 azon|OJJ45871.1 agla|OJJ79984.1

Group9079: abra|OJJ76936.1 acar|OOF96837.1 acla|EAW14959.1 aory|EIT72660.1 ater|EAU29986.1  
atub|OJI82860.1 awen|OJJ29878.1 acar|OOG00384.1 ater|EAU32857.1

Group9080: abra|OJJ76980.1 acar|OOF91426.1 afla|EED45952.1 akaw|GAA87065.1 aluc|OJZ84378.1  
anig|EHA27711.1 atub|OJI89691.1 awen|OJJ36086.1 aory|EIT76167.1

Group9081: abra|OJJ76994.1 acar|OOF91441.1 acla|EAW10677.1 akaw|GAA87052.1 aluc|OJZ84394.1  
anig|EHA27724.1 ater|EAU33601.1 atub|OJI89677.1 azon|OJJ42964.1

Group9082: abra|OJJ77039.1 acar|OOF90077.1 afla|EED52764.1 akaw|GAA87013.1 aluc|OJZ84441.1  
anig|EHA27760.1 aory|EIT78251.1 atub|OJI89632.1 awen|OJJ35563.1

Group9083: abra|OJJ77054.1 acar|OOF92944.1 afla|EED51059.1 akaw|GAA86998.1 aluc|OJZ84459.1  
anig|EHA27774.1 aory|EIT77022.1 ater|EAU31960.1 atub|OJI89616.1

Group9084: acla|EAW14398.1 afis|EAW19104.1 afla|EED52251.1 afum|EAL93836.1 agla|OJJ85946.1  
ater|EAU34835.1 aver|OJJ00282.1 asyd|OJJ60955.1 aory|EIT74497.1

Group9085: abra|OJJ77101.1 acar|OOF92986.1 afla|EED45188.1 akaw|GAA86955.1 aluc|OJZ84509.1  
anig|EHA27808.1 aory|EIT73729.1 atub|OJI89571.1 azon|OJJ42738.1

Group9086: abra|OJJ77102.1 acar|OOF92987.1 afla|EED45186.1 akaw|GAA86954.1 aluc|OJZ84511.1  
anig|EHA27809.1 aory|EIT73793.1 atub|OJI89570.1 azon|OJJ42740.1

Group9087: abra|OJJ77113.1 acla|EAW10827.1 afla|EED45704.1 anig|EHA27820.1 aory|EIT75704.1  
ater|EAU31906.1 atub|OJI89557.1 afis|EAW24737.1 afum|EAL89384.1

Group9088: abra|OJJ77184.1 acar|OOF93073.1 akaw|GAA90755.1 aluc|OJZ84592.1 anid|CBF73620.1  
anig|EHA27882.1 atub|OJI89486.1 awen|OJJ31679.1 azon|OJJ47346.1

Group9089: abra|OJJ77196.1 akaw|GAA90745.1 aluc|OJZ84603.1 anig|EHA27893.1 aory|EIT76206.1  
atub|OJI89476.1 aver|OJJ07906.1 awen|OJJ37284.1 afla|EED48097.1

Group9090: abra|OJJ77221.1 acar|OOF93106.1 acla|EAW13212.1 akaw|GAA90718.1 aluc|OJZ84631.1  
anig|EHA27919.1 ater|EAU33911.1 atub|OJI89448.1 afla|EED49403.1

Group9091: afis|EAW19026.1 afum|EAL93757.1 ater|EAU36166.1 acla|EAW14254.1 afla|EED49653.1  
anid|CBF87511.1 aory|EIT80949.1 asyd|OJJ52978.1 aver|OJJ08944.1

Group9092: abra|OJJ77256.1 anid|CBF85477.1 anig|EHA22319.1 asyd|OJJ54570.1 aver|OJJ07584.1  
afla|EED54058.1 aory|EIT76142.1 ater|EAU35689.1 awen|OJJ36255.1

Group9093: abra|OJJ77406.1 acar|OOF93272.1 acla|EAW08567.1 afis|EAW23613.1 afum|EAL87850.1  
akaw|GAA91359.1 aluc|OJZ84813.1 anig|EHA28077.1 atub|OJI89272.1

Group9094: abra|OJJ77417.1 afla|EED52415.1 agla|OJJ79834.1 akaw|GAA91344.1 aluc|OJZ84829.1  
anig|EHA26668.1 aory|EIT74801.1 atub|OJI89258.1 anig|EHA26665.1

Group9095: afla|EED51174.1 aory|EIT81321.1 afis|EAW24706.1 afum|EAL89348.2 anid|CBF80158.1  
asyd|OJJ57603.1 aver|OJJ05581.1 awen|OJJ40794.1 aver|OJI99516.1

Group9096: abra|OJJ77439.1 acar|OOF99276.1 afla|EED51469.1 agla|OJJ84708.1 aory|EIT80740.1  
asyd|OJJ59180.1 atub|OJI82504.1 aver|OJJ01801.1 awen|OJJ37965.1

Group9097: acla|EAW11633.1 agla|OJJ82469.1 ater|EAU31379.1 afis|EAW23824.1 afla|EED51982.1  
afum|EAL87257.1 aory|EIT81440.1 awen|OJJ33781.1 azon|OJJ42884.1

Group9098: aory|EIT82373.1 acar|OOF98767.1 afis|EAW24715.1 afla|EED52382.1 akaw|GAA90460.1 aluc|OJZ85764.1 anig|EHA24792.1 atub|OJI79548.1 afla|EED56739.1

Group9099: abra|OJJ77548.1 aory|EIT77201.1 acar|OOF97222.1 agla|OJJ82568.1 akaw|GAA84075.1 aluc|OJZ80989.1 atub|OJI82596.1 azon|OJJ49034.1 afla|EED47793.1

Group9100: abra|OJJ77610.1 acar|OOF99118.1 afum|EAL86782.1 aluc|OJZ80923.1 anig|EHA19423.1 asyd|OJJ52469.1 atub|OJI82656.1 aver|OJJ03946.1 awen|OJJ35351.1

Group9101: abra|OJJ77651.1 acar|OOF99085.1 akaw|GAA83984.1 aluc|OJZ80878.1 anig|EHA19458.1 asyd|OJJ60545.1 atub|OJI82699.1 aver|OJJ08474.1 aver|OJI99871.1

Group9102: abra|OJJ77769.1 agla|OJJ79715.1 afla|EED47272.1 akaw|GAA83280.1 anid|CBF86359.1 ater|EAU37600.1 azon|OJJ43665.1 atub|OJI90157.1 aluc|OJZ83790.1

Group9103: abra|OJJ77789.1 acla|EAW12265.1 afla|EED50778.1 aluc|OJZ90953.1 acla|EAW12370.1 afla|EED54249.1 agla|OJJ88405.1 aory|EIT78075.1 agla|OJJ88406.1

Group9104: abra|OJJ77896.1 aluc|OJZ90965.1 atub|OJI82956.1 awen|OJJ35885.1 azon|OJJ42025.1 acar|OOF97572.1 aluc|OJZ81977.1 anig|EHA19765.1 akaw|GAA93033.1

Group9105: abra|OJJ77951.1 afis|EAW19520.1 afla|EED55082.1 akaw|GAA83712.1 aluc|OJZ91022.1 anig|EHA19722.1 aory|EIT81637.1 ater|EAU38717.1 atub|OJI83014.1

Group9106: afla|EED53048.1 acar|OOF98857.1 akaw|GAA83747.1 aluc|OJZ90984.1 anid|CBF71211.1 anig|EHA19689.1 asyd|OJJ55199.1 atub|OJI82975.1 aver|OJJ07015.1

Group9107: abra|OJJ77960.1 acar|OOF91996.1 afis|EAW21810.1 afum|EAL88679.1 akaw|GAA83702.1 aluc|OJZ91029.1 atub|OJI83022.1 aver|OJJ02114.1 ater|EAU32564.1

Group9108: abra|OJJ78030.1 acar|OOF93442.1 afla|EED47542.1 akaw|GAA85955.1 aluc|OJZ91107.1 anig|EHA19805.1 aory|EIT74575.1 atub|OJI83104.1 azon|OJJ42777.1

Group9109: abra|OJJ78191.1 acar|OOF98666.1 afla|EED53445.1 agla|OJJ86666.1 akaw|GAA85838.1 aluc|OJZ91262.1 anig|EHA19950.1 atub|OJI83251.1 aory|EIT74872.1

Group9110: abra|OJJ78312.1 acar|OOF90132.1 akaw|GAA92407.1 aluc|OJZ91381.1 anig|EHA20063.1 asyd|OJJ61204.1 atub|OJI83374.1 aver|OJJ00528.1 akaw|GAA85722.1

Group9111: akaw|GAA85678.1 acla|EAW09179.1 afis|EAW21967.1 afla|EED46688.1 afum|EAL92981.1 agla|OJJ84130.1 anid|CBF82733.1 aory|EIT77924.1 ater|EAU31087.1

Group9112: acar|OOF89813.1 acla|EAW14632.1 afis|EAW23652.1 afla|EED52133.1 agla|OJJ79805.1 aory|EIT74392.1 ater|EAU32803.1 aver|OJJ07302.1 awen|OJJ40925.1

Group9113: acar|OOF90608.1 acla|EAW06503.1 afis|EAW16944.1 afum|EAL86471.1 akaw|GAA91561.1 aluc|OJZ82378.1 anid|CBF83060.1 atub|OJI88064.1 azon|OJJ42653.1

Group9114: acar|OOF90862.1 acla|EAW12398.1 afis|EAW16846.1 afum|EAL86392.1 asyd|OJJ54166.1 awen|OJJ36027.1 azon|OJJ47628.1 agla|OJJ78551.1 anid|CBF82405.1

Group9115: aver|OJI96460.1 acla|EAW13438.1 aory|EIT79267.1 awen|OJJ40042.1 afla|EED47281.1 anig|EHA25773.1 aory|EIT79322.1 atub|OJI88512.1 agla|OJJ78869.1

Group9116: acar|OOF91866.1 asyd|OJJ58348.1 aver|OJJ02065.1 acar|OOF97895.1 acla|EAW10259.1 afis|EAW25334.1 afla|EED53812.1 afum|EAL89997.1 akaw|GAA82711.1

Group9117: acar|OOF91944.1 afla|EED46098.1 agla|OJJ83701.1 akaw|GAA85823.1 aory|EIT76402.1 asyd|OJJ61027.1 awen|OJJ30695.1 akaw|GAA92465.1 afla|EED57040.1

Group9118: awen|OJJ33536.1 afla|EED48330.1 akaw|GAA83722.1 aluc|OJZ91011.1 anig|EHA19713.1 aory|EIT76309.1 asyd|OJJ60497.1 atub|OJI83002.1 azon|OJJ48591.1

Group9119: acar|OOF93058.1 afla|EED45785.1 afum|EAL91579.1 aory|EIT75464.1 ater|EAU31842.1 acla|EAW12894.1 afis|EAW17770.1 anid|CBF86635.1 awen|OJJ37073.1

Group9120: acar|OOF93391.1 agla|OJJ79771.1 anid|CBF87482.1 asyd|OJJ52946.1 ater|EAU36394.1 atub|OJI84520.1 aver|OJJ08913.1 awen|OJJ41683.1 azon|OJJ51829.1

Group9121: afla|EED46051.1 aory|EIT83485.1 afis|EAW23643.1 agla|OJJ82137.1 asyd|OJJ52372.1 ater|EAU35169.1 awen|OJJ39956.1 ater|EAU30990.1 awen|OJJ39961.1

Group9122: acar|OOF94769.1 acla|EAW12701.1 afis|EAW17864.1 afla|EED46227.1 afum|EAL91672.1 akaw|GAA86206.1 anid|CBF84083.1 aory|EIT76490.1 ater|EAU33079.1

Group9123: acar|OOF94900.1 acla|EAW14619.1 afis|EAW19357.1 afum|EAL94077.1 anid|CBF73428.1 asyd|OJJ58361.1 ater|EAU36410.1 aver|OJJ02045.1 aver|OJJ08106.1

Group9124: acar|OOF95037.1 afla|EED48165.1 aory|EIT83031.1 asyd|OJJ56127.1 aver|OJJ05069.1 acar|OOF96827.1 afis|EAW17236.1 afum|EAL86653.1 anid|CBF78337.1

Group9125: awen|OJJ36311.1 acla|EAW11091.1 afis|EAW20766.1 afum|EAL84853.1 asyd|OJJ64586.1 ater|EAU29633.1 aver|OJJ07575.1 asyd|OJJ54580.1 aver|OJJ05899.1

Group9126: acar|OOF95311.1 afla|EED49674.1 anid|CBF71486.1 aory|EIT80994.1 asyd|OJJ54940.1 awen|OJJ33541.1 asyd|OJJ58307.1 aver|OJJ02105.1 aver|OJJ07254.1

Group9127: acar|OOF95546.1 acla|EAW14598.1 afis|EAW19327.1 afla|EED48187.1 afum|EBA27513.1 agla|OJJ84438.1 anid|CBF82027.1 aory|EIT72925.1 awen|OJJ30151.1

Group9128: acla|EAW14391.1 afis|EAW19098.1 afla|EED54332.1 afum|EAL93830.1 aory|EIT76114.1 aver|OJJ04351.1 azon|OJJ46041.1 agla|OJJ84503.1 awen|OJJ32491.1

Group9129: acar|OOF96114.1 afis|EAW24504.1 afla|EED48395.1 anid|CBF89954.1 aory|EIT83057.1 asyd|OJJ62109.1 aver|OJJ96215.1 azon|OJJ50120.1 afum|EAL86172.1

Group9130: acar|OOF96689.1 akaw|GAA85853.1 aluc|OJZ91246.1 anid|CBF83945.1 asyd|OJJ53664.1 atub|OJJ83243.1 aver|OJJ07771.1 asyd|OJJ56721.1 aver|OJJ06004.1

Group9131: acar|OOF96855.1 acla|EAW14992.1 afis|EAW24518.1 afum|EAL86184.1 agla|OJJ81259.1 aory|EIT78854.1 ater|EAU32757.1 awen|OJJ32603.1 afla|EED54709.1

Group9132: aver|OJJ05436.1 acla|EAW08146.1 afis|EAW23193.1 afla|EED47072.1 afum|EAL88290.1 agla|OJJ86368.1 ater|EAU36317.1 awen|OJJ36595.1 anid|CBF74518.1

Group9133: acar|OOF97463.1 acla|EAW13052.1 afis|EAW17615.1 afla|EED49206.1 afum|EAL91428.1 akaw|GAA83310.1 anid|CBF90171.1 aory|EIT78545.1 ater|EAU37049.1

Group9134: acar|OOF97639.1 afla|EED55683.1 agla|OJJ80678.1 anid|CBF74954.1 anig|EHA18774.1 aory|EIT77090.1 asyd|OJJ60491.1 aver|OJJ99817.1 awen|OJJ38071.1

Group9135: acar|OOF98602.1 afis|EAW21895.1 afla|EED46413.1 afum|EBA27478.1 agla|OJJ84237.1 aory|EIT72333.1 asyd|OJJ61291.1 aver|OJJ00617.1 awen|OJJ34184.1

Group9136: acar|OOF98772.1 acla|EAW06577.1 afis|EAW17131.1 afla|EED52292.1 afum|EAL86591.1 agla|OJJ85165.1 asyd|OJJ57691.1 awen|OJJ33404.1 agla|OJJ84600.1

Group9137: acar|OOF98849.1 acla|EAW06674.1 afis|EAW16091.1 afla|EED48627.1 afum|EAL88723.1 akaw|GAA83696.1 anid|CBF85464.1 aory|EIT73280.1 ater|EAU33163.1

Group9138: acar|OOF99007.1 afis|EAW23654.1 afla|EED45846.1 akaw|GAA91466.1 aluc|OJZ82071.1 asyd|OJJ52509.1 atub|OJJ84628.1 aver|OJJ01856.1 asyd|OJJ63572.1

Group9139: agla|OJJ85921.1 acla|EAW14251.1 afis|EAW19030.1 afla|EED52648.1 anid|CBF85564.1 aory|EIT74253.1 asyd|OJJ59934.1 aver|OJJ02353.1 awen|OJJ37064.1

Group9140: acar|OOG00140.1 acla|EAW09393.1 afis|EAW21740.1 afla|EED58015.1 agla|OJJ84433.1 anid|CBF83697.1 aory|EIT79732.1 ater|EAU38421.1 awen|OJJ34022.1

Group9141: acar|OOG00207.1 afla|EED53210.1 agla|OJJ78700.1 anig|EHA26131.1 aory|EIT74945.1 atub|OJJ82857.1 azon|OJJ50126.1 afla|EED44915.1 aory|EIT73506.1

Group9142: aory|EIT77690.1 afla|EED49709.1 agla|OJJ88111.1 akaw|GAA84676.1 aluc|OJZ87013.1 asyd|OJJ53592.1 atub|OJJ83506.1 aver|OJJ08156.1 awen|OJJ29854.1

Group9143: acar|OOG00584.1 afla|EED47839.1 akaw|GAA83105.1 aluc|OJZ88653.1 anig|EHA18345.1 aory|EIT77165.1 atub|OJJ91240.1 aver|OJJ98273.1 azon|OJJ44492.1

Group9144: acar|OOG00781.1 acla|EAW07515.1 afla|EED54577.1 anid|CBF89047.1 aory|EIT78806.1 asyd|OJJ62756.1 aver|OJJ96798.1 awen|OJJ35175.1 azon|OJJ49932.1

Group9145: acla|EAW06462.1 afla|EED58101.1 agla|OJJ89355.1 aory|EIT79126.1 asyd|OJJ56460.1 ater|EAU35498.1 aver|OJJ06261.1 awen|OJJ35616.1 azon|OJJ46907.1

Group9146: acla|EAW06697.1 afis|EAW16242.1 afum|EAL88864.1 anid|CBF69397.1 anid|CBF84546.1 asyd|OJJ53471.1 ater|EAU33900.1 aver|OJJ08285.1 awen|OJJ30214.1

Group9147: acla|EAW07056.1 afis|EAW16682.1 afla|EED47441.1 afum|EAL89286.1 anid|CBF89915.1 aory|EIT81914.1 asyd|OJJ62127.1 ater|EAU35872.1 aver|OJJ96235.1

Group9148: acla|EAW07457.1 afis|EAW22488.1 afla|EED54517.1 afum|EAL90705.1 akaw|GAA88615.1 anid|CBF88946.1 aory|EIT78851.1 asyd|OJJ62813.1 ater|EAU39226.1

Group9149: acla|EAW07462.1 afis|EAW22493.1 afla|EED54522.1 afum|EAL90700.1 agla|OJJ80846.1 aory|EIT78808.1 ater|EAU39222.1 awen|OJJ35114.1 azon|OJJ49979.1

Group9150: acla|EAW07611.1 afis|EAW22641.1 afla|EED45986.1 afum|EAL90551.1 agla|OJJ84039.1 aory|EIT75586.1 aver|OJJ04317.1 awen|OJJ35264.1 awen|OJJ34412.1

Group9151: acla|EAW07704.1 afis|EAW22722.1 afla|EED50007.1 agla|OJJ83681.1 anid|CBF88034.1 asyd|OJJ63534.1 aver|OJJ97398.1 awen|OJJ35416.1 aory|EIT74710.1

Group9152: acla|EAW07796.1 afis|EAW22833.1 afla|EED50108.1 afum|EAL90369.1 akaw|GAA89526.1 anid|CBF87878.1 aory|EIT74636.1 ater|EAU38876.1 awen|OJJ38891.1

Group9153: acla|EAW08692.1 anig|EHA24751.1 afis|EAW16421.1 afla|EED52252.1 agla|OJJ86219.1 aory|EIT74454.1 ater|EAU33982.1 awen|OJJ33627.1 ater|EAU29300.1

Group9154: acla|EAW08960.1 afis|EAW15434.1 afla|EED51779.1 afum|EAL84210.1 aluc|OJZ89488.1 aory|EIT81696.1 awen|OJJ29678.1 azon|OJJ50850.1 afis|EAW24647.1

Group9155: acla|EAW09082.1 afis|EAW25669.1 afla|EED46154.1 afum|EAL84341.1 anid|CBF69525.1 aory|EIT76492.1 asyd|OJJ59185.1 ater|EAU31773.1 awen|OJJ33422.1

Group9156: acla|EAW09106.1 afis|EAW25710.1 afla|EED51115.1 afum|EAL84383.1 anid|CBF83223.1 asyd|OJJ55569.1 ater|EAU33341.1 aver|OJJ06648.1 awen|OJJ30275.1

Group9157: acla|EAW09109.1 afis|EAW25716.1 afla|EED52044.1 afum|EAL84390.2 anid|CBF74827.1 aory|EIT81372.1 asyd|OJJ60138.1 ater|EAU34875.1 aver|OJJ04124.1

Group9158: acla|EAW09110.1 afis|EAW25715.1 afla|EED53391.1 afum|EAL84389.2 agla|OJJ84456.1 asyd|OJJ54848.1 ater|EAU31032.1 awen|OJJ34476.1 azon|OJJ42415.1

Group9159: acla|EAW09208.1 afis|EAW21939.1 afla|EED46656.1 agla|OJJ81052.1 aluc|OJZ91386.1 anid|CBF84081.1 anig|EHA20057.1 ater|EAU30944.1 atub|OJI83379.1

Group9160: acla|EAW09256.1 afis|EAW21891.1 afla|EED46417.1 afum|EAL92905.1 agla|OJJ84242.1 aory|EIT72332.1 ater|EAU30888.1 awen|OJJ34180.1 azon|OJJ43452.1

Group9161: acla|EAW09347.1 afis|EAW21802.1 afla|EED49375.1 afum|EAL92828.1 anid|CBF78346.1 aory|EIT79485.1 asyd|OJJ56139.1 aver|OJJ05078.1 awen|OJJ40847.1

Group9162: acla|EAW09623.1 afis|EAW21517.1 afla|EED55955.1 afum|EAL92537.1 anid|CBF76425.1 asyd|OJJ61092.1 ater|EAU35023.1 aver|OJJ00407.1 awen|OJJ39177.1

Group9163: acla|EAW09775.1 afis|EAW21363.1 afum|EAL92379.1 agla|OJJ85484.1 anid|CBF83877.1 anig|EHA23100.1 ater|EAU35197.1 awen|OJJ39335.1 azon|OJJ51680.1

Group9164: acla|EAW09903.1 afis|EAW21151.1 afla|EED57519.1 afum|EAL92170.1 anid|CBF71745.1 aory|EIT81840.1 asyd|OJJ61789.1 ater|EAU33856.1 aver|OJI95889.1

Group9165: acla|EAW09949.1 afis|EAW21227.1 afum|EAL92239.2 agla|OJJ78503.1 anid|CBF83284.1 asyd|OJJ60565.1 aver|OJI99891.1 awen|OJJ36535.1 azon|OJJ44410.1

Group9166: acla|EAW10098.1 afis|EAW25489.1 afum|EAL90154.1 asyd|OJJ53060.1 ater|EAU34660.1 aver|OJJ03784.1 azon|OJJ44797.1 agla|OJJ87137.1 anid|CBF77726.1

Group9167: acla|EAW10510.1 afis|EAW25057.1 afla|EED55395.1 afum|EAL89725.1 akaw|GAA83000.1 anid|CBF85935.1 aory|EIT80810.1 ater|EAU35806.1 azon|OJJ44046.1

Group9168: acla|EAW10849.1 afis|EAW20283.1 afla|EED51079.1 afum|EAL85417.1 agla|OJJ82442.1 aory|EIT81679.1 ater|EAU34005.1 afis|EAW24684.1 aory|EIT76981.1

Group9169: acla|EAW11370.1 afis|EAW18125.1 afum|EAL87483.1 agla|OJJ87019.1 awen|OJJ35527.1 azon|OJJ46956.1 anid|CBF86927.1 anig|EHA21087.1 asyd|OJJ52261.1

Group9170: acla|EAW11533.1 afis|EAW23921.1 afla|EED48136.1 afum|EBA27312.1 anid|CBF89559.1 aory|EIT76210.1 asyd|OJJ62343.1 aver|OJI96447.1 azon|OJJ45191.1

Group9171: acla|EAW12171.1 afis|EAW17191.1 afum|EAL86619.2 afla|EED46575.1 anid|CBF75737.1 aory|EIT77817.1 ater|EAU35875.1 asyd|OJJ57513.1 aver|OJJ05666.1

Group9172: acla|EAW12180.1 afis|EAW21257.1 afla|EED45193.1 afum|EAL92272.1 aory|EIT73658.1 asyd|OJJ56082.1 ater|EAU32949.1 aver|OJJ05025.1 aory|EIT75997.1

Group9173: acla|EAW12380.1 afis|EAW16826.1 afla|EED57473.1 afum|EAL86375.1 anid|CBF87495.1 aory|EIT80128.1 asyd|OJJ52966.1 ater|EAU31803.1 aver|OJJ08932.1

Group9174: anid|CBF85683.1 aver|OJI98347.1 afis|EAW16913.1 agla|OJJ80713.1 asyd|OJJ53486.1 ater|EAU37353.1 awen|OJJ35845.1 agla|OJJ89201.1 asyd|OJJ64257.1

Group9175: acla|EAW13309.1 agla|OJJ84902.1 aory|EIT77729.1 asyd|OJJ55794.1 atub|OJI89926.1 aver|OJJ06883.1 awen|OJJ33116.1 azon|OJJ46332.1 afla|EED44848.1

Group9176: acla|EAW13493.1 afis|EAW20593.1 afla|EED52232.1 afum|EAL84468.1 anid|CBF78913.1 aory|EIT74326.1 asyd|OJJ55616.1 ater|EAU35239.1 aver|OJJ06691.1

Group9177: afis|EAW19233.1 afum|EAL93962.1 agla|OJJ88475.1 aory|EIT80180.1 anid|CBF78623.1 asyd|OJJ65127.1 ater|EAU37230.1 aver|OJI99255.1 awen|OJJ37590.1

Group9178: acla|EAW13545.1 afis|EAW20617.1 afum|EAL84444.1 anid|CBF81468.1 asyd|OJJ59444.1 ater|EAU38172.1 aver|OJJ02829.1 afis|EAW23633.1 afum|EAL87827.2

Group9179: acla|EAW14792.1 afis|EAW24323.1 afla|EED47943.1 afum|EAL85993.1 akaw|GAA88280.1 anid|CBF74062.1 aory|EIT79830.1 ater|EAU30429.1 atub|OJI88188.1

Group9180: acla|EAW14876.1 afis|EAW24393.1 afla|EED47817.1 afum|EAL86065.1 agla|OJJ78873.1 anid|CBF73715.1 aory|EIT77108.1 asyd|OJJ56641.1 aver|OJJ06085.1

Group9181: acla|EAW15039.1 afis|EAW24563.1 afla|EED51162.1 afum|EAL86224.1 anid|CBF80178.1 aory|EIT81341.1 asyd|OJJ65362.1 aver|OJI99527.1 awen|OJJ34439.1

Group9182: acla|EAW15352.1 afis|EAW20361.1 afum|EAL84493.1 asyd|OJJ55542.1 ater|EAU38527.1 aver|OJJ06620.1 awen|OJJ33274.1 afis|EAW20569.1 ater|EAU37110.1

Group9183: acla|EAW15353.1 afis|EAW20360.1 afla|EED56798.1 afum|EAL85477.1 anid|CBF79110.1 aory|EIT73835.1 asyd|OJJ55045.1 aver|OJJ07162.1 awen|OJJ36891.1

Group9184: afis|EAW15407.1 afla|EED54363.1 aory|EIT75986.1 awen|OJJ40121.1 afis|EAW17367.1 afum|EAL91204.1 aver|OJJ08376.1 azon|OJJ42232.1 aver|OJJ02033.1

Group9185: afis|EAW15839.1 afum|EAL85512.1 agla|OJJ82003.1 anid|CBF70848.1 anig|EHA24394.1 asyd|OJJ52570.1 ater|EAU33396.1 aver|OJJ04599.1 awen|OJJ38552.1

Group9186: afis|EAW17022.1 akaw|GAA84315.1 aluc|OJZ89010.1 anig|EHA25070.1 atub|OJI85779.1 afis|EAW19370.1 afla|EED56074.1 afum|EAL94089.1 aory|EIT76714.1

Group9187: afis|EAW17614.1 afla|EED49205.1 afum|EAL91427.1 akaw|GAA83309.1 anid|CBF73974.1 aory|EIT78553.1 asyd|OJJ61247.1 ater|EAU36631.1 aver|OJJ00571.1

Group9188: afis|EAW19018.1 afum|EAL93750.1 agla|OJJ81482.1 anid|CBF73866.1 asyd|OJJ57950.1 ater|EAU36614.1 aver|OJI96129.1 agla|OJJ86909.1 aver|OJJ04449.1

Group9189: afis|EAW22745.1 agla|OJJ85233.1 akaw|GAA91090.1 aluc|OJZ87908.1 aory|EIT80680.1 aver|OJJ04886.1 awen|OJJ36950.1 afla|EED51629.1 asyd|OJJ55937.1

Group9190: afis|EAW23725.1 afla|EED54369.1 afum|EAL87164.1 anid|CBF80093.1 aory|EIT75901.1 asyd|OJJ58301.1 ater|EAU31559.1 aver|OJJ02123.1 awen|OJJ33662.1

Group9191: afis|EAW24589.1 afla|EED57467.1 agla|OJJ82376.1 anid|CBF82016.1 aory|EIT80068.1 asyd|OJJ60274.1 aver|OJI96483.1 awen|OJJ40075.1 aver|OJJ05119.1

Group9192: afis|EAW24710.1 afla|EED57577.1 afum|EAL89351.1 anid|CBF80539.1 aory|EIT82954.1 asyd|OJJ65359.1 ater|EAU30093.1 aver|OJI99508.1 awen|OJJ35407.1

Group9193: afis|EAW25705.1 afla|EED44735.1 afum|EAL84378.1 aory|EIT77803.1 asyd|OJJ63128.1 ater|EAU31742.1 aver|OJI97827.1 awen|OJJ34906.1 azon|OJJ44482.1

Group9194: afla|EED45154.1 anid|CBF84224.1 asyd|OJJ57183.1 ater|EAU33861.1 aver|OJJ03107.1 awen|OJJ34567.1 afla|EED56553.1 aory|EIT79604.1 ater|EAU37800.1

Group9195: aluc|OJZ85150.1 anig|EHA19891.1 aory|EIT76278.1 asyd|OJJ54433.1 awen|OJJ33529.1 akaw|GAA86602.1 anig|EHA25385.1 atub|OJI80424.1 ater|EAU37657.1

Group9196: afla|EED48373.1 akaw|GAA87139.1 aluc|OJZ84298.1 anid|CBF78786.1 anig|EHA27635.1 aory|EIT83076.1 asyd|OJJ52098.1 atub|OJI89771.1 aver|OJJ03019.1

Group9197: afla|EED51064.1 agla|OJJ86414.1 anid|CBF78517.1 aory|EIT77046.1 asyd|OJJ65309.1 aver|OJI99449.1 awen|OJJ33561.1 azon|OJJ50766.1 anid|CBF78515.1

Group9198: afla|EED54340.1 aory|EIT75900.1 awen|OJJ36117.1 afum|EAL87108.1 agla|OJJ82022.1 anid|CBF71659.1 asyd|OJJ61835.1 aver|OJI95934.1 ater|EAU32862.1

Group9199: afla|EED54365.1 agla|OJJ80330.1 akaw|GAA86635.1 aluc|OJJ85192.1 anid|CBF73847.1 aory|EIT76162.1 asyd|OJJ56552.1 ater|EAU29948.1 aver|OJJ06169.1

Group9200: afla|EED55116.1 anid|CBF75417.1 aory|EIT81627.1 asyd|OJJ59791.1 ater|EAU38524.1 aver|OJJ02496.1 awen|OJJ37900.1 asyd|OJJ61701.1 aver|OJI95790.1

Group9201: afla|EED57948.1 agla|OJJ79920.1 akaw|GAA84387.1 anid|CBF83602.1 anig|EHA23446.1 aory|EIT82352.1 ater|EAU38365.1 atub|OJI85690.1 aver|OJJ07833.1

Group9202: agla|OJJ82212.1 akaw|GAA90757.1 aluc|OJJ84590.1 asyd|OJJ60314.1 atub|OJI89488.1 aver|OJI99655.1 awen|OJJ37954.1 asyd|OJJ58903.1 ater|EAU33756.1

Group9203: akaw|GAA89007.1 aluc|OJJ80001.1 anig|EHA19810.1 asyd|OJJ51835.1 ater|EAU30105.1 awen|OJJ34752.1 azon|OJJ45153.1 aluc|OJJ86476.1 azon|OJJ51294.1

Group9204: abra|OJJ65506.1 abra|OJJ65818.1 awen|OJJ29551.1 awen|OJJ29615.1 awen|OJJ29592.1 awen|OJJ29638.1 awen|OJJ29574.1 akaw|GAA93240.1

Group9205: abra|OJJ65542.1 abra|OJJ67279.1 abra|OJJ65832.1 abra|OJJ78309.1 asyd|OJJ51968.1 asyd|OJJ51992.1 awen|OJJ29628.1 aver|OJI99571.1

Group9206: abra|OJJ65785.1 abra|OJJ68042.1 aluc|OJJ81112.1 aluc|OJJ82915.1 acar|OOF90404.1 anig|EHA21338.1 atub|OJI89141.1 akaw|GAA90911.1

Group9207: abra|OJJ67521.1 abra|OJJ70181.1 afis|EAW19751.1 afum|EAL85146.1 agla|OJJ80471.1 ater|EAU36092.1 azon|OJJ45960.1 acar|OOF95578.1

Group9208: abra|OJJ75992.1 abra|OJJ77978.1 anig|EHA19756.1 anig|EHA23150.1 akaw|GAA86002.1 aluc|OJJ291053.1 atub|OJI83049.1 acar|OOF98681.1

Group9209: acar|OOF94031.1 acar|OOF94101.1 abra|OJJ66422.1 agla|OJJ84436.1 akaw|GAA90287.1 aluc|OJJ83053.1 anig|EHA28118.1 atub|OJI87894.1

Group9210: acar|OOF94047.1 acar|OOF94117.1 aver|OJI96455.1 asyd|OJJ62360.1 awen|OJJ32291.1 akaw|GAA84177.1 aluc|OJJ81102.1 atub|OJI82478.1

Group9211: acar|OOF94054.1 acar|OOF94124.1 abra|OJJ66390.1 akaw|GAA90256.1 aluc|OJJ83084.1 anig|EHA28147.1 atub|OJI87860.1 azon|OJJ46015.1

Group9212: acar|OOF94089.1 acar|OOF94159.1 afla|EED51675.1 anid|CBF87054.1 aory|EIT80733.1 asyd|OJJ60441.1 ater|EAU36804.1 aver|OJI99757.1

Group9213: acar|OOF94795.1 acar|OOF95808.1 abra|OJJ69043.1 akaw|GAA90572.1 aluc|OJJ86028.1 anig|EHA24584.1 atub|OJI79817.1 azon|OJJ42399.1

Group9214: acar|OOF95042.1 acar|OOF95109.1 abra|OJJ74661.1 afis|EAW18425.1 akaw|GAA81950.1 aluc|OJJ29238.1 anig|EHA26716.1 atub|OJI86672.1

Group9215: acar|OOF95627.1 acar|OOF95678.1 acla|EAW10949.1 anid|CBF71795.1 asyd|OJJ57418.1 aver|OJI98867.1 awen|OJJ36985.1 asyd|OJJ64767.1

Group9216: afis|EAW15521.1 afis|EAW17759.1 acla|EAW15037.1 asyd|OJJ54438.1 afla|EED56155.1 aory|EIT76867.1 ater|EAU29606.1 afis|EAW25617.1

Group9217: afis|EAW17145.1 afis|EAW25652.1 anid|CBF71257.1 anid|CBF80826.1 agla|OJJ87916.1 asyd|OJJ57920.1 aver|OJJ04472.1 anid|CBF80832.1

Group9218: afis|EAW18099.1 afis|EAW20671.1 afis|EAW21807.1 afum|EAL85401.1 afum|EAL86716.1 akaw|GAA92340.1 akaw|GAA93212.1 awen|OJJ29632.1

Group9219: afla|EED50205.1 afla|EED52402.1 aory|EIT77283.1 aory|EIT83295.1 anid|CBF80133.1 asyd|OJJ57904.1 ater|EAU35873.1 aver|OJJ04490.1

Group9220: afum|EAL84367.1 afum|EAL86717.1 abra|OJJ68568.1 acla|EAW13720.1 afla|EED52526.1 aluc|OJJ81968.1 anig|EHA22279.1 atub|OJI84519.1

Group9221: afum|EAL90937.1 afum|EAL91119.1 acar|OOF98469.1 afis|EAW20300.1 agla|OJJ88439.1 asyd|OJJ62721.1 aver|OJJ01791.1 azon|OJJ49995.1

Group9222: agla|OJJ78667.1 agla|OJJ79271.1 agla|OJJ80298.1 asyd|OJJ60507.1 asyd|OJJ65157.1 acla|EAW13440.1 aver|OJI99833.1 awen|OJJ40852.1



Group9223: agla|OJJ78959.1 agla|OJJ85943.1 abra|OJJ78200.1 acar|OOF98655.1 akaw|GAA85829.1  
aluc|OJZ91271.1 anig|EHA19958.1 atub|OJI83260.1

Group9224: agla|OJJ80410.1 agla|OJJ80411.1 abra|OJJ67601.1 acar|OOF91952.1 afla|EED47760.1  
aory|EIT77150.1 asyd|OJJ59779.1 awen|OJJ36712.1

Group9225: agla|OJJ81527.1 abra|OJJ70446.1 acar|OOF92544.1 akaw|GAA90135.1 aluc|OJZ83212.1  
anig|EHA21072.1 atub|OJI87725.1 azon|OJJ50644.1

Group9226: agla|OJJ82367.1 agla|OJJ87520.1 abra|OJJ76438.1 acar|OOF99683.1 akaw|GAA82353.1  
aluc|OJZ91771.1 anig|EHA22771.1 atub|OJI86229.1

Group9227: agla|OJJ87623.1 agla|OJJ89294.1 asyd|OJJ52764.1 asyd|OJJ54087.1 aver|OJJ08651.1  
aver|OJJ08747.1 afis|EAW19735.1 afum|EAL86794.1

Group9228: aluc|OJZ79779.1 aluc|OJZ80211.1 aluc|OJZ81116.1 aluc|OJZ80324.1 aluc|OJZ79800.1  
aluc|OJZ88830.1 aluc|OJZ79861.1 akaw|GAA92961.1

Group9229: anid|CBF70488.1 anid|CBF84336.1 anid|CBF88734.1 anid|CBF89682.1 anid|CBF74751.1  
anid|CBF74302.1 anid|CBF77827.1 anig|EHA26857.1

Group9230: anid|CBF73471.1 anid|CBF89307.1 abra|OJJ70827.1 acla|EAW09025.1 anig|EHA17996.1  
afla|EED48483.1 aory|EIT73134.1 aory|EIT73198.1

Group9231: anig|EHA21298.1 anig|EHA21854.1 abra|OJJ67998.1 acar|OOF92040.1 akaw|GAA90952.1  
aluc|OJZ82872.1 ater|EAU33480.1 atub|OJI89096.1

Group9232: asyd|OJJ54286.1 asyd|OJJ57635.1 aver|OJJ04437.1 aver|OJJ05240.1 aver|OJJ07873.1  
anid|CBF74901.1 ater|EAU29682.1 anid|CBF87450.1

Group9233: asyd|OJJ55575.1 asyd|OJJ62614.1 afla|EED51129.1 agla|OJJ81311.1 anid|CBF90352.1  
aory|EIT81299.1 ater|EAU37569.1 aver|OJJ06654.1

Group9234: asyd|OJJ56430.1 asyd|OJJ65104.1 acla|EAW14591.1 afis|EAW19321.1 afum|EAL94039.1  
agla|OJJ82955.1 aver|OJJ06291.1 aver|OJI99231.1

Group9235: asyd|OJJ57392.1 asyd|OJJ61778.1 afis|EAW23425.1 afla|EED48337.1 afla|EED53049.1  
aory|EIT76295.1 ater|EAU35010.1 anid|CBF84291.1

Group9236: ater|EAU31780.1 abra|OJJ75593.1 aluc|OJZ89045.1 anid|CBF81783.1 anig|EHA23490.1  
atub|OJI85742.1 awen|OJJ33346.1 ater|EAU29819.1

Group9237: ater|EAU31681.1 ater|EAU32193.1 afis|EAW19665.1 afum|EAL86858.1 anid|CBF83924.1  
asyd|OJJ55428.1 aver|OJJ06507.1 azon|OJJ50194.1

Group9238: ater|EAU33182.1 ater|EAU35438.1 abra|OJJ66403.1 akaw|GAA90271.1 aluc|OJZ83070.1  
anid|CBF74241.1 anig|EHA28134.1 atub|OJI87876.1

Group9239: ater|EAU35500.1 ater|EAU37634.1 ater|EAU37635.1 abra|OJJ75366.1 afis|EAW22480.1  
afla|EED54392.1 aory|EIT75858.1 agla|OJJ83599.1

Group9240: aver|OJI95756.1 aver|OJJ03474.1 aver|OJJ07017.1 afla|EED56874.1 aory|EIT77566.1  
asyd|OJJ55196.1 ater|EAU37686.1 awen|OJJ40083.1

Group9241: awen|OJJ29742.1 awen|OJJ33472.1 awen|OJJ33471.1 awen|OJJ38762.1 awen|OJJ34539.1  
awen|OJJ31077.1 awen|OJJ40128.1 acar|OOF90469.1

Group9242: awen|OJJ29863.1 awen|OJJ32233.1 awen|OJJ38934.1 abra|OJJ74437.1 ater|EAU38801.1  
afla|EED57522.1 agla|OJJ86496.1 aory|EIT81865.1

Group9243: awen|OJJ30774.1 awen|OJJ31707.1 acla|EAW13759.1 afla|EED53053.1 anid|CBF75178.1  
asyd|OJJ59953.1 ater|EAU30744.1 aver|OJJ02336.1

Group9244: awen|OJJ30781.1 awen|OJJ31700.1 abra|OJJ74543.1 acar|OOF95213.1 akaw|GAA82055.1  
aluc|OJZ92125.1 anig|EHA26823.1 atub|OJI86557.1

Group9245: awen|OJJ30789.1 awen|OJJ31692.1 acla|EAW09118.1 ater|EAU36745.1 afis|EAW16193.1  
afum|EAL88824.1 afla|EED49618.1 aory|EIT81011.1

Group9246: awen|OJJ31652.1 awen|OJJ39922.1 abra|OJJ74357.1 acar|OOF99852.1 afla|EED45403.1  
akaw|GAA86673.1 aluc|OJZ89770.1 atub|OJI85033.1

Group9247: awen|OJJ32421.1 awen|OJJ38256.1 akaw|GAA83096.1 aluc|OJZ88643.1 abra|OJJ73393.1  
anig|EHA18327.1 azon|OJJ51357.1 atub|OJI91228.1

Group9248: awen|OJJ33367.1 awen|OJJ34645.1 acla|EAW13546.1 afla|EED46259.1 agla|OJJ78469.1 aory|EIT76451.1 ater|EAU29447.1 agla|OJJ88372.1

Group9249: azon|OJJ42123.1 azon|OJJ42751.1 abra|OJJ72163.1 akaw|GAA84765.1 aluc|OJZ86918.1 anig|EHA21726.1 atub|OJI83603.1 awen|OJJ29679.1

Group9250: azon|OJJ42217.1 azon|OJJ42355.1 abra|OJJ77929.1 acar|OOF98867.1 akaw|GAA83734.1 aluc|OJZ90997.1 anig|EHA19705.1 atub|OJI82987.1

Group9251: azon|OJJ42380.1 azon|OJJ46456.1 abra|OJJ68370.1 acar|OOF95038.1 akaw|GAA92155.1 aluc|OJZ85562.1 anig|EHA25069.1 atub|OJI79342.1

Group9252: azon|OJJ42668.1 azon|OJJ49109.1 abra|OJJ75741.1 acar|OOG00122.1 akaw|GAA84474.1 aluc|OJZ89194.1 anig|EHA23364.1 atub|OJI85596.1

Group9253: azon|OJJ43541.1 azon|OJJ49998.1 afla|EED52563.1 anid|CBF79152.1 aory|EIT74188.1 asyd|OJJ55205.1 ater|EAU38341.1 aver|OJJ07011.1

Group9254: azon|OJJ43568.1 azon|OJJ45832.1 ater|EAU31965.1 awen|OJJ38329.1 acar|OOF90161.1 asyd|OJJ59615.1 afis|EAW22743.1 awen|OJJ29945.1

Group9255: azon|OJJ43587.1 azon|OJJ46445.1 abra|OJJ73314.1 acar|OOF98733.1 akaw|GAA92809.1 aluc|OJZ88732.1 anig|EHA18435.1 atub|OJI91307.1

Group9256: azon|OJJ43919.1 azon|OJJ50661.1 awen|OJJ35806.1 agla|OJJ87371.1 asyd|OJJ59396.1 agla|OJJ88048.1 aver|OJJ02876.1 anid|CBF79746.1

Group9257: azon|OJJ44126.1 azon|OJJ49997.1 acar|OOF93310.1 afis|EAW24585.1 afum|EAL88042.1 agla|OJJ80221.1 ater|EAU32202.1 azon|OJJ43540.1

Group9258: azon|OJJ45076.1 azon|OJJ50104.1 aory|EIT72347.1 afla|EED46498.1 aver|OJJ04023.1 aory|EIT72416.1 asyd|OJJ55510.1 ater|EAU32300.1

Group9259: azon|OJJ45115.1 azon|OJJ45686.1 azon|OJJ46496.1 azon|OJJ48981.1 azon|OJJ51110.1 azon|OJJ46510.1 aver|OJJ01292.1 asyd|OJJ58680.1

Group9260: azon|OJJ45169.1 azon|OJJ46865.1 acar|OOF96694.1 afis|EAW16437.1 afla|EED46603.1 aory|EIT77862.1 ater|EAU36666.1 awen|OJJ36274.1

Group9261: aluc|OJZ79663.1 aluc|OJZ80168.1 aluc|OJZ80047.1 aluc|OJZ80334.1 aluc|OJZ80488.1 aluc|OJZ80253.1 aluc|OJZ88813.1 aluc|OJZ79792.1

Group9262: abra|OJJ65421.1 afla|EED48896.1 akaw|GAA92642.1 anid|CBF87516.1 asyd|OJJ52980.1 ater|EAU36148.1 aver|OJJ08949.1 awen|OJJ35775.1

Group9263: abra|OJJ65633.1 anid|CBF82220.1 asyd|OJJ55373.1 ater|EAU35402.1 aver|OJJ06452.1 awen|OJJ31257.1 afla|EED54055.1 aory|EIT75907.1

Group9264: abra|OJJ65680.1 afis|EAW20903.1 anid|CBF82302.1 azon|OJJ47402.1 anig|EHA19604.1 akaw|GAA83833.1 aluc|OJZ90884.1 atub|OJI82879.1

Group9265: abra|OJJ65724.1 acar|OOG01114.1 afla|EED52284.1 agla|OJJ79398.1 asyd|OJJ52034.1 aver|OJI97995.1 azon|OJJ42308.1 asyd|OJJ62974.1

Group9266: abra|OJJ65788.1 acla|EAW10803.1 afis|EAW24775.1 afum|EAL89416.1 anid|CBF82868.1 anig|EHA18726.1 ater|EAU34032.1 awen|OJJ37934.1

Group9267: abra|OJJ65794.1 afla|EED52269.1 aory|EIT74396.1 asyd|OJJ65314.1 aver|OJI99455.1 azon|OJJ42715.1 acla|EAW14869.1 ater|EAU30136.1

Group9268: abra|OJJ65808.1 akaw|GAA92879.1 aluc|OJZ82529.1 anig|EHA22495.1 asyd|OJJ63153.1 atub|OJI88347.1 aver|OJI97802.1 asyd|OJJ63152.1

Group9269: afum|EAL85465.1 abra|OJJ77463.1 afis|EAW20345.1 akaw|GAA84153.1 aluc|OJZ81074.1 anig|EHA19295.1 atub|OJI82511.1 awen|OJJ41840.1

Group9270: abra|OJJ65863.1 acar|OOF95034.1 akaw|GAA92282.1 aluc|OJZ90179.1 anig|EHA23678.1 aory|EIT75041.1 atub|OJI81606.1 azon|OJJ51790.1

Group9271: abra|OJJ65889.1 acar|OOF94953.1 akaw|GAA86015.1 aluc|OJZ90243.1 asyd|OJJ65116.1 atub|OJI81671.1 aver|OJI99242.1 azon|OJJ47730.1

Group9272: abra|OJJ65914.1 acar|OOF94965.1 akaw|GAA92318.1 aluc|OJZ90216.1 anig|EHA23714.1 ater|EAU32851.1 atub|OJI81647.1 awen|OJJ35886.1

Group9273: ater|EAU31059.1 acla|EAW13302.1 aory|EIT74213.1 afis|EAW23645.1 afla|EED52624.1 anid|CBF84296.1 awen|OJJ29669.1 azon|OJJ42659.1

Group9274: abra|OJJ65926.1 acar|OOF94987.1 akaw|GAA92308.1 aluc|OJZ90205.1 anig|EHA23702.1 asyd|OJJ57266.1 atub|OJI81634.1 aver|OJJ03395.1

Group9275: abra|OJJ65936.1 acar|OOF95001.1 afla|EED46397.1 akaw|GAA92299.1 aluc|OJZ90196.1 aory|EIT72321.1 atub|OJI81623.1 azon|OJJ42446.1

Group9276: abra|OJJ65939.1 acar|OOF95002.1 afla|EED49788.1 akaw|GAA92297.1 aluc|OJZ90194.1 anig|EHA23693.1 aory|EIT77638.1 atub|OJI81621.1

Group9277: abra|OJJ66086.1 afla|EED54166.1 akaw|GAA84159.1 aluc|OJZ81082.1 atub|OJI82502.1 awen|OJJ33593.1 asyd|OJJ62095.1 aver|OJJ96201.1

Group9278: afum|EAL92635.1 agla|OJJ87899.1 aluc|OJZ80198.1 anig|EHA26130.1 asyd|OJJ56528.1 ater|EAU29449.1 aver|OJJ06195.1 awen|OJJ31591.1

Group9279: abra|OJJ66107.1 afla|EED49582.1 anid|CBF85234.1 ater|EAU33589.1 aver|OJI97985.1 aory|EIT82612.1 asyd|OJJ62984.1 awen|OJJ39698.1

Group9280: akaw|GAA91918.1 asyd|OJJ62307.1 agla|OJJ87096.1 aluc|OJZ81962.1 anig|EHA22285.1 atub|OJI84513.1 awen|OJJ32716.1 aver|OJI96415.1

Group9281: abra|OJJ66122.1 acar|OOF90188.1 anid|CBF80738.1 anig|EHA22239.1 asyd|OJJ54542.1 aver|OJJ07639.1 azon|OJJ47323.1 azon|OJJ50406.1

Group9282: afla|EED49727.1 asyd|OJJ58706.1 anid|CBF84222.1 awen|OJJ32442.1 aory|EIT77632.1 asyd|OJJ63399.1 aver|OJJ01318.1 agla|OJJ83109.1

Group9283: aory|EIT77763.1 abra|OJJ72187.1 acar|OOF96812.1 afla|EED44769.1 akaw|GAA84746.1 aluc|OJZ86937.1 anig|EHA21707.1 atub|OJI83584.1

Group9284: abra|OJJ66135.1 acar|OOF94021.1 akaw|GAA92692.1 aluc|OJZ90150.1 anig|EHA20920.1 ater|EAU29938.1 atub|OJI84649.1 anid|CBF78933.1

Group9285: azon|OJJ42406.1 afla|EED52318.1 akaw|GAA83721.1 aory|EIT76283.1 agla|OJJ81796.1 aory|EIT74387.1 asyd|OJJ64672.1 anid|CBF75764.1

Group9286: abra|OJJ66227.1 acar|OOF90677.1 akaw|GAA89062.1 aluc|OJZ80532.1 anig|EHA25663.1 asyd|OJJ56693.1 atub|OJI88399.1 aver|OJJ06031.1

Group9287: abra|OJJ66242.1 acar|OOF98734.1 afis|EAW23512.1 abra|OJJ72743.1 akaw|GAA85354.1 aluc|OJZ90716.1 anig|EHA24135.1 atub|OJI82143.1

Group9288: anig|EHA24966.1 aory|EIT75035.1 aver|OJJ01836.1 afla|EED53155.1 akaw|GAA92153.1 aluc|OJZ85560.1 atub|OJI79345.1 asyd|OJJ59226.1

Group9289: asyd|OJJ58255.1 acar|OOF94380.1 akaw|GAA92136.1 aluc|OJZ83587.1 afla|EED57050.1 anig|EHA26575.1 aory|EIT82253.1 aver|OJJ02168.1

Group9290: abra|OJJ66332.1 acar|OOG00529.1 afla|EED56852.1 akaw|GAA90209.1 aluc|OJZ83136.1 anig|EHA28195.1 aory|EIT77516.1 atub|OJI87798.1

Group9291: abra|OJJ66376.1 afla|EED48192.1 akaw|GAA90244.1 aluc|OJZ83096.1 anig|EHA28160.1 aory|EIT72933.1 asyd|OJJ62482.1 atub|OJI87840.1

Group9292: afis|EAW19007.1 afla|EED49643.1 afum|EAL93741.1 aory|EIT80941.1 akaw|GAA90361.1 aluc|OJZ85871.1 atub|OJI79657.1 anig|EHA24712.1

Group9293: abra|OJJ66407.1 acla|EAW14868.1 afla|EED53097.1 akaw|GAA90275.1 aluc|OJZ83066.1 anig|EHA28131.1 aory|EIT74795.1 atub|OJI87880.1

Group9294: abra|OJJ66468.1 afla|EED45604.1 agla|OJJ85473.1 akaw|GAA92152.1 aluc|OJZ85559.1 aory|EIT75587.1 atub|OJI79346.1 awen|OJJ35057.1

Group9295: ater|EAU36796.1 acla|EAW09989.1 afis|EAW21103.1 afla|EED51685.1 afum|EAL92124.1 aory|EIT80523.1 awen|OJJ36359.1 azon|OJJ48034.1

Group9296: abra|OJJ66635.1 agla|OJJ81099.1 aluc|OJZ80814.1 anid|CBF74289.1 asyd|OJJ51913.1 atub|OJI87663.1 aver|OJJ05354.1 azon|OJJ43017.1

Group9297: abra|OJJ66783.1 acar|OOF98651.1 akaw|GAA89718.1 aluc|OJZ80666.1 aory|EIT77167.1 atub|OJI87521.1 afum|EAL86844.1 anig|EHA27344.1

Group9298: abra|OJJ66788.1 acar|OOF93862.1 akaw|GAA89722.1 aluc|OJZ80662.1 anig|EHA27348.1 atub|OJI87517.1 afla|EED45999.1 aory|EIT75755.1

Group9299: abra|OJJ66842.1 acar|OOF91619.1 akaw|GAA90478.1 aluc|OJZ85742.1 anig|EHA24810.1 ater|EAU37397.1 atub|OJI79527.1 awen|OJJ37463.1

Group9300: akaw|GAA91533.1 acla|EAW14451.1 afis|EAW19159.1 afla|EED54243.1 afum|EBA27507.1 anid|CBF86289.1 aory|EIT76061.1 ater|EAU37432.1

Group9301: afis|EAW17777.1 afum|EAL91586.1 afla|EED44889.1 aory|EIT83249.1 asyd|OJJ64750.1 ater|EAU31839.1 aver|OJI98851.1 awen|OJJ41518.1

Group9302: abra|OJJ66966.1 acar|OOF93643.1 afla|EED55268.1 akaw|GAA92197.1 aluc|OJZ85612.1 anig|EHA24914.1 aory|EIT83531.1 atub|OJI79405.1

Group9303: abra|OJJ66998.1 acar|OOF93618.1 akaw|GAA92167.1 aluc|OJZ85575.1 anig|EHA24944.1 atub|OJI79371.1 afum|EAL91341.2 afis|EAW25616.1

Group9304: abra|OJJ67024.1 akaw|GAA83296.1 anig|EHA24958.1 aory|EIT79521.1 asyd|OJJ52361.1 aver|OJI99599.1 aver|OJJ01987.1 agla|OJJ88611.1

Group9305: abra|OJJ67029.1 acar|OOF92968.1 acla|EAW10802.1 afla|EED49512.1 akaw|GAA82083.1 aluc|OJZ92097.1 aory|EIT82618.1 azon|OJJ47933.1

Group9306: abra|OJJ67030.1 acar|OOF91479.1 afis|EAW17354.1 akaw|GAA92150.1 aluc|OJZ85555.1 anig|EHA24964.1 atub|OJI79349.1 awen|OJJ36015.1

Group9307: abra|OJJ67093.1 afla|EED52013.1 akaw|GAA91068.1 aluc|OJZ87882.1 anig|EHA20185.1 aory|EIT81413.1 atub|OJI80769.1 aver|OJJ08326.1

Group9308: abra|OJJ67103.1 acar|OOF98446.1 acla|EAW07387.1 akaw|GAA91058.1 aluc|OJZ87870.1 anig|EHA20176.1 atub|OJI80779.1 azon|OJJ43579.1

Group9309: anig|EHA20161.1 acar|OOF98432.1 afla|EED55140.1 agla|OJJ78842.1 anid|CBF78818.1 asyd|OJJ65265.1 aver|OJI99416.1 awen|OJJ38064.1

Group9310: abra|OJJ67138.1 acar|OOF98418.1 agla|OJJ80244.1 akaw|GAA91031.1 aluc|OJZ87834.1 anig|EHA20313.1 atub|OJI80807.1 awen|OJJ36378.1

Group9311: abra|OJJ67207.1 acar|OOF98354.1 akaw|GAA90970.1 aluc|OJZ87767.1 anid|CBF89587.1 anig|EHA20251.1 asyd|OJJ62317.1 atub|OJI80878.1

Group9312: abra|OJJ67265.1 agla|OJJ81019.1 akaw|GAA91681.1 anig|EHA20207.1 atub|OJI80929.1 acar|OOF98301.1 aluc|OJZ87713.1 acla|EAW13208.1

Group9313: abra|OJJ67368.1 acar|OOF92442.1 akaw|GAA86456.1 aluc|OJZ84998.1 anig|EHA25207.1 aory|EIT74218.1 ater|EAU39602.1 atub|OJI80604.1

Group9314: abra|OJJ67414.1 akaw|GAA92400.1 aluc|OJZ83261.1 anig|EHA27888.1 atub|OJI87677.1 awen|OJJ38896.1 agla|OJJ88131.1 asyd|OJJ55566.1

Group9315: abra|OJJ67415.1 acar|OOF93051.1 afla|EED53045.1 agla|OJJ85100.1 anig|EHA25169.1 atub|OJI80649.1 azon|OJJ43513.1 awen|OJJ32479.1

Group9316: abra|OJJ67417.1 acar|OOF93053.1 akaw|GAA86411.1 aluc|OJZ84951.1 anig|EHA25167.1 atub|OJI80651.1 awen|OJJ38766.1 azon|OJJ43511.1

Group9317: abra|OJJ67448.1 acar|OOF99139.1 akaw|GAA89803.1 aluc|OJZ81888.1 ater|EAU35113.1 atub|OJI84441.1 azon|OJJ43519.1 afla|EED57539.1

Group9318: abra|OJJ67470.1 acar|OOF89933.1 acla|EAW06302.1 afla|EED52996.1 akaw|GAA86366.1 anig|EHA25123.1 aory|EIT77430.1 atub|OJI80703.1

Group9319: abra|OJJ67537.1 acar|OOG00242.1 akaw|GAA88122.1 aluc|OJZ81395.1 atub|OJI91600.1 aver|OJJ07829.1 azon|OJJ43559.1 asyd|OJJ53705.1

Group9320: abra|OJJ67563.1 acar|OOG00281.1 afla|EED55967.1 akaw|GAA88102.1 aluc|OJZ81369.1 anig|EHA18668.1 aory|EIT76720.1 atub|OJI91574.1

Group9321: abra|OJJ67595.1 afis|EAW20297.1 afum|EAL85426.1 agla|OJJ88387.1 ater|EAU38944.1 atub|OJI88456.1 anid|CBF77122.1 aver|OJI99733.1

Group9322: abra|OJJ67604.1 acar|OOF91954.1 akaw|GAA89121.1 aluc|OJZ81717.1 anig|EHA25722.1 asyd|OJJ61711.1 atub|OJI88465.1 aver|OJI98906.1

Group9323: abra|OJJ67635.1 acar|OOF96455.1 afla|EED48408.1 akaw|GAA89154.1 aluc|OJZ81681.1  
anig|EHA25760.1 atub|OJI88500.1 agla|OJJ82592.1

Group9324: abra|OJJ67637.1 aluc|OJZ81679.1 anid|CBF87120.1 asyd|OJJ60359.1 atub|OJI88502.1  
aver|OJI99697.1 awen|OJJ33616.1 ater|EAU29523.1

Group9325: abra|OJJ67679.1 akaw|GAA89192.1 aluc|OJZ81639.1 anig|EHA25805.1 asyd|OJJ53349.1  
atub|OJI88541.1 aver|OJJ08395.1 acla|EAW12061.1

Group9326: abra|OJJ67682.1 afis|EAW19875.1 afum|EAL85024.1 akaw|GAA89195.1 aluc|OJZ81636.1  
anig|EHA25808.1 atub|OJI88544.1 ater|EAU30907.1

Group9327: abra|OJJ67690.1 afum|EAL86724.1 aory|EIT72972.1 asyd|OJJ62707.1 ater|EAU32453.1  
atub|OJI86665.1 awen|OJJ36179.1 anid|CBF78433.1

Group9328: abra|OJJ67704.1 acar|OOF98710.1 akaw|GAA89212.1 aluc|OJZ81617.1 anig|EHA25826.1  
atub|OJI88563.1 azon|OJJ42195.1 aory|EIT75780.1

Group9329: abra|OJJ67716.1 afis|EAW19890.1 afla|EED46278.1 aory|EIT76343.1 asyd|OJJ60197.1  
atub|OJI80366.1 aver|OJJ07195.1 aver|OJJ04068.1

Group9330: abra|OJJ67720.1 akaw|GAA92885.1 anig|EHA25833.1 atub|OJI88571.1 aver|OJI95869.1  
abra|OJJ70190.1 ater|EAU31225.1 azon|OJJ43537.1

Group9331: abra|OJJ67786.1 acar|OOF90619.1 afla|EED51852.1 agla|OJJ78974.1 aory|EIT81700.1  
asyd|OJJ60223.1 aver|OJJ04044.1 awen|OJJ33659.1

Group9332: abra|OJJ67843.1 acar|OOF92020.1 akaw|GAA91849.1 aluc|OJZ82049.1 anig|EHA22209.1  
asyd|OJJ63642.1 atub|OJI84607.1 aver|OJI97294.1

Group9333: ater|EAU32015.1 acla|EAW11694.1 afis|EAW23711.1 afum|EAL87155.1 asyd|OJJ59161.1  
aver|OJJ01751.1 awen|OJJ33504.1 azon|OJJ46437.1

Group9334: abra|OJJ67891.1 acar|OOF90315.1 agla|OJJ84835.1 akaw|GAA91897.1 aluc|OJZ81999.1  
anig|EHA19897.1 ater|EAU39317.1 atub|OJI84549.1

Group9335: akaw|GAA91263.1 anig|EHA21247.1 afis|EAW20399.1 afla|EED51971.1 afum|EAL85498.1  
anid|CBF79900.1 aory|EIT81375.1 azon|OJJ48750.1

Group9336: abra|OJJ67971.1 afis|EAW16715.1 afla|EED55256.1 agla|OJJ80337.1 aluc|OJZ80478.1  
anig|EHA22003.1 aory|EIT83618.1 asyd|OJJ56138.1

Group9337: abra|OJJ68005.1 acar|OOF92047.1 akaw|GAA90945.1 aluc|OJZ82879.1 anig|EHA21305.1  
asyd|OJJ64160.1 atub|OJI89103.1 aver|OJI98237.1

Group9338: abra|OJJ68008.1 acar|OOF92050.1 afum|EAL86543.1 akaw|GAA90942.1 aluc|OJZ82882.1  
anig|EHA21308.1 atub|OJI89106.1 ater|EAU31761.1

Group9339: abra|OJJ68066.1 acar|OOF90622.1 acla|EAW15143.1 akaw|GAA90893.1 aluc|OJZ82936.1  
atub|OJI89165.1 awen|OJJ33049.1 agla|OJJ82056.1

Group9340: agla|OJJ83641.1 asyd|OJJ56660.1 acla|EAW09999.1 afis|EAW21072.1 afla|EED47789.1  
aory|EIT77187.1 aver|OJJ07406.1 aver|OJJ06064.1

Group9341: abra|OJJ68087.1 acar|OOF90255.1 akaw|GAA86872.1 aluc|OJZ89996.1 anig|EHA27371.1  
asyd|OJJ56932.1 atub|OJI84812.1 azon|OJJ46836.1

Group9342: abra|OJJ68099.1 acar|OOF93902.1 akaw|GAA86884.1 aluc|OJZ90007.1 anig|EHA27382.1  
atub|OJI84800.1 awen|OJJ37264.1 azon|OJJ46012.1

Group9343: abra|OJJ68136.1 acar|OOF93923.1 afis|EAW19309.1 afum|EAL94026.2 akaw|GAA86916.1  
aluc|OJZ90039.1 anig|EHA27414.1 atub|OJI84767.1

Group9344: acar|OOF94576.1 aory|EIT75961.1 acla|EAW15344.1 afla|EED54355.1 asyd|OJJ56917.1  
azon|OJJ46842.1 anid|CBF77240.1 aver|OJJ03375.1

Group9345: abra|OJJ68244.1 acar|OOG00394.1 afis|EAW18880.1 afla|EED49705.1 aory|EIT77710.1  
atub|OJI84567.1 awen|OJJ32675.1 agla|OJJ85238.1

Group9346: abra|OJJ68246.1 acar|OOF97525.1 agla|OJJ83212.1 akaw|GAA83215.1 aluc|OJZ83717.1  
anig|EHA18867.1 atub|OJI90092.1 awen|OJJ41816.1

Group9347: abra|OJJ68292.1 akaw|GAA83181.1 aluc|OJZ83681.1 anig|EHA18835.1 aory|EIT81661.1  
atub|OJI90052.1 awen|OJJ41219.1 ater|EAU32731.1

Group9348: abra|OJJ68313.1 acar|OOF96695.1 afla|EED47754.1 akaw|GAA83160.1 aluc|OJZ83660.1 anig|EHA18812.1 atub|OJI90031.1 aver|OJJ07315.1

Group9349: abra|OJJ68341.1 acar|OOF89852.1 akaw|GAA92108.1 aluc|OJZ83617.1 anig|EHA18775.1 atub|OJI89990.1 awen|OJJ40124.1 azon|OJJ45193.1

Group9350: abra|OJJ68360.1 acar|OOF99379.1 afla|EED45109.1 akaw|GAA82514.1 aluc|OJZ91597.1 anig|EHA22627.1 aory|EIT73776.1 atub|OJI86048.1

Group9351: abra|OJJ68403.1 afla|EED48372.1 akaw|GAA92543.1 aluc|OJZ90091.1 anig|EHA20983.1 aory|EIT83048.1 ater|EAU33483.1 atub|OJI84714.1

Group9352: abra|OJJ68409.1 acar|OOF93968.1 akaw|GAA92541.1 aluc|OJZ90089.1 anig|EHA20985.1 atub|OJI84717.1 awen|OJJ33720.1 akaw|GAA87622.1

Group9353: afla|EED51305.1 afis|EAW20761.1 afum|EAL84858.1 agla|OJJ86655.1 anid|CBF71470.1 aory|EIT81498.1 asyd|OJJ54945.1 aver|OJJ07250.1

Group9354: abra|OJJ68591.1 afla|EED57758.1 akaw|GAA91920.1 aluc|OJZ81960.1 anig|EHA22287.1 aory|EIT81044.1 ater|EAU35718.1 atub|OJI84511.1

Group9355: afla|EED47362.1 aory|EIT82862.1 acar|OOF92454.1 ater|EAU32760.1 agla|OJJ86668.1 anid|CBF78928.1 asyd|OJJ55634.1 aver|OJJ06711.1

Group9356: abra|OJJ68595.1 afla|EED44779.1 agla|OJJ79463.1 anid|CBF69449.1 aory|EIT77767.1 ater|EAU35433.1 anid|CBF83149.1 atub|OJI80341.1

Group9357: abra|OJJ68868.1 afis|EAW16175.1 afla|EED51072.1 akaw|GAA90385.1 aluc|OJZ85846.1 anig|EHA24718.1 aory|EIT77053.1 atub|OJI79634.1

Group9358: abra|OJJ68905.1 afla|EED52081.1 afum|EAL91019.1 anig|EHA25685.1 aory|EIT76931.1 atub|OJI88422.1 aver|OJJ03455.1 awen|OJJ40167.1

Group9359: acla|EAW14232.1 afis|EAW19048.1 afum|EAL93777.1 aory|EIT82019.1 ater|EAU32087.1 awen|OJJ31478.1 agla|OJJ84557.1 afla|EED50407.1

Group9360: abra|OJJ69002.1 acar|OOF92715.1 agla|OJJ85375.1 aluc|OJZ85988.1 asyd|OJJ58283.1 aver|OJJ02140.1 awen|OJJ41517.1 azon|OJJ48240.1

Group9361: abra|OJJ69021.1 agla|OJJ87908.1 akaw|GAA90538.1 aluc|OJZ86007.1 anig|EHA24603.1 atub|OJI79796.1 agla|OJJ85711.1 ater|EAU29899.1

Group9362: abra|OJJ69027.1 akaw|GAA90543.1 aluc|OJZ86013.1 anid|CBF76221.1 anig|EHA24598.1 atub|OJI79802.1 awen|OJJ31674.1 afla|EED53396.1

Group9363: abra|OJJ69028.1 agla|OJJ79300.1 akaw|GAA90544.1 aluc|OJZ86014.1 anid|CBF76223.1 anig|EHA24597.1 atub|OJI79803.1 awen|OJJ31673.1

Group9364: abra|OJJ69174.1 acar|OOF91130.1 akaw|GAA86288.1 aluc|OJZ86161.1 anig|EHA24463.1 atub|OJI79953.1 azon|OJJ46834.1 acar|OOF93937.1

Group9365: abra|OJJ69348.1 anig|EHA18747.1 atub|OJI88256.1 awen|OJJ38174.1 azon|OJJ42137.1 anid|CBF83079.1 asyd|OJJ52796.1 aver|OJJ08774.1

Group9366: azon|OJJ48491.1 acar|OOF94373.1 agla|OJJ79592.1 anid|CBF74160.1 asyd|OJJ53930.1 ater|EAU31218.1 aver|OJJ08029.1 awen|OJJ33026.1

Group9367: abra|OJJ69425.1 acar|OOF94311.1 agla|OJJ79346.1 akaw|GAA88291.1 aluc|OJZ82262.1 anig|EHA28481.1 asyd|OJJ52459.1 atub|OJI88176.1

Group9368: abra|OJJ69427.1 acar|OOF94309.1 afla|EED52059.1 akaw|GAA88293.1 aluc|OJZ82264.1 anig|EHA28479.1 aory|EIT81422.1 atub|OJI88174.1

Group9369: abra|OJJ69428.1 acar|OOF94308.1 akaw|GAA88294.1 aluc|OJZ82265.1 anig|EHA28478.1 atub|OJI88173.1 awen|OJJ39638.1 azon|OJJ47765.1

Group9370: abra|OJJ69434.1 acar|OOF94303.1 afla|EED49523.1 akaw|GAA88298.1 aluc|OJZ82270.1 anig|EHA28473.1 aory|EIT82576.1 atub|OJI88168.1

Group9371: abra|OJJ69555.1 acla|EAW13604.1 abra|OJJ72384.1 acar|OOF90288.1 akaw|GAA86133.1 aluc|OJZ90371.1 atub|OJI81797.1 agla|OJJ87532.1

Group9372: abra|OJJ69563.1 aory|EIT79512.1 asyd|OJJ55176.1 aver|OJJ07031.1 awen|OJJ29814.1 acar|OOF98337.1 afla|EED49421.1 azon|OJJ42661.1

Group9373: abra|OJJ69566.1 aory|EIT79529.1 abra|OJJ73128.1 acar|OOF90604.1 acla|EAW11775.1  
afla|EED49418.1 anig|EHA18702.1 azon|OJJ42289.1

Group9374: abra|OJJ69573.1 acar|OOF91581.1 acla|EAW14395.1 akaw|GAA91570.1 aluc|OJZ82390.1  
anig|EHA28373.1 atub|OJI88051.1 awen|OJJ32496.1

Group9375: abra|OJJ69577.1 acar|OOF91578.1 afis|EAW19100.1 aluc|OJZ82395.1 aory|EIT76155.1  
atub|OJI88047.1 awen|OJJ32493.1 azon|OJJ46038.1

Group9376: abra|OJJ69650.1 acar|OOF96861.1 akaw|GAA91627.1 aluc|OJZ82454.1 anig|EHA28321.1  
atub|OJI87984.1 afis|EAW19668.1 afum|EAL86855.1

Group9377: abra|OJJ69726.1 acar|OOF93548.1 akaw|GAA90179.1 aluc|OJZ83171.1 anig|EHA28245.1  
atub|OJI87767.1 azon|OJJ47343.1 aory|EIT75546.1

Group9378: abra|OJJ69750.1 afis|EAW19965.1 afum|EAL84946.1 akaw|GAA90201.1 aluc|OJZ83147.1  
anig|EHA28211.1 atub|OJI87790.1 anig|EHA28212.1

Group9379: abra|OJJ69752.1 acar|OOG00536.1 akaw|GAA90203.1 aluc|OJZ83145.1 anig|EHA28209.1  
atub|OJI87792.1 awen|OJJ31962.1 azon|OJJ42094.1

Group9380: abra|OJJ69755.1 afla|EED45418.1 akaw|GAA92452.1 aluc|OJZ81566.1 anig|EHA21150.1  
aory|EIT82456.1 ater|EAU30037.1 atub|OJI88619.1

Group9381: abra|OJJ69782.1 afis|EAW19285.1 akaw|GAA87874.1 aluc|OJZ85515.1 anig|EHA25048.1  
atub|OJI80051.1 awen|OJJ30810.1 afis|EAW18910.1

Group9382: abra|OJJ69785.1 acar|OOF97620.1 agla|OJJ85957.1 anig|EHA25045.1 aory|EIT74493.1  
asyd|OJJ56178.1 awen|OJJ35829.1 azon|OJJ48193.1

Group9383: aory|EIT75364.1 acar|OOF93576.1 afis|EAW24739.1 afla|EED45537.1 afum|EBA27379.1  
akaw|GAA87858.1 anid|CBF80396.1 azon|OJJ45019.1

Group9384: abra|OJJ69808.1 acar|OOF93569.1 afla|EED45863.1 akaw|GAA87852.1 aluc|OJZ85492.1  
anig|EHA25027.1 aory|EIT75512.1 atub|OJI80073.1

Group9385: abra|OJJ69821.1 acar|OOF93342.1 afla|EED51605.1 akaw|GAA87839.1 aluc|OJZ85475.1  
aory|EIT80578.1 atub|OJI80088.1 anig|EHA21834.1

Group9386: abra|OJJ69829.1 acar|OOF93354.1 agla|OJJ79194.1 akaw|GAA87831.1 aluc|OJZ85467.1  
anig|EHA25008.1 atub|OJI80096.1 awen|OJJ32855.1

Group9387: abra|OJJ69851.1 acar|OOF93378.1 akaw|GAA87807.1 aluc|OJZ85442.1 anig|EHA24986.1  
atub|OJI80125.1 afis|EAW21631.1 awen|OJJ40024.1

Group9388: abra|OJJ69880.1 acar|OOF93395.1 afla|EED46215.1 akaw|GAA87778.1 aluc|OJZ85413.1  
anig|EHA25592.1 aory|EIT76375.1 atub|OJI80164.1

Group9389: abra|OJJ69882.1 acar|OOF93400.1 akaw|GAA87776.1 aluc|OJZ85411.1 anig|EHA25590.1  
atub|OJI80166.1 awen|OJJ33524.1 azon|OJJ42492.1

Group9390: abra|OJJ70034.1 afis|EAW24625.1 afum|EAL86249.1 anid|CBF79092.1 anig|EHA18719.1  
aver|OJJ08541.1 afis|EAW24621.1 aver|OJJ08544.1

Group9391: abra|OJJ70045.1 afis|EAW16416.1 agla|OJJ80726.1 akaw|GAA87629.1 aluc|OJZ85246.1  
anig|EHA25446.1 asyd|OJJ57151.1 atub|OJI80325.1

Group9392: abra|OJJ70055.1 akaw|GAA85315.1 aluc|OJZ90676.1 aver|OJJ00039.1 afis|EAW24586.1  
afum|EAL88040.1 anig|EHA27498.1 aver|OJJ08529.1

Group9393: abra|OJJ70065.1 acar|OOF93553.1 afla|EED46369.1 akaw|GAA87611.1 aluc|OJZ85232.1  
anig|EHA25436.1 aory|EIT81169.1 atub|OJI80346.1

Group9394: anid|CBF80550.1 abra|OJJ76736.1 akaw|GAA90363.1 abra|OJJ76738.1 afis|EAW19005.1  
afum|EAL93739.1 aluc|OJZ85869.1 atub|OJI79655.1

Group9395: abra|OJJ70086.1 acla|EAW12310.1 afis|EAW21037.1 afum|EAL92076.2 akaw|GAA92273.1  
aluc|OJZ90167.1 atub|OJI89255.1 atub|OJI81595.1

Group9396: abra|OJJ70111.1 afla|EED51525.1 akaw|GAA83852.1 aluc|OJZ90863.1 anig|EHA19576.1  
aory|EIT80609.1 atub|OJI82861.1 awen|OJJ40163.1

Group9397: abra|OJJ70117.1 akaw|GAA87593.1 aluc|OJZ85213.1 anid|CBF84298.1 anig|EHA25416.1  
asyd|OJJ52179.1 atub|OJI80373.1 aver|OJJ05966.1

Group9398: afis|EAW24745.1 afia|EED48475.1 anid|CBF73382.1 aory|EIT73052.1 awen|OJJ29802.1 afum|EAL89391.1 ater|EAU37149.1 agla|OJJ78874.1

Group9399: abra|OJJ70148.1 afia|EED52388.1 akaw|GAA90560.1 aory|EIT83294.1 abra|OJJ71751.1 anig|EHA25741.1 asyd|OJJ53403.1 aver|OJJ04198.1

Group9400: abra|OJJ70161.1 akaw|GAA86608.1 aluc|OJZ85158.1 anig|EHA25374.1 atub|OJI80435.1 acar|OOG00107.1 agla|OJJ89298.1 awen|OJJ39599.1

Group9401: abra|OJJ70198.1 acla|EAW12119.1 afis|EAW17261.1 afum|EAL86678.1 akaw|GAA86578.1 aluc|OJZ85129.1 anig|EHA25348.1 atub|OJI80464.1

Group9402: abra|OJJ70200.1 acar|OOF92580.1 akaw|GAA93214.1 aluc|OJZ85127.1 anig|EHA25346.1 atub|OJI80466.1 awen|OJJ30063.1 akaw|GAA86576.1

Group9403: abra|OJJ70216.1 acar|OOF92564.1 akaw|GAA86561.1 aluc|OJZ85110.1 anig|EHA25331.1 asyd|OJJ61743.1 atub|OJI80483.1 aver|OJI95840.1

Group9404: abra|OJJ70222.1 akaw|GAA86557.1 aluc|OJZ85105.1 anig|EHA25327.1 atub|OJI80489.1 awen|OJJ38080.1 aver|OJI96677.1 aory|EIT76141.1

Group9405: abra|OJJ70249.1 acar|OOF92548.1 afia|EED50196.1 anig|EHA25310.1 aory|EIT77382.1 awen|OJJ34411.1 azon|OJJ46186.1 awen|OJJ30067.1

Group9406: abra|OJJ70255.1 acar|OOF93348.1 afia|EED55138.1 akaw|GAA86110.1 aluc|OJZ90342.1 anig|EHA25304.1 aory|EIT81616.1 atub|OJI81769.1

Group9407: abra|OJJ70261.1 afia|EED45530.1 akaw|GAA86536.1 aluc|OJZ85083.1 anig|EHA25297.1 aory|EIT75465.1 ater|EAU32500.1 atub|OJI80515.1

Group9408: abra|OJJ70277.1 akaw|GAA92872.1 aluc|OJZ82539.1 anig|EHA22507.1 asyd|OJJ55017.1 atub|OJI88783.1 aver|OJJ07188.1 awen|OJJ32617.1

Group9409: abra|OJJ70280.1 akaw|GAA92868.1 aluc|OJZ82544.1 atub|OJI88787.1 azon|OJJ45991.1 aver|OJJ01890.1 atub|OJI88354.1 awen|OJJ39639.1

Group9410: abra|OJJ70287.1 acar|OOF91738.1 afia|EED48873.1 akaw|GAA92861.1 aluc|OJZ82552.1 aory|EIT81179.1 atub|OJI88793.1 awen|OJJ38797.1

Group9411: anid|CBF69719.1 asyd|OJJ58925.1 acar|OOF98770.1 afis|EAW16870.1 afum|EAL91625.1 aver|OJJ01521.1 azon|OJJ45904.1 aver|OJI99598.1

Group9412: anid|CBF80471.1 afis|EAW17123.1 afia|EED46216.1 afum|EAL86584.1 aory|EIT76510.1 asyd|OJJ54771.1 ater|EAU35115.1 aver|OJJ07395.1

Group9413: abra|OJJ70302.1 acar|OOF91755.1 afia|EED45962.1 akaw|GAA93020.1 aluc|OJZ82565.1 anig|EHA27509.1 ater|EAU32148.1 atub|OJI88809.1

Group9414: abra|OJJ70303.1 acar|OOF91756.1 akaw|GAA93019.1 aluc|OJZ82566.1 anig|EHA27508.1 aory|EIT75475.1 atub|OJI88810.1 afia|EED45963.1

Group9415: abra|OJJ70325.1 acar|OOF91781.1 agla|OJJ87947.1 akaw|GAA92581.1 aluc|OJZ82594.1 anid|CBF89612.1 anig|EHA27481.1 atub|OJI88829.1

Group9416: abra|OJJ70330.1 acar|OOF91790.1 akaw|GAA92585.1 aluc|OJZ82599.1 anid|CBF87302.1 atub|OJI88835.1 aver|OJJ05911.1 afis|EAW15388.1

Group9417: abra|OJJ70331.1 acar|OOF91791.1 afis|EAW15387.1 akaw|GAA92586.1 aluc|OJZ82601.1 anig|EHA27478.1 atub|OJI88837.1 aver|OJJ05912.1

Group9418: abra|OJJ70347.1 akaw|GAA92599.1 aluc|OJZ82616.1 anig|EHA27461.1 asyd|OJJ60740.1 atub|OJI88851.1 aver|OJJ00072.1 awen|OJJ33352.1

Group9419: abra|OJJ70350.1 afis|EAW17019.1 afia|EED51526.1 akaw|GAA89818.1 aluc|OJZ81872.1 aory|EIT80752.1 aver|OJJ03456.1 awen|OJJ40165.1

Group9420: abra|OJJ70406.1 acar|OOF98106.1 afia|EED45215.1 akaw|GAA92455.1 aluc|OJZ81562.1 anig|EHA27370.1 aory|EIT73775.1 atub|OJI88622.1

Group9421: abra|OJJ70418.1 akaw|GAA88221.1 aluc|OJZ82185.1 anid|CBF69412.1 anig|EHA18391.1 asyd|OJJ63816.1 atub|OJI88252.1 aver|OJI97122.1

Group9422: acla|EAW11588.1 afis|EAW23865.1 afum|EAL87293.1 aory|EIT74285.1 acar|OOG00288.1 afia|EED52592.1 ater|EAU32689.1 atub|OJI87742.1



Group9423: acla|EAW06948.1 agla|OJJ89078.1 afis|EAW16563.1 afla|EED45794.1 afum|EAL89160.1  
agla|OJJ82758.1 aory|EIT75797.1 azon|OJJ49117.1

Group9424: abra|OJJ70438.1 acar|OOF91841.1 afla|EED48140.1 akaw|GAA90142.1 aluc|OJZ83205.1  
aory|EIT76222.1 atub|OJI87732.1 azon|OJJ51108.1

Group9425: abra|OJJ70922.1 acar|OOF98201.1 afis|EAW21020.1 afum|EAL92058.1 akaw|GAA83018.1  
aluc|OJZ87604.1 anig|EHA20803.1 atub|OJI81044.1

Group9426: abra|OJJ71050.1 anig|EHA20698.1 abra|OJJ71051.1 akaw|GAA82906.1 aluc|OJZ87476.1  
anig|EHA20697.1 atub|OJI81172.1 asyd|OJJ63592.1

Group9427: abra|OJJ71077.1 afla|EED46425.1 akaw|GAA82885.1 aluc|OJZ87453.1 ater|EAU30880.1  
atub|OJI81195.1 awen|OJJ36404.1 awen|OJJ33727.1

Group9428: abra|OJJ71090.1 acar|OOF98049.1 agla|OJJ87148.1 akaw|GAA82871.1 aluc|OJZ87438.1  
ater|EAU29809.1 atub|OJI81210.1 awen|OJJ35051.1

Group9429: abra|OJJ71099.1 akaw|GAA83835.1 aluc|OJZ90882.1 anig|EHA28513.1 aory|EIT76287.1  
atub|OJI83755.1 afla|EED48319.1 azon|OJJ46592.1

Group9430: abra|OJJ71216.1 acar|OOF94574.1 acla|EAW15347.1 anig|EHA20560.1 atub|OJI87216.1  
aver|OJJ03894.1 aluc|OJZ92773.1 akaw|GAA91760.1

Group9431: abra|OJJ71257.1 afla|EED53790.1 aluc|OJZ87286.1 asyd|OJJ59891.1 atub|OJI81355.1  
aver|OJJ02395.1 awen|OJJ41049.1 azon|OJJ44611.1

Group9432: abra|OJJ71285.1 acar|OOF97887.1 agla|OJJ83883.1 aluc|OJZ87258.1 asyd|OJJ59929.1  
atub|OJI81384.1 awen|OJJ41061.1 azon|OJJ44644.1

Group9433: abra|OJJ71736.1 akaw|GAA85150.1 aluc|OJZ86487.1 anig|EHA22180.1 aory|EIT73750.1  
asyd|OJJ52524.1 atub|OJI84042.1 atub|OJI89784.1

Group9434: afla|EED55199.1 aory|EIT83630.1 afis|EAW17199.1 afum|EBA27282.1 anid|CBF80261.1  
asyd|OJJ54174.1 ater|EAU36725.1 aver|OJJ08565.1

Group9435: abra|OJJ71772.1 acar|OOF90397.1 akaw|GAA85135.1 aluc|OJZ86502.1 anig|EHA22142.1  
atub|OJI84024.1 awen|OJJ40723.1 azon|OJJ45843.1

Group9436: abra|OJJ71773.1 acar|OOF90396.1 akaw|GAA85134.1 aluc|OJZ86503.1 anig|EHA22141.1  
atub|OJI84023.1 awen|OJJ40722.1 azon|OJJ45844.1

Group9437: abra|OJJ71774.1 acar|OOF90395.1 akaw|GAA85133.1 aluc|OJZ86504.1 anig|EHA22140.1  
atub|OJI84022.1 awen|OJJ40721.1 azon|OJJ45845.1

Group9438: aory|EIT77623.1 afla|EED49715.1 akaw|GAA84675.1 aluc|OJZ87014.1 asyd|OJJ53591.1  
atub|OJI83505.1 aver|OJJ08157.1 awen|OJJ29856.1

Group9439: abra|OJJ71799.1 acar|OOF96479.1 agla|OJJ82295.1 akaw|GAA85111.1 aluc|OJZ86529.1  
anig|EHA22117.1 ater|EAU38224.1 atub|OJI83992.1

Group9440: abra|OJJ71911.1 acar|OOF96569.1 afla|EED51107.1 akaw|GAA85009.1 aluc|OJZ86648.1  
anig|EHA22021.1 aory|EIT81335.1 atub|OJI83878.1

Group9441: abra|OJJ71953.1 acar|OOF96618.1 akaw|GAA84975.1 aluc|OJZ86687.1 anig|EHA21986.1  
aory|EIT82635.1 atub|OJI83838.1 afla|EED49591.1

Group9442: abra|OJJ72073.1 acar|OOF99319.1 akaw|GAA84844.1 aluc|OJZ86827.1 anig|EHA21810.1  
atub|OJI83691.1 aver|OJJ07659.1 azon|OJJ51731.1

Group9443: abra|OJJ72078.1 akaw|GAA83328.1 aluc|OJZ83824.1 anig|EHA18968.1 atub|OJI90191.1  
aver|OJJ08590.1 afla|EED58003.1 aory|EIT79715.1

Group9444: abra|OJJ72098.1 acar|OOF96743.1 afis|EAW17296.1 akaw|GAA84823.1 aluc|OJZ86853.1  
anig|EHA21786.1 atub|OJI83666.1 azon|OJJ42798.1

Group9445: abra|OJJ72155.1 acar|OOF96788.1 acla|EAW09342.1 akaw|GAA84772.1 aluc|OJZ86911.1  
anig|EHA21733.1 atub|OJI83610.1 awen|OJJ38508.1

Group9446: abra|OJJ72160.1 acar|OOF96796.1 akaw|GAA84767.1 aluc|OJZ86916.1 anig|EHA21728.1  
atub|OJI83605.1 awen|OJJ35674.1 azon|OJJ42753.1

Group9447: abra|OJJ72172.1 afla|EED53529.1 akaw|GAA84756.1 aluc|OJZ86927.1 asyd|OJJ60512.1  
atub|OJI83594.1 aver|OJI99837.1 awen|OJJ36998.1

Group9448: abra|OJJ72225.1 acar|OOF96848.1 akaw|GAA84712.1 aluc|OJZ86975.1 anig|EHA21673.1 aory|EAU34020.1 atub|OJI83546.1 awen|OJJ36430.1

Group9449: abra|OJJ72235.1 acar|OOF96857.1 akaw|GAA84704.1 aluc|OJZ86983.1 anig|EHA21664.1 atub|OJI83536.1 awen|OJJ34545.1 azon|OJJ42224.1

Group9450: abra|OJJ72245.1 acar|OOF96872.1 akaw|GAA84693.1 aluc|OJZ86994.1 anig|EHA21651.1 atub|OJI83525.1 aver|OJJ02012.1 azon|OJJ47854.1

Group9451: abra|OJJ72246.1 acar|OOF96874.1 akaw|GAA84692.1 aluc|OJZ86995.1 anig|EHA21650.1 atub|OJI83524.1 aver|OJJ02010.1 azon|OJJ47856.1

Group9452: abra|OJJ72257.1 acar|OOF96889.1 akaw|GAA84680.1 aluc|OJZ87008.1 anig|EHA21638.1 aory|EIT78168.1 atub|OJI83511.1 afla|EED52819.1

Group9453: awen|OJJ39614.1 acar|OOF93144.1 afla|EED48639.1 agla|OJJ78980.1 aory|EIT76620.1 ater|EAU37752.1 aory|EIT73113.1 awen|OJJ38067.1

Group9454: abra|OJJ72262.1 afla|EED51740.1 agla|OJJ87797.1 abra|OJJ77983.1 akaw|GAA85997.1 aluc|OJZ91058.1 anig|EHA19761.1 atub|OJI83054.1

Group9455: abra|OJJ72301.1 acar|OOF94923.1 akaw|GAA86052.1 aluc|OJZ90282.1 anig|EHA23772.1 asyd|OJJ62082.1 atub|OJI81706.1 aver|OJI96190.1

Group9456: abra|OJJ72521.1 anid|CBF75174.1 afla|EED46473.1 akaw|GAA86068.1 aluc|OJZ90303.1 anig|EHA23790.1 aory|EIT72334.1 awen|OJJ30885.1

Group9457: abra|OJJ72525.1 acar|OOF99516.1 agla|OJJ88724.1 aluc|OJZ90505.1 anig|EHA23963.1 atub|OJI81929.1 awen|OJJ41812.1 azon|OJJ48045.1

Group9458: abra|OJJ72531.1 acar|OOF94722.1 akaw|GAA86253.1 aluc|OJZ90510.1 anid|CBF85175.1 anig|EHA23967.1 atub|OJI81935.1 awen|OJJ37800.1

Group9459: abra|OJJ72570.1 afla|EED53148.1 anid|CBF83014.1 aory|EIT74956.1 asyd|OJJ61508.1 ater|EAU37811.1 aver|OJI99644.1 aver|OJJ00845.1

Group9460: abra|OJJ72578.1 acar|OOF94676.1 akaw|GAA85204.1 aluc|OJZ90559.1 anid|CBF81860.1 anig|EHA24005.1 atub|OJI81982.1 azon|OJJ45930.1

Group9461: awen|OJJ30623.1 asyd|OJJ62304.1 ater|EAU31749.1 afla|EED45569.1 anid|CBF89614.1 aory|EIT75642.1 aver|OJI96412.1 azon|OJJ48028.1

Group9462: abra|OJJ72745.1 acar|OOF90853.1 acla|EAW12599.1 akaw|GAA85355.1 aluc|OJZ90717.1 anig|EHA24136.1 atub|OJI82144.1 acar|OOF90713.1

Group9463: aory|EIT77718.1 acla|EAW13329.1 afis|EAW20444.1 afla|EED44826.1 afum|EBA27198.1 agla|OJJ84877.1 ater|EAU37715.1 awen|OJJ33134.1

Group9464: ater|EAU35516.1 acla|EAW11206.1 afis|EAW15936.1 afla|EED58119.1 afum|EAL88572.1 anid|CBF80964.1 aory|EIT79154.1 awen|OJJ35643.1

Group9465: agla|OJJ82327.1 anig|EHA25324.1 asyd|OJJ54335.1 atub|OJI80495.1 awen|OJJ37033.1 awen|OJJ41692.1 akaw|GAA86555.1 aluc|OJZ85103.1

Group9466: abra|OJJ73077.1 acar|OOG00312.1 afla|EED53424.1 akaw|GAA88085.1 aluc|OJZ81349.1 anig|EHA18651.1 aory|EIT75086.1 atub|OJI91553.1

Group9467: abra|OJJ73089.1 acar|OOG00323.1 acla|EAW11115.1 afla|EED45467.1 akaw|GAA88071.1 aluc|OJZ81336.1 anig|EHA18640.1 atub|OJI91539.1

Group9468: abra|OJJ73106.1 agla|OJJ87928.1 anid|CBF87412.1 asyd|OJJ54090.1 aver|OJJ08647.1 azon|OJJ46446.1 asyd|OJJ52897.1 aver|OJJ08868.1

Group9469: abra|OJJ73126.1 acar|OOG00349.1 afla|EED53573.1 akaw|GAA88038.1 aluc|OJZ81297.1 anig|EHA18605.1 atub|OJI91506.1 anig|EHA18606.1

Group9470: abra|OJJ73152.1 acar|OOG00364.1 akaw|GAA88020.1 aluc|OJZ81278.1 anid|CBF86006.1 anig|EHA18578.1 atub|OJI91486.1 azon|OJJ51713.1

Group9471: abra|OJJ73328.1 afla|EED48231.1 aluc|OJZ91200.1 anig|EHA19900.1 aory|EIT72905.1 asyd|OJJ65323.1 atub|OJI83217.1 aver|OJI99468.1

Group9472: abra|OJJ73399.1 acar|OOG00599.1 akaw|GAA83091.1 aluc|OJZ88638.1 anig|EHA18331.1 atub|OJI91224.1 aver|OJJ06007.1 asyd|OJJ56718.1

Group9473: abra|OJJ73420.1 acar|OOG00623.1 acla|EAW13605.1 afis|EAW20247.1 afum|EAL85365.2 akaw|GAA83071.1 awen|OJJ37579.1 azon|OJJ48024.1

Group9474: abra|OJJ73427.1 acar|OOG00633.1 akaw|GAA83065.1 aluc|OJZ88616.1 anig|EHA18307.1 ater|EAU36880.1 atub|OJI91201.1 azon|OJJ43923.1

Group9475: abra|OJJ73435.1 acar|OOG00642.1 akaw|GAA83058.1 aluc|OJZ88606.1 anig|EHA18299.1 atub|OJI91190.1 aver|OJI96135.1 awen|OJJ33325.1

Group9476: abra|OJJ73450.1 acar|OOG00653.1 afla|EED51807.1 akaw|GAA83046.1 aluc|OJZ88591.1 anig|EHA18287.1 aory|EIT81691.1 atub|OJI91177.1

Group9477: acar|OOF90597.1 afis|EAW24744.1 afum|EAL89390.1 anid|CBF84285.1 asyd|OJJ58314.1 aver|OJJ02097.1 azon|OJJ42093.1 ater|EAU34259.1

Group9478: abra|OJJ73995.1 acar|OOF94225.1 afla|EED51679.1 aluc|OJZ88049.1 anig|EHA17821.1 aory|EIT77469.1 atub|OJI90657.1 aver|OJJ03001.1

Group9479: abra|OJJ74008.1 acar|OOG01130.1 akaw|GAA87489.1 aluc|OJZ88036.1 anig|EHA17809.1 asyd|OJJ61383.1 atub|OJI90643.1 aver|OJJ00710.1

Group9480: abra|OJJ74010.1 acar|OOG01131.1 akaw|GAA87491.1 aluc|OJZ88034.1 anig|EHA17807.1 asyd|OJJ61382.1 atub|OJI90640.1 aver|OJJ00709.1

Group9481: abra|OJJ74011.1 acar|OOG01133.1 afla|EED47557.1 akaw|GAA87493.1 aluc|OJZ88030.1 anig|EHA17805.1 atub|OJI90637.1 aory|EIT74565.1

Group9482: abra|OJJ74137.1 acar|OOF95593.1 akaw|GAA89748.1 aluc|OJZ80636.1 anig|EHA27197.1 ater|EAU39604.1 atub|OJI87491.1 awen|OJJ33586.1

Group9483: abra|OJJ74138.1 acar|OOF95592.1 akaw|GAA89747.1 aluc|OJZ80637.1 anig|EHA27196.1 ater|EAU39605.1 atub|OJI87492.1 awen|OJJ33585.1

Group9484: abra|OJJ74179.1 acar|OOF95542.1 afla|EED48879.1 akaw|GAA86836.1 aluc|OJZ89955.1 aory|EIT81178.1 atub|OJI84851.1 aver|OJJ03488.1

Group9485: abra|OJJ74365.1 acar|OOF95365.1 afla|EED48363.1 akaw|GAA86665.1 aluc|OJZ89762.1 anig|EHA26982.1 aory|EIT83079.1 atub|OJI85040.1

Group9486: abra|OJJ74369.1 acar|OOF95363.1 agla|OJJ89236.1 akaw|GAA86662.1 aluc|OJZ89759.1 anig|EHA26979.1 awen|OJJ40218.1 azon|OJJ49843.1

Group9487: abra|OJJ74372.1 acla|EAW07076.1 akaw|GAA86656.1 aluc|OJZ89750.1 anig|EHA26973.1 ater|EAU36709.1 atub|OJI85052.1 aver|OJJ06459.1

Group9488: abra|OJJ74379.1 acar|OOF95358.1 akaw|GAA87279.1 aluc|OJZ89741.1 anig|EHA26965.1 atub|OJI85060.1 awen|OJJ33358.1 azon|OJJ50315.1

Group9489: abra|OJJ74393.1 acar|OOF95342.1 akaw|GAA87291.1 aluc|OJZ89727.1 atub|OJI85073.1 aver|OJJ00246.1 agla|OJJ82677.1 asyd|OJJ60920.1

Group9490: aory|EIT79191.1 afum|EAL87119.1 afla|EED47271.1 agla|OJJ82620.1 ater|EAU32195.1 acla|EAW11773.1 afis|EAW23676.1 awen|OJJ29773.1

Group9491: abra|OJJ74559.1 acar|OOF93083.1 agla|OJJ87487.1 akaw|GAA82038.1 anig|EHA26808.1 atub|OJI86573.1 awen|OJJ41475.1 azon|OJJ43918.1

Group9492: abra|OJJ74747.1 acar|OOF95741.1 afla|EED49965.1 akaw|GAA83664.1 aluc|OJZ92327.1 anig|EHA26643.1 aory|EIT83428.1 atub|OJI86757.1

Group9493: abra|OJJ74873.1 acar|OOF95874.1 akaw|GAA83547.1 aluc|OJZ92451.1 anig|EHA26517.1 atub|OJI86879.1 awen|OJJ39876.1 asyd|OJJ62281.1

Group9494: akaw|GAA83493.1 agla|OJJ86731.1 acla|EAW08441.1 afis|EAW23486.1 afla|EED57385.1 afum|EAL87977.1 anid|CBF89757.1 azon|OJJ47932.1

Group9495: abra|OJJ74961.1 acar|OOF97353.1 acla|EAW08411.1 agla|OJJ86691.1 anid|CBF89817.1 asyd|OJJ62189.1 aver|OJI96298.1 azon|OJJ47904.1

Group9496: abra|OJJ75127.1 acar|OOF97208.1 akaw|GAA88734.1 aluc|OJZ92692.1 anid|CBF89429.1 anig|EHA26308.1 atub|OJI87120.1 azon|OJJ47751.1

Group9497: aver|OJJ03174.1 azon|OJJ46527.1 acar|OOG00290.1 acla|EAW12455.1 afla|EED51632.1 anid|CBF84178.1 aory|EIT80501.1 asyd|OJJ57130.1

Group9498: abra|OJJ75234.1 acar|OOF94558.1 akaw|GAA91777.1 aluc|OJZ92795.1 anig|EHA26213.1 atub|OJI87238.1 awen|OJJ39989.1 azon|OJJ45243.1

Group9499: abra|OJJ75249.1 acar|OOF91827.1 afla|EED51022.1 asyd|OJJ60674.1 atub|OJI87262.1 aver|OJJ99997.1 awen|OJJ36156.1 acar|OOG00965.1

Group9500: abra|OJJ75260.1 acar|OOF94542.1 akaw|GAA91798.1 aluc|OJZ92818.1 anig|EHA26190.1 atub|OJI87276.1 azon|OJJ43908.1 awen|OJJ38761.1

Group9501: abra|OJJ75295.1 aluc|OJZ90845.1 anig|EHA25378.1 ater|EAU36044.1 atub|OJI82832.1 aver|OJJ06528.1 awen|OJJ40184.1 aver|OJI95774.1

Group9502: abra|OJJ75325.1 acar|OOF94645.1 acla|EAW12069.1 akaw|GAA92020.1 aluc|OJZ92888.1 anig|EHA26075.1 atub|OJI87346.1 awen|OJJ30536.1

Group9503: abra|OJJ75328.1 acar|OOF90142.1 afla|EED48381.1 akaw|GAA92023.1 aluc|OJZ92891.1 anig|EHA26072.1 aory|EIT83088.1 atub|OJI87349.1

Group9504: ater|EAU37650.1 acar|OOG00117.1 acla|EAW07061.1 afis|EAW16684.1 afla|EED48490.1 aory|EIT73090.1 azon|OJJ42235.1 azon|OJJ45218.1

Group9505: abra|OJJ75352.1 afis|EAW25185.1 afla|EED53819.1 akaw|GAA92045.1 aluc|OJZ92914.1 anig|EHA26051.1 aory|EIT78407.1 atub|OJI87374.1

Group9506: abra|OJJ75365.1 afis|EAW17962.1 afum|EAL91772.1 aluc|OJZ92935.1 anig|EHA26037.1 atub|OJI87395.1 atub|OJI80907.1 aver|OJJ01291.1

Group9507: abra|OJJ75535.1 afla|EED46910.1 akaw|GAA91955.1 aluc|OJZ82663.1 anig|EHA27437.1 aory|EIT72749.1 atub|OJI88896.1 azon|OJJ49040.1

Group9508: abra|OJJ75541.1 acar|OOF90860.1 akaw|GAA84295.1 aluc|OJZ88989.1 anig|EHA23537.1 atub|OJI85798.1 awen|OJJ35898.1 azon|OJJ43915.1

Group9509: abra|OJJ75567.1 acar|OOF90885.1 akaw|GAA84319.1 aluc|OJZ89015.1 anig|EHA23515.1 asyd|OJJ52898.1 ater|EAU31415.1 atub|OJI85774.1

Group9510: abra|OJJ75568.1 acar|OOF90886.1 afla|EED54163.1 agla|OJJ85899.1 aluc|OJZ89016.1 anig|EHA23514.1 aory|EIT75933.1 atub|OJI85773.1

Group9511: abra|OJJ75578.1 acar|OOF90895.1 acla|EAW13757.1 akaw|GAA84329.1 aluc|OJZ89028.1 anig|EHA23505.1 atub|OJI85763.1 azon|OJJ46062.1

Group9512: abra|OJJ75584.1 afla|EED55988.1 akaw|GAA84336.1 aluc|OJZ89035.1 anig|EHA23499.1 aory|EIT76706.1 atub|OJI85755.1 acla|EAW06995.1

Group9513: acla|EAW09370.1 afum|EAL92795.1 afis|EAW21765.1 afla|EED46334.1 agla|OJJ84386.1 aory|EIT81257.1 awen|OJJ34048.1 azon|OJJ48183.1

Group9514: abra|OJJ75704.1 afum|EAL89397.1 agla|OJJ83953.1 aluc|OJZ89155.1 ater|EAU31769.1 atub|OJI87801.1 awen|OJJ36182.1 azon|OJJ42007.1

Group9515: aory|EIT73848.1 ater|EAU30293.1 afis|EAW19505.1 afla|EED56796.1 anid|CBF83979.1 asyd|OJJ61406.1 aver|OJJ00736.1 afum|EAL86988.1

Group9516: abra|OJJ75883.1 afla|EED47845.1 akaw|GAA84586.1 aluc|OJZ89330.1 anig|EHA23245.1 aory|EIT77232.1 atub|OJI85470.1 awen|OJJ41919.1

Group9517: acla|EAW10263.1 afis|EAW25330.1 afum|EAL89992.1 afla|EED57803.1 aory|EIT81120.1 ater|EAU30152.1 aver|OJI98324.1 asyd|OJJ55359.1

Group9518: abra|OJJ76110.1 acar|OOF99816.1 acla|EAW09710.1 afum|EBA27461.1 aluc|OJZ89566.1 atub|OJI85238.1 azon|OJJ51585.1 asyd|OJJ60867.1

Group9519: abra|OJJ76149.1 acar|OOF99778.1 agla|OJJ85613.1 aluc|OJZ92080.1 atub|OJI86510.1 aver|OJJ00466.1 awen|OJJ39234.1 azon|OJJ51621.1

Group9520: acar|OOF99551.1 afla|EED53231.1 aory|EIT75189.1 afum|EAL93707.1 ater|EAU38165.1 awen|OJJ31575.1 acla|EAW14314.1 asyd|OJJ59085.1

Group9521: agla|OJJ79956.1 acla|EAW12319.1 afis|EAW16902.1 afla|EED45265.1 afum|EAL86437.1 aory|EIT73652.1 awen|OJJ29717.1 awen|OJJ29924.1

Group9522: abra|OJJ76357.1 acar|OOF99608.1 akaw|GAA82283.1 aluc|OJZ91856.1 atub|OJI86307.1 aver|OJJ01513.1 azon|OJJ47100.1 asyd|OJJ58916.1

Group9523: abra|OJJ76415.1 acar|OOF99655.1 agla|OJJ82341.1 aluc|OJZ91798.1 awen|OJJ32221.1 azon|OJJ46773.1 ater|EAU38187.1 aver|OJJ01075.1

Group9524: abra|OJJ76475.1 afis|EAW23592.1 afum|EAL87874.1 akaw|GAA82387.1 aluc|OJZ91733.1 anig|EHA22740.1 atub|OJI86192.1 awen|OJJ34755.1

Group9525: abra|OJJ76499.1 afla|EED56465.1 akaw|GAA86205.1 aory|EIT72845.1 asyd|OJJ60352.1 ater|EAU36868.1 afis|EAW23443.1 anid|CBF80766.1

Group9526: abra|OJJ76600.1 agla|OJJ79790.1 akaw|GAA82503.1 aluc|OJZ91608.1 anig|EHA22637.1 atub|OJI86060.1 awen|OJJ30242.1 azon|OJJ46833.1

Group9527: asyd|OJJ64031.1 abra|OJJ76646.1 akaw|GAA92814.1 aluc|OJZ91565.1 anig|EHA22594.1 atub|OJI86015.1 aver|OJI98116.1 asyd|OJJ56046.1

Group9528: abra|OJJ76675.1 acar|OOF99334.1 afis|EAW25184.1 afum|EAL89859.1 akaw|GAA92517.1 aluc|OJZ91530.1 anig|EHA22569.1 atub|OJI85984.1

Group9529: acla|EAW07062.1 azon|OJJ45052.1 afis|EAW16693.1 afla|EED45071.1 afum|EAL89291.1 aory|EIT73802.1 ater|EAU34152.1 aver|OJJ01782.1

Group9530: abra|OJJ76702.1 acar|OOF99316.1 agla|OJJ84121.1 akaw|GAA92497.1 aluc|OJZ91509.1 anid|CBF78146.1 anig|EHA22548.1 atub|OJI85961.1

Group9531: abra|OJJ76720.1 acar|OOF97651.1 afla|EED47263.1 akaw|GAA92480.1 aluc|OJZ91490.1 anig|EHA22534.1 aory|EIT79251.1 atub|OJI85947.1

Group9532: abra|OJJ76727.1 afla|EED56123.1 agla|OJJ86581.1 anig|EHA28102.1 aory|EIT76858.1 asyd|OJJ55398.1 ater|EAU30982.1 awen|OJJ30160.1

Group9533: abra|OJJ76734.1 afis|EAW21009.1 agla|OJJ82882.1 aluc|OJZ80162.1 asyd|OJJ58391.1 aver|OJJ07900.1 awen|OJJ32613.1 afis|EAW17034.1

Group9534: abra|OJJ76912.1 akaw|GAA87126.1 aluc|OJZ84312.1 anig|EHA27647.1 atub|OJI89756.1 aver|OJJ05995.1 awen|OJJ37021.1 agla|OJJ83564.1

Group9535: abra|OJJ76913.1 acar|OOF98741.1 akaw|GAA87125.1 aluc|OJZ84313.1 anig|EHA27648.1 atub|OJI89755.1 aver|OJJ05994.1 awen|OJJ37022.1

Group9536: abra|OJJ76988.1 acar|OOF91432.1 afla|EED46111.1 akaw|GAA87058.1 aluc|OJZ84388.1 anig|EHA27718.1 aory|EIT76518.1 atub|OJI89684.1

Group9537: abra|OJJ77005.1 acar|OOF91450.1 akaw|GAA87043.1 aluc|OJZ84404.1 anig|EHA27734.1 ater|EAU32185.1 atub|OJI89668.1 azon|OJJ50405.1

Group9538: afla|EED54149.1 aory|EIT76116.1 asyd|OJJ53602.1 aver|OJJ08146.1 akaw|GAA91860.1 aluc|OJZ82039.1 anig|EHA22218.1 atub|OJI84597.1

Group9539: awen|OJJ29670.1 acar|OOF98731.1 afla|EED48910.1 akaw|GAA87771.1 aluc|OJZ85406.1 anig|EHA25585.1 aver|OJJ08853.1 aver|OJI98890.1

Group9540: abra|OJJ77235.1 acar|OOF93117.1 akaw|GAA90708.1 aluc|OJZ84645.1 asyd|OJJ61794.1 ater|EAU33902.1 atub|OJI89435.1 aver|OJI95894.1

Group9541: abra|OJJ77420.1 acar|OOF90641.1 acla|EAW14626.1 akaw|GAA90295.1 aluc|OJZ83042.1 anig|EHA22538.1 atub|OJI87908.1 azon|OJJ45271.1

Group9542: abra|OJJ77422.1 afis|EAW24698.1 afla|EED51169.1 afum|EAL89340.1 anid|CBF90109.1 aory|EIT81319.1 ater|EAU31625.1 awen|OJJ40787.1

Group9543: abra|OJJ77431.1 afis|EAW24696.1 afum|EAL89338.1 anid|CBF90099.1 asyd|OJJ62030.1 ater|EAU31623.1 aver|OJI96121.1 awen|OJJ40792.1

Group9544: abra|OJJ77434.1 afis|EAW24699.1 afum|EAL89341.2 asyd|OJJ62029.1 aver|OJI96120.1 awen|OJJ40786.1 anid|CBF90101.1 ater|EAU31626.1

Group9545: abra|OJJ77435.1 acar|OOF97515.1 acla|EAW08777.1 afla|EED48086.1 afum|EAL86654.1 aory|EIT81472.1 azon|OJJ46405.1 afla|EED52055.1

Group9546: abra|OJJ77496.1 acar|OOF99231.1 agla|OJJ79563.1 aory|EIT78991.1 awen|OJJ36058.1 afla|EED50860.1 azon|OJJ45260.1 agla|OJJ79153.1

Group9547: aory|EIT73905.1 azon|OJJ46048.1 afla|EED56791.1 anid|CBF71422.1 asyd|OJJ54992.1 aver|OJJ07209.1 awen|OJJ31993.1 ater|EAU32727.1

Group9548: aory|EIT73792.1 agla|OJJ83250.1 awen|OJJ41102.1 anig|EHA20899.1 ater|EAU39541.1 atub|OJI80593.1 agla|OJJ79434.1 aluc|OJZ85005.1

Group9549: abra|OJJ77731.1 acar|OOF98995.1 afla|EED47651.1 akaw|GAA83904.1 aluc|OJZ90791.1 anig|EHA19525.1 aory|EIT80176.1 atub|OJI82780.1

Group9550: abra|OJJ77736.1 acar|OOF98985.1 afla|EED54278.1 akaw|GAA83893.1 aluc|OJZ90802.1 anig|EHA19531.1 atub|OJI82791.1 awen|OJJ36026.1

Group9551: abra|OJJ77749.1 acar|OOF90666.1 akaw|GAA83885.1 aluc|OJZ90810.1 anig|EHA19538.1 atub|OJI82799.1 azon|OJJ42324.1 akaw|GAA88768.1

Group9552: abra|OJJ77763.1 acar|OOF97506.1 acla|EAW12047.1 afis|EAW17016.1 akaw|GAA89815.1 aluc|OJZ81875.1 anig|EHA20909.1 acar|OOF89896.1

Group9553: abra|OJJ77794.1 acar|OOF90716.1 asyd|OJJ54626.1 aver|OJJ07530.1 awen|OJJ38009.1 abra|OJJ77797.1 agla|OJJ83011.1 anid|CBF80615.1

Group9554: abra|OJJ77812.1 acar|OOF93334.1 akaw|GAA83837.1 anid|CBF80740.1 anig|EHA19602.1 ater|EAU35344.1 atub|OJI82877.1 ater|EAU31073.1

Group9555: abra|OJJ77879.1 acar|OOF96529.1 afis|EAW22771.1 afum|EAL89321.1 akaw|GAA83774.1 aluc|OJZ90954.1 anig|EHA19659.1 atub|OJI82944.1

Group9556: aver|OJJ05263.1 awen|OJJ30807.1 azon|OJJ48046.1 afis|EAW24240.1 afum|EAL85908.1 atub|OJI87442.1 anig|EHA24976.1 anid|CBF89325.1

Group9557: abra|OJJ77977.1 acar|OOF93312.1 agla|OJJ88228.1 akaw|GAA89019.1 aluc|OJZ80585.1 anid|CBF87755.1 asyd|OJJ57292.1 aver|OJJ05864.1

Group9558: abra|OJJ78028.1 acar|OOF97287.1 akaw|GAA85958.1 aluc|OJZ91103.1 anig|EHA19803.1 ater|EAU31770.1 atub|OJI83100.1 azon|OJJ42009.1

Group9559: abra|OJJ78034.1 acar|OOF98463.1 agla|OJJ81557.1 akaw|GAA85948.1 aluc|OJZ91114.1 anig|EHA19813.1 atub|OJI83118.1 awen|OJJ35948.1

Group9560: abra|OJJ78101.1 acar|OOF98773.1 acla|EAW07103.1 akaw|GAA85902.1 aluc|OJZ91165.1 anig|EHA18602.1 atub|OJI83181.1 anid|CBF80283.1

Group9561: afis|EAW16147.1 azon|OJJ43970.1 acla|EAW06618.1 afla|EED48689.1 anid|CBF79581.1 aory|EIT73166.1 asyd|OJJ57972.1 aver|OJJ04429.1

Group9562: abra|OJJ78120.1 acar|OOF98723.1 akaw|GAA85888.1 aluc|OJZ91183.1 anig|EHA19876.1 asyd|OJJ54308.1 atub|OJI83201.1 aver|OJJ05254.1

Group9563: abra|OJJ78122.1 afla|EED49665.1 akaw|GAA85886.1 anig|EHA19878.1 aory|EIT74889.1 ater|EAU31568.1 atub|OJI83203.1 aory|EIT80979.1

Group9564: abra|OJJ78149.1 afis|EAW17181.1 aluc|OJZ91201.1 anig|EHA19906.1 asyd|OJJ61780.1 atub|OJI83218.1 aver|OJI95880.1 afum|EAL86610.1

Group9565: abra|OJJ78166.1 acla|EAW10842.1 afis|EAW24723.1 afla|EED45492.1 afum|EAL89372.1 agla|OJJ89012.1 anid|CBF78356.1 aory|EIT75360.1

Group9566: abra|OJJ78177.1 afis|EAW22124.1 akaw|GAA85856.1 aluc|OJZ91226.1 anid|CBF76068.1 anig|EHA19932.1 asyd|OJJ65399.1 atub|OJI83239.1

Group9567: abra|OJJ78195.1 acar|OOF98660.1 afla|EED52679.1 akaw|GAA85834.1 aluc|OJZ91266.1 anig|EHA19954.1 aory|EIT74230.1 atub|OJI83255.1

Group9568: abra|OJJ78196.1 acar|OOF98659.1 akaw|GAA85833.1 aluc|OJZ91267.1 anig|EHA19955.1 atub|OJI83256.1 awen|OJJ40833.1 azon|OJJ42579.1

Group9569: acar|OOF90271.1 acla|EAW13552.1 agla|OJJ80443.1 anid|CBF87441.1 aver|OJJ02466.1 asyd|OJJ59821.1 aory|EIT77635.1 awen|OJJ33464.1

Group9570: aver|OJI98259.1 acla|EAW10787.1 asyd|OJJ64181.1 acla|EAW12421.1 afla|EED52222.1 anid|CBF83046.1 aory|EIT74356.1 anid|CBF85573.1

Group9571: acar|OOF91813.1 agla|OJJ79114.1 asyd|OJJ55384.1 ater|EAU31022.1 aver|OJJ08273.1 awen|OJJ36173.1 asyd|OJJ54435.1 asyd|OJJ60332.1

Group9572: acar|OOF91835.1 afla|EED54608.1 akaw|GAA86591.1 aluc|OJZ85138.1 anig|EHA25354.1 aory|EIT78931.1 atub|OJI80454.1 awen|OJJ32894.1

Group9573: afum|EAL86182.1 agla|OJJ87465.1 azon|OJJ42591.1 afla|EED58055.1 aory|EIT79764.1  
ater|EAU35453.1 awen|OJJ31869.1 awen|OJJ38824.1

Group9574: acar|OOF92005.1 afla|EED46125.1 agla|OJJ80835.1 aory|EIT76419.1 ater|EAU36061.1  
aver|OJJ05887.1 awen|OJJ34649.1 asyd|OJJ59683.1

Group9575: acar|OOF92559.1 afla|EED47335.1 anid|CBF81558.1 aory|EIT82837.1 asyd|OJJ59499.1  
ater|EAU38092.1 aver|OJJ02775.1 awen|OJJ32598.1

Group9576: acar|OOF93022.1 agla|OJJ84215.1 akaw|GAA89204.1 aluc|OJZ81626.1 anid|CBF84613.1  
anig|EHA25817.1 atub|OJI88554.1 awen|OJJ29705.1

Group9577: acar|OOF93139.1 afla|EED45155.1 anid|CBF84225.1 aory|EIT73638.1 asyd|OJJ57182.1  
ater|EAU33860.1 aver|OJJ03108.1 ater|EAU37802.1

Group9578: acar|OOF93252.1 akaw|GAA87876.1 aluc|OJZ85517.1 asyd|OJJ57352.1 atub|OJI80049.1  
aver|OJJ05813.1 awen|OJJ35826.1 anig|EHA25050.1

Group9579: acar|OOF93301.1 afla|EED57510.1 agla|OJJ82926.1 aory|EIT81837.1 asyd|OJJ64583.1  
aver|OJI98681.1 awen|OJJ36288.1 awen|OJJ29790.1

Group9580: acar|OOF93864.1 afla|EED47783.1 akaw|GAA86247.1 anid|CBF82004.1 anig|EHA23960.1  
aory|EIT77175.1 atub|OJI81926.1 awen|OJJ36959.1

Group9581: acar|OOF94001.1 agla|OJJ79469.1 asyd|OJJ53706.1 aver|OJJ07830.1 awen|OJJ33637.1  
afla|EED47078.1 aory|EIT72480.1 awen|OJJ36283.1

Group9582: acar|OOF94002.1 afla|EED45233.1 anid|CBF73947.1 aory|EIT73699.1 asyd|OJJ53707.1  
aver|OJJ07831.1 awen|OJJ32558.1 afla|EED45232.1

Group9583: acar|OOF94505.1 afla|EED52367.1 akaw|GAA92890.1 aluc|OJZ80025.1 awen|OJJ36241.1  
acla|EAW07590.1 azon|OJJ45227.1 akaw|GAA93085.1

Group9584: acar|OOF95224.1 acla|EAW07168.1 afis|EAW22183.1 afum|EAL91006.2 anid|CBF88389.1  
asyd|OJJ63741.1 aver|OJI97199.1 azon|OJJ50295.1

Group9585: acar|OOF95323.1 acla|EAW06833.1 afla|EED53446.1 agla|OJJ88207.1 akaw|GAA87311.1  
aluc|OJZ89706.1 aory|EIT74837.1 awen|OJJ37919.1

Group9586: acar|OOF95522.1 acla|EAW07251.1 afis|EAW22272.1 agla|OJJ87783.1 anid|CBF88532.1  
asyd|OJJ63814.1 aver|OJI97124.1 awen|OJJ34845.1

Group9587: acar|OOF95545.1 aory|EIT82462.1 asyd|OJJ59655.1 atub|OJI85048.1 aver|OJJ02627.1  
azon|OJJ46452.1 akaw|GAA86658.1 aluc|OJZ89754.1

Group9588: aory|EIT74997.1 ater|EAU29363.1 afla|EED48304.1 anig|EHA25873.1 aory|EIT76308.1  
awen|OJJ35912.1 afla|EED53462.1 agla|OJJ80122.1

Group9589: acar|OOF96061.1 afla|EED45985.1 anid|CBF85237.1 aory|EIT75476.1 asyd|OJJ62982.1  
ater|EAU33614.1 aver|OJI97987.1 azon|OJJ47328.1

Group9590: afis|EAW15418.1 afum|EAL84226.1 afla|EED50614.1 agla|OJJ80128.1 aory|EIT78054.1  
asyd|OJJ64717.1 ater|EAU36021.1 aver|OJI98820.1

Group9591: agla|OJJ85407.1 acla|EAW12652.1 afis|EAW18032.1 afum|EAL91843.1 aory|EIT81764.1  
asyd|OJJ58289.1 ater|EAU31549.1 aver|OJJ02135.1

Group9592: acar|OOF97516.1 acla|EAW12033.1 afis|EAW20284.1 afum|EBA27230.1 anid|CBF85595.1  
asyd|OJJ64164.1 aver|OJI98242.1 azon|OJJ45219.1

Group9593: acar|OOF97537.1 afis|EAW20329.1 afla|EED52857.1 afum|EAL85456.1 anid|CBF86760.1  
asyd|OJJ65101.1 aver|OJI99227.1 acla|EAW15055.1

Group9594: acar|OOF98716.1 afis|EAW24716.1 afla|EED46063.1 afum|EAL89364.1 anid|CBF87718.1  
aory|EIT83486.1 asyd|OJJ60329.1 awen|OJJ32554.1

Group9595: acar|OOF98771.1 afis|EAW16869.1 afum|EAL86408.2 anid|CBF69720.1 asyd|OJJ58926.1  
aver|OJJ01522.1 awen|OJJ36306.1 azon|OJJ45905.1

Group9596: acar|OOF99259.1 akaw|GAA91878.1 aluc|OJZ82021.1 anig|EHA22235.1 atub|OJI84573.1  
acla|EAW11675.1 anid|CBF73436.1 aver|OJJ08111.1

Group9597: acar|OOG00292.1 acla|EAW12452.1 afla|EED51636.1 anid|CBF84174.1 aory|EIT80653.1  
asyd|OJJ57128.1 aver|OJJ03176.1 azon|OJJ46529.1

Group9598: acar|OOG00544.1 acla|EAW11651.1 afis|EAW23802.1 afum|EAL87236.1 asyd|OJJ65160.1  
ater|EAU31356.1 awen|OJJ35849.1 azon|OJJ42812.1

Group9599: ater|EAU39162.1 acla|EAW09026.1 afis|EAW22741.1 afla|EED49795.1 afum|EAL90454.1  
agla|OJJ78547.1 aory|EIT77688.1 aver|OJI95793.1

Group9600: acar|OOG01212.1 afis|EAW22984.1 agla|OJJ83303.1 anid|CBF87585.1 anig|EHA17722.1  
asyd|OJJ63256.1 aver|OJI97701.1 azon|OJJ49521.1

Group9601: acla|EAW06581.1 afis|EAW17092.1 afla|EED53428.1 afum|EAL86569.1 aory|EIT74920.1  
ater|EAU31405.1 azon|OJJ50131.1 ater|EAU33863.1

Group9602: acla|EAW06797.1 afis|EAW16346.1 afum|EAL88971.1 anid|CBF89214.1 aory|EIT74969.1  
ater|EAU34112.1 afla|EED53524.1 aver|OJI96643.1

Group9603: agla|OJJ83630.1 anid|CBF86700.1 ater|EAU33510.1 awen|OJJ34516.1 afla|EED54639.1  
asyd|OJJ64742.1 aver|OJI98846.1 awen|OJJ40119.1

Group9604: acla|EAW07115.1 afis|EAW22127.1 afum|EAL91061.1 anid|CBF83959.1 asyd|OJJ61428.1  
ater|EAU37214.1 aver|OJJ00764.1 azon|OJJ47383.1

Group9605: acla|EAW07188.1 afis|EAW22201.1 afla|EED57594.1 afum|EAL90991.1 agla|OJJ88513.1  
aory|EIT82942.1 ater|EAU34213.1 awen|OJJ34788.1

Group9606: acla|EAW08018.1 afis|EAW23052.1 afum|EAL88428.2 agla|OJJ89424.1 aory|EIT80290.1  
awen|OJJ35683.1 azon|OJJ44152.1 afla|EED54966.1

Group9607: acla|EAW08302.1 afis|EAW23338.1 afum|EAL88140.1 asyd|OJJ62446.1 afla|EED55628.1  
awen|OJJ39556.1 agla|OJJ86492.1 aver|OJI96583.1

Group9608: acla|EAW08990.1 afla|EED57080.1 anid|CBF70705.1 asyd|OJJ58456.1 ater|EAU37969.1  
aver|OJJ01056.1 agla|OJJ79340.1 aory|EIT82263.1

Group9609: acla|EAW09028.1 afis|EAW17359.1 afis|EAW22739.1 afum|EAL90456.1 agla|OJJ78545.1  
ater|EAU39161.1 aver|OJI95794.1 afum|EAL91196.1

Group9610: acla|EAW09098.1 agla|OJJ78890.1 anid|CBF84261.1 ater|EAU31572.1 aver|OJJ03077.1  
afis|EAW25694.1 afum|EAL84368.2 asyd|OJJ57211.1

Group9611: acla|EAW09123.1 afis|EAW19674.1 afla|EED45947.1 afum|EAL86847.2 agla|OJJ80970.1  
aory|EIT75658.1 awen|OJJ32667.1 ater|EAU30256.1

Group9612: acla|EAW09566.1 afis|EAW21570.1 afum|EBA27468.1 agla|OJJ85772.1 anid|CBF76320.1  
aory|EIT76631.1 asyd|OJJ61012.1 aver|OJJ00331.1

Group9613: acla|EAW09977.1 afis|EAW21112.1 afla|EED45988.1 afum|EAL92135.1 anid|CBF87179.1  
aory|EIT75427.1 asyd|OJJ54077.1 aver|OJJ08661.1

Group9614: acla|EAW10253.1 afis|EAW25339.1 afla|EED53820.1 afum|EAL90002.1 agla|OJJ83881.1  
aory|EIT78466.1 ater|EAU34485.1 awen|OJJ41058.1

Group9615: acla|EAW10396.1 afis|EAW25181.1 afla|EED53639.1 afum|EAL89855.1 anid|CBF69472.1  
asyd|OJJ59266.1 ater|EAU34338.1 aver|OJJ01878.1

Group9616: acla|EAW10798.1 afis|EAW24779.1 agla|OJJ88221.1 anid|CBF83178.1 asyd|OJJ55540.1  
aver|OJJ06618.1 awen|OJJ37941.1 afla|EED49722.1

Group9617: acla|EAW10843.1 afum|EAL89369.1 afis|EAW24720.1 afla|EED53233.1 agla|OJJ87995.1  
asyd|OJJ64486.1 aver|OJI98587.1 azon|OJJ43679.1

Group9618: acla|EAW11085.1 afis|EAW20773.1 afum|EAL84846.1 anid|CBF90337.1 aory|EIT76641.1  
asyd|OJJ59877.1 ater|EAU35825.1 aver|OJJ02409.1

Group9619: acla|EAW11222.1 afis|EAW18281.1 afla|EED48748.1 afum|EAL87647.1 akaw|GAA84255.1  
anid|CBF79489.1 aory|EIT73200.1 ater|EAU33287.1

Group9620: acla|EAW11621.1 afis|EAW23837.1 afla|EED52573.1 afum|EAL87268.1 aory|EIT74212.1  
asyd|OJJ56994.1 aver|OJJ03293.1 awen|OJJ33799.1

Group9621: acla|EAW11768.1 afis|EAW23681.1 afla|EED47434.1 afum|EAL87124.1 aory|EIT81922.1  
asyd|OJJ55513.1 ater|EAU29290.1 aver|OJJ06590.1

Group9622: acla|EAW11868.1 afis|EAW19479.1 afla|EED56687.1 afum|EAL87017.1 aory|EIT73845.1  
ater|EAU34791.1 awen|OJJ36884.1 azon|OJJ42922.1



Group9623: acla|EAW11974.1 afis|EAW19612.1 afla|EED56960.1 afum|EAL86910.1 aory|EIT77528.1  
ater|EAU32913.1 awen|OJJ41858.1 azon|OJJ47052.1

Group9624: acla|EAW12130.1 afis|EAW17255.1 afla|EED48389.1 afum|EAL86673.2 akaw|GAA86865.1  
anid|CBF82354.1 aory|EIT83091.1 atub|OJI84821.1

Group9625: acla|EAW12132.1 afis|EAW17219.1 afla|EED51385.1 afum|EAL86644.1 aluc|OJZ88710.1  
aory|EIT80584.1 atub|OJI91297.1 azon|OJJ50154.1

Group9626: acla|EAW12262.1 afis|EAW16968.1 afum|EAL86496.1 anid|CBF83937.1 asyd|OJJ55433.1  
aver|OJJ06510.1 awen|OJJ36436.1 azon|OJJ45263.1

Group9627: acla|EAW12340.1 afis|EAW15382.1 afla|EED56841.1 anid|CBF80189.1 aory|EIT77576.1  
asyd|OJJ52070.1 ater|EAU31367.1 aver|OJJ03034.1

Group9628: acla|EAW12374.1 afis|EAW16820.1 afla|EED45874.1 afum|EBA27271.1 anid|CBF69524.1  
asyd|OJJ59204.1 aver|OJJ01816.1 azon|OJJ50870.1

Group9629: acla|EAW12381.1 afis|EAW22413.1 afla|EED46912.1 afum|EAL92429.1 aory|EIT72559.1  
awen|OJJ36112.1 azon|OJJ45692.1 afum|EAL90779.1

Group9630: acla|EAW12393.1 afis|EAW16841.1 afla|EED51875.1 afum|EAL86388.1 aory|EIT81706.1  
asyd|OJJ63067.1 aver|OJI97895.1 azon|OJJ47714.1

Group9631: acla|EAW12559.1 afis|EAW24091.1 afla|EED46848.1 afum|EAL91946.2 agla|OJJ87165.1  
akaw|GAA89841.1 ater|EAU30515.1 awen|OJJ41398.1

Group9632: acla|EAW12572.1 afis|EAW24078.1 afla|EED51395.1 afum|EAL91933.1 agla|OJJ87149.1  
aory|EIT80743.1 ater|EAU30499.1 awen|OJJ41416.1

Group9633: acla|EAW12755.1 afis|EAW17918.1 afla|EED46321.1 afum|EAL91729.1 akaw|GAA85182.1  
anid|CBF76957.1 aory|EIT81193.1 ater|EAU33141.1

Group9634: acla|EAW12864.1 afis|EAW17813.1 afum|EAL91622.1 anid|CBF80722.1 asyd|OJJ54568.1  
ater|EAU30288.1 aver|OJJ07586.1 azon|OJJ44403.1

Group9635: acla|EAW12874.1 afis|EAW17802.1 afla|EED45796.1 afum|EAL91610.1 aory|EIT75648.1  
ater|EAU31831.1 asyd|OJJ61386.1 aver|OJJ00714.1

Group9636: acla|EAW12994.1 afis|EAW17672.1 afla|EED50481.1 afum|EBA27436.1 agla|OJJ79544.1  
aory|EIT82137.1 awen|OJJ37170.1 azon|OJJ50865.1

Group9637: acla|EAW13332.1 afis|EAW20447.1 afla|EED44823.1 afum|EAL84605.1 aory|EIT77748.1  
ater|EAU37712.1 aver|OJJ06863.1 awen|OJJ33137.1

Group9638: acla|EAW13523.1 afla|EED57079.1 anid|CBF82203.1 asyd|OJJ52181.1 ater|EAU29291.1  
aver|OJJ05964.1 awen|OJJ34429.1 aory|EIT82290.1

Group9639: acla|EAW13619.1 afis|EAW19979.1 afum|EBA27212.1 asyd|OJJ61567.1 ater|EAU37664.1  
aver|OJJ00887.1 awen|OJJ36068.1 azon|OJJ50241.1

Group9640: awen|OJJ33831.1 afis|EAW16762.1 afla|EED48119.1 afum|EAL86333.1 ater|EAU29806.1  
asyd|OJJ53532.1 aver|OJJ08218.1 azon|OJJ42616.1

Group9641: acla|EAW14271.1 afis|EAW22464.1 afla|EED49640.1 afum|EAL90727.1 agla|OJJ89360.1  
anid|CBF82495.1 aory|EIT80935.1 awen|OJJ37069.1

Group9642: acla|EAW14382.1 afis|EAW19088.1 afla|EED54320.1 afum|EAL93818.1 agla|OJJ84516.1  
akaw|GAA91582.1 anid|CBF79688.1 azon|OJJ46229.1

Group9643: acla|EAW14667.1 afis|EAW24198.1 afum|EAL85870.1 agla|OJJ79679.1 anid|CBF74321.1  
asyd|OJJ53998.1 aver|OJJ08095.1 awen|OJJ33101.1

Group9644: acla|EAW14956.1 afis|EAW23763.1 afla|EED53475.1 afum|EAL87196.1 aory|EIT74970.1  
asyd|OJJ57952.1 ater|EAU36896.1 aver|OJJ04445.1

Group9645: acla|EAW14958.1 afis|EAW24475.1 afla|EED52400.1 afum|EAL86147.1 agla|OJJ82598.1  
aory|EIT83306.1 awen|OJJ30938.1 azon|OJJ50151.1

Group9646: acla|EAW14989.1 afis|EAW24510.1 afla|EED45970.1 afum|EAL86179.1 aluc|OJZ83019.1  
anid|CBF73497.1 aory|EIT75818.1 ater|EAU30633.1

Group9647: acla|EAW15193.1 afis|EAW20162.1 afum|EAL85280.1 agla|OJJ88768.1 anid|CBF83902.1  
asyd|OJJ55414.1 awen|OJJ32057.1 azon|OJJ46091.1

Group9648: acla|EAW15304.1 afis|EAW25739.1 agla|OJJ88185.1 anid|CBF69360.1 asyd|OJJ57312.1  
aver|OJJ05850.1 awen|OJJ35540.1 atub|OJI88255.1

Group9649: acla|EAW15339.1 afis|EAW20370.1 afla|EED45212.1 afum|EAL85484.1 anid|CBF75990.1  
aory|EIT73752.1 ater|EAU37784.1 awen|OJJ38806.1

Group9650: afis|EAW15613.1 afum|EAL85722.1 akaw|GAA83735.1 asyd|OJJ54690.1 ater|EAU30431.1  
aver|OJJ07479.1 azon|OJJ42183.1 anig|EHA19704.1

Group9651: afis|EAW16671.1 afla|EED47560.1 afum|EAL89276.1 anid|CBF82085.1 aory|EIT74537.1  
asyd|OJJ54259.1 ater|EAU34536.1 aver|OJJ05212.1

Group9652: afis|EAW17298.1 afla|EED49518.1 anid|CBF81687.1 asyd|OJJ59561.1 ater|EAU29436.1  
aver|OJJ02707.1 aory|EIT82602.1 asyd|OJJ60042.1

Group9653: afis|EAW18030.1 afla|EED50491.1 afum|EAL91841.1 aluc|OJZ87315.1 aory|EIT82092.1  
atub|OJI81330.1 aver|OJI97482.1 ater|EAU36807.1

Group9654: afis|EAW18104.1 afum|EAL89392.1 afis|EAW20338.1 afum|EAL85459.1 anid|CBF86695.1  
asyd|OJJ64155.1 ater|EAU33491.1 aver|OJJ04471.1

Group9655: afis|EAW19776.1 afla|EED49440.1 afum|EAL85121.1 anid|CBF76189.1 aory|EIT79582.1  
asyd|OJJ57342.1 ater|EAU39072.1 aver|OJJ05820.1

Group9656: afis|EAW19866.1 afla|EED48493.1 afum|EAL85030.1 aory|EIT73271.1 ater|EAU38716.1  
awen|OJJ41888.1 asyd|OJJ62671.1 awen|OJJ37878.1

Group9657: afis|EAW19886.1 afla|EED57357.1 afum|EAL85011.1 anid|CBF82754.1 aory|EIT80143.1  
asyd|OJJ61609.1 ater|EAU33759.1 aver|OJJ00932.1

Group9658: anid|CBF88868.1 afla|EED56605.1 aory|EIT79681.1 akaw|GAA93300.1 anig|EHA25611.1  
asyd|OJJ54554.1 aver|OJI99480.1 awen|OJJ33512.1

Group9659: afis|EAW20319.1 afla|EED47508.1 afum|EAL85447.1 anid|CBF78532.1 aory|EIT74553.1  
asyd|OJJ65298.1 aver|OJI99438.1 awen|OJJ36330.1

Group9660: afis|EAW20734.1 afla|EED51866.1 aluc|OJZ87038.1 anig|EHA23278.1 aory|EIT81721.1  
asyd|OJJ54378.1 atub|OJI83477.1 anig|EHA25210.1

Group9661: afis|EAW21029.1 afla|EED55085.1 afum|EAL92067.2 agla|OJJ88640.1 anid|CBF84416.1  
aory|EIT81592.1 asyd|OJJ53559.1 aver|OJJ08195.1

Group9662: afis|EAW21030.1 afla|EED55086.1 afum|EAL92069.1 agla|OJJ88643.1 anid|CBF84414.1  
aory|EIT81594.1 asyd|OJJ53560.1 aver|OJJ08194.1

Group9663: afis|EAW21073.1 afum|EAL92096.1 ater|EAU36810.1 awen|OJJ36924.1 afis|EAW24619.1  
afum|EAL86247.1 asyd|OJJ56920.1 aver|OJJ03372.1

Group9664: afis|EAW21128.1 afum|EAL88867.1 akaw|GAA87228.1 aluc|OJZ84201.1 anid|CBF73407.1  
atub|OJI89883.1 afis|EAW24040.1 anig|EHA25772.1

Group9665: afis|EAW21628.1 afla|EED47435.1 afum|EAL92663.1 anid|CBF76690.1 aory|EIT81891.1  
asyd|OJJ61227.1 aver|OJJ00550.1 awen|OJJ33877.1

Group9666: afis|EAW22304.1 afla|EED49500.1 agla|OJJ82728.1 anid|CBF85190.1 aory|EIT82581.1  
ater|EAU38703.1 awen|OJJ31406.1 afum|EAL91593.1

Group9667: aver|OJJ08911.1 afla|EED45036.1 agla|OJJ81205.1 anid|CBF75956.1 aory|EIT73593.1  
asyd|OJJ62489.1 awen|OJJ35943.1 asyd|OJJ52944.1

Group9668: anig|EHA19540.1 afla|EED48397.1 akaw|GAA85012.1 aluc|OJZ86645.1 aory|EIT83074.1  
atub|OJI83882.1 asyd|OJJ55474.1 azon|OJJ42568.1

Group9669: afis|EAW23636.1 afla|EED50224.1 afum|EAL87824.1 anid|CBF70172.1 aory|EIT77338.1  
asyd|OJJ58794.1 ater|EAU30758.1 aver|OJJ01399.1

Group9670: afis|EAW24452.1 afla|EED55222.1 afum|EAL86121.1 anid|CBF73818.1 aory|EIT83526.1  
asyd|OJJ56572.1 ater|EAU29993.1 aver|OJJ06151.1

Group9671: agla|OJJ84650.1 anid|CBF83058.1 asyd|OJJ55508.1 ater|EAU32779.1 akaw|GAA83708.1  
aluc|OJZ91027.1 atub|OJI83018.1 anid|CBF74142.1

Group9672: afis|EAW24527.1 afla|EED55266.1 afum|EAL86191.1 anid|CBF84640.1 aory|EIT83543.1  
asyd|OJJ53358.1 ater|EAU37242.1 aver|OJJ08383.1

Group9673: afis|EAW24678.1 anid|CBF90088.1 asyd|OJJ57390.1 aver|OJI96124.1 afis|EAW24703.1 afum|EAL89345.1 ater|EAU31632.1 asyd|OJJ62034.1

Group9674: afis|EAW24722.1 afla|EED53236.1 afum|EAL89371.1 anid|CBF82176.1 aory|EIT74978.1 asyd|OJJ64483.1 aver|OJI98584.1 azon|OJJ43677.1

Group9675: afis|EAW25171.1 afla|EED51940.1 afum|EAL89844.1 asyd|OJJ56509.1 ater|EAU29519.1 aver|OJJ06210.1 awen|OJJ35896.1 aver|OJJ08252.1

Group9676: afis|EAW25627.1 afla|EED45969.1 afum|EAL84315.1 anid|CBF82423.1 aory|EIT75513.1 asyd|OJJ52964.1 ater|EAU36879.1 aver|OJJ08930.1

Group9677: afla|EED45122.1 aory|EIT73826.1 asyd|OJJ57416.1 awen|OJJ35842.1 afla|EED45123.1 agla|OJJ79344.1 aory|EIT75622.1 ater|EAU37751.1

Group9678: afla|EED46047.1 akaw|GAA92080.1 aluc|OJZ83644.1 aory|EIT83475.1 asyd|OJJ56880.1 ater|EAU30182.1 aver|OJJ03281.1 asyd|OJJ57006.1

Group9679: afla|EED47577.1 agla|OJJ80418.1 anid|CBF81533.1 aory|EIT74570.1 asyd|OJJ59485.1 aver|OJJ02789.1 awen|OJJ40853.1 agla|OJJ81823.1

Group9680: afla|EED47894.1 akaw|GAA86249.1 aluc|OJZ90504.1 anig|EHA23962.1 aory|EIT77238.1 atub|OJI81928.1 awen|OJJ31309.1 awen|OJJ38088.1

Group9681: afla|EED50239.1 agla|OJJ82251.1 aory|EIT77373.1 asyd|OJJ65272.1 aver|OJI99424.1 awen|OJJ35699.1 azon|OJJ43655.1 azon|OJJ50309.1

Group9682: afla|EED50965.1 aluc|OJZ80362.1 anid|CBF84013.1 aory|EIT77068.1 asyd|OJJ61380.1 aver|OJJ00707.1 awen|OJJ29826.1 awen|OJJ41774.1

Group9683: afla|EED51146.1 aory|EIT81353.1 asyd|OJJ56871.1 awen|OJJ30234.1 azon|OJJ46826.1 anid|CBF78574.1 asyd|OJJ65069.1 aver|OJI99194.1

Group9684: afla|EED51801.1 agla|OJJ78555.1 aory|EIT81703.1 asyd|OJJ57234.1 ater|EAU32272.1 aver|OJJ03051.1 awen|OJJ35819.1 azon|OJJ42502.1

Group9685: afla|EED52042.1 agla|OJJ82690.1 aory|EIT81445.1 asyd|OJJ61433.1 ater|EAU37779.1 aver|OJJ00768.1 asyd|OJJ52786.1 aver|OJJ08761.1

Group9686: afla|EED52175.1 akaw|GAA88461.1 aluc|OJZ88351.1 anig|EHA18083.1 aory|EIT74452.1 asyd|OJJ60084.1 atub|OJI90946.1 aver|OJJ04170.1

Group9687: afla|EED54201.1 afum|EAL85372.1 anid|CBF75978.1 aory|EIT76166.1 asyd|OJJ55418.1 ater|EAU32161.1 aver|OJJ06495.1 azon|OJJ50842.1

Group9688: afla|EED54742.1 anid|CBF78080.1 aory|EIT78954.1 asyd|OJJ55878.1 ater|EAU32535.1 aver|OJJ04823.1 awen|OJJ38266.1 aory|EIT78757.1

Group9689: afla|EED56558.1 agla|OJJ88413.1 akaw|GAA92923.1 aluc|OJZ82514.1 anig|EHA20904.1 asyd|OJJ57316.1 aver|OJJ05845.1 awen|OJJ33379.1

Group9690: afla|EED56567.1 aluc|OJZ88350.1 aory|EIT79594.1 asyd|OJJ56922.1 atub|OJI90945.1 aver|OJJ03371.1 azon|OJJ48671.1 asyd|OJJ62605.1

Group9691: afla|EED57356.1 agla|OJJ86314.1 anid|CBF74605.1 aory|EIT80139.1 asyd|OJJ58332.1 aver|OJJ01923.1 awen|OJJ34597.1 aver|OJJ02079.1

Group9692: afum|EAL92634.2 agla|OJJ87896.1 aluc|OJZ80194.1 asyd|OJJ52335.1 ater|EAU29451.1 aver|OJJ06197.1 awen|OJJ31628.1 asyd|OJJ56526.1

Group9693: agla|OJJ81745.1 akaw|GAA92806.1 aluc|OJZ88729.1 anig|EHA18332.1 atub|OJI91223.1 aver|OJI98066.1 akaw|GAA83090.1 asyd|OJJ62923.1

Group9694: agla|OJJ85513.1 anid|CBF87357.1 asyd|OJJ56542.1 ater|EAU36633.1 aver|OJJ05540.1 azon|OJJ51537.1 asyd|OJJ55375.1 aver|OJJ06461.1

Group9695: akaw|GAA89825.1 aluc|OJZ81863.1 anig|EHA22363.1 asyd|OJJ65112.1 atub|OJI84430.1 aver|OJI96896.1 awen|OJJ30085.1 asyd|OJJ53796.1

Group9696: abra|OJJ65444.1 abra|OJJ73318.1 akaw|GAA92802.1 aluc|OJZ88726.1 anig|EHA18431.1 atub|OJI91303.1 acar|OOF90376.1

Group9697: abra|OJJ65534.1 abra|OJJ65602.1 aluc|OJZ79709.1 aluc|OJZ79954.1 aluc|OJZ80151.1 awen|OJJ29544.1 awen|OJJ29650.1

Group9698: abra|OJJ65561.1 abra|OJJ65733.1 abra|OJJ65825.1 acla|EAW07109.1 afis|EAW22121.1 azon|OJJ50251.1 ater|EAU36018.1

Group9699: abra|OJJ70403.1 abra|OJJ74817.1 acar|OOF91878.1 aluc|OJZ92774.1 atub|OJI87217.1 akaw|GAA91761.1 anig|EHA26235.1

Group9700: acar|OOF90383.1 acar|OOF90385.1 afla|EED49707.1 asyd|OJJ54939.1 aver|OJJ07257.1 awen|OJJ30843.1 aver|OJJ08817.1

Group9701: acar|OOF90513.1 acar|OOF90514.1 abra|OJJ69552.1 akaw|GAA92501.1 aluc|OJZ91514.1 anig|EHA18709.1 atub|OJI85968.1

Group9702: acar|OOF92295.1 acar|OOF92336.1 abra|OJJ67505.1 akaw|GAA86333.1 aluc|OJZ84858.1 anig|EHA25091.1 atub|OJI80738.1

Group9703: acar|OOF94029.1 acar|OOF94099.1 abra|OJJ66424.1 akaw|GAA90288.1 aluc|OJZ83052.1 anig|EHA28116.1 atub|OJI87896.1

Group9704: acar|OOF94060.1 acar|OOF94130.1 abra|OJJ66012.1 acla|EAW12366.1 akaw|GAA92142.1 aluc|OJZ85547.1 atub|OJI79343.1

Group9705: acar|OOF95054.1 acar|OOF95121.1 abra|OJJ74659.1 akaw|GAA81952.1 aluc|OJZ92236.1 anig|EHA26718.1 atub|OJI86669.1

Group9706: acar|OOF95061.1 acar|OOF95128.1 abra|OJJ74654.1 akaw|GAA81956.1 aluc|OJZ92233.1 anig|EHA26722.1 atub|OJI86664.1

Group9707: acar|OOF95636.1 acar|OOF95687.1 abra|OJJ74673.1 akaw|GAA81940.1 aluc|OJZ92250.1 anig|EHA26706.1 atub|OJI86683.1

Group9708: acar|OOF98699.1 acar|OOF98700.1 abra|OJJ70124.1 akaw|GAA86645.1 aluc|OJZ85202.1 anig|EHA25408.1 atub|OJI80399.1

Group9709: acar|OOF99133.1 acar|OOG01134.1 abra|OJJ75543.1 akaw|GAA84299.1 aluc|OJZ88993.1 anig|EHA23534.1 atub|OJI85795.1

Group9710: acar|OOG00245.1 acar|OOG00263.1 abra|OJJ67539.1 akaw|GAA88120.1 aluc|OJZ81393.1 anig|EHA18686.1 atub|OJI91598.1

Group9711: acar|OOG00246.1 acar|OOG00264.1 abra|OJJ67540.1 akaw|GAA88119.1 aluc|OJZ81392.1 anig|EHA18685.1 atub|OJI91597.1

Group9712: afum|EAL85379.1 afum|EAL87817.1 aluc|OJZ79810.1 aluc|OJZ79957.1 afis|EAW19387.1 anig|EHA21845.1 awen|OJJ29569.1

Group9713: afum|EAL90933.1 afum|EAL91124.1 afla|EED52355.1 agla|OJJ83478.1 akaw|GAA87892.1 azon|OJJ42063.1 azon|OJJ42062.1

Group9714: agla|OJJ78566.1 agla|OJJ89693.1 acla|EAW08144.1 afis|EAW23180.1 afum|EAL88303.1 azon|OJJ47609.1 awen|OJJ36598.1

Group9715: agla|OJJ79308.1 agla|OJJ84499.1 afis|EAW19110.1 afla|EED57648.1 afum|EAL93841.2 aory|EIT79880.1 awen|OJJ32503.1

Group9716: agla|OJJ79364.1 agla|OJJ84921.1 agla|OJJ86637.1 agla|OJJ84922.1 agla|OJJ85121.1 anid|CBF80817.1 anig|EHA22300.1

Group9717: agla|OJJ80014.1 agla|OJJ80018.1 agla|OJJ80444.1 awen|OJJ38763.1 azon|OJJ51132.1 asyd|OJJ59795.1 awen|OJJ33433.1

Group9718: agla|OJJ80553.1 agla|OJJ85190.1 agla|OJJ86423.1 agla|OJJ84511.1 agla|OJJ84513.1 agla|OJJ87332.1 agla|OJJ87333.1

Group9719: agla|OJJ81317.1 agla|OJJ83542.1 agla|OJJ85999.1 afis|EAW20674.1 aluc|OJZ80140.1 anid|CBF84439.1 aory|EIT78799.1

Group9720: agla|OJJ83799.1 agla|OJJ86158.1 aluc|OJZ79693.1 aluc|OJZ79906.1 aluc|OJZ81126.1 asyd|OJJ52320.1 aver|OJJ05900.1

Group9721: akaw|GAA92341.1 akaw|GAA93146.1 akaw|GAA93220.1 akaw|GAA92653.1 akaw|GAA93096.1 akaw|GAA93271.1 aluc|OJZ80323.1

Group9722: akaw|GAA92359.1 akaw|GAA92361.1 abra|OJJ65460.1 agla|OJJ79296.1 asyd|OJJ52173.1 acla|EAW11447.1 afla|EED52346.1

Group9723: akaw|GAA92608.1 akaw|GAA92958.1 abra|OJJ65616.1 acla|EAW11449.1 afla|EED52349.1 abra|OJJ66313.1 aluc|OJZ80004.1

Group9724: akaw|GAA93274.1 akaw|GAA93310.1 aluc|OJZ79676.1 aluc|OJZ80120.1 aluc|OJZ81147.1 aluc|OJZ88801.1 abra|OJJ66179.1

Group9725: aluc|OJZ79625.1 aluc|OJZ90862.1 aluc|OJZ80185.1 abra|OJJ70106.1 agla|OJJ81743.1 akaw|GAA83853.1 anig|EHA26922.1

Group9726: aluc|OJZ79673.1 aluc|OJZ88804.1 asyd|OJJ52019.1 asyd|OJJ52273.1 abra|OJJ66183.1 akaw|GAA93191.1 akaw|GAA93344.1

Group9727: aluc|OJZ79696.1 aluc|OJZ88837.1 asyd|OJJ52056.1 asyd|OJJ52167.1 abra|OJJ65729.1 acar|OOF96902.1 afla|EED54492.1

Group9728: aluc|OJZ80014.1 aluc|OJZ80092.1 abra|OJJ66175.1 acar|OOF97139.1 acla|EAW08830.1 afis|EAW16714.1 anig|EHA26114.1

Group9729: anid|CBF79026.1 anid|CBF87275.1 acla|EAW14555.1 afis|EAW17237.1 afum|EAL86595.1 asyd|OJJ55940.1 aver|OJJ04889.1

Group9730: anid|CBF81400.1 anid|CBF83110.1 acla|EAW09041.1 afis|EAW15400.1 afla|EED45073.1 afum|EAL84248.1 aory|EIT73649.1

Group9731: anig|EHA19569.1 anig|EHA27836.1 abra|OJJ77128.1 acar|OOF93017.1 akaw|GAA90800.1 aluc|OJZ84538.1 atub|OJI89542.1

Group9732: anig|EHA21872.1 anig|EHA26121.1 abra|OJJ66306.1 akaw|GAA93149.1 aluc|OJZ91228.1 acar|OOF90507.1 aluc|OJZ80008.1

Group9733: asyd|OJJ51854.1 asyd|OJJ54878.1 afla|EED50242.1 akaw|GAA83269.1 anid|CBF88280.1 aory|EIT77311.1 aluc|OJZ87733.1

Group9734: asyd|OJJ52104.1 asyd|OJJ64009.1 aver|OJI97594.1 aver|OJI98097.1 anid|CBF85316.1 ater|EAU34365.1 azon|OJJ50183.1

Group9735: asyd|OJJ52161.1 asyd|OJJ52176.1 acla|EAW11072.1 afla|EED50551.1 aory|EIT82040.1 aver|OJJ00281.1 asyd|OJJ60953.1

Group9736: asyd|OJJ52271.1 asyd|OJJ52315.1 asyd|OJJ51920.1 asyd|OJJ51995.1 akaw|GAA89005.1 akaw|GAA92333.1 aluc|OJZ79473.1

Group9737: asyd|OJJ52888.1 asyd|OJJ55405.1 asyd|OJJ62611.1 asyd|OJJ63961.1 aver|OJJ03448.1 aver|OJJ06485.1 aver|OJJ07671.1

Group9738: asyd|OJJ54343.1 asyd|OJJ54528.1 aver|OJJ03007.1 aver|OJJ05295.1 akaw|GAA85810.1 aluc|OJZ91289.1 atub|OJI83279.1

Group9739: ater|EAU33181.1 ater|EAU35443.1 afla|EED45067.1 anid|CBF84552.1 aory|EIT73756.1 asyd|OJJ53482.1 aver|OJJ08277.1

Group9740: aver|OJI96131.1 aver|OJJ04892.1 acla|EAW15060.1 afum|EAL85111.2 asyd|OJJ55943.1 ater|EAU37825.1 agla|OJJ82585.1

Group9741: aver|OJJ06627.1 aver|OJJ07716.1 anid|CBF83182.1 agla|OJJ80382.1 ater|EAU36808.1 asyd|OJJ55550.1 awen|OJJ35782.1

Group9742: awen|OJJ30182.1 awen|OJJ30894.1 abra|OJJ74480.1 akaw|GAA87373.1 aluc|OJZ89639.1 atub|OJI85164.1 acar|OOF96768.1

Group9743: awen|OJJ30783.1 awen|OJJ31698.1 abra|OJJ67839.1 acar|OOF92014.1 akaw|GAA91845.1 aluc|OJZ82053.1 atub|OJI84611.1

Group9744: awen|OJJ30877.1 awen|OJJ33939.1 awen|OJJ33317.1 awen|OJJ30918.1 awen|OJJ31456.1 afis|EAW19028.1 afum|EAL93758.1

Group9745: awen|OJJ33688.1 abra|OJJ74729.1 acar|OOF92036.1 akaw|GAA81888.1 aluc|OJZ92313.1 anig|EHA26656.1 atub|OJI86742.1

Group9746: awen|OJJ31359.1 awen|OJJ38671.1 abra|OJJ68029.1 akaw|GAA90924.1 aluc|OJZ82902.1 atub|OJI89128.1 azon|OJJ46859.1

Group9747: awen|OJJ32700.1 awen|OJJ33320.1 awen|OJJ39607.1 awen|OJJ32701.1 afla|EED54688.1 afla|EED54689.1 aory|EIT78885.1

Group9748: awen|OJJ33465.1 awen|OJJ38085.1 afis|EAW20739.1 asyd|OJJ56939.1 aver|OJJ03346.1  
afla|EED46860.1 aory|EIT72670.1

Group9749: awen|OJJ33556.1 awen|OJJ33557.1 asyd|OJJ52927.1 aver|OJJ08895.1 afla|EED50327.1  
aory|EIT77355.1 afis|EAW16165.1

Group9750: awen|OJJ34707.1 awen|OJJ35048.1 acla|EAW12023.1 afis|EAW19832.1 afum|EAL85060.1  
aver|OJJ08534.1 azon|OJJ50136.1

Group9751: azon|OJJ42218.1 azon|OJJ42501.1 azon|OJJ43570.1 acar|OOF90551.1 awen|OJJ41549.1  
afis|EAW22623.1 agla|OJJ79471.1

Group9752: azon|OJJ50292.1 abra|OJJ69152.1 acar|OOF91151.1 akaw|GAA86310.1 aluc|OJZ86139.1  
anig|EHA24485.1 atub|OJI79931.1

Group9753: azon|OJJ42472.1 azon|OJJ42785.1 azon|OJJ43529.1 azon|OJJ51058.1 azon|OJJ48053.1  
azon|OJJ45122.1 azon|OJJ50325.1

Group9754: azon|OJJ42586.1 azon|OJJ45998.1 acar|OOF92160.1 akaw|GAA89799.1 aluc|OJZ81892.1  
anig|EHA22350.1 atub|OJI84445.1

Group9755: azon|OJJ46005.1 azon|OJJ47953.1 acla|EAW08459.1 afis|EAW23504.1 afum|EAL87957.1  
agla|OJJ86750.1 awen|OJJ39830.1

Group9756: agla|OJJ79522.1 agla|OJJ88709.1 agla|OJJ81045.1 agla|OJJ82034.1 agla|OJJ85366.1  
agla|OJJ82928.1 agla|OJJ89310.1

Group9757: aluc|OJZ79560.1 aluc|OJZ80030.1 aluc|OJZ79858.1 aluc|OJZ88827.1 aluc|OJZ79782.1  
aluc|OJZ80429.1 aluc|OJZ80241.1

Group9758: abra|OJJ65470.1 aluc|OJZ87040.1 anid|CBF76054.1 asyd|OJJ62366.1 atub|OJI83545.1  
aver|OJI96500.1 awen|OJJ37045.1

Group9759: abra|OJJ65476.1 acar|OOF98953.1 afla|EED47796.1 ater|EAU31614.1 anid|CBF79154.1  
asyd|OJJ62575.1 aver|OJI96697.1

Group9760: abra|OJJ65493.1 agla|OJJ85324.1 akaw|GAA91467.1 aluc|OJZ82072.1 anig|EHA18712.1  
atub|OJI79314.1 aver|OJI98909.1

Group9761: abra|OJJ65547.1 acar|OOF97960.1 akaw|GAA93195.1 aluc|OJZ79942.1 atub|OJI87430.1  
awen|OJJ29539.1 akaw|GAA93187.1

Group9762: abra|OJJ65607.1 acla|EAW12428.1 afis|EAW19528.1 afum|EAL86976.2 akaw|GAA93116.1  
aluc|OJZ80588.1 azon|OJJ48014.1

Group9763: anid|CBF80257.1 asyd|OJJ54183.1 ater|EAU36723.1 aver|OJJ08557.1 acla|EAW13743.1  
afis|EAW19839.1 afum|EAL85054.2

Group9764: awen|OJJ33738.1 acar|OOF91732.1 afla|EED52383.1 anig|EHA19836.1 aory|EIT83298.1  
aluc|OJZ86320.1 atub|OJI84215.1

Group9765: abra|OJJ65683.1 acar|OOF95486.1 agla|OJJ78865.1 anid|CBF75920.1 ater|EAU30725.1  
aver|OJJ08165.1 awen|OJJ34745.1

Group9766: afis|EAW25611.1 agla|OJJ88492.1 afla|EED53588.1 aory|EIT74897.1 aver|OJJ07160.1  
asyd|OJJ62355.1 afum|EAL92214.1

Group9767: abra|OJJ65795.1 acar|OOF96896.1 afla|EED51402.1 aory|EIT80451.1 asyd|OJJ62238.1  
aver|OJI96347.1 awen|OJJ37610.1

Group9768: abra|OJJ65807.1 afla|EED47496.1 aluc|OJZ82528.1 anig|EHA22494.1 aory|EIT74566.1  
awen|OJJ33614.1 azon|OJJ42014.1

Group9769: abra|OJJ65837.1 akaw|GAA92980.1 aluc|OJZ79992.1 anig|EHA21147.1 akaw|GAA93036.1  
ater|EAU35416.1 akaw|GAA93103.1

Group9770: abra|OJJ65867.1 aluc|OJZ90173.1 anig|EHA23672.1 atub|OJI81601.1 ater|EAU30769.1  
awen|OJJ35394.1 azon|OJJ50615.1

Group9771: abra|OJJ65874.1 agla|OJJ84702.1 akaw|GAA92269.1 aluc|OJZ90163.1 anig|EHA23669.1  
azon|OJJ45109.1 awen|OJJ38804.1

Group9772: abra|OJJ65882.1 akaw|GAA90453.1 aluc|OJZ85771.1 asyd|OJJ65100.1 atub|OJI79556.1  
aver|OJI99226.1 ater|EAU36740.1

Group9773: abra|OJJ65891.1 acar|OOF94954.1 akaw|GAA86014.1 aluc|OJZ90241.1 anig|EHA23738.1 atub|OJI81670.1 awen|OJJ37827.1

Group9774: abra|OJJ65906.1 acar|OOF93399.1 akaw|GAA92325.1 aluc|OJZ90223.1 anig|EHA23724.1 ater|EAU34024.1 atub|OJI81656.1

Group9775: ater|EAU32518.1 akaw|GAA93171.1 aluc|OJZ83030.1 anig|EHA28106.1 asyd|OJJ52501.1 atub|OJI87918.1 aver|OJJ05539.1

Group9776: abra|OJJ65940.1 acar|OOF95005.1 agla|OJJ89023.1 akaw|GAA92296.1 aluc|OJZ90193.1 anig|EHA23692.1 atub|OJI81620.1

Group9777: abra|OJJ65950.1 acar|OOF92922.1 agla|OJJ87999.1 aluc|OJZ83007.1 atub|OJI89242.1 aver|OJJ08451.1 awen|OJJ30038.1

Group9778: abra|OJJ65977.1 acar|OOF92894.1 akaw|GAA90851.1 aluc|OJZ82982.1 anig|EHA21396.1 atub|OJI89216.1 awen|OJJ31295.1

Group9779: abra|OJJ65982.1 acar|OOF92891.1 akaw|GAA90855.1 aluc|OJZ82978.1 anig|EHA21393.1 atub|OJI89211.1 awen|OJJ35855.1

Group9780: abra|OJJ65997.1 akaw|GAA90869.1 aluc|OJZ82964.1 anig|EHA21380.1 ater|EAU33862.1 atub|OJI89196.1 anig|EHA24971.1

Group9781: asyd|OJJ62944.1 aver|OJI98046.1 afla|EED55278.1 aory|EIT83593.1 aver|OJJ07922.1 awen|OJJ33327.1 atub|OJI87200.1

Group9782: abra|OJJ66039.1 afla|EED49333.1 akaw|GAA86615.1 aluc|OJZ85167.1 aory|EIT79483.1 ater|EAU32795.1 atub|OJI80444.1

Group9783: abra|OJJ66074.1 afla|EED52684.1 akaw|GAA84172.1 aluc|OJZ81097.1 anig|EHA19274.1 aory|EIT74216.1 atub|OJI82485.1

Group9784: aver|OJI99624.1 acla|EAW13613.1 afla|EED53480.1 akaw|GAA88583.1 aluc|OJZ88487.1 anig|EHA20149.1 aory|EIT75250.1

Group9785: abra|OJJ66116.1 acar|OOF95021.1 akaw|GAA92678.1 aluc|OJZ90133.1 anig|EHA20938.1 asyd|OJJ52521.1 atub|OJI84663.1

Group9786: abra|OJJ66129.1 anig|EHA20925.1 abra|OJJ66130.1 akaw|GAA92687.1 aluc|OJZ90145.1 atub|OJI84654.1 awen|OJJ33721.1

Group9787: abra|OJJ66134.1 acar|OOF94022.1 afla|EED51824.1 akaw|GAA92691.1 aluc|OJZ90149.1 anig|EHA20921.1 atub|OJI84650.1

Group9788: abra|OJJ66141.1 akaw|GAA92696.1 aluc|OJZ90154.1 anig|EHA20915.1 asyd|OJJ64759.1 atub|OJI84645.1 azon|OJJ42386.1

Group9789: abra|OJJ66153.1 afla|EED45844.1 anid|CBF71482.1 asyd|OJJ60379.1 ater|EAU37971.1 aver|OJJ03873.1 awen|OJJ40104.1

Group9790: asyd|OJJ57411.1 ater|EAU35429.1 aver|OJJ05770.1 afis|EAW20691.1 afum|EAL86273.1 asyd|OJJ60275.1 ater|EAU31611.1

Group9791: abra|OJJ66167.1 afla|EED54668.1 akaw|GAA83593.1 aluc|OJZ92403.1 anig|EHA26563.1 aory|EIT78789.1 atub|OJI86831.1

Group9792: abra|OJJ66177.1 agla|OJJ85094.1 aluc|OJZ80013.1 anig|EHA26115.1 asyd|OJJ56758.1 atub|OJI87459.1 awen|OJJ38803.1

Group9793: abra|OJJ66197.1 acar|OOF95791.1 afla|EED53394.1 agla|OJJ81774.1 asyd|OJJ55465.1 awen|OJJ41831.1 awen|OJJ35538.1

Group9794: abra|OJJ66199.1 acar|OOF91931.1 afis|EAW16948.1 afum|EAL86475.1 akaw|GAA89090.1 anig|EHA25692.1 atub|OJI88429.1

Group9795: abra|OJJ66206.1 afis|EAW17408.1 afla|EED48166.1 agla|OJJ81618.1 anid|CBF76000.1 asyd|OJJ60265.1 ater|EAU37953.1

Group9796: abra|OJJ66208.1 acar|OOF90652.1 akaw|GAA89079.1 aluc|OJZ80512.1 anig|EHA25681.1 atub|OJI88418.1 azon|OJJ42563.1

Group9797: abra|OJJ66222.1 afis|EAW20825.1 akaw|GAA89064.1 aluc|OJZ80528.1 atub|OJI88402.1 awen|OJJ39957.1 afum|EAL84804.1

Group9798: abra|OJJ66241.1 afis|EAW16930.1 afla|EED53698.1 ater|EAU34192.1 azon|OJJ44470.1  
agla|OJJ84652.1 aluc|OJZ80547.1

Group9799: abra|OJJ66278.1 acla|EAW15063.1 afla|EED45032.1 afum|EAL85114.1 anig|EHA23658.1  
ater|EAU38973.1 atub|OJI89945.1

Group9800: abra|OJJ66279.1 acar|OOF96459.1 afis|EAW19507.1 afum|EAL86987.1 anig|EHA23659.1  
ater|EAU36494.1 atub|OJI89944.1

Group9801: abra|OJJ66283.1 acar|OOF91927.1 acla|EAW10349.1 anig|EHA23663.1 ater|EAU38976.1  
atub|OJI89940.1 ater|EAU38975.1

Group9802: abra|OJJ66328.1 afis|EAW17144.1 afla|EED47885.1 aluc|OJZ91241.1 anid|CBF82971.1  
atub|OJI79303.1 afis|EAW20656.1

Group9803: afum|EAL90431.1 anid|CBF79083.1 afla|EED47305.1 aory|EIT82825.1 ater|EAU37854.1  
aver|OJJ05552.1 awen|OJJ32867.1

Group9804: abra|OJJ66445.1 akaw|GAA86650.1 aluc|OJZ85208.1 anig|EHA26090.1 asyd|OJJ56744.1  
aver|OJJ07916.1 azon|OJJ50084.1

Group9805: abra|OJJ66492.1 acar|OOF93283.1 akaw|GAA85441.1 aluc|OJZ83346.1 anig|EHA24979.1  
ater|EAU34029.1 atub|OJI82240.1

Group9806: afis|EAW22298.1 afum|EAL90883.1 agla|OJJ86326.1 anid|CBF69368.1 asyd|OJJ53654.1  
asyd|OJJ60387.1 ater|EAU36564.1

Group9807: acla|EAW11674.1 acar|OOF92982.1 afis|EAW23695.1 afla|EED51840.1 afum|EAL87139.1  
aory|EIT81695.1 ater|EAU31565.1

Group9808: abra|OJJ66510.1 azon|OJJ51380.1 abra|OJJ75779.1 akaw|GAA84495.1 aluc|OJZ89219.1  
anig|EHA23343.1 atub|OJI85573.1

Group9809: azon|OJJ46501.1 acla|EAW12906.1 afis|EAW17782.1 afla|EED56297.1 aory|EIT80563.1  
atub|OJI89933.1 aory|EIT73403.1

Group9810: abra|OJJ66776.1 acar|OOF93855.1 afla|EED51424.1 akaw|GAA89711.1 aluc|OJZ80673.1  
aory|EIT80482.1 atub|OJI87527.1

Group9811: abra|OJJ66798.1 afis|EAW22088.1 afla|EED57474.1 asyd|OJJ56428.1 atub|OJI89598.1  
aver|OJJ03128.1 awen|OJJ31393.1

Group9812: abra|OJJ66810.1 afla|EED46150.1 agla|OJJ88619.1 aory|EIT76481.1 asyd|OJJ54552.1  
atub|OJI79332.1 aver|OJI96980.1

Group9813: abra|OJJ66824.1 akaw|GAA90459.1 aluc|OJZ85765.1 anig|EHA24791.1 atub|OJI79549.1  
acar|OOG00558.1 azon|OJJ49025.1

Group9814: abra|OJJ66935.1 acar|OOF94943.1 aluc|OJZ85389.1 anig|EHA24888.1 akaw|GAA87756.1  
atub|OJI80181.1 anig|EHA25573.1

Group9815: abra|OJJ66946.1 akaw|GAA91474.1 aluc|OJZ85634.1 anig|EHA24897.1 asyd|OJJ63596.1  
atub|OJI79424.1 aver|OJI97340.1

Group9816: abra|OJJ66969.1 afla|EED56783.1 akaw|GAA92194.1 aluc|OJZ85609.1 anig|EHA24917.1  
aory|EIT73926.1 atub|OJI79402.1

Group9817: abra|OJJ66977.1 acar|OOF93640.1 akaw|GAA92187.1 aluc|OJZ85597.1 anig|EHA24925.1  
atub|OJI79393.1 azon|OJJ46406.1

Group9818: abra|OJJ66978.1 acar|OOF93641.1 akaw|GAA92186.1 aluc|OJZ85596.1 anig|EHA24926.1  
atub|OJI79392.1 azon|OJJ48711.1

Group9819: abra|OJJ67014.1 acar|OOF93606.1 akaw|GAA92159.1 aluc|OJZ85566.1 anig|EHA24952.1  
atub|OJI79361.1 ater|EAU31042.1

Group9820: acla|EAW15303.1 afis|EAW17015.1 akaw|GAA89814.1 aluc|OJZ81876.1 acar|OOF92825.1  
ater|EAU31620.1 afis|EAW25738.1

Group9821: abra|OJJ67026.1 acla|EAW11886.1 akaw|GAA83301.1 anid|CBF81862.1 ater|EAU31650.1  
aver|OJI95821.1 ater|EAU30724.1

Group9822: abra|OJJ67034.1 afla|EED56204.1 akaw|GAA90579.1 aluc|OJZ86037.1 aory|EIT73386.1  
ater|EAU36046.1 atub|OJI79824.1



Group9823: abra|OJJ67060.1 afla|EED48485.1 anid|CBF89311.1 anig|EHA22169.1 aory|EIT73239.1 asyd|OJJ59580.1 aver|OJJ02689.1

Group9824: abra|OJJ67066.1 acar|OOF96439.1 akaw|GAA83293.1 aluc|OJZ83795.1 anig|EHA18940.1 atub|OJI90165.1 azon|OJJ50262.1

Group9825: abra|OJJ67078.1 akaw|GAA91079.1 aluc|OJZ87894.1 anid|CBF70190.1 asyd|OJJ59829.1 atub|OJI80758.1 aver|OJJ02458.1

Group9826: abra|OJJ67130.1 acar|OOF99012.1 afla|EED53376.1 aory|EIT75221.1 asyd|OJJ59558.1 aver|OJJ02710.1 awen|OJJ39795.1

Group9827: abra|OJJ67155.1 acar|OOF91669.1 akaw|GAA91017.1 aluc|OJZ87818.1 anig|EHA20299.1 ater|EAU35207.1 atub|OJI80826.1

Group9828: abra|OJJ67217.1 acar|OOF93377.1 acla|EAW11102.1 akaw|GAA91093.1 aluc|OJZ87913.1 ater|EAU29431.1 atub|OJI79340.1

Group9829: asyd|OJJ58705.1 aver|OJJ01317.1 afla|EED56582.1 agla|OJJ79966.1 aory|EIT79628.1 awen|OJJ40587.1 azon|OJJ42309.1

Group9830: abra|OJJ67231.1 acar|OOF98322.1 agla|OJJ89179.1 akaw|GAA91656.1 aluc|OJZ87743.1 asyd|OJJ64981.1 atub|OJI80898.1

Group9831: anid|CBF78375.1 afis|EAW25697.1 afum|EAL84372.1 afla|EED56870.1 agla|OJJ79800.1 asyd|OJJ57320.1 aver|OJJ05841.1

Group9832: abra|OJJ67353.1 acar|OOF91852.1 afis|EAW25677.1 afum|EAL84347.1 anid|CBF73490.1 anig|EHA25228.1 asyd|OJJ54610.1

Group9833: abra|OJJ67367.1 acar|OOF92443.1 akaw|GAA86455.1 aluc|OJZ84997.1 anig|EHA25208.1 atub|OJI80603.1 azon|OJJ42413.1

Group9834: abra|OJJ67382.1 acar|OOF92431.1 akaw|GAA86442.1 aluc|OJZ84984.1 anig|EHA25197.1 atub|OJI80616.1 azon|OJJ45903.1

Group9835: abra|OJJ67557.1 acar|OOG00272.1 aluc|OJZ81376.1 aory|EIT74385.1 atub|OJI91582.1 awen|OJJ29920.1 agla|OJJ84145.1

Group9836: anid|CBF90356.1 ater|EAU36813.1 afla|EED51131.1 agla|OJJ81309.1 aory|EIT81314.1 asyd|OJJ55573.1 aver|OJJ06652.1

Group9837: ater|EAU34362.1 afla|EED56877.1 aory|EIT77518.1 asyd|OJJ54821.1 aver|OJJ07340.1 awen|OJJ37089.1 aver|OJJ08816.1

Group9838: abra|OJJ67581.1 afla|EED44748.1 akaw|GAA85344.1 aluc|OJZ90706.1 anig|EHA24577.1 atub|OJI82133.1 awen|OJJ36299.1

Group9839: abra|OJJ67589.1 akaw|GAA89108.1 anid|CBF84243.1 anig|EHA25708.1 asyd|OJJ57196.1 atub|OJI88449.1 aver|OJJ03095.1

Group9840: abra|OJJ67627.1 akaw|GAA89147.1 aluc|OJZ81689.1 anig|EHA25754.1 atub|OJI88490.1 ater|EAU30032.1 awen|OJJ36957.1

Group9841: abra|OJJ67640.1 akaw|GAA89158.1 aluc|OJZ81676.1 anid|CBF77412.1 anig|EHA25765.1 atub|OJI88505.1 azon|OJJ48531.1

Group9842: abra|OJJ67643.1 akaw|GAA93106.1 aluc|OJZ80598.1 anig|EHA25769.1 aory|EIT82302.1 asyd|OJJ55803.1 atub|OJI88510.1

Group9843: abra|OJJ67659.1 akaw|GAA89174.1 aluc|OJZ81659.1 atub|OJI88524.1 aver|OJI98977.1 awen|OJJ41960.1 anid|CBF70175.1

Group9844: abra|OJJ67683.1 aluc|OJZ81635.1 anid|CBF73537.1 asyd|OJJ56719.1 ater|EAU30904.1 atub|OJI88545.1 aver|OJJ06006.1

Group9845: abra|OJJ67706.1 afis|EAW23760.1 afum|EBA27303.1 anig|EHA21358.1 ater|EAU30777.1 atub|OJI88565.1 aver|OJI99276.1

Group9846: afla|EED50755.1 abra|OJJ73326.1 agla|OJJ84167.1 akaw|GAA92792.1 aluc|OJZ88712.1 anig|EHA18414.1 atub|OJI91299.1

Group9847: afla|EED48994.1 aory|EIT80027.1 anid|CBF87387.1 asyd|OJJ52843.1 acar|OOF96795.1 aver|OJJ08819.1 azon|OJJ51746.1

Group9848: abra|OJJ67805.1 acla|EAW13532.1 afis|EAW17482.1 aluc|OJZ90852.1 ater|EAU33223.1 atub|OJI82851.1 afum|EAL87841.1

Group9849: abra|OJJ67812.1 afis|EAW19367.1 afla|EED48199.1 afum|EAL94086.1 anid|CBF87297.1 aory|EIT72948.1 ater|EAU30774.1

Group9850: abra|OJJ67819.1 afum|EAL86777.1 anid|CBF79158.1 anig|EHA20933.1 ater|EAU38016.1 aver|OJJ07618.1 awen|OJJ36344.1

Group9851: abra|OJJ67876.1 acar|OOF92854.1 afis|EAW21801.1 afum|EAL92827.1 akaw|GAA91884.1 aluc|OJZ82013.1 atub|OJI84562.1

Group9852: asyd|OJJ56421.1 aver|OJJ08898.1 asyd|OJJ55463.1 afla|EED46393.1 aory|EIT72410.1 afum|EAL85341.1 azon|OJJ46466.1

Group9853: acla|EAW15309.1 afis|EAW20269.1 awen|OJJ39874.1 afla|EED52435.1 afum|EBA27229.1 aory|EIT83304.1 asyd|OJJ60803.1

Group9854: abra|OJJ67955.1 agla|OJJ82452.1 akaw|GAA91241.1 aluc|OJZ82828.1 anig|EHA21266.1 atub|OJI89058.1 acar|OOF92800.1

Group9855: abra|OJJ67979.1 acar|OOF92820.1 akaw|GAA91223.1 aluc|OJZ82847.1 anig|EHA21284.1 atub|OJI89077.1 awen|OJJ38660.1

Group9856: abra|OJJ67980.1 acar|OOF92022.1 akaw|GAA91222.1 aluc|OJZ82848.1 anig|EHA21285.1 atub|OJI89078.1 awen|OJJ30801.1

Group9857: abra|OJJ68004.1 acar|OOF92046.1 akaw|GAA90946.1 aluc|OJZ82878.1 anig|EHA21304.1 atub|OJI89102.1 acla|EAW10448.1

Group9858: abra|OJJ68006.1 acar|OOF92048.1 akaw|GAA90944.1 aluc|OJZ82880.1 anig|EHA21306.1 ater|EAU31763.1 atub|OJI89104.1

Group9859: abra|OJJ68017.1 acar|OOF92060.1 agla|OJJ78754.1 akaw|GAA90934.1 aluc|OJZ82890.1 anig|EHA21316.1 atub|OJI89115.1

Group9860: afis|EAW17410.1 afum|EAL91244.2 anid|CBF84542.1 asyd|OJJ53468.1 aver|OJJ08288.1 azon|OJJ50176.1 agla|OJJ79331.1

Group9861: abra|OJJ68105.1 acar|OOF93579.1 acla|EAW13241.1 agla|OJJ88425.1 asyd|OJJ61245.1 aver|OJI99635.1 agla|OJJ83824.1

Group9862: ater|EAU32652.1 abra|OJJ72593.1 acar|OOF97551.1 akaw|GAA85220.1 aluc|OJZ90574.1 atub|OJI81998.1 afla|EED47249.1

Group9863: abra|OJJ68289.1 acar|OOF97559.1 akaw|GAA83182.1 aluc|OJZ83682.1 anig|EHA18836.1 atub|OJI90053.1 awen|OJJ33733.1

Group9864: abra|OJJ68290.1 acla|EAW11095.1 awen|OJJ41508.1 abra|OJJ69501.1 agla|OJJ83611.1 ater|EAU32042.1 azon|OJJ47418.1

Group9865: abra|OJJ68293.1 acar|OOF97560.1 akaw|GAA83180.1 aluc|OJZ83680.1 anig|EHA18834.1 atub|OJI90051.1 awen|OJJ41482.1

Group9866: abra|OJJ68306.1 afis|EAW21032.1 agla|OJJ78583.1 akaw|GAA83168.1 aluc|OJZ83667.1 atub|OJI90038.1 asyd|OJJ52735.1

Group9867: abra|OJJ68310.1 acar|OOF96698.1 akaw|GAA83164.1 aluc|OJZ83663.1 atub|OJI90034.1 acla|EAW12363.1 azon|OJJ42237.1

Group9868: abra|OJJ68314.1 acar|OOF96690.1 akaw|GAA83159.1 aluc|OJZ83659.1 anig|EHA18811.1 atub|OJI90030.1 awen|OJJ30841.1

Group9869: abra|OJJ68315.1 acar|OOF97575.1 akaw|GAA83158.1 aluc|OJZ83658.1 anig|EHA18810.1 atub|OJI90028.1 azon|OJJ43591.1

Group9870: abra|OJJ68401.1 acar|OOF93972.1 akaw|GAA92546.1 aluc|OJZ90095.1 anig|EHA20981.1 atub|OJI84711.1 azon|OJJ49016.1

Group9871: abra|OJJ68429.1 acar|OOF93961.1 akaw|GAA86942.1 aluc|OJZ90067.1 anig|EHA21007.1 atub|OJI84740.1 awen|OJJ35052.1

Group9872: abra|OJJ68435.1 akaw|GAA86936.1 aluc|OJZ90062.1 anid|CBF80381.1 anig|EHA21011.1 atub|OJI84745.1 aver|OJJ05141.1

Group9873: abra|OJJ68581.1 asyd|OJJ52742.1 ater|EAU29645.1 atub|OJI91461.1 aver|OJJ02998.1 awen|OJJ38361.1 anid|CBF78423.1

Group9874: abra|OJJ68583.1 afla|EED54193.1 aory|EIT76123.1 asyd|OJJ52740.1 atub|OJI91459.1 aver|OJJ02997.1 awen|OJJ38358.1

Group9875: afis|EAW25655.1 afla|EED45054.1 agla|OJJ83647.1 anid|CBF78631.1 aory|EIT73702.1 asyd|OJJ65121.1 aver|OJI99249.1

Group9876: abra|OJJ68625.1 acar|OOF92134.1 akaw|GAA92896.1 aluc|OJZ81930.1 anig|EHA22317.1 atub|OJI84483.1 azon|OJJ42332.1

Group9877: abra|OJJ68639.1 acar|OOF92143.1 aluc|OJZ81916.1 anig|EHA22331.1 asyd|OJJ53598.1 atub|OJI84468.1 aver|OJJ08150.1

Group9878: afla|EED48267.1 agla|OJJ87541.1 aory|EIT72939.1 asyd|OJJ60930.1 atub|OJI80380.1 aver|OJJ00256.1 asyd|OJJ53338.1

Group9879: abra|OJJ68835.1 acar|OOF90555.1 akaw|GAA90416.1 aluc|OJZ85814.1 anig|EHA24745.1 atub|OJI79600.1 awen|OJJ35363.1

Group9880: abra|OJJ68838.1 afla|EED52962.1 akaw|GAA90412.1 aluc|OJZ85817.1 anig|EHA24744.1 atub|OJI79603.1 aory|EIT78717.1

Group9881: abra|OJJ68842.1 acar|OOF90547.1 akaw|GAA90406.1 aluc|OJZ85822.1 anig|EHA24739.1 atub|OJI79609.1 azon|OJJ44329.1

Group9882: abra|OJJ68891.1 acar|OOF97646.1 akaw|GAA90365.1 aluc|OJZ85867.1 anig|EHA28086.1 atub|OJI79653.1 awen|OJJ37241.1

Group9883: acla|EAW10335.1 afis|EAW25257.1 afum|EAL89918.1 asyd|OJJ52543.1 aver|OJJ03861.1 awen|OJJ40969.1 azon|OJJ44555.1

Group9884: abra|OJJ68931.1 acar|OOF91514.1 agla|OJJ84589.1 aver|OJJ04413.1 awen|OJJ31462.1 afla|EED50386.1 asyd|OJJ57989.1

Group9885: anid|CBF71418.1 afla|EED50433.1 aory|EIT82063.1 asyd|OJJ54989.1 ater|EAU32830.1 aver|OJJ07212.1 awen|OJJ29997.1

Group9886: abra|OJJ69020.1 akaw|GAA90537.1 aluc|OJZ86006.1 anig|EHA24604.1 atub|OJI79795.1 agla|OJJ85315.1 ater|EAU29900.1

Group9887: afla|EED53342.1 aory|EIT74834.1 akaw|GAA92122.1 aluc|OJZ83600.1 anig|EHA18759.1 atub|OJI89972.1 awen|OJJ35023.1

Group9888: abra|OJJ69059.1 acar|OOF91224.1 akaw|GAA90589.1 aluc|OJZ86047.1 anig|EHA24564.1 atub|OJI79844.1 awen|OJJ38350.1

Group9889: ater|EAU37437.1 afla|EED52297.1 akaw|GAA86600.1 aluc|OJZ85148.1 anig|EHA25387.1 aory|EIT74362.1 atub|OJI80422.1

Group9890: abra|OJJ69441.1 acar|OOF94298.1 acla|EAW11923.1 akaw|GAA88377.1 aluc|OJZ82277.1 anig|EHA28469.1 atub|OJI88162.1

Group9891: abra|OJJ69442.1 acar|OOF94297.1 akaw|GAA88376.1 aluc|OJZ82278.1 anig|EHA28468.1 atub|OJI88161.1 aver|OJI98014.1

Group9892: abra|OJJ69690.1 akaw|GAA88814.1 aluc|OJZ82497.1 anig|EHA28275.1 ater|EAU33152.1 atub|OJI87934.1 akaw|GAA92979.1

Group9893: abra|OJJ69760.1 ater|EAU29408.1 aory|EIT77531.1 akaw|GAA84865.1 aluc|OJZ86806.1 anig|EHA21877.1 atub|OJI83711.1

Group9894: abra|OJJ69793.1 acar|OOF93585.1 akaw|GAA87865.1 aluc|OJZ85506.1 anig|EHA25038.1 atub|OJI80059.1 awen|OJJ32206.1

Group9895: abra|OJJ69807.1 afis|EAW20366.1 afum|EAL85482.1 aluc|OJZ85494.1 ater|EAU29813.1 atub|OJI80071.1 awen|OJJ38363.1

Group9896: abra|OJJ69823.1 acar|OOF93340.1 akaw|GAA87837.1 aluc|OJZ85473.1 anig|EHA25014.1 atub|OJI80090.1 afla|EED56824.1

Group9897: abra|OJJ69826.1 acar|OOF93351.1 akaw|GAA87834.1 aluc|OJZ85470.1 anig|EHA25011.1 ater|EAU32700.1 atub|OJI80093.1

Group9898: anid|CBF70124.1 asyd|OJJ63947.1 aver|OJI96995.1 afla|EED53617.1 aory|EIT75095.1 atub|OJI83154.1 awen|OJJ29953.1

Group9899: abra|OJJ69835.1 akaw|GAA87825.1 aluc|OJZ85461.1 anig|EHA25003.1 atub|OJI80102.1 asyd|OJJ53551.1 aver|OJJ08203.1

Group9900: abra|OJJ69837.1 acar|OOF89895.1 akaw|GAA87823.1 aluc|OJZ85459.1 anig|EHA25001.1 asyd|OJJ53653.1 atub|OJI80104.1

Group9901: afis|EAW19691.1 acla|EAW12051.1 afla|EED48468.1 afum|EAL86835.1 aory|EIT76270.1 asyd|OJJ62961.1 aver|OJI98006.1

Group9902: abra|OJJ69892.1 agla|OJJ86388.1 akaw|GAA87758.1 aluc|OJZ85392.1 anig|EHA25576.1 asyd|OJJ54425.1 atub|OJI80179.1

Group9903: azon|OJJ46029.1 afis|EAW17328.1 afum|EAL91165.1 anid|CBF83207.1 asyd|OJJ55551.1 ater|EAU29241.1 aver|OJJ06628.1

Group9904: abra|OJJ69899.1 acar|OOF98467.1 afla|EED45550.1 aory|EIT75463.1 asyd|OJJ55060.1 ater|EAU37249.1 aver|OJJ07151.1

Group9905: agla|OJJ80662.1 acar|OOF98066.1 afis|EAW22082.1 afum|EAL85691.1 afla|EED49423.1 aory|EIT79507.1 azon|OJJ48138.1

Group9906: abra|OJJ69932.1 akaw|GAA87726.1 aluc|OJZ85354.1 anig|EHA25540.1 atub|OJI80216.1 aver|OJI95750.1 agla|OJJ88378.1

Group9907: aory|EIT73092.1 acar|OOF96082.1 acla|EAW12196.1 afla|EED48624.1 anid|CBF78879.1 asyd|OJJ64594.1 aver|OJI98691.1

Group9908: abra|OJJ70037.1 afis|EAW17095.1 akaw|GAA88364.1 aluc|OJZ82291.1 anig|EHA18734.1 ater|EAU38710.1 atub|OJI88148.1

Group9909: abra|OJJ70038.1 afis|EAW17094.1 aluc|OJZ82292.1 anig|EHA18735.1 ater|EAU38709.1 atub|OJI88147.1 akaw|GAA88363.1

Group9910: ater|EAU32025.1 akaw|GAA86452.1 aluc|OJZ84995.1 afla|EED46132.1 anig|EHA21904.1 afla|EED52089.1 atub|OJI80605.1

Group9911: abra|OJJ70051.1 afla|EED48110.1 aory|EIT76218.1 asyd|OJJ57159.1 ater|EAU37425.1 aver|OJJ03154.1 azon|OJJ42158.1

Group9912: abra|OJJ70059.1 aver|OJJ03870.1 azon|OJJ43583.1 aluc|OJZ83449.1 atub|OJI82341.1 awen|OJJ30957.1 akaw|GAA85521.1

Group9913: abra|OJJ70062.1 acar|OOF93550.1 akaw|GAA87614.1 aluc|OJZ85235.1 anig|EHA25439.1 ater|EAU29812.1 atub|OJI80343.1

Group9914: abra|OJJ70064.1 acar|OOF93552.1 afla|EED45173.1 akaw|GAA87612.1 aluc|OJZ85233.1 anig|EHA25437.1 atub|OJI80345.1

Group9915: azon|OJJ44018.1 acar|OOF95582.1 afla|EED53509.1 anig|EHA18388.1 aory|EIT74905.1 asyd|OJJ57341.1 aver|OJJ05821.1

Group9916: abra|OJJ70084.1 acar|OOF93328.1 akaw|GAA87603.1 aluc|OJZ85223.1 anig|EHA25427.1 atub|OJI80358.1 awen|OJJ32642.1

Group9917: abra|OJJ70089.1 acla|EAW12307.1 afis|EAW21034.1 afum|EAL92072.2 anig|EHA22485.1 atub|OJI89252.1 awen|OJJ39971.1

Group9918: abra|OJJ70104.1 akaw|GAA87596.1 aluc|OJZ85216.1 anig|EHA25419.1 asyd|OJJ58181.1 atub|OJI80369.1 azon|OJJ45181.1

Group9919: abra|OJJ70105.1 acar|OOF95839.1 akaw|GAA87595.1 aluc|OJZ85215.1 anig|EHA25418.1 ater|EAU30871.1 atub|OJI80370.1

Group9920: abra|OJJ70107.1 acar|OOG00112.1 agla|OJJ81742.1 akaw|GAA83854.1 aluc|OJZ90861.1 anig|EHA26921.1 aluc|OJZ79626.1

Group9921: afla|EED47795.1 aory|EIT77102.1 acla|EAW12020.1 anid|CBF81916.1 asyd|OJJ59696.1 aver|OJJ02591.1 awen|OJJ31360.1

Group9922: abra|OJJ70122.1 acar|OOF90917.1 agla|OJJ86726.1 akaw|GAA86647.1 aluc|OJZ85204.1 anig|EHA25409.1 atub|OJI80397.1

Group9923: abra|OJJ70147.1 afla|EED52390.1 akaw|GAA90561.1 anig|EHA25742.1 aory|EIT83292.1 asyd|OJJ53402.1 aver|OJJ04199.1

Group9924: abra|OJJ70160.1 acar|OOF93313.1 akaw|GAA86607.1 aluc|OJZ85157.1 anig|EHA25373.1 atub|OJI80434.1 awen|OJJ32182.1

Group9925: abra|OJJ70170.1 acar|OOG00402.1 akaw|GAA86618.1 aluc|OJZ85171.1 anid|CBF87114.1 atub|OJI80447.1 azon|OJJ47278.1

Group9926: abra|OJJ70196.1 acar|OOF90058.1 akaw|GAA86580.1 aluc|OJZ85131.1 anig|EHA25350.1 atub|OJI80462.1 awen|OJJ40107.1

Group9927: abra|OJJ70202.1 afis|EAW25730.1 aluc|OJZ85125.1 anig|EHA25344.1 ater|EAU30246.1 atub|OJI80468.1 awen|OJJ32208.1

Group9928: abra|OJJ70227.1 afla|EED52373.1 akaw|GAA93009.1 aluc|OJZ82576.1 anid|CBF73532.1 asyd|OJJ56723.1 aver|OJJ06002.1

Group9929: abra|OJJ70229.1 agla|OJJ88090.1 akaw|GAA86553.1 aluc|OJZ85101.1 anig|EHA25323.1 atub|OJI80496.1 awen|OJJ39209.1

Group9930: acla|EAW07216.1 afis|EAW19605.1 afla|EED48181.1 asyd|OJJ57100.1 ater|EAU36003.1 aver|OJJ08823.1 awen|OJJ37374.1

Group9931: abra|OJJ70281.1 acar|OOF91733.1 akaw|GAA92867.1 aluc|OJZ82546.1 asyd|OJJ62800.1 atub|OJI88788.1 aver|OJI96847.1

Group9932: aory|EIT81581.1 acla|EAW13266.1 afis|EAW17362.1 afum|EAL91199.1 asyd|OJJ57191.1 aver|OJJ03100.1 awen|OJJ29649.1

Group9933: abra|OJJ70404.1 afis|EAW19308.1 akaw|GAA91950.1 aluc|OJZ82668.1 atub|OJI88901.1 aver|OJJ03245.1 azon|OJJ42500.1

Group9934: abra|OJJ70407.1 afla|EED53381.1 akaw|GAA91947.1 aluc|OJZ82671.1 anig|EHA21038.1 aory|EIT75053.1 atub|OJI88907.1

Group9935: abra|OJJ70433.1 akaw|GAA90146.1 aluc|OJZ83201.1 anig|EHA21063.1 atub|OJI87736.1 aver|OJI96790.1 awen|OJJ41821.1

Group9936: abra|OJJ70465.1 acar|OOF97460.1 akaw|GAA83314.1 aluc|OJZ83808.1 atub|OJI90175.1 awen|OJJ37226.1 azon|OJJ50929.1

Group9937: acar|OOF97422.1 acla|EAW08171.1 afis|EAW23207.1 afum|EBA27342.1 akaw|GAA83352.1 aory|EIT72570.1 awen|OJJ39439.1

Group9938: abra|OJJ70663.1 afla|EED51846.1 akaw|GAA89999.1 aluc|OJZ84013.1 anig|EHA19136.1 atub|OJI90383.1 aory|EIT81693.1

Group9939: abra|OJJ70816.1 akaw|GAA91696.1 aluc|OJZ87696.1 anig|EHA20884.1 atub|OJI80946.1 azon|OJJ42050.1 ater|EAU37986.1

Group9940: abra|OJJ71041.1 acar|OOF97196.1 afla|EED56868.1 akaw|GAA82915.1 aluc|OJZ87487.1 aory|EIT77521.1 atub|OJI81161.1

Group9941: abra|OJJ71089.1 acar|OOF98048.1 akaw|GAA82872.1 aluc|OJZ87439.1 anig|EHA20664.1 atub|OJI81209.1 aver|OJI99591.1

Group9942: abra|OJJ71092.1 acar|OOF98046.1 akaw|GAA82869.1 aluc|OJZ87436.1 anig|EHA20662.1 atub|OJI81212.1 azon|OJJ43494.1

Group9943: abra|OJJ71109.1 acar|OOF98040.1 akaw|GAA82860.1 aluc|OJZ87426.1 anig|EHA20648.1 atub|OJI81223.1 azon|OJJ45898.1

Group9944: abra|OJJ71202.1 afis|EAW16710.1 akaw|GAA82782.1 aluc|OJZ87341.1 anig|EHA20578.1 atub|OJI81303.1 awen|OJJ38292.1

Group9945: abra|OJJ71238.1 akaw|GAA82750.1 aluc|OJZ87307.1 anig|EHA20543.1 atub|OJI81338.1 aver|OJI97600.1 agla|OJJ83108.1

Group9946: abra|OJJ71412.1 anid|CBF80562.1 anig|EHA19901.1 asyd|OJJ55495.1 ater|EAU30134.1 aver|OJJ06573.1 awen|OJJ39982.1

Group9947: afla|EED57198.1 awen|OJJ32024.1 afis|EAW20151.1 afum|EAL85266.1 ater|EAU38766.1 acla|EAW15181.1 azon|OJJ46066.1

Group9948: abra|OJJ71710.1 acar|OOF96416.1 akaw|GAA85178.1 aluc|OJZ86455.1 anig|EHA21452.1 atub|OJI84072.1 azon|OJJ46023.1

Group9949: abra|OJJ71746.1 acar|OOF96437.1 afla|EED49269.1 akaw|GAA85160.1 aluc|OJZ86477.1 aory|EIT82212.1 atub|OJI84053.1

Group9950: anid|CBF80176.1 acar|OOF92901.1 afla|EED51173.1 anig|EHA25376.1 aory|EIT81316.1 agla|OJJ88683.1 aver|OJI99526.1

Group9951: abra|OJJ71762.1 acar|OOF90731.1 afis|EAW20638.1 afla|EED45242.1 anid|CBF82414.1 aory|EIT73703.1 acla|EAW07348.1

Group9952: abra|OJJ71765.1 afis|EAW24474.1 afla|EED48647.1 anig|EHA22153.1 aory|EIT73075.1 asyd|OJJ52754.1 aver|OJJ07374.1

Group9953: abra|OJJ71766.1 acar|OOF90206.1 akaw|GAA85141.1 aluc|OJZ86496.1 anig|EHA22148.1 atub|OJI84030.1 azon|OJJ46960.1

Group9954: abra|OJJ71769.1 acar|OOF96442.1 akaw|GAA85138.1 aluc|OJZ86499.1 anig|EHA22145.1 atub|OJI84027.1 azon|OJJ44477.1

Group9955: ater|EAU34853.1 awen|OJJ31123.1 acla|EAW13851.1 afis|EAW18565.1 afum|EAL93267.2 agla|OJJ81614.1 azon|OJJ46604.1

Group9956: abra|OJJ71825.1 acar|OOF96502.1 akaw|GAA85085.1 aluc|OJZ86557.1 anig|EHA22092.1 ater|EAU36063.1 atub|OJI83965.1

Group9957: abra|OJJ71830.1 acar|OOF96506.1 akaw|GAA85081.1 aluc|OJZ86562.1 ater|EAU34870.1 atub|OJI83959.1 awen|OJJ31136.1

Group9958: abra|OJJ71915.1 acar|OOF92082.1 acla|EAW13304.1 atub|OJI89559.1 awen|OJJ31867.1 acar|OOF92446.1 azon|OJJ42304.1

Group9959: abra|OJJ71933.1 agla|OJJ79132.1 anid|CBF80476.1 asyd|OJJ54716.1 aver|OJJ07451.1 awen|OJJ37071.1 azon|OJJ50307.1

Group9960: abra|OJJ71939.1 aluc|OJZ85540.1 anig|EHA24968.1 ater|EAU35754.1 atub|OJI89782.1 aver|OJJ06472.1 asyd|OJJ65144.1

Group9961: abra|OJJ72030.1 agla|OJJ79437.1 akaw|GAA84901.1 aluc|OJZ86768.1 anig|EHA21911.1 atub|OJI83760.1 asyd|OJJ56786.1

Group9962: abra|OJJ72165.1 akaw|GAA84763.1 aluc|OJZ86920.1 anig|EHA21724.1 atub|OJI83601.1 awen|OJJ29681.1 acar|OOF96798.1

Group9963: abra|OJJ72166.1 acar|OOF96799.1 akaw|GAA84762.1 aluc|OJZ86921.1 anig|EHA21723.1 atub|OJI83600.1 azon|OJJ43589.1

Group9964: abra|OJJ72244.1 acar|OOF96870.1 akaw|GAA84695.1 aluc|OJZ86992.1 anig|EHA21653.1 atub|OJI83527.1 azon|OJJ46216.1

Group9965: abra|OJJ72271.1 afis|EAW20689.1 akaw|GAA86026.1 aluc|OJZ90253.1 atub|OJI81679.1 acla|EAW06361.1 awen|OJJ30154.1

Group9966: abra|OJJ72306.1 akaw|GAA86057.1 aluc|OJZ90287.1 anig|EHA23777.1 ater|EAU29587.1 atub|OJI81711.1 awen|OJJ30540.1

Group9967: abra|OJJ72310.1 aluc|OJZ90292.1 anid|CBF89252.1 anig|EHA23781.1 asyd|OJJ65158.1 ater|EAU39466.1 atub|OJI81716.1

Group9968: abra|OJJ72311.1 acar|OOF90706.1 agla|OJJ86229.1 aluc|OJZ90293.1 anig|EHA23782.1 atub|OJI81717.1 aver|OJJ06473.1

Group9969: abra|OJJ72361.1 acar|OOF93349.1 afla|EED57480.1 akaw|GAA86111.1 aluc|OJZ90343.1 aory|EIT80169.1 atub|OJI81770.1

Group9970: abra|OJJ72372.1 acar|OOF94854.1 akaw|GAA86122.1 aluc|OJZ90361.1 anig|EHA23830.1 atub|OJI81788.1 anig|EHA23825.1

Group9971: abra|OJJ72524.1 acar|OOF98685.1 agla|OJJ83808.1 akaw|GAA86248.1 aluc|OJZ90503.1 anig|EHA23961.1 atub|OJI81927.1

Group9972: abra|OJJ72532.1 acar|OOF94721.1 akaw|GAA86254.1 aluc|OJZ90511.1 anid|CBF85173.1 anig|EHA23968.1 atub|OJI81936.1

Group9973: abra|OJJ72537.1 aluc|OJZ90518.1 anig|EHA23973.1 atub|OJI81942.1 abra|OJJ77424.1 acar|OOF94714.1 aver|OJI99459.1

Group9974: abra|OJJ72616.1 afis|EAW15946.1 akaw|GAA92009.1 aluc|OJZ92874.1 anid|CBF81448.1 anig|EHA26085.1 atub|OJI87334.1

Group9975: abra|OJJ72709.1 afum|EAL85031.1 anig|EHA24107.1 atub|OJI82104.1 awen|OJJ41893.1 azon|OJJ42594.1 afis|EAW19865.1

Group9976: abra|OJJ72870.1 aluc|OJZ83383.1 anig|EHA24242.1 asyd|OJJ65315.1 atub|OJI82270.1 afum|EAL89186.1 agla|OJJ85840.1

Group9977: abra|OJJ73068.1 acar|OOG00303.1 akaw|GAA88092.1 aluc|OJZ81357.1 anig|EHA18657.1 atub|OJI91561.1 acla|EAW12432.1

Group9978: abra|OJJ73080.1 acar|OOF91965.1 akaw|GAA88082.1 aluc|OJZ81346.1 anig|EHA18649.1 atub|OJI91550.1 azon|OJJ42463.1

Group9979: abra|OJJ73082.1 acar|OOG00316.1 akaw|GAA88078.1 aluc|OJZ81341.1 anig|EHA18647.1 ater|EAU38109.1 atub|OJI91546.1

Group9980: abra|OJJ73087.1 afla|EED48882.1 akaw|GAA88073.1 aluc|OJZ81338.1 anig|EHA18642.1 aory|EIT81225.1 atub|OJI91541.1

Group9981: asyd|OJJ55509.1 acar|OOF97221.1 akaw|GAA83709.1 aluc|OJZ91026.1 ater|EAU32780.1 atub|OJI83017.1 awen|OJJ38712.1

Group9982: abra|OJJ73153.1 acar|OOG00365.1 akaw|GAA88019.1 aluc|OJZ81277.1 anig|EHA18577.1 atub|OJI91485.1 awen|OJJ29892.1

Group9983: abra|OJJ73301.1 acar|OOF91869.1 akaw|GAA92704.1 aluc|OJZ88744.1 anig|EHA18448.1 atub|OJI91316.1 azon|OJJ50500.1

Group9984: abra|OJJ73310.1 acar|OOF90736.1 akaw|GAA92812.1 aluc|OJZ88735.1 anig|EHA18438.1 ater|EAU30392.1 atub|OJI91311.1

Group9985: abra|OJJ73332.1 acar|OOF91493.1 agla|OJJ81113.1 akaw|GAA92789.1 anig|EHA18399.1 aory|EIT74059.1 afla|EED57240.1

Group9986: abra|OJJ73477.1 acar|OOF92543.1 acla|EAW12325.1 akaw|GAA83024.1 aluc|OJZ88570.1 anig|EHA18267.1 atub|OJI91156.1

Group9987: akaw|GAA87461.1 anid|CBF88894.1 acla|EAW07446.1 afis|EAW22473.1 afla|EED54505.1 afum|EAL90718.1 aory|EIT78749.1

Group9988: abra|OJJ73533.1 acar|OOF99640.1 agla|OJJ87023.1 akaw|GAA83963.1 aluc|OJZ80851.1 anig|EHA21808.1 atub|OJI82717.1

Group9989: abra|OJJ73540.1 acar|OOF92654.1 agla|OJJ85033.1 akaw|GAA88611.1 aluc|OJZ88519.1 anig|EHA21862.1 atub|OJI91104.1

Group9990: abra|OJJ73705.1 acar|OOG00869.1 akaw|GAA88458.1 aluc|OJZ88346.1 anig|EHA18079.1 ater|EAU30713.1 atub|OJI90942.1

Group9991: abra|OJJ73711.1 acla|EAW12409.1 akaw|GAA88452.1 aluc|OJZ88339.1 anig|EHA18074.1 atub|OJI90935.1 azon|OJJ50261.1

Group9992: abra|OJJ73715.1 acar|OOG00875.1 akaw|GAA88448.1 aluc|OJZ88335.1 anig|EHA18071.1 atub|OJI90931.1 azon|OJJ45232.1

Group9993: aory|EIT72286.1 acla|EAW07852.1 afis|EAW22888.1 afum|EAL90310.1 akaw|GAA89584.1 anid|CBF87796.1 awen|OJJ38834.1

Group9994: abra|OJJ74004.1 acar|OOG01125.1 akaw|GAA87485.1 aluc|OJZ88040.1 anig|EHA17813.1 atub|OJI90647.1 agla|OJJ83134.1

Group9995: abra|OJJ74013.1 acar|OOG01136.1 akaw|GAA87496.1 aluc|OJZ88026.1 anig|EHA17803.1 atub|OJI90634.1 aver|OJI96477.1

Group9996: acar|OOF90011.1 acla|EAW09033.1 afum|EAL90460.1 agla|OJJ78519.1 aory|EIT76954.1 afis|EAW22735.1 afla|EED51047.1

Group9997: aver|OJI95818.1 azon|OJJ42327.1 asyd|OJJ61723.1 afla|EED56597.1 aory|EIT79615.1 awen|OJJ30239.1 agla|OJJ80956.1

Group9998: abra|OJJ74120.1 afla|EED54374.1 agla|OJJ84790.1 akaw|GAA87149.1 aluc|OJZ84288.1  
anig|EHA19566.1 aory|EIT75859.1

Group9999: abra|OJJ74133.1 acar|OOF95600.1 akaw|GAA89753.1 aluc|OJZ80630.1 anig|EHA27201.1  
atub|OJI87486.1 azon|OJJ42575.1

Group10000: abra|OJJ74163.1 acar|OOF95559.1 akaw|GAA86853.1 aluc|OJZ89973.1 anig|EHA27170.1  
atub|OJI84834.1 azon|OJJ50833.1

Group10001: abra|OJJ74184.1 acar|OOF95536.1 akaw|GAA86833.1 aluc|OJZ89952.1 anig|EHA27153.1  
atub|OJI84854.1 azon|OJJ42445.1

Group10002: abra|OJJ74258.1 acar|OOF95470.1 agla|OJJ88793.1 akaw|GAA86763.1 aluc|OJZ89873.1  
anig|EHA27073.1 atub|OJI84934.1

Group10003: abra|OJJ74303.1 atub|OJI84979.1 acar|OOF95427.1 afla|EED57788.1 akaw|GAA86722.1  
aluc|OJZ89827.1 anid|CBF88720.1

Group10004: abra|OJJ74422.1 acar|OOF95318.1 anig|EHA26936.1 atub|OJI85099.1 afis|EAW19687.1  
asyd|OJJ65222.1 awen|OJJ34663.1

Group10005: abra|OJJ74441.1 acar|OOF95305.1 afla|EED45620.1 akaw|GAA87334.1 aluc|OJZ89680.1  
anig|EHA26916.1 atub|OJI85120.1

Group10006: abra|OJJ74442.1 acar|OOF95304.1 akaw|GAA87335.1 aluc|OJZ89679.1 anig|EHA26915.1  
atub|OJI85121.1 acla|EAW12161.1

Group10007: afla|EED49714.1 aory|EIT77662.1 akaw|GAA84674.1 aluc|OJZ87015.1 asyd|OJJ53590.1  
atub|OJI83504.1 aver|OJJ08158.1

Group10008: abra|OJJ74540.1 afla|EED51454.1 afum|EAL86342.1 akaw|GAA82062.1 aluc|OJZ92120.1  
atub|OJI86553.1 aluc|OJZ79684.1

Group10009: ater|EAU33340.1 afis|EAW20286.1 akaw|GAA82048.1 aluc|OJZ92132.1 atub|OJI86564.1  
awen|OJJ37823.1 azon|OJJ42240.1

Group10010: abra|OJJ74653.1 acar|OOG00867.1 akaw|GAA81957.1 aluc|OJZ92232.1 atub|OJI86662.1  
awen|OJJ34777.1 afis|EAW22068.1

Group10011: abra|OJJ74691.1 afla|EED47158.1 aluc|OJZ92268.1 aory|EIT79287.1 ater|EAU38045.1  
atub|OJI86702.1 aver|OJJ03743.1

Group10012: afla|EED46968.1 awen|OJJ40483.1 azon|OJJ49345.1 acla|EAW10676.1 afum|EAL89543.1  
agla|OJJ82114.1 anid|CBF75627.1

Group10013: abra|OJJ74793.1 acar|OOF95784.1 akaw|GAA83620.1 aluc|OJZ92373.1 anig|EHA26600.1  
atub|OJI86803.1 aver|OJJ02008.1

Group10014: abra|OJJ74816.1 acla|EAW12267.1 akaw|GAA83599.1 aluc|OJZ92395.1 anig|EHA26579.1  
aver|OJJ05789.1 azon|OJJ42191.1

Group10015: abra|OJJ74818.1 acar|OOF95806.1 akaw|GAA83597.1 aluc|OJZ92397.1 anig|EHA26568.1  
ater|EAU32633.1 atub|OJI86827.1

Group10016: abra|OJJ74825.1 acar|OOF99295.1 aluc|OJZ92400.1 atub|OJI86829.1 abra|OJJ74826.1  
anig|EHA26565.1 aluc|OJZ92401.1

Group10017: abra|OJJ74934.1 acar|OOF95925.1 akaw|GAA83486.1 aluc|OJZ92507.1 anig|EHA26466.1  
atub|OJI86940.1 aluc|OJZ80309.1

Group10018: abra|OJJ74979.1 acar|OOF97341.1 akaw|GAA83453.1 aluc|OJZ92543.1 anig|EHA26433.1  
atub|OJI86979.1 awen|OJJ39761.1

Group10019: abra|OJJ74982.1 acar|OOF97337.1 akaw|GAA83450.1 aluc|OJZ92546.1 anig|EHA26430.1  
atub|OJI86982.1 agla|OJJ86678.1

Group10020: abra|OJJ75117.1 acar|OOF97215.1 acla|EAW06578.1 akaw|GAA88727.1 aluc|OJZ92684.1  
atub|OJI87112.1 azon|OJJ43664.1

Group10021: abra|OJJ75220.1 agla|OJJ83396.1 aluc|OJZ84409.1 asyd|OJJ55427.1 atub|OJI89662.1  
aver|OJJ06506.1 akaw|GAA87038.1

Group10022: abra|OJJ75252.1 acar|OOF89847.1 akaw|GAA91791.1 aluc|OJZ92811.1 anig|EHA26197.1  
atub|OJI87268.1 azon|OJJ44475.1



Group10023: abra|OJJ75319.1 acar|OOF94507.1 akaw|GAA92014.1 aluc|OJZ92880.1 anig|EHA26080.1 atub|OJI87339.1 azon|OJJ42604.1

Group10024: asyd|OJJ54676.1 afum|EAL86852.2 anid|CBF80541.1 awen|OJJ31938.1 afla|EED48443.1 aver|OJJ07491.1 azon|OJJ46598.1

Group10025: abra|OJJ75336.1 acar|OOF94494.1 akaw|GAA92030.1 aluc|OJZ92900.1 anig|EHA26063.1 atub|OJI87358.1 awen|OJJ36997.1

Group10026: abra|OJJ75344.1 acar|OOF94491.1 agla|OJJ84455.1 akaw|GAA92037.1 aluc|OJZ92906.1 anig|EHA26057.1 atub|OJI87366.1

Group10027: abra|OJJ75351.1 acar|OOF94483.1 akaw|GAA92043.1 aluc|OJZ92913.1 anig|EHA26052.1 atub|OJI87373.1 azon|OJJ45814.1

Group10028: abra|OJJ75353.1 acar|OOF94485.1 akaw|GAA92046.1 aluc|OJZ92915.1 anig|EHA26050.1 atub|OJI87375.1 awen|OJJ38721.1

Group10029: abra|OJJ75359.1 acar|OOF94479.1 akaw|GAA92054.1 aluc|OJZ92925.1 anig|EHA26044.1 atub|OJI87386.1 azon|OJJ43200.1

Group10030: abra|OJJ75362.1 acar|OOF89871.1 akaw|GAA92058.1 aluc|OJZ92931.1 anig|EHA26040.1 atub|OJI87391.1 azon|OJJ45869.1

Group10031: abra|OJJ75371.1 acar|OOF89962.1 akaw|GAA92064.1 aluc|OJZ92939.1 anig|EHA26033.1 atub|OJI87399.1 awen|OJJ31304.1

Group10032: abra|OJJ75424.1 akaw|GAA84199.1 aluc|OJZ88876.1 anig|EHA23629.1 ater|EAU33728.1 atub|OJI85915.1 awen|OJJ41697.1

Group10033: abra|OJJ75533.1 afla|EED46911.1 akaw|GAA91953.1 aluc|OJZ82665.1 anig|EHA27439.1 aory|EIT72640.1 atub|OJI88898.1

Group10034: abra|OJJ75536.1 akaw|GAA91956.1 aluc|OJZ82662.1 anig|EHA27436.1 atub|OJI88895.1 aver|OJI99010.1 azon|OJJ46514.1

Group10035: abra|OJJ75540.1 acar|OOF90859.1 akaw|GAA84294.1 aluc|OJZ88988.1 anig|EHA23538.1 atub|OJI85800.1 azon|OJJ43916.1

Group10036: abra|OJJ75556.1 acar|OOF90587.1 akaw|GAA84311.1 aluc|OJZ89006.1 anig|EHA23522.1 atub|OJI85783.1 azon|OJJ42073.1

Group10037: abra|OJJ75588.1 afla|EED55987.1 akaw|GAA84339.1 aluc|OJZ89039.1 anig|EHA23496.1 aory|EIT76606.1 atub|OJI85751.1

Group10038: afis|EAW19006.1 afum|EAL93740.1 awen|OJJ32644.1 acar|OOF93329.1 akaw|GAA90362.1 aluc|OJZ85870.1 atub|OJI79656.1

Group10039: afis|EAW19004.1 afum|EAL93738.1 anid|CBF82894.1 awen|OJJ32645.1 akaw|GAA90364.1 aluc|OJZ85868.1 atub|OJI79654.1

Group10040: abra|OJJ75765.1 afla|EED54893.1 aory|EIT79407.1 asyd|OJJ58671.1 atub|OJI87193.1 aver|OJJ01282.1 awen|OJJ30929.1

Group10041: abra|OJJ75926.1 acar|OOF99982.1 afla|EED46844.1 akaw|GAA84629.1 aluc|OJZ89375.1 anig|EHA23208.1 atub|OJI85423.1

Group10042: abra|OJJ76015.1 acar|OOF99910.1 akaw|GAA88945.1 aluc|OJZ89461.1 anig|EHA23127.1 atub|OJI85333.1 azon|OJJ50329.1

Group10043: abra|OJJ76020.1 acar|OOF99905.1 akaw|GAA88940.1 aluc|OJZ89467.1 anig|EHA23121.1 atub|OJI85328.1 aver|OJI99554.1

Group10044: abra|OJJ76055.1 afla|EED48993.1 anid|CBF86023.1 anig|EHA23089.1 asyd|OJJ64454.1 aver|OJI98557.1 awen|OJJ30147.1

Group10045: abra|OJJ76279.1 afla|EED48939.1 akaw|GAA82211.1 aluc|OJZ91941.1 anig|EHA22900.1 aory|EIT80029.1 atub|OJI86384.1

Group10046: abra|OJJ76470.1 acar|OOF96464.1 afla|EED47273.1 akaw|GAA82382.1 aluc|OJZ91739.1 aver|OJJ01279.1 awen|OJJ38936.1

Group10047: abra|OJJ76595.1 akaw|GAA82499.1 atub|OJI86064.1 acar|OOF90606.1 afla|EED53599.1 aory|EIT75174.1 anig|EHA22640.1

Group10048: afis|EAW19360.1 afum|EAL94080.1 acla|EAW14625.1 afla|EED49735.1 aory|EIT77607.1 asyd|OJJ62358.1 azon|OJJ45913.1

Group10049: abra|OJJ76654.1 acar|OOF99344.1 akaw|GAA92994.1 aluc|OJZ91551.1 anig|EHA22586.1 ater|EAU37780.1 atub|OJI86004.1

Group10050: abra|OJJ76657.1 acar|OOF99347.1 akaw|GAA92997.1 aluc|OJZ91548.1 anig|EHA22583.1 ater|EAU37783.1 atub|OJI86001.1

Group10051: ater|EAU32745.1 acla|EAW15034.1 afis|EAW22730.1 afum|EAL90465.1 anid|CBF69520.1 asyd|OJJ59207.1 aver|OJJ01818.1

Group10052: abra|OJJ76698.1 agla|OJJ78475.1 aory|EIT73159.1 azon|OJJ45928.1 anid|CBF87458.1 asyd|OJJ53409.1 aver|OJJ08342.1

Group10053: abra|OJJ76703.1 acar|OOF89910.1 akaw|GAA92496.1 aluc|OJZ91508.1 anig|EHA22547.1 atub|OJI85960.1 azon|OJJ51652.1

Group10054: abra|OJJ76728.1 acar|OOF90684.1 anig|EHA24276.1 abra|OJJ77450.1 afla|EED47460.1 aory|EIT79958.1 ater|EAU33901.1

Group10055: abra|OJJ76741.1 acar|OOF94681.1 afla|EED46914.1 akaw|GAA83302.1 anig|EHA24960.1 aory|EIT72665.1 azon|OJJ42574.1

Group10056: abra|OJJ76864.1 afla|EED47869.1 anig|EHA27616.1 aory|EIT77205.1 ater|EAU34267.1 atub|OJI89809.1 awen|OJJ38127.1

Group10057: abra|OJJ76865.1 afla|EED47868.1 anig|EHA27617.1 aory|EIT77216.1 ater|EAU34266.1 atub|OJI89808.1 awen|OJJ38128.1

Group10058: abra|OJJ76893.1 acar|OOF97193.1 agla|OJJ85292.1 anig|EHA25831.1 ater|EAU30174.1 awen|OJJ31279.1 azon|OJJ43581.1

Group10059: acla|EAW07063.1 afis|EAW16694.1 afla|EED45072.1 afum|EAL89292.1 aory|EIT73749.1 ater|EAU34151.1 azon|OJJ45051.1

Group10060: abra|OJJ76921.1 acar|OOF91368.1 akaw|GAA87117.1 aluc|OJZ84321.1 anig|EHA27656.1 atub|OJI89747.1 awen|OJJ33257.1

Group10061: abra|OJJ77023.1 afla|EED52861.1 akaw|GAA87029.1 aluc|OJZ84423.1 anig|EHA27745.1 aory|EIT78595.1 atub|OJI89650.1

Group10062: abra|OJJ77026.1 acar|OOF91464.1 akaw|GAA87025.1 aluc|OJZ84428.1 anig|EHA27747.1 atub|OJI89646.1 awen|OJJ30416.1

Group10063: abra|OJJ77034.1 acar|OOF91473.1 akaw|GAA87017.1 aluc|OJZ84437.1 anig|EHA27756.1 atub|OJI89636.1 ater|EAU29367.1

Group10064: abra|OJJ77053.1 acar|OOF92942.1 akaw|GAA86999.1 aluc|OJZ84458.1 anig|EHA27773.1 atub|OJI89617.1 awen|OJJ29905.1

Group10065: abra|OJJ77059.1 afla|EED52210.1 akaw|GAA86993.1 aluc|OJZ84466.1 anig|EHA27778.1 aory|EIT74394.1 atub|OJI89610.1

Group10066: agla|OJJ87921.1 afis|EAW19748.1 afla|EED45936.1 afum|EAL92049.1 aory|EIT75380.1 ater|EAU32158.1 awen|OJJ34722.1

Group10067: abra|OJJ77168.1 acar|OOF93059.1 acla|EAW12895.1 agla|OJJ81694.1 aluc|OJZ84581.1 anig|EHA27874.1 atub|OJI89499.1

Group10068: abra|OJJ77172.1 acar|OOF93061.1 acla|EAW13647.1 akaw|GAA90761.1 aluc|OJZ84585.1 anig|EHA27878.1 atub|OJI89495.1

Group10069: anig|EHA27454.1 atub|OJI89788.1 acla|EAW09119.1 asyd|OJJ54982.1 aory|EIT78998.1 aver|OJJ03925.1 afla|EED50917.1

Group10070: abra|OJJ77392.1 acar|OOF93260.1 akaw|GAA91369.1 aluc|OJZ84800.1 anig|EHA28066.1 atub|OJI89282.1 azon|OJJ50265.1

Group10071: abra|OJJ77415.1 acar|OOF98448.1 agla|OJJ78621.1 akaw|GAA91350.1 aluc|OJZ84824.1 atub|OJI89263.1 awen|OJJ41822.1

Group10072: abra|OJJ77456.1 afla|EED49594.1 anig|EHA19290.1 aory|EIT82609.1 asyd|OJJ56404.1 ater|EAU39561.1 aver|OJJ06308.1

Group10073: abra|OJJ77542.1 acar|OOF99182.1 akaw|GAA84080.1 aluc|OJZ80994.1 anig|EHA19367.1  
ater|EAU38456.1 atub|OJI82590.1

Group10074: anid|CBF71420.1 azon|OJJ46047.1 afla|EED56792.1 asyd|OJJ54991.1 ater|EAU32728.1  
aver|OJJ07210.1 awen|OJJ31992.1

Group10075: abra|OJJ77544.1 acar|OOF99181.1 akaw|GAA84079.1 aluc|OJZ80993.1 anig|EHA19368.1  
ater|EAU38455.1 atub|OJI82591.1

Group10076: anid|CBF75958.1 afla|EED45676.1 aory|EIT75553.1 afla|EED52107.1 agla|OJJ78530.1  
aory|EIT76907.1 ater|EAU36996.1

Group10077: abra|OJJ77719.1 acla|EAW08570.1 akaw|GAA83858.1 aluc|OJZ90846.1 aory|EIT77655.1  
ater|EAU32756.1 atub|OJI82839.1

Group10078: abra|OJJ77730.1 acar|OOF99000.1 akaw|GAA83907.1 aluc|OJZ90790.1 anig|EHA19523.1  
atub|OJI82778.1 awen|OJJ29956.1

Group10079: abra|OJJ77793.1 acar|OOF90717.1 agla|OJJ83012.1 asyd|OJJ58565.1 aver|OJJ02064.1  
awen|OJJ38010.1 aver|OJJ01172.1

Group10080: abra|OJJ77814.1 acar|OOG01054.1 afis|EAW16953.1 aluc|OJZ88121.1 asyd|OJJ59176.1  
aver|OJJ01795.1 awen|OJJ38388.1

Group10081: abra|OJJ77848.1 acar|OOF98924.1 acla|EAW14866.1 akaw|GAA83799.1 aluc|OJZ90923.1  
anig|EHA19635.1 atub|OJI82915.1

Group10082: abra|OJJ77871.1 acar|OOF98900.1 akaw|GAA83779.1 aluc|OJZ90945.1 anig|EHA19653.1  
atub|OJI82937.1 awen|OJJ30237.1

Group10083: abra|OJJ77950.1 afla|EED49859.1 aluc|OJZ91021.1 anig|EHA19721.1 aory|EIT83403.1  
ater|EAU37436.1 atub|OJI83013.1

Group10084: abra|OJJ77970.1 acar|OOF98845.1 akaw|GAA83692.1 aluc|OJZ91040.1 anid|CBF85456.1  
anig|EHA19739.1 atub|OJI83036.1

Group10085: abra|OJJ77987.1 akaw|GAA85993.1 aluc|OJZ91062.1 anig|EHA19766.1 atub|OJI83058.1  
awen|OJJ33715.1 aory|EIT75619.1

Group10086: azon|OJJ43034.1 afis|EAW23758.1 afla|EED45475.1 aory|EIT75757.1 asyd|OJJ64547.1  
ater|EAU37841.1 aver|OJI98643.1

Group10087: abra|OJJ78036.1 anig|EHA25166.1 afla|EED45652.1 atub|OJI80648.1 afla|EED52845.1  
aory|EIT78592.1 ater|EAU33569.1

Group10088: abra|OJJ78046.1 akaw|GAA85942.1 aluc|OJZ91120.1 anid|CBF76243.1 anig|EHA19818.1  
atub|OJI83124.1 awen|OJJ31401.1

Group10089: abra|OJJ78070.1 afis|EAW23479.1 anig|EHA19842.1 atub|OJI83159.1 aver|OJJ05976.1  
acar|OOF92824.1 agla|OJJ82952.1

Group10090: abra|OJJ78096.1 afla|EED46926.1 akaw|GAA84547.1 aluc|OJZ81970.1 anig|EHA26143.1  
aory|EIT72661.1 atub|OJI79698.1

Group10091: abra|OJJ78135.1 afla|EED47411.1 aluc|OJZ82085.1 aver|OJJ00303.1 awen|OJJ29926.1  
afla|EED47410.1 aluc|OJZ82084.1

Group10092: abra|OJJ78136.1 afla|EED53386.1 aluc|OJZ82086.1 aory|EIT75084.1 asyd|OJJ52736.1  
aver|OJJ02990.1 awen|OJJ29927.1

Group10093: abra|OJJ78157.1 afla|EED48913.1 akaw|GAA85868.1 aluc|OJZ91211.1 anig|EHA19916.1  
aory|EIT81246.1 atub|OJI83229.1

Group10094: abra|OJJ78175.1 acar|OOF90380.1 aluc|OJZ91224.1 anig|EHA19930.1 asyd|OJJ57209.1  
aver|OJJ03080.1 aory|EIT73676.1

Group10095: abra|OJJ78194.1 acar|OOF98663.1 akaw|GAA85835.1 aluc|OJZ91265.1 anid|CBF82953.1  
anig|EHA19953.1 atub|OJI83254.1

Group10096: abra|OJJ78205.1 acar|OOF98649.1 akaw|GAA85822.1 aluc|OJZ91277.1 anig|EHA19963.1  
atub|OJI83266.1 awen|OJJ29567.1

Group10097: abra|OJJ78311.1 acar|OOF90330.1 afis|EAW17201.1 afla|EED56925.1 afum|EAL86628.1  
anig|EHA20062.1 ater|EAU29640.1

Group10098: abra|OJJ78314.1 akaw|GAA85716.1 aluc|OJZ91387.1 anig|EHA20065.1 asyd|OJJ56083.1 atub|OJI83380.1 aver|OJJ05026.1

Group10099: abra|OJJ78341.1 acar|OOF98539.1 akaw|GAA85692.1 aluc|OJZ91413.1 anig|EHA20086.1 ater|EAU31065.1 atub|OJI83407.1

Group10100: abra|OJJ78342.1 acar|OOF98538.1 agla|OJJ84605.1 akaw|GAA85691.1 aluc|OJZ91414.1 anig|EHA20087.1 atub|OJI83408.1

Group10101: afum|EAL86784.2 afis|EAW19742.1 afla|EED56524.1 agla|OJJ82488.1 aory|EIT82921.1 asyd|OJJ60342.1 aver|OJJ07300.1

Group10102: acar|OOF89843.1 acla|EAW10859.1 aory|EIT75121.1 ater|EAU29341.1 awen|OJJ36180.1 azon|OJJ44011.1 awen|OJJ40844.1

Group10103: acar|OOF90105.1 agla|OJJ84646.1 akaw|GAA87357.1 aluc|OJZ89657.1 anig|EHA26894.1 atub|OJI85144.1 awen|OJJ36224.1

Group10104: aver|OJJ01972.1 acla|EAW14595.1 afis|EAW19324.1 afla|EED57236.1 afum|EAL94042.1 asyd|OJJ54477.1 aory|EIT74119.1

Group10105: afla|EED44800.1 agla|OJJ84850.1 awen|OJJ33162.1 acla|EAW13354.1 afis|EAW20468.1 afum|EAL84584.1 ater|EAU37695.1

Group10106: acar|OOF91586.1 afla|EED45784.1 agla|OJJ85380.1 aory|EIT75424.1 asyd|OJJ59941.1 ater|EAU31846.1 aver|OJJ02346.1

Group10107: acar|OOF91587.1 afla|EED45783.1 agla|OJJ85381.1 aory|EIT75684.1 asyd|OJJ59943.1 ater|EAU31847.1 aver|OJJ02345.1

Group10108: acar|OOF91731.1 afla|EED52519.1 aluc|OJZ86321.1 anig|EHA19837.1 aory|EIT82774.1 atub|OJI84213.1 awen|OJJ33740.1

Group10109: anid|CBF84500.1 akaw|GAA92280.1 aluc|OJZ90177.1 anig|EHA23676.1 asyd|OJJ53505.1 atub|OJI81604.1 aver|OJJ08241.1

Group10110: acar|OOF91881.1 acla|EAW10805.1 afis|EAW24765.1 afla|EED51966.1 afum|EBA27381.1 aory|EIT81438.1 asyd|OJJ56523.1

Group10111: acar|OOF91983.1 afla|EED56296.1 aory|EIT73428.1 asyd|OJJ54284.1 atub|OJI89932.1 aver|OJJ05238.1 awen|OJJ37070.1

Group10112: acar|OOF92444.1 afis|EAW16803.1 agla|OJJ87317.1 ater|EAU32887.1 azon|OJJ49097.1 asyd|OJJ58339.1 aver|OJJ02072.1

Group10113: acar|OOF92546.1 afla|EED48227.1 akaw|GAA92149.1 aluc|OJZ85554.1 anig|EHA24963.1 aory|EIT72929.1 atub|OJI79351.1

Group10114: agla|OJJ84340.1 afis|EAW20668.1 afla|EED53061.1 anig|EHA17700.1 aory|EIT74773.1 asyd|OJJ60418.1 aver|OJI99742.1

Group10115: ater|EAU36151.1 acla|EAW12120.1 afis|EAW17260.1 afla|EED48875.1 afum|EAL86677.1 aory|EIT81221.1 awen|OJJ35773.1

Group10116: afis|EAW16921.1 afum|EAL86448.1 anid|CBF73423.1 afis|EAW16414.1 afum|EAL89038.1 asyd|OJJ54161.1 aver|OJJ08585.1

Group10117: acar|OOF93175.1 afla|EED47510.1 aory|EIT74549.1 asyd|OJJ63013.1 ater|EAU31932.1 aver|OJJ04461.1 azon|OJJ42258.1

Group10118: acar|OOF93327.1 afla|EED53182.1 anig|EHA26133.1 ater|EAU35986.1 aver|OJJ07601.1 awen|OJJ31083.1 awen|OJJ35808.1

Group10119: acar|OOF93361.1 afis|EAW20745.1 agla|OJJ85097.1 asyd|OJJ56493.1 atub|OJI82460.1 aver|OJI99444.1 afis|EAW16251.1

Group10120: aory|EIT73610.1 acla|EAW14096.1 afis|EAW21809.1 afum|EAL88829.2 agla|OJJ86299.1 anig|EHA19726.1 ater|EAU30722.1

Group10121: acar|OOF93384.1 agla|OJJ80146.1 aory|EIT72746.1 ater|EAU32667.1 asyd|OJJ61539.1 aver|OJJ00866.1 azon|OJJ43166.1

Group10122: acar|OOF93994.1 afla|EED46878.1 anid|CBF84499.1 aory|EIT72586.1 asyd|OJJ53528.1 aver|OJJ08222.1 azon|OJJ51729.1

Group10123: acar|OOF94573.1 acla|EAW15348.1 akaw|GAA82768.1 aluc|OJZ87327.1 anig|EHA19267.1 atub|OJI81318.1 aver|OJJ03895.1

Group10124: afum|EAL85105.2 acla|EAW09091.1 afis|EAW17508.1 aory|EIT76499.1 ater|EAU36366.1 afis|EAW19377.1 afis|EAW19789.1

Group10125: acla|EAW11968.1 afis|EAW19616.1 afla|EED56964.1 afum|EAL86906.2 aory|EIT77561.1 ater|EAU32916.1 awen|OJJ37898.1

Group10126: acar|OOF94907.1 aver|OJJ08790.1 awen|OJJ40865.1 afis|EAW24596.1 agla|OJJ80219.1 anig|EHA25389.1 aver|OJI96487.1

Group10127: acar|OOF94915.1 asyd|OJJ53586.1 acla|EAW14558.1 aver|OJJ08162.1 afla|EED45461.1 aory|EIT76816.1 afla|EED55783.1

Group10128: acar|OOF94995.1 akaw|GAA91649.1 aluc|OJZ87753.1 anig|EHA20240.1 ater|EAU39601.1 atub|OJI80891.1 awen|OJJ36100.1

Group10129: acar|OOF95587.1 akaw|GAA89742.1 aluc|OJZ80642.1 anig|EHA27190.1 atub|OJI87497.1 awen|OJJ37789.1 azon|OJJ43526.1

Group10130: acar|OOF95803.1 acla|EAW14957.1 afis|EAW17785.1 asyd|OJJ52954.1 aver|OJJ08920.1 acla|EAW09539.1 afla|EED52915.1

Group10131: acar|OOF96113.1 afis|EAW24503.1 afla|EED48396.1 aory|EIT83084.1 asyd|OJJ62110.1 aver|OJI96216.1 azon|OJJ50121.1

Group10132: acar|OOF96163.1 acla|EAW08024.1 afis|EAW23058.1 afum|EAL88421.1 akaw|GAA85561.1 anid|CBF81035.1 aory|EIT80328.1

Group10133: acar|OOF96565.1 acla|EAW11013.1 afis|EAW23732.1 anid|CBF78318.1 asyd|OJJ54556.1 aver|OJJ05038.1 asyd|OJJ56094.1

Group10134: akaw|GAA83443.1 aluc|OJZ92558.1 anig|EHA26422.1 atub|OJI86994.1 asyd|OJJ57626.1 aver|OJI99501.1 azon|OJJ43875.1

Group10135: ater|EAU34271.1 awen|OJJ40923.1 azon|OJJ45211.1 akaw|GAA92633.1 anid|CBF71813.1 asyd|OJJ52465.1 aver|OJJ03950.1

Group10136: acar|OOF96637.1 agla|OJJ81297.1 anid|CBF87941.1 asyd|OJJ57967.1 aver|OJJ04435.1 awen|OJJ33491.1 ater|EAU35869.1

Group10137: acar|OOF96871.1 akaw|GAA84694.1 azon|OJJ47852.1 aluc|OJZ86993.1 anig|EHA21652.1 atub|OJI83526.1 aver|OJJ02007.1

Group10138: acar|OOF97405.1 afis|EAW16894.1 akaw|GAA86524.1 aluc|OJZ85070.1 anig|EHA25284.1 atub|OJI80528.1 awen|OJJ29746.1

Group10139: acar|OOF98076.1 akaw|GAA82893.1 aluc|OJZ87462.1 anid|CBF86128.1 anig|EHA20684.1 ater|EAU32051.1 atub|OJI81186.1

Group10140: acar|OOF98088.1 acla|EAW10137.1 afis|EAW23635.1 afla|EED56572.1 afum|EAL87825.1 anid|CBF71566.1 aory|EIT79618.1

Group10141: acar|OOF98554.1 acla|EAW13534.1 afis|EAW17486.1 afum|EAL93436.2 anig|EHA20072.1 aory|EIT80022.1 atub|OJI83387.1

Group10142: acar|OOF98721.1 acla|EAW09869.1 afis|EAW19903.1 afum|EAL94096.1 agla|OJJ79564.1 ater|EAU37749.1 afum|EAL86548.1

Group10143: acar|OOF98729.1 akaw|GAA87769.1 aluc|OJZ85404.1 anig|EHA25583.1 asyd|OJJ52866.1 aver|OJJ08848.1 awen|OJJ40141.1

Group10144: acar|OOF98740.1 afis|EAW25597.1 afum|EAL84303.1 awen|OJJ40808.1 anid|CBF82031.1 asyd|OJJ53734.1 aver|OJJ07849.1

Group10145: acar|OOG00467.1 acla|EAW06903.1 afis|EAW16520.1 afla|EED56151.1 afum|EAL89115.1 anid|CBF75549.1 aory|EIT76578.1

Group10146: acla|EAW07006.1 afum|EBA27370.1 agla|OJJ82623.1 anid|CBF81986.1 asyd|OJJ56155.1 ater|EAU36735.1 aver|OJJ05095.1

Group10147: acla|EAW07118.1 afis|EAW17372.1 akaw|GAA90194.1 aluc|OJZ83154.1 anid|CBF76129.1 anig|EHA28220.1 atub|OJI87783.1

Group10148: acla|EAW08349.1 afla|EED55570.1 agla|OJJ83852.1 ater|EAU37951.1 aver|OJJ04135.1 anid|CBF74853.1 asyd|OJJ60127.1

Group10149: acla|EAW08532.1 afis|EAW23571.1 afla|EED54701.1 afum|EAL87895.2 aory|EIT78780.1 awen|OJJ41511.1 azon|OJJ48011.1

Group10150: acla|EAW08776.1 afis|EAW15630.1 afum|EAL85704.1 asyd|OJJ57953.1 ater|EAU31446.1 aver|OJJ04444.1 azon|OJJ49098.1

Group10151: acla|EAW08790.1 afis|EAW15612.1 afum|EAL85723.1 anid|CBF79048.1 ater|EAU37846.1 azon|OJJ42551.1 azon|OJJ42690.1

Group10152: acla|EAW08793.1 afis|EAW15633.1 afla|EED52683.1 aory|EIT74288.1 anid|CBF71036.1 asyd|OJJ52665.1 aver|OJJ04692.1

Group10153: acla|EAW08951.1 afis|EAW15459.1 afum|EAL85860.1 anid|CBF78360.1 asyd|OJJ57338.1 ater|EAU31585.1 aver|OJJ05824.1

Group10154: aory|EIT76507.1 afis|EAW15614.1 afla|EED46085.1 afum|EAL85721.1 agla|OJJ84457.1 ater|EAU37826.1 ater|EAU31985.1

Group10155: acla|EAW09328.1 afis|EAW21785.1 afum|EAL92812.1 aver|OJJ00512.1 anid|CBF76615.1 aory|EIT77901.1 ater|EAU38468.1

Group10156: acla|EAW10107.1 afis|EAW25480.1 afla|EED53978.1 afum|EAL90145.1 agla|OJJ87128.1 awen|OJJ41221.1 aory|EIT78329.1

Group10157: acla|EAW10391.1 afis|EAW25200.1 afla|EED53647.1 afum|EAL89863.2 aory|EIT75327.1 asyd|OJJ63000.1 aver|OJJ97966.1

Group10158: asyd|OJJ62848.1 ater|EAU32016.1 aver|OJJ07736.1 agla|OJJ80505.1 azon|OJJ42028.1 agla|OJJ89600.1 awen|OJJ37495.1

Group10159: afla|EED48161.1 aory|EIT83035.1 ater|EAU32688.1 anid|CBF76016.1 asyd|OJJ52434.1 aver|OJJ03976.1 azon|OJJ45937.1

Group10160: acla|EAW11009.1 akaw|GAA85912.1 asyd|OJJ61457.1 ater|EAU32838.1 atub|OJJ83169.1 aver|OJJ00795.1 aluc|OJJ291154.1

Group10161: acla|EAW11024.1 afis|EAW20838.1 anid|CBF82163.1 ater|EAU37264.1 afla|EED46649.1 afum|EAL84795.1 aory|EIT77935.1

Group10162: acla|EAW11038.1 afis|EAW16190.1 afla|EED49621.1 afum|EAL88821.2 aory|EIT80943.1 azon|OJJ45962.1 azon|OJJ45946.1

Group10163: ater|EAU36746.1 acla|EAW11049.1 afis|EAW16189.1 afla|EED49632.1 afum|EAL88820.2 aory|EIT80969.1 azon|OJJ45959.1

Group10164: acla|EAW11081.1 afis|EAW24664.1 afla|EED55932.1 afum|EAL89322.1 anid|CBF82329.1 aory|EIT76860.1 azon|OJJ45895.1

Group10165: acla|EAW11191.1 afla|EED54939.1 afum|EAL88558.2 akaw|GAA85541.1 aluc|OJJ283474.1 anid|CBF81003.1 ater|EAU34828.1

Group10166: acla|EAW11439.1 afis|EAW23986.1 afum|EAL87415.2 awen|OJJ35454.1 azon|OJJ51289.1 agla|OJJ86920.1 ater|EAU29765.1

Group10167: akaw|GAA92880.1 acla|EAW11450.1 afla|EED52348.1 agla|OJJ83278.1 aluc|OJJ280003.1 anig|EHA21870.1 awen|OJJ29564.1

Group10168: acla|EAW11711.1 afis|EAW23728.1 afla|EED52211.1 afum|EBA27302.1 anid|CBF85586.1 aory|EIT74336.1 ater|EAU32749.1

Group10169: acla|EAW11732.1 afis|EAW23764.1 afum|EAL87197.1 agla|OJJ78958.1 asyd|OJJ52071.1 aver|OJJ03032.1 azon|OJJ42829.1

Group10170: acla|EAW12042.1 afla|EED56293.1 aory|EIT73398.1 asyd|OJJ57620.1 ater|EAU37840.1 aver|OJJ05566.1 azon|OJJ42462.1

Group10171: acla|EAW12050.1 afla|EED56294.1 aory|EIT73305.1 asyd|OJJ57621.1 ater|EAU37839.1 aver|OJJ05565.1 azon|OJJ42461.1

Group10172: azon|OJJ50599.1 afum|EBA27289.1 akaw|GAA85221.1 aluc|OJJ290575.1 anig|EHA24019.1 atub|OJJ81999.1 awen|OJJ36191.1

Group10173: acla|EAW12190.1 afla|EED52085.1 aory|EIT76919.1 asyd|OJJ55647.1 ater|EAU36876.1 aver|OJJ06732.1 ater|EAU33188.1

Group10174: asyd|OJJ54509.1 afis|EAW19961.1 afum|EAL84954.1 ater|EAU37380.1 awen|OJJ39610.1 afla|EED57051.1 aory|EIT82314.1

Group10175: acla|EAW12244.1 afis|EAW17146.1 asyd|OJJ59649.1 aver|OJJ02633.1 azon|OJJ48730.1 agla|OJJ85326.1 azon|OJJ42911.1

Group10176: afis|EAW17467.1 afla|EED54400.1 afum|EAL91296.1 aory|EIT75887.1 asyd|OJJ58076.1 ater|EAU35543.1 aver|OJJ04331.1

Group10177: acla|EAW12383.1 afla|EED54197.1 agla|OJJ78719.1 aory|EIT75932.1 awen|OJJ38699.1 ater|EAU33853.1 aver|OJJ98299.1

Group10178: acla|EAW12425.1 afla|EED52218.1 akaw|GAA84849.1 aluc|OJZ86822.1 anid|CBF83038.1 aory|EIT74368.1 atub|OJI83695.1

Group10179: acla|EAW12446.1 afla|EED52537.1 aory|EIT74248.1 ater|EAU29648.1 acla|EAW15007.1 afis|EAW24535.1 afum|EAL86200.1

Group10180: acla|EAW12616.1 afis|EAW18068.1 afum|EAL91880.1 agla|OJJ81011.1 asyd|OJJ58329.1 aver|OJJ02082.1 awen|OJJ41455.1

Group10181: acla|EAW12724.1 afis|EAW17887.1 afla|EED46274.1 afum|EAL91696.1 agla|OJJ83060.1 awen|OJJ41672.1 azon|OJJ48387.1

Group10182: acla|EAW12816.1 afis|EAW17981.1 afla|EED51924.1 afum|EAL91790.1 agla|OJJ80238.1 aory|EIT81459.1 awen|OJJ41564.1

Group10183: afla|EED53694.1 aory|EIT75299.1 afis|EAW21378.1 agla|OJJ78598.1 anid|CBF85730.1 asyd|OJJ64282.1 aver|OJI98374.1

Group10184: acla|EAW12882.1 afis|EAW17795.1 afum|EAL91603.1 agla|OJJ84738.1 asyd|OJJ54200.1 ater|EAU36885.1 aver|OJJ08524.1

Group10185: afla|EED51128.1 anid|CBF90350.1 aory|EIT81350.1 agla|OJJ81312.1 asyd|OJJ55576.1 ater|EAU37573.1 aver|OJJ06655.1

Group10186: acla|EAW13211.1 afis|EAW17430.1 afla|EED47239.1 afum|EAL91258.1 agla|OJJ80131.1 aory|EIT79299.1 azon|OJJ47812.1

Group10187: acla|EAW13284.1 afla|EED48190.1 agla|OJJ82046.1 aory|EIT72947.1 asyd|OJJ56058.1 aver|OJJ05000.1 awen|OJJ33507.1

Group10188: acla|EAW13521.1 afis|EAW20747.1 afum|EAL87985.1 ater|EAU31793.1 awen|OJJ34473.1 afla|EED48969.1 aory|EIT79997.1

Group10189: acla|EAW13586.1 afum|EAL84902.1 agla|OJJ87989.1 asyd|OJJ52162.1 awen|OJJ30033.1 azon|OJJ43667.1 afis|EAW20016.1

Group10190: acla|EAW13617.1 afla|EED48924.1 agla|OJJ86967.1 aory|EIT80007.1 asyd|OJJ59205.1 awen|OJJ29736.1 azon|OJJ42772.1

Group10191: acla|EAW13673.1 afis|EAW19950.1 afla|EED54751.1 afum|EAL84965.1 aory|EIT78814.1 awen|OJJ31428.1 aory|EIT81673.1

Group10192: acla|EAW13676.1 afis|EAW19931.1 afla|EED48977.1 afum|EAL84978.1 anid|CBF76644.1 ater|EAU34786.1 awen|OJJ37835.1

Group10193: acla|EAW13727.1 afis|EAW20341.1 afla|EED50165.1 afum|EAL85463.1 anid|CBF79796.1 asyd|OJJ56280.1 aver|OJJ08480.1

Group10194: acla|EAW13731.1 afis|EAW19848.1 afum|EBA27217.1 anid|CBF82492.1 asyd|OJJ56116.1 ater|EAU39290.1 aver|OJJ05057.1

Group10195: acla|EAW13747.1 afis|EAW19823.1 afum|EAL85070.1 anid|CBF87170.1 asyd|OJJ60290.1 aver|OJI99630.1 azon|OJJ50616.1

Group10196: acla|EAW14554.1 afis|EAW19271.1 afum|EBA27511.1 agla|OJJ88410.1 ater|EAU29495.1 awen|OJJ37632.1 azon|OJJ47019.1

Group10197: acla|EAW14629.1 afis|EAW17252.1 afla|EED57076.1 afum|EAL86671.2 aory|EIT82261.1 asyd|OJJ56524.1 aver|OJJ06199.1

Group10198: acla|EAW14870.1 afla|EED56762.1 anid|CBF80292.1 aory|EIT73866.1 asyd|OJJ59194.1  
ater|EAU31801.1 aver|OJJ01810.1

Group10199: acla|EAW14950.1 afis|EAW24467.1 afum|EAL86139.1 anid|CBF85607.1 asyd|OJJ64198.1  
aver|OJJ98287.1 azon|OJJ45772.1

Group10200: acla|EAW15017.1 afis|EAW24548.1 afum|EAL86212.1 asyd|OJJ56858.1 ater|EAU30730.1  
aver|OJJ03471.1 awen|OJJ38777.1

Group10201: acla|EAW15325.1 afis|EAW20336.1 afla|EED53114.1 afum|EBA27233.1 aory|EIT74784.1  
ater|EAU37787.1 awen|OJJ31651.1

Group10202: acla|EAW15366.1 afis|EAW17226.1 afla|EED51519.1 afum|EAL86648.1 aory|EIT80474.1  
asyd|OJJ54522.1 aver|OJJ07662.1

Group10203: anid|CBF76052.1 afla|EED54194.1 aory|EIT76093.1 asyd|OJJ52529.1 ater|EAU33852.1  
aver|OJJ03871.1 ater|EAU34638.1

Group10204: afis|EAW15553.1 afla|EED53618.1 aory|EIT74877.1 asyd|OJJ63945.1 atub|OJI83152.1  
aver|OJI96997.1 awen|OJJ39626.1

Group10205: awen|OJJ41766.1 afla|EED48378.1 agla|OJJ86209.1 aory|EIT83086.1 asyd|OJJ64822.1  
anid|CBF86608.1 aver|OJI98935.1

Group10206: afis|EAW16690.1 afum|EAL89290.1 asyd|OJJ52717.1 aver|OJJ04746.1 afis|EAW17132.1  
afum|EAL86592.1 anid|CBF71114.1

Group10207: afis|EAW16758.1 afum|EAL86330.1 anid|CBF78505.1 asyd|OJJ56110.1 ater|EAU29655.1  
aver|OJJ05053.1 afla|EED51667.1

Group10208: afis|EAW16923.1 afla|EED52030.1 afum|EAL86449.1 aory|EIT81450.1 asyd|OJJ54634.1  
aver|OJJ07522.1 awen|OJJ29801.1

Group10209: akaw|GAA90159.1 asyd|OJJ64677.1 aluc|OJZ83188.1 azon|OJJ45179.1 afum|EAL91083.1  
anid|CBF86785.1 aver|OJI98778.1

Group10210: afis|EAW17086.1 afla|EED54865.1 afum|EAL87816.2 anig|EHA22234.1 ater|EAU35234.1  
atub|OJI84574.1 anig|EHA24788.1

Group10211: afis|EAW17329.1 afum|EAL91166.1 anid|CBF83206.1 asyd|OJJ55552.1 ater|EAU29242.1  
aver|OJJ06629.1 azon|OJJ46030.1

Group10212: afis|EAW17361.1 afum|EAL91198.1 anid|CBF87332.1 asyd|OJJ56399.1 ater|EAU31360.1  
aver|OJJ06313.1 anid|CBF76185.1

Group10213: afis|EAW17605.1 afum|EAL91418.1 akaw|GAA92445.1 aluc|OJZ81574.1 anig|EHA25863.1  
atub|OJI88607.1 azon|OJJ44984.1

Group10214: afis|EAW18387.1 afum|EAL93062.1 anid|CBF70770.1 aver|OJJ01029.1 awen|OJJ31764.1  
afla|EED53020.1 agla|OJJ84950.1

Group10215: afis|EAW19199.1 agla|OJJ86724.1 anid|CBF76193.1 asyd|OJJ53368.1 ater|EAU31800.1  
aver|OJJ03315.1 aver|OJJ08379.1

Group10216: afis|EAW20335.1 afum|EBA27232.1 anid|CBF71679.1 asyd|OJJ61823.1 aver|OJI95923.1  
akaw|GAA88745.1 aluc|OJZ92705.1

Group10217: afis|EAW20397.1 afla|EED57025.1 agla|OJJ84195.1 aory|EIT80002.1 asyd|OJJ64225.1  
awen|OJJ37009.1 afla|EED48960.1

Group10218: afis|EAW21055.1 afla|EED54200.1 afum|EAL92091.1 aory|EIT76084.1 asyd|OJJ54691.1  
ater|EAU32447.1 aver|OJJ07478.1

Group10219: afis|EAW21127.1 afla|EED48221.1 afum|EAL88871.1 akaw|GAA87229.1 aluc|OJZ84200.1  
aory|EIT72951.1 atub|OJI89884.1

Group10220: afis|EAW21309.1 afum|EAL92325.1 anid|CBF83400.1 asyd|OJJ60643.1 ater|EAU35939.1  
aver|OJI99962.1 azon|OJJ44279.1

Group10221: afis|EAW21792.1 afla|EED46605.1 afum|EAL92817.1 anid|CBF90027.1 aory|EIT77868.1  
asyd|OJJ62065.1 aver|OJI96171.1

Group10222: afis|EAW22077.1 afla|EED56694.1 afum|EAL91093.2 anid|CBF84149.1 aory|EIT73955.1  
asyd|OJJ57121.1 ater|EAU30147.1



Group10223: afis|EAW22098.1 afla|EED48272.1 afum|EAL91091.2 aory|EIT72934.1 asyd|OJJ54148.1  
ater|EAU38943.1 aver|OJJ08593.1

Group10224: afis|EAW22223.1 afum|EAL90971.1 anid|CBF69392.1 asyd|OJJ56492.1 ater|EAU33092.1  
aver|OJJ06226.1 azon|OJJ47605.1

Group10225: afis|EAW23625.1 afla|EED45750.1 afum|EAL87835.1 aory|EIT75598.1 asyd|OJJ55363.1  
ater|EAU32046.1 aver|OJJ06445.1

Group10226: afis|EAW23685.1 afla|EED57652.1 afum|EAL87130.1 agla|OJJ78696.1 aory|EIT79919.1  
ater|EAU34270.1 aver|OJI98899.1

Group10227: afis|EAW23849.1 afla|EED52566.1 afum|EAL87277.1 agla|OJJ82492.1 aory|EIT74262.1  
ater|EAU33516.1 awen|OJJ33805.1

Group10228: afis|EAW23915.1 akaw|GAA85870.1 aluc|OJZ91208.1 awen|OJJ35046.1 azon|OJJ50613.1  
anig|EHA19915.1 atub|OJI83224.1

Group10229: afla|EED49124.1 awen|OJJ36333.1 agla|OJJ86964.1 aver|OJJ02415.1 anid|CBF75314.1  
asyd|OJJ59872.1 ater|EAU29714.1

Group10230: afis|EAW24477.1 anid|CBF69438.1 asyd|OJJ52390.1 aver|OJJ01933.1 afla|EED53176.1  
agla|OJJ87867.1 aory|EIT75134.1

Group10231: afis|EAW24713.1 afla|EED54611.1 agla|OJJ87527.1 aory|EIT78802.1 asyd|OJJ53079.1  
aver|OJJ03768.1 awen|OJJ36607.1

Group10232: afis|EAW25186.1 afla|EED47736.1 afum|EAL89860.2 ater|EAU35594.1 aver|OJJ08837.1  
anid|CBF82361.1 aory|EIT77170.1

Group10233: afis|EAW25651.1 agla|OJJ81744.1 aluc|OJZ80187.1 asyd|OJJ62924.1 ater|EAU37898.1  
aver|OJI98065.1 azon|OJJ50377.1

Group10234: afla|EED44854.1 anid|CBF78815.1 aory|EIT82719.1 aory|EIT82730.1 asyd|OJJ65263.1  
aver|OJI99414.1 awen|OJJ34503.1

Group10235: afla|EED45044.1 agla|OJJ84353.1 aory|EIT73706.1 asyd|OJJ58384.1 ater|EAU37461.1  
aver|OJJ02034.1 awen|OJJ39645.1

Group10236: afla|EED45300.1 akaw|GAA90425.1 aluc|OJZ85804.1 anig|EHA24750.1 aory|EIT73573.1  
atub|OJI79590.1 ater|EAU30976.1

Group10237: afla|EED45562.1 aory|EIT75731.1 afla|EED57227.1 akaw|GAA87619.1 aluc|OJZ85240.1  
atub|OJI80335.1 anig|EHA25441.1

Group10238: afla|EED45575.1 anid|CBF74994.1 aory|EIT75630.1 asyd|OJJ59242.1 aver|OJJ01852.1  
ater|EAU37983.1 azon|OJJ45067.1

Group10239: afla|EED45886.1 agla|OJJ80673.1 anid|CBF75882.1 aory|EIT75675.1 asyd|OJJ60251.1  
aver|OJJ04006.1 awen|OJJ35874.1

Group10240: afla|EED46046.1 anig|EHA27452.1 asyd|OJJ54976.1 atub|OJI89789.1 aver|OJJ03922.1  
awen|OJJ32212.1 asyd|OJJ54984.1

Group10241: afla|EED46049.1 anid|CBF77118.1 aory|EIT83488.1 asyd|OJJ56878.1 ater|EAU39543.1  
aory|EIT81916.1 atub|OJI81199.1

Group10242: afla|EED47345.1 agla|OJJ79751.1 aory|EIT82850.1 aver|OJJ07565.1 awen|OJJ29767.1  
azon|OJJ49003.1 ater|EAU31777.1

Group10243: afla|EED47425.1 anid|CBF82193.1 aory|EIT81900.1 asyd|OJJ52186.1 ater|EAU29297.1  
aver|OJJ05959.1 awen|OJJ36973.1

Group10244: afla|EED47469.1 agla|OJJ79971.1 anig|EHA25784.1 aory|EIT79970.1 ater|EAU31068.1  
awen|OJJ35931.1 awen|OJJ34653.1

Group10245: afla|EED47870.1 anig|EHA27620.1 aory|EIT77230.1 asyd|OJJ61764.1 ater|EAU37245.1  
aver|OJI95863.1 awen|OJJ39973.1

Group10246: afla|EED49454.1 agla|OJJ85294.1 anid|CBF80385.1 aory|EIT79463.1 asyd|OJJ54787.1  
aver|OJJ07377.1 awen|OJJ31281.1

Group10247: afla|EED50207.1 anid|CBF82198.1 aory|EIT77343.1 asyd|OJJ52183.1 ater|EAU29293.1  
aver|OJJ05962.1 awen|OJJ34427.1

Group10248: afla|EED50780.1 anid|CBF78322.1 aory|EIT78058.1 asyd|OJJ56096.1 aver|OJJ05040.1 ater|EAU36099.1 azon|OJJ42248.1

Group10249: afla|EED50796.1 aory|EIT78102.1 asyd|OJJ54742.1 ater|EAU31419.1 aver|OJJ07422.1 awen|OJJ32720.1 azon|OJJ51218.1

Group10250: afla|EED51075.1 anid|CBF87082.1 aory|EIT76983.1 asyd|OJJ60415.1 ater|EAU32194.1 aver|OJI99740.1 awen|OJJ38057.1

Group10251: afla|EED51527.1 agla|OJJ81393.1 asyd|OJJ54813.1 aver|OJJ07348.1 afla|EED53583.1 aory|EIT75065.1 awen|OJJ35388.1

Group10252: afla|EED51637.1 anid|CBF84495.1 aory|EIT80544.1 asyd|OJJ53526.1 ater|EAU35686.1 aver|OJJ08224.1 awen|OJJ32550.1

Group10253: afla|EED51695.1 akaw|GAA86245.1 anid|CBF82002.1 anig|EHA23959.1 aory|EIT80643.1 atub|OJI81925.1 akaw|GAA86246.1

Group10254: afla|EED52147.1 agla|OJJ88641.1 anid|CBF80186.1 asyd|OJJ52190.1 aver|OJJ05956.1 awen|OJJ29974.1 azon|OJJ45078.1

Group10255: afla|EED52227.1 anid|CBF82127.1 aory|EIT74449.1 asyd|OJJ54296.1 ater|EAU37212.1 aver|OJJ05251.1 awen|OJJ36070.1

Group10256: afla|EED52266.1 agla|OJJ82579.1 asyd|OJJ60517.1 aver|OJI99844.1 awen|OJJ35907.1 azon|OJJ45107.1 anid|CBF86988.1

Group10257: afla|EED52314.1 agla|OJJ87504.1 aory|EIT74376.1 asyd|OJJ54910.1 ater|EAU33815.1 aver|OJJ07292.1 awen|OJJ37811.1

Group10258: afla|EED52465.1 aluc|OJZ87035.1 anig|EHA25213.1 aory|EIT82789.1 atub|OJI83480.1 awen|OJJ30799.1 agla|OJJ84730.1

Group10259: afla|EED53550.1 agla|OJJ82963.1 aory|EIT74991.1 asyd|OJJ52687.1 aver|OJJ04715.1 agla|OJJ78662.1 awen|OJJ38323.1

Group10260: afla|EED54066.1 anid|CBF74924.1 aory|EIT76035.1 asyd|OJJ61408.1 ater|EAU31003.1 aver|OJJ00738.1 azon|OJJ42636.1

Group10261: afla|EED54378.1 aluc|OJZ87037.1 anig|EHA25211.1 aory|EIT75882.1 asyd|OJJ52554.1 atub|OJI83478.1 aver|OJJ03847.1

Group10262: afla|EED54888.1 akaw|GAA86659.1 aluc|OJZ89755.1 anig|EHA26977.1 aory|EIT79366.1 atub|OJI85047.1 aver|OJJ00799.1

Group10263: afla|EED55071.1 aory|EIT81945.1 ater|EAU37975.1 azon|OJJ50349.1 anid|CBF80573.1 asyd|OJJ52849.1 aver|OJJ08827.1

Group10264: afla|EED55764.1 anid|CBF87737.1 aory|EIT76801.1 asyd|OJJ65053.1 ater|EAU36714.1 aver|OJI99176.1 azon|OJJ47815.1

Group10265: afla|EED56551.1 anid|CBF80504.1 aory|EIT79636.1 asyd|OJJ54734.1 ater|EAU39450.1 aver|OJI97956.1 aver|OJJ07437.1

Group10266: afla|EED56557.1 agla|OJJ88412.1 akaw|GAA92924.1 aluc|OJZ82515.1 asyd|OJJ57317.1 aver|OJJ05844.1 awen|OJJ33378.1

Group10267: afla|EED56559.1 akaw|GAA92921.1 aluc|OJZ82510.1 anig|EHA20908.1 asyd|OJJ57314.1 aver|OJJ05847.1 awen|OJJ33376.1

Group10268: afla|EED56855.1 anig|EHA19935.1 aory|EIT77517.1 asyd|OJJ55049.1 aver|OJI99563.1 anig|EHA19934.1 aver|OJI99564.1

Group10269: afla|EED56903.1 agla|OJJ87523.1 aory|EIT77550.1 asyd|OJJ53514.1 ater|EAU30079.1 aver|OJJ08237.1 awen|OJJ40162.1

Group10270: afla|EED56921.1 akaw|GAA89749.1 aluc|OJZ80635.1 aory|EIT77565.1 atub|OJI87490.1 awen|OJJ32542.1 anid|CBF82770.1

Group10271: afla|EED57045.1 agla|OJJ82533.1 aory|EIT82268.1 asyd|OJJ52763.1 ater|EAU38773.1 aver|OJJ08746.1 awen|OJJ36237.1

Group10272: afla|EED57579.1 anid|CBF89418.1 aory|EIT82972.1 asyd|OJJ62453.1 ater|EAU36881.1 aver|OJI96588.1 awen|OJJ31389.1

Group10273: agla|OJJ78975.1 akaw|GAA83144.1 aluc|OJZ88701.1 anig|EHA18385.1 asyd|OJJ62632.1 atub|OJI91282.1 awen|OJJ32216.1

Group10274: agla|OJJ80901.1 akaw|GAA91207.1 aluc|OJZ81542.1 anig|EHA25892.1 azon|OJJ43255.1 ater|EAU36288.1 atub|OJI88644.1

Group10275: agla|OJJ82912.1 akaw|GAA84837.1 aluc|OJZ86837.1 asyd|OJJ56204.1 aver|OJJ05131.1 atub|OJI83681.1 anid|CBF75980.1

Group10276: agla|OJJ87897.1 aluc|OJZ80195.1 aory|EIT79523.1 asyd|OJJ52334.1 aver|OJJ05793.1 awen|OJJ31362.1 asyd|OJJ57375.1

Group10277: agla|OJJ88416.1 akaw|GAA92922.1 aluc|OJZ82513.1 anig|EHA20905.1 asyd|OJJ57313.1 aver|OJJ08123.1 awen|OJJ33718.1

Group10278: akaw|GAA91033.1 aluc|OJZ87843.1 asyd|OJJ54599.1 atub|OJI80805.1 aver|OJJ07553.1 awen|OJJ31645.1 asyd|OJJ57925.1

Group10279: asyd|OJJ59036.1 ater|EAU37517.1 atub|OJI79386.1 aver|OJJ01631.1 azon|OJJ49591.1 asyd|OJJ62323.1 aver|OJI96429.1

Group10280: abra|OJJ65452.1 abra|OJJ65570.1 abra|OJJ65527.1 akaw|GAA93119.1 akaw|GAA93278.1 aluc|OJZ80235.1

Group10281: abra|OJJ65509.1 abra|OJJ65822.1 abra|OJJ65731.1 awen|OJJ29546.1 awen|OJJ29607.1 akaw|GAA93289.1

Group10282: abra|OJJ68474.1 abra|OJJ69672.1 akaw|GAA88796.1 aluc|OJZ82479.1 anig|EHA28296.1 atub|OJI87959.1

Group10283: abra|OJJ73135.1 abra|OJJ78187.1 anid|CBF85171.1 asyd|OJJ60247.1 aver|OJJ04013.1 afis|EAW15646.1

Group10284: acar|OOF92657.1 acar|OOF97631.1 aluc|OJZ83632.1 anig|EHA18785.1 atub|OJI90001.1 akaw|GAA92093.1

Group10285: acar|OOF94040.1 acar|OOF94110.1 abra|OJJ66406.1 akaw|GAA90274.1 aluc|OJZ83067.1 atub|OJI87879.1

Group10286: acar|OOF95029.1 acar|OOF95877.1 akaw|GAA83684.1 aluc|OJZ91050.1 anig|EHA19746.1 atub|OJI83045.1

Group10287: acar|OOF95619.1 acar|OOF95671.1 abra|OJJ67064.1 akaw|GAA83294.1 aluc|OJZ83796.1 anig|EHA18942.1

Group10288: afum|EAL84881.1 afum|EAL87107.1 afum|EAL92048.1 afum|EAL94109.1 afum|EAL85503.1 afum|EAL91105.1

Group10289: afum|EAL86279.1 afum|EAL86759.1 afum|EAL86739.1 aluc|OJZ82090.1 anig|EHA21839.1 akaw|GAA93042.1

Group10290: agla|OJJ78751.1 agla|OJJ79298.1 agla|OJJ85892.1 agla|OJJ82208.1 agla|OJJ79871.1 aver|OJJ06000.1

Group10291: agla|OJJ78863.1 agla|OJJ86143.1 agla|OJJ84406.1 agla|OJJ84596.1 asyd|OJJ65342.1 aver|OJI99488.1

Group10292: agla|OJJ81525.1 agla|OJJ83613.1 afis|EAW25592.1 afum|EAL84299.2 anid|CBF82326.1 ater|EAU32211.1

Group10293: agla|OJJ83532.1 agla|OJJ83538.1 abra|OJJ70354.1 afla|EED48239.1 aluc|OJZ80604.1 aory|EIT72889.1

Group10294: agla|OJJ84147.1 agla|OJJ84853.1 asyd|OJJ58689.1 aver|OJJ01301.1 aory|EIT76069.1 awen|OJJ40081.1

Group10295: agla|OJJ85428.1 agla|OJJ86970.1 agla|OJJ82397.1 agla|OJJ85894.1 acla|EAW12314.1 aory|EIT77476.1

Group10296: agla|OJJ85647.1 agla|OJJ87448.1 anid|CBF81918.1 awen|OJJ31299.1 asyd|OJJ65137.1 aver|OJI99271.1

Group10297: akaw|GAA82059.1 akaw|GAA83940.1 aluc|OJZ80610.1 aluc|OJZ80822.1 abra|OJJ66437.1 afum|EBA27257.1

Group10298: akaw|GAA88999.1 akaw|GAA92353.1 akaw|GAA93062.1 aluc|OJZ80234.1 aluc|OJZ80393.1 aluc|OJZ80501.1

Group10299: akaw|GAA92615.1 akaw|GAA93181.1 aluc|OJZ80046.1 anig|EHA17706.1 atub|OJI87468.1 aluc|OJZ79875.1

Group10300: akaw|GAA92956.1 akaw|GAA93132.1 aluc|OJZ80249.1 aluc|OJZ80307.1 aluc|OJZ88842.1 abra|OJJ65722.1

Group10301: aluc|OJZ79549.1 aluc|OJZ79984.1 aluc|OJZ80077.1 aluc|OJZ79743.1 aluc|OJZ80258.1 akaw|GAA93216.1

Group10302: aluc|OJZ79574.1 aluc|OJZ88808.1 aluc|OJZ79754.1 aluc|OJZ80112.1 aluc|OJZ81138.1 aluc|OJZ79669.1

Group10303: aluc|OJZ79748.1 aluc|OJZ79793.1 abra|OJJ66061.1 acar|OOF99134.1 afla|EED57044.1 aory|EIT82260.1

Group10304: aluc|OJZ80108.1 aluc|OJZ86033.1 akaw|GAA90576.1 anid|CBF73579.1 anig|EHA24581.1 atub|OJI79821.1

Group10305: aluc|OJZ80121.1 aluc|OJZ88797.1 abra|OJJ65718.1 aver|OJJ03131.1 akaw|GAA92627.1 asyd|OJJ62710.1

Group10306: anid|CBF70120.1 anid|CBF76211.1 abra|OJJ66451.1 afis|EAW15395.1 aver|OJJ05919.1 aver|OJJ08486.1

Group10307: anid|CBF71194.1 anid|CBF71815.1 asyd|OJJ52514.1 aver|OJI98860.1 aver|OJI99668.1 asyd|OJJ64758.1

Group10308: anid|CBF75857.1 anid|CBF82342.1 agla|OJJ83798.1 asyd|OJJ56257.1 asyd|OJJ57579.1 aver|OJJ05601.1

Group10309: anid|CBF75872.1 anid|CBF81776.1 awen|OJJ38087.1 asyd|OJJ60236.1 aver|OJJ04029.1 asyd|OJJ54470.1

Group10310: anid|CBF76081.1 anid|CBF81135.1 anid|CBF80652.1 anid|CBF86730.1 afla|EED48083.1 asyd|OJJ53648.1

Group10311: anid|CBF78399.1 anid|CBF78480.1 afla|EED48094.1 asyd|OJJ65356.1 ater|EAU32693.1 aver|OJI99505.1

Group10312: aory|EIT76368.1 aory|EIT80996.1 acla|EAW12271.1 afla|EED46235.1 aluc|OJZ83582.1 afla|EED49611.1

Group10313: asyd|OJJ52245.1 asyd|OJJ52265.1 akaw|GAA92953.1 aluc|OJZ79529.1 ater|EAU35415.1 asyd|OJJ52287.1

Group10314: asyd|OJJ53369.1 asyd|OJJ64222.1 anid|CBF73868.1 ater|EAU31570.1 aver|OJJ08378.1 aver|OJI98305.1

Group10315: asyd|OJJ54675.1 asyd|OJJ55945.1 asyd|OJJ56883.1 aver|OJJ03439.1 aver|OJJ04894.1 aver|OJJ07628.1

Group10316: asyd|OJJ55469.1 asyd|OJJ62349.1 aver|OJI96456.1 aver|OJI99665.1 afis|EAW19744.1 anid|CBF85275.1

Group10317: asyd|OJJ59620.1 asyd|OJJ60333.1 afis|EAW17032.1 aluc|OJZ79602.1 aver|OJI99678.1 awen|OJJ36174.1

Group10318: ater|EAU29263.1 ater|EAU29264.1 anid|CBF80331.1 asyd|OJJ54841.1 aver|OJJ07320.1 asyd|OJJ61548.1

Group10319: ater|EAU29430.1 ater|EAU39347.1 anid|CBF80714.1 aory|EIT77684.1 asyd|OJJ58388.1 aver|OJJ02030.1

Group10320: ater|EAU30977.1 ater|EAU37123.1 abra|OJJ68828.1 akaw|GAA90424.1 aluc|OJZ85805.1 atub|OJI79591.1

Group10321: atub|OJI87842.1 abra|OJJ66373.1 acar|OOF91466.1 akaw|GAA90246.1 aluc|OJZ83094.1 anig|EHA28158.1

Group10322: aver|OJJ05186.1 aver|OJJ07923.1 afla|EED49650.1 anid|CBF82052.1 asyd|OJJ54234.1 ater|EAU35451.1

Group10323: awen|OJJ29631.1 awen|OJJ32583.1 abra|OJJ67274.1 akaw|GAA92072.1 aluc|OJZ81159.1 ater|EAU30099.1

Group10324: awen|OJJ30181.1 awen|OJJ35359.1 awen|OJJ33786.1 acar|OOF97382.1 afla|EED49773.1 aory|EIT77646.1

Group10325: awen|OJJ30229.1 awen|OJJ37834.1 awen|OJJ35460.1 aory|EIT82841.1 acar|OOF96655.1 afla|EED48288.1

Group10326: awen|OJJ30782.1 awen|OJJ31699.1 acar|OOF95212.1 afis|EAW21197.1 afla|EED51082.1 aory|EIT76947.1

Group10327: awen|OJJ31923.1 awen|OJJ31924.1 afis|EAW21057.1 afum|EAL92092.2 agla|OJJ86218.1 awen|OJJ31921.1

Group10328: awen|OJJ32578.1 awen|OJJ33915.1 awen|OJJ34575.1 afla|EED51615.1 agla|OJJ79230.1 aory|EIT80725.1

Group10329: awen|OJJ32587.1 awen|OJJ40143.1 anid|CBF82324.1 ater|EAU32210.1 afis|EAW25593.1 afum|EAL84300.1

Group10330: awen|OJJ35554.1 awen|OJJ38665.1 afla|EED45524.1 agla|OJJ79658.1 aory|EIT75717.1 agla|OJJ79657.1

Group10331: awen|OJJ36151.1 awen|OJJ39651.1 aory|EIT80995.1 afla|EED49642.1 aory|EIT80963.1 azon|OJJ45200.1

Group10332: azon|OJJ43902.1 azon|OJJ45176.1 aory|EIT76053.1 asyd|OJJ54879.1 awen|OJJ33642.1 awen|OJJ36384.1

Group10333: azon|OJJ46408.1 azon|OJJ46425.1 acla|EAW12201.1 agla|OJJ79017.1 awen|OJJ39828.1 agla|OJJ89184.1

Group10334: azon|OJJ47737.1 azon|OJJ47738.1 acla|EAW10002.1 asyd|OJJ52067.1 atub|OJJ90794.1 aver|OJJ04279.1

Group10335: ater|EAU32799.1 ater|EAU32800.1 acla|EAW11704.1 afis|EAW25203.1 awen|OJJ40149.1 afis|EAW15641.1

Group10336: agla|OJJ79260.1 agla|OJJ83552.1 agla|OJJ80192.1 agla|OJJ86165.1 agla|OJJ83845.1 agla|OJJ81286.1

Group10337: agla|OJJ84815.1 agla|OJJ84818.1 agla|OJJ84817.1 agla|OJJ84819.1 agla|OJJ84820.1 agla|OJJ84821.1

Group10338: aluc|OJZ79561.1 aluc|OJZ79857.1 aluc|OJZ80400.1 aluc|OJZ80031.1 aluc|OJZ88825.1 aluc|OJZ80210.1

Group10339: aluc|OJZ79569.1 aluc|OJZ79651.1 aluc|OJZ79845.1 aluc|OJZ79805.1 aluc|OJZ80038.1 aluc|OJZ80181.1

Group10340: aluc|OJZ79594.1 aluc|OJZ79691.1 aluc|OJZ80032.1 aluc|OJZ79803.1 aluc|OJZ80428.1 aluc|OJZ80209.1

Group10341: aluc|OJZ79765.1 aluc|OJZ80131.1 aluc|OJZ79930.1 aluc|OJZ80443.1 aluc|OJZ81121.1 aluc|OJZ79913.1

Group10342: abra|OJJ65430.1 akaw|BAL04878.1 aluc|OJZ79468.1 aory|AFM82519.1 azon|OJJ41973.1 acar|OOF89757.1

Group10343: abra|OJJ65441.1 acar|OOF89781.1 akaw|BAL04886.1 aory|AFM82515.1 abra|OJJ74156.1 azon|OJJ41974.1

Group10344: abra|OJJ65471.1 acar|OOF91980.1 acla|EAW12245.1 afis|EAW16985.1 afum|EBA27276.1 aluc|OJZ87039.1

Group10345: abra|OJJ65578.1 acla|EAW08290.1 afis|EAW23352.1 afla|EED55611.1 afum|EAL88124.2 aory|EIT81778.1

Group10346: abra|OJJ65597.1 akaw|GAA92335.1 aluc|OJZ80458.1 anid|CBF78445.1 anig|EHA20202.1 asyd|OJJ52117.1

Group10347: abra|OJJ65605.1 asyd|OJJ52072.1 ater|EAU31024.1 aver|OJJ03031.1 azon|OJJ45965.1 awen|OJJ35369.1

Group10348: abra|OJJ65639.1 afla|EED47430.1 aluc|OJZ91196.1 anid|CBF82228.1 aory|EIT81917.1 ater|EAU35409.1

Group10349: abra|OJJ65720.1 afis|EAW17325.1 afum|EAL91162.1 agla|OJJ81285.1 anid|CBF82951.1 agla|OJJ86251.1

Group10350: asyd|OJJ61776.1 aver|OJI95879.1 azon|OJJ46057.1 afis|EAW19284.1 afum|EAL94010.1 ater|EAU34096.1

Group10351: acar|OOF92886.1 abra|OJJ65986.1 akaw|GAA90860.1 aluc|OJZ82973.1 atub|OJI89206.1 awen|OJJ29601.1

Group10352: awen|OJJ29547.1 afis|EAW22023.1 afum|EAL87807.1 akaw|GAA93360.1 anid|CBF75934.1 afum|EAL86764.1

Group10353: abra|OJJ65841.1 afla|EED44983.1 akaw|GAA92842.1 aory|EIT73608.1 asyd|OJJ51840.1 atub|OJI80376.1

Group10354: abra|OJJ65857.1 acar|OOF95017.1 akaw|GAA92288.1 aluc|OJZ90185.1 anig|EHA23684.1 atub|OJI81612.1

Group10355: abra|OJJ65879.1 anid|CBF70159.1 asyd|OJJ58802.1 ater|EAU36040.1 aver|OJJ01406.1 awen|OJJ40927.1

Group10356: agla|OJJ85712.1 anid|CBF82295.1 asyd|OJJ52730.1 afis|EAW17761.1 afum|EAL91571.1 ater|EAU32268.1

Group10357: abra|OJJ65907.1 acar|OOF90312.1 akaw|GAA92324.1 aluc|OJZ90222.1 anig|EHA23720.1 atub|OJI81655.1

Group10358: afis|EAW20774.1 acla|EAW11084.1 anid|CBF90339.1 asyd|OJJ59878.1 ater|EAU35826.1 aver|OJJ02408.1

Group10359: abra|OJJ65983.1 akaw|GAA90856.1 aluc|OJZ82977.1 atub|OJI89210.1 azon|OJJ50384.1 acar|OOF92890.1

Group10360: abra|OJJ66000.1 acar|OOF92100.1 akaw|GAA90872.1 aluc|OJZ82961.1 anig|EHA21377.1 atub|OJI89193.1

Group10361: abra|OJJ66042.1 afla|EED53086.1 afum|EAL85337.1 aory|EIT74810.1 atub|OJI87253.1 aver|OJJ08351.1

Group10362: abra|OJJ66048.1 afla|EED47798.1 anid|CBF85569.1 aory|EIT77152.1 asyd|OJJ61616.1 aver|OJJ00939.1

Group10363: abra|OJJ66062.1 akaw|GAA84176.1 aluc|OJZ81101.1 atub|OJI82479.1 abra|OJJ66068.1 anig|EHA19269.1

Group10364: abra|OJJ66075.1 afla|EED55023.1 anig|EHA22528.1 aory|EIT81973.1 asyd|OJJ54331.1 awen|OJJ41954.1

Group10365: abra|OJJ66077.1 acar|OOF99297.1 akaw|GAA84169.1 aluc|OJZ81094.1 anig|EHA19277.1 atub|OJI82489.1

Group10366: abra|OJJ66078.1 acar|OOF99294.1 akaw|GAA84168.1 aluc|OJZ81093.1 anig|EHA19278.1 atub|OJI82490.1

Group10367: abra|OJJ66084.1 acar|OOF99281.1 akaw|GAA84161.1 aluc|OJZ81084.1 anig|EHA19284.1 atub|OJI82500.1

Group10368: abra|OJJ66117.1 acar|OOF94009.1 akaw|GAA92679.1 aluc|OJZ90134.1 anig|EHA20937.1 atub|OJI84662.1

Group10369: abra|OJJ66147.1 aluc|OJZ87030.1 asyd|OJJ52810.1 ater|EAU32276.1 aver|OJJ08788.1 awen|OJJ32687.1

Group10370: anig|EHA22187.1 acar|OOF98855.1 agla|OJJ78699.1 aluc|OJZ80595.1 asyd|OJJ64212.1 awen|OJJ29866.1

Group10371: abra|OJJ66210.1 acar|OOF90650.1 akaw|GAA89077.1 aluc|OJZ80514.1 anig|EHA25679.1 atub|OJI88416.1

Group10372: abra|OJJ66240.1 akaw|GAA89049.1 aluc|OJZ80545.1 anig|EHA25650.1 ater|EAU37347.1 atub|OJI88386.1

Group10373: abra|OJJ66258.1 acar|OOF90728.1 aluc|OJZ80565.1 anig|EHA25633.1 atub|OJI88366.1 awen|OJJ38261.1

Group10374: abra|OJJ66264.1 acar|OOF90740.1 akaw|GAA89031.1 aluc|OJZ80572.1 anig|EHA25626.1 atub|OJI88359.1

Group10375: abra|OJJ66285.1 acar|OOF97578.1 afla|EED53302.1 anig|EHA23665.1 aory|EIT75229.1 atub|OJI89938.1

Group10376: afum|EAL86538.1 afis|EAW20678.1 agla|OJJ81546.1 anid|CBF84458.1 aory|EIT78065.1 asyd|OJJ52425.1

Group10377: acar|OOF93931.1 afis|EAW24668.1 akaw|GAA92101.1 aluc|OJZ83624.1 anig|EHA27516.1 atub|OJI87852.1

Group10378: abra|OJJ66338.1 aluc|OJZ83131.1 anig|EHA28191.1 atub|OJI87804.1 awen|OJJ38742.1 awen|OJJ35029.1

Group10379: abra|OJJ66372.1 acar|OOF90518.1 akaw|GAA90241.1 aluc|OJZ83099.1 anig|EHA28163.1 atub|OJI87836.1

Group10380: awen|OJJ32643.1 acar|OOF97524.1 afla|EED45828.1 anid|CBF82890.1 aory|EIT75667.1 ater|EAU29947.1

Group10381: asyd|OJJ54304.1 afis|EAW21272.1 afum|EAL92287.1 anid|CBF80705.1 ater|EAU31603.1 azon|OJJ45142.1

Group10382: afla|EED47337.1 awen|OJJ33857.1 anid|CBF81977.1 asyd|OJJ54442.1 aver|OJJ05822.1 asyd|OJJ57340.1

Group10383: abra|OJJ66434.1 acar|OOF93320.1 agla|OJJ84362.1 akaw|GAA90299.1 aluc|OJZ83038.1 atub|OJI87911.1

Group10384: azon|OJJ50390.1 afla|EED49675.1 anid|CBF80084.1 aory|EIT81002.1 asyd|OJJ58306.1 aver|OJJ02106.1

Group10385: abra|OJJ66447.1 afla|EED47381.1 aory|EIT82864.1 asyd|OJJ54739.1 aver|OJJ07426.1 awen|OJJ33682.1

Group10386: azon|OJJ46451.1 abra|OJJ74445.1 akaw|GAA87337.1 aluc|OJZ89677.1 anig|EHA26912.1 atub|OJI85123.1

Group10387: abra|OJJ66462.1 acar|OOF98735.1 asyd|OJJ63039.1 aver|OJI97928.1 azon|OJJ42626.1 abra|OJJ73164.1

Group10388: abra|OJJ66472.1 akaw|GAA92458.1 aluc|OJZ81559.1 anid|CBF75988.1 asyd|OJJ53458.1 atub|OJI88626.1

Group10389: abra|OJJ66490.1 acar|OOF90904.1 akaw|GAA91210.1 aluc|OJZ81545.1 anig|EHA25890.1 atub|OJI88639.1

Group10390: afla|EED45120.1 aluc|OJZ92859.1 aory|EIT73830.1 atub|OJI87317.1 awen|OJJ31226.1 akaw|GAA91837.1

Group10391: abra|OJJ66621.1 acar|OOF91044.1 akaw|GAA91104.1 aluc|OJZ81428.1 anig|EHA25994.1 atub|OJI88752.1

Group10392: abra|OJJ66765.1 acar|OOF93846.1 akaw|GAA89701.1 aluc|OJZ80683.1 anig|EHA27330.1 atub|OJI87542.1

Group10393: afum|EAL89363.1 akaw|GAA83432.1 atub|OJI90305.1 agla|OJJ87489.1 aluc|OJZ83933.1 asyd|OJJ64748.1

Group10394: abra|OJJ66782.1 acar|OOF93859.1 akaw|GAA89717.1 aluc|OJZ80667.1 atub|OJI87522.1 afis|EAW19290.1

Group10395: abra|OJJ66795.1 acar|OOF93872.1 akaw|GAA86860.1 aluc|OJZ89984.1 anig|EHA27355.1 atub|OJI84826.1

Group10396: abra|OJJ66801.1 acla|EAW14120.1 asyd|OJJ57638.1 ater|EAU37623.1 aver|OJJ01944.1 azon|OJJ44711.1

Group10397: abra|OJJ66817.1 acar|OOF91600.1 akaw|GAA90455.1 aluc|OJZ85769.1 atub|OJI79554.1 azon|OJJ50733.1

Group10398: abra|OJJ66838.1 akaw|GAA90475.1 aluc|OJZ85748.1 acar|OOF95831.1 ater|EAU35194.1 asyd|OJJ55923.1

Group10399: abra|OJJ66951.1 acar|OOF91716.1 akaw|GAA91469.1 aluc|OJZ85628.1 anig|EHA24901.1 atub|OJI79420.1

Group10400: abra|OJJ66961.1 acar|OOF93646.1 akaw|GAA92200.1 aluc|OJZ85615.1 anig|EHA24911.1 atub|OJI79408.1

Group10401: abra|OJJ66975.1 acar|OOF93638.1 akaw|GAA92190.1 aluc|OJZ85602.1 anig|EHA24922.1 atub|OJI79397.1

Group10402: afum|EBA27187.1 acla|EAW13433.1 afis|EAW20549.1 agla|OJJ88737.1 awen|OJJ33261.1 azon|OJJ50632.1

Group10403: abra|OJJ66999.1 acar|OOF93617.1 akaw|GAA92166.1 aluc|OJZ85574.1 anig|EHA24945.1 atub|OJI79369.1

Group10404: abra|OJJ67018.1 acar|OOF99009.1 afla|EED49608.1 anig|EHA18792.1 aory|EIT73526.1 afla|EED45163.1

Group10405: abra|OJJ67020.1 acar|OOG00388.1 akaw|GAA92143.1 aluc|OJZ85548.1 anig|EHA24954.1 atub|OJI79357.1

Group10406: abra|OJJ67021.1 acar|OOG00387.1 akaw|GAA92144.1 aluc|OJZ85549.1 anig|EHA24955.1 atub|OJI79356.1

Group10407: abra|OJJ67022.1 acar|OOG00386.1 akaw|GAA92145.1 aluc|OJZ85550.1 anig|EHA24956.1 atub|OJI79355.1

Group10408: abra|OJJ67023.1 acar|OOG00385.1 akaw|GAA92146.1 aluc|OJZ85551.1 anig|EHA24957.1 atub|OJI79354.1

Group10409: abra|OJJ67033.1 acar|OOF98677.1 akaw|GAA92156.1 aluc|OJZ85563.1 anig|EHA24969.1 atub|OJI79341.1

Group10410: abra|OJJ67041.1 afla|EED52067.1 agla|OJJ78564.1 anig|EHA18601.1 azon|OJJ42507.1 afla|EED53081.1

Group10411: abra|OJJ67044.1 afla|EED57120.1 aluc|OJZ83572.1 anig|EHA18599.1 azon|OJJ42511.1 azon|OJJ48982.1

Group10412: abra|OJJ67046.1 afla|EED52064.1 anig|EHA18597.1 aory|EIT72301.1 azon|OJJ42509.1 ater|EAU35195.1

Group10413: abra|OJJ67065.1 afla|EED45196.1 anid|CBF83087.1 anig|EHA18941.1 akaw|GAA89179.1 aluc|OJZ81654.1

Group10414: abra|OJJ67073.1 acar|OOF99306.1 akaw|GAA91082.1 aluc|OJZ87899.1 anig|EHA20196.1 atub|OJI80752.1

Group10415: abra|OJJ67076.1 acar|OOF99074.1 akaw|GAA92134.1 aluc|OJZ83589.1 anig|EHA22154.1 atub|OJI89955.1

Group10416: abra|OJJ67084.1 akaw|GAA91075.1 aluc|OJZ87890.1 asyd|OJJ59833.1 atub|OJI80762.1 aver|OJJ02455.1

Group10417: abra|OJJ67090.1 akaw|GAA91071.1 aluc|OJZ87885.1 anig|EHA20188.1 atub|OJI80766.1 awen|OJJ38312.1

Group10418: abra|OJJ67108.1 acar|OOF98444.1 akaw|GAA91056.1 aluc|OJZ87867.1 anig|EHA20173.1 atub|OJI80781.1

Group10419: abra|OJJ67110.1 acar|OOF98442.1 akaw|GAA91054.1 aluc|OJZ87865.1 anig|EHA20171.1 atub|OJI80783.1

Group10420: abra|OJJ67119.1 acar|OOF98433.1 akaw|GAA91046.1 aluc|OJZ87856.1 anig|EHA20162.1 atub|OJI80791.1

Group10421: afla|EED54178.1 acla|EAW08584.1 afis|EAW16400.1 afum|EBA27365.1 azon|OJJ47064.1 azon|OJJ42648.1

Group10422: abra|OJJ67222.1 acar|OOF92457.1 aluc|OJZ87754.1 anig|EHA20241.1 atub|OJI80890.1 awen|OJJ41933.1



Group10423: abra|OJJ67223.1 acar|OOF98329.1 akaw|GAA91650.1 aluc|OJZ87751.1 anig|EHA20239.1 atub|OJI80892.1

Group10424: agla|OJJ87686.1 afla|EED48226.1 aory|EIT72932.1 asyd|OJJ54915.1 ater|EAU30160.1 aver|OJJ07288.1

Group10425: abra|OJJ67267.1 akaw|GAA89063.1 aluc|OJZ80529.1 anig|EHA19570.1 atub|OJI88401.1 anig|EHA25666.1

Group10426: abra|OJJ67287.1 aluc|OJZ85071.1 atub|OJI80527.1 abra|OJJ67645.1 awen|OJJ35366.1 azon|OJJ45347.1

Group10427: abra|OJJ67316.1 acar|OOF92499.1 akaw|GAA86502.1 aluc|OJZ85045.1 anig|EHA25262.1 atub|OJI80553.1

Group10428: abra|OJJ67378.1 acar|OOF92434.1 akaw|GAA86445.1 aluc|OJZ84987.1 anig|EHA25200.1 atub|OJI80613.1

Group10429: afis|EAW21098.1 afum|EAL92121.1 acar|OOF91914.1 afla|EED50862.1 anig|EHA20145.1 aory|EIT79061.1

Group10430: awen|OJJ41051.1 afis|EAW16411.1 afum|EAL89035.1 anid|CBF73417.1 aver|OJJ03473.1 azon|OJJ44613.1

Group10431: abra|OJJ67525.1 agla|OJJ88365.1 akaw|GAA88138.1 aluc|OJZ81409.1 anig|EHA18707.1 atub|OJI91615.1

Group10432: agla|OJJ89427.1 afla|EED48105.1 aory|EIT76250.1 asyd|OJJ52803.1 aver|OJJ08780.1 awen|OJJ38062.1

Group10433: abra|OJJ67558.1 agla|OJJ86033.1 aluc|OJZ81375.1 atub|OJI91581.1 awen|OJJ30156.1 anid|CBF88274.1

Group10434: abra|OJJ67561.1 acar|OOG00277.1 akaw|GAA88105.1 aluc|OJZ81372.1 anig|EHA18671.1 atub|OJI91578.1

Group10435: abra|OJJ67582.1 akaw|GAA85347.1 aluc|OJZ90709.1 anid|CBF76179.1 anig|EHA24576.1 atub|OJI82136.1

Group10436: awen|OJJ31273.1 acla|EAW07079.1 acar|OOF90671.1 afla|EED52119.1 aory|EIT74478.1 anid|CBF89958.1

Group10437: abra|OJJ67656.1 acar|OOF91989.1 akaw|GAA89172.1 aluc|OJZ81661.1 anig|EHA25782.1 atub|OJI88522.1

Group10438: abra|OJJ67665.1 akaw|GAA89181.1 aluc|OJZ81651.1 anig|EHA25792.1 atub|OJI88531.1 azon|OJJ45276.1

Group10439: abra|OJJ67670.1 acar|OOF90914.1 akaw|GAA89186.1 aluc|OJZ81645.1 anig|EHA25798.1 atub|OJI88537.1

Group10440: abra|OJJ67671.1 acar|OOF90915.1 akaw|GAA89187.1 aluc|OJZ81644.1 anig|EHA25799.1 atub|OJI88538.1

Group10441: abra|OJJ67691.1 afis|EAW22025.1 afla|EED55372.1 afum|EAL85442.1 agla|OJJ86871.1 aory|EIT80897.1

Group10442: abra|OJJ67725.1 acar|OOF98717.1 akaw|GAA89219.1 aluc|OJZ81610.1 anig|EHA25836.1 atub|OJI88576.1

Group10443: abra|OJJ67757.1 acar|OOF98136.1 afla|EED56905.1 agla|OJJ84581.1 aory|EIT77493.1 afla|EED56904.1

Group10444: acla|EAW07632.1 anid|CBF79138.1 aory|EIT80510.1 aver|OJJ03897.1 afla|EED51734.1 ater|EAU33339.1

Group10445: abra|OJJ67780.1 afis|EAW15615.1 afla|EED45885.1 afum|EAL85720.1 aory|EIT75828.1 ater|EAU31882.1

Group10446: abra|OJJ67803.1 afla|EED53415.1 agla|OJJ84579.1 aluc|OJZ90854.1 aory|EIT75008.1 aver|OJJ07761.1

Group10447: abra|OJJ67815.1 acar|OOF94643.1 anid|CBF82006.1 anig|EHA20936.1 aory|EIT78893.1 ater|EAU38017.1

Group10448: abra|OJJ67816.1 acar|OOF91993.1 afum|EAL86778.1 ater|EAU38018.1 aver|OJJ07622.1 awen|OJJ36346.1

Group10449: afum|EAL85091.1 afis|EAW19799.1 agla|OJJ79579.1 anid|CBF80376.1 asyd|OJJ54811.1 aver|OJJ07350.1

Group10450: abra|OJJ67885.1 acar|OOF92861.1 akaw|GAA91892.1 aluc|OJZ82004.1 anig|EHA22252.1 atub|OJI84554.1

Group10451: abra|OJJ67902.1 acar|OOF89863.1 akaw|GAA91907.1 aluc|OJZ81987.1 anig|EHA22269.1 atub|OJI84538.1

Group10452: abra|OJJ67943.1 acar|OOF92792.1 akaw|GAA91253.1 aluc|OJZ82815.1 anig|EHA21255.1 atub|OJI89046.1

Group10453: abra|OJJ67982.1 acar|OOF92023.1 akaw|GAA91220.1 aluc|OJZ82850.1 anig|EHA21287.1 atub|OJI89080.1

Group10454: abra|OJJ67983.1 acar|OOF92024.1 akaw|GAA91219.1 aluc|OJZ82851.1 atub|OJI89081.1 anig|EHA23744.1

Group10455: abra|OJJ68007.1 acar|OOF92049.1 akaw|GAA90943.1 aluc|OJZ82881.1 anig|EHA21307.1 atub|OJI89105.1

Group10456: abra|OJJ68009.1 acar|OOF92051.1 akaw|GAA90941.1 aluc|OJZ82883.1 anig|EHA21309.1 atub|OJI89108.1

Group10457: abra|OJJ68014.1 acar|OOF92056.1 akaw|GAA90937.1 aluc|OJZ82887.1 anig|EHA21313.1 atub|OJI89112.1

Group10458: abra|OJJ68023.1 acar|OOF92067.1 akaw|GAA90928.1 aluc|OJZ82897.1 anig|EHA21321.1 atub|OJI89122.1

Group10459: abra|OJJ68025.1 akaw|GAA90927.1 aluc|OJZ82898.1 anig|EHA21322.1 atub|OJI89124.1 acar|OOF92068.1

Group10460: asyd|OJJ53538.1 acla|EAW12055.1 aluc|OJZ92004.1 atub|OJI86439.1 akaw|GAA82163.1 anig|EHA22944.1

Group10461: abra|OJJ68055.1 agla|OJJ87898.1 aluc|OJZ80197.1 asyd|OJJ57374.1 aver|OJJ05794.1 awen|OJJ31627.1

Group10462: abra|OJJ68132.1 acar|OOF90086.1 akaw|GAA86912.1 aluc|OJZ90035.1 atub|OJI84771.1 awen|OJJ39616.1

Group10463: abra|OJJ68155.1 afla|EED47516.1 akaw|GAA90124.1 aluc|OJZ83226.1 aory|EIT74590.1 atub|OJI87710.1

Group10464: abra|OJJ68161.1 agla|OJJ89558.1 akaw|GAA85356.1 aluc|OJZ90718.1 anig|EHA19728.1 atub|OJI82145.1

Group10465: abra|OJJ68162.1 akaw|GAA85357.1 aluc|OJZ90719.1 anig|EHA19727.1 atub|OJI82146.1 awen|OJJ37323.1

Group10466: aory|EIT79542.1 acar|OOF98704.1 anig|EHA20950.1 atub|OJI84676.1 azon|OJJ45278.1 awen|OJJ33319.1

Group10467: abra|OJJ68294.1 afla|EED46577.1 akaw|GAA83179.1 aluc|OJZ83678.1 asyd|OJJ52231.1 atub|OJI90049.1

Group10468: abra|OJJ68309.1 acar|OOF96699.1 akaw|GAA83165.1 aluc|OJZ83664.1 anig|EHA18814.1 atub|OJI90035.1

Group10469: abra|OJJ68312.1 acar|OOF96696.1 akaw|GAA83161.1 aluc|OJZ83661.1 anig|EHA18813.1 atub|OJI90032.1

Group10470: abra|OJJ68318.1 akaw|GAA83155.1 aluc|OJZ83655.1 anig|EHA18807.1 atub|OJI90025.1 azon|OJJ45026.1

Group10471: abra|OJJ68327.1 acar|OOF90098.1 akaw|GAA92078.1 aluc|OJZ83646.1 anig|EHA18798.1 atub|OJI90015.1

Group10472: abra|OJJ68328.1 acar|OOF97595.1 akaw|GAA92079.1 aluc|OJZ83645.1 anig|EHA18797.1 atub|OJI90014.1

Group10473: abra|OJJ68329.1 acar|OOF97594.1 akaw|GAA92081.1 aluc|OJZ83643.1 anig|EHA18796.1 atub|OJI90013.1

Group10474: abra|OJJ68330.1 acar|OOF97609.1 akaw|GAA92082.1 aluc|OJZ83642.1 anig|EHA18795.1 atub|OJI90012.1

Group10475: abra|OJJ68345.1 acar|OOF97644.1 akaw|GAA92112.1 aluc|OJZ83613.1 anig|EHA18770.1 atub|OJI89986.1

Group10476: abra|OJJ68374.1 akaw|GAA92665.1 aluc|OJZ90119.1 anig|EHA20952.1 atub|OJI84678.1 awen|OJJ31418.1

Group10477: abra|OJJ68394.1 afla|EED57178.1 akaw|GAA92554.1 aluc|OJZ90102.1 ater|EAU36573.1 atub|OJI84704.1

Group10478: abra|OJJ68413.1 afis|EAW15645.1 akaw|GAA92537.1 aluc|OJZ90085.1 anig|EHA20989.1 atub|OJI84721.1

Group10479: abra|OJJ68418.1 acar|OOF93925.1 akaw|GAA92530.1 aluc|OJZ90079.1 anig|EHA20994.1 atub|OJI84727.1

Group10480: anid|CBF73566.1 asyd|OJJ56697.1 aver|OJJ06027.1 acla|EAW14119.1 afis|EAW18827.1 afum|EAL93561.1

Group10481: abra|OJJ68576.1 acar|OOF92878.1 akaw|GAA91915.1 aluc|OJZ81965.1 anig|EHA22282.1 atub|OJI84516.1

Group10482: abra|OJJ68578.1 akaw|GAA91917.1 aluc|OJZ81963.1 anig|EHA22284.1 atub|OJI84514.1 acar|OOF92104.1

Group10483: abra|OJJ68640.1 agla|OJJ84965.1 akaw|GAA89778.1 aluc|OJZ81915.1 asyd|OJJ60398.1 atub|OJI84467.1

Group10484: abra|OJJ68808.1 acar|OOF90609.1 akaw|GAA90446.1 aluc|OJZ85780.1 anig|EHA24775.1 atub|OJI79565.1

Group10485: asyd|OJJ64662.1 aver|OJI97479.1 aver|OJI98764.1 anid|CBF84018.1 ater|EAU38121.1 awen|OJJ31107.1

Group10486: abra|OJJ68817.1 acar|OOF96411.1 akaw|GAA90435.1 aluc|OJZ85792.1 anig|EHA24768.1 atub|OJI79578.1

Group10487: abra|OJJ68820.1 akaw|GAA90431.1 aluc|OJZ85796.1 atub|OJI79582.1 awen|OJJ31951.1 azon|OJJ42671.1

Group10488: abra|OJJ68821.1 asyd|OJJ61025.1 awen|OJJ30915.1 afla|EED51704.1 aory|EIT80539.1 ater|EAU30961.1

Group10489: abra|OJJ68839.1 acar|OOF97928.1 akaw|GAA90410.1 aluc|OJZ85818.1 anig|EHA24743.1 atub|OJI79604.1

Group10490: abra|OJJ68848.1 acar|OOF90542.1 akaw|GAA90401.1 aluc|OJZ85828.1 anig|EHA24733.1 atub|OJI79616.1

Group10491: abra|OJJ68854.1 akaw|GAA90399.1 aluc|OJZ85832.1 anig|EHA24731.1 ater|EAU38595.1 atub|OJI79620.1

Group10492: abra|OJJ68869.1 anid|CBF79171.1 anig|EHA24717.1 asyd|OJJ56242.1 aver|OJJ05165.1 awen|OJJ36396.1

Group10493: abra|OJJ68881.1 acar|OOF90517.1 akaw|GAA90375.1 aluc|OJZ85857.1 anig|EHA28093.1 atub|OJI79643.1

Group10494: abra|OJJ68887.1 akaw|GAA90369.1 aluc|OJZ85863.1 anig|EHA28089.1 atub|OJI79649.1 awen|OJJ41446.1

Group10495: agla|OJJ85339.1 asyd|OJJ64783.1 aver|OJI98894.1 aluc|OJZ91594.1 atub|OJI86045.1 anig|EHA22623.1

Group10496: abra|OJJ68909.1 afis|EAW23719.1 anig|EHA21436.1 asyd|OJJ54999.1 aver|OJJ07719.1 awen|OJJ34233.1

Group10497: abra|OJJ68914.1 acar|OOF91501.1 akaw|GAA90335.1 aluc|OJZ85897.1 anig|EHA24695.1 atub|OJI79682.1

Group10498: abra|OJJ68995.1 acar|OOF92706.1 akaw|GAA90514.1 aluc|OJZ85979.1 anig|EHA24627.1 atub|OJI79769.1

Group10499: abra|OJJ69068.1 acar|OOF91230.1 akaw|GAA90599.1 aluc|OJZ86057.1 anig|EHA24555.1 atub|OJI79854.1

Group10500: abra|OJJ69135.1 acar|OOF91166.1 akaw|GAA86321.1 aluc|OJZ86123.1 anig|EHA24498.1 atub|OJI79919.1

Group10501: abra|OJJ69336.1 acar|OOF94390.1 akaw|GAA88206.1 aluc|OJZ82168.1 anig|EHA28564.1 atub|OJI88269.1

Group10502: abra|OJJ69502.1 acar|OOF94249.1 akaw|GAA88321.1 aluc|OJZ82341.1 anig|EHA28419.1 atub|OJI88099.1

Group10503: abra|OJJ69526.1 acar|OOF94215.1 akaw|GAA88299.1 aluc|OJZ82366.1 anig|EHA28399.1 atub|OJI88076.1

Group10504: aver|OJJ08860.1 acar|OOF91857.1 acla|EAW15093.1 afum|EAL91111.1 akaw|GAA87906.1 ater|EAU34633.1

Group10505: abra|OJJ69560.1 afis|EAW25594.1 awen|OJJ36408.1 acar|OOF91590.1 acla|EAW07717.1 ater|EAU29336.1

Group10506: abra|OJJ69626.1 acar|OOF92685.1 akaw|GAA91606.1 aluc|OJZ82431.1 anig|EHA28340.1 atub|OJI88010.1

Group10507: abra|OJJ69638.1 afum|EAL90965.1 akaw|GAA91618.1 aluc|OJZ82444.1 anig|EHA28329.1 atub|OJI87996.1

Group10508: abra|OJJ69641.1 acar|OOF96819.1 akaw|GAA91619.1 aluc|OJZ82445.1 anig|EHA28328.1 atub|OJI87995.1

Group10509: abra|OJJ69642.1 acar|OOF95888.1 akaw|GAA91620.1 aluc|OJZ82446.1 anig|EHA28327.1 atub|OJI87994.1

Group10510: abra|OJJ69656.1 acar|OOF98682.1 akaw|GAA91635.1 aluc|OJZ82462.1 anig|EHA28313.1 atub|OJI87976.1

Group10511: abra|OJJ69686.1 acar|OOF91754.1 akaw|GAA88810.1 aluc|OJZ82493.1 anig|EHA28279.1 atub|OJI87939.1

Group10512: abra|OJJ69694.1 afla|EED48240.1 anid|CBF84029.1 aory|EIT72961.1 asyd|OJJ61366.1 aver|OJJ00693.1

Group10513: abra|OJJ69714.1 acar|OOF96660.1 anig|EHA19585.1 atub|OJI89168.1 aver|OJJ07492.1 awen|OJJ30133.1

Group10514: abra|OJJ69724.1 acar|OOF94192.1 akaw|GAA90177.1 aluc|OJZ83173.1 anig|EHA28247.1 atub|OJI87765.1

Group10515: abra|OJJ69736.1 acar|OOF94184.1 akaw|GAA90189.1 aluc|OJZ83160.1 anig|EHA28224.1 atub|OJI87777.1

Group10516: abra|OJJ69771.1 afis|EAW25194.1 asyd|OJJ52879.1 ater|EAU31193.1 aver|OJJ07169.1 asyd|OJJ55037.1

Group10517: abra|OJJ69798.1 acar|OOF92533.1 akaw|GAA87861.1 aluc|OJZ85502.1 anig|EHA25035.1 atub|OJI80063.1

Group10518: abra|OJJ69820.1 acar|OOF93343.1 akaw|GAA87840.1 aluc|OJZ85476.1 anig|EHA25017.1 atub|OJI80087.1

Group10519: abra|OJJ69843.1 acar|OOF93366.1 akaw|GAA87816.1 aluc|OJZ85451.1 anig|EHA24994.1 atub|OJI80116.1

Group10520: abra|OJJ69849.1 acar|OOF93372.1 akaw|GAA87809.1 aluc|OJZ85444.1 anig|EHA24988.1 atub|OJI80123.1

Group10521: abra|OJJ69854.1 acar|OOF93380.1 akaw|GAA87804.1 aluc|OJZ85439.1 anig|EHA24984.1 atub|OJI80129.1

Group10522: abra|OJJ69876.1 akaw|GAA87780.1 aluc|OJZ85415.1 anig|EHA25594.1 atub|OJI80161.1 acla|EAW13220.1

Group10523: azon|OJJ48214.1 acar|OOF94715.1 akaw|GAA86261.1 aluc|OJZ90519.1 anig|EHA23972.1 atub|OJI81943.1

Group10524: abra|OJJ69918.1 acar|OOF93430.1 akaw|GAA87738.1 aluc|OJZ85370.1 anig|EHA25554.1 atub|OJI80200.1

Group10525: abra|OJJ69947.1 acar|OOF93456.1 akaw|GAA87713.1 aluc|OJZ85340.1 anig|EHA25528.1 atub|OJI80231.1

Group10526: abra|OJJ70007.1 acar|OOF93513.1 aluc|OJZ85272.1 ater|EAU32548.1 atub|OJI80299.1 awen|OJJ38245.1

Group10527: abra|OJJ70035.1 afis|EAW24623.1 afum|EAL86251.1 anid|CBF79088.1 anig|EHA18720.1 aver|OJJ08542.1

Group10528: abra|OJJ70056.1 acar|OOF93541.1 akaw|GAA87618.1 aluc|OJZ85239.1 anid|CBF83197.1 atub|OJI80336.1

Group10529: abra|OJJ70071.1 acar|OOF97445.1 akaw|GAA87608.1 aluc|OJZ85228.1 anig|EHA25432.1 atub|OJI80351.1

Group10530: abra|OJJ70073.1 acla|EAW12447.1 aory|EIT74228.1 acar|OOG00947.1 acla|EAW12166.1 anid|CBF75785.1

Group10531: abra|OJJ70090.1 acla|EAW12306.1 afis|EAW21033.1 afum|EAL92071.1 anig|EHA22486.1 atub|OJI89251.1

Group10532: abra|OJJ70103.1 akaw|GAA87597.1 aluc|OJZ85217.1 anig|EHA25421.1 atub|OJI80368.1 awen|OJJ39119.1

Group10533: abra|OJJ70136.1 acar|OOF93596.1 akaw|GAA86629.1 aluc|OJZ85184.1 anig|EHA25396.1 atub|OJI80413.1

Group10534: abra|OJJ70138.1 afis|EAW19841.1 akaw|GAA86627.1 aluc|OJZ85182.1 anig|EHA25394.1 atub|OJI80415.1

Group10535: abra|OJJ70166.1 acar|OOF94004.1 akaw|GAA86613.1 aluc|OJZ85164.1 anig|EHA25361.1 atub|OJI80440.1

Group10536: abra|OJJ70201.1 acar|OOF92579.1 akaw|GAA86575.1 aluc|OJZ85126.1 anig|EHA25345.1 atub|OJI80467.1

Group10537: abra|OJJ70210.1 acar|OOF90367.1 akaw|GAA86566.1 aluc|OJZ85117.1 anig|EHA25337.1 atub|OJI80476.1

Group10538: abra|OJJ70219.1 acar|OOF92560.1 aluc|OJZ85108.1 asyd|OJJ57681.1 atub|OJI80485.1 aver|OJJ05487.1

Group10539: abra|OJJ70221.1 afla|EED54371.1 aory|EIT75998.1 atub|OJI80487.1 agla|OJJ78677.1 awen|OJJ40934.1

Group10540: abra|OJJ70241.1 acar|OOF93542.1 agla|OJJ79704.1 akaw|GAA89190.1 aluc|OJZ81641.1 atub|OJI84630.1

Group10541: abra|OJJ70256.1 afla|EED44861.1 anig|EHA25305.1 aory|EIT82727.1 ater|EAU36571.1 anid|CBF69432.1

Group10542: abra|OJJ70284.1 acar|OOF91737.1 akaw|GAA92863.1 aluc|OJZ82550.1 anig|EHA22514.1 atub|OJI88791.1

Group10543: abra|OJJ70311.1 afis|EAW17295.1 akaw|GAA93012.1 aluc|OJZ82573.1 anig|EHA27500.1 atub|OJI88817.1

Group10544: abra|OJJ70322.1 acar|OOF91777.1 akaw|GAA92578.1 aluc|OJZ82591.1 anig|EHA27484.1 atub|OJI88826.1

Group10545: abra|OJJ70334.1 acar|OOF91812.1 akaw|GAA84587.1 aluc|OJZ89331.1 anig|EHA27476.1 atub|OJI85469.1

Group10546: abra|OJJ70338.1 akaw|GAA92591.1 aluc|OJZ82608.1 atub|OJI88843.1 aver|OJJ04185.1 awen|OJJ34534.1

Group10547: abra|OJJ70345.1 acar|OOF97499.1 akaw|GAA92595.1 aluc|OJZ82612.1 anig|EHA27466.1 atub|OJI88847.1

Group10548: abra|OJJ70399.1 acar|OOF91876.1 akaw|GAA91959.1 aluc|OJZ82658.1 anig|EHA27415.1 atub|OJI88890.1

Group10549: afla|EED52104.1 aory|EIT76899.1 ater|EAU33022.1 acar|OOF98874.1 awen|OJJ32047.1 acla|EAW13637.1

Group10550: abra|OJJ70411.1 acar|OOF90920.1 akaw|GAA91945.1 aluc|OJZ82675.1 anig|EHA21041.1 atub|OJI88910.1

Group10551: abra|OJJ70415.1 acar|OOF91855.1 akaw|GAA91941.1 aluc|OJZ82680.1 anig|EHA21048.1 atub|OJI88913.1

Group10552: akaw|GAA90155.1 anig|EHA21056.1 afla|EED46002.1 aluc|OJZ83192.1 aory|EIT75649.1 atub|OJI87746.1

Group10553: anid|CBF81919.1 asyd|OJJ65136.1 acar|OOF90359.1 agla|OJJ87447.1 aver|OJI99270.1 azon|OJJ46518.1

Group10554: abra|OJJ70443.1 akaw|GAA90137.1 aluc|OJZ83210.1 anig|EHA21070.1 atub|OJI87727.1 azon|OJJ50192.1

Group10555: abra|OJJ70447.1 acar|OOF92545.1 akaw|GAA90134.1 aluc|OJZ83213.1 anig|EHA21073.1 atub|OJI87724.1

Group10556: abra|OJJ70454.1 akaw|GAA90129.1 aluc|OJZ83220.1 anig|EHA21078.1 atub|OJI87717.1 awen|OJJ38301.1

Group10557: abra|OJJ70455.1 acar|OOG00546.1 akaw|GAA90128.1 aluc|OJZ83221.1 anig|EHA21079.1 atub|OJI87716.1

Group10558: abra|OJJ70459.1 afla|EED46518.1 aluc|OJZ83800.1 anig|EHA18948.1 aory|EIT72338.1 acar|OOG00889.1

Group10559: abra|OJJ70491.1 acar|OOF97434.1 aluc|OJZ83835.1 anig|EHA18978.1 atub|OJI90202.1 akaw|GAA83339.1

Group10560: abra|OJJ70524.1 akaw|GAA83371.1 aluc|OJZ83869.1 anig|EHA19010.1 atub|OJI90237.1 awen|OJJ30866.1

Group10561: abra|OJJ70693.1 agla|OJJ86502.1 akaw|GAA90024.1 aluc|OJZ84040.1 anig|EHA19162.1 atub|OJI90412.1

Group10562: abra|OJJ70829.1 afis|EAW18252.1 anig|EHA20879.1 aver|OJI99193.1 awen|OJJ37512.1 azon|OJJ48417.1

Group10563: awen|OJJ34594.1 asyd|OJJ52729.1 afis|EAW17760.1 afum|EAL91570.1 anid|CBF82297.1 ater|EAU32269.1

Group10564: abra|OJJ70948.1 aluc|OJZ89074.1 anid|CBF80794.1 asyd|OJJ54501.1 ater|EAU37594.1 atub|OJI85712.1

Group10565: abra|OJJ71010.1 acar|OOF98132.1 akaw|GAA82943.1 aluc|OJZ87520.1 anig|EHA20731.1 atub|OJI81128.1

Group10566: afis|EAW17009.1 afla|EED48915.1 afum|EAL86528.2 aory|EIT81230.1 azon|OJJ46210.1 awen|OJJ41834.1

Group10567: abra|OJJ71070.1 acar|OOF98075.1 akaw|GAA82892.1 aluc|OJZ87461.1 anig|EHA20683.1 atub|OJI81187.1

Group10568: abra|OJJ71078.1 acar|OOF98061.1 aluc|OJZ87452.1 anig|EHA20674.1 ater|EAU35427.1 atub|OJI81196.1

Group10569: abra|OJJ71080.1 acar|OOF98063.1 akaw|GAA82882.1 aluc|OJZ87450.1 anig|EHA20672.1 atub|OJI81198.1

Group10570: abra|OJJ71083.1 acar|OOF98055.1 akaw|GAA82878.1 aluc|OJZ87445.1 anig|EHA20669.1 atub|OJI81203.1

Group10571: acar|OOF93275.1 afla|EED56368.1 aory|EIT73394.1 akaw|GAA91356.1 aluc|OJZ84816.1 atub|OJI89269.1

Group10572: abra|OJJ71115.1 acar|OOF98035.1 akaw|GAA82855.1 aluc|OJZ87420.1 anig|EHA20644.1 atub|OJI81228.1

Group10573: abra|OJJ71148.1 afum|EAL89902.1 akaw|GAA82829.1 aluc|OJZ87390.1 anig|EHA20619.1 atub|OJI81257.1

Group10574: abra|OJJ71221.1 aluc|OJZ87328.1 anig|EHA20565.1 atub|OJI81317.1 awen|OJJ30958.1 akaw|GAA82769.1

Group10575: ater|EAU36915.1 acar|OOF90884.1 afis|EAW22125.1 asyd|OJJ55526.1 aver|OJJ06604.1 afum|EAL91063.1

Group10576: abra|OJJ71273.1 acar|OOF97901.1 akaw|GAA82717.1 aluc|OJZ87271.1 anig|EHA20512.1 atub|OJI81371.1

Group10577: abra|OJJ71410.1 acar|OOF97762.1 akaw|GAA82590.1 aluc|OJZ87130.1 anig|EHA20392.1 atub|OJI81510.1

Group10578: abra|OJJ71441.1 acar|OOF90398.1 akaw|GAA82566.1 aluc|OJZ87099.1 anig|EHA20369.1 atub|OJI81539.1

Group10579: abra|OJJ71575.1 akaw|GAA89349.1 aluc|OJZ86312.1 atub|OJI84223.1 asyd|OJJ64555.1 aver|OJI98652.1

Group10580: akaw|GAA89333.1 atub|OJI84204.1 acla|EAW15135.1 afis|EAW20107.1 afum|EAL85224.1 anid|CBF84913.1

Group10581: abra|OJJ71631.1 akaw|GAA89294.1 aluc|OJZ86373.1 anig|EHA25362.1 atub|OJI84161.1 atub|OJI80441.1

Group10582: abra|OJJ71641.1 acar|OOF96357.1 akaw|GAA89285.1 aluc|OJZ86384.1 anig|EHA21511.1 atub|OJI84149.1

Group10583: abra|OJJ71739.1 acar|OOF96430.1 akaw|GAA85153.1 aluc|OJZ86484.1 anig|EHA22177.1 atub|OJI84045.1

Group10584: abra|OJJ71782.1 akaw|GAA85128.1 aluc|OJZ86512.1 anid|CBF74969.1 anig|EHA22134.1 atub|OJI84015.1

Group10585: abra|OJJ71788.1 akaw|GAA85123.1 aluc|OJZ86518.1 asyd|OJJ62325.1 atub|OJI84006.1 aver|OJI96430.1

Group10586: abra|OJJ71789.1 acar|OOF96469.1 akaw|GAA85121.1 aluc|OJZ86519.1 anig|EHA22127.1 atub|OJI84003.1

Group10587: abra|OJJ71800.1 acar|OOF96481.1 akaw|GAA85110.1 aluc|OJZ86530.1 anig|EHA22116.1 atub|OJI83991.1

Group10588: abra|OJJ71812.1 acar|OOF96490.1 akaw|GAA85100.1 aluc|OJZ86543.1 anig|EHA22107.1 atub|OJI83980.1

Group10589: abra|OJJ71836.1 afla|EED52767.1 agla|OJJ81630.1 aluc|OJZ86567.1 asyd|OJJ58654.1 aver|OJJ01263.1

Group10590: abra|OJJ71859.1 acar|OOF96531.1 akaw|GAA85056.1 aluc|OJZ86596.1 anig|EHA22066.1 atub|OJI83927.1

Group10591: abra|OJJ71901.1 acar|OOF90471.1 akaw|GAA85019.1 aluc|OJZ86638.1 anig|EHA22031.1 atub|OJI83889.1

Group10592: afis|EAW19988.1 anid|CBF73969.1 asyd|OJJ62369.1 aver|OJI96503.1 afum|EAL84927.1 anig|EHA22195.1

Group10593: abra|OJJ72125.1 acar|OOF96765.1 akaw|GAA84798.1 aluc|OJZ86882.1 anig|EHA21762.1 atub|OJI83637.1

Group10594: ater|EAU31365.1 awen|OJJ34585.1 asyd|OJJ52932.1 anid|CBF87463.1 aver|OJJ08897.1 azon|OJJ42194.1

Group10595: abra|OJJ72156.1 acar|OOF96789.1 akaw|GAA84771.1 aluc|OJZ86912.1 anig|EHA21732.1 atub|OJI83609.1

Group10596: abra|OJJ72174.1 acar|OOF96805.1 akaw|GAA84752.1 aluc|OJZ86931.1 anig|EHA21717.1 atub|OJI83590.1

Group10597: abra|OJJ72175.1 acar|OOF96806.1 akaw|GAA84753.1 aluc|OJZ86930.1 anig|EHA21716.1 atub|OJI83591.1

Group10598: abra|OJJ72176.1 acar|OOF96807.1 akaw|GAA84754.1 aluc|OJZ86929.1 anig|EHA21715.1 atub|OJI83592.1

Group10599: abra|OJJ72178.1 akaw|GAA91085.1 aluc|OJZ87902.1 anid|CBF75982.1 anig|EHA20198.1 azon|OJJ50246.1

Group10600: abra|OJJ72184.1 akaw|GAA84750.1 aluc|OJZ86933.1 anig|EHA21713.1 asyd|OJJ57958.1 atub|OJI83588.1

Group10601: abra|OJJ72185.1 acar|OOF96809.1 akaw|GAA84749.1 aluc|OJZ86934.1 anig|EHA21710.1 atub|OJI83587.1

Group10602: abra|OJJ72186.1 acar|OOF96810.1 akaw|GAA84748.1 aluc|OJZ86935.1 anig|EHA21709.1 atub|OJI83586.1

Group10603: abra|OJJ72194.1 akaw|GAA84739.1 aluc|OJZ86945.1 anig|EHA21699.1 atub|OJI83577.1 aver|OJI97566.1

Group10604: abra|OJJ72204.1 akaw|GAA84732.1 aluc|OJZ86954.1 anig|EHA21693.1 atub|OJI83569.1 awen|OJJ29939.1

Group10605: abra|OJJ72221.1 acar|OOF96843.1 akaw|GAA84716.1 aluc|OJZ86971.1 anig|EHA21677.1 atub|OJI83550.1

Group10606: abra|OJJ72239.1 acar|OOF96864.1 akaw|GAA84700.1 aluc|OJZ86987.1 anig|EHA21659.1 atub|OJI83532.1

Group10607: abra|OJJ72240.1 acar|OOF96865.1 akaw|GAA84699.1 aluc|OJZ86988.1 anig|EHA21658.1 atub|OJI83531.1

Group10608: abra|OJJ72252.1 acar|OOF96883.1 akaw|GAA84685.1 aluc|OJZ87003.1 anig|EHA21643.1 atub|OJI83516.1

Group10609: abra|OJJ72256.1 acar|OOF96888.1 akaw|GAA84681.1 aluc|OJZ87007.1 anig|EHA21639.1 atub|OJI83512.1

Group10610: acla|EAW12258.1 agla|OJJ79787.1 afis|EAW16979.1 afum|EAL86506.1 awen|OJJ35996.1 azon|OJJ50268.1

Group10611: anid|CBF80595.1 afla|EED49584.1 aory|EIT82628.1 asyd|OJJ62163.1 ater|EAU31435.1 aver|OJI96273.1

Group10612: abra|OJJ72316.1 acar|OOF94894.1 akaw|GAA86063.1 aluc|OJZ90297.1 anig|EHA23786.1 atub|OJI81721.1

Group10613: abra|OJJ72367.1 acar|OOF94845.1 akaw|GAA86117.1 aluc|OJZ90355.1 atub|OJI81782.1 azon|OJJ45146.1

Group10614: acla|EAW08391.1 afum|EAL94103.2 afla|EED57628.1 agla|OJJ80817.1 aory|EIT82956.1 ater|EAU36097.1

Group10615: abra|OJJ72374.1 agla|OJJ80747.1 anig|EHA23827.1 asyd|OJJ55140.1 ater|EAU32918.1 atub|OJI81771.1

Group10616: abra|OJJ72435.1 acar|OOF94800.1 akaw|GAA86175.1 aluc|OJZ90418.1 anig|EHA23886.1 atub|OJI81851.1

Group10617: abra|OJJ72456.1 acar|OOF94782.1 akaw|GAA86192.1 aluc|OJZ90441.1 anig|EHA23906.1 atub|OJI81871.1

Group10618: abra|OJJ72501.1 acar|OOF94739.1 akaw|GAA86230.1 aluc|OJZ90484.1 anig|EHA23942.1 atub|OJI81909.1

Group10619: abra|OJJ72512.1 acar|OOF94731.1 akaw|GAA86239.1 aluc|OJZ90494.1 anig|EHA23953.1 atub|OJI81919.1

Group10620: abra|OJJ72574.1 acar|OOF94685.1 akaw|GAA85200.1 aluc|OJZ90555.1 anig|EHA24002.1 atub|OJI81978.1

Group10621: abra|OJJ72577.1 acar|OOF94682.1 agla|OJJ88580.1 akaw|GAA85203.1 aluc|OJZ90558.1 atub|OJI81981.1

Group10622: acla|EAW13708.1 acar|OOF94989.1 afla|EED47558.1 aluc|OJZ84462.1 aory|EIT74536.1 ater|EAU33405.1



Group10623: abra|OJJ72610.1 acar|OOF94644.1 akaw|GAA85236.1 aluc|OJZ90592.1 anig|EHA24031.1 atub|OJI82015.1

Group10624: abra|OJJ72617.1 akaw|GAA85241.1 aluc|OJZ90598.1 anig|EHA24037.1 atub|OJI82022.1 ater|EAU39349.1

Group10625: abra|OJJ72644.1 acar|OOF94626.1 akaw|GAA85265.1 aluc|OJZ90623.1 anig|EHA24060.1 atub|OJI82049.1

Group10626: abra|OJJ72671.1 acar|OOF97387.1 akaw|GAA85291.1 aluc|OJZ90649.1 anig|EHA24085.1 atub|OJI82079.1

Group10627: abra|OJJ72672.1 acar|OOF97386.1 akaw|GAA85292.1 aluc|OJZ90650.1 anig|EHA24086.1 atub|OJI82080.1

Group10628: abra|OJJ72676.1 acar|OOF97381.1 akaw|GAA85295.1 aluc|OJZ90654.1 anig|EHA24089.1 atub|OJI82083.1

Group10629: abra|OJJ72680.1 acar|OOF95929.1 akaw|GAA85298.1 aluc|OJZ90658.1 anig|EHA24093.1 atub|OJI82087.1

Group10630: asyd|OJJ58315.1 acar|OOF97087.1 akaw|GAA84853.1 aluc|OJZ86818.1 atub|OJI83699.1 aver|OJJ02096.1

Group10631: abra|OJJ72747.1 acar|OOF95970.1 akaw|GAA85359.1 aluc|OJZ90721.1 anig|EHA24139.1 atub|OJI82149.1

Group10632: abra|OJJ72893.1 acar|OOF96084.1 akaw|GAA85480.1 aluc|OJZ83402.1 anig|EHA24253.1 atub|OJI82289.1

Group10633: abra|OJJ72952.1 akaw|GAA85533.1 aluc|OJZ83462.1 anig|EHA24305.1 atub|OJI82354.1 anid|CBF77659.1

Group10634: abra|OJJ72961.1 acar|OOF96143.1 acla|EAW11188.1 afum|EAL88555.1 aluc|OJZ83469.1 anid|CBF81010.1

Group10635: abra|OJJ73069.1 acar|OOG00302.1 akaw|GAA88091.1 aluc|OJZ81356.1 anig|EHA18656.1 atub|OJI91560.1

Group10636: abra|OJJ73088.1 acar|OOG00320.1 akaw|GAA88072.1 aluc|OJZ81337.1 anig|EHA18641.1 atub|OJI91540.1

Group10637: abra|OJJ73137.1 akaw|GAA88035.1 aluc|OJZ81294.1 anig|EHA18603.1 atub|OJI91503.1 azon|OJJ47527.1

Group10638: abra|OJJ73166.1 acar|OOF89877.1 akaw|GAA88010.1 aluc|OJZ81268.1 anig|EHA18568.1 atub|OJI91474.1

Group10639: abra|OJJ73299.1 acla|EAW12038.1 afla|EED49379.1 akaw|GAA92707.1 aluc|OJZ88748.1 atub|OJI91320.1

Group10640: abra|OJJ73302.1 acar|OOF91870.1 akaw|GAA92703.1 aluc|OJZ88743.1 anig|EHA18447.1 atub|OJI91315.1

Group10641: abra|OJJ73311.1 acar|OOF90734.1 akaw|GAA92811.1 aluc|OJZ88734.1 anig|EHA18437.1 atub|OJI91310.1

Group10642: abra|OJJ73315.1 acar|OOF98706.1 akaw|GAA92805.1 aluc|OJZ88728.1 anig|EHA18433.1 atub|OJI91306.1

Group10643: abra|OJJ73316.1 acar|OOF98707.1 agla|OJJ85299.1 akaw|GAA92804.1 asyd|OJJ52015.1 aver|OJJ07820.1

Group10644: abra|OJJ73355.1 acar|OOG00564.1 akaw|GAA83129.1 aluc|OJZ88685.1 anig|EHA18365.1 atub|OJI91265.1

Group10645: abra|OJJ73398.1 akaw|GAA83089.1 aluc|OJZ88636.1 anig|EHA18334.1 atub|OJI91221.1 azon|OJJ42505.1

Group10646: abra|OJJ73429.1 acar|OOG00635.1 akaw|GAA83063.1 aluc|OJZ88614.1 anig|EHA18305.1 atub|OJI91199.1

Group10647: abra|OJJ73468.1 afla|EED55020.1 aory|EIT81957.1 asyd|OJJ62950.1 ater|EAU30736.1 aver|OJI98037.1

Group10648: abra|OJJ73494.1 acar|OOG00686.1 akaw|GAA87443.1 aluc|OJZ88554.1 anig|EHA18252.1 atub|OJI91139.1

Group10649: abra|OJJ73524.1 acar|OOF94525.1 afla|EED51013.1 anig|EHA18230.1 aory|EIT77005.1 ater|EAU38118.1

Group10650: abra|OJJ73662.1 akaw|GAA88494.1 aluc|OJZ88390.1 anig|EHA18117.1 atub|OJI90985.1 azon|OJJ46544.1

Group10651: abra|OJJ73663.1 akaw|GAA88493.1 aluc|OJZ88389.1 anig|EHA18116.1 atub|OJI90984.1 azon|OJJ50139.1

Group10652: abra|OJJ73695.1 anid|CBF87423.1 asyd|OJJ52904.1 aver|OJJ08874.1 afla|EED51191.1 anid|CBF87425.1

Group10653: abra|OJJ73702.1 acar|OOG00868.1 akaw|GAA88460.1 aluc|OJZ88349.1 anig|EHA18082.1 atub|OJI90944.1

Group10654: abra|OJJ73710.1 akaw|GAA88453.1 aluc|OJZ88340.1 anid|CBF76664.1 anig|EHA18075.1 atub|OJI90936.1

Group10655: abra|OJJ73723.1 acar|OOG00892.1 akaw|GAA88439.1 aluc|OJZ88327.1 anig|EHA18063.1 atub|OJI90922.1

Group10656: abra|OJJ73747.1 acar|OOG00911.1 akaw|GAA88419.1 aluc|OJZ88305.1 anig|EHA18043.1 atub|OJI90900.1

Group10657: abra|OJJ73748.1 acar|OOG00913.1 akaw|GAA88418.1 aluc|OJZ88304.1 anig|EHA18042.1 atub|OJI90899.1

Group10658: abra|OJJ73823.1 acar|OOG00975.1 akaw|GAA89442.1 aluc|OJZ88225.1 anig|EHA17973.1 atub|OJI90826.1

Group10659: abra|OJJ73852.1 afla|EED57230.1 anig|EHA19926.1 aory|EIT74060.1 asyd|OJJ55228.1 azon|OJJ42637.1

Group10660: abra|OJJ73873.1 acar|OOG01015.1 akaw|GAA89485.1 aluc|OJZ88177.1 anig|EHA17929.1 atub|OJI90775.1

Group10661: abra|OJJ73877.1 acar|OOG01017.1 akaw|GAA89489.1 aluc|OJZ88172.1 anig|EHA17925.1 atub|OJI90770.1

Group10662: abra|OJJ73941.1 acar|OOG01070.1 akaw|GAA89546.1 aluc|OJZ88103.1 anig|EHA17872.1 atub|OJI90711.1

Group10663: abra|OJJ74012.1 akaw|GAA87495.1 aluc|OJZ88027.1 anig|EHA17804.1 atub|OJI90635.1 aver|OJJ03919.1

Group10664: abra|OJJ74141.1 acar|OOF95589.1 akaw|GAA89744.1 aluc|OJZ80640.1 anig|EHA27192.1 atub|OJI87495.1

Group10665: abra|OJJ74175.1 acar|OOF95555.1 agla|OJJ85296.1 akaw|GAA86841.1 aluc|OJZ89960.1 atub|OJI84845.1

Group10666: abra|OJJ74176.1 akaw|GAA86840.1 aluc|OJZ89959.1 anig|EHA27159.1 atub|OJI84846.1 anig|EHA27160.1

Group10667: abra|OJJ74178.1 acar|OOF95543.1 aluc|OJZ89956.1 akaw|GAA86837.1 anig|EHA27156.1 atub|OJI84850.1

Group10668: abra|OJJ74182.1 acar|OOG00344.1 afla|EED47784.1 anig|EHA18613.1 aory|EIT77181.1 atub|OJI91314.1

Group10669: abra|OJJ74215.1 acar|OOF95506.1 akaw|GAA86803.1 aluc|OJZ89919.1 anig|EHA27119.1 atub|OJI84886.1

Group10670: abra|OJJ74221.1 afla|EED52530.1 aluc|OJZ89913.1 anig|EHA27113.1 aory|EIT74279.1 atub|OJI84892.1

Group10671: awen|OJJ37058.1 afis|EAW25698.1 afum|EAL84373.1 anid|CBF69711.1 asyd|OJJ59041.1 aver|OJJ01636.1

Group10672: abra|OJJ74319.1 akaw|GAA86707.1 aluc|OJZ89809.1 anig|EHA27019.1 atub|OJI84997.1 ater|EAU39321.1

Group10673: abra|OJJ74356.1 acar|OOF95374.1 akaw|GAA86675.1 aluc|OJZ89772.1 anig|EHA26990.1 atub|OJI85031.1

Group10674: abra|OJJ74368.1 akaw|GAA86663.1 aluc|OJZ89760.1 anig|EHA26980.1 aver|OJJ04193.1 awen|OJJ38112.1

Group10675: abra|OJJ74377.1 acar|OOF95361.1 akaw|GAA87276.1 aluc|OJZ89745.1 anig|EHA26967.1 atub|OJI85057.1

Group10676: abra|OJJ74404.1 acar|OOF95337.1 akaw|GAA87298.1 aluc|OJZ89720.1 anig|EHA26947.1 atub|OJI85080.1

Group10677: abra|OJJ74439.1 acar|OOF95307.1 akaw|GAA87332.1 aluc|OJZ89682.1 anig|EHA26918.1 atub|OJI85118.1

Group10678: abra|OJJ74451.1 acar|OOF95300.1 akaw|GAA87342.1 aluc|OJZ89672.1 anig|EHA26907.1 atub|OJI85128.1

Group10679: abra|OJJ74509.1 akaw|GAA82090.1 aluc|OJZ92090.1 anig|EHA26851.1 atub|OJI86520.1 acar|OOF95233.1

Group10680: abra|OJJ74520.1 akaw|GAA82080.1 aluc|OJZ92099.1 anig|EHA26843.1 atub|OJI86532.1 acar|OOF95228.1

Group10681: acla|EAW11015.1 afis|EAW20642.1 afla|EED53090.1 aory|EIT74794.1 afum|EBA27178.1 agla|OJJ84405.1

Group10682: aory|EIT82288.1 awen|OJJ35543.1 azon|OJJ42180.1 acla|EAW12959.1 afla|EED57072.1 ater|EAU32797.1

Group10683: abra|OJJ74721.1 acar|OOF91440.1 akaw|GAA81895.1 aluc|OJZ92305.1 anig|EHA26663.1 atub|OJI86735.1

Group10684: abra|OJJ74746.1 acar|OOF95740.1 afla|EED52026.1 akaw|GAA83665.1 aluc|OJZ92326.1 atub|OJI86756.1

Group10685: abra|OJJ74794.1 acar|OOF95785.1 akaw|GAA83619.1 aluc|OJZ92374.1 anig|EHA26599.1 atub|OJI86804.1

Group10686: abra|OJJ74795.1 acar|OOF95786.1 akaw|GAA83618.1 aluc|OJZ92375.1 anig|EHA26598.1 atub|OJI86805.1

Group10687: abra|OJJ74796.1 acar|OOF95787.1 akaw|GAA83617.1 aluc|OJZ92376.1 anig|EHA26597.1 atub|OJI86806.1

Group10688: afis|EAW23527.1 afum|EBA27328.1 acla|EAW08481.1 afla|EED57426.1 awen|OJJ39856.1 aory|EIT80094.1

Group10689: abra|OJJ74933.1 acar|OOF95924.1 akaw|GAA83487.1 aluc|OJZ92506.1 anig|EHA26467.1 atub|OJI86938.1

Group10690: abra|OJJ74972.1 afla|EED45924.1 anig|EHA21620.1 aver|OJJ07895.1 afum|EAL94095.1 ater|EAU36098.1

Group10691: abra|OJJ75065.1 acar|OOF97269.1 akaw|GAA88677.1 aluc|OJZ92631.1 ater|EAU39424.1 atub|OJI87062.1

Group10692: abra|OJJ75200.1 agla|OJJ79497.1 aluc|OJZ92764.1 asyd|OJJ62076.1 atub|OJI87208.1 aver|OJI96183.1

Group10693: abra|OJJ75235.1 akaw|GAA91778.1 aluc|OJZ92796.1 atub|OJI87239.1 anig|EHA26212.1 atub|OJI87240.1

Group10694: abra|OJJ75261.1 acar|OOF94541.1 akaw|GAA91799.1 aluc|OJZ92819.1 anig|EHA26189.1 atub|OJI87277.1

Group10695: abra|OJJ75267.1 acar|OOF94536.1 akaw|GAA91803.1 aluc|OJZ92825.1 anig|EHA26182.1 atub|OJI87282.1

Group10696: abra|OJJ75280.1 acar|OOF94528.1 akaw|GAA91818.1 aluc|OJZ92841.1 anig|EHA26170.1 atub|OJI87297.1

Group10697: abra|OJJ75301.1 acar|OOG00389.1 akaw|GAA91834.1 aluc|OJZ92856.1 anig|EHA26150.1 atub|OJI87313.1

Group10698: azon|OJJ44317.1 acla|EAW09870.1 afis|EAW21256.1 afum|EAL92271.1 agla|OJJ87499.1 awen|OJJ36571.1

Group10699: abra|OJJ75312.1 acar|OOF94517.1 akaw|GAA91996.1 aluc|OJZ92866.1 anig|EHA26099.1 atub|OJI87324.1

Group10700: abra|OJJ75324.1 acar|OOF90137.1 akaw|GAA92019.1 aluc|OJZ92886.1 atub|OJI87345.1 acla|EAW12068.1

Group10701: afla|EED48382.1 afis|EAW21075.1 afum|EAL92098.1 anid|CBF87052.1 aory|EIT83064.1 aver|OJI99759.1

Group10702: abra|OJJ75331.1 acar|OOF94496.1 akaw|GAA92026.1 aluc|OJZ92895.1 anig|EHA26068.1 atub|OJI87352.1

Group10703: abra|OJJ75333.1 acar|OOF94498.1 akaw|GAA92027.1 aluc|OJZ92897.1 anig|EHA26067.1 atub|OJI87355.1

Group10704: abra|OJJ75530.1 acar|OOF90857.1 akaw|GAA84292.1 aluc|OJZ88986.1 anig|EHA23540.1 atub|OJI85802.1

Group10705: abra|OJJ75531.1 akaw|GAA91951.1 aluc|OJZ82667.1 anig|EHA27441.1 atub|OJI88900.1 azon|OJJ43936.1

Group10706: abra|OJJ75565.1 acar|OOF90882.1 akaw|GAA84317.1 aluc|OJZ89013.1 anig|EHA23517.1 atub|OJI85776.1

Group10707: abra|OJJ75583.1 akaw|GAA84335.1 aluc|OJZ89034.1 anig|EHA23500.1 atub|OJI85756.1 acar|OOF90901.1

Group10708: abra|OJJ75599.1 afla|EED55137.1 akaw|GAA84350.1 aluc|OJZ89050.1 aory|EIT81597.1 atub|OJI85737.1

Group10709: afla|EED45366.1 agla|OJJ83652.1 aory|EIT82445.1 acar|OOG00334.1 afis|EAW22128.1 ater|EAU30031.1

Group10710: abra|OJJ75647.1 acar|OOG00191.1 akaw|GAA84392.1 aluc|OJZ89096.1 anig|EHA23441.1 atub|OJI85684.1

Group10711: akaw|GAA84412.1 acla|EAW09430.1 afis|EAW21706.1 afum|EAL92741.1 aory|EIT79758.1 ater|EAU38390.1

Group10712: acla|EAW08984.1 afum|EAL89329.1 ater|EAU31417.1 afla|EED48346.1 afis|EAW24688.1 aory|EIT76288.1

Group10713: abra|OJJ75751.1 akaw|GAA84484.1 aluc|OJZ89205.1 anig|EHA23354.1 atub|OJI85587.1 awen|OJJ36146.1

Group10714: abra|OJJ75755.1 acar|OOG00109.1 akaw|GAA84487.1 aluc|OJZ89208.1 anig|EHA23351.1 atub|OJI85584.1

Group10715: abra|OJJ75771.1 agla|OJJ79604.1 asyd|OJJ58676.1 atub|OJI87187.1 aver|OJJ01288.1 awen|OJJ30925.1

Group10716: abra|OJJ75775.1 akaw|GAA84493.1 aluc|OJZ89216.1 anid|CBF83116.1 anig|EHA23344.1 atub|OJI85576.1

Group10717: abra|OJJ75793.1 afum|EAL89022.1 akaw|GAA84512.1 aluc|OJZ89241.1 anig|EHA23326.1 atub|OJI85557.1

Group10718: abra|OJJ75859.1 acar|OOG00036.1 akaw|GAA84564.1 aluc|OJZ89297.1 anig|EHA23266.1 atub|OJI85501.1

Group10719: abra|OJJ75887.1 aluc|OJZ89339.1 acla|EAW12093.1 acar|OOF99323.1 atub|OJI85460.1 awen|OJJ37189.1

Group10720: abra|OJJ75925.1 acar|OOF99983.1 akaw|GAA84628.1 aluc|OJZ89374.1 anig|EHA23209.1 atub|OJI85424.1

Group10721: abra|OJJ75962.1 acar|OOF99953.1 akaw|GAA84662.1 aluc|OJZ89410.1 anig|EHA23177.1 atub|OJI85386.1

Group10722: abra|OJJ76124.1 acar|OOF99801.1 akaw|GAA88843.1 aluc|OJZ89581.1 anig|EHA23027.1 atub|OJI85223.1

Group10723: awen|OJJ39988.1 acar|OOF96879.1 akaw|GAA84689.1 aluc|OJZ86999.1 anig|EHA21647.1 atub|OJI83520.1

Group10724: abra|OJJ76369.1 akaw|GAA82295.1 aluc|OJZ91843.1 anig|EHA22826.1 atub|OJI86295.1 acar|OOF99618.1

Group10725: abra|OJJ76397.1 acar|OOF99638.1 akaw|GAA82317.1 aluc|OJZ91815.1 anig|EHA22806.1 atub|OJI86271.1

Group10726: abra|OJJ76596.1 akaw|GAA82500.1 aluc|OJZ91611.1 asyd|OJJ54847.1 atub|OJI86063.1 aver|OJJ07317.1

Group10727: abra|OJJ76611.1 acar|OOF99378.1 akaw|GAA82515.1 aluc|OJZ91596.1 anig|EHA22626.1 atub|OJI86047.1

Group10728: abra|OJJ76615.1 afis|EAW17371.1 afla|EED46485.1 afum|EAL91209.1 anig|EHA22618.1 ater|EAU32674.1

Group10729: abra|OJJ76616.1 aluc|OJZ91592.1 anid|CBF79101.1 ater|EAU31046.1 atub|OJI86043.1 azon|OJJ46457.1

Group10730: abra|OJJ76617.1 aluc|OJZ91591.1 anid|CBF79103.1 ater|EAU31047.1 atub|OJI86042.1 azon|OJJ42682.1

Group10731: abra|OJJ76655.1 acar|OOF99345.1 akaw|GAA92995.1 aluc|OJZ91550.1 anig|EHA22585.1 atub|OJI86003.1

Group10732: abra|OJJ76660.1 akaw|GAA93000.1 aluc|OJZ91543.1 anig|EHA22580.1 ater|EAU38719.1 atub|OJI85997.1

Group10733: abra|OJJ76682.1 asyd|OJJ52827.1 atub|OJI87914.1 aver|OJJ08803.1 akaw|GAA90303.1 aluc|OJZ83034.1

Group10734: abra|OJJ76706.1 akaw|GAA92492.1 aluc|OJZ91504.1 anid|CBF74590.1 anig|EHA22544.1 atub|OJI85957.1

Group10735: abra|OJJ76707.1 akaw|GAA92491.1 aluc|OJZ91503.1 anid|CBF74591.1 anig|EHA22543.1 atub|OJI85956.1

Group10736: abra|OJJ76708.1 akaw|GAA92490.1 aluc|OJZ91502.1 anid|CBF75584.1 anig|EHA22542.1 atub|OJI85955.1

Group10737: acla|EAW14593.1 afla|EED57237.1 aory|EIT74052.1 asyd|OJJ54482.1 ater|EAU32501.1 aver|OJJ01971.1

Group10738: abra|OJJ76710.1 akaw|GAA92488.1 aluc|OJZ91500.1 anig|EHA22540.1 asyd|OJJ53825.1 atub|OJI85953.1

Group10739: abra|OJJ76732.1 akaw|GAA92668.1 aluc|OJZ90122.1 anig|EHA20948.1 atub|OJI84673.1 azon|OJJ46853.1

Group10740: abra|OJJ76749.1 acar|OOF89995.1 akaw|GAA88936.1 aluc|OJZ89471.1 anig|EHA28271.1 aory|EIT81012.1

Group10741: abra|OJJ76750.1 acar|OOF89996.1 akaw|GAA88938.1 aluc|OJZ89469.1 anig|EHA28273.1 atub|OJI88343.1

Group10742: abra|OJJ76794.1 acar|OOF91288.1 akaw|GAA87231.1 aluc|OJZ84198.1 anig|EHA27555.1 atub|OJI89886.1

Group10743: abra|OJJ76876.1 agla|OJJ85995.1 asyd|OJJ65375.1 ater|EAU38551.1 aver|OJI99542.1 ater|EAU35086.1

Group10744: aver|OJI96465.1 anig|EHA24748.1 awen|OJJ41824.1 akaw|GAA90419.1 aluc|OJZ85811.1 atub|OJI79597.1

Group10745: abra|OJJ76960.1 acar|OOF91405.1 akaw|GAA87083.1 aluc|OJZ84355.1 anig|EHA27693.1 atub|OJI89712.1

Group10746: abra|OJJ76965.1 acar|OOF91409.1 akaw|GAA87079.1 aluc|OJZ84361.1 anig|EHA27696.1 atub|OJI89707.1

Group10747: abra|OJJ76966.1 acar|OOF91410.1 aluc|OJZ84362.1 anig|EHA27697.1 ater|EAU35236.1 atub|OJI89706.1

Group10748: abra|OJJ76983.1 acar|OOF91428.1 akaw|GAA87063.1 aluc|OJZ84382.1 anig|EHA27713.1 atub|OJI89689.1

Group10749: acla|EAW12965.1 afis|EAW17698.1 afum|EAL91512.1 awen|OJJ37135.1 agla|OJJ79477.1 azon|OJJ50835.1

Group10750: abra|OJJ76989.1 acar|OOF91433.1 akaw|GAA87057.1 aluc|OJZ84389.1 anig|EHA27719.1 atub|OJI89683.1

Group10751: abra|OJJ77029.1 akaw|GAA87022.1 aluc|OJZ84431.1 anig|EHA27751.1 atub|OJI89642.1 aver|OJJ08329.1

Group10752: abra|OJJ77118.1 acar|OOF93006.1 akaw|GAA90811.1 aluc|OJZ84528.1 anig|EHA27825.1 atub|OJI89552.1

Group10753: abra|OJJ77121.1 acar|OOF93008.1 akaw|GAA90808.1 aluc|OJZ84531.1 anig|EHA27828.1 atub|OJI89549.1

Group10754: abra|OJJ77162.1 akaw|GAA90770.1 aluc|OJZ84575.1 anig|EHA27868.1 atub|OJI89507.1 acar|OOF93048.1

Group10755: abra|OJJ77197.1 akaw|GAA90744.1 aluc|OJZ84604.1 aory|EIT80010.1 atub|OJI89475.1 awen|OJJ38743.1

Group10756: afla|EED45429.1 aluc|OJZ89737.1 aory|EIT82426.1 atub|OJI85064.1 akaw|GAA87282.1 aory|EIT77471.1

Group10757: abra|OJJ77249.1 akaw|GAA93200.1 aluc|OJZ84660.1 anig|EHA27942.1 atub|OJI89420.1 azon|OJJ47625.1

Group10758: abra|OJJ77252.1 anid|CBF71241.1 asyd|OJJ55161.1 ater|EAU32974.1 aver|OJJ07046.1 awen|OJJ41793.1

Group10759: abra|OJJ77283.1 acar|OOF93157.1 akaw|GAA90666.1 aluc|OJZ84693.1 anig|EHA27969.1 atub|OJI89389.1

Group10760: abra|OJJ77286.1 acar|OOF93163.1 akaw|GAA90663.1 aluc|OJZ84697.1 anig|EHA27972.1 atub|OJI89385.1

Group10761: abra|OJJ77293.1 acar|OOF93170.1 akaw|GAA91458.1 aluc|OJZ84705.1 anig|EHA27979.1 atub|OJI89378.1

Group10762: azon|OJJ44221.1 acla|EAW11080.1 agla|OJJ78856.1 asyd|OJJ61763.1 ater|EAU32699.1 aver|OJI95862.1

Group10763: abra|OJJ77314.1 acar|OOF93190.1 ater|EAU36933.1 atub|OJI89358.1 afla|EED49328.1 aory|EIT79488.1

Group10764: abra|OJJ77352.1 akaw|GAA91409.1 aluc|OJZ84763.1 anig|EHA28032.1 atub|OJI89321.1 awen|OJJ37311.1

Group10765: abra|OJJ77391.1 acar|OOF93259.1 akaw|GAA91370.1 aluc|OJZ84799.1 anig|EHA28065.1 atub|OJI89283.1

Group10766: abra|OJJ77399.1 acar|OOF89804.1 akaw|GAA91364.1 aluc|OJZ84806.1 anig|EHA28072.1 atub|OJI89277.1

Group10767: abra|OJJ77400.1 anig|EHA28073.1 abra|OJJ77402.1 akaw|GAA91363.1 aluc|OJZ84807.1 atub|OJI89276.1

Group10768: abra|OJJ77401.1 anig|EHA28074.1 abra|OJJ77403.1 akaw|GAA91362.1 aluc|OJZ84808.1 atub|OJI89275.1

Group10769: abra|OJJ77426.1 afis|EAW24704.1 afum|EAL89346.1 asyd|OJJ65317.1 ater|EAU31631.1 aver|OJI99457.1

Group10770: abra|OJJ77433.1 agla|OJJ82672.1 anid|CBF90094.1 asyd|OJJ62033.1 aver|OJI96123.1 afis|EAW24705.1

Group10771: afla|EED51170.1 anid|CBF78267.1 aory|EIT81331.1 aver|OJJ05022.1 afis|EAW24683.1 asyd|OJJ56079.1

Group10772: abra|OJJ77461.1 afla|EED49596.1 anig|EHA19294.1 asyd|OJJ56402.1 ater|EAU39563.1 aver|OJJ06310.1

Group10773: aory|EIT72890.1 afis|EAW19807.1 afla|EED48208.1 afum|EAL85085.1 ater|EAU30742.1 awen|OJJ34560.1

Group10774: atub|OJI89805.1 acar|OOF91775.1 aluc|OJZ84276.1 anig|EHA27621.1 awen|OJJ41855.1 azon|OJJ51657.1

Group10775: abra|OJJ77540.1 acar|OOF99186.1 akaw|GAA84082.1 aluc|OJZ80996.1 anig|EHA19365.1 atub|OJI82588.1

Group10776: abra|OJJ77541.1 acar|OOF99187.1 akaw|GAA84081.1 aluc|OJZ80995.1 anig|EHA19366.1 atub|OJI82589.1

Group10777: abra|OJJ77645.1 acar|OOF99090.1 akaw|GAA83989.1 aluc|OJZ80884.1 anig|EHA19453.1 atub|OJI82693.1

Group10778: anid|CBF87761.1 asyd|OJJ63917.1 afla|EED55599.1 aory|EIT82670.1 aver|OJI97025.1 awen|OJJ33421.1

Group10779: abra|OJJ77672.1 acar|OOF89815.1 akaw|GAA83960.1 aluc|OJZ80847.1 anig|EHA19476.1 atub|OJI82720.1

Group10780: abra|OJJ77679.1 afis|EAW19871.1 afla|EED56845.1 afum|EAL85026.1 aluc|OJZ79989.1 aory|EIT77461.1

Group10781: abra|OJJ77703.1 acar|OOF99037.1 akaw|GAA83927.1 aluc|OJZ90768.1 anig|EHA19503.1 atub|OJI82756.1

Group10782: abra|OJJ77706.1 acar|OOF99034.1 akaw|GAA83924.1 aluc|OJZ90771.1 anig|EHA19506.1 atub|OJI82759.1

Group10783: abra|OJJ77720.1 afla|EED52339.1 anig|EHA22491.1 aory|EIT74350.1 ater|EAU36727.1 afis|EAW18825.1

Group10784: abra|OJJ77728.1 acar|OOF99010.1 akaw|GAA83908.1 aluc|OJZ90789.1 anig|EHA19522.1 atub|OJI82777.1

Group10785: abra|OJJ77732.1 acar|OOF98991.1 akaw|GAA83903.1 aluc|OJZ90792.1 anig|EHA19526.1 atub|OJI82781.1

Group10786: abra|OJJ77733.1 acar|OOF98992.1 akaw|GAA83901.1 aluc|OJZ90794.1 anig|EHA19528.1 atub|OJI82783.1

Group10787: abra|OJJ77750.1 afis|EAW23114.1 afum|EAL92030.1 akaw|GAA83884.1 aluc|OJZ90811.1 atub|OJI82800.1

Group10788: abra|OJJ77770.1 agla|OJJ86554.1 akaw|GAA83876.1 aluc|OJZ90820.1 anig|EHA19546.1 atub|OJI82808.1

Group10789: abra|OJJ77785.1 acar|OOF98974.1 akaw|GAA83862.1 aluc|OJZ90838.1 anig|EHA19561.1 atub|OJI82825.1

Group10790: abra|OJJ77790.1 afla|EED54248.1 aory|EIT75978.1 awen|OJJ32560.1 agla|OJJ81250.1 agla|OJJ82010.1

Group10791: abra|OJJ77801.1 acar|OOF90928.1 akaw|GAA83848.1 aluc|OJZ90867.1 anig|EHA19587.1 atub|OJI82865.1

Group10792: abra|OJJ77803.1 acar|OOF90103.1 akaw|GAA83846.1 aluc|OJZ90869.1 anig|EHA19589.1 atub|OJI82867.1

Group10793: abra|OJJ77849.1 acar|OOF98923.1 akaw|GAA83798.1 aluc|OJZ90924.1 anig|EHA19636.1 atub|OJI82916.1

Group10794: afis|EAW25704.1 asyd|OJJ62981.1 ater|EAU33718.1 aver|OJI97988.1 afum|EAL84377.1 anid|CBF85239.1

Group10795: abra|OJJ77912.1 acar|OOF98859.1 akaw|GAA83745.1 aluc|OJZ90986.1 anig|EHA19691.1 atub|OJI82977.1

Group10796: abra|OJJ77963.1 acar|OOF92549.1 acla|EAW08133.1 agla|OJJ82391.1 anig|EHA19730.1 acla|EAW12841.1

Group10797: abra|OJJ78015.1 acar|OOF98807.1 akaw|GAA85968.1 aluc|OJZ91091.1 anig|EHA19792.1 atub|OJI83088.1

Group10798: abra|OJJ78035.1 acar|OOF98464.1 afis|EAW16432.1 akaw|GAA85947.1 aluc|OJZ91115.1 atub|OJI83119.1

Group10799: abra|OJJ78042.1 afis|EAW17174.1 aver|OJJ05322.1 awen|OJJ34517.1 acla|EAW12151.1 afum|EAL86604.2

Group10800: abra|OJJ78053.1 acla|EAW06391.1 akaw|GAA85938.1 aluc|OJZ91124.1 anig|EHA19824.1 atub|OJI83129.1

Group10801: agla|OJJ88216.1 afis|EAW16427.1 afla|EED51785.1 aory|EIT81717.1 awen|OJJ36320.1 aver|OJI98042.1

Group10802: abra|OJJ78066.1 akaw|GAA85924.1 aluc|OJZ91143.1 anig|EHA19839.1 atub|OJI83156.1 awen|OJJ32238.1

Group10803: abra|OJJ78068.1 afis|EAW23478.1 akaw|GAA85923.1 aluc|OJZ91144.1 anig|EHA19840.1 atub|OJI83157.1

Group10804: afla|EED56830.1 aory|EIT73894.1 anid|CBF87309.1 afis|EAW16917.1 asyd|OJJ62991.1 aver|OJI97977.1

Group10805: acar|OOF97898.1 anid|CBF76233.1 aluc|OJZ87268.1 anig|EHA20510.1 atub|OJI81374.1 akaw|GAA82714.1

Group10806: abra|OJJ78131.1 acar|OOF91246.1 akaw|GAA85876.1 aluc|OJZ91193.1 anig|EHA19889.1 atub|OJI83212.1

Group10807: abra|OJJ78134.1 aluc|OJZ91195.1 anig|EHA19894.1 atub|OJI83215.1 awen|OJJ29976.1 azon|OJJ50083.1

Group10808: abra|OJJ78162.1 afla|EED48082.1 akaw|GAA85863.1 aluc|OJZ91216.1 anig|EHA19922.1 atub|OJI83234.1

Group10809: abra|OJJ78168.1 asyd|OJJ59101.1 ater|EAU30168.1 aver|OJJ05743.1 asyd|OJJ57435.1 aver|OJJ01692.1

Group10810: anid|CBF81921.1 aver|OJI99269.1 awen|OJJ31300.1 acar|OOF90379.1 agla|OJJ87445.1 asyd|OJJ65135.1

Group10811: abra|OJJ78178.1 acar|OOF93332.1 akaw|GAA85855.1 aluc|OJZ91242.1 anig|EHA19942.1 atub|OJI83240.1

Group10812: abra|OJJ78182.1 acar|OOF92536.1 akaw|GAA85854.1 aluc|OJZ91245.1 anig|EHA19944.1 atub|OJI83242.1

Group10813: abra|OJJ78193.1 akaw|GAA85836.1 aluc|OJZ91264.1 anig|EHA19952.1 atub|OJI83253.1 aory|EIT81857.1

Group10814: abra|OJJ78201.1 acar|OOF98653.1 akaw|GAA85828.1 aluc|OJZ91272.1 anig|EHA19959.1 atub|OJI83261.1

Group10815: abra|OJJ78257.1 acar|OOF98605.1 akaw|GAA85769.1 aluc|OJZ91331.1 anig|EHA20013.1 atub|OJI83324.1

Group10816: abra|OJJ78291.1 acar|OOF98577.1 akaw|GAA85736.1 aluc|OJZ91365.1 anig|EHA20043.1 atub|OJI83358.1

Group10817: abra|OJJ78300.1 acar|OOF98566.1 akaw|GAA85726.1 aluc|OJZ91377.1 anig|EHA20052.1 atub|OJI83370.1

Group10818: abra|OJJ78310.1 anig|EHA20061.1 ater|EAU29639.1 afis|EAW19862.1 afum|EAL85033.1 awen|OJJ41889.1

Group10819: abra|OJJ78313.1 acar|OOF90131.1 agla|OJJ79272.1 akaw|GAA92408.1 anig|EHA20064.1 awen|OJJ33978.1

Group10820: abra|OJJ78320.1 acar|OOF98555.1 akaw|GAA85710.1 aluc|OJZ91393.1 anig|EHA20071.1 atub|OJI83386.1

Group10821: aory|EIT74091.1 ater|EAU32691.1 afis|EAW16871.1 afla|EED57119.1 afum|EAL86409.1 awen|OJJ38670.1

Group10822: anid|CBF82900.1 acla|EAW15045.1 asyd|OJJ63347.1 afla|EED57631.1 afum|EAL86231.1 aver|OJI97613.1



Group10823: aory|EIT81598.1 ater|EAU36165.1 afla|EED55135.1 anid|CBF85666.1 asyd|OJJ64246.1  
aver|OJI98337.1

Group10824: acar|OOF90519.1 afla|EED53434.1 aory|EIT75046.1 asyd|OJJ63992.1 aver|OJI96962.1  
awen|OJJ37883.1

Group10825: acar|OOF90568.1 akaw|GAA84846.1 aluc|OJZ86825.1 atub|OJI83693.1 aver|OJJ05791.1  
ater|EAU31615.1

Group10826: acar|OOF90607.1 acla|EAW06502.1 afis|EAW16943.1 afum|EAL86470.1 anid|CBF83062.1  
azon|OJJ42652.1

Group10827: acar|OOF90639.1 agla|OJJ79570.1 anid|CBF82096.1 asyd|OJJ54262.1 ater|EAU37952.1  
awen|OJJ30883.1

Group10828: anid|CBF70282.1 afla|EED52810.1 aory|EIT78221.1 asyd|OJJ58740.1 aver|OJJ01350.1  
azon|OJJ45701.1

Group10829: acar|OOF91474.1 afla|EED49607.1 aory|EIT80983.1 acla|EAW14635.1 afis|EAW22085.1  
afum|EAL85694.1

Group10830: anid|CBF73401.1 asyd|OJJ62226.1 awen|OJJ39817.1 afis|EAW15643.1 ater|EAU35280.1  
aver|OJI96335.1

Group10831: acar|OOF91710.1 afla|EED46364.1 akaw|GAA82958.1 aluc|OJZ87539.1 aory|EIT81251.1  
atub|OJI81108.1

Group10832: acar|OOF91713.1 afla|EED46366.1 akaw|GAA82956.1 aluc|OJZ87537.1 aory|EIT81252.1  
atub|OJI81110.1

Group10833: acar|OOF91933.1 agla|OJJ86357.1 asyd|OJJ61498.1 ater|EAU31269.1 aver|OJJ00835.1  
afis|EAW15550.1

Group10834: acar|OOF92000.1 anig|EHA22204.1 awen|OJJ39936.1 aluc|OJZ82056.1 atub|OJI84615.1  
anig|EHA22203.1

Group10835: azon|OJJ45295.1 afis|EAW16444.1 afum|EAL89045.1 anid|CBF83799.1 asyd|OJJ60889.1  
aver|OJJ00213.1

Group10836: acar|OOF92395.1 afla|EED57546.1 aory|EIT81835.1 anid|CBF87345.1 asyd|OJJ52821.1  
azon|OJJ50181.1

Group10837: afla|EED48899.1 aory|EIT81241.1 awen|OJJ31601.1 anid|CBF84022.1 asyd|OJJ61375.1  
aver|OJJ00702.1

Group10838: acar|OOF92821.1 acla|EAW12157.1 afis|EAW17189.1 afum|EAL86615.1 ater|EAU36220.1  
aver|OJJ05977.1

Group10839: acar|OOF93593.1 azon|OJJ49475.1 anid|CBF76709.1 asyd|OJJ61238.1 aver|OJJ00561.1  
awen|OJJ34119.1

Group10840: ater|EAU35139.1 afis|EAW24662.1 afla|EED49438.1 aory|EIT79517.1 asyd|OJJ62363.1  
aver|OJI96497.1

Group10841: acar|OOF93963.1 akaw|GAA92865.1 aluc|OJZ82549.1 anig|EHA22513.1 atub|OJI88790.1  
azon|OJJ42553.1

Group10842: acar|OOF93969.1 acla|EAW13729.1 afis|EAW19857.1 afum|EAL85038.1 asyd|OJJ54928.1  
azon|OJJ50684.1

Group10843: acar|OOF94016.1 ater|EAU31927.1 afis|EAW17059.1 afum|EAL86555.1 anid|CBF88302.1  
azon|OJJ43508.1

Group10844: anid|CBF80757.1 acla|EAW15365.1 afis|EAW17225.1 afla|EED51522.1 afum|EAL86647.1  
aory|EIT80644.1

Group10845: acar|OOF94259.1 agla|OJJ79983.1 asyd|OJJ63562.1 ater|EAU29647.1 aver|OJI97371.1  
ater|EAU30278.1

Group10846: acar|OOF94674.1 afis|EAW25596.1 afum|EAL84302.1 anid|CBF82033.1 awen|OJJ40809.1  
awen|OJJ40810.1

Group10847: acar|OOF94920.1 afla|EED53412.1 agla|OJJ79309.1 aory|EIT75202.1 asyd|OJJ59730.1  
awen|OJJ36159.1

Group10848: aflu|EED45497.1 aory|EIT75628.1 ater|EAU37348.1 aflu|EAW12361.1 afis|EAW16790.1 afum|EBA27269.1

Group10849: azon|OJJ46838.1 ater|EAU38833.1 anid|CBF71821.1 asyd|OJJ52369.1 awen|OJJ37044.1 aver|OJJ01979.1

Group10850: acar|OOF95611.1 akaw|GAA89759.1 aluc|OJZ80624.1 anig|EHA21151.1 atub|OJI87478.1 aluc|OJZ85538.1

Group10851: aflu|EAW14931.1 aflu|EED55230.1 agla|OJJ80292.1 aory|EIT83524.1 awen|OJJ32752.1 ater|EAU30000.1

Group10852: aver|OJJ05286.1 aflu|EED55024.1 anig|EHA22527.1 aory|EIT81971.1 asyd|OJJ54332.1 awen|OJJ41953.1

Group10853: aflu|EAW11539.1 afis|EAW23912.1 afum|EAL87341.1 aflu|EED50619.1 ater|EAU32320.1 aory|EIT78117.1

Group10854: acar|OOF98223.1 aory|EIT79698.1 asyd|OJJ57922.1 aver|OJJ04470.1 awen|OJJ29819.1 aflu|EED56538.1

Group10855: acar|OOF98338.1 aflu|EED49425.1 aory|EIT79491.1 asyd|OJJ55174.1 aver|OJJ07033.1 awen|OJJ41932.1

Group10856: acar|OOF98376.1 aflu|EAW14535.1 akaw|GAA90989.1 aluc|OJZ87787.1 anig|EHA20269.1 atub|OJI80860.1

Group10857: azon|OJJ43412.1 aflu|EAW09215.1 afis|EAW21932.1 afum|EAL92945.2 awen|OJJ34223.1 agla|OJJ84189.1

Group10858: acar|OOF98569.1 aflu|EAW09217.1 aflu|EED46624.1 akaw|GAA85728.1 aluc|OJZ91373.1 awen|OJJ34221.1

Group10859: afum|EAL91132.1 aflu|EED52347.1 akaw|GAA91495.1 aluc|OJZ85656.1 atub|OJI79448.1 azon|OJJ43934.1

Group10860: acar|OOF98980.1 aflu|EED51701.1 anid|CBF85292.1 aory|EIT80694.1 asyd|OJJ64962.1 aver|OJI99085.1

Group10861: acar|OOF99230.1 afis|EAW16459.1 afum|EAL89055.1 asyd|OJJ52560.1 azon|OJJ47381.1 awen|OJJ37788.1

Group10862: acar|OOF99269.1 aflu|EAW10003.1 afum|EAL87166.1 akaw|GAA93034.1 aluc|OJZ86778.1 atub|OJI83742.1

Group10863: acar|OOF99359.1 afis|EAW15419.1 afum|EAL84225.1 agla|OJJ80129.1 asyd|OJJ64793.1 aver|OJI98907.1

Group10864: acar|OOF99534.1 afum|EAL92233.1 akaw|GAA91224.1 aluc|OJZ82846.1 atub|OJI89076.1 awen|OJJ30815.1

Group10865: acar|OOG00030.1 afis|EAW22476.1 akaw|GAA82110.1 asyd|OJJ64490.1 ater|EAU39429.1 anig|EHA23339.1

Group10866: acar|OOG00308.1 aflu|EED45138.1 asyd|OJJ55192.1 ater|EAU31199.1 awen|OJJ32684.1 azon|OJJ43672.1

Group10867: acar|OOG00631.1 aflu|EAW14122.1 afis|EAW18837.1 afum|EAL93571.1 agla|OJJ83237.1 awen|OJJ39741.1

Group10868: aflu|EAW06433.1 afis|EAW18539.1 aflu|EED45457.1 afum|EAL93237.1 aory|EIT82411.1 asyd|OJJ54410.1

Group10869: aflu|EAW06527.1 afis|EAW16069.1 afum|EAL88701.2 agla|OJJ86099.1 awen|OJJ30366.1 azon|OJJ45385.1

Group10870: aflu|EAW06980.1 afis|EAW16594.1 afum|EAL89190.1 anid|CBF81899.1 asyd|OJJ59684.1 aver|OJJ02603.1

Group10871: aflu|EAW07016.1 aflu|EED44965.1 agla|OJJ82605.1 aory|EIT73509.1 awen|OJJ40072.1 anid|CBF82042.1

Group10872: aflu|EAW07046.1 afis|EAW16670.1 afum|EAL89275.1 asyd|OJJ64078.1 ater|EAU39591.1 aver|OJI98166.1

Group10873: acla|EAW07196.1 afis|EAW22208.1 afum|EBA27417.1 agla|OJJ87836.1 akaw|GAA87391.1  
aver|OJI97175.1

Group10874: aory|EIT75409.1 afis|EAW21191.1 afla|EED45482.1 afum|EAL92211.1 asyd|OJJ61494.1  
awen|OJJ30948.1

Group10875: acla|EAW07623.1 afis|EAW22652.1 afum|EAL90540.1 agla|OJJ81035.1 awen|OJJ35271.1  
azon|OJJ49836.1

Group10876: acla|EAW08045.1 agla|OJJ89590.1 asyd|OJJ59365.1 aver|OJJ02909.1 awen|OJJ36703.1  
anid|CBF81332.1

Group10877: acla|EAW08095.1 afla|EED47675.1 agla|OJJ82740.1 aory|EIT80240.1 ater|EAU31466.1  
awen|OJJ32590.1

Group10878: acla|EAW08123.1 afis|EAW23160.1 afum|EAL88323.1 agla|OJJ89671.1 awen|OJJ36623.1  
azon|OJJ47590.1

Group10879: acla|EAW08291.1 afis|EAW23349.1 afum|EAL88127.1 agla|OJJ86476.1 awen|OJJ39540.1  
azon|OJJ47739.1

Group10880: acla|EAW08351.1 afis|EAW16824.1 afum|EAL90929.1 agla|OJJ83279.1 aluc|OJJ80477.1  
afum|EAL90930.1

Group10881: acla|EAW08583.1 afla|EED51137.1 aory|EIT81310.1 asyd|OJJ61697.1 ater|EAU35444.1  
aver|OJI95783.1

Group10882: acla|EAW08586.1 afis|EAW24711.1 afum|EAL89352.1 anid|CBF69534.1 asyd|OJJ55944.1  
aver|OJJ04893.1

Group10883: acla|EAW09027.1 afis|EAW22740.1 afla|EED49801.1 afum|EAL90455.1 agla|OJJ78546.1  
aory|EIT77594.1

Group10884: acla|EAW09031.1 afis|EAW22737.1 afla|EED49797.1 afum|EAL90458.2 agla|OJJ78516.1  
aory|EIT77624.1

Group10885: acla|EAW09032.1 afis|EAW22736.1 afla|EED49799.1 afum|EAL90459.1 agla|OJJ78517.1  
aory|EIT77686.1

Group10886: acla|EAW09060.1 afis|EAW25633.1 afla|EED55179.1 afum|EAL84321.1 aory|EIT81667.1  
azon|OJJ50760.1

Group10887: acla|EAW09075.1 anid|CBF75396.1 asyd|OJJ65398.1 ater|EAU35625.1 aver|OJJ02470.1  
asyd|OJJ59817.1

Group10888: acla|EAW09332.1 afis|EAW21788.1 agla|OJJ84335.1 aory|EIT77941.1 ater|EAU38471.1  
awen|OJJ34074.1

Group10889: acla|EAW09334.1 afis|EAW21789.1 afum|EAL92815.1 ater|EAU35494.1 afla|EED44767.1  
awen|OJJ31288.1

Group10890: acla|EAW09350.1 afis|EAW21815.1 afum|EAL92831.1 anid|CBF76635.1 asyd|OJJ61198.1  
aver|OJJ00523.1

Group10891: acla|EAW09790.1 afis|EAW21346.1 afum|EAL92363.1 agla|OJJ87385.1 awen|OJJ39352.1  
azon|OJJ51693.1

Group10892: acla|EAW09792.1 afis|EAW21344.1 afum|EAL92361.1 agla|OJJ87387.1 awen|OJJ39354.1  
azon|OJJ51695.1

Group10893: acla|EAW09793.1 afis|EAW21343.1 afum|EAL92360.1 agla|OJJ87388.1 awen|OJJ39355.1  
azon|OJJ51696.1

Group10894: afla|EED45049.1 afum|EBA27450.1 aory|EIT73758.1 awen|OJJ31602.1 anid|CBF80088.1  
afis|EAW21153.1

Group10895: acla|EAW09941.1 afis|EAW21186.1 afum|EAL92208.1 agla|OJJ79981.1 awen|OJJ36527.1  
azon|OJJ44400.1

Group10896: acla|EAW09943.1 afis|EAW21221.1 afum|EBA27453.1 asyd|OJJ57321.1 ater|EAU37400.1  
aver|OJJ05840.1

Group10897: acla|EAW10023.1 aory|EIT81874.1 ater|EAU31048.1 aory|EIT81884.1 asyd|OJJ65355.1  
aver|OJI99504.1

Group10898: acla|EAW10307.1 afla|EED45940.1 agla|OJJ79266.1 aory|EIT75741.1 asyd|OJJ64745.1 awen|OJJ38707.1

Group10899: acla|EAW10401.1 afis|EAW25177.1 afum|EAL89850.1 anid|CBF87304.1 asyd|OJJ61747.1 aver|OJI95844.1

Group10900: acla|EAW10409.1 afum|EAL85466.1 anid|CBF85659.1 asyd|OJJ64229.1 afis|EAW20346.1 aver|OJI98322.1

Group10901: acla|EAW10554.1 afis|EAW25021.1 afum|EAL89674.1 agla|OJJ89189.1 awen|OJJ40619.1 azon|OJJ49467.1

Group10902: acla|EAW10821.1 afis|EAW24751.1 afla|EED46134.1 aory|EIT76503.1 asyd|OJJ61398.1 aver|OJJ00727.1

Group10903: acla|EAW10836.1 afis|EAW24727.1 afum|EAL89375.2 agla|OJJ79449.1 awen|OJJ37857.1 agla|OJJ85244.1

Group10904: acla|EAW11031.1 afla|EED49639.1 afum|EAL88028.1 aory|EIT80989.1 azon|OJJ45952.1 aory|EIT80990.1

Group10905: acla|EAW11048.1 afis|EAW16188.1 afla|EED49631.1 afum|EAL88819.2 aory|EIT80944.1 azon|OJJ45945.1

Group10906: acla|EAW11369.1 afis|EAW18126.1 afum|EAL87484.1 ater|EAU29686.1 awen|OJJ35528.1 azon|OJJ46955.1

Group10907: acla|EAW11509.1 afis|EAW23944.1 afum|EAL87369.1 awen|OJJ39011.1 azon|OJJ51336.1 ater|EAU32290.1

Group10908: acla|EAW11697.1 afla|EED55120.1 aory|EIT81610.1 awen|OJJ31848.1 azon|OJJ46275.1 ater|EAU31406.1

Group10909: acla|EAW11774.1 akaw|GAA88136.1 aluc|OJZ81407.1 anig|EHA26066.1 atub|OJI91614.1 awen|OJJ31320.1

Group10910: acla|EAW11919.1 afis|EAW19552.1 afla|EED46516.1 afum|EAL86957.1 aory|EIT72359.1 azon|OJJ50150.1

Group10911: acla|EAW11922.1 afis|EAW18845.1 asyd|OJJ64701.1 aver|OJI98805.1 awen|OJJ35513.1 azon|OJJ51815.1

Group10912: asyd|OJJ57322.1 aver|OJJ05838.1 afla|EED51380.1 aory|EIT80730.1 awen|OJJ34572.1 azon|OJJ48189.1

Group10913: acla|EAW12133.1 afis|EAW17218.1 afla|EED51384.1 afum|EAL86643.2 aory|EIT80508.1 azon|OJJ50153.1

Group10914: acla|EAW12188.1 afis|EAW17126.1 afla|EED49687.1 afum|EAL86586.1 aory|EIT80962.1 awen|OJJ34565.1

Group10915: acla|EAW12284.1 afis|EAW16955.1 afum|EAL86482.2 agla|OJJ79123.1 asyd|OJJ55379.1 aver|OJJ08274.1

Group10916: asyd|OJJ53688.1 aver|OJJ07805.1 akaw|GAA92447.1 aluc|OJZ81571.1 anig|EHA25868.1 atub|OJI88614.1

Group10917: acla|EAW12368.1 afis|EAW16791.1 afla|EED54678.1 afum|EAL86360.1 aory|EIT78930.1 ater|EAU34475.1

Group10918: acla|EAW12436.1 afla|EED47340.1 aory|EIT82891.1 asyd|OJJ52819.1 ater|EAU36733.1 awen|OJJ31378.1

Group10919: anig|EHA22526.1 aver|OJJ04034.1 aver|OJJ08540.1 afla|EED52531.1 aory|EIT74259.1 awen|OJJ32262.1

Group10920: anid|CBF80374.1 afis|EAW19798.1 afum|EAL85092.1 agla|OJJ79580.1 asyd|OJJ54810.1 aver|OJJ07351.1

Group10921: awen|OJJ32766.1 afla|EED53058.1 agla|OJJ78710.1 aory|EIT74762.1 asyd|OJJ60330.1 ater|EAU37693.1

Group10922: acla|EAW12890.1 afis|EAW16314.1 afum|EAL88936.1 ater|EAU33698.1 afla|EED54181.1 ater|EAU29327.1

Group10923: acla|EAW12958.1 afis|EAW17701.1 afla|EED51719.1 afum|EAL91516.1 anid|CBF90385.1 aory|EIT80750.1

Group10924: acla|EAW12998.1 agla|OJJ78993.1 ater|EAU38104.1 awen|OJJ32609.1 awen|OJJ38387.1 agla|OJJ78996.1

Group10925: awen|OJJ33442.1 anid|CBF87306.1 aory|EIT73950.1 asyd|OJJ59787.1 ater|EAU34820.1 aver|OJJ02501.1

Group10926: acla|EAW13298.1 afis|EAW17313.1 afum|EAL91148.1 asyd|OJJ58460.1 aver|OJJ01060.1 ater|EAU32991.1

Group10927: acla|EAW13303.1 afis|EAW23646.1 afla|EED52625.1 anid|CBF84294.1 awen|OJJ29668.1 azon|OJJ42658.1

Group10928: acla|EAW13454.1 awen|OJJ30236.1 afis|EAW20562.1 ater|EAU37116.1 afla|EED52342.1 aory|EIT74436.1

Group10929: acla|EAW13561.1 afis|EAW20680.1 afum|EAL84416.2 akaw|GAA92612.1 aluc|OJZ80201.1 awen|OJJ30835.1

Group10930: acla|EAW13663.1 afis|EAW20292.1 afla|EED53473.1 aory|EIT75213.1 asyd|OJJ57226.1 aver|OJJ98794.1

Group10931: acla|EAW13694.1 afis|EAW16422.1 agla|OJJ81391.1 ater|EAU39441.1 atub|OJI83263.1 awen|OJJ39636.1

Group10932: acla|EAW13695.1 afis|EAW19909.1 afum|EAL84997.1 anid|CBF79755.1 asyd|OJJ58099.1 aver|OJJ04305.1

Group10933: acla|EAW13732.1 afis|EAW19847.1 afum|EAL85047.1 anid|CBF82493.1 asyd|OJJ56115.1 aver|OJJ05056.1

Group10934: acla|EAW14099.1 afis|EAW25584.1 anid|CBF90365.1 asyd|OJJ61022.1 ater|EAU35436.1 aver|OJJ00343.1

Group10935: afis|EAW16156.1 asyd|OJJ52799.1 aver|OJJ08776.1 afla|EED45362.1 aory|EIT82416.1 ater|EAU32999.1

Group10936: acla|EAW14204.1 afis|EAW19078.1 afum|EAL93806.2 anid|CBF82136.1 asyd|OJJ54317.1 aver|OJJ05271.1

Group10937: acla|EAW14205.1 afis|EAW19077.1 afum|EAL93805.2 anid|CBF82138.1 asyd|OJJ54318.1 aver|OJJ05272.1

Group10938: acla|EAW14265.1 afis|EAW19014.1 afum|EBA27501.1 agla|OJJ81766.1 awen|OJJ31648.1 azon|OJJ43169.1

Group10939: acla|EAW14279.1 afis|EAW16812.1 afum|EAL86741.1 ater|EAU32794.1 afis|EAW20666.1 afis|EAW22497.1

Group10940: acla|EAW14280.1 afla|EED46986.1 afum|EAL85151.1 aory|EIT72610.1 asyd|OJJ62552.1 aver|OJJ96678.1

Group10941: acla|EAW14560.1 afis|EAW19273.1 afum|EAL93999.2 awen|OJJ37634.1 ater|EAU29491.1 agla|OJJ88400.1

Group10942: acla|EAW14640.1 afis|EAW19553.1 afla|EED49441.1 afum|EAL86956.1 aory|EIT79519.1 asyd|OJJ55492.1

Group10943: acla|EAW14641.1 afla|EED53091.1 agla|OJJ87615.1 aory|EIT74804.1 asyd|OJJ57692.1 azon|OJJ42297.1

Group10944: acla|EAW14719.1 afis|EAW24255.1 afum|EAL85923.1 agla|OJJ79618.1 awen|OJJ33045.1 azon|OJJ48474.1

Group10945: acla|EAW14742.1 afis|EAW24273.1 afla|EED48003.1 afum|EAL85941.2 aory|EIT82895.1 awen|OJJ33024.1

Group10946: acla|EAW14928.1 afis|EAW17061.1 afla|EED49820.1 aory|EIT77613.1 aory|EIT77787.1 ater|EAU36520.1

Group10947: acla|EAW14972.1 afis|EAW24497.1 afum|EAL86167.1 anid|CBF75739.1 asyd|OJJ57515.1 aver|OJJ05664.1

Group10948: anid|CBF69383.1 anid|CBF85125.1 afum|EBA27267.1 ater|EAU32996.1 asyd|OJJ57407.1 aver|OJJ05774.1

Group10949: acla|EAW15252.1 afis|EAW20225.1 afla|EED53436.1 afum|EAL85342.1 aory|EIT75219.1 awen|OJJ31965.1

Group10950: acla|EAW15258.1 afis|EAW20237.1 afla|EED45968.1 afum|EAL85355.1 anid|CBF82916.1 aory|EIT75571.1

Group10951: acla|EAW15273.1 afis|EAW20243.1 afla|EED47509.1 afum|EAL85360.1 aory|EIT74551.1 azon|OJJ51776.1

Group10952: anid|CBF80134.1 ater|EAU35874.1 afla|EED50206.1 aory|EIT77322.1 asyd|OJJ57903.1 aver|OJJ04491.1

Group10953: afis|EAW15501.1 agla|OJJ80179.1 asyd|OJJ56010.1 ater|EAU32618.1 aver|OJJ04955.1 awen|OJJ38161.1

Group10954: afis|EAW16171.1 afla|EED49648.1 aory|EIT81001.1 aver|OJJ00805.1 awen|OJJ30152.1 azon|OJJ46420.1

Group10955: afis|EAW16211.1 afum|EAL88838.1 asyd|OJJ57149.1 aver|OJJ05568.1 aver|OJJ03161.1 asyd|OJJ57618.1

Group10956: afis|EAW16252.1 anid|CBF89278.1 asyd|OJJ55340.1 ater|EAU35484.1 aver|OJJ07022.1 asyd|OJJ55185.1

Group10957: afis|EAW16254.1 ater|EAU31545.1 afis|EAW16410.1 afum|EAL89034.1 anid|CBF73415.1 awen|OJJ41052.1

Group10958: afis|EAW16405.1 afla|EED47774.1 afum|EAL89023.1 aory|EIT77129.1 awen|OJJ30220.1 azon|OJJ43942.1

Group10959: afis|EAW16792.1 afum|EAL86361.1 agla|OJJ86551.1 asyd|OJJ54826.1 aver|OJJ07334.1 awen|OJJ38000.1

Group10960: afis|EAW16793.1 afla|EED45972.1 afum|EAL86362.1 agla|OJJ79964.1 aory|EIT75672.1 awen|OJJ33624.1

Group10961: afis|EAW16856.1 afla|EED50959.1 afum|EAL86399.1 asyd|OJJ61379.1 aver|OJJ00706.1 aory|EIT76949.1

Group10962: afis|EAW16860.1 afla|EED45902.1 aory|EIT75712.1 asyd|OJJ59235.1 aver|OJJ01845.1 awen|OJJ36994.1

Group10963: afis|EAW16919.1 afla|EED56829.1 aory|EIT83113.1 asyd|OJJ62993.1 aver|OJJ97975.1 afla|EED51185.1

Group10964: afis|EAW17029.1 aluc|OJZ80159.1 asyd|OJJ55864.1 aver|OJJ04805.1 awen|OJJ33827.1 asyd|OJJ59624.1

Group10965: afis|EAW17030.1 agla|OJJ79118.1 asyd|OJJ60335.1 aver|OJJ99680.1 awen|OJJ36176.1 aver|OJJ03410.1

Group10966: afis|EAW17053.1 afla|EED53168.1 afum|EAL86537.1 akaw|GAA88276.1 anig|EHA28495.1 atub|OJJ80950.1

Group10967: afis|EAW17203.1 afla|EED52909.1 afum|EAL86629.2 aory|EIT78608.1 asyd|OJJ64727.1 aver|OJJ01308.1

Group10968: afis|EAW17297.1 asyd|OJJ55437.1 ater|EAU29435.1 aver|OJJ06513.1 awen|OJJ36111.1 anid|CBF83929.1

Group10969: afis|EAW17762.1 afum|EAL91572.1 anid|CBF82293.1 asyd|OJJ52732.1 ater|EAU32267.1 aver|OJJ05349.1

Group10970: afis|EAW18258.1 afum|EAL87621.1 anid|CBF74968.1 asyd|OJJ64754.1 ater|EAU35673.1 aver|OJJ98856.1

Group10971: afis|EAW18822.1 afum|EAL93559.1 anid|CBF84664.1 asyd|OJJ57152.1 ater|EAU37633.1 aver|OJJ03158.1

Group10972: afis|EAW19506.1 afla|EED56797.1 aory|EIT73919.1 asyd|OJJ52890.1 ater|EAU30294.1 aver|OJJ08861.1

Group10973: afis|EAW19731.1 afum|EAL86797.1 asyd|OJJ54950.1 ater|EAU30302.1 aver|OJJ07245.1 anid|CBF71453.1

Group10974: afla|EED51942.1 aory|EIT81380.1 azon|OJJ47544.1 asyd|OJJ52400.1 aver|OJJ01920.1 awen|OJJ33501.1

Group10975: afis|EAW19739.1 afla|EED56527.1 afum|EAL86790.1 agla|OJJ79781.1 aory|EIT82923.1 awen|OJJ34644.1

Group10976: afis|EAW19858.1 afla|EED56900.1 afum|EAL85037.1 aory|EIT77529.1 asyd|OJJ52512.1 aver|OJJ03479.1

Group10977: afis|EAW19869.1 afum|EAL85028.1 agla|OJJ89321.1 akaw|GAA85276.1 aluc|OJZ90635.1 aver|OJJ05207.1

Group10978: afis|EAW19905.1 afla|EED54743.1 afum|EAL85002.1 aory|EIT78929.1 ater|EAU34056.1 azon|OJJ51042.1

Group10979: afis|EAW19981.1 afum|EBA27211.1 agla|OJJ79259.1 asyd|OJJ57156.1 azon|OJJ42436.1 azon|OJJ45351.1

Group10980: afis|EAW20393.1 afla|EED54889.1 anid|CBF73690.1 aory|EIT79424.1 asyd|OJJ56652.1 aver|OJJ06073.1

Group10981: afis|EAW20699.1 afum|EAL84874.1 asyd|OJJ56274.1 atub|OJI79832.1 aver|OJJ08491.1 anid|CBF82275.1

Group10982: afis|EAW20819.1 afum|EAL84810.1 akaw|GAA82837.1 aluc|OJZ87398.1 atub|OJI81248.1 awen|OJJ33644.1

Group10983: afis|EAW21074.1 afla|EED48209.1 anid|CBF74242.1 aory|EIT72914.1 asyd|OJJ53972.1 aver|OJJ08071.1

Group10984: afla|EED49491.1 agla|OJJ81021.1 anid|CBF83099.1 aory|EIT82648.1 asyd|OJJ60676.1 aver|OJI99999.1

Group10985: afis|EAW21209.1 afum|EAL92220.1 agla|OJJ79293.1 asyd|OJJ54584.1 atub|OJI84637.1 aver|OJJ07573.1

Group10986: afis|EAW22001.1 afum|EAL93016.1 anid|CBF82668.1 asyd|OJJ61663.1 ater|EAU31120.1 aver|OJJ00984.1

Group10987: afis|EAW22099.1 afla|EED52304.1 afum|EAL91090.1 aory|EIT74339.1 ater|EAU32748.1 aver|OJJ05878.1

Group10988: afis|EAW22300.1 agla|OJJ82722.1 anid|CBF85182.1 awen|OJJ31412.1 aver|OJI99533.1 anid|CBF80147.1

Group10989: afis|EAW22746.1 agla|OJJ88065.1 aory|EIT80580.1 asyd|OJJ55934.1 aver|OJJ04883.1 awen|OJJ36947.1

Group10990: asyd|OJJ55935.1 afla|EED52577.1 agla|OJJ85232.1 aory|EIT74273.1 aver|OJJ04884.1 awen|OJJ36948.1

Group10991: akaw|GAA85275.1 aluc|OJZ80498.1 awen|OJJ31084.1 afum|EAL90263.1 asyd|OJJ62321.1 ater|EAU33523.1

Group10992: afis|EAW23618.1 afla|EED48177.1 afum|EAL87844.1 asyd|OJJ55362.1 aver|OJJ08472.1 aver|OJJ06444.1

Group10993: afis|EAW23644.1 afla|EED46050.1 aory|EIT83494.1 ater|EAU35170.1 awen|OJJ39955.1 ater|EAU30989.1

Group10994: afis|EAW23689.1 afla|EED52257.1 afum|EAL87185.1 anid|CBF76147.1 asyd|OJJ54885.1 ater|EAU34905.1

Group10995: afis|EAW24014.1 afum|EAL87444.1 agla|OJJ82998.1 asyd|OJJ53236.1 awen|OJJ35486.1 aver|OJJ03615.1

Group10996: afis|EAW24587.1 agla|OJJ82375.1 anid|CBF87337.1 asyd|OJJ52811.1 aver|OJI96481.1 aver|OJJ08789.1

Group10997: afis|EAW24677.1 asyd|OJJ57400.1 awen|OJJ40793.1 afis|EAW24707.1 afum|EAL89349.1 ater|EAU31629.1

Group10998: afis|EAW24790.1 aluc|OJZ92173.1 afla|EED47192.1 aory|EIT79308.1 awen|OJJ40376.1 azon|OJJ49227.1

Group10999: afis|EAW25607.1 afla|EED50615.1 agla|OJJ82289.1 aory|EIT78044.1 asyd|OJJ52088.1 awen|OJJ36106.1

Group11000: afis|EAW25731.1 afum|EAL84402.2 anid|CBF78390.1 asyd|OJJ62330.1 aver|OJJ04860.1 aver|OJI96436.1

Group11001: afla|EED44731.1 anid|CBF87318.1 aory|EIT77804.1 asyd|OJJ59108.1 atub|OJI79309.1 aver|OJJ01699.1

Group11002: afla|EED45037.1 aory|EIT73555.1 asyd|OJJ59695.1 ater|EAU31333.1 aver|OJJ02592.1 azon|OJJ42416.1

Group11003: afla|EED45640.1 anid|CBF78492.1 aory|EIT75641.1 asyd|OJJ56057.1 aver|OJJ04999.1 awen|OJJ33618.1

Group11004: afla|EED45653.1 anid|CBF78350.1 aory|EIT75430.1 asyd|OJJ56142.1 aver|OJJ05081.1 awen|OJJ35378.1

Group11005: afla|EED45770.1 anid|CBF71764.1 aory|EIT75526.1 asyd|OJJ61724.1 aver|OJI95822.1 awen|OJJ30372.1

Group11006: afla|EED45876.1 anid|CBF84189.1 aory|EIT75523.1 asyd|OJJ57133.1 ater|EAU39448.1 aver|OJJ03170.1

Group11007: afla|EED45896.1 anid|CBF87396.1 aory|EIT75706.1 asyd|OJJ52859.1 aver|OJJ08836.1 awen|OJJ38132.1

Group11008: asyd|OJJ65304.1 agla|OJJ89018.1 anid|CBF82272.1 ater|EAU35670.1 aver|OJI99442.1 awen|OJJ38658.1

Group11009: afla|EED46391.1 anid|CBF80108.1 aory|EIT72424.1 asyd|OJJ58327.1 atub|OJI84525.1 aver|OJJ02084.1

Group11010: afla|EED46481.1 anid|CBF83918.1 aory|EIT72434.1 asyd|OJJ55497.1 aver|OJJ06575.1 awen|OJJ36917.1

Group11011: afla|EED46519.1 akaw|GAA83305.1 aluc|OJZ83801.1 anig|EHA18949.1 aory|EIT72402.1 atub|OJI90169.1

Group11012: afla|EED47258.1 afum|EAL91081.1 anid|CBF80296.1 aory|EIT79204.1 asyd|OJJ60438.1 aver|OJJ02284.1

Group11013: afla|EED47352.1 agla|OJJ84843.1 aory|EIT82876.1 asyd|OJJ62340.1 aver|OJI96445.1 awen|OJJ33169.1

Group11014: afla|EED47650.1 akaw|GAA85926.1 aory|EIT80193.1 ater|EAU30408.1 awen|OJJ30178.1 azon|OJJ46788.1

Group11015: afla|EED48125.1 atub|OJI80333.1 afla|EED56928.1 aory|EIT77474.1 aory|EIT76262.1 awen|OJJ36397.1

Group11016: afla|EED48193.1 aluc|OJZ87032.1 anig|EHA25216.1 aory|EIT72958.1 asyd|OJJ62483.1 atub|OJI83483.1

Group11017: afla|EED48238.1 agla|OJJ78755.1 anid|CBF78629.1 aory|EIT72904.1 aver|OJJ08130.1 awen|OJJ30816.1

Group11018: afla|EED48294.1 akaw|GAA86603.1 aluc|OJZ85151.1 anig|EHA25384.1 ater|EAU37315.1 atub|OJI80425.1

Group11019: afla|EED48298.1 aory|EIT76301.1 afla|EED52299.1 anig|EHA25382.1 ater|EAU37313.1 atub|OJI80427.1

Group11020: afla|EED48322.1 asyd|OJJ56109.1 atub|OJI89796.1 aver|OJJ05052.1 awen|OJJ33527.1 azon|OJJ48590.1

Group11021: afla|EED48325.1 anid|CBF75766.1 aory|EIT76277.1 atub|OJI89793.1 awen|OJJ33528.1 azon|OJJ45976.1

Group11022: afla|EED48383.1 aory|EIT83046.1 asyd|OJJ62117.1 ater|EAU35082.1 aver|OJI96224.1 awen|OJJ31903.1



Group11023: afla|EED48415.1 agla|OJJ85774.1 anid|CBF78041.1 aory|EIT83080.1 asyd|OJJ59809.1  
aver|OJJ02481.1

Group11024: afla|EED48454.1 aory|EIT83471.1 asyd|OJJ59209.1 aver|OJJ01820.1 awen|OJJ37836.1  
aory|EIT83466.1

Group11025: afla|EED48504.1 aory|EIT73089.1 asyd|OJJ53410.1 aver|OJJ08341.1 azon|OJJ45927.1  
anid|CBF87460.1

Group11026: aver|OJJ03959.1 anid|CBF82936.1 anig|EHA24789.1 asyd|OJJ65139.1 ater|EAU35235.1  
awen|OJJ37939.1

Group11027: afla|EED48928.1 anid|CBF79039.1 aory|EIT80013.1 asyd|OJJ52411.1 ater|EAU29323.1  
aver|OJJ08489.1

Group11028: afla|EED49097.1 aory|EIT82511.1 asyd|OJJ59250.1 ater|EAU33805.1 aver|OJJ01859.1  
awen|OJJ29929.1

Group11029: afla|EED49378.1 aory|EIT79460.1 asyd|OJJ63498.1 ater|EAU36892.1 aver|OJI97431.1  
awen|OJJ41769.1

Group11030: afla|EED49492.1 agla|OJJ81022.1 anid|CBF83101.1 aory|EIT82626.1 asyd|OJJ64761.1  
aver|OJI98862.1

Group11031: afla|EED49493.1 agla|OJJ81023.1 anid|CBF83103.1 aory|EIT82653.1 asyd|OJJ64760.1  
aver|OJI98861.1

Group11032: afla|EED49613.1 akaw|GAA89215.1 aluc|OJZ81614.1 aory|EIT80961.1 atub|OJI88568.1  
aver|OJJ02004.1

Group11033: afla|EED50603.1 anig|EHA18745.1 ater|EAU31539.1 aver|OJI95798.1 atub|OJI86838.1  
azon|OJJ42280.1

Group11034: afla|EED50843.1 anid|CBF75998.1 aory|EIT79006.1 asyd|OJJ53689.1 ater|EAU30180.1  
awen|OJJ37948.1

Group11035: afla|EED51050.1 anid|CBF85593.1 aory|EIT77066.1 asyd|OJJ64191.1 aver|OJI98268.1  
azon|OJJ46837.1

Group11036: afla|EED51087.1 anid|CBF83993.1 aory|EIT76986.1 agla|OJJ80680.1 azon|OJJ42245.1  
agla|OJJ80682.1

Group11037: afla|EED51130.1 agla|OJJ81310.1 anid|CBF90354.1 asyd|OJJ55574.1 ater|EAU37577.1  
aver|OJJ06653.1

Group11038: afla|EED51150.1 agla|OJJ88366.1 anid|CBF80151.1 aory|EIT81301.1 ater|EAU38048.1  
aver|OJI99511.1

Group11039: afla|EED51495.1 akaw|GAA91746.1 aluc|OJZ92757.1 aory|EIT80437.1 atub|OJI87201.1  
asyd|OJJ54974.1

Group11040: afla|EED51504.1 anid|CBF75008.1 aory|EIT80576.1 asyd|OJJ60054.1 ater|EAU31282.1  
aver|OJJ02235.1

Group11041: afla|EED51555.1 anid|CBF89723.1 aory|EIT80555.1 asyd|OJJ62236.1 ater|EAU36623.1  
aver|OJI96345.1

Group11042: afla|EED51557.1 anid|CBF79921.1 aory|EIT80713.1 asyd|OJJ58199.1 ater|EAU38230.1  
aver|OJJ04209.1

Group11043: afla|EED51558.1 anid|CBF77716.1 aory|EIT80698.1 asyd|OJJ53065.1 ater|EAU33176.1  
aver|OJJ03780.1

Group11044: afla|EED51665.1 aluc|OJZ80141.1 anid|CBF70597.1 aory|EIT80426.1 ater|EAU30913.1  
anid|CBF82265.1

Group11045: afla|EED51776.1 agla|OJJ85279.1 aory|EIT81743.1 asyd|OJJ56966.1 aver|OJJ03321.1  
anid|CBF73576.1

Group11046: afla|EED51898.1 akaw|GAA92702.1 aluc|OJZ88741.1 aory|EIT76175.1 atub|OJI91313.1  
awen|OJJ36085.1

Group11047: afla|EED52020.1 anid|CBF88297.1 aory|EIT81381.1 ater|EAU31924.1 aver|OJJ07787.1  
anid|CBF86048.1

Group11048: aflagEED52140.1 anid|CBF89346.1 aory|EIT74427.1 asyd|OJJ62504.1 ater|EAU37454.1 aver|OJI96625.1

Group11049: aflagEED52145.1 anid|CBF87484.1 asyd|OJJ52948.1 aver|OJJ08915.1 anid|CBF87483.1 aory|EIT74429.1

Group11050: aflagEED52195.1 agla|OJJ80687.1 aory|EIT74488.1 asyd|OJJ61472.1 aver|OJJ00813.1 awen|OJJ32527.1

Group11051: aflagEED52335.1 akaw|GAA86512.1 aluc|OJZ85057.1 anid|CBF70200.1 aory|EIT74469.1 atub|OJI80543.1

Group11052: aflagEED52795.1 anid|CBF88875.1 aory|EIT78179.1 asyd|OJJ54653.1 ater|EAU30966.1 aver|OJJ07508.1

Group11053: aflagEED52803.1 akaw|GAA89087.1 aluc|OJZ80504.1 anig|EHA25689.1 aory|EIT78152.1 atub|OJI88426.1

Group11054: aflagEED52978.1 akaw|GAA86389.1 anid|CBF70037.1 ater|EAU29853.1 aver|OJJ01468.1 azon|OJJ50476.1

Group11055: aflagEED53135.1 aory|EIT75248.1 asyd|OJJ57974.1 ater|EAU31427.1 aver|OJJ04427.1 azon|OJJ45208.1

Group11056: aflagEED53154.1 anid|CBF84351.1 aory|EIT75092.1 asyd|OJJ59650.1 aver|OJJ02632.1 ater|EAU34773.1

Group11057: aflagEED53327.1 aory|EIT74832.1 asyd|OJJ65383.1 ater|EAU32671.1 aver|OJI99553.1 awen|OJJ38738.1

Group11058: aflagEED54054.1 agla|OJJ82673.1 anid|CBF73933.1 aory|EIT76065.1 asyd|OJJ53673.1 ater|EAU30472.1

Group11059: aflagEED54192.1 anid|CBF76177.1 asyd|OJJ54095.1 ater|EAU33851.1 aver|OJJ08644.1 azon|OJJ45224.1

Group11060: aflagEED54706.1 anid|CBF73852.1 aory|EIT78865.1 asyd|OJJ56517.1 ater|EAU29954.1 aver|OJJ06205.1

Group11061: aflagEED55081.1 akaw|GAA84903.1 aluc|OJZ86767.1 anig|EHA21913.1 aory|EIT81657.1 atub|OJI83761.1

Group11062: aflagEED55149.1 anid|CBF83895.1 aory|EIT81662.1 ater|EAU33495.1 aver|OJJ05759.1 asyd|OJJ57419.1

Group11063: aflagEED55261.1 anid|CBF82107.1 aory|EIT83554.1 asyd|OJJ54273.1 aver|OJJ05234.1 aver|OJJ05229.1

Group11064: aflagEED55433.1 agla|OJJ82942.1 aory|EIT80832.1 awen|OJJ36301.1 awen|OJJ31586.1 asyd|OJJ55472.1

Group11065: aflagEED56595.1 agla|OJJ83770.1 aory|EIT79684.1 asyd|OJJ54325.1 aver|OJJ05279.1 awen|OJJ30241.1

Group11066: aflagEED56601.1 aver|OJI98848.1 agla|OJJ83888.1 asyd|OJJ64744.1 aory|EIT80964.1 awen|OJJ33407.1

Group11067: aflagEED56604.1 agla|OJJ81898.1 aory|EIT79637.1 asyd|OJJ65335.1 aver|OJI99481.1 awen|OJJ33513.1

Group11068: aflagEED56871.1 anid|CBF74702.1 aory|EIT77445.1 asyd|OJJ60217.1 ater|EAU31411.1 aver|OJJ04051.1

Group11069: aflagEED57053.1 agla|OJJ78600.1 aory|EIT82308.1 atub|OJI86755.1 awen|OJJ35633.1 azon|OJJ42411.1

Group11070: aflagEED57075.1 aory|EIT82287.1 asyd|OJJ61458.1 aver|OJJ00796.1 awen|OJJ41744.1 azon|OJJ46568.1

Group11071: aflagEED57078.1 agla|OJJ79341.1 anid|CBF70707.1 aory|EIT82310.1 asyd|OJJ58454.1 aver|OJJ01054.1

Group11072: aflagEED57381.1 aory|EIT80125.1 asyd|OJJ63943.1 aver|OJI96999.1 awen|OJJ35021.1 azon|OJJ47389.1

Group11073: afla|EED57513.1 aory|EIT81860.1 asyd|OJJ64585.1 aver|OJI98683.1 awen|OJJ29792.1 azon|OJJ43594.1

Group11074: afla|EED57915.1 afum|EAL86571.1 aory|EIT82347.1 asyd|OJJ62083.1 ater|EAU31850.1 awen|OJJ38259.1

Group11075: agla|OJJ78820.1 akaw|GAA88081.1 awen|OJJ33747.1 azon|OJJ42201.1 aluc|OJJ281345.1 atub|OJI91549.1

Group11076: agla|OJJ80670.1 anid|CBF80575.1 asyd|OJJ55187.1 ater|EAU37974.1 aver|OJJ07020.1 awen|OJJ31432.1

Group11077: agla|OJJ84711.1 akaw|GAA91832.1 aluc|OJJ292854.1 asyd|OJJ57293.1 atub|OJI87311.1 aver|OJJ05863.1

Group11078: agla|OJJ86472.1 anid|CBF74893.1 asyd|OJJ60104.1 ater|EAU35597.1 aver|OJJ04158.1 awen|OJJ39535.1

Group11079: agla|OJJ88688.1 anid|CBF82376.1 asyd|OJJ54195.1 ater|EAU29280.1 aver|OJJ08531.1 awen|OJJ31675.1

Group11080: akaw|GAA83149.1 aluc|OJJ279892.1 anig|EHA18390.1 ater|EAU33733.1 atub|OJI91287.1 awen|OJJ35353.1

Group11081: akaw|GAA83832.1 aluc|OJJ290886.1 anig|EHA19605.1 atub|OJI82880.1 awen|OJJ29664.1 azon|OJJ47401.1

Group11082: akaw|GAA85147.1 aluc|OJJ286491.1 asyd|OJJ55409.1 atub|OJI84037.1 aver|OJJ06488.1 awen|OJJ35933.1

Group11083: akaw|GAA88766.1 anid|CBF69550.1 asyd|OJJ64983.1 ater|EAU38122.1 aver|OJI99103.1 awen|OJJ31666.1

Group11084: akaw|GAA88968.1 aluc|OJJ289435.1 anig|EHA23152.1 asyd|OJJ54808.1 atub|OJI85358.1 aver|OJJ07353.1

Group11085: akaw|GAA90690.1 aluc|OJJ284664.1 asyd|OJJ62586.1 ater|EAU29540.1 atub|OJI89416.1 aver|OJI96705.1

Group11086: akaw|GAA92619.1 aluc|OJJ280493.1 asyd|OJJ56761.1 akaw|GAA93044.1 anig|EHA21838.1 aluc|OJJ280238.1

Group11087: anig|EHA22606.1 aluc|OJJ291579.1 aory|EIT73465.1 aver|OJJ02479.1 ater|EAU31719.1 azon|OJJ45984.1

Group11088: asyd|OJJ53494.1 aluc|OJJ289757.1 anid|CBF79128.1 atub|OJI85043.1 aver|OJJ08254.1 awen|OJJ36424.1

Group11089: anid|CBF82200.1 asyd|OJJ52182.1 aver|OJJ05963.1 awen|OJJ34428.1 anid|CBF82202.1 ater|EAU29292.1

Group11090: anid|CBF82938.1 asyd|OJJ54755.1 ater|EAU31004.1 aver|OJJ08348.1 asyd|OJJ54754.1 aver|OJJ05259.1

Group11091: abra|OJJ65464.1 abra|OJJ67272.1 abra|OJJ65463.1 afla|EED49681.1 afla|EED50600.1

Group11092: abra|OJJ65468.1 abra|OJJ65659.1 abra|OJJ65707.1 akaw|GAA92647.1 ater|EAU30113.1

Group11093: abra|OJJ65510.1 abra|OJJ65823.1 ater|EAU30110.1 agla|OJJ78479.1 akaw|GAA93290.1

Group11094: abra|OJJ67520.1 abra|OJJ70182.1 acar|OOF94082.1 acar|OOF94152.1 afum|EAL94105.1

Group11095: abra|OJJ67522.1 abra|OJJ70180.1 acar|OOF94081.1 acar|OOF94151.1 awen|OJJ34532.1

Group11096: acar|OOF90423.1 acar|OOF90427.1 anid|CBF71777.1 asyd|OJJ61717.1 aver|OJI95811.1

Group11097: acar|OOF93737.1 acar|OOF93826.1 abra|OJJ66741.1 anig|EHA27310.1 atub|OJI87565.1

Group11098: acar|OOF94048.1 acar|OOF94118.1 akaw|GAA82257.1 aluc|OJJ291887.1 atub|OJI86337.1

Group11099: acar|OOF95666.1 acar|OOF95717.1 agla|OJJ82099.1 akaw|GAA81913.1 azon|OJJ49331.1

Group11100: acar|OOF97363.1 acar|OOF97647.1 abra|OJJ72277.1 asyd|OJJ55823.1 aver|OJJ04765.1

Group11101: afis|EAW18100.1 afis|EAW20670.1 agla|OJJ83479.1 agla|OJJ83543.1 aluc|OJJ291233.1

Group11102: afis|EAW19854.1 afis|EAW24644.1 acar|OOF91482.1 acla|EAW13497.1 afum|EAL85041.1  
Group11103: afum|EAL86748.1 afum|EAL86770.1 afla|EED48246.1 azon|OJJ45213.1 agla|OJJ78812.1  
Group11104: afum|EAL90936.1 afum|EAL91120.1 afis|EAW15511.1 agla|OJJ87696.1 asyd|OJJ52157.1  
Group11105: agla|OJJ78802.1 agla|OJJ83553.1 agla|OJJ86307.1 agla|OJJ79435.1 agla|OJJ79130.1  
Group11106: agla|OJJ79528.1 agla|OJJ80559.1 agla|OJJ88962.1 acar|OOF93971.1 awen|OJJ32693.1  
Group11107: agla|OJJ79590.1 agla|OJJ82596.1 agla|OJJ81185.1 afis|EAW25162.1 awen|OJJ33247.1  
Group11108: agla|OJJ79775.1 awen|OJJ30128.1 awen|OJJ31420.1 asyd|OJJ55627.1 aver|OJJ06704.1  
Group11109: agla|OJJ80714.1 agla|OJJ86337.1 agla|OJJ81203.1 afis|EAW16748.1 azon|OJJ50284.1  
Group11110: agla|OJJ83216.1 agla|OJJ86811.1 awen|OJJ38792.1 afla|EED51649.1 aory|EIT80589.1  
Group11111: agla|OJJ84034.1 agla|OJJ84149.1 agla|OJJ84040.1 agla|OJJ84035.1 agla|OJJ84033.1  
Group11112: agla|OJJ87384.1 agla|OJJ87389.1 agla|OJJ87390.1 asyd|OJJ64720.1 awen|OJJ37149.1  
Group11113: akaw|GAA88992.1 akaw|GAA93235.1 acar|OOF90174.1 afla|EED51669.1 aluc|OJZ80347.1  
Group11114: akaw|GAA92348.1 akaw|GAA93073.1 aluc|OJZ80226.1 akaw|GAA93134.1 asyd|OJJ52326.1  
Group11115: akaw|GAA92964.1 akaw|GAA93161.1 aluc|OJZ79723.1 aluc|OJZ79794.1 aluc|OJZ80328.1  
Group11116: akaw|GAA93122.1 akaw|GAA93331.1 awen|OJJ29555.1 awen|OJJ29643.1 ater|EAU30106.1  
Group11117: aluc|OJZ79486.1 aluc|OJZ79630.1 afla|EED50609.1 aory|EIT78131.1 asyd|OJJ53649.1  
Group11118: aluc|OJZ79526.1 aluc|OJZ79769.1 aluc|OJZ79876.1 aluc|OJZ79665.1 aluc|OJZ80045.1  
Group11119: aluc|OJZ79583.1 aluc|OJZ80492.1 akaw|GAA93323.1 anig|EHA17686.1 akaw|GAA93329.1  
Group11120: aluc|OJZ79649.1 aluc|OJZ79994.1 atub|OJI84503.1 awen|OJJ29797.1 azon|OJJ48188.1  
Group11121: aluc|OJZ79672.1 aluc|OJZ88805.1 abra|OJJ65594.1 akaw|GAA93282.1 asyd|OJJ51939.1  
Group11122: aluc|OJZ79742.1 aluc|OJZ79985.1 aluc|OJZ79903.1 aluc|OJZ80180.1 aluc|OJZ80259.1  
Group11123: aluc|OJZ80133.1 aluc|OJZ81119.1 abra|OJJ65481.1 akaw|GAA93068.1 akaw|GAA93334.1  
Group11124: aluc|OJZ80447.1 aluc|OJZ80484.1 acla|EAW11472.1 asyd|OJJ52151.1 akaw|GAA93182.1  
Group11125: anid|CBF74637.1 anid|CBF76235.1 asyd|OJJ54460.1 ater|EAU35373.1 aver|OJJ07709.1  
Group11126: anid|CBF80277.1 anid|CBF89297.1 afla|EED48478.1 aory|EIT73190.1 awen|OJJ40130.1  
Group11127: anig|EHA19678.1 anig|EHA23791.1 akaw|GAA83755.1 aluc|OJZ90977.1 atub|OJI82967.1  
Group11128: asyd|OJJ51883.1 asyd|OJJ51885.1 asyd|OJJ51984.1 asyd|OJJ51927.1 akaw|GAA93093.1  
Group11129: asyd|OJJ51922.1 asyd|OJJ52313.1 abra|OJJ67771.1 anig|EHA21860.1 ater|EAU30370.1  
Group11130: asyd|OJJ51938.1 asyd|OJJ52131.1 asyd|OJJ52144.1 asyd|OJJ52241.1 acla|EAW11452.1  
Group11131: asyd|OJJ51946.1 asyd|OJJ56266.1 agla|OJJ84078.1 aluc|OJZ80204.1 anid|CBF84331.1  
Group11132: asyd|OJJ52079.1 asyd|OJJ54403.1 anid|CBF78256.1 ater|EAU32805.1 aver|OJJ03025.1  
Group11133: asyd|OJJ52519.1 asyd|OJJ55475.1 azon|OJJ42592.1 ater|EAU33746.1 ater|EAU29634.1  
Group11134: asyd|OJJ52522.1 asyd|OJJ55476.1 azon|OJJ42595.1 asyd|OJJ58317.1 aver|OJJ02093.1  
Group11135: asyd|OJJ54544.1 asyd|OJJ56714.1 aver|OJJ06011.1 aver|OJJ07633.1 anid|CBF85159.1  
Group11136: asyd|OJJ55441.1 asyd|OJJ58383.1 asyd|OJJ56929.1 asyd|OJJ55467.1 asyd|OJJ61692.1  
Group11137: asyd|OJJ56624.1 asyd|OJJ58589.1 asyd|OJJ59716.1 afis|EAW22933.1 ater|EAU38744.1  
Group11138: asyd|OJJ57919.1 asyd|OJJ61729.1 afla|EED47666.1 akaw|GAA92535.1 aory|EIT80270.1  
Group11139: asyd|OJJ58691.1 asyd|OJJ65367.1 agla|OJJ88816.1 aver|OJJ01303.1 azon|OJJ50313.1  
Group11140: ater|EAU29356.1 aory|EIT81756.1 acar|OOF92526.1 awen|OJJ32241.1 afla|EED51789.1

Group11141: ater|EAU29429.1 ater|EAU39348.1 anid|CBF80712.1 asyd|OJJ58389.1 aver|OJJ02029.1  
Group11142: ater|EAU33399.1 ater|EAU33406.1 afis|EAW24578.1 agla|OJJ86014.1 asyd|OJJ61757.1  
Group11143: ater|EAU33758.1 ater|EAU36615.1 akaw|GAA88720.1 aluc|OJZ92677.1 asyd|OJJ56928.1  
Group11144: ater|EAU36874.1 ater|EAU39017.1 acla|EAW13653.1 afis|EAW19952.1 afum|EAL84963.1  
Group11145: aver|OJI96461.1 aver|OJI97960.1 anid|CBF74677.1 asyd|OJJ55664.1 awen|OJJ31385.1  
Group11146: aver|OJI98000.1 aver|OJJ07714.1 asyd|OJJ62967.1 afis|EAW16726.1 azon|OJJ42979.1  
Group11147: awen|OJJ29963.1 awen|OJJ29965.1 awen|OJJ29964.1 afis|EAW17001.1 azon|OJJ48032.1  
Group11148: awen|OJJ30772.1 awen|OJJ31709.1 agla|OJJ87853.1 azon|OJJ48233.1 azon|OJJ45039.1  
Group11149: awen|OJJ30848.1 awen|OJJ36211.1 abra|OJJ77767.1 acar|OOF97503.1 anig|EHA20913.1  
Group11150: awen|OJJ31095.1 abra|OJJ69639.1 afum|EAL86340.1 anid|CBF89403.1 azon|OJJ50089.1  
Group11151: awen|OJJ31343.1 awen|OJJ37498.1 acla|EAW12411.1 agla|OJJ81568.1 acla|EAW13606.1  
Group11152: awen|OJJ36251.1 asyd|OJJ64970.1 aver|OJI99094.1 ater|EAU33751.1 azon|OJJ45933.1  
Group11153: awen|OJJ32516.1 awen|OJJ36007.1 awen|OJJ40099.1 agla|OJJ87733.1 azon|OJJ42078.1  
Group11154: awen|OJJ33331.1 abra|OJJ70319.1 aluc|OJZ82588.1 anig|EHA27487.1 atub|OJI88823.1  
Group11155: awen|OJJ33365.1 awen|OJJ40869.1 awen|OJJ35876.1 awen|OJJ35792.1 awen|OJJ30542.1  
Group11156: awen|OJJ36468.1 awen|OJJ38291.1 agla|OJJ88684.1 ater|EAU31889.1 awen|OJJ35857.1  
Group11157: awen|OJJ36943.1 awen|OJJ39647.1 abra|OJJ65478.1 ater|EAU31613.1 azon|OJJ42377.1  
Group11158: azon|OJJ42212.1 azon|OJJ46790.1 afla|EED57029.1 aory|EIT82293.1 agla|OJJ79829.1  
Group11159: azon|OJJ42813.1 azon|OJJ49487.1 azon|OJJ44476.1 azon|OJJ49473.1 azon|OJJ47564.1  
Group11160: azon|OJJ44447.1 azon|OJJ46469.1 agla|OJJ84395.1 agla|OJJ87726.1 awen|OJJ38734.1  
Group11161: azon|OJJ44853.1 azon|OJJ45564.1 akaw|GAA84667.1 aluc|OJZ87022.1 atub|OJI83496.1  
Group11162: azon|OJJ45685.1 azon|OJJ46495.1 azon|OJJ48980.1 azon|OJJ46509.1 azon|OJJ51111.1  
Group11163: anid|CBF71593.1 anid|CBF80250.1 anid|CBF80255.1 anid|CBF82190.1 anid|CBF89813.1  
Group11164: awen|OJJ29550.1 awen|OJJ29593.1 awen|OJJ29573.1 awen|OJJ29637.1 awen|OJJ29616.1  
Group11165: azon|OJJ45072.1 azon|OJJ49483.1 acla|EAW11913.1 asyd|OJJ54173.1 aver|OJJ08566.1  
Group11166: agla|OJJ82005.1 agla|OJJ89325.1 agla|OJJ85454.1 agla|OJJ86193.1 agla|OJJ88741.1  
Group11167: aluc|OJZ79474.1 aluc|OJZ79524.1 aluc|OJZ79717.1 aluc|OJZ79872.1 aluc|OJZ88834.1  
Group11168: aluc|OJZ79511.1 aluc|OJZ79780.1 aluc|OJZ79860.1 aluc|OJZ88829.1 aluc|OJZ80243.1  
Group11169: aluc|OJZ79557.1 aluc|OJZ79777.1 aluc|OJZ79864.1 aluc|OJZ80213.1 aluc|OJZ79798.1  
Group11170: aluc|OJZ79567.1 aluc|OJZ79846.1 aluc|OJZ88814.1 aluc|OJZ80289.1 aluc|OJZ79716.1  
Group11171: abra|OJJ65418.1 aory|AFM82510.1 abra|OJJ65582.1 akaw|BAL04872.1 azon|OJJ41972.1  
Group11172: abra|OJJ65422.1 acar|OOF89753.1 akaw|BAL04879.1 aluc|OJZ79502.1 aory|AFM82520.1  
Group11173: abra|OJJ65436.1 acar|OOF89789.1 afis|EAW25780.1 akaw|BAL04882.1 aory|AFM82516.1  
Group11174: abra|OJJ65546.1 akaw|GAA92849.1 aluc|OJZ88791.1 asyd|OJJ55711.1 aver|OJJ06797.1  
Group11175: awen|OJJ41835.1 afis|EAW17010.1 afla|EED48916.1 afum|EAL86530.1 aory|EIT81216.1  
Group11176: abra|OJJ65610.1 agla|OJJ88301.1 anid|CBF83166.1 asyd|OJJ55505.1 aver|OJJ06582.1  
Group11177: abra|OJJ65619.1 acar|OOF98688.1 afum|EAL87790.1 asyd|OJJ62681.1 ater|EAU37844.1  
Group11178: abra|OJJ65653.1 acar|OOF97622.1 agla|OJJ88776.1 ater|EAU37667.1 awen|OJJ36082.1  
Group11179: abra|OJJ65678.1 akaw|GAA84549.1 aluc|OJZ89281.1 anig|EHA23668.1 atub|OJI85518.1

Group11180: abra|OJJ65737.1 afla|EED56167.1 aory|EIT76771.1 ater|EAU31845.1 awen|OJJ36040.1  
Group11181: abra|OJJ65745.1 acar|OOG00551.1 acla|EAW14212.1 afis|EAW19069.1 agla|OJJ84536.1  
Group11182: abra|OJJ65789.1 acla|EAW13288.1 afis|EAW17331.1 afum|EAL91168.1 anig|EHA18727.1  
Group11183: abra|OJJ65804.1 akaw|GAA92932.1 aluc|OJZ82525.1 anid|CBF85283.1 anig|EHA22489.1  
Group11184: abra|OJJ65865.1 akaw|GAA92279.1 aluc|OJZ90176.1 anig|EHA23675.1 atub|OJI81603.1  
Group11185: abra|OJJ65875.1 asyd|OJJ53362.1 aver|OJJ07648.1 awen|OJJ36102.1 azon|OJJ42113.1  
Group11186: abra|OJJ65883.1 afis|EAW21015.1 afum|EAL92053.1 asyd|OJJ53345.1 azon|OJJ50731.1  
Group11187: abra|OJJ65886.1 acar|OOF94946.1 akaw|GAA86018.1 aluc|OJZ90246.1 atub|OJI81674.1  
Group11188: asyd|OJJ63946.1 aory|EIT75260.1 atub|OJI83153.1 aver|OJI96996.1 awen|OJJ39627.1  
Group11189: abra|OJJ65931.1 akaw|GAA92304.1 aluc|OJZ90201.1 anig|EHA23698.1 atub|OJI81629.1  
Group11190: ater|EAU37748.1 aver|OJJ04225.1 afla|EED44873.1 aory|EIT82724.1 asyd|OJJ58179.1  
Group11191: acar|OOF95830.1 akaw|GAA89761.1 aluc|OJZ80622.1 anig|EHA27209.1 atub|OJI87476.1  
Group11192: abra|OJJ66015.1 ater|EAU32220.1 aver|OJJ05325.1 abra|OJJ66460.1 awen|OJJ32689.1  
Group11193: abra|OJJ66021.1 afla|EED56777.1 aory|EIT73924.1 asyd|OJJ61424.1 atub|OJI82845.1  
Group11194: awen|OJJ34670.1 anid|CBF79112.1 afum|EAL86464.1 ater|EAU37684.1 agla|OJJ81793.1  
Group11195: abra|OJJ66034.1 afla|EED45347.1 anig|EHA18396.1 ater|EAU31821.1 atub|OJI87433.1  
Group11196: abra|OJJ66049.1 atub|OJI87255.1 abra|OJJ66143.1 afis|EAW16402.1 afum|EAL89024.1  
Group11197: abra|OJJ66051.1 anid|CBF70059.1 anig|EHA27185.1 aver|OJJ07386.1 awen|OJJ31006.1  
Group11198: abra|OJJ66057.1 akaw|GAA93127.1 aluc|OJZ81107.1 anig|EHA19262.1 atub|OJI82472.1  
Group11199: afla|EED54828.1 agla|OJJ81753.1 aory|EIT79363.1 azon|OJJ46462.1 awen|OJJ33382.1  
Group11200: agla|OJJ82272.1 aluc|OJZ87835.1 anid|CBF76060.1 afla|EED51101.1 aory|EIT81302.1  
Group11201: abra|OJJ66102.1 akaw|GAA92669.1 aluc|OJZ90123.1 anig|EHA20947.1 atub|OJI84672.1  
Group11202: abra|OJJ66121.1 afis|EAW16828.1 aluc|OJZ90140.1 anig|EHA20928.1 atub|OJI84658.1  
Group11203: ater|EAU37651.1 acar|OOG00118.1 acla|EAW07060.1 azon|OJJ45217.1 afla|EED48491.1  
Group11204: abra|OJJ66148.1 afla|EED53484.1 akaw|GAA88366.1 aluc|OJZ82289.1 atub|OJI88150.1  
Group11205: abra|OJJ66156.1 ater|EAU33999.1 afum|EAL90467.1 afis|EAW22728.1 awen|OJJ31976.1  
Group11206: akaw|GAA84885.1 aluc|OJZ86786.1 anig|EHA21896.1 awen|OJJ29810.1 atub|OJI83733.1  
Group11207: abra|OJJ66198.1 acar|OOF91932.1 akaw|GAA89091.1 anig|EHA25693.1 atub|OJI88430.1  
Group11208: abra|OJJ66255.1 acar|OOF90726.1 aluc|OJZ80563.1 anig|EHA25635.1 atub|OJI88368.1  
Group11209: abra|OJJ66259.1 afla|EED53427.1 aluc|OJZ80566.1 anig|EHA25632.1 atub|OJI88365.1  
Group11210: afis|EAW24560.1 asyd|OJJ55938.1 aver|OJJ04887.1 anid|CBF78919.1 azon|OJJ43547.1  
Group11211: abra|OJJ66281.1 anig|EHA23661.1 ater|EAU38972.1 atub|OJI89942.1 azon|OJJ44258.1  
Group11212: abra|OJJ66284.1 anig|EHA23664.1 atub|OJI89939.1 azon|OJJ42281.1 acar|OOF94958.1  
Group11213: abra|OJJ66329.1 akaw|GAA90206.1 aluc|OJZ83139.1 anig|EHA28198.1 atub|OJI87795.1  
Group11214: acar|OOF99381.1 afis|EAW17074.1 anig|EHA19928.1 asyd|OJJ59188.1 aver|OJJ01805.1  
Group11215: abra|OJJ66396.1 akaw|GAA90261.1 aluc|OJZ83079.1 anig|EHA28142.1 atub|OJI87866.1  
Group11216: abra|OJJ66402.1 akaw|GAA90270.1 aluc|OJZ83071.1 anig|EHA28135.1 atub|OJI87875.1  
Group11217: abra|OJJ66413.1 aluc|OJZ83062.1 atub|OJI87883.1 aver|OJJ07281.1 azon|OJJ43650.1  
Group11218: abra|OJJ66435.1 akaw|GAA83942.1 aluc|OJZ80824.1 anig|EHA28110.1 atub|OJI87912.1

Group11219: abra|OJJ66446.1 akaw|GAA86651.1 aluc|OJZ85209.1 anig|EHA26089.1 aver|OJJ07917.1  
Group11220: abra|OJJ66452.1 anid|CBF75802.1 awen|OJJ37490.1 asyd|OJJ57536.1 aver|OJJ05643.1  
Group11221: abra|OJJ66502.1 akaw|GAA91208.1 aluc|OJZ81543.1 atub|OJI88641.1 asyd|OJJ57671.1  
Group11222: abra|OJJ66515.1 akaw|GAA91196.1 aluc|OJZ81530.1 anig|EHA25906.1 atub|OJI88656.1  
Group11223: abra|OJJ66516.1 akaw|GAA91195.1 aluc|OJZ81529.1 anig|EHA25907.1 atub|OJI88657.1  
Group11224: abra|OJJ66771.1 akaw|GAA89708.1 aluc|OJZ80676.1 anig|EHA27336.1 atub|OJI87535.1  
Group11225: abra|OJJ66775.1 acar|OOF93854.1 akaw|GAA89710.1 aluc|OJZ80674.1 atub|OJI87531.1  
Group11226: abra|OJJ66796.1 akaw|GAA86861.1 aluc|OJZ89985.1 anig|EHA27356.1 atub|OJI84825.1  
Group11227: abra|OJJ66825.1 awen|OJJ31935.1 azon|OJJ46601.1 afum|EAL86851.1 agla|OJJ82611.1  
Group11228: abra|OJJ66920.1 afis|EAW19565.1 afla|EED48985.1 agla|OJJ82090.1 aory|EIT79976.1  
Group11229: abra|OJJ66945.1 akaw|GAA91475.1 aluc|OJZ85636.1 anig|EHA24896.1 atub|OJI79426.1  
Group11230: abra|OJJ66960.1 akaw|GAA92201.1 aluc|OJZ85616.1 anig|EHA24910.1 atub|OJI79409.1  
Group11231: abra|OJJ66973.1 afum|EAL85069.1 agla|OJJ82219.1 anig|EHA24920.1 agla|OJJ88219.1  
Group11232: afis|EAW19734.1 afum|EAL86795.1 agla|OJJ89293.1 asyd|OJJ57616.1 aver|OJJ05570.1  
Group11233: ater|EAU37976.1 awen|OJJ31433.1 agla|OJJ80671.1 asyd|OJJ55186.1 aver|OJJ07021.1  
Group11234: afla|EED46927.1 aory|EIT72776.1 afis|EAW24754.1 awen|OJJ40022.1 aver|OJJ08132.1  
Group11235: abra|OJJ67075.1 afla|EED57257.1 ater|EAU31941.1 atub|OJI89956.1 aory|EIT74064.1  
Group11236: abra|OJJ67131.1 agla|OJJ80718.1 asyd|OJJ59557.1 aver|OJJ02711.1 anid|CBF81676.1  
Group11237: abra|OJJ67234.1 acar|OOF98318.1 akaw|GAA91658.1 aluc|OJZ87741.1 anig|EHA20233.1  
Group11238: abra|OJJ67257.1 akaw|GAA91672.1 aluc|OJZ87722.1 anig|EHA20216.1 atub|OJI80920.1  
Group11239: abra|OJJ67258.1 akaw|GAA91673.1 aluc|OJZ87721.1 anig|EHA20215.1 atub|OJI80921.1  
Group11240: azon|OJJ42454.1 acar|OOF94552.1 acla|EAW12195.1 afis|EAW16908.1 afum|EAL86444.1  
Group11241: abra|OJJ67277.1 akaw|GAA92070.1 aluc|OJZ81157.1 asyd|OJJ52004.1 asyd|OJJ52002.1  
Group11242: abra|OJJ67282.1 akaw|GAA86527.1 aluc|OJZ85075.1 anig|EHA25290.1 atub|OJI80523.1  
Group11243: abra|OJJ67301.1 afla|EED57136.1 akaw|GAA86515.1 aluc|OJZ85060.1 atub|OJI80538.1  
Group11244: abra|OJJ67363.1 akaw|GAA86458.1 aluc|OJZ85000.1 anig|EHA25218.1 atub|OJI80600.1  
Group11245: abra|OJJ67404.1 anig|EHA25177.1 atub|OJI80636.1 akaw|GAA86423.1 aluc|OJZ84964.1  
Group11246: abra|OJJ67405.1 akaw|GAA86422.1 aluc|OJZ84963.1 anig|EHA25176.1 atub|OJI80637.1  
Group11247: abra|OJJ67432.1 akaw|GAA86397.1 aluc|OJZ84932.1 anig|EHA25150.1 atub|OJI80667.1  
Group11248: abra|OJJ67479.1 anig|EHA25117.1 akaw|GAA86359.1 aluc|OJZ84888.1 atub|OJI80712.1  
Group11249: abra|OJJ67566.1 acar|OOG00284.1 akaw|GAA88099.1 aluc|OJZ81366.1 atub|OJI91570.1  
Group11250: abra|OJJ67579.1 akaw|GAA90578.1 aluc|OJZ86036.1 anig|EHA24579.1 atub|OJI79823.1  
Group11251: acar|OOF91826.1 afla|EED51021.1 aory|EIT77019.1 anig|EHA26199.1 atub|OJI87261.1  
Group11252: abra|OJJ67583.1 akaw|GAA85346.1 aluc|OJZ90708.1 anig|EHA24575.1 atub|OJI82135.1  
Group11253: abra|OJJ67602.1 akaw|GAA89120.1 aluc|OJZ81719.1 anig|EHA25720.1 atub|OJI88463.1  
Group11254: abra|OJJ67605.1 akaw|GAA89122.1 aluc|OJZ81716.1 anig|EHA25723.1 atub|OJI88466.1  
Group11255: abra|OJJ67618.1 akaw|GAA89135.1 aluc|OJZ81701.1 anig|EHA25733.1 atub|OJI88480.1  
Group11256: abra|OJJ67619.1 akaw|GAA89136.1 aluc|OJZ81700.1 anig|EHA25734.1 atub|OJI88481.1  
Group11257: abra|OJJ67620.1 aluc|OJZ81698.1 anig|EHA25735.1 atub|OJI88482.1 akaw|GAA89138.1

Group11258: agla|OJJ79401.1 afla|EED45284.1 aory|EIT73654.1 asyd|OJJ52807.1 aver|OJJ08787.1  
Group11259: abra|OJJ67641.1 aluc|OJZ81674.1 anig|EHA25766.1 atub|OJI88507.1 akaw|GAA89160.1  
Group11260: abra|OJJ67644.1 akaw|GAA89163.1 aluc|OJZ81671.1 anig|EHA25771.1 atub|OJI88511.1  
Group11261: abra|OJJ67646.1 akaw|GAA89164.1 aluc|OJZ81670.1 anig|EHA25774.1 atub|OJI88514.1  
Group11262: abra|OJJ67651.1 akaw|GAA89167.1 aluc|OJZ81666.1 anig|EHA25777.1 atub|OJI88517.1  
Group11263: abra|OJJ67657.1 akaw|GAA89173.1 aluc|OJZ81660.1 anig|EHA25783.1 atub|OJI88523.1  
Group11264: abra|OJJ67666.1 akaw|GAA89182.1 aluc|OJZ81650.1 anig|EHA25793.1 atub|OJI88532.1  
Group11265: abra|OJJ67672.1 akaw|GAA89188.1 aluc|OJZ81643.1 anig|EHA25800.1 atub|OJI88539.1  
Group11266: abra|OJJ67697.1 acar|OOF90177.1 aluc|OJZ81623.1 anig|EHA25820.1 atub|OJI88557.1  
Group11267: abra|OJJ67698.1 akaw|GAA89207.1 aluc|OJZ81622.1 anig|EHA25821.1 atub|OJI88558.1  
Group11268: abra|OJJ67722.1 acar|OOF93285.1 anig|EHA25835.1 atub|OJI88572.1 ater|EAU31223.1  
Group11269: abra|OJJ67732.1 agla|OJJ85827.1 atub|OJI88583.1 akaw|GAA92423.1 aluc|OJZ81599.1  
Group11270: abra|OJJ67754.1 afla|EED49704.1 aory|EIT77676.1 atub|OJI84568.1 awen|OJJ36304.1  
Group11271: abra|OJJ67762.1 akaw|GAA92446.1 aluc|OJZ81572.1 anig|EHA25866.1 atub|OJI88611.1  
Group11272: abra|OJJ67775.1 afis|EAW20789.1 ater|EAU33383.1 atub|OJI80490.1 ater|EAU30087.1  
Group11273: abra|OJJ67787.1 acar|OOF94974.1 aluc|OJZ81080.1 anig|EHA20679.1 ater|EAU30330.1  
Group11274: abra|OJJ67807.1 aluc|OJZ90850.1 asyd|OJJ52899.1 atub|OJI82855.1 azon|OJJ42358.1  
Group11275: abra|OJJ67822.1 akaw|GAA91459.1 aluc|OJZ82062.1 anig|EHA22191.1 atub|OJI84620.1  
Group11276: abra|OJJ67841.1 acar|OOF92018.1 akaw|GAA91847.1 aluc|OJZ82051.1 atub|OJI84609.1  
Group11277: abra|OJJ67867.1 acar|OOF92848.1 akaw|GAA91874.1 aluc|OJZ82025.1 atub|OJI84578.1  
Group11278: abra|OJJ67899.1 akaw|GAA91903.1 aluc|OJZ81991.1 anig|EHA22265.1 atub|OJI84542.1  
Group11279: azon|OJJ44460.1 ater|EAU37624.1 acla|EAW12451.1 afis|EAW16755.1 afum|EAL86327.1  
Group11280: anid|CBF79879.1 awen|OJJ33768.1 asyd|OJJ58171.1 aver|OJJ04232.1 azon|OJJ42872.1  
Group11281: abra|OJJ67995.1 acar|OOF92038.1 akaw|GAA90954.1 aluc|OJZ82870.1 atub|OJI89093.1  
Group11282: ater|EAU36713.1 akaw|GAA92596.1 aluc|OJZ82613.1 atub|OJI88848.1 anid|CBF87736.1  
Group11283: abra|OJJ68018.1 akaw|GAA90933.1 aluc|OJZ82892.1 atub|OJI89116.1 awen|OJJ32559.1  
Group11284: abra|OJJ68028.1 akaw|GAA90925.1 aluc|OJZ82901.1 anig|EHA21326.1 atub|OJI89127.1  
Group11285: abra|OJJ68103.1 akaw|GAA86887.1 aluc|OJZ90011.1 anig|EHA27386.1 atub|OJI84796.1  
Group11286: abra|OJJ68113.1 afis|EAW19855.1 afum|EAL85040.1 asyd|OJJ54979.1 aver|OJJ03937.1  
Group11287: abra|OJJ68120.1 akaw|GAA86901.1 aluc|OJZ90024.1 anig|EHA27400.1 atub|OJI84783.1  
Group11288: abra|OJJ68142.1 akaw|GAA92376.1 aluc|OJZ83235.1 anig|EHA21092.1 atub|OJI87701.1  
Group11289: abra|OJJ68202.1 acar|OOF96118.1 afla|EED46966.1 atub|OJI90439.1 awen|OJJ39623.1  
Group11290: abra|OJJ68209.1 akaw|GAA83237.1 aluc|OJZ83736.1 anig|EHA18885.1 atub|OJI90114.1  
Group11291: abra|OJJ68220.1 acar|OOF97510.1 akaw|GAA83225.1 anig|EHA18873.1 atub|OJI90101.1  
Group11292: abra|OJJ68272.1 akaw|GAA83197.1 aluc|OJZ83699.1 anig|EHA18850.1 atub|OJI90070.1  
Group11293: abra|OJJ68275.1 aluc|OJZ83695.1 anig|EHA18847.1 atub|OJI90067.1 azon|OJJ48131.1  
Group11294: afum|EAL85008.1 aory|EIT83549.1 acla|EAW12413.1 afis|EAW18941.1 afla|EED55208.1  
Group11295: abra|OJJ68311.1 acar|OOF96697.1 akaw|GAA83162.1 aluc|OJZ83662.1 atub|OJI90033.1  
Group11296: abra|OJJ68317.1 akaw|GAA83156.1 aluc|OJZ83656.1 anig|EHA18808.1 atub|OJI90026.1



Group11297: abra|OJJ68324.1 acar|OOF97618.1 akaw|GAA92075.1 aluc|OJZ83649.1 atub|OJI90018.1  
Group11298: abra|OJJ68347.1 acar|OOF90953.1 akaw|GAA92114.1 aluc|OJZ83611.1 atub|OJI89984.1  
Group11299: abra|OJJ68350.1 akaw|GAA92118.1 aluc|OJZ83605.1 atub|OJI89977.1 awen|OJJ30193.1  
Group11300: abra|OJJ68419.1 akaw|GAA92529.1 aluc|OJZ90078.1 anig|EHA20995.1 atub|OJI84728.1  
Group11301: abra|OJJ68508.1 akaw|GAA92763.1 aluc|OJZ82722.1 anig|EHA21176.1 atub|OJI88956.1  
Group11302: aory|EIT81282.1 afla|EED48834.1 agla|OJJ81089.1 ater|EAU34703.1 azon|OJJ45534.1  
Group11303: abra|OJJ68571.1 afis|EAW25567.1 afla|EED54379.1 aory|EIT75856.1 awen|OJJ37970.1  
Group11304: abra|OJJ68572.1 anid|CBF75888.1 asyd|OJJ60259.1 aver|OJJ03997.1 awen|OJJ33511.1  
Group11305: abra|OJJ68587.1 akaw|GAA91919.1 aluc|OJZ81961.1 anig|EHA22286.1 atub|OJI84512.1  
Group11306: abra|OJJ68589.1 acar|OOF92453.1 anid|CBF69459.1 ater|EAU35432.1 ater|EAU32764.1  
Group11307: abra|OJJ68590.1 afla|EED49872.1 aory|EIT83406.1 ater|EAU35717.1 azon|OJJ50748.1  
Group11308: abra|OJJ68594.1 acla|EAW11910.1 afis|EAW20746.1 afla|EED46090.1 azon|OJJ45786.1  
Group11309: abra|OJJ68627.1 aluc|OJZ81928.1 anig|EHA22321.1 atub|OJI84480.1 awen|OJJ39968.1  
Group11310: abra|OJJ68632.1 akaw|GAA89771.1 aluc|OJZ81924.1 anig|EHA22324.1 atub|OJI84476.1  
Group11311: abra|OJJ68653.1 asyd|OJJ57278.1 atub|OJI81011.1 abra|OJJ69048.1 azon|OJJ48229.1  
Group11312: abra|OJJ68811.1 acar|OOF90614.1 akaw|GAA90443.1 aluc|OJZ85784.1 atub|OJI79568.1  
Group11313: ater|EAU29276.1 akaw|GAA84591.1 aluc|OJZ89336.1 atub|OJI85463.1 aver|OJJ01766.1  
Group11314: afis|EAW15414.1 afum|EAL84232.2 akaw|GAA82234.1 aluc|OJZ91913.1 azon|OJJ50410.1  
Group11315: abra|OJJ68860.1 acar|OOF90529.1 akaw|GAA90393.1 aluc|OJZ85838.1 atub|OJI79626.1  
Group11316: abra|OJJ68883.1 akaw|GAA90373.1 aluc|OJZ85859.1 atub|OJI79645.1 aver|OJJ03405.1  
Group11317: abra|OJJ68884.1 akaw|GAA90372.1 aluc|OJZ85860.1 anig|EHA28092.1 atub|OJI79646.1  
Group11318: abra|OJJ68885.1 akaw|GAA90371.1 aluc|OJZ85861.1 anig|EHA28091.1 atub|OJI79647.1  
Group11319: abra|OJJ68886.1 akaw|GAA90370.1 aluc|OJZ85862.1 anig|EHA28090.1 atub|OJI79648.1  
Group11320: abra|OJJ68888.1 akaw|GAA90368.1 aluc|OJZ85864.1 anig|EHA28088.1 atub|OJI79650.1  
Group11321: abra|OJJ68889.1 akaw|GAA90367.1 aluc|OJZ85865.1 anig|EHA28087.1 atub|OJI79651.1  
Group11322: afis|EAW19830.1 afum|EAL85062.1 anid|CBF76075.1 ater|EAU32496.1 awen|OJJ36314.1  
Group11323: abra|OJJ68947.1 akaw|GAA90307.1 aluc|OJZ85933.1 anig|EHA24665.1 atub|OJI79722.1  
Group11324: abra|OJJ68954.1 acar|OOF91532.1 aluc|OJZ85940.1 anig|EHA24659.1 atub|OJI79728.1  
Group11325: abra|OJJ69014.1 akaw|GAA90531.1 aluc|OJZ86000.1 anig|EHA24610.1 atub|OJI79787.1  
Group11326: abra|OJJ69045.1 akaw|GAA90574.1 aluc|OJZ86030.1 anig|EHA24582.1 atub|OJI79819.1  
Group11327: abra|OJJ69134.1 akaw|GAA86322.1 aluc|OJZ86122.1 anig|EHA24499.1 atub|OJI79918.1  
Group11328: abra|OJJ69163.1 acar|OOF91142.1 aluc|OJZ86150.1 atub|OJI79942.1 azon|OJJ43763.1  
Group11329: abra|OJJ69437.1 akaw|GAA88379.1 aluc|OJZ82273.1 anig|EHA28472.1 atub|OJI88166.1  
Group11330: abra|OJJ69489.1 akaw|GAA88331.1 aluc|OJZ82328.1 anig|EHA28430.1 atub|OJI88110.1  
Group11331: abra|OJJ69528.1 akaw|GAA88380.1 aluc|OJZ82368.1 anig|EHA28397.1 atub|OJI88074.1  
Group11332: abra|OJJ69533.1 agla|OJJ86580.1 akaw|GAA83223.1 atub|OJI90099.1 aluc|OJZ83724.1  
Group11333: acar|OOF95575.1 afla|EED48703.1 akaw|GAA86620.1 aluc|OJZ85175.1 aory|EIT73233.1  
Group11334: abra|OJJ69569.1 acla|EAW09065.1 agla|OJJ79943.1 awen|OJJ41337.1 azon|OJJ42268.1  
Group11335: abra|OJJ69605.1 acar|OOF98997.1 asyd|OJJ65118.1 aver|OJI99244.1 aver|OJI99245.1

Group11336: abra|OJJ69607.1 acar|OOF92700.1 akaw|GAA91592.1 aluc|OJZ82415.1 atub|OJI88026.1  
Group11337: abra|OJJ69654.1 akaw|GAA91633.1 aluc|OJZ82460.1 anig|EHA28315.1 atub|OJI87978.1  
Group11338: azon|OJJ48026.1 anid|CBF70510.1 asyd|OJJ58574.1 aver|OJJ01177.1 awen|OJJ33414.1  
Group11339: abra|OJJ69695.1 akaw|GAA88815.1 aluc|OJZ82498.1 anig|EHA28274.1 atub|OJI87932.1  
Group11340: abra|OJJ69729.1 akaw|GAA90182.1 aluc|OJZ83168.1 anig|EHA28233.1 atub|OJI87769.1  
Group11341: abra|OJJ69730.1 akaw|GAA90183.1 aluc|OJZ83167.1 anig|EHA28232.1 atub|OJI87770.1  
Group11342: abra|OJJ69737.1 acar|OOF94183.1 akaw|GAA90190.1 aluc|OJZ83159.1 atub|OJI87778.1  
Group11343: abra|OJJ69806.1 akaw|GAA87853.1 aluc|OJZ85495.1 anig|EHA25028.1 atub|OJI80070.1  
Group11344: acla|EAW14882.1 afis|EAW24401.1 afum|EAL86072.1 agla|OJJ79322.1 awen|OJJ30172.1  
Group11345: abra|OJJ69848.1 acar|OOF93370.1 akaw|GAA87810.1 aluc|OJZ85445.1 anig|EHA24989.1  
Group11346: asyd|OJJ65102.1 akaw|GAA92969.1 aver|OJI99229.1 awen|OJJ38709.1 awen|OJJ31619.1  
Group11347: abra|OJJ69862.1 akaw|GAA87794.1 aluc|OJZ85429.1 atub|OJI80146.1 anig|EHA25608.1  
Group11348: abra|OJJ69863.1 akaw|GAA87793.1 aluc|OJZ85428.1 anig|EHA25607.1 atub|OJI80147.1  
Group11349: aory|EIT81676.1 afis|EAW15461.1 afla|EED48436.1 asyd|OJJ54362.1 aver|OJJ05315.1  
Group11350: abra|OJJ69891.1 akaw|GAA87759.1 aluc|OJZ85393.1 anig|EHA25577.1 atub|OJI80178.1  
Group11351: abra|OJJ70027.1 acar|OOF98709.1 akaw|GAA92697.1 aluc|OJZ90155.1 atub|OJI84644.1  
Group11352: abra|OJJ70039.1 afis|EAW24622.1 afum|EAL86250.1 anig|EHA18721.1 atub|OJI79323.1  
Group11353: abra|OJJ70044.1 akaw|GAA87631.1 aluc|OJZ85247.1 anig|EHA25447.1 atub|OJI80322.1  
Group11354: abra|OJJ70053.1 akaw|GAA85318.1 aluc|OJZ90679.1 anig|EHA27496.1 awen|OJJ30546.1  
Group11355: afis|EAW25602.1 awen|OJJ40144.1 agla|OJJ80364.1 anid|CBF82322.1 ater|EAU32209.1  
Group11356: abra|OJJ70069.1 akaw|GAA87610.1 aluc|OJZ85231.1 anig|EHA25434.1 atub|OJI80349.1  
Group11357: abra|OJJ70072.1 afla|EED51154.1 anid|CBF80156.1 aory|EIT81342.1 aver|OJI99515.1  
Group11358: abra|OJJ70096.1 akaw|GAA87599.1 aluc|OJZ85219.1 anig|EHA25423.1 atub|OJI80364.1  
Group11359: anig|EHA22568.1 afla|EED55094.1 aory|EIT81630.1 asyd|OJJ62607.1 aver|OJI96470.1  
Group11360: abra|OJJ70123.1 acar|OOF98698.1 akaw|GAA86646.1 aluc|OJZ85203.1 atub|OJI80398.1  
Group11361: abra|OJJ70150.1 afla|EED52386.1 akaw|GAA90557.1 aory|EIT83290.1 ater|EAU35374.1  
Group11362: abra|OJJ70151.1 agla|OJJ83851.1 akaw|GAA86599.1 aluc|OJZ85146.1 atub|OJI80420.1  
Group11363: abra|OJJ70164.1 akaw|GAA86611.1 aluc|OJZ85162.1 anig|EHA25360.1 atub|OJI80438.1  
Group11364: abra|OJJ70169.1 acar|OOG00401.1 akaw|GAA86617.1 aluc|OJZ85170.1 atub|OJI80446.1  
Group11365: abra|OJJ70175.1 acar|OOF93302.1 akaw|GAA86597.1 aluc|OJZ85144.1 atub|OJI80449.1  
Group11366: abra|OJJ70186.1 akaw|GAA86589.1 aluc|OJZ85136.1 anig|EHA25368.1 atub|OJI80456.1  
Group11367: abra|OJJ70194.1 akaw|GAA86581.1 aluc|OJZ85132.1 anig|EHA25351.1 atub|OJI80461.1  
Group11368: abra|OJJ70204.1 akaw|GAA86573.1 aluc|OJZ85123.1 atub|OJI80470.1 azon|OJJ47991.1  
Group11369: abra|OJJ70206.1 acar|OOF92573.1 akaw|GAA86571.1 aluc|OJZ85121.1 atub|OJI80472.1  
Group11370: abra|OJJ70230.1 afla|EED46888.1 aluc|OJZ90860.1 anig|EHA18748.1 aory|EIT72671.1  
Group11371: abra|OJJ70252.1 akaw|GAA86539.1 aluc|OJZ85087.1 atub|OJI80512.1 awen|OJJ37027.1  
Group11372: abra|OJJ70278.1 akaw|GAA92871.1 aluc|OJZ82540.1 anig|EHA22508.1 atub|OJI88784.1  
Group11373: abra|OJJ70291.1 acar|OOF91745.1 akaw|GAA92857.1 aluc|OJZ82556.1 atub|OJI88798.1  
Group11374: abra|OJJ70292.1 acar|OOF91746.1 akaw|GAA92856.1 aluc|OJZ82557.1 atub|OJI88799.1

Group11375: abra|OJJ70299.1 akaw|GAA93022.1 aluc|OJZ82563.1 anig|EHA27511.1 atub|OJI88806.1  
Group11376: abra|OJJ70301.1 akaw|GAA93021.1 aluc|OJZ82564.1 anig|EHA27510.1 atub|OJI88808.1  
Group11377: abra|OJJ70314.1 akaw|GAA92570.1 aluc|OJZ82580.1 anig|EHA27491.1 atub|OJI88821.1  
Group11378: akaw|GAA92764.1 aluc|OJZ82721.1 atub|OJI88955.1 acar|OOF96899.1 anig|EHA21175.1  
Group11379: abra|OJJ70357.1 akaw|GAA92602.1 aluc|OJZ82619.1 anig|EHA27458.1 atub|OJI88854.1  
Group11380: acar|OOF95923.1 akaw|GAA83489.1 aluc|OJZ92504.1 aory|EIT82472.1 atub|OJI86936.1  
Group11381: abra|OJJ70441.1 afla|EED45987.1 aory|EIT75643.1 aver|OJI98304.1 awen|OJJ37918.1  
Group11382: abra|OJJ70444.1 akaw|GAA90136.1 aluc|OJZ83211.1 anig|EHA21071.1 atub|OJI87726.1  
Group11383: abra|OJJ70458.1 akaw|GAA83304.1 aluc|OJZ83799.1 anig|EHA18947.1 atub|OJI90168.1  
Group11384: abra|OJJ70531.1 acar|OOF97401.1 akaw|GAA83376.1 aluc|OJZ83874.1 atub|OJI90242.1  
Group11385: abra|OJJ70534.1 acar|OOF97398.1 akaw|GAA83379.1 aluc|OJZ83877.1 atub|OJI90245.1  
Group11386: abra|OJJ70581.1 akaw|GAA83425.1 aluc|OJZ83926.1 anig|EHA19058.1 atub|OJI90298.1  
Group11387: abra|OJJ70621.1 akaw|GAA89960.1 aluc|OJZ83967.1 anig|EHA19095.1 atub|OJI90340.1  
Group11388: abra|OJJ70662.1 akaw|GAA89998.1 aluc|OJZ84012.1 anig|EHA19135.1 atub|OJI90381.1  
Group11389: abra|OJJ70679.1 akaw|GAA90011.1 aluc|OJZ84027.1 anig|EHA19148.1 atub|OJI90399.1  
Group11390: abra|OJJ70831.1 anig|EHA20973.1 asyd|OJJ52722.1 aver|OJJ04486.1 awen|OJJ35066.1  
Group11391: abra|OJJ70885.1 acar|OOF94897.1 akaw|GAA87403.1 aluc|OJZ87637.1 atub|OJI81010.1  
Group11392: abra|OJJ71071.1 acar|OOF90617.1 akaw|GAA82891.1 aluc|OJZ87460.1 anig|EHA20682.1  
Group11393: abra|OJJ71073.1 akaw|GAA82889.1 aluc|OJZ87458.1 anig|EHA20680.1 atub|OJI81190.1  
Group11394: acla|EAW13667.1 afis|EAW17064.1 aver|OJJ00804.1 afla|EED52444.1 aory|EIT82750.1  
Group11395: abra|OJJ71107.1 akaw|GAA82862.1 aluc|OJZ87428.1 anig|EHA20650.1 atub|OJI81221.1  
Group11396: afis|EAW19925.1 afum|EAL84984.2 acar|OOF93586.1 acla|EAW13681.1 azon|OJJ50108.1  
Group11397: anid|CBF85314.1 asyd|OJJ64008.1 aver|OJI98095.1 afla|EED53707.1 aory|EIT75285.1  
Group11398: abra|OJJ71217.1 acar|OOF94575.1 acla|EAW15346.1 anig|EHA20561.1 aver|OJJ03893.1  
Group11399: abra|OJJ71224.1 akaw|GAA82765.1 aluc|OJZ87323.1 anig|EHA20558.1 atub|OJI81322.1  
Group11400: akaw|GAA82745.1 anid|CBF85404.1 asyd|OJJ64063.1 aver|OJI98149.1 awen|OJJ29831.1  
Group11401: abra|OJJ71269.1 acar|OOF97904.1 akaw|GAA82721.1 aluc|OJZ87275.1 atub|OJI81366.1  
Group11402: afum|EAL90001.1 agla|OJJ83867.1 afis|EAW25338.1 awen|OJJ41033.1 azon|OJJ44632.1  
Group11403: abra|OJJ71343.1 akaw|GAA82649.1 aluc|OJZ87198.1 anig|EHA20452.1 atub|OJI81441.1  
Group11404: abra|OJJ71566.1 akaw|GAA89358.1 aluc|OJZ86303.1 anig|EHA21569.1 atub|OJI84233.1  
Group11405: abra|OJJ71619.1 afis|EAW21025.1 aluc|OJZ86360.1 atub|OJI84174.1 acar|OOF98296.1  
Group11406: azon|OJJ49119.1 acar|OOF98229.1 aluc|OJZ79831.1 anig|EHA26123.1 ater|EAU32273.1  
Group11407: abra|OJJ71629.1 akaw|GAA89296.1 aluc|OJZ86371.1 anig|EHA21521.1 atub|OJI84163.1  
Group11408: abra|OJJ71735.1 akaw|GAA85149.1 aluc|OJZ86488.1 anig|EHA22181.1 atub|OJI84041.1  
Group11409: abra|OJJ71764.1 acar|OOF93297.1 agla|OJJ82501.1 asyd|OJJ65291.1 atub|OJI84034.1  
Group11410: abra|OJJ71768.1 akaw|GAA85139.1 aluc|OJZ86498.1 anig|EHA22146.1 atub|OJI84028.1  
Group11411: abra|OJJ71784.1 akaw|GAA85126.1 aluc|OJZ86514.1 anig|EHA22130.1 atub|OJI84010.1  
Group11412: abra|OJJ71822.1 akaw|GAA85088.1 aluc|OJZ86554.1 anig|EHA22095.1 atub|OJI83968.1  
Group11413: abra|OJJ71944.1 akaw|GAA84982.1 aluc|OJZ86680.1 anig|EHA21994.1 atub|OJI83847.1

Group11414: abra|OJJ71945.1 akaw|GAA84981.1 aluc|OJZ86681.1 anig|EHA21993.1 atub|OJI83846.1  
Group11415: abra|OJJ71976.1 akaw|GAA84954.1 aluc|OJZ86713.1 anig|EHA21965.1 atub|OJI83816.1  
Group11416: abra|OJJ71992.1 akaw|GAA84937.1 aluc|OJZ86729.1 anig|EHA21950.1 atub|OJI83799.1  
Group11417: abra|OJJ72002.1 akaw|GAA84929.1 aluc|OJZ86739.1 anig|EHA21941.1 atub|OJI83789.1  
Group11418: abra|OJJ72039.1 akaw|GAA84895.1 aluc|OJZ86776.1 anig|EHA21905.1 atub|OJI83745.1  
Group11419: abra|OJJ72130.1 akaw|GAA84792.1 aluc|OJZ86888.1 anig|EHA21755.1 atub|OJI83631.1  
Group11420: ater|EAU36011.1 abra|OJJ76598.1 agla|OJJ83625.1 afla|EED54877.1 aory|EIT79400.1  
Group11421: anid|CBF83143.1 acla|EAW12872.1 aluc|OJZ89213.1 anig|EHA23345.1 atub|OJI85579.1  
Group11422: abra|OJJ72212.1 acar|OOF96833.1 akaw|GAA84722.1 aluc|OJZ86964.1 atub|OJI83559.1  
Group11423: anid|CBF85310.1 aory|EIT80481.1 afla|EED51662.1 asyd|OJJ64004.1 awen|OJJ33578.1  
Group11424: abra|OJJ72258.1 acar|OOF96890.1 afla|EED52818.1 aluc|OJZ87009.1 atub|OJI83510.1  
Group11425: abra|OJJ72279.1 akaw|GAA86031.1 aluc|OJZ90258.1 anig|EHA23753.1 atub|OJI81684.1  
Group11426: abra|OJJ72307.1 akaw|GAA86058.1 aluc|OJZ90288.1 anig|EHA23778.1 atub|OJI81712.1  
Group11427: abra|OJJ72309.1 aluc|OJZ90290.1 anig|EHA23780.1 asyd|OJJ65159.1 azon|OJJ42572.1  
Group11428: aory|EIT81786.1 acar|OOF90668.1 afis|EAW16639.1 afum|EAL89241.1 afla|EED55658.1  
Group11429: abra|OJJ72376.1 akaw|GAA86124.1 aluc|OJZ90363.1 anig|EHA23838.1 acar|OOF94842.1  
Group11430: abra|OJJ72419.1 akaw|GAA86161.1 aluc|OJZ90402.1 atub|OJI81833.1 azon|OJJ45687.1  
Group11431: afis|EAW17832.1 afla|EED46174.1 afum|EAL91642.1 aory|EIT76434.1 acla|EAW12668.1  
Group11432: agla|OJJ87942.1 acla|EAW07125.1 afis|EAW22135.1 afum|EAL91055.1 awen|OJJ33870.1  
Group11433: azon|OJJ43491.1 afla|EED57238.1 aory|EIT73982.1 asyd|OJJ53398.1 aver|OJJ02219.1  
Group11434: afis|EAW17889.1 afum|EAL91698.1 acla|EAW12726.1 awen|OJJ41670.1 azon|OJJ48385.1  
Group11435: abra|OJJ72607.1 acar|OOF94648.1 aory|EIT74208.1 afis|EAW21219.1 afla|EED52549.1  
Group11436: awen|OJJ39812.1 acla|EAW14121.1 afla|EED46083.1 aory|EIT76421.1 awen|OJJ39863.1  
Group11437: awen|OJJ30861.1 acar|OOF98794.1 akaw|GAA87803.1 aluc|OJZ85438.1 atub|OJI80130.1  
Group11438: abra|OJJ72694.1 agla|OJJ79706.1 asyd|OJJ60096.1 aver|OJJ04182.1 awen|OJJ33888.1  
Group11439: abra|OJJ72708.1 akaw|GAA85312.1 aluc|OJZ90673.1 anig|EHA24106.1 atub|OJI82103.1  
Group11440: abra|OJJ72746.1 akaw|GAA85358.1 aluc|OJZ90720.1 anig|EHA24137.1 atub|OJI82148.1  
Group11441: abra|OJJ72805.1 akaw|GAA85408.1 aluc|OJZ83303.1 anig|EHA24186.1 atub|OJI82203.1  
Group11442: abra|OJJ72841.1 akaw|GAA85443.1 aluc|OJZ83348.1 anig|EHA24216.1 atub|OJI82242.1  
Group11443: abra|OJJ72974.1 afla|EED54542.1 aory|EIT78763.1 ater|EAU38893.1 awen|OJJ30812.1  
Group11444: abra|OJJ73012.1 akaw|GAA85591.1 aluc|OJZ83527.1 anig|EHA24350.1 atub|OJI82416.1  
Group11445: abra|OJJ73078.1 acar|OOG00313.1 akaw|GAA88084.1 aluc|OJZ81348.1 atub|OJI91552.1  
Group11446: abra|OJJ73112.1 afla|EED48401.1 anig|EHA24048.1 aory|EIT83068.1 atub|OJI82037.1  
Group11447: abra|OJJ73114.1 akaw|GAA88055.1 aluc|OJZ81317.1 atub|OJI91520.1 anig|EHA18622.1  
Group11448: abra|OJJ73117.1 akaw|GAA88051.1 aluc|OJZ81313.1 anig|EHA18617.1 atub|OJI91517.1  
Group11449: abra|OJJ73123.1 akaw|GAA88042.1 aluc|OJZ81301.1 anig|EHA18610.1 atub|OJI91510.1  
Group11450: awen|OJJ34469.1 akaw|GAA81896.1 aluc|OJZ92304.1 anig|EHA26669.1 atub|OJI86734.1  
Group11451: abra|OJJ73139.1 akaw|GAA88033.1 aluc|OJZ81292.1 anig|EHA18591.1 atub|OJI91500.1  
Group11452: ater|EAU38088.1 aver|OJJ05860.1 afla|EED53213.1 aory|EIT74847.1 asyd|OJJ57295.1

Group11453: abra|OJJ73291.1 akaw|GAA92712.1 aluc|OJZ88757.1 atub|OJI91327.1 aver|OJJ03840.1  
Group11454: afis|EAW19379.1 afla|EED48339.1 acla|EAW08559.1 anid|CBF71405.1 aver|OJJ07174.1  
Group11455: abra|OJJ73333.1 acar|OOF91494.1 agla|OJJ81112.1 asyd|OJJ57264.1 aver|OJJ03397.1  
Group11456: abra|OJJ73367.1 akaw|GAA83117.1 aluc|OJZ88673.1 anig|EHA18355.1 atub|OJI91254.1  
Group11457: abra|OJJ73394.1 aluc|OJZ85152.1 abra|OJJ73395.1 anig|EHA25379.1 atub|OJI80430.1  
Group11458: abra|OJJ73397.1 aluc|OJZ88637.1 anig|EHA18333.1 atub|OJI91222.1 azon|OJJ42512.1  
Group11459: afum|EAL90873.1 acla|EAW07669.1 afis|EAW22317.1 ater|EAU31005.1 aver|OJJ07473.1  
Group11460: abra|OJJ73482.1 akaw|GAA87431.1 aluc|OJZ88566.1 anig|EHA18263.1 atub|OJI91152.1  
Group11461: abra|OJJ73542.1 acar|OOG00717.1 akaw|GAA88609.1 aluc|OJZ88517.1 atub|OJI91102.1  
Group11462: abra|OJJ73548.1 akaw|GAA88604.1 aluc|OJZ88512.1 anig|EHA18218.1 atub|OJI91097.1  
Group11463: azon|OJJ43669.1 anid|CBF82169.1 asyd|OJJ54346.1 ater|EAU32687.1 aver|OJJ05298.1  
Group11464: abra|OJJ73615.1 akaw|GAA88538.1 aluc|OJZ88434.1 anig|EHA18158.1 atub|OJI91031.1  
Group11465: abra|OJJ73635.1 aluc|OJZ88415.1 atub|OJI91011.1 asyd|OJJ59092.1 aver|OJJ01682.1  
Group11466: abra|OJJ73706.1 anig|EHA18078.1 akaw|GAA88457.1 aluc|OJZ88345.1 atub|OJI90941.1  
Group11467: abra|OJJ73713.1 afis|EAW21078.1 akaw|GAA88450.1 aluc|OJZ88337.1 anig|EHA18072.1  
Group11468: abra|OJJ73722.1 acar|OOG00891.1 akaw|GAA88440.1 aluc|OJZ88328.1 atub|OJI90923.1  
Group11469: abra|OJJ73725.1 afla|EED53600.1 aory|EIT75231.1 aver|OJJ08871.1 azon|OJJ45997.1  
Group11470: abra|OJJ73737.1 akaw|GAA88427.1 aluc|OJZ88314.1 ater|EAU39057.1 atub|OJI90909.1  
Group11471: abra|OJJ73755.1 afis|EAW24620.1 afum|EAL86248.1 anig|EHA19510.1 aver|OJJ08548.1  
Group11472: afla|EED56729.1 aory|EIT73953.1 asyd|OJJ64768.1 aver|OJI98868.1 ater|EAU33981.1  
Group11473: abra|OJJ73811.1 akaw|GAA89430.1 aluc|OJZ88239.1 anig|EHA17986.1 atub|OJI90841.1  
Group11474: abra|OJJ73853.1 afla|EED57229.1 anig|EHA21757.1 aory|EIT74043.1 azon|OJJ42633.1  
Group11475: abra|OJJ73942.1 akaw|GAA89547.1 aluc|OJZ88102.1 anig|EHA17871.1 atub|OJI90710.1  
Group11476: abra|OJJ73948.1 acar|OOG01076.1 akaw|GAA89553.1 aluc|OJZ88096.1 atub|OJI90704.1  
Group11477: abra|OJJ73954.1 akaw|GAA89559.1 aluc|OJZ88090.1 anig|EHA17860.1 atub|OJI90698.1  
Group11478: abra|OJJ73957.1 akaw|GAA85099.1 atub|OJI83978.1 agla|OJJ89635.1 aluc|OJZ86545.1  
Group11479: abra|OJJ74026.1 akaw|GAA87508.1 aluc|OJZ88012.1 anig|EHA17792.1 atub|OJI90621.1  
Group11480: abra|OJJ74112.1 acar|OOF90000.1 asyd|OJJ63248.1 ater|EAU30630.1 atub|OJI90534.1  
Group11481: agla|OJJ86579.1 aluc|OJZ82541.1 akaw|GAA92870.1 atub|OJI88785.1 anig|EHA22509.1  
Group11482: abra|OJJ74151.1 akaw|GAA89732.1 aluc|OJZ80651.1 anig|EHA27181.1 atub|OJI87506.1  
Group11483: abra|OJJ74160.1 akaw|GAA89724.1 aluc|OJZ80659.1 anig|EHA27173.1 atub|OJI87515.1  
Group11484: abra|OJJ74214.1 akaw|GAA86804.1 aluc|OJZ89920.1 anig|EHA27120.1 atub|OJI84885.1  
Group11485: anid|CBF84306.1 asyd|OJJ56674.1 aver|OJJ06050.1 afla|EED49875.1 aory|EIT83387.1  
Group11486: abra|OJJ74402.1 akaw|GAA87297.1 aluc|OJZ89721.1 anig|EHA26948.1 atub|OJI85079.1  
Group11487: asyd|OJJ65130.1 afla|EED47450.1 agla|OJJ88202.1 anig|EHA25401.1 aory|EIT81897.1  
Group11488: abra|OJJ74430.1 afla|EED57468.1 anig|EHA26929.1 aory|EIT80153.1 afis|EAW24539.1  
Group11489: agla|OJJ81569.1 asyd|OJJ54208.1 ater|EAU38806.1 aver|OJJ01904.1 awen|OJJ30144.1  
Group11490: abra|OJJ74474.1 akaw|GAA87368.1 aluc|OJZ89644.1 anig|EHA26883.1 atub|OJI85159.1  
Group11491: abra|OJJ74475.1 akaw|GAA87369.1 aluc|OJZ89643.1 anig|EHA26882.1 atub|OJI85160.1

Group11492: afis|EAW22195.1 afum|EAL90996.1 afla|EED57582.1 aory|EIT82945.1 awen|OJJ34778.1  
Group11493: abra|OJJ74514.1 akaw|GAA82085.1 aluc|OJZ92095.1 anig|EHA26846.1 atub|OJI86528.1  
Group11494: abra|OJJ74518.1 afla|EED54605.1 akaw|GAA92800.1 aluc|OJZ88722.1 anig|EHA28205.1  
Group11495: abra|OJJ74534.1 akaw|GAA82066.1 aluc|OJZ92116.1 anig|EHA26829.1 atub|OJI86549.1  
Group11496: abra|OJJ74575.1 akaw|GAA82030.1 aluc|OJZ92153.1 anig|EHA26796.1 atub|OJI86581.1  
Group11497: abra|OJJ74597.1 aluc|OJZ92172.1 akaw|GAA82011.1 anig|EHA26777.1 atub|OJI86604.1  
Group11498: abra|OJJ74660.1 asyd|OJJ55546.1 atub|OJI86670.1 awen|OJJ30940.1 aver|OJJ06623.1  
Group11499: abra|OJJ74850.1 akaw|GAA83572.1 aluc|OJZ92426.1 anig|EHA26541.1 atub|OJI86856.1  
Group11500: abra|OJJ74886.1 akaw|GAA83533.1 aluc|OJZ92463.1 anig|EHA26504.1 atub|OJI86892.1  
Group11501: azon|OJJ42866.1 acla|EAW11650.1 afis|EAW23805.1 afum|EBA27306.1 awen|OJJ33762.1  
Group11502: abra|OJJ74951.1 afla|EED51748.1 anig|EHA26451.1 aory|EIT80488.1 atub|OJI86958.1  
Group11503: abra|OJJ74973.1 anig|EHA21622.1 asyd|OJJ55445.1 aver|OJJ06518.1 awen|OJJ36163.1  
Group11504: abra|OJJ75008.1 akaw|GAA88631.1 aluc|OJZ92573.1 anig|EHA26408.1 atub|OJI87009.1  
Group11505: abra|OJJ75118.1 akaw|GAA88728.1 aluc|OJZ92685.1 anig|EHA26315.1 atub|OJI87113.1  
Group11506: abra|OJJ75140.1 akaw|GAA88747.1 aluc|OJZ92707.1 anig|EHA26293.1 atub|OJI87133.1  
Group11507: abra|OJJ75196.1 akaw|GAA91748.1 aluc|OJZ92759.1 anig|EHA26247.1 atub|OJI87203.1  
Group11508: abra|OJJ75224.1 akaw|GAA91772.1 aluc|OJZ92787.1 anig|EHA26221.1 atub|OJI87230.1  
Group11509: agla|OJJ80388.1 afla|EED49688.1 aory|EIT80937.1 awen|OJJ32520.1 agla|OJJ82223.1  
Group11510: abra|OJJ75250.1 afla|EED47799.1 aluc|OJZ92809.1 atub|OJI87266.1 atub|OJI87264.1  
Group11511: abra|OJJ75294.1 aluc|OJZ88715.1 anid|CBF79577.1 azon|OJJ42162.1 aluc|OJZ79599.1  
Group11512: abra|OJJ75316.1 acar|OOF94514.1 aluc|OJZ92870.1 anig|EHA26095.1 atub|OJI87328.1  
Group11513: abra|OJJ75320.1 akaw|GAA92015.1 aluc|OJZ92881.1 anig|EHA26079.1 atub|OJI87340.1  
Group11514: abra|OJJ75360.1 aluc|OJZ92927.1 anig|EHA26043.1 atub|OJI87387.1 akaw|GAA92055.1  
Group11515: abra|OJJ75479.1 acar|OOF90815.1 akaw|GAA84248.1 aluc|OJZ88937.1 atub|OJI85853.1  
Group11516: abra|OJJ75534.1 akaw|GAA91954.1 aluc|OJZ82664.1 anig|EHA27438.1 atub|OJI88897.1  
Group11517: abra|OJJ75571.1 akaw|GAA84322.1 aluc|OJZ89019.1 anig|EHA23511.1 atub|OJI85770.1  
Group11518: abra|OJJ75585.1 akaw|GAA84337.1 aluc|OJZ89036.1 anig|EHA23498.1 atub|OJI85754.1  
Group11519: abra|OJJ75586.1 akaw|GAA84338.1 aluc|OJZ89037.1 anig|EHA23497.1 atub|OJI85753.1  
Group11520: afis|EAW19826.1 afum|EAL85066.1 acla|EAW15058.1 agla|OJJ81773.1 awen|OJJ40152.1  
Group11521: abra|OJJ75597.1 akaw|GAA84348.1 aluc|OJZ89048.1 anig|EHA23488.1 atub|OJI85739.1  
Group11522: abra|OJJ75600.1 akaw|GAA84351.1 aluc|OJZ89051.1 anig|EHA23487.1 atub|OJI85736.1  
Group11523: abra|OJJ75608.1 akaw|GAA84358.1 aluc|OJZ89060.1 anig|EHA23478.1 atub|OJI85726.1  
Group11524: abra|OJJ75750.1 akaw|GAA84483.1 aluc|OJZ89203.1 anig|EHA23355.1 atub|OJI85588.1  
Group11525: azon|OJJ42173.1 afla|EED45357.1 aory|EIT82400.1 awen|OJJ35918.1 aver|OJJ07430.1  
Group11526: abra|OJJ75767.1 asyd|OJJ58673.1 atub|OJI87191.1 aver|OJJ01284.1 awen|OJJ30921.1  
Group11527: abra|OJJ75772.1 asyd|OJJ58677.1 atub|OJI87186.1 aver|OJJ01289.1 awen|OJJ30926.1  
Group11528: abra|OJJ75837.1 afis|EAW25763.1 aluc|OJZ88051.1 anig|EHA17823.1 atub|OJI90659.1  
Group11529: abra|OJJ75860.1 akaw|GAA84565.1 aluc|OJZ89298.1 anig|EHA23265.1 atub|OJI85500.1  
Group11530: abra|OJJ75993.1 akaw|GAA88965.1 aluc|OJZ89438.1 anig|EHA23148.1 atub|OJI85355.1

Group11531: abra|OJJ76014.1 akaw|GAA88946.1 aluc|OJZ89460.1 atub|OJI85334.1 azon|OJJ50328.1  
Group11532: abra|OJJ76162.1 akaw|GAA82109.1 aluc|OJZ92067.1 anig|EHA22994.1 atub|OJI86498.1  
Group11533: abra|OJJ76168.1 akaw|GAA91444.1 aluc|OJZ84721.1 anig|EHA27994.1 atub|OJI89362.1  
Group11534: abra|OJJ76277.1 akaw|GAA82209.1 aluc|OJZ91943.1 anig|EHA22902.1 atub|OJI86386.1  
Group11535: abra|OJJ76289.1 acar|OOF99531.1 akaw|GAA82218.1 aluc|OJZ91933.1 atub|OJI86375.1  
Group11536: abra|OJJ76329.1 afum|EAL93528.1 aluc|OJZ91884.1 asyd|OJJ58950.1 atub|OJI86335.1  
Group11537: abra|OJJ76445.1 akaw|GAA82357.1 aluc|OJZ91765.1 atub|OJI86223.1 acar|OOF99688.1  
Group11538: abra|OJJ76592.1 acar|OOF99395.1 akaw|GAA82496.1 aluc|OJZ91614.1 atub|OJI86067.1  
Group11539: abra|OJJ76629.1 acar|OOF99369.1 akaw|GAA92828.1 aluc|OJZ91583.1 atub|OJI86032.1  
Group11540: abra|OJJ76645.1 akaw|GAA92815.1 aluc|OJZ91566.1 anig|EHA22595.1 atub|OJI86016.1  
Group11541: abra|OJJ76666.1 acar|OOF99532.1 afla|EED49840.1 anig|EHA21628.1 aory|EIT83401.1  
Group11542: abra|OJJ76676.1 acar|OOF99333.1 akaw|GAA92516.1 aluc|OJZ91529.1 atub|OJI85983.1  
Group11543: abra|OJJ76723.1 akaw|GAA92478.1 aluc|OJZ91488.1 anig|EHA22532.1 atub|OJI85943.1  
Group11544: abra|OJJ76854.1 akaw|GAA87168.1 aluc|OJZ84266.1 anig|EHA27608.1 atub|OJI89817.1  
Group11545: abra|OJJ76872.1 anig|EHA24716.1 acar|OOF90111.1 akaw|GAA89114.1 aluc|OJZ81726.1  
Group11546: abra|OJJ76883.1 acar|OOF90100.1 anid|CBF87196.1 asyd|OJJ56897.1 awen|OJJ30941.1  
Group11547: abra|OJJ76891.1 akaw|GAA87151.1 aluc|OJZ84284.1 atub|OJI89787.1 awen|OJJ36187.1  
Group11548: abra|OJJ76892.1 acar|OOF92132.1 anig|EHA25830.1 ater|EAU36567.1 azon|OJJ43582.1  
Group11549: awen|OJJ35548.1 afla|EED56941.1 akaw|GAA86007.1 atub|OJI81663.1 aluc|OJZ90233.1  
Group11550: abra|OJJ76990.1 akaw|GAA87056.1 aluc|OJZ84390.1 atub|OJI89681.1 azon|OJJ49723.1  
Group11551: abra|OJJ77017.1 afla|EED53227.1 anig|EHA20227.1 aory|EIT75128.1 aver|OJJ02005.1  
Group11552: abra|OJJ77020.1 akaw|GAA87032.1 aluc|OJZ84420.1 anig|EHA27742.1 atub|OJI89653.1  
Group11553: abra|OJJ77022.1 akaw|GAA87030.1 aluc|OJZ84422.1 anig|EHA27744.1 atub|OJI89651.1  
Group11554: abra|OJJ77027.1 akaw|GAA87024.1 aluc|OJZ84429.1 anig|EHA27748.1 atub|OJI89645.1  
Group11555: abra|OJJ77170.1 akaw|GAA90763.1 aluc|OJZ84583.1 anig|EHA27876.1 atub|OJI89497.1  
Group11556: abra|OJJ77185.1 akaw|GAA90754.1 aluc|OJZ84594.1 anig|EHA27883.1 atub|OJI89485.1  
Group11557: abra|OJJ77278.1 akaw|GAA90671.1 aluc|OJZ84688.1 anig|EHA27963.1 atub|OJI89394.1  
Group11558: abra|OJJ77307.1 akaw|GAA87995.1 aluc|OJZ81250.1 anig|EHA18558.1 atub|OJI91447.1  
Group11559: abra|OJJ77387.1 acar|OOF93256.1 akaw|GAA91374.1 aluc|OJZ84795.1 atub|OJI89287.1  
Group11560: awen|OJJ35376.1 acar|OOF90041.1 akaw|GAA85851.1 aluc|OJZ91248.1 atub|OJI83245.1  
Group11561: abra|OJJ77458.1 acar|OOG00737.1 acla|EAW07629.1 anig|EHA19292.1 asyd|OJJ60066.1  
Group11562: abra|OJJ77465.1 acar|OOF99270.1 akaw|GAA84152.1 aluc|OJZ81073.1 atub|OJI82513.1  
Group11563: abra|OJJ77500.1 akaw|GAA84121.1 aluc|OJZ81037.1 anig|EHA19329.1 atub|OJI82546.1  
Group11564: abra|OJJ77551.1 akaw|GAA84072.1 aluc|OJZ80986.1 anig|EHA19374.1 atub|OJI82600.1  
Group11565: abra|OJJ77552.1 akaw|GAA84071.1 aluc|OJZ80985.1 anig|EHA19375.1 atub|OJI82601.1  
Group11566: abra|OJJ77606.1 acla|EAW12878.1 asyd|OJJ57436.1 ater|EAU36087.1 aver|OJJ05742.1  
Group11567: abra|OJJ77641.1 akaw|GAA83993.1 aluc|OJZ80889.1 anig|EHA19449.1 atub|OJI82689.1  
Group11568: abra|OJJ77646.1 aluc|OJZ80883.1 atub|OJI82694.1 awen|OJJ37814.1 acar|OOF91727.1  
Group11569: abra|OJJ77738.1 akaw|GAA83891.1 aluc|OJZ90804.1 atub|OJI82793.1 awen|OJJ35813.1

Group11570: awen|OJJ34501.1 afla|EED44857.1 anid|CBF78811.1 asyd|OJJ65261.1 aver|OJI99412.1  
Group11571: anid|CBF83029.1 afis|EAW25582.1 afum|EAL84292.1 asyd|OJJ56287.1 aver|OJJ08461.1  
Group11572: abra|OJJ77805.1 akaw|GAA83844.1 aluc|OJZ90871.1 anig|EHA19591.1 atub|OJI82871.1  
Group11573: abra|OJJ77935.1 acar|OOF98871.1 akaw|GAA83728.1 aluc|OJZ91003.1 atub|OJI82994.1  
Group11574: azon|OJJ45370.1 agla|OJJ86118.1 asyd|OJJ59985.1 aver|OJJ02306.1 awen|OJJ30345.1  
Group11575: abra|OJJ77942.1 afis|EAW16408.1 akaw|GAA83723.1 aluc|OJZ91010.1 atub|OJI83001.1  
Group11576: abra|OJJ77958.1 akaw|GAA83725.1 aluc|OJZ91006.1 anig|EHA19711.1 atub|OJI82998.1  
Group11577: abra|OJJ77961.1 acar|OOF90714.1 anid|CBF81947.1 asyd|OJJ57369.1 aver|OJJ05799.1  
Group11578: abra|OJJ77979.1 akaw|GAA86001.1 aluc|OJZ91054.1 anig|EHA19757.1 atub|OJI83050.1  
Group11579: abra|OJJ77981.1 akaw|GAA85999.1 aluc|OJZ91056.1 anig|EHA19759.1 atub|OJI83052.1  
Group11580: abra|OJJ78031.1 akaw|GAA85954.1 aluc|OJZ91108.1 anig|EHA19806.1 atub|OJI83105.1  
Group11581: abra|OJJ78058.1 agla|OJJ85719.1 akaw|GAA85934.1 aluc|OJZ91128.1 atub|OJI83139.1  
Group11582: abra|OJJ78069.1 akaw|GAA85922.1 aluc|OJZ91145.1 anig|EHA19841.1 atub|OJI83158.1  
Group11583: abra|OJJ78080.1 akaw|GAA85913.1 aluc|OJZ91153.1 anig|EHA19850.1 atub|OJI83168.1  
Group11584: abra|OJJ78081.1 akaw|GAA85911.1 aluc|OJZ91155.1 anig|EHA19851.1 atub|OJI83170.1  
Group11585: abra|OJJ78089.1 akaw|GAA85905.1 aluc|OJZ91162.1 anig|EHA19856.1 atub|OJI83177.1  
Group11586: abra|OJJ78106.1 acar|OOF98759.1 aluc|OJZ91171.1 atub|OJI83185.1 awen|OJJ30277.1  
Group11587: anid|CBF73972.1 asyd|OJJ62367.1 afis|EAW17323.1 afum|EAL91159.1 aver|OJI96501.1  
Group11588: abra|OJJ78159.1 akaw|GAA85867.1 aluc|OJZ91212.1 anig|EHA19918.1 atub|OJI83230.1  
Group11589: abra|OJJ78161.1 akaw|GAA85864.1 aluc|OJZ91215.1 anig|EHA19921.1 atub|OJI83233.1  
Group11590: abra|OJJ78171.1 agla|OJJ80024.1 ater|EAU30166.1 asyd|OJJ59097.1 aver|OJJ01688.1  
Group11591: abra|OJJ78176.1 akaw|GAA85857.1 aluc|OJZ91225.1 anig|EHA19931.1 atub|OJI83238.1  
Group11592: abra|OJJ78184.1 acar|OOF93286.1 akaw|GAA85850.1 aluc|OJZ91249.1 atub|OJI83247.1  
Group11593: abra|OJJ78197.1 acar|OOF98658.1 aluc|OJZ91268.1 anig|EHA19956.1 atub|OJI83257.1  
Group11594: acla|EAW07044.1 afla|EED44975.1 aory|EIT73531.1 ater|EAU30335.1 azon|OJJ46852.1  
Group11595: azon|OJJ47989.1 acar|OOG00346.1 acla|EAW13485.1 akaw|GAA88048.1 aluc|OJZ81305.1  
Group11596: acar|OOF89858.1 akaw|GAA87911.1 aluc|OJZ88781.1 anig|EHA18475.1 atub|OJI91353.1  
Group11597: acar|OOF89868.1 acla|EAW13237.1 afla|EED49459.1 aory|EIT79486.1 ater|EAU38425.1  
Group11598: acar|OOF90158.1 aory|EIT73596.1 awen|OJJ37847.1 azon|OJJ43182.1 afla|EED45042.1  
Group11599: azon|OJJ50402.1 acla|EAW07416.1 afis|EAW15632.1 asyd|OJJ60062.1 aver|OJJ02228.1  
Group11600: acar|OOF90558.1 asyd|OJJ53527.1 ater|EAU37836.1 aver|OJJ08223.1 anid|CBF84497.1  
Group11601: acar|OOF90580.1 afla|EED45486.1 asyd|OJJ54094.1 aver|OJJ08645.1 aory|EIT75714.1  
Group11602: acar|OOF90600.1 aluc|OJZ85172.1 afla|EED48699.1 anid|CBF78730.1 aory|EIT73228.1  
Group11603: acar|OOF91083.1 acla|EAW08612.1 afla|EED51225.1 akaw|GAA92245.1 aory|EIT83192.1  
Group11604: acar|OOF91240.1 akaw|GAA90581.1 aluc|OJZ86039.1 anig|EHA24572.1 atub|OJI79826.1  
Group11605: acar|OOF91741.1 afla|EED48871.1 anig|EHA22517.1 aory|EIT81191.1 awen|OJJ38799.1  
Group11606: acar|OOF91793.1 anig|EHA25412.1 awen|OJJ32139.1 azon|OJJ43633.1 ater|EAU34523.1  
Group11607: acar|OOF91815.1 afum|EAL86657.1 anid|CBF89379.1 asyd|OJJ52303.1 aver|OJJ02178.1  
Group11608: acar|OOF91816.1 agla|OJJ79106.1 asyd|OJJ55392.1 aver|OJJ08265.1 awen|OJJ34588.1



Group11609: aluc|OJZ88613.1 anid|CBF87199.1 afis|EAW16201.1 afum|EAL88828.1 atub|OJI91198.1  
Group11610: acar|OOF92086.1 afis|EAW25709.1 afum|EAL84382.1 afla|EED50159.1 aory|EIT76929.1  
Group11611: acar|OOF92135.1 afis|EAW19863.1 ater|EAU31608.1 awen|OJJ41891.1 afum|EAL85032.1  
Group11612: acar|OOF92451.1 anid|CBF80402.1 ater|EAU32762.1 aver|OJJ07408.1 ater|EAU35437.1  
Group11613: acar|OOF92581.1 akaw|GAA86577.1 aluc|OJZ85128.1 anig|EHA25347.1 atub|OJI80465.1  
Group11614: acar|OOF92905.1 afis|EAW16769.1 afla|EED53153.1 afum|EAL86337.1 aory|EIT75263.1  
Group11615: ater|EAU29916.1 awen|OJJ32299.1 afis|EAW19915.1 afla|EED45532.1 afum|EAL84992.1  
Group11616: afis|EAW23680.1 afum|EAL87123.1 asyd|OJJ54288.1 ater|EAU37627.1 aver|OJJ05242.1  
Group11617: acar|OOF93145.1 agla|OJJ80311.1 aory|EIT73225.1 ater|EAU37753.1 awen|OJJ38068.1  
Group11618: acar|OOF93265.1 afla|EED56025.1 afum|EAL84407.1 aory|EIT76725.1 awen|OJJ30874.1  
Group11619: acar|OOF93293.1 afla|EED54454.1 agla|OJJ78525.1 aory|EIT81155.1 awen|OJJ41198.1  
Group11620: acla|EAW08970.1 agla|OJJ86272.1 afis|EAW15449.1 afum|EAL84197.1 ater|EAU30839.1  
Group11621: acar|OOF93346.1 akaw|GAA86108.1 aluc|OJZ90340.1 atub|OJI81767.1 ater|EAU36841.1  
Group11622: acar|OOF93932.1 aluc|OJZ83621.1 anig|EHA27513.1 atub|OJI87848.1 akaw|GAA92104.1  
Group11623: acar|OOF93934.1 akaw|GAA92105.1 aluc|OJZ83620.1 anig|EHA27512.1 atub|OJI87847.1  
Group11624: acar|OOF94197.1 afla|EED47770.1 asyd|OJJ59945.1 ater|EAU30396.1 aver|OJJ02343.1  
Group11625: asyd|OJJ65336.1 aver|OJI99482.1 afla|EED48619.1 awen|OJJ33514.1 aory|EIT79599.1  
Group11626: acar|OOF94512.1 akaw|GAA92000.1 aluc|OJZ92871.1 anid|CBF88861.1 atub|OJI87329.1  
Group11627: afis|EAW16981.1 afum|EAL86508.1 agla|OJJ79788.1 awen|OJJ35995.1 acla|EAW12255.1  
Group11628: afis|EAW16973.1 afla|EED51778.1 aory|EIT81699.1 aver|OJJ02700.1 azon|OJJ42647.1  
Group11629: akaw|GAA84852.1 aluc|OJZ86819.1 atub|OJI83698.1 agla|OJJ83637.1 aver|OJJ04869.1  
Group11630: acar|OOF94677.1 anid|CBF87491.1 anig|EHA26147.1 asyd|OJJ52951.1 aver|OJJ08917.1  
Group11631: azon|OJJ50289.1 acla|EAW14837.1 afis|EAW24365.1 afum|EAL86037.1 awen|OJJ32849.1  
Group11632: anig|EHA28515.1 ater|EAU31655.1 afla|EED53334.1 aory|EIT75105.1 atub|OJI82827.1  
Group11633: acar|OOF94960.1 aory|EIT73121.1 atub|OJI88446.1 aver|OJJ07461.1 afla|EED48595.1  
Group11634: acar|OOF95008.1 acla|EAW12216.1 afis|EAW25557.1 afum|EBA27171.1 awen|OJJ31977.1  
Group11635: acar|OOF95009.1 acla|EAW12219.1 afis|EAW25560.1 afum|EAL84284.1 awen|OJJ31979.1  
Group11636: acar|OOF95022.1 afla|EED53083.1 aory|EIT74806.1 asyd|OJJ62857.1 aver|OJI96909.1  
Group11637: ater|EAU30958.1 afla|EED46244.1 anid|CBF80415.1 aory|EIT76385.1 azon|OJJ50735.1  
Group11638: afla|EED45397.1 ater|EAU33508.1 aory|EIT82396.1 asyd|OJJ54513.1 aver|OJI95770.1  
Group11639: acar|OOF95599.1 akaw|GAA88039.1 aluc|OJZ81298.1 anig|EHA18607.1 atub|OJI91507.1  
Group11640: acar|OOF95837.1 afla|EED49641.1 anid|CBF70130.1 aory|EIT80985.1 ater|EAU32469.1  
Group11641: aory|EIT81704.1 afla|EED51881.1 afla|EED51882.1 anig|EHA22155.1 azon|OJJ42106.1  
Group11642: acar|OOF96501.1 anid|CBF74630.1 asyd|OJJ57583.1 aver|OJJ05598.1 azon|OJJ51751.1  
Group11643: acar|OOF96692.1 afla|EED54107.1 aory|EIT75906.1 asyd|OJJ57567.1 aver|OJJ05612.1  
Group11644: acar|OOF96790.1 akaw|GAA84770.1 aluc|OJZ86913.1 anig|EHA21731.1 atub|OJI83608.1  
Group11645: acar|OOF97570.1 acla|EAW09121.1 atub|OJI83131.1 aver|OJJ08167.1 awen|OJJ29722.1  
Group11646: acar|OOF97637.1 akaw|GAA92099.1 aluc|OJZ83626.1 anig|EHA18779.1 atub|OJI89995.1  
Group11647: acar|OOF97927.1 akaw|GAA82747.1 aluc|OJZ87303.1 anig|EHA20542.1 awen|OJJ38050.1

Group11648: azon|OJJ45429.1 aluc|OJZ85169.1 anid|CBF81952.1 anig|EHA25363.1 awen|OJJ32776.1  
Group11649: acar|OOF98232.1 awen|OJJ38716.1 acar|OOF99029.1 aory|EIT72316.1 afla|EED46400.1  
Group11650: acar|OOF98332.1 afla|EED47391.1 atub|OJI87441.1 aver|OJI97587.1 azon|OJJ42119.1  
Group11651: acar|OOF98719.1 anig|EHA22488.1 asyd|OJJ55518.1 ater|EAU34694.1 aver|OJJ06596.1  
Group11652: acar|OOF98727.1 afis|EAW21205.1 afis|EAW21206.1 afum|EAL92216.1 afum|EAL92217.1  
Group11653: acar|OOF98795.1 akaw|GAA87802.1 aluc|OJZ85437.1 atub|OJI80131.1 azon|OJJ45923.1  
Group11654: acar|OOF98989.1 agla|OJJ78509.1 asyd|OJJ60481.1 ater|EAU29496.1 aver|OJI99802.1  
Group11655: asyd|OJJ64276.1 aver|OJI98368.1 afla|EED56303.1 aory|EIT73418.1 anid|CBF85721.1  
Group11656: acar|OOF99109.1 afla|EED51168.1 anid|CBF80169.1 aory|EIT81340.1 aver|OJI99522.1  
Group11657: acar|OOF99111.1 awen|OJJ30483.1 acla|EAW06491.1 afis|EAW15987.1 afum|EAL88619.1  
Group11658: acar|OOF99135.1 afla|EED48438.1 agla|OJJ84624.1 asyd|OJJ61434.1 ater|EAU29760.1  
Group11659: acar|OOF99286.1 akaw|GAA84163.1 aluc|OJZ81088.1 anig|EHA19282.1 atub|OJI82496.1  
Group11660: acar|OOF99304.1 akaw|GAA91081.1 aluc|OJZ87897.1 anig|EHA20195.1 atub|OJI80753.1  
Group11661: acar|OOF99861.1 aory|EIT74417.1 acar|OOG00208.1 azon|OJJ42204.1 afla|EED52215.1  
Group11662: acar|OOG00291.1 acla|EAW12453.1 afla|EED51635.1 atub|OJI84634.1 azon|OJJ46528.1  
Group11663: acar|OOG00296.1 acla|EAW15040.1 anid|CBF80514.1 asyd|OJJ54737.1 awen|OJJ36952.1  
Group11664: acar|OOG00321.1 akaw|GAA89088.1 aluc|OJZ80503.1 anig|EHA25690.1 atub|OJI88427.1  
Group11665: acar|OOG00408.1 afum|EAL84201.1 agla|OJJ88745.1 anig|EHA23823.1 azon|OJJ50323.1  
Group11666: acar|OOG00534.1 afum|EAL86635.1 anid|CBF86043.1 asyd|OJJ54464.1 aver|OJJ07790.1  
Group11667: acar|OOG00539.1 akaw|GAA92714.1 aluc|OJZ88760.1 anig|EHA18456.1 atub|OJI91330.1  
Group11668: acar|OOG00636.1 afum|EAL87770.2 anig|EHA18412.1 asyd|OJJ54770.1 aver|OJI99272.1  
Group11669: acar|OOG00696.1 agla|OJJ84879.1 aluc|OJZ80909.1 asyd|OJJ58133.1 aver|OJJ04272.1  
Group11670: acar|OOG00736.1 afis|EAW16805.1 afla|EED49871.1 anid|CBF80485.1 aory|EIT83385.1  
Group11671: acla|EAW06330.1 anig|EHA24793.1 akaw|GAA90461.1 atub|OJI79547.1 aluc|OJZ85763.1  
Group11672: acla|EAW06451.1 afis|EAW15948.1 afla|EED58111.1 afum|EAL88581.1 awen|OJJ35636.1  
Group11673: acla|EAW06593.1 afis|EAW16016.1 afum|EAL88645.1 awen|OJJ30448.1 azon|OJJ45440.1  
Group11674: acla|EAW06760.1 afis|EAW16310.1 afum|EAL88932.1 awen|OJJ37710.1 azon|OJJ44969.1  
Group11675: asyd|OJJ59634.1 afla|EED49577.1 aory|EIT82583.1 ater|EAU29693.1 aver|OJJ02647.1  
Group11676: acla|EAW07111.1 afis|EAW22123.1 afla|EED46075.1 afum|EAL91064.1 aory|EIT83491.1  
Group11677: acla|EAW07112.1 afla|EED49434.1 asyd|OJJ56891.1 aver|OJJ07732.1 aver|OJJ07733.1  
Group11678: acla|EAW07205.1 afis|EAW22217.1 afum|EAL90977.1 agla|OJJ87827.1 awen|OJJ34803.1  
Group11679: acla|EAW07212.1 afis|EAW22225.1 afum|EAL90969.1 aver|OJJ01781.1 azon|OJJ42276.1  
Group11680: acla|EAW07266.1 afis|EAW22287.1 afum|EAL90894.1 awen|OJJ34860.1 agla|OJJ87762.1  
Group11681: acla|EAW07770.1 agla|OJJ86197.1 agla|OJJ88487.1 afis|EAW18238.1 afum|EBA27320.1  
Group11682: acla|EAW08000.1 afum|EAL88446.1 afis|EAW23035.1 awen|OJJ35706.1 agla|OJJ89442.1  
Group11683: acla|EAW08471.1 anid|CBF83637.1 asyd|OJJ60784.1 aver|OJJ00117.1 awen|OJJ39842.1  
Group11684: acla|EAW08548.1 afis|EAW23585.1 afum|EAL87879.1 awen|OJJ39912.1 azon|OJJ45888.1  
Group11685: acla|EAW08573.1 afis|EAW23631.1 afla|EED45134.1 afum|EBA27324.1 aory|EIT73823.1  
Group11686: acla|EAW08739.1 afis|EAW15697.1 afum|EAL85651.2 anig|EHA24533.1 afla|EED51356.1

Group11687: acla|EAW08945.1 afum|EAL91099.1 akaw|GAA83285.1 anig|EHA18931.1 awen|OJJ34617.1  
Group11688: acla|EAW08947.1 afum|EBA27420.1 akaw|GAA83287.1 anig|EHA18932.1 awen|OJJ34619.1  
Group11689: acla|EAW08948.1 afum|EAL91101.1 akaw|GAA83288.1 anig|EHA18933.1 awen|OJJ34620.1  
Group11690: azon|OJJ43668.1 anid|CBF84735.1 asyd|OJJ53301.1 aver|OJJ08440.1 awen|OJJ30041.1  
Group11691: acla|EAW09046.1 agla|OJJ89274.1 anid|CBF81248.1 asyd|OJJ59324.1 aver|OJJ02950.1  
Group11692: acla|EAW09067.1 afis|EAW25642.1 afum|EAL84329.1 anid|CBF80275.1 awen|OJJ36095.1  
Group11693: acla|EAW09081.1 afla|EED46121.1 aory|EIT73727.1 afis|EAW17182.1 aory|EIT76387.1  
Group11694: acla|EAW09115.1 afis|EAW22087.1 afla|EED49612.1 afum|EAL85696.1 aory|EIT80971.1  
Group11695: acla|EAW09339.1 afis|EAW21794.1 afum|EAL92819.1 awen|OJJ34078.1 azon|OJJ44263.1  
Group11696: azon|OJJ51423.1 afla|EED57812.1 awen|OJJ39091.1 asyd|OJJ60990.1 aver|OJJ00310.1  
Group11697: acla|EAW09827.1 afis|EAW21306.1 afum|EAL92322.1 agla|OJJ87433.1 awen|OJJ39392.1  
Group11698: aluc|OJZ88612.1 anid|CBF87197.1 atub|OJI91197.1 afis|EAW16200.1 afum|EAL88827.1  
Group11699: acla|EAW10017.1 agla|OJJ78661.1 aory|EIT77856.1 asyd|OJJ57247.1 aver|OJJ03047.1  
Group11700: acla|EAW10115.1 anid|CBF77102.1 asyd|OJJ55094.1 aver|OJJ07114.1 awen|OJJ32552.1  
Group11701: acla|EAW10400.1 afis|EAW18584.1 agla|OJJ86755.1 awen|OJJ39597.1 azon|OJJ41988.1  
Group11702: acla|EAW10648.1 ater|EAU30169.1 acla|EAW11698.1 afis|EAW24243.1 afum|EAL85911.1  
Group11703: acla|EAW10834.1 afis|EAW24730.1 afum|EAL89377.1 agla|OJJ85245.1 awen|OJJ37856.1  
Group11704: acla|EAW11069.1 afis|EAW20805.1 afum|EAL84823.1 asyd|OJJ54168.1 aver|OJJ08571.1  
Group11705: acla|EAW11093.1 afis|EAW21814.1 afum|EBA27228.1 agla|OJJ82561.1 asyd|OJJ62723.1  
Group11706: afla|EED52113.1 anid|CBF80518.1 aory|EIT76897.1 asyd|OJJ65293.1 aver|OJJ01917.1  
Group11707: acla|EAW11331.1 afis|EAW18164.1 afum|EAL87524.1 awen|OJJ30510.1 azon|OJJ50193.1  
Group11708: acla|EAW11517.1 afis|EAW23936.1 afum|EAL87361.1 agla|OJJ79417.1 azon|OJJ51344.1  
Group11709: acla|EAW11623.1 ater|EAU31391.1 asyd|OJJ58185.1 aver|OJJ04220.1 azon|OJJ48754.1  
Group11710: acla|EAW11706.1 agla|OJJ86727.1 anid|CBF73384.1 ater|EAU32802.1 ater|EAU37150.1  
Group11711: acla|EAW11769.1 afla|EED45360.1 aory|EIT82406.1 ater|EAU34823.1 awen|OJJ33643.1  
Group11712: acla|EAW11905.1 afla|EED48384.1 agla|OJJ85502.1 aory|EIT83062.1 awen|OJJ37790.1  
Group11713: acla|EAW11924.1 afis|EAW19558.1 afla|EED49684.1 afum|EAL86953.1 aory|EIT80976.1  
Group11714: acla|EAW11992.1 afis|EAW19632.1 afum|EAL86890.1 awen|OJJ41876.1 azon|OJJ47075.1  
Group11715: acla|EAW12277.1 afis|EAW16963.1 afla|EED45225.1 afum|EAL86490.1 awen|OJJ40084.1  
Group11716: acla|EAW12348.1 afum|EAL85144.1 afis|EAW19753.1 agla|OJJ80816.1 awen|OJJ29875.1  
Group11717: acla|EAW12892.1 afis|EAW20657.1 anid|CBF87746.1 asyd|OJJ52092.1 atub|OJI88906.1  
Group11718: anid|CBF82320.1 afis|EAW25603.1 agla|OJJ80365.1 ater|EAU32208.1 awen|OJJ40145.1  
Group11719: acla|EAW13289.1 afis|EAW17330.1 afum|EAL91167.2 ater|EAU29262.1 azon|OJJ43172.1  
Group11720: acla|EAW13621.1 afis|EAW19662.1 afum|EAL86860.2 awen|OJJ30664.1 azon|OJJ44765.1  
Group11721: acla|EAW13658.1 afis|EAW20398.1 afum|EAL85497.1 anid|CBF85425.1 aver|OJI99263.1  
Group11722: acla|EAW13714.1 afis|EAW23648.1 afla|EED48131.1 aory|EIT76223.1 ater|EAU31787.1  
Group11723: acla|EAW13842.1 anid|CBF84469.1 asyd|OJJ53536.1 ater|EAU33155.1 aver|OJJ08215.1  
Group11724: acla|EAW13898.1 afis|EAW18610.1 afum|EAL93320.1 agla|OJJ81663.1 awen|OJJ32071.1  
Group11725: acla|EAW14024.1 afis|EAW18730.1 afum|EAL93455.2 awen|OJJ32272.1 azon|OJJ42749.1

Group11726: acla|EAW14025.1 afis|EAW18731.1 afum|EAL93456.1 awen|OJJ32273.1 azon|OJJ42750.1  
Group11727: acla|EAW14135.1 afis|EAW18848.1 afla|EED50815.1 akaw|GAA82477.1 aory|EIT78994.1  
Group11728: awen|OJJ36044.1 afis|EAW17301.1 afla|EED45574.1 aory|EIT75612.1 ater|EAU36622.1  
Group11729: afla|EED52864.1 anid|CBF71142.1 aory|EIT78636.1 aver|OJJ04778.1 azon|OJJ43924.1  
Group11730: acla|EAW14638.1 afis|EAW23679.1 afum|EAL87122.2 ater|EAU35562.1 azon|OJJ47910.1  
Group11731: acla|EAW14643.1 afla|EED48987.1 aory|EIT80004.1 asyd|OJJ63817.1 aver|OJI97121.1  
Group11732: acla|EAW14718.1 afis|EAW24254.1 afum|EAL85922.1 ater|EAU31196.1 awen|OJJ33046.1  
Group11733: acla|EAW14823.1 afis|EAW24352.1 afum|EAL86022.1 agla|OJJ81769.1 ater|EAU30387.1  
Group11734: acla|EAW14988.1 afis|EAW24513.1 afum|EBA27261.1 agla|OJJ83395.1 aver|OJJ08783.1  
Group11735: acla|EAW15032.1 afis|EAW19345.1 afla|EED52029.1 anig|EHA24138.1 aory|EIT81473.1  
Group11736: acla|EAW15342.1 afis|EAW20365.1 afla|EED45742.1 afum|EAL85481.2 aory|EIT75784.1  
Group11737: afis|EAW15410.1 afla|EED51877.1 afum|EAL84236.1 aory|EIT81759.1 ater|EAU37984.1  
Group11738: afis|EAW15648.1 anid|CBF85168.1 asyd|OJJ60245.1 ater|EAU30251.1 aver|OJJ04016.1  
Group11739: awen|OJJ29791.1 afla|EED57511.1 aory|EIT81867.1 asyd|OJJ64582.1 aver|OJI98680.1  
Group11740: afis|EAW16253.1 afla|EED56873.1 ater|EAU31543.1 aory|EIT77464.1 asyd|OJJ54141.1  
Group11741: afis|EAW16389.1 afum|EAL89015.1 anid|CBF84475.1 awen|OJJ32037.1 aver|OJJ08217.1  
Group11742: afis|EAW16456.1 afum|EAL89053.1 asyd|OJJ52206.1 ater|EAU39537.1 aver|OJI95787.1  
Group11743: afis|EAW16706.1 asyd|OJJ53363.1 aver|OJJ07649.1 awen|OJJ36104.1 azon|OJJ42114.1  
Group11744: afis|EAW16711.1 afum|EAL89299.1 anid|CBF70512.1 asyd|OJJ54856.1 ater|EAU29466.1  
Group11745: afum|EAL86306.2 aluc|OJZ86493.1 anig|EHA22151.1 atub|OJI84033.1 akaw|GAA85144.1  
Group11746: afis|EAW16764.1 afla|EED47351.1 afum|EAL86335.1 asyd|OJJ54357.1 aver|OJJ05311.1  
Group11747: afis|EAW16910.1 afum|EAL86446.1 asyd|OJJ56951.1 aver|OJJ03334.1 azon|OJJ42448.1  
Group11748: afis|EAW16911.1 afum|EAL86447.1 asyd|OJJ56952.1 aver|OJJ03333.1 azon|OJJ42449.1  
Group11749: afis|EAW17007.1 akaw|GAA90343.1 aluc|OJZ85889.1 awen|OJJ37866.1 azon|OJJ42655.1  
Group11750: afis|EAW17060.1 afum|EAL86556.1 anid|CBF88300.1 ater|EAU31926.1 azon|OJJ43509.1  
Group11751: afis|EAW17078.1 akaw|GAA92154.1 aluc|OJZ85561.1 anig|EHA24967.1 atub|OJI79344.1  
Group11752: afis|EAW17141.1 afla|EED56546.1 agla|OJJ82273.1 aory|EIT79701.1 awen|OJJ35659.1  
Group11753: afis|EAW17150.1 afum|EAL86594.1 anid|CBF86604.1 asyd|OJJ64824.1 aver|OJI98937.1  
Group11754: afis|EAW17310.1 afla|EED49774.1 afum|EAL91145.1 aory|EIT77689.1 awen|OJJ32902.1  
Group11755: afis|EAW17311.1 afum|EAL91146.1 asyd|OJJ64145.1 aver|OJI98226.1 azon|OJJ42533.1  
Group11756: afla|EED47547.1 anid|CBF69509.1 aory|EIT74573.1 asyd|OJJ59216.1 aver|OJJ01826.1  
Group11757: afis|EAW17422.1 afum|EAL91247.1 asyd|OJJ61568.1 ater|EAU37823.1 aver|OJJ00888.1  
Group11758: afis|EAW17520.1 anid|CBF71793.1 asyd|OJJ63026.1 ater|EAU35354.1 aver|OJI97942.1  
Group11759: afis|EAW17521.1 anid|CBF71792.1 asyd|OJJ63027.1 ater|EAU35353.1 aver|OJI97941.1  
Group11760: afis|EAW17763.1 afum|EAL91573.1 anid|CBF82290.1 asyd|OJJ52734.1 ater|EAU32266.1  
Group11761: afis|EAW17852.1 afla|EED46206.1 afum|EAL91660.1 awen|OJJ41721.1 aory|EIT76447.1  
Group11762: afis|EAW18093.1 aory|EIT78055.1 aver|OJI97252.1 azon|OJJ42725.1 agla|OJJ89387.1  
Group11763: afis|EAW18324.1 anig|EHA23342.1 asyd|OJJ59740.1 ater|EAU29684.1 awen|OJJ32314.1  
Group11764: afis|EAW18555.1 afum|EAL93255.1 aory|EIT80620.1 ater|EAU39464.1 afla|EED51439.1

Group11765: afis|EAW19009.1 afum|EAL93743.1 akaw|GAA90359.1 aluc|OJZ85873.1 atub|OJI79659.1  
Group11766: afis|EAW19140.1 afla|EED53206.1 agla|OJJ80464.1 asyd|OJJ53821.1 ater|EAU35706.1  
Group11767: afis|EAW19372.1 afla|EED45374.1 aory|EIT82425.1 asyd|OJJ60288.1 aver|OJI99620.1  
Group11768: afis|EAW19517.1 afla|EED45882.1 afum|EAL86980.2 aory|EIT75651.1 ater|EAU33655.1  
Group11769: afis|EAW19522.1 afla|EED46522.1 aory|EIT72363.1 asyd|OJJ64208.1 akaw|GAA92090.1  
Group11770: afis|EAW19728.1 afum|EAL86799.1 anid|CBF71457.1 asyd|OJJ54949.1 aver|OJJ07246.1  
Group11771: afis|EAW19740.1 afla|EED56528.1 afum|EAL86789.1 aory|EIT82925.1 awen|OJJ34641.1  
Group11772: afis|EAW19770.1 afum|EAL85130.1 asyd|OJJ55399.1 ater|EAU32214.1 aver|OJJ06479.1  
Group11773: afis|EAW19796.1 afum|EAL85094.1 aory|EIT81735.1 ater|EAU31582.1 awen|OJJ41524.1  
Group11774: afis|EAW19808.1 afum|EAL85084.1 asyd|OJJ61798.1 ater|EAU33903.1 aver|OJI95897.1  
Group11775: afis|EAW19861.1 afum|EAL85034.1 anid|CBF71554.1 asyd|OJJ56281.1 ater|EAU38548.1  
Group11776: afis|EAW20216.1 afla|EED55532.1 aory|EIT80814.1 asyd|OJJ56329.1 aver|OJJ06384.1  
Group11777: afis|EAW20254.1 afum|EAL85371.1 anid|CBF90399.1 ater|EAU35996.1 awen|OJJ38310.1  
Group11778: agla|OJJ86325.1 asyd|OJJ56104.1 ater|EAU31560.1 aver|OJJ05046.1 awen|OJJ40020.1  
Group11779: afis|EAW20381.1 afla|EED46310.1 afum|EAL85494.1 aory|EIT76336.1 azon|OJJ42056.1  
Group11780: afis|EAW20580.1 afla|EED53405.1 afum|EAL84484.1 aory|EIT75078.1 awen|OJJ33280.1  
Group11781: afis|EAW20705.1 afum|EAL87726.1 agla|OJJ82562.1 ater|EAU39566.1 awen|OJJ31381.1  
Group11782: afis|EAW20844.1 afla|EED50399.1 afum|EAL84789.1 asyd|OJJ54456.1 ater|EAU32497.1  
Group11783: afis|EAW21031.1 afla|EED55087.1 afum|EAL92070.1 agla|OJJ88642.1 aver|OJJ08193.1  
Group11784: afis|EAW21040.1 afum|EAL92079.1 anid|CBF69836.1 asyd|OJJ59037.1 aver|OJJ01632.1  
Group11785: afis|EAW21058.1 afum|EAL92093.2 afla|EED56621.1 asyd|OJJ64179.1 ater|EAU32060.1  
Group11786: afis|EAW21203.1 anid|CBF86720.1 asyd|OJJ64716.1 ater|EAU32104.1 aver|OJI98819.1  
Group11787: afis|EAW21216.1 afum|EAL92227.2 aluc|OJZ79469.1 anid|CBF73942.1 azon|OJJ46547.1  
Group11788: afis|EAW21805.1 afum|EAL85391.1 agla|OJJ80479.1 akaw|GAA87895.1 asyd|OJJ62695.1  
Group11789: anig|EHA17701.1 asyd|OJJ52138.1 akaw|GAA93338.1 aluc|OJZ79977.1 aluc|OJZ80376.1  
Group11790: afis|EAW22563.1 afla|EED53099.1 afum|EAL90632.1 aory|EIT74819.1 awen|OJJ29708.1  
Group11791: afis|EAW23612.1 afum|EAL87853.1 anid|CBF74000.1 asyd|OJJ61471.1 aver|OJJ00812.1  
Group11792: afis|EAW23664.1 afla|EED50427.1 agla|OJJ83622.1 anid|CBF75930.1 aory|EIT82076.1  
Group11793: afis|EAW23692.1 akaw|GAA92975.1 anig|EHA18086.1 atub|OJI89952.1 awen|OJJ35047.1  
Group11794: afis|EAW23920.1 afum|EBA27311.1 asyd|OJJ57137.1 aver|OJJ03166.1 azon|OJJ46493.1  
Group11795: afis|EAW24470.1 afla|EED48147.1 afum|EAL86142.1 aory|EIT76229.1 ater|EAU37772.1  
Group11796: afis|EAW24481.1 akaw|GAA82567.1 aluc|OJZ87100.1 anig|EHA20370.1 atub|OJI81538.1  
Group11797: afis|EAW24509.1 afla|EED48172.1 afum|EAL86178.1 aory|EIT83034.1 ater|EAU32786.1  
Group11798: afis|EAW24514.1 afum|EAL86180.1 aory|EIT81903.1 asyd|OJJ56876.1 ater|EAU39544.1  
Group11799: afis|EAW24542.1 asyd|OJJ54767.1 aver|OJJ07400.1 afla|EED44757.1 awen|OJJ37968.1  
Group11800: afis|EAW24549.1 afla|EED53107.1 afum|EAL86213.1 agla|OJJ84626.1 aory|EIT74771.1  
Group11801: afis|EAW24600.1 agla|OJJ80222.1 anig|EHA25388.1 aver|OJI96490.1 awen|OJJ29703.1  
Group11802: afis|EAW24618.1 afla|EED54044.1 afum|EAL86246.1 aory|EIT76068.1 ater|EAU29289.1  
Group11803: afis|EAW24772.1 afum|EAL89414.2 asyd|OJJ58395.1 ater|EAU34033.1 aver|OJJ03009.1

Group11804: afis|EAW24897.1 afla|EED52558.1 afum|EAL89551.1 aory|EIT74317.1 ater|EAU37216.1  
Group11805: asyd|OJJ52783.1 afla|EED52088.1 aory|EIT76916.1 aver|OJJ04877.1 awen|OJJ32286.1  
Group11806: afis|EAW25262.1 afum|EBA27391.1 asyd|OJJ64042.1 aver|OJI98126.1 awen|OJJ40974.1  
Group11807: afis|EAW25583.1 afum|EAL84293.1 anid|CBF83031.1 asyd|OJJ56286.1 aver|OJJ08463.1  
Group11808: afis|EAW25672.1 anid|CBF70504.1 asyd|OJJ58577.1 ater|EAU33457.1 aver|OJJ01181.1  
Group11809: afis|EAW25703.1 afum|EAL84376.1 ater|EAU33410.1 azon|OJJ50782.1 azon|OJJ50781.1  
Group11810: afis|EAW25712.1 afla|EED55198.1 aory|EIT83573.1 ater|EAU36724.1 azon|OJJ42322.1  
Group11811: afla|EED44726.1 akaw|GAA92138.1 aory|EIT77794.1 asyd|OJJ59109.1 aver|OJJ01701.1  
Group11812: afla|EED44753.1 akaw|GAA93270.1 aluc|OJZ81133.1 asyd|OJJ51865.1 ater|EAU35395.1  
Group11813: afla|EED44867.1 aory|EIT82720.1 atub|OJI83117.1 awen|OJJ32254.1 aory|EIT82723.1  
Group11814: afla|EED44919.1 agla|OJJ79288.1 aory|EIT73519.1 asyd|OJJ60041.1 aver|OJJ02244.1  
Group11815: afla|EED45069.1 agla|OJJ84403.1 aory|EIT73671.1 aory|EIT73806.1 awen|OJJ40092.1  
Group11816: afla|EED45070.1 agla|OJJ83555.1 anid|CBF81787.1 asyd|OJJ57968.1 atub|OJI83167.1  
Group11817: afla|EED45231.1 aory|EIT73618.1 asyd|OJJ53708.1 aver|OJJ07832.1 awen|OJJ32557.1  
Group11818: afla|EED45257.1 aluc|OJZ79657.1 anid|CBF76103.1 aory|EIT73624.1 ater|EAU36306.1  
Group11819: afla|EED45269.1 anid|CBF80768.1 aory|EIT73800.1 asyd|OJJ54508.1 aver|OJJ07674.1  
Group11820: awen|OJJ30964.1 afla|EED55970.1 aory|EIT76658.1 asyd|OJJ56496.1 aver|OJJ06223.1  
Group11821: afla|EED45434.1 anid|CBF79176.1 aory|EIT82413.1 asyd|OJJ56413.1 aver|OJJ06302.1  
Group11822: afla|EED45440.1 agla|OJJ88689.1 aory|EIT82381.1 awen|OJJ33936.1 aory|EIT82432.1  
Group11823: afla|EED45485.1 anig|EHA23321.1 aory|EIT75381.1 ater|EAU36549.1 awen|OJJ33563.1  
Group11824: afla|EED45498.1 anid|CBF84307.1 aory|EIT75762.1 asyd|OJJ57248.1 aver|OJJ03046.1  
Group11825: afla|EED45534.1 anid|CBF83282.1 aory|EIT75631.1 asyd|OJJ61443.1 aver|OJJ00779.1  
Group11826: afla|EED45577.1 agla|OJJ79089.1 aory|EIT75751.1 ater|EAU36771.1 awen|OJJ36955.1  
Group11827: afla|EED45593.1 aory|EIT75639.1 asyd|OJJ52188.1 aver|OJJ03864.1 asyd|OJJ52540.1  
Group11828: afla|EED45631.1 aory|EIT75596.1 awen|OJJ30950.1 asyd|OJJ61500.1 aver|OJJ00837.1  
Group11829: afla|EED45649.1 aory|EIT75389.1 asyd|OJJ57902.1 aver|OJJ00712.1 aver|OJJ04492.1  
Group11830: afla|EED45699.1 anid|CBF89939.1 aory|EIT75576.1 asyd|OJJ62112.1 aver|OJI96220.1  
Group11831: afla|EED45702.1 aory|EIT75839.1 ater|EAU31907.1 awen|OJJ29761.1 azon|OJJ50387.1  
Group11832: afla|EED45778.1 aory|EIT75841.1 asyd|OJJ60500.1 aver|OJI99820.1 awen|OJJ36013.1  
Group11833: afla|EED45810.1 agla|OJJ89200.1 aory|EIT75390.1 aver|OJI96467.1 awen|OJJ40811.1  
Group11834: afla|EED46052.1 aory|EIT83481.1 asyd|OJJ55010.1 aver|OJI99609.1 azon|OJJ45209.1  
Group11835: afla|EED46076.1 aory|EIT83474.1 asyd|OJJ56875.1 ater|EAU30975.1 aver|OJI99559.1  
Group11836: afla|EED46218.1 aory|EIT76420.1 asyd|OJJ56438.1 aver|OJJ06282.1 azon|OJJ48040.1  
Group11837: afla|EED46362.1 aory|EIT81177.1 asyd|OJJ59950.1 aver|OJJ02339.1 awen|OJJ40929.1  
Group11838: afla|EED46385.1 agla|OJJ78982.1 aluc|OJZ85543.1 aory|EIT72373.1 aver|OJI99260.1  
Group11839: afla|EED46573.1 afum|EAL86977.1 anid|CBF76642.1 aory|EIT77846.1 asyd|OJJ61202.1  
Group11840: afla|EED46873.1 aory|EIT72685.1 asyd|OJJ62345.1 ater|EAU32997.1 aver|OJI96450.1  
Group11841: afla|EED46882.1 aory|EIT72695.1 asyd|OJJ52080.1 ater|EAU29585.1 aver|OJJ03022.1  
Group11842: afla|EED47079.1 anid|CBF89959.1 aory|EIT72483.1 asyd|OJJ54597.1 aver|OJJ07555.1

Group11843: afla|EED47257.1 aory|EIT79263.1 asyd|OJJ60435.1 atub|OJI87259.1 aver|OJJ02287.1  
Group11844: afla|EED47471.1 agla|OJJ78721.1 aory|EIT79952.1 asyd|OJJ61786.1 aver|OJI95886.1  
Group11845: afla|EED47519.1 aory|EIT74561.1 asyd|OJJ58132.1 aver|OJJ04273.1 awen|OJJ31322.1  
Group11846: awen|OJJ31280.1 agla|OJJ85293.1 akaw|GAA87343.1 aluc|OJZ89671.1 atub|OJI85129.1  
Group11847: afla|EED47576.1 aory|EIT74523.1 asyd|OJJ65246.1 ater|EAU29464.1 aver|OJI99398.1  
Group11848: afla|EED47689.1 awen|OJJ34121.1 akaw|GAA88330.1 aluc|OJZ82330.1 ater|EAU34061.1  
Group11849: afla|EED47695.1 agla|OJJ85098.1 aory|EIT80204.1 awen|OJJ29798.1 agla|OJJ80341.1  
Group11850: ater|EAU33650.1 akaw|GAA82961.1 aluc|OJZ87542.1 atub|OJI81105.1 azon|OJJ43564.1  
Group11851: afla|EED48090.1 aory|EIT76228.1 asyd|OJJ56497.1 aver|OJJ06222.1 azon|OJJ48158.1  
Group11852: afla|EED48104.1 anid|CBF87341.1 aory|EIT76235.1 asyd|OJJ52802.1 aver|OJJ08779.1  
Group11853: afla|EED48175.1 anid|CBF79169.1 aory|EIT83041.1 aver|OJJ07814.1 anig|EHA28264.1  
Group11854: afla|EED48211.1 aory|EIT72923.1 ater|EAU33167.1 awen|OJJ41708.1 azon|OJJ42458.1  
Group11855: afla|EED48244.1 anid|CBF71807.1 aory|EIT72954.1 ater|EAU32958.1 azon|OJJ46507.1  
Group11856: afla|EED48280.1 afum|EAL89209.1 agla|OJJ86338.1 anid|CBF71527.1 asyd|OJJ56408.1  
Group11857: afla|EED48310.1 anid|CBF79065.1 aory|EIT76293.1 asyd|OJJ56228.1 aver|OJJ05163.1  
Group11858: afla|EED48311.1 anid|CBF79063.1 aory|EIT76314.1 aver|OJJ06244.1 asyd|OJJ56474.1  
Group11859: afla|EED48331.1 aory|EIT76282.1 asyd|OJJ63901.1 aver|OJI97039.1 anid|CBF88681.1  
Group11860: afla|EED48434.1 anid|CBF81924.1 aory|EIT81670.1 asyd|OJJ58559.1 aver|OJJ01158.1  
Group11861: afla|EED48725.1 aory|EIT73267.1 asyd|OJJ56161.1 aver|OJJ05100.1 awen|OJJ39996.1  
Group11862: afla|EED48861.1 aory|EIT81281.1 ater|EAU34441.1 awen|OJJ36401.1 awen|OJJ30100.1  
Group11863: afla|EED49429.1 aory|EIT79459.1 akaw|GAA90294.1 aluc|OJZ83043.1 atub|OJI87907.1  
Group11864: afla|EED49435.1 aluc|OJZ85524.1 anig|EHA25056.1 aory|EIT79500.1 atub|OJI80043.1  
Group11865: afla|EED49576.1 aory|EIT82580.1 asyd|OJJ59635.1 ater|EAU29694.1 aver|OJJ02646.1  
Group11866: afla|EED49581.1 aory|EIT82659.1 asyd|OJJ59629.1 ater|EAU29691.1 aver|OJJ02651.1  
Group11867: aluc|OJZ85541.1 aory|EIT74277.1 asyd|OJJ55206.1 ater|EAU38342.1 aver|OJJ07010.1  
Group11868: anid|CBF73592.1 afla|EED51112.1 aory|EIT81359.1 asyd|OJJ56219.1 aver|OJJ05151.1  
Group11869: afla|EED49646.1 ater|EAU32755.1 aory|EIT81019.1 asyd|OJJ59191.1 aver|OJJ01808.1  
Group11870: afla|EED49657.1 anid|CBF89998.1 aory|EIT81009.1 asyd|OJJ62079.1 aver|OJI96186.1  
Group11871: afla|EED49658.1 anid|CBF84187.1 aory|EIT81006.1 asyd|OJJ57138.1 aver|OJJ03164.1  
Group11872: afla|EED49689.1 agla|OJJ83406.1 anid|CBF84423.1 asyd|OJJ53546.1 aver|OJJ08207.1  
Group11873: afla|EED49743.1 aory|EIT77678.1 afla|EED49744.1 anid|CBF82185.1 aory|EIT77611.1  
Group11874: afla|EED49769.1 anid|CBF87979.1 aory|EIT77605.1 asyd|OJJ63491.1 aver|OJI97438.1  
Group11875: afla|EED49823.1 akaw|GAA93231.1 aory|EIT77637.1 awen|OJJ33486.1 aluc|OJZ79995.1  
Group11876: afla|EED50209.1 anid|CBF74144.1 aory|EIT77294.1 asyd|OJJ53918.1 aver|OJJ08016.1  
Group11877: afla|EED50230.1 aory|EIT77259.1 asyd|OJJ58371.1 aver|OJJ02035.1 awen|OJJ31991.1  
Group11878: afla|EED50266.1 anid|CBF84346.1 aory|EIT77293.1 asyd|OJJ55455.1 aver|OJI99494.1  
Group11879: afla|EED50478.1 aory|EIT82033.1 aver|OJI96169.1 awen|OJJ37168.1 azon|OJJ50864.1  
Group11880: afla|EED50960.1 aory|EIT77007.1 asyd|OJJ61376.1 aver|OJJ00703.1 awen|OJJ41772.1  
Group11881: afla|EED51120.1 anid|CBF71493.1 aory|EIT81358.1 asyd|OJJ54935.1 aver|OJJ07262.1

Group11882: aflagEED51138.1 agla|OJJ88618.1 aory|EIT81357.1 asyd|OJJ54549.1 aver|OJJ07610.1  
Group11883: aflagEED51152.1 anid|CBF80142.1 aory|EIT81333.1 aver|OJI99536.1 ater|EAU31007.1  
Group11884: aflagEED51160.1 anid|CBF80160.1 aory|EIT81318.1 atub|OJI79835.1 aver|OJI99517.1  
Group11885: aflagEED51493.1 aory|EIT80757.1 aflagEED51494.1 agla|OJJ80050.1 awen|OJJ33324.1  
Group11886: aflagEED51559.1 aory|EIT80591.1 asyd|OJJ53064.1 ater|EAU33177.1 aver|OJJ03781.1  
Group11887: aflagEED51638.1 aory|EIT80492.1 asyd|OJJ63610.1 aver|OJI97327.1 awen|OJJ32918.1  
Group11888: aflagEED51645.1 aory|EIT80490.1 ater|EAU33075.1 azon|OJJ42229.1 aver|OJJ02052.1  
Group11889: aflagEED51660.1 aory|EIT80764.1 asyd|OJJ64003.1 aver|OJI98092.1 asyd|OJJ54855.1  
Group11890: aflagEED51720.1 aory|EIT80575.1 asyd|OJJ54175.1 ater|EAU30767.1 aver|OJJ08564.1  
Group11891: aflagEED51726.1 akaw|GAA93164.1 aluc|OJZ83023.1 aory|EIT80422.1 aver|OJJ07427.1  
Group11892: aflagEED51756.1 aory|EIT80424.1 asyd|OJJ63601.1 ater|EAU29426.1 aver|OJI97335.1  
Group11893: aflagEED51833.1 akaw|GAA87143.1 aluc|OJZ84294.1 atub|OJI89775.1 aver|OJI95766.1  
Group11894: aflagEED52071.1 anig|EHA27863.1 aory|EIT72307.1 asyd|OJJ65089.1 aver|OJI99215.1  
Group11895: aflagEED52151.1 anid|CBF83081.1 aory|EIT74369.1 asyd|OJJ61481.1 aver|OJJ00823.1  
Group11896: aflagEED52183.1 anid|CBF90370.1 aory|EIT74342.1 ater|EAU33485.1 azon|OJJ43603.1  
Group11897: aflagEED52207.1 aory|EIT74361.1 asyd|OJJ58612.1 ater|EAU37642.1 aver|OJJ01218.1  
Group11898: aflagEED52300.1 anig|EHA25381.1 aory|EIT74422.1 ater|EAU37312.1 atub|OJI80428.1  
Group11899: aflagEED52384.1 aory|EIT83311.1 aflagEED52517.1 aory|EIT82810.1 awen|OJJ33739.1  
Group11900: agla|OJJ83635.1 aluc|OJZ86817.1 atub|OJI83700.1 akaw|GAA84854.1 aver|OJJ04861.1  
Group11901: aflagEED52623.1 akaw|GAA82380.1 aluc|OJZ91741.1 aory|EIT74196.1 atub|OJI86199.1  
Group11902: aflagEED53052.1 aory|EIT74776.1 asyd|OJJ57577.1 anid|CBF75853.1 aver|OJJ05603.1  
Group11903: aflagEED53129.1 aory|EIT75192.1 asyd|OJJ54657.1 ater|EAU33824.1 aver|OJJ07502.1  
Group11904: aflagEED53199.1 agla|OJJ89089.1 aory|EIT74875.1 asyd|OJJ55201.1 awen|OJJ32919.1  
Group11905: aflagEED53336.1 agla|OJJ84992.1 aory|EIT74873.1 ater|EAU30433.1 awen|OJJ31390.1  
Group11906: aflagEED53409.1 asyd|OJJ54988.1 aver|OJJ07213.1 anid|CBF71416.1 ater|EAU34394.1  
Group11907: aflagEED53693.1 anid|CBF83124.1 aory|EIT75336.1 asyd|OJJ64576.1 aver|OJI98673.1  
Group11908: aflagEED53766.1 aory|EIT78434.1 akaw|GAA83259.1 aluc|OJZ83765.1 atub|OJI90136.1  
Group11909: aflagEED54105.1 aory|EIT76089.1 asyd|OJJ62066.1 aver|OJI96172.1 anid|CBF90025.1  
Group11910: aflagEED54187.1 agla|OJJ78606.1 aory|EIT76005.1 awen|OJJ34610.1 azon|OJJ43040.1  
Group11911: aflagEED54311.1 agla|OJJ80604.1 aory|EIT76144.1 ater|EAU37851.1 awen|OJJ29576.1  
Group11912: aflagEED54354.1 anid|CBF77242.1 aory|EIT76130.1 asyd|OJJ56916.1 aver|OJJ03376.1  
Group11913: aflagEED55062.1 agla|OJJ80727.1 anid|CBF76079.1 aory|EIT81970.1 awen|OJJ33518.1  
Group11914: aflagEED55105.1 aory|EIT81572.1 asyd|OJJ62957.1 aver|OJI98010.1 azon|OJJ49874.1  
Group11915: aflagEED55109.1 aory|EIT81600.1 asyd|OJJ54953.1 ater|EAU33570.1 aver|OJJ07243.1  
Group11916: aflagEED55111.1 anid|CBF75002.1 aory|EIT81625.1 asyd|OJJ60077.1 aver|OJJ04186.1  
Group11917: aflagEED55150.1 agla|OJJ83986.1 aory|EIT81654.1 ater|EAU37414.1 awen|OJJ34907.1  
Group11918: aflagEED55186.1 anid|CBF86702.1 aory|EIT83622.1 asyd|OJJ64741.1 aver|OJI98845.1  
Group11919: ater|EAU34574.1 agla|OJJ79310.1 awen|OJJ29582.1 azon|OJJ50267.1 asyd|OJJ54280.1  
Group11920: aflagEED55530.1 aory|EIT80818.1 asyd|OJJ54311.1 aver|OJJ05264.1 azon|OJJ43673.1



Group11921: afla|EED55971.1 aory|EIT76727.1 asyd|OJJ56495.1 aver|OJJ06224.1 awen|OJJ30966.1  
Group11922: afla|EED56578.1 afum|EAL88808.1 agla|OJJ82557.1 aory|EIT79608.1 awen|OJJ30511.1  
Group11923: afla|EED56614.1 anid|CBF80621.1 aory|EIT79658.1 asyd|OJJ54629.1 aver|OJJ07527.1  
Group11924: afla|EED56667.1 anid|CBF77228.1 asyd|OJJ60222.1 awen|OJJ34637.1 aver|OJJ04046.1  
Group11925: afla|EED56788.1 aory|EIT73914.1 ater|EAU38499.1 awen|OJJ36167.1 azon|OJJ47806.1  
Group11926: afla|EED56790.1 asyd|OJJ54993.1 aver|OJJ07208.1 awen|OJJ31994.1 azon|OJJ46049.1  
Group11927: afla|EED57035.1 aory|EIT82272.1 asyd|OJJ65363.1 ater|EAU32831.1 aver|OJI99537.1  
Group11928: afla|EED57108.1 aluc|OJZ84843.1 aory|EIT74030.1 asyd|OJJ57405.1 awen|OJJ35020.1  
Group11929: afla|EED57402.1 aory|EIT80141.1 ater|EAU29522.1 awen|OJJ36984.1 azon|OJJ43866.1  
Group11930: afla|EED57512.1 aory|EIT81849.1 aver|OJI98682.1 azon|OJJ42241.1 asyd|OJJ64584.1  
Group11931: afla|EED57520.1 aory|EIT81842.1 asyd|OJJ54648.1 aver|OJJ07514.1 azon|OJJ42441.1  
Group11932: afum|EAL92631.1 asyd|OJJ53615.1 aver|OJJ05935.1 asyd|OJJ54764.1 aver|OJJ07403.1  
Group11933: agla|OJJ79107.1 asyd|OJJ55394.1 aver|OJJ08263.1 aluc|OJZ80184.1 azon|OJJ48017.1  
Group11934: agla|OJJ79256.1 anid|CBF77657.1 asyd|OJJ53116.1 ater|EAU31054.1 aver|OJJ03738.1  
Group11935: atub|OJI89780.1 anid|CBF84139.1 asyd|OJJ62468.1 ater|EAU35753.1 aver|OJI96603.1  
Group11936: agla|OJJ80979.1 anid|CBF78501.1 asyd|OJJ61884.1 ater|EAU32639.1 aver|OJI95982.1  
Group11937: agla|OJJ81526.1 anid|CBF81072.1 asyd|OJJ56890.1 ater|EAU29637.1 awen|OJJ37975.1  
Group11938: agla|OJJ82215.1 anig|EHA20957.1 ater|EAU29924.1 atub|OJI84688.1 awen|OJJ38718.1  
Group11939: agla|OJJ83164.1 anid|CBF87407.1 asyd|OJJ52891.1 ater|EAU38998.1 aver|OJJ08862.1  
Group11940: agla|OJJ83648.1 anid|CBF78632.1 asyd|OJJ65122.1 aver|OJI99250.1 awen|OJJ40566.1  
Group11941: agla|OJJ84618.1 aluc|OJZ81023.1 aory|EIT74823.1 atub|OJI82560.1 awen|OJJ31265.1  
Group11942: agla|OJJ85280.1 asyd|OJJ56964.1 aver|OJJ03322.1 anid|CBF73577.1 asyd|OJJ56965.1  
Group11943: agla|OJJ85482.1 akaw|GAA92275.1 aluc|OJZ90169.1 atub|OJI81597.1 aver|OJI99606.1  
Group11944: agla|OJJ88529.1 aluc|OJZ79622.1 aory|EIT81220.1 atub|OJI82655.1 anid|CBF83743.1  
Group11945: akaw|GAA81958.1 aluc|OJZ92231.1 anig|EHA26726.1 asyd|OJJ54870.1 atub|OJI86661.1  
Group11946: akaw|GAA83226.1 aluc|OJZ83726.1 anig|EHA18874.1 asyd|OJJ54660.1 atub|OJI90102.1  
Group11947: akaw|GAA83699.1 aluc|OJZ91034.1 ater|EAU30331.1 atub|OJI83030.1 aver|OJJ05853.1  
Group11948: aver|OJJ02026.1 anid|CBF86673.1 asyd|OJJ64776.1 ater|EAU30444.1 aver|OJI98876.1  
Group11949: akaw|GAA83900.1 aluc|OJZ90795.1 asyd|OJJ55180.1 atub|OJI82784.1 aver|OJJ07027.1  
Group11950: akaw|GAA84677.1 aluc|OJZ87012.1 asyd|OJJ53593.1 atub|OJI83507.1 aver|OJJ08155.1  
Group11951: akaw|GAA85946.1 aluc|OJZ91116.1 anig|EHA19815.1 atub|OJI83120.1 azon|OJJ42804.1  
Group11952: akaw|GAA89126.1 aluc|OJZ81712.1 anig|EHA25727.1 aory|EIT75894.1 atub|OJI88472.1  
Group11953: akaw|GAA89307.1 aluc|OJZ86362.1 anig|EHA21529.1 atub|OJI84172.1 aver|OJJ01270.1  
Group11954: akaw|GAA89766.1 aluc|OJZ80617.1 anig|EHA27215.1 atub|OJI87471.1 azon|OJJ48139.1  
Group11955: akaw|GAA92120.1 aluc|OJZ83603.1 ater|EAU35151.1 azon|OJJ51594.1 atub|OJI89975.1  
Group11956: akaw|GAA92141.1 anid|CBF87326.1 asyd|OJJ59112.1 atub|OJI79313.1 aver|OJJ01704.1  
Group11957: akaw|GAA92558.1 aluc|OJZ90105.1 anig|EHA20965.1 atub|OJI84699.1 azon|OJJ45560.1  
Group11958: anid|CBF69440.1 asyd|OJJ52394.1 ater|EAU38171.1 aver|OJJ01929.1 azon|OJJ43196.1  
Group11959: anid|CBF69492.1 asyd|OJJ63452.1 ater|EAU33838.1 aver|OJI97480.1 ater|EAU31074.1

Group11960: anid|CBF74998.1 asyd|OJJ63341.1 aver|OJI97620.1 awen|OJJ37042.1 azon|OJJ43648.1  
Group11961: anid|CBF79085.1 asyd|OJJ62952.1 ater|EAU38541.1 aver|OJJ01750.1 asyd|OJJ59160.1  
Group11962: anid|CBF80082.1 asyd|OJJ58308.1 aver|OJJ02104.1 awen|OJJ31908.1 azon|OJJ50391.1  
Group11963: anid|CBF82195.1 asyd|OJJ52185.1 ater|EAU29295.1 aver|OJJ05960.1 awen|OJJ34425.1  
Group11964: anid|CBF83948.1 anig|EHA19749.1 asyd|OJJ61436.1 aver|OJJ00770.1 azon|OJJ43215.1  
Group11965: anid|CBF83950.1 anig|EHA19750.1 asyd|OJJ61437.1 aver|OJJ00771.1 azon|OJJ43214.1  
Group11966: anid|CBF87478.1 asyd|OJJ52943.1 ater|EAU31727.1 aver|OJJ08910.1 awen|OJJ35977.1  
Group11967: anid|CBF88188.1 asyd|OJJ63632.1 aver|OJI97304.1 awen|OJJ35273.1 azon|OJJ49834.1  
Group11968: anig|EHA25383.1 aory|EIT74367.1 ater|EAU37314.1 atub|OJI80426.1 aory|EIT74355.1  
Group11969: asyd|OJJ63014.1 aver|OJI99848.1 asyd|OJJ65343.1 aver|OJI99489.1 azon|OJJ45198.1  
Group11970: abra|OJJ65450.1 abra|OJJ65503.1 abra|OJJ65815.1 akaw|GAA93239.1  
Group11971: abra|OJJ65455.1 abra|OJJ65567.1 abra|OJJ65524.1 aluc|OJZ80442.1  
Group11972: abra|OJJ65499.1 abra|OJJ75563.1 afum|EAL84359.1 afis|EAW25690.1  
Group11973: abra|OJJ65530.1 abra|OJJ65571.1 akaw|GAA93121.1 akaw|GAA93276.1  
Group11974: abra|OJJ65663.1 abra|OJJ66171.1 acar|OOF93533.1 aluc|OJZ80020.1  
Group11975: abra|OJJ67054.1 abra|OJJ72693.1 asyd|OJJ60495.1 aver|OJI99818.1  
Group11976: abra|OJJ67724.1 agla|OJJ84234.1 atub|OJI89641.1 aluc|OJZ84432.1  
Group11977: abra|OJJ75756.1 afla|EED54065.1 aluc|OJZ85789.1 akaw|GAA90438.1  
Group11978: abra|OJJ70079.1 abra|OJJ70081.1 abra|OJJ70080.1 afla|EED45677.1  
Group11979: acar|OOF89763.1 acar|OOF89772.1 acar|OOF89773.1 anig|EHA21431.1  
Group11980: acar|OOF90488.1 acar|OOF90495.1 abra|OJJ65752.1 agla|OJJ87639.1  
Group11981: acar|OOF90679.1 acar|OOF91584.1 asyd|OJJ54337.1 aver|OJJ05289.1  
Group11982: acar|OOF93347.1 acar|OOF93422.1 asyd|OJJ53700.1 aver|OJJ07817.1  
Group11983: acar|OOF94030.1 acar|OOF94100.1 abra|OJJ66423.1 anig|EHA28117.1  
Group11984: acar|OOF94078.1 acar|OOF94148.1 abra|OJJ72265.1 azon|OJJ45046.1  
Group11985: acar|OOF94625.1 acar|OOG00106.1 awen|OJJ32529.1 azon|OJJ44254.1  
Group11986: acar|OOF95056.1 acar|OOF95123.1 afla|EED51489.1 aory|EIT80720.1  
Group11987: acar|OOF95057.1 acar|OOF95124.1 acla|EAW12275.1 anid|CBF79677.1  
Group11988: afis|EAW20337.1 afis|EAW23183.1 anid|CBF80591.1 anid|CBF86728.1  
Group11989: afla|EED54186.1 afla|EED56602.1 aory|EIT75929.1 aory|EIT79673.1  
Group11990: afum|EAL86280.1 afum|EAL87741.1 akaw|GAA93041.1 anig|EHA21840.1  
Group11991: afum|EAL86726.1 afum|EAL87779.1 afla|EED53571.1 ater|EAU32014.1  
Group11992: afum|EAL86747.1 afum|EAL86768.1 aluc|OJZ91229.1 anig|EHA21822.1  
Group11993: agla|OJJ78414.1 agla|OJJ87181.1 awen|OJJ33558.1 azon|OJJ42434.1  
Group11994: agla|OJJ78835.1 agla|OJJ88736.1 agla|OJJ78836.1 agla|OJJ78837.1  
Group11995: agla|OJJ79277.1 agla|OJJ84151.1 asyd|OJJ52300.1 aluc|OJZ79966.1  
Group11996: agla|OJJ79632.1 agla|OJJ86973.1 awen|OJJ35800.1 awen|OJJ39643.1  
Group11997: agla|OJJ80316.1 agla|OJJ88819.1 agla|OJJ84494.1 afla|EED51747.1  
Group11998: agla|OJJ80558.1 agla|OJJ88963.1 afla|EED48400.1 aory|EIT83045.1

Group11999: agla|OJJ81222.1 agla|OJJ84586.1 afis|EAW19758.1 agla|OJJ81890.1  
Group12000: agla|OJJ82937.1 agla|OJJ82943.1 agla|OJJ82939.1 agla|OJJ82938.1  
Group12001: agla|OJJ84643.1 agla|OJJ85058.1 abra|OJJ69548.1 afis|EAW17238.1  
Group12002: agla|OJJ84783.1 agla|OJJ85242.1 asyd|OJJ53820.1 awen|OJJ40826.1  
Group12003: agla|OJJ84794.1 agla|OJJ89484.1 agla|OJJ89485.1 agla|OJJ84924.1  
Group12004: agla|OJJ85011.1 agla|OJJ85273.1 abra|OJJ68079.1 afis|EAW24646.1  
Group12005: agla|OJJ86309.1 agla|OJJ89019.1 akaw|GAA92981.1 akaw|GAA93104.1  
Group12006: agla|OJJ89335.1 agla|OJJ89338.1 agla|OJJ84372.1 agla|OJJ85303.1  
Group12007: akaw|GAA87902.1 akaw|GAA93074.1 afla|EED44728.1 aory|EIT77793.1  
Group12008: akaw|GAA87905.1 akaw|GAA93251.1 akaw|GAA93054.1 abra|OJJ65620.1  
Group12009: akaw|GAA87907.1 akaw|GAA93051.1 asyd|OJJ52066.1 azon|OJJ42053.1  
Group12010: akaw|GAA92610.1 akaw|GAA93007.1 afis|EAW20664.1 agla|OJJ87703.1  
Group12011: akaw|GAA92936.1 akaw|GAA93100.1 akaw|GAA93315.1 ater|EAU36045.1  
Group12012: akaw|GAA93180.1 akaw|GAA93249.1 aluc|OJZ79979.1 aluc|OJZ88816.1  
Group12013: akaw|GAA93325.1 akaw|GAA93327.1 aluc|OJZ79910.1 aluc|OJZ80098.1  
Group12014: aluc|OJZ79478.1 aluc|OJZ80166.1 aluc|OJZ80255.1 aluc|OJZ79698.1  
Group12015: aluc|OJZ79496.1 aluc|OJZ80390.1 aluc|OJZ80500.1 aluc|OJZ79915.1  
Group12016: aluc|OJZ79514.1 aluc|OJZ88821.1 akaw|GAA93339.1 asyd|OJJ51841.1  
Group12017: aluc|OJZ79528.1 aluc|OJZ79826.1 acla|EAW11471.1 afla|EED47390.1  
Group12018: aluc|OJZ79577.1 aluc|OJZ80088.1 aluc|OJZ80410.1 asyd|OJJ52327.1  
Group12019: aluc|OJZ79616.1 aluc|OJZ80095.1 atub|OJI87461.1 akaw|GAA92888.1  
Group12020: aluc|OJZ79668.1 aluc|OJZ88809.1 aluc|OJZ79755.1 aluc|OJZ80111.1  
Group12021: aluc|OJZ79726.1 aluc|OJZ79935.1 aluc|OJZ80138.1 aluc|OJZ80230.1  
Group12022: aluc|OJZ79778.1 aluc|OJZ80325.1 aluc|OJZ79799.1 aluc|OJZ80212.1  
Group12023: aluc|OJZ79914.1 aluc|OJZ79932.1 aluc|OJZ80387.1 aluc|OJZ80132.1  
Group12024: aluc|OJZ80114.1 aluc|OJZ80449.1 aluc|OJZ80482.1 asyd|OJJ52328.1  
Group12025: aluc|OJZ80125.1 aluc|OJZ88795.1 anig|EHA20892.1 asyd|OJJ51844.1  
Group12026: aluc|OJZ80208.1 aluc|OJZ80427.1 aluc|OJZ79856.1 abra|OJJ65562.1  
Group12027: aluc|OJZ80244.1 aluc|OJZ80431.1 akaw|GAA93345.1 atub|OJI80387.1  
Group12028: anid|CBF70185.1 anid|CBF78519.1 afla|EED55118.1 aory|EIT81628.1  
Group12029: anid|CBF71474.1 anid|CBF75356.1 anid|CBF78886.1 agla|OJJ89171.1  
Group12030: anid|CBF75354.1 anid|CBF78887.1 ater|EAU34810.1 agla|OJJ78411.1  
Group12031: anid|CBF76137.1 anid|CBF89568.1 asyd|OJJ62338.1 aver|OJI96443.1  
Group12032: anid|CBF76145.1 anid|CBF84592.1 anid|CBF86034.1 awen|OJJ33509.1  
Group12033: anid|CBF84381.1 anid|CBF89336.1 afis|EAW17051.1 awen|OJJ33549.1  
Group12034: anig|EHA28193.1 anid|CBF69487.1 aver|OJJ01853.1 asyd|OJJ59243.1  
Group12035: asyd|OJJ51842.1 asyd|OJJ52214.1 asyd|OJJ52137.1 afis|EAW22018.1  
Group12036: asyd|OJJ51897.1 asyd|OJJ52288.1 asyd|OJJ51994.1 asyd|OJJ52133.1  
Group12037: asyd|OJJ51945.1 asyd|OJJ51999.1 asyd|OJJ52122.1 ater|EAU35389.1

Group12038: asyd|OJJ52014.1 asyd|OJJ53701.1 afis|EAW25566.1 aver|OJJ07819.1  
Group12039: asyd|OJJ52030.1 asyd|OJJ53580.1 anid|CBF76225.1 aver|OJI98041.1  
Group12040: asyd|OJJ52168.1 asyd|OJJ52217.1 abra|OJJ65495.1 acla|EAW10811.1  
Group12041: asyd|OJJ52433.1 asyd|OJJ61678.1 asyd|OJJ59286.1 aver|OJJ04341.1  
Group12042: asyd|OJJ52491.1 asyd|OJJ54423.1 asyd|OJJ54421.1 asyd|OJJ53822.1  
Group12043: asyd|OJJ52934.1 asyd|OJJ62631.1 aver|OJI96746.1 aver|OJJ08901.1  
Group12044: asyd|OJJ55073.1 asyd|OJJ57666.1 aver|OJJ07135.1 anid|CBF69565.1  
Group12045: asyd|OJJ62610.1 asyd|OJJ63015.1 azon|OJJ42120.1 agla|OJJ85425.1  
Group12046: ater|EAU31389.1 ater|EAU36655.1 asyd|OJJ54720.1 aver|OJJ07448.1  
Group12047: ater|EAU31436.1 ater|EAU35967.1 afla|EED47221.1 aory|EIT79302.1  
Group12048: ater|EAU34021.1 ater|EAU37626.1 asyd|OJJ57223.1 aver|OJJ03064.1  
Group12049: aver|OJI96458.1 aver|OJI97961.1 awen|OJJ29735.1 ater|EAU39428.1  
Group12050: aver|OJI96729.1 aver|OJJ07512.1 afla|EED45673.1 aory|EIT75609.1  
Group12051: aver|OJI98278.1 aver|OJJ07749.1 abra|OJJ74635.1 asyd|OJJ54868.1  
Group12052: aver|OJJ00699.1 aver|OJJ02112.1 asyd|OJJ61372.1 awen|OJJ36386.1  
Group12053: aver|OJJ01960.1 aver|OJJ07459.1 acar|OOF94959.1 afla|EED53665.1  
Group12054: awen|OJJ29570.1 awen|OJJ29596.1 awen|OJJ29619.1 awen|OJJ29634.1  
Group12055: awen|OJJ29580.1 awen|OJJ32581.1 awen|OJJ29609.1 abra|OJJ65511.1  
Group12056: awen|OJJ29821.1 awen|OJJ31315.1 agla|OJJ84599.1 azon|OJJ42606.1  
Group12057: awen|OJJ29982.1 awen|OJJ30082.1 awen|OJJ29981.1 afla|EED49718.1  
Group12058: awen|OJJ30179.1 awen|OJJ30184.1 awen|OJJ31476.1 acar|OOF99002.1  
Group12059: awen|OJJ30183.1 awen|OJJ36369.1 ater|EAU29248.1 asyd|OJJ57921.1  
Group12060: awen|OJJ30788.1 awen|OJJ31693.1 afla|EED55298.1 aory|EIT83596.1  
Group12061: awen|OJJ30821.1 awen|OJJ37783.1 afum|EAL84796.1 azon|OJJ45547.1  
Group12062: awen|OJJ32288.1 awen|OJJ37493.1 awen|OJJ39605.1 acar|OOF96541.1  
Group12063: awen|OJJ32517.1 awen|OJJ36006.1 abra|OJJ77882.1 azon|OJJ43500.1  
Group12064: awen|OJJ34405.1 awen|OJJ38782.1 afis|EAW20916.1 azon|OJJ43629.1  
Group12065: awen|OJJ37436.1 awen|OJJ37812.1 agla|OJJ86965.1 aver|OJJ07576.1  
Group12066: azon|OJJ42089.1 azon|OJJ45168.1 asyd|OJJ57262.1 aver|OJJ03401.1  
Group12067: azon|OJJ42306.1 azon|OJJ44448.1 afla|EED47777.1 aory|EIT77154.1  
Group12068: azon|OJJ42403.1 azon|OJJ50426.1 azon|OJJ43600.1 azon|OJJ42643.1  
Group12069: azon|OJJ42585.1 azon|OJJ45996.1 asyd|OJJ53498.1 aver|OJJ08247.1  
Group12070: azon|OJJ42781.1 azon|OJJ46443.1 afla|EED47659.1 aory|EIT80208.1  
Group12071: azon|OJJ43528.1 azon|OJJ44455.1 azon|OJJ50088.1 azon|OJJ45123.1  
Group12072: azon|OJJ45268.1 azon|OJJ45309.1 azon|OJJ45693.1 ater|EAU36691.1  
Group12073: azon|OJJ46178.1 azon|OJJ50239.1 aory|EIT77223.1 aver|OJJ03856.1  
Group12074: azon|OJJ50228.1 azon|OJJ51244.1 acar|OOF90576.1 anig|EHA21042.1  
Group12075: anid|CBF69387.1 anid|CBF79009.1 anid|CBF84587.1 anid|CBF84335.1  
Group12076: awen|OJJ31896.1 awen|OJJ31899.1 awen|OJJ31898.1 awen|OJJ31912.1

Group12077: agla|OJJ78542.1 agla|OJJ86873.1 agla|OJJ80124.1 agla|OJJ88958.1  
Group12078: agla|OJJ79465.1 agla|OJJ87519.1 agla|OJJ82006.1 agla|OJJ89694.1  
Group12079: agla|OJJ79774.1 agla|OJJ80630.1 agla|OJJ85469.1 agla|OJJ85034.1  
Group12080: agla|OJJ83779.1 agla|OJJ83780.1 agla|OJJ83790.1 agla|OJJ83789.1  
Group12081: agla|OJJ89404.1 agla|OJJ89405.1 agla|OJJ89406.1 agla|OJJ89407.1  
Group12082: aluc|OJZ79471.1 aluc|OJZ79552.1 aluc|OJZ80341.1 aluc|OJZ79814.1  
Group12083: aluc|OJZ79522.1 aluc|OJZ80415.1 aluc|OJZ79873.1 aluc|OJZ88835.1  
Group12084: aluc|OJZ79527.1 aluc|OJZ79768.1 aluc|OJZ80044.1 aluc|OJZ88811.1  
Group12085: aluc|OJZ79556.1 aluc|OJZ79757.1 aluc|OJZ79666.1 aluc|OJZ79893.1  
Group12086: aluc|OJZ79588.1 aluc|OJZ79732.1 aluc|OJZ80062.1 aluc|OJZ79702.1  
Group12087: aluc|OJZ79764.1 aluc|OJZ79912.1 aluc|OJZ80496.1 aluc|OJZ81122.1  
Group12088: abra|OJJ65423.1 akaw|BAL04884.1 aory|AFM82511.1 azon|OJJ41969.1  
Group12089: abra|OJJ65432.1 akaw|BAL04876.1 aluc|OJZ79481.1 aory|AFM82513.1  
Group12090: akaw|GAA92350.1 anig|EHA17688.1 akaw|GAA93097.1 aluc|OJZ80224.1  
Group12091: abra|OJJ65581.1 asyd|OJJ60475.1 aver|OJI99795.1 awen|OJJ30890.1  
Group12092: abra|OJJ65595.1 akaw|GAA92337.1 aluc|OJZ80456.1 asyd|OJJ52119.1  
Group12093: afum|EAL88797.1 afis|EAW20720.1 asyd|OJJ54640.1 aver|OJJ07517.1  
Group12094: abra|OJJ65596.1 akaw|GAA92336.1 aluc|OJZ80457.1 asyd|OJJ52118.1  
Group12095: abra|OJJ65601.1 agla|OJJ80066.1 asyd|OJJ52028.1 aver|OJI98896.1  
Group12096: abra|OJJ65642.1 acar|OOF97539.1 asyd|OJJ60383.1 awen|OJJ32712.1  
Group12097: abra|OJJ65656.1 anid|CBF87109.1 asyd|OJJ60336.1 aver|OJI99681.1  
Group12098: abra|OJJ65690.1 atub|OJI83490.1 aver|OJI96727.1 awen|OJJ30912.1  
Group12099: afum|EBA27227.1 acar|OOF91401.1 akaw|GAA84023.1 azon|OJJ49807.1  
Group12100: abra|OJJ65713.1 agla|OJJ84755.1 akaw|GAA93053.1 awen|OJJ29561.1  
Group12101: anig|EHA21376.1 aluc|OJZ82960.1 atub|OJI89192.1 awen|OJJ40824.1  
Group12102: abra|OJJ65759.1 afum|EAL84942.1 ater|EAU31474.1 awen|OJJ30961.1  
Group12103: abra|OJJ65805.1 aluc|OJZ82065.1 anig|EHA22487.1 atub|OJI84623.1  
Group12104: abra|OJJ65866.1 aluc|OJZ90174.1 anig|EHA23673.1 atub|OJI81602.1  
Group12105: abra|OJJ65893.1 akaw|GAA86012.1 aluc|OJZ90239.1 atub|OJI81668.1  
Group12106: abra|OJJ65927.1 aluc|OJZ90204.1 anig|EHA23701.1 atub|OJI81633.1  
Group12107: abra|OJJ65979.1 akaw|GAA90852.1 aluc|OJZ82981.1 atub|OJI89214.1  
Group12108: abra|OJJ66016.1 akaw|GAA92451.1 aluc|OJZ81567.1 atub|OJI88618.1  
Group12109: abra|OJJ66029.1 atub|OJI87437.1 abra|OJJ76717.1 awen|OJJ38001.1  
Group12110: abra|OJJ66033.1 atub|OJI87434.1 abra|OJJ67821.1 ater|EAU31099.1  
Group12111: abra|OJJ66090.1 anid|CBF78152.1 asyd|OJJ59152.1 aver|OJJ01742.1  
Group12112: abra|OJJ66101.1 akaw|GAA92667.1 aluc|OJZ90121.1 atub|OJI84674.1  
Group12113: azon|OJJ44973.1 anid|CBF73584.1 asyd|OJJ56214.1 aver|OJJ05147.1  
Group12114: anid|CBF84391.1 afla|EED48183.1 aory|EIT72918.1 aver|OJJ08168.1  
Group12115: abra|OJJ66181.1 akaw|GAA93311.1 aluc|OJZ81145.1 aluc|OJZ80118.1

Group12116: abra|OJJ66194.1 akaw|GAA89094.1 anig|EHA25696.1 atub|OJI88433.1  
Group12117: abra|OJJ66224.1 acar|OOF92074.1 anig|EHA25665.1 asyd|OJJ60327.1  
Group12118: abra|OJJ66225.1 aluc|OJZ80530.1 anig|EHA25664.1 atub|OJI88400.1  
Group12119: abra|OJJ66267.1 aluc|OJZ85746.1 anig|EHA28104.1 atub|OJI79531.1  
Group12120: awen|OJJ31447.1 akaw|GAA84548.1 aluc|OJZ89280.1 anig|EHA23284.1  
Group12121: abra|OJJ66276.1 afum|EAL85123.1 anig|EHA23657.1 atub|OJI89946.1  
Group12122: abra|OJJ66303.1 afla|EED47881.1 aluc|OJZ80190.1 asyd|OJJ62690.1  
Group12123: abra|OJJ66337.1 aluc|OJZ83132.1 anig|EHA28192.1 atub|OJI87803.1  
Group12124: abra|OJJ66426.1 akaw|GAA90290.1 aluc|OJZ83048.1 atub|OJI87900.1  
Group12125: anid|CBF89343.1 ater|EAU29255.1 akaw|GAA82057.1 aluc|OJZ92123.1  
Group12126: abra|OJJ66780.1 akaw|GAA89715.1 aluc|OJZ80669.1 atub|OJI87523.1  
Group12127: abra|OJJ66816.1 akaw|GAA90454.1 aluc|OJZ85770.1 atub|OJI79555.1  
Group12128: abra|OJJ66904.1 aluc|OJZ85679.1 anig|EHA24862.1 atub|OJI79469.1  
Group12129: abra|OJJ66939.1 afla|EED57211.1 aory|EIT74028.1 atub|OJI79434.1  
Group12130: acla|EAW12298.1 afis|EAW16933.1 agla|OJJ86890.1 afum|EAL86458.1  
Group12131: abra|OJJ67039.1 akaw|GAA93111.1 anig|EHA25080.1 aluc|OJZ80592.1  
Group12132: abra|OJJ67040.1 ater|EAU34935.1 afis|EAW17158.1 agla|OJJ88355.1  
Group12133: abra|OJJ67072.1 akaw|GAA91083.1 aluc|OJZ87900.1 atub|OJI80751.1  
Group12134: azon|OJJ46831.1 afla|EED55084.1 aory|EIT81591.1 ater|EAU35954.1  
Group12135: abra|OJJ67098.1 akaw|GAA91063.1 aluc|OJZ87875.1 atub|OJI80774.1  
Group12136: abra|OJJ67123.1 aory|EIT78609.1 atub|OJI80795.1 awen|OJJ32528.1  
Group12137: acar|OOF99013.1 afla|EED53375.1 aory|EIT74863.1 awen|OJJ39794.1  
Group12138: abra|OJJ67188.1 acar|OOF98375.1 anig|EHA20268.1 aory|EIT80257.1  
Group12139: abra|OJJ67218.1 asyd|OJJ52203.1 ater|EAU37937.1 aver|OJI99452.1  
Group12140: abra|OJJ67219.1 ater|EAU37938.1 aver|OJI99453.1 anid|CBF77069.1  
Group12141: abra|OJJ67243.1 acla|EAW13444.1 ater|EAU33582.1 atub|OJI80906.1  
Group12142: awen|OJJ33399.1 asyd|OJJ58504.1 ater|EAU38213.1 aver|OJJ01105.1  
Group12143: abra|OJJ67416.1 anig|EHA25168.1 atub|OJI80650.1 azon|OJJ43512.1  
Group12144: awen|OJJ29833.1 afla|EED46100.1 aory|EIT76358.1 afla|EED46101.1  
Group12145: awen|OJJ30909.1 acla|EAW07065.1 akaw|GAA87319.1 anig|EHA19568.1  
Group12146: abra|OJJ67590.1 akaw|GAA89109.1 anig|EHA25709.1 atub|OJI88450.1  
Group12147: abra|OJJ67591.1 akaw|GAA89110.1 atub|OJI88451.1 aver|OJJ05785.1  
Group12148: abra|OJJ67592.1 akaw|GAA89111.1 anig|EHA25710.1 atub|OJI88452.1  
Group12149: abra|OJJ67594.1 akaw|GAA89113.1 anig|EHA25712.1 atub|OJI88454.1  
Group12150: abra|OJJ67632.1 akaw|GAA89152.1 aluc|OJZ81684.1 atub|OJI88497.1  
Group12151: abra|OJJ67650.1 aluc|OJZ81667.1 anig|EHA25776.1 atub|OJI88516.1  
Group12152: abra|OJJ67658.1 akaw|GAA85195.1 aluc|OJZ90550.1 atub|OJI81972.1  
Group12153: abra|OJJ67733.1 akaw|GAA92782.1 aluc|OJZ82701.1 atub|OJI88934.1  
Group12154: abra|OJJ67760.1 acar|OOF94973.1 aluc|OJZ81573.1 atub|OJI88608.1

Group12155: abra|OJJ67809.1 acar|OOF94199.1 aluc|OJZ90849.1 atub|OJI80340.1  
Group12156: abra|OJJ67811.1 aluc|OJZ81262.1 ater|EAU29357.1 aver|OJJ07825.1  
Group12157: abra|OJJ67820.1 anig|EHA20934.1 ater|EAU31098.1 aver|OJJ07619.1  
Group12158: abra|OJJ67835.1 afum|EAL87811.1 atub|OJI89150.1 awen|OJJ41604.1  
Group12159: abra|OJJ67855.1 akaw|GAA91861.1 aluc|OJZ82037.1 atub|OJI84592.1  
Group12160: abra|OJJ67886.1 aluc|OJZ81411.1 atub|OJI91617.1 akaw|GAA88139.1  
Group12161: abra|OJJ67934.1 akaw|GAA91262.1 aluc|OJZ82806.1 atub|OJI89037.1  
Group12162: anid|CBF80171.1 afla|EED51161.1 aory|EIT81309.1 aver|OJI99523.1  
Group12163: anid|CBF71799.1 asyd|OJJ64765.1 aver|OJI98865.1 awen|OJJ33438.1  
Group12164: agla|OJJ78806.1 anid|CBF88783.1 asyd|OJJ63994.1 aver|OJI96958.1  
Group12165: abra|OJJ68051.1 akaw|GAA90904.1 aluc|OJZ82922.1 anig|EHA21345.1  
Group12166: abra|OJJ68052.1 akaw|GAA90903.1 aluc|OJZ82923.1 anig|EHA21346.1  
Group12167: abra|OJJ68067.1 afla|EED47513.1 aory|EIT74557.1 aver|OJJ07731.1  
Group12168: abra|OJJ68137.1 akaw|GAA92380.1 aluc|OJZ83239.1 anig|EHA25842.1  
Group12169: abra|OJJ68138.1 akaw|GAA92379.1 aluc|OJZ83238.1 atub|OJI87698.1  
Group12170: azon|OJJ50303.1 agla|OJJ84356.1 afla|EED49719.1 aory|EIT77707.1  
Group12171: abra|OJJ68150.1 agla|OJJ87675.1 asyd|OJJ52382.1 aver|OJJ01941.1  
Group12172: abra|OJJ68153.1 akaw|GAA90123.1 aluc|OJZ83227.1 atub|OJI87709.1  
Group12173: abra|OJJ68165.1 acar|OOF90662.1 anig|EHA18925.1 atub|OJI90155.1  
Group12174: abra|OJJ68222.1 akaw|GAA83222.1 aluc|OJZ83723.1 atub|OJI90098.1  
Group12175: abra|OJJ68241.1 acar|OOG00393.1 atub|OJI82859.1 awen|OJJ29876.1  
Group12176: abra|OJJ68243.1 agla|OJJ79094.1 asyd|OJJ65316.1 aver|OJI96899.1  
Group12177: abra|OJJ68260.1 aluc|OJZ83705.1 anig|EHA18855.1 atub|OJI90077.1  
Group12178: abra|OJJ68269.1 akaw|GAA91933.1 aluc|OJZ82689.1 atub|OJI88921.1  
Group12179: abra|OJJ68276.1 akaw|GAA83194.1 aluc|OJZ83694.1 atub|OJI90066.1  
Group12180: abra|OJJ68279.1 akaw|GAA83193.1 aluc|OJZ83692.1 atub|OJI90064.1  
Group12181: abra|OJJ68346.1 akaw|GAA92113.1 aluc|OJZ83612.1 atub|OJI89985.1  
Group12182: abra|OJJ68404.1 aory|EIT73532.1 awen|OJJ38103.1 azon|OJJ42686.1  
Group12183: abra|OJJ68405.1 asyd|OJJ65107.1 aver|OJI99234.1 awen|OJJ38104.1  
Group12184: abra|OJJ68408.1 ater|EAU31646.1 aver|OJI96707.1 awen|OJJ39972.1  
Group12185: abra|OJJ68551.1 akaw|GAA91302.1 aluc|OJZ82768.1 atub|OJI88999.1  
Group12186: agla|OJJ83094.1 akaw|GAA87849.1 aluc|OJZ85489.1 aver|OJJ05536.1  
Group12187: azon|OJJ50789.1 anid|CBF84430.1 asyd|OJJ53638.1 aver|OJJ01168.1  
Group12188: abra|OJJ68628.1 aluc|OJZ81927.1 anig|EHA22322.1 atub|OJI84479.1  
Group12189: anig|EHA28294.1 akaw|GAA88798.1 aluc|OJZ82481.1 atub|OJI87957.1  
Group12190: aver|OJJ05253.1 agla|OJJ80152.1 asyd|OJJ56241.1 asyd|OJJ54307.1  
Group12191: abra|OJJ68718.1 anig|EHA22406.1 aluc|OJZ81811.1 atub|OJI84383.1  
Group12192: abra|OJJ68882.1 akaw|GAA90374.1 aluc|OJZ85858.1 atub|OJI79644.1  
Group12193: abra|OJJ68896.1 anig|EHA24709.1 asyd|OJJ62624.1 ater|EAU33937.1

Group12194: abra|OJJ68940.1 aluc|OJZ85925.1 anig|EHA24671.1 atub|OJI79715.1  
Group12195: abra|OJJ69046.1 akaw|GAA90575.1 aluc|OJZ86032.1 atub|OJI79820.1  
Group12196: abra|OJJ69069.1 akaw|GAA90600.1 aluc|OJZ86058.1 atub|OJI79855.1  
Group12197: abra|OJJ69295.1 aluc|OJZ82124.1 anig|EHA28608.1 atub|OJI88314.1  
Group12198: afis|EAW23683.1 afum|EBA27300.1 ater|EAU32096.1 aver|OJI97352.1  
Group12199: afum|EAL85009.1 acar|OOF91888.1 ater|EAU33735.1 agla|OJJ83850.1  
Group12200: abra|OJJ69527.1 aluc|OJZ82367.1 anig|EHA28398.1 atub|OJI88075.1  
Group12201: abra|OJJ69546.1 afis|EAW17239.1 agla|OJJ84360.1 anig|EHA19681.1  
Group12202: abra|OJJ69562.1 aluc|OJZ82388.1 anig|EHA28375.1 atub|OJI88053.1  
Group12203: abra|OJJ69598.1 aver|OJJ08325.1 awen|OJJ38316.1 asyd|OJJ53422.1  
Group12204: abra|OJJ69604.1 asyd|OJJ52865.1 aver|OJJ08846.1 azon|OJJ46011.1  
Group12205: ater|EAU36838.1 acla|EAW15300.1 afis|EAW25737.1 anid|CBF69359.1  
Group12206: abra|OJJ69670.1 akaw|GAA88794.1 aluc|OJZ82477.1 anig|EHA28298.1  
Group12207: abra|OJJ69671.1 akaw|GAA88795.1 aluc|OJZ82478.1 anig|EHA28297.1  
Group12208: abra|OJJ69710.1 akaw|GAA90160.1 aluc|OJZ83187.1 atub|OJI87752.1  
Group12209: anid|CBF80602.1 acar|OOF95026.1 aver|OJJ07474.1 asyd|OJJ54700.1  
Group12210: aver|OJJ04448.1 anid|CBF80288.1 asyd|OJJ61491.1 aver|OJJ00832.1  
Group12211: abra|OJJ69767.1 akaw|GAA87886.1 aluc|OJZ85531.1 atub|OJI80037.1  
Group12212: asyd|OJJ56551.1 azon|OJJ51771.1 agla|OJJ85390.1 aver|OJJ06171.1  
Group12213: awen|OJJ41949.1 asyd|OJJ61040.1 ater|EAU38818.1 azon|OJJ46802.1  
Group12214: abra|OJJ69847.1 akaw|GAA87811.1 aluc|OJZ85446.1 atub|OJI80121.1  
Group12215: abra|OJJ69853.1 akaw|GAA87805.1 aluc|OJZ85440.1 atub|OJI80128.1  
Group12216: abra|OJJ69883.1 atub|OJI80167.1 akaw|GAA87775.1 aluc|OJZ85410.1  
Group12217: awen|OJJ33592.1 afla|EED55228.1 aory|EIT83513.1 azon|OJJ43670.1  
Group12218: afla|EED52111.1 anid|CBF80516.1 asyd|OJJ65294.1 aver|OJJ01916.1  
Group12219: afum|EAL84424.1 afis|EAW20649.1 afla|EED50438.1 azon|OJJ50344.1  
Group12220: agla|OJJ78862.1 aver|OJI99695.1 awen|OJJ34612.1 asyd|OJJ60357.1  
Group12221: abra|OJJ70100.1 agla|OJJ88106.1 awen|OJJ31426.1 awen|OJJ37816.1  
Group12222: abra|OJJ70101.1 afis|EAW19516.1 asyd|OJJ52930.1 awen|OJJ37567.1  
Group12223: abra|OJJ70127.1 akaw|GAA86643.1 aluc|OJZ85200.1 atub|OJI80401.1  
Group12224: abra|OJJ70133.1 anig|EHA25398.1 asyd|OJJ60983.1 atub|OJI80410.1  
Group12225: abra|OJJ70134.1 anig|EHA25397.1 asyd|OJJ60981.1 atub|OJI80411.1  
Group12226: abra|OJJ70184.1 anid|CBF89258.1 anig|EHA25370.1 ater|EAU30711.1  
Group12227: acar|OOF92595.1 afla|EED52024.1 afum|EAL87780.1 aory|EIT81433.1  
Group12228: abra|OJJ70207.1 atub|OJI88819.1 acla|EAW08957.1 agla|OJJ80659.1  
Group12229: abra|OJJ70262.1 agla|OJJ83806.1 akaw|GAA86535.1 atub|OJI80516.1  
Group12230: abra|OJJ70318.1 akaw|GAA92575.1 aluc|OJZ82586.1 anig|EHA27488.1  
Group12231: abra|OJJ70358.1 aluc|OJZ82620.1 anig|EHA27457.1 atub|OJI88855.1  
Group12232: ater|EAU36616.1 afla|EED47543.1 agla|OJJ85092.1 aory|EIT74593.1



Group12233: abra|OJJ70400.1 acar|OOF91877.1 aluc|OJZ82659.1 atub|OJI88891.1  
Group12234: abra|OJJ70416.1 anig|EHA21049.1 asyd|OJJ61785.1 aver|OJI95885.1  
Group12235: abra|OJJ70826.1 acar|OOG00734.1 acla|EAW09024.1 anig|EHA17997.1  
Group12236: abra|OJJ70871.1 aluc|OJZ87649.1 anig|EHA20843.1 atub|OJI80994.1  
Group12237: abra|OJJ70884.1 afla|EED52123.1 agla|OJJ82944.1 aory|EIT74366.1  
Group12238: agla|OJJ89557.1 aluc|OJZ85807.1 atub|OJI79593.1 akaw|GAA90422.1  
Group12239: abra|OJJ71033.1 akaw|GAA82921.1 aluc|OJZ87496.1 atub|OJI81152.1  
Group12240: agla|OJJ80140.1 acla|EAW08981.1 afis|EAW15428.1 afum|EAL84215.1  
Group12241: abra|OJJ71220.1 acar|OOF94577.1 acla|EAW15345.1 anig|EHA20564.1  
Group12242: abra|OJJ71408.1 acar|OOF97763.1 aluc|OJZ87134.1 atub|OJI81508.1  
Group12243: abra|OJJ71440.1 afla|EED45386.1 agla|OJJ82298.1 awen|OJJ30854.1  
Group12244: afla|EED51190.1 agla|OJJ85275.1 asyd|OJJ61033.1 aver|OJJ00351.1  
Group12245: abra|OJJ71644.1 acar|OOF96360.1 aluc|OJZ86387.1 atub|OJI84146.1  
Group12246: abra|OJJ71706.1 ater|EAU29929.1 akaw|GAA91388.1 awen|OJJ33559.1  
Group12247: abra|OJJ71729.1 akaw|GAA85164.1 aluc|OJZ86472.1 atub|OJI84057.1  
Group12248: aory|EIT75143.1 acar|OOF95276.1 afla|EED53387.1 awen|OJJ32232.1  
Group12249: acla|EAW10853.1 acar|OOF95927.1 asyd|OJJ65215.1 aver|OJI99365.1  
Group12250: abra|OJJ71778.1 aluc|OJZ86509.1 atub|OJI84018.1 awen|OJJ33357.1  
Group12251: abra|OJJ71838.1 aluc|OJZ86570.1 anig|EHA22085.1 atub|OJI83952.1  
Group12252: afis|EAW21523.1 acla|EAW09616.1 afum|EAL92544.1 anid|CBF76412.1  
Group12253: abra|OJJ72031.1 acar|OOF96681.1 aluc|OJZ86769.1 atub|OJI83759.1  
Group12254: afum|EAL85413.1 afis|EAW20278.1 agla|OJJ85651.1 awen|OJJ40959.1  
Group12255: abra|OJJ72220.1 anig|EHA21678.1 aver|OJJ02620.1 asyd|OJJ59663.1  
Group12256: aory|EIT79295.1 acar|OOF93160.1 afla|EED47161.1 ater|EAU38820.1  
Group12257: agla|OJJ86669.1 akaw|GAA90291.1 aluc|OJZ83047.1 atub|OJI87901.1  
Group12258: abra|OJJ72266.1 akaw|GAA86020.1 aluc|OJZ90248.1 acla|EAW10035.1  
Group12259: azon|OJJ42730.1 afis|EAW21275.1 afum|EAL92290.2 ater|EAU31601.1  
Group12260: abra|OJJ72455.1 akaw|GAA86191.1 aluc|OJZ90440.1 atub|OJI81870.1  
Group12261: anig|EHA22067.1 akaw|GAA85058.1 aluc|OJZ86593.1 atub|OJI83930.1  
Group12262: abra|OJJ72677.1 afis|EAW20000.1 afum|EAL84919.1 anig|EHA24090.1  
Group12263: abra|OJJ72710.1 akaw|GAA85313.1 aluc|OJZ90674.1 atub|OJI82105.1  
Group12264: abra|OJJ72730.1 akaw|GAA85336.1 aluc|OJZ90699.1 atub|OJI82125.1  
Group12265: abra|OJJ72778.1 aluc|OJZ83276.1 anig|EHA24164.1 atub|OJI82180.1  
Group12266: abra|OJJ72929.1 akaw|GAA85511.1 aluc|OJZ83439.1 atub|OJI82330.1  
Group12267: abra|OJJ72963.1 acar|OOF96145.1 aluc|OJZ83472.1 anid|CBF81007.1  
Group12268: abra|OJJ72996.1 akaw|GAA85570.1 aluc|OJZ83504.1 atub|OJI82398.1  
Group12269: abra|OJJ73094.1 aluc|OJZ81331.1 anig|EHA18635.1 atub|OJI91534.1  
Group12270: abra|OJJ73095.1 aluc|OJZ81330.1 anig|EHA18634.1 atub|OJI91533.1  
Group12271: abra|OJJ73111.1 agla|OJJ85316.1 aluc|OJZ90610.1 atub|OJI82036.1

Group12272: abra|OJJ73163.1 agla|OJJ89559.1 ater|EAU29644.1 awen|OJJ38359.1  
Group12273: abra|OJJ73293.1 akaw|GAA92710.1 aluc|OJZ88754.1 atub|OJI91324.1  
Group12274: abra|OJJ73295.1 acar|OOF98236.1 agla|OJJ88327.1 awen|OJJ32708.1  
Group12275: abra|OJJ73306.1 afla|EED53246.1 anig|EHA21032.1 aory|EIT74893.1  
Group12276: acla|EAW09266.1 afum|EAL92896.1 awen|OJJ34171.1 afis|EAW21882.1  
Group12277: abra|OJJ73347.1 akaw|GAA83135.1 aluc|OJZ88692.1 atub|OJI91272.1  
Group12278: abra|OJJ73410.1 akaw|GAA83081.1 aluc|OJZ88628.1 atub|OJI91212.1  
Group12279: abra|OJJ73462.1 acar|OOG00663.1 afis|EAW16338.1 akaw|GAA83036.1  
Group12280: abra|OJJ73473.1 akaw|GAA83028.1 aluc|OJZ88574.1 atub|OJI91160.1  
Group12281: aory|EIT74414.1 afla|EED52374.1 agla|OJJ81201.1 awen|OJJ32686.1  
Group12282: azon|OJJ45023.1 afla|EED56165.1 awen|OJJ36243.1 agla|OJJ85808.1  
Group12283: abra|OJJ73669.1 akaw|GAA88488.1 anig|EHA18111.1 atub|OJI90978.1  
Group12284: abra|OJJ73696.1 anid|CBF87426.1 asyd|OJJ52905.1 aver|OJJ08875.1  
Group12285: asyd|OJJ53741.1 aver|OJJ07854.1 awen|OJJ37845.1 acar|OOF92059.1  
Group12286: azon|OJJ42669.1 aory|EIT80250.1 asyd|OJJ52363.1 aver|OJJ01983.1  
Group12287: afis|EAW24660.1 afum|EAL89310.1 asyd|OJJ59254.1 aver|OJJ01864.1  
Group12288: abra|OJJ73878.1 akaw|GAA89490.1 aluc|OJZ88171.1 atub|OJI90769.1  
Group12289: abra|OJJ73911.1 anig|EHA17900.1 aver|OJI96669.1 awen|OJJ32659.1  
Group12290: abra|OJJ73913.1 akaw|GAA89519.1 aluc|OJZ88135.1 atub|OJI90738.1  
Group12291: abra|OJJ73963.1 afla|EED50152.1 aluc|OJZ88081.1 atub|OJI90690.1  
Group12292: agla|OJJ86140.1 anid|CBF73932.1 asyd|OJJ53675.1 aver|OJJ07791.1  
Group12293: abra|OJJ74108.1 aluc|OJZ87926.1 atub|OJI90538.1 awen|OJJ38575.1  
Group12294: abra|OJJ74122.1 aluc|OJZ84286.1 anig|EHA19565.1 atub|OJI89785.1  
Group12295: ater|EAU30162.1 awen|OJJ37805.1 afla|EED49587.1 aory|EIT82584.1  
Group12296: agla|OJJ82688.1 awen|OJJ32588.1 afis|EAW16732.1 ater|EAU33546.1  
Group12297: akaw|GAA86784.1 anig|EHA27097.1 atub|OJI84910.1 aluc|OJZ89897.1  
Group12298: abra|OJJ74371.1 akaw|GAA86657.1 aluc|OJZ89753.1 atub|OJI85049.1  
Group12299: abra|OJJ74403.1 afla|EED57260.1 aory|EIT73978.1 aver|OJJ07367.1  
Group12300: abra|OJJ74405.1 akaw|GAA87299.1 aluc|OJZ89719.1 atub|OJI85081.1  
Group12301: afum|EAL86359.1 acar|OOF90166.1 afis|EAW16789.1 azon|OJJ50670.1  
Group12302: afis|EAW22189.1 acla|EAW07175.1 awen|OJJ34769.1 azon|OJJ45777.1  
Group12303: abra|OJJ74632.1 akaw|GAA81977.1 anig|EHA26745.1 atub|OJI86642.1  
Group12304: azon|OJJ49805.1 akaw|GAA92413.1 aluc|OJZ83271.1 asyd|OJJ53099.1  
Group12305: abra|OJJ74703.1 akaw|GAA81916.1 aluc|OJZ92281.1 atub|OJI86713.1  
Group12306: abra|OJJ74719.1 acar|OOF95730.1 akaw|GAA81897.1 aluc|OJZ92303.1  
Group12307: abra|OJJ74733.1 akaw|GAA81886.1 aluc|OJZ92315.1 atub|OJI86745.1  
Group12308: abra|OJJ74799.1 asyd|OJJ60237.1 agla|OJJ86754.1 aver|OJJ04028.1  
Group12309: abra|OJJ75232.1 acar|OOF94560.1 aluc|OJZ92791.1 atub|OJI87235.1  
Group12310: abra|OJJ75253.1 akaw|GAA91792.1 aluc|OJZ92812.1 atub|OJI87269.1

Group12311: abra|OJJ75332.1 acar|OOF94497.1 aluc|OJZ92896.1 atub|OJI87354.1  
Group12312: asyd|OJJ56170.1 afis|EAW16915.1 anid|CBF81997.1 aver|OJJ05103.1  
Group12313: asyd|OJJ62927.1 agla|OJJ88008.1 aluc|OJZ89301.1 atub|OJI85497.1  
Group12314: abra|OJJ75392.1 afla|EED46229.1 acla|EAW06360.1 aory|EIT76459.1  
Group12315: abra|OJJ75467.1 anig|EHA23589.1 atub|OJI85869.1 aluc|OJZ88923.1  
Group12316: abra|OJJ75573.1 akaw|GAA84324.1 aluc|OJZ89021.1 atub|OJI85768.1  
Group12317: abra|OJJ75594.1 akaw|GAA84345.1 aluc|OJZ89046.1 atub|OJI85741.1  
Group12318: abra|OJJ75598.1 akaw|GAA84349.1 aluc|OJZ89049.1 atub|OJI85738.1  
Group12319: acar|OOF95347.1 afla|EED44864.1 aory|EIT82715.1 anig|EHA22132.1  
Group12320: abra|OJJ75619.1 aluc|OJZ89072.1 atub|OJI85716.1 akaw|GAA84368.1  
Group12321: abra|OJJ75733.1 akaw|GAA84466.1 aluc|OJZ89184.1 atub|OJI85605.1  
Group12322: abra|OJJ75761.1 aluc|OJZ89212.1 anig|EHA23346.1 atub|OJI85580.1  
Group12323: ater|EAU32203.1 asyd|OJJ63062.1 atub|OJI87199.1 aver|OJI97900.1  
Group12324: abra|OJJ75823.1 akaw|GAA84536.1 aluc|OJZ89269.1 atub|OJI85530.1  
Group12325: abra|OJJ75838.1 akaw|GAA84551.1 aluc|OJZ89283.1 atub|OJI85516.1  
Group12326: abra|OJJ75849.1 acar|OOF99376.1 anig|EHA23276.1 azon|OJJ42506.1  
Group12327: abra|OJJ75852.1 akaw|GAA84557.1 aluc|OJZ89289.1 atub|OJI85510.1  
Group12328: abra|OJJ75918.1 aluc|OJZ89367.1 anig|EHA23216.1 atub|OJI85431.1  
Group12329: abra|OJJ75937.1 akaw|GAA84638.1 aluc|OJZ89384.1 atub|OJI85414.1  
Group12330: abra|OJJ75948.1 akaw|GAA84651.1 aluc|OJZ89397.1 atub|OJI85400.1  
Group12331: abra|OJJ75955.1 aluc|OJZ89404.1 anig|EHA23183.1 atub|OJI85393.1  
Group12332: abra|OJJ75969.1 akaw|GAA88987.1 aluc|OJZ89416.1 atub|OJI85378.1  
Group12333: anig|EHA21692.1 akaw|GAA84731.1 aluc|OJZ86955.1 atub|OJI83568.1  
Group12334: abra|OJJ75994.1 aluc|OJZ89439.1 anig|EHA23146.1 atub|OJI85354.1  
Group12335: abra|OJJ76032.1 aluc|OJZ89484.1 anig|EHA23110.1 atub|OJI85317.1  
Group12336: anid|CBF74612.1 aver|OJJ08260.1 asyd|OJJ59625.1 aver|OJJ03071.1  
Group12337: aory|EIT74283.1 afla|EED52635.1 asyd|OJJ58195.1 awen|OJJ32822.1  
Group12338: abra|OJJ76163.1 aluc|OJZ92066.1 anig|EHA22993.1 atub|OJI86497.1  
Group12339: abra|OJJ76209.1 akaw|GAA82149.1 aluc|OJZ92019.1 atub|OJI86454.1  
Group12340: abra|OJJ76223.1 aluc|OJZ92008.1 anig|EHA22947.1 atub|OJI86443.1  
Group12341: abra|OJJ76241.1 acar|OOF99486.1 aluc|OJZ91990.1 atub|OJI86425.1  
Group12342: abra|OJJ76304.1 akaw|GAA82236.1 aluc|OJZ91911.1 atub|OJI86361.1  
Group12343: abra|OJJ76306.1 akaw|GAA82237.1 aluc|OJZ91909.1 atub|OJI86359.1  
Group12344: abra|OJJ76388.1 aluc|OJZ91825.1 atub|OJI86280.1 acar|OOF99629.1  
Group12345: abra|OJJ76400.1 akaw|GAA82319.1 aluc|OJZ91813.1 atub|OJI86268.1  
Group12346: aory|EIT82085.1 akaw|GAA86610.1 aluc|OJZ85161.1 atub|OJI80437.1  
Group12347: abra|OJJ76586.1 akaw|GAA82490.1 aluc|OJZ91620.1 atub|OJI86073.1  
Group12348: abra|OJJ76589.1 akaw|GAA82493.1 aluc|OJZ91617.1 atub|OJI86070.1  
Group12349: abra|OJJ76643.1 akaw|GAA92986.1 aluc|OJZ91564.1 asyd|OJJ56045.1

Group12350: abra|OJJ76644.1 akaw|GAA92987.1 aluc|OJZ91563.1 atub|OJI86014.1  
Group12351: abra|OJJ76726.1 anig|EHA28101.1 asyd|OJJ55397.1 awen|OJJ30161.1  
Group12352: abra|OJJ76814.1 afla|EED44775.1 akaw|GAA87207.1 atub|OJI89860.1  
Group12353: abra|OJJ76873.1 akaw|GAA85847.1 aluc|OJZ91252.1 anig|EHA28100.1  
Group12354: abra|OJJ76885.1 afla|EED52848.1 aory|EIT78641.1 asyd|OJJ56895.1  
Group12355: abra|OJJ77009.1 akaw|GAA87039.1 aluc|OJZ84408.1 atub|OJI89663.1  
Group12356: abra|OJJ77025.1 akaw|GAA87026.1 aluc|OJZ84427.1 atub|OJI89647.1  
Group12357: abra|OJJ77045.1 akaw|GAA87008.1 aluc|OJZ84448.1 atub|OJI89627.1  
Group12358: abra|OJJ77060.1 akaw|GAA91853.1 aluc|OJZ84467.1 atub|OJI89609.1  
Group12359: abra|OJJ77061.1 akaw|GAA86992.1 aluc|OJZ84468.1 anig|EHA27779.1  
Group12360: abra|OJJ77097.1 akaw|GAA86959.1 aluc|OJZ84505.1 atub|OJI89575.1  
Group12361: acla|EAW09034.1 afis|EAW22734.1 afum|EAL90461.1 agla|OJJ78520.1  
Group12362: abra|OJJ77292.1 anig|EHA27978.1 atub|OJI89379.1 aluc|OJZ84703.1  
Group12363: abra|OJJ77393.1 acar|OOF93261.1 aluc|OJZ84801.1 azon|OJJ50266.1  
Group12364: abra|OJJ77413.1 asyd|OJJ62931.1 aver|OJI98059.1 awen|OJJ41770.1  
Group12365: abra|OJJ77416.1 akaw|GAA91345.1 aluc|OJZ84828.1 atub|OJI89259.1  
Group12366: abra|OJJ77427.1 anid|CBF84180.1 asyd|OJJ57157.1 aver|OJJ03156.1  
Group12367: aory|EIT81327.1 afla|EED51158.1 anid|CBF80154.1 aver|OJI99514.1  
Group12368: awen|OJJ29986.1 agla|OJJ86405.1 asyd|OJJ54664.1 aver|OJJ02025.1  
Group12369: azon|OJJ43921.1 afis|EAW25723.1 afum|EAL84396.1 asyd|OJJ57275.1  
Group12370: abra|OJJ77482.1 aluc|OJZ81055.1 anig|EHA19312.1 atub|OJI82529.1  
Group12371: abra|OJJ77593.1 aluc|OJZ80943.1 anig|EHA19410.1 akaw|GAA84035.1  
Group12372: abra|OJJ77611.1 acar|OOF99117.1 anig|EHA19424.1 awen|OJJ30422.1  
Group12373: ater|EAU37176.1 afla|EED47697.1 aory|EIT80212.1 awen|OJJ31251.1  
Group12374: afis|EAW22093.1 afla|EED50926.1 aory|EIT78978.1 ater|EAU31790.1  
Group12375: abra|OJJ77711.1 afla|EED45384.1 aory|EIT82436.1 atub|OJI82763.1  
Group12376: abra|OJJ77726.1 aluc|OJZ88662.1 aory|EIT83094.1 aver|OJJ05763.1  
Group12377: abra|OJJ77737.1 akaw|GAA83892.1 aluc|OJZ90803.1 atub|OJI82792.1  
Group12378: abra|OJJ77742.1 anig|EHA18408.1 abra|OJJ78141.1 aver|OJJ06437.1  
Group12379: afla|EED51780.1 agla|OJJ87025.1 asyd|OJJ54713.1 aver|OJJ07453.1  
Group12380: abra|OJJ77813.1 afis|EAW16857.1 afum|EAL86400.1 aluc|OJZ88123.1  
Group12381: abra|OJJ77885.1 akaw|GAA82229.1 aluc|OJZ91920.1 ater|EAU37964.1  
Group12382: abra|OJJ77930.1 akaw|GAA83733.1 aluc|OJZ90998.1 atub|OJI82988.1  
Group12383: abra|OJJ77933.1 akaw|GAA83730.1 aluc|OJZ91001.1 atub|OJI82991.1  
Group12384: abra|OJJ77943.1 akaw|GAA83714.1 atub|OJI83011.1 aluc|OJZ91019.1  
Group12385: acar|OOF96773.1 anid|CBF74011.1 asyd|OJJ53753.1 aver|OJJ07865.1  
Group12386: abra|OJJ78037.1 aluc|OJZ87777.1 ater|EAU31866.1 agla|OJJ81396.1  
Group12387: abra|OJJ78043.1 akaw|GAA89418.1 aluc|OJZ88255.1 atub|OJI90853.1  
Group12388: abra|OJJ78047.1 anig|EHA19819.1 acla|EAW15271.1 afis|EAW20238.1

Group12389: abra|OJJ78048.1 acar|OOF95284.1 anid|CBF86030.1 anig|EHA19820.1  
Group12390: anig|EHA27897.1 akaw|GAA90740.1 aluc|OJZ84608.1 atub|OJI89472.1  
Group12391: abra|OJJ78092.1 akaw|GAA85906.1 aluc|OJZ91161.1 atub|OJI83176.1  
Group12392: abra|OJJ78099.1 aluc|OJZ81973.1 anig|EHA26142.1 atub|OJI79695.1  
Group12393: acar|OOF91491.1 akaw|GAA90345.1 aluc|OJZ85887.1 atub|OJI79674.1  
Group12394: ater|EAU33250.1 afla|EED45087.1 agla|OJJ80643.1 aory|EIT73753.1  
Group12395: abra|OJJ78143.1 anid|CBF73530.1 asyd|OJJ56724.1 aver|OJJ06001.1  
Group12396: abra|OJJ78167.1 agla|OJJ84481.1 ater|EAU30097.1 awen|OJJ31321.1  
Group12397: agla|OJJ78789.1 awen|OJJ36114.1 asyd|OJJ64786.1 aver|OJI98898.1  
Group12398: abra|OJJ78204.1 akaw|GAA89022.1 aluc|OJZ80582.1 atub|OJI88348.1  
Group12399: awen|OJJ36508.1 afla|EED53594.1 aory|EIT74996.1 atub|OJI83687.1  
Group12400: abra|OJJ78335.1 atub|OJI83401.1 abra|OJJ78336.1 aluc|OJZ91408.1  
Group12401: acar|OOF89790.1 akaw|BAL04883.1 aory|AFM82514.1 azon|OJJ41970.1  
Group12402: acar|OOF90014.1 afla|EED57084.1 agla|OJJ80260.1 aory|EIT82295.1  
Group12403: acar|OOF90099.1 anid|CBF84624.1 asyd|OJJ54553.1 aver|OJI96747.1  
Group12404: acar|OOF90172.1 afla|EED53602.1 aory|EIT75188.1 aver|OJI98824.1  
Group12405: acar|OOF90231.1 afla|EED53290.1 aory|EIT75111.1 awen|OJJ31455.1  
Group12406: acar|OOF90239.1 anid|CBF80663.1 asyd|OJJ54607.1 aver|OJJ07549.1  
Group12407: acar|OOF90390.1 awen|OJJ35044.1 azon|OJJ45353.1 agla|OJJ88295.1  
Group12408: acar|OOF90510.1 afla|EED47874.1 agla|OJJ85526.1 azon|OJJ48718.1  
Group12409: awen|OJJ34540.1 atub|OJI86046.1 akaw|GAA92837.1 anig|EHA22624.1  
Group12410: acar|OOF90570.1 acla|EAW13530.1 afla|EED45167.1 aory|EIT73590.1  
Group12411: aluc|OJZ82067.1 awen|OJJ32571.1 akaw|GAA91462.1 anig|EHA19360.1  
Group12412: acar|OOF90626.1 akaw|GAA90434.1 aluc|OJZ85793.1 atub|OJI79579.1  
Group12413: acar|OOF90642.1 akaw|GAA84624.1 aluc|OJZ89370.1 awen|OJJ32892.1  
Group12414: aver|OJJ07190.1 afis|EAW19849.1 afum|EAL85044.1 agla|OJJ81562.1  
Group12415: acar|OOF90911.1 agla|OJJ87940.1 aory|EIT79034.1 afla|EED50872.1  
Group12416: acar|OOF90913.1 acla|EAW11057.1 asyd|OJJ56444.1 ater|EAU37670.1  
Group12417: aory|EIT73656.1 afla|EED45080.1 asyd|OJJ54725.1 aver|OJJ07442.1  
Group12418: agla|OJJ81919.1 asyd|OJJ52649.1 aver|OJJ04678.1 awen|OJJ38464.1  
Group12419: acar|OOF91242.1 aver|OJJ05125.1 awen|OJJ32857.1 asyd|OJJ56198.1  
Group12420: acar|OOF91356.1 acla|EAW12402.1 afis|EAW16850.1 afum|EAL86396.1  
Group12421: acar|OOF91378.1 anid|CBF87269.1 ater|EAU29527.1 awen|OJJ38078.1  
Group12422: aver|OJJ00844.1 anid|CBF83013.1 asyd|OJJ61507.1 ater|EAU30759.1  
Group12423: aver|OJJ08465.1 azon|OJJ47777.1 afla|EED47903.1 aory|EIT77245.1  
Group12424: acar|OOF91729.1 anid|CBF78054.1 aver|OJJ04810.1 azon|OJJ45180.1  
Group12425: acar|OOF91794.1 acla|EAW15266.1 afis|EAW17057.1 afum|EAL86553.1  
Group12426: afis|EAW17028.1 aluc|OJZ79598.1 asyd|OJJ58569.1 aver|OJI98840.1  
Group12427: acar|OOF91817.1 agla|OJJ79125.1 asyd|OJJ55390.1 aver|OJJ08267.1

Group12428: acar|OOF91842.1 afla|EED45903.1 aory|EIT75562.1 awen|OJJ31983.1  
Group12429: acar|OOF91867.1 afis|EAW19200.1 afum|EAL93931.1 asyd|OJJ58347.1  
Group12430: acar|OOF91911.1 aluc|OJZ85606.1 azon|OJJ42118.1 aluc|OJZ90141.1  
Group12431: acar|OOF91926.1 afis|EAW22249.1 afum|EAL90925.1 atub|OJI82858.1  
Group12432: anid|CBF78495.1 asyd|OJJ61882.1 ater|EAU32641.1 aver|OJI95980.1  
Group12433: acla|EAW11046.1 afis|EAW23433.1 afla|EED49629.1 aory|EIT80998.1  
Group12434: acar|OOF92452.1 afla|EED53907.1 aory|EIT78482.1 ater|EAU32763.1  
Group12435: acar|OOF92538.1 anid|CBF71805.1 asyd|OJJ65350.1 aver|OJI99498.1  
Group12436: acla|EAW14292.1 afis|EAW18991.1 afum|EAL93727.1 awen|OJJ31613.1  
Group12437: acar|OOF92542.1 asyd|OJJ65177.1 aver|OJI99330.1 awen|OJJ39690.1  
Group12438: acar|OOF92793.1 asyd|OJJ57284.1 aver|OJJ05872.1 azon|OJJ50348.1  
Group12439: acar|OOF92869.1 akaw|GAA86457.1 aluc|OJZ84999.1 atub|OJI80601.1  
Group12440: acar|OOF93070.1 anig|EHA19733.1 atub|OJI83028.1 awen|OJJ33370.1  
Group12441: acar|OOF93174.1 afla|EED47511.1 aory|EIT74594.1 ater|EAU31933.1  
Group12442: acar|OOF93176.1 acla|EAW06584.1 asyd|OJJ56443.1 aver|OJJ06278.1  
Group12443: acar|OOF93298.1 anid|CBF80338.1 asyd|OJJ54838.1 aver|OJJ07323.1  
Group12444: afla|EED56666.1 aory|EIT79625.1 awen|OJJ34581.1 azon|OJJ42192.1  
Group12445: acar|OOF93401.1 akaw|GAA87774.1 aluc|OJZ85409.1 anig|EHA25588.1  
Group12446: acar|OOF93615.1 akaw|GAA92165.1 aluc|OJZ85573.1 atub|OJI79368.1  
Group12447: anig|EHA25152.1 akaw|GAA86399.1 aluc|OJZ84934.1 atub|OJI80665.1  
Group12448: asyd|OJJ59768.1 ater|EAU34798.1 aver|OJJ02517.1 awen|OJJ36898.1  
Group12449: agla|OJJ88964.1 ater|EAU36815.1 afla|EED45989.1 aory|EIT75588.1  
Group12450: acar|OOF94005.1 acla|EAW08898.1 anid|CBF73449.1 aver|OJJ08118.1  
Group12451: agla|OJJ79280.1 asyd|OJJ64891.1 ater|EAU30236.1 aver|OJI99008.1  
Group12452: acar|OOF94191.1 afla|EED48648.1 aory|EIT73046.1 ater|EAU35422.1  
Group12453: acar|OOF94508.1 acla|EAW15351.1 afis|EAW20362.1 afum|EAL85478.2  
Group12454: acar|OOF94532.1 afis|EAW17963.1 afum|EAL91773.1 azon|OJJ42388.1  
Group12455: acar|OOF94921.1 agla|OJJ79305.1 aver|OJJ03053.1 awen|OJJ36160.1  
Group12456: acar|OOF95007.1 acla|EAW12212.1 afis|EAW25552.1 afum|EAL84275.1  
Group12457: afum|EAL85116.1 anid|CBF82795.1 asyd|OJJ55217.1 aver|OJJ06999.1  
Group12458: acar|OOF95425.1 acla|EAW07351.1 ater|EAU39514.1 azon|OJJ45605.1  
Group12459: acar|OOF95541.1 afis|EAW20728.1 acla|EAW15263.1 azon|OJJ45015.1  
Group12460: acla|EAW12174.1 akaw|GAA84861.1 aluc|OJZ86810.1 atub|OJI83707.1  
Group12461: acar|OOF95834.1 akaw|GAA86064.1 aluc|OJZ90298.1 atub|OJI81726.1  
Group12462: acar|OOF95869.1 afla|EED47529.1 agla|OJJ79290.1 awen|OJJ32584.1  
Group12463: awen|OJJ39220.1 agla|OJJ86772.1 afla|EED57423.1 aory|EIT80052.1  
Group12464: acar|OOF95942.1 azon|OJJ42256.1 asyd|OJJ61387.1 aver|OJJ00715.1  
Group12465: acar|OOF96412.1 agla|OJJ82203.1 aory|EIT81293.1 afla|EED51118.1  
Group12466: acar|OOF96447.1 asyd|OJJ64726.1 ater|EAU34580.1 aver|OJI98827.1

Group12467: acar|OOF96590.1 anid|CBF74614.1 anig|EHA27723.1 awen|OJJ29532.1  
Group12468: acar|OOF96638.1 afla|EED57109.1 aory|EIT74163.1 awen|OJJ29687.1  
Group12469: acar|OOF96776.1 anid|CBF73993.1 asyd|OJJ53752.1 aver|OJJ07864.1  
Group12470: acar|OOF96876.1 aory|EIT75481.1 awen|OJJ38802.1 azon|OJJ43573.1  
Group12471: ater|EAU32315.1 acla|EAW11534.1 afis|EAW23916.1 afum|EAL87343.1  
Group12472: acar|OOF97584.1 aory|EIT73196.1 azon|OJJ50755.1 afla|EED48473.1  
Group12473: ater|EAU30463.1 afla|EED50987.1 anid|CBF73678.1 aory|EIT77020.1  
Group12474: acar|OOF97613.1 agla|OJJ88994.1 atub|OJI80140.1 awen|OJJ37277.1  
Group12475: acar|OOF97614.1 atub|OJI80141.1 aver|OJJ05134.1 awen|OJJ35442.1  
Group12476: acar|OOF97625.1 afum|EAL86146.1 agla|OJJ85955.1 awen|OJJ36071.1  
Group12477: acar|OOF98017.1 acla|EAW10736.1 aory|EIT75944.1 awen|OJJ36178.1  
Group12478: acar|OOF98056.1 agla|OJJ88710.1 asyd|OJJ64700.1 aver|OJI98804.1  
Group12479: acar|OOF98331.1 afis|EAW21475.1 afum|EAL92495.1 agla|OJJ83522.1  
Group12480: anig|EHA24934.1 akaw|GAA92177.1 aluc|OJZ85587.1 atub|OJI79382.1  
Group12481: afla|EED49099.1 aory|EIT82529.1 afis|EAW23421.1 afum|EAL88048.2  
Group12482: acar|OOF98853.1 akaw|GAA93109.1 aluc|OJZ80594.1 anig|EHA22188.1  
Group12483: acar|OOF98854.1 aluc|OJZ80596.1 anig|EHA22186.1 awen|OJJ29869.1  
Group12484: acar|OOF98976.1 akaw|GAA92125.1 aluc|OJZ83597.1 atub|OJI89969.1  
Group12485: acar|OOF98986.1 aory|EIT76158.1 awen|OJJ36025.1 azon|OJJ43605.1  
Group12486: acar|OOF99008.1 afla|EED45162.1 aver|OJJ06556.1 azon|OJJ50000.1  
Group12487: acar|OOF99051.1 akaw|GAA83947.1 atub|OJI82738.1 aluc|OJZ80828.1  
Group12488: acar|OOF99184.1 aluc|OJZ80183.1 asyd|OJJ59803.1 aver|OJJ02488.1  
Group12489: acar|OOF99284.1 aluc|OJZ81086.1 atub|OJI82498.1 azon|OJJ50600.1  
Group12490: acar|OOF99301.1 agla|OJJ79461.1 asyd|OJJ54303.1 atub|OJI80756.1  
Group12491: afum|EAL85338.1 afis|EAW20223.1 aver|OJJ08352.1 anig|EHA25399.1  
Group12492: afum|EAL88831.1 awen|OJJ37829.1 afis|EAW16203.1 agla|OJJ81274.1  
Group12493: acar|OOG00065.1 aluc|OJZ82066.1 ater|EAU31588.1 awen|OJJ32570.1  
Group12494: acar|OOG00092.1 akaw|GAA84508.1 aluc|OJZ89237.1 anig|EHA23329.1  
Group12495: acar|OOG00126.1 acla|EAW10036.1 akaw|GAA86021.1 aluc|OJZ90249.1  
Group12496: afla|EED45048.1 aory|EIT73760.1 azon|OJJ42418.1 awen|OJJ32633.1  
Group12497: acla|EAW09451.1 awen|OJJ33954.1 agla|OJJ79915.1 azon|OJJ48616.1  
Group12498: acar|OOG00224.1 asyd|OJJ54072.1 aver|OJJ08667.1 awen|OJJ40009.1  
Group12499: acar|OOG00433.1 anid|CBF69470.1 asyd|OJJ59274.1 aver|OJJ01887.1  
Group12500: acar|OOG00435.1 anid|CBF69468.1 asyd|OJJ59275.1 aver|OJJ01888.1  
Group12501: acar|OOG00543.1 afla|EED47887.1 aory|EIT77233.1 aver|OJJ07415.1  
Group12502: acla|EAW06296.1 afis|EAW18402.1 afum|EAL93080.1 agla|OJJ84962.1  
Group12503: ater|EAU31426.1 aory|EIT75187.1 asyd|OJJ57975.1 aver|OJJ04426.1  
Group12504: acla|EAW06548.1 aluc|OJZ80952.1 anig|EHA19402.1 atub|OJI82631.1  
Group12505: acla|EAW06579.1 afis|EAW16687.1 afla|EED51145.1 aory|EIT81337.1

Group12506: acla|EAW06681.1 afis|EAW16084.1 afum|EAL88716.1 awen|OJJ30348.1  
Group12507: anig|EHA28235.1 aver|OJJ06471.1 ater|EAU36717.1 atub|OJI87768.1  
Group12508: acla|EAW07098.1 afis|EAW22110.1 afum|EAL91074.1 aver|OJJ02734.1  
Group12509: acla|EAW07106.1 afis|EAW22118.1 afum|EAL91068.1 awen|OJJ34701.1  
Group12510: acla|EAW07142.1 awen|OJJ37872.1 agla|OJJ79600.1 anid|CBF69373.1  
Group12511: acla|EAW07214.1 afis|EAW22227.1 afum|EAL90967.1 azon|OJJ42275.1  
Group12512: acla|EAW07350.1 afis|EAW22380.1 afum|EAL90811.1 awen|OJJ34955.1  
Group12513: acla|EAW07368.1 afis|EAW19831.1 afum|EAL85061.1 agla|OJJ87290.1  
Group12514: acla|EAW08184.1 afla|EED47032.1 agla|OJJ86375.1 asyd|OJJ60176.1  
Group12515: acla|EAW08499.1 afis|EAW23544.1 afum|EAL87922.1 ater|EAU35330.1  
Group12516: acla|EAW08732.1 afis|EAW15706.1 afum|EAL85641.1 awen|OJJ38399.1  
Group12517: acla|EAW08774.1 afum|EBA27238.1 asyd|OJJ53503.1 awen|OJJ32666.1  
Group12518: agla|OJJ81399.1 asyd|OJJ53832.1 aver|OJJ07937.1 azon|OJJ45799.1  
Group12519: acla|EAW08914.1 afis|EAW15480.1 agla|OJJ80159.1 azon|OJJ43151.1  
Group12520: acla|EAW08946.1 afum|EAL91100.1 akaw|GAA83286.1 awen|OJJ34618.1  
Group12521: acla|EAW08952.1 afis|EAW15460.1 afum|EAL85859.1 ater|EAU30837.1  
Group12522: acla|EAW08962.1 afis|EAW15443.1 afum|EAL84204.1 ater|EAU35570.1  
Group12523: acla|EAW08998.1 afis|EAW22069.1 agla|OJJ78772.1 aluc|OJZ79993.1  
Group12524: acla|EAW09003.1 afla|EED57115.1 aory|EIT74101.1 awen|OJJ36036.1  
Group12525: acla|EAW09037.1 afis|EAW22731.1 afum|EAL90464.2 agla|OJJ78523.1  
Group12526: acla|EAW09351.1 afis|EAW21816.1 afum|EAL92832.1 ater|EAU36734.1  
Group12527: acla|EAW09418.1 afis|EAW21718.1 awen|OJJ33991.1 azon|OJJ48562.1  
Group12528: acla|EAW09512.1 afis|EAW21620.1 afum|EAL92656.1 agla|OJJ82577.1  
Group12529: acla|EAW09753.1 afis|EAW21388.1 afum|EAL92403.2 anid|CBF71411.1  
Group12530: acla|EAW09794.1 afis|EAW21342.1 afum|EAL92359.1 ater|EAU35966.1  
Group12531: acla|EAW09868.1 agla|OJJ87500.1 awen|OJJ36572.1 azon|OJJ44316.1  
Group12532: acla|EAW10015.1 afis|EAW21039.1 afum|EAL92078.1 awen|OJJ35723.1  
Group12533: acla|EAW10024.1 aory|EIT81883.1 afla|EED57488.1 afum|EAL89366.2  
Group12534: acla|EAW10196.1 afla|EED53877.1 aory|EIT78437.1 ater|EAU34550.1  
Group12535: acla|EAW10299.1 afis|EAW25293.1 afum|EAL89956.1 awen|OJJ29696.1  
Group12536: acla|EAW10406.1 afis|EAW20556.1 afum|EAL84505.1 anid|CBF73656.1  
Group12537: acla|EAW10412.1 afla|EED55128.1 asyd|OJJ52933.1 aver|OJJ08899.1  
Group12538: agla|OJJ85499.1 asyd|OJJ65169.1 aver|OJI99321.1 anid|CBF80667.1  
Group12539: acla|EAW10839.1 afla|EED55833.1 aory|EIT76690.1 azon|OJJ43607.1  
Group12540: acla|EAW10848.1 afis|EAW20282.1 afum|EAL85416.1 agla|OJJ80881.1  
Group12541: acla|EAW10876.1 afis|EAW20982.1 afum|EAL84648.2 awen|OJJ34329.1  
Group12542: acla|EAW11021.1 afis|EAW20835.1 afla|EED47444.1 aory|EIT81899.1  
Group12543: acla|EAW11032.1 afis|EAW23432.1 afla|EED49638.1 aory|EIT81010.1  
Group12544: acla|EAW11056.1 afis|EAW20820.1 afum|EAL84809.1 ater|EAU39614.1



Group12545: acla|EAW11257.1 afis|EAW18242.1 afum|EAL87606.1 ater|EAU37479.1  
Group12546: acla|EAW11532.1 afis|EAW23922.1 afum|EAL87347.1 awen|OJJ35398.1  
Group12547: acla|EAW11670.1 asyd|OJJ56436.1 aver|OJJ06285.1 awen|OJJ38759.1  
Group12548: acla|EAW11728.1 asyd|OJJ56132.1 aver|OJJ05073.1 azon|OJJ46136.1  
Group12549: acla|EAW11776.1 anid|CBF70506.1 asyd|OJJ58576.1 aver|OJJ01180.1  
Group12550: acla|EED49645.1 asyd|OJJ60260.1 ater|EAU36670.1 aver|OJJ03996.1  
Group12551: acla|EAW11978.1 agla|OJJ80762.1 aver|OJJ07084.1 awen|OJJ41863.1  
Group12552: acla|EAW12029.1 anid|CBF81953.1 asyd|OJJ52952.1 aver|OJJ08918.1  
Group12553: acla|EAW12092.1 acla|EED48247.1 ater|EAU32454.1 azon|OJJ47354.1  
Group12554: acla|EAW12127.1 afis|EAW17246.1 afum|EBA27285.1 ater|EAU38592.1  
Group12555: acla|EAW12128.1 afis|EAW17249.1 afum|EAL86668.1 ater|EAU38590.1  
Group12556: awen|OJJ33498.1 acla|EED46280.1 agla|OJJ84142.1 aory|EIT76348.1  
Group12557: acla|EAW12185.1 afis|EAW17121.1 afum|EAL86582.1 awen|OJJ34474.1  
Group12558: acla|EAW12198.1 anid|CBF69436.1 asyd|OJJ52389.1 aver|OJJ01934.1  
Group12559: acla|EAW12202.1 acla|EED50214.1 aory|EIT77340.1 asyd|OJJ54578.1  
Group12560: acla|EAW12215.1 afis|EAW25556.1 afum|EAL84279.2 awen|OJJ31978.1  
Group12561: acla|EAW12294.1 afis|EAW16925.1 afum|EAL86450.1 ater|EAU32508.1  
Group12562: acla|EAW12311.1 afis|EAW24615.1 acla|EED50193.1 afum|EAL86244.1  
Group12563: acla|EAW12329.1 agla|OJJ79949.1 asyd|OJJ54495.1 aver|OJJ07685.1  
Group12564: acla|EAW12342.1 afis|EAW16878.1 afum|EAL86415.1 agla|OJJ78656.1  
Group12565: acla|EAW12417.1 acla|EED52219.1 anid|CBF83053.1 aory|EIT74492.1  
Group12566: acla|EAW12423.1 acla|EED52221.1 anid|CBF83042.1 aory|EIT74446.1  
Group12567: acla|EAW12438.1 afis|EAW16750.1 afum|EAL86323.1 agla|OJJ79212.1  
Group12568: acla|EAW12448.1 acla|EED48612.1 aory|EIT74314.1 aory|EIT73183.1  
Group12569: acla|EAW12598.1 afum|EAL88792.1 akaw|GAA92360.1 aluc|OJZ79830.1  
Group12570: acla|EAW12670.1 agla|OJJ86842.1 ater|EAU34483.1 aver|OJJ08589.1  
Group12571: acla|EAW12685.1 afis|EAW17848.1 afum|EAL91657.1 awen|OJJ41725.1  
Group12572: acla|EAW12780.1 anig|EHA21241.1 asyd|OJJ58201.1 azon|OJJ48322.1  
Group12573: acla|EAW12905.1 afis|EAW17783.1 acla|EED51534.1 afum|EAL91591.2  
Group12574: acla|EAW12960.1 aory|EIT82286.1 awen|OJJ35545.1 azon|OJJ42179.1  
Group12575: acla|EAW13122.1 afis|EAW17542.1 afum|EAL91356.1 azon|OJJ51003.1  
Group12576: acla|EAW13222.1 agla|OJJ85887.1 aory|EIT73584.1 acla|EED45038.1  
Group12577: acla|EAW13227.1 afis|EAW17409.1 afum|EAL91243.1 ater|EAU37361.1  
Group12578: acla|EAW13228.1 afis|EAW17407.1 afum|EAL91242.1 asyd|OJJ52224.1  
Group12579: anig|EHA22106.1 acla|EED45487.1 aory|EIT75569.1 awen|OJJ30902.1  
Group12580: acla|EAW13447.1 acla|EED46203.1 aory|EIT76386.1 ater|EAU29432.1  
Group12581: acla|EAW13449.1 afis|EAW20555.1 afum|EBA27183.1 azon|OJJ43198.1  
Group12582: acla|EAW13522.1 anid|CBF87074.1 asyd|OJJ61529.1 awen|OJJ34704.1  
Group12583: acla|EAW13547.1 agla|OJJ88374.1 ater|EAU29445.1 acla|EED46256.1

Group12584: acla|EAW13650.1 afis|EAW19955.1 afum|EAL84959.1 ater|EAU36871.1  
Group12585: acla|EAW13705.1 afis|EAW21064.1 afum|EBA27264.1 aluc|OJZ83579.1  
Group12586: acla|EED56408.1 aory|EIT82999.1 anid|CBF81958.1 ater|EAU30737.1  
Group12587: acla|EAW14133.1 afis|EAW18846.1 afum|EAL93577.1 agla|OJJ83523.1  
Group12588: awen|OJJ38284.1 aver|OJI97629.1 anid|CBF87706.1 asyd|OJJ63333.1  
Group12589: acla|EAW14281.1 afum|EAL85155.2 asyd|OJJ62554.1 aver|OJI96680.1  
Group12590: acla|EAW14510.1 afis|EAW19228.1 afum|EAL93958.1 awen|OJJ37586.1  
Group12591: acla|EAW14592.1 acla|EED55209.1 anig|EHA27992.1 aory|EIT83610.1  
Group12592: acla|EAW14809.1 afis|EAW24338.1 awen|OJJ32880.1 azon|OJJ48978.1  
Group12593: acla|EAW14840.1 afum|EBA27256.1 ater|EAU30371.1 awen|OJJ32846.1  
Group12594: acla|EAW14842.1 afis|EAW24369.1 afum|EAL86041.1 ater|EAU30369.1  
Group12595: acla|EAW14924.1 azon|OJJ42508.1 acla|EED52070.1 aory|EIT72305.1  
Group12596: acla|EAW14926.1 acla|EED49818.1 aory|EIT77663.1 asyd|OJJ62980.1  
Group12597: acla|EAW14978.1 acla|EED56850.1 aory|EIT77569.1 awen|OJJ36317.1  
Group12598: acla|EAW15003.1 afis|EAW24538.1 afum|EAL86202.1 azon|OJJ48341.1  
Group12599: acla|EAW15008.1 afis|EAW15437.1 afum|EAL84208.2 anid|CBF71217.1  
Group12600: acla|EAW15028.1 afis|EAW24558.1 afum|EAL86221.1 awen|OJJ31238.1  
Group12601: acla|EAW15029.1 acla|EED57259.1 aory|EIT74138.1 awen|OJJ36137.1  
Group12602: acla|EAW15050.1 afis|EAW17412.1 agla|OJJ89306.1 anig|EHA23279.1  
Group12603: acla|EAW15151.1 afis|EAW20119.1 afum|EAL85236.2 agla|OJJ88830.1  
Group12604: ater|EAU32829.1 asyd|OJJ60433.1 anid|CBF87063.1 aver|OJI99755.1  
Group12605: acla|EAW15259.1 afis|EAW20236.1 afum|EAL85353.1 awen|OJJ37031.1  
Group12606: acla|EAW15341.1 afis|EAW20367.1 afum|EAL85483.1 azon|OJJ50763.1  
Group12607: acla|EAW15359.1 afis|EAW20352.1 afum|EAL85470.1 ater|EAU32215.1  
Group12608: agla|OJJ85076.1 asyd|OJJ60488.1 aver|OJI99814.1 awen|OJJ33534.1  
Group12609: afis|EAW15403.1 anid|CBF80699.1 ater|EAU33084.1 ater|EAU35084.1  
Group12610: afis|EAW15406.1 acla|EED51744.1 afum|EAL84240.1 aory|EIT80709.1  
Group12611: afis|EAW15408.1 acla|EED47794.1 afum|EAL84239.1 aory|EIT77179.1  
Group12612: afis|EAW15442.1 afum|EAL84205.1 asyd|OJJ64163.1 aver|OJI98240.1  
Group12613: afis|EAW15629.1 afum|EAL85705.1 anid|CBF73658.1 asyd|OJJ54444.1  
Group12614: acla|EED46061.1 aory|EIT83479.1 aver|OJI99637.1 anid|CBF87165.1  
Group12615: acla|EED53178.1 aory|EIT74964.1 asyd|OJJ53365.1 aver|OJJ08382.1  
Group12616: asyd|OJJ55027.1 aver|OJJ07177.1 ater|EAU36685.1 awen|OJJ41484.1  
Group12617: afis|EAW16166.1 afum|EAL88801.1 aver|OJJ08858.1 azon|OJJ49589.1  
Group12618: afis|EAW16179.1 aory|EIT82839.1 acla|EED47366.1 agla|OJJ79066.1  
Group12619: afis|EAW16181.1 ater|EAU29303.1 aver|OJJ07307.1 ater|EAU33872.1  
Group12620: acla|EED48450.1 awen|OJJ31972.1 agla|OJJ86297.1 afum|EAL86288.2  
Group12621: azon|OJJ44590.1 anid|CBF88935.1 asyd|OJJ62854.1 aver|OJI96907.1  
Group12622: afis|EAW16424.1 afum|EAL85137.1 anig|EHA19882.1 azon|OJJ48340.1

Group12623: aver|OJI99614.1 aluc|OJZ88481.1 asyd|OJJ52498.1 awen|OJJ38950.1  
Group12624: afis|EAW16708.1 afla|EED46491.1 anid|CBF71843.1 aory|EIT72371.1  
Group12625: afis|EAW16728.1 afum|EAL86303.2 afis|EAW16730.1 awen|OJJ38303.1  
Group12626: afis|EAW16760.1 agla|OJJ87811.1 asyd|OJJ56901.1 awen|OJJ41527.1  
Group12627: afis|EAW16819.1 afum|EBA27270.1 asyd|OJJ56741.1 aver|OJJ05986.1  
Group12628: afis|EAW16859.1 asyd|OJJ62623.1 aver|OJI99301.1 awen|OJJ36991.1  
Group12629: afis|EAW16899.1 afla|EED53179.1 afum|EAL86434.1 aory|EIT75198.1  
Group12630: ater|EAU31586.1 anid|CBF73499.1 asyd|OJJ59268.1 aver|OJJ01880.1  
Group12631: anid|CBF87043.1 asyd|OJJ60446.1 aver|OJI99764.1 awen|OJJ36367.1  
Group12632: afis|EAW16971.1 afla|EED57581.1 aory|EIT82962.1 ater|EAU37145.1  
Group12633: asyd|OJJ54420.1 aver|OJJ06548.1 agla|OJJ87528.1 awen|OJJ36611.1  
Group12634: afis|EAW17008.1 akaw|GAA90342.1 aluc|OJZ85890.1 awen|OJJ37867.1  
Group12635: afis|EAW17023.1 akaw|GAA89823.1 aluc|OJZ81867.1 anig|EHA25072.1  
Group12636: afis|EAW17039.1 aluc|OJZ79601.1 aver|OJI98841.1 awen|OJJ33826.1  
Group12637: atub|OJI91281.1 akaw|GAA83143.1 aluc|OJZ88700.1 anig|EHA18380.1  
Group12638: afis|EAW17125.1 anid|CBF83967.1 asyd|OJJ59818.1 aver|OJJ00761.1  
Group12639: afis|EAW17220.1 anid|CBF75874.1 asyd|OJJ60233.1 aver|OJJ04032.1  
Group12640: atub|OJI84038.1 asyd|OJJ55410.1 aver|OJJ06489.1 awen|OJJ35934.1  
Group12641: anig|EHA21859.1 akaw|GAA93038.1 aluc|OJZ82091.1 aory|EIT72971.1  
Group12642: afis|EAW17526.1 afum|EAL86501.1 anid|CBF82920.1 ater|EAU39525.1  
Group12643: afis|EAW17774.1 anid|CBF88655.1 asyd|OJJ63886.1 aver|OJI97053.1  
Group12644: afis|EAW17798.1 afum|EAL91606.1 asyd|OJJ57628.1 ater|EAU33841.1  
Group12645: afis|EAW18181.1 afum|EAL87542.1 awen|OJJ30529.1 azon|OJJ50211.1  
Group12646: afis|EAW18554.1 afla|EED48113.1 afum|EAL93254.1 aory|EIT76197.1  
Group12647: afis|EAW18556.1 afla|EED45068.1 afum|EAL93256.1 aory|EIT73780.1  
Group12648: asyd|OJJ60429.1 aver|OJI99752.1 ater|EAU36739.1 anid|CBF87059.1  
Group12649: afis|EAW19319.1 afum|EAL94036.1 ater|EAU29615.1 azon|OJJ45035.1  
Group12650: afis|EAW19332.1 afum|EAL94049.1 ater|EAU29937.1 azon|OJJ44394.1  
Group12651: afis|EAW19346.1 afla|EED54638.1 afum|EAL94066.1 aory|EIT78912.1  
Group12652: asyd|OJJ61754.1 aver|OJI95852.1 awen|OJJ33647.1 azon|OJJ42778.1  
Group12653: afis|EAW19369.1 afum|EAL94088.1 aory|EIT76838.1 afla|EED56076.1  
Group12654: anid|CBF78721.1 ater|EAU29521.1 asyd|OJJ63988.1 aver|OJI96965.1  
Group12655: aver|OJJ07067.1 agla|OJJ80745.1 anid|CBF71279.1 asyd|OJJ55136.1  
Group12656: afis|EAW19669.1 afum|EAL86854.2 awen|OJJ31936.1 azon|OJJ46600.1  
Group12657: afis|EAW19671.1 afla|EED46494.1 agla|OJJ81540.1 aory|EIT72433.1  
Group12658: afis|EAW19741.1 afum|EAL86788.1 afla|EED56529.1 aory|EIT82922.1  
Group12659: afis|EAW19760.1 ater|EAU36857.1 aory|EIT83283.1 afla|EED52427.1  
Group12660: afis|EAW19788.1 afla|EED47534.1 afum|EAL85106.2 aory|EIT74580.1  
Group12661: afis|EAW19805.1 afla|EED51065.1 afum|EAL85088.2 aory|EIT76967.1

Group12662: asyd|OJJ54160.1 aver|OJJ08584.1 anid|CBF82401.1 ater|EAU31753.1  
Group12663: afis|EAW19967.1 afum|EAL84949.1 atub|OJI83199.1 awen|OJJ41818.1  
Group12664: afis|EAW19969.1 afla|EED45226.1 afum|EAL84951.2 atub|OJI83198.1  
Group12665: awen|OJJ32248.1 aluc|OJZ83022.1 asyd|OJJ56052.1 aver|OJJ07433.1  
Group12666: afis|EAW19971.1 afum|EAL84953.1 atub|OJI83196.1 aver|OJJ07431.1  
Group12667: afis|EAW20264.1 afla|EED45398.1 ater|EAU32478.1 awen|OJJ33383.1  
Group12668: afis|EAW20272.1 afla|EED52438.1 afum|EAL85406.1 asyd|OJJ60800.1  
Group12669: afis|EAW20287.1 afum|EAL85419.1 ater|EAU31587.1 azon|OJJ42679.1  
Group12670: afis|EAW20330.1 asyd|OJJ63985.1 aver|OJI96968.1 azon|OJJ45655.1  
Group12671: afis|EAW20558.1 afum|EAL84503.1 ater|EAU35417.1 aory|EIT74154.1  
Group12672: afis|EAW20630.1 afum|EAL84437.1 agla|OJJ80446.1 azon|OJJ50721.1  
Group12673: afis|EAW20645.1 afla|EED50442.1 afum|EAL84428.1 aory|EIT82074.1  
Group12674: afis|EAW20646.1 afum|EAL84427.1 afis|EAW22096.1 afla|EED50441.1  
Group12675: afis|EAW20647.1 afla|EED50440.1 afum|EAL84426.1 aory|EIT82099.1  
Group12676: afis|EAW20648.1 afla|EED50439.1 afum|EAL84425.1 aory|EIT82155.1  
Group12677: afis|EAW20712.1 agla|OJJ85311.1 aver|OJJ03120.1 asyd|OJJ51870.1  
Group12678: afis|EAW20827.1 akaw|GAA83753.1 asyd|OJJ56855.1 ater|EAU35992.1  
Group12679: afis|EAW20843.1 aory|EIT83050.1 ater|EAU37767.1 awen|OJJ33415.1  
Group12680: afis|EAW21028.1 agla|OJJ89399.1 awen|OJJ36154.1 azon|OJJ50772.1  
Group12681: afis|EAW21217.1 afum|EAL92229.1 ater|EAU31939.1 azon|OJJ42770.1  
Group12682: afis|EAW21279.1 afum|EAL92294.1 ater|EAU31597.1 azon|OJJ42726.1  
Group12683: afis|EAW22019.1 akaw|GAA93155.1 aluc|OJZ80421.1 akaw|GAA93175.1  
Group12684: afis|EAW22086.1 afla|EED49609.1 afum|EAL85695.1 aory|EIT81016.1  
Group12685: afis|EAW22092.1 afla|EED45137.1 aory|EIT73670.1 azon|OJJ46491.1  
Group12686: anig|EHA22333.1 akaw|GAA89780.1 aluc|OJZ81911.1 atub|OJI84464.1  
Group12687: afis|EAW22250.1 afla|EED44890.1 agla|OJJ89328.1 awen|OJJ37802.1  
Group12688: afis|EAW22302.1 agla|OJJ82724.1 anid|CBF85186.1 awen|OJJ31410.1  
Group12689: afis|EAW22305.1 agla|OJJ82732.1 anid|CBF85179.1 awen|OJJ31405.1  
Group12690: afis|EAW22307.1 agla|OJJ82733.1 anid|CBF85177.1 awen|OJJ31404.1  
Group12691: afis|EAW22481.1 afum|EAL90714.1 agla|OJJ81329.1 asyd|OJJ55316.1  
Group12692: afla|EED48517.1 aory|EIT73055.1 asyd|OJJ64974.1 ater|EAU38745.1  
Group12693: afis|EAW23632.1 agla|OJJ83716.1 anig|EHA18445.1 awen|OJJ30960.1  
Group12694: afis|EAW23640.1 akaw|GAA85577.1 aluc|OJZ83513.1 ater|EAU35167.1  
Group12695: afis|EAW23665.1 anid|CBF86366.1 asyd|OJJ64967.1 aver|OJI99091.1  
Group12696: aluc|OJZ88354.1 akaw|GAA88465.1 anig|EHA18087.1 atub|OJI90949.1  
Group12697: afis|EAW24054.1 afum|EAL91908.2 aory|EIT76118.1 ater|EAU29610.1  
Group12698: afis|EAW24057.1 afum|EAL91913.1 aory|EIT80623.1 afla|EED51497.1  
Group12699: afis|EAW24471.1 afum|EAL86144.1 asyd|OJJ53920.1 aver|OJJ08018.1  
Group12700: afis|EAW24528.1 afum|EAL86193.1 asyd|OJJ55346.1 aver|OJJ06432.1

Group12701: afis|EAW24529.1 afum|EAL86194.1 asyd|OJJ55347.1 aver|OJJ06433.1  
Group12702: afis|EAW24530.1 afum|EAL86195.1 asyd|OJJ55348.1 aver|OJJ06434.1  
Group12703: afis|EAW24561.1 afum|EAL86222.1 anid|CBF83496.1 ater|EAU34205.1  
Group12704: afis|EAW24626.1 anid|CBF79093.1 aver|OJJ08545.1 awen|OJJ29934.1  
Group12705: afis|EAW24630.1 afla|EED50781.1 aory|EIT78119.1 ater|EAU34864.1  
Group12706: afis|EAW24665.1 asyd|OJJ57399.1 afis|EAW24667.1 anid|CBF84287.1  
Group12707: anid|CBF82396.1 azon|OJJ51730.1 asyd|OJJ54155.1 aver|OJJ08578.1  
Group12708: afis|EAW25175.1 afum|EAL89848.1 akaw|GAA82884.1 azon|OJJ42794.1  
Group12709: afis|EAW25576.1 afum|EAL84286.1 asyd|OJJ55342.1 aver|OJJ06428.1  
Group12710: afis|EAW25577.1 afum|EAL84287.2 asyd|OJJ55343.1 aver|OJJ06429.1  
Group12711: afis|EAW25578.1 afum|EAL84289.1 asyd|OJJ55344.1 aver|OJJ06430.1  
Group12712: afis|EAW25579.1 afum|EAL84290.1 asyd|OJJ55345.1 aver|OJJ06431.1  
Group12713: afis|EAW25587.1 afla|EED46133.1 afum|EAL84294.1 aory|EIT76488.1  
Group12714: ater|EAU37771.1 anid|CBF82097.1 asyd|OJJ54260.1 aver|OJJ05213.1  
Group12715: afis|EAW25733.1 anid|CBF69362.1 anig|EHA24047.1 ater|EAU30733.1  
Group12716: afla|EED44727.1 anid|CBF87319.1 atub|OJI79310.1 aver|OJJ01700.1  
Group12717: afla|EED44732.1 asyd|OJJ59105.1 atub|OJI79306.1 aver|OJJ01696.1  
Group12718: afla|EED44811.1 agla|OJJ84865.1 aory|EIT77726.1 awen|OJJ33147.1  
Group12719: afla|EED44963.1 aory|EIT73469.1 ater|EAU39567.1 azon|OJJ48659.1  
Group12720: afla|EED45045.1 aory|EIT73660.1 asyd|OJJ56220.1 aver|OJJ05152.1  
Group12721: afla|EED45098.1 aory|EIT73650.1 asyd|OJJ54179.1 aver|OJJ08561.1  
Group12722: afla|EED45099.1 aory|EIT73692.1 asyd|OJJ54180.1 aver|OJJ08560.1  
Group12723: afla|EED45112.1 anig|EHA26087.1 awen|OJJ31618.1 atub|OJI87333.1  
Group12724: afla|EED45287.1 agla|OJJ88708.1 aory|EIT73683.1 awen|OJJ38832.1  
Group12725: afla|EED45426.1 aory|EIT82451.1 ater|EAU34031.1 awen|OJJ37935.1  
Group12726: afla|EED45451.1 agla|OJJ83723.1 aory|EIT82450.1 awen|OJJ34521.1  
Group12727: afla|EED45507.1 anig|EHA20199.1 aory|EIT75575.1 ater|EAU30776.1  
Group12728: afla|EED45817.1 aory|EIT75396.1 asyd|OJJ64188.1 aver|OJI98265.1  
Group12729: afla|EED45919.1 afum|EAL94094.1 anig|EHA18741.1 aver|OJI96911.1  
Group12730: afla|EED45991.1 aory|EIT75747.1 ater|EAU33128.1 awen|OJJ30976.1  
Group12731: afla|EED46066.1 aory|EIT83502.1 asyd|OJJ56239.1 aory|EIT74811.1  
Group12732: afla|EED46071.1 asyd|OJJ62490.1 aver|OJI95771.1 aver|OJI95940.1  
Group12733: afla|EED46128.1 agla|OJJ86613.1 aory|EIT76505.1 ater|EAU38911.1  
Group12734: afla|EED46224.1 aory|EIT76406.1 asyd|OJJ61419.1 aver|OJJ00754.1  
Group12735: afla|EED46304.1 aory|EIT76339.1 aluc|OJZ92003.1 asyd|OJJ53539.1  
Group12736: afla|EED46593.1 aory|EIT77886.1 awen|OJJ37810.1 aory|EIT77644.1  
Group12737: afla|EED47256.1 aory|EIT79235.1 asyd|OJJ60436.1 aver|OJJ02286.1  
Group12738: afla|EED47264.1 asyd|OJJ53566.1 ater|EAU30453.1 aver|OJJ08188.1  
Group12739: afla|EED47265.1 aory|EIT79272.1 aver|OJJ07848.1 asyd|OJJ53733.1

Group12740: afla|EED47437.1 anid|CBF74960.1 asyd|OJJ52444.1 aver|OJJ03972.1  
Group12741: afla|EED47492.1 asyd|OJJ52775.1 afla|EED47493.1 aory|EIT74556.1  
Group12742: afla|EED47527.1 aory|EIT74558.1 ater|EAU29487.1 awen|OJJ33445.1  
Group12743: afla|EED47574.1 aluc|OJZ80355.1 afla|EED50194.1 aory|EIT77390.1  
Group12744: aver|OJJ07953.1 awen|OJJ36960.1 anid|CBF74035.1 asyd|OJJ53851.1  
Group12745: afla|EED47758.1 aory|EIT77198.1 asyd|OJJ63034.1 aver|OJI97933.1  
Group12746: afla|EED47767.1 aory|EIT77174.1 asyd|OJJ52370.1 aver|OJJ01978.1  
Group12747: afla|EED47780.1 agla|OJJ83889.1 asyd|OJJ62411.1 aver|OJI96545.1  
Group12748: afla|EED47864.1 agla|OJJ84437.1 aory|EIT77217.1 awen|OJJ35950.1  
Group12749: afla|EED48095.1 aory|EIT76230.1 asyd|OJJ60351.1 aver|OJI99690.1  
Group12750: afla|EED48148.1 agla|OJJ78447.1 aory|EIT76244.1 awen|OJJ35062.1  
Group12751: afla|EED48367.1 afum|EAL94106.1 anid|CBF80285.1 aory|EIT83106.1  
Group12752: afla|EED48476.1 anid|CBF89293.1 aory|EIT73248.1 ater|EAU36719.1  
Group12753: afla|EED48494.1 aory|EIT73138.1 ater|EAU33398.1 aver|OJI99309.1  
Group12754: afla|EED48900.1 aory|EIT81199.1 ater|EAU39620.1 awen|OJJ30204.1  
Group12755: afla|EED48999.1 aluc|OJZ83983.1 aory|EIT79987.1 anig|EHA19110.1  
Group12756: afla|EED49056.1 agla|OJJ84409.1 aory|EIT82484.1 asyd|OJJ56097.1  
Group12757: afla|EED49072.1 aory|EIT82562.1 asyd|OJJ57956.1 aver|OJI99543.1  
Group12758: afla|EED49450.1 aory|EIT79466.1 asyd|OJJ52788.1 azon|OJJ42629.1  
Group12759: afla|EED49466.1 agla|OJJ82725.1 awen|OJJ33412.1 azon|OJJ46198.1  
Group12760: afla|EED49541.1 aory|EIT82616.1 asyd|OJJ54938.1 aver|OJJ07258.1  
Group12761: afla|EED49579.1 aory|EIT82607.1 asyd|OJJ59619.1 ater|EAU29692.1  
Group12762: afla|EED49580.1 aory|EIT82572.1 asyd|OJJ59630.1 aver|OJJ02650.1  
Group12763: afla|EED49672.1 anid|CBF84329.1 aory|EIT80965.1 aver|OJI96140.1  
Group12764: afla|EED49698.1 asyd|OJJ56434.1 aver|OJJ06286.1 awen|OJJ29977.1  
Group12765: afla|EED49745.1 agla|OJJ79839.1 anid|CBF82183.1 aory|EIT77674.1  
Group12766: afla|EED49830.1 asyd|OJJ64836.1 aver|OJI98949.1 aory|EIT76349.1  
Group12767: afla|EED50153.1 aory|EIT76928.1 asyd|OJJ63401.1 aver|OJI97536.1  
Group12768: azon|OJJ42664.1 anid|CBF83288.1 asyd|OJJ57256.1 aver|OJJ03038.1  
Group12769: afla|EED50222.1 asyd|OJJ54609.1 aver|OJJ07547.1 anid|CBF80660.1  
Group12770: afla|EED50264.1 anid|CBF84349.1 aory|EIT77324.1 asyd|OJJ55453.1  
Group12771: afla|EED50265.1 anid|CBF84347.1 aory|EIT77375.1 asyd|OJJ55454.1  
Group12772: afla|EED50400.1 aory|EIT82118.1 atub|OJI86190.1 awen|OJJ37001.1  
Group12773: afla|EED50617.1 agla|OJJ79385.1 aory|EIT78122.1 awen|OJJ39037.1  
Group12774: afla|EED50777.1 agla|OJJ86278.1 aory|EIT78080.1 awen|OJJ29910.1  
Group12775: afla|EED51095.1 aory|EIT81993.1 asyd|OJJ56754.1 aver|OJJ05969.1  
Group12776: afla|EED51117.1 agla|OJJ82663.1 aory|EIT81364.1 aver|OJJ06746.1  
Group12777: afla|EED51135.1 aory|EIT81360.1 asyd|OJJ53806.1 aver|OJJ07904.1  
Group12778: afla|EED51148.1 aory|EIT81317.1 asyd|OJJ56869.1 awen|OJJ30235.1

Group12779: afla|EED51153.1 anid|CBF80182.1 aory|EIT81363.1 aver|OJI99529.1  
Group12780: afla|EED51456.1 aluc|OJZ87836.1 aory|EIT80639.1 aver|OJJ08844.1  
Group12781: afla|EED51462.1 aory|EIT80610.1 ater|EAU30456.1 awen|OJJ41461.1  
Group12782: afla|EED51488.1 aory|EIT80469.1 asyd|OJJ54741.1 aver|OJJ07423.1  
Group12783: afla|EED51664.1 aory|EIT80716.1 asyd|OJJ65172.1 aver|OJI99324.1  
Group12784: afla|EED51711.1 agla|OJJ81858.1 aory|EIT80556.1 awen|OJJ35917.1  
Group12785: afla|EED51783.1 aory|EIT81719.1 aver|OJJ05159.1 awen|OJJ29734.1  
Group12786: afla|EED51847.1 anid|CBF80437.1 asyd|OJJ54782.1 aver|OJJ07384.1  
Group12787: afla|EED52001.1 agla|OJJ81472.1 aory|EIT81458.1 awen|OJJ34615.1  
Group12788: afla|EED52053.1 asyd|OJJ58713.1 aver|OJJ01326.1 anid|CBF70330.1  
Group12789: afla|EED52095.1 anid|CBF82418.1 aory|EIT76927.1 awen|OJJ29694.1  
Group12790: afla|EED52125.1 aluc|OJZ87029.1 aory|EIT74420.1 atub|OJI83485.1  
Group12791: aory|EIT74348.1 asyd|OJJ58698.1 aver|OJJ01310.1 ater|EAU31702.1  
Group12792: afla|EED52208.1 agla|OJJ79200.1 aory|EIT74458.1 awen|OJJ36202.1  
Group12793: afla|EED52275.1 aory|EIT74459.1 aver|OJJ04004.1 awen|OJJ41101.1  
Group12794: akaw|GAA85319.1 aluc|OJZ90680.1 anig|EHA27495.1 awen|OJJ30547.1  
Group12795: afla|EED52377.1 aory|EIT82372.1 asyd|OJJ61399.1 aver|OJJ00728.1  
Group12796: afla|EED52414.1 agla|OJJ88597.1 asyd|OJJ52083.1 awen|OJJ37428.1  
Group12797: afla|EED52580.1 aory|EIT74291.1 ater|EAU34999.1 awen|OJJ35810.1  
Group12798: afla|EED52644.1 aory|EIT74240.1 ater|EAU38850.1 afla|EED52645.1  
Group12799: afla|EED52841.1 asyd|OJJ59114.1 awen|OJJ40871.1 aver|OJI99246.1  
Group12800: afla|EED52961.1 akaw|GAA90411.1 aory|EIT78735.1 azon|OJJ46261.1  
Group12801: afla|EED53060.1 akaw|GAA88009.1 aluc|OJZ81267.1 aory|EIT74799.1  
Group12802: afla|EED53077.1 akaw|GAA83284.1 anig|EHA18930.1 aory|EIT74781.1  
Group12803: afla|EED53101.1 aory|EIT74764.1 asyd|OJJ62819.1 aver|OJI96864.1  
Group12804: afla|EED53141.1 aory|EIT74966.1 asyd|OJJ52378.1 aver|OJJ01969.1  
Group12805: afla|EED53183.1 agla|OJJ89057.1 aory|EIT75233.1 aver|OJJ07600.1  
Group12806: afla|EED53185.1 agla|OJJ82951.1 aory|EIT75081.1 awen|OJJ31589.1  
Group12807: afla|EED53218.1 aory|EIT75254.1 ater|EAU32833.1 awen|OJJ31960.1  
Group12808: afla|EED53267.1 aory|EIT75238.1 asyd|OJJ64360.1 aver|OJI98456.1  
Group12809: afla|EED53303.1 aory|EIT74980.1 asyd|OJJ59258.1 aver|OJJ01869.1  
Group12810: afla|EED53406.1 asyd|OJJ59968.1 aver|OJJ02323.1 awen|OJJ41951.1  
Group12811: anid|CBF70080.1 asyd|OJJ55930.1 aver|OJJ04876.1 awen|OJJ33306.1  
Group12812: afla|EED53574.1 agla|OJJ85440.1 aluc|OJZ84845.1 aory|EIT75215.1  
Group12813: afla|EED53620.1 aory|EIT75225.1 afla|EED54853.1 awen|OJJ37957.1  
Group12814: afla|EED53952.1 asyd|OJJ54541.1 aver|OJJ07640.1 anid|CBF79654.1  
Group12815: afla|EED54102.1 agla|OJJ81289.1 aory|EIT76135.1 aver|OJJ04436.1  
Group12816: afla|EED54258.1 agla|OJJ85932.1 aory|EIT76102.1 awen|OJJ37460.1  
Group12817: afla|EED54341.1 aory|EIT76063.1 asyd|OJJ59957.1 aver|OJJ02332.1

Group12818: afla|EED54403.1 akaw|GAA91213.1 aluc|OJZ82858.1 aory|EIT75845.1  
Group12819: afla|EED54890.1 akaw|GAA83675.1 anig|EHA24762.1 aory|EIT79402.1  
Group12820: afla|EED55108.1 aory|EIT81569.1 ater|EAU30760.1 asyd|OJJ54918.1  
Group12821: afla|EED55117.1 anid|CBF78521.1 aory|EIT81618.1 asyd|OJJ53434.1  
Group12822: afla|EED55167.1 aory|EIT81576.1 ater|EAU32711.1 azon|OJJ45273.1  
Group12823: afla|EED55191.1 asyd|OJJ64707.1 aver|OJI98809.1 awen|OJJ30080.1  
Group12824: afla|EED55708.1 aory|EIT83224.1 asyd|OJJ60059.1 aver|OJJ02230.1  
Group12825: afla|EED55752.1 agla|OJJ85247.1 aory|EIT76751.1 awen|OJJ39612.1  
Group12826: asyd|OJJ52170.1 akaw|GAA93141.1 aluc|OJZ80034.1 aluc|OJZ79854.1  
Group12827: afla|EED56533.1 aory|EIT79691.1 asyd|OJJ52844.1 aver|OJJ08821.1  
Group12828: afla|EED56751.1 anid|CBF73547.1 aory|EIT73872.1 ater|EAU34582.1  
Group12829: afla|EED56794.1 aory|EIT73868.1 asyd|OJJ52881.1 aver|OJJ08852.1  
Group12830: afla|EED56880.1 aory|EIT77482.1 asyd|OJJ54818.1 aver|OJJ07343.1  
Group12831: afla|EED56890.1 aory|EIT77486.1 ater|EAU30300.1 awen|OJJ35824.1  
Group12832: afla|EED56922.1 aory|EIT77562.1 awen|OJJ36057.1 azon|OJJ45172.1  
Group12833: afla|EED57043.1 akaw|GAA85824.1 aory|EIT82269.1 agla|OJJ83700.1  
Group12834: afla|EED57065.1 aory|EIT73508.1 ater|EAU33400.1 azon|OJJ46513.1  
Group12835: afla|EED57101.1 aory|EIT82266.1 ater|EAU33029.1 aver|OJJ03088.1  
Group12836: afla|EED57122.1 aory|EIT74103.1 asyd|OJJ52875.1 awen|OJJ35395.1  
Group12837: afla|EED57232.1 aory|EIT74132.1 asyd|OJJ54475.1 aver|OJJ05161.1  
Group12838: afla|EED57524.1 aory|EIT81870.1 aver|OJJ08135.1 awen|OJJ36252.1  
Group12839: afla|EED57525.1 aory|EIT81871.1 asyd|OJJ53613.1 aver|OJJ08136.1  
Group12840: afla|EED57550.1 aory|EIT81839.1 asyd|OJJ52828.1 aver|OJJ08804.1  
Group12841: afla|EED57551.1 aory|EIT81855.1 asyd|OJJ52826.1 aver|OJJ08802.1  
Group12842: afla|EED57632.1 agla|OJJ81254.1 aory|EIT82966.1 awen|OJJ36467.1  
Group12843: afla|EED57766.1 aory|EIT81077.1 asyd|OJJ53424.1 aver|OJJ08321.1  
Group12844: afum|EAL84947.1 anid|CBF86370.1 asyd|OJJ56510.1 aver|OJJ06209.1  
Group12845: afum|EAL85443.1 anid|CBF83211.1 asyd|OJJ55200.1 ater|EAU35711.1  
Group12846: afum|EAL86284.1 akaw|GAA92938.1 aluc|OJZ82094.1 anig|EHA21849.1  
Group12847: anid|CBF78540.1 asyd|OJJ56048.1 atub|OJI89154.1 aver|OJJ04991.1  
Group12848: afum|EAL87851.1 anid|CBF73999.1 asyd|OJJ61470.1 aver|OJJ00811.1  
Group12849: afum|EAL92213.1 agla|OJJ88491.1 ater|EAU36105.1 aver|OJI97250.1  
Group12850: aver|OJJ07490.1 anid|CBF80543.1 asyd|OJJ54677.1 awen|OJJ31818.1  
Group12851: anig|EHA18621.1 ater|EAU29574.1 asyd|OJJ64223.1 awen|OJJ31928.1  
Group12852: agla|OJJ78711.1 ater|EAU37692.1 awen|OJJ32765.1 azon|OJJ46796.1  
Group12853: agla|OJJ78775.1 asyd|OJJ52064.1 aver|OJJ04996.1 awen|OJJ30066.1  
Group12854: agla|OJJ78790.1 asyd|OJJ65113.1 ater|EAU34531.1 aver|OJI99239.1  
Group12855: agla|OJJ78861.1 akaw|GAA92188.1 aluc|OJZ85599.1 atub|OJI79394.1  
Group12856: agla|OJJ79126.1 asyd|OJJ55387.1 aver|OJJ08270.1 awen|OJJ30822.1



Group12857: agla|OJJ79243.1 asyd|OJJ56595.1 aver|OJJ06130.1 awen|OJJ32773.1  
Group12858: agla|OJJ79347.1 asyd|OJJ52458.1 aory|EIT77530.1 awen|OJJ31958.1  
Group12859: agla|OJJ80035.1 awen|OJJ30090.1 anig|EHA24070.1 atub|OJI82062.1  
Group12860: akaw|GAA88217.1 aluc|OJZ82180.1 anig|EHA28554.1 atub|OJI88257.1  
Group12861: agla|OJJ80205.1 awen|OJJ36373.1 azon|OJJ42211.1 azon|OJJ45684.1  
Group12862: agla|OJJ80669.1 asyd|OJJ55188.1 aver|OJJ07019.1 awen|OJJ31430.1  
Group12863: agla|OJJ81535.1 anid|CBF74184.1 asyd|OJJ53944.1 aver|OJJ08041.1  
Group12864: agla|OJJ81536.1 anid|CBF74182.1 asyd|OJJ53945.1 aver|OJJ08042.1  
Group12865: azon|OJJ50332.1 asyd|OJJ54963.1 aver|OJJ07228.1 awen|OJJ38736.1  
Group12866: agla|OJJ82209.1 asyd|OJJ60323.1 aver|OJI99671.1 awen|OJJ37959.1  
Group12867: agla|OJJ82210.1 asyd|OJJ60322.1 aver|OJI99670.1 awen|OJJ37958.1  
Group12868: agla|OJJ82738.1 asyd|OJJ59814.1 aver|OJJ02472.1 awen|OJJ29907.1  
Group12869: agla|OJJ83650.1 anid|CBF87155.1 asyd|OJJ54413.1 aver|OJJ08133.1  
Group12870: agla|OJJ83683.1 awen|OJJ35414.1 azon|OJJ49762.1 anig|EHA17981.1  
Group12871: agla|OJJ84737.1 asyd|OJJ54201.1 ater|EAU36886.1 aver|OJJ08523.1  
Group12872: agla|OJJ85077.1 asyd|OJJ60487.1 aver|OJI99813.1 awen|OJJ33533.1  
Group12873: agla|OJJ85842.1 anid|CBF71750.1 asyd|OJJ61732.1 aver|OJI95826.1  
Group12874: agla|OJJ85847.1 asyd|OJJ62352.1 atub|OJI84594.1 azon|OJJ42787.1  
Group12875: agla|OJJ86250.1 anig|EHA22184.1 asyd|OJJ53782.1 aver|OJJ07888.1  
Group12876: agla|OJJ86416.1 asyd|OJJ52979.1 aver|OJJ08945.1 awen|OJJ36945.1  
Group12877: agla|OJJ86672.1 akaw|GAA90292.1 aluc|OJZ83046.1 atub|OJI87902.1  
Group12878: agla|OJJ87087.1 asyd|OJJ53137.1 aver|OJJ03715.1 azon|OJJ44748.1  
Group12879: agla|OJJ87284.1 asyd|OJJ62327.1 aver|OJI96432.1 azon|OJJ51823.1  
Group12880: anid|CBF78499.1 asyd|OJJ61883.1 ater|EAU32640.1 aver|OJI95981.1  
Group12881: agla|OJJ88170.1 asyd|OJJ57612.1 aver|OJJ05573.1 awen|OJJ31659.1  
Group12882: agla|OJJ88376.1 anid|CBF83745.1 asyd|OJJ65110.1 aver|OJI99237.1  
Group12883: akaw|GAA81959.1 aluc|OJZ92230.1 anig|EHA26727.1 atub|OJI86660.1  
Group12884: akaw|GAA82113.1 aluc|OJZ92063.1 atub|OJI86495.1 anig|EHA22992.1  
Group12885: akaw|GAA82568.1 aluc|OJZ87102.1 anig|EHA20371.1 atub|OJI81537.1  
Group12886: akaw|GAA84296.1 aluc|OJZ88990.1 anig|EHA23536.1 atub|OJI85797.1  
Group12887: akaw|GAA84297.1 aluc|OJZ88991.1 anig|EHA23535.1 atub|OJI85796.1  
Group12888: akaw|GAA84513.1 aluc|OJZ89242.1 anig|EHA23325.1 atub|OJI85556.1  
Group12889: akaw|GAA84858.1 aluc|OJZ86813.1 atub|OJI83704.1 awen|OJJ33631.1  
Group12890: akaw|GAA84936.1 aluc|OJZ86730.1 anig|EHA21949.1 atub|OJI83798.1  
Group12891: akaw|GAA85316.1 aluc|OJZ90677.1 anig|EHA21626.1 awen|OJJ30545.1  
Group12892: akaw|GAA85845.1 aluc|OJZ91254.1 asyd|OJJ53340.1 aver|OJJ08405.1  
Group12893: akaw|GAA85939.1 aluc|OJZ91123.1 anid|CBF76247.1 atub|OJI83128.1  
Group12894: akaw|GAA85943.1 aluc|OJZ91119.1 anig|EHA19817.1 atub|OJI83123.1  
Group12895: akaw|GAA85945.1 aluc|OJZ91117.1 anig|EHA19816.1 atub|OJI83121.1

Group12896: akaw|GAA85951.1 aluc|OJZ91111.1 anig|EHA19808.1 atub|OJI83108.1  
Group12897: akaw|GAA86065.1 aluc|OJZ90299.1 anig|EHA23787.1 atub|OJI81724.1  
Group12898: akaw|GAA86634.1 aluc|OJZ85191.1 atub|OJI80406.1 awen|OJJ39940.1  
Group12899: akaw|GAA86654.1 aluc|OJZ89748.1 anig|EHA26971.1 atub|OJI85054.1  
Group12900: akaw|GAA86674.1 aluc|OJZ89771.1 atub|OJI85032.1 azon|OJJ48042.1  
Group12901: akaw|GAA87092.1 aluc|OJZ84346.1 atub|OJI89722.1 azon|OJJ43063.1  
Group12902: akaw|GAA87509.1 aluc|OJZ88011.1 anig|EHA17791.1 atub|OJI90620.1  
Group12903: akaw|GAA87609.1 aluc|OJZ85230.1 anig|EHA25433.1 atub|OJI80350.1  
Group12904: akaw|GAA87812.1 aluc|OJZ85447.1 anig|EHA24990.1 atub|OJI80120.1  
Group12905: akaw|GAA87848.1 aluc|OJZ85488.1 anig|EHA25025.1 atub|OJI80076.1  
Group12906: akaw|GAA88045.1 aluc|OJZ81308.1 anig|EHA18616.1 atub|OJI91516.1  
Group12907: akaw|GAA88435.1 aluc|OJZ88323.1 anig|EHA18059.1 atub|OJI90918.1  
Group12908: akaw|GAA88799.1 aluc|OJZ82482.1 anig|EHA28293.1 atub|OJI87956.1  
Group12909: akaw|GAA89216.1 aluc|OJZ81613.1 atub|OJI88569.1 aver|OJJ02003.1  
Group12910: akaw|GAA89763.1 aluc|OJZ80620.1 anig|EHA27211.1 atub|OJI87474.1  
Group12911: akaw|GAA89767.1 aluc|OJZ80616.1 anig|EHA27216.1 atub|OJI87470.1  
Group12912: akaw|GAA90344.1 aluc|OJZ85888.1 anig|EHA24699.1 atub|OJI79675.1  
Group12913: akaw|GAA90439.1 aluc|OJZ85788.1 atub|OJI79574.1 awen|OJJ35350.1  
Group12914: akaw|GAA90539.1 aluc|OJZ86009.1 anig|EHA24601.1 atub|OJI79798.1  
Group12915: akaw|GAA90859.1 aluc|OJZ82974.1 anig|EHA21390.1 atub|OJI89207.1  
Group12916: akaw|GAA91038.1 aluc|OJZ87848.1 atub|OJI80800.1 azon|OJJ46806.1  
Group12917: akaw|GAA91770.1 aluc|OJZ92784.1 anig|EHA26225.1 atub|OJI87226.1  
Group12918: akaw|GAA91836.1 aluc|OJZ92858.1 anig|EHA26148.1 atub|OJI87316.1  
Group12919: akaw|GAA91877.1 aluc|OJZ82022.1 anig|EHA22233.1 atub|OJI84575.1  
Group12920: akaw|GAA91906.1 aluc|OJZ81988.1 atub|OJI84539.1 azon|OJJ42605.1  
Group12921: akaw|GAA92050.1 aluc|OJZ92920.1 anig|EHA26049.1 atub|OJI87379.1  
Group12922: akaw|GAA92102.1 aluc|OJZ83623.1 anig|EHA27515.1 atub|OJI87850.1  
Group12923: akaw|GAA92148.1 aluc|OJZ85553.1 atub|OJI79352.1 anig|EHA24962.1  
Group12924: asyd|OJJ52316.1 akaw|GAA92939.1 anig|EHA21843.1 azon|OJJ42036.1  
Group12925: akaw|GAA92557.1 aluc|OJZ90104.1 anig|EHA20966.1 atub|OJI84700.1  
Group12926: akaw|GAA92563.1 aluc|OJZ90110.1 anig|EHA20958.1 atub|OJI84689.1  
Group12927: akaw|GAA92598.1 aluc|OJZ82615.1 anig|EHA27464.1 atub|OJI88850.1  
Group12928: akaw|GAA92716.1 aluc|OJZ88762.1 anig|EHA18458.1 atub|OJI91332.1  
Group12929: akaw|GAA92876.1 aluc|OJZ82535.1 anig|EHA22503.1 atub|OJI88779.1  
Group12930: akaw|GAA93110.1 aluc|OJZ80593.1 anig|EHA22189.1 awen|OJJ29865.1  
Group12931: aluc|OJZ80303.1 atub|OJI87456.1 aver|OJJ02221.1 asyd|OJJ53396.1  
Group12932: aluc|OJZ83761.1 atub|OJI90134.1 azon|OJJ42427.1 aver|OJJ05049.1  
Group12933: aluc|OJZ84345.1 anig|EHA27681.1 atub|OJI89723.1 awen|OJJ32234.1  
Group12934: aluc|OJZ87025.1 anig|EHA21633.1 atub|OJI83493.1 azon|OJJ45794.1

Group12935: aluc|OJZ87031.1 anig|EHA25217.1 asyd|OJJ54379.1 atub|OJI83484.1  
Group12936: awen|OJJ36949.1 aory|EIT74207.1 aver|OJJ04885.1 asyd|OJJ55936.1  
Group12937: aluc|OJZ89699.1 ater|EAU39615.1 atub|OJI85102.1 awen|OJJ40949.1  
Group12938: aluc|OJZ91141.1 asyd|OJJ55528.1 atub|OJI83151.1 aver|OJJ05144.1  
Group12939: anid|CBF69434.1 asyd|OJJ52387.1 ater|EAU36795.1 aver|OJJ01936.1  
Group12940: anid|CBF69494.1 asyd|OJJ59238.1 ater|EAU29440.1 aver|OJJ01848.1  
Group12941: anid|CBF70703.1 asyd|OJJ58457.1 ater|EAU37970.1 aver|OJJ01057.1  
Group12942: anid|CBF71430.1 asyd|OJJ52412.1 ater|EAU37827.1 aver|OJJ01946.1  
Group12943: anid|CBF71499.1 asyd|OJJ54931.1 aver|OJJ07625.1 aver|OJJ07266.1  
Group12944: anid|CBF71523.1 asyd|OJJ53435.1 aver|OJJ08314.1 azon|OJJ43609.1  
Group12945: anid|CBF73648.1 asyd|OJJ65134.1 aver|OJI95772.1 asyd|OJJ52404.1  
Group12946: anid|CBF74618.1 asyd|OJJ57622.1 ater|EAU36113.1 aver|OJJ05564.1  
Group12947: anid|CBF74675.1 asyd|OJJ55665.1 aver|OJI97962.1 azon|OJJ46185.1  
Group12948: anid|CBF74691.1 asyd|OJJ60211.1 aver|OJJ04057.1 awen|OJJ40117.1  
Group12949: anid|CBF74971.1 asyd|OJJ60087.1 ater|EAU31429.1 aver|OJJ04174.1  
Group12950: anid|CBF77110.1 asyd|OJJ62964.1 aver|OJI98003.1 azon|OJJ43190.1  
Group12951: anid|CBF78148.1 asyd|OJJ65379.1 ater|EAU32100.1 aver|OJI99549.1  
Group12952: anid|CBF78238.1 asyd|OJJ56040.1 ater|EAU37375.1 aver|OJJ04986.1  
Group12953: anid|CBF78472.1 asyd|OJJ54762.1 ater|EAU30253.1 aver|OJJ07405.1  
Group12954: anid|CBF78534.1 aory|EIT74360.1 asyd|OJJ65297.1 aver|OJI99437.1  
Group12955: anid|CBF78610.1 asyd|OJJ65111.1 ater|EAU32524.1 aver|OJI99238.1  
Group12956: anid|CBF78782.1 asyd|OJJ55215.1 aver|OJJ07001.1 azon|OJJ43631.1  
Group12957: anid|CBF80106.1 asyd|OJJ58324.1 atub|OJI84524.1 aver|OJJ02087.1  
Group12958: anid|CBF80121.1 asyd|OJJ58341.1 aver|OJJ02070.1 azon|OJJ51179.1  
Group12959: anid|CBF80287.1 asyd|OJJ56857.1 ater|EAU36075.1 aver|OJJ03470.1  
Group12960: anid|CBF80469.1 asyd|OJJ54772.1 aver|OJJ07394.1 ater|EAU32686.1  
Group12961: anid|CBF81872.1 asyd|OJJ62653.1 ater|EAU30094.1 aver|OJI96752.1  
Group12962: anid|CBF82023.1 atub|OJI80139.1 aver|OJJ05135.1 awen|OJJ37276.1  
Group12963: anid|CBF82124.1 asyd|OJJ54294.1 ater|EAU29308.1 aver|OJJ05249.1  
Group12964: anid|CBF82205.1 asyd|OJJ52180.1 aver|OJJ05965.1 awen|OJJ34424.1  
Group12965: anid|CBF82775.1 asyd|OJJ58566.1 aver|OJJ01173.1 awen|OJJ34605.1  
Group12966: anid|CBF82808.1 asyd|OJJ57639.1 ater|EAU37477.1 aver|OJJ01945.1  
Group12967: anid|CBF83909.1 asyd|OJJ55420.1 ater|EAU36531.1 aver|OJJ06497.1  
Group12968: anid|CBF84008.1 asyd|OJJ61381.1 ater|EAU37360.1 aver|OJJ00708.1  
Group12969: anid|CBF84017.1 asyd|OJJ61378.1 aver|OJJ00705.1 awen|OJJ29825.1  
Group12970: anid|CBF84158.1 asyd|OJJ57125.1 ater|EAU31584.1 aver|OJJ03179.1  
Group12971: anid|CBF84267.1 asyd|OJJ57207.1 aver|OJJ03082.1 awen|OJJ41829.1  
Group12972: anid|CBF84454.1 asyd|OJJ52036.1 azon|OJJ42035.1 awen|OJJ33685.1  
Group12973: anid|CBF84576.1 asyd|OJJ53383.1 ater|EAU32828.1 aver|OJJ08360.1

Group12974: anid|CBF84699.1 asyd|OJJ53315.1 aver|OJJ08428.1 azon|OJJ42544.1  
Group12975: anid|CBF85024.1 asyd|OJJ63109.1 aver|OJI97851.1 azon|OJJ42614.1  
Group12976: anid|CBF86758.1 asyd|OJJ64710.1 aver|OJI98812.1 ater|EAU36702.1  
Group12977: anid|CBF87067.1 asyd|OJJ60427.1 aver|OJI99749.1 asyd|OJJ56866.1  
Group12978: anid|CBF87151.1 asyd|OJJ60306.1 aver|OJI99647.1 azon|OJJ42490.1  
Group12979: anid|CBF87158.1 asyd|OJJ60307.1 aver|OJI99648.1 ater|EAU32325.1  
Group12980: anid|CBF87316.1 asyd|OJJ59107.1 atub|OJI79308.1 aver|OJJ01698.1  
Group12981: anid|CBF87330.1 asyd|OJJ59104.1 atub|OJI79305.1 aver|OJJ01695.1  
Group12982: anid|CBF87371.1 aver|OJJ06191.1 azon|OJJ42109.1 asyd|OJJ56532.1  
Group12983: anid|CBF87456.1 asyd|OJJ52925.1 ater|EAU38161.1 aver|OJJ08893.1  
Group12984: anid|CBF87496.1 asyd|OJJ52967.1 aver|OJJ08933.1 awen|OJJ36410.1  
Group12985: anid|CBF88657.1 asyd|OJJ63887.1 ater|EAU37502.1 aver|OJI97052.1  
Group12986: anid|CBF88756.1 asyd|OJJ63975.1 ater|EAU34975.1 aver|OJI96979.1  
Group12987: anid|CBF89119.1 asyd|OJJ62658.1 ater|EAU30179.1 aver|OJI96756.1  
Group12988: anid|CBF89120.1 asyd|OJJ62659.1 ater|EAU30178.1 aver|OJI96757.1  
Group12989: anid|CBF89129.1 asyd|OJJ62662.1 ater|EAU30175.1 aver|OJI96760.1  
Group12990: anid|CBF89373.1 asyd|OJJ62936.1 ater|EAU39611.1 aver|OJI98055.1  
Group12991: anig|EHA19812.1 ater|EAU29875.1 atub|OJI83112.1 awen|OJJ34678.1  
Group12992: anig|EHA21835.1 asyd|OJJ55805.1 aver|OJJ04753.1 awen|OJJ29600.1  
Group12993: ater|EAU33817.1 asyd|OJJ52684.1 aver|OJJ08670.1 azon|OJJ45037.1  
Group12994: anig|EHA27967.1 asyd|OJJ58982.1 ater|EAU36532.1 aver|OJJ01577.1  
Group12995: aory|EIT74786.1 ater|EAU31573.1 awen|OJJ33259.1 azon|OJJ50633.1  
Group12996: asyd|OJJ52199.1 ater|EAU32864.1 aver|OJJ05951.1 awen|OJJ34088.1  
Group12997: asyd|OJJ52544.1 aver|OJJ03860.1 awen|OJJ40970.1 azon|OJJ44556.1  
Group12998: asyd|OJJ52744.1 awen|OJJ41771.1 asyd|OJJ62932.1 aver|OJI98058.1  
Group12999: asyd|OJJ53630.1 atub|OJI91469.1 aver|OJJ05947.1 awen|OJJ30587.1  
Group13000: asyd|OJJ53632.1 atub|OJI91471.1 aver|OJJ05949.1 awen|OJJ30583.1  
Group13001: asyd|OJJ54491.1 aver|OJJ07688.1 awen|OJJ36286.1 azon|OJJ46776.1  
Group13002: asyd|OJJ55095.1 atub|OJI83026.1 aver|OJJ07113.1 awen|OJJ30194.1  
Group13003: asyd|OJJ55422.1 aver|OJJ06500.1 asyd|OJJ62319.1 azon|OJJ45048.1  
Group13004: asyd|OJJ55697.1 aver|OJJ06782.1 awen|OJJ33233.1 azon|OJJ46571.1  
Group13005: asyd|OJJ57371.1 ater|EAU37762.1 aver|OJJ05797.1 awen|OJJ35959.1  
Group13006: asyd|OJJ57372.1 ater|EAU37761.1 aver|OJJ05796.1 awen|OJJ35958.1  
Group13007: asyd|OJJ59106.1 aver|OJJ01697.1 asyd|OJJ63962.1 atub|OJI79307.1  
Group13008: asyd|OJJ60935.1 ater|EAU30756.1 aver|OJJ00261.1 awen|OJJ29908.1  
Group13009: asyd|OJJ61511.1 ater|EAU30984.1 aver|OJJ00848.1 awen|OJJ34636.1  
Group13010: asyd|OJJ61753.1 ater|EAU30962.1 aver|OJI95851.1 awen|OJJ33646.1  
Group13011: asyd|OJJ62359.1 atub|OJI86338.1 aver|OJI96454.1 awen|OJJ32290.1  
Group13012: ater|EAU33663.1 azon|OJJ44486.1 aver|OJJ06542.1 awen|OJJ29834.1

Group13013: abra|OJJ65453.1 abra|OJJ65526.1 abra|OJJ65569.1  
Group13014: abra|OJJ65473.1 abra|OJJ65558.1 abra|OJJ67124.1  
Group13015: abra|OJJ65559.1 abra|OJJ65829.1 akaw|GAA93246.1  
Group13016: abra|OJJ65754.1 abra|OJJ65846.1 aluc|OJZ88783.1  
Group13017: abra|OJJ65827.1 abra|OJJ65828.1 akaw|GAA93245.1  
Group13018: abra|OJJ66017.1 abra|OJJ66458.1 ater|EAU32217.1  
Group13019: abra|OJJ76729.1 abra|OJJ77448.1 afla|EED54075.1  
Group13020: acar|OOF90195.1 acar|OOF90197.1 aluc|OJZ79950.1  
Group13021: acar|OOF90264.1 acar|OOG00798.1 acar|OOF93084.1  
Group13022: acar|OOF90438.1 acar|OOF90445.1 asyd|OJJ55926.1  
Group13023: acar|OOF90561.1 acar|OOF90562.1 acar|OOF90563.1  
Group13024: acar|OOF90631.1 acar|OOF90634.1 afis|EAW25541.1  
Group13025: acar|OOF94097.1 acar|OOF94167.1 agla|OJJ78969.1  
Group13026: acar|OOF95058.1 acar|OOF95125.1 acla|EAW08663.1  
Group13027: acar|OOF95060.1 acar|OOF95127.1 anid|CBF79679.1  
Group13028: acar|OOG00250.1 acar|OOG00268.1 azon|OJJ42098.1  
Group13029: afis|EAW18108.1 afis|EAW24036.1 afis|EAW25563.1  
Group13030: afum|EAL90931.1 afum|EAL91126.1 acla|EAW14873.1  
Group13031: agla|OJJ78408.1 agla|OJJ78919.1 agla|OJJ82792.1  
Group13032: agla|OJJ78433.1 agla|OJJ85459.1 agla|OJJ89640.1  
Group13033: agla|OJJ79065.1 agla|OJJ87918.1 awen|OJJ36226.1  
Group13034: agla|OJJ79274.1 agla|OJJ88809.1 agla|OJJ82201.1  
Group13035: agla|OJJ81537.1 agla|OJJ86488.1 agla|OJJ87265.1  
Group13036: agla|OJJ83424.1 agla|OJJ89193.1 ater|EAU34811.1  
Group13037: agla|OJJ83549.1 agla|OJJ89316.1 afum|EAL87730.1  
Group13038: agla|OJJ83609.1 agla|OJJ83610.1 azon|OJJ47419.1  
Group13039: agla|OJJ84374.1 agla|OJJ85305.1 agla|OJJ89339.1  
Group13040: agla|OJJ86585.1 agla|OJJ87693.1 aver|OJJ04106.1  
Group13041: agla|OJJ88218.1 asyd|OJJ63999.1 aver|OJI98088.1  
Group13042: agla|OJJ88811.1 agla|OJJ89486.1 anid|CBF88644.1  
Group13043: akaw|GAA92347.1 akaw|GAA93057.1 acla|EAW09608.1  
Group13044: akaw|GAA92952.1 akaw|GAA93250.1 asyd|OJJ52135.1  
Group13045: akaw|GAA93243.1 akaw|GAA93291.1 abra|OJJ65732.1  
Group13046: aluc|OJZ79470.1 aluc|OJZ79695.1 aluc|OJZ79900.1  
Group13047: aluc|OJZ79477.1 aluc|OJZ80340.1 aluc|OJZ79553.1  
Group13048: aluc|OJZ79532.1 aluc|OJZ80330.1 aluc|OJZ79907.1  
Group13049: aluc|OJZ79546.1 aluc|OJZ80342.1 aluc|OJZ79842.1  
Group13050: aluc|OJZ79572.1 aluc|OJZ81135.1 aluc|OJZ81136.1  
Group13051: aluc|OJZ79578.1 aluc|OJZ80409.1 aluc|OJZ80089.1

Group13052: aluc|OJZ79590.1 aluc|OJZ80060.1 aluc|OJZ80407.1  
Group13053: aluc|OJZ79621.1 aluc|OJZ80053.1 aluc|OJZ80216.1  
Group13054: aluc|OJZ79633.1 aluc|OJZ79682.1 aluc|OJZ79632.1  
Group13055: aluc|OJZ79661.1 aluc|OJZ80110.1 akaw|GAA89010.1  
Group13056: aluc|OJZ79662.1 aluc|OJZ88847.1 aluc|OJZ80305.1  
Group13057: aluc|OJZ79688.1 aluc|OJZ80464.1 aluc|OJZ79840.1  
Group13058: aluc|OJZ79690.1 aluc|OJZ80036.1 aory|EIT75739.1  
Group13059: aluc|OJZ79722.1 aluc|OJZ79868.1 akaw|GAA93162.1  
Group13060: aluc|OJZ79725.1 aluc|OJZ80229.1 aluc|OJZ80137.1  
Group13061: aluc|OJZ79759.1 aluc|OJZ80331.1 akaw|GAA93330.1  
Group13062: aluc|OJZ79784.1 aluc|OJZ80378.1 akaw|GAA93174.1  
Group13063: aluc|OJZ79819.1 aluc|OJZ80413.1 akaw|GAA93221.1  
Group13064: aluc|OJZ79823.1 aluc|OJZ88820.1 anig|EHA17703.1  
Group13065: aluc|OJZ79850.1 aluc|OJZ80295.1 akaw|GAA93153.1  
Group13066: aluc|OJZ79972.1 aluc|OJZ80476.1 aluc|OJZ88836.1  
Group13067: aluc|OJZ80116.1 aluc|OJZ80451.1 akaw|GAA93356.1  
Group13068: aluc|OJZ80261.1 aluc|OJZ80343.1 akaw|GAA88995.1  
Group13069: aluc|OJZ80448.1 aluc|OJZ80483.1 akaw|GAA93359.1  
Group13070: anid|CBF79007.1 anid|CBF79011.1 anid|CBF84589.1  
Group13071: anid|CBF84377.1 anid|CBF89339.1 anig|EHA19814.1  
Group13072: anid|CBF87241.1 anid|CBF87256.1 agla|OJJ82041.1  
Group13073: anig|EHA21127.1 anig|EHA21136.1 acla|EAW08997.1  
Group13074: anig|EHA21832.1 anig|EHA21864.1 anid|CBF84450.1  
Group13075: asyd|OJJ51839.1 asyd|OJJ52329.1 aluc|OJZ79788.1  
Group13076: asyd|OJJ51921.1 asyd|OJJ52312.1 aluc|OJZ79961.1  
Group13077: asyd|OJJ51923.1 asyd|OJJ52311.1 acla|EAW11463.1  
Group13078: asyd|OJJ51928.1 asyd|OJJ51983.1 asyd|OJJ51962.1  
Group13079: asyd|OJJ51941.1 asyd|OJJ52142.1 asyd|OJJ52127.1  
Group13080: asyd|OJJ51950.1 asyd|OJJ62679.1 aluc|OJZ80358.1  
Group13081: asyd|OJJ51959.1 asyd|OJJ62654.1 aver|OJI96753.1  
Group13082: asyd|OJJ51964.1 asyd|OJJ62581.1 aver|OJI96701.1  
Group13083: asyd|OJJ51989.1 asyd|OJJ54463.1 aver|OJJ07707.1  
Group13084: asyd|OJJ52018.1 asyd|OJJ52146.1 asyd|OJJ52218.1  
Group13085: asyd|OJJ52024.1 asyd|OJJ52283.1 afum|EAL87731.1  
Group13086: asyd|OJJ52194.1 asyd|OJJ54732.1 asyd|OJJ54368.1  
Group13087: asyd|OJJ52219.1 asyd|OJJ52305.1 ater|EAU35390.1  
Group13088: asyd|OJJ52266.1 asyd|OJJ52318.1 asyd|OJJ62696.1  
Group13089: asyd|OJJ53280.1 asyd|OJJ56764.1 aver|OJJ03569.1  
Group13090: asyd|OJJ53535.1 asyd|OJJ63010.1 aver|OJJ08216.1

Group13091: asyd|OJJ53552.1 asyd|OJJ63020.1 ater|EAU31402.1  
Group13092: asyd|OJJ53793.1 asyd|OJJ57301.1 aver|OJJ07903.1  
Group13093: asyd|OJJ54694.1 asyd|OJJ62715.1 awen|OJJ38794.1  
Group13094: asyd|OJJ54863.1 asyd|OJJ62955.1 aver|OJI98011.1  
Group13095: asyd|OJJ58372.1 asyd|OJJ62488.1 agla|OJJ80481.1  
Group13096: asyd|OJJ59285.1 asyd|OJJ65369.1 aver|OJJ07161.1  
Group13097: ater|EAU37462.1 afla|EED47164.1 aory|EIT79262.1  
Group13098: ater|EAU29535.1 ater|EAU34637.1 anid|CBF80205.1  
Group13099: ater|EAU29605.1 ater|EAU30191.1 asyd|OJJ52414.1  
Group13100: ater|EAU39200.1 asyd|OJJ55519.1 aver|OJJ06597.1  
Group13101: atub|OJI87528.1 atub|OJI87530.1 atub|OJI87529.1  
Group13102: aver|OJI97246.1 aver|OJJ08769.1 asyd|OJJ63689.1  
Group13103: aver|OJJ02492.1 aver|OJJ08766.1 asyd|OJJ59797.1  
Group13104: aver|OJJ05160.1 aver|OJJ07378.1 asyd|OJJ54718.1  
Group13105: aver|OJJ06703.1 aver|OJJ07808.1 asyd|OJJ55626.1  
Group13106: awen|OJJ29575.1 awen|OJJ29614.1 akaw|GAA92645.1  
Group13107: awen|OJJ30087.1 awen|OJJ38073.1 agla|OJJ85527.1  
Group13108: awen|OJJ30778.1 awen|OJJ31703.1 agla|OJJ82180.1  
Group13109: awen|OJJ30790.1 awen|OJJ31691.1 anid|CBF80735.1  
Group13110: awen|OJJ30819.1 awen|OJJ38002.1 atub|OJI84643.1  
Group13111: awen|OJJ31595.1 awen|OJJ40839.1 azon|OJJ49490.1  
Group13112: awen|OJJ31918.1 awen|OJJ31919.1 afis|EAW20128.1  
Group13113: awen|OJJ31970.1 awen|OJJ35520.1 afis|EAW19977.1  
Group13114: awen|OJJ32042.1 awen|OJJ34523.1 awen|OJJ34522.1  
Group13115: awen|OJJ32342.1 aver|OJI98034.1 asyd|OJJ56969.1  
Group13116: awen|OJJ32514.1 awen|OJJ36009.1 abra|OJJ77883.1  
Group13117: awen|OJJ35967.1 awen|OJJ35968.1 afum|EAL86713.1  
Group13118: awen|OJJ36925.1 awen|OJJ36930.1 azon|OJJ43654.1  
Group13119: awen|OJJ40017.1 awen|OJJ40018.1 awen|OJJ31326.1  
Group13120: azon|OJJ42236.1 azon|OJJ45313.1 azon|OJJ46424.1  
Group13121: azon|OJJ42670.1 azon|OJJ45164.1 azon|OJJ48054.1  
Group13122: azon|OJJ43556.1 azon|OJJ45986.1 azon|OJJ46494.1  
Group13123: azon|OJJ43576.1 azon|OJJ45574.1 azon|OJJ47406.1  
Group13124: azon|OJJ43643.1 azon|OJJ48721.1 agla|OJJ84717.1  
Group13125: azon|OJJ44501.1 azon|OJJ45177.1 acar|OOF94767.1  
Group13126: azon|OJJ46560.1 azon|OJJ51073.1 awen|OJJ32916.1  
Group13127: abra|OJJ65433.1 abra|OJJ65439.1 aluc|OJZ79731.1  
Group13128: abra|OJJ65454.1 abra|OJJ65568.1 abra|OJJ65525.1  
Group13129: abra|OJJ65629.1 abra|OJJ65662.1 abra|OJJ65730.1

Group13130: anid|CBF69925.1 anid|CBF73430.1 anid|CBF84241.1  
Group13131: anid|CBF71863.1 anid|CBF76093.1 anid|CBF80239.1  
Group13132: asyd|OJJ51880.1 asyd|OJJ52236.1 asyd|OJJ52277.1  
Group13133: asyd|OJJ51890.1 asyd|OJJ52307.1 asyd|OJJ62687.1  
Group13134: asyd|OJJ51896.1 asyd|OJJ51997.1 asyd|OJJ52308.1  
Group13135: asyd|OJJ51937.1 asyd|OJJ52242.1 asyd|OJJ52132.1  
Group13136: asyd|OJJ51940.1 asyd|OJJ52143.1 asyd|OJJ52128.1  
Group13137: asyd|OJJ51951.1 asyd|OJJ62678.1 afum|EAL85395.1  
Group13138: asyd|OJJ51958.1 asyd|OJJ52278.1 asyd|OJJ62655.1  
Group13139: asyd|OJJ51986.1 asyd|OJJ62708.1 afis|EAW20717.1  
Group13140: ater|EAU32912.1 ater|EAU32920.1 ater|EAU32919.1  
Group13141: atub|OJI83367.1 atub|OJI83369.1 atub|OJI83368.1  
Group13142: aver|OJI96127.1 aver|OJJ04447.1 ater|EAU36835.1  
Group13143: awen|OJJ29530.1 awen|OJJ29608.1 awen|OJJ29531.1  
Group13144: awen|OJJ29549.1 awen|OJJ29620.1 awen|OJJ29633.1  
Group13145: azon|OJJ42045.1 azon|OJJ42048.1 azon|OJJ42047.1  
Group13146: azon|OJJ42570.1 azon|OJJ46523.1 azon|OJJ46435.1  
Group13147: acla|EAW08958.1 acla|EAW10829.1 acla|EAW14874.1  
Group13148: afis|EAW16431.1 afis|EAW18465.1 afis|EAW20644.1  
Group13149: agla|OJJ78941.1 agla|OJJ87858.1 agla|OJJ86639.1  
Group13150: agla|OJJ79794.1 agla|OJJ83136.1 agla|OJJ87697.1  
Group13151: agla|OJJ79795.1 agla|OJJ81748.1 agla|OJJ86424.1  
Group13152: agla|OJJ80621.1 agla|OJJ80623.1 agla|OJJ80622.1  
Group13153: agla|OJJ81012.1 agla|OJJ83432.1 aver|OJI96722.1  
Group13154: agla|OJJ81343.1 agla|OJJ83434.1 agla|OJJ82253.1  
Group13155: agla|OJJ82004.1 agla|OJJ86549.1 agla|OJJ83785.1  
Group13156: agla|OJJ82220.1 agla|OJJ89483.1 agla|OJJ87263.1  
Group13157: agla|OJJ82842.1 agla|OJJ82844.1 ater|EAU38146.1  
Group13158: agla|OJJ84373.1 agla|OJJ89336.1 agla|OJJ85304.1  
Group13159: agla|OJJ85904.1 agla|OJJ85907.1 agla|OJJ85905.1  
Group13160: aluc|OJZ79510.1 aluc|OJZ80402.1 aluc|OJZ79862.1  
Group13161: aluc|OJZ79525.1 aluc|OJZ79980.1 aluc|OJZ80369.1  
Group13162: aluc|OJZ79550.1 aluc|OJZ80078.1 aluc|OJZ79744.1  
Group13163: aluc|OJZ79568.1 aluc|OJZ80459.1 aluc|OJZ80288.1  
Group13164: aluc|OJZ79647.1 aluc|OJZ80336.1 aluc|OJZ80043.1  
Group13165: aluc|OJZ79708.1 aluc|OJZ79953.1 aluc|OJZ80152.1  
Group13166: aluc|OJZ79728.1 aluc|OJZ80232.1 aluc|OJZ79938.1  
Group13167: aluc|OJZ79791.1 aluc|OJZ80333.1 aluc|OJZ80048.1  
Group13168: aluc|OJZ79816.1 aluc|OJZ80082.1 aluc|OJZ80251.1



Group13169: aluc|OJZ79818.1 aluc|OJZ80105.1 aluc|OJZ80084.1  
Group13170: aluc|OJZ79981.1 aluc|OJZ80489.1 aluc|OJZ80169.1  
Group13171: abra|OJJ65419.1 aory|EIT83501.1 asyd|OJJ52296.1  
Group13172: abra|OJJ65427.1 agla|OJJ86334.1 akaw|GAA92644.1  
Group13173: abra|OJJ65442.1 akaw|BAL04887.1 azon|OJJ41976.1  
Group13174: anig|EHA17698.1 akaw|GAA92965.1 aluc|OJZ80329.1  
Group13175: abra|OJJ65538.1 afum|EAL91912.1 asyd|OJJ57188.1  
Group13176: abra|OJJ65565.1 akaw|GAA93355.1 awen|OJJ32280.1  
Group13177: abra|OJJ65593.1 aluc|OJZ80057.1 akaw|GAA93258.1  
Group13178: awen|OJJ32908.1 atub|OJI86040.1 asyd|OJJ54901.1  
Group13179: abra|OJJ65615.1 aluc|OJZ80006.1 akaw|GAA93150.1  
Group13180: akaw|GAA92882.1 abra|OJJ70029.1 atub|OJI79317.1  
Group13181: abra|OJJ65641.1 acar|OOF97538.1 awen|OJJ32714.1  
Group13182: abra|OJJ65646.1 acla|EAW06926.1 awen|OJJ35899.1  
Group13183: abra|OJJ65667.1 aluc|OJZ81152.1 atub|OJI88769.1  
Group13184: abra|OJJ65669.1 anid|CBF76111.1 atub|OJI82833.1  
Group13185: abra|OJJ65674.1 aluc|OJZ79541.1 aver|OJJ03423.1  
Group13186: abra|OJJ65675.1 aluc|OJZ79542.1 aver|OJJ03430.1  
Group13187: abra|OJJ65677.1 afis|EAW20905.1 afum|EAL84728.2  
Group13188: asyd|OJJ54177.1 aver|OJJ08562.1 azon|OJJ42582.1  
Group13189: abra|OJJ65704.1 aluc|OJZ79923.1 ater|EAU35383.1  
Group13190: abra|OJJ65705.1 acar|OOF90744.1 aluc|OJZ79926.1  
Group13191: agla|OJJ83803.1 acar|OOF90629.1 aluc|OJZ79482.1  
Group13192: abra|OJJ65757.1 afla|EED46308.1 aory|EIT76345.1  
Group13193: aory|EIT78110.1 acla|EAW14267.1 afla|EED50758.1  
Group13194: asyd|OJJ54316.1 ater|EAU32012.1 aver|OJJ05270.1  
Group13195: acla|EAW13704.1 afis|EAW19882.1 afum|EAL85016.1  
Group13196: abra|OJJ65790.1 anig|EHA18728.1 anig|EHA18729.1  
Group13197: abra|OJJ65793.1 asyd|OJJ57208.1 aver|OJJ03081.1  
Group13198: anid|CBF80352.1 asyd|OJJ54830.1 aver|OJJ07331.1  
Group13199: abra|OJJ65798.1 asyd|OJJ54902.1 aver|OJJ02468.1  
Group13200: afla|EED47497.1 aory|EIT74577.1 azon|OJJ42013.1  
Group13201: abra|OJJ65811.1 anig|EHA22497.1 atub|OJI88776.1  
Group13202: awen|OJJ37048.1 afla|EED53430.1 aory|EIT74995.1  
Group13203: abra|OJJ65842.1 akaw|GAA92841.1 ater|EAU33404.1  
Group13204: abra|OJJ65845.1 akaw|GAA92839.1 aluc|OJZ88784.1  
Group13205: ater|EAU36824.1 afla|EED54136.1 aory|EIT75925.1  
Group13206: anid|CBF80140.1 agla|OJJ85369.1 aver|OJJ01889.1  
Group13207: acla|EAW11042.1 afla|EED49625.1 aory|EIT80945.1

Group13208: afla|EED54351.1 afis|EAW20559.1 afum|EAL84502.1  
Group13209: abra|OJJ65908.1 anig|EHA21129.1 awen|OJJ33613.1  
Group13210: ater|EAU29593.1 afum|EAL85115.1 aluc|OJZ81563.1  
Group13211: abra|OJJ66031.1 afla|EED52375.1 atub|OJI87436.1  
Group13212: abra|OJJ66032.1 atub|OJI87435.1 awen|OJJ37489.1  
Group13213: abra|OJJ66035.1 atub|OJI87432.1 awen|OJJ37488.1  
Group13214: abra|OJJ66037.1 ater|EAU32812.1 atub|OJI82469.1  
Group13215: abra|OJJ66095.1 asyd|OJJ55458.1 aver|OJJ03133.1  
Group13216: abra|OJJ66097.1 aver|OJJ03134.1 asyd|OJJ55457.1  
Group13217: anid|CBF82365.1 asyd|OJJ54199.1 aver|OJJ08525.1  
Group13218: acar|OOF98883.1 aver|OJI97586.1 asyd|OJJ63362.1  
Group13219: aver|OJJ06719.1 aluc|OJZ89983.1 asyd|OJJ52508.1  
Group13220: acla|EAW13555.1 aver|OJJ07460.1 afla|EED49761.1  
Group13221: abra|OJJ66164.1 afla|EED47402.1 agla|OJJ79412.1  
Group13222: abra|OJJ66174.1 asyd|OJJ61492.1 aver|OJJ00833.1  
Group13223: abra|OJJ66178.1 akaw|GAA93275.1 aluc|OJZ79677.1  
Group13224: abra|OJJ66184.1 acar|OOF96460.1 asyd|OJJ65284.1  
Group13225: abra|OJJ66188.1 afla|EED48374.1 aory|EIT83087.1  
Group13226: abra|OJJ66205.1 aluc|OJZ89829.1 atub|OJI84977.1  
Group13227: afum|EAL92110.2 acla|EAW13633.1 afis|EAW21087.1  
Group13228: abra|OJJ66272.1 anig|EHA23653.1 atub|OJI89950.1  
Group13229: abra|OJJ66273.1 acla|EAW10348.1 afis|EAW19777.1  
Group13230: abra|OJJ66274.1 anig|EHA23655.1 atub|OJI89948.1  
Group13231: abra|OJJ66280.1 anig|EHA23660.1 atub|OJI89943.1  
Group13232: abra|OJJ66287.1 anig|EHA23667.1 atub|OJI89936.1  
Group13233: abra|OJJ66298.1 asyd|OJJ56621.1 azon|OJJ42429.1  
Group13234: abra|OJJ66299.1 acla|EAW10957.1 afum|EAL87796.1  
Group13235: abra|OJJ66301.1 afla|EED47877.1 aluc|OJZ80192.1  
Group13236: abra|OJJ66309.1 asyd|OJJ52054.1 anig|EHA21831.1  
Group13237: abra|OJJ66316.1 afla|EED52351.1 akaw|GAA93076.1  
Group13238: abra|OJJ66380.1 asyd|OJJ54799.1 aver|OJJ07360.1  
Group13239: abra|OJJ66381.1 asyd|OJJ54798.1 aver|OJJ07361.1  
Group13240: abra|OJJ66382.1 asyd|OJJ54797.1 aver|OJJ07362.1  
Group13241: abra|OJJ66432.1 acar|OOF90242.1 agla|OJJ84658.1  
Group13242: abra|OJJ66436.1 akaw|GAA83941.1 aluc|OJZ80823.1  
Group13243: abra|OJJ66495.1 asyd|OJJ54146.1 aver|OJI96128.1  
Group13244: abra|OJJ66602.1 aluc|OJZ81444.1 atub|OJI88734.1  
Group13245: abra|OJJ66663.1 aluc|OJZ80784.1 anig|EHA27245.1  
Group13246: abra|OJJ66730.1 aluc|OJZ80719.1 atub|OJI87575.1

Group13247: abra|OJJ66805.1 afla|EED53420.1 atub|OJI79339.1  
Group13248: abra|OJJ66814.1 afla|EED53416.1 atub|OJI79327.1  
Group13249: abra|OJJ66885.1 anig|EHA24845.1 atub|OJI79487.1  
Group13250: abra|OJJ66913.1 aluc|OJZ85667.1 atub|OJI79460.1  
Group13251: abra|OJJ66930.1 afla|EED49766.1 awen|OJJ41938.1  
Group13252: agla|OJJ89296.1 aver|OJJ08535.1 asyd|OJJ54192.1  
Group13253: abra|OJJ67002.1 afis|EAW25644.1 agla|OJJ83006.1  
Group13254: abra|OJJ67025.1 akaw|GAA83297.1 anig|EHA24959.1  
Group13255: abra|OJJ67042.1 afla|EED52066.1 aory|EIT72304.1  
Group13256: abra|OJJ67049.1 agla|OJJ82956.1 anig|EHA18594.1  
Group13257: azon|OJJ42485.1 afla|EED52158.1 aory|EIT74503.1  
Group13258: abra|OJJ67051.1 asyd|OJJ62602.1 awen|OJJ33861.1  
Group13259: abra|OJJ67055.1 afla|EED52906.1 aory|EIT78640.1  
Group13260: abra|OJJ67063.1 acar|OOF95670.1 anig|EHA18943.1  
Group13261: abra|OJJ67107.1 aluc|OJZ81114.1 atub|OJI86628.1  
Group13262: abra|OJJ67135.1 agla|OJJ78765.1 anig|EHA20146.1  
Group13263: abra|OJJ67136.1 agla|OJJ86210.1 anig|EHA20315.1  
Group13264: acla|EAW08555.1 afum|EAL87869.1 afis|EAW23597.1  
Group13265: abra|OJJ67220.1 ater|EAU37939.1 aver|OJI99454.1  
Group13266: abra|OJJ67221.1 afla|EED50961.1 atub|OJI81177.1  
Group13267: abra|OJJ67289.1 akaw|GAA87404.1 atub|OJI81012.1  
Group13268: abra|OJJ67315.1 afla|EED46372.1 aory|EIT72289.1  
Group13269: abra|OJJ67355.1 anig|EHA25225.1 asyd|OJJ54611.1  
Group13270: abra|OJJ67362.1 acar|OOF92460.1 aluc|OJZ85001.1  
Group13271: asyd|OJJ58445.1 aver|OJJ01045.1 anid|CBF70718.1  
Group13272: abra|OJJ67603.1 anig|EHA25721.1 atub|OJI88464.1  
Group13273: abra|OJJ67613.1 akaw|GAA89131.1 aluc|OJZ81707.1  
Group13274: acar|OOF91967.1 asyd|OJJ60369.1 aver|OJI99705.1  
Group13275: anid|CBF73891.1 asyd|OJJ53661.1 aver|OJJ07769.1  
Group13276: abra|OJJ67626.1 akaw|GAA89146.1 aluc|OJZ81690.1  
Group13277: abra|OJJ67705.1 atub|OJI88564.1 aver|OJI99277.1  
Group13278: abra|OJJ67712.1 ater|EAU33736.1 acar|OOF94899.1  
Group13279: abra|OJJ67768.1 afla|EED55026.1 aory|EIT81984.1  
Group13280: abra|OJJ67800.1 aluc|OJZ90856.1 afla|EED50187.1  
Group13281: acar|OOF99271.1 asyd|OJJ52758.1 aver|OJJ08740.1  
Group13282: abra|OJJ67834.1 afum|EAL87812.1 atub|OJI89151.1  
Group13283: abra|OJJ67895.1 aluc|OJZ81995.1 atub|OJI84545.1  
Group13284: abra|OJJ67946.1 aluc|OJZ82818.1 anig|EHA21258.1  
Group13285: abra|OJJ67960.1 atub|OJI89063.1 aluc|OJZ82833.1

Group13286: abra|OJJ68026.1 acar|OOF92069.1 anig|EHA21323.1  
Group13287: acla|EAW08928.1 afla|EED45085.1 aory|EIT73673.1  
Group13288: abra|OJJ68158.1 aluc|OJZ83223.1 atub|OJI87713.1  
Group13289: abra|OJJ68213.1 akaw|GAA83233.1 atub|OJI90110.1  
Group13290: abra|OJJ68247.1 akaw|GAA83214.1 aluc|OJZ83716.1  
Group13291: agla|OJJ80188.1 akaw|GAA89978.1 aluc|OJZ83989.1  
Group13292: anid|CBF86783.1 aver|OJI98782.1 asyd|OJJ64680.1  
Group13293: anid|CBF76040.1 asyd|OJJ52460.1 aver|OJJ03955.1  
Group13294: anid|CBF82267.1 asyd|OJJ59955.1 aver|OJJ02334.1  
Group13295: ater|EAU35301.1 asyd|OJJ58134.1 aver|OJJ04271.1  
Group13296: anid|CBF84434.1 asyd|OJJ53635.1 aver|OJJ01171.1  
Group13297: ater|EAU36743.1 afum|EAL88826.2 afis|EAW16195.1  
Group13298: awen|OJJ36254.1 asyd|OJJ64168.1 aver|OJI98243.1  
Group13299: abra|OJJ68629.1 aluc|OJZ81926.1 atub|OJI84478.1  
Group13300: anid|CBF76074.1 asyd|OJJ55071.1 aver|OJJ07140.1  
Group13301: aory|EIT72254.1 afla|EED46756.1 awen|OJJ41298.1  
Group13302: azon|OJJ42015.1 asyd|OJJ65326.1 aver|OJI99471.1  
Group13303: abra|OJJ68831.1 aluc|OJZ85809.1 atub|OJI79595.1  
Group13304: afum|EAL84273.1 acla|EAW12210.1 afis|EAW25550.1  
Group13305: afis|EAW17014.1 akaw|GAA89813.1 aluc|OJZ81877.1  
Group13306: afum|EAL89943.1 afis|EAW25280.1 azon|OJJ50338.1  
Group13307: abra|OJJ68946.1 aluc|OJZ85932.1 atub|OJI79721.1  
Group13308: abra|OJJ68974.1 aluc|OJZ85963.1 atub|OJI79750.1  
Group13309: aory|EIT82518.1 afla|EED49095.1 anid|CBF80558.1  
Group13310: abra|OJJ69076.1 acar|OOF91215.1 asyd|OJJ55841.1  
Group13311: afis|EAW19978.1 acla|EAW14481.1 afum|EAL94012.2  
Group13312: abra|OJJ69338.1 aluc|OJZ82170.1 atub|OJI88267.1  
Group13313: abra|OJJ69360.1 aluc|OJZ82193.1 atub|OJI88242.1  
Group13314: abra|OJJ69495.1 aluc|OJZ82335.1 atub|OJI88105.1  
Group13315: abra|OJJ69549.1 aluc|OJZ82379.1 atub|OJI88062.1  
Group13316: abra|OJJ69586.1 aluc|OJZ82403.1 atub|OJI88038.1  
Group13317: abra|OJJ69601.1 acar|OOF93268.1 awen|OJJ38319.1  
Group13318: abra|OJJ69610.1 aluc|OJZ82418.1 atub|OJI88023.1  
Group13319: agla|OJJ88060.1 asyd|OJJ56268.1 aver|OJJ08499.1  
Group13320: atub|OJI87960.1 akaw|GAA88793.1 aluc|OJZ82476.1  
Group13321: abra|OJJ69740.1 aluc|OJZ83156.1 atub|OJI87781.1  
Group13322: agla|OJJ82665.1 asyd|OJJ60040.1 aver|OJJ02245.1  
Group13323: abra|OJJ69781.1 afis|EAW24837.1 aver|OJJ05999.1  
Group13324: asyd|OJJ59192.1 afla|EED53431.1 aory|EIT75228.1

Group13325: anid|CBF84269.1 asyd|OJJ57206.1 aver|OJJ03083.1  
Group13326: aory|EIT74838.1 afis|EAW25613.1 afla|EED53589.1  
Group13327: asyd|OJJ64743.1 anid|CBF86696.1 aver|OJI98847.1  
Group13328: azon|OJJ42398.1 aver|OJI99434.1 asyd|OJJ65283.1  
Group13329: abra|OJJ70032.1 anig|EHA18717.1 atub|OJI79321.1  
Group13330: abra|OJJ70040.1 anig|EHA18722.1 atub|OJI79326.1  
Group13331: abra|OJJ70091.1 acar|OOF90921.1 atub|OJI80359.1  
Group13332: abra|OJJ70092.1 atub|OJI80360.1 atub|OJI88455.1  
Group13333: abra|OJJ70099.1 afla|EED48387.1 aory|EIT83070.1  
Group13334: aory|EIT75501.1 afla|EED45516.1 agla|OJJ79484.1  
Group13335: abra|OJJ70191.1 akaw|GAA86585.1 azon|OJJ43536.1  
Group13336: aver|OJJ07775.1 ater|EAU33242.1 awen|OJJ36207.1  
Group13337: abra|OJJ70259.1 aluc|OJZ85085.1 anig|EHA25300.1  
Group13338: anid|CBF74552.1 asyd|OJJ57684.1 aver|OJJ05490.1  
Group13339: abra|OJJ70271.1 agla|OJJ82947.1 awen|OJJ34691.1  
Group13340: abra|OJJ70344.1 acar|OOF91922.1 anig|EHA27467.1  
Group13341: abra|OJJ70362.1 acar|OOF89853.1 ater|EAU29960.1  
Group13342: abra|OJJ70393.1 akaw|GAA91966.1 anig|EHA27421.1  
Group13343: abra|OJJ70405.1 acar|OOF93981.1 anig|EHA21037.1  
Group13344: abra|OJJ70408.1 acar|OOF94952.1 awen|OJJ32276.1  
Group13345: abra|OJJ70479.1 asyd|OJJ55444.1 aver|OJJ06517.1  
Group13346: abra|OJJ70507.1 anig|EHA18994.1 atub|OJI90219.1  
Group13347: abra|OJJ70545.1 aluc|OJZ83890.1 atub|OJI90257.1  
Group13348: abra|OJJ70635.1 ater|EAU33583.1 awen|OJJ31594.1  
Group13349: afla|EED56727.1 aory|EIT73927.1 azon|OJJ48357.1  
Group13350: abra|OJJ70737.1 aluc|OJZ84082.1 atub|OJI90452.1  
Group13351: abra|OJJ70771.1 aluc|OJZ84117.1 atub|OJI90490.1  
Group13352: abra|OJJ70822.1 acla|EAW09020.1 anig|EHA18000.1  
Group13353: abra|OJJ70825.1 acla|EAW09023.1 anig|EHA17998.1  
Group13354: afum|EAL88031.1 afis|EAW23430.1 azon|OJJ45956.1  
Group13355: abra|OJJ70886.1 acla|EAW10809.1 aluc|OJZ87636.1  
Group13356: abra|OJJ70903.1 akaw|GAA87417.1 aluc|OJZ87621.1  
Group13357: abra|OJJ70908.1 anig|EHA20814.1 atub|OJI81033.1  
Group13358: abra|OJJ70909.1 aluc|OJZ87615.1 anig|EHA20812.1  
Group13359: abra|OJJ71197.1 akaw|GAA82786.1 anig|EHA20582.1  
Group13360: abra|OJJ71215.1 anig|EHA20559.1 aver|OJJ03896.1  
Group13361: aluc|OJZ81564.1 akaw|GAA92454.1 atub|OJI88621.1  
Group13362: abra|OJJ71431.1 akaw|GAA82572.1 aluc|OJZ87107.1  
Group13363: abra|OJJ71437.1 asyd|OJJ55468.1 aver|OJJ06551.1

Group13364: abra|OJJ71448.1 aluc|OJZ87093.1 atub|OJI81545.1  
Group13365: abra|OJJ71459.1 aluc|OJZ87084.1 azon|OJJ44805.1  
Group13366: abra|OJJ71530.1 anig|EHA21600.1 atub|OJI84272.1  
Group13367: abra|OJJ71569.1 aluc|OJZ86306.1 atub|OJI84230.1  
Group13368: abra|OJJ71604.1 awen|OJJ38715.1 azon|OJJ42405.1  
Group13369: abra|OJJ71605.1 aluc|OJZ86345.1 atub|OJI84189.1  
Group13370: abra|OJJ71606.1 aluc|OJZ86346.1 anig|EHA21540.1  
Group13371: abra|OJJ71640.1 aluc|OJZ86383.1 atub|OJI84150.1  
Group13372: abra|OJJ71683.1 aluc|OJZ86425.1 atub|OJI84106.1  
Group13373: abra|OJJ71776.1 akaw|GAA85132.1 aluc|OJZ86506.1  
Group13374: abra|OJJ71785.1 aluc|OJZ86515.1 atub|OJI84009.1  
Group13375: anid|CBF70301.1 aver|OJJ01341.1 asyd|OJJ58728.1  
Group13376: abra|OJJ71833.1 atub|OJI83956.1 aluc|OJZ86565.1  
Group13377: abra|OJJ71835.1 acar|OOF96509.1 aluc|OJZ86566.1  
Group13378: afum|EAL90928.1 acar|OOF90709.1 awen|OJJ36067.1  
Group13379: abra|OJJ71927.1 acar|OOF96584.1 agla|OJJ85699.1  
Group13380: abra|OJJ71943.1 aluc|OJZ86679.1 atub|OJI83848.1  
Group13381: awen|OJJ35354.1 afla|EED47438.1 aory|EIT81895.1  
Group13382: abra|OJJ72057.1 acar|OOF96714.1 atub|OJI83725.1  
Group13383: abra|OJJ72072.1 afis|EAW19914.1 ater|EAU32298.1  
Group13384: abra|OJJ72104.1 akaw|GAA84818.1 aluc|OJZ86859.1  
Group13385: anid|CBF73513.1 asyd|OJJ55808.1 aver|OJJ04756.1  
Group13386: atub|OJI88063.1 acar|OOF90605.1 anig|EHA28386.1  
Group13387: abra|OJJ72275.1 anig|EHA19912.1 awen|OJJ35392.1  
Group13388: abra|OJJ72276.1 anig|EHA19913.1 awen|OJJ35393.1  
Group13389: abra|OJJ72288.1 aluc|OJZ90267.1 atub|OJI81692.1  
Group13390: azon|OJJ51716.1 afla|EED49861.1 aory|EIT83391.1  
Group13391: azon|OJJ42108.1 asyd|OJJ56533.1 aver|OJJ06190.1  
Group13392: abra|OJJ72390.1 atub|OJI81802.1 aluc|OJZ90377.1  
Group13393: abra|OJJ72500.1 anig|EHA23941.1 atub|OJI81908.1  
Group13394: abra|OJJ72526.1 aluc|OJZ90506.1 atub|OJI81930.1  
Group13395: abra|OJJ72597.1 aluc|OJZ90578.1 atub|OJI82003.1  
Group13396: abra|OJJ72612.1 anig|EHA24033.1 atub|OJI82017.1  
Group13397: aver|OJJ03327.1 anid|CBF77092.1 asyd|OJJ56958.1  
Group13398: awen|OJJ39033.1 aory|EIT78028.1 afla|EED50605.1  
Group13399: abra|OJJ72691.1 asyd|OJJ52468.1 aver|OJJ03947.1  
Group13400: abra|OJJ72711.1 anig|EHA24108.1 atub|OJI82106.1  
Group13401: abra|OJJ72766.1 aluc|OJZ90741.1 atub|OJI82168.1  
Group13402: abra|OJJ72812.1 aluc|OJZ83310.1 atub|OJI82210.1

Group13403: abra|OJJ72832.1 aluc|OJZ83333.1 atub|OJI82229.1  
Group13404: anid|CBF85195.1 asyd|OJJ63017.1 aver|OJI97947.1  
Group13405: abra|OJJ72958.1 acar|OOF96140.1 atub|OJI82360.1  
Group13406: abra|OJJ73045.1 aluc|OJZ83556.1 anig|EHA24374.1  
Group13407: abra|OJJ73060.1 aluc|OJZ80026.1 anig|EHA26112.1  
Group13408: abra|OJJ73061.1 aluc|OJZ90872.1 anig|EHA19592.1  
Group13409: abra|OJJ73064.1 aluc|OJZ81362.1 atub|OJI91566.1  
Group13410: abra|OJJ73070.1 aluc|OJZ81355.1 atub|OJI91559.1  
Group13411: abra|OJJ73102.1 akaw|GAA88063.1 aluc|OJZ81326.1  
Group13412: abra|OJJ73129.1 anig|EHA18703.1 azon|OJJ42287.1  
Group13413: abra|OJJ73165.1 asyd|OJJ58360.1 aver|OJJ02046.1  
Group13414: aory|EIT72407.1 afla|EED46508.1 asyd|OJJ54747.1  
Group13415: abra|OJJ73292.1 aluc|OJZ88756.1 atub|OJI91326.1  
Group13416: abra|OJJ73307.1 anig|EHA21033.1 awen|OJJ35330.1  
Group13417: anid|CBF71403.1 asyd|OJJ55029.1 aver|OJJ07175.1  
Group13418: anid|CBF74654.1 asyd|OJJ61480.1 aver|OJJ00821.1  
Group13419: afla|EED48949.1 aory|EIT79994.1 ater|EAU31698.1  
Group13420: abra|OJJ73419.1 acar|OOG00621.1 akaw|GAA83072.1  
Group13421: acar|OOG00676.1 afla|EED53517.1 aory|EIT74919.1  
Group13422: abra|OJJ73521.1 acar|OOF90602.1 aver|OJJ04731.1  
Group13423: asyd|OJJ55175.1 acar|OOF98340.1 aver|OJJ07032.1  
Group13424: abra|OJJ73523.1 aory|EIT72915.1 afla|EED48257.1  
Group13425: agla|OJJ81320.1 acar|OOF94217.1 azon|OJJ48031.1  
Group13426: abra|OJJ73703.1 anig|EHA18081.1 awen|OJJ33597.1  
Group13427: anid|CBF89961.1 aver|OJI96211.1 asyd|OJJ62105.1  
Group13428: abra|OJJ73709.1 aluc|OJZ88341.1 atub|OJI90937.1  
Group13429: abra|OJJ73749.1 aluc|OJZ88303.1 atub|OJI90898.1  
Group13430: akaw|GAA82096.1 aluc|OJZ92083.1 atub|OJI86513.1  
Group13431: abra|OJJ73893.1 aluc|OJZ88155.1 atub|OJI90755.1  
Group13432: abra|OJJ74121.1 afum|EAL85398.1 aluc|OJZ84287.1  
Group13433: abra|OJJ74187.1 afum|EAL86235.1 ater|EAU32781.1  
Group13434: agla|OJJ79816.1 afla|EED51187.1 asyd|OJJ57220.1  
Group13435: awen|OJJ37003.1 asyd|OJJ52473.1 aver|OJJ03943.1  
Group13436: abra|OJJ74500.1 aluc|OJZ89618.1 atub|OJI85184.1  
Group13437: abra|OJJ74516.1 asyd|OJJ54858.1 atub|OJI86530.1  
Group13438: abra|OJJ74517.1 afis|EAW24049.1 asyd|OJJ54860.1  
Group13439: abra|OJJ74567.1 aluc|OJZ92146.1 anig|EHA26803.1  
Group13440: anid|CBF85874.1 aver|OJI98470.1 asyd|OJJ64374.1  
Group13441: aver|OJI96389.1 anid|CBF89655.1 asyd|OJJ62280.1

Group13442: abra|OJJ74902.1 akaw|GAA86630.1 aluc|OJZ85185.1  
Group13443: atub|OJI86906.1 akaw|GAA83520.1 aluc|OJZ92475.1  
Group13444: abra|OJJ75050.1 aluc|OJZ92616.1 anig|EHA26372.1  
Group13445: abra|OJJ75051.1 aluc|OJZ92617.1 anig|EHA26371.1  
Group13446: asyd|OJJ55809.1 aver|OJJ04757.1 anid|CBF73511.1  
Group13447: abra|OJJ75184.1 aluc|OJZ92748.1 anig|EHA26255.1  
Group13448: abra|OJJ75193.1 acar|OOF92441.1 azon|OJJ43635.1  
Group13449: abra|OJJ75221.1 anig|EHA26224.1 atub|OJI87227.1  
Group13450: anig|EHA26223.1 atub|OJI87228.1 anid|CBF84476.1  
Group13451: abra|OJJ75225.1 afla|EED48955.1 aory|EIT80016.1  
Group13452: abra|OJJ75226.1 acar|OOF94563.1 anig|EHA26220.1  
Group13453: abra|OJJ75259.1 aluc|OJZ92816.1 atub|OJI87274.1  
Group13454: abra|OJJ75277.1 aluc|OJZ92839.1 atub|OJI87295.1  
Group13455: abra|OJJ75343.1 akaw|GAA92036.1 atub|OJI87365.1  
Group13456: aver|OJJ04537.1 anid|CBF79456.1 asyd|OJJ57857.1  
Group13457: abra|OJJ75481.1 aluc|OJZ88941.1 atub|OJI85849.1  
Group13458: abra|OJJ75542.1 akaw|GAA84298.1 aluc|OJZ88992.1  
Group13459: abra|OJJ75587.1 aluc|OJZ89038.1 atub|OJI85752.1  
Group13460: abra|OJJ75648.1 acar|OOG00192.1 aluc|OJZ89097.1  
Group13461: abra|OJJ75685.1 aluc|OJZ89136.1 atub|OJI85649.1  
Group13462: abra|OJJ75691.1 akaw|GAA84428.1 aluc|OJZ89142.1  
Group13463: abra|OJJ75703.1 akaw|GAA84439.1 aluc|OJZ89154.1  
Group13464: abra|OJJ75706.1 aluc|OJZ89157.1 atub|OJI85634.1  
Group13465: afla|EED54451.1 aory|EIT81153.1 ater|EAU39266.1  
Group13466: abra|OJJ75730.1 aluc|OJZ89182.1 atub|OJI85607.1  
Group13467: ater|EAU30356.1 afla|EED47831.1 aory|EIT77106.1  
Group13468: abra|OJJ75872.1 aluc|OJZ89315.1 atub|OJI85482.1  
Group13469: aver|OJI99935.1 anid|CBF83343.1 asyd|OJJ60611.1  
Group13470: aver|OJI98895.1 asyd|OJJ64784.1 anid|CBF83888.1  
Group13471: abra|OJJ76136.1 aluc|OJZ89599.1 atub|OJI85205.1  
Group13472: abra|OJJ76169.1 acar|OOF89917.1 anig|EHA27995.1  
Group13473: abra|OJJ76237.1 agla|OJJ87582.1 awen|OJJ31905.1  
Group13474: abra|OJJ76282.1 anig|EHA22898.1 atub|OJI86381.1  
Group13475: abra|OJJ76305.1 aluc|OJZ91910.1 atub|OJI86360.1  
Group13476: aver|OJJ01556.1 anid|CBF69791.1 asyd|OJJ58962.1  
Group13477: aory|EIT81951.1 afla|EED55068.1 azon|OJJ50761.1  
Group13478: abra|OJJ76668.1 anig|EHA22360.1 anid|CBF83130.1  
Group13479: azon|OJJ49992.1 asyd|OJJ60963.1 aver|OJJ00288.1  
Group13480: abra|OJJ76681.1 anig|EHA28109.1 atub|OJI87913.1



Group13481: abra|OJJ76735.1 afis|EAW21008.1 aluc|OJZ80161.1  
Group13482: abra|OJJ76755.1 aluc|OJZ84158.1 anig|EHA27520.1  
Group13483: abra|OJJ76879.1 asyd|OJJ60060.1 ater|EAU38554.1  
Group13484: abra|OJJ76881.1 agla|OJJ83398.1 asyd|OJJ56899.1  
Group13485: abra|OJJ76894.1 afla|EED57871.1 aluc|OJZ82046.1  
Group13486: ater|EAU31578.1 afla|EED54079.1 aory|EIT75980.1  
Group13487: abra|OJJ76963.1 acla|EAW15301.1 anid|CBF69364.1  
Group13488: abra|OJJ76998.1 acar|OOF91444.1 anig|EHA27727.1  
Group13489: asyd|OJJ52268.1 akaw|GAA91194.1 aluc|OJZ81528.1  
Group13490: ater|EAU29539.1 afla|EED55090.1 aory|EIT81609.1  
Group13491: abra|OJJ77083.1 aory|EIT82369.1 aver|OJJ08346.1  
Group13492: asyd|OJJ52100.1 afla|EED49838.1 aory|EIT83390.1  
Group13493: abra|OJJ77234.1 aluc|OJZ84644.1 atub|OJI89437.1  
Group13494: agla|OJJ87589.1 acar|OOF93156.1 aluc|OJZ80473.1  
Group13495: aver|OJI99401.1 agla|OJJ79236.1 asyd|OJJ65249.1  
Group13496: abra|OJJ77436.1 acar|OOF94972.1 agla|OJJ82718.1  
Group13497: abra|OJJ77462.1 asyd|OJJ56401.1 aver|OJJ06311.1  
Group13498: abra|OJJ77563.1 aluc|OJZ80975.1 anig|EHA19384.1  
Group13499: abra|OJJ77592.1 aluc|OJZ80944.1 atub|OJI82639.1  
Group13500: abra|OJJ77696.1 aluc|OJZ90759.1 atub|OJI82746.1  
Group13501: asyd|OJJ60258.1 acla|EAW15293.1 aver|OJJ03998.1  
Group13502: abra|OJJ77766.1 acar|OOF97504.1 anig|EHA20912.1  
Group13503: abra|OJJ77775.1 anig|EHA19551.1 atub|OJI82814.1  
Group13504: afis|EAW16159.1 agla|OJJ85019.1 ater|EAU35526.1  
Group13505: abra|OJJ77795.1 acar|OOF90712.1 awen|OJJ38008.1  
Group13506: abra|OJJ77828.1 atub|OJI82895.1 aluc|OJZ90902.1  
Group13507: abra|OJJ77872.1 afis|EAW16223.1 awen|OJJ30238.1  
Group13508: agla|OJJ87728.1 awen|OJJ40103.1 azon|OJJ42373.1  
Group13509: abra|OJJ77907.1 aluc|OJZ90978.1 atub|OJI82968.1  
Group13510: abra|OJJ77914.1 afla|EED51611.1 aory|EIT80662.1  
Group13511: abra|OJJ77915.1 afla|EED51609.1 aory|EIT80525.1  
Group13512: abra|OJJ77941.1 aluc|OJZ91008.1 atub|OJI83000.1  
Group13513: abra|OJJ77998.1 aluc|OJZ91074.1 atub|OJI83069.1  
Group13514: abra|OJJ78071.1 anid|CBF87123.1 aver|OJJ08736.1  
Group13515: abra|OJJ78090.1 aluc|OJZ91159.1 atub|OJI83174.1  
Group13516: abra|OJJ78100.1 aluc|OJZ81974.1 atub|OJI79694.1  
Group13517: aory|EIT76397.1 afla|EED46251.1 ater|EAU37247.1  
Group13518: abra|OJJ78165.1 akaw|GAA92954.1 ater|EAU30328.1  
Group13519: abra|OJJ78180.1 afis|EAW19763.1 ater|EAU36859.1

Group13520: acar|OOF89771.1 acla|EAW08168.1 anig|EHA21138.1  
Group13521: acar|OOF89783.1 anid|CBF87194.1 awen|OJJ30942.1  
Group13522: acar|OOF90007.1 aflu|EED45511.1 aory|EIT75792.1  
Group13523: acar|OOF90016.1 acla|EAW07718.1 aflu|EED47873.1  
Group13524: afum|EAL88059.1 aflu|EED57311.1 aory|EIT74057.1  
Group13525: acar|OOF90039.1 aflu|EED56935.1 aory|EIT77574.1  
Group13526: acar|OOF90089.1 acla|EAW15338.1 aflu|EED53069.1  
Group13527: acar|OOF90171.1 acla|EAW09325.1 awen|OJJ33546.1  
Group13528: acar|OOF90201.1 aflu|EED51998.1 aory|EIT81476.1  
Group13529: acar|OOF90286.1 aluc|OJZ84547.1 atub|OJI89533.1  
Group13530: acar|OOF90368.1 anig|EHA23742.1 azon|OJJ49782.1  
Group13531: agla|OJJ82267.1 awen|OJJ30817.1 azon|OJJ46539.1  
Group13532: acar|OOF90450.1 anid|CBF82346.1 ater|EAU33653.1  
Group13533: asyd|OJJ52812.1 aver|OJJ08791.1 azon|OJJ43865.1  
Group13534: acar|OOF90468.1 aflu|EED53720.1 aory|EIT75294.1  
Group13535: acar|OOF90536.1 acla|EAW11292.1 azon|OJJ50401.1  
Group13536: aver|OJJ05145.1 anid|CBF73623.1 asyd|OJJ56212.1  
Group13537: anid|CBF85208.1 aver|OJI97937.1 asyd|OJJ63031.1  
Group13538: anid|CBF83801.1 aver|OJJ00214.1 asyd|OJJ60890.1  
Group13539: acar|OOF90572.1 aflu|EED45166.1 aory|EIT73787.1  
Group13540: acar|OOF90610.1 asyd|OJJ54124.1 aver|OJJ08613.1  
Group13541: acar|OOF90623.1 aflu|EED49835.1 afum|EAL84843.2  
Group13542: asyd|OJJ54479.1 aflu|EED52150.1 aory|EIT74494.1  
Group13543: agla|OJJ79092.1 aory|EIT83085.1 awen|OJJ31975.1  
Group13544: acar|OOF90685.1 aflu|EED55099.1 aory|EIT81646.1  
Group13545: acar|OOF90903.1 anig|EHA25865.1 atub|OJI88610.1  
Group13546: acla|EAW10870.1 afis|EAW20988.1 afum|EAL84641.1  
Group13547: acar|OOF91760.1 afum|EAL85381.1 azon|OJJ42426.1  
Group13548: agla|OJJ88057.1 asyd|OJJ56264.1 aver|OJJ08502.1  
Group13549: acar|OOF91785.1 aflu|EED50928.1 aory|EIT79038.1  
Group13550: acar|OOF91853.1 asyd|OJJ58351.1 aver|OJJ02056.1  
Group13551: acar|OOF91912.1 aflu|EED48618.1 aory|EIT73257.1  
Group13552: acar|OOF91915.1 afis|EAW17742.1 aver|OJJ03427.1  
Group13553: acar|OOF91919.1 aflu|EED52010.1 aory|EIT81397.1  
Group13554: acar|OOF92527.1 aflu|EED52078.1 aory|EIT76921.1  
Group13555: acar|OOF92558.1 agla|OJJ87573.1 awen|OJJ40605.1  
Group13556: acar|OOF92697.1 aflu|EED48163.1 aory|EIT83039.1  
Group13557: acar|OOF93146.1 aflu|EED49522.1 aory|EIT82655.1  
Group13558: acar|OOF93186.1 aluc|OJZ92894.1 anig|EHA26069.1

Group13559: acla|EAW10018.1 afis|EAW20416.1 afum|EAL89229.1  
Group13560: azon|OJJ43593.1 asyd|OJJ61555.1 aver|OJJ00878.1  
Group13561: acar|OOF93559.1 aver|OJI96960.1 awen|OJJ41961.1  
Group13562: acar|OOF93563.1 acla|EAW15372.1 azon|OJJ49996.1  
Group13563: aver|OJI95853.1 agla|OJJ79832.1 asyd|OJJ61755.1  
Group13564: acar|OOF93634.1 aory|EIT73965.1 afla|EED57139.1  
Group13565: acar|OOF93878.1 afis|EAW19288.1 asyd|OJJ63019.1  
Group13566: acar|OOF94173.1 anig|EHA28282.1 aver|OJJ07860.1  
Group13567: acar|OOF94382.1 asyd|OJJ55055.1 aver|OJJ07929.1  
Group13568: acar|OOF94383.1 asyd|OJJ55054.1 aver|OJJ07155.1  
Group13569: acar|OOF94488.1 aluc|OJZ92910.1 atub|OJI87370.1  
Group13570: akaw|GAA89159.1 atub|OJI88506.1 aluc|OJZ81675.1  
Group13571: acar|OOF94642.1 afla|EED54694.1 aory|EIT78888.1  
Group13572: acar|OOF94680.1 acla|EAW11915.1 ater|EAU33994.1  
Group13573: anid|CBF84386.1 asyd|OJJ59691.1 aver|OJJ02596.1  
Group13574: aver|OJI96462.1 ater|EAU34576.1 asyd|OJJ55663.1  
Group13575: acar|OOF95235.1 aluc|OJZ89608.1 atub|OJI85195.1  
Group13576: acar|OOF95248.1 aver|OJI99580.1 awen|OJJ38747.1  
Group13577: acar|OOF95249.1 aver|OJI99579.1 awen|OJJ38745.1  
Group13578: acar|OOF95250.1 aver|OJI99578.1 awen|OJJ38746.1  
Group13579: awen|OJJ38895.1 afla|EED48421.1 aory|EIT83063.1  
Group13580: acar|OOF95613.1 afla|EED51176.1 aory|EIT81334.1  
Group13581: afis|EAW20917.1 afum|EAL84717.1 awen|OJJ34404.1  
Group13582: anig|EHA26755.1 atub|OJI86630.1 aluc|OJZ92202.1  
Group13583: anid|CBF84438.1 asyd|OJJ53637.1 aver|OJJ01169.1  
Group13584: anid|CBF84987.1 asyd|OJJ63123.1 aver|OJI97831.1  
Group13585: agla|OJJ83747.1 asyd|OJJ64380.1 aver|OJI98476.1  
Group13586: acar|OOF96794.1 asyd|OJJ60411.1 azon|OJJ45234.1  
Group13587: acar|OOF96891.1 afla|EED52817.1 aory|EIT78210.1  
Group13588: acar|OOF97088.1 agla|OJJ85080.1 aver|OJI96137.1  
Group13589: aver|OJI98818.1 anid|CBF86722.1 asyd|OJJ64715.1  
Group13590: acar|OOF97275.1 afis|EAW19853.1 anig|EHA18369.1  
Group13591: afis|EAW23441.1 awen|OJJ39758.1 acla|EAW08398.1  
Group13592: acar|OOF97567.1 awen|OJJ29727.1 azon|OJJ44461.1  
Group13593: ater|EAU32638.1 afla|EED52564.1 aory|EIT74252.1  
Group13594: acar|OOF97588.1 afla|EED52459.1 aory|EIT82742.1  
Group13595: acar|OOF97619.1 agla|OJJ85960.1 awen|OJJ36079.1  
Group13596: acar|OOF97643.1 afla|EED45610.1 aory|EIT75686.1  
Group13597: acar|OOF98057.1 agla|OJJ88711.1 asyd|OJJ64699.1

Group13598: acar|OOF98084.1 akaw|GAA82903.1 atub|OJI81176.1  
Group13599: acar|OOF98168.1 afla|EED55408.1 aory|EIT80856.1  
Group13600: acar|OOF98352.1 akaw|GAA87700.1 azon|OJJ44814.1  
Group13601: anid|CBF78625.1 asyd|OJJ65126.1 aver|OJI99254.1  
Group13602: acar|OOF98696.1 aver|OJJ05894.1 azon|OJJ46431.1  
Group13603: acar|OOF98899.1 afum|EAL88851.1 atub|OJI82938.1  
Group13604: acar|OOF98996.1 asyd|OJJ65117.1 aver|OJI99243.1  
Group13605: awen|OJJ35026.1 acla|EAW15296.1 ater|EAU37654.1  
Group13606: acar|OOF99082.1 aory|EIT72397.1 afla|EED46487.1  
Group13607: aver|OJI98313.1 agla|OJJ79990.1 awen|OJJ36308.1  
Group13608: acar|OOF99296.1 afla|EED46492.1 aory|EIT72427.1  
Group13609: asyd|OJJ64553.1 anid|CBF86213.1 aver|OJI98650.1  
Group13610: afis|EAW21266.1 acla|EAW09860.1 afum|EAL92281.1  
Group13611: anid|CBF83725.1 asyd|OJJ60842.1 aver|OJJ00167.1  
Group13612: ater|EAU39618.1 afla|EED52447.1 aory|EIT82816.1  
Group13613: acar|OOG00489.1 afis|EAW16897.1 agla|OJJ84612.1  
Group13614: ater|EAU34443.1 asyd|OJJ56610.1 aver|OJJ06113.1  
Group13615: anid|CBF89226.1 asyd|OJJ62517.1 aver|OJI96636.1  
Group13616: acar|OOG00733.1 afis|EAW16800.1 anid|CBF80491.1  
Group13617: acar|OOG00885.1 afla|EED55019.1 azon|OJJ51782.1  
Group13618: acar|OOG00910.1 agla|OJJ81043.1 aver|OJI97286.1  
Group13619: acla|EAW06521.1 afla|EED56607.1 aory|EIT79647.1  
Group13620: ater|EAU33705.1 afla|EED53340.1 aory|EIT74976.1  
Group13621: acla|EAW06585.1 agla|OJJ79821.1 ater|EAU37856.1  
Group13622: acla|EAW06633.1 afis|EAW16132.1 afum|EAL88762.1  
Group13623: aver|OJI98210.1 anid|CBF85520.1 asyd|OJJ64127.1  
Group13624: anid|CBF85538.1 aver|OJI98221.1 asyd|OJJ64140.1  
Group13625: acla|EAW06669.1 afis|EAW16096.1 afum|EAL88728.1  
Group13626: acla|EAW06679.1 afis|EAW16086.1 afum|EAL88718.1  
Group13627: acla|EAW06838.1 afis|EAW16458.1 afum|EAL89054.1  
Group13628: acla|EAW06839.1 afum|EAL89056.2 afis|EAW16460.1  
Group13629: acla|EAW06978.1 afis|EAW16592.1 afum|EAL89188.1  
Group13630: acla|EAW07058.1 anid|CBF73843.1 aver|OJJ06166.1  
Group13631: afum|EAL89048.1 ater|EAU36716.1 anid|CBF87741.1  
Group13632: acla|EAW07087.1 afum|EAL89046.1 aver|OJJ03912.1  
Group13633: acla|EAW07090.1 asyd|OJJ60593.1 aver|OJI99917.1  
Group13634: aory|EIT75269.1 afla|EED53642.1 awen|OJJ30138.1  
Group13635: acla|EAW07108.1 afis|EAW22120.1 afum|EAL91066.1  
Group13636: acla|EAW07110.1 afis|EAW22122.1 afum|EAL91065.1

Group13637: acla|EAW07172.1 afis|EAW22187.1 afum|EAL91003.1  
Group13638: acla|EAW07211.1 afis|EAW22224.1 afum|EAL90970.1  
Group13639: acla|EAW07285.1 afis|EAW22318.1 afum|EAL90872.2  
Group13640: anid|CBF73621.1 asyd|OJJ56213.1 aver|OJJ05146.1  
Group13641: acla|EAW07487.1 afis|EAW22520.1 afum|EAL90673.1  
Group13642: acla|EAW07493.1 afis|EAW22526.1 afum|EAL90668.1  
Group13643: acla|EAW07587.1 afis|EAW22618.1 afum|EAL90578.1  
Group13644: asyd|OJJ60310.1 aver|OJI99651.1 awen|OJJ34012.1  
Group13645: acla|EAW07719.1 afis|EAW22750.1 afum|EAL90449.1  
Group13646: aory|EIT81780.1 afla|EED55635.1 azon|OJJ47755.1  
Group13647: acla|EAW08401.1 afis|EAW23468.1 afum|EAL87998.1  
Group13648: aver|OJI96373.1 asyd|OJJ62264.1 azon|OJJ43240.1  
Group13649: acla|EAW08484.1 afis|EAW23530.1 afum|EAL87936.1  
Group13650: acla|EAW08518.1 afis|EAW23556.1 afum|EAL87910.1  
Group13651: acla|EAW08699.1 afis|EAW15736.1 afum|EAL85612.2  
Group13652: acla|EAW08766.1 afis|EAW15664.1 afum|EAL85684.1  
Group13653: acla|EAW08778.1 afis|EAW15623.1 afum|EAL85711.1  
Group13654: acla|EAW08974.1 afis|EAW15453.1 afum|EAL84192.1  
Group13655: acla|EAW08978.1 afis|EAW15431.1 afum|EAL84212.1  
Group13656: acla|EAW09015.1 afis|EAW20065.1 ater|EAU30766.1  
Group13657: acla|EAW09062.1 agla|OJJ88760.1 anid|CBF78316.1  
Group13658: acla|EAW09076.1 asyd|OJJ59977.1 aver|OJJ02314.1  
Group13659: acla|EAW09097.1 afis|EAW25691.1 afum|EAL84361.1  
Group13660: acla|EAW09113.1 afis|EAW16774.1 afum|EAL86343.2  
Group13661: acla|EAW09125.1 afum|EAL94068.1 ater|EAU34936.1  
Group13662: asyd|OJJ60859.1 anid|CBF83755.1 aver|OJJ00184.1  
Group13663: acla|EAW09443.1 afis|EAW21693.1 afum|EAL92727.1  
Group13664: acla|EAW09543.1 afis|EAW21590.1 afum|EAL92608.1  
Group13665: acla|EAW09597.1 afis|EAW21540.1 afum|EAL92560.1  
Group13666: ater|EAU30139.1 afla|EED48248.1 akaw|GAA92066.1  
Group13667: acla|EAW09758.1 afis|EAW21383.1 afum|EAL92398.1  
Group13668: acla|EAW09836.1 afis|EAW21298.1 afum|EAL92315.1  
Group13669: acla|EAW09884.1 afis|EAW21242.1 afum|EAL92255.1  
Group13670: acla|EAW09996.1 afis|EAW21077.1 afum|EAL92100.1  
Group13671: acla|EAW10103.1 afis|EAW25484.1 afum|EAL90149.1  
Group13672: acla|EAW10227.1 afis|EAW25365.1 ater|EAU30940.1  
Group13673: acla|EAW10395.1 afis|EAW25182.1 afum|EAL89856.1  
Group13674: acla|EAW10443.1 afis|EAW25124.1 afum|EAL89795.1  
Group13675: acla|EAW10511.1 afis|EAW25056.1 afum|EAL89724.1

Group13676: acla|EAW10718.1 afis|EAW25571.1 afum|EAL89289.1  
Group13677: acla|EAW10733.1 afis|EAW24842.1 afum|EAL89488.1  
Group13678: acla|EAW10763.1 afis|EAW24813.1 afum|EAL89457.1  
Group13679: acla|EAW10784.1 afla|EED57526.1 aory|EIT81845.1  
Group13680: acla|EAW10817.1 afis|EAW24757.1 afum|EAL89399.1  
Group13681: acla|EAW10828.1 afis|EAW24736.1 afum|EAL89383.2  
Group13682: anid|CBF74920.1 asyd|OJJ60079.1 aver|OJJ04166.1  
Group13683: acla|EAW10833.1 afis|EAW24731.1 afum|EAL89378.1  
Group13684: acla|EAW10835.1 afis|EAW24728.1 afum|EBA27377.1  
Group13685: acla|EAW10837.1 afis|EAW24726.1 afum|EAL89374.1  
Group13686: ater|EAU35994.1 afis|EAW20252.1 afum|EAL85370.1  
Group13687: acla|EAW10838.1 afla|EED55832.1 aory|EIT76669.1  
Group13688: anid|CBF82831.1 aver|OJJ00904.1 asyd|OJJ61582.1  
Group13689: acla|EAW11033.1 afla|EED49637.1 aory|EIT81003.1  
Group13690: acla|EAW11043.1 afla|EED49626.1 aory|EIT80954.1  
Group13691: acla|EAW11045.1 afla|EED49628.1 aory|EIT81000.1  
Group13692: agla|OJJ86141.1 asyd|OJJ55482.1 aver|OJJ06561.1  
Group13693: acla|EAW11047.1 afla|EED49630.1 aory|EIT80951.1  
Group13694: asyd|OJJ55039.1 aver|OJJ07168.1 ater|EAU35915.1  
Group13695: anig|EHA17707.1 akaw|GAA92950.1 aluc|OJZ81139.1  
Group13696: acla|EAW11468.1 afis|EAW20727.1 afum|EBA27361.1  
Group13697: acla|EAW11516.1 afis|EAW23937.1 afum|EAL87362.1  
Group13698: anid|CBF77100.1 aver|OJJ03332.1 asyd|OJJ56953.1  
Group13699: aluc|OJZ88122.1 asyd|OJJ61460.1 aver|OJJ00797.1  
Group13700: acla|EAW11682.1 afis|EAW23699.1 afum|EAL87140.1  
Group13701: acla|EAW11695.1 afis|EAW23712.1 afum|EAL87156.2  
Group13702: ater|EAU37842.1 afla|EED54051.1 aory|EIT75938.1  
Group13703: acla|EAW11712.1 afis|EAW23727.1 afum|EBA27301.1  
Group13704: anid|CBF85113.1 asyd|OJJ63050.1 aver|OJI97913.1  
Group13705: ater|EAU34966.1 asyd|OJJ61455.1 aver|OJJ00791.1  
Group13706: acla|EAW12034.1 afum|EBA27231.1 afis|EAW20285.1  
Group13707: acla|EAW12058.1 afis|EAW19699.1 afum|EAL86828.1  
Group13708: acla|EAW12064.1 afla|EED54089.1 aory|EIT76091.1  
Group13709: acla|EAW12200.1 afis|EAW25310.1 agla|OJJ89131.1  
Group13710: acla|EAW12209.1 afis|EAW25549.1 afum|EAL84272.1  
Group13711: acla|EAW12211.1 afis|EAW25551.1 afum|EAL84274.1  
Group13712: acla|EAW12213.1 afis|EAW25553.1 afum|EAL84277.1  
Group13713: acla|EAW12214.1 afis|EAW25554.1 afum|EAL84278.1  
Group13714: acla|EAW12217.1 afis|EAW25558.1 afum|EAL84282.1

Group13715: acla|EAW12218.1 afis|EAW25559.1 afum|EAL84283.1  
Group13716: acla|EAW12251.1 anid|CBF74952.1 awen|OJJ38332.1  
Group13717: afis|EAW16957.1 aver|OJJ02654.1 anid|CBF81774.1  
Group13718: acla|EAW12287.1 afis|EAW16951.1 afum|EAL86478.1  
Group13719: acla|EAW12356.1 akaw|GAA92919.1 asyd|OJJ52439.1  
Group13720: asyd|OJJ65081.1 anid|CBF78585.1 aver|OJI99206.1  
Group13721: acla|EAW12424.1 anid|CBF83040.1 ater|EAU36465.1  
Group13722: acla|EAW12445.1 aory|EIT74205.1 azon|OJJ51540.1  
Group13723: acla|EAW12646.1 afis|EAW18039.1 afum|EAL91850.1  
Group13724: acla|EAW12877.1 afis|EAW18833.1 afum|EAL93569.1  
Group13725: acla|EAW12889.1 afis|EAW17787.1 afum|EAL91596.1  
Group13726: acla|EAW12896.1 afis|EAW17771.1 afum|EAL91580.1  
Group13727: acla|EAW12930.1 afis|EAW17707.1 afum|EAL91521.2  
Group13728: awen|OJJ37129.1 afla|EED45709.1 aory|EIT75795.1  
Group13729: aory|EIT82271.1 afla|EED57073.1 awen|OJJ35544.1  
Group13730: acla|EAW13181.1 afis|EAW17459.1 afum|EAL91287.1  
Group13731: acla|EAW13234.1 afis|EAW17396.1 afum|EAL91234.2  
Group13732: acla|EAW13269.1 afis|EAW17350.1 afum|EAL91193.1  
Group13733: acla|EAW13471.1 afum|EBA27181.1 awen|OJJ33289.1  
Group13734: acla|EAW13488.1 asyd|OJJ57241.1 azon|OJJ42369.1  
Group13735: afla|EED52641.1 aory|EIT74265.1 awen|OJJ30501.1  
Group13736: acla|EAW13609.1 afis|EAW20001.1 afum|EAL84918.1  
Group13737: acla|EAW13622.1 afis|EAW22102.1 afum|EAL91088.1  
Group13738: acla|EAW13631.1 afis|EAW21089.1 afum|EAL92112.1  
Group13739: acla|EAW13668.1 afum|EAL85439.1 ater|EAU37463.1  
Group13740: agla|OJJ78676.1 azon|OJJ48734.1 ater|EAU30333.1  
Group13741: acla|EAW13745.1 afum|EBA27295.1 aver|OJJ05558.1  
Group13742: acla|EAW13755.1 afis|EAW19811.1 afum|EAL85081.1  
Group13743: acla|EAW13765.1 afis|EAW19794.1 afum|EAL85096.2  
Group13744: acla|EAW13859.1 afis|EAW15438.1 afum|EAL84207.1  
Group13745: acla|EAW14081.1 afis|EAW18788.1 afum|EAL93522.2  
Group13746: acla|EAW14095.1 afum|EBA27362.1 agla|OJJ86300.1  
Group13747: acla|EAW14261.1 afis|EAW19019.1 awen|OJJ31307.1  
Group13748: aory|EIT80629.1 afla|EED51732.1 anid|CBF79136.1  
Group13749: acla|EAW14273.1 aluc|OJZ87300.1 atub|OJI81340.1  
Group13750: acla|EAW14458.1 afis|EAW19166.1 afum|EAL93896.1  
Group13751: acla|EAW14536.1 aory|EIT78882.1 afla|EED54702.1  
Group13752: anid|CBF78490.1 aver|OJI99474.1 asyd|OJJ65329.1  
Group13753: acla|EAW14584.1 afis|EAW19317.1 afum|EAL94034.1

Group13754: aver|OJI99654.1 asyd|OJJ60313.1 awen|OJJ34015.1  
Group13755: acla|EAW14881.1 afis|EAW24400.1 afum|EAL86071.1  
Group13756: acla|EAW14925.1 afla|EED49817.1 aory|EIT77657.1  
Group13757: acla|EAW14951.1 afis|EAW24468.1 afum|EAL86140.1  
Group13758: acla|EAW14955.1 afla|EED57791.1 aory|EIT81078.1  
Group13759: acla|EAW14984.1 afis|EAW24506.1 afum|EAL86174.1  
Group13760: acla|EAW14995.1 afis|EAW24521.1 afum|EAL86186.1  
Group13761: acla|EAW15025.1 afum|EAL86638.1 awen|OJJ35955.1  
Group13762: acla|EAW15057.1 afis|EAW19780.1 afum|EAL85109.1  
Group13763: ater|EAU34054.1 afla|EED45170.1 aory|EIT73812.1  
Group13764: acla|EAW15260.1 afis|EAW20235.1 afum|EAL85352.1  
Group13765: acla|EAW15269.1 afis|EAW20240.1 afum|EAL85358.1  
Group13766: acla|EAW15288.1 afum|EAL86978.1 afis|EAW19519.1  
Group13767: acla|EAW15292.1 agla|OJJ84603.1 awen|OJJ36128.1  
Group13768: acla|EAW15299.1 afis|EAW25741.1 anid|CBF69357.1  
Group13769: afis|EAW15385.1 asyd|OJJ60081.1 aver|OJJ05930.1  
Group13770: afis|EAW15464.1 asyd|OJJ57379.1 aver|OJJ05779.1  
Group13771: aory|EIT77913.1 afla|EED46602.1 azon|OJJ46007.1  
Group13772: afis|EAW15639.1 ater|EAU30734.1 azon|OJJ42124.1  
Group13773: afis|EAW15649.1 asyd|OJJ53725.1 aver|OJI98280.1  
Group13774: afis|EAW16068.1 afum|EAL88700.2 awen|OJJ30367.1  
Group13775: afis|EAW16153.1 afla|EED45106.1 aory|EIT73674.1  
Group13776: afis|EAW16154.1 afla|EED45107.1 aory|EIT73576.1  
Group13777: afis|EAW16168.1 afla|EED57466.1 awen|OJJ38679.1  
Group13778: afum|EAL87138.1 afla|EED48463.1 aory|EIT76273.1  
Group13779: afis|EAW16172.1 afla|EED50601.1 aory|EIT78015.1  
Group13780: afis|EAW16197.1 aver|OJJ08287.1 asyd|OJJ53469.1  
Group13781: afis|EAW16228.1 agla|OJJ88692.1 awen|OJJ37851.1  
Group13782: afis|EAW16413.1 afum|EAL89037.1 anid|CBF73424.1  
Group13783: afis|EAW16426.1 asyd|OJJ61463.1 aver|OJJ05755.1  
Group13784: anig|EHA19925.1 akaw|GAA92002.1 awen|OJJ32680.1  
Group13785: afis|EAW16441.1 afum|EAL89042.1 azon|OJJ45297.1  
Group13786: afis|EAW16442.1 afum|EAL89043.1 azon|OJJ45296.1  
Group13787: afis|EAW16633.1 afla|EED53429.1 aory|EIT74831.1  
Group13788: afis|EAW16635.1 afum|EAL89237.1 ater|EAU37744.1  
Group13789: aver|OJJ08811.1 anid|CBF87376.1 asyd|OJJ52833.1  
Group13790: afis|EAW16797.1 afla|EED46068.1 aory|EIT83498.1  
Group13791: afis|EAW16896.1 afum|EAL86433.1 awen|OJJ32236.1  
Group13792: afis|EAW16907.1 afla|EED51714.1 aory|EIT80505.1



Group13793: afis|EAW16924.1 afla|EED45474.1 aory|EIT75616.1  
Group13794: afis|EAW16942.1 afum|EBA27274.1 anid|CBF84649.1  
Group13795: afis|EAW16958.1 awen|OJJ32043.1 ater|EAU37671.1  
Group13796: afis|EAW16970.1 afum|EAL86498.1 ater|EAU37853.1  
Group13797: afla|EED45041.1 awen|OJJ37846.1 azon|OJJ43183.1  
Group13798: afis|EAW17013.1 akaw|GAA89812.1 aluc|OJZ81878.1  
Group13799: afis|EAW17021.1 akaw|GAA89820.1 aluc|OJZ81870.1  
Group13800: afis|EAW17027.1 aluc|OJZ79603.1 awen|OJJ40157.1  
Group13801: afis|EAW17066.1 afum|EAL90927.1 asyd|OJJ52120.1  
Group13802: afis|EAW17115.1 afum|EAL86577.1 awen|OJJ35966.1  
Group13803: afis|EAW17133.1 afla|EED52045.1 awen|OJJ37886.1  
Group13804: afis|EAW17157.1 agla|OJJ88354.1 ater|EAU34934.1  
Group13805: afis|EAW17244.1 afum|EBA27284.1 ater|EAU37685.1  
Group13806: afis|EAW17254.1 asyd|OJJ59282.1 aver|OJJ01901.1  
Group13807: awen|OJJ34566.1 afla|EED45153.1 aory|EIT73773.1  
Group13808: afis|EAW17374.1 afum|EAL91210.1 anid|CBF88126.1  
Group13809: anid|CBF71585.1 asyd|OJJ61872.1 aver|OJ195970.1  
Group13810: afis|EAW17527.1 afum|EAL86502.1 ater|EAU39524.1  
Group13811: afis|EAW17752.1 afla|EED48584.1 asyd|OJJ54474.1  
Group13812: afis|EAW18091.1 agla|OJJ79756.1 asyd|OJJ62670.1  
Group13813: afis|EAW18095.1 afla|EED56535.1 aory|EIT79697.1  
Group13814: afis|EAW18133.1 afla|EED47886.1 aory|EIT77249.1  
Group13815: anid|CBF76044.1 aver|OJJ03953.1 asyd|OJJ52462.1  
Group13816: ater|EAU32196.1 asyd|OJJ54758.1 aver|OJJ07412.1  
Group13817: ater|EAU39465.1 afla|EED46932.1 aory|EIT72641.1  
Group13818: aory|EIT83066.1 afla|EED48392.1 awen|OJJ30962.1  
Group13819: afis|EAW19227.1 afla|EED49597.1 awen|OJJ37949.1  
Group13820: afis|EAW19255.1 afla|EED56899.1 awen|OJJ32282.1  
Group13821: afis|EAW19385.1 afla|EED52380.1 aory|EIT82371.1  
Group13822: afis|EAW19518.1 afum|EAL86979.1 aluc|OJZ81079.1  
Group13823: afis|EAW19534.1 afum|EAL86972.1 ater|EAU36060.1  
Group13824: afis|EAW19535.1 afum|EBA27296.1 awen|OJJ29902.1  
Group13825: afis|EAW19559.1 afum|EAL86952.1 azon|OJJ47318.1  
Group13826: afis|EAW19561.1 awen|OJJ35389.1 azon|OJJ50605.1  
Group13827: akaw|GAA93094.1 afla|EED49495.1 aory|EIT82621.1  
Group13828: azon|OJJ46905.1 afla|EED50996.1 aory|EIT76979.1  
Group13829: anid|CBF73989.1 aver|OJ197958.1 awen|OJJ38741.1  
Group13830: afis|EAW19747.1 afum|EAL91595.1 afla|EED47526.1  
Group13831: afis|EAW19766.1 ater|EAU36862.1 azon|OJJ42249.1

Group13832: afis|EAW19824.1 afum|EAL85068.1 aory|EIT83367.1  
Group13833: anid|CBF71501.1 asyd|OJJ54930.1 aver|OJJ07267.1  
Group13834: afis|EAW19889.1 afla|EED51139.1 azon|OJJ42765.1  
Group13835: afis|EAW19968.1 afum|EAL84950.2 atub|OJI83197.1  
Group13836: aver|OJJ07821.1 afla|EED55889.1 asyd|OJJ52017.1  
Group13837: anid|CBF87204.1 afum|EAL84869.1 ater|EAU37637.1  
Group13838: afis|EAW20260.1 afum|EAL94037.1 agla|OJJ88690.1  
Group13839: afis|EAW20270.1 afum|EAL85404.1 asyd|OJJ60802.1  
Group13840: afis|EAW20290.1 afum|EAL85421.1 azon|OJJ50178.1  
Group13841: afis|EAW20321.1 asyd|OJJ65357.1 aver|OJI99506.1  
Group13842: awen|OJJ34570.1 asyd|OJJ55125.1 aver|OJJ07079.1  
Group13843: afla|EED56668.1 aory|EIT79657.1 ater|EAU31814.1  
Group13844: azon|OJJ46411.1 afla|EED51754.1 aory|EIT80606.1  
Group13845: afis|EAW20411.1 afum|EAL89233.1 ater|EAU30196.1  
Group13846: afis|EAW20673.1 agla|OJJ83423.1 anid|CBF84447.1  
Group13847: afis|EAW20710.1 afum|EAL87791.1 awen|OJJ29623.1  
Group13848: afis|EAW20731.1 afla|EED54426.1 aory|EIT75889.1  
Group13849: afis|EAW20778.1 afla|EED50592.1 aory|EIT82087.1  
Group13850: afis|EAW20786.1 afum|EAL84838.2 azon|OJJ42752.1  
Group13851: afis|EAW20823.1 afum|EAL84806.1 aver|OJJ00337.1  
Group13852: afis|EAW20826.1 afum|EAL84803.1 asyd|OJJ56856.1  
Group13853: afis|EAW20855.1 awen|OJJ40931.1 azon|OJJ42353.1  
Group13854: afis|EAW21004.1 agla|OJJ82565.1 awen|OJJ37980.1  
Group13855: afis|EAW21016.1 afum|EAL92054.1 ater|EAU37795.1  
Group13856: afis|EAW21027.1 afum|EAL92065.1 ater|EAU32574.1  
Group13857: afis|EAW21063.1 ater|EAU31346.1 awen|OJJ30101.1  
Group13858: agla|OJJ78558.1 awen|OJJ37794.1 asyd|OJJ53111.1  
Group13859: afis|EAW21196.1 asyd|OJJ59259.1 aver|OJJ01871.1  
Group13860: afis|EAW21200.1 awen|OJJ32935.1 ater|EAU31235.1  
Group13861: afis|EAW21201.1 awen|OJJ32936.1 azon|OJJ45228.1  
Group13862: afis|EAW21214.1 afum|EAL92225.1 awen|OJJ29901.1  
Group13863: afis|EAW21277.1 afum|EAL92292.1 ater|EAU31599.1  
Group13864: aver|OJI97601.1 agla|OJJ82388.1 asyd|OJJ53439.1  
Group13865: afis|EAW21808.1 agla|OJJ78924.1 awen|OJJ35922.1  
Group13866: afis|EAW22081.1 afum|EAL85690.1 aory|EIT81007.1  
Group13867: anid|CBF88955.1 asyd|OJJ62807.1 aver|OJI96853.1  
Group13868: asyd|OJJ62622.1 awen|OJJ36992.1 aver|OJI99300.1  
Group13869: afis|EAW22747.1 akaw|GAA91088.1 aluc|OJZ87905.1  
Group13870: afis|EAW23233.1 afum|EAL88249.1 ater|EAU36362.1

Group13871: afis|EAW23458.1 afum|EAL88009.1 ater|EAU39520.1  
Group13872: afis|EAW23669.1 afum|EAL87114.1 asyd|OJJ53732.1  
Group13873: aory|EIT79602.1 afla|EED56554.1 ater|EAU37799.1  
Group13874: afis|EAW23702.1 afum|EAL87143.1 asyd|OJJ52253.1  
Group13875: afis|EAW23714.1 afum|EAL87159.1 aver|OJI95857.1  
Group13876: akaw|GAA92444.1 aluc|OJZ81575.1 atub|OJI88606.1  
Group13877: afis|EAW23845.1 afla|EED46471.1 aory|EIT72380.1  
Group13878: afis|EAW23914.1 awen|OJJ35045.1 agla|OJJ82266.1  
Group13879: azon|OJJ48047.1 atub|OJI89954.1 awen|OJJ37779.1  
Group13880: afis|EAW24397.1 agla|OJJ78877.1 awen|OJJ32808.1  
Group13881: afla|EED45372.1 asyd|OJJ54839.1 aver|OJJ07322.1  
Group13882: afis|EAW24594.1 aver|OJI96486.1 agla|OJJ80220.1  
Group13883: afis|EAW24604.1 agla|OJJ82372.1 aver|OJI96495.1  
Group13884: atub|OJI79830.1 afla|EED45394.1 aory|EIT82440.1  
Group13885: aluc|OJZ85564.1 akaw|GAA92157.1 atub|OJI79358.1  
Group13886: afis|EAW24903.1 asyd|OJJ60234.1 aver|OJJ04031.1  
Group13887: afis|EAW25174.1 afum|EAL89847.1 azon|OJJ42795.1  
Group13888: afis|EAW25193.1 afum|EBA27388.1 ater|EAU31574.1  
Group13889: akaw|GAA92422.1 aluc|OJZ81600.1 atub|OJI88582.1  
Group13890: afis|EAW25608.1 afla|EED53585.1 aory|EIT74870.1  
Group13891: afis|EAW25610.1 afla|EED53587.1 aory|EIT74929.1  
Group13892: afis|EAW25615.1 afla|EED53581.1 aory|EIT75131.1  
Group13893: afis|EAW25662.1 asyd|OJJ53541.1 aver|OJJ08212.1  
Group13894: aluc|OJZ81310.1 akaw|GAA88049.1 aver|OJJ03854.1  
Group13895: afis|EAW25685.1 afum|EAL84354.1 awen|OJJ30831.1  
Group13896: afis|EAW25722.1 afum|EBA27176.1 agla|OJJ78648.1  
Group13897: asyd|OJJ55726.1 agla|OJJ84802.1 anid|CBF79202.1  
Group13898: afla|EED44751.1 aory|EIT77783.1 azon|OJJ50358.1  
Group13899: afla|EED44758.1 asyd|OJJ54766.1 aver|OJJ07401.1  
Group13900: awen|OJJ34013.1 asyd|OJJ60311.1 aver|OJI99652.1  
Group13901: afla|EED44925.1 agla|OJJ84469.1 aory|EIT73467.1  
Group13902: afla|EED44978.1 aory|EIT73711.1 awen|OJJ40147.1  
Group13903: afla|EED45028.1 aory|EIT73644.1 asyd|OJJ54865.1  
Group13904: afla|EED45034.1 aory|EIT73640.1 asyd|OJJ56414.1  
Group13905: afla|EED45057.1 aory|EIT73762.1 aver|OJI98828.1  
Group13906: afla|EED45100.1 asyd|OJJ54181.1 aver|OJJ08559.1  
Group13907: afla|EED45118.1 aory|EIT73538.1 ater|EAU39527.1  
Group13908: afla|EED45152.1 aory|EIT73552.1 awen|OJJ39619.1  
Group13909: afla|EED45189.1 anid|CBF78859.1 aory|EIT73774.1

Group13910: afla|EED45356.1 agla|OJJ80032.1 aory|EIT82403.1  
Group13911: afla|EED45388.1 asyd|OJJ54926.1 aver|OJJ07269.1  
Group13912: afla|EED45404.1 afum|EAL86631.1 aory|EIT82448.1  
Group13913: afla|EED45405.1 aory|EIT82464.1 aver|OJJ03841.1  
Group13914: asyd|OJJ54712.1 aver|OJJ07454.1 awen|OJJ36968.1  
Group13915: afla|EED45431.1 aory|EIT82405.1 awen|OJJ35314.1  
Group13916: afla|EED45535.1 aory|EIT75788.1 awen|OJJ31940.1  
Group13917: afla|EED45582.1 aory|EIT75789.1 ater|EAU34196.1  
Group13918: afla|EED45607.1 aory|EIT75825.1 asyd|OJJ64153.1  
Group13919: afla|EED45669.1 agla|OJJ83733.1 aory|EIT75418.1  
Group13920: afla|EED45680.1 aory|EIT75533.1 azon|OJJ45980.1  
Group13921: afla|EED45691.1 aory|EIT75579.1 azon|OJJ42599.1  
Group13922: afla|EED45695.1 anid|CBF71634.1 aory|EIT75487.1  
Group13923: afla|EED45779.1 agla|OJJ87547.1 awen|OJJ29653.1  
Group13924: aver|OJJ05867.1 asyd|OJJ57290.1 azon|OJJ44495.1  
Group13925: anid|CBF85471.1 asyd|OJJ53605.1 aver|OJJ08143.1  
Group13926: afla|EED45819.1 asyd|OJJ64187.1 aver|OJJ98264.1  
Group13927: afla|EED45852.1 aory|EIT75764.1 awen|OJJ29657.1  
Group13928: afla|EED45853.1 aory|EIT75708.1 awen|OJJ29658.1  
Group13929: afla|EED45868.1 aory|EIT75716.1 asyd|OJJ54396.1  
Group13930: afla|EED45893.1 aory|EIT75699.1 awen|OJJ30143.1  
Group13931: afla|EED45914.1 aory|EIT75544.1 ater|EAU31437.1  
Group13932: afla|EED46145.1 anig|EHA25875.1 aory|EIT76435.1  
Group13933: afla|EED46156.1 aory|EIT76418.1 awen|OJJ33423.1  
Group13934: afla|EED46157.1 aory|EIT76509.1 azon|OJJ44013.1  
Group13935: afla|EED46158.1 aory|EIT76399.1 agla|OJJ88969.1  
Group13936: afla|EED46194.1 aory|EIT76432.1 azon|OJJ43521.1  
Group13937: agla|OJJ79525.1 akaw|GAA88578.1 aluc|OJJ288482.1  
Group13938: afla|EED46257.1 agla|OJJ88352.1 aory|EIT76446.1  
Group13939: afla|EED46383.1 aluc|OJJ285542.1 aver|OJJ99261.1  
Group13940: afla|EED46390.1 aory|EIT72400.1 azon|OJJ45861.1  
Group13941: afla|EED46556.1 aory|EIT77947.1 ater|EAU31401.1  
Group13942: afla|EED46601.1 aory|EIT77830.1 awen|OJJ40507.1  
Group13943: afla|EED46869.1 aory|EIT72688.1 anid|CBF85340.1  
Group13944: afla|EED46913.1 aory|EIT72615.1 azon|OJJ42573.1  
Group13945: afla|EED46916.1 agla|OJJ84152.1 aory|EIT72616.1  
Group13946: afla|EED46985.1 aory|EIT72729.1 ater|EAU29557.1  
Group13947: afum|EAL92633.1 asyd|OJJ53616.1 aver|OJJ05936.1  
Group13948: afla|EED47105.1 agla|OJJ85115.1 aory|EIT72783.1

Group13949: afla|EED47129.1 aory|EIT79269.1 ater|EAU36462.1  
Group13950: afla|EED47246.1 aory|EIT79318.1 awen|OJJ40109.1  
Group13951: afla|EED47270.1 aory|EIT79271.1 awen|OJJ31415.1  
Group13952: aluc|OJZ83993.1 ater|EAU38493.1 anig|EHA19117.1  
Group13953: afla|EED47309.1 aory|EIT82849.1 azon|OJJ45902.1  
Group13954: afla|EED47317.1 aory|EIT82831.1 asyd|OJJ54266.1  
Group13955: asyd|OJJ54594.1 aver|OJJ07558.1 anid|CBF80684.1  
Group13956: afla|EED47367.1 agla|OJJ88086.1 aory|EIT82852.1  
Group13957: afla|EED47368.1 aory|EIT82844.1 awen|OJJ37989.1  
Group13958: afla|EED47393.1 aory|EIT81933.1 ater|EAU36823.1  
Group13959: afla|EED47397.1 aory|EIT81926.1 asyd|OJJ62949.1  
Group13960: afla|EED47465.1 asyd|OJJ58367.1 aver|OJJ02039.1  
Group13961: afla|EED47467.1 aory|EIT79951.1 awen|OJJ31953.1  
Group13962: anid|CBF73902.1 asyd|OJJ63009.1 aver|OJI97949.1  
Group13963: awen|OJJ35836.1 asyd|OJJ53337.1 aver|OJJ08407.1  
Group13964: afla|EED47499.1 aory|EIT74533.1 aver|OJJ07503.1  
Group13965: afla|EED47504.1 aory|EIT74515.1 ater|EAU34202.1  
Group13966: afla|EED47525.1 aluc|OJZ89487.1 ater|EAU33899.1  
Group13967: afla|EED47536.1 aory|EIT74587.1 awen|OJJ30811.1  
Group13968: afla|EED47544.1 aory|EIT74568.1 ater|EAU29443.1  
Group13969: afla|EED47667.1 aory|EIT80171.1 asyd|OJJ57918.1  
Group13970: afla|EED47744.1 anid|CBF85568.1 aory|EIT77100.1  
Group13971: afla|EED47759.1 aory|EIT77166.1 azon|OJJ46421.1  
Group13972: afla|EED47871.1 agla|OJJ89267.1 aory|EIT77244.1  
Group13973: afla|EED47891.1 aluc|OJZ89215.1 atub|OJI85577.1  
Group13974: afla|EED48120.1 agla|OJJ87525.1 aory|EIT76208.1  
Group13975: afla|EED48170.1 agla|OJJ84365.1 aory|EIT83043.1  
Group13976: afla|EED48173.1 aory|EIT83038.1 azon|OJJ45859.1  
Group13977: afla|EED48182.1 aory|EIT83037.1 awen|OJJ31671.1  
Group13978: afla|EED48198.1 aory|EIT72911.1 ater|EAU35692.1  
Group13979: afla|EED48215.1 aory|EIT72898.1 awen|OJJ30535.1  
Group13980: afla|EED48276.1 aory|EIT72942.1 awen|OJJ39634.1  
Group13981: afla|EED48326.1 aory|EIT76286.1 atub|OJI89792.1  
Group13982: afla|EED48359.1 aory|EIT83101.1 awen|OJJ35382.1  
Group13983: afla|EED48377.1 aory|EIT83090.1 awen|OJJ40870.1  
Group13984: afla|EED48417.1 akaw|GAA83298.1 aory|EIT83105.1  
Group13985: afla|EED48422.1 agla|OJJ84728.1 aory|EIT83071.1  
Group13986: afla|EED48425.1 aory|EIT83108.1 aver|OJJ05981.1  
Group13987: afla|EED48440.1 aory|EIT81674.1 ater|EAU31013.1

Group13988: aflu|EED48465.1 aory|EIT76266.1 awen|OJJ31684.1  
Group13989: aflu|EED48479.1 anid|CBF89299.1 aory|EIT73101.1  
Group13990: aflu|EED48482.1 anid|CBF89305.1 aory|EIT73266.1  
Group13991: aflu|EED48484.1 anid|CBF89309.1 aory|EIT73170.1  
Group13992: aflu|EED48585.1 aory|EIT73268.1 azon|OJJ46653.1  
Group13993: aflu|EED48718.1 aory|EIT73184.1 awen|OJJ36199.1  
Group13994: aflu|EED48881.1 aory|EIT81249.1 awen|OJJ34564.1  
Group13995: aflu|EED48890.1 agla|OJJ85104.1 aory|EIT81255.1  
Group13996: aflu|EED48922.1 aory|EIT80031.1 ater|EAU29374.1  
Group13997: aflu|EED48933.1 agla|OJJ87939.1 awen|OJJ34700.1  
Group13998: aflu|EED48981.1 aory|EIT80006.1 awen|OJJ29942.1  
Group13999: aflu|EED48998.1 aory|EIT80030.1 azon|OJJ47608.1  
Group14000: aflu|EED49071.1 aory|EIT82493.1 awen|OJJ33719.1  
Group14001: aver|OJJ05747.1 asyd|OJJ57433.1 awen|OJJ34682.1  
Group14002: aflu|EED49377.1 aver|OJJ05892.1 awen|OJJ31163.1  
Group14003: aflu|EED49471.1 aory|EIT79522.1 awen|OJJ35944.1  
Group14004: aflu|EED49563.1 aory|EIT82630.1 azon|OJJ46532.1  
Group14005: awen|OJJ36196.1 asyd|OJJ60086.1 aver|OJJ04173.1  
Group14006: aflu|EED49686.1 aory|EIT81015.1 aver|OJJ08573.1  
Group14007: aflu|EED49692.1 aory|EIT77652.1 ater|EAU30297.1  
Group14008: aflu|EED49693.1 aory|EIT77661.1 ater|EAU30298.1  
Group14009: asyd|OJJ56420.1 aver|OJJ06294.1 awen|OJJ33800.1  
Group14010: ater|EAU33986.1 aflu|EED55030.1 aory|EIT81959.1  
Group14011: aflu|EED49841.1 aory|EIT83419.1 aver|OJJ02119.1  
Group14012: aflu|EED49843.1 aory|EIT83422.1 aver|OJJ02121.1  
Group14013: aflu|EED49866.1 aory|EIT83386.1 awen|OJJ34965.1  
Group14014: aflu|EED49874.1 asyd|OJJ57240.1 azon|OJJ42368.1  
Group14015: aflu|EED49892.1 agla|OJJ86460.1 aory|EIT72466.1  
Group14016: aflu|EED49896.1 aory|EIT72453.1 awen|OJJ32243.1  
Group14017: aflu|EED49897.1 aory|EIT72469.1 awen|OJJ36267.1  
Group14018: akaw|GAA89231.1 aluc|OJZ86449.1 atub|OJI84075.1  
Group14019: aflu|EED49995.1 akaw|GAA83022.1 aory|EIT74711.1  
Group14020: aflu|EED50042.1 aluc|OJZ80205.1 awen|OJJ29563.1  
Group14021: aflu|EED50238.1 agla|OJJ82252.1 aory|EIT77299.1  
Group14022: asyd|OJJ54064.1 ater|EAU38597.1 aver|OJJ08678.1  
Group14023: aflu|EED50611.1 aory|EIT77999.1 aver|OJI98679.1  
Group14024: aflu|EED50616.1 aory|EIT78097.1 ater|EAU38695.1  
Group14025: aflu|EED50783.1 aory|EIT78089.1 awen|OJJ36389.1  
Group14026: aflu|EED50786.1 aory|EIT78092.1 asyd|OJJ61708.1

Group14027: afa|EED50929.1 aory|EIT79026.1 aver|OJJ00175.1  
Group14028: anid|CBF87724.1 asyd|OJJ58694.1 aver|OJJ01306.1  
Group14029: afa|EED51103.1 aory|EIT81296.1 azon|OJJ43532.1  
Group14030: afa|EED51105.1 asyd|OJJ54972.1 aver|OJJ07219.1  
Group14031: afa|EED51133.1 aory|EIT81325.1 aver|OJJ05879.1  
Group14032: afa|EED51438.1 aory|EIT80705.1 ater|EAU31576.1  
Group14033: afa|EED51445.1 aory|EIT80618.1 asyd|OJJ56235.1  
Group14034: afa|EED51447.1 aory|EIT80463.1 asyd|OJJ56230.1  
Group14035: afa|EED51448.1 aory|EIT80724.1 asyd|OJJ56231.1  
Group14036: afa|EED51449.1 aory|EIT80727.1 asyd|OJJ56237.1  
Group14037: afa|EED51452.1 aory|EIT80545.1 awen|OJJ29933.1  
Group14038: afa|EED51466.1 agla|OJJ85775.1 aory|EIT80542.1  
Group14039: afa|EED51485.1 aory|EIT80685.1 asyd|OJJ57966.1  
Group14040: afa|EED51578.1 afum|EAL87212.1 aory|EIT80719.1  
Group14041: afa|EED51610.1 agla|OJJ81284.1 aory|EIT80485.1  
Group14042: afa|EED51668.1 aory|EIT80726.1 ater|EAU31404.1  
Group14043: asyd|OJJ62620.1 aver|OJJ99298.1 awen|OJJ36995.1  
Group14044: afa|EED51708.1 aory|EIT80687.1 ater|EAU35483.1  
Group14045: afa|EED51731.1 anid|CBF79141.1 ater|EAU33338.1  
Group14046: afa|EED51758.1 agla|OJJ82195.1 aory|EIT80634.1  
Group14047: anid|CBF76115.1 atub|OJJ80381.1 azon|OJJ42566.1  
Group14048: afa|EED51831.1 aory|EIT81752.1 aver|OJJ95764.1  
Group14049: afa|EED51838.1 aory|EIT81767.1 asyd|OJJ65402.1  
Group14050: asyd|OJJ56394.1 aver|OJJ06319.1 anid|CBF73503.1  
Group14051: asyd|OJJ65292.1 anid|CBF80520.1 aver|OJJ01918.1  
Group14052: awen|OJJ34471.1 asyd|OJJ52871.1 aver|OJJ08937.1  
Group14053: afa|EED52253.1 aory|EIT74479.1 ater|EAU31604.1  
Group14054: afa|EED52260.1 anig|EHA28242.1 aory|EIT74443.1  
Group14055: afa|EED52354.1 aluc|OJJ79664.1 akaw|GAA93089.1  
Group14056: afa|EED52362.1 afum|EAL86495.1 aver|OJJ95834.1  
Group14057: afa|EED52396.1 atub|OJJ88385.1 awen|OJJ35569.1  
Group14058: afa|EED52404.1 aory|EIT83297.1 awen|OJJ38809.1  
Group14059: afa|EED52405.1 asyd|OJJ62985.1 aver|OJJ97983.1  
Group14060: afa|EED52794.1 asyd|OJJ54652.1 aver|OJJ07509.1  
Group14061: afa|EED52851.1 aory|EIT78662.1 atub|OJJ84703.1  
Group14062: afa|EED53065.1 aory|EIT74800.1 asyd|OJJ56238.1  
Group14063: afa|EED53067.1 aory|EIT74807.1 asyd|OJJ56236.1  
Group14064: afa|EED53151.1 aory|EIT75197.1 aver|OJJ01958.1  
Group14065: akaw|GAA88050.1 aluc|OJJ81312.1 aver|OJJ03853.1

Group14066: afla|EED53189.1 asyd|OJJ54352.1 aver|OJJ05305.1  
Group14067: afla|EED53266.1 aory|EIT74910.1 asyd|OJJ64359.1  
Group14068: afla|EED53390.1 asyd|OJJ54121.1 aver|OJJ08616.1  
Group14069: afla|EED53572.1 aory|EIT75190.1 awen|OJJ32942.1  
Group14070: afla|EED53697.1 aory|EIT75282.1 ater|EAU34795.1  
Group14071: anid|CBF85420.1 asyd|OJJ64074.1 aver|OJI98161.1  
Group14072: afla|EED54046.1 aory|EIT75926.1 aver|OJJ06475.1  
Group14073: afla|EED54049.1 aory|EIT76151.1 asyd|OJJ52553.1  
Group14074: anid|CBF71465.1 asyd|OJJ54947.1 aver|OJJ07248.1  
Group14075: afla|EED54069.1 aory|EIT76098.1 ater|EAU39444.1  
Group14076: afla|EED54077.1 aory|EIT76056.1 ater|EAU29609.1  
Group14077: afla|EED54082.1 aory|EIT75954.1 awen|OJJ37943.1  
Group14078: afla|EED54133.1 agla|OJJ78605.1 aory|EIT76110.1  
Group14079: afla|EED54141.1 aory|EIT76122.1 aver|OJI97560.1  
Group14080: afla|EED54148.1 aory|EIT76121.1 awen|OJJ36292.1  
Group14081: afla|EED54158.1 aory|EIT76107.1 awen|OJJ36153.1  
Group14082: afla|EED54255.1 aory|EIT75999.1 ater|EAU32330.1  
Group14083: afla|EED54352.1 aory|EIT75958.1 anig|EHA26174.1  
Group14084: anid|CBF78743.1 aver|OJI95877.1 aory|EIT72648.1  
Group14085: afla|EED54471.1 aory|EIT81142.1 awen|OJJ37950.1  
Group14086: afla|EED54672.1 aory|EIT78906.1 ater|EAU29968.1  
Group14087: afla|EED54687.1 aory|EIT78755.1 awen|OJJ31386.1  
Group14088: afla|EED54737.1 aory|EIT78897.1 awen|OJJ33333.1  
Group14089: asyd|OJJ53397.1 akaw|GAA90558.1 aver|OJJ02220.1  
Group14090: afla|EED54926.1 aory|EIT80352.1 azon|OJJ49999.1  
Group14091: afla|EED54956.1 aory|EIT80283.1 azon|OJJ50603.1  
Group14092: afla|EED55036.1 aory|EIT81985.1 awen|OJJ39967.1  
Group14093: afla|EED55037.1 aory|EIT81981.1 awen|OJJ39966.1  
Group14094: afla|EED55040.1 aory|EIT81942.1 ater|EAU37350.1  
Group14095: agla|OJJ79292.1 asyd|OJJ54794.1 aver|OJJ02015.1  
Group14096: afla|EED55115.1 aory|EIT81665.1 awen|OJJ37018.1  
Group14097: afla|EED55163.1 agla|OJJ84027.1 ater|EAU37668.1  
Group14098: afla|EED55262.1 aory|EIT83606.1 awen|OJJ32898.1  
Group14099: afla|EED55340.1 aver|OJJ05801.1 asyd|OJJ57367.1  
Group14100: afla|EED55507.1 anid|CBF81667.1 aory|EIT80843.1  
Group14101: afla|EED55969.1 aory|EIT76555.1 asyd|OJJ56494.1  
Group14102: afla|EED56419.1 agla|OJJ82193.1 aory|EIT72880.1  
Group14103: afla|EED56539.1 agla|OJJ80935.1 aory|EIT79699.1  
Group14104: afla|EED56556.1 aory|EIT79616.1 ater|EAU37798.1



Group14105: afla|EED56586.1 awen|OJJ40102.1 agla|OJJ87729.1  
Group14106: akaw|GAA84494.1 aluc|OJZ89217.1 atub|OJI85575.1  
Group14107: afla|EED56759.1 aory|EIT73844.1 azon|OJJ50645.1  
Group14108: afla|EED56779.1 aory|EIT73878.1 awen|OJJ38022.1  
Group14109: afla|EED56786.1 aory|EIT73896.1 awen|OJJ36374.1  
Group14110: afla|EED56799.1 aory|EIT73883.1 awen|OJJ33574.1  
Group14111: afla|EED56801.1 aory|EIT73929.1 azon|OJJ44088.1  
Group14112: afla|EED56816.1 akaw|GAA86081.1 atub|OJI81741.1  
Group14113: afla|EED56849.1 aory|EIT77509.1 azon|OJJ46001.1  
Group14114: afla|EED56907.1 aory|EIT77496.1 awen|OJJ36148.1  
Group14115: akaw|GAA92512.1 aluc|OJZ91525.1 azon|OJJ45173.1  
Group14116: afla|EED56952.1 aory|EIT77554.1 awen|OJJ41846.1  
Group14117: afla|EED57020.1 asyd|OJJ57948.1 aver|OJJ04450.1  
Group14118: aver|OJJ01355.1 anid|CBF70275.1 asyd|OJJ58745.1  
Group14119: afla|EED57231.1 aory|EIT74156.1 asyd|OJJ54480.1  
Group14120: afla|EED57241.1 aory|EIT74062.1 atub|OJI87884.1  
Group14121: afla|EED57301.1 aory|EIT74115.1 ater|EAU30083.1  
Group14122: afla|EED57483.1 aory|EIT80093.1 ater|EAU33069.1  
Group14123: afla|EED57600.1 aory|EIT82927.1 ater|EAU31886.1  
Group14124: afla|EED57732.1 aory|EIT79865.1 awen|OJJ32620.1  
Group14125: afla|EED57734.1 aory|EIT79908.1 azon|OJJ51788.1  
Group14126: afla|EED57870.1 asyd|OJJ55541.1 aver|OJJ06619.1  
Group14127: afum|EAL84360.1 aver|OJI97999.1 asyd|OJJ62968.1  
Group14128: afum|EAL84870.1 anid|CBF87206.1 aver|OJI99462.1  
Group14129: afum|EAL85150.1 anid|CBF85132.1 aver|OJI97925.1  
Group14130: afum|EAL85390.1 akaw|GAA87896.1 asyd|OJJ62698.1  
Group14131: afum|EAL85430.2 agla|OJJ85933.1 ater|EAU30731.1  
Group14132: afum|EAL86281.1 akaw|GAA93040.1 anig|EHA21841.1  
Group14133: afum|EAL86283.1 agla|OJJ86638.1 aluc|OJZ82093.1  
Group14134: afum|EAL86637.1 anid|CBF86054.1 aver|OJJ07784.1  
Group14135: afum|EAL86725.1 aluc|OJZ79964.1 asyd|OJJ56759.1  
Group14136: afum|EAL86769.1 aluc|OJZ79808.1 anig|EHA21842.1  
Group14137: afum|EAL86774.1 agla|OJJ78482.1 awen|OJJ31337.1  
Group14138: afum|EAL87145.1 aory|EIT74463.1 awen|OJJ41935.1  
Group14139: afum|EAL87748.1 aluc|OJZ80160.1 awen|OJJ40154.1  
Group14140: afum|EAL87797.1 awen|OJJ37931.1 azon|OJJ41994.1  
Group14141: aluc|OJZ87034.1 anig|EHA25214.1 atub|OJI83481.1  
Group14142: aver|OJI95816.1 anid|CBF83098.1 asyd|OJJ61721.1  
Group14143: asyd|OJJ53198.1 aver|OJJ03652.1 azon|OJJ45242.1

Group14144: anig|EHA17685.1 akaw|GAA92626.1 aluc|OJZ80122.1  
Group14145: aluc|OJZ86453.1 akaw|GAA89227.1 atub|OJI84079.1  
Group14146: anid|CBF73495.1 asyd|OJJ60828.1 aver|OJJ00154.1  
Group14147: afum|EAL92636.2 asyd|OJJ53627.1 aver|OJJ05944.1  
Group14148: afum|EAL94098.1 asyd|OJJ53727.1 aver|OJI98282.1  
Group14149: agla|OJJ78528.1 azon|OJJ51356.1 awen|OJJ30176.1  
Group14150: agla|OJJ78531.1 asyd|OJJ65330.1 aver|OJI99475.1  
Group14151: agla|OJJ78658.1 aver|OJJ03762.1 awen|OJJ36609.1  
Group14152: agla|OJJ78854.1 asyd|OJJ53815.1 aver|OJJ04321.1  
Group14153: asyd|OJJ62063.1 agla|OJJ87806.1 aver|OJI96162.1  
Group14154: anid|CBF82173.1 asyd|OJJ54355.1 aver|OJJ05309.1  
Group14155: agla|OJJ79112.1 asyd|OJJ55386.1 aver|OJJ08271.1  
Group14156: awen|OJJ34017.1 asyd|OJJ60316.1 aver|OJI99657.1  
Group14157: agla|OJJ79119.1 asyd|OJJ55395.1 aver|OJJ08262.1  
Group14158: agla|OJJ79121.1 asyd|OJJ55380.1 awen|OJJ41413.1  
Group14159: ater|EAU37988.1 agla|OJJ80065.1 awen|OJJ30906.1  
Group14160: agla|OJJ79845.1 asyd|OJJ60830.1 aver|OJJ00155.1  
Group14161: agla|OJJ80046.1 asyd|OJJ62577.1 aver|OJI96698.1  
Group14162: agla|OJJ80193.1 asyd|OJJ58368.1 aver|OJJ02038.1  
Group14163: agla|OJJ80333.1 atub|OJI81898.1 awen|OJJ32600.1  
Group14164: agla|OJJ80606.1 asyd|OJJ53692.1 aver|OJJ07809.1  
Group14165: agla|OJJ80632.1 aluc|OJZ80312.1 atub|OJI80385.1  
Group14166: agla|OJJ80870.1 asyd|OJJ53599.1 aver|OJJ08149.1  
Group14167: agla|OJJ81070.1 awen|OJJ35777.1 azon|OJJ43900.1  
Group14168: anid|CBF83076.1 aver|OJJ00824.1 asyd|OJJ61482.1  
Group14169: asyd|OJJ65115.1 aver|OJI99241.1 anid|CBF76239.1  
Group14170: agla|OJJ81474.1 asyd|OJJ54227.1 aver|OJJ05180.1  
Group14171: agla|OJJ81543.1 anid|CBF79166.1 aver|OJI96475.1  
Group14172: agla|OJJ81706.1 asyd|OJJ55015.1 aver|OJJ07196.1  
Group14173: agla|OJJ82007.1 awen|OJJ36165.1 aver|OJJ07896.1  
Group14174: agla|OJJ82211.1 asyd|OJJ60321.1 awen|OJJ37955.1  
Group14175: agla|OJJ82464.1 asyd|OJJ56947.1 aver|OJJ03338.1  
Group14176: agla|OJJ82476.1 asyd|OJJ57274.1 ater|EAU30951.1  
Group14177: agla|OJJ82477.1 ater|EAU30950.1 aver|OJJ03447.1  
Group14178: agla|OJJ82504.1 anid|CBF81857.1 ater|EAU31863.1  
Group14179: agla|OJJ82615.1 ater|EAU30080.1 awen|OJJ40131.1  
Group14180: agla|OJJ82664.1 asyd|OJJ53573.1 aver|OJJ08184.1  
Group14181: agla|OJJ82666.1 awen|OJJ29652.1 azon|OJJ45047.1  
Group14182: agla|OJJ82760.1 asyd|OJJ52976.1 aver|OJJ08942.1

Group14183: agla|OJJ83096.1 akaw|GAA92801.1 aluc|OJZ88723.1  
Group14184: agla|OJJ83480.1 aver|OJI96894.1 asyd|OJJ53795.1  
Group14185: agla|OJJ83558.1 ater|EAU38736.1 awen|OJJ34150.1  
Group14186: agla|OJJ84447.1 asyd|OJJ52111.1 aver|OJJ05255.1  
Group14187: agla|OJJ84465.1 aory|EIT74901.1 ater|EAU31930.1  
Group14188: agla|OJJ84472.1 asyd|OJJ54483.1 aver|OJJ07696.1  
Group14189: agla|OJJ84569.1 akaw|GAA89015.1 aluc|OJZ79786.1  
Group14190: agla|OJJ84723.1 aver|OJI99734.1 asyd|OJJ60404.1  
Group14191: agla|OJJ84978.1 aver|OJJ01042.1 azon|OJJ50498.1  
Group14192: agla|OJJ85295.1 asyd|OJJ65028.1 aver|OJI99147.1  
Group14193: agla|OJJ85331.1 asyd|OJJ61769.1 aver|OJI95866.1  
Group14194: agla|OJJ85704.1 awen|OJJ39151.1 azon|OJJ51479.1  
Group14195: agla|OJJ86222.1 awen|OJJ30264.1 ater|EAU33253.1  
Group14196: agla|OJJ86592.1 asyd|OJJ61475.1 aver|OJJ00816.1  
Group14197: ater|EAU37272.1 aver|OJJ06012.1 asyd|OJJ56713.1  
Group14198: agla|OJJ87380.1 anid|CBF86671.1 ater|EAU33420.1  
Group14199: agla|OJJ87731.1 awen|OJJ40101.1 azon|OJJ42077.1  
Group14200: agla|OJJ88186.1 anid|CBF82335.1 azon|OJJ41996.1  
Group14201: agla|OJJ88188.1 aver|OJJ05943.1 asyd|OJJ53626.1  
Group14202: agla|OJJ88230.1 awen|OJJ40915.1 azon|OJJ43558.1  
Group14203: agla|OJJ88336.1 aver|OJJ05347.1 awen|OJJ30917.1  
Group14204: aluc|OJZ86812.1 atub|OJI83705.1 akaw|GAA84859.1  
Group14205: agla|OJJ88812.1 asyd|OJJ54515.1 aver|OJJ07669.1  
Group14206: agla|OJJ88813.1 asyd|OJJ55402.1 aver|OJJ06482.1  
Group14207: agla|OJJ88814.1 asyd|OJJ54516.1 aver|OJJ07667.1  
Group14208: agla|OJJ88815.1 asyd|OJJ54517.1 aver|OJJ07666.1  
Group14209: agla|OJJ88848.1 aluc|OJZ88659.1 aver|OJJ05765.1  
Group14210: asyd|OJJ56750.1 anig|EHA21627.1 aver|OJJ05980.1  
Group14211: agla|OJJ88983.1 awen|OJJ41815.1 azon|OJJ43557.1  
Group14212: agla|OJJ89314.1 asyd|OJJ57225.1 aver|OJJ03062.1  
Group14213: akaw|BAL04873.1 aory|AFM82512.1 azon|OJJ41982.1  
Group14214: akaw|BAL04881.1 aory|AFM82508.1 azon|OJJ41987.1  
Group14215: akaw|GAA82390.1 aluc|OJZ91730.1 anig|EHA22737.1  
Group14216: akaw|GAA82413.1 aluc|OJZ91705.1 atub|OJI90105.1  
Group14217: akaw|GAA82771.1 aluc|OJZ87330.1 atub|OJI81314.1  
Group14218: akaw|GAA82772.1 aluc|OJZ87331.1 atub|OJI81313.1  
Group14219: akaw|GAA82957.1 aluc|OJZ87538.1 atub|OJI81109.1  
Group14220: akaw|GAA83094.1 aluc|OJZ88641.1 atub|OJI91226.1  
Group14221: akaw|GAA83224.1 aluc|OJZ83725.1 atub|OJI90100.1

Group14222: akaw|GAA83895.1 aluc|OJZ90800.1 atub|OJI82789.1  
Group14223: akaw|GAA83896.1 aluc|OJZ90799.1 atub|OJI82788.1  
Group14224: akaw|GAA83899.1 aluc|OJZ90796.1 atub|OJI82785.1  
Group14225: akaw|GAA83933.1 aluc|OJZ90762.1 atub|OJI82750.1  
Group14226: akaw|GAA84052.1 aluc|OJZ80964.1 atub|OJI82622.1  
Group14227: akaw|GAA84086.1 aluc|OJZ81001.1 atub|OJI82584.1  
Group14228: akaw|GAA84167.1 aluc|OJZ81092.1 atub|OJI82491.1  
Group14229: akaw|GAA84219.1 aluc|OJZ88897.1 atub|OJI85892.1  
Group14230: akaw|GAA84274.1 aluc|OJZ88967.1 atub|OJI85823.1  
Group14231: akaw|GAA84737.1 aluc|OJZ86949.1 atub|OJI83574.1  
Group14232: akaw|GAA84847.1 aluc|OJZ86824.1 atub|OJI83694.1  
Group14233: asyd|OJJ53606.1 anid|CBF85469.1 aver|OJJ08142.1  
Group14234: akaw|GAA84850.1 aluc|OJZ86821.1 atub|OJI83696.1  
Group14235: akaw|GAA84855.1 aluc|OJZ86816.1 atub|OJI83701.1  
Group14236: akaw|GAA84857.1 aluc|OJZ86814.1 atub|OJI83703.1  
Group14237: akaw|GAA84862.1 aluc|OJZ86809.1 atub|OJI83708.1  
Group14238: akaw|GAA84966.1 aluc|OJZ86697.1 atub|OJI83828.1  
Group14239: akaw|GAA85047.1 aluc|OJZ86606.1 anid|CBF80329.1  
Group14240: ater|EAU37352.1 anig|EHA26088.1 atub|OJI87332.1  
Group14241: akaw|GAA85277.1 aluc|OJZ90636.1 atub|OJI82064.1  
Group14242: akaw|GAA85307.1 aluc|OJZ90667.1 atub|OJI82097.1  
Group14243: akaw|GAA85348.1 aluc|OJZ90710.1 atub|OJI82137.1  
Group14244: akaw|GAA85353.1 aluc|OJZ90715.1 atub|OJI82141.1  
Group14245: akaw|GAA85437.1 aluc|OJZ83341.1 atub|OJI82236.1  
Group14246: akaw|GAA85438.1 aluc|OJZ83342.1 atub|OJI82237.1  
Group14247: akaw|GAA85439.1 aluc|OJZ83343.1 atub|OJI82238.1  
Group14248: akaw|GAA85440.1 aluc|OJZ83344.1 atub|OJI82239.1  
Group14249: akaw|GAA85520.1 atub|OJI82340.1 aluc|OJZ83448.1  
Group14250: akaw|GAA85821.1 aluc|OJZ91278.1 atub|OJI83267.1  
Group14251: akaw|GAA85846.1 aluc|OJZ91253.1 awen|OJJ34438.1  
Group14252: akaw|GAA85944.1 aluc|OJZ91118.1 atub|OJI83122.1  
Group14253: akaw|GAA85953.1 aluc|OJZ91109.1 atub|OJI83106.1  
Group14254: akaw|GAA86040.1 aluc|OJZ90268.1 atub|OJI81693.1  
Group14255: akaw|GAA86048.1 aluc|OJZ90277.1 atub|OJI81701.1  
Group14256: akaw|GAA86107.1 aluc|OJZ90339.1 atub|OJI81766.1  
Group14257: akaw|GAA86113.1 aluc|OJZ90348.1 atub|OJI81774.1  
Group14258: akaw|GAA86368.1 aluc|OJZ84897.1 atub|OJI80701.1  
Group14259: akaw|GAA86412.1 aluc|OJZ84952.1 anig|EHA23275.1  
Group14260: akaw|GAA86413.1 aluc|OJZ84954.1 atub|OJI80646.1

Group14261: akaw|GAA86583.1 anig|EHA25353.1 atub|OJI80459.1  
Group14262: akaw|GAA86598.1 aluc|OJZ85145.1 anig|EHA27469.1  
Group14263: akaw|GAA86639.1 aluc|OJZ85196.1 atub|OJI80405.1  
Group14264: aluc|OJZ89899.1 anig|EHA27099.1 atub|OJI84908.1  
Group14265: akaw|GAA86922.1 aluc|OJZ90046.1 atub|OJI84760.1  
Group14266: akaw|GAA87150.1 aluc|OJZ84285.1 atub|OJI89786.1  
Group14267: akaw|GAA87301.1 aluc|OJZ89717.1 atub|OJI85083.1  
Group14268: akaw|GAA87303.1 aluc|OJZ89715.1 atub|OJI85087.1  
Group14269: akaw|GAA87454.1 aluc|OJZ88541.1 atub|OJI91126.1  
Group14270: akaw|GAA87468.1 aluc|OJZ88528.1 atub|OJI91112.1  
Group14271: akaw|GAA87630.1 atub|OJI80324.1 awen|OJJ36371.1  
Group14272: akaw|GAA87709.1 aluc|OJZ85335.1 atub|OJI80236.1  
Group14273: akaw|GAA87763.1 aluc|OJZ85398.1 atub|OJI80173.1  
Group14274: akaw|GAA87872.1 aluc|OJZ85513.1 ater|EAU30245.1  
Group14275: akaw|GAA88052.1 aluc|OJZ81314.1 anig|EHA18618.1  
Group14276: akaw|GAA88104.1 aluc|OJZ81371.1 atub|OJI91576.1  
Group14277: akaw|GAA88263.1 aluc|OJZ82232.1 atub|OJI88205.1  
Group14278: akaw|GAA88998.1 asyd|OJJ51942.1 aluc|OJZ79920.1  
Group14279: atub|OJI80388.1 akaw|GAA92354.1 aluc|OJZ80394.1  
Group14280: akaw|GAA89140.1 aluc|OJZ81696.1 atub|OJI88484.1  
Group14281: akaw|GAA89218.1 aluc|OJZ81611.1 atub|OJI88574.1  
Group14282: akaw|GAA89226.1 aluc|OJZ86454.1 atub|OJI84080.1  
Group14283: akaw|GAA89229.1 aluc|OJZ86451.1 atub|OJI84077.1  
Group14284: akaw|GAA89306.1 aluc|OJZ86363.1 atub|OJI84171.1  
Group14285: akaw|GAA89822.1 aluc|OJZ81868.1 anig|EHA25071.1  
Group14286: ater|EAU33239.1 anid|CBF75898.1 aver|OJJ08122.1  
Group14287: akaw|GAA90163.1 aluc|OJZ83184.1 anig|EHA18398.1  
Group14288: akaw|GAA90164.1 aluc|OJZ83183.1 anig|EHA18397.1  
Group14289: akaw|GAA90168.1 asyd|OJJ57147.1 azon|OJJ42371.1  
Group14290: akaw|GAA90236.1 aluc|OJZ83104.1 atub|OJI87831.1  
Group14291: akaw|GAA90304.1 aluc|OJZ83033.1 atub|OJI87915.1  
Group14292: akaw|GAA90327.1 aluc|OJZ85906.1 anig|EHA24686.1  
Group14293: akaw|GAA90556.1 asyd|OJJ53399.1 aver|OJJ02218.1  
Group14294: akaw|GAA90598.1 aluc|OJZ86056.1 atub|OJI79853.1  
Group14295: akaw|GAA90675.1 aluc|OJZ84683.1 atub|OJI89399.1  
Group14296: akaw|GAA90691.1 aluc|OJZ84663.1 atub|OJI89417.1  
Group14297: akaw|GAA91037.1 aluc|OJZ87847.1 atub|OJI80801.1  
Group14298: akaw|GAA91078.1 aluc|OJZ87893.1 atub|OJI80759.1  
Group14299: akaw|GAA91164.1 aluc|OJZ81491.1 atub|OJI88689.1

Group14300: akaw|GAA91349.1 aluc|OJZ84825.1 atub|OJI89262.1  
Group14301: akaw|GAA91371.1 aluc|OJZ84798.1 atub|OJI89284.1  
Group14302: akaw|GAA91401.1 aluc|OJZ84770.1 atub|OJI89311.1  
Group14303: akaw|GAA91648.1 aluc|OJZ82475.1 atub|OJI87961.1  
Group14304: akaw|GAA91804.1 aluc|OJZ92826.1 atub|OJI87283.1  
Group14305: asyd|OJJ56129.1 anid|CBF78341.1 aver|OJJ05070.1  
Group14306: akaw|GAA92271.1 aluc|OJZ90165.1 atub|OJI81593.1  
Group14307: akaw|GAA92453.1 aluc|OJZ81565.1 atub|OJI88620.1  
Group14308: akaw|GAA92457.1 aluc|OJZ81560.1 atub|OJI88625.1  
Group14309: akaw|GAA92508.1 aluc|OJZ91521.1 atub|OJI85976.1  
Group14310: akaw|GAA92536.1 aluc|OJZ90084.1 atub|OJI84722.1  
Group14311: akaw|GAA92701.1 aluc|OJZ88740.1 atub|OJI91312.1  
Group14312: akaw|GAA92797.1 aluc|OJZ88719.1 anig|EHA28202.1  
Group14313: akaw|GAA92798.1 aluc|OJZ88720.1 anig|EHA28203.1  
Group14314: akaw|GAA92827.1 aluc|OJZ91582.1 atub|OJI86031.1  
Group14315: akaw|GAA92830.1 aory|EIT79180.1 ater|EAU39332.1  
Group14316: akaw|GAA92852.1 aluc|OJZ80011.1 anig|EHA26119.1  
Group14317: akaw|GAA93078.1 aluc|OJZ80097.1 anig|EHA17687.1  
Group14318: akaw|GAA93102.1 aluc|OJZ79586.1 awen|OJJ36956.1  
Group14319: akaw|GAA93203.1 aluc|OJZ79706.1 anid|CBF81148.1  
Group14320: akaw|GAA93280.1 atub|OJI88197.1 aluc|OJZ79973.1  
Group14321: akaw|GAA93284.1 aluc|OJZ90160.1 atub|OJI84640.1  
Group14322: akaw|GAA93296.1 anig|EHA25615.1 ater|EAU32741.1  
Group14323: asyd|OJJ61845.1 aver|OJI95945.1 anid|CBF71636.1  
Group14324: aluc|OJZ79924.1 ater|EAU35382.1 awen|OJJ34694.1  
Group14325: aluc|OJZ80147.1 asyd|OJJ64228.1 aver|OJI98321.1  
Group14326: aluc|OJZ81328.1 anig|EHA18632.1 atub|OJI91531.1  
Group14327: aluc|OJZ81358.1 anig|EHA18658.1 atub|OJI91562.1  
Group14328: aluc|OJZ81648.1 atub|OJI88534.1 azon|OJJ43499.1  
Group14329: aluc|OJZ82223.1 anig|EHA28517.1 atub|OJI88212.1  
Group14330: aver|OJI97549.1 anid|CBF85247.1 asyd|OJJ63386.1  
Group14331: aluc|OJZ83413.1 anig|EHA24262.1 atub|OJI82300.1  
Group14332: aluc|OJZ83479.1 anig|EHA24316.1 atub|OJI82370.1  
Group14333: aluc|OJZ83607.1 anig|EHA18766.1 atub|OJI89980.1  
Group14334: aluc|OJZ85333.1 anig|EHA25521.1 atub|OJI80240.1  
Group14335: aluc|OJZ85377.1 anig|EHA25560.1 atub|OJI80192.1  
Group14336: aluc|OJZ85745.1 atub|OJI79530.1 anig|EHA28105.1  
Group14337: aluc|OJZ86064.1 aver|OJJ04784.1 awen|OJJ38355.1  
Group14338: aluc|OJZ86131.1 atub|OJI79927.1 anig|EHA24490.1

Group14339: aluc|OJZ87027.1 anig|EHA21631.1 atub|OJI83491.1  
Group14340: aluc|OJZ87707.1 anig|EHA20889.1 atub|OJI80936.1  
Group14341: aluc|OJZ88661.1 aver|OJJ05767.1 asyd|OJJ61523.1  
Group14342: aluc|OJZ88841.1 aory|EIT83506.1 asyd|OJJ52035.1  
Group14343: aluc|OJZ89304.1 atub|OJI85495.1 anig|EHA23262.1  
Group14344: aluc|OJZ89489.1 asyd|OJJ61847.1 atub|OJI85314.1  
Group14345: aluc|OJZ89584.1 anig|EHA23025.1 atub|OJI85219.1  
Group14346: aluc|OJZ89609.1 anig|EHA26855.1 atub|OJI85193.1  
Group14347: aluc|OJZ89909.1 anig|EHA27109.1 atub|OJI84897.1  
Group14348: aluc|OJZ90839.1 ater|EAU38786.1 atub|OJI82826.1  
Group14349: aluc|OJZ91209.1 anig|EHA19914.1 atub|OJI83227.1  
Group14350: aluc|OJZ91244.1 anig|EHA19943.1 atub|OJI83241.1  
Group14351: azon|OJJ43146.1 asyd|OJJ57172.1 awen|OJJ32420.1  
Group14352: asyd|OJJ64430.1 anid|CBF85981.1 aver|OJI98531.1  
Group14353: aluc|OJZ91572.1 anig|EHA22601.1 atub|OJI86023.1  
Group14354: aluc|OJZ92424.1 anig|EHA26543.1 atub|OJI86854.1  
Group14355: anid|CBF69423.1 asyd|OJJ57143.1 aver|OJJ04751.1  
Group14356: anid|CBF69429.1 asyd|OJJ52371.1 aver|OJJ01977.1  
Group14357: anid|CBF69475.1 asyd|OJJ59269.1 aver|OJJ01882.1  
Group14358: anid|CBF69479.1 asyd|OJJ59271.1 aver|OJJ01884.1  
Group14359: anid|CBF69496.1 asyd|OJJ59236.1 aver|OJJ01846.1  
Group14360: anid|CBF69542.1 asyd|OJJ59169.1 aver|OJJ01759.1  
Group14361: anid|CBF69576.1 asyd|OJJ59148.1 aver|OJJ01738.1  
Group14362: anid|CBF69646.1 asyd|OJJ59079.1 aver|OJJ01672.1  
Group14363: anid|CBF69926.1 asyd|OJJ59038.1 aver|OJJ01633.1  
Group14364: ater|EAU34088.1 asyd|OJJ52862.1 aver|OJJ08841.1  
Group14365: anid|CBF69969.1 asyd|OJJ58904.1 ater|EAU31720.1  
Group14366: anid|CBF70094.1 asyd|OJJ58836.1 aver|OJJ01439.1  
Group14367: anid|CBF70112.1 asyd|OJJ58821.1 aver|OJJ01425.1  
Group14368: anid|CBF70219.1 asyd|OJJ52962.1 aver|OJJ08928.1  
Group14369: anid|CBF70263.1 asyd|OJJ58752.1 aver|OJJ01996.1  
Group14370: anid|CBF70518.1 asyd|OJJ60538.1 aver|OJI99865.1  
Group14371: anid|CBF70526.1 asyd|OJJ52963.1 aver|OJJ08929.1  
Group14372: anid|CBF70531.1 asyd|OJJ58555.1 aver|OJJ01153.1  
Group14373: anid|CBF70614.1 asyd|OJJ58507.1 aver|OJJ01108.1  
Group14374: anid|CBF70724.1 asyd|OJJ55959.1 aver|OJJ04905.1  
Group14375: anid|CBF71062.1 asyd|OJJ52681.1 aver|OJJ04707.1  
Group14376: anid|CBF71165.1 asyd|OJJ55846.1 aver|OJJ04789.1  
Group14377: anid|CBF71247.1 asyd|OJJ55158.1 aver|OJJ07050.1

Group14378: anid|CBF71285.1 asyd|OJJ55130.1 aver|OJJ07073.1  
Group14379: anid|CBF71399.1 asyd|OJJ55025.1 aver|OJJ07180.1  
Group14380: anid|CBF71401.1 asyd|OJJ55026.1 aver|OJJ07178.1  
Group14381: anid|CBF71449.1 asyd|OJJ54959.1 aver|OJJ07232.1  
Group14382: anid|CBF71551.1 asyd|OJJ56284.1 aver|OJJ08476.1  
Group14383: anid|CBF71760.1 asyd|OJJ61728.1 aver|OJI95824.1  
Group14384: anid|CBF71766.1 asyd|OJJ61722.1 aver|OJI95817.1  
Group14385: anid|CBF71779.1 asyd|OJJ61741.1 aver|OJI95838.1  
Group14386: anid|CBF73403.1 asyd|OJJ54745.1 aver|OJJ07420.1  
Group14387: anid|CBF73411.1 asyd|OJJ55942.1 aver|OJJ04891.1  
Group14388: anid|CBF73509.1 asyd|OJJ55810.1 aver|OJJ04758.1  
Group14389: anid|CBF73526.1 asyd|OJJ61525.1 aver|OJJ00857.1  
Group14390: anid|CBF73528.1 asyd|OJJ56726.1 aver|OJJ05997.1  
Group14391: anid|CBF73551.1 asyd|OJJ63991.1 aver|OJI96963.1  
Group14392: anid|CBF73572.1 asyd|OJJ56689.1 aver|OJJ06034.1  
Group14393: anid|CBF73588.1 asyd|OJJ56217.1 aver|OJJ05149.1  
Group14394: anid|CBF73609.1 asyd|OJJ56675.1 aver|OJJ06049.1  
Group14395: anid|CBF73676.1 asyd|OJJ56661.1 aver|OJJ06063.1  
Group14396: anid|CBF73696.1 asyd|OJJ56651.1 aver|OJJ06074.1  
Group14397: anid|CBF73737.1 asyd|OJJ56633.1 aver|OJJ06093.1  
Group14398: anid|CBF73786.1 asyd|OJJ56601.1 aver|OJJ06123.1  
Group14399: anid|CBF73848.1 asyd|OJJ56553.1 aver|OJJ06168.1  
Group14400: anid|CBF73952.1 asyd|OJJ53711.1 aver|OJJ07837.1  
Group14401: anid|CBF73954.1 asyd|OJJ53712.1 aver|OJJ07838.1  
Group14402: anid|CBF73955.1 asyd|OJJ53713.1 aver|OJJ07839.1  
Group14403: anid|CBF73957.1 asyd|OJJ53714.1 aver|OJJ07840.1  
Group14404: anid|CBF73963.1 asyd|OJJ62372.1 aver|OJI96506.1  
Group14405: anid|CBF73967.1 asyd|OJJ62370.1 aver|OJI96504.1  
Group14406: anid|CBF74146.1 asyd|OJJ53919.1 aver|OJJ08017.1  
Group14407: anid|CBF74401.1 aver|OJJ05401.1 asyd|OJJ57765.1  
Group14408: anid|CBF74469.1 asyd|OJJ57701.1 aver|OJJ05463.1  
Group14409: anid|CBF74503.1 asyd|OJJ57724.1 aver|OJJ05445.1  
Group14410: anid|CBF74505.1 asyd|OJJ57725.1 aver|OJJ05444.1  
Group14411: anid|CBF74507.1 asyd|OJJ57727.1 aver|OJJ05442.1  
Group14412: anid|CBF74509.1 asyd|OJJ57728.1 aver|OJJ05441.1  
Group14413: anid|CBF74542.1 asyd|OJJ57689.1 aver|OJJ05476.1  
Group14414: anid|CBF74641.1 asyd|OJJ59265.1 aver|OJJ01875.1  
Group14415: anid|CBF74722.1 asyd|OJJ60199.1 aver|OJJ04066.1  
Group14416: anid|CBF74781.1 aver|OJJ04102.1 asyd|OJJ60162.1



Group14417: anid|CBF74892.1 asyd|OJJ52155.1 aver|OJJ00746.1  
Group14418: anid|CBF75026.1 asyd|OJJ60075.1 aver|OJJ04187.1  
Group14419: anid|CBF75028.1 asyd|OJJ60053.1 aver|OJJ02236.1  
Group14420: anid|CBF75248.1 asyd|OJJ59906.1 aver|OJJ02379.1  
Group14421: anid|CBF75862.1 asyd|OJJ60229.1 aver|OJJ04038.1  
Group14422: anid|CBF75870.1 asyd|OJJ60242.1 aver|OJJ04024.1  
Group14423: anid|CBF75894.1 asyd|OJJ60267.1 aver|OJJ03987.1  
Group14424: anid|CBF75996.1 asyd|OJJ59249.1 aver|OJJ01787.1  
Group14425: anid|CBF76042.1 asyd|OJJ52461.1 aver|OJJ03954.1  
Group14426: anid|CBF76046.1 asyd|OJJ52463.1 aver|OJJ03952.1  
Group14427: anid|CBF76048.1 asyd|OJJ52464.1 aver|OJJ03951.1  
Group14428: anid|CBF76273.1 asyd|OJJ60976.1 aver|OJJ00300.1  
Group14429: anid|CBF76370.1 asyd|OJJ61063.1 aver|OJJ00380.1  
Group14430: anid|CBF76500.1 asyd|OJJ61129.1 aver|OJJ00450.1  
Group14431: anid|CBF76729.1 asyd|OJJ61249.1 aver|OJJ00573.1  
Group14432: anid|CBF76731.1 asyd|OJJ61250.1 aver|OJJ00574.1  
Group14433: anid|CBF76753.1 asyd|OJJ61261.1 aver|OJJ00587.1  
Group14434: anid|CBF76928.1 asyd|OJJ57068.1 aver|OJJ03230.1  
Group14435: anid|CBF77020.1 asyd|OJJ57015.1 aver|OJJ03273.1  
Group14436: anid|CBF77135.1 asyd|OJJ56946.1 aver|OJJ03339.1  
Group14437: anid|CBF77162.1 asyd|OJJ56862.1 aver|OJJ03463.1  
Group14438: anid|CBF77520.1 aver|OJJ03670.1 asyd|OJJ53181.1  
Group14439: anid|CBF77992.1 asyd|OJJ55253.1 aver|OJJ06971.1  
Group14440: anid|CBF78052.1 aver|OJI97562.1 azon|OJJ43663.1  
Group14441: anid|CBF78269.1 asyd|OJJ56078.1 aver|OJJ05021.1  
Group14442: anid|CBF78271.1 asyd|OJJ56076.1 aver|OJJ05019.1  
Group14443: anid|CBF78303.1 asyd|OJJ56098.1 aver|OJJ05041.1  
Group14444: anid|CBF78309.1 asyd|OJJ56092.1 aver|OJJ05035.1  
Group14445: anid|CBF78329.1 asyd|OJJ56084.1 aver|OJJ05027.1  
Group14446: anid|CBF78335.1 asyd|OJJ56126.1 aver|OJJ05068.1  
Group14447: anid|CBF78425.1 asyd|OJJ58319.1 aver|OJJ02092.1  
Group14448: anid|CBF78457.1 asyd|OJJ64189.1 aver|OJI98266.1  
Group14449: anid|CBF78577.1 asyd|OJJ65071.1 aver|OJI99196.1  
Group14450: anid|CBF78579.1 asyd|OJJ65072.1 aver|OJI99197.1  
Group14451: anid|CBF78844.1 asyd|OJJ65276.1 aver|OJI99428.1  
Group14452: anid|CBF79020.1 asyd|OJJ57252.1 aver|OJJ03042.1  
Group14453: anid|CBF79099.1 asyd|OJJ55028.1 aver|OJJ07176.1  
Group14454: anid|CBF79180.1 aver|OJJ04747.1 asyd|OJJ52718.1  
Group14455: anid|CBF79425.1 asyd|OJJ57838.1 aver|OJJ04552.1

Group14456: anid|CBF79568.1 aver|OJJ04475.1 asyd|OJJ57916.1  
Group14457: anid|CBF79589.1 asyd|OJJ57980.1 aver|OJJ04420.1  
Group14458: anid|CBF79624.1 asyd|OJJ58005.1 aver|OJJ04396.1  
Group14459: anid|CBF79744.1 asyd|OJJ58087.1 aver|OJJ04322.1  
Group14460: anid|CBF79749.1 asyd|OJJ58097.1 aver|OJJ04307.1  
Group14461: anid|CBF79917.1 asyd|OJJ58192.1 aver|OJJ04213.1  
Group14462: anid|CBF79937.1 asyd|OJJ58209.1 aver|OJJ02213.1  
Group14463: anid|CBF80069.1 asyd|OJJ58295.1 aver|OJJ02129.1  
Group14464: anid|CBF80115.1 asyd|OJJ58330.1 aver|OJJ02081.1  
Group14465: anid|CBF80119.1 asyd|OJJ58340.1 aver|OJJ02071.1  
Group14466: anid|CBF80432.1 asyd|OJJ54778.1 aver|OJJ07387.1  
Group14467: anid|CBF80445.1 asyd|OJJ54795.1 aver|OJJ07370.1  
Group14468: anid|CBF80448.1 asyd|OJJ54756.1 aver|OJJ07414.1  
Group14469: anid|CBF80506.1 asyd|OJJ54735.1 aver|OJJ07436.1  
Group14470: anid|CBF80531.1 asyd|OJJ55618.1 aver|OJJ06693.1  
Group14471: anid|CBF80580.1 asyd|OJJ56927.1 aver|OJJ03367.1  
Group14472: anid|CBF80716.1 asyd|OJJ58387.1 aver|OJJ02031.1  
Group14473: anid|CBF80718.1 aver|OJJ02032.1 asyd|OJJ58386.1  
Group14474: anid|CBF80925.1 asyd|OJJ56318.1 aver|OJJ06396.1  
Group14475: anid|CBF80984.1 asyd|OJJ53565.1 aver|OJJ08189.1  
Group14476: anid|CBF81046.1 asyd|OJJ56439.1 aver|OJJ06281.1  
Group14477: anid|CBF81475.1 asyd|OJJ59449.1 aver|OJJ02823.1  
Group14478: anid|CBF81477.1 asyd|OJJ59450.1 aver|OJJ02822.1  
Group14479: anid|CBF81778.1 asyd|OJJ54866.1 aver|OJJ96473.1  
Group14480: anid|CBF81781.1 asyd|OJJ58364.1 aver|OJJ02042.1  
Group14481: anid|CBF81895.1 asyd|OJJ59681.1 aver|OJJ02607.1  
Group14482: anid|CBF81929.1 asyd|OJJ57420.1 aver|OJJ05758.1  
Group14483: anid|CBF81931.1 asyd|OJJ57417.1 aver|OJJ05760.1  
Group14484: awen|OJJ35532.1 asyd|OJJ54281.1 aver|OJJ05233.1  
Group14485: anid|CBF82112.1 asyd|OJJ54287.1 aver|OJJ05241.1  
Group14486: anid|CBF82115.1 asyd|OJJ54290.1 aver|OJJ05245.1  
Group14487: anid|CBF82167.1 asyd|OJJ54345.1 aver|OJJ05297.1  
Group14488: anid|CBF82171.1 asyd|OJJ54354.1 aver|OJJ05308.1  
Group14489: anid|CBF82292.1 asyd|OJJ52733.1 aver|OJJ05348.1  
Group14490: anid|CBF82306.1 asyd|OJJ61693.1 aver|OJJ08127.1  
Group14491: anid|CBF82372.1 aory|EIT75863.1 azon|OJJ42562.1  
Group14492: anid|CBF82440.1 asyd|OJJ54126.1 aver|OJJ08610.1  
Group14493: anid|CBF82604.1 asyd|OJJ54027.1 aver|OJJ08713.1  
Group14494: anid|CBF82777.1 asyd|OJJ53737.1 aver|OJJ07852.1

Group14495: anid|CBF82883.1 asyd|OJJ55064.1 aver|OJJ07147.1  
Group14496: anid|CBF83007.1 asyd|OJJ56437.1 aver|OJJ06284.1  
Group14497: anid|CBF83070.1 asyd|OJJ61487.1 aver|OJJ00829.1  
Group14498: anid|CBF83078.1 asyd|OJJ52798.1 aver|OJJ08775.1  
Group14499: anid|CBF83356.1 asyd|OJJ60617.1 aver|OJI99941.1  
Group14500: anid|CBF83386.1 asyd|OJJ60633.1 aver|OJI99956.1  
Group14501: anid|CBF83704.1 asyd|OJJ52494.1 aver|OJJ06530.1  
Group14502: anid|CBF83831.1 asyd|OJJ60908.1 aver|OJJ00235.1  
Group14503: anid|CBF83917.1 asyd|OJJ55493.1 aver|OJJ06569.1  
Group14504: anid|CBF83942.1 asyd|OJJ61447.1 aver|OJJ00783.1  
Group14505: anid|CBF83984.1 asyd|OJJ57947.1 aver|OJJ04451.1  
Group14506: anid|CBF84006.1 aver|OJI97563.1 azon|OJJ42261.1  
Group14507: anid|CBF84229.1 asyd|OJJ57180.1 aver|OJJ03110.1  
Group14508: anid|CBF84236.1 asyd|OJJ57187.1 aver|OJJ03102.1  
Group14509: anid|CBF84379.1 asyd|OJJ62965.1 aver|OJI98002.1  
Group14510: anid|CBF84398.1 asyd|OJJ53579.1 aver|OJJ08179.1  
Group14511: anid|CBF84406.1 asyd|OJJ53569.1 aver|OJJ08186.1  
Group14512: anid|CBF84417.1 asyd|OJJ53558.1 aver|OJJ08196.1  
Group14513: anid|CBF84428.1 asyd|OJJ53639.1 aver|OJJ01167.1  
Group14514: anid|CBF84484.1 asyd|OJJ64713.1 aver|OJI98816.1  
Group14515: anid|CBF84535.1 asyd|OJJ55561.1 aver|OJJ06642.1  
Group14516: aver|OJJ08390.1 asyd|OJJ53353.1 awen|OJJ36233.1  
Group14517: anid|CBF84843.1 asyd|OJJ63205.1 aver|OJI97750.1  
Group14518: anid|CBF85117.1 asyd|OJJ63048.1 aver|OJI97915.1  
Group14519: anid|CBF85140.1 asyd|OJJ63036.1 aver|OJI97931.1  
Group14520: anid|CBF85146.1 asyd|OJJ63003.1 aver|OJI97957.1  
Group14521: anid|CBF85161.1 asyd|OJJ54545.1 aver|OJJ07632.1  
Group14522: anid|CBF85226.1 asyd|OJJ57608.1 aver|OJJ05576.1  
Group14523: anid|CBF85286.1 asyd|OJJ56752.1 aver|OJJ05972.1  
Group14524: anid|CBF85288.1 asyd|OJJ56753.1 aver|OJJ05970.1  
Group14525: anid|CBF85424.1 asyd|OJJ64076.1 aver|OJI98163.1  
Group14526: anid|CBF85774.1 asyd|OJJ64309.1 aver|OJI98402.1  
Group14527: anid|CBF86059.1 asyd|OJJ54469.1 aver|OJJ07780.1  
Group14528: anid|CBF86346.1 asyd|OJJ64977.1 aver|OJI99099.1  
Group14529: anid|CBF86377.1 asyd|OJJ64963.1 aver|OJI99086.1  
Group14530: anid|CBF86407.1 asyd|OJJ64946.1 aver|OJI99068.1  
Group14531: anid|CBF86615.1 asyd|OJJ64816.1 aver|OJI98929.1  
Group14532: anid|CBF86645.1 asyd|OJJ64797.1 aver|OJI98911.1  
Group14533: anid|CBF86749.1 asyd|OJJ64706.1 aver|OJI98808.1

Group14534: anid|CBF86768.1 asyd|OJJ64689.1 aver|OJI98792.1  
Group14535: anid|CBF86873.1 asyd|OJJ64629.1 aver|OJI98727.1  
Group14536: anid|CBF86921.1 asyd|OJJ55624.1 aver|OJJ06699.1  
Group14537: anid|CBF87048.1 asyd|OJJ60443.1 aver|OJI99761.1  
Group14538: anid|CBF87065.1 asyd|OJJ53736.1 aver|OJJ07851.1  
Group14539: anid|CBF87086.1 asyd|OJJ60412.1 aver|OJI99739.1  
Group14540: anid|CBF87118.1 asyd|OJJ60358.1 aver|OJI99696.1  
Group14541: anid|CBF87135.1 asyd|OJJ60371.1 aver|OJI99706.1  
Group14542: anid|CBF87167.1 asyd|OJJ60294.1 aver|OJI99632.1  
Group14543: anid|CBF87183.1 asyd|OJJ55021.1 aver|OJI96404.1  
Group14544: awen|OJJ36059.1 asyd|OJJ62966.1 aver|OJI98001.1  
Group14545: anid|CBF87444.1 asyd|OJJ63360.1 aver|OJI97589.1  
Group14546: anid|CBF87446.1 asyd|OJJ63361.1 aver|OJI97588.1  
Group14547: anid|CBF87449.1 asyd|OJJ58570.1 aver|OJJ01174.1  
Group14548: anid|CBF87518.1 asyd|OJJ52981.1 aver|OJJ08950.1  
Group14549: anid|CBF87520.1 asyd|OJJ52982.1 aver|OJJ08951.1  
Group14550: anid|CBF87722.1 asyd|OJJ63340.1 aver|OJI97621.1  
Group14551: anid|CBF87751.1 asyd|OJJ56865.1 aver|OJJ06180.1  
Group14552: anid|CBF88207.1 aver|OJI97290.1 asyd|OJJ63644.1  
Group14553: anid|CBF88271.1 asyd|OJJ63681.1 aver|OJI97258.1  
Group14554: anid|CBF88397.1 aver|OJI97194.1 asyd|OJJ63746.1  
Group14555: anid|CBF88461.1 asyd|OJJ63775.1 aver|OJI97162.1  
Group14556: anid|CBF88562.1 asyd|OJJ63834.1 aver|OJI97103.1  
Group14557: anid|CBF88678.1 asyd|OJJ63899.1 aver|OJI97041.1  
Group14558: anid|CBF88772.1 asyd|OJJ63984.1 aver|OJI96969.1  
Group14559: anid|CBF88776.1 asyd|OJJ63472.1 aver|OJI97459.1  
Group14560: anid|CBF88778.1 asyd|OJJ63473.1 aver|OJI97457.1  
Group14561: anid|CBF88843.1 asyd|OJJ62868.1 aver|OJI96921.1  
Group14562: anid|CBF88871.1 asyd|OJJ64581.1 aver|OJI98678.1  
Group14563: anid|CBF89117.1 asyd|OJJ62657.1 aver|OJI96755.1  
Group14564: anid|CBF89122.1 asyd|OJJ62660.1 aver|OJI96758.1  
Group14565: anid|CBF89131.1 asyd|OJJ62663.1 aver|OJI96761.1  
Group14566: anid|CBF89135.1 asyd|OJJ62651.1 aver|OJI96751.1  
Group14567: anid|CBF89173.1 aver|OJI96666.1 asyd|OJJ62540.1  
Group14568: anid|CBF89175.1 asyd|OJJ62539.1 aver|OJI96665.1  
Group14569: anid|CBF89375.1 asyd|OJJ62472.1 aver|OJI96607.1  
Group14570: anid|CBF89410.1 asyd|OJJ62456.1 aver|OJI96591.1  
Group14571: anid|CBF89557.1 asyd|OJJ62342.1 aver|OJI96446.1  
Group14572: anid|CBF89565.1 asyd|OJJ62346.1 aver|OJI96451.1

Group14573: anid|CBF89566.1 asyd|OJJ62339.1 aver|OJI96444.1  
Group14574: anid|CBF89570.1 asyd|OJJ65271.1 aver|OJI99423.1  
Group14575: anid|CBF89604.1 asyd|OJJ62308.1 aver|OJI96416.1  
Group14576: anid|CBF89835.1 asyd|OJJ62179.1 aver|OJI96288.1  
Group14577: anid|CBF90092.1 asyd|OJJ62035.1 aver|OJI96125.1  
Group14578: anid|CBF90311.1 asyd|OJJ61914.1 aver|OJI96007.1  
Group14579: anid|CBF90378.1 asyd|OJJ62125.1 aver|OJI96233.1  
Group14580: anig|EHA22529.1 ater|EAU33342.1 aver|OJJ01797.1  
Group14581: anig|EHA23285.1 ater|EAU29434.1 azon|OJJ42274.1  
Group14582: anig|EHA23408.1 asyd|OJJ60337.1 aver|OJI99682.1  
Group14583: anig|EHA27750.1 atub|OJI89643.1 aver|OJJ08328.1  
Group14584: aory|EIT75673.1 ater|EAU32771.1 aver|OJI97598.1  
Group14585: aory|EIT77107.1 asyd|OJJ59778.1 aver|OJJ02508.1  
Group14586: aory|EIT82307.1 asyd|OJJ57951.1 aver|OJJ04446.1  
Group14587: asyd|OJJ52205.1 ater|EAU36867.1 aver|OJI95788.1  
Group14588: asyd|OJJ52351.1 ater|EAU33822.1 aver|OJJ07897.1  
Group14589: asyd|OJJ52373.1 ater|EAU38987.1 aver|OJJ01976.1  
Group14590: asyd|OJJ52474.1 aver|OJJ03942.1 awen|OJJ37004.1  
Group14591: asyd|OJJ52479.1 aver|OJJ05893.1 awen|OJJ31164.1  
Group14592: asyd|OJJ52761.1 aver|OJJ08743.1 awen|OJJ40744.1  
Group14593: asyd|OJJ52774.1 ater|EAU38646.1 aver|OJJ08757.1  
Group14594: asyd|OJJ52814.1 aver|OJJ08793.1 awen|OJJ40868.1  
Group14595: asyd|OJJ52848.1 aver|OJJ08826.1 awen|OJJ37375.1  
Group14596: asyd|OJJ53447.1 aver|OJJ08305.1 awen|OJJ41339.1  
Group14597: asyd|OJJ53619.1 atub|OJI91473.1 awen|OJJ30586.1  
Group14598: asyd|OJJ53744.1 ater|EAU30917.1 aver|OJJ07858.1  
Group14599: asyd|OJJ53771.1 ater|EAU30267.1 aver|OJJ07879.1  
Group14600: asyd|OJJ53814.1 ater|EAU31387.1 aver|OJJ07915.1  
Group14601: asyd|OJJ54096.1 ater|EAU36840.1 aver|OJJ08643.1  
Group14602: asyd|OJJ54187.1 ater|EAU35237.1 aver|OJJ08555.1  
Group14603: asyd|OJJ54327.1 ater|EAU29306.1 aver|OJJ05281.1  
Group14604: asyd|OJJ54391.1 ater|EAU32810.1 aver|OJI99555.1  
Group14605: asyd|OJJ54507.1 ater|EAU33037.1 aver|OJJ07675.1  
Group14606: asyd|OJJ54650.1 ater|EAU30281.1 aver|OJJ07511.1  
Group14607: asyd|OJJ54651.1 ater|EAU30280.1 aver|OJJ07510.1  
Group14608: asyd|OJJ54666.1 aver|OJJ02023.1 awen|OJJ34681.1  
Group14609: asyd|OJJ54669.1 aver|OJJ02020.1 azon|OJJ50312.1  
Group14610: asyd|OJJ54825.1 ater|EAU34239.1 aver|OJJ07335.1  
Group14611: asyd|OJJ54850.1 ater|EAU35599.1 aver|OJJ07316.1

Group14612: asyd|OJJ54923.1 aver|OJJ07272.1 azon|OJJ45632.1  
Group14613: asyd|OJJ55408.1 aver|OJJ06487.1 awen|OJJ35932.1  
Group14614: asyd|OJJ56041.1 ater|EAU37376.1 aver|OJJ04987.1  
Group14615: asyd|OJJ56059.1 aver|OJJ05001.1 awen|OJJ33508.1  
Group14616: asyd|OJJ56124.1 aver|OJJ05066.1 awen|OJJ35913.1  
Group14617: asyd|OJJ56140.1 aver|OJJ05079.1 awen|OJJ38744.1  
Group14618: asyd|OJJ56160.1 aver|OJJ05099.1 awen|OJJ39997.1  
Group14619: asyd|OJJ56207.1 ater|EAU36042.1 aver|OJJ05138.1  
Group14620: asyd|OJJ56503.1 ater|EAU31639.1 aver|OJJ06216.1  
Group14621: asyd|OJJ56976.1 aver|OJJ03312.1 awen|OJJ33540.1  
Group14622: asyd|OJJ57086.1 aver|OJJ03215.1 awen|OJJ36210.1  
Group14623: asyd|OJJ57127.1 ater|EAU36117.1 aver|OJJ03178.1  
Group14624: asyd|OJJ57283.1 aver|OJJ05873.1 azon|OJJ46800.1  
Group14625: asyd|OJJ57408.1 ater|EAU34547.1 aver|OJJ05773.1  
Group14626: asyd|OJJ58044.1 ater|EAU38803.1 azon|OJJ50745.1  
Group14627: asyd|OJJ58197.1 ater|EAU38231.1 aver|OJJ04210.1  
Group14628: asyd|OJJ58353.1 aver|OJJ02054.1 awen|OJJ36814.1  
Group14629: asyd|OJJ58354.1 aver|OJJ02053.1 azon|OJJ42228.1  
Group14630: asyd|OJJ58556.1 aver|OJJ01154.1 azon|OJJ42243.1  
Group14631: asyd|OJJ58560.1 ater|EAU38542.1 aver|OJJ01159.1  
Group14632: asyd|OJJ59257.1 aver|OJJ01868.1 awen|OJJ36073.1  
Group14633: asyd|OJJ59278.1 aver|OJJ01893.1 awen|OJJ40926.1  
Group14634: asyd|OJJ59579.1 aver|OJJ02690.1 azon|OJJ43186.1  
Group14635: asyd|OJJ60281.1 aver|OJJ99610.1 awen|OJJ39505.1  
Group14636: asyd|OJJ60308.1 aver|OJJ99649.1 awen|OJJ34010.1  
Group14637: asyd|OJJ60309.1 aver|OJJ99650.1 awen|OJJ34011.1  
Group14638: asyd|OJJ60312.1 aver|OJJ99653.1 awen|OJJ34014.1  
Group14639: asyd|OJJ60315.1 aver|OJJ99656.1 awen|OJJ34016.1  
Group14640: asyd|OJJ60477.1 ater|EAU39530.1 aver|OJJ99797.1  
Group14641: asyd|OJJ60499.1 aver|OJJ99821.1 awen|OJJ33596.1  
Group14642: asyd|OJJ60515.1 aver|OJJ99841.1 azon|OJJ45783.1  
Group14643: asyd|OJJ61039.1 ater|EAU38819.1 azon|OJJ46801.1  
Group14644: asyd|OJJ61400.1 aver|OJJ00729.1 awen|OJJ33520.1  
Group14645: asyd|OJJ61409.1 aver|OJJ00739.1 azon|OJJ45992.1  
Group14646: asyd|OJJ61695.1 ater|EAU39523.1 aver|OJJ95779.1  
Group14647: asyd|OJJ62167.1 aver|OJJ96278.1 awen|OJJ40170.1  
Group14648: asyd|OJJ62329.1 ater|EAU32507.1 aver|OJJ96435.1  
Group14649: asyd|OJJ62457.1 ater|EAU33527.1 aver|OJJ96592.1  
Group14650: asyd|OJJ62466.1 aver|OJJ96601.1 awen|OJJ34590.1

Group14651: asyd|OJJ62496.1 ater|EAU36884.1 aver|OJJ07650.1  
Group14652: asyd|OJJ62621.1 aver|OJI99299.1 awen|OJJ36993.1  
Group14653: asyd|OJJ62929.1 aver|OJI98061.1 awen|OJJ41768.1  
Group14654: asyd|OJJ63061.1 ater|EAU30423.1 aver|OJI97902.1  
Group14655: asyd|OJJ63173.1 aver|OJI97781.1 ater|EAU38713.1  
Group14656: asyd|OJJ63495.1 ater|EAU31462.1 aver|OJI97434.1  
Group14657: asyd|OJJ63987.1 ater|EAU32301.1 aver|OJI96966.1  
Group14658: asyd|OJJ64183.1 ater|EAU39599.1 aver|OJI98260.1  
Group14659: asyd|OJJ64320.1 ater|EAU32177.1 aver|OJI98413.1  
Group14660: asyd|OJJ64790.1 aver|OJI98902.1 awen|OJJ41509.1  
Group14661: asyd|OJJ64795.1 aver|OJI98910.1 awen|OJJ36234.1  
Group14662: asyd|OJJ64971.1 ater|EAU33961.1 aver|OJI99095.1  
Group14663: asyd|OJJ65243.1 aver|OJI99395.1 awen|OJJ38300.1  
Group14664: asyd|OJJ65288.1 aver|OJJ08735.1 awen|OJJ31971.1  
Group14665: asyd|OJJ65299.1 aver|OJI99439.1 azon|OJJ51833.1  
Group14666: asyd|OJJ65365.1 ater|EAU35430.1 aver|OJJ01304.1  
Group14667: ater|EAU31954.1 atub|OJI88933.1 aver|OJJ03916.1  
Group14668: abra|OJJ65465.1 abra|OJJ65474.1  
Group14669: abra|OJJ65494.1 abra|OJJ65649.1  
Group14670: abra|OJJ65549.1 abra|OJJ65555.1  
Group14671: abra|OJJ65650.1 abra|OJJ75560.1  
Group14672: abra|OJJ65652.1 abra|OJJ75561.1  
Group14673: abra|OJJ67053.1 abra|OJJ68239.1  
Group14674: acar|OOF89765.1 acar|OOF89774.1  
Group14675: acar|OOF90106.1 acar|OOF98053.1  
Group14676: acar|OOF90422.1 acar|OOF90426.1  
Group14677: acar|OOF90439.1 acar|OOF90446.1  
Group14678: acar|OOF90440.1 acar|OOF90447.1  
Group14679: acar|OOF90473.1 acar|OOF90480.1  
Group14680: acar|OOF90474.1 acar|OOF90481.1  
Group14681: acar|OOF90475.1 acar|OOF90482.1  
Group14682: acar|OOF90476.1 acar|OOF90483.1  
Group14683: acar|OOF90477.1 acar|OOF90484.1  
Group14684: acar|OOF90478.1 acar|OOF90485.1  
Group14685: acar|OOF90494.1 acar|OOF90503.1  
Group14686: acar|OOF91720.1 acar|OOF91724.1  
Group14687: acar|OOF91722.1 acar|OOF91726.1  
Group14688: acar|OOF94045.1 acar|OOF94115.1  
Group14689: acar|OOF94072.1 acar|OOF94142.1

Group14690: acar|OOF94080.1 acar|OOF94150.1  
Group14691: acar|OOF94096.1 acar|OOF94166.1  
Group14692: acar|OOF95044.1 acar|OOF95111.1  
Group14693: acar|OOF95052.1 acar|OOF95119.1  
Group14694: acar|OOF95053.1 acar|OOF95120.1  
Group14695: acar|OOF95059.1 acar|OOF95126.1  
Group14696: acar|OOF95622.1 acar|OOF95674.1  
Group14697: acar|OOG00253.1 acar|OOG00271.1  
Group14698: acla|EAW12036.1 acla|EAW12879.1  
Group14699: acla|EED45097.1 acla|EED45491.1  
Group14700: acla|EED49210.1 acla|EED56618.1  
Group14701: agla|OJJ78406.1 agla|OJJ78764.1  
Group14702: agla|OJJ78457.1 agla|OJJ83498.1  
Group14703: agla|OJJ78465.1 agla|OJJ80594.1  
Group14704: agla|OJJ78481.1 agla|OJJ79796.1  
Group14705: agla|OJJ78540.1 agla|OJJ78728.1  
Group14706: agla|OJJ79010.1 agla|OJJ80225.1  
Group14707: agla|OJJ79091.1 agla|OJJ81300.1  
Group14708: agla|OJJ79759.1 agla|OJJ88429.1  
Group14709: agla|OJJ79780.1 agla|OJJ85457.1  
Group14710: agla|OJJ79844.1 agla|OJJ85998.1  
Group14711: agla|OJJ80514.1 agla|OJJ85398.1  
Group14712: agla|OJJ80605.1 agla|OJJ82356.1  
Group14713: agla|OJJ80624.1 agla|OJJ80625.1  
Group14714: agla|OJJ81291.1 agla|OJJ89319.1  
Group14715: agla|OJJ87859.1 agla|OJJ78921.1  
Group14716: agla|OJJ82050.1 agla|OJJ82055.1  
Group14717: agla|OJJ82066.1 agla|OJJ82954.1  
Group14718: agla|OJJ82254.1 agla|OJJ83433.1  
Group14719: agla|OJJ82847.1 agla|OJJ88204.1  
Group14720: agla|OJJ82922.1 agla|OJJ83800.1  
Group14721: agla|OJJ84077.1 agla|OJJ87264.1  
Group14722: agla|OJJ84907.1 agla|OJJ83287.1  
Group14723: agla|OJJ85486.1 agla|OJJ85488.1  
Group14724: agla|OJJ86336.1 agla|OJJ87980.1  
Group14725: agla|OJJ86550.1 agla|OJJ87009.1  
Group14726: agla|OJJ86648.1 agla|OJJ89311.1  
Group14727: agla|OJJ86729.1 agla|OJJ88110.1  
Group14728: agla|OJJ87097.1 agla|OJJ87099.1



Group14729: agla|OJJ87637.1 agla|OJJ88095.1  
Group14730: akaw|GAA92068.1 akaw|GAA93092.1  
Group14731: akaw|GAA92349.1 akaw|GAA93135.1  
Group14732: akaw|GAA92368.1 akaw|GAA93353.1  
Group14733: akaw|GAA92611.1 akaw|GAA93006.1  
Group14734: akaw|GAA93028.1 akaw|GAA93067.1  
Group14735: akaw|GAA93184.1 akaw|GAA93265.1  
Group14736: akaw|GAA93294.1 akaw|GAA93312.1  
Group14737: aluc|OJZ79483.1 aluc|OJZ79694.1  
Group14738: aluc|OJZ79495.1 aluc|OJZ80499.1  
Group14739: aluc|OJZ79533.1 aluc|OJZ79761.1  
Group14740: aluc|OJZ79566.1 aluc|OJZ79848.1  
Group14741: aluc|OJZ79573.1 aluc|OJZ81137.1  
Group14742: aluc|OJZ79610.1 aluc|OJZ80080.1  
Group14743: aluc|OJZ79635.1 aluc|OJZ80075.1  
Group14744: aluc|OJZ79671.1 aluc|OJZ79751.1  
Group14745: aluc|OJZ79707.1 aluc|OJZ80153.1  
Group14746: aluc|OJZ79718.1 aluc|OJZ79871.1  
Group14747: aluc|OJZ79727.1 aluc|OJZ80231.1  
Group14748: aluc|OJZ79745.1 aluc|OJZ79983.1  
Group14749: aluc|OJZ79763.1 aluc|OJZ79911.1  
Group14750: aluc|OJZ79775.1 aluc|OJZ80136.1  
Group14751: aluc|OJZ79820.1 aluc|OJZ80412.1  
Group14752: aluc|OJZ79929.1 aluc|OJZ80389.1  
Group14753: aluc|OJZ79931.1 aluc|OJZ80388.1  
Group14754: aluc|OJZ79965.1 aluc|OJZ80475.1  
Group14755: aluc|OJZ79982.1 aluc|OJZ80079.1  
Group14756: aluc|OJZ79990.1 aluc|OJZ91545.1  
Group14757: aluc|OJZ80021.1 aluc|OJZ80176.1  
Group14758: aluc|OJZ80041.1 aluc|OJZ80337.1  
Group14759: aluc|OJZ80054.1 aluc|OJZ80215.1  
Group14760: aluc|OJZ80157.1 aluc|OJZ80319.1  
Group14761: aluc|OJZ80245.1 aluc|OJZ80432.1  
Group14762: anid|CBF69531.1 anid|CBF86063.1  
Group14763: anid|CBF71837.1 anid|CBF82958.1  
Group14764: anid|CBF80694.1 anid|CBF84322.1  
Group14765: anid|CBF81146.1 anid|CBF89248.1  
Group14766: anid|CBF82215.1 anid|CBF82216.1  
Group14767: anid|CBF82240.1 anid|CBF87228.1

Group14768: anid|CBF86379.1 anid|CBF89320.1  
Group14769: aory|EIT78835.1 afla|EED54654.1  
Group14770: asyd|OJJ51850.1 asyd|OJJ52246.1  
Group14771: asyd|OJJ51873.1 asyd|OJJ51981.1  
Group14772: asyd|OJJ51874.1 asyd|OJJ51980.1  
Group14773: asyd|OJJ51884.1 asyd|OJJ52234.1  
Group14774: asyd|OJJ51926.1 asyd|OJJ52309.1  
Group14775: asyd|OJJ51953.1 asyd|OJJ62676.1  
Group14776: asyd|OJJ51969.1 asyd|OJJ51991.1  
Group14777: asyd|OJJ52023.1 asyd|OJJ52284.1  
Group14778: asyd|OJJ52116.1 asyd|OJJ52171.1  
Group14779: asyd|OJJ52195.1 asyd|OJJ54370.1  
Group14780: asyd|OJJ52238.1 asyd|OJJ52267.1  
Group14781: asyd|OJJ52251.1 asyd|OJJ52258.1  
Group14782: asyd|OJJ52295.1 asyd|OJJ62685.1  
Group14783: asyd|OJJ52776.1 asyd|OJJ52777.1  
Group14784: asyd|OJJ52809.1 asyd|OJJ65405.1  
Group14785: asyd|OJJ53799.1 asyd|OJJ54445.1  
Group14786: asyd|OJJ54140.1 asyd|OJJ55189.1  
Group14787: ater|EAU29592.1 ater|EAU30415.1  
Group14788: ater|EAU29979.1 ater|EAU32471.1  
Group14789: ater|EAU31049.1 ater|EAU34695.1  
Group14790: ater|EAU31653.1 ater|EAU39310.1  
Group14791: ater|EAU31728.1 ater|EAU39616.1  
Group14792: ater|EAU31744.1 ater|EAU33403.1  
Group14793: ater|EAU33564.1 ater|EAU37222.1  
Group14794: ater|EAU34493.1 ater|EAU37114.1  
Group14795: aver|OJI95753.1 aver|OJJ06438.1  
Group14796: aver|OJI96735.1 aver|OJJ03399.1  
Group14797: aver|OJI97923.1 aver|OJI97924.1  
Group14798: aver|OJI98315.1 aver|OJJ07713.1  
Group14799: aver|OJI98892.1 aver|OJJ05269.1  
Group14800: aver|OJI99302.1 aver|OJJ07469.1  
Group14801: aver|OJI99629.1 aver|OJJ07369.1  
Group14802: aver|OJJ00340.1 aver|OJJ05776.1  
Group14803: aver|OJJ03365.1 aver|OJJ07296.1  
Group14804: aver|OJJ03398.1 aver|OJJ08768.1  
Group14805: aver|OJJ03444.1 aver|OJJ03886.1  
Group14806: aver|OJJ07615.1 aver|OJJ07623.1

Group14807: awen|OJJ29556.1 awen|OJJ29644.1  
Group14808: awen|OJJ29557.1 awen|OJJ29646.1  
Group14809: awen|OJJ29606.1 awen|OJJ32582.1  
Group14810: awen|OJJ29710.1 awen|OJJ29794.1  
Group14811: awen|OJJ30791.1 awen|OJJ31690.1  
Group14812: awen|OJJ30793.1 awen|OJJ31688.1  
Group14813: awen|OJJ30795.1 awen|OJJ31686.1  
Group14814: awen|OJJ31284.1 awen|OJJ37716.1  
Group14815: awen|OJJ31944.1 awen|OJJ31945.1  
Group14816: awen|OJJ32039.1 awen|OJJ32999.1  
Group14817: awen|OJJ32565.1 awen|OJJ37837.1  
Group14818: awen|OJJ32783.1 awen|OJJ33782.1  
Group14819: awen|OJJ32940.1 awen|OJJ37849.1  
Group14820: awen|OJJ33282.1 awen|OJJ33283.1  
Group14821: awen|OJJ33400.1 awen|OJJ36228.1  
Group14822: awen|OJJ33581.1 awen|OJJ35019.1  
Group14823: awen|OJJ33694.1 awen|OJJ38676.1  
Group14824: awen|OJJ34110.1 awen|OJJ34111.1  
Group14825: awen|OJJ35406.1 awen|OJJ40654.1  
Group14826: awen|OJJ37974.1 awen|OJJ37977.1  
Group14827: azon|OJJ42072.1 azon|OJJ48733.1  
Group14828: azon|OJJ42273.1 azon|OJJ42642.1  
Group14829: azon|OJJ42400.1 azon|OJJ51826.1  
Group14830: azon|OJJ42439.1 azon|OJJ46535.1  
Group14831: azon|OJJ42453.1 azon|OJJ46972.1  
Group14832: azon|OJJ42465.1 azon|OJJ45246.1  
Group14833: azon|OJJ42469.1 azon|OJJ45911.1  
Group14834: azon|OJJ42565.1 azon|OJJ42571.1  
Group14835: azon|OJJ44500.1 azon|OJJ45797.1  
Group14836: azon|OJJ45075.1 azon|OJJ50103.1  
Group14837: azon|OJJ45269.1 azon|OJJ45308.1  
Group14838: azon|OJJ45900.1 azon|OJJ51057.1  
Group14839: azon|OJJ46559.1 azon|OJJ50752.1  
Group14840: azon|OJJ47255.1 azon|OJJ48052.1  
Group14841: azon|OJJ47256.1 azon|OJJ47344.1  
Group14842: azon|OJJ47341.1 azon|OJJ48413.1  
Group14843: azon|OJJ47807.1 azon|OJJ51804.1  
Group14844: azon|OJJ50234.1 azon|OJJ51283.1  
Group14845: abra|OJJ65445.1 abra|OJJ65480.1

Group14846: abra|OJJ65447.1 abra|OJJ65563.1  
Group14847: abra|OJJ65448.1 abra|OJJ65564.1  
Group14848: abra|OJJ65467.1 abra|OJJ65660.1  
Group14849: abra|OJJ65469.1 abra|OJJ65706.1  
Group14850: abra|OJJ65504.1 abra|OJJ65816.1  
Group14851: abra|OJJ65505.1 abra|OJJ65817.1  
Group14852: abra|OJJ65523.1 abra|OJJ65566.1  
Group14853: abra|OJJ65543.1 abra|OJJ67280.1  
Group14854: abra|OJJ65544.1 abra|OJJ68291.1  
Group14855: abra|OJJ65618.1 abra|OJJ65716.1  
Group14856: abra|OJJ65664.1 abra|OJJ66172.1  
Group14857: abra|OJJ66290.1 abra|OJJ69757.1  
Group14858: anid|CBF70348.1 anid|CBF73871.1  
Group14859: anid|CBF74009.1 anid|CBF79031.1  
Group14860: anid|CBF75900.1 anid|CBF75902.1  
Group14861: anid|CBF80274.1 anid|CBF81843.1  
Group14862: anid|CBF80692.1 anid|CBF84326.1  
Group14863: anid|CBF81151.1 anid|CBF86888.1  
Group14864: anid|CBF82313.1 anid|CBF84375.1  
Group14865: anid|CBF82962.1 anid|CBF89290.1  
Group14866: anid|CBF84591.1 anid|CBF86032.1  
Group14867: acar|OOF89762.1 acar|OOF89775.1  
Group14868: asyd|OJJ51846.1 asyd|OJJ52141.1  
Group14869: asyd|OJJ51853.1 asyd|OJJ51915.1  
Group14870: asyd|OJJ51855.1 asyd|OJJ54877.1  
Group14871: asyd|OJJ51881.1 asyd|OJJ52154.1  
Group14872: asyd|OJJ51886.1 asyd|OJJ52169.1  
Group14873: asyd|OJJ51899.1 asyd|OJJ52150.1  
Group14874: asyd|OJJ51924.1 asyd|OJJ52310.1  
Group14875: asyd|OJJ51933.1 asyd|OJJ52322.1  
Group14876: asyd|OJJ51934.1 asyd|OJJ52323.1  
Group14877: asyd|OJJ51935.1 asyd|OJJ52324.1  
Group14878: asyd|OJJ51936.1 asyd|OJJ52325.1  
Group14879: asyd|OJJ51952.1 asyd|OJJ62677.1  
Group14880: asyd|OJJ51954.1 asyd|OJJ62675.1  
Group14881: asyd|OJJ51985.1 asyd|OJJ52304.1  
Group14882: asyd|OJJ51996.1 asyd|OJJ52314.1  
Group14883: asyd|OJJ52020.1 asyd|OJJ52274.1  
Group14884: asyd|OJJ52022.1 asyd|OJJ52285.1

Group14885: asyd|OJJ52048.1 asyd|OJJ65411.1  
Group14886: asyd|OJJ52049.1 asyd|OJJ62684.1  
Group14887: asyd|OJJ52147.1 asyd|OJJ52317.1  
Group14888: asyd|OJJ52153.1 asyd|OJJ52280.1  
Group14889: asyd|OJJ52164.1 asyd|OJJ62673.1  
Group14890: asyd|OJJ52405.1 asyd|OJJ57627.1  
Group14891: asyd|OJJ53068.1 asyd|OJJ56149.1  
Group14892: asyd|OJJ53279.1 asyd|OJJ56763.1  
Group14893: asyd|OJJ53281.1 asyd|OJJ56765.1  
Group14894: asyd|OJJ53364.1 asyd|OJJ63018.1  
Group14895: asyd|OJJ53642.1 asyd|OJJ58062.1  
Group14896: asyd|OJJ54645.1 asyd|OJJ54646.1  
Group14897: asyd|OJJ54695.1 asyd|OJJ54696.1  
Group14898: asyd|OJJ55603.1 asyd|OJJ55606.1  
Group14899: asyd|OJJ55604.1 asyd|OJJ55607.1  
Group14900: acar|OOF90179.1 acar|OOF95343.1  
Group14901: acar|OOF90489.1 acar|OOF90496.1  
Group14902: acar|OOF90490.1 acar|OOF90497.1  
Group14903: asyd|OJJ61553.1 asyd|OJJ61554.1  
Group14904: acar|OOF91719.1 acar|OOF91723.1  
Group14905: ater|EAU32502.1 ater|EAU35993.1  
Group14906: ater|EAU32796.1 ater|EAU34346.1  
Group14907: ater|EAU33996.1 ater|EAU33997.1  
Group14908: ater|EAU36312.1 ater|EAU37068.1  
Group14909: atub|OJI85695.1 atub|OJI85696.1  
Group14910: aver|OJI96218.1 aver|OJJ02089.1  
Group14911: acar|OOF94068.1 acar|OOF94138.1  
Group14912: acar|OOF94083.1 acar|OOF94153.1  
Group14913: acar|OOF94495.1 acar|OOF95399.1  
Group14914: acar|OOF94692.1 acar|OOF94693.1  
Group14915: awen|OJJ29533.1 awen|OJJ29641.1  
Group14916: awen|OJJ29543.1 awen|OJJ29648.1  
Group14917: awen|OJJ29545.1 awen|OJJ32591.1  
Group14918: awen|OJJ29554.1 awen|OJJ29642.1  
Group14919: awen|OJJ29579.1 awen|OJJ29604.1  
Group14920: awen|OJJ29591.1 awen|OJJ29639.1  
Group14921: awen|OJJ29743.1 awen|OJJ37019.1  
Group14922: awen|OJJ30129.1 awen|OJJ34493.1  
Group14923: awen|OJJ30748.1 awen|OJJ31733.1

Group14924: awen|OJJ30749.1 awen|OJJ31732.1  
Group14925: awen|OJJ30751.1 awen|OJJ31730.1  
Group14926: awen|OJJ30754.1 awen|OJJ31727.1  
Group14927: awen|OJJ30761.1 awen|OJJ31720.1  
Group14928: awen|OJJ30770.1 awen|OJJ31711.1  
Group14929: awen|OJJ30842.1 awen|OJJ32917.1  
Group14930: awen|OJJ31325.1 awen|OJJ35387.1  
Group14931: awen|OJJ31419.1 awen|OJJ40216.1  
Group14932: awen|OJJ31425.1 awen|OJJ35805.1  
Group14933: awen|OJJ31900.1 awen|OJJ38092.1  
Group14934: awen|OJJ31901.1 awen|OJJ31915.1  
Group14935: awen|OJJ31957.1 awen|OJJ36420.1  
Group14936: awen|OJJ32038.1 awen|OJJ37770.1  
Group14937: awen|OJJ32247.1 awen|OJJ37028.1  
Group14938: acar|OOF95041.1 acar|OOF95108.1  
Group14939: awen|OJJ35795.1 awen|OJJ38065.1  
Group14940: awen|OJJ35868.1 awen|OJJ38662.1  
Group14941: awen|OJJ36478.1 awen|OJJ36479.1  
Group14942: awen|OJJ37813.1 awen|OJJ40904.1  
Group14943: awen|OJJ37820.1 awen|OJJ37822.1  
Group14944: awen|OJJ37937.1 awen|OJJ37938.1  
Group14945: awen|OJJ39718.1 awen|OJJ39720.1  
Group14946: azon|OJJ42017.1 azon|OJJ45014.1  
Group14947: azon|OJJ42188.1 azon|OJJ48025.1  
Group14948: azon|OJJ42277.1 azon|OJJ46531.1  
Group14949: azon|OJJ42342.1 azon|OJJ46520.1  
Group14950: azon|OJJ42464.1 azon|OJJ45245.1  
Group14951: azon|OJJ42466.1 azon|OJJ45247.1  
Group14952: azon|OJJ42516.1 azon|OJJ42578.1  
Group14953: azon|OJJ45025.1 azon|OJJ50324.1  
Group14954: azon|OJJ45185.1 azon|OJJ50400.1  
Group14955: azon|OJJ46141.1 azon|OJJ46142.1  
Group14956: azon|OJJ46422.1 azon|OJJ51802.1  
Group14957: azon|OJJ47563.1 azon|OJJ47811.1  
Group14958: acar|OOF97689.1 acar|OOF97739.1  
Group14959: acla|EAW08289.1 acla|EAW12997.1  
Group14960: acla|EAW11777.1 acla|EAW15026.1  
Group14961: afis|EAW15485.1 afis|EAW19658.1  
Group14962: afis|EAW16170.1 afis|EAW18840.1

Group14963: afis|EAW17171.1 afis|EAW19371.1  
Group14964: afla|EED45528.1 afla|EED45619.1  
Group14965: afum|EAL86285.2 afum|EAL86738.1  
Group14966: abra|OJJ71213.1 abra|OJJ75255.1  
Group14967: agla|OJJ78454.1 agla|OJJ87959.1  
Group14968: agla|OJJ78455.1 agla|OJJ81298.1  
Group14969: agla|OJJ78464.1 agla|OJJ79291.1  
Group14970: agla|OJJ85036.1 agla|OJJ78643.1  
Group14971: agla|OJJ78556.1 agla|OJJ88574.1  
Group14972: agla|OJJ78729.1 agla|OJJ80326.1  
Group14973: agla|OJJ78771.1 agla|OJJ82972.1  
Group14974: agla|OJJ79080.1 agla|OJJ86872.1  
Group14975: agla|OJJ79279.1 agla|OJJ88489.1  
Group14976: agla|OJJ79365.1 agla|OJJ85429.1  
Group14977: agla|OJJ79383.1 agla|OJJ79384.1  
Group14978: agla|OJJ79468.1 agla|OJJ79470.1  
Group14979: agla|OJJ79872.1 agla|OJJ85343.1  
Group14980: agla|OJJ79908.1 agla|OJJ80988.1  
Group14981: agla|OJJ80062.1 agla|OJJ83548.1  
Group14982: agla|OJJ80313.1 agla|OJJ88794.1  
Group14983: agla|OJJ80317.1 agla|OJJ83606.1  
Group14984: agla|OJJ80627.1 agla|OJJ80628.1  
Group14985: agla|OJJ80686.1 agla|OJJ83810.1  
Group14986: agla|OJJ81336.1 agla|OJJ88494.1  
Group14987: agla|OJJ81481.1 agla|OJJ81825.1  
Group14988: agla|OJJ82687.1 agla|OJJ86252.1  
Group14989: agla|OJJ83431.1 agla|OJJ88334.1  
Group14990: agla|OJJ83484.1 agla|OJJ88341.1  
Group14991: agla|OJJ83551.1 agla|OJJ89315.1  
Group14992: agla|OJJ83782.1 agla|OJJ86854.1  
Group14993: agla|OJJ83784.1 agla|OJJ84565.1  
Group14994: agla|OJJ83786.1 agla|OJJ86853.1  
Group14995: agla|OJJ84757.1 agla|OJJ85318.1  
Group14996: agla|OJJ84887.1 agla|OJJ88098.1  
Group14997: agla|OJJ84908.1 agla|OJJ88820.1  
Group14998: agla|OJJ84923.1 agla|OJJ86841.1  
Group14999: agla|OJJ85443.1 agla|OJJ88023.1  
Group15000: agla|OJJ85959.1 agla|OJJ87960.1  
Group15001: agla|OJJ86651.1 agla|OJJ87958.1

Group15002: agla|OJJ87026.1 agla|OJJ89634.1  
Group15003: agla|OJJ87394.1 agla|OJJ88697.1  
Group15004: agla|OJJ87765.1 agla|OJJ88707.1  
Group15005: agla|OJJ87851.1 agla|OJJ87852.1  
Group15006: agla|OJJ87981.1 agla|OJJ88089.1  
Group15007: agla|OJJ88094.1 agla|OJJ88096.1  
Group15008: akaw|GAA92660.1 akaw|GAA93117.1  
Group15009: aluc|OJZ79475.1 aluc|OJZ79908.1  
Group15010: aluc|OJZ79494.1 aluc|OJZ80223.1  
Group15011: aluc|OJZ79497.1 aluc|OJZ80391.1  
Group15012: aluc|OJZ79515.1 aluc|OJZ79519.1  
Group15013: aluc|OJZ79523.1 aluc|OJZ79770.1  
Group15014: aluc|OJZ79535.1 aluc|OJZ80009.1  
Group15015: aluc|OJZ79548.1 aluc|OJZ79812.1  
Group15016: aluc|OJZ79555.1 aluc|OJZ79767.1  
Group15017: aluc|OJZ79585.1 aluc|OJZ80490.1  
Group15018: aluc|OJZ79589.1 aluc|OJZ80061.1  
Group15019: aluc|OJZ79592.1 aluc|OJZ80058.1  
Group15020: aluc|OJZ79620.1 aluc|OJZ80502.1  
Group15021: aluc|OJZ79639.1 aluc|OJZ88798.1  
Group15022: aluc|OJZ79640.1 aluc|OJZ80348.1  
Group15023: aluc|OJZ79641.1 aluc|OJZ79997.1  
Group15024: aluc|OJZ79719.1 aluc|OJZ79772.1  
Group15025: aluc|OJZ79730.1 aluc|OJZ80233.1  
Group15026: aluc|OJZ79741.1 aluc|OJZ79986.1  
Group15027: aluc|OJZ79758.1 aluc|OJZ80332.1  
Group15028: aluc|OJZ79776.1 aluc|OJZ88832.1  
Group15029: aluc|OJZ79804.1 aluc|OJZ80037.1  
Group15030: aluc|OJZ79809.1 aluc|OJZ79956.1  
Group15031: aluc|OJZ79815.1 aluc|OJZ80081.1  
Group15032: aluc|OJZ79817.1 aluc|OJZ80083.1  
Group15033: aluc|OJZ79833.1 aluc|OJZ80220.1  
Group15034: aluc|OJZ79882.1 aluc|OJZ91290.1  
Group15035: aluc|OJZ79943.1 aluc|OJZ79970.1  
Group15036: aluc|OJZ80051.1 aluc|OJZ80372.1  
Group15037: aluc|OJZ80096.1 aluc|OJZ80130.1  
Group15038: aluc|OJZ80103.1 aluc|OJZ80368.1  
Group15039: aluc|OJZ80104.1 aluc|OJZ81117.1  
Group15040: aluc|OJZ80126.1 aluc|OJZ88794.1



Group15041: aluc|OJZ80148.1 aluc|OJZ80264.1  
Group15042: aluc|OJZ80150.1 aluc|OJZ80349.1  
Group15043: aluc|OJZ80156.1 aluc|OJZ80320.1  
Group15044: aluc|OJZ80158.1 aluc|OJZ80318.1  
Group15045: aluc|OJZ80165.1 aluc|OJZ80256.1  
Group15046: aluc|OJZ80297.1 aluc|OJZ88822.1  
Group15047: aluc|OJZ80380.1 aluc|OJZ88826.1  
Group15048: aluc|OJZ80450.1 aluc|OJZ81141.1  
Group15049: abra|OJJ65415.1 azon|OJJ41986.1  
Group15050: abra|OJJ65428.1 acar|OOF89752.1  
Group15051: abra|OJJ65443.1 atub|OJI87361.1  
Group15052: abra|OJJ65459.1 aluc|OJZ85536.1  
Group15053: abra|OJJ65479.1 akaw|GAA92641.1  
Group15054: abra|OJJ65507.1 acar|OOF93531.1  
Group15055: abra|OJJ65512.1 atub|OJI82850.1  
Group15056: abra|OJJ65513.1 atub|OJI82849.1  
Group15057: abra|OJJ65514.1 atub|OJI82844.1  
Group15058: abra|OJJ65516.1 atub|OJI82842.1  
Group15059: abra|OJJ65518.1 atub|OJI82841.1  
Group15060: abra|OJJ65519.1 atub|OJI82840.1  
Group15061: abra|OJJ65520.1 akaw|GAA93118.1  
Group15062: abra|OJJ65535.1 akaw|GAA93332.1  
Group15063: abra|OJJ65537.1 afla|EED53063.1  
Group15064: azon|OJJ43209.1 awen|OJJ33443.1  
Group15065: abra|OJJ65587.1 afum|EAL91137.2  
Group15066: akaw|GAA92356.1 aluc|OJZ80396.1  
Group15067: abra|OJJ65611.1 afla|EED54386.1  
Group15068: abra|OJJ65614.1 afla|EED47876.1  
Group15069: aluc|OJZ80005.1 akaw|GAA93151.1  
Group15070: abra|OJJ65627.1 agla|OJJ78557.1  
Group15071: abra|OJJ65630.1 afla|EED52038.1  
Group15072: abra|OJJ65631.1 afla|EED52039.1  
Group15073: abra|OJJ65638.1 ater|EAU35407.1  
Group15074: abra|OJJ65643.1 awen|OJJ36081.1  
Group15075: abra|OJJ65668.1 aluc|OJZ81151.1  
Group15076: abra|OJJ65681.1 anig|EHA25308.1  
Group15077: aory|EIT72290.1 afla|EED46378.1  
Group15078: abra|OJJ65692.1 aver|OJJ08176.1  
Group15079: abra|OJJ65693.1 aory|EIT73820.1

Group15080: abra|OJJ65703.1 azon|OJJ46175.1  
Group15081: abra|OJJ65715.1 aluc|OJZ80206.1  
Group15082: abra|OJJ65736.1 afum|EAL86728.1  
Group15083: azon|OJJ41997.1 agla|OJJ79521.1  
Group15084: abra|OJJ65749.1 aluc|OJZ79838.1  
Group15085: abra|OJJ65755.1 ater|EAU35418.1  
Group15086: abra|OJJ65761.1 ater|EAU33983.1  
Group15087: abra|OJJ65783.1 aluc|OJZ81113.1  
Group15088: abra|OJJ65786.1 aluc|OJZ81111.1  
Group15089: abra|OJJ65838.1 ater|EAU31694.1  
Group15090: abra|OJJ65840.1 awen|OJJ29610.1  
Group15091: abra|OJJ65878.1 aver|OJJ03995.1  
Group15092: abra|OJJ65935.1 atub|OJI81625.1  
Group15093: abra|OJJ65960.1 anig|EHA21413.1  
Group15094: abra|OJJ65978.1 atub|OJI89215.1  
Group15095: abra|OJJ66007.1 anig|EHA21369.1  
Group15096: abra|OJJ66024.1 azon|OJJ45088.1  
Group15097: abra|OJJ66050.1 atub|OJI87254.1  
Group15098: abra|OJJ66150.1 afla|EED54060.1  
Group15099: abra|OJJ66151.1 afla|EED54061.1  
Group15100: abra|OJJ66159.1 ater|EAU39622.1  
Group15101: abra|OJJ66192.1 acar|OOF91938.1  
Group15102: abra|OJJ66226.1 acar|OOF92073.1  
Group15103: afum|EAL85124.1 afis|EAW19778.1  
Group15104: abra|OJJ66291.1 aver|OJJ02331.1  
Group15105: abra|OJJ66302.1 aluc|OJZ80191.1  
Group15106: abra|OJJ66304.1 azon|OJJ42058.1  
Group15107: abra|OJJ66305.1 aluc|OJZ91227.1  
Group15108: abra|OJJ66311.1 aluc|OJZ80188.1  
Group15109: abra|OJJ66318.1 afla|EED47883.1  
Group15110: abra|OJJ66321.1 afla|EED47880.1  
Group15111: abra|OJJ66327.1 afis|EAW17211.1  
Group15112: abra|OJJ66334.1 atub|OJI87800.1  
Group15113: abra|OJJ66408.1 acla|EAW15052.1  
Group15114: abra|OJJ66416.1 atub|OJI87889.1  
Group15115: ater|EAU29256.1 akaw|GAA82058.1  
Group15116: afla|EED47387.1 aory|EIT82828.1  
Group15117: ater|EAU31817.1 asyd|OJJ54867.1  
Group15118: abra|OJJ66466.1 aver|OJI96977.1

Group15119: agla|OJJ81843.1 ater|EAU36163.1  
Group15120: abra|OJJ66497.1 asyd|OJJ54147.1  
Group15121: abra|OJJ66517.1 aluc|OJZ81527.1  
Group15122: abra|OJJ66582.1 akaw|GAA91136.1  
Group15123: abra|OJJ66584.1 anig|EHA25967.1  
Group15124: abra|OJJ66673.1 anig|EHA27255.1  
Group15125: abra|OJJ66790.1 aluc|OJZ89977.1  
Group15126: abra|OJJ66804.1 azon|OJJ41968.1  
Group15127: abra|OJJ66806.1 atub|OJI79337.1  
Group15128: abra|OJJ66809.1 atub|OJI79333.1  
Group15129: abra|OJJ66812.1 atub|OJI79330.1  
Group15130: abra|OJJ66813.1 atub|OJI79329.1  
Group15131: abra|OJJ66821.1 anig|EHA24787.1  
Group15132: abra|OJJ66914.1 atub|OJI79459.1  
Group15133: abra|OJJ67000.1 aluc|OJZ85572.1  
Group15134: abra|OJJ67003.1 atub|OJI79366.1  
Group15135: abra|OJJ67010.1 anig|EHA25580.1  
Group15136: abra|OJJ67017.1 acar|OOF93605.1  
Group15137: abra|OJJ67038.1 akaw|GAA93112.1  
Group15138: aflu|EED52069.1 aory|EIT72302.1  
Group15139: abra|OJJ67045.1 anig|EHA18598.1  
Group15140: abra|OJJ67047.1 anig|EHA18596.1  
Group15141: ater|EAU31768.1 azon|OJJ42008.1  
Group15142: abra|OJJ67226.1 aluc|OJZ87748.1  
Group15143: abra|OJJ67241.1 anig|EHA20225.1  
Group15144: abra|OJJ67254.1 anig|EHA20218.1  
Group15145: abra|OJJ67297.1 atub|OJI79589.1  
Group15146: abra|OJJ67304.1 aflu|EED45664.1  
Group15147: aver|OJJ03935.1 asyd|OJJ52477.1  
Group15148: asyd|OJJ61365.1 aver|OJJ00692.1  
Group15149: abra|OJJ67678.1 afis|EAW25667.1  
Group15150: aory|EIT80657.1 aflu|EED51441.1  
Group15151: aory|EIT75589.1 aflu|EED45855.1  
Group15152: abra|OJJ67707.1 atub|OJI88566.1  
Group15153: abra|OJJ67711.1 afis|EAW20749.1  
Group15154: abra|OJJ67717.1 aver|OJJ07194.1  
Group15155: abra|OJJ67721.1 anig|EHA25834.1  
Group15156: asyd|OJJ65406.1 aver|OJJ05896.1  
Group15157: abra|OJJ67782.1 awen|OJJ36194.1

Group15158: abra|OJJ67783.1 agla|OJJ78614.1  
Group15159: abra|OJJ67784.1 agla|OJJ78613.1  
Group15160: abra|OJJ67804.1 aluc|OJZ90853.1  
Group15161: abra|OJJ67825.1 anig|EHA22194.1  
Group15162: abra|OJJ67827.1 anig|EHA22197.1  
Group15163: abra|OJJ67828.1 anig|EHA22198.1  
Group15164: agla|OJJ79083.1 awen|OJJ41028.1  
Group15165: abra|OJJ67831.1 anig|EHA22201.1  
Group15166: anid|CBF88293.1 ater|EAU31922.1  
Group15167: abra|OJJ67970.1 acar|OOF95032.1  
Group15168: abra|OJJ67994.1 aluc|OJZ82868.1  
Group15169: abra|OJJ68024.1 atub|OJI89123.1  
Group15170: afla|EED49506.1 aory|EIT82599.1  
Group15171: abra|OJJ68151.1 aver|OJJ07754.1  
Group15172: abra|OJJ68175.1 acla|EAW14646.1  
Group15173: abra|OJJ68231.1 acar|OOF95815.1  
Group15174: abra|OJJ68367.1 asyd|OJJ52876.1  
Group15175: afis|EAW21273.1 afum|EAL92288.1  
Group15176: abra|OJJ68504.1 acar|OOF90926.1  
Group15177: abra|OJJ68540.1 atub|OJI88989.1  
Group15178: aory|EIT82773.1 afla|EED52527.1  
Group15179: abra|OJJ68573.1 awen|OJJ32253.1  
Group15180: abra|OJJ68580.1 atub|OJI91462.1  
Group15181: akaw|GAA91964.1 aluc|OJZ82653.1  
Group15182: abra|OJJ68630.1 anig|EHA22323.1  
Group15183: abra|OJJ68631.1 aluc|OJZ81925.1  
Group15184: abra|OJJ68658.1 agla|OJJ83715.1  
Group15185: abra|OJJ68667.1 acar|OOF97782.1  
Group15186: abra|OJJ68712.1 atub|OJI84388.1  
Group15187: abra|OJJ68816.1 atub|OJI79577.1  
Group15188: abra|OJJ68872.1 atub|OJI79637.1  
Group15189: abra|OJJ68907.1 anig|EHA21438.1  
Group15190: abra|OJJ68936.1 aluc|OJZ85921.1  
Group15191: abra|OJJ68939.1 atub|OJI79714.1  
Group15192: afla|EED50398.1 aory|EIT82071.1  
Group15193: abra|OJJ68964.1 aluc|OJZ85951.1  
Group15194: abra|OJJ68981.1 atub|OJI79755.1  
Group15195: abra|OJJ69148.1 anig|EHA24487.1  
Group15196: aory|EIT79487.1 afla|EED49464.1

Group15197: abra|OJJ69213.1 asyd|OJJ52248.1  
Group15198: abra|OJJ69260.1 atub|OJI80032.1  
Group15199: asyd|OJJ53388.1 aver|OJJ08355.1  
Group15200: asyd|OJJ53888.1 aver|OJJ07986.1  
Group15201: abra|OJJ69464.1 aluc|OJZ82307.1  
Group15202: abra|OJJ69472.1 anig|EHA28443.1  
Group15203: abra|OJJ69487.1 atub|OJI88112.1  
Group15204: abra|OJJ69547.1 anig|EHA19682.1  
Group15205: asyd|OJJ64577.1 aver|OJI98674.1  
Group15206: abra|OJJ69589.1 aluc|OJZ82407.1  
Group15207: abra|OJJ69591.1 anig|EHA28358.1  
Group15208: afla|EED47671.1 aory|EIT80190.1  
Group15209: abra|OJJ69622.1 aluc|OJZ82520.1  
Group15210: abra|OJJ69756.1 anig|EHA21152.1  
Group15211: abra|OJJ69762.1 anig|EHA28305.1  
Group15212: aver|OJJ08201.1 asyd|OJJ53553.1  
Group15213: abra|OJJ70028.1 anig|EHA28108.1  
Group15214: abra|OJJ70052.1 anig|EHA21624.1  
Group15215: abra|OJJ70054.1 anid|CBF82503.1  
Group15216: aory|EIT82305.1 afla|EED57087.1  
Group15217: abra|OJJ70112.1 anig|EHA26093.1  
Group15218: abra|OJJ70113.1 anig|EHA26092.1  
Group15219: afum|EAL85603.1 afis|EAW15745.1  
Group15220: abra|OJJ70125.1 acar|OOF98335.1  
Group15221: abra|OJJ70145.1 akaw|GAA90565.1  
Group15222: abra|OJJ70157.1 aluc|OJZ85154.1  
Group15223: abra|OJJ70163.1 anig|EHA25801.1  
Group15224: awen|OJJ40746.1 aver|OJJ08744.1  
Group15225: abra|OJJ70192.1 akaw|GAA86584.1  
Group15226: aver|OJI95876.1 asyd|OJJ61774.1  
Group15227: abra|OJJ70246.1 acar|OOF92552.1  
Group15228: abra|OJJ70258.1 agla|OJJ78611.1  
Group15229: akaw|GAA92006.1 ater|EAU33099.1  
Group15230: asyd|OJJ60045.1 aver|OJJ02242.1  
Group15231: afla|EED48314.1 anig|EHA27468.1  
Group15232: abra|OJJ70359.1 anig|EHA27456.1  
Group15233: abra|OJJ70361.1 aory|EIT73560.1  
Group15234: abra|OJJ70642.1 aluc|OJZ83992.1  
Group15235: asyd|OJJ64580.1 aver|OJI98677.1

Group15236: abra|OJJ70723.1 atub|OJI90441.1  
Group15237: abra|OJJ70740.1 atub|OJI90455.1  
Group15238: abra|OJJ70823.1 acla|EAW09021.1  
Group15239: abra|OJJ70889.1 anig|EHA20831.1  
Group15240: abra|OJJ70896.1 aluc|OJZ87627.1  
Group15241: abra|OJJ70927.1 aluc|OJZ87600.1  
Group15242: abra|OJJ70937.1 aluc|OJZ87591.1  
Group15243: abra|OJJ71018.1 atub|OJI81136.1  
Group15244: abra|OJJ71074.1 aluc|OJZ87456.1  
Group15245: abra|OJJ71093.1 anig|EHA25713.1  
Group15246: abra|OJJ71137.1 atub|OJI86689.1  
Group15247: abra|OJJ71222.1 anig|EHA20566.1  
Group15248: asyd|OJJ52506.1 aver|OJJ06718.1  
Group15249: abra|OJJ71240.1 aluc|OJZ87305.1  
Group15250: afla|EED53806.1 aory|EIT78431.1  
Group15251: abra|OJJ71391.1 aluc|OJZ87149.1  
Group15252: abra|OJJ71392.1 anig|EHA20408.1  
Group15253: abra|OJJ71436.1 atub|OJI81536.1  
Group15254: abra|OJJ71659.1 atub|OJI84131.1  
Group15255: abra|OJJ71696.1 azon|OJJ42070.1  
Group15256: abra|OJJ71730.1 awen|OJJ31956.1  
Group15257: abra|OJJ71750.1 acar|OOF93993.1  
Group15258: asyd|OJJ60380.1 aver|OJI99709.1  
Group15259: abra|OJJ71781.1 anig|EHA22133.1  
Group15260: afum|EAL87904.1 afis|EAW23564.1  
Group15261: afla|EED51273.1 aory|EIT81556.1  
Group15262: abra|OJJ71834.1 atub|OJI83955.1  
Group15263: abra|OJJ71912.1 aluc|OJZ86649.1  
Group15264: azon|OJJ42210.1 acar|OOF99438.1  
Group15265: abra|OJJ71950.1 atub|OJI83842.1  
Group15266: abra|OJJ71999.1 akaw|GAA84930.1  
Group15267: abra|OJJ72000.1 anig|EHA21942.1  
Group15268: abra|OJJ72029.1 aluc|OJZ86766.1  
Group15269: abra|OJJ72077.1 aluc|OJZ86831.1  
Group15270: akaw|GAA84839.1 anig|EHA21800.1  
Group15271: aver|OJI99827.1 asyd|OJJ60503.1  
Group15272: abra|OJJ72138.1 anig|EHA21747.1  
Group15273: aver|OJJ05769.1 asyd|OJJ57412.1  
Group15274: abra|OJJ72195.1 atub|OJI83576.1

Group15275: abra|OJJ72199.1 anig|EHA24125.1  
Group15276: abra|OJJ72320.1 anig|EHA23793.1  
Group15277: abra|OJJ72331.1 ater|EAU30183.1  
Group15278: abra|OJJ72365.1 aluc|OJZ90352.1  
Group15279: abra|OJJ72449.1 aluc|OJZ90433.1  
Group15280: abra|OJJ72522.1 agla|OJJ78796.1  
Group15281: afis|EAW21066.1 afum|EAL86269.1  
Group15282: afla|EED49868.1 aory|EIT83418.1  
Group15283: abra|OJJ72646.1 atub|OJI82051.1  
Group15284: abra|OJJ72652.1 anig|EHA24067.1  
Group15285: abra|OJJ72667.1 atub|OJI82076.1  
Group15286: abra|OJJ72742.1 anig|EHA24134.1  
Group15287: abra|OJJ72785.1 akaw|GAA85392.1  
Group15288: abra|OJJ72839.1 aluc|OJZ83339.1  
Group15289: abra|OJJ72877.1 aluc|OJZ83388.1  
Group15290: abra|OJJ72881.1 atub|OJI82278.1  
Group15291: abra|OJJ72884.1 atub|OJI82279.1  
Group15292: abra|OJJ73055.1 aluc|OJZ83566.1  
Group15293: abra|OJJ73096.1 afla|EED55097.1  
Group15294: abra|OJJ73101.1 atub|OJI91528.1  
Group15295: abra|OJJ73131.1 anig|EHA18705.1  
Group15296: aory|EIT73695.1 afla|EED45126.1  
Group15297: abra|OJJ73213.1 atub|OJI91411.1  
Group15298: abra|OJJ73296.1 acar|OOF98237.1  
Group15299: anid|CBF88298.1 ater|EAU31925.1  
Group15300: abra|OJJ73358.1 akaw|GAA83126.1  
Group15301: asyd|OJJ52822.1 aver|OJJ08798.1  
Group15302: abra|OJJ73418.1 akaw|GAA83073.1  
Group15303: abra|OJJ73421.1 acar|OOG00624.1  
Group15304: abra|OJJ73525.1 acar|OOF90212.1  
Group15305: abra|OJJ73572.1 anig|EHA18197.1  
Group15306: abra|OJJ73625.1 akaw|GAA88528.1  
Group15307: asyd|OJJ59214.1 aver|OJJ01824.1  
Group15308: abra|OJJ73760.1 anig|EHA18033.1  
Group15309: abra|OJJ73918.1 anig|EHA17894.1  
Group15310: abra|OJJ73979.1 atub|OJI90674.1  
Group15311: abra|OJJ73999.1 aluc|OJZ88044.1  
Group15312: abra|OJJ74124.1 afla|EED52214.1  
Group15313: abra|OJJ74128.1 anig|EHA27205.1

Group15314: abra|OJJ74181.1 azon|OJJ47414.1  
Group15315: abra|OJJ74263.1 atub|OJI84938.1  
Group15316: abra|OJJ74274.1 aluc|OJZ89859.1  
Group15317: abra|OJJ74412.1 atub|OJI85088.1  
Group15318: abra|OJJ74427.1 aluc|OJZ89693.1  
Group15319: abra|OJJ74448.1 aver|OJI98050.1  
Group15320: abra|OJJ74476.1 acar|OOF95270.1  
Group15321: afla|EED47163.1 aory|EIT79316.1  
Group15322: aver|OJJ06705.1 asyd|OJJ55628.1  
Group15323: abra|OJJ74737.1 anig|EHA26652.1  
Group15324: abra|OJJ74813.1 afla|EED56019.1  
Group15325: asyd|OJJ65385.1 anid|CBF82911.1  
Group15326: abra|OJJ74970.1 aver|OJJ02992.1  
Group15327: abra|OJJ75018.1 aluc|OJZ92584.1  
Group15328: abra|OJJ75028.1 aluc|OJZ92595.1  
Group15329: abra|OJJ75041.1 anig|EHA26379.1  
Group15330: abra|OJJ75049.1 atub|OJI87050.1  
Group15331: abra|OJJ75167.1 atub|OJI87162.1  
Group15332: abra|OJJ75264.1 aluc|OJZ92822.1  
Group15333: abra|OJJ75278.1 anig|EHA23286.1  
Group15334: abra|OJJ75298.1 aver|OJI95773.1  
Group15335: aver|OJI98032.1 asyd|OJJ62951.1  
Group15336: abra|OJJ75470.1 atub|OJI85864.1  
Group15337: abra|OJJ75509.1 acla|EAW06520.1  
Group15338: asyd|OJJ64192.1 aver|OJI98269.1  
Group15339: abra|OJJ75601.1 acar|OOF98769.1  
Group15340: abra|OJJ75640.1 aluc|OJZ89089.1  
Group15341: abra|OJJ75661.1 atub|OJI85672.1  
Group15342: abra|OJJ75678.1 aluc|OJZ89128.1  
Group15343: abra|OJJ75683.1 ater|EAU32978.1  
Group15344: afla|EED46499.1 aory|EIT72317.1  
Group15345: abra|OJJ75839.1 acar|OOF96619.1  
Group15346: abra|OJJ75870.1 aluc|OJZ89313.1  
Group15347: abra|OJJ75923.1 anig|EHA23211.1  
Group15348: abra|OJJ75927.1 anid|CBF83333.1  
Group15349: afla|EED55816.1 aory|EIT76764.1  
Group15350: abra|OJJ76155.1 aluc|OJZ92073.1  
Group15351: abra|OJJ76185.1 aluc|OJZ92044.1  
Group15352: abra|OJJ76206.1 aluc|OJZ92022.1



Group15353: abra|OJJ76221.1 anig|EHA22949.1  
Group15354: abra|OJJ76232.1 anig|EHA18751.1  
Group15355: abra|OJJ76264.1 akaw|GAA82196.1  
Group15356: abra|OJJ76281.1 aluc|OJZ91939.1  
Group15357: abra|OJJ76407.1 atub|OJI86259.1  
Group15358: abra|OJJ76488.1 aluc|OJZ91717.1  
Group15359: abra|OJJ76562.1 atub|OJI86098.1  
Group15360: abra|OJJ76696.1 agla|OJJ81055.1  
Group15361: abra|OJJ76711.1 acar|OOF92525.1  
Group15362: abra|OJJ76713.1 aver|OJJ01955.1  
Group15363: asyd|OJJ53478.1 aver|OJJ08279.1  
Group15364: abra|OJJ76742.1 azon|OJJ45657.1  
Group15365: abra|OJJ76747.1 azon|OJJ42802.1  
Group15366: abra|OJJ76748.1 acar|OOF89842.1  
Group15367: abra|OJJ76886.1 anig|EHA26976.1  
Group15368: abra|OJJ76890.1 afis|EAW16701.1  
Group15369: abra|OJJ76925.1 aver|OJI98300.1  
Group15370: anid|CBF82270.1 afum|EAL94104.1  
Group15371: abra|OJJ77255.1 anig|EHA22320.1  
Group15372: abra|OJJ77308.1 anig|EHA28071.1  
Group15373: abra|OJJ77337.1 aluc|OJZ84745.1  
Group15374: abra|OJJ77357.1 anig|EHA28036.1  
Group15375: abra|OJJ77445.1 ater|EAU35413.1  
Group15376: abra|OJJ77449.1 aver|OJJ04308.1  
Group15377: afla|EED53270.1 aory|EIT75001.1  
Group15378: abra|OJJ77741.1 anig|EHA18409.1  
Group15379: abra|OJJ77745.1 anig|EHA20900.1  
Group15380: abra|OJJ77753.1 agla|OJJ83618.1  
Group15381: abra|OJJ77755.1 aluc|OJZ90812.1  
Group15382: abra|OJJ77764.1 anig|EHA20910.1  
Group15383: abra|OJJ77791.1 acla|EAW12266.1  
Group15384: abra|OJJ77800.1 anig|EHA19584.1  
Group15385: afum|EAL87846.1 afis|EAW23616.1  
Group15386: abra|OJJ77850.1 acar|OOF99855.1  
Group15387: abra|OJJ77886.1 aluc|OJZ91919.1  
Group15388: abra|OJJ77891.1 aluc|OJZ90962.1  
Group15389: aver|OJI98085.1 asyd|OJJ62904.1  
Group15390: abra|OJJ77923.1 atub|OJI81810.1  
Group15391: abra|OJJ77999.1 acar|OOF98823.1

Group15392: abra|OJJ78022.1 aluc|OJZ91097.1  
Group15393: abra|OJJ78067.1 aver|OJI97461.1  
Group15394: abra|OJJ78133.1 anig|EHA19892.1  
Group15395: abra|OJJ78140.1 aluc|OJZ82074.1  
Group15396: abra|OJJ78148.1 ater|EAU33812.1  
Group15397: abra|OJJ78170.1 ater|EAU30167.1  
Group15398: abra|OJJ78172.1 ater|EAU30165.1  
Group15399: abra|OJJ78173.1 agla|OJJ84480.1  
Group15400: afla|EED46351.1 aory|EIT81214.1  
Group15401: abra|OJJ78338.1 aluc|OJZ91410.1  
Group15402: acar|OOF89769.1 afis|EAW21001.1  
Group15403: acar|OOF89778.1 azon|OJJ47002.1  
Group15404: acar|OOF89779.1 afla|EED45938.1  
Group15405: acar|OOF89787.1 anig|EHA21132.1  
Group15406: asyd|OJJ62550.1 aver|OJI96675.1  
Group15407: acar|OOF89879.1 afla|EED44756.1  
Group15408: aver|OJI98235.1 asyd|OJJ64158.1  
Group15409: asyd|OJJ58088.1 aver|OJJ04313.1  
Group15410: acar|OOF90010.1 ater|EAU35968.1  
Group15411: afla|EED45506.1 aory|EIT75735.1  
Group15412: aory|EIT74425.1 afla|EED52288.1  
Group15413: acar|OOF90120.1 aory|EIT76247.1  
Group15414: acar|OOF90240.1 anig|EHA19270.1  
Group15415: acar|OOF90350.1 azon|OJJ48146.1  
Group15416: acar|OOF90353.1 azon|OJJ49967.1  
Group15417: acar|OOF90386.1 asyd|OJJ58091.1  
Group15418: aver|OJJ00867.1 asyd|OJJ61540.1  
Group15419: acar|OOF90581.1 ater|EAU30980.1  
Group15420: afla|EED48258.1 aory|EIT72901.1  
Group15421: asyd|OJJ56445.1 aver|OJJ06277.1  
Group15422: asyd|OJJ54366.1 aver|OJJ05319.1  
Group15423: acar|OOF90696.1 aver|OJJ07890.1  
Group15424: asyd|OJJ63397.1 aver|OJI97539.1  
Group15425: acar|OOF90879.1 anig|EHA28165.1  
Group15426: afla|EED46578.1 aory|EIT77897.1  
Group15427: acar|OOF90905.1 atub|OJI88612.1  
Group15428: acar|OOF90923.1 ater|EAU36146.1  
Group15429: atub|OJI88950.1 aluc|OJZ82716.1  
Group15430: acar|OOF91228.1 afla|EED50198.1

Group15431: acar|OOF91349.1 afum|EAL91904.2  
Group15432: afla|EED50444.1 aory|EIT82168.1  
Group15433: acar|OOF91455.1 afla|EED54129.1  
Group15434: aver|OJJ05593.1 asyd|OJJ57590.1  
Group15435: aver|OJI99666.1 asyd|OJJ52516.1  
Group15436: acar|OOF91829.1 afla|EED57242.1  
Group15437: afla|EED48360.1 aory|EIT83089.1  
Group15438: akaw|GAA89132.1 aluc|OJZ81704.1  
Group15439: aory|EIT83052.1 afla|EED48361.1  
Group15440: asyd|OJJ56634.1 aver|OJJ06092.1  
Group15441: acar|OOF92007.1 awen|OJJ36186.1  
Group15442: aory|EIT83215.1 afla|EED55711.1  
Group15443: acar|OOF92400.1 aluc|OJZ84945.1  
Group15444: asyd|OJJ65374.1 aver|OJI99541.1  
Group15445: awen|OJJ33635.1 aver|OJI95802.1  
Group15446: acar|OOF92529.1 akaw|GAA88767.1  
Group15447: acar|OOF92550.1 agla|OJJ82743.1  
Group15448: acar|OOF92583.1 asyd|OJJ59221.1  
Group15449: acar|OOF92585.1 azon|OJJ44382.1  
Group15450: acar|OOF92588.1 azon|OJJ45971.1  
Group15451: acar|OOF92589.1 azon|OJJ45972.1  
Group15452: acar|OOF92591.1 azon|OJJ45973.1  
Group15453: acar|OOF92656.1 anid|CBF82954.1  
Group15454: acar|OOF92666.1 afis|EAW19289.1  
Group15455: aory|EIT74892.1 afla|EED53130.1  
Group15456: acar|OOF92823.1 aver|OJJ05975.1  
Group15457: acar|OOF92943.1 azon|OJJ42244.1  
Group15458: acar|OOF93023.1 awen|OJJ29706.1  
Group15459: acar|OOF93316.1 ater|EAU31546.1  
Group15460: afis|EAW16773.1 anid|CBF75884.1  
Group15461: acar|OOF93323.1 ater|EAU31652.1  
Group15462: agla|OJJ82678.1 awen|OJJ40229.1  
Group15463: asyd|OJJ61771.1 aver|OJI95873.1  
Group15464: acar|OOF93374.1 aluc|OJZ87910.1  
Group15465: aver|OJJ01830.1 acla|EAW11969.1  
Group15466: acar|OOF93425.1 atub|OJI80196.1  
Group15467: acar|OOF93558.1 azon|OJJ50777.1  
Group15468: afla|EED56033.1 aory|EIT76821.1  
Group15469: aory|EIT74853.1 afla|EED53123.1

Group15470: acar|OOF93921.1 azon|OJJ46794.1  
Group15471: acar|OOF93944.1 anig|EHA21026.1  
Group15472: acar|OOF93978.1 anig|EHA19268.1  
Group15473: aver|OJJ08182.1 asyd|OJJ53575.1  
Group15474: acar|OOF94017.1 azon|OJJ50606.1  
Group15475: acar|OOF94207.1 azon|OJJ43894.1  
Group15476: afum|EAL92223.1 afis|EAW16436.1  
Group15477: acar|OOF94482.1 azon|OJJ42800.1  
Group15478: acar|OOF94706.1 aluc|OJZ90534.1  
Group15479: acla|EAW11911.1 ater|EAU33993.1  
Group15480: acar|OOF94811.1 ater|EAU38811.1  
Group15481: aver|OJJ06614.1 asyd|OJJ55536.1  
Group15482: acar|OOF94870.1 ater|EAU32909.1  
Group15483: acar|OOF94911.1 aluc|OJZ79927.1  
Group15484: asyd|OJJ57514.1 aver|OJJ05665.1  
Group15485: asyd|OJJ59919.1 aver|OJJ02367.1  
Group15486: acar|OOF94977.1 awen|OJJ40090.1  
Group15487: asyd|OJJ58859.1 aver|OJJ01460.1  
Group15488: acar|OOF94979.1 atub|OJI83024.1  
Group15489: acar|OOF95018.1 awen|OJJ34375.1  
Group15490: acar|OOF95030.1 azon|OJJ42314.1  
Group15491: acar|OOF95197.1 agla|OJJ84713.1  
Group15492: acar|OOF95245.1 awen|OJJ38748.1  
Group15493: acar|OOF95282.1 atub|OJI85148.1  
Group15494: aver|OJJ07589.1 asyd|OJJ54565.1  
Group15495: acar|OOF95336.1 azon|OJJ42567.1  
Group15496: aory|EIT79480.1 afla|EED49470.1  
Group15497: acar|OOF95595.1 anig|EHA24753.1  
Group15498: acar|OOF95804.1 anig|EHA26572.1  
Group15499: acar|OOF95832.1 agla|OJJ79166.1  
Group15500: acar|OOF96404.1 akaw|GAA89239.1  
Group15501: acar|OOF96413.1 aory|EIT81338.1  
Group15502: acar|OOF96443.1 awen|OJJ34651.1  
Group15503: anid|CBF73447.1 aver|OJJ08117.1  
Group15504: acar|OOF97140.1 anig|EHA23741.1  
Group15505: acar|OOF97517.1 awen|OJJ38800.1  
Group15506: acar|OOF97568.1 acla|EAW12162.1  
Group15507: akaw|GAA85697.1 aluc|OJZ91406.1  
Group15508: acar|OOF97582.1 aver|OJJ01908.1

Group15509: acar|OOF97586.1 awen|OJJ31355.1  
Group15510: acar|OOF97604.1 akaw|GAA92086.1  
Group15511: acar|OOF97623.1 agla|OJJ89302.1  
Group15512: acar|OOF97645.1 awen|OJJ37239.1  
Group15513: acar|OOF97841.1 akaw|GAA84347.1  
Group15514: acar|OOF97995.1 aory|EIT74596.1  
Group15515: atub|OJI84462.1 aluc|OJZ81909.1  
Group15516: acar|OOF98129.1 acla|EAW13630.1  
Group15517: acar|OOF98182.1 afum|EAL86714.1  
Group15518: agla|OJJ80661.1 awen|OJJ35940.1  
Group15519: aory|EIT73714.1 afla|EED45047.1  
Group15520: acar|OOF98456.1 azon|OJJ50966.1  
Group15521: acar|OOF98462.1 afla|EED45452.1  
Group15522: acar|OOF98568.1 aluc|OJZ91374.1  
Group15523: acar|OOF98684.1 awen|OJJ32681.1  
Group15524: acar|OOF98692.1 azon|OJJ46426.1  
Group15525: acar|OOF98693.1 azon|OJJ46427.1  
Group15526: acar|OOF98695.1 azon|OJJ46429.1  
Group15527: acar|OOF98701.1 atub|OJI79833.1  
Group15528: acar|OOF98725.1 aver|OJJ07746.1  
Group15529: acar|OOF98797.1 agla|OJJ83928.1  
Group15530: acar|OOF98897.1 azon|OJJ42503.1  
Group15531: aver|OJJ05334.1 asyd|OJJ54398.1  
Group15532: aory|EIT83044.1 afla|EED48365.1  
Group15533: aver|OJJ08426.1 asyd|OJJ53317.1  
Group15534: acar|OOF99160.1 acla|EAW12191.1  
Group15535: acar|OOF99180.1 atub|OJI82592.1  
Group15536: acar|OOF99489.1 afla|EED50915.1  
Group15537: acar|OOF99540.1 awen|OJJ29880.1  
Group15538: afla|EED57864.1 aory|EIT81087.1  
Group15539: acar|OOF99894.1 awen|OJJ36412.1  
Group15540: afum|EAL84209.1 afis|EAW15436.1  
Group15541: afis|EAW19521.1 aory|EIT72421.1  
Group15542: acar|OOG00124.1 aver|OJJ07152.1  
Group15543: acar|OOG00293.1 atub|OJI84638.1  
Group15544: acar|OOG00397.1 asyd|OJJ58095.1  
Group15545: acar|OOG00398.1 asyd|OJJ58092.1  
Group15546: asyd|OJJ54220.1 aver|OJJ05172.1  
Group15547: aver|OJJ08916.1 asyd|OJJ52950.1

Group15548: acar|OOG00613.1 azon|OJJ43531.1  
Group15549: acar|OOG00614.1 azon|OJJ47351.1  
Group15550: acar|OOG01135.1 atub|OJI90636.1  
Group15551: acla|EAW06549.1 azon|OJJ45408.1  
Group15552: acla|EAW06580.1 awen|OJJ34550.1  
Group15553: acla|EAW06614.1 afis|EAW16151.1  
Group15554: acla|EAW06733.1 ater|EAU37615.1  
Group15555: asyd|OJJ59229.1 aver|OJJ01839.1  
Group15556: acla|EAW07068.1 aver|OJJ07755.1  
Group15557: afla|EED53644.1 aory|EIT75348.1  
Group15558: acla|EAW07099.1 afis|EAW22114.1  
Group15559: acla|EAW07101.1 afis|EAW22116.1  
Group15560: afla|EED45536.1 aory|EIT75510.1  
Group15561: acla|EAW07119.1 afis|EAW17373.1  
Group15562: acla|EAW07209.1 afis|EAW22221.1  
Group15563: awen|OJJ38305.1 asyd|OJJ57343.1  
Group15564: acla|EAW07226.1 afis|EAW22240.1  
Group15565: acla|EAW07615.1 awen|OJJ35279.1  
Group15566: acla|EAW07627.1 asyd|OJJ60064.1  
Group15567: acla|EAW08257.1 afla|EED55681.1  
Group15568: afis|EAW19752.1 afum|EAL85145.1  
Group15569: afla|EED55271.1 aory|EIT83516.1  
Group15570: aory|EIT78685.1 afla|EED52931.1  
Group15571: acla|EAW08927.1 azon|OJJ48235.1  
Group15572: acla|EAW08941.1 afis|EAW15458.1  
Group15573: acla|EAW08943.1 azon|OJJ47384.1  
Group15574: agla|OJJ79122.1 asyd|OJJ55381.1  
Group15575: acla|EAW09017.1 ater|EAU30726.1  
Group15576: acla|EAW09053.1 aory|EIT81629.1  
Group15577: afla|EED48938.1 aory|EIT80040.1  
Group15578: acla|EAW09116.1 asyd|OJJ54394.1  
Group15579: asyd|OJJ53855.1 aver|OJJ07955.1  
Group15580: acla|EAW09584.1 afum|EBA27464.1  
Group15581: acla|EAW09622.1 awen|OJJ37330.1  
Group15582: acla|EAW09695.1 awen|OJJ39254.1  
Group15583: acla|EAW10032.1 atub|OJI79836.1  
Group15584: acla|EAW10041.1 ater|EAU38848.1  
Group15585: afis|EAW25399.1 afum|EAL90058.1  
Group15586: acla|EAW10256.1 agla|OJJ83865.1

Group15587: afis|EAW25285.1 afum|EAL89948.1  
Group15588: afla|EED55838.1 aory|EIT76731.1  
Group15589: acla|EAW10832.1 anid|CBF78968.1  
Group15590: asyd|OJJ56902.1 aver|OJJ03391.1  
Group15591: acla|EAW10858.1 awen|OJJ29625.1  
Group15592: asyd|OJJ56062.1 aver|OJJ05004.1  
Group15593: acla|EAW11053.1 aory|EIT81014.1  
Group15594: acla|EAW11071.1 agla|OJJ85146.1  
Group15595: acla|EAW11110.1 anid|CBF75394.1  
Group15596: asyd|OJJ59611.1 aver|OJJ02658.1  
Group15597: aver|OJJ02688.1 asyd|OJJ59581.1  
Group15598: aluc|OJZ79802.1 akaw|GAA89001.1  
Group15599: acla|EAW11457.1 aluc|OJZ83375.1  
Group15600: acla|EAW11469.1 afis|EAW19375.1  
Group15601: akaw|GAA92658.1 aluc|OJZ79613.1  
Group15602: awen|OJJ30139.1 agla|OJJ79603.1  
Group15603: acla|EAW11703.1 afis|EAW25204.1  
Group15604: acla|EAW11705.1 ater|EAU32801.1  
Group15605: acla|EAW11916.1 ater|EAU33995.1  
Group15606: afis|EAW19557.1 afum|EAL86954.1  
Group15607: acla|EAW12165.1 awen|OJJ37889.1  
Group15608: acla|EAW12181.1 afis|EAW16678.1  
Group15609: acla|EAW12197.1 afis|EAW25311.1  
Group15610: acla|EAW12290.1 azon|OJJ43174.1  
Group15611: acla|EAW12328.1 afis|EAW17183.1  
Group15612: acla|EAW12373.1 awen|OJJ33598.1  
Group15613: acla|EAW12394.1 afis|EAW16842.1  
Group15614: acla|EAW12415.1 anid|CBF83057.1  
Group15615: acla|EAW12418.1 anid|CBF83051.1  
Group15616: acla|EAW12419.1 anid|CBF83049.1  
Group15617: acla|EAW12422.1 anid|CBF83044.1  
Group15618: asyd|OJJ53555.1 aver|OJJ08200.1  
Group15619: acla|EAW12907.1 asyd|OJJ60508.1  
Group15620: aver|OJJ00748.1 awen|OJJ38294.1  
Group15621: aluc|OJZ84202.1 atub|OJI89882.1  
Group15622: acla|EAW13436.1 ater|EAU29243.1  
Group15623: afis|EAW20850.1 afum|EBA27205.1  
Group15624: aver|OJJ01788.1 awen|OJJ35126.1  
Group15625: acla|EAW13448.1 ater|EAU29433.1

Group15626: acla|EAW13516.1 ater|EAU29415.1  
Group15627: acla|EAW13519.1 ater|EAU29411.1  
Group15628: acla|EAW13535.1 anid|CBF69540.1  
Group15629: acla|EAW13537.1 anid|CBF69538.1  
Group15630: acla|EAW13539.1 azon|OJJ45983.1  
Group15631: aory|EIT74516.1 acla|EED47582.1  
Group15632: aory|EIT74514.1 acla|EED47540.1  
Group15633: acla|EAW13623.1 atub|OJI83192.1  
Group15634: acla|EAW13636.1 aory|EIT83099.1  
Group15635: acla|EED48983.1 aory|EIT80026.1  
Group15636: acla|EAW13686.1 afis|EAW19920.1  
Group15637: aver|OJJ07855.1 asyd|OJJ53742.1  
Group15638: acla|EAW13806.1 awen|OJJ30706.1  
Group15639: acla|EAW14026.1 afum|EAL93457.1  
Group15640: acla|EAW14253.1 acla|EED56617.1  
Group15641: acla|EAW14285.1 afum|EAL86336.1  
Group15642: acla|EAW14312.1 afum|EAL93709.1  
Group15643: acla|EAW14515.1 acla|EED47655.1  
Group15644: aver|OJJ03142.1 asyd|OJJ57174.1  
Group15645: acla|EAW14587.1 afis|EAW19318.1  
Group15646: acla|EAW14621.1 ater|EAU32945.1  
Group15647: aver|OJJ00030.1 asyd|OJJ60705.1  
Group15648: anid|CBF80180.1 aver|OJI99528.1  
Group15649: anig|EHA19881.1 afis|EAW16423.1  
Group15650: acla|EAW15018.1 afis|EAW24550.1  
Group15651: acla|EAW15021.1 awen|OJJ29754.1  
Group15652: acla|EAW15059.1 afum|EAL85110.1  
Group15653: acla|EAW15061.1 afum|EAL85112.1  
Group15654: afis|EAW16192.1 afum|EAL88823.1  
Group15655: acla|EAW15268.1 afis|EAW20241.1  
Group15656: aver|OJI99626.1 anid|CBF82284.1  
Group15657: acla|EAW15321.1 afis|EAW20322.1  
Group15658: acla|EAW15340.1 afis|EAW20369.1  
Group15659: acla|EAW15369.1 ater|EAU38090.1  
Group15660: afis|EAW15384.1 aver|OJJ05931.1  
Group15661: afis|EAW15386.1 aver|OJJ05929.1  
Group15662: afis|EAW15391.1 aver|OJJ05928.1  
Group15663: afis|EAW15435.1 afum|EBA27169.1  
Group15664: afis|EAW15439.1 afum|EBA27168.1



Group15665: afis|EAW15507.1 afum|EBA27421.1  
Group15666: aver|OJJ03125.1 asyd|OJJ52046.1  
Group15667: afis|EAW15551.1 asyd|OJJ65145.1  
Group15668: afis|EAW15624.1 afum|EAL85710.1  
Group15669: afis|EAW15635.1 ater|EAU35924.1  
Group15670: afis|EAW15986.1 afum|EAL88618.1  
Group15671: afis|EAW16158.1 ater|EAU35525.1  
Group15672: afis|EAW16183.1 afum|EAL88814.1  
Group15673: afis|EAW16212.1 agla|OJJ79505.1  
Group15674: afis|EAW16255.1 ater|EAU31544.1  
Group15675: afis|EAW16303.1 afum|EAL88925.1  
Group15676: afis|EAW16349.1 afum|EAL88974.1  
Group15677: asyd|OJJ57380.1 aver|OJJ05778.1  
Group15678: afis|EAW16404.1 agla|OJJ78759.1  
Group15679: afis|EAW16438.1 afum|EAL89041.1  
Group15680: afis|EAW16440.1 ater|EAU32056.1  
Group15681: afis|EAW16452.1 anid|CBF74895.1  
Group15682: afis|EAW16692.1 aver|OJI99220.1  
Group15683: afis|EAW16712.1 afum|EAL89300.1  
Group15684: afis|EAW16719.1 anid|CBF75716.1  
Group15685: afis|EAW16722.1 afum|EAL86296.2  
Group15686: afis|EAW16729.1 afum|EAL86304.2  
Group15687: afis|EAW16731.1 afum|EAL86307.1  
Group15688: afis|EAW16756.1 afum|EAL86328.1  
Group15689: afis|EAW16757.1 afum|EAL86329.1  
Group15690: afis|EAW16766.1 asyd|OJJ64182.1  
Group15691: afis|EAW16796.1 afum|EAL86365.1  
Group15692: afis|EAW16799.1 aflag|EED46871.1  
Group15693: afis|EAW16814.1 asyd|OJJ62350.1  
Group15694: afis|EAW16818.1 afum|EAL86740.1  
Group15695: afis|EAW16830.1 afum|EAL86378.1  
Group15696: afis|EAW16868.1 afum|EAL86407.1  
Group15697: afis|EAW16877.1 afum|EAL86414.1  
Group15698: afis|EAW16898.1 agla|OJJ84611.1  
Group15699: afis|EAW16929.1 afum|EAL86454.1  
Group15700: afis|EAW16935.1 afum|EAL86460.1  
Group15701: asyd|OJJ52545.1 aver|OJJ03859.1  
Group15702: aver|OJJ03765.1 asyd|OJJ53082.1  
Group15703: afis|EAW17002.1 asyd|OJJ60318.1

Group15704: afis|EAW17006.1 awen|OJJ37865.1  
Group15705: afla|EED54038.1 aory|EIT74599.1  
Group15706: afis|EAW17070.1 azon|OJJ46013.1  
Group15707: awen|OJJ31608.1 ater|EAU37817.1  
Group15708: asyd|OJJ53080.1 aver|OJJ03767.1  
Group15709: afis|EAW17087.1 afum|EAL86564.2  
Group15710: afis|EAW17100.1 aver|OJJ08552.1  
Group15711: afis|EAW17140.1 awen|OJJ34743.1  
Group15712: afis|EAW17143.1 akaw|GAA92902.1  
Group15713: afis|EAW17208.1 asyd|OJJ57945.1  
Group15714: afis|EAW17209.1 agla|OJJ79438.1  
Group15715: afis|EAW17215.1 afum|EAL86641.1  
Group15716: afis|EAW17233.1 aver|OJJ98012.1  
Group15717: afis|EAW17248.1 ater|EAU38591.1  
Group15718: afis|EAW17303.1 afum|EAL91112.2  
Group15719: afis|EAW17358.1 ater|EAU37994.1  
Group15720: afis|EAW17434.1 afum|EAL91261.1  
Group15721: afis|EAW17485.1 afum|EBA27326.1  
Group15722: afis|EAW17773.1 afum|EAL91582.1  
Group15723: afis|EAW18131.1 afum|EAL87490.1  
Group15724: afis|EAW18153.1 afum|EAL87512.1  
Group15725: afis|EAW18256.1 afum|EAL87619.1  
Group15726: afis|EAW18289.1 afum|EBA27322.1  
Group15727: afis|EAW18316.1 afum|EAL87683.1  
Group15728: afla|EED52830.1 aory|EIT78185.1  
Group15729: afla|EED52789.1 aory|EIT78211.1  
Group15730: afis|EAW18831.1 afum|EAL93565.2  
Group15731: afis|EAW19017.1 afum|EBA27503.1  
Group15732: afis|EAW19043.1 afum|EAL93772.1  
Group15733: afis|EAW19112.1 afum|EAL93843.2  
Group15734: afis|EAW19256.1 azon|OJJ44577.1  
Group15735: afis|EAW19298.1 afum|EAL94017.1  
Group15736: afis|EAW19300.1 afum|EAL94019.1  
Group15737: afis|EAW19301.1 afum|EAL94020.1  
Group15738: afis|EAW19306.1 afum|EAL94024.1  
Group15739: afis|EAW19307.1 afum|EAL94025.1  
Group15740: afis|EAW19365.1 afum|EAL94084.2  
Group15741: afis|EAW19366.1 afum|EAL94085.1  
Group15742: afis|EAW19485.1 afum|EAL87010.1

Group15743: afis|EAW19542.1 afum|EAL86966.1  
Group15744: afis|EAW19596.1 afum|EAL86922.1  
Group15745: afis|EAW19667.1 afum|EAL86856.1  
Group15746: afis|EAW19678.1 aver|OJJ08345.1  
Group15747: afis|EAW19685.1 afum|EAL86839.1  
Group15748: afis|EAW19702.1 afum|EAL86824.1  
Group15749: afis|EAW19755.1 afum|EAL85142.1  
Group15750: afis|EAW19756.1 afum|EAL85141.1  
Group15751: afis|EAW19757.1 afum|EAL85140.1  
Group15752: afis|EAW19762.1 ater|EAU36858.1  
Group15753: afis|EAW19765.1 ater|EAU36861.1  
Group15754: afis|EAW19767.1 ater|EAU36863.1  
Group15755: afis|EAW19768.1 ater|EAU36864.1  
Group15756: aory|EIT80917.1 afla|EED55488.1  
Group15757: afis|EAW19774.1 afum|EAL85125.1  
Group15758: afis|EAW19793.1 afum|EAL85097.1  
Group15759: afis|EAW19821.1 ater|EAU29480.1  
Group15760: afis|EAW19828.1 azon|OJJ42656.1  
Group15761: afis|EAW19840.1 anig|EHA26574.1  
Group15762: agla|OJJ79742.1 awen|OJJ33426.1  
Group15763: afis|EAW19859.1 afum|EAL85036.1  
Group15764: afis|EAW19860.1 afum|EAL85035.1  
Group15765: afis|EAW19898.1 ater|EAU29942.1  
Group15766: afis|EAW19902.1 ater|EAU34043.1  
Group15767: afis|EAW19910.1 afum|EAL84996.2  
Group15768: afis|EAW19916.1 afum|EAL84991.1  
Group15769: aver|OJJ05136.1 atub|OJI80142.1  
Group15770: afis|EAW19919.1 afum|EAL84989.2  
Group15771: afis|EAW19970.1 afum|EAL84952.1  
Group15772: afis|EAW19986.1 afum|EAL84929.1  
Group15773: afis|EAW20277.1 afum|EAL85411.1  
Group15774: afis|EAW20332.1 akaw|GAA88765.1  
Group15775: afis|EAW20373.1 afum|EAL85487.1  
Group15776: afis|EAW20410.1 afum|EAL89234.2  
Group15777: afis|EAW20413.1 afum|EBA27372.1  
Group15778: afis|EAW20491.1 afum|EAL84563.1  
Group15779: afis|EAW20576.1 afum|EAL84489.1  
Group15780: afis|EAW20639.1 afum|EAL84430.1  
Group15781: afis|EAW20658.1 asyd|OJJ52093.1

Group15782: afis|EAW20663.1 azon|OJJ42049.1  
Group15783: afis|EAW20672.1 anid|CBF84449.1  
Group15784: afis|EAW20679.1 afum|EAL84418.2  
Group15785: afis|EAW20683.1 anid|CBF87355.1  
Group15786: afis|EAW20708.1 azon|OJJ42239.1  
Group15787: afis|EAW20716.1 asyd|OJJ52042.1  
Group15788: afis|EAW20753.1 afum|EAL84864.1  
Group15789: afis|EAW20759.1 afum|EAL84861.1  
Group15790: afis|EAW20760.1 afum|EAL84859.1  
Group15791: asyd|OJJ60271.1 aver|OJJ03979.1  
Group15792: afis|EAW20795.1 azon|OJJ46413.1  
Group15793: afis|EAW20804.1 afum|EAL84824.1  
Group15794: afis|EAW20817.1 afum|EBA27206.1  
Group15795: afis|EAW20828.1 awen|OJJ41727.1  
Group15796: afis|EAW20851.1 afum|EBA27204.1  
Group15797: afis|EAW20857.1 awen|OJJ40933.1  
Group15798: afis|EAW20889.1 afum|EAL84744.1  
Group15799: afis|EAW21000.1 afla|EED44720.1  
Group15800: afla|EED48316.1 aory|EIT76291.1  
Group15801: afis|EAW21017.1 afum|EAL92055.1  
Group15802: afis|EAW21042.1 ater|EAU31433.1  
Group15803: afis|EAW21053.1 afum|EAL92089.1  
Group15804: afis|EAW21059.1 afla|EED48133.1  
Group15805: afis|EAW21071.1 ater|EAU31984.1  
Group15806: afis|EAW21130.1 afum|EAL92148.1  
Group15807: asyd|OJJ59446.1 aver|OJJ02826.1  
Group15808: afis|EAW21189.1 afla|EED54139.1  
Group15809: afis|EAW21199.1 awen|OJJ32934.1  
Group15810: afis|EAW21204.1 ater|EAU32103.1  
Group15811: afis|EAW21207.1 afum|EAL92218.1  
Group15812: afis|EAW21270.1 afum|EBA27458.1  
Group15813: afis|EAW21304.1 awen|OJJ39394.1  
Group15814: afis|EAW21322.1 afum|EAL92339.1  
Group15815: aory|EIT76643.1 afla|EED55809.1  
Group15816: afis|EAW21444.1 afum|EAL92462.2  
Group15817: afis|EAW21544.1 afum|EAL92564.1  
Group15818: afis|EAW21630.1 afum|EAL92664.1  
Group15819: afis|EAW21686.1 afum|EAL92720.1  
Group15820: afis|EAW21748.1 afum|EBA27472.1

Group15821: asyd|OJJ63023.1 aver|OJI97945.1  
Group15822: afis|EAW21839.1 afum|EBA27476.1  
Group15823: asyd|OJJ61235.1 aver|OJJ00558.1  
Group15824: afis|EAW21845.1 afum|EAL92857.2  
Group15825: asyd|OJJ64549.1 aver|OJI98645.1  
Group15826: afis|EAW22053.1 awen|OJJ31621.1  
Group15827: afis|EAW22094.1 afum|EAL87821.1  
Group15828: anid|CBF87084.1 aver|OJJ07534.1  
Group15829: afis|EAW22100.1 afum|EAL91089.1  
Group15830: afis|EAW22154.1 afum|EAL91036.1  
Group15831: afis|EAW22477.1 afum|EAL90715.1  
Group15832: afis|EAW22566.1 awen|OJJ36325.1  
Group15833: anid|CBF80824.1 asyd|OJJ59908.1  
Group15834: agla|OJJ79472.1 awen|OJJ38894.1  
Group15835: afis|EAW22673.1 afum|EAL90519.1  
Group15836: afis|EAW22710.1 agla|OJJ78681.1  
Group15837: afla|EED46247.1 aory|EIT76483.1  
Group15838: afis|EAW23081.1 afum|EAL88398.1  
Group15839: afis|EAW23121.1 afum|EAL88359.1  
Group15840: afis|EAW23531.1 afum|EAL87935.1  
Group15841: afis|EAW23593.1 awen|OJJ34756.1  
Group15842: awen|OJJ40950.1 agla|OJJ87027.1  
Group15843: afis|EAW23615.1 afum|EAL87847.2  
Group15844: afis|EAW23637.1 afum|EAL86632.1  
Group15845: afis|EAW23653.1 ater|EAU32808.1  
Group15846: afis|EAW23693.1 afum|EAL87136.1  
Group15847: afis|EAW23694.1 ater|EAU30657.1  
Group15848: afis|EAW23812.1 afum|EAL87247.1  
Group15849: afis|EAW24020.1 afum|EAL87450.1  
Group15850: afis|EAW24030.1 afum|EAL87461.1  
Group15851: afis|EAW24241.1 afum|EAL85909.2  
Group15852: afis|EAW24355.1 afum|EBA27253.1  
Group15853: afis|EAW24407.1 ater|EAU29649.1  
Group15854: aory|EIT77209.1 anid|CBF80266.1  
Group15855: afla|EED55093.1 aory|EIT81574.1  
Group15856: afis|EAW24534.1 ater|EAU29282.1  
Group15857: afis|EAW24541.1 afum|EBA27262.1  
Group15858: afis|EAW24545.1 afum|EAL86209.1  
Group15859: afis|EAW24590.1 aver|OJI96484.1

Group15860: afis|EAW24592.1 aver|OJI96485.1  
Group15861: afis|EAW24601.1 aver|OJI96491.1  
Group15862: afis|EAW24605.1 agla|OJJ82373.1  
Group15863: afis|EAW24613.1 afum|EAL86243.1  
Group15864: afis|EAW24616.1 afum|EAL86245.1  
Group15865: afis|EAW24643.1 anid|CBF82188.1  
Group15866: afis|EAW24645.1 afum|EAL90944.1  
Group15867: afis|EAW24648.1 afum|EAL86749.1  
Group15868: afis|EAW24652.1 afum|EAL89318.1  
Group15869: afis|EAW24653.1 afum|EAL89317.1  
Group15870: afis|EAW24654.1 afum|EAL89316.1  
Group15871: afis|EAW24655.1 afum|EAL89315.1  
Group15872: afis|EAW24656.1 afum|EAL89314.2  
Group15873: afis|EAW24657.1 afum|EAL89313.1  
Group15874: afis|EAW24658.1 afum|EAL89312.1  
Group15875: afis|EAW24659.1 afum|EAL89311.1  
Group15876: afis|EAW24676.1 asyd|OJJ57384.1  
Group15877: afis|EAW24680.1 asyd|OJJ57386.1  
Group15878: afis|EAW24681.1 asyd|OJJ57387.1  
Group15879: afis|EAW24729.1 afum|EBA27378.1  
Group15880: afis|EAW25009.1 afla|EED55429.1  
Group15881: afis|EAW25189.1 agla|OJJ79841.1  
Group15882: afis|EAW25239.1 awen|OJJ35620.1  
Group15883: afis|EAW25466.1 afum|EAL90129.2  
Group15884: afis|EAW25564.1 asyd|OJJ57957.1  
Group15885: afis|EAW25595.1 afum|EAL84301.1  
Group15886: afis|EAW25598.1 afum|EAL84304.1  
Group15887: aory|EIT75745.1 afla|EED45529.1  
Group15888: afis|EAW25606.1 aver|OJJ07494.1  
Group15889: afis|EAW25612.1 afla|EED53578.1  
Group15890: afis|EAW25660.1 afum|EAL84334.1  
Group15891: afis|EAW25684.1 awen|OJJ33833.1  
Group15892: aver|OJJ03421.1 afum|EAL86563.2  
Group15893: afis|EAW25718.1 afum|EAL84393.2  
Group15894: afis|EAW25719.1 afum|EAL84394.2  
Group15895: afla|EED44729.1 aory|EIT77802.1  
Group15896: afla|EED44750.1 aory|EIT77761.1  
Group15897: afla|EED44764.1 aory|EIT77782.1  
Group15898: afla|EED44768.1 aory|EIT77764.1

Group15899: aflagEED44821.1 aory|EIT77714.1  
Group15900: aflagEED44868.1 aory|EIT82725.1  
Group15901: aflagEED44869.1 aory|EIT82721.1  
Group15902: aflagEED44870.1 aory|EIT82726.1  
Group15903: aflagEED44874.1 aory|EIT83253.1  
Group15904: aflagEED44882.1 aory|EIT83258.1  
Group15905: aflagEED44887.1 aory|EIT83243.1  
Group15906: aflagEED44888.1 aory|EIT83242.1  
Group15907: aflagEED44900.1 aory|EIT83239.1  
Group15908: aflagEED44902.1 aory|EIT73501.1  
Group15909: aflagEED44904.1 aory|EIT73473.1  
Group15910: aflagEED44912.1 aory|EIT73484.1  
Group15911: aflagEED44913.1 aory|EIT73495.1  
Group15912: aflagEED44917.1 aory|EIT73474.1  
Group15913: aflagEED44927.1 aory|EIT73523.1  
Group15914: aflagEED44933.1 aory|EIT73513.1  
Group15915: aflagEED44934.1 aory|EIT73504.1  
Group15916: aflagEED44937.1 ater|EAU29359.1  
Group15917: aflagEED44953.1 aory|EIT73483.1  
Group15918: aflagEED44957.1 aory|EIT73471.1  
Group15919: aflagEED44968.1 aory|EIT73502.1  
Group15920: aflagEED44995.1 aory|EIT73578.1  
Group15921: aflagEED45006.1 aory|EIT73822.1  
Group15922: aflagEED45007.1 aory|EIT73602.1  
Group15923: aflagEED45050.1 aory|EIT73799.1  
Group15924: aflagEED45051.1 aory|EIT73581.1  
Group15925: aflagEED45053.1 aory|EIT73785.1  
Group15926: aflagEED45056.1 aory|EIT73580.1  
Group15927: aflagEED45058.1 ater|EAU37132.1  
Group15928: aflagEED45061.1 aory|EIT73603.1  
Group15929: aflagEED45086.1 aory|EIT73585.1  
Group15930: aflagEED45089.1 aory|EIT73598.1  
Group15931: aflagEED45091.1 aory|EIT73789.1  
Group15932: aflagEED45092.1 aory|EIT73550.1  
Group15933: aflagEED45103.1 aory|EIT73777.1  
Group15934: aflagEED45115.1 aory|EIT73763.1  
Group15935: aflagEED45125.1 azon|OJJ45672.1  
Group15936: aflagEED45135.1 aory|EIT73599.1  
Group15937: aflagEED45139.1 aory|EIT73748.1

Group15938: aflagEED45142.1 aory|EIT73655.1  
Group15939: aflagEED45143.1 aory|EIT73592.1  
Group15940: aflagEED45157.1 aory|EIT73623.1  
Group15941: aflagEED45158.1 aory|EIT73819.1  
Group15942: aflagEED45165.1 aory|EIT73527.1  
Group15943: aflagEED45181.1 aory|EIT73690.1  
Group15944: aflagEED45187.1 aory|EIT73627.1  
Group15945: aflagEED45190.1 aory|EIT73571.1  
Group15946: aflagEED45198.1 aory|EIT73718.1  
Group15947: aflagEED45200.1 aory|EIT73788.1  
Group15948: aflagEED45203.1 aory|EIT73810.1  
Group15949: aflagEED45208.1 aluc|OJZ89967.1  
Group15950: aflagEED45209.1 aory|EIT73634.1  
Group15951: aflagEED45219.1 aory|EIT73587.1  
Group15952: aflagEED45220.1 aory|EIT73684.1  
Group15953: aflagEED45222.1 aory|EIT73784.1  
Group15954: aflagEED45230.1 ater|EAU30187.1  
Group15955: aflagEED45254.1 aory|EIT73693.1  
Group15956: aflagEED45255.1 aory|EIT73535.1  
Group15957: aflagEED45283.1 aory|EIT73557.1  
Group15958: aflagEED45301.1 aory|EIT73704.1  
Group15959: aflagEED45365.1 aory|EIT82430.1  
Group15960: aflagEED45367.1 aory|EIT82461.1  
Group15961: aflagEED45385.1 aory|EIT82454.1  
Group15962: aflagEED45391.1 aory|EIT82419.1  
Group15963: aflagEED45416.1 aory|EIT82390.1  
Group15964: aflagEED45422.1 aory|EIT82417.1  
Group15965: aflagEED45425.1 aory|EIT82453.1  
Group15966: aflagEED45432.1 aory|EIT82422.1  
Group15967: aflagEED45441.1 aory|EIT82397.1  
Group15968: asyd|OJJ61484.1 aver|OJJ00826.1  
Group15969: aflagEED45456.1 aory|EIT82407.1  
Group15970: aflagEED45463.1 aory|EIT82402.1  
Group15971: aflagEED45468.1 aory|EIT75640.1  
Group15972: aflagEED45476.1 aory|EIT75404.1  
Group15973: aflagEED45480.1 aory|EIT75530.1  
Group15974: aflagEED45484.1 aory|EIT75722.1  
Group15975: aflagEED45495.1 aory|EIT75570.1  
Group15976: aflagEED45508.1 aory|EIT75495.1



Group15977: aflagEED45509.1 aory|EIT75516.1  
Group15978: aflagEED45510.1 aory|EIT75653.1  
Group15979: aflagEED45522.1 aory|EIT75812.1  
Group15980: aflagEED45526.1 aory|EIT75401.1  
Group15981: aflagEED45546.1 aory|EIT75548.1  
Group15982: aflagEED45580.1 aory|EIT75467.1  
Group15983: aflagEED45591.1 aory|EIT75635.1  
Group15984: aflagEED45603.1 aory|EIT75402.1  
Group15985: aflagEED45612.1 azon|OJJ47860.1  
Group15986: aflagEED45613.1 aory|EIT75458.1  
Group15987: aflagEED45614.1 aory|EIT75414.1  
Group15988: aflagEED45623.1 aory|EIT75445.1  
Group15989: aflagEED45626.1 aory|EIT75729.1  
Group15990: aflagEED45627.1 ater|EAU32690.1  
Group15991: aflagEED45630.1 asyd|OJJ56234.1  
Group15992: aflagEED45637.1 aory|EIT75478.1  
Group15993: aflagEED45650.1 aory|EIT75494.1  
Group15994: aflagEED45651.1 aory|EIT75652.1  
Group15995: aflagEED45660.1 aory|EIT75660.1  
Group15996: aflagEED45671.1 aory|EIT75785.1  
Group15997: aflagEED45686.1 aory|EIT75624.1  
Group15998: aflagEED45687.1 aory|EIT75738.1  
Group15999: aflagEED45689.1 aory|EIT75691.1  
Group16000: aflagEED45705.1 aory|EIT75453.1  
Group16001: aflagEED45749.1 aory|EIT75472.1  
Group16002: aflagEED45761.1 aory|EIT75568.1  
Group16003: azon|OJJ43180.1 awen|OJJ32632.1  
Group16004: aflagEED45801.1 aory|EIT75497.1  
Group16005: aflagEED45814.1 aory|EIT75529.1  
Group16006: aflagEED45824.1 aory|EIT75633.1  
Group16007: aflagEED45833.1 aory|EIT75505.1  
Group16008: aflagEED45856.1 aory|EIT75490.1  
Group16009: aflagEED45859.1 aory|EIT75665.1  
Group16010: aflagEED45873.1 aory|EIT75410.1  
Group16011: aflagEED45898.1 aory|EIT75506.1  
Group16012: aver|OJJ08365.1 asyd|OJJ53378.1  
Group16013: aflagEED45956.1 aory|EIT75695.1  
Group16014: aflagEED45966.1 aory|EIT75806.1  
Group16015: aflagEED45978.1 aory|EIT75437.1

Group16016: aflagEED45979.1 aory|EIT75807.1  
Group16017: aflagEED45980.1 aory|EIT75834.1  
Group16018: aflagEED45995.1 aory|EIT75687.1  
Group16019: aflagEED46011.1 aory|EIT75573.1  
Group16020: aflagEED46056.1 aory|EIT83493.1  
Group16021: aflagEED46062.1 aory|EIT83496.1  
Group16022: aflagEED46064.1 aory|EIT83487.1  
Group16023: aflagEED46065.1 aory|EIT83480.1  
Group16024: aflagEED46074.1 aory|EIT83483.1  
Group16025: aflagEED46092.1 aory|EIT76502.1  
Group16026: aflagEED46135.1 aory|EIT76361.1  
Group16027: aflagEED46152.1 aory|EIT76467.1  
Group16028: aflagEED46189.1 aory|EIT76374.1  
Group16029: aflagEED46198.1 aory|EIT76454.1  
Group16030: aflagEED46222.1 aory|EIT76363.1  
Group16031: aflagEED46228.1 aory|EIT76359.1  
Group16032: aflagEED46233.1 aory|EIT76382.1  
Group16033: aflagEED46249.1 aory|EIT76370.1  
Group16034: aflagEED46250.1 aory|EIT76484.1  
Group16035: aflagEED46255.1 aory|EIT76360.1  
Group16036: aflagEED46281.1 aory|EIT76338.1  
Group16037: aflagEED46292.1 aory|EIT76337.1  
Group16038: aflagEED46299.1 aory|EIT76340.1  
Group16039: aflagEED46303.1 aory|EIT76330.1  
Group16040: aflagEED46306.1 atub|OJI80332.1  
Group16041: aflagEED46319.1 aory|EIT81234.1  
Group16042: aflagEED46343.1 aory|EIT81262.1  
Group16043: aflagEED46349.1 aory|EIT81190.1  
Group16044: aflagEED46357.1 aory|EIT81175.1  
Group16045: aflagEED46358.1 aory|EIT81259.1  
Group16046: aflagEED46375.1 aory|EIT72288.1  
Group16047: aflagEED46380.1 aory|EIT72293.1  
Group16048: aflagEED46384.1 aory|EIT72372.1  
Group16049: aflagEED46444.1 anid|CBF87453.1  
Group16050: aflagEED46445.1 aory|EIT72423.1  
Group16051: aflagEED46500.1 aory|EIT72367.1  
Group16052: aflagEED46501.1 aory|EIT72408.1  
Group16053: aflagEED46503.1 aory|EIT72422.1  
Group16054: aflagEED46504.1 aory|EIT72417.1

Group16055: aflagEED46505.1 aory|EIT72413.1  
Group16056: aflagEED46517.1 aory|EIT72445.1  
Group16057: aflagEED46521.1 aory|EIT72348.1  
Group16058: aflagEED46530.1 aory|EIT72429.1  
Group16059: aflagEED46531.1 aory|EIT72315.1  
Group16060: aflagEED46536.1 aory|EIT72323.1  
Group16061: aflagEED46552.1 agla|OJJ81457.1  
Group16062: aflagEED46579.1 aory|EIT77957.1  
Group16063: aflagEED46580.1 aory|EIT77892.1  
Group16064: aflagEED46581.1 aory|EIT77861.1  
Group16065: akaw|GAA86637.1 aluc|OJZ85194.1  
Group16066: aflagEED46592.1 aory|EIT77836.1  
Group16067: aflagEED46596.1 aory|EIT77922.1  
Group16068: aflagEED46613.1 aory|EIT77841.1  
Group16069: aflagEED46647.1 aory|EIT77944.1  
Group16070: aflagEED46743.1 aory|EIT77860.1  
Group16071: aflagEED46786.1 aory|EIT72753.1  
Group16072: aflagEED46817.1 aory|EIT72534.1  
Group16073: aflagEED46840.1 aory|EIT72555.1  
Group16074: aflagEED46841.1 aory|EIT72612.1  
Group16075: aflagEED46842.1 aory|EIT72657.1  
Group16076: aflagEED46843.1 aory|EIT72734.1  
Group16077: aflagEED46853.1 aory|EIT72773.1  
Group16078: aflagEED46875.1 aory|EIT72549.1  
Group16079: aflagEED46880.1 aory|EIT72717.1  
Group16080: aflagEED46881.1 aory|EIT72751.1  
Group16081: aflagEED46893.1 aory|EIT72591.1  
Group16082: aflagEED46895.1 aory|EIT72676.1  
Group16083: aflagEED46896.1 aory|EIT72719.1  
Group16084: aflagEED46908.1 aory|EIT72722.1  
Group16085: ater|EAU31347.1 agla|OJJ80843.1  
Group16086: aver|OJJ03000.1 asyd|OJJ56209.1  
Group16087: aflagEED46928.1 aory|EIT72558.1  
Group16088: aflagEED46929.1 aory|EIT72702.1  
Group16089: aflagEED46950.1 aory|EIT72731.1  
Group16090: aflagEED46963.1 anid|CBF78261.1  
Group16091: aflagEED46987.1 aory|EIT72561.1  
Group16092: aflagEED47034.1 aory|EIT72556.1  
Group16093: aflagEED47065.1 aory|EIT72502.1

Group16094: aflagEED47074.1 aory|EIT72475.1  
Group16095: aflagEED47133.1 aory|EIT79253.1  
Group16096: aflagEED47220.1 aory|EIT79176.1  
Group16097: aflagEED47228.1 aory|EIT79194.1  
Group16098: aflagEED47235.1 aory|EIT79305.1  
Group16099: aflagEED47241.1 aory|EIT79208.1  
Group16100: aflagEED47245.1 aory|EIT79257.1  
Group16101: aflagEED47247.1 aory|EIT79236.1  
Group16102: aflagEED47250.1 aory|EIT79285.1  
Group16103: aflagEED47262.1 aory|EIT79317.1  
Group16104: aflagEED47267.1 aory|EIT79281.1  
Group16105: aflagEED47275.1 aory|EIT79301.1  
Group16106: aflagEED47280.1 aory|EIT79213.1  
Group16107: aflagEED47287.1 aory|EIT79224.1  
Group16108: aflagEED47290.1 aory|EIT79278.1  
Group16109: aflagEED47297.1 aory|EIT82856.1  
Group16110: aflagEED47302.1 aory|EIT82865.1  
Group16111: aflagEED47303.1 aory|EIT82892.1  
Group16112: aflagEED47363.1 aory|EIT82847.1  
Group16113: aflagEED47364.1 aory|EIT82829.1  
Group16114: aflagEED47385.1 aory|EIT82836.1  
Group16115: aflagEED47386.1 aory|EIT82835.1  
Group16116: aflagEED47398.1 aory|EIT81935.1  
Group16117: aflagEED47399.1 aory|EIT81931.1  
Group16118: aflagEED47401.1 aory|EIT83381.1  
Group16119: aflagEED47416.1 aory|EIT81910.1  
Group16120: aflagEED47417.1 aory|EIT81915.1  
Group16121: aflagEED47419.1 aory|EIT81908.1  
Group16122: aflagEED47422.1 aory|EIT81923.1  
Group16123: aflagEED47453.1 aory|EIT79968.1  
Group16124: aflagEED47455.1 aory|EIT79954.1  
Group16125: aflagEED47475.1 aory|EIT79949.1  
Group16126: aflagEED47489.1 aory|EIT79971.1  
Group16127: asydlOJJ64154.1 aver|OJI98233.1  
Group16128: aflagEED47518.1 aory|EIT74550.1  
Group16129: aflagEED47535.1 aory|EIT74559.1  
Group16130: aflagEED47563.1 aory|EIT74582.1  
Group16131: aflagEED47564.1 agla|OJJ86149.1  
Group16132: aflagEED47571.1 aluc|OJZ80352.1

Group16133: aflagEED47572.1 aluc|OJZ80353.1  
Group16134: aflagEED47585.1 aory|EIT74528.1  
Group16135: aflagEED47622.1 aory|EIT80268.1  
Group16136: aflagEED47648.1 aory|EIT80216.1  
Group16137: aflagEED47662.1 aory|EIT80254.1  
Group16138: aflagEED47677.1 aory|EIT80275.1  
Group16139: aflagEED47680.1 aory|EIT80203.1  
Group16140: aflagEED47693.1 aory|EIT80184.1  
Group16141: aflagEED47721.1 aory|EIT77145.1  
Group16142: aflagEED47727.1 aory|EIT77199.1  
Group16143: aflagEED47741.1 aory|EIT77162.1  
Group16144: aflagEED47743.1 aory|EIT77157.1  
Group16145: aflagEED47756.1 aory|EIT77156.1  
Group16146: aflagEED47768.1 aory|EIT77188.1  
Group16147: aflagEED47787.1 aory|EIT77183.1  
Group16148: aflagEED47801.1 aory|EIT77138.1  
Group16149: aflagEED47806.1 aory|EIT77190.1  
Group16150: aflagEED47812.1 aory|EIT77151.1  
Group16151: aflagEED47841.1 aory|EIT77213.1  
Group16152: aflagEED47843.1 aory|EIT77239.1  
Group16153: aflagEED47861.1 aory|EIT77235.1  
Group16154: aflagEED47866.1 aory|EIT77250.1  
Group16155: aflagEED47882.1 asyd|OJJ62689.1  
Group16156: aflagEED47895.1 aory|EIT77211.1  
Group16157: aflagEED47901.1 ater|EAU30658.1  
Group16158: aflagEED47925.1 aory|EIT79809.1  
Group16159: aflagEED47934.1 aory|EIT79860.1  
Group16160: aflagEED47959.1 aory|EIT79814.1  
Group16161: aflagEED47962.1 aory|EIT79837.1  
Group16162: aflagEED48078.1 aory|EIT82478.1  
Group16163: aflagEED48102.1 anid|CBF84010.1  
Group16164: aflagEED48111.1 aory|EIT76224.1  
Group16165: aflagEED48114.1 aory|EIT76231.1  
Group16166: aflagEED48122.1 aory|EIT76202.1  
Group16167: aflagEED48123.1 aory|EIT76251.1  
Group16168: aflagEED48124.1 aory|EIT76189.1  
Group16169: aflagEED48134.1 aory|EIT76256.1  
Group16170: aflagEED48138.1 aory|EIT76211.1  
Group16171: aflagEED48139.1 aory|EIT76236.1

Group16172: aver|OJI96141.1 asyd|OJJ53760.1  
Group16173: aflag|EED48152.1 aory|EIT76199.1  
Group16174: aflag|EED48157.1 aory|EIT83033.1  
Group16175: aflag|EED48162.1 aory|EIT83040.1  
Group16176: aflag|EED48212.1 aory|EIT72924.1  
Group16177: aflag|EED48213.1 aory|EIT72895.1  
Group16178: aflag|EED48218.1 aory|EIT72930.1  
Group16179: aflag|EED48223.1 aory|EIT72937.1  
Group16180: aflag|EED48224.1 aory|EIT72941.1  
Group16181: aflag|EED48225.1 aory|EIT72953.1  
Group16182: aflag|EED48237.1 aory|EIT72900.1  
Group16183: aflag|EED48255.1 aory|EIT72892.1  
Group16184: aflag|EED48282.1 aory|EIT72913.1  
Group16185: aflag|EED48283.1 aory|EIT72943.1  
Group16186: aflag|EED48297.1 aory|EIT76313.1  
Group16187: aflag|EED48307.1 aory|EIT76279.1  
Group16188: aflag|EED48312.1 aory|EIT76298.1  
Group16189: aflag|EED48323.1 atub|OJI89795.1  
Group16190: aflag|EED48333.1 aory|EIT76290.1  
Group16191: aflag|EED48335.1 aory|EIT76316.1  
Group16192: aflag|EED48348.1 aory|EIT76305.1  
Group16193: aflag|EED48356.1 aory|EIT72299.1  
Group16194: aflag|EED48358.1 aory|EIT83100.1  
Group16195: aflag|EED48368.1 aory|EIT83069.1  
Group16196: aflag|EED48369.1 aory|EIT83054.1  
Group16197: aflag|EED48371.1 aory|EIT83058.1  
Group16198: aflag|EED48375.1 aory|EIT83075.1  
Group16199: aflag|EED48376.1 aory|EIT83072.1  
Group16200: aflag|EED48380.1 aory|EIT83081.1  
Group16201: aflag|EED48398.1 awen|OJJ32511.1  
Group16202: aflag|EED48404.1 aory|EIT83103.1  
Group16203: aflag|EED48426.1 aory|EIT83102.1  
Group16204: aflag|EED48445.1 aory|EIT81668.1  
Group16205: aflag|EED48446.1 aory|EIT83467.1  
Group16206: aflag|EED48451.1 aory|EIT83469.1  
Group16207: aflag|EED48452.1 aory|EIT83473.1  
Group16208: aflag|EED48453.1 aory|EIT83470.1  
Group16209: aflag|EED48458.1 aory|EIT76275.1  
Group16210: aflag|EED48459.1 aory|EIT76267.1

Group16211: aflagEED48460.1 aory|EIT76271.1  
Group16212: aflagEED48461.1 aory|EIT76274.1  
Group16213: aflagEED48462.1 aory|EIT76268.1  
Group16214: aflagEED48470.1 aory|EIT73062.1  
Group16215: aflagEED48488.1 aory|EIT73044.1  
Group16216: aflagEED48505.1 aory|EIT73262.1  
Group16217: aflagEED48518.1 aory|EIT73229.1  
Group16218: aflagEED48520.1 aory|EIT73080.1  
Group16219: aflagEED48532.1 aory|EIT73237.1  
Group16220: aflagEED48606.1 aory|EIT73081.1  
Group16221: aflagEED48607.1 aory|EIT73065.1  
Group16222: aflagEED48611.1 aory|EIT73091.1  
Group16223: aflagEED48614.1 aory|EIT73104.1  
Group16224: aflagEED48620.1 aory|EIT73039.1  
Group16225: aflagEED48621.1 aory|EIT73162.1  
Group16226: aflagEED48646.1 ater|EAU37621.1  
Group16227: aflagEED48649.1 aory|EIT73132.1  
Group16228: aflagEED48671.1 aory|EIT73133.1  
Group16229: aflagEED48693.1 ater|EAU33235.1  
Group16230: aflagEED48734.1 aory|EIT73040.1  
Group16231: aflagEED48764.1 aory|EIT73025.1  
Group16232: aflagEED48804.1 aory|EIT73026.1  
Group16233: aflagEED48883.1 aory|EIT81258.1  
Group16234: aflagEED48884.1 aory|EIT81218.1  
Group16235: awen|OJJ39625.1 agla|OJJ78435.1  
Group16236: aflagEED48891.1 aory|EIT81223.1  
Group16237: aflagEED48898.1 aory|EIT81231.1  
Group16238: aflagEED48904.1 aory|EIT81164.1  
Group16239: aflagEED48921.1 aory|EIT80046.1  
Group16240: aflagEED48932.1 aory|EIT79984.1  
Group16241: aflagEED48934.1 aory|EIT80009.1  
Group16242: aflagEED48940.1 ater|EAU29925.1  
Group16243: aflagEED48941.1 ater|EAU29926.1  
Group16244: aflagEED48954.1 aory|EIT80000.1  
Group16245: aflagEED48973.1 aory|EIT79998.1  
Group16246: aflagEED48975.1 aory|EIT79978.1  
Group16247: aflagEED48982.1 aory|EIT80036.1  
Group16248: aflagEED49031.1 aory|EIT82556.1  
Group16249: aflagEED49070.1 aory|EIT82501.1

Group16250: aflag|OJJ89202.1 awen|OJJ40105.1  
Group16251: aflag|EED49136.1 aory|EIT78587.1  
Group16252: aflag|EED49139.1 awen|OJJ35365.1  
Group16253: aflag|EED49146.1 aory|EIT78524.1  
Group16254: aflag|EED49160.1 aory|EIT78577.1  
Group16255: aflag|EED49168.1 aory|EIT78521.1  
Group16256: aflag|EED49172.1 aory|EIT78549.1  
Group16257: aflag|EED49185.1 aory|EIT78533.1  
Group16258: aflag|EED49270.1 aory|EIT82206.1  
Group16259: aflag|EED49285.1 aory|EIT82209.1  
Group16260: aflag|EED49292.1 aory|EIT82225.1  
Group16261: aflag|EED49346.1 aory|EIT79514.1  
Group16262: aflag|EED49351.1 aory|EIT79555.1  
Group16263: aflag|EED49395.1 aory|EIT79532.1  
Group16264: aflag|EED49415.1 aory|EIT79589.1  
Group16265: aflag|EED49417.1 aory|EIT79501.1  
Group16266: aflag|EED49420.1 aory|EIT79476.1  
Group16267: aflag|EED49426.1 aory|EIT79518.1  
Group16268: aflag|EED49430.1 aory|EIT79547.1  
Group16269: aflag|EED49431.1 aory|EIT79481.1  
Group16270: aflag|EED49442.1 aory|EIT79566.1  
Group16271: aflag|EED49446.1 aory|EIT79541.1  
Group16272: aflag|EED49447.1 aory|EIT79478.1  
Group16273: aflag|EED49451.1 aory|EIT79550.1  
Group16274: aflag|EED49456.1 aory|EIT79533.1  
Group16275: aflag|EED49472.1 aory|EIT79588.1  
Group16276: aflag|EED49475.1 aory|EIT79577.1  
Group16277: aflag|EED49479.1 aory|EIT79539.1  
Group16278: aflag|EED49484.1 aory|EIT79557.1  
Group16279: aflag|EED49527.1 aory|EIT82627.1  
Group16280: aflag|EED49531.1 aory|EIT82596.1  
Group16281: aflag|EED49538.1 aory|EIT82636.1  
Group16282: aflag|EED49542.1 aory|EIT82631.1  
Group16283: aflag|EED49564.1 aory|EIT82632.1  
Group16284: aflag|EED49565.1 aory|EIT82622.1  
Group16285: aflag|EED49571.1 aory|EIT82646.1  
Group16286: aflag|EED49578.1 aory|EIT82608.1  
Group16287: aflag|EED49600.1 ater|EAU35384.1  
Group16288: aflag|EED49605.1 aory|EIT80986.1



Group16289: afla|EED49620.1 aory|EIT80978.1  
Group16290: afla|EED49644.1 aory|EIT81021.1  
Group16291: afla|EED49647.1 aory|EIT80980.1  
Group16292: afla|EED49655.1 aory|EIT80946.1  
Group16293: afla|EED49661.1 aory|EIT80936.1  
Group16294: afla|EED49663.1 aory|EIT80957.1  
Group16295: afla|EED49664.1 aory|EIT81020.1  
Group16296: afla|EED49669.1 aory|EIT80952.1  
Group16297: afla|EED49673.1 aory|EIT80988.1  
Group16298: afla|EED49696.1 aory|EIT77640.1  
Group16299: afla|EED49717.1 aory|EIT77618.1  
Group16300: afla|EED49720.1 aory|EIT77645.1  
Group16301: afla|EED49726.1 aory|EIT77680.1  
Group16302: afla|EED49728.1 agla|OJJ82708.1  
Group16303: afla|EED49730.1 aory|EIT77630.1  
Group16304: afla|EED49738.1 aory|EIT77701.1  
Group16305: afla|EED49748.1 aory|EIT77639.1  
Group16306: afla|EED49760.1 aory|EIT77673.1  
Group16307: afla|EED49765.1 aory|EIT77672.1  
Group16308: anig|EHA18923.1 ater|EAU39470.1  
Group16309: afla|EED49775.1 aory|EIT77636.1  
Group16310: afla|EED49783.1 aory|EIT77685.1  
Group16311: afla|EED49790.1 asyd|OJJ56233.1  
Group16312: afla|EED49800.1 aory|EIT77627.1  
Group16313: afla|EED49813.1 aory|EIT77669.1  
Group16314: afla|EED49829.1 aory|EIT77656.1  
Group16315: afla|EED49834.1 aory|EIT83393.1  
Group16316: afla|EED49836.1 aory|EIT83388.1  
Group16317: afla|EED49845.1 aver|OJJ02117.1  
Group16318: afla|EED49847.1 awen|OJJ36077.1  
Group16319: afla|EED49849.1 awen|OJJ36075.1  
Group16320: afla|EED49856.1 aory|EIT78828.1  
Group16321: afla|EED49860.1 aory|EIT83416.1  
Group16322: afla|EED49865.1 aory|EIT83420.1  
Group16323: afla|EED49869.1 aory|EIT83394.1  
Group16324: afla|EED49900.1 aory|EIT72457.1  
Group16325: afla|EED49919.1 aory|EIT72273.1  
Group16326: afla|EED49928.1 aory|EIT72266.1  
Group16327: afla|EED49943.1 aory|EIT83443.1

Group16328: aflagEED49948.1 aory|EIT83430.1  
Group16329: aflagEED49970.1 aory|EIT83453.1  
Group16330: aflagEED49979.1 aory|EIT74644.1  
Group16331: aflagEED49981.1 aory|EIT74651.1  
Group16332: aflagEED50014.1 aory|EIT74624.1  
Group16333: aflagEED50039.1 aory|EIT74715.1  
Group16334: aflagEED50047.1 aory|EIT74680.1  
Group16335: aflagEED50053.1 aory|EIT74706.1  
Group16336: aflagEED50067.1 aory|EIT74668.1  
Group16337: aflagEED50083.1 aory|EIT74672.1  
Group16338: aflagEED50101.1 aory|EIT74678.1  
Group16339: aflagEED50107.1 aory|EIT74709.1  
Group16340: aflagEED50127.1 aory|EIT74612.1  
Group16341: aflagEED50131.1 aory|EIT74730.1  
Group16342: aflagEED50138.1 aory|EIT74694.1  
Group16343: aflagEED50139.1 aory|EIT74729.1  
Group16344: aflagEED50140.1 aory|EIT74641.1  
Group16345: aflagEED50161.1 aory|EIT76915.1  
Group16346: aflagEED50177.1 aory|EIT72284.1  
Group16347: aflagEED50185.1 aory|EIT77378.1  
Group16348: aflagEED50186.1 aory|EIT77386.1  
Group16349: aflagEED50213.1 aory|EIT77274.1  
Group16350: aver|OJI97120.1 asyd|OJJ63818.1  
Group16351: aflagEED50217.1 aory|EIT77319.1  
Group16352: aflagEED50233.1 aory|EIT77285.1  
Group16353: aflagEED50234.1 aory|EIT77346.1  
Group16354: aflagEED50241.1 aory|EIT77354.1  
Group16355: aflagEED50267.1 aory|EIT77288.1  
Group16356: aflagEED50290.1 aory|EIT77359.1  
Group16357: aflagEED50416.1 anid|CBF78083.1  
Group16358: aflagEED50422.1 aory|EIT82052.1  
Group16359: aflagEED50428.1 aory|EIT82012.1  
Group16360: aflagEED50443.1 aory|EIT82006.1  
Group16361: aflagEED50459.1 aory|EIT82126.1  
Group16362: aflagEED50473.1 aory|EIT82005.1  
Group16363: aflagEED50515.1 aory|EIT82157.1  
Group16364: aflagEED50519.1 aory|EIT82089.1  
Group16365: aflagEED50526.1 aory|EIT82073.1  
Group16366: aflagEED50559.1 aory|EIT82004.1

Group16367: aflagEED50572.1 aory|EIT82161.1  
Group16368: aflagEED50580.1 aory|EIT82114.1  
Group16369: aflagEED50598.1 aory|EIT78091.1  
Group16370: aflagEED50606.1 aory|EIT78118.1  
Group16371: aflagEED50610.1 aory|EIT78113.1  
Group16372: aflagEED50659.1 aory|EIT78034.1  
Group16373: aflagEED50697.1 aory|EIT78098.1  
Group16374: aflagEED50704.1 aory|EIT77997.1  
Group16375: aflagEED50751.1 aory|EIT78120.1  
Group16376: aflagEED50757.1 aory|EIT78063.1  
Group16377: aflagEED50760.1 aory|EIT77979.1  
Group16378: aflagEED50784.1 aory|EIT78018.1  
Group16379: aflagEED50789.1 aory|EIT77984.1  
Group16380: aflagEED50810.1 aory|EIT79063.1  
Group16381: aflagEED50811.1 aory|EIT79000.1  
Group16382: aflagEED50812.1 aory|EIT79039.1  
Group16383: aflagEED50842.1 aory|EIT79003.1  
Group16384: aflagEED50849.1 aory|EIT79037.1  
Group16385: aflagEED50850.1 aory|EIT79055.1  
Group16386: aflagEED50856.1 aory|EIT79020.1  
Group16387: aflagEED50857.1 aory|EIT79052.1  
Group16388: aflagEED50859.1 aory|EIT79017.1  
Group16389: aflagEED50930.1 aory|EIT78996.1  
Group16390: aflagEED50931.1 aory|EIT79019.1  
Group16391: aflagEED50934.1 aory|EIT79002.1  
Group16392: aflagEED50945.1 aory|EIT77008.1  
Group16393: aflagEED50951.1 aory|EIT77039.1  
Group16394: aflagEED50958.1 aory|EIT77029.1  
Group16395: aflagEED50963.1 aory|EIT77004.1  
Group16396: aflagEED50968.1 aory|EIT76957.1  
Group16397: aflagEED50994.1 aory|EIT76976.1  
Group16398: aflagEED51000.1 aory|EIT76969.1  
Group16399: aflagEED51015.1 aory|EIT77011.1  
Group16400: aflagEED51016.1 aory|EIT76984.1  
Group16401: aflagEED51017.1 aory|EIT77033.1  
Group16402: aflagEED51020.1 aory|EIT76994.1  
Group16403: aflagEED51025.1 aory|EIT76974.1  
Group16404: aflagEED51041.1 aory|EIT76965.1  
Group16405: aflagEED51044.1 aory|EIT76940.1

Group16406: aflagEED51046.1 aory|EIT76989.1  
Group16407: aflagEED51048.1 aory|EIT76991.1  
Group16408: aflagEED51053.1 aory|EIT77003.1  
Group16409: aflagEED51060.1 aory|EIT77035.1  
Group16410: aflagEED51061.1 aory|EIT76945.1  
Group16411: aflagEED51067.1 aory|EIT76977.1  
Group16412: aflagEED51069.1 aory|EIT76944.1  
Group16413: aflagEED51088.1 aory|EIT81995.1  
Group16414: aflagEED51104.1 aory|EIT81304.1  
Group16415: aflagEED51108.1 aory|EIT81313.1  
Group16416: aflagEED51111.1 aory|EIT81336.1  
Group16417: aflagEED51122.1 aory|EIT81343.1  
Group16418: aflagEED51136.1 aory|EIT81306.1  
Group16419: aflagEED51143.1 awen|OJJ38780.1  
Group16420: aflagEED51149.1 aory|EIT81298.1  
Group16421: aflagEED51155.1 aory|EIT81332.1  
Group16422: aflagEED51164.1 aver|OJI99532.1  
Group16423: aflagEED51179.1 aory|EIT81328.1  
Group16424: aflagEED51181.1 aory|EIT81351.1  
Group16425: aflagEED51184.1 aory|EIT81345.1  
Group16426: aflagEED51188.1 aver|OJJ07635.1  
Group16427: aflagEED51267.1 aory|EIT81519.1  
Group16428: aflagEED51304.1 aory|EIT81559.1  
Group16429: aflagEED51352.1 aory|EIT80461.1  
Group16430: aflagEED51355.1 aory|EIT80608.1  
Group16431: aflagEED51375.1 aory|EIT80504.1  
Group16432: aflagEED51377.1 aory|EIT80593.1  
Group16433: aflagEED51378.1 aory|EIT80484.1  
Group16434: aflagEED51382.1 aory|EIT80712.1  
Group16435: aflagEED51383.1 aory|EIT80548.1  
Group16436: aflagEED51435.1 aory|EIT80475.1  
Group16437: aflagEED51455.1 aory|EIT80454.1  
Group16438: aflagEED51482.1 aory|EIT80696.1  
Group16439: aflagEED51490.1 aory|EIT80615.1  
Group16440: aflagEED51491.1 aory|EIT80648.1  
Group16441: aflagEED51492.1 aory|EIT80518.1  
Group16442: aflagEED51518.1 aory|EIT80611.1  
Group16443: aflagEED51529.1 aory|EIT80536.1  
Group16444: aflagEED51549.1 aory|EIT80429.1

Group16445: afla|EED51554.1 aory|EIT80602.1  
Group16446: afla|EED51566.1 aory|EIT80440.1  
Group16447: afla|EED51587.1 aory|EIT80590.1  
Group16448: afla|EED51588.1 aory|EIT80681.1  
Group16449: afla|EED51589.1 aluc|OJZ92919.1  
Group16450: afla|EED51601.1 aory|EIT80732.1  
Group16451: afla|EED51604.1 aory|EIT80423.1  
Group16452: afla|EED51628.1 aory|EIT80586.1  
Group16453: afla|EED51630.1 aluc|OJZ87907.1  
Group16454: afla|EED51646.1 aory|EIT80701.1  
Group16455: afla|EED51648.1 aory|EIT80676.1  
Group16456: afla|EED51661.1 aory|EIT80568.1  
Group16457: afla|EED51666.1 aory|EIT80513.1  
Group16458: afla|EED51676.1 aory|EIT80595.1  
Group16459: afla|EED51698.1 anid|CBF83162.1  
Group16460: afla|EED51707.1 aory|EIT80447.1  
Group16461: afla|EED51709.1 aory|EIT80672.1  
Group16462: afla|EED51721.1 aory|EIT80669.1  
Group16463: afla|EED51723.1 aory|EIT80613.1  
Group16464: afla|EED51724.1 aory|EIT80677.1  
Group16465: afla|EED51725.1 aory|EIT80546.1  
Group16466: afla|EED51728.1 aory|EIT80747.1  
Group16467: afla|EED51733.1 anid|CBF79139.1  
Group16468: afla|EED51746.1 aory|EIT80691.1  
Group16469: afla|EED51753.1 aory|EIT80759.1  
Group16470: afla|EED51769.1 aory|EIT80018.1  
Group16471: afla|EED51772.1 aory|EIT81737.1  
Group16472: afla|EED51777.1 aory|EIT81774.1  
Group16473: afla|EED51819.1 aory|EIT81718.1  
Group16474: afla|EED51823.1 aory|EIT81729.1  
Group16475: afla|EED51828.1 aory|EIT81714.1  
Group16476: afla|EED51834.1 aory|EIT81727.1  
Group16477: afla|EED51842.1 aory|EIT81739.1  
Group16478: afla|EED51858.1 aory|EIT81745.1  
Group16479: afla|EED51859.1 aory|EIT81702.1  
Group16480: afla|EED51933.1 aory|EIT81477.1  
Group16481: afla|EED51941.1 aory|EIT81464.1  
Group16482: afla|EED51968.1 aory|EIT81405.1  
Group16483: afla|EED51972.1 aory|EIT81455.1

Group16484: aflagEED51992.1 aory|EIT81456.1  
Group16485: aflagEED51993.1 aory|EIT81444.1  
Group16486: aflagEED51994.1 aory|EIT81410.1  
Group16487: aflagEED52000.1 aory|EIT81470.1  
Group16488: aflagEED52003.1 aory|EIT81393.1  
Group16489: aflagEED52011.1 aory|EIT81437.1  
Group16490: aflagEED52012.1 aory|EIT81449.1  
Group16491: aflagEED52014.1 aory|EIT81378.1  
Group16492: aflagEED52018.1 aory|EIT81428.1  
Group16493: asyd|OJJ55491.1 anid|CBF83145.1  
Group16494: aflagEED52037.1 agla|OJJ78909.1  
Group16495: aflagEED52043.1 aory|EIT81411.1  
Group16496: aflagEED52052.1 aory|EIT81479.1  
Group16497: aflagEED52056.1 aory|EIT81384.1  
Group16498: aflagEED52062.1 aory|EIT81386.1  
Group16499: aflagEED52072.1 aory|EIT72303.1  
Group16500: aflagEED52074.1 aory|EIT76935.1  
Group16501: aflagEED52075.1 afum|EAL86754.2  
Group16502: aflagEED52076.1 aory|EIT76925.1  
Group16503: aflagEED52080.1 aory|EIT76937.1  
Group16504: aflagEED52092.1 aory|EIT76906.1  
Group16505: aflagEED52102.1 aory|EIT76920.1  
Group16506: aflagEED52106.1 aory|EIT76939.1  
Group16507: aflagEED52148.1 awen|OJJ32932.1  
Group16508: aflagEED52155.1 aory|EIT74335.1  
Group16509: aflagEED52160.1 azon|OJJ42481.1  
Group16510: aflagEED52166.1 azon|OJJ50339.1  
Group16511: aflagEED52169.1 aory|EIT74467.1  
Group16512: aflagEED52170.1 aory|EIT74462.1  
Group16513: aflagEED52174.1 aory|EIT74330.1  
Group16514: aflagEED52189.1 aory|EIT74457.1  
Group16515: aflagEED52193.1 aory|EIT74511.1  
Group16516: aflagEED52217.1 aory|EIT74468.1  
Group16517: aflagEED52223.1 aory|EIT74364.1  
Group16518: aflagEED52226.1 aory|EIT74484.1  
Group16519: aflagEED52235.1 aory|EIT74508.1  
Group16520: aflagEED52240.1 aory|EIT74444.1  
Group16521: aflagEED52249.1 aory|EIT74341.1  
Group16522: aflagEED52250.1 aory|EIT74431.1

Group16523: aflagEED52256.1 aory|EIT74398.1  
Group16524: aflagEED52258.1 awen|OJJ33778.1  
Group16525: aflagEED52272.1 aory|EIT74380.1  
Group16526: aflagEED52280.1 aory|EIT74509.1  
Group16527: aflagEED52283.1 aory|EIT74470.1  
Group16528: aflagEED52286.1 aory|EIT74363.1  
Group16529: aflagEED52295.1 aory|EIT74437.1  
Group16530: aflagEED52307.1 aory|EIT74421.1  
Group16531: aflagEED52308.1 aory|EIT74321.1  
Group16532: aflagEED52309.1 aory|EIT74426.1  
Group16533: aflagEED52316.1 aory|EIT74329.1  
Group16534: aflagEED52327.1 aory|EIT74455.1  
Group16535: aflagEED52333.1 aory|EIT74389.1  
Group16536: aflagEED52334.1 aory|EIT74512.1  
Group16537: aflagEED52338.1 aory|EIT74388.1  
Group16538: aflagEED52340.1 aory|EIT74439.1  
Group16539: asyd|OJJ61886.1 aver|OJI95984.1  
Group16540: aflagEED52369.1 aory|EIT82367.1  
Group16541: aflagEED52378.1 aory|EIT82370.1  
Group16542: aflagEED52407.1 ater|EAU37126.1  
Group16543: aflagEED52411.1 aory|EIT83279.1  
Group16544: aflagEED52416.1 aory|EIT83317.1  
Group16545: aflagEED52419.1 aory|EIT83319.1  
Group16546: atub|OJI88613.1 anig|EHA25867.1  
Group16547: aflagEED52460.1 aory|EIT82802.1  
Group16548: aflagEED52512.1 aory|EIT82782.1  
Group16549: aflagEED52516.1 aory|EIT82818.1  
Group16550: aflagEED52518.1 aory|EIT82806.1  
Group16551: aflagEED52523.1 aory|EIT82747.1  
Group16552: aflagEED52532.1 aory|EIT74182.1  
Group16553: aflagEED52533.1 aory|EIT74258.1  
Group16554: aflagEED52539.1 awen|OJJ38790.1  
Group16555: aflagEED52542.1 awen|OJJ38791.1  
Group16556: aflagEED52557.1 aory|EIT74223.1  
Group16557: aflagEED52560.1 azon|OJJ43114.1  
Group16558: aflagEED52579.1 aory|EIT74281.1  
Group16559: aflagEED52581.1 aory|EIT74217.1  
Group16560: aflagEED52652.1 atub|OJI82035.1  
Group16561: aflagEED52677.1 aory|EIT74220.1

Group16562: aflagEED52722.1 aory|EIT78155.1  
Group16563: aflagEED52796.1 aory|EIT78242.1  
Group16564: aflagEED52805.1 aory|EIT78213.1  
Group16565: aflagEED52826.1 aory|EIT78238.1  
Group16566: aflagEED52835.1 aory|EIT78603.1  
Group16567: aflagEED52837.1 aory|EIT78667.1  
Group16568: aflagEED52839.1 aory|EIT78670.1  
Group16569: aflagEED52840.1 aory|EIT78610.1  
Group16570: aflagEED52842.1 aory|EIT78647.1  
Group16571: aflagEED52846.1 aory|EIT78665.1  
Group16572: aflagEED52847.1 aory|EIT78605.1  
Group16573: aflagEED52850.1 aory|EIT78649.1  
Group16574: aflagEED52859.1 aory|EIT78657.1  
Group16575: aflagEED52869.1 afum|EAL93229.1  
Group16576: aflagEED52885.1 aory|EIT78677.1  
Group16577: aflagEED52886.1 aory|EIT78589.1  
Group16578: aflagEED52901.1 aory|EIT78626.1  
Group16579: aflagEED52964.1 aory|EIT78720.1  
Group16580: aflagEED53007.1 aory|EIT77420.1  
Group16581: aflagEED53046.1 azon|OJJ49872.1  
Group16582: aflagEED53070.1 aory|EIT74815.1  
Group16583: aflagEED53076.1 aory|EIT74769.1  
Group16584: aver|OJJ01855.1 asyd|OJJ59245.1  
Group16585: aflagEED53080.1 aory|EIT74778.1  
Group16586: aflagEED53087.1 aory|EIT74766.1  
Group16587: aflagEED53138.1 aory|EIT74862.1  
Group16588: aflagEED53149.1 aory|EIT75019.1  
Group16589: aflagEED53165.1 aory|EIT75096.1  
Group16590: aflagEED53186.1 aory|EIT75227.1  
Group16591: aflagEED53195.1 aory|EIT75020.1  
Group16592: aflagEED53204.1 aory|EIT75181.1  
Group16593: aflagEED53223.1 aory|EIT74936.1  
Group16594: aflagEED53229.1 aory|EIT75218.1  
Group16595: aflagEED53238.1 aory|EIT75258.1  
Group16596: aflagEED53245.1 aory|EIT74975.1  
Group16597: aflagEED53247.1 aory|EIT75014.1  
Group16598: aflagEED53278.1 aory|EIT74915.1  
Group16599: aflagEED53291.1 aory|EIT75033.1  
Group16600: aflagEED53314.1 aory|EIT74856.1



Group16601: aflagEED53320.1 aory|EIT75170.1  
Group16602: aflagEED53329.1 aory|EIT75097.1  
Group16603: aflagEED53335.1 aory|EIT75139.1  
Group16604: aflagEED53365.1 aory|EIT74941.1  
Group16605: aflagEED53366.1 aory|EIT74858.1  
Group16606: aflagEED53367.1 aory|EIT75159.1  
Group16607: aflagEED53397.1 aory|EIT74835.1  
Group16608: aflagEED53408.1 aory|EIT75114.1  
Group16609: aflagEED53413.1 aory|EIT75222.1  
Group16610: aver|OJJ08577.1 asyd|OJJ54163.1  
Group16611: aflagEED53433.1 aory|EIT75157.1  
Group16612: aflagEED53448.1 aory|EIT74932.1  
Group16613: aflagEED53453.1 aory|EIT75203.1  
Group16614: aflagEED53454.1 aory|EIT75264.1  
Group16615: aflagEED53456.1 aory|EIT74959.1  
Group16616: aflagEED53457.1 aory|EIT74912.1  
Group16617: aflagEED53459.1 aory|EIT75255.1  
Group16618: aflagEED53474.1 aory|EIT74827.1  
Group16619: aflagEED53477.1 aory|EIT74937.1  
Group16620: aflagEED53486.1 aory|EIT75040.1  
Group16621: aflagEED53492.1 aory|EIT75257.1  
Group16622: aflagEED53495.1 aory|EIT74973.1  
Group16623: aflagEED53498.1 azon|OJJ44464.1  
Group16624: aflagEED53499.1 aory|EIT74979.1  
Group16625: aflagEED53504.1 aory|EIT75088.1  
Group16626: aflagEED53551.1 aory|EIT75137.1  
Group16627: aflagEED53579.1 aory|EIT74839.1  
Group16628: aflagEED53580.1 aory|EIT75006.1  
Group16629: aflagEED53593.1 aory|EIT74946.1  
Group16630: aflagEED53601.1 aory|EIT74826.1  
Group16631: aflagEED53611.1 aory|EIT75206.1  
Group16632: aflagEED53619.1 aory|EIT74864.1  
Group16633: aflagEED53630.1 aory|EIT75136.1  
Group16634: aflagEED53634.1 aory|EIT75208.1  
Group16635: aflagEED53638.1 aory|EIT75183.1  
Group16636: aflagEED53655.1 aory|EIT75280.1  
Group16637: aflagEED53656.1 aory|EIT75276.1  
Group16638: aflagEED53695.1 aory|EIT75312.1  
Group16639: aver|OJI95755.1 anid|CBF76153.1

Group16640: aflagEED53710.1 aory|EIT75274.1  
Group16641: aflagEED53717.1 aory|EIT75283.1  
Group16642: aflagEED53751.1 aory|EIT78411.1  
Group16643: aflagEED53760.1 aory|EIT78436.1  
Group16644: aflagEED53787.1 atub|OJI86834.1  
Group16645: aflagEED53801.1 aory|EIT78373.1  
Group16646: aflagEED53837.1 aory|EIT78398.1  
Group16647: aflagEED53908.1 aory|EIT78496.1  
Group16648: aflagEED53918.1 aory|EIT78258.1  
Group16649: aflagEED53982.1 aory|EIT78278.1  
Group16650: aflagEED53990.1 aory|EIT78332.1  
Group16651: aflagEED54020.1 aory|EIT78337.1  
Group16652: aflagEED54025.1 aory|EIT78266.1  
Group16653: aflagEED54045.1 aver|OJJ06476.1  
Group16654: aflagEED54048.1 aory|EIT76086.1  
Group16655: aflagEED54052.1 aory|EIT75895.1  
Group16656: aflagEED54056.1 aory|EIT76108.1  
Group16657: aflagEED54067.1 aory|EIT76064.1  
Group16658: aflagEED54081.1 aory|EIT76055.1  
Group16659: aflagEED54090.1 aory|EIT76136.1  
Group16660: aflagEED54096.1 aory|EIT76016.1  
Group16661: aflagEED54099.1 aory|EIT76127.1  
Group16662: aflagEED54101.1 aory|EIT76012.1  
Group16663: asyd|OJJ60827.1 aver|OJJ00153.1  
Group16664: aflagEED54106.1 aory|EIT75948.1  
Group16665: aflagEED54113.1 aory|EIT76049.1  
Group16666: aflagEED54132.1 aory|EIT75946.1  
Group16667: aflagEED54147.1 aory|EIT76129.1  
Group16668: aflagEED54150.1 aory|EIT75994.1  
Group16669: aflagEED54152.1 atub|OJI91291.1  
Group16670: aflagEED54157.1 aory|EIT75962.1  
Group16671: aflagEED54165.1 aory|EIT76077.1  
Group16672: aflagEED54173.1 aory|EIT75960.1  
Group16673: aflagEED54174.1 aory|EIT76117.1  
Group16674: aflagEED54190.1 ater|EAU33850.1  
Group16675: aver|OJI97593.1 asyd|OJJ52103.1  
Group16676: aflagEED54236.1 aory|EIT76097.1  
Group16677: aflagEED54250.1 aory|EIT75995.1  
Group16678: aflagEED54312.1 aory|EIT75936.1

Group16679: aflagEED54323.1 aory|EIT75913.1  
Group16680: aflagEED54335.1 aory|EIT75972.1  
Group16681: aflagEED54342.1 aory|EIT75981.1  
Group16682: aflagEED54346.1 aory|EIT76163.1  
Group16683: aflagEED54359.1 anid|CBF80458.1  
Group16684: aflagEED54360.1 aory|EIT75959.1  
Group16685: aflagEED54368.1 aory|EIT76160.1  
Group16686: aflagEED54382.1 aory|EIT75851.1  
Group16687: aflagEED54383.1 aory|EIT75864.1  
Group16688: aflagEED54393.1 aory|EIT75874.1  
Group16689: aflagEED54395.1 aory|EIT75868.1  
Group16690: aflagEED54402.1 aory|EIT75865.1  
Group16691: atub|QJI90163.1 aluc|OJZ79712.1  
Group16692: aflagEED54406.1 aory|EIT75850.1  
Group16693: aflagEED54419.1 aory|EIT75867.1  
Group16694: aflagEED54475.1 aory|EIT81128.1  
Group16695: aflagEED54497.1 aory|EIT78764.1  
Group16696: aflagEED54541.1 aory|EIT78883.1  
Group16697: aflagEED54551.1 aory|EIT78940.1  
Group16698: aflagEED54613.1 agla|OJJ87531.1  
Group16699: aflagEED54619.1 aory|EIT78953.1  
Group16700: aflagEED54623.1 aory|EIT78938.1  
Group16701: aflagEED54657.1 aory|EIT78842.1  
Group16702: aflagEED54659.1 aory|EIT78928.1  
Group16703: aflagEED54660.1 aory|EIT78804.1  
Group16704: aflagEED54667.1 aory|EIT78909.1  
Group16705: aflagEED54684.1 aory|EIT78878.1  
Group16706: aflagEED54690.1 aory|EIT78847.1  
Group16707: aflagEED54733.1 aory|EIT78778.1  
Group16708: aflagEED54745.1 aory|EIT78855.1  
Group16709: aflagEED54747.1 aory|EIT78793.1  
Group16710: aflagEED54759.1 aory|EIT79403.1  
Group16711: aflagEED54772.1 aory|EIT79397.1  
Group16712: aflagEED54801.1 aory|EIT79344.1  
Group16713: aflagEED54814.1 aory|EIT79375.1  
Group16714: aflagEED54830.1 aory|EIT79371.1  
Group16715: aflagEED54866.1 aory|EIT79414.1  
Group16716: aflagEED54876.1 aory|EIT79354.1  
Group16717: aflagEED54891.1 aory|EIT79452.1

Group16718: aflagEED54895.1 aory|EIT79418.1  
Group16719: aflagEED54903.1 aory|EIT80360.1  
Group16720: aflagEED54910.1 aory|EIT80364.1  
Group16721: aflagEED54914.1 aory|EIT80342.1  
Group16722: aflagEED54925.1 aory|EIT80311.1  
Group16723: aflagEED55008.1 aory|EIT80348.1  
Group16724: aflagEED55022.1 aory|EIT81980.1  
Group16725: aflagEED55029.1 aory|EIT81955.1  
Group16726: aflagEED55038.1 aory|EIT81978.1  
Group16727: aflagEED55041.1 aory|EIT81975.1  
Group16728: aflagEED55043.1 aory|EIT81982.1  
Group16729: aflagEED55066.1 aory|EIT81963.1  
Group16730: aflagEED55069.1 aory|EIT81990.1  
Group16731: aflagEED55104.1 aory|EIT81632.1  
Group16732: aflagEED55114.1 aory|EIT81626.1  
Group16733: aflagEED55124.1 aory|EIT81615.1  
Group16734: aflagEED55136.1 aory|EIT81599.1  
Group16735: aflagEED55139.1 aory|EIT81651.1  
Group16736: aflagEED55142.1 aory|EIT81652.1  
Group16737: aflagEED55151.1 aory|EIT81623.1  
Group16738: aflagEED55169.1 aory|EIT81655.1  
Group16739: aflagEED55173.1 aory|EIT81638.1  
Group16740: aflagEED55195.1 aory|EIT83609.1  
Group16741: aflagEED55196.1 aory|EIT83567.1  
Group16742: aflagEED55227.1 aory|EIT83623.1  
Group16743: aflagEED55234.1 aory|EIT83541.1  
Group16744: aflagEED55255.1 aory|EIT83558.1  
Group16745: aflagEED55260.1 aory|EIT83624.1  
Group16746: aflagEED55284.1 aory|EIT83602.1  
Group16747: aflagEED55295.1 aory|EIT83607.1  
Group16748: aflagEED55296.1 aory|EIT83540.1  
Group16749: aflagEED55299.1 aory|EIT83508.1  
Group16750: aflagEED55307.1 agla|OJJ89029.1  
Group16751: aflagEED55346.1 aory|EIT80905.1  
Group16752: aflagEED55365.1 aory|EIT80930.1  
Group16753: aflagEED55494.1 aory|EIT80907.1  
Group16754: aflagEED55603.1 aory|EIT82698.1  
Group16755: aflagEED55670.1 aory|EIT77098.1  
Group16756: aflagEED55785.1 aory|EIT76539.1

Group16757: aflagEED55787.1 aory|EIT76738.1  
Group16758: aflagEED55813.1 aory|EIT76575.1  
Group16759: aflagEED55852.1 aory|EIT76760.1  
Group16760: aflagEED55872.1 aory|EIT76613.1  
Group16761: asyd|OJJ60516.1 aver|OJI99842.1  
Group16762: aflagEED55905.1 aory|EIT76845.1  
Group16763: aflagEED55942.1 aory|EIT76639.1  
Group16764: aflagEED55968.1 aory|EIT76618.1  
Group16765: aflagEED55972.1 aory|EIT76808.1  
Group16766: aflagEED55974.1 aory|EIT76695.1  
Group16767: aflagEED55977.1 aory|EIT76653.1  
Group16768: aflagEED55995.1 aory|EIT76611.1  
Group16769: aflagEED56026.1 aory|EIT76675.1  
Group16770: aflagEED56030.1 aory|EIT76812.1  
Group16771: aflagEED56032.1 aory|EIT76786.1  
Group16772: aflagEED56075.1 aory|EIT76684.1  
Group16773: aflagEED56084.1 aory|EIT76565.1  
Group16774: aflagEED56124.1 aory|EIT76772.1  
Group16775: aflagEED56168.1 aory|EIT76878.1  
Group16776: aflagEED56197.1 aory|EIT73392.1  
Group16777: aflagEED56202.1 aory|EIT73349.1  
Group16778: aflagEED56209.1 aory|EIT73435.1  
Group16779: aflagEED56305.1 aory|EIT73385.1  
Group16780: aflagEED56316.1 aory|EIT73419.1  
Group16781: aflagEED56317.1 aory|EIT73452.1  
Group16782: aflagEED56324.1 aory|EIT73453.1  
Group16783: aflagEED56334.1 aory|EIT73416.1  
Group16784: aflagEED56343.1 aory|EIT73451.1  
Group16785: aflagEED56356.1 aory|EIT73334.1  
Group16786: aflagEED56358.1 aory|EIT73294.1  
Group16787: aflagEED56381.1 aory|EIT73364.1  
Group16788: aflagEED56382.1 aory|EIT73384.1  
Group16789: aflagEED56409.1 aory|EIT83007.1  
Group16790: aflagEED56417.1 aory|EIT72884.1  
Group16791: aflagEED56428.1 ater|EAU33598.1  
Group16792: aflagEED56448.1 aory|EIT72858.1  
Group16793: aflagEED56462.1 aory|EIT72806.1  
Group16794: aflagEED56532.1 aory|EIT79692.1  
Group16795: aflagEED56537.1 aory|EIT79690.1

Group16796: afa|EED56543.1 aory|EIT79696.1  
Group16797: afa|EED56547.1 aory|EIT79689.1  
Group16798: afa|EED56552.1 ater|EAU37801.1  
Group16799: afa|EED56565.1 aory|EIT79598.1  
Group16800: afa|EED56587.1 aory|EIT79611.1  
Group16801: afa|EED56594.1 aory|EIT79609.1  
Group16802: afa|EED56606.1 aory|EIT79592.1  
Group16803: afa|EED56608.1 aory|EIT79622.1  
Group16804: afa|EED56611.1 aory|EIT79683.1  
Group16805: afa|EED56615.1 aory|EIT79643.1  
Group16806: afa|EED56628.1 aory|EIT79664.1  
Group16807: afa|EED56629.1 aory|EIT79593.1  
Group16808: afa|EED56642.1 aory|EIT79661.1  
Group16809: afa|EED56717.1 aory|EIT73832.1  
Group16810: afa|EED56740.1 aory|EIT73909.1  
Group16811: afa|EED56753.1 aory|EIT73925.1  
Group16812: afa|EED56754.1 aory|EIT73913.1  
Group16813: afa|EED56756.1 aory|EIT73852.1  
Group16814: afa|EED56763.1 aory|EIT73933.1  
Group16815: afa|EED56770.1 aory|EIT73839.1  
Group16816: afa|EED56772.1 aory|EIT73932.1  
Group16817: afa|EED56774.1 aory|EIT73886.1  
Group16818: afa|EED56780.1 aory|EIT73922.1  
Group16819: afa|EED56784.1 aory|EIT73859.1  
Group16820: afa|EED56793.1 aory|EIT73855.1  
Group16821: afa|EED56807.1 aory|EIT73936.1  
Group16822: asyd|OJJ52739.1 aver|OJJ02996.1  
Group16823: afa|EED56826.1 aory|EIT73890.1  
Group16824: afa|EED56838.1 aory|EIT82823.1  
Group16825: afa|EED56844.1 aory|EIT77527.1  
Group16826: afa|EED56854.1 aory|EIT77581.1  
Group16827: afa|EED56863.1 aory|EIT77579.1  
Group16828: afa|EED56866.1 aory|EIT77485.1  
Group16829: afa|EED56867.1 aory|EIT77588.1  
Group16830: afa|EED56887.1 aory|EIT77495.1  
Group16831: afa|EED56892.1 agla|OJJ80498.1  
Group16832: afa|EED56894.1 aory|EIT77453.1  
Group16833: afa|EED56901.1 aory|EIT77452.1  
Group16834: afa|EED56923.1 aory|EIT77539.1

Group16835: aflagEED56924.1 azonOJJ45174.1  
Group16836: aflagEED56931.1 aoryEIT77456.1  
Group16837: aflagEED56942.1 aoryEIT77572.1  
Group16838: aflagEED57037.1 aoryEIT82278.1  
Group16839: aflagEED57041.1 aoryEIT82296.1  
Group16840: aflagEED57058.1 aoryEIT82259.1  
Group16841: aflagEED57081.1 aoryEIT82281.1  
Group16842: aflagEED57094.1 aoryEIT82300.1  
Group16843: aflagEED57114.1 aoryEIT74124.1  
Group16844: aflagEED57116.1 aoryEIT74004.1  
Group16845: aflagEED57123.1 aoryEIT74023.1  
Group16846: aflagEED57161.1 aoryEIT74072.1  
Group16847: aflagEED57208.1 aoryEIT73966.1  
Group16848: aflagEED57213.1 aoryEIT74044.1  
Group16849: aflagEED57226.1 aoryEIT74142.1  
Group16850: aflagEED57239.1 aoryEIT74063.1  
Group16851: aflagEED57244.1 aoryEIT74131.1  
Group16852: aflagEED57258.1 aoryEIT74100.1  
Group16853: aflagEED57264.1 aoryEIT74070.1  
Group16854: aflagEED57267.1 aoryEIT73962.1  
Group16855: aflagEED57268.1 aoryEIT74068.1  
Group16856: aflagEED57272.1 aoryEIT73983.1  
Group16857: aflagEED57300.1 aoryEIT74061.1  
Group16858: aflagEED57305.1 aoryEIT73996.1  
Group16859: aflagEED57332.1 aoryEIT73986.1  
Group16860: aflagEED57343.1 aoryEIT80157.1  
Group16861: aflagEED57360.1 aoryEIT80119.1  
Group16862: aflagEED57414.1 aoryEIT80154.1  
Group16863: aflagEED57455.1 aoryEIT80145.1  
Group16864: aflagEED57471.1 aoryEIT80144.1  
Group16865: aflagEED57482.1 aoryEIT80087.1  
Group16866: aflagEED57486.1 aoryEIT81878.1  
Group16867: aflagEED57490.1 aoryEIT81879.1  
Group16868: aflagEED57492.1 aoryEIT81881.1  
Group16869: aflagEED57514.1 alucOJZ80818.1  
Group16870: aflagEED57540.1 aoryEIT81859.1  
Group16871: aflagEED57564.1 aoryEIT81856.1  
Group16872: aflagEED57569.1 aoryEIT82928.1  
Group16873: aflagEED57570.1 aoryEIT82980.1

Group16874: aflagEED57573.1 aory|EIT82982.1  
Group16875: aflagEED57580.1 aory|EIT82979.1  
Group16876: aflagEED57617.1 aory|EIT82994.1  
Group16877: aflagEED57618.1 aory|EIT82933.1  
Group16878: aflagEED57642.1 aory|EIT79879.1  
Group16879: aflagEED57675.1 aory|EIT79932.1  
Group16880: aflagEED57676.1 aory|EIT79883.1  
Group16881: aflagEED57711.1 aory|EIT79912.1  
Group16882: aflagEED57801.1 aory|EIT81049.1  
Group16883: aflagEED57825.1 aory|EIT81114.1  
Group16884: aflagEED57856.1 aory|EIT81121.1  
Group16885: aflagEED57863.1 awen|OJJ37046.1  
Group16886: aflagEED57869.1 aory|EIT81033.1  
Group16887: aflagEED57874.1 aory|EIT83268.1  
Group16888: aflagEED57882.1 aory|EIT83267.1  
Group16889: aflagEED57888.1 aory|EIT83274.1  
Group16890: aflagEED57889.1 aory|EIT82738.1  
Group16891: aflagEED57908.1 aory|EIT82354.1  
Group16892: aflagEED57911.1 aory|EIT82321.1  
Group16893: aflagEED57917.1 aory|EIT82337.1  
Group16894: aflagEED57939.1 aory|EIT82361.1  
Group16895: aflagEED58000.1 aory|EIT79807.1  
Group16896: aflagEED58005.1 aory|EIT79733.1  
Group16897: aflagEED58012.1 aory|EIT79792.1  
Group16898: aflagEED58035.1 aory|EIT79740.1  
Group16899: aflagEED58079.1 aory|EIT79124.1  
Group16900: aflagEED58086.1 aory|EIT79108.1  
Group16901: aflagEED58159.1 aory|EIT79106.1  
Group16902: afum|EAL84781.1 aver|OJJ00745.1  
Group16903: afum|EAL84868.1 anid|CBF87203.1  
Group16904: afum|EAL84981.1 anig|EHA23978.1  
Group16905: afum|EAL85103.1 ater|EAU36159.1  
Group16906: afum|EAL85126.1 aory|EIT72581.1  
Group16907: afum|EAL85340.1 aluc|OJZ80252.1  
Group16908: afum|EAL85380.1 aluc|OJZ79828.1  
Group16909: afum|EAL85388.1 akaw|GAA87897.1  
Group16910: agla|OJJ83629.1 awen|OJJ31324.1  
Group16911: afum|EAL85422.1 azon|OJJ50177.1  
Group16912: afum|EAL86277.1 ater|EAU32476.1



Group16913: afum|EAL86402.1 anig|EHA24468.1  
Group16914: afum|EAL86442.1 aory|EIT73553.1  
Group16915: afum|EAL86536.1 akaw|GAA88275.1  
Group16916: afum|EAL86544.1 ater|EAU36563.1  
Group16917: afum|EAL86721.1 aory|EIT80420.1  
Group16918: afum|EAL86745.1 anig|EHA21857.1  
Group16919: afum|EAL87133.1 anig|EHA23472.1  
Group16920: asyd|OJJ62933.1 aver|OJI98057.1  
Group16921: afum|EAL87783.1 anig|EHA21824.1  
Group16922: afum|EAL87805.1 akaw|GAA83754.1  
Group16923: afum|EAL88866.1 agla|OJJ85627.1  
Group16924: afum|EAL89008.2 aver|OJJ08172.1  
Group16925: afum|EAL89014.2 aluc|OJZ90828.1  
Group16926: asyd|OJJ65079.1 aver|OJI99204.1  
Group16927: afum|EAL91123.1 anid|CBF73643.1  
Group16928: afum|EAL91129.1 agla|OJJ83276.1  
Group16929: afum|EAL91130.1 aluc|OJZ80471.1  
Group16930: azon|OJJ51754.1 aver|OJJ08137.1  
Group16931: afum|EAL91910.1 ater|EAU29608.1  
Group16932: afum|EAL92628.1 asyd|OJJ60378.1  
Group16933: afum|EAL92630.1 aver|OJJ05865.1  
Group16934: anig|EHA25785.1 awen|OJJ34652.1  
Group16935: afum|EAL94099.1 ater|EAU32776.1  
Group16936: agla|OJJ78462.1 awen|OJJ30562.1  
Group16937: agla|OJJ78483.1 awen|OJJ31338.1  
Group16938: agla|OJJ78563.1 azon|OJJ42288.1  
Group16939: agla|OJJ78649.1 awen|OJJ34647.1  
Group16940: aver|OJI97953.1 asyd|OJJ63007.1  
Group16941: agla|OJJ78784.1 awen|OJJ38720.1  
Group16942: agla|OJJ78808.1 ater|EAU36741.1  
Group16943: agla|OJJ78811.1 asyd|OJJ61464.1  
Group16944: agla|OJJ78823.1 atub|OJI91290.1  
Group16945: asyd|OJJ55466.1 aver|OJJ04320.1  
Group16946: agla|OJJ79168.1 atub|OJI81723.1  
Group16947: agla|OJJ79255.1 ater|EAU31055.1  
Group16948: agla|OJJ79268.1 awen|OJJ36379.1  
Group16949: agla|OJJ79273.1 awen|OJJ29898.1  
Group16950: agla|OJJ79304.1 asyd|OJJ61694.1  
Group16951: agla|OJJ79355.1 azon|OJJ41992.1

Group16952: agla|OJJ79395.1 awen|OJJ31596.1  
Group16953: agla|OJJ79474.1 awen|OJJ41515.1  
Group16954: agla|OJJ79764.1 awen|OJJ30388.1  
Group16955: agla|OJJ79867.1 anig|EHA18423.1  
Group16956: agla|OJJ79970.1 awen|OJJ40935.1  
Group16957: aluc|OJZ90633.1 atub|OJI82060.1  
Group16958: agla|OJJ80047.1 awen|OJJ39631.1  
Group16959: aver|OJJ07233.1 ater|EAU36848.1  
Group16960: agla|OJJ80211.1 asyd|OJJ54600.1  
Group16961: agla|OJJ80324.1 awen|OJJ32723.1  
Group16962: agla|OJJ80392.1 awen|OJJ29731.1  
Group16963: agla|OJJ80516.1 ater|EAU33706.1  
Group16964: agla|OJJ80551.1 ater|EAU33818.1  
Group16965: agla|OJJ80676.1 aory|EIT82796.1  
Group16966: agla|OJJ80681.1 aory|EIT77045.1  
Group16967: agla|OJJ80807.1 awen|OJJ37979.1  
Group16968: agla|OJJ80832.1 aver|OJJ08250.1  
Group16969: agla|OJJ80839.1 asyd|OJJ62682.1  
Group16970: agla|OJJ81000.1 asyd|OJJ53485.1  
Group16971: agla|OJJ81001.1 asyd|OJJ53432.1  
Group16972: agla|OJJ81473.1 azon|OJJ42205.1  
Group16973: agla|OJJ81559.1 aver|OJJ07189.1  
Group16974: agla|OJJ81563.1 aver|OJI98884.1  
Group16975: agla|OJJ81741.1 aory|EIT80044.1  
Group16976: agla|OJJ81751.1 awen|OJJ37976.1  
Group16977: agla|OJJ81929.1 asyd|OJJ60095.1  
Group16978: agla|OJJ82214.1 awen|OJJ31963.1  
Group16979: agla|OJJ82329.1 ater|EAU32947.1  
Group16980: agla|OJJ82378.1 atub|OJI87465.1  
Group16981: agla|OJJ82458.1 anig|EHA24122.1  
Group16982: agla|OJJ82524.1 awen|OJJ36131.1  
Group16983: agla|OJJ82593.1 atub|OJI83010.1  
Group16984: agla|OJJ82599.1 asyd|OJJ56418.1  
Group16985: agla|OJJ82721.1 awen|OJJ31413.1  
Group16986: agla|OJJ82726.1 awen|OJJ31409.1  
Group16987: agla|OJJ82734.1 awen|OJJ31403.1  
Group16988: agla|OJJ82825.1 azon|OJJ45349.1  
Group16989: agla|OJJ83024.1 azon|OJJ48352.1  
Group16990: agla|OJJ83077.1 awen|OJJ36193.1

Group16991: agla|OJJ83080.1 azon|OJJ42083.1  
Group16992: agla|OJJ83429.1 aver|OJI96720.1  
Group16993: agla|OJJ83430.1 aver|OJI96721.1  
Group16994: agla|OJJ83547.1 aory|EIT72973.1  
Group16995: agla|OJJ83626.1 ater|EAU29764.1  
Group16996: agla|OJJ83631.1 azon|OJJ43580.1  
Group16997: agla|OJJ83645.1 ater|EAU32793.1  
Group16998: agla|OJJ83649.1 awen|OJJ40565.1  
Group16999: aver|OJJ04762.1 asyd|OJJ55818.1  
Group17000: agla|OJJ83708.1 awen|OJJ32719.1  
Group17001: agla|OJJ83734.1 anid|CBF87185.1  
Group17002: agla|OJJ83898.1 ater|EAU37775.1  
Group17003: agla|OJJ83934.1 ater|EAU34916.1  
Group17004: agla|OJJ83942.1 anig|EHA22258.1  
Group17005: agla|OJJ84017.1 ater|EAU30204.1  
Group17006: agla|OJJ84265.1 awen|OJJ35916.1  
Group17007: agla|OJJ84357.1 anid|CBF76139.1  
Group17008: agla|OJJ84466.1 awen|OJJ38772.1  
Group17009: agla|OJJ84474.1 awen|OJJ32544.1  
Group17010: agla|OJJ84475.1 awen|OJJ32545.1  
Group17011: asyd|OJJ52391.1 aver|OJJ01932.1  
Group17012: agla|OJJ84753.1 awen|OJJ37025.1  
Group17013: agla|OJJ85026.1 awen|OJJ31416.1  
Group17014: asyd|OJJ64578.1 aver|OJI98675.1  
Group17015: agla|OJJ85120.1 aluc|OJZ80067.1  
Group17016: aver|OJJ01266.1 asyd|OJJ58658.1  
Group17017: agla|OJJ85333.1 awen|OJJ31554.1  
Group17018: agla|OJJ85395.1 ater|EAU31593.1  
Group17019: agla|OJJ85430.1 awen|OJJ30931.1  
Group17020: agla|OJJ85433.1 awen|OJJ29698.1  
Group17021: agla|OJJ85452.1 asyd|OJJ52561.1  
Group17022: agla|OJJ85456.1 aluc|OJZ80472.1  
Group17023: agla|OJJ85641.1 azon|OJJ42208.1  
Group17024: agla|OJJ85642.1 azon|OJJ42206.1  
Group17025: agla|OJJ85920.1 awen|OJJ37065.1  
Group17026: agla|OJJ86108.1 ater|EAU30188.1  
Group17027: agla|OJJ86351.1 aver|OJJ07137.1  
Group17028: agla|OJJ86397.1 awen|OJJ39468.1  
Group17029: agla|OJJ86417.1 aory|EIT72727.1

Group17030: agla|OJJ86477.1 awen|OJJ39542.1  
Group17031: agla|OJJ86505.1 azon|OJJ46434.1  
Group17032: agla|OJJ86570.1 awen|OJJ38740.1  
Group17033: agla|OJJ86663.1 awen|OJJ33830.1  
Group17034: agla|OJJ86804.1 awen|OJJ38958.1  
Group17035: agla|OJJ86865.1 awen|OJJ38037.1  
Group17036: agla|OJJ86883.1 awen|OJJ33366.1  
Group17037: agla|OJJ86985.1 anid|CBF80063.1  
Group17038: agla|OJJ87308.1 awen|OJJ41239.1  
Group17039: aver|OJJ01914.1 asyd|OJJ56226.1  
Group17040: agla|OJJ87732.1 awen|OJJ40100.1  
Group17041: agla|OJJ87746.1 awen|OJJ34884.1  
Group17042: agla|OJJ87925.1 azon|OJJ46449.1  
Group17043: agla|OJJ88091.1 atub|OJI80497.1  
Group17044: asyd|OJJ58702.1 aver|OJJ01314.1  
Group17045: asyd|OJJ57605.1 aver|OJJ05578.1  
Group17046: agla|OJJ88604.1 ater|EAU29842.1  
Group17047: agla|OJJ88744.1 azon|OJJ50322.1  
Group17048: agla|OJJ88992.1 awen|OJJ40801.1  
Group17049: agla|OJJ89072.1 anig|EHA19731.1  
Group17050: agla|OJJ89197.1 asyd|OJJ52441.1  
Group17051: agla|OJJ89219.1 awen|OJJ30972.1  
Group17052: agla|OJJ89307.1 ater|EAU31833.1  
Group17053: asyd|OJJ60961.1 aver|OJJ00286.1  
Group17054: akaw|BAL04875.1 aluc|OJZ79480.1  
Group17055: akaw|BAL04877.1 aory|AFM82521.1  
Group17056: akaw|BAL04880.1 azon|OJJ41981.1  
Group17057: akaw|BAL04885.1 azon|OJJ41975.1  
Group17058: akaw|GAA82072.1 aluc|OJZ92110.1  
Group17059: akaw|GAA82111.1 aluc|OJZ92065.1  
Group17060: akaw|GAA82141.1 aluc|OJZ92030.1  
Group17061: akaw|GAA82415.1 atub|OJI86162.1  
Group17062: akaw|GAA82583.1 aluc|OJZ87120.1  
Group17063: akaw|GAA82587.1 aluc|OJZ87126.1  
Group17064: akaw|GAA82791.1 aluc|OJZ87350.1  
Group17065: akaw|GAA82792.1 aluc|OJZ87351.1  
Group17066: akaw|GAA82881.1 aluc|OJZ87449.1  
Group17067: akaw|GAA82937.1 aluc|OJZ87514.1  
Group17068: akaw|GAA83048.1 atub|OJI91179.1

Group17069: aver|OJJ03449.1 asyd|OJJ62612.1  
Group17070: akaw|GAA83093.1 aluc|OJZ88640.1  
Group17071: akaw|GAA83527.1 atub|OJI86898.1  
Group17072: akaw|GAA83592.1 aluc|OJZ92405.1  
Group17073: akaw|GAA83607.1 atub|OJI86816.1  
Group17074: akaw|GAA83676.1 anig|EHA24763.1  
Group17075: akaw|GAA83680.1 anig|EHA25617.1  
Group17076: akaw|GAA83825.1 aluc|OJZ90893.1  
Group17077: akaw|GAA83964.1 aluc|OJZ80853.1  
Group17078: akaw|GAA83967.1 aluc|OJZ80856.1  
Group17079: akaw|GAA83968.1 aluc|OJZ80860.1  
Group17080: akaw|GAA84022.1 aluc|OJZ80926.1  
Group17081: akaw|GAA84224.1 aluc|OJZ88904.1  
Group17082: akaw|GAA84272.1 aluc|OJZ88965.1  
Group17083: akaw|GAA84441.1 atub|OJI85633.1  
Group17084: akaw|GAA84482.1 aluc|OJZ89202.1  
Group17085: akaw|GAA84590.1 aluc|OJZ89335.1  
Group17086: akaw|GAA84678.1 aluc|OJZ87011.1  
Group17087: akaw|GAA84730.1 aluc|OJZ86956.1  
Group17088: akaw|GAA84848.1 aluc|OJZ86823.1  
Group17089: akaw|GAA84902.1 anig|EHA21912.1  
Group17090: akaw|GAA85223.1 atub|OJI82001.1  
Group17091: akaw|GAA85297.1 aluc|OJZ90657.1  
Group17092: akaw|GAA85335.1 aluc|OJZ90698.1  
Group17093: akaw|GAA85436.1 aluc|OJZ83340.1  
Group17094: akaw|GAA85709.1 aluc|OJZ91394.1  
Group17095: akaw|GAA85756.1 aluc|OJZ91344.1  
Group17096: akaw|GAA85809.1 atub|OJI83280.1  
Group17097: akaw|GAA85842.1 aluc|OJZ91257.1  
Group17098: akaw|GAA85844.1 aluc|OJZ91255.1  
Group17099: akaw|GAA85848.1 aluc|OJZ91251.1  
Group17100: akaw|GAA86082.1 atub|OJI81742.1  
Group17101: asyd|OJJ62465.1 aver|OJI96600.1  
Group17102: akaw|GAA86258.1 aluc|OJZ90516.1  
Group17103: akaw|GAA86460.1 atub|OJI80596.1  
Group17104: akaw|GAA86614.1 aluc|OJZ85166.1  
Group17105: akaw|GAA86619.1 aluc|OJZ85173.1  
Group17106: akaw|GAA86636.1 aluc|OJZ85193.1  
Group17107: akaw|GAA86991.1 aluc|OJZ84469.1

Group17108: akaw|GAA87108.1 aluc|OJZ84330.1  
Group17109: akaw|GAA87398.1 aluc|OJZ89614.1  
Group17110: akaw|GAA87494.1 aluc|OJZ88028.1  
Group17111: akaw|GAA87615.1 aluc|OJZ85236.1  
Group17112: akaw|GAA87708.1 aluc|OJZ85331.1  
Group17113: akaw|GAA87743.1 atub|OJI80194.1  
Group17114: akaw|GAA87782.1 anig|EHA25596.1  
Group17115: akaw|GAA87797.1 aluc|OJZ85432.1  
Group17116: akaw|GAA88008.1 atub|OJI91466.1  
Group17117: akaw|GAA88137.1 aluc|OJZ81408.1  
Group17118: aluc|OJZ82372.1 atub|OJI88070.1  
Group17119: akaw|GAA88449.1 aluc|OJZ88336.1  
Group17120: akaw|GAA88462.1 asyd|OJJ54534.1  
Group17121: akaw|GAA88579.1 aluc|OJZ88483.1  
Group17122: akaw|GAA88580.1 aluc|OJZ88484.1  
Group17123: akaw|GAA88582.1 aluc|OJZ88486.1  
Group17124: akaw|GAA89000.1 aluc|OJZ80236.1  
Group17125: akaw|GAA89004.1 aluc|OJZ88833.1  
Group17126: akaw|GAA89009.1 aluc|OJZ79999.1  
Group17127: akaw|GAA89020.1 aluc|OJZ80584.1  
Group17128: akaw|GAA89137.1 aluc|OJZ81699.1  
Group17129: akaw|GAA89214.1 aluc|OJZ81615.1  
Group17130: akaw|GAA89320.1 aluc|OJZ86350.1  
Group17131: akaw|GAA89353.1 atub|OJI84227.1  
Group17132: akaw|GAA89383.1 aluc|OJZ86276.1  
Group17133: akaw|GAA89469.1 aluc|OJZ88195.1  
Group17134: akaw|GAA89524.1 aluc|OJZ88128.1  
Group17135: akaw|GAA89768.1 aluc|OJZ80615.1  
Group17136: akaw|GAA89769.1 aluc|OJZ80614.1  
Group17137: akaw|GAA89770.1 aluc|OJZ80613.1  
Group17138: akaw|GAA89821.1 aluc|OJZ81869.1  
Group17139: akaw|GAA89874.1 aluc|OJZ81805.1  
Group17140: akaw|GAA89979.1 atub|OJI90361.1  
Group17141: akaw|GAA90140.1 aluc|OJZ83207.1  
Group17142: akaw|GAA90180.1 aluc|OJZ83170.1  
Group17143: akaw|GAA90181.1 aluc|OJZ83169.1  
Group17144: akaw|GAA90263.1 atub|OJI87868.1  
Group17145: akaw|GAA90296.1 aluc|OJZ83041.1  
Group17146: akaw|GAA90302.1 aluc|OJZ83035.1

Group17147: akaw|GAA90313.1 aluc|OJZ85926.1  
Group17148: akaw|GAA90338.1 aluc|OJZ85894.1  
Group17149: akaw|GAA90429.1 aluc|OJZ85800.1  
Group17150: akaw|GAA90689.1 aluc|OJZ84665.1  
Group17151: aory|EIT79695.1 aver|OJJ07425.1  
Group17152: akaw|GAA90891.1 aluc|OJZ82937.1  
Group17153: akaw|GAA90892.1 aluc|OJZ82938.1  
Group17154: akaw|GAA90901.1 aluc|OJZ82925.1  
Group17155: akaw|GAA91087.1 aluc|OJZ87904.1  
Group17156: akaw|GAA91091.1 aluc|OJZ87911.1  
Group17157: akaw|GAA91211.1 aluc|OJZ82860.1  
Group17158: akaw|GAA91214.1 aluc|OJZ82857.1  
Group17159: akaw|GAA91361.1 aluc|OJZ84810.1  
Group17160: akaw|GAA91450.1 aluc|OJZ84714.1  
Group17161: akaw|GAA91843.1 atub|OJI84613.1  
Group17162: akaw|GAA91981.1 aluc|OJZ82632.1  
Group17163: akaw|GAA92047.1 aluc|OJZ92918.1  
Group17164: akaw|GAA92048.1 aory|EIT80479.1  
Group17165: akaw|GAA92135.1 aluc|OJZ83588.1  
Group17166: akaw|GAA92173.1 atub|OJI79378.1  
Group17167: akaw|GAA92339.1 aluc|OJZ80455.1  
Group17168: akaw|GAA92343.1 aluc|OJZ79595.1  
Group17169: akaw|GAA92355.1 aluc|OJZ80395.1  
Group17170: akaw|GAA92363.1 aluc|OJZ79881.1  
Group17171: akaw|GAA92365.1 asyd|OJJ52301.1  
Group17172: akaw|GAA92369.1 aluc|OJZ79660.1  
Group17173: akaw|GAA92387.1 aluc|OJZ83247.1  
Group17174: akaw|GAA92395.1 aluc|OJZ83255.1  
Group17175: akaw|GAA92482.1 aluc|OJZ91494.1  
Group17176: akaw|GAA92483.1 aluc|OJZ91495.1  
Group17177: akaw|GAA92493.1 aluc|OJZ91505.1  
Group17178: akaw|GAA92559.1 atub|OJI84698.1  
Group17179: akaw|GAA92572.1 aluc|OJZ82583.1  
Group17180: akaw|GAA92607.1 aluc|OJZ80064.1  
Group17181: akaw|GAA92618.1 aluc|OJZ79584.1  
Group17182: akaw|GAA92620.1 aluc|OJZ79534.1  
Group17183: akaw|GAA92622.1 aluc|OJZ80497.1  
Group17184: akaw|GAA92623.1 aluc|OJZ80438.1  
Group17185: akaw|GAA92624.1 aluc|OJZ79837.1

Group17186: akaw|GAA92632.1 aluc|OJZ79472.1  
Group17187: akaw|GAA92635.1 aluc|OJZ79739.1  
Group17188: akaw|GAA92637.1 ater|EAU34939.1  
Group17189: akaw|GAA92659.1 azon|OJJ42651.1  
Group17190: akaw|GAA92699.1 aluc|OJZ88738.1  
Group17191: akaw|GAA92717.1 atub|OJI91334.1  
Group17192: akaw|GAA92813.1 aluc|OJZ88736.1  
Group17193: akaw|GAA92843.1 ater|EAU35394.1  
Group17194: akaw|GAA92851.1 atub|OJI87464.1  
Group17195: akaw|GAA92854.1 awen|OJJ30191.1  
Group17196: akaw|GAA92931.1 aluc|OJZ82524.1  
Group17197: akaw|GAA92949.1 aluc|OJZ88806.1  
Group17198: akaw|GAA92966.1 aluc|OJZ79870.1  
Group17199: akaw|GAA92976.1 atub|OJI89951.1  
Group17200: akaw|GAA93027.1 aluc|OJZ80440.1  
Group17201: akaw|GAA93058.1 aluc|OJZ80491.1  
Group17202: akaw|GAA93061.1 aluc|OJZ80495.1  
Group17203: akaw|GAA93066.1 aluc|OJZ80435.1  
Group17204: akaw|GAA93081.1 aluc|OJZ80227.1  
Group17205: akaw|GAA93084.1 aluc|OJZ80481.1  
Group17206: aluc|OJZ80237.1 asyd|OJJ56760.1  
Group17207: akaw|GAA93133.1 aluc|OJZ80250.1  
Group17208: akaw|GAA93136.1 aluc|OJZ80225.1  
Group17209: akaw|GAA93138.1 aluc|OJZ80221.1  
Group17210: akaw|GAA93139.1 aluc|OJZ79834.1  
Group17211: akaw|GAA93152.1 aluc|OJZ80002.1  
Group17212: akaw|GAA93163.1 aluc|OJZ80436.1  
Group17213: akaw|GAA93166.1 aluc|OJZ83025.1  
Group17214: akaw|GAA93167.1 aluc|OJZ83026.1  
Group17215: akaw|GAA93169.1 aluc|OJZ83028.1  
Group17216: akaw|GAA93202.1 aluc|OJZ79705.1  
Group17217: akaw|GAA93210.1 aluc|OJZ79489.1  
Group17218: akaw|GAA93225.1 anig|EHA21869.1  
Group17219: akaw|GAA93236.1 aluc|OJZ80346.1  
Group17220: akaw|GAA93254.1 aluc|OJZ79904.1  
Group17221: akaw|GAA93260.1 aluc|OJZ80403.1  
Group17222: akaw|GAA93264.1 aluc|OJZ79570.1  
Group17223: akaw|GAA93266.1 aluc|OJZ80063.1  
Group17224: akaw|GAA93273.1 aluc|OJZ79674.1



Group17225: akaw|GAA93281.1 aluc|OJZ79576.1  
Group17226: akaw|GAA93287.1 aluc|OJZ90157.1  
Group17227: akaw|GAA93297.1 anig|EHA25614.1  
Group17228: akaw|GAA93298.1 anig|EHA25613.1  
Group17229: akaw|GAA93303.1 aluc|OJZ81120.1  
Group17230: akaw|GAA93304.1 aluc|OJZ80444.1  
Group17231: akaw|GAA93305.1 aluc|OJZ80446.1  
Group17232: akaw|GAA93313.1 aluc|OJZ80123.1  
Group17233: akaw|GAA93314.1 aluc|OJZ80124.1  
Group17234: akaw|GAA93322.1 aluc|OJZ79531.1  
Group17235: akaw|GAA93336.1 aluc|OJZ79562.1  
Group17236: akaw|GAA93337.1 aluc|OJZ79563.1  
Group17237: akaw|GAA93347.1 aluc|OJZ79737.1  
Group17238: akaw|GAA93348.1 aluc|OJZ79736.1  
Group17239: aluc|OJZ79536.1 asyd|OJJ52063.1  
Group17240: aluc|OJZ79537.1 atub|OJI80384.1  
Group17241: aluc|OJZ79827.1 anig|EHA26122.1  
Group17242: aluc|OJZ79888.1 atub|OJI80540.1  
Group17243: aluc|OJZ79918.1 asyd|OJJ51943.1  
Group17244: aluc|OJZ79971.1 anig|EHA20893.1  
Group17245: aluc|OJZ80146.1 atub|OJI85103.1  
Group17246: aluc|OJZ80461.1 atub|OJI87466.1  
Group17247: aluc|OJZ80462.1 atub|OJI87467.1  
Group17248: aluc|OJZ80590.1 anig|EHA25074.1  
Group17249: aluc|OJZ80799.1 anig|EHA27235.1  
Group17250: aluc|OJZ80840.1 atub|OJI82727.1  
Group17251: aluc|OJZ80907.1 atub|OJI82671.1  
Group17252: aluc|OJZ80910.1 atub|OJI82669.1  
Group17253: aluc|OJZ81012.1 atub|OJI82572.1  
Group17254: aluc|OJZ81085.1 atub|OJI82499.1  
Group17255: aluc|OJZ81187.1 atub|OJI91383.1  
Group17256: aluc|OJZ81223.1 atub|OJI91421.1  
Group17257: aver|OJJ05989.1 asyd|OJJ56734.1  
Group17258: anid|CBF79121.1 atub|OJI85465.1  
Group17259: aluc|OJZ81652.1 anid|CBF83094.1  
Group17260: aluc|OJZ81706.1 atub|OJI88477.1  
Group17261: aluc|OJZ81781.1 atub|OJI84354.1  
Group17262: aluc|OJZ81790.1 anig|EHA22425.1  
Group17263: aluc|OJZ81792.1 anig|EHA22423.1

Group17264: aluc|OJZ81827.1 atub|OJI84397.1  
Group17265: aluc|OJZ81914.1 atub|OJI84466.1  
Group17266: aluc|OJZ81933.1 anig|EHA22315.1  
Group17267: aluc|OJZ82100.1 atub|OJI88337.1  
Group17268: aluc|OJZ82192.1 atub|OJI88243.1  
Group17269: aluc|OJZ82212.1 anig|EHA28528.1  
Group17270: aluc|OJZ82275.1 atub|OJI88164.1  
Group17271: aluc|OJZ82325.1 atub|OJI88115.1  
Group17272: aluc|OJZ82356.1 atub|OJI88084.1  
Group17273: aluc|OJZ82452.1 atub|OJI87988.1  
Group17274: aluc|OJZ82511.1 anig|EHA20907.1  
Group17275: asyd|OJJ61545.1 aver|OJJ00872.1  
Group17276: aluc|OJZ82587.1 atub|OJI88822.1  
Group17277: aluc|OJZ82595.1 atub|OJI88830.1  
Group17278: aluc|OJZ82600.1 atub|OJI88836.1  
Group17279: aluc|OJZ82639.1 anig|EHA27431.1  
Group17280: aluc|OJZ82650.1 atub|OJI88882.1  
Group17281: aluc|OJZ82669.1 atub|OJI88904.1  
Group17282: aluc|OJZ82733.1 atub|OJI88966.1  
Group17283: aluc|OJZ82761.1 atub|OJI88994.1  
Group17284: aluc|OJZ82855.1 atub|OJI89085.1  
Group17285: aluc|OJZ82933.1 atub|OJI89162.1  
Group17286: aluc|OJZ83020.1 anid|CBF81988.1  
Group17287: aluc|OJZ83032.1 atub|OJI87916.1  
Group17288: aluc|OJZ83049.1 atub|OJI87899.1  
Group17289: aluc|OJZ83050.1 atub|OJI87898.1  
Group17290: aluc|OJZ83143.1 anig|EHA23288.1  
Group17291: aluc|OJZ83209.1 atub|OJI87728.1  
Group17292: aluc|OJZ83437.1 atub|OJI82328.1  
Group17293: aluc|OJZ83507.1 atub|OJI82401.1  
Group17294: aluc|OJZ83529.1 atub|OJI82419.1  
Group17295: aluc|OJZ83547.1 atub|OJI82438.1  
Group17296: aluc|OJZ83563.1 atub|OJI82453.1  
Group17297: aluc|OJZ83578.1 atub|OJI89953.1  
Group17298: aluc|OJZ83586.1 atub|OJI89959.1  
Group17299: aluc|OJZ83636.1 atub|OJI90005.1  
Group17300: aluc|OJZ83679.1 atub|OJI90050.1  
Group17301: aluc|OJZ83792.1 atub|OJI90160.1  
Group17302: aluc|OJZ83973.1 atub|OJI90346.1

Group17303: aluc|OJZ83990.1 anig|EHA19115.1  
Group17304: aluc|OJZ84015.1 atub|OJI90386.1  
Group17305: aluc|OJZ84087.1 atub|OJI90459.1  
Group17306: aluc|OJZ84096.1 atub|OJI90469.1  
Group17307: asyd|OJJ55756.1 aver|OJJ06841.1  
Group17308: aluc|OJZ84310.1 atub|OJI89758.1  
Group17309: aluc|OJZ84544.1 atub|OJI89536.1  
Group17310: aluc|OJZ84614.1 atub|OJI89467.1  
Group17311: aluc|OJZ84639.1 atub|OJI89441.1  
Group17312: aluc|OJZ84670.1 atub|OJI89410.1  
Group17313: aluc|OJZ84696.1 atub|OJI89386.1  
Group17314: aluc|OJZ84710.1 atub|OJI89373.1  
Group17315: aluc|OJZ84743.1 atub|OJI89338.1  
Group17316: aluc|OJZ84879.1 anig|EHA25108.1  
Group17317: aluc|OJZ84906.1 atub|OJI80691.1  
Group17318: aluc|OJZ84909.1 atub|OJI80689.1  
Group17319: aluc|OJZ85241.1 atub|OJI80334.1  
Group17320: aluc|OJZ85334.1 atub|OJI80239.1  
Group17321: aluc|OJZ85360.1 atub|OJI80211.1  
Group17322: aluc|OJZ85454.1 atub|OJI80110.1  
Group17323: aluc|OJZ85486.1 atub|OJI80078.1  
Group17324: aluc|OJZ85493.1 atub|OJI80072.1  
Group17325: aver|OJJ05941.1 asyd|OJJ53624.1  
Group17326: aluc|OJZ85557.1 atub|OJI79348.1  
Group17327: aluc|OJZ85638.1 atub|OJI79429.1  
Group17328: aluc|OJZ85669.1 atub|OJI79461.1  
Group17329: aluc|OJZ85697.1 atub|OJI79486.1  
Group17330: aluc|OJZ85700.1 atub|OJI79490.1  
Group17331: aluc|OJZ85710.1 atub|OJI79501.1  
Group17332: aluc|OJZ85749.1 atub|OJI79533.1  
Group17333: aluc|OJZ85923.1 atub|OJI79713.1  
Group17334: aluc|OJZ85936.1 atub|OJI79725.1  
Group17335: aluc|OJZ85987.1 atub|OJI79776.1  
Group17336: aluc|OJZ86077.1 atub|OJI79874.1  
Group17337: aluc|OJZ86084.1 atub|OJI79880.1  
Group17338: aluc|OJZ86264.1 atub|OJI84279.1  
Group17339: aluc|OJZ86332.1 atub|OJI84203.1  
Group17340: aluc|OJZ86341.1 atub|OJI84195.1  
Group17341: aluc|OJZ86388.1 atub|OJI84145.1

Group17342: aluc|OJZ86389.1 anig|EHA21508.1  
Group17343: aluc|OJZ86433.1 atub|OJI84099.1  
Group17344: aluc|OJZ86434.1 atub|OJI84097.1  
Group17345: aluc|OJZ86458.1 atub|OJI84069.1  
Group17346: aluc|OJZ86540.1 atub|OJI83983.1  
Group17347: aluc|OJZ86560.1 atub|OJI83961.1  
Group17348: aluc|OJZ86599.1 atub|OJI83924.1  
Group17349: aluc|OJZ86737.1 atub|OJI83791.1  
Group17350: aluc|OJZ86997.1 atub|OJI83522.1  
Group17351: aluc|OJZ87068.1 atub|OJI81568.1  
Group17352: aluc|OJZ87098.1 atub|OJI81540.1  
Group17353: aluc|OJZ87242.1 atub|OJI81400.1  
Group17354: aluc|OJZ87345.1 atub|OJI81299.1  
Group17355: aluc|OJZ87375.1 atub|OJI81271.1  
Group17356: aluc|OJZ87414.1 atub|OJI81234.1  
Group17357: aluc|OJZ87415.1 atub|OJI81233.1  
Group17358: aluc|OJZ87416.1 atub|OJI81232.1  
Group17359: aluc|OJZ87494.1 atub|OJI81155.1  
Group17360: aluc|OJZ87566.1 anig|EHA20768.1  
Group17361: aluc|OJZ87616.1 anig|EHA20813.1  
Group17362: aluc|OJZ87633.1 atub|OJI81016.1  
Group17363: aluc|OJZ87783.1 atub|OJI80864.1  
Group17364: aluc|OJZ87819.1 atub|OJI80825.1  
Group17365: aluc|OJZ87822.1 atub|OJI80822.1  
Group17366: aluc|OJZ87837.1 anid|CBF76058.1  
Group17367: aluc|OJZ87916.1 anig|EHA17711.1  
Group17368: aluc|OJZ87928.1 atub|OJI90540.1  
Group17369: aluc|OJZ88082.1 atub|OJI90691.1  
Group17370: aluc|OJZ88146.1 atub|OJI90750.1  
Group17371: aluc|OJZ88147.1 atub|OJI90751.1  
Group17372: aluc|OJZ88148.1 anig|EHA17909.1  
Group17373: aluc|OJZ88208.1 atub|OJI90809.1  
Group17374: aluc|OJZ88266.1 atub|OJI90866.1  
Group17375: aluc|OJZ88268.1 atub|OJI90868.1  
Group17376: aluc|OJZ88293.1 atub|OJI90889.1  
Group17377: aluc|OJZ88306.1 atub|OJI90901.1  
Group17378: aluc|OJZ88492.1 atub|OJI91079.1  
Group17379: aluc|OJZ88547.1 atub|OJI91132.1  
Group17380: aluc|OJZ88658.1 aver|OJJ05764.1

Group17381: aluc|OJZ88660.1 aver|OJJ05766.1  
Group17382: aluc|OJZ88711.1 atub|OJI91298.1  
Group17383: aluc|OJZ88725.1 atub|OJI91302.1  
Group17384: aluc|OJZ88887.1 atub|OJI85902.1  
Group17385: aluc|OJZ88910.1 atub|OJI85881.1  
Group17386: aluc|OJZ88924.1 atub|OJI85868.1  
Group17387: aluc|OJZ88938.1 atub|OJI85852.1  
Group17388: aluc|OJZ88940.1 atub|OJI85850.1  
Group17389: aluc|OJZ88944.1 atub|OJI85845.1  
Group17390: aluc|OJZ89026.1 anig|EHA23506.1  
Group17391: aluc|OJZ89027.1 atub|OJI85764.1  
Group17392: aluc|OJZ89057.1 atub|OJI85729.1  
Group17393: aluc|OJZ89101.1 atub|OJI85680.1  
Group17394: aluc|OJZ89190.1 atub|OJI85600.1  
Group17395: aluc|OJZ89220.1 atub|OJI85572.1  
Group17396: aluc|OJZ89314.1 atub|OJI85483.1  
Group17397: aluc|OJZ89462.1 anig|EHA23126.1  
Group17398: aluc|OJZ89491.1 atub|OJI85312.1  
Group17399: aluc|OJZ89582.1 atub|OJI85221.1  
Group17400: aluc|OJZ89585.1 atub|OJI85217.1  
Group17401: aluc|OJZ89826.1 anig|EHA27032.1  
Group17402: aluc|OJZ89948.1 anig|EHA27149.1  
Group17403: aluc|OJZ89975.1 anig|EHA27349.1  
Group17404: aluc|OJZ90354.1 atub|OJI81781.1  
Group17405: aluc|OJZ90409.1 atub|OJI81841.1  
Group17406: aluc|OJZ90434.1 atub|OJI81865.1  
Group17407: aluc|OJZ90482.1 atub|OJI81907.1  
Group17408: aluc|OJZ90486.1 anig|EHA23944.1  
Group17409: aluc|OJZ90530.1 atub|OJI81952.1  
Group17410: aluc|OJZ90742.1 atub|OJI82169.1  
Group17411: aluc|OJZ90760.1 atub|OJI82747.1  
Group17412: aluc|OJZ90844.1 atub|OJI82831.1  
Group17413: aluc|OJZ90898.1 atub|OJI82890.1  
Group17414: aluc|OJZ91075.1 atub|OJI83070.1  
Group17415: aluc|OJZ91134.1 atub|OJI83144.1  
Group17416: aluc|OJZ91140.1 aver|OJJ05143.1  
Group17417: anid|CBF80174.1 aver|OJI99525.1  
Group17418: aluc|OJZ91320.1 atub|OJI83313.1  
Group17419: aluc|OJZ91426.1 atub|OJI83419.1

Group17420: aluc|OJZ91437.1 atub|OJI83431.1  
Group17421: aluc|OJZ91439.1 atub|OJI83433.1  
Group17422: aluc|OJZ91441.1 anig|EHA20105.1  
Group17423: aluc|OJZ91511.1 atub|OJI85963.1  
Group17424: aluc|OJZ91546.1 atub|OJI85999.1  
Group17425: aluc|OJZ91554.1 anig|EHA22589.1  
Group17426: aluc|OJZ91558.1 atub|OJI86010.1  
Group17427: aluc|OJZ91601.1 atub|OJI86053.1  
Group17428: aluc|OJZ91637.1 atub|OJI86090.1  
Group17429: aluc|OJZ91665.1 anig|EHA22685.1  
Group17430: aluc|OJZ91668.1 atub|OJI86123.1  
Group17431: aluc|OJZ91681.1 atub|OJI86134.1  
Group17432: aluc|OJZ91682.1 atub|OJI86135.1  
Group17433: aluc|OJZ91757.1 ater|EAU38397.1  
Group17434: aluc|OJZ91766.1 anig|EHA22766.1  
Group17435: aluc|OJZ91772.1 anig|EHA22772.1  
Group17436: aluc|OJZ91979.1 ater|EAU30952.1  
Group17437: aluc|OJZ91980.1 anig|EHA20390.1  
Group17438: aluc|OJZ91996.1 atub|OJI86431.1  
Group17439: aluc|OJZ92101.1 atub|OJI86535.1  
Group17440: aluc|OJZ92194.1 atub|OJI87955.1  
Group17441: aluc|OJZ92215.1 atub|OJI86646.1  
Group17442: aluc|OJZ92228.1 atub|OJI86658.1  
Group17443: aluc|OJZ92300.1 atub|OJI86729.1  
Group17444: aluc|OJZ92302.1 atub|OJI86732.1  
Group17445: aluc|OJZ92390.1 atub|OJI86820.1  
Group17446: aluc|OJZ92532.1 anig|EHA26442.1  
Group17447: aluc|OJZ92533.1 atub|OJI86969.1  
Group17448: aluc|OJZ92554.1 atub|OJI86990.1  
Group17449: aluc|OJZ92623.1 anig|EHA26366.1  
Group17450: aluc|OJZ92624.1 anig|EHA26365.1  
Group17451: aluc|OJZ92697.1 atub|OJI87125.1  
Group17452: aluc|OJZ92726.1 anig|EHA26275.1  
Group17453: aluc|OJZ92739.1 atub|OJI87164.1  
Group17454: aluc|OJZ92753.1 atub|OJI87178.1  
Group17455: aluc|OJZ92794.1 atub|OJI87237.1  
Group17456: aluc|OJZ92821.1 anig|EHA26187.1  
Group17457: aluc|OJZ92836.1 asyd|OJJ53763.1  
Group17458: aluc|OJZ92885.1 atub|OJI87344.1

Group17459: anid|CBF69445.1 aver|OJJ06465.1  
Group17460: aver|OJJ06643.1 asyd|OJJ55562.1  
Group17461: anid|CBF70352.1 aver|OJJ06047.1  
Group17462: anid|CBF70804.1 awen|OJJ36116.1  
Group17463: azon|OJJ42432.1 aver|OJI95858.1  
Group17464: anid|CBF71203.1 asyd|OJJ55036.1  
Group17465: anid|CBF71207.1 aver|OJI96130.1  
Group17466: anid|CBF71438.1 asyd|OJJ56672.1  
Group17467: anid|CBF71480.1 aver|OJJ01276.1  
Group17468: anid|CBF73396.1 aver|OJJ03014.1  
Group17469: anid|CBF73399.1 asyd|OJJ52427.1  
Group17470: anid|CBF73435.1 aver|OJJ08110.1  
Group17471: anid|CBF73440.1 aver|OJJ08113.1  
Group17472: anid|CBF73451.1 aver|OJJ08119.1  
Group17473: anid|CBF73469.1 aver|OJJ08121.1  
Group17474: anid|CBF73596.1 azon|OJJ44481.1  
Group17475: aver|OJJ08771.1 asyd|OJJ52793.1  
Group17476: anid|CBF73654.1 aver|OJI99659.1  
Group17477: anid|CBF74660.1 asyd|OJJ54389.1  
Group17478: anid|CBF75167.1 asyd|OJJ59958.1  
Group17479: anid|CBF75411.1 asyd|OJJ56173.1  
Group17480: anid|CBF75892.1 aver|OJJ08873.1  
Group17481: anid|CBF76078.1 ater|EAU33662.1  
Group17482: asyd|OJJ54531.1 aver|OJJ07657.1  
Group17483: anid|CBF77678.1 aver|OJJ04867.1  
Group17484: asyd|OJJ55288.1 aver|OJJ06940.1  
Group17485: anid|CBF78129.1 asyd|OJJ55909.1  
Group17486: anid|CBF78403.1 aver|OJI99308.1  
Group17487: anid|CBF78542.1 azon|OJJ44497.1  
Group17488: anid|CBF78716.1 anig|EHA26173.1  
Group17489: anid|CBF78942.1 aver|OJJ01865.1  
Group17490: anid|CBF78966.1 aver|OJJ06747.1  
Group17491: anid|CBF79122.1 atub|OJI85464.1  
Group17492: anid|CBF79240.1 awen|OJJ36954.1  
Group17493: anid|CBF79296.1 aver|OJJ06859.1  
Group17494: anid|CBF79919.1 asyd|OJJ58198.1  
Group17495: anid|CBF80173.1 aver|OJI99524.1  
Group17496: anid|CBF80355.1 asyd|OJJ54827.1  
Group17497: anid|CBF80421.1 ater|EAU29528.1

Group17498: aver|OJJ08828.1 asyd|OJJ52850.1  
Group17499: anid|CBF81163.1 anig|EHA21126.1  
Group17500: anid|CBF81768.1 asyd|OJJ56691.1  
Group17501: anid|CBF81993.1 asyd|OJJ52780.1  
Group17502: anid|CBF82041.1 aver|OJJ05175.1  
Group17503: anid|CBF82299.1 asyd|OJJ52728.1  
Group17504: anid|CBF82475.1 aver|OJJ08635.1  
Group17505: anid|CBF83022.1 asyd|OJJ61032.1  
Group17506: anid|CBF83035.1 asyd|OJJ53749.1  
Group17507: anid|CBF83093.1 atub|OJI88530.1  
Group17508: anid|CBF83261.1 asyd|OJJ60582.1  
Group17509: anid|CBF83739.1 awen|OJJ39941.1  
Group17510: aver|OJJ02108.1 asyd|OJJ58304.1  
Group17511: anid|CBF84493.1 anig|EHA19601.1  
Group17512: anid|CBF84557.1 asyd|OJJ62587.1  
Group17513: anid|CBF84611.1 ater|EAU36755.1  
Group17514: anid|CBF85199.1 ater|EAU32058.1  
Group17515: anid|CBF85290.1 anig|EHA18732.1  
Group17516: anid|CBF85323.1 azon|OJJ42069.1  
Group17517: anid|CBF86658.1 asyd|OJJ64787.1  
Group17518: anid|CBF86718.1 aver|OJJ01995.1  
Group17519: anid|CBF86734.1 aver|OJJ03078.1  
Group17520: aver|OJJ08358.1 asyd|OJJ53384.1  
Group17521: anid|CBF87251.1 ater|EAU29531.1  
Group17522: anid|CBF87359.1 awen|OJJ39789.1  
Group17523: anid|CBF87362.1 awen|OJJ39788.1  
Group17524: anid|CBF87364.1 awen|OJJ39787.1  
Group17525: asyd|OJJ52945.1 aver|OJJ08912.1  
Group17526: anid|CBF87572.1 asyd|OJJ63245.1  
Group17527: anid|CBF87729.1 aver|OJJ08124.1  
Group17528: anig|EHA22620.1 asyd|OJJ53393.1  
Group17529: anid|CBF88304.1 ater|EAU31928.1  
Group17530: anid|CBF88820.1 atub|OJI85023.1  
Group17531: anid|CBF89267.1 aver|OJJ06189.1  
Group17532: anid|CBF89292.1 ater|EAU33883.1  
Group17533: anid|CBF89408.1 awen|OJJ37801.1  
Group17534: anig|EHA17689.1 aory|EIT76245.1  
Group17535: anig|EHA17690.1 aver|OJJ07504.1  
Group17536: anig|EHA17972.1 atub|OJI90825.1



Group17537: anig|EHA18411.1 awen|OJJ41830.1  
Group17538: anig|EHA18473.1 atub|OJI91351.1  
Group17539: anig|EHA18791.1 atub|OJI90008.1  
Group17540: anig|EHA18927.1 atub|OJI90158.1  
Group17541: anig|EHA19666.1 atub|OJI82953.1  
Group17542: anig|EHA20156.1 awen|OJJ33216.1  
Group17543: anig|EHA20660.1 azon|OJJ45830.1  
Group17544: anig|EHA20956.1 atub|OJI84687.1  
Group17545: anig|EHA21514.1 atub|OJI84154.1  
Group17546: anig|EHA21666.1 ater|EAU37750.1  
Group17547: anig|EHA21667.1 atub|OJI87921.1  
Group17548: anig|EHA21756.1 ater|EAU30221.1  
Group17549: anig|EHA21938.1 atub|OJI83786.1  
Group17550: anig|EHA22022.1 atub|OJI83879.1  
Group17551: anig|EHA22139.1 atub|OJI84021.1  
Group17552: anig|EHA22429.1 atub|OJI84360.1  
Group17553: anig|EHA22551.1 asyd|OJJ61683.1  
Group17554: anig|EHA22998.1 atub|OJI86501.1  
Group17555: anig|EHA23038.1 atub|OJI85235.1  
Group17556: anig|EHA23473.1 ater|EAU36242.1  
Group17557: anig|EHA23493.1 atub|OJI85746.1  
Group17558: anig|EHA23654.1 atub|OJI89949.1  
Group17559: anig|EHA23993.1 asyd|OJJ56936.1  
Group17560: anig|EHA24193.1 atub|OJI82211.1  
Group17561: anig|EHA24245.1 atub|OJI82276.1  
Group17562: anig|EHA24778.1 atub|OJI79561.1  
Group17563: anig|EHA24783.1 azon|OJJ51811.1  
Group17564: anig|EHA24863.1 atub|OJI79468.1  
Group17565: ater|EAU36850.1 aver|OJJ07234.1  
Group17566: anig|EHA25153.1 atub|OJI80664.1  
Group17567: anig|EHA25829.1 ater|EAU30173.1  
Group17568: anig|EHA25862.1 atub|OJI88604.1  
Group17569: anig|EHA26152.1 azon|OJJ45940.1  
Group17570: anig|EHA26571.1 ater|EAU31075.1  
Group17571: anig|EHA26576.1 ater|EAU30921.1  
Group17572: anig|EHA26577.1 ater|EAU38785.1  
Group17573: anig|EHA26783.1 atub|OJI86597.1  
Group17574: anig|EHA26854.1 atub|OJI85194.1  
Group17575: anig|EHA26974.1 atub|OJI85050.1

Group17576: anig|EHA27361.1 atub|OJI84818.1  
Group17577: anig|EHA27465.1 atub|OJI88849.1  
Group17578: anig|EHA27584.1 atub|OJI89847.1  
Group17579: anig|EHA28206.1 awen|OJJ32250.1  
Group17580: asyd|OJJ62668.1 aver|OJI96766.1  
Group17581: anig|EHA28359.1 atub|OJI88033.1  
Group17582: aory|EIT72738.1 ater|EAU30545.1  
Group17583: aory|EIT74344.1 awen|OJJ39516.1  
Group17584: aory|EIT75337.1 asyd|OJJ60852.1  
Group17585: aory|EIT77273.1 aver|OJJ06755.1  
Group17586: aory|EIT77983.1 ater|EAU36271.1  
Group17587: asyd|OJJ56701.1 aver|OJJ06024.1  
Group17588: aory|EIT80754.1 awen|OJJ41599.1  
Group17589: aory|EIT80933.1 atub|OJI88345.1  
Group17590: aory|EIT81297.1 ater|EAU31887.1  
Group17591: aory|EIT81834.1 ater|EAU36137.1  
Group17592: asyd|OJJ53427.1 aver|OJJ08318.1  
Group17593: aory|EIT83114.1 asyd|OJJ62486.1  
Group17594: asyd|OJJ52076.1 aver|OJJ03027.1  
Group17595: asyd|OJJ52078.1 aver|OJJ03026.1  
Group17596: asyd|OJJ52089.1 aver|OJJ03478.1  
Group17597: asyd|OJJ52105.1 aver|OJI97595.1  
Group17598: asyd|OJJ52148.1 ater|EAU30127.1  
Group17599: asyd|OJJ52191.1 aver|OJJ05955.1  
Group17600: asyd|OJJ52345.1 aver|OJJ06549.1  
Group17601: asyd|OJJ52347.1 aver|OJI99660.1  
Group17602: asyd|OJJ52348.1 aver|OJJ05332.1  
Group17603: asyd|OJJ52352.1 aver|OJJ01994.1  
Group17604: asyd|OJJ52356.1 aver|OJJ01993.1  
Group17605: asyd|OJJ52357.1 aver|OJJ01992.1  
Group17606: asyd|OJJ52379.1 aver|OJJ01968.1  
Group17607: asyd|OJJ52380.1 aver|OJJ01967.1  
Group17608: asyd|OJJ52381.1 aver|OJJ01966.1  
Group17609: asyd|OJJ52383.1 aver|OJJ01940.1  
Group17610: asyd|OJJ52388.1 aver|OJJ01935.1  
Group17611: asyd|OJJ52392.1 aver|OJJ01931.1  
Group17612: asyd|OJJ52393.1 aver|OJJ01930.1  
Group17613: asyd|OJJ52406.1 aver|OJI98316.1  
Group17614: asyd|OJJ52413.1 aver|OJJ00342.1

Group17615: asyd|OJJ52415.1 aver|OJJ08922.1  
Group17616: asyd|OJJ52428.1 aver|OJJ05543.1  
Group17617: asyd|OJJ52430.1 aver|OJJ05541.1  
Group17618: asyd|OJJ52445.1 aver|OJJ03971.1  
Group17619: asyd|OJJ52454.1 aver|OJJ03961.1  
Group17620: asyd|OJJ52472.1 aver|OJJ03944.1  
Group17621: asyd|OJJ52478.1 aver|OJJ03934.1  
Group17622: asyd|OJJ52483.1 aver|OJJ03924.1  
Group17623: asyd|OJJ52484.1 aver|OJJ03923.1  
Group17624: asyd|OJJ52488.1 aver|OJJ03915.1  
Group17625: asyd|OJJ52490.1 aver|OJJ03914.1  
Group17626: asyd|OJJ52495.1 aver|OJJ06531.1  
Group17627: asyd|OJJ52496.1 aver|OJJ03888.1  
Group17628: asyd|OJJ52497.1 aver|OJJ99615.1  
Group17629: asyd|OJJ52499.1 aver|OJJ03884.1  
Group17630: asyd|OJJ52515.1 aver|OJJ99667.1  
Group17631: asyd|OJJ52528.1 aver|OJJ03872.1  
Group17632: asyd|OJJ52541.1 aver|OJJ03863.1  
Group17633: asyd|OJJ52542.1 aver|OJJ03862.1  
Group17634: asyd|OJJ52550.1 aver|OJJ03850.1  
Group17635: asyd|OJJ52552.1 aver|OJJ03848.1  
Group17636: asyd|OJJ52719.1 ater|EAU38047.1  
Group17637: asyd|OJJ52743.1 aver|OJJ02999.1  
Group17638: asyd|OJJ52750.1 aver|OJJ04009.1  
Group17639: asyd|OJJ52760.1 aver|OJJ08742.1  
Group17640: asyd|OJJ52767.1 aver|OJJ08750.1  
Group17641: asyd|OJJ52772.1 aver|OJJ08755.1  
Group17642: asyd|OJJ52773.1 aver|OJJ08756.1  
Group17643: asyd|OJJ52782.1 aver|OJJ08760.1  
Group17644: asyd|OJJ52790.1 aver|OJJ08765.1  
Group17645: asyd|OJJ52795.1 aver|OJJ08773.1  
Group17646: asyd|OJJ52806.1 aver|OJJ08786.1  
Group17647: asyd|OJJ52813.1 aver|OJJ08792.1  
Group17648: asyd|OJJ52816.1 aver|OJJ08795.1  
Group17649: asyd|OJJ52832.1 aver|OJJ08807.1  
Group17650: asyd|OJJ52846.1 aver|OJJ08824.1  
Group17651: asyd|OJJ52852.1 aver|OJJ08830.1  
Group17652: asyd|OJJ52853.1 aver|OJJ08831.1  
Group17653: asyd|OJJ52863.1 aver|OJJ08842.1

Group17654: asyd|OJJ52870.1 aver|OJJ98021.1  
Group17655: asyd|OJJ52884.1 aver|OJJ08855.1  
Group17656: asyd|OJJ52885.1 aver|OJJ08856.1  
Group17657: asyd|OJJ52886.1 aver|OJJ08857.1  
Group17658: asyd|OJJ52894.1 aver|OJJ08865.1  
Group17659: asyd|OJJ52900.1 aver|OJJ08869.1  
Group17660: asyd|OJJ52908.1 aver|OJJ08877.1  
Group17661: asyd|OJJ52909.1 aver|OJJ08878.1  
Group17662: asyd|OJJ52910.1 aver|OJJ08879.1  
Group17663: asyd|OJJ52911.1 aver|OJJ08880.1  
Group17664: asyd|OJJ52917.1 aver|OJJ08887.1  
Group17665: asyd|OJJ52922.1 aver|OJJ08891.1  
Group17666: asyd|OJJ52923.1 aver|OJJ08892.1  
Group17667: asyd|OJJ52947.1 aver|OJJ08914.1  
Group17668: asyd|OJJ52955.1 aver|OJJ08921.1  
Group17669: asyd|OJJ52957.1 aver|OJJ08923.1  
Group17670: asyd|OJJ52971.1 aver|OJJ08938.1  
Group17671: asyd|OJJ52972.1 aver|OJJ08939.1  
Group17672: asyd|OJJ52974.1 aver|OJJ08940.1  
Group17673: asyd|OJJ53040.1 aver|OJJ03804.1  
Group17674: asyd|OJJ53069.1 aver|OJJ03776.1  
Group17675: asyd|OJJ53113.1 aver|OJJ03742.1  
Group17676: asyd|OJJ53346.1 aver|OJJ08399.1  
Group17677: asyd|OJJ53351.1 aver|OJJ08393.1  
Group17678: asyd|OJJ53354.1 aver|OJJ08389.1  
Group17679: asyd|OJJ53355.1 aver|OJJ08386.1  
Group17680: asyd|OJJ53359.1 aver|OJJ07645.1  
Group17681: asyd|OJJ53377.1 aver|OJJ08366.1  
Group17682: asyd|OJJ53381.1 aver|OJJ08362.1  
Group17683: asyd|OJJ53412.1 aver|OJJ08339.1  
Group17684: asyd|OJJ53413.1 aver|OJJ08338.1  
Group17685: asyd|OJJ53415.1 aver|OJJ08336.1  
Group17686: asyd|OJJ53416.1 aver|OJJ08335.1  
Group17687: asyd|OJJ53417.1 aver|OJJ08334.1  
Group17688: asyd|OJJ53418.1 aver|OJJ08333.1  
Group17689: asyd|OJJ53420.1 aver|OJJ08331.1  
Group17690: asyd|OJJ53421.1 aver|OJJ08330.1  
Group17691: asyd|OJJ53425.1 aver|OJJ08320.1  
Group17692: asyd|OJJ53430.1 aver|OJJ08315.1

Group17693: asyd|OJJ53440.1 aver|OJJ08311.1  
Group17694: asyd|OJJ53442.1 aver|OJJ08309.1  
Group17695: asyd|OJJ53450.1 aver|OJJ08302.1  
Group17696: asyd|OJJ53460.1 aver|OJJ08295.1  
Group17697: asyd|OJJ53489.1 aver|OJJ03353.1  
Group17698: asyd|OJJ53491.1 aver|OJJ03351.1  
Group17699: asyd|OJJ53495.1 aver|OJJ08253.1  
Group17700: asyd|OJJ53497.1 aver|OJJ08248.1  
Group17701: asyd|OJJ53500.1 aver|OJJ08245.1  
Group17702: asyd|OJJ53504.1 aver|OJJ08242.1  
Group17703: asyd|OJJ53506.1 aver|OJJ08240.1  
Group17704: asyd|OJJ53520.1 aver|OJJ08230.1  
Group17705: asyd|OJJ53521.1 aver|OJJ08229.1  
Group17706: asyd|OJJ53522.1 aver|OJJ08228.1  
Group17707: asyd|OJJ53524.1 aver|OJJ08226.1  
Group17708: asyd|OJJ53533.1 awen|OJJ33416.1  
Group17709: asyd|OJJ53550.1 aver|OJJ06170.1  
Group17710: asyd|OJJ53554.1 aver|OJJ08202.1  
Group17711: asyd|OJJ53556.1 aver|OJJ08199.1  
Group17712: asyd|OJJ53568.1 aver|OJJ08187.1  
Group17713: asyd|OJJ53595.1 aver|OJJ08153.1  
Group17714: asyd|OJJ53600.1 aver|OJJ08148.1  
Group17715: asyd|OJJ53607.1 aver|OJJ08141.1  
Group17716: asyd|OJJ53608.1 aver|OJJ08140.1  
Group17717: asyd|OJJ53620.1 awen|OJJ34583.1  
Group17718: asyd|OJJ53621.1 aver|OJJ05938.1  
Group17719: asyd|OJJ53629.1 aver|OJJ05946.1  
Group17720: asyd|OJJ53686.1 aver|OJJ07804.1  
Group17721: asyd|OJJ53709.1 aver|OJJ07835.1  
Group17722: asyd|OJJ53710.1 aver|OJJ07836.1  
Group17723: asyd|OJJ53726.1 aver|OJJ98281.1  
Group17724: asyd|OJJ53728.1 aver|OJJ98283.1  
Group17725: asyd|OJJ53746.1 aver|OJJ07861.1  
Group17726: asyd|OJJ53755.1 aver|OJJ07866.1  
Group17727: asyd|OJJ53756.1 aver|OJJ07867.1  
Group17728: asyd|OJJ53757.1 aver|OJJ07868.1  
Group17729: asyd|OJJ53766.1 aver|OJJ07874.1  
Group17730: asyd|OJJ53767.1 aver|OJJ07875.1  
Group17731: asyd|OJJ53768.1 aver|OJJ07876.1

Group17732: asyd|OJJ53792.1 aver|OJJ03441.1  
Group17733: asyd|OJJ53797.1 aver|OJJ96897.1  
Group17734: asyd|OJJ53807.1 aver|OJJ07907.1  
Group17735: asyd|OJJ53818.1 aver|OJJ07533.1  
Group17736: asyd|OJJ53826.1 aver|OJJ07927.1  
Group17737: asyd|OJJ53827.1 aver|OJJ07931.1  
Group17738: asyd|OJJ53828.1 aver|OJJ07932.1  
Group17739: asyd|OJJ53829.1 aver|OJJ07933.1  
Group17740: asyd|OJJ53837.1 aver|OJJ07940.1  
Group17741: asyd|OJJ53854.1 aver|OJJ07957.1  
Group17742: asyd|OJJ53929.1 aver|OJJ08028.1  
Group17743: asyd|OJJ53934.1 aver|OJJ08032.1  
Group17744: asyd|OJJ53943.1 aver|OJJ08040.1  
Group17745: awen|OJJ37049.1 ater|EAU39531.1  
Group17746: asyd|OJJ54091.1 azon|OJJ46447.1  
Group17747: asyd|OJJ54093.1 aver|OJJ08646.1  
Group17748: asyd|OJJ54123.1 aver|OJJ08614.1  
Group17749: asyd|OJJ54131.1 aver|OJJ08604.1  
Group17750: asyd|OJJ54132.1 aver|OJJ08603.1  
Group17751: asyd|OJJ54170.1 aver|OJJ08569.1  
Group17752: asyd|OJJ54184.1 aver|OJJ08556.1  
Group17753: asyd|OJJ54190.1 aver|OJJ08549.1  
Group17754: asyd|OJJ54202.1 aver|OJJ08522.1  
Group17755: asyd|OJJ54212.1 aver|OJJ08519.1  
Group17756: asyd|OJJ54216.1 aver|OJJ08515.1  
Group17757: asyd|OJJ54217.1 aver|OJJ08514.1  
Group17758: asyd|OJJ54223.1 aver|OJJ05176.1  
Group17759: asyd|OJJ54228.1 aver|OJJ05181.1  
Group17760: asyd|OJJ54309.1 aver|OJJ05257.1  
Group17761: asyd|OJJ54319.1 aver|OJJ05273.1  
Group17762: asyd|OJJ54338.1 aver|OJJ05290.1  
Group17763: asyd|OJJ54341.1 aver|OJJ05293.1  
Group17764: asyd|OJJ54342.1 aver|OJJ05294.1  
Group17765: asyd|OJJ54347.1 aver|OJJ05299.1  
Group17766: asyd|OJJ54349.1 aver|OJJ05301.1  
Group17767: asyd|OJJ54356.1 aver|OJJ05310.1  
Group17768: asyd|OJJ54363.1 aver|OJJ05316.1  
Group17769: asyd|OJJ54364.1 aver|OJJ05317.1  
Group17770: asyd|OJJ54365.1 aver|OJJ05318.1

Group17771: asyd|OJJ54371.1 aver|OJJ05326.1  
Group17772: asyd|OJJ54373.1 aver|OJJ05327.1  
Group17773: asyd|OJJ54374.1 aver|OJJ05328.1  
Group17774: asyd|OJJ54414.1 aver|OJJ05557.1  
Group17775: asyd|OJJ54416.1 aver|OJJ05556.1  
Group17776: asyd|OJJ54417.1 aver|OJJ05555.1  
Group17777: asyd|OJJ54431.1 ater|EAU31020.1  
Group17778: asyd|OJJ54432.1 awen|OJJ39736.1  
Group17779: asyd|OJJ54437.1 aver|OJJ04033.1  
Group17780: asyd|OJJ54452.1 azon|OJJ50686.1  
Group17781: asyd|OJJ54453.1 aver|OJJ07702.1  
Group17782: asyd|OJJ54454.1 aver|OJJ07701.1  
Group17783: asyd|OJJ54484.1 aver|OJJ07695.1  
Group17784: asyd|OJJ54489.1 aver|OJJ07690.1  
Group17785: asyd|OJJ54498.1 aver|OJJ07682.1  
Group17786: asyd|OJJ54505.1 aver|OJJ07677.1  
Group17787: asyd|OJJ54514.1 aver|OJJ07670.1  
Group17788: asyd|OJJ54519.1 aver|OJJ07665.1  
Group17789: asyd|OJJ54526.1 aver|OJJ05306.1  
Group17790: asyd|OJJ54559.1 aver|OJJ07604.1  
Group17791: asyd|OJJ54561.1 aver|OJJ07595.1  
Group17792: ater|EAU37339.1 aver|OJI99597.1  
Group17793: asyd|OJJ54575.1 aver|OJJ07579.1  
Group17794: asyd|OJJ54593.1 aver|OJJ07559.1  
Group17795: asyd|OJJ54595.1 aver|OJJ07557.1  
Group17796: asyd|OJJ54604.1 aver|OJJ07551.1  
Group17797: asyd|OJJ54605.1 aver|OJJ07550.1  
Group17798: asyd|OJJ54617.1 aver|OJJ07542.1  
Group17799: asyd|OJJ54623.1 aver|OJJ07535.1  
Group17800: asyd|OJJ54625.1 aver|OJJ07531.1  
Group17801: asyd|OJJ54636.1 aver|OJJ07520.1  
Group17802: asyd|OJJ54637.1 aver|OJJ07519.1  
Group17803: asyd|OJJ54679.1 aver|OJJ07488.1  
Group17804: asyd|OJJ54709.1 aver|OJJ07457.1  
Group17805: asyd|OJJ54717.1 aver|OJJ07450.1  
Group17806: asyd|OJJ54721.1 aver|OJJ07447.1  
Group17807: asyd|OJJ54723.1 aver|OJJ07443.1  
Group17808: asyd|OJJ54746.1 aver|OJJ07419.1  
Group17809: asyd|OJJ54763.1 aver|OJJ07404.1

Group17810: asyd|OJJ54777.1 aver|OJJ07388.1  
Group17811: asyd|OJJ54803.1 aver|OJJ95781.1  
Group17812: asyd|OJJ54817.1 aver|OJJ07344.1  
Group17813: asyd|OJJ54820.1 aver|OJJ07341.1  
Group17814: asyd|OJJ54843.1 aver|OJJ07319.1  
Group17815: asyd|OJJ54846.1 aver|OJJ07636.1  
Group17816: asyd|OJJ54873.1 aver|OJJ03889.1  
Group17817: asyd|OJJ54874.1 aver|OJJ03890.1  
Group17818: asyd|OJJ54875.1 aver|OJJ03891.1  
Group17819: asyd|OJJ54882.1 ater|EAU37340.1  
Group17820: asyd|OJJ54906.1 aver|OJJ07295.1  
Group17821: asyd|OJJ54933.1 aver|OJJ07265.1  
Group17822: asyd|OJJ54964.1 aver|OJJ07227.1  
Group17823: asyd|OJJ54965.1 aver|OJJ07226.1  
Group17824: asyd|OJJ54966.1 aver|OJJ07225.1  
Group17825: asyd|OJJ54968.1 aver|OJJ07223.1  
Group17826: asyd|OJJ54969.1 aver|OJJ07222.1  
Group17827: asyd|OJJ54990.1 aver|OJJ07211.1  
Group17828: asyd|OJJ55005.1 aver|OJJ07202.1  
Group17829: asyd|OJJ55044.1 aver|OJJ07163.1  
Group17830: asyd|OJJ55053.1 aver|OJJ07156.1  
Group17831: asyd|OJJ55056.1 aver|OJJ07154.1  
Group17832: asyd|OJJ55058.1 aver|OJJ07607.1  
Group17833: asyd|OJJ55059.1 aver|OJJ07153.1  
Group17834: asyd|OJJ55061.1 aver|OJJ07150.1  
Group17835: asyd|OJJ55063.1 aver|OJJ07148.1  
Group17836: asyd|OJJ55070.1 aver|OJJ07141.1  
Group17837: asyd|OJJ55162.1 aver|OJJ07045.1  
Group17838: asyd|OJJ55177.1 aver|OJJ07030.1  
Group17839: asyd|OJJ55195.1 aver|OJJ07018.1  
Group17840: asyd|OJJ55211.1 aver|OJJ07006.1  
Group17841: asyd|OJJ55273.1 aver|OJJ06954.1  
Group17842: asyd|OJJ55274.1 aver|OJJ06953.1  
Group17843: asyd|OJJ55341.1 aver|OJJ98025.1  
Group17844: asyd|OJJ55352.1 aver|OJJ06441.1  
Group17845: asyd|OJJ55356.1 atub|OJJ80374.1  
Group17846: asyd|OJJ55357.1 aver|OJJ01942.1  
Group17847: asyd|OJJ55400.1 aver|OJJ06480.1  
Group17848: asyd|OJJ55401.1 aver|OJJ06481.1



Group17849: asyd|OJJ55403.1 aver|OJJ06483.1  
Group17850: asyd|OJJ55404.1 aver|OJJ06484.1  
Group17851: asyd|OJJ55407.1 aver|OJJ03918.1  
Group17852: asyd|OJJ55416.1 aver|OJJ06493.1  
Group17853: asyd|OJJ55421.1 aver|OJJ06498.1  
Group17854: asyd|OJJ55443.1 aver|OJJ06516.1  
Group17855: asyd|OJJ55461.1 aver|OJJ06527.1  
Group17856: asyd|OJJ55473.1 aver|OJJ08258.1  
Group17857: asyd|OJJ55483.1 aver|OJJ06562.1  
Group17858: asyd|OJJ55502.1 aver|OJJ06580.1  
Group17859: asyd|OJJ55534.1 aver|OJJ06612.1  
Group17860: asyd|OJJ55557.1 aver|OJJ06638.1  
Group17861: asyd|OJJ55563.1 aver|OJJ06644.1  
Group17862: asyd|OJJ55571.1 aver|OJJ06650.1  
Group17863: asyd|OJJ55605.1 aver|OJJ06682.1  
Group17864: asyd|OJJ55613.1 aver|OJJ06688.1  
Group17865: asyd|OJJ55619.1 aver|OJJ06694.1  
Group17866: asyd|OJJ55620.1 aver|OJJ06695.1  
Group17867: asyd|OJJ55621.1 aver|OJJ06696.1  
Group17868: asyd|OJJ55636.1 aver|OJJ06715.1  
Group17869: asyd|OJJ55661.1 aver|OJJ06744.1  
Group17870: asyd|OJJ55662.1 aver|OJJ06745.1  
Group17871: asyd|OJJ55677.1 aver|OJJ06760.1  
Group17872: asyd|OJJ55712.1 aver|OJJ06798.1  
Group17873: asyd|OJJ55806.1 aver|OJJ04754.1  
Group17874: asyd|OJJ55812.1 aver|OJJ04760.1  
Group17875: asyd|OJJ55848.1 aver|OJJ04791.1  
Group17876: asyd|OJJ55865.1 aver|OJJ04808.1  
Group17877: asyd|OJJ55884.1 aver|OJJ04829.1  
Group17878: asyd|OJJ55897.1 aver|OJJ04842.1  
Group17879: asyd|OJJ55917.1 aver|OJJ04857.1  
Group17880: asyd|OJJ55927.1 aver|OJJ99310.1  
Group17881: asyd|OJJ55931.1 aver|OJJ04880.1  
Group17882: asyd|OJJ55932.1 aver|OJJ04881.1  
Group17883: asyd|OJJ55953.1 aver|OJJ04899.1  
Group17884: asyd|OJJ55954.1 aver|OJJ04900.1  
Group17885: asyd|OJJ56038.1 aver|OJJ04984.1  
Group17886: asyd|OJJ56042.1 aver|OJJ04988.1  
Group17887: asyd|OJJ56053.1 aver|OJJ04994.1

Group17888: asyd|OJJ56061.1 aver|OJJ05003.1  
Group17889: asyd|OJJ56068.1 aver|OJJ05011.1  
Group17890: asyd|OJJ56077.1 aver|OJJ05020.1  
Group17891: asyd|OJJ56080.1 aver|OJJ05023.1  
Group17892: asyd|OJJ56088.1 aver|OJJ05031.1  
Group17893: asyd|OJJ56091.1 aver|OJJ05034.1  
Group17894: asyd|OJJ56099.1 aver|OJJ05042.1  
Group17895: asyd|OJJ56108.1 aver|OJJ05051.1  
Group17896: asyd|OJJ56112.1 aver|OJJ05055.1  
Group17897: asyd|OJJ56114.1 aver|OJJ07446.1  
Group17898: asyd|OJJ56134.1 aver|OJJ05074.1  
Group17899: asyd|OJJ56135.1 aver|OJJ05075.1  
Group17900: asyd|OJJ56136.1 aver|OJJ05076.1  
Group17901: asyd|OJJ56137.1 aver|OJJ05077.1  
Group17902: asyd|OJJ56150.1 aver|OJJ05089.1  
Group17903: asyd|OJJ56151.1 aver|OJJ05090.1  
Group17904: asyd|OJJ56171.1 aver|OJJ05104.1  
Group17905: asyd|OJJ56172.1 aver|OJJ05105.1  
Group17906: asyd|OJJ56174.1 aver|OJJ05106.1  
Group17907: asyd|OJJ56176.1 aver|OJJ05107.1  
Group17908: asyd|OJJ56177.1 aver|OJJ05109.1  
Group17909: asyd|OJJ56182.1 aver|OJJ07199.1  
Group17910: asyd|OJJ56183.1 aver|OJJ05111.1  
Group17911: asyd|OJJ56184.1 aver|OJJ05113.1  
Group17912: asyd|OJJ56188.1 aver|OJJ05116.1  
Group17913: asyd|OJJ56201.1 aver|OJJ05128.1  
Group17914: asyd|OJJ56206.1 aver|OJJ05137.1  
Group17915: asyd|OJJ56210.1 aver|OJJ05139.1  
Group17916: asyd|OJJ56218.1 aver|OJJ05150.1  
Group17917: asyd|OJJ56221.1 aver|OJJ05153.1  
Group17918: asyd|OJJ56227.1 azon|OJJ51831.1  
Group17919: asyd|OJJ56245.1 aver|OJJ05168.1  
Group17920: asyd|OJJ56247.1 aver|OJJ08513.1  
Group17921: asyd|OJJ56248.1 aver|OJJ08512.1  
Group17922: asyd|OJJ56250.1 aver|OJJ08510.1  
Group17923: asyd|OJJ56251.1 aver|OJJ08509.1  
Group17924: asyd|OJJ56259.1 aver|OJJ08505.1  
Group17925: asyd|OJJ56260.1 aver|OJJ08504.1  
Group17926: asyd|OJJ56270.1 aver|OJJ08495.1

Group17927: asyd|OJJ56390.1 aver|OJJ06323.1  
Group17928: asyd|OJJ56410.1 awen|OJJ34673.1  
Group17929: asyd|OJJ56412.1 aver|OJJ06303.1  
Group17930: asyd|OJJ56419.1 aver|OJJ06295.1  
Group17931: asyd|OJJ56424.1 aver|OJJ06293.1  
Group17932: asyd|OJJ56433.1 aver|OJJ06287.1  
Group17933: asyd|OJJ56471.1 aver|OJJ06248.1  
Group17934: asyd|OJJ56472.1 aver|OJJ06247.1  
Group17935: asyd|OJJ56511.1 aver|OJJ06208.1  
Group17936: asyd|OJJ56513.1 aver|OJJ06207.1  
Group17937: asyd|OJJ56527.1 aver|OJJ06196.1  
Group17938: asyd|OJJ56539.1 aver|OJJ06183.1  
Group17939: asyd|OJJ56541.1 aver|OJJ06181.1  
Group17940: asyd|OJJ56547.1 aver|OJJ06175.1  
Group17941: asyd|OJJ56629.1 aver|OJJ06097.1  
Group17942: asyd|OJJ56637.1 aver|OJJ06089.1  
Group17943: asyd|OJJ56668.1 aver|OJJ06055.1  
Group17944: asyd|OJJ56683.1 aver|OJJ06040.1  
Group17945: asyd|OJJ56703.1 aver|OJJ06022.1  
Group17946: asyd|OJJ56705.1 aver|OJJ06020.1  
Group17947: asyd|OJJ56706.1 aver|OJJ06019.1  
Group17948: asyd|OJJ56711.1 aver|OJJ06014.1  
Group17949: asyd|OJJ56727.1 aver|OJJ05993.1  
Group17950: asyd|OJJ56728.1 aver|OJJ05992.1  
Group17951: asyd|OJJ56733.1 aver|OJJ05990.1  
Group17952: asyd|OJJ56743.1 aver|OJJ08349.1  
Group17953: asyd|OJJ56755.1 aver|OJJ05968.1  
Group17954: asyd|OJJ56800.1 aver|OJJ03534.1  
Group17955: asyd|OJJ56846.1 aver|OJJ04250.1  
Group17956: asyd|OJJ56850.1 aver|OJJ03464.1  
Group17957: asyd|OJJ56872.1 aver|OJJ96732.1  
Group17958: asyd|OJJ56887.1 awen|OJJ30429.1  
Group17959: asyd|OJJ56894.1 aver|OJJ07734.1  
Group17960: asyd|OJJ56905.1 aver|OJJ03388.1  
Group17961: asyd|OJJ56918.1 aver|OJJ03374.1  
Group17962: asyd|OJJ56919.1 aver|OJJ03373.1  
Group17963: asyd|OJJ56924.1 aver|OJJ03370.1  
Group17964: asyd|OJJ56925.1 aver|OJJ03369.1  
Group17965: asyd|OJJ56926.1 aver|OJJ03368.1

Group17966: asyd|OJJ56935.1 aver|OJJ03349.1  
Group17967: asyd|OJJ56957.1 aver|OJJ03328.1  
Group17968: asyd|OJJ57003.1 aver|OJJ03284.1  
Group17969: asyd|OJJ57007.1 aver|OJJ03280.1  
Group17970: asyd|OJJ57117.1 aver|OJJ03183.1  
Group17971: asyd|OJJ57123.1 aver|OJJ03181.1  
Group17972: asyd|OJJ57135.1 aver|OJJ03168.1  
Group17973: asyd|OJJ57150.1 aver|OJJ03159.1  
Group17974: asyd|OJJ57153.1 aver|OJJ07869.1  
Group17975: asyd|OJJ57173.1 aver|OJJ03143.1  
Group17976: asyd|OJJ57186.1 aver|OJJ03104.1  
Group17977: asyd|OJJ57192.1 aver|OJJ03099.1  
Group17978: asyd|OJJ57217.1 aver|OJJ07885.1  
Group17979: asyd|OJJ57222.1 aver|OJJ03065.1  
Group17980: asyd|OJJ57231.1 aver|OJJ03058.1  
Group17981: asyd|OJJ57235.1 aver|OJJ03050.1  
Group17982: asyd|OJJ57239.1 azon|OJJ42367.1  
Group17983: asyd|OJJ57243.1 azon|OJJ42363.1  
Group17984: asyd|OJJ57250.1 aver|OJJ03044.1  
Group17985: asyd|OJJ57253.1 aver|OJJ03041.1  
Group17986: asyd|OJJ57254.1 aver|OJJ03040.1  
Group17987: asyd|OJJ57265.1 aver|OJJ03396.1  
Group17988: asyd|OJJ57267.1 aver|OJJ03394.1  
Group17989: asyd|OJJ57269.1 aver|OJI96734.1  
Group17990: asyd|OJJ57270.1 aver|OJI96733.1  
Group17991: asyd|OJJ57279.1 aver|OJJ05877.1  
Group17992: asyd|OJJ57286.1 aver|OJJ05870.1  
Group17993: asyd|OJJ57289.1 aver|OJJ05868.1  
Group17994: asyd|OJJ57291.1 aver|OJJ05866.1  
Group17995: asyd|OJJ57296.1 aver|OJJ05854.1  
Group17996: asyd|OJJ57307.1 aver|OJI99611.1  
Group17997: asyd|OJJ57353.1 aver|OJJ05812.1  
Group17998: asyd|OJJ57376.1 aver|OJJ05792.1  
Group17999: asyd|OJJ57377.1 aver|OJJ05781.1  
Group18000: asyd|OJJ57382.1 aver|OJJ05775.1  
Group18001: asyd|OJJ57421.1 aver|OJJ05757.1  
Group18002: asyd|OJJ57422.1 aver|OJJ05756.1  
Group18003: asyd|OJJ57423.1 aver|OJJ05754.1  
Group18004: asyd|OJJ57434.1 aver|OJJ05744.1

Group18005: asyd|OJJ57440.1 aver|OJJ05738.1  
Group18006: asyd|OJJ57566.1 aver|OJJ05613.1  
Group18007: asyd|OJJ57570.1 aver|OJJ05609.1  
Group18008: asyd|OJJ57573.1 aver|OJJ05606.1  
Group18009: asyd|OJJ57575.1 aver|OJJ05605.1  
Group18010: asyd|OJJ57576.1 aver|OJJ05604.1  
Group18011: asyd|OJJ57578.1 aver|OJJ05602.1  
Group18012: asyd|OJJ57591.1 aver|OJJ05591.1  
Group18013: asyd|OJJ57593.1 aver|OJJ05590.1  
Group18014: asyd|OJJ57595.1 aver|OJJ05588.1  
Group18015: asyd|OJJ57597.1 aver|OJJ05586.1  
Group18016: asyd|OJJ57598.1 aver|OJJ05584.1  
Group18017: asyd|OJJ57604.1 aver|OJJ05579.1  
Group18018: asyd|OJJ57617.1 aver|OJJ05569.1  
Group18019: asyd|OJJ57619.1 aver|OJJ05567.1  
Group18020: asyd|OJJ57630.1 awen|OJJ33428.1  
Group18021: asyd|OJJ57631.1 awen|OJJ33429.1  
Group18022: asyd|OJJ57636.1 aver|OJJ01943.1  
Group18023: asyd|OJJ57641.1 aver|OJJ05497.1  
Group18024: asyd|OJJ57643.1 aver|OJJ05500.1  
Group18025: asyd|OJJ57674.1 aver|OJJ05480.1  
Group18026: asyd|OJJ57682.1 aver|OJJ05488.1  
Group18027: asyd|OJJ57711.1 aver|OJJ05454.1  
Group18028: asyd|OJJ57738.1 aver|OJJ05429.1  
Group18029: asyd|OJJ57909.1 aver|OJJ04483.1  
Group18030: asyd|OJJ57941.1 aver|OJJ04455.1  
Group18031: asyd|OJJ57976.1 aver|OJJ04425.1  
Group18032: asyd|OJJ58040.1 ater|EAU38802.1  
Group18033: asyd|OJJ58042.1 aver|OJJ04359.1  
Group18034: asyd|OJJ58043.1 ater|EAU38804.1  
Group18035: asyd|OJJ58109.1 aver|OJJ04295.1  
Group18036: asyd|OJJ58144.1 aver|OJJ04259.1  
Group18037: asyd|OJJ58163.1 aver|OJJ04239.1  
Group18038: asyd|OJJ58196.1 aver|OJJ04211.1  
Group18039: asyd|OJJ58223.1 aver|OJJ02199.1  
Group18040: asyd|OJJ58236.1 aver|OJJ02189.1  
Group18041: asyd|OJJ58253.1 aver|OJJ02170.1  
Group18042: asyd|OJJ58311.1 aver|OJJ02100.1  
Group18043: asyd|OJJ58312.1 aver|OJJ02099.1

Group18044: asyd|OJJ58333.1 aver|OJJ02077.1  
Group18045: asyd|OJJ58335.1 aver|OJJ02075.1  
Group18046: asyd|OJJ58336.1 aver|OJJ02074.1  
Group18047: asyd|OJJ58359.1 aver|OJJ02048.1  
Group18048: asyd|OJJ58363.1 aver|OJJ02043.1  
Group18049: asyd|OJJ58366.1 aver|OJJ02040.1  
Group18050: asyd|OJJ58447.1 aver|OJJ01049.1  
Group18051: asyd|OJJ58509.1 aver|OJJ01110.1  
Group18052: asyd|OJJ58554.1 aver|OJJ01152.1  
Group18053: asyd|OJJ58557.1 aver|OJJ01156.1  
Group18054: asyd|OJJ58572.1 aver|OJJ01175.1  
Group18055: asyd|OJJ58573.1 aver|OJJ01176.1  
Group18056: asyd|OJJ58591.1 aver|OJJ01193.1  
Group18057: asyd|OJJ58602.1 aver|OJJ01204.1  
Group18058: asyd|OJJ58663.1 aver|OJJ01269.1  
Group18059: asyd|OJJ58684.1 aver|OJJ01296.1  
Group18060: asyd|OJJ58688.1 aver|OJJ01300.1  
Group18061: asyd|OJJ58693.1 aver|OJJ01305.1  
Group18062: asyd|OJJ58701.1 aver|OJJ01313.1  
Group18063: asyd|OJJ58711.1 aver|OJJ01324.1  
Group18064: asyd|OJJ58856.1 aver|OJJ01457.1  
Group18065: asyd|OJJ58940.1 aver|OJJ01536.1  
Group18066: asyd|OJJ59083.1 aver|OJJ01676.1  
Group18067: asyd|OJJ59086.1 aver|OJJ01678.1  
Group18068: asyd|OJJ59095.1 aver|OJJ01685.1  
Group18069: asyd|OJJ59102.1 aver|OJJ01693.1  
Group18070: asyd|OJJ59103.1 aver|OJJ01694.1  
Group18071: asyd|OJJ59113.1 aver|OJJ01705.1  
Group18072: asyd|OJJ59116.1 aver|OJJ01706.1  
Group18073: asyd|OJJ59153.1 aver|OJJ01743.1  
Group18074: asyd|OJJ59179.1 aver|OJJ01799.1  
Group18075: asyd|OJJ59195.1 aver|OJJ01811.1  
Group18076: asyd|OJJ59212.1 aver|OJJ01822.1  
Group18077: asyd|OJJ59213.1 aver|OJJ01823.1  
Group18078: asyd|OJJ59225.1 aver|OJJ01835.1  
Group18079: asyd|OJJ59256.1 aver|OJJ01867.1  
Group18080: asyd|OJJ59283.1 aver|OJJ01902.1  
Group18081: asyd|OJJ59284.1 aver|OJJ01903.1  
Group18082: asyd|OJJ59436.1 aver|OJJ02835.1

Group18083: asyd|OJJ59482.1 aver|OJJ02792.1  
Group18084: asyd|OJJ59509.1 aver|OJJ02765.1  
Group18085: asyd|OJJ59574.1 aver|OJJ02694.1  
Group18086: asyd|OJJ59575.1 aver|OJJ02693.1  
Group18087: asyd|OJJ59618.1 aver|OJJ02652.1  
Group18088: asyd|OJJ59623.1 aver|OJJ01913.1  
Group18089: asyd|OJJ59805.1 aver|OJJ02485.1  
Group18090: asyd|OJJ59806.1 aver|OJJ02484.1  
Group18091: asyd|OJJ59807.1 aver|OJJ02482.1  
Group18092: asyd|OJJ59811.1 aver|OJJ02477.1  
Group18093: asyd|OJJ59812.1 aver|OJJ02476.1  
Group18094: asyd|OJJ59827.1 aver|OJJ02460.1  
Group18095: asyd|OJJ59902.1 aver|OJJ02384.1  
Group18096: asyd|OJJ59903.1 aver|OJJ02383.1  
Group18097: asyd|OJJ59948.1 aver|OJJ02341.1  
Group18098: asyd|OJJ59954.1 aver|OJJ02335.1  
Group18099: asyd|OJJ59963.1 aver|OJJ02327.1  
Group18100: asyd|OJJ59964.1 aver|OJJ02326.1  
Group18101: asyd|OJJ59965.1 aver|OJJ02325.1  
Group18102: asyd|OJJ59987.1 aver|OJJ02304.1  
Group18103: asyd|OJJ60000.1 aver|OJJ02291.1  
Group18104: asyd|OJJ60044.1 aver|OJJ02243.1  
Group18105: asyd|OJJ60046.1 aver|OJJ02241.1  
Group18106: asyd|OJJ60071.1 aver|OJJ04190.1  
Group18107: asyd|OJJ60078.1 aver|OJJ04165.1  
Group18108: asyd|OJJ60092.1 aver|OJJ04179.1  
Group18109: asyd|OJJ60198.1 aver|OJJ04067.1  
Group18110: asyd|OJJ60204.1 atub|OJI90227.1  
Group18111: asyd|OJJ60208.1 aver|OJJ07742.1  
Group18112: asyd|OJJ60228.1 aver|OJJ04039.1  
Group18113: asyd|OJJ60240.1 aver|OJJ04026.1  
Group18114: asyd|OJJ60248.1 aver|OJJ08134.1  
Group18115: asyd|OJJ60283.1 aver|OJI99613.1  
Group18116: asyd|OJJ60286.1 aver|OJI99618.1  
Group18117: asyd|OJJ60287.1 aver|OJI99619.1  
Group18118: asyd|OJJ60295.1 aver|OJI99633.1  
Group18119: asyd|OJJ60339.1 azon|OJJ47734.1  
Group18120: asyd|OJJ60344.1 aver|OJI99685.1  
Group18121: asyd|OJJ60347.1 aver|OJI99689.1

Group18122: asyd|OJJ60348.1 aver|OJI99645.1  
Group18123: asyd|OJJ60353.1 aver|OJI99692.1  
Group18124: asyd|OJJ60356.1 aver|OJI99694.1  
Group18125: asyd|OJJ60374.1 ater|EAU33978.1  
Group18126: asyd|OJJ60384.1 aver|OJI99712.1  
Group18127: asyd|OJJ60385.1 aver|OJI99714.1  
Group18128: asyd|OJJ60393.1 aver|OJI99722.1  
Group18129: asyd|OJJ60394.1 aver|OJI99723.1  
Group18130: asyd|OJJ60400.1 aver|OJI99729.1  
Group18131: asyd|OJJ60401.1 aver|OJI99730.1  
Group18132: asyd|OJJ60406.1 aver|OJI99736.1  
Group18133: asyd|OJJ60408.1 aver|OJI99737.1  
Group18134: asyd|OJJ60409.1 aver|OJI99738.1  
Group18135: asyd|OJJ60417.1 aver|OJI99741.1  
Group18136: asyd|OJJ60419.1 aver|OJI99743.1  
Group18137: asyd|OJJ60422.1 aver|OJI99745.1  
Group18138: asyd|OJJ60423.1 aver|OJI99747.1  
Group18139: asyd|OJJ60431.1 aver|OJI99754.1  
Group18140: asyd|OJJ60437.1 aver|OJJ02285.1  
Group18141: asyd|OJJ60479.1 aver|OJI99799.1  
Group18142: asyd|OJJ60482.1 aver|OJI99807.1  
Group18143: asyd|OJJ60483.1 aver|OJI99808.1  
Group18144: asyd|OJJ60484.1 aver|OJI99809.1  
Group18145: asyd|OJJ60501.1 aver|OJI99819.1  
Group18146: asyd|OJJ60505.1 aver|OJI99830.1  
Group18147: asyd|OJJ60514.1 aver|OJI99840.1  
Group18148: asyd|OJJ60566.1 aver|OJI99892.1  
Group18149: asyd|OJJ60585.1 aver|OJI99908.1  
Group18150: asyd|OJJ60604.1 aver|OJI99930.1  
Group18151: asyd|OJJ60623.1 aver|OJI99947.1  
Group18152: asyd|OJJ60667.1 aver|OJI99990.1  
Group18153: asyd|OJJ60680.1 aver|OJJ00005.1  
Group18154: asyd|OJJ60726.1 azon|OJJ48654.1  
Group18155: asyd|OJJ60774.1 aver|OJJ00108.1  
Group18156: asyd|OJJ60775.1 aver|OJJ00109.1  
Group18157: asyd|OJJ60866.1 aver|OJJ00192.1  
Group18158: asyd|OJJ60907.1 aver|OJJ00234.1  
Group18159: asyd|OJJ60910.1 aver|OJJ00237.1  
Group18160: asyd|OJJ60928.1 aver|OJJ00254.1



Group18161: asyd|OJJ60945.1 aver|OJJ00271.1  
Group18162: asyd|OJJ60946.1 aver|OJJ00273.1  
Group18163: asyd|OJJ60950.1 aver|OJJ00277.1  
Group18164: asyd|OJJ60951.1 aver|OJJ00278.1  
Group18165: asyd|OJJ60986.1 aver|OJJ00305.1  
Group18166: asyd|OJJ61005.1 aver|OJJ00323.1  
Group18167: asyd|OJJ61021.1 azon|OJJ45275.1  
Group18168: asyd|OJJ61041.1 aver|OJJ00357.1  
Group18169: asyd|OJJ61086.1 aver|OJJ00401.1  
Group18170: asyd|OJJ61143.1 awen|OJJ39232.1  
Group18171: asyd|OJJ61163.1 aver|OJJ00487.1  
Group18172: asyd|OJJ61192.1 aver|OJJ00516.1  
Group18173: asyd|OJJ61215.1 aver|OJJ00539.1  
Group18174: asyd|OJJ61331.1 aver|OJJ00656.1  
Group18175: asyd|OJJ61377.1 aver|OJJ00704.1  
Group18176: asyd|OJJ61390.1 aver|OJJ00719.1  
Group18177: asyd|OJJ61394.1 aver|OJJ00723.1  
Group18178: asyd|OJJ61402.1 aver|OJJ00730.1  
Group18179: asyd|OJJ61418.1 aver|OJJ00753.1  
Group18180: asyd|OJJ61429.1 aver|OJJ00765.1  
Group18181: asyd|OJJ61444.1 aver|OJJ00780.1  
Group18182: asyd|OJJ61446.1 aver|OJJ00782.1  
Group18183: asyd|OJJ61449.1 aver|OJJ00784.1  
Group18184: asyd|OJJ61450.1 aver|OJJ00785.1  
Group18185: asyd|OJJ61461.1 aver|OJJ00800.1  
Group18186: asyd|OJJ61462.1 aver|OJJ00807.1  
Group18187: asyd|OJJ61468.1 aver|OJJ00808.1  
Group18188: asyd|OJJ61478.1 aver|OJJ00819.1  
Group18189: asyd|OJJ61479.1 aver|OJJ00820.1  
Group18190: asyd|OJJ61483.1 aver|OJJ00825.1  
Group18191: asyd|OJJ61485.1 aver|OJJ00827.1  
Group18192: asyd|OJJ61493.1 awen|OJJ41827.1  
Group18193: asyd|OJJ61497.1 aver|OJJ00834.1  
Group18194: asyd|OJJ61501.1 aver|OJJ00839.1  
Group18195: asyd|OJJ61504.1 aver|OJJ00841.1  
Group18196: asyd|OJJ61512.1 aver|OJJ00849.1  
Group18197: asyd|OJJ61513.1 aver|OJJ00850.1  
Group18198: asyd|OJJ61514.1 aver|OJJ00851.1  
Group18199: asyd|OJJ61533.1 aver|OJJ00861.1

Group18200: awen|OJJ30110.1 ater|EAU31339.1  
Group18201: asyd|OJJ61541.1 aver|OJJ00868.1  
Group18202: asyd|OJJ61542.1 aver|OJJ00869.1  
Group18203: asyd|OJJ61543.1 aver|OJJ00870.1  
Group18204: asyd|OJJ61544.1 aver|OJJ00871.1  
Group18205: asyd|OJJ61552.1 aver|OJJ00877.1  
Group18206: asyd|OJJ61556.1 aver|OJJ00879.1  
Group18207: asyd|OJJ61557.1 aver|OJJ00880.1  
Group18208: asyd|OJJ61558.1 aver|OJJ00881.1  
Group18209: asyd|OJJ61559.1 aver|OJJ00882.1  
Group18210: asyd|OJJ61560.1 aver|OJJ00883.1  
Group18211: asyd|OJJ61585.1 aver|OJJ00907.1  
Group18212: asyd|OJJ61615.1 aver|OJJ00938.1  
Group18213: asyd|OJJ61703.1 aver|OJI95792.1  
Group18214: asyd|OJJ61707.1 aver|OJI95804.1  
Group18215: asyd|OJJ61709.1 aver|OJI95805.1  
Group18216: asyd|OJJ61740.1 aver|OJI95837.1  
Group18217: asyd|OJJ61742.1 aver|OJI95839.1  
Group18218: asyd|OJJ61768.1 aver|OJI95865.1  
Group18219: asyd|OJJ61773.1 aver|OJI95875.1  
Group18220: asyd|OJJ61846.1 aver|OJI95946.1  
Group18221: asyd|OJJ61888.1 aver|OJI95985.1  
Group18222: asyd|OJJ61902.1 aver|OJI95995.1  
Group18223: asyd|OJJ62009.1 aver|OJI96101.1  
Group18224: asyd|OJJ62096.1 aver|OJI96202.1  
Group18225: asyd|OJJ62130.1 aver|OJI96239.1  
Group18226: asyd|OJJ62142.1 aver|OJI96252.1  
Group18227: asyd|OJJ62242.1 aver|OJI96352.1  
Group18228: asyd|OJJ62267.1 aver|OJI96376.1  
Group18229: asyd|OJJ62320.1 azon|OJJ45049.1  
Group18230: asyd|OJJ62328.1 aver|OJI96434.1  
Group18231: asyd|OJJ62416.1 aver|OJI96551.1  
Group18232: asyd|OJJ62461.1 aver|OJI96596.1  
Group18233: asyd|OJJ62478.1 aver|OJI96615.1  
Group18234: asyd|OJJ62479.1 aver|OJI96616.1  
Group18235: asyd|OJJ62548.1 aver|OJI96676.1  
Group18236: asyd|OJJ62556.1 aver|OJI96681.1  
Group18237: asyd|OJJ62558.1 aver|OJI96683.1  
Group18238: asyd|OJJ62578.1 aver|OJI96699.1

Group18239: asyd|OJJ62617.1 aver|OJJ03452.1  
Group18240: asyd|OJJ62618.1 aver|OJJ03453.1  
Group18241: asyd|OJJ62656.1 aver|OJI96754.1  
Group18242: asyd|OJJ62664.1 aver|OJI96762.1  
Group18243: asyd|OJJ62686.1 aver|OJJ03115.1  
Group18244: asyd|OJJ62719.1 awen|OJJ32592.1  
Group18245: asyd|OJJ62779.1 aver|OJI96824.1  
Group18246: asyd|OJJ62805.1 aver|OJI96851.1  
Group18247: asyd|OJJ62900.1 aver|OJI96954.1  
Group18248: asyd|OJJ62914.1 aver|OJI98075.1  
Group18249: asyd|OJJ62926.1 aver|OJI98063.1  
Group18250: asyd|OJJ62930.1 aver|OJI98060.1  
Group18251: asyd|OJJ62938.1 aver|OJI98053.1  
Group18252: asyd|OJJ62942.1 aver|OJI98048.1  
Group18253: asyd|OJJ62959.1 aver|OJI98008.1  
Group18254: asyd|OJJ62977.1 aver|OJI97992.1  
Group18255: asyd|OJJ62983.1 aver|OJI97986.1  
Group18256: asyd|OJJ63001.1 aver|OJI97965.1  
Group18257: asyd|OJJ63005.1 aver|OJI97955.1  
Group18258: asyd|OJJ63006.1 aver|OJI97954.1  
Group18259: asyd|OJJ63011.1 ater|EAU33154.1  
Group18260: asyd|OJJ63042.1 aver|OJI97926.1  
Group18261: asyd|OJJ63132.1 aver|OJI97822.1  
Group18262: asyd|OJJ63334.1 aver|OJI97628.1  
Group18263: asyd|OJJ63351.1 aver|OJI97610.1  
Group18264: asyd|OJJ63352.1 aver|OJI97609.1  
Group18265: asyd|OJJ63357.1 aver|OJI97604.1  
Group18266: asyd|OJJ63358.1 aver|OJI97597.1  
Group18267: asyd|OJJ63415.1 aver|OJI97523.1  
Group18268: asyd|OJJ63470.1 aver|OJI97462.1  
Group18269: asyd|OJJ63510.1 aver|OJI97420.1  
Group18270: asyd|OJJ63526.1 aver|OJI97405.1  
Group18271: asyd|OJJ63527.1 aver|OJI97404.1  
Group18272: asyd|OJJ63646.1 aver|OJI97288.1  
Group18273: asyd|OJJ63688.1 aver|OJI97247.1  
Group18274: asyd|OJJ63778.1 aver|OJI97159.1  
Group18275: asyd|OJJ63815.1 aver|OJI97123.1  
Group18276: asyd|OJJ63937.1 aver|OJI97005.1  
Group18277: asyd|OJJ63948.1 aver|OJI96994.1

Group18278: asyd|OJJ63949.1 aver|OJI96992.1  
Group18279: asyd|OJJ63971.1 ater|EAU31414.1  
Group18280: asyd|OJJ64024.1 aver|OJI98110.1  
Group18281: asyd|OJJ64029.1 aver|OJI98115.1  
Group18282: asyd|OJJ64129.1 aver|OJI98212.1  
Group18283: asyd|OJJ64138.1 aver|OJI98220.1  
Group18284: asyd|OJJ64159.1 aver|OJI98236.1  
Group18285: asyd|OJJ64161.1 aver|OJI98238.1  
Group18286: asyd|OJJ64169.1 aver|OJI98244.1  
Group18287: asyd|OJJ64170.1 aver|OJI98245.1  
Group18288: asyd|OJJ64173.1 aver|OJI98248.1  
Group18289: asyd|OJJ64184.1 aver|OJI98261.1  
Group18290: asyd|OJJ64185.1 aver|OJI98262.1  
Group18291: asyd|OJJ64217.1 azon|OJJ50408.1  
Group18292: asyd|OJJ64220.1 aver|OJI98303.1  
Group18293: asyd|OJJ64224.1 ater|EAU29575.1  
Group18294: asyd|OJJ64234.1 aver|OJI98326.1  
Group18295: asyd|OJJ64236.1 aver|OJI98329.1  
Group18296: asyd|OJJ64245.1 aver|OJI98336.1  
Group18297: asyd|OJJ64287.1 aver|OJI98379.1  
Group18298: asyd|OJJ64292.1 aver|OJI98385.1  
Group18299: asyd|OJJ64315.1 aver|OJI98408.1  
Group18300: asyd|OJJ64321.1 aver|OJI98414.1  
Group18301: asyd|OJJ64323.1 aver|OJI98416.1  
Group18302: asyd|OJJ64324.1 aver|OJI98417.1  
Group18303: asyd|OJJ64329.1 aver|OJI98422.1  
Group18304: asyd|OJJ64338.1 aver|OJI98431.1  
Group18305: asyd|OJJ64438.1 aver|OJI98539.1  
Group18306: asyd|OJJ64568.1 aver|OJI98665.1  
Group18307: asyd|OJJ64573.1 aver|OJI98670.1  
Group18308: asyd|OJJ64579.1 aver|OJI98676.1  
Group18309: asyd|OJJ64648.1 aver|OJI98748.1  
Group18310: asyd|OJJ64679.1 aver|OJI98781.1  
Group18311: asyd|OJJ64681.1 aver|OJI98783.1  
Group18312: asyd|OJJ64711.1 aver|OJI98813.1  
Group18313: asyd|OJJ64728.1 aver|OJI98832.1  
Group18314: asyd|OJJ64746.1 aver|OJI98849.1  
Group18315: asyd|OJJ64756.1 aver|OJI98858.1  
Group18316: asyd|OJJ64762.1 aver|OJI98863.1

Group18317: asyd|OJJ64764.1 aver|OJI98864.1  
Group18318: asyd|OJJ64769.1 aver|OJI98869.1  
Group18319: asyd|OJJ64789.1 aver|OJI98901.1  
Group18320: asyd|OJJ64804.1 aver|OJI98918.1  
Group18321: asyd|OJJ64805.1 aver|OJI98919.1  
Group18322: asyd|OJJ64823.1 aver|OJI98936.1  
Group18323: asyd|OJJ64845.1 aver|OJI98956.1  
Group18324: asyd|OJJ64964.1 aver|OJI99087.1  
Group18325: asyd|OJJ64965.1 aver|OJI99088.1  
Group18326: asyd|OJJ65066.1 aver|OJI99190.1  
Group18327: asyd|OJJ65077.1 aver|OJI99202.1  
Group18328: asyd|OJJ65087.1 aver|OJI99213.1  
Group18329: asyd|OJJ65125.1 aver|OJI99253.1  
Group18330: asyd|OJJ65142.1 awen|OJJ30555.1  
Group18331: asyd|OJJ65161.1 aver|OJI99312.1  
Group18332: asyd|OJJ65168.1 aver|OJI99320.1  
Group18333: asyd|OJJ65173.1 aver|OJI99326.1  
Group18334: asyd|OJJ65174.1 aver|OJI99327.1  
Group18335: asyd|OJJ65175.1 aver|OJI99328.1  
Group18336: asyd|OJJ65176.1 aver|OJI99329.1  
Group18337: asyd|OJJ65180.1 aver|OJI99333.1  
Group18338: asyd|OJJ65248.1 aver|OJI99400.1  
Group18339: asyd|OJJ65250.1 aver|OJI99402.1  
Group18340: asyd|OJJ65251.1 aver|OJI99403.1  
Group18341: asyd|OJJ65253.1 aver|OJI99404.1  
Group18342: asyd|OJJ65254.1 aver|OJI99405.1  
Group18343: asyd|OJJ65255.1 aver|OJI99406.1  
Group18344: asyd|OJJ65256.1 aver|OJI99407.1  
Group18345: asyd|OJJ65266.1 aver|OJI99418.1  
Group18346: asyd|OJJ65277.1 awen|OJJ37825.1  
Group18347: asyd|OJJ65278.1 ater|EAU37989.1  
Group18348: asyd|OJJ65280.1 aver|OJI99430.1  
Group18349: asyd|OJJ65281.1 aver|OJI99432.1  
Group18350: asyd|OJJ65282.1 aver|OJI99433.1  
Group18351: asyd|OJJ65300.1 aver|OJI99440.1  
Group18352: asyd|OJJ65319.1 aver|OJI99464.1  
Group18353: asyd|OJJ65321.1 aver|OJI99466.1  
Group18354: asyd|OJJ65328.1 aver|OJJ07721.1  
Group18355: asyd|OJJ65338.1 aver|OJI99485.1

Group18356: asyd|OJJ65339.1 aver|OJI99486.1  
Group18357: asyd|OJJ65344.1 aver|OJI99491.1  
Group18358: asyd|OJJ65345.1 aver|OJI99492.1  
Group18359: asyd|OJJ65346.1 aver|OJI99493.1  
Group18360: asyd|OJJ65348.1 aver|OJI99495.1  
Group18361: asyd|OJJ65352.1 aver|OJI99500.1  
Group18362: asyd|OJJ65368.1 aver|OJJ07158.1  
Group18363: asyd|OJJ65371.1 aver|OJI99538.1  
Group18364: asyd|OJJ65372.1 aver|OJI99539.1  
Group18365: asyd|OJJ65380.1 aver|OJI99550.1  
Group18366: asyd|OJJ65396.1 aver|OJI99568.1  
Group18367: asyd|OJJ65397.1 aver|OJI99569.1  
Group18368: ater|EAU29231.1 aver|OJJ05341.1  
Group18369: ater|EAU29234.1 aver|OJJ05345.1  
Group18370: ater|EAU29235.1 aver|OJJ05346.1  
Group18371: ater|EAU29236.1 aver|OJJ05336.1  
Group18372: ater|EAU29273.1 aver|OJJ01770.1  
Group18373: ater|EAU29274.1 aver|OJJ01768.1  
Group18374: ater|EAU29275.1 aver|OJJ01767.1  
Group18375: ater|EAU29277.1 aver|OJJ01764.1  
Group18376: ater|EAU29278.1 aver|OJJ01769.1  
Group18377: ater|EAU29311.1 awen|OJJ33834.1  
Group18378: ater|EAU29572.1 awen|OJJ35316.1  
Group18379: ater|EAU29964.1 awen|OJJ35823.1  
Group18380: ater|EAU30217.1 aver|OJJ07306.1  
Group18381: ater|EAU30323.1 azon|OJJ43176.1  
Group18382: ater|EAU31067.1 azon|OJJ51655.1  
Group18383: ater|EAU31202.1 awen|OJJ34630.1  
Group18384: ater|EAU31340.1 awen|OJJ30108.1  
Group18385: ater|EAU31341.1 awen|OJJ30107.1  
Group18386: ater|EAU31343.1 awen|OJJ30104.1  
Group18387: ater|EAU31408.1 awen|OJJ35957.1  
Group18388: ater|EAU31460.1 aver|OJJ03431.1  
Group18389: ater|EAU31500.1 azon|OJJ43624.1  
Group18390: ater|EAU31767.1 azon|OJJ42006.1  
Group18391: ater|EAU31844.1 aver|OJJ08411.1  
Group18392: ater|EAU31942.1 awen|OJJ39688.1  
Group18393: ater|EAU32082.1 aver|OJJ04405.1  
Group18394: ater|EAU32156.1 awen|OJJ40036.1

Group18395: ater|EAU32226.1 aver|OJJ05223.1  
Group18396: ater|EAU32514.1 aver|OJI96493.1  
Group18397: ater|EAU32643.1 aver|OJI98830.1  
Group18398: ater|EAU32645.1 awen|OJJ33503.1  
Group18399: ater|EAU32816.1 awen|OJJ32541.1  
Group18400: ater|EAU33085.1 azon|OJJ43687.1  
Group18401: ater|EAU33127.1 awen|OJJ30977.1  
Group18402: ater|EAU33622.1 aver|OJJ06435.1  
Group18403: ater|EAU33623.1 aver|OJJ06439.1  
Group18404: aver|OJJ01876.1 awen|OJJ37972.1  
Group18405: ater|EAU33847.1 azon|OJJ47376.1  
Group18406: ater|EAU33867.1 azon|OJJ43524.1  
Group18407: ater|EAU34046.1 awen|OJJ40110.1  
Group18408: ater|EAU35705.1 aver|OJJ07434.1  
Group18409: ater|EAU35749.1 aver|OJJ07760.1  
Group18410: ater|EAU35856.1 awen|OJJ29672.1  
Group18411: ater|EAU36048.1 awen|OJJ30956.1  
Group18412: ater|EAU36049.1 awen|OJJ30955.1  
Group18413: ater|EAU36073.1 awen|OJJ35067.1  
Group18414: ater|EAU36632.1 aver|OJJ07139.1  
Group18415: ater|EAU36708.1 aver|OJJ06458.1  
Group18416: ater|EAU37130.1 azon|OJJ42059.1  
Group18417: ater|EAU37404.1 aver|OJJ00327.1  
Group18418: ater|EAU37682.1 azon|OJJ42271.1  
Group18419: ater|EAU38632.1 azon|OJJ46583.1  
Group18420: ater|EAU39020.1 awen|OJJ35319.1  
Group18421: ater|EAU39067.1 azon|OJJ43881.1  
Group18422: ater|EAU39607.1 awen|OJJ34657.1  
Group18423: ater|EAU39621.1 awen|OJJ30205.1  
Group18424: atub|OJI79324.1 awen|OJJ37861.1  
Group18425: atub|OJI80138.1 aver|OJJ05133.1  
Group18426: atub|OJI80488.1 awen|OJJ30846.1  
Group18427: atub|OJI81832.1 awen|OJJ32217.1  
Group18428: atub|OJI82286.1 awen|OJJ37002.1  
Group18429: atub|OJI83113.1 awen|OJJ33409.1  
Group18430: atub|OJI85941.1 azon|OJJ42295.1  
Group18431: awen|OJJ35371.1 aver|OJJ08813.1  
Group18432: atub|OJI91292.1 awen|OJJ40849.1  
Group18433: aver|OJI95801.1 awen|OJJ33636.1

Group18434: aver|OJJ95803.1 awen|OJJ33638.1  
Group18435: awen|OJJ41693.1 azon|OJJ43939.1  
Group18436: aver|OJJ00456.1 awen|OJJ39222.1  
Group18437: aver|OJJ00747.1 awen|OJJ38295.1  
Group18438: aver|OJJ01155.1 azon|OJJ42242.1  
Group18439: aver|OJJ02009.1 azon|OJJ47857.1  
Group18440: aver|OJJ02011.1 azon|OJJ47855.1  
Group18441: aver|OJJ03475.1 azon|OJJ45210.1  
Group18442: aver|OJJ03855.1 awen|OJJ37016.1  
Group18443: aver|OJJ03887.1 awen|OJJ32656.1  
Group18444: aver|OJJ03905.1 azon|OJJ44713.1  
Group18445: aver|OJJ04012.1 azon|OJJ42213.1  
Group18446: aver|OJJ06257.1 awen|OJJ41171.1  
Group18447: aver|OJJ06609.1 azon|OJJ42588.1  
Group18448: aver|OJJ08606.1 azon|OJJ48023.1  
Group18449: aver|OJJ08745.1 awen|OJJ40748.1  
Group18450: aver|OJJ08814.1 awen|OJJ35372.1  
Group18451: awen|OJJ30852.1 azon|OJJ43035.1  
Group18452: awen|OJJ30860.1 azon|OJJ50318.1  
Group18453: awen|OJJ31336.1 azon|OJJ47386.1  
Group18454: awen|OJJ31678.1 azon|OJJ45087.1  
Group18455: awen|OJJ31681.1 azon|OJJ42499.1  
Group18456: awen|OJJ31937.1 azon|OJJ46599.1  
Group18457: awen|OJJ32697.1 azon|OJJ51791.1  
Group18458: awen|OJJ32805.1 azon|OJJ49027.1  
Group18459: awen|OJJ33693.1 azon|OJJ46548.1  
Group18460: awen|OJJ34034.1 azon|OJJ48206.1  
Group18461: awen|OJJ34125.1 azon|OJJ44223.1  
Group18462: awen|OJJ34491.1 azon|OJJ46008.1  
Group18463: awen|OJJ34631.1 azon|OJJ43116.1  
Group18464: awen|OJJ35355.1 azon|OJJ43597.1  
Group18465: awen|OJJ35832.1 azon|OJJ45773.1  
Group18466: awen|OJJ36291.1 azon|OJJ50428.1  
Group18467: awen|OJJ37017.1 azon|OJJ42676.1  
Group18468: awen|OJJ37464.1 azon|OJJ51142.1  
Group18469: awen|OJJ38086.1 azon|OJJ46847.1  
Group18470: awen|OJJ38304.1 azon|OJJ45932.1  
Group18471: awen|OJJ38829.1 azon|OJJ49625.1  
Group18472: awen|OJJ39499.1 azon|OJJ47701.1



Group18473: awen|OJJ40027.1 azon|OJJ42011.1

Group18474: awen|OJJ41079.1 azon|OJJ44661.1

**Additional data file 2:** Core genome of *Aspergillus*. The file consists of all the clusters containing at least one protein from all the analysed 18 species. Abbreviations - abra : *Aspergillus brasiliensis*, acar : *A. carbonarius*, acla : *A. clavatus*, afis : *A. fischeri*, afla : *A. flavus*, afum : *A. fumigatus*, agla : *A. glaucus*, akaw : *A. kawachii*, alue : *A. luchuensis*, anid : *A. nidulans*, anig : *A. niger*, aora : *A. oryzae*, asyd : *A. sydowii*, ater : *A. terreus*, atub : *A. tubingenesis*, aver : *A. versicolor*, awen : *A. wentii*, azon : *A. zonatus*.

Group1: abra|OJJ66207.1 abra|OJJ67944.1 abra|OJJ69734.1 abra|OJJ73921.1 abra|OJJ75305.1 abra|OJJ75840.1 abra|OJJ73699.1 abra|OJJ69537.1 abra|OJJ78094.1 acar|OOF90653.1 acar|OOF94187.1 acar|OOG00776.1 acar|OOG01052.1 acar|OOF92566.1 acar|OOF93189.1 acar|OOF97512.1 acar|OOF98777.1 acla|EAW07798.1 acla|EAW08899.1 acla|EAW11681.1 akaw|GAA89528.1 akaw|GAA90187.1 akaw|GAA91252.1 aluc|OJZ80511.1 aluc|OJZ82816.1 aluc|OJZ88125.1 aluc|OJZ89282.1 aluc|OJZ83162.1 anid|CBF73441.1 anid|CBF90374.1 anid|CBF87872.1 anig|EHA17891.1 anig|EHA21256.1 anig|EHA21434.1 anig|EHA25711.1 anig|EHA28226.1 anig|EHA18088.1 anig|EHA19858.1 anig|EHA25622.1 anig|EHA25682.1 anig|EHA23283.1 aory|EIT74664.1 aory|EIT83097.1 aory|EIT80579.1 aory|EIT81467.1 aory|EIT83286.1 asyd|OJJ56148.1 asyd|OJJ63431.1 atub|OJI87775.1 atub|OJI89047.1 atub|OJI90732.1 atub|OJI88419.1 aver|OJI97506.1 aver|OJI99587.1 aver|OJJ03355.1 aver|OJJ05088.1 aver|OJJ08114.1 aver|OJJ03487.1 awen|OJJ29812.1 awen|OJJ35864.1 awen|OJJ38889.1 azon|OJJ42489.1 azon|OJJ4494.1 azon|OJJ46205.1 azon|OJJ47369.1 azon|OJJ45854.1 afis|EAW22835.1 afla|EED50110.1 afla|EED51745.1 afum|EAL90367.2 agla|OJJ78560.1 akaw|GAA89080.1 aory|EIT81736.1 ater|EAU35730.1 abra|OJJ67593.1 akaw|GAA89112.1 atub|OJI88453.1 acar|OOF91540.1 abra|OJJ70223.1 afla|EED52040.1 afum|EAL91343.1 akaw|GAA85904.1 aluc|OJZ91163.1 anid|CBF80212.1 atub|OJI83179.1 acar|OOF96620.1 akaw|GAA84550.1 atub|OJI85517.1 afla|EED52433.1 acla|EAW10758.1 afis|EAW16932.1 afla|EED48405.1 afla|EED51820.1 afla|EED51822.1 afla|EED52154.1 aory|EIT74440.1 anid|CBF73982.1 ater|EAU33387.1

Group2: abra|OJJ67588.1 abra|OJJ73922.1 abra|OJJ75304.1 acar|OOF99263.1 acar|OOG01053.1 acar|OOF99291.1 acar|OOF99559.1 acla|EAW07086.1 acla|EAW08665.1 acla|EAW08900.1 acla|EAW11679.1 acla|EAW15286.1 acla|EAW07799.1 afis|EAW16180.1 afis|EAW16446.1 afis|EAW20684.1 afla|EED44993.1 afla|EED47804.1 afla|EED49850.1 afla|EED50111.1 afla|EED52159.1 afum|EAL89049.1 afum|EAL91342.1 akaw|GAA82422.1 akaw|GAA89107.1 akaw|GAA89529.1 anid|CBF73453.1 anid|CBF87069.1 anid|CBF76036.1 anid|CBF87869.1 anid|CBF90372.1 anig|EHA17890.1 anig|EHA25707.1 anig|EHA20896.1 anig|EHA21433.1 anig|EHA24938.1 aory|EIT73739.1 aory|EIT74412.1 aory|EIT74615.1 aory|EIT80956.1 asyd|OJJ56147.1 asyd|OJJ63429.1 ater|EAU29302.1 ater|EAU30156.1 ater|EAU37759.1 ater|EAU30201.1 atub|OJI86150.1 atub|OJI88448.1 atub|OJI88518.1 atub|OJI90731.1 aver|OJI97508.1 aver|OJI99595.1 aver|OJJ03909.1 aver|OJJ05087.1 aver|OJI99581.1 aver|OJI99596.1 aver|OJJ07364.1 aver|OJJ08120.1 aver|OJJ08464.1 aver|OJI99625.1 aver|OJJ07311.1 aver|OJJ08781.1 awen|OJJ36076.1 awen|OJJ38362.1 awen|OJJ32929.1 awen|OJJ38888.1 azon|OJJ42030.1 azon|OJJ42483.1 azon|OJJ46579.1 azon|OJJ48580.1 afis|EAW22836.1 afum|EAL90366.1 agla|OJJ80563.1 aluc|OJZ85583.1 aluc|OJZ88124.1 asyd|OJJ61536.1 ater|EJA38874.1 awen|OJJ32292.1 abra|OJJ67652.1 afis|EAW16453.1 afis|EAW25605.1 agla|OJJ79232.1 akaw|GAA89168.1 aluc|OJZ81665.1 anig|EHA25778.1 ater|EAU33874.1 aver|OJJ07366.1 azon|OJJ50363.1 acla|EAW14636.1 ater|EAU36802.1 awen|OJJ34576.1 afum|EAL88812.1 aver|OJI99592.1 asyd|OJJ52456.1 aver|OJJ03957.1 awen|OJJ34650.1

Group3: abra|OJJ67584.1 abra|OJJ67975.1 abra|OJJ75778.1 abra|OJJ77754.1 acar|OOF92816.1 acar|OOF96723.1 acla|EAW08895.1 acla|EAW11760.1 acla|EAW12170.1 acla|EAW12336.1 acla|EAW14856.1 afla|EED47354.1 afla|EED52019.1 afla|EED47890.1 afla|EED48583.1 agla|OJJ79933.1 agla|OJJ80111.1 agla|OJJ83619.1 agla|OJJ86349.1 akaw|GAA84491.1 akaw|GAA85345.1 akaw|GAA87318.1 akaw|GAA91228.1 akaw|GAA92525.1 akaw|GAA90346.1 akaw|GAA85925.1 aluc|OJZ82842.1 aluc|OJZ85886.1 aluc|OJZ89214.1 aluc|OJZ90707.1 aluc|OJZ91539.1 aluc|OJZ91139.1 anid|CBF71467.1 anid|CBF83055.1 anid|CBF86052.1 anid|CBF87072.1 anid|CBF88289.1 anig|EHA19567.1 anig|EHA20193.1 anig|EHA21280.1 anig|EHA22576.1 anig|EHA24574.1 anig|EHA24700.1 anig|EHA28244.1 aory|EIT73118.1 aory|EIT76300.1 aory|EIT77964.1 aory|EIT81441.1 aory|EIT82867.1 ater|EAU29417.1 ater|EAU31921.1 ater|EAU32663.1 ater|EAU36720.1 atub|OJI79672.1 atub|OJI83150.1 atub|OJI85993.1 atub|OJI91114.1 atub|OJI82134.1 atub|OJI85578.1 atub|OJI89072.1 atub|OJI82802.1 aver|OJI96730.1 aver|OJJ05906.1 awen|OJJ29758.1 awen|OJJ34705.1 awen|OJJ40111.1 awen|OJJ29917.1 awen|OJJ30910.1 awen|OJJ38044.1 awen|OJJ39589.1 awen|OJJ29944.1 afis|EAW23793.1 afum|EAL87227.2 asyd|OJJ62861.1 aver|OJI96914.1 asyd|OJJ61528.1 abra|OJJ70374.1 acar|OOF91895.1 afis|EAW16886.1 afum|EAL86424.2 ater|EAU30225.1 azon|OJJ48577.1 acar|OOF93599.1 azon|OJJ49991.1 afla|EED46560.1 akaw|GAA87467.1 aluc|OJZ88529.1

Group4: abra|OJJ67662.1 abra|OJJ77815.1 abra|OJJ78181.1 abra|OJJ74373.1 abra|OJJ78098.1 abra|OJJ76619.1 acar|OOF91828.1 acar|OOF91847.1 acar|OOF92934.1 acar|OOF94993.1 acar|OOF97632.1 acar|OOF95055.1 acar|OOF95122.1 acla|EAW07064.1 afis|EAW19759.1 afis|EAW23638.1 akaw|GAA83602.1 akaw|GAA84851.1 akaw|GAA92094.1 akaw|GAA83831.1 akaw|GAA85928.1 akaw|GAA89177.1 akaw|GAA86655.1 akaw|GAA85575.1 akaw|GAA85859.1 aluc|OJZ81656.1 aluc|OJZ83631.1 aluc|OJZ90887.1 aluc|OJZ91221.1 aluc|OJZ81972.1 aluc|OJZ86820.1 aluc|OJZ89749.1 aluc|OJZ92392.1 aluc|OJZ83511.1 aluc|OJZ89332.1 aluc|OJZ91137.1 anid|CBF80211.1 anid|CBF82304.1 anig|EHA19289.1 anig|EHA24757.1 anig|EHA19606.1 anig|EHA25789.1 anig|EHA26583.1 aory|EIT74370.1 aory|EIT76972.1 ater|EAU35165.1 ater|EAU36856.1 atub|OJI79585.1 atub|OJI79696.1 atub|OJI83697.1 atub|OJI85053.1 atub|OJI86822.1 atub|OJI82881.1 atub|OJI88527.1 atub|OJI90000.1 atub|OJI83148.1 aver|OJJ04870.1 aver|OJJ06306.1

aver|OJJ07785.1 awen|OJJ29662.1 awen|OJJ29874.1 awen|OJJ33672.1 agla|OJJ83634.1 asyd|OJJ52727.1  
aver|OJJ02001.1 azon|OJJ47400.1 afla|EED51023.1 abra|OJJ74811.1 acar|OOF95802.1 afla|EED52130.1  
afum|EAL85129.1 atub|OJI85468.1 abra|OJJ77455.1 afla|EED49595.1 anig|EHA19288.1 asyd|OJJ56406.1  
ater|EAU32666.1 ater|EAU38928.1 ater|EAU39559.1 anid|CBF79115.1 afis|EAW19771.1 akaw|GAA84588.1  
akaw|GAA84589.1 aluc|OJZ89334.1 atub|OJI82404.1

Group5: abra|OJJ67238.1 abra|OJJ68732.1 acar|OOF92227.1 acar|OOF98313.1 acla|EAW12167.1  
acla|EAW12516.1 afis|EAW15603.1 afis|EAW17072.1 afis|EAW19893.1 afis|EAW21005.1 afis|EAW24131.1  
afis|EAW24651.1 afis|EAW22083.1 afis|EAW24734.1 afla|EED46089.1 afla|EED46801.1 afla|EED48098.1  
afila|EED52234.1 afla|EED48355.1 afla|EED49615.1 afla|EED55083.1 afla|EED56403.1 afum|EAL85692.1  
afum|EAL89381.1 afum|EAL91987.1 afum|EAL85730.1 afum|EAL86560.1 agla|OJJ79085.1 agla|OJJ82566.1  
agla|OJJ86784.1 agla|OJJ87207.1 akaw|GAA89881.1 akaw|GAA91663.1 aluc|OJZ81798.1 aluc|OJZ87737.1  
anid|CBF75787.1 anid|CBF86562.1 anid|CBF86663.1 anig|EHA20229.1 anig|EHA22418.1 aory|EIT72725.1  
aory|EIT74466.1 aory|EIT76413.1 aory|EIT80974.1 aory|EIT81644.1 aory|EIT83015.1 asyd|OJJ59270.1  
asyd|OJJ64851.1 asyd|OJJ60947.1 asyd|OJJ64782.1 asyd|OJJ65051.1 ater|EAU30561.1 ater|EAU31344.1  
ater|EAU38103.1 atub|OJI80903.1 atub|OJI84369.1 aver|OJI98893.1 aver|OJI99174.1 aver|OJJ00274.1  
aver|OJJ08481.1 aver|OJI98963.1 aver|OJJ01883.1 aver|OJJ07136.1 awen|OJJ30103.1 awen|OJJ40222.1  
awen|OJJ41358.1 awen|OJJ31256.1 awen|OJJ37981.1 awen|OJJ46971.1 azon|OJJ48822.1 abra|OJJ73660.1  
acar|OOG00838.1 akaw|GAA88498.1 aluc|OJZ88393.1 anig|EHA18121.1 aory|EIT72296.1 atub|OJI90988.1  
awen|OJJ38335.1 anid|CBF74724.1 aluc|OJZ80164.1 aory|EIT76217.1 ater|EAU32520.1

Group7: abra|OJJ65820.1 abra|OJJ66803.1 acar|OOF90643.1 acar|OOF94182.1 afis|EAW16457.1  
afis|EAW21767.1 afla|EED55145.1 afla|EED55917.1 akaw|GAA92417.1 akaw|GAA93242.1 anid|CBF75176.1  
anid|CBF84668.1 anid|CBF85153.1 anid|CBF88209.1 anid|CBF75912.1 anid|CBF80593.1 anid|CBF80303.1  
anid|CBF80770.1 anig|EHA18419.1 anig|EHA24965.1 anig|EHA21352.1 aory|EIT76564.1 aory|EIT81636.1  
aory|EIT81823.1 asyd|OJJ52880.1 asyd|OJJ54446.1 asyd|OJJ60235.1 asyd|OJJ61610.1 ater|EAU32131.1  
ater|EAU35090.1 ater|EAU37273.1 aver|OJJ04030.1 aver|OJJ08401.1 aver|OJJ08851.1 aver|OJJ07396.1  
azon|OJJ42892.1 azon|OJJ45918.1 azon|OJJ48221.1 azon|OJJ48680.1 azon|OJJ49289.1 agla|OJJ83550.1  
anig|EHA26118.1 awen|OJJ41193.1 azon|OJJ42522.1 abra|OJJ67032.1 acla|EAW08788.1 afis|EAW19897.1  
afis|EAW23754.1 agla|OJJ82646.1 akaw|GAA92151.1 aluc|OJZ85558.1 ater|EAU30865.1 atub|OJI79347.1  
abra|OJJ76132.1 acar|OOF99791.1 acla|EAW09686.1 afis|EAW21453.1 afla|EED55883.1 afum|EAL92472.1  
agla|OJJ85599.1 akaw|GAA88835.1 aluc|OJZ89593.1 anid|CBF76549.1 anig|EHA23018.1 aory|EIT76608.1  
asyd|OJJ61156.1 atub|OJI85209.1 aver|OJJ00478.1 awen|OJJ39247.1 azon|OJJ51608.1 abra|OJJ77926.1  
acar|OOF89902.1 afum|EAL87190.2 akaw|GAA83738.1 aluc|OJZ90994.1 atub|OJI82984.1 aver|OJJ07910.1  
aver|OJJ00933.1

Group8: abra|OJJ66275.1 abra|OJJ77982.1 abra|OJJ70821.1 abra|OJJ71091.1 abra|OJJ75537.1  
abra|OJJ78258.1 acar|OOF97571.1 acar|OOF98050.1 acar|OOG00735.1 acar|OOF98604.1 acla|EAW07624.1  
acla|EAW08950.1 acla|EAW09019.1 acla|EAW09117.1 acla|EAW13520.1 acla|EAW15062.1 afla|EED45116.1  
afila|EED47649.1 afla|EED49862.1 afla|EED51183.1 akaw|GAA82870.1 akaw|GAA91957.1 akaw|GAA85998.1  
aluc|OJZ82661.1 aluc|OJZ84344.1 aluc|OJZ87437.1 aluc|OJZ91057.1 aluc|OJZ91332.1 anig|EHA18001.1  
anig|EHA18935.1 anig|EHA20663.1 anig|EHA27435.1 anig|EHA27680.1 anig|EHA19760.1 anig|EHA23147.1  
anig|EHA23656.1 anig|EHA20014.1 aory|EIT73707.1 aory|EIT80187.1 aory|EIT83384.1 asyd|OJJ57246.1  
asyd|OJJ60063.1 asyd|OJJ63687.1 atub|OJI81211.1 atub|OJI83130.1 atub|OJI83325.1 atub|OJI88893.1  
atub|OJI89724.1 atub|OJI83053.1 atub|OJI89947.1 aver|OJI99011.1 aver|OJJ08178.1 awen|OJJ29725.1  
awen|OJJ32235.1 awen|OJJ34622.1 afla|EED49876.1 afum|EAL85113.2 akaw|GAA87094.1 aory|EIT83412.1  
ater|EAU38971.1 afis|EAW16804.1 agla|OJJ85462.1 anid|CBF80487.1 ater|EAU29410.1 azon|OJJ42361.1  
acla|EAW10019.1 afis|EAW20415.1 afum|EAL89230.2 anid|CBF85555.1 ater|EAU29808.1 azon|OJJ43495.1  
aver|OJI97248.1 afum|EAL91103.2 akaw|GAA83290.1 akaw|GAA83291.1 afla|EED45117.1 aver|OJJ08105.1

Group9: abra|OJJ68001.1 abra|OJJ69377.1 abra|OJJ77432.1 abra|OJJ78055.1 acar|OOF92044.1  
acar|OOF94347.1 afis|EAW19338.1 afis|EAW24682.1 afis|EAW20700.1 afis|EAW24697.1 afis|EAW25724.1  
afila|EED45393.1 afla|EED47975.1 afla|EED51175.1 afla|EED57518.1 afum|EAL84397.1 afum|EAL84875.1  
afum|EAL89339.1 afum|EAL94057.1 agla|OJJ83163.1 agla|OJJ85718.1 agla|OJJ88362.1 akaw|GAA85937.1  
akaw|GAA88581.1 akaw|GAA88246.1 akaw|GAA90949.1 aluc|OJZ82213.1 aluc|OJZ82875.1 aluc|OJZ88485.1  
aluc|OJZ91125.1 anid|CBF70387.1 anid|CBF79143.1 anid|CBF90097.1 anid|CBF74114.1 anid|CBF80184.1  
anig|EHA21301.1 anig|EHA28527.1 aory|EIT75060.1 aory|EIT80443.1 aory|EIT79828.1 aory|EIT81356.1  
aory|EIT81872.1 aory|EIT82404.1 asyd|OJJ53903.1 asyd|OJJ56275.1 asyd|OJJ57401.1 asyd|OJJ57276.1  
asyd|OJJ58638.1 asyd|OJJ62031.1 ater|EAU31624.1 ater|EAU37396.1 ater|EAU31762.1 ater|EAU38791.1  
atub|OJI79831.1 atub|OJI83136.1 atub|OJI88222.1 atub|OJI89099.1 aver|OJI96122.1 aver|OJJ01245.1  
aver|OJI99530.1 aver|OJJ08000.1 aver|OJJ08490.1 awen|OJJ32995.1 awen|OJJ37839.1 awen|OJJ40791.1  
azon|OJJ48191.1 azon|OJJ48520.1 acla|EAW14609.1 azon|OJJ43922.1 acla|EAW13612.1 afla|EED53479.1  
anig|EHA20150.1 anig|EHA19826.1 afla|EED51738.1 afla|EED51739.1 ater|EAU33967.1

Group10: abra|OJJ73857.1 abra|OJJ76179.1 acar|OOF94216.1 acar|OOF99761.1 acar|OOG01005.1  
acla|EAW07747.1 acla|EAW09647.1 afis|EAW17299.1 afis|EAW22784.1 afis|EAW20842.1 afis|EAW21493.1  
afila|EED48870.1 afla|EED50046.1 afum|EAL84790.1 afum|EAL92512.1 afum|EAL90415.1 agla|OJJ83596.1  
agla|OJJ85655.1 akaw|GAA82124.1 akaw|GAA89472.1 akaw|GAA92487.1 aluc|OJZ80154.1 aluc|OJZ88191.1  
aluc|OJZ92051.1 aluc|OJZ91499.1 anid|CBF76107.1 anid|CBF87969.1 anid|CBF76478.1 anid|CBF80461.1  
anid|CBF83927.1 anig|EHA17943.1 anig|EHA22980.1 anig|EHA22539.1 aory|EIT74611.1 aory|EIT76730.1

aory|EIT80155.1 aory|EIT81260.1 asyd|OJJ53335.1 asyd|OJJ61118.1 asyd|OJJ55439.1 asyd|OJJ60355.1  
asyd|OJJ63488.1 ater|EAU29437.1 ater|EAU35045.1 ater|EAU38925.1 ater|EAU29951.1 atub|OJI80378.1  
atub|OJI90790.1 atub|OJI85952.1 atub|OJI86482.1 aver|OJI97441.1 aver|OJJ06514.1 aver|OJI99693.1  
aver|OJJ08409.1 aver|OJJ00436.1 awen|OJJ36113.1 awen|OJJ38951.1 awen|OJJ39202.1 awen|OJJ40168.1  
azon|OJJ49724.1 azon|OJJ51661.1 abra|OJJ70289.1 acar|OOF91742.1 akaw|GAA92859.1 aluc|OJZ82554.1  
anig|EHA22518.1 atub|OJI88795.1 awen|OJJ38795.1 afla|EED57355.1 afla|EED55928.1

Group11: abra|OJJ66566.1 abra|OJJ74913.1 acar|OOF91007.1 acar|OOF95904.1 acla|EAW08458.1  
acla|EAW10929.1 afis|EAW20932.1 afis|EAW23503.1 afla|EED50286.1 afla|EED57404.1 afum|EAL84702.1  
afum|EAL87958.1 agla|OJJ83956.1 agla|OJJ86749.1 akaw|GAA83509.1 akaw|GAA91151.1 aluc|OJZ81479.1  
aluc|OJZ92486.1 anid|CBF82508.1 anid|CBF89725.1 anig|EHA18724.1 anig|EHA18871.1 anig|EHA25948.1  
anig|EHA26487.1 aory|EIT77296.1 aory|EIT80109.1 asyd|OJJ54080.1 asyd|OJJ62235.1 ater|EAU35292.1  
ater|EAU38577.1 atub|OJI86917.1 atub|OJI88701.1 aver|OJI96344.1 aver|OJJ08658.1 awen|OJJ34386.1  
awen|OJJ39829.1 azon|OJJ47952.1 azon|OJJ48118.1 acar|OOF91006.1 acla|EAW10930.1 afis|EAW20931.1  
afla|EED50285.1 afum|EAL84703.2 agla|OJJ83957.1 akaw|GAA91152.1 anid|CBF82510.1 anig|EHA25947.1  
aory|EIT77323.1 asyd|OJJ54081.1 ater|EAU38576.1 aver|OJJ08657.1 awen|OJJ34387.1 azon|OJJ48119.1  
abra|OJJ68224.1 acar|OOF95905.1 acla|EAW08457.1 afis|EAW23498.1 afla|EED57403.1 afum|EAL87965.1  
akaw|GAA83219.1 aluc|OJZ83721.1 anig|EHA18870.1 aory|EIT80136.1 ater|EAU35291.1 atub|OJI90095.1  
awen|OJJ39827.1 anig|EHA26486.1 atub|OJI86918.1 agla|OJJ83079.1

Group12: abra|OJJ67365.1 abra|OJJ70373.1 abra|OJJ72695.1 abra|OJJ77105.1 abra|OJJ78039.1  
abra|OJJ77002.1 acar|OOF90082.1 acar|OOF91896.1 acar|OOF92990.1 acar|OOF91448.1 acla|EAW08775.1  
acla|EAW12337.1 afis|EAW16885.1 afis|EAW20732.1 afis|EAW25626.1 afla|EED47350.1 afla|EED50231.1  
afla|EED54427.1 afum|EAL84314.2 afum|EAL86423.2 agla|OJJ78903.1 agla|OJJ79932.1 agla|OJJ85297.1  
akaw|GAA86951.1 akaw|GAA91977.1 aluc|OJZ80600.1 aluc|OJZ84401.1 aluc|OJZ82637.1 aluc|OJZ84514.1  
anid|CBF80656.1 anid|CBF82934.1 anid|CBF83105.1 anig|EHA27442.1 anig|EHA27812.1 aory|EIT75862.1  
aory|EIT77345.1 aory|EIT81172.1 aory|EIT81924.1 aory|EIT82860.1 asyd|OJJ53449.1 asyd|OJJ54612.1  
asyd|OJJ61456.1 ater|EAU30228.1 ater|EAU38239.1 atub|OJI88868.1 atub|OJI89567.1 atub|OJI89671.1  
aver|OJJ00792.1 aver|OJJ05324.1 aver|OJJ07546.1 aver|OJJ08303.1 awen|OJJ29598.1 awen|OJJ29759.1  
awen|OJJ31482.1 awen|OJJ34518.1 awen|OJJ36047.1 azon|OJJ42524.1 afla|EED55182.1 akaw|GAA87046.1  
anig|EHA27731.1 aory|EIT81588.1 asyd|OJJ55521.1 ater|EAU32705.1 aver|OJJ06599.1 azon|OJJ50398.1  
afla|EED48862.1 ater|EAU32222.1

Group13: abra|OJJ74143.1 abra|OJJ77919.1 acar|OOF95048.1 acar|OOF95115.1 acar|OOF95586.1  
acar|OOF98862.1 acar|OOF99364.1 afla|EED47372.1 afla|EED48594.1 akaw|GAA83744.1 akaw|GAA89741.1  
akaw|GAA92822.1 akaw|GAA92977.1 aluc|OJZ80240.1 aluc|OJZ91576.1 aluc|OJZ80643.1 aluc|OJZ90987.1  
anid|CBF75107.1 anid|CBF76688.1 anid|CBF85354.1 anid|CBF86773.1 anig|EHA19692.1 anig|EHA27189.1  
aory|EIT73093.1 aory|EIT82880.1 asyd|OJJ59996.1 asyd|OJJ61226.1 asyd|OJJ64036.1 asyd|OJJ64686.1  
ater|EAU32382.1 ater|EAU33556.1 atub|OJI82978.1 atub|OJI87498.1 aver|OJI98121.1 aver|OJJ00549.1  
aver|OJJ02295.1 aver|OJI98789.1 abra|OJJ69652.1 acar|OOF98861.1 acla|EAW06691.1 afis|EAW16074.1  
afla|EED48593.1 afum|EAL88706.2 agla|OJJ86094.1 akaw|GAA91631.1 aluc|OJZ82458.1 anid|CBF75109.1  
anig|EHA28317.1 aory|EIT73047.1 ater|EAU33557.1 atub|OJI87980.1 awen|OJJ30359.1 azon|OJJ45380.1  
acla|EAW06690.1 afis|EAW16075.1 afum|EAL88707.1 awen|OJJ30358.1 abra|OJJ76634.1 afla|EED53145.1  
agla|OJJ82986.1 anig|EHA22603.1 aory|EIT75089.1 ater|EAU37809.1 atub|OJI86025.1 awen|OJJ31622.1  
azon|OJJ47320.1

Group14: abra|OJJ65763.1 abra|OJJ65764.1 abra|OJJ68458.1 abra|OJJ70187.1 acar|OOF91603.1  
acar|OOF93288.1 acar|OOF99308.1 acar|OOF99313.1 afis|EAW16734.1 afis|EAW19114.1 afla|EED45012.1  
afla|EED57380.1 afla|EED57383.1 afum|EAL86261.1 afum|EAL86308.1 afum|EAL86264.1 afum|EAL93846.1  
akaw|GAA83845.1 akaw|GAA86588.1 akaw|GAA92381.1 aluc|OJZ83240.1 aluc|OJZ85135.1 aluc|OJZ90870.1  
anid|CBF74944.1 anid|CBF83824.1 anid|CBF84265.1 anig|EHA19590.1 anig|EHA25367.1 anig|EHA21095.1  
anig|EHA22863.1 aory|EIT73582.1 aory|EIT75916.1 aory|EIT80067.1 aory|EIT80069.1 asyd|OJJ57214.1  
asyd|OJJ58070.1 asyd|OJJ63941.1 asyd|OJJ60903.1 asyd|OJJ63609.1 asyd|OJJ63938.1 atub|OJI80457.1  
atub|OJI82868.1 atub|OJI87697.1 aver|OJI97001.1 aver|OJJ00229.1 aver|OJJ03075.1 aver|OJJ04337.1  
aver|OJJ07009.1 awen|OJJ30374.1 awen|OJJ30814.1 awen|OJJ32530.1 acla|EAW14406.1 agla|OJJ89198.1  
azon|OJJ47391.1 aver|OJI97004.1 aver|OJI97328.1 awen|OJJ40814.1 azon|OJJ50090.1 ater|EAU37377.1  
azon|OJJ42904.1 ater|EAU38814.1 asyd|OJJ55207.1

Group15: abra|OJJ69361.1 abra|OJJ71787.1 abra|OJJ75622.1 acar|OOF94364.1 acar|OOF96466.1  
acar|OOG00218.1 acla|EAW08453.1 acla|EAW09357.1 acla|EAW14751.1 afis|EAW21780.1 afis|EAW23502.1  
afis|EAW24282.1 afla|EED46347.1 afla|EED47994.1 afum|EAL85951.1 afum|EAL87959.1 afum|EAL92809.1  
agla|OJJ80637.1 agla|OJJ84344.1 akaw|GAA84369.1 akaw|GAA85124.1 akaw|GAA88230.1 aluc|OJZ82194.1  
aluc|OJZ86517.1 aluc|OJZ89073.1 anig|EHA22129.1 anig|EHA23464.1 anig|EHA28543.1 aory|EIT79847.1  
aory|EIT81244.1 asyd|OJJ53917.1 asyd|OJJ56885.1 asyd|OJJ61185.1 asyd|OJJ62326.1 ater|EAU31230.1  
ater|EAU38460.1 atub|OJI84007.1 atub|OJI85713.1 atub|OJI88241.1 aver|OJI96431.1 aver|OJJ00509.1  
aver|OJJ08015.1 awen|OJJ33015.1 awen|OJJ34069.1 awen|OJJ39823.1 azon|OJJ47947.1 azon|OJJ48162.1  
azon|OJJ48502.1 afla|EED57398.1 anid|CBF76607.1 agla|OJJ86745.1 abra|OJJ74918.1 acar|OOF95909.1  
akaw|GAA83505.1 aluc|OJZ92489.1 anid|CBF89735.1 anig|EHA26483.1 aory|EIT80098.1 asyd|OJJ62232.1  
ater|EAU35287.1 atub|OJI86922.1 aver|OJI96341.1

Group16: abra|OJJ69532.1 abra|OJJ73245.1 abra|OJJ75746.1 abra|OJJ71793.1 acar|OOF90431.1 acar|OOF92663.1 acar|OOG00484.1 acar|OOF96473.1 acla|EAW06919.1 acla|EAW08051.1 afis|EAW16536.1 afis|EAW23087.1 afla|EED48561.1 afla|EED48728.1 afla|EED56133.1 afum|EAL88392.1 afum|EAL89133.1 agla|OJJ82786.1 agla|OJJ89597.1 akaw|GAA84479.1 akaw|GAA85117.1 akaw|GAA87935.1 akaw|GAA88383.1 aluc|OJJ81182.1 aluc|OJJ82371.1 aluc|OJJ86523.1 aluc|OJJ89199.1 anid|CBF75152.1 anid|CBF81741.1 anid|CBF82143.1 anig|EHA18500.1 anig|EHA23358.1 anig|EHA28393.1 anig|EHA22123.1 aory|EIT73145.1 aory|EIT73234.1 aory|EIT76572.1 aory|EIT79614.1 asyd|OJJ54322.1 asyd|OJJ59597.1 asyd|OJJ59975.1 asyd|OJJ56163.1 atub|OJJ83999.1 atub|OJJ91379.1 atub|OJJ85591.1 aver|OJJ02316.1 aver|OJJ05102.1 aver|OJJ05276.1 aver|OJJ02671.1 awen|OJJ30245.1 awen|OJJ39992.1 awen|OJJ40286.1 ater|EAU36211.1 ater|EAU36599.1 atub|OJJ88071.1 awen|OJJ36697.1 azon|OJJ47500.1 azon|OJJ49147.1 afla|EED56590.1 agla|OJJ79942.1 anig|EHA23359.1

Group17: abra|OJJ67548.1 abra|OJJ67738.1 abra|OJJ69732.1 abra|OJJ75389.1 abra|OJJ67871.1 acar|OOF90253.1 acar|OOF90937.1 acar|OOF94189.1 acar|OOF94221.1 acar|OOF94457.1 acla|EAW11677.1 acla|EAW12103.1 afla|EED45500.1 afla|EED48836.1 afla|EED51171.1 afla|EED52156.1 akaw|GAA88112.1 akaw|GAA90185.1 akaw|GAA92429.1 akaw|GAA92752.1 akaw|GAA91880.1 aluc|OJJ81382.1 aluc|OJJ81593.1 aluc|OJJ83164.1 aluc|OJJ92960.1 aluc|OJJ82019.1 anid|CBF73431.1 anid|CBF87554.1 anig|EHA18677.1 anig|EHA25848.1 anig|EHA26015.1 anig|EHA28228.1 anig|EHA22237.1 aory|EIT74393.1 aory|EIT75554.1 aory|EIT81271.1 aory|EIT82420.1 aory|EIT81347.1 ater|EAU30799.1 ater|EAU34705.1 atub|OJJ84570.1 atub|OJJ87418.1 atub|OJJ87773.1 atub|OJJ88590.1 atub|OJJ91588.1 aver|OJJ08108.1 aver|OJJ08968.1 azon|OJJ42487.1 azon|OJJ45532.1 afis|EAW17283.1 afum|EAL86701.1 agla|OJJ81086.1 anid|CBF82821.1 asyd|OJJ52999.1 asyd|OJJ61577.1 aver|OJJ00899.1 awen|OJJ35752.1 afla|EED45454.1 anid|CBF80162.1 aver|OJJ99518.1

Group18: abra|OJJ67797.1 abra|OJJ73515.1 abra|OJJ68679.1 abra|OJJ70328.1 abra|OJJ76402.1 acar|OOF91783.1 acar|OOF92181.1 acar|OOG00703.1 acla|EAW07449.1 acla|EAW12568.1 afis|EAW18727.1 afis|EAW22482.1 afis|EAW24082.1 afla|EED45270.1 afla|EED51391.1 afum|EAL90712.1 afum|EAL91937.1 agla|OJJ79953.1 agla|OJJ82286.1 agla|OJJ87548.1 akaw|GAA82322.1 akaw|GAA89832.1 akaw|GAA92583.1 akaw|GAA87464.1 aluc|OJJ81855.1 aluc|OJJ82597.1 aluc|OJJ88532.1 aluc|OJJ91810.1 anig|EHA18233.1 anig|EHA22369.1 anig|EHA27480.1 anig|EHA22803.1 aory|EIT73742.1 aory|EIT78822.1 aory|EIT80707.1 asyd|OJJ53887.1 asyd|OJJ62829.1 ater|EAU30215.1 ater|EAU30505.1 ater|EAU39231.1 ater|EAU38177.1 atub|OJJ84423.1 atub|OJJ88833.1 atub|OJJ91117.1 atub|OJJ86266.1 aver|OJJ96872.1 aver|OJJ07985.1 awen|OJJ29718.1 awen|OJJ32268.1 awen|OJJ35101.1 acla|EAW14021.1 aluc|OJJ90857.1 anid|CBF88889.1 atub|OJJ82853.1 azon|OJJ50007.1 afla|EED50684.1 afla|EED54508.1 acar|OOF99644.1 afum|EAL93452.1 aory|EIT78049.1

Group19: abra|OJJ67556.1 abra|OJJ67739.1 abra|OJJ69721.1 abra|OJJ75388.1 abra|OJJ67870.1 acar|OOF90043.1 acar|OOF90938.1 acar|OOF94195.1 acar|OOF94224.1 acar|OOF94458.1 acla|EAW11676.1 acla|EAW12104.1 afla|EED45513.1 afla|EED48837.1 afla|EED51172.1 afla|EED52163.1 akaw|GAA88108.1 akaw|GAA90174.1 akaw|GAA92430.1 akaw|GAA92751.1 akaw|GAA91879.1 aluc|OJJ81378.1 aluc|OJJ81592.1 aluc|OJJ92959.1 aluc|OJJ82020.1 aluc|OJJ83176.1 anid|CBF73444.1 anid|CBF82822.1 anid|CBF87553.1 anig|EHA18673.1 anig|EHA25849.1 anig|EHA26016.1 anig|EHA28250.1 anig|EHA22236.1 aory|EIT74418.1 aory|EIT75385.1 aory|EIT81285.1 aory|EIT82421.1 aory|EIT81323.1 asyd|OJJ52998.1 asyd|OJJ61578.1 atub|OJJ84572.1 atub|OJJ87417.1 atub|OJJ87761.1 atub|OJJ91584.1 atub|OJJ88591.1 aver|OJJ00900.1 aver|OJJ08115.1 aver|OJJ08967.1 azon|OJJ42478.1 azon|OJJ45531.1 afis|EAW17282.1 afum|EAL86700.1 agla|OJJ81085.1 ater|EAU30800.1 ater|EAU34706.1 awen|OJJ35753.1 anid|CBF80164.1 aver|OJJ99519.1

Group20: abra|OJJ67608.1 abra|OJJ70431.1 acar|OOF89840.1 acar|OOF91955.1 acla|EAW11023.1 acla|EAW14999.1 afis|EAW18722.1 afis|EAW19401.1 afis|EAW20837.1 afis|EAW24523.1 afla|EED45470.1 afla|EED46489.1 afla|EED50679.1 afum|EAL84797.1 afum|EAL86188.1 afum|EAL93446.1 agla|OJJ79209.1 agla|OJJ83714.1 akaw|GAA89124.1 akaw|GAA90149.1 aluc|OJJ81714.1 aluc|OJJ83199.1 anid|CBF74338.1 anid|CBF82877.1 aory|EIT72354.1 aory|EIT75736.1 asyd|OJJ57954.1 asyd|OJJ59255.1 asyd|OJJ61569.1 ater|EAU30785.1 ater|EAU36144.1 ater|EAU36801.1 atub|OJJ87739.1 atub|OJJ88468.1 aver|OJJ00889.1 aver|OJJ01866.1 awen|OJJ32698.1 awen|OJJ34547.1 azon|OJJ42767.1 azon|OJJ43003.1 anig|EHA25725.1 agla|OJJ78774.1 anig|EHA21062.1 abra|OJJ76408.1 acar|OOF99650.1 acla|EAW14020.1 agla|OJJ80462.1 akaw|GAA82327.1 aluc|OJJ91804.1 anid|CBF70690.1 anig|EHA22798.1 asyd|OJJ58469.1 ater|EAU38182.1 atub|OJJ86258.1 aver|OJJ01070.1 awen|OJJ32266.1 azon|OJJ46779.1 azon|OJJ51803.1 asyd|OJJ51967.1

Group21: abra|OJJ67735.1 abra|OJJ68593.1 abra|OJJ73309.1 abra|OJJ77765.1 acar|OOF90932.1 acar|OOF97505.1 acla|EAW12049.1 acla|EAW12177.1 afis|EAW17018.1 afis|EAW19983.1 afla|EED45460.1 afla|EED45667.1 afla|EED48486.1 afla|EED52023.1 afum|EAL84933.1 afum|EAL86540.1 akaw|GAA89817.1 akaw|GAA92425.1 aluc|OJJ81597.1 aluc|OJJ81873.1 anid|CBF69451.1 anid|CBF80428.1 anid|CBF83139.1 anid|CBF88295.1 anid|CBF89312.1 anid|CBF86046.1 anig|EHA20911.1 anig|EHA25844.1 anig|EHA28237.1 aory|EIT73076.1 aory|EIT75517.1 aory|EIT81451.1 aory|EIT82410.1 aory|EIT79328.1 asyd|OJJ61573.1 asyd|OJJ62373.1 ater|EAU29529.1 ater|EAU30794.1 ater|EAU31923.1 ater|EAU35431.1 ater|EAU36706.1 atub|OJJ80342.1 atub|OJJ87755.1 aver|OJJ96507.1 aver|OJJ00893.1 aver|OJJ07788.1 aver|OJJ06454.1 agla|OJJ79464.1 atub|OJJ88585.1 awen|OJJ38079.1 azon|OJJ46787.1 azon|OJJ47411.1 akaw|GAA90162.1 aluc|OJJ83185.1 abra|OJJ70061.1 anig|EHA21035.1 acar|OOF91380.1 anig|EHA28257.1

Group23: abra|OJJ70376.1 abra|OJJ76944.1 acar|OOF91394.1 acar|OOF91893.1 acar|OOF94281.1  
acla|EAW09924.1 acla|EAW12333.1 acla|EAW12657.1 acla|EAW13468.1 afis|EAW16889.1 afis|EAW18023.1  
afis|EAW20581.1 afis|EAW21172.1 afla|EED47357.1 afla|EED52279.1 afla|EED54755.1 afum|EAL84483.1  
afum|EAL86427.2 afum|EAL92192.1 afum|EAL91835.1 agla|OJJ79937.1 agla|OJJ80007.1 agla|OJJ88693.1  
akaw|GAA87096.1 akaw|GAA88352.1 akaw|GAA91976.1 aluc|OJZ82303.1 aluc|OJZ84342.1 aluc|OJZ82638.1  
aory|EIT79353.1 aory|EIT82885.1 asyd|OJJ54585.1 asyd|OJJ55452.1 ater|EAU35839.1 ater|EAU37103.1  
atub|OJI88134.1 atub|OJI89726.1 atub|OJI88871.1 aver|OJJ06525.1 aver|OJJ07569.1 awen|OJJ29755.1  
awen|OJJ33285.1 awen|OJJ36510.1 azon|OJJ42518.1 azon|OJJ46073.1 azon|OJJ50660.1 abra|OJJ69460.1  
anid|CBF83321.1 anig|EHA28452.1 asyd|OJJ60544.1 aver|OJI99870.1 azon|OJJ44385.1 anid|CBF76070.1  
anid|CBF80669.1 anig|EHA27432.1 ater|EAU29931.1 ater|EAU30227.1 anig|EHA27678.1 aory|EIT74323.1

Group24: abra|OJJ69144.1 abra|OJJ70352.1 abra|OJJ77612.1 acar|OOF91158.1 acar|OOF99116.1  
acla|EAW06570.1 acla|EAW08667.1 acla|EAW13589.1 afis|EAW15744.1 afis|EAW16026.1 afis|EAW20014.1  
afum|EAL84904.1 afum|EAL85604.1 afum|EAL88655.1 agla|OJJ81906.1 agla|OJJ86054.1 agla|OJJ87984.1  
akaw|GAA84019.1 akaw|GAA86313.1 aluc|OJZ80922.1 aluc|OJZ86130.1 anid|CBF71034.1 anid|CBF77968.1  
anid|CBF84719.1 anig|EHA19425.1 anig|EHA24491.1 aory|EIT75778.1 aory|EIT81521.1 aory|EIT83013.1  
asyd|OJJ52664.1 asyd|OJJ53328.1 asyd|OJJ55266.1 asyd|OJJ60058.1 ater|EAU29366.1 ater|EAU30124.1  
ater|EAU32401.1 atub|OJI79926.1 atub|OJI82658.1 aver|OJJ02231.1 aver|OJJ04691.1 aver|OJJ06960.1  
aver|OJJ08416.1 awen|OJJ30028.1 awen|OJJ38444.1 azon|OJJ43750.1 azon|OJJ45430.1 azon|OJJ48427.1  
ater|EAU33615.1 awen|OJJ30431.1 awen|OJJ41731.1 afla|EED46021.1 afla|EED56407.1 anid|CBF75022.1  
acla|EAW12683.1 afis|EAW17846.1 afum|EAL91655.1 ater|EAU33048.1 afla|EED51306.1

Group25: abra|OJJ70961.1 abra|OJJ76031.1 acar|OOF98169.1 acar|OOF99897.1 acla|EAW09101.1  
acla|EAW09782.1 acla|EAW10522.1 afis|EAW21356.1 afis|EAW25044.1 afis|EAW25699.1 afis|EAW25729.1  
afla|EED45847.1 afla|EED55407.1 afla|EED55771.1 afum|EAL84400.2 afum|EAL89712.1 afum|EAL92371.2  
agla|OJJ78663.1 agla|OJJ87377.1 agla|OJJ89150.1 agla|OJJ88275.1 akaw|GAA82986.1 akaw|GAA91201.1  
aluc|OJZ81536.1 aluc|OJZ87571.1 aluc|OJZ89483.1 anid|CBF76249.1 anid|CBF85912.1 anig|EHA20773.1  
anig|EHA23111.1 anig|EHA25900.1 aory|EIT75461.1 aory|EIT80822.1 aory|EIT75500.1 aory|EIT76538.1  
asyd|OJJ59042.1 asyd|OJJ60969.1 asyd|OJJ64398.1 ater|EAU35202.1 ater|EAU35794.1 ater|EAU36445.1  
ater|EAU37742.1 atub|OJI81078.1 atub|OJI85318.1 aver|OJI98494.1 aver|OJJ00294.1 aver|OJJ01637.1  
awen|OJJ37057.1 awen|OJJ39342.1 awen|OJJ40655.1 azon|OJJ51688.1 ater|EAU36998.1 afla|EED54858.1  
anid|CBF69709.1 atub|OJI88650.1 aory|EIT79380.1

Group26: abra|OJJ71513.1 abra|OJJ73019.1 abra|OJJ77809.1 acar|OOF96188.1 acar|OOF96228.1  
acar|OOF96266.1 acar|OOF98958.1 acla|EAW07995.1 acla|EAW11308.1 acla|EAW15070.1 afis|EAW18195.1  
afis|EAW23030.1 afis|EAW20042.1 afla|EED45337.1 afla|EED54986.1 afla|EED56290.1 afum|EAL85162.1  
afum|EAL88452.1 afum|EAL87556.1 agla|OJJ85896.1 agla|OJJ89448.1 agla|OJJ88920.1 akaw|GAA83840.1  
akaw|GAA85596.1 akaw|GAA89403.1 aluc|OJZ83533.1 aluc|OJZ86251.1 aluc|OJZ90876.1 anid|CBF80914.1  
anid|CBF86102.1 anig|EHA19596.1 anig|EHA24355.1 anig|EHA21614.1 aory|EIT73286.1 aory|EIT80288.1  
asyd|OJJ56326.1 asyd|OJJ64481.1 ater|EAU29627.1 ater|EAU33801.1 atub|OJI82424.1 atub|OJI82873.1  
atub|OJI84291.1 aver|OJI98582.1 aver|OJJ06387.1 awen|OJJ30557.1 awen|OJJ35716.1 azon|OJJ44174.1  
azon|OJJ45510.1 azon|OJJ46319.1 anid|CBF84784.1 anid|CBF84786.1 aory|EIT73629.1 asyd|OJJ63232.1  
ater|EAU38649.1 aver|OJI97724.1 awen|OJJ31798.1

Group27: abra|OJJ67095.1 abra|OJJ67686.1 abra|OJJ69631.1 abra|OJJ76432.1 acar|OOF92679.1  
acar|OOF94074.1 acar|OOF94144.1 acar|OOF99676.1 acla|EAW10021.1 acla|EAW12377.1 acla|EAW13992.1  
afis|EAW16823.1 afis|EAW18700.1 afis|EAW22316.1 afla|EED50648.1 afla|EED55075.1 afum|EAL86374.1  
afum|EAL90874.1 afum|EAL93422.1 agla|OJJ79102.1 agla|OJJ82361.1 akaw|GAA82347.1 akaw|GAA89198.1  
akaw|GAA91066.1 akaw|GAA91611.1 aluc|OJZ81632.1 aluc|OJZ82438.1 aluc|OJZ87880.1 aluc|OJZ91780.1  
anid|CBF70637.1 anid|CBF82989.1 anig|EHA20183.1 anig|EHA25811.1 anig|EHA28335.1 aory|EIT78077.1  
aory|EIT81953.1 aory|EIT82431.1 asyd|OJJ52074.1 asyd|OJJ54406.1 asyd|OJJ58493.1 asyd|OJJ64734.1  
ater|EAU29368.1 ater|EAU35424.1 ater|EAU38206.1 atub|OJI80771.1 atub|OJI86236.1 atub|OJI88003.1  
atub|OJI88548.1 aver|OJI98838.1 aver|OJJ01096.1 aver|OJJ03029.1 awen|OJJ32183.1 awen|OJJ40928.1  
azon|OJJ46764.1 anig|EHA22777.1

Group28: abra|OJJ68117.1 abra|OJJ77078.1 abra|OJJ68815.1 acar|OOF90616.1 acar|OOF92960.1  
acar|OOF93911.1 afis|EAW17741.1 afis|EAW17974.1 afla|EED45883.1 afla|EED55321.1 afum|EAL91555.1  
afum|EAL91783.1 agla|OJJ81756.1 agla|OJJ85465.1 agla|OJJ89268.1 akaw|GAA86898.1 akaw|GAA86975.1  
akaw|GAA90440.1 aluc|OJZ84488.1 aluc|OJZ85787.1 aluc|OJZ88708.1 aluc|OJZ90021.1 anid|CBF71442.1  
anid|CBF84572.1 anig|EHA24771.1 anig|EHA27397.1 anig|EHA27792.1 aory|EIT75581.1 aory|EIT76204.1  
asyd|OJJ53389.1 asyd|OJJ54954.1 ater|EAU30960.1 ater|EAU35114.1 ater|EAU36891.1 atub|OJI79571.1  
atub|OJI84786.1 atub|OJI89592.1 atub|OJI91296.1 aver|OJI99661.1 aver|OJJ03907.1 aver|OJJ07242.1  
aver|OJJ08354.1 awen|OJJ32944.1 awen|OJJ39601.1 azon|OJJ42107.1 azon|OJJ42757.1 azon|OJJ42786.1  
azon|OJJ44596.1 azon|OJJ47560.1 acla|EAW11105.1 afla|EED52131.1 acla|EAW12809.1 ater|EAU36942.1  
awen|OJJ32177.1 aory|EIT74465.1

Group30: abra|OJJ68096.1 abra|OJJ70248.1 abra|OJJ73110.1 abra|OJJ74007.1 acar|OOF92551.1  
acar|OOF93899.1 acar|OOG00337.1 acar|OOG01129.1 afla|EED44907.1 afla|EED44932.1 afla|EED56562.1  
agla|OJJ78703.1 agla|OJJ88418.1 akaw|GAA86542.1 akaw|GAA86880.1 akaw|GAA88056.1 akaw|GAA92925.1  
akaw|GAA87488.1 aluc|OJZ81318.1 aluc|OJZ82516.1 aluc|OJZ85090.1 aluc|OJZ88037.1 aluc|OJZ90004.1

anid|CBF74975.1 anid|CBF78035.1 anid|CBF81473.1 anig|EHA17810.1 anig|EHA18624.1 anig|EHA25311.1  
anig|EHA27379.1 anig|EHA20903.1 aory|EIT73500.1 aory|EIT73507.1 asyd|OJJ55224.1 asyd|OJJ59448.1  
asyd|OJJ60089.1 asyd|OJJ61384.1 asyd|OJJ57439.1 ater|EAU39548.1 ater|EAU39587.1 atub|OJI80509.1  
atub|OJI84804.1 atub|OJI91521.1 atub|OJI90644.1 aver|OJJ00711.1 aver|OJJ04176.1 aver|OJJ05739.1  
aver|OJJ02824.1 awen|OJJ33639.1 awen|OJJ40047.1 acla|EAW07039.1 afis|EAW16665.1 afum|EAL89269.1  
azon|OJJ50123.1

Group31: abra|OJJ69067.1 abra|OJJ70519.1 abra|OJJ77965.1 acar|OOF91229.1 acar|OOF97409.1  
acar|OOF98850.1 acla|EAW08156.1 acla|EAW08763.1 afis|EAW15666.1 afis|EAW16089.1 afis|EAW23194.1  
afila|EED46889.1 afila|EED47060.1 afila|EED48625.1 afum|EAL85682.1 afum|EAL88289.1 afum|EAL88721.1  
agla|OJJ81804.1 agla|OJJ86130.1 agla|OJJ86345.1 akaw|GAA83366.1 akaw|GAA83698.1 akaw|GAA90597.1  
aluc|OJJ83864.1 aluc|OJJ91035.1 aluc|OJJ86055.1 anid|CBF71178.1 anid|CBF74704.1 anid|CBF75129.1  
anig|EHA19005.1 anig|EHA19734.1 anig|EHA24556.1 aory|EIT72496.1 aory|EIT73097.1 asyd|OJJ55863.1  
asyd|OJJ60218.1 asyd|OJJ59982.1 ater|EAU32505.1 ater|EAU33161.1 ater|EAU36321.1 atub|OJI79852.1  
atub|OJI83031.1 atub|OJI90232.1 aver|OJJ02309.1 aver|OJJ04050.1 aver|OJJ04804.1 awen|OJJ30341.1  
awen|OJJ38341.1 awen|OJJ36585.1 azon|OJJ42517.1 azon|OJJ43041.1 aory|EIT72708.1 acla|EAW06676.1  
azon|OJJ47622.1

Group33: abra|OJJ66203.1 abra|OJJ68990.1 abra|OJJ74346.1 acar|OOF91561.1 acar|OOF91930.1  
acar|OOF95383.1 acla|EAW07400.1 acla|EAW14202.1 afis|EAW19080.1 afis|EAW22426.1 afila|EED50168.1  
afila|EED52504.1 afum|EAL91073.1 afum|EAL90765.1 afum|EAL93809.1 agla|OJJ84526.1 agla|OJJ87597.1  
agla|OJJ84718.1 akaw|GAA86684.1 akaw|GAA89082.1 aluc|OJJ80508.1 aluc|OJJ85975.1 aluc|OJJ89784.1  
anid|CBF76870.1 anid|CBF79672.1 anid|CBF88817.1 anig|EHA24631.1 anig|EHA26999.1 anig|EHA25684.1  
aory|EIT76001.1 aory|EIT82781.1 asyd|OJJ52200.1 asyd|OJJ58034.1 asyd|OJJ61321.1 asyd|OJJ62887.1  
ater|EAU32126.1 ater|EAU32863.1 ater|EAU32522.1 ater|EAU39281.1 atub|OJI85021.1 atub|OJI88421.1  
aver|OJI96939.1 aver|OJJ00646.1 aver|OJJ04365.1 aver|OJJ05950.1 aver|OJJ07745.1 awen|OJJ32472.1  
awen|OJJ35005.1 awen|OJJ34090.1 azon|OJJ45647.1 azon|OJJ46232.1 akaw|GAA90510.1 atub|OJI79765.1

Group34: abra|OJJ71614.1 abra|OJJ77069.1 acar|OOF92952.1 acar|OOF96330.1 acla|EAW13507.1  
acla|EAW15156.1 afis|EAW20123.1 afis|EAW21377.1 afis|EAW20124.1 afis|EAW20605.1 afila|EED47726.1  
afila|EED57252.1 afum|EAL84455.1 afum|EAL85242.1 agla|OJJ88636.1 agla|OJJ88823.1 akaw|GAA86984.1  
akaw|GAA89313.1 aluc|OJJ84477.1 aluc|OJJ86355.1 anid|CBF84947.1 anid|CBF86944.1 anig|EHA21535.1  
anig|EHA27785.1 aory|EIT73980.1 aory|EIT77148.1 asyd|OJJ55590.1 asyd|OJJ63148.1 ater|EAU35261.1  
ater|EAU38740.1 atub|OJI84179.1 atub|OJI89602.1 aver|OJI97806.1 aver|OJJ06669.1 awen|OJJ31893.1  
awen|OJJ33448.1 azon|OJJ46243.1 azon|OJJ50705.1 abra|OJJ71611.1 acar|OOF96327.1 acla|EAW15155.1  
afila|EED57253.1 afum|EAL85241.2 agla|OJJ88828.1 akaw|GAA89316.1 anid|CBF84945.1 aory|EIT74161.1  
asyd|OJJ63149.1 atub|OJI84182.1 aver|OJI97805.1 awen|OJJ31892.1 azon|OJJ42421.1 azon|OJJ46244.1

Group35: afis|EAW16487.1 afis|EAW19960.1 afila|EED48721.1 afila|EED49671.1 afum|EAL84955.1  
afum|EAL89081.1 agla|OJJ79324.1 agla|OJJ82857.1 agla|OJJ88164.1 aory|EIT73140.1 aory|EIT80950.1  
aory|EIT75645.1 aory|EIT79202.1 ater|EAU35270.1 ater|EAU36551.1 abra|OJJ68065.1 acla|EAW06870.1  
afila|EED45908.1 akaw|GAA90894.1 aluc|OJJ82935.1 anid|CBF75512.1 anid|CBF84598.1 anig|EHA21355.1  
anig|EHA22760.1 asyd|OJJ53379.1 atub|OJI89164.1 aver|OJJ02547.1 awen|OJJ29993.1 azon|OJJ49197.1  
abra|OJJ71770.1 akaw|GAA85137.1 aluc|OJJ86500.1 anig|EHA22144.1 atub|OJI84026.1 azon|OJJ48613.1  
abra|OJJ78207.1 acar|OOF98647.1 acla|EAW11241.1 afis|EAW18262.1 afum|EAL87626.1 akaw|GAA85819.1  
aluc|OJJ291280.1 anid|CBF79531.1 anig|EHA19965.1 asyd|OJJ57895.1 ater|EAU33270.1 atub|OJI83270.1  
aver|OJJ04500.1 awen|OJJ30636.1 afila|EED47227.1 asyd|OJJ59741.1 awen|OJJ40346.1 aver|OJJ08364.1

Group37: abra|OJJ72940.1 abra|OJJ77077.1 acar|OOF92763.1 acar|OOF92959.1 acar|OOF97146.1  
afis|EAW18980.1 afis|EAW21099.1 afis|EAW24628.1 afila|EED53187.1 afila|EED54887.1 agla|OJJ80287.1  
agla|OJJ82940.1 akaw|GAA86976.1 akaw|GAA91285.1 aluc|OJJ82784.1 aluc|OJJ84487.1 anig|EHA18922.1  
anig|EHA21226.1 aory|EIT75171.1 aory|EIT79411.1 asyd|OJJ58358.1 asyd|OJJ60157.1 ater|EAU34862.1  
ater|EAU37837.1 atub|OJI89016.1 atub|OJI89593.1 aver|OJJ02049.1 aver|OJJ04107.1 awen|OJJ31588.1  
awen|OJJ37322.1 azon|OJJ47304.1 azon|OJJ47677.1 abra|OJJ70575.1 acla|EAW08374.1 afis|EAW23403.1  
afila|EED47010.1 afum|EAL88067.1 agla|OJJ86391.1 akaw|GAA83419.1 aluc|OJJ83919.1 anid|CBF74791.1  
anig|EHA19052.1 aory|EIT72601.1 ater|EAU36372.1 atub|OJI90290.1 awen|OJJ39474.1 acla|EAW14304.1  
afum|EAL93716.2 anid|CBF69653.1 asyd|OJJ59075.1 aver|OJJ01668.1 anig|EHA27791.1

Group38: abra|OJJ65887.1 abra|OJJ73728.1 abra|OJJ73840.1 abra|OJJ75062.1 acar|OOF94948.1  
acar|OOF97272.1 acar|OOG00894.1 acar|OOG00991.1 acla|EAW07735.1 acla|EAW09321.1 afis|EAW21824.1  
afis|EAW24409.1 afila|EED45566.1 afila|EED50029.1 afum|EAL86078.1 afum|EAL92840.1 agla|OJJ83601.1  
agla|OJJ85455.1 agla|OJJ89020.1 akaw|GAA86017.1 akaw|GAA88434.1 akaw|GAA88674.1 akaw|GAA89458.1  
aluc|OJJ88209.1 aluc|OJJ88322.1 aluc|OJJ90245.1 aluc|OJJ92628.1 anid|CBF84638.1 anid|CBF87998.1  
anig|EHA17956.1 anig|EHA18058.1 anig|EHA26362.1 aory|EIT74733.1 aory|EIT75750.1 asyd|OJJ53366.1  
asyd|OJJ63506.1 ater|EAU38301.1 ater|EAU38950.1 atub|OJI81673.1 atub|OJI87058.1 atub|OJI90810.1  
atub|OJI90917.1 aver|OJI97424.1 aver|OJJ08381.1 awen|OJJ32729.1 awen|OJJ37942.1 awen|OJJ38966.1  
awen|OJJ41210.1 azon|OJJ46022.1 azon|OJJ48676.1 aory|EIT76918.1

Group39: abra|OJJ66342.1 abra|OJJ71162.1 abra|OJJ75572.1 acar|OOF89825.1 acar|OOF94094.1  
acar|OOF94165.1 acar|OOF97998.1 acla|EAW09994.1 acla|EAW10337.1 afis|EAW21096.1 afis|EAW25252.1

afla|EED51678.1 afla|EED53719.1 afla|EED54679.1 afum|EAL86170.1 afum|EAL89914.1 afum|EAL92119.1  
agla|OJJ80114.1 agla|OJJ89225.1 akaw|GAA82817.1 akaw|GAA84323.1 akaw|GAA90216.1 aluc|OJZ83127.1  
aluc|OJZ87378.1 aluc|OJZ89020.1 anid|CBF80117.1 anid|CBF85345.1 anig|EHA20610.1 anig|EHA23510.1  
anig|EHA28188.1 aory|EIT75350.1 aory|EIT78900.1 aory|EIT80684.1 asyd|OJJ54726.1 asyd|OJJ64027.1  
atub|OJI81268.1 atub|OJI85769.1 atub|OJI87806.1 aver|OJI98113.1 aver|OJJ07441.1 awen|OJJ36352.1  
awen|OJJ40966.1 awen|OJJ38784.1 ater|EAU34396.1 azon|OJJ44550.1 abra|OJJ67575.1 acar|OOF90092.1  
akaw|GAA89104.1 anig|EHA25706.1 atub|OJI88443.1 afis|EAW24500.1

Group40: abra|OJJ73400.1 abra|OJJ73868.1 acar|OOG00598.1 acar|OOG01011.1 acla|EAW07007.1  
acla|EAW07756.1 afis|EAW16623.1 afis|EAW19494.1 afis|EAW22793.1 afla|EED44972.1 afla|EED48978.1  
afla|EED50061.1 afla|EED56714.1 afum|EAL87000.1 afum|EAL89214.1 afum|EAL90406.1 agla|OJJ83569.1  
agla|OJJ85298.1 akaw|GAA83092.1 akaw|GAA89474.1 akaw|GAA89692.1 aluc|OJZ80692.1 aluc|OJZ88189.1  
aluc|OJZ88639.1 anid|CBF81984.1 anid|CBF87954.1 anig|EHA17940.1 anig|EHA18328.1 anig|EHA27323.1  
aory|EIT73515.1 aory|EIT73856.1 aory|EIT74647.1 aory|EIT79983.1 asyd|OJJ56154.1 asyd|OJJ59777.1  
asyd|OJJ63479.1 ater|EAU34806.1 ater|EAU36732.1 ater|EAU38918.1 atub|OJI87552.1 atub|OJI90788.1  
atub|OJI91225.1 aver|OJI97451.1 aver|OJJ02509.1 aver|OJJ05094.1 awen|OJJ36912.1 awen|OJJ38940.1  
azon|OJJ45543.1 azon|OJJ49714.1 anid|CBF75442.1

Group41: abra|OJJ65606.1 abra|OJJ68131.1 abra|OJJ68372.1 abra|OJJ69834.1 acar|OOF90085.1  
acar|OOF93362.1 acar|OOG00535.1 afla|EED45615.1 afla|EED45682.1 afla|EED54532.1 agla|OJJ80470.1  
agla|OJJ80842.1 agla|OJJ83418.1 akaw|GAA86911.1 akaw|GAA87826.1 aluc|OJZ85462.1 aluc|OJZ90034.1  
anig|EHA25004.1 anig|EHA25073.1 anig|EHA27410.1 aory|EIT75511.1 aory|EIT75540.1 aory|EIT78869.1  
aory|EIT81830.1 asyd|OJJ52349.1 asyd|OJJ56735.1 asyd|OJJ60489.1 atub|OJI80101.1 atub|OJI84772.1  
aver|OJI99815.1 aver|OJJ05882.1 aver|OJJ05988.1 awen|OJJ32535.1 awen|OJJ33535.1 awen|OJJ34624.1  
awen|OJJ35129.1 awen|OJJ40106.1 acla|EAW07472.1 afis|EAW17054.1 afum|EAL86551.2 akaw|GAA83834.1  
aluc|OJZ90883.1 anid|CBF86106.1 ater|EAU30279.1 atub|OJI82467.1 anig|EHA19603.1 atub|OJI82878.1  
azon|OJJ47403.1 afla|EED57508.1

Group42: abra|OJJ65781.1 abra|OJJ69519.1 abra|OJJ69805.1 acar|OOF93570.1 acar|OOF94236.1  
acla|EAW09965.1 acla|EAW15041.1 afis|EAW17149.1 afis|EAW21123.1 afis|EAW24564.1 afla|EED50957.1  
afla|EED51796.1 afla|EED54117.1 afla|EED57909.1 afum|EAL86225.1 afum|EAL92146.1 agla|OJJ78698.1  
agla|OJJ79809.1 agla|OJJ80088.1 akaw|GAA87854.1 akaw|GAA88307.1 akaw|GAA90882.1 aluc|OJZ82358.1  
aluc|OJZ82950.1 aluc|OJZ85496.1 anid|CBF77670.1 anid|CBF87020.1 anig|EHA21430.1 anig|EHA25029.1  
anig|EHA28405.1 aory|EIT76140.1 aory|EIT77042.1 aory|EIT81685.1 aory|EIT82334.1 asyd|OJJ53106.1  
asyd|OJJ60460.1 ater|EAU32188.1 ater|EAU36777.1 atub|OJI80069.1 atub|OJI88083.1 atub|OJI89182.1  
aver|OJI99780.1 aver|OJJ03746.1 awen|OJJ36453.1 awen|OJJ37008.1 awen|OJJ40041.1 azon|OJJ44424.1  
azon|OJJ50127.1 aver|OJI99293.1

Group43: abra|OJJ67343.1 abra|OJJ74161.1 abra|OJJ74904.1 acar|OOF92471.1 acar|OOF95566.1  
acar|OOF95902.1 afis|EAW18497.1 afis|EAW23515.1 afis|EAW24769.1 afum|EAL89410.1 afum|EAL93187.1  
agla|OJJ83565.1 agla|OJJ85096.1 agla|OJJ86763.1 agla|OJJ88214.1 akaw|GAA83518.1 akaw|GAA86474.1  
akaw|GAA89723.1 aluc|OJZ80660.1 aluc|OJZ85015.1 aluc|OJZ92477.1 anid|CBF70261.1 anid|CBF89705.1  
anig|EHA25236.1 anig|EHA26493.1 anig|EHA27172.1 aory|EIT77595.1 aory|EIT78639.1 aory|EIT80122.1  
asyd|OJJ58753.1 asyd|OJJ62252.1 asyd|OJJ62467.1 atub|OJI80582.1 atub|OJI86908.1 atub|OJI87516.1  
aver|OJI96362.1 aver|OJJ01361.1 awen|OJJ31051.1 awen|OJJ37928.1 awen|OJJ39840.1 acla|EAW08468.1  
afla|EED49731.1 afum|EAL87948.1 anid|CBF89382.1 ater|EAU35304.1 azon|OJJ43252.1 ater|EAU34034.1  
aver|OJI96602.1 afla|EED57415.1

Group44: abra|OJJ68123.1 abra|OJJ69603.1 abra|OJJ72218.1 acar|OOF92701.1 acar|OOF93917.1  
acar|OOF96841.1 acla|EAW12866.1 acla|EAW14975.1 afis|EAW17815.1 afis|EAW24499.1 afla|EED45599.1  
afla|EED51849.1 afla|EED54703.1 afum|EAL86169.1 afum|EAL91624.1 agla|OJJ78971.1 agla|OJJ85550.1  
agla|OJJ81686.1 akaw|GAA84717.1 akaw|GAA86904.1 akaw|GAA91591.1 aluc|OJZ82414.1 aluc|OJZ86970.1  
aluc|OJZ90027.1 anig|EHA21680.1 anig|EHA27403.1 anig|EHA28353.1 aory|EIT75721.1 aory|EIT78771.1  
aory|EIT81733.1 asyd|OJJ54895.1 asyd|OJJ58303.1 asyd|OJJ56516.1 asyd|OJJ56725.1 atub|OJI83551.1  
atub|OJI84780.1 atub|OJI88027.1 aver|OJJ02109.1 aver|OJJ05998.1 aver|OJJ06206.1 awen|OJJ32626.1  
awen|OJJ36932.1 anid|CBF73850.1 ater|EAU30287.1 azon|OJJ50345.1 anid|CBF80089.1 ater|EAU31562.1  
awen|OJJ33657.1 ater|EAU29952.1

Group45: abra|OJJ68536.1 abra|OJJ72481.1 acar|OOF90150.1 acar|OOF94753.1 acla|EAW10385.1  
acla|EAW12826.1 afis|EAW17874.1 afis|EAW17991.1 afis|EAW25211.1 afla|EED45114.1 afla|EED51912.1  
afla|EED46241.1 afum|EAL89872.1 afum|EAL91801.1 afum|EAL91682.1 agla|OJJ80251.1 agla|OJJ83074.1  
akaw|GAA86216.1 akaw|GAA91315.1 aluc|OJZ82750.1 aluc|OJZ90468.1 anid|CBF79986.1 anid|CBF89933.1  
anig|EHA21199.1 anig|EHA23927.1 aory|EIT73554.1 aory|EIT76181.1 aory|EIT76362.1 ater|EAU31453.1  
ater|EAU37217.1 ater|EAU31502.1 ater|EAU33093.1 atub|OJI81892.1 atub|OJI88986.1 aver|OJI96221.1  
aver|OJJ02185.1 awen|OJJ41004.1 awen|OJJ41694.1 azon|OJJ45116.1 azon|OJJ46814.1 azon|OJJ48270.1  
azon|OJJ48393.1 acla|EAW12711.1 asyd|OJJ58240.1 asyd|OJJ62114.1 awen|OJJ41555.1 anid|CBF69461.1  
aver|OJJ01892.1 asyd|OJJ59277.1

Group46: abra|OJJ72575.1 abra|OJJ77969.1 acar|OOF94684.1 acar|OOF98846.1 akaw|GAA82423.1  
akaw|GAA87621.1 akaw|GAA83693.1 akaw|GAA85201.1 aluc|OJZ90556.1 aluc|OJZ91039.1 anig|EHA19738.1



anig|EHA24003.1 asyd|OJJ54419.1 asyd|OJJ59096.1 atub|OJI81979.1 atub|OJI83035.1 acla|EAW06671.1 afis|EAW16094.1 afla|EED48630.1 afla|EED56583.1 afum|EAL88726.1 agla|OJJ88578.1 anid|CBF85458.1 aory|EIT73102.1 aory|EIT79674.1 asyd|OJJ58704.1 asyd|OJJ64100.1 ater|EAU30075.1 ater|EAU33170.1 aver|OJI98183.1 aver|OJJ01316.1 awen|OJJ30336.1 awen|OJJ40588.1 azon|OJJ42310.1 azon|OJJ45364.1 abra|OJJ76510.1 acar|OOF99461.1 afla|EED54610.1 agla|OJJ87529.1 aluc|OJZ91695.1 anig|EHA22708.1 aory|EIT78921.1 ater|EAU38073.1 atub|OJI86149.1 aver|OJJ01687.1 aver|OJJ06547.1 awen|OJJ36612.1 agla|OJJ86127.1 anid|CBF70342.1

Group47: acar|OOF91492.1 acar|OOF98333.1 acar|OOF92665.1 acar|OOF93877.1 afis|EAW15510.1 afis|EAW17137.1 afis|EAW16415.1 afis|EAW16568.1 afis|EAW17138.1 afis|EAW25618.1 afum|EAL89039.1 afum|EAL89165.1 anid|CBF80635.1 anid|CBF89254.1 ater|EAU31707.1 ater|EAU36836.1 abra|OJJ74339.1 acla|EAW07389.1 afis|EAW22415.1 afla|EED52493.1 afum|EAL90777.1 agla|OJJ87679.1 akaw|GAA86691.1 aluc|OJZ89792.1 anid|CBF88800.1 anig|EHA27005.1 aory|EIT82748.1 asyd|OJJ62896.1 ater|EAU39292.1 atub|OJI85014.1 aver|OJI96948.1 awen|OJJ34994.1 azon|OJJ45637.1 agla|OJJ82753.1 anig|EHA22499.1 atub|OJI84627.1 afis|EAW19287.1 acla|EAW06953.1 awen|OJJ40251.1 azon|OJJ49111.1 acar|OOG00127.1 akaw|GAA86019.1 aluc|OJZ90247.1 asyd|OJJ61228.1 aver|OJJ00551.1 anid|CBF76692.1 akaw|GAA91465.1 aluc|OJZ82070.1 afum|EAL84308.2

Group48: abra|OJJ66388.1 abra|OJJ69074.1 acla|EAW08755.1 acla|EAW11763.1 afis|EAW15677.1 afis|EAW23796.1 afis|EAW25170.1 afla|EED46854.1 afla|EED51603.1 afla|EED53628.1 afum|EAL85670.1 afum|EAL87230.1 afum|EAL89843.1 akaw|GAA90254.1 akaw|GAA90605.1 aluc|OJZ83086.1 aluc|OJZ86063.1 anid|CBF71157.1 anid|CBF79858.1 anid|CBF85251.1 aory|EIT72587.1 aory|EIT74962.1 aory|EIT80702.1 asyd|OJJ51987.1 asyd|OJJ54461.1 asyd|OJJ54551.1 asyd|OJJ55842.1 asyd|OJJ58159.1 asyd|OJJ59172.1 asyd|OJJ62925.1 asyd|OJJ64763.1 ater|EAU31334.1 ater|EAU32484.1 ater|EAU34334.1 atub|OJI79860.1 atub|OJI87858.1 aver|OJI98064.1 aver|OJJ04243.1 aver|OJJ04785.1 aver|OJJ07708.1 awen|OJJ30141.1 awen|OJJ33753.1 awen|OJJ38354.1 azon|OJJ42861.1 azon|OJJ43857.1 acar|OOF91216.1 agla|OJJ81826.1 anig|EHA24550.1

Group49: abra|OJJ66054.1 abra|OJJ67991.1 abra|OJJ68633.1 acar|OOF92033.1 acar|OOF92137.1 acla|EAW07055.1 acla|EAW12619.1 afis|EAW16409.1 afis|EAW16681.1 afis|EAW18065.1 afla|EED45379.1 afla|EED47440.1 afla|EED51440.1 afum|EAL84867.1 afum|EAL89033.1 afum|EAL89285.1 afum|EAL91877.1 akaw|GAA89772.1 akaw|GAA90957.1 aluc|OJZ81922.1 aluc|OJZ82865.1 anid|CBF73413.1 anid|CBF86422.1 anid|CBF87201.1 anig|EHA21295.1 anig|EHA22325.1 aory|EIT80529.1 aory|EIT81893.1 aory|EIT82380.1 asyd|OJJ59980.1 asyd|OJJ64938.1 ater|EAU30466.1 ater|EAU35871.1 atub|OJI84474.1 atub|OJI89090.1 aver|OJI99059.1 aver|OJJ02311.1 awen|OJJ36169.1 awen|OJJ41452.1 azon|OJJ47178.1 azon|OJJ48910.1 agla|OJJ87352.1 anid|CBF75131.1 aver|OJJ01785.1 asyd|OJJ59979.1 anid|CBF75132.1 aver|OJJ02312.1

Group50: abra|OJJ69511.1 abra|OJJ74314.1 acar|OOF94242.1 acar|OOF95413.1 acla|EAW07365.1 acla|EAW09962.1 afis|EAW21133.1 afis|EAW22392.1 afla|EED46140.1 afla|EED56055.1 afum|EAL90799.1 afum|EAL92151.1 agla|OJJ80083.1 agla|OJJ87654.1 akaw|GAA86711.1 akaw|GAA88313.1 aluc|OJZ82349.1 aluc|OJZ89812.1 anid|CBF87003.1 anid|CBF88741.1 anig|EHA27022.1 anig|EHA28411.1 aory|EIT76474.1 aory|EIT76698.1 asyd|OJJ60468.1 asyd|OJJ63953.1 ater|EAU36765.1 ater|EAU39326.1 atub|OJI84993.1 atub|OJI88091.1 aver|OJI96988.1 aver|OJI99788.1 awen|OJJ34969.1 awen|OJJ36463.1 acar|OOF94243.1 acla|EAW09961.1 afis|EAW21134.1 afum|EAL92153.1 agla|OJJ80077.1 anid|CBF87002.1 aory|EIT76417.1 ater|EAU36766.1 awen|OJJ36462.1 azon|OJJ44415.1 azon|OJJ44422.1 azon|OJJ45618.1 afla|EED46139.1

Group55: abra|OJJ66953.1 abra|OJJ70025.1 acar|OOF93535.1 acar|OOF93655.1 agla|OJJ79210.1 agla|OJJ85149.1 akaw|GAA87635.1 akaw|GAA92208.1 aluc|OJZ85251.1 aluc|OJZ85625.1 anig|EHA24903.1 anig|EHA25451.1 aory|EIT80438.1 aory|EIT82112.1 asyd|OJJ55882.1 asyd|OJJ65094.1 ater|EAU32531.1 ater|EAU37243.1 atub|OJI79418.1 atub|OJI80318.1 aver|OJI99218.1 aver|OJJ04827.1 awen|OJJ30173.1 awen|OJJ38273.1 awen|OJJ41598.1 acla|EAW08800.1 afis|EAW15597.1 afla|EED50419.1 afum|EBA27239.1 anid|CBF78088.1 azon|OJJ43909.1 asyd|OJJ55868.1 acar|OOF93534.1 acla|EAW08799.1 afis|EAW15598.1 afum|EAL85734.1 agla|OJJ88612.1 akaw|GAA87636.1 anid|CBF78056.1 anig|EHA25452.1 aory|EIT82031.1 ater|EAU32530.1 atub|OJI80317.1 aver|OJJ04811.1 azon|OJJ43905.1

Group56: agla|OJJ81571.1 agla|OJJ85255.1 asyd|OJJ54206.1 asyd|OJJ59064.1 asyd|OJJ54427.1 ater|EAU31423.1 ater|EAU38101.1 aver|OJJ01658.1 aver|OJJ01906.1 awen|OJJ30145.1 awen|OJJ31520.1 abra|OJJ76240.1 acar|OOF99485.1 acla|EAW14198.1 afis|EAW18923.1 afla|EED50910.1 afum|EAL93655.1 agla|OJJ85250.1 akaw|GAA82174.1 aluc|OJZ91991.1 anid|CBF69674.1 anig|EHA22937.1 aory|EIT79045.1 asyd|OJJ59065.1 ater|EAU38098.1 atub|OJI86426.1 awen|OJJ31518.1 azon|OJJ47234.1 abra|OJJ76243.1 acar|OOF99488.1 acla|EAW06837.1 afis|EAW18926.1 afla|EED50916.1 afum|EAL93657.1 akaw|GAA82176.1 aluc|OJZ91988.1 anid|CBF69676.1 anig|EHA22935.1 aory|EIT78980.1 atub|OJI86423.1 azon|OJJ47236.1 afis|EAW16385.1 afla|EED48287.1 afum|EAL89013.2 aory|EIT72910.1

Group57: abra|OJJ69646.1 abra|OJJ77015.1 abra|OJJ77136.1 acar|OOF90285.1 acar|OOF91423.1 acar|OOF91458.1 acla|EAW09001.1 acla|EAW10860.1 acla|EAW12947.1 acla|EAW13503.1 afis|EAW17722.1 afis|EAW20602.1 afis|EAW20998.1 afum|EAL84459.1 afum|EAL91537.1 agla|OJJ78915.1 agla|OJJ79354.1 agla|OJJ88647.1 akaw|GAA87035.1 akaw|GAA90793.1 akaw|GAA91624.1 aluc|OJZ82450.1 aluc|OJZ84416.1 aluc|OJZ84546.1 anig|EHA27739.1 anig|EHA27843.1 anig|EHA28324.1 aory|EIT75439.1 aory|EIT77113.1 asyd|OJJ52539.1 asyd|OJJ55599.1 atub|OJI87989.1 atub|OJI89534.1 atub|OJI89658.1 aver|OJJ03865.1

aver|OJJ06679.1 awen|OJJ33394.1 awen|OJJ35790.1 afla|EED45724.1 afla|EED47731.1 anid|CBF86932.1  
ater|EAU35247.1 azon|OJJ43330.1 agla|OJJ84075.1

Group58: acar|OOF92599.1 acar|OOF92620.1 abra|OJJ72332.1 acar|OOF94882.1 acla|EAW11990.1  
afis|EAW19630.1 afla|EED56982.1 afum|EAL86892.1 agla|OJJ80775.1 akaw|GAA86084.1 aluc|OJJ290316.1  
anid|CBF71323.1 anig|EHA23803.1 aory|EIT77586.1 asyd|OJJ55109.1 ater|EAU32896.1 atub|OJJ81744.1  
aver|OJJ07097.1 awen|OJJ41874.1 azon|OJJ47072.1 abra|OJJ72333.1 acar|OOF94880.1 acla|EAW11989.1  
afis|EAW19629.1 afla|EED56981.1 afum|EAL86893.1 akaw|GAA86085.1 anid|CBF71321.1 aory|EIT77447.1  
ater|EAU32897.1 azon|OJJ47071.1 abra|OJJ72335.1 acla|EAW11987.1 afis|EAW19627.1 afla|EED56979.1  
afum|EAL86894.1 agla|OJJ80773.1 akaw|GAA86087.1 anid|CBF71319.1 aory|EIT77480.1 asyd|OJJ55111.1  
ater|EAU32899.1 aver|OJJ07095.1 azon|OJJ47069.1

Group59: acar|OOF92600.1 acar|OOF92621.1 abra|OJJ76130.1 acar|OOF99793.1 acla|EAW09689.1  
afis|EAW21450.1 afla|EED55879.1 afum|EAL92469.1 agla|OJJ85598.1 akaw|GAA88837.1 aluc|OJJ289591.1  
anid|CBF76555.1 anig|EHA23020.1 aory|EIT76712.1 asyd|OJJ61157.1 ater|EAU35092.1 atub|OJJ85211.1  
aver|OJJ00479.1 awen|OJJ39248.1 azon|OJJ51607.1 abra|OJJ76131.1 acar|OOF99792.1 acla|EAW09687.1  
afis|EAW21452.1 afla|EED55881.1 afum|EAL92471.1 akaw|GAA88836.1 aluc|OJJ289592.1 anid|CBF76551.1  
anig|EHA23019.1 aory|EIT76739.1 ater|EAU35091.1 atub|OJJ85210.1 abra|OJJ77110.1 acla|EAW09688.1  
afis|EAW21451.1 afla|EED55880.1 afum|EAL92470.1 akaw|GAA90818.1 aluc|OJJ284519.1 anid|CBF76553.1  
anig|EHA27817.1 aory|EIT76614.1 atub|OJJ89561.1

Group61: abra|OJJ65992.1 abra|OJJ66994.1 abra|OJJ68819.1 acar|OOF90628.1 acar|OOF92880.1  
afis|EAW20003.1 afis|EAW20740.1 afla|EED46008.1 afla|EED47482.1 afla|EED49530.1 agla|OJJ87844.1  
agla|OJJ87962.1 akaw|GAA90432.1 akaw|GAA90866.1 akaw|GAA92170.1 aluc|OJJ282967.1 aluc|OJJ285578.1  
aluc|OJJ285795.1 anig|EHA18425.1 anig|EHA21383.1 anig|EHA24761.1 anig|EHA24941.1 aory|EIT75392.1  
aory|EIT79965.1 aory|EIT82595.1 asyd|OJJ52756.1 asyd|OJJ53312.1 asyd|OJJ54834.1 atub|OJJ79374.1  
atub|OJJ79581.1 atub|OJJ89200.1 atub|OJJ91621.1 aver|OJJ07327.1 aver|OJJ08431.1 aver|OJJ08738.1  
azon|OJJ43639.1 azon|OJJ50209.1 acla|EAW13602.1 afum|EAL84916.1 anid|CBF80344.1 anid|CBF84693.1  
ater|EAU37349.1 awen|OJJ30010.1

Group62: abra|OJJ68708.1 abra|OJJ69824.1 acar|OOF92210.1 acar|OOF93339.1 acla|EAW08971.1  
acla|EAW12537.1 afis|EAW15450.1 afis|EAW24112.1 afla|EED46821.1 afla|EED56823.1 akaw|GAA87836.1  
akaw|GAA89862.1 aluc|OJJ281821.1 aluc|OJJ285472.1 anig|EHA22396.1 anig|EHA25013.1 atub|OJJ80091.1  
atub|OJJ84392.1 awen|OJJ41377.1 awen|OJJ41767.1 abra|OJJ68707.1 acar|OOF92209.1 acla|EAW12538.1  
afis|EAW24111.1 afum|EAL91965.1 agla|OJJ87188.1 akaw|GAA89861.1 aluc|OJJ281823.1 anid|CBF86525.1  
anig|EHA22395.1 aory|EIT72582.1 asyd|OJJ64873.1 ater|EAU30539.1 atub|OJJ84393.1 aver|OJJ98986.1  
azon|OJJ48844.1 afum|EAL91966.1 agla|OJJ87189.1 anid|CBF86527.1 aory|EIT72529.1 asyd|OJJ64872.1  
ater|EAU30540.1 aver|OJJ98984.1

Group64: agla|OJJ84606.1 agla|OJJ86279.1 anid|CBF78809.1 anid|CBF85739.1 asyd|OJJ64288.1  
asyd|OJJ65260.1 aver|OJJ98381.1 aver|OJJ99411.1 awen|OJJ30086.1 awen|OJJ30833.1 awen|OJJ38668.1  
azon|OJJ44554.1 azon|OJJ44649.1 abra|OJJ67129.1 acar|OOF98424.1 afis|EAW19329.1 afla|EED47551.1  
afum|EAL94046.1 akaw|GAA91039.1 aluc|OJJ287849.1 anig|EHA20152.1 aory|EIT74544.1 ater|EAU29453.1  
atub|OJJ80799.1 abra|OJJ67137.1 acar|OOF98421.1 acla|EAW14610.1 afis|EAW19339.1 afla|EED47549.1  
afum|EAL94058.1 akaw|GAA91032.1 aluc|OJJ287840.1 anid|CBF78807.1 anig|EHA20314.1 aory|EIT74530.1  
asyd|OJJ65259.1 ater|EAU29452.1 atub|OJJ80806.1 aver|OJJ99410.1 agla|OJJ83890.1 awen|OJJ41067.1  
agla|OJJ89228.1 awen|OJJ40968.1

Group65: abra|OJJ65919.1 abra|OJJ71178.1 acar|OOF94968.1 acar|OOF97988.1 acla|EAW10328.1  
acla|EAW13616.1 afis|EAW19973.1 afis|EAW25266.1 afla|EED50456.1 afla|EED53730.1 afum|EAL84937.1  
afum|EAL89929.1 agla|OJJ80057.1 agla|OJJ89242.1 akaw|GAA82807.1 akaw|GAA92313.1 aluc|OJJ287365.1  
aluc|OJJ290211.1 anid|CBF84421.1 anid|CBF85372.1 anig|EHA20600.1 anig|EHA23709.1 aory|EIT75304.1  
aory|EIT82028.1 asyd|OJJ53545.1 asyd|OJJ57927.1 asyd|OJJ64047.1 ater|EAU31473.1 ater|EAU34407.1  
atub|OJJ81279.1 atub|OJJ81642.1 aver|OJJ97591.1 aver|OJJ98132.1 aver|OJJ98886.1 aver|OJJ08208.1  
awen|OJJ36011.1 awen|OJJ40979.1 azon|OJJ42397.1 azon|OJJ44566.1 azon|OJJ45171.1 azon|OJJ50333.1  
asyd|OJJ54388.1

Group66: abra|OJJ66757.1 abra|OJJ68421.1 abra|OJJ70242.1 acar|OOF92554.1 acar|OOF93838.1  
afis|EAW19495.1 afis|EAW21208.1 afum|EAL86999.1 afum|EAL92219.1 agla|OJJ78585.1 agla|OJJ81224.1  
agla|OJJ86343.1 agla|OJJ87022.1 akaw|GAA86545.1 akaw|GAA89691.1 akaw|GAA92527.1 aluc|OJJ280693.1  
aluc|OJJ285093.1 aluc|OJJ290076.1 anig|EHA20997.1 anig|EHA27322.1 anig|EHA25314.1 aory|EIT73935.1  
aory|EIT77370.1 asyd|OJJ59201.1 asyd|OJJ59780.1 ater|EAU34261.1 ater|EAU34807.1 atub|OJJ80506.1  
atub|OJJ87553.1 atub|OJJ84632.1 atub|OJJ84730.1 aver|OJJ01814.1 aver|OJJ02507.1 awen|OJJ36122.1  
awen|OJJ36911.1 azon|OJJ42905.1 azon|OJJ45981.1 acla|EAW11883.1 afla|EED50220.1 afla|EED56713.1  
anid|CBF75444.1

Group67: abra|OJJ67357.1 abra|OJJ69620.1 abra|OJJ69925.1 acar|OOF92464.1 acar|OOF92686.1  
acar|OOF93436.1 acla|EAW06385.1 acla|EAW08905.1 afis|EAW15491.1 afis|EAW18491.1 afla|EED49005.1  
afla|EED52913.1 afum|EAL85832.1 afum|EAL93181.1 agla|OJJ80168.1 agla|OJJ85086.1 akaw|GAA86464.1  
akaw|GAA87732.1 akaw|GAA91604.1 aluc|OJJ282429.1 aluc|OJJ285004.1 aluc|OJJ285363.1 anig|EHA25223.1

anig|EHA25546.1 anig|EHA28342.1 aory|EIT78593.1 aory|EIT82534.1 asyd|OJJ53723.1 asyd|OJJ56020.1  
asyd|OJJ58801.1 ater|EAU29917.1 ater|EAU32628.1 atub|OJI80207.1 atub|OJI80594.1 atub|OJI88012.1  
awen|OJJ31044.1 awen|OJJ38147.1 azon|OJJ43140.1 azon|OJJ50555.1 anid|CBF70161.1 aver|OJJ01405.1  
aver|OJJ04967.1

Group68: abra|OJJ69659.1 abra|OJJ71032.1 acar|OOF92597.1 acar|OOF92618.1 acar|OOF92644.1  
acar|OOF98104.1 aluc|OJZ82466.1 aluc|OJZ87497.1 anig|EHA20713.1 anig|EHA28309.1 atub|OJI81151.1  
atub|OJI87972.1 acla|EAW08698.1 acla|EAW12766.1 afis|EAW15737.1 afis|EAW17928.1 afla|EED49112.1  
afla|EED51315.1 afum|EAL85611.1 afum|EAL91739.1 agla|OJJ81894.1 agla|OJJ83005.1 akaw|GAA91638.1  
akaw|GAA91639.1 aluc|OJZ82465.1 anid|CBF71049.1 anid|CBF80811.1 anig|EHA28310.1 aory|EIT78548.1  
aory|EIT81553.1 asyd|OJJ52673.1 asyd|OJJ54450.1 ater|EAU32405.1 ater|EAU33543.1 atub|OJI87973.1  
aver|OJJ04699.1 aver|OJJ07704.1 awen|OJJ38433.1 awen|OJJ41618.1 azon|OJJ43810.1 azon|OJJ48339.1  
akaw|GAA82922.1

Group69: abra|OJJ70622.1 abra|OJJ71755.1 abra|OJJ72061.1 abra|OJJ76523.1 acar|OOF96715.1  
acar|OOF96808.1 acar|OOF99444.1 acla|EAW13671.1 acla|EAW14172.1 afis|EAW15618.1 afis|EAW18886.1  
afla|EED50879.1 afla|EED53904.1 afla|EED57853.1 agla|OJJ80215.1 agla|OJJ80629.1 akaw|GAA82436.1  
akaw|GAA84874.1 aluc|OJZ84834.1 aluc|OJZ86797.1 aluc|OJZ91685.1 anig|EHA21886.1 anig|EHA22697.1  
anig|EHA25744.1 aory|EIT78491.1 aory|EIT78970.1 aory|EIT81115.1 ater|EAU31982.1 ater|EAU32969.1  
ater|EAU38058.1 atub|OJI83721.1 atub|OJI86137.1 aver|OJJ01614.1 aver|OJJ02222.1 awen|OJJ32444.1  
awen|OJJ38463.1 azon|OJJ47202.1 azon|OJJ47982.1 afum|EAL93619.1 anid|CBF69896.1 asyd|OJJ59001.1

Group71: abra|OJJ65673.1 abra|OJJ68238.1 abra|OJJ66038.1 abra|OJJ68515.1 abra|OJJ74212.1  
abra|OJJ74240.1 acar|OOF92683.1 acar|OOF95490.1 acar|OOF95508.1 afla|EED47448.1 afla|EED57720.1  
akaw|GAA86780.1 akaw|GAA86806.1 akaw|GAA91332.1 aluc|OJZ79540.1 aluc|OJZ89922.1 aluc|OJZ82729.1  
aluc|OJZ89892.1 anig|EHA21182.1 anig|EHA27091.1 anig|EHA27122.1 aory|EIT79930.1 aory|EIT81920.1  
atub|OJI84883.1 atub|OJI84915.1 atub|OJI88962.1 aver|OJI97104.1 aver|OJJ03419.1 acla|EAW07265.1  
afum|EAL90895.1 ater|EAU34298.1 agla|OJJ87719.1 anid|CBF88605.1 awen|OJJ34900.1 azon|OJJ50067.1  
afis|EAW22286.1 anid|CBF88560.1 asyd|OJJ63833.1 ater|EAU34323.1 asyd|OJJ63857.1

Group72: abra|OJJ66697.1 abra|OJJ68381.1 acar|OOF93705.1 acar|OOF93791.1 acar|OOF93987.1  
acla|EAW11832.1 acla|EAW12357.1 afis|EAW16780.1 afis|EAW19443.1 afla|EED56190.1 afla|EED56651.1  
afum|EAL86351.1 afum|EAL87052.1 agla|OJJ79770.1 agla|OJJ81157.1 akaw|GAA89641.1 akaw|GAA92564.1  
aluc|OJZ80748.1 aluc|OJZ90112.1 anid|CBF80588.1 anid|CBF81398.1 anig|EHA20960.1 anig|EHA27274.1  
aory|EIT73439.1 aory|EIT79687.1 asyd|OJJ54689.1 asyd|OJJ59403.1 ater|EAU30272.1 ater|EAU34745.1  
atub|OJI84692.1 atub|OJI87197.1 atub|OJI87605.1 aver|OJI99850.1 aver|OJJ02870.1 aver|OJJ07480.1  
aver|OJJ07987.1 awen|OJJ29847.1 awen|OJJ36844.1 azon|OJJ42956.1 azon|OJJ50350.1

Group73: abra|OJJ68502.1 abra|OJJ73653.1 acar|OOF98748.1 acar|OOG00831.1 acla|EAW07563.1  
acla|EAW12139.1 acla|EAW15367.1 afis|EAW17197.1 afis|EAW17227.1 afis|EAW22597.1 afla|EED45179.1  
afla|EED51197.1 afla|EED51520.1 afla|EED54722.1 afum|EAL86625.1 afum|EAL86649.1 afum|EAL90601.1  
agla|OJJ80961.1 agla|OJJ86657.1 akaw|GAA88505.1 akaw|GAA92769.1 aluc|OJZ82715.1 aluc|OJZ88400.1  
anid|CBF69884.1 anid|CBF89553.1 anig|EHA18128.1 anig|EHA21170.1 aory|EIT73539.1 aory|EIT78945.1  
aory|EIT80690.1 asyd|OJJ59011.1 asyd|OJJ65377.1 ater|EAU31751.1 ater|EAU39106.1 atub|OJI88949.1  
atub|OJI90995.1 aver|OJI99545.1 aver|OJJ01604.1 awen|OJJ35225.1 azon|OJJ51827.1

Group74: abra|OJJ66378.1 abra|OJJ68574.1 abra|OJJ75363.1 acar|OOF89872.1 acar|OOF92870.1  
akaw|GAA90247.1 akaw|GAA91914.1 aluc|OJZ81966.1 aluc|OJZ83093.1 atub|OJI84517.1 atub|OJI87392.1  
atub|OJI87843.1 acla|EAW08967.1 agla|OJJ89584.1 anid|CBF87061.1 anig|EHA22281.1 anig|EHA28155.1  
asyd|OJJ60430.1 ater|EAU36814.1 aver|OJI99753.1 afla|EED48897.1 afum|EAL93812.1 akaw|GAA92059.1  
aluc|OJZ92932.1 azon|OJJ46231.1 afis|EAW19083.1 agla|OJJ81069.1 anig|EHA26039.1 aory|EIT81242.1  
ater|EAU36156.1 awen|OJJ35776.1 azon|OJJ45936.1 acla|EAW14375.1 afla|EED54315.1 aory|EIT76109.1  
ater|EAU32130.1 awen|OJJ32478.1 afla|EED46053.1 aory|EIT83489.1

Group75: abra|OJJ66645.1 abra|OJJ77622.1 acar|OOF93665.1 acar|OOF93749.1 acar|OOF99113.1  
afis|EAW19398.1 afis|EAW25441.1 afla|EED46395.1 afla|EED56341.1 afum|EAL87096.1 afum|EAL90099.1  
agla|OJJ81109.1 agla|OJJ84218.1 akaw|GAA84009.1 akaw|GAA89598.1 aluc|OJZ80804.1 aluc|OJZ80911.1  
anid|CBF74274.1 anid|CBF85786.1 anig|EHA19435.1 anig|EHA27230.1 aory|EIT72345.1 aory|EIT73378.1  
aory|EIT83124.1 ater|EAU33678.1 ater|EAU36124.1 atub|OJI82668.1 atub|OJI87652.1 acla|EAW10153.1  
acla|EAW11788.1 afla|EED50354.1 asyd|OJJ51908.1 asyd|OJJ64317.1 aver|OJJ05362.1 awen|OJJ36793.1  
azon|OJJ43006.1 azon|OJJ43662.1 aver|OJI98410.1 awen|OJJ30031.1

Group77: abra|OJJ68971.1 abra|OJJ74920.1 acar|OOF91548.1 acar|OOF95911.1 acla|EAW08451.1  
acla|EAW14216.1 afis|EAW19065.1 afis|EAW23496.1 afla|EED54431.1 afla|EED57396.1 afum|EAL87967.1  
afum|EAL93794.1 agla|OJJ83427.1 agla|OJJ84542.1 agla|OJJ86743.1 akaw|GAA83503.1 akaw|GAA90498.1  
aluc|OJZ85958.1 aluc|OJZ92491.1 anid|CBF79648.1 anid|CBF89739.1 anig|EHA24643.1 anig|EHA26481.1  
aory|EIT75884.1 aory|EIT80127.1 asyd|OJJ52407.1 asyd|OJJ58022.1 asyd|OJJ62230.1 ater|EAU32108.1  
ater|EAU35285.1 atub|OJI79746.1 atub|OJI86924.1 aver|OJI96339.1 aver|OJJ04377.1 awen|OJJ31497.1  
awen|OJJ39821.1 azon|OJJ46209.1 azon|OJJ47945.1 anid|CBF76133.1

Group79: abra|OJJ69282.1 abra|OJJ71129.1 acar|OOF90163.1 acar|OOF98023.1 acar|OOF94440.1  
acla|EAW10369.1 acla|EAW14671.1 afis|EAW24202.1 afis|EAW25223.1 afla|EED48070.1 afla|EED53683.1  
afum|EAL85872.1 afum|EAL89884.1 agla|OJJ79190.1 agla|OJJ79675.1 akaw|GAA82845.1 akaw|GAA88154.1  
aluc|OJJ82110.1 aluc|OJJ87406.1 anid|CBF74328.1 anid|CBF85271.1 anig|EHA20636.1 anig|EHA28620.1  
aory|EIT75297.1 aory|EIT83329.1 asyd|OJJ53993.1 asyd|OJJ62910.1 ater|EAU31153.1 ater|EAU34382.1  
atub|OJJ81240.1 atub|OJJ88326.1 aver|OJJ98079.1 aver|OJJ08091.1 awen|OJJ33096.1 awen|OJJ40889.1  
azon|OJJ42425.1 azon|OJJ44518.1 azon|OJJ44851.1

Group81: abra|OJJ72988.1 abra|OJJ77279.1 acar|OOF93153.1 acar|OOF96164.1 acla|EAW08023.1  
acla|EAW13278.1 afis|EAW17339.1 afis|EAW23057.1 afum|EAL88423.2 afum|EAL91183.1 akaw|GAA85562.1  
akaw|GAA90670.1 aluc|OJJ83496.1 aluc|OJJ84689.1 anig|EHA24331.1 anig|EHA27964.1 asyd|OJJ54336.1  
asyd|OJJ56391.1 ater|EAU33849.1 ater|EAU37607.1 atub|OJJ82390.1 atub|OJJ89393.1 aver|OJJ05288.1  
aver|OJJ06322.1 awen|OJJ35679.1 awen|OJJ40816.1 afla|EED51042.1 afla|EED54960.1 agla|OJJ79345.1  
agla|OJJ89418.1 anid|CBF81037.1 aory|EIT80299.1 azon|OJJ44147.1 azon|OJJ50224.1 anid|CBF84215.1  
aory|EIT77041.1 asyd|OJJ57175.1 aver|OJJ03139.1

Group82: abra|OJJ73798.1 abra|OJJ76038.1 acar|OOF99891.1 acar|OOG00949.1 acla|EAW07105.1  
acla|EAW07691.1 afla|EED45540.1 afla|EED49992.1 agla|OJJ86348.1 agla|OJJ87936.1 akaw|GAA88927.1  
akaw|GAA89416.1 aluc|OJJ88257.1 aluc|OJJ89493.1 anid|CBF71497.1 anid|CBF88069.1 anig|EHA18002.1  
anig|EHA23106.1 aory|EIT74740.1 aory|EIT75450.1 asyd|OJJ54934.1 asyd|OJJ60320.1 asyd|OJJ63552.1  
ater|EAU32047.1 ater|EAU38995.1 atub|OJJ85309.1 atub|OJJ90856.1 aver|OJJ97382.1 aver|OJJ99669.1  
aver|OJJ07264.1 awen|OJJ34497.1 awen|OJJ34697.1 awen|OJJ35343.1 azon|OJJ45277.1 azon|OJJ49485.1  
azon|OJJ49775.1 afis|EAW22706.1 afum|EAL90486.1

Group83: abra|OJJ74861.1 abra|OJJ78108.1 aluc|OJJ91173.1 aluc|OJJ92439.1 anig|EHA19866.1  
anig|EHA26528.1 atub|OJJ83187.1 atub|OJJ86868.1 acar|OOF95861.1 agla|OJJ86823.1 akaw|GAA83559.1  
akaw|GAA85898.1 awen|OJJ39889.1 azon|OJJ43220.1 acar|OOF98757.1 acla|EAW06608.1 afis|EAW16215.1  
afla|EED48709.1 afum|EAL88842.1 agla|OJJ86220.1 anid|CBF79542.1 aory|EIT73181.1 asyd|OJJ57900.1  
ater|EAU33259.1 aver|OJJ04494.1 awen|OJJ30257.1 azon|OJJ43953.1 abra|OJJ78109.1 acla|EAW06607.1  
afis|EAW16216.1 afla|EED48710.1 afum|EAL88843.1 akaw|GAA85897.1 anid|CBF79540.1 aory|EIT73231.1  
ater|EAU33260.1 awen|OJJ30256.1 azon|OJJ43954.1

Group85: abra|OJJ69585.1 acar|OOF91569.1 acla|EAW14381.1 acla|EAW14383.1 acla|EAW14384.1  
afis|EAW19087.1 afis|EAW19089.1 afis|EAW19090.1 afla|EED54319.1 afla|EED54321.1 afla|EED54322.1  
afum|EAL93817.1 afum|EAL93819.1 afum|EAL93820.1 agla|OJJ84514.1 agla|OJJ84515.1 agla|OJJ84517.1  
akaw|GAA91580.1 akaw|GAA91581.1 akaw|GAA91583.1 aluc|OJJ82402.1 anid|CBF79686.1 anid|CBF79690.1  
anid|CBF79692.1 anig|EHA28363.1 aory|EIT76048.1 aory|EIT76070.1 aory|EIT76088.1 asyd|OJJ58048.1  
ater|EAU32135.1 ater|EAU32138.1 ater|EAU32139.1 atub|OJJ88039.1 aver|OJJ04355.1 awen|OJJ32484.1  
azon|OJJ46222.1 azon|OJJ46228.1 azon|OJJ46230.1

Group87: abra|OJJ73172.1 abra|OJJ75139.1 acar|OOF97197.1 acar|OOG00411.1 acla|EAW06855.1  
acla|EAW08318.1 afis|EAW16472.1 afis|EAW23353.1 afla|EED47207.1 afla|EED55602.1 afum|EAL88123.1  
afum|EAL89066.1 agla|OJJ82874.1 agla|OJJ86473.1 akaw|GAA87999.1 akaw|GAA88746.1 aluc|OJJ81255.1  
aluc|OJJ92706.1 anid|CBF74897.1 anid|CBF81437.1 anig|EHA18563.1 anig|EHA26294.1 aory|EIT79222.1  
aory|EIT82665.1 asyd|OJJ59426.1 asyd|OJJ60103.1 ater|EAU35596.1 ater|EAU36570.1 atub|OJJ87132.1  
atub|OJJ91451.1 aver|OJJ02845.1 aver|OJJ04159.1 awen|OJJ39536.1 awen|OJJ40364.1 azon|OJJ47731.1  
azon|OJJ49213.1 anid|CBF74899.1

Group89: aory|EIT73009.1 aory|EIT82639.1 abra|OJJ75430.1 acar|OOF90776.1 acla|EAW13800.1  
acla|EAW13801.1 acla|EAW13802.1 afis|EAW18330.1 afis|EAW18331.1 afis|EAW18332.1 afla|EED48794.1  
afla|EED48795.1 afla|EED49574.1 afum|EAL87695.1 afum|EAL87696.1 afum|EAL87697.1 agla|OJJ88054.1  
akaw|GAA84206.1 akaw|GAA84207.1 aluc|OJJ88883.1 aluc|OJJ88884.1 anid|CBF79398.1 anid|CBF79400.1  
anid|CBF79402.1 anig|EHA23623.1 aory|EIT72994.1 aory|EIT73029.1 asyd|OJJ57827.1 ater|EAU33343.1  
ater|EAU33344.1 atub|OJJ85907.1 atub|OJJ85908.1 atub|OJJ85909.1 aver|OJJ04565.1 awen|OJJ30712.1  
azon|OJJ43305.1 afla|EED48796.1

Group90: aory|EIT73779.1 aory|EIT77467.1 awen|OJJ29827.1 awen|OJJ36939.1 abra|OJJ65853.1  
acar|OOF95014.1 acla|EAW11610.1 afis|EAW23843.1 afla|EED56987.1 afum|EAL93778.1 agla|OJJ78690.1  
akaw|GAA92291.1 aluc|OJJ90188.1 anig|EHA23687.1 ater|EAU31468.1 atub|OJJ81615.1 aver|OJJ99116.1  
awen|OJJ29704.1 azon|OJJ46986.1 abra|OJJ77924.1 acar|OOF90880.1 afla|EED45127.1 akaw|GAA83740.1  
aluc|OJJ90991.1 anid|CBF86319.1 anig|EHA19699.1 asyd|OJJ64996.1 atub|OJJ82982.1 acar|OOG00327.1  
asyd|OJJ55713.1 atub|OJJ87196.1 aver|OJJ06799.1 afum|EAL87274.1 agla|OJJ86442.1 asyd|OJJ62873.1  
ater|EAU31778.1 aver|OJJ96926.1

Group91: abra|OJJ67337.1 acar|OOF92476.1 acla|EAW06397.1 afis|EAW18501.1 afla|EED52900.1  
afum|EAL93192.1 agla|OJJ85126.1 akaw|GAA86479.1 aluc|OJJ85020.1 anid|CBF75182.1 anig|EHA25241.1  
aory|EIT78666.1 asyd|OJJ59951.1 ater|EAU30070.1 atub|OJJ80577.1 aver|OJJ02338.1 awen|OJJ31055.1  
azon|OJJ50565.1 abra|OJJ69524.1 acar|OOF94230.1 acla|EAW11627.1 afis|EAW23829.1 afla|EED54410.1  
afum|EAL87261.1 agla|OJJ82483.1 akaw|GAA88301.1 aluc|OJJ82364.1 anid|CBF75186.1 anig|EHA28401.1

aory|EIT75866.1 ater|EAU31384.1 atub|OJI88078.1 awen|OJJ38733.1 azon|OJJ50221.1 afla|EED51976.1  
aory|EIT81396.1 agla|OJJ78561.1

Group94: abra|OJJ68844.1 abra|OJJ73357.1 acar|OOF90545.1 acar|OOG00565.1 acla|EAW06977.1  
acla|EAW15277.1 afis|EAW16591.1 afis|EAW20248.1 afla|EED45005.1 afla|EED57097.1 afum|EAL85366.1  
afum|EAL89187.1 akaw|GAA83127.1 akaw|GAA90404.1 aluc|OJZ85824.1 aluc|OJZ88683.1 anid|CBF78712.1  
anid|CBF81894.1 anig|EHA18363.1 anig|EHA24737.1 aory|EIT73755.1 aory|EIT82298.1 asyd|OJJ59680.1  
asyd|OJJ63029.1 ater|EAU32039.1 ater|EAU36671.1 atub|OJI79611.1 atub|OJI91263.1 aver|OJI97939.1  
aver|OJJ02608.1 awen|OJJ31246.1 awen|OJJ40224.1 azon|OJJ48439.1 azon|OJJ49082.1 agla|OJJ82668.1  
azon|OJJ45914.1

Group95: abra|OJJ69553.1 abra|OJJ70394.1 aory|EIT78629.1 aory|EIT82274.1 acar|OOF91880.1  
afla|EED57090.1 agla|OJJ82606.1 akaw|GAA91965.1 aluc|OJZ82652.1 anid|CBF75146.1 anig|EHA27420.1  
asyd|OJJ59972.1 ater|EAU30264.1 atub|OJI88884.1 aver|OJJ02319.1 awen|OJJ41493.1 abra|OJJ71088.1  
acar|OOF98047.1 acla|EAW06408.1 afis|EAW18512.1 afla|EED52888.1 afum|EAL93207.1 agla|OJJ85018.1  
akaw|GAA82873.1 aluc|OJZ87440.1 anid|CBF70237.1 anig|EHA20665.1 asyd|OJJ58768.1 ater|EAU29455.1  
atub|OJI81208.1 aver|OJJ01377.1 awen|OJJ31066.1 azon|OJJ46021.1 acar|OOF98419.1 acar|OOF99514.1  
azon|OJJ42344.1

Group96: abra|OJJ71749.1 abra|OJJ72735.1 acar|OOF90204.1 acar|OOF95966.1 afla|EED52022.1  
afla|EED52611.1 afum|EAL85108.1 afum|EAL87310.1 agla|OJJ78437.1 agla|OJJ82556.1 akaw|GAA85163.1  
akaw|GAA85341.1 aluc|OJZ86473.1 aluc|OJZ90703.1 anig|EHA22158.1 anig|EHA24129.1 aory|EIT73811.1  
aory|EIT74178.1 aory|EIT81402.1 asyd|OJJ54106.1 asyd|OJJ56840.1 aver|OJJ03498.1 aver|OJJ08629.1  
awen|OJJ31677.1 awen|OJJ33864.1 afis|EAW23882.1 agla|OJJ80999.1 anid|CBF77189.1 ater|EAU33464.1  
atub|OJI82130.1 atub|OJI84056.1 azon|OJJ42521.1 azon|OJJ48689.1 acla|EAW11571.1 afis|EAW19784.1  
afla|EED45206.1

Group97: abra|OJJ71850.1 abra|OJJ73479.1 acar|OOF96520.1 acar|OOG00674.1 acla|EAW06803.1  
acla|EAW13882.1 afis|EAW16352.1 afis|EAW18594.1 afla|EED52753.1 afla|EED53519.1 afum|EAL88977.1  
afum|EAL93302.1 agla|OJJ81646.1 agla|OJJ88248.1 akaw|GAA85067.1 akaw|GAA87429.1 aluc|OJZ86584.1  
aluc|OJZ88568.1 anid|CBF70389.1 anid|CBF89223.1 anig|EHA18265.1 anig|EHA22076.1 aory|EIT75113.1  
aory|EIT78157.1 asyd|OJJ58637.1 asyd|OJJ62519.1 ater|EAU34109.1 ater|EAU34888.1 atub|OJI83939.1  
atub|OJI91154.1 aver|OJI96638.1 aver|OJJ01243.1 awen|OJJ31157.1 awen|OJJ37755.1 azon|OJJ45016.1  
azon|OJJ46632.1

Group98: abra|OJJ72143.1 abra|OJJ77114.1 acar|OOF93003.1 acar|OOF96781.1 acla|EAW12957.1  
acla|EAW14937.1 afis|EAW17702.1 afis|EAW24453.1 afum|EAL86122.1 afum|EAL91517.1 agla|OJJ79467.1  
agla|OJJ80300.1 akaw|GAA84780.1 akaw|GAA90815.1 aluc|OJZ84523.1 aluc|OJZ86900.1 anid|CBF73820.1  
anid|CBF89927.1 anig|EHA21742.1 anig|EHA27821.1 aory|EIT75637.1 aory|EIT83612.1 asyd|OJJ56569.1  
asyd|OJJ62120.1 atub|OJI83619.1 atub|OJI89556.1 aver|OJI96228.1 aver|OJJ06153.1 awen|OJJ32744.1  
awen|OJJ37133.1 azon|OJJ45294.1 azon|OJJ50831.1 afla|EED55221.1 ater|EAU29992.1 ater|EAU31909.1  
afla|EED45698.1

Group99: abra|OJJ72622.1 abra|OJJ76815.1 acar|OOF91310.1 acar|OOF94641.1 acla|EAW11602.1  
acla|EAW13375.1 afis|EAW20489.1 afis|EAW23856.1 afum|EAL84566.1 afum|EAL87284.1 agla|OJJ82510.1  
agla|OJJ84827.1 akaw|GAA85243.1 akaw|GAA87206.1 aluc|OJZ84225.1 aluc|OJZ90600.1 anid|CBF77244.1  
anid|CBF79220.1 anig|EHA24038.1 anig|EHA27574.1 aory|EIT74289.1 aory|EIT77786.1 asyd|OJJ55735.1  
asyd|OJJ56812.1 ater|EAU29567.1 ater|EAU33499.1 atub|OJI82024.1 atub|OJI89859.1 aver|OJJ03523.1  
aver|OJJ06821.1 awen|OJJ33189.1 awen|OJJ33817.1 azon|OJJ46391.1 azon|OJJ48719.1 afla|EED52576.1  
afla|EED44774.1

Group100: abra|OJJ73827.1 abra|OJJ74268.1 acar|OOF95463.1 acar|OOG00979.1 acla|EAW07312.1  
acla|EAW07722.1 afis|EAW22334.1 afis|EAW22754.1 afla|EED50015.1 afla|EED57748.1 afum|EAL90445.1  
afum|EAL90858.1 agla|OJJ83671.1 agla|OJJ87714.1 akaw|GAA86755.1 akaw|GAA89445.1 aluc|OJZ88222.1  
aluc|OJZ89865.1 anid|CBF88019.1 anid|CBF88645.1 anig|EHA17969.1 anig|EHA27065.1 aory|EIT74682.1  
aory|EIT81059.1 asyd|OJJ63522.1 asyd|OJJ63881.1 ater|EAU38966.1 ater|EAU39471.1 atub|OJI84943.1  
atub|OJI90822.1 aver|OJI97058.1 aver|OJI97408.1 awen|OJJ34912.1 awen|OJJ35426.1 azon|OJJ45572.1  
azon|OJJ49750.1

Group101: abra|OJJ76503.1 abra|OJJ76504.1 acar|OOF99462.1 acar|OOF99465.1 afis|EAW18906.1  
afis|EAW18907.1 afla|EED50840.1 afla|EED50841.1 afum|EAL93638.1 afum|EAL93639.1 agla|OJJ81511.1  
agla|OJJ81512.1 akaw|GAA82419.1 akaw|GAA82420.1 aluc|OJZ91697.1 aluc|OJZ91699.1 anid|CBF69713.1  
anid|CBF69715.1 anig|EHA22712.1 anig|EHA22713.1 aory|EIT78986.1 aory|EIT79030.1 asyd|OJJ59043.1  
asyd|OJJ59044.1 ater|EAU38075.1 ater|EAU38076.1 atub|OJI86152.1 atub|OJI86154.1 aver|OJJ01638.1  
aver|OJJ01639.1 awen|OJJ32463.1 awen|OJJ32464.1 azon|OJJ47220.1 azon|OJJ47221.1 acla|EAW14191.1  
acla|EAW14192.1

Group103: afla|EED46026.1 afla|EED49987.1 akaw|GAA89413.1 akaw|GAA90839.1 aluc|OJZ82994.1  
aluc|OJZ88260.1 aory|EIT74653.1 aory|EIT75776.1 atub|OJI89228.1 atub|OJI90859.1 awen|OJJ30039.1  
awen|OJJ35338.1 abra|OJJ65964.1 acar|OOF92910.1 acla|EAW13583.1 afis|EAW20018.1 afis|EAW22701.1  
afum|EAL84899.2 afum|EAL90491.1 agla|OJJ87998.1 anid|CBF84731.1 anig|EHA21408.1 asyd|OJJ53303.1

ater|EAU29378.1 ater|EAU39001.1 aver|OJJ08438.1 azon|OJJ43685.1 abra|OJJ73794.1 acar|OOG00953.1  
acla|EAW07686.1 agla|OJJ79008.1 anid|CBF88080.1 anig|EHA18005.1 asyd|OJJ63557.1 aver|OJI97375.1  
azon|OJJ49780.1

Group105: abra|OJJ76497.1 acar|OOF99470.1 acla|EAW14363.1 afis|EAW18913.1 aflla|EED50836.1  
afum|EAL93644.1 agla|OJJ81517.1 akaw|GAA82414.1 aluc|OJZ91703.1 anid|CBF69695.1 anig|EHA22717.1  
aory|EIT79010.1 asyd|OJJ59053.1 ater|EAU38080.1 atub|OJI86163.1 aver|OJJ01647.1 awen|OJJ31506.1  
azon|OJJ41989.1 azon|OJJ47222.1 abra|OJJ76500.1 acar|OOF99467.1 acla|EAW14196.1 afis|EAW18912.1  
aflla|EED50837.1 afum|EAL93643.1 akaw|GAA82416.1 aluc|OJZ91702.1 anid|CBF69697.1 anig|EHA22716.1  
aory|EIT79064.1 asyd|OJJ59051.1 ater|EAU38079.1 atub|OJI86161.1 awen|OJJ31505.1 azon|OJJ47223.1  
azon|OJJ41991.1

Group106: abra|OJJ72950.1 abra|OJJ74416.1 acla|EAW06831.1 acla|EAW11196.1 afis|EAW15926.1  
afis|EAW16381.1 afis|EAW19938.1 afum|EAL88562.1 afum|EAL89006.1 akaw|GAA85531.1 akaw|GAA87307.1  
aluc|OJZ83460.1 aluc|OJZ89710.1 anid|CBF81021.1 anid|CBF89371.1 atub|OJI82352.1 atub|OJI85092.1  
aver|OJI96612.1 aver|OJJ06329.1 awen|OJJ35654.1 awen|OJJ37914.1 acar|OOF96132.1 aflla|EED54935.1  
agla|OJJ89379.1 anig|EHA24304.1 aory|EIT80345.1 asyd|OJJ56383.1 ater|EAU35529.1 azon|OJJ48008.1  
acar|OOF95327.1 aflla|EED49933.1 anig|EHA26941.1 aory|EIT83444.1 asyd|OJJ62476.1 ater|EAU34071.1

Group107: abra|OJJ68266.1 acar|OOF97546.1 acla|EAW06826.1 afis|EAW16377.1 aflla|EED53460.1  
afum|EAL89002.1 agla|OJJ78595.1 akaw|GAA91930.1 aluc|OJZ82692.1 anid|CBF74547.1 anig|EHA27369.1  
aory|EIT75115.1 asyd|OJJ57687.1 ater|EAU34075.1 atub|OJI88924.1 aver|OJJ05493.1 awen|OJJ37911.1  
azon|OJJ45090.1 abra|OJJ68268.1 acar|OOF97548.1 acla|EAW07026.1 afis|EAW16652.1 aflla|EED44948.1  
afum|EAL89256.1 agla|OJJ78685.1 akaw|GAA91932.1 aluc|OJZ82690.1 anid|CBF74545.1 anig|EHA27367.1  
aory|EIT73496.1 ater|EAU39576.1 atub|OJI88922.1 aver|OJJ05494.1 awen|OJJ40062.1 azon|OJJ45565.1

Group108: abra|OJJ69218.1 acar|OOF91100.1 acla|EAW08627.1 afis|EAW15804.1 aflla|EED51241.1  
afum|EAL85546.1 agla|OJJ81971.1 akaw|GAA92227.1 aluc|OJZ86200.1 anid|CBF70912.1 anig|EHA24423.1  
aory|EIT83194.1 asyd|OJJ52602.1 ater|EAU33444.1 atub|OJI79993.1 aver|OJJ04628.1 awen|OJJ38514.1  
azon|OJJ43738.1 abra|OJJ69219.1 acar|OOF91099.1 acla|EAW08626.1 afis|EAW15805.1 aflla|EED51240.1  
afum|EAL85545.1 akaw|GAA92228.1 aluc|OJZ86201.1 anid|CBF70910.1 anig|EHA24422.1 aory|EIT83177.1  
asyd|OJJ52601.1 ater|EAU33443.1 atub|OJI79994.1 aver|OJJ04627.1 awen|OJJ38516.1 azon|OJJ43737.1

Group109: abra|OJJ73774.1 acar|OOG00931.1 acla|EAW07658.1 afis|EAW22676.1 aflla|EED49957.1  
afum|EAL90516.1 agla|OJJ79041.1 akaw|GAA88402.1 aluc|OJZ88280.1 anid|CBF88133.1 anig|EHA18025.1  
aory|EIT83452.1 asyd|OJJ63590.1 ater|EAU39033.1 atub|OJI90880.1 aver|OJI97343.1 awen|OJJ35305.1  
azon|OJJ49811.1 abra|OJJ73775.1 acar|OOG00932.1 acla|EAW07660.1 afis|EAW22677.1 aflla|EED49958.1  
afum|EAL90515.1 agla|OJJ79040.1 akaw|GAA88401.1 aluc|OJZ88279.1 anid|CBF88131.1 anig|EHA18024.1  
aory|EIT83440.1 asyd|OJJ63589.1 ater|EAU39032.1 atub|OJI90879.1 aver|OJI97344.1 azon|OJJ49810.1

Group110: abra|OJJ74284.1 acar|OOF89817.1 acla|EAW07328.1 afis|EAW22360.1 aflla|EED57768.1  
afum|EAL90831.1 agla|OJJ87609.1 akaw|GAA86740.1 aluc|OJZ89849.1 anid|CBF88679.1 anig|EHA27050.1  
aory|EIT81097.1 asyd|OJJ63900.1 ater|EAU39494.1 atub|OJI84957.1 aver|OJI97040.1 awen|OJJ34934.1  
azon|OJJ45587.1 abra|OJJ74285.1 acar|OOF95446.1 acla|EAW07329.1 afis|EAW22361.1 aflla|EED57769.1  
afum|EAL90830.1 agla|OJJ87610.1 akaw|GAA86739.1 aluc|OJZ89848.1 anid|CBF88686.1 anig|EHA27049.1  
aory|EIT81110.1 asyd|OJJ63902.1 ater|EAU39495.1 atub|OJI84958.1 aver|OJI97038.1 awen|OJJ34935.1

Group111: abra|OJJ74383.1 acar|OOF95354.1 acla|EAW07424.1 afis|EAW22450.1 aflla|EED54465.1  
afum|EAL90741.1 agla|OJJ87572.1 akaw|GAA87284.1 aluc|OJZ89735.1 anid|CBF88925.1 anig|EHA26961.1  
aory|EIT81125.1 asyd|OJJ62853.1 ater|EAU39257.1 atub|OJI85066.1 aver|OJI96906.1 awen|OJJ35075.1  
azon|OJJ50032.1 abra|OJJ74384.1 acar|OOF95353.1 acla|EAW07423.1 afis|EAW22449.1 aflla|EED54467.1  
afum|EAL90742.1 akaw|GAA87285.1 aluc|OJZ89734.1 anid|CBF88927.1 anig|EHA26960.1 aory|EIT81127.1  
asyd|OJJ62852.1 ater|EAU39255.1 atub|OJI85067.1 aver|OJI96905.1 awen|OJJ35076.1 azon|OJJ50031.1

Group112: abra|OJJ75811.1 acar|OOG00066.1 acla|EAW14862.1 afis|EAW24390.1 aflla|EED47820.1  
afum|EAL86062.1 agla|OJJ78870.1 akaw|GAA84525.1 aluc|OJZ89258.1 anid|CBF73709.1 anig|EHA23310.1  
aory|EIT77118.1 asyd|OJJ56644.1 ater|EAU30344.1 atub|OJI85541.1 aver|OJJ06082.1 awen|OJJ32814.1  
azon|OJJ49018.1 abra|OJJ75812.1 acar|OOG00063.1 acla|EAW14861.1 afis|EAW24389.1 afum|EAL86061.1  
agla|OJJ83285.1 akaw|GAA84526.1 aluc|OJZ89259.1 anid|CBF73707.1 anig|EHA23309.1 aory|EIT77172.1  
asyd|OJJ56645.1 ater|EAU30345.1 atub|OJI85540.1 aver|OJJ06081.1 awen|OJJ32815.1 azon|OJJ49017.1

Group113: abra|OJJ77674.1 acar|OOF99062.1 acla|EAW06583.1 afis|EAW16009.1 aflla|EED56386.1  
afum|EAL88639.1 agla|OJJ86034.1 akaw|GAA83958.1 aluc|OJZ80845.1 anid|CBF74571.1 anig|EHA19478.1  
aory|EIT83011.1 asyd|OJJ57651.1 ater|EAU33634.1 atub|OJI82722.1 aver|OJJ05511.1 awen|OJJ30456.1  
azon|OJJ45447.1 abra|OJJ77675.1 acar|OOF99061.1 acla|EAW06587.1 afis|EAW16010.1 aflla|EED56387.1  
afum|EAL88640.1 agla|OJJ86035.1 akaw|GAA83957.1 aluc|OJZ80844.1 anid|CBF74569.1 anig|EHA19479.1  
aory|EIT82998.1 ater|EAU33633.1 atub|OJI82723.1 aver|OJJ05510.1 awen|OJJ30455.1 azon|OJJ45446.1

Group114: abra|OJJ65981.1 abra|OJJ73719.1 acar|OOF92892.1 acar|OOG00881.1 acla|EAW07608.1  
acla|EAW13600.1 afis|EAW20005.1 afis|EAW22638.1 aflla|EED46007.1 aflla|EED49889.1 afum|EAL84913.1  
afum|EAL90554.2 akaw|GAA88444.1 akaw|GAA90854.1 aluc|OJZ82979.1 aluc|OJZ88332.1 anid|CBF84697.1

anid|CBF88205.1 anig|EHA18067.1 anig|EHA21394.1 asyd|OJJ53314.1 asyd|OJJ63639.1 atub|OJI89212.1  
atub|OJI90927.1 aver|OJI97297.1 aver|OJJ08429.1 awen|OJJ30019.1 awen|OJJ35261.1 agla|OJJ80980.1  
aory|EIT72460.1 aory|EIT75522.1 ater|EAU29347.1 ater|EAU39068.1 azon|OJJ44553.1

Group115: abra|OJJ66667.1 abra|OJJ72896.1 acar|OOF93682.1 acar|OOF93767.1 acar|OOF96087.1  
acla|EAW11355.1 acla|EAW11808.1 afis|EAW18139.1 afis|EAW19418.1 afla|EED50375.1 afla|EED58065.1  
afum|EAL87076.1 afum|EAL87496.1 agla|OJJ81131.1 agla|OJJ83822.1 akaw|GAA85483.1 akaw|GAA89616.1  
aluc|OJJ80780.1 aluc|OJJ83405.1 anig|EHA24256.1 anig|EHA27249.1 aory|EIT79750.1 aory|EIT83148.1  
atub|OJI82294.1 atub|OJI87632.1 awen|OJJ35581.1 awen|OJJ36816.1 azon|OJJ42986.1 azon|OJJ46941.1  
anid|CBF74365.1 asyd|OJJ57784.1 ater|EAU34724.1 aver|OJJ05380.1 ater|EAU35462.1

Group116: abra|OJJ69228.1 abra|OJJ71754.1 asyd|OJJ52597.1 asyd|OJJ53400.1 aver|OJJ04201.1  
aver|OJJ04624.1 abra|OJJ69224.1 acar|OOF91096.1 acla|EAW08622.1 afis|EAW15810.1 afla|EED51237.1  
afum|EAL85541.1 agla|OJJ81976.1 akaw|GAA92232.1 aluc|OJJ86204.1 anid|CBF70905.1 anig|EHA24418.1  
aory|EIT83188.1 ater|EAU33440.1 atub|OJI79998.1 awen|OJJ38521.1 azon|OJJ43734.1 acar|OOF91092.1  
acla|EAW08620.1 afis|EAW15813.1 afla|EED51233.1 afum|EAL85538.1 akaw|GAA92236.1 aluc|OJJ86208.1  
anid|CBF70903.1 aory|EIT83195.1 ater|EAU33435.1 atub|OJI80002.1 awen|OJJ38526.1

Group117: abra|OJJ69289.1 abra|OJJ70324.1 acar|OOF91780.1 acar|OOF94433.1 acla|EAW12318.1  
acla|EAW14678.1 afis|EAW16903.1 afis|EAW24209.1 afla|EED45264.1 afla|EED48062.1 afum|EAL85879.1  
afum|EAL86439.1 akaw|GAA88161.1 akaw|GAA92580.1 aluc|OJJ82118.1 aluc|OJJ82593.1 anig|EHA27482.1  
anig|EHA28613.1 asyd|OJJ53986.1 asyd|OJJ54375.1 ater|EAU30213.1 ater|EAU31159.1 atub|OJI88319.1  
atub|OJI88828.1 aver|OJJ05329.1 aver|OJJ08084.1 awen|OJJ29716.1 awen|OJJ33087.1 azon|OJJ42612.1  
azon|OJJ44859.1 agla|OJJ79662.1 anid|CBF74267.1 aory|EIT83358.1 aory|EIT73698.1

Group118: abra|OJJ69846.1 abra|OJJ72321.1 acar|OOF94891.1 acar|OOF97566.1 afis|EAW19582.1  
afis|EAW19642.1 afla|EED47805.1 afla|EED56993.1 agla|OJJ79220.1 agla|OJJ80784.1 akaw|GAA86072.1  
akaw|GAA87813.1 aluc|OJJ85448.1 aluc|OJJ90307.1 anig|EHA23794.1 anig|EHA24991.1 aory|EIT77130.1  
aory|EIT77504.1 atub|OJI80119.1 atub|OJI81731.1 aver|OJJ05597.1 aver|OJJ07110.1 acla|EAW12002.1  
afum|EAL86880.1 anid|CBF71346.1 asyd|OJJ55096.1 ater|EAU32886.1 awen|OJJ41887.1 azon|OJJ42708.1  
azon|OJJ46844.1 acla|EAW07815.1 anid|CBF74628.1 asyd|OJJ57585.1 ater|EAU30349.1

Group119: abra|OJJ70036.1 abra|OJJ72033.1 acla|EAW08504.1 acla|EAW09509.1 afis|EAW17096.1  
afis|EAW21624.1 afla|EED48527.1 afla|EED57027.1 afla|EED57851.1 akaw|GAA84899.1 akaw|GAA88365.1  
aluc|OJJ82290.1 aluc|OJJ86772.1 anig|EHA18733.1 anig|EHA21909.1 anig|EHA26569.1 aory|EIT72294.1  
aory|EIT73160.1 aory|EIT81085.1 ater|EAU38312.1 ater|EAU38711.1 atub|OJI83756.1 atub|OJI88149.1  
aver|OJJ03867.1 aver|OJJ08171.1 acar|OOF96691.1 afum|EAL92660.1 agla|OJJ79695.1 anid|CBF71556.1  
asyd|OJJ52536.1 awen|OJJ33874.1 azon|OJJ48675.1 afla|EED46381.1 afla|EED46382.1

Group121: abra|OJJ74623.1 abra|OJJ74837.1 acar|OOF95085.1 acar|OOF95151.1 acar|OOF95841.1  
acla|EAW10761.1 acla|EAW14613.1 afis|EAW19343.1 afis|EAW24815.1 afla|EED47168.1 afla|EED50136.1  
afila|EED56891.1 afum|EAL89459.1 afum|EAL94062.1 akaw|GAA81986.1 akaw|GAA83583.1 aluc|OJJ92204.1  
aluc|OJJ92414.1 anig|EHA26551.1 anig|EHA26754.1 aory|EIT74736.1 aory|EIT79324.1 aory|EIT77583.1  
ater|EAU36492.1 ater|EAU39073.1 atub|OJI86632.1 atub|OJI86844.1 azon|OJJ48665.1 azon|OJJ49253.1  
agla|OJJ82911.1 anid|CBF85881.1 asyd|OJJ64378.1 aver|OJI98474.1 awen|OJJ40401.1

Group122: agla|OJJ84376.1 agla|OJJ85709.1 asyd|OJJ57959.1 asyd|OJJ61061.1 abra|OJJ71937.1  
acar|OOF96594.1 acar|OOF96595.1 acla|EAW09592.1 acla|EAW09593.1 afis|EAW21545.1 afis|EAW21546.1  
afila|EED55996.1 afla|EED55997.1 afum|EAL92565.1 afum|EAL92566.1 agla|OJJ85708.1 akaw|GAA84987.1  
aluc|OJJ86674.1 anid|CBF76366.1 anid|CBF76368.1 anig|EHA21999.1 anig|EHA22000.1 aory|EIT76685.1  
aory|EIT76776.1 asyd|OJJ61062.1 ater|EAU34993.1 ater|EAU34994.1 atub|OJI83854.1 aver|OJJ00378.1  
aver|OJJ00379.1 awen|OJJ39144.1 awen|OJJ39146.1 azon|OJJ51476.1 azon|OJJ51477.1

Group123: abra|OJJ67331.1 acar|OOF92482.1 acla|EAW06403.1 afis|EAW18507.1 afla|EED52893.1  
afum|EAL93201.1 agla|OJJ85114.1 akaw|GAA86485.1 aluc|OJJ85026.1 anid|CBF70247.1 anig|EHA25247.1  
aory|EIT78591.1 asyd|OJJ58761.1 ater|EAU30064.1 atub|OJI80571.1 aver|OJJ01371.1 awen|OJJ31060.1  
azon|OJJ50571.1 abra|OJJ67332.1 acar|OOF92481.1 acla|EAW06402.1 afis|EAW18506.1 afla|EED52895.1  
afum|EAL93200.1 akaw|GAA86484.1 aluc|OJJ85025.1 anig|EHA25246.1 aory|EIT78664.1 asyd|OJJ58760.1  
ater|EAU30065.1 atub|OJI80572.1 aver|OJJ01368.1 awen|OJJ31059.1 azon|OJJ50569.1

Group124: abra|OJJ68518.1 acar|OOF92724.1 acla|EAW12845.1 afis|EAW18008.1 afla|EED51887.1  
afum|EAL91820.1 agla|OJJ80274.1 akaw|GAA91330.1 aluc|OJJ82732.1 anid|CBF80034.1 anig|EHA21184.1  
aory|EIT81755.1 asyd|OJJ58272.1 ater|EAU31524.1 atub|OJI88965.1 aver|OJJ02152.1 awen|OJJ41532.1  
azon|OJJ48252.1 atub|OJI79785.1 abra|OJJ69012.1 acar|OOF92723.1 acla|EAW12846.1 afis|EAW18009.1  
afila|EED51886.1 afum|EAL91821.1 agla|OJJ80275.1 akaw|GAA90529.1 aluc|OJJ85998.1 anid|CBF80035.1  
anig|EHA24612.1 aory|EIT81715.1 ater|EAU31525.1 awen|OJJ41531.1 azon|OJJ48251.1

Group125: abra|OJJ69958.1 acar|OOF93468.1 acla|EAW08829.1 afis|EAW15568.1 afla|EED49078.1  
afum|EAL85765.1 agla|OJJ85182.1 akaw|GAA87702.1 aluc|OJJ85324.1 anid|CBF78110.1 anig|EHA25514.1  
aory|EIT82568.1 ater|EAU32562.1 atub|OJI80248.1 abra|OJJ69959.1 acla|EAW08833.1 afis|EAW15567.1  
afila|EED49076.1 afla|EED49077.1 afum|EAL85766.1 agla|OJJ85184.1 akaw|GAA87701.1 anid|CBF78112.1

anid|CBF78114.1 aory|EIT82498.1 aory|EIT82525.1 asyd|OJJ55899.1 ater|EAU32566.1 atub|OJI80249.1  
aver|OJJ04844.1 awen|OJJ38227.1 azon|OJJ43068.1 acla|EAW08832.1 azon|OJJ47853.1

Group126: abra|OJJ71382.1 acar|OOF97787.1 acla|EAW10157.1 afis|EAW25437.1 afla|EED53925.1  
afum|EAL90095.1 agla|OJJ87082.1 akaw|GAA82612.1 aluc|OJZ87158.1 anid|CBF77596.1 anig|EHA20417.1  
aory|EIT78347.1 asyd|OJJ53142.1 ater|EAU34609.1 atub|OJI81482.1 aver|OJJ03710.1 awen|OJJ41165.1  
azon|OJJ44743.1 abra|OJJ71383.1 acar|OOF97786.1 acla|EAW10158.1 afis|EAW25436.1 afla|EED53924.1  
afum|EAL90094.1 agla|OJJ87081.1 akaw|GAA82611.1 aluc|OJZ87157.1 anid|CBF77594.1 anig|EHA20416.1  
aory|EIT78262.1 asyd|OJJ53143.1 ater|EAU34608.1 atub|OJI81483.1 aver|OJJ03709.1

Group127: abra|OJJ72469.1 acar|OOF94768.1 acla|EAW12702.1 afis|EAW17865.1 afla|EED46230.1  
afum|EAL91673.1 agla|OJJ83099.1 akaw|GAA86207.1 aluc|OJZ90456.1 anid|CBF76910.1 anig|EHA23918.1  
aory|EIT76409.1 asyd|OJJ57089.1 ater|EAU33080.1 atub|OJI81883.1 aver|OJJ03211.1 awen|OJJ41706.1  
azon|OJJ48402.1 abra|OJJ72470.1 acar|OOF94765.1 acla|EAW12703.1 afis|EAW17866.1 afla|EED46231.1  
afum|EAL91674.1 agla|OJJ83086.1 akaw|GAA86208.1 aluc|OJZ90457.1 anid|CBF76912.1 anig|EHA23919.1  
aory|EIT76527.1 ater|EAU33081.1 atub|OJI81884.1 awen|OJJ41705.1 azon|OJJ48401.1

Group128: abra|OJJ72932.1 acar|OOF96112.1 acla|EAW06458.1 afis|EAW15954.1 afla|EED58104.1  
afum|EAL88587.1 agla|OJJ89359.1 akaw|GAA85514.1 aluc|OJZ83442.1 anid|CBF81063.1 anig|EHA24288.1  
aory|EIT79164.1 asyd|OJJ56456.1 ater|EAU35503.1 atub|OJI82333.1 aver|OJJ06266.1 awen|OJJ35622.1  
azon|OJJ46902.1 abra|OJJ72934.1 acar|OOF96115.1 acla|EAW06457.1 afis|EAW15953.1 afla|EED58105.1  
afum|EAL88586.1 akaw|GAA85515.1 aluc|OJZ83443.1 anid|CBF81061.1 anig|EHA24289.1 aory|EIT79130.1  
asyd|OJJ56455.1 ater|EAU35504.1 atub|OJI82334.1 aver|OJJ06267.1 awen|OJJ35623.1

Group129: abra|OJJ76465.1 acar|OOF99703.1 acla|EAW13966.1 afis|EAW18675.1 afla|EED50624.1  
afum|EAL93395.2 agla|OJJ82401.1 aluc|OJZ91745.1 anid|CBF70588.1 anig|EHA22748.1 aory|EIT78145.1  
asyd|OJJ58523.1 ater|EAU38235.1 atub|OJI86203.1 aver|OJJ01124.1 awen|OJJ32147.1 azon|OJJ46731.1  
abra|OJJ76466.1 acar|OOF99704.1 acla|EAW13965.1 afis|EAW18674.1 afla|EED50625.1 afum|EAL93394.1  
akaw|GAA82377.1 aluc|OJZ91744.1 anid|CBF70586.1 anig|EHA22747.1 aory|EIT77989.1 asyd|OJJ58524.1  
ater|EAU38236.1 atub|OJI86202.1 aver|OJJ01125.1 awen|OJJ32146.1 azon|OJJ46730.1

Group130: abra|OJJ66702.1 abra|OJJ76322.1 acar|OOF93706.1 acar|OOF93792.1 afla|EED45227.1  
afila|EED56652.1 anid|CBF78509.1 anid|CBF81402.1 anig|EHA22872.1 anig|EHA27277.1 aory|EIT73751.1  
aory|EIT79654.1 asyd|OJJ59404.1 asyd|OJJ65313.1 ater|EAU29738.1 ater|EAU34746.1 atub|OJI86345.1  
atub|OJI87602.1 acla|EAW11833.1 afis|EAW19444.1 afum|EAL87051.1 agla|OJJ81158.1 akaw|GAA89644.1  
aluc|OJZ80745.1 aver|OJJ02869.1 awen|OJJ36845.1 azon|OJJ42319.1 azon|OJJ42955.1 acar|OOF97765.1  
akaw|GAA82251.1 aluc|OJZ91893.1 aver|OJI99451.1 awen|OJJ40922.1

Group131: abra|OJJ68714.1 abra|OJJ76939.1 acar|OOF91389.1 acar|OOF92214.1 afum|EAL84486.2  
afum|EAL91972.2 aluc|OJZ81814.1 aluc|OJZ84338.1 anig|EHA22401.1 anig|EHA27672.1 atub|OJI84386.1  
atub|OJI89730.1 awen|OJJ33278.1 awen|OJJ41371.1 azon|OJJ48840.1 azon|OJJ50652.1 acla|EAW12532.1  
acla|EAW13466.1 afis|EAW20578.1 afis|EAW24117.1 afla|EED46815.1 afla|EED52313.1 agla|OJJ88717.1  
akaw|GAA87100.1 akaw|GAA89867.1 anid|CBF86537.1 aory|EIT74384.1 asyd|OJJ64866.1 ater|EAU37106.1  
aver|OJI98979.1 anid|CBF78940.1 asyd|OJJ55646.1 aver|OJJ06731.1

Group132: abra|OJJ69799.1 abra|OJJ75720.1 acar|OOF90260.1 acar|OOF93578.1 afis|EAW21759.1  
afis|EAW24741.1 afum|EAL89387.1 afum|EAL92789.1 akaw|GAA84456.1 akaw|GAA87860.1 aluc|OJZ85501.1  
aluc|OJZ89172.1 anid|CBF80400.1 anid|CBF83678.1 anig|EHA23383.1 anig|EHA25034.1 aory|EIT75373.1  
aory|EIT79769.1 asyd|OJJ54761.1 asyd|OJJ55920.1 asyd|OJJ60823.1 atub|OJI80064.1 atub|OJI85618.1  
aver|OJJ00149.1 aver|OJJ04873.1 aver|OJJ07409.1 azon|OJJ45021.1 azon|OJJ48200.1 acla|EAW09376.1  
afila|EED45538.1 agla|OJJ84391.1 ater|EAU38431.1 awen|OJJ34043.1

Group133: abra|OJJ71453.1 abra|OJJ72857.1 acar|OOF96054.1 acar|OOF97693.1 acar|OOF97744.1  
acar|OOF98763.1 afis|EAW22749.1 afis|EAW24033.1 afla|EED45033.1 afla|EED49120.1 afum|EAL87464.1  
afum|EAL90450.1 akaw|GAA82558.1 akaw|GAA85456.1 aluc|OJZ83364.1 aluc|OJZ87090.1 anig|EHA20361.1  
anig|EHA24229.1 aory|EIT73568.1 aory|EIT78580.1 asyd|OJJ59869.1 asyd|OJJ65349.1 ater|EAU29414.1  
ater|EAU29711.1 atub|OJI81548.1 atub|OJI82255.1 aver|OJI99497.1 aver|OJJ02418.1 acla|EAW11389.1  
agla|OJJ86999.1 anid|CBF75320.1 awen|OJJ35505.1 azon|OJJ46979.1

Group134: abra|OJJ72895.1 abra|OJJ73247.1 acar|OOF96086.1 acar|OOG00487.1 acla|EAW06921.1  
acla|EAW11356.1 afis|EAW16538.1 afis|EAW18138.1 afla|EED56131.1 afla|EED58064.1 afum|EAL87495.1  
afum|EAL89135.1 agla|OJJ82784.1 agla|OJJ83821.1 akaw|GAA85482.1 akaw|GAA87933.1 aluc|OJZ81180.1  
aluc|OJZ83404.1 anig|EHA18498.1 anig|EHA24255.1 aory|EIT76761.1 aory|EIT79757.1 ater|EAU35461.1  
ater|EAU36601.1 atub|OJI82293.1 atub|OJI91377.1 awen|OJJ35580.1 awen|OJJ40283.1 azon|OJJ46943.1  
azon|OJJ49145.1 anid|CBF81745.1 asyd|OJJ59599.1 aver|OJJ02669.1

Group135: anid|CBF74543.1 anid|CBF80800.1 asyd|OJJ54487.1 asyd|OJJ57688.1 aver|OJJ05495.1  
aver|OJJ07692.1 awen|OJJ30771.1 awen|OJJ31710.1 abra|OJJ67440.1 acar|OOF92387.1 acar|OOF92388.1  
acla|EAW06324.1 afis|EAW18438.1 afla|EED52977.1 afum|EAL93120.1 agla|OJJ85004.1 akaw|GAA86390.1  
aluc|OJZ84924.1 anid|CBF70039.1 anig|EHA25142.1 anig|EHA25143.1 aory|EIT78691.1 aory|EIT78713.1



asyd|OJJ58866.1 ater|EAU29862.1 atub|OJI80675.1 aver|OJJ01467.1 azon|OJJ50475.1 acla|EAW06323.1 afis|EAW18437.1 afum|EAL93119.1 ater|EAU29854.1 afila|EED52975.1

Group136: aory|EIT76219.1 abra|OJJ66160.1 acla|EAW07091.1 ater|EAU30184.1 abra|OJJ76943.1 acar|OOF91392.1 acla|EAW14645.1 afis|EAW23759.1 afila|EED45469.1 afum|EAL87193.2 agla|OJJ78794.1 akaw|GAA87097.1 aluc|OJZ84341.1 anid|CBF86208.1 anig|EHA27675.1 anig|EHA27676.1 aory|EIT75611.1 asyd|OJJ64548.1 atub|OJI89727.1 aver|OJI98644.1 awen|OJJ40873.1 afis|EAW21192.1 anid|CBF78488.1 asyd|OJJ58352.1 ater|EAU36866.1 aver|OJJ02055.1 awen|OJJ31298.1 afis|EAW22111.1 afila|EED48116.1 aver|OJJ07112.1 azon|OJJ50585.1 awen|OJJ29841.1 awen|OJJ30060.1

Group137: abra|OJJ68073.1 acar|OOF92659.1 acla|EAW14013.1 afis|EAW18719.1 afila|EED50674.1 afum|EAL93443.2 agla|OJJ82339.1 akaw|GAA92398.1 aluc|OJZ83259.1 anid|CBF70677.1 anig|EHA21113.1 aory|EIT78139.1 asyd|OJJ58472.1 ater|EAU38185.1 atub|OJI87680.1 aver|OJJ01073.1 awen|OJJ32224.1 azon|OJJ46775.1 abra|OJJ68477.1 acar|OOF92676.1 acla|EAW07215.1 afis|EAW22228.1 afila|EED57619.1 afum|EAL90966.1 agla|OJJ87821.1 anid|CBF88467.1 anig|EHA21112.1 aory|EIT82940.1 asyd|OJJ63779.1 ater|EAU34233.1 aver|OJI97158.1 awen|OJJ34810.1 azon|OJJ45740.1

Group138: abra|OJJ71306.1 acar|OOF97864.1 acla|EAW10234.1 afis|EAW25358.1 afila|EED53840.1 afum|EAL90020.1 agla|OJJ83908.1 akaw|GAA82685.1 aluc|OJZ87238.1 anid|CBF77463.1 anig|EHA20484.1 aory|EIT78472.1 asyd|OJJ53218.1 ater|EAU34506.1 atub|OJI81404.1 aver|OJJ03634.1 awen|OJJ41084.1 azon|OJJ44664.1 abra|OJJ71307.1 acla|EAW10233.1 afis|EAW25359.1 afila|EED53841.1 afum|EAL90021.1 agla|OJJ83909.1 akaw|GAA82684.1 aluc|OJZ87237.1 anid|CBF77461.1 aory|EIT78435.1 asyd|OJJ53217.1 ater|EAU34507.1 atub|OJI81405.1 awen|OJJ41085.1 azon|OJJ44665.1

Group139: abra|OJJ71587.1 acar|OOF96317.1 acla|EAW15133.1 afis|EAW20105.1 afila|EED53369.1 afum|EAL85222.1 agla|OJJ88850.1 akaw|GAA89336.1 aluc|OJZ86327.1 anid|CBF84906.1 anig|EHA21551.1 aory|EIT75191.1 asyd|OJJ63169.1 ater|EAU38724.1 atub|OJI84207.1 aver|OJI97785.1 awen|OJJ31876.1 azon|OJJ46259.1 abra|OJJ71588.1 acla|EAW15132.1 afis|EAW20104.1 afum|EAL85221.1 agla|OJJ88849.1 akaw|GAA89335.1 aluc|OJZ86328.1 anid|CBF84908.1 anig|EHA21550.1 aory|EIT75224.1 asyd|OJJ63168.1 atub|OJI84206.1 aver|OJI97786.1 awen|OJJ31877.1 azon|OJJ46257.1

Group140: abra|OJJ72666.1 acar|OOF94609.1 acla|EAW11529.1 afis|EAW23925.1 afila|EED50596.1 afum|EAL87350.1 agla|OJJ79403.1 akaw|GAA85287.1 aluc|OJZ90645.1 anid|CBF77250.1 anig|EHA24080.1 aory|EIT82072.1 asyd|OJJ56809.1 ater|EAU32310.1 atub|OJI82075.1 aver|OJJ03525.1 awen|OJJ39029.1 azon|OJJ51358.1 abra|OJJ72668.1 acla|EAW11530.1 afis|EAW23924.1 afila|EED50597.1 afum|EAL87349.1 agla|OJJ79402.1 akaw|GAA85288.1 aluc|OJZ90646.1 anid|CBF77248.1 anig|EHA24081.1 aory|EIT78140.1 asyd|OJJ56810.1 ater|EAU32312.1 awen|OJJ39031.1 azon|OJJ51359.1

Group141: abra|OJJ74273.1 acar|OOF95457.1 acla|EAW07318.1 afis|EAW22350.1 afila|EED57754.1 afum|EAL90842.1 agla|OJJ87709.1 akaw|GAA86750.1 aluc|OJZ89860.1 anid|CBF88653.1 anig|EHA27060.1 aory|EIT81054.1 ater|EAU39489.1 aver|OJI97054.1 awen|OJJ34904.1 azon|OJJ45578.1 abra|OJJ74279.1 acar|OOF95452.1 acla|EAW07323.1 afis|EAW22355.1 afila|EED57761.1 afum|EAL90836.1 agla|OJJ87608.1 akaw|GAA86745.1 aluc|OJZ89854.1 anid|CBF88666.1 anig|EHA27055.1 aory|EIT81031.1 asyd|OJJ63892.1 atub|OJI84952.1 aver|OJI97047.1 awen|OJJ34929.1 azon|OJJ45582.1

Group142: abra|OJJ68218.1 abra|OJJ69789.1 acar|OOF93590.1 acar|OOF97507.1 agla|OJJ78902.1 agla|OJJ86249.1 akaw|GAA83228.1 akaw|GAA87869.1 aluc|OJZ83728.1 aluc|OJZ85510.1 anid|CBF84393.1 anid|CBF86693.1 atub|OJI80056.1 atub|OJI90104.1 acla|EAW09054.1 acla|EAW12123.1 afis|EAW25629.1 afila|EED55183.1 afum|EAL84317.1 anig|EHA18876.1 aory|EIT80665.1 aory|EIT81643.1 asyd|OJJ55507.1 ater|EAU32706.1 aver|OJJ06584.1 aver|OJJ08175.1 awen|OJJ36048.1 azon|OJJ43184.1 afila|EED51722.1 anig|EHA25042.1 asyd|OJJ53581.1 anid|CBF83169.1

Group143: abra|OJJ68305.1 abra|OJJ68976.1 afila|EED55146.1 afila|EED57528.1 agla|OJJ80112.1 agla|OJJ84537.1 akaw|GAA83169.1 akaw|GAA90501.1 aluc|OJZ83668.1 aluc|OJZ85964.1 aory|EIT81602.1 aory|EIT81847.1 asyd|OJJ59831.1 asyd|OJJ65307.1 atub|OJI79752.1 atub|OJI90039.1 awen|OJJ31501.1 awen|OJJ36340.1 azon|OJJ46215.1 azon|OJJ48729.1 acar|OOF91551.1 acar|OOF96683.1 acla|EAW14213.1 afis|EAW19068.1 afum|EAL93797.1 anid|CBF78527.1 anig|EHA18823.1 anig|EHA24640.1 aver|OJI99445.1 afila|EED54434.1 aory|EIT75875.1 ater|EAU32117.1

Group145: abra|OJJ70543.1 abra|OJJ73773.1 acar|OOF94608.1 acar|OOG00929.1 afis|EAW15411.1 afis|EAW22675.1 afum|EAL84235.1 afum|EAL90517.1 akaw|GAA83389.1 akaw|GAA88403.1 aluc|OJZ83888.1 aluc|OJZ88281.1 anid|CBF74491.1 anid|CBF88137.1 anig|EHA18026.1 anig|EHA19025.1 aory|EIT72732.1 aory|EIT83438.1 asyd|OJJ57716.1 asyd|OJJ63598.1 ater|EAU36301.1 ater|EAU39034.1 atub|OJI90255.1 atub|OJI90881.1 azon|OJJ45068.1 azon|OJJ49812.1 acla|EAW07657.1 afila|EED49956.1 agla|OJJ79042.1 aver|OJI97338.1 aver|OJJ05451.1 awen|OJJ35304.1

Group147: abra|OJJ73071.1 abra|OJJ77012.1 acla|EAW09005.1 acla|EAW15322.1 afis|EAW20323.1 afis|EAW25545.1 akaw|GAA87037.1 akaw|GAA88090.1 aluc|OJZ81354.1 aluc|OJZ84412.1 asyd|OJJ54270.1 asyd|OJJ55537.1 ater|EAU32181.1 ater|EAU39595.1 atub|OJI89661.1 atub|OJI91558.1 aver|OJJ05226.1 aver|OJJ06615.1 acar|OOG00304.1 afila|EED44875.1 afum|EAL85448.1 agla|OJJ78910.1 anid|CBF82101.1

anid|CBF83180.1 anig|EHA18655.1 aory|EIT83261.1 awen|OJJ36038.1 azon|OJJ51343.1 afla|EED54130.1 afum|EAL84263.1 anig|EHA27738.1 aory|EIT76050.1

Group149: acar|OOF94510.1 acar|OOG00617.1 agla|OJJ78704.1 agla|OJJ82589.1 agla|OJJ88673.1 awen|OJJ33431.1 awen|OJJ40048.1 abra|OJJ73366.1 acar|OOG00573.1 acla|EAW12876.1 afis|EAW17800.1 afum|EAL91608.1 akaw|GAA83118.1 aluc|OJZ88674.1 anid|CBF87487.1 anig|EHA18356.1 asyd|OJJ52958.1 ater|EAU31398.1 atub|OJI91255.1 aver|OJJ08926.1 abra|OJJ73415.1 afla|EED44896.1 akaw|GAA83076.1 aluc|OJZ88622.1 anig|EHA18315.1 aory|EIT83248.1 asyd|OJJ62646.1 atub|OJI91207.1 aver|OJJ07782.1 azon|OJJ50122.1 afis|EAW20384.1 asyd|OJJ54467.1

Group150: acar|OOF95065.1 acar|OOF95131.1 acar|OOF95066.1 acar|OOF95132.1 abra|OJJ74648.1 acla|EAW10738.1 acla|EAW10739.1 afis|EAW24835.1 afis|EAW24836.1 afla|EED47139.1 afla|EED47140.1 afum|EAL89480.1 afum|EAL89481.2 agla|OJJ82028.1 akaw|GAA81962.1 akaw|GAA81963.1 aluc|OJZ92226.1 anid|CBF74584.1 anid|CBF74586.1 anig|EHA26730.1 aory|EIT79207.1 aory|EIT79226.1 asyd|OJJ57656.1 ater|EAU36469.1 ater|EAU36470.1 atub|OJI86656.1 aver|OJJ05516.1 aver|OJJ05517.1 awen|OJJ40422.1 awen|OJJ40423.1 azon|OJJ49280.1 azon|OJJ49281.1

Group151: acar|OOF95215.1 acar|OOG00549.1 afla|EED45224.1 afla|EED52255.1 afla|EED57542.1 afum|EAL86491.1 afum|EAL91022.1 aory|EIT73609.1 aory|EIT74331.1 aory|EIT81831.1 asyd|OJJ52204.1 asyd|OJJ54774.1 asyd|OJJ64753.1 ater|EAU30189.1 ater|EAU32767.1 ater|EAU34175.1 aver|OJI98855.1 aver|OJJ07392.1 aver|OJJ07305.1 abra|OJJ74541.1 acla|EAW07155.1 acla|EAW12276.1 afis|EAW16964.1 agla|OJJ87885.1 akaw|GAA82061.1 aluc|OJZ92121.1 anid|CBF86686.1 anig|EHA26824.1 atub|OJI86554.1 awen|OJJ34744.1 azon|OJJ42779.1 anid|CBF80465.1

Group153: asyd|OJJ60702.1 asyd|OJJ64821.1 aver|OJI98934.1 aver|OJJ00028.1 abra|OJJ72028.1 acar|OOF96677.1 afis|EAW21619.1 afla|EED57848.1 akaw|GAA84904.1 aluc|OJZ86765.1 anid|CBF83493.1 anig|EHA21914.1 aory|EIT81067.1 ater|EAU38309.1 atub|OJI83762.1 awen|OJJ37096.1 azon|OJJ48684.1 abra|OJJ77154.1 acar|OOF93040.1 acla|EAW12917.1 afis|EAW17740.1 afla|EED45741.1 afum|EAL91554.1 agla|OJJ81711.1 akaw|GAA90776.1 aluc|OJZ84568.1 anid|CBF86610.1 anig|EHA27862.1 aory|EIT75552.1 ater|EAU31867.1 atub|OJI89514.1 azon|OJJ50798.1

Group154: atub|OJI81651.1 atub|OJI86062.1 abra|OJJ65911.1 acar|OOF94961.1 acla|EAW12054.1 afis|EAW19697.1 afla|EED57032.1 afum|EAL86830.1 agla|OJJ80819.1 akaw|GAA92321.1 aluc|OJJ90219.1 anid|CBF71392.1 anig|EHA23717.1 aory|EIT82283.1 asyd|OJJ55041.1 ater|EAU33691.1 aver|OJI98387.1 awen|OJJ41939.1 azon|OJJ50749.1 abra|OJJ76597.1 akaw|GAA82501.1 aluc|OJZ91610.1 anig|EHA22639.1 acla|EAW11329.1 afis|EAW18166.1 afla|EED56329.1 afum|EAL87526.1 agla|OJJ85952.1 anid|CBF85749.1 aory|EIT73387.1 asyd|OJJ64295.1 aver|OJJ07167.1

Group155: abra|OJJ66622.1 acar|OOF91045.1 acla|EAW10875.1 afis|EAW20983.1 afla|EED50338.1 afum|EAL84647.2 agla|OJJ84060.1 akaw|GAA91103.1 aluc|OJZ81427.1 anid|CBF82618.1 anig|EHA25995.1 aory|EIT77260.1 asyd|OJJ54020.1 ater|EAU38633.1 atub|OJI88753.1 aver|OJJ08720.1 awen|OJJ34328.1 azon|OJJ48073.1 afla|EED50340.1 akaw|GAA91102.1 aluc|OJZ81426.1 acar|OOF91046.1 acla|EAW10874.1 afis|EAW20984.1 afla|EED50339.1 afum|EAL84646.1 agla|OJJ84063.1 anid|CBF82622.1 aory|EIT77350.1 atub|OJI88754.1 awen|OJJ34327.1 azon|OJJ48069.1

Group156: abra|OJJ68143.1 acar|OOF97481.1 acla|EAW13069.1 afis|EAW17595.1 afla|EED49225.1 afum|EAL91408.1 agla|OJJ81333.1 akaw|GAA92375.1 aluc|OJZ83234.1 anid|CBF90206.1 anig|EHA21091.1 aory|EIT83153.1 asyd|OJJ61974.1 ater|EAU37033.1 atub|OJI87702.1 aver|OJI96067.1 awen|OJJ37251.1 azon|OJJ50946.1 abra|OJJ68185.1 acla|EAW13066.1 afis|EAW17598.1 afla|EED49223.1 afum|EAL91411.1 agla|OJJ81335.1 akaw|GAA83261.1 aluc|OJZ83767.1 anid|CBF90203.1 asyd|OJJ61976.1 ater|EAU37035.1 atub|OJI90138.1 aver|OJI96069.1 awen|OJJ37248.1

Group157: abra|OJJ70602.1 acar|OOF97117.1 acla|EAW08180.1 afis|EAW23215.1 afla|EED47037.1 afum|EAL88269.1 akaw|GAA89942.1 aluc|OJZ83947.1 anig|EHA19076.1 aory|EIT72544.1 asyd|OJJ60180.1 ater|EAU36345.1 atub|OJI90318.1 awen|OJJ39449.1 abra|OJJ70604.1 acar|OOF97116.1 acla|EAW08178.1 afis|EAW23213.1 afum|EBA27340.1 agla|OJJ78731.1 akaw|GAA89944.1 aluc|OJZ83949.1 anid|CBF74742.1 anig|EHA19078.1 aory|EIT72666.1 asyd|OJJ60182.1 ater|EAU36343.1 atub|OJI90320.1 aver|OJJ04082.1 awen|OJJ39447.1 azon|OJJ47649.1 anid|CBF74745.1

Group158: abra|OJJ71268.1 acar|OOF97905.1 acar|OOF97907.1 acla|EAW10269.1 acla|EAW10270.1 afis|EAW25324.1 afis|EAW25325.1 afla|EED53799.1 afla|EED53800.1 afum|EAL89985.1 afum|EAL89986.1 agla|OJJ83862.1 agla|OJJ83863.1 akaw|GAA82722.1 aluc|OJZ87276.1 anid|CBF75258.1 anid|CBF75260.1 anig|EHA20517.1 anig|EHA20518.1 aory|EIT78367.1 aory|EIT78397.1 asyd|OJJ59900.1 asyd|OJJ59901.1 ater|EAU34470.1 atub|OJI81365.1 aver|OJJ02385.1 aver|OJJ02386.1 awen|OJJ41038.1 awen|OJJ41039.1 azon|OJJ44627.1 ater|EAU34472.1 ater|EAU34471.1

Group159: abra|OJJ72382.1 acar|OOF94837.1 acla|EAW11953.1 acla|EAW11954.1 afis|EAW19590.1 afis|EAW19591.1 afla|EED56945.1 afum|EAL86927.1 afum|EAL86928.1 agla|OJJ80730.1 agla|OJJ80732.1 akaw|GAA86129.1 akaw|GAA86131.1 aluc|OJZ90369.1 anid|CBF71264.1 anid|CBF71266.1 anig|EHA23843.1 anig|EHA23844.1 aory|EIT77519.1 aory|EIT77568.1 asyd|OJJ55144.1 asyd|OJJ55146.1 ater|EAU32934.1

ater|EAU32936.1 atub|OJI81795.1 aver|OJJ07061.1 aver|OJJ07063.1 awen|OJJ41805.1 awen|OJJ41808.1  
azon|OJJ47024.1 azon|OJJ47026.1 acar|OOF94836.1

Group160: abra|OJJ72953.1 acar|OOF96134.1 acla|EAW11198.1 afis|EAW15928.1 afla|EED54933.1  
afum|EAL88564.1 agla|OJJ89377.1 akaw|GAA85534.1 aluc|OJZ83463.1 anid|CBF81024.1 anig|EHA24306.1  
aory|EIT80331.1 asyd|OJJ56385.1 ater|EAU35524.1 atub|OJI82355.1 aver|OJJ06327.1 awen|OJJ35652.1  
azon|OJJ46886.1 abra|OJJ72954.1 acar|OOF96135.1 acla|EAW11199.1 afis|EAW15929.1 afla|EED54932.1  
afum|EAL88565.1 akaw|GAA85535.1 anid|CBF81026.1 anig|EHA24307.1 aory|EIT80358.1 asyd|OJJ56386.1  
ater|EAU35523.1 awen|OJJ35651.1 azon|OJJ46887.1

Group161: abra|OJJ74876.1 acar|OOF95878.1 acar|OOF95879.1 acla|EAW08494.1 acla|EAW08495.1  
afis|EAW23540.1 afis|EAW23541.1 afla|EED57438.1 afla|EED57439.1 afum|EAL87925.1 afum|EAL87926.1  
agla|OJJ86795.1 akaw|GAA83544.1 akaw|GAA83545.1 aluc|OJZ92453.1 anid|CBF89661.1 anid|CBF89663.1  
anig|EHA26514.1 anig|EHA26515.1 aory|EIT80116.1 aory|EIT80129.1 asyd|OJJ62276.1 asyd|OJJ62277.1  
ater|EAU35326.1 ater|EAU35327.1 atub|OJI86881.1 atub|OJI86882.1 aver|OJI96385.1 aver|OJI96386.1  
awen|OJJ39871.1 awen|OJJ39872.1 azon|OJJ43230.1

Group162: abra|OJJ75341.1 acar|OOF89856.1 acla|EAW09853.1 afis|EAW21282.1 afla|EED54833.1  
afum|EAL92299.1 akaw|GAA92034.1 aluc|OJZ92904.1 anid|CBF83359.1 anig|EHA26059.1 aory|EIT79370.1  
ater|EAU35911.1 atub|OJI87363.1 awen|OJJ39417.1 abra|OJJ75940.1 acar|OOF99970.1 acla|EAW09854.1  
afis|EAW21281.1 afla|EED54832.1 afum|EAL92298.1 agla|OJJ87478.1 akaw|GAA84642.1 aluc|OJZ89387.1  
anid|CBF73743.1 anid|CBF73745.1 anig|EHA23328.1 aory|EIT77117.1 aory|EIT77194.1 asyd|OJJ56623.1  
aver|OJI99942.1 awen|OJJ39418.1 azon|OJJ44300.1

Group163: abra|OJJ75791.1 acar|OOG00087.1 acar|OOG00097.1 acla|EAW14890.1 acla|EAW14891.1  
afis|EAW24412.1 afis|EAW24413.1 afla|EED47763.1 afla|EED47764.1 afum|EAL86081.1 afum|EAL86082.1  
agla|OJJ79215.1 agla|OJJ79216.1 akaw|GAA84506.1 akaw|GAA84510.1 aluc|OJZ89235.1 aluc|OJZ89239.1  
anid|CBF73743.1 anid|CBF73745.1 anig|EHA23328.1 aory|EIT77117.1 aory|EIT77194.1 asyd|OJJ56623.1  
ater|EAU30316.1 ater|EAU30317.1 atub|OJI85559.1 aver|OJJ06102.1 aver|OJJ06103.1 awen|OJJ32796.1  
awen|OJJ32798.1 azon|OJJ49036.1 azon|OJJ49037.1

Group164: abra|OJJ76816.1 acar|OOF91311.1 acla|EAW13376.1 afis|EAW20490.1 afla|EED44773.1  
afum|EAL84564.1 agla|OJJ84837.1 akaw|GAA87205.1 aluc|OJZ84226.1 anig|EHA27575.1 aory|EIT77777.1  
asyd|OJJ55730.1 atub|OJI89858.1 aver|OJJ06816.1 awen|OJJ33190.1 azon|OJJ46392.1 abra|OJJ76822.1  
acar|OOF91317.1 acla|EAW13382.1 afis|EAW20496.1 afla|EED44772.1 afum|EAL84558.1 agla|OJJ84806.1  
akaw|GAA87200.1 aluc|OJZ84233.1 anid|CBF79209.1 anig|EHA27580.1 aory|EIT77769.1 ater|EAU37190.1  
atub|OJI89852.1 awen|OJJ33196.1 azon|OJJ46400.1

Group165: abra|OJJ78214.1 acla|EAW11236.1 afis|EAW18269.1 afla|EED48735.1 afum|EAL87634.1  
agla|OJJ88158.1 akaw|GAA85813.1 aluc|OJZ91286.1 anid|CBF79514.1 anig|EHA19971.1 aory|EIT73143.1  
asyd|OJJ57887.1 ater|EAU33276.1 atub|OJI83276.1 aver|OJJ04507.1 awen|OJJ30643.1 azon|OJJ47972.1  
abra|OJJ78215.1 acar|OOF98641.1 acla|EAW11235.1 afis|EAW18270.1 afla|EED48736.1 afum|EAL87635.1  
agla|OJJ88157.1 akaw|GAA85812.1 aluc|OJZ91287.1 anid|CBF79512.1 anig|EHA19972.1 aory|EIT73147.1  
asyd|OJJ57886.1 atub|OJI83277.1 aver|OJJ04508.1

Group168: abra|OJJ66675.1 abra|OJJ75504.1 acar|OOF90835.1 acar|OOF93687.1 acar|OOF93772.1  
afis|EAW16470.1 afis|EAW19425.1 afum|EAL87069.1 afum|EAL89064.1 akaw|GAA84268.1 akaw|GAA89623.1  
aluc|OJZ80773.1 aluc|OJZ88960.1 anig|EHA23560.1 anig|EHA27257.1 atub|OJI85829.1 atub|OJI87625.1  
acla|EAW06851.1 afla|EED50383.1 agla|OJJ81137.1 anid|CBF74378.1 aory|EIT83131.1 asyd|OJJ57778.1  
ater|EAU34729.1 aver|OJJ05387.1 awen|OJJ36823.1 azon|OJJ42980.1 afla|EED49104.1 asyd|OJJ57938.1  
aver|OJJ04456.1 aory|EIT82490.1

Group169: abra|OJJ67685.1 abra|OJJ69630.1 acar|OOF92680.1 acar|OOF94075.1 acar|OOF94145.1  
acar|OOF96015.1 afum|EAL86373.1 afum|EAL87420.1 akaw|GAA89197.1 akaw|GAA91610.1 aluc|OJZ81633.1  
aluc|OJZ82435.1 anig|EHA25810.1 anig|EHA28336.1 atub|OJI88006.1 atub|OJI88547.1 afla|EED55077.1  
aory|EIT81950.1 acla|EAW12376.1 afis|EAW16822.1 agla|OJJ86924.1 anid|CBF82987.1 asyd|OJJ64732.1  
ater|EAU35425.1 aver|OJI98836.1 awen|OJJ35458.1 azon|OJJ51285.1 anid|CBF77369.1 asyd|OJJ53260.1  
aver|OJJ03591.1 acla|EAW11432.1

Group170: acar|OOF91973.1 acar|OOF94079.1 acar|OOF94149.1 acar|OOF99292.1 afla|EED45949.1  
acla|EED47803.1 aluc|OJZ79501.1 aluc|OJZ79636.1 aluc|OJZ81691.1 aluc|OJZ80076.1 aory|EIT75701.1  
aory|EIT77131.1 asyd|OJJ52720.1 asyd|OJJ61396.1 asyd|OJJ61537.1 ater|EAU29987.1 ater|EAU30155.1  
aver|OJJ00725.1 aver|OJJ04752.1 awen|OJJ32293.1 awen|OJJ35892.1 abra|OJJ67625.1 acla|EAW15287.1  
afis|EAW20776.1 afum|EAL84844.1 agla|OJJ85083.1 akaw|GAA89145.1 anid|CBF87439.1 anig|EHA25753.1  
atub|OJI88489.1 azon|OJJ42146.1

Group171: acar|OOF92319.1 acar|OOF92361.1 abra|OJJ67475.1 acla|EAW06297.1 afis|EAW18404.1  
acla|EED53004.1 afum|EAL93084.1 agla|OJJ84961.1 akaw|GAA86362.1 aluc|OJZ84889.1 anid|CBF70745.1  
anig|EHA25118.1 aory|EIT77437.1 asyd|OJJ58438.1 ater|EAU29821.1 atub|OJI80708.1 aver|OJJ01038.1  
awen|OJJ31746.1 abra|OJJ67478.1 acla|EAW06294.1 afis|EAW18400.1 afla|EED53006.1 afum|EAL93078.1

agla|OJJ84971.1 akaw|GAA86360.1 anid|CBF70749.1 aory|EIT77424.1 ater|EAU29816.1 atub|OJI80711.1 awen|OJJ31749.1 azon|OJJ50474.1

Group172: acar|OOF98484.1 acar|OOF98497.1 abra|OJJ78390.1 acar|OOF98498.1 acla|EAW09142.1 acla|EAW09143.1 afis|EAW22004.1 afis|EAW22005.1 afla|EED46729.1 afum|EAL93019.1 afum|EAL93020.1 agla|OJJ84093.1 agla|OJJ84094.1 akaw|GAA85641.1 akaw|GAA85642.1 aluc|OJZ91469.1 anid|CBF82660.1 anid|CBF82662.1 anig|EHA20131.1 aory|EIT77865.1 aory|EIT77967.1 asyd|OJJ61666.1 asyd|OJJ61667.1 ater|EAU31123.1 ater|EAU31125.1 atub|OJI83462.1 aver|OJJ00987.1 awen|OJJ34299.1 awen|OJJ34300.1 azon|OJJ43338.1 azon|OJJ43339.1

Group174: afla|EED46122.1 afla|EED53117.1 afla|EED48931.1 afla|EED51100.1 akaw|GAA86153.1 akaw|GAA92990.1 aory|EIT74792.1 aory|EIT79985.1 aory|EIT81307.1 atub|OJI81824.1 atub|OJI86011.1 abra|OJJ72410.1 acar|OOF94819.1 acla|EAW14266.1 afis|EAW19012.1 afum|EAL93746.1 agla|OJJ81770.1 aluc|OJZ90394.1 anig|EHA23863.1 aory|EIT76367.1 ater|EAU37790.1 awen|OJJ31644.1 abra|OJJ76649.1 acar|OOF99352.1 aluc|OJZ91559.1 anid|CBF86747.1 anig|EHA22591.1 asyd|OJJ64703.1 aver|OJI98807.1 azon|OJJ47337.1 afis|EAW16798.1

Group176: ater|EAU33722.1 ater|EAU38738.1 abra|OJJ71609.1 acar|OOF96326.1 acla|EAW15150.1 acla|EAW15152.1 afis|EAW20118.1 afis|EAW20120.1 afla|EED53353.1 afla|EED57256.1 afum|EAL85235.1 afum|EBA27224.1 agla|OJJ88826.1 agla|OJJ88831.1 akaw|GAA89318.1 akaw|GAA89319.1 aluc|OJZ86351.1 aluc|OJZ86353.1 anid|CBF84937.1 anid|CBF84939.1 anig|EHA21536.1 aory|EIT74846.1 asyd|OJJ63156.1 ater|EAU38737.1 atub|OJI84184.1 aver|OJI97800.1 aver|OJI97801.1 awen|OJJ31888.1 azon|OJJ46246.1 aory|EIT74143.1 asyd|OJJ63154.1

Group177: awen|OJJ33301.1 awen|OJJ37090.1 abra|OJJ76956.1 acar|OOF91397.1 acla|EAW13475.1 afla|EED52244.1 agla|OJJ88687.1 akaw|GAA87087.1 aluc|OJZ84351.1 anid|CBF78932.1 anig|EHA27688.1 aory|EIT74404.1 asyd|OJJ62348.1 ater|EAU37096.1 atub|OJI89715.1 azon|OJJ50794.1 abra|OJJ77159.1 acar|OOF93045.1 acla|EAW12913.1 afis|EAW17747.1 afla|EED45747.1 afum|EAL91559.1 agla|OJJ81707.1 akaw|GAA90772.1 aluc|OJZ84572.1 anid|CBF86617.1 aory|EIT75770.1 asyd|OJJ64815.1 ater|EAU31860.1 atub|OJI89510.1 aver|OJI98928.1

Group178: abra|OJJ65971.1 acar|OOF92902.1 acla|EAW13592.1 afis|EAW20012.1 afla|EED46018.1 afum|EAL84906.1 akaw|GAA90846.1 aluc|OJZ82987.1 anid|CBF84721.1 anig|EHA21402.1 aory|EIT75680.1 asyd|OJJ53329.1 ater|EAU29354.1 atub|OJI89221.1 aver|OJJ08415.1 awen|OJJ30025.1 abra|OJJ65972.1 acar|OOF92900.1 acla|EAW13593.1 afis|EAW20011.1 afla|EED46017.1 afum|EAL84907.1 agla|OJJ87976.1 anid|CBF83963.1 anig|EHA21401.1 aory|EIT75560.1 asyd|OJJ61425.1 ater|EAU29353.1 aver|OJJ00759.1 awen|OJJ30024.1 azon|OJJ43649.1

Group179: abra|OJJ66528.1 acar|OOF90981.1 acla|EAW10962.1 afis|EAW20897.1 afla|EED50247.1 afum|EAL84735.1 agla|OJJ84007.1 akaw|GAA91185.1 aluc|OJZ81518.1 anid|CBF82460.1 anig|EHA25916.1 aory|EIT77290.1 ater|EAU38531.1 atub|OJI88667.1 awen|OJJ34450.1 azon|OJJ51738.1 abra|OJJ66529.1 acar|OOF90980.1 acla|EAW10961.1 afis|EAW20898.1 afla|EED50248.1 afum|EAL84734.2 agla|OJJ84008.1 akaw|GAA91184.1 aluc|OJZ81519.1 anid|CBF82458.1 aory|EIT77356.1 asyd|OJJ54115.1 atub|OJI88668.1 aver|OJJ08620.1 azon|OJJ51737.1

Group180: abra|OJJ66543.1 acar|OOF90995.1 afla|EED50933.1 agla|OJJ78717.1 akaw|GAA91168.1 aluc|OJZ81496.1 anid|CBF71517.1 anig|EHA25934.1 aory|EIT79048.1 asyd|OJJ54917.1 ater|EAU29874.1 atub|OJI88685.1 aver|OJJ07286.1 awen|OJJ30168.1 abra|OJJ67418.1 acar|OOF92403.1 acla|EAW06346.1 afis|EAW18457.1 afla|EED52951.1 afum|EAL93142.1 agla|OJJ85040.1 akaw|GAA86410.1 aluc|OJZ84950.1 anid|CBF70055.1 anig|EHA25165.1 aory|EIT78701.1 asyd|OJJ58858.1 atub|OJI80652.1 aver|OJJ01459.1 awen|OJJ31009.1 azon|OJJ50523.1

Group181: abra|OJJ67409.1 acar|OOF92406.1 acla|EAW06349.1 afis|EAW18461.1 afla|EED52947.1 afum|EAL93147.1 agla|OJJ85045.1 akaw|GAA86418.1 aluc|OJZ84959.1 anid|CBF70089.1 anig|EHA25173.1 aory|EIT78700.1 asyd|OJJ58841.1 ater|EAU29879.1 atub|OJI80641.1 aver|OJJ01443.1 awen|OJJ31013.1 azon|OJJ50526.1 abra|OJJ67410.1 acar|OOF92404.1 afis|EAW18460.1 afla|EED52948.1 afum|EAL93146.1 akaw|GAA86417.1 aluc|OJZ84958.1 anid|CBF70087.1 anig|EHA25172.1 aory|EIT78733.1 ater|EAU29878.1 atub|OJI80642.1 awen|OJJ31012.1

Group182: abra|OJJ67954.1 acar|OOF92799.1 acla|EAW11644.1 afis|EAW23813.1 afis|EAW23814.1 afla|EED51991.1 afla|EED52002.1 afum|EAL87248.1 agla|OJJ82453.1 akaw|GAA91242.1 akaw|GAA91243.1 aluc|OJZ82827.1 anid|CBF79881.1 anig|EHA21264.1 anig|EHA21265.1 aory|EIT81469.1 aory|EIT81487.1 asyd|OJJ58172.1 ater|EAU31366.1 atub|OJI89057.1 aver|OJJ04231.1 awen|OJJ33769.1 azon|OJJ46009.1 anid|CBF79883.1 asyd|OJJ58173.1 acla|EAW11643.1 afum|EAL87249.1 agla|OJJ82454.1 ater|EAU31369.1 awen|OJJ33770.1 azon|OJJ42873.1

Group183: abra|OJJ68614.1 acar|OOF92124.1 acar|OOF92125.1 acla|EAW12605.1 acla|EAW12606.1 afis|EAW18078.1 afis|EAW18079.1 afla|EED51472.1 afla|EED51473.1 afum|EAL91890.1 afum|EAL91891.1 agla|OJJ87372.1 akaw|GAA92907.1 akaw|GAA92908.1 aluc|OJZ81940.1 aluc|OJZ81941.1 anid|CBF86395.1 anid|CBF86397.1 anig|EHA22308.1 aory|EIT80638.1 aory|EIT80738.1 asyd|OJJ64952.1 asyd|OJJ64954.1

ater|EAU30443.1 ater|EAU30445.1 atub|OJI84493.1 atub|OJI84494.1 aver|OJI99074.1 aver|OJI99076.1  
awen|OJJ41467.1 azon|OJJ48924.1

Group186: abra|OJJ74487.1 acar|OOF95262.1 acla|EAW07208.1 afis|EAW22220.1 afla|EED57613.1  
afum|EAL90974.1 agla|OJJ87824.1 akaw|GAA87381.1 aluc|OJZ89631.1 anig|EHA26874.1 ater|EAU34230.1  
atub|OJI85171.1 aver|OJI97165.1 awen|OJJ34805.1 abra|OJJ74488.1 acar|OOF95261.1 acla|EAW07207.1  
afis|EAW22219.1 afla|EED57612.1 afum|EAL90975.1 agla|OJJ87825.1 akaw|GAA87382.1 aluc|OJZ89630.1  
anid|CBF88457.1 anig|EHA26873.1 aory|EIT82983.1 asyd|OJJ63772.1 ater|EAU34229.1 atub|OJI85172.1  
aver|OJI97166.1 azon|OJJ45743.1

Group188: abra|OJJ74864.1 acar|OOF95864.1 acar|OOF95866.1 acla|EAW08515.1 acla|EAW08517.1  
afis|EAW23553.1 afis|EAW23555.1 afla|EED57448.1 afla|EED57450.1 afum|EAL87911.1 afum|EAL87913.1  
agla|OJJ86813.1 agla|OJJ86815.1 akaw|GAA83554.1 akaw|GAA83556.1 aluc|OJZ92442.1 anid|CBF89641.1  
anid|CBF89643.1 anig|EHA26525.1 aory|EIT80074.1 aory|EIT80092.1 asyd|OJJ62288.1 asyd|OJJ62290.1  
ater|EAU35336.1 ater|EAU35338.1 atub|OJI86871.1 aver|OJI96396.1 aver|OJI96398.1 awen|OJJ39884.1  
awen|OJJ39886.1 azon|OJJ43221.1

Group189: abra|OJJ75158.1 acar|OOF97180.1 acar|OOF97181.1 acla|EAW08333.1 acla|EAW08334.1  
afis|EAW23368.1 afis|EAW23369.1 afla|EED55588.1 afla|EED55589.1 afum|EAL88104.2 afum|EAL88105.1  
agla|OJJ86455.1 agla|OJJ86456.1 akaw|GAA88764.1 akaw|GAA88769.1 aluc|OJZ92728.1 anid|CBF74819.1  
anid|CBF74821.1 anig|EHA26273.1 aory|EIT82662.1 aory|EIT82702.1 asyd|OJJ60141.1 asyd|OJJ60142.1  
ater|EAU35619.1 ater|EAU35620.1 atub|OJI87152.1 aver|OJJ04121.1 awen|OJJ39518.1 awen|OJJ39519.1  
azon|OJJ47713.1 azon|OJJ47715.1

Group190: abra|OJJ75500.1 acar|OOF90833.1 acla|EAW09294.1 afis|EAW21853.1 afla|EED46457.1  
afum|EAL92866.1 agla|OJJ84283.1 akaw|GAA84266.1 aluc|OJZ88959.1 anid|CBF76739.1 anig|EHA23561.1  
aory|EIT72412.1 asyd|OJJ61254.1 ater|EAU30852.1 atub|OJI85830.1 aver|OJJ00577.1 awen|OJJ34137.1  
azon|OJJ44207.1 abra|OJJ75502.1 acar|OOF90834.1 acla|EAW09295.1 afis|EAW21852.1 afla|EED46458.1  
afum|EAL92865.1 akaw|GAA84267.1 anid|CBF76737.1 aory|EIT72344.1 asyd|OJJ61253.1 ater|EAU30851.1  
awen|OJJ34135.1 azon|OJJ44209.1

Group191: abra|OJJ76457.1 acar|OOF99697.1 acla|EAW13972.1 acla|EAW13973.1 afis|EAW18681.1  
afis|EAW18682.1 afla|EED50628.1 afum|EAL93402.1 afum|EAL93403.1 agla|OJJ82393.1 agla|OJJ82394.1  
akaw|GAA82369.1 akaw|GAA82370.1 aluc|OJZ91752.1 aluc|OJZ91753.1 anid|CBF70601.1 anid|CBF70603.1  
anig|EHA22755.1 anig|EHA22756.1 aory|EIT78067.1 asyd|OJJ58516.1 asyd|OJJ58517.1 ater|EAU38228.1  
atub|OJI86210.1 atub|OJI86211.1 aver|OJJ01117.1 aver|OJJ01118.1 awen|OJJ32153.1 azon|OJJ46737.1  
afis|EED50629.1 aory|EIT78047.1

Group192: abra|OJJ77384.1 acla|EAW09036.1 afla|EED56897.1 akaw|GAA91377.1 aluc|OJZ84792.1  
anig|EHA28060.1 aory|EIT77450.1 asyd|OJJ57351.1 ater|EAU38783.1 atub|OJI89290.1 aver|OJJ05814.1  
awen|OJJ35827.1 abra|OJJ78137.1 acar|OOF99382.1 acla|EAW14634.1 afis|EAW22732.1 afla|EED55765.1  
afum|EAL90463.1 agla|OJJ78522.1 aluc|OJZ82078.1 anid|CBF78393.1 ater|EAU30739.1 awen|OJJ32040.1  
azon|OJJ47350.1 acar|OOF96813.1 anig|EHA25049.1 aluc|OJZ82079.1 atub|OJI88447.1 akaw|GAA87875.1  
aluc|OJZ85516.1 atub|OJI80050.1

Group195: abra|OJJ68217.1 abra|OJJ69796.1 acar|OOF92535.1 acar|OOF97501.1 akaw|GAA83229.1  
akaw|GAA87863.1 aluc|OJZ83729.1 aluc|OJZ85504.1 anig|EHA18877.1 anig|EHA25036.1 aory|EIT80435.1  
aory|EIT81864.1 atub|OJI80061.1 atub|OJI90106.1 awen|OJJ31685.1 awen|OJJ32019.1 azon|OJJ42231.1  
azon|OJJ46071.1 acla|EAW15175.1 afis|EAW20145.1 afla|EED51644.1 afum|EAL85260.1 agla|OJJ89015.1  
anid|CBF81813.1 asyd|OJJ59648.1 ater|EAU39446.1 aver|OJJ02634.1 asyd|OJJ58357.1 ater|EAU33077.1  
aver|OJJ02050.1

Group196: abra|OJJ68439.1 abra|OJJ71007.1 acar|OOF93955.1 acar|OOF98135.1 afis|EAW19801.1  
afis|EAW25026.1 agla|OJJ79158.1 agla|OJJ87950.1 akaw|GAA82946.1 akaw|GAA86933.1 aluc|OJZ87524.1  
aluc|OJZ90058.1 anid|CBF81549.1 anid|CBF82379.1 anig|EHA20734.1 anig|EHA21013.1 asyd|OJJ54138.1  
asyd|OJJ59494.1 ater|EAU30748.1 ater|EAU35761.1 atub|OJI81124.1 atub|OJI84749.1 aver|OJJ02780.1  
aver|OJJ08598.1 acla|EAW10559.1 afla|EED55448.1 afum|EAL89669.1 aory|EIT80786.1 awen|OJJ40613.1  
azon|OJJ49462.1

Group197: abra|OJJ69676.1 abra|OJJ72100.1 acar|OOF90056.1 acar|OOF96745.1 aluc|OJZ82484.1  
aluc|OJZ86855.1 anig|EHA21784.1 anig|EHA28290.1 asyd|OJJ60799.1 asyd|OJJ62562.1 atub|OJI83664.1  
atub|OJI87948.1 awen|OJJ31984.1 awen|OJJ34027.1 afis|EAW21744.1 afum|EAL92777.1 agla|OJJ81779.1  
agla|OJJ84428.1 akaw|GAA84821.1 akaw|GAA88801.1 ater|EAU32512.1 aver|OJI96686.1 azon|OJJ42257.1  
acla|EAW09389.1 afla|EED58033.1 anid|CBF83660.1 aory|EIT79754.1 ater|EAU38444.1 aver|OJJ00132.1  
acar|OOF95939.1

Group198: abra|OJJ72836.1 abra|OJJ73712.1 agla|OJJ78798.1 agla|OJJ86951.1 akaw|GAA85433.1  
akaw|GAA88451.1 aluc|OJZ83336.1 aluc|OJZ88338.1 anig|EHA18073.1 anig|EHA24212.1 aory|EIT75956.1  
aory|EIT78575.1 asyd|OJJ53233.1 asyd|OJJ54785.1 ater|EAU29729.1 ater|EAU32826.1 atub|OJI82233.1  
atub|OJI90934.1 aver|OJJ03618.1 aver|OJJ07380.1 awen|OJJ35489.1 awen|OJJ38098.1 acar|OOF96038.1

acla|EAW11404.1 afis|EAW24017.1 afla|EED49142.1 afum|EAL87447.1 anid|CBF77418.1 azon|OJJ47000.1  
afla|EED54085.1

Group200: acar|OOF98095.1 acar|OOF99166.1 acla|EAW06529.1 acla|EAW10590.1 afis|EAW16066.1  
afis|EAW24978.1 afla|EED48587.1 afla|EED55481.1 afum|EAL88698.1 afum|EAL89638.1 anid|CBF75098.1  
anid|CBF81606.1 asyd|OJJ59522.1 asyd|OJJ60007.1 ater|EAU33563.1 ater|EAU35727.1 aver|OJJ02278.1  
aver|OJJ02750.1 awen|OJJ30369.1 awen|OJJ40575.1 azon|OJJ45388.1 azon|OJJ49435.1 abra|OJJ71044.1  
agla|OJJ79139.1 akaw|GAA82912.1 aluc|OJZ87482.1 anig|EHA20704.1 aory|EIT73215.1 aory|EIT80785.1  
atub|OJI81166.1

Group206: abra|OJJ66942.1 acar|OOF91706.1 acar|OOF91708.1 acla|EAW14500.1 acla|EAW14501.1  
afis|EAW19214.1 afis|EAW19215.1 afla|EED47685.1 afla|EED47686.1 afum|EAL93947.1 afum|EAL93948.1  
agla|OJJ88482.1 akaw|GAA91478.1 akaw|GAA91479.1 aluc|OJZ85640.1 anid|CBF78591.1 anig|EHA24894.1  
aory|EIT80213.1 aory|EIT80244.1 asyd|OJJ65083.1 ater|EAU37253.1 atub|OJI79431.1 aver|OJJ99209.1  
awen|OJJ37572.1 azon|OJJ51231.1 anid|CBF78589.1 ater|EAU37254.1 aver|OJI99208.1 awen|OJJ37571.1  
asyd|OJJ65084.1

Group207: abra|OJJ67140.1 acar|OOF98417.1 acla|EAW14599.1 afis|EAW19328.1 afum|EAL94045.1  
agla|OJJ86277.1 akaw|GAA91029.1 aluc|OJZ87832.1 anid|CBF83940.1 anig|EHA20311.1 aory|EIT74592.1  
asyd|OJJ53609.1 ater|EAU29456.1 atub|OJI80809.1 aver|OJJ08139.1 awen|OJJ30097.1 azon|OJJ44450.1  
abra|OJJ67993.1 acar|OOF92035.1 acla|EAW13634.1 afis|EAW23673.1 afla|EED47394.1 afum|EAL87116.1  
akaw|GAA90955.1 aluc|OJZ82867.1 anig|EHA21297.1 aory|EIT81925.1 atub|OJI89092.1 azon|OJJ45993.1  
afla|EED47553.1

Group208: abra|OJJ70660.1 acar|OOF97061.1 acla|EAW15046.1 afis|EAW23152.1 afla|EED48515.1  
afum|EAL86237.1 agla|OJJ89650.1 akaw|GAA89996.1 aluc|OJZ84010.1 anid|CBF74423.1 anig|EHA19132.1  
aory|EIT73250.1 asyd|OJJ57754.1 ater|EAU36259.1 atub|OJI90379.1 aver|OJJ05413.1 awen|OJJ36648.1  
azon|OJJ47567.1 acla|EAW08098.1 afum|EAL88329.1 agla|OJJ89649.1 anig|EHA19133.1 azon|OJJ47566.1  
acar|OOF97062.1 afis|EAW24607.1 anid|CBF87133.1 aory|EIT73278.1 asyd|OJJ60373.1 ater|EAU36260.1  
aver|OJI99708.1

Group209: abra|OJJ71126.1 acar|OOF98025.1 acar|OOF98026.1 acla|EAW10372.1 acla|EAW10373.1  
afis|EAW25219.1 afis|EAW25220.1 afla|EED53686.1 afla|EED53687.1 afum|EAL89880.1 afum|EAL89881.1  
agla|OJJ79187.1 akaw|GAA82848.1 akaw|GAA82849.1 aluc|OJZ87409.1 anid|CBF85301.1 anig|EHA20639.1  
aory|EIT75287.1 aory|EIT75345.1 asyd|OJJ62915.1 asyd|OJJ62916.1 ater|EAU34378.1 ater|EAU34379.1  
atub|OJI81236.1 atub|OJI81237.1 aver|OJI98074.1 awen|OJJ40885.1 awen|OJJ40886.1 azon|OJJ44513.1  
azon|OJJ44514.1

Group211: abra|OJJ74957.1 acar|OOF97356.1 acla|EAW08414.1 afis|EAW23455.1 afla|EED57346.1  
afum|EAL88011.1 agla|OJJ86695.1 akaw|GAA83465.1 akaw|GAA83466.1 aluc|OJZ92529.1 anid|CBF89806.1  
anig|EHA26445.1 anig|EHA26446.1 aory|EIT80091.1 asyd|OJJ62193.1 ater|EAU36921.1 atub|OJI86965.1  
atub|OJI86966.1 aver|OJI96302.1 awen|OJJ39774.1 azon|OJJ47901.1 acla|EAW08415.1 afis|EAW23454.1  
afla|EED57349.1 afum|EAL88012.1 agla|OJJ86696.1 anid|CBF89804.1 ater|EAU36920.1 aver|OJI96305.1  
awen|OJJ39775.1

Group212: abra|OJJ75967.1 acar|OOF99952.1 acla|EAW09831.1 afis|EAW21302.1 afla|EED57262.1  
afum|EAL92319.1 agla|OJJ87435.1 akaw|GAA88989.1 aluc|OJZ89414.1 anid|CBF83395.1 anig|EHA23173.1  
aory|EIT74086.1 asyd|OJJ60638.1 ater|EAU35935.1 atub|OJI85381.1 aver|OJI99960.1 awen|OJJ39396.1  
azon|OJJ44280.1 acla|EAW09826.1 afis|EAW21307.1 afum|EAL92323.1 anid|CBF83397.1 asyd|OJJ60645.1  
ater|EAU35937.1 aver|OJI99963.1 afis|EAW21308.1 afum|EAL92324.1 anid|CBF83399.1 asyd|OJJ60644.1  
ater|EAU35938.1

Group213: abra|OJJ76386.1 acar|OOF99627.1 acla|EAW14037.1 acla|EAW14038.1 afis|EAW18743.1  
afis|EAW18744.1 afla|EED50699.1 afla|EED50700.1 afum|EAL93469.1 afum|EAL93470.1 agla|OJJ82309.1  
akaw|GAA82305.1 akaw|GAA82306.1 aluc|OJZ91827.1 aluc|OJZ91828.1 anid|CBF69994.1 anid|CBF69996.1  
anig|EHA22816.1 aory|EIT78103.1 aory|EIT78138.1 asyd|OJJ58888.1 asyd|OJJ58889.1 ater|EAU37870.1  
ater|EAU37873.1 atub|OJI86282.1 atub|OJI86283.1 aver|OJJ01489.1 awen|OJJ32308.1 awen|OJJ32309.1  
azon|OJJ42718.1

Group214: abra|OJJ65770.1 abra|OJJ69062.1 acar|OOF91221.1 acar|OOG00531.1 afla|EED46866.1  
afla|EED56884.1 akaw|GAA90592.1 akaw|GAA90890.1 aluc|OJZ82939.1 aluc|OJZ86050.1 anig|EHA21359.1  
anig|EHA24561.1 aory|EIT72522.1 aory|EIT77460.1 atub|OJI79847.1 atub|OJI89171.1 aver|OJJ03011.1  
aver|OJJ07939.1 afis|EAW15670.1 afum|EAL85677.1 anid|CBF81578.1 asyd|OJJ53834.1 ater|EAU32494.1  
awen|OJJ38346.1 acla|EAW11671.1 agla|OJJ81808.1 agla|OJJ85313.1 awen|OJJ38760.1 azon|OJJ42640.1

Group216: abra|OJJ67846.1 abra|OJJ69869.1 acar|OOF90337.1 acar|OOF92827.1 acla|EAW11753.1  
acla|EAW15317.1 akaw|GAA87787.1 akaw|GAA91854.1 aluc|OJZ82045.1 aluc|OJZ85422.1 anig|EHA22212.1  
anig|EHA25601.1 asyd|OJJ52765.1 asyd|OJJ58155.1 ater|EAU31327.1 ater|EAU32679.1 aver|OJJ04248.1  
aver|OJJ08748.1 awen|OJJ31347.1 awen|OJJ33731.1 afis|EAW23786.1 afla|EED51595.1 afum|EAL87220.2  
agla|OJJ78939.1 anid|CBF79847.1 atub|OJI84604.1 azon|OJJ42847.1 atub|OJI80153.1 aory|EIT80419.1

Group217: abra|OJJ69627.1 abra|OJJ76818.1 acar|OOF91313.1 acar|OOF92684.1 acla|EAW08738.1  
acla|EAW13378.1 agla|OJJ84834.1 agla|OJJ86329.1 akaw|GAA87204.1 akaw|GAA91607.1 anig|EHA27577.1  
anig|EHA28339.1 atub|OJI88009.1 atub|OJI89856.1 awen|OJJ33192.1 awen|OJJ38390.1 azon|OJJ43848.1  
azon|OJJ46477.1 afis|EAW15698.1 afila|EED51354.1 afum|EAL85650.1 aluc|OJZ82432.1 anid|CBF78282.1  
aory|EIT80486.1 asyd|OJJ56072.1 ater|EAU39440.1 aver|OJJ05015.1 aluc|OJZ84228.1 asyd|OJJ52533.1

Group218: abra|OJJ69629.1 abra|OJJ74245.1 acar|OOF92681.1 acar|OOF95485.1 afila|EED55078.1  
afila|EED57736.1 aluc|OJZ82434.1 aluc|OJZ89887.1 asyd|OJJ63867.1 asyd|OJJ64731.1 acla|EAW07299.1  
agla|OJJ87688.1 akaw|GAA91609.1 anig|EHA28337.1 aory|EIT81976.1 atub|OJI84920.1 atub|OJI88007.1  
aver|OJI98835.1 awen|OJJ34926.1 afis|EAW22346.1 afum|EAL90846.1 akaw|GAA86775.1 anid|CBF82985.1  
anig|EHA27086.1 ater|EAU39484.1 aver|OJI97072.1 azon|OJJ50069.1 ater|EAU35426.1 aory|EIT79895.1

Group221: acar|OOF92608.1 acar|OOF92629.1 abra|OJJ67199.1 acar|OOF98365.1 acla|EAW14525.1  
acla|EAW14526.1 afis|EAW19243.1 afis|EAW19244.1 afila|EED47633.1 afila|EED47634.1 afum|EAL93972.1  
afum|EAL93973.1 agla|OJJ88454.1 akaw|GAA90979.1 akaw|GAA90980.1 aluc|OJZ87775.1 anid|CBF78652.1  
anig|EHA20259.1 aory|EIT80236.1 asyd|OJJ65195.1 ater|EAU29500.1 atub|OJI80870.1 aver|OJI99344.1  
awen|OJJ37599.1 azon|OJJ51254.1 agla|OJJ88453.1 anid|CBF78654.1 azon|OJJ51255.1 ater|EAU29499.1

Group222: afis|EAW21841.1 afis|EAW25659.1 agla|OJJ84294.1 agla|OJJ87901.1 aory|EIT72356.1  
aory|EIT79167.1 asyd|OJJ52337.1 asyd|OJJ61239.1 asyd|OJJ54547.1 aver|OJI96725.1 aver|OJI96959.1  
aver|OJJ07630.1 aver|OJJ00562.1 abra|OJJ68267.1 acar|OOF97547.1 acla|EAW09304.1 afila|EED46529.1  
afum|EAL92853.1 akaw|GAA91931.1 aluc|OJZ82691.1 anid|CBF76711.1 anig|EHA27368.1 aory|EIT7344.1  
atub|OJI88923.1 awen|OJJ34124.1 azon|OJJ44222.1 aluc|OJZ80200.1 afila|EED47266.1 anid|CBF85164.1

Group223: afila|EED48230.1 afila|EED58028.1 anid|CBF83667.1 anid|CBF86363.1 aory|EIT72902.1  
aory|EIT79778.1 asyd|OJJ60808.1 asyd|OJJ64969.1 aver|OJI99093.1 aver|OJJ00136.1 awen|OJJ30134.1  
awen|OJJ35830.1 abra|OJJ72106.1 acar|OOF96749.1 acla|EAW09385.1 afis|EAW21750.1 afum|EAL92781.2  
agla|OJJ84424.1 akaw|GAA84816.1 aluc|OJZ86861.1 anig|EHA21779.1 ater|EAU38440.1 atub|OJI83659.1  
awen|OJJ34031.1 azon|OJJ48204.1 anid|CBF83471.1 ater|EAU34242.1 aver|OJJ00014.1 asyd|OJJ60689.1

Group224: azon|OJJ42769.1 azon|OJJ50372.1 abra|OJJ71617.1 acar|OOF96333.1 afila|EED57118.1  
agla|OJJ80138.1 akaw|GAA89310.1 aluc|OJZ86358.1 anig|EHA21532.1 aory|EIT73985.1 atub|OJI84176.1  
awen|OJJ40249.1 abra|OJJ77100.1 acar|OOF92984.1 acla|EAW12282.1 afis|EAW16959.1 afila|EED45239.1  
afum|EAL86486.1 akaw|GAA86956.1 aluc|OJZ84508.1 anid|CBF80512.1 anig|EHA27807.1 aory|EIT73744.1  
asyd|OJJ54736.1 ater|EAU30185.1 atub|OJI89572.1 aver|OJJ07435.1 agla|OJJ85349.1 awen|OJJ30386.1

Group225: azon|OJJ46793.1 azon|OJJ51796.1 abra|OJJ77127.1 acar|OOF93013.1 acla|EAW12902.1  
afis|EAW16407.1 afila|EED51674.1 agla|OJJ81607.1 akaw|GAA90801.1 aluc|OJZ84537.1 anid|CBF82038.1  
anig|EHA27835.1 aory|EIT79575.1 asyd|OJJ59200.1 ater|EAU36805.1 atub|OJI89543.1 aver|OJJ01812.1  
awen|OJJ36343.1 acar|OOF93300.1 afila|EED49754.1 aory|EIT81671.1 asyd|OJJ54221.1 asyd|OOF99299.1  
aory|EIT77631.1 afila|EED48439.1 awen|OJJ38768.1 aory|EIT80498.1 afum|EAL91133.1 aver|OJJ05173.1

Group226: abra|OJJ67152.1 acar|OOF90071.1 acar|OOF98406.1 acla|EAW14572.1 acla|EAW14573.1  
afis|EAW19295.1 afis|EAW19296.1 afila|EED47590.1 afila|EED47591.1 afum|EAL94014.1 afum|EAL94015.1  
agla|OJJ88385.1 ater|EAU30490.1 akaw|GAA91020.1 aluc|OJZ87823.1 aluc|OJZ87823.1 anid|CBF78768.1  
anid|CBF78770.1 anig|EHA20303.1 aory|EIT74518.1 aory|EIT74526.1 asyd|OJJ65238.1 ater|EAU29476.1  
ater|EAU29477.1 atub|OJI80820.1 atub|OJI80821.1 aver|OJI99388.1 awen|OJJ37646.1 azon|OJJ44911.1

Group228: abra|OJJ68668.1 acar|OOF92168.1 acla|EAW12580.1 afis|EAW24068.1 afila|EED51407.1  
afum|EAL91924.1 agla|OJJ87316.1 aluc|OJZ81882.1 anid|CBF86457.1 anig|EHA22358.1 aory|EIT80674.1  
asyd|OJJ64915.1 ater|EAU30490.1 atub|OJI84435.1 aver|OJI99035.1 awen|OJJ41422.1 azon|OJJ48887.1  
acla|EAW12579.1 afis|EAW24069.1 afila|EED51406.1 afum|EAL91925.1 agla|OJJ87315.1 akaw|GAA89809.1  
aluc|OJZ81881.1 anid|CBF86458.1 aory|EIT80695.1 asyd|OJJ64914.1 awen|OJJ41421.1 azon|OJJ48886.1

Group229: abra|OJJ68715.1 acar|OOF92215.1 acar|OOF92216.1 acla|EAW12530.1 acla|EAW12531.1  
afis|EAW24118.1 afis|EAW24119.1 afila|EED46814.1 afum|EAL91973.1 afum|EAL91974.1 agla|OJJ87193.1  
akaw|GAA89868.1 aluc|OJZ81813.1 anid|CBF86539.1 anid|CBF86540.1 anig|EHA22402.1 anig|EHA22403.1  
aory|EIT72603.1 aory|EIT72683.1 asyd|OJJ64863.1 asyd|OJJ64865.1 ater|EAU30546.1 ater|EAU30547.1  
atub|OJI84385.1 aver|OJI98974.1 aver|OJI98978.1 awen|OJJ41370.1 azon|OJJ48839.1 afila|EED46813.1

Group230: abra|OJJ68757.1 acar|OOF92245.1 acla|EAW12494.1 afis|EAW24151.1 afila|EED46780.1  
afum|EAL92006.1 akaw|GAA89901.1 aluc|OJZ81770.1 anid|CBF77913.1 anig|EHA22446.1 aory|EIT72705.1  
asyd|OJJ55298.1 ater|EAU30583.1 atub|OJI84342.1 aver|OJJ06928.1 awen|OJJ41327.1 abra|OJJ68758.1  
acla|EAW12493.1 afis|EAW24152.1 afila|EED46779.1 afum|EAL92007.1 agla|OJJ89543.1 akaw|GAA89902.1  
aluc|OJZ81769.1 anid|CBF77911.1 aory|EIT72741.1 atub|OJI84341.1 awen|OJJ41326.1 azon|OJJ48800.1

Group231: abra|OJJ70392.1 acar|OOF90061.1 acla|EAW12387.1 acla|EAW12388.1 afis|EAW16834.1  
afis|EAW16835.1 afila|EED47328.1 afum|EAL86381.1 afum|EAL86382.2 agla|OJJ81545.1 agla|OJJ89426.1  
akaw|GAA91967.1 aluc|OJZ82649.1 anid|CBF74687.1 anid|CBF74689.1 anig|EHA27422.1 anig|EHA27423.1  
aory|EIT82824.1 asyd|OJJ60210.1 ater|EAU30239.1 atub|OJI88881.1 aver|OJJ04058.1 awen|OJJ35685.1  
azon|OJJ44153.1 acar|OOF90060.1 afila|EED47327.1 aory|EIT82846.1 ater|EAU30242.1 acar|OOF91882.1

Group232: abra|OJJ70540.1 acar|OOF97393.1 acla|EAW08138.1 acla|EAW08139.1 afis|EAW23174.1 afis|EAW23175.1 afla|EED46944.1 afla|EED46945.1 afum|EAL88308.1 afum|EAL88309.1 agla|OJJ89686.1 agla|OJJ89687.1 akaw|GAA83385.1 akaw|GAA83386.1 aluc|OJZ83885.1 anid|CBF74496.1 anid|CBF74498.1 anig|EHA19022.1 aory|EIT72667.1 aory|EIT72762.1 asyd|OJJ57719.1 asyd|OJJ57720.1 ater|EAU36303.1 ater|EAU36304.1 atub|OJI90252.1 aver|OJJ05448.1 awen|OJJ36603.1 azon|OJJ47603.1 azon|OJJ47604.1

Group233: abra|OJJ73887.1 acar|OOG01025.1 acar|OOG01026.1 acla|EAW07769.1 acla|EAW07771.1 afis|EAW22805.1 afis|EAW22807.1 afla|EED50075.1 afum|EAL90394.1 afum|EBA27407.1 agla|OJJ83582.1 akaw|GAA89498.1 akaw|GAA89499.1 aluc|OJZ88162.1 anid|CBF87924.1 anig|EHA17916.1 anig|EHA17917.1 aory|EIT74704.1 asyd|OJJ63459.1 asyd|OJJ63460.1 ater|EAU38903.1 ater|EAU38904.1 atub|OJI90761.1 aver|OJI97472.1 aver|OJI97473.1 awen|OJJ38923.1 azon|OJJ49700.1 aory|EIT74626.1 afla|EED50076.1

Group234: abra|OJJ74769.1 acar|OOF95760.1 acla|EAW10642.1 afis|EAW24924.1 afla|EED55549.1 afum|EAL89579.1 agla|OJJ82153.1 akaw|GAA83643.1 aluc|OJZ92352.1 anid|CBF75699.1 anig|EHA26622.1 aory|EIT82671.1 asyd|OJJ57496.1 atub|OJI86780.1 aver|OJJ05684.1 awen|OJJ40521.1 azon|OJJ49380.1 abra|OJJ74770.1 acla|EAW10641.1 afis|EAW24925.1 afla|EED55548.1 afum|EAL89558.1 akaw|GAA83642.1 anid|CBF75701.1 aory|EIT82683.1 ater|EAU35655.1 atub|OJI86781.1 aver|OJJ05683.1 azon|OJJ49381.1

Group235: abra|OJJ74915.1 acar|OOF95906.1 acar|OOF95907.1 acla|EAW08455.1 acla|EAW08456.1 afis|EAW23499.1 afis|EAW23500.1 afla|EED57400.1 afla|EED57401.1 afum|EAL87962.2 afum|EAL87963.1 agla|OJJ86747.1 agla|OJJ86748.1 akaw|GAA83507.1 akaw|GAA83508.1 aluc|OJZ92487.1 anid|CBF89730.1 anid|CBF89731.1 anig|EHA26485.1 aory|EIT80151.1 aory|EIT80164.1 asyd|OJJ62234.1 ater|EAU23291.1 ater|EAU35290.1 atub|OJI86920.1 aver|OJI96343.1 awen|OJJ39825.1 azon|OJJ47949.1 azon|OJJ47950.1

Group236: abra|OJJ75075.1 acar|OOF97258.1 acar|OOF97259.1 acla|EAW08256.1 afis|EAW23290.1 afla|EED55682.1 afum|EAL88189.1 agla|OJJ86548.1 akaw|GAA88687.1 akaw|GAA88688.1 aluc|OJZ92641.1 anid|CBF89509.1 anig|EHA26351.1 aory|EIT77074.1 asyd|OJJ62397.1 ater|EAU37583.1 atub|OJI87072.1 aver|OJI96531.1 awen|OJJ39667.1 azon|OJJ47797.1 aory|EIT77075.1 acla|EAW08258.1 afis|EAW23289.1 afla|EED55680.1 afum|EAL88188.1 anid|CBF89508.1 asyd|OJJ62398.1 ater|EAU37582.1 azon|OJJ47796.1

Group238: abra|OJJ75492.1 acar|OOF90824.1 acar|OOF90825.1 acla|EAW11224.1 acla|EAW11225.1 afis|EAW18278.1 afis|EAW18279.1 afla|EED48745.1 afla|EED48746.1 afum|EAL87644.1 afum|EAL87645.1 agla|OJJ88147.1 agla|OJJ88148.1 akaw|GAA84257.1 akaw|GAA84258.1 aluc|OJZ88951.1 anid|CBF79492.1 anid|CBF79494.1 anig|EHA23569.1 anig|EHA23570.1 aory|EIT73072.1 aory|EIT73072.1 aory|EIT73086.1 asyd|OJJ57877.1 ater|EAU33284.1 ater|EAU33285.1 atub|OJI85838.1 aver|OJJ04517.1 awen|OJJ30651.1 azon|OJJ47964.1

Group239: abra|OJJ75717.1 acar|OOG00139.1 acar|OOG00141.1 acla|EAW09392.1 acla|EAW09394.1 afis|EAW21739.1 afis|EAW21741.1 afla|EED58014.1 afla|EED58016.1 afum|EAL92773.1 afum|EAL92774.1 agla|OJJ84432.1 agla|OJJ84449.1 akaw|GAA84452.1 akaw|GAA84453.1 aluc|OJZ89169.1 anid|CBF83696.1 anid|CBF83699.1 anig|EHA23386.1 aory|EIT79752.1 aory|EIT79775.1 asyd|OJJ60825.1 ater|EAU38420.1 ater|EAU38429.1 atub|OJI85621.1 aver|OJJ00151.1 awen|OJJ34021.1 awen|OJJ34023.1 azon|OJJ48535.1

Group240: abra|OJJ77333.1 acar|OOF93207.1 acla|EAW13139.1 afis|EAW17511.1 afla|EED49310.1 afum|EAL91331.1 agla|OJJ81447.1 akaw|GAA91425.1 aluc|OJZ84741.1 anid|CBF71568.1 anig|EHA28015.1 aory|EIT82226.1 asyd|OJJ61881.1 ater|EAU36952.1 atub|OJI89340.1 aver|OJI95979.1 awen|OJJ37333.1 azon|OJJ51021.1 afla|EED49307.1 afum|EAL91330.1 anid|CBF71531.1 asyd|OJJ61893.1 aver|OJI95989.1 azon|OJJ51020.1 acla|EAW13140.1 afis|EAW17512.1 anig|EHA28014.1 aory|EIT82236.1 awen|OJJ37334.1

Group243: abra|OJJ66383.1 abra|OJJ71952.1 acar|OOF94059.1 acar|OOF94129.1 acar|OOF96603.1 afla|EED51643.1 afla|EED53089.1 akaw|GAA84976.1 akaw|GAA90249.1 aluc|OJZ83091.1 aluc|OJZ86686.1 aory|EIT74787.1 aory|EIT80741.1 atub|OJI83839.1 atub|OJI87845.1 azon|OJJ48234.1 azon|OJJ51069.1 acla|EAW12654.1 afis|EAW18031.1 afum|EAL91842.1 agla|OJJ85401.1 anid|CBF76050.1 anig|EHA21987.1 asyd|OJJ52485.1 ater|EAU36811.1 aver|OJJ03921.1 awen|OJJ41506.1 ater|EAU35537.1

Group245: abra|OJJ68302.1 abra|OJJ74425.1 acar|OOF90436.1 acar|OOF90443.1 acar|OOF96685.1 afis|EAW24469.1 afis|EAW25516.1 aluc|OJZ80145.1 aluc|OJZ83671.1 aluc|OJZ89698.1 atub|OJI85105.1 atub|OJI90042.1 awen|OJJ34908.1 awen|OJJ41259.1 acla|EAW14952.1 afla|EED55056.1 afum|EAL86141.1 afum|EAL90181.1 agla|OJJ87287.1 akaw|GAA83172.1 anid|CBF77786.1 anig|EHA18826.1 aory|EIT81972.1 asyd|OJJ56269.1 ater|EAU33362.1 aver|OJJ08496.1 azon|OJJ42850.1 asyd|OJJ54439.1

Group247: abra|OJJ71231.1 abra|OJJ72448.1 acar|OOF94788.1 acar|OOF97944.1 afla|EED46190.1 afla|EED56273.1 akaw|GAA82757.1 akaw|GAA86186.1 aluc|OJZ87316.1 aluc|OJZ90432.1 ater|EAU33047.1 ater|EAU33789.1 atub|OJI81329.1 atub|OJI81864.1 awen|OJJ31638.1 awen|OJJ41732.1 acla|EAW12682.1 afis|EAW17845.1 afum|EAL91654.1 agla|OJJ81772.1 agla|OJJ83123.1 anig|EHA20550.1 asyd|OJJ55268.1 aver|OJJ06959.1 azon|OJJ48428.1 anid|CBF77966.1 anig|EHA23901.1 aory|EIT76458.1

Group248: acar|OOF95098.1 acar|OOF95164.1 acar|OOF96577.1 afis|EAW21529.1 afis|EAW24614.1 agla|OJJ80793.1 agla|OJJ81846.1 agla|OJJ85693.1 agla|OJJ84478.1 aory|EIT76721.1 aory|EIT79947.1 asyd|OJJ52471.1 asyd|OJJ61079.1 ater|EAU31519.1 ater|EAU35012.1 abra|OJJ71920.1 acla|EAW09610.1 afla|EED47452.1 afla|EED55978.1 afum|EAL92550.1 akaw|GAA85002.1 aluc|OJZ86657.1 anid|CBF76400.1 anig|EHA22014.1 atub|OJI83870.1 aver|OJJ00395.1 awen|OJJ39164.1 azon|OJJ51493.1



Group250: afis|EAW18309.1 afis|EAW25696.1 awen|OJJ30683.1 awen|OJJ32214.1 abra|OJJ75441.1 acar|OOF90786.1 acla|EAW13822.1 afla|EED53243.1 afum|EAL87675.1 agla|OJJ88078.1 akaw|GAA84216.1 aluc|OJJ88894.1 anid|CBF79436.1 anig|EHA23612.1 aory|EIT72989.1 asyd|OJJ54980.1 asyd|OJJ57846.1 ater|EAU33319.1 atub|OJJ85895.1 aver|OJJ04318.1 aver|OJJ04546.1 awen|OJJ32538.1 azon|OJJ43103.1 afla|EED50918.1 aory|EIT74822.1 aory|EIT78997.1 asyd|OJJ52725.1 ater|EAU32817.1

Group252: agla|OJJ82640.1 agla|OJJ85276.1 asyd|OJJ57347.1 asyd|OJJ65114.1 aver|OJJ99240.1 aver|OJJ05818.1 aver|OJJ00352.1 aver|OJJ05340.1 awen|OJJ30078.1 awen|OJJ32593.1 abra|OJJ78114.1 acar|OOF98754.1 acla|EAW07003.1 afis|EAW16620.1 afla|EED48645.1 afum|EAL89217.1 agla|OJJ84764.1 akaw|GAA85893.1 aluc|OJJ291179.1 anid|CBF81971.1 anig|EHA19870.1 aory|EIT73182.1 ater|EAU36705.1 atub|OJJ83191.1 azon|OJJ42184.1 aory|EIT73798.1 asyd|OJJ61034.1 ater|EAU37620.1

Group256: abra|OJJ67322.1 acar|OOF92491.1 acar|OOF92492.1 acla|EAW06413.1 acla|EAW06414.1 afis|EAW18517.1 afis|EAW18518.1 afla|EED52880.1 afla|EED52881.1 afum|EAL93212.1 afum|EAL93213.1 agla|OJJ85130.1 akaw|GAA86495.1 akaw|GAA86496.1 aluc|OJJ85037.1 aluc|OJJ85038.1 anid|CBF70228.1 anid|CBF70236.1 aory|EIT72742.1 aory|OJJ64893.1 ater|EAU30514.1 ater|EAU30516.1 atub|OJJ84415.1 aver|OJJ99014.1 awen|OJJ41397.1 awen|OJJ41399.1 azon|OJJ48865.1 aory|EIT72593.1

Group257: abra|OJJ67358.1 acar|OOF92463.1 acla|EAW06384.1 afis|EAW18490.1 afla|EED52916.1 afum|EAL93180.1 agla|OJJ85085.1 akaw|GAA86463.1 aluc|OJJ85003.1 anid|CBF70157.1 anig|EHA25222.1 aory|EIT78645.1 asyd|OJJ58803.1 ater|EAU29914.1 atub|OJJ80595.1 aver|OJJ01407.1 awen|OJJ31043.1 azon|EHA22376.1 abra|OJJ67360.1 acla|EAW06383.1 afis|EAW18489.1 afla|EED52917.1 afum|EAL93179.1 akaw|GAA86461.1 anid|CBF70155.1 anig|EHA25220.1 aory|EIT78598.1 asyd|OJJ58804.1

Group259: abra|OJJ68687.1 acar|OOF92189.1 acar|OOF92190.1 acla|EAW12558.1 acla|EAW12560.1 afis|EAW24090.1 afis|EAW24092.1 afla|EED46847.1 afla|EED46849.1 afum|EAL91945.1 afum|EAL91947.2 agla|OJJ87160.1 agla|OJJ87166.1 akaw|GAA89840.1 akaw|GAA89842.1 aluc|OJJ81846.1 anid|CBF86494.1 anig|EHA22376.1 aory|EIT72742.1 asyd|OJJ64893.1 ater|EAU30514.1 ater|EAU30516.1 atub|OJJ84415.1 aver|OJJ99014.1 awen|OJJ41397.1 awen|OJJ41399.1 azon|OJJ48865.1 aory|EIT72593.1

Group260: abra|OJJ68761.1 acar|OOF92248.1 acla|EAW12490.1 afis|EAW24155.1 afla|EED46777.1 afum|EAL92010.1 akaw|GAA89905.1 aluc|OJJ81765.1 anid|CBF77904.1 anig|EHA22449.1 asyd|OJJ55301.1 atub|OJJ84337.1 abra|OJJ68762.1 acla|EAW12489.1 afis|EAW24156.1 afum|EAL92011.1 agla|OJJ89525.1 akaw|GAA89906.1 aluc|OJJ81764.1 anid|CBF77902.1 anig|EHA22450.1 aory|EIT72652.1 asyd|OJJ55302.1 ater|EAU30587.1 atub|OJJ84336.1 aver|OJJ06924.1 awen|OJJ41322.1 azon|OJJ48795.1

Group261: abra|OJJ69707.1 acar|OOF94204.1 acla|EAW14911.1 afla|EED55248.1 agla|OJJ79247.1 akaw|GAA90156.1 aluc|OJJ83191.1 anid|CBF73771.1 anig|EHA28261.1 aory|EIT77697.1 asyd|OJJ56592.1 atub|OJJ87748.1 awen|OJJ55897.1 azon|OJJ50407.1 abra|OJJ72111.1 acar|OOF90025.1 afis|EAW24432.1 afum|EAL86100.1 akaw|GAA84811.1 aluc|OJJ86866.1 anig|EHA21775.1 ater|EAU30013.1 atub|OJJ83654.1 aver|OJJ06133.1 awen|OJJ32770.1 aory|EIT83627.1 azon|OJJ44000.1 afla|EED49732.1

Group263: abra|OJJ70208.1 acar|OOF90365.1 acla|EAW13177.1 afis|EAW22620.1 afla|EED51827.1 afum|EAL87187.2 agla|OJJ85385.1 akaw|GAA86568.1 aluc|OJJ85119.1 anid|CBF84539.1 anig|EHA25339.1 aory|EIT81723.1 asyd|OJJ53483.1 ater|EAU32773.1 atub|OJJ80474.1 aver|OJJ08276.1 awen|OJJ33335.1 azon|OJJ51798.1 acla|EAW11725.1 afis|EAW23750.1 asyd|OJJ64104.1 aver|OJJ98187.1 azon|OJJ51793.1 afum|EAL90576.1 afla|EED53104.1 anid|CBF85467.1 agla|OJJ87544.1 aory|EIT74796.1

Group264: anig|EHA20613.1 atub|OJJ81264.1 abra|OJJ71157.1 acar|OOF98002.1 acla|EAW10341.1 afis|EAW25250.1 afla|EED53714.1 afum|EAL89912.1 agla|OJJ89220.1 akaw|GAA82821.1 aluc|OJJ87382.1 anid|CBF85305.1 aory|EIT74933.1 asyd|OJJ63998.1 ater|EAU34356.1 aver|OJJ98087.1 awen|OJJ40962.1 azon|OJJ44543.1 acla|EAW10342.1 afis|EAW25247.1 afla|EED53713.1 afum|EAL89909.1 agla|OJJ89214.1 akaw|GAA82822.1 aluc|OJJ87383.1 anid|CBF85306.1 awen|OJJ40961.1 azon|OJJ44529.1

Group265: abra|OJJ71667.1 acar|OOF96377.1 acar|OOF96378.1 acla|EAW15205.1 acla|EAW15206.1 afis|EAW20170.1 afis|EAW20171.1 afla|EED57177.1 afla|EED57179.1 afum|EAL85288.1 afum|EAL85289.1 agla|OJJ88759.1 akaw|GAA89264.1 akaw|GAA89265.1 aluc|OJJ86409.1 anid|CBF85026.1 anid|CBF85028.1 anig|EHA21490.1 aory|EIT73988.1 aory|EIT74058.1 asyd|OJJ63103.1 ater|EAU35205.1 ater|EAU35206.1 atub|OJJ84122.1 aver|OJJ97858.1 aver|OJJ97859.1 awen|OJJ32067.1 azon|OJJ46099.1

Group267: abra|OJJ75148.1 acar|OOF97189.1 acar|OOF97190.1 acla|EAW08321.1 acla|EAW08322.1 afis|EAW23356.1 afis|EAW23357.1 afla|EED55606.1 afla|EED55607.1 afum|EAL88119.2 afum|EAL88120.2 agla|OJJ86469.1 akaw|GAA88753.1 akaw|GAA88754.1 aluc|OJJ92713.1 aluc|OJJ92714.1 anid|CBF74884.1 anig|EHA26286.1 aory|EIT81807.1 asyd|OJJ60109.1 ater|EAU35607.1 ater|EAU35608.1 atub|OJJ87139.1 atub|OJJ87140.1 aver|OJJ04153.1 awen|OJJ39530.1 azon|OJJ47726.1 azon|OJJ47728.1

Group269: abra|OJJ76491.1 acar|OOF99722.1 acar|OOF99723.1 acla|EAW13941.1 acla|EAW13944.1 afis|EAW18652.1 afis|EAW18653.1 afla|EED52680.1 afla|EED52681.1 afum|EAL93368.1 afum|EAL93369.1 agla|OJJ82422.1 akaw|GAA82406.1 akaw|GAA82407.1 aluc|OJJ91713.1 aluc|OJJ91714.1 anid|CBF70539.1 anid|CBF70540.1 anig|EHA22724.1 aory|EIT74312.1 aory|EIT74318.1 asyd|OJJ58549.1 ater|EAU38259.1 ater|EAU38260.1 atub|OJJ86172.1 aver|OJJ01147.1 awen|OJJ32120.1 azon|OJJ46706.1

Group270: abra|OJJ76517.1 acar|OOF99456.1 acla|EAW14184.1 acla|EAW14185.1 afis|EAW18899.1 afis|EAW18900.1 afla|EED50848.1 afla|EED50853.1 afum|EAL93631.1 afum|EAL93632.1 agla|OJJ81505.1 akaw|GAA82429.1 akaw|GAA82430.1 aluc|OJZ91689.1 anid|CBF69917.1 anid|CBF69919.1 anig|EHA22702.1 aory|EIT78983.1 aory|EIT79046.1 asyd|OJJ58989.1 ater|EAU38067.1 ater|EAU38068.1 atub|OJI86142.1 aver|OJJ01626.1 aver|OJJ01627.1 awen|OJJ32457.1 azon|OJJ47214.1 azon|OJJ47215.1

Group271: abra|OJJ76807.1 acar|OOF91299.1 acla|EAW13366.1 afis|EAW20480.1 afla|EED44787.1 afum|EAL84574.1 agla|OJJ84832.1 akaw|GAA87216.1 aluc|OJZ84214.1 anid|CBF79227.1 anig|EHA27567.1 aory|EIT77778.1 asyd|OJJ55739.1 ater|EAU29559.1 atub|OJI89869.1 aver|OJJ06825.1 awen|OJJ33179.1 azon|OJJ46382.1 afla|EED44788.1 aory|EIT77780.1 awen|OJJ33175.1 azon|OJJ46828.1 acar|OOF91301.1 acla|EAW13367.1 afis|EAW20481.1 afum|EAL84573.1 akaw|GAA87215.1 aluc|OJZ84215.1

Group272: abra|OJJ77199.1 acar|OOF93082.1 acar|OOF93087.1 acla|EAW13188.1 acla|EAW13189.1 afis|EAW17452.1 afis|EAW17453.1 afla|EED49369.1 afla|EED49370.1 afum|EAL91280.1 afum|EAL91281.2 agla|OJJ80350.1 agla|OJJ80360.1 akaw|GAA90742.1 aluc|OJZ84606.1 anid|CBF71675.1 anid|CBF71677.1 anig|EHA27896.1 anig|EHA27896.1 aory|EIT79469.1 aory|EIT79540.1 asyd|OJJ61825.1 ater|EAU33932.1 ater|EAU33933.1 atub|OJI89473.1 aver|OJI95925.1 awen|OJJ37394.1 azon|OJJ51067.1

Group273: abra|OJJ77369.1 acar|OOF93239.1 acla|EAW13106.1 acla|EAW13107.1 afis|EAW17558.1 afla|EED49266.1 afla|EED49267.1 afum|EAL91372.1 agla|OJJ81410.1 akaw|GAA91392.1 akaw|GAA91393.1 aluc|OJZ84778.1 aluc|OJZ84779.1 anid|CBF90279.1 anig|EHA28046.1 aory|EIT82182.1 aory|EIT82245.1 asyd|OJJ61916.1 atub|OJI89309.1 atub|OJI89309.1 aver|OJJ6009.1 awen|OJJ37296.1 azon|OJJ50989.1 afis|EAW17557.1 afum|EAL91371.1 agla|OJJ81411.1 anid|CBF90281.1 asyd|OJJ61917.1

Group276: acar|OOF92615.1 acar|OOF92636.1 abra|OJJ69082.1 acar|OOF91209.1 acla|EAW08752.1 afis|EAW15684.1 afla|EED51370.1 afum|EAL85664.1 agla|OJJ81833.1 akaw|GAA90611.1 akaw|GAA90612.1 aluc|OJZ86070.1 anid|CBF71148.1 anig|EHA24544.1 aory|EIT80661.1 asyd|OJJ55837.1 ater|EAU32473.1 atub|OJI79866.1 atub|OJI79867.1 aver|OJJ04780.1 awen|OJJ38376.1 azon|OJJ43860.1 acla|EAW08751.1 afis|EAW15685.1 afla|EED51369.1 afum|EAL85663.1 anid|CBF71146.1

Group277: acar|OOF93141.1 acar|OOF96894.1 asyd|OJJ55471.1 asyd|OJJ61030.1 asyd|OJJ57185.1 abra|OJJ72261.1 acla|EAW13265.1 afis|EAW16849.1 afla|EED49789.1 afum|EAL86395.1 agla|OJJ88181.1 akaw|GAA84669.1 aluc|OJZ87020.1 anid|CBF84231.1 anig|EHA21635.1 aory|EIT77692.1 ater|EAU33865.1 atub|OJI83498.1 aver|OJJ00350.1 aver|OJJ03105.1 awen|OJJ36910.1 azon|OJJ50296.1 acla|EAW12401.1 afla|EED51180.1 aory|EIT81355.1 anid|CBF89260.1 azon|OJJ50917.1

Group278: acar|OOF94414.1 acar|OOF97591.1 afis|EAW24229.1 afis|EAW24933.1 afla|EED46551.1 afla|EED48042.1 afum|EAL85898.1 afum|EAL89589.1 aory|EIT77904.1 aory|EIT83324.1 asyd|OJJ53967.1 asyd|OJJ64577.1 ater|EAU29958.1 ater|EAU31178.1 aver|OJJ98780.1 aver|OJJ08063.1 anig|EHA28592.1 abra|OJJ69311.1 acla|EAW14698.1 agla|OJJ79642.1 akaw|GAA88180.1 aluc|OJZ82140.1 anid|CBF74228.1 anig|EHA24084.1 atub|OJI88297.1 awen|OJJ33068.1 azon|OJJ48455.1

Group280: afis|EAW18048.1 afis|EAW24488.1 afum|EAL86157.1 afum|EAL86730.1 afum|EAL91860.1 abra|OJJ68602.1 acar|OOF92112.1 acla|EAW12637.1 afla|EED51498.1 agla|OJJ85419.1 akaw|GAA91926.1 aluc|OJZ81954.1 ater|EAU29958.1 anig|EHA22293.1 aory|EIT80704.1 asyd|OJJ58129.1 acla|EAW11735.1 atub|OJI84505.1 aver|OJJ04276.1 awen|OJJ32709.1 awen|OJJ41486.1 azon|OJJ48216.1 afla|EED48171.1 agla|OJJ83081.1 aory|EIT83032.1 ater|EAU38954.1 aver|OJI98885.1

Group282: afla|EED51568.1 afla|EED51716.1 afla|EED56540.1 agla|OJJ78952.1 agla|OJJ80278.1 aory|EIT79700.1 aory|EIT80654.1 aory|EIT80755.1 asyd|OJJ57607.1 asyd|OJJ58114.1 aver|OJJ04291.1 aver|OJJ05577.1 aver|OJJ33707.1 awen|OJJ34440.1 abra|OJJ67863.1 acar|OOF92843.1 acla|EAW11735.1 afis|EAW23768.1 afum|EAL87202.1 agla|OJJ85386.1 akaw|GAA91870.1 aluc|OJZ82029.1 anid|CBF79783.1 anig|EHA22227.1 ater|EAU31312.1 atub|OJI84583.1 azon|OJJ42833.1

Group284: afum|EAL86514.1 afum|EAL91321.1 asyd|OJJ52759.1 asyd|OJJ54478.1 asyd|OJJ61874.1 azon|OJJ42558.1 azon|OJJ51475.1 azon|OJJ51028.1 abra|OJJ74834.1 acar|OOF95824.1 acla|EAW13149.1 afis|EAW17498.1 afla|EED49318.1 agla|OJJ81459.1 akaw|GAA83586.1 aluc|OJZ92411.1 anid|CBF71582.1 anig|EHA26554.1 aory|EIT82205.1 ater|EAU34444.1 ater|EAU36943.1 atub|OJI86841.1 aver|OJI95972.1 awen|OJJ37343.1 acla|EAW12237.1 afis|EAW16990.1 aver|OJJ08741.1

Group285: agla|OJJ79575.1 agla|OJJ86866.1 agla|OJJ88176.1 agla|OJJ89239.1 asyd|OJJ62473.1 asyd|OJJ64049.1 ater|EAU34049.1 ater|EAU34409.1 aver|OJI96608.1 aver|OJI98135.1 awen|OJJ38034.1 awen|OJJ40680.1 awen|OJJ40981.1 abra|OJJ74157.1 acar|OOF95570.1 acla|EAW12279.1 afis|EAW16961.1 afla|EED49740.1 afum|EAL86487.2 akaw|GAA89727.1 aluc|OJZ80656.1 anid|CBF89363.1 anig|EHA27176.1 aory|EIT75292.1 atub|OJI87511.1 azon|OJJ44568.1 anid|CBF85376.1

Group289: azon|OJJ42747.1 azon|OJJ51180.1 abra|OJJ76401.1 acar|OOF99642.1 acla|EAW14023.1 afis|EAW18729.1 afla|EED50685.1 afum|EAL93454.1 agla|OJJ82287.1 akaw|GAA82321.1 aluc|OJZ91811.1 anid|CBF70016.1 anig|EHA22804.1 aory|EIT78004.1 asyd|OJJ58877.1 ater|EAU38175.1 atub|OJI86267.1 aver|OJJ01479.1 awen|OJJ32270.1 akaw|GAA82320.1 aluc|OJZ91812.1 acar|OOF99643.1 acla|EAW14022.1 afis|EAW18728.1 afum|EAL93453.1 anid|CBF70018.1 ater|EAU38176.1

Group290: abra|OJJ65930.1 acar|OOF94991.1 acla|EAW12067.1 afis|EAW19710.1 afla|EED57049.1 afum|EAL86817.2 agla|OJJ82841.1 akaw|GAA92305.1 akaw|GAA92306.1 aluc|OJZ90202.1 anid|CBF84278.1 anig|EHA23699.1 aory|EIT82284.1 asyd|OJJ57230.1 ater|EAU32834.1 atub|OJI81631.1 aver|OJJ03059.1 awen|OJJ32205.1 azon|OJJ42677.1 afla|EED57054.1 acar|OOF94992.1 acla|EAW12066.1 afis|EAW19709.1 afum|EAL86818.1 aory|EIT82258.1 ater|EAU32836.1 azon|OJJ42678.1

Group291: abra|OJJ66585.1 acar|OOF91022.1 acla|EAW10906.1 acla|EAW10907.1 afis|EAW20951.1 afis|EAW20952.1 afla|EED50307.1 afla|EED50308.1 afum|EAL84682.1 afum|EAL84683.2 agla|OJJ83929.1 akaw|GAA91132.1 akaw|GAA91134.1 aluc|OJZ81461.1 anid|CBF82552.1 anid|CBF82554.1 anig|EHA25968.1 aory|EIT77335.1 aory|EIT77337.1 asyd|OJJ54058.1 ater|EAU38602.1 ater|EAU38603.1 atub|OJI88718.1 aver|OJJ08683.1 awen|OJJ34364.1 awen|OJJ34365.1 azon|OJJ48100.1

Group293: abra|OJJ67205.1 acar|OOF98357.1 acar|OOF98358.1 acla|EAW14519.1 afis|EAW19237.1 afla|EED47640.1 afum|EAL93965.2 agla|OJJ88462.1 akaw|GAA90972.1 akaw|GAA90973.1 aluc|OJZ87769.1 anid|CBF78640.1 anig|EHA20253.1 aory|EIT80182.1 asyd|OJJ65189.1 ater|EAU37226.1 atub|OJI80876.1 aver|OJI98437.1 awen|OJJ38481.1 azon|OJJ43782.1 acla|EAW14518.1 afis|EAW19236.1 afla|EED47646.1 afum|EAL93964.1 anid|CBF78638.1 aory|EIT80263.1 ater|EAU37227.1

Group295: abra|OJJ68390.1 afla|EED49558.1 agla|OJJ87147.1 aory|EIT82645.1 atub|OJI84701.1 abra|OJJ77648.1 acar|OOF99088.1 acla|EAW12091.1 afis|EAW19985.1 afum|EBA27209.1 akaw|GAA83987.1 aluc|OJZ80881.1 anid|CBF87267.1 anig|EHA19455.1 asyd|OJJ62371.1 ater|EAU33659.1 atub|OJI82696.1 aver|OJJ04660.1 awen|OJJ38481.1 azon|OJJ43782.1 acla|EAW08658.1 aver|OJI96505.1 afla|EED52196.1 aory|EIT74391.1 ater|EAU29811.1 aluc|OJZ83787.1 anid|CBF85559.1

Group296: abra|OJJ69188.1 acar|OOF91124.1 acla|EAW08657.1 afis|EAW15774.1 afla|EED51274.1 afum|EAL85575.1 agla|OJJ81937.1 akaw|GAA86276.1 akaw|GAA86277.1 aluc|OJZ86174.1 anid|CBF70974.1 anig|EHA24450.1 anig|EHA24451.1 aory|EIT81499.1 asyd|OJJ52632.1 ater|EAU32367.1 atub|OJI79966.1 aver|OJJ04660.1 awen|OJJ38481.1 azon|OJJ43782.1 acla|EAW08658.1 afis|EAW15773.1 afla|EED49465.1 anid|CBF70972.1 ater|EAU32368.1 azon|OJJ43781.1 aory|EIT79571.1

Group297: abra|OJJ69236.1 acar|OOF91082.1 acar|OOF91084.1 acla|EAW08611.1 acla|EAW08613.1 afis|EAW15821.1 afis|EAW15822.1 afla|EED51224.1 afla|EED51226.1 afum|EAL85529.1 afum|EAL85530.1 agla|OJJ81985.1 akaw|GAA92244.1 akaw|GAA92246.1 aluc|OJZ86216.1 anid|CBF70886.1 anid|CBF70887.1 anig|EHA24410.1 aory|EIT83181.1 aory|EIT83189.1 asyd|OJJ52589.1 ater|EAU33426.1 ater|EAU33427.1 atub|OJI80011.1 aver|OJJ04616.1 awen|OJJ38535.1 azon|OJJ43727.1

Group298: abra|OJJ70462.1 acar|OOF97462.1 acar|OOF97465.1 acla|EAW13051.1 acla|EAW13053.1 afis|EAW17613.1 afis|EAW17616.1 afla|EED49204.1 afla|EED49207.1 afum|EAL91426.1 afum|EAL91429.1 agla|OJJ81324.1 akaw|GAA83308.1 akaw|GAA83311.1 aluc|OJZ83805.1 anid|CBF90169.1 anid|CBF90172.1 anig|EHA18952.1 aory|EIT78583.1 aory|EIT83172.1 asyd|OJJ61991.1 ater|EAU37048.1 ater|EAU37050.1 atub|OJI90172.1 aver|OJI96083.1 awen|OJJ37229.1 azon|OJJ50932.1

Group299: abra|OJJ71130.1 acar|OOF98022.1 acla|EAW10367.1 acla|EAW10368.1 afis|EAW25224.1 afis|EAW25225.1 afla|EED53669.1 afla|EED53682.1 afum|EAL89885.1 afum|EAL89886.1 akaw|GAA82844.1 aluc|OJZ87405.1 anid|CBF85264.1 anid|CBF85265.1 anig|EHA20634.1 anig|EHA20635.1 aory|EIT75307.1 aory|EIT75353.1 ater|EAU34383.1 ater|EAU34384.1 atub|OJI81241.1 aver|OJI98082.1 aver|OJI98083.1 agla|OJJ79183.1 asyd|OJJ62906.1 awen|OJJ40890.1 azon|OJJ44519.1

Group301: abra|OJJ72938.1 acar|OOF96120.1 acar|OOF96121.1 acla|EAW06452.1 acla|EAW06453.1 afis|EAW15949.1 afla|EED58109.1 afla|EED58110.1 afum|EAL88582.1 agla|OJJ89365.1 akaw|GAA85519.1 aluc|OJZ83447.1 anid|CBF81052.1 anig|EHA24293.1 anig|EHA24294.1 aory|EIT79139.1 aory|EIT79141.1 asyd|OJJ56450.1 ater|EAU35509.1 atub|OJI82338.1 atub|OJI82339.1 aver|OJJ06272.1 awen|OJJ35627.1 azon|OJJ46898.1 anid|CBF81054.1 ater|EAU35508.1 aver|OJJ06271.1

Group302: abra|OJJ73010.1 acar|OOF96182.1 acar|OOF96183.1 acla|EAW08002.1 acla|EAW08003.1 afis|EAW23037.1 afis|EAW23038.1 afla|EED54980.1 afum|EAL88443.1 afum|EAL88444.1 agla|OJJ89440.1 akaw|GAA85588.1 akaw|GAA85589.1 aluc|OJZ83525.1 anid|CBF80929.1 anid|CBF80931.1 anig|EHA24348.1 aory|EIT80318.1 aory|EIT80383.1 asyd|OJJ56316.1 ater|EAU29618.1 ater|EAU29621.1 atub|OJI82414.1 aver|OJJ06398.1 awen|OJJ35704.1 azon|OJJ44166.1 afla|EED54979.1

Group303: abra|OJJ73242.1 acar|OOG00479.1 acar|OOG00481.1 acla|EAW06915.1 acla|EAW06916.1 afis|EAW16532.1 afis|EAW16533.1 afla|EED56136.1 afla|EED56140.1 afum|EAL89129.1 afum|EAL89130.2 agla|OJJ82788.1 akaw|GAA87938.1 akaw|GAA87939.1 aluc|OJZ81186.1 anid|CBF81734.1 anid|CBF81736.1 anig|EHA18503.1 aory|EIT76580.1 aory|EIT76630.1 asyd|OJJ59594.1 ater|EAU36595.1 ater|EAU36596.1 atub|OJI91382.1 aver|OJJ02674.1 awen|OJJ40289.1 azon|OJJ49150.1

Group304: abra|OJJ73503.1 acar|OOG00688.1 acla|EAW07435.1 acla|EAW07436.1 afis|EAW22461.1 afis|EAW22462.1 afla|EED54482.1 afla|EED54483.1 afum|EAL90729.1 afum|EAL90730.1 agla|OJJ87561.1 akaw|GAA87450.1 akaw|GAA87451.1 aluc|OJZ88545.1 anid|CBF88911.1 anid|CBF88912.1 anig|EHA18245.1 aory|EIT81150.1 asyd|OJJ62841.1 ater|EAU39244.1 atub|OJI91130.1 aver|OJI96884.1 aver|OJI96885.1 awen|OJJ35087.1 awen|OJJ35088.1 azon|OJJ50020.1 aory|EIT81157.1

Group306: abra|OJJ76286.1 acar|OOF99527.1 acla|EAW14330.1 afis|EAW18958.1 afum|EAL93691.1 akaw|GAA82215.1 aory|EIT76999.1 asyd|OJJ59136.1 awen|OJJ31557.1 azon|OJJ47274.1 abra|OJJ76287.1 acar|OOF99530.1 acla|EAW14329.1 afis|EAW18959.1 afla|EED51005.1 afum|EAL93692.1 agla|OJJ85336.1 akaw|GAA82216.1 aluc|OJJ291935.1 anid|CBF69598.1 anig|EHA22895.1 aory|EIT76941.1 ater|EAU38141.1 atub|OJI86377.1 aver|OJJ01725.1 awen|OJJ31558.1 azon|OJJ47275.1

Group307: abra|OJJ77576.1 acar|OOF99151.1 acla|EAW06541.1 acla|EAW06542.1 afis|EAW16053.1 afis|EAW16054.1 afla|EED56444.1 afla|EED56445.1 afum|EAL88685.1 afum|EAL88686.1 agla|OJJ86087.1 akaw|GAA84049.1 akaw|GAA84050.1 aluc|OJJ280961.1 anid|CBF75070.1 anid|CBF75072.1 anig|EHA19396.1 aory|EIT72818.1 asyd|OJJ60021.1 ater|EAU33580.1 ater|EAU33584.1 atub|OJI82625.1 aver|OJJ02264.1 awen|OJJ30385.1 awen|OJJ30389.1 azon|OJJ45401.1 aory|EIT72866.1

Group308: abra|OJJ77839.1 acar|OOF98932.1 acla|EAW11284.1 afis|EAW18216.1 afla|EED56254.1 afum|EAL87582.1 akaw|GAA83808.1 aory|EIT73366.1 ater|EAU33774.1 azon|OJJ50174.1 abra|OJJ77840.1 acar|OOF98931.1 acla|EAW11283.1 afis|EAW18217.1 afla|EED56253.1 afum|EAL87583.1 agla|OJJ85865.1 akaw|GAA83807.1 aluc|OJJ290915.1 anid|CBF86146.1 anig|EHA19627.1 aory|EIT73438.1 asyd|OJJ64511.1 atub|OJI82907.1 aver|OJI98609.1 awen|OJJ30595.1 azon|OJJ50175.1

Group309: abra|OJJ65742.1 abra|OJJ77048.1 acar|OOF91730.1 acar|OOF92937.1 aluc|OJJ84452.1 aluc|OJJ286322.1 atub|OJI84212.1 atub|OJI89624.1 acla|EAW13550.1 afis|EAW20627.1 afla|EED49777.1 afum|EAL84441.1 agla|OJJ86946.1 akaw|GAA87005.1 anid|CBF83228.1 anig|EHA27767.1 aory|EIT77606.1 asyd|OJJ55581.1 ater|EAU32164.1 ater|OJJ06660.1 awen|OJJ33462.1 azon|OJJ50718.1 afla|EED52520.1 anig|EHA19838.1 aory|EIT82787.1 awen|OJJ33741.1

Group313: abra|OJJ71059.1 abra|OJJ73085.1 akaw|GAA82900.1 akaw|GAA88075.1 anig|EHA18644.1 anig|EHA20691.1 ater|EAU29720.1 ater|EAU35713.1 atub|OJI81179.1 atub|OJI91543.1 aver|OJJ02730.1 aver|OJJ06544.1 awen|OJJ34513.1 awen|OJJ40561.1 acar|OOF98083.1 acla|EAW10600.1 afis|EAW24968.1 afum|EAL89627.1 agla|OJJ82234.1 aluc|OJJ287469.1 anid|CBF81643.1 aory|EIT80808.1 asyd|OJJ59538.1 azon|OJJ49422.1 afla|EED57716.1 aory|EIT79920.1

Group316: acla|EAW06814.1 acla|EAW11026.1 afis|EAW16363.1 afis|EAW20840.1 afum|EAL84793.1 afum|EAL88988.1 agla|OJJ78575.1 agla|OJJ80753.1 aver|OJI96276.1 aver|OJI96627.1 awen|OJJ37768.1 awen|OJJ40172.1 abra|OJJ73491.1 acar|OOG00684.1 afla|EED53503.1 agla|OJJ79965.1 akaw|GAA87440.1 aluc|OJJ288557.1 anid|CBF89245.1 anid|EHA18255.1 aory|EIT74859.1 asyd|OJJ62507.1 ater|EAU34089.1 atub|OJI91142.1 azon|OJJ45066.1 asyd|OJJ62165.1

Group317: acla|EAW11040.1 acla|EAW11477.1 afla|EED47466.1 afla|EED49623.1 afla|EED50532.1 agla|OJJ82839.1 agla|OJJ86906.1 aory|EIT79957.1 aory|EIT81005.1 aory|EIT82111.1 awen|OJJ31954.1 awen|OJJ35441.1 azon|OJJ45954.1 azon|OJJ51301.1 abra|OJJ72795.1 acar|OOF89880.1 afis|EAW23976.1 afum|EAL87406.1 akaw|GAA85398.1 aluc|OJJ283292.1 anid|CBF77345.1 anig|EHA24176.1 asyd|OJJ53272.1 ater|EAU29776.1 atub|OJI82193.1 aver|OJJ03577.1

Group318: afla|EED44930.1 afla|EED51540.1 ater|EAU31301.1 ater|EAU38559.1 awen|OJJ33684.1 awen|OJJ36221.1 abra|OJJ67873.1 acar|OOF92853.1 acla|EAW11724.1 afis|EAW23749.1 afum|EAL87183.1 agla|OJJ78962.1 agla|OJJ89691.1 akaw|GAA91882.1 aluc|OJJ282015.1 anid|CBF79817.1 anig|EHA22241.1 aory|EIT80515.1 asyd|OJJ58137.1 atub|OJI84564.1 aver|OJJ04268.1 azon|OJJ42827.1 aver|OJJ03949.1 afis|EAW24762.1 afum|EAL89404.1 asyd|OJJ52466.1

Group319: afla|EED50195.1 afla|EED57633.1 anid|CBF78576.1 anid|CBF84581.1 anid|CBF88483.1 aory|EIT77388.1 aory|EIT82958.1 asyd|OJJ59798.1 asyd|OJJ63787.1 asyd|OJJ65070.1 aver|OJI97151.1 aver|OJI99195.1 aver|OJJ02491.1 abra|OJJ74472.1 acar|OOF95272.1 acla|EAW07225.1 afis|EAW22239.1 afum|EAL90953.1 agla|OJJ87812.1 akaw|GAA87366.1 aluc|OJJ289647.1 anig|EHA26885.1 ater|EAU34246.1 atub|OJI85157.1 awen|OJJ34817.1 azon|OJJ45732.1

Group323: abra|OJJ66489.1 acar|OOF90965.1 acar|OOF90966.1 acla|EAW10979.1 acla|EAW10980.1 afis|EAW20879.1 afis|EAW20880.1 afla|EED45565.1 afum|EAL84752.1 afum|EAL84753.1 agla|OJJ83989.1 akaw|GAA92472.1 akaw|GAA92473.1 aluc|OJJ281546.1 anid|CBF82862.1 anid|CBF82864.1 anig|EHA25889.1 aory|EIT75388.1 aory|EIT75432.1 asyd|OJJ61598.1 ater|EAU30811.1 atub|OJI88638.1 aver|OJJ00922.1 awen|OJJ34480.1 azon|OJJ51757.1 afla|EED45564.1

Group324: abra|OJJ67172.1 acar|OOF98391.1 acla|EAW14551.1 afis|EAW19268.1 afla|EED47606.1 afum|EAL93995.1 agla|OJJ88427.1 akaw|GAA91002.1 aluc|OJJ287803.1 anid|CBF78699.1 anig|EHA20284.1 aory|EIT80198.1 asyd|OJJ65220.1 ater|EAU29549.1 atub|OJI80844.1 aver|OJI99369.1 awen|OJJ37629.1 azon|OJJ47017.1 afla|EED47607.1 anid|CBF78697.1 aory|EIT80260.1 acar|OOF98392.1 acla|EAW14552.1 afis|EAW19269.1 afum|EAL93996.1 anig|EHA20285.1

Group326: abra|OJJ68235.1 acar|OOF93581.1 acla|EAW10392.1 afis|EAW25199.1 afum|EBA27389.1 agla|OJJ85249.1 anid|CBF85213.1 asyd|OJJ54665.1 ater|EAU34341.1 atub|OJI83115.1 aver|OJI97964.1 awen|OJJ33408.1 abra|OJJ71100.1 afla|EED53646.1 akaw|GAA82868.1 aluc|OJJ287435.1 anig|EHA20657.1 aory|EIT75355.1 atub|OJI81213.1 azon|OJJ47678.1 aver|OJJ02024.1 awen|OJJ31517.1 asyd|OJJ63002.1 agla|OJJ86390.1 awen|OJJ39475.1 agla|OJJ89313.1

Group327: abra|OJJ68548.1 acar|OOF92744.1 acla|EAW12819.1 acla|EAW12820.1 afis|EAW17984.1 afis|EAW17985.1 afla|EED51920.1 afla|EED51921.1 afum|EAL91793.1 afum|EAL91794.1 agla|OJJ80241.1 akaw|GAA91305.1 akaw|GAA91306.1 aluc|OJZ82765.1 anid|CBF79988.1 anid|CBF79990.1 anig|EHA21208.1 aory|EIT81392.1 aory|EIT81447.1 asyd|OJJ58239.1 ater|EAU31494.1 ater|EAU31495.1 atub|OJI88997.1 aver|OJJ02186.1 awen|OJJ41561.1 azon|OJJ48276.1

Group328: abra|OJJ68713.1 acar|OOF92213.1 acla|EAW11027.1 afis|EAW20841.1 afla|EED46816.1 afum|EAL84792.1 agla|OJJ80754.1 akaw|GAA89866.1 aluc|OJZ81815.1 anid|CBF86535.1 anig|EHA22400.1 aory|EIT72698.1 asyd|OJJ62166.1 ater|EAU30544.1 atub|OJI84387.1 aver|OJI96277.1 awen|OJJ40171.1 azon|OJJ50392.1 afis|EAW24116.1 anid|CBF84526.1 acla|EAW12533.1 agla|OJJ88735.1 afum|EAL91971.1 awen|OJJ41372.1 aver|OJI98980.1 asyd|OJJ64867.1

Group330: abra|OJJ70396.1 acar|OOG01144.1 acla|EAW11244.1 afis|EAW19549.1 afla|EED49895.1 afum|EAL89219.1 agla|OJJ88525.1 akaw|GAA91962.1 aluc|OJZ82655.1 anig|EHA24571.1 asyd|OJJ65105.1 ater|EAU33680.1 atub|OJI88886.1 aver|OJI99232.1 awen|OJJ31981.1 azon|OJJ47790.1 afis|EAW18105.1 akaw|GAA92884.1 aory|EIT77372.1 afis|EAW16617.1 afum|EAL86960.1 anig|EHA27418.1 afla|EED50268.1 anid|CBF84502.1 asyd|OJJ53512.1 aver|OJI96187.1

Group331: abra|OJJ71980.1 acar|OOF96631.1 acla|EAW09559.1 acla|EAW09561.1 afis|EAW21576.1 afis|EAW21578.1 afla|EED57795.1 afum|EAL92595.1 afum|EAL92596.1 agla|OJJ85761.1 akaw|GAA84949.1 akaw|GAA84950.1 aluc|OJZ86717.1 anid|CBF76292.1 anid|CBF76294.1 anig|EHA21962.1 aory|EIT81026.1 aory|EIT81117.1 asyd|OJJ61004.1 ater|EAU34955.1 ater|EAU34956.1 atub|OJI83812.1 aver|OJJ00322.1 awen|OJJ39103.1 azon|OJJ51431.1 afla|EED57794.1

Group332: abra|OJJ75736.1 acar|OOF89930.1 acla|EAW14905.1 afis|EAW24426.1 afla|EED55252.1 afum|EAL86094.1 agla|OJJ79240.1 akaw|GAA84469.1 aluc|OJZ89188.1 anid|CBF73780.1 anig|EHA23369.1 aory|EIT83550.1 asyd|OJJ56598.1 ater|EAU30018.1 atub|OJI85602.1 aver|OJJ06127.1 awen|OJJ32778.1 azon|OJJ44006.1 acla|EAW14906.1 afis|EAW24427.1 afla|EED55251.1 afum|EAL86095.1 aluc|OJZ89187.1 anig|EHA23370.1 ater|EAU30019.1 awen|OJJ32779.1

Group333: abra|OJJ75938.1 acar|OOF99972.1 acar|OOF99973.1 acla|EAW09855.1 acla|EAW09856.1 afis|EAW21271.1 afis|EAW21280.1 afla|EED54831.1 afum|EAL92286.1 afum|EAL92296.1 agla|OJJ87477.1 akaw|GAA84639.1 akaw|GAA84640.1 aluc|OJZ89385.1 anid|CBF83352.1 anid|CBF83354.1 anig|EHA23199.1 aory|EIT79381.1 aory|EIT79404.1 asyd|OJJ60616.1 ater|EAU35907.1 ater|EAU35908.1 atub|OJI85413.1 aver|OJI99940.1 awen|OJJ39421.1 azon|OJJ44303.1

Group334: abra|OJJ76077.1 acar|OOF99848.1 acar|OOF99849.1 acla|EAW09743.1 acla|EAW09744.1 afis|EAW21398.1 afis|EAW21399.1 afla|EED55817.1 afla|EED55818.1 afum|EAL92412.1 afum|EAL92413.1 agla|OJJ85524.1 akaw|GAA88889.1 akaw|GAA88890.1 aluc|OJZ89533.1 anid|CBF83833.1 anig|EHA23070.1 aory|EIT76532.1 aory|EIT76875.1 asyd|OJJ60909.1 ater|EAU35159.1 atub|OJI85272.1 aver|OJJ00236.1 awen|OJJ39304.1 azon|OJJ51548.1 ater|EAU35160.1

Group335: abra|OJJ78321.1 acar|OOF98553.1 acla|EAW09204.1 acla|EAW09205.1 afis|EAW21942.1 afis|EAW21943.1 afla|EED46659.1 afla|EED46660.1 afum|EAL92956.1 afum|EAL92957.1 agla|OJJ84181.1 akaw|GAA85707.1 akaw|GAA85708.1 aluc|OJZ91396.1 anid|CBF84053.1 anid|CBF84055.1 anig|EHA20073.1 aory|EIT77914.1 aory|EIT77936.1 asyd|OJJ61344.1 ater|EAU30947.1 ater|EAU30991.1 atub|OJI83388.1 aver|OJJ00669.1 awen|OJJ34234.1 azon|OJJ43402.1

Group337: abra|OJJ66243.1 abra|OJJ72838.1 afla|EED45789.1 afla|EED49140.1 aluc|OJZ80548.1 aluc|OJZ83338.1 anig|EHA24214.1 anig|EHA25648.1 aory|EIT75668.1 aory|EIT78573.1 atub|OJI82235.1 atub|OJI88383.1 acar|OOF96040.1 acla|EAW11403.1 afis|EAW24018.1 afum|EAL87448.1 akaw|GAA85435.1 akaw|GAA89048.1 anid|CBF87091.1 asyd|OJJ55451.1 ater|EAU29728.1 awen|OJJ35491.1 azon|OJJ46999.1 aver|OJJ06524.1 agla|OJJ78562.1

Group340: abra|OJJ69049.1 abra|OJJ77527.1 akaw|GAA84093.1 akaw|GAA90580.1 aluc|OJZ81008.1 aluc|OJZ86038.1 anig|EHA19352.1 anig|EHA24573.1 asyd|OJJ51977.1 asyd|OJJ54328.1 atub|OJI79825.1 atub|OJI82576.1 acar|OOF99199.1 acla|EAW06702.1 afis|EAW16247.1 afum|EAL88875.1 agla|OJJ86256.1 anid|CBF82150.1 aory|EIT75005.1 ater|EAU37457.1 aver|OJJ05282.1 awen|OJJ30209.1 azon|OJJ43933.1 afla|EED53308.1 asyd|OJJ57961.1

Group342: abra|OJJ70211.1 abra|OJJ76495.1 acar|OOF92571.1 acar|OOF99727.1 akaw|GAA82411.1 akaw|GAA86565.1 aluc|OJZ85115.1 aluc|OJZ91709.1 azon|OJJ46702.1 azon|OJJ50101.1 acla|EAW13937.1 afis|EAW18648.1 afla|EED52691.1 afum|EAL93364.1 agla|OJJ82426.1 anid|CBF70533.1 anig|EHA22720.1 anig|EHA25335.1 aory|EIT74236.1 asyd|OJJ58553.1 atub|OJI80479.1 atub|OJI86168.1 aver|OJJ01151.1 awen|OJJ32116.1 ater|EAU38263.1

Group343: abra|OJJ74685.1 abra|OJJ77443.1 acar|OOF95646.1 acar|OOF95697.1 asyd|OJJ52766.1 asyd|OJJ57547.1 asyd|OJJ56548.1 aver|OJJ05631.1 aver|OJJ06174.1 aver|OJJ08749.1 awen|OJJ30371.1 awen|OJJ40449.1 acla|EAW10711.1 afis|EAW24859.1 afla|EED47099.1 afum|EAL89507.1 agla|OJJ82077.1 akaw|GAA81929.1 aluc|OJZ92262.1 anid|CBF75821.1 anig|EHA26697.1 aory|EIT72503.1 ater|EAU36441.1 atub|OJI86696.1 azon|OJJ49305.1

Group344: abra|OJJ75156.1 abra|OJJ77714.1 acar|OOF97183.1 acar|OOF99026.1 akaw|GAA83918.1 akaw|GAA88762.1 aluc|OJZ90779.1 aluc|OJZ92725.1 anig|EHA19512.1 anig|EHA26276.1 ater|EAU35617.1 ater|EAU38821.1 atub|OJI82766.1 atub|OJI87150.1 acla|EAW08331.1 afis|EAW23366.1 afla|EED55592.1 afum|EAL88107.1 agla|OJJ86458.1 anid|CBF74825.1 aory|EIT82696.1 asyd|OJJ60139.1 aver|OJJ04123.1 awen|OJJ39521.1 azon|OJJ47717.1

Group345: acar|OOF90695.1 acar|OOF91261.1 afla|EED44834.1 afla|EED46120.1 agla|OJJ84890.1 agla|OJJ88358.1 anid|CBF79319.1 anid|CBF85127.1 asyd|OJJ55782.1 asyd|OJJ63353.1 aver|OJI97608.1 aver|OJJ06871.1 aver|OJJ07891.1 abra|OJJ76767.1 acla|EAW13321.1 afis|EAW20436.1 afum|EAL84616.1 akaw|GAA87259.1 aluc|OJZ84170.1 anig|EHA27531.1 aory|EIT77716.1 ater|EAU37722.1 atub|OJI89914.1 awen|OJJ33127.1 azon|OJJ46343.1

Group347: acla|EAW06619.1 acla|EAW13553.1 awen|OJJ30278.1 awen|OJJ33599.1 azon|OJJ42199.1 azon|OJJ50720.1 abra|OJJ77044.1 acar|OOF90272.1 afis|EAW16146.1 afis|EAW20629.1 afla|EED49763.1 afum|EAL84438.1 afum|EAL88775.1 agla|OJJ80445.1 agla|OJJ86199.1 akaw|GAA87009.1 aluc|OJZ84447.1 anid|CBF84471.1 anig|EHA27764.1 aory|EIT77658.1 asyd|OJJ53537.1 ater|EAU32165.1 atub|OJI89628.1 aver|OJJ08214.1 azon|OJJ43971.1

Group348: acla|EAW07744.1 acla|EAW10138.1 afis|EAW20748.1 afis|EAW22781.1 afla|EED47130.1 afla|EED50040.1 afum|EAL84866.1 afum|EAL90418.1 anid|CBF71564.1 anid|CBF87981.1 ater|EAU33992.1 ater|EAU38933.1 awen|OJJ36890.1 awen|OJJ38956.1 abra|OJJ73849.1 acar|OOG00999.1 agla|OJJ83643.1 akaw|GAA89466.1 aluc|OJZ88200.1 anig|EHA17948.1 aory|EIT79245.1 asyd|OJJ63496.1 atub|OJI90798.1 aver|OJI97433.1 azon|OJJ49728.1

Group349: afis|EAW15424.1 afis|EAW16124.1 afum|EAL84220.1 afum|EAL88754.1 aory|EIT73054.1 aory|EIT80955.1 abra|OJJ69804.1 acar|OOF93572.1 acla|EAW06641.1 afla|EED48664.1 agla|OJJ86166.1 akaw|GAA87855.1 aluc|OJZ85497.1 anid|CBF85532.1 anig|EHA25030.1 asyd|OJJ64135.1 ater|EAU37174.1 atub|OJI80068.1 aver|OJI98218.1 awen|OJJ30306.1 azon|OJJ48681.1 acar|OOF91913.1 afla|EED47503.1 aory|EIT74578.1 ater|EAU33207.1

Group350: afis|EAW20695.1 afis|EAW25202.1 afum|EAL86271.1 afum|EAL89865.1 anid|CBF80363.1 anid|CBF85220.1 asyd|OJJ54819.1 asyd|OJJ60277.1 asyd|OJJ62998.1 ater|EAU34342.1 ater|EAU35428.1 aver|OJI97968.1 aver|OJJ07342.1 abra|OJJ71102.1 acar|OOF98041.1 acla|EAW10389.1 afla|EED53649.1 agla|OJJ88973.1 akaw|GAA82866.1 aluc|OJZ87433.1 anig|EHA20655.1 aory|EIT75301.1 atub|OJI81215.1 awen|OJJ40837.1 azon|OJJ46857.1

Group354: afla|EED45547.1 afla|EED48860.1 afum|EAL84770.1 afum|EAL86315.1 aory|EIT75539.1 aory|EIT81273.1 awen|OJJ29954.1 awen|OJJ34505.1 abra|OJJ67746.1 acar|OOF90945.1 acla|EAW12433.1 afis|EAW20865.1 agla|OJJ83914.1 akaw|GAA92437.1 aluc|OJZ81583.1 anid|CBF80387.1 anig|EHA25856.1 asyd|OJJ61074.1 ater|EAU30808.1 atub|OJI88598.1 aver|OJJ00391.1 azon|OJJ51781.1 acla|EAW10996.1 agla|OJJ79837.1 afis|EAW16740.1

Group355: afla|EED45554.1 afla|EED57298.1 aory|EIT74121.1 aory|EIT75629.1 asyd|OJJ56283.1 asyd|OJJ61592.1 asyd|OJJ61824.1 ater|EAU30081.1 ater|EAU30816.1 aver|OJI95924.1 aver|OJJ00914.1 aver|OJJ08478.1 abra|OJJ67752.1 acar|OOF90956.1 acla|EAW10988.1 afis|EAW20872.1 afum|EAL84762.1 agla|OJJ83979.1 akaw|GAA92442.1 aluc|OJZ81577.1 anid|CBF82847.1 anig|EHA25861.1 atub|OJI88603.1 awen|OJJ34489.1 azon|OJJ51766.1

Group357: afum|EAL90938.1 afum|EAL91118.1 abra|OJJ70518.1 acar|OOF97412.1 acla|EAW08157.1 afis|EAW23195.1 afla|EED57873.1 afum|EAL88288.2 agla|OJJ86332.1 akaw|GAA83365.1 aluc|OJZ83863.1 anid|CBF74706.1 anig|EHA19003.1 aory|EIT83278.1 asyd|OJJ60219.1 ater|EAU36323.1 atub|OJI90231.1 aver|OJJ04049.1 awen|OJJ39425.1 azon|OJJ47626.1 afis|EAW20299.1 agla|OJJ84725.1 asyd|OJJ62722.1 aver|OJJ01792.1 azon|OJJ49994.1

Group359: agla|OJJ83698.1 agla|OJJ89439.1 akaw|GAA85587.1 akaw|GAA85825.1 aluc|OJZ83524.1 aluc|OJZ91276.1 anig|EHA19962.1 anig|EHA24347.1 asyd|OJJ56315.1 asyd|OJJ58149.1 atub|OJI82413.1 atub|OJI83265.1 abra|OJJ73009.1 acar|OOF96181.1 acla|EAW08004.1 afis|EAW23039.1 afla|EED45399.1 afum|EAL88442.1 anid|CBF80933.1 aory|EIT82471.1 ater|EAU29619.1 aver|OJJ06399.1 awen|OJJ35703.1 azon|OJJ44165.1 aver|OJJ04255.1

Group360: aluc|OJZ83601.1 aluc|OJZ88595.1 anig|EHA18289.1 anig|EHA18760.1 asyd|OJJ56054.1 asyd|OJJ61370.1 atub|OJI89973.1 atub|OJI91180.1 aver|OJJ00697.1 aver|OJJ04995.1 awen|OJJ35022.1 awen|OJJ37732.1 abra|OJJ73445.1 acar|OOG00650.1 acla|EAW06781.1 afis|EAW16331.1 afla|EED53547.1 afum|EAL88956.1 agla|OJJ88261.1 akaw|GAA83049.1 anid|CBF84027.1 aory|EIT75029.1 ater|EAU34127.1 azon|OJJ45215.1 akaw|GAA92121.1

Group367: abra|OJJ67359.1 acar|OOF93335.1 acla|EAW10444.1 afla|EED55318.1 agla|OJJ89047.1 akaw|GAA86462.1 anid|CBF87506.1 anig|EHA25221.1 aory|EIT76259.1 asyd|OJJ58362.1 ater|EAU39395.1 aver|OJJ02044.1 awen|OJJ40742.1 abra|OJJ70853.1 acar|OOF98263.1 afis|EAW25123.1 afum|EAL89794.1 akaw|GAA91720.1 aluc|OJZ87668.1 anid|CBF85688.1 anig|EHA20859.1 asyd|OJJ64259.1 atub|OJI80975.1 aver|OJI98351.1 azon|OJJ44113.1

Group372: abra|OJJ70648.1 acar|OOF97073.1 acla|EAW08111.1 acla|EAW08112.1 afis|EAW23139.1 afis|EAW23140.1 afla|EED48502.1 afum|EAL88341.1 afum|EAL88342.1 agla|OJJ89661.1 akaw|GAA89984.1 aluc|OJZ83998.1 anid|CBF74444.1 anid|CBF74446.1 anig|EHA19121.1 aory|EIT73212.1 aory|EIT73270.1 asyd|OJJ57742.1 ater|EAU36277.1 atub|OJI90367.1 aver|OJJ05425.1 awen|OJJ36636.1 azon|OJJ47580.1 afla|EED48503.1 ater|EAU36278.1

Group373: abra|OJJ70697.1 acar|OOF90045.1 acla|EAW08067.1 afis|EAW23103.1 afla|EED48544.1 afum|EAL88376.1 agla|OJJ89639.1 akaw|GAA90028.1 akaw|GAA90029.1 aluc|OJZ84044.1 anid|CBF81363.1 anig|EHA19166.1 aory|EIT73061.1 asyd|OJJ59383.1 ater|EAU36232.1 atub|OJI90416.1 aver|OJJ02890.1 awen|OJJ36677.1 azon|OJJ47521.1 afla|EED48545.1 acla|EAW08068.1 afis|EAW23104.1 afum|EAL88375.1 anid|CBF81365.1 aory|EIT73082.1

Group376: abra|OJJ72657.1 acar|OOF94617.1 acla|EAW11521.1 afis|EAW23933.1 afla|EED50585.1 afum|EAL87357.1 agla|OJJ79413.1 akaw|GAA85279.1 akaw|GAA85280.1 aluc|OJZ90638.1 anid|CBF77273.1 anig|EHA24073.1 aory|EIT82169.1 asyd|OJJ56797.1 ater|EAU32304.1 atub|OJI82066.1 aver|OJJ03537.1 awen|OJJ39022.1 azon|OJJ51347.1 acla|EAW11520.1 afum|EAL87358.1 aory|EIT82139.1 afis|EAW23932.1 afla|EED50586.1 azon|OJJ51348.1

Group378: abra|OJJ74406.1 acar|OOF95334.1 acla|EAW06822.1 afis|EAW16185.1 afla|EED53465.1 afum|EAL88816.2 agla|OJJ78591.1 akaw|GAA87300.1 aluc|OJZ89718.1 anid|CBF89935.1 anig|EHA26946.1 aory|EIT74868.1 asyd|OJJ62121.1 ater|EAU34079.1 atub|OJI85082.1 aver|OJI96229.1 awen|OJJ37907.1 azon|OJJ45085.1 afis|EAW16370.1 acla|EAW11051.1 afla|EED49634.1 aory|EIT80960.1 azon|OJJ45955.1 ater|EAU36747.1 azon|OJJ45949.1

Group379: abra|OJJ76313.1 acar|OOF99561.1 acar|OOF99562.1 acla|EAW14106.1 afis|EAW18806.1 afis|EAW18807.1 afla|EED50770.1 afum|EAL93542.1 afum|EAL93543.1 agla|OJJ80536.1 akaw|GAA82241.1 aluc|OJZ91904.1 anid|CBF69790.1 anig|EHA22880.1 aory|EIT78083.1 asyd|OJJ58961.1 ater|EAU37958.1 atub|OJI86354.1 aver|OJJ01555.1 awen|OJJ32382.1 azon|OJJ47143.1 agla|OJJ80538.1 acla|EAW14105.1 anid|CBF69788.1 awen|OJJ32381.1

Group380: abra|OJJ76772.1 acar|OOF91266.1 acla|EAW13327.1 afis|EAW20442.1 afla|EED44828.1 afum|EAL84610.2 agla|OJJ84883.1 akaw|GAA87253.1 akaw|GAA87254.1 aluc|OJZ84176.1 anid|CBF79308.1 anig|EHA27535.1 aory|EIT77723.1 asyd|OJJ55777.1 ater|EAU37717.1 atub|OJI89908.1 atub|OJI89909.1 aver|OJJ06866.1 awen|OJJ33132.1 azon|OJJ46347.1 acla|EAW13326.1 afis|EAW20441.1 afla|EED44829.1 afum|EAL84611.1 anid|CBF79310.1

Group381: abra|OJJ77345.1 acar|OOF93215.1 acla|EAW13129.1 acla|EAW13130.1 afis|EAW17533.1 afis|EAW17534.1 afla|EED49295.1 afla|EED49296.1 afum|EAL91347.1 afum|EAL91348.1 agla|OJJ81437.1 akaw|GAA91415.1 akaw|GAA91416.1 aluc|OJZ84756.1 anid|CBF90328.1 anid|CBF90329.1 anig|EHA28025.1 aory|EIT82179.1 asyd|OJJ61906.1 ater|EAU36962.1 ater|EAU36963.1 atub|OJI89328.1 aver|OJI95999.1 awen|OJJ37319.1 azon|OJJ51011.1

Group384: abra|OJJ66370.1 abra|OJJ77693.1 acar|OOF98983.1 acar|OOF99046.1 akaw|GAA83937.1 akaw|GAA90239.1 atub|OJI82743.1 atub|OJI87834.1 acla|EAW06572.1 afis|EAW16024.1 afla|EED56405.1 afis|EAL88653.1 agla|OJJ81572.1 aluc|OJZ83101.1 anid|CBF75012.1 anig|EHA19493.1 anig|EHA28166.1 aory|EIT83000.1 asyd|OJJ60056.1 ater|EAU33617.1 aver|OJJ02233.1 awen|OJJ30433.1 azon|OJJ45432.1 aluc|OJZ80819.1

Group385: abra|OJJ67097.1 abra|OJJ77658.1 aluc|OJZ80870.1 aluc|OJZ87876.1 anig|EHA19465.1 anig|EHA20181.1 atub|OJI80773.1 atub|OJI82707.1 acar|OOF98457.1 acar|OOF99078.1 acla|EAW06500.1 afis|EAW15996.1 afla|EED56370.1 afum|EAL88628.2 agla|OJJ86011.1 akaw|GAA83977.1 akaw|GAA91064.1 anid|CBF81691.1 aory|EIT73327.1 asyd|OJJ59562.1 ater|EAU33651.1 aver|OJJ02706.1 awen|OJJ30473.1 azon|OJJ45465.1

Group387: abra|OJJ68864.1 abra|OJJ75043.1 acar|OOF90525.1 acar|OOF97290.1 akaw|GAA88660.1 akaw|GAA90389.1 aluc|OJZ85842.1 aluc|OJZ92609.1 atub|OJI79630.1 atub|OJI87043.1 awen|OJJ31662.1 awen|OJJ39696.1 acla|EAW08232.1 afis|EAW23266.1 afla|EED55747.1 afum|EAL88213.1 agla|OJJ86586.1 anid|CBF84130.1 anig|EHA24722.1 aory|EIT83228.1 asyd|OJJ57114.1 ater|EAU37532.1 aver|OJJ03186.1 azon|OJJ47828.1

Group389: abra|OJJ70579.1 abra|OJJ75835.1 akaw|GAA83423.1 akaw|GAA84545.1 aluc|OJZ83923.1 aluc|OJZ89278.1 anig|EHA19056.1 anig|EHA23291.1 atub|OJI85521.1 atub|OJI90295.1 awen|OJJ32048.1 awen|OJJ39470.1 acar|OOF97142.1 acla|EAW08201.1 afis|EAW23235.1 afla|EED47014.1 afum|EAL88247.1 agla|OJJ86395.1 anid|CBF75150.1 aory|EIT72630.1 asyd|OJJ59974.1 ater|EAU36368.1 aver|OJJ02317.1 azon|OJJ47672.1

Group391: acar|OOF90694.1 acar|OOF95969.1 afla|EED46110.1 afla|EED52607.1 agla|OJJ82549.1 agla|OJJ84416.1 awen|OJJ31372.1 awen|OJJ33859.1 abra|OJJ72741.1 acla|EAW11574.1 afis|EAW23880.1 afum|EAL87308.1 akaw|GAA85352.1 aluc|OJZ90714.1 anid|CBF77193.1 anig|EHA24133.1 aory|EIT74176.1 asyd|OJJ56836.1 ater|EAU33467.1 atub|OJI82140.1 aver|OJJ03501.1 azon|OJJ48693.1 asyd|OJJ58816.1 aory|EIT76373.1

Group392: acar|OOF92653.1 acar|OOG00348.1 abra|OJJ69030.1 afla|EED56357.1 akaw|GAA90546.1 aluc|OJZ86016.1 anig|EHA24595.1 aory|EIT73420.1 ater|EAU31400.1 atub|OJI79805.1 awen|OJJ34779.1 abra|OJJ73125.1 acla|EAW07183.1 afis|EAW22196.1 afum|EAL90995.1 agla|OJJ87849.1 akaw|GAA88040.1 aluc|OJZ81299.1 anid|CBF88408.1 anig|EHA18608.1 asyd|OJJ63753.1 atub|OJI91508.1 aver|OJI97188.1 azon|OJJ45760.1

Group394: acar|OOF95062.1 acar|OOF95129.1 afla|EED47135.1 afla|EED49651.1 anid|CBF74606.1 anid|CBF84541.1 asyd|OJJ53476.1 asyd|OJJ57659.1 aver|OJJ05520.1 aver|OJJ08280.1 abra|OJJ74650.1 acla|EAW10735.1 afis|EAW24839.1 afum|EAL89485.1 agla|OJJ82030.1 akaw|GAA81960.1 aluc|OJZ92229.1 anig|EHA26728.1 aory|EIT79283.1 ater|EAU36464.1 atub|OJI86659.1 awen|OJJ40425.1 azon|OJJ49283.1 ater|EAU29279.1

Group403: aory|EIT74183.1 aory|EIT82897.1 ater|EAU31229.1 ater|EAU37935.1 aver|OJJ03325.1 aver|OJJ08019.1 abra|OJJ69359.1 acar|OOF94365.1 acla|EAW14750.1 afis|EAW24281.1 afla|EED47995.1 afum|EAL85950.1 agla|OJJ80635.1 akaw|GAA88229.1 aluc|OJZ82191.1 anid|CBF74148.1 anig|EHA28544.1 asyd|OJJ53921.1 asyd|OJJ56960.1 atub|OJI88244.1 awen|OJJ33016.1 azon|OJJ48501.1 acar|OOF90185.1 afla|EED52650.1

Group406: abra|OJJ66593.1 acar|OOF91028.1 acla|EAW10898.1 afis|EAW20960.1 afum|EAL84673.1 agla|OJJ83918.1 akaw|GAA91124.1 aluc|OJZ81454.1 anid|CBF82567.1 anig|EHA25974.1 aory|EIT77369.1 asyd|OJJ54050.1 ater|EAU38610.1 atub|OJI88727.1 aver|OJJ08692.1 awen|OJJ34357.1 azon|OJJ48093.1 acla|EAW10899.1 afis|EAW20959.1 afla|EED50315.1 afum|EAL84674.1 akaw|GAA91125.1 aluc|OJZ81455.1 aory|EIT77298.1

Group409: abra|OJJ66987.1 acar|OOF93625.1 acla|EAW08983.1 afis|EAW24689.1 afla|EED48347.1 afum|EAL89330.1 agla|OJJ83266.1 akaw|GAA92176.1 aluc|OJZ85586.1 anid|CBF73671.1 anig|EHA24935.1 aory|EIT76285.1 asyd|OJJ56664.1 ater|EAU31416.1 atub|OJI79381.1 aver|OJJ06059.1 awen|OJJ32833.1 azon|OJJ49002.1 acla|EAW14852.1 afis|EAW24379.1 afla|EED47832.1 afum|EAL86051.1 aory|EIT77109.1 ater|EAU30357.1

Group410: abra|OJJ67104.1 acar|OOF95836.1 afla|EED47889.1 aluc|OJZ82016.1 anig|EHA22240.1 aory|EIT77218.1 atub|OJI84565.1 abra|OJJ75997.1 acar|OOF99928.1 acla|EAW09808.1 afis|EAW21328.1 afla|EED57286.1 afum|EAL92346.2 agla|OJJ87411.1 akaw|GAA88962.1 aluc|OJZ89443.1 anid|CBF83430.1 anig|EHA23143.1 aory|EIT74039.1 asyd|OJJ60660.1 ater|EAU35953.1 aver|OJI99983.1 awen|OJJ39370.1 azon|OJJ51710.1

Group412: afis|EAW15422.1 afum|EAL84222.1 abra|OJJ74863.1 acar|OOF95863.1 acla|EAW08764.1 afla|EED57451.1 agla|OJJ81802.1 akaw|GAA83557.1 aluc|OJZ92441.1 anid|CBF89639.1 anig|EHA26526.1 aory|EIT80148.1 asyd|OJJ62291.1 ater|EAU32509.1 atub|OJI86870.1 aver|OJI96399.1 awen|OJJ39887.1 azon|OJJ50235.1 afum|EAL85683.1 afis|EAW15665.1 afla|EED46890.1 awen|OJJ38340.1 acla|EAW08989.1 aory|EIT72560.1

Group414: abra|OJJ68074.1 acar|OOF96032.1 acla|EAW11411.1 afis|EAW24010.1 afla|EED49151.1 afum|EAL87440.1 agla|OJJ86942.1 akaw|GAA92399.1 aluc|OJZ83260.1 anid|CBF77404.1 anig|EHA21114.1 aory|EIT79051.1 asyd|OJJ53240.1 ater|EAU29741.1 atub|OJI87679.1 aver|OJJ03610.1 awen|OJJ35482.1 azon|OJJ51266.1 aory|EIT78571.1 afla|EED50884.1 ater|EAU38050.1 asyd|OJJ59006.1 aver|OJJ01610.1 awen|OJJ37601.1

Group415: abra|OJJ68223.1 acla|EAW07100.1 afis|EAW20575.1 afum|EAL84490.1 akaw|GAA83221.1 aluc|OJZ83722.1 anig|EHA18872.1 atub|OJI90097.1 azon|OJJ50650.1 abra|OJJ76992.1 acar|OOF91437.1 afla|EED52310.1 agla|OJJ88718.1 akaw|GAA87054.1 aluc|OJZ84392.1 anid|CBF78937.1 anig|EHA27721.1 aory|EIT74487.1 asyd|OJJ55645.1 ater|EAU37109.1 atub|OJI89679.1 aver|OJJ06730.1 awen|OJJ33275.1 acla|EAW13463.1

Group418: abra|OJJ70549.1 afla|EED53198.1 agla|OJJ89090.1 akaw|GAA83393.1 aluc|OJZ83893.1 asyd|OJJ55203.1 atub|OJI90260.1 aver|OJJ07013.1 abra|OJJ70550.1 acar|OOF97171.1 acla|EAW08341.1 afis|EAW23376.1 afla|EED55581.1 afum|EAL88095.1 agla|OJJ86447.1 anid|CBF74843.1 anig|EHA19029.1 asyd|OJJ60130.1 ater|EAU35630.1 atub|OJI90261.1 aver|OJJ04131.1 awen|OJJ39507.1 azon|OJJ47706.1 aory|EIT74938.1

Group421: abra|OJJ71639.1 acar|OOF96356.1 acla|EAW15180.1 afis|EAW20150.1 afla|EED57200.1 afum|EAL85264.1 agla|OJJ88784.1 akaw|GAA89286.1 akaw|GAA89287.1 aluc|OJZ86382.1 anid|CBF84986.1 anig|EHA21512.1 aory|EIT73993.1 asyd|OJJ63125.1 ater|EAU38765.1 atub|OJI84151.1 aver|OJI97830.1 awen|OJJ32023.1 azon|OJJ46067.1 acla|EAW15179.1 afis|EAW20149.1 anid|CBF84984.1 aory|EIT74054.1 afum|EAL85265.1

Group422: abra|OJJ71666.1 acar|OOF96376.1 acla|EAW15203.1 acla|EAW15204.1 afis|EAW20168.1 afis|EAW20169.1 afla|EED57180.1 afum|EAL85286.1 afum|EAL85287.1 agla|OJJ88761.1 akaw|GAA89266.1 akaw|GAA89267.1 aluc|OJZ86408.1 anid|CBF85015.1 anid|CBF85017.1 anig|EHA21491.1 aory|EIT74089.1 asyd|OJJ63104.1 ater|EAU38800.1 atub|OJI84123.1 aver|OJI97857.1 awen|OJJ32065.1 awen|OJJ32066.1 azon|OJJ46098.1



Group426: abra|OJJ74271.1 acar|OOF95459.1 acla|EAW07315.1 afis|EAW22331.1 afla|EED57752.1 afum|EAL90861.1 agla|OJJ87711.1 akaw|GAA86752.1 aluc|OJZ89862.1 anid|CBF88649.1 anig|EHA27062.1 aory|EIT81123.1 asyd|OJJ63884.1 ater|EAU39460.1 atub|OJI84946.1 aver|OJI97056.1 awen|OJJ34909.1 azon|OJJ45576.1 abra|OJJ74564.1 acar|OOF95196.1 akaw|GAA82037.1 aluc|OJZ92145.1 anig|EHA26804.1 atub|OJI86574.1

Group427: abra|OJJ74337.1 acar|OOF95390.1 acla|EAW07388.1 afis|EAW22412.1 afla|EED52492.1 afum|EAL90780.1 agla|OJJ80127.1 akaw|GAA86692.1 aluc|OJZ89793.1 anid|CBF88798.1 anig|EHA27006.1 aory|EIT82746.1 asyd|OJJ64791.1 ater|EAU39293.1 atub|OJI85013.1 aver|OJI98903.1 awen|OJJ34993.1 azon|OJJ45636.1 afis|EAW15417.1 afla|EED50613.1 afum|EAL84228.1 aory|EIT78052.1 ater|EAU37467.1 awen|OJJ32510.1

Group429: abra|OJJ77163.1 acar|OOF93049.1 acla|EAW11721.1 afis|EAW23742.1 afla|EED45436.1 afum|EAL87179.1 agla|OJJ81702.1 akaw|GAA90769.1 aluc|OJZ84576.1 anid|CBF86622.1 anig|EHA27869.1 aory|EIT82382.1 asyd|OJJ65088.1 ater|EAU37973.1 atub|OJI89506.1 aver|OJI99214.1 awen|OJJ37083.1 azon|OJJ42895.1 anid|CBF87116.1 awen|OJJ35821.1 ater|EAU31855.1 asyd|OJJ64812.1 aver|OJI98925.1 anid|CBF71823.1

Group430: abra|OJJ65741.1 abra|OJJ71669.1 asyd|OJJ61538.1 asyd|OJJ63100.1 aver|OJI97862.1 aver|OJI98822.1 aver|OJJ00865.1 acar|OOF96381.1 acla|EAW15209.1 afis|EAW20174.1 afla|EED57174.1 afum|EAL85292.1 agla|OJJ88756.1 akaw|GAA89262.1 aluc|OJZ86412.1 anid|CBF85033.1 anig|EHA21487.1 aory|EIT74095.1 ater|EAU35210.1 atub|OJI84119.1 awen|OJJ41764.1 azon|OJJ46103.1 afla|EED54878.1

Group434: abra|OJJ67714.1 abra|OJJ68753.1 akaw|GAA89213.1 akaw|GAA89897.1 aluc|OJZ81616.1 aluc|OJZ81774.1 anig|EHA22442.1 anig|EHA25827.1 atub|OJI84347.1 atub|OJI88567.1 acar|OOF92242.1 acla|EAW12498.1 afis|EAW24147.1 afla|EED46784.1 afum|EAL92002.1 agla|OJJ87227.1 anid|CBF77921.1 aory|EIT72760.1 asyd|OJJ55295.1 ater|EAU30579.1 aver|OJJ06931.1 awen|OJJ41332.1 azon|OJJ48802.1

Group435: abra|OJJ70999.1 abra|OJJ75834.1 acar|OOF98141.1 acla|EAW10556.1 afis|EAW25023.1 afla|EED55445.1 afum|EAL89672.1 agla|OJJ89191.1 akaw|GAA82949.1 aluc|OJZ87528.1 anid|CBF81543.1 anig|EHA20738.1 aory|EIT80817.1 asyd|OJJ59491.1 ater|EAU35764.1 atub|OJI81120.1 aver|OJJ02783.1 awen|OJJ40617.1 azon|OJJ49465.1 akaw|GAA84544.1 aluc|OJZ89277.1 anig|EHA23292.1 atub|OJI85522.1

Group436: abra|OJJ73227.1 abra|OJJ77180.1 acar|OOF91798.1 acar|OOG00465.1 agla|OJJ82802.1 agla|OJJ84567.1 asyd|OJJ52864.1 asyd|OJJ59702.1 acla|EAW06901.1 afis|EAW16518.1 afla|EED56153.1 afum|EAL89113.1 akaw|GAA87953.1 aluc|OJZ81201.1 anid|CBF75551.1 anig|EHA18516.1 aory|EIT76710.1 ater|EAU36584.1 atub|OJI91396.1 aver|OJJ02585.1 aver|OJJ08843.1 awen|OJJ40305.1 azon|OJJ49166.1

Group438: abra|OJJ75609.1 abra|OJJ76068.1 akaw|GAA84359.1 akaw|GAA88899.1 aluc|OJZ89061.1 aluc|OJZ89522.1 anig|EHA23079.1 anig|EHA23477.1 atub|OJI85281.1 atub|OJI85725.1 acar|OOG00229.1 acla|EAW09371.1 afis|EAW21764.1 afla|EED46335.1 afum|EAL92794.1 agla|OJJ84387.1 anid|CBF83753.1 aory|EIT81195.1 asyd|OJJ60858.1 ater|EAU38451.1 aver|OJJ00182.1 awen|OJJ34047.1 azon|OJJ48184.1

Group441: acar|OOF94062.1 acar|OOF94132.1 abra|OJJ66364.1 acla|EAW08975.1 afis|EAW15454.1 afla|EED54752.1 afum|EAL84191.1 agla|OJJ80556.1 akaw|GAA90237.1 aluc|OJZ83103.1 anid|CBF80456.1 anig|EHA28167.1 aory|EIT78886.1 asyd|OJJ54768.1 ater|EAU32265.1 atub|OJI87832.1 aver|OJJ07399.1 awen|OJJ36431.1 azon|OJJ43598.1 atub|OJI80330.1 afla|EED48876.1 aory|EIT81202.1 awen|OJJ31672.1

Group442: acla|EAW10867.1 acla|EAW11076.1 afla|EED50345.1 afla|EED55539.1 afum|EAL84638.1 afum|EAL87765.1 aory|EIT77302.1 aory|EIT80884.1 asyd|OJJ54018.1 asyd|OJJ56874.1 abra|OJJ66629.1 acar|OOF91053.1 afis|EAW20991.1 agla|OJJ84069.1 akaw|GAA91096.1 aluc|OJZ81419.1 anid|CBF82616.1 anig|EHA26002.1 ater|EAU38640.1 atub|OJI88762.1 aver|OJJ08722.1 awen|OJJ34319.1 azon|OJJ48065.1

Group446: afla|EED44969.1 afla|EED46569.1 afla|EED51147.1 aory|EIT73475.1 aory|EIT77864.1 aory|EIT81352.1 asyd|OJJ56870.1 asyd|OJJ61208.1 abra|OJJ75570.1 acar|OOF90888.1 acla|EAW09352.1 afis|EAW21817.1 afum|EAL92833.1 agla|OJJ84325.1 akaw|GAA84321.1 aluc|OJZ89018.1 anid|CBF76652.1 anig|EHA23512.1 ater|EAU38486.1 atub|OJI85771.1 aver|OJJ00532.1 awen|OJJ34091.1 azon|OJJ44255.1

Group447: afla|EED47292.1 afla|EED54844.1 agla|OJJ87461.1 agla|OJJ89110.1 aory|EIT79178.1 aory|EIT79336.1 asyd|OJJ60317.1 asyd|OJJ60627.1 asyd|OJJ62712.1 abra|OJJ75953.1 acar|OOF99959.1 acla|EAW09843.1 afis|EAW21292.1 afum|EAL92309.1 akaw|GAA84656.1 aluc|OJZ89402.1 anid|CBF83376.1 anig|EHA23185.1 ater|EAU35925.1 atub|OJI85395.1 aver|OJI99951.1 awen|OJJ39407.1 azon|OJJ44290.1

Group448: afla|EED48892.1 afla|EED55381.1 aory|EIT80798.1 aory|EIT81174.1 asyd|OJJ56534.1 asyd|OJJ64421.1 aver|OJI98520.1 aver|OJJ06188.1 abra|OJJ70928.1 acar|OOF98198.1 acla|EAW10494.1 afis|EAW25073.1 afum|EAL89742.1 agla|OJJ89119.1 akaw|GAA83014.1 aluc|OJZ87599.1 anid|CBF85962.1 anig|EHA20799.1 ater|EAU39552.1 atub|OJI81048.1 awen|OJJ40684.1 azon|OJJ44061.1 awen|OJJ34526.1

Group449: afla|EED54572.1 afla|EED56566.1 asyd|OJJ53770.1 asyd|OJJ62761.1 ater|EAU30266.1 ater|EAU39167.1 aver|OJI96804.1 aver|OJJ07878.1 abra|OJJ73591.1 acar|OOG00775.1 acla|EAW07510.1

afis|EAW22541.1 afum|EAL90653.1 agla|OJJ80900.1 akaw|GAA88561.1 aluc|OJZ88459.1 anid|CBF89038.1  
anig|EHA18179.1 aory|EIT78798.1 aory|EIT79646.1 atub|OJI91057.1 awen|OJJ35170.1 azon|OJJ49937.1

Group452: akaw|GAA83965.1 akaw|GAA90739.1 aluc|OJZ80854.1 aluc|OJZ84609.1 abra|OJJ77200.1  
acar|OOF93088.1 acla|EAW13191.1 afis|EAW17450.1 afla|EED49372.1 afum|EAL91278.2 agla|OJJ80362.1  
akaw|GAA90738.1 aluc|OJZ84610.1 anid|CBF71683.1 anig|EHA27899.1 aory|EIT79587.1 asyd|OJJ61822.1  
ater|EAU33930.1 atub|OJI89471.1 aver|OJI95922.1 awen|OJJ37396.1 azon|OJJ51068.1 anig|EHA27898.1

Group455: aory|EIT75378.1 aory|EIT78539.1 awen|OJJ34056.1 awen|OJJ35494.1 azon|OJJ46995.1  
azon|OJJ50589.1 abra|OJJ72842.1 acar|OOF96043.1 acla|EAW11400.1 afis|EAW24021.1 afla|EED45752.1  
afla|EED49134.1 afla|EED49135.1 afum|EAL87451.1 agla|OJJ86954.1 akaw|GAA85444.1 aluc|OJZ83350.1  
anid|CBF77424.1 anig|EHA24217.1 asyd|OJJ53230.1 ater|EAU29725.1 atub|OJI82243.1 aver|OJJ03622.1

Group456: asyd|OJJ51978.1 asyd|OJJ52250.1 asyd|OJJ56074.1 abra|OJJ76969.1 acar|OOF91414.1  
acla|EAW13273.1 acla|EAW13494.1 afis|EAW20594.1 afla|EED47642.1 afum|EAL84467.1 agla|OJJ88662.1  
akaw|GAA87075.1 aluc|OJZ84365.1 anid|CBF78279.1 anig|EHA27700.1 aory|EIT80239.1 ater|EAU35240.1  
atub|OJI89703.1 aver|OJJ05017.1 awen|OJJ33318.1 azon|OJJ50690.1 afis|EAW17345.1 afum|EAL91189.2

Group461: ater|EAU29737.1 ater|EAU36828.1 abra|OJJ68505.1 acar|OOF90180.1 acar|OOF91789.1  
acla|EAW11100.1 afis|EAW20763.1 afla|EED53200.1 afum|EAL84856.1 agla|OJJ84006.1 akaw|GAA92768.1  
aluc|OJZ82717.1 anid|CBF80354.1 anig|EHA21171.1 aory|EIT75122.1 asyd|OJJ54828.1 atub|OJI88951.1  
aver|OJJ07333.1 awen|OJJ29787.1 azon|OJJ42797.1 asyd|OJJ58563.1 aver|OJJ01162.1 azon|OJJ42773.1

Group467: abra|OJJ66772.1 acar|OOF93853.1 acla|EAW08992.1 afis|EAW15416.1 afla|EED48724.1  
afum|EAL84229.2 agla|OJJ79941.1 anid|CBF81992.1 anig|EHA27337.1 aory|EIT73206.1 asyd|OJJ56162.1  
ater|EAU32712.1 aver|OJJ05101.1 awen|OJJ39993.1 azon|OJJ42917.1 abra|OJJ75745.1 akaw|GAA84478.1  
aluc|OJZ89198.1 anig|EHA23360.1 atub|OJI85592.1 afla|EED55174.1 aory|EIT81585.1 awen|OJJ36897.1

Group471: abra|OJJ67925.1 acar|OOF92776.1 afis|EAW17948.1 afum|EAL91758.1 agla|OJJ89340.1  
akaw|GAA91272.1 aluc|OJZ82797.1 anid|CBF80065.1 anig|EHA21238.1 ater|EAU31422.1 atub|OJI89028.1  
aver|OJJ02091.1 awen|OJJ41595.1 azon|OJJ48310.1 abra|OJJ74125.1 acla|EAW14963.1 afla|EED48217.1  
akaw|GAA89760.1 aluc|OJZ80623.1 anig|EHA27208.1 aory|EIT72959.1 asyd|OJJ58320.1 awen|OJJ31633.1

Group473: awen|OJJ41504.1 abra|OJJ71797.1 acar|OOF96477.1 acla|EAW13728.1 afis|EAW18033.1  
afum|EAL91844.1 agla|OJJ85408.1 akaw|GAA85113.1 aluc|OJZ86527.1 anid|CBF81681.1 anig|EHA22119.1  
aory|EIT81720.1 asyd|OJJ53625.1 asyd|OJJ58292.1 atub|OJI83995.1 aver|OJJ05942.1 awen|OJJ31297.1  
azon|OJJ50337.1 acar|OOF92709.1 afla|EED51862.1 anid|CBF80076.1 ater|EAU31550.1 aver|OJJ02132.1

Group476: abra|OJJ68512.1 akaw|GAA91334.1 aluc|OJZ82727.1 anig|EHA21180.1 atub|OJI88960.1  
abra|OJJ69632.1 acar|OOF92677.1 acla|EAW10562.1 afis|EAW25029.1 afla|EED55452.1 afum|EAL89666.1  
agla|OJJ79155.1 akaw|GAA91612.1 aluc|OJZ82439.1 anid|CBF81553.1 anig|EHA28334.1 aory|EIT80876.1  
asyd|OJJ59496.1 ater|EAU35758.1 atub|OJI88002.1 aver|OJJ02778.1 awen|OJJ40610.1 azon|OJJ49459.1

Group478: abra|OJJ72302.1 acar|OOF94922.1 acla|EAW10039.1 afis|EAW24476.1 afla|EED56937.1  
afum|EAL86149.1 agla|OJJ86412.1 akaw|GAA86053.1 aluc|OJZ90283.1 anid|CBF78363.1 anig|EHA23773.1  
aory|EIT77524.1 asyd|OJJ57323.1 ater|EAU29927.1 atub|OJI81707.1 aver|OJJ05837.1 awen|OJJ40788.1  
acla|EAW12030.1 afis|EAW24671.1 afum|EAL89324.1 anig|EHA28157.1 azon|OJJ48190.1 awen|OJJ34571.1

Group480: abra|OJJ73797.1 acar|OOG00952.1 acla|EAW07688.1 afis|EAW22703.1 afla|EED49989.1  
afum|EAL90489.1 agla|OJJ79006.1 akaw|GAA89415.1 aluc|OJZ88258.1 anid|CBF88074.1 anig|EHA18003.1  
aory|EIT73485.1 asyd|OJJ63555.1 ater|EAU38999.1 atub|OJI90857.1 aver|OJI97379.1 awen|OJJ35340.1  
azon|OJJ49778.1 aory|EIT74604.1 afis|EAW21081.1 afum|EAL92102.1 agla|OJJ79284.1 afla|EED44920.1

Group481: abra|OJJ74536.1 acar|OOF96722.1 afla|EED46724.1 akaw|GAA82065.1 aluc|OJZ92117.1  
anig|EHA26827.1 aory|EIT77932.1 asyd|OJJ61662.1 ater|EAU31119.1 atub|OJI86550.1 abra|OJJ78387.1  
acar|OOF98501.1 acla|EAW09146.1 afis|EAW22000.1 afum|EAL93015.1 agla|OJJ84097.1 akaw|GAA85645.1  
aluc|OJZ91466.1 anid|CBF82670.1 atub|OJI83459.1 aver|OJJ00983.1 awen|OJJ34296.1 azon|OJJ43342.1

Group484: abra|OJJ76940.1 acar|OOF91390.1 acla|EAW09287.1 afis|EAW21860.1 afla|EED45974.1  
afum|EAL92873.1 agla|OJJ79533.1 akaw|GAA87099.1 aluc|OJZ84339.1 anid|CBF89674.1 anig|EHA27673.1  
aory|EIT75604.1 asyd|OJJ62270.1 ater|EAU29774.1 atub|OJI89729.1 aver|OJI96379.1 awen|OJJ34144.1  
azon|OJJ50245.1 afla|EED46450.1 agla|OJJ84275.1 aory|EIT72411.1 ater|EAU30859.1 azon|OJJ43482.1

Group486: abra|OJJ78343.1 acar|OOF98537.1 acla|EAW13688.1 afis|EAW19912.1 afla|EED47242.1  
afum|EAL84995.1 agla|OJJ84607.1 akaw|GAA85690.1 aluc|OJZ91415.1 anid|CBF87843.1 anig|EHA20088.1  
aory|EIT79169.1 asyd|OJJ61361.1 ater|EAU31064.1 atub|OJI83410.1 aver|OJJ00688.1 awen|OJJ33622.1  
azon|OJJ43388.1 afla|EED46677.1 anid|CBF84039.1 aory|EIT77968.1 awen|OJJ34250.1 agla|OJJ88201.1

Group489: abra|OJJ68479.1 abra|OJJ69702.1 akaw|GAA88821.1 akaw|GAA92402.1 aluc|OJZ82505.1  
aluc|OJZ83263.1 atub|OJI87674.1 atub|OJI87926.1 acar|OOF92670.1 acla|EAW15184.1 afis|EAW20154.1  
afla|EED57195.1 afum|EAL85269.1 agla|OJJ88775.1 anid|CBF84996.1 anig|EHA28265.1 aory|EIT74166.1  
asyd|OJJ63119.1 ater|EAU38769.1 aver|OJI97839.1 awen|OJJ32030.1 azon|OJJ46082.1

Group490: abra|OJJ69764.1 abra|OJJ76049.1 acla|EAW08772.1 acla|EAW09780.1 aluc|OJZ85534.1  
aluc|OJZ89505.1 ater|EAU29246.1 ater|EAU35201.1 acar|OOF99880.1 afis|EAW21358.1 afla|EED55773.1  
afum|EAL92373.1 agla|OJJ85477.1 akaw|GAA88916.1 anid|CBF76263.1 anig|EHA23095.1 aory|EIT76750.1  
asyd|OJJ60971.1 atub|OJI85298.1 aver|OJJ00296.1 awen|OJJ39340.1 azon|OJJ51686.1

Group492: acar|OOF93735.1 acar|OOF93823.1 abra|OJJ66740.1 acla|EAW07107.1 afis|EAW19478.1  
afla|EED56686.1 afum|EAL87018.1 agla|OJJ78581.1 akaw|GAA89678.1 aluc|OJZ80708.1 anid|CBF69805.1  
anig|EHA27309.1 aory|EIT73937.1 asyd|OJJ58969.1 ater|EAU30765.1 atub|OJI87566.1 aver|OJJ01564.1  
awen|OJJ40135.1 azon|OJJ45831.1 afis|EAW22119.1 agla|OJJ81206.1 afum|EAL91067.1

Group496: acla|EAW12269.1 acla|EAW15163.1 agla|OJJ78609.1 agla|OJJ88803.1 ater|EAU31506.1  
ater|EAU38748.1 aver|OJI97813.1 aver|OJI98043.1 abra|OJJ71622.1 acar|OOF96339.1 afis|EAW20132.1  
afla|EED57220.1 afum|EAL85248.1 akaw|GAA89303.1 aluc|OJZ86365.1 anid|CBF84960.1 anig|EHA21527.1  
aory|EIT74164.1 asyd|OJJ63141.1 atub|OJI84169.1 awen|OJJ31998.1 azon|OJJ50773.1

Group500: afis|EAW18163.1 afis|EAW21088.1 afum|EAL87523.1 afum|EAL92111.1 abra|OJJ77694.1  
acar|OOF99045.1 acla|EAW11332.1 afla|EED56330.1 agla|OJJ85962.1 akaw|GAA83936.1 aluc|OJZ90757.1  
anid|CBF85753.1 anig|EHA19494.1 aory|EIT73367.1 asyd|OJJ64297.1 ater|EAU33690.1 atub|OJI82744.1  
aver|OJI98390.1 awen|OJJ30508.1 azon|OJJ50317.1 acla|EAW10845.1 acla|EAW13632.1

Group501: afla|EED45701.1 afla|EED55177.1 aory|EIT75733.1 aory|EIT81570.1 ater|EAU31908.1  
ater|EAU32716.1 azon|OJJ50388.1 azon|OJJ50758.1 abra|OJJ68251.1 acar|OOF97530.1 acla|EAW09063.1  
afis|EAW25635.1 afum|EAL84323.1 agla|OJJ78897.1 akaw|GAA83210.1 aluc|OJZ83712.1 anid|CBF83153.1  
anig|EHA18863.1 asyd|OJJ55515.1 atub|OJI90087.1 aver|OJJ06592.1 awen|OJJ36092.1

Group502: afla|EED49422.1 afla|EED56716.1 afla|EED53576.1 aory|EIT73869.1 aory|EIT74843.1  
aory|EIT79474.1 abra|OJJ66759.1 acar|OOF93842.1 acla|EAW11885.1 afis|EAW19497.1 afum|EAL86996.1  
agla|OJJ81661.1 akaw|GAA89696.1 aluc|OJZ80689.1 anid|CBF75434.1 anig|EHA27326.1 asyd|OJJ59785.1  
ater|EAU34809.1 atub|OJI87548.1 aver|OJJ02503.1 awen|OJJ36914.1 azon|OJJ42897.1

Group504: afla|EED52027.1 afla|EED55465.1 aory|EIT80878.1 aory|EIT81484.1 awen|OJJ35115.1  
awen|OJJ40599.1 abra|OJJ77085.1 acar|OOF92969.1 acla|EAW10573.1 afis|EAW24994.1 afum|EAL89655.1  
agla|OJJ82261.1 akaw|GAA86970.1 aluc|OJZ84494.1 anid|CBF81588.1 anig|EHA27797.1 asyd|OJJ59513.1  
ater|EAU35745.1 atub|OJI89586.1 aver|OJJ02760.1 azon|OJJ49449.1 azon|OJJ49978.1

Group509: agla|OJJ79128.1 agla|OJJ84540.1 asyd|OJJ53810.1 asyd|OJJ58024.1 aver|OJJ04376.1  
aver|OJJ07911.1 awen|OJJ31498.1 awen|OJJ36278.1 abra|OJJ68972.1 acar|OOF91549.1 acla|EAW14215.1  
afis|EAW19066.1 afla|EED54432.1 afum|EAL93795.1 akaw|GAA90499.1 aluc|OJZ85961.1 anid|CBF79650.1  
anig|EHA24642.1 aory|EIT75890.1 ater|EAU32114.1 atub|OJI79748.1 azon|OJJ46211.1

Group510: agla|OJJ81570.1 agla|OJJ84260.1 asyd|OJJ54207.1 asyd|OJJ61270.1 awen|OJJ30146.1  
awen|OJJ34161.1 abra|OJJ78235.1 acar|OOF98625.1 acla|EAW09275.1 afis|EAW21872.1 afla|EED46436.1  
afum|EAL92886.1 akaw|GAA85790.1 aluc|OJZ91309.1 anid|CBF76772.1 anig|EHA19993.1 aory|EIT72312.1  
ater|EAU30870.1 atub|OJI83302.1 aver|OJJ00599.1 aver|OJJ01907.1 azon|OJJ43468.1

Group511: agla|OJJ82328.1 agla|OJJ89180.1 ater|EAU35772.1 ater|EAU39458.1 atub|OJI81101.1  
atub|OJI87185.1 awen|OJJ30919.1 awen|OJJ40626.1 abra|OJJ70986.1 acar|OOF98145.1 acla|EAW10546.1  
afis|EAW25014.1 afla|EED55435.1 afum|EAL89682.1 akaw|GAA82963.1 aluc|OJZ87544.1 anid|CBF81525.1  
anig|EHA20748.1 aory|EIT80926.1 asyd|OJJ59480.1 aver|OJJ02794.1 azon|OJJ49057.1

Group512: agla|OJJ83608.1 agla|OJJ87442.1 anig|EHA21812.1 anig|EHA23178.1 ater|EAU35930.1  
ater|EAU39415.1 awen|OJJ36034.1 awen|OJJ39401.1 abra|OJJ75961.1 acar|OOF99954.1 acla|EAW09837.1  
afis|EAW21297.1 afla|EED54848.1 afum|EAL92314.1 akaw|GAA84661.1 aluc|OJZ89409.1 anid|CBF83385.1  
aory|EIT79420.1 asyd|OJJ60632.1 atub|OJI85387.1 aver|OJI99955.1 azon|OJJ44285.1

Group513: akaw|GAA83114.1 akaw|GAA92362.1 aluc|OJZ79905.1 aluc|OJZ81127.1 aluc|OJZ88669.1  
aluc|OJZ88850.1 abra|OJJ73371.1 acar|OOG00577.1 acla|EAW06992.1 afis|EAW16606.1 afla|EED45025.1  
afum|EAL89203.1 agla|OJJ82647.1 anid|CBF81913.1 anig|EHA18352.1 aory|EIT73821.1 asyd|OJJ59694.1  
ater|EAU36688.1 atub|OJI91251.1 aver|OJJ02593.1 awen|OJJ40200.1 azon|OJJ49067.1

Group515: asyd|OJJ54189.1 asyd|OJJ55024.1 ater|EAU32854.1 ater|EAU36887.1 aver|OJJ07182.1  
aver|OJJ08550.1 abra|OJJ69557.1 acar|OOF91593.1 acla|EAW12881.1 afis|EAW17796.1 afla|EED57033.1  
afum|EAL91604.2 agla|OJJ89112.1 akaw|GAA91566.1 aluc|OJZ82384.1 anid|CBF71395.1 anig|EHA28379.1  
aory|EIT82249.1 atub|OJI88056.1 awen|OJJ41608.1 azon|OJJ48327.1 agla|OJJ84736.1

Group517: asyd|OJJ55069.1 asyd|OJJ55250.1 ater|EAU31464.1 ater|EAU32149.1 aver|OJJ06973.1  
aver|OJJ07142.1 abra|OJJ77233.1 acar|OOF93115.1 acla|EAW12666.1 afis|EAW17830.1 afla|EED46172.1  
afum|EAL91640.1 agla|OJJ80651.1 akaw|GAA90709.1 aluc|OJZ84643.1 anid|CBF77996.1 anig|EHA27929.1  
aory|EIT74935.1 atub|OJI89438.1 awen|OJJ41759.1 azon|OJJ48451.1 afla|EED53219.1

Group526: acla|EAW15302.1 anid|CBF84723.1 abra|OJJ76196.1 acar|OOF99748.1 afla|EED52713.1  
agla|OJJ81243.1 akaw|GAA82138.1 aluc|OJZ92033.1 anig|EHA22966.1 aory|EIT78196.1 ater|EAU38283.1

atub|OJJ86466.1 awen|OJJ32095.1 azon|OJJ46673.1 afis|EAW20227.1 afum|EAL85344.1 aver|OJJ08433.1  
afis|EAW25742.1 afla|EED46022.1 aory|EIT75659.1 asyd|OJJ53309.1 awen|OJJ30032.1

Group539: abra|OJJ69330.1 acar|OOF94397.1 acla|EAW14710.1 afis|EAW24245.1 afla|EED48029.1  
afum|EAL85913.2 agla|OJJ79629.1 akaw|GAA88201.1 aluc|OJZ82162.1 anid|CBF86924.1 anig|EHA28570.1  
aory|EIT83325.1 asyd|OJJ55608.1 ater|EAU32738.1 atub|OJJ88275.1 aver|OJJ06683.1 awen|OJJ38017.1  
azon|OJJ51787.1 asyd|OJJ53731.1 afis|EAW23670.1 afum|EAL87115.1 agla|OJJ81340.1

Group542: abra|OJJ70674.1 acar|OOF97053.1 acla|EAW08090.1 afis|EAW23125.1 afla|EED48525.1  
afum|EAL88355.1 agla|OJJ87945.1 akaw|GAA90006.1 aluc|OJZ84022.1 anid|CBF74410.1 anig|EHA19143.1  
aory|EIT73109.1 asyd|OJJ57761.1 ater|EAU36253.1 atub|OJJ90393.1 aver|OJJ05405.1 awen|OJJ36655.1  
azon|OJJ47551.1 awen|OJJ33435.1 afla|EED47672.1 aory|EIT80214.1 ater|EAU37239.1

Group543: abra|OJJ71147.1 acar|OOF98008.1 acla|EAW10357.1 afis|EAW25237.1 afla|EED53704.1  
afum|EAL89898.1 agla|OJJ89205.1 akaw|GAA82830.1 aluc|OJZ87391.1 anid|CBF85312.1 anig|EHA20620.1  
aory|EIT75340.1 asyd|OJJ64005.1 ater|EAU34361.1 atub|OJJ81256.1 aver|OJJ98093.1 awen|OJJ40948.1  
azon|OJJ44541.1 afis|EAW25236.1 afum|EAL89897.1 awen|OJJ40953.1 azon|OJJ44540.1

Group544: abra|OJJ72457.1 acar|OOF94781.1 acla|EAW12689.1 afis|EAW17853.1 afla|EED46207.1  
afum|EAL91661.1 agla|OJJ83117.1 akaw|GAA86193.1 aluc|OJZ90443.1 anid|CBF77956.1 anig|EHA23907.1  
aory|EIT76431.1 asyd|OJJ61702.1 ater|EAU33055.1 atub|OJJ81872.1 aver|OJJ95791.1 awen|OJJ41720.1  
azon|OJJ48418.1 afla|EED45133.1 aory|EIT73615.1 awen|OJJ30412.1 agla|OJJ86835.1

Group545: abra|OJJ73099.1 acar|OOG00332.1 acla|EAW07049.1 afis|EAW16675.1 afla|EED49659.1  
afum|EBA27373.1 agla|OJJ78688.1 akaw|GAA88064.1 aluc|OJZ81327.1 anid|CBF89880.1 anig|EHA18631.1  
aory|EIT80967.1 asyd|OJJ54564.1 ater|EAU33734.1 atub|OJJ91530.1 aver|OJJ07590.1 awen|OJJ40031.1  
azon|OJJ50640.1 acla|EAW08376.1 afis|EAW23405.1 afum|EAL88065.2 ater|EAU37518.1

Group547: abra|OJJ76094.1 acar|OOF99830.1 acar|OOF99831.1 acla|EAW09725.1 afis|EAW21416.1  
afila|EED55842.1 afum|EAL92431.1 agla|OJJ85546.1 akaw|GAA88872.1 akaw|GAA88873.1 aluc|OJZ89550.1  
anid|CBF83794.1 anig|EHA23056.1 aory|EIT76615.1 asyd|OJJ60885.1 ater|EAU35132.1 atub|OJJ85255.1  
atub|OJJ85256.1 aver|OJJ00209.1 awen|OJJ39286.1 azon|OJJ51568.1 aory|EIT76662.1

Group548: abra|OJJ76170.1 acar|OOF99769.1 acla|EAW13698.1 afis|EAW21484.1 afla|EED55916.1  
afum|EAL92504.1 agla|OJJ85638.1 akaw|GAA82116.1 aluc|OJZ92060.1 anid|CBF76494.1 anig|EHA22989.1  
aory|EIT76674.1 asyd|OJJ61126.1 ater|EAU35054.1 atub|OJJ86492.1 aver|OJJ00447.1 awen|OJJ39213.1  
azon|OJJ51641.1 acla|EAW09655.1 afla|EED49764.1 aory|EIT77609.1 awen|OJJ29776.1

Group550: abra|OJJ68047.1 abra|OJJ70802.1 acar|OOF96908.1 acar|OOF96943.1 aory|EIT72863.1  
aory|EIT81579.1 acla|EAW11122.1 afis|EAW15851.1 afla|EED56522.1 afum|EAL88487.1 agla|OJJ87257.1  
akaw|GAA90118.1 aluc|OJZ84148.1 anid|CBF81176.1 anig|EHA21341.1 asyd|OJJ59292.1 ater|EAU31666.1  
atub|OJJ90520.1 aver|OJJ02983.1 awen|OJJ36776.1 azon|OJJ47422.1

Group552: abra|OJJ72113.1 abra|OJJ72712.1 anig|EHA21773.1 anig|EHA24109.1 atub|OJJ82107.1  
atub|OJJ83652.1 acar|OOF96753.1 acla|EAW14914.1 afis|EAW24435.1 afla|EED55246.1 afum|EAL86103.1  
agla|OJJ79250.1 akaw|GAA84809.1 aluc|OJZ86868.1 anid|CBF73765.1 aory|EIT83588.1 asyd|OJJ56590.1  
ater|EAU30011.1 aver|OJJ06135.1 awen|OJJ32764.1 azon|OJJ43998.1

Group554: acar|OOF91686.1 acar|OOF91797.1 ater|EAU30834.1 ater|EAU37279.1 awen|OJJ37554.1  
awen|OJJ37864.1 abra|OJJ66921.1 acla|EAW14487.1 afis|EAW19196.1 afla|EED47712.1 afum|EAL93928.1  
agla|OJJ88511.1 akaw|GAA91498.1 aluc|OJZ85659.1 anid|CBF78550.1 anig|EHA24874.1 aory|EIT80197.1  
asyd|OJJ65057.1 atub|OJJ79452.1 aver|OJJ99182.1 azon|OJJ51215.1

Group555: acar|OOF93691.1 acar|OOF93775.1 abra|OJJ66681.1 acla|EAW11818.1 afis|EAW19429.1  
afila|EED56633.1 afum|EAL87065.1 agla|OJJ81141.1 akaw|GAA89626.1 aluc|OJZ80768.1 anid|CBF74384.1  
anig|EHA27260.1 aory|EIT79639.1 asyd|OJJ57774.1 ater|EAU34732.1 atub|OJJ87621.1 awen|OJJ36828.1  
azon|OJJ42976.1 aver|OJJ05392.1 aver|OJJ05391.1 awen|OJJ36827.1

Group559: acla|EAW09341.1 acla|EAW11685.1 afis|EAW21796.1 afis|EAW23700.1 afum|EAL87141.1  
afum|EAL92821.1 abra|OJJ75576.1 acar|OOF90894.1 afla|EED46599.1 agla|OJJ84330.1 akaw|GAA84328.1  
aluc|OJZ89025.1 anid|CBF76627.1 anig|EHA23507.1 aory|EIT77837.1 asyd|OJJ61195.1 ater|EAU38478.1  
atub|OJJ85765.1 aver|OJJ00519.1 awen|OJJ34081.1 azon|OJJ44259.1

Group560: afis|EAW16155.1 afis|EAW23200.1 afum|EAL88027.1 afum|EAL88283.1 ater|EAU36328.1  
ater|EAU36668.1 abra|OJJ70513.1 acar|OOF97416.1 acla|EAW08162.1 afla|EED47054.1 agla|OJJ78748.1  
akaw|GAA83360.1 aluc|OJZ83858.1 anid|CBF74719.1 anig|EHA18999.1 aory|EIT72491.1 asyd|OJJ60202.1  
atub|OJJ90225.1 aver|OJJ04064.1 awen|OJJ39430.1 azon|OJJ47634.1

Group561: afis|EAW17104.1 afis|EAW25308.1 agla|OJJ88961.1 agla|OJJ89287.1 abra|OJJ71251.1  
acar|OOF97919.1 acla|EAW10284.1 afum|EAL89971.1 akaw|GAA82736.1 aluc|OJZ87291.1 anid|CBF75291.1  
anig|EHA20532.1 aory|EIT78474.1 asyd|OJJ59887.1 ater|EAU34456.1 atub|OJJ81350.1 aver|OJJ02399.1  
awen|OJJ41022.1 azon|OJJ44609.1 asyd|OJJ65171.1 afla|EED53785.1

Group563: afis|EAW22109.1 afis|EAW22582.1 afum|EAL90617.1 afum|EAL91075.1 abra|OJJ73636.1  
acar|OOG00816.1 acla|EAW07548.1 afla|EED54627.1 agla|OJJ80942.1 akaw|GAA88519.1 aluc|OJZ88414.1  
anid|CBF88345.1 anig|EHA18141.1 aory|EIT78908.1 asyd|OJJ63718.1 ater|EAU39122.1 atub|OJI91010.1  
aver|OJI97222.1 awen|OJJ35210.1 azon|OJJ49899.1 anid|CBF89563.1

Group566: afla|EED45981.1 afla|EED55382.1 aory|EIT75435.1 aory|EIT80896.1 ater|EAU33990.1  
ater|EAU39553.1 abra|OJJ70929.1 acar|OOF98196.1 acla|EAW10495.1 afis|EAW25072.1 afum|EAL89741.1  
agla|OJJ89122.1 akaw|GAA83013.1 aluc|OJZ87598.1 anid|CBF85960.1 anig|EHA20798.1 asyd|OJJ64420.1  
atub|OJI81049.1 aver|OJI98519.1 awen|OJJ40683.1 azon|OJJ44060.1

Group567: afla|EED48911.1 afla|EED51260.1 aory|EIT81176.1 aory|EIT81506.1 awen|OJJ29671.1  
awen|OJJ38491.1 abra|OJJ69199.1 acar|OOF91116.1 acla|EAW08647.1 afis|EAW15784.1 afum|EAL85566.1  
agla|OJJ81947.1 akaw|GAA92212.1 aluc|OJZ86184.1 anid|CBF70950.1 anig|EHA24440.1 asyd|OJJ52622.1  
ater|EAU32357.1 atub|OJI79976.1 aver|OJJ04649.1 azon|OJJ43792.1

Group568: afla|EED51201.1 afla|EED53566.1 asyd|OJJ62648.1 asyd|OJJ65376.1 aver|OJI96748.1  
aver|OJI99544.1 abra|OJJ73167.1 acar|OOG00407.1 acla|EAW06285.1 afis|EAW22140.1 afum|EAL91050.1  
agla|OJJ87935.1 akaw|GAA88004.1 aluc|OJZ81260.1 anid|CBF89140.1 anig|EHA18567.1 aory|EIT75205.1  
ater|EAU34142.1 atub|OJI91456.1 awen|OJJ34714.1 azon|OJJ50465.1

Group570: agla|OJJ78645.1 agla|OJJ81233.1 agla|OJJ83403.1 abra|OJJ71870.1 acar|OOF96539.1  
acla|EAW13900.1 afis|EAW18612.1 afla|EED52733.1 afum|EAL93322.1 akaw|GAA85045.1 aluc|OJZ86609.1  
anid|CBF70422.1 anig|EHA22057.1 aory|EIT78158.1 asyd|OJJ58619.1 ater|EAU34909.1 atub|OJI83917.1  
aver|OJJ01226.1 awen|OJJ32073.1 azon|OJJ46654.1 agla|OJJ81232.1

Group573: akaw|GAA82012.1 akaw|GAA83300.1 anig|EHA23471.1 anig|EHA26778.1 azon|OJJ46821.1  
azon|OJJ49225.1 abra|OJJ74596.1 acar|OOF95173.1 acla|EAW10785.1 afis|EAW24793.1 afla|EED47193.1  
afum|EAL89435.1 agla|OJJ82887.1 aluc|OJZ92171.1 anid|CBF81462.1 aory|EIT79250.1 asyd|OJJ59441.1  
ater|EAU36515.1 atub|OJI86603.1 aver|OJJ02832.1 awen|OJJ40374.1

Group574: aluc|OJZ79634.1 aluc|OJZ79637.1 aluc|OJZ79681.1 aluc|OJZ90921.1 abra|OJJ77846.1  
acar|OOF98926.1 acla|EAW11277.1 afis|EAW18223.1 afla|EED56246.1 afum|EAL87589.2 agla|OJJ85859.1  
akaw|GAA83801.1 anid|CBF86151.1 anig|EHA19633.1 aory|EIT73368.1 asyd|OJJ64517.1 ater|EAU33768.1  
atub|OJI82913.1 aver|OJI98615.1 awen|OJJ30601.1 azon|OJJ50167.1

Group576: aluc|OJZ80315.1 aluc|OJZ86416.1 anid|CBF76119.1 anid|CBF85040.1 atub|OJI80382.1  
atub|OJI84115.1 abra|OJJ71674.1 acar|OOF96385.1 acla|EAW15213.1 afis|EAW20178.1 afla|EED57170.1  
afum|EAL85296.1 agla|OJJ84688.1 akaw|GAA89258.1 anig|EHA21483.1 aory|EIT74051.1 asyd|OJJ63096.1  
ater|EAU35214.1 aver|OJI97866.1 awen|OJJ31177.1 azon|OJJ46108.1

Group580: anid|CBF71344.1 anid|CBF71770.1 asyd|OJJ55097.1 asyd|OJJ55529.1 aver|OJJ07109.1  
aver|OJJ07313.1 abra|OJJ72319.1 acar|OOF94892.1 acla|EAW12001.1 afis|EAW19641.1 afla|EED56992.1  
afum|EAL86881.1 agla|OJJ80783.1 akaw|GAA86071.1 aluc|OJZ90306.1 anig|EHA23792.1 aory|EIT77578.1  
ater|EAU32888.1 atub|OJI81730.1 awen|OJJ41886.1 azon|OJJ50727.1

Group584: asyd|OJJ53054.1 asyd|OJJ62331.1 aver|OJI96437.1 aver|OJJ03790.1 abra|OJJ67212.1  
acar|OOF98347.1 acla|EAW08554.1 afis|EAW23596.1 afla|EED55272.1 afum|EAL87871.1 agla|OJJ86856.1  
akaw|GAA90965.1 aluc|OJZ87761.1 anid|CBF89583.1 anig|EHA20246.1 aory|EIT83575.1 ater|EAU35356.1  
atub|OJI80883.1 awen|OJJ39918.1 azon|OJJ45892.1 anid|CBF77738.1

Group585: asyd|OJJ53773.1 asyd|OJJ64196.1 aver|OJI98285.1 aver|OJJ01986.1 abra|OJJ71111.1  
acar|OOF98036.1 acla|EAW10381.1 afis|EAW25212.1 afla|EED53666.1 afum|EAL89873.1 agla|OJJ88949.1  
akaw|GAA82858.1 aluc|OJZ87423.1 anid|CBF85604.1 anig|EHA19933.1 anig|EHA20646.1 aory|EIT75278.1  
ater|EAU34369.1 atub|OJI81225.1 awen|OJJ40874.1 azon|OJJ46813.1

Group592: abra|OJJ65854.1 acar|OOF95015.1 acla|EAW13528.1 afis|EAW20729.1 afla|EED48906.1  
afum|EAL84879.1 agla|OJJ84616.1 akaw|GAA92290.1 aluc|OJZ90187.1 anid|CBF85584.1 anig|EHA23686.1  
aory|EIT81194.1 asyd|OJJ64174.1 atub|OJI81614.1 aver|OJJ06463.1 awen|OJJ29911.1 azon|OJJ42620.1  
afla|EED55134.1 aory|EIT81587.1 ater|EAU32788.1 aver|OJI98249.1

Group594: abra|OJJ66784.1 afla|EED47234.1 anid|CBF87107.1 aory|EIT79229.1 abra|OJJ75747.1  
acar|OOG00125.1 acla|EAW09092.1 afla|EED52418.1 agla|OJJ82218.1 akaw|GAA84480.1 aluc|OJZ89200.1  
anig|EHA23357.1 aory|EIT83316.1 asyd|OJJ56738.1 ater|EAU31807.1 atub|OJI85590.1 aver|OJJ05987.1  
awen|OJJ41471.1 azon|OJJ44445.1 afum|EAL84355.1 afis|EAW25686.1

Group600: abra|OJJ69337.1 acar|OOF94389.1 acla|EAW06601.1 afis|EAW16003.1 afla|EED48032.1  
afum|EAL88635.2 agla|OJJ79631.1 akaw|GAA88207.1 aluc|OJZ82169.1 anid|CBF85846.1 anig|EHA28563.1  
aory|EIT83338.1 asyd|OJJ53958.1 ater|EAU31185.1 atub|OJI88268.1 aver|OJJ08054.1 awen|OJJ33053.1  
azon|OJJ48464.1 asyd|OJJ64357.1 ater|EAU33640.1 aver|OJI98453.1

Group605: abra|OJJ70312.1 acar|OOF93014.1 acla|EAW13439.1 afis|EAW20553.1 afla|EED45906.1  
afum|EAL84508.1 agla|OJJ80823.1 akaw|GAA93011.1 aluc|OJZ82574.1 anid|CBF78981.1 anig|EHA27499.1

aory|EIT75600.1 asyd|OJJ55678.1 ater|EAU37124.1 atub|OJI88818.1 aver|OJJ06761.1 awen|OJJ41921.1 azon|OJJ42685.1 anig|EHA23882.1 afla|EED52345.1 aory|EIT74410.1

Group606: abra|OJJ70650.1 acar|OOF97072.1 acla|EAW08109.1 afis|EAW23142.1 afla|EED47570.1 afum|EAL88339.1 agla|OJJ89659.1 akaw|GAA89986.1 aluc|OJZ84000.1 anid|CBF74440.1 anig|EHA19122.1 aory|EIT73130.1 asyd|OJJ57744.1 ater|EAU36275.1 atub|OJI90369.1 aver|OJJ05423.1 awen|OJJ36638.1 azon|OJJ47578.1 afla|EED44702.1 aluc|OJZ80351.1 aory|EIT79586.1

Group607: abra|OJJ70731.1 acar|OOF97007.1 acla|EAW11182.1 afis|EAW15913.1 afla|EED57767.1 afum|EAL88548.2 agla|OJJ89577.1 akaw|GAA90059.1 aluc|OJZ84076.1 anid|CBF81305.1 anig|EHA19195.1 aory|EIT81027.1 asyd|OJJ59352.1 ater|EAU36192.1 atub|OJI90448.1 aver|OJJ02922.1 awen|OJJ36717.1 azon|OJJ47476.1 acla|EAW10824.1 afum|EAL89393.1 awen|OJJ36142.1

Group610: abra|OJJ71163.1 acar|OOF97997.1 acla|EAW14151.1 afis|EAW18864.1 afla|EED53721.1 afum|EAL93596.1 agla|OJJ85239.1 akaw|GAA82816.1 aluc|OJZ87377.1 anid|CBF85347.1 anig|EHA20609.1 aory|EIT75273.1 asyd|OJJ64028.1 ater|EAU34397.1 atub|OJI81269.1 aver|OJI98114.1 awen|OJJ32721.1 azon|OJJ50355.1 afla|EED45395.1 aory|EIT82387.1 awen|OJJ39952.1

Group612: abra|OJJ71741.1 acar|OOF96432.1 acla|EAW06445.1 afis|EAW18550.1 afla|EED52825.1 afum|EAL93250.1 agla|OJJ81594.1 akaw|GAA85155.1 aluc|OJZ86482.1 anid|CBF70273.1 anig|EHA22165.1 aory|EIT78166.1 asyd|OJJ58746.1 ater|EAU33222.1 atub|OJI84048.1 aver|OJJ01356.1 awen|OJJ31108.1 azon|OJJ46554.1 ater|EAU31802.1 afla|EED56761.1 aory|EIT73941.1

Group613: abra|OJJ72042.1 acar|OOF96701.1 acla|EAW09503.1 afis|EAW21633.1 afla|EED57861.1 afum|EAL92666.2 agla|OJJ79697.1 akaw|GAA84891.1 aluc|OJZ86780.1 anid|CBF83510.1 anig|EHA21902.1 aory|EIT81075.1 asyd|OJJ60709.1 ater|EAU38319.1 atub|OJI83740.1 aver|OJJ00035.1 awen|OJJ33882.1 azon|OJJ48672.1 afum|EAL91062.1 acla|EAW07114.1 afis|EAW22126.1

Group617: abra|OJJ72859.1 acar|OOF96056.1 acla|EAW11387.1 afis|EAW18109.1 afla|EED49118.1 afum|EAL87466.1 agla|OJJ86997.1 akaw|GAA85458.1 aluc|OJZ83366.1 anid|CBF75326.1 anig|EHA24231.1 aory|EIT78544.1 asyd|OJJ59867.1 ater|EAU29709.1 atub|OJI82257.1 aver|OJJ02421.1 awen|OJJ35507.1 azon|OJJ46977.1 afla|EED55499.1 agla|OJJ87955.1 aory|EIT80816.1

Group619: abra|OJJ73104.1 acar|OOG00342.1 acla|EAW12431.1 afis|EAW16738.1 afla|EED44914.1 afum|EAL86313.2 agla|OJJ82713.1 akaw|GAA88061.1 aluc|OJZ81323.1 anid|CBF82088.1 anig|EHA18629.1 aory|EIT73472.1 asyd|OJJ54256.1 ater|EAU39589.1 atub|OJI91526.1 aver|OJJ05209.1 awen|OJJ39338.1 anid|CBF75878.1 asyd|OJJ60230.1 aver|OJJ04036.1 azon|OJJ51650.1

Group623: abra|OJJ74191.1 acar|OOF95530.1 acla|EAW07243.1 afis|EAW22264.1 afla|EED57656.1 afum|EAL90916.1 agla|OJJ87791.1 akaw|GAA86826.1 aluc|OJZ89944.1 anid|CBF88515.1 anig|EHA27143.1 aory|EIT80760.1 asyd|OJJ63805.1 ater|EAU34274.1 atub|OJI84862.1 aver|OJI97133.1 awen|OJJ34837.1 azon|OJJ45710.1 afla|EED51484.1 asyd|OJJ58154.1 aver|OJJ04249.1

Group624: abra|OJJ74556.1 acar|OOF95199.1 acla|EAW12292.1 afis|EAW16945.1 afla|EED46082.1 afum|EAL86472.2 agla|OJJ89555.1 akaw|GAA82040.1 aluc|OJZ92139.1 anid|CBF88435.1 anig|EHA26810.1 aory|EIT76401.1 asyd|OJJ63762.1 ater|EAU35227.1 atub|OJI86571.1 aver|OJI97178.1 awen|OJJ36332.1 azon|OJJ46487.1 acla|EAW11680.1 afis|EAW23697.1 anid|CBF76117.1

Group628: abra|OJJ76531.1 acar|OOF99442.1 acla|EAW12929.1 afis|EAW17727.1 afla|EED48895.1 afum|EAL91542.1 agla|OJJ87872.1 akaw|GAA82443.1 aluc|OJZ91673.1 anid|CBF90286.1 anig|EHA22691.1 aory|EIT81184.1 asyd|OJJ61920.1 ater|EAU36831.1 atub|OJI86128.1 aver|OJI96012.1 awen|OJJ39163.1 azon|OJJ44435.1 acar|OOF93188.1 acla|EAW12526.1 awen|OJJ40114.1

Group630: abra|OJJ76842.1 acar|OOF89970.1 acla|EAW13405.1 afis|EAW20516.1 afla|EED52466.1 afum|EAL84541.1 agla|OJJ84774.1 akaw|GAA87180.1 aluc|OJZ84253.1 anid|CBF79059.1 anig|EHA27598.1 aory|EIT82819.1 asyd|OJJ55708.1 ater|EAU37185.1 atub|OJI89830.1 aver|OJJ06794.1 awen|OJJ33222.1 azon|OJJ45121.1 aluc|OJZ87023.1 anig|EHA21634.1 atub|OJI83495.1

Group631: abra|OJJ77007.1 acar|OOF91453.1 acla|EAW15047.1 afis|EAW24611.1 afla|EED47377.1 afum|EAL86241.1 agla|OJJ78906.1 akaw|GAA87041.1 aluc|OJZ84406.1 anid|CBF83177.1 anig|EHA27736.1 aory|EIT75955.1 asyd|OJJ55523.1 ater|EAU32183.1 atub|OJI89666.1 aver|OJJ06601.1 awen|OJJ36042.1 azon|OJJ45129.1 acla|EAW15048.1 aory|EIT82833.1 afla|EED54123.1

Group632: abra|OJJ77033.1 acar|OOF91472.1 acla|EAW07271.1 afis|EAW22292.1 afla|EED57692.1 afum|EAL90889.1 agla|OJJ87756.1 akaw|GAA87018.1 aluc|OJZ84436.1 anid|CBF88573.1 anig|EHA27755.1 aory|EIT79900.1 asyd|OJJ63839.1 ater|EAU34305.1 atub|OJI89637.1 aver|OJI97098.1 awen|OJJ34866.1 azon|OJJ45662.1 afla|EED51864.1 aory|EIT81771.1 awen|OJJ30800.1

Group633: abra|OJJ77037.1 acar|OOF90079.1 acla|EAW13558.1 afis|EAW20634.1 afla|EED49758.1 afum|EAL84434.1 agla|OJJ86283.1 akaw|GAA87014.1 aluc|OJZ84440.1 anid|CBF83213.1 anig|EHA27759.1 aory|EIT77698.1 asyd|OJJ65203.1 ater|EAU32169.1 atub|OJI89633.1 aver|OJJ06646.1 awen|OJJ33605.1 azon|OJJ50726.1 asyd|OJJ55565.1 azon|OJJ42610.1 aver|OJI99352.1

Group635: abra|OJJ77191.1 acar|OOF93077.1 acla|EAW13182.1 afis|EAW17458.1 afla|EED49364.1 afum|EAL91286.1 agla|OJJ80049.1 akaw|GAA90749.1 aluc|OJZ84599.1 anid|CBF71666.1 anig|EHA27889.1 aory|EIT79494.1 asyd|OJJ59263.1 ater|EAU33943.1 atub|OJI89480.1 aver|OJJ01874.1 awen|OJJ37389.1 azon|OJJ51062.1 agla|OJJ80359.1 asyd|OJJ61831.1 aver|OJI95930.1

Group636: abra|OJJ77325.1 acar|OOF93201.1 acla|EAW13147.1 afis|EAW17500.1 afla|EED45479.1 afum|EAL91323.1 agla|OJJ81453.1 akaw|GAA91431.1 aluc|OJZ84735.1 anid|CBF71578.1 anig|EHA28008.1 aory|EIT82181.1 asyd|OJJ61876.1 ater|EAU36946.1 atub|OJI89346.1 aver|OJI95974.1 awen|OJJ37341.1 azon|OJJ51026.1 agla|OJJ78829.1 aory|EIT75365.1 asyd|OJJ62947.1

Group637: abra|OJJ77475.1 acar|OOF99250.1 acla|EAW06757.1 afis|EAW16307.1 afla|EED53242.1 afum|EAL88929.1 agla|OJJ88269.1 akaw|GAA84143.1 aluc|OJZ81063.1 anid|CBF69567.1 anig|EHA19305.1 aory|EIT75142.1 asyd|OJJ59151.1 ater|EAU29335.1 atub|OJI82522.1 aver|OJJ08866.1 awen|OJJ34880.1 azon|OJJ44967.1 aver|OJJ01741.1 awen|OJJ36323.1 asyd|OJJ52895.1

Group638: abra|OJJ78236.1 acar|OOF98624.1 acla|EAW09274.1 afis|EAW21874.1 afla|EED46435.1 afum|EAL92888.1 agla|OJJ84259.1 akaw|GAA85789.1 aluc|OJZ91310.1 anid|CBF76774.1 anig|EHA19994.1 aory|EIT72385.1 asyd|OJJ61272.1 ater|EAU30873.1 atub|OJI83303.1 aver|OJJ00600.1 awen|OJJ34162.1 azon|OJJ43467.1 afla|EED46434.1 awen|OJJ34163.1 asyd|OJJ61271.1

Group644: abra|OJJ74604.1 abra|OJJ77441.1 acar|OOF95100.1 acar|OOF95166.1 acla|EAW10775.1 afis|EAW24801.1 afla|EED47186.1 afum|EAL89442.1 agla|OJJ82895.1 akaw|GAA82004.1 aluc|OJZ92183.1 anid|CBF81510.1 anig|EHA26770.1 aory|EIT79225.1 asyd|OJJ59469.1 ater|EAU36506.1 atub|OJI86611.1 aver|OJJ02805.1 awen|OJJ40384.1 azon|OJJ49233.1

Group646: acar|OOF90425.1 acar|OOF90429.1 acar|OOF93386.1 abra|OJJ69872.1 acla|EAW08934.1 afis|EAW15465.1 afla|EED46918.1 afum|EAL85857.1 agla|OJJ78859.1 akaw|GAA87784.1 aluc|OJZ85419.1 anid|CBF71773.1 anig|EHA25598.1 aory|EIT72659.1 asyd|OJJ61719.1 ater|EAU32668.1 atub|OJI80156.1 aver|OJI95813.1 awen|OJJ38110.1 azon|OJJ43167.1

Group648: acar|OOF90442.1 acar|OOF90448.1 abra|OJJ78364.1 acar|OOF98523.1 acla|EAW09171.1 afis|EAW21975.1 afla|EED46698.1 afum|EAL92990.1 agla|OJJ84127.1 akaw|GAA85669.1 aluc|OJZ91440.1 anid|CBF82718.1 anig|EHA20104.1 aory|EIT77954.1 asyd|OJJ61636.1 ater|EAU31093.1 atub|OJI83434.1 aver|OJJ00959.1 awen|OJJ34268.1 azon|OJJ43367.1

Group649: acar|OOF90479.1 acar|OOF90486.1 acar|OOF96185.1 abra|OJJ73013.1 acla|EAW07999.1 afis|EAW23034.1 afla|EED54982.1 afum|EAL88447.1 agla|OJJ89443.1 akaw|GAA85592.1 aluc|OJZ83528.1 anid|CBF80924.1 anig|EHA24351.1 aory|EIT80284.1 asyd|OJJ56320.1 ater|EAU29623.1 atub|OJI82417.1 aver|OJJ06394.1 awen|OJJ35708.1 azon|OJJ44168.1

Group652: acar|OOF92603.1 acar|OOF92624.1 asyd|OJJ51990.1 asyd|OJJ56630.1 abra|OJJ68460.1 acla|EAW14885.1 afis|EAW24404.1 afla|EED47809.1 afum|EAL86075.1 agla|OJJ89341.1 akaw|GAA92382.1 aluc|OJZ83241.1 anid|CBF73735.1 anig|EHA21096.1 aory|EIT77126.1 ater|EAU30327.1 atub|OJI87696.1 aver|OJJ06096.1 awen|OJJ32804.1 azon|OJJ49024.1

Group653: acar|OOF92614.1 acar|OOF92635.1 awen|OJJ30756.1 awen|OJJ31725.1 abra|OJJ67454.1 acla|EAW06311.1 afis|EAW18420.1 afla|EED52988.1 afum|EAL93104.1 agla|OJJ84988.1 akaw|GAA86377.1 aluc|OJZ84911.1 anid|CBF70700.1 anig|EHA25132.1 aory|EIT78732.1 asyd|OJJ58461.1 ater|EAU29838.1 atub|OJI80687.1 aver|OJJ01061.1 azon|OJJ50488.1

Group655: acar|OOF93670.1 acar|OOF93754.1 abra|OJJ66651.1 acla|EAW11794.1 afis|EAW19404.1 afla|EED50359.1 afum|EAL87091.1 agla|OJJ81118.1 akaw|GAA89603.1 aluc|OJZ80795.1 anid|CBF74343.1 anig|EHA27236.1 aory|EIT83145.1 asyd|OJJ51900.1 asyd|OJJ57797.1 ater|EAU36141.1 atub|OJI87646.1 aver|OJJ05367.1 awen|OJJ36800.1 azon|OJJ42998.1

Group656: acar|OOF93714.1 acar|OOF93801.1 agla|OJJ81170.1 agla|OJJ82654.1 abra|OJJ66712.1 acla|EAW11843.1 afis|EAW19454.1 afla|EED56662.1 afum|EAL87042.1 akaw|GAA89654.1 aluc|OJZ80735.1 anid|CBF81419.1 anig|EHA27286.1 aory|EIT79629.1 asyd|OJJ59414.1 ater|EAU34757.1 atub|OJI87592.1 aver|OJJ02859.1 awen|OJJ36855.1 azon|OJJ42945.1

Group659: acar|OOF95099.1 acar|OOF95165.1 asyd|OJJ59458.1 asyd|OJJ62484.1 abra|OJJ74605.1 acla|EAW10774.1 afis|EAW24802.1 afla|EED47184.1 afum|EAL89443.1 agla|OJJ82896.1 akaw|GAA82003.1 aluc|OJZ92184.1 anid|CBF81490.1 anig|EHA26769.1 aory|EIT79286.1 ater|EAU36505.1 atub|OJI86612.1 aver|OJJ02815.1 awen|OJJ40385.1 azon|OJJ49235.1

Group661: acar|OOF95637.1 acar|OOF95688.1 aver|OJJ05622.1 aver|OJJ07803.1 abra|OJJ74674.1 acla|EAW10723.1 afis|EAW24850.1 afla|EED47121.1 afum|EAL89496.1 agla|OJJ82064.1 akaw|GAA81939.1 aluc|OJZ92251.1 anid|CBF75837.1 anig|EHA26705.1 aory|EIT79282.1 asyd|OJJ57556.1 ater|EAU36453.1 atub|OJI86684.1 awen|OJJ40435.1 azon|OJJ49296.1

Group662: acar|OOF96241.1 acar|OOF96278.1 afum|EAL85174.2 afum|EAL87772.2 abra|OJJ71525.1 acla|EAW15082.1 afis|EAW20054.1 afla|EED45326.1 agla|OJJ88906.1 akaw|GAA89392.1 aluc|OJZ86265.1

anid|CBF84810.1 anig|EHA21603.1 aory|EIT73801.1 asyd|OJJ63220.1 ater|EAU38663.1 atub|OJI84278.1  
aver|OJI97735.1 awen|OJJ31812.1 azon|OJJ46310.1

Group663: acar|OOF96244.1 acar|OOF96281.1 afum|EAL85177.1 afum|EAL87761.1 abra|OJJ71529.1  
acla|EAW15085.1 afis|EAW20057.1 afla|EED45323.1 agla|OJJ88903.1 akaw|GAA89389.1 aluc|OJZ86269.1  
anid|CBF84842.1 anig|EHA21601.1 aory|EIT73791.1 asyd|OJJ63216.1 ater|EAU38666.1 atub|OJI84273.1  
aver|OJI97739.1 awen|OJJ31816.1 azon|OJJ46307.1

Group664: acar|OOF96246.1 acar|OOF96283.1 afum|EAL85179.1 afum|EAL87759.1 abra|OJJ71533.1  
acla|EAW15087.1 afis|EAW20059.1 afla|EED45321.1 agla|OJJ88901.1 akaw|GAA89387.1 aluc|OJZ86271.1  
anid|CBF84838.1 anig|EHA21598.1 aory|EIT73620.1 asyd|OJJ63214.1 ater|EAU38668.1 atub|OJI84270.1  
aver|OJI97741.1 awen|OJJ31819.1 azon|OJJ46305.1

Group665: acar|OOF96247.1 acar|OOF96284.1 afum|EAL85180.1 afum|EAL87758.1 abra|OJJ71534.1  
acla|EAW15088.1 afis|EAW20060.1 afla|EED45319.1 agla|OJJ88899.1 akaw|GAA89386.1 aluc|OJZ86272.1  
anid|CBF84836.1 anig|EHA21597.1 aory|EIT73579.1 asyd|OJJ63213.1 ater|EAU38669.1 atub|OJI84268.1  
aver|OJI97742.1 awen|OJJ31820.1 azon|OJJ46304.1

Group666: acar|OOF97654.1 acar|OOF97701.1 abra|OJJ71503.1 acla|EAW10045.1 afis|EAW25539.1  
afla|EED44716.1 afum|EAL90202.1 agla|OJJ87266.1 akaw|GAA82517.1 aluc|OJZ87044.1 anid|CBF77824.1  
anig|EHA20317.1 aory|EIT83461.1 asyd|OJJ53006.1 ater|EAU33380.1 atub|OJI81591.1 aver|OJJ03837.1  
awen|OJJ41281.1 azon|OJJ49499.1 afla|EED44715.1

Group671: acla|EAW10425.1 acla|EAW11189.1 afum|EAL88556.2 afum|EAL89817.2 abra|OJJ70818.1  
acar|OOF98284.1 afis|EAW25144.1 afla|EED55301.1 agla|OJJ89017.1 akaw|GAA91697.1 aluc|OJZ87695.1  
anid|CBF85681.1 anig|EHA20883.1 aory|EIT83608.1 asyd|OJJ64255.1 ater|EAU39416.1 atub|OJI80947.1  
aver|OJI98346.1 awen|OJJ40769.1 azon|OJJ46879.1

Group672: afis|EAW16434.1 afis|EAW20510.1 agla|OJJ84787.1 agla|OJJ85600.1 abra|OJJ76837.1  
acar|OOF91329.1 acla|EAW13399.1 afla|EED52451.1 afum|EAL84546.1 akaw|GAA87186.1 aluc|OJZ84248.1  
anid|CBF79187.1 anig|EHA27593.1 aory|EIT82791.1 asyd|OJJ55716.1 ater|EAU37204.1 atub|OJI89835.1  
aver|OJJ06802.1 awen|OJJ33211.1 azon|OJJ46484.1

Group673: afis|EAW17153.1 afis|EAW21838.1 afum|EAL87745.2 afum|EBA27475.1 abra|OJJ75520.1  
acar|OOF90847.1 acla|EAW09307.1 afla|EED46537.1 agla|OJJ84300.1 akaw|GAA84284.1 aluc|OJZ88977.1  
anid|CBF76703.1 anig|EHA23548.1 aory|EIT72350.1 asyd|OJJ61234.1 ater|EAU38513.1 atub|OJI85812.1  
aver|OJJ00557.1 awen|OJJ34114.1 azon|OJJ44226.1

Group674: afis|EAW17990.1 afis|EAW20711.1 afum|EAL91127.1 afum|EAL91800.1 abra|OJJ68535.1  
acar|OOF92737.1 acla|EAW12825.1 afla|EED51913.1 agla|OJJ80250.1 akaw|GAA91316.1 aluc|OJZ82748.1  
anid|CBF79983.1 anig|EHA21198.1 aory|EIT81369.1 asyd|OJJ58245.1 ater|EAU31501.1 atub|OJI88983.1  
aver|OJJ02181.1 awen|OJJ41556.1 azon|OJJ48271.1

Group677: afla|EED45834.1 afla|EED51243.1 aory|EIT75702.1 aory|EIT83187.1 abra|OJJ69216.1  
acar|OOF91102.1 acla|EAW08629.1 afis|EAW15802.1 afum|EAL85548.1 agla|OJJ81969.1 akaw|GAA92225.1  
aluc|OJZ86198.1 anid|CBF70916.1 anig|EHA24425.1 asyd|OJJ52604.1 ater|EAU33446.1 atub|OJI79990.1  
aver|OJJ04630.1 awen|OJJ38512.1 azon|OJJ43740.1

Group678: afla|EED46513.1 afla|EED55226.1 aory|EIT72395.1 aory|EIT83617.1 abra|OJJ72126.1  
acar|OOF96766.1 acla|EAW14932.1 afis|EAW24447.1 afum|EAL86116.1 agla|OJJ80293.1 akaw|GAA84797.1  
aluc|OJZ86883.1 anid|CBF73809.1 anig|EHA21761.1 asyd|OJJ56577.1 ater|EAU29999.1 atub|OJI83636.1  
aver|OJJ06146.1 awen|OJJ32750.1 azon|OJJ43988.1

Group681: agla|OJJ78415.1 agla|OJJ84293.1 abra|OJJ69363.1 acar|OOF94362.1 acla|EAW14753.1  
afis|EAW24284.1 afla|EED47992.1 afum|EAL85953.1 akaw|GAA88232.1 aluc|OJZ82196.1 anid|CBF74135.1  
anig|EHA28541.1 aory|EIT79812.1 asyd|OJJ53915.1 ater|EAU31232.1 atub|OJI88239.1 aver|OJJ08013.1  
awen|OJJ33012.1 azon|OJJ48503.1 agla|OJJ83146.1

Group684: agla|OJJ79930.1 agla|OJJ82748.1 awen|OJJ29762.1 awen|OJJ33576.1 abra|OJJ70370.1  
acar|OOF91900.1 acla|EAW12338.1 afis|EAW16884.1 afla|EED47358.1 afum|EAL86420.1 akaw|GAA91980.1  
aluc|OJZ82634.1 anid|CBF80682.1 anig|EHA27445.1 aory|EIT82887.1 asyd|OJJ54592.1 ater|EAU30230.1  
atub|OJI88865.1 aver|OJJ07560.1 azon|OJJ50386.1

Group688: aory|EIT72414.1 aory|EIT75970.1 abra|OJJ66829.1 acar|OOF91607.1 acla|EAW14412.1  
afis|EAW19120.1 afla|EED46512.1 afla|EED54294.1 afum|EAL93852.1 agla|OJJ80435.1 akaw|GAA90466.1  
aluc|OJZ85758.1 anid|CBF75403.1 anig|EHA24798.1 asyd|OJJ59823.1 ater|EAU37383.1 atub|OJI79543.1  
aver|OJJ02464.1 awen|OJJ37451.1 azon|OJJ51128.1

Group690: asyd|OJJ52010.1 asyd|OJJ52511.1 asyd|OJJ58584.1 abra|OJJ76189.1 acar|OOF99753.1  
acla|EAW13913.1 afis|EAW18624.1 afum|EAL93335.1 agla|OJJ81236.1 akaw|GAA82133.1 aluc|OJZ92039.1  
anid|CBF70490.1 anig|EHA22972.1 aory|EIT78164.1 ater|EAU34924.1 atub|OJI86473.1 aver|OJJ01188.1  
awen|OJJ32087.1 azon|OJJ46666.1 afla|EED52723.1



Group691: asyd|OJJ52365.1 asyd|OJJ62740.1 aver|OJI96783.1 aver|OJJ01982.1 abra|OJJ74531.1  
acar|OOF95221.1 acla|EAW07161.1 afis|EAW22176.1 afla|EED57555.1 afum|EAL91013.1 agla|OJJ87878.1  
akaw|GAA82069.1 aluc|OJZ92113.1 anid|CBF89075.1 anig|EHA26832.1 aory|EIT81844.1 ater|EAU34181.1  
atub|OJI86546.1 awen|OJJ34753.1 azon|OJJ45807.1

Group692: asyd|OJJ52442.1 asyd|OJJ59129.1 ater|EAU33481.1 ater|EAU38150.1 abra|OJJ76293.1  
acar|OOF99538.1 acla|EAW14323.1 afis|EAW18965.1 afla|EED51014.1 afum|EAL93697.2 agla|OJJ85347.1  
akaw|GAA82221.1 aluc|OJZ91929.1 anid|CBF69609.1 anig|EHA22891.1 aory|EIT76953.1 atub|OJI86372.1  
aver|OJJ01717.1 awen|OJJ31565.1 azon|OJJ46798.1

Group693: asyd|OJJ52683.1 asyd|OJJ58527.1 aver|OJJ01128.1 aver|OJJ08669.1 abra|OJJ76471.1  
acar|OOF99708.1 acla|EAW13962.1 afis|EAW18671.1 afla|EED50620.1 afum|EAL93390.1 agla|OJJ82404.1  
akaw|GAA82383.1 aluc|OJZ91738.1 anid|CBF70581.1 anig|EHA22744.1 aory|EIT78086.1 ater|EAU38240.1  
atub|OJI86196.1 awen|OJJ32143.1 azon|OJJ46724.1

Group694: asyd|OJJ52787.1 asyd|OJJ58807.1 aver|OJJ01410.1 aver|OJJ08762.1 abra|OJJ67374.1  
acar|OOF92437.1 acla|EAW06381.1 afis|EAW18487.1 afla|EED52921.1 afum|EAL93176.1 agla|OJJ85082.1  
akaw|GAA86448.1 aluc|OJZ84991.1 anid|CBF70149.1 anig|EHA25203.1 aory|EIT78597.1 ater|EAU29912.1  
atub|OJI80609.1 awen|OJJ31041.1 azon|OJJ48423.1

Group695: asyd|OJJ54188.1 asyd|OJJ58628.1 aver|OJJ01234.1 aver|OJJ08551.1 abra|OJJ71860.1  
acar|OOF96532.1 acla|EAW13891.1 afis|EAW18603.1 afla|EED52744.1 afum|EAL93311.1 agla|OJJ81655.1  
akaw|GAA85055.1 aluc|OJZ86597.1 anid|CBF70407.1 anig|EHA22065.1 aory|EIT78216.1 ater|EAU34898.1  
atub|OJI83926.1 awen|OJJ31169.1 azon|OJJ46646.1

Group697: asyd|OJJ55918.1 asyd|OJJ60822.1 aver|OJJ00148.1 aver|OJJ04871.1 abra|OJJ75721.1  
acar|OOF90261.1 acla|EAW09377.1 afis|EAW21758.1 afla|EED58019.1 afum|EAL92788.2 agla|OJJ84392.1  
akaw|GAA84457.1 aluc|OJZ89173.1 anid|CBF83680.1 anig|EHA23382.1 aory|EIT79759.1 ater|EAU38432.1  
atub|OJI85617.1 awen|OJJ34042.1 azon|OJJ48199.1

Group698: asyd|OJJ57403.1 asyd|OJJ62790.1 aver|OJI96837.1 aver|OJJ07752.1 abra|OJJ73561.1  
acar|OOG00743.1 acla|EAW07478.1 afis|EAW22510.1 afla|EED54538.1 afum|EAL90683.1 agla|OJJ80868.1  
akaw|GAA88593.1 aluc|OJZ88500.1 anid|CBF88979.1 anig|EHA18209.1 aory|EIT78737.1 ater|EAU39204.1  
atub|OJI91087.1 awen|OJJ35136.1 azon|OJJ49963.1

Group699: asyd|OJJ61696.1 asyd|OJJ63657.1 aver|OJI95780.1 aver|OJI97277.1 abra|OJJ73686.1  
acar|OOG00858.1 acla|EAW07601.1 afis|EAW22632.1 afla|EED49882.1 afum|EAL90561.1 agla|OJJ80987.1  
akaw|GAA88473.1 aluc|OJZ88363.1 anid|CBF88232.1 anig|EHA18095.1 aory|EIT72462.1 ater|EAU39076.1  
atub|OJI90959.1 awen|OJJ35254.1 azon|OJJ49852.1

Group701: ater|EAU29422.1 ater|EAU29976.1 awen|OJJ32730.1 awen|OJJ40859.1 abra|OJJ72200.1  
acar|OOF96820.1 acla|EAW14947.1 afis|EAW24462.1 afla|EED55204.1 afum|EAL86133.1 agla|OJJ80320.1  
akaw|GAA84736.1 aluc|OJZ86950.1 anid|CBF73838.1 anig|EHA21697.1 aory|EIT83625.1 asyd|OJJ56557.1  
atub|OJI83573.1 aver|OJJ06163.1 azon|OJJ45283.1

Group702: aver|OJI99622.1 aver|OJJ08782.1 abra|OJJ69941.1 acar|OOF93451.1 acla|EAW08881.1  
afis|EAW15514.1 afla|EED49021.1 agla|OJJ80185.1 akaw|GAA87718.1 aluc|OJZ85345.1 anid|CBF87265.1  
anig|EHA25533.1 asyd|OJJ60386.1 ater|EAU32610.1 atub|OJI80225.1 aver|OJI99715.1 awen|OJJ38168.1  
azon|OJJ43128.1 afum|EAL85817.1 aory|EIT82522.1

Group703: aver|OJJ00302.1 aver|OJJ08608.1 abra|OJJ68423.1 acar|OOF93930.1 acla|EAW11595.1  
afis|EAW23861.1 afla|EED51802.1 afum|EAL87289.1 agla|OJJ87920.1 akaw|GAA86949.1 aluc|OJZ90074.1  
anid|CBF82425.1 anig|EHA20999.1 aory|EIT81707.1 asyd|OJJ54128.1 asyd|OJJ60984.1 ater|EAU30753.1  
atub|OJI84732.1 awen|OJJ36149.1 azon|OJJ43896.1

Group705: azon|OJJ42149.1 azon|OJJ43551.1 abra|OJJ67976.1 acar|OOF92817.1 acla|EAW11759.1  
afis|EAW23792.1 afla|EED51600.1 afum|EAL87226.1 agla|OJJ78821.1 akaw|GAA91227.1 aluc|OJZ82843.1  
anid|CBF79854.1 anig|EHA21281.1 aory|EIT80489.1 asyd|OJJ58158.1 ater|EAU31332.1 atub|OJI89073.1  
aver|OJJ04245.1 awen|OJJ33749.1 awen|OJJ34607.1

Group716: abra|OJJ66628.1 acar|OOF91051.1 acla|EAW10868.1 afis|EAW20990.1 afla|EED46119.1  
afum|EAL84639.1 agla|OJJ84068.1 akaw|GAA91097.1 aluc|OJZ81420.1 anid|CBF82620.1 anig|EHA26001.1  
aory|EIT77263.1 asyd|OJJ54019.1 ater|EAU38639.1 atub|OJI88761.1 aver|OJJ08721.1 awen|OJJ34320.1  
azon|OJJ48067.1 aory|EIT76479.1 afla|EED50344.1

Group719: abra|OJJ66927.1 acar|OOF91695.1 acla|EAW14492.1 afis|EAW19206.1 afla|EED47706.1  
afum|EAL93936.1 agla|OJJ88505.1 akaw|GAA91490.1 aluc|OJZ85652.1 anid|CBF78561.1 anig|EHA24881.1  
aory|EIT80267.1 asyd|OJJ65063.1 ater|EAU37266.1 atub|OJI79443.1 aver|OJI99187.1 awen|OJJ37559.1  
azon|OJJ51221.1 ater|EAU31748.1 awen|OJJ37930.1

Group720: abra|OJJ66958.1 acar|OOF93650.1 acla|EAW14962.1 afis|EAW24485.1 afla|EED45449.1  
afum|EAL86154.1 agla|OJJ88956.1 akaw|GAA92203.1 aluc|OJZ85618.1 anid|CBF82826.1 anig|EHA24908.1

aory|EIT82465.1 asyd|OJJ55929.1 ater|EAU37956.1 atub|OJI79411.1 aver|OJJ04879.1 awen|OJJ34538.1 azon|OJJ51794.1 agla|OJJ83743.1 aver|OJJ00902.1

Group731: abra|OJJ69242.1 acar|OOF91077.1 acla|EAW08606.1 afis|EAW15827.1 afla|EED51218.1 afum|EAL85524.1 agla|OJJ81990.1 akaw|GAA92251.1 aluc|OJZ86222.1 anid|CBF70872.1 anig|EHA24405.1 aory|EIT80412.1 asyd|OJJ52582.1 ater|EAU33421.1 atub|OJI80016.1 aver|OJJ04610.1 awen|OJJ38541.1 azon|OJJ43722.1 asyd|OJJ54750.1 aver|OJJ07417.1

Group740: abra|OJJ70960.1 acar|OOF98170.1 acla|EAW10521.1 afis|EAW25045.1 afla|EED48351.1 afum|EAL89713.1 agla|OJJ89149.1 akaw|GAA82987.1 aluc|OJZ87572.1 anid|CBF85914.1 anig|EHA20774.1 aory|EIT80893.1 asyd|OJJ64399.1 ater|EAU35795.1 atub|OJI81077.1 aver|OJI98495.1 awen|OJJ40656.1 azon|OJJ44034.1 aory|EIT72298.1 afla|EED55406.1

Group741: abra|OJJ71146.1 acar|OOF98009.1 acar|OOF98010.1 acla|EAW10360.1 afis|EAW25233.1 afla|EED53679.1 afum|EAL89894.1 agla|OJJ79174.1 akaw|GAA82831.1 aluc|OJZ87392.1 anid|CBF85327.1 anig|EHA20621.1 anig|EHA20622.1 aory|EIT75303.1 asyd|OJJ64017.1 ater|EAU34392.1 atub|OJI81254.1 aver|OJI98103.1 awen|OJJ40899.1 azon|OJJ44526.1

Group743: abra|OJJ71853.1 acar|OOF96523.1 afla|EED52750.1 afum|EAL93305.1 agla|OJJ81650.1 akaw|GAA85064.1 aluc|OJZ86587.1 anid|CBF70395.1 anig|EHA22073.1 aory|EIT78183.1 asyd|OJJ58634.1 atub|OJI83936.1 aver|OJJ01240.1 awen|OJJ31160.1 acla|EAW13885.1 afis|EAW18597.1 ater|EAU34891.1 azon|OJJ46636.1 asyd|OJJ54226.1 aver|OJJ05179.1

Group745: abra|OJJ72207.1 acar|OOF96828.1 acla|EAW14969.1 afis|EAW24492.1 afla|EED54697.1 afum|EAL86161.1 agla|OJJ80329.1 akaw|GAA84727.1 aluc|OJZ86959.1 anid|CBF71478.1 anig|EHA21689.1 aory|EIT78783.1 asyd|OJJ54943.1 ater|EAU29944.1 atub|OJI83564.1 aver|OJJ07252.1 awen|OJJ33962.1 azon|OJJ42613.1 azon|OJJ48606.1 awen|OJJ32703.1

Group746: abra|OJJ72535.1 acar|OOF94717.1 acla|EAW12742.1 afis|EAW17905.1 afla|EED46297.1 afum|EAL91714.1 agla|OJJ83037.1 akaw|GAA86257.1 aluc|OJZ90515.1 anid|CBF76985.1 anig|EHA23970.1 aory|EIT76354.1 asyd|OJJ57035.1 ater|EAU33123.1 atub|OJI81939.1 aver|OJJ03257.1 awen|OJJ41645.1 azon|OJJ48367.1 aluc|OJZ90514.1 aory|EIT76342.1

Group747: abra|OJJ72848.1 acar|OOF96049.1 acla|EAW11395.1 afis|EAW24026.1 afla|EED49128.1 afum|EAL87457.1 agla|OJJ86959.1 akaw|GAA85449.1 aluc|OJZ83357.1 anid|CBF84482.1 anig|EHA24222.1 aory|EIT78568.1 asyd|OJJ53530.1 ater|EAU29718.1 atub|OJI82248.1 aver|OJJ08220.1 awen|OJJ35499.1 azon|OJJ43175.1 acla|EAW12378.1 awen|OJJ40008.1

Group748: abra|OJJ73145.1 acar|OOG00357.1 acla|EAW07021.1 afis|EAW16647.1 afla|EED45442.1 afum|EAL89251.1 agla|OJJ82595.1 akaw|GAA88027.1 aluc|OJZ81286.1 anid|CBF82058.1 anig|EHA18585.1 aory|EIT82414.1 asyd|OJJ54238.1 ater|EAU39572.1 atub|OJI91493.1 aver|OJJ05190.1 awen|OJJ40067.1 azon|OJJ45557.1 aver|OJJ01178.1 afla|EED50972.1

Group749: abra|OJJ73181.1 acar|OOG00417.1 afla|EED47213.1 afum|EAL89070.1 akaw|GAA87994.1 aluc|OJZ81249.1 anig|EHA18557.1 ater|EAU36561.1 awen|OJJ40360.1 azon|OJJ49208.1 acla|EAW06859.1 afis|EAW16476.1 agla|OJJ82869.1 anid|CBF75495.1 aory|EIT79277.1 asyd|OJJ59750.1 atub|OJI91445.1 aver|OJJ02537.1 acar|OOG00418.1 atub|OJI91444.1

Group750: abra|OJJ73280.1 acar|OOG00516.1 acla|EAW06955.1 afis|EAW16570.1 afla|EED56094.1 afum|EAL89167.1 agla|OJJ82745.1 akaw|GAA92725.1 aluc|OJZ88769.1 anid|CBF81824.1 anig|EHA18465.1 aory|EIT76687.1 asyd|OJJ59656.1 ater|EAU36638.1 atub|OJI91342.1 aver|OJJ02626.1 awen|OJJ40248.1 azon|OJJ49110.1 afum|EAL87777.1 aory|EIT72969.1

Group751: abra|OJJ73388.1 acar|OOG00590.1 acla|EAW07000.1 afis|EAW16615.1 afla|EED44990.1 afum|EAL89221.1 agla|OJJ82629.1 akaw|GAA83101.1 aluc|OJZ88649.1 anid|CBF82980.1 anig|EHA18340.1 aory|EIT73600.1 asyd|OJJ53668.1 ater|EAU36700.1 atub|OJI91236.1 aver|OJJ07774.1 awen|OJJ40187.1 azon|OJJ49474.1 anig|EHA18404.1 ater|EAU37639.1

Group752: abra|OJJ73407.1 acar|OOG00604.1 acla|EAW07012.1 afis|EAW16632.1 afla|EED48324.1 afum|EAL89228.1 agla|OJJ82617.1 akaw|GAA83084.1 aluc|OJZ88631.1 anid|CBF82011.1 anig|EHA18321.1 aory|EIT73498.1 asyd|OJJ56190.1 ater|EAU36752.1 atub|OJI91215.1 aver|OJJ05118.1 awen|OJJ40077.1 azon|OJJ43490.1 aory|EIT76284.1 afla|EED48295.1

Group753: abra|OJJ73423.1 acar|OOG00627.1 acla|EAW07036.1 afis|EAW16662.1 afla|EED44895.1 afum|EAL89266.1 agla|OJJ78707.1 akaw|GAA83069.1 aluc|OJZ88620.1 anid|CBF84550.1 anig|EHA18311.1 aory|EIT83238.1 asyd|OJJ53473.1 ater|EAU31782.1 atub|OJI91205.1 aver|OJJ08283.1 awen|OJJ40051.1 azon|OJJ47485.1 afla|EED56569.1 aory|EIT79633.1

Group754: abra|OJJ73685.1 acar|OOG00855.1 acar|OOG00856.1 acla|EAW07600.1 afis|EAW22631.1 afla|EED49880.1 afla|EED49881.1 afum|EBA27410.1 agla|OJJ80989.1 akaw|GAA88474.1 aluc|OJZ88364.1 anid|CBF88234.1 anig|EHA18096.1 aory|EIT72461.1 ater|EAU39077.1 atub|OJI90961.1 aver|OJI97276.1 awen|OJJ35252.1 azon|OJJ49854.1 asyd|OJJ63658.1

Group755: abra|OJJ73793.1 acar|OOG00954.1 acla|EAW07685.1 afis|EAW22700.1 afla|EED49986.1  
afum|EAL90492.1 agla|OJJ79009.1 akaw|GAA89412.1 aluc|OJZ88261.1 anid|CBF88081.1 anig|EHA18006.1  
aory|EIT74617.1 asyd|OJJ63558.1 ater|EAU39002.1 atub|OJI90860.1 aver|OJI97374.1 awen|OJJ35337.1  
azon|OJJ49781.1 ater|EAU30260.1 awen|OJJ38024.1

Group756: abra|OJJ73803.1 acar|OOG00958.1 acla|EAW07675.1 afis|EAW22690.1 afla|EED49983.1  
afum|EAL90502.1 agla|OJJ79015.1 akaw|GAA89422.1 aluc|OJZ88250.1 anid|CBF88089.1 anig|EHA17993.1  
aory|EIT74622.1 asyd|OJJ63564.1 ater|EAU39009.1 atub|OJI90849.1 aver|OJI97369.1 awen|OJJ33510.1  
azon|OJJ49784.1 acar|OOG00352.1 afla|EED46078.1

Group757: abra|OJJ73866.1 acar|OOF97590.1 acla|EAW06976.1 afis|EAW16590.1 afla|EED46107.1  
afum|EAL89185.1 agla|OJJ83704.1 akaw|GAA89476.1 aluc|OJZ88187.1 anid|CBF76004.1 anig|EHA17938.1  
aory|EIT76398.1 asyd|OJJ57426.1 ater|EAU29326.1 atub|OJI90786.1 aver|OJJ03990.1 awen|OJJ40225.1  
azon|OJJ49083.1 anid|CBF75976.1 asyd|OJJ60263.1

Group758: abra|OJJ74117.1 acar|OOG01222.1 acla|EAW07959.1 afis|EAW22994.1 afla|EED58187.1  
afum|EAL90205.1 agla|OJJ83290.1 akaw|GAA87590.1 aluc|OJZ87915.1 anid|CBF87568.1 anig|EHA17710.1  
aory|EIT79090.1 asyd|OJJ63243.1 ater|EAU30624.1 atub|OJI90527.1 aver|OJI97713.1 awen|OJJ38567.1  
azon|OJJ50434.1 anig|EHA17709.1 afum|EAL90206.1

Group760: abra|OJJ74757.1 acar|OOF95750.1 acla|EAW10654.1 afis|EAW24913.1 afla|EED46998.1  
afum|EAL89567.1 agla|OJJ82924.1 akaw|GAA83654.1 aluc|OJZ92341.1 anid|CBF75675.1 anig|EHA26633.1  
aory|EIT72680.1 asyd|OJJ57485.1 ater|EAU36385.1 atub|OJI86767.1 aver|OJJ05695.1 awen|OJJ40509.1  
azon|OJJ49368.1 afla|EED48195.1 aory|EIT72956.1

Group761: abra|OJJ74761.1 acar|OOF95754.1 acla|EAW10650.1 afis|EAW24917.1 afla|EED47002.1  
afum|EAL89572.2 agla|OJJ82145.1 akaw|GAA83650.1 aluc|OJZ92345.1 anid|CBF75683.1 anig|EHA26629.1  
aory|EIT72569.1 asyd|OJJ57489.1 ater|EAU36381.1 atub|OJI86771.1 aver|OJJ05691.1 awen|OJJ40513.1  
azon|OJJ49372.1 anid|CBF75685.1 atub|OJI86772.1

Group762: abra|OJJ74833.1 acar|OOF95823.1 acla|EAW11247.1 afis|EAW18253.1 afla|EED56199.1  
afum|EAL87616.1 agla|OJJ88191.1 akaw|GAA83587.1 aluc|OJZ92410.1 anid|CBF86203.1 anig|EHA26555.1  
aory|EIT73440.1 asyd|OJJ58331.1 ater|EAU33725.1 atub|OJI86840.1 aver|OJJ02080.1 awen|OJJ30627.1  
azon|OJJ47986.1 aver|OJI98640.1 asyd|OJJ64544.1

Group764: abra|OJJ74964.1 acar|OOF97350.1 acla|EAW08410.1 afis|EAW23459.1 afla|EED57342.1  
afum|EAL88007.2 agla|OJJ86690.1 akaw|GAA83462.1 aluc|OJZ92534.1 anid|CBF89818.1 anig|EHA26441.1  
aory|EIT80102.1 asyd|OJJ62188.1 ater|EAU37472.1 atub|OJI86970.1 aver|OJI96297.1 awen|OJJ39771.1  
azon|OJJ47905.1 afla|EED57341.1 aory|EIT80055.1

Group766: abra|OJJ75618.1 acar|OOG00217.1 acla|EAW09356.1 afis|EAW21782.1 afla|EED46350.1  
afum|EAL92810.1 agla|OJJ84341.1 akaw|GAA84367.1 aluc|OJZ89071.1 anid|CBF76611.1 anig|EHA23465.1  
aory|EIT81207.1 asyd|OJJ61187.1 ater|EAU38459.1 atub|OJI85717.1 aver|OJJ00510.1 awen|OJJ34070.1  
azon|OJJ48159.1 afum|EAL85431.1 anid|CBF76609.1

Group769: abra|OJJ76070.1 acar|OOF99859.1 acla|EAW09749.1 afis|EAW21393.1 afla|EED55810.1  
afum|EAL92407.1 agla|OJJ85517.1 akaw|GAA88897.1 aluc|OJZ89524.1 anid|CBF71432.1 anig|EHA23077.1  
aory|EIT76869.1 asyd|OJJ61713.1 ater|EAU35164.1 atub|OJI85279.1 aver|OJJ07221.1 awen|OJJ39311.1  
azon|OJJ51541.1 asyd|OJJ54970.1 ater|EAU32747.1

Group771: abra|OJJ76117.1 acar|OOF99808.1 acla|EAW09703.1 afis|EAW21437.1 afla|EED45636.1  
afum|EAL92452.2 agla|OJJ85581.1 akaw|GAA88850.1 aluc|OJZ89574.1 anid|CBF76585.1 anig|EHA23033.1  
aory|EIT76558.1 asyd|OJJ61172.1 ater|EAU35108.1 atub|OJI85230.1 aver|OJJ00497.1 awen|OJJ39261.1  
azon|OJJ51593.1 aory|EIT75602.1 afla|EED55865.1

Group772: abra|OJJ76529.1 acar|OOF99449.1 acla|EAW14176.1 afis|EAW18891.1 afla|EED50873.1  
afum|EBA27495.1 agla|OJJ81497.1 akaw|GAA82440.1 akaw|GAA82441.1 aluc|OJZ91675.1 aluc|OJZ91676.1  
anid|CBF69904.1 anig|EHA22693.1 aory|EIT79015.1 asyd|OJJ58997.1 ater|EAU38063.1 atub|OJI86130.1  
aver|OJJ01619.1 awen|OJJ32450.1 azon|OJJ47208.1

Group773: abra|OJJ77055.1 acar|OOF92945.1 acla|EAW13514.1 afis|EAW19907.1 afla|EED54205.1  
afum|EAL84999.1 agla|OJJ88625.1 akaw|GAA86997.1 aluc|OJZ84460.1 anid|CBF86958.1 anig|EHA27775.1  
aory|EIT76071.1 asyd|OJJ55597.1 ater|EAU35255.1 atub|OJI89615.1 aver|OJJ06677.1 awen|OJJ33456.1  
azon|OJJ50712.1 afis|EAW20612.1 acla|EAW13697.1

Group775: abra|OJJ77859.1 acar|OOF98914.1 acla|EAW11267.1 afis|EAW18231.1 afla|EED52136.1  
afum|EAL87599.1 agla|OJJ85846.1 akaw|GAA83790.1 aluc|OJZ90933.1 anid|CBF86176.1 anig|EHA19643.1  
aory|EIT73335.1 asyd|OJJ64527.1 ater|EAU33760.1 atub|OJI82925.1 aver|OJI98625.1 awen|OJJ30611.1  
azon|OJJ48005.1 azon|OJJ42776.1 awen|OJJ36209.1

Group776: abra|OJJ77974.1 acar|OOF98840.1 acla|EAW06664.1 afis|EAW16101.1 afla|EED48636.1  
afum|EAL88733.1 agla|OJJ86121.1 akaw|GAA83686.1 aluc|OJZ91047.1 anid|CBF85446.1 anig|EHA19744.1

aory|EIT73060.1 asyd|OJJ64094.1 ater|EAU33175.1 aver|OJI98176.1 awen|OJJ30331.1 azon|OJJ45359.1  
anid|CBF85444.1 asyd|OJJ64092.1 atub|OJI83043.1

Group778: abra|OJJ78259.1 acar|OOF98601.1 acla|EAW09251.1 afis|EAW21896.1 afla|EED46412.1  
afum|EBA27479.1 agla|OJJ84236.1 akaw|GAA85766.1 aluc|OJZ91333.1 anig|EHA20015.1 aory|EIT72351.1  
asyd|OJJ61292.1 ater|EAU30891.1 atub|OJI83326.1 aver|OJJ00618.1 awen|OJJ34185.1 azon|OJJ43448.1  
aluc|OJZ91334.1 akaw|GAA85767.1 anid|CBF76812.1

Group783: abra|OJJ68371.1 abra|OJJ72091.1 acar|OOF96736.1 acla|EAW09472.1 afis|EAW21661.1  
afla|EED57928.1 afum|EAL92696.1 agla|OJJ79735.1 akaw|GAA84829.1 aluc|OJZ86846.1 anid|CBF83566.1  
anig|EHA21792.1 aory|EIT82318.1 asyd|OJJ60745.1 ater|EAU38349.1 atub|OJI83673.1 aver|OJJ00077.1  
awen|OJJ33927.1 azon|OJJ48635.1

Group784: acar|OOF90452.1 acar|OOF90459.1 abra|OJJ71882.1 acla|EAW13911.1 afis|EAW18623.1  
afla|EED52721.1 afum|EAL93333.1 agla|OJJ81237.1 akaw|GAA85034.1 aluc|OJZ86620.1 anid|CBF70493.1  
anig|EHA22046.1 aory|EIT78225.1 asyd|OJJ58583.1 ater|EAU34923.1 atub|OJI83905.1 aver|OJJ01187.1  
awen|OJJ32086.1 azon|OJJ46665.1

Group785: acar|OOF90454.1 acar|OOF90462.1 abra|OJJ71884.1 acla|EAW09637.1 afis|EAW21503.1  
afla|EED55939.1 afum|EAL92522.1 agla|OJJ85666.1 akaw|GAA85032.1 aluc|OJZ86622.1 anid|CBF76453.1  
anig|EHA22044.1 aory|EIT76619.1 asyd|OJJ61107.1 ater|EAU35035.1 atub|OJI83903.1 aver|OJJ00424.1  
awen|OJJ39192.1 azon|OJJ51508.1

Group786: acar|OOF90455.1 acar|OOF90461.1 abra|OJJ71885.1 acla|EAW09636.1 afis|EAW21504.1  
afla|EED55940.1 afum|EAL92523.1 agla|OJJ85667.1 akaw|GAA85031.1 aluc|OJZ86623.1 anid|CBF76451.1  
anig|EHA22043.1 aory|EIT76886.1 asyd|OJJ61106.1 ater|EAU35034.1 atub|OJI83902.1 aver|OJJ00423.1  
awen|OJJ39191.1 azon|OJJ51507.1

Group787: acar|OOF90456.1 acar|OOF90463.1 abra|OJJ71886.1 acla|EAW09635.1 afis|EAW21505.1  
afla|EED55941.1 afum|EAL92524.1 agla|OJJ85668.1 akaw|GAA85030.1 aluc|OJZ86624.1 anid|CBF76449.1  
anig|EHA22042.1 aory|EIT76597.1 asyd|OJJ61105.1 ater|EAU35033.1 atub|OJI83901.1 aver|OJJ00422.1  
awen|OJJ39190.1 azon|OJJ51506.1

Group790: acar|OOF92286.1 acar|OOF92327.1 abra|OJJ67516.1 acla|EAW06255.1 afis|EAW18362.1  
afla|EED53043.1 afum|EAL93033.1 agla|OJJ84926.1 akaw|GAA86324.1 aluc|OJZ84848.1 anid|CBF70825.1  
anig|EHA25082.1 aory|EIT77408.1 asyd|OJJ58399.1 ater|EAU32230.1 atub|OJI80748.1 aver|OJJ01000.1  
awen|OJJ31788.1 azon|OJJ50438.1

Group791: acar|OOF92287.1 acar|OOF92328.1 abra|OJJ67515.1 acla|EAW06254.1 afis|EAW18361.1  
afla|EED53044.1 afum|EAL93032.2 agla|OJJ84925.1 akaw|GAA86325.1 aluc|OJZ84849.1 anid|CBF70827.1  
anig|EHA25083.1 aory|EIT77438.1 asyd|OJJ58398.1 ater|EAU32229.1 atub|OJI80747.1 aver|OJJ00999.1  
awen|OJJ31789.1 azon|OJJ42001.1

Group792: acar|OOF92288.1 acar|OOF92329.1 abra|OJJ67514.1 acla|EAW06260.1 afis|EAW18367.1  
afla|EED53038.1 afum|EAL93041.1 agla|OJJ84931.1 akaw|GAA86326.1 aluc|OJZ84850.1 anid|CBF70815.1  
anig|EHA25084.1 aory|EIT77399.1 asyd|OJJ58404.1 ater|EAU32236.1 atub|OJI80746.1 aver|OJJ01005.1  
awen|OJJ31783.1 azon|OJJ50443.1

Group793: acar|OOF92289.1 acar|OOF92330.1 abra|OJJ67513.1 acla|EAW06259.1 afis|EAW18366.1  
afla|EED53039.1 afum|EAL93040.1 agla|OJJ84930.1 akaw|GAA86327.1 aluc|OJZ84851.1 anid|CBF70817.1  
anig|EHA25085.1 aory|EIT77396.1 asyd|OJJ58403.1 ater|EAU32235.1 atub|OJI80745.1 aver|OJJ01004.1  
awen|OJJ31784.1 azon|OJJ50442.1

Group794: acar|OOF92291.1 acar|OOF92332.1 abra|OJJ67510.1 afis|EAW18368.1 afla|EED53037.1  
afum|EAL93043.1 agla|OJJ84933.1 akaw|GAA86329.1 aluc|OJZ84854.1 anid|CBF70814.1 anig|EHA25087.1  
aory|EIT77401.1 asyd|OJJ58405.1 ater|EAU32238.1 atub|OJI80742.1 aver|OJJ01006.1 awen|OJJ31781.1  
azon|OJJ43320.1 acla|EAW06262.1

Group795: acar|OOF92293.1 acar|OOF92334.1 abra|OJJ67507.1 acla|EAW06264.1 afis|EAW18370.1  
afla|EED53036.1 afum|EAL93045.1 agla|OJJ84935.1 akaw|GAA86331.1 aluc|OJZ84856.1 anid|CBF70808.1  
anig|EHA25089.1 aory|EIT77405.1 asyd|OJJ58408.1 ater|EAU32240.1 atub|OJI80740.1 aver|OJJ01010.1  
awen|OJJ31779.1 azon|OJJ50445.1

Group796: acar|OOF92297.1 acar|OOF92338.1 abra|OJJ67503.1 acla|EAW06267.1 afis|EAW18373.1  
afla|EED53033.1 afum|EAL93048.1 agla|OJJ84937.1 akaw|GAA86335.1 aluc|OJZ84860.1 anid|CBF70800.1  
anig|EHA25093.1 aory|EIT77403.1 asyd|OJJ58411.1 ater|EAU32243.1 atub|OJI80736.1 aver|OJJ01013.1  
awen|OJJ31777.1 azon|OJJ50448.1

Group797: acar|OOF92298.1 acar|OOF92339.1 abra|OJJ67502.1 acla|EAW06268.1 afis|EAW18374.1  
afla|EED53032.1 afum|EAL93049.1 agla|OJJ84938.1 akaw|GAA86336.1 aluc|OJZ84861.1 anid|CBF70798.1  
anig|EHA25094.1 aory|EIT77421.1 asyd|OJJ58412.1 ater|EAU32244.1 atub|OJI80735.1 aver|OJJ01014.1  
awen|OJJ31766.1 azon|OJJ50449.1

Group798: acar|OOF92299.1 acar|OOF92340.1 abra|OJJ67501.1 acla|EAW06269.1 afis|EAW18375.1  
afla|EED53031.1 afum|EAL93050.1 agla|OJJ84939.1 akaw|GAA86337.1 aluc|OJZ84862.1 anid|CBF70797.1  
anig|EHA25095.1 aory|EIT77415.1 asyd|OJJ58413.1 ater|EAU32245.1 atub|OJI80734.1 aver|OJJ01015.1  
awen|OJJ31767.1 azon|OJJ50450.1

Group799: acar|OOF92301.1 acar|OOF92342.1 abra|OJJ67499.1 acla|EAW06271.1 afis|EAW18377.1  
afla|EED53029.1 afum|EAL93052.1 agla|OJJ84941.1 akaw|GAA86339.1 aluc|OJZ84864.1 anid|CBF70793.1  
anig|EHA25096.1 aory|EIT77426.1 asyd|OJJ58415.1 ater|EAU32247.1 atub|OJI80732.1 aver|OJJ01017.1  
awen|OJJ31769.1 azon|OJJ50452.1

Group800: acar|OOF92303.1 acar|OOF92343.1 abra|OJJ67498.1 acla|EAW06272.1 afis|EAW18378.1  
afla|EED53028.1 afum|EAL93053.1 agla|OJJ84942.1 akaw|GAA86340.1 aluc|OJZ84865.1 anid|CBF70791.1  
anig|EHA25097.1 aory|EIT77397.1 asyd|OJJ58416.1 ater|EAU32248.1 atub|OJI80731.1 aver|OJJ01018.1  
awen|OJJ31770.1 azon|OJJ50453.1

Group801: acar|OOF92304.1 acar|OOF92345.1 abra|OJJ67496.1 acla|EAW06274.1 afis|EAW18380.1  
afla|EED53026.1 afum|EAL93055.1 agla|OJJ84944.1 akaw|GAA86342.1 aluc|OJZ84867.1 anid|CBF70787.1  
anig|EHA25099.1 aory|EIT77406.1 asyd|OJJ58418.1 ater|EAU32249.1 atub|OJI80729.1 aver|OJJ01020.1  
awen|OJJ31772.1 azon|OJJ50455.1

Group802: acar|OOF92305.1 acar|OOF92346.1 abra|OJJ67495.1 acla|EAW06275.1 afis|EAW18381.1  
afla|EED53025.1 afum|EAL93056.1 agla|OJJ84945.1 akaw|GAA86343.1 aluc|OJZ84869.1 anid|CBF70785.1  
anig|EHA25100.1 aory|EIT77407.1 asyd|OJJ58419.1 ater|EAU32250.1 atub|OJI80728.1 aver|OJJ01021.1  
awen|OJJ31773.1 azon|OJJ50456.1

Group803: acar|OOF92306.1 acar|OOF92347.1 abra|OJJ67494.1 acla|EAW06276.1 afis|EAW18382.1  
afla|EED53024.1 afum|EAL93057.1 agla|OJJ84946.1 akaw|GAA86344.1 aluc|OJZ84870.1 anid|CBF70783.1  
anig|EHA25101.1 aory|EIT77418.1 asyd|OJJ58420.1 ater|EAU32251.1 atub|OJI80727.1 aver|OJJ01022.1  
awen|OJJ31774.1 azon|OJJ50457.1

Group804: acar|OOF92307.1 acar|OOF92348.1 abra|OJJ67492.1 acla|EAW06278.1 afis|EAW18384.1  
afla|EED53022.1 afum|EAL93059.1 agla|OJJ84948.1 akaw|GAA86346.1 aluc|OJZ84872.1 anid|CBF70781.1  
anig|EHA25103.1 aory|EIT77395.1 asyd|OJJ58422.1 ater|EAU32253.1 atub|OJI80726.1 aver|OJJ01023.1  
awen|OJJ31775.1 azon|OJJ50458.1

Group805: acar|OOF92308.1 acar|OOF92349.1 abra|OJJ67491.1 acla|EAW06279.1 afis|EAW18385.1  
afla|EED53021.1 afum|EAL93060.1 agla|OJJ84949.1 akaw|GAA86347.1 aluc|OJZ84874.1 anid|CBF70779.1  
anig|EHA25104.1 aory|EIT77414.1 asyd|OJJ58423.1 ater|EAU32254.1 atub|OJI80725.1 aver|OJJ01024.1  
awen|OJJ31776.1 azon|OJJ45926.1

Group806: acar|OOF92310.1 acar|OOF92351.1 abra|OJJ67490.1 acla|EAW06282.1 afis|EAW18388.1  
afla|EED53019.1 afum|EAL93063.1 agla|OJJ84951.1 akaw|GAA86348.1 aluc|OJZ84875.1 anid|CBF70772.1  
anig|EHA25106.1 aory|EIT77433.1 asyd|OJJ58427.1 ater|EAU32261.1 atub|OJI80723.1 aver|OJJ01028.1  
awen|OJJ31763.1 azon|OJJ50461.1

Group807: acar|OOF92311.1 acar|OOF92352.1 abra|OJJ67489.1 acla|EAW06284.1 afis|EAW18390.1  
afla|EED53017.1 afum|EAL93065.1 agla|OJJ84953.1 akaw|GAA86350.1 aluc|OJZ84878.1 anid|CBF70776.1  
anig|EHA25107.1 aory|EIT77439.1 asyd|OJJ58425.1 ater|EAU32263.1 atub|OJI80721.1 aver|OJJ01026.1  
awen|OJJ31761.1 azon|OJJ50464.1

Group808: acar|OOF92312.1 acar|OOF92353.1 abra|OJJ67488.1 acla|EAW06286.1 afis|EAW18391.1  
afla|EED53016.1 afum|EAL93066.1 agla|OJJ84955.1 akaw|GAA86351.1 aluc|OJZ84880.1 anid|CBF70777.1  
anig|EHA25110.1 aory|EIT77398.1 asyd|OJJ58424.1 ater|EAU32278.1 atub|OJI80719.1 aver|OJJ01025.1  
awen|OJJ31758.1 azon|OJJ50466.1

Group809: acar|OOF92314.1 acar|OOF92355.1 abra|OJJ67485.1 acla|EAW06289.1 afis|EAW18394.1  
afla|EED53013.1 afum|EAL93070.1 agla|OJJ84966.1 akaw|GAA86354.1 aluc|OJZ84883.1 anid|CBF70762.1  
anig|EHA25112.1 aory|EIT77419.1 asyd|OJJ58430.1 ater|EAU32282.1 atub|OJI80717.1 aver|OJJ01032.1  
awen|OJJ31756.1 azon|OJJ50472.1

Group810: acar|OOF92317.1 acar|OOF92359.1 abra|OJJ67482.1 acla|EAW06291.1 afis|EAW18397.1  
afla|EED53009.1 afum|EAL93074.1 agla|OJJ84968.1 akaw|GAA86357.1 aluc|OJZ84886.1 anid|CBF70756.1  
anig|EHA25115.1 aory|EIT77428.1 asyd|OJJ58434.1 ater|EAU32285.1 atub|OJI80714.1 aver|OJJ01035.1  
awen|OJJ31754.1 azon|OJJ50470.1

Group812: acar|OOF92320.1 acar|OOF92362.1 abra|OJJ67474.1 acla|EAW06298.1 afis|EAW18405.1  
afla|EED53003.1 afum|EAL93085.1 agla|OJJ84956.1 akaw|GAA86363.1 aluc|OJZ84891.1 anid|CBF69754.1  
anig|EHA25120.1 aory|EIT77409.1 asyd|OJJ58942.1 ater|EAU29822.1 atub|OJI80707.1 aver|OJJ01538.1  
awen|OJJ31745.1 azon|OJJ50505.1

Group813: acar|OOF92596.1 acar|OOF92617.1 abra|OJJ68969.1 acla|EAW14218.1 afis|EAW19063.1  
afla|EED54429.1 afum|EAL93792.1 agla|OJJ84544.1 akaw|GAA90496.1 aluc|OJZ85956.1 anid|CBF79645.1

anig|EHA24645.1 aory|EIT75848.1 asyd|OJJ58020.1 ater|EAU32106.1 atub|OJI79744.1 aver|OJJ04379.1  
awen|OJJ31494.1 azon|OJJ46207.1

Group814: acar|OOF92598.1 acar|OOF92619.1 abra|OJJ68487.1 acla|EAW06807.1 afis|EAW16356.1  
afla|EED53514.1 afum|EAL88981.1 agla|OJJ88237.1 akaw|GAA92784.1 aluc|OJZ82699.1 anid|CBF89230.1  
anig|EHA21155.1 aory|EIT74940.1 asyd|OJJ62515.1 ater|EAU34103.1 atub|OJI88931.1 aver|OJI96634.1  
awen|OJJ37760.1 azon|OJJ45058.1

Group815: acar|OOF92601.1 acar|OOF92622.1 abra|OJJ77122.1 acla|EAW12935.1 afis|EAW17711.1  
afla|EED45713.1 afum|EAL91526.1 agla|OJJ81737.1 akaw|GAA90806.1 aluc|OJZ84532.1 anid|CBF76922.1  
anig|EHA27830.1 aory|EIT75682.1 asyd|OJJ57071.1 ater|EAU31890.1 atub|OJI89548.1 aver|OJJ03227.1  
awen|OJJ37125.1 azon|OJJ50824.1

Group816: acar|OOF92602.1 acar|OOF92623.1 abra|OJJ75110.1 acla|EAW08316.1 afis|EAW23324.1  
afla|EED55642.1 afum|EAL88155.1 agla|OJJ86519.1 akaw|GAA88719.1 aluc|OJZ92676.1 anid|CBF89451.1  
anig|EHA26322.1 aory|EIT81779.1 asyd|OJJ62432.1 ater|EAU35572.1 atub|OJI87104.1 aver|OJI96568.1  
awen|OJJ39570.1 azon|OJJ47763.1

Group817: acar|OOF92604.1 acar|OOF92625.1 abra|OJJ78212.1 acla|EAW11239.1 afis|EAW18266.1  
afla|EED48732.1 afum|EAL87631.1 agla|OJJ88160.1 akaw|GAA85815.1 aluc|OJZ91284.1 anid|CBF79520.1  
anig|EHA19969.1 aory|EIT73261.1 asyd|OJJ57890.1 ater|EAU33273.1 atub|OJI83274.1 aver|OJJ04504.1  
awen|OJJ30640.1 azon|OJJ47975.1

Group818: acar|OOF92606.1 acar|OOF92627.1 abra|OJJ72009.1 acla|EAW09531.1 afis|EAW21601.1  
afla|EED57828.1 afum|EAL92620.1 agla|OJJ85796.1 akaw|GAA84924.1 aluc|OJZ86745.1 anid|CBF83460.1  
anig|EHA21934.1 aory|EIT81025.1 asyd|OJJ60683.1 ater|EAU38291.1 atub|OJI83782.1 aver|OJJ00008.1  
awen|OJJ39081.1 azon|OJJ51413.1

Group819: acar|OOF92607.1 acar|OOF92628.1 abra|OJJ71278.1 acla|EAW10260.1 afis|EAW25333.1  
afla|EED53813.1 afum|EAL89996.1 agla|OJJ83874.1 akaw|GAA82710.1 aluc|OJZ87265.1 anid|CBF75238.1  
anig|EHA20507.1 aory|EIT78421.1 asyd|OJJ59912.1 ater|EAU34479.1 atub|OJI81377.1 aver|OJJ02374.1  
awen|OJJ41027.1 azon|OJJ44637.1

Group820: acar|OOF92609.1 acar|OOF92630.1 abra|OJJ74612.1 acla|EAW10770.1 afis|EAW24806.1  
afla|EED47177.1 afum|EAL89448.1 agla|OJJ82901.1 akaw|GAA81996.1 aluc|OJZ92192.1 anid|CBF85894.1  
anig|EHA26762.1 aory|EIT79234.1 asyd|OJJ64389.1 ater|EAU36500.1 atub|OJI86621.1 aver|OJI98483.1  
awen|OJJ40390.1 azon|OJJ49240.1

Group821: acar|OOF92610.1 acar|OOF92631.1 abra|OJJ71181.1 acla|EAW10323.1 afis|EAW25269.1  
afla|EED53734.1 afum|EAL89932.1 agla|OJJ89237.1 akaw|GAA82804.1 aluc|OJZ87362.1 anid|CBF85380.1  
anig|EHA20597.1 aory|EIT75356.1 asyd|OJJ64050.1 ater|EAU34412.1 atub|OJI81283.1 aver|OJI98136.1  
awen|OJJ40983.1 azon|OJJ44569.1

Group822: acar|OOF92611.1 acar|OOF92632.1 abra|OJJ72794.1 acla|EAW11478.1 afis|EAW23975.1  
afla|EED50533.1 afum|EAL87405.1 agla|OJJ86905.1 akaw|GAA85397.1 aluc|OJZ83290.1 anid|CBF77343.1  
anig|EHA24175.1 aory|EIT82080.1 asyd|OJJ53273.1 ater|EAU29777.1 atub|OJI82192.1 aver|OJJ03576.1  
awen|OJJ35440.1 azon|OJJ51303.1

Group823: acar|OOF92612.1 acar|OOF92633.1 abra|OJJ66525.1 acla|EAW10966.1 afis|EAW20894.1  
afla|EED50243.1 afum|EAL84739.1 agla|OJJ84001.1 akaw|GAA91188.1 aluc|OJZ81515.1 anid|CBF82444.1  
anig|EHA25913.1 aory|EIT77371.1 asyd|OJJ54119.1 ater|EAU38528.1 atub|OJI88664.1 aver|OJJ08617.1  
awen|OJJ34454.1 azon|OJJ51741.1

Group824: acar|OOF92616.1 acar|OOF92637.1 abra|OJJ76860.1 acla|EAW13421.1 afis|EAW20532.1  
afla|EED52482.1 afum|EAL84525.1 agla|OJJ84699.1 akaw|GAA87162.1 aluc|OJZ84272.1 anid|CBF79000.1  
anig|EHA27614.1 aory|EIT82763.1 asyd|OJJ55688.1 ater|EAU37152.1 atub|OJI89811.1 aver|OJJ06772.1  
awen|OJJ33239.1 azon|OJJ50618.1

Group825: acar|OOF93657.1 acar|OOF93741.1 abra|OJJ66636.1 acla|EAW11779.1 afis|EAW19389.1  
afla|EED50347.1 afum|EAL87106.1 agla|OJJ81100.1 akaw|GAA89589.1 aluc|OJZ80813.1 anid|CBF74291.1  
anig|EHA27221.1 aory|EIT81936.1 asyd|OJJ51912.1 ater|EAU36052.1 atub|OJI87662.1 aver|OJJ05353.1  
awen|OJJ36782.1 azon|OJJ43016.1

Group826: acar|OOF93659.1 acar|OOF93743.1 abra|OJJ66639.1 acla|EAW11782.1 afis|EAW19392.1  
afla|EED50350.1 afum|EAL87102.1 agla|OJJ81103.1 akaw|GAA89592.1 aluc|OJZ80810.1 anid|CBF74285.1  
anig|EHA27224.1 aory|EIT81937.1 asyd|OJJ51914.1 ater|EAU36055.1 atub|OJI87658.1 aver|OJJ05356.1  
awen|OJJ36785.1 azon|OJJ43013.1

Group827: acar|OOF93660.1 acar|OOF93744.1 abra|OJJ66640.1 acla|EAW11783.1 afis|EAW19393.1  
afla|EED50351.1 agla|OJJ81104.1 akaw|GAA89593.1 aluc|OJZ80809.1 anig|EHA27225.1 aory|EIT81941.1  
asyd|OJJ51863.1 ater|EAU36056.1 atub|OJI87657.1 aver|OJJ05357.1 awen|OJJ36787.1 azon|OJJ43012.1  
afum|EAL87101.1 anid|CBF74283.1

Group828: acar|OOF93663.1 acar|OOF93747.1 abra|OJJ66643.1 acla|EAW11786.1 afis|EAW19396.1  
afla|EED50352.1 afum|EAL87098.1 agla|OJJ81107.1 akaw|GAA89596.1 aluc|OJZ80806.1 anid|CBF74278.1  
anig|EHA27228.1 aory|EIT83119.1 asyd|OJJ51859.1 ater|EAU36122.1 atub|OJI87654.1 aver|OJJ05360.1  
awen|OJJ36791.1 azon|OJJ43008.1

Group829: acar|OOF93667.1 acar|OOF93751.1 abra|OJJ66647.1 acla|EAW11790.1 afis|EAW19400.1  
afla|EED50355.1 afum|EAL87094.1 agla|OJJ81111.1 akaw|GAA89600.1 aluc|OJZ80802.1 anid|CBF74336.1  
anig|EHA27232.1 aory|EIT83130.1 asyd|OJJ51906.1 ater|EAU36126.1 atub|OJI87650.1 aver|OJJ05363.1  
awen|OJJ36795.1 azon|OJJ43004.1

Group830: acar|OOF93669.1 acar|OOF93753.1 abra|OJJ66649.1 acla|EAW11792.1 afis|EAW19403.1  
afla|EED50358.1 afum|EAL87092.1 agla|OJJ81117.1 akaw|GAA89602.1 aluc|OJZ80800.1 anid|CBF74298.1  
anig|EHA27234.1 aory|EIT83146.1 asyd|OJJ51902.1 ater|EAU36143.1 atub|OJI87648.1 aver|OJJ05365.1  
awen|OJJ36798.1 azon|OJJ43001.1

Group831: acar|OOF93671.1 acar|OOF93755.1 abra|OJJ66653.1 acla|EAW11795.1 afis|EAW19405.1  
afla|EED50361.1 afum|EAL87090.1 agla|OJJ81119.1 akaw|GAA89604.1 aluc|OJZ80794.1 anid|CBF74345.1  
anig|EHA27237.1 aory|EIT83126.1 asyd|OJJ57796.1 ater|EAU36140.1 atub|OJI87645.1 aver|OJJ05368.1  
awen|OJJ36801.1 azon|OJJ42997.1

Group832: acar|OOF93672.1 acar|OOF93756.1 abra|OJJ66655.1 acla|EAW11796.1 afis|EAW19406.1  
afla|EED50362.1 afum|EAL87088.1 agla|OJJ81120.1 akaw|GAA89605.1 aluc|OJZ80793.1 anid|CBF74347.1  
anig|EHA27238.1 aory|EIT83144.1 asyd|OJJ57795.1 ater|EAU36139.1 atub|OJI87644.1 aver|OJJ05369.1  
awen|OJJ36802.1 azon|OJJ42996.1

Group833: acar|OOF93673.1 acar|OOF93757.1 abra|OJJ66656.1 acla|EAW11797.1 afis|EAW19407.1  
afla|EED50363.1 afum|EAL87087.1 agla|OJJ81121.1 akaw|GAA89606.1 aluc|OJZ80792.1 anid|CBF74349.1  
anig|EHA27239.1 aory|EIT83134.1 asyd|OJJ57794.1 ater|EAU36138.1 atub|OJI87643.1 aver|OJJ05370.1  
awen|OJJ36803.1 azon|OJJ42995.1

Group834: acar|OOF93674.1 acar|OOF93758.1 abra|OJJ66657.1 acla|EAW11798.1 afis|EAW19408.1  
afla|EED50364.1 afum|EAL87086.1 agla|OJJ81122.1 akaw|GAA89607.1 aluc|OJZ80791.1 anid|CBF74356.1  
anig|EHA27240.1 aory|EIT83115.1 asyd|OJJ57793.1 ater|EAU34715.1 atub|OJI87642.1 aver|OJJ05371.1  
awen|OJJ36804.1 azon|OJJ42994.1

Group835: acar|OOF93676.1 acar|OOF93761.1 abra|OJJ66660.1 acla|EAW11802.1 afis|EAW19412.1  
afla|EED50367.1 afum|EAL87082.1 agla|OJJ81126.1 akaw|GAA89610.1 aluc|OJZ80788.1 anid|CBF74358.1  
anig|EHA27242.1 aory|EIT83138.1 asyd|OJJ57789.1 ater|EAU34718.1 atub|OJI87639.1 aver|OJJ05375.1  
awen|OJJ36808.1 azon|OJJ42992.1

Group836: acar|OOF93677.1 acar|OOF93762.1 abra|OJJ66661.1 acla|EAW11803.1 afis|EAW19413.1  
afla|EED50368.1 afum|EAL87081.1 agla|OJJ81127.1 akaw|GAA89611.1 aluc|OJZ80787.1 anid|CBF74360.1  
anig|EHA27243.1 aory|EIT83132.1 asyd|OJJ57788.1 ater|EAU34719.1 atub|OJI87638.1 aver|OJJ05376.1  
awen|OJJ36809.1 azon|OJJ42991.1

Group837: acar|OOF93678.1 acar|OOF93763.1 abra|OJJ66662.1 acla|EAW11804.1 afis|EAW19414.1  
afla|EED50369.1 afum|EAL87080.2 agla|OJJ81128.1 akaw|GAA89612.1 aluc|OJZ80786.1 anid|CBF74362.1  
anig|EHA27244.1 aory|EIT83123.1 asyd|OJJ57787.1 ater|EAU34720.1 atub|OJI87636.1 aver|OJJ05377.1  
awen|OJJ36810.1 azon|OJJ42990.1

Group838: acar|OOF93679.1 acar|OOF93765.1 abra|OJJ66664.1 acla|EAW11805.1 afis|EAW19415.1  
afla|EED50371.1 afum|EAL87079.1 agla|OJJ81129.1 akaw|GAA89613.1 aluc|OJZ80783.1 anid|CBF74364.1  
anig|EHA27246.1 aory|EIT83116.1 asyd|OJJ57785.1 ater|EAU34721.1 atub|OJI87635.1 aver|OJJ05379.1  
awen|OJJ36812.1 azon|OJJ42989.1

Group839: acar|OOF93681.1 acar|OOF93764.1 abra|OJJ66666.1 acla|EAW11807.1 afis|EAW19417.1  
afla|EED50373.1 afum|EAL87077.1 agla|OJJ81130.1 akaw|GAA89615.1 aluc|OJZ80781.1 anid|CBF86348.1  
anig|EHA27248.1 aory|EIT83140.1 asyd|OJJ64978.1 ater|EAU34723.1 atub|OJI87633.1 aver|OJI99100.1  
awen|OJJ36815.1 azon|OJJ42987.1

Group840: acar|OOF93685.1 acar|OOF93770.1 abra|OJJ66671.1 acla|EAW11812.1 afis|EAW19422.1  
afla|EED50379.1 afum|EAL87072.1 agla|OJJ81134.1 akaw|GAA89620.1 aluc|OJZ80776.1 anid|CBF74373.1  
anig|EHA27253.1 aory|EIT83120.1 asyd|OJJ57781.1 ater|EAU34726.1 atub|OJI87628.1 aver|OJJ05384.1  
awen|OJJ36820.1 azon|OJJ42982.1

Group841: acar|OOF93686.1 acar|OOF93771.1 abra|OJJ66672.1 acla|EAW11813.1 afis|EAW19423.1  
afla|EED50380.1 afum|EAL87071.1 agla|OJJ81135.1 akaw|GAA89621.1 aluc|OJZ80775.1 anid|CBF74375.1  
anig|EHA27254.1 aory|EIT83122.1 asyd|OJJ57780.1 ater|EAU34727.1 atub|OJI87627.1 aver|OJJ05385.1  
awen|OJJ36821.1 azon|OJJ42981.1

Group842: acar|OOF93690.1 acar|OOF93776.1 abra|OJJ66680.1 acla|EAW11817.1 afis|EAW19428.1  
afla|EED56632.1 afum|EAL87066.1 agla|OJJ81140.1 akaw|GAA89625.1 aluc|OJZ80769.1 anid|CBF74382.1

anig|EHA27259.1 aory|EIT79645.1 asyd|OJJ57775.1 ater|EAU34731.1 atub|OJI87622.1 aver|OJJ05390.1  
awen|OJJ36826.1 azon|OJJ42977.1

Group843: acar|OOF93692.1 acar|OOF93778.1 abra|OJJ66683.1 acla|EAW11820.1 afis|EAW19431.1  
afla|EED56635.1 afum|EAL87063.1 agla|OJJ81143.1 akaw|GAA89628.1 aluc|OJZ80766.1 anid|CBF81374.1  
anig|EHA27262.1 aory|EIT79669.1 asyd|OJJ59388.1 ater|EAU34734.1 atub|OJI87619.1 aver|OJJ02885.1  
awen|OJJ36832.1 azon|OJJ42974.1

Group844: acar|OOF93693.1 acar|OOF93777.1 abra|OJJ66682.1 acla|EAW11819.1 afis|EAW19430.1  
afla|EED56634.1 afum|EAL87064.1 agla|OJJ81142.1 akaw|GAA89627.1 aluc|OJZ80767.1 anid|CBF74386.1  
anig|EHA27261.1 aory|EIT79632.1 asyd|OJJ57773.1 ater|EAU34733.1 atub|OJI87620.1 aver|OJJ05393.1  
awen|OJJ36829.1 azon|OJJ42975.1

Group845: acar|OOF93696.1 acar|OOF93781.1 abra|OJJ66687.1 acla|EAW11822.1 afis|EAW19433.1  
afla|EED56638.1 afum|EAL87062.1 agla|OJJ81145.1 akaw|GAA89631.1 aluc|OJZ80762.1 anid|CBF81380.1  
anig|EHA27265.1 aory|EIT79671.1 asyd|OJJ59391.1 ater|EAU34735.1 atub|OJI87616.1 aver|OJJ02881.1  
awen|OJJ36833.1 azon|OJJ42972.1

Group846: acar|OOF93699.1 acar|OOF93784.1 abra|OJJ66690.1 acla|EAW11825.1 afis|EAW19436.1  
afla|EED56641.1 afum|EAL87059.1 agla|OJJ81148.1 akaw|GAA89634.1 aluc|OJZ80759.1 anid|CBF81383.1  
anig|EHA27268.1 aory|EIT79678.1 asyd|OJJ59395.1 ater|EAU34738.1 atub|OJI87613.1 aver|OJJ02877.1  
awen|OJJ36834.1 azon|OJJ42969.1

Group847: acar|OOF93701.1 acar|OOF93787.1 abra|OJJ66693.1 acla|EAW11828.1 afis|EAW19440.1  
afla|EED56647.1 afum|EAL87056.1 agla|OJJ81155.1 akaw|GAA89637.1 aluc|OJZ80752.1 anid|CBF79760.1  
anig|EHA27271.1 aory|EIT79660.1 asyd|OJJ58101.1 ater|EAU34741.1 atub|OJI87609.1 aver|OJJ04303.1  
awen|OJJ36840.1 azon|OJJ42961.1

Group848: acar|OOF93703.1 acar|OOF93790.1 abra|OJJ66695.1 acla|EAW11830.1 afis|EAW19442.1  
afla|EED56649.1 afum|EAL87054.1 agla|OJJ81153.1 akaw|GAA89639.1 aluc|OJZ80750.1 anid|CBF81395.1  
anig|EHA27272.1 aory|EIT79630.1 asyd|OJJ59401.1 ater|EAU34743.1 atub|OJI87607.1 aver|OJJ02872.1  
awen|OJJ36842.1 azon|OJJ42958.1

Group849: acar|OOF93707.1 acar|OOF93793.1 abra|OJJ66703.1 acla|EAW11834.1 afis|EAW19445.1  
afla|EED56653.1 afum|EAL87050.1 agla|OJJ81160.1 akaw|GAA89645.1 aluc|OJZ80744.1 anid|CBF81404.1  
anig|EHA27278.1 aory|EIT79624.1 asyd|OJJ59405.1 ater|EAU34747.1 atub|OJI87601.1 aver|OJJ02868.1  
awen|OJJ36846.1 azon|OJJ42954.1

Group850: acar|OOF93708.1 acar|OOF93794.1 abra|OJJ66704.1 acla|EAW11835.1 afis|EAW19446.1  
afla|EED56654.1 afum|EAL87049.1 agla|OJJ81161.1 akaw|GAA89646.1 aluc|OJZ80743.1 anid|CBF81405.1  
anig|EHA27279.1 aory|EIT79662.1 asyd|OJJ59406.1 ater|EAU34748.1 atub|OJI87600.1 aver|OJJ02867.1  
awen|OJJ36847.1 azon|OJJ42953.1

Group851: acar|OOF93709.1 acar|OOF93795.1 abra|OJJ66706.1 acla|EAW11837.1 afis|EAW19448.1  
afla|EED56656.1 afum|EBA27299.1 agla|OJJ81163.1 akaw|GAA89648.1 aluc|OJZ80741.1 anid|CBF81409.1  
anig|EHA27281.1 aory|EIT79680.1 asyd|OJJ59408.1 ater|EAU34750.1 atub|OJI87598.1 aver|OJJ02865.1  
awen|OJJ36849.1 azon|OJJ42951.1

Group852: acar|OOF93710.1 acar|OOF93796.1 abra|OJJ66708.1 acla|EAW11839.1 afis|EAW19450.1  
afla|EED56658.1 afum|EAL87046.1 agla|OJJ81165.1 akaw|GAA89650.1 aluc|OJZ80739.1 anid|CBF81412.1  
anig|EHA27283.1 aory|EIT79655.1 asyd|OJJ59410.1 ater|EAU34752.1 atub|OJI87596.1 aver|OJJ02863.1  
awen|OJJ36851.1 azon|OJJ42949.1

Group853: acar|OOF93711.1 acar|OOF93797.1 abra|OJJ66709.1 acla|EAW11840.1 afis|EAW19451.1  
afla|EED56659.1 afum|EAL87045.1 agla|OJJ81166.1 akaw|GAA89651.1 aluc|OJZ80738.1 anid|CBF81414.1  
anig|EHA27284.1 aory|EIT79675.1 asyd|OJJ59411.1 ater|EAU34753.1 atub|OJI87595.1 aver|OJJ02862.1  
awen|OJJ36852.1 azon|OJJ42948.1

Group854: acar|OOF93715.1 acar|OOF93802.1 abra|OJJ66713.1 acla|EAW11844.1 afis|EAW19455.1  
afla|EED56663.1 afum|EAL87041.1 agla|OJJ81171.1 akaw|GAA89655.1 aluc|OJZ80734.1 anid|CBF81421.1  
anig|EHA27287.1 aory|EIT79656.1 asyd|OJJ59415.1 ater|EAU34758.1 atub|OJI87591.1 aver|OJJ02858.1  
awen|OJJ36856.1 azon|OJJ42944.1

Group855: acar|OOF93716.1 acar|OOF93803.1 abra|OJJ66714.1 acla|EAW11845.1 afis|EAW19456.1  
afla|EED56664.1 afum|EAL87040.1 agla|OJJ81173.1 akaw|GAA89656.1 aluc|OJZ80733.1 anid|CBF81423.1  
anig|EHA27288.1 aory|EIT79663.1 asyd|OJJ59416.1 ater|EAU34759.1 atub|OJI87590.1 aver|OJJ02857.1  
awen|OJJ36858.1 azon|OJJ42943.1

Group856: acar|OOF93717.1 acar|OOF93804.1 abra|OJJ66715.1 acla|EAW11846.1 afis|EAW19457.1  
afla|EED56665.1 afum|EAL87039.1 agla|OJJ81174.1 akaw|GAA89657.1 aluc|OJZ80732.1 anid|CBF81425.1  
anig|EHA27289.1 aory|EIT79668.1 asyd|OJJ59417.1 ater|EAU34760.1 atub|OJI87589.1 aver|OJJ02856.1  
awen|OJJ36859.1 azon|OJJ42942.1



Group857: acar|OOF93718.1 acar|OOF93805.1 abra|OJJ66716.1 acla|EAW11847.1 afis|EAW19458.1  
afla|EED56669.1 afum|EAL87038.1 agla|OJJ81175.1 akaw|GAA89658.1 aluc|OJZ80731.1 anid|CBF81427.1  
anig|EHA27290.1 aory|EIT79631.1 asyd|OJJ59418.1 ater|EAU34761.1 atub|OJI87588.1 aver|OJJ02851.1  
awen|OJJ36860.1 azon|OJJ42941.1

Group858: acar|OOF93721.1 acar|OOF93808.1 abra|OJJ66719.1 acla|EAW11850.1 afis|EAW19461.1  
afla|EED56672.1 afum|EAL87035.1 agla|OJJ81178.1 akaw|GAA89661.1 aluc|OJZ80728.1 anid|CBF74529.1  
anig|EHA27293.1 aory|EIT82995.1 asyd|OJJ57737.1 ater|EAU34764.1 atub|OJI87584.1 aver|OJJ05430.1  
awen|OJJ36863.1 azon|OJJ42938.1

Group859: acar|OOF93723.1 acar|OOF93810.1 abra|OJJ66721.1 acla|EAW11852.1 afis|EAW19463.1  
afla|EED56674.1 afum|EAL87033.1 agla|OJJ81180.1 akaw|GAA89663.1 aluc|OJZ80726.1 anid|CBF75491.1  
anig|EHA27294.1 aory|EIT73836.1 asyd|OJJ59753.1 ater|EAU34766.1 atub|OJI87582.1 aver|OJJ02535.1  
awen|OJJ36865.1 azon|OJJ42936.1

Group860: acar|OOF93724.1 acar|OOF93811.1 abra|OJJ66722.1 acla|EAW11853.1 afis|EAW19464.1  
afla|EED56675.1 afum|EAL87032.1 agla|OJJ81181.1 akaw|GAA89664.1 aluc|OJZ80725.1 anid|CBF75490.1  
anig|EHA27295.1 aory|EIT73882.1 asyd|OJJ59754.1 ater|EAU34768.1 atub|OJI87581.1 aver|OJJ02534.1  
awen|OJJ36866.1 azon|OJJ42935.1

Group861: acar|OOF93726.1 acar|OOF93814.1 abra|OJJ66726.1 acla|EAW11856.1 afis|EAW19467.1  
afla|EED56677.1 afum|EAL87029.1 agla|OJJ81187.1 akaw|GAA89667.1 aluc|OJZ80722.1 anid|CBF75486.1  
anig|EHA27298.1 aory|EIT73931.1 asyd|OJJ59756.1 ater|EAU34777.1 atub|OJI87578.1 aver|OJJ02532.1  
awen|OJJ36872.1 azon|OJJ42932.1

Group862: acar|OOF93727.1 acar|OOF93815.1 abra|OJJ66727.1 acla|EAW11857.1 afis|EAW19468.1  
afla|EED56678.1 afum|EAL87028.1 agla|OJJ81188.1 akaw|GAA89668.1 aluc|OJZ80721.1 anid|CBF75484.1  
anig|EHA27299.1 aory|EIT73958.1 asyd|OJJ59757.1 ater|EAU34778.1 atub|OJI87577.1 aver|OJJ02531.1  
awen|OJJ36873.1 azon|OJJ42931.1

Group863: acar|OOF93728.1 acar|OOF93816.1 abra|OJJ66728.1 acla|EAW11858.1 afis|EAW19469.1  
afla|EED56679.1 afum|EAL87027.1 agla|OJJ81190.1 akaw|GAA89669.1 aluc|OJZ80720.1 anid|CBF75482.1  
anig|EHA27300.1 aory|EIT73843.1 asyd|OJJ59758.1 ater|EAU34779.1 atub|OJI87576.1 aver|OJJ02530.1  
awen|OJJ36874.1 azon|OJJ42930.1

Group864: acar|OOF93729.1 acar|OOF93817.1 abra|OJJ66731.1 acla|EAW11859.1 afis|EAW19470.1  
afla|EED56680.1 afum|EAL87026.1 agla|OJJ81191.1 akaw|GAA89670.1 aluc|OJZ80718.1 anid|CBF75480.1  
anig|EHA27301.1 aory|EIT73854.1 asyd|OJJ59759.1 ater|EAU34780.1 atub|OJI87574.1 aver|OJJ02529.1  
awen|OJJ36875.1 azon|OJJ42929.1

Group865: acar|OOF93731.1 acar|OOF93819.1 abra|OJJ66733.1 acla|EAW11861.1 afis|EAW19472.1  
afla|EED56682.1 afum|EAL87024.1 agla|OJJ81193.1 akaw|GAA89672.1 aluc|OJZ80716.1 anid|CBF75474.1  
anig|EHA27303.1 aory|EIT73961.1 asyd|OJJ59761.1 ater|EAU34782.1 atub|OJI87572.1 aver|OJJ02527.1  
awen|OJJ36877.1 azon|OJJ42927.1

Group866: acar|OOF93734.1 acar|OOF93822.1 abra|OJJ66736.1 acla|EAW11864.1 afis|EAW19475.1  
afla|EED56683.1 afum|EAL87021.1 agla|OJJ81198.1 akaw|GAA89675.1 aluc|OJZ80711.1 anid|CBF75470.1  
anig|EHA27306.1 aory|EIT73904.1 asyd|OJJ59764.1 ater|EAU34787.1 atub|OJI87569.1 aver|OJJ02524.1  
awen|OJJ36880.1 azon|OJJ42925.1

Group867: acar|OOF93736.1 acar|OOF93825.1 abra|OJJ66739.1 acla|EAW11866.1 afis|EAW19477.1  
afla|EED56685.1 afum|EAL87019.1 agla|OJJ81207.1 akaw|GAA89677.1 aluc|OJZ80709.1 anid|CBF71519.1  
anig|EHA27308.1 aory|EIT73831.1 asyd|OJJ54916.1 ater|EAU34789.1 atub|OJI87567.1 aver|OJJ07287.1  
awen|OJJ36882.1 azon|OJJ42923.1

Group868: acar|OOF93739.1 acar|OOF93829.1 abra|OJJ66743.1 acla|EAW11872.1 afis|EAW19483.1  
afla|EED56701.1 afum|EAL87012.1 agla|OJJ81208.1 akaw|GAA89681.1 aluc|OJZ80704.1 anid|CBF75464.1  
anig|EHA27313.1 aory|EIT73864.1 asyd|OJJ59767.1 ater|EAU34796.1 atub|OJI87562.1 aver|OJJ02520.1  
awen|OJJ36895.1 azon|OJJ42918.1

Group870: acar|OOF94064.1 acar|OOF94134.1 abra|OJJ66360.1 acla|EAW10009.1 afis|EAW21047.1  
afla|EED51623.1 afum|EAL92083.1 agla|OJJ82365.1 akaw|GAA90233.1 aluc|OJZ83108.1 anid|CBF87099.1  
anig|EHA28171.1 aory|EIT80605.1 asyd|OJJ60391.1 ater|EAU36819.1 atub|OJI87826.1 aver|OJI99720.1  
awen|OJJ32175.1 azon|OJJ46754.1

Group871: acar|OOF94087.1 acar|OOF94157.1 abra|OJJ66351.1 acla|EAW06467.1 afis|EAW15962.1  
afla|EED58095.1 afum|EAL88595.1 agla|OJJ89350.1 akaw|GAA90224.1 aluc|OJZ83117.1 anid|CBF81081.1  
anig|EHA28180.1 aory|EIT79147.1 asyd|OJJ56464.1 ater|EAU35492.1 atub|OJI87817.1 aver|OJJ06256.1  
awen|OJJ35612.1 azon|OJJ46912.1

Group872: acar|OOF94090.1 acar|OOF94160.1 abra|OJJ66347.1 acla|EAW09988.1 afis|EAW21105.1  
afla|EED51687.1 afum|EAL92126.1 agla|OJJ80110.1 akaw|GAA90221.1 aluc|OJZ83120.1 anid|CBF87045.1

anig|EHA28184.1 aory|EIT80607.1 asyd|OJJ60445.1 ater|EAU36794.1 atub|OJI87813.1 aver|OJI99763.1  
awen|OJJ36366.1 azon|OJJ43506.1

Group874: acar|OOF95064.1 acar|OOF95130.1 abra|OJJ74649.1 acla|EAW10737.1 afis|EAW24838.1  
afla|EED47138.1 afum|EAL89484.1 agla|OJJ82029.1 akaw|GAA81961.1 aluc|OJZ92227.1 anid|CBF74603.1  
anig|EHA26729.1 aory|EIT79201.1 asyd|OJJ57657.1 ater|EAU36468.1 atub|OJI86657.1 aver|OJJ05518.1  
awen|OJJ40424.1 azon|OJJ49282.1

Group875: acar|OOF95067.1 acar|OOF95133.1 abra|OJJ74647.1 acla|EAW10740.1 afis|EAW24834.1  
afla|EED47141.1 afum|EAL89479.1 agla|OJJ82027.1 akaw|GAA81964.1 aluc|OJZ92225.1 anid|CBF74582.1  
anig|EHA26731.1 aory|EIT79244.1 asyd|OJJ57655.1 ater|EAU36471.1 atub|OJI86655.1 aver|OJJ05515.1  
awen|OJJ40421.1 azon|OJJ49279.1

Group876: acar|OOF95068.1 acar|OOF95134.1 abra|OJJ74646.1 acla|EAW10741.1 afis|EAW24833.1  
afla|EED47142.1 afum|EAL89478.1 agla|OJJ82026.1 akaw|GAA81965.1 aluc|OJZ92224.1 anid|CBF74580.1  
anig|EHA26732.1 aory|EIT79261.1 asyd|OJJ57654.1 ater|EAU36472.1 atub|OJI86654.1 aver|OJJ05514.1  
awen|OJJ40420.1 azon|OJJ49278.1

Group877: acar|OOF95069.1 acar|OOF95135.1 abra|OJJ68490.1 acla|EAW10742.1 afis|EAW24832.1  
afla|EED47143.1 afum|EAL89477.1 agla|OJJ82025.1 akaw|GAA92780.1 aluc|OJZ922703.1 anid|CBF74578.1  
anig|EHA21158.1 aory|EIT79304.1 asyd|OJJ57653.1 ater|EAU36473.1 atub|OJI88936.1 aver|OJJ05513.1  
awen|OJJ40419.1 azon|OJJ49277.1

Group878: acar|OOF95070.1 acar|OOF95136.1 abra|OJJ74645.1 acla|EAW10743.1 afis|EAW24831.1  
afla|EED47144.1 afum|EAL89476.1 agla|OJJ82019.1 akaw|GAA81966.1 aluc|OJZ92223.1 anid|CBF74576.1  
anig|EHA26733.1 aory|EIT79280.1 asyd|OJJ57652.1 ater|EAU36474.1 atub|OJI86653.1 aver|OJJ05512.1  
awen|OJJ40418.1 azon|OJJ49276.1

Group879: acar|OOF95076.1 acar|OOF95140.1 abra|OJJ74640.1 acla|EAW10748.1 afis|EAW24826.1  
afla|EED47149.1 afum|EAL89470.1 agla|OJJ82015.1 akaw|GAA81971.1 aluc|OJZ92219.1 anid|CBF85858.1  
anig|EHA26739.1 aory|EIT79249.1 asyd|OJJ64367.1 ater|EAU36479.1 atub|OJI86650.1 aver|OJI98462.1  
awen|OJJ40412.1 azon|OJJ49262.1

Group880: acar|OOF95080.1 acar|OOF95145.1 abra|OJJ74631.1 acla|EAW10753.1 afis|EAW24822.1  
afla|EED47153.1 afum|EAL89466.1 agla|OJJ82920.1 akaw|GAA81978.1 aluc|OJZ92212.1 anid|CBF85851.1  
anig|EHA26746.1 aory|EIT79200.1 asyd|OJJ64363.1 ater|EAU36483.1 atub|OJI86641.1 aver|OJI98458.1  
awen|OJJ40408.1 azon|OJJ49257.1

Group882: acar|OOF95084.1 acar|OOF95149.1 abra|OJJ74624.1 acla|EAW10760.1 afis|EAW24816.1  
afla|EED47167.1 afum|EAL89460.2 agla|OJJ82910.1 akaw|GAA81984.1 aluc|OJZ92206.1 anid|CBF85879.1  
anig|EHA26752.1 aory|EIT79187.1 asyd|OJJ64377.1 ater|EAU39452.1 atub|OJI86635.1 aver|OJI98473.1  
awen|OJJ40402.1 azon|OJJ43613.1

Group883: acar|OOF95086.1 acar|OOF95152.1 abra|OJJ74618.1 acla|EAW10764.1 afis|EAW24812.1  
afla|EED47171.1 afum|EAL89455.1 agla|OJJ82907.1 akaw|GAA81988.1 aluc|OJZ92201.1 anid|CBF85885.1  
anig|EHA26756.1 aory|EIT79186.1 asyd|OJJ64381.1 ater|EAU36495.1 atub|OJI86629.1 aver|OJI98477.1  
awen|OJJ40396.1 azon|OJJ49249.1

Group884: acar|OOF95087.1 acar|OOF95153.1 abra|OJJ74617.1 acla|EAW10765.1 afis|EAW24811.1  
afla|EED47172.1 afum|EAL89454.1 agla|OJJ82906.1 akaw|GAA81989.1 aluc|OJZ92200.1 anid|CBF85886.1  
anig|EHA26757.1 aory|EIT79291.1 asyd|OJJ64382.1 ater|EAU36496.1 atub|OJI86627.1 aver|OJI98478.1  
awen|OJJ40395.1 azon|OJJ49248.1

Group885: acar|OOF95089.1 acar|OOF95155.1 abra|OJJ74615.1 acla|EAW10767.1 afis|EAW24809.1  
afla|EED47174.1 afum|EAL89452.1 agla|OJJ82904.1 akaw|GAA81991.1 aluc|OJZ92198.1 anid|CBF85888.1  
anig|EHA26759.1 aory|EIT79300.1 asyd|OJJ64384.1 ater|EAU36497.1 atub|OJI86625.1 aver|OJI98480.1  
awen|OJJ40393.1 azon|OJJ49246.1

Group886: acar|OOF95090.1 acar|OOF95156.1 abra|OJJ74614.1 acla|EAW10768.1 afis|EAW24808.1  
afla|EED47175.1 afum|EAL89450.2 agla|OJJ82903.1 akaw|GAA81992.1 aluc|OJZ92197.1 anid|CBF85890.1  
anig|EHA26760.1 aory|EIT79254.1 asyd|OJJ64385.1 ater|EAU36498.1 atub|OJI86624.1 aver|OJI98481.1  
awen|OJJ40392.1 azon|OJJ49245.1

Group887: acar|OOF95091.1 acar|OOF95157.1 abra|OJJ74613.1 acla|EAW10769.1 afis|EAW24807.1  
afla|EED47176.1 afum|EAL89449.1 agla|OJJ82902.1 akaw|GAA81995.1 aluc|OJZ92193.1 anid|CBF85892.1  
anig|EHA26761.1 aory|EIT79197.1 asyd|OJJ64387.1 ater|EAU36499.1 atub|OJI86622.1 aver|OJI98482.1  
awen|OJJ40391.1 azon|OJJ49241.1

Group888: acar|OOF95092.1 acar|OOF95158.1 abra|OJJ74611.1 acla|EAW10771.1 afis|EAW24805.1  
afla|EED47180.1 afum|EAL89447.1 agla|OJJ82900.1 akaw|GAA81997.1 aluc|OJZ92191.1 anid|CBF81492.1  
anig|EHA26763.1 aory|EIT79217.1 asyd|OJJ59459.1 ater|EAU36502.1 atub|OJI86620.1 aver|OJJ02814.1  
awen|OJJ40389.1 azon|OJJ49239.1

Group889: acar|OOF95093.1 acar|OOF95159.1 abra|OJJ74610.1 acla|EAW10772.1 afis|EAW24804.1  
afla|EED47181.1 afum|EAL89446.1 agla|OJJ82899.1 akaw|GAA81998.1 aluc|OJZ92190.1 anid|CBF81493.1  
anig|EHA26764.1 aory|EIT79264.1 asyd|OJJ59460.1 ater|EAU36503.1 atub|OJI86619.1 aver|OJJ02813.1  
awen|OJJ40388.1 azon|OJJ49238.1

Group890: acar|OOF95095.1 acar|OOF95162.1 abra|OJJ74608.1 acla|EAW10773.1 afis|EAW24803.1  
afla|EED47183.1 afum|EAL89444.1 agla|OJJ82897.1 akaw|GAA82000.1 aluc|OJZ92188.1 anid|CBF81495.1  
anig|EHA26765.1 aory|EIT79220.1 asyd|OJJ59463.1 ater|EAU36504.1 atub|OJI86617.1 aver|OJJ02811.1  
azon|OJJ49236.1 awen|OJJ40386.1

Group891: acar|OOF95101.1 acar|OOF95167.1 abra|OJJ74603.1 acla|EAW10776.1 afis|EAW24798.1  
afla|EED47189.1 afum|EAL89440.1 agla|OJJ82894.1 akaw|GAA82005.1 aluc|OJZ92182.1 anid|CBF81508.1  
anig|EHA26771.1 aory|EIT79258.1 asyd|OJJ59468.1 ater|EAU36507.1 atub|OJI86610.1 aver|OJJ02806.1  
awen|OJJ40383.1 azon|OJJ49232.1

Group893: acar|OOF95104.1 acar|OOF95170.1 abra|OJJ74600.1 acla|EAW10779.1 afis|EAW24795.1  
afla|EED47187.1 afum|EAL89437.1 agla|OJJ82891.1 akaw|GAA82008.1 aluc|OJZ92179.1 anid|CBF81503.1  
anig|EHA26774.1 aory|EIT79230.1 asyd|OJJ59466.1 ater|EAU36510.1 atub|OJI86607.1 aver|OJJ02808.1  
awen|OJJ40380.1 azon|OJJ49230.1

Group894: acar|OOF95106.1 acar|OOF95172.1 abra|OJJ74598.1 acla|EAW10781.1 afis|EAW24788.1  
afla|EED47191.1 afum|EAL89427.1 agla|OJJ82890.1 akaw|GAA82010.1 aluc|OJZ92176.1 anid|CBF81466.1  
anig|EHA26776.1 aory|EIT79298.1 asyd|OJJ59443.1 ater|EAU36513.1 atub|OJI86605.1 aver|OJJ02830.1  
awen|OJJ40378.1 azon|OJJ49229.1

Group895: acar|OOF95629.1 acar|OOF95680.1 abra|OJJ74664.1 acla|EAW10731.1 afis|EAW24844.1  
afla|EED47127.1 afum|EAL89490.1 agla|OJJ82044.1 akaw|GAA81947.1 aluc|OJZ92241.1 anid|CBF75849.1  
anig|EHA26713.1 aory|EIT79274.1 asyd|OJJ57571.1 ater|EAU36460.1 atub|OJI86675.1 aver|OJJ05608.1  
awen|OJJ40429.1 azon|OJJ49290.1

Group896: acar|OOF95630.1 acar|OOF95681.1 abra|OJJ74665.1 acla|EAW10730.1 afis|EAW24845.1  
afla|EED47126.1 afum|EAL89491.1 agla|OJJ82045.1 akaw|GAA81946.1 aluc|OJZ92242.1 anid|CBF75847.1  
anig|EHA26712.1 aory|EIT79168.1 asyd|OJJ57562.1 ater|EAU36459.1 atub|OJI86676.1 aver|OJJ05616.1  
awen|OJJ40430.1 azon|OJJ49291.1

Group897: acar|OOF95631.1 acar|OOF95683.1 abra|OJJ74666.1 acla|EAW10729.1 afis|EAW24846.1  
afla|EED47125.1 afum|EAL89492.1 agla|OJJ82058.1 akaw|GAA81945.1 aluc|OJZ92244.1 anid|CBF75845.1  
anig|EHA26711.1 aory|EIT79177.1 asyd|OJJ57561.1 ater|EAU36457.1 atub|OJI86678.1 aver|OJJ05617.1  
awen|OJJ40431.1 azon|OJJ49292.1

Group898: acar|OOF95632.1 acar|OOF95684.1 abra|OJJ74671.1 acla|EAW10726.1 afis|EAW24849.1  
afla|EED47122.1 afum|EAL89495.1 agla|OJJ82061.1 akaw|GAA81942.1 aluc|OJZ92248.1 anid|CBF75839.1  
anig|EHA26708.1 aory|EIT79246.1 asyd|OJJ57557.1 ater|EAU36454.1 atub|OJI86681.1 aver|OJJ05621.1  
awen|OJJ40434.1 azon|OJJ49295.1

Group899: acar|OOF95633.1 acar|OOF95685.1 abra|OJJ74668.1 acla|EAW10728.1 afis|EAW24847.1  
afla|EED47124.1 afum|EAL89493.1 agla|OJJ82059.1 akaw|GAA81944.1 aluc|OJZ92246.1 anid|CBF75843.1  
anig|EHA26710.1 aory|EIT79296.1 asyd|OJJ57560.1 ater|EAU36456.1 atub|OJI86679.1 aver|OJJ05618.1  
awen|OJJ40432.1 azon|OJJ49293.1

Group900: acar|OOF95638.1 acar|OOF95689.1 abra|OJJ74675.1 acla|EAW10722.1 afis|EAW24851.1  
afla|EED47120.1 afum|EAL89498.1 agla|OJJ82065.1 akaw|GAA81938.1 aluc|OJZ92252.1 anid|CBF75835.1  
anig|EHA26704.1 aory|EIT79290.1 asyd|OJJ57555.1 ater|EAU36452.1 atub|OJI86685.1 aver|OJJ05623.1  
awen|OJJ40436.1 azon|OJJ49297.1

Group901: acar|OOF95639.1 acar|OOF95690.1 abra|OJJ74677.1 acla|EAW10720.1 afis|EAW24853.1  
afla|EED47118.1 afum|EAL89500.1 agla|OJJ82067.1 akaw|GAA81937.1 aluc|OJZ92254.1 anid|CBF75831.1  
anig|EHA26703.1 aory|EIT79297.1 asyd|OJJ57553.1 ater|EAU36449.1 atub|OJI86687.1 aver|OJJ05625.1  
awen|OJJ40438.1 azon|OJJ49299.1

Group902: acar|OOF95640.1 acar|OOF95691.1 abra|OJJ74678.1 acla|EAW10719.1 afis|EAW24854.1  
afla|EED47117.1 afum|EAL89501.1 agla|OJJ82068.1 akaw|GAA81936.1 aluc|OJZ92255.1 anid|CBF90310.1  
anig|EHA26702.1 aory|EIT79215.1 asyd|OJJ61915.1 ater|EAU36448.1 atub|OJI86688.1 aver|OJI96008.1  
awen|OJJ40439.1 azon|OJJ46990.1

Group903: acar|OOF95641.1 acar|OOF95692.1 abra|OJJ74679.1 acla|EAW10716.1 afis|EAW24855.1  
afla|EED47094.1 afum|EAL89503.2 agla|OJJ82069.1 akaw|GAA81935.1 aluc|OJZ92256.1 anid|CBF75829.1  
anig|EHA26701.1 aory|EIT72488.1 asyd|OJJ57552.1 ater|EAU36447.1 atub|OJI86690.1 aver|OJJ05626.1  
awen|OJJ40443.1 azon|OJJ49301.1

Group904: acar|OOF95643.1 acar|OOF95694.1 abra|OJJ74681.1 acla|EAW10714.1 afis|EAW24856.1  
afla|EED47096.1 afum|EAL89504.1 agla|OJJ82071.1 akaw|GAA81933.1 aluc|OJZ92258.1 anid|CBF75827.1

anig|EHA26700.1 aory|EIT72489.1 asyd|OJJ57550.1 ater|EAU36446.1 atub|OJI86692.1 aver|OJJ05628.1  
awen|OJJ40445.1 azon|OJJ49302.1

Group905: acar|OOF95644.1 acar|OOF95695.1 abra|OJJ74683.1 acla|EAW10713.1 afis|EAW24857.1  
afla|EED47097.1 afum|EAL89505.2 agla|OJJ82072.1 akaw|GAA81931.1 aluc|OJZ92260.1 anid|CBF75825.1  
anig|EHA26699.1 aory|EIT72494.1 asyd|OJJ57549.1 ater|EAU36443.1 atub|OJI86694.1 aver|OJJ05629.1  
awen|OJJ40446.1 azon|OJJ49303.1

Group906: acar|OOF95645.1 acar|OOF95696.1 abra|OJJ74684.1 acla|EAW10712.1 afis|EAW24858.1  
afla|EED47098.1 afum|EAL89506.2 agla|OJJ82073.1 akaw|GAA81930.1 aluc|OJZ92261.1 anid|CBF75823.1  
anig|EHA26698.1 aory|EIT72492.1 asyd|OJJ57548.1 ater|EAU36442.1 atub|OJI86695.1 aver|OJJ05630.1  
awen|OJJ40447.1 azon|OJJ49304.1

Group907: acar|OOF95647.1 acar|OOF95698.1 abra|OJJ74686.1 acla|EAW10710.1 afis|EAW24860.1  
afla|EED47100.1 afum|EAL89509.1 agla|OJJ82078.1 akaw|GAA81928.1 aluc|OJZ92263.1 anid|CBF75819.1  
anig|EHA26696.1 aory|EIT72779.1 asyd|OJJ57546.1 ater|EAU36440.1 atub|OJI86697.1 aver|OJJ05632.1  
awen|OJJ40450.1 azon|OJJ49306.1

Group908: acar|OOF95648.1 acar|OOF95699.1 abra|OJJ74687.1 acla|EAW10709.1 afis|EAW24861.1  
afla|EED47101.1 afum|EAL89510.1 agla|OJJ82079.1 akaw|GAA81927.1 aluc|OJZ92264.1 anid|CBF75817.1  
anig|EHA26695.1 aory|EIT72784.1 asyd|OJJ57545.1 ater|EAU36439.1 atub|OJI86698.1 aver|OJJ05633.1  
awen|OJJ40451.1 azon|OJJ49307.1

Group909: acar|OOF95649.1 acar|OOF95700.1 abra|OJJ74688.1 acla|EAW10708.1 afis|EAW24862.1  
afla|EED47102.1 afum|EAL89511.1 agla|OJJ82080.1 akaw|GAA81926.1 aluc|OJZ92265.1 anid|CBF75815.1  
anig|EHA26694.1 aory|EIT72778.1 asyd|OJJ57544.1 ater|EAU36438.1 atub|OJI86699.1 aver|OJJ05634.1  
awen|OJJ40452.1 azon|OJJ49308.1

Group910: acar|OOF95650.1 acar|OOF95701.1 abra|OJJ74689.1 acla|EAW10707.1 afis|EAW24863.1  
afla|EED47103.1 afum|EAL89513.1 agla|OJJ82081.1 akaw|GAA81925.1 aluc|OJZ92266.1 anid|CBF75813.1  
anig|EHA26693.1 aory|EIT72782.1 asyd|OJJ57543.1 ater|EAU36437.1 atub|OJI86700.1 aver|OJJ05635.1  
awen|OJJ40453.1 azon|OJJ49309.1

Group911: acar|OOF95651.1 acar|OOF95702.1 abra|OJJ74690.1 acla|EAW10706.1 afis|EAW24864.1  
afla|EED47104.1 afum|EAL89514.1 agla|OJJ82082.1 akaw|GAA81924.1 aluc|OJZ92267.1 anid|CBF75811.1  
anig|EHA26692.1 aory|EIT72780.1 asyd|OJJ57542.1 ater|EAU36436.1 atub|OJI86701.1 aver|OJJ05636.1  
awen|OJJ40454.1 azon|OJJ49310.1

Group912: acar|OOF95653.1 acar|OOF95704.1 abra|OJJ74693.1 acla|EAW10705.1 afis|EAW24865.1  
afla|EED47106.1 afum|EAL89515.1 agla|OJJ82083.1 akaw|GAA81923.1 aluc|OJZ92270.1 anid|CBF75809.1  
anig|EHA26691.1 aory|EIT72781.1 asyd|OJJ57541.1 ater|EAU36435.1 atub|OJI86704.1 aver|OJJ05637.1  
awen|OJJ40455.1 azon|OJJ49311.1

Group913: acar|OOF95660.1 acar|OOF95711.1 abra|OJJ68465.1 acla|EAW10698.1 afis|EAW24872.1  
afla|EED47112.1 afum|EAL89522.1 agla|OJJ82093.1 akaw|GAA92385.1 aluc|OJZ83244.1 anid|CBF75794.1  
anig|EHA21099.1 aory|EIT79170.1 asyd|OJJ57530.1 ater|EAU36429.1 atub|OJI87692.1 aver|OJJ05648.1  
awen|OJJ40463.1 azon|OJJ49323.1

Group914: acar|OOF95661.1 acar|OOF95712.1 abra|OJJ68466.1 acla|EAW10697.1 afis|EAW24873.1  
afla|EED47113.1 afum|EAL89523.1 agla|OJJ82094.1 akaw|GAA92386.1 aluc|OJZ83245.1 anid|CBF75792.1  
anig|EHA21100.1 aory|EIT79294.1 asyd|OJJ57531.1 ater|EAU36428.1 atub|OJI87691.1 aver|OJJ05647.1  
awen|OJJ40464.1 azon|OJJ49324.1

Group915: acar|OOF95662.1 acar|OOF95713.1 abra|OJJ68467.1 acla|EAW10696.1 afis|EAW24874.1  
afla|EED47114.1 afum|EAL89524.1 agla|OJJ82095.1 akaw|GAA92388.1 aluc|OJZ83248.1 anid|CBF75790.1  
anig|EHA21101.1 aory|EIT79175.1 asyd|OJJ57532.1 ater|EAU36427.1 atub|OJI87689.1 aver|OJJ05646.1  
awen|OJJ40465.1 azon|OJJ49325.1

Group916: acar|OOF95663.1 acar|OOF95714.1 abra|OJJ74702.1 acla|EAW10695.1 afis|EAW24875.1  
afla|EED47115.1 afum|EAL89525.1 agla|OJJ82096.1 akaw|GAA81917.1 aluc|OJZ92279.1 anid|CBF75789.1  
anig|EHA26685.1 aory|EIT79273.1 asyd|OJJ57533.1 ater|EAU36426.1 atub|OJI86712.1 aver|OJJ05645.1  
awen|OJJ40466.1 azon|OJJ49328.1

Group917: acar|OOF95665.1 acar|OOF95716.1 abra|OJJ74704.1 acla|EAW10693.1 afis|EAW24877.1  
afla|EED47089.1 afum|EAL89527.1 agla|OJJ82098.1 akaw|GAA81914.1 aluc|OJZ92284.1 anid|CBF75758.1  
anig|EHA26684.1 aory|EIT72484.1 asyd|OJJ57527.1 ater|EAU36424.1 atub|OJI86715.1 aver|OJJ05651.1  
awen|OJJ40467.1 azon|OJJ49330.1

Group918: acar|OOF96224.1 acar|OOF96262.1 abra|OJJ71508.1 acla|EAW15066.1 afis|EAW20038.1  
afla|EED45342.1 afum|EAL85159.1 agla|OJJ88925.1 akaw|GAA89405.1 aluc|OJZ86247.1 anid|CBF84777.1  
anig|EHA21617.1 aory|EIT73643.1 asyd|OJJ63237.1 ater|EAU38653.1 atub|OJI84295.1 aver|OJI97719.1  
awen|OJJ31793.1 azon|OJJ43703.1

Group919: acar|OOF96229.1 acar|OOF96267.1 abra|OJJ71515.1 acla|EAW15072.1 afis|EAW20044.1  
afla|EED45336.1 afum|EAL85164.2 agla|OJJ88918.1 akaw|GAA89401.1 aluc|OJZ86253.1 anid|CBF84789.1  
anig|EHA21612.1 aory|EIT73570.1 asyd|OJJ63230.1 ater|EAU38648.1 atub|OJI84290.1 aver|OJI97726.1  
awen|OJJ31800.1 azon|OJJ46321.1

Group920: acar|OOF96233.1 acar|OOF96270.1 abra|OJJ71517.1 acla|EAW15075.1 afis|EAW20046.1  
afla|EED45334.1 afum|EAL85167.1 agla|OJJ88914.1 akaw|GAA89400.1 aluc|OJZ86256.1 anid|CBF84795.1  
anig|EHA21610.1 aory|EIT73786.1 asyd|OJJ63227.1 ater|EAU38656.1 atub|OJI84287.1 aver|OJI97728.1  
awen|OJJ31804.1 azon|OJJ46318.1

Group921: acar|OOF96234.1 acar|OOF96271.1 abra|OJJ71518.1 acla|EAW15076.1 afis|EAW20047.1  
afla|EED45333.1 afum|EAL85168.2 agla|OJJ88913.1 akaw|GAA89399.1 aluc|OJZ86257.1 anid|CBF84797.1  
anig|EHA21609.1 aory|EIT73741.1 asyd|OJJ63226.1 ater|EAU38657.1 atub|OJI84286.1 aver|OJI97729.1  
awen|OJJ31805.1 azon|OJJ46317.1

Group922: acar|OOF96235.1 acar|OOF96272.1 abra|OJJ71519.1 acla|EAW15077.1 afis|EAW20048.1  
afla|EED45332.1 afum|EAL85169.1 agla|OJJ88912.1 akaw|GAA89398.1 aluc|OJZ86258.1 anid|CBF84799.1  
anig|EHA21608.1 aory|EIT73661.1 asyd|OJJ63225.1 ater|EAU38658.1 atub|OJI84285.1 aver|OJI97730.1  
awen|OJJ31806.1 azon|OJJ46316.1

Group923: acar|OOF96236.1 acar|OOF96273.1 abra|OJJ71520.1 acla|EAW15078.1 afis|EAW20049.1  
afum|EAL85170.2 agla|OJJ88911.1 akaw|GAA89397.1 aluc|OJZ86259.1 anid|CBF84801.1 anig|EHA21607.1  
aory|EIT73827.1 asyd|OJJ63224.1 ater|EAU38659.1 atub|OJI84284.1 aver|OJI97731.1 awen|OJJ31807.1  
azon|OJJ46315.1 afla|EED45331.1

Group924: acar|OOF96239.1 acar|OOF96276.1 abra|OJJ71523.1 acla|EAW15080.1 afis|EAW20052.1  
afla|EED45328.1 afum|EAL85172.1 agla|OJJ88908.1 akaw|GAA89394.1 aluc|OJZ86262.1 anid|CBF84806.1  
anig|EHA21605.1 aory|EIT73685.1 asyd|OJJ63222.1 ater|EAU38661.1 atub|OJI84281.1 aver|OJI97733.1  
awen|OJJ31810.1 azon|OJJ46312.1

Group925: acar|OOF96240.1 acar|OOF96277.1 abra|OJJ71524.1 acla|EAW15081.1 afis|EAW20053.1  
afla|EED45327.1 afum|EAL85173.2 agla|OJJ88907.1 akaw|GAA89393.1 aluc|OJZ86263.1 anid|CBF84808.1  
anig|EHA21604.1 aory|EIT73613.1 asyd|OJJ63221.1 ater|EAU38662.1 atub|OJI84280.1 aver|OJI97734.1  
awen|OJJ31811.1 azon|OJJ46311.1

Group926: acar|OOF96242.1 acar|OOF96279.1 abra|OJJ71527.1 acla|EAW15083.1 afis|EAW20055.1  
afla|EED45325.1 afum|EAL85175.2 agla|OJJ88905.1 akaw|GAA89391.1 aluc|OJZ86266.1 anid|CBF84813.1  
anig|EHA21602.1 aory|EIT73716.1 asyd|OJJ63218.1 ater|EAU38664.1 atub|OJI84275.1 aver|OJI97737.1  
awen|OJJ31814.1 azon|OJJ46309.1

Group928: acar|OOF96245.1 acar|OOF96282.1 abra|OJJ71531.1 acla|EAW15086.1 afis|EAW20058.1  
afla|EED45322.1 afum|EAL85178.1 agla|OJJ88902.1 akaw|GAA89388.1 aluc|OJZ86270.1 anid|CBF84840.1  
anig|EHA21599.1 aory|EIT73696.1 asyd|OJJ63215.1 ater|EAU38667.1 atub|OJI84271.1 aver|OJI97740.1  
awen|OJJ31817.1 azon|OJJ46306.1

Group930: acar|OOF96249.1 acar|OOF96286.1 abra|OJJ71537.1 acla|EAW15090.1 afis|EAW20062.1  
afla|EED45317.1 afum|EAL85182.2 agla|OJJ88897.1 akaw|GAA89384.1 aluc|OJZ86274.1 anid|CBF84832.1  
anig|EHA21595.1 aory|EIT73715.1 asyd|OJJ63211.1 ater|EAU38671.1 atub|OJI84266.1 aver|OJI97744.1  
awen|OJJ31822.1 azon|OJJ46303.1

Group931: acar|OOF96250.1 acar|OOF96287.1 abra|OJJ71540.1 acla|EAW15095.1 afis|EAW20064.1  
afla|EED45313.1 afum|EAL85184.1 agla|OJJ88893.1 akaw|GAA89381.1 aluc|OJZ86278.1 anid|CBF84828.1  
anig|EHA21593.1 aory|EIT73604.1 asyd|OJJ63209.1 ater|EAU38673.1 atub|OJI84261.1 aver|OJI97746.1  
awen|OJJ31825.1 azon|OJJ46300.1

Group932: acar|OOF96251.1 acar|OOF96290.1 abra|OJJ71543.1 acla|EAW15097.1 afis|EAW20069.1  
afla|EED45310.1 afum|EAL85187.1 agla|OJJ88891.1 akaw|GAA89379.1 aluc|OJZ86281.1 anid|CBF84823.1  
anig|EHA21590.1 aory|EIT73765.1 asyd|OJJ63206.1 ater|EAU38675.1 atub|OJI84258.1 aver|OJI97749.1  
awen|OJJ31828.1 azon|OJJ46296.1

Group933: acar|OOF96252.1 acar|OOF96291.1 abra|OJJ71545.1 acla|EAW15099.1 afis|EAW20071.1  
afla|EED45308.1 afum|EAL85189.1 agla|OJJ88889.1 akaw|GAA89377.1 aluc|OJZ86283.1 anid|CBF84845.1  
anig|EHA21588.1 aory|EIT73815.1 asyd|OJJ63204.1 ater|EAU38676.1 atub|OJI84255.1 aver|OJI97751.1  
awen|OJJ31830.1 azon|OJJ46294.1

Group934: acar|OOF96254.1 acar|OOF96293.1 abra|OJJ71549.1 acla|EAW15103.1 afis|EAW20075.1  
afla|EED45304.1 afum|EAL85193.2 agla|OJJ88885.1 akaw|GAA89373.1 aluc|OJZ86287.1 anid|CBF84853.1  
anig|EHA21584.1 aory|EIT73551.1 asyd|OJJ63200.1 ater|EAU38683.1 atub|OJI84251.1 aver|OJI97755.1  
awen|OJJ31834.1 azon|OJJ46290.1

Group935: acar|OOF96255.1 acar|OOF96294.1 abra|OJJ71550.1 acla|EAW15104.1 afis|EAW20076.1  
afla|EED45302.1 afum|EAL85194.1 agla|OJJ88884.1 akaw|GAA89372.1 aluc|OJZ86288.1 anid|CBF84855.1

anig|EHA21583.1 aory|EIT73645.1 asyd|OJJ63199.1 ater|EAU38684.1 atub|OJI84250.1 aver|OJI97756.1  
awen|OJJ31835.1 azon|OJJ46289.1

Group936: acar|OOF96256.1 acar|OOF96295.1 abra|OJJ71551.1 acla|EAW15105.1 afis|EAW20077.1  
afla|EED45298.1 afum|EAL85195.1 agla|OJJ88883.1 akaw|GAA89371.1 aluc|OJZ86289.1 anid|CBF84867.1  
anig|EHA21582.1 aory|EIT73681.1 asyd|OJJ63198.1 ater|EAU38685.1 atub|OJI84249.1 aver|OJI97757.1  
awen|OJJ31836.1 azon|OJJ46288.1

Group937: acar|OOF96257.1 acar|OOF96296.1 abra|OJJ71554.1 acla|EAW15108.1 afis|EAW20079.1  
afla|EED45296.1 afum|EAL85198.1 agla|OJJ88880.1 akaw|GAA89368.1 aluc|OJZ86292.1 anid|CBF84858.1  
anig|EHA21579.1 aory|EIT73808.1 asyd|OJJ63195.1 ater|EAU38687.1 atub|OJI84246.1 aver|OJI97760.1  
awen|OJJ31839.1 azon|OJJ46284.1

Group938: acar|OOF96906.1 acar|OOF96942.1 abra|OJJ70803.1 acla|EAW11121.1 afis|EAW15850.1  
afla|EED56523.1 afum|EAL88486.1 agla|OJJ87258.1 akaw|GAA90119.1 aluc|OJZ84149.1 anid|CBF81174.1  
anig|EHA19253.1 aory|EIT72791.1 asyd|OJJ59291.1 ater|EAU31665.1 atub|OJI90521.1 aver|OJJ02984.1  
awen|OJJ36777.1 azon|OJJ47421.1

Group939: acar|OOF96913.1 acar|OOF96948.1 abra|OJJ70797.1 acla|EAW11126.1 afis|EAW15855.1  
afla|EED56517.1 afum|EAL88491.1 agla|OJJ87252.1 akaw|GAA90113.1 aluc|OJZ84142.1 anid|CBF81185.1  
anig|EHA19250.1 aory|EIT72794.1 asyd|OJJ59297.1 ater|EAU31670.1 atub|OJI90516.1 aver|OJJ02978.1  
awen|OJJ36772.1 azon|OJJ47426.1

Group940: acar|OOF96914.1 acar|OOF96949.1 abra|OJJ70796.1 acla|EAW11127.1 afis|EAW15856.1  
afla|EED56516.1 afum|EAL88492.1 agla|OJJ87251.1 akaw|GAA90112.1 aluc|OJZ84141.1 anid|CBF81187.1  
anig|EHA19249.1 aory|EIT72847.1 asyd|OJJ59298.1 ater|EAU31671.1 atub|OJI90515.1 aver|OJJ02977.1  
awen|OJJ36771.1 azon|OJJ47427.1

Group941: acar|OOF96916.1 acar|OOF96951.1 abra|OJJ70794.1 acla|EAW11129.1 afis|EAW15858.1  
afla|EED56514.1 afum|EAL88494.1 agla|OJJ87249.1 akaw|GAA90110.1 aluc|OJZ84139.1 anid|CBF81191.1  
anig|EHA19247.1 aory|EIT72852.1 asyd|OJJ59300.1 ater|EAU31673.1 atub|OJI90513.1 aver|OJJ02975.1  
awen|OJJ36769.1 azon|OJJ47429.1

Group942: acar|OOF96917.1 acar|OOF96952.1 abra|OJJ70793.1 acla|EAW11130.1 afis|EAW15861.1  
afla|EED56513.1 afum|EAL88496.1 agla|OJJ87248.1 akaw|GAA90109.1 aluc|OJZ84138.1 anid|CBF81193.1  
anig|EHA19246.1 aory|EIT72867.1 asyd|OJJ59301.1 ater|EAU31674.1 atub|OJI90512.1 aver|OJJ02974.1  
awen|OJJ36768.1 azon|OJJ47430.1

Group943: acar|OOF96918.1 acar|OOF96953.1 abra|OJJ70792.1 acla|EAW11131.1 afis|EAW15862.1  
afla|EED56512.1 afum|EAL88497.1 agla|OJJ87247.1 akaw|GAA90108.1 aluc|OJZ84137.1 anid|CBF81194.1  
anig|EHA19245.1 aory|EIT72817.1 asyd|OJJ59302.1 ater|EAU31675.1 atub|OJI90511.1 aver|OJJ02973.1  
awen|OJJ36767.1 azon|OJJ48009.1

Group944: acar|OOF96919.1 acar|OOF96954.1 abra|OJJ70791.1 acla|EAW11132.1 afis|EAW15863.1  
afla|EED56511.1 afum|EAL88498.1 agla|OJJ87246.1 akaw|GAA90107.1 aluc|OJZ84136.1 anid|CBF81196.1  
anig|EHA19244.1 aory|EIT72814.1 asyd|OJJ59303.1 ater|EAU31676.1 atub|OJI90510.1 aver|OJJ02972.1  
awen|OJJ36766.1 azon|OJJ47431.1

Group945: acar|OOF96921.1 acar|OOF96956.1 abra|OJJ70789.1 acla|EAW11133.1 afis|EAW15865.1  
afla|EED56510.1 afum|EAL88499.1 agla|OJJ87244.1 akaw|GAA90105.1 aluc|OJZ84134.1 anid|CBF81200.1  
anig|EHA19242.1 aory|EIT72849.1 asyd|OJJ59304.1 ater|EAU31678.1 atub|OJI90508.1 aver|OJJ02971.1  
awen|OJJ36765.1 azon|OJJ47433.1

Group946: acar|OOF96924.1 acar|OOF96959.1 abra|OJJ70786.1 acla|EAW11135.1 afis|EAW15867.1  
afla|EED56508.1 afum|EAL88501.1 agla|OJJ87241.1 akaw|GAA90103.1 aluc|OJZ84131.1 anid|CBF81205.1  
anig|EHA19239.1 aory|EIT72789.1 asyd|OJJ59307.1 ater|EAU31680.1 atub|OJI90505.1 aver|OJJ02968.1  
awen|OJJ36762.1 azon|OJJ47436.1

Group947: acar|OOF96927.1 acar|OOF96962.1 abra|OJJ70781.1 acla|EAW11138.1 afis|EAW15869.1  
afla|EED56505.1 afum|EAL88503.1 agla|OJJ87238.1 akaw|GAA90100.1 aluc|OJZ84128.1 anid|CBF81211.1  
anig|EHA19236.1 aory|EIT72793.1 asyd|OJJ59310.1 ater|EAU31686.1 atub|OJI90502.1 aver|OJJ02965.1  
awen|OJJ36760.1 azon|OJJ47439.1

Group948: acar|OOF96928.1 acar|OOF96963.1 abra|OJJ70780.1 acla|EAW11139.1 afis|EAW15870.1  
afla|EED56504.1 afum|EAL88504.1 agla|OJJ87237.1 akaw|GAA90099.1 aluc|OJZ84127.1 anid|CBF81213.1  
anig|EHA19235.1 aory|EIT72861.1 asyd|OJJ59311.1 ater|EAU31687.1 atub|OJI90501.1 aver|OJJ02964.1  
awen|OJJ36759.1 azon|OJJ47440.1

Group949: acar|OOF96930.1 acar|OOF96965.1 abra|OJJ70778.1 acla|EAW11141.1 afis|EAW15872.1  
afla|EED56503.1 afum|EAL88506.1 agla|OJJ87235.1 akaw|GAA90097.1 aluc|OJZ84125.1 anid|CBF81219.1  
anig|EHA19233.1 aory|EIT72819.1 asyd|OJJ59312.1 ater|EAU31689.1 atub|OJI90499.1 aver|OJJ02963.1  
awen|OJJ36758.1 azon|OJJ47442.1

Group951: acar|OOF96932.1 acar|OOF96967.1 abra|OJJ70776.1 acla|EAW11143.1 afis|EAW15874.1  
afla|EED56501.1 afum|EAL88508.1 agla|OJJ87234.1 akaw|GAA90095.1 aluc|OJZ84123.1 anid|CBF81222.1  
anig|EHA19231.1 aory|EIT72827.1 asyd|OJJ59314.1 ater|EAU31691.1 atub|OJI90495.1 aver|OJJ02961.1  
awen|OJJ36756.1 azon|OJJ47444.1

Group952: acar|OOF97657.1 acar|OOF97704.1 abra|OJJ71500.1 acla|EAW10048.1 afis|EAW25536.1  
afla|EED44712.1 afum|EAL90200.1 agla|OJJ87267.1 akaw|GAA82520.1 aluc|OJZ87047.1 anid|CBF77819.1  
anig|EHA20320.1 aory|EIT83462.1 asyd|OJJ53009.1 ater|EAU33377.1 atub|OJI81588.1 aver|OJJ03834.1  
awen|OJJ41278.1 azon|OJJ49501.1

Group953: acar|OOF97658.1 acar|OOF97705.1 abra|OJJ71499.1 acla|EAW10050.1 afis|EAW25534.1  
afla|EED44709.1 afum|EAL90198.1 agla|OJJ87269.1 akaw|GAA82521.1 aluc|OJZ87048.1 anid|CBF77817.1  
anig|EHA20321.1 aory|EIT83458.1 asyd|OJJ53010.1 ater|EAU33376.1 atub|OJI81587.1 aver|OJJ03833.1  
awen|OJJ41276.1 azon|OJJ49508.1

Group954: acar|OOF97660.1 acar|OOF97707.1 abra|OJJ71497.1 acla|EAW10052.1 afis|EAW25532.1  
afla|EED54033.1 afum|EAL90196.2 agla|OJJ87270.1 akaw|GAA82523.1 aluc|OJZ87050.1 anid|CBF77813.1  
anig|EHA20323.1 aory|EIT78299.1 asyd|OJJ53012.1 ater|EAU33374.1 atub|OJI81585.1 aver|OJJ03831.1  
awen|OJJ41274.1 azon|OJJ49506.1

Group955: acar|OOF97661.1 acar|OOF97708.1 abra|OJJ71496.1 acla|EAW10053.1 afis|EAW25531.1  
afla|EED54032.1 afum|EBA27398.1 agla|OJJ87271.1 akaw|GAA82524.1 aluc|OJZ87051.1 anid|CBF77811.1  
anig|EHA20324.1 aory|EIT78333.1 asyd|OJJ53013.1 ater|EAU33373.1 atub|OJI81584.1 aver|OJJ03830.1  
awen|OJJ41273.1 azon|OJJ49505.1

Group956: acar|OOF97663.1 acar|OOF97710.1 abra|OJJ71494.1 acla|EAW10055.1 afis|EAW25529.1  
afla|EED54030.1 afum|EAL90194.1 agla|OJJ87273.1 akaw|GAA82526.1 aluc|OJZ87053.1 anid|CBF77821.1  
anig|EHA20326.1 aory|EIT78259.1 asyd|OJJ53015.1 ater|EAU33372.1 atub|OJI81582.1 aver|OJJ03828.1  
awen|OJJ41271.1 azon|OJJ49509.1

Group957: acar|OOF97664.1 acar|OOF97711.1 abra|OJJ71493.1 acla|EAW10057.1 afis|EAW25527.1  
afla|EED54028.1 afum|EAL90192.1 agla|OJJ87275.1 akaw|GAA82527.1 aluc|OJZ87054.1 anid|CBF77805.1  
anig|EHA20327.1 aory|EIT78292.1 asyd|OJJ53017.1 ater|EAU33370.1 atub|OJI81581.1 aver|OJJ03826.1  
awen|OJJ41269.1 azon|OJJ49511.1

Group958: acar|OOF97666.1 acar|OOF97713.1 abra|OJJ71491.1 acla|EAW10059.1 afis|EAW25525.1  
afla|EED55229.1 afum|EAL90190.2 agla|OJJ81067.1 akaw|GAA82529.1 aluc|OJZ87056.1 anid|CBF77802.1  
anig|EHA20329.1 aory|EIT83576.1 asyd|OJJ53019.1 ater|EAU32314.1 atub|OJI81579.1 aver|OJJ03824.1  
awen|OJJ40768.1 azon|OJJ44041.1

Group959: acar|OOF97669.1 acar|OOF97715.1 abra|OJJ71489.1 acla|EAW10061.1 afis|EAW25523.1  
afla|EED54026.1 afum|EAL90188.2 agla|OJJ87278.1 akaw|GAA82531.1 aluc|OJZ87058.1 anid|CBF77800.1  
anig|EHA20331.1 aory|EIT78257.1 asyd|OJJ53021.1 ater|EAU33368.1 atub|OJI81577.1 aver|OJJ03822.1  
awen|OJJ41267.1 azon|OJJ44832.1

Group960: acar|OOF97671.1 acar|OOF97718.1 abra|OJJ71486.1 acla|EAW10064.1 afis|EAW25521.1  
afla|EED54023.1 afum|EAL90186.2 agla|OJJ87281.1 akaw|GAA82534.1 aluc|OJZ87061.1 anid|CBF77796.1  
anig|EHA20334.1 aory|EIT78303.1 asyd|OJJ53024.1 ater|EAU33367.1 atub|OJI81574.1 aver|OJJ03819.1  
awen|OJJ41264.1 azon|OJJ44829.1

Group961: acar|OOF97672.1 acar|OOF97719.1 abra|OJJ71485.1 acla|EAW10065.1 afis|EAW25520.1  
afla|EED54022.1 afum|EAL90185.1 agla|OJJ87282.1 akaw|GAA82535.1 aluc|OJZ87062.1 anid|CBF77794.1  
anig|EHA20335.1 aory|EIT78334.1 asyd|OJJ53025.1 ater|EAU33366.1 atub|OJI81573.1 aver|OJJ03818.1  
awen|OJJ41263.1 azon|OJJ44828.1

Group962: acar|OOF97673.1 acar|OOF97720.1 abra|OJJ71481.1 acla|EAW10068.1 afis|EAW25517.1  
afla|EED54017.1 afum|EAL90182.1 agla|OJJ87286.1 akaw|GAA82538.1 aluc|OJZ87066.1 anid|CBF77788.1  
anig|EHA20338.1 aory|EIT78273.1 asyd|OJJ53028.1 ater|EAU33363.1 atub|OJI81570.1 aver|OJJ03816.1  
awen|OJJ41260.1 azon|OJJ44825.1

Group963: acar|OOF97674.1 acar|OOF97721.1 abra|OJJ71478.1 acla|EAW10071.1 afis|EAW25515.1  
afla|EED54016.1 afum|EAL90180.1 agla|OJJ87288.1 akaw|GAA82539.1 aluc|OJZ87067.1 anid|CBF77785.1  
anig|EHA20339.1 aory|EIT78267.1 asyd|OJJ53029.1 ater|EAU33361.1 atub|OJI81569.1 aver|OJJ03815.1  
awen|OJJ41258.1 azon|OJJ44824.1

Group964: acar|OOF97675.1 acar|OOF97723.1 abra|OJJ71476.1 acla|EAW10073.1 afis|EAW25513.1  
afla|EED54014.1 afum|EAL90178.1 agla|OJJ87291.1 akaw|GAA82540.1 aluc|OJZ87070.1 anid|CBF77781.1  
anig|EHA20340.1 aory|EIT78254.1 asyd|OJJ53031.1 ater|EAU33359.1 atub|OJI81567.1 aver|OJJ03813.1  
awen|OJJ41256.1 azon|OJJ44821.1

Group965: acar|OOF97678.1 acar|OOF97726.1 abra|OJJ71474.1 acla|EAW10076.1 afis|EAW25510.1  
afla|EED54011.1 afum|EAL90176.2 agla|OJJ87295.1 akaw|GAA82542.1 aluc|OJZ87072.1 anid|CBF77775.1

anig|EHA20342.1 aory|EIT78253.1 asyd|OJJ53034.1 ater|EAU33357.1 atub|OJI81565.1 aver|OJJ03810.1  
awen|OJJ41252.1 azon|OJJ44819.1

Group966: acar|OOF97679.1 acar|OOF97727.1 abra|OJJ71472.1 acla|EAW10078.1 afis|EAW25508.1  
afla|EED54008.1 afum|EAL90174.1 agla|OJJ87297.1 akaw|GAA82544.1 aluc|OJZ87074.1 anid|CBF77772.1  
anig|EHA20343.1 aory|EIT78280.1 asyd|OJJ53036.1 ater|EAU33355.1 atub|OJI81563.1 aver|OJJ03808.1  
awen|OJJ41250.1 azon|OJJ44817.1

Group967: acar|OOF97680.1 acar|OOF97729.1 abra|OJJ71470.1 acla|EAW10081.1 afis|EAW25506.1  
afla|EED54006.1 afum|EAL90172.1 agla|OJJ87298.1 akaw|GAA82545.1 aluc|OJZ87075.1 anid|CBF77768.1  
anig|EHA20345.1 aory|EIT78338.1 asyd|OJJ53037.1 ater|EAU33354.1 atub|OJI81561.1 aver|OJJ03807.1  
awen|OJJ41249.1 azon|OJJ44816.1

Group968: acar|OOF97681.1 acar|OOF97730.1 abra|OJJ71469.1 acla|EAW10082.1 afis|EAW25505.1  
afla|EED54005.1 afum|EAL90171.1 agla|OJJ87299.1 akaw|GAA82546.1 aluc|OJZ87076.1 anid|CBF77766.1  
anig|EHA20346.1 aory|EIT78265.1 asyd|OJJ53038.1 ater|EAU33353.1 atub|OJI81560.1 aver|OJJ03806.1  
awen|OJJ41248.1 azon|OJJ44813.1

Group969: acar|OOF97682.1 acar|OOF97731.1 abra|OJJ71468.1 acla|EAW10083.1 afis|EAW25504.1  
afla|EED54003.1 afum|EAL90170.1 agla|OJJ87300.1 akaw|GAA82547.1 aluc|OJZ87077.1 anid|CBF77764.1  
anig|EHA20347.1 aory|EIT78261.1 asyd|OJJ53039.1 ater|EAU33352.1 atub|OJI81559.1 aver|OJJ03805.1  
awen|OJJ41247.1 azon|OJJ44812.1

Group970: acar|OOF97684.1 acar|OOF97734.1 abra|OJJ71464.1 acla|EAW10086.1 afis|EAW25501.1  
afla|EED54000.1 afum|EAL90167.1 agla|OJJ87303.1 akaw|GAA82550.1 aluc|OJZ87080.1 anid|CBF77756.1  
anig|EHA20351.1 aory|EIT78290.1 asyd|OJJ53043.1 ater|EAU34671.1 atub|OJI81557.1 aver|OJJ03801.1  
awen|OJJ41243.1 azon|OJJ44809.1

Group971: acar|OOF97685.1 acar|OOF97735.1 abra|OJJ71465.1 acla|EAW10085.1 afis|EAW25502.1  
afla|EED54001.1 afum|EAL90168.1 agla|OJJ87302.1 akaw|GAA82549.1 aluc|OJZ87079.1 anid|CBF77758.1  
anig|EHA20350.1 aory|EIT78293.1 asyd|OJJ53042.1 ater|EAU34672.1 atub|OJI81558.1 aver|OJJ03802.1  
awen|OJJ41244.1 azon|OJJ44810.1

Group972: acar|OOF97686.1 acar|OOF97736.1 abra|OJJ71463.1 acla|EAW10088.1 afis|EAW25499.1  
afla|EED53999.1 afum|EAL90165.1 agla|OJJ87305.1 akaw|GAA82551.1 aluc|OJZ87081.1 anid|CBF77754.1  
anig|EHA20352.1 aory|EIT78297.1 asyd|OJJ53044.1 ater|EAU34670.1 atub|OJI81556.1 aver|OJJ03800.1  
awen|OJJ41241.1 azon|OJJ44807.1

Group973: acar|OOF97690.1 acar|OOF97740.1 abra|OJJ71458.1 acla|EAW10091.1 afis|EAW25496.1  
afla|EED53996.1 afum|EAL90162.1 agla|OJJ87309.1 akaw|GAA82553.1 aluc|OJZ87085.1 anid|CBF77749.1  
anig|EHA20355.1 aory|EIT78288.1 asyd|OJJ53047.1 ater|EAU34667.1 atub|OJI81553.1 aver|OJJ03798.1  
awen|OJJ41238.1 azon|OJJ44804.1

Group974: acar|OOF97691.1 acar|OOF97741.1 abra|OJJ71456.1 acla|EAW10093.1 afis|EAW25494.1  
afla|EED53994.1 afum|EAL90160.1 agla|OJJ87311.1 akaw|GAA82555.1 aluc|OJZ87087.1 anid|CBF77745.1  
anig|EHA20357.1 aory|EIT78318.1 asyd|OJJ53049.1 ater|EAU34665.1 atub|OJI81551.1 aver|OJJ03796.1  
awen|OJJ41236.1 azon|OJJ44802.1

Group976: acar|OOF97694.1 acar|OOF97743.1 abra|OJJ71454.1 acla|EAW10095.1 afis|EAW25492.1  
afla|EED53992.1 afum|EAL90157.1 agla|OJJ87140.1 akaw|GAA82557.1 aluc|OJZ87089.1 anid|CBF77743.1  
anig|EHA20360.1 aory|EIT78276.1 asyd|OJJ53051.1 ater|EAU34663.1 atub|OJI81549.1 aver|OJJ03794.1  
awen|OJJ41234.1 azon|OJJ44799.1

Group977: acar|OOF97695.1 acar|OOF97745.1 abra|OJJ71451.1 acla|EAW10096.1 afis|EAW25491.1  
afla|EED53991.1 afum|EAL90156.1 agla|OJJ87139.1 akaw|GAA82559.1 aluc|OJZ87091.1 anid|CBF77741.1  
anig|EHA20362.1 aory|EIT78277.1 asyd|OJJ53052.1 ater|EAU34662.1 atub|OJI81547.1 aver|OJJ03792.1  
awen|OJJ41233.1 azon|OJJ44798.1

Group978: acar|OOF97697.1 acar|OOF97747.1 abra|OJJ71447.1 acla|EAW10099.1 afis|EAW25488.1  
afla|EED53986.1 afum|EAL90153.1 agla|OJJ87136.1 akaw|GAA82562.1 aluc|OJZ87094.1 anid|CBF77724.1  
anig|EHA20365.1 aory|EIT78270.1 asyd|OJJ53061.1 ater|EAU34659.1 atub|OJI81544.1 aver|OJJ03783.1  
awen|OJJ41229.1 azon|OJJ44796.1

Group979: acar|OOF97698.1 acar|OOF97748.1 abra|OJJ71446.1 acla|EAW10100.1 afis|EAW25487.1  
afla|EED53985.1 afum|EAL90152.1 agla|OJJ87135.1 akaw|GAA82563.1 aluc|OJZ87095.1 anid|CBF77722.1  
anig|EHA20366.1 aory|EIT78345.1 asyd|OJJ53062.1 ater|EAU34658.1 atub|OJI81543.1 aver|OJJ03782.1  
awen|OJJ41228.1 azon|OJJ44795.1

Group980: acar|OOF97699.1 acar|OOF97749.1 abra|OJJ71444.1 acla|EAW10102.1 afis|EAW25485.1  
afla|EED53983.1 afum|EAL90150.1 agla|OJJ87133.1 akaw|GAA82565.1 aluc|OJZ87097.1 anid|CBF77713.1  
anig|EHA20368.1 aory|EIT78331.1 asyd|OJJ53067.1 ater|EAU34656.1 atub|OJI81541.1 aver|OJJ03778.1  
awen|OJJ41226.1 azon|OJJ44781.1



Group981: acar|OOF98471.1 acar|OOF98473.1 abra|OJJ78401.1 acla|EAW09131.1 afis|EAW22015.1  
afla|EED46740.1 afum|EAL93030.1 agla|OJJ84082.1 akaw|GAA85630.1 aluc|OJZ91480.1 anid|CBF82625.1  
anig|EHA20142.1 aory|EIT77878.1 asyd|OJJ54012.1 ater|EAU31136.1 atub|OJI83473.1 aver|OJJ08730.1  
awen|OJJ34311.1 azon|OJJ43327.1

Group982: acar|OOF98472.1 acar|OOF98486.1 abra|OJJ78402.1 acla|EAW09130.1 afis|EAW22016.1  
afla|EED46741.1 afum|EAL93031.1 agla|OJJ84081.1 akaw|GAA85629.1 aluc|OJZ91481.1 anid|CBF82627.1  
anig|EHA20143.1 aory|EIT77969.1 asyd|OJJ54011.1 ater|EAU31137.1 atub|OJI83474.1 aver|OJJ08731.1  
awen|OJJ34312.1 azon|OJJ43328.1

Group983: acar|OOF98475.1 acar|OOF98487.1 abra|OJJ78399.1 acla|EAW09133.1 afis|EAW22013.1  
afla|EED46738.1 afum|EAL93028.1 agla|OJJ84084.1 akaw|GAA85632.1 aluc|OJZ91478.1 anid|CBF82644.1  
anig|EHA20140.1 aory|EIT77900.1 asyd|OJJ61676.1 ater|EAU31135.1 atub|OJI83471.1 aver|OJJ00997.1  
awen|OJJ34309.1 azon|OJJ48062.1

Group984: acar|OOF98476.1 acar|OOF98489.1 abra|OJJ78398.1 acla|EAW09134.1 afis|EAW22012.1  
afla|EED46737.1 afum|EAL93027.1 agla|OJJ84085.1 akaw|GAA85633.1 aluc|OJZ91477.1 anid|CBF82646.1  
anig|EHA20139.1 aory|EIT77930.1 asyd|OJJ61675.1 ater|EAU31134.1 atub|OJI83470.1 aver|OJJ00996.1  
awen|OJJ34308.1 azon|OJJ48061.1

Group985: acar|OOF98478.1 acar|OOF98491.1 abra|OJJ78396.1 acla|EAW09136.1 afis|EAW22011.1  
afla|EED46735.1 afum|EAL93026.1 agla|OJJ84087.1 akaw|GAA85635.1 aluc|OJZ91475.1 anid|CBF82649.1  
anig|EHA20137.1 aory|EIT77821.1 asyd|OJJ61673.1 ater|EAU31132.1 atub|OJI83468.1 aver|OJJ00994.1  
awen|OJJ34306.1 azon|OJJ43333.1

Group986: acar|OOF98481.1 acar|OOF98494.1 abra|OJJ78393.1 acla|EAW09139.1 afis|EAW22008.1  
afla|EED46732.1 afum|EAL93023.1 agla|OJJ84090.1 akaw|GAA85638.1 aluc|OJZ91472.1 anid|CBF82655.1  
anig|EHA20134.1 aory|EIT77839.1 asyd|OJJ61670.1 ater|EAU31130.1 atub|OJI83465.1 aver|OJJ00991.1  
awen|OJJ34303.1 azon|OJJ43335.1

Group987: acar|OOF98482.1 acar|OOF98495.1 abra|OJJ78391.1 acla|EAW09141.1 afis|EAW22006.1  
afla|EED46730.1 afum|EAL93021.2 agla|OJJ84092.1 akaw|GAA85640.1 aluc|OJZ91470.1 anid|CBF82659.1  
anig|EHA20132.1 aory|EIT77908.1 asyd|OJJ61668.1 ater|EAU31128.1 atub|OJI83463.1 aver|OJJ00989.1  
awen|OJJ34301.1 azon|OJJ43337.1

Group988: acar|OOF98483.1 acar|OOF98496.1 abra|OJJ78392.1 acla|EAW09140.1 afis|EAW22007.1  
afla|EED46731.1 afum|EAL93022.1 agla|OJJ84091.1 akaw|GAA85639.1 aluc|OJZ91471.1 anid|CBF82657.1  
anig|EHA20133.1 aory|EIT77818.1 asyd|OJJ61669.1 ater|EAU31129.1 atub|OJI83464.1 aver|OJJ00990.1  
awen|OJJ34302.1 azon|OJJ43336.1

Group989: acar|OOF98531.1 acar|OOF98532.1 abra|OJJ78355.1 acla|EAW09180.1 afis|EAW21966.1  
afla|EED46687.1 afum|EAL92980.1 agla|OJJ84137.1 akaw|GAA85679.1 aluc|OJZ91430.1 anid|CBF82734.1  
anig|EHA20099.1 aory|EIT77938.1 asyd|OJJ61626.1 ater|EAU31086.1 atub|OJI83423.1 aver|OJJ00951.1  
awen|OJJ34260.1 azon|OJJ43377.1

Group991: afis|EAW15984.1 afis|EAW22037.1 abra|OJJ77639.1 acar|OOF99107.1 acla|EAW06489.1  
afla|EED56354.1 afum|EAL88616.1 agla|OJJ85987.1 akaw|GAA83995.1 aluc|OJZ80891.1 anid|CBF85810.1  
anig|EHA19447.1 aory|EIT73316.1 asyd|OJJ64340.1 ater|EAU33668.1 atub|OJI82687.1 aver|OJI98433.1  
awen|OJJ30486.1 azon|OJJ45477.1

Group992: afis|EAW16169.1 afis|EAW20696.1 abra|OJJ78079.1 acar|OOF98785.1 acla|EAW06612.1  
afla|EED48696.1 afum|EAL88803.1 agla|OJJ86214.1 akaw|GAA85915.1 aluc|OJZ91151.1 anid|CBF79561.1  
anig|EHA19849.1 aory|EIT73253.1 asyd|OJJ57924.1 ater|EAU33245.1 atub|OJI83165.1 aver|OJJ04468.1  
awen|OJJ30269.1 azon|OJJ43965.1

Group994: afis|EAW16703.1 afis|EAW22511.1 abra|OJJ73562.1 acar|OOG00744.1 acla|EAW07479.1  
afla|EED54539.1 afum|EAL90682.1 agla|OJJ80876.1 akaw|GAA88592.1 aluc|OJZ88499.1 anid|CBF88981.1  
anig|EHA18208.1 aory|EIT78923.1 asyd|OJJ62789.1 ater|EAU39198.1 atub|OJI91086.1 aver|OJI96836.1  
awen|OJJ35137.1 azon|OJJ49962.1

Group995: afis|EAW17302.1 afis|EAW21312.1 abra|OJJ75975.1 acar|OOF99944.1 acla|EAW09822.1  
afla|EED57269.1 afum|EAL92328.1 agla|OJJ87430.1 akaw|GAA88981.1 aluc|OJZ89422.1 anid|CBF83405.1  
anig|EHA23165.1 aory|EIT74144.1 asyd|OJJ60646.1 ater|EAU35941.1 atub|OJI85371.1 aver|OJI99964.1  
awen|OJJ39388.1 azon|OJJ44276.1

Group996: afis|EAW20681.1 afis|EAW24898.1 abra|OJJ74730.1 acar|OOF89795.1 acla|EAW10669.1  
afla|EED46977.1 afum|EAL89552.2 agla|OJJ82121.1 akaw|GAA81887.1 aluc|OJZ92314.1 anid|CBF75653.1  
anig|EHA26655.1 aory|EIT72604.1 asyd|OJJ57466.1 ater|EAU36401.1 atub|OJI86743.1 aver|OJJ05715.1  
awen|OJJ40490.1 azon|OJJ49353.1

Group997: afis|EAW21461.1 afis|EAW22039.1 abra|OJJ76153.1 acar|OOF89976.1 acla|EAW09678.1  
afla|EED55893.1 afum|EAL92480.1 agla|OJJ85609.1 akaw|GAA82102.1 aluc|OJZ92076.1 anid|CBF76534.1

anig|EHA23002.1 aory|EIT76550.1 asyd|OJJ61148.1 ater|EAU35074.1 atub|OJI86506.1 aver|OJJ00470.1  
awen|OJJ39238.1 azon|OJJ51616.1

Group1000: afla|EED47569.1 afla|EED49784.1 abra|OJJ77270.1 acar|OOF93140.1 acla|EAW13268.1  
afis|EAW17349.1 afum|EAL91192.2 agla|OJJ88227.1 akaw|GAA90678.1 aluc|OJZ84677.1 anid|CBF84233.1  
anig|EHA27955.1 aory|EIT77705.1 asyd|OJJ57184.1 ater|EAU33864.1 atub|OJI89403.1 aver|OJJ03106.1  
awen|OJJ34563.1 azon|OJJ50311.1

Group1003: agla|OJJ78416.1 agla|OJJ80642.1 abra|OJJ72427.1 acar|OOF94806.1 acla|EAW12660.1  
afis|EAW17824.1 afla|EED46164.1 afum|EAL91634.1 akaw|GAA86168.1 aluc|OJZ90411.1 anid|CBF78007.1  
anig|EHA23877.1 aory|EIT76471.1 asyd|OJJ55244.1 ater|EAU33025.1 atub|OJI81842.1 aver|OJJ06980.1  
awen|OJJ41754.1 azon|OJJ48444.1

Group1004: agla|OJJ78484.1 agla|OJJ87510.1 abra|OJJ75909.1 acar|OOF99994.1 acla|EAW09880.1  
afis|EAW21246.1 afla|EED54806.1 afum|EAL92259.1 akaw|GAA84615.1 aluc|OJZ89359.1 anid|CBF83238.1  
anig|EHA23222.1 aory|EIT79446.1 asyd|OJJ60599.1 ater|EAU35886.1 atub|OJI85439.1 aver|OJI99922.1  
awen|OJJ36559.1 azon|OJJ44332.1

Group1005: agla|OJJ78485.1 agla|OJJ87511.1 abra|OJJ75908.1 acar|OOF99995.1 acla|EAW09881.1  
afis|EAW21245.1 afla|EED54805.1 afum|EAL92258.1 akaw|GAA84614.1 aluc|OJZ89358.1 anid|CBF83236.1  
anig|EHA23223.1 aory|EIT79346.1 asyd|OJJ60600.1 ater|EAU35885.1 atub|OJI85440.1 aver|OJI99923.1  
awen|OJJ36558.1 azon|OJJ44333.1

Group1006: agla|OJJ78486.1 agla|OJJ87512.1 abra|OJJ75907.1 acar|OOF99996.1 acla|EAW09882.1  
afis|EAW21244.1 afla|EED54804.1 afum|EAL92257.1 akaw|GAA84613.1 aluc|OJZ89357.1 anid|CBF83253.1  
anig|EHA23224.1 aory|EIT79338.1 asyd|OJJ60588.1 ater|EAU35884.1 atub|OJI85441.1 aver|OJI99911.1  
awen|OJJ36555.1 azon|OJJ44334.1

Group1009: agla|OJJ82043.1 agla|OJJ82886.1 abra|OJJ74586.1 acar|OOF95180.1 acla|EAW10792.1  
afis|EAW24784.1 afla|EED47201.1 afum|EAL89423.1 akaw|GAA82019.1 aluc|OJZ92164.1 anid|CBF81451.1  
anig|EHA26785.1 aory|EIT79216.1 asyd|OJJ59433.1 ater|EAU36525.1 atub|OJI86593.1 aver|OJJ02838.1  
awen|OJJ40369.1 azon|OJJ49218.1

Group1010: agla|OJJ82106.1 agla|OJJ85287.1 abra|OJJ74712.1 acar|OOF95721.1 acla|EAW10686.1  
afis|EAW24884.1 afla|EED47082.1 afum|EAL89534.1 akaw|GAA81905.1 aluc|OJZ92293.1 anid|CBF75745.1  
anig|EHA26676.1 aory|EIT72490.1 asyd|OJJ57520.1 ater|EAU36417.1 atub|OJI86723.1 aver|OJJ05658.1  
awen|OJJ40474.1 azon|OJJ49338.1

Group1011: agla|OJJ82204.1 agla|OJJ88613.1 abra|OJJ66850.1 acar|OOF91626.1 acla|EAW14428.1  
afis|EAW19135.1 afla|EED54279.1 afum|EAL93867.1 akaw|GAA91556.1 aluc|OJZ85734.1 anid|CBF86332.1  
anig|EHA24816.1 aory|EIT76149.1 asyd|OJJ64990.1 ater|EAU37406.1 atub|OJI79519.1 aver|OJI99110.1  
awen|OJJ37471.1 azon|OJJ51151.1

Group1012: agla|OJJ87407.1 agla|OJJ87526.1 abra|OJJ76001.1 acar|OOF99924.1 acla|EAW09804.1  
afis|EAW21332.1 afla|EED57290.1 afum|EAL92350.1 akaw|GAA88959.1 aluc|OJZ89446.1 anid|CBF83435.1  
anig|EHA23140.1 aory|EIT74092.1 asyd|OJJ60664.1 ater|EAU35958.1 atub|OJI85347.1 aver|OJI99987.1  
awen|OJJ39366.1 azon|OJJ51705.1

Group1013: akaw|GAA87623.1 akaw|GAA91524.1 abra|OJJ66888.1 acar|OOF91659.1 acla|EAW14460.1  
afis|EAW19168.1 afla|EED54229.1 afum|EAL93898.1 agla|OJJ88556.1 aluc|OJZ85694.1 anid|CBF86275.1  
anig|EHA24847.1 aory|EIT75898.1 asyd|OJJ65023.1 ater|EAU37305.1 atub|OJI79484.1 aver|OJI99142.1  
awen|OJJ37521.1 azon|OJJ51187.1

Group1014: akaw|GAA90564.1 akaw|GAA91190.1 abra|OJJ66522.1 acar|OOF90976.1 acla|EAW10968.1  
afis|EAW20892.1 afla|EED45587.1 afum|EAL84741.1 agla|OJJ84000.1 aluc|OJZ81513.1 anid|CBF82751.1  
anig|EHA25911.1 aory|EIT75801.1 asyd|OJJ61613.1 ater|EAU30831.1 atub|OJI88662.1 aver|OJJ00936.1  
awen|OJJ34455.1 azon|OJJ51742.1

Group1017: anid|CBF75896.1 anid|CBF87037.1 abra|OJJ68334.1 acar|OOF97603.1 acla|EAW09978.1  
afis|EAW21111.1 afla|EED51763.1 afum|EAL92134.1 agla|OJJ80102.1 akaw|GAA92087.1 aluc|OJZ83637.1  
anig|EHA18789.1 aory|EIT79989.1 asyd|OJJ60451.1 ater|EAU36787.1 atub|OJI90006.1 aver|OJI99769.1  
awen|OJJ36440.1 azon|OJJ44433.1

Group1018: anid|CBF76123.1 anid|CBF81569.1 abra|OJJ71017.1 acar|OOF98123.1 acla|EAW10567.1  
afis|EAW25033.1 afla|EED55458.1 afum|EAL89661.1 agla|OJJ82245.1 akaw|GAA82938.1 aluc|OJZ87515.1  
anig|EHA20726.1 aory|EIT80849.1 asyd|OJJ59506.1 ater|EAU35752.1 atub|OJI81135.1 aver|OJJ02768.1  
awen|OJJ40606.1 azon|OJJ49455.1

Group1023: aory|EIT76145.1 aory|EIT78526.1 abra|OJJ72823.1 acar|OOF96028.1 acla|EAW11415.1  
afis|EAW24006.1 afla|EED49155.1 afum|EAL87436.1 agla|OJJ86937.1 akaw|GAA85424.1 aluc|OJZ83325.1  
anid|CBF77396.1 anig|EHA24203.1 asyd|OJJ53244.1 ater|EAU29745.1 atub|OJI82222.1 aver|OJJ03606.1  
awen|OJJ35478.1 azon|OJJ51270.1

Group1024: aory|EIT76394.1 aory|EIT77963.1 abra|OJJ78294.1 acar|OOF98573.1 acla|EAW09222.1  
afis|EAW21926.1 afla|EED46618.1 afum|EAL92939.1 agla|OJJ84196.1 akaw|GAA85733.1 aluc|OJZ91368.1  
anid|CBF76880.1 anig|EHA20046.1 asyd|OJJ61326.1 ater|EAU30932.1 atub|OJI83361.1 aver|OJJ00651.1  
awen|OJJ34216.1 azon|OJJ43418.1

Group1026: asyd|OJJ51877.1 asyd|OJJ54109.1 abra|OJJ66556.1 acar|OOF91001.1 acla|EAW10938.1  
afis|EAW20923.1 afla|EED50277.1 afum|EAL84711.1 agla|OJJ83966.1 akaw|GAA91159.1 aluc|OJZ81487.1  
anid|CBF82451.1 anig|EHA25940.1 aory|EIT77347.1 ater|EAU38570.1 atub|OJI88693.1 aver|OJJ08625.1  
awen|OJJ34397.1 azon|OJJ48133.1

Group1027: asyd|OJJ51975.1 asyd|OJJ60994.1 abra|OJJ71988.1 acar|OOF96641.1 acla|EAW09550.1  
afis|EAW21586.1 afla|EED57807.1 afum|EAL92604.1 agla|OJJ85779.1 akaw|GAA84941.1 aluc|OJZ86725.1  
anid|CBF76287.1 anig|EHA21954.1 aory|EIT81038.1 ater|EAU34945.1 atub|OJI83803.1 aver|OJJ00314.1  
awen|OJJ39095.1 azon|OJJ51428.1

Group1028: asyd|OJJ52256.1 asyd|OJJ61135.1 abra|OJJ76154.1 acar|OOF99776.1 acla|EAW09663.1  
afis|EAW21474.1 afla|EED46116.1 afum|EAL92493.1 agla|OJJ85624.1 akaw|GAA82103.1 aluc|OJZ92074.1  
anid|CBF76511.1 anig|EHA23001.1 aory|EIT76380.1 ater|EAU35059.1 atub|OJI86505.1 aver|OJJ00457.1  
awen|OJJ39223.1 azon|OJJ51633.1

Group1029: asyd|OJJ52749.1 asyd|OJJ64102.1 abra|OJJ77967.1 acar|OOF98848.1 acla|EAW06673.1  
afis|EAW16092.1 afla|EED48628.1 afum|EAL88724.1 agla|OJJ86129.1 akaw|GAA83695.1 aluc|OJZ91037.1  
anid|CBF85462.1 anig|EHA19736.1 aory|EIT73247.1 ater|EAU33164.1 atub|OJI83033.1 aver|OJI98185.1  
awen|OJJ30338.1 azon|OJJ45366.1

Group1031: asyd|OJJ53278.1 asyd|OJJ56762.1 abra|OJJ72786.1 acar|OOF96003.1 acla|EAW11483.1  
afis|EAW23970.1 afla|EED50538.1 afum|EAL87400.1 agla|OJJ86899.1 akaw|GAA85393.1 aluc|OJZ83284.1  
anid|CBF77331.1 anig|EHA24170.1 aory|EIT82142.1 ater|EAU29782.1 atub|OJI82187.1 aver|OJJ03570.1  
awen|OJJ38973.1 azon|OJJ51308.1

Group1032: asyd|OJJ53282.1 asyd|OJJ56766.1 abra|OJJ72783.1 acar|OOF96001.1 acla|EAW11484.1  
afis|EAW23969.1 afla|EED50540.1 afum|EAL87399.1 agla|OJJ86898.1 akaw|GAA85391.1 aluc|OJZ83282.1  
anid|CBF77330.1 anig|EHA24169.1 aory|EIT82164.1 ater|EAU29783.1 atub|OJI82186.1 aver|OJJ03568.1  
awen|OJJ38974.1 azon|OJJ51309.1

Group1033: asyd|OJJ53391.1 asyd|OJJ55131.1 abra|OJJ72369.1 acar|OOF94851.1 acla|EAW11966.1  
afis|EAW19602.1 afla|EED56958.1 afum|EAL86916.1 agla|OJJ80744.1 akaw|GAA86119.1 aluc|OJZ90357.1  
anid|CBF71283.1 anig|EHA23833.1 aory|EIT77537.1 ater|EAU32923.1 atub|OJI81785.1 aver|OJJ07072.1  
awen|OJJ41838.1 azon|OJJ47049.1

Group1035: asyd|OJJ53802.1 asyd|OJJ61125.1 abra|OJJ76171.1 acar|OOF99768.1 acla|EAW09654.1  
afis|EAW21485.1 afla|EED55918.1 afum|EAL92505.1 agla|OJJ85644.1 akaw|GAA82117.1 aluc|OJZ92059.1  
anid|CBF76492.1 anig|EHA22988.1 aory|EIT76579.1 ater|EAU35053.1 atub|OJI86491.1 aver|OJJ00446.1  
awen|OJJ39212.1 azon|OJJ51642.1

Group1038: asyd|OJJ57870.1 asyd|OJJ61020.1 abra|OJJ75464.1 acar|OOF90276.1 acla|EAW13831.1  
afis|EAW18300.1 afla|EED48769.1 afum|EAL87666.1 agla|OJJ88123.1 akaw|GAA84237.1 aluc|OJZ88920.1  
anid|CBF79478.1 anig|EHA23592.1 aory|EIT73032.1 ater|EAU33308.1 atub|OJI85872.1 aver|OJJ04524.1  
awen|OJJ30675.1 azon|OJJ43275.1

Group1040: ater|EAU30138.1 ater|EAU38860.1 abra|OJJ73936.1 acar|OOG01067.1 acla|EAW07813.1  
afis|EAW22849.1 afla|EED50124.1 afum|EAL90351.1 agla|OJJ83475.1 akaw|GAA89542.1 aluc|OJZ88108.1  
anid|CBF87853.1 anig|EHA17877.1 aory|EIT74737.1 asyd|OJJ63417.1 atub|OJI90715.1 aver|OJI97521.1  
awen|OJJ38872.1 azon|OJJ49662.1

Group1041: ater|EAU30572.1 ater|EAU36084.1 abra|OJJ68744.1 acar|OOF90309.1 acla|EAW14290.1  
afis|EAW18993.1 afla|EED46791.1 afum|EAL93728.1 agla|OJJ82981.1 akaw|GAA89891.1 aluc|OJZ81782.1  
anid|CBF77932.1 anig|EHA22433.1 aory|EIT72766.1 asyd|OJJ52417.1 atub|OJI84356.1 aver|OJJ03362.1  
awen|OJJ31615.1 azon|OJJ47315.1

Group1043: atub|OJI80331.1 atub|OJI90561.1 abra|OJJ74085.1 acar|OOG01195.1 acla|EAW07929.1  
afis|EAW22967.1 afla|EED54404.1 afum|EAL90230.1 agla|OJJ83320.1 akaw|GAA87565.1 aluc|OJZ87950.1  
anid|CBF87610.1 anig|EHA17736.1 aory|EIT75873.1 asyd|OJJ63271.1 ater|EAU30655.1 aver|OJI97686.1  
awen|OJJ38596.1 azon|OJJ47331.1

Group1045: aver|OJI96684.1 aver|OJJ05918.1 abra|OJJ73439.1 acar|OOG00645.1 acla|EAW06773.1  
afis|EAW16324.1 afla|EED53558.1 afum|EAL88947.1 agla|OJJ88286.1 akaw|GAA83054.1 aluc|OJZ88601.1  
anid|CBF89160.1 anig|EHA18295.1 aory|EIT74902.1 asyd|OJJ62559.1 ater|EAU34133.1 atub|OJI91186.1  
awen|OJJ37724.1 azon|OJJ44983.1

Group1046: aver|OJI98887.1 aver|OJJ06757.1 abra|OJJ77001.1 acar|OOF91446.1 acla|EAW13450.1  
afis|EAW20561.1 afla|EED52343.1 afum|EAL84500.1 agla|OJJ88729.1 akaw|GAA87047.1 aluc|OJZ84400.1

anid|CBF78975.1 anig|EHA27730.1 aory|EIT74333.1 asyd|OJJ55674.1 ater|EAU37119.1 atub|OJI89672.1  
awen|OJJ33268.1 azon|OJJ50642.1

Group1047: aver|OJI98940.1 aver|OJI99461.1 abra|OJJ69903.1 acar|OOF93421.1 acla|EAW08920.1  
afis|EAW15474.1 afla|EED46925.1 afum|EAL85847.1 agla|OJJ89052.1 akaw|GAA87749.1 aluc|OJZ85382.1  
anid|CBF86601.1 anig|EHA25565.1 aory|EIT72600.1 asyd|OJJ64827.1 ater|EAU32654.1 atub|OJI80188.1  
awen|OJJ36395.1 azon|OJJ44109.1

Group1049: aver|OJJ01895.1 aver|OJJ04283.1 abra|OJJ68598.1 acar|OOF92108.1 acla|EAW12641.1  
afis|EAW18044.1 afla|EED51502.1 afum|EAL91855.2 agla|OJJ85415.1 akaw|GAA91922.1 aluc|OJZ81958.1  
anid|CBF79781.1 anig|EHA22289.1 aory|EIT80736.1 asyd|OJJ58122.1 ater|EAU31279.1 atub|OJI84509.1  
awen|OJJ41490.1 azon|OJJ48220.1

Group1050: aver|OJJ05206.1 aver|OJJ06610.1 aluc|OJZ88621.1 anig|EHA18312.1 atub|OJI91206.1  
abra|OJJ73422.1 acar|OOG00625.1 acla|EAW07037.1 afis|EAW16663.1 afla|EED44906.1 afum|EAL89267.1  
agla|OJJ78706.1 akaw|GAA83070.1 anid|CBF82078.1 aory|EIT73489.1 asyd|OJJ54252.1 ater|EAU39585.1  
awen|OJJ40050.1 azon|OJJ50117.1

Group1052: awen|OJJ29714.1 awen|OJJ31500.1 abra|OJJ72682.1 acar|OOF95931.1 acla|EAW12316.1  
afis|EAW16904.1 afla|EED45262.1 afum|EAL86440.1 agla|OJJ84538.1 akaw|GAA85300.1 aluc|OJZ90660.1  
anid|CBF80774.1 anig|EHA24095.1 aory|EIT73651.1 asyd|OJJ54502.1 ater|EAU30211.1 atub|OJI82089.1  
aver|OJJ07679.1 azon|OJJ46214.1

Group1053: awen|OJJ30059.1 awen|OJJ32960.1 abra|OJJ69424.1 acar|OOF94312.1 acla|EAW14803.1  
afis|EAW24334.1 afla|EED47930.1 afum|EAL86004.1 agla|OJJ83203.1 akaw|GAA88290.1 aluc|OJZ82260.1  
anig|EHA28482.1 aory|EIT79819.1 ater|EAU30414.1 atub|OJI88178.1 anid|CBF74037.1 aver|OJJ07954.1  
azon|OJJ48958.1 asyd|OJJ53852.1

Group1054: awen|OJJ30747.1 awen|OJJ31734.1 abra|OJJ67459.1 acar|OOF92371.1 acla|EAW06307.1  
afis|EAW18416.1 afla|EED52993.1 afum|EAL93098.1 agla|OJJ84982.1 akaw|GAA86374.1 aluc|OJZ84905.1  
anid|CBF70716.1 anig|EHA25129.1 aory|EIT77436.1 asyd|OJJ58446.1 ater|EAU29831.1 atub|OJI80693.1  
aver|OJJ01046.1 azon|OJJ50492.1

Group1055: awen|OJJ30760.1 awen|OJJ31721.1 abra|OJJ67449.1 acar|OOF90341.1 acla|EAW06315.1  
afis|EAW18429.1 afla|EED52984.1 afum|EAL93109.1 agla|OJJ84994.1 akaw|GAA86381.1 aluc|OJZ84915.1  
anid|CBF70683.1 anig|EHA25136.1 aory|EIT78705.1 asyd|OJJ58466.1 ater|EAU29845.1 atub|OJI80683.1  
aver|OJJ01065.1 azon|OJJ50482.1

Group1056: awen|OJJ30764.1 awen|OJJ31717.1 abra|OJJ67446.1 acar|OOF90343.1 acla|EAW06317.1  
afis|EAW18431.1 afla|EED52982.1 afum|EAL93111.2 agla|OJJ84997.1 akaw|GAA86383.1 aluc|OJZ84917.1  
anid|CBF70025.1 anig|EHA25137.1 aory|EIT78725.1 asyd|OJJ58872.1 ater|EAU29847.1 atub|OJI80681.1  
aver|OJJ01475.1 azon|OJJ50481.1

Group1057: awen|OJJ30768.1 awen|OJJ31713.1 abra|OJJ67442.1 acar|OOF92386.1 acla|EAW06321.1  
afis|EAW18435.1 afla|EED52980.1 afum|EAL93116.1 agla|OJJ85002.1 akaw|GAA86387.1 aluc|OJZ84922.1  
anid|CBF70033.1 anig|EHA25140.1 aory|EIT78731.1 asyd|OJJ58868.1 ater|EAU29851.1 atub|OJI80677.1  
aver|OJJ01470.1 azon|OJJ50478.1

Group1060: awen|OJJ32955.1 awen|OJJ34548.1 abra|OJJ69452.1 acar|OOF94289.1 acla|EAW14816.1  
afis|EAW24346.1 afla|EED47917.1 afum|EAL86016.1 agla|OJJ83207.1 akaw|GAA88367.1 aluc|OJZ82288.1  
anid|CBF74019.1 anig|EHA28460.1 aory|EIT83370.1 asyd|OJJ53841.1 ater|EAU30400.1 atub|OJI88151.1  
aver|OJJ07944.1 azon|OJJ48966.1

Group1061: awen|OJJ35632.1 awen|OJJ41410.1 abra|OJJ68673.1 acar|OOF92174.1 acla|EAW12575.1  
afis|EAW24073.1 afla|EED51400.1 afum|EAL91929.1 agla|OJJ87142.1 akaw|GAA89826.1 aluc|OJZ81862.1  
anid|CBF86467.1 anig|EHA22364.1 aory|EIT80717.1 asyd|OJJ64908.1 ater|EAU30495.1 atub|OJI84429.1  
aver|OJI99030.1 azon|OJJ48882.1

Group1062: awen|OJJ35956.1 awen|OJJ39245.1 abra|OJJ76134.1 acar|OOF99789.1 acla|EAW09684.1  
afis|EAW21455.1 afla|EED55885.1 afum|EAL92474.1 agla|OJJ85603.1 akaw|GAA88833.1 aluc|OJZ89596.1  
anid|CBF76546.1 anig|EHA23016.1 aory|EIT76856.1 asyd|OJJ61154.1 ater|EAU35080.1 atub|OJI85207.1  
aver|OJJ00476.1 azon|OJJ51610.1

Group1063: awen|OJJ35989.1 awen|OJJ38023.1 abra|OJJ75270.1 acar|OOF94533.1 acla|EAW12238.1  
afis|EAW16989.1 afla|EED48968.1 afum|EAL86513.1 agla|OJJ79827.1 akaw|GAA91808.1 aluc|OJZ92830.1  
anid|CBF87435.1 anig|EHA26179.1 aory|EIT79996.1 asyd|OJJ52914.1 ater|EAU31738.1 atub|OJI87287.1  
aver|OJJ08884.1 azon|OJJ50274.1

Group1064: awen|OJJ36336.1 awen|OJJ40727.1 abra|OJJ70865.1 acar|OOF98251.1 acla|EAW10457.1  
afis|EAW25110.1 afla|EED55332.1 afum|EAL89781.1 agla|OJJ89071.1 akaw|GAA91732.1 aluc|OJZ87654.1  
anid|CBF86071.1 anig|EHA20848.1 aory|EIT76213.1 asyd|OJJ64460.1 ater|EAU39380.1 atub|OJI80988.1  
aver|OJI98563.1 azon|OJJ44099.1

Group1065: awen|OJJ38099.1 awen|OJJ40555.1 abra|OJJ74809.1 acar|OOF95801.1 acla|EAW10605.1 afis|EAW24962.1 afla|EED55500.1 afum|EAL89620.1 agla|OJJ82197.1 akaw|GAA83603.1 aluc|OJZ92391.1 anid|CBF81656.1 anig|EHA26584.1 aory|EIT80890.1 asyd|OJJ59547.1 ater|EAU35693.1 atub|OJI86821.1 aver|OJJ02721.1 azon|OJJ49417.1

Group1066: awen|OJJ40158.1 awen|OJJ41199.1 abra|OJJ71411.1 acar|OOF97761.1 acla|EAW10126.1 afis|EAW25462.1 afla|EED53951.1 afum|EAL90125.1 agla|OJJ87114.1 akaw|GAA82589.1 aluc|OJZ87129.1 anid|CBF77649.1 anig|EHA20391.1 aory|EIT78320.1 asyd|OJJ53118.1 ater|EAU34631.1 atub|OJI81511.1 aver|OJJ03736.1 azon|OJJ44770.1

Group1068: azon|OJJ43179.1 azon|OJJ47539.1 abra|OJJ70678.1 acar|OOF97049.1 acla|EAW08086.1 afis|EAW23122.1 afla|EED48531.1 afum|EAL88358.1 agla|OJJ89617.1 akaw|GAA90010.1 aluc|OJZ84026.1 anid|CBF74402.1 anig|EHA19147.1 aory|EIT73068.1 asyd|OJJ57764.1 ater|EAU36250.1 atub|OJI90398.1 aver|OJJ05402.1 awen|OJJ36659.1

Group1069: azon|OJJ44484.1 azon|OJJ48556.1 abra|OJJ75695.1 acar|OOG00157.1 acla|EAW09413.1 afis|EAW21723.1 afla|EED57992.1 afum|EAL92756.1 agla|OJJ79861.1 akaw|GAA84431.1 aluc|OJZ89146.1 anid|CBF83716.1 anig|EHA23402.1 aory|EIT79772.1 asyd|OJJ60837.1 ater|EAU38407.1 atub|OJI85642.1 aver|OJJ00161.1 awen|OJJ33996.1

Group1070: azon|OJJ45306.1 azon|OJJ46721.1 abra|OJJ76474.1 acar|OOF99711.1 acla|EAW13959.1 afis|EAW18668.1 afla|EED52660.1 afum|EAL93386.1 agla|OJJ82407.1 akaw|GAA82386.1 aluc|OJZ91735.1 anid|CBF70575.1 anig|EHA22741.1 aory|EIT74271.1 asyd|OJJ58530.1 ater|EAU38243.1 atub|OJI86193.1 aver|OJJ01132.1 awen|OJJ32140.1

Group1072: azon|OJJ45841.1 azon|OJJ45942.1 abra|OJJ69362.1 acar|OOF94363.1 acla|EAW14752.1 afis|EAW24283.1 afla|EED47993.1 afum|EAL85952.1 agla|OJJ83145.1 akaw|GAA88231.1 aluc|OJZ82195.1 anid|CBF74136.1 anig|EHA28542.1 aory|EIT79842.1 asyd|OJJ53916.1 ater|EAU31231.1 atub|OJI88240.1 aver|OJJ08014.1 awen|OJJ33013.1

Group1073: azon|OJJ50179.1 azon|OJJ50395.1 abra|OJJ68426.1 acar|OOF93927.1 acla|EAW11928.1 afis|EAW19562.1 afla|EED50583.1 afum|EAL86950.1 agla|OJJ81713.1 akaw|GAA86946.1 aluc|OJZ90071.1 anid|CBF89380.1 anig|EHA21002.1 aory|EIT82053.1 asyd|OJJ62464.1 ater|EAU31050.1 atub|OJI84735.1 aver|OJI96599.1 awen|OJJ35963.1

Group1077: abra|OJJ65944.1 acar|OOF92929.1 acla|EAW13567.1 afis|EAW20033.1 afla|EED46044.1 afum|EAL84883.1 agla|OJJ88021.1 akaw|GAA90822.1 aluc|OJZ83013.1 anid|CBF84765.1 anig|EHA21428.1 aory|EIT75479.1 asyd|OJJ53284.1 ater|EAU29399.1 atub|OJI89248.1 aver|OJJ08457.1 awen|OJJ30056.1 azon|OJJ46327.1 afla|EED46043.1

Group1083: abra|OJJ66594.1 acar|OOF91029.1 acla|EAW10897.1 afis|EAW20961.1 afla|EED50316.1 afum|EAL84672.1 agla|OJJ83917.1 akaw|GAA91123.1 aluc|OJZ81453.1 anid|CBF82569.1 anig|EHA25975.1 aory|EIT77366.1 asyd|OJJ54049.1 ater|EAU38611.1 atub|OJI88728.1 aver|OJJ08694.1 awen|OJJ34356.1 azon|OJJ48092.1 aory|EIT77330.1

Group1084: abra|OJJ66648.1 acar|OOF93752.1 acla|EAW11791.1 afis|EAW19402.1 afla|EED50356.1 afum|EAL87093.1 agla|OJJ81115.1 akaw|GAA89601.1 aluc|OJZ80801.1 anid|CBF74340.1 anig|EHA27233.1 aory|EIT83133.1 asyd|OJJ51904.1 ater|EAU36127.1 atub|OJI87649.1 aver|OJJ05364.1 awen|OJJ36797.1 azon|OJJ43002.1 acar|OOF93668.1

Group1085: abra|OJJ66851.1 acar|OOF91627.1 acla|EAW14429.1 afis|EAW19136.1 afla|EED54277.1 afum|EAL93868.1 agla|OJJ88615.1 akaw|GAA91555.1 aluc|OJZ85733.1 anid|CBF86327.1 anig|EHA24817.1 aory|EIT75982.1 asyd|OJJ64992.1 ater|EAU37407.1 atub|OJI79518.1 aver|OJI99111.1 awen|OJJ37473.1 azon|OJJ51152.1 anid|CBF86329.1

Group1086: abra|OJJ66857.1 acar|OOF91634.1 acla|EAW14436.1 afis|EAW19144.1 afla|EED54269.1 afum|EAL93875.1 agla|OJJ88587.1 akaw|GAA91548.1 aluc|OJZ85726.1 anid|CBF86314.1 anig|EHA24822.1 aory|EIT75975.1 asyd|OJJ64999.1 ater|EAU37416.1 atub|OJI79512.1 aver|OJI99119.1 awen|OJJ37483.1 azon|OJJ51160.1 aory|EIT76087.1

Group1087: abra|OJJ66865.1 acar|OOF91641.1 acla|EAW14441.1 afis|EAW19149.1 afla|EED54264.1 afum|EAL93880.1 agla|OJJ88575.1 akaw|GAA91543.1 aluc|OJZ85717.1 anid|CBF86306.1 anig|EHA24827.1 aory|EIT76024.1 asyd|OJJ65005.1 ater|EAU37422.1 atub|OJI79507.1 aver|OJI99124.1 awen|OJJ37502.1 azon|OJJ51167.1 afla|EED54263.1

Group1088: abra|OJJ67116.1 acar|OOF98436.1 acla|EAW13746.1 afis|EAW19825.1 afla|EED56208.1 afum|EAL85067.1 agla|OJJ83144.1 akaw|GAA91049.1 aluc|OJZ87859.1 anid|CBF83120.1 anig|EHA20165.1 aory|EIT73304.1 asyd|OJJ61473.1 ater|EAU31280.1 atub|OJI80788.1 aver|OJJ00814.1 awen|OJJ36528.1 azon|OJJ47562.1 agla|OJJ79980.1

Group1093: abra|OJJ67523.1 awen|OJJ30978.1 abra|OJJ69776.1 acar|OOF93595.1 acla|EAW11058.1 afis|EAW20815.1 afla|EED53102.1 afum|EBA27207.1 agla|OJJ81282.1 akaw|GAA87877.1 aluc|OJZ85518.1

anid|CBF86687.1 anig|EHA25051.1 aory|EIT74763.1 asyd|OJJ64752.1 ater|EAU38934.1 atub|OJI80048.1  
aver|OJI98853.1 azon|OJJ45137.1

Group1098: abra|OJJ67796.1 agla|OJJ84477.1 abra|OJJ75071.1 acar|OOF97263.1 acla|EAW08252.1  
afis|EAW23286.1 afla|EED55688.1 afum|EAL88193.1 akaw|GAA88683.1 aluc|OJZ92637.1 anid|CBF89516.1  
anig|EHA26354.1 aory|EIT77084.1 asyd|OJJ62394.1 ater|EAU37586.1 atub|OJI87068.1 aver|OJI96527.1  
awen|OJJ39670.1 azon|OJJ47800.1

Group1099: aory|EIT77379.1 abra|OJJ71274.1 acar|OOF97900.1 acla|EAW10254.1 afis|EAW25337.1  
afla|EED53807.1 afum|EAL90000.1 agla|OJJ83868.1 akaw|GAA82716.1 aluc|OJZ87270.1 anid|CBF75246.1  
anig|EHA20511.1 asyd|OJJ59907.1 ater|EAU34477.1 atub|OJI81372.1 aver|OJJ02378.1 awen|OJJ41034.1  
azon|OJJ44631.1 aory|EIT78377.1

Group1104: abra|OJJ68219.1 acar|OOF97509.1 acla|EAW09056.1 afis|EAW25630.1 afla|EED55187.1  
afum|EAL84318.1 agla|OJJ78900.1 akaw|GAA83227.1 aluc|OJZ83727.1 anid|CBF83164.1 anig|EHA18875.1  
aory|EIT83560.1 asyd|OJJ55506.1 ater|EAU32707.1 atub|OJI90103.1 aver|OJJ06581.1 awen|OJJ36050.1  
azon|OJJ50396.1 acla|EAW09057.1

Group1106: abra|OJJ68422.1 acar|OOF97621.1 acla|EAW10999.1 afis|EAW20862.1 afla|EED45444.1  
afum|EAL84773.1 agla|OJJ83749.1 akaw|GAA92526.1 aluc|OJZ90075.1 anid|CBF71444.1 anig|EHA20998.1  
aory|EIT82447.1 asyd|OJJ60710.1 ater|EAU30805.1 atub|OJI84731.1 aver|OJJ00036.1 awen|OJJ34508.1  
azon|OJJ51786.1 agla|OJJ89303.1

Group1108: abra|OJJ68521.1 acar|OOF92726.1 acla|EAW12843.1 afis|EAW18006.1 afla|EED51889.1  
afum|EAL91818.1 agla|OJJ80269.1 akaw|GAA91328.1 aluc|OJZ82735.1 anid|CBF80030.1 anig|EHA21186.1  
aory|EIT82919.1 asyd|OJJ58269.1 ater|EAU31522.1 atub|OJI88969.1 aver|OJJ02154.1 awen|OJJ41536.1  
azon|OJJ48254.1 agla|OJJ80268.1

Group1109: abra|OJJ68529.1 acar|OOF92733.1 acla|EAW12835.1 afis|EAW18000.1 afla|EED51896.1  
afum|EAL91811.1 agla|OJJ80263.1 akaw|GAA91321.1 aluc|OJZ82742.1 anid|CBF80021.1 anig|EHA21193.1  
aory|EIT76177.1 asyd|OJJ58263.1 ater|EAU31512.1 atub|OJI88977.1 aver|OJJ02161.1 awen|OJJ41542.1  
azon|OJJ48260.1 aory|EIT76174.1

Group1110: abra|OJJ68552.1 acar|OOF92747.1 acla|EAW12815.1 afis|EAW17980.1 afla|EED51925.1  
afum|EAL91789.1 agla|OJJ80237.1 akaw|GAA91301.1 aluc|OJZ82769.1 anid|CBF79979.1 anig|EHA21211.1  
aory|EIT81371.1 asyd|OJJ58235.1 ater|EAU31490.1 atub|OJI89000.1 aver|OJJ02190.1 awen|OJJ41565.1  
azon|OJJ48280.1 akaw|GAA92005.1

Group1111: abra|OJJ68565.1 acar|OOF92758.1 acla|EAW12801.1 afis|EAW17967.1 afla|EED51939.1  
afum|EAL91776.1 agla|OJJ80213.1 akaw|GAA91289.1 aluc|OJZ82780.1 anid|CBF79959.1 anig|EHA21223.1  
aory|EIT81465.1 asyd|OJJ58221.1 ater|EAU31477.1 atub|OJI89013.1 aver|OJJ02201.1 awen|OJJ41577.1  
azon|OJJ48290.1 akaw|GAA91288.1

Group1112: abra|OJJ68634.1 acar|OOF92138.1 acla|EAW12618.1 afis|EAW18066.1 afla|EED51450.1  
afum|EBA27443.1 agla|OJJ87353.1 akaw|GAA89773.1 aluc|OJZ81921.1 anid|CBF86420.1 anig|EHA22326.1  
anig|EHA22327.1 aory|EIT80631.1 asyd|OJJ64939.1 ater|EAU30462.1 atub|OJI84473.1 aver|OJI99061.1  
awen|OJJ41453.1 azon|OJJ48911.1

Group1113: abra|OJJ68759.1 acar|OOF92246.1 acla|EAW12492.1 afis|EAW24153.1 afla|EED46778.1  
afum|EAL92008.1 agla|OJJ89544.1 akaw|GAA89903.1 aluc|OJZ81767.1 anid|CBF77909.1 anig|EHA22447.1  
aory|EIT72606.1 asyd|OJJ55299.1 ater|EAU30585.1 atub|OJI84340.1 aver|OJJ06926.1 awen|OJJ41324.1  
azon|OJJ48798.1 ater|EAU30584.1

Group1114: abra|OJJ68992.1 acar|OOF92704.1 acla|EAW12644.1 afis|EAW18041.1 afla|EED51855.1  
afla|EED51856.1 afum|EAL91852.1 agla|OJJ85413.1 akaw|GAA90512.1 aluc|OJZ85977.1 anid|CBF80101.1  
anig|EHA24629.1 aory|EIT81757.1 asyd|OJJ58297.1 ater|EAU31556.1 atub|OJI79767.1 aver|OJJ02127.1  
awen|OJJ41496.1 azon|OJJ48224.1

Group1115: abra|OJJ69111.1 acar|OOF91183.1 acla|EAW08721.1 afis|EAW15726.1 afla|EED51338.1  
afum|EAL85621.1 agla|OJJ81865.1 akaw|GAA90636.1 aluc|OJZ86100.1 anid|CBF71089.1 anig|EHA24519.1  
aory|EIT81534.1 asyd|OJJ52700.1 ater|EAU32431.1 atub|OJI79895.1 aver|OJJ04728.1 awen|OJJ38410.1  
azon|OJJ43832.1 afla|EED51337.1

Group1116: abra|OJJ69231.1 acar|OOF91089.1 acla|EAW08618.1 afis|EAW15816.1 afla|EED51231.1  
afum|EAL85535.1 agla|OJJ81980.1 akaw|GAA92239.1 aluc|OJZ86211.1 anid|CBF70897.1 anig|EHA24415.1  
aory|EIT83178.1 asyd|OJJ52594.1 ater|EAU33432.1 atub|OJI80005.1 aver|OJJ04621.1 awen|OJJ38530.1  
azon|OJJ43732.1 atub|OJI80006.1

Group1117: abra|OJJ69301.1 acar|OOF94424.1 acla|EAW14687.1 afis|EAW24218.1 afla|EED48053.1  
afum|EAL85887.1 agla|OJJ79652.1 akaw|GAA88170.1 aluc|OJZ82129.1 anid|CBF74250.1 anig|EHA28602.1  
aory|EIT83328.1 asyd|OJJ53976.1 ater|EAU31168.1 atub|OJI88307.1 aver|OJJ08075.1 awen|OJJ33078.1  
azon|OJJ44868.1 aory|EIT83336.1

Group1118: abra|OJJ69328.1 acar|OOF94399.1 acla|EAW14712.1 afis|EAW24247.1 afla|EED48026.1  
afum|EAL85915.1 agla|OJJ79626.1 akaw|GAA88199.1 aluc|OJZ82160.1 anid|CBF74202.1 anig|EHA28572.1  
aory|EIT83332.1 asyd|OJJ53955.1 ater|EAU31188.1 atub|OJI88277.1 aver|OJJ08051.1 awen|OJJ33059.1  
azon|OJJ48467.1 afla|EED48027.1

Group1119: abra|OJJ69488.1 acar|OOF94260.1 acla|EAW09905.1 afis|EAW21154.1 afla|EED54658.1  
afum|EAL92172.1 agla|OJJ80039.1 akaw|GAA88332.1 aluc|OJZ82327.1 anid|CBF86989.1 anig|EHA28431.1  
aory|EIT78787.1 asyd|OJJ60510.1 ater|EAU39556.1 atub|OJI88111.1 aver|OJI99836.1 awen|OJJ36482.1  
azon|OJJ44363.1 anig|EHA21818.1

Group1120: abra|OJJ69514.1 acar|OOF94239.1 acla|EAW09954.1 afis|EAW21142.1 afla|EED46141.1  
afum|EAL92161.1 agla|OJJ80069.1 akaw|GAA88310.1 aluc|OJZ82352.1 anid|CBF87008.1 anig|EHA28408.1  
aory|EIT76511.1 asyd|OJJ60471.1 ater|EAU36763.1 atub|OJI88088.1 aver|OJI99791.1 awen|OJJ36466.1  
azon|OJJ44412.1 azon|OJJ42893.1

Group1121: abra|OJJ69523.1 acar|OOF94231.1 acla|EAW09971.1 afis|EAW21117.1 afla|EED51790.1  
afum|EAL92141.1 agla|OJJ80094.1 akaw|GAA88302.1 aluc|OJZ82363.1 anid|CBF87028.1 anig|EHA28402.1  
aory|EIT81753.1 asyd|OJJ60456.1 ater|EAU36782.1 atub|OJI88079.1 aver|OJJ06754.1 awen|OJJ36447.1  
azon|OJJ44428.1 aver|OJI99774.1

Group1122: abra|OJJ69615.1 acar|OOF92691.1 acla|EAW12075.1 afis|EAW19716.1 afla|EED53109.1  
afum|EAL86811.1 agla|OJJ80862.1 akaw|GAA91599.1 aluc|OJZ82423.1 anid|CBF80080.1 anig|EHA28346.1  
aory|EIT74768.1 asyd|OJJ58309.1 ater|EAU37777.1 atub|OJI88017.1 aver|OJJ02103.1 awen|OJJ35106.1  
azon|OJJ45858.1 awen|OJJ34696.1

Group1123: abra|OJJ69668.1 acar|OOF95768.1 acla|EAW10632.1 afis|EAW24935.1 afla|EED55537.1  
afum|EAL87763.1 agla|OJJ82162.1 akaw|GAA91646.1 aluc|OJZ82473.1 anid|CBF75718.1 anig|EHA28300.1  
aory|EIT80819.1 asyd|OJJ57503.1 ater|EAU35664.1 atub|OJI87964.1 aver|OJJ05675.1 awen|OJJ40530.1  
azon|OJJ49390.1 afum|EAL89592.1

Group1131: abra|OJJ70466.1 acar|OOF97458.1 acla|EAW13048.1 afis|EAW17619.1 afla|EED49199.1  
afum|EAL91432.1 agla|OJJ81306.1 akaw|GAA83315.1 aluc|OJZ83810.1 anid|CBF90163.1  
anig|EHA18955.1 aory|EIT78513.1 asyd|OJJ61994.1 ater|EAU37053.1 atub|OJI90177.1 aver|OJI96086.1  
awen|OJJ37225.1 azon|OJJ50928.1

Group1132: abra|OJJ70467.1 acar|OOF97457.1 acla|EAW13047.1 afis|EAW17620.1 afla|EED49197.1  
afum|EAL91433.2 agla|OJJ81305.1 akaw|GAA83316.1 aluc|OJZ83811.1 anid|CBF90161.1  
anig|EHA18956.1 aory|EIT78563.1 asyd|OJJ61995.1 ater|EAU37054.1 atub|OJI90178.1 aver|OJI96087.1  
awen|OJJ37224.1 azon|OJJ50927.1

Group1133: abra|OJJ70612.1 acar|OOF97110.1 acla|EAW13015.1 afis|EAW17652.1 afla|EED50506.1  
afum|EAL91467.1 agla|OJJ79552.1 akaw|GAA89951.1 aluc|OJZ83958.1 anid|CBF90075.1 anig|EHA19086.1  
aory|EIT82132.1 asyd|OJJ62041.1 ater|EAU37088.1 atub|OJI90330.1 aver|OJI96147.1 awen|OJJ37193.1  
azon|OJJ50892.1 aver|OJJ07605.1

Group1134: abra|OJJ70647.1 acar|OOF97074.1 acla|EAW08113.1 afis|EAW23138.1 afla|EED48501.1  
afum|EAL88343.1 agla|OJJ89662.1 akaw|GAA89983.1 aluc|OJZ83997.1 anid|CBF74448.1 anig|EHA19120.1  
aory|EIT73103.1 asyd|OJJ57741.1 ater|EAU36279.1 atub|OJI90366.1 aver|OJJ05426.1 awen|OJJ36635.1  
azon|OJJ47581.1 awen|OJJ36634.1

Group1135: abra|OJJ70656.1 acar|OOF97066.1 acla|EAW08103.1 afis|EAW23148.1 afla|EED48511.1  
afum|EAL88333.1 agla|OJJ89654.1 akaw|GAA89992.1 aluc|OJZ84006.1 anid|CBF74430.1 anig|EHA19128.1  
aory|EIT73155.1 asyd|OJJ57750.1 ater|EAU32975.1 atub|OJI90375.1 aver|OJJ05417.1 awen|OJJ36643.1  
azon|OJJ47571.1 acar|OOG00309.1

Group1136: abra|OJJ70745.1 acar|OOF96999.1 acla|EAW11175.1 afis|EAW15906.1 afla|EED56463.1  
afum|EAL88541.1 agla|OJJ89566.1 akaw|GAA90066.1 aluc|OJZ84090.1 anid|CBF81270.1 anig|EHA19203.1  
aory|EIT72857.1 asyd|OJJ59333.1 ater|EAU36183.1 atub|OJI90461.1 aver|OJJ02941.1 awen|OJJ36725.1  
azon|OJJ47484.1 ater|EAU30153.1

Group1137: abra|OJJ70747.1 acar|OOF96998.1 acla|EAW11174.1 afis|EAW15905.1 afla|EED56464.1  
afum|EAL88540.1 agla|OJJ89565.1 akaw|GAA90067.1 aluc|OJZ84091.1 anid|CBF81274.1 anig|EHA19204.1  
aory|EIT72825.1 asyd|OJJ59334.1 ater|EAU36182.1 atub|OJI90462.1 aver|OJJ02940.1 awen|OJJ36726.1  
azon|OJJ47471.1 aory|EIT72838.1

Group1138: abra|OJJ70748.1 acar|OOF96997.1 acla|EAW11173.1 afis|EAW15904.1 afla|EED56466.1  
afum|EAL88539.1 agla|OJJ89564.1 akaw|GAA90068.1 aluc|OJZ84092.1 anid|CBF81276.1 anig|EHA19205.1  
aory|EIT72390.1 asyd|OJJ59335.1 ater|EAU36181.1 atub|OJI90463.1 aver|OJJ02939.1 awen|OJJ36727.1  
azon|OJJ47470.1 afla|EED46475.1

Group1140: abra|OJJ70840.1 acar|OOF98274.1 acla|EAW13281.1 afis|EAW17336.1 afla|EED46105.1  
afum|EAL91180.1 agla|OJJ82057.1 akaw|GAA91708.1 aluc|OJZ87681.1 anid|CBF85633.1 anig|EHA20871.1

aory|EIT76521.1 asyd|OJJ56056.1 ater|EAU33888.1 atub|OJI80962.1 aver|OJJ04998.1 awen|OJJ33506.1 azon|OJJ50300.1 azon|OJJ51817.1

Group1141: abra|OJJ70845.1 acar|OOF98270.1 acla|EAW10436.1 afis|EAW25131.1 afla|EED55314.1 afum|EAL89802.1 agla|OJJ89035.1 akaw|GAA91713.1 aluc|OJZ87676.1 anid|CBF86816.1 anig|EHA20866.1 aory|EIT83519.1 asyd|OJJ64657.1 ater|EAU39403.1 atub|OJI80967.1 aver|OJI98760.1 awen|OJJ40756.1 azon|OJJ44121.1 aver|OJJ02113.1

Group1142: abra|OJJ70882.1 acar|OOF98239.1 acla|EAW10470.1 afis|EAW25097.1 afla|EED55351.1 afum|EAL89768.1 agla|OJJ85476.1 akaw|GAA91744.1 aluc|OJZ87640.1 anid|CBF86010.1 anig|EHA20834.1 aory|EIT80916.1 asyd|OJJ64447.1 ater|EAU39355.1 atub|OJI81005.1 aver|OJI98550.1 awen|OJJ40711.1 azon|OJJ44087.1 ater|EAU29372.1

Group1143: abra|OJJ70985.1 acar|OOF98146.1 acla|EAW10545.1 afis|EAW25013.1 afla|EED55432.1 afum|EAL89683.1 agla|OJJ89177.1 akaw|GAA82964.1 aluc|OJZ87545.1 aluc|OJZ87546.1 anid|CBF81523.1 anig|EHA20749.1 aory|EIT80770.1 asyd|OJJ59478.1 ater|EAU35773.1 atub|OJI81100.1 aver|OJJ02795.1 awen|OJJ40627.1 azon|OJJ49056.1

Group1144: abra|OJJ71009.1 acar|OOF98133.1 acla|EAW10561.1 afis|EAW25028.1 afla|EED55451.1 afum|EAL89667.1 agla|OJJ79156.1 agla|OJJ82560.1 akaw|GAA82944.1 aluc|OJZ87522.1 anid|CBF81555.1 anig|EHA20732.1 aory|EIT80765.1 asyd|OJJ59497.1 ater|EAU35759.1 atub|OJI81127.1 aver|OJJ02777.1 awen|OJJ40611.1 azon|OJJ49460.1

Group1145: abra|OJJ71029.1 acar|OOF98110.1 acla|EAW10582.1 afis|EAW24987.1 afla|EED55471.1 afum|EAL89647.1 agla|OJJ82275.1 akaw|GAA82926.1 aluc|OJZ87501.1 anid|CBF81601.1 anig|EHA20716.1 aory|EIT80792.1 asyd|OJJ59520.1 ater|EAU35738.1 atub|OJI81148.1 aver|OJJ02753.1 awen|OJJ40583.1 azon|OJJ41984.1 azon|OJJ49442.1

Group1146: abra|OJJ71043.1 acar|OOF98096.1 acla|EAW10591.1 afis|EAW24977.1 afla|EED55482.1 afum|EAL89637.1 agla|OJJ79140.1 akaw|GAA82913.1 aluc|OJZ87485.1 anid|CBF81627.1 anig|EHA20706.1 aory|EIT80881.1 asyd|OJJ59529.1 ater|EAU35726.1 atub|OJI81163.1 aver|OJJ02741.1 awen|OJJ40574.1 azon|OJJ49436.1 afla|EED55483.1

Group1147: abra|OJJ71134.1 acar|OOF98018.1 acla|EAW10363.1 afis|EAW25229.1 afla|EED53673.1 afum|EAL89890.2 agla|OJJ79179.1 akaw|GAA82840.1 aluc|OJZ87401.1 anid|CBF85338.1 anig|EHA20630.1 aory|EIT75324.1 asyd|OJJ64023.1 ater|EAU34387.1 atub|OJI81245.1 aver|OJI98109.1 awen|OJJ40894.1 azon|OJJ44523.1 aory|EIT75321.1

Group1148: abra|OJJ71194.1 acar|OOF97972.1 acla|EAW10310.1 afis|EAW25283.1 afla|EED53749.1 afum|EAL89946.1 agla|OJJ89257.1 akaw|GAA82789.1 aluc|OJZ87348.1 anid|CBF85422.1 anig|EHA20584.1 aory|EIT78394.1 asyd|OJJ64075.1 ater|EAU34425.1 atub|OJI81295.1 aver|OJI98162.1 awen|OJJ40996.1 azon|OJJ44586.1 asyd|OJJ60350.1

Group1149: abra|OJJ71328.1 acar|OOF97846.1 acla|EAW10211.1 afis|EAW25383.1 afla|EED53860.1 afum|EAL90041.1 agla|OJJ83775.1 akaw|GAA82664.1 aluc|OJZ87214.1 anid|CBF77488.1 anig|EHA20465.1 aory|EIT78406.1 asyd|OJJ53195.1 ater|EAU34529.1 atub|OJI81425.1 aver|OJJ03655.1 awen|OJJ41109.1 azon|OJJ44687.1 aory|EIT78415.1

Group1150: abra|OJJ71401.1 acar|OOF97769.1 acla|EAW10133.1 afis|EAW25454.1 afla|EED53942.1 afla|EED53943.1 afum|EAL90113.1 agla|OJJ87107.1 akaw|GAA82596.1 aluc|OJZ87141.1 anid|CBF77635.1 anig|EHA20399.1 aory|EIT78263.1 asyd|OJJ53125.1 ater|EAU34624.1 atub|OJI81501.1 aver|OJJ03729.1 awen|OJJ41186.1 azon|OJJ44762.1

Group1152: abra|OJJ71994.1 acar|OOF96648.1 acla|EAW09538.1 afis|EAW21594.1 afla|EED57816.1 afum|EAL92612.1 agla|OJJ85787.1 akaw|GAA84934.1 aluc|OJZ86732.1 anid|CBF83446.1 anig|EHA21947.1 aory|EIT81030.1 asyd|OJJ60671.1 ater|EAU34930.1 atub|OJI83796.1 aver|OJI99994.1 awen|OJJ39087.1 azon|OJJ51418.1 ater|EAU32744.1

Group1153: abra|OJJ72045.1 acar|OOF96703.1 acla|EAW09501.1 afis|EAW21635.1 afla|EED48487.1 afum|EAL92669.1 agla|OJJ79700.1 akaw|GAA84889.1 aluc|OJZ86782.1 anid|CBF83498.1 anig|EHA21900.1 aory|EIT83266.1 asyd|OJJ60712.1 ater|EAU38321.1 atub|OJI83738.1 aver|OJJ00045.1 awen|OJJ33884.1 azon|OJJ48669.1 aory|EIT73220.1

Group1156: abra|OJJ72423.1 acar|OOF90372.1 acla|EAW12860.1 afis|EAW17809.1 afla|EED46159.1 afum|EAL91617.1 agla|OJJ80653.1 akaw|GAA86165.1 aluc|OJZ90406.1 anid|CBF78020.1 anig|EHA23874.1 aory|EIT76396.1 asyd|OJJ55235.1 ater|EAU33015.1 atub|OJI81837.1 aver|OJJ06988.1 awen|OJJ41763.1 azon|OJJ44903.1 afla|EED46160.1

Group1157: abra|OJJ72434.1 acar|OOF94801.1 acla|EAW12667.1 afis|EAW17831.1 afla|EED46173.1 afum|EAL91641.1 agla|OJJ80640.1 akaw|GAA86174.1 aluc|OJZ90417.1 anid|CBF77994.1 anig|EHA23885.1 aory|EIT76438.1 asyd|OJJ55252.1 ater|EAU33034.1 atub|OJI81850.1 aver|OJI99643.1 awen|OJJ41750.1 azon|OJJ48442.1 aver|OJJ06972.1



Group1159: abra|OJJ72549.1 acar|OOF94703.1 acla|EAW12754.1 afis|EAW17917.1 afla|EED46320.1 afum|EBA27439.1 agla|OJJ83026.1 akaw|GAA85181.1 aluc|OJZ90537.1 anid|CBF76959.1 anig|EHA23985.1 aory|EIT81197.1 atub|OJI81958.1 awen|OJJ41628.1 asyd|OJJ57052.1 aver|OJJ03244.1 azon|OJJ48353.1 ater|EAU33139.1 asyd|OJJ57051.1

Group1161: abra|OJJ72629.1 acar|OOF94635.1 acla|EAW11593.1 afis|EAW23864.1 afla|EED52589.1 afum|EAL87292.1 agla|OJJ82532.1 akaw|GAA85249.1 aluc|OJZ90606.1 anid|CBF77222.1 anig|EHA24044.1 aory|EIT74309.1 asyd|OJJ56820.1 ater|EAU33487.1 atub|OJI82030.1 aver|OJJ03515.1 awen|OJJ33839.1 azon|OJJ48708.1 awen|OJJ33432.1

Group1162: abra|OJJ72716.1 acar|OOF95949.1 acla|EAW11552.1 afis|EAW23901.1 afla|EED52636.1 afum|EAL87328.1 agla|OJJ79367.1 akaw|GAA85324.1 aluc|OJZ90685.1 anid|CBF77143.1 anig|EHA24113.1 aory|EIT74168.1 asyd|OJJ56912.1 ater|EAU32337.1 atub|OJI82111.1 aver|OJJ03380.1 awen|OJJ39048.1 azon|OJJ51378.1 afis|EAW25771.1

Group1163: abra|OJJ72751.1 acar|OOF95974.1 acla|EAW11510.1 afis|EAW23943.1 afla|EED50573.1 afum|EAL87368.1 agla|OJJ79431.1 akaw|GAA85363.1 aluc|OJZ90725.1 anid|CBF77256.1 anig|EHA24143.1 aory|EIT82138.1 asyd|OJJ56806.1 ater|EAU36036.1 atub|OJI82153.1 aver|OJJ03528.1 awen|OJJ39012.1 azon|OJJ51337.1 awen|OJJ40567.1

Group1166: abra|OJJ72907.1 acar|OOF96090.1 acla|EAW11346.1 afis|EAW18148.1 afla|EED58076.1 afum|EAL87506.1 agla|OJJ83833.1 akaw|GAA85492.1 aluc|OJZ83417.1 anid|CBF81114.1 anig|EHA24266.1 aory|EIT79127.1 ater|EAU35470.1 atub|OJI82304.1 aver|OJJ06234.1 awen|OJJ35591.1 azon|OJJ46913.1 asyd|OJJ56485.1 asyd|OJJ57077.1

Group1167: abra|OJJ73268.1 acar|OOG00508.1 acla|EAW06945.1 afis|EAW16559.1 afla|EED56102.1 afum|EAL89157.1 agla|OJJ82763.1 akaw|GAA87914.1 aluc|OJZ81161.1 anid|CBF81806.1 anig|EHA18478.1 aory|EIT76895.1 asyd|OJJ59644.1 ater|EAU36627.1 atub|OJI91356.1 aver|OJJ02638.1 awen|OJJ40257.1 azon|OJJ49121.1 acar|OOF91712.1

Group1168: abra|OJJ73284.1 acar|OOG00520.1 acla|EAW06959.1 afis|EAW16574.1 afla|EED56090.1 afum|EAL89171.2 agla|OJJ82706.1 akaw|GAA92721.1 aluc|OJZ88765.1 anid|CBF81830.1 anig|EHA18461.1 aory|EIT76622.1 asyd|OJJ59660.1 ater|EAU36642.1 atub|OJI91338.1 aver|OJJ02622.1 awen|OJJ40244.1 azon|OJJ49105.1 asyd|OJJ52085.1

Group1169: abra|OJJ73346.1 acar|OOG00556.1 acla|EAW06973.1 afis|EAW16587.1 afla|EED56078.1 afum|EAL89182.1 agla|OJJ82679.1 akaw|GAA83136.1 aluc|OJZ88693.1 anid|CBF81890.1 anig|EHA18373.1 aory|EIT76830.1 asyd|OJJ59676.1 ater|EAU36664.1 ater|EAU39117.1 atub|OJI91273.1 aver|OJJ02610.1 awen|OJJ40228.1 azon|OJJ49093.1

Group1170: abra|OJJ73352.1 acar|OOG00563.1 acla|EAW12784.1 afis|EAW19851.1 afla|EED52646.1 afum|EAL85042.1 agla|OJJ81301.1 akaw|GAA83131.1 aluc|OJZ88687.1 anid|CBF73979.1 anig|EHA18367.1 aory|EIT74299.1 asyd|OJJ54702.1 ater|EAU32479.1 atub|OJI91267.1 aver|OJJ07471.1 awen|OJJ32014.1 azon|OJJ46075.1 afis|EAW17946.1

Group1171: abra|OJJ73409.1 acar|OOG00606.1 acla|EAW07013.1 afis|EAW16640.1 afla|EED44962.1 afum|EAL89242.1 agla|OJJ82610.1 akaw|GAA83082.1 aluc|OJZ88629.1 anid|CBF82018.1 anig|EHA18319.1 aory|EIT73512.1 asyd|OJJ56191.1 ater|EAU36751.1 atub|OJI91213.1 aver|OJJ05120.1 awen|OJJ40074.1 azon|OJJ45550.1 anid|CBF76269.1

Group1172: abra|OJJ73438.1 acar|OOG00644.1 acla|EAW06774.1 afis|EAW16325.1 afla|EED53556.1 afum|EAL88949.1 agla|OJJ88288.1 akaw|GAA83055.1 aluc|OJZ88602.1 anid|CBF89162.1 anig|EHA18296.1 aory|EIT75182.1 asyd|OJJ62547.1 ater|EAU34132.1 atub|OJI91187.1 aver|OJI96673.1 awen|OJJ37725.1 azon|OJJ44985.1 afla|EED53557.1

Group1175: abra|OJJ73649.1 acar|OOG00830.1 acla|EAW07562.1 afis|EAW22596.1 afla|EED54646.1 afum|EAL90602.1 agla|OJJ80960.1 akaw|GAA88506.1 aluc|OJZ88401.1 anid|CBF88373.1 anig|EHA18129.1 aory|EIT78830.1 asyd|OJJ63733.1 ater|EAU39107.1 atub|OJI90997.1 aver|OJI97208.1 awen|OJJ35224.1 azon|OJJ49885.1 afla|EED54647.1

Group1177: abra|OJJ73743.1 acar|OOG00906.1 acla|EAW07637.1 afis|EAW22657.1 afla|EED49925.1 afum|EAL90535.1 agla|OJJ81040.1 akaw|GAA88422.1 aluc|OJZ88309.1 anid|CBF80225.1 anig|EHA18046.1 aory|EIT72274.1 asyd|OJJ54399.1 ater|EAU39050.1 atub|OJI90904.1 aver|OJJ05335.1 awen|OJJ35266.1 azon|OJJ49829.1 ater|EAU30036.1

Group1179: abra|OJJ73822.1 acar|OOG00974.1 acla|EAW07711.1 afis|EAW22727.1 afla|EED50013.1 afum|EAL90468.2 agla|OJJ83675.1 akaw|GAA89441.1 aluc|OJZ88226.1 anid|CBF88026.1 anig|EHA17974.1 aory|EIT74607.1 asyd|OJJ63528.1 ater|EAU38970.1 atub|OJI90827.1 aver|OJI97403.1 awen|OJJ35422.1 azon|OJJ49754.1 aory|EIT74669.1

Group1180: abra|OJJ73906.1 acar|OOG01039.1 acla|EAW07784.1 afis|EAW22820.1 afla|EED50095.1 afum|EBA27405.1 agla|OJJ83518.1 akaw|GAA89513.1 aluc|OJZ88141.1 anid|CBF87897.1 anig|EHA17904.1

aory|EIT74756.1 asyd|OJJ63443.1 ater|EAU38890.1 atub|OJI90744.1 aver|OJI97493.1 awen|OJJ38907.1 azon|OJJ49688.1 afla|EED50094.1

Group1182: abra|OJJ73974.1 acar|OOG01101.1 acla|EAW07845.1 afis|EAW22881.1 afla|EED50179.1 afum|EAL90318.1 agla|OJJ83449.1 akaw|GAA89577.1 aluc|OJZ88070.1 anid|CBF87807.1 anig|EHA17843.1 aory|EIT77377.1 asyd|OJJ63387.1 ater|EAU38845.1 atub|OJI90679.1 aver|OJI97548.1 awen|OJJ38841.1 azon|OJJ49638.1 agla|OJJ83448.1

Group1183: abra|OJJ73990.1 acar|OOG01116.1 acla|EAW07861.1 afis|EAW22896.1 afla|EED54867.1 afum|EAL90302.1 agla|OJJ83416.1 akaw|GAA87473.1 aluc|OJZ88055.1 anid|CBF87777.1 anig|EHA17827.1 aory|EIT79357.1 asyd|OJJ63370.1 atub|OJI90663.1 aver|OJI97576.1 awen|OJJ38822.1 azon|OJJ49621.1 ater|EAU35980.1 awen|OJJ38821.1

Group1185: abra|OJJ74469.1 acar|OOF95278.1 acla|EAW07228.1 afis|EAW22242.1 afla|EED57635.1 afum|EAL90951.1 agla|OJJ87809.1 akaw|GAA87362.1 aluc|OJZ89651.1 anid|CBF88489.1 anig|EHA26889.1 aory|EIT82991.1 asyd|OJJ63790.1 ater|EAU34249.1 atub|OJI85153.1 aver|OJI97147.1 awen|OJJ34820.1 azon|OJJ45730.1 aver|OJJ06299.1

Group1187: abra|OJJ74764.1 acar|OOF95757.1 acla|EAW10646.1 afis|EAW24920.1 afla|EED55553.1 afum|EAL89575.1 agla|OJJ82149.1 akaw|GAA83647.1 aluc|OJZ92348.1 anig|EHA26626.1 aory|EIT82708.1 asyd|OJJ57492.1 asyd|OJJ62481.1 ater|EAU35652.1 atub|OJI86775.1 aver|OJJ05688.1 awen|OJJ40517.1 azon|OJJ49376.1 anid|CBF75691.1

Group1188: abra|OJJ74777.1 acar|OOF95766.1 acla|EAW10634.1 afis|EAW24932.1 afla|EED55541.1 afum|EAL89588.1 agla|OJJ82160.1 akaw|GAA83635.1 aluc|OJZ92358.1 anid|CBF75714.1 anig|EHA26615.1 aory|EIT82707.1 asyd|OJJ57501.1 ater|EAU35662.1 atub|OJI86788.1 aver|OJJ05677.1 awen|OJJ40528.1 azon|OJJ49389.1 afum|EAL87767.1

Group1190: abra|OJJ74880.1 acar|OOF95883.1 acla|EAW08490.1 afis|EAW23536.1 afla|EED57434.1 afum|EAL87930.1 agla|OJJ86791.1 akaw|GAA83540.1 aluc|OJZ92457.1 anid|CBF89670.1 anig|EHA26510.1 aory|EIT80126.1 asyd|OJJ62272.1 ater|EAU35322.1 atub|OJI86886.1 aver|OJI96381.1 awen|OJJ39866.1 azon|OJJ43234.1 afla|EED57433.1

Group1191: abra|OJJ74903.1 acar|OOF95901.1 acla|EAW08469.1 afis|EAW23516.1 afla|EED57417.1 afum|EAL87947.2 agla|OJJ86764.1 akaw|GAA83519.1 aluc|OJZ92476.1 anid|CBF89704.1 anig|EHA26494.1 aory|EIT80064.1 asyd|OJJ62253.1 ater|EAU35305.1 atub|OJI86907.1 aver|OJI96363.1 awen|OJJ39841.1 azon|OJJ43251.1 aory|EIT80158.1

Group1192: abra|OJJ74942.1 acar|OOF97373.1 acla|EAW08428.1 afis|EAW23472.1 afla|EED57368.1 afum|EAL87994.1 agla|OJJ86711.1 akaw|GAA83479.1 aluc|OJZ92516.1 anid|CBF89779.1 anig|EHA26459.1 aory|EIT80072.1 asyd|OJJ62207.1 ater|EAU36908.1 atub|OJI86949.1 aver|OJI96319.1 awen|OJJ39798.1 azon|OJJ47919.1 awen|OJJ40002.1

Group1193: abra|OJJ75019.1 acar|OOF89964.1 akaw|GAA88640.1 aluc|OJZ92586.1 anid|CBF84112.1 anig|EHA26399.1 atub|OJI87018.1 abra|OJJ75020.1 acla|EAW08212.1 afis|EAW23246.1 afla|EED55727.1 afum|EAL88235.1 agla|OJJ86614.1 aory|EIT83220.1 asyd|OJJ57103.1 ater|EAU37528.1 aver|OJJ03196.1 awen|OJJ39724.1 azon|OJJ47850.1

Group1194: abra|OJJ75054.1 acar|OOF97283.1 acla|EAW08239.1 afis|EAW23273.1 afla|EED51546.1 afum|EAL88206.1 agla|OJJ86575.1 akaw|GAA88667.1 aluc|OJZ92619.1 anid|CBF89542.1 anig|EHA26369.1 aory|EIT77094.1 asyd|OJJ62380.1 ater|EAU37558.1 atub|OJI87053.1 aver|OJI96514.1 awen|OJJ39684.1 azon|OJJ47821.1 aory|EIT80554.1

Group1195: abra|OJJ75063.1 acar|OOF97271.1 acla|EAW08246.1 afis|EAW23280.1 afla|EED55696.1 afum|EAL88199.1 agla|OJJ86567.1 akaw|GAA88675.1 aluc|OJZ92629.1 anid|CBF89529.1 anig|EHA26361.1 aory|EIT77085.1 asyd|OJJ62387.1 ater|EAU37578.1 atub|OJI87059.1 aver|OJI96520.1 awen|OJJ39677.1 azon|OJJ43147.1 awen|OJJ31335.1

Group1199: abra|OJJ75173.1 acar|OOF94605.1 acla|EAW13003.1 afis|EAW17665.1 afla|EED50492.1 afum|EAL91479.1 agla|OJJ79538.1 akaw|GAA88780.1 aluc|OJZ92741.1 anid|CBF90049.1 anig|EHA26262.1 aory|EIT82090.1 asyd|OJJ62054.1 ater|EAU31988.1 atub|OJI87166.1 aver|OJI96160.1 awen|OJJ37176.1 azon|OJJ50876.1 asyd|OJJ61465.1

Group1202: abra|OJJ75302.1 acar|OOF92541.1 acla|EAW09084.1 afis|EAW25675.1 afla|EED47643.1 afum|EAL84345.1 agla|OJJ86330.1 akaw|GAA91835.1 aluc|OJZ92857.1 anid|CBF78280.1 anig|EHA26149.1 aory|EIT76311.1 asyd|OJJ52225.1 ater|EAU36081.1 atub|OJI87314.1 aver|OJJ05016.1 awen|OJJ35856.1 azon|OJJ42600.1 asyd|OJJ56073.1

Group1203: abra|OJJ75308.1 acar|OOF94521.1 acla|EAW12232.1 afis|EAW16996.1 afla|EED48959.1 afum|EAL86520.1 agla|OJJ79823.1 akaw|GAA91992.1 aluc|OJZ92862.1 anid|CBF87466.1 anig|EHA26103.1 aory|EIT80011.1 asyd|OJJ52936.1 ater|EAU31732.1 atub|OJI87320.1 aver|OJJ08903.1 awen|OJJ35985.1 azon|OJJ47407.1 azon|OJJ50280.1

Group1204: abra|OJJ75752.1 acar|OOG00116.1 acla|EAW09398.1 afis|EAW16786.1 afla|EED47412.1 afum|EAL86356.1 agla|OJJ78549.1 akaw|GAA84485.1 aluc|OJZ89206.1 anid|CBF84608.1 anig|EHA23353.1 aory|EIT81898.1 asyd|OJJ60434.1 ater|EAU37659.1 atub|OJI85586.1 aver|OJI99756.1 awen|OJJ40856.1 azon|OJJ42408.1 ater|EAU30953.1

Group1206: abra|OJJ75996.1 acar|OOF99929.1 acla|EAW09809.1 afis|EAW21327.1 afla|EED57285.1 afum|EAL92345.1 agla|OJJ87412.1 akaw|GAA88963.1 aluc|OJZ89442.1 anid|CBF83428.1 anig|EHA23144.1 aory|EIT74010.1 asyd|OJJ60659.1 ater|EAU35952.1 atub|OJI85351.1 aver|OJI99982.1 awen|OJJ39371.1 azon|OJJ51711.1 afla|EED57284.1

Group1208: abra|OJJ76593.1 acar|OOF99394.1 acla|EAW14308.1 afis|EAW18977.1 afla|EED53193.1 afum|EAL93713.2 agla|OJJ82935.1 akaw|GAA82497.1 aluc|OJZ91613.1 anid|CBF69648.1 anig|EHA22642.1 aory|EIT74974.1 asyd|OJJ59078.1 ater|EAU38168.1 atub|OJI86066.1 aver|OJJ01671.1 awen|OJJ31583.1 azon|OJJ47298.1 afla|EED53194.1

Group1211: abra|OJJ76859.1 acar|OOF91347.1 acla|EAW13420.1 afis|EAW20531.1 afla|EED52481.1 afum|EAL84526.1 agla|OJJ84700.1 akaw|GAA87163.1 aluc|OJZ84271.1 anid|CBF79002.1 anig|EHA27613.1 aory|EIT82813.1 asyd|OJJ55689.1 ater|EAU32506.1 atub|OJI89812.1 aver|OJJ06773.1 awen|OJJ33238.1 azon|OJJ50610.1 afis|EAW15383.1

Group1212: abra|OJJ76952.1 acar|OOF91399.1 acla|EAW13478.1 afis|EAW20585.1 afla|EED52259.1 afum|EAL84480.1 agla|OJJ80829.1 akaw|GAA87090.1 aluc|OJZ84348.1 anid|CBF78926.1 anig|EHA27685.1 aory|EIT76185.1 asyd|OJJ55629.1 ater|EAU37094.1 atub|OJI89720.1 aver|OJJ06706.1 awen|OJJ33298.1 azon|OJJ50675.1 afis|EAW16394.1

Group1219: abra|OJJ77364.1 acar|OOF93233.1 acla|EAW13112.1 afis|EAW17552.1 afla|EED49273.1 afum|EAL91366.1 agla|OJJ81416.1 akaw|GAA91398.1 aluc|OJZ84773.1 anid|CBF90298.1 anig|EHA28041.1 aory|EIT82235.1 asyd|OJJ61925.1 ater|EAU36982.1 atub|OJI89308.1 aver|OJI96017.1 awen|OJJ37301.1 azon|OJJ50994.1 anid|CBF87295.1

Group1220: abra|OJJ77453.1 acar|OOF99273.1 acla|EAW12649.1 afis|EAW18036.1 afla|EED54071.1 afum|EAL91847.1 agla|OJJ78571.1 akaw|GAA84155.1 aluc|OJZ81076.1 anid|CBF81938.1 anig|EHA19286.1 aory|EIT76067.1 asyd|OJJ57409.1 ater|EAU29318.1 ater|EAU31609.1 atub|OJI82509.1 aver|OJJ05772.1 awen|OJJ34693.1 azon|OJJ48230.1

Group1224: abra|OJJ77564.1 acar|OOF99168.1 acla|EAW06526.1 afis|EAW16070.1 afla|EED48589.1 afum|EAL88702.1 agla|OJJ86098.1 akaw|GAA84062.1 aluc|OJZ80974.1 anid|CBF75103.1 anig|EHA19385.1 aory|EIT83270.1 asyd|OJJ60005.1 ater|EAU33561.1 atub|OJI82611.1 aver|OJJ02281.1 awen|OJJ30365.1 azon|OJJ45384.1 afla|EED57884.1

Group1226: abra|OJJ77599.1 acar|OOF99127.1 acla|EAW06563.1 afis|EAW16033.1 afla|EED56415.1 afla|EED56416.1 afum|EAL88664.1 agla|OJJ86061.1 akaw|GAA84029.1 aluc|OJZ80934.1 anid|CBF75034.1 anig|EHA19416.1 aory|EIT72886.1 asyd|OJJ60050.1 ater|EAU33608.1 atub|OJI82646.1 aver|OJJ02239.1 awen|OJJ30414.1 azon|OJJ45422.1

Group1230: abra|OJJ77818.1 acar|OOF98950.1 acla|EAW11305.1 afis|EAW18192.1 afla|EED56282.1 afum|EAL87560.1 agla|OJJ85885.1 akaw|GAA83828.1 aluc|OJZ90890.1 anid|CBF86109.1 anig|EHA19609.1 aory|EIT73431.1 asyd|OJJ64488.1 ater|EAU33797.1 atub|OJI82884.1 aver|OJI98589.1 awen|OJJ30564.1 azon|OJJ45507.1 aory|EIT73332.1

Group1231: abra|OJJ77831.1 acar|OOF98939.1 acla|EAW11295.1 afis|EAW18207.1 afla|EED56264.1 afum|EAL87572.1 agla|OJJ85875.1 akaw|GAA83816.1 aluc|OJZ90905.1 anid|CBF86133.1 anig|EHA19620.1 aory|EIT73347.1 asyd|OJJ64503.1 ater|EAU33782.1 atub|OJI82898.1 aver|OJI98602.1 awen|OJJ30579.1 azon|OJJ45497.1 afla|EED56263.1

Group1233: abra|OJJ77901.1 acar|OOF98882.1 acla|EAW06511.1 afis|EAW16229.1 afla|EED53352.1 afum|EAL88852.1 agla|OJJ86237.1 akaw|GAA83761.1 aluc|OJZ90970.1 anid|CBF86221.1 anig|EHA19672.1 aory|EIT75062.1 asyd|OJJ64562.1 ater|EAU33715.1 atub|OJI82961.1 aver|OJI98659.1 awen|OJJ30233.1 azon|OJJ43950.1 anid|CBF86220.1

Group1235: abra|OJJ78155.1 acar|OOF90381.1 acla|EAW11243.1 afis|EAW18260.1 afla|EED48719.1 afum|EAL87623.1 agla|OJJ88167.1 akaw|GAA85871.1 aluc|OJZ91207.1 anid|CBF79523.1 anig|EHA19911.1 aory|EIT73142.1 asyd|OJJ57893.1 ater|EAU33268.1 atub|OJI83223.1 aver|OJJ04502.1 awen|OJJ30632.1 awen|OJJ30633.1 azon|OJJ47984.1

Group1236: abra|OJJ78254.1 acar|OOF98608.1 acla|EAW09255.1 afis|EAW21892.1 afla|EED46416.1 afum|EAL92906.1 agla|OJJ84240.1 akaw|GAA85772.1 aluc|OJZ91328.1 anid|CBF76804.1 anig|EHA20010.1 aory|EIT72374.1 asyd|OJJ61288.1 atub|OJI83321.1 aver|OJJ00614.1 awen|OJJ34181.1 azon|OJJ43451.1 acar|OOF99280.1 ater|EAU36657.1

Group1237: abra|OJJ78362.1 acar|OOF98525.1 acla|EAW09173.1 afis|EAW21973.1 afla|EED46696.1 afum|EAL92988.1 agla|OJJ84129.1 akaw|GAA85671.1 aluc|OJZ91436.1 anid|CBF82714.1 anig|EHA20102.1

aory|EIT77832.1 asyd|OJJ61638.1 ater|EAU31091.1 atub|OJI83430.1 aver|OJJ00961.1 awen|OJJ34266.1  
azon|OJJ43370.1 aory|EIT77819.1

Group1328: anig|EHA20833.1 afum|EAL89767.1 abra|OJJ70883.1 acar|OOF98234.1 acla|EAW10471.1  
afis|EAW25096.1 afla|EED55352.1 agla|OJJ89081.1 akaw|GAA87402.1 aluc|OJZ87638.1 anid|CBF86008.1  
aory|EIT80853.1 asyd|OJJ64446.1 ater|EAU39354.1 atub|OJI81009.1 aver|OJI98549.1 awen|OJJ40710.1  
azon|OJJ44086.1

Group1340: asyd|OJJ60628.1 abra|OJJ75954.1 acar|OOF99958.1 acla|EAW09842.1 afis|EAW21293.1  
afla|EED54845.1 afum|EAL92310.1 agla|OJJ87460.1 akaw|GAA84657.1 aluc|OJZ89403.1 anid|CBF83378.1  
anig|EHA23184.1 aory|EIT79413.1 ater|EAU35926.1 atub|OJI85394.1 aver|OJI99952.1 awen|OJJ39406.1  
azon|OJJ44289.1

Group1365: abra|OJJ65896.1 acar|OOF94956.1 acla|EAW11696.1 afis|EAW23713.1 afla|EED44871.1  
afum|EAL87157.1 agla|OJJ81717.1 akaw|GAA86009.1 aluc|OJZ90235.1 anid|CBF83004.1 anig|EHA23735.1  
aory|EIT82717.1 asyd|OJJ61502.1 ater|EAU31796.1 atub|OJI81665.1 aver|OJJ00840.1 awen|OJJ37102.1  
azon|OJJ50803.1

Group1366: abra|OJJ65913.1 acar|OOF94964.1 acla|EAW12019.1 afis|EAW19660.1 afla|EED57030.1  
afum|EAL86863.1 agla|OJJ80822.1 akaw|GAA92319.1 aluc|OJZ90217.1 anid|CBF71390.1 anig|EHA23715.1  
aory|EIT82277.1 asyd|OJJ55042.1 ater|EAU32852.1 atub|OJI81649.1 aver|OJJ07166.1 awen|OJJ41922.1  
azon|OJJ42684.1

Group1367: abra|OJJ65945.1 acar|OOF92928.1 acla|EAW13569.1 afis|EAW20032.1 afla|EED46042.1  
afum|EAL84884.1 agla|OJJ88019.1 akaw|GAA90823.1 aluc|OJZ83012.1 anid|CBF84764.1 anig|EHA21427.1  
aory|EIT75566.1 asyd|OJJ53285.1 ater|EAU29398.1 atub|OJI89247.1 aver|OJJ08456.1 awen|OJJ30055.1  
azon|OJJ43701.1

Group1368: abra|OJJ65946.1 acar|OOF92925.1 acla|EAW13570.1 afis|EAW20031.1 afla|EED46041.1  
afum|EAL84885.1 agla|OJJ88018.1 akaw|GAA90824.1 aluc|OJZ83011.1 anid|CBF84760.1 anig|EHA21426.1  
aory|EIT75583.1 asyd|OJJ53286.1 ater|EAU29395.1 atub|OJI89246.1 aver|OJJ08455.1 awen|OJJ30054.1  
azon|OJJ43702.1

Group1369: abra|OJJ65948.1 acar|OOF92924.1 acla|EAW13571.1 afis|EAW20030.1 afla|EED46039.1  
afum|EAL84887.1 agla|OJJ88016.1 akaw|GAA90826.1 aluc|OJZ83009.1 anid|CBF84756.1 anig|EHA21424.1  
aory|EIT75781.1 asyd|OJJ53288.1 ater|EAU29393.1 atub|OJI89244.1 aver|OJJ08453.1 awen|OJJ30052.1  
azon|OJJ43700.1

Group1370: abra|OJJ65949.1 acar|OOF92923.1 acla|EAW13572.1 afis|EAW20029.1 afla|EED46038.1  
afum|EAL84888.1 agla|OJJ88015.1 akaw|GAA90827.1 aluc|OJZ83008.1 anid|CBF84754.1 anig|EHA21423.1  
aory|EIT75542.1 asyd|OJJ53289.1 ater|EAU29392.1 atub|OJI89243.1 aver|OJJ08452.1 awen|OJJ30051.1  
azon|OJJ43698.1

Group1371: abra|OJJ65951.1 acar|OOF92921.1 acla|EAW13573.1 afis|EAW20028.1 afla|EED46037.1  
afum|EAL84889.1 agla|OJJ88000.1 akaw|GAA90828.1 aluc|OJZ83006.1 anid|CBF84753.1 anig|EHA21422.1  
aory|EIT75829.1 asyd|OJJ53290.1 ater|EAU29391.1 atub|OJI89241.1 aver|OJJ08450.1 awen|OJJ30042.1  
azon|OJJ43688.1

Group1372: abra|OJJ65952.1 acar|OOF92920.1 acla|EAW13574.1 afis|EAW20027.1 afla|EED46036.1  
afum|EAL84890.1 agla|OJJ88001.1 akaw|GAA90829.1 aluc|OJZ83005.1 anid|CBF84751.1 anig|EHA21421.1  
aory|EIT75375.1 asyd|OJJ53291.1 ater|EAU29390.1 atub|OJI89240.1 aver|OJJ08449.1 awen|OJJ30043.1  
azon|OJJ43689.1

Group1373: abra|OJJ65954.1 acar|OOF92918.1 acla|EAW13575.1 afis|EAW20026.1 afla|EED46034.1  
afum|EAL84891.1 agla|OJJ88004.1 akaw|GAA90831.1 aluc|OJZ83003.1 anid|CBF84749.1 anig|EHA21419.1  
aory|EIT75468.1 asyd|OJJ53293.1 ater|EAU29388.1 atub|OJI89237.1 aver|OJJ08447.1 awen|OJJ30045.1  
azon|OJJ43691.1

Group1374: abra|OJJ65956.1 acar|OOF92916.1 acla|EAW13577.1 afis|EAW20024.1 afla|EED46032.1  
afum|EAL84893.1 agla|OJJ88006.1 akaw|GAA90833.1 aluc|OJZ83001.1 anid|CBF84745.1 anig|EHA21417.1  
aory|EIT75584.1 asyd|OJJ53295.1 ater|EAU29386.1 atub|OJI89235.1 aver|OJJ08445.1 awen|OJJ30046.1  
azon|OJJ43693.1

Group1375: abra|OJJ65957.1 acar|OOF92915.1 acla|EAW13578.1 afis|EAW20023.1 afla|EED46031.1  
afum|EAL84894.1 agla|OJJ88007.1 akaw|GAA90834.1 aluc|OJZ83000.1 anid|CBF84743.1 anig|EHA21416.1  
aory|EIT75718.1 asyd|OJJ53296.1 ater|EAU29385.1 atub|OJI89234.1 aver|OJJ08444.1 awen|OJJ30047.1  
azon|OJJ43694.1

Group1376: abra|OJJ65958.1 acar|OOF92914.1 acla|EAW13579.1 afis|EAW20022.1 afla|EED46030.1  
afum|EAL84895.1 agla|OJJ88011.1 akaw|GAA90835.1 aluc|OJZ82999.1 anid|CBF84741.1 anig|EHA21415.1  
aory|EIT75399.1 asyd|OJJ53297.1 ater|EAU29384.1 atub|OJI89233.1 aver|OJJ08443.1 awen|OJJ30048.1  
azon|OJJ43695.1

Group1377: abra|OJJ65959.1 acar|OOF92913.1 acla|EAW13580.1 afis|EAW20021.1 afla|EED46029.1 afum|EAL84896.2 agla|OJJ88012.1 akaw|GAA90836.1 aluc|OJZ82998.1 anid|CBF84739.1 anig|EHA21414.1 aory|EIT75790.1 asyd|OJJ53298.1 ater|EAU29383.1 atub|OJI89232.1 aver|OJJ08442.1 awen|OJJ30049.1 azon|OJJ43696.1

Group1378: abra|OJJ65963.1 acar|OOF92911.1 acla|EAW13582.1 afis|EAW20019.1 afla|EED46027.1 afum|EAL84898.1 agla|OJJ87997.1 akaw|GAA90838.1 aluc|OJZ82995.1 anid|CBF84733.1 anig|EHA21410.1 aory|EIT75391.1 asyd|OJJ53302.1 ater|EAU29380.1 atub|OJI89229.1 aver|OJJ08439.1 awen|OJJ30040.1 azon|OJJ43684.1

Group1379: abra|OJJ65969.1 acar|OOF92904.1 acla|EAW13590.1 afis|EAW20013.1 afla|EED46020.1 afum|EAL84905.1 agla|OJJ87978.1 akaw|GAA90844.1 aluc|OJZ82989.1 anid|CBF84715.1 anig|EHA21404.1 aory|EIT75372.1 asyd|OJJ53326.1 ater|EAU29355.1 atub|OJI89223.1 aver|OJJ08417.1 awen|OJJ30027.1 azon|OJJ43661.1

Group1380: abra|OJJ65976.1 acar|OOF92896.1 acla|EAW13597.1 afis|EAW20007.1 afla|EED46013.1 afum|EAL84911.1 agla|OJJ87972.1 akaw|GAA90850.1 aluc|OJZ82983.1 anid|CBF84706.1 anig|EHA21397.1 aory|EIT75456.1 asyd|OJJ53321.1 ater|EAU29349.1 atub|OJI89217.1 aver|OJJ08422.1 awen|OJJ30020.1 azon|OJJ49472.1

Group1385: abra|OJJ66483.1 acar|OOF90960.1 acla|EAW10986.1 afis|EAW20874.1 afla|EED45556.1 afum|EAL84760.1 agla|OJJ83981.1 akaw|GAA92468.1 aluc|OJZ81551.1 anid|CBF82851.1 anig|EHA25883.1 aory|EIT75688.1 asyd|OJJ61594.1 ater|EAU30815.1 atub|OJI88634.1 aver|OJJ00916.1 awen|OJJ34486.1 azon|OJJ51763.1

Group1386: akaw|GAA92469.1 aluc|OJZ81550.1 atub|OJI88635.1 abra|OJJ66485.1 acar|OOF90962.1 acla|EAW10984.1 afis|EAW20876.1 afla|EED45558.1 afum|EAL84757.1 agla|OJJ83983.1 anid|CBF82855.1 anig|EHA25885.1 aory|EIT75434.1 asyd|OJJ61595.1 ater|EAU30813.1 aver|OJJ00918.1 awen|OJJ34484.1 azon|OJJ51761.1

Group1387: abra|OJJ66488.1 acar|OOF90964.1 acla|EAW10981.1 afis|EAW20878.1 afla|EED45563.1 afum|EAL84754.1 agla|OJJ83988.1 akaw|GAA92471.1 aluc|OJZ81547.1 anid|CBF82860.1 anig|EHA25888.1 aory|EIT75724.1 asyd|OJJ61597.1 ater|EAU38706.1 atub|OJI88637.1 aver|OJJ00921.1 awen|OJJ34481.1 azon|OJJ51758.1

Group1388: abra|OJJ66491.1 acar|OOF90967.1 acla|EAW10978.1 afis|EAW20881.1 afla|EED45568.1 afum|EAL84751.1 agla|OJJ83990.1 akaw|GAA91209.1 aluc|OJZ81544.1 anid|CBF82866.1 anig|EHA25891.1 aory|EIT75376.1 asyd|OJJ61599.1 ater|EAU30823.1 atub|OJI88640.1 aver|OJJ00923.1 awen|OJJ34479.1 azon|OJJ51756.1

Group1389: abra|OJJ66504.1 acar|OOF90968.1 acla|EAW10977.1 afis|EAW20882.1 afla|EED45567.1 afum|EAL84750.1 agla|OJJ83991.1 akaw|GAA91206.1 aluc|OJZ81541.1 anid|CBF82764.1 anig|EHA25895.1 aory|EIT75654.1 asyd|OJJ61604.1 ater|EAU30824.1 atub|OJI88645.1 aver|OJJ00927.1 awen|OJJ34478.1 azon|OJJ51755.1

Group1390: abra|OJJ66506.1 acar|OOF90970.1 acla|EAW10975.1 afis|EAW20885.1 afla|EED45570.1 afum|EAL84748.1 agla|OJJ83992.1 akaw|GAA91204.1 aluc|OJZ81539.1 anid|CBF82758.1 anig|EHA25897.1 aory|EIT75723.1 asyd|OJJ61607.1 ater|EAU30825.1 atub|OJI88647.1 aver|OJJ00930.1 awen|OJJ34462.1 azon|OJJ51752.1

Group1391: abra|OJJ66507.1 acar|OOF90971.1 acla|EAW10974.1 afis|EAW20886.1 afla|EED45571.1 afum|EAL84747.1 agla|OJJ83993.1 akaw|GAA91203.1 aluc|OJZ81538.1 anid|CBF82760.1 anig|EHA25898.1 aory|EIT75837.1 asyd|OJJ61606.1 ater|EAU30826.1 atub|OJI88648.1 aver|OJJ00929.1 awen|OJJ34461.1 azon|OJJ51750.1

Group1392: abra|OJJ66508.1 acar|OOF90972.1 acla|EAW10973.1 afis|EAW20887.1 afla|EED45572.1 afum|EAL84746.1 agla|OJJ83994.1 akaw|GAA91202.1 aluc|OJZ81537.1 anid|CBF82762.1 anig|EHA25899.1 aory|EIT75742.1 asyd|OJJ61605.1 ater|EAU30827.1 atub|OJI88649.1 aver|OJJ00928.1 awen|OJJ34460.1 azon|OJJ51749.1

Group1393: abra|OJJ66518.1 acar|OOF90973.1 acla|EAW10971.1 afis|EAW20888.1 afla|EED45576.1 afum|EAL84745.1 agla|OJJ83996.1 akaw|GAA91193.1 aluc|OJZ81526.1 anid|CBF82768.1 anig|EHA25908.1 aory|EIT75514.1 asyd|OJJ61601.1 ater|EAU30828.1 atub|OJI88659.1 aver|OJJ00925.1 awen|OJJ34459.1 azon|OJJ51748.1

Group1394: abra|OJJ66532.1 acar|OOF90983.1 acla|EAW10960.1 afis|EAW20899.1 afla|EED50249.1 afum|EAL84733.1 agla|OJJ84012.1 akaw|GAA91183.1 aluc|OJZ81520.1 anid|CBF82455.1 anig|EHA25917.1 aory|EIT77292.1 asyd|OJJ54114.1 ater|EAU38532.1 atub|OJI88669.1 aver|OJJ08621.1 awen|OJJ34449.1 azon|OJJ51735.1

Group1395: abra|OJJ66534.1 acar|OOF90986.1 acla|EAW10958.1 afis|EAW20901.1 afla|EED50251.1 afum|EAL84730.1 agla|OJJ84015.1 akaw|GAA91181.1 aluc|OJZ81522.1 anid|CBF82453.1 anig|EHA25920.1

aory|EIT77336.1 asyd|OJJ54112.1 ater|EAU38534.1 atub|OJI88671.1 aver|OJJ08623.1 awen|OJJ34447.1 azon|OJJ51733.1

Group1396: abra|OJJ66536.1 acar|OOF90987.1 acla|EAW10955.1 afis|EAW20906.1 afla|EED50254.1 afum|EAL84727.1 agla|OJJ84022.1 akaw|GAA91179.1 aluc|OJZ81524.1 anid|CBF82467.1 anig|EHA25922.1 aory|EIT77306.1 asyd|OJJ54098.1 ater|EAU38536.1 atub|OJI88673.1 aver|OJJ08640.1 awen|OJJ34445.1 azon|OJJ51728.1

Group1397: abra|OJJ66538.1 acar|OOF90989.1 acla|EAW10953.1 afis|EAW20908.1 afla|EED50256.1 afum|EAL84725.1 agla|OJJ84024.1 akaw|GAA91177.1 aluc|OJZ81509.1 anid|CBF82471.1 anig|EHA25924.1 aory|EIT77316.1 asyd|OJJ54100.1 ater|EAU38538.1 atub|OJI88675.1 aver|OJJ08638.1 awen|OJJ34443.1 azon|OJJ51720.1

Group1398: abra|OJJ66542.1 acar|OOF90994.1 acla|EAW09002.1 afis|EAW25543.1 afla|EED50261.1 afum|EAL84261.1 agla|OJJ84031.1 akaw|GAA91167.1 aluc|OJZ81495.1 anid|CBF80805.1 anig|EHA25935.1 aory|EIT77304.1 asyd|OJJ54485.1 ater|EAU38562.1 atub|OJI88686.1 aver|OJJ07694.1 awen|OJJ34423.1 azon|OJJ49761.1

Group1399: abra|OJJ66544.1 acar|OOF90996.1 acla|EAW10945.1 afis|EAW20913.1 afla|EED50263.1 afum|EAL84721.1 agla|OJJ79574.1 akaw|GAA91169.1 aluc|OJZ81497.1 anid|CBF84410.1 anig|EHA25933.1 aory|EIT77352.1 asyd|OJJ53562.1 ater|EAU38564.1 atub|OJI88684.1 aver|OJJ08190.1 awen|OJJ34421.1 azon|OJJ48150.1

Group1401: abra|OJJ66558.1 acar|OOF90013.1 acla|EAW10937.1 afis|EAW20924.1 afla|EED50278.1 afum|EAL84710.1 agla|OJJ83965.1 akaw|GAA91158.1 aluc|OJZ81486.1 anid|CBF82449.1 anig|EHA25941.1 aory|EIT77317.1 asyd|OJJ54111.1 ater|EAU38571.1 atub|OJI88694.1 aver|OJJ08624.1 awen|OJJ34396.1 azon|OJJ48132.1

Group1402: abra|OJJ66562.1 acar|OOF91003.1 acla|EAW10934.1 afis|EAW20927.1 afla|EED50281.1 afum|EAL84707.1 agla|OJJ83961.1 akaw|GAA91155.1 aluc|OJZ81483.1 anid|CBF82497.1 anig|EHA25944.1 aory|EIT77267.1 asyd|OJJ54088.1 ater|EAU38573.1 atub|OJI88698.1 aver|OJJ08650.1 awen|OJJ34392.1 azon|OJJ48123.1

Group1403: abra|OJJ66563.1 acar|OOF91004.1 acla|EAW10933.1 afis|EAW20928.1 afla|EED50282.1 afum|EAL84706.1 agla|OJJ83960.1 akaw|GAA91154.1 aluc|OJZ81482.1 anid|CBF82515.1 anig|EHA25945.1 aory|EIT77363.1 asyd|OJJ54084.1 ater|EAU38574.1 atub|OJI88699.1 aver|OJJ08654.1 awen|OJJ34390.1 azon|OJJ48122.1

Group1404: abra|OJJ66564.1 acar|OOF91005.1 acla|EAW10932.1 afis|EAW20929.1 afla|EED50283.1 afum|EAL84705.1 agla|OJJ83959.1 akaw|GAA91153.1 aluc|OJZ81481.1 anid|CBF82513.1 anig|EHA25946.1 aory|EIT77279.1 asyd|OJJ54083.1 ater|EAU38575.1 atub|OJI88700.1 aver|OJJ08655.1 awen|OJJ34389.1 azon|OJJ48121.1

Group1405: abra|OJJ66568.1 acar|OOF91009.1 acla|EAW10927.1 afis|EAW20402.1 afla|EED50288.1 afum|EAL85501.1 agla|OJJ83952.1 akaw|GAA91149.1 aluc|OJZ81476.1 anid|CBF82504.1 anig|EHA25950.1 aory|EIT77254.1 asyd|OJJ54078.1 ater|EAU38579.1 atub|OJI88703.1 aver|OJJ08660.1 awen|OJJ34384.1 azon|OJJ48115.1

Group1406: abra|OJJ66570.1 acar|OOF91010.1 acla|EAW10924.1 afis|EAW20934.1 afla|EED50291.1 afum|EAL84700.1 agla|OJJ83951.1 akaw|GAA91148.1 aluc|OJZ81474.1 anid|CBF82532.1 anig|EHA25951.1 aory|EIT77301.1 asyd|OJJ54076.1 ater|EAU38580.1 atub|OJI88704.1 aver|OJJ08663.1 awen|OJJ34382.1 azon|OJJ48114.1

Group1407: abra|OJJ66573.1 acar|OOF91014.1 acla|EAW10917.1 afis|EAW20941.1 afla|EED50296.1 afum|EAL84693.1 agla|OJJ83946.1 akaw|GAA91145.1 aluc|OJZ81471.1 anid|CBF82534.1 anig|EHA25956.1 aory|EIT77257.1 asyd|OJJ54069.1 ater|EAU38586.1 atub|OJI88707.1 aver|OJJ08673.1 awen|OJJ34376.1 azon|OJJ50768.1

Group1408: abra|OJJ66576.1 acar|OOF91017.1 acla|EAW10914.1 afis|EAW20944.1 afla|EED50298.1 afum|EAL84690.2 agla|OJJ83943.1 akaw|GAA91142.1 aluc|OJZ81468.1 anid|CBF82539.1 anig|EHA25959.1 aory|EIT77376.1 asyd|OJJ54066.1 ater|EAU38588.1 atub|OJI88710.1 aver|OJJ08676.1 awen|OJJ34372.1 azon|OJJ48108.1

Group1409: abra|OJJ66577.1 acar|OOF91018.1 acla|EAW10913.1 afis|EAW20945.1 afla|EED50299.1 afum|EAL84689.2 agla|OJJ83941.1 akaw|GAA91141.1 aluc|OJZ81467.1 anid|CBF82541.1 anig|EHA25960.1 aory|EIT77303.1 asyd|OJJ54065.1 ater|EAU38596.1 atub|OJI88711.1 aver|OJJ08677.1 awen|OJJ34371.1 azon|OJJ48107.1

Group1410: abra|OJJ66579.1 acar|OOF91019.1 acla|EAW10911.1 afis|EAW20947.1 afla|EED50301.1 afum|EAL84687.1 agla|OJJ83939.1 akaw|GAA91139.1 aluc|OJZ81465.1 anid|CBF82545.1 anig|EHA25962.1 aory|EIT77341.1 asyd|OJJ54063.1 ater|EAU38598.1 atub|OJI88713.1 aver|OJJ08679.1 awen|OJJ34369.1 azon|OJJ48105.1

Group1411: abra|OJJ66580.1 acar|OOF91020.1 acla|EAW10910.1 afis|EAW20948.1 afla|EED50302.1 afum|EAL84686.1 agla|OJJ83938.1 akaw|GAA91138.1 aluc|OJZ81464.1 anid|CBF82547.1 anig|EHA25963.1 aory|EIT77278.1 asyd|OJJ54062.1 ater|EAU38599.1 atub|OJI88714.1 aver|OJJ08680.1 awen|OJJ34368.1 azon|OJJ48104.1

Group1412: abra|OJJ66581.1 acar|OOF89819.1 acla|EAW10909.1 afis|EAW20949.1 afla|EED50303.1 afum|EAL84685.1 agla|OJJ83936.1 akaw|GAA91137.1 aluc|OJZ81463.1 anid|CBF82549.1 anig|EHA25964.1 aory|EIT77276.1 asyd|OJJ54061.1 ater|EAU38600.1 atub|OJI88715.1 aver|OJJ08681.1 awen|OJJ34367.1 azon|OJJ48103.1

Group1413: abra|OJJ66583.1 acar|OOF91021.1 acla|EAW10908.1 afis|EAW20950.1 afla|EED50305.1 afum|EAL84684.1 agla|OJJ83930.1 akaw|GAA91135.1 aluc|OJZ81462.1 anid|CBF82550.1 anig|EHA25966.1 aory|EIT77342.1 asyd|OJJ54060.1 ater|EAU38601.1 atub|OJI88716.1 aver|OJJ08682.1 awen|OJJ34366.1 azon|OJJ48101.1

Group1414: abra|OJJ66587.1 acar|OOF91024.1 acla|EAW10904.1 afis|EAW20954.1 afla|EED50310.1 afum|EAL84680.2 agla|OJJ83925.1 akaw|GAA91130.1 aluc|OJZ81459.1 anid|CBF82558.1 anig|EHA25970.1 aory|EIT77289.1 asyd|OJJ54056.1 ater|EAU38605.1 atub|OJI88720.1 aver|OJJ08685.1 awen|OJJ34362.1 azon|OJJ48098.1

Group1415: abra|OJJ66588.1 acar|OOF91025.1 acla|EAW10903.1 afis|EAW20955.1 afla|EED50311.1 afum|EAL84679.1 agla|OJJ83924.1 akaw|GAA91129.1 aluc|OJZ81458.1 anid|CBF82560.1 anig|EHA25971.1 aory|EIT77266.1 asyd|OJJ54054.1 ater|EAU38606.1 atub|OJI88721.1 aver|OJJ08687.1 awen|OJJ34361.1 azon|OJJ48097.1

Group1416: abra|OJJ66589.1 acar|OOF91026.1 acla|EAW10902.1 afis|EAW20956.1 afla|EED50312.1 afum|EAL84677.1 agla|OJJ83922.1 akaw|GAA91128.1 aluc|OJZ81457.1 anid|CBF82562.1 anig|EHA25972.1 aory|EIT77295.1 asyd|OJJ54052.1 ater|EAU38607.1 atub|OJI88722.1 aver|OJJ08688.1 awen|OJJ34360.1 azon|OJJ48096.1

Group1417: abra|OJJ66590.1 acar|OOF91027.1 acla|EAW10901.1 afis|EAW20957.1 afla|EED50313.1 afum|EAL84676.1 agla|OJJ83920.1 akaw|GAA91127.1 aluc|OJZ81456.1 anid|CBF82564.1 anig|EHA25973.1 aory|EIT77362.1 asyd|OJJ54051.1 ater|EAU38608.1 atub|OJI88723.1 aver|OJJ08689.1 awen|OJJ34359.1 azon|OJJ48095.1

Group1418: abra|OJJ66596.1 acar|OOF91030.1 acla|EAW10896.1 afis|EAW20962.1 afla|EED50317.1 afum|EAL84671.1 agla|OJJ83916.1 akaw|GAA91122.1 aluc|OJZ81450.1 anid|CBF82571.1 anig|EHA25976.1 aory|EIT77307.1 asyd|OJJ54048.1 ater|EAU38612.1 atub|OJI88729.1 aver|OJJ08695.1 awen|OJJ34354.1 azon|OJJ48091.1

Group1419: abra|OJJ66598.1 acar|OOF91031.1 acla|EAW10895.1 afis|EAW20963.1 afla|EED50318.1 afum|EAL84670.1 agla|OJJ83915.1 akaw|GAA91121.1 aluc|OJZ81449.1 anid|CBF82572.1 anig|EHA25977.1 aory|EIT77348.1 asyd|OJJ54047.1 ater|EAU38613.1 atub|OJI88730.1 aver|OJJ08696.1 awen|OJJ34352.1 azon|OJJ48089.1

Group1420: abra|OJJ66600.1 acar|OOF91033.1 acla|EAW10892.1 afis|EAW20966.1 afla|EED50320.1 afum|EAL84667.1 agla|OJJ84043.1 akaw|GAA91119.1 aluc|OJZ81446.1 anid|CBF82578.1 anig|EHA25979.1 aory|EIT77255.1 asyd|OJJ54042.1 ater|EAU38616.1 atub|OJI88732.1 aver|OJJ08699.1 awen|OJJ34349.1 azon|OJJ48086.1

Group1421: abra|OJJ66601.1 acar|OOF91034.1 acla|EAW10891.1 afis|EAW20967.1 afla|EED50321.1 afum|EAL84666.1 agla|OJJ84044.1 akaw|GAA91118.1 aluc|OJZ81445.1 anid|CBF82580.1 anig|EHA25980.1 aory|EIT77332.1 asyd|OJJ54041.1 ater|EAU38617.1 atub|OJI88733.1 aver|OJJ08700.1 awen|OJJ34348.1 azon|OJJ48085.1

Group1422: abra|OJJ66604.1 acar|OOF90114.1 acla|EAW10889.1 afis|EAW20969.1 afla|EED50323.1 afum|EAL84665.1 agla|OJJ84046.1 akaw|GAA91116.1 aluc|OJZ81442.1 anid|CBF82584.1 anig|EHA25982.1 aory|EIT77349.1 asyd|OJJ54039.1 ater|EAU38619.1 atub|OJI88736.1 aver|OJJ08701.1 awen|OJJ34346.1 azon|OJJ48084.1

Group1423: abra|OJJ66606.1 acar|OOF90112.1 acla|EAW10887.1 afis|EAW20971.1 afla|EED50325.1 afum|EAL84663.1 agla|OJJ84048.1 akaw|GAA91114.1 aluc|OJZ81440.1 anid|CBF82585.1 anig|EHA25984.1 aory|EIT77291.1 asyd|OJJ54037.1 ater|EAU38620.1 atub|OJI88738.1 aver|OJJ08703.1 awen|OJJ34344.1 azon|OJJ48083.1

Group1424: abra|OJJ66610.1 acar|OOF91035.1 acla|EAW10886.1 afis|EAW20972.1 afla|EED50326.1 afum|EAL84661.1 agla|OJJ84050.1 akaw|GAA91113.1 aluc|OJZ81439.1 anid|CBF82587.1 anig|EHA25985.1 aory|EIT77361.1 asyd|OJJ54036.1 ater|EAU38622.1 atub|OJI88742.1 aver|OJJ08704.1 awen|OJJ34341.1 azon|OJJ48081.1

Group1425: abra|OJJ66612.1 acar|OOF91036.1 acla|EAW10884.1 afis|EAW20974.1 afla|EED50329.1 afum|EAL84659.1 agla|OJJ84052.1 akaw|GAA91111.1 aluc|OJZ81437.1 anid|CBF82593.1 anig|EHA25987.1

aory|EIT77331.1 asyd|OJJ54033.1 ater|EAU38624.1 atub|OJI88744.1 aver|OJJ08707.1 awen|OJJ34339.1 azon|OJJ48079.1

Group1426: abra|OJJ66613.1 acar|OOF91038.1 acla|EAW10883.1 afis|EAW20975.1 afla|EED50330.1 afum|EAL84658.1 agla|OJJ84053.1 akaw|GAA91110.1 aluc|OJZ81436.1 anid|CBF82595.1 anig|EHA25988.1 aory|EIT77270.1 asyd|OJJ54032.1 ater|EAU38625.1 atub|OJI88745.1 aver|OJJ08708.1 awen|OJJ34337.1 azon|OJJ48078.1

Group1427: abra|OJJ66617.1 acar|OOF91040.1 acla|EAW10880.1 afis|EAW20978.1 afla|EED50333.1 afum|EAL84655.1 agla|OJJ84055.1 akaw|GAA91108.1 aluc|OJZ81432.1 anid|CBF82598.1 anig|EHA25990.1 aory|EIT77374.1 asyd|OJJ54030.1 ater|EAU38627.1 atub|OJI88748.1 aver|OJJ08710.1 awen|OJJ34334.1 azon|OJJ48076.1

Group1428: abra|OJJ66619.1 acar|OOF91042.1 acla|EAW10878.1 afis|EAW20980.1 afla|EED50335.1 afum|EAL84651.2 agla|OJJ84057.1 akaw|GAA91106.1 aluc|OJZ81430.1 anid|CBF71772.1 anig|EHA25992.1 aory|EIT77286.1 asyd|OJJ61720.1 ater|EAU38628.1 atub|OJI88750.1 aver|OJI95814.1 awen|OJJ34332.1 azon|OJJ48074.1

Group1429: abra|OJJ66624.1 acar|OOF91048.1 acla|EAW10872.1 afis|EAW20986.1 afla|EED50341.1 afum|EAL84644.1 agla|OJJ84065.1 akaw|GAA91101.1 aluc|OJZ81425.1 anid|CBF82611.1 anig|EHA25997.1 aory|EIT77327.1 asyd|OJJ54022.1 ater|EAU38635.1 atub|OJI88756.1 aver|OJJ08718.1 awen|OJJ34325.1 azon|OJJ48071.1

Group1430: abra|OJJ66627.1 acar|OOF91052.1 acla|EAW10869.1 afis|EAW20989.1 afla|EED50343.1 afum|EAL84640.2 agla|OJJ84067.1 akaw|GAA91098.1 aluc|OJZ81421.1 anid|CBF82605.1 anig|EHA26000.1 aory|EIT77281.1 asyd|OJJ54026.1 ater|EAU38638.1 atub|OJI88760.1 aver|OJJ08714.1 awen|OJJ34321.1 azon|OJJ48066.1

Group1431: abra|OJJ66749.1 acar|OOF93832.1 acla|EAW11875.1 afis|EAW19486.1 afla|EED56704.1 afum|EAL87008.1 agla|OJJ81211.1 akaw|GAA89685.1 aluc|OJZ80700.1 anid|CBF75460.1 anig|EHA27316.1 aory|EIT73946.1 asyd|OJJ59769.1 ater|EAU34799.1 atub|OJI87559.1 aver|OJJ02516.1 awen|OJJ36902.1 azon|OJJ42915.1

Group1432: abra|OJJ66751.1 acar|OOF93833.1 acla|EAW11876.1 afis|EAW19487.1 afla|EED56705.1 afum|EAL87007.1 agla|OJJ81213.1 akaw|GAA89686.1 aluc|OJZ80699.1 anid|CBF75458.1 anig|EHA27317.1 aory|EIT73903.1 asyd|OJJ59771.1 ater|EAU34800.1 atub|OJI87558.1 aver|OJJ02515.1 awen|OJJ36903.1 azon|OJJ42913.1

Group1433: abra|OJJ66752.1 acar|OOF93834.1 acla|EAW11877.1 afis|EAW19488.1 afla|EED56706.1 afum|EAL87006.1 agla|OJJ81214.1 akaw|GAA89687.1 aluc|OJZ80698.1 anid|CBF75456.1 anig|EHA27318.1 aory|EIT73834.1 asyd|OJJ59772.1 ater|EAU34801.1 atub|OJI87557.1 aver|OJJ02514.1 awen|OJJ36904.1 azon|OJJ42912.1

Group1434: abra|OJJ66753.1 acar|OOF93835.1 acla|EAW11880.1 afis|EAW19491.1 afla|EED56710.1 afum|EAL87003.1 agla|OJJ81220.1 akaw|GAA89688.1 aluc|OJZ80697.1 anid|CBF75452.1 anig|EHA27319.1 aory|EIT73847.1 asyd|OJJ59774.1 ater|EAU34803.1 atub|OJI87556.1 aver|OJJ02512.1 awen|OJJ36907.1 azon|OJJ42909.1

Group1435: abra|OJJ66755.1 acar|OOF93836.1 acla|EAW11881.1 afis|EAW19492.1 afla|EED56711.1 afum|EAL87002.1 agla|OJJ81221.1 akaw|GAA89689.1 aluc|OJZ80696.1 anid|CBF75450.1 anig|EHA27320.1 aory|EIT73907.1 asyd|OJJ59775.1 ater|EAU34804.1 atub|OJI87555.1 aver|OJJ02511.1 awen|OJJ36908.1 azon|OJJ42908.1

Group1437: abra|OJJ66819.1 acar|OOF91602.1 acla|EAW14405.1 afis|EAW19113.1 afla|EED54301.1 afum|EAL93845.1 agla|OJJ84489.1 akaw|GAA90457.1 aluc|OJZ85767.1 anid|CBF79734.1 anig|EHA24786.1 aory|EIT76106.1 asyd|OJJ58069.1 ater|EAU37372.1 atub|OJI79552.1 aver|OJJ04338.1 awen|OJJ32523.1 azon|OJJ50791.1

Group1438: abra|OJJ66828.1 acar|OOF91606.1 acla|EAW14411.1 afis|EAW19119.1 afla|EED54295.1 afum|EAL93851.1 agla|OJJ80434.1 akaw|GAA90464.1 aluc|OJZ85759.1 anid|CBF79724.1 anig|EHA24797.1 aory|EIT76143.1 asyd|OJJ58075.1 ater|EAU37382.1 atub|OJI79544.1 aver|OJJ04332.1 awen|OJJ37450.1 azon|OJJ51127.1

Group1439: abra|OJJ66830.1 acar|OOF91608.1 acla|EAW14413.1 afis|EAW19121.1 afla|EED54293.1 afum|EAL93853.1 agla|OJJ80436.1 akaw|GAA90467.1 aluc|OJZ85757.1 anid|CBF79722.1 anig|EHA24799.1 aory|EIT76028.1 asyd|OJJ58077.1 ater|EAU37384.1 atub|OJI79542.1 aver|OJJ04330.1 awen|OJJ37452.1 azon|OJJ51129.1

Group1440: abra|OJJ66832.1 acar|OOF91609.1 acla|EAW14414.1 afis|EAW19122.1 afla|EED54292.1 afum|EAL93854.1 agla|OJJ80437.1 akaw|GAA90468.1 aluc|OJZ85756.1 anid|CBF79720.1 anig|EHA24800.1 aory|EIT76096.1 asyd|OJJ58078.1 ater|EAU37385.1 atub|OJI79541.1 aver|OJJ04329.1 awen|OJJ37453.1 azon|OJJ51130.1



Group1441: abra|OJJ66833.1 acar|OOF91610.1 acla|EAW14415.1 afis|EAW19123.1 afla|EED54291.1 afum|EAL93855.1 agla|OJJ80438.1 akaw|GAA90469.1 aluc|OJZ85755.1 anid|CBF79718.1 anig|EHA24801.1 aory|EIT76111.1 asyd|OJJ58079.1 ater|EAU37386.1 atub|OJI79540.1 aver|OJJ04328.1 awen|OJJ37454.1 azon|OJJ51131.1

Group1442: abra|OJJ66834.1 acar|OOF91611.1 acla|EAW14416.1 afis|EAW19124.1 afla|EED54290.1 afum|EAL93856.1 agla|OJJ80439.1 akaw|GAA90470.1 aluc|OJZ85754.1 anid|CBF79717.1 anig|EHA24802.1 aory|EIT76047.1 asyd|OJJ58080.1 ater|EAU37387.1 atub|OJI79538.1 aver|OJJ04327.1 awen|OJJ37455.1 azon|OJJ51134.1

Group1443: abra|OJJ66835.1 acar|OOF91613.1 acla|EAW14419.1 afis|EAW19126.1 afla|EED54288.1 afum|EAL93858.1 agla|OJJ80441.1 akaw|GAA90472.1 aluc|OJZ85752.1 anid|CBF79737.1 anig|EHA24804.1 aory|EIT75920.1 asyd|OJJ58083.1 ater|EAU37393.1 atub|OJI79535.1 aver|OJJ04325.1 awen|OJJ37457.1 azon|OJJ51137.1

Group1444: abra|OJJ66836.1 acar|OOF91614.1 acla|EAW14420.1 afis|EAW19127.1 afla|EED54287.1 afum|EAL93859.1 agla|OJJ88596.1 akaw|GAA90473.1 aluc|OJZ85751.1 anid|CBF79739.1 anig|EHA24805.1 aory|EIT75974.1 asyd|OJJ58084.1 ater|EAU37394.1 atub|OJI79534.1 aver|OJJ04324.1 awen|OJJ37459.1 azon|OJJ51138.1

Group1446: abra|OJJ66843.1 acar|OOF91620.1 acla|EAW14417.1 afis|EAW19130.1 afla|EED54284.1 afum|EAL93862.1 agla|OJJ88602.1 akaw|GAA90479.1 aluc|OJZ85740.1 anid|CBF79758.1 anig|EHA24811.1 aory|EIT76041.1 asyd|OJJ58100.1 ater|EAU37398.1 atub|OJI79525.1 aver|OJJ04304.1 awen|OJJ37465.1 azon|OJJ51143.1

Group1447: abra|OJJ66846.1 acar|OOF91624.1 acla|EAW14425.1 afis|EAW19132.1 afla|EED54281.1 afum|EAL93864.1 agla|OJJ88607.1 akaw|GAA91559.1 aluc|OJZ85737.1 anid|CBF86338.1 anig|EHA24813.1 aory|EIT76060.1 asyd|OJJ64988.1 ater|EAU37405.1 atub|OJI79522.1 aver|OJI99108.1 awen|OJJ37468.1 azon|OJJ51146.1

Group1448: abra|OJJ66847.1 acar|OOF91625.1 acla|EAW14426.1 afis|EAW19133.1 afla|EED54280.1 afum|EAL93865.1 agla|OJJ88608.1 akaw|GAA91558.1 aluc|OJZ85736.1 anid|CBF86336.1 anig|EHA24814.1 aory|EIT76085.1 asyd|OJJ64989.1 ater|EAU37401.1 atub|OJI79521.1 aver|OJI99109.1 awen|OJJ37469.1 azon|OJJ51147.1

Group1449: abra|OJJ66853.1 acar|OOF91629.1 acla|EAW14431.1 afis|EAW19138.1 afla|EED54275.1 afum|EAL93870.1 agla|OJJ88617.1 akaw|GAA91553.1 aluc|OJZ85731.1 anid|CBF86324.1 anig|EHA24818.1 aory|EIT75921.1 asyd|OJJ64993.1 ater|EAU37408.1 atub|OJI79516.1 aver|OJI99112.1 awen|OJJ37475.1 azon|OJJ51155.1

Group1450: abra|OJJ66854.1 acar|OOF91630.1 acla|EAW14432.1 afis|EAW19139.1 afla|EED54274.1 afum|EAL93871.2 agla|OJJ88591.1 akaw|GAA91552.1 aluc|OJZ85730.1 anid|CBF86322.1 anig|EHA24819.1 aory|EIT75977.1 asyd|OJJ64994.1 ater|EAU37410.1 atub|OJI79515.1 aver|OJI99113.1 awen|OJJ37476.1 azon|OJJ51157.1

Group1451: abra|OJJ66855.1 acar|OOF91632.1 acla|EAW14433.1 afis|EAW19141.1 afla|EED54272.1 afum|EAL93872.1 agla|OJJ88589.1 akaw|GAA91551.1 aluc|OJZ85728.1 anid|CBF86321.1 anig|EHA24820.1 aory|EIT76058.1 asyd|OJJ64995.1 ater|EAU37412.1 atub|OJI79514.1 aver|OJI99115.1 awen|OJJ37481.1 azon|OJJ51158.1

Group1452: abra|OJJ66856.1 acar|OOF91633.1 acla|EAW14434.1 afis|EAW19142.1 afla|EED54271.1 afum|EAL93873.1 agla|OJJ88588.1 akaw|GAA91550.1 aluc|OJZ85727.1 anid|CBF86317.1 anig|EHA24821.1 aory|EIT76153.1 asyd|OJJ64997.1 ater|EAU37413.1 atub|OJI79513.1 aver|OJI99117.1 awen|OJJ37482.1 azon|OJJ51159.1

Group1453: abra|OJJ66858.1 acar|OOF91636.1 acla|EAW14437.1 afis|EAW19145.1 afla|EED54268.1 afum|EAL93876.1 agla|OJJ88586.1 akaw|GAA91547.1 aluc|OJZ85725.1 anid|CBF86313.1 anig|EHA24823.1 aory|EIT76154.1 asyd|OJJ65000.1 ater|EAU37417.1 atub|OJI79511.1 aver|OJI99120.1 awen|OJJ37484.1 azon|OJJ51161.1

Group1454: abra|OJJ66861.1 acar|OOF91638.1 acla|EAW14438.1 afis|EAW19146.1 afla|EED54267.1 afum|EAL93877.1 agla|OJJ88584.1 akaw|GAA91546.1 aluc|OJZ85721.1 anid|CBF86311.1 anig|EHA24824.1 aory|EIT76119.1 asyd|OJJ65001.1 ater|EAU37420.1 atub|OJI79510.1 aver|OJI99121.1 awen|OJJ37485.1 azon|OJJ51163.1

Group1455: abra|OJJ66864.1 acar|OOF91640.1 acla|EAW14440.1 afis|EAW19148.1 afla|EED54265.1 afum|EAL93879.1 agla|OJJ88576.1 akaw|GAA91544.1 aluc|OJZ85719.1 anid|CBF86308.1 anig|EHA24826.1 aory|EIT75979.1 asyd|OJJ65004.1 ater|EAU37421.1 atub|OJI79508.1 aver|OJI99123.1 awen|OJJ37501.1 azon|OJJ51166.1

Group1456: abra|OJJ66866.1 acar|OOF91643.1 acla|EAW14442.1 afis|EAW19150.1 afla|EED54257.1 afum|EAL93881.1 agla|OJJ88572.1 akaw|GAA91542.1 aluc|OJZ85716.1 anid|CBF86305.1 anig|EHA24828.1

aory|EIT76051.1 asyd|OJJ65006.1 ater|EAU37424.1 atub|OJI79506.1 aver|OJI99125.1 awen|OJJ37503.1 azon|OJJ51168.1

Group1457: abra|OJJ66869.1 acar|OOF91646.1 acla|EAW14445.1 afis|EAW19153.1 afla|EED54252.1 afum|EAL93884.1 agla|OJJ88569.1 akaw|GAA91539.1 aluc|OJZ85712.1 anid|CBF86299.1 anig|EHA24831.1 aory|EIT76023.1 asyd|OJJ65009.1 ater|EAU37426.1 atub|OJI79503.1 aver|OJI99128.1 awen|OJJ37506.1 azon|OJJ51172.1

Group1458: abra|OJJ66871.1 acar|OOF91647.1 acla|EAW14446.1 afis|EAW19154.1 afla|EED54251.1 afum|EAL93885.1 agla|OJJ88568.1 akaw|GAA91538.1 aluc|OJZ85711.1 anid|CBF86297.1 anig|EHA24832.1 aory|EIT75939.1 asyd|OJJ65010.1 ater|EAU37427.1 atub|OJI79502.1 aver|OJI99129.1 awen|OJJ37507.1 azon|OJJ51173.1

Group1459: abra|OJJ66873.1 acar|OOF91649.1 acla|EAW14448.1 afis|EAW19156.1 afla|EED54246.1 afum|EAL93887.1 agla|OJJ88566.1 akaw|GAA91536.1 aluc|OJZ85708.1 anid|CBF86294.1 anig|EHA24834.1 aory|EIT75988.1 asyd|OJJ65012.1 ater|EAU37429.1 atub|OJI79499.1 aver|OJI99131.1 awen|OJJ37509.1 azon|OJJ51174.1

Group1460: abra|OJJ66874.1 acar|OOF91650.1 acla|EAW14449.1 afis|EAW19157.1 afla|EED54245.1 afum|EBA27505.1 agla|OJJ88565.1 akaw|GAA91535.1 aluc|OJZ85707.1 anid|CBF86292.1 anig|EHA24835.1 aory|EIT75937.1 asyd|OJJ65013.1 ater|EAU37430.1 atub|OJI79498.1 aver|OJI99132.1 awen|OJJ37510.1 azon|OJJ51175.1

Group1461: abra|OJJ66875.1 acar|OOF91651.1 acla|EAW14450.1 afis|EAW19158.1 afla|EED54244.1 afum|EBA27506.1 agla|OJJ88564.1 akaw|GAA91534.1 aluc|OJZ85706.1 anid|CBF86291.1 anig|EHA24836.1 aory|EIT76133.1 asyd|OJJ65014.1 ater|EAU37431.1 atub|OJI79497.1 aver|OJI99133.1 awen|OJJ37511.1 azon|OJJ51176.1

Group1462: abra|OJJ66879.1 acar|OOF91654.1 acla|EAW14454.1 afis|EAW19162.1 afla|EED54240.1 afum|EAL93892.2 agla|OJJ88562.1 akaw|GAA91530.1 aluc|OJZ85703.1 anid|CBF86285.1 anig|EHA24840.1 aory|EIT76157.1 asyd|OJJ65017.1 ater|EAU37311.1 atub|OJI79493.1 aver|OJI99135.1 awen|OJJ37515.1 azon|OJJ51178.1

Group1463: abra|OJJ66880.1 acar|OOF91655.1 acla|EAW14455.1 afis|EAW19163.1 afla|EED54239.1 afum|EAL93893.1 agla|OJJ88561.1 akaw|GAA91529.1 aluc|OJZ85702.1 anid|CBF86282.1 anig|EHA24841.1 aory|EIT76014.1 asyd|OJJ65018.1 ater|EAU37310.1 atub|OJI79492.1 aver|OJI99136.1 awen|OJJ37516.1 azon|OJJ51181.1

Group1464: abra|OJJ66883.1 acar|OOF91657.1 acla|EAW14457.1 afis|EAW19165.1 afla|EED54232.1 afum|EAL93895.1 agla|OJJ88559.1 akaw|GAA91527.1 aluc|OJZ85699.1 anid|CBF86279.1 anig|EHA24843.1 aory|EIT75967.1 asyd|OJJ65020.1 ater|EAU37308.1 atub|OJI79489.1 aver|OJI99138.1 awen|OJJ37518.1 azon|OJJ51185.1

Group1465: abra|OJJ66887.1 acar|OOF91660.1 acla|EAW14459.1 afis|EAW19167.1 afla|EED54230.1 afum|EAL93897.1 agla|OJJ88557.1 akaw|GAA91525.1 aluc|OJZ85696.1 anid|CBF86276.1 anig|EHA24846.1 aory|EIT75971.1 asyd|OJJ65022.1 ater|EAU37306.1 atub|OJI79485.1 aver|OJI99141.1 awen|OJJ37520.1 azon|OJJ51186.1

Group1466: abra|OJJ66889.1 acar|OOF91661.1 acla|EAW14461.1 afis|EAW19169.1 afla|EED54228.1 afum|EAL93899.1 agla|OJJ88555.1 akaw|GAA91523.1 aluc|OJZ85693.1 anid|CBF86273.1 anig|EHA24848.1 aory|EIT76026.1 asyd|OJJ65024.1 ater|EAU37304.1 atub|OJI79483.1 aver|OJI99143.1 awen|OJJ37522.1 azon|OJJ51188.1

Group1467: abra|OJJ66890.1 acar|OOF91662.1 acla|EAW14462.1 afis|EAW19170.1 afla|EED54226.1 afum|EAL93900.1 agla|OJJ88554.1 akaw|GAA91522.1 aluc|OJZ85692.1 anid|CBF86271.1 anig|EHA24849.1 aory|EIT75952.1 asyd|OJJ65025.1 ater|EAU37303.1 atub|OJI79482.1 aver|OJI99144.1 awen|OJJ37523.1 azon|OJJ51189.1

Group1468: abra|OJJ66891.1 acar|OOF91663.1 acla|EAW14463.1 afis|EAW19171.1 afla|EED54224.1 afum|EAL93901.1 agla|OJJ88553.1 akaw|GAA91521.1 aluc|OJZ85691.1 anid|CBF86270.1 anig|EHA24850.1 aory|EIT75965.1 asyd|OJJ65026.1 ater|EAU37302.1 atub|OJI79481.1 aver|OJI99145.1 awen|OJJ37524.1 azon|OJJ51190.1

Group1469: abra|OJJ66893.1 acar|OOF91664.1 acla|EAW14465.1 afis|EAW19173.1 afla|EED54222.1 afum|EAL93903.1 agla|OJJ88551.1 akaw|GAA91519.1 aluc|OJZ85689.1 anid|CBF86266.1 anig|EHA24852.1 aory|EIT76009.1 asyd|OJJ65029.1 ater|EAU37300.1 atub|OJI79479.1 aver|OJI99148.1 awen|OJJ37526.1 azon|OJJ51193.1

Group1470: abra|OJJ66894.1 acar|OOF91665.1 acla|EAW14466.1 afis|EAW19174.1 afla|EED54221.1 afum|EAL93904.1 agla|OJJ88550.1 akaw|GAA91518.1 aluc|OJZ85688.1 anid|CBF86265.1 anig|EHA24853.1 aory|EIT76027.1 asyd|OJJ65030.1 ater|EAU37299.1 atub|OJI79478.1 aver|OJI99149.1 awen|OJJ37527.1 azon|OJJ51194.1

Group1471: abra|OJJ66895.1 acar|OOF91666.1 acla|EAW14467.1 afis|EAW19175.1 afla|EED54220.1 afum|EAL93905.1 agla|OJJ88548.1 akaw|GAA91517.1 aluc|OJZ85687.1 anid|CBF86263.1 anig|EHA24854.1 aory|EIT75931.1 asyd|OJJ65031.1 ater|EAU37298.1 atub|OJI79477.1 aver|OJI99150.1 awen|OJJ37528.1 azon|OJJ51195.1

Group1472: abra|OJJ66896.1 acar|OOF91667.1 acla|EAW14468.1 afis|EAW19176.1 afla|EED54219.1 afum|EAL93906.1 agla|OJJ88547.1 akaw|GAA91516.1 aluc|OJZ85686.1 anid|CBF86262.1 anig|EHA24855.1 aory|EIT76150.1 asyd|OJJ65032.1 ater|EAU37297.1 atub|OJI79476.1 aver|OJI99151.1 awen|OJJ37530.1 azon|OJJ51196.1

Group1473: abra|OJJ66897.1 acar|OOF91668.1 acla|EAW14469.1 afis|EAW19177.1 afla|EED54218.1 afum|EAL93907.1 agla|OJJ88546.1 akaw|GAA91515.1 aluc|OJZ85685.1 anid|CBF86260.1 anig|EHA24856.1 aory|EIT75968.1 asyd|OJJ65033.1 ater|EAU37296.1 atub|OJI79475.1 aver|OJI99152.1 awen|OJJ37531.1 azon|OJJ51197.1

Group1474: abra|OJJ66899.1 acar|OOF91671.1 acla|EAW14470.1 afis|EAW19179.1 afla|EED54217.1 afum|EAL93909.1 agla|OJJ88544.1 akaw|GAA91513.1 aluc|OJZ85683.1 anid|CBF86259.1 anig|EHA24858.1 aory|EIT76147.1 asyd|OJJ65035.1 ater|EAU37294.1 atub|OJI79473.1 aver|OJI99154.1 awen|OJJ37533.1 azon|OJJ51199.1

Group1475: abra|OJJ66900.1 acar|OOF91672.1 acla|EAW14471.1 afis|EAW19180.1 afla|EED54216.1 afum|EAL93910.1 agla|OJJ88543.1 akaw|GAA91512.1 aluc|OJZ85682.1 anid|CBF86257.1 anig|EHA24859.1 aory|EIT76034.1 asyd|OJJ65036.1 ater|EAU37293.1 atub|OJI79472.1 aver|OJI99155.1 awen|OJJ37534.1 azon|OJJ51200.1

Group1476: abra|OJJ66903.1 acar|OOF91673.1 acla|EAW14473.1 afis|EAW19182.1 afla|EED54213.1 afum|EAL93912.1 agla|OJJ88540.1 akaw|GAA91510.1 aluc|OJZ85680.1 anid|CBF86253.1 anig|EHA24861.1 aory|EIT76125.1 asyd|OJJ65038.1 ater|EAU37291.1 atub|OJI79470.1 aver|OJI99157.1 awen|OJJ37536.1 azon|OJJ51202.1

Group1477: abra|OJJ66905.1 acar|OOF91675.1 acla|EAW14474.1 afis|EAW19183.1 afla|EED54212.1 afum|EAL93913.1 agla|OJJ88539.1 akaw|GAA91509.1 aluc|OJZ85676.1 anid|CBF86252.1 anig|EHA24864.1 aory|EIT75985.1 asyd|OJJ65041.1 ater|EAU37290.1 atub|OJI79467.1 aver|OJI99159.1 awen|OJJ37538.1 azon|OJJ51203.1

Group1478: abra|OJJ66906.1 acar|OOF91676.1 acla|EAW14475.1 afis|EAW19184.1 afla|EED54211.1 afum|EAL93915.1 akaw|GAA91508.1 aluc|OJZ85675.1 anid|CBF86250.1 anig|EHA24865.1 aory|EIT76099.1 asyd|OJJ65042.1 ater|EAU37289.1 atub|OJI79466.1 aver|OJI99160.1 awen|OJJ37539.1 azon|OJJ51204.1 agla|OJJ88538.1

Group1479: abra|OJJ66907.1 acar|OOF91677.1 acla|EAW14476.1 afla|EED54210.1 afum|EAL93916.1 agla|OJJ88537.1 akaw|GAA91507.1 aluc|OJZ85673.1 anid|CBF86248.1 anig|EHA24866.1 aory|EIT76017.1 asyd|OJJ65043.1 ater|EAU37287.1 atub|OJI79465.1 aver|OJI99162.1 awen|OJJ37542.1 afis|EAW19185.1 azon|OJJ51206.1

Group1480: abra|OJJ66909.1 acar|OOF91679.1 acla|EAW14478.1 afis|EAW19187.1 afla|EED47724.1 afum|EAL93918.1 agla|OJJ88534.1 akaw|GAA91505.1 aluc|OJZ85671.1 anid|CBF86246.1 anig|EHA24868.1 aory|EIT77160.1 asyd|OJJ65044.1 ater|EAU37286.1 atub|OJI79463.1 aver|OJI99165.1 awen|OJJ37545.1 azon|OJJ51210.1

Group1481: abra|OJJ66911.1 acar|OOF91680.1 acla|EAW14480.1 afis|EAW19189.1 afla|EED47722.1 afum|EAL93921.1 agla|OJJ88532.1 akaw|GAA91504.1 aluc|OJZ85670.1 anid|CBF86243.1 anig|EHA24869.1 aory|EIT77116.1 asyd|OJJ65046.1 ater|EAU37285.1 atub|OJI79462.1 aver|OJI99167.1 awen|OJJ37549.1 azon|OJJ51211.1

Group1482: abra|OJJ66915.1 acar|OOF91682.1 acla|EAW14482.1 afis|EAW19191.1 afla|EED47718.1 afum|EAL93922.1 agla|OJJ88518.1 akaw|GAA91503.1 aluc|OJZ85665.1 anid|CBF86239.1 anig|EHA24870.1 aory|EIT80246.1 asyd|OJJ65049.1 ater|EAU37284.1 atub|OJI79458.1 aver|OJI99171.1 awen|OJJ37551.1 azon|OJJ51212.1

Group1483: abra|OJJ66918.1 acar|OOF91685.1 acla|EAW14485.1 afis|EAW19194.1 afla|EED47714.1 afum|EAL93925.2 agla|OJJ88515.1 akaw|GAA91500.1 aluc|OJZ85661.1 anid|CBF78544.1 anig|EHA24872.1 aory|EIT80273.1 asyd|OJJ65054.1 ater|EAU37281.1 atub|OJI79455.1 aver|OJI99177.1 awen|OJJ37552.1 azon|OJJ51213.1

Group1484: abra|OJJ66919.1 acar|OOF91687.1 acla|EAW14486.1 afis|EAW19195.1 afla|EED47713.1 afum|EAL93927.2 agla|OJJ88514.1 akaw|GAA91499.1 aluc|OJZ85660.1 anid|CBF78546.1 anig|EHA24873.1 aory|EIT80279.1 asyd|OJJ65055.1 ater|EAU37280.1 atub|OJI79454.1 aver|OJI99178.1 awen|OJJ37553.1 azon|OJJ51214.1

Group1485: abra|OJJ66923.1 acar|OOF91690.1 acla|EAW14489.1 afis|EAW19203.1 afla|EED47709.1 afum|EAL93933.1 agla|OJJ88509.1 akaw|GAA91496.1 aluc|OJZ85657.1 anid|CBF78554.1 anig|EHA24876.1

aory|EIT80207.1 asyd|OJJ65059.1 ater|EAU37277.1 atub|OJI79449.1 aver|OJI99184.1 awen|OJJ37556.1 azon|OJJ51219.1

Group1486: abra|OJJ66924.1 acar|OOF91692.1 acla|EAW14490.1 afis|EAW19204.1 afla|EED47708.1 afum|EAL93934.1 agla|OJJ88508.1 akaw|GAA91493.1 aluc|OJZ85654.1 anid|CBF78558.1 anig|EHA24878.1 aory|EIT80227.1 asyd|OJJ65061.1 ater|EAU37268.1 atub|OJI79446.1 aver|OJI99185.1 awen|OJJ37557.1 azon|OJJ51220.1

Group1487: abra|OJJ66928.1 acar|OOF91696.1 acla|EAW14493.1 afis|EAW19207.1 afla|EED47705.1 afum|EAL93937.1 agla|OJJ88504.1 akaw|GAA91489.1 aluc|OJZ85651.1 anid|CBF78563.1 anig|EHA24882.1 aory|EIT80245.1 asyd|OJJ65064.1 ater|EAU37265.1 atub|OJI79442.1 aver|OJI99188.1 awen|OJJ37560.1 azon|OJJ51222.1

Group1488: abra|OJJ66931.1 acar|OOF91698.1 acla|EAW14494.1 afis|EAW19208.1 afla|EED47703.1 afum|EAL93938.2 agla|OJJ88501.1 akaw|GAA91487.1 aluc|OJZ85649.1 anid|CBF78566.1 anig|EHA24884.1 aory|EIT80217.1 asyd|OJJ65067.1 ater|EAU37260.1 atub|OJI79440.1 aver|OJI99191.1 awen|OJJ37562.1 azon|OJJ51225.1

Group1489: abra|OJJ66934.1 acar|OOF91701.1 acla|EAW14496.1 afis|EAW19210.1 afla|EED47702.1 afum|EAL93940.1 agla|OJJ88490.1 akaw|GAA91485.1 aluc|OJZ85647.1 anid|CBF78570.1 anig|EHA24887.1 aory|EIT80269.1 asyd|OJJ65075.1 ater|EAU37258.1 atub|OJI79438.1 aver|OJI99200.1 awen|OJJ37564.1 azon|OJJ51227.1

Group1490: afum|EAL92928.1 abra|OJJ78283.1 acar|OOF98585.1 acla|EAW09232.1 afis|EAW21916.1 afla|EED46633.1 agla|OJJ84207.1 akaw|GAA85744.1 aluc|OJZ91357.1 anig|EHA20035.1 aory|EIT77912.1 asyd|OJJ61312.1 ater|EAU30918.1 atub|OJI83350.1 aver|OJJ00637.1 awen|OJJ34206.1 azon|OJJ43428.1 anid|CBF76852.1

Group1492: abra|OJJ66938.1 acar|OOF91704.1 acla|EAW14497.1 afis|EAW19211.1 afla|EED47699.1 afum|EAL93941.1 agla|OJJ88486.1 akaw|GAA91482.1 aluc|OJZ85644.1 anid|CBF78583.1 anig|EHA24891.1 aory|EIT80265.1 asyd|OJJ65078.1 ater|EAU37256.1 atub|OJI79435.1 aver|OJI99203.1 awen|OJJ37565.1 azon|OJJ51228.1

Group1493: abra|OJJ66940.1 acar|OOF91705.1 acla|EAW14498.1 afis|EAW19212.1 afla|EED47698.1 afum|EBA27508.1 agla|OJJ88485.1 akaw|GAA91481.1 aluc|OJZ85642.1 anid|CBF78581.1 anig|EHA24892.1 aory|EIT80243.1 asyd|OJJ65076.1 ater|EAU37255.1 atub|OJI79433.1 aver|OJI99201.1 awen|OJJ37568.1 azon|OJJ51229.1

Group1494: abra|OJJ66948.1 acar|OOF91714.1 acla|EAW14503.1 afis|EAW19217.1 afla|EED47682.1 afum|EAL93950.1 agla|OJJ88478.1 akaw|GAA91472.1 aluc|OJZ85632.1 anid|CBF78594.1 anig|EHA24899.1 aory|EIT80231.1 asyd|OJJ65091.1 ater|EAU37251.1 atub|OJI79422.1 aver|OJI99216.1 awen|OJJ37574.1 azon|OJJ51234.1

Group1495: abra|OJJ66952.1 acar|OOF93656.1 acla|EAW14505.1 afis|EAW19218.1 afla|EED47681.1 afum|EAL93951.2 akaw|GAA91468.1 aluc|OJZ85626.1 anid|CBF78597.1 anig|EHA24902.1 aory|EIT80228.1 asyd|OJJ65093.1 ater|EAU37250.1 atub|OJI79419.1 aver|OJI99217.1 azon|OJJ51235.1 agla|OJJ88477.1 awen|OJJ37576.1

Group1496: abra|OJJ66955.1 acar|OOF93653.1 acla|EAW14506.1 afis|EAW19219.1 afla|EED47670.1 afum|EAL93952.1 agla|OJJ88476.1 akaw|GAA92206.1 aluc|OJZ85621.1 anid|CBF78603.1 anig|EHA24905.1 aory|EIT80271.1 asyd|OJJ65097.1 ater|EAU37238.1 atub|OJI79414.1 aver|OJI99223.1 awen|OJJ37577.1 azon|OJJ51236.1

Group1497: abra|OJJ66956.1 acar|OOF93652.1 acla|EAW14507.1 afis|EAW19220.1 afla|EED47669.1 afum|EAL93953.1 agla|OJJ88464.1 akaw|GAA92205.1 aluc|OJZ85620.1 anid|CBF78605.1 anig|EHA24906.1 aory|EIT80172.1 asyd|OJJ65098.1 ater|EAU37237.1 atub|OJI79413.1 aver|OJI99224.1 awen|OJJ37583.1 azon|OJJ51237.1

Group1498: abra|OJJ66962.1 acar|OOF93645.1 acla|EAW14512.1 afis|EAW19230.1 afla|EED47658.1 afum|EAL93959.1 agla|OJJ88473.1 akaw|GAA92199.1 aluc|OJZ85614.1 anid|CBF78614.1 anig|EHA24912.1 aory|EIT80215.1 asyd|OJJ65178.1 ater|EAU37233.1 atub|OJI79407.1 aver|OJI99331.1 awen|OJJ37588.1 azon|OJJ51242.1

Group1499: abra|OJJ66980.1 acar|OOF93631.1 acla|EAW11770.1 afis|EAW23678.1 afla|EED52197.1 afum|EAL87121.1 agla|OJJ78538.1 akaw|GAA92184.1 aluc|OJZ85594.1 anid|CBF89572.1 anig|EHA24928.1 aory|EIT74397.1 asyd|OJJ62335.1 ater|EAU35375.1 atub|OJI79390.1 aver|OJI96441.1 awen|OJJ35575.1 azon|OJJ43197.1

Group1501: abra|OJJ66992.1 acar|OOF93622.1 acla|EAW15343.1 afis|EAW20364.1 afla|EED51949.1 afum|EAL85480.2 agla|OJJ81790.1 akaw|GAA92172.1 aluc|OJZ85580.1 anid|CBF69463.1 anig|EHA24939.1 aory|EIT81480.1 asyd|OJJ59276.1 ater|EAU36758.1 atub|OJI79376.1 aver|OJJ01891.1 awen|OJJ32524.1 azon|OJJ50243.1

Group1503: abra|OJJ67118.1 acar|OOF98434.1 acla|EAW11710.1 afis|EAW23729.1 afla|EED47523.1 afum|EAL87167.1 agla|OJJ88177.1 akaw|GAA91047.1 aluc|OJZ87857.1 anid|CBF69394.1 anig|EHA20163.1 aory|EIT74567.1 asyd|OJJ52918.1 ater|EAU30755.1 atub|OJI80790.1 aver|OJJ08888.1 awen|OJJ32546.1 azon|OJJ51795.1

Group1504: abra|OJJ67150.1 acar|OOF98408.1 acla|EAW14575.1 afis|EAW19299.1 afla|EED47588.1 afum|EAL94018.1 agla|OJJ88383.1 akaw|GAA91023.1 aluc|OJZ87826.1 anid|CBF78774.1 anig|EHA20305.1 aory|EIT74538.1 asyd|OJJ65240.1 ater|EAU29474.1 atub|OJI80817.1 aver|OJI99390.1 awen|OJJ37648.1 azon|OJJ44913.1

Group1505: abra|OJJ67151.1 acar|OOF98407.1 acla|EAW14574.1 afis|EAW19297.1 afla|EED47589.1 afum|EAL94016.1 agla|OJJ88384.1 akaw|GAA91022.1 aluc|OJZ87825.1 anid|CBF78772.1 anig|EHA20304.1 aory|EIT74535.1 asyd|OJJ65239.1 ater|EAU29475.1 atub|OJI80819.1 aver|OJI99389.1 awen|OJJ37647.1 azon|OJJ44912.1

Group1506: abra|OJJ67153.1 acar|OOF98405.1 acla|EAW14571.1 afis|EAW19294.1 afla|EED47592.1 afum|EAL94013.1 agla|OJJ88386.1 akaw|GAA91019.1 aluc|OJZ87821.1 anid|CBF78767.1 anig|EHA20302.1 aory|EIT74534.1 asyd|OJJ65237.1 ater|EAU29478.1 atub|OJI80823.1 aver|OJI99386.1 awen|OJJ37645.1 azon|OJJ44910.1

Group1507: abra|OJJ67154.1 acar|OOF98404.1 acla|EAW14570.1 afis|EAW19283.1 afla|EED47593.1 afum|EAL94009.1 agla|OJJ88395.1 akaw|GAA91018.1 aluc|OJZ87820.1 anid|CBF78763.1 anig|EHA20301.1 aory|EIT80189.1 asyd|OJJ65235.1 ater|EAU29479.1 atub|OJI80824.1 aver|OJI99384.1 awen|OJJ37644.1 azon|OJJ44909.1

Group1508: abra|OJJ67157.1 acar|OOF98402.1 acla|EAW14568.1 afis|EAW19281.1 afla|EED47596.1 afum|EAL94007.1 agla|OJJ88393.1 akaw|GAA91015.1 aluc|OJZ87816.1 anid|CBF78760.1 anig|EHA20297.1 aory|EIT80256.1 asyd|OJJ65233.1 ater|EAU29482.1 atub|OJI80828.1 aver|OJI99382.1 awen|OJJ37642.1 azon|OJJ44906.1

Group1509: abra|OJJ67159.1 acar|OOF98400.1 acla|EAW14567.1 afis|EAW19280.1 afla|EED47598.1 afum|EAL94006.1 agla|OJJ88391.1 akaw|GAA91013.1 aluc|OJZ87814.1 anid|CBF78756.1 anig|EHA20295.1 aory|EIT80259.1 asyd|OJJ65231.1 ater|EAU29483.1 atub|OJI80830.1 aver|OJI99380.1 awen|OJJ37640.1 azon|OJJ44904.1

Group1510: abra|OJJ67163.1 acar|OOF98397.1 acla|EAW14565.1 afis|EAW19278.1 afla|EED47600.1 afum|EAL94004.1 agla|OJJ88389.1 akaw|GAA91011.1 aluc|OJZ87812.1 anid|CBF78752.1 anig|EHA20294.1 aory|EIT80253.1 asyd|OJJ65229.1 ater|EAU29485.1 atub|OJI80832.1 aver|OJI99378.1 awen|OJJ37638.1 azon|OJJ44882.1

Group1511: abra|OJJ67164.1 acar|OOF98398.1 acla|EAW14564.1 afis|EAW19277.1 afla|EED47601.1 afum|EAL94003.1 agla|OJJ88396.1 akaw|GAA91010.1 aluc|OJZ87811.1 anid|CBF78750.1 anig|EHA20293.1 aory|EIT80205.1 asyd|OJJ65228.1 ater|EAU29486.1 atub|OJI80833.1 aver|OJI99377.1 awen|OJJ37637.1 azon|OJJ44883.1

Group1512: abra|OJJ67173.1 acar|OOF98390.1 acla|EAW14550.1 afis|EAW19267.1 afla|EED47608.1 afum|EAL93994.1 agla|OJJ88426.1 akaw|GAA91001.1 aluc|OJZ87802.1 anid|CBF78695.1 anig|EHA20283.1 aory|EIT80277.1 asyd|OJJ65218.1 ater|EAU29548.1 atub|OJI80845.1 aver|OJI99368.1 awen|OJJ37628.1 azon|OJJ47016.1

Group1513: abra|OJJ67175.1 acar|OOF98388.1 acla|EAW14548.1 afis|EAW19265.1 afla|EED47609.1 afum|EAL93992.1 agla|OJJ88424.1 akaw|GAA90999.1 aluc|OJZ87800.1 anid|CBF78691.1 anig|EHA20281.1 aory|EIT80181.1 asyd|OJJ65216.1 ater|EAU29546.1 atub|OJI80847.1 aver|OJI99366.1 awen|OJJ37626.1 azon|OJJ47015.1

Group1514: abra|OJJ67176.1 acar|OOF98386.1 acla|EAW14547.1 afis|EAW19264.1 afla|EED47610.1 afum|EAL93991.1 agla|OJJ88423.1 akaw|GAA90998.1 aluc|OJZ87799.1 anid|CBF78688.1 anig|EHA20280.1 aory|EIT80241.1 asyd|OJJ65214.1 ater|EAU29545.1 atub|OJI80848.1 aver|OJI99364.1 awen|OJJ37625.1 azon|OJJ47014.1

Group1516: abra|OJJ67179.1 acar|OOF98384.1 acla|EAW14544.1 afis|EAW19262.1 afla|EED47613.1 afum|EAL93989.1 agla|OJJ88420.1 akaw|GAA90997.1 aluc|OJZ87796.1 anid|CBF78682.1 anig|EHA20277.1 aory|EIT80281.1 asyd|OJJ65211.1 ater|EAU29542.1 atub|OJI80851.1 aver|OJI99361.1 awen|OJJ37622.1 azon|OJJ47011.1

Group1517: abra|OJJ67180.1 acar|OOF98382.1 acla|EAW14543.1 afis|EAW19261.1 afla|EED47614.1 afum|EAL93988.1 agla|OJJ88433.1 akaw|GAA90996.1 aluc|OJZ87795.1 anid|CBF78680.1 anig|EHA20276.1 aory|EIT80274.1 asyd|OJJ65210.1 ater|EAU29514.1 atub|OJI80852.1 aver|OJI99360.1 awen|OJJ37621.1 azon|OJJ47010.1

Group1518: abra|OJJ67182.1 acar|OOF98380.1 acla|EAW14541.1 afis|EAW19259.1 afla|EED47616.1 afum|EAL93986.1 agla|OJJ88436.1 akaw|GAA90994.1 aluc|OJZ87793.1 anid|CBF78678.1 anig|EHA20274.1

aory|EIT80183.1 asyd|OJJ65209.1 ater|EAU29516.1 atub|OJI80854.1 aver|OJI99358.1 awen|OJJ37620.1 azon|OJJ47009.1

Group1519: abra|OJJ67183.1 acar|OOF98379.1 acla|EAW14540.1 afis|EAW19258.1 afla|EED47618.1 afum|EAL93985.1 agla|OJJ88437.1 akaw|GAA90993.1 aluc|OJZ87792.1 anid|CBF78676.1 anig|EHA20273.1 aory|EIT80276.1 asyd|OJJ65208.1 ater|EAU29517.1 atub|OJI80855.1 aver|OJI99357.1 awen|OJJ37619.1 azon|OJJ47008.1

Group1520: abra|OJJ67187.1 acar|OOF98377.1 acla|EAW14537.1 afis|EAW19253.1 afla|EED47621.1 afum|EAL93982.1 agla|OJJ88444.1 akaw|GAA90990.1 aluc|OJZ87788.1 anid|CBF78671.1 anig|EHA20270.1 aory|EIT80226.1 asyd|OJJ65205.1 ater|EAU29510.1 atub|OJI80859.1 aver|OJI99354.1 awen|OJJ37616.1 azon|OJJ47005.1

Group1521: abra|OJJ67189.1 acar|OOF98374.1 acla|EAW14534.1 afis|EAW19252.1 afla|EED47626.1 afum|EAL93981.1 agla|OJJ88445.1 akaw|GAA90988.1 aluc|OJZ87786.1 anid|CBF78669.1 anig|EHA20266.1 aory|EIT80202.1 asyd|OJJ65202.1 ater|EAU29506.1 atub|OJI80861.1 aver|OJI99351.1 awen|OJJ37615.1 azon|OJJ47004.1

Group1522: abra|OJJ67190.1 acar|OOF98373.1 acla|EAW14533.1 afis|EAW19251.1 afla|EED47627.1 afum|EAL93980.1 agla|OJJ88446.1 akaw|GAA90987.1 aluc|OJZ87785.1 anid|CBF78667.1 anig|EHA20265.1 aory|EIT80224.1 asyd|OJJ65201.1 ater|EAU29505.1 atub|OJI80862.1 aver|OJI99350.1 awen|OJJ37614.1 azon|OJJ51262.1

Group1523: abra|OJJ67192.1 acar|OOF98372.1 acla|EAW14532.1 afis|EAW19250.1 afla|EED47628.1 afum|EAL93979.1 agla|OJJ88447.1 akaw|GAA90986.1 aluc|OJZ87784.1 anid|CBF78663.1 anig|EHA20264.1 aory|EIT80188.1 asyd|OJJ65199.1 ater|EAU29504.1 atub|OJI80863.1 aver|OJI99348.1 awen|OJJ37612.1 azon|OJJ51261.1

Group1524: abra|OJJ67193.1 acar|OOF98371.1 acla|EAW14531.1 afis|EAW19249.1 afla|EED47629.1 afum|EAL93978.1 agla|OJJ88448.1 akaw|GAA90985.1 aluc|OJZ87782.1 anid|CBF78665.1 anig|EHA20263.1 aory|EIT80199.1 asyd|OJJ65200.1 ater|EAU29503.1 atub|OJI80865.1 aver|OJI99349.1 awen|OJJ37611.1 azon|OJJ51260.1

Group1525: abra|OJJ67195.1 acar|OOF98369.1 acla|EAW14529.1 afis|EAW19247.1 afla|EED47631.1 afum|EAL93976.1 agla|OJJ88450.1 akaw|GAA90983.1 aluc|OJZ87780.1 anid|CBF78658.1 anig|EHA20262.1 aory|EIT80177.1 asyd|OJJ65197.1 ater|EAU29501.1 atub|OJI80867.1 aver|OJI99346.1 awen|OJJ37604.1 azon|OJJ51257.1

Group1526: abra|OJJ67200.1 acar|OOF98364.1 acla|EAW14524.1 afis|EAW19242.1 afla|EED47635.1 afum|EAL93971.2 agla|OJJ88455.1 akaw|GAA90978.1 aluc|OJZ87774.1 anid|CBF78650.1 anig|EHA20258.1 aory|EIT80223.1 asyd|OJJ65194.1 ater|EAU29498.1 atub|OJI80871.1 aver|OJI99343.1 awen|OJJ37598.1 azon|OJJ51253.1

Group1527: abra|OJJ67201.1 acar|OOF98362.1 acla|EAW14523.1 afis|EAW19241.1 afla|EED47636.1 afum|EAL93970.2 agla|OJJ88456.1 akaw|GAA90977.1 aluc|OJZ87773.1 anid|CBF78648.1 anig|EHA20257.1 aory|EIT80218.1 asyd|OJJ65193.1 ater|EAU29497.1 atub|OJI80872.1 aver|OJI99342.1 awen|OJJ37597.1 azon|OJJ51252.1

Group1528: abra|OJJ67202.1 acar|OOF98361.1 acla|EAW14522.1 afis|EAW19240.1 afla|EED47637.1 afum|EAL93969.1 agla|OJJ88458.1 akaw|GAA90976.1 aluc|OJZ87772.1 anid|CBF78646.1 anig|EHA20256.1 aory|EIT80185.1 asyd|OJJ65192.1 ater|EAU37223.1 atub|OJI80873.1 aver|OJI99341.1 awen|OJJ37596.1 azon|OJJ51251.1

Group1529: abra|OJJ67203.1 acar|OOF98360.1 acla|EAW14521.1 afis|EAW19239.1 afla|EED47638.1 afum|EBA27509.1 agla|OJJ88459.1 akaw|GAA90975.1 aluc|OJZ87771.1 anid|CBF78644.1 anig|EHA20255.1 aory|EIT80222.1 asyd|OJJ65191.1 ater|EAU37224.1 atub|OJI80874.1 aver|OJI99340.1 awen|OJJ37595.1 azon|OJJ51250.1

Group1530: abra|OJJ67204.1 acar|OOF98359.1 acla|EAW14520.1 afis|EAW19238.1 afla|EED47639.1 afum|EAL93966.1 agla|OJJ88461.1 akaw|GAA90974.1 aluc|OJZ87770.1 anid|CBF78642.1 anig|EHA20254.1 aory|EIT80175.1 asyd|OJJ65190.1 ater|EAU37225.1 atub|OJI80875.1 aver|OJI99339.1 awen|OJJ37594.1 azon|OJJ51249.1

Group1531: abra|OJJ67213.1 acar|OOF98346.1 acla|EAW08553.1 afis|EAW23595.1 afla|EED47505.1 afum|EAL87872.1 agla|OJJ88655.1 akaw|GAA90964.1 aluc|OJZ87760.1 anid|CBF89585.1 anig|EHA20245.1 aory|EIT74581.1 asyd|OJJ62318.1 ater|EAU35355.1 atub|OJI80884.1 aver|OJI96426.1 awen|OJJ39917.1 azon|OJJ45891.1

Group1532: abra|OJJ67215.1 acar|OOF98343.1 acla|EAW10167.1 afis|EAW25427.1 afla|EED53915.1 afum|EAL90086.1 agla|OJJ87071.1 akaw|GAA90962.1 aluc|OJZ87757.1 anid|CBF77551.1 anig|EHA20243.1 aory|EIT78350.1 asyd|OJJ53152.1 ater|EAU34597.1 atub|OJI80886.1 aver|OJJ03699.1 awen|OJJ41156.1 azon|OJJ44734.1

Group1533: abra|OJJ67225.1 acar|OOF98326.1 acla|EAW10408.1 afis|EAW25160.1 afla|EED53622.1 afum|EAL89835.1 agla|OJJ88637.1 akaw|GAA91652.1 aluc|OJZ87749.1 anid|CBF80654.1 anig|EHA20237.1 aory|EIT75132.1 asyd|OJJ54613.1 ater|EAU34333.1 atub|OJI80894.1 aver|OJJ07545.1 awen|OJJ33447.1 azon|OJJ50704.1

Group1534: abra|OJJ67239.1 acar|OOF89889.1 acla|EAW13993.1 afis|EAW18701.1 afla|EED50650.1 afum|EAL93424.1 agla|OJJ82360.1 akaw|GAA91664.1 aluc|OJZ87736.1 anid|CBF70640.1 anig|EHA20228.1 aory|EIT78150.1 asyd|OJJ58491.1 ater|EAU38205.1 atub|OJI80904.1 aver|OJJ01094.1 awen|OJJ32184.1 azon|OJJ48705.1

Group1535: abra|OJJ67298.1 acar|OOF92514.1 acla|EAW15241.1 afis|EAW20208.1 afla|EED57135.1 afum|EAL85325.1 agla|OJJ84656.1 akaw|GAA86516.1 aluc|OJZ85061.1 anid|CBF85098.1 anig|EHA25276.1 aory|EIT74134.1 asyd|OJJ63059.1 ater|EAU32018.1 atub|OJI80536.1 aver|OJI97904.1 awen|OJJ31212.1 azon|OJJ46148.1

Group1536: abra|OJJ67306.1 acar|OOF92507.1 acla|EAW06427.1 afis|EAW18531.1 afla|EED52870.1 afum|EAL93228.1 agla|OJJ85144.1 akaw|GAA86509.1 aluc|OJZ85052.1 anid|CBF70204.1 anig|EHA25269.1 aory|EIT78588.1 asyd|OJJ58784.1 ater|EAU30039.1 atub|OJI80546.1 aver|OJJ01392.1 awen|OJJ31089.1 azon|OJJ50594.1

Group1537: abra|OJJ67308.1 acar|OOF92504.1 acla|EAW06424.1 afis|EAW18528.1 afla|EED52873.1 afum|EAL93225.1 agla|OJJ85141.1 akaw|GAA86507.1 aluc|OJZ85050.1 anid|CBF70208.1 anig|EHA25267.1 aory|EIT78611.1 asyd|OJJ58781.1 ater|EAU30041.1 atub|OJI80548.1 aver|OJJ01389.1 awen|OJJ31086.1 azon|OJJ50591.1

Group1538: abra|OJJ67310.1 acar|OOF92502.1 acla|EAW06422.1 afis|EAW18526.1 afla|EED52875.1 afum|EAL93221.1 agla|OJJ85140.1 akaw|GAA86505.1 aluc|OJZ85048.1 anid|CBF70211.1 anig|EHA25265.1 aory|EIT78615.1 asyd|OJJ58779.1 ater|EAU30043.1 atub|OJI80550.1 aver|OJJ01388.1 awen|OJJ31080.1 azon|OJJ50588.1

Group1539: abra|OJJ67311.1 acar|OOF92501.1 acla|EAW06421.1 afis|EAW18525.1 afla|EED52876.1 afum|EAL93220.1 agla|OJJ85139.1 akaw|GAA86504.1 aluc|OJZ85047.1 anid|CBF70213.1 anig|EHA25264.1 aory|EIT78600.1 asyd|OJJ58778.1 ater|EAU30044.1 atub|OJI80551.1 aver|OJJ01387.1 awen|OJJ31079.1 azon|OJJ50587.1

Group1540: abra|OJJ67319.1 acar|OOF92496.1 acla|EAW06417.1 afis|EAW18521.1 afla|EED52877.1 afum|EAL93216.1 agla|OJJ85133.1 akaw|GAA86499.1 aluc|OJZ85041.1 anid|CBF70223.1 anig|EHA25259.1 aory|EIT78623.1 asyd|OJJ58774.1 ater|EAU30049.1 atub|OJI80556.1 aver|OJJ01383.1 awen|OJJ31073.1 azon|OJJ49993.1

Group1541: abra|OJJ67321.1 acar|OOF92493.1 acla|EAW06415.1 afis|EAW18519.1 afla|EED52879.1 afum|EAL93214.1 agla|OJJ85131.1 akaw|GAA86497.1 aluc|OJZ85039.1 anid|CBF70226.1 anig|EHA25257.1 aory|EIT78673.1 asyd|OJJ58773.1 ater|EAU30051.1 atub|OJI80558.1 aver|OJJ01382.1 awen|OJJ31071.1 azon|OJJ50581.1

Group1542: abra|OJJ67323.1 acar|OOF92490.1 acla|EAW06412.1 afis|EAW18516.1 afla|EED52882.1 afum|EAL93211.1 agla|OJJ85129.1 akaw|GAA86493.1 aluc|OJZ85035.1 anid|CBF70232.1 anig|EHA25255.1 aory|EIT78656.1 asyd|OJJ58771.1 ater|EAU30054.1 atub|OJI80562.1 aver|OJJ01380.1 awen|OJJ31592.1 azon|OJJ50579.1

Group1543: abra|OJJ67325.1 acar|OOF92488.1 acla|EAW06410.1 afis|EAW18514.1 afla|EED52884.1 afum|EAL93209.1 agla|OJJ85107.1 akaw|GAA86491.1 aluc|OJZ85033.1 anid|CBF70234.1 anig|EHA25253.1 aory|EIT78594.1 asyd|OJJ58770.1 ater|EAU30055.1 atub|OJI80564.1 aver|OJJ01379.1 awen|OJJ31068.1 azon|OJJ50577.1

Group1544: abra|OJJ67326.1 acar|OOF92487.1 acla|EAW06409.1 afis|EAW18513.1 afla|EED52887.1 afum|EAL93208.1 agla|OJJ85108.1 akaw|GAA86490.1 aluc|OJZ85032.1 anid|CBF70236.1 anig|EHA25252.1 aory|EIT78631.1 asyd|OJJ58769.1 ater|EAU30057.1 atub|OJI80565.1 aver|OJJ01378.1 awen|OJJ31067.1 azon|OJJ50576.1

Group1545: abra|OJJ67327.1 acar|OOF92486.1 acla|EAW06407.1 afis|EAW18511.1 afla|EED52889.1 afum|EAL93206.1 agla|OJJ85109.1 akaw|GAA86489.1 aluc|OJZ85030.1 anid|CBF70239.1 anig|EHA25251.1 aory|EIT78676.1 asyd|OJJ58767.1 ater|EAU30058.1 atub|OJI80567.1 aver|OJJ01376.1 awen|OJJ31065.1 azon|OJJ50575.1

Group1546: abra|OJJ67328.1 acar|OOF92485.1 acla|EAW06406.1 afis|EAW18510.1 afla|EED52890.1 afum|EAL93205.1 agla|OJJ85110.1 akaw|GAA86488.1 aluc|OJZ85029.1 anid|CBF70241.1 anig|EHA25250.1 aory|EIT78606.1 asyd|OJJ58766.1 ater|EAU30059.1 atub|OJI80568.1 aver|OJJ01375.1 awen|OJJ31064.1 azon|OJJ50574.1

Group1547: abra|OJJ67329.1 acar|OOF92483.1 acla|EAW06405.1 afis|EAW18509.1 afla|EED52891.1 afum|EAL93204.1 agla|OJJ85111.1 akaw|GAA86487.1 aluc|OJZ85028.1 anid|CBF70243.1 anig|EHA25249.1

aory|EIT78599.1 asyd|OJJ58765.1 ater|EAU30060.1 atub|OJI80569.1 aver|OJJ01374.1 awen|OJJ31063.1 azon|OJJ50573.1

Group1548: abra|OJJ67330.1 acar|OOF92484.1 acla|EAW06404.1 afis|EAW18508.1 afla|EED52894.1 afum|EAL93203.1 agla|OJJ85112.1 akaw|GAA86486.1 aluc|OJZ85027.1 anid|CBF70245.1 anig|EHA25248.1 aory|EIT78590.1 asyd|OJJ58762.1 ater|EAU30063.1 atub|OJI80570.1 aver|OJJ01372.1 awen|OJJ31061.1 azon|OJJ50572.1

Group1549: abra|OJJ67334.1 acar|OOF92479.1 acla|EAW06400.1 afis|EAW18504.1 afla|EED52897.1 afum|EAL93197.1 agla|OJJ85119.1 akaw|GAA86482.1 aluc|OJZ85023.1 anid|CBF70249.1 anig|EHA25244.1 aory|EIT78613.1 asyd|OJJ58759.1 ater|EAU30067.1 atub|OJI80574.1 aver|OJJ01367.1 awen|OJJ31058.1 azon|OJJ50567.1

Group1550: abra|OJJ67335.1 acar|OOF92478.1 acla|EAW06399.1 afis|EAW18503.1 afla|EED52898.1 afum|EAL93196.2 agla|OJJ85118.1 akaw|GAA86481.1 aluc|OJZ85022.1 anid|CBF70251.1 anig|EHA25243.1 aory|EIT78654.1 asyd|OJJ58758.1 ater|EAU30068.1 atub|OJI80575.1 aver|OJJ01366.1 awen|OJJ31057.1 azon|OJJ50568.1

Group1551: abra|OJJ67336.1 acar|OOF92477.1 acla|EAW06398.1 afis|EAW18502.1 afla|EED52899.1 afum|EAL93195.1 agla|OJJ85123.1 akaw|GAA86480.1 aluc|OJZ85021.1 anid|CBF70253.1 anig|EHA25242.1 aory|EIT78660.1 asyd|OJJ58757.1 ater|EAU30069.1 atub|OJI80576.1 aver|OJJ01365.1 awen|OJJ31056.1 azon|OJJ50566.1

Group1552: abra|OJJ67339.1 acar|OOF92474.1 acla|EAW06395.1 afis|EAW18499.1 afla|EED52902.1 afum|EAL93190.1 agla|OJJ85128.1 akaw|GAA86477.1 aluc|OJZ85018.1 anid|CBF70257.1 anig|EHA25239.1 aory|EIT78634.1 asyd|OJJ58755.1 ater|EAU30071.1 atub|OJI80579.1 aver|OJJ01363.1 awen|OJJ31053.1 azon|OJJ50563.1

Group1553: abra|OJJ67340.1 acar|OOF92473.1 acla|EAW06394.1 afis|EAW18498.1 afla|EED52903.1 afum|EAL93188.1 agla|OJJ85105.1 akaw|GAA86476.1 aluc|OJZ85017.1 anid|CBF70259.1 anig|EHA25238.1 aory|EIT78622.1 asyd|OJJ58754.1 ater|EAU30072.1 atub|OJI80580.1 aver|OJJ01362.1 awen|OJJ31052.1 azon|OJJ50564.1

Group1554: abra|OJJ67346.1 acar|OOF92469.1 acla|EAW06390.1 afis|EAW18496.1 afla|EED52907.1 afum|EAL93186.1 agla|OJJ85091.1 akaw|GAA86472.1 aluc|OJZ85013.1 anid|CBF70170.1 anig|EHA25234.1 aory|EIT78612.1 asyd|OJJ58795.1 ater|EAU30073.1 atub|OJI80584.1 aver|OJJ01400.1 awen|OJJ31049.1 azon|OJJ50560.1

Group1555: abra|OJJ67347.1 acar|OOF92468.1 acla|EAW06389.1 afis|EAW18495.1 afla|EED52908.1 afum|EAL93185.1 agla|OJJ85090.1 akaw|GAA86471.1 aluc|OJZ85012.1 anid|CBF70168.1 anig|EHA25233.1 aory|EIT78663.1 asyd|OJJ58797.1 ater|EAU29921.1 atub|OJI80585.1 aver|OJJ01401.1 awen|OJJ31048.1 azon|OJJ50559.1

Group1556: abra|OJJ67350.1 acar|OOF92466.1 acla|EAW06386.1 afis|EAW18492.1 afla|EED52912.1 afum|EAL93182.1 agla|OJJ85087.1 akaw|GAA86468.1 aluc|OJZ85009.1 anid|CBF70162.1 anig|EHA25230.1 aory|EIT78650.1 asyd|OJJ58800.1 ater|EAU29918.1 atub|OJI80588.1 aver|OJJ01404.1 awen|OJJ31045.1 azon|OJJ50556.1

Group1557: abra|OJJ67375.1 acar|OOF92436.1 acla|EAW06380.1 afis|EAW18486.1 afla|EED52922.1 afum|EAL93175.1 agla|OJJ85081.1 akaw|GAA86447.1 aluc|OJZ84990.1 anid|CBF70147.1 anig|EHA25202.1 aory|EIT78638.1 asyd|OJJ58808.1 ater|EAU29911.1 atub|OJI80610.1 aver|OJJ01411.1 awen|OJJ31033.1 azon|OJJ50552.1

Group1558: abra|OJJ67377.1 acar|OOF92435.1 acla|EAW06379.1 afis|EAW18485.1 afla|EED52923.1 afum|EBA27486.1 agla|OJJ85074.1 akaw|GAA86446.1 aluc|OJZ84988.1 anid|CBF70145.1 anig|EHA25201.1 aory|EIT78668.1 asyd|OJJ58809.1 ater|EAU29910.1 atub|OJI80611.1 aver|OJJ01412.1 awen|OJJ31035.1 azon|OJJ50550.1

Group1559: abra|OJJ67380.1 acar|OOF92432.1 acla|EAW06377.1 afis|EAW18483.1 afla|EED52925.1 afum|EAL93172.1 agla|OJJ85072.1 akaw|GAA86444.1 aluc|OJZ84986.1 anid|CBF86341.1 anig|EHA25199.1 aory|EIT78658.1 asyd|OJJ64985.1 ater|EAU29909.1 atub|OJI80614.1 aver|OJI99105.1 awen|OJJ31037.1 azon|OJJ50548.1

Group1560: abra|OJJ67381.1 acar|OOF92433.1 acla|EAW06376.1 afis|EAW18482.1 afla|EED52926.1 afum|EAL93171.1 agla|OJJ85063.1 akaw|GAA86443.1 aluc|OJZ84985.1 anid|CBF86343.1 anig|EHA25198.1 aory|EIT78671.1 asyd|OJJ64984.1 ater|EAU29908.1 atub|OJI80615.1 aver|OJI99104.1 awen|OJJ31038.1 azon|OJJ50547.1

Group1561: abra|OJJ67385.1 acar|OOF92428.1 acla|EAW06374.1 afis|EAW18480.1 afla|EED52929.1 afum|EAL93169.1 agla|OJJ85066.1 akaw|GAA86439.1 aluc|OJZ84981.1 anid|CBF70139.1 anig|EHA25194.1 aory|EIT78702.1 asyd|OJJ58812.1 ater|EAU29896.1 atub|OJI80620.1 aver|OJJ01415.1 awen|OJJ31040.1 azon|OJJ50545.1



Group1562: abra|OJJ67387.1 acar|OOF92427.1 acla|EAW06372.1 afis|EAW18478.1 afla|EED52932.1 afum|EAL93166.1 agla|OJJ85068.1 akaw|GAA86437.1 aluc|OJZ84980.1 anid|CBF70136.1 anig|EHA25192.1 aory|EIT78730.1 asyd|OJJ58814.1 ater|EAU29895.1 atub|OJI80622.1 aver|OJJ01417.1 awen|OJJ31031.1 azon|OJJ50544.1

Group1563: abra|OJJ67393.1 acar|OOF92423.1 acla|EAW06370.1 afis|EAW18476.1 afla|EED52934.1 afum|EAL93163.1 agla|OJJ85071.1 akaw|GAA86434.1 aluc|OJZ84976.1 anid|CBF70132.1 anig|EHA25188.1 aory|EIT78693.1 asyd|OJJ58817.1 ater|EAU29893.1 atub|OJI80625.1 aver|OJJ01421.1 awen|OJJ31029.1 azon|OJJ50542.1

Group1564: abra|OJJ67394.1 acar|OOF92422.1 acla|EAW06369.1 afis|EAW18475.1 afla|EED52935.1 afum|EAL93162.1 agla|OJJ85062.1 akaw|GAA86433.1 aluc|OJZ84975.1 anid|CBF70116.1 anig|EHA25187.1 aory|EIT78723.1 asyd|OJJ58819.1 ater|EAU29892.1 atub|OJI80626.1 aver|OJJ01423.1 awen|OJJ31028.1 azon|OJJ50541.1

Group1565: abra|OJJ67395.1 acar|OOF92421.1 acla|EAW06368.1 afis|EAW18474.1 afla|EED52936.1 afum|EAL93161.1 agla|OJJ85061.1 akaw|GAA86432.1 aluc|OJZ84974.1 anid|CBF70108.1 anig|EHA25186.1 aory|EIT78688.1 asyd|OJJ58823.1 ater|EAU29891.1 atub|OJI80627.1 aver|OJJ01427.1 awen|OJJ31026.1 azon|OJJ50540.1

Group1566: abra|OJJ67396.1 acar|OOF92419.1 acla|EAW06364.1 afis|EAW18473.1 afla|EED52937.1 afum|EAL93160.2 agla|OJJ85060.1 akaw|GAA86431.1 aluc|OJZ84973.1 anid|CBF70107.1 anig|EHA25185.1 aory|EIT78722.1 asyd|OJJ58827.1 ater|EAU29890.1 atub|OJI80628.1 aver|OJJ01430.1 awen|OJJ31025.1 azon|OJJ50539.1

Group1567: abra|OJJ67398.1 acar|OOF92418.1 acla|EAW06362.1 afis|EAW18471.1 afla|EED52939.1 afum|EAL93158.1 agla|OJJ85056.1 akaw|GAA86429.1 aluc|OJZ84971.1 anid|CBF70105.1 anig|EHA25183.1 aory|EIT78698.1 asyd|OJJ58829.1 ater|EAU29888.1 atub|OJI80630.1 aver|OJJ01432.1 awen|OJJ31023.1 azon|OJJ50537.1

Group1568: abra|OJJ67399.1 acar|OOF92417.1 acla|EAW06359.1 afis|EAW18470.1 afla|EED52940.1 afum|EAL93156.1 agla|OJJ85055.1 akaw|GAA86428.1 aluc|OJZ84969.1 anid|CBF70103.1 anig|EHA25182.1 aory|EIT78679.1 asyd|OJJ58830.1 ater|EAU29887.1 atub|OJI80631.1 aver|OJJ01433.1 awen|OJJ31022.1 azon|OJJ50536.1

Group1569: abra|OJJ67400.1 acar|OOF92416.1 acla|EAW06358.1 afis|EAW18469.1 afla|EED52941.1 afum|EAL93155.1 agla|OJJ85054.1 akaw|GAA86427.1 aluc|OJZ84968.1 anid|CBF70101.1 anig|EHA25181.1 aory|EIT78692.1 asyd|OJJ58831.1 ater|EAU29886.1 atub|OJI80632.1 aver|OJJ01434.1 awen|OJJ31021.1 azon|OJJ50535.1

Group1570: abra|OJJ67401.1 acar|OOF92415.1 acla|EAW06357.1 afis|EAW18468.1 afla|EED52942.1 afum|EAL93154.1 agla|OJJ85053.1 akaw|GAA86426.1 aluc|OJZ84967.1 anid|CBF70100.1 anig|EHA25180.1 aory|EIT78694.1 asyd|OJJ58832.1 ater|EAU29885.1 atub|OJI80633.1 aver|OJJ01435.1 awen|OJJ31020.1 azon|OJJ50534.1

Group1571: abra|OJJ67403.1 acar|OOF92413.1 acla|EAW06355.1 afis|EAW18466.1 afla|EED52944.1 afum|EAL93152.1 agla|OJJ85051.1 akaw|GAA86424.1 aluc|OJZ84965.1 anid|CBF70096.1 anig|EHA25178.1 aory|EIT78707.1 asyd|OJJ58834.1 ater|EAU29883.1 atub|OJI80635.1 aver|OJJ01437.1 awen|OJJ31018.1 azon|OJJ50532.1

Group1572: abra|OJJ67411.1 acar|OOF89994.1 acla|EAW06348.1 afis|EAW18459.1 afla|EED52949.1 afum|EAL93145.1 agla|OJJ85042.1 akaw|GAA86416.1 aluc|OJZ84957.1 anid|CBF70085.1 anig|EHA25171.1 aory|EIT78721.1 asyd|OJJ58842.1 ater|EAU29877.1 atub|OJI80643.1 aver|OJJ01444.1 awen|OJJ31011.1 azon|OJJ50525.1

Group1573: abra|OJJ67412.1 acar|OOF89992.1 acla|EAW06347.1 afis|EAW18458.1 afla|EED52950.1 afum|EAL93143.1 agla|OJJ85041.1 akaw|GAA86415.1 aluc|OJZ84956.1 anid|CBF70084.1 anig|EHA25170.1 aory|EIT78692.1 asyd|OJJ58843.1 ater|EAU29876.1 atub|OJI80644.1 aver|OJJ01445.1 awen|OJJ31010.1 azon|OJJ50524.1

Group1574: abra|OJJ67419.1 acar|OOF92402.1 acla|EAW06345.1 afis|EAW18456.1 afla|EED52952.1 afum|EAL93141.1 agla|OJJ85039.1 akaw|GAA86409.1 aluc|OJZ84949.1 anid|CBF70053.1 anig|EHA25164.1 aory|EIT78736.1 asyd|OJJ58857.1 ater|EAU29873.1 atub|OJI80653.1 aver|OJJ01458.1 awen|OJJ31008.1 azon|OJJ50522.1

Group1575: abra|OJJ67421.1 acar|OOF92401.1 acla|EAW06344.1 afis|EAW18455.1 afla|EED52953.1 afum|EAL93140.1 agla|OJJ85038.1 akaw|GAA86408.1 aluc|OJZ84947.1 anid|CBF70057.1 anig|EHA25163.1 aory|EIT78696.1 asyd|OJJ58855.1 ater|EAU29872.1 atub|OJI80654.1 aver|OJJ01456.1 awen|OJJ31007.1 azon|OJJ50521.1

Group1576: abra|OJJ67423.1 acar|OOF89873.1 acla|EAW06341.1 afis|EAW18453.1 afla|EED52955.1 afum|EAL93138.1 agla|OJJ85032.1 akaw|GAA86406.1 aluc|OJZ84944.1 anid|CBF70061.1 anig|EHA25161.1

aory|EIT78714.1 asyd|OJJ58853.1 ater|EAU29870.1 atub|OJI80656.1 aver|OJJ01454.1 awen|OJJ31005.1  
azon|OJJ50519.1

Group1577: abra|OJJ67424.1 acar|OOF89874.1 acla|EAW06340.1 afis|EAW18452.1 afla|EED52956.1  
afum|EAL93137.1 agla|OJJ85030.1 akaw|GAA86405.1 aluc|OJZ84943.1 anid|CBF70062.1 anig|EHA25160.1  
aory|EIT78680.1 asyd|OJJ58852.1 ater|EAU29869.1 atub|OJI80657.1 aver|OJJ01453.1 awen|OJJ31004.1  
azon|OJJ50517.1

Group1578: abra|OJJ67426.1 acar|OOF92399.1 acla|EAW06338.1 afis|EAW18450.1 afla|EED52958.1  
afum|EAL93135.1 agla|OJJ85028.1 akaw|GAA86404.1 aluc|OJZ84941.1 anid|CBF70064.1 anig|EHA25158.1  
aory|EIT78699.1 asyd|OJJ58850.1 ater|EAU29868.1 atub|OJI80659.1 aver|OJJ01451.1 awen|OJJ31002.1  
azon|OJJ50516.1

Group1579: abra|OJJ67429.1 acar|OOF92397.1 acla|EAW06335.1 afis|EAW18447.1 afla|EED52963.1  
afum|EAL93132.1 agla|OJJ85024.1 akaw|GAA86401.1 aluc|OJZ84937.1 anid|CBF70070.1 anig|EHA25155.1  
aory|EIT78728.1 asyd|OJJ58847.1 ater|EAU29866.1 atub|OJI80662.1 aver|OJJ01448.1 awen|OJJ30999.1  
azon|OJJ50513.1

Group1581: abra|OJJ67434.1 acar|OOF92394.1 acla|EAW06332.1 afis|EAW18445.1 afla|EED52967.1  
afum|EAL93130.1 agla|OJJ85021.1 akaw|GAA86396.1 aluc|OJZ84930.1 anid|CBF70041.1 anig|EHA25149.1  
aory|EIT78729.1 asyd|OJJ58865.1 ater|EAU29864.1 atub|OJI80669.1 aver|OJJ01466.1 awen|OJJ30993.1  
azon|OJJ50510.1

Group1582: abra|OJJ67435.1 acar|OOF92393.1 acla|EAW06331.1 afis|EAW18444.1 afla|EED52968.1  
afum|EAL93128.1 agla|OJJ85020.1 akaw|GAA86395.1 aluc|OJZ84929.1 anid|CBF70043.1 anig|EHA25148.1  
aory|EIT78686.1 asyd|OJJ58864.1 ater|EAU29863.1 atub|OJI80670.1 aver|OJJ01465.1 awen|OJJ30992.1  
azon|OJJ50511.1

Group1583: abra|OJJ67437.1 acar|OOF92391.1 acla|EAW06327.1 afis|EAW18441.1 afla|EED52972.1  
afum|EAL93123.1 agla|OJJ85006.1 akaw|GAA86393.1 aluc|OJZ84927.1 anid|CBF70049.1 anig|EHA25146.1  
aory|EIT78690.1 asyd|OJJ58861.1 ater|EAU29860.1 atub|OJI80672.1 aver|OJJ01462.1 awen|OJJ30989.1  
azon|OJJ50507.1

Group1584: abra|OJJ67438.1 acar|OOF92389.1 acla|EAW06328.1 afis|EAW18442.1 afla|EED52971.1  
afum|EAL93125.1 agla|OJJ85008.1 akaw|GAA86392.1 aluc|OJZ84926.1 anid|CBF70047.1 anig|EHA25145.1  
aory|EIT78682.1 asyd|OJJ58862.1 ater|EAU29859.1 atub|OJI80673.1 aver|OJJ01463.1 awen|OJJ30990.1  
azon|OJJ50508.1

Group1585: abra|OJJ67439.1 acar|OOF92390.1 acla|EAW06329.1 afis|EAW18443.1 afla|EED52970.1  
afum|EAL93126.1 agla|OJJ85009.1 akaw|GAA86391.1 aluc|OJZ84925.1 anid|CBF70045.1 anig|EHA25144.1  
aory|EIT78727.1 asyd|OJJ58863.1 ater|EAU29858.1 atub|OJI80674.1 aver|OJJ01464.1 awen|OJJ30991.1  
azon|OJJ50509.1

Group1587: abra|OJJ67471.1 acar|OOF89932.1 acla|EAW06300.1 afis|EAW18407.1 afla|EED52997.1  
afum|EAL93087.1 agla|OJJ84959.1 akaw|GAA86365.1 aluc|OJZ84895.1 anid|CBF70741.1 anig|EHA25122.1  
aory|EIT77423.1 asyd|OJJ58439.1 ater|EAU29825.1 atub|OJI80705.1 aver|OJJ01039.1 awen|OJJ31743.1  
azon|OJJ50501.1

Group1589: abra|OJJ67742.1 acar|OOF90949.1 acla|EAW10991.1 afis|EAW20869.1 afla|EED45539.1  
afum|EAL84765.1 agla|OJJ83977.1 akaw|GAA92433.1 aluc|OJZ81588.1 anid|CBF82842.1 anig|EHA25852.1  
aory|EIT75440.1 asyd|OJJ61589.1 ater|EAU30819.1 atub|OJI88594.1 aver|OJJ00911.1 awen|OJJ34495.1  
azon|OJJ51769.1

Group1590: abra|OJJ67743.1 acar|OOF90948.1 acla|EAW10992.1 afis|EAW20868.1 afla|EED45543.1  
afum|EAL84766.2 agla|OJJ83976.1 akaw|GAA92434.1 aluc|OJZ81586.1 anid|CBF82840.1 anig|EHA25853.1  
aory|EIT75711.1 asyd|OJJ61588.1 ater|EAU30820.1 atub|OJI88595.1 aver|OJJ00910.1 awen|OJJ34498.1  
azon|OJJ51773.1

Group1591: abra|OJJ67744.1 acar|OOF90947.1 acla|EAW10993.1 afis|EAW20867.1 afla|EED45544.1  
afum|EAL84767.1 agla|OJJ83975.1 akaw|GAA92435.1 aluc|OJZ81585.1 anid|CBF82838.1 anig|EHA25854.1  
aory|EIT75422.1 asyd|OJJ61587.1 ater|EAU30821.1 atub|OJI88596.1 aver|OJJ00909.1 awen|OJJ34499.1  
azon|OJJ51774.1

Group1592: abra|OJJ67747.1 acar|OOF90944.1 acla|EAW10997.1 afis|EAW20864.1 afla|EED45548.1  
afum|EAL84771.1 agla|OJJ83751.1 akaw|GAA92438.1 aluc|OJZ81582.1 anid|CBF82835.1 anig|EHA25857.1  
aory|EIT75692.1 asyd|OJJ61584.1 ater|EAU30807.1 atub|OJI88599.1 aver|OJJ00906.1 awen|OJJ34506.1  
azon|OJJ51784.1

Group1593: abra|OJJ67748.1 acar|OOF90943.1 acla|EAW10998.1 afis|EAW20863.1 afla|EED45549.1  
afum|EAL84772.1 agla|OJJ83750.1 akaw|GAA92439.1 aluc|OJZ81581.1 anid|CBF82833.1 anig|EHA25858.1  
aory|EIT75610.1 asyd|OJJ61583.1 ater|EAU30806.1 atub|OJI88600.1 aver|OJJ00905.1 awen|OJJ34507.1  
azon|OJJ51785.1

Group1594: abra|OJJ67749.1 acar|OOF90950.1 acla|EAW10990.1 afis|EAW20870.1 afla|EED45552.1 afum|EAL84764.1 agla|OJJ83978.1 akaw|GAA92440.1 aluc|OJZ81580.1 anid|CBF82844.1 anig|EHA25859.1 aory|EIT75541.1 asyd|OJJ61590.1 ater|EAU30818.1 atub|OJI88601.1 aver|OJJ00912.1 awen|OJJ34494.1 azon|OJJ51768.1

Group1596: abra|OJJ67847.1 acar|OOF92828.1 acla|EAW11752.1 afis|EAW23785.1 afla|EED51594.1 afum|EAL87219.2 agla|OJJ78938.1 akaw|GAA91855.1 aluc|OJZ82044.1 anid|CBF79845.1 anig|EHA22213.1 aory|EIT80570.1 asyd|OJJ58153.1 ater|EAU31326.1 atub|OJI84603.1 aver|OJJ04251.1 awen|OJJ33730.1 azon|OJJ42852.1

Group1597: abra|OJJ67848.1 acar|OOF92829.1 acla|EAW11751.1 afis|EAW23784.1 afla|EED51593.1 afum|EAL87218.2 agla|OJJ78937.1 akaw|GAA91856.1 aluc|OJZ82043.1 anid|CBF79841.1 anig|EHA22214.1 aory|EIT80650.1 asyd|OJJ58152.1 ater|EAU31325.1 atub|OJI84602.1 aver|OJJ04252.1 awen|OJJ33729.1 azon|OJJ42853.1

Group1598: abra|OJJ67851.1 acar|OOF92832.1 acla|EAW11748.1 afis|EAW23781.1 afla|EED51585.1 afum|EAL87215.1 agla|OJJ78933.1 akaw|GAA91859.1 aluc|OJZ82040.1 anid|CBF79839.1 anig|EHA22216.1 aory|EIT80522.1 asyd|OJJ58148.1 ater|EAU31322.1 atub|OJI84599.1 aver|OJJ04256.1 awen|OJJ33724.1 azon|OJJ42856.1

Group1599: abra|OJJ67859.1 acar|OOF92840.1 acla|EAW11739.1 afis|EAW23772.1 afla|EED51573.1 afum|EAL87206.1 agla|OJJ78947.1 akaw|GAA91866.1 aluc|OJZ82033.1 anid|CBF79823.1 anig|EHA22223.1 aory|EIT80715.1 asyd|OJJ58141.1 ater|EAU31316.1 atub|OJI84588.1 aver|OJJ04264.1 awen|OJJ33703.1 azon|OJJ42837.1

Group1600: abra|OJJ67861.1 acar|OOF92839.1 acla|EAW11737.1 afis|EAW23770.1 afla|EED51571.1 afum|EAL87204.1 agla|OJJ78949.1 anid|CBF79821.1 anig|EHA22225.1 aory|EIT80633.1 asyd|OJJ58138.1 ater|EAU31314.1 aver|OJJ04267.1 awen|OJJ33705.1 azon|OJJ42836.1 akaw|GAA91868.1 aluc|OJZ82031.1 atub|OJI84586.1

Group1601: abra|OJJ67865.1 acar|OOF92845.1 acla|EAW11734.1 afis|EAW23766.1 afla|EED51552.1 afum|EAL87199.1 agla|OJJ78956.1 akaw|GAA91872.1 aluc|OJZ82027.1 anid|CBF79770.1 anig|EHA22229.1 aory|EIT80651.1 asyd|OJJ58112.1 ater|EAU31310.1 atub|OJI84581.1 aver|OJJ04293.1 awen|OJJ33692.1 azon|OJJ42832.1

Group1602: abra|OJJ67866.1 acar|OOF92846.1 acla|EAW11733.1 afis|EAW23765.1 afla|EED51550.1 afum|EAL87198.1 agla|OJJ78957.1 akaw|GAA91873.1 aluc|OJZ82026.1 anid|CBF79772.1 anig|EHA22230.1 aory|EIT80718.1 asyd|OJJ58110.1 ater|EAU31311.1 atub|OJI84579.1 aver|OJJ04294.1 awen|OJJ33689.1 azon|OJJ42830.1

Group1603: abra|OJJ67881.1 acar|OOF92865.1 acla|EAW11722.1 afis|EAW23744.1 afla|EED51536.1 afum|EAL87180.1 agla|OJJ78963.1 akaw|GAA91888.1 aluc|OJZ82009.1 anid|CBF81714.1 anig|EHA22248.1 aory|EIT80594.1 asyd|OJJ59582.1 ater|EAU31299.1 atub|OJI84558.1 aver|OJJ02687.1 awen|OJJ33679.1 azon|OJJ42820.1

Group1604: abra|OJJ67913.1 acar|OOF92766.1 acla|EAW12796.1 afis|EAW17959.1 afla|EED51948.1 afum|EAL91770.1 agla|OJJ80207.1 akaw|GAA91283.1 aluc|OJZ82786.1 anid|CBF79950.1 anig|EHA21227.1 aory|EIT81390.1 asyd|OJJ58216.1 ater|EAU31448.1 atub|OJI89018.1 aver|OJJ02206.1 awen|OJJ41583.1 azon|OJJ48295.1

Group1605: abra|OJJ67915.1 acar|OOF92767.1 acla|EAW12794.1 afis|EAW17957.1 afla|EED51950.1 afum|EAL91768.1 agla|OJJ80204.1 akaw|GAA91281.1 aluc|OJZ82788.1 anid|CBF79947.1 anig|EHA21229.1 aory|EIT81406.1 asyd|OJJ58214.1 ater|EAU31445.1 atub|OJI89020.1 aver|OJJ02208.1 awen|OJJ41585.1 azon|OJJ48297.1

Group1606: abra|OJJ67917.1 acar|OOF92769.1 acla|EAW12792.1 afis|EAW17955.1 afla|EED51952.1 afum|EAL91766.1 agla|OJJ80202.1 akaw|GAA91279.1 aluc|OJZ82790.1 anid|CBF79943.1 anig|EHA21231.1 aory|EIT81414.1 asyd|OJJ58212.1 ater|EAU31443.1 atub|OJI89021.1 aver|OJJ02210.1 awen|OJJ41587.1 azon|OJJ48302.1

Group1607: abra|OJJ67918.1 acar|OOF92770.1 acla|EAW12791.1 afis|EAW17951.1 afla|EED51953.1 afum|EAL91761.1 agla|OJJ80201.1 akaw|GAA91278.1 aluc|OJZ82791.1 anid|CBF79941.1 anig|EHA21232.1 aory|EIT81400.1 asyd|OJJ58211.1 ater|EAU31442.1 atub|OJI89022.1 aver|OJJ02211.1 awen|OJJ41588.1 azon|OJJ48303.1

Group1608: abra|OJJ67919.1 acar|OOF92771.1 acla|EAW12790.1 afis|EAW17952.1 afla|EED51954.1 afum|EAL91762.1 agla|OJJ80200.1 akaw|GAA91277.1 aluc|OJZ82792.1 anid|CBF79939.1 anig|EHA21233.1 aory|EIT81379.1 asyd|OJJ58210.1 ater|EAU31441.1 atub|OJI89023.1 aver|OJJ02212.1 awen|OJJ41589.1 azon|OJJ48304.1

Group1609: abra|OJJ67920.1 acar|OOF92772.1 acla|EAW12789.1 afis|EAW17953.1 afla|EED51955.1 afum|EAL91763.1 agla|OJJ80199.1 akaw|GAA91276.1 aluc|OJZ82793.1 anid|CBF79934.1 anig|EHA21234.1

aory|EIT81461.1 asyd|OJJ58207.1 ater|EAU31440.1 atub|OJI89024.1 aver|OJJ02215.1 awen|OJJ41590.1 azon|OJJ48305.1

Group1610: abra|OJJ67922.1 acar|OOF92773.1 acla|EAW12788.1 afis|EAW17954.1 afla|EED51956.1 afum|EAL91765.1 agla|OJJ80198.1 akaw|GAA91275.1 aluc|OJZ82794.1 anid|CBF79932.1 anig|EHA21235.1 aory|EIT81403.1 asyd|OJJ58206.1 ater|EAU31439.1 atub|OJI89025.1 aver|OJJ02216.1 awen|OJJ41591.1 azon|OJJ48306.1

Group1611: abra|OJJ67923.1 acar|OOF92774.1 acla|EAW12787.1 afis|EAW17950.1 afla|EED51957.1 afum|EAL91760.1 agla|OJJ80197.1 akaw|GAA91274.1 aluc|OJZ82795.1 anid|CBF79931.1 anig|EHA21236.1 aory|EIT81374.1 asyd|OJJ58205.1 ater|EAU31438.1 atub|OJI89026.1 aver|OJJ02217.1 awen|OJJ41592.1 azon|OJJ48308.1

Group1612: abra|OJJ67926.1 acar|OOF92775.1 acla|EAW12785.1 afis|EAW17947.1 afla|EED51959.1 afum|EAL91757.1 agla|OJJ80195.1 akaw|GAA91271.1 aluc|OJZ82798.1 anid|CBF79929.1 anig|EHA21239.1 aory|EIT81382.1 asyd|OJJ58204.1 ater|EAU31431.1 atub|OJI89029.1 aver|OJJ04202.1 awen|OJJ41596.1 azon|OJJ48312.1

Group1613: abra|OJJ67928.1 acar|OOF92777.1 acla|EAW12781.1 afis|EAW17943.1 afla|EED51961.1 afum|EAL91754.1 agla|OJJ82989.1 akaw|GAA91269.1 aluc|OJZ82800.1 anid|CBF79925.1 anig|EHA21240.1 aory|EIT81385.1 asyd|OJJ58202.1 ater|EAU31396.1 atub|OJI89031.1 aver|OJJ04207.1 awen|OJJ41600.1 azon|OJJ48323.1

Group1614: abra|OJJ67929.1 acar|OOF92779.1 acla|EAW11622.1 afis|EAW23836.1 afla|EED51962.1 afum|EAL87267.1 agla|OJJ82498.1 akaw|GAA91268.1 aluc|OJZ82801.1 anid|CBF79923.1 anig|EHA21242.1 aory|EIT81370.1 asyd|OJJ58200.1 ater|EAU31395.1 atub|OJI89032.1 aver|OJJ04208.1 awen|OJJ33798.1 azon|OJJ48745.1

Group1615: abra|OJJ67936.1 acar|OOF92785.1 acla|EAW11625.1 afis|EAW23831.1 afla|EED51974.1 afum|EAL87263.1 agla|OJJ82481.1 akaw|GAA91260.1 aluc|OJZ82808.1 anid|CBF79904.1 anig|EHA21248.1 aory|EIT81407.1 asyd|OJJ58187.1 ater|EAU31385.1 atub|OJI89039.1 aver|OJJ04218.1 awen|OJJ33789.1 azon|OJJ48757.1

Group1616: abra|OJJ67938.1 acar|OOF92787.1 acla|EAW11628.1 afis|EAW23828.1 afla|EED51977.1 afum|EAL87260.1 agla|OJJ82484.1 akaw|GAA91258.1 aluc|OJZ82810.1 anid|CBF79908.1 anig|EHA21249.1 aory|EIT81387.1 asyd|OJJ58189.1 ater|EAU31383.1 atub|OJI89040.1 aver|OJJ04216.1 awen|OJJ33787.1 azon|OJJ48759.1

Group1617: abra|OJJ67940.1 acar|OOF92789.1 acla|EAW11630.1 afis|EAW23826.1 afla|EED51980.1 afum|EAL87258.1 agla|OJJ82486.1 akaw|GAA91256.1 aluc|OJZ82812.1 anid|CBF79911.1 anig|EHA21252.1 aory|EIT81452.1 asyd|OJJ58190.1 ater|EAU31381.1 atub|OJI89043.1 aver|OJJ04215.1 awen|OJJ33784.1 azon|OJJ42886.1

Group1618: abra|OJJ67942.1 acar|OOF92791.1 acla|EAW11636.1 afis|EAW23821.1 afla|EED51983.1 afum|EAL87256.1 agla|OJJ82468.1 akaw|GAA91254.1 aluc|OJZ82814.1 anid|CBF79894.1 anig|EHA21254.1 aory|EIT81391.1 asyd|OJJ58182.1 ater|EAU31373.1 atub|OJI89045.1 aver|OJJ04224.1 awen|OJJ33777.1 azon|OJJ42883.1

Group1619: abra|OJJ67951.1 acar|OOF92798.1 acla|EAW11641.1 afis|EAW23816.1 afla|EED51989.1 afum|EAL87251.1 agla|OJJ82462.1 akaw|GAA91246.1 aluc|OJZ82824.1 anid|CBF79887.1 anig|EHA21262.1 aory|EIT81439.1 asyd|OJJ58175.1 ater|EAU31371.1 atub|OJI89053.1 aver|OJJ04229.1 awen|OJJ33773.1 azon|OJJ42877.1

Group1620: abra|OJJ67957.1 acar|OOF92802.1 acla|EAW11646.1 afis|EAW23810.1 afla|EED52005.1 afum|EAL87244.1 agla|OJJ82450.1 akaw|GAA91239.1 aluc|OJZ82830.1 anid|CBF79876.1 anig|EHA21268.1 aory|EIT81434.1 asyd|OJJ58169.1 ater|EAU31363.1 atub|OJI89060.1 aver|OJJ04234.1 awen|OJJ33766.1 azon|OJJ42870.1

Group1621: abra|OJJ67958.1 acar|OOF92803.1 acla|EAW11647.1 afis|EAW23809.1 afla|EED52006.1 afum|EAL87243.1 agla|OJJ82449.1 akaw|GAA91238.1 aluc|OJZ82831.1 anid|CBF79874.1 anig|EHA21269.1 aory|EIT81404.1 asyd|OJJ58168.1 ater|EAU31362.1 atub|OJI89061.1 aver|OJJ04235.1 awen|OJJ33765.1 azon|OJJ42868.1

Group1622: abra|OJJ67977.1 acar|OOF92819.1 acla|EAW11758.1 afis|EAW23791.1 afla|EED51599.1 afum|EAL87225.1 agla|OJJ78819.1 akaw|GAA91226.1 aluc|OJZ82844.1 anid|CBF79853.1 anig|EHA21282.1 aory|EIT80507.1 asyd|OJJ58157.1 ater|EAU31330.1 atub|OJI89074.1 aver|OJJ04246.1 awen|OJJ33746.1 azon|OJJ42843.1

Group1623: abra|OJJ67978.1 acar|OOF92818.1 acla|EAW11757.1 afis|EAW23790.1 afla|EED51598.1 afum|EAL87224.1 agla|OJJ78817.1 akaw|GAA91225.1 aluc|OJZ82845.1 anid|CBF79851.1 anig|EHA21283.1 aory|EIT80526.1 asyd|OJJ58156.1 ater|EAU31329.1 atub|OJI89075.1 aver|OJJ04247.1 awen|OJJ33745.1 azon|OJJ42844.1

Group1624: abra|OJJ68015.1 acar|OOF92057.1 acla|EAW08795.1 afis|EAW15605.1 afla|EED55861.1 afum|EAL85728.1 agla|OJJ79064.1 akaw|GAA90936.1 aluc|OJZ82888.1 anid|CBF69625.1 anig|EHA21314.1 aory|EIT76549.1 asyd|OJJ59120.1 ater|EAU37248.1 atub|OJI89113.1 aver|OJJ01709.1 awen|OJJ32398.1 azon|OJJ43874.1

Group1626: abra|OJJ68060.1 acar|OOF92081.1 acla|EAW13655.1 afis|EAW19935.1 afla|EED45904.1 afum|EAL84975.2 agla|OJJ79327.1 akaw|GAA90896.1 aluc|OJZ82932.1 anid|CBF84602.1 anig|EHA21353.1 aory|EIT75822.1 asyd|OJJ53375.1 ater|EAU36898.1 atub|OJI89161.1 aver|OJJ08369.1 awen|OJJ29978.1 azon|OJJ50215.1

Group1627: abra|OJJ68075.1 acar|OOF94470.1 acla|EAW12117.1 afis|EAW17265.1 afla|EED48857.1 afum|EAL86682.1 agla|OJJ85378.1 akaw|GAA92736.1 aluc|OJZ92944.1 anid|CBF87528.1 anig|EHA26028.1 aory|EIT81286.1 asyd|OJJ52984.1 ater|EAU36128.1 atub|OJI87403.1 aver|OJJ08953.1 awen|OJJ35769.1 azon|OJJ50248.1

Group1628: abra|OJJ68089.1 acar|OOF93893.1 acla|EAW15283.1 afis|EAW17127.1 afla|EED48286.1 afum|EAL86587.1 agla|OJJ78597.1 akaw|GAA86874.1 aluc|OJZ89998.1 anid|CBF80813.1 anig|EHA27373.1 aory|EIT72919.1 asyd|OJJ54451.1 ater|EAU34073.1 atub|OJI84810.1 aver|OJJ07703.1 awen|OJJ29885.1 azon|OJJ50148.1

Group1629: abra|OJJ68125.1 acar|OOF93919.1 acla|EAW12869.1 afis|EAW17817.1 afla|EED45601.1 afum|EAL91627.1 agla|OJJ81689.1 akaw|GAA86906.1 aluc|OJZ90029.1 anid|CBF80748.1 anig|EHA27405.1 aory|EIT75765.1 asyd|OJJ54539.1 ater|EAU30285.1 atub|OJI84778.1 aver|OJJ07642.1 awen|OJJ36934.1 azon|OJJ42822.1

Group1631: abra|OJJ68139.1 acar|OOF98356.1 acla|EAW14517.1 afis|EAW19235.1 afla|EED47647.1 afum|EAL93963.1 agla|OJJ88463.1 akaw|GAA92378.1 aluc|OJZ83237.1 anid|CBF78634.1 anig|EHA21094.1 aory|EIT80221.1 asyd|OJJ65123.1 ater|EAU37228.1 atub|OJI87699.1 aver|OJI99251.1 awen|OJJ37592.1 azon|OJJ51245.1

Group1632: abra|OJJ68145.1 acar|OOF89988.1 acla|EAW07390.1 afis|EAW22416.1 afla|EED52494.1 afum|EAL90776.1 agla|OJJ87680.1 akaw|GAA92373.1 aluc|OJZ83231.1 anid|CBF88053.1 anig|EHA21089.1 aory|EIT82805.1 asyd|OJJ63540.1 ater|EAU39291.1 atub|OJI87705.1 aver|OJI97393.1 awen|OJJ34995.1 azon|OJJ45638.1

Group1634: abra|OJJ68168.1 acar|OOF97466.1 acla|EAW13054.1 afis|EAW17612.1 afla|EED49203.1 afum|EAL91425.1 agla|OJJ81325.1 akaw|GAA83275.1 aluc|OJZ83781.1 anid|CBF90174.1 anig|EHA18921.1 aory|EIT78579.1 asyd|OJJ61990.1 ater|EAU37047.1 atub|OJI90151.1 aver|OJI96082.1 awen|OJJ37230.1 azon|OJJ50933.1

Group1635: abra|OJJ68169.1 acar|OOF97467.1 acla|EAW13055.1 afis|EAW17611.1 afla|EED49202.1 afum|EAL91424.1 agla|OJJ81326.1 akaw|GAA83274.1 aluc|OJZ83780.1 anid|CBF90175.1 anig|EHA18920.1 aory|EIT78562.1 asyd|OJJ61989.1 ater|EAU37046.1 atub|OJI90150.1 aver|OJI96081.1 awen|OJJ37231.1 azon|OJJ50934.1

Group1636: abra|OJJ68171.1 acar|OOF97468.1 acla|EAW13056.1 afis|EAW17610.1 afla|EED49201.1 afum|EAL91423.1 agla|OJJ81331.1 akaw|GAA83273.1 aluc|OJZ83779.1 anid|CBF90177.1 anig|EHA18919.1 aory|EIT78514.1 asyd|OJJ61988.1 ater|EAU37045.1 atub|OJI90149.1 aver|OJI96080.1 awen|OJJ37232.1 azon|OJJ50935.1

Group1637: abra|OJJ68172.1 acar|OOF97470.1 acla|EAW13057.1 afis|EAW17609.1 afla|EED49213.1 afum|EAL91422.1 agla|OJJ81356.1 akaw|GAA83272.1 aluc|OJZ83778.1 anid|CBF90179.1 anig|EHA18918.1 aory|EIT83168.1 asyd|OJJ61987.1 ater|EAU37044.1 atub|OJI90148.1 aver|OJI96079.1 awen|OJJ37233.1 azon|OJJ50936.1

Group1638: abra|OJJ68173.1 acar|OOF97471.1 acla|EAW13058.1 afis|EAW17608.1 afla|EED49214.1 afum|EAL91421.1 agla|OJJ81355.1 akaw|GAA83271.1 aluc|OJZ83777.1 anid|CBF90181.1 anig|EHA18917.1 aory|EIT83162.1 asyd|OJJ61986.1 ater|EAU37043.1 atub|OJI90147.1 aver|OJI96078.1 awen|OJJ37234.1 azon|OJJ50937.1

Group1639: abra|OJJ68176.1 acar|OOF97473.1 acla|EAW13060.1 afis|EAW17604.1 afla|EED49217.1 afum|EAL91417.1 agla|OJJ81352.1 akaw|GAA83268.1 aluc|OJZ83774.1 anid|CBF90186.1 anig|EHA18914.1 aory|EIT83159.1 asyd|OJJ61983.1 ater|EAU37041.1 atub|OJI90145.1 aver|OJI96075.1 awen|OJJ37237.1 azon|OJJ50939.1

Group1640: abra|OJJ68177.1 acar|OOF97474.1 acla|EAW13061.1 afis|EAW17603.1 afla|EED49218.1 afum|EAL91416.1 agla|OJJ81351.1 akaw|GAA83267.1 aluc|OJZ83773.1 anid|CBF90188.1 anig|EHA18913.1 aory|EIT83167.1 asyd|OJJ61982.1 ater|EAU37040.1 atub|OJI90144.1 aver|OJI96074.1 awen|OJJ37238.1 azon|OJJ50940.1

Group1641: abra|OJJ68181.1 acar|OOF97477.1 acla|EAW13063.1 afis|EAW17601.1 afla|EED49220.1 afum|EBA27434.1 agla|OJJ81348.1 akaw|GAA83265.1 aluc|OJZ83771.1 anid|CBF90190.1 anig|EHA18911.1

aory|EIT83161.1 asyd|OJJ61981.1 ater|EAU37038.1 atub|OJI90142.1 aver|OJI96073.1 awen|OJJ37244.1 azon|OJJ50942.1

Group1642: abra|OJJ68182.1 acar|OOF97476.1 acla|EAW13064.1 afis|EAW17600.1 afla|EED49221.1 afum|EAL91414.1 agla|OJJ81347.1 akaw|GAA83264.1 aluc|OJZ83770.1 anid|CBF90192.1 anig|EHA18910.1 aory|EIT83165.1 asyd|OJJ61980.1 ater|EAU37037.1 atub|OJI90141.1 aver|OJI96072.1 awen|OJJ37245.1 azon|OJJ50943.1

Group1643: abra|OJJ68184.1 acar|OOF97479.1 acla|EAW13065.1 afis|EAW17599.1 afla|EED49222.1 afum|EAL91412.2 agla|OJJ81345.1 akaw|GAA83262.1 aluc|OJZ83768.1 anig|EHA18908.1 aory|EIT83170.1 asyd|OJJ61978.1 ater|EAU37036.1 atub|OJI90139.1 aver|OJI96070.1 awen|OJJ37247.1 azon|OJJ50945.1 anid|CBF90194.1

Group1644: abra|OJJ68190.1 acar|OOF97486.1 acla|EAW13072.1 afis|EAW17592.1 afla|EED49230.1 afum|EAL91405.1 agla|OJJ81357.1 akaw|GAA83255.1 aluc|OJZ83756.1 anid|CBF90212.1 anig|EHA18903.1 aory|EIT83166.1 asyd|OJJ61969.1 ater|EAU37029.1 atub|OJI90131.1 aver|OJI96062.1 awen|OJJ37254.1 azon|OJJ50949.1

Group1645: abra|OJJ68193.1 acar|OOF97489.1 acla|EAW13076.1 afis|EAW17588.1 afla|EED49234.1 afum|EAL91401.1 agla|OJJ81364.1 akaw|GAA83252.1 aluc|OJZ83753.1 anid|CBF90220.1 anig|EHA18900.1 aory|EIT83171.1 asyd|OJJ61966.1 ater|EAU37023.1 atub|OJI90128.1 aver|OJI96058.1 awen|OJJ37258.1 azon|OJJ50953.1

Group1646: abra|OJJ68194.1 acar|OOF97490.1 acla|EAW13077.1 afis|EAW17587.1 afla|EED49235.1 afum|EAL91400.1 agla|OJJ81365.1 akaw|GAA83251.1 aluc|OJZ83752.1 anid|CBF90222.1 anig|EHA18899.1 aory|EIT83154.1 asyd|OJJ61965.1 ater|EAU37022.1 atub|OJI90127.1 aver|OJI96057.1 awen|OJJ37259.1 azon|OJJ50954.1

Group1647: abra|OJJ68196.1 acar|OOF97491.1 acla|EAW13079.1 afis|EAW17585.1 afla|EED49237.1 afum|EAL91398.2 agla|OJJ81368.1 akaw|GAA83249.1 aluc|OJZ83750.1 anid|CBF90225.1 anig|EHA18897.1 aory|EIT83169.1 asyd|OJJ61963.1 ater|EAU37020.1 atub|OJI90125.1 aver|OJI96055.1 awen|OJJ37261.1 azon|OJJ50956.1

Group1648: abra|OJJ68197.1 acar|OOF89886.1 acla|EAW13080.1 afis|EAW17584.1 afla|EED49239.1 afum|EAL91397.1 agla|OJJ81369.1 akaw|GAA83248.1 aluc|OJZ83749.1 anid|CBF90227.1 anig|EHA18896.1 aory|EIT82222.1 asyd|OJJ61962.1 ater|EAU37019.1 atub|OJI90124.1 aver|OJI96054.1 awen|OJJ37262.1 azon|OJJ50957.1

Group1649: abra|OJJ68199.1 acar|OOF90119.1 acla|EAW13081.1 afis|EAW17583.1 afla|EED49240.1 afum|EAL91396.1 agla|OJJ81370.1 akaw|GAA83247.1 aluc|OJZ83748.1 anid|CBF90229.1 anig|EHA18895.1 aory|EIT82239.1 asyd|OJJ61961.1 ater|EAU37018.1 atub|OJI90123.1 aver|OJI96053.1 awen|OJJ37265.1 azon|OJJ50959.1

Group1650: abra|OJJ68200.1 acar|OOF90117.1 acla|EAW13083.1 afis|EAW17581.1 afla|EED49241.1 agla|OJJ81372.1 akaw|GAA83245.1 aluc|OJZ83747.1 anid|CBF90232.1 anig|EHA18893.1 aory|EIT82216.1 asyd|OJJ61959.1 ater|EAU37016.1 atub|OJI90122.1 aver|OJI96051.1 awen|OJJ37267.1 azon|OJJ50960.1 afum|EAL91394.1

Group1651: abra|OJJ68201.1 acar|OOF90116.1 acla|EAW13084.1 afis|EAW17580.1 afla|EED49242.1 afum|EAL91393.1 agla|OJJ81379.1 akaw|GAA83244.1 aluc|OJZ83746.1 anid|CBF90234.1 anig|EHA18892.1 aory|EIT82232.1 asyd|OJJ61958.1 ater|EAU37015.1 atub|OJI90121.1 aver|OJI96050.1 awen|OJJ37268.1 azon|OJJ50961.1

Group1652: abra|OJJ68203.1 acar|OOF90234.1 acla|EAW13086.1 afis|EAW17579.1 afla|EED49243.1 afum|EAL91392.1 agla|OJJ81378.1 akaw|GAA83243.1 aluc|OJZ83744.1 anid|CBF90238.1 anig|EHA18891.1 aory|EIT82211.1 asyd|OJJ61957.1 ater|EAU37014.1 atub|OJI90120.1 aver|OJI96049.1 awen|OJJ37269.1 azon|OJJ50962.1

Group1653: abra|OJJ68204.1 acar|OOF90236.1 acla|EAW13087.1 afis|EAW17577.1 afla|EED49244.1 afum|EAL91390.1 agla|OJJ81377.1 akaw|GAA83242.1 aluc|OJZ83741.1 anid|CBF90245.1 anig|EHA18890.1 aory|EIT82198.1 asyd|OJJ61951.1 ater|EAU37013.1 atub|OJI90119.1 aver|OJI96042.1 awen|OJJ37270.1 azon|OJJ50969.1

Group1654: abra|OJJ68205.1 acar|OOF90235.1 acla|EAW13088.1 afis|EAW17576.1 afla|EED49245.1 afum|EAL91389.1 agla|OJJ81381.1 akaw|GAA83241.1 aluc|OJZ83740.1 anid|CBF90247.1 anig|EHA18889.1 aory|EIT82237.1 asyd|OJJ61950.1 ater|EAU37012.1 atub|OJI90118.1 aver|OJI96041.1 awen|OJJ37271.1 azon|OJJ50971.1

Group1655: abra|OJJ68207.1 acar|OOF97493.1 acla|EAW13090.1 afis|EAW17574.1 afla|EED49247.1 afum|EAL91387.1 agla|OJJ81384.1 akaw|GAA83239.1 aluc|OJZ83738.1 anid|CBF90250.1 anig|EHA18887.1 aory|EIT82189.1 asyd|OJJ61948.1 ater|EAU37010.1 atub|OJI90116.1 aver|OJI96040.1 awen|OJJ37273.1 azon|OJJ50973.1

Group1656: abra|OJJ68211.1 acar|OOF97495.1 acla|EAW12973.1 afis|EAW17691.1 afla|EED50453.1 afum|EAL91505.1 agla|OJJ79488.1 akaw|GAA83235.1 aluc|OJZ83734.1 anid|CBF89980.1 anig|EHA18883.1 aory|EIT82051.1 asyd|OJJ62090.1 ater|EAU31953.1 atub|OJI90112.1 aver|OJI96196.1 awen|OJJ37145.1 azon|OJJ50845.1

Group1657: abra|OJJ68212.1 acar|OOF97496.1 acla|EAW12972.1 afis|EAW17692.1 afla|EED50452.1 afum|EAL91506.1 agla|OJJ79487.1 akaw|GAA83234.1 aluc|OJZ83733.1 anid|CBF89978.1 anig|EHA18882.1 aory|EIT82145.1 asyd|OJJ62091.1 ater|EAU31958.1 atub|OJI90111.1 aver|OJI96197.1 awen|OJJ37144.1 azon|OJJ50844.1

Group1658: abra|OJJ68249.1 acar|OOF97528.1 acla|EAW09061.1 afis|EAW25634.1 afla|EED55178.1 afum|EAL84322.1 agla|OJJ78898.1 akaw|GAA83212.1 aluc|OJZ83714.1 anid|CBF83155.1 anig|EHA18865.1 aory|EIT81648.1 asyd|OJJ55514.1 ater|EAU32715.1 atub|OJI90089.1 aver|OJJ06591.1 awen|OJJ36053.1 azon|OJJ50759.1

Group1659: abra|OJJ68257.1 acar|OOF97534.1 acla|EAW09064.1 afis|EAW25636.1 afla|EED55176.1 afum|EAL84324.1 agla|OJJ78896.1 akaw|GAA83205.1 aluc|OJZ83707.1 anid|CBF83151.1 anig|EHA18858.1 aory|EIT81641.1 asyd|OJJ55516.1 ater|EAU32717.1 atub|OJI90079.1 aver|OJJ06593.1 awen|OJJ36093.1 azon|OJJ50756.1

Group1660: abra|OJJ68259.1 acar|OOF97536.1 acla|EAW14109.1 afis|EAW18811.1 afla|EED50761.1 afum|EAL93547.1 agla|OJJ80544.1 akaw|GAA92415.1 aluc|OJZ83273.1 anid|CBF69795.1 anig|EHA18856.1 aory|EIT78026.1 asyd|OJJ58964.1 ater|EAU37966.1 atub|OJI87668.1 aver|OJJ01558.1 awen|OJJ32387.1 azon|OJJ47147.1

Group1662: abra|OJJ68281.1 acar|OOF97555.1 acla|EAW09093.1 afis|EAW25687.1 afla|EED55157.1 afum|EAL84356.1 agla|OJJ78886.1 akaw|GAA83191.1 aluc|OJZ83690.1 anid|CBF83933.1 anig|EHA18844.1 aory|EIT81633.1 asyd|OJJ55435.1 ater|EAU32721.1 atub|OJI90062.1 aver|OJJ06512.1 awen|OJJ36120.1 azon|OJJ50742.1

Group1663: abra|OJJ68301.1 acar|OOF96686.1 acla|EAW12631.1 afis|EAW18053.1 afla|EED56195.1 afum|EAL91864.1 agla|OJJ87336.1 akaw|GAA83173.1 aluc|OJZ83672.1 anid|CBF83350.1 anig|EHA18827.1 aory|EIT73338.1 asyd|OJJ60615.1 ater|EAU34830.1 atub|OJI90043.1 aver|OJI99939.1 awen|OJJ41435.1 azon|OJJ48899.1

Group1666: abra|OJJ68449.1 acar|OOF93946.1 acla|EAW11772.1 afis|EAW23677.1 afla|EED54146.1 afum|EAL87120.1 agla|OJJ78443.1 akaw|GAA86924.1 aluc|OJZ90048.1 anid|CBF75094.1 anig|EHA21022.1 aory|EIT75945.1 asyd|OJJ60010.1 ater|EAU29439.1 atub|OJI84758.1 aver|OJJ02275.1 awen|OJJ38063.1 azon|OJJ50775.1

Group1667: abra|OJJ68459.1 acar|OOF92643.1 acla|EAW08639.1 afis|EAW15792.1 afla|EED51253.1 afum|EAL85558.1 agla|OJJ81955.1 akaw|GAA92421.1 aluc|OJZ80815.1 anid|CBF70968.1 anig|EHA21125.1 aory|EIT81555.1 asyd|OJJ52614.1 ater|EAU32350.1 atub|OJI87664.1 aver|OJJ04641.1 awen|OJJ38500.1 azon|OJJ43801.1

Group1668: abra|OJJ68464.1 acar|OOF94169.1 acla|EAW10056.1 afis|EAW25528.1 afla|EED54029.1 afum|EAL90193.2 agla|OJJ87274.1 akaw|GAA92384.1 aluc|OJZ83243.1 anid|CBF77807.1 anig|EHA21098.1 aory|EIT78344.1 asyd|OJJ53016.1 ater|EAU33371.1 atub|OJI87693.1 aver|OJJ03827.1 awen|OJJ41270.1 azon|OJJ49510.1

Group1669: abra|OJJ68468.1 acar|OOF89893.1 acla|EAW10429.1 afis|EAW25140.1 afla|EED55305.1 afum|EAL89812.1 agla|OJJ89027.1 akaw|GAA92389.1 aluc|OJZ83249.1 anid|CBF86095.1 anig|EHA21102.1 aory|EIT83530.1 asyd|OJJ64474.1 ater|EAU39409.1 atub|OJI87688.1 aver|OJI98578.1 awen|OJJ40764.1 azon|OJJ44129.1

Group1670: abra|OJJ68475.1 acar|OOF92975.1 acla|EAW06477.1 afis|EAW15972.1 afla|EED58084.1 afum|EAL88604.1 agla|OJJ83843.1 akaw|GAA92396.1 aluc|OJZ83256.1 anid|CBF81100.1 anig|EHA21110.1 aory|EIT79134.1 asyd|OJJ56477.1 ater|EAU35476.1 atub|OJI87682.1 aver|OJJ06241.1 awen|OJJ35600.1 azon|OJJ46920.1

Group1671: abra|OJJ68476.1 acar|OOF99927.1 acla|EAW09807.1 afis|EAW21329.1 afla|EED57287.1 afum|EAL92347.1 agla|OJJ87410.1 akaw|GAA92397.1 aluc|OJZ83258.1 anid|CBF83431.1 anig|EHA21111.1 aory|EIT74125.1 asyd|OJJ60661.1 ater|EAU35955.1 atub|OJI87681.1 aver|OJI99984.1 awen|OJJ39369.1 azon|OJJ51709.1

Group1672: abra|OJJ68478.1 acar|OOF96519.1 acla|EAW13881.1 afis|EAW18593.1 afla|EED52754.1 afum|EAL93301.1 agla|OJJ81645.1 akaw|GAA92401.1 aluc|OJZ83262.1 anid|CBF70381.1 anig|EHA21115.1 aory|EIT78198.1 asyd|OJJ58642.1 ater|EAU34887.1 atub|OJI87675.1 aver|OJJ01248.1 awen|OJJ31156.1 azon|OJJ46631.1

Group1673: abra|OJJ68485.1 acar|OOG00353.1 acla|EAW07017.1 afis|EAW16643.1 afla|EED44966.1 afum|EAL89246.1 agla|OJJ82604.1 akaw|GAA92786.1 aluc|OJZ82697.1 anid|CBF82045.1 anig|EHA21146.1

aory|EIT73490.1 asyd|OJJ54225.1 ater|EAU39568.1 atub|OJI88929.1 aver|OJJ05178.1 awen|OJJ40071.1  
azon|OJJ45553.1

Group1674: abra|OJJ68486.1 acar|OOF95442.1 acla|EAW07333.1 afis|EAW22365.1 afla|EED57773.1  
afum|EBA27416.1 agla|OJJ87616.1 akaw|GAA92785.1 aluc|OJZ82698.1 anid|CBF88690.1 anig|EHA21153.1  
aory|EIT81113.1 asyd|OJJ63908.1 ater|EAU39499.1 atub|OJI88930.1 aver|OJI97033.1 awen|OJJ34939.1  
azon|OJJ45591.1

Group1675: abra|OJJ68497.1 acar|OOF99362.1 acla|EAW14277.1 afis|EAW18997.1 afla|EED53139.1  
afum|EAL93732.1 agla|OJJ80191.1 akaw|GAA92773.1 aluc|OJZ82710.1 anid|CBF86779.1 anig|EHA21165.1  
aory|EIT74918.1 asyd|OJJ64682.1 ater|EAU37806.1 atub|OJI88943.1 aver|OJI98784.1 awen|OJJ31625.1  
azon|OJJ47325.1

Group1676: abra|OJJ68499.1 acar|OOF93648.1 acla|EAW14509.1 afis|EAW19222.1 afla|EED47663.1  
afum|EAL93954.1 agla|OJJ88466.1 akaw|GAA92772.1 aluc|OJZ82712.1 anid|CBF78608.1 anig|EHA21167.1  
aory|EIT80278.1 asyd|OJJ65103.1 ater|EAU37236.1 atub|OJI88945.1 aver|OJI99230.1 awen|OJJ37585.1  
azon|OJJ51239.1

Group1677: abra|OJJ68500.1 acar|OOF92674.1 acla|EAW08059.1 afis|EAW23095.1 afla|EED48553.1  
afum|EAL88383.1 agla|OJJ89607.1 akaw|GAA92771.1 aluc|OJZ82713.1 anid|CBF75180.1 anig|EHA21168.1  
aory|EIT73191.1 asyd|OJJ59952.1 ater|EAU36223.1 atub|OJI88946.1 aver|OJJ02337.1 awen|OJJ36686.1  
azon|OJJ47510.1

Group1678: abra|OJJ68501.1 acar|OOF89894.1 acla|EAW11963.1 afis|EAW19600.1 afla|EED56956.1  
afum|EAL86918.1 agla|OJJ80742.1 akaw|GAA92770.1 aluc|OJZ82714.1 anid|CBF71291.1 anig|EHA21169.1  
aory|EIT77492.1 asyd|OJJ55128.1 ater|EAU32925.1 atub|OJI88947.1 aver|OJJ07076.1 awen|OJJ41841.1  
azon|OJJ47038.1

Group1679: abra|OJJ68507.1 acar|OOF92954.1 acla|EAW07233.1 afis|EAW22254.1 afla|EED57640.1  
afum|EAL90924.1 agla|OJJ87802.1 akaw|GAA92766.1 aluc|OJZ82719.1 anid|CBF88500.1 anig|EHA21173.1  
aory|EIT82931.1 asyd|OJJ63795.1 ater|EAU34255.1 atub|OJI88953.1 aver|OJI97142.1 awen|OJJ34826.1  
azon|OJJ45723.1

Group1680: abra|OJJ68510.1 acar|OOF92672.1 acla|EAW07690.1 afis|EAW22705.1 afla|EED49991.1  
afum|EAL90487.1 agla|OJJ79004.1 akaw|GAA92761.1 aluc|OJZ82724.1 anid|CBF88071.1 anig|EHA21178.1  
aory|EIT74613.1 asyd|OJJ63553.1 ater|EAU38996.1 atub|OJI88958.1 aver|OJI97381.1 awen|OJJ35342.1  
azon|OJJ49776.1

Group1681: abra|OJJ68511.1 acar|OOF92678.1 acla|EAW14940.1 afis|EAW24455.1 afla|EED55219.1  
afum|EAL86124.1 agla|OJJ80302.1 akaw|GAA91335.1 aluc|OJZ82725.1 anid|CBF75392.1 anig|EHA21179.1  
aory|EIT83615.1 asyd|OJJ59834.1 ater|EAU29438.1 atub|OJI88959.1 aver|OJJ02454.1 awen|OJJ32742.1  
azon|OJJ45292.1

Group1682: abra|OJJ68517.1 acar|OOF99154.1 acla|EAW06536.1 afis|EAW16059.1 afla|EED48573.1  
afum|EAL88692.1 agla|OJJ86106.1 akaw|GAA91331.1 aluc|OJZ82731.1 anid|CBF75082.1 anig|EHA21183.1  
aory|EIT73064.1 asyd|OJJ60019.1 ater|EAU33575.1 atub|OJI88964.1 aver|OJJ02266.1 awen|OJJ30380.1  
azon|OJJ45396.1

Group1683: abra|OJJ68524.1 acar|OOF92729.1 acla|EAW12839.1 afis|EAW18004.1 afla|EED51892.1  
afum|EAL91815.2 agla|OJJ80272.1 akaw|GAA91325.1 aluc|OJZ82738.1 anid|CBF80032.1 anig|EHA21189.1  
aory|EIT76182.1 asyd|OJJ58271.1 ater|EAU31516.1 atub|OJI88973.1 aver|OJJ02153.1 awen|OJJ41538.1  
azon|OJJ48256.1

Group1684: abra|OJJ68526.1 acar|OOF92730.1 acla|EAW12838.1 afis|EAW18003.1 afla|EED51893.1  
afum|EAL91814.2 agla|OJJ80266.1 akaw|GAA91324.1 aluc|OJZ82739.1 anid|CBF80026.1 anig|EHA21190.1  
aory|EIT76172.1 asyd|OJJ58266.1 ater|EAU31515.1 atub|OJI88974.1 aver|OJJ02157.1 awen|OJJ41539.1  
azon|OJJ48257.1

Group1685: abra|OJJ68527.1 acar|OOF92731.1 acla|EAW12837.1 afis|EAW18002.1 afla|EED51894.1  
afum|EAL91813.1 agla|OJJ80265.1 akaw|GAA91323.1 aluc|OJZ82740.1 anid|CBF80025.1 anig|EHA21191.1  
aory|EIT76169.1 asyd|OJJ58265.1 ater|EAU31514.1 atub|OJI88975.1 aver|OJJ02158.1 awen|OJJ41540.1  
azon|OJJ48258.1

Group1686: abra|OJJ68528.1 acar|OOF92732.1 acla|EAW12836.1 afis|EAW18001.1 afla|EED51895.1  
afum|EAL91812.1 agla|OJJ80264.1 akaw|GAA91322.1 aluc|OJZ82741.1 anid|CBF80023.1 anig|EHA21192.1  
aory|EIT76176.1 asyd|OJJ58264.1 ater|EAU31513.1 atub|OJI88976.1 aver|OJJ02160.1 awen|OJJ41541.1  
azon|OJJ48259.1

Group1687: abra|OJJ68531.1 acar|OOF92734.1 acla|EAW12834.1 afis|EAW17999.1 afla|EED51899.1  
afum|EAL91810.1 agla|OJJ80262.1 akaw|GAA91320.1 aluc|OJZ82743.1 anid|CBF80019.1 anig|EHA21194.1  
aory|EIT76173.1 asyd|OJJ58262.1 ater|EAU31511.1 atub|OJI88978.1 aver|OJJ02162.1 awen|OJJ41543.1  
azon|OJJ48261.1



Group1688: abra|OJJ68532.1 acar|OOF92735.1 acla|EAW12833.1 afis|EAW17998.1 afla|EED51900.1 afum|EAL91809.2 agla|OJJ80261.1 akaw|GAA91319.1 aluc|OJZ82744.1 anid|CBF80017.1 anig|EHA21195.1 aory|EIT76171.1 asyd|OJJ58261.1 ater|EAU31510.1 atub|OJI88979.1 aver|OJJ02163.1 awen|OJJ41544.1 azon|OJJ48262.1

Group1689: abra|OJJ68533.1 acar|OOF92736.1 afis|EAW17997.1 afla|EED51903.1 afum|EAL91807.2 akaw|GAA91318.1 aluc|OJZ82746.1 anig|EHA21196.1 aory|EIT76183.1 asyd|OJJ58260.1 atub|OJI88980.1 aver|OJJ02164.1 awen|OJJ41545.1 acla|EAW12832.1 agla|OJJ80257.1 ater|EAU31509.1 azon|OJJ48263.1 anid|CBF80015.1

Group1690: abra|OJJ68537.1 acar|OOF90151.1 acla|EAW12827.1 afis|EAW17992.1 afla|EED51911.1 afum|EAL91802.1 agla|OJJ80253.1 akaw|GAA91314.1 aluc|OJZ82751.1 anid|CBF80004.1 anig|EHA21200.1 aory|EIT76179.1 asyd|OJJ58250.1 ater|EAU31503.1 atub|OJI88987.1 aver|OJJ02174.1 awen|OJJ41554.1 azon|OJJ48269.1

Group1691: abra|OJJ68538.1 acar|OOF90152.1 acla|EAW12828.1 afis|EAW17993.1 afla|EED51908.1 afum|EAL91803.1 agla|OJJ80254.1 akaw|GAA91313.1 aluc|OJZ82752.1 anid|CBF80005.1 anig|EHA21201.1 aory|EIT76170.1 asyd|OJJ58251.1 ater|EAU31504.1 atub|OJI88988.1 aver|OJJ02173.1 awen|OJJ41553.1 azon|OJJ48268.1

Group1692: abra|OJJ68541.1 acar|OOF92739.1 acla|EAW12829.1 afis|EAW17994.1 afla|EED51907.1 afum|EAL91804.1 agla|OJJ80255.1 akaw|GAA91312.1 aluc|OJZ82753.1 anid|CBF80009.1 anig|EHA21202.1 aory|EIT76184.1 asyd|OJJ58256.1 ater|EAU31505.1 atub|OJI88990.1 aver|OJJ02167.1 awen|OJJ41551.1 azon|OJJ48267.1

Group1693: abra|OJJ68542.1 acar|OOF92740.1 acla|EAW12830.1 afis|EAW17995.1 afla|EED51906.1 afum|EAL91805.1 agla|OJJ80259.1 akaw|GAA91311.1 aluc|OJZ82755.1 anid|CBF80011.1 anig|EHA21203.1 aory|EIT76180.1 asyd|OJJ58257.1 ater|EAU31507.1 atub|OJI88991.1 aver|OJJ02166.1 awen|OJJ41550.1 azon|OJJ48266.1

Group1694: abra|OJJ68544.1 acar|OOF92742.1 acla|EAW12823.1 afis|EAW17988.1 afla|EED51915.1 afum|EAL91797.1 agla|OJJ80248.1 akaw|GAA91309.1 aluc|OJZ82759.1 anid|CBF79996.1 anig|EHA21205.1 aory|EIT81365.1 asyd|OJJ58247.1 ater|EAU31498.1 atub|OJI88993.1 aver|OJJ02179.1 awen|OJJ41558.1 azon|OJJ48273.1

Group1695: abra|OJJ68546.1 acar|OOF92743.1 acla|EAW12822.1 afis|EAW17987.1 afla|EED51916.1 afum|EAL91796.1 agla|OJJ80242.1 akaw|GAA91308.1 aluc|OJZ82762.1 anid|CBF80000.1 anig|EHA21206.1 aory|EIT81367.1 asyd|OJJ58248.1 ater|EAU31497.1 atub|OJI88995.1 aver|OJJ02176.1 awen|OJJ41559.1 azon|OJJ48274.1

Group1696: abra|OJJ68549.1 acar|OOF92745.1 acla|EAW12818.1 afis|EAW17983.1 afla|EED51922.1 afum|EAL91792.1 agla|OJJ80240.1 akaw|GAA91304.1 aluc|OJZ82766.1 anid|CBF79992.1 anig|EHA21209.1 aory|EIT81388.1 asyd|OJJ58238.1 ater|EAU31493.1 atub|OJI88998.1 aver|OJJ02187.1 awen|OJJ41562.1 azon|OJJ48277.1

Group1697: abra|OJJ68554.1 acar|OOF92749.1 acla|EAW12813.1 afis|EAW17978.1 afla|EED51927.1 afum|EAL91787.1 agla|OJJ80235.1 akaw|GAA91299.1 aluc|OJZ82771.1 anid|CBF79976.1 anig|EHA21213.1 aory|EIT81454.1 asyd|OJJ58232.1 ater|EAU31489.1 atub|OJI89002.1 aver|OJJ02192.1 awen|OJJ41567.1 azon|OJJ44836.1

Group1698: abra|OJJ68555.1 acar|OOF92750.1 acla|EAW12812.1 afis|EAW17977.1 afla|EED51928.1 afum|EAL91786.1 agla|OJJ80234.1 akaw|GAA91298.1 aluc|OJZ82772.1 anid|CBF79975.1 anig|EHA21214.1 aory|EIT81416.1 asyd|OJJ58231.1 ater|EAU31488.1 atub|OJI89003.1 aver|OJJ02193.1 awen|OJJ41568.1 azon|OJJ44837.1

Group1699: abra|OJJ68556.1 acar|OOF92751.1 acla|EAW12811.1 afis|EAW17976.1 afla|EED51929.1 afum|EAL91785.1 agla|OJJ80233.1 akaw|GAA91297.1 aluc|OJZ82773.1 anid|CBF79973.1 anig|EHA21215.1 aory|EIT81423.1 asyd|OJJ58230.1 ater|EAU31487.1 atub|OJI89004.1 aver|OJJ02194.1 awen|OJJ41569.1 azon|OJJ44838.1

Group1700: abra|OJJ68557.1 acar|OOF92752.1 acla|EAW12810.1 afis|EAW17975.1 afla|EED51930.1 afum|EAL91784.1 agla|OJJ80232.1 akaw|GAA91296.1 aluc|OJZ82774.1 anid|CBF79972.1 anig|EHA21216.1 aory|EIT81446.1 asyd|OJJ58229.1 ater|EAU31486.1 atub|OJI89005.1 aver|OJJ02195.1 awen|OJJ41570.1 azon|OJJ48283.1

Group1701: abra|OJJ68559.1 acar|OOF92754.1 acla|EAW12806.1 afis|EAW17972.1 afla|EED51932.1 afum|EAL91781.1 agla|OJJ80230.1 akaw|GAA91294.1 aluc|OJZ82775.1 anid|CBF79968.1 anig|EHA21218.1 aory|EIT81462.1 asyd|OJJ58227.1 ater|EAU31482.1 atub|OJI89007.1 aver|OJJ02197.1 awen|OJJ41572.1 azon|OJJ48285.1

Group1702: abra|OJJ68561.1 acar|OOF92755.1 acla|EAW12804.1 afis|EAW17970.1 afla|EED51934.1 afum|EAL91779.1 agla|OJJ80228.1 akaw|GAA91292.1 aluc|OJZ82777.1 anid|CBF79964.1 anig|EHA21220.1

aory|EIT81427.1 asyd|OJJ58224.1 ater|EAU31480.1 atub|OJI89009.1 aver|OJJ02198.1 awen|OJJ41574.1  
azon|OJJ48287.1

Group1703: abra|OJJ68564.1 acar|OOF92757.1 acla|EAW12802.1 afis|EAW17968.1 afla|EED51937.1  
afum|EAL91777.1 agla|OJJ80226.1 akaw|GAA91290.1 aluc|OJZ82779.1 anid|CBF79961.1 anig|EHA21222.1  
aory|EIT81398.1 asyd|OJJ58222.1 ater|EAU31478.1 atub|OJI89012.1 aver|OJJ02200.1 awen|OJJ41576.1  
azon|OJJ48289.1

Group1704: abra|OJJ68567.1 acar|OOF92761.1 acla|EAW12798.1 afis|EAW17964.1 afla|EED51946.1  
afum|EAL91774.1 agla|OJJ80209.1 akaw|GAA91286.1 aluc|OJZ82782.1 anid|CBF79954.1 anig|EHA21225.1  
aory|EIT81431.1 asyd|OJJ58218.1 ater|EAU31450.1 atub|OJI89015.1 aver|OJJ02204.1 awen|OJJ41580.1  
azon|OJJ48293.1

Group1705: abra|OJJ68599.1 acar|OOF92109.1 acla|EAW12640.1 afis|EAW18045.1 afla|EED51501.1  
afum|EAL91857.1 agla|OJJ85416.1 akaw|GAA91923.1 aluc|OJZ81957.1 anid|CBF79779.1 anig|EHA22290.1  
aory|EIT80534.1 asyd|OJJ58121.1 ater|EAU31278.1 atub|OJI84508.1 aver|OJJ04284.1 awen|OJJ41489.1  
azon|OJJ48219.1

Group1706: abra|OJJ68601.1 acar|OOF92111.1 acla|EAW12638.1 afis|EAW18047.1 afla|EED51499.1  
afum|EAL91859.1 agla|OJJ85418.1 akaw|GAA91925.1 aluc|OJZ81955.1 anid|CBF79776.1 anig|EHA22292.1  
aory|EIT80455.1 asyd|OJJ58119.1 ater|EAU31276.1 atub|OJI84506.1 aver|OJJ04286.1 awen|OJJ41487.1  
azon|OJJ48217.1

Group1707: abra|OJJ68605.1 acar|OOF92114.1 acla|EAW12588.1 afis|EAW18087.1 afla|EED51483.1  
afum|EAL91899.1 agla|OJJ85421.1 akaw|GAA92916.1 aluc|OJZ81952.1 anid|CBF79764.1 anig|EHA22301.1  
aory|EIT80442.1 asyd|OJJ58103.1 ater|EAU30435.1 atub|OJI84502.1 aver|OJJ04301.1 awen|OJJ41480.1  
azon|OJJ48212.1

Group1708: abra|OJJ68606.1 acar|OOF92117.1 acla|EAW12587.1 afis|EAW18086.1 afla|EED51480.1  
afum|EAL91898.1 agla|OJJ85422.1 akaw|GAA92915.1 aluc|OJZ81948.1 anid|CBF79762.1 anig|EHA22302.1  
aory|EIT80466.1 asyd|OJJ58102.1 ater|EAU30436.1 atub|OJI84501.1 aver|OJJ04302.1 awen|OJJ41479.1  
azon|OJJ48211.1

Group1710: abra|OJJ68608.1 acar|OOF92119.1 acla|EAW12594.1 afis|EAW18084.1 afla|EED51478.1  
afum|EAL91896.1 agla|OJJ85424.1 akaw|GAA92913.1 aluc|OJZ81946.1 anid|CBF86386.1 anig|EHA22303.1  
aory|EIT80678.1 asyd|OJJ64959.1 ater|EAU30438.1 atub|OJI84499.1 aver|OJI99081.1 awen|OJJ41477.1  
azon|OJJ48209.1

Group1711: abra|OJJ68610.1 acar|OOF92120.1 acla|EAW12601.1 afis|EAW18083.1 afla|EED51477.1  
afum|EAL91895.1 agla|OJJ85446.1 akaw|GAA92912.1 aluc|OJZ81945.1 anid|CBF86388.1 anig|EHA22304.1  
aory|EIT80541.1 asyd|OJJ64958.1 ater|EAU30439.1 atub|OJI84498.1 aver|OJI99080.1 awen|OJJ41472.1  
azon|OJJ48931.1

Group1712: abra|OJJ68611.1 acar|OOF92121.1 acla|EAW12602.1 afis|EAW18082.1 afla|EED51476.1  
afum|EAL91894.1 agla|OJJ85447.1 akaw|GAA92911.1 aluc|OJZ81944.1 anid|CBF86390.1 anig|EHA22305.1  
aory|EIT80460.1 asyd|OJJ64957.1 ater|EAU30440.1 atub|OJI84497.1 aver|OJI99079.1 awen|OJJ41470.1  
azon|OJJ48927.1

Group1713: abra|OJJ68612.1 acar|OOF92122.1 acla|EAW12603.1 afis|EAW18081.1 afla|EED51475.1  
afum|EAL91893.1 agla|OJJ87374.1 akaw|GAA92910.1 aluc|OJZ81943.1 anid|CBF86391.1 anig|EHA22306.1  
aory|EIT80723.1 asyd|OJJ64956.1 ater|EAU30441.1 atub|OJI84496.1 aver|OJI99078.1 awen|OJJ41469.1  
azon|OJJ48926.1

Group1714: abra|OJJ68613.1 acar|OOF92123.1 acla|EAW12604.1 afis|EAW18080.1 afla|EED51474.1  
afum|EAL91892.1 agla|OJJ87373.1 akaw|GAA92909.1 aluc|OJZ81942.1 anid|CBF86393.1 anig|EHA22307.1  
aory|EIT80697.1 asyd|OJJ64955.1 ater|EAU30442.1 atub|OJI84495.1 aver|OJI99077.1 awen|OJJ41468.1  
azon|OJJ48925.1

Group1715: abra|OJJ68615.1 acar|OOF92126.1 acla|EAW12607.1 afis|EAW18077.1 afla|EED51471.1  
afum|EAL91889.1 agla|OJJ87370.1 akaw|GAA92906.1 aluc|OJZ81939.1 anid|CBF86404.1 anig|EHA22309.1  
aory|EIT80562.1 asyd|OJJ64951.1 ater|EAU30446.1 atub|OJI84492.1 aver|OJI99073.1 awen|OJJ41466.1  
azon|OJJ48923.1

Group1716: abra|OJJ68617.1 acar|OOF92128.1 acla|EAW12609.1 afis|EAW18075.1 afla|EED51467.1  
afum|EAL91887.1 agla|OJJ87367.1 akaw|GAA92904.1 aluc|OJZ81937.1 anid|CBF86400.1 anig|EHA22311.1  
aory|EIT80468.1 asyd|OJJ64949.1 ater|EAU30452.1 atub|OJI84490.1 aver|OJI99071.1 awen|OJJ41464.1  
azon|OJJ48919.1

Group1717: abra|OJJ68618.1 acar|OOF92129.1 acla|EAW12610.1 afis|EAW18074.1 afla|EED51464.1  
afum|EAL91886.1 agla|OJJ87366.1 akaw|GAA92903.1 aluc|OJZ81936.1 anid|CBF86398.1 anig|EHA22312.1  
aory|EIT80711.1 asyd|OJJ64948.1 ater|EAU30454.1 atub|OJI84489.1 aver|OJI99070.1 awen|OJJ41463.1  
azon|OJJ48918.1

Group1718: abra|OJJ68619.1 acar|OOF92130.1 acla|EAW12611.1 afis|EAW18073.1 afla|EED51463.1 afum|EAL91885.1 agla|OJJ87365.1 akaw|GAA92899.1 aluc|OJZ81935.1 anid|CBF86406.1 anig|EHA22313.1 aory|EIT80619.1 asyd|OJJ64947.1 ater|EAU30455.1 atub|OJI84488.1 aver|OJI99069.1 awen|OJJ41462.1 azon|OJJ48917.1

Group1719: abra|OJJ68620.1 acar|OOF92131.1 acla|EAW13703.1 afis|EAW19885.1 afla|EED57031.1 afum|EAL85012.1 agla|OJJ89079.1 akaw|GAA92898.1 aluc|OJZ81934.1 anid|CBF82756.1 anig|EHA22314.1 aory|EIT82313.1 asyd|OJJ61608.1 ater|EAU33697.1 atub|OJI84487.1 aver|OJJ00931.1 awen|OJJ36996.1 azon|OJJ42189.1

Group1720: abra|OJJ68623.1 acar|OOF92133.1 acla|EAW12612.1 afis|EAW18072.1 afla|EED51461.1 afum|EAL91884.1 agla|OJJ87364.1 akaw|GAA92897.1 aluc|OJZ81932.1 anid|CBF86411.1 anig|EHA22316.1 aory|EIT80603.1 asyd|OJJ64944.1 ater|EAU30457.1 atub|OJI84485.1 aver|OJI99066.1 awen|OJJ41459.1 azon|OJJ48916.1

Group1721: abra|OJJ68626.1 acar|OOF92136.1 acla|EAW12613.1 afis|EAW18071.1 afla|EED51460.1 afum|EAL91883.1 agla|OJJ87363.1 akaw|GAA92895.1 aluc|OJZ81929.1 anid|CBF86413.1 anig|EHA22318.1 aory|EIT80647.1 asyd|OJJ64943.1 ater|EAU30458.1 atub|OJI84481.1 aver|OJI99065.1 awen|OJJ41458.1 azon|OJJ48915.1

Group1722: abra|OJJ68636.1 acar|OOF92140.1 acla|EAW12615.1 afis|EAW18069.1 afla|EED51458.1 afum|EAL91881.2 agla|OJJ87356.1 akaw|GAA89775.1 aluc|OJZ81919.1 anid|CBF86416.1 anig|EHA22328.1 aory|EIT80491.1 asyd|OJJ64941.1 ater|EAU30460.1 atub|OJI84471.1 aver|OJI99063.1 awen|OJJ41456.1 azon|OJJ48913.1

Group1723: abra|OJJ68637.1 acar|OOF92141.1 acla|EAW12614.1 afis|EAW18070.1 afla|EED51459.1 afum|EAL91882.1 agla|OJJ87357.1 akaw|GAA89776.1 aluc|OJZ81918.1 anid|CBF86415.1 anig|EHA22329.1 aory|EIT80742.1 asyd|OJJ64942.1 ater|EAU30459.1 atub|OJI84470.1 aver|OJI99064.1 awen|OJJ41457.1 azon|OJJ48914.1

Group1724: abra|OJJ68642.1 acar|OOF92146.1 acla|EAW12620.1 afis|EAW18064.1 afla|EED51433.1 afum|EAL91876.1 akaw|GAA89782.1 aluc|OJZ81910.1 anid|CBF86424.1 anig|EHA22334.1 aory|EIT80728.1 asyd|OJJ64937.1 ater|EAU30467.1 atub|OJI84463.1 aver|OJI99058.1 awen|OJJ41451.1 azon|OJJ48909.1 agla|OJJ87350.1

Group1725: abra|OJJ68643.1 acar|OOF92145.1 acla|EAW12621.1 afis|EAW18063.1 afla|EED51432.1 afum|EAL91875.1 agla|OJJ87349.1 akaw|GAA89783.1 aluc|OJZ81908.1 anid|CBF86426.1 anig|EHA22335.1 aory|EIT80621.1 asyd|OJJ64936.1 ater|EAU30468.1 atub|OJI84461.1 aver|OJI99057.1 awen|OJJ41449.1 azon|OJJ48908.1

Group1726: abra|OJJ68647.1 acar|OOF92149.1 acla|EAW12623.1 afis|EAW18061.1 afla|EED51429.1 afum|EAL91872.1 agla|OJJ87325.1 akaw|GAA89787.1 aluc|OJZ81904.1 anid|CBF86430.1 anig|EHA22339.1 aory|EIT80637.1 asyd|OJJ64934.1 ater|EAU30473.1 atub|OJI84457.1 aver|OJI99054.1 awen|OJJ41445.1 azon|OJJ48907.1

Group1727: abra|OJJ68648.1 acar|OOF92150.1 acla|EAW12624.1 afis|EAW18060.1 afla|EED51428.1 afum|EAL91871.1 agla|OJJ87326.1 akaw|GAA89788.1 aluc|OJZ81903.1 anid|CBF86432.1 anig|EHA22340.1 aory|EIT80552.1 asyd|OJJ64933.1 ater|EAU30474.1 atub|OJI84456.1 aver|OJI99053.1 awen|OJJ41444.1 azon|OJJ48905.1

Group1728: abra|OJJ68649.1 acar|OOF92151.1 acla|EAW12625.1 afis|EAW18059.1 afla|EED51427.1 afum|EAL91870.1 agla|OJJ87327.1 akaw|GAA89789.1 aluc|OJZ81902.1 anid|CBF86434.1 anig|EHA22341.1 aory|EIT80495.1 asyd|OJJ64932.1 ater|EAU30475.1 atub|OJI84455.1 aver|OJI99051.1 awen|OJJ41442.1 azon|OJJ48904.1

Group1729: abra|OJJ68650.1 acar|OOF92152.1 acla|EAW12626.1 afis|EAW18058.1 afla|EED51426.1 afum|EBA27442.1 agla|OJJ87328.1 akaw|GAA89790.1 aluc|OJZ81901.1 anid|CBF86435.1 anig|EHA22342.1 aory|EIT80761.1 asyd|OJJ64931.1 ater|EAU30476.1 atub|OJI84454.1 aver|OJI99050.1 awen|OJJ41441.1 azon|OJJ48903.1

Group1730: abra|OJJ68652.1 acar|OOF92153.1 acla|EAW12628.1 afis|EAW18056.1 afla|EED51423.1 afum|EAL91867.1 agla|OJJ87330.1 akaw|GAA89792.1 aluc|OJZ81899.1 anid|CBF86443.1 anig|EHA22344.1 aory|EIT80509.1 asyd|OJJ64928.1 ater|EAU30478.1 atub|OJI84452.1 aver|OJI99047.1 awen|OJJ41439.1 azon|OJJ48901.1

Group1731: abra|OJJ68655.1 acar|OOF92155.1 acla|EAW12630.1 afis|EAW18054.1 afla|EED51421.1 afum|EAL91865.1 agla|OJJ87335.1 akaw|GAA89794.1 aluc|OJZ81897.1 anid|CBF86438.1 anig|EHA22345.1 aory|EIT80746.1 asyd|OJJ64927.1 ater|EAU30479.1 atub|OJI84450.1 aver|OJI99045.1 awen|OJJ41436.1 azon|OJJ48900.1

Group1732: abra|OJJ68656.1 acar|OOF92156.1 acla|EAW12632.1 afis|EAW18052.1 afla|EED51418.1 afum|EAL91863.1 agla|OJJ87339.1 akaw|GAA89795.1 aluc|OJZ81896.1 anid|CBF86439.1 anig|EHA22346.1

aory|EIT80553.1 asyd|OJJ64925.1 ater|EAU30480.1 atub|OJI84449.1 aver|OJI99044.1 awen|OJJ41433.1 azon|OJJ48898.1

Group1733: abra|OJJ68657.1 acar|OOF92157.1 acla|EAW12633.1 afis|EAW18051.1 afla|EED51417.1 afum|EAL91862.1 agla|OJJ87340.1 akaw|GAA89796.1 aluc|OJZ81895.1 anid|CBF86440.1 anig|EHA22347.1 aory|EIT80630.1 asyd|OJJ64924.1 ater|EAU30481.1 atub|OJI84448.1 aver|OJI99043.1 awen|OJJ41432.1 azon|OJJ48897.1

Group1734: abra|OJJ68659.1 acar|OOF92159.1 acla|EAW12590.1 afis|EAW24059.1 afla|EED51416.1 afum|EAL91914.1 agla|OJJ87341.1 akaw|GAA89797.1 aluc|OJZ81894.1 anid|CBF86444.1 anig|EHA22348.1 aory|EIT80652.1 asyd|OJJ64923.1 ater|EAU30482.1 atub|OJI84447.1 aver|OJI99042.1 awen|OJJ41431.1 azon|OJJ48896.1

Group1735: abra|OJJ68660.1 acar|OOF92158.1 acla|EAW12591.1 afis|EAW24060.1 afla|EED51415.1 afum|EAL91915.1 agla|OJJ87342.1 akaw|GAA89798.1 aluc|OJZ81893.1 anid|CBF86446.1 anig|EHA22349.1 aory|EIT80731.1 asyd|OJJ64922.1 ater|EAU30483.1 atub|OJI84446.1 aver|OJI99041.1 awen|OJJ41430.1 azon|OJJ48895.1

Group1736: abra|OJJ68662.1 acar|OOF92162.1 acla|EAW12586.1 afis|EAW24062.1 afla|EED51412.1 afum|EAL91917.1 agla|OJJ87344.1 akaw|GAA89802.1 aluc|OJZ81889.1 anid|CBF86449.1 anig|EHA22352.1 aory|EIT80533.1 asyd|OJJ64920.1 ater|EAU30484.1 atub|OJI84442.1 aver|OJI99040.1 awen|OJJ41428.1 azon|OJJ48893.1

Group1737: abra|OJJ68664.1 acar|OOF92165.1 acla|EAW12585.1 afis|EAW24063.1 afla|EED51411.1 afum|EAL91918.1 agla|OJJ87345.1 akaw|GAA89805.1 aluc|OJZ81886.1 anid|CBF86451.1 anig|EHA22354.1 aory|EIT80561.1 asyd|OJJ64919.1 ater|EAU30485.1 atub|OJI84439.1 aver|OJI99039.1 awen|OJJ41426.1 azon|OJJ48891.1

Group1738: abra|OJJ68665.1 acar|OOF92167.1 acla|EAW12584.1 afis|EAW24064.1 afla|EED51410.1 afum|EAL91919.1 agla|OJJ87346.1 akaw|GAA89806.1 aluc|OJZ81885.1 anid|CBF86452.1 anig|EHA22355.1 aory|EIT80617.1 asyd|OJJ64918.1 ater|EAU30486.1 atub|OJI84438.1 aver|OJI99038.1 awen|OJJ41425.1 azon|OJJ48890.1

Group1739: abra|OJJ68666.1 acar|OOF92166.1 acla|EAW12583.1 afis|EAW24065.1 afla|EED51409.1 afum|EAL91920.1 agla|OJJ87347.1 akaw|GAA89807.1 aluc|OJZ81884.1 anid|CBF86454.1 anig|EHA22356.1 aory|EIT80471.1 asyd|OJJ64917.1 ater|EAU30487.1 atub|OJI84437.1 aver|OJI99037.1 awen|OJJ41424.1 azon|OJJ48889.1

Group1740: abra|OJJ68670.1 acar|OOF92170.1 acla|EAW12577.1 afis|EAW24071.1 afla|EED51404.1 afum|EAL91927.1 agla|OJJ87312.1 akaw|GAA89811.1 aluc|OJZ81879.1 anid|CBF86462.1 anig|EHA22359.1 aory|EIT80762.1 asyd|OJJ64912.1 ater|EAU30492.1 atub|OJI84433.1 aver|OJI99033.1 awen|OJJ41419.1 azon|OJJ48884.1

Group1741: abra|OJJ68677.1 acar|OOF92179.1 acla|EAW12570.1 afis|EAW24080.1 afla|EED51393.1 afum|EAL91935.1 agla|OJJ87151.1 akaw|GAA89830.1 aluc|OJZ81857.1 anid|CBF86478.1 anig|EHA22367.1 aory|EIT80640.1 asyd|OJJ64902.1 ater|EAU30501.1 atub|OJI84425.1 aver|OJI99024.1 awen|OJJ41418.1 azon|OJJ48875.1

Group1742: abra|OJJ68678.1 acar|OOF92180.1 acla|EAW12569.1 afis|EAW24081.1 afla|EED51392.1 afum|EAL91936.1 agla|OJJ87152.1 akaw|GAA89831.1 aluc|OJZ81856.1 anid|CBF86480.1 anig|EHA22368.1 aory|EIT80524.1 asyd|OJJ64901.1 ater|EAU30504.1 atub|OJI84424.1 aver|OJI99022.1 awen|OJJ41407.1 azon|OJJ48873.1

Group1743: abra|OJJ68681.1 acar|OOF92183.1 acla|EAW12566.1 afis|EAW24084.1 afla|EED51389.1 afum|EAL91939.1 agla|OJJ87154.1 akaw|GAA89834.1 aluc|OJZ81852.1 anid|CBF86484.1 anig|EHA22370.1 aory|EIT80477.1 asyd|OJJ64899.1 ater|EAU30507.1 atub|OJI84421.1 aver|OJI99020.1 awen|OJJ41405.1 azon|OJJ48871.1

Group1744: abra|OJJ68682.1 acar|OOF92184.1 acla|EAW12565.1 afis|EAW24085.1 afla|EED51388.1 afum|EAL91940.1 agla|OJJ87155.1 akaw|GAA89835.1 aluc|OJZ81851.1 anid|CBF86486.1 anig|EHA22371.1 aory|EIT80535.1 asyd|OJJ64898.1 ater|EAU30508.1 atub|OJI84420.1 aver|OJI99019.1 awen|OJJ41404.1 azon|OJJ48870.1

Group1745: abra|OJJ68684.1 acar|OOF92186.1 acla|EAW12563.1 afis|EAW24087.1 afla|EED51386.1 afum|EAL91942.1 agla|OJJ87157.1 akaw|GAA89837.1 aluc|OJZ81849.1 anid|CBF86489.1 anig|EHA22373.1 aory|EIT80476.1 asyd|OJJ64896.1 ater|EAU30511.1 atub|OJI84418.1 aver|OJI99017.1 awen|OJJ41402.1 azon|OJJ48868.1

Group1746: abra|OJJ68685.1 acar|OOF92187.1 acla|EAW12562.1 afis|EAW24088.1 afla|EED46851.1 afum|EAL91943.1 agla|OJJ87158.1 akaw|GAA89838.1 aluc|OJZ81848.1 anid|CBF86491.1 anig|EHA22374.1 aory|EIT72584.1 asyd|OJJ64895.1 ater|EAU30512.1 atub|OJI84417.1 aver|OJI99016.1 awen|OJJ41401.1 azon|OJJ48867.1

Group1747: abra|OJJ68686.1 acar|OOF92188.1 acla|EAW12561.1 afis|EAW24089.1 afla|EED46850.1 afum|EAL91944.1 agla|OJJ87159.1 akaw|GAA89839.1 aluc|OJZ81847.1 anid|CBF86493.1 anig|EHA22375.1 aory|EIT72520.1 asyd|OJJ64894.1 ater|EAU30513.1 atub|OJI84416.1 aver|OJI99015.1 awen|OJJ41400.1 azon|OJJ48866.1

Group1748: abra|OJJ68689.1 acar|OOF92193.1 acla|EAW12555.1 afis|EAW24096.1 afla|EED46838.1 afum|EAL91950.1 agla|OJJ87169.1 akaw|GAA89844.1 aluc|OJZ81843.1 anid|CBF86498.1 anig|EHA22379.1 aory|EIT72590.1 asyd|OJJ64889.1 ater|EAU30523.1 atub|OJI84411.1 aver|OJI99003.1 awen|OJJ41394.1 azon|OJJ48862.1

Group1749: abra|OJJ68690.1 acar|OOF92194.1 acla|EAW12554.1 afis|EAW24097.1 afla|EED46837.1 afum|EAL91951.2 agla|OJJ87171.1 akaw|GAA89845.1 aluc|OJZ81842.1 anid|CBF86500.1 anig|EHA22380.1 aory|EIT72693.1 asyd|OJJ64888.1 ater|EAU30524.1 atub|OJI84410.1 aver|OJI99002.1 awen|OJJ41392.1 azon|OJJ48861.1

Group1750: abra|OJJ68691.1 acar|OOF92195.1 acla|EAW12553.1 afis|EAW24098.1 afla|EED46836.1 afum|EAL91952.1 agla|OJJ87172.1 akaw|GAA89846.1 aluc|OJZ81841.1 anid|CBF86501.1 anig|EHA22381.1 aory|EIT72579.1 asyd|OJJ64887.1 ater|EAU30525.1 atub|OJI84409.1 aver|OJI99001.1 awen|OJJ41391.1 azon|OJJ48860.1

Group1751: abra|OJJ68692.1 acar|OOF92196.1 acla|EAW12552.1 afis|EAW24099.1 afla|EED46835.1 afum|EAL91953.2 agla|OJJ87173.1 akaw|GAA89847.1 aluc|OJZ81840.1 anid|CBF86503.1 anig|EHA22382.1 aory|EIT72533.1 asyd|OJJ64886.1 ater|EAU30526.1 atub|OJI84408.1 aver|OJI99000.1 awen|OJJ41390.1 azon|OJJ48859.1

Group1752: abra|OJJ68693.1 acar|OOF92197.1 acla|EAW12551.1 afis|EAW24100.1 afla|EED46834.1 afum|EAL91954.1 agla|OJJ87174.1 akaw|GAA89848.1 aluc|OJZ81838.1 anid|CBF86505.1 anig|EHA22383.1 aory|EIT72706.1 asyd|OJJ64885.1 ater|EAU30527.1 atub|OJI84407.1 aver|OJI98999.1 awen|OJJ41389.1 azon|OJJ48858.1

Group1753: abra|OJJ68695.1 acar|OOF92199.1 acla|EAW12549.1 afis|EAW24101.1 afla|EED46832.1 afum|EAL91955.1 agla|OJJ87176.1 akaw|GAA89850.1 aluc|OJZ81836.1 anid|CBF86507.1 anig|EHA22385.1 aory|EIT72575.1 asyd|OJJ64883.1 ater|EAU30529.1 atub|OJI84405.1 aver|OJI98997.1 awen|OJJ41387.1 azon|OJJ48856.1

Group1754: abra|OJJ68696.1 acar|OOF92200.1 acla|EAW12548.1 afis|EAW24102.1 afla|EED46831.1 afum|EAL91956.1 agla|OJJ87177.1 akaw|GAA89851.1 aluc|OJZ81835.1 anid|CBF86509.1 anig|EHA22386.1 aory|EIT72546.1 asyd|OJJ64882.1 ater|EAU30530.1 atub|OJI84404.1 aver|OJI98996.1 awen|OJJ41386.1 azon|OJJ48855.1

Group1755: abra|OJJ68697.1 acar|OOF92201.1 acla|EAW12547.1 afis|EAW24103.1 afla|EED46830.1 afum|EAL91957.1 agla|OJJ87178.1 akaw|GAA89852.1 aluc|OJZ81834.1 anid|CBF86511.1 anig|EHA22387.1 aory|EIT72771.1 asyd|OJJ64881.1 ater|EAU30531.1 atub|OJI84403.1 aver|OJI98995.1 awen|OJJ41385.1 azon|OJJ48854.1

Group1756: abra|OJJ68698.1 acar|OOF92202.1 acla|EAW12546.1 afis|EAW24104.1 afla|EED46829.1 afum|EAL91958.1 agla|OJJ87179.1 akaw|GAA89853.1 aluc|OJZ81833.1 anid|CBF86513.1 anig|EHA22388.1 aory|EIT72709.1 asyd|OJJ64880.1 ater|EAU30532.1 atub|OJI84402.1 aver|OJI98994.1 awen|OJJ41384.1 azon|OJJ48853.1

Group1757: abra|OJJ68703.1 acar|OOF92205.1 acla|EAW12542.1 afis|EAW24107.1 afla|EED46826.1 afum|EAL91961.1 agla|OJJ87182.1 akaw|GAA89857.1 aluc|OJZ81828.1 anid|CBF86518.1 anig|EHA22391.1 aory|EIT72757.1 asyd|OJJ64877.1 ater|EAU30535.1 atub|OJI84398.1 aver|OJI98990.1 awen|OJJ41381.1 azon|OJJ48850.1

Group1758: abra|OJJ68704.1 acar|OOF92206.1 acla|EAW12541.1 afis|EAW24108.1 afla|EED46825.1 afum|EAL91962.1 agla|OJJ87183.1 akaw|GAA89858.1 aluc|OJZ81826.1 anid|CBF86520.1 anig|EHA22392.1 aory|EIT72547.1 asyd|OJJ64876.1 ater|EAU30536.1 atub|OJI84396.1 aver|OJI98989.1 awen|OJJ41380.1 azon|OJJ48848.1

Group1759: abra|OJJ68706.1 acar|OOF92208.1 acla|EAW12539.1 afis|EAW24110.1 afla|EED46822.1 afum|EAL91964.1 agla|OJJ87185.1 akaw|GAA89860.1 aluc|OJZ81824.1 anid|CBF86523.1 anig|EHA22394.1 aory|EIT72674.1 asyd|OJJ64874.1 ater|EAU30538.1 atub|OJI84394.1 aver|OJI98987.1 awen|OJJ41378.1 azon|OJJ48846.1

Group1760: abra|OJJ68709.1 acar|OOF92211.1 acla|EAW12536.1 afis|EAW24113.1 afla|EED46820.1 afum|EAL91967.1 agla|OJJ87190.1 akaw|GAA89863.1 aluc|OJZ81818.1 anid|CBF86529.1 anig|EHA22397.1 aory|EIT72599.1 asyd|OJJ64871.1 ater|EAU30541.1 atub|OJI84391.1 aver|OJI98983.1 awen|OJJ41375.1 azon|OJJ48843.1

Group1761: abra|OJJ68710.1 acar|OOF92212.1 acla|EAW12535.1 afis|EAW24114.1 afla|EED46819.1 afum|EAL91968.1 agla|OJJ87191.1 akaw|GAA89864.1 aluc|OJZ81817.1 anid|CBF86531.1 anig|EHA22398.1

aory|EIT72684.1 asyd|OJJ64870.1 ater|EAU30542.1 atub|OJI84390.1 aver|OJI98982.1 awen|OJJ41374.1 azon|OJJ48842.1

Group1762: abra|OJJ68717.1 acar|OOF92217.1 acla|EAW12529.1 afis|EAW24120.1 aflu|EED46812.1 afum|EAL91975.1 agla|OJJ87194.1 akaw|GAA89869.1 aluc|OJZ81812.1 anid|CBF86542.1 anig|EHA22405.1 aory|EIT72532.1 asyd|OJJ64862.1 ater|EAU30548.1 atub|OJI84384.1 aver|OJI98973.1 awen|OJJ41369.1 azon|OJJ48836.1

Group1763: abra|OJJ68719.1 acar|OOF92218.1 acla|EAW12528.1 afis|EAW24121.1 aflu|EED46810.1 afum|EAL91977.1 agla|OJJ87196.1 akaw|GAA89870.1 aluc|OJZ81810.1 anid|CBF86546.1 anig|EHA22407.1 aory|EIT72617.1 asyd|OJJ64860.1 ater|EAU30549.1 atub|OJI84382.1 aver|OJI98972.1 awen|OJJ41368.1 azon|OJJ48835.1

Group1764: abra|OJJ68722.1 acar|OOF92221.1 acla|EAW12524.1 afis|EAW24124.1 aflu|EED46809.1 afum|EAL91980.1 agla|OJJ87199.1 akaw|GAA89872.1 aluc|OJZ81807.1 anid|CBF86551.1 anig|EHA22410.1 aory|EIT72759.1 asyd|OJJ64857.1 ater|EAU30551.1 atub|OJI84379.1 aver|OJI98969.1 awen|OJJ41365.1 azon|OJJ48832.1

Group1765: abra|OJJ68723.1 acar|OOF92222.1 acla|EAW12523.1 afis|EAW24125.1 aflu|EED46808.1 afum|EAL91981.1 agla|OJJ87200.1 akaw|GAA89873.1 aluc|OJZ81806.1 anid|CBF86553.1 anig|EHA22411.1 aory|EIT72530.1 asyd|OJJ64856.1 ater|EAU30552.1 atub|OJI84378.1 aver|OJI98968.1 awen|OJJ41364.1 azon|OJJ48831.1

Group1766: abra|OJJ68725.1 acar|OOF92224.1 acla|EAW12521.1 afis|EAW24126.1 aflu|EED46806.1 afum|EAL91982.1 agla|OJJ87202.1 akaw|GAA89876.1 aluc|OJZ81803.1 anid|CBF86555.1 anig|EHA22413.1 aory|EIT72636.1 asyd|OJJ64855.1 ater|EAU30553.1 atub|OJI84375.1 aver|OJI98967.1 awen|OJJ41363.1 azon|OJJ48829.1

Group1767: abra|OJJ68728.1 acar|OOF92225.1 acla|EAW12520.1 afis|EAW24127.1 aflu|EED46805.1 afum|EAL91983.1 agla|OJJ87203.1 akaw|GAA89877.1 aluc|OJZ81802.1 anid|CBF86557.1 anig|EHA22414.1 aory|EIT72714.1 asyd|OJJ64854.1 ater|EAU30557.1 atub|OJI84374.1 aver|OJI98966.1 awen|OJJ41362.1 azon|OJJ48827.1

Group1768: abra|OJJ68729.1 acar|OOF92226.1 acla|EAW12519.1 afis|EAW24128.1 aflu|EED46804.1 afum|EAL91984.1 agla|OJJ87204.1 akaw|GAA89878.1 aluc|OJZ81801.1 anid|CBF86559.1 anig|EHA22415.1 aory|EIT72675.1 asyd|OJJ64853.1 ater|EAU30558.1 atub|OJI84372.1 aver|OJI98965.1 awen|OJJ41361.1 azon|OJJ48825.1

Group1769: abra|OJJ68730.1 acar|OOF92228.1 acla|EAW12518.1 afis|EAW24129.1 aflu|EED46803.1 afum|EAL91985.1 agla|OJJ87205.1 akaw|GAA89879.1 aluc|OJZ81800.1 anid|CBF86560.1 anig|EHA22416.1 aory|EIT72669.1 asyd|OJJ64852.1 ater|EAU30559.1 atub|OJI84371.1 aver|OJI98964.1 awen|OJJ41360.1 azon|OJJ48824.1

Group1770: abra|OJJ68734.1 acar|OOF92230.1 acla|EAW12513.1 afis|EAW24133.1 aflu|EED46800.1 afum|EAL91988.1 agla|OJJ87210.1 akaw|GAA89882.1 aluc|OJZ81796.1 anid|CBF86566.1 anig|EHA22420.1 aory|EIT72682.1 asyd|OJJ64849.1 ater|EAU30562.1 atub|OJI84367.1 aver|OJI98961.1 awen|OJJ41356.1 azon|OJJ48819.1

Group1771: abra|OJJ68735.1 acar|OOF92231.1 acla|EAW12512.1 afis|EAW24134.1 aflu|EED46799.1 afum|EAL91989.2 agla|OJJ87211.1 akaw|GAA89883.1 aluc|OJZ81794.1 anid|CBF86568.1 anig|EHA22421.1 aory|EIT72755.1 asyd|OJJ64848.1 ater|EAU30563.1 atub|OJI84366.1 aver|OJI98960.1 awen|OJJ41355.1 azon|OJJ48818.1

Group1772: abra|OJJ68736.1 acar|OOF92232.1 acla|EAW12511.1 afis|EAW24135.1 aflu|EED46798.1 afum|EAL91990.1 agla|OJJ87212.1 akaw|GAA89884.1 aluc|OJZ81793.1 anid|CBF86570.1 anig|EHA22422.1 aory|EIT72542.1 asyd|OJJ64847.1 ater|EAU30564.1 atub|OJI84365.1 aver|OJI98959.1 awen|OJJ41354.1 azon|OJJ48817.1

Group1773: abra|OJJ68738.1 acar|OOF92234.1 afis|EAW24137.1 aflu|EED46797.1 afum|EAL91992.1 agla|OJJ87215.1 akaw|GAA89886.1 aluc|OJZ81789.1 anid|CBF77943.1 anig|EHA22426.1 aory|EIT72631.1 asyd|OJJ55282.1 ater|EAU30566.1 atub|OJI84363.1 aver|OJJ06946.1 awen|OJJ41352.1 azon|OJJ48815.1 acla|EAW12509.1

Group1774: abra|OJJ68739.1 acar|OOF92235.1 acla|EAW12508.1 afis|EAW24138.1 aflu|EED46796.1 afum|EAL91993.1 agla|OJJ87216.1 akaw|GAA89887.1 aluc|OJZ81788.1 anid|CBF77941.1 anig|EHA22427.1 aory|EIT72772.1 asyd|OJJ55283.1 ater|EAU30567.1 atub|OJI84362.1 aver|OJJ06945.1 awen|OJJ41351.1 azon|OJJ48814.1

Group1775: abra|OJJ68742.1 acar|OOF90307.1 acla|EAW12506.1 afis|EAW24141.1 aflu|EED46793.1 afum|EAL91996.1 agla|OJJ87220.1 akaw|GAA89889.1 aluc|OJZ81784.1 anid|CBF77936.1 anig|EHA22431.1 aory|EIT72574.1 asyd|OJJ55286.1 ater|EAU30570.1 atub|OJI84358.1 aver|OJJ06942.1 awen|OJJ41347.1 azon|OJJ48811.1

Group1776: abra|OJJ68743.1 acar|OOF90308.1 acla|EAW12505.1 afis|EAW24142.1 afla|EED46792.1 afum|EAL91997.1 agla|OJJ87221.1 akaw|GAA89890.1 aluc|OJZ81783.1 anid|CBF77934.1 anig|EHA22432.1 aory|EIT72571.1 asyd|OJJ55287.1 ater|EAU30571.1 atub|OJI84357.1 aver|OJJ06941.1 awen|OJJ41346.1 azon|OJJ48810.1

Group1777: abra|OJJ68748.1 acar|OOF92236.1 acla|EAW12503.1 afis|EAW24143.1 afla|EED46789.1 afum|EAL91998.1 agla|OJJ87222.1 akaw|GAA89892.1 aluc|OJZ81779.1 anid|CBF77930.1 anig|EHA22436.1 aory|EIT72633.1 asyd|OJJ55290.1 ater|EAU30574.1 atub|OJI84353.1 aver|OJJ06939.1 awen|OJJ41345.1 azon|OJJ48809.1

Group1778: abra|OJJ68749.1 acar|OOF92237.1 acla|EAW12502.1 afis|EAW24144.1 afla|EED46788.1 afum|EAL91999.1 agla|OJJ87223.1 akaw|GAA89893.1 aluc|OJZ81778.1 anid|CBF77928.1 anig|EHA22438.1 aory|EIT72562.1 asyd|OJJ55291.1 ater|EAU30575.1 atub|OJI84351.1 aver|OJJ06936.1 awen|OJJ41336.1 azon|OJJ48806.1

Group1779: abra|OJJ68750.1 acar|OOF92238.1 acla|EAW12501.1 afis|EAW24145.1 afla|EED46787.1 afum|EAL92000.1 agla|OJJ87224.1 akaw|GAA89894.1 aluc|OJZ81777.1 anid|CBF77926.1 anig|EHA22439.1 aory|EIT72718.1 asyd|OJJ55292.1 ater|EAU30576.1 atub|OJI84350.1 aver|OJJ06935.1 awen|OJJ41335.1 azon|OJJ48804.1

Group1780: abra|OJJ68752.1 acar|OOF92239.1 acla|EAW12499.1 afis|EAW24146.1 afla|EED46783.1 afum|EAL92001.1 agla|OJJ87226.1 akaw|GAA89896.1 aluc|OJZ81775.1 anid|CBF77923.1 anig|EHA22441.1 aory|EIT72696.1 asyd|OJJ55294.1 ater|EAU30578.1 atub|OJI84348.1 aver|OJJ06932.1 awen|OJJ41333.1 azon|OJJ48803.1

Group1781: abra|OJJ68756.1 acar|OOF92244.1 acla|EAW12495.1 afis|EAW24150.1 afla|EED46781.1 afum|EAL92005.1 agla|OJJ89542.1 akaw|GAA89900.1 aluc|OJZ81771.1 anid|CBF77915.1 anig|EHA22445.1 aory|EIT72518.1 asyd|OJJ55297.1 ater|EAU30582.1 atub|OJI84344.1 aver|OJJ06929.1 awen|OJJ41328.1 azon|OJJ48801.1

Group1782: abra|OJJ68763.1 acar|OOF92249.1 acla|EAW12488.1 afis|EAW24157.1 afla|EED46776.1 afum|EAL92012.2 agla|OJJ89524.1 akaw|GAA89907.1 aluc|OJZ81762.1 anid|CBF77900.1 anig|EHA22451.1 aory|EIT72774.1 asyd|OJJ55303.1 ater|EAU30588.1 atub|OJI84334.1 aver|OJJ06923.1 awen|OJJ41321.1 azon|OJJ48794.1

Group1783: abra|OJJ68766.1 acar|OOF92252.1 acla|EAW12485.1 afis|EAW24160.1 afla|EED46773.1 afum|EAL92016.1 agla|OJJ89521.1 akaw|GAA89910.1 aluc|OJZ81759.1 anid|CBF77894.1 anig|EHA22453.1 aory|EIT72644.1 asyd|OJJ55306.1 ater|EAU30591.1 atub|OJI84331.1 aver|OJJ06920.1 awen|OJJ41318.1 azon|OJJ48791.1

Group1784: abra|OJJ68768.1 acar|OOF92253.1 acla|EAW12484.1 afis|EAW24161.1 afla|EED46772.1 afum|EAL92017.1 agla|OJJ89519.1 akaw|GAA89911.1 aluc|OJZ81758.1 anid|CBF77892.1 anig|EHA22454.1 aory|EIT72707.1 asyd|OJJ55307.1 ater|EAU30592.1 atub|OJI84329.1 aver|OJJ06919.1 awen|OJJ41316.1 azon|OJJ48790.1

Group1785: abra|OJJ68769.1 acar|OOF92254.1 acla|EAW12483.1 afis|EAW24162.1 afla|EED46771.1 afum|EAL92018.1 agla|OJJ89518.1 akaw|GAA89912.1 aluc|OJZ81757.1 anid|CBF77890.1 anig|EHA22455.1 aory|EIT72701.1 asyd|OJJ55308.1 ater|EAU30593.1 atub|OJI84328.1 aver|OJJ06918.1 awen|OJJ41315.1 azon|OJJ48789.1

Group1786: abra|OJJ68770.1 acar|OOF92255.1 acla|EAW12482.1 afis|EAW24163.1 afla|EED46770.1 afum|EAL92020.1 agla|OJJ89517.1 akaw|GAA89913.1 aluc|OJZ81756.1 anid|CBF77888.1 anig|EHA22456.1 aory|EIT72763.1 asyd|OJJ55309.1 ater|EAU30594.1 atub|OJI84327.1 aver|OJJ06917.1 awen|OJJ41314.1 azon|OJJ48788.1

Group1787: abra|OJJ68785.1 acar|OOF92269.1 acla|EAW12469.1 afis|EAW24172.1 afla|EED46757.1 afum|EAL92034.1 agla|OJJ89503.1 akaw|GAA89927.1 aluc|OJZ81743.1 anid|CBF77861.1 anig|EHA22469.1 aory|EIT72255.1 asyd|OJJ55323.1 ater|EAU30607.1 atub|OJI84314.1 aver|OJJ06905.1 awen|OJJ41300.1 azon|OJJ48774.1

Group1788: abra|OJJ68788.1 acar|OOF92272.1 acla|EAW12466.1 afis|EAW24175.1 afla|EED46754.1 afum|EAL92037.1 agla|OJJ89499.1 akaw|GAA89929.1 aluc|OJZ81740.1 anid|CBF77855.1 anig|EHA22472.1 aory|EIT72259.1 asyd|OJJ55326.1 ater|EAU30610.1 atub|OJI84311.1 aver|OJJ06902.1 awen|OJJ41295.1 azon|OJJ48771.1

Group1789: abra|OJJ68790.1 acar|OOF92274.1 acla|EAW12463.1 afis|EAW24178.1 afla|EED46751.1 afum|EAL92040.1 agla|OJJ89496.1 akaw|GAA89932.1 aluc|OJZ81736.1 anid|CBF77849.1 anig|EHA22475.1 aory|EIT72252.1 asyd|OJJ55329.1 ater|EAU30613.1 atub|OJI84308.1 aver|OJJ06899.1 awen|OJJ41291.1 azon|OJJ48765.1

Group1790: abra|OJJ68793.1 acar|OOF92278.1 acla|EAW12460.1 afis|EAW24182.1 afla|EED46749.1 afum|EAL92042.1 agla|OJJ89493.1 akaw|GAA89933.1 aluc|OJZ81734.1 anid|CBF77844.1 anig|EHA22478.1

aory|EIT72258.1 asyd|OJJ55332.1 ater|EAU30615.1 atub|OJI84305.1 aver|OJJ06896.1 awen|OJJ41288.1 azon|OJJ48762.1

Group1791: abra|OJJ68794.1 acar|OOF92277.1 acla|EAW12459.1 afis|EAW24183.1 afla|EED46748.1 afum|EAL92043.1 agla|OJJ89492.1 akaw|GAA89934.1 aluc|OJZ81733.1 anid|CBF77842.1 anig|EHA22479.1 aory|EIT72260.1 asyd|OJJ55333.1 ater|EAU30616.1 atub|OJI84304.1 aver|OJJ06895.1 awen|OJJ41287.1 azon|OJJ48769.1

Group1792: abra|OJJ68797.1 acar|OOF92281.1 acla|EAW14657.1 afis|EAW24186.1 afla|EED46746.1 afum|EAL92046.1 agla|OJJ89489.1 akaw|GAA89936.1 aluc|OJZ81730.1 anid|CBF77836.1 anig|EHA22482.1 aory|EIT72257.1 asyd|OJJ55336.1 ater|EAU30619.1 atub|OJI84301.1 aver|OJJ06891.1 awen|OJJ41284.1 azon|OJJ43704.1

Group1794: abra|OJJ68855.1 acar|OOF90533.1 acla|EAW15256.1 afis|EAW20230.1 afla|EED57124.1 afum|EAL85347.2 agla|OJJ84632.1 akaw|GAA90398.1 aluc|OJZ85833.1 anid|CBF85122.1 anig|EHA24730.1 aory|EIT74034.1 asyd|OJJ63044.1 ater|EAU32032.1 atub|OJI79621.1 aver|OJI97919.1 awen|OJJ31233.1 azon|OJJ46156.1

Group1795: abra|OJJ68856.1 acar|OOF90532.1 afla|EED57125.1 afum|EAL85346.1 agla|OJJ84633.1 akaw|GAA90397.1 aluc|OJZ85834.1 anid|CBF85120.1 anig|EHA24729.1 aory|EIT74077.1 ater|EAU32031.1 atub|OJI79622.1 aver|OJI97918.1 awen|OJJ31232.1 azon|OJJ46155.1 acla|EAW15255.1 afis|EAW20229.1 asyd|OJJ63045.1

Group1796: abra|OJJ68859.1 acar|OOF90530.1 acla|EAW15250.1 afis|EAW20218.1 afla|EED57129.1 afum|EAL85333.1 agla|OJJ84638.1 akaw|GAA90394.1 aluc|OJZ85837.1 anid|CBF85115.1 anig|EHA24726.1 aory|EIT74090.1 asyd|OJJ63049.1 ater|EAU32027.1 atub|OJI79625.1 aver|OJI97914.1 awen|OJJ31228.1 azon|OJJ46151.1

Group1797: abra|OJJ68871.1 acar|OOF89965.1 acla|EAW15248.1 afis|EAW20214.1 afla|EED57130.1 afum|EAL85331.1 agla|OJJ84640.1 akaw|GAA90383.1 aluc|OJZ85848.1 anid|CBF85111.1 anig|EHA28098.1 aory|EIT74018.1 asyd|OJJ63051.1 ater|EAU32024.1 atub|OJI79636.1 aver|OJI97912.1 awen|OJJ31220.1 azon|OJJ46137.1

Group1798: abra|OJJ68913.1 acar|OOF91500.1 acla|EAW15323.1 afis|EAW20327.1 afla|EED57093.1 afum|EAL85453.1 agla|OJJ86344.1 akaw|GAA90336.1 aluc|OJZ85896.1 anid|CBF87781.1 anig|EHA24696.1 aory|EIT82282.1 asyd|OJJ63373.1 ater|EAU32055.1 atub|OJI79681.1 aver|OJI97573.1 awen|OJJ39915.1 azon|OJJ45889.1

Group1799: abra|OJJ68918.1 acar|OOF91506.1 acla|EAW14259.1 afis|EAW19021.1 afla|EED56623.1 afum|EAL93752.1 agla|OJJ84614.1 akaw|GAA90331.1 aluc|OJZ85901.1 anid|CBF85579.1 anig|EHA24691.1 aory|EIT79672.1 asyd|OJJ64177.1 ater|EAU32063.1 atub|OJI79686.1 aver|OJI98253.1 awen|OJJ31311.1 azon|OJJ46160.1

Group1800: abra|OJJ68919.1 acar|OOF91507.1 acla|EAW14260.1 afis|EAW19020.1 afla|EED56622.1 afum|EAL93751.1 agla|OJJ84615.1 akaw|GAA90330.1 aluc|OJZ85902.1 anid|CBF85577.1 anig|EHA24690.1 aory|EIT79600.1 asyd|OJJ64178.1 ater|EAU32062.1 atub|OJI79687.1 aver|OJI98254.1 awen|OJJ31310.1 azon|OJJ46161.1

Group1801: abra|OJJ68926.1 acar|OOF91512.1 acla|EAW14248.1 afis|EAW19032.1 afla|EED50385.1 afum|EAL93761.1 agla|OJJ84590.1 akaw|GAA90322.1 aluc|OJZ85911.1 anid|CBF79596.1 anig|EHA24681.1 aory|EIT83141.1 asyd|OJJ57985.1 ater|EAU32071.1 atub|OJI79701.1 aver|OJJ04415.1 awen|OJJ31461.1 azon|OJJ46163.1

Group1803: abra|OJJ68932.1 acar|OOF91515.1 acla|EAW14247.1 afis|EAW19033.1 afla|EED50387.1 afum|EAL93762.2 agla|OJJ84588.1 akaw|GAA90317.1 aluc|OJZ85916.1 anid|CBF79600.1 anig|EHA24675.1 aory|EIT83129.1 asyd|OJJ57990.1 ater|EAU32073.1 atub|OJI79707.1 aver|OJJ04412.1 awen|OJJ31463.1 azon|OJJ46164.1

Group1804: abra|OJJ68933.1 acar|OOF91516.1 acla|EAW14246.1 afla|EED50389.1 agla|OJJ84587.1 akaw|GAA90316.1 aluc|OJZ85917.1 anig|EHA24674.1 aory|EIT83117.1 asyd|OJJ57991.1 ater|EAU32074.1 atub|OJI79710.1 aver|OJJ04411.1 awen|OJJ31464.1 azon|OJJ46166.1 afum|EAL93763.1 anid|CBF79601.1 afis|EAW19034.1

Group1805: abra|OJJ68937.1 acar|OOF91518.1 acla|EAW14243.1 afis|EAW19037.1 afla|EED50391.1 afum|EAL93766.1 agla|OJJ84584.1 akaw|GAA90314.1 aluc|OJZ85922.1 anid|CBF79605.1 anig|EHA24672.1 aory|EIT82128.1 asyd|OJJ57993.1 ater|EAU32076.1 atub|OJI79712.1 aver|OJJ04409.1 awen|OJJ31466.1 azon|OJJ46169.1

Group1806: abra|OJJ68941.1 acar|OOF91521.1 acla|EAW14242.1 afis|EAW19038.1 afla|EED50393.1 afum|EAL93767.1 agla|OJJ84582.1 akaw|GAA90312.1 aluc|OJZ85927.1 anid|CBF79609.1 anig|EHA24670.1 aory|EIT82042.1 asyd|OJJ57994.1 ater|EAU32077.1 atub|OJI79716.1 aver|OJJ04408.1 awen|OJJ31468.1 azon|OJJ46172.1



Group1807: abra|OJJ68943.1 acar|OOF91522.1 acla|EAW14241.1 afis|EAW19039.1 afla|EED50394.1 afum|EAL93768.1 agla|OJJ84573.1 akaw|GAA90310.1 aluc|OJZ85929.1 anid|CBF79610.1 anig|EHA24669.1 aory|EIT82167.1 asyd|OJJ57995.1 ater|EAU32078.1 atub|OJI79717.1 aver|OJJ04407.1 awen|OJJ31469.1 azon|OJJ46173.1

Group1808: abra|OJJ68944.1 acar|OOF91524.1 acla|EAW14239.1 afis|EAW19041.1 afla|EED50396.1 afum|EAL93770.1 agla|OJJ84564.1 akaw|GAA90309.1 aluc|OJZ85930.1 anid|CBF79612.1 anig|EHA24667.1 aory|EIT82062.1 asyd|OJJ57999.1 ater|EAU32080.1 atub|OJI79719.1 aver|OJJ04403.1 awen|OJJ31470.1 azon|OJJ46179.1

Group1809: abra|OJJ68945.1 acar|OOF91525.1 acla|EAW14238.1 afis|EAW19042.1 afla|EED50397.1 afum|EAL93771.1 agla|OJJ84563.1 akaw|GAA90308.1 aluc|OJZ85931.1 anid|CBF79613.1 anig|EHA24666.1 aory|EIT82121.1 asyd|OJJ57998.1 ater|EAU32081.1 atub|OJI79720.1 aver|OJJ04404.1 awen|OJJ31471.1 azon|OJJ46181.1

Group1810: abra|OJJ68948.1 acar|OOF91526.1 acla|EAW14236.1 afis|EAW19044.1 afla|EED50401.1 afum|EAL93773.1 agla|OJJ84561.1 akaw|GAA90306.1 aluc|OJZ85934.1 anig|EHA24664.1 aory|EIT82075.1 ater|EAU32083.1 atub|OJI79723.1 azon|OJJ46184.1 anid|CBF79617.1 asyd|OJJ58000.1 aver|OJJ04402.1 awen|OJJ31473.1

Group1811: abra|OJJ68949.1 acar|OOF91527.1 acla|EAW14235.1 afis|EAW19045.1 afla|EED50402.1 afum|EAL93774.1 agla|OJJ84560.1 akaw|GAA90305.1 aluc|OJZ85935.1 anid|CBF79619.1 anig|EHA24663.1 aory|EIT82000.1 asyd|OJJ58001.1 ater|EAU32084.1 atub|OJI79724.1 aver|OJJ04400.1 awen|OJJ31474.1 azon|OJJ46188.1

Group1812: abra|OJJ68952.1 acar|OOF91530.1 acla|EAW14234.1 afis|EAW19046.1 afla|EED50405.1 afum|EAL93775.1 agla|OJJ84559.1 akaw|GAA90481.1 aluc|OJZ85938.1 anid|CBF79621.1 anig|EHA24661.1 aory|EIT82119.1 asyd|OJJ58003.1 ater|EAU32085.1 atub|OJI79726.1 aver|OJJ04398.1 awen|OJJ31475.1 azon|OJJ46189.1

Group1813: abra|OJJ68953.1 acar|OOF91531.1 acla|EAW14233.1 afis|EAW19047.1 afla|EED50406.1 afum|EAL93776.1 agla|OJJ84558.1 akaw|GAA90482.1 aluc|OJZ85939.1 anid|CBF79622.1 anig|EHA24660.1 aory|EIT82158.1 asyd|OJJ58004.1 ater|EAU32086.1 atub|OJI79727.1 aver|OJJ04397.1 awen|OJJ31477.1 azon|OJJ46190.1

Group1814: abra|OJJ68956.1 acar|OOF91535.1 acla|EAW14229.1 afis|EAW19052.1 afla|EED54409.1 afum|EAL93781.1 agla|OJJ84555.1 akaw|GAA90484.1 aluc|OJZ85942.1 anid|CBF79627.1 anig|EHA24657.1 aory|EIT75857.1 asyd|OJJ58009.1 ater|EAU32089.1 atub|OJI79730.1 aver|OJJ04391.1 awen|OJJ31483.1 azon|OJJ46193.1

Group1815: abra|OJJ68957.1 acar|OOF91534.1 acla|EAW14228.1 afis|EAW19053.1 afla|EED54411.1 afum|EAL93782.1 agla|OJJ84554.1 akaw|GAA90485.1 aluc|OJZ85943.1 anid|CBF79628.1 anig|EHA24656.1 aory|EIT75871.1 asyd|OJJ58010.1 ater|EAU32090.1 atub|OJI79731.1 aver|OJJ04390.1 awen|OJJ31484.1 azon|OJJ46194.1

Group1816: abra|OJJ68959.1 acar|OOF91537.1 acla|EAW14226.1 afis|EAW19055.1 afla|EED54413.1 afum|EAL93784.1 agla|OJJ84552.1 akaw|GAA90487.1 aluc|OJZ85945.1 anid|CBF79630.1 anig|EHA24654.1 aory|EIT75877.1 asyd|OJJ58012.1 ater|EAU32091.1 atub|OJI79733.1 aver|OJJ04388.1 awen|OJJ31486.1 azon|OJJ46196.1

Group1817: abra|OJJ68960.1 acar|OOF91538.1 acla|EAW14225.1 afis|EAW19056.1 afla|EED54414.1 afum|EAL93785.1 agla|OJJ84551.1 akaw|GAA90488.1 aluc|OJZ85946.1 anid|CBF79632.1 anig|EHA24653.1 aory|EIT75852.1 asyd|OJJ58013.1 ater|EAU32092.1 atub|OJI79734.1 aver|OJJ04387.1 awen|OJJ31487.1 azon|OJJ46197.1

Group1818: abra|OJJ68961.1 acar|OOF91539.1 acla|EAW14224.1 afis|EAW19057.1 afla|EED54415.1 afum|EAL93786.1 agla|OJJ84550.1 akaw|GAA90489.1 aluc|OJZ85947.1 anid|CBF79634.1 anig|EHA24652.1 aory|EIT75893.1 asyd|OJJ58014.1 ater|EAU32093.1 atub|OJI79735.1 aver|OJJ04386.1 awen|OJJ31488.1 azon|OJJ46199.1

Group1819: abra|OJJ68963.1 acar|OOF91541.1 acla|EAW14223.1 afis|EAW19058.1 afla|EED54418.1 afum|EAL93787.1 agla|OJJ84549.1 akaw|GAA90491.1 aluc|OJZ85950.1 anid|CBF79638.1 anig|EHA24650.1 aory|EIT75892.1 asyd|OJJ58015.1 ater|EAU32094.1 atub|OJI79738.1 aver|OJJ04385.1 awen|OJJ31489.1 azon|OJJ46201.1

Group1820: abra|OJJ68965.1 acar|OOF91542.1 acla|EAW14222.1 afis|EAW19059.1 afla|EED54421.1 afum|EAL93788.1 agla|OJJ84548.1 akaw|GAA90492.1 aluc|OJZ85952.1 anid|CBF79639.1 anig|EHA24649.1 aory|EIT75888.1 asyd|OJJ58016.1 ater|EAU32095.1 atub|OJI79740.1 aver|OJJ04384.1 awen|OJJ31490.1 azon|OJJ46202.1

Group1821: abra|OJJ68966.1 acar|OOF91544.1 acla|EAW14221.1 afis|EAW19060.1 afla|EED54422.1 afum|EAL93789.1 agla|OJJ84547.1 akaw|GAA90493.1 aluc|OJZ85953.1 anid|CBF79640.1 anig|EHA24648.1

aory|EIT75846.1 asyd|OJJ58017.1 ater|EAU32098.1 atub|OJI79741.1 aver|OJJ04382.1 awen|OJJ31491.1 azon|OJJ46203.1

Group1822: abra|OJJ68967.1 acar|OOF91545.1 acla|EAW14220.1 afis|EAW19061.1 afla|EED54423.1 afum|EAL93790.1 agla|OJJ84546.1 akaw|GAA90494.1 aluc|OJZ85954.1 anid|CBF79641.1 anig|EHA24647.1 aory|EIT75876.1 asyd|OJJ58018.1 ater|EAU32099.1 atub|OJI79742.1 aver|OJJ04381.1 awen|OJJ31492.1 azon|OJJ46204.1

Group1823: abra|OJJ68968.1 acar|OOF91546.1 acla|EAW14219.1 afis|EAW19062.1 afla|EED54428.1 afum|EAL93791.1 agla|OJJ84545.1 akaw|GAA90495.1 aluc|OJZ85955.1 anid|CBF79643.1 anig|EHA24646.1 aory|EIT75878.1 asyd|OJJ58019.1 ater|EAU32105.1 atub|OJI79743.1 aver|OJJ04380.1 awen|OJJ31493.1 azon|OJJ46206.1

Group1824: abra|OJJ68970.1 acar|OOF91547.1 acla|EAW14217.1 afis|EAW19064.1 afla|EED54430.1 afum|EAL93793.2 agla|OJJ84543.1 akaw|GAA90497.1 aluc|OJZ85957.1 anid|CBF79646.1 anig|EHA24644.1 aory|EIT75886.1 asyd|OJJ58021.1 ater|EAU32107.1 atub|OJI79745.1 aver|OJJ04378.1 awen|OJJ31496.1 azon|OJJ46208.1

Group1825: abra|OJJ68973.1 acar|OOF91550.1 acla|EAW14214.1 afis|EAW19067.1 afla|EED54433.1 afum|EAL93796.1 agla|OJJ84539.1 akaw|GAA90500.1 aluc|OJZ85962.1 anid|CBF79652.1 anig|EHA24641.1 aory|EIT75842.1 asyd|OJJ58025.1 ater|EAU32115.1 atub|OJI79749.1 aver|OJJ04374.1 awen|OJJ31499.1 azon|OJJ46213.1

Group1826: abra|OJJ68978.1 acar|OOF91553.1 acla|EAW14210.1 afis|EAW19071.1 afla|EED54436.1 afum|EAL93799.1 agla|OJJ84534.1 akaw|GAA90503.1 aluc|OJZ85966.1 anid|CBF79663.1 anig|EHA24638.1 aory|EIT75872.1 asyd|OJJ58028.1 ater|EAU32119.1 atub|OJI79754.1 aver|OJJ04371.1 awen|OJJ31503.1 azon|OJJ46218.1

Group1827: abra|OJJ68982.1 acar|OOF91554.1 acla|EAW14209.1 afis|EAW19072.1 afla|EED54437.1 afum|EAL93800.1 agla|OJJ84532.1 akaw|GAA90504.1 aluc|OJZ85968.1 anid|CBF79661.1 anig|EHA24637.1 aory|EIT75860.1 asyd|OJJ58029.1 ater|EAU32120.1 atub|OJI79756.1 aver|OJJ04370.1 awen|OJJ32466.1 azon|OJJ46219.1

Group1828: abra|OJJ68984.1 acar|OOF91555.1 acla|EAW14207.1 afis|EAW19074.1 afla|EED54439.1 afum|EAL93802.1 agla|OJJ84529.1 akaw|GAA90506.1 aluc|OJZ85970.1 anid|CBF79667.1 anig|EHA24635.1 aory|EIT75870.1 asyd|OJJ58031.1 ater|EAU32122.1 atub|OJI79758.1 aver|OJJ04368.1 awen|OJJ32468.1 azon|OJJ46238.1

Group1829: abra|OJJ68991.1 acar|OOF92703.1 acla|EAW12643.1 afis|EAW18042.1 afla|EED51854.1 afum|EAL91853.1 agla|OJJ85414.1 akaw|GAA90511.1 aluc|OJZ85976.1 anid|CBF80097.1 anig|EHA24630.1 aory|EIT81766.1 asyd|OJJ58299.1 ater|EAU31557.1 atub|OJI79766.1 aver|OJJ02125.1 awen|OJJ41492.1 azon|OJJ48223.1

Group1830: abra|OJJ68994.1 acar|OOF92705.1 acla|EAW12645.1 afis|EAW18040.1 afla|EED51857.1 afum|EAL91851.1 agla|OJJ85412.1 akaw|GAA90513.1 aluc|OJZ85978.1 anid|CBF80103.1 anig|EHA24628.1 aory|EIT81744.1 asyd|OJJ58296.1 ater|EAU31555.1 atub|OJI79768.1 aver|OJJ02128.1 awen|OJJ41497.1 azon|OJJ48225.1

Group1831: abra|OJJ68996.1 acar|OOF92707.1 acla|EAW12647.1 afis|EAW18038.1 afla|EED51860.1 afum|EAL91849.1 agla|OJJ85410.1 akaw|GAA90515.1 aluc|OJZ85980.1 anid|CBF80073.1 anig|EHA24626.1 aory|EIT81689.1 asyd|OJJ58294.1 ater|EAU31552.1 atub|OJI79770.1 aver|OJJ02130.1 awen|OJJ41499.1 azon|OJJ48227.1

Group1832: abra|OJJ68997.1 acar|OOF92708.1 acla|EAW12648.1 afis|EAW18037.1 afla|EED51861.1 afum|EAL91848.1 agla|OJJ85409.1 akaw|GAA90516.1 aluc|OJZ85981.1 anid|CBF80074.1 anig|EHA24625.1 aory|EIT81730.1 asyd|OJJ58293.1 ater|EAU31551.1 atub|OJI79771.1 aver|OJJ02131.1 awen|OJJ41500.1 azon|OJJ48228.1

Group1833: abra|OJJ69004.1 acar|OOF92717.1 acla|EAW12855.1 afis|EAW18018.1 afla|EED51873.1 afum|EAL91830.1 agla|OJJ85372.1 akaw|GAA90522.1 aluc|OJZ85990.1 anid|CBF80052.1 anig|EHA24620.1 aory|EIT81725.1 asyd|OJJ58280.1 ater|EAU31534.1 atub|OJI79779.1 aver|OJJ02143.1 awen|OJJ41521.1 azon|OJJ48243.1

Group1834: abra|OJJ69005.1 acar|OOF92718.1 acla|EAW12854.1 afla|EED51874.1 afum|EAL91829.1 akaw|GAA90523.1 aluc|OJZ85991.1 anig|EHA24619.1 aory|EIT81686.1 ater|EAU31533.1 atub|OJI79780.1 afis|EAW18017.1 asyd|OJJ58279.1 aver|OJJ02144.1 awen|OJJ41522.1 agla|OJJ85371.1 anid|CBF80050.1 azon|OJJ48244.1

Group1835: abra|OJJ69008.1 acar|OOF92719.1 acla|EAW12850.1 afis|EAW18013.1 afla|EED51883.1 afum|EAL91825.1 agla|OJJ80286.1 akaw|GAA90525.1 aluc|OJZ85994.1 anid|CBF80040.1 anig|EHA24616.1 aory|EIT81726.1 asyd|OJJ58275.1 ater|EAU31529.1 atub|OJI79782.1 aver|OJJ02149.1 awen|OJJ41528.1 azon|OJJ48248.1

Group1836: abra|OJJ69010.1 acar|OOF92721.1 acla|EAW12848.1 afis|EAW18011.1 afla|EED51885.1 afum|EAL91823.1 agla|OJJ80283.1 akaw|GAA90527.1 aluc|OJZ85996.1 anid|CBF80037.1 anig|EHA24614.1 aory|EIT81760.1 asyd|OJJ58273.1 ater|EAU31527.1 atub|OJI79784.1 aver|OJJ02151.1 awen|OJJ41530.1 azon|OJJ48250.1

Group1837: azon|OJJ51098.1 abra|OJJ74349.1 acar|OOF95381.1 acla|EAW07403.1 afis|EAW22429.1 afla|EED52507.1 afum|EAL90762.1 agla|OJJ87594.1 akaw|GAA86681.1 aluc|OJZ89781.1 anid|CBF88824.1 anig|EHA26996.1 aory|EIT82792.1 asyd|OJJ62884.1 ater|EAU39278.1 atub|OJI85025.1 aver|OJI96936.1 awen|OJJ35008.1

Group1838: abra|OJJ69024.1 acar|OOF92985.1 acla|EAW06466.1 afis|EAW15961.1 afla|EED58096.1 afum|EAL88594.1 agla|OJJ89351.1 akaw|GAA90541.1 aluc|OJZ86011.1 anid|CBF81079.1 anig|EHA24600.1 aory|EIT79116.1 asyd|OJJ56463.1 ater|EAU35493.1 atub|OJI79800.1 aver|OJJ06258.1 awen|OJJ35613.1 azon|OJJ46911.1

Group1839: abra|OJJ69026.1 acar|OOF92660.1 acla|EAW12556.1 afis|EAW24095.1 afla|EED46839.1 afum|EAL91949.1 agla|OJJ87168.1 akaw|GAA92787.1 aluc|OJZ82696.1 anid|CBF75138.1 anig|EHA21145.1 aory|EIT72775.1 asyd|OJJ59978.1 ater|EAU30520.1 atub|OJI88928.1 aver|OJJ02313.1 awen|OJJ41395.1 azon|OJJ48863.1

Group1840: abra|OJJ69029.1 acar|OOF92658.1 acla|EAW10072.1 afis|EAW25514.1 afla|EED54015.1 afum|EAL90179.1 agla|OJJ87289.1 akaw|GAA90545.1 aluc|OJZ86015.1 anid|CBF77783.1 anig|EHA24596.1 aory|EIT78264.1 asyd|OJJ53030.1 ater|EAU33360.1 atub|OJI79804.1 aver|OJJ03814.1 awen|OJJ41257.1 azon|OJJ44822.1

Group1841: abra|OJJ69034.1 acar|OOF89828.1 acla|EAW08636.1 afis|EAW15795.1 afla|EED51250.1 afum|EAL85555.1 agla|OJJ81958.1 akaw|GAA90549.1 aluc|OJZ86019.1 anid|CBF70929.1 anig|EHA24592.1 aory|EIT81525.1 asyd|OJJ52611.1 ater|EAU32347.1 atub|OJI79808.1 aver|OJJ04638.1 awen|OJJ38503.1 azon|OJJ43748.1

Group1842: abra|OJJ69036.1 acar|OOF92649.1 acla|EAW12687.1 afis|EAW17850.1 afla|EED46204.1 afum|EAL91659.1 agla|OJJ83119.1 akaw|GAA90551.1 aluc|OJZ86021.1 anid|CBF77960.1 anig|EHA24590.1 aory|EIT76404.1 asyd|OJJ55272.1 ater|EAU33052.1 atub|OJI79810.1 aver|OJJ06955.1 awen|OJJ41723.1 azon|OJJ48421.1

Group1843: abra|OJJ69037.1 acar|OOF92647.1 acla|EAW14104.1 afis|EAW18805.1 afla|EED50771.1 afum|EAL93541.1 agla|OJJ80535.1 akaw|GAA90552.1 aluc|OJZ86022.1 anid|CBF88044.1 anig|EHA24589.1 aory|EIT78003.1 asyd|OJJ63545.1 ater|EAU37943.1 atub|OJI79811.1 aver|OJI97389.1 awen|OJJ32380.1 azon|OJJ47142.1

Group1844: abra|OJJ69038.1 acar|OOF92646.1 acla|EAW06768.1 afis|EAW16318.1 afla|EED53563.1 afum|EAL88942.1 agla|OJJ88279.1 akaw|GAA90553.1 aluc|OJZ86023.1 anid|CBF89147.1 anig|EHA24588.1 aory|EIT74896.1 asyd|OJJ62568.1 ater|EAU34139.1 atub|OJI79812.1 aver|OJI96692.1 awen|OJJ37718.1 azon|OJJ44975.1

Group1845: abra|OJJ69039.1 acar|OOF92645.1 acla|EAW11330.1 afis|EAW18165.1 afla|EED53435.1 afum|EAL87525.2 agla|OJJ85953.1 akaw|GAA90554.1 aluc|OJZ86024.1 anid|CBF85751.1 anig|EHA24587.1 aory|EIT74836.1 asyd|OJJ64296.1 ater|EAU36013.1 atub|OJI79813.1 aver|OJI98389.1 awen|OJJ30512.1 azon|OJJ50291.1

Group1846: abra|OJJ69057.1 acar|OOF91226.1 acla|EAW08757.1 afis|EAW15674.1 afla|EED46856.1 afum|EAL85673.1 agla|OJJ81821.1 akaw|GAA90587.1 aluc|OJZ86045.1 anid|CBF71161.1 anig|EHA24566.1 aory|EIT72754.1 asyd|OJJ55844.1 ater|EAU32486.1 atub|OJI79842.1 aver|OJJ04787.1 awen|OJJ38352.1 azon|OJJ42790.1

Group1847: abra|OJJ69058.1 acar|OOF91225.1 acla|EAW08756.1 afis|EAW15673.1 afla|EED46857.1 afum|EAL85675.1 agla|OJJ81820.1 akaw|GAA90588.1 aluc|OJZ86046.1 anid|CBF71163.1 anig|EHA24565.1 aory|EIT72609.1 asyd|OJJ55845.1 ater|EAU32487.1 atub|OJI79843.1 aver|OJJ04788.1 awen|OJJ38351.1 azon|OJJ42791.1

Group1848: abra|OJJ69064.1 acar|OOF91219.1 acla|EAW08760.1 afis|EAW15668.1 afla|EED46876.1 afum|EAL85680.1 agla|OJJ81806.1 akaw|GAA90594.1 aluc|OJZ86052.1 anid|CBF71174.1 anig|EHA24559.1 aory|EIT72756.1 asyd|OJJ55853.1 ater|EAU32503.1 atub|OJI79849.1 aver|OJJ04796.1 awen|OJJ38344.1 azon|OJJ43043.1

Group1849: abra|OJJ69065.1 acar|OOF91218.1 acla|EAW08759.1 afis|EAW15667.1 afla|EED46877.1 afum|EAL85681.1 agla|OJJ81805.1 akaw|GAA90595.1 aluc|OJZ86053.1 anid|CBF71176.1 anig|EHA24558.1 aory|EIT72761.1 asyd|OJJ55854.1 ater|EAU32504.1 atub|OJI79850.1 aver|OJJ04797.1 awen|OJJ38343.1 azon|OJJ43042.1

Group1850: abra|OJJ69071.1 acar|OOF91231.1 acla|EAW08767.1 afis|EAW15663.1 afla|EED46886.1 afum|EAL85685.1 agla|OJJ81785.1 akaw|GAA90602.1 aluc|OJZ86060.1 anid|CBF71180.1 anig|EHA24553.1

aory|EIT72594.1 asyd|OJJ55862.1 ater|EAU32510.1 atub|OJI79857.1 aver|OJJ04803.1 awen|OJJ38339.1 azon|OJJ43024.1

Group1852: abra|OJJ69080.1 acar|OOF91211.1 acla|EAW08754.1 afis|EAW15682.1 afla|EED51372.1 afum|EAL85666.1 agla|OJJ81831.1 akaw|GAA90609.1 aluc|OJZ86068.1 anid|CBF71152.1 anig|EHA24546.1 aory|EIT80462.1 asyd|OJJ55839.1 ater|EAU32475.1 atub|OJI79864.1 aver|OJJ04782.1 awen|OJJ38374.1 azon|OJJ43858.1

Group1853: abra|OJJ69081.1 acar|OOF91210.1 acla|EAW08753.1 afis|EAW15683.1 afla|EED51371.1 afum|EAL85665.1 agla|OJJ81832.1 akaw|GAA90610.1 aluc|OJZ86069.1 anid|CBF71150.1 anig|EHA24545.1 aory|EIT80441.1 asyd|OJJ55838.1 ater|EAU32474.1 atub|OJI79865.1 aver|OJJ04781.1 awen|OJJ38375.1 azon|OJJ43859.1

Group1854: abra|OJJ69084.1 acar|OOF91208.1 acla|EAW08750.1 afis|EAW15686.1 afla|EED51368.1 afum|EAL85662.1 agla|OJJ81834.1 akaw|GAA90613.1 aluc|OJZ86071.1 anid|CBF71144.1 anig|EHA24543.1 aory|EIT80616.1 asyd|OJJ55836.1 ater|EAU32467.1 atub|OJI79868.1 aver|OJJ04779.1 awen|OJJ38377.1 azon|OJJ43861.1

Group1855: abra|OJJ69089.1 acar|OOF91204.1 acla|EAW08743.1 afis|EAW15693.1 afla|EED51360.1 afum|EAL85655.1 agla|OJJ81840.1 akaw|GAA90618.1 aluc|OJZ86078.1 anid|CBF71129.1 anig|EHA24538.1 aory|EIT80527.1 asyd|OJJ55829.1 ater|EAU32462.1 atub|OJI79875.1 aver|OJJ04771.1 awen|OJJ38384.1 azon|OJJ43853.1

Group1856: abra|OJJ69090.1 acar|OOF91203.1 acla|EAW08742.1 afis|EAW15694.1 afla|EED51359.1 afum|EAL85654.1 agla|OJJ81841.1 akaw|GAA90619.1 aluc|OJZ86079.1 anid|CBF71127.1 anig|EHA24537.1 aory|EIT80431.1 asyd|OJJ55828.1 ater|EAU32461.1 atub|OJI79876.1 aver|OJJ04770.1 awen|OJJ38385.1 azon|OJJ43852.1

Group1857: abra|OJJ69091.1 acar|OOF91202.1 acla|EAW08741.1 afis|EAW15695.1 afla|EED51358.1 afum|EAL85653.1 agla|OJJ81842.1 akaw|GAA90620.1 aluc|OJZ86080.1 anid|CBF71119.1 anig|EHA24535.1 aory|EIT80729.1 asyd|OJJ55827.1 ater|EAU32460.1 atub|OJI79877.1 aver|OJJ04769.1 awen|OJJ38386.1 azon|OJJ43850.1

Group1858: abra|OJJ69093.1 acar|OOF91201.1 acla|EAW08740.1 afis|EAW15696.1 afla|EED51357.1 afum|EAL85652.2 agla|OJJ81850.1 akaw|GAA90621.1 aluc|OJZ86081.1 anid|CBF71121.1 anig|EHA24534.1 aory|EIT80641.1 asyd|OJJ55826.1 ater|EAU32455.1 atub|OJI79878.1 aver|OJJ04768.1 awen|OJJ38389.1 azon|OJJ43849.1

Group1859: abra|OJJ69094.1 acar|OOF91200.1 acla|EAW08737.1 afis|EAW15699.1 afla|EED51353.1 afum|EAL85649.1 agla|OJJ81849.1 akaw|GAA90622.1 aluc|OJZ86083.1 anid|CBF71123.1 anig|EHA24532.1 aory|EIT80448.1 asyd|OJJ55825.1 ater|EAU32452.1 atub|OJI79879.1 aver|OJJ04767.1 awen|OJJ38391.1 azon|OJJ43847.1

Group1860: abra|OJJ69099.1 acar|OOF91197.1 acla|EAW08734.1 afis|EAW15702.1 afla|EED51349.1 afum|EAL85645.1 agla|OJJ81844.1 akaw|GAA90625.1 aluc|OJZ86088.1 anid|CBF71108.1 anig|EHA24529.1 aory|EIT80559.1 asyd|OJJ52712.1 ater|EAU32442.1 atub|OJI79884.1 aver|OJJ04741.1 awen|OJJ38396.1 azon|OJJ43845.1

Group1861: abra|OJJ69100.1 acar|OOF91196.1 acla|EAW08733.1 afis|EAW15707.1 afla|EED51348.1 afum|EAL85640.1 agla|OJJ81851.1 akaw|GAA90626.1 aluc|OJZ86089.1 anid|CBF71106.1 anig|EHA24528.1 aory|EIT80499.1 asyd|OJJ52711.1 atub|OJI79885.1 aver|OJJ04740.1 awen|OJJ38397.1 ater|EAU32441.1 azon|OJJ43844.1

Group1862: abra|OJJ69104.1 acar|OOF91194.1 acla|EAW08728.1 afis|EAW15703.1 afla|EED51345.1 afum|EAL85644.1 agla|OJJ81855.1 akaw|GAA90629.1 aluc|OJZ86092.1 anid|CBF71100.1 anig|EHA24525.1 aory|EIT80418.1 asyd|OJJ52707.1 ater|EAU32438.1 atub|OJI79888.1 aver|OJJ04736.1 awen|OJJ38402.1 azon|OJJ43841.1

Group1863: abra|OJJ69108.1 acar|OOF91181.1 acla|EAW08724.1 afis|EAW15732.1 afla|EED51341.1 afum|EAL85615.2 agla|OJJ81861.1 akaw|GAA90633.1 aluc|OJZ86096.1 anid|CBF71094.1 anig|EHA24522.1 aory|EIT81523.1 asyd|OJJ52704.1 ater|EAU32434.1 atub|OJI79892.1 aver|OJJ04733.1 awen|OJJ38406.1 azon|OJJ43836.1

Group1864: abra|OJJ69110.1 acar|OOF91184.1 acla|EAW08722.1 afis|EAW15730.1 afla|EED51339.1 afum|EAL85617.1 agla|OJJ81864.1 akaw|GAA90635.1 aluc|OJZ86098.1 anid|CBF71090.1 anig|EHA24520.1 aory|EIT81546.1 asyd|OJJ52701.1 ater|EAU32432.1 atub|OJI79894.1 aver|OJJ04729.1 awen|OJJ38409.1 azon|OJJ43833.1

Group1865: abra|OJJ69113.1 acar|OOF91185.1 acla|EAW08719.1 afis|EAW15728.1 afla|EED51335.1 afum|EAL85619.1 agla|OJJ81867.1 akaw|GAA90638.1 aluc|OJZ86102.1 anid|CBF71085.1 anig|EHA24517.1 aory|EIT81524.1 asyd|OJJ52698.1 ater|EAU32430.1 atub|OJI79897.1 aver|OJJ04726.1 awen|OJJ38412.1 azon|OJJ43830.1

Group1866: abra|OJJ69116.1 acar|OOF91188.1 acla|EAW08716.1 afis|EAW15724.1 afla|EED51332.1 afum|EAL85623.1 agla|OJJ81870.1 akaw|GAA90641.1 aluc|OJZ86105.1 anid|CBF71079.1 anig|EHA24515.1 aory|EIT81503.1 asyd|OJJ52695.1 ater|EAU32427.1 atub|OJI79900.1 aver|OJJ04723.1 awen|OJJ38415.1 azon|OJJ43827.1

Group1867: abra|OJJ69119.1 acar|OOF91191.1 acla|EAW08713.1 afis|EAW15721.1 afla|EED51329.1 afum|EAL85626.1 agla|OJJ81873.1 akaw|GAA90644.1 aluc|OJZ86108.1 anid|CBF71075.1 anig|EHA24513.1 aory|EIT81515.1 asyd|OJJ52692.1 ater|EAU32424.1 atub|OJI79903.1 aver|OJJ04720.1 awen|OJJ38418.1 azon|OJJ43824.1

Group1868: abra|OJJ69120.1 acar|OOF91192.1 acla|EAW08712.1 afis|EAW15720.1 afla|EED51328.1 afum|EAL85628.1 agla|OJJ81874.1 akaw|GAA90645.1 aluc|OJZ86109.1 anid|CBF71073.1 anig|EHA24512.1 aory|EIT81554.1 asyd|OJJ52691.1 ater|EAU32423.1 atub|OJI79904.1 aver|OJJ04719.1 awen|OJJ38419.1 azon|OJJ43823.1

Group1869: abra|OJJ69121.1 acar|OOF91193.1 acla|EAW08711.1 afis|EAW15719.1 afla|EED51327.1 afum|EAL85629.2 agla|OJJ81875.1 akaw|GAA90646.1 aluc|OJZ86110.1 anid|CBF71071.1 anig|EHA24511.1 aory|EIT81517.1 asyd|OJJ52690.1 ater|EAU32420.1 atub|OJI79905.1 aver|OJJ04718.1 awen|OJJ38420.1 azon|OJJ43822.1

Group1870: abra|OJJ69122.1 acar|OOF91178.1 acla|EAW08710.1 afis|EAW15718.1 afla|EED51326.1 afum|EAL85630.2 agla|OJJ81877.1 akaw|GAA90647.1 aluc|OJZ86111.1 anid|CBF71070.1 anig|EHA24510.1 aory|EIT81526.1 asyd|OJJ52689.1 ater|EAU32421.1 atub|OJI79906.1 aver|OJJ04717.1 awen|OJJ38421.1 azon|OJJ43821.1

Group1871: abra|OJJ69123.1 acar|OOF91177.1 acla|EAW08709.1 afis|EAW15717.1 afla|EED51325.1 afum|EAL85631.1 agla|OJJ81878.1 akaw|GAA90648.1 aluc|OJZ86112.1 anid|CBF71068.1 anig|EHA24509.1 aory|EIT81505.1 asyd|OJJ52688.1 ater|EAU32422.1 atub|OJI79907.1 aver|OJJ04716.1 awen|OJJ38422.1 azon|OJJ43820.1

Group1872: abra|OJJ69125.1 acar|OOF91175.1 acla|EAW08707.1 afis|EAW15715.1 afla|EED51323.1 afum|EAL85633.1 agla|OJJ81886.1 akaw|GAA90650.1 aluc|OJZ86114.1 anid|CBF71064.1 anig|EHA24507.1 aory|EIT81539.1 asyd|OJJ52685.1 ater|EAU32419.1 atub|OJI79909.1 aver|OJJ04713.1 awen|OJJ38425.1 azon|OJJ43818.1

Group1873: abra|OJJ69126.1 acar|OOF91174.1 acla|EAW08706.1 afis|EAW15714.1 afla|EED51322.1 afum|EAL85634.1 agla|OJJ81887.1 akaw|GAA90651.1 aluc|OJZ86115.1 anid|CBF71058.1 anig|EHA24506.1 aory|EIT81529.1 asyd|OJJ52680.1 ater|EAU32418.1 atub|OJI79910.1 aver|OJJ04706.1 awen|OJJ38426.1 azon|OJJ43817.1

Group1874: abra|OJJ69127.1 acar|OOF91173.1 acla|EAW08705.1 afis|EAW15713.1 afla|EED51321.1 afum|EAL85635.1 agla|OJJ81888.1 akaw|GAA90652.1 aluc|OJZ86116.1 anid|CBF71060.1 anig|EHA24505.1 aory|EIT81530.1 asyd|OJJ52679.1 ater|EAU32417.1 atub|OJI79911.1 aver|OJJ04705.1 awen|OJJ38427.1 azon|OJJ43816.1

Group1875: abra|OJJ69128.1 acar|OOF91172.1 acla|EAW08704.1 afis|EAW15712.1 afla|EED51320.1 afum|EAL85636.1 agla|OJJ81889.1 akaw|GAA90653.1 aluc|OJZ86117.1 anid|CBF71057.1 anig|EHA24504.1 aory|EIT81550.1 asyd|OJJ52678.1 ater|EAU32416.1 atub|OJI79912.1 aver|OJJ04704.1 awen|OJJ38428.1 azon|OJJ43815.1

Group1876: abra|OJJ69131.1 acar|OOF91169.1 acla|EAW08701.1 afis|EAW15709.1 afla|EED51317.1 afum|EAL85638.1 agla|OJJ81892.1 akaw|GAA90656.1 aluc|OJZ86120.1 anid|CBF71053.1 anig|EHA24501.1 aory|EIT81516.1 asyd|OJJ52675.1 ater|EAU32414.1 atub|OJI79916.1 aver|OJJ04701.1 awen|OJJ38431.1 azon|OJJ43812.1

Group1877: abra|OJJ69132.1 acar|OOF91168.1 acla|EAW08700.1 afis|EAW15708.1 afla|EED51316.1 afum|EAL85639.1 agla|OJJ81893.1 akaw|GAA90657.1 aluc|OJZ86121.1 anid|CBF71051.1 anig|EHA24500.1 aory|EIT81557.1 asyd|OJJ52674.1 ater|EAU32413.1 atub|OJI79917.1 aver|OJJ04700.1 awen|OJJ38432.1 azon|OJJ43811.1

Group1878: abra|OJJ69136.1 acar|OOF91164.1 acla|EAW08697.1 afis|EAW15738.1 afla|EED51314.1 afum|EAL85610.1 agla|OJJ81895.1 akaw|GAA86320.1 aluc|OJZ86124.1 anid|CBF71047.1 anig|EHA24497.1 aory|EIT81566.1 asyd|OJJ52672.1 ater|EAU32406.1 atub|OJI79920.1 aver|OJJ04698.1 awen|OJJ38434.1 azon|OJJ43808.1

Group1879: abra|OJJ69138.1 acar|OOF91163.1 acla|EAW08696.1 afis|EAW15739.1 afla|EED51313.1 afum|EAL85609.1 agla|OJJ81900.1 akaw|GAA86319.1 aluc|OJZ86125.1 anid|CBF71045.1 anig|EHA24496.1 aory|EIT81532.1 asyd|OJJ52671.1 ater|EAU32408.1 atub|OJI79921.1 aver|OJJ04697.1 awen|OJJ38438.1 azon|OJJ43807.1

Group1880: abra|OJJ69143.1 acar|OOF91159.1 acla|EAW08666.1 afis|EAW15743.1 afla|EED51309.1 afum|EAL85605.1 agla|OJJ81904.1 akaw|GAA86314.1 aluc|OJZ86129.1 anid|CBF71038.1 anig|EHA24492.1

aory|EIT81535.1 asyd|OJJ52666.1 ater|EAU32402.1 atub|OJI79925.1 aver|OJJ04693.1 awen|OJJ38443.1 azon|OJJ43749.1

Group1881: abra|OJJ69147.1 acar|OOF91156.1 acla|EAW08669.1 afis|EAW15757.1 afla|EED51302.1 afum|EAL85591.1 agla|OJJ81905.1 akaw|GAA86311.1 aluc|OJZ86133.1 anid|CBF71025.1 anig|EHA24488.1 aory|EIT81545.1 asyd|OJJ52660.1 ater|EAU32400.1 atub|OJI79929.1 aver|OJJ04688.1 awen|OJJ38445.1 azon|OJJ43751.1

Group1882: abra|OJJ69154.1 acar|OOF91149.1 acla|EAW08671.1 afis|EAW15753.1 afla|EED51298.1 afum|EAL85596.1 agla|OJJ81909.1 akaw|GAA86308.1 aluc|OJZ86141.1 anid|CBF71023.1 anig|EHA24483.1 aory|EIT81538.1 asyd|OJJ52659.1 ater|EAU32397.1 atub|OJI79933.1 aver|OJJ04687.1 awen|OJJ38453.1 azon|OJJ43753.1

Group1883: abra|OJJ69155.1 acar|OOF91148.1 acla|EAW08672.1 afis|EAW15752.1 afla|EED51297.1 afum|EAL85597.1 agla|OJJ81910.1 akaw|GAA86307.1 aluc|OJZ86142.1 anid|CBF71021.1 anig|EHA24482.1 aory|EIT81540.1 asyd|OJJ52658.1 ater|EAU32396.1 atub|OJI79934.1 aver|OJJ04686.1 awen|OJJ38454.1 azon|OJJ43754.1

Group1884: abra|OJJ69156.1 acar|OOF91147.1 acla|EAW08673.1 afis|EAW15751.1 afla|EED51296.1 afum|EAL85598.1 agla|OJJ81911.1 akaw|GAA86306.1 aluc|OJZ86143.1 anid|CBF71019.1 anig|EHA24481.1 aory|EIT81520.1 asyd|OJJ52657.1 ater|EAU32395.1 atub|OJI79935.1 aver|OJJ04685.1 awen|OJJ38455.1 azon|OJJ43755.1

Group1885: abra|OJJ69157.1 acar|OOF91146.1 acla|EAW08674.1 afis|EAW15750.1 afum|EAL85599.1 agla|OJJ81913.1 akaw|GAA86305.1 aluc|OJZ86144.1 anid|CBF71017.1 anig|EHA24480.1 aory|EIT81492.1 asyd|OJJ52656.1 ater|EAU32394.1 atub|OJI79936.1 aver|OJJ04684.1 awen|OJJ38456.1 azon|OJJ43756.1 afla|EED51295.1

Group1886: abra|OJJ69158.1 acar|OOF91145.1 acla|EAW08675.1 afis|EAW15749.1 afla|EED51294.1 afum|EAL85600.1 agla|OJJ81914.1 akaw|GAA86304.1 aluc|OJZ86145.1 anid|CBF71015.1 anig|EHA24479.1 aory|EIT81541.1 asyd|OJJ52655.1 ater|EAU32393.1 atub|OJI79937.1 aver|OJJ04683.1 awen|OJJ38457.1 azon|OJJ43757.1

Group1887: abra|OJJ69159.1 acar|OOF91144.1 acla|EAW08676.1 afis|EAW15748.1 afla|EED51293.1 afum|EAL85601.1 agla|OJJ81915.1 akaw|GAA86303.1 aluc|OJZ86146.1 anid|CBF71013.1 anig|EHA24478.1 aory|EIT81547.1 asyd|OJJ52654.1 ater|EAU32392.1 atub|OJI79938.1 aver|OJJ04682.1 awen|OJJ38458.1 azon|OJJ43759.1

Group1888: abra|OJJ69161.1 acar|OOF91141.1 acla|EAW08678.1 afis|EAW15746.1 afla|EED51291.1 afum|EAL85602.1 agla|OJJ81917.1 akaw|GAA86301.1 aluc|OJZ86148.1 anid|CBF71009.1 anig|EHA24476.1 aory|EIT81488.1 asyd|OJJ52651.1 ater|EAU32390.1 atub|OJI79940.1 aver|OJJ04680.1 awen|OJJ38460.1 azon|OJJ43761.1

Group1889: abra|OJJ69162.1 acar|OOF91140.1 acla|EAW08679.1 afis|EAW15754.1 afla|EED51290.1 afum|EAL85595.1 agla|OJJ81918.1 akaw|GAA86300.1 aluc|OJZ86149.1 anid|CBF71007.1 anig|EHA24475.1 aory|EIT81493.1 asyd|OJJ52650.1 ater|EAU32389.1 atub|OJI79941.1 aver|OJJ04679.1 awen|OJJ38462.1 azon|OJJ43762.1

Group1890: abra|OJJ69164.1 acar|OOF91139.1 acla|EAW08680.1 afis|EAW15758.1 afla|EED51289.1 afum|EAL85590.1 agla|OJJ81920.1 akaw|GAA86299.1 aluc|OJZ86151.1 anid|CBF71006.1 anig|EHA24474.1 aory|EIT81496.1 asyd|OJJ52648.1 ater|EAU32388.1 atub|OJI79943.1 aver|OJJ04677.1 awen|OJJ38466.1 azon|OJJ43764.1

Group1891: abra|OJJ69165.1 acar|OOF91138.1 acla|EAW08681.1 afis|EAW15759.1 afla|EED51288.1 afum|EAL85589.1 agla|OJJ81921.1 akaw|GAA86298.1 aluc|OJZ86152.1 anid|CBF71004.1 anig|EHA24473.1 aory|EIT81511.1 asyd|OJJ52647.1 ater|EAU32387.1 atub|OJI79944.1 aver|OJJ04676.1 awen|OJJ38467.1 azon|OJJ43765.1

Group1892: abra|OJJ69166.1 acar|OOF91137.1 acla|EAW08682.1 afis|EAW15760.1 afla|EED51287.1 afum|EAL85588.1 agla|OJJ81922.1 akaw|GAA86297.1 aluc|OJZ86153.1 anid|CBF71002.1 anig|EHA24472.1 aory|EIT81510.1 asyd|OJJ52646.1 ater|EAU32386.1 atub|OJI79945.1 aver|OJJ04675.1 awen|OJJ38468.1 azon|OJJ43766.1

Group1893: abra|OJJ69167.1 acar|OOF91136.1 acla|EAW08683.1 afis|EAW15761.1 afla|EED51286.1 afum|EAL85587.1 agla|OJJ81923.1 akaw|GAA86296.1 aluc|OJZ86154.1 anid|CBF71000.1 anig|EHA24471.1 aory|EIT81497.1 asyd|OJJ52645.1 ater|EAU32385.1 atub|OJI79946.1 aver|OJJ04674.1 awen|OJJ38469.1 azon|OJJ43767.1

Group1894: abra|OJJ69168.1 acar|OOF91135.1 acla|EAW08684.1 afis|EAW15762.1 afla|EED51285.1 afum|EAL85586.1 agla|OJJ81924.1 akaw|GAA86295.1 aluc|OJZ86155.1 anid|CBF70998.1 anig|EHA24470.1 aory|EIT81522.1 asyd|OJJ52644.1 ater|EAU32384.1 atub|OJI79947.1 aver|OJJ04673.1 awen|OJJ38470.1 azon|OJJ43769.1

Group1895: abra|OJJ69177.1 acar|OOF91129.1 acla|EAW08686.1 afis|EAW15763.1 afla|EED51284.1 afum|EAL85585.1 agla|OJJ81925.1 akaw|GAA86287.1 aluc|OJZ86163.1 anid|CBF70996.1 anig|EHA24461.1 aory|EIT81489.1 asyd|OJJ52643.1 ater|EAU32378.1 atub|OJI79955.1 aver|OJJ04672.1 awen|OJJ38471.1 azon|OJJ43770.1

Group1896: abra|OJJ69178.1 acar|OOF90317.1 acla|EAW08687.1 afis|EAW15764.1 afla|EED51283.1 afum|EAL85584.1 agla|OJJ81927.1 akaw|GAA86286.1 aluc|OJZ86164.1 anid|CBF70994.1 anig|EHA24460.1 aory|EIT81513.1 asyd|OJJ52642.1 ater|EAU32377.1 atub|OJI79956.1 aver|OJJ04670.1 awen|OJJ38472.1 azon|OJJ43772.1

Group1897: abra|OJJ69179.1 acar|OOF90318.1 acla|EAW08688.1 afis|EAW15765.1 afla|EED51282.1 afum|EAL85583.1 agla|OJJ81928.1 akaw|GAA86285.1 aluc|OJZ86165.1 anid|CBF70993.1 anig|EHA24459.1 aory|EIT81558.1 asyd|OJJ52641.1 ater|EAU32376.1 atub|OJI79957.1 aver|OJJ04669.1 awen|OJJ38473.1 azon|OJJ43773.1

Group1898: abra|OJJ69180.1 acar|OOF90319.1 acla|EAW08689.1 afis|EAW15766.1 afla|EED51281.1 afum|EAL85582.1 agla|OJJ81930.1 akaw|GAA86284.1 aluc|OJZ86166.1 anig|EHA24458.1 aory|EIT81544.1 asyd|OJJ52640.1 ater|EAU32375.1 atub|OJI79958.1 awen|OJJ38474.1 anid|CBF70991.1 aver|OJJ04668.1 azon|OJJ43774.1

Group1899: abra|OJJ69181.1 acar|OOF90321.1 acla|EAW08690.1 afis|EAW15767.1 afla|EED51280.1 afum|EAL85581.1 agla|OJJ81931.1 akaw|GAA86283.1 aluc|OJZ86167.1 anid|CBF70989.1 anig|EHA24457.1 aory|EIT81536.1 asyd|OJJ52639.1 ater|EAU32374.1 atub|OJI79959.1 aver|OJJ04667.1 awen|OJJ38475.1 azon|OJJ43775.1

Group1900: abra|OJJ69183.1 acar|OOF90320.1 acla|EAW08691.1 afis|EAW15768.1 afla|EED51279.1 afum|EAL85580.1 agla|OJJ81932.1 akaw|GAA86282.1 aluc|OJZ86168.1 anid|CBF70987.1 anig|EHA24456.1 aory|EIT81531.1 asyd|OJJ52638.1 ater|EAU32373.1 atub|OJI79960.1 aver|OJJ04666.1 awen|OJJ38476.1 azon|OJJ43776.1

Group1901: abra|OJJ69184.1 acar|OOF91128.1 acla|EAW08662.1 afis|EAW15769.1 afla|EED51278.1 afum|EAL85579.1 agla|OJJ81933.1 akaw|GAA86281.1 aluc|OJZ86170.1 anid|CBF70983.1 anig|EHA24455.1 aory|EIT81490.1 asyd|OJJ52636.1 ater|EAU32372.1 atub|OJI79962.1 aver|OJJ04664.1 awen|OJJ38477.1 azon|OJJ43777.1

Group1902: abra|OJJ69186.1 acar|OOF91126.1 acla|EAW08660.1 afis|EAW15771.1 afla|EED51276.1 afum|EAL85577.1 agla|OJJ81935.1 akaw|GAA86279.1 aluc|OJZ86172.1 anid|CBF70979.1 anig|EHA24453.1 aory|EIT81507.1 asyd|OJJ52634.1 ater|EAU32370.1 atub|OJI79964.1 aver|OJJ04662.1 awen|OJJ38479.1 azon|OJJ43779.1

Group1903: abra|OJJ69187.1 acar|OOF91125.1 acla|EAW08659.1 afis|EAW15772.1 afla|EED51275.1 afum|EAL85576.1 agla|OJJ81936.1 akaw|GAA86278.1 aluc|OJZ86173.1 anid|CBF70977.1 anig|EHA24452.1 aory|EIT81560.1 asyd|OJJ52633.1 ater|EAU32369.1 atub|OJI79965.1 aver|OJJ04661.1 awen|OJJ38480.1 azon|OJJ43780.1

Group1904: abra|OJJ69189.1 acar|OOF91122.1 acla|EAW08656.1 afis|EAW15775.1 afla|EED51271.1 afum|EAL85574.1 agla|OJJ81938.1 akaw|GAA86275.1 aluc|OJZ86175.1 anid|CBF70976.1 anig|EHA24449.1 aory|EIT81533.1 asyd|OJJ52631.1 ater|EAU32366.1 atub|OJI79967.1 aver|OJJ04659.1 awen|OJJ38482.1 azon|OJJ43783.1

Group1905: abra|OJJ69191.1 acar|OOF91120.1 acla|EAW08654.1 afis|EAW15777.1 afla|EED51268.1 afum|EAL85572.1 agla|OJJ81940.1 akaw|GAA86273.1 aluc|OJZ86177.1 anid|CBF70933.1 anig|EHA24447.1 aory|EIT81563.1 asyd|OJJ52629.1 ater|EAU32364.1 atub|OJI79969.1 aver|OJJ04657.1 awen|OJJ38484.1 azon|OJJ43785.1

Group1906: abra|OJJ69192.1 acar|OOF91121.1 acla|EAW08653.1 afis|EAW15778.1 afla|EED51266.1 afum|EAL85571.1 agla|OJJ81941.1 akaw|GAA86272.1 aluc|OJZ86178.1 anid|CBF70935.1 anig|EHA24446.1 aory|EIT81565.1 asyd|OJJ52628.1 ater|EAU32363.1 atub|OJI79970.1 aver|OJJ04656.1 awen|OJJ38485.1 azon|OJJ43786.1

Group1907: abra|OJJ69193.1 acar|OOF91119.1 acla|EAW08652.1 afis|EAW15779.1 afla|EED51265.1 afum|EAL85570.1 agla|OJJ81942.1 akaw|GAA86271.1 aluc|OJZ86179.1 anid|CBF70937.1 anig|EHA24445.1 aory|EIT81542.1 asyd|OJJ52627.1 ater|EAU32362.1 atub|OJI79971.1 aver|OJJ04655.1 awen|OJJ38486.1 azon|OJJ43787.1

Group1908: abra|OJJ69194.1 acar|OOF91118.1 acla|EAW08651.1 afis|EAW15780.1 afla|EED51264.1 afum|EBA27235.1 agla|OJJ81943.1 akaw|GAA86270.1 aluc|OJZ86180.1 anid|CBF70939.1 anig|EHA24444.1 aory|EIT81528.1 asyd|OJJ52626.1 ater|EAU32361.1 atub|OJI79972.1 aver|OJJ04654.1 awen|OJJ38487.1 azon|OJJ43788.1

Group1909: abra|OJJ69196.1 acar|OOF90027.1 acla|EAW08650.1 afis|EAW15781.1 afla|EED51263.1 afum|EAL85569.1 agla|OJJ81944.1 akaw|GAA92209.1 aluc|OJZ86181.1 anid|CBF70941.1 anig|EHA24443.1

aory|EIT81567.1 asyd|OJJ52625.1 ater|EAU32360.1 atub|OJI79973.1 aver|OJJ04652.1 awen|OJJ38488.1 azon|OJJ43789.1

Group1910: abra|OJJ69197.1 acar|OOF90026.1 acla|EAW08649.1 afis|EAW15782.1 afla|EED51262.1 afum|EAL85568.1 agla|OJJ81945.1 akaw|GAA92210.1 aluc|OJZ86182.1 anid|CBF70945.1 anig|EHA24442.1 aory|EIT81562.1 asyd|OJJ52624.1 ater|EAU32359.1 atub|OJI79974.1 aver|OJJ04651.1 awen|OJJ38489.1 azon|OJJ43790.1

Group1911: abra|OJJ69198.1 acar|OOF91117.1 acla|EAW08648.1 afis|EAW15783.1 afla|EED51261.1 afum|EAL85567.1 agla|OJJ81946.1 akaw|GAA92211.1 aluc|OJZ86183.1 anid|CBF70946.1 anig|EHA24441.1 aory|EIT81552.1 asyd|OJJ52623.1 ater|EAU32358.1 atub|OJI79975.1 aver|OJJ04650.1 awen|OJJ38490.1 azon|OJJ43791.1

Group1912: abra|OJJ69200.1 acar|OOF91115.1 acla|EAW08646.1 afis|EAW15785.1 afla|EED51259.1 afum|EAL85565.1 agla|OJJ81948.1 akaw|GAA92213.1 aluc|OJZ86185.1 anid|CBF70954.1 anig|EHA24439.1 aory|EIT81568.1 asyd|OJJ52621.1 ater|EAU32356.1 atub|OJI79977.1 aver|OJJ04648.1 awen|OJJ38492.1 azon|OJJ43794.1

Group1913: abra|OJJ69204.1 acar|OOF91112.1 acla|EAW08643.1 afis|EAW15788.1 afla|EED51257.1 afum|EAL85562.1 agla|OJJ81951.1 akaw|GAA92216.1 aluc|OJZ86188.1 anid|CBF70960.1 anig|EHA24435.1 aory|EIT81501.1 asyd|OJJ52618.1 ater|EAU32353.1 atub|OJI79980.1 aver|OJJ04645.1 awen|OJJ38496.1 azon|OJJ43797.1

Group1914: abra|OJJ69205.1 acar|OOF91109.1 acla|EAW08642.1 afis|EAW15789.1 afla|EED51256.1 afum|EAL85561.1 agla|OJJ81952.1 akaw|GAA92217.1 aluc|OJZ86189.1 anid|CBF70962.1 anig|EHA24434.1 aory|EIT81537.1 asyd|OJJ52617.1 ater|EAU32352.1 atub|OJI79981.1 aver|OJJ04644.1 awen|OJJ38497.1 azon|OJJ43798.1

Group1915: abra|OJJ69206.1 acar|OOF91111.1 acla|EAW08641.1 afis|EAW15790.1 afla|EED51255.1 afum|EAL85560.1 agla|OJJ81953.1 akaw|GAA92218.1 aluc|OJZ86190.1 anid|CBF70964.1 anig|EHA24433.1 aory|EIT81514.1 asyd|OJJ52616.1 ater|EAU32351.1 atub|OJI79982.1 aver|OJJ04643.1 awen|OJJ38498.1 azon|OJJ43799.1

Group1916: abra|OJJ69208.1 acar|OOF91108.1 acla|EAW08638.1 afis|EAW15793.1 afla|EED51252.1 afum|EAL85557.1 agla|OJJ81956.1 akaw|GAA92219.1 aluc|OJZ86191.1 anid|CBF70970.1 anig|EHA24431.1 aory|EIT81504.1 asyd|OJJ52613.1 ater|EAU32349.1 atub|OJI79983.1 aver|OJJ04640.1 awen|OJJ38501.1 azon|OJJ43802.1

Group1917: abra|OJJ69209.1 acar|OOF91107.1 acla|EAW08637.1 afis|EAW15794.1 afla|EED51251.1 afum|EAL85556.1 agla|OJJ81957.1 akaw|GAA92220.1 aluc|OJZ86192.1 anid|CBF70931.1 anig|EHA24430.1 aory|EIT81500.1 asyd|OJJ52612.1 ater|EAU32348.1 atub|OJI79984.1 aver|OJJ04639.1 awen|OJJ38502.1 azon|OJJ43803.1

Group1918: abra|OJJ69210.1 acar|OOF91106.1 acla|EAW08635.1 afis|EAW15796.1 afla|EED51249.1 afum|EAL85554.1 agla|OJJ81960.1 akaw|GAA92221.1 aluc|OJZ86193.1 anid|CBF70927.1 anig|EHA24429.1 aory|EIT81508.1 asyd|OJJ52610.1 ater|EAU32346.1 atub|OJI79985.1 aver|OJJ04637.1 awen|OJJ38504.1 azon|OJJ43747.1

Group1919: abra|OJJ69211.1 acar|OOF91105.1 acla|EAW08634.1 afis|EAW15797.1 afla|EED51248.1 afum|EAL85553.2 agla|OJJ81961.1 akaw|GAA92222.1 aluc|OJZ86194.1 anid|CBF70925.1 anig|EHA24428.1 aory|EIT81561.1 asyd|OJJ52609.1 ater|EAU32345.1 atub|OJI79986.1 aver|OJJ04636.1 awen|OJJ38505.1 azon|OJJ43746.1

Group1920: abra|OJJ69212.1 acar|OOF91104.1 acla|EAW08633.1 afis|EAW15798.1 afla|EED51247.1 afum|EAL85552.1 agla|OJJ81962.1 akaw|GAA92223.1 aluc|OJZ86195.1 anid|CBF70923.1 anig|EHA24427.1 aory|EIT81502.1 asyd|OJJ52608.1 ater|EAU32344.1 atub|OJI79988.1 aver|OJJ04635.1 awen|OJJ38506.1 azon|OJJ43745.1

Group1921: abra|OJJ69215.1 acar|OOF91103.1 acla|EAW08630.1 afis|EAW15801.1 afla|EED51244.1 afum|EAL85549.2 agla|OJJ81968.1 akaw|GAA92224.1 aluc|OJZ86196.1 anid|CBF70918.1 anig|EHA24426.1 aory|EIT83186.1 asyd|OJJ52605.1 ater|EAU33447.1 atub|OJI79989.1 aver|OJJ04632.1 awen|OJJ38510.1 azon|OJJ43742.1

Group1922: abra|OJJ69217.1 acar|OOF91101.1 acla|EAW08628.1 afis|EAW15803.1 afla|EED51242.1 afum|EAL85547.1 agla|OJJ81970.1 akaw|GAA92226.1 aluc|OJZ86199.1 anid|CBF70914.1 anig|EHA24424.1 aory|EIT83176.1 asyd|OJJ52603.1 ater|EAU33445.1 atub|OJI79991.1 aver|OJJ04629.1 awen|OJJ38513.1 azon|OJJ43739.1

Group1923: abra|OJJ69222.1 acar|OOF91098.1 acla|EAW12739.1 afis|EAW17902.1 afla|EED51238.1 afum|EAL91710.1 agla|OJJ81973.1 akaw|GAA92230.1 aluc|OJZ86202.1 anid|CBF70908.1 anig|EHA24420.1 aory|EIT83180.1 asyd|OJJ52599.1 ater|EAU33438.1 atub|OJI79996.1 aver|OJJ04626.1 awen|OJJ38518.1 azon|OJJ43736.1



Group1924: abra|OJJ69230.1 acar|OOF91090.1 acla|EAW08619.1 afis|EAW15815.1 afla|EED51232.1 afum|EAL85536.1 agla|OJJ81979.1 akaw|GAA92238.1 aluc|OJZ86210.1 anid|CBF70899.1 anig|EHA24416.1 aory|EIT83190.1 asyd|OJJ52595.1 ater|EAU33433.1 atub|OJI80004.1 aver|OJJ04622.1 awen|OJJ38528.1 azon|OJJ43733.1

Group1925: abra|OJJ69232.1 acar|OOF91088.1 acla|EAW08617.1 afis|EAW15817.1 afla|EED51230.1 afum|EAL85534.1 agla|OJJ81981.1 akaw|GAA92240.1 aluc|OJZ86212.1 anid|CBF70895.1 anig|EHA24414.1 aory|EIT83179.1 asyd|OJJ52593.1 ater|EAU33431.1 atub|OJI80007.1 aver|OJJ04620.1 awen|OJJ38531.1 azon|OJJ43731.1

Group1926: abra|OJJ69234.1 acar|OOF91086.1 acla|EAW08615.1 afis|EAW15819.1 afla|EED51228.1 afum|EAL85532.1 agla|OJJ81983.1 akaw|GAA92242.1 aluc|OJZ86214.1 anid|CBF70891.1 anig|EHA24412.1 aory|EIT83174.1 asyd|OJJ52591.1 ater|EAU33429.1 atub|OJI80009.1 aver|OJJ04618.1 awen|OJJ38533.1 azon|OJJ43729.1

Group1927: abra|OJJ69235.1 acar|OOF91085.1 acla|EAW08614.1 afis|EAW15820.1 afla|EED51227.1 afum|EAL85531.1 agla|OJJ81984.1 akaw|GAA92243.1 aluc|OJZ86215.1 anid|CBF70889.1 anig|EHA24411.1 aory|EIT83196.1 asyd|OJJ52590.1 ater|EAU33428.1 atub|OJI80010.1 aver|OJJ04617.1 awen|OJJ38534.1 azon|OJJ43728.1

Group1928: abra|OJJ69237.1 acar|OOF91081.1 acla|EAW08610.1 afis|EAW15823.1 afla|EED51223.1 afum|EAL85528.1 agla|OJJ81986.1 akaw|GAA92247.1 aluc|OJZ86217.1 anid|CBF70884.1 anig|EHA24409.1 aory|EIT83191.1 asyd|OJJ52588.1 ater|EAU33425.1 atub|OJI80012.1 aver|OJJ04615.1 awen|OJJ38536.1 azon|OJJ43726.1

Group1929: abra|OJJ69238.1 acar|OOF91080.1 acla|EAW08609.1 afis|EAW15824.1 afla|EED51221.1 afum|EAL85527.1 agla|OJJ81987.1 akaw|GAA92248.1 aluc|OJZ86218.1 anid|CBF70878.1 anig|EHA24408.1 aory|EIT80400.1 asyd|OJJ52586.1 ater|EAU33424.1 atub|OJI80013.1 aver|OJJ04613.1 awen|OJJ38538.1 azon|OJJ43725.1

Group1930: abra|OJJ69239.1 acar|OOF91079.1 acla|EAW08608.1 afis|EAW15825.1 afla|EED51220.1 afum|EAL85526.1 agla|OJJ81988.1 akaw|GAA92249.1 aluc|OJZ86220.1 anid|CBF70876.1 anig|EHA24407.1 aory|EIT80394.1 asyd|OJJ52584.1 ater|EAU33423.1 atub|OJI80014.1 aver|OJJ04612.1 awen|OJJ38539.1 azon|OJJ43724.1

Group1931: abra|OJJ69240.1 acar|OOF91078.1 acla|EAW08607.1 afis|EAW15826.1 afla|EED51219.1 afum|EAL85525.1 agla|OJJ81989.1 akaw|GAA92250.1 aluc|OJZ86221.1 anid|CBF70874.1 anig|EHA24406.1 aory|EIT80397.1 asyd|OJJ52583.1 ater|EAU33422.1 atub|OJI80015.1 aver|OJJ04611.1 awen|OJJ38540.1 azon|OJJ43723.1

Group1932: abra|OJJ69244.1 acar|OOF91076.1 acla|EAW08605.1 afis|EAW15828.1 afla|EED51217.1 afum|EAL85523.1 agla|OJJ81992.1 akaw|GAA92252.1 aluc|OJZ86225.1 anid|CBF70869.1 anig|EHA24403.1 aory|EIT80398.1 asyd|OJJ52580.1 ater|EAU33419.1 atub|OJI80018.1 aver|OJJ04608.1 awen|OJJ38542.1 azon|OJJ43721.1

Group1934: abra|OJJ69248.1 acar|OOF91073.1 acla|EAW08601.1 afis|EAW15832.1 afla|EED51214.1 afum|EAL85520.1 agla|OJJ81996.1 akaw|GAA92255.1 aluc|OJZ86229.1 anid|CBF70861.1 anig|EHA24400.1 aory|EIT80409.1 asyd|OJJ52576.1 ater|EAU33416.1 atub|OJI80022.1 aver|OJJ04605.1 awen|OJJ38545.1 azon|OJJ43717.1

Group1935: abra|OJJ69249.1 acar|OOF91072.1 acla|EAW08600.1 afis|EAW15833.1 afla|EED51213.1 afum|EAL85519.1 agla|OJJ81997.1 akaw|GAA92256.1 aluc|OJZ86230.1 anid|CBF70859.1 anig|EHA24399.1 aory|EIT80405.1 asyd|OJJ52575.1 ater|EAU33415.1 atub|OJI80023.1 aver|OJJ04604.1 awen|OJJ38546.1 azon|OJJ43716.1

Group1936: abra|OJJ69250.1 acar|OOF91071.1 acla|EAW08599.1 afis|EAW15834.1 afla|EED51212.1 afum|EAL85518.1 agla|OJJ81998.1 akaw|GAA92257.1 aluc|OJZ86231.1 anid|CBF70858.1 anig|EHA24398.1 aory|EIT80395.1 asyd|OJJ52574.1 ater|EAU33414.1 atub|OJI80024.1 aver|OJJ04603.1 awen|OJJ38547.1 azon|OJJ43715.1

Group1937: abra|OJJ69252.1 acar|OOF91069.1 acla|EAW08597.1 afis|EAW15836.1 afla|EED51210.1 afum|EAL85515.1 agla|OJJ82000.1 akaw|GAA92259.1 aluc|OJZ86232.1 anid|CBF70854.1 anig|EHA24397.1 aory|EIT80401.1 asyd|OJJ52573.1 ater|EAU33412.1 atub|OJI80026.1 aver|OJJ04602.1 awen|OJJ38550.1 azon|OJJ43713.1

Group1938: atub|OJI80028.1 abra|OJJ69256.1 acar|OOF91065.1 acla|EAW08593.1 afis|EAW15841.1 afla|EED51208.1 afum|EAL85510.1 agla|OJJ84917.1 akaw|GAA92262.1 aluc|OJZ86236.1 anid|CBF70845.1 anig|EHA24392.1 aory|EIT80413.1 asyd|OJJ52568.1 ater|EAU33394.1 aver|OJJ04597.1 awen|OJJ38555.1 azon|OJJ43711.1

Group1939: abra|OJJ69257.1 acar|OOF91064.1 acla|EAW08592.1 afis|EAW15842.1 afla|EED51207.1 afum|EAL85509.1 agla|OJJ84916.1 akaw|GAA92263.1 aluc|OJZ86237.1 anid|CBF70843.1 anig|EHA24391.1

aory|EIT80396.1 asyd|OJJ52567.1 ater|EAU33393.1 atub|OJI80029.1 aver|OJJ04596.1 awen|OJJ38556.1 azon|OJJ43710.1

Group1941: abra|OJJ69262.1 acar|OOF91060.1 acla|EAW08589.1 afis|EAW15846.1 afla|EED51204.1 afum|EAL85505.1 agla|OJJ84913.1 akaw|GAA92267.1 aluc|OJZ86241.1 anid|CBF70835.1 anig|EHA24388.1 aory|EIT80414.1 asyd|OJJ52564.1 ater|EAU33390.1 atub|OJI80033.1 aver|OJJ04592.1 awen|OJJ38561.1 azon|OJJ48761.1

Group1942: abra|OJJ69263.1 acar|OOF91059.1 acla|EAW08588.1 afis|EAW15847.1 afla|EED51203.1 afum|EAL85504.1 agla|OJJ84911.1 akaw|GAA92268.1 aluc|OJZ86242.1 anid|CBF70833.1 anig|EHA24387.1 aory|EIT80410.1 asyd|OJJ52563.1 ater|EAU33389.1 atub|OJI80034.1 aver|OJJ04591.1 awen|OJJ38562.1 azon|OJJ43615.1

Group1943: abra|OJJ69268.1 acar|OOF89861.1 acla|EAW14653.1 afis|EAW24188.1 afla|EED48081.1 afum|EAL85861.1 agla|OJJ79691.1 akaw|GAA88143.1 aluc|OJZ82097.1 anid|CBF74306.1 anig|EHA28632.1 aory|EIT82476.1 asyd|OJJ54008.1 ater|EAU31140.1 atub|OJI88340.1 aver|OJJ08103.1 awen|OJJ33111.1 azon|OJJ41999.1

Group1944: abra|OJJ69275.1 acar|OOF94447.1 acla|EAW14663.1 afis|EAW24194.1 afla|EED48077.1 afum|EAL85866.1 agla|OJJ79684.1 akaw|GAA88148.1 aluc|OJZ82102.1 anid|CBF74313.1 anig|EHA28627.1 aory|EIT82481.1 asyd|OJJ54002.1 ater|EAU31145.1 atub|OJI88333.1 aver|OJJ08099.1 awen|OJJ33105.1 azon|OJJ44844.1

Group1945: abra|OJJ69276.1 acar|OOF94446.1 acla|EAW14664.1 afis|EAW24195.1 afla|EED48076.1 afum|EAL85867.1 agla|OJJ79683.1 akaw|GAA88149.1 aluc|OJZ82103.1 anid|CBF74315.1 anig|EHA28626.1 aory|EIT82479.1 asyd|OJJ54001.1 ater|EAU31146.1 atub|OJI88332.1 aver|OJJ08098.1 awen|OJJ33104.1 azon|OJJ44845.1

Group1946: abra|OJJ69277.1 acar|OOF94445.1 acla|EAW14665.1 afis|EAW24196.1 afla|EED48075.1 afum|EAL85868.1 agla|OJJ79682.1 akaw|GAA88150.1 aluc|OJZ82104.1 anid|CBF74317.1 anig|EHA28625.1 aory|EIT82482.1 asyd|OJJ54000.1 ater|EAU31147.1 atub|OJI88331.1 aver|OJJ08097.1 awen|OJJ33103.1 azon|OJJ44846.1

Group1947: abra|OJJ69278.1 acar|OOF94444.1 acla|EAW14666.1 afis|EAW24197.1 afla|EED48074.1 afum|EAL85869.1 agla|OJJ79681.1 akaw|GAA88151.1 aluc|OJZ82105.1 anid|CBF74319.1 anig|EHA28624.1 aory|EIT82477.1 asyd|OJJ53999.1 ater|EAU31148.1 atub|OJI88330.1 aver|OJJ08096.1 awen|OJJ33102.1 azon|OJJ44847.1

Group1948: abra|OJJ69279.1 acar|OOF94443.1 acla|EAW14668.1 afis|EAW24199.1 afla|EED48073.1 afum|EAL85871.1 agla|OJJ79678.1 akaw|GAA88152.1 aluc|OJZ82106.1 anid|CBF74323.1 anig|EHA28623.1 aory|EIT83321.1 asyd|OJJ53996.1 ater|EAU31150.1 atub|OJI88329.1 aver|OJJ08094.1 awen|OJJ33099.1 azon|OJJ44848.1

Group1949: abra|OJJ69281.1 acar|OOF94441.1 acla|EAW14670.1 afis|EAW24201.1 afla|EED48071.1 afum|EBA27248.1 agla|OJJ79676.1 akaw|GAA88153.1 aluc|OJZ82109.1 anid|CBF74326.1 anig|EHA28621.1 aory|EIT83320.1 asyd|OJJ53994.1 ater|EAU31152.1 atub|OJI88327.1 aver|OJJ08092.1 awen|OJJ33097.1 azon|OJJ44850.1

Group1950: abra|OJJ69283.1 acar|OOF94439.1 acla|EAW14672.1 afis|EAW24203.1 afla|EED48069.1 afum|EAL85873.2 agla|OJJ79674.1 akaw|GAA88155.1 aluc|OJZ82112.1 anid|CBF74330.1 anig|EHA28619.1 aory|EIT83340.1 asyd|OJJ53992.1 ater|EAU31154.1 atub|OJI88325.1 aver|OJJ08090.1 awen|OJJ33095.1 azon|OJJ44852.1

Group1951: abra|OJJ69284.1 acar|OOF94438.1 acla|EAW14673.1 afis|EAW24204.1 afla|EED48067.1 afum|EAL85874.2 agla|OJJ79673.1 akaw|GAA88156.1 aluc|OJZ82113.1 anid|CBF74332.1 anig|EHA28618.1 aory|EIT83335.1 asyd|OJJ53991.1 ater|EAU31155.1 atub|OJI88324.1 aver|OJJ08089.1 awen|OJJ33094.1 azon|OJJ44854.1

Group1952: abra|OJJ69285.1 acar|OOF94436.1 acla|EAW14674.1 afis|EAW24205.1 afla|EED48066.1 afum|EAL85875.1 agla|OJJ79672.1 akaw|GAA88157.1 aluc|OJZ82114.1 anid|CBF74272.1 anig|EHA28617.1 aory|EIT83356.1 asyd|OJJ53990.1 ater|EAU31156.1 atub|OJI88323.1 aver|OJJ08088.1 awen|OJJ33093.1 azon|OJJ44855.1

Group1953: abra|OJJ69286.1 acar|OOF94437.1 acla|EAW14675.1 afis|EAW24206.1 afla|EED48065.1 afum|EAL85876.1 agla|OJJ79671.1 akaw|GAA88158.1 aluc|OJZ82115.1 anid|CBF74271.1 anig|EHA28616.1 aory|EIT83359.1 asyd|OJJ53989.1 ater|EAU31157.1 atub|OJI88322.1 aver|OJJ08087.1 awen|OJJ33092.1 azon|OJJ44856.1

Group1954: abra|OJJ69288.1 acar|OOF94434.1 acla|EAW14677.1 afis|EAW24208.1 afla|EED48063.1 afum|EAL85878.1 agla|OJJ79669.1 akaw|GAA88160.1 aluc|OJZ82117.1 anid|CBF74269.1 anig|EHA28614.1 aory|EIT83351.1 asyd|OJJ53987.1 ater|EAU31158.1 atub|OJI88320.1 aver|OJJ08085.1 awen|OJJ33089.1 azon|OJJ44858.1

Group1955: abra|OJJ69292.1 acar|OOF94431.1 acla|EAW14680.1 afis|EAW24211.1 afla|EED48060.1 afum|EAL85880.1 agla|OJJ79654.1 akaw|GAA88163.1 aluc|OJZ82121.1 anid|CBF74263.1 anig|EHA28611.1 aory|EIT83350.1 asyd|OJJ53983.1 ater|EAU31161.1 atub|OJI88317.1 aver|OJJ08082.1 awen|OJJ33085.1 azon|OJJ44861.1

Group1956: abra|OJJ69293.1 acar|OOF94430.1 acla|EAW14681.1 afis|EAW24212.1 afla|EED48059.1 afum|EAL85881.1 agla|OJJ79663.1 akaw|GAA88164.1 aluc|OJZ82122.1 anid|CBF74261.1 anig|EHA28610.1 aory|EIT83323.1 asyd|OJJ53982.1 ater|EAU31162.1 atub|OJI88316.1 aver|OJJ08081.1 awen|OJJ33084.1 azon|OJJ44862.1

Group1957: abra|OJJ69294.1 acar|OOF94429.1 acla|EAW14682.1 afis|EAW24213.1 afla|EED48058.1 afum|EAL85882.1 agla|OJJ79665.1 akaw|GAA88165.1 aluc|OJZ82123.1 anid|CBF74260.1 anig|EHA28609.1 aory|EIT83345.1 asyd|OJJ53981.1 ater|EAU31163.1 atub|OJI88315.1 aver|OJJ08080.1 awen|OJJ33083.1 azon|OJJ44863.1

Group1958: abra|OJJ69296.1 acar|OOF94428.1 acla|EAW14683.1 afis|EAW24214.1 afla|EED48057.1 afum|EAL85883.1 agla|OJJ79666.1 akaw|GAA88166.1 aluc|OJZ82125.1 anid|CBF74258.1 anig|EHA28607.1 aory|EIT83357.1 asyd|OJJ53980.1 ater|EAU31164.1 atub|OJI88313.1 aver|OJJ08079.1 awen|OJJ33082.1 azon|OJJ44864.1

Group1959: abra|OJJ69297.1 acar|OOF94427.1 acla|EAW14684.1 afis|EAW24215.1 afla|EED48056.1 afum|EAL85884.1 agla|OJJ79667.1 akaw|GAA88167.1 aluc|OJZ82126.1 anid|CBF74256.1 anig|EHA28606.1 aory|EIT83352.1 asyd|OJJ53979.1 ater|EAU31165.1 atub|OJI88312.1 aver|OJJ08078.1 awen|OJJ33081.1 azon|OJJ44865.1

Group1960: abra|OJJ69298.1 acar|OOF94425.1 acla|EAW14685.1 afis|EAW24216.1 afla|EED48055.1 afum|EAL85885.1 agla|OJJ79668.1 akaw|GAA88168.1 aluc|OJZ82127.1 anid|CBF74254.1 anig|EHA28605.1 aory|EIT83339.1 asyd|OJJ53978.1 ater|EAU31166.1 atub|OJI88311.1 aver|OJJ08077.1 awen|OJJ33080.1 azon|OJJ44866.1

Group1961: abra|OJJ69299.1 acar|OOF94426.1 acla|EAW14686.1 afis|EAW24217.1 afla|EED48054.1 afum|EAL85886.1 agla|OJJ79653.1 akaw|GAA88169.1 aluc|OJZ82128.1 anid|CBF74252.1 anig|EHA28603.1 aory|EIT83360.1 asyd|OJJ53977.1 ater|EAU31167.1 atub|OJI88310.1 aver|OJJ08076.1 awen|OJJ33079.1 azon|OJJ44867.1

Group1962: abra|OJJ69302.1 acar|OOF94423.1 acla|EAW14688.1 afis|EAW24219.1 afla|EED48052.1 afum|EAL85888.1 agla|OJJ79651.1 akaw|GAA88171.1 aluc|OJZ82130.1 anid|CBF74248.1 anig|EHA28601.1 aory|EIT83354.1 asyd|OJJ53975.1 ater|EAU31169.1 atub|OJI88306.1 aver|OJJ08074.1 awen|OJJ33077.1 azon|OJJ44869.1

Group1963: abra|OJJ69305.1 acar|OOF94420.1 acla|EAW14691.1 afis|EAW24222.1 afla|EED48050.1 afum|EAL85891.2 agla|OJJ79648.1 akaw|GAA88174.1 aluc|OJZ82134.1 anid|CBF74239.1 anig|EHA28597.1 aory|EIT83349.1 asyd|OJJ53971.1 ater|EAU31172.1 atub|OJI88303.1 aver|OJJ08070.1 awen|OJJ33074.1 azon|OJJ44873.1

Group1964: abra|OJJ69307.1 acar|OOF94419.1 acla|EAW14694.1 afis|EAW24225.1 afla|EED48046.1 afum|EAL85893.1 agla|OJJ79646.1 akaw|GAA88176.1 aluc|OJZ82136.1 anid|CBF74234.1 anig|EHA28595.1 aory|EIT83343.1 asyd|OJJ53969.1 ater|EAU31174.1 atub|OJI88301.1 aver|OJJ08067.1 awen|OJJ33071.1 azon|OJJ44875.1

Group1965: abra|OJJ69308.1 acar|OOF94418.1 acla|EAW14695.1 afis|EAW24226.1 afla|EED48045.1 afum|EAL85894.1 agla|OJJ79645.1 akaw|GAA88177.1 aluc|OJZ82137.1 anid|CBF74232.1 anig|EHA28594.1 aory|EIT83341.1 asyd|OJJ53968.1 ater|EAU31175.1 atub|OJI88300.1 aver|OJJ08066.1 awen|OJJ33070.1 azon|OJJ44877.1

Group1966: abra|OJJ69312.1 acar|OOF94415.1 acla|EAW14738.1 afis|EAW24269.1 afla|EED48008.1 afum|EAL85937.1 agla|OJJ79596.1 akaw|GAA88181.1 aluc|OJZ82141.1 anid|CBF74167.1 anig|EHA28591.1 aory|EIT82915.1 asyd|OJJ53936.1 ater|EAU31214.1 atub|OJI88296.1 aver|OJJ08034.1 awen|OJJ33031.1 azon|OJJ44848.1

Group1967: abra|OJJ69313.1 acar|OOF94413.1 acla|EAW14737.1 afis|EAW24268.1 afla|EED48009.1 afum|EAL85936.1 agla|OJJ79597.1 akaw|GAA88182.1 aluc|OJZ82142.1 anid|CBF74169.1 anig|EHA28589.1 aory|EIT82903.1 asyd|OJJ53937.1 ater|EAU31213.1 atub|OJI88295.1 aver|OJJ08035.1 awen|OJJ33032.1 azon|OJJ44848.1

Group1968: abra|OJJ69314.1 acar|OOF94412.1 acla|EAW14736.1 afis|EAW24267.1 afla|EED48010.1 afum|EAL85935.1 agla|OJJ79598.1 akaw|GAA88183.1 aluc|OJZ82143.1 anid|CBF74171.1 anig|EHA28588.1 aory|EIT82909.1 asyd|OJJ53938.1 ater|EAU31212.1 atub|OJI88294.1 aver|OJJ08036.1 awen|OJJ33033.1 azon|OJJ44848.1

Group1969: abra|OJJ69315.1 acar|OOF90302.1 acla|EAW14734.1 afis|EAW24266.1 afla|EED48011.1 afum|EAL85934.1 agla|OJJ79606.1 akaw|GAA88184.1 aluc|OJZ82144.1 anid|CBF74173.1 anig|EHA28586.1

aory|EIT82916.1 asyd|OJJ53940.1 ater|EAU31210.1 atub|OJI88292.1 aver|OJJ08037.1 awen|OJJ33034.1 azon|OJJ48485.1

Group1970: abra|OJJ69316.1 acar|OOF90303.1 acla|EAW14732.1 afis|EAW24265.1 afla|EED48012.1 afum|EAL85933.1 agla|OJJ79607.1 akaw|GAA88185.1 aluc|OJZ82145.1 anid|CBF74175.1 anig|EHA28585.1 aory|EIT82905.1 asyd|OJJ53941.1 ater|EAU31209.1 atub|OJI88291.1 aver|OJJ08038.1 awen|OJJ33035.1 azon|OJJ48484.1

Group1971: abra|OJJ69319.1 acar|OOF94411.1 acla|EAW14726.1 afis|EAW24262.1 akaw|GAA88188.1 aluc|OJZ82148.1 ater|EAU31207.1 atub|OJI88287.1 aver|OJJ08043.1 awen|OJJ33039.1 azon|OJJ48479.1 afum|EAL85930.1 agla|OJJ79610.1 anid|CBF74186.1 anig|EHA28582.1 aory|EIT82904.1 asyd|OJJ53946.1 afla|EED48015.1

Group1972: abra|OJJ69329.1 acar|OOF94398.1 acla|EAW14711.1 afis|EAW24246.1 afla|EED48028.1 afum|EAL85914.1 agla|OJJ79627.1 akaw|GAA88200.1 aluc|OJZ82161.1 anid|CBF74210.1 anig|EHA28571.1 aory|EIT83322.1 asyd|OJJ53956.1 ater|EAU31187.1 atub|OJI88276.1 aver|OJJ08052.1 awen|OJJ33058.1 azon|OJJ48466.1

Group1973: abra|OJJ69332.1 acar|OOF94395.1 acla|EAW14708.1 afis|EAW24239.1 afla|EED48031.1 afum|EAL85907.1 agla|OJJ79630.1 akaw|GAA88203.1 aluc|OJZ82164.1 anid|CBF74213.1 anig|EHA28568.1 aory|EIT83322.1 asyd|OJJ53957.1 ater|EAU31186.1 atub|OJI88273.1 aver|OJJ08053.1 awen|OJJ33054.1 azon|OJJ48465.1

Group1974: anig|EHA28560.1 abra|OJJ69342.1 acar|OOF94385.1 acla|EAW14704.1 afis|EAW24235.1 afla|EED48036.1 afum|EAL85904.1 agla|OJJ79636.1 akaw|GAA88211.1 aluc|OJZ82174.1 anid|CBF74219.1 aory|EIT83346.1 asyd|OJJ53961.1 ater|EAU31183.1 atub|OJI88263.1 aver|OJJ08057.1 awen|OJJ33063.1 azon|OJJ48461.1

Group1975: abra|OJJ69343.1 acar|OOF94386.1 acla|EAW14703.1 afis|EAW24234.1 afla|EED48037.1 afum|EAL85903.1 agla|OJJ79637.1 akaw|GAA88212.1 aluc|OJZ82175.1 anid|CBF74221.1 anig|EHA28559.1 aory|EIT83326.1 asyd|OJJ53962.1 ater|EAU31182.1 atub|OJI88262.1 aver|OJJ08058.1 awen|OJJ33064.1 azon|OJJ48460.1

Group1976: abra|OJJ69345.1 acar|OOF94379.1 acla|EAW14701.1 afis|EAW24232.1 afla|EED48039.1 afum|EAL85901.2 agla|OJJ79639.1 akaw|GAA88214.1 aluc|OJZ82177.1 anid|CBF74223.1 anig|EHA28557.1 aory|EIT83353.1 asyd|OJJ53964.1 ater|EAU31180.1 atub|OJI88260.1 aver|OJJ08060.1 awen|OJJ33065.1 azon|OJJ48458.1

Group1977: abra|OJJ69346.1 acar|OOF94378.1 acla|EAW14700.1 afis|EAW24231.1 afla|EED48040.1 afum|EAL85900.1 agla|OJJ79640.1 akaw|GAA88215.1 aluc|OJZ82178.1 anid|CBF74224.1 anig|EHA28556.1 aory|EIT83342.1 asyd|OJJ53965.1 ater|EAU31179.1 atub|OJI88259.1 aver|OJJ08061.1 awen|OJJ33066.1 azon|OJJ48457.1

Group1978: abra|OJJ69349.1 acar|OOF94376.1 acla|EAW14739.1 afis|EAW24270.1 afla|EED48007.1 afum|EAL85938.1 agla|OJJ79595.1 akaw|GAA88219.1 aluc|OJZ82181.1 anid|CBF74165.1 anig|EHA28553.1 aory|EIT82896.1 asyd|OJJ53935.1 ater|EAU31215.1 atub|OJI88254.1 aver|OJJ08033.1 awen|OJJ33030.1 azon|OJJ48489.1

Group1979: abra|OJJ69351.1 acar|OOF94375.1 acla|EAW14740.1 afis|EAW24271.1 afla|EED48006.1 afum|EAL85939.1 agla|OJJ79594.1 akaw|GAA88220.1 aluc|OJZ82183.1 anid|CBF74163.1 anig|EHA28552.1 aory|EIT82918.1 asyd|OJJ53933.1 ater|EAU31216.1 atub|OJI88253.1 aver|OJJ08031.1 awen|OJJ33028.1 azon|OJJ48490.1

Group1980: abra|OJJ69353.1 acar|OOF94372.1 acla|EAW14743.1 afis|EAW24274.1 afla|EED48002.1 afum|EAL85942.1 agla|OJJ79587.1 akaw|GAA88222.1 aluc|OJZ82186.1 anid|CBF74158.1 anig|EHA28550.1 aory|EIT82912.1 asyd|OJJ53927.1 ater|EAU31221.1 atub|OJI88251.1 aver|OJJ08026.1 awen|OJJ33023.1 azon|OJJ48494.1

Group1981: abra|OJJ69355.1 acar|OOF94370.1 acla|EAW14745.1 afis|EAW24276.1 afla|EED48000.1 afum|EAL85945.1 agla|OJJ79585.1 akaw|GAA88224.1 aluc|OJZ82187.1 anid|CBF74156.1 anig|EHA28548.1 aory|EIT82907.1 asyd|OJJ53925.1 ater|EAU31219.1 atub|OJI88249.1 aver|OJJ08024.1 awen|OJJ33021.1 azon|OJJ48496.1

Group1982: abra|OJJ69357.1 acar|OOF94367.1 acla|EAW14748.1 afis|EAW24279.1 afla|EED47997.1 afum|EAL85948.1 agla|OJJ80633.1 akaw|GAA88227.1 aluc|OJZ82189.1 anid|CBF74151.1 anig|EHA28546.1 aory|EIT82902.1 asyd|OJJ53923.1 ater|EAU31228.1 atub|OJI88246.1 aver|OJJ08021.1 awen|OJJ33018.1 azon|OJJ48499.1

Group1983: abra|OJJ69366.1 acar|OOF94359.1 acla|EAW14756.1 afis|EAW24287.1 afla|EED47989.1 afum|EAL85956.1 agla|OJJ83152.1 akaw|GAA88235.1 aluc|OJZ82200.1 anid|CBF74129.1 anig|EHA28539.1 aory|EIT79810.1 asyd|OJJ53912.1 ater|EAU31238.1 atub|OJI88236.1 aver|OJJ08010.1 awen|OJJ33009.1 azon|OJJ48506.1

Group1984: abra|OJJ69367.1 acar|OOF94358.1 acla|EAW14757.1 afis|EAW24288.1 afla|EED47988.1 afum|EAL85957.1 agla|OJJ83153.1 akaw|GAA88236.1 aluc|OJZ82201.1 anid|CBF74127.1 anig|EHA28538.1 aory|EIT79844.1 asyd|OJJ53911.1 ater|EAU31239.1 atub|OJI88235.1 aver|OJJ08009.1 awen|OJJ33008.1 azon|OJJ48507.1

Group1985: abra|OJJ69369.1 acar|OOF89837.1 acla|EAW14759.1 afis|EAW24290.1 afla|EED47986.1 afum|EAL85958.1 agla|OJJ83155.1 akaw|GAA88238.1 aluc|OJZ82203.1 anid|CBF74125.1 anig|EHA28536.1 aory|EIT79849.1 asyd|OJJ53909.1 ater|EAU31240.1 atub|OJI88233.1 aver|OJJ08007.1 awen|OJJ33006.1 azon|OJJ48509.1

Group1986: abra|OJJ69370.1 acar|OOF94357.1 acla|EAW14760.1 afis|EAW24291.1 afla|EED47985.1 afum|EAL85959.1 agla|OJJ83156.1 akaw|GAA88239.1 aluc|OJZ82204.1 anid|CBF74123.1 anig|EHA28535.1 aory|EIT79854.1 asyd|OJJ53908.1 ater|EAU31241.1 atub|OJI88232.1 aver|OJJ08006.1 awen|OJJ33005.1 azon|OJJ48510.1

Group1987: abra|OJJ69371.1 acar|OOF94355.1 acla|EAW14761.1 afis|EAW24292.1 afla|EED47984.1 afum|EAL85960.1 agla|OJJ83157.1 akaw|GAA88240.1 aluc|OJZ82205.1 anid|CBF74121.1 anig|EHA28534.1 aory|EIT79808.1 asyd|OJJ53907.1 ater|EAU31242.1 atub|OJI88231.1 aver|OJJ08005.1 awen|OJJ33004.1 azon|OJJ48511.1

Group1988: abra|OJJ69373.1 acar|OOF94354.1 acla|EAW14763.1 afis|EAW24294.1 afla|EED47982.1 afum|EAL85962.1 agla|OJJ83159.1 akaw|GAA88242.1 aluc|OJZ82208.1 anid|CBF74118.1 anig|EHA28532.1 aory|EIT79845.1 asyd|OJJ53905.1 ater|EAU31244.1 atub|OJI88228.1 aver|OJJ08003.1 awen|OJJ33001.1 azon|OJJ48513.1

Group1989: abra|OJJ69375.1 acar|OOF94351.1 acla|EAW14765.1 afis|EAW24296.1 afla|EED47980.1 afum|EAL85964.1 agla|OJJ83161.1 akaw|GAA88244.1 aluc|OJZ82210.1 anid|CBF75402.1 anig|EHA28530.1 aory|EIT79827.1 asyd|OJJ59822.1 ater|EAU31246.1 atub|OJI88226.1 aver|OJJ02465.1 awen|OJJ32998.1 azon|OJJ48514.1

Group1990: abra|OJJ69376.1 acar|OOF94349.1 acla|EAW14766.1 afis|EAW24297.1 afla|EED47979.1 afum|EAL85965.1 agla|OJJ83162.1 akaw|GAA88245.1 aluc|OJZ82211.1 anid|CBF74116.1 anig|EHA28529.1 aory|EIT79833.1 asyd|OJJ53904.1 ater|EAU31248.1 atub|OJI88225.1 aver|OJJ08001.1 awen|OJJ32997.1 azon|OJJ48515.1

Group1991: abra|OJJ69381.1 acar|OOF94344.1 acla|EAW14768.1 afis|EAW24299.1 afla|EED47973.1 afum|EAL85967.1 agla|OJJ83167.1 akaw|GAA88249.1 aluc|OJZ82216.1 anid|CBF74108.1 anig|EHA28524.1 aory|EIT79831.1 asyd|OJJ53901.1 ater|EAU31250.1 atub|OJI88219.1 aver|OJJ07998.1 awen|OJJ32993.1 azon|OJJ48523.1

Group1992: abra|OJJ69383.1 acar|OOF94343.1 acla|EAW14770.1 afis|EAW24301.1 afla|EED47971.1 afum|EAL85969.1 agla|OJJ83169.1 akaw|GAA88251.1 aluc|OJZ82217.1 anid|CBF74104.1 anig|EHA28523.1 aory|EIT79840.1 asyd|OJJ53899.1 ater|EAU31252.1 atub|OJI88218.1 aver|OJJ07996.1 awen|OJJ32991.1 azon|OJJ48525.1

Group1993: abra|OJJ69384.1 acar|OOF94342.1 acla|EAW14771.1 afis|EAW24302.1 afla|EED47970.1 afum|EAL85970.1 agla|OJJ83170.1 akaw|GAA88252.1 aluc|OJZ82218.1 anid|CBF74102.1 anig|EHA28522.1 aory|EIT79832.1 asyd|OJJ53898.1 ater|EAU31253.1 atub|OJI88217.1 aver|OJJ07995.1 awen|OJJ32990.1 azon|OJJ45840.1

Group1994: abra|OJJ69385.1 acar|OOF94341.1 acla|EAW14772.1 afis|EAW24303.1 afla|EED47969.1 afum|EAL85971.1 agla|OJJ83171.1 akaw|GAA88253.1 aluc|OJZ82219.1 anid|CBF74100.1 anig|EHA28521.1 aory|EIT79817.1 asyd|OJJ53897.1 ater|EAU31256.1 atub|OJI88216.1 aver|OJJ07994.1 awen|OJJ32989.1 azon|OJJ48526.1

Group1995: abra|OJJ69386.1 acar|OOF94340.1 acla|EAW14773.1 afis|EAW24304.1 afla|EED47968.1 afum|EAL85972.1 agla|OJJ83172.1 akaw|GAA88254.1 aluc|OJZ82220.1 anid|CBF79548.1 anig|EHA28520.1 aory|EIT79824.1 asyd|OJJ62162.1 ater|EAU31257.1 atub|OJI88215.1 aver|OJI96272.1 awen|OJJ32988.1 azon|OJJ48527.1

Group1996: abra|OJJ69387.1 acar|OOF94339.1 acla|EAW14774.1 afis|EAW24305.1 afla|EED47965.1 afum|EAL85973.1 agla|OJJ83173.1 akaw|GAA88255.1 aluc|OJZ82221.1 anid|CBF74098.1 anig|EHA28519.1 aory|EIT79856.1 asyd|OJJ53896.1 ater|EAU31258.1 atub|OJI88214.1 aver|OJJ07993.1 awen|OJJ32987.1 azon|OJJ48932.1

Group1997: abra|OJJ69398.1 acar|OOF94332.1 acla|EAW14780.1 afis|EAW24311.1 afla|EED47956.1 afum|EAL85979.1 agla|OJJ83179.1 akaw|GAA88264.1 aluc|OJZ82234.1 anid|CBF74081.1 anig|EHA28507.1 aory|EIT79851.1 asyd|OJJ53882.1 ater|EAU31264.1 atub|OJI88204.1 aver|OJJ07980.1 awen|OJJ32981.1 azon|OJJ48936.1

Group1998: abra|OJJ69400.1 acar|OOF94330.1 acla|EAW14782.1 afis|EAW24313.1 afla|EED47954.1 afum|EAL85981.1 agla|OJJ83181.1 akaw|GAA88266.1 aluc|OJZ82236.1 anid|CBF74079.1 anig|EHA28505.1

aory|EIT79862.1 asyd|OJJ53880.1 ater|EAU31266.1 atub|OJI88202.1 aver|OJJ07978.1 awen|OJJ32979.1 azon|OJJ48938.1

Group1999: abra|OJJ69402.1 acar|OOF94329.1 acla|EAW14784.1 afis|EAW24315.1 afla|EED47952.1 afum|EAL85983.1 agla|OJJ83183.1 akaw|GAA88267.1 aluc|OJZ82238.1 anid|CBF74078.1 anig|EHA28503.1 aory|EIT79841.1 asyd|OJJ53878.1 ater|EAU31267.1 atub|OJI88200.1 aver|OJJ07976.1 awen|OJJ32977.1 azon|OJJ48940.1

Group2000: abra|OJJ69404.1 acar|OOF94327.1 acla|EAW14786.1 afis|EAW24317.1 afla|EED47950.1 afum|EAL85985.1 agla|OJJ83185.1 akaw|GAA88269.1 aluc|OJZ82240.1 anid|CBF74074.1 anig|EHA28501.1 aory|EIT79859.1 asyd|OJJ53876.1 ater|EAU31270.1 atub|OJI88198.1 aver|OJJ07974.1 awen|OJJ32975.1 azon|OJJ48942.1

Group2001: abra|OJJ69405.1 acar|OOF94326.1 acla|EAW14787.1 afis|EAW24318.1 afla|EED47949.1 afum|EAL85987.1 agla|OJJ83186.1 akaw|GAA88270.1 aluc|OJZ82242.1 anid|CBF74073.1 anig|EHA28500.1 aory|EIT79816.1 asyd|OJJ53875.1 ater|EAU31271.1 atub|OJI88196.1 aver|OJJ07973.1 awen|OJJ32974.1 azon|OJJ48943.1

Group2002: abra|OJJ69410.1 acar|OOF94323.1 afla|EED47946.1 afum|EAL85990.1 akaw|GAA88277.1 aluc|OJZ82247.1 anid|CBF74069.1 anig|EHA28494.1 aory|EIT79850.1 asyd|OJJ53873.1 ater|EAU31273.1 atub|OJI88191.1 aver|OJJ07971.1 azon|OJJ48945.1 acla|EAW14789.1 afis|EAW24320.1 agla|OJJ83189.1 awen|OJJ32972.1

Group2003: abra|OJJ69411.1 acar|OOF94322.1 acla|EAW14790.1 afis|EAW24321.1 afla|EED47945.1 afum|EAL85991.1 agla|OJJ83190.1 akaw|GAA88278.1 aluc|OJZ82248.1 anid|CBF74068.1 anig|EHA28493.1 aory|EIT79836.1 asyd|OJJ53872.1 ater|EAU31274.1 atub|OJI88190.1 aver|OJJ07970.1 awen|OJJ32971.1 azon|OJJ48946.1

Group2004: abra|OJJ69412.1 acar|OOF94321.1 acla|EAW14791.1 afis|EAW24322.1 afla|EED47944.1 afum|EAL85992.1 agla|OJJ83191.1 akaw|GAA88279.1 aluc|OJZ82249.1 anid|CBF74066.1 anig|EHA28492.1 aory|EIT79820.1 asyd|OJJ53871.1 ater|EAU30430.1 atub|OJI88189.1 aver|OJJ07969.1 awen|OJJ32970.1 azon|OJJ48947.1

Group2006: abra|OJJ69414.1 acar|OOF94318.1 acla|EAW14795.1 afis|EAW24326.1 afla|EED47940.1 afum|EAL85996.1 agla|OJJ83193.1 akaw|GAA88282.1 aluc|OJZ82251.1 anid|CBF74056.1 anig|EHA28490.1 aory|EIT79834.1 asyd|OJJ53868.1 ater|EAU30427.1 atub|OJI88186.1 aver|OJJ07966.1 awen|OJJ32968.1 azon|OJJ48949.1

Group2007: abra|OJJ69415.1 acar|OOF94317.1 acla|EAW14796.1 afis|EAW24327.1 afla|EED47939.1 afum|EAL85997.1 agla|OJJ83194.1 akaw|GAA88283.1 aluc|OJZ82252.1 anid|CBF74054.1 anig|EHA28489.1 aory|EIT79852.1 asyd|OJJ53867.1 ater|EAU30426.1 atub|OJI88185.1 aver|OJJ07965.1 awen|OJJ32967.1 azon|OJJ48950.1

Group2008: abra|OJJ69417.1 acar|OOF94315.1 acla|EAW14798.1 afis|EAW24329.1 afla|EED47937.1 afum|EAL85999.1 agla|OJJ83196.1 akaw|GAA88285.1 aluc|OJZ82254.1 anid|CBF74052.1 anig|EHA28487.1 aory|EIT79861.1 asyd|OJJ53865.1 atub|OJI88183.1 aver|OJJ07963.1 awen|OJJ32965.1 azon|OJJ48953.1 ater|EAU30424.1

Group2009: abra|OJJ69419.1 acar|OOF90227.1 acla|EAW14799.1 afis|EAW24330.1 afla|EED47935.1 afum|EAL86000.1 agla|OJJ83197.1 akaw|GAA88286.1 aluc|OJZ82255.1 anid|CBF74050.1 anig|EHA28486.1 aory|EIT79863.1 asyd|OJJ53863.1 ater|EAU30422.1 atub|OJI88182.1 aver|OJJ07962.1 awen|OJJ32964.1 azon|OJJ48954.1

Group2010: abra|OJJ69420.1 acar|OOF90228.1 acla|EAW14800.1 afis|EAW24331.1 afla|EED47933.1 afum|EAL86001.1 agla|OJJ83198.1 akaw|GAA88287.1 aluc|OJZ82256.1 anid|CBF74048.1 anig|EHA28485.1 aory|EIT79848.1 asyd|OJJ53862.1 ater|EAU30418.1 atub|OJI88181.1 aver|OJJ07961.1 awen|OJJ32963.1 azon|OJJ48955.1

Group2011: abra|OJJ69421.1 acar|OOF90226.1 acla|EAW14801.1 afis|EAW24332.1 afla|EED47932.1 afum|EAL86002.1 agla|OJJ83199.1 akaw|GAA88288.1 aluc|OJZ82258.1 anid|CBF74045.1 anig|EHA28484.1 aory|EIT79839.1 asyd|OJJ53857.1 ater|EAU30417.1 atub|OJI88180.1 aver|OJJ07958.1 awen|OJJ32962.1 azon|OJJ48960.1

Group2012: abra|OJJ69423.1 acar|OOF94313.1 acla|EAW14802.1 afis|EAW24333.1 afla|EED47931.1 afum|EAL86003.1 agla|OJJ83202.1 akaw|GAA88289.1 aluc|OJZ82259.1 anid|CBF74039.1 anig|EHA28483.1 aory|EIT79843.1 asyd|OJJ53859.1 ater|EAU30416.1 atub|OJI88179.1 aver|OJJ07959.1 awen|OJJ32961.1 azon|OJJ48959.1

Group2013: abra|OJJ69446.1 acar|OOF94294.1 acla|EAW14811.1 afis|EAW24341.1 afla|EED47922.1 afum|EAL86012.1 agla|OJJ83224.1 akaw|GAA88372.1 aluc|OJZ82282.1 anid|CBF74027.1 anig|EHA28465.1 aory|EIT83372.1 asyd|OJJ53846.1 ater|EAU30406.1 atub|OJI88157.1 aver|OJJ07948.1 awen|OJJ32950.1 azon|OJJ48970.1

Group2014: abra|OJJ69448.1 acar|OOF94293.1 acla|EAW14812.1 afis|EAW24342.1 afla|EED47920.1 afum|EAL86013.1 agla|OJJ83223.1 akaw|GAA88371.1 aluc|OJZ82283.1 anid|CBF74025.1 anig|EHA28464.1 aory|EIT83362.1 asyd|OJJ53845.1 ater|EAU30404.1 atub|OJI88155.1 aver|OJJ07947.1 awen|OJJ32951.1 azon|OJJ48969.1

Group2015: abra|OJJ69449.1 acar|OOF94292.1 acla|EAW14813.1 afis|EAW24343.1 afla|EED47919.1 afum|EAL86014.1 agla|OJJ83210.1 akaw|GAA88370.1 aluc|OJZ82285.1 anid|CBF74028.1 anig|EHA28463.1 aory|EIT83364.1 asyd|OJJ53847.1 ater|EAU30403.1 atub|OJI88154.1 aver|OJJ07949.1 awen|OJJ32952.1 azon|OJJ48968.1

Group2016: abra|OJJ69453.1 acar|OOF94288.1 acla|EAW14817.1 afis|EAW24347.1 afla|EED47916.1 afum|EAL86017.1 agla|OJJ83206.1 akaw|GAA88359.1 aluc|OJZ82296.1 anid|CBF74017.1 anig|EHA28459.1 aory|EIT83378.1 asyd|OJJ53840.1 ater|EAU30399.1 atub|OJI88143.1 aver|OJJ07943.1 awen|OJJ32956.1 azon|OJJ48964.1

Group2017: abra|OJJ69456.1 acar|OOF94285.1 acla|EAW14821.1 afis|EAW24349.1 afla|EED47914.1 afum|EAL86019.2 agla|OJJ81762.1 akaw|GAA88356.1 aluc|OJZ82299.1 anid|CBF76155.1 anig|EHA28456.1 aory|EIT83376.1 asyd|OJJ52360.1 ater|EAU30395.1 atub|OJI88140.1 aver|OJJ01988.1 awen|OJJ32875.1 azon|OJJ48976.1

Group2018: abra|OJJ69457.1 acar|OOF94284.1 acla|EAW14820.1 afis|EAW24350.1 afla|EED47913.1 afum|EAL86020.2 agla|OJJ81761.1 akaw|GAA88355.1 aluc|OJZ82300.1 anid|CBF76157.1 anig|EHA28455.1 aory|EIT83375.1 asyd|OJJ52359.1 ater|EAU30394.1 atub|OJI88139.1 aver|OJJ01990.1 awen|OJJ32874.1 azon|OJJ48975.1

Group2019: abra|OJJ69458.1 acar|OOF94283.1 acla|EAW14819.1 afis|EAW24351.1 afla|EED47912.1 afum|EAL86021.1 agla|OJJ81760.1 akaw|GAA88354.1 aluc|OJZ82301.1 anid|CBF76159.1 anig|EHA28454.1 aory|EIT83371.1 asyd|OJJ52358.1 ater|EAU30393.1 atub|OJI88137.1 aver|OJJ01991.1 awen|OJJ32873.1 azon|OJJ48974.1

Group2020: abra|OJJ69459.1 acar|OOF94282.1 acla|EAW09925.1 afis|EAW21173.1 afla|EED54758.1 afum|EAL92193.1 agla|OJJ80005.1 akaw|GAA88353.1 aluc|OJZ82302.1 anid|CBF83317.1 anig|EHA28453.1 aory|EIT79382.1 asyd|OJJ60559.1 ater|EAU35840.1 atub|OJI88135.1 aver|OJI99885.1 awen|OJJ36511.1 azon|OJJ44387.1

Group2021: abra|OJJ69463.1 acar|OOF94278.1 acla|EAW09922.1 afis|EAW21170.1 afla|EED54735.1 afum|EAL92189.2 agla|OJJ80010.1 akaw|GAA88349.1 aluc|OJZ82306.1 anid|CBF83232.1 anig|EHA28450.1 aory|EIT78745.1 asyd|OJJ60541.1 ater|EAU35837.1 atub|OJI88132.1 aver|OJI99868.1 awen|OJJ36507.1 azon|OJJ44379.1

Group2022: abra|OJJ69467.1 acar|OOF94275.1 acla|EAW09920.1 afis|EAW21168.1 afla|EED54732.1 afum|EAL92187.1 agla|OJJ80012.1 akaw|GAA88346.1 aluc|OJZ82311.1 anid|CBF86960.1 anig|EHA28447.1 aory|EIT78891.1 asyd|OJJ60539.1 ater|EAU35835.1 atub|OJI88129.1 aver|OJI99866.1 awen|OJJ36505.1 azon|OJJ44377.1

Group2023: abra|OJJ69468.1 acar|OOF94274.1 acla|EAW09919.1 afis|EAW21167.1 afla|EED54731.1 afum|EAL92186.1 agla|OJJ80013.1 akaw|GAA88345.1 aluc|OJZ82312.1 anid|CBF86961.1 anig|EHA28446.1 aory|EIT78775.1 asyd|OJJ60537.1 ater|EAU35834.1 atub|OJI88128.1 aver|OJI99864.1 awen|OJJ36504.1 azon|OJJ44376.1

Group2024: abra|OJJ69469.1 acar|OOF94273.1 acla|EAW09918.1 afis|EAW21166.1 afla|EED54730.1 afum|EAL92185.1 agla|OJJ80015.1 akaw|GAA88344.1 aluc|OJZ82313.1 anid|CBF86963.1 anig|EHA28445.1 aory|EIT78843.1 asyd|OJJ60536.1 ater|EAU35833.1 atub|OJI88127.1 aver|OJI99863.1 awen|OJJ36503.1 azon|OJJ44375.1

Group2025: abra|OJJ69471.1 acar|OOF94272.1 acla|EAW09917.1 afis|EAW21165.1 afla|EED54729.1 afum|EAL92184.1 agla|OJJ80016.1 akaw|GAA88343.1 aluc|OJZ82314.1 anid|CBF86964.1 anig|EHA28444.1 aory|EIT78934.1 asyd|OJJ60535.1 ater|EAU35832.1 atub|OJI88126.1 aver|OJI99862.1 awen|OJJ36500.1 azon|OJJ44374.1

Group2026: abra|OJJ69473.1 acar|OOF94270.1 acla|EAW09915.1 afis|EAW21163.1 afla|EED54726.1 afum|EAL92182.1 agla|OJJ80020.1 akaw|GAA88342.1 aluc|OJZ82316.1 anid|CBF86968.1 anig|EHA28442.1 aory|EIT78844.1 asyd|OJJ60532.1 ater|EAU35829.1 atub|OJI88125.1 aver|OJI99859.1 awen|OJJ36497.1 azon|OJJ44372.1

Group2027: abra|OJJ69474.1 acar|OOF94268.1 acla|EAW09914.1 afis|EAW21162.1 afla|EED54725.1 afum|EAL92181.1 agla|OJJ80021.1 akaw|GAA88341.1 aluc|OJZ82317.1 anid|CBF86970.1 anig|EHA28441.1 aory|EIT78833.1 asyd|OJJ60531.1 ater|EAU35828.1 atub|OJI88124.1 aver|OJI99858.1 awen|OJJ36496.1 azon|OJJ44371.1

Group2028: abra|OJJ69475.1 acar|OOF94269.1 acla|EAW09913.1 afis|EAW21161.1 afla|EED54724.1 afum|EAL92180.1 agla|OJJ80022.1 akaw|GAA88340.1 aluc|OJZ82318.1 anid|CBF86972.1 anig|EHA28440.1

aory|EIT78951.1 asyd|OJJ60530.1 ater|EAU35827.1 atub|OJI88123.1 aver|OJI99857.1 awen|OJJ36495.1 azon|OJJ44370.1

Group2029: abra|OJJ69477.1 acar|OOF94265.1 acla|EAW09911.1 afis|EAW21160.1 afla|EED54649.1 afum|EAL92178.1 agla|OJJ80028.1 akaw|GAA88338.1 aluc|OJZ82320.1 anid|CBF86977.1 anig|EHA28438.1 aory|EIT78896.1 asyd|OJJ60527.1 ater|EAU35822.1 atub|OJI88120.1 aver|OJI99855.1 awen|OJJ36492.1 azon|OJJ44365.1

Group2030: abra|OJJ69481.1 acar|OOF94263.1 acla|EAW09908.1 akaw|GAA88335.1 aluc|OJZ82323.1 anig|EHA28435.1 atub|OJI88117.1 awen|OJJ36488.1 agla|OJJ80036.1 afis|EAW21157.1 afum|EAL92175.1 afla|EED54653.1 aory|EIT78820.1 ater|EAU35819.1 anid|CBF86982.1 asyd|OJJ60523.1 aver|OJI99847.1 azon|OJJ44359.1

Group2031: abra|OJJ69483.1 acar|OOF94262.1 acla|EAW09907.1 afis|EAW21156.1 afla|EED54652.1 afum|EAL92174.1 agla|OJJ80037.1 akaw|GAA88334.1 aluc|OJZ82324.1 anid|CBF86984.1 anig|EHA28434.1 aory|EIT78871.1 asyd|OJJ60518.1 ater|EAU35818.1 atub|OJI88116.1 aver|OJI99845.1 awen|OJJ36487.1 azon|OJJ44360.1

Group2032: abra|OJJ69485.1 acar|OOF94261.1 acla|EAW09906.1 afis|EAW21155.1 afla|EED54661.1 afum|EAL92173.1 agla|OJJ80038.1 akaw|GAA88333.1 aluc|OJZ82326.1 anid|CBF86986.1 anig|EHA28432.1 aory|EIT78925.1 asyd|OJJ60520.1 ater|EAU35817.1 atub|OJI88114.1 aver|OJI99846.1 awen|OJJ36486.1 azon|OJJ44362.1

Group2034: abra|OJJ69496.1 acar|OOF94254.1 acla|EAW09950.1 afis|EAW21146.1 afla|EED46146.1 afum|EAL92165.1 agla|OJJ80070.1 akaw|GAA88325.1 aluc|OJZ82336.1 anid|CBF87010.1 anig|EHA28424.1 aory|EIT76496.1 asyd|OJJ60472.1 ater|EAU36761.1 atub|OJI88104.1 aver|OJI99792.1 awen|OJJ36469.1 azon|OJJ44354.1

Group2035: abra|OJJ69497.1 acar|OOF94256.1 acla|EAW09951.1 afis|EAW21145.1 afla|EED46147.1 afum|EAL92164.1 agla|OJJ80071.1 akaw|GAA88324.1 aluc|OJZ82337.1 anid|CBF86995.1 anig|EHA28423.1 aory|EIT76462.1 asyd|OJJ60473.1 ater|EAU36757.1 atub|OJI88103.1 aver|OJI99793.1 awen|OJJ36470.1 azon|OJJ44355.1

Group2036: abra|OJJ69498.1 acar|OOF94257.1 acla|EAW09952.1 afis|EAW21144.1 afla|EED46148.1 afum|EAL92163.1 agla|OJJ80072.1 akaw|GAA88323.1 aluc|OJZ82338.1 anid|CBF86997.1 anig|EHA28422.1 aory|EIT76514.1 asyd|OJJ60474.1 ater|EAU36756.1 atub|OJI88102.1 aver|OJI99794.1 awen|OJJ36471.1 azon|OJJ44356.1

Group2037: abra|OJJ69505.1 acar|OOF94247.1 acla|EAW09957.1 afis|EAW21136.1 afla|EED51811.1 afum|EAL92155.1 agla|OJJ80076.1 akaw|GAA88318.1 aluc|OJZ82344.1 anid|CBF87016.1 anig|EHA28416.1 aory|EIT81758.1 asyd|OJJ60463.1 ater|EAU36774.1 atub|OJI88096.1 aver|OJI99783.1 awen|OJJ36456.1 azon|OJJ44420.1

Group2038: abra|OJJ69506.1 acar|OOF94246.1 acla|EAW09958.1 afis|EAW21137.1 afla|EED51812.1 afum|EAL92156.1 agla|OJJ80081.1 akaw|GAA88317.1 aluc|OJZ82345.1 anid|CBF87014.1 anig|EHA28415.1 aory|EIT81705.1 asyd|OJJ60464.1 ater|EAU36773.1 atub|OJI88095.1 aver|OJI99784.1 awen|OJJ36457.1 azon|OJJ44418.1

Group2039: abra|OJJ69508.1 acar|OOF94245.1 acla|EAW09959.1 afis|EAW21138.1 afla|EED51813.1 afum|EAL92157.2 agla|OJJ80080.1 akaw|GAA88316.1 aluc|OJZ82346.1 anid|CBF87012.1 anig|EHA28414.1 aory|EIT81694.1 asyd|OJJ60465.1 ater|EAU36772.1 atub|OJI88094.1 aver|OJI99785.1 awen|OJJ36458.1 azon|OJJ44419.1

Group2040: abra|OJJ69510.1 acar|OOF94244.1 acla|EAW09960.1 afis|EAW21135.1 afla|EED46138.1 afum|EAL92154.1 agla|OJJ80078.1 akaw|GAA88314.1 aluc|OJZ82348.1 anid|CBF87000.1 anig|EHA28412.1 aory|EIT76494.1 asyd|OJJ60467.1 ater|EAU36767.1 atub|OJI88092.1 aver|OJI99787.1 awen|OJJ36461.1 azon|OJJ44416.1

Group2041: abra|OJJ69513.1 acar|OOF94240.1 acla|EAW09955.1 afis|EAW21141.1 afla|EED46142.1 afum|EAL92160.1 agla|OJJ80068.1 akaw|GAA88311.1 aluc|OJZ82351.1 anid|CBF87007.1 anig|EHA28409.1 aory|EIT76415.1 asyd|OJJ60470.1 ater|EAU36762.1 atub|OJI88089.1 aver|OJI99790.1 awen|OJJ36465.1 azon|OJJ44413.1

Group2042: abra|OJJ69516.1 acar|OOF94238.1 acla|EAW09964.1 afis|EAW21124.1 afla|EED51799.1 afum|EAL92147.1 agla|OJJ80086.1 akaw|GAA88308.1 aluc|OJZ82354.1 anid|CBF87018.1 anig|EHA28406.1 aory|EIT81724.1 asyd|OJJ60461.1 ater|EAU36776.1 atub|OJI88086.1 aver|OJI99781.1 awen|OJJ36454.1 azon|OJJ44423.1

Group2043: abra|OJJ69520.1 acar|OOF94237.1 acla|EAW09966.1 afis|EAW21122.1 afla|EED51795.1 afum|EAL92145.1 agla|OJJ80089.1 akaw|GAA88306.1 aluc|OJZ82359.1 anid|CBF87021.1 anig|EHA28404.1 aory|EIT81713.1 asyd|OJJ60459.1 ater|EAU36778.1 atub|OJI88082.1 aver|OJI99779.1 awen|OJJ36452.1 azon|OJJ44425.1



Group2044: abra|OJJ69522.1 acar|OOF94233.1 acla|EAW09968.1 afis|EAW21120.1 afla|EED51793.1 afum|EBA27448.1 agla|OJJ80091.1 akaw|GAA88305.1 aluc|OJZ82362.1 anid|CBF87025.1 anig|EHA28403.1 aory|EIT81754.1 asyd|OJJ60457.1 ater|EAU36779.1 atub|OJI88080.1 aver|OJI99777.1 awen|OJJ36450.1 azon|OJJ44427.1

Group2045: abra|OJJ69525.1 acar|OOF94229.1 acla|EAW09972.1 afis|EAW21116.1 afla|EED51767.1 afum|EAL92139.1 agla|OJJ80095.1 akaw|GAA88300.1 aluc|OJZ82365.1 anid|CBF87030.1 anig|EHA28400.1 aory|EIT79993.1 asyd|OJJ60455.1 ater|EAU36783.1 atub|OJI88077.1 aver|OJI99773.1 awen|OJJ36446.1 azon|OJJ44429.1

Group2047: abra|OJJ69535.1 acar|OOF95965.1 acla|EAW11570.1 afis|EAW23883.1 afla|EED52612.1 afum|EAL87311.1 agla|OJJ82570.1 akaw|GAA88385.1 aluc|OJZ82373.1 anid|CBF77187.1 anig|EHA28391.1 aory|EIT74250.1 asyd|OJJ56841.1 ater|EAU33463.1 atub|OJI88069.1 aver|OJJ03497.1 awen|OJJ33865.1 azon|OJJ48688.1

Group2048: abra|OJJ69536.1 acar|OOF91604.1 acla|EAW14409.1 afis|EAW19117.1 afla|EED54297.1 afum|EAL93849.1 agla|OJJ80432.1 akaw|GAA91927.1 aluc|OJZ82695.1 anid|CBF79728.1 anig|EHA21143.1 aory|EIT75966.1 asyd|OJJ58073.1 ater|EAU37379.1 atub|OJI88927.1 aver|OJJ04334.1 awen|OJJ37447.1 azon|OJJ51125.1

Group2049: abra|OJJ69575.1 acar|OOF91580.1 acla|EAW14394.1 afis|EAW19102.1 afla|EED54308.1 afum|EAL93834.1 agla|OJJ84500.1 akaw|GAA91572.1 aluc|OJZ82392.1 anid|CBF79696.1 anig|EHA28372.1 aory|EIT75942.1 asyd|OJJ58050.1 ater|EAU32151.1 atub|OJI88049.1 aver|OJJ04353.1 awen|OJJ32495.1 azon|OJJ46034.1

Group2050: abra|OJJ69580.1 acar|OOF91573.1 acla|EAW14388.1 afis|EAW19095.1 afla|EED54328.1 afum|EAL93826.1 agla|OJJ84506.1 akaw|GAA91576.1 aluc|OJZ82398.1 anid|CBF79705.1 anig|EHA28367.1 aory|EIT75940.1 asyd|OJJ58055.1 ater|EAU32143.1 atub|OJI88044.1 aver|OJJ04348.1 awen|OJJ32488.1 azon|OJJ46043.1

Group2052: abra|OJJ69584.1 acar|OOF91570.1 acla|EAW14385.1 afis|EAW19091.1 afla|EED54326.1 afum|EAL93821.1 agla|OJJ84512.1 akaw|GAA91579.1 aluc|OJZ82401.1 anid|CBF79711.1 anig|EHA28364.1 aory|EIT76092.1 asyd|OJJ58058.1 ater|EAU32140.1 atub|OJI88040.1 aver|OJJ04345.1 awen|OJJ32485.1 azon|OJJ46046.1

Group2053: abra|OJJ69587.1 acar|OOF91568.1 acla|EAW14380.1 afis|EAW19086.1 afla|EED54318.1 afum|EAL93816.1 agla|OJJ84518.1 akaw|GAA91584.1 aluc|OJZ82404.1 anid|CBF79684.1 anig|EHA28362.1 aory|EIT76159.1 asyd|OJJ58047.1 ater|EAU32134.1 atub|OJI88037.1 aver|OJJ04356.1 awen|OJJ32483.1 azon|OJJ46227.1

Group2054: abra|OJJ69588.1 acar|OOF91567.1 acla|EAW14379.1 afis|EAW19085.1 afla|EED54317.1 afum|EAL93815.1 agla|OJJ84521.1 akaw|GAA91585.1 aluc|OJZ82406.1 anid|CBF79683.1 anig|EHA28361.1 aory|EIT75897.1 asyd|OJJ58046.1 ater|EAU32133.1 atub|OJI88036.1 aver|OJJ04357.1 awen|OJJ32482.1 azon|OJJ46226.1

Group2055: abra|OJJ69590.1 acar|OOF91565.1 acla|EAW14378.1 afis|EAW19084.1 afla|EED54316.1 afum|EAL93814.1 agla|OJJ84522.1 akaw|GAA91586.1 aluc|OJZ82408.1 anid|CBF79676.1 anig|EHA28360.1 aory|EIT75902.1 asyd|OJJ58038.1 ater|EAU32132.1 atub|OJI88034.1 aver|OJJ04362.1 awen|OJJ32481.1 azon|OJJ46224.1

Group2057: abra|OJJ69602.1 acar|OOF92702.1 acla|EAW10013.1 afis|EAW21041.1 afla|EED51373.1 afum|EAL92080.1 agla|OJJ84213.1 akaw|GAA91590.1 aluc|OJZ82413.1 anid|CBF80091.1 anig|EHA28354.1 aory|EIT80745.1 asyd|OJJ58302.1 ater|EAU31725.1 atub|OJI88028.1 aver|OJJ02110.1 awen|OJJ32696.1 azon|OJJ50700.1

Group2058: abra|OJJ69616.1 acar|OOF92690.1 acla|EAW12076.1 afis|EAW19717.1 afla|EED53108.1 afum|EAL86810.1 agla|OJJ80861.1 akaw|GAA91600.1 aluc|OJZ82424.1 anid|CBF80078.1 anig|EHA28345.1 aory|EIT74760.1 asyd|OJJ58310.1 ater|EAU37776.1 atub|OJI88016.1 aver|OJJ02101.1 awen|OJJ35107.1 azon|OJJ49987.1

Group2059: abra|OJJ69628.1 afla|EED55079.1 agla|OJJ86032.1 aluc|OJZ82433.1 anid|CBF82983.1 anig|EHA28338.1 asyd|OJJ64730.1 ater|EAU30171.1 atub|OJI88008.1 aver|OJI98834.1 awen|OJJ30457.1 azon|OJJ45448.1 acar|OOF92682.1 afis|EAW16821.1 afum|EAL86371.1 acla|EAW12375.1 aory|EIT81573.1 akaw|GAA91608.1

Group2061: abra|OJJ69637.1 acar|OOF92675.1 acla|EAW12571.1 afis|EAW24079.1 afla|EED51394.1 afum|EAL91934.1 agla|OJJ87150.1 akaw|GAA91617.1 aluc|OJZ82443.1 anid|CBF86476.1 anig|EHA28330.1 aory|EIT80502.1 asyd|OJJ64903.1 ater|EAU30500.1 atub|OJI87997.1 aver|OJI99025.1 awen|OJJ41417.1 azon|OJJ48876.1

Group2062: azon|OJJ44974.1 abra|OJJ73161.1 acar|OOG00404.1 acla|EAW06767.1 afis|EAW16317.1 afla|EED53564.1 afum|EAL88940.1 agla|OJJ88278.1 akaw|GAA88011.1 aluc|OJZ81269.1 anid|CBF89145.1

anig|EHA18569.1 aory|EIT75175.1 asyd|OJJ62569.1 ater|EAU34140.1 atub|OJI91476.1 aver|OJI96693.1 awen|OJJ37717.1

Group2063: abra|OJJ69655.1 acar|OOG00750.1 acla|EAW07485.1 afis|EAW22518.1 afla|EED54547.1 afum|EAL90675.1 agla|OJJ80878.1 akaw|GAA91634.1 aluc|OJZ82461.1 anid|CBF88995.1 anig|EHA28314.1 aory|EIT78864.1 asyd|OJJ62783.1 ater|EAU39191.1 atub|OJI87977.1 aver|OJI96828.1 awen|OJJ35145.1 azon|OJJ49955.1

Group2064: abra|OJJ69657.1 acar|OOF95821.1 acla|EAW11286.1 afis|EAW18213.1 afla|EED56258.1 afum|EAL87579.1 agla|OJJ85869.1 akaw|GAA91636.1 aluc|OJZ82463.1 anid|CBF75160.1 anig|EHA28312.1 aory|EIT73422.1 asyd|OJJ59962.1 ater|EAU33776.1 atub|OJI87975.1 aver|OJJ02328.1 awen|OJJ30591.1 azon|OJJ50185.1

Group2065: abra|OJJ69663.1 acar|OOF98113.1 acla|EAW10577.1 afis|EAW24990.1 afla|EED55469.1 afum|EAL89650.1 agla|OJJ82264.1 akaw|GAA91641.1 aluc|OJZ82468.1 anid|CBF81596.1 anig|EHA28307.1 aory|EIT80882.1 asyd|OJJ59517.1 ater|EAU35741.1 atub|OJI87970.1 aver|OJJ02756.1 awen|OJJ40595.1 azon|OJJ49446.1

Group2066: abra|OJJ69664.1 acar|OOG00819.1 acla|EAW07551.1 afis|EAW22585.1 afla|EED54630.1 afum|EAL90614.1 agla|OJJ80945.1 akaw|GAA91642.1 aluc|OJZ82469.1 anid|CBF88352.1 anig|EHA28306.1 aory|EIT78765.1 asyd|OJJ63721.1 ater|EAU39114.1 atub|OJI87968.1 aver|OJI97219.1 awen|OJJ35213.1 azon|OJJ49896.1

Group2067: abra|OJJ69665.1 acar|OOG00018.1 acla|EAW09937.1 afis|EAW21182.1 afla|EED54777.1 afum|EAL92203.1 agla|OJJ79988.1 akaw|GAA91643.1 aluc|OJZ82470.1 anid|CBF83310.1 anig|EHA28303.1 aory|EIT79439.1 asyd|OJJ60549.1 ater|EAU35848.1 atub|OJI87967.1 aver|OJI99875.1 awen|OJJ36521.1 azon|OJJ44397.1

Group2068: abra|OJJ69666.1 acar|OOG00019.1 acla|EAW09936.1 afis|EAW21181.1 afla|EED54778.1 afum|EAL92202.1 agla|OJJ79998.1 akaw|GAA91644.1 aluc|OJZ82471.1 anid|CBF83308.1 anig|EHA28302.1 aory|EIT79454.1 asyd|OJJ60550.1 ater|EAU35847.1 atub|OJI87966.1 aver|OJI99876.1 awen|OJJ36520.1 azon|OJJ44396.1

Group2069: abra|OJJ69667.1 acar|OOF97488.1 acla|EAW13075.1 afis|EAW17589.1 afla|EED49233.1 afum|EAL91402.1 agla|OJJ81360.1 akaw|GAA91645.1 aluc|OJZ82472.1 anid|CBF90218.1 anig|EHA28301.1 aory|EIT83160.1 asyd|OJJ61967.1 ater|EAU37024.1 atub|OJI87965.1 aver|OJI96059.1 awen|OJJ37257.1 azon|OJJ50952.1

Group2070: abra|OJJ69669.1 acar|OOF95822.1 acla|EAW06663.1 afis|EAW16102.1 afla|EED48637.1 afum|EAL88734.1 agla|OJJ86131.1 akaw|GAA91647.1 aluc|OJZ82474.1 anid|CBF85442.1 anig|EHA28299.1 aory|EIT73069.1 asyd|OJJ64091.1 ater|EAU33179.1 atub|OJI87963.1 aver|OJI98175.1 awen|OJJ30330.1 azon|OJJ45358.1

Group2071: abra|OJJ69677.1 acar|OOF92983.1 acla|EAW14808.1 afis|EAW24337.1 afla|EED47927.1 afum|EAL86008.1 agla|OJJ83205.1 akaw|GAA88802.1 aluc|OJZ82485.1 anid|CBF74030.1 anig|EHA28289.1 aory|EIT79853.1 asyd|OJJ53849.1 ater|EAU30411.1 atub|OJI87947.1 aver|OJJ07950.1 awen|OJJ32957.1 azon|OJJ48963.1

Group2072: abra|OJJ69682.1 acar|OOF93221.1 acla|EAW13124.1 afis|EAW17540.1 afla|EED49287.1 afum|EAL91354.1 agla|OJJ81429.1 akaw|GAA92416.1 aluc|OJZ83274.1 anid|CBF90315.1 anig|EHA28284.1 aory|EIT82215.1 asyd|OJJ61912.1 ater|EAU36970.1 atub|OJI87666.1 aver|OJI96005.1 awen|OJJ37313.1 azon|OJJ51005.1

Group2073: abra|OJJ69687.1 acar|OOF92648.1 acla|EAW10319.1 afis|EAW25273.1 afla|EED53738.1 afum|EAL89936.1 agla|OJJ89247.1 akaw|GAA88811.1 aluc|OJZ82494.1 anid|CBF85387.1 anig|EHA28278.1 aory|EIT75306.1 asyd|OJJ64055.1 ater|EAU34416.1 atub|OJI87938.1 aver|OJI98140.1 awen|OJJ40987.1 azon|OJJ44574.1

Group2074: abra|OJJ69698.1 acar|OOF90521.1 acla|EAW15242.1 afis|EAW20209.1 afla|EED57134.1 afum|EAL85326.1 agla|OJJ84655.1 akaw|GAA88816.1 aluc|OJZ82500.1 anid|CBF85100.1 anig|EHA28270.1 aory|EIT74032.1 asyd|OJJ63057.1 ater|EAU32019.1 atub|OJI87931.1 aver|OJI97905.1 awen|OJJ31213.1 azon|OJJ46146.1

Group2075: abra|OJJ69699.1 acar|OOF95410.1 acla|EAW07370.1 afis|EAW22395.1 afla|EED56059.1 afum|EAL90796.1 agla|OJJ87658.1 akaw|GAA88818.1 aluc|OJZ82502.1 anid|CBF88747.1 anig|EHA28269.1 aory|EIT76693.1 asyd|OJJ63956.1 ater|EAU39322.1 atub|OJI87929.1 aver|OJI96985.1 awen|OJJ34973.1 azon|OJJ45622.1

Group2076: abra|OJJ69701.1 acar|OOF93222.1 acla|EAW13123.1 afis|EAW17541.1 afla|EED49286.1 afum|EAL91355.1 agla|OJJ81428.1 akaw|GAA88820.1 aluc|OJZ82504.1 anid|CBF90313.1 anig|EHA28266.1 aory|EIT82202.1 asyd|OJJ61913.1 ater|EAU36971.1 atub|OJI87927.1 aver|OJI96006.1 awen|OJJ37312.1 azon|OJJ51004.1

Group2077: abra|OJJ69703.1 acar|OOF98863.1 acla|EAW06689.1 afis|EAW16076.1 afla|EED48596.1 afum|EAL88708.1 agla|OJJ86093.1 akaw|GAA88822.1 aluc|OJZ82506.1 anid|CBF75115.1 anig|EHA28263.1 aory|EIT73056.1 asyd|OJJ59995.1 ater|EAU33555.1 atub|OJI87925.1 aver|OJJ02296.1 awen|OJJ30357.1 azon|OJJ45379.1

Group2078: abra|OJJ69718.1 acar|OOF94196.1 acla|EAW09976.1 afis|EAW21113.1 afla|EED51764.1 afum|EAL92136.1 agla|OJJ80098.1 akaw|GAA90171.1 aluc|OJZ83179.1 anid|CBF87036.1 anig|EHA28253.1 aory|EIT80019.1 asyd|OJJ60452.1 ater|EAU36786.1 atub|OJI87758.1 aver|OJI99770.1 awen|OJJ36441.1 azon|OJJ44432.1

Group2079: abra|OJJ69746.1 acar|OOF94176.1 acla|EAW09985.1 afis|EAW21108.1 afla|EED51696.1 afum|EAL92129.1 agla|OJJ80107.1 akaw|GAA90198.1 aluc|OJZ83150.1 anid|CBF87041.1 anig|EHA28216.1 aory|EIT80588.1 asyd|OJJ60448.1 ater|EAU36792.1 atub|OJI87787.1 aver|OJI99766.1 awen|OJJ36382.1 azon|OJJ51534.1

Group2080: aver|OJJ05453.1 abra|OJJ70544.1 acar|OOF94607.1 acla|EAW08135.1 afis|EAW23171.1 afla|EED46949.1 afum|EAL88312.2 agla|OJJ89683.1 akaw|GAA83390.1 aluc|OJZ83889.1 anid|CBF74485.1 anig|EHA19026.1 aory|EIT72627.1 asyd|OJJ57712.1 ater|EAU36300.1 atub|OJI90256.1 awen|OJJ36606.1 azon|OJJ47601.1

Group2082: abra|OJJ69822.1 acar|OOF93341.1 acla|EAW08969.1 afis|EAW15448.1 afla|EED56825.1 afum|EAL84198.2 agla|OJJ86271.1 akaw|GAA87838.1 aluc|OJZ85474.1 anid|CBF78305.1 anig|EHA25015.1 aory|EIT73942.1 asyd|OJJ56090.1 ater|EAU30838.1 atub|OJI80089.1 aver|OJJ05033.1 awen|OJJ31223.1 azon|OJJ45071.1

Group2085: abra|OJJ69898.1 acar|OOF93417.1 acla|EAW08922.1 afis|EAW15471.1 afla|EED46922.1 afum|EAL85850.1 agla|OJJ80151.1 akaw|GAA87752.1 aluc|OJZ85385.1 anid|CBF78234.1 anig|EHA25569.1 aory|EIT72668.1 asyd|OJJ56036.1 ater|EAU32657.1 atub|OJI80185.1 aver|OJJ04982.1 awen|OJJ38121.1 azon|OJJ48022.1

Group2086: abra|OJJ69901.1 acar|OOF93419.1 acla|EAW08921.1 afis|EAW15473.1 afla|EED46923.1 afum|EAL85848.1 akaw|GAA87750.1 aluc|OJZ85383.1 anid|CBF78228.1 anig|EHA25567.1 aory|EIT72551.1 asyd|OJJ56034.1 ater|EAU32656.1 atub|OJI80187.1 aver|OJJ04980.1 awen|OJJ38126.1 azon|OJJ43160.1 agla|OJJ80154.1

Group2087: abra|OJJ69906.1 acar|OOF93423.1 acla|EAW08918.1 afis|EAW15476.1 afla|EED46939.1 afum|EAL85845.1 agla|OJJ80155.1 akaw|GAA87747.1 aluc|OJZ85380.1 anid|CBF78226.1 anig|EHA25563.1 aory|EIT72564.1 asyd|OJJ56033.1 ater|EAU32651.1 atub|OJI80190.1 aver|OJJ04979.1 awen|OJJ38133.1 azon|OJJ43159.1

Group2088: abra|OJJ69914.1 acar|OOF93426.1 acla|EAW08915.1 afis|EAW15479.1 afla|EED46934.1 afum|EAL85842.1 agla|OJJ80158.1 akaw|GAA87742.1 aluc|OJZ85374.1 anid|CBF78221.1 anig|EHA25558.1 aory|EIT72728.1 asyd|OJJ56028.1 ater|EAU32648.1 atub|OJI80195.1 aver|OJJ04975.1 awen|OJJ38138.1 azon|OJJ43152.1

Group2090: abra|OJJ69940.1 acar|OOF93449.1 acla|EAW08883.1 afis|EAW15506.1 afla|EED49019.1 afum|EAL85818.1 agla|OJJ80183.1 akaw|GAA87719.1 aluc|OJZ85347.1 anid|CBF84473.1 anig|EHA25534.1 aory|EIT82494.1 asyd|OJJ53540.1 ater|EAU32612.1 atub|OJI80223.1 aver|OJJ08213.1 awen|OJJ38166.1 azon|OJJ45800.1

Group2092: abra|OJJ69953.1 acar|OOF93463.1 acla|EAW08869.1 afis|EAW15525.1 afla|EED49036.1 afum|EAL85803.1 agla|OJJ85221.1 akaw|GAA87706.1 aluc|OJZ85329.1 anid|CBF78217.1 anig|EHA25518.1 aory|EIT82537.1 asyd|OJJ55991.1 ater|EAU32598.1 atub|OJI80243.1 aver|OJJ04939.1 awen|OJJ38189.1 azon|OJJ43106.1

Group2093: abra|OJJ69955.1 acar|OOF93465.1 acla|EAW08867.1 afis|EAW15527.1 afla|EED49038.1 afum|EAL85801.1 agla|OJJ85219.1 akaw|GAA87704.1 aluc|OJZ85327.1 anid|CBF78212.1 anig|EHA25517.1 aory|EIT82564.1 asyd|OJJ55989.1 ater|EAU32597.1 atub|OJI80245.1 aver|OJJ04937.1 awen|OJJ38191.1 azon|OJJ43104.1

Group2094: abra|OJJ69962.1 acar|OOF93470.1 acla|EAW08834.1 afis|EAW15566.1 afla|EED49075.1 afum|EAL85767.2 agla|OJJ85185.1 akaw|GAA87697.1 aluc|OJZ85321.1 anid|CBF78116.1 anig|EHA25511.1 aory|EIT82536.1 asyd|OJJ55900.1 ater|EAU32567.1 atub|OJI80252.1 aver|OJJ04845.1 awen|OJJ38226.1 azon|OJJ43069.1

Group2095: abra|OJJ69963.1 acar|OOF93471.1 acla|EAW08835.1 afis|EAW15565.1 afla|EED49074.1 agla|OJJ85186.1 akaw|GAA87696.1 aluc|OJZ85320.1 anid|CBF78118.1 anig|EHA25510.1 aory|EIT82524.1 asyd|OJJ55901.1 ater|EAU32568.1 atub|OJI80253.1 aver|OJJ04846.1 awen|OJJ38225.1 azon|OJJ43070.1 afum|EAL85768.1

Group2096: abra|OJJ69971.1 acar|OOF93475.1 acla|EAW08842.1 afis|EAW15559.1 afla|EED49063.1 afum|EAL85773.1 agla|OJJ85195.1 akaw|GAA87690.1 aluc|OJZ85311.1 anid|CBF78159.1 anig|EHA25506.1

aory|EIT82560.1 asyd|OJJ55960.1 ater|EAU32575.1 atub|OJI80260.1 aver|OJJ04906.1 awen|OJJ38217.1 azon|OJJ43077.1

Group2097: abra|OJJ69974.1 acar|OOF93479.1 acla|EAW08844.1 afis|EAW15556.1 afla|EED49061.1 afum|EAL85776.1 agla|OJJ85198.1 akaw|GAA87687.1 aluc|OJZ85307.1 anid|CBF78163.1 anig|EHA25503.1 aory|EIT82517.1 asyd|OJJ55964.1 ater|EAU32577.1 atub|OJI80264.1 aver|OJJ04910.1 awen|OJJ38214.1 azon|OJJ43081.1

Group2098: abra|OJJ69975.1 acar|OOF93481.1 acla|EAW08846.1 afis|EAW15554.1 afla|EED49057.1 afum|EAL85779.1 agla|OJJ85201.1 akaw|GAA87686.1 aluc|OJZ85306.1 anid|CBF78167.1 anig|EHA25502.1 aory|EIT82497.1 asyd|OJJ55968.1 ater|EAU32580.1 atub|OJI80265.1 aver|OJJ04915.1 awen|OJJ38210.1 azon|OJJ43084.1

Group2099: abra|OJJ69978.1 acar|OOF93484.1 acla|EAW08847.1 afis|EAW15549.1 afla|EED49055.1 afum|EAL85783.1 agla|OJJ85202.1 akaw|GAA87683.1 aluc|OJZ85302.1 anid|CBF78165.1 anig|EHA25499.1 aory|EIT82558.1 asyd|OJJ55969.1 ater|EAU32583.1 atub|OJI80268.1 aver|OJJ04916.1 awen|OJJ38209.1 azon|OJJ43086.1

Group2100: abra|OJJ69979.1 acar|OOF93483.1 acla|EAW08849.1 afis|EAW15547.1 afla|EED49054.1 afum|EAL85785.1 agla|OJJ85205.1 akaw|GAA87682.1 aluc|OJZ85301.1 anid|CBF78176.1 anig|EHA25498.1 aory|EIT82504.1 asyd|OJJ55970.1 ater|EAU32582.1 atub|OJI80269.1 aver|OJJ04917.1 awen|OJJ38208.1 azon|OJJ43087.1

Group2101: abra|OJJ69982.1 acar|OOF93486.1 acla|EAW08852.1 afis|EAW15544.1 afla|EED49051.1 afum|EAL85787.1 agla|OJJ85207.1 akaw|GAA87680.1 aluc|OJZ85298.1 anid|CBF78182.1 anig|EHA25496.1 aory|EIT82527.1 asyd|OJJ55973.1 ater|EAU32584.1 atub|OJI80272.1 aver|OJJ04921.1 awen|OJJ38205.1 azon|OJJ43090.1

Group2102: abra|OJJ69983.1 acar|OOF93487.1 acla|EAW08853.1 afis|EAW15543.1 afla|EED49050.1 afum|EAL85788.1 agla|OJJ85208.1 akaw|GAA87679.1 aluc|OJZ85297.1 anid|CBF78183.1 anig|EHA25495.1 aory|EIT82528.1 asyd|OJJ55974.1 ater|EAU32585.1 atub|OJI80273.1 aver|OJJ04922.1 awen|OJJ38204.1 azon|OJJ43091.1

Group2103: abra|OJJ69984.1 acar|OOF93489.1 acla|EAW08855.1 afis|EAW15541.1 afla|EED49049.1 afum|EAL85789.1 agla|OJJ85209.1 akaw|GAA87677.1 aluc|OJZ85295.1 anid|CBF78187.1 anig|EHA25493.1 aory|EIT82548.1 asyd|OJJ55976.1 ater|EAU32586.1 atub|OJI80275.1 aver|OJJ04924.1 awen|OJJ38202.1 azon|OJJ43093.1

Group2104: abra|OJJ69985.1 acar|OOF93490.1 acla|EAW08856.1 afis|EAW15540.1 afla|EED49048.1 afum|EAL85790.1 agla|OJJ85210.1 akaw|GAA87676.1 aluc|OJZ85294.1 anid|CBF78189.1 anig|EHA25492.1 aory|EIT82530.1 asyd|OJJ55977.1 ater|EAU32587.1 atub|OJI80276.1 aver|OJJ04925.1 awen|OJJ38201.1 azon|OJJ43094.1

Group2105: abra|OJJ69987.1 acar|OOF93491.1 acla|EAW08858.1 afis|EAW15538.1 afla|EED49046.1 afum|EAL85792.1 agla|OJJ85211.1 akaw|GAA87674.1 aluc|OJZ85292.1 anid|CBF78193.1 anig|EHA25490.1 aory|EIT82570.1 asyd|OJJ55979.1 ater|EAU32589.1 atub|OJI80278.1 aver|OJJ04927.1 awen|OJJ38200.1 azon|OJJ43095.1

Group2106: abra|OJJ69989.1 acar|OOF93494.1 acla|EAW08861.1 afis|EAW15533.1 afla|EED49044.1 afum|EAL85795.1 agla|OJJ85214.1 akaw|GAA87672.1 aluc|OJZ85290.1 anid|CBF78199.1 anig|EHA25488.1 aory|EIT82552.1 asyd|OJJ55983.1 ater|EAU32592.1 atub|OJI80280.1 aver|OJJ04930.1 awen|OJJ38197.1 azon|OJJ43096.1

Group2107: abra|OJJ69990.1 acar|OOF93496.1 acla|EAW08863.1 afis|EAW15531.1 afla|EED49042.1 afum|EAL85797.1 agla|OJJ85216.1 akaw|GAA87671.1 aluc|OJZ85289.1 anid|CBF78202.1 anig|EHA25486.1 aory|EIT82550.1 asyd|OJJ55985.1 ater|EAU32594.1 atub|OJI80281.1 aver|OJJ04932.1 awen|OJJ38195.1 azon|OJJ43099.1

Group2108: abra|OJJ69991.1 acar|OOF93497.1 acla|EAW08864.1 afis|EAW15530.1 afla|EED49041.1 afum|EAL85798.1 agla|OJJ85217.1 akaw|GAA87670.1 aluc|OJZ85288.1 anid|CBF78204.1 anig|EHA25485.1 aory|EIT82567.1 asyd|OJJ55986.1 ater|EAU32595.1 atub|OJI80282.1 aver|OJJ04933.1 awen|OJJ38194.1 azon|OJJ43100.1

Group2109: abra|OJJ69995.1 acar|OOF93502.1 acla|EAW08824.1 afis|EAW15573.1 afla|EED49082.1 afum|EAL85761.1 agla|OJJ85179.1 akaw|GAA87666.1 aluc|OJZ85284.1 anid|CBF78105.1 anig|EHA25481.1 aory|EIT82549.1 asyd|OJJ55895.1 ater|EAU32558.1 atub|OJI80286.1 aver|OJJ04840.1 awen|OJJ38232.1 azon|OJJ43064.1

Group2110: abra|OJJ70001.1 acar|OOF93507.1 acla|EAW08818.1 afis|EAW15579.1 afla|EED49093.1 afum|EAL85755.1 agla|OJJ85173.1 akaw|GAA87660.1 aluc|OJZ85278.1 anid|CBF78100.1 anig|EHA25475.1 aory|EIT82531.1 asyd|OJJ55889.1 ater|EAU32551.1 atub|OJI80292.1 aver|OJJ04834.1 awen|OJJ38241.1 azon|OJJ43058.1

Group2111: abra|OJJ70003.1 acar|OOF93509.1 acla|EAW08816.1 afis|EAW15581.1 afla|EED49090.1  
afum|EAL85753.2 agla|OJJ85170.1 akaw|GAA87657.1 aluc|OJZ85276.1 anid|CBF78096.1 anig|EHA25473.1  
aory|EIT82539.1 asyd|OJJ55886.1 ater|EAU32549.1 atub|OJI80294.1 aver|OJJ04831.1 awen|OJJ38243.1  
azon|OJJ43055.1

Group2112: abra|OJJ70008.1 acar|OOF93514.1 acla|EAW08815.1 afis|EAW15582.1 afla|EED49088.1  
afum|EAL85752.1 agla|OJJ85169.1 akaw|GAA87654.1 aluc|OJZ85271.1 anid|CBF78090.1 anig|EHA25470.1  
aory|EIT82507.1 asyd|OJJ55883.1 ater|EAU32547.1 atub|OJI80300.1 aver|OJJ04828.1 awen|OJJ38246.1  
azon|OJJ43052.1

Group2114: abra|OJJ70013.1 acar|OOF93519.1 acla|EAW08811.1 afis|EAW15586.1 afla|EED54443.1  
afum|EAL85746.1 agla|OJJ85166.1 akaw|GAA87649.1 aluc|OJZ85264.1 anid|CBF78063.1 anig|EHA25464.1  
aory|EIT81154.1 asyd|OJJ55870.1 ater|EAU32543.1 atub|OJI80305.1 aver|OJJ04815.1 awen|OJJ38252.1  
azon|OJJ43032.1

Group2115: abra|OJJ70014.1 acar|OOF93520.1 acla|EAW08809.1 afis|EAW15587.1 afla|EED50410.1  
afum|EAL85745.1 agla|OJJ85161.1 akaw|GAA87648.1 aluc|OJZ85263.1 anid|CBF78069.1 anig|EHA25463.1  
aory|EIT82131.1 asyd|OJJ55872.1 ater|EAU32541.1 atub|OJI80306.1 aver|OJJ04817.1 awen|OJJ38254.1  
azon|OJJ43033.1

Group2116: abra|OJJ70015.1 acar|OOF93521.1 acla|EAW08808.1 afis|EAW15588.1 afla|EED50411.1  
afum|EAL85744.1 agla|OJJ85160.1 akaw|GAA87646.1 aluc|OJZ85261.1 anid|CBF78071.1 anig|EHA25462.1  
aory|EIT82015.1 asyd|OJJ55873.1 ater|EAU32539.1 atub|OJI80307.1 aver|OJJ04818.1 awen|OJJ38255.1  
azon|OJJ43038.1

Group2117: abra|OJJ70016.1 acar|OOF93522.1 acla|EAW08807.1 afis|EAW15589.1 afla|EED50412.1  
afum|EAL85743.1 agla|OJJ85159.1 akaw|GAA87645.1 aluc|OJZ85260.1 anid|CBF78072.1 anig|EHA25461.1  
aory|EIT82097.1 asyd|OJJ55874.1 ater|EAU32538.1 atub|OJI80308.1 aver|OJJ04819.1 awen|OJJ38262.1  
azon|OJJ43023.1

Group2118: abra|OJJ70018.1 acar|OOF93524.1 acla|EAW08805.1 afis|EAW15591.1 afla|EED50414.1  
afum|EAL85741.1 agla|OJJ85157.1 akaw|GAA87643.1 aluc|OJZ85258.1 anid|CBF78076.1 anig|EHA25459.1  
aory|EIT82095.1 asyd|OJJ55876.1 ater|EAU32537.1 atub|OJI80310.1 aver|OJJ04821.1 awen|OJJ38264.1  
azon|OJJ43021.1

Group2119: abra|OJJ70026.1 acar|OOF93536.1 acla|EAW08802.1 afis|EAW15595.1 afla|EED50418.1  
afum|EAL85736.2 agla|OJJ85151.1 akaw|GAA87634.1 aluc|OJZ85250.1 anid|CBF78087.1 anig|EHA25450.1  
aory|EIT82070.1 asyd|OJJ55881.1 ater|EAU32532.1 atub|OJI80319.1 aver|OJJ04826.1 awen|OJJ38271.1  
azon|OJJ43910.1

Group2120: abra|OJJ70042.1 acar|OOF93537.1 acla|EAW08803.1 afis|EAW15594.1 afla|EED50417.1  
afum|EAL85737.2 agla|OJJ85153.1 akaw|GAA87633.1 aluc|OJZ85249.1 anid|CBF78085.1 anig|EHA25449.1  
aory|EIT82162.1 asyd|OJJ55880.1 ater|EAU32533.1 atub|OJI80320.1 aver|OJJ04825.1 awen|OJJ38270.1  
azon|OJJ43912.1

Group2123: abra|OJJ70159.1 acar|OOF93314.1 acla|EAW06525.1 afis|EAW16241.1 afla|EED57104.1  
afum|EAL88863.1 agla|OJJ88977.1 akaw|GAA86606.1 aluc|OJZ85156.1 anid|CBF78253.1 anig|EHA25372.1  
aory|EIT73977.1 asyd|OJJ56050.1 ater|EAU34336.1 atub|OJI80433.1 aver|OJJ04993.1 awen|OJJ36019.1  
azon|OJJ42535.1

Group2125: abra|OJJ70321.1 acar|OOF91776.1 acla|EAW12313.1 afis|EAW16939.1 afla|EED45249.1  
afum|EAL86466.1 agla|OJJ79973.1 akaw|GAA92577.1 aluc|OJZ82590.1 anid|CBF75409.1 anig|EHA27485.1  
aory|EIT73687.1 asyd|OJJ59815.1 ater|EAU30208.1 atub|OJI88825.1 aver|OJJ02473.1 awen|OJJ29713.1  
azon|OJJ45106.1

Group2127: abra|OJJ70367.1 acar|OOF91904.1 acla|EAW12332.1 afis|EAW16890.1 afla|EED53384.1  
afum|EAL86428.2 agla|OJJ79944.1 akaw|GAA91984.1 aluc|OJZ82629.1 anid|CBF80798.1 anig|EHA27448.1  
aory|EIT75200.1 asyd|OJJ54488.1 ater|EAU30224.1 atub|OJI88862.1 aver|OJJ07691.1 awen|OJJ29748.1  
azon|OJJ50203.1

Group2128: abra|OJJ70389.1 acar|OOF90063.1 acla|EAW12390.1 afis|EAW16837.1 afla|EED47319.1  
afum|EAL86385.1 agla|OJJ83707.1 akaw|GAA91969.1 aluc|OJZ82647.1 anid|CBF80639.1 anig|EHA27425.1  
aory|EIT82834.1 asyd|OJJ54621.1 ater|EAU30244.1 atub|OJI88879.1 aver|OJJ07537.1 awen|OJJ33871.1  
azon|OJJ43960.1

Group2129: abra|OJJ70449.1 acar|OOF91831.1 acla|EAW09124.1 afis|EAW24708.1 afla|EED52336.1  
afum|EAL89350.1 agla|OJJ82814.1 akaw|GAA90132.1 aluc|OJZ83215.1 anid|CBF83955.1 anig|EHA21075.1  
aory|EIT74337.1 asyd|OJJ61431.1 ater|EAU37947.1 atub|OJI87721.1 aver|OJJ00766.1 awen|OJJ39949.1  
azon|OJJ51122.1

Group2130: abra|OJJ70463.1 acar|OOF97461.1 acla|EAW13050.1 afis|EAW17617.1 afla|EED49208.1  
afum|EAL91430.1 agla|OJJ81323.1 akaw|GAA83312.1 aluc|OJZ83806.1 anid|CBF90167.1 anig|EHA18953.1

aory|EIT83163.1 asyd|OJJ61992.1 ater|EAU37051.1 atub|OJI90173.1 aver|OJI96084.1 awen|OJJ37228.1 azon|OJJ50931.1

Group2131: abra|OJJ70464.1 acar|OOF97459.1 acla|EAW13049.1 afis|EAW17618.1 afla|EED49209.1 afum|EAL91431.1 agla|OJJ81322.1 akaw|GAA83313.1 aluc|OJZ83807.1 anid|CBF90165.1 anig|EHA18954.1 aory|EIT83149.1 asyd|OJJ61993.1 ater|EAU37052.1 atub|OJI90174.1 aver|OJI96085.1 awen|OJJ37227.1 azon|OJJ50930.1

Group2132: abra|OJJ70468.1 acar|OOF97456.1 acla|EAW13046.1 afis|EAW17621.1 afla|EED49196.1 afum|EAL91434.1 agla|OJJ81304.1 akaw|GAA83317.1 aluc|OJZ83812.1 anid|CBF90159.1 anig|EHA18957.1 aory|EIT78509.1 asyd|OJJ61996.1 ater|EAU37055.1 atub|OJI90179.1 aver|OJI96088.1 awen|OJJ37223.1 azon|OJJ50926.1

Group2133: abra|OJJ70469.1 acar|OOF97455.1 acla|EAW13045.1 afis|EAW17622.1 afla|EED49195.1 afum|EAL91435.1 agla|OJJ81303.1 akaw|GAA83318.1 aluc|OJZ83813.1 anid|CBF90157.1 anig|EHA18958.1 aory|EIT78576.1 asyd|OJJ61997.1 ater|EAU37056.1 atub|OJI90180.1 aver|OJI96089.1 awen|OJJ37222.1 azon|OJJ50925.1

Group2134: abra|OJJ70470.1 acar|OOF97453.1 acla|EAW13044.1 afis|EAW17623.1 afla|EED49194.1 afum|EAL91437.1 agla|OJJ81302.1 akaw|GAA83319.1 aluc|OJZ83814.1 anid|CBF90156.1 anig|EHA18959.1 aory|EIT78552.1 asyd|OJJ61998.1 ater|EAU37057.1 atub|OJI90181.1 aver|OJI96090.1 awen|OJJ37221.1 azon|OJJ50924.1

Group2135: abra|OJJ70473.1 acar|OOF97452.1 acla|EAW13041.1 afis|EAW17626.1 afla|EED49192.1 afum|EAL91440.1 agla|OJJ81276.1 akaw|GAA83322.1 aluc|OJZ83817.1 anid|CBF90150.1 anig|EHA18962.1 aory|EIT78505.1 asyd|OJJ62001.1 ater|EAU37060.1 atub|OJI90184.1 aver|OJI96093.1 awen|OJJ37218.1 azon|OJJ50921.1

Group2136: abra|OJJ70475.1 acar|OOF97450.1 acla|EAW13039.1 afis|EAW17628.1 afla|EED49190.1 afum|EAL91442.1 agla|OJJ81275.1 akaw|GAA83324.1 aluc|OJZ83819.1 anid|CBF90147.1 anig|EHA18964.1 aory|EIT78550.1 asyd|OJJ62002.1 ater|EAU37062.1 atub|OJI90186.1 aver|OJI96094.1 awen|OJJ37216.1 azon|OJJ50919.1

Group2137: abra|OJJ70476.1 acar|OOF97449.1 acla|EAW13038.1 afis|EAW17629.1 afla|EED49189.1 afum|EAL91443.1 agla|OJJ81272.1 akaw|GAA83325.1 aluc|OJZ83820.1 anid|CBF90141.1 anig|EHA18965.1 aory|EIT78529.1 asyd|OJJ62006.1 ater|EAU37063.1 atub|OJI90187.1 aver|OJI96098.1 awen|OJJ37215.1 azon|OJJ50916.1

Group2138: abra|OJJ70477.1 acar|OOF97448.1 acla|EAW13037.1 afis|EAW17630.1 afla|EED49188.1 afum|EAL91445.1 agla|OJJ81271.1 akaw|GAA83326.1 aluc|OJZ83822.1 anid|CBF90143.1 anig|EHA18966.1 aory|EIT78536.1 asyd|OJJ62005.1 ater|EAU37065.1 atub|OJI90189.1 aver|OJI96096.1 awen|OJJ37214.1 azon|OJJ50914.1

Group2139: abra|OJJ70478.1 acar|OOF97447.1 acla|EAW13036.1 afis|EAW17631.1 afla|EED49187.1 afum|EAL91446.1 agla|OJJ81270.1 akaw|GAA83327.1 aluc|OJZ83823.1 anid|CBF90145.1 anig|EHA18967.1 aory|EIT78534.1 asyd|OJJ62004.1 ater|EAU37066.1 atub|OJI90190.1 aver|OJI96095.1 awen|OJJ37213.1 azon|OJJ50913.1

Group2140: abra|OJJ70481.1 acar|OOF97444.1 acla|EAW13035.1 afis|EAW17632.1 afla|EED49186.1 afum|EAL91447.1 agla|OJJ81269.1 akaw|GAA83329.1 aluc|OJZ83825.1 anid|CBF90139.1 anig|EHA18969.1 aory|EIT78523.1 asyd|OJJ62011.1 ater|EAU37067.1 atub|OJI90192.1 aver|OJI96103.1 awen|OJJ37212.1 azon|OJJ50912.1

Group2141: abra|OJJ70482.1 acar|OOF97443.1 acla|EAW13034.1 afis|EAW17633.1 afla|EED50531.1 afum|EAL91448.1 agla|OJJ81266.1 akaw|GAA83330.1 aluc|OJZ83826.1 anid|CBF90137.1 anig|EHA18970.1 aory|EIT82093.1 asyd|OJJ62012.1 ater|EAU37069.1 atub|OJI90193.1 aver|OJI96104.1 awen|OJJ37211.1 azon|OJJ50911.1

Group2142: abra|OJJ70483.1 acar|OOF97442.1 acla|EAW13033.1 afis|EAW17634.1 afla|EED50530.1 afum|EAL91449.1 agla|OJJ81265.1 akaw|GAA83331.1 aluc|OJZ83827.1 anid|CBF90135.1 anig|EHA18971.1 aory|EIT82030.1 asyd|OJJ62013.1 ater|EAU37070.1 atub|OJI90194.1 aver|OJI96105.1 awen|OJJ37210.1 azon|OJJ50910.1

Group2143: abra|OJJ70484.1 acar|OOF97441.1 acla|EAW13031.1 afis|EAW17636.1 afla|EED50528.1 afum|EAL91451.2 agla|OJJ81263.1 akaw|GAA83333.1 aluc|OJZ83829.1 anid|CBF90132.1 anig|EHA18972.1 aory|EIT82038.1 asyd|OJJ62015.1 ater|EAU37072.1 atub|OJI90196.1 aver|OJI96106.1 awen|OJJ37208.1 azon|OJJ50908.1

Group2144: abra|OJJ70488.1 acar|OOF97438.1 acla|EAW13028.1 afis|EAW17639.1 afla|EED50524.1 afum|EAL91454.1 agla|OJJ79567.1 akaw|GAA83336.1 aluc|OJZ83832.1 anid|CBF90125.1 anig|EHA18975.1 aory|EIT82049.1 asyd|OJJ62018.1 ater|EAU37075.1 atub|OJI90199.1 aver|OJI96109.1 awen|OJJ37206.1 azon|OJJ50905.1

Group2145: abra|OJJ70489.1 acar|OOF97437.1 acla|EAW13027.1 afis|EAW17640.1 afla|EED50523.1 afum|EAL91455.1 agla|OJJ79568.1 akaw|GAA83337.1 aluc|OJZ83833.1 anig|EHA18976.1 aory|EIT82102.1 asyd|OJJ62019.1 ater|EAU37076.1 atub|OJI90200.1 aver|OJI96110.1 awen|OJJ37205.1 azon|OJJ50904.1 anid|CBF90123.1

Group2146: abra|OJJ70490.1 acar|OOF97436.1 acla|EAW13026.1 afis|EAW17641.1 afla|EED50522.1 afum|EAL91456.1 agla|OJJ79569.1 akaw|GAA83338.1 aluc|OJZ83834.1 anid|CBF90121.1 anig|EHA18977.1 aory|EIT82016.1 asyd|OJJ62020.1 ater|EAU37077.1 atub|OJI90201.1 aver|OJI96111.1 awen|OJJ37204.1 azon|OJJ50903.1

Group2147: abra|OJJ70492.1 acar|OOF97435.1 acla|EAW13025.1 afis|EAW17642.1 afla|EED50518.1 afum|EAL91457.1 agla|OJJ79562.1 akaw|GAA83340.1 aluc|OJZ83836.1 anid|CBF90119.1 anig|EHA18979.1 aory|EIT82059.1 asyd|OJJ62021.1 ater|EAU37078.1 atub|OJI90203.1 aver|OJI96112.1 awen|OJJ37203.1 azon|OJJ50902.1

Group2148: abra|OJJ70493.1 acar|OOF97432.1 acla|EAW13024.1 afis|EAW17643.1 afla|EED50517.1 afum|EAL91458.1 agla|OJJ79561.1 akaw|GAA83341.1 aluc|OJZ83837.1 anid|CBF90118.1 anig|EHA18980.1 aory|EIT82149.1 asyd|OJJ62022.1 ater|EAU37079.1 atub|OJI90204.1 aver|OJI96113.1 awen|OJJ37202.1 azon|OJJ50901.1

Group2149: abra|OJJ70495.1 acar|OOF97431.1 acla|EAW13022.1 afis|EAW17645.1 afla|EED50512.1 afum|EAL91460.1 agla|OJJ79559.1 akaw|GAA83343.1 aluc|OJZ83840.1 anid|CBF90114.1 anig|EHA18982.1 aory|EIT82064.1 asyd|OJJ62024.1 ater|EAU37081.1 atub|OJI90206.1 aver|OJI96115.1 awen|OJJ37200.1 azon|OJJ50899.1

Group2150: abra|OJJ70498.1 acar|OOF97428.1 acla|EAW08176.1 afis|EAW23212.1 afla|EED47039.1 afum|EAL88272.1 agla|OJJ78733.1 akaw|GAA83346.1 aluc|OJZ83843.1 anid|CBF74740.1 anig|EHA18985.1 aory|EIT72595.1 asyd|OJJ60184.1 ater|EAU36340.1 atub|OJI90209.1 aver|OJJ04080.1 awen|OJJ39445.1 azon|OJJ47647.1

Group2151: abra|OJJ70499.1 acar|OOF97427.1 acla|EAW08175.1 afis|EAW23211.1 afla|EED47040.1 afum|EAL88273.1 agla|OJJ78734.1 akaw|GAA83347.1 aluc|OJZ83844.1 anid|CBF74738.1 anig|EHA18986.1 aory|EIT72653.1 asyd|OJJ60185.1 ater|EAU36339.1 atub|OJI90210.1 aver|OJJ04079.1 awen|OJJ39444.1 azon|OJJ47646.1

Group2152: abra|OJJ70500.1 acar|OOF97425.1 acla|EAW08174.1 afis|EAW23210.1 afla|EED47041.1 afum|EAL88274.1 agla|OJJ78735.1 akaw|GAA83348.1 aluc|OJZ83845.1 anid|CBF74736.1 anig|EHA18987.1 aory|EIT72592.1 asyd|OJJ60186.1 ater|EAU36338.1 atub|OJI90211.1 aver|OJJ04078.1 awen|OJJ39443.1 azon|OJJ47645.1

Group2153: abra|OJJ70504.1 acar|OOF97421.1 acla|EAW08170.1 afis|EAW23206.1 afla|EED47047.1 afum|EAL88277.1 agla|OJJ78739.1 akaw|GAA83353.1 aluc|OJZ83849.1 anid|CBF74734.1 anig|EHA18991.1 aory|EIT72747.1 asyd|OJJ60189.1 ater|EAU36334.1 atub|OJI90215.1 aver|OJJ04075.1 awen|OJJ39438.1 azon|OJJ47641.1

Group2154: abra|OJJ70509.1 acar|OOF97420.1 acla|EAW08166.1 afis|EAW23204.1 afla|EED47050.1 afum|EAL88279.1 agla|OJJ78743.1 akaw|GAA83356.1 aluc|OJZ83854.1 anid|CBF74730.1 anig|EHA18995.1 aory|EIT72509.1 asyd|OJJ60194.1 ater|EAU36332.1 atub|OJI90221.1 aver|OJJ04071.1 awen|OJJ39434.1 azon|OJJ47638.1

Group2155: abra|OJJ70510.1 acar|OOF97419.1 acla|EAW08165.1 afis|EAW23203.1 afla|EED47051.1 afum|EAL88280.1 agla|OJJ78745.1 akaw|GAA83357.1 aluc|OJZ83855.1 anid|CBF74728.1 anig|EHA18996.1 aory|EIT72511.1 asyd|OJJ60195.1 ater|EAU36331.1 atub|OJI90222.1 aver|OJJ04070.1 awen|OJJ39433.1 azon|OJJ47637.1

Group2156: abra|OJJ70512.1 acar|OOF97417.1 acla|EAW08163.1 afis|EAW23201.1 afla|EED47053.1 afum|EAL88282.1 agla|OJJ78747.1 akaw|GAA83359.1 aluc|OJZ83857.1 anid|CBF74721.1 anig|EHA18998.1 aory|EIT72498.1 asyd|OJJ60201.1 ater|EAU36329.1 atub|OJI90224.1 aver|OJJ04065.1 awen|OJJ39431.1 azon|OJJ47635.1

Group2157: abra|OJJ70514.1 acar|OOF97415.1 acla|EAW08161.1 afis|EAW23199.1 afla|EED47055.1 afum|EAL88284.1 agla|OJJ78749.1 akaw|GAA83361.1 aluc|OJZ83859.1 anid|CBF74717.1 anig|EHA19000.1 aory|EIT72508.1 asyd|OJJ60203.1 ater|EAU36327.1 atub|OJI90226.1 aver|OJJ04063.1 awen|OJJ39429.1 azon|OJJ47633.1

Group2158: abra|OJJ70515.1 acar|OOF97414.1 acla|EAW08160.1 afis|EAW23198.1 afla|EED47056.1 afum|EAL88285.1 agla|OJJ86331.1 akaw|GAA83362.1 aluc|OJZ83860.1 anid|CBF74715.1 anig|EHA19001.1 aory|EIT72476.1 asyd|OJJ60205.1 ater|EAU36325.1 atub|OJI90228.1 aver|OJJ04062.1 awen|OJJ39428.1 azon|OJJ47632.1

Group2159: abra|OJJ70521.1 acar|OOF97407.1 acla|EAW08154.1 afis|EAW23185.1 afla|EED47062.1 afum|EAL88298.1 agla|OJJ86360.1 akaw|GAA83368.1 aluc|OJZ83866.1 anid|CBF74698.1 anig|EHA19007.1

aory|EIT72505.1 asyd|OJJ60215.1 ater|EAU36320.1 atub|OJI90234.1 aver|OJJ04053.1 awen|OJJ36587.1 azon|OJJ47619.1

Group2160: abra|OJJ70522.1 acar|OOF97406.1 acla|EAW08153.1 afis|EAW23186.1 afla|EED47064.1 afum|EAL88297.1 agla|OJJ86361.1 akaw|GAA83369.1 aluc|OJZ83867.1 anid|CBF74696.1 anig|EHA19008.1 aory|EIT72495.1 asyd|OJJ60214.1 ater|EAU36319.1 atub|OJI90235.1 aver|OJJ04054.1 awen|OJJ36588.1 azon|OJJ47618.1

Group2161: abra|OJJ70529.1 acar|OOF97402.1 acla|EAW08142.1 afis|EAW23178.1 afla|EED49000.1 afum|EAL88305.1 agla|OJJ89690.1 akaw|GAA83374.1 aluc|OJZ83872.1 anid|CBF74512.1 anig|EHA19013.1 aory|EIT80028.1 asyd|OJJ57730.1 ater|EAU36311.1 atub|OJI90240.1 aver|OJJ05439.1 awen|OJJ36601.1 azon|OJJ47607.1

Group2162: abra|OJJ70532.1 acar|OOF97400.1 acla|EAW08145.1 afis|EAW23181.1 afla|EED47073.1 afum|EAL88302.1 akaw|GAA83377.1 aluc|OJZ83875.1 anid|CBF74516.1 anig|EHA19015.1 aory|EIT72487.1 asyd|OJJ57732.1 ater|EAU36314.1 atub|OJI90243.1 aver|OJJ05437.1 awen|OJJ36597.1 azon|OJJ47611.1 agla|OJJ86370.1

Group2163: abra|OJJ70536.1 acar|OOF97397.1 acla|EAW08148.1 afis|EAW23191.1 afla|EED47070.1 afum|EAL88292.1 agla|OJJ86367.1 akaw|GAA83381.1 aluc|OJZ83880.1 anid|CBF74521.1 anig|EHA19018.1 aory|EIT72473.1 asyd|OJJ57733.1 ater|EAU36315.1 atub|OJI90247.1 aver|OJJ05434.1 awen|OJJ36593.1 azon|OJJ47612.1

Group2164: abra|OJJ70537.1 acar|OOF97396.1 acla|EAW08149.1 afis|EAW23190.1 afla|EED47069.1 afum|EAL88293.1 agla|OJJ86365.1 akaw|GAA83382.1 aluc|OJZ83881.1 anid|CBF74523.1 anig|EHA19019.1 aory|EIT72486.1 asyd|OJJ57734.1 ater|EAU36309.1 atub|OJI90249.1 aver|OJJ05433.1 awen|OJJ36592.1 azon|OJJ47614.1

Group2165: abra|OJJ70539.1 acar|OOF97394.1 acla|EAW08151.1 afis|EAW23188.1 afla|EED47067.1 afum|EAL88295.1 agla|OJJ86363.1 akaw|GAA83384.1 aluc|OJZ83884.1 anid|CBF74527.1 anig|EHA19021.1 aory|EIT72500.1 asyd|OJJ57736.1 ater|EAU36310.1 atub|OJI90251.1 aver|OJJ05431.1 awen|OJJ36590.1 azon|OJJ47616.1

Group2166: abra|OJJ70541.1 acar|OOF97392.1 acla|EAW08137.1 afis|EAW23173.1 afla|EED46946.1 afum|EAL88310.1 agla|OJJ89685.1 akaw|GAA83387.1 aluc|OJZ83886.1 anid|CBF74495.1 anig|EHA19023.1 aory|EIT72576.1 asyd|OJJ57718.1 ater|EAU36302.1 atub|OJI90253.1 aver|OJJ05449.1 awen|OJJ36604.1 azon|OJJ47602.1

Group2167: abra|OJJ70552.1 acar|OOF97168.1 acla|EAW08344.1 afis|EAW23379.1 afla|EED55578.1 afum|EAL88092.1 agla|OJJ86444.1 akaw|GAA83396.1 aluc|OJZ83895.1 anid|CBF74849.1 anig|EHA19031.1 aory|EIT82685.1 asyd|OJJ60128.1 ater|EAU35633.1 atub|OJI90263.1 aver|OJJ04133.1 awen|OJJ39503.1 azon|OJJ47704.1

Group2168: abra|OJJ70554.1 acar|OOF97165.1 acla|EAW08350.1 afis|EAW23383.1 afla|EED55571.1 afum|EAL88088.1 agla|OJJ86437.1 akaw|GAA83399.1 aluc|OJZ83897.1 anid|CBF74854.1 anig|EHA19034.1 aory|EIT82660.1 asyd|OJJ60126.1 ater|EAU35636.1 atub|OJI90267.1 aver|OJJ04136.1 awen|OJJ39498.1 azon|OJJ47700.1

Group2169: abra|OJJ70555.1 acar|OOF97164.1 acla|EAW08353.1 afis|EAW23384.1 afla|EED55572.1 afum|EAL88087.1 agla|OJJ86436.1 akaw|GAA83400.1 aluc|OJZ83898.1 anid|CBF74856.1 anig|EHA19035.1 aory|EIT82663.1 asyd|OJJ60125.1 ater|EAU35637.1 atub|OJI90268.1 aver|OJJ04137.1 awen|OJJ39497.1 azon|OJJ47699.1

Group2170: abra|OJJ70556.1 acar|OOF97163.1 acla|EAW08354.1 afis|EAW23385.1 afla|EED55573.1 afum|EAL88086.2 agla|OJJ86435.1 akaw|GAA83401.1 aluc|OJZ83899.1 anid|CBF74875.1 anig|EHA19036.1 aory|EIT82690.1 asyd|OJJ60114.1 ater|EAU35638.1 atub|OJI90269.1 aver|OJJ04148.1 awen|OJJ39496.1 azon|OJJ47698.1

Group2171: abra|OJJ70557.1 acar|OOF97162.1 acla|EAW08355.1 afis|EAW23386.1 afla|EED55574.1 afum|EAL88085.1 agla|OJJ86432.1 akaw|GAA83402.1 aluc|OJZ83900.1 anid|CBF74873.1 anig|EHA19037.1 aory|EIT82673.1 asyd|OJJ60115.1 ater|EAU35639.1 atub|OJI90270.1 aver|OJJ04147.1 awen|OJJ39495.1 azon|OJJ47696.1

Group2172: abra|OJJ70559.1 acar|OOF97161.1 acla|EAW08357.1 afis|EAW23388.1 afla|EED55576.1 afum|EAL88083.1 agla|OJJ86430.1 akaw|GAA83404.1 aluc|OJZ83903.1 anid|CBF74870.1 anig|EHA19038.1 aory|EIT82706.1 asyd|OJJ60117.1 ater|EAU35640.1 atub|OJI90272.1 aver|OJJ04145.1 awen|OJJ39493.1 azon|OJJ47694.1

Group2173: abra|OJJ70560.1 acar|OOF97160.1 acla|EAW08358.1 afis|EAW23389.1 afla|EED55568.1 afum|EAL88082.1 agla|OJJ86428.1 akaw|GAA83405.1 aluc|OJZ83904.1 anid|CBF74868.1 anig|EHA19039.1 aory|EIT82664.1 asyd|OJJ60118.1 ater|EAU35642.1 atub|OJI90273.1 aver|OJJ04144.1 awen|OJJ39492.1 azon|OJJ47693.1



Group2174: abra|OJJ70561.1 acar|OOF97158.1 acla|EAW08360.1 afis|EAW23391.1 afla|EED55566.1 afum|EAL88080.1 agla|OJJ86426.1 akaw|GAA83406.1 aluc|OJZ83905.1 anid|CBF74864.1 anig|EHA19040.1 aory|EIT82703.1 asyd|OJJ60121.1 ater|EAU35644.1 atub|OJI90276.1 aver|OJJ04141.1 awen|OJJ39488.1 azon|OJJ47691.1

Group2175: abra|OJJ70564.1 acar|OOF97156.1 acla|EAW08362.1 afis|EAW23393.1 afla|EED55564.1 afum|EAL88077.1 agla|OJJ86420.1 akaw|GAA83408.1 aluc|OJZ83907.1 anid|CBF74860.1 anig|EHA19042.1 aory|EIT82692.1 asyd|OJJ60123.1 ater|EAU35646.1 atub|OJI90278.1 aver|OJJ04139.1 awen|OJJ39486.1 azon|OJJ47689.1

Group2176: abra|OJJ70567.1 acar|OOF97155.1 acla|EAW08366.1 afis|EAW23396.1 afla|EED55560.1 afum|EAL88074.1 agla|OJJ86410.1 akaw|GAA83411.1 aluc|OJZ83910.1 anid|CBF74807.1 anig|EHA19044.1 aory|EIT82680.1 asyd|OJJ60148.1 ater|EAU35649.1 atub|OJI90281.1 aver|OJJ04115.1 awen|OJJ39483.1 azon|OJJ48236.1

Group2177: abra|OJJ70568.1 acar|OOF97154.1 acla|EAW08367.1 afis|EAW23397.1 afla|EED55559.1 afum|EAL88073.1 agla|OJJ86409.1 akaw|GAA83412.1 aluc|OJZ83911.1 anid|CBF74805.1 anig|EHA19045.1 aory|EIT82705.1 asyd|OJJ60149.1 ater|EAU35650.1 atub|OJI90282.1 aver|OJJ04114.1 awen|OJJ39482.1 azon|OJJ47684.1

Group2178: abra|OJJ70569.1 acar|OOF97152.1 acla|EAW08371.1 afis|EAW23398.1 afla|EED55554.1 afum|EAL88072.1 agla|OJJ86403.1 akaw|GAA83413.1 aluc|OJZ83913.1 anid|CBF74803.1 anig|EHA19046.1 aory|EIT82712.1 asyd|OJJ60150.1 ater|EAU35651.1 atub|OJI90283.1 aver|OJJ04113.1 awen|OJJ39481.1 azon|OJJ47683.1

Group2179: abra|OJJ70570.1 acar|OOF97151.1 acla|EAW08370.1 afis|EAW23399.1 afla|EED47005.1 afum|EAL88071.1 agla|OJJ86402.1 akaw|GAA83414.1 aluc|OJZ83914.1 anid|CBF74801.1 anig|EHA19047.1 aory|EIT72537.1 asyd|OJJ60152.1 ater|EAU36378.1 atub|OJI90284.1 aver|OJJ04112.1 awen|OJJ39480.1 azon|OJJ47682.1

Group2180: abra|OJJ70571.1 acar|OOF97150.1 acla|EAW08369.1 afis|EAW23400.1 afla|EED47006.1 afum|EAL88070.1 agla|OJJ86401.1 akaw|GAA83415.1 aluc|OJZ83915.1 anid|CBF73601.1 anig|EHA19048.1 aory|EIT72638.1 asyd|OJJ56680.1 ater|EAU36377.1 atub|OJI90285.1 aver|OJJ06043.1 awen|OJJ39479.1 azon|OJJ47681.1

Group2181: abra|OJJ70574.1 acar|OOF97147.1 acla|EAW08373.1 afis|EAW23402.1 afla|EED47009.1 afum|EAL88068.1 agla|OJJ86389.1 akaw|GAA83418.1 aluc|OJZ83918.1 anid|CBF74795.1 anig|EHA19051.1 aory|EIT72635.1 asyd|OJJ60155.1 ater|EAU36373.1 atub|OJI90289.1 aver|OJJ04109.1 awen|OJJ39476.1 azon|OJJ47679.1

Group2182: abra|OJJ70576.1 acar|OOF97145.1 acla|EAW08375.1 afis|EAW23404.1 afla|EED47011.1 afum|EAL88066.1 agla|OJJ86392.1 akaw|GAA83420.1 aluc|OJZ83920.1 anid|CBF74793.1 anig|EHA19053.1 aory|EIT72673.1 asyd|OJJ60156.1 ater|EAU36371.1 atub|OJI90292.1 aver|OJJ04108.1 awen|OJJ39473.1 azon|OJJ47675.1

Group2183: abra|OJJ70577.1 acar|OOF97144.1 acla|EAW08203.1 afis|EAW23237.1 afla|EED47012.1 afum|EAL88245.1 agla|OJJ86393.1 akaw|GAA83421.1 aluc|OJZ83921.1 anid|CBF74787.1 anig|EHA19054.1 aory|EIT72690.1 asyd|OJJ60159.1 ater|EAU36370.1 atub|OJI90293.1 aver|OJJ04105.1 awen|OJJ39472.1 azon|OJJ47674.1

Group2184: abra|OJJ70578.1 acar|OOF97143.1 acla|EAW08202.1 afis|EAW23236.1 afla|EED47013.1 afum|EAL88246.1 agla|OJJ86394.1 akaw|GAA83422.1 aluc|OJZ83922.1 anid|CBF74785.1 anig|EHA19055.1 aory|EIT72768.1 asyd|OJJ60160.1 ater|EAU36369.1 atub|OJI90294.1 aver|OJJ04104.1 awen|OJJ39471.1 azon|OJJ47673.1

Group2185: abra|OJJ70580.1 acar|OOF97138.1 acla|EAW08200.1 afis|EAW23234.1 afla|EED47015.1 afum|EAL88248.1 agla|OJJ86396.1 akaw|GAA83424.1 aluc|OJZ83925.1 anid|CBF74783.1 anig|EHA19057.1 aory|EIT72553.1 asyd|OJJ60161.1 ater|EAU36367.1 atub|OJI90297.1 aver|OJJ04103.1 awen|OJJ39469.1 azon|OJJ47669.1

Group2186: abra|OJJ70582.1 acar|OOF97137.1 acla|EAW08198.1 afis|EAW23232.1 afla|EED47016.1 afum|EAL88250.1 agla|OJJ86398.1 akaw|GAA83426.1 aluc|OJZ83927.1 anid|CBF74779.1 anig|EHA19059.1 aory|EIT72651.1 asyd|OJJ60163.1 ater|EAU36361.1 atub|OJI90299.1 aver|OJJ04101.1 awen|OJJ39467.1 azon|OJJ47667.1

Group2187: abra|OJJ70584.1 acar|OOF97136.1 acla|EAW08197.1 afis|EAW23231.1 afla|EED47019.1 afum|EAL88252.1 agla|OJJ86399.1 akaw|GAA83427.1 aluc|OJZ83928.1 anid|CBF74777.1 anig|EHA19060.1 aory|EIT72752.1 asyd|OJJ60164.1 ater|EAU36360.1 atub|OJI90300.1 aver|OJJ04100.1 awen|OJJ39466.1 azon|OJJ47666.1

Group2188: abra|OJJ70585.1 acar|OOF97135.1 acla|EAW08196.1 afis|EAW23230.1 afla|EED47020.1 afum|EAL88253.1 agla|OJJ86400.1 akaw|GAA83428.1 aluc|OJZ83929.1 anid|CBF74775.1 anig|EHA19061.1

aory|EIT72543.1 asyd|OJJ60165.1 ater|EAU36359.1 atub|OJI90301.1 aver|OJJ04099.1 awen|OJJ39465.1 azon|OJJ47665.1

Group2189: abra|OJJ70589.1 acar|OOF97128.1 acla|EAW08192.1 afis|EAW23226.1 afla|EED47024.1 afum|EAL88257.1 agla|OJJ86383.1 akaw|GAA83433.1 aluc|OJZ83934.1 anid|CBF74767.1 anig|EHA19065.1 aory|EIT72765.1 asyd|OJJ60169.1 ater|EAU36356.1 atub|OJI90306.1 aver|OJJ04095.1 awen|OJJ39461.1 azon|OJJ47660.1

Group2190: abra|OJJ70592.1 acar|OOF97126.1 acla|EAW08188.1 afis|EAW23222.1 afla|EED47028.1 afum|EAL88262.1 agla|OJJ86379.1 akaw|GAA83437.1 aluc|OJZ83938.1 anid|CBF74759.1 anig|EHA19068.1 aory|EIT72692.1 asyd|OJJ60173.1 ater|EAU36353.1 atub|OJI90311.1 aver|OJJ04091.1 awen|OJJ39458.1 azon|OJJ47656.1

Group2191: abra|OJJ70594.1 acar|OOF97124.1 acla|EAW08186.1 afis|EAW23220.1 afla|EED47030.1 afum|EAL88264.1 agla|OJJ86377.1 akaw|GAA83439.1 aluc|OJZ83940.1 anid|CBF74757.1 anig|EHA19070.1 aory|EIT72550.1 asyd|OJJ60174.1 ater|EAU36351.1 atub|OJI90313.1 aver|OJJ04089.1 awen|OJJ39456.1 azon|OJJ47654.1

Group2192: abra|OJJ70595.1 acar|OOF97123.1 acla|EAW08185.1 afis|EAW23219.1 afla|EED47031.1 afum|EAL88265.1 agla|OJJ86376.1 akaw|GAA83440.1 aluc|OJZ83941.1 anid|CBF74755.1 anig|EHA19071.1 aory|EIT72573.1 asyd|OJJ60175.1 ater|EAU36350.1 atub|OJI90314.1 aver|OJJ04088.1 awen|OJJ39455.1 azon|OJJ47653.1

Group2193: abra|OJJ70600.1 acar|OOF97120.1 acla|EAW08182.1 afis|EAW23217.1 afla|EED47035.1 afum|EAL88267.1 agla|OJJ86373.1 akaw|GAA89940.1 aluc|OJZ83945.1 anid|CBF74749.1 anig|EHA19074.1 aory|EIT72655.1 asyd|OJJ60178.1 ater|EAU36347.1 atub|OJI90316.1 aver|OJJ04084.1 awen|OJJ39451.1 azon|OJJ47651.1

Group2194: abra|OJJ70606.1 acar|OOF97115.1 acla|EAW13020.1 afis|EAW17647.1 afla|EED50511.1 afum|EAL91462.1 agla|OJJ79557.1 akaw|GAA89946.1 aluc|OJZ83952.1 anid|CBF90111.1 anig|EHA19080.1 aory|EIT82166.1 asyd|OJJ62026.1 ater|EAU37083.1 atub|OJI90323.1 aver|OJI96117.1 awen|OJJ37198.1 azon|OJJ50897.1

Group2195: abra|OJJ70607.1 acar|OOF97114.1 acla|EAW13019.1 afis|EAW17648.1 afla|EED50510.1 afum|EAL91464.1 agla|OJJ79556.1 akaw|GAA89947.1 aluc|OJZ83954.1 anid|CBF90087.1 anig|EHA19081.1 aory|EIT82125.1 asyd|OJJ62036.1 ater|EAU37084.1 atub|OJI90324.1 aver|OJI96142.1 awen|OJJ37197.1 azon|OJJ50896.1

Group2196: abra|OJJ70608.1 acar|OOF97113.1 acla|EAW13018.1 afis|EAW17649.1 afla|EED50509.1 afum|EAL91465.1 agla|OJJ79555.1 akaw|GAA89948.1 aluc|OJZ83955.1 anid|CBF90085.1 anig|EHA19082.1 aory|EIT82043.1 asyd|OJJ62037.1 ater|EAU37085.1 atub|OJI90325.1 aver|OJI96143.1 awen|OJJ37196.1 azon|OJJ50895.1

Group2197: abra|OJJ70611.1 acar|OOF97111.1 acla|EAW13016.1 afis|EAW17651.1 afla|EED50508.1 afum|EAL91466.1 agla|OJJ79553.1 akaw|GAA89950.1 aluc|OJZ83957.1 anid|CBF90077.1 anig|EHA19084.1 aory|EIT82060.1 asyd|OJJ62040.1 ater|EAU37087.1 atub|OJI90327.1 aver|OJI96146.1 awen|OJJ37194.1 azon|OJJ50893.1

Group2198: abra|OJJ70613.1 acar|OOF97109.1 acla|EAW13014.1 afis|EAW17653.1 afla|EED50505.1 afum|EAL91468.1 agla|OJJ79551.1 akaw|GAA89952.1 aluc|OJZ83959.1 anid|CBF90074.1 anig|EHA19087.1 aory|EIT82010.1 asyd|OJJ62042.1 ater|EAU37089.1 atub|OJI90331.1 aver|OJI96148.1 awen|OJJ37192.1 azon|OJJ50891.1

Group2199: abra|OJJ70616.1 acar|OOF97105.1 acla|EAW13011.1 afis|EAW17656.1 afla|EED50502.1 afum|EAL91471.1 agla|OJJ79549.1 akaw|GAA89955.1 aluc|OJZ83962.1 anid|CBF90066.1 anig|EHA19090.1 aory|EIT82103.1 asyd|OJJ62045.1 ater|EAU31997.1 atub|OJI90334.1 aver|OJI96151.1 awen|OJJ37187.1 azon|OJJ50889.1

Group2200: abra|OJJ70617.1 acar|OOF97104.1 acla|EAW13010.1 afis|EAW17657.1 afla|EED50501.1 afum|EAL91472.1 agla|OJJ79548.1 akaw|GAA89956.1 aluc|OJZ83963.1 anid|CBF90065.1 anig|EHA19091.1 aory|EIT82023.1 asyd|OJJ62046.1 ater|EAU31996.1 atub|OJI90335.1 aver|OJI96152.1 awen|OJJ37186.1 azon|OJJ50888.1

Group2201: abra|OJJ70618.1 acar|OOF97103.1 acla|EAW13009.1 afis|EAW17658.1 afla|EED50500.1 afum|EAL91473.1 agla|OJJ79547.1 akaw|GAA89957.1 aluc|OJZ83964.1 anid|CBF90063.1 anig|EHA19092.1 aory|EIT82147.1 asyd|OJJ62048.1 ater|EAU31994.1 atub|OJI90337.1 aver|OJI96153.1 awen|OJJ37185.1 azon|OJJ50886.1

Group2202: abra|OJJ70619.1 acar|OOF97102.1 acla|EAW13008.1 afis|EAW17659.1 afla|EED50499.1 afum|EAL91474.1 agla|OJJ79546.1 akaw|GAA89958.1 aluc|OJZ83965.1 anid|CBF90061.1 anig|EHA19093.1 aory|EIT82055.1 asyd|OJJ62049.1 ater|EAU31993.1 atub|OJI90338.1 aver|OJI96154.1 awen|OJJ37184.1 azon|OJJ50885.1

Group2203: abra|OJJ70620.1 acar|OOF97101.1 acla|EAW13007.1 afis|EAW17660.1 afla|EED50497.1 afum|EAL91475.1 agla|OJJ79529.1 akaw|GAA89959.1 aluc|OJZ83966.1 anid|CBF90059.1 anig|EHA19094.1 aory|EIT82172.1 asyd|OJJ62050.1 ater|EAU31992.1 atub|OJI90339.1 aver|OJI96155.1 awen|OJJ37182.1 azon|OJJ50884.1

Group2204: abra|OJJ70625.1 acar|OOF97099.1 acla|EAW13005.1 afis|EAW17663.1 afla|EED50495.1 afum|EAL91477.2 agla|OJJ79532.1 akaw|GAA89963.1 aluc|OJZ83970.1 anid|CBF90056.1 anig|EHA19099.1 aory|EIT82160.1 asyd|OJJ62052.1 ater|EAU31990.1 atub|OJI90343.1 aver|OJI96158.1 awen|OJJ37179.1 azon|OJJ50881.1

Group2205: abra|OJJ70626.1 acar|OOF97098.1 acla|EAW08131.1 afis|EAW23168.1 afla|EED46953.1 afum|EAL88316.1 agla|OJJ89679.1 akaw|GAA89964.1 aluc|OJZ83971.1 anid|CBF74478.1 anig|EHA19100.1 aory|EIT72624.1 asyd|OJJ57707.1 ater|EAU36297.1 atub|OJI90344.1 aver|OJJ05457.1 awen|OJJ36615.1 azon|OJJ47598.1

Group2206: abra|OJJ70627.1 acar|OOF97097.1 acla|EAW08130.1 afis|EAW23167.1 afla|EED46954.1 afum|EAL88317.2 agla|OJJ89678.1 akaw|GAA89965.1 aluc|OJZ83972.1 anid|CBF74476.1 anig|EHA19101.1 aory|EIT72656.1 asyd|OJJ57706.1 ater|EAU36296.1 atub|OJI90345.1 aver|OJJ05458.1 awen|OJJ36616.1 azon|OJJ41979.1

Group2207: abra|OJJ70628.1 acar|OOF97096.1 acla|EAW08129.1 afis|EAW23166.1 afla|EED46955.1 afum|EAL88318.1 agla|OJJ89677.1 akaw|GAA89966.1 aluc|OJZ83974.1 anid|CBF74475.1 anig|EHA19102.1 aory|EIT72623.1 asyd|OJJ57705.1 ater|EAU36295.1 atub|OJI90347.1 aver|OJJ05459.1 awen|OJJ36617.1 azon|OJJ47597.1

Group2208: abra|OJJ70629.1 acar|OOF97095.1 acla|EAW08128.1 afis|EAW23165.1 afla|EED46957.1 afum|EBA27343.1 agla|OJJ89676.1 akaw|GAA89967.1 aluc|OJZ83976.1 anid|CBF74473.1 anig|EHA19103.1 aory|EIT72540.1 asyd|OJJ57704.1 ater|EAU36294.1 atub|OJI90349.1 aver|OJJ05460.1 awen|OJJ36618.1 azon|OJJ47595.1

Group2209: abra|OJJ70630.1 acar|OOF97093.1 acla|EAW08126.1 afis|EAW23163.1 afla|EED46958.1 afum|EAL88320.1 agla|OJJ89674.1 akaw|GAA89969.1 aluc|OJZ83978.1 anid|CBF74467.1 anig|EHA19105.1 aory|EIT72637.1 asyd|OJJ57700.1 ater|EAU36293.1 atub|OJI90351.1 aver|OJJ05464.1 awen|OJJ36620.1 azon|OJJ47593.1

Group2210: abra|OJJ70639.1 acar|OOF97080.1 acla|EAW08118.1 afis|EAW23133.1 afla|EED48995.1 afum|EAL88348.1 agla|OJJ89666.1 akaw|GAA89975.1 aluc|OJZ83986.1 anid|CBF74456.1 anig|EHA19112.1 aory|EIT80032.1 asyd|OJJ57677.1 ater|EAU36286.1 atub|OJI90358.1 aver|OJJ05483.1 awen|OJJ36627.1 azon|OJJ47586.1

Group2211: abra|OJJ70640.1 acar|OOF97081.1 acla|EAW08117.1 afis|EAW23134.1 afla|EED48497.1 afum|EAL88347.1 agla|OJJ89665.1 akaw|GAA89976.1 aluc|OJZ83987.1 anid|CBF74455.1 anig|EHA19113.1 aory|EIT73203.1 asyd|OJJ57676.1 ater|EAU36282.1 atub|OJI90359.1 aver|OJJ05482.1 awen|OJJ36630.1 azon|OJJ47584.1

Group2212: abra|OJJ70646.1 acar|OOF97075.1 acla|EAW08114.1 afis|EAW23137.1 afla|EED48500.1 afum|EAL88344.1 agla|OJJ89663.1 akaw|GAA89982.1 aluc|OJZ83996.1 anid|CBF74450.1 anig|EHA19119.1 aory|EIT73193.1 asyd|OJJ57740.1 ater|EAU36280.1 atub|OJI90365.1 aver|OJJ05427.1 awen|OJJ36633.1 azon|OJJ47582.1

Group2213: abra|OJJ70653.1 acar|OOF97070.1 acla|EAW08106.1 afis|EAW23145.1 afla|EED48508.1 afum|EAL88336.1 agla|OJJ89657.1 akaw|GAA89989.1 aluc|OJZ84003.1 anid|CBF74436.1 anig|EHA19125.1 aory|EIT73083.1 asyd|OJJ57747.1 ater|EAU36266.1 atub|OJI90372.1 aver|OJJ05420.1 awen|OJJ36640.1 azon|OJJ47574.1

Group2214: abra|OJJ70654.1 acar|OOF97068.1 acla|EAW08105.1 afis|EAW23146.1 afla|EED48509.1 afum|EAL88335.1 agla|OJJ89656.1 akaw|GAA89990.1 aluc|OJZ84004.1 anid|CBF74434.1 anig|EHA19126.1 aory|EIT73165.1 asyd|OJJ57748.1 ater|EAU36265.1 atub|OJI90373.1 aver|OJJ05419.1 awen|OJJ36641.1 azon|OJJ47573.1

Group2215: abra|OJJ70657.1 acar|OOF97065.1 acla|EAW08102.1 afis|EAW23149.1 afla|EED48512.1 afum|EAL88332.1 agla|OJJ89653.1 akaw|GAA89993.1 aluc|OJZ84007.1 anid|CBF74428.1 anig|EHA19129.1 aory|EIT73157.1 asyd|OJJ57751.1 ater|EAU36263.1 atub|OJI90376.1 aver|OJJ05416.1 awen|OJJ36645.1 azon|OJJ47570.1

Group2216: abra|OJJ70659.1 acar|OOF97063.1 acla|EAW08100.1 afis|EAW23151.1 afla|EED48514.1 afum|EAL88330.2 agla|OJJ89651.1 akaw|GAA89995.1 aluc|OJZ84009.1 anid|CBF74424.1 anig|EHA19131.1 aory|EIT73110.1 asyd|OJJ57753.1 ater|EAU36261.1 atub|OJI90378.1 aver|OJJ05414.1 awen|OJJ36647.1 azon|OJJ47568.1

Group2217: abra|OJJ70661.1 acar|OOF97060.1 acla|EAW08097.1 afis|EAW23153.1 afla|EED48516.1 afum|EAL88328.1 agla|OJJ89648.1 akaw|GAA89997.1 aluc|OJZ84011.1 anid|CBF74421.1 anig|EHA19134.1

aory|EIT73108.1 asyd|OJJ57755.1 ater|EAU36258.1 atub|OJI90380.1 aver|OJJ05412.1 awen|OJJ36649.1 azon|OJJ47553.1

Group2218: abra|OJJ70666.1 acar|OOF97058.1 acla|EAW08096.1 afis|EAW23154.1 afla|EED48519.1 afum|EAL88327.2 agla|OJJ89646.1 akaw|GAA90001.1 aluc|OJZ84016.1 anid|CBF74419.1 anig|EHA19138.1 aory|EIT73174.1 asyd|OJJ57756.1 ater|EAU36257.1 atub|OJI90387.1 aver|OJJ05411.1 awen|OJJ36650.1 azon|OJJ47545.1

Group2219: abra|OJJ70669.1 acar|OOF97057.1 acla|EAW08094.1 afis|EAW23129.1 afla|EED48521.1 afum|EAL88351.1 agla|OJJ89645.1 akaw|GAA90002.1 aluc|OJZ84017.1 anid|CBF74417.1 anig|EHA19139.1 aory|EIT73127.1 asyd|OJJ57757.1 ater|EAU36256.1 atub|OJI90389.1 aver|OJJ05410.1 awen|OJJ36651.1 azon|OJJ47547.1

Group2220: abra|OJJ70671.1 acar|OOF97055.1 acla|EAW08093.1 afis|EAW23128.1 afla|EED48522.1 afum|EAL88352.1 agla|OJJ89644.1 akaw|GAA90003.1 aluc|OJZ84019.1 anid|CBF74413.1 anig|EHA19140.1 aory|EIT73195.1 asyd|OJJ57758.1 ater|EAU36255.1 atub|OJI90390.1 aver|OJJ05408.1 awen|OJJ36652.1 azon|OJJ47548.1

Group2221: abra|OJJ70672.1 acar|OOF97054.1 acla|EAW08092.1 afis|EAW23127.1 afla|EED48523.1 afum|EAL88353.1 agla|OJJ89643.1 akaw|GAA90004.1 aluc|OJZ84020.1 anid|CBF74412.1 anig|EHA19141.1 aory|EIT73139.1 asyd|OJJ57759.1 ater|EAU36254.1 atub|OJI90391.1 aver|OJJ05407.1 awen|OJJ36653.1 azon|OJJ47549.1

Group2222: abra|OJJ70675.1 acar|OOF97052.1 acla|EAW08089.1 afis|EAW23124.1 afla|EED48528.1 afum|EAL88356.1 agla|OJJ89641.1 akaw|GAA90007.1 aluc|OJZ84023.1 anid|CBF74406.1 anig|EHA19144.1 aory|EIT73244.1 asyd|OJJ57762.1 ater|EAU36252.1 atub|OJI90395.1 aver|OJJ05404.1 awen|OJJ36656.1 azon|OJJ47552.1

Group2223: abra|OJJ70677.1 acar|OOF97050.1 acla|EAW08087.1 afis|EAW23123.1 afla|EED48530.1 afum|EAL88357.1 agla|OJJ89616.1 akaw|GAA90009.1 aluc|OJZ84025.1 anid|CBF74404.1 anig|EHA19146.1 aory|EIT73116.1 asyd|OJJ57763.1 ater|EAU36251.1 atub|OJI90397.1 aver|OJJ05403.1 awen|OJJ36658.1 azon|OJJ47540.1

Group2224: abra|OJJ70680.1 acar|OOF97047.1 acla|EAW08084.1 afis|EAW23120.1 afla|EED48533.1 afum|EAL88360.1 agla|OJJ89619.1 akaw|GAA90012.1 aluc|OJZ84028.1 anid|CBF74398.1 anig|EHA19149.1 aory|EIT73210.1 asyd|OJJ57766.1 ater|EAU36249.1 atub|OJI90400.1 aver|OJJ05400.1 awen|OJJ36661.1 azon|OJJ47537.1

Group2225: abra|OJJ70681.1 acar|OOF97046.1 acla|EAW08083.1 afis|EAW23119.1 afla|EED48534.1 afum|EAL88361.1 agla|OJJ89621.1 akaw|GAA90013.1 aluc|OJZ84029.1 anid|CBF74396.1 anig|EHA19150.1 aory|EIT73258.1 asyd|OJJ57767.1 ater|EAU36248.1 atub|OJI90401.1 aver|OJJ05399.1 awen|OJJ36662.1 azon|OJJ47536.1

Group2226: abra|OJJ70684.1 acar|OOF97043.1 acla|EAW08078.1 afis|EAW23117.1 afla|EED48535.1 afum|EAL88363.1 agla|OJJ89624.1 akaw|GAA90016.1 aluc|OJZ84032.1 anid|CBF74393.1 anig|EHA19153.1 aory|EIT73171.1 asyd|OJJ57769.1 ater|EAU36245.1 atub|OJI90404.1 aver|OJJ05397.1 awen|OJJ36665.1 azon|OJJ47534.1

Group2227: abra|OJJ70685.1 acar|OOF97042.1 acla|EAW08077.1 afis|EAW23116.1 afla|EED48536.1 afum|EAL88364.1 agla|OJJ89625.1 akaw|GAA90017.1 aluc|OJZ84033.1 anid|CBF74391.1 anig|EHA19154.1 aory|EIT73186.1 asyd|OJJ57770.1 ater|EAU36244.1 atub|OJI90405.1 aver|OJJ05396.1 awen|OJJ36666.1 azon|OJJ47533.1

Group2229: abra|OJJ70689.1 acar|OOF97038.1 acla|EAW08076.1 afis|EAW23111.1 afla|EED48537.1 afum|EAL88368.1 agla|OJJ89630.1 akaw|GAA90021.1 aluc|OJZ84037.1 anid|CBF74389.1 anig|EHA19158.1 aory|EIT73070.1 asyd|OJJ57771.1 ater|EAU36239.1 atub|OJI90409.1 aver|OJJ05395.1 awen|OJJ36670.1 azon|OJJ47529.1

Group2230: abra|OJJ70694.1 acar|OOF97035.1 acla|EAW08071.1 afis|EAW23107.1 afla|EED48541.1 afum|EAL88372.1 agla|OJJ89636.1 akaw|GAA90025.1 aluc|OJZ84041.1 anid|CBF81370.1 anig|EHA19163.1 aory|EIT73129.1 asyd|OJJ59386.1 ater|EAU36235.1 atub|OJI90413.1 aver|OJJ02887.1 awen|OJJ36674.1 azon|OJJ47524.1

Group2231: abra|OJJ70696.1 acar|OOF97033.1 acla|EAW08069.1 afis|EAW23105.1 afla|EED48543.1 afum|EAL88374.1 agla|OJJ89638.1 akaw|GAA90027.1 aluc|OJZ84043.1 anid|CBF81367.1 anig|EHA19165.1 aory|EIT73169.1 asyd|OJJ59384.1 ater|EAU36233.1 atub|OJI90415.1 aver|OJJ02889.1 awen|OJJ36676.1 azon|OJJ47522.1

Group2232: abra|OJJ70700.1 acar|OOF90048.1 acla|EAW08065.1 afis|EAW23101.1 afla|EED48549.1 afum|EAL88377.1 agla|OJJ89613.1 akaw|GAA90031.1 aluc|OJZ84046.1 anid|CBF81359.1 anig|EHA19167.1 aory|EIT73156.1 asyd|OJJ59381.1 ater|EAU36227.1 atub|OJI90418.1 aver|OJJ02892.1 awen|OJJ36680.1 azon|OJJ47517.1

Group2233: abra|OJJ70701.1 acar|OOF89978.1 acla|EAW08064.1 afis|EAW23100.1 afla|EED48548.1 afum|EAL88378.2 agla|OJJ89612.1 akaw|GAA90032.1 aluc|OJZ84047.1 anig|EHA19168.1 aory|EIT73049.1 asyd|OJJ59380.1 ater|EAU36228.1 atub|OJI90419.1 aver|OJJ02893.1 awen|OJJ36681.1 azon|OJJ47516.1 anid|CBF81358.1

Group2234: abra|OJJ70702.1 acar|OOF89980.1 acla|EAW08063.1 afis|EAW23099.1 afla|EED48547.1 afum|EAL88379.1 agla|OJJ89611.1 akaw|GAA90033.1 aluc|OJZ84049.1 anid|CBF81356.1 anig|EHA19169.1 aory|EIT73063.1 asyd|OJJ59379.1 ater|EAU36230.1 atub|OJI90420.1 aver|OJJ02894.1 awen|OJJ36682.1 azon|OJJ47515.1

Group2235: abra|OJJ70704.1 acar|OOF97032.1 acla|EAW08061.1 afis|EAW23097.1 afla|EED48551.1 afum|EAL88381.2 agla|OJJ89609.1 akaw|GAA90035.1 aluc|OJZ84051.1 anid|CBF81352.1 anig|EHA19171.1 aory|EIT73218.1 asyd|OJJ59377.1 ater|EAU36225.1 atub|OJI90422.1 aver|OJJ02896.1 awen|OJJ36684.1 azon|OJJ47512.1

Group2236: abra|OJJ70705.1 acar|OOF97031.1 acla|EAW08060.1 afis|EAW23096.1 afla|EED48552.1 afum|EAL88382.2 agla|OJJ89608.1 akaw|GAA90036.1 aluc|OJZ84052.1 anid|CBF81350.1 anig|EHA19172.1 aory|EIT73272.1 asyd|OJJ59376.1 ater|EAU36224.1 atub|OJI90423.1 aver|OJJ02897.1 awen|OJJ36685.1 azon|OJJ47511.1

Group2238: abra|OJJ70708.1 acar|OOF97028.1 acla|EAW08056.1 afis|EAW23092.1 afla|EED48556.1 afum|EBA27345.1 agla|OJJ89604.1 akaw|GAA90039.1 aluc|OJZ84055.1 anid|CBF81348.1 anig|EHA19176.1 aory|EIT73227.1 asyd|OJJ59374.1 ater|EAU36215.1 atub|OJI90426.1 aver|OJJ02900.1 awen|OJJ36690.1 azon|OJJ47506.1

Group2239: abra|OJJ70710.1 acar|OOF97026.1 acla|EAW08054.1 afis|EAW23090.1 afla|EED48558.1 afum|EAL88389.1 agla|OJJ89602.1 akaw|GAA90041.1 aluc|OJZ84057.1 anid|CBF81345.1 anig|EHA19177.1 aory|EIT73059.1 asyd|OJJ59372.1 ater|EAU36213.1 atub|OJI90428.1 aver|OJJ02902.1 awen|OJJ36692.1 azon|OJJ47504.1

Group2240: abra|OJJ70711.1 acar|OOF97025.1 acla|EAW08053.1 afis|EAW23089.1 afla|EED48559.1 afum|EAL88390.1 agla|OJJ89601.1 akaw|GAA90042.1 aluc|OJZ84058.1 anid|CBF81343.1 anig|EHA19178.1 aory|EIT73173.1 asyd|OJJ59371.1 ater|EAU36212.1 atub|OJI90429.1 aver|OJJ02903.1 awen|OJJ36694.1 azon|OJJ47503.1

Group2241: abra|OJJ70714.1 acar|OOF97022.1 acla|EAW08049.1 afis|EAW23085.1 afla|EED48563.1 afum|EAL88394.1 agla|OJJ89595.1 akaw|GAA90045.1 aluc|OJZ84061.1 anid|CBF81339.1 anig|EHA19181.1 aory|EIT73232.1 asyd|OJJ59369.1 ater|EAU36209.1 atub|OJI90432.1 aver|OJJ02905.1 awen|OJJ36699.1 azon|OJJ47498.1

Group2242: abra|OJJ70715.1 acar|OOF97021.1 acla|EAW08048.1 afis|EAW23084.1 afla|EED48564.1 afum|EAL88395.1 agla|OJJ89594.1 akaw|GAA90046.1 aluc|OJZ84062.1 anid|CBF81337.1 anig|EHA19182.1 aory|EIT73208.1 asyd|OJJ59368.1 ater|EAU36208.1 atub|OJI90433.1 aver|OJJ02906.1 awen|OJJ36700.1 azon|OJJ47497.1

Group2243: abra|OJJ70716.1 acar|OOF97020.1 acla|EAW08047.1 afis|EAW23083.1 afla|EED48565.1 afum|EAL88396.1 agla|OJJ89592.1 akaw|GAA90047.1 aluc|OJZ84063.1 anid|CBF81335.1 anig|EHA19183.1 aory|EIT73176.1 asyd|OJJ59367.1 ater|EAU36207.1 atub|OJI90434.1 aver|OJJ02907.1 awen|OJJ36701.1 azon|OJJ47496.1

Group2244: abra|OJJ70717.1 acar|OOF97019.1 acla|EAW08046.1 afis|EAW23082.1 afla|EED48566.1 afum|EAL88397.1 agla|OJJ89591.1 akaw|GAA90048.1 aluc|OJZ84064.1 anid|CBF81333.1 anig|EHA19184.1 aory|EIT73236.1 asyd|OJJ59366.1 ater|EAU36206.1 atub|OJI90435.1 aver|OJJ02908.1 awen|OJJ36702.1 azon|OJJ47495.1

Group2245: abra|OJJ70718.1 acar|OOF97018.1 acla|EAW08044.1 afis|EAW23080.1 afla|EED48567.1 afum|EAL88399.1 agla|OJJ89588.1 akaw|GAA90049.1 aluc|OJZ84065.1 anid|CBF81330.1 anig|EHA19185.1 aory|EIT73202.1 asyd|OJJ59364.1 ater|EAU36205.1 atub|OJI90436.1 aver|OJJ02910.1 awen|OJJ36704.1 azon|OJJ47494.1

Group2246: abra|OJJ70719.1 acar|OOF97017.1 acla|EAW08043.1 afis|EAW23079.1 afla|EED48568.1 afum|EAL88400.1 agla|OJJ89587.1 akaw|GAA90050.1 aluc|OJZ84066.1 anid|CBF81328.1 anig|EHA19186.1 aory|EIT73095.1 asyd|OJJ59363.1 ater|EAU36204.1 atub|OJI90437.1 aver|OJJ02911.1 awen|OJJ36705.1 azon|OJJ47493.1

Group2247: abra|OJJ70720.1 acar|OOF97016.1 acla|EAW08042.1 afis|EAW23078.1 afla|EED48569.1 afum|EAL88401.1 agla|OJJ89586.1 akaw|GAA90051.1 aluc|OJZ84067.1 anid|CBF81326.1 anig|EHA19187.1 aory|EIT73149.1 asyd|OJJ59362.1 ater|EAU36202.1 atub|OJI90438.1 aver|OJJ02912.1 awen|OJJ36706.1 azon|OJJ47489.1

Group2249: abra|OJJ70726.1 acar|OOF97013.1 acla|EAW08040.1 afis|EAW23075.1 afla|EED56447.1 afum|EAL88404.1 agla|OJJ89582.1 akaw|GAA90054.1 aluc|OJZ84071.1 anid|CBF81318.1 anig|EHA19190.1

aory|EIT72820.1 asyd|OJJ59359.1 ater|EAU36199.1 atub|OJI90443.1 aver|OJJ02915.1 awen|OJJ36709.1  
azon|OJJ47492.1

Group2250: abra|OJJ70727.1 acar|OOF97012.1 acla|EAW08039.1 afis|EAW23074.1 afla|EED56449.1  
afum|EAL88405.1 agla|OJJ89581.1 akaw|GAA90055.1 aluc|OJZ84072.1 anid|CBF81316.1 anig|EHA19191.1  
aory|EIT72790.1 asyd|OJJ59358.1 ater|EAU36198.1 atub|OJI90444.1 aver|OJJ02916.1 awen|OJJ36710.1  
azon|OJJ47487.1

Group2251: abra|OJJ70728.1 acar|OOF97011.1 acla|EAW08038.1 afis|EAW23073.1 afla|EED56450.1  
afum|EAL88406.1 agla|OJJ89580.1 akaw|GAA90056.1 aluc|OJZ84073.1 anid|CBF81314.1 anig|EHA19192.1  
aory|EIT72843.1 asyd|OJJ59357.1 ater|EAU36197.1 atub|OJI90445.1 aver|OJJ02917.1 awen|OJJ36711.1  
azon|OJJ47488.1

Group2252: abra|OJJ70729.1 acar|OOF97009.1 acla|EAW11184.1 afis|EAW15915.1 afla|EED56455.1  
afum|EAL88550.2 agla|OJJ89579.1 akaw|GAA90057.1 aluc|OJZ84074.1 anid|CBF81309.1 anig|EHA19193.1  
aory|EIT72851.1 asyd|OJJ59354.1 ater|EAU36193.1 atub|OJI90446.1 aver|OJJ02920.1 awen|OJJ36715.1  
azon|OJJ47474.1

Group2253: abra|OJJ70733.1 acar|OOF97005.1 acla|EAW11180.1 afis|EAW15911.1 afla|EED56457.1  
afum|EAL88546.2 agla|OJJ89575.1 akaw|GAA90061.1 aluc|OJZ84078.1 anid|CBF81301.1 anig|EHA19197.1  
aory|EIT72816.1 asyd|OJJ59350.1 ater|EAU36191.1 atub|OJI90450.1 aver|OJJ02924.1 awen|OJJ36719.1  
azon|OJJ47478.1

Group2254: abra|OJJ70735.1 acar|OOF97004.1 acla|EAW11179.1 afis|EAW15910.1 afla|EED56458.1  
afum|EAL88545.1 agla|OJJ89574.1 akaw|GAA90062.1 aluc|OJZ84080.1 anid|CBF81299.1 anig|EHA19198.1  
aory|EIT72821.1 asyd|OJJ59349.1 ater|EAU36189.1 atub|OJI90451.1 aver|OJJ02925.1 awen|OJJ36720.1  
azon|OJJ47479.1

Group2255: abra|OJJ70738.1 acar|OOF97003.1 acla|EAW11178.1 afis|EAW15909.1 afla|EED56459.1  
afum|EAL88544.1 agla|OJJ89573.1 akaw|GAA90063.1 aluc|OJZ84083.1 anid|CBF81298.1 anig|EHA19199.1  
aory|EIT72803.1 asyd|OJJ59348.1 ater|EAU36188.1 atub|OJI90453.1 aver|OJJ02926.1 awen|OJJ36721.1  
azon|OJJ47480.1

Group2256: abra|OJJ70741.1 acar|OOF97002.1 acla|EAW11176.1 afis|EAW15907.1 afla|EED56461.1  
afum|EAL88542.1 agla|OJJ78421.1 akaw|GAA90065.1 aluc|OJZ84086.1 anid|CBF81263.1 anig|EHA19202.1  
aory|EIT72874.1 asyd|OJJ59332.1 ater|EAU36186.1 atub|OJI90457.1 aver|OJJ02942.1 awen|OJJ36723.1  
azon|OJJ47482.1

Group2257: abra|OJJ70751.1 acar|OOF96994.1 acla|EAW11170.1 afis|EAW15901.1 afla|EED56470.1  
afum|EAL88536.1 agla|OJJ89561.1 akaw|GAA90071.1 aluc|OJZ84095.1 anid|CBF81281.1 anig|EHA19208.1  
aory|EIT72864.1 asyd|OJJ59338.1 ater|EAU36180.1 atub|OJI90468.1 aver|OJJ02936.1 awen|OJJ36730.1  
azon|OJJ47467.1

Group2258: abra|OJJ70752.1 acar|OOF96992.1 acla|EAW11169.1 afis|EAW15900.1 afla|EED56471.1  
afum|EAL88535.1 agla|OJJ89560.1 akaw|GAA90072.1 aluc|OJZ84097.1 anid|CBF81283.1 anig|EHA19209.1  
aory|EIT72802.1 asyd|OJJ59340.1 ater|EAU36179.1 atub|OJI90470.1 aver|OJJ02935.1 awen|OJJ36731.1  
azon|OJJ47466.1

Group2259: abra|OJJ70753.1 acar|OOF96991.1 acla|EAW11168.1 afis|EAW15899.1 afla|EED56472.1  
afum|EAL88534.1 agla|OJJ89553.1 akaw|GAA90073.1 aluc|OJZ84098.1 anid|CBF81285.1 anig|EHA19210.1  
aory|EIT72807.1 asyd|OJJ59341.1 ater|EAU36178.1 atub|OJI90471.1 aver|OJJ02934.1 awen|OJJ36732.1  
azon|OJJ47465.1

Group2260: abra|OJJ70754.1 acar|OOF96990.1 acla|EAW11167.1 afis|EAW15898.1 afla|EED56473.1  
afum|EAL88533.1 agla|OJJ89552.1 akaw|GAA90074.1 aluc|OJZ84099.1 anid|CBF81287.1 anig|EHA19211.1  
aory|EIT72796.1 asyd|OJJ59342.1 ater|EAU36177.1 atub|OJI90472.1 aver|OJJ02933.1 awen|OJJ36733.1  
azon|OJJ47464.1

Group2261: abra|OJJ70755.1 acar|OOF96989.1 acla|EAW11166.1 afis|EAW15897.1 afla|EED56474.1  
afum|EAL88532.1 agla|OJJ89551.1 akaw|GAA90075.1 aluc|OJZ84100.1 anid|CBF81288.1 anig|EHA19212.1  
aory|EIT72834.1 asyd|OJJ59343.1 ater|EAU36176.1 atub|OJI90473.1 aver|OJJ02931.1 awen|OJJ36734.1  
azon|OJJ47463.1

Group2262: abra|OJJ70756.1 acar|OOF96988.1 acla|EAW11165.1 afis|EAW15896.1 afla|EED56475.1  
afum|EAL88531.1 agla|OJJ89550.1 akaw|GAA90076.1 aluc|OJZ84101.1 anid|CBF81290.1 anig|EHA19213.1  
aory|EIT72841.1 asyd|OJJ59344.1 ater|EAU36175.1 atub|OJI90474.1 aver|OJJ02930.1 awen|OJJ36735.1  
azon|OJJ47462.1

Group2263: abra|OJJ70758.1 acar|OOF96986.1 acla|EAW11163.1 afis|EAW15894.1 afla|EED56477.1  
afum|EAL88529.1 agla|OJJ89548.1 akaw|GAA90078.1 aluc|OJZ84103.1 anid|CBF81294.1 anig|EHA19215.1  
aory|EIT72822.1 asyd|OJJ59346.1 ater|EAU36173.1 atub|OJI90476.1 aver|OJJ02928.1 awen|OJJ36737.1  
azon|OJJ47460.1

Group2264: abra|OJJ70760.1 acar|OOF96984.1 acla|EAW11161.1 afis|EAW15892.1 afla|EED56479.1  
afum|EAL88527.1 agla|OJJ89530.1 akaw|GAA90080.1 aluc|OJZ84105.1 anid|CBF81259.1 anig|EHA19217.1  
aory|EIT72795.1 asyd|OJJ59330.1 ater|EAU31714.1 atub|OJI90479.1 aver|OJJ02944.1 awen|OJJ36739.1  
azon|OJJ47459.1

Group2265: abra|OJJ70762.1 acar|OOF96982.1 acla|EAW11159.1 afis|EAW15890.1 afla|EED56482.1  
afum|EAL88525.2 agla|OJJ89532.1 akaw|GAA90082.1 aluc|OJZ84107.1 anid|CBF81256.1 anig|EHA19219.1  
aory|EIT72811.1 asyd|OJJ59328.1 ater|EAU31712.1 atub|OJI90481.1 aver|OJJ02946.1 awen|OJJ36740.1  
azon|OJJ47457.1

Group2266: abra|OJJ70766.1 acar|OOF96979.1 acla|EAW11156.1 afis|EAW15887.1 afla|EED56485.1  
afum|EAL88521.2 agla|OJJ89534.1 akaw|GAA90086.1 aluc|OJZ84112.1 anid|CBF81250.1 anig|EHA19222.1  
aory|EIT72797.1 asyd|OJJ59325.1 ater|EAU31709.1 atub|OJI90485.1 aver|OJJ02949.1 awen|OJJ36743.1  
azon|OJJ47454.1

Group2267: abra|OJJ70767.1 acar|OOF96977.1 acla|EAW11154.1 afis|EAW15885.1 afla|EED56487.1  
afum|EAL88519.1 agla|OJJ89536.1 akaw|GAA90087.1 aluc|OJZ84113.1 anid|CBF81243.1 anig|EHA19223.1  
aory|EIT72824.1 asyd|OJJ59321.1 ater|EAU31705.1 atub|OJI90486.1 aver|OJJ02952.1 awen|OJJ36746.1  
azon|OJJ47453.1

Group2268: abra|OJJ70768.1 acar|OOF96978.1 acla|EAW11153.1 afis|EAW15884.1 afla|EED56488.1  
afum|EAL88518.1 agla|OJJ89537.1 akaw|GAA90088.1 aluc|OJZ84114.1 anid|CBF81241.1 anig|EHA19224.1  
aory|EIT72873.1 asyd|OJJ59320.1 ater|EAU31704.1 atub|OJI90487.1 aver|OJJ02953.1 awen|OJJ36747.1  
azon|OJJ47452.1

Group2269: abra|OJJ70770.1 acar|OOF96976.1 acla|EAW11151.1 afis|EAW15882.1 afla|EED56489.1  
afum|EAL88516.1 agla|OJJ89539.1 akaw|GAA90090.1 aluc|OJZ84116.1 anid|CBF81237.1 anig|EHA19226.1  
aory|EIT72859.1 asyd|OJJ59319.1 ater|EAU31703.1 atub|OJI90489.1 aver|OJJ02954.1 awen|OJJ36749.1  
azon|OJJ47450.1

Group2270: abra|OJJ70774.1 acar|OOF96936.1 acla|EAW11147.1 afis|EAW15878.1 afla|EED56497.1  
afum|EAL88512.1 agla|OJJ87230.1 akaw|GAA90094.1 aluc|OJZ84121.1 anid|CBF81230.1 anig|EHA19229.1  
aory|EIT72868.1 asyd|OJJ59316.1 ater|EAU31699.1 atub|OJI90493.1 aver|OJJ02957.1 awen|OJJ36752.1  
azon|OJJ47447.1

Group2271: abra|OJJ70795.1 acar|OOF96950.1 acla|EAW11128.1 afis|EAW15857.1 afla|EED56515.1  
afum|EAL88493.1 agla|OJJ87250.1 akaw|GAA90111.1 aluc|OJZ84140.1 anid|CBF81189.1 anig|EHA19248.1  
aory|EIT72805.1 asyd|OJJ59299.1 ater|EAU31672.1 atub|OJI90514.1 aver|OJJ02976.1 awen|OJJ36770.1  
azon|OJJ47428.1

Group2272: abra|OJJ70809.1 acar|OOF98293.1 acla|EAW10418.1 afis|EAW25151.1 afla|EED55282.1  
afum|EAL89826.2 agla|OJJ89004.1 akaw|GAA91689.1 aluc|OJZ87705.1 anid|CBF81138.1 anig|EHA20888.1  
aory|EIT83553.1 asyd|OJJ56507.1 ater|EAU39430.1 atub|OJI80938.1 aver|OJJ06212.1 awen|OJJ40780.1  
azon|OJJ46872.1

Group2273: abra|OJJ70815.1 acar|OOF98285.1 acla|EAW10424.1 afis|EAW25145.1 afla|EED55294.1  
afum|EAL89818.1 agla|OJJ89008.1 akaw|GAA91695.1 aluc|OJZ87698.1 anid|CBF85679.1 anig|EHA20885.1  
aory|EIT83533.1 asyd|OJJ64254.1 ater|EAU39423.1 atub|OJI80945.1 aver|OJI98344.1 awen|OJJ40770.1  
azon|OJJ46878.1

Group2274: abra|OJJ70833.1 acar|OOF98281.1 acla|EAW10427.1 afis|EAW25142.1 afla|EED55303.1  
afum|EAL89814.1 agla|OJJ89025.1 akaw|GAA91701.1 aluc|OJZ87689.1 anid|CBF85686.1 anig|EHA20878.1  
aory|EIT83517.1 asyd|OJJ64258.1 ater|EAU39411.1 atub|OJI80951.1 aver|OJI98350.1 awen|OJJ40766.1  
azon|OJJ44131.1

Group2275: abra|OJJ70834.1 acar|OOF98280.1 acla|EAW10428.1 afis|EAW25141.1 afla|EED55304.1  
afum|EAL89813.1 agla|OJJ89026.1 akaw|GAA91702.1 aluc|OJZ87688.1 anid|CBF86093.1 anig|EHA20877.1  
aory|EIT83571.1 asyd|OJJ64473.1 ater|EAU39410.1 atub|OJI80952.1 aver|OJI98577.1 awen|OJJ40765.1  
azon|OJJ44130.1

Group2276: abra|OJJ70837.1 acar|OOF98277.1 acla|EAW10432.1 afis|EAW25137.1 afla|EED55309.1  
afum|EAL89808.2 agla|OJJ89030.1 akaw|GAA91705.1 aluc|OJZ87684.1 anid|CBF85710.1 anig|EHA20874.1  
aory|EIT83613.1 asyd|OJJ64270.1 ater|EAU39407.1 atub|OJI80959.1 aver|OJI98362.1 awen|OJJ40761.1  
azon|OJJ44125.1

Group2277: abra|OJJ70839.1 acar|OOF98275.1 acla|EAW10433.1 afis|EAW25135.1 afla|EED55311.1  
afum|EAL89806.2 agla|OJJ89032.1 akaw|GAA91707.1 aluc|OJZ87682.1 anid|CBF85706.1 anig|EHA20872.1  
aory|EIT83546.1 asyd|OJJ64268.1 ater|EAU39406.1 atub|OJI80961.1 aver|OJI98360.1 awen|OJJ40759.1  
azon|OJJ44123.1

Group2278: abra|OJJ70843.1 acar|OOF98272.1 acla|EAW10434.1 afis|EAW25134.1 afla|EED55312.1  
afum|EAL89805.1 agla|OJJ89033.1 akaw|GAA91711.1 aluc|OJZ87678.1 anid|CBF85705.1 anig|EHA20868.1

aory|EIT83614.1 asyd|OJJ64267.1 ater|EAU39405.1 atub|OJI80965.1 aver|OJI98359.1 awen|OJJ40758.1 azon|OJJ44122.1

Group2279: abra|OJJ70848.1 acar|OOF98266.1 acla|EAW10439.1 afis|EAW25128.1 afla|EED55316.1 afum|EAL89799.1 agla|OJJ89042.1 akaw|GAA91716.1 aluc|OJZ87672.1 anid|CBF85697.1 anig|EHA20863.1 aory|EIT83568.1 asyd|OJJ64263.1 ater|EAU39401.1 atub|OJI80970.1 aver|OJI98355.1 awen|OJJ40753.1 azon|OJJ44117.1

Group2280: abra|OJJ70851.1 acar|OOF98265.1 acla|EAW10441.1 afis|EAW25126.1 afla|EED55317.1 afum|EAL89797.1 agla|OJJ89044.1 akaw|GAA91718.1 aluc|OJZ87670.1 anid|CBF85694.1 anig|EHA20861.1 aory|EIT83542.1 asyd|OJJ64261.1 ater|EAU39399.1 atub|OJI80972.1 aver|OJI98353.1 awen|OJJ40750.1 azon|OJJ44115.1

Group2281: abra|OJJ70854.1 acar|OOF98262.1 acla|EAW10447.1 afis|EAW25120.1 afla|EED55322.1 afum|EAL89791.1 agla|OJJ89053.1 akaw|GAA91721.1 aluc|OJZ87667.1 anid|CBF86087.1 anig|EHA20858.1 aory|EIT76263.1 asyd|OJJ64469.1 ater|EAU39392.1 atub|OJI80976.1 aver|OJI98573.1 awen|OJJ40739.1 azon|OJJ44108.1

Group2282: abra|OJJ70855.1 acar|OOF98261.1 acla|EAW10446.1 afis|EAW25121.1 afla|EED55320.1 afum|EAL89792.1 agla|OJJ89049.1 akaw|GAA91722.1 aluc|OJZ87665.1 anid|CBF86089.1 anig|EHA20857.1 aory|EIT76239.1 asyd|OJJ64471.1 ater|EAU39393.1 atub|OJI80978.1 aver|OJI98575.1 awen|OJJ40740.1 azon|OJJ44110.1

Group2283: abra|OJJ70856.1 acar|OOF98260.1 acla|EAW10445.1 afis|EAW25122.1 afla|EED55319.1 afum|EAL89793.1 agla|OJJ89048.1 akaw|GAA91723.1 aluc|OJZ87664.1 anid|CBF86091.1 anig|EHA20856.1 aory|EIT76220.1 asyd|OJJ64472.1 ater|EAU39394.1 atub|OJI80979.1 aver|OJI98576.1 awen|OJJ40741.1 azon|OJJ44112.1

Group2284: abra|OJJ70857.1 acar|OOF98259.1 acla|EAW10449.1 afis|EAW25118.1 afla|EED55324.1 afum|EAL89789.1 agla|OJJ89059.1 akaw|GAA91724.1 aluc|OJZ87663.1 anid|CBF86086.1 anig|EHA20855.1 aory|EIT76226.1 asyd|OJJ64468.1 ater|EAU39386.1 atub|OJI80980.1 aver|OJI98572.1 awen|OJJ40737.1 azon|OJJ44107.1

Group2285: abra|OJJ70858.1 acar|OOF98258.1 acla|EAW10450.1 afis|EAW25117.1 afla|EED55325.1 afum|EAL89788.1 agla|OJJ89063.1 akaw|GAA91725.1 aluc|OJZ87662.1 anid|CBF86084.1 anig|EHA20854.1 aory|EIT76188.1 asyd|OJJ64467.1 ater|EAU39387.1 atub|OJI80981.1 aver|OJI98571.1 awen|OJJ40734.1 azon|OJJ44106.1

Group2286: abra|OJJ70859.1 acar|OOF98257.1 acla|EAW10451.1 afis|EAW25116.1 afla|EED55326.1 afum|EAL89787.1 agla|OJJ89064.1 akaw|GAA91726.1 aluc|OJZ87661.1 anid|CBF86082.1 anig|EHA20853.1 aory|EIT76238.1 asyd|OJJ64466.1 ater|EAU39388.1 atub|OJI80982.1 aver|OJI98570.1 awen|OJJ40733.1 azon|OJJ44105.1

Group2287: abra|OJJ70860.1 acar|OOF98256.1 acla|EAW10452.1 afis|EAW25115.1 afla|EED55327.1 afum|EAL89786.1 agla|OJJ89065.1 akaw|GAA91727.1 aluc|OJZ87660.1 anid|CBF86080.1 anig|EHA20852.1 aory|EIT76212.1 asyd|OJJ64465.1 ater|EAU39389.1 atub|OJI80983.1 aver|OJI98569.1 awen|OJJ40732.1 azon|OJJ44104.1

Group2288: abra|OJJ70861.1 acar|OOF98255.1 acla|EAW10453.1 afis|EAW25114.1 afla|EED55328.1 afum|EAL89785.1 agla|OJJ89066.1 akaw|GAA91728.1 aluc|OJZ87659.1 anid|CBF86079.1 anig|EHA20851.1 aory|EIT76255.1 asyd|OJJ64464.1 ater|EAU39390.1 atub|OJI80984.1 aver|OJI98568.1 awen|OJJ40731.1 azon|OJJ44103.1

Group2289: abra|OJJ70862.1 acar|OOF98254.1 acla|EAW10454.1 afis|EAW25113.1 afla|EED55329.1 afum|EAL89784.1 agla|OJJ89067.1 akaw|GAA91729.1 aluc|OJZ87658.1 anid|CBF86077.1 anig|EHA20850.1 aory|EIT76257.1 asyd|OJJ64463.1 ater|EAU39383.1 atub|OJI80985.1 aver|OJI98567.1 awen|OJJ40730.1 azon|OJJ44102.1

Group2290: abra|OJJ70864.1 acar|OOF98252.1 acla|EAW10456.1 afis|EAW25111.1 afla|EED55331.1 afum|EAL89782.2 agla|OJJ89070.1 akaw|GAA91731.1 aluc|OJZ87656.1 anid|CBF86073.1 anig|EHA20849.1 aory|EIT76253.1 asyd|OJJ64461.1 ater|EAU39381.1 atub|OJI80987.1 aver|OJI98564.1 awen|OJJ40728.1 azon|OJJ44100.1

Group2291: abra|OJJ70878.1 acar|OOF98242.1 acla|EAW10467.1 afis|EAW25100.1 afla|EED55345.1 afum|EAL89771.1 agla|OJJ85468.1 akaw|GAA91741.1 aluc|OJZ87644.1 anid|CBF86015.1 anig|EHA20837.1 aory|EIT80879.1 asyd|OJJ64450.1 ater|EAU39362.1 atub|OJI81001.1 aver|OJI98553.1 awen|OJJ40714.1 azon|OJJ44091.1

Group2292: abra|OJJ70880.1 acar|OOF98241.1 acla|EAW10468.1 afis|EAW25099.1 afla|EED55347.1 afum|EAL89770.1 agla|OJJ85472.1 akaw|GAA91742.1 aluc|OJZ87643.1 anid|CBF86013.1 anig|EHA20836.1 aory|EIT80895.1 asyd|OJJ64449.1 ater|EAU39361.1 atub|OJI81002.1 aver|OJI98552.1 awen|OJJ40713.1 azon|OJJ44090.1



Group2293: abra|OJJ70890.1 acar|OOF98227.1 acla|EAW10472.1 afis|EAW25095.1 afla|EED55353.1 afum|EAL89766.2 agla|OJJ89082.1 akaw|GAA87406.1 aluc|OJZ87634.1 anid|CBF86004.1 anig|EHA20829.1 aory|EIT80918.1 asyd|OJJ64445.1 ater|EAU39353.1 atub|OJI81015.1 aver|OJI98548.1 awen|OJJ40709.1 azon|OJJ44085.1

Group2294: abra|OJJ70892.1 acar|OOF90217.1 acla|EAW10474.1 afis|EAW25093.1 afla|EED55354.1 afum|EAL89764.1 agla|OJJ89084.1 akaw|GAA87408.1 aluc|OJZ87631.1 anid|CBF86001.1 anig|EHA20827.1 aory|EIT80886.1 asyd|OJJ64443.1 ater|EAU39351.1 atub|OJI81018.1 aver|OJI98545.1 awen|OJJ40707.1 azon|OJJ44083.1

Group2295: abra|OJJ70895.1 acar|OOF90219.1 acla|EAW10482.1 afis|EAW25085.1 afla|EED55362.1 afum|EAL89754.1 agla|OJJ89097.1 akaw|GAA87411.1 aluc|OJZ87628.1 anid|CBF85988.1 anig|EHA20824.1 aory|EIT80873.1 asyd|OJJ64434.1 ater|EAU39341.1 atub|OJI81022.1 aver|OJI98535.1 awen|OJJ40697.1 azon|OJJ44075.1

Group2296: abra|OJJ70897.1 acar|OOF90220.1 acla|EAW10481.1 afis|EAW25086.1 afla|EED55361.1 afum|EAL89755.1 agla|OJJ89096.1 akaw|GAA87412.1 aluc|OJZ87626.1 anid|CBF85990.1 anig|EHA20823.1 aory|EIT80880.1 asyd|OJJ64435.1 ater|EAU39342.1 atub|OJI81023.1 aver|OJI98536.1 awen|OJJ40698.1 azon|OJJ44076.1

Group2297: abra|OJJ70898.1 acar|OOF98228.1 acla|EAW10480.1 afis|EAW25087.1 afla|EED55360.1 afum|EAL89756.1 agla|OJJ89095.1 akaw|GAA87413.1 aluc|OJZ87625.1 anid|CBF85992.1 anig|EHA20822.1 aory|EIT80799.1 asyd|OJJ64436.1 ater|EAU39343.1 atub|OJI81024.1 aver|OJI98537.1 awen|OJJ40700.1 azon|OJJ44077.1

Group2298: abra|OJJ70899.1 acar|OOF98221.1 acla|EAW10479.1 afis|EAW25088.1 afla|EED55359.1 afum|EAL89757.1 agla|OJJ89094.1 akaw|GAA87414.1 aluc|OJZ87624.1 anid|CBF85994.1 anig|EHA20821.1 aory|EIT80835.1 asyd|OJJ64437.1 ater|EAU39344.1 atub|OJI81025.1 aver|OJI98538.1 awen|OJJ40701.1 azon|OJJ44078.1

Group2299: abra|OJJ70901.1 acar|OOF98218.1 acla|EAW10477.1 afis|EAW25090.1 afla|EED55357.1 afum|EAL89760.2 agla|OJJ89087.1 akaw|GAA87416.1 aluc|OJZ87622.1 anid|CBF85997.1 anig|EHA20819.1 aory|EIT80906.1 asyd|OJJ64440.1 ater|EAU39345.1 atub|OJI81027.1 aver|OJI98542.1 awen|OJJ40704.1 azon|OJJ44080.1

Group2300: abra|OJJ70906.1 acar|OOF98214.1 acla|EAW10484.1 afis|EAW25083.1 afla|EED55367.1 afum|EAL89752.1 agla|OJJ89102.1 akaw|GAA87420.1 aluc|OJZ87618.1 anid|CBF85985.1 anig|EHA20816.1 aory|EIT80861.1 asyd|OJJ64432.1 ater|EAU39339.1 atub|OJI81031.1 aver|OJI98533.1 awen|OJJ40695.1 azon|OJJ44072.1

Group2301: abra|OJJ70911.1 acar|OOF98211.1 acla|EAW10486.1 afis|EAW25081.1 afla|EED55369.1 afum|EAL89750.1 agla|OJJ89105.1 akaw|GAA87422.1 aluc|OJZ87614.1 anid|CBF85977.1 anig|EHA20811.1 aory|EIT80845.1 asyd|OJJ64429.1 ater|EAU39519.1 atub|OJI81035.1 aver|OJI98529.1 awen|OJJ40693.1 azon|OJJ44069.1

Group2302: abra|OJJ70912.1 acar|OOF98210.1 acla|EAW10487.1 afis|EAW25080.1 afla|EED55370.1 afum|EAL89749.1 agla|OJJ89106.1 akaw|GAA87423.1 aluc|OJZ87613.1 anid|CBF85975.1 anig|EHA20810.1 aory|EIT80866.1 asyd|OJJ64428.1 ater|EAU39539.1 atub|OJI81036.1 aver|OJI98528.1 awen|OJJ40692.1 azon|OJJ44068.1

Group2303: abra|OJJ70913.1 acar|OOF89971.1 acla|EAW10488.1 afis|EAW25079.1 afla|EED55371.1 afum|EAL89748.1 agla|OJJ89107.1 akaw|GAA87424.1 aluc|OJZ87612.1 anid|CBF85973.1 anig|EHA20809.1 aory|EIT80872.1 asyd|OJJ64427.1 ater|EAU39540.1 atub|OJI81037.1 aver|OJI98527.1 awen|OJJ40691.1 azon|OJJ44067.1

Group2304: abra|OJJ70915.1 acar|OOF98209.1 acla|EAW10489.1 afis|EAW25078.1 afla|EED55375.1 afum|EAL89747.1 agla|OJJ89115.1 akaw|GAA87425.1 aluc|OJZ87610.1 anid|CBF85970.1 anig|EHA20808.1 aory|EIT80925.1 asyd|OJJ64426.1 ater|EAU39545.1 atub|OJI81038.1 aver|OJI98526.1 awen|OJJ40689.1 azon|OJJ44066.1

Group2305: abra|OJJ70916.1 acar|OOF98208.1 acla|EAW10490.1 afis|EAW25077.1 afla|EED55376.1 afum|EAL89746.1 agla|OJJ89116.1 akaw|GAA87426.1 aluc|OJZ87609.1 anid|CBF85968.1 anig|EHA20807.1 aory|EIT80812.1 asyd|OJJ64425.1 ater|EAU39546.1 atub|OJI81039.1 aver|OJI98524.1 awen|OJJ40688.1 azon|OJJ44065.1

Group2306: abra|OJJ70918.1 acar|OOF98206.1 acla|EAW10492.1 afis|EAW25075.1 afla|EED55378.1 afum|EAL89744.1 agla|OJJ89117.1 akaw|GAA87428.1 aluc|OJZ87608.1 anid|CBF85964.1 anig|EHA20806.1 aory|EIT80830.1 asyd|OJJ64423.1 ater|EAU39550.1 atub|OJI81040.1 aver|OJI98522.1 awen|OJJ40686.1 azon|OJJ44063.1

Group2307: abra|OJJ70931.1 acar|OOF98195.1 acla|EAW10497.1 afis|EAW25070.1 afla|EED55384.1 afum|EAL89739.1 agla|OJJ89124.1 akaw|GAA83011.1 aluc|OJZ87596.1 anid|CBF85958.1 anig|EHA20796.1

aory|EIT80805.1 asyd|OJJ64418.1 ater|EAU39555.1 atub|OJI81051.1 aver|OJI98517.1 awen|OJJ40681.1 azon|OJJ44058.1

Group2308: abra|OJJ70933.1 acar|OOF89985.1 acla|EAW10499.1 afis|EAW25068.1 afla|EED55386.1 afum|EAL89737.2 agla|OJJ89126.1 akaw|GAA83009.1 aluc|OJZ87594.1 anid|CBF85954.1 anig|EHA20794.1 aory|EIT80870.1 asyd|OJJ64416.1 ater|EAU35815.1 atub|OJI81053.1 aver|OJI98515.1 awen|OJJ40675.1 azon|OJJ44056.1

Group2309: abra|OJJ70940.1 acar|OOF98192.1 acla|EAW10505.1 afis|EAW25062.1 afla|EED55391.1 afum|EAL89731.2 agla|OJJ89133.1 akaw|GAA83004.1 aluc|OJZ87588.1 anid|CBF85943.1 anig|EHA20789.1 aory|EIT80778.1 asyd|OJJ64412.1 ater|EAU35810.1 atub|OJI81060.1 aver|OJI98511.1 awen|OJJ40669.1 azon|OJJ44050.1

Group2310: abra|OJJ70941.1 acar|OOF98191.1 acla|EAW10506.1 afis|EAW25061.1 afla|EED55392.1 afum|EAL89729.1 agla|OJJ89134.1 akaw|GAA83003.1 aluc|OJZ87587.1 anid|CBF85941.1 anig|EHA20788.1 aory|EIT80784.1 asyd|OJJ64411.1 ater|EAU35809.1 atub|OJI81061.1 aver|OJI98510.1 awen|OJJ40668.1 azon|OJJ44049.1

Group2311: abra|OJJ70942.1 acar|OOF98190.1 acla|EAW10507.1 afis|EAW25060.1 afla|EED55393.1 afum|EAL89728.1 agla|OJJ89135.1 akaw|GAA83002.1 aluc|OJZ87586.1 anid|CBF85940.1 anig|EHA20787.1 aory|EIT80892.1 asyd|OJJ64410.1 ater|EAU35808.1 atub|OJI81062.1 aver|OJI98509.1 awen|OJJ40667.1 azon|OJJ44048.1

Group2312: abra|OJJ70944.1 acar|OOF98187.1 acla|EAW10512.1 afis|EAW25055.1 afla|EED55396.1 afum|EAL89723.2 agla|OJJ89137.1 akaw|GAA82999.1 aluc|OJZ87584.1 anid|CBF85933.1 anig|EHA20785.1 aory|EIT80802.1 asyd|OJJ64408.1 ater|EAU35805.1 atub|OJI81064.1 aver|OJI98506.1 awen|OJJ40665.1 azon|OJJ44044.1

Group2313: abra|OJJ70945.1 acar|OOF98186.1 acla|EAW10513.1 afis|EAW25054.1 afla|EED55397.1 afum|EAL89722.1 agla|OJJ89138.1 akaw|GAA82998.1 aluc|OJZ87583.1 anid|CBF85931.1 anig|EHA20784.1 aory|EIT80901.1 asyd|OJJ64407.1 ater|EAU35804.1 atub|OJI81065.1 aver|OJI98505.1 awen|OJJ40664.1 azon|OJJ44045.1

Group2314: abra|OJJ70946.1 acar|OOF98185.1 acla|EAW10514.1 afis|EAW25053.1 afla|EED55398.1 afum|EAL89721.1 agla|OJJ89139.1 akaw|GAA82997.1 aluc|OJZ87582.1 anid|CBF85929.1 anig|EHA20783.1 aory|EIT80773.1 asyd|OJJ64406.1 ater|EAU35803.1 atub|OJI81066.1 aver|OJI98504.1 awen|OJJ40663.1 azon|OJJ44043.1

Group2315: abra|OJJ70954.1 acar|OOF98176.1 acla|EAW10515.1 afis|EAW25051.1 afla|EED55400.1 afum|EAL89719.1 agla|OJJ89141.1 akaw|GAA82993.1 aluc|OJZ87578.1 anid|CBF85925.1 anig|EHA20780.1 aory|EIT80833.1 asyd|OJJ64405.1 ater|EAU35801.1 atub|OJI81071.1 aver|OJI98501.1 awen|OJJ40661.1 azon|OJJ44040.1

Group2316: abra|OJJ70955.1 acar|OOF98175.1 acla|EAW10516.1 afis|EAW25050.1 afla|EED55401.1 afum|EAL89718.1 agla|OJJ89142.1 akaw|GAA82992.1 aluc|OJZ87577.1 anid|CBF85923.1 anig|EHA20779.1 aory|EIT80841.1 asyd|OJJ64404.1 ater|EAU35800.1 atub|OJI81072.1 aver|OJI98500.1 awen|OJJ40660.1 azon|OJJ44039.1

Group2317: abra|OJJ70957.1 acar|OOF98173.1 acla|EAW10518.1 afis|EAW25048.1 afla|EED55403.1 afum|EAL89716.1 agla|OJJ89144.1 akaw|GAA82990.1 aluc|OJZ87575.1 anid|CBF85920.1 anig|EHA20777.1 aory|EIT80783.1 asyd|OJJ64402.1 ater|EAU35798.1 atub|OJI81074.1 aver|OJI98498.1 awen|OJJ40659.1 azon|OJJ44037.1

Group2318: abra|OJJ70958.1 acar|OOF98172.1 acla|EAW10519.1 afis|EAW25047.1 afla|EED55404.1 afum|EAL89715.1 agla|OJJ89145.1 akaw|GAA82989.1 aluc|OJZ87574.1 anid|CBF85918.1 anig|EHA20776.1 aory|EIT80839.1 asyd|OJJ64401.1 ater|EAU35797.1 atub|OJI81075.1 aver|OJI98497.1 awen|OJJ40658.1 azon|OJJ44036.1

Group2319: abra|OJJ70959.1 acar|OOF98171.1 acla|EAW10520.1 afis|EAW25046.1 afla|EED55405.1 afum|EAL89714.1 agla|OJJ89148.1 akaw|GAA82988.1 aluc|OJZ87573.1 anid|CBF85916.1 anig|EHA20775.1 aory|EIT80804.1 asyd|OJJ64400.1 ater|EAU35796.1 atub|OJI81076.1 aver|OJI98496.1 awen|OJJ40657.1 azon|OJJ44035.1

Group2320: abra|OJJ70963.1 acar|OOF98167.1 acla|EAW10524.1 afis|EAW25042.1 afla|EED55410.1 afum|EAL89710.1 agla|OJJ89152.1 akaw|GAA82984.1 aluc|OJZ87569.1 anid|CBF85908.1 anig|EHA20771.1 aory|EIT80900.1 asyd|OJJ64396.1 ater|EAU35792.1 atub|OJI81080.1 aver|OJI98492.1 awen|OJJ40647.1 azon|OJJ44032.1

Group2321: abra|OJJ70964.1 acar|OOF98166.1 acla|EAW10525.1 afis|EAW25041.1 afla|EED55411.1 afum|EAL89709.1 agla|OJJ89153.1 akaw|GAA82983.1 aluc|OJZ87568.1 anid|CBF85907.1 anig|EHA20770.1 aory|EIT80795.1 asyd|OJJ64395.1 ater|EAU35791.1 atub|OJI81081.1 aver|OJI98490.1 awen|OJJ40646.1 azon|OJJ44031.1

Group2322: abra|OJJ70968.1 acar|OOF98162.1 acla|EAW10528.1 afis|EAW25038.1 afla|EED55415.1 afum|EAL89706.1 agla|OJJ89155.1 akaw|GAA82980.1 aluc|OJZ87564.1 anid|CBF85901.1 anig|EHA20766.1 aory|EIT80889.1 asyd|OJJ64392.1 ater|EAU35788.1 atub|OJI81083.1 aver|OJI98487.1 awen|OJJ40644.1 azon|OJJ44028.1

Group2323: abra|OJJ70971.1 acar|OOF98159.1 acla|EAW10531.1 afis|EAW24998.1 afla|EED55418.1 afum|EAL89703.1 agla|OJJ89158.1 akaw|GAA82977.1 aluc|OJZ87561.1 anid|CBF85898.1 anig|EHA20763.1 aory|EIT80823.1 asyd|OJJ64390.1 ater|EAU35786.1 atub|OJI81086.1 aver|OJI98485.1 awen|OJJ40641.1 azon|OJJ44026.1

Group2324: abra|OJJ70973.1 acar|OOF98158.1 acla|EAW10532.1 afis|EAW24999.1 afla|EED55419.1 afum|EAL89699.1 agla|OJJ89161.1 akaw|GAA82976.1 aluc|OJZ87559.1 anid|CBF81499.1 anig|EHA20762.1 aory|EIT80834.1 asyd|OJJ59465.1 ater|EAU35785.1 atub|OJI81088.1 aver|OJJ02809.1 awen|OJJ40640.1 azon|OJJ44024.1

Group2325: abra|OJJ70976.1 acar|OOF98154.1 acla|EAW10535.1 afis|EAW25002.1 afla|EED55422.1 afum|EAL89696.1 agla|OJJ89165.1 akaw|GAA82973.1 aluc|OJZ87556.1 anid|CBF81486.1 anig|EHA20759.1 aory|EIT80883.1 ater|EAU35783.1 atub|OJI81091.1 awen|OJJ40637.1 azon|OJJ49046.1 asyd|OJJ59457.1 aver|OJJ02816.1

Group2326: abra|OJJ70977.1 acar|OOF98155.1 acla|EAW10536.1 afis|EAW25003.1 afla|EED55423.1 afum|EAL89695.1 agla|OJJ89166.1 akaw|GAA82972.1 aluc|OJZ87555.1 anid|CBF81484.1 anig|EHA20758.1 aory|EIT80840.1 asyd|OJJ59456.1 ater|EAU35782.1 atub|OJI81092.1 aver|OJJ02817.1 awen|OJJ40636.1 azon|OJJ49047.1

Group2327: abra|OJJ70979.1 acar|OOF98153.1 acla|EAW10538.1 afis|EAW25005.1 afla|EED55425.1 afum|EAL89693.1 agla|OJJ89168.1 akaw|GAA82970.1 aluc|OJZ87553.1 anid|CBF81481.1 anig|EHA20756.1 aory|EIT80871.1 asyd|OJJ59454.1 ater|EAU35780.1 atub|OJI81093.1 aver|OJJ02819.1 awen|OJJ40634.1 azon|OJJ49049.1

Group2328: abra|OJJ70980.1 acar|OOF98151.1 acla|EAW10539.1 afis|EAW25006.1 afla|EED55426.1 afum|EAL89691.2 agla|OJJ89169.1 akaw|GAA82969.1 aluc|OJZ87551.1 anid|CBF81512.1 anig|EHA20754.1 aory|EIT80772.1 asyd|OJJ59470.1 ater|EAU35779.1 atub|OJI81094.1 aver|OJJ02804.1 awen|OJJ40633.1 azon|OJJ49050.1

Group2329: abra|OJJ70981.1 acar|OOF98150.1 acla|EAW10540.1 afis|EAW25007.1 afla|EED55427.1 afum|EAL89690.1 agla|OJJ89170.1 akaw|GAA82968.1 aluc|OJZ87550.1 anid|CBF81514.1 anig|EHA20753.1 aory|EIT80826.1 asyd|OJJ59472.1 ater|EAU35778.1 atub|OJI81095.1 aver|OJJ02802.1 awen|OJJ40632.1 azon|OJJ49051.1

Group2330: abra|OJJ70982.1 acar|OOF98148.1 acla|EAW10541.1 afis|EAW25008.1 afla|EED55428.1 afum|EBA27387.1 agla|OJJ89173.1 akaw|GAA82967.1 aluc|OJZ87549.1 anid|CBF81516.1 anig|EHA20752.1 aory|EIT80794.1 asyd|OJJ59473.1 ater|EAU35777.1 atub|OJI81097.1 aver|OJJ02801.1 awen|OJJ40631.1 azon|OJJ49052.1

Group2331: abra|OJJ70983.1 acar|OOF98149.1 acla|EAW10542.1 afis|EAW25010.1 afla|EED55430.1 afum|EAL89686.1 agla|OJJ89174.1 akaw|GAA82966.1 aluc|OJZ87548.1 anid|CBF81518.1 anig|EHA20751.1 aory|EIT80803.1 asyd|OJJ59474.1 ater|EAU35776.1 atub|OJI81098.1 aver|OJJ02799.1 awen|OJJ40630.1 azon|OJJ49053.1

Group2332: abra|OJJ70984.1 acar|OOF98147.1 acla|EAW10543.1 afis|EAW25011.1 afla|EED55431.1 afum|EAL89685.1 agla|OJJ89175.1 akaw|GAA82965.1 aluc|OJZ87547.1 anid|CBF81519.1 anig|EHA20750.1 aory|EIT80824.1 asyd|OJJ59475.1 ater|EAU35775.1 atub|OJI81099.1 aver|OJJ02798.1 awen|OJJ40629.1 azon|OJJ49054.1

Group2333: abra|OJJ70989.1 acar|OOF98144.1 acla|EAW10547.1 afis|EAW25015.1 afla|EED55437.1 afum|EAL89681.1 agla|OJJ89181.1 akaw|GAA82962.1 aluc|OJZ87543.1 anid|CBF81527.1 anig|EHA20747.1 aory|EIT80927.1 asyd|OJJ59481.1 ater|EAU35771.1 atub|OJI81104.1 aver|OJJ02793.1 awen|OJJ40625.1 azon|OJJ49058.1

Group2334: abra|OJJ70991.1 acar|OOF98143.1 acla|EAW10548.1 afis|EAW25016.1 afla|EED55439.1 afum|EAL89680.1 agla|OJJ89182.1 akaw|GAA82960.1 aluc|OJZ87541.1 anid|CBF81529.1 anig|EHA20746.1 aory|EIT80844.1 asyd|OJJ59483.1 ater|EAU35770.1 atub|OJI81106.1 aver|OJJ02791.1 awen|OJJ40624.1 azon|OJJ49059.1

Group2335: abra|OJJ70996.1 acar|OOF90034.1 acla|EAW10552.1 afis|EAW25019.1 afla|EED55442.1 afum|EAL89676.1 agla|OJJ89187.1 akaw|GAA82952.1 aluc|OJZ87532.1 anid|CBF81538.1 anig|EHA20741.1 aory|EIT80858.1 asyd|OJJ59488.1 ater|EAU35767.1 atub|OJI81117.1 aver|OJJ02786.1 awen|OJJ40621.1 azon|OJJ49469.1

Group2336: abra|OJJ70998.1 acar|OOF98142.1 acla|EAW10555.1 afis|EAW25022.1 afla|EED55444.1 afum|EAL89673.1 agla|OJJ89190.1 akaw|GAA82950.1 aluc|OJZ87529.1 anid|CBF81541.1 anig|EHA20739.1

aory|EIT80864.1 asyd|OJJ59490.1 ater|EAU35765.1 atub|OJI81119.1 aver|OJJ02784.1 awen|OJJ40618.1 azon|OJJ49466.1

Group2337: abra|OJJ71001.1 acar|OOF98139.1 acla|EAW10558.1 afis|EAW25025.1 afla|EED55447.1 afum|EAL89670.1 agla|OJJ79159.1 akaw|GAA82947.1 aluc|OJZ87525.1 anid|CBF81547.1 anig|EHA20736.1 aory|EIT80809.1 asyd|OJJ59493.1 ater|EAU35762.1 atub|OJI81123.1 aver|OJJ02781.1 awen|OJJ40614.1 azon|OJJ49463.1

Group2338: abra|OJJ71008.1 acar|OOF98134.1 acla|EAW10560.1 afis|EAW25027.1 afla|EED55449.1 afum|EAL89668.1 agla|OJJ79157.1 akaw|GAA82945.1 aluc|OJZ87523.1 anid|CBF81551.1 anig|EHA20733.1 aory|EIT80929.1 asyd|OJJ59495.1 ater|EAU35760.1 atub|OJI81125.1 aver|OJJ02779.1 awen|OJJ40612.1 azon|OJJ49461.1

Group2339: abra|OJJ71013.1 acar|OOF98126.1 acla|EAW10564.1 afis|EAW25031.1 afla|EED55454.1 afum|EAL89664.1 agla|OJJ82242.1 akaw|GAA82941.1 aluc|OJZ87518.1 anid|CBF81564.1 anig|EHA20729.1 aory|EIT80774.1 asyd|OJJ59502.1 ater|EAU35756.1 atub|OJI81131.1 aver|OJJ02772.1 awen|OJJ40608.1 azon|OJJ49458.1

Group2340: abra|OJJ71016.1 acar|OOF98124.1 acla|EAW10566.1 afis|EAW25032.1 afla|EED55457.1 afum|EAL89662.1 agla|OJJ82244.1 akaw|GAA82939.1 aluc|OJZ87516.1 anid|CBF81567.1 anig|EHA20727.1 aory|EIT80779.1 asyd|OJJ59504.1 ater|EAU35755.1 atub|OJI81134.1 aver|OJJ02770.1 awen|OJJ40607.1 azon|OJJ49456.1

Group2341: abra|OJJ71019.1 acar|OOF98122.1 acla|EAW10568.1 afis|EAW25034.1 afla|EED55459.1 afum|EAL89660.1 agla|OJJ82255.1 akaw|GAA82936.1 aluc|OJZ87513.1 anid|CBF81574.1 anig|EHA20725.1 aory|EIT80788.1 asyd|OJJ59507.1 ater|EAU35751.1 atub|OJI81138.1 aver|OJJ02767.1 awen|OJJ40604.1 azon|OJJ49454.1

Group2342: abra|OJJ71021.1 acar|OOF98119.1 acla|EAW10570.1 afis|EAW25036.1 afla|EED55462.1 afum|EAL89658.1 agla|OJJ82257.1 akaw|GAA82934.1 aluc|OJZ87511.1 anid|CBF81583.1 anig|EHA20723.1 aory|EIT80855.1 asyd|OJJ59510.1 ater|EAU35747.1 atub|OJI81140.1 aver|OJJ02764.1 awen|OJJ40602.1 azon|OJJ49452.1

Group2343: abra|OJJ71022.1 acar|OOF98117.1 acla|EAW10571.1 afis|EAW25037.1 afla|EED55463.1 afum|EAL89657.1 agla|OJJ82258.1 akaw|GAA82933.1 aluc|OJZ87510.1 anid|CBF81585.1 anig|EHA20722.1 aory|EIT80922.1 asyd|OJJ59511.1 ater|EAU38720.1 atub|OJI81141.1 aver|OJJ02762.1 awen|OJJ40601.1 azon|OJJ49451.1

Group2344: abra|OJJ71023.1 acar|OOF98118.1 acla|EAW10572.1 afis|EAW24995.1 afla|EED55464.1 afum|EAL89656.1 agla|OJJ82259.1 akaw|GAA82932.1 aluc|OJZ87509.1 anid|CBF81586.1 anig|EHA20721.1 aory|EIT80875.1 asyd|OJJ59512.1 ater|EAU35746.1 atub|OJI81142.1 aver|OJJ02761.1 awen|OJJ40600.1 azon|OJJ49450.1

Group2345: abra|OJJ71028.1 acar|OOF98111.1 acla|EAW10579.1 afis|EAW24988.1 afla|EED55470.1 afum|EAL89648.1 agla|OJJ82274.1 akaw|GAA82927.1 aluc|OJZ87502.1 anid|CBF81599.1 anig|EHA20717.1 aory|EIT80811.1 asyd|OJJ59519.1 ater|EAU35739.1 atub|OJI81147.1 aver|OJJ02754.1 awen|OJJ40593.1 azon|OJJ49443.1

Group2346: abra|OJJ71030.1 acar|OOF98109.1 acla|EAW10583.1 afis|EAW24986.1 afla|EED55472.1 afum|EAL89646.1 agla|OJJ82276.1 akaw|GAA82925.1 aluc|OJZ87498.1 anid|CBF81603.1 anig|EHA20715.1 aory|EIT80838.1 asyd|OJJ59521.1 ater|EAU35737.1 atub|OJI81149.1 aver|OJJ02752.1 awen|OJJ40582.1 azon|OJJ49441.1

Group2347: abra|OJJ71036.1 acar|OOF98101.1 acla|EAW10586.1 afis|EAW24982.1 afla|EED55477.1 afum|EAL89642.1 agla|OJJ82279.1 akaw|GAA82919.1 aluc|OJZ87491.1 anid|CBF81614.1 anig|EHA20711.1 aory|EIT80831.1 asyd|OJJ59526.1 ater|EAU35734.1 atub|OJI81157.1 aver|OJJ02746.1 awen|OJJ40579.1 azon|OJJ49430.1

Group2348: abra|OJJ71038.1 acar|OOF98100.1 acla|EAW10587.1 afis|EAW24981.1 afla|EED55478.1 afum|EAL89641.1 agla|OJJ79136.1 akaw|GAA82918.1 aluc|OJZ87490.1 anid|CBF81612.1 anig|EHA20710.1 aory|EIT80854.1 asyd|OJJ59525.1 ater|EAU35733.1 atub|OJI81158.1 aver|OJJ02747.1 awen|OJJ40578.1 azon|OJJ49431.1

Group2349: abra|OJJ71040.1 acar|OOF98098.1 acla|EAW10589.1 afis|EAW24979.1 afla|EED55480.1 afum|EAL89639.1 agla|OJJ79138.1 akaw|GAA82916.1 aluc|OJZ87488.1 anid|CBF81608.1 anig|EHA20708.1 aory|EIT80915.1 asyd|OJJ59523.1 ater|EAU35729.1 atub|OJI81160.1 aver|OJJ02749.1 awen|OJJ40576.1 azon|OJJ49434.1

Group2350: abra|OJJ71042.1 acar|OOF98097.1 acla|EAW10592.1 afis|EAW24976.1 afla|EED55484.1 afum|EAL89636.1 agla|OJJ79141.1 akaw|GAA82914.1 aluc|OJZ87486.1 anid|CBF81629.1 anig|EHA20707.1 aory|EIT80868.1 asyd|OJJ59530.1 ater|EAU35725.1 atub|OJI81162.1 aver|OJJ02740.1 awen|OJJ40573.1 azon|OJJ49438.1

Group2351: abra|OJJ71045.1 acar|OOF98094.1 acla|EAW10593.1 afis|EAW24975.1 afla|EED55485.1 afum|EAL89635.1 agla|OJJ82241.1 akaw|GAA82911.1 aluc|OJZ87481.1 anid|CBF81630.1 anig|EHA20703.1 aory|EIT80859.1 asyd|OJJ59531.1 ater|EAU35723.1 atub|OJI81167.1 aver|OJJ02739.1 awen|OJJ40572.1 azon|OJJ49429.1

Group2352: abra|OJJ71047.1 acar|OOF98092.1 acla|EAW10595.1 afis|EAW24973.1 afla|EED55486.1 afum|EAL89633.1 agla|OJJ82239.1 akaw|GAA82909.1 aluc|OJZ87479.1 anid|CBF81634.1 anig|EHA20701.1 aory|EIT80885.1 asyd|OJJ59533.1 ater|EAU35721.1 atub|OJI81169.1 aver|OJJ02737.1 awen|OJJ40570.1 azon|OJJ49427.1

Group2353: abra|OJJ71048.1 acar|OOF98091.1 acla|EAW10596.1 afis|EAW24972.1 afla|EED55487.1 afum|EBA27384.1 agla|OJJ82238.1 akaw|GAA82908.1 aluc|OJZ87478.1 anid|CBF81636.1 anig|EHA20700.1 aory|EIT80911.1 asyd|OJJ59534.1 ater|EAU35720.1 atub|OJI81170.1 aver|OJJ02736.1 awen|OJJ40569.1 azon|OJJ49426.1

Group2354: abra|OJJ71049.1 acar|OOF98090.1 acla|EAW10597.1 afis|EAW24971.1 afla|EED55490.1 afum|EAL89630.2 agla|OJJ82237.1 akaw|GAA82907.1 aluc|OJZ87477.1 anid|CBF81638.1 anig|EHA20699.1 aory|EIT80796.1 asyd|OJJ59535.1 ater|EAU35719.1 atub|OJI81171.1 aver|OJJ02735.1 awen|OJJ40568.1 azon|OJJ49425.1

Group2355: abra|OJJ71052.1 acar|OOF98087.1 acla|EAW10603.1 afis|EAW24965.1 afla|EED55495.1 afum|EAL89623.1 agla|OJJ82224.1 akaw|GAA82905.1 aluc|OJZ87475.1 anid|CBF81647.1 anig|EHA20695.1 aory|EIT80847.1 asyd|OJJ59541.1 ater|EAU35709.1 atub|OJI81173.1 aver|OJJ02727.1 awen|OJJ40558.1 azon|OJJ49419.1

Group2357: abra|OJJ71061.1 acar|OOF98082.1 acla|EAW10598.1 afis|EAW24970.1 afla|EED55491.1 afum|EAL89629.1 agla|OJJ82236.1 akaw|GAA82898.1 aluc|OJZ87467.1 anid|CBF81640.1 anig|EHA20689.1 aory|EIT80891.1 asyd|OJJ59536.1 ater|EAU35715.1 atub|OJI81181.1 aver|OJJ02733.1 awen|OJJ40564.1 azon|OJJ49424.1

Group2358: abra|OJJ71075.1 acar|OOF98069.1 acla|EAW10604.1 afis|EAW24964.1 afla|EED55497.1 afum|EAL89622.1 agla|OJJ82226.1 akaw|GAA82887.1 aluc|OJZ87455.1 anid|CBF81649.1 anig|EHA20676.1 aory|EIT80869.1 asyd|OJJ59542.1 ater|EAU35707.1 atub|OJI81193.1 aver|OJJ02726.1 awen|OJJ40556.1 azon|OJJ49418.1

Group2359: abra|OJJ71103.1 acar|OOF90221.1 acla|EAW10388.1 afis|EAW25205.1 afla|EED53664.1 afum|EAL89866.2 agla|OJJ88951.1 akaw|GAA82865.1 aluc|OJZ87432.1 anid|CBF85221.1 anig|EHA20653.1 aory|EIT75288.1 asyd|OJJ62997.1 ater|EAU34349.1 atub|OJI81216.1 aver|OJI97970.1 awen|OJJ40840.1 azon|OJJ46822.1

Group2360: abra|OJJ71104.1 acar|OOF90222.1 acla|EAW10387.1 afis|EAW25206.1 afla|EED53662.1 afum|EAL89867.1 agla|OJJ88952.1 akaw|GAA82864.1 aluc|OJZ87431.1 anid|CBF85223.1 anig|EHA20652.1 aory|EIT75326.1 asyd|OJJ62996.1 ater|EAU34348.1 atub|OJI81217.1 aver|OJI97971.1 awen|OJJ40841.1 azon|OJJ46823.1

Group2361: abra|OJJ71105.1 acar|OOF90223.1 acla|EAW10386.1 afis|EAW25207.1 afla|EED53660.1 afum|EAL89868.1 agla|OJJ79791.1 akaw|GAA82863.1 aluc|OJZ87430.1 anid|CBF85225.1 anig|EHA20651.1 aory|EIT75316.1 asyd|OJJ62995.1 ater|EAU34347.1 atub|OJI81218.1 aver|OJI97972.1 awen|OJJ35846.1 azon|OJJ45132.1

Group2362: abra|OJJ71112.1 acar|OOF98038.1 acla|EAW10380.1 afis|EAW25213.1 afla|EED53667.1 afum|EAL89874.1 agla|OJJ88948.1 akaw|GAA82857.1 aluc|OJZ87422.1 anid|CBF85606.1 anig|EHA20645.1 aory|EIT75347.1 asyd|OJJ64197.1 ater|EAU34370.1 atub|OJI81226.1 aver|OJI98286.1 awen|OJJ40875.1 azon|OJJ46812.1

Group2363: abra|OJJ71117.1 acar|OOF98033.1 acla|EAW10378.1 afis|EAW25215.1 afla|EED53692.1 afum|EAL89876.1 agla|OJJ88944.1 akaw|GAA82853.1 aluc|OJZ87418.1 anid|CBF85254.1 anig|EHA20642.1 aory|EIT75323.1 asyd|OJJ62921.1 ater|EAU34372.1 atub|OJI81230.1 aver|OJI98068.1 awen|OJJ40878.1 azon|OJJ44506.1

Group2364: abra|OJJ71119.1 acar|OOF98031.1 acla|EAW10376.1 afis|EAW25217.1 afla|EED53690.1 afum|EAL89878.1 agla|OJJ79184.1 akaw|GAA82851.1 aluc|OJZ87417.1 anid|CBF85273.1 anig|EHA20641.1 aory|EIT75328.1 asyd|OJJ62920.1 ater|EAU34374.1 atub|OJI81231.1 aver|OJI98070.1 awen|OJJ40880.1 azon|OJJ44508.1

Group2365: abra|OJJ71125.1 acar|OOF98028.1 acla|EAW10374.1 afis|EAW25218.1 afla|EED53688.1 afum|EAL89879.1 agla|OJJ79186.1 akaw|GAA82850.1 aluc|OJZ87410.1 anid|CBF85299.1 anig|EHA20640.1 aory|EIT75354.1 asyd|OJJ62917.1 ater|EAU34377.1 atub|OJI81235.1 aver|OJI98073.1 awen|OJJ40883.1 azon|OJJ44512.1

Group2366: abra|OJJ71128.1 acar|OOF98024.1 acla|EAW10370.1 afis|EAW25222.1 afla|EED53684.1 afum|EAL89883.1 agla|OJJ79189.1 akaw|GAA82846.1 aluc|OJZ87407.1 anid|CBF85258.1 anig|EHA20637.1

aory|EIT75281.1 asyd|OJJ62911.1 ater|EAU34381.1 atub|OJI81239.1 aver|OJI98078.1 awen|OJJ40888.1 azon|OJJ44517.1

Group2367: abra|OJJ71132.1 acar|OOF98020.1 acla|EAW10365.1 afis|EAW25227.1 afla|EED53671.1 afum|EAL89888.1 agla|OJJ79181.1 akaw|GAA82842.1 aluc|OJZ87403.1 anid|CBF85269.1 anig|EHA20632.1 aory|EIT75290.1 asyd|OJJ62908.1 ater|EAU34385.1 atub|OJI81243.1 aver|OJI98080.1 awen|OJJ40892.1 azon|OJJ44521.1

Group2368: abra|OJJ71133.1 acar|OOF98019.1 acla|EAW10364.1 afis|EAW25228.1 afla|EED53672.1 afum|EAL89889.1 agla|OJJ79180.1 akaw|GAA82841.1 aluc|OJZ87402.1 anid|CBF85262.1 anig|EHA20631.1 aory|EIT75302.1 asyd|OJJ62905.1 ater|EAU34386.1 atub|OJI81244.1 aver|OJI98084.1 awen|OJJ40893.1 azon|OJJ44522.1

Group2369: abra|OJJ71142.1 acar|OOF98014.1 acla|EAW10359.1 afis|EAW25234.1 afla|EED53675.1 afum|EAL89895.1 agla|OJJ89203.1 akaw|GAA82835.1 aluc|OJZ87396.1 anid|CBF85334.1 anig|EHA20626.1 aory|EIT75320.1 asyd|OJJ64021.1 ater|EAU34389.1 atub|OJI81250.1 aver|OJI98107.1 awen|OJJ40946.1 azon|OJJ44527.1

Group2370: abra|OJJ71143.1 acar|OOF98013.1 acla|EAW10358.1 afis|EAW25235.1 afla|EED53676.1 afum|EAL89896.2 agla|OJJ89204.1 akaw|GAA82834.1 aluc|OJZ87395.1 anid|CBF85332.1 anig|EHA20625.1 aory|EIT75309.1 asyd|OJJ64020.1 ater|EAU34390.1 atub|OJI81251.1 aver|OJI98106.1 awen|OJJ40947.1 azon|OJJ44528.1

Group2371: abra|OJJ71145.1 acar|OOF98011.1 acla|EAW10361.1 afis|EAW25232.1 afla|EED53678.1 afum|EAL89893.1 agla|OJJ79175.1 akaw|GAA82832.1 aluc|OJZ87393.1 anid|CBF85329.1 anig|EHA20623.1 aory|EIT75284.1 asyd|OJJ64018.1 ater|EAU34391.1 atub|OJI81253.1 aver|OJI98104.1 awen|OJJ40898.1 azon|OJJ44525.1

Group2372: abra|OJJ71150.1 acar|OOF98007.1 acla|EAW10352.1 afis|EAW25242.1 afla|EED53702.1 afum|EAL89904.1 agla|OJJ89208.1 akaw|GAA82827.1 aluc|OJZ87388.1 anid|CBF85319.1 anig|EHA20617.1 aory|EIT75296.1 asyd|OJJ64011.1 ater|EAU34367.1 atub|OJI81259.1 aver|OJI98099.1 awen|OJJ40955.1 azon|OJJ44538.1

Group2373: abra|OJJ71151.1 acar|OOF98006.1 acla|EAW10346.1 afis|EAW25243.1 afla|EED53700.1 afum|EAL89905.1 agla|OJJ89209.1 akaw|GAA82826.1 aluc|OJZ87387.1 anid|CBF85321.1 anig|EHA20616.1 aory|EIT75325.1 asyd|OJJ64012.1 ater|EAU34360.1 atub|OJI81260.1 aver|OJI98100.1 awen|OJJ40956.1 azon|OJJ44537.1

Group2374: abra|OJJ71158.1 acar|OOF98000.1 acla|EAW10339.1 afis|EAW25248.1 afla|EED53716.1 afum|EAL89910.1 agla|OJJ89222.1 akaw|GAA82820.1 aluc|OJZ87381.1 anid|CBF85341.1 anig|EHA20612.1 aory|EIT75359.1 asyd|OJJ64025.1 ater|EAU34355.1 atub|OJI81265.1 aver|OJI98111.1 awen|OJJ40964.1 azon|OJJ44545.1

Group2375: abra|OJJ71167.1 acar|OOF97996.1 acla|EAW10336.1 afis|EAW25253.1 afla|EED53722.1 afum|EAL89916.1 agla|OJJ89227.1 akaw|GAA82814.1 aluc|OJZ87374.1 anid|CBF85349.1 anig|EHA20607.1 aory|EIT75275.1 asyd|OJJ64033.1 ater|EAU34398.1 atub|OJI81272.1 aver|OJI98117.1 awen|OJJ40967.1 azon|OJJ44551.1

Group2376: abra|OJJ71169.1 acar|OOF97994.1 acla|EAW10333.1 afis|EAW25259.1 afla|EED53724.1 afum|EAL89921.1 agla|OJJ89230.1 akaw|GAA82812.1 aluc|OJZ87372.1 anid|CBF85360.1 anig|EHA20605.1 aory|EIT75308.1 asyd|OJJ64039.1 ater|EAU34400.1 atub|OJI81274.1 aver|OJI98123.1 awen|OJJ40972.1 azon|OJJ44558.1

Group2377: abra|OJJ71170.1 acar|OOF97993.1 acla|EAW10332.1 afla|EED53725.1 agla|OJJ89231.1 akaw|GAA82811.1 aluc|OJZ87371.1 anid|CBF85362.1 anig|EHA20604.1 aory|EIT75319.1 asyd|OJJ64040.1 ater|EAU34401.1 atub|OJI81275.1 aver|OJI98124.1 awen|OJJ40973.1 afis|EAW25260.1 afum|EAL89922.1 azon|OJJ44559.1

Group2378: abra|OJJ71173.1 acar|OOF97992.1 acla|EAW10331.1 afis|EAW25263.1 afla|EED53727.1 afum|EAL89926.2 agla|OJJ89233.1 akaw|GAA82810.1 aluc|OJZ87369.1 anid|CBF85365.1 anig|EHA20603.1 aory|EIT75277.1 asyd|OJJ64043.1 ater|EAU34402.1 atub|OJI81276.1 aver|OJI98127.1 awen|OJJ40975.1 azon|OJJ47355.1

Group2379: abra|OJJ71174.1 acar|OOF97991.1 acla|EAW10330.1 afis|EAW25264.1 afla|EED53728.1 afum|EAL89927.1 agla|OJJ89234.1 akaw|GAA82809.1 aluc|OJZ87368.1 anid|CBF85367.1 anig|EHA20602.1 aory|EIT75295.1 asyd|OJJ64045.1 ater|EAU34403.1 atub|OJI81277.1 aver|OJI98128.1 awen|OJJ40976.1 azon|OJJ44563.1

Group2380: abra|OJJ71179.1 acar|OOF97987.1 acla|EAW10327.1 afis|EAW25267.1 afla|EED53731.1 afum|EAL89930.1 agla|OJJ89241.1 akaw|GAA82806.1 aluc|OJZ87364.1 anid|CBF85374.1 anig|EHA20599.1 aory|EIT75331.1 asyd|OJJ64048.1 ater|EAU34408.1 atub|OJI81280.1 aver|OJI98133.1 awen|OJJ40980.1 azon|OJJ44567.1

Group2381: abra|OJJ71182.1 acar|OOF97984.1 acla|EAW10322.1 afis|EAW25270.1 afla|EED53735.1 afum|EAL89933.1 agla|OJJ89243.1 akaw|GAA82803.1 aluc|OJZ87361.1 anid|CBF85382.1 anig|EHA20596.1 aory|EIT75338.1 asyd|OJJ64051.1 ater|EAU34413.1 atub|OJI81284.1 aver|OJI98137.1 awen|OJJ40984.1 azon|OJJ44570.1

Group2382: abra|OJJ71183.1 acar|OOF97983.1 acla|EAW10321.1 afis|EAW25271.1 afla|EED53736.1 afum|EAL89934.1 agla|OJJ89244.1 akaw|GAA82802.1 aluc|OJZ87360.1 anid|CBF85384.1 anig|EHA20595.1 aory|EIT75335.1 asyd|OJJ64053.1 ater|EAU34414.1 atub|OJI81285.1 aver|OJI98138.1 awen|OJJ40985.1 azon|OJJ44572.1

Group2383: abra|OJJ71184.1 acar|OOF97982.1 acla|EAW10320.1 afis|EAW25272.1 afla|EED53737.1 afum|EAL89935.1 agla|OJJ89245.1 akaw|GAA82801.1 aluc|OJZ87359.1 anid|CBF85385.1 anig|EHA20594.1 aory|EIT75311.1 asyd|OJJ64054.1 ater|EAU34415.1 atub|OJI81286.1 aver|OJI98139.1 awen|OJJ40986.1 azon|OJJ44573.1

Group2384: abra|OJJ71185.1 acar|OOF97981.1 acla|EAW10318.1 afis|EAW25274.1 afla|EED53739.1 afum|EAL89937.1 agla|OJJ89248.1 akaw|GAA82800.1 aluc|OJZ87358.1 anid|CBF85389.1 anig|EHA20593.1 aory|EIT75291.1 asyd|OJJ64056.1 ater|EAU34417.1 atub|OJI81287.1 aver|OJI98141.1 awen|OJJ40988.1 azon|OJJ44575.1

Group2385: abra|OJJ71187.1 acar|OOF97980.1 acla|EAW10316.1 afis|EAW25276.1 afla|EED53742.1 afum|EAL89939.1 agla|OJJ89250.1 akaw|GAA82798.1 aluc|OJZ87357.1 anid|CBF85392.1 anig|EHA20591.1 aory|EIT75317.1 asyd|OJJ64058.1 ater|EAU34419.1 atub|OJI81288.1 aver|OJI98143.1 awen|OJJ40990.1 azon|OJJ44578.1

Group2386: abra|OJJ71188.1 acar|OOF97979.1 acla|EAW10315.1 afis|EAW25277.1 afla|EED53744.1 afum|EAL89940.1 agla|OJJ89251.1 akaw|GAA82797.1 aluc|OJZ87356.1 anid|CBF85394.1 anig|EHA20590.1 aory|EIT75351.1 asyd|OJJ64059.1 ater|EAU34420.1 atub|OJI81289.1 aver|OJI98145.1 awen|OJJ40991.1 azon|OJJ44580.1

Group2387: abra|OJJ71189.1 acar|OOF97978.1 acla|EAW10314.1 afis|EAW25278.1 afla|EED53745.1 afum|EAL89941.1 agla|OJJ89252.1 akaw|GAA82796.1 aluc|OJZ87355.1 anid|CBF85396.1 anig|EHA20589.1 aory|EIT75313.1 asyd|OJJ64060.1 ater|EAU34421.1 atub|OJI81290.1 aver|OJI98146.1 awen|OJJ40992.1 azon|OJJ44581.1

Group2388: abra|OJJ71192.1 acar|OOF97975.1 acla|EAW10312.1 afis|EAW25281.1 afla|EED53747.1 afum|EAL89944.1 agla|OJJ89255.1 akaw|GAA82793.1 aluc|OJZ87352.1 anid|CBF85418.1 anig|EHA20586.1 aory|EIT75318.1 asyd|OJJ64073.1 ater|EAU34422.1 atub|OJI81293.1 aver|OJI98160.1 awen|OJJ40994.1 azon|OJJ44583.1

Group2389: abra|OJJ71198.1 acar|OOF97970.1 acla|EAW10305.1 afis|EAW25287.1 afla|EED53752.1 afum|EAL89950.1 agla|OJJ89260.1 akaw|GAA82785.1 aluc|OJZ87344.1 anid|CBF85429.1 anig|EHA20581.1 asyd|OJJ64083.1 ater|EAU34428.1 atub|OJI81300.1 aver|OJI98168.1 awen|OJJ40999.1 azon|OJJ44591.1 aory|EIT78420.1

Group2390: abra|OJJ71203.1 acar|OOF97968.1 acla|EAW10304.1 afis|EAW25288.1 afla|EED53753.1 afum|EAL89951.1 agla|OJJ89261.1 akaw|GAA82781.1 aluc|OJZ87340.1 anid|CBF85431.1 anig|EHA20577.1 aory|EIT78400.1 asyd|OJJ64084.1 ater|EAU34429.1 atub|OJI81304.1 aver|OJI98169.1 awen|OJJ41000.1 azon|OJJ44594.1

Group2391: abra|OJJ71204.1 acar|OOF97967.1 acla|EAW10303.1 afis|EAW25289.1 afla|EED53754.1 afum|EAL89952.1 agla|OJJ89262.1 akaw|GAA82780.1 aluc|OJZ87339.1 anid|CBF85433.1 anig|EHA20576.1 aory|EIT78451.1 asyd|OJJ64085.1 ater|EAU34430.1 atub|OJI81305.1 aver|OJI98170.1 awen|OJJ41001.1 azon|OJJ44593.1

Group2392: abra|OJJ71205.1 acar|OOF97965.1 acla|EAW10302.1 afis|EAW25290.1 afla|EED53755.1 afum|EAL89953.1 agla|OJJ89263.1 akaw|GAA82779.1 aluc|OJZ87338.1 anid|CBF85435.1 anig|EHA20575.1 aory|EIT78386.1 asyd|OJJ64086.1 ater|EAU34431.1 atub|OJI81306.1 aver|OJI98171.1 awen|OJJ41002.1 azon|OJJ44592.1

Group2393: abra|OJJ71206.1 acar|OOF97966.1 acla|EAW10301.1 afis|EAW25291.1 afla|EED53756.1 afum|EAL89954.1 agla|OJJ89265.1 akaw|GAA82778.1 aluc|OJZ87337.1 anid|CBF85413.1 anig|EHA20574.1 aory|EIT78379.1 asyd|OJJ64069.1 ater|EAU34432.1 atub|OJI81307.1 aver|OJI98156.1 awen|OJJ41003.1 azon|OJJ44595.1

Group2394: abra|OJJ71210.1 acar|OOF97956.1 acla|EAW10300.1 afis|EAW25292.1 afla|EED53757.1 afum|EAL89955.1 agla|OJJ89269.1 akaw|GAA82774.1 aluc|OJZ87333.1 anid|CBF85411.1 anig|EHA20569.1 aory|EIT78389.1 asyd|OJJ64068.1 ater|EAU34433.1 atub|OJI81311.1 aver|OJI98155.1 awen|OJJ41006.1 azon|OJJ44602.1

Group2395: abra|OJJ71211.1 acar|OOF97955.1 acla|EAW10298.1 afis|EAW25294.1 afla|EED53759.1 afum|EAL89957.1 agla|OJJ89270.1 akaw|GAA82773.1 aluc|OJZ87332.1 anid|CBF85409.1 anig|EHA20568.1

aory|EIT78363.1 asyd|OJJ64067.1 ater|EAU34434.1 atub|OJI81312.1 aver|OJI98154.1 awen|OJJ41008.1 azon|OJJ44601.1

Group2396: abra|OJJ71227.1 acar|OOF97952.1 acla|EAW10295.1 afis|EAW25297.1 afla|EED53763.1 afum|EAL89960.1 agla|OJJ89273.1 akaw|GAA82762.1 aluc|OJZ87320.1 anid|CBF85405.1 anig|EHA20554.1 aory|EIT78455.1 asyd|OJJ64064.1 ater|EAU34438.1 atub|OJI81325.1 aver|OJI98151.1 awen|OJJ41011.1 azon|OJJ44598.1

Group2397: abra|OJJ71241.1 acar|OOF97926.1 acla|EAW09108.1 afis|EAW25717.1 afla|EED53769.1 afum|EAL84392.2 agla|OJJ85442.1 akaw|GAA82746.1 aluc|OJZ87301.1 anid|CBF77088.1 anig|EHA20541.1 aory|EIT78470.1 asyd|OJJ56975.1 ater|EAU34440.1 atub|OJI81339.1 aver|OJJ03313.1 awen|OJJ33601.1 azon|OJJ44472.1

Group2398: abra|OJJ71244.1 acar|OOF97924.1 acla|EAW10291.1 afis|EAW25300.1 afla|EED53774.1 afum|EAL89963.2 agla|OJJ89280.1 akaw|GAA82743.1 aluc|OJZ87298.1 anid|CBF75193.1 anig|EHA20539.1 aory|EIT78388.1 asyd|OJJ59938.1 ater|EAU34448.1 atub|OJI81342.1 aver|OJJ02349.1 awen|OJJ41015.1 azon|OJJ44603.1

Group2399: abra|OJJ71245.1 acar|OOF97923.1 acla|EAW10290.1 afis|EAW25301.1 afla|EED53776.1 afum|EAL89964.1 agla|OJJ89281.1 akaw|GAA82742.1 aluc|OJZ87297.1 anid|CBF75195.1 anig|EHA20538.1 aory|EIT78454.1 asyd|OJJ59937.1 ater|EAU34449.1 atub|OJI81343.1 aver|OJJ02350.1 awen|OJJ41016.1 azon|OJJ42625.1

Group2400: abra|OJJ71248.1 acar|OOF97920.1 acla|EAW10287.1 afis|EAW25305.1 afla|EED53783.1 afum|EAL89968.2 agla|OJJ89284.1 akaw|GAA82739.1 aluc|OJZ87294.1 anid|CBF75296.1 anig|EHA20535.1 aory|EIT78359.1 asyd|OJJ59884.1 ater|EAU34453.1 atub|OJI81346.1 aver|OJJ02402.1 awen|OJJ41019.1 azon|OJJ44606.1

Group2401: abra|OJJ71255.1 acar|OOF97916.1 acla|EAW10281.1 afis|EAW25313.1 afla|EED53788.1 afum|EAL89974.1 agla|OJJ83848.1 akaw|GAA82733.1 aluc|OJZ87288.1 anid|CBF75287.1 anig|EHA20529.1 aory|EIT78401.1 asyd|OJJ59889.1 ater|EAU34458.1 atub|OJI81353.1 aver|OJJ02397.1 awen|OJJ41053.1 azon|OJJ44614.1

Group2402: abra|OJJ71256.1 acar|OOF97915.1 acla|EAW10280.1 afis|EAW25314.1 afla|EED53789.1 afum|EAL89975.1 agla|OJJ83849.1 akaw|GAA82732.1 aluc|OJZ87287.1 anid|CBF75285.1 anig|EHA20528.1 aory|EIT78413.1 asyd|OJJ59890.1 ater|EAU34459.1 atub|OJI81354.1 aver|OJJ02396.1 awen|OJJ41050.1 azon|OJJ44612.1

Group2403: abra|OJJ71258.1 acar|OOF97914.1 acla|EAW10278.1 afis|EAW25316.1 afla|EED53791.1 afum|EAL89977.2 agla|OJJ83854.1 akaw|GAA82731.1 aluc|OJZ87285.1 anid|CBF75283.1 anig|EHA20527.1 aory|EIT78447.1 asyd|OJJ59892.1 ater|EAU34460.1 atub|OJI81356.1 aver|OJJ02394.1 awen|OJJ41047.1 azon|OJJ44616.1

Group2404: abra|OJJ71259.1 acar|OOF97913.1 acla|EAW10277.1 afis|EAW25317.1 afla|EED53792.1 afum|EAL89978.2 agla|OJJ83855.1 akaw|GAA82730.1 aluc|OJZ87284.1 anid|CBF75281.1 anig|EHA20526.1 aory|EIT78371.1 asyd|OJJ59893.1 ater|EAU34464.1 atub|OJI81357.1 aver|OJJ02393.1 awen|OJJ41046.1 azon|OJJ44617.1

Group2405: abra|OJJ71262.1 acar|OOF97912.1 acla|EAW10275.1 afis|EAW25319.1 afla|EED53794.1 afum|EAL89980.2 agla|OJJ83857.1 akaw|GAA82727.1 aluc|OJZ87281.1 anid|CBF75269.1 anig|EHA20523.1 aory|EIT78456.1 asyd|OJJ59895.1 ater|EAU34465.1 atub|OJI81360.1 aver|OJJ02391.1 awen|OJJ41044.1 azon|OJJ44619.1

Group2406: abra|OJJ71263.1 acar|OOF97911.1 acla|EAW10274.1 afis|EAW25320.1 afla|EED53795.1 afum|EAL89981.1 agla|OJJ83858.1 akaw|GAA82726.1 aluc|OJZ87280.1 anid|CBF75267.1 anig|EHA20522.1 aory|EIT78395.1 asyd|OJJ59896.1 ater|EAU34466.1 atub|OJI81361.1 aver|OJJ02390.1 awen|OJJ41043.1 azon|OJJ44620.1

Group2407: abra|OJJ71264.1 acar|OOF97910.1 acla|EAW10273.1 afis|EAW25321.1 afla|EED53796.1 afum|EAL89982.1 agla|OJJ83859.1 akaw|GAA82725.1 aluc|OJZ87279.1 anid|CBF75265.1 anig|EHA20521.1 aory|EIT78365.1 asyd|OJJ59897.1 ater|EAU34467.1 atub|OJI81362.1 aver|OJJ02389.1 awen|OJJ41042.1 azon|OJJ44621.1

Group2408: abra|OJJ71265.1 acar|OOF97909.1 acla|EAW10272.1 afis|EAW25322.1 afla|EED53797.1 afum|EAL89983.1 agla|OJJ83860.1 akaw|GAA82724.1 aluc|OJZ87278.1 anid|CBF75263.1 anig|EHA20520.1 aory|EIT78429.1 asyd|OJJ59898.1 ater|EAU34468.1 atub|OJI81363.1 aver|OJJ02388.1 awen|OJJ41041.1 azon|OJJ44624.1

Group2409: abra|OJJ71267.1 acar|OOF97908.1 acla|EAW10271.1 afis|EAW25323.1 afla|EED53798.1 afum|EAL89984.1 agla|OJJ83861.1 akaw|GAA82723.1 aluc|OJZ87277.1 anid|CBF75261.1 anig|EHA20519.1 aory|EIT78438.1 asyd|OJJ59899.1 ater|EAU34469.1 atub|OJI81364.1 aver|OJJ02387.1 awen|OJJ41040.1 azon|OJJ44626.1



Group2410: abra|OJJ71270.1 acar|OOF97902.1 acla|EAW10268.1 afis|EAW25326.1 afla|EED53803.1 afum|EAL89987.1 agla|OJJ83870.1 akaw|GAA82720.1 aluc|OJZ87274.1 anid|CBF75254.1 anig|EHA20515.1 aory|EIT78467.1 asyd|OJJ59904.1 ater|EAU34473.1 atub|OJI81368.1 aver|OJJ02381.1 awen|OJJ41031.1 azon|OJJ44634.1

Group2411: abra|OJJ71271.1 acar|OOF97903.1 acla|EAW10267.1 afis|EAW25327.1 afla|EED53804.1 afum|EAL89988.1 agla|OJJ83869.1 akaw|GAA82719.1 aluc|OJZ87273.1 anid|CBF75252.1 anig|EHA20514.1 aory|EIT78360.1 asyd|OJJ59905.1 ater|EAU34474.1 atub|OJI81369.1 aver|OJJ02380.1 awen|OJJ41032.1 azon|OJJ44633.1

Group2413: abra|OJJ71277.1 acar|OOF97896.1 acla|EAW10258.1 afis|EAW25335.1 afla|EED53811.1 afum|EAL89998.1 agla|OJJ83872.1 akaw|GAA82712.1 aluc|OJZ87266.1 anid|CBF75240.1 anig|EHA20508.1 aory|EIT78414.1 asyd|OJJ59911.1 ater|EAU34478.1 atub|OJI81376.1 aver|OJJ02375.1 awen|OJJ41029.1 azon|OJJ44636.1

Group2414: abra|OJJ71279.1 acar|OOF97892.1 acla|EAW10261.1 afis|EAW25332.1 afla|EED53814.1 afum|EAL89994.1 agla|OJJ83875.1 akaw|GAA82709.1 aluc|OJZ87264.1 anid|CBF75236.1 anig|EHA20506.1 aory|EIT78424.1 asyd|OJJ59913.1 ater|EAU34480.1 atub|OJI81378.1 aver|OJJ02373.1 awen|OJJ41026.1 azon|OJJ44638.1

Group2415: abra|OJJ71280.1 acar|OOF97893.1 acla|EAW10262.1 afis|EAW25331.1 afla|EED53815.1 afum|EAL89993.1 agla|OJJ83877.1 akaw|GAA82708.1 aluc|OJZ87263.1 anid|CBF75234.1 anig|EHA20505.1 aory|EIT78448.1 asyd|OJJ59914.1 ater|EAU34481.1 atub|OJI81379.1 aver|OJJ02372.1 awen|OJJ41025.1 azon|OJJ44639.1

Group2416: abra|OJJ71286.1 acar|OOF97886.1 acla|EAW10251.1 afis|EAW25341.1 afla|EED53822.1 afum|EBA27392.1 agla|OJJ83884.1 akaw|GAA82703.1 aluc|OJZ87257.1 anid|CBF75213.1 anig|EHA20502.1 aory|EIT78427.1 asyd|OJJ59928.1 ater|EAU34487.1 atub|OJI81385.1 aver|OJJ02358.1 awen|OJJ41062.1 azon|OJJ44645.1

Group2417: abra|OJJ71287.1 acar|OOF97884.1 acla|EAW10250.1 afis|EAW25342.1 afla|EED53823.1 afum|EAL90005.2 agla|OJJ83885.1 akaw|GAA82702.1 aluc|OJZ87256.1 anid|CBF75211.1 anig|EHA20501.1 aory|EIT78440.1 asyd|OJJ59927.1 ater|EAU34488.1 atub|OJI81386.1 aver|OJJ02359.1 awen|OJJ41063.1 azon|OJJ44646.1

Group2418: abra|OJJ71288.1 acar|OOF97885.1 acla|EAW10249.1 afis|EAW25343.1 afla|EED53824.1 afum|EAL90006.1 agla|OJJ83886.1 akaw|GAA82701.1 aluc|OJZ87255.1 anid|CBF75209.1 anig|EHA20500.1 aory|EIT78410.1 asyd|OJJ59926.1 ater|EAU34489.1 atub|OJI81387.1 aver|OJJ02360.1 awen|OJJ41065.1 azon|OJJ44647.1

Group2419: abra|OJJ71289.1 acar|OOF97883.1 acla|EAW10248.1 afis|EAW25344.1 afla|EED53825.1 afum|EAL90007.1 agla|OJJ83887.1 akaw|GAA82700.1 aluc|OJZ87254.1 anid|CBF75207.1 anig|EHA20499.1 aory|EIT78419.1 asyd|OJJ59925.1 ater|EAU34490.1 atub|OJI81388.1 aver|OJJ02361.1 awen|OJJ41066.1 azon|OJJ44648.1

Group2420: abra|OJJ71290.1 acar|OOF97882.1 acla|EAW10247.1 afis|EAW25345.1 afla|EED53826.1 afum|EAL90008.2 agla|OJJ83891.1 akaw|GAA82699.1 aluc|OJZ87253.1 anid|CBF75205.1 anig|EHA20498.1 aory|EIT78441.1 asyd|OJJ59924.1 ater|EAU34491.1 atub|OJI81389.1 aver|OJJ02362.1 awen|OJJ41068.1 azon|OJJ44650.1

Group2421: abra|OJJ71291.1 acar|OOF97881.1 acla|EAW10246.1 afis|EAW25346.1 afla|EED53827.1 afum|EAL90009.1 agla|OJJ83892.1 akaw|GAA82698.1 aluc|OJZ87252.1 anid|CBF75203.1 anig|EHA20497.1 aory|EIT78374.1 asyd|OJJ59923.1 ater|EAU34492.1 atub|OJI81390.1 aver|OJJ02363.1 awen|OJJ41069.1 azon|OJJ44651.1

Group2422: abra|OJJ71293.1 acar|OOF97877.1 acla|EAW10245.1 afis|EAW25347.1 afla|EED53828.1 afum|EAL90010.2 agla|OJJ83893.1 akaw|GAA82696.1 aluc|OJZ87250.1 anid|CBF77426.1 anig|EHA20495.1 aory|EIT78392.1 asyd|OJJ53229.1 ater|EAU34495.1 atub|OJI81392.1 aver|OJJ03623.1 awen|OJJ41070.1 azon|OJJ44652.1

Group2423: abra|OJJ71294.1 acar|OOF97876.1 acla|EAW10244.1 afis|EAW25348.1 afla|EED53829.1 afum|EAL90011.1 agla|OJJ83894.1 akaw|GAA82695.1 aluc|OJZ87249.1 anid|CBF77428.1 anig|EHA20494.1 aory|EIT78450.1 asyd|OJJ53228.1 ater|EAU34496.1 atub|OJI81393.1 aver|OJJ03624.1 awen|OJJ41071.1 azon|OJJ44653.1

Group2424: abra|OJJ71295.1 acar|OOF97875.1 acla|EAW10243.1 afis|EAW25349.1 afla|EED53830.1 afum|EAL90012.1 agla|OJJ83895.1 akaw|GAA82694.1 aluc|OJZ87248.1 anid|CBF77430.1 anig|EHA20493.1 asyd|OJJ53227.1 ater|EAU34497.1 atub|OJI81394.1 aver|OJJ03625.1 awen|OJJ41072.1 azon|OJJ44654.1 aory|EIT78356.1

Group2425: abra|OJJ71296.1 acar|OOF97874.1 acla|EAW10242.1 afis|EAW25350.1 afla|EED53831.1 afum|EAL90013.1 agla|OJJ83896.1 akaw|GAA82693.1 aluc|OJZ87247.1 anid|CBF77432.1 anig|EHA20492.1

aory|EIT78425.1 asyd|OJJ53226.1 ater|EAU34498.1 atub|OJI81395.1 aver|OJJ03626.1 awen|OJJ41073.1 azon|OJJ44655.1

Group2426: abra|OJJ71297.1 acar|OOF97873.1 acla|EAW10241.1 afis|EAW25351.1 afla|EED53832.1 afum|EAL90014.1 agla|OJJ83897.1 akaw|GAA82692.1 aluc|OJZ87246.1 anid|CBF77434.1 anig|EHA20491.1 aory|EIT78366.1 asyd|OJJ53225.1 ater|EAU34499.1 atub|OJI81396.1 aver|OJJ03627.1 awen|OJJ41074.1 azon|OJJ44656.1

Group2427: abra|OJJ71300.1 acar|OOF97870.1 acla|EAW10238.1 afis|EAW25354.1 afla|EED53835.1 afum|EAL90016.1 agla|OJJ83902.1 akaw|GAA82689.1 aluc|OJZ87243.1 anid|CBF77471.1 anig|EHA20488.1 aory|EIT78370.1 asyd|OJJ53222.1 ater|EAU34502.1 atub|OJI81399.1 aver|OJJ03630.1 awen|OJJ41077.1 azon|OJJ44659.1

Group2428: abra|OJJ71302.1 acar|OOF97869.1 acla|EAW10237.1 afis|EAW25355.1 afla|EED53836.1 afum|EAL90017.1 agla|OJJ83903.1 akaw|GAA82688.1 aluc|OJZ87241.1 anid|CBF77469.1 anig|EHA20487.1 aory|EIT78369.1 asyd|OJJ53221.1 ater|EAU34503.1 atub|OJI81401.1 aver|OJJ03631.1 awen|OJJ41078.1 azon|OJJ44660.1

Group2429: abra|OJJ71303.1 acar|OOF97868.1 acla|EAW10236.1 afis|EAW25356.1 afla|EED53838.1 afum|EAL90018.1 agla|OJJ83905.1 akaw|GAA82687.1 aluc|OJZ87240.1 anid|CBF77467.1 anig|EHA20486.1 aory|EIT78449.1 asyd|OJJ53220.1 ater|EAU34504.1 atub|OJI81402.1 aver|OJJ03632.1 awen|OJJ41081.1 azon|OJJ44662.1

Group2430: abra|OJJ71304.1 acar|OOF97867.1 acla|EAW10235.1 afis|EAW25357.1 afla|EED53839.1 afum|EAL90019.1 agla|OJJ83906.1 akaw|GAA82686.1 aluc|OJZ87239.1 anid|CBF77465.1 anig|EHA20485.1 aory|EIT78442.1 asyd|OJJ53219.1 ater|EAU34505.1 atub|OJI81403.1 aver|OJJ03633.1 awen|OJJ41082.1 azon|OJJ44663.1

Group2431: abra|OJJ71308.1 acar|OOF97863.1 acla|EAW10232.1 afis|EAW25360.1 afum|EAL90022.1 agla|OJJ83910.1 akaw|GAA82683.1 aluc|OJZ87236.1 anid|CBF77459.1 anig|EHA20483.1 aory|EIT78368.1 asyd|OJJ53216.1 ater|EAU34508.1 atub|OJI81406.1 aver|OJJ03635.1 awen|OJJ41086.1 azon|OJJ44666.1 afla|EED53842.1

Group2432: abra|OJJ71310.1 acar|OOF97862.1 acla|EAW10230.1 afis|EAW25362.1 afla|EED53844.1 afum|EAL90024.1 agla|OJJ83912.1 akaw|GAA82681.1 aluc|OJZ87234.1 anid|CBF77455.1 anig|EHA20481.1 aory|EIT78471.1 asyd|OJJ53214.1 ater|EAU34509.1 atub|OJI81408.1 aver|OJJ03637.1 awen|OJJ41088.1 azon|OJJ44668.1

Group2433: abra|OJJ71311.1 acar|OOF97861.1 acla|EAW10229.1 afis|EAW25363.1 afla|EED53845.1 afum|EAL90025.1 agla|OJJ83913.1 akaw|GAA82680.1 aluc|OJZ87233.1 anid|CBF77453.1 anig|EHA20480.1 aory|EIT78383.1 asyd|OJJ53213.1 ater|EAU34510.1 atub|OJI81409.1 aver|OJJ03638.1 awen|OJJ41089.1 azon|OJJ44669.1

Group2434: abra|OJJ71312.1 acar|OOF97860.1 acla|EAW10228.1 afis|EAW25364.1 afla|EED53846.1 afum|EAL90026.1 agla|OJJ83752.1 akaw|GAA82679.1 aluc|OJZ87232.1 anid|CBF77452.1 anig|EHA20479.1 aory|EIT78459.1 asyd|OJJ53211.1 ater|EAU34511.1 atub|OJI81410.1 aver|OJJ03639.1 awen|OJJ41091.1 azon|OJJ44670.1

Group2435: abra|OJJ71315.1 acar|OOF97857.1 acla|EAW10224.1 afis|EAW25368.1 afla|EED53849.1 afum|EAL90028.2 agla|OJJ83755.1 akaw|GAA82676.1 aluc|OJZ87229.1 anid|CBF77446.1 anig|EHA20476.1 aory|EIT78461.1 asyd|OJJ53208.1 ater|EAU34513.1 atub|OJI81413.1 aver|OJJ03642.1 awen|OJJ41094.1 azon|OJJ44673.1

Group2436: abra|OJJ71316.1 acar|OOF97856.1 acla|EAW10223.1 afis|EAW25369.1 afla|EED53850.1 afum|EAL90029.2 agla|OJJ83756.1 akaw|GAA82675.1 aluc|OJZ87228.1 anid|CBF77444.1 anig|EHA20475.1 aory|EIT78384.1 asyd|OJJ53207.1 ater|EAU34514.1 atub|OJI81414.1 aver|OJJ03643.1 awen|OJJ41095.1 azon|OJJ44674.1

Group2437: abra|OJJ71317.1 acar|OOF97855.1 acla|EAW10222.1 afis|EAW25370.1 afla|EED53851.1 afum|EAL90030.1 agla|OJJ83757.1 akaw|GAA82674.1 aluc|OJZ87227.1 anid|CBF77442.1 anig|EHA20474.1 aory|EIT78393.1 asyd|OJJ53206.1 ater|EAU34515.1 atub|OJI81415.1 aver|OJJ03644.1 awen|OJJ41096.1 azon|OJJ44675.1

Group2438: abra|OJJ71320.1 acar|OOF97854.1 acla|EAW10219.1 afis|EAW25373.1 afla|EED53854.1 afum|EAL90033.1 agla|OJJ83760.1 akaw|GAA82671.1 aluc|OJZ87224.1 anid|CBF77475.1 anig|EHA20471.1 aory|EIT78376.1 asyd|OJJ53203.1 ater|EAU34518.1 atub|OJI81418.1 aver|OJJ03647.1 awen|OJJ41099.1 azon|OJJ44678.1

Group2439: abra|OJJ71321.1 acar|OOF97852.1 acla|EAW10218.1 afis|EAW25375.1 afla|EED53855.1 afum|EAL90034.1 agla|OJJ83761.1 akaw|GAA82670.1 aluc|OJZ87223.1 anid|CBF77477.1 anig|EHA20470.1 aory|EIT78390.1 asyd|OJJ53202.1 ater|EAU34519.1 atub|OJI81419.1 aver|OJJ03648.1 awen|OJJ41100.1 azon|OJJ44679.1

Group2440: abra|OJJ71322.1 acar|OOF97853.1 acla|EAW10217.1 afis|EAW25376.1 afla|EED53856.1 afum|EAL90035.1 agla|OJJ83765.1 akaw|GAA82669.1 aluc|OJZ87222.1 anid|CBF77479.1 anig|EHA20469.1 aory|EIT78453.1 asyd|OJJ53201.1 ater|EAU34520.1 atub|OJI81420.1 aver|OJJ03649.1 awen|OJJ41103.1 azon|OJJ44680.1

Group2441: abra|OJJ71324.1 acar|OOF97850.1 acla|EAW10215.1 afis|EAW25378.1 afla|EED53858.1 afum|EAL90037.1 agla|OJJ83767.1 akaw|GAA82667.1 aluc|OJZ87220.1 anid|CBF77483.1 anig|EHA20468.1 aory|EIT78426.1 asyd|OJJ53199.1 ater|EAU34522.1 atub|OJI81421.1 aver|OJJ03651.1 awen|OJJ41105.1 azon|OJJ44682.1

Group2442: abra|OJJ71325.1 acar|OOF97849.1 acla|EAW10214.1 afis|EAW25379.1 afla|EED53859.1 afum|EAL90038.1 agla|OJJ83772.1 akaw|GAA82666.1 aluc|OJZ87219.1 anid|CBF77485.1 anig|EHA20467.1 aory|EIT78378.1 asyd|OJJ53197.1 ater|EAU34527.1 atub|OJI81422.1 aver|OJJ03653.1 awen|OJJ41106.1 azon|OJJ44683.1

Group2444: abra|OJJ71333.1 acar|OOF97842.1 acla|EAW10206.1 afis|EAW25389.1 afla|EED53866.1 afum|EAL90048.2 agla|OJJ83792.1 akaw|GAA82659.1 aluc|OJZ87209.1 anid|CBF77500.1 anig|EHA20461.1 aory|EIT78380.1 asyd|OJJ53190.1 ater|EAU34537.1 atub|OJI81430.1 aver|OJJ03660.1 awen|OJJ41116.1 azon|OJJ44692.1

Group2445: abra|OJJ71334.1 acar|OOF97838.1 acla|EAW10205.1 afis|EAW25390.1 afla|EED53867.1 afum|EAL90049.1 agla|OJJ87028.1 akaw|GAA82658.1 aluc|OJZ87208.1 anid|CBF77502.1 anig|EHA20459.1 aory|EIT78439.1 asyd|OJJ53189.1 ater|EAU34538.1 atub|OJI81431.1 aver|OJJ03661.1 awen|OJJ41117.1 azon|OJJ44693.1

Group2446: abra|OJJ71337.1 acar|OOF97835.1 acla|EAW10202.1 afis|EAW25393.1 afla|EED53870.1 afum|EAL90052.1 agla|OJJ87031.1 akaw|GAA82655.1 aluc|OJZ87205.1 anid|CBF77508.1 anig|EHA20458.1 aory|EIT78391.1 asyd|OJJ53186.1 ater|EAU34541.1 atub|OJI81435.1 aver|OJJ03665.1 awen|OJJ41119.1 azon|OJJ43212.1

Group2447: abra|OJJ71339.1 acar|OOF97833.1 acla|EAW10200.1 afis|EAW25395.1 afla|EED53872.1 afum|EAL90054.1 agla|OJJ87033.1 akaw|GAA82653.1 aluc|OJZ87203.1 anid|CBF77512.1 anig|EHA20456.1 aory|EIT78468.1 asyd|OJJ53185.1 ater|EAU34543.1 atub|OJI81437.1 aver|OJJ03666.1 awen|OJJ41121.1 azon|OJJ44696.1

Group2448: abra|OJJ71340.1 acar|OOF97832.1 acla|EAW10199.1 afis|EAW25396.1 afla|EED53873.1 afum|EAL90055.1 agla|OJJ87034.1 akaw|GAA82652.1 aluc|OJZ87202.1 anid|CBF77514.1 anig|EHA20455.1 aory|EIT78362.1 asyd|OJJ53184.1 ater|EAU34544.1 atub|OJI81438.1 aver|OJJ03667.1 awen|OJJ41122.1 azon|OJJ44697.1

Group2449: abra|OJJ71341.1 acar|OOF97831.1 acla|EAW10198.1 afis|EAW25397.1 afla|EED53874.1 afum|EAL90056.1 agla|OJJ87035.1 akaw|GAA82651.1 aluc|OJZ87201.1 anid|CBF77516.1 anig|EHA20454.1 aory|EIT78399.1 asyd|OJJ53183.1 ater|EAU34545.1 atub|OJI81439.1 aver|OJJ03668.1 awen|OJJ41123.1 azon|OJJ44698.1

Group2450: abra|OJJ71342.1 acar|OOF97830.1 acla|EAW10197.1 afis|EAW25398.1 afla|EED53875.1 afum|EAL90057.1 agla|OJJ87036.1 akaw|GAA82650.1 aluc|OJZ87200.1 anid|CBF77518.1 anig|EHA20453.1 aory|EIT78445.1 asyd|OJJ53182.1 ater|EAU34549.1 atub|OJI81440.1 aver|OJJ03669.1 awen|OJJ41124.1 azon|OJJ44699.1

Group2451: abra|OJJ71345.1 acar|OOF97827.1 acla|EAW10194.1 afis|EAW25401.1 afla|EED53879.1 afum|EAL90060.1 agla|OJJ87042.1 akaw|GAA82647.1 aluc|OJZ87196.1 anid|CBF77524.1 anig|EHA20451.1 aory|EIT78402.1 asyd|OJJ53180.1 ater|EAU34552.1 atub|OJI81443.1 aver|OJJ03671.1 awen|OJJ41128.1 azon|OJJ44702.1

Group2452: abra|OJJ71346.1 acar|OOF97824.1 acla|EAW10192.1 afis|EAW25403.1 afla|EED53882.1 afum|EAL90062.1 agla|OJJ87044.1 akaw|GAA82646.1 aluc|OJZ87193.1 anid|CBF77530.1 anig|EHA20450.1 aory|EIT78396.1 asyd|OJJ53177.1 ater|EAU34554.1 atub|OJI81445.1 aver|OJJ03675.1 awen|OJJ41130.1 azon|OJJ44704.1

Group2453: abra|OJJ71347.1 acar|OOF97823.1 acla|EAW10191.1 afis|EAW25404.1 afla|EED53883.1 afum|EAL90063.1 agla|OJJ87045.1 akaw|GAA82645.1 aluc|OJZ87192.1 anid|CBF77532.1 anig|EHA20449.1 aory|EIT78372.1 asyd|OJJ53176.1 ater|EAU34555.1 atub|OJI81446.1 aver|OJJ03676.1 awen|OJJ41131.1 azon|OJJ44705.1

Group2454: abra|OJJ71349.1 acar|OOF97821.1 acla|EAW10189.1 afis|EAW25406.1 afla|EED53885.1 afum|EAL90065.1 agla|OJJ87047.1 akaw|GAA82643.1 aluc|OJZ87190.1 anid|CBF77536.1 anig|EHA20447.1 aory|EIT78483.1 asyd|OJJ53174.1 ater|EAU34557.1 atub|OJI81448.1 aver|OJJ03678.1 awen|OJJ41133.1 azon|OJJ44707.1

Group2455: abra|OJJ71351.1 acar|OOF97818.1 acla|EAW10187.1 afis|EAW25408.1 afla|EED53887.1 afum|EAL90067.1 agla|OJJ87049.1 akaw|GAA82641.1 aluc|OJZ87188.1 anid|CBF77540.1 anig|EHA20445.1

aory|EIT78477.1 asyd|OJJ53172.1 ater|EAU34559.1 atub|OJI81450.1 aver|OJJ03680.1 awen|OJJ41135.1 azon|OJJ44709.1

Group2456: abra|OJJ71352.1 acar|OOF97819.1 acla|EAW10186.1 afis|EAW25409.1 afla|EED53888.1 afum|EAL90068.1 agla|OJJ87050.1 akaw|GAA82640.1 aluc|OJZ87187.1 anid|CBF77588.1 anig|EHA20444.1 aory|EIT78490.1 asyd|OJJ53171.1 ater|EAU34560.1 atub|OJI81451.1 aver|OJJ03681.1 awen|OJJ41136.1 azon|OJJ44715.1

Group2457: abra|OJJ71353.1 acar|OOF97817.1 acla|EAW10183.1 afis|EAW25411.1 afla|EED53890.1 afum|EAL90070.1 agla|OJJ87052.1 akaw|GAA82639.1 aluc|OJZ87186.1 anid|CBF77584.1 anig|EHA20443.1 aory|EIT78494.1 asyd|OJJ53169.1 ater|EAU34562.1 atub|OJI81452.1 aver|OJJ03683.1 awen|OJJ41138.1 azon|OJJ44717.1

Group2458: abra|OJJ71354.1 acar|OOF97816.1 acla|EAW10182.1 afis|EAW25412.1 afla|EED53891.1 afum|EAL90071.1 agla|OJJ87054.1 akaw|GAA82638.1 aluc|OJZ87185.1 anid|CBF77582.1 anig|EHA20442.1 aory|EIT78487.1 asyd|OJJ53168.1 ater|EAU34563.1 atub|OJI81453.1 aver|OJJ03684.1 awen|OJJ41139.1 azon|OJJ44719.1

Group2459: abra|OJJ71355.1 acar|OOF97815.1 acla|EAW10181.1 afis|EAW25413.1 afla|EED53892.1 afum|EAL90072.1 agla|OJJ87055.1 akaw|GAA82637.1 aluc|OJZ87184.1 anid|CBF77580.1 anig|EHA20441.1 aory|EIT78502.1 asyd|OJJ53167.1 ater|EAU34564.1 atub|OJI81455.1 aver|OJJ03685.1 awen|OJJ41140.1 azon|OJJ44720.1

Group2460: abra|OJJ71357.1 acar|OOF97813.1 acla|EAW10179.1 afis|EAW25415.1 afla|EED53894.1 afum|EAL90074.1 agla|OJJ87057.1 akaw|GAA82635.1 aluc|OJZ87182.1 anid|CBF77576.1 anig|EHA20440.1 aory|EIT78485.1 asyd|OJJ53165.1 ater|EAU34566.1 atub|OJI81457.1 aver|OJJ03687.1 awen|OJJ41142.1 azon|OJJ44722.1

Group2461: abra|OJJ71358.1 acar|OOF97812.1 acla|EAW10178.1 afis|EAW25416.1 afla|EED53895.1 afum|EAL90075.1 agla|OJJ87058.1 akaw|GAA82634.1 aluc|OJZ87181.1 anid|CBF77574.1 anig|EHA20439.1 aory|EIT78501.1 asyd|OJJ53164.1 ater|EAU34567.1 atub|OJI81458.1 aver|OJJ03688.1 awen|OJJ41144.1 azon|OJJ44723.1

Group2462: abra|OJJ71359.1 acar|OOF97811.1 acla|EAW10177.1 afis|EAW25417.1 afla|EED53896.1 afum|EAL90076.1 agla|OJJ87059.1 akaw|GAA82633.1 aluc|OJZ87180.1 anid|CBF77573.1 anig|EHA20438.1 aory|EIT78493.1 asyd|OJJ53163.1 ater|EAU34568.1 atub|OJI81459.1 aver|OJJ03689.1 awen|OJJ41145.1 azon|OJJ44724.1

Group2463: abra|OJJ71360.1 acar|OOF97810.1 acla|EAW10176.1 afis|EAW25418.1 afla|EED53897.1 afum|EAL90077.1 agla|OJJ87060.1 akaw|GAA82632.1 aluc|OJZ87179.1 anid|CBF77571.1 anig|EHA20437.1 aory|EIT78486.1 asyd|OJJ53162.1 ater|EAU34569.1 atub|OJI81460.1 aver|OJJ03690.1 awen|OJJ41146.1 azon|OJJ44725.1

Group2464: abra|OJJ71361.1 acar|OOF97809.1 acla|EAW10175.1 afis|EAW25419.1 afla|EED53898.1 afum|EAL90078.1 agla|OJJ87061.1 akaw|GAA82631.1 aluc|OJZ87178.1 anid|CBF77569.1 anig|EHA20436.1 aory|EIT78503.1 asyd|OJJ53161.1 ater|EAU34570.1 atub|OJI81461.1 aver|OJJ03691.1 awen|OJJ41147.1 azon|OJJ44726.1

Group2465: abra|OJJ71363.1 acar|OOF97808.1 acla|EAW10174.1 afis|EAW25420.1 afla|EED53899.1 afum|EAL90079.1 agla|OJJ87064.1 akaw|GAA82630.1 aluc|OJZ87177.1 anid|CBF77567.1 anig|EHA20435.1 aory|EIT78497.1 asyd|OJJ53160.1 ater|EAU34571.1 atub|OJI81462.1 aver|OJJ03692.1 awen|OJJ41148.1 azon|OJJ44727.1

Group2466: abra|OJJ71365.1 acar|OOF97807.1 acla|EAW10173.1 afis|EAW25421.1 afla|EED53900.1 afum|EAL90080.2 agla|OJJ87063.1 akaw|GAA82629.1 aluc|OJZ87175.1 anid|CBF77563.1 anig|EHA20433.1 aory|EIT78488.1 asyd|OJJ53158.1 ater|EAU34572.1 atub|OJI81463.1 aver|OJJ03693.1 awen|OJJ41149.1 azon|OJJ44728.1

Group2467: abra|OJJ71366.1 acar|OOF97806.1 acla|EAW10172.1 afis|EAW25422.1 afla|EED53901.1 afum|EAL90081.1 agla|OJJ87062.1 akaw|GAA82628.1 aluc|OJZ87174.1 anid|CBF77561.1 anig|EHA20432.1 aory|EIT78499.1 asyd|OJJ53157.1 ater|EAU34573.1 atub|OJI81464.1 aver|OJJ03694.1 awen|OJJ41150.1 azon|OJJ44729.1

Group2468: abra|OJJ71367.1 acar|OOF97805.1 acla|EAW10171.1 afis|EAW25423.1 afla|EED53902.1 afum|EAL90082.1 agla|OJJ87065.1 akaw|GAA82627.1 aluc|OJZ87173.1 anid|CBF77559.1 anig|EHA20431.1 aory|EIT78495.1 asyd|OJJ53156.1 ater|EAU34577.1 atub|OJI81465.1 aver|OJJ03695.1 awen|OJJ41151.1 azon|OJJ44730.1

Group2469: abra|OJJ71368.1 acar|OOF97804.1 acla|EAW10170.1 afis|EAW25424.1 afla|EED53903.1 afum|EAL90083.1 agla|OJJ87066.1 akaw|GAA82626.1 aluc|OJZ87172.1 anid|CBF77557.1 anig|EHA20430.1 aory|EIT78480.1 asyd|OJJ53155.1 ater|EAU34578.1 atub|OJI81466.1 aver|OJJ03696.1 awen|OJJ41152.1 azon|OJJ44731.1

Group2470: abra|OJJ71370.1 acar|OOF97798.1 acla|EAW10168.1 afis|EAW25426.1 afla|EED53914.1 afum|EAL90085.1 agla|OJJ87070.1 akaw|GAA82624.1 aluc|OJZ87170.1 anid|CBF77553.1 anig|EHA20428.1 aory|EIT78484.1 asyd|OJJ53153.1 ater|EAU34591.1 atub|OJI81469.1 aver|OJJ03698.1 awen|OJJ41155.1 azon|OJJ44733.1

Group2471: abra|OJJ71371.1 acar|OOF97797.1 acla|EAW10166.1 afis|EAW25428.1 afla|EED53916.1 afum|EAL90087.1 agla|OJJ87073.1 akaw|GAA82623.1 aluc|OJZ87169.1 anid|CBF77549.1 anig|EHA20427.1 aory|EIT78314.1 asyd|OJJ53151.1 ater|EAU34598.1 atub|OJI81470.1 aver|OJJ03700.1 awen|OJJ41157.1 azon|OJJ44735.1

Group2472: abra|OJJ71372.1 acar|OOF97796.1 acla|EAW10165.1 afis|EAW25429.1 afla|EED53917.1 afum|EAL90088.1 agla|OJJ87074.1 akaw|GAA82622.1 aluc|OJZ87168.1 anid|CBF77547.1 anig|EHA20426.1 aory|EIT78324.1 asyd|OJJ53150.1 ater|EAU34600.1 atub|OJI81471.1 aver|OJJ03701.1 awen|OJJ41158.1 azon|OJJ44736.1

Group2473: abra|OJJ71374.1 acar|OOF97794.1 acla|EAW10163.1 afis|EAW25431.1 afla|EED53919.1 afum|EAL90089.1 agla|OJJ87076.1 akaw|GAA82620.1 aluc|OJZ87166.1 anid|CBF77543.1 anig|EHA20425.1 aory|EIT78269.1 asyd|OJJ53148.1 ater|EAU34603.1 atub|OJI81473.1 aver|OJJ03703.1 awen|OJJ41160.1 azon|OJJ44738.1

Group2474: abra|OJJ71376.1 acar|OOF97792.1 acla|EAW10148.1 afis|EAW25445.1 afla|EED53931.1 afum|EAL90103.1 agla|OJJ87089.1 akaw|GAA82618.1 aluc|OJZ87164.1 anid|CBF77610.1 anig|EHA20423.1 aory|EIT78328.1 asyd|OJJ53135.1 ater|EAU34615.1 atub|OJI81475.1 aver|OJJ03717.1 awen|OJJ41174.1 azon|OJJ44750.1

Group2475: abra|OJJ71378.1 acar|OOF97791.1 acla|EAW10146.1 afis|EAW25447.1 afla|EED53929.1 afum|EAL90105.1 agla|OJJ87086.1 akaw|GAA82616.1 aluc|OJZ87162.1 anid|CBF77606.1 anig|EHA20421.1 aory|EIT78352.1 asyd|OJJ53138.1 ater|EAU34613.1 atub|OJI81477.1 aver|OJJ03714.1 awen|OJJ41169.1 azon|OJJ44747.1

Group2476: abra|OJJ71379.1 acar|OOF97790.1 acla|EAW10154.1 afis|EAW25440.1 afla|EED53928.1 afum|EAL90098.1 agla|OJJ87085.1 akaw|GAA82615.1 aluc|OJZ87161.1 anid|CBF77602.1 anig|EHA20420.1 aory|EIT78271.1 asyd|OJJ53139.1 ater|EAU34612.1 atub|OJI81478.1 aver|OJJ03713.1 awen|OJJ41168.1 azon|OJJ44746.1

Group2477: abra|OJJ71380.1 acar|OOF97789.1 acla|EAW10155.1 afis|EAW25439.1 afla|EED53927.1 afum|EAL90097.1 agla|OJJ87084.1 akaw|GAA82614.1 aluc|OJZ87160.1 anid|CBF77600.1 anig|EHA20419.1 aory|EIT78298.1 asyd|OJJ53140.1 ater|EAU34611.1 atub|OJI81480.1 aver|OJJ03712.1 awen|OJJ41167.1 azon|OJJ44745.1

Group2478: abra|OJJ71384.1 acar|OOF97785.1 acla|EAW10159.1 afis|EAW25435.1 afla|EED53923.1 afum|EAL90093.1 agla|OJJ87080.1 akaw|GAA82610.1 aluc|OJZ87156.1 anid|CBF77592.1 anig|EHA20415.1 aory|EIT78272.1 asyd|OJJ53144.1 ater|EAU34607.1 atub|OJI81484.1 aver|OJJ03708.1 awen|OJJ41164.1 azon|OJJ44742.1

Group2479: abra|OJJ71386.1 acar|OOF97783.1 acla|EAW10161.1 afis|EAW25433.1 afla|EED53921.1 afum|EAL90091.1 agla|OJJ87078.1 akaw|GAA82608.1 aluc|OJZ87154.1 anid|CBF77590.1 anig|EHA20413.1 aory|EIT78355.1 asyd|OJJ53146.1 ater|EAU34605.1 atub|OJI81486.1 aver|OJJ03706.1 awen|OJJ41162.1 azon|OJJ44740.1

Group2480: abra|OJJ71389.1 acar|OOF97779.1 acla|EAW10150.1 afis|EAW25443.1 afla|EED53933.1 afum|EAL90101.1 agla|OJJ87092.1 akaw|GAA82605.1 aluc|OJZ87151.1 anid|CBF77614.1 anig|EHA20410.1 aory|EIT78302.1 asyd|OJJ53133.1 ater|EAU34616.1 atub|OJI81489.1 aver|OJJ03719.1 awen|OJJ41176.1 azon|OJJ44752.1

Group2481: abra|OJJ71390.1 acar|OOF97778.1 acla|EAW10151.1 afis|EAW25442.1 afla|EED53934.1 afum|EAL90100.1 agla|OJJ87094.1 akaw|GAA82604.1 aluc|OJZ87150.1 anid|CBF77616.1 anig|EHA20409.1 aory|EIT78339.1 asyd|OJJ53132.1 ater|EAU34617.1 atub|OJI81490.1 aver|OJJ03720.1 awen|OJJ41177.1 azon|OJJ44753.1

Group2482: abra|OJJ71393.1 acar|OOF97775.1 acla|EAW10145.1 afis|EAW25448.1 afla|EED53935.1 afum|EAL90106.1 agla|OJJ87095.1 akaw|GAA82603.1 aluc|OJZ87148.1 anid|CBF77624.1 anig|EHA20407.1 aory|EIT78256.1 asyd|OJJ53131.1 ater|EAU34618.1 atub|OJI81492.1 aver|OJJ03723.1 awen|OJJ41179.1 azon|OJJ44755.1

Group2483: abra|OJJ71395.1 acar|OOF97774.1 acla|EAW10144.1 afis|EAW25449.1 afla|EED53936.1 afum|EAL90108.1 agla|OJJ87101.1 akaw|GAA82602.1 aluc|OJZ87147.1 anid|CBF77626.1 anig|EHA20406.1 aory|EIT78279.1 asyd|OJJ53130.1 ater|EAU34619.1 atub|OJI81494.1 aver|OJJ03724.1 awen|OJJ41180.1 azon|OJJ44756.1

Group2484: abra|OJJ71397.1 acar|OOF97772.1 acla|EAW10142.1 afis|EAW25451.1 afla|EED53938.1 afum|EAL90110.1 agla|OJJ87103.1 akaw|GAA82600.1 aluc|OJZ87145.1 anid|CBF77629.1 anig|EHA20404.1

aory|EIT78274.1 asyd|OJJ53128.1 ater|EAU34621.1 atub|OJI81496.1 aver|OJJ03726.1 awen|OJJ41182.1 azon|OJJ44758.1

Group2485: abra|OJJ71399.1 acar|OOF97771.1 acla|EAW10135.1 afis|EAW25452.1 afla|EED53940.1 afum|EAL90111.1 agla|OJJ87105.1 akaw|GAA82598.1 aluc|OJZ87143.1 anid|CBF77056.1 anig|EHA20403.1 aory|EIT78282.1 asyd|OJJ56993.1 ater|EAU34622.1 atub|OJI81498.1 aver|OJJ03294.1 awen|OJJ41184.1 azon|OJJ44760.1

Group2486: abra|OJJ71400.1 acar|OOF97770.1 acla|EAW10134.1 afis|EAW25453.1 afla|EED53941.1 afum|EAL90112.1 agla|OJJ87106.1 akaw|GAA82597.1 aluc|OJZ87142.1 anid|CBF77633.1 anig|EHA20402.1 aory|EIT78319.1 asyd|OJJ53126.1 ater|EAU34623.1 atub|OJI81500.1 aver|OJJ03728.1 awen|OJJ41185.1 azon|OJJ44761.1

Group2487: abra|OJJ71402.1 acar|OOF97768.1 acla|EAW10132.1 afis|EAW25455.1 afla|EED53944.1 afum|EAL90114.1 agla|OJJ87108.1 akaw|GAA82595.1 aluc|OJZ87139.1 anid|CBF77637.1 anig|EHA20398.1 aory|EIT78284.1 asyd|OJJ53124.1 ater|EAU34625.1 atub|OJI81502.1 aver|OJJ03730.1 awen|OJJ41187.1 azon|OJJ44763.1

Group2488: abra|OJJ71404.1 acar|OOF97767.1 acla|EAW10131.1 afis|EAW25456.1 afla|EED53945.1 afum|EAL90115.2 agla|OJJ87109.1 akaw|GAA82594.1 aluc|OJZ87138.1 anid|CBF77639.1 anig|EHA20397.1 aory|EIT78325.1 asyd|OJJ53123.1 ater|EAU34626.1 atub|OJI81503.1 aver|OJJ03731.1 awen|OJJ41188.1 azon|OJJ44764.1

Group2489: abra|OJJ71405.1 acar|OOF97766.1 acla|EAW10130.1 afis|EAW25457.1 afla|EED53946.1 afum|EAL90117.1 agla|OJJ87110.1 akaw|GAA82593.1 aluc|OJZ87137.1 anid|CBF77641.1 anig|EHA20396.1 aory|EIT78306.1 asyd|OJJ53122.1 ater|EAU34627.1 atub|OJI81504.1 aver|OJJ03732.1 awen|OJJ41189.1 azon|OJJ44767.1

Group2490: abra|OJJ71407.1 acar|OOF97764.1 acla|EAW10128.1 afis|EAW25459.1 afla|EED53948.1 afum|EAL90119.1 agla|OJJ87112.1 akaw|GAA82592.1 aluc|OJZ87135.1 anid|CBF77645.1 anig|EHA20394.1 aory|EIT78349.1 asyd|OJJ53120.1 ater|EAU34629.1 atub|OJI81507.1 aver|OJJ03734.1 awen|OJJ41191.1 azon|OJJ44768.1

Group2492: abra|OJJ71413.1 acar|OOF90159.1 acla|EAW10125.1 afis|EAW25463.1 afla|EED53955.1 afum|EAL90126.1 agla|OJJ87115.1 akaw|GAA82588.1 aluc|OJZ87128.1 anid|CBF77653.1 anig|EHA20389.1 aory|EIT78291.1 asyd|OJJ53114.1 ater|EAU34632.1 atub|OJI81512.1 aver|OJJ03741.1 awen|OJJ41200.1 azon|OJJ44771.1

Group2493: abra|OJJ71416.1 acar|OOF90160.1 acla|EAW10123.1 afis|EAW25464.1 afla|EED53958.1 afum|EAL90127.1 agla|OJJ87116.1 akaw|GAA82586.1 aluc|OJZ87124.1 anid|CBF77655.1 anig|EHA20387.1 aory|EIT78307.1 asyd|OJJ53115.1 ater|EAU34634.1 atub|OJI81516.1 aver|OJJ03740.1 awen|OJJ41201.1 azon|OJJ44774.1

Group2494: abra|OJJ71418.1 acar|OOF97758.1 acla|EAW10122.1 afis|EAW25465.1 afla|EED53960.1 afum|EAL90128.2 agla|OJJ87117.1 akaw|GAA82585.1 aluc|OJZ87122.1 anid|CBF77651.1 anig|EHA20386.1 aory|EIT78354.1 asyd|OJJ53117.1 ater|EAU34635.1 atub|OJI81519.1 aver|OJJ03737.1 awen|OJJ41205.1 azon|OJJ44775.1

Group2495: abra|OJJ71420.1 acar|OOF97757.1 acla|EAW10120.1 afis|EAW25467.1 afla|EED53963.1 afum|EAL90131.1 agla|OJJ87118.1 akaw|GAA82582.1 aluc|OJZ87118.1 anid|CBF77666.1 anig|EHA20384.1 aory|EIT78330.1 asyd|OJJ53102.1 ater|EAU34636.1 atub|OJI81522.1 aver|OJJ03751.1 awen|OJJ41206.1 azon|OJJ44777.1

Group2496: abra|OJJ71421.1 acar|OOF97756.1 acla|EAW10111.1 afis|EAW25476.1 afla|EED53964.1 afum|EAL90139.1 agla|OJJ87120.1 akaw|GAA82581.1 aluc|OJZ87117.1 anid|CBF77674.1 anig|EHA20383.1 aory|EIT78326.1 asyd|OJJ53091.1 ater|EAU34640.1 atub|OJI81523.1 aver|OJJ03755.1 awen|OJJ41207.1 azon|OJJ44779.1

Group2497: abra|OJJ71423.1 acar|OOF97755.1 acla|EAW10116.1 afis|EAW25471.1 afla|EED53968.1 afum|EAL90135.1 agla|OJJ87122.1 akaw|GAA82579.1 aluc|OJZ87115.1 anid|CBF77682.1 anig|EHA20381.1 aory|EIT78300.1 asyd|OJJ53088.1 ater|EAU34644.1 atub|OJI81525.1 aver|OJJ03758.1 awen|OJJ41212.1 azon|OJJ44793.1

Group2498: abra|OJJ71424.1 acar|OOF97754.1 acla|EAW10119.1 afis|EAW25470.1 afla|EED53969.1 afum|EAL90134.1 agla|OJJ87123.1 akaw|GAA82578.1 aluc|OJZ87114.1 anid|CBF77684.1 anig|EHA20380.1 aory|EIT78285.1 asyd|OJJ53087.1 ater|EAU34646.1 atub|OJI81526.1 aver|OJJ03759.1 awen|OJJ41213.1 azon|OJJ44792.1

Group2499: abra|OJJ71425.1 acar|OOF97753.1 acla|EAW10118.1 afis|EAW25469.1 afla|EED53970.1 afum|EAL90133.1 agla|OJJ87124.1 akaw|GAA82577.1 aluc|OJZ87113.1 anid|CBF77686.1 anig|EHA20379.1 aory|EIT78275.1 asyd|OJJ53086.1 ater|EAU34647.1 atub|OJI81527.1 aver|OJJ03760.1 awen|OJJ41214.1 azon|OJJ44791.1

Group2500: abra|OJJ71426.1 acar|OOF97752.1 acla|EAW10117.1 afis|EAW25468.1 afla|EED53971.1 afum|EAL90132.1 agla|OJJ87125.1 akaw|GAA82576.1 aluc|OJZ87112.1 anid|CBF77688.1 anig|EHA20378.1 aory|EIT78308.1 asyd|OJJ53085.1 ater|EAU34648.1 atub|OJI81528.1 aver|OJJ03761.1 awen|OJJ41215.1 azon|OJJ44790.1

Group2501: abra|OJJ71428.1 acar|OOF97750.1 acla|EAW10110.1 afis|EAW25477.1 afla|EED53972.1 afum|EAL90140.1 agla|OJJ87126.1 akaw|GAA82575.1 aluc|OJZ87110.1 anid|CBF77709.1 anig|EHA20377.1 aory|EIT78305.1 asyd|OJJ53077.1 ater|EAU34649.1 atub|OJI81529.1 aver|OJJ03771.1 awen|OJJ41216.1 azon|OJJ44789.1

Group2502: abra|OJJ71432.1 acar|OOF90401.1 acla|EAW10106.1 afis|EAW25481.1 afla|EED53979.1 afum|EAL90146.1 agla|OJJ87129.1 akaw|GAA82571.1 aluc|OJZ87106.1 anid|CBF77701.1 anig|EHA20374.1 aory|EIT78311.1 asyd|OJJ53072.1 ater|EAU34652.1 atub|OJI81532.1 aver|OJJ03773.1 awen|OJJ41222.1 azon|OJJ44785.1

Group2503: abra|OJJ71435.1 acar|OOF90399.1 acla|EAW10104.1 afis|EAW25483.1 afla|EED53981.1 afum|EAL90148.1 agla|OJJ87131.1 akaw|GAA82569.1 aluc|OJZ87103.1 anid|CBF77698.1 anig|EHA20372.1 aory|EIT78335.1 asyd|OJJ53070.1 ater|EAU34654.1 atub|OJI81535.1 aver|OJJ03775.1 awen|OJJ41224.1 azon|OJJ44783.1

Group2504: abra|OJJ71507.1 acar|OOF96261.1 acla|EAW15065.1 afis|EAW20037.1 afla|EED45343.1 afum|EAL85158.1 agla|OJJ88926.1 akaw|GAA89406.1 aluc|OJZ86246.1 anid|CBF84775.1 anig|EHA21618.1 aory|EIT73818.1 asyd|OJJ63238.1 ater|EAU38647.1 atub|OJI84296.1 aver|OJI97718.1 awen|OJJ31792.1 azon|OJJ46326.1

Group2505: abra|OJJ71542.1 acar|OOF96289.1 acla|EAW15096.1 afis|EAW20068.1 afla|EED45311.1 afum|EAL85186.1 agla|OJJ88892.1 akaw|GAA89380.1 aluc|OJZ86280.1 anid|CBF84825.1 anig|EHA21591.1 aory|EIT73564.1 asyd|OJJ63207.1 ater|EAU38674.1 atub|OJI84259.1 aver|OJI97748.1 awen|OJJ31827.1 azon|OJJ46297.1

Group2506: abra|OJJ71556.1 acar|OOF90418.1 acla|EAW15109.1 afis|EAW20080.1 afla|EED45295.1 afum|EAL85199.1 agla|OJJ88879.1 akaw|GAA89367.1 aluc|OJZ86293.1 anid|CBF84857.1 anig|EHA21578.1 aory|EIT73533.1 asyd|OJJ63194.1 ater|EAU38688.1 atub|OJI84243.1 aver|OJI97761.1 awen|OJJ31840.1 azon|OJJ46283.1

Group2507: abra|OJJ71560.1 acar|OOF90420.1 acla|EAW15112.1 afis|EAW20083.1 afla|EED45291.1 afum|EAL85202.1 agla|OJJ88875.1 akaw|GAA89364.1 aluc|OJZ86297.1 anid|CBF84871.1 anig|EHA21575.1 aory|EIT73626.1 asyd|OJJ63191.1 ater|EAU38691.1 atub|OJI84240.1 aver|OJI97765.1 awen|OJJ31843.1 azon|OJJ46280.1

Group2508: abra|OJJ71561.1 acar|OOF90421.1 acla|EAW15113.1 afis|EAW20084.1 afla|EED45290.1 afum|EAL85203.1 agla|OJJ88874.1 akaw|GAA89363.1 aluc|OJZ86298.1 anid|CBF84873.1 anig|EHA21574.1 aory|EIT73721.1 asyd|OJJ63190.1 ater|EAU38692.1 atub|OJI84239.1 aver|OJI97766.1 awen|OJJ31844.1 azon|OJJ46279.1

Group2509: abra|OJJ71562.1 acar|OOF96298.1 acla|EAW15114.1 afis|EAW20085.1 afla|EED45289.1 afum|EAL85204.1 agla|OJJ88873.1 akaw|GAA89362.1 aluc|OJZ86299.1 anid|CBF84875.1 anig|EHA21573.1 aory|EIT73546.1 asyd|OJJ63189.1 ater|EAU38693.1 atub|OJI84237.1 aver|OJI97767.1 awen|OJJ31845.1 azon|OJJ46278.1

Group2510: abra|OJJ71563.1 acar|OOF96299.1 acla|EAW15115.1 afis|EAW20086.1 afla|EED45288.1 afum|EAL85205.1 agla|OJJ88872.1 akaw|GAA89361.1 aluc|OJZ86300.1 anid|CBF84877.1 anig|EHA21572.1 aory|EIT73633.1 asyd|OJJ63188.1 ater|EAU38694.1 atub|OJI84236.1 aver|OJI97768.1 awen|OJJ31846.1 azon|OJJ46277.1

Group2511: abra|OJJ71568.1 acar|OOF96302.1 acla|EAW15118.1 afis|EAW20088.1 afla|EED45282.1 afum|EAL85207.1 agla|OJJ88868.1 akaw|GAA89356.1 aluc|OJZ86305.1 anid|CBF84880.1 anig|EHA21567.1 aory|EIT73561.1 asyd|OJJ63185.1 ater|EAU38697.1 atub|OJI84231.1 aver|OJI97770.1 awen|OJJ31849.1 azon|OJJ46274.1

Group2512: abra|OJJ71570.1 acar|OOF96303.1 acla|EAW15119.1 afis|EAW20089.1 afla|EED45281.1 afum|EAL85208.1 agla|OJJ88867.1 akaw|GAA89355.1 aluc|OJZ86307.1 anid|CBF84882.1 anig|EHA21566.1 aory|EIT73628.1 asyd|OJJ63184.1 ater|EAU38698.1 atub|OJI84229.1 aver|OJI97771.1 awen|OJJ31851.1 azon|OJJ46273.1

Group2513: abra|OJJ71573.1 acar|OOF96305.1 acla|EAW15122.1 afis|EAW20092.1 afla|EED45278.1 afum|EAL85211.1 agla|OJJ88862.1 akaw|GAA89351.1 aluc|OJZ86310.1 anid|CBF84897.1 anig|EHA21563.1 aory|EIT73632.1 asyd|OJJ63175.1 ater|EAU38701.1 atub|OJI84225.1 aver|OJI97779.1 awen|OJJ31855.1 azon|OJJ46270.1

Group2514: abra|OJJ71577.1 acar|OOF96306.1 acla|EAW15124.1 afis|EAW20094.1 afla|EED45276.1 afum|EAL85212.1 agla|OJJ88860.1 akaw|GAA89347.1 aluc|OJZ86314.1 anid|CBF84893.1 anig|EHA21561.1

aory|EIT73817.1 asyd|OJJ63177.1 ater|EAU38704.1 atub|OJI84221.1 aver|OJI97777.1 awen|OJJ31857.1  
azon|OJJ46268.1

Group2515: abra|OJJ71580.1 acar|OOF96310.1 acla|EAW15127.1 afis|EAW20097.1 afla|EED45273.1  
afum|EAL85215.1 agla|OJJ88857.1 akaw|GAA89344.1 aluc|OJZ86317.1 anid|CBF84888.1 anig|EHA21558.1  
aory|EIT73668.1 asyd|OJJ63180.1 ater|EAU38705.1 atub|OJI84218.1 aver|OJI97774.1 awen|OJJ31860.1  
azon|OJJ46265.1

Group2516: abra|OJJ71584.1 acar|OOF96314.1 acla|EAW15129.1 afis|EAW20101.1 afla|EED53372.1  
afum|EAL85218.1 agla|OJJ88854.1 akaw|GAA89339.1 aluc|OJZ86324.1 anid|CBF84901.1 anig|EHA21554.1  
aory|EIT74990.1 asyd|OJJ63172.1 ater|EAU38721.1 atub|OJI84210.1 aver|OJI97782.1 awen|OJJ31871.1  
azon|OJJ46263.1

Group2517: abra|OJJ71585.1 acar|OOF96315.1 acla|EAW15130.1 afis|EAW20102.1 afla|EED53371.1  
afum|EAL85219.1 agla|OJJ88853.1 akaw|GAA89338.1 aluc|OJZ86325.1 anid|CBF84903.1 anig|EHA21553.1  
aory|EIT75070.1 asyd|OJJ63171.1 ater|EAU38722.1 atub|OJI84209.1 aver|OJI97783.1 awen|OJJ31872.1  
azon|OJJ46262.1

Group2518: abra|OJJ71586.1 acar|OOF96316.1 acla|EAW15131.1 afis|EAW20103.1 afla|EED53370.1  
afum|EAL85220.1 agla|OJJ88851.1 akaw|GAA89337.1 aluc|OJZ86326.1 anid|CBF84905.1 anig|EHA21552.1  
aory|EIT75110.1 asyd|OJJ63170.1 ater|EAU38723.1 atub|OJI84208.1 aver|OJI97784.1 awen|OJJ31875.1  
azon|OJJ46260.1

Group2519: abra|OJJ71593.1 acar|OOF96321.1 acla|EAW15138.1 afis|EAW20110.1 afla|EED53362.1  
afum|EAL85227.1 agla|OJJ88842.1 akaw|GAA89330.1 aluc|OJZ86335.1 anid|CBF84919.1 anig|EHA21546.1  
aory|EIT74851.1 asyd|OJJ63164.1 ater|EAU38728.1 atub|OJI84200.1 aver|OJI97791.1 awen|OJJ31881.1  
azon|OJJ46253.1

Group2520: abra|OJJ71594.1 acar|OOF96322.1 acla|EAW15139.1 afis|EAW20111.1 afla|EED53361.1  
afum|EAL85228.2 agla|OJJ88841.1 akaw|GAA89329.1 aluc|OJZ86336.1 anid|CBF84921.1 anig|EHA21545.1  
aory|EIT75176.1 asyd|OJJ63163.1 ater|EAU38729.1 atub|OJI84199.1 aver|OJI97792.1 awen|OJJ31882.1  
azon|OJJ46252.1

Group2521: abra|OJJ71595.1 acar|OOF96323.1 acla|EAW15140.1 afis|EAW20112.1 afla|EED53360.1  
afum|EAL85229.1 agla|OJJ88840.1 akaw|GAA89328.1 aluc|OJZ86337.1 anid|CBF84923.1 anig|EHA21544.1  
aory|EIT75201.1 asyd|OJJ63162.1 ater|EAU38730.1 atub|OJI84198.1 aver|OJI97793.1 awen|OJJ31883.1  
azon|OJJ46251.1

Group2522: abra|OJJ71596.1 acar|OOF96324.1 acla|EAW15141.1 afis|EAW20113.1 afla|EED53357.1  
afum|EAL85230.1 agla|OJJ82514.1 akaw|GAA89327.1 aluc|OJZ86338.1 anid|CBF84924.1 anig|EHA21543.1  
aory|EIT75098.1 asyd|OJJ63161.1 ater|EAU38732.1 atub|OJI84197.1 aver|OJI97794.1 azon|OJJ46250.1  
awen|OJJ31884.1

Group2523: abra|OJJ71615.1 acar|OOF96331.1 acla|EAW15157.1 afis|EAW20125.1 afla|EED57251.1  
afum|EAL85243.1 agla|OJJ88822.1 akaw|GAA89312.1 aluc|OJZ86356.1 anid|CBF84949.1 anig|EHA21534.1  
aory|EIT74081.1 asyd|OJJ63147.1 ater|EAU38741.1 atub|OJI84178.1 aver|OJI97807.1 awen|OJJ31894.1  
azon|OJJ46242.1

Group2524: abra|OJJ71621.1 acar|OOF96338.1 acla|EAW15161.1 afis|EAW20130.1 afla|EED57222.1  
afum|EAL85246.1 agla|OJJ88805.1 akaw|GAA89305.1 aluc|OJZ86364.1 anid|CBF84956.1 anig|EHA21528.1  
aory|EIT74137.1 asyd|OJJ63143.1 ater|EAU38747.1 atub|OJI84170.1 aver|OJI97811.1 awen|OJJ31996.1  
azon|OJJ46051.1

Group2525: abra|OJJ71623.1 acar|OOF96340.1 acla|EAW15164.1 afis|EAW20133.1 afla|EED57219.1  
afum|EAL85249.1 agla|OJJ88802.1 akaw|GAA89302.1 aluc|OJZ86366.1 anid|CBF84962.1 anig|EHA21526.1  
aory|EIT74020.1 asyd|OJJ63140.1 ater|EAU38749.1 atub|OJI84168.1 aver|OJI97814.1 awen|OJJ32001.1  
azon|OJJ46054.1

Group2526: abra|OJJ71624.1 acar|OOF96341.1 acla|EAW15165.1 afis|EAW20134.1 afla|EED57218.1  
afum|EAL85250.1 agla|OJJ88801.1 akaw|GAA89301.1 aluc|OJZ86367.1 anid|CBF84964.1 anig|EHA21525.1  
aory|EIT74013.1 asyd|OJJ63139.1 ater|EAU38750.1 atub|OJI84167.1 aver|OJI97815.1 awen|OJJ32002.1  
azon|OJJ46055.1

Group2527: abra|OJJ71626.1 acar|OOF96343.1 acla|EAW15166.1 afis|EAW20135.1 afla|EED57217.1  
afum|EBA27225.1 agla|OJJ88799.1 akaw|GAA89300.1 aluc|OJZ86368.1 anid|CBF84965.1 anig|EHA21524.1  
aory|EIT73997.1 asyd|OJJ63138.1 ater|EAU38758.1 atub|OJI84166.1 aver|OJI97816.1 awen|OJJ32003.1  
azon|OJJ46056.1

Group2528: abra|OJJ71627.1 acar|OOF96345.1 acla|EAW15168.1 afis|EAW20137.1 afla|EED57212.1  
afum|EAL85252.1 agla|OJJ88798.1 akaw|GAA89298.1 aluc|OJZ86369.1 anid|CBF84968.1 anig|EHA21523.1  
aory|EIT74094.1 asyd|OJJ63136.1 ater|EAU38756.1 atub|OJI84165.1 aver|OJI97818.1 awen|OJJ32006.1  
azon|OJJ46058.1



Group2529: abra|OJJ71628.1 acar|OOF96346.1 acla|EAW15169.1 afis|EAW20138.1 afla|EED57210.1 afum|EAL85253.1 agla|OJJ88797.1 akaw|GAA89297.1 aluc|OJZ86370.1 anid|CBF84970.1 anig|EHA21522.1 aory|EIT74150.1 asyd|OJJ63135.1 ater|EAU38755.1 atub|OJI84164.1 aver|OJI97819.1 awen|OJJ32007.1 azon|OJJ46063.1

Group2530: abra|OJJ71630.1 acar|OOF96347.1 acla|EAW15172.1 afis|EAW20141.1 afla|EED57209.1 afum|EAL85256.1 agla|OJJ88791.1 akaw|GAA89295.1 aluc|OJZ86372.1 anid|CBF84973.1 anig|EHA21520.1 aory|EIT74038.1 asyd|OJJ63133.1 ater|EAU38753.1 atub|OJI84162.1 aver|OJI97821.1 awen|OJJ32010.1 azon|OJJ46079.1

Group2531: abra|OJJ71633.1 acar|OOF96350.1 acla|EAW15174.1 afis|EAW20143.1 afla|EED57205.1 afum|EAL85258.1 agla|OJJ88789.1 akaw|GAA89293.1 aluc|OJZ86376.1 anid|CBF84978.1 anig|EHA21518.1 aory|EIT74107.1 asyd|OJJ63130.1 atub|OJI84158.1 aver|OJI97824.1 awen|OJJ32013.1 azon|OJJ46076.1 ater|EAU38760.1

Group2532: abra|OJJ71637.1 acar|OOF96354.1 acla|EAW15177.1 afis|EAW20147.1 afla|EED57202.1 afum|EAL85262.1 agla|OJJ88786.1 akaw|GAA89289.1 aluc|OJZ86380.1 anid|CBF84980.1 anig|EHA21513.1 aory|EIT73995.1 asyd|OJJ63127.1 ater|EAU38763.1 atub|OJI84153.1 aver|OJI97828.1 awen|OJJ32021.1 azon|OJJ46069.1

Group2533: abra|OJJ71643.1 acar|OOF96359.1 acla|EAW15183.1 afis|EAW20153.1 afla|EED57197.1 afum|EAL85268.1 agla|OJJ88781.1 akaw|GAA89283.1 aluc|OJZ86386.1 anid|CBF84993.1 anig|EHA21509.1 aory|EIT74014.1 asyd|OJJ63121.1 ater|EAU38767.1 atub|OJI84147.1 aver|OJI97837.1 awen|OJJ32026.1 azon|OJJ46080.1

Group2534: abra|OJJ71649.1 acar|OOF96363.1 acla|EAW15186.1 afis|EAW20156.1 afla|EED57194.1 afum|EAL85271.1 agla|OJJ88774.1 akaw|GAA89280.1 aluc|OJZ86393.1 anid|CBF84998.1 anig|EHA21505.1 aory|EIT74147.1 asyd|OJJ63118.1 ater|EAU38770.1 atub|OJI84140.1 aver|OJI97841.1 awen|OJJ32031.1 azon|OJJ46083.1

Group2535: abra|OJJ71655.1 acar|OOF96369.1 acla|EAW15192.1 afis|EAW20161.1 afla|EED57187.1 afum|EAL85279.1 agla|OJJ88769.1 akaw|GAA89274.1 aluc|OJZ86401.1 anid|CBF85009.1 anig|EHA21499.1 aory|EIT74084.1 asyd|OJJ63112.1 ater|EAU38778.1 atub|OJI84134.1 aver|OJI97847.1 awen|OJJ32056.1 azon|OJJ46090.1

Group2536: abra|OJJ71656.1 acar|OOF96370.1 acla|EAW15194.1 afis|EAW20163.1 afla|EED57186.1 afum|EAL85281.1 agla|OJJ88767.1 akaw|GAA89273.1 aluc|OJZ86402.1 anid|CBF85011.1 anig|EHA21498.1 aory|EIT74088.1 asyd|OJJ63111.1 ater|EAU38794.1 atub|OJI84133.1 aver|OJI97849.1 awen|OJJ32058.1 azon|OJJ46092.1

Group2537: abra|OJJ71663.1 acar|OOF96373.1 acla|EAW15199.1 afis|EAW20165.1 afla|EED57183.1 afum|EAL85283.1 agla|OJJ88764.1 akaw|GAA89270.1 aluc|OJZ86405.1 anid|CBF85022.1 anig|EHA21494.1 aory|EIT74158.1 asyd|OJJ63107.1 ater|EAU38797.1 atub|OJI84126.1 aver|OJI97854.1 awen|OJJ32062.1 azon|OJJ46095.1

Group2538: abra|OJJ71665.1 acar|OOF96375.1 acla|EAW15202.1 afis|EAW20167.1 afla|EED57181.1 afum|EAL85285.1 agla|OJJ88762.1 akaw|GAA89268.1 aluc|OJZ86407.1 anid|CBF85019.1 anig|EHA21492.1 aory|EIT74007.1 asyd|OJJ63105.1 ater|EAU38799.1 atub|OJI84124.1 aver|OJI97856.1 awen|OJJ32064.1 azon|OJJ46097.1

Group2539: abra|OJJ71668.1 acar|OOF96380.1 acla|EAW15208.1 afis|EAW20173.1 afla|EED57175.1 afum|EAL85291.1 agla|OJJ88757.1 akaw|GAA89263.1 aluc|OJZ86411.1 anid|CBF85031.1 anig|EHA21488.1 aory|EIT74021.1 asyd|OJJ63101.1 ater|EAU35209.1 atub|OJI84120.1 aver|OJI97861.1 awen|OJJ32068.1 azon|OJJ46101.1

Group2540: abra|OJJ71670.1 acar|OOF96382.1 acla|EAW15210.1 afis|EAW20175.1 afla|EED57173.1 afum|EAL85293.1 agla|OJJ84691.1 akaw|GAA89261.1 aluc|OJZ86413.1 anid|CBF85035.1 anig|EHA21486.1 aory|EIT73987.1 asyd|OJJ63099.1 ater|EAU35211.1 atub|OJI84118.1 aver|OJI97863.1 awen|OJJ31174.1 azon|OJJ46104.1

Group2541: abra|OJJ71671.1 acar|OOF96383.1 acla|EAW15211.1 afis|EAW20176.1 afla|EED57172.1 afum|EAL85294.1 agla|OJJ84690.1 akaw|GAA89260.1 aluc|OJZ86414.1 anid|CBF85037.1 anig|EHA21485.1 aory|EIT73964.1 asyd|OJJ63098.1 ater|EAU35212.1 atub|OJI84117.1 aver|OJI97864.1 awen|OJJ31175.1 azon|OJJ46105.1

Group2542: abra|OJJ71672.1 acar|OOF96384.1 acla|EAW15212.1 afis|EAW20177.1 afla|EED57171.1 afum|EAL85295.1 agla|OJJ84689.1 akaw|GAA89259.1 aluc|OJZ86415.1 anid|CBF85039.1 anig|EHA21484.1 aory|EIT74066.1 asyd|OJJ63097.1 ater|EAU35213.1 atub|OJI84116.1 aver|OJI97865.1 awen|OJJ31176.1 azon|OJJ46106.1

Group2543: abra|OJJ71675.1 acar|OOF96386.1 acla|EAW15214.1 afis|EAW20179.1 afla|EED57169.1 afum|EAL85297.1 agla|OJJ84687.1 akaw|GAA89257.1 aluc|OJZ86417.1 anid|CBF85042.1 anig|EHA21482.1

aory|EIT74151.1 asyd|OJJ63095.1 ater|EAU35215.1 atub|OJI84114.1 aver|OJI97867.1 awen|OJJ31178.1 azon|OJJ46109.1

Group2544: abra|OJJ71676.1 acar|OOF96387.1 acla|EAW15215.1 afis|EAW20180.1 afla|EED57168.1 afum|EAL85298.1 agla|OJJ84686.1 akaw|GAA89256.1 aluc|OJZ86418.1 anid|CBF85044.1 anig|EHA21481.1 aory|EIT73991.1 asyd|OJJ63094.1 ater|EAU35216.1 atub|OJI84113.1 aver|OJI97868.1 awen|OJJ31179.1 azon|OJJ46110.1

Group2545: abra|OJJ71677.1 acar|OOF96388.1 acla|EAW15216.1 afis|EAW20181.1 afla|EED57167.1 afum|EAL85299.1 agla|OJJ84685.1 akaw|GAA89255.1 aluc|OJZ86419.1 anid|CBF85046.1 anig|EHA21480.1 aory|EIT74127.1 asyd|OJJ63093.1 ater|EAU35217.1 atub|OJI84112.1 aver|OJI97869.1 awen|OJJ31180.1 azon|OJJ46111.1

Group2546: abra|OJJ71678.1 acar|OOF96389.1 acla|EAW15217.1 afis|EAW20182.1 afla|EED57166.1 afum|EAL85300.1 agla|OJJ84684.1 akaw|GAA89254.1 aluc|OJZ86420.1 anid|CBF85048.1 anig|EHA21479.1 aory|EIT74003.1 asyd|OJJ63092.1 ater|EAU35218.1 atub|OJI84111.1 aver|OJI97870.1 awen|OJJ31181.1 azon|OJJ46112.1

Group2547: abra|OJJ71679.1 acar|OOF96390.1 acla|EAW15218.1 afis|EAW20183.1 afla|EED57165.1 afum|EAL85301.1 agla|OJJ84683.1 akaw|GAA89253.1 aluc|OJZ86421.1 anid|CBF85050.1 anig|EHA21478.1 aory|EIT74002.1 asyd|OJJ63091.1 ater|EAU35219.1 atub|OJI84110.1 aver|OJI97871.1 awen|OJJ31182.1 azon|OJJ46113.1

Group2548: abra|OJJ71682.1 acar|OOF96393.1 acla|EAW15221.1 afis|EAW20186.1 afla|EED57164.1 afum|EAL85305.1 agla|OJJ84680.1 akaw|GAA89250.1 aluc|OJZ86424.1 anid|CBF85054.1 anig|EHA21474.1 aory|EIT74048.1 asyd|OJJ63088.1 ater|EAU35222.1 atub|OJI84107.1 aver|OJI97874.1 awen|OJJ31186.1 azon|OJJ46116.1

Group2549: abra|OJJ71685.1 acar|OOF96395.1 acla|EAW15223.1 afis|EAW20188.1 afla|EED57158.1 afum|EAL85307.1 agla|OJJ84678.1 akaw|GAA89248.1 aluc|OJZ86427.1 anid|CBF85058.1 anig|EHA21472.1 aory|EIT73974.1 asyd|OJJ63086.1 ater|EAU35223.1 atub|OJI84104.1 aver|OJI97876.1 awen|OJJ31188.1 azon|OJJ46118.1

Group2550: abra|OJJ71686.1 acar|OOF96396.1 acla|EAW15224.1 afis|EAW20189.1 afla|EED57157.1 afum|EAL85308.1 agla|OJJ84677.1 akaw|GAA89247.1 aluc|OJZ86428.1 anid|CBF85060.1 anig|EHA21471.1 aory|EIT74135.1 asyd|OJJ63085.1 ater|EAU35224.1 atub|OJI84103.1 aver|OJI97877.1 awen|OJJ31189.1 azon|OJJ46119.1

Group2551: abra|OJJ71687.1 acar|OOF96397.1 acla|EAW15225.1 afis|EAW20190.1 afla|EED57156.1 afum|EAL85309.1 agla|OJJ84676.1 akaw|GAA89246.1 aluc|OJZ86429.1 anid|CBF85062.1 anig|EHA21470.1 aory|EIT74033.1 asyd|OJJ63084.1 ater|EAU35225.1 atub|OJI84102.1 aver|OJI97879.1 awen|OJJ31190.1 azon|OJJ46124.1

Group2552: abra|OJJ71689.1 acar|OOF96398.1 acla|EAW15226.1 afis|EAW20191.1 afla|EED57155.1 afum|EAL85310.1 agla|OJJ84675.1 akaw|GAA89245.1 aluc|OJZ86431.1 anid|CBF85064.1 anig|EHA21469.1 aory|EIT74046.1 asyd|OJJ63083.1 ater|EAU35226.1 atub|OJI84100.1 aver|OJI97881.1 awen|OJJ31196.1 azon|OJJ46120.1

Group2553: abra|OJJ71691.1 acar|OOF96399.1 acla|EAW15228.1 afis|EAW20192.1 afla|EED57152.1 afum|EAL85312.2 agla|OJJ84673.1 akaw|GAA89244.1 aluc|OJZ86435.1 anid|CBF85065.1 anig|EHA21468.1 aory|EIT74165.1 asyd|OJJ63082.1 ater|EAU32000.1 atub|OJI84095.1 aver|OJI97882.1 awen|OJJ31197.1 azon|OJJ46125.1

Group2554: abra|OJJ71692.1 acar|OOF96400.1 acla|EAW15229.1 afis|EAW20193.1 afla|EED57151.1 afum|EAL85313.1 agla|OJJ84672.1 akaw|GAA89243.1 aluc|OJZ86436.1 anid|CBF85067.1 anig|EHA21467.1 aory|EIT74001.1 asyd|OJJ63081.1 ater|EAU32001.1 atub|OJI84094.1 aver|OJI97883.1 awen|OJJ31198.1 azon|OJJ46126.1

Group2555: abra|OJJ71693.1 acar|OOF96402.1 acla|EAW15230.1 afis|EAW20194.1 afla|EED57150.1 afum|EAL85314.1 agla|OJJ84671.1 akaw|GAA89242.1 aluc|OJZ86437.1 anid|CBF85069.1 anig|EHA21466.1 aory|EIT74019.1 asyd|OJJ63080.1 ater|EAU32002.1 atub|OJI84093.1 aver|OJI97884.1 awen|OJJ31199.1 azon|OJJ46127.1

Group2556: abra|OJJ71697.1 acar|OOF96405.1 acla|EAW15233.1 afis|EAW20197.1 afla|EED57147.1 afum|EAL85317.1 agla|OJJ84668.1 akaw|GAA89238.1 aluc|OJZ86440.1 anid|CBF85078.1 anig|EHA21461.1 aory|EIT74146.1 asyd|OJJ63076.1 ater|EAU32005.1 atub|OJI84088.1 aver|OJI97888.1 awen|OJJ31203.1 azon|OJJ46128.1

Group2557: abra|OJJ71699.1 acar|OOF96407.1 acla|EAW15235.1 afis|EAW20199.1 afla|EED57145.1 afum|EAL85319.1 agla|OJJ84666.1 akaw|GAA89236.1 aluc|OJZ86442.1 anid|CBF85082.1 anig|EHA21459.1 aory|EIT74005.1 asyd|OJJ63073.1 ater|EAU32007.1 atub|OJI84086.1 aver|OJI97890.1 awen|OJJ31205.1 azon|OJJ41971.1

Group2558: abra|OJJ71700.1 acar|OOF96408.1 acla|EAW15236.1 afis|EAW20200.1 afla|EED57144.1 afum|EAL85320.1 agla|OJJ84665.1 akaw|GAA89235.1 aluc|OJZ86443.1 anid|CBF85084.1 anig|EHA21458.1 aory|EIT74097.1 asyd|OJJ63072.1 ater|EAU32008.1 atub|OJI84085.1 aver|OJI97891.1 awen|OJJ31206.1 azon|OJJ46130.1

Group2559: abra|OJJ71701.1 acar|OOF96409.1 acla|EAW15237.1 afis|EAW20201.1 afla|EED57143.1 afum|EAL85321.1 agla|OJJ84663.1 akaw|GAA89234.1 aluc|OJZ86444.1 anid|CBF85085.1 anig|EHA21457.1 aory|EIT73998.1 asyd|OJJ63070.1 ater|EAU32009.1 atub|OJI84084.1 aver|OJI97892.1 awen|OJJ31207.1 azon|OJJ46131.1

Group2560: abra|OJJ71705.1 acar|OOF96415.1 afis|EAW20206.1 afla|EED57137.1 afum|EAL85324.1 agla|OJJ84661.1 akaw|GAA89232.1 aluc|OJZ86447.1 anig|EHA21454.1 aory|EIT74126.1 asyd|OJJ63064.1 ater|EAU32017.1 atub|OJI84081.1 aver|OJI97897.1 awen|OJJ31210.1 acla|EAW15239.1 anid|CBF85093.1 azon|OJJ46134.1

Group2561: abra|OJJ71714.1 acar|OOF96419.1 acla|EAW06442.1 afis|EAW18547.1 afla|EED52833.1 afum|EAL93247.1 agla|OJJ81584.1 akaw|GAA85175.1 aluc|OJZ86459.1 anid|CBF70177.1 anig|EHA21449.1 aory|EIT78161.1 asyd|OJJ58793.1 ater|EAU30022.1 atub|OJI84068.1 aver|OJJ01397.1 awen|OJJ31099.1 azon|OJJ46565.1

Group2562: abra|OJJ71715.1 acar|OOF96420.1 acla|EAW06441.1 afis|EAW18546.1 afla|EED52832.1 afum|EAL93246.1 agla|OJJ81587.1 akaw|GAA85174.1 aluc|OJZ86461.1 anid|CBF70265.1 anig|EHA21448.1 aory|EIT78207.1 asyd|OJJ58750.1 ater|EAU34832.1 atub|OJI84067.1 aver|OJJ01360.1 awen|OJJ31100.1 azon|OJJ46562.1

Group2563: abra|OJJ71716.1 acar|OOF96421.1 acla|EAW06440.1 afis|EAW18545.1 afla|EED52831.1 afum|EAL93245.1 agla|OJJ81589.1 akaw|GAA85173.1 aluc|OJZ86462.1 anid|CBF70267.1 anig|EHA21447.1 aory|EIT78194.1 asyd|OJJ58749.1 ater|EAU34833.1 atub|OJI84066.1 aver|OJJ01359.1 awen|OJJ31101.1 azon|OJJ46561.1

Group2564: abra|OJJ71719.1 acar|OOF96423.1 acla|EAW06439.1 afis|EAW18543.1 afla|EED52829.1 afum|EAL93243.1 agla|OJJ81591.1 akaw|GAA85171.1 aluc|OJZ86465.1 anid|CBF70269.1 anig|EHA21445.1 aory|EIT78205.1 asyd|OJJ58748.1 ater|EAU34834.1 atub|OJI84064.1 aver|OJJ01358.1 awen|OJJ31103.1 azon|OJJ46558.1

Group2565: abra|OJJ71720.1 acar|OOF96425.1 acla|EAW06444.1 afis|EAW18549.1 afla|EED52828.1 afum|EAL93249.1 agla|OJJ81592.1 akaw|GAA85170.1 aluc|OJZ86466.1 anid|CBF70271.1 anig|EHA21444.1 aory|EIT78197.1 asyd|OJJ58747.1 ater|EAU34836.1 atub|OJI84063.1 aver|OJJ01357.1 awen|OJJ31105.1 azon|OJJ46557.1

Group2566: abra|OJJ71742.1 acar|OOF96433.1 acla|EAW06446.1 afis|EAW18551.1 afla|EED52823.1 afum|EAL93251.1 agla|OJJ81605.1 akaw|GAA85156.1 aluc|OJZ86481.1 anid|CBF70277.1 anig|EHA22164.1 aory|EIT78237.1 asyd|OJJ58744.1 ater|EAU34839.1 atub|OJI84049.1 aver|OJJ01354.1 awen|OJJ31111.1 azon|OJJ46587.1

Group2567: abra|OJJ71745.1 acar|OOF96436.1 acla|EAW06449.1 afis|EAW18553.1 afla|EED52822.1 afum|EAL93253.1 agla|OJJ81603.1 akaw|GAA85159.1 aluc|OJZ86478.1 anid|CBF70280.1 anig|EHA22162.1 aory|EIT78230.1 asyd|OJJ58741.1 ater|EAU34841.1 atub|OJI84052.1 aver|OJJ01351.1 awen|OJJ31114.1 azon|OJJ46590.1

Group2568: abra|OJJ71803.1 acar|OOF96483.1 acla|EAW13844.1 afis|EAW18558.1 afla|EED52808.1 afum|EAL93258.1 agla|OJJ81601.1 akaw|GAA85107.1 aluc|OJZ86533.1 anid|CBF70286.1 anig|EHA22113.1 aory|EIT78195.1 asyd|OJJ58737.1 ater|EAU34847.1 atub|OJI83988.1 aver|OJJ01348.1 awen|OJJ31116.1 azon|OJJ46596.1

Group2569: abra|OJJ71806.1 acar|OOF96484.1 acla|EAW13845.1 afis|EAW18559.1 afla|EED52807.1 afum|EAL93259.1 agla|OJJ81600.1 akaw|GAA85106.1 aluc|OJZ86536.1 anid|CBF70288.1 anig|EHA22112.1 aory|EIT78169.1 asyd|OJJ58735.1 ater|EAU34848.1 atub|OJI83987.1 aver|OJJ01347.1 awen|OJJ31117.1 azon|OJJ46595.1

Group2570: abra|OJJ71809.1 acar|OOF96487.1 acla|EAW13848.1 afis|EAW18562.1 afla|EED52792.1 afum|EAL93263.1 agla|OJJ81609.1 akaw|GAA85103.1 aluc|OJZ86539.1 anid|CBF70294.1 anig|EHA22110.1 aory|EIT78177.1 asyd|OJJ58732.1 ater|EAU34850.1 atub|OJI83984.1 aver|OJJ01344.1 awen|OJJ31120.1 azon|OJJ46597.1

Group2571: abra|OJJ71810.1 acar|OOF96488.1 acla|EAW13849.1 afis|EAW18563.1 afla|EED52791.1 afum|EAL93265.2 agla|OJJ81612.1 akaw|GAA85102.1 aluc|OJZ86541.1 anid|CBF70298.1 anig|EHA22109.1 aory|EIT78239.1 asyd|OJJ58730.1 ater|EAU34851.1 atub|OJI83982.1 aver|OJJ01343.1 awen|OJJ31121.1 azon|OJJ46602.1

Group2572: abra|OJJ71811.1 acar|OOF96489.1 acla|EAW13850.1 afis|EAW18564.1 afla|EED52790.1 afum|EAL93266.1 agla|OJJ81613.1 akaw|GAA85101.1 aluc|OJZ86542.1 anid|CBF70300.1 anig|EHA22108.1

aory|EIT78209.1 asyd|OJJ58729.1 ater|EAU34852.1 atub|OJI83981.1 aver|OJJ01342.1 awen|OJJ31122.1 azon|OJJ46603.1

Group2573: abra|OJJ71813.1 acar|OOF96491.1 acla|EAW13853.1 afis|EAW18567.1 afla|EED52786.1 afum|EAL93269.2 agla|OJJ81616.1 akaw|GAA85097.1 aluc|OJZ86546.1 anid|CBF70305.1 anig|EHA22104.1 aory|EIT78200.1 asyd|OJJ58726.1 ater|EAU34854.1 atub|OJI83977.1 aver|OJJ01339.1 awen|OJJ31124.1 azon|OJJ46605.1

Group2574: abra|OJJ71816.1 acar|OOF96493.1 acla|EAW13856.1 afis|EAW18570.1 afla|EED52781.1 afum|EAL93273.1 agla|OJJ81621.1 akaw|GAA85094.1 aluc|OJZ86548.1 anid|CBF70311.1 anig|EHA22101.1 aory|EIT78224.1 asyd|OJJ58723.1 ater|EAU34855.1 atub|OJI83974.1 aver|OJJ01336.1 awen|OJJ31127.1 azon|OJJ46608.1

Group2575: abra|OJJ71817.1 acar|OOF96494.1 acla|EAW13857.1 afis|EAW18571.1 afla|EED52780.1 afum|EAL93274.1 agla|OJJ81622.1 akaw|GAA85093.1 aluc|OJZ86549.1 anid|CBF70313.1 anig|EHA22100.1 aory|EIT78222.1 asyd|OJJ58722.1 ater|EAU34856.1 atub|OJI83973.1 aver|OJJ01335.1 awen|OJJ31128.1 azon|OJJ46609.1

Group2576: abra|OJJ71818.1 acar|OOF96495.1 acla|EAW13860.1 afis|EAW18572.1 afla|EED52776.1 afum|EAL93275.1 agla|OJJ81623.1 akaw|GAA85092.1 aluc|OJZ86550.1 anid|CBF70315.1 anig|EHA22099.1 aory|EIT78170.1 asyd|OJJ58721.1 ater|EAU34857.1 atub|OJI83972.1 aver|OJJ01334.1 awen|OJJ31129.1 azon|OJJ46610.1

Group2577: abra|OJJ71819.1 acar|OOF96496.1 acla|EAW13861.1 afis|EAW18573.1 afla|EED52775.1 afum|EAL93276.1 agla|OJJ81624.1 akaw|GAA85091.1 aluc|OJZ86551.1 anid|CBF70317.1 anig|EHA22098.1 aory|EIT78219.1 asyd|OJJ58720.1 ater|EAU34858.1 atub|OJI83971.1 aver|OJJ01333.1 awen|OJJ31130.1 azon|OJJ46611.1

Group2578: abra|OJJ71820.1 acar|OOF96497.1 acla|EAW13862.1 afis|EAW18574.1 afla|EED52774.1 afum|EAL93277.1 agla|OJJ81625.1 akaw|GAA85090.1 aluc|OJZ86552.1 anid|CBF70319.1 anig|EHA22097.1 aory|EIT78236.1 asyd|OJJ58719.1 ater|EAU34869.1 atub|OJI83970.1 aver|OJJ01332.1 awen|OJJ31131.1 azon|OJJ46612.1

Group2579: abra|OJJ71821.1 acar|OOF96498.1 acla|EAW13863.1 afis|EAW18575.1 afla|EED52773.1 afum|EAL93278.1 agla|OJJ81626.1 akaw|GAA85089.1 aluc|OJZ86553.1 anid|CBF70320.1 anig|EHA22096.1 aory|EIT78159.1 asyd|OJJ58718.1 ater|EAU34868.1 atub|OJI83969.1 aver|OJJ01331.1 awen|OJJ31132.1 azon|OJJ46613.1

Group2580: abra|OJJ71823.1 acar|OOF96499.1 acla|EAW13864.1 afis|EAW18576.1 afla|EED52772.1 afum|EAL93279.1 agla|OJJ81627.1 akaw|GAA85087.1 aluc|OJZ86555.1 anid|CBF70322.1 anig|EHA22094.1 aory|EIT78160.1 asyd|OJJ58717.1 ater|EAU34867.1 atub|OJI83967.1 aver|OJJ01330.1 awen|OJJ31133.1 azon|OJJ46614.1

Group2581: abra|OJJ71824.1 acar|OOF96500.1 acla|EAW13865.1 afis|EAW18577.1 afla|EED52771.1 afum|EAL93280.1 agla|OJJ81628.1 akaw|GAA85086.1 aluc|OJZ86556.1 anid|CBF70324.1 anig|EHA22093.1 aory|EIT78235.1 asyd|OJJ58716.1 ater|EAU34866.1 atub|OJI83966.1 aver|OJJ01329.1 awen|OJJ31134.1 azon|OJJ46615.1

Group2582: abra|OJJ71829.1 acar|OOF96505.1 acla|EAW13866.1 afis|EAW18578.1 afla|EED52770.1 afum|EAL93281.1 agla|OJJ81629.1 akaw|GAA85082.1 aluc|OJZ86561.1 anid|CBF70354.1 anig|EHA22089.1 aory|EIT78184.1 asyd|OJJ58657.1 ater|EAU34861.1 atub|OJI83960.1 aver|OJJ01265.1 awen|OJJ31135.1 azon|OJJ46616.1

Group2583: abra|OJJ71837.1 acar|OOF90146.1 acla|EAW13868.1 afis|EAW18580.1 afla|EED52766.1 afum|EAL93284.1 agla|OJJ81631.1 akaw|GAA85078.1 aluc|OJZ86568.1 anid|CBF70360.1 anig|EHA22086.1 aory|EIT78154.1 asyd|OJJ58653.1 ater|EAU34873.1 atub|OJI83953.1 aver|OJJ01262.1 awen|OJJ31143.1 azon|OJJ46619.1

Group2584: abra|OJJ71840.1 acar|OOF90149.1 acla|EAW13871.1 afis|EAW18582.1 afla|EED52762.1 afum|EAL93286.1 agla|OJJ81634.1 akaw|GAA85077.1 aluc|OJZ86573.1 anid|CBF70362.1 anig|EHA22084.1 aory|EIT78249.1 asyd|OJJ58652.1 ater|EAU34876.1 atub|OJI83950.1 aver|OJJ01258.1 awen|OJJ31146.1 azon|OJJ46621.1

Group2585: abra|OJJ71842.1 acar|OOF96511.1 acla|EAW13873.1 afis|EAW18585.1 afla|EED52761.1 afum|EAL93289.1 agla|OJJ81636.1 akaw|GAA85075.1 aluc|OJZ86575.1 anid|CBF70366.1 anig|EHA22082.1 aory|EIT78178.1 asyd|OJJ58650.1 ater|EAU34878.1 atub|OJI83948.1 aver|OJJ01256.1 awen|OJJ31148.1 azon|OJJ46623.1

Group2586: abra|OJJ71843.1 acar|OOF96512.1 acla|EAW13874.1 afis|EAW18586.1 afla|EED52760.1 afum|EAL93290.1 agla|OJJ81637.1 akaw|GAA85074.1 aluc|OJZ86576.1 anid|CBF70370.1 anig|EHA22081.1 aory|EIT78214.1 asyd|OJJ58649.1 ater|EAU34879.1 atub|OJI83946.1 aver|OJJ01255.1 awen|OJJ31149.1 azon|OJJ46624.1

Group2587: abra|OJJ71844.1 acar|OOF96513.1 acla|EAW13875.1 afis|EAW18587.1 afla|EED52759.1  
afum|EAL93294.2 agla|OJJ81638.1 akaw|GAA85073.1 aluc|OJZ86577.1 anid|CBF70372.1 anig|EHA22080.1  
aory|EIT78199.1 asyd|OJJ58648.1 ater|EAU34880.1 atub|OJI83945.1 aver|OJJ01254.1 awen|OJJ31150.1  
azon|OJJ46625.1

Group2588: abra|OJJ71845.1 acar|OOF96514.1 acla|EAW13876.1 afis|EAW18588.1 afla|EED52758.1  
afum|EAL93295.2 agla|OJJ81640.1 akaw|GAA85072.1 aluc|OJZ86578.1 anid|CBF70374.1 anig|EHA22079.1  
aory|EIT78218.1 asyd|OJJ58647.1 ater|EAU34881.1 atub|OJI83944.1 aver|OJJ01253.1 awen|OJJ31151.1  
azon|OJJ46626.1

Group2589: abra|OJJ71846.1 acar|OOF96515.1 acla|EAW13877.1 afis|EAW18589.1 afla|EED52757.1  
afum|EAL93296.2 agla|OJJ81641.1 akaw|GAA85071.1 aluc|OJZ86579.1 anid|CBF70375.1 anig|EHA22078.1  
aory|EIT78231.1 asyd|OJJ58646.1 ater|EAU34882.1 atub|OJI83943.1 aver|OJJ01252.1 awen|OJJ31152.1  
azon|OJJ46627.1

Group2590: abra|OJJ71851.1 acar|OOF96521.1 acla|EAW13883.1 afis|EAW18595.1 afla|EED52752.1  
afum|EAL93303.1 agla|OJJ81647.1 akaw|GAA85066.1 aluc|OJZ86585.1 anid|CBF70391.1 anig|EHA22075.1  
aory|EIT78172.1 asyd|OJJ58636.1 ater|EAU34889.1 atub|OJI83938.1 aver|OJJ01242.1 awen|OJJ31158.1  
azon|OJJ46633.1

Group2591: abra|OJJ71854.1 acar|OOF96524.1 acla|EAW13886.1 afis|EAW18598.1 afla|EED52749.1  
afum|EAL93306.1 agla|OJJ81651.1 akaw|GAA85063.1 aluc|OJZ86588.1 anid|CBF70397.1 anig|EHA22072.1  
aory|EIT78201.1 asyd|OJJ58633.1 ater|EAU34892.1 atub|OJI83935.1 aver|OJJ01239.1 awen|OJJ31161.1  
azon|OJJ46637.1

Group2592: abra|OJJ71855.1 acar|OOF96525.1 acla|EAW13887.1 afis|EAW18599.1 afla|EED52748.1  
afum|EAL93307.1 agla|OJJ81652.1 akaw|GAA85062.1 aluc|OJZ86589.1 anid|CBF70399.1 anig|EHA22071.1  
aory|EIT78171.1 asyd|OJJ58632.1 ater|EAU34893.1 atub|OJI83934.1 aver|OJJ01238.1 awen|OJJ31162.1  
azon|OJJ46638.1

Group2593: abra|OJJ71857.1 acar|OOF96527.1 acla|EAW13889.1 afis|EAW18601.1 afla|EED52746.1  
afum|EAL93309.1 agla|OJJ81653.1 akaw|GAA85060.1 aluc|OJZ86591.1 anid|CBF70403.1 anig|EHA22069.1  
aory|EIT78188.1 asyd|OJJ58630.1 ater|EAU34895.1 atub|OJI83932.1 aver|OJJ01236.1 awen|OJJ31166.1  
azon|OJJ46640.1

Group2594: abra|OJJ71858.1 acar|OOF96528.1 acla|EAW13890.1 afis|EAW18602.1 afla|EED52745.1  
afum|EAL93310.1 agla|OJJ81654.1 akaw|GAA85059.1 aluc|OJZ86592.1 anid|CBF70405.1 anig|EHA22068.1  
aory|EIT78217.1 asyd|OJJ58629.1 ater|EAU34896.1 atub|OJI83931.1 aver|OJJ01235.1 awen|OJJ31167.1  
azon|OJJ46641.1

Group2595: abra|OJJ71861.1 acar|OOF96533.1 acla|EAW13892.1 afis|EAW18604.1 afla|EED52743.1  
afum|EAL93312.1 agla|OJJ81656.1 akaw|GAA85054.1 aluc|OJZ86598.1 anid|CBF70409.1 anig|EHA22064.1  
aory|EIT78243.1 asyd|OJJ58627.1 ater|EAU34899.1 atub|OJI83925.1 aver|OJJ01233.1 awen|OJJ31170.1  
azon|OJJ46647.1

Group2596: abra|OJJ71864.1 acar|OOF96534.1 acla|EAW13894.1 afis|EAW18606.1 afla|EED52740.1  
afum|EBA27488.1 agla|OJJ81660.1 akaw|GAA85052.1 aluc|OJZ86601.1 anig|EHA22062.1 aory|EIT78163.1  
ater|EAU34901.1 atub|OJI83922.1 awen|OJJ31172.1 azon|OJJ46649.1 anid|CBF70412.1 asyd|OJJ58625.1  
aver|OJJ01231.1

Group2597: abra|OJJ71865.1 acar|OOF96535.1 acla|EAW13895.1 afis|EAW18607.1 afla|EED52739.1  
afum|EAL93317.1 agla|OJJ81666.1 akaw|GAA85051.1 aluc|OJZ86602.1 anid|CBF70414.1 anig|EHA22061.1  
aory|EIT78220.1 asyd|OJJ58624.1 ater|EAU34902.1 atub|OJI83921.1 aver|OJJ01230.1 awen|OJJ31173.1  
azon|OJJ46650.1

Group2598: abra|OJJ71866.1 acar|OOF96536.1 acla|EAW13896.1 afis|EAW18608.1 afla|EED52738.1  
afum|EAL93318.1 agla|OJJ81665.1 akaw|GAA85049.1 aluc|OJZ86603.1 anid|CBF70416.1 anig|EHA22060.1  
aory|EIT78223.1 asyd|OJJ58623.1 ater|EAU34903.1 atub|OJI83920.1 aver|OJJ01229.1 awen|OJJ32069.1  
azon|OJJ46651.1

Group2599: abra|OJJ71869.1 acar|OOF96540.1 acla|EAW13899.1 afis|EAW18611.1 afla|EED52736.1  
afum|EAL93321.1 agla|OJJ81234.1 akaw|GAA85046.1 aluc|OJZ86608.1 anid|CBF70420.1 anig|EHA22058.1  
aory|EIT78190.1 asyd|OJJ58620.1 ater|EAU34908.1 atub|OJI83918.1 aver|OJJ01227.1 awen|OJJ32072.1  
azon|OJJ46652.1

Group2600: abra|OJJ71873.1 acar|OOF96544.1 acla|EAW13903.1 afis|EAW18615.1 afla|EED48366.1  
afum|EAL93325.1 agla|OJJ81229.1 akaw|GAA85042.1 aluc|OJZ86612.1 anid|CBF70428.1 anig|EHA22054.1  
aory|EIT83110.1 asyd|OJJ58616.1 ater|EAU34912.1 atub|OJI83914.1 aver|OJJ01223.1 awen|OJJ32076.1  
azon|OJJ46656.1

Group2601: abra|OJJ71874.1 acar|OOF96545.1 acla|EAW13904.1 afis|EAW18616.1 afla|EED52730.1  
afum|EAL93326.1 agla|OJJ81228.1 akaw|GAA85041.1 aluc|OJZ86613.1 anid|CBF70426.1 anig|EHA22053.1

aory|EIT78192.1 asyd|OJJ58617.1 ater|EAU34913.1 atub|OJI83913.1 aver|OJJ01224.1 awen|OJJ32077.1 azon|OJJ46657.1

Group2603: abra|OJJ71878.1 acar|OOF96546.1 acla|EAW13907.1 afis|EAW18619.1 afla|EED52726.1 afum|EAL93329.1 agla|OJJ81241.1 akaw|GAA85038.1 aluc|OJZ86616.1 anid|CBF70501.1 anig|EHA22050.1 aory|EIT78153.1 asyd|OJJ58579.1 ater|EAU34919.1 atub|OJI83910.1 aver|OJJ01183.1 awen|OJJ32081.1 azon|OJJ46660.1

Group2604: abra|OJJ71879.1 acar|OOF96547.1 acla|EAW13908.1 afis|EAW18620.1 afla|EED52725.1 afum|EAL93330.1 agla|OJJ81240.1 akaw|GAA85037.1 aluc|OJZ86617.1 anid|CBF70499.1 anig|EHA22049.1 aory|EIT78189.1 asyd|OJJ58580.1 ater|EAU34920.1 atub|OJI83909.1 aver|OJJ01184.1 awen|OJJ32082.1 azon|OJJ46661.1

Group2605: abra|OJJ71880.1 acar|OOF96548.1 acla|EAW13909.1 afis|EAW18621.1 afla|EED52724.1 afum|EAL93331.1 agla|OJJ81239.1 akaw|GAA85036.1 aluc|OJZ86618.1 anid|CBF70497.1 anig|EHA22048.1 aory|EIT78181.1 asyd|OJJ58581.1 ater|EAU34921.1 atub|OJI83908.1 aver|OJJ01185.1 awen|OJJ32084.1 azon|OJJ46663.1

Group2606: abra|OJJ71889.1 acar|OOF96551.1 acla|EAW09632.1 afis|EAW21508.1 afla|EED55945.1 afum|EAL92528.1 agla|OJJ85671.1 akaw|GAA85028.1 aluc|OJZ86626.1 anid|CBF76443.1 anig|EHA22039.1 aory|EIT76729.1 asyd|OJJ61102.1 ater|EAU35030.1 atub|OJI83899.1 aver|OJJ00419.1 awen|OJJ39187.1 azon|OJJ51504.1

Group2607: abra|OJJ71891.1 acar|OOF96552.1 acla|EAW09631.1 afis|EAW21509.1 afla|EED55947.1 afum|EAL92529.1 agla|OJJ85673.1 akaw|GAA85027.1 aluc|OJZ86630.1 anid|CBF76441.1 anig|EHA22038.1 aory|EIT76718.1 asyd|OJJ61101.1 ater|EAU35029.1 atub|OJI83898.1 aver|OJJ00416.1 awen|OJJ39185.1 azon|OJJ51503.1

Group2608: abra|OJJ71895.1 acar|OOF96556.1 acla|EAW09627.1 afis|EAW21513.1 afla|EED55951.1 afum|EAL92533.1 agla|OJJ85677.1 akaw|GAA85023.1 aluc|OJZ86634.1 anid|CBF76433.1 anig|EHA22035.1 aory|EIT76705.1 asyd|OJJ61096.1 ater|EAU35027.1 atub|OJI83894.1 aver|OJJ00411.1 awen|OJJ39181.1 azon|OJJ51512.1

Group2609: abra|OJJ71896.1 acar|OOF96557.1 acla|EAW09626.1 afis|EAW21514.1 afla|EED55952.1 afum|EAL92534.1 agla|OJJ85678.1 akaw|GAA85022.1 aluc|OJZ86635.1 anid|CBF76431.1 anig|EHA22034.1 aory|EIT76554.1 asyd|OJJ61095.1 ater|EAU35026.1 atub|OJI83893.1 aver|OJJ00410.1 awen|OJJ39180.1 azon|OJJ51513.1

Group2610: abra|OJJ71898.1 acar|OOF96559.1 acla|EAW09624.1 afis|EAW21516.1 afla|EED55954.1 afum|EAL92536.1 agla|OJJ85680.1 akaw|GAA85020.1 aluc|OJZ86637.1 anid|CBF76427.1 anig|EHA22032.1 aory|EIT76837.1 asyd|OJJ61093.1 ater|EAU35024.1 atub|OJI83891.1 aver|OJJ00408.1 awen|OJJ39178.1 azon|OJJ51516.1

Group2611: abra|OJJ71902.1 acar|OOF96560.1 acla|EAW09621.1 afis|EAW21518.1 afla|EED55956.1 afum|EAL92539.1 agla|OJJ85681.1 akaw|GAA85018.1 aluc|OJZ86639.1 anid|CBF76423.1 anig|EHA22030.1 aory|EIT76726.1 asyd|OJJ61091.1 ater|EAU35022.1 atub|OJI83888.1 aver|OJJ00406.1 awen|OJJ39175.1 azon|OJJ51515.1

Group2612: abra|OJJ71903.1 acar|OOF96561.1 acla|EAW09620.1 afis|EAW21519.1 afla|EED55957.1 afum|EAL92540.1 agla|OJJ85682.1 akaw|GAA85017.1 aluc|OJZ86640.1 anid|CBF76419.1 anig|EHA22029.1 aory|EIT76756.1 asyd|OJJ61090.1 ater|EAU35021.1 atub|OJI83887.1 aver|OJJ00405.1 awen|OJJ39174.1 azon|OJJ51514.1

Group2613: abra|OJJ71905.1 acar|OOF96562.1 acla|EAW09618.1 afis|EAW21521.1 afla|EED55959.1 afum|EAL92542.1 agla|OJJ85684.1 akaw|GAA85015.1 aluc|OJZ86642.1 anid|CBF76416.1 anig|EHA22027.1 aory|EIT76533.1 asyd|OJJ61088.1 ater|EAU35020.1 atub|OJI83885.1 aver|OJJ00403.1 awen|OJJ39172.1 azon|OJJ51501.1

Group2614: abra|OJJ71908.1 acar|OOF96568.1 acla|EAW09615.1 afis|EAW21524.1 afla|EED55962.1 afum|EAL92545.1 agla|OJJ85687.1 akaw|GAA85011.1 aluc|OJZ86646.1 anid|CBF76410.1 anig|EHA22024.1 aory|EIT76688.1 asyd|OJJ61085.1 ater|EAU35017.1 atub|OJI83881.1 aver|OJJ00400.1 awen|OJJ39169.1 azon|OJJ51498.1

Group2615: abra|OJJ71917.1 acar|OOF96574.1 acla|EAW09613.1 afis|EAW21526.1 afla|EED55965.1 afum|EAL92547.1 agla|OJJ85689.1 akaw|GAA85005.1 aluc|OJZ86654.1 anid|CBF76406.1 anig|EHA22017.1 aory|EIT76778.1 asyd|OJJ61082.1 ater|EAU35015.1 atub|OJI83873.1 aver|OJJ00398.1 awen|OJJ39167.1 azon|OJJ51496.1

Group2616: abra|OJJ71918.1 acar|OOF96575.1 acla|EAW09612.1 afis|EAW21527.1 afla|EED55966.1 afum|EAL92548.1 agla|OJJ85690.1 akaw|GAA85004.1 aluc|OJZ86655.1 anid|CBF76404.1 anig|EHA22016.1 aory|EIT76686.1 asyd|OJJ61081.1 ater|EAU35014.1 atub|OJI83872.1 aver|OJJ00397.1 awen|OJJ39166.1 azon|OJJ51495.1

Group2617: abra|OJJ71921.1 acar|OOF96578.1 acla|EAW09607.1 afis|EAW21530.1 afla|EED55979.1 afum|EAL92551.1 agla|OJJ85694.1 akaw|GAA85001.1 aluc|OJZ86658.1 anid|CBF76398.1 anig|EHA22013.1 aory|EIT76728.1 asyd|OJJ61078.1 ater|EAU35009.1 atub|OJI83869.1 aver|OJJ00394.1 awen|OJJ39162.1 azon|OJJ51492.1

Group2618: abra|OJJ71922.1 acar|OOF96579.1 acla|EAW09606.1 afis|EAW21531.1 afla|EED55980.1 afum|EAL92552.1 agla|OJJ85695.1 akaw|GAA85000.1 aluc|OJZ86659.1 anid|CBF76396.1 anig|EHA22012.1 aory|EIT76765.1 asyd|OJJ61077.1 ater|EAU35008.1 atub|OJI83868.1 aver|OJJ00393.1 awen|OJJ39161.1 azon|OJJ51491.1

Group2619: abra|OJJ71923.1 acar|OOF96580.1 acla|EAW09605.1 afis|EAW21532.1 afla|EED55981.1 afum|EAL92553.1 agla|OJJ85696.1 akaw|GAA84999.1 aluc|OJZ86660.1 anid|CBF76394.1 anig|EHA22011.1 aory|EIT76691.1 asyd|OJJ61076.1 ater|EAU35007.1 atub|OJI83867.1 aver|OJJ00392.1 awen|OJJ39160.1 azon|OJJ51490.1

Group2620: abra|OJJ71924.1 acar|OOF96581.1 acla|EAW09604.1 afis|EAW21533.1 afla|EED55982.1 afum|EAL92554.1 agla|OJJ85697.1 akaw|GAA84998.1 aluc|OJZ86661.1 anid|CBF76392.1 anig|EHA22010.1 aory|EIT76892.1 asyd|OJJ61073.1 ater|EAU35006.1 atub|OJI83864.1 aver|OJJ00390.1 awen|OJJ39159.1 azon|OJJ51489.1

Group2621: abra|OJJ71928.1 acar|OOF96585.1 afis|EAW21536.1 afla|EED55986.1 afum|EAL92556.2 agla|OJJ85700.1 anid|CBF76386.1 aory|EIT76707.1 aver|OJJ00386.1 acla|EAW09601.1 akaw|GAA84995.1 aluc|OJZ86665.1 anig|EHA22008.1 asyd|OJJ61070.1 ater|EAU35003.1 atub|OJI83861.1 awen|OJJ39155.1 azon|OJJ51486.1

Group2622: abra|OJJ71929.1 acar|OOF96586.1 acla|EAW09600.1 afis|EAW21537.1 afla|EED55989.1 afum|EAL92557.1 agla|OJJ85701.1 akaw|GAA84994.1 aluc|OJZ86666.1 anid|CBF76382.1 anig|EHA22007.1 aory|EIT76583.1 asyd|OJJ61068.1 ater|EAU35002.1 atub|OJI83860.1 aver|OJJ00384.1 awen|OJJ39154.1 azon|OJJ51485.1

Group2623: abra|OJJ71931.1 acar|OOF96588.1 acla|EAW09598.1 afis|EAW21539.1 afla|EED55991.1 afum|EAL92559.2 agla|OJJ85703.1 akaw|GAA84992.1 aluc|OJZ86668.1 anid|CBF76378.1 anig|EHA22005.1 aory|EIT76546.1 asyd|OJJ61066.1 ater|EAU35001.1 atub|OJI83859.1 aver|OJJ00382.1 awen|OJJ39152.1 azon|OJJ51478.1

Group2624: abra|OJJ71935.1 acar|OOF96591.1 acla|EAW09595.1 afis|EAW21542.1 afla|EED55993.1 afum|EAL92562.1 agla|OJJ85705.1 akaw|GAA84989.1 aluc|OJZ86672.1 anid|CBF76374.1 anig|EHA22002.1 aory|EIT76774.1 asyd|OJJ61064.1 ater|EAU34997.1 atub|OJI83856.1 aver|OJJ00381.1 awen|OJJ39148.1 azon|OJJ51482.1

Group2625: abra|OJJ71938.1 acar|OOF96596.1 acla|EAW09591.1 afis|EAW21547.1 afla|EED55999.1 afum|EAL92567.1 agla|OJJ85710.1 akaw|GAA84986.1 aluc|OJZ86675.1 anid|CBF76364.1 anig|EHA21998.1 aory|EIT76832.1 asyd|OJJ61060.1 ater|EAU34992.1 atub|OJI83853.1 aver|OJJ00377.1 awen|OJJ39143.1 azon|OJJ51464.1

Group2626: abra|OJJ71940.1 acar|OOF96598.1 acla|EAW09590.1 afis|EAW21548.1 afla|EED56001.1 afum|EAL92568.1 agla|OJJ85726.1 akaw|GAA84985.1 aluc|OJZ86676.1 anid|CBF76362.1 anig|EHA21997.1 aory|EIT76581.1 asyd|OJJ61059.1 ater|EAU34991.1 atub|OJI83852.1 aver|OJJ00376.1 awen|OJJ39142.1 azon|OJJ51465.1

Group2627: abra|OJJ71942.1 acar|OOF96599.1 acla|EAW09588.1 afis|EAW21550.1 afla|EED56002.1 afum|EAL92570.1 agla|OJJ85728.1 akaw|GAA84983.1 aluc|OJZ86678.1 anid|CBF76358.1 anig|EHA21995.1 aory|EIT76540.1 asyd|OJJ61057.1 ater|EAU34989.1 atub|OJI83849.1 aver|OJJ00374.1 awen|OJJ39140.1 azon|OJJ51467.1

Group2628: abra|OJJ71946.1 acar|OOF96600.1 acla|EAW09587.1 afis|EAW21551.1 afla|EED56003.1 afum|EAL92571.1 agla|OJJ85729.1 akaw|GAA84980.1 aluc|OJZ86682.1 anid|CBF76356.1 anig|EHA21992.1 aory|EIT76839.1 asyd|OJJ61056.1 ater|EAU34988.1 atub|OJI83845.1 aver|OJJ00373.1 awen|OJJ39139.1 azon|OJJ51470.1

Group2629: abra|OJJ71951.1 acar|OOF96602.1 acla|EAW09583.1 afis|EAW21554.1 afla|EED56006.1 afum|EAL92574.1 agla|OJJ85731.1 akaw|GAA84977.1 aluc|OJZ86685.1 anid|CBF76350.1 anig|EHA21988.1 aory|EIT76802.1 asyd|OJJ61053.1 ater|EAU34980.1 atub|OJI83841.1 aver|OJJ00370.1 awen|OJJ39136.1 azon|OJJ51474.1

Group2630: abra|OJJ71956.1 acar|OOF96615.1 acla|EAW09579.1 afis|EAW21558.1 afla|EED56010.1 afum|EAL92577.1 agla|OJJ85736.1 akaw|GAA84971.1 aluc|OJZ86691.1 anid|CBF76344.1 anig|EHA21982.1 aory|EIT76530.1 asyd|OJJ61049.1 ater|EAU34976.1 atub|OJI83833.1 aver|OJJ00365.1 awen|OJJ39132.1 azon|OJJ51460.1

Group2631: abra|OJJ71957.1 acar|OOF96613.1 acla|EAW09578.1 afis|EAW21559.1 afla|EED56011.1 afum|EAL92578.1 agla|OJJ85737.1 akaw|GAA84970.1 aluc|OJZ86692.1 anid|CBF76342.1 anig|EHA21981.1

aory|EIT76831.1 asyd|OJJ61048.1 ater|EAU34974.1 atub|OJI83832.1 aver|OJJ00364.1 awen|OJJ39131.1 azon|OJJ51459.1

Group2632: abra|OJJ71959.1 acar|OOF96611.1 acla|EAW09577.1 afis|EAW21560.1 afla|EED56012.1 afum|EAL92579.1 agla|OJJ85739.1 akaw|GAA84969.1 aluc|OJZ86693.1 anid|CBF76340.1 anig|EHA21980.1 aory|EIT76670.1 asyd|OJJ61046.1 atub|OJI83831.1 aver|OJJ00363.1 awen|OJJ39129.1 azon|OJJ51458.1 ater|EAU34973.1

Group2633: abra|OJJ71960.1 acar|OOF96610.1 acla|EAW09576.1 afis|EAW21561.1 afla|EED56014.1 afum|EAL92580.1 agla|OJJ85740.1 akaw|GAA84968.1 aluc|OJZ86694.1 anid|CBF76338.1 anig|EHA21979.1 aory|EIT76536.1 asyd|OJJ61045.1 ater|EAU34972.1 atub|OJI83830.1 aver|OJJ00362.1 awen|OJJ39128.1 azon|OJJ51456.1

Group2634: abra|OJJ71961.1 acar|OOF96609.1 acla|EAW09575.1 afis|EAW21562.1 afla|EED56015.1 afum|EAL92581.1 agla|OJJ85741.1 akaw|GAA84967.1 aluc|OJZ86696.1 anid|CBF76336.1 anig|EHA21978.1 aory|EIT76848.1 asyd|OJJ61044.1 ater|EAU34971.1 atub|OJI83829.1 aver|OJJ00361.1 awen|OJJ39127.1 azon|OJJ51455.1

Group2635: abra|OJJ71966.1 acar|OOF89890.1 acla|EAW09571.1 afis|EAW21565.1 afum|EAL92584.1 agla|OJJ85750.1 akaw|GAA84962.1 aluc|OJZ86702.1 anid|CBF76330.1 anig|EHA21974.1 aory|EIT76870.1 asyd|OJJ61038.1 ater|EAU34967.1 atub|OJI83824.1 aver|OJJ00356.1 awen|OJJ39120.1 azon|OJJ51450.1 afla|EED56022.1

Group2636: abra|OJJ71969.1 acar|OOF96604.1 acla|EAW09570.1 afis|EAW21566.1 afla|EED56031.1 afum|EAL92585.1 agla|OJJ85751.1 akaw|GAA84961.1 aluc|OJZ86704.1 anid|CBF76328.1 anig|EHA21972.1 aory|EIT76642.1 asyd|OJJ61016.1 ater|EAU34965.1 atub|OJI83823.1 aver|OJJ00336.1 awen|OJJ39115.1 azon|OJJ51449.1

Group2637: abra|OJJ71970.1 acar|OOF96621.1 acla|EAW09569.1 afis|EAW21567.1 afla|EED56034.1 afum|EAL92586.1 agla|OJJ85752.1 akaw|GAA84960.1 aluc|OJZ86705.1 anid|CBF76326.1 anig|EHA21971.1 aory|EIT76629.1 asyd|OJJ61015.1 ater|EAU34964.1 atub|OJI83822.1 aver|OJJ00334.1 awen|OJJ39113.1 azon|OJJ51448.1

Group2638: abra|OJJ71971.1 acar|OOF96622.1 acla|EAW09568.1 afis|EAW21568.1 afla|EED56035.1 afum|EAL92587.1 agla|OJJ85753.1 akaw|GAA84959.1 aluc|OJZ86706.1 anid|CBF76324.1 anig|EHA21970.1 aory|EIT76766.1 asyd|OJJ61014.1 ater|EAU34963.1 atub|OJI83821.1 aver|OJJ00333.1 awen|OJJ39112.1 azon|OJJ51447.1

Group2639: abra|OJJ71972.1 acar|OOF96623.1 acla|EAW09567.1 afis|EAW21569.1 afla|EED56036.1 afum|EBA27467.1 agla|OJJ85754.1 akaw|GAA84958.1 aluc|OJZ86707.1 anid|CBF76322.1 anig|EHA21969.1 aory|EIT76617.1 asyd|OJJ61013.1 ater|EAU34962.1 atub|OJI83820.1 aver|OJJ00332.1 awen|OJJ39111.1 azon|OJJ51446.1

Group2640: abra|OJJ71973.1 acar|OOF96625.1 acla|EAW09565.1 afis|EAW21571.1 afla|EED56037.1 afum|EAL92589.1 agla|OJJ85771.1 akaw|GAA84957.1 aluc|OJZ86708.1 anid|CBF76318.1 anig|EHA21968.1 aory|EIT76745.1 asyd|OJJ61011.1 ater|EAU34961.1 atub|OJI83819.1 aver|OJJ00330.1 awen|OJJ39110.1 azon|OJJ51445.1

Group2641: abra|OJJ71974.1 acar|OOF96624.1 acla|EAW09564.1 afis|EAW21572.1 afla|EED56038.1 afum|EAL92590.1 agla|OJJ85768.1 akaw|GAA84956.1 aluc|OJZ86709.1 anid|CBF76316.1 anig|EHA21967.1 aory|EIT76889.1 asyd|OJJ61010.1 ater|EAU34960.1 atub|OJI83818.1 aver|OJJ00329.1 awen|OJJ39109.1 azon|OJJ51444.1

Group2642: abra|OJJ71975.1 acar|OOF96626.1 acla|EAW09563.1 afis|EAW21573.1 afla|EED57792.1 afum|EAL92591.2 agla|OJJ85766.1 akaw|GAA84955.1 aluc|OJZ86710.1 anid|CBF76314.1 anig|EHA21966.1 aory|EIT81122.1 asyd|OJJ61009.1 ater|EAU34959.1 atub|OJI83817.1 aver|OJJ00328.1 awen|OJJ39108.1 azon|OJJ51443.1

Group2643: abra|OJJ71978.1 acar|OOF96628.1 acla|EAW09562.1 afis|EAW21575.1 afla|EED57793.1 afum|EAL92593.1 agla|OJJ85764.1 akaw|GAA84952.1 aluc|OJZ86715.1 anid|CBF76306.1 anig|EHA21963.1 aory|EIT81108.1 asyd|OJJ61006.1 ater|EAU34957.1 atub|OJI83814.1 aver|OJJ00324.1 awen|OJJ39105.1 azon|OJJ51438.1

Group2644: abra|OJJ71983.1 acar|OOF96634.1 acla|EAW09556.1 afis|EAW21581.1 afla|EED57799.1 afum|EAL92599.2 agla|OJJ85757.1 akaw|GAA84946.1 aluc|OJZ86720.1 anid|CBF76300.1 anig|EHA21959.1 aory|EIT81064.1 asyd|OJJ61001.1 ater|EAU34953.1 atub|OJI83809.1 aver|OJJ00319.1 awen|OJJ39100.1 azon|OJJ51434.1

Group2645: abra|OJJ71987.1 acar|OOF96642.1 acla|EAW09551.1 afis|EAW21585.1 afla|EED57806.1 afum|EAL92603.2 agla|OJJ85777.1 akaw|GAA84942.1 aluc|OJZ86724.1 anid|CBF76289.1 anig|EHA21955.1 aory|EIT81058.1 asyd|OJJ60995.1 ater|EAU34946.1 atub|OJI83804.1 aver|OJJ00315.1 awen|OJJ39096.1 azon|OJJ51429.1



Group2646: abra|OJJ71990.1 acar|OOF96644.1 acla|EAW09545.1 afis|EAW21588.1 afla|EED57809.1  
afum|EAL92606.1 agla|OJJ85781.1 akaw|GAA84939.1 aluc|OJZ86727.1 anid|CBF76285.1 anig|EHA21952.1  
aory|EIT81040.1 asyd|OJJ60992.1 ater|EAU34943.1 atub|OJI83801.1 aver|OJJ00312.1 awen|OJJ39093.1  
azon|OJJ51426.1

Group2647: abra|OJJ71991.1 acar|OOF96645.1 acla|EAW09544.1 afis|EAW21589.1 afla|EED57811.1  
afum|EAL92607.1 agla|OJJ85782.1 akaw|GAA84938.1 aluc|OJZ86728.1 anid|CBF76283.1 anig|EHA21951.1  
aory|EIT81035.1 asyd|OJJ60991.1 ater|EAU34942.1 atub|OJI83800.1 aver|OJJ00311.1 awen|OJJ39092.1  
azon|OJJ51425.1

Group2648: abra|OJJ71993.1 acar|OOF96647.1 acla|EAW09542.1 afis|EAW21591.1 afla|EED57813.1  
afum|EAL92609.1 agla|OJJ85784.1 akaw|GAA84935.1 aluc|OJZ86731.1 anid|CBF83440.1 anig|EHA21948.1  
aory|EIT81099.1 asyd|OJJ60668.1 ater|EAU34940.1 atub|OJI83797.1 aver|OJI99991.1 awen|OJJ39090.1  
azon|OJJ51421.1

Group2649: abra|OJJ71995.1 acar|OOF96649.1 acla|EAW09540.1 afis|EAW21593.1 afla|EED57815.1  
afum|EAL92611.1 agla|OJJ85788.1 akaw|GAA84933.1 aluc|OJZ86733.1 anid|CBF83444.1 anig|EHA21946.1  
aory|EIT81101.1 asyd|OJJ60670.1 ater|EAU34931.1 atub|OJI83795.1 aver|OJI99993.1 awen|OJJ39088.1  
azon|OJJ51419.1

Group2650: abra|OJJ71997.1 acar|OOF96651.1 acla|EAW09541.1 afis|EAW21592.1 afla|EED57814.1  
afum|EAL92610.1 agla|OJJ85789.1 akaw|GAA84932.1 aluc|OJZ86735.1 anid|CBF83442.1 anig|EHA21944.1  
aory|EIT81111.1 asyd|OJJ60669.1 ater|EAU34932.1 atub|OJI83793.1 aver|OJI99992.1 awen|OJJ39089.1  
azon|OJJ51420.1

Group2651: abra|OJJ71998.1 acar|OOF96653.1 acla|EAW09536.1 afis|EAW21596.1 afla|EED57819.1  
afum|EAL92614.1 agla|OJJ85790.1 akaw|GAA84931.1 aluc|OJZ86736.1 anid|CBF83453.1 anig|EHA21943.1  
aory|EIT81091.1 asyd|OJJ60672.1 ater|EAU34928.1 atub|OJI83792.1 aver|OJI99995.1 awen|OJJ39086.1  
azon|OJJ51417.1

Group2652: abra|OJJ72007.1 acar|OOF96657.1 acla|EAW09534.1 afis|EAW21599.1 afla|EED57824.1  
afum|EAL92618.1 agla|OJJ85794.1 akaw|GAA84926.1 aluc|OJZ86743.1 anid|CBF83457.1 anig|EHA21936.1  
aory|EIT81107.1 asyd|OJJ60679.1 ater|EAU38289.1 atub|OJI83784.1 aver|OJJ00004.1 awen|OJJ39083.1  
azon|OJJ51415.1

Group2654: abra|OJJ72010.1 acar|OOF96658.1 acla|EAW09529.1 afis|EAW21603.1 afla|EED57829.1  
afum|EAL92622.1 agla|OJJ85797.1 akaw|GAA84923.1 aluc|OJZ86746.1 anid|CBF83462.1 anig|EHA21933.1  
aory|EIT81061.1 asyd|OJJ60684.1 ater|EAU38292.1 atub|OJI83781.1 aver|OJJ00009.1 awen|OJJ39080.1  
azon|OJJ51412.1

Group2655: abra|OJJ72014.1 acar|OOF96663.1 acla|EAW09526.1 afis|EAW21606.1 afla|EED57833.1  
afum|EAL92625.1 agla|OJJ85801.1 akaw|GAA84919.1 aluc|OJZ86750.1 anid|CBF83469.1 anig|EHA21929.1  
aory|EIT81024.1 asyd|OJJ60688.1 ater|EAU38295.1 atub|OJI83777.1 aver|OJJ00013.1 awen|OJJ39076.1  
azon|OJJ51408.1

Group2656: abra|OJJ72015.1 acar|OOF96664.1 acla|EAW09525.1 afis|EAW21607.1 afla|EED57834.1  
afum|EAL92626.1 agla|OJJ85802.1 akaw|GAA84918.1 aluc|OJZ86751.1 anid|CBF83473.1 anig|EHA21928.1  
aory|EIT81105.1 asyd|OJJ60690.1 ater|EAU38296.1 atub|OJI83775.1 aver|OJJ00015.1 awen|OJJ39075.1  
azon|OJJ51407.1

Group2657: abra|OJJ72016.1 acar|OOF96666.1 acla|EAW09524.1 afis|EAW21608.1 afla|EED57837.1  
afum|EAL92642.1 agla|OJJ85803.1 akaw|GAA84917.1 aluc|OJZ86752.1 anid|CBF83475.1 anig|EHA21927.1  
aory|EIT81080.1 asyd|OJJ60691.1 ater|EAU38297.1 atub|OJI83774.1 aver|OJJ00016.1 awen|OJJ39074.1  
azon|OJJ51406.1

Group2658: abra|OJJ72017.1 acar|OOF96665.1 acla|EAW09523.1 afis|EAW21609.1 afla|EED57838.1  
afum|EAL92643.1 agla|OJJ85804.1 akaw|GAA84916.1 aluc|OJZ86753.1 anid|CBF83477.1 anig|EHA21926.1  
aory|EIT81100.1 asyd|OJJ60692.1 ater|EAU38298.1 atub|OJI83773.1 aver|OJJ00017.1 awen|OJJ39073.1  
azon|OJJ51405.1

Group2659: abra|OJJ72018.1 acar|OOF96667.1 acla|EAW09521.1 afis|EAW21611.1 afla|EED57840.1  
afum|EAL92645.1 agla|OJJ78616.1 akaw|GAA84914.1 aluc|OJZ86755.1 anid|CBF83480.1 anig|EHA21924.1  
aory|EIT81096.1 asyd|OJJ60694.1 ater|EAU38302.1 atub|OJI83772.1 aver|OJJ00020.1 awen|OJJ39071.1  
azon|OJJ51402.1

Group2660: abra|OJJ72019.1 acar|OOF96669.1 acla|EAW09520.1 afis|EAW21612.1 afla|EED57841.1  
afum|EAL92646.1 agla|OJJ78617.1 akaw|GAA84913.1 aluc|OJZ86756.1 anid|CBF83482.1 anig|EHA21923.1  
aory|EIT81062.1 asyd|OJJ60695.1 ater|EAU38303.1 atub|OJI83771.1 aver|OJJ00021.1 awen|OJJ39070.1  
azon|OJJ51401.1

Group2661: abra|OJJ72020.1 acar|OOF96668.1 acla|EAW09515.1 afis|EAW21617.1 afla|EED57842.1  
afum|EAL92652.1 agla|OJJ78622.1 akaw|GAA84912.1 aluc|OJZ86757.1 anid|CBF83484.1 anig|EHA21922.1

aory|EIT81032.1 asyd|OJJ60696.1 ater|EAU38304.1 atub|OJI83770.1 aver|OJJ00022.1 awen|OJJ39069.1 azon|OJJ51400.1

Group2662: abra|OJJ72022.1 acar|OOF96671.1 acla|EAW09517.1 afis|EAW21615.1 afla|EED57844.1 afum|EAL92649.1 agla|OJJ78624.1 akaw|GAA84910.1 aluc|OJZ86759.1 anid|CBF83485.1 anig|EHA21920.1 aory|EIT81023.1 asyd|OJJ60698.1 ater|EAU38305.1 atub|OJI83768.1 aver|OJJ00024.1 awen|OJJ39067.1 azon|OJJ51398.1

Group2663: abra|OJJ72024.1 acar|OOF96673.1 acla|EAW09519.1 afis|EAW21613.1 afla|EED57846.1 afum|EAL92647.1 agla|OJJ78626.1 akaw|GAA84908.1 aluc|OJZ86761.1 anid|CBF83489.1 anig|EHA21918.1 aory|EIT81029.1 asyd|OJJ60700.1 ater|EAU38307.1 atub|OJI83766.1 aver|OJJ00026.1 awen|OJJ39065.1 azon|OJJ51396.1

Group2664: abra|OJJ72032.1 acar|OOF96682.1 acla|EAW09511.1 afis|EAW21621.1 afla|EED57850.1 afum|EAL92657.2 agla|OJJ82578.1 akaw|GAA84900.1 aluc|OJZ86770.1 anid|CBF83495.1 anig|EHA21910.1 aory|EIT81046.1 asyd|OJJ60704.1 ater|EAU38310.1 atub|OJI83757.1 aver|OJJ00029.1 awen|OJJ33873.1 azon|OJJ48677.1

Group2665: abra|OJJ72044.1 acar|OOF96702.1 acla|EAW09502.1 afis|EAW21634.1 afla|EED57876.1 afum|EAL92667.1 agla|OJJ79699.1 akaw|GAA84890.1 aluc|OJZ86781.1 anid|CBF83500.1 anig|EHA21901.1 aory|EIT83264.1 asyd|OJJ60711.1 ater|EAU38320.1 atub|OJI83739.1 aver|OJJ00038.1 awen|OJJ33883.1 azon|OJJ48670.1

Group2666: abra|OJJ72046.1 acar|OOF96704.1 acla|EAW09500.1 afis|EAW21636.1 afla|EED57879.1 afum|EAL92670.1 agla|OJJ79701.1 akaw|GAA84888.1 aluc|OJZ86783.1 anid|CBF83517.1 anig|EHA21899.1 aory|EIT83275.1 asyd|OJJ60714.1 ater|EAU38322.1 atub|OJI83737.1 aver|OJJ00047.1 awen|OJJ33885.1 azon|OJJ48668.1

Group2667: abra|OJJ72048.1 acar|OOF96706.1 acla|EAW09498.1 afis|EAW21638.1 afla|EED57881.1 afum|EAL92672.2 agla|OJJ79703.1 akaw|GAA84886.1 aluc|OJZ86785.1 anid|CBF83521.1 anig|EHA21897.1 aory|EIT83269.1 asyd|OJJ60716.1 ater|EAU38323.1 atub|OJI83735.1 aver|OJJ00049.1 awen|OJJ33887.1 azon|OJJ48666.1

Group2668: abra|OJJ72052.1 acar|OOF96709.1 acla|EAW09495.1 afis|EAW21641.1 afla|EED57902.1 afum|EAL92675.1 agla|OJJ79708.1 akaw|GAA84882.1 aluc|OJZ86789.1 anid|CBF83526.1 anig|EHA21894.1 aory|EIT82320.1 asyd|OJJ60718.1 ater|EAU38326.1 atub|OJI83730.1 aver|OJJ00051.1 awen|OJJ33898.1 azon|OJJ48662.1

Group2669: abra|OJJ72054.1 acar|OOF96711.1 acla|EAW09493.1 afis|EAW21643.1 afla|EED57900.1 afum|EAL92677.1 agla|OJJ79710.1 akaw|GAA84880.1 aluc|OJZ86791.1 anid|CBF83528.1 anig|EHA21892.1 aory|EIT82343.1 asyd|OJJ60720.1 ater|EAU38328.1 atub|OJI83728.1 aver|OJJ00053.1 awen|OJJ33900.1 azon|OJJ48660.1

Group2670: abra|OJJ72056.1 acar|OOF96713.1 acla|EAW09492.1 afis|EAW21644.1 afla|EED57899.1 afum|EAL92678.1 agla|OJJ79711.1 akaw|GAA84878.1 aluc|OJZ86793.1 anid|CBF83530.1 anig|EHA21890.1 aory|EIT82331.1 asyd|OJJ60721.1 ater|EAU38329.1 atub|OJI83726.1 aver|OJJ00054.1 awen|OJJ33901.1 azon|OJJ48658.1

Group2671: abra|OJJ72062.1 acar|OOF96716.1 acla|EAW09489.1 afis|EAW21647.1 afla|EED57896.1 afum|EAL92681.1 agla|OJJ79718.1 akaw|GAA84873.1 aluc|OJZ86798.1 anid|CBF83537.1 anig|EHA21885.1 aory|EIT82735.1 asyd|OJJ60725.1 ater|EAU38332.1 atub|OJI83720.1 aver|OJJ00058.1 awen|OJJ33907.1 azon|OJJ48655.1

Group2672: abra|OJJ72063.1 acar|OOF96717.1 acla|EAW09479.1 afis|EAW21657.1 afla|EED57895.1 afum|EAL92692.1 agla|OJJ79719.1 akaw|GAA84872.1 aluc|OJZ86799.1 anid|CBF83539.1 anig|EHA21884.1 aory|EIT82741.1 asyd|OJJ60727.1 ater|EAU38333.1 atub|OJI83719.1 aver|OJJ00059.1 awen|OJJ33908.1 azon|OJJ48653.1

Group2673: abra|OJJ72064.1 acar|OOF96718.1 acla|EAW09478.1 afis|EAW21658.1 afla|EED57894.1 afum|EAL92693.1 agla|OJJ79720.1 akaw|GAA84871.1 aluc|OJZ86800.1 anid|CBF83541.1 anig|EHA21883.1 aory|EIT82736.1 asyd|OJJ60728.1 ater|EAU38334.1 atub|OJI83718.1 aver|OJJ00060.1 awen|OJJ33909.1 azon|OJJ48652.1

Group2674: abra|OJJ72065.1 acar|OOF96719.1 acla|EAW09477.1 afis|EAW21659.1 afla|EED57893.1 afum|EAL92694.1 agla|OJJ79721.1 akaw|GAA84870.1 aluc|OJZ86801.1 anid|CBF83542.1 anig|EHA21882.1 aory|EIT82740.1 asyd|OJJ60729.1 ater|EAU38335.1 atub|OJI83717.1 aver|OJJ00061.1 awen|OJJ33910.1 azon|OJJ48651.1

Group2675: abra|OJJ72068.1 acar|OOF96724.1 acla|EAW09483.1 afis|EAW21653.1 afla|EED57886.1 afum|EAL92688.1 agla|OJJ79724.1 akaw|GAA84867.1 aluc|OJZ86803.1 anid|CBF83550.1 anig|EHA21879.1 aory|EIT83265.1 asyd|OJJ60733.1 ater|EAU38339.1 atub|OJI83715.1 aver|OJJ00065.1 awen|OJJ33914.1 azon|OJJ48647.1

Group2676: abra|OJJ72075.1 acar|OOF96727.1 acla|EAW09485.1 afis|EAW21651.1 afla|EED57918.1 afum|EAL92685.2 agla|OJJ79727.1 akaw|GAA84842.1 aluc|OJZ86829.1 anid|CBF83553.1 anig|EHA21806.1 aory|EIT82364.1 asyd|OJJ60735.1 ater|EAU38343.1 atub|OJI83689.1 aver|OJJ00067.1 awen|OJJ33917.1 azon|OJJ48643.1

Group2677: abra|OJJ72085.1 acar|OOF96730.1 acla|EAW09488.1 afis|EAW21648.1 afla|EED57923.1 afum|EAL92682.2 agla|OJJ79730.1 akaw|GAA84835.1 aluc|OJZ86839.1 anid|CBF83559.1 anig|EHA21798.1 aory|EIT82355.1 asyd|OJJ60738.1 ater|EAU38345.1 atub|OJI83679.1 aver|OJJ00070.1 awen|OJJ33919.1 azon|OJJ48645.1

Group2678: abra|OJJ72086.1 acar|OOF96732.1 acla|EAW09467.1 afis|EAW21669.1 afla|EED57933.1 afum|EAL92704.1 agla|OJJ79740.1 akaw|GAA84834.1 aluc|OJZ86840.1 anid|CBF83582.1 anig|EHA21797.1 aory|EIT82344.1 asyd|OJJ60781.1 ater|EAU38353.1 atub|OJI83678.1 aver|OJJ00114.1 awen|OJJ33932.1 azon|OJJ48640.1

Group2679: abra|OJJ72087.1 acar|OOF96731.1 acla|EAW09468.1 afis|EAW21668.1 afla|EED57932.1 afum|EAL92703.1 agla|OJJ79739.1 akaw|GAA84833.1 aluc|OJZ86841.1 anid|CBF83580.1 anig|EHA21796.1 aory|EIT82317.1 asyd|OJJ60749.1 ater|EAU38352.1 atub|OJI83677.1 aver|OJJ00081.1 awen|OJJ33931.1 azon|OJJ48639.1

Group2680: abra|OJJ72089.1 acar|OOF96735.1 acla|EAW09470.1 afis|EAW21666.1 afla|EED57930.1 afum|EAL92701.1 agla|OJJ79737.1 akaw|GAA84831.1 aluc|OJZ86843.1 anid|CBF83569.1 anig|EHA21794.1 aory|EIT82323.1 asyd|OJJ60747.1 ater|EAU38351.1 atub|OJI83675.1 aver|OJJ00079.1 awen|OJJ33930.1 azon|OJJ48637.1

Group2681: abra|OJJ72090.1 acar|OOF96734.1 acla|EAW09471.1 afis|EAW21665.1 afla|EED57929.1 afum|EAL92700.1 agla|OJJ79736.1 akaw|GAA84830.1 aluc|OJZ86844.1 anid|CBF83568.1 anig|EHA21793.1 aory|EIT82319.1 asyd|OJJ60746.1 ater|EAU38350.1 atub|OJI83674.1 aver|OJJ00078.1 awen|OJJ33929.1 azon|OJJ48636.1

Group2682: abra|OJJ72092.1 acar|OOF96737.1 acla|EAW09473.1 afis|EAW21662.1 afla|EED57927.1 afum|EAL92697.1 agla|OJJ79734.1 akaw|GAA84828.1 aluc|OJZ86847.1 anid|CBF83564.1 anig|EHA21791.1 aory|EIT82336.1 asyd|OJJ60744.1 ater|EAU38348.1 atub|OJI83672.1 aver|OJJ00076.1 awen|OJJ33926.1 azon|OJJ48634.1

Group2683: abra|OJJ72094.1 acar|OOF96739.1 acla|EAW09475.1 afis|EAW21664.1 afla|EED57925.1 afum|EAL92699.1 agla|OJJ79732.1 akaw|GAA84826.1 aluc|OJZ86849.1 anid|CBF83562.1 anig|EHA21789.1 aory|EIT82328.1 asyd|OJJ60742.1 ater|EAU38347.1 atub|OJI83670.1 aver|OJJ00074.1 awen|OJJ33924.1 azon|OJJ48632.1

Group2684: abra|OJJ72095.1 acar|OOF96740.1 acla|EAW09476.1 afis|EAW21660.1 afla|EED57924.1 afum|EAL92695.1 agla|OJJ79731.1 akaw|GAA84825.1 aluc|OJZ86850.1 anid|CBF83560.1 anig|EHA21788.1 aory|EIT82356.1 asyd|OJJ60741.1 ater|EAU38346.1 atub|OJI83669.1 aver|OJJ00073.1 awen|OJJ33923.1 azon|OJJ48631.1

Group2685: abra|OJJ72096.1 acar|OOF96741.1 acla|EAW09391.1 afis|EAW21742.1 afla|EED58036.1 afum|EAL92775.1 agla|OJJ84431.1 akaw|GAA84824.1 aluc|OJZ86851.1 anid|CBF83748.1 anig|EHA21787.1 aory|EIT79774.1 asyd|OJJ60855.1 ater|EAU38446.1 atub|OJI83668.1 aver|OJJ00179.1 awen|OJJ34024.1 azon|OJJ48534.1

Group2686: abra|OJJ72099.1 acar|OOF96744.1 acla|EAW09390.1 afis|EAW21743.1 afla|EED58034.1 afum|EAL92776.1 agla|OJJ84427.1 akaw|GAA84822.1 aluc|OJZ86854.1 anid|CBF83738.1 anig|EHA21785.1 aory|EIT79762.1 asyd|OJJ60853.1 ater|EAU38445.1 atub|OJI83665.1 aver|OJJ00177.1 awen|OJJ34026.1 azon|OJJ48530.1

Group2687: abra|OJJ72101.1 acar|OOF96746.1 acla|EAW09388.1 afis|EAW21746.1 afla|EED58032.1 afum|EAL92778.1 agla|OJJ84430.1 akaw|GAA84820.1 aluc|OJZ86856.1 anid|CBF83662.1 anig|EHA21783.1 aory|EIT79789.1 asyd|OJJ60804.1 ater|EAU38443.1 atub|OJI83663.1 aver|OJJ00133.1 awen|OJJ34028.1 azon|OJJ48201.1

Group2688: abra|OJJ72105.1 acar|OOF96748.1 acla|EAW09386.1 afis|EAW21749.1 afla|EED58029.1 afum|EAL92780.2 agla|OJJ84425.1 akaw|GAA84817.1 aluc|OJZ86860.1 anid|CBF83665.1 anig|EHA21780.1 aory|EIT79704.1 asyd|OJJ60806.1 ater|EAU38441.1 atub|OJI83660.1 aver|OJJ00135.1 awen|OJJ34030.1 azon|OJJ48203.1

Group2689: abra|OJJ72110.1 acar|OOF90022.1 acla|EAW14910.1 afis|EAW24431.1 afla|EED55244.1 afum|EAL86099.1 agla|OJJ79245.1 akaw|GAA84812.1 aluc|OJZ86865.1 anid|CBF73773.1 anig|EHA21776.1 aory|EIT83529.1 asyd|OJJ56593.1 ater|EAU30014.1 atub|OJI83655.1 aver|OJJ06132.1 awen|OJJ32771.1 azon|OJJ44001.1

Group2690: abra|OJJ72112.1 acar|OOF96752.1 acla|EAW14912.1 afis|EAW24433.1 afla|EED55247.1 afum|EAL86101.1 agla|OJJ79248.1 akaw|GAA84810.1 aluc|OJZ86867.1 anid|CBF73767.1 anig|EHA21774.1

aory|EIT83512.1 asyd|OJJ56591.1 ater|EAU30012.1 atub|OJI83653.1 aver|OJJ06134.1 awen|OJJ32768.1 azon|OJJ43999.1

Group2691: abra|OJJ72115.1 acar|OOF96755.1 acla|EAW14916.1 afis|EAW24438.1 afla|EED55241.1 afum|EAL86106.1 agla|OJJ78777.1 akaw|GAA84807.1 aluc|OJZ86870.1 anid|CBF73762.1 anig|EHA21771.1 aory|EIT83515.1 asyd|OJJ56588.1 ater|EAU30009.1 atub|OJI83649.1 aver|OJJ06137.1 awen|OJJ32761.1 azon|OJJ43996.1

Group2692: abra|OJJ72116.1 acar|OOF96756.1 acla|EAW14917.1 afis|EAW24439.1 afla|EED55239.1 afum|EAL86107.1 agla|OJJ78778.1 akaw|GAA84806.1 aluc|OJZ86871.1 anid|CBF73760.1 anig|EHA21770.1 aory|EIT83598.1 asyd|OJJ56587.1 ater|EAU30008.1 atub|OJI83648.1 aver|OJJ06138.1 awen|OJJ32760.1 azon|OJJ43995.1

Group2693: abra|OJJ72117.1 acar|OOF96758.1 acla|EAW14918.1 afis|EAW24440.1 afla|EED55238.1 afum|EAL86108.1 agla|OJJ78779.1 akaw|GAA84805.1 aluc|OJZ86872.1 anid|CBF73758.1 anig|EHA21769.1 aory|EIT83628.1 asyd|OJJ56586.1 ater|EAU30007.1 atub|OJI83647.1 aver|OJJ06139.1 awen|OJJ32759.1 azon|OJJ43994.1

Group2694: abra|OJJ72118.1 acar|OOF96759.1 acla|EAW14919.1 afis|EAW24441.1 afla|EED55237.1 afum|EAL86109.1 agla|OJJ78780.1 akaw|GAA84804.1 aluc|OJZ86873.1 anid|CBF73756.1 anig|EHA21768.1 aory|EIT83564.1 asyd|OJJ56585.1 ater|EAU30006.1 atub|OJI83645.1 aver|OJJ06140.1 awen|OJJ32758.1 azon|OJJ43993.1

Group2695: abra|OJJ72119.1 acar|OOF96760.1 acla|EAW14920.1 afis|EAW24442.1 afla|EED55236.1 afum|EAL86110.1 agla|OJJ78783.1 akaw|GAA84803.1 aluc|OJZ86875.1 anid|CBF73754.1 anig|EHA21767.1 aory|EIT83587.1 asyd|OJJ56584.1 ater|EAU30005.1 atub|OJI83643.1 aver|OJJ06141.1 awen|OJJ32757.1 azon|OJJ43991.1

Group2696: abra|OJJ72123.1 acar|OOF96763.1 acla|EAW14923.1 afis|EAW24445.1 afla|EED55232.1 afum|EAL86114.1 agla|OJJ80290.1 akaw|GAA84800.1 aluc|OJZ86880.1 anid|CBF73749.1 anig|EHA21764.1 aory|EIT83556.1 asyd|OJJ56580.1 ater|EAU30002.1 atub|OJI83639.1 aver|OJJ06144.1 awen|OJJ32754.1 azon|OJJ43989.1

Group2697: abra|OJJ72124.1 acar|OOF96764.1 acla|EAW14930.1 afis|EAW24446.1 afla|EED55231.1 afum|EAL86115.1 agla|OJJ80291.1 akaw|GAA84799.1 aluc|OJZ86881.1 anid|CBF73806.1 anig|EHA21763.1 aory|EIT83582.1 asyd|OJJ56579.1 ater|EAU30001.1 atub|OJI83638.1 aver|OJJ06145.1 awen|OJJ32753.1 azon|OJJ43992.1

Group2699: abra|OJJ72139.1 acar|OOF96777.1 acla|EAW14933.1 afis|EAW24448.1 afla|EED55225.1 afum|EAL86117.1 agla|OJJ80294.1 akaw|GAA84783.1 aluc|OJZ86897.1 anid|CBF73811.1 anig|EHA21746.1 aory|EIT83551.1 asyd|OJJ56576.1 ater|EAU29998.1 atub|OJI83622.1 aver|OJJ06147.1 awen|OJJ32749.1 azon|OJJ45300.1

Group2700: abra|OJJ72140.1 acar|OOF96778.1 acla|EAW14934.1 afis|EAW24449.1 afla|EED55224.1 afum|EAL86118.1 agla|OJJ80295.1 akaw|GAA84784.1 aluc|OJZ86896.1 anid|CBF73813.1 anig|EHA21745.1 aory|EIT83509.1 asyd|OJJ56575.1 ater|EAU29997.1 atub|OJI83623.1 aver|OJJ06148.1 awen|OJJ32748.1 azon|OJJ45301.1

Group2701: abra|OJJ72141.1 acar|OOF96779.1 acla|EAW14935.1 afis|EAW24450.1 afla|EED55223.1 afum|EAL86119.1 agla|OJJ80296.1 akaw|GAA84782.1 aluc|OJZ86898.1 anid|CBF73815.1 anig|EHA21744.1 aory|EIT83569.1 asyd|OJJ56574.1 ater|EAU29996.1 atub|OJI83621.1 aver|OJJ06149.1 awen|OJJ32747.1 azon|OJJ45299.1

Group2702: abra|OJJ72145.1 acar|OOF96782.1 acla|EAW14939.1 afis|EAW24454.1 afla|EED55220.1 afum|EAL86123.1 agla|OJJ80301.1 akaw|GAA84779.1 aluc|OJZ86902.1 anid|CBF73822.1 anig|EHA21741.1 aory|EIT83594.1 asyd|OJJ56567.1 ater|EAU29991.1 atub|OJI83618.1 aver|OJJ06154.1 awen|OJJ32743.1 azon|OJJ45293.1

Group2703: abra|OJJ72146.1 acar|OOF96783.1 acla|EAW14941.1 afis|EAW24456.1 afla|EED55218.1 afum|EAL86126.1 agla|OJJ80303.1 akaw|GAA84778.1 aluc|OJZ86903.1 anid|CBF73824.1 anig|EHA21740.1 aory|EIT83584.1 asyd|OJJ56566.1 ater|EAU29988.1 atub|OJI83617.1 aver|OJJ06155.1 awen|OJJ32741.1 azon|OJJ45291.1

Group2704: abra|OJJ72147.1 acar|OOF96784.1 acla|EAW14942.1 afis|EAW24457.1 afla|EED55217.1 afum|EAL86127.1 agla|OJJ80304.1 akaw|GAA84777.1 aluc|OJZ86904.1 anid|CBF73826.1 anig|EHA21739.1 aory|EIT83603.1 asyd|OJJ56564.1 ater|EAU29985.1 atub|OJI83616.1 aver|OJJ06157.1 awen|OJJ32740.1 azon|OJJ45290.1

Group2705: abra|OJJ72148.1 acar|OOF96785.1 acla|EAW14943.1 afis|EAW24458.1 afla|EED55216.1 afum|EAL86128.1 agla|OJJ80305.1 akaw|GAA84776.1 aluc|OJZ86905.1 anid|CBF73828.1 anig|EHA21738.1 aory|EIT83601.1 asyd|OJJ56563.1 ater|EAU29984.1 atub|OJI83615.1 aver|OJJ06158.1 awen|OJJ32739.1 azon|OJJ45289.1

Group2706: abra|OJJ72149.1 acar|OOF96786.1 acla|EAW14944.1 afis|EAW24459.1 afla|EED55215.1 afum|EAL86129.1 agla|OJJ80306.1 akaw|GAA84775.1 aluc|OJZ86906.1 anid|CBF73830.1 anig|EHA21737.1 aory|EIT83574.1 asyd|OJJ56562.1 ater|EAU29983.1 atub|OJI83614.1 aver|OJJ06159.1 awen|OJJ32738.1 azon|OJJ45288.1

Group2707: abra|OJJ72150.1 acar|OOF96787.1 acla|EAW14945.1 afis|EAW24460.1 afla|EED55214.1 afum|EAL86130.1 agla|OJJ80308.1 akaw|GAA84774.1 aluc|OJZ86909.1 anid|CBF73832.1 anig|EHA21736.1 aory|EIT83521.1 asyd|OJJ56561.1 ater|EAU29982.1 atub|OJI83613.1 aver|OJJ06160.1 awen|OJJ32736.1 azon|OJJ45287.1

Group2708: abra|OJJ72209.1 acar|OOF96830.1 acla|EAW14967.1 afis|EAW24490.1 afla|EED54675.1 afum|EAL86159.1 agla|OJJ81567.1 akaw|GAA84725.1 aluc|OJZ86961.1 anid|CBF89709.1 anig|EHA21687.1 aory|EIT78852.1 asyd|OJJ62250.1 ater|EAU29966.1 atub|OJI83562.1 aver|OJI96360.1 awen|OJJ32706.1 azon|OJJ45248.1

Group2711: abra|OJJ72290.1 acar|OOF94933.1 acla|EAW12012.1 afis|EAW19652.1 afla|EED57003.1 afum|EAL86870.1 agla|OJJ80798.1 akaw|GAA86042.1 aluc|OJZ90271.1 anid|CBF71361.1 anig|EHA23763.1 aory|EIT77490.1 asyd|OJJ55084.1 ater|EAU32876.1 atub|OJI81695.1 aver|OJJ07123.1 awen|OJJ41903.1 azon|OJJ42697.1

Group2712: abra|OJJ72296.1 acar|OOF94928.1 acla|EAW12007.1 afis|EAW19647.1 afla|EED56998.1 afum|EAL86875.1 agla|OJJ80789.1 akaw|GAA86047.1 aluc|OJZ90276.1 anid|CBF71354.1 anig|EHA23768.1 aory|EIT77515.1 asyd|OJJ55089.1 ater|EAU32881.1 atub|OJI81700.1 aver|OJJ07118.1 awen|OJJ41898.1 azon|OJJ42702.1

Group2713: abra|OJJ72298.1 acar|OOF94926.1 acla|EAW12006.1 afis|EAW19646.1 afla|EED56997.1 afum|EAL86876.1 agla|OJJ80788.1 akaw|GAA86049.1 aluc|OJZ90278.1 anid|CBF71352.1 anig|EHA23769.1 aory|EIT77535.1 asyd|OJJ55091.1 ater|EAU32883.1 atub|OJI81703.1 aver|OJJ07117.1 awen|OJJ41897.1 azon|OJJ42703.1

Group2714: abra|OJJ72299.1 acar|OOF94924.1 acla|EAW12005.1 afis|EAW19645.1 afla|EED56996.1 afum|EAL86877.1 agla|OJJ80787.1 akaw|GAA86050.1 aluc|OJZ90280.1 anid|CBF71350.1 anig|EHA23770.1 aory|EIT77477.1 asyd|OJJ55092.1 ater|EAU32884.1 atub|OJI81704.1 aver|OJJ07116.1 awen|OJJ41896.1 azon|OJJ42704.1

Group2715: abra|OJJ72318.1 acar|OOF94893.1 acla|EAW12000.1 afis|EAW19640.1 afla|EED56991.1 afum|EAL86882.1 agla|OJJ80782.1 akaw|GAA86067.1 aluc|OJZ90301.1 anid|CBF71343.1 anig|EHA23789.1 aory|EIT77491.1 asyd|OJJ55098.1 ater|EAU32889.1 atub|OJI81727.1 aver|OJJ07108.1 awen|OJJ41885.1 azon|OJJ42710.1

Group2716: abra|OJJ72324.1 acar|OOF89799.1 acla|EAW11999.1 afis|EAW19639.1 afla|EED56990.1 afum|EAL86883.1 agla|OJJ80781.1 akaw|GAA86074.1 aluc|OJZ90309.1 anid|CBF71341.1 anig|EHA23796.1 aory|EIT77478.1 asyd|OJJ55099.1 ater|EAU32890.1 atub|OJI81734.1 aver|OJJ07107.1 awen|OJJ41884.1 azon|OJJ42711.1

Group2717: abra|OJJ72327.1 acar|OOF94887.1 acla|EAW11996.1 afis|EAW19636.1 afla|EED56988.1 afum|EAL86886.1 agla|OJJ80778.1 akaw|GAA86077.1 aluc|OJZ90312.1 anid|CBF71335.1 anig|EHA23799.1 aory|EIT77538.1 asyd|OJJ55103.1 ater|EAU32892.1 atub|OJI81737.1 aver|OJJ07104.1 awen|OJJ41881.1 azon|OJJ47079.1

Group2718: abra|OJJ72328.1 acar|OOF94886.1 acla|EAW11995.1 afis|EAW19635.1 afla|EED56986.1 afum|EAL86887.1 agla|OJJ80777.1 akaw|GAA86078.1 aluc|OJZ90313.1 anid|CBF71333.1 anig|EHA23800.1 aory|EIT77532.1 asyd|OJJ55104.1 atub|OJI81738.1 aver|OJJ07103.1 awen|OJJ41880.1 azon|OJJ47078.1 ater|EAU32893.1

Group2719: abra|OJJ72338.1 acar|OOF94878.1 acla|EAW11985.1 afis|EAW19625.1 afla|EED56977.1 afum|EBA27293.1 agla|OJJ80768.1 akaw|GAA86089.1 aluc|OJZ90318.1 anid|CBF71315.1 anig|EHA23804.1 aory|EIT77446.1 asyd|OJJ55113.1 ater|EAU32903.1 atub|OJI81747.1 aver|OJJ07093.1 awen|OJJ41872.1 azon|OJJ47067.1

Group2720: abra|OJJ72339.1 acar|OOF94877.1 acla|EAW11984.1 afis|EAW19624.1 afla|EED56976.1 afum|EAL86898.1 agla|OJJ80767.1 akaw|GAA86090.1 aluc|OJZ90319.1 anid|CBF71313.1 anig|EHA23805.1 aory|EIT77523.1 asyd|OJJ55114.1 ater|EAU32902.1 atub|OJI81748.1 aver|OJJ07092.1 awen|OJJ41871.1 azon|OJJ47066.1

Group2721: abra|OJJ72343.1 acar|OOF94874.1 acla|EAW11983.1 afis|EAW19621.1 afla|EED56973.1 afum|EAL86900.1 agla|OJJ80766.1 akaw|GAA86092.1 aluc|OJZ90322.1 anid|CBF71293.1 anig|EHA23808.1 aory|EIT77575.1 asyd|OJJ55117.1 ater|EAU32905.1 atub|OJI81749.1 aver|OJJ07089.1 awen|OJJ41868.1 azon|OJJ47061.1

Group2722: abra|OJJ72344.1 acar|OOF94873.1 acla|EAW11982.1 afis|EAW19620.1 afla|EED56972.1 afum|EAL86902.1 agla|OJJ80765.1 akaw|GAA86093.1 aluc|OJZ90323.1 anid|CBF71296.1 anig|EHA23809.1

aory|EIT77533.1 asyd|OJJ55118.1 ater|EAU32906.1 atub|OJI81750.1 aver|OJJ07088.1 awen|OJJ41867.1 azon|OJJ47060.1

Group2723: abra|OJJ72345.1 acar|OOF94872.1 acla|EAW11981.1 afis|EAW19619.1 afla|EED56967.1 afum|EAL86903.1 agla|OJJ80764.1 akaw|GAA86094.1 aluc|OJZ90324.1 anid|CBF71298.1 anig|EHA23810.1 aory|EIT77589.1 asyd|OJJ55119.1 ater|EAU32907.1 atub|OJI81751.1 aver|OJJ07087.1 awen|OJJ41866.1 azon|OJJ47059.1

Group2724: abra|OJJ72346.1 acar|OOF94871.1 acla|EAW11980.1 afis|EAW19618.1 afla|EED56968.1 afum|EAL86904.1 agla|OJJ80763.1 akaw|GAA86095.1 aluc|OJZ90325.1 anid|CBF71300.1 anig|EHA23811.1 aory|EIT77479.1 asyd|OJJ55120.1 ater|EAU32908.1 atub|OJI81752.1 aver|OJJ07086.1 awen|OJJ41865.1 azon|OJJ47058.1

Group2725: abra|OJJ72349.1 acar|OOF94869.1 acla|EAW11977.1 afis|EAW19609.1 afla|EED56969.1 afum|EAL86913.1 agla|OJJ80761.1 akaw|GAA86096.1 aluc|OJZ90328.1 anid|CBF71302.1 anig|EHA23812.1 aory|EIT77540.1 asyd|OJJ55121.1 ater|EAU32910.1 atub|OJI81755.1 aver|OJJ07083.1 awen|OJJ41862.1 azon|OJJ47055.1

Group2726: abra|OJJ72351.1 acar|OOF94867.1 acla|EAW11975.1 afis|EAW19611.1 afla|EED56966.1 afum|EAL86911.1 agla|OJJ80759.1 akaw|GAA86098.1 aluc|OJZ90330.1 anid|CBF71306.1 anig|EHA23814.1 aory|EIT77494.1 asyd|OJJ55123.1 ater|EAU32921.1 atub|OJI81757.1 aver|OJJ07080.1 awen|OJJ41859.1 azon|OJJ47053.1

Group2727: abra|OJJ72352.1 acar|OOF94866.1 acla|EAW11973.1 afis|EAW19613.1 afla|EED56961.1 afum|EAL86909.1 agla|OJJ80758.1 akaw|GAA86099.1 aluc|OJZ90331.1 anid|CBF71308.1 anig|EHA23815.1 aory|EIT77512.1 asyd|OJJ55126.1 ater|EAU32914.1 atub|OJI81758.1 aver|OJJ07078.1 awen|OJJ41857.1 azon|OJJ47051.1

Group2728: abra|OJJ72353.1 acar|OOF94865.1 acla|EAW11972.1 afis|EAW19614.1 afla|EED56962.1 afum|EAL86908.1 agla|OJJ80757.1 akaw|GAA86100.1 aluc|OJZ90332.1 anid|CBF71310.1 anig|EHA23816.1 aory|EIT77559.1 asyd|OJJ55127.1 ater|EAU32915.1 atub|OJI81759.1 aver|OJJ07077.1 awen|OJJ41856.1 azon|OJJ47050.1

Group2729: abra|OJJ72355.1 acar|OOF94863.1 acla|EAW11961.1 afis|EAW19598.1 afla|EED56954.1 afum|EAL86920.1 agla|OJJ80740.1 akaw|GAA86102.1 aluc|OJZ90334.1 anid|CBF71287.1 anig|EHA23818.1 aory|EIT77544.1 asyd|OJJ55129.1 ater|EAU32927.1 atub|OJI81761.1 aver|OJJ07074.1 awen|OJJ41844.1 azon|OJJ44888.1

Group2730: abra|OJJ72368.1 acar|OOF94849.1 acla|EAW11964.1 afis|EAW19601.1 afla|EED56957.1 afum|EAL86917.1 agla|OJJ80743.1 akaw|GAA86118.1 aluc|OJZ90356.1 anid|CBF71281.1 anig|EHA23834.1 aory|EIT77555.1 asyd|OJJ55133.1 ater|EAU32924.1 atub|OJI81783.1 aver|OJJ07071.1 awen|OJJ41839.1 azon|OJJ47044.1

Group2732: abra|OJJ72373.1 acar|OOF94855.1 acla|EAW11967.1 afis|EAW19617.1 afla|EED56965.1 afum|EAL86905.1 agla|OJJ80746.1 akaw|GAA86123.1 aluc|OJZ90362.1 anid|CBF71277.1 anig|EHA23829.1 aory|EIT77547.1 asyd|OJJ55139.1 ater|EAU32917.1 atub|OJI81789.1 aver|OJJ07066.1 awen|OJJ41850.1 azon|OJJ47046.1

Group2733: abra|OJJ72377.1 acar|OOF94841.1 acla|EAW11958.1 afis|EAW19595.1 afla|EED56951.1 afum|EAL86923.1 agla|OJJ80736.1 akaw|GAA86125.1 aluc|OJZ90364.1 anid|CBF71262.1 anig|EHA23839.1 aory|EIT77501.1 asyd|OJJ55150.1 ater|EAU32929.1 atub|OJI81791.1 aver|OJJ07057.1 awen|OJJ41849.1 azon|OJJ47020.1

Group2734: abra|OJJ72379.1 acar|OOF94840.1 acla|EAW11957.1 afis|EAW19594.1 afla|EED56950.1 afum|EAL86924.1 agla|OJJ80735.1 akaw|GAA86127.1 aluc|OJZ90366.1 anid|CBF71275.1 anig|EHA23841.1 aory|EIT77449.1 asyd|OJJ55149.1 ater|EAU32930.1 atub|OJI81793.1 aver|OJJ07058.1 awen|OJJ41811.1 azon|OJJ47021.1

Group2735: abra|OJJ72381.1 acar|OOF94838.1 acla|EAW11955.1 afis|EAW19592.1 afla|EED56948.1 afum|EAL86926.1 agla|OJJ80733.1 akaw|GAA86128.1 aluc|OJZ90368.1 anid|CBF71268.1 anig|EHA23842.1 aory|EIT77465.1 asyd|OJJ55147.1 ater|EAU32933.1 atub|OJI81794.1 aver|OJJ07060.1 awen|OJJ41809.1 azon|OJJ47023.1

Group2736: abra|OJJ72388.1 acar|OOF94835.1 acla|EAW11949.1 afis|EAW19586.1 afla|EED56914.1 afum|EAL86932.1 agla|OJJ80723.1 akaw|GAA86136.1 aluc|OJZ90374.1 anid|CBF71254.1 anig|EHA23848.1 aory|EIT77498.1 asyd|OJJ55153.1 ater|EAU32962.1 atub|OJI81800.1 aver|OJJ07054.1 awen|OJJ41800.1 azon|OJJ47031.1

Group2737: abra|OJJ72389.1 acar|OOF94834.1 acla|EAW11948.1 afis|EAW19585.1 afla|EED56913.1 afum|EAL86933.1 agla|OJJ80722.1 akaw|GAA86137.1 aluc|OJZ90376.1 anid|CBF71253.1 anig|EHA23849.1 aory|EIT77525.1 asyd|OJJ55155.1 ater|EAU32963.1 atub|OJI81801.1 aver|OJJ07053.1 awen|OJJ41799.1 azon|OJJ47032.1

Group2738: abra|OJJ72391.1 acar|OOF94833.1 acla|EAW11947.1 afis|EAW19584.1 afla|EED56912.1 afum|EAL86934.1 agla|OJJ80712.1 akaw|GAA86138.1 aluc|OJZ90378.1 anid|CBF71251.1 anig|EHA23850.1 aory|EIT77463.1 asyd|OJJ55156.1 ater|EAU32967.1 atub|OJI81803.1 aver|OJJ07052.1 awen|OJJ41798.1 azon|OJJ47033.1

Group2739: abra|OJJ72394.1 acar|OOF94832.1 acla|EAW11946.1 afis|EAW19583.1 afla|EED56911.1 afum|EAL86935.2 agla|OJJ80711.1 akaw|GAA86139.1 aluc|OJZ90379.1 anid|CBF71249.1 anig|EHA23851.1 aory|EIT77567.1 asyd|OJJ55157.1 ater|EAU32968.1 atub|OJI81804.1 aver|OJJ07051.1 awen|OJJ41797.1 azon|OJJ47034.1

Group2740: abra|OJJ72395.1 acar|OOF94831.1 acla|EAW11945.1 afis|EAW19581.1 afla|EED56910.1 afum|EAL86937.1 agla|OJJ80710.1 akaw|GAA86140.1 aluc|OJZ90380.1 anid|CBF71245.1 anig|EHA23852.1 aory|EIT77560.1 asyd|OJJ55159.1 ater|EAU32972.1 atub|OJI81806.1 aver|OJJ07049.1 awen|OJJ41795.1 azon|OJJ47036.1

Group2741: abra|OJJ72396.1 acar|OOF94830.1 acla|EAW11944.1 afis|EAW19580.1 afla|EED56909.1 afum|EAL86938.1 agla|OJJ80709.1 akaw|GAA86141.1 aluc|OJZ90381.1 anid|CBF71243.1 anig|EHA23853.1 aory|EIT77483.1 asyd|OJJ55160.1 ater|EAU32973.1 atub|OJI81807.1 aver|OJJ07047.1 awen|OJJ41794.1 azon|OJJ47037.1

Group2742: abra|OJJ72397.1 acar|OOF94829.1 acla|EAW11943.1 afis|EAW19579.1 afla|EED56804.1 afum|EAL86939.1 agla|OJJ80708.1 akaw|GAA86142.1 aluc|OJZ90382.1 anid|CBF71239.1 anig|EHA23854.1 aory|EIT73874.1 asyd|OJJ55163.1 ater|EAU32976.1 atub|OJI81808.1 aver|OJJ07044.1 awen|OJJ41792.1 azon|OJJ47041.1

Group2743: abra|OJJ72399.1 acar|OOF94828.1 acla|EAW11941.1 afis|EAW19577.1 afla|EED56805.1 afum|EAL86941.2 agla|OJJ80706.1 akaw|GAA86144.1 aluc|OJZ90384.1 anid|CBF71236.1 anig|EHA23856.1 aory|EIT73858.1 asyd|OJJ55165.1 ater|EAU33003.1 atub|OJI81811.1 aver|OJJ07042.1 awen|OJJ41790.1 azon|OJJ47039.1

Group2744: abra|OJJ72401.1 acar|OOF94827.1 acla|EAW11940.1 afis|EAW19575.1 afla|EED56808.1 afum|EAL86942.1 agla|OJJ80704.1 akaw|GAA86145.1 aluc|OJZ90386.1 anid|CBF71234.1 anig|EHA23857.1 aory|EIT73879.1 asyd|OJJ55166.1 ater|EAU33002.1 atub|OJI81814.1 aver|OJJ07040.1 awen|OJJ41788.1 azon|OJJ44890.1

Group2745: abra|OJJ72402.1 acar|OOF94826.1 acla|EAW11939.1 afis|EAW19574.1 afla|EED56809.1 afum|EAL86943.1 agla|OJJ80702.1 akaw|GAA86146.1 aluc|OJZ90387.1 anid|CBF71232.1 anig|EHA23858.1 aory|EIT73889.1 asyd|OJJ55167.1 ater|EAU33001.1 atub|OJI81815.1 aver|OJJ07039.1 awen|OJJ41787.1 azon|OJJ44891.1

Group2746: abra|OJJ72404.1 acar|OOF94824.1 acla|EAW11937.1 afis|EAW19572.1 afla|EED56811.1 afum|EAL86945.1 agla|OJJ80700.1 akaw|GAA86148.1 aluc|OJZ90389.1 anid|CBF71228.1 anig|EHA23859.1 aory|EIT73949.1 asyd|OJJ55170.1 ater|EAU32995.1 atub|OJI81818.1 aver|OJJ07037.1 awen|OJJ41785.1 azon|OJJ44893.1

Group2747: abra|OJJ72405.1 acar|OOF94823.1 acla|EAW11936.1 afis|EAW19571.1 afla|EED56812.1 afum|EAL86946.1 agla|OJJ80699.1 akaw|GAA86149.1 aluc|OJZ90390.1 anid|CBF71226.1 anig|EHA23860.1 aory|EIT73876.1 asyd|OJJ55171.1 ater|EAU32994.1 atub|OJI81819.1 aver|OJJ07036.1 awen|OJJ41784.1 azon|OJJ44894.1

Group2748: abra|OJJ72408.1 acar|OOF94821.1 acla|EAW11933.1 afis|EAW19569.1 afla|EED56814.1 afum|EAL86947.1 agla|OJJ80697.1 akaw|GAA86151.1 aluc|OJZ90392.1 anid|CBF78033.1 anig|EHA23862.1 aory|EIT73916.1 asyd|OJJ55227.1 ater|EAU32992.1 atub|OJI81821.1 aver|OJJ06994.1 awen|OJJ41782.1 azon|OJJ44896.1

Group2749: abra|OJJ72412.1 acar|OOF94817.1 acla|EAW11929.1 afis|EAW19563.1 afla|EED56817.1 afum|EAL86949.1 agla|OJJ80692.1 akaw|GAA86155.1 aluc|OJZ90396.1 anid|CBF78024.1 anig|EHA23866.1 aory|EIT73850.1 asyd|OJJ55233.1 ater|EAU32986.1 atub|OJI81827.1 aver|OJJ06990.1 awen|OJJ41778.1 azon|OJJ44899.1

Group2750: abra|OJJ72413.1 acar|OOF94816.1 acla|EAW12857.1 afis|EAW17821.1 afla|EED56818.1 afum|EAL91631.1 agla|OJJ80690.1 akaw|GAA86156.1 aluc|OJZ90397.1 anid|CBF78026.1 anig|EHA23867.1 aory|EIT73888.1 asyd|OJJ55232.1 ater|EAU32985.1 atub|OJI81828.1 aver|OJJ06991.1 awen|OJJ41777.1 azon|OJJ44900.1

Group2751: abra|OJJ72414.1 acar|OOF94815.1 acla|EAW12858.1 afis|EAW17820.1 afla|EED56819.1 afum|EAL91630.1 agla|OJJ80689.1 akaw|GAA86157.1 aluc|OJZ90398.1 anid|CBF78027.1 anig|EHA23868.1 aory|EIT73947.1 asyd|OJJ55231.1 ater|EAU32984.1 atub|OJI81829.1 aver|OJJ06992.1 awen|OJJ41776.1 azon|OJJ44901.1

Group2752: abra|OJJ72415.1 acar|OOF94814.1 acla|EAW12859.1 afis|EAW17808.1 afla|EED56820.1 afum|EAL91616.1 agla|OJJ80688.1 akaw|GAA86158.1 aluc|OJZ90399.1 anid|CBF78029.1 anig|EHA23869.1

aory|EIT73877.1 asyd|OJJ55230.1 ater|EAU32982.1 atub|OJI81830.1 aver|OJJ06993.1 awen|OJJ41775.1 azon|OJJ44902.1

Group2754: abra|OJJ72421.1 acar|OOF90370.1 acla|EAW12862.1 afis|EAW17811.1 afla|EED46162.1 afum|EAL91619.1 agla|OJJ80655.1 akaw|GAA86163.1 aluc|OJZ90404.1 anid|CBF78013.1 anig|EHA23872.1 aory|EIT76383.1 asyd|OJJ55240.1 ater|EAU33017.1 atub|OJI81835.1 aver|OJJ06983.1 awen|OJJ41761.1 azon|OJJ44878.1

Group2755: abra|OJJ72422.1 acar|OOF90371.1 acla|EAW12861.1 afis|EAW17810.1 afla|EED46161.1 afum|EAL91618.1 agla|OJJ80654.1 akaw|GAA86164.1 aluc|OJZ90405.1 anid|CBF78014.1 anig|EHA23873.1 aory|EIT76437.1 asyd|OJJ55239.1 ater|EAU33016.1 atub|OJI81836.1 aver|OJJ06984.1 awen|OJJ41762.1 azon|OJJ44879.1

Group2757: abra|OJJ72425.1 acar|OOF94810.1 acla|EAW12659.1 afis|EAW17823.1 afla|EED46166.1 afum|EAL91633.1 agla|OJJ80641.1 akaw|GAA86167.1 aluc|OJZ90408.1 anid|CBF78009.1 anig|EHA23876.1 aory|EIT76477.1 asyd|OJJ55242.1 ater|EAU33024.1 atub|OJI81840.1 aver|OJJ06982.1 awen|OJJ41751.1 azon|OJJ48443.1

Group2758: abra|OJJ72428.1 acar|OOF94804.1 acla|EAW12661.1 afis|EAW17825.1 afla|EED46163.1 afum|EAL91635.1 agla|OJJ80646.1 akaw|GAA86169.1 aluc|OJZ90412.1 anid|CBF78005.1 anig|EHA23878.1 aory|EIT76524.1 asyd|OJJ55245.1 ater|EAU33026.1 atub|OJI81843.1 aver|OJJ06979.1 awen|OJJ41755.1 azon|OJJ48445.1

Group2759: abra|OJJ72429.1 acar|OOF94805.1 acla|EAW12662.1 afis|EAW17826.1 afla|EED46168.1 afum|EAL91636.1 agla|OJJ80647.1 akaw|GAA86170.1 aluc|OJZ90413.1 anid|CBF78003.1 anig|EHA23879.1 aory|EIT76408.1 asyd|OJJ55246.1 ater|EAU33027.1 atub|OJI81845.1 aver|OJJ06978.1 awen|OJJ41756.1 azon|OJJ48446.1

Group2760: abra|OJJ72430.1 acar|OOF94803.1 acla|EAW12663.1 afis|EAW17827.1 afla|EED46169.1 afum|EAL91637.1 agla|OJJ80648.1 akaw|GAA86171.1 aluc|OJZ90414.1 anid|CBF78001.1 anig|EHA23880.1 aory|EIT76516.1 asyd|OJJ55247.1 ater|EAU33031.1 atub|OJI81846.1 aver|OJJ06977.1 awen|OJJ41757.1 azon|OJJ48447.1

Group2761: abra|OJJ72439.1 acar|OOF94798.1 acla|EAW12672.1 afis|EAW17835.1 afla|EED46180.1 afum|EAL91645.1 agla|OJJ83131.1 akaw|GAA86178.1 aluc|OJZ90423.1 anid|CBF77987.1 anig|EHA23892.1 aory|EIT76377.1 asyd|OJJ55256.1 ater|EAU33039.1 atub|OJI81855.1 aver|OJJ06968.1 awen|OJJ41741.1 azon|OJJ48437.1

Group2762: abra|OJJ72440.1 acar|OOF94797.1 acla|EAW12673.1 afis|EAW17836.1 afla|EED46181.1 afum|EAL91646.1 agla|OJJ83130.1 akaw|GAA86179.1 aluc|OJZ90424.1 anid|CBF77985.1 anig|EHA23893.1 aory|EIT76515.1 asyd|OJJ55257.1 ater|EAU33040.1 atub|OJI81856.1 aver|OJJ06967.1 awen|OJJ41740.1 azon|OJJ48436.1

Group2763: abra|OJJ72443.1 acar|OOF94793.1 acla|EAW12676.1 afis|EAW17839.1 afla|EED46184.1 afum|EAL91649.1 agla|OJJ83128.1 akaw|GAA86182.1 aluc|OJZ90427.1 anid|CBF77979.1 anig|EHA23897.1 aory|EIT76493.1 asyd|OJJ55260.1 ater|EAU33042.1 atub|OJI81859.1 aver|OJJ06965.1 awen|OJJ41737.1 azon|OJJ48434.1

Group2764: abra|OJJ72445.1 acar|OOF94791.1 acla|EAW12678.1 afis|EAW17841.1 afla|EED46186.1 afum|EAL91650.1 agla|OJJ83126.1 akaw|GAA86183.1 aluc|OJZ90429.1 anid|CBF77975.1 anig|EHA23898.1 aory|EIT76513.1 asyd|OJJ55262.1 ater|EAU33043.1 atub|OJI81861.1 aver|OJJ06963.1 awen|OJJ41735.1 azon|OJJ48432.1

Group2765: abra|OJJ72446.1 acar|OOF94790.1 acla|EAW12679.1 afis|EAW17842.1 afla|EED46187.1 afum|EAL91651.1 agla|OJJ83125.1 akaw|GAA86184.1 aluc|OJZ90430.1 anid|CBF77973.1 anig|EHA23899.1 aory|EIT76407.1 asyd|OJJ55263.1 ater|EAU33044.1 atub|OJI81862.1 aver|OJJ06962.1 awen|OJJ41734.1 azon|OJJ48431.1

Group2766: abra|OJJ72450.1 acar|OOF94786.1 acla|EAW12684.1 afis|EAW17847.1 afla|EED46201.1 afum|EAL91656.1 agla|OJJ83122.1 akaw|GAA86187.1 aluc|OJZ90435.1 anid|CBF77964.1 anig|EHA23902.1 aory|EIT76452.1 asyd|OJJ55269.1 ater|EAU33049.1 atub|OJI81866.1 aver|OJJ06958.1 awen|OJJ41726.1 azon|OJJ48425.1

Group2767: abra|OJJ72458.1 acar|OOF94779.1 acla|EAW12690.1 afis|EAW17854.1 afla|EED46208.1 afum|EAL91662.1 agla|OJJ83116.1 akaw|GAA86194.1 aluc|OJZ90445.1 anid|CBF77955.1 anig|EHA23908.1 aory|EIT76378.1 asyd|OJJ55275.1 ater|EAU33056.1 atub|OJI81873.1 aver|OJJ06952.1 awen|OJJ41719.1 azon|OJJ48416.1

Group2768: abra|OJJ72459.1 acar|OOF94780.1 acla|EAW12691.1 afis|EAW17855.1 afla|EED46209.1 afum|EAL91663.1 agla|OJJ83115.1 akaw|GAA86195.1 aluc|OJZ90446.1 anid|CBF77953.1 anig|EHA23909.1 aory|EIT76395.1 asyd|OJJ55276.1 ater|EAU33057.1 atub|OJI81874.1 aver|OJJ06951.1 awen|OJJ41718.1 azon|OJJ48415.1



Group2769: abra|OJJ72460.1 acar|OOF94778.1 acla|EAW12692.1 afis|EAW17856.1 afla|EED46210.1 afum|EAL91664.1 agla|OJJ83113.1 akaw|GAA86196.1 aluc|OJZ90447.1 anid|CBF77951.1 anig|EHA23910.1 aory|EIT76442.1 asyd|OJJ55277.1 ater|EAU33058.1 atub|OJI81875.1 aver|OJJ06950.1 awen|OJJ41716.1 azon|OJJ48411.1

Group2770: abra|OJJ72461.1 acar|OOF94777.1 acla|EAW12693.1 afis|EAW17857.1 afla|EED46212.1 afum|EAL91665.1 agla|OJJ83112.1 akaw|GAA86197.1 aluc|OJZ90448.1 anid|CBF77949.1 anig|EHA23911.1 aory|EIT76364.1 asyd|OJJ55278.1 ater|EAU33059.1 atub|OJI81876.1 aver|OJJ06949.1 awen|OJJ41715.1 azon|OJJ48410.1

Group2771: abra|OJJ72462.1 acar|OOF94775.1 acla|EAW12694.1 afis|EAW17858.1 afla|EED46213.1 afum|EAL91666.1 agla|OJJ83111.1 akaw|GAA86198.1 aluc|OJZ90449.1 anid|CBF77947.1 anig|EHA23912.1 aory|EIT76487.1 asyd|OJJ55279.1 ater|EAU33064.1 atub|OJI81877.1 aver|OJJ06948.1 awen|OJJ41714.1 azon|OJJ48409.1

Group2772: abra|OJJ72467.1 acar|OOF94773.1 acla|EAW12699.1 afis|EAW17862.1 afla|EED46225.1 afum|EAL91670.2 agla|OJJ83101.1 akaw|GAA86203.1 aluc|OJZ90454.1 anid|CBF88078.1 anig|EHA23916.1 aory|EIT76473.1 asyd|OJJ57087.1 ater|EAU33070.1 atub|OJI81881.1 aver|OJJ03214.1 awen|OJJ41709.1 azon|OJJ48404.1

Group2773: abra|OJJ72468.1 acar|OOF94772.1 acla|EAW12700.1 afis|EAW17863.1 afla|EED46226.1 afum|EAL91671.1 agla|OJJ83100.1 akaw|GAA86204.1 aluc|OJZ90455.1 anid|CBF84085.1 anig|EHA23917.1 aory|EIT76453.1 asyd|OJJ57088.1 ater|EAU33078.1 atub|OJI81882.1 aver|OJJ03213.1 awen|OJJ41707.1 azon|OJJ48403.1

Group2774: abra|OJJ72471.1 acar|OOF94764.1 acla|EAW12704.1 afis|EAW17867.1 afla|EED46236.1 afum|EAL91675.1 agla|OJJ83087.1 akaw|GAA86209.1 aluc|OJZ90458.1 anid|CBF89893.1 anig|EHA23920.1 aory|EIT76466.1 asyd|OJJ62139.1 ater|EAU33082.1 atub|OJI81885.1 aver|OJI96249.1 awen|OJJ41704.1 azon|OJJ48400.1

Group2775: abra|OJJ72476.1 acar|OOF94760.1 acla|EAW12707.1 afis|EAW17870.1 afla|EED46238.1 afum|EAL91678.1 agla|OJJ83090.1 akaw|GAA86212.1 aluc|OJZ90462.1 anid|CBF89899.1 anig|EHA23923.1 aory|EIT76429.1 asyd|OJJ62136.1 ater|EAU33088.1 atub|OJI81888.1 aver|OJI96246.1 awen|OJJ41700.1 azon|OJJ48397.1

Group2776: abra|OJJ72478.1 acar|OOF94756.1 acla|EAW12709.1 afis|EAW17872.1 afla|EED46239.1 afum|EAL91680.1 agla|OJJ83092.1 akaw|GAA86214.1 aluc|OJZ90465.1 anid|CBF89903.1 anig|EHA23925.1 aory|EIT76379.1 asyd|OJJ62134.1 ater|EAU33090.1 atub|OJI81890.1 aver|OJI96244.1 awen|OJJ41698.1 azon|OJJ48395.1

Group2778: abra|OJJ72488.1 acar|OOF94747.1 acla|EAW12719.1 afis|EAW17882.1 afla|EED46269.1 afum|EAL91690.1 agla|OJJ83065.1 akaw|GAA86223.1 aluc|OJZ90475.1 anig|EHA23934.1 aory|EIT76427.1 asyd|OJJ57008.1 ater|EAU33102.1 atub|OJI81900.1 aver|OJJ03279.1 awen|OJJ41684.1 azon|OJJ48392.1 anid|CBF77035.1

Group2779: abra|OJJ72489.1 acar|OOF92642.1 acla|EAW12720.1 afis|EAW17883.1 afla|EED46270.1 afum|EAL91691.1 agla|OJJ83064.1 akaw|GAA86224.1 aluc|OJZ90476.1 anid|CBF77033.1 anig|EHA23935.1 aory|EIT76482.1 asyd|OJJ57009.1 ater|EAU33103.1 atub|OJI81901.1 aver|OJJ03278.1 awen|OJJ41682.1 azon|OJJ48391.1

Group2780: abra|OJJ72493.1 acar|OOF94745.1 acla|EAW12722.1 afis|EAW17885.1 afla|EED46272.1 afum|EAL91693.1 agla|OJJ83062.1 akaw|GAA86227.1 aluc|OJZ90479.1 anid|CBF77029.1 anig|EHA23938.1 aory|EIT76321.1 asyd|OJJ57011.1 ater|EAU33105.1 atub|OJI81904.1 aver|OJJ03276.1 awen|OJJ41674.1 azon|OJJ48389.1

Group2781: abra|OJJ72494.1 acar|OOF94744.1 acla|EAW12723.1 afis|EAW17886.1 afla|EED46273.1 afum|EAL91694.1 agla|OJJ83061.1 akaw|GAA86228.1 aluc|OJZ90480.1 anid|CBF77027.1 anig|EHA23939.1 aory|EIT76334.1 asyd|OJJ57012.1 ater|EAU33106.1 atub|OJI81905.1 aver|OJJ03275.1 awen|OJJ41673.1 azon|OJJ48388.1

Group2782: abra|OJJ72497.1 acar|OOF94742.1 acla|EAW12725.1 afis|EAW17888.1 afla|EED46275.1 afum|EAL91697.1 agla|OJJ83059.1 akaw|GAA86229.1 aluc|OJZ90481.1 anid|CBF77026.1 anig|EHA23940.1 aory|EIT76333.1 asyd|OJJ57013.1 ater|EAU33107.1 atub|OJI81906.1 aver|OJJ03274.1 awen|OJJ41671.1 azon|OJJ48386.1

Group2783: abra|OJJ72503.1 acar|OOF94738.1 acla|EAW12727.1 afis|EAW17890.1 afla|EED46282.1 afum|EAL91699.1 agla|OJJ83055.1 akaw|GAA86231.1 aluc|OJZ90485.1 anid|CBF77016.1 anig|EHA23943.1 aory|EIT76352.1 asyd|OJJ57017.1 ater|EAU33110.1 atub|OJI81910.1 aver|OJJ03272.1 awen|OJJ41667.1 azon|OJJ48384.1

Group2784: abra|OJJ72507.1 acar|OOF94735.1 acla|EAW12730.1 afis|EAW17893.1 afla|EED46286.1 afum|EAL91702.1 agla|OJJ83049.1 akaw|GAA86235.1 aluc|OJZ90490.1 anid|CBF77006.1 anig|EHA23948.1

aory|EIT76341.1 asyd|OJJ57021.1 ater|EAU33114.1 atub|OJI81914.1 aver|OJJ03268.1 awen|OJJ41659.1 azon|OJJ48379.1

Group2785: abra|OJJ72509.1 acar|OOF94733.1 acla|EAW12732.1 afis|EAW17895.1 afla|EED46267.1 afum|EAL91703.1 agla|OJJ83047.1 akaw|GAA86237.1 aluc|OJZ90492.1 anid|CBF77004.1 anig|EHA23950.1 aory|EIT76414.1 asyd|OJJ57023.1 ater|EAU33115.1 atub|OJI81916.1 aver|OJJ03266.1 awen|OJJ41657.1 azon|OJJ48377.1

Group2786: abra|OJJ72511.1 acar|OOF94732.1 acla|EAW12733.1 afis|EAW17896.1 afla|EED46266.1 afum|EAL91704.1 agla|OJJ83046.1 akaw|GAA86238.1 aluc|OJZ90493.1 anid|CBF77002.1 anig|EHA23951.1 aory|EIT76411.1 asyd|OJJ57025.1 ater|EAU33116.1 atub|OJI81917.1 aver|OJJ03265.1 awen|OJJ41655.1 azon|OJJ48375.1

Group2787: abra|OJJ72513.1 acar|OOF94730.1 acla|EAW12734.1 afis|EAW17897.1 afla|EED46265.1 afum|EAL91705.1 agla|OJJ83045.1 akaw|GAA86240.1 aluc|OJZ90495.1 anid|CBF76998.1 anig|EHA23954.1 aory|EIT76381.1 asyd|OJJ57027.1 ater|EAU33117.1 atub|OJI81920.1 aver|OJJ03263.1 awen|OJJ41654.1 azon|OJJ48374.1

Group2788: abra|OJJ72514.1 acar|OOF94729.1 acla|EAW12735.1 afis|EAW17898.1 afla|EED46264.1 afum|EAL91706.1 agla|OJJ83044.1 akaw|GAA86241.1 aluc|OJZ90496.1 anid|CBF76996.1 anig|EHA23955.1 aory|EIT76461.1 asyd|OJJ57028.1 ater|EAU33118.1 atub|OJI81921.1 aver|OJJ03262.1 awen|OJJ41653.1 azon|OJJ48373.1

Group2789: abra|OJJ72515.1 acar|OOF94728.1 afis|EAW17899.1 afla|EED46263.1 agla|OJJ83043.1 akaw|GAA86242.1 aluc|OJZ90497.1 anid|CBF76994.1 anig|EHA23956.1 aory|EIT76422.1 asyd|OJJ57029.1 atub|OJI81922.1 aver|OJJ03261.1 awen|OJJ41652.1 azon|OJJ48372.1 acla|EAW12736.1 afum|EAL91707.1 ater|EAU33119.1

Group2790: abra|OJJ72516.1 acar|OOF94727.1 acla|EAW12737.1 afis|EAW17900.1 afla|EED46262.1 afum|EAL91708.1 agla|OJJ83042.1 akaw|GAA86243.1 aluc|OJZ90498.1 anid|CBF76992.1 anig|EHA23957.1 aory|EIT76428.1 asyd|OJJ57030.1 ater|EAU33120.1 atub|OJI81923.1 aver|OJJ03260.1 awen|OJJ41651.1 azon|OJJ48371.1

Group2791: abra|OJJ72518.1 acar|OOF94726.1 acla|EAW12738.1 afis|EAW17901.1 afla|EED46261.1 afum|EAL91709.1 agla|OJJ83041.1 akaw|GAA86244.1 aluc|OJZ90499.1 anid|CBF76990.1 anig|EHA23958.1 aory|EIT76470.1 asyd|OJJ57032.1 ater|EAU33121.1 atub|OJI81924.1 aver|OJJ03259.1 awen|OJJ41648.1 azon|OJJ48370.1

Group2792: abra|OJJ72538.1 acar|OOF89947.1 acla|EAW12744.1 afis|EAW17907.1 afla|EED46301.1 afum|EAL91716.2 agla|OJJ83035.1 akaw|GAA86262.1 aluc|OJZ90520.1 anid|CBF76981.1 anig|EHA23974.1 aory|EIT76350.1 asyd|OJJ57037.1 ater|EAU33125.1 atub|OJI81944.1 aver|OJJ03255.1 awen|OJJ41643.1 azon|OJJ48364.1

Group2793: abra|OJJ72539.1 acar|OOF89942.1 acla|EAW12745.1 afis|EAW17908.1 afla|EED46302.1 afum|EAL91717.2 agla|OJJ83034.1 akaw|GAA86263.1 aluc|OJZ90522.1 anid|CBF76979.1 anig|EHA23975.1 aory|EIT76327.1 asyd|OJJ57038.1 ater|EAU33126.1 atub|OJI81945.1 aver|OJJ03253.1 awen|OJJ41641.1 azon|OJJ48363.1

Group2794: abra|OJJ72543.1 acar|OOF94712.1 acla|EAW12747.1 afis|EAW17911.1 afla|EED46313.1 afum|EAL91720.1 agla|OJJ83032.1 akaw|GAA86267.1 aluc|OJZ90527.1 anid|CBF76967.1 anig|EHA23979.1 aory|EIT76323.1 asyd|OJJ57041.1 ater|EAU33131.1 atub|OJI81949.1 aver|OJJ03252.1 awen|OJJ41638.1 azon|OJJ48360.1

Group2795: abra|OJJ72544.1 acar|OOF94711.1 acla|EAW12748.1 afis|EAW17912.1 afla|EED46314.1 afum|EAL91721.1 agla|OJJ83031.1 akaw|GAA86268.1 aluc|OJZ90528.1 anid|CBF76969.1 anig|EHA23980.1 aory|EIT76335.1 asyd|OJJ57042.1 ater|EAU33132.1 atub|OJI81950.1 aver|OJJ03251.1 awen|OJJ41637.1 azon|OJJ48359.1

Group2796: abra|OJJ72545.1 acar|OOF94710.1 acla|EAW12749.1 afis|EAW17913.1 afla|EED46315.1 afum|EAL91722.1 agla|OJJ83030.1 akaw|GAA86269.1 aluc|OJZ90529.1 anid|CBF76971.1 anig|EHA23981.1 aory|EIT76319.1 asyd|OJJ57043.1 ater|EAU33133.1 atub|OJI81951.1 aver|OJJ03250.1 awen|OJJ41636.1 azon|OJJ48356.1

Group2797: abra|OJJ72551.1 acar|OOF94702.1 acla|EAW12756.1 afis|EAW17919.1 afla|EED46322.1 afum|EAL91730.1 agla|OJJ83023.1 akaw|GAA85183.1 aluc|OJZ90538.1 anid|CBF76955.1 anig|EHA23986.1 aory|EIT81188.1 asyd|OJJ57054.1 ater|EAU33554.1 atub|OJI81959.1 aver|OJJ03243.1 awen|OJJ41627.1 azon|OJJ48350.1

Group2798: abra|OJJ72554.1 acar|OOF94700.1 acla|EAW12759.1 afis|EAW17921.1 afla|EED46324.1 afum|EAL91732.1 agla|OJJ83020.1 akaw|GAA85186.1 aluc|OJZ90541.1 anid|CBF76951.1 anig|EHA23989.1 aory|EIT81201.1 asyd|OJJ57057.1 ater|EAU33550.1 atub|OJI81963.1 aver|OJJ03241.1 awen|OJJ41624.1 azon|OJJ48347.1

Group2799: abra|OJJ72555.1 acar|OOF94698.1 acla|EAW12760.1 afis|EAW17922.1 afla|EED46325.1 afum|EAL91733.1 agla|OJJ83019.1 akaw|GAA85187.1 aluc|OJZ90542.1 anid|CBF76949.1 anig|EHA23990.1 aory|EIT81261.1 asyd|OJJ57058.1 ater|EAU33549.1 atub|OJI81964.1 aver|OJJ03240.1 awen|OJJ41623.1 azon|OJJ48346.1

Group2801: abra|OJJ72564.1 acar|OOF94690.1 acla|EAW12764.1 afis|EAW17926.1 afla|EED46328.1 afum|EAL91737.1 agla|OJJ83013.1 akaw|GAA92409.1 aluc|OJZ83268.1 anid|CBF76942.1 anig|EHA21121.1 aory|EIT81217.1 asyd|OJJ57062.1 ater|EAU33545.1 atub|OJI87669.1 aver|OJJ03236.1 awen|OJJ41620.1 azon|OJJ48343.1

Group2802: abra|OJJ72565.1 acar|OOF94689.1 acla|EAW12765.1 afis|EAW17927.1 afla|EED58037.1 afum|EAL91738.1 agla|OJJ83007.1 akaw|GAA92406.1 aluc|OJZ83267.1 anid|CBF76940.1 anig|EHA21120.1 aory|EIT79801.1 asyd|OJJ57063.1 ater|EAU33544.1 atub|OJI87670.1 aver|OJJ03235.1 awen|OJJ41619.1 azon|OJJ48342.1

Group2803: abra|OJJ72567.1 acar|OOF94687.1 acla|EAW12767.1 afis|EAW17930.1 afla|EED49111.1 afum|EAL91741.1 agla|OJJ83003.1 akaw|GAA85194.1 aluc|OJZ90549.1 anid|CBF76936.1 anig|EHA23997.1 aory|EIT78530.1 asyd|OJJ57064.1 ater|EAU33540.1 atub|OJI81971.1 aver|OJJ03234.1 awen|OJJ41616.1 azon|OJJ48337.1

Group2805: abra|OJJ72581.1 acar|OOF94671.1 acla|EAW12768.1 afis|EAW17931.1 afla|EED49110.1 afum|EAL91742.1 agla|OJJ83002.1 akaw|GAA85207.1 aluc|OJZ90562.1 anid|CBF76934.1 anig|EHA24008.1 aory|EIT78507.1 asyd|OJJ57065.1 ater|EAU33539.1 atub|OJI81985.1 aver|OJJ03233.1 awen|OJJ41615.1 azon|OJJ48336.1

Group2806: abra|OJJ72582.1 acar|OOF94670.1 acla|EAW12769.1 afis|EAW17932.1 afla|EED49109.1 afum|EAL91743.1 agla|OJJ83001.1 akaw|GAA85208.1 aluc|OJZ90563.1 anid|CBF76932.1 anig|EHA24009.1 aory|EIT78546.1 asyd|OJJ57066.1 ater|EAU33538.1 atub|OJI81986.1 aver|OJJ03232.1 awen|OJJ41614.1 azon|OJJ48335.1

Group2807: abra|OJJ72583.1 acar|OOF94669.1 acla|EAW12770.1 afis|EAW17933.1 afla|EED49108.1 afum|EAL91744.1 agla|OJJ83000.1 akaw|GAA85209.1 aluc|OJZ90564.1 anid|CBF76930.1 anig|EHA24010.1 aory|EIT78564.1 asyd|OJJ57067.1 ater|EAU33537.1 atub|OJI81987.1 aver|OJJ03231.1 awen|OJJ41613.1 azon|OJJ48333.1

Group2808: abra|OJJ72585.1 acar|OOF94667.1 acla|EAW12771.1 afis|EAW17934.1 afla|EED49107.1 afum|EAL91745.1 agla|OJJ82999.1 akaw|GAA85211.1 aluc|OJZ90566.1 anid|CBF77039.1 anig|EHA24012.1 aory|EIT78519.1 asyd|OJJ57002.1 ater|EAU33536.1 atub|OJI81989.1 aver|OJJ03285.1 awen|OJJ41612.1 azon|OJJ48331.1

Group2809: abra|OJJ72588.1 acar|OOF94662.1 acla|EAW12774.1 afis|EAW17937.1 afla|EED49105.1 afum|EAL91748.1 agla|OJJ82995.1 akaw|GAA85214.1 aluc|OJZ90569.1 anid|CBF77044.1 anig|EHA24014.1 aory|EIT78518.1 asyd|OJJ56999.1 ater|EAU33533.1 atub|OJI81992.1 aver|OJJ03288.1 awen|OJJ41609.1 azon|OJJ48328.1

Group2810: abra|OJJ72589.1 acar|OOF94661.1 acla|EAW12775.1 afis|EAW17938.1 afla|EED49103.1 afum|EAL91749.1 agla|OJJ82994.1 akaw|GAA85215.1 aluc|OJZ90570.1 anid|CBF77046.1 anig|EHA24015.1 aory|EIT82547.1 asyd|OJJ56998.1 ater|EAU33530.1 atub|OJI81993.1 aver|OJJ03289.1 awen|OJJ41607.1 azon|OJJ48325.1

Group2811: abra|OJJ72592.1 acar|OOF94658.1 acla|EAW12778.1 afis|EAW17941.1 afla|EED52574.1 afum|EAL91752.1 agla|OJJ82991.1 akaw|GAA85219.1 aluc|OJZ90573.1 anid|CBF77049.1 anig|EHA24018.1 aory|EIT74256.1 asyd|OJJ56996.1 ater|EAU33524.1 atub|OJI81997.1 aver|OJJ03291.1 awen|OJJ41602.1 azon|OJJ48320.1

Group2812: abra|OJJ72596.1 acar|OOF94657.1 acla|EAW11620.1 afla|EED52571.1 akaw|GAA85224.1 aluc|OJZ90577.1 anig|EHA24021.1 aory|EIT74280.1 ater|EAU33521.1 atub|OJI82002.1 azon|OJJ48744.1 afis|EAW23838.1 afum|EAL87269.1 asyd|OJJ56992.1 aver|OJJ03295.1 anid|CBF77058.1 agla|OJJ82497.1 awen|OJJ33801.1

Group2813: abra|OJJ72598.1 acar|OOF94656.1 acla|EAW11619.1 afis|EAW23853.1 afla|EED52570.1 afum|EAL87281.1 agla|OJJ82496.1 akaw|GAA85225.1 aluc|OJZ90579.1 anid|CBF77060.1 anig|EHA24022.1 aory|EIT74300.1 asyd|OJJ56991.1 ater|EAU33520.1 atub|OJI82004.1 aver|OJJ03296.1 awen|OJJ33802.1 azon|OJJ48743.1

Group2814: abra|OJJ72599.1 acar|OOF94655.1 acla|EAW11618.1 afis|EAW23852.1 afla|EED52569.1 afum|EAL87280.1 agla|OJJ82495.1 akaw|GAA85226.1 aluc|OJZ90580.1 anid|CBF77062.1 anig|EHA24023.1 aory|EIT74211.1 asyd|OJJ56990.1 ater|EAU33519.1 atub|OJI82005.1 aver|OJJ03297.1 awen|OJJ33803.1 azon|OJJ48742.1

Group2815: abra|OJJ72600.1 acar|OOF94653.1 acla|EAW11617.1 afis|EAW23851.1 afla|EED52568.1 afum|EAL87279.1 agla|OJJ82494.1 akaw|GAA85228.1 aluc|OJZ90583.1 anid|CBF77063.1 anig|EHA24024.1

aory|EIT74296.1 asyd|OJJ56989.1 ater|EAU33518.1 atub|OJI82006.1 aver|OJJ03298.1 awen|OJJ33804.1 azon|OJJ48740.1

Group2816: abra|OJJ72603.1 acar|OOF94650.1 acla|EAW11611.1 afis|EAW23844.1 afla|EED52553.1 afum|EAL87275.1 agla|OJJ82490.1 akaw|GAA85231.1 aluc|OJZ90586.1 anid|CBF77071.1 anig|EHA24026.1 aory|EIT74313.1 asyd|OJJ56986.1 ater|EAU33511.1 atub|OJI82009.1 aver|OJJ03301.1 awen|OJJ33807.1 azon|OJJ48737.1

Group2817: abra|OJJ72605.1 acar|OOF94649.1 afis|EAW23848.1 afla|EED52565.1 agla|OJJ82491.1 akaw|GAA85232.1 aluc|OJZ90588.1 anig|EHA24027.1 aory|EIT74169.1 atub|OJI82011.1 aver|OJJ03300.1 acla|EAW11614.1 afum|EAL87276.2 anid|CBF77067.1 asyd|OJJ56987.1 ater|EAU33515.1 awen|OJJ33806.1 azon|OJJ48727.1

Group2818: abra|OJJ72625.1 acar|OOF94639.1 acla|EAW11599.1 afis|EAW23858.1 afla|EED52583.1 afum|EAL87286.1 agla|OJJ82525.1 akaw|GAA85245.1 aluc|OJZ90602.1 anid|CBF77236.1 anig|EHA24039.1 aory|EIT74247.1 asyd|OJJ56814.1 ater|EAU33493.1 atub|OJI82026.1 aver|OJJ03521.1 awen|OJJ33819.1 azon|OJJ48716.1

Group2819: abra|OJJ72626.1 acar|OOF94638.1 acla|EAW11598.1 afis|EAW23859.1 afla|EED52584.1 afum|EAL87287.1 agla|OJJ82526.1 akaw|GAA85246.1 aluc|OJZ90603.1 anid|CBF77234.1 anig|EHA24040.1 aory|EIT74284.1 asyd|OJJ56815.1 ater|EAU33492.1 atub|OJI82027.1 aver|OJJ03520.1 awen|OJJ33820.1 azon|OJJ48715.1

Group2820: abra|OJJ72627.1 acar|OOF94637.1 acla|EAW11596.1 afis|EAW23860.1 afla|EED52585.1 afum|EAL87288.1 agla|OJJ82527.1 akaw|GAA85247.1 aluc|OJZ90604.1 anid|CBF77232.1 anig|EHA24041.1 aory|EIT74206.1 asyd|OJJ56816.1 ater|EAU33490.1 atub|OJI82028.1 awen|OJJ33821.1 azon|OJJ48714.1 aver|OJJ03519.1

Group2822: abra|OJJ72640.1 acar|OOF94631.1 acla|EAW11584.1 afis|EAW23869.1 afla|EED52597.1 afum|EAL87297.1 agla|OJJ82538.1 akaw|GAA85261.1 aluc|OJZ90619.1 anid|CBF77217.1 anig|EHA24056.1 aory|EIT74235.1 asyd|OJJ56823.1 ater|EAU33478.1 atub|OJI82045.1 aver|OJJ03512.1 awen|OJJ33845.1 azon|OJJ48702.1

Group2823: abra|OJJ72641.1 acar|OOF94630.1 acla|EAW11583.1 afis|EAW23870.1 afla|EED52598.1 afum|EAL87298.1 agla|OJJ82539.1 akaw|GAA85262.1 aluc|OJZ90620.1 anid|CBF77219.1 anig|EHA24057.1 aory|EIT74294.1 asyd|OJJ56822.1 ater|EAU33479.1 atub|OJI82046.1 aver|OJJ03513.1 awen|OJJ33846.1 azon|OJJ48701.1

Group2824: abra|OJJ72642.1 acar|OOF94629.1 acla|EAW11582.1 afis|EAW23871.1 afla|EED52599.1 afum|EAL87299.1 agla|OJJ82540.1 akaw|GAA85263.1 aluc|OJZ90621.1 anid|CBF77220.1 anig|EHA24058.1 aory|EIT74246.1 asyd|OJJ56821.1 ater|EAU33475.1 atub|OJI82047.1 aver|OJJ03514.1 awen|OJJ33847.1 azon|OJJ48700.1

Group2825: abra|OJJ72647.1 acar|OOF94623.1 acla|EAW11581.1 afis|EAW23872.1 afla|EED52600.1 afum|EAL87300.1 agla|OJJ82542.1 akaw|GAA85267.1 aluc|OJZ90625.1 anid|CBF84521.1 anig|EHA24062.1 aory|EIT74293.1 asyd|OJJ60278.1 ater|EAU33474.1 atub|OJI82052.1 aver|OJJ03978.1 awen|OJJ33848.1 azon|OJJ48699.1

Group2826: abra|OJJ72648.1 acar|OOF94622.1 acla|EAW11580.1 afis|EAW23874.1 afla|EED52602.1 afum|EAL87302.1 agla|OJJ82544.1 akaw|GAA85269.1 aluc|OJZ90627.1 anid|CBF77209.1 anig|EHA24063.1 aory|EIT74307.1 asyd|OJJ56829.1 ater|EAU33472.1 atub|OJI82053.1 aver|OJJ03507.1 awen|OJJ33850.1 azon|OJJ48698.1

Group2827: abra|OJJ72653.1 acar|OOF94620.1 afis|EAW23877.1 afla|EED52605.1 afum|EAL87305.1 agla|OJJ82547.1 akaw|GAA85272.1 aluc|OJZ90631.1 anid|CBF77201.1 anig|EHA24068.1 aory|EIT74181.1 asyd|OJJ56833.1 ater|EAU33469.1 atub|OJI82057.1 aver|OJJ03504.1 awen|OJJ33854.1 azon|OJJ48695.1 acla|EAW11577.1

Group2828: abra|OJJ72654.1 acar|OOF94619.1 acla|EAW11576.1 afis|EAW23878.1 afla|EED52606.1 afum|EAL87306.1 agla|OJJ82548.1 akaw|GAA85273.1 aluc|OJZ90632.1 anid|CBF77199.1 anig|EHA24069.1 aory|EIT74260.1 asyd|OJJ56834.1 ater|EAU33468.1 atub|OJI82059.1 aver|OJJ03503.1 awen|OJJ33858.1 azon|OJJ48694.1

Group2829: abra|OJJ72658.1 acar|OOF94615.1 acla|EAW11522.1 afis|EAW23931.1 afla|EED50587.1 afum|EAL87356.1 agla|OJJ79411.1 akaw|GAA85281.1 aluc|OJZ90639.1 anid|CBF77275.1 anig|EHA24074.1 aory|EIT82143.1 asyd|OJJ56796.1 ater|EAU32296.1 atub|OJI82067.1 aver|OJJ03538.1 awen|OJJ39023.1 azon|OJJ51349.1

Group2830: abra|OJJ72659.1 acar|OOF94614.1 acla|EAW11523.1 afis|EAW23930.1 afla|EED50588.1 afum|EAL87355.1 agla|OJJ79407.1 akaw|GAA85282.1 aluc|OJZ90640.1 anid|CBF77277.1 anig|EHA24075.1 aory|EIT82106.1 asyd|OJJ56795.1 ater|EAU32306.1 atub|OJI82068.1 aver|OJJ03539.1 awen|OJJ39024.1 azon|OJJ51350.1

Group2831: abra|OJJ72661.1 acar|OOF94612.1 acla|EAW11526.1 afis|EAW23928.1 afla|EED50590.1 afum|EAL87353.1 agla|OJJ79406.1 akaw|GAA85284.1 aluc|OJZ90642.1 anid|CBF77281.1 anig|EHA24077.1 aory|EIT82136.1 asyd|OJJ56793.1 ater|EAU32307.1 atub|OJI82070.1 aver|OJJ03541.1 awen|OJJ39026.1 azon|OJJ51352.1

Group2832: abra|OJJ72662.1 acar|OOF94611.1 acla|EAW11527.1 afis|EAW23927.1 afla|EED50591.1 afum|EAL87352.1 agla|OJJ79405.1 akaw|GAA85285.1 aluc|OJZ90643.1 anid|CBF77254.1 anig|EHA24078.1 aory|EIT82117.1 asyd|OJJ56807.1 ater|EAU32308.1 atub|OJI82071.1 aver|OJJ03527.1 awen|OJJ39027.1 azon|OJJ51353.1

Group2833: abra|OJJ72663.1 acar|OOF94610.1 acla|EAW11528.1 afis|EAW23926.1 afla|EED50594.1 afum|EAL87351.1 agla|OJJ79404.1 akaw|GAA85286.1 aluc|OJZ90644.1 anid|CBF77252.1 anig|EHA24079.1 aory|EIT82151.1 asyd|OJJ56808.1 ater|EAU32309.1 atub|OJI82072.1 aver|OJJ03526.1 awen|OJJ39028.1 azon|OJJ51354.1

Group2834: abra|OJJ72669.1 acar|OOF97389.1 acla|EAW11531.1 afis|EAW23923.1 afla|EED50599.1 afum|EAL87348.1 agla|OJJ79397.1 akaw|GAA85289.1 aluc|OJZ90647.1 anid|CBF77090.1 anig|EHA24082.1 aory|EIT78106.1 asyd|OJJ56959.1 ater|EAU32313.1 atub|OJI82077.1 aver|OJJ03326.1 awen|OJJ39032.1 azon|OJJ51360.1

Group2835: abra|OJJ72670.1 acar|OOF97388.1 acla|EAW11537.1 afis|EAW23919.1 afla|EED50608.1 afum|EAL87345.1 agla|OJJ79386.1 akaw|GAA85290.1 aluc|OJZ90648.1 anid|CBF77096.1 anig|EHA24083.1 aory|EIT78069.1 asyd|OJJ56955.1 ater|EAU32318.1 atub|OJI82078.1 aver|OJJ03330.1 awen|OJJ39036.1 azon|OJJ51364.1

Group2836: abra|OJJ72675.1 acar|OOF97380.1 acla|EAW11538.1 afis|EAW23913.1 afla|EED50618.1 afum|EAL87342.1 agla|OJJ79382.1 akaw|GAA85294.1 aluc|OJZ90653.1 anid|CBF77098.1 anig|EHA24088.1 aory|EIT78036.1 asyd|OJJ56954.1 ater|EAU32319.1 atub|OJI82082.1 aver|OJJ03331.1 awen|OJJ39038.1 azon|OJJ51365.1

Group2837: abra|OJJ72683.1 acar|OOF95932.1 acla|EAW13159.1 afis|EAW17487.1 afla|EED49329.1 afum|EAL91310.1 agla|OJJ81475.1 akaw|GAA85301.1 aluc|OJZ90661.1 anid|CBF771613.1 anig|EHA24096.1 aory|EIT79552.1 asyd|OJJ61862.1 ater|EAU36932.1 atub|OJI82090.1 aver|OJI95960.1 awen|OJJ37355.1 azon|OJJ51040.1

Group2838: abra|OJJ72684.1 acar|OOF95933.1 acla|EAW11540.1 afis|EAW23911.1 afla|EED52657.1 afum|EAL87340.1 agla|OJJ79380.1 akaw|GAA85302.1 aluc|OJZ90662.1 anid|CBF77104.1 anig|EHA24097.1 aory|EIT74175.1 asyd|OJJ56950.1 ater|EAU32321.1 atub|OJI82091.1 aver|OJJ03335.1 awen|OJJ39040.1 azon|OJJ51367.1

Group2839: abra|OJJ72685.1 acar|OOF95934.1 acla|EAW11541.1 afis|EAW23910.1 afla|EED52655.1 afum|EAL87339.1 agla|OJJ79379.1 akaw|GAA85303.1 aluc|OJZ90663.1 anid|CBF77106.1 anig|EHA24098.1 aory|EIT74315.1 asyd|OJJ56949.1 ater|EAU32322.1 atub|OJI82092.1 aver|OJJ03336.1 awen|OJJ39041.1 azon|OJJ51368.1

Group2840: abra|OJJ72687.1 acar|OOF95936.1 acla|EAW11542.1 afis|EAW23909.1 afla|EED52654.1 afum|EAL87337.1 agla|OJJ79378.1 akaw|GAA85305.1 aluc|OJZ90665.1 anid|CBF77108.1 anig|EHA24100.1 aory|EIT74231.1 asyd|OJJ56948.1 ater|EAU32324.1 atub|OJI82094.1 aver|OJJ03337.1 awen|OJJ39042.1 azon|OJJ51370.1

Group2841: abra|OJJ72706.1 acar|OOF95943.1 acla|EAW11546.1 afis|EAW23907.1 afla|EED52642.1 afum|EAL87335.1 agla|OJJ79369.1 akaw|GAA85310.1 aluc|OJZ90671.1 anid|CBF77127.1 anig|EHA24104.1 aory|EIT74245.1 asyd|OJJ56941.1 ater|EAU32331.1 atub|OJI82101.1 aver|OJJ03344.1 awen|OJJ39043.1 azon|OJJ51372.1

Group2842: abra|OJJ72707.1 acar|OOF95944.1 acla|EAW11548.1 afis|EAW23905.1 afla|EED52640.1 afum|EAL87333.1 agla|OJJ79370.1 akaw|GAA85311.1 aluc|OJZ90672.1 anid|CBF77125.1 anig|EHA24105.1 aory|EIT74243.1 asyd|OJJ56940.1 ater|EAU32332.1 atub|OJI82102.1 aver|OJJ03345.1 awen|OJJ39044.1 azon|OJJ51373.1

Group2843: abra|OJJ72714.1 acar|OOF95946.1 acla|EAW11550.1 afis|EAW23903.1 afla|EED52638.1 afum|EAL87331.1 agla|OJJ79372.1 akaw|GAA85322.1 aluc|OJZ90683.1 anid|CBF77139.1 anig|EHA24111.1 aory|EIT74295.1 asyd|OJJ56914.1 ater|EAU32335.1 atub|OJI82109.1 aver|OJJ03378.1 awen|OJJ39046.1 azon|OJJ51375.1

Group2844: abra|OJJ72715.1 acar|OOF95947.1 acla|EAW11551.1 afis|EAW23902.1 afla|EED52637.1 afum|EAL87329.1 agla|OJJ79373.1 akaw|GAA85323.1 aluc|OJZ90684.1 anid|CBF77141.1 anig|EHA24112.1 aory|EIT74272.1 asyd|OJJ56913.1 ater|EAU32336.1 atub|OJI82110.1 aver|OJJ03379.1 awen|OJJ39047.1 azon|OJJ51376.1

Group2845: abra|OJJ72719.1 acar|OOF95952.1 acla|EAW11555.1 afis|EAW23898.1 afla|EED52632.1 afum|EAL87325.1 agla|OJJ78640.1 akaw|GAA85326.1 aluc|OJZ90688.1 anid|CBF77148.1 anig|EHA24116.1

aory|EIT74173.1 asyd|OJJ56910.1 ater|EAU32339.1 atub|OJI82113.1 aver|OJJ03383.1 awen|OJJ39050.1  
azon|OJJ51382.1

Group2846: abra|OJJ72721.1 acar|OOF95954.1 acla|EAW11557.1 afis|EAW23896.1 afla|EED52630.1  
afum|EAL87324.1 agla|OJJ78637.1 akaw|GAA85327.1 aluc|OJZ90690.1 anid|CBF77152.1 anig|EHA24117.1  
aory|EIT74255.1 asyd|OJJ56908.1 ater|EAU32340.1 atub|OJI82115.1 aver|OJJ03385.1 awen|OJJ39052.1  
azon|OJJ51384.1

Group2847: abra|OJJ72722.1 acar|OOF95955.1 acla|EAW11558.1 afis|EAW23895.1 afla|EED52629.1  
afum|EAL87323.1 agla|OJJ78636.1 akaw|GAA85328.1 aluc|OJZ90691.1 anid|CBF77154.1 anig|EHA24118.1  
aory|EIT74200.1 asyd|OJJ56907.1 ater|EAU32341.1 atub|OJI82116.1 aver|OJJ03386.1 awen|OJJ39053.1  
azon|OJJ51385.1

Group2848: abra|OJJ72725.1 acar|OOF95958.1 acla|EAW11562.1 afis|EAW23891.1 afla|EED52621.1  
afum|EAL87319.1 agla|OJJ78631.1 akaw|GAA85331.1 aluc|OJZ90694.1 anid|CBF77171.1 anig|EHA24119.1  
aory|EIT74302.1 asyd|OJJ56851.1 ater|EAU33451.1 atub|OJI82119.1 aver|OJJ03466.1 awen|OJJ39058.1  
azon|OJJ51389.1

Group2849: abra|OJJ72727.1 acar|OOF95960.1 acla|EAW11564.1 afis|EAW23889.1 afla|EED52619.1  
afum|EBA27309.1 agla|OJJ78629.1 akaw|GAA85333.1 aluc|OJZ90696.1 anid|CBF77175.1 anig|EHA24121.1  
aory|EIT74266.1 asyd|OJJ56848.1 ater|EAU33454.1 atub|OJI82122.1 aver|OJJ03491.1 awen|OJJ39061.1  
azon|OJJ51391.1

Group2850: abra|OJJ72729.1 acar|OOF95961.1 acla|EAW11565.1 afis|EAW23888.1 afla|EED52617.1  
afum|EAL87315.1 agla|OJJ78628.1 akaw|GAA85334.1 aluc|OJZ90697.1 anid|CBF77177.1 anig|EHA24123.1  
aory|EIT74304.1 asyd|OJJ56847.1 ater|EAU33456.1 atub|OJI82123.1 aver|OJJ03492.1 awen|OJJ39063.1  
azon|OJJ51392.1

Group2851: abra|OJJ72733.1 acar|OOF95963.1 acla|EAW11568.1 afis|EAW23885.1 afla|EED52614.1  
afum|EBA27307.1 agla|OJJ82572.1 akaw|GAA85339.1 aluc|OJZ90701.1 anid|CBF77183.1 anig|EHA24127.1  
aory|EIT74261.1 asyd|OJJ56843.1 ater|EAU33461.1 atub|OJI82128.1 aver|OJJ03495.1 awen|OJJ33867.1  
azon|OJJ48687.1

Group2852: abra|OJJ72736.1 acar|OOF95967.1 acla|EAW11572.1 afis|EAW23881.1 afla|EED52610.1  
afum|EAL87309.1 agla|OJJ82558.1 akaw|GAA85342.1 aluc|OJZ90704.1 anid|CBF77191.1 anig|EHA24130.1  
aory|EIT74269.1 asyd|OJJ56839.1 ater|EAU33465.1 atub|OJI82131.1 aver|OJJ03499.1 awen|OJJ33863.1  
azon|OJJ48690.1

Group2853: abra|OJJ72748.1 acar|OOF95971.1 acla|EAW11515.1 afis|EAW23938.1 afla|EED50579.1  
afum|EAL87363.1 agla|OJJ79426.1 akaw|GAA85360.1 aluc|OJZ90722.1 anid|CBF77265.1 anig|EHA24140.1  
aory|EIT82037.1 asyd|OJJ56801.1 ater|EAU32295.1 atub|OJI82150.1 aver|OJJ03533.1 awen|OJJ39017.1  
azon|OJJ51342.1

Group2854: abra|OJJ72749.1 acar|OOF95972.1 acla|EAW11514.1 afis|EAW23939.1 afla|EED50578.1  
afum|EAL87364.1 agla|OJJ79427.1 akaw|GAA85361.1 aluc|OJZ90723.1 anid|CBF77263.1 anig|EHA24141.1  
aory|EIT82108.1 asyd|OJJ56802.1 ater|EAU32294.1 atub|OJI82151.1 aver|OJJ03532.1 awen|OJJ39016.1  
azon|OJJ51341.1

Group2855: abra|OJJ72750.1 acar|OOF95973.1 acla|EAW11513.1 afis|EAW23940.1 afla|EED50577.1  
afum|EAL87365.1 agla|OJJ79428.1 akaw|GAA85362.1 aluc|OJZ90724.1 anid|CBF77262.1 anig|EHA24142.1  
aory|EIT82017.1 asyd|OJJ56803.1 ater|EAU32293.1 atub|OJI82152.1 aver|OJJ03531.1 awen|OJJ39015.1  
azon|OJJ51340.1

Group2856: abra|OJJ72755.1 acar|OOF95976.1 acla|EAW11512.1 afis|EAW23941.1 afla|EED50576.1  
afum|EAL87366.1 agla|OJJ79429.1 akaw|GAA85365.1 aluc|OJZ90728.1 anid|CBF77260.1 anig|EHA24145.1  
aory|EIT82066.1 asyd|OJJ56804.1 ater|EAU32292.1 atub|OJI82155.1 aver|OJJ03530.1 awen|OJJ39014.1  
azon|OJJ51339.1

Group2857: abra|OJJ72756.1 acar|OOF95977.1 acla|EAW11508.1 afis|EAW23945.1 afla|EED50571.1  
afum|EAL87370.1 agla|OJJ79436.1 akaw|GAA85366.1 aluc|OJZ90729.1 anid|CBF77290.1 anig|EHA24146.1  
aory|EIT82165.1 asyd|OJJ56784.1 ater|EAU32289.1 atub|OJI82156.1 aver|OJJ03549.1 awen|OJJ39009.1  
azon|OJJ51335.1

Group2858: abra|OJJ72761.1 acar|OOF95980.1 acla|EAW11503.1 afis|EAW23949.1 afla|EED50567.1  
afum|EAL87375.1 agla|OJJ79442.1 akaw|GAA85371.1 aluc|OJZ90735.1 anid|CBF77283.1 anig|EHA24151.1  
aory|EIT82002.1 asyd|OJJ56792.1 ater|EAU29803.1 atub|OJI82163.1 aver|OJJ03542.1 awen|OJJ39000.1  
azon|OJJ51331.1

Group2859: abra|OJJ72763.1 acar|OOF95983.1 acla|EAW11501.1 afis|EAW23951.1 afla|EED50565.1  
afum|EAL87379.1 agla|OJJ79444.1 akaw|GAA85373.1 aluc|OJZ90738.1 anid|CBF77296.1 anig|EHA24153.1  
aory|EIT82176.1 asyd|OJJ56782.1 ater|EAU29801.1 atub|OJI82165.1 aver|OJJ03551.1 awen|OJJ38997.1  
azon|OJJ51329.1

Group2860: abra|OJJ72764.1 acar|OOF95984.1 acla|EAW11500.1 afis|EAW23952.1 afla|EED50564.1 afum|EAL87380.1 agla|OJJ79445.1 akaw|GAA85374.1 aluc|OJZ90739.1 anid|CBF77298.1 anig|EHA24154.1 aory|EIT82174.1 asyd|OJJ56781.1 ater|EAU29800.1 atub|OJI82166.1 aver|OJJ03552.1 awen|OJJ38996.1 azon|OJJ51328.1

Group2861: abra|OJJ72765.1 acar|OOF95985.1 acla|EAW11499.1 afis|EAW23953.1 afla|EED50562.1 afum|EAL87381.1 agla|OJJ79446.1 akaw|GAA85375.1 aluc|OJZ90740.1 anid|CBF77300.1 anig|EHA24155.1 aory|EIT82008.1 asyd|OJJ56780.1 ater|EAU29799.1 atub|OJI82167.1 aver|OJJ03553.1 awen|OJJ38995.1 azon|OJJ51327.1

Group2862: abra|OJJ72767.1 acar|OOF95986.1 acla|EAW11498.1 afis|EAW23954.1 afla|EED50561.1 afum|EAL87382.1 agla|OJJ79447.1 akaw|GAA85376.1 aluc|OJZ90743.1 anid|CBF77302.1 anig|EHA24156.1 aory|EIT82091.1 asyd|OJJ56779.1 ater|EAU29798.1 atub|OJI82170.1 aver|OJJ03554.1 awen|OJJ38994.1 azon|OJJ51326.1

Group2863: abra|OJJ72768.1 acar|OOF95987.1 acla|EAW11497.1 afis|EAW23955.1 afla|EED50557.1 afum|EAL87383.1 agla|OJJ86878.1 akaw|GAA85377.1 aluc|OJZ90745.1 anid|CBF77304.1 anig|EHA24157.1 aory|EIT82133.1 asyd|OJJ56778.1 ater|EAU29797.1 atub|OJI82171.1 aver|OJJ03555.1 awen|OJJ38993.1 azon|OJJ51324.1

Group2864: abra|OJJ72769.1 acar|OOF95988.1 acla|EAW11496.1 afis|EAW23956.1 afla|EED50556.1 afum|EAL87384.1 agla|OJJ86879.1 akaw|GAA85378.1 aluc|OJZ90746.1 anid|CBF77306.1 anig|EHA24158.1 aory|EIT82152.1 asyd|OJJ56777.1 ater|EAU29796.1 atub|OJI82172.1 aver|OJJ03556.1 awen|OJJ38991.1 azon|OJJ51323.1

Group2865: abra|OJJ72770.1 acar|OOF95989.1 acla|EAW11495.1 afis|EAW23957.1 afla|EED50555.1 afum|EAL87385.1 agla|OJJ86880.1 akaw|GAA85379.1 aluc|OJZ90747.1 anid|CBF77308.1 anig|EHA24159.1 aory|EIT82065.1 asyd|OJJ56776.1 ater|EAU29795.1 atub|OJI82173.1 aver|OJJ03557.1 awen|OJJ38990.1 azon|OJJ51322.1

Group2866: abra|OJJ72773.1 acar|OOF95992.1 acla|EAW11493.1 afis|EAW23960.1 afla|EED50552.1 afum|EAL87389.1 agla|OJJ86885.1 akaw|GAA85382.1 aluc|OJZ90750.1 anid|CBF77314.1 anig|EHA24161.1 aory|EIT82096.1 asyd|OJJ56773.1 ater|EAU29792.1 atub|OJI82176.1 aver|OJJ03560.1 awen|OJJ38987.1 azon|OJJ51319.1

Group2867: abra|OJJ72775.1 acar|OOF95993.1 acla|EAW11491.1 afis|EAW23962.1 afla|EED50548.1 afum|EAL87391.2 agla|OJJ86887.1 akaw|GAA85384.1 anig|EHA24162.1 aory|EIT82083.1 ater|EAU29790.1 atub|OJI82177.1 awen|OJJ38985.1 azon|OJJ51317.1 anid|CBF83986.1 asyd|OJJ61403.1 aver|OJJ00731.1 aluc|OJZ90752.1

Group2868: abra|OJJ72776.1 acar|OOF95994.1 acla|EAW11490.1 afis|EAW23963.1 afla|EED50547.1 afum|EAL87393.1 agla|OJJ86888.1 akaw|GAA85385.1 aluc|OJZ90754.1 anid|CBF77316.1 anig|EHA24163.1 aory|EIT82035.1 asyd|OJJ56772.1 ater|EAU29789.1 atub|OJI82178.1 aver|OJJ03561.1 awen|OJJ38984.1 azon|OJJ51316.1

Group2869: abra|OJJ72779.1 acar|OOF95996.1 acla|EAW11488.1 afis|EAW23965.1 afla|EED50545.1 afum|EAL87395.1 agla|OJJ86894.1 akaw|GAA85387.1 aluc|OJZ83277.1 anid|CBF77322.1 anig|EHA24165.1 aory|EIT82007.1 asyd|OJJ56770.1 ater|EAU29787.1 atub|OJI82181.1 aver|OJJ03563.1 awen|OJJ38978.1 azon|OJJ51314.1

Group2870: abra|OJJ72780.1 acar|OOF95999.1 acla|EAW11487.1 afis|EAW23966.1 afla|EED50544.1 afum|EAL87396.1 agla|OJJ86895.1 akaw|GAA85388.1 aluc|OJZ83279.1 anid|CBF77324.1 anig|EHA24166.1 aory|EIT82088.1 asyd|OJJ56769.1 ater|EAU29786.1 atub|OJI82183.1 aver|OJJ03565.1 awen|OJJ38977.1 azon|OJJ51313.1

Group2871: abra|OJJ72781.1 acar|OOF96000.1 acla|EAW11486.1 afis|EAW23967.1 afla|EED50542.1 afum|EAL87397.1 agla|OJJ86896.1 akaw|GAA85389.1 aluc|OJZ83280.1 anid|CBF77326.1 anig|EHA24167.1 aory|EIT82086.1 asyd|OJJ56768.1 ater|EAU29785.1 atub|OJI82184.1 aver|OJJ03566.1 awen|OJJ38976.1 azon|OJJ51312.1

Group2872: abra|OJJ72782.1 acar|OOF96002.1 acla|EAW11485.1 afis|EAW23968.1 afla|EED50541.1 afum|EAL87398.2 agla|OJJ86897.1 akaw|GAA85390.1 aluc|OJZ83281.1 anid|CBF77328.1 anig|EHA24168.1 aory|EIT82024.1 asyd|OJJ56767.1 ater|EAU29784.1 atub|OJI82185.1 aver|OJJ03567.1 awen|OJJ38975.1 azon|OJJ51310.1

Group2873: abra|OJJ72792.1 acar|OOF90123.1 acla|EAW11480.1 afis|EAW23973.1 afla|EED50535.1 afum|EAL87403.1 agla|OJJ86902.1 akaw|GAA85395.1 aluc|OJZ83288.1 anid|CBF77339.1 anig|EHA24173.1 aory|EIT82084.1 asyd|OJJ53275.1 ater|EAU29779.1 atub|OJI82190.1 aver|OJJ03574.1 awen|OJJ35438.1 azon|OJJ51305.1

Group2874: abra|OJJ72797.1 acar|OOF96005.1 acla|EAW11475.1 afis|EAW23978.1 afla|EED49183.1 afum|EAL87408.1 agla|OJJ86908.1 akaw|GAA85400.1 aluc|OJZ83294.1 anid|CBF77349.1 anig|EHA24178.1

aory|EIT78581.1 asyd|OJJ53271.1 ater|EAU29772.1 atub|OJI82195.1 aver|OJJ03579.1 awen|OJJ35446.1 azon|OJJ51300.1

Group2875: abra|OJJ72798.1 acar|OOF96006.1 acla|EAW11474.1 afis|EAW23979.1 afla|EED49182.1 afum|EAL87409.1 agla|OJJ86910.1 akaw|GAA85401.1 aluc|OJZ83295.1 anid|CBF77351.1 anig|EHA24179.1 aory|EIT78531.1 asyd|OJJ53270.1 ater|EAU29771.1 atub|OJI82196.1 aver|OJJ03580.1 awen|OJJ35447.1 azon|OJJ51299.1

Group2876: abra|OJJ72800.1 acar|OOF96008.1 acla|EAW11444.1 afis|EAW23981.1 afla|EED49178.1 afum|EAL87411.1 agla|OJJ86914.1 akaw|GAA85403.1 aluc|OJZ83298.1 anid|CBF77356.1 anig|EHA24181.1 aory|EIT78527.1 asyd|OJJ53268.1 ater|EAU29770.1 atub|OJI82198.1 aver|OJJ03583.1 awen|OJJ35449.1 azon|OJJ51297.1

Group2877: abra|OJJ72801.1 acar|OOF96009.1 acla|EAW11443.1 afis|EAW23982.1 afla|EED49177.1 afum|EAL87412.1 agla|OJJ86916.1 akaw|GAA85404.1 aluc|OJZ83299.1 anid|CBF77358.1 anig|EHA24182.1 aory|EIT78537.1 asyd|OJJ53267.1 ater|EAU29769.1 atub|OJI82199.1 aver|OJJ03584.1 awen|OJJ35450.1 azon|OJJ51293.1

Group2878: abra|OJJ72803.1 acar|OOF96011.1 acla|EAW11441.1 afis|EAW23984.1 afla|EED49175.1 afum|EAL87413.1 agla|OJJ86918.1 akaw|GAA85406.1 aluc|OJZ83301.1 anid|CBF77362.1 anig|EHA24183.1 aory|EIT78558.1 asyd|OJJ53265.1 ater|EAU29767.1 atub|OJI82201.1 aver|OJJ03586.1 awen|OJJ35452.1 azon|OJJ51291.1

Group2879: abra|OJJ72804.1 acar|OOF96012.1 acla|EAW11440.1 afis|EAW23985.1 afla|EED49173.1 afum|EAL87414.1 agla|OJJ86919.1 akaw|GAA85407.1 aluc|OJZ83302.1 anid|CBF77364.1 anig|EHA24184.1 aory|EIT78557.1 asyd|OJJ53264.1 ater|EAU29766.1 atub|OJI82202.1 aver|OJJ03587.1 awen|OJJ35453.1 azon|OJJ51290.1

Group2880: abra|OJJ72808.1 acar|OOF96014.1 acla|EAW11433.1 afis|EAW23989.1 afla|EED49169.1 afum|EAL87419.1 agla|OJJ86923.1 akaw|GAA85411.1 aluc|OJZ83306.1 anid|CBF77367.1 anig|EHA24189.1 aory|EIT78567.1 asyd|OJJ53261.1 ater|EAU29761.1 atub|OJI82206.1 aver|OJJ03590.1 awen|OJJ35457.1 azon|OJJ51286.1

Group2881: abra|OJJ72810.1 acar|OOF96017.1 acla|EAW11430.1 afis|EAW23993.1 afla|EED49167.1 afum|EAL87423.1 agla|OJJ86926.1 akaw|GAA85413.1 aluc|OJZ83308.1 anid|CBF77373.1 anig|EHA24191.1 aory|EIT78512.1 asyd|OJJ53258.1 ater|EAU29758.1 atub|OJI82208.1 aver|OJJ03593.1 awen|OJJ35462.1 azon|OJJ51281.1

Group2882: abra|OJJ72811.1 acar|OOF96018.1 acla|EAW11429.1 afis|EAW23994.1 afla|EED49166.1 afum|EAL87424.1 agla|OJJ86927.1 akaw|GAA85414.1 aluc|OJZ83309.1 anid|CBF77375.1 anig|EHA24192.1 aory|EIT78551.1 asyd|OJJ53257.1 ater|EAU29757.1 atub|OJI82209.1 aver|OJJ03594.1 awen|OJJ35463.1 azon|OJJ51280.1

Group2883: abra|OJJ72814.1 acar|OOF96020.1 acla|EAW11428.1 afis|EAW23995.1 afla|EED49165.1 afum|EAL87425.1 agla|OJJ86928.1 akaw|GAA85415.1 aluc|OJZ83312.1 anid|CBF77378.1 anig|EHA24194.1 aory|EIT78566.1 asyd|OJJ53255.1 ater|EAU29756.1 atub|OJI82212.1 aver|OJJ03597.1 awen|OJJ35465.1 azon|OJJ51278.1

Group2884: abra|OJJ72815.1 acar|OOF96021.1 acla|EAW11427.1 afis|EAW23996.1 afla|EED49164.1 afum|EAL87426.1 agla|OJJ86929.1 akaw|GAA85416.1 aluc|OJZ83314.1 anid|CBF77379.1 anig|EHA24195.1 aory|EIT78572.1 asyd|OJJ53254.1 ater|EAU29755.1 atub|OJI82213.1 aver|OJJ03599.1 awen|OJJ35467.1 azon|OJJ51277.1

Group2885: abra|OJJ72818.1 acar|OOF96024.1 acla|EAW11422.1 afis|EAW23999.1 afla|EED49162.1 afum|EAL87429.1 agla|OJJ86933.1 akaw|GAA85419.1 aluc|OJZ83320.1 anid|CBF77385.1 anig|EHA24198.1 aory|EIT78542.1 asyd|OJJ53250.1 ater|EAU29750.1 atub|OJI82217.1 awen|OJJ35470.1 azon|OJJ51274.1 aver|OJJ03602.1

Group2886: abra|OJJ72820.1 acar|OOF96025.1 acla|EAW11419.1 afis|EAW24003.1 afla|EED49158.1 afum|EAL87433.1 agla|OJJ86935.1 akaw|GAA85421.1 aluc|OJZ83322.1 anid|CBF77390.1 anig|EHA24200.1 aory|EIT78547.1 asyd|OJJ53247.1 ater|EAU29748.1 atub|OJI82219.1 aver|OJJ03604.1 awen|OJJ35474.1 azon|OJJ51272.1

Group2887: abra|OJJ72822.1 acar|OOF96027.1 acla|EAW11417.1 afis|EAW24005.1 afla|EED49156.1 afum|EAL87435.1 agla|OJJ86936.1 akaw|GAA85423.1 aluc|OJZ83324.1 anid|CBF77394.1 anig|EHA24202.1 aory|EIT78532.1 asyd|OJJ53245.1 ater|EAU29746.1 atub|OJI82221.1 aver|OJJ03605.1 awen|OJJ35477.1 azon|OJJ51271.1

Group2888: abra|OJJ72824.1 acar|OOF96029.1 acla|EAW11414.1 afis|EAW24007.1 afla|EED49154.1 afum|EAL87437.1 agla|OJJ86938.1 akaw|GAA85425.1 aluc|OJZ83326.1 anid|CBF77398.1 anig|EHA24204.1 aory|EIT78570.1 asyd|OJJ53243.1 ater|EAU29744.1 atub|OJI82223.1 aver|OJJ03607.1 awen|OJJ35479.1 azon|OJJ51269.1



Group2889: abra|OJJ72825.1 acar|OOF96030.1 acla|EAW11413.1 afis|EAW24008.1 afla|EED49153.1 afum|EAL87438.1 agla|OJJ86939.1 akaw|GAA85426.1 aluc|OJZ83327.1 anid|CBF77400.1 anig|EHA24205.1 aory|EIT78506.1 asyd|OJJ53242.1 ater|EAU29743.1 atub|OJI82224.1 aver|OJJ03608.1 awen|OJJ35480.1 azon|OJJ51268.1

Group2890: abra|OJJ72826.1 acar|OOF96031.1 acla|EAW11412.1 afis|EAW24009.1 afla|EED49152.1 afum|EAL87439.1 agla|OJJ86940.1 akaw|GAA85427.1 aluc|OJZ83328.1 anid|CBF77402.1 anig|EHA24206.1 aory|EIT78555.1 asyd|OJJ53241.1 ater|EAU29742.1 atub|OJI82225.1 aver|OJJ03609.1 awen|OJJ35481.1 azon|OJJ51267.1

Group2891: abra|OJJ72827.1 acar|OOF96033.1 acla|EAW11410.1 afis|EAW24011.1 afla|EED49150.1 afum|EAL87441.1 agla|OJJ86943.1 akaw|GAA85428.1 aluc|OJZ83330.1 anid|CBF77406.1 anig|EHA24207.1 aory|EIT78559.1 asyd|OJJ53239.1 ater|EAU29740.1 atub|OJI82226.1 aver|OJJ03611.1 awen|OJJ35483.1 azon|OJJ51265.1

Group2892: abra|OJJ72831.1 acar|OOF96035.1 acla|EAW11408.1 afis|EAW24013.1 afla|EED49147.1 afum|EAL87443.1 agla|OJJ86945.1 akaw|GAA85430.1 aluc|OJZ83332.1 anid|CBF77410.1 anig|EHA24209.1 aory|EIT78522.1 asyd|OJJ53237.1 ater|EAU29734.1 atub|OJI82228.1 aver|OJJ03614.1 awen|OJJ35485.1 azon|OJJ51263.1

Group2893: abra|OJJ72833.1 acar|OOF96036.1 acla|EAW11406.1 afis|EAW24015.1 afla|EED49144.1 afum|EAL87445.1 agla|OJJ86949.1 akaw|GAA85431.1 aluc|OJZ83334.1 anid|CBF77414.1 anig|EHA24210.1 aory|EIT78508.1 asyd|OJJ53235.1 ater|EAU29731.1 atub|OJI82230.1 aver|OJJ03616.1 awen|OJJ35487.1 azon|OJJ47003.1

Group2894: abra|OJJ72835.1 acar|OOF96037.1 acla|EAW11405.1 afis|EAW24016.1 afla|EED49143.1 afum|EAL87446.1 agla|OJJ86950.1 akaw|GAA85432.1 aluc|OJZ83335.1 anid|CBF77416.1 anig|EHA24211.1 aory|EIT78565.1 asyd|OJJ53234.1 ater|EAU29730.1 atub|OJI82232.1 aver|OJJ03617.1 awen|OJJ35488.1 azon|OJJ47001.1

Group2895: abra|OJJ72837.1 acar|OOF96039.1 acla|EAW06923.1 afis|EAW16540.1 afla|EED53743.1 afum|EAL89137.1 agla|OJJ85576.1 akaw|GAA85434.1 aluc|OJZ83337.1 anid|CBF69989.1 anig|EHA24213.1 aory|EIT75293.1 asyd|OJJ58892.1 ater|EAU39054.1 atub|OJI82234.1 aver|OJJ01493.1 awen|OJJ40280.1 azon|OJJ49143.1

Group2896: abra|OJJ72840.1 acar|OOF96042.1 acla|EAW11402.1 afis|EAW24019.1 afla|EED49137.1 afum|EAL87449.1 agla|OJJ86952.1 akaw|GAA85442.1 aluc|OJZ83347.1 anid|CBF77420.1 anig|EHA24215.1 aory|EIT78560.1 asyd|OJJ53232.1 ater|EAU29727.1 atub|OJI82241.1 aver|OJJ03619.1 awen|OJJ35492.1 azon|OJJ46998.1

Group2897: abra|OJJ72844.1 acar|OOF96045.1 acla|EAW11399.1 afis|EAW24022.1 afla|EED49132.1 afum|EAL87453.1 agla|OJJ86955.1 akaw|GAA85445.1 aluc|OJZ83352.1 anid|CBF75300.1 anig|EHA24218.1 aory|EIT78561.1 asyd|OJJ59881.1 ater|EAU29724.1 atub|OJI82244.1 aver|OJJ02405.1 awen|OJJ35495.1 azon|OJJ46994.1

Group2898: abra|OJJ72847.1 acar|OOF96048.1 acla|EAW11396.1 afis|EAW24025.1 afla|EED49129.1 afum|EAL87456.1 agla|OJJ86958.1 akaw|GAA85448.1 aluc|OJZ83355.1 anid|CBF75305.1 anig|EHA24221.1 aory|EIT78574.1 asyd|OJJ59876.1 ater|EAU29719.1 atub|OJI82247.1 aver|OJJ02410.1 awen|OJJ35498.1 azon|OJJ46991.1

Group2899: abra|OJJ72850.1 acar|OOF96051.1 acla|EAW11393.1 afis|EAW24028.1 afla|EED49126.1 afum|EAL87459.1 agla|OJJ86961.1 akaw|GAA85451.1 aluc|OJZ83359.1 anid|CBF75310.1 anig|EHA24224.1 aory|EIT78543.1 asyd|OJJ59874.1 ater|EAU29716.1 atub|OJI82250.1 aver|OJJ02413.1 awen|OJJ35501.1 azon|OJJ46988.1

Group2900: abra|OJJ72853.1 acar|OOF96052.1 acla|EAW11391.1 afis|EAW24031.1 afla|EED49123.1 afum|EAL87462.1 agla|OJJ87001.1 akaw|GAA85454.1 aluc|OJZ83362.1 anid|CBF75316.1 anig|EHA24227.1 aory|EIT78584.1 asyd|OJJ59871.1 ater|EAU29713.1 atub|OJI82253.1 aver|OJJ02416.1 awen|OJJ35503.1 azon|OJJ46983.1

Group2901: abra|OJJ72854.1 acar|OOF96053.1 acla|EAW11390.1 afis|EAW24032.1 afla|EED49121.1 afum|EAL87463.1 agla|OJJ87000.1 akaw|GAA85455.1 aluc|OJZ83363.1 anid|CBF75318.1 anig|EHA24228.1 aory|EIT78515.1 asyd|OJJ59870.1 ater|EAU29712.1 atub|OJI82254.1 aver|OJJ02417.1 awen|OJJ35504.1 azon|OJJ46981.1

Group2902: abra|OJJ72858.1 acar|OOF96055.1 acla|EAW11388.1 afis|EAW24034.1 afla|EED49119.1 afum|EAL87465.1 agla|OJJ86998.1 akaw|GAA85457.1 aluc|OJZ83365.1 anid|CBF75324.1 anig|EHA24230.1 aory|EIT78541.1 asyd|OJJ59868.1 ater|EAU29710.1 atub|OJI82256.1 aver|OJJ02419.1 awen|OJJ35506.1 azon|OJJ46978.1

Group2903: abra|OJJ72860.1 acar|OOF96057.1 acla|EAW11386.1 afis|EAW18110.1 afla|EED49117.1 afum|EAL87467.1 agla|OJJ86996.1 akaw|GAA85459.1 aluc|OJZ83367.1 anid|CBF75328.1 anig|EHA24232.1

aory|EIT78582.1 asyd|OJJ59865.1 ater|EAU29708.1 atub|OJI82259.1 aver|OJJ02422.1 awen|OJJ35508.1  
azon|OJJ47630.1

Group2904: abra|OJJ72861.1 acar|OOF96058.1 acla|EAW11385.1 afis|EAW18111.1 afla|EED49114.1  
afum|EAL87468.1 agla|OJJ86995.1 akaw|GAA85460.1 aluc|OJZ83368.1 anid|CBF75330.1 anig|EHA24233.1  
aory|EIT78525.1 asyd|OJJ59864.1 ater|EAU29707.1 atub|OJI82260.1 aver|OJJ02423.1 awen|OJJ35509.1  
azon|OJJ46976.1

Group2905: abra|OJJ72862.1 acar|OOF96060.1 acla|EAW11384.1 afis|EAW18112.1 afla|EED49113.1  
afum|EAL87469.1 agla|OJJ86994.1 akaw|GAA85461.1 aluc|OJZ83369.1 anid|CBF75332.1 anig|EHA24234.1  
aory|EIT78586.1 asyd|OJJ59863.1 ater|EAU29706.1 atub|OJI82261.1 aver|OJJ02424.1 awen|OJJ35510.1  
azon|OJJ46975.1

Group2906: abra|OJJ72863.1 acar|OOF96062.1 acla|EAW11379.1 afis|EAW18116.1 afla|EED58041.1  
afum|EAL87473.1 agla|OJJ86980.1 akaw|GAA85462.1 aluc|OJZ83376.1 anid|CBF75340.1 anig|EHA24235.1  
aory|EIT79770.1 asyd|OJJ59859.1 ater|EAU29701.1 atub|OJI82262.1 aver|OJJ02428.1 awen|OJJ35515.1  
azon|OJJ46970.1

Group2907: abra|OJJ72865.1 acar|OOF96064.1 acla|EAW11382.1 afis|EAW18114.1 afla|EED58039.1  
afum|EAL87471.1 agla|OJJ86982.1 akaw|GAA85464.1 aluc|OJZ83378.1 anid|CBF75336.1 anig|EHA24237.1  
aory|EIT79795.1 asyd|OJJ59861.1 ater|EAU29703.1 atub|OJI82264.1 aver|OJJ02426.1 awen|OJJ35512.1  
azon|OJJ46973.1

Group2908: abra|OJJ72866.1 acar|OOF96065.1 acla|EAW11383.1 afis|EAW18113.1 afla|EED58038.1  
afum|EAL87470.1 agla|OJJ86991.1 akaw|GAA85465.1 aluc|OJZ83379.1 anid|CBF75334.1 anig|EHA24238.1  
aory|EIT79794.1 asyd|OJJ59862.1 ater|EAU29705.1 atub|OJI82265.1 aver|OJJ02425.1 awen|OJJ35511.1  
azon|OJJ46974.1

Group2909: abra|OJJ72869.1 acar|OOF96068.1 acla|EAW11376.1 afis|EAW18119.1 afla|EED58044.1  
afum|EAL87477.1 agla|OJJ87011.1 akaw|GAA85468.1 aluc|OJZ83382.1 anid|CBF75346.1 anig|EHA24241.1  
aory|EIT79722.1 asyd|OJJ59854.1 ater|EAU29698.1 atub|OJI82268.1 aver|OJJ02431.1 awen|OJJ35518.1  
azon|OJJ46966.1

Group2910: abra|OJJ72871.1 acar|OOF96069.1 acla|EAW11375.1 afis|EAW18120.1 afla|EED58045.1  
afum|EAL87478.1 agla|OJJ87014.1 akaw|GAA85469.1 aluc|OJZ83385.1 anid|CBF75348.1 anig|EHA24243.1  
aory|EIT79798.1 asyd|OJJ59853.1 ater|EAU29697.1 atub|OJI82271.1 aver|OJJ02432.1 awen|OJJ35521.1  
azon|OJJ46965.1

Group2911: abra|OJJ72874.1 acar|OOF96071.1 acla|EAW11374.1 afis|EAW18121.1 afla|EED58046.1  
afum|EAL87479.1 agla|OJJ87015.1 akaw|GAA85470.1 aluc|OJZ83386.1 anid|CBF75352.1 anig|EHA24244.1  
aory|EIT79741.1 asyd|OJJ59852.1 ater|EAU29695.1 atub|OJI82272.1 aver|OJJ02435.1 awen|OJJ35523.1  
azon|OJJ46963.1

Group2912: abra|OJJ72880.1 acar|OOF96073.1 acla|EAW11366.1 afis|EAW18129.1 afla|EED58053.1  
afum|EAL87486.1 agla|OJJ83795.1 akaw|GAA85472.1 aluc|OJZ83391.1 anid|CBF75366.1 anig|EHA24246.1  
aory|EIT79707.1 asyd|OJJ59848.1 ater|EAU35448.1 atub|OJI82277.1 aver|OJJ02440.1 awen|OJJ35557.1  
azon|OJJ46953.1

Group2913: abra|OJJ72886.1 acar|OOF96076.1 acla|EAW11364.1 afis|EAW18130.1 afla|EED58054.1  
afum|EAL87487.1 agla|OJJ83802.1 akaw|GAA85473.1 aluc|OJZ83394.1 anid|CBF75370.1 anig|EHA24247.1  
aory|EIT79721.1 asyd|OJJ59847.1 ater|EAU35452.1 atub|OJI82280.1 aver|OJJ02441.1 awen|OJJ35561.1  
azon|OJJ46951.1

Group2914: abra|OJJ72887.1 acar|OOF96077.1 acla|EAW11363.1 afis|EAW18132.1 afla|EED58056.1  
afum|EAL87489.1 agla|OJJ83814.1 akaw|GAA85474.1 aluc|OJZ83395.1 anid|CBF75372.1 anig|EHA24248.1  
aory|EIT79771.1 asyd|OJJ59846.1 ater|EAU35454.1 atub|OJI82281.1 aver|OJJ02442.1 awen|OJJ35571.1  
azon|OJJ46949.1

Group2915: abra|OJJ72890.1 acar|OOF96080.1 acla|EAW11360.1 afis|EAW18134.1 afla|EED58059.1  
afum|EAL87491.1 agla|OJJ83818.1 akaw|GAA85477.1 aluc|OJZ83398.1 anid|CBF75380.1 anig|EHA24251.1  
aory|EIT79745.1 asyd|OJJ59843.1 ater|EAU35457.1 atub|OJI82284.1 aver|OJJ02446.1 awen|OJJ35576.1  
azon|OJJ46946.1

Group2916: abra|OJJ72892.1 acar|OOF96083.1 acla|EAW11358.1 afis|EAW18136.1 afla|EED58061.1  
afum|EAL87493.1 agla|OJJ83819.1 akaw|GAA85479.1 aluc|OJZ83400.1 anid|CBF75376.1 anig|EHA24252.1  
aory|EIT79756.1 asyd|OJJ59840.1 ater|EAU35459.1 atub|OJI82288.1 aver|OJJ02449.1 awen|OJJ35578.1  
azon|OJJ46945.1

Group2917: abra|OJJ72894.1 acar|OOF96085.1 acla|EAW11357.1 afis|EAW18137.1 afla|EED58062.1  
afum|EAL87494.1 agla|OJJ83820.1 akaw|GAA85481.1 aluc|OJZ83403.1 anid|CBF75384.1 anig|EHA24254.1  
aory|EIT79803.1 asyd|OJJ59838.1 ater|EAU35460.1 atub|OJI82291.1 aver|OJJ02450.1 awen|OJJ35579.1  
azon|OJJ46944.1

Group2918: abra|OJJ72898.1 acar|OOF96088.1 acla|EAW11353.1 afis|EAW18141.1 afla|EED58067.1 afum|EAL87498.1 agla|OJJ83826.1 akaw|GAA85485.1 aluc|OJZ83407.1 anid|CBF81129.1 anig|EHA24258.1 aory|EIT79748.1 asyd|OJJ56491.1 ater|EAU35464.1 atub|OJI82296.1 aver|OJJ06227.1 awen|OJJ35583.1 azon|OJJ46939.1

Group2919: abra|OJJ72904.1 acar|OOF89820.1 acla|EAW11350.1 afis|EAW18145.1 afla|EED58072.1 afum|EAL87502.1 agla|OJJ83828.1 akaw|GAA85489.1 aluc|OJZ83414.1 anid|CBF81120.1 anig|EHA24263.1 aory|EIT79155.1 asyd|OJJ56488.1 ater|EAU35468.1 atub|OJI82301.1 aver|OJJ06231.1 awen|OJJ35588.1 azon|OJJ46937.1

Group2920: abra|OJJ72906.1 acar|OOF96089.1 acla|EAW11348.1 afis|EAW18147.1 afla|EED58075.1 afum|EAL87505.1 agla|OJJ83832.1 akaw|GAA85491.1 aluc|OJZ83416.1 anid|CBF81116.1 anig|EHA24265.1 aory|EIT79152.1 asyd|OJJ56486.1 ater|EAU35446.1 atub|OJI82303.1 aver|OJJ06233.1 awen|OJJ35590.1 azon|OJJ46935.1

Group2921: abra|OJJ72909.1 acar|OOF96092.1 acla|EAW11344.1 afis|EAW18150.1 afla|EED58078.1 afum|EAL87508.1 agla|OJJ83835.1 akaw|GAA85494.1 aluc|OJZ83419.1 anid|CBF81110.1 anig|EHA24268.1 aory|EIT79111.1 asyd|OJJ56483.1 ater|EAU35472.1 atub|OJI82306.1 aver|OJJ06236.1 awen|OJJ35593.1 azon|OJJ46915.1

Group2922: abra|OJJ72910.1 acar|OOF96093.1 acla|EAW11343.1 afis|EAW18151.1 afla|EED58080.1 afum|EAL87509.1 agla|OJJ83836.1 akaw|GAA85495.1 aluc|OJZ83421.1 anid|CBF81108.1 anig|EHA24269.1 aory|EIT79142.1 asyd|OJJ56481.1 ater|EAU35473.1 atub|OJI82307.1 aver|OJJ06238.1 awen|OJJ35594.1 azon|OJJ46916.1

Group2923: abra|OJJ72912.1 acar|OOF96094.1 acla|EAW06479.1 afis|EAW15974.1 afla|EED58082.1 afum|EAL88606.1 agla|OJJ83838.1 akaw|GAA85496.1 aluc|OJZ83422.1 anid|CBF81105.1 anig|EHA24270.1 aory|EIT79133.1 asyd|OJJ56479.1 ater|EAU35474.1 atub|OJI82308.1 aver|OJJ06239.1 awen|OJJ35597.1 azon|OJJ46918.1

Group2924: abra|OJJ72913.1 acar|OOF96095.1 acla|EAW06478.1 afis|EAW15973.1 afla|EED58083.1 afum|EAL88605.1 agla|OJJ83842.1 akaw|GAA85497.1 aluc|OJZ83423.1 anid|CBF81101.1 anig|EHA24271.1 aory|EIT79117.1 asyd|OJJ56478.1 ater|EAU35475.1 atub|OJI82309.1 aver|OJJ06240.1 awen|OJJ35599.1 azon|OJJ46919.1

Group2925: abra|OJJ72914.1 acar|OOF96096.1 acla|EAW06476.1 afis|EAW15971.1 afla|EED58085.1 afum|EAL88603.1 agla|OJJ83844.1 akaw|GAA85498.1 aluc|OJZ83424.1 anid|CBF81098.1 anig|EHA24272.1 aory|EIT79112.1 asyd|OJJ56476.1 ater|EAU35477.1 atub|OJI82310.1 aver|OJJ06242.1 awen|OJJ35601.1 azon|OJJ46921.1

Group2926: abra|OJJ72917.1 acar|OOF96099.1 acla|EAW06474.1 afis|EAW15968.1 afla|EED58089.1 afum|EAL88601.1 agla|OJJ89290.1 akaw|GAA85500.1 aluc|OJZ83427.1 anid|CBF81094.1 anig|EHA24279.1 aory|EIT79146.1 asyd|OJJ56470.1 ater|EAU35480.1 atub|OJI82315.1 aver|OJJ06249.1 awen|OJJ35605.1 azon|OJJ46925.1

Group2927: abra|OJJ72920.1 acar|OOF96102.1 acla|EAW06471.1 afis|EAW15965.1 afla|EED58091.1 afum|EAL88598.1 agla|OJJ89346.1 akaw|GAA85503.1 aluc|OJZ83430.1 anid|CBF81089.1 anig|EHA24281.1 aory|EIT79110.1 asyd|OJJ56467.1 ater|EAU35487.1 atub|OJI82318.1 aver|OJJ06252.1 awen|OJJ35608.1 azon|OJJ46928.1

Group2928: abra|OJJ72922.1 acar|OOF96103.1 acla|EAW06469.1 afis|EAW15964.1 afla|EED58093.1 afum|EAL88597.1 agla|OJJ89348.1 akaw|GAA85504.1 aluc|OJZ83432.1 anid|CBF81085.1 anig|EHA24282.1 aory|EIT79125.1 asyd|OJJ56465.1 ater|EAU35488.1 atub|OJI82321.1 aver|OJJ06254.1 awen|OJJ35610.1 azon|OJJ46930.1

Group2929: abra|OJJ72930.1 acar|OOF96110.1 acla|EAW06460.1 afis|EAW15956.1 afla|EED58102.1 afum|EAL88589.1 agla|OJJ89357.1 akaw|GAA85512.1 aluc|OJZ83440.1 anid|CBF81067.1 anig|EHA24286.1 aory|EIT79135.1 asyd|OJJ56458.1 ater|EAU35501.1 atub|OJI82331.1 aver|OJJ06264.1 awen|OJJ35618.1 azon|OJJ46904.1

Group2930: abra|OJJ72931.1 acar|OOF96111.1 acla|EAW06459.1 afis|EAW15955.1 afla|EED58103.1 afum|EAL88588.1 agla|OJJ89358.1 akaw|GAA85513.1 aluc|OJZ83441.1 anid|CBF81065.1 anig|EHA24287.1 aory|EIT79109.1 asyd|OJJ56457.1 ater|EAU35502.1 atub|OJI82332.1 aver|OJJ06265.1 awen|OJJ35619.1 azon|OJJ46903.1

Group2931: abra|OJJ72935.1 acar|OOF96116.1 acla|EAW06456.1 afis|EAW15952.1 afla|EED58106.1 afum|EAL88585.1 agla|OJJ89362.1 akaw|GAA85516.1 aluc|OJZ83444.1 anid|CBF81059.1 anig|EHA24290.1 aory|EIT79114.1 asyd|OJJ56454.1 ater|EAU35505.1 atub|OJI82335.1 aver|OJJ06268.1 awen|OJJ35624.1 azon|OJJ46901.1

Group2932: abra|OJJ72936.1 acar|OOF96117.1 acla|EAW06455.1 afis|EAW15951.1 afla|EED58107.1 afum|EAL88584.1 agla|OJJ89363.1 akaw|GAA85517.1 aluc|OJZ83445.1 anid|CBF81057.1 anig|EHA24291.1

aory|EIT79166.1 asyd|OJJ56453.1 ater|EAU35506.1 atub|OJI82336.1 aver|OJJ06269.1 awen|OJJ35625.1  
azon|OJJ46900.1

Group2933: abra|OJJ72937.1 acar|OOF96119.1 acla|EAW06454.1 afis|EAW15950.1 afla|EED58108.1  
afum|EAL88583.1 agla|OJJ89364.1 akaw|GAA85518.1 aluc|OJZ83446.1 anid|CBF81056.1 anig|EHA24292.1  
aory|EIT79143.1 asyd|OJJ56451.1 ater|EAU35507.1 atub|OJI82337.1 aver|OJJ06270.1 awen|OJJ35626.1  
azon|OJJ46899.1

Group2934: abra|OJJ72942.1 acar|OOF96123.1 acla|EAW11209.1 afis|EAW15942.1 afla|EED58116.1  
afum|EAL88576.1 agla|OJJ89368.1 akaw|GAA85524.1 aluc|OJZ83452.1 anid|CBF80959.1 anig|EHA24298.1  
aory|EIT79144.1 asyd|OJJ56346.1 ater|EAU35514.1 atub|OJI82344.1 aver|OJJ06367.1 awen|OJJ35640.1  
azon|OJJ46895.1

Group2935: abra|OJJ72945.1 acar|OOF96126.1 acla|EAW11205.1 afis|EAW15935.1 afla|EED58120.1  
afum|EAL88571.1 agla|OJJ89371.1 akaw|GAA85527.1 aluc|OJZ83455.1 anid|CBF80966.1 anig|EHA24301.1  
aory|EIT79156.1 asyd|OJJ56349.1 ater|EAU35517.1 atub|OJI82347.1 aver|OJJ06364.1 awen|OJJ35644.1  
azon|OJJ46892.1

Group2936: abra|OJJ72949.1 acar|OOF96130.1 acla|EAW11195.1 afis|EAW15925.1 afla|EED54936.1  
afum|EAL88561.1 agla|OJJ89380.1 akaw|GAA85530.1 aluc|OJZ83459.1 anid|CBF81019.1 anig|EHA24303.1  
aory|EIT80380.1 asyd|OJJ56382.1 ater|EAU35530.1 atub|OJI82351.1 aver|OJJ06331.1 awen|OJJ35655.1  
azon|OJJ46884.1

Group2937: abra|OJJ72956.1 acar|OOF96137.1 acla|EAW11201.1 afis|EAW15931.1 afla|EED54930.1  
afum|EAL88567.1 agla|OJJ89375.1 akaw|GAA85537.1 aluc|OJZ83465.1 anid|CBF81029.1 anig|EHA24309.1  
aory|EIT80323.1 asyd|OJJ56388.1 ater|EAU35521.1 atub|OJI82358.1 aver|OJJ06325.1 awen|OJJ35648.1  
azon|OJJ46889.1

Group2938: abra|OJJ72960.1 acar|OOF96142.1 acla|EAW11192.1 afis|EAW15922.1 afla|EED54938.1  
afum|EAL88559.1 agla|OJJ89386.1 akaw|GAA85540.1 aluc|OJZ83468.1 anid|CBF81013.1 anig|EHA24312.1  
aory|EIT80338.1 asyd|OJJ56379.1 ater|EAU35533.1 atub|OJI82362.1 aver|OJJ06334.1 awen|OJJ35658.1  
azon|OJJ46881.1

Group2939: abra|OJJ72967.1 acar|OOF96149.1 acla|EAW11187.1 afis|EAW15918.1 afla|EED54943.1  
afum|EAL88554.1 agla|OJJ89393.1 akaw|GAA85546.1 aluc|OJZ83478.1 anid|CBF81002.1 anig|EHA24315.1  
aory|EIT80355.1 asyd|OJJ56373.1 ater|EAU35538.1 atub|OJI82368.1 aver|OJJ06340.1 awen|OJJ35661.1  
azon|OJJ44132.1

Group2940: abra|OJJ72971.1 acar|OOF96150.1 acla|EAW08037.1 afis|EAW23072.1 afla|EED54944.1  
afum|EAL88407.1 agla|OJJ89394.1 akaw|GAA85547.1 aluc|OJZ83482.1 anid|CBF80992.1 anig|EHA24317.1  
aory|EIT80389.1 asyd|OJJ56368.1 ater|EAU35539.1 atub|OJI82372.1 aver|OJJ06346.1 awen|OJJ35663.1  
azon|OJJ44133.1

Group2941: abra|OJJ72972.1 acar|OOF96151.1 acla|EAW08036.1 afis|EAW23071.1 afla|EED54945.1  
afum|EAL88408.1 agla|OJJ89395.1 akaw|GAA85548.1 aluc|OJZ83483.1 anid|CBF80994.1 anig|EHA24318.1  
aory|EIT80359.1 asyd|OJJ56369.1 ater|EAU35540.1 atub|OJI82373.1 aver|OJJ06345.1 awen|OJJ35664.1  
azon|OJJ44134.1

Group2942: abra|OJJ72973.1 acar|OOF96152.1 acla|EAW08035.1 afis|EAW23070.1 afla|EED54946.1  
afum|EAL88409.1 agla|OJJ89396.1 akaw|GAA85549.1 aluc|OJZ83484.1 anid|CBF80996.1 anig|EHA24319.1  
aory|EIT80382.1 asyd|OJJ56370.1 ater|EAU37593.1 atub|OJI82374.1 aver|OJJ06344.1 awen|OJJ35665.1  
azon|OJJ44135.1

Group2943: abra|OJJ72975.1 acar|OOF96153.1 acla|EAW08034.1 afis|EAW23069.1 afla|EED54947.1  
afum|EAL88410.1 agla|OJJ89397.1 akaw|GAA85550.1 aluc|OJZ83485.1 anid|CBF80998.1 anig|EHA24320.1  
aory|EIT80368.1 asyd|OJJ56371.1 ater|EAU37596.1 atub|OJI82376.1 aver|OJJ06343.1 awen|OJJ35666.1  
azon|OJJ44137.1

Group2944: abra|OJJ72976.1 acar|OOF96154.1 acla|EAW08033.1 afis|EAW23068.1 afla|EED54948.1  
afum|EAL88411.1 agla|OJJ89398.1 akaw|GAA85551.1 aluc|OJZ83486.1 anid|CBF81000.1 anig|EHA24321.1  
aory|EIT80295.1 asyd|OJJ56372.1 ater|EAU37597.1 atub|OJI82377.1 aver|OJJ06342.1 awen|OJJ35667.1  
azon|OJJ44138.1

Group2945: abra|OJJ72979.1 acar|OOF96158.1 acla|EAW08031.1 afis|EAW23065.1 afla|EED54952.1  
afum|EAL88414.1 agla|OJJ89409.1 akaw|GAA85554.1 aluc|OJZ83489.1 anid|CBF80981.1 anig|EHA24324.1  
aory|EIT80321.1 asyd|OJJ56358.1 ater|EAU37601.1 atub|OJI82381.1 aver|OJJ06356.1 awen|OJJ35670.1  
azon|OJJ44140.1

Group2946: abra|OJJ72980.1 acar|OOF96156.1 acla|EAW08030.1 afis|EAW23064.1 afla|EED54953.1  
afum|EAL88415.1 agla|OJJ89410.1 akaw|GAA85555.1 aluc|OJZ83490.1 anid|CBF80979.1 anig|EHA24325.1  
aory|EIT80361.1 asyd|OJJ56357.1 ater|EAU37602.1 atub|OJI82382.1 aver|OJJ06357.1 awen|OJJ35671.1  
azon|OJJ44141.1

Group2947: abra|OJJ72982.1 acar|OOF96159.1 acla|EAW08028.1 afis|EAW23062.1 afla|EED54955.1 afum|EAL88417.1 agla|OJJ89412.1 akaw|GAA85557.1 aluc|OJZ83492.1 anid|CBF80975.1 anig|EHA24327.1 aory|EIT80363.1 asyd|OJJ56355.1 ater|EAU37603.1 atub|OJI82386.1 aver|OJJ06359.1 awen|OJJ35673.1 azon|OJJ44142.1

Group2948: abra|OJJ72983.1 acar|OOF96160.1 acla|EAW08027.1 afis|EAW23061.1 afla|EED54957.1 afum|EAL88418.1 agla|OJJ89414.1 akaw|GAA85558.1 aluc|OJZ83493.1 anid|CBF80973.1 anig|EHA24328.1 aory|EIT80353.1 asyd|OJJ56354.1 ater|EAU37604.1 atub|OJI82387.1 aver|OJJ06360.1 awen|OJJ35676.1 azon|OJJ44143.1

Group2949: abra|OJJ72984.1 acar|OOF96161.1 acla|EAW08026.1 afis|EAW23060.1 afla|EED54958.1 afum|EAL88419.1 agla|OJJ89415.1 akaw|GAA85559.1 aluc|OJZ83494.1 anid|CBF80972.1 anig|EHA24329.1 aory|EIT80387.1 asyd|OJJ56353.1 ater|EAU37605.1 atub|OJI82388.1 aver|OJJ06361.1 awen|OJJ35677.1 azon|OJJ44144.1

Group2950: abra|OJJ72985.1 acar|OOF96162.1 acla|EAW08025.1 afis|EAW23059.1 afla|EED54959.1 afum|EAL88420.1 agla|OJJ89417.1 akaw|GAA85560.1 aluc|OJZ83495.1 anid|CBF80970.1 anig|EHA24330.1 aory|EIT80388.1 asyd|OJJ56352.1 ater|EAU37606.1 atub|OJI82389.1 aver|OJJ06362.1 awen|OJJ35678.1 azon|OJJ44146.1

Group2951: abra|OJJ72989.1 acar|OOF96165.1 acla|EAW08022.1 afis|EAW23056.1 afla|EED54961.1 afum|EAL88424.1 agla|OJJ89419.1 akaw|GAA85563.1 aluc|OJZ83497.1 anid|CBF81039.1 anig|EHA24332.1 aory|EIT80362.1 asyd|OJJ56392.1 ater|EAU37608.1 atub|OJI82391.1 aver|OJJ06321.1 awen|OJJ35680.1 azon|OJJ44148.1

Group2952: abra|OJJ72990.1 acar|OOF96166.1 acla|EAW08021.1 afis|EAW23055.1 afla|EED54962.1 afum|EAL88425.1 agla|OJJ89420.1 akaw|GAA85564.1 aluc|OJZ83498.1 anid|CBF81041.1 anig|EHA24333.1 aory|EIT80303.1 asyd|OJJ56393.1 ater|EAU37609.1 atub|OJI82392.1 aver|OJJ06320.1 awen|OJJ35681.1 azon|OJJ44149.1

Group2953: abra|OJJ72991.1 acar|OOF96167.1 acla|EAW08020.1 afis|EAW23054.1 afla|EED54964.1 afum|EAL88426.1 agla|OJJ89422.1 akaw|GAA85565.1 aluc|OJZ83499.1 anid|CBF81043.1 anig|EHA24334.1 aory|EIT80378.1 asyd|OJJ56441.1 ater|EAU37610.1 atub|OJI82393.1 aver|OJJ06280.1 awen|OJJ35682.1 azon|OJJ44150.1

Group2954: abra|OJJ72997.1 acar|OOF96173.1 acla|EAW08016.1 afis|EAW23050.1 afla|EED54968.1 afum|EAL88430.1 agla|OJJ89429.1 akaw|GAA85571.1 aluc|OJZ83505.1 anid|CBF80953.1 anig|EHA24338.1 aory|EIT80340.1 asyd|OJJ56343.1 ater|EAU29602.1 atub|OJI82399.1 aver|OJJ06370.1 awen|OJJ35689.1 azon|OJJ44154.1

Group2955: abra|OJJ72998.1 acar|OOF89938.1 acla|EAW08015.1 afis|EAW23049.1 afla|EED54969.1 afum|EAL88431.1 agla|OJJ89430.1 akaw|GAA85572.1 aluc|OJZ83506.1 anid|CBF80951.1 anig|EHA24339.1 aory|EIT80346.1 asyd|OJJ56342.1 ater|EAU29601.1 atub|OJI82400.1 aver|OJJ06371.1 awen|OJJ35690.1 azon|OJJ44155.1

Group2956: abra|OJJ72999.1 acar|OOF89939.1 acla|EAW08014.1 afis|EAW23048.1 afla|EED54970.1 afum|EAL88432.1 agla|OJJ89431.1 akaw|GAA85573.1 aluc|OJZ83509.1 anid|CBF80949.1 anig|EHA24340.1 aory|EIT80379.1 asyd|OJJ56341.1 ater|EAU29600.1 atub|OJI82402.1 aver|OJJ06372.1 awen|OJJ35691.1 azon|OJJ44157.1

Group2957: abra|OJJ73002.1 acar|OOF96175.1 acla|EAW08011.1 afis|EAW23046.1 afla|EED54973.1 afum|EAL88435.1 agla|OJJ89432.1 akaw|GAA85580.1 aluc|OJZ83516.1 anid|CBF80946.1 anig|EHA24341.1 aory|EIT80343.1 asyd|OJJ56339.1 ater|EAU29614.1 atub|OJI82407.1 aver|OJJ06374.1 awen|OJJ35694.1 azon|OJJ44158.1

Group2958: abra|OJJ73003.1 acar|OOF96176.1 acla|EAW08010.1 afis|EAW23045.1 afla|EED54974.1 afum|EAL88436.1 agla|OJJ89433.1 akaw|GAA85581.1 aluc|OJZ83517.1 anid|CBF80944.1 anig|EHA24342.1 aory|EIT80339.1 asyd|OJJ56338.1 ater|EAU29613.1 atub|OJI82408.1 aver|OJJ06375.1 awen|OJJ35695.1 azon|OJJ44159.1

Group2959: abra|OJJ73006.1 acar|OOF96178.1 acla|EAW08007.1 afis|EAW23042.1 afla|EED54976.1 afum|EAL88439.1 agla|OJJ89436.1 akaw|GAA85584.1 aluc|OJZ83521.1 anid|CBF80938.1 anig|EHA24344.1 aory|EIT80316.1 asyd|OJJ56312.1 ater|EAU29617.1 atub|OJI82410.1 aver|OJJ06402.1 awen|OJJ35700.1 azon|OJJ44162.1

Group2960: abra|OJJ73008.1 acar|OOF96180.1 acla|EAW08005.1 afis|EAW23040.1 afla|EED54978.1 afum|EAL88441.1 agla|OJJ89438.1 akaw|GAA85586.1 aluc|OJZ83523.1 anid|CBF80935.1 anig|EHA24346.1 aory|EIT80392.1 asyd|OJJ56314.1 ater|EAU29603.1 atub|OJI82412.1 aver|OJJ06400.1 awen|OJJ35702.1 azon|OJJ44164.1

Group2961: abra|OJJ73016.1 acar|OOF96186.1 acla|EAW07997.1 afis|EAW23032.1 afla|EED54984.1 afum|EAL88450.1 agla|OJJ89445.1 akaw|GAA85594.1 aluc|OJZ83531.1 anid|CBF80910.1 anig|EHA24353.1

aory|EIT80327.1 asyd|OJJ56328.1 ater|EAU29625.1 atub|OJI82421.1 aver|OJJ06385.1 awen|OJJ35713.1 azon|OJJ44172.1

Group2962: abra|OJJ73022.1 acar|OOF96190.1 acla|EAW07993.1 afis|EAW23028.1 afla|EED54987.1 afum|EAL88453.2 agla|OJJ89451.1 akaw|GAA85597.1 aluc|OJZ83535.1 anid|CBF80920.1 anig|EHA24356.1 aory|EIT80371.1 asyd|OJJ56322.1 ater|EAU29630.1 atub|OJI82426.1 aver|OJJ06391.1 awen|OJJ35717.1 azon|OJJ44176.1

Group2963: abra|OJJ73023.1 acar|OOF96191.1 acla|EAW07992.1 afis|EAW23027.1 afla|EED54988.1 afum|EAL88455.1 agla|OJJ89452.1 akaw|GAA85598.1 aluc|OJZ83536.1 anid|CBF80918.1 anig|EHA24357.1 aory|EIT80332.1 asyd|OJJ56323.1 ater|EAU29629.1 atub|OJI82427.1 aver|OJJ06390.1 awen|OJJ35718.1 azon|OJJ44177.1

Group2964: abra|OJJ73025.1 acar|OOF96192.1 acla|EAW07991.1 afis|EAW23026.1 afla|EED54989.1 afum|EAL88456.1 agla|OJJ89453.1 akaw|GAA85599.1 aluc|OJZ83537.1 anid|CBF80916.1 anig|EHA24358.1 aory|EIT80337.1 asyd|OJJ56324.1 ater|EAU29628.1 atub|OJI82428.1 aver|OJJ06389.1 awen|OJJ35719.1 azon|OJJ44178.1

Group2965: abra|OJJ73029.1 acar|OOF96195.1 acla|EAW07988.1 afis|EAW23023.1 afla|EED54993.1 afum|EAL88459.1 agla|OJJ89456.1 akaw|GAA85602.1 aluc|OJZ83540.1 anid|CBF80905.1 anig|EHA24360.1 aory|EIT80347.1 asyd|OJJ56332.1 ater|EAU29651.1 atub|OJI82432.1 aver|OJJ06382.1 awen|OJJ30720.1 azon|OJJ44181.1

Group2966: abra|OJJ73030.1 acar|OOF96196.1 acla|EAW07987.1 afis|EAW23022.1 afla|EED54994.1 afum|EAL88460.1 agla|OJJ89457.1 akaw|GAA85603.1 aluc|OJZ83541.1 anid|CBF80903.1 anig|EHA24361.1 aory|EIT80374.1 asyd|OJJ56333.1 ater|EAU29253.1 atub|OJI82433.1 aver|OJJ06381.1 awen|OJJ30721.1 azon|OJJ44182.1

Group2967: abra|OJJ73031.1 acar|OOF96197.1 acla|EAW07986.1 afis|EAW23021.1 afla|EED54995.1 afum|EAL88461.1 agla|OJJ89458.1 akaw|GAA85604.1 aluc|OJZ83542.1 anid|CBF80901.1 anig|EHA24362.1 aory|EIT80385.1 asyd|OJJ56334.1 ater|EAU29652.1 atub|OJI82434.1 aver|OJJ06380.1 awen|OJJ30722.1 azon|OJJ44183.1

Group2968: abra|OJJ73032.1 acar|OOF96198.1 acla|EAW07985.1 afis|EAW23020.1 afla|EED54996.1 afum|EAL88462.1 agla|OJJ89459.1 akaw|GAA85605.1 aluc|OJZ83543.1 anid|CBF80900.1 anig|EHA24363.1 aory|EIT80298.1 asyd|OJJ56335.1 ater|EAU29653.1 atub|OJI82435.1 aver|OJJ06379.1 awen|OJJ30723.1 azon|OJJ44184.1

Group2969: abra|OJJ73037.1 acar|OOF96200.1 acla|EAW07982.1 afis|EAW23017.1 afla|EED54999.1 afum|EAL88464.1 agla|OJJ89463.1 akaw|GAA85608.1 aluc|OJZ83548.1 anid|EHA24366.1 aory|EIT80350.1 asyd|OJJ56309.1 ater|EAU29657.1 atub|OJI82439.1 aver|OJJ06405.1 awen|OJJ29535.1 azon|OJJ44187.1 anid|CBF80894.1

Group2970: abra|OJJ73038.1 acar|OOF96201.1 acla|EAW07981.1 afis|EAW23016.1 afla|EED55000.1 afum|EAL88465.1 agla|OJJ89464.1 akaw|GAA85609.1 aluc|OJZ83549.1 anid|CBF80896.1 anig|EHA24367.1 aory|EIT80294.1 asyd|OJJ56310.1 ater|EAU29658.1 atub|OJI82440.1 aver|OJJ06404.1 awen|OJJ29534.1 azon|OJJ44188.1

Group2971: abra|OJJ73039.1 acar|OOF96204.1 acla|EAW07980.1 afis|EAW23015.1 afla|EED55001.1 afum|EAL88466.1 agla|OJJ89465.1 akaw|GAA85610.1 aluc|OJZ83550.1 anid|CBF80890.1 anig|EHA24368.1 aory|EIT80296.1 asyd|OJJ56307.1 ater|EAU29659.1 atub|OJI82441.1 aver|OJJ06408.1 awen|OJJ30728.1 azon|OJJ44189.1

Group2972: abra|OJJ73040.1 acar|OOF96203.1 acla|EAW07979.1 afis|EAW23014.1 afla|EED55002.1 afum|EAL88467.2 agla|OJJ89466.1 akaw|GAA85611.1 aluc|OJZ83551.1 anid|CBF80888.1 anig|EHA24369.1 aory|EIT80286.1 asyd|OJJ56306.1 ater|EAU29660.1 atub|OJI82442.1 aver|OJJ06409.1 awen|OJJ30729.1 azon|OJJ44190.1

Group2973: abra|OJJ73041.1 acar|OOF96202.1 acla|EAW07978.1 afis|EAW23013.1 afla|EED55003.1 afum|EAL88468.1 agla|OJJ89467.1 akaw|GAA85612.1 aluc|OJZ83552.1 anid|CBF80886.1 anig|EHA24370.1 aory|EIT80391.1 asyd|OJJ56305.1 ater|EAU29661.1 atub|OJI82443.1 aver|OJJ06410.1 awen|OJJ30730.1 azon|OJJ44191.1

Group2974: abra|OJJ73042.1 acar|OOF96205.1 acla|EAW07977.1 afis|EAW23012.1 afla|EED55004.1 afum|EAL88469.1 agla|OJJ89468.1 akaw|GAA85613.1 aluc|OJZ83553.1 anid|CBF80885.1 anig|EHA24371.1 aory|EIT80335.1 asyd|OJJ56304.1 ater|EAU29662.1 atub|OJI82444.1 aver|OJJ06411.1 awen|OJJ30731.1 azon|OJJ44192.1

Group2975: abra|OJJ73046.1 acar|OOF96208.1 acla|EAW07973.1 afis|EAW23008.1 afla|EED55007.1 afum|EAL88472.1 agla|OJJ89472.1 akaw|GAA85617.1 aluc|OJZ83557.1 anid|CBF80879.1 anig|EHA24375.1 aory|EIT80310.1 asyd|OJJ56302.1 ater|EAU29665.1 atub|OJI82447.1 aver|OJJ06415.1 awen|OJJ30733.1 azon|OJJ44196.1

Group2976: abra|OJJ73048.1 acar|OOF96211.1 acla|EAW07971.1 afis|EAW23006.1 afla|EED55009.1 afum|EAL88474.1 agla|OJJ89473.1 akaw|GAA85619.1 aluc|OJZ83559.1 anid|CBF80875.1 anig|EHA24377.1 aory|EIT80349.1 asyd|OJJ56300.1 ater|EAU29667.1 atub|OJI82449.1 aver|OJJ06417.1 awen|OJJ30735.1 azon|OJJ44197.1

Group2977: abra|OJJ73049.1 acar|OOF96212.1 acla|EAW07970.1 afis|EAW23005.1 afla|EED55010.1 afum|EAL88475.1 agla|OJJ89474.1 akaw|GAA85620.1 aluc|OJZ83560.1 anid|CBF80873.1 anig|EHA24378.1 aory|EIT80326.1 asyd|OJJ56299.1 ater|EAU29668.1 atub|OJI82450.1 aver|OJJ06418.1 awen|OJJ30736.1 azon|OJJ44198.1

Group2978: abra|OJJ73050.1 acar|OOF96213.1 acla|EAW07969.1 afis|EAW23004.1 afla|EED55011.1 afum|EAL88476.2 agla|OJJ89475.1 akaw|GAA85621.1 aluc|OJZ83561.1 anid|CBF80871.1 anig|EHA24379.1 aory|EIT80312.1 asyd|OJJ56298.1 ater|EAU29669.1 atub|OJI82451.1 aver|OJJ06419.1 awen|OJJ30737.1 azon|OJJ44199.1

Group2979: abra|OJJ73051.1 acar|OOF96214.1 acla|EAW07968.1 afis|EAW23003.1 afla|EED55012.1 afum|EAL88477.1 agla|OJJ89476.1 akaw|GAA85622.1 aluc|OJZ83562.1 anid|CBF80869.1 anig|EHA24380.1 aory|EIT80369.1 asyd|OJJ56297.1 ater|EAU29670.1 atub|OJI82452.1 aver|OJJ06420.1 awen|OJJ30738.1 azon|OJJ44200.1

Group2980: abra|OJJ73052.1 acar|OOF96215.1 acla|EAW07967.1 afis|EAW23002.1 afla|EED55013.1 afum|EAL88478.1 agla|OJJ89477.1 akaw|GAA85623.1 aluc|OJZ83564.1 anid|CBF80868.1 anig|EHA24381.1 aory|EIT80329.1 asyd|OJJ56296.1 ater|EAU29671.1 atub|OJI82454.1 aver|OJJ06421.1 awen|OJJ30739.1 azon|OJJ44201.1

Group2981: abra|OJJ73056.1 acar|OOF96217.1 acla|EAW07965.1 afis|EAW23000.1 afla|EED55015.1 afum|EAL88480.1 agla|OJJ89479.1 akaw|GAA85624.1 aluc|OJZ83567.1 anid|CBF80864.1 anig|EHA24383.1 aory|EIT80314.1 asyd|OJJ56294.1 ater|EAU29673.1 atub|OJI82456.1 aver|OJJ06423.1 awen|OJJ30741.1 azon|OJJ44204.1

Group2982: abra|OJJ73058.1 acar|OOF96218.1 acla|EAW07963.1 afis|EAW22998.1 afla|EED55017.1 afum|EAL88482.1 agla|OJJ89481.1 akaw|GAA85626.1 aluc|OJZ83569.1 anid|CBF80860.1 anig|EHA24385.1 aory|EIT80381.1 asyd|OJJ56292.1 ater|EAU29674.1 atub|OJI82458.1 aver|OJJ06425.1 awen|OJJ30743.1 azon|OJJ44202.1

Group2983: abra|OJJ73059.1 acar|OOF96220.1 acla|EAW07962.1 afis|EAW22997.1 afla|EED55018.1 afum|EAL88483.1 agla|OJJ89482.1 akaw|GAA85627.1 aluc|OJZ83570.1 anid|CBF80856.1 anig|EHA24386.1 aory|EIT80291.1 asyd|OJJ56291.1 ater|EAU29675.1 atub|OJI82459.1 aver|OJJ06426.1 awen|OJJ30744.1 azon|OJJ44205.1

Group2985: abra|OJJ73142.1 acar|OOG00354.1 acla|EAW07018.1 afis|EAW16644.1 afla|EED44956.1 afum|EAL89248.1 agla|OJJ82603.1 akaw|GAA88030.1 aluc|OJZ81289.1 anid|CBF82053.1 anig|EHA18588.1 aory|EIT73503.1 asyd|OJJ54235.1 ater|EAU39569.1 atub|OJI91497.1 aver|OJJ05187.1 awen|OJJ40070.1 azon|OJJ45554.1

Group2986: abra|OJJ73143.1 acar|OOG00355.1 acla|EAW07019.1 afis|EAW16645.1 afla|EED44955.1 afum|EAL89249.1 agla|OJJ82602.1 akaw|GAA88029.1 aluc|OJZ81288.1 anid|CBF82055.1 anig|EHA18587.1 aory|EIT73491.1 asyd|OJJ54236.1 ater|EAU39570.1 atub|OJI91496.1 aver|OJJ05188.1 awen|OJJ40069.1 azon|OJJ45555.1

Group2987: abra|OJJ73147.1 acar|OOG00358.1 acla|EAW07023.1 afis|EAW16649.1 afla|EED44951.1 afum|EAL89253.1 agla|OJJ78458.1 akaw|GAA88025.1 aluc|OJZ81284.1 anid|CBF82061.1 anig|EHA18583.1 aory|EIT73464.1 asyd|OJJ54240.1 ater|EAU39573.1 atub|OJI91491.1 aver|OJJ05192.1 awen|OJJ40065.1 azon|OJJ45561.1

Group2988: abra|OJJ73148.1 acar|OOG00360.1 acla|EAW07024.1 afis|EAW16650.1 afla|EED44950.1 afum|EAL89254.1 agla|OJJ78459.1 akaw|GAA88024.1 aluc|OJZ81282.1 anid|CBF82063.1 anig|EHA18582.1 aory|EIT73478.1 asyd|OJJ54241.1 ater|EAU39574.1 atub|OJI91490.1 aver|OJJ05193.1 awen|OJJ40064.1 azon|OJJ45562.1

Group2989: abra|OJJ73149.1 acar|OOG00361.1 acla|EAW07025.1 afis|EAW16651.1 afla|EED44949.1 afum|EAL89255.1 agla|OJJ78460.1 akaw|GAA88023.1 aluc|OJZ81281.1 anid|CBF82064.1 anig|EHA18581.1 aory|EIT73505.1 asyd|OJJ54242.1 ater|EAU39575.1 atub|OJI91489.1 aver|OJJ05194.1 awen|OJJ40063.1 azon|OJJ45563.1

Group2990: abra|OJJ73151.1 acar|OOG00363.1 acla|EAW07028.1 afis|EAW16654.1 afla|EED44946.1 afum|EAL89258.1 agla|OJJ78687.1 akaw|GAA88021.1 aluc|OJZ81279.1 anid|CBF82067.1 anig|EHA18579.1 aory|EIT73521.1 asyd|OJJ54244.1 ater|EAU39578.1 atub|OJI91487.1 aver|OJJ05196.1 awen|OJJ40060.1 azon|OJJ45567.1

Group2991: abra|OJJ73156.1 acar|OOG00371.1 acla|EAW07030.1 afis|EAW16656.1 afla|EED44941.1 afum|EAL89260.1 agla|OJJ78716.1 akaw|GAA88016.1 aluc|OJZ81274.1 anid|CBF82070.1 anig|EHA18574.1

aory|EIT73470.1 asyd|OJJ54246.1 ater|EAU39579.1 atub|OJI91481.1 aver|OJJ05199.1 awen|OJJ40058.1 azon|OJJ50081.1

Group2992: abra|OJJ73158.1 acar|OOG00369.1 acla|EAW07032.1 afis|EAW16658.1 afla|EED44944.1 afum|EAL89262.1 agla|OJJ78714.1 akaw|GAA88014.1 aluc|OJZ81272.1 anid|CBF82072.1 anig|EHA18572.1 aory|EIT73479.1 asyd|OJJ54248.1 ater|EAU39581.1 atub|OJI91479.1 aver|OJJ05202.1 awen|OJJ40056.1 azon|OJJ50105.1

Group2993: abra|OJJ73159.1 acar|OOG00368.1 acla|EAW07033.1 afis|EAW16659.1 afla|EED44936.1 afum|EAL89263.1 agla|OJJ78713.1 akaw|GAA88013.1 aluc|OJZ81271.1 anid|CBF82073.1 anig|EHA18571.1 aory|EIT73463.1 asyd|OJJ54249.1 ater|EAU39582.1 atub|OJI91478.1 aver|OJJ05203.1 awen|OJJ40055.1 azon|OJJ50106.1

Group2994: abra|OJJ73160.1 acar|OOG00405.1 acla|EAW06769.1 afis|EAW16319.1 afla|EED53562.1 afum|EAL88943.1 agla|OJJ88280.1 akaw|GAA88012.1 aluc|OJZ81270.1 anid|CBF89151.1 anig|EHA18570.1 aory|EIT74869.1 asyd|OJJ62566.1 ater|EAU34138.1 atub|OJI91477.1 aver|OJI96690.1 awen|OJJ37720.1 azon|OJJ44978.1

Group2995: abra|OJJ73168.1 acar|OOG00409.1 acla|EAW07130.1 afis|EAW22141.1 afla|EED53567.1 afum|EAL91049.1 agla|OJJ87934.1 akaw|GAA88003.1 aluc|OJZ81259.1 anid|CBF89137.1 anig|EHA18566.1 aory|EIT75049.1 asyd|OJJ62649.1 ater|EAU34143.1 atub|OJI91455.1 aver|OJI96749.1 awen|OJJ34715.1 azon|OJJ45847.1

Group2996: abra|OJJ73170.1 acar|OOG00410.1 acla|EAW10796.1 afis|EAW24780.1 afla|EED47205.1 afum|EAL89419.1 agla|OJJ82876.1 akaw|GAA88001.1 aluc|OJZ81257.1 anid|CBF81439.1 anig|EHA18564.1 aory|EIT79182.1 asyd|OJJ59428.1 ater|EAU36528.1 atub|OJI91453.1 aver|OJJ02843.1 awen|OJJ40366.1 azon|OJJ49215.1

Group2997: abra|OJJ73173.1 acar|OOG00413.1 acla|EAW06856.1 afis|EAW16473.1 afla|EED47208.1 afum|EAL89067.1 agla|OJJ82873.1 akaw|GAA87998.1 aluc|OJZ81254.1 anid|CBF81435.1 anig|EHA18562.1 aory|EIT79309.1 asyd|OJJ59424.1 ater|EAU36569.1 atub|OJI91450.1 aver|OJJ02846.1 awen|OJJ40363.1 azon|OJJ49211.1

Group2998: abra|OJJ73176.1 acar|OOG00416.1 acla|EAW06858.1 afis|EAW16475.1 afla|EED47210.1 afum|EAL89069.1 agla|OJJ82871.1 akaw|GAA87996.1 aluc|OJZ81251.1 anid|CBF81431.1 anig|EHA18560.1 aory|EIT79330.1 asyd|OJJ59422.1 ater|EAU36562.1 atub|OJI91448.1 aver|OJJ02848.1 awen|OJJ40361.1 azon|OJJ49209.1

Group2999: abra|OJJ73183.1 acar|OOG00420.1 acla|EAW06861.1 afis|EAW16478.1 afla|EED47215.1 afum|EAL89072.1 agla|OJJ82867.1 akaw|GAA87992.1 aluc|OJZ81246.1 anid|CBF75501.1 anig|EHA18555.1 aory|EIT79241.1 asyd|OJJ59747.1 ater|EAU36560.1 atub|OJI91442.1 aver|OJJ02541.1 awen|OJJ40357.1 azon|OJJ49206.1

Group3000: abra|OJJ73184.1 acar|OOG00421.1 acla|EAW06862.1 afis|EAW16479.1 afla|EED47216.1 afum|EAL89073.1 agla|OJJ82866.1 akaw|GAA87991.1 aluc|OJZ81245.1 anid|CBF75499.1 anig|EHA18554.1 aory|EIT79319.1 asyd|OJJ59748.1 ater|EAU36559.1 atub|OJI91441.1 aver|OJJ02540.1 awen|OJJ40356.1 azon|OJJ49205.1

Group3001: abra|OJJ73185.1 acar|OOG00422.1 acla|EAW06863.1 afis|EAW16480.1 afla|EED47217.1 afum|EAL89074.1 agla|OJJ82865.1 akaw|GAA87990.1 aluc|OJZ81244.1 anid|CBF75503.1 anig|EHA18553.1 aory|EIT79172.1 asyd|OJJ59746.1 ater|EAU36558.1 atub|OJI91440.1 aver|OJJ02542.1 awen|OJJ40354.1 azon|OJJ49204.1

Group3002: abra|OJJ73189.1 acar|OOG00425.1 acla|EAW06865.1 afis|EAW16482.1 afla|EED47222.1 afum|EAL89076.1 agla|OJJ82862.1 akaw|GAA87988.1 aluc|OJZ81241.1 anid|CBF75506.1 anig|EHA18551.1 aory|EIT79303.1 asyd|OJJ59744.1 ater|EAU36556.1 atub|OJI91438.1 aver|OJJ02544.1 awen|OJJ40350.1 azon|OJJ49202.1

Group3003: abra|OJJ73190.1 acar|OOG00426.1 acla|EAW06866.1 afis|EAW16483.1 afla|EED47223.1 afum|EAL89077.1 agla|OJJ82861.1 akaw|GAA87987.1 aluc|OJZ81240.1 anid|CBF75508.1 anig|EHA18550.1 aory|EIT79190.1 asyd|OJJ59743.1 ater|EAU36555.1 atub|OJI91437.1 aver|OJJ02545.1 awen|OJJ40348.1 azon|OJJ49201.1

Group3004: abra|OJJ73191.1 acar|OOG00428.1 acla|EAW06867.1 afis|EAW16484.1 afla|EED47224.1 afum|EAL89078.1 agla|OJJ82860.1 akaw|GAA87986.1 aluc|OJZ81239.1 anid|CBF75520.1 anig|EHA18549.1 aory|EIT79323.1 asyd|OJJ59736.1 ater|EAU36554.1 atub|OJI91436.1 aver|OJJ02551.1 awen|OJJ40343.1 azon|OJJ49200.1

Group3005: abra|OJJ73193.1 acar|OOG00429.1 acla|EAW06869.1 afis|EAW16486.1 afla|EED47226.1 afum|EAL89080.1 agla|OJJ82858.1 akaw|GAA87984.1 aluc|OJZ81236.1 anid|CBF75516.1 anig|EHA18547.1 aory|EIT79231.1 asyd|OJJ59738.1 ater|EAU36552.1 atub|OJI91434.1 aver|OJJ02549.1 awen|OJJ40345.1 azon|OJJ49198.1



Group3006: abra|OJJ73194.1 acar|OOG00431.1 acla|EAW06871.1 afis|EAW16488.1 afla|EED47229.1 afum|EAL89082.1 agla|OJJ82852.1 akaw|GAA87983.1 aluc|OJZ81235.1 anid|CBF75510.1 anig|EHA18546.1 aory|EIT79266.1 asyd|OJJ59742.1 ater|EAU36548.1 atub|OJI91432.1 aver|OJJ02546.1 awen|OJJ40342.1 azon|OJJ49196.1

Group3007: abra|OJJ73196.1 acar|OOG00434.1 acla|EAW06873.1 afis|EAW16490.1 afla|EED47231.1 afum|EAL89084.1 agla|OJJ82829.1 akaw|GAA87981.1 aluc|OJZ81233.1 anid|CBF75522.1 anig|EHA18544.1 aory|EIT79209.1 asyd|OJJ59735.1 ater|EAU36547.1 atub|OJI91430.1 aver|OJJ02552.1 awen|OJJ40339.1 azon|OJJ49193.1

Group3008: abra|OJJ73199.1 acar|OOG00438.1 acla|EAW06876.1 afis|EAW16493.1 afla|EED47237.1 afum|EAL89087.1 agla|OJJ82832.1 akaw|GAA87978.1 aluc|OJZ81230.1 anid|CBF75527.1 anig|EHA18541.1 aory|EIT79313.1 asyd|OJJ59732.1 ater|EAU36545.1 atub|OJI91427.1 aver|OJJ02555.1 awen|OJJ40336.1 azon|OJJ49190.1

Group3009: abra|OJJ73202.1 acar|OOG00441.1 acla|EAW06879.1 afis|EAW16496.1 afla|EED47251.1 afum|EAL89090.1 agla|OJJ82835.1 akaw|GAA87975.1 aluc|OJZ81227.1 anid|CBF75606.1 anig|EHA18538.1 aory|EIT79275.1 asyd|OJJ59727.1 ater|EAU36543.1 atub|OJI91424.1 aver|OJJ02559.1 awen|OJJ40333.1 azon|OJJ49187.1

Group3010: abra|OJJ73203.1 acar|OOG00442.1 acla|EAW06880.1 afis|EAW16497.1 afla|EED56182.1 afum|EBA27367.1 agla|OJJ82836.1 akaw|GAA87974.1 aluc|OJZ81224.1 anid|CBF75605.1 anig|EHA18537.1 aory|EIT73365.1 asyd|OJJ59726.1 ater|EAU36542.1 atub|OJI91422.1 aver|OJJ02560.1 awen|OJJ40332.1 azon|OJJ49186.1

Group3011: abra|OJJ73204.1 acar|OOG00443.1 acla|EAW06881.1 afis|EAW16498.1 afla|EED56181.1 afum|EAL89093.1 agla|OJJ82838.1 akaw|GAA87973.1 aluc|OJZ81222.1 anid|CBF75604.1 anig|EHA18536.1 aory|EIT73379.1 asyd|OJJ59725.1 ater|EAU36541.1 atub|OJI91420.1 aver|OJJ02561.1 awen|OJJ40331.1 azon|OJJ49185.1

Group3012: abra|OJJ73205.1 acar|OOG00444.1 acla|EAW06882.1 afis|EAW16499.1 afla|EED56180.1 afum|EAL89094.1 agla|OJJ82826.1 akaw|GAA87972.1 aluc|OJZ81221.1 anid|CBF75602.1 anig|EHA18535.1 aory|EIT76650.1 asyd|OJJ59724.1 ater|EAU36540.1 atub|OJI91419.1 aver|OJJ02562.1 awen|OJJ40330.1 azon|OJJ49184.1

Group3013: abra|OJJ73206.1 acar|OOG00445.1 acla|EAW06883.1 afis|EAW16500.1 afla|EED56179.1 afum|EAL89095.1 agla|OJJ82827.1 akaw|GAA87971.1 aluc|OJZ81220.1 anid|CBF75600.1 anig|EHA18534.1 aory|EIT76763.1 asyd|OJJ59723.1 ater|EAU36539.1 atub|OJI91418.1 aver|OJJ02563.1 awen|OJJ40328.1 azon|OJJ49183.1

Group3014: abra|OJJ73207.1 acar|OOG00446.1 acla|EAW06884.1 afis|EAW16501.1 afla|EED56178.1 afum|EAL89096.1 agla|OJJ82828.1 akaw|GAA87970.1 aluc|OJZ81219.1 anid|CBF75598.1 anig|EHA18533.1 aory|EIT76626.1 asyd|OJJ59722.1 ater|EAU36538.1 atub|OJI91417.1 aver|OJJ02564.1 awen|OJJ40327.1 azon|OJJ49182.1

Group3015: abra|OJJ73209.1 acar|OOG00447.1 acla|EAW06885.1 afis|EAW16502.1 afla|EED56177.1 afum|EAL89097.1 agla|OJJ82815.1 akaw|GAA87969.1 aluc|OJZ81218.1 anid|CBF75589.1 anig|EHA18532.1 aory|EIT76868.1 asyd|OJJ59721.1 ater|EAU36537.1 atub|OJI91416.1 aver|OJJ02565.1 awen|OJJ40326.1 azon|OJJ49181.1

Group3016: abra|OJJ73210.1 acar|OOG00449.1 acla|EAW06886.1 afis|EAW16503.1 afla|EED56175.1 afum|EAL89098.1 agla|OJJ82816.1 akaw|GAA87968.1 aluc|OJZ81217.1 anid|CBF75591.1 anig|EHA18531.1 aory|EIT76792.1 asyd|OJJ59720.1 ater|EAU36536.1 atub|OJI91415.1 aver|OJJ02566.1 awen|OJJ40324.1 azon|OJJ49180.1

Group3017: abra|OJJ73212.1 acar|OOG00448.1 acla|EAW06888.1 afis|EAW16505.1 afla|EED56173.1 afum|EAL89100.1 agla|OJJ82818.1 akaw|GAA87966.1 aluc|OJZ81215.1 anid|CBF75594.1 anig|EHA18529.1 aory|EIT76612.1 asyd|OJJ59718.1 ater|EAU36535.1 atub|OJI91412.1 aver|OJJ02568.1 awen|OJJ40321.1 azon|OJJ49178.1

Group3018: abra|OJJ73216.1 acar|OOG00453.1 acla|EAW06891.1 afis|EAW16508.1 afla|EED56170.1 afum|EAL89103.1 agla|OJJ82822.1 akaw|GAA87963.1 aluc|OJZ81212.1 anid|CBF75578.1 anig|EHA18526.1 aory|EIT76719.1 asyd|OJJ59714.1 ater|EAU36572.1 atub|OJI91407.1 aver|OJJ02572.1 awen|OJJ40317.1 azon|OJJ47186.1

Group3019: abra|OJJ73218.1 acar|OOG00455.1 acla|EAW06892.1 afis|EAW16509.1 afla|EED56164.1 afum|EAL89104.2 agla|OJJ82812.1 akaw|GAA87961.1 aluc|OJZ81210.1 anid|CBF75572.1 anig|EHA18524.1 aory|EIT76824.1 asyd|OJJ59711.1 ater|EAU36575.1 atub|OJI91405.1 aver|OJJ02575.1 awen|OJJ40315.1 azon|OJJ49175.1

Group3020: abra|OJJ73219.1 acar|OOG00457.1 acla|EAW06894.1 afis|EAW16511.1 afla|EED56162.1 afum|EAL89106.1 agla|OJJ82811.1 akaw|GAA87959.1 aluc|OJZ81208.1 anid|CBF75568.1 anig|EHA18523.1

aory|EIT76692.1 asyd|OJJ59709.1 ater|EAU36577.1 atub|OJI91404.1 aver|OJJ02576.1 awen|OJJ40313.1 azon|OJJ49173.1

Group3021: abra|OJJ73220.1 acar|OOG00458.1 acla|EAW06895.1 afis|EAW16512.1 afla|EED56161.1 afum|EAL89107.2 agla|OJJ82810.1 akaw|GAA87958.1 aluc|OJZ81207.1 anid|CBF75566.1 anig|EHA18522.1 aory|EIT76654.1 asyd|OJJ59708.1 ater|EAU36578.1 atub|OJI91403.1 aver|OJJ02577.1 awen|OJJ40312.1 azon|OJJ49172.1

Group3022: abra|OJJ73222.1 acar|OOG00460.1 acla|EAW06897.1 afis|EAW16514.1 afla|EED56159.1 afum|EAL89109.1 agla|OJJ82808.1 akaw|GAA87956.1 aluc|OJZ81205.1 anid|CBF75562.1 anig|EHA18520.1 aory|EIT76696.1 asyd|OJJ59706.1 ater|EAU36580.1 atub|OJI91401.1 aver|OJJ02579.1 awen|OJJ40309.1 azon|OJJ49170.1

Group3023: abra|OJJ73223.1 acar|OOG00461.1 acla|EAW06898.1 afis|EAW16515.1 afla|EED56158.1 afum|EAL89110.2 agla|OJJ82807.1 akaw|GAA87955.1 aluc|OJZ81204.1 anid|CBF75560.1 anig|EHA18519.1 aory|EIT76553.1 asyd|OJJ59705.1 ater|EAU36581.1 atub|OJI91400.1 aver|OJJ02580.1 awen|OJJ40308.1 azon|OJJ49169.1

Group3024: abra|OJJ73224.1 acar|OOG00462.1 acla|EAW06899.1 afis|EAW16516.1 afla|EED56157.1 afum|EAL89111.2 agla|OJJ82806.1 akaw|GAA87954.1 aluc|OJZ81203.1 anid|CBF75558.1 anig|EHA18518.1 aory|EIT76604.1 asyd|OJJ59704.1 ater|EAU36582.1 atub|OJI91398.1 aver|OJJ02582.1 awen|OJJ40307.1 azon|OJJ49168.1

Group3025: abra|OJJ73228.1 acar|OOG00466.1 acla|EAW06902.1 afis|EAW16519.1 afla|EED56152.1 afum|EAL89114.1 agla|OJJ82801.1 akaw|GAA87952.1 aluc|OJZ81200.1 anid|CBF75555.1 anig|EHA18515.1 aory|EIT76840.1 asyd|OJJ57431.1 ater|EAU36585.1 atub|OJI91395.1 aver|OJJ05749.1 awen|OJJ40303.1 azon|OJJ49165.1

Group3026: abra|OJJ73229.1 acar|OOG00468.1 acla|EAW06904.1 afis|EAW16521.1 afla|EED56150.1 afum|EAL89116.1 agla|OJJ82800.1 akaw|GAA87951.1 aluc|OJZ81199.1 anid|CBF75547.1 anig|EHA18514.1 aory|EIT76779.1 asyd|OJJ57441.1 ater|EAU36586.1 atub|OJI91394.1 aver|OJJ05737.1 awen|OJJ40302.1 azon|OJJ49164.1

Group3027: abra|OJJ73230.1 acar|OOG00469.1 acla|EAW06905.1 afis|EAW16522.1 afla|EED56149.1 afum|EAL89117.1 agla|OJJ82799.1 akaw|GAA87950.1 aluc|OJZ81198.1 anid|CBF75545.1 anig|EHA18513.1 aory|EIT76528.1 asyd|OJJ57442.1 ater|EAU36587.1 atub|OJI91393.1 aver|OJJ05736.1 awen|OJJ40301.1 azon|OJJ49163.1

Group3028: abra|OJJ73231.1 acar|OOG00470.1 acla|EAW06906.1 afis|EAW16523.1 afla|EED56148.1 afum|EAL89118.1 agla|OJJ82798.1 akaw|GAA87949.1 aluc|OJZ81197.1 anid|CBF75543.1 anig|EHA18512.1 aory|EIT76854.1 asyd|OJJ57443.1 ater|EAU36588.1 atub|OJI91392.1 aver|OJJ05735.1 awen|OJJ40300.1 azon|OJJ49162.1

Group3029: abra|OJJ73232.1 acar|OOG00471.1 acla|EAW06907.1 afis|EAW16524.1 afla|EED56147.1 afum|EAL89119.1 agla|OJJ82797.1 akaw|GAA87948.1 aluc|OJZ81196.1 anid|CBF75541.1 anig|EHA18511.1 aory|EIT76769.1 asyd|OJJ57446.1 ater|EAU36589.1 atub|OJI91391.1 aver|OJJ05734.1 awen|OJJ40299.1 azon|OJJ49161.1

Group3030: abra|OJJ73234.1 acar|OOG00472.1 acla|EAW06909.1 afis|EAW16526.1 afla|EED56145.1 afum|EAL89122.1 agla|OJJ82796.1 akaw|GAA87946.1 aluc|OJZ81194.1 anid|CBF75537.1 anig|EHA18509.1 aory|EIT76537.1 asyd|OJJ57447.1 ater|EAU36590.1 atub|OJI91389.1 aver|OJJ05732.1 awen|OJJ40297.1 azon|OJJ49159.1

Group3031: abra|OJJ73236.1 acar|OOG00473.1 acla|EAW06910.1 afis|EAW16527.1 afla|EED56144.1 afum|EAL89123.2 agla|OJJ82795.1 akaw|GAA87945.1 aluc|OJZ81193.1 anid|CBF75535.1 anig|EHA18508.1 aory|EIT76806.1 asyd|OJJ57448.1 ater|EAU36591.1 atub|OJI91388.1 aver|OJJ05731.1 awen|OJJ40296.1 azon|OJJ49158.1

Group3032: abra|OJJ73237.1 acar|OOG00474.1 acla|EAW06911.1 afis|EAW16528.1 afla|EED56143.1 afum|EAL89124.1 agla|OJJ82793.1 akaw|GAA87944.1 aluc|OJZ81191.1 anid|CBF75533.1 anig|EHA18507.1 aory|EIT76880.1 asyd|OJJ57449.1 ater|EAU36592.1 atub|OJI91387.1 aver|OJJ05730.1 awen|OJJ40295.1 azon|OJJ49157.1

Group3033: abra|OJJ73239.1 acar|OOG00476.1 acla|EAW06912.1 afis|EAW16529.1 afla|EED56141.1 afum|EAL89125.1 agla|OJJ82791.1 akaw|GAA87942.1 aluc|OJZ81189.1 anid|CBF75529.1 anig|EHA18505.1 aory|EIT76699.1 asyd|OJJ57450.1 ater|EAU36593.1 atub|OJI91385.1 aver|OJJ05728.1 awen|OJJ40293.1 azon|OJJ49154.1

Group3034: abra|OJJ73240.1 acar|OOG00477.1 acla|EAW06913.1 afis|EAW16530.1 afla|EED56138.1 afum|EAL89127.1 agla|OJJ82790.1 akaw|GAA87941.1 aluc|OJZ81188.1 anid|CBF81731.1 anig|EHA18504.1 aory|EIT76798.1 asyd|OJJ59592.1 ater|EAU36594.1 atub|OJI91384.1 aver|OJJ02677.1 awen|OJJ40291.1 azon|OJJ49153.1

Group3035: abra|OJJ73246.1 acar|OOG00485.1 acla|EAW06920.1 afis|EAW16537.1 afla|EED56132.1 afum|EAL89134.1 agla|OJJ82785.1 akaw|GAA87934.1 aluc|OJZ81181.1 anid|CBF81743.1 anig|EHA18499.1 aory|EIT76834.1 asyd|OJJ59598.1 ater|EAU36600.1 atub|OJI91378.1 aver|OJJ02670.1 awen|OJJ40285.1 azon|OJJ49146.1

Group3036: abra|OJJ73248.1 acar|OOG00488.1 acla|EAW06922.1 afis|EAW16539.1 afla|EED56130.1 afum|EAL89136.1 agla|OJJ82783.1 akaw|GAA87932.1 aluc|OJZ81179.1 anid|CBF81746.1 anig|EHA18497.1 aory|EIT76822.1 asyd|OJJ59600.1 ater|EAU36602.1 atub|OJI91375.1 aver|OJJ02668.1 awen|OJJ40282.1 azon|OJJ49144.1

Group3037: abra|OJJ73249.1 acar|OOG00491.1 acla|EAW06924.1 afis|EAW16541.1 afla|EED56127.1 afum|EAL89138.1 agla|OJJ82782.1 akaw|GAA87931.1 aluc|OJZ81178.1 anid|CBF81748.1 anig|EHA18496.1 aory|EIT76785.1 asyd|OJJ59601.1 ater|EAU36603.1 atub|OJI91374.1 aver|OJJ02667.1 awen|OJJ40279.1 azon|OJJ49142.1

Group3038: abra|OJJ73251.1 acar|OOG00495.1 acla|EAW06929.1 afis|EAW16544.1 afla|EED56121.1 afum|EAL89142.2 agla|OJJ82779.1 akaw|GAA87929.1 aluc|OJZ81176.1 anid|CBF81754.1 anig|EHA18494.1 aory|EIT76628.1 asyd|OJJ59604.1 ater|EAU36607.1 atub|OJI91372.1 aver|OJJ02665.1 awen|OJJ40276.1 azon|OJJ49139.1

Group3039: abra|OJJ73252.1 acar|OOG00494.1 acla|EAW06930.1 afis|EAW16545.1 afla|EED56120.1 afum|EAL89143.1 agla|OJJ82778.1 akaw|GAA87928.1 aluc|OJZ81175.1 anid|CBF81755.1 anig|EHA18493.1 aory|EIT76556.1 asyd|OJJ59605.1 ater|EAU36608.1 atub|OJI91371.1 aver|OJJ02664.1 awen|OJJ40275.1 azon|OJJ49138.1

Group3040: abra|OJJ73253.1 acar|OOG00496.1 acla|EAW06931.1 afis|EAW16546.1 afum|EAL89144.1 agla|OJJ82777.1 akaw|GAA87927.1 aluc|OJZ81174.1 anid|CBF81757.1 anig|EHA18492.1 aory|EIT76862.1 asyd|OJJ59606.1 ater|EAU36609.1 atub|OJI91370.1 aver|OJJ02663.1 awen|OJJ40271.1 azon|OJJ49137.1 afla|EED56118.1

Group3041: abra|OJJ73256.1 acar|OOG00499.1 acla|EAW06933.1 afis|EAW16548.1 afla|EED56116.1 afum|EAL89146.1 agla|OJJ82775.1 akaw|GAA87925.1 aluc|OJZ81172.1 anid|CBF81761.1 anig|EHA18490.1 aory|EIT76624.1 asyd|OJJ59607.1 ater|EAU36611.1 atub|OJI91367.1 aver|OJJ02662.1 awen|OJJ40269.1 azon|OJJ49133.1

Group3042: abra|OJJ73257.1 acar|OOG00498.1 acla|EAW06934.1 afis|EAW16549.1 afla|EED56115.1 afum|EAL89147.1 agla|OJJ82774.1 akaw|GAA87924.1 aluc|OJZ81171.1 anid|CBF81763.1 anig|EHA18489.1 aory|EIT76873.1 asyd|OJJ59608.1 ater|EAU36612.1 atub|OJI91366.1 aver|OJJ02661.1 awen|OJJ40268.1 azon|OJJ49132.1

Group3043: abra|OJJ73258.1 acar|OOG00500.1 acla|EAW06935.1 afis|EAW16550.1 afla|EED56112.1 afum|EAL89148.1 agla|OJJ82773.1 akaw|GAA87923.1 aluc|OJZ81170.1 anid|CBF81765.1 anig|EHA18488.1 aory|EIT76657.1 ater|EAU36613.1 atub|OJI91365.1 awen|OJJ40267.1 azon|OJJ49131.1 asyd|OJJ59609.1 aver|OJJ02660.1

Group3044: abra|OJJ73259.1 acar|OOG00501.1 acla|EAW06936.1 afis|EAW16551.1 afla|EED56111.1 afum|EAL89149.1 agla|OJJ82772.1 akaw|GAA87922.1 aluc|OJZ81169.1 anid|CBF81766.1 anig|EHA18487.1 aory|EIT76585.1 asyd|OJJ59610.1 ater|EAU36617.1 atub|OJI91364.1 aver|OJJ02659.1 awen|OJJ40266.1 azon|OJJ49130.1

Group3045: abra|OJJ73262.1 acar|OOG00502.1 acla|EAW06939.1 afis|EAW16554.1 afla|EED56108.1 afum|EAL89152.1 agla|OJJ82769.1 akaw|GAA87920.1 aluc|OJZ81167.1 anid|CBF81795.1 anig|EHA18484.1 aory|EIT76711.1 asyd|OJJ59637.1 ater|EAU36619.1 atub|OJI91362.1 aver|OJJ02644.1 awen|OJJ40264.1 azon|OJJ49127.1

Group3046: abra|OJJ73263.1 acar|OOG00503.1 acla|EAW06940.1 afis|EAW16555.1 afla|EED56107.1 afum|EAL89153.1 agla|OJJ82768.1 akaw|GAA87919.1 aluc|OJZ81166.1 anid|CBF81796.1 anig|EHA18483.1 aory|EIT76566.1 asyd|OJJ59638.1 ater|EAU36620.1 atub|OJI91361.1 aver|OJJ02643.1 awen|OJJ40263.1 azon|OJJ49126.1

Group3047: abra|OJJ73264.1 acar|OOG00504.1 acla|EAW06941.1 afis|EAW16556.1 afla|EED56106.1 afum|EAL89154.1 agla|OJJ82767.1 akaw|GAA87918.1 aluc|OJZ81165.1 anid|CBF81798.1 anig|EHA18482.1 aory|EIT76736.1 asyd|OJJ59639.1 ater|EAU36621.1 atub|OJI91360.1 aver|OJJ02642.1 awen|OJJ40262.1 azon|OJJ49125.1

Group3048: abra|OJJ73265.1 acar|OOG00505.1 acla|EAW06942.1 afis|EAW16557.1 afla|EED56105.1 afum|EAL89155.1 agla|OJJ82766.1 akaw|GAA87917.1 aluc|OJZ81164.1 anid|CBF81802.1 anig|EHA18481.1 aory|EIT76677.1 asyd|OJJ59642.1 ater|EAU36624.1 atub|OJI91359.1 aver|OJJ02640.1 awen|OJJ40260.1 azon|OJJ49122.1

Group3049: abra|OJJ73266.1 acar|OOG00506.1 acla|EAW06943.1 afis|EAW16558.1 afla|EED56104.1 afum|EAL89156.1 agla|OJJ82765.1 akaw|GAA87916.1 aluc|OJZ81163.1 anid|CBF81800.1 anig|EHA18480.1

aory|EIT76573.1 asyd|OJJ59640.1 ater|EAU36625.1 atub|OJI91358.1 aver|OJJ02641.1 awen|OJJ40259.1 azon|OJJ49123.1

Group3050: abra|OJJ73269.1 acar|OOG00509.1 acla|EAW06946.1 afis|EAW16561.1 afla|EED56101.1 afum|EAL89159.1 agla|OJJ82762.1 akaw|GAA87913.1 aluc|OJZ81160.1 anid|CBF81808.1 anig|EHA18477.1 aory|EIT76636.1 asyd|OJJ59645.1 ater|EAU36628.1 atub|OJI91355.1 aver|OJJ02637.1 awen|OJJ40256.1 azon|OJJ49120.1

Group3051: abra|OJJ73275.1 acar|OOG00514.1 acla|EAW06950.1 afis|EAW16565.1 afla|EED56098.1 afum|EAL89162.1 agla|OJJ82756.1 akaw|GAA92730.1 aluc|OJZ88774.1 anid|CBF81817.1 anig|EHA18468.1 aory|EIT76722.1 asyd|OJJ59651.1 ater|EAU36634.1 atub|OJI91345.1 aver|OJJ02631.1 awen|OJJ40253.1 azon|OJJ49115.1

Group3052: abra|OJJ73278.1 acar|OOG00515.1 acla|EAW06954.1 afis|EAW16569.1 afla|EED56095.1 afum|EAL89166.1 agla|OJJ82751.1 akaw|GAA92727.1 aluc|OJZ88771.1 anid|CBF81822.1 anig|EHA18467.1 aory|EIT82359.1 asyd|OJJ59654.1 ater|EAU36637.1 atub|OJI91344.1 aver|OJJ02628.1 awen|OJJ40250.1 azon|OJJ41980.1

Group3053: abra|OJJ73281.1 acar|OOG00517.1 acla|EAW06956.1 afis|EAW16571.1 afla|EED56093.1 afum|EAL89168.1 agla|OJJ82703.1 akaw|GAA92724.1 aluc|OJZ88768.1 anid|CBF81826.1 anig|EHA18464.1 aory|EIT76754.1 asyd|OJJ59657.1 ater|EAU36639.1 atub|OJI91341.1 aver|OJJ02625.1 awen|OJJ40247.1 azon|OJJ49108.1

Group3054: abra|OJJ73283.1 acar|OOG00519.1 acla|EAW06958.1 afis|EAW16573.1 afla|EED56091.1 afum|EAL89170.2 agla|OJJ82705.1 akaw|GAA92722.1 aluc|OJZ88766.1 anid|CBF81828.1 anig|EHA18462.1 aory|EIT76851.1 asyd|OJJ59659.1 ater|EAU36641.1 atub|OJI91339.1 aver|OJJ02623.1 awen|OJJ40245.1 azon|OJJ49106.1

Group3055: abra|OJJ73287.1 acar|OOG00522.1 acla|EAW06962.1 afis|EAW16577.1 afla|EED56087.1 afum|EAL89173.1 agla|OJJ82700.1 akaw|GAA92718.1 aluc|OJZ88763.1 anid|CBF81876.1 anig|EHA18459.1 aory|EIT76884.1 asyd|OJJ59665.1 ater|EAU36645.1 atub|OJI91335.1 aver|OJJ02618.1 awen|OJJ40240.1 azon|OJJ49103.1

Group3057: abra|OJJ73338.1 acar|OOG00523.1 acla|EAW06963.1 afis|EAW16578.1 afla|EED56086.1 afum|EAL89174.1 agla|OJJ82699.1 akaw|GAA83146.1 aluc|OJZ88703.1 anid|CBF81878.1 anig|EHA18387.1 aory|EIT76746.1 asyd|OJJ59666.1 ater|EAU36646.1 atub|OJI91284.1 aver|OJJ02617.1 awen|OJJ40239.1 azon|OJJ49102.1

Group3058: abra|OJJ73339.1 acar|OOG00524.1 acla|EAW06964.1 afis|EAW16579.1 afla|EED56085.1 afum|EAL89175.1 agla|OJJ82698.1 akaw|GAA83145.1 aluc|OJZ88702.1 anid|CBF81880.1 anig|EHA18386.1 aory|EIT76894.1 asyd|OJJ59667.1 ater|EAU36647.1 atub|OJI91283.1 aver|OJJ02616.1 awen|OJJ40238.1 azon|OJJ49101.1

Group3059: abra|OJJ73340.1 acar|OOG00527.1 acla|EAW06965.1 afis|EAW16580.1 afla|EED56082.1 afum|EAL89176.1 agla|OJJ82695.1 akaw|GAA83142.1 aluc|OJZ88699.1 anid|CBF81883.1 anig|EHA18379.1 aory|EIT76744.1 asyd|OJJ59669.1 ater|EAU36649.1 atub|OJI91280.1 aver|OJJ02614.1 awen|OJJ40234.1 azon|OJJ49100.1

Group3060: abra|OJJ73343.1 acar|OOG00553.1 acla|EAW06970.1 afis|EAW16584.1 afla|EED56081.1 afum|EAL89179.1 agla|OJJ82694.1 akaw|GAA83139.1 aluc|OJZ88696.1 anid|CBF81885.1 anig|EHA18376.1 aory|EIT76749.1 asyd|OJJ59671.1 ater|EAU36661.1 atub|OJI91277.1 aver|OJJ02613.1 awen|OJJ40232.1 azon|OJJ49096.1

Group3061: abra|OJJ73344.1 acar|OOG00554.1 acla|EAW06971.1 afis|EAW16585.1 afla|EED56080.1 afum|EAL89180.1 agla|OJJ82693.1 akaw|GAA83138.1 aluc|OJZ88695.1 anid|CBF81887.1 anig|EHA18375.1 aory|EIT76713.1 asyd|OJJ59672.1 ater|EAU36662.1 atub|OJI91275.1 aver|OJJ02612.1 awen|OJJ40231.1 azon|OJJ49095.1

Group3062: abra|OJJ73345.1 acar|OOG00555.1 acla|EAW06972.1 afis|EAW16586.1 afla|EED56079.1 afum|EAL89181.2 agla|OJJ82692.1 akaw|GAA83137.1 aluc|OJZ88694.1 anid|CBF81889.1 anig|EHA18374.1 aory|EIT76590.1 asyd|OJJ59673.1 ater|EAU36663.1 atub|OJI91274.1 aver|OJJ02611.1 awen|OJJ40230.1 azon|OJJ49094.1

Group3063: abra|OJJ73359.1 acar|OOG00567.1 acla|EAW06979.1 afis|EAW16593.1 afla|EED45008.1 afum|EAL89189.1 agla|OJJ82660.1 akaw|GAA83125.1 aluc|OJZ88681.1 anid|CBF81897.1 anig|EHA18362.1 aory|EIT73639.1 asyd|OJJ59682.1 ater|EAU36673.1 atub|OJI91262.1 aver|OJJ02606.1 awen|OJJ40214.1 azon|OJJ49080.1

Group3064: abra|OJJ73361.1 acar|OOG00568.1 acla|EAW06981.1 afis|EAW16595.1 afla|EED45014.1 afum|EAL89191.1 agla|OJJ82659.1 akaw|GAA83123.1 aluc|OJZ88679.1 anid|CBF81901.1 anig|EHA18360.1 aory|EIT73637.1 asyd|OJJ59685.1 ater|EAU36674.1 atub|OJI91260.1 aver|OJJ02602.1 awen|OJJ40213.1 azon|OJJ49079.1

Group3065: abra|OJJ73362.1 acar|OOG00569.1 acla|EAW06982.1 afis|EAW16596.1 afla|EED45015.1 afum|EAL89192.1 agla|OJJ82658.1 akaw|GAA83122.1 aluc|OJZ88678.1 anid|CBF81902.1 anig|EHA18359.1 aory|EIT73689.1 asyd|OJJ59686.1 ater|EAU36675.1 atub|OJI91259.1 aver|OJJ02601.1 awen|OJJ40212.1 azon|OJJ49078.1

Group3066: abra|OJJ73365.1 acar|OOG00572.1 acla|EAW06985.1 afis|EAW16599.1 afla|EED45018.1 afum|EAL89195.1 agla|OJJ82655.1 akaw|GAA83119.1 aluc|OJZ88675.1 anid|CBF81905.1 anig|EHA18357.1 aory|EIT73617.1 asyd|OJJ59688.1 ater|EAU36680.1 atub|OJI91256.1 aver|OJJ02599.1 awen|OJJ40209.1 azon|OJJ49075.1

Group3067: abra|OJJ73368.1 acar|OOG00574.1 acla|EAW06988.1 afis|EAW16602.1 afla|EED45021.1 afum|EAL89198.1 agla|OJJ82650.1 akaw|GAA83116.1 aluc|OJZ88672.1 anid|CBF81909.1 anig|EHA18354.1 aory|EIT73783.1 asyd|OJJ59690.1 ater|EAU36683.1 atub|OJI91253.1 aver|OJJ02597.1 awen|OJJ40204.1 azon|OJJ49071.1

Group3068: abra|OJJ73378.1 acar|OOF90413.1 acla|EAW06994.1 afis|EAW16609.1 afla|EED45027.1 afum|EAL89205.1 agla|OJJ82638.1 akaw|GAA83111.1 aluc|OJZ88665.1 anid|CBF81965.1 anig|EHA18350.1 aory|EIT73642.1 asyd|OJJ57355.1 ater|EAU36693.1 atub|OJI91247.1 aver|OJJ05810.1 awen|OJJ40198.1 azon|OJJ49069.1

Group3069: abra|OJJ73382.1 acar|OOG00581.1 acla|EAW06997.1 afis|EAW16611.1 afla|EED45000.1 afum|EAL89207.1 agla|OJJ82634.1 akaw|GAA83107.1 aluc|OJZ88656.1 anid|CBF81963.1 anig|EHA18347.1 aory|EIT73611.1 asyd|OJJ57358.1 ater|EAU36696.1 atub|OJI91242.1 aver|OJJ05808.1 awen|OJJ40193.1 azon|OJJ49061.1

Group3070: abra|OJJ73383.1 acar|OOG00582.1 acla|EAW06998.1 afis|EAW16613.1 afla|EED44999.1 afum|EAL89223.1 agla|OJJ82633.1 akaw|GAA83106.1 aluc|OJZ88654.1 anid|CBF81961.1 anig|EHA18346.1 aory|EIT73720.1 asyd|OJJ57359.1 ater|EAU36697.1 atub|OJI91241.1 aver|OJJ05807.1 awen|OJJ40192.1 azon|OJJ49060.1

Group3071: abra|OJJ73402.1 acar|OOG00600.1 acla|EAW07005.1 afis|EAW16622.1 afla|EED44970.1 afum|EAL89215.1 agla|OJJ82622.1 akaw|GAA83088.1 aluc|OJZ88635.1 anid|CBF81987.1 anig|EHA18325.1 aory|EIT73499.1 asyd|OJJ56156.1 ater|EAU36736.1 atub|OJI91219.1 aver|OJJ05096.1 awen|OJJ40086.1 azon|OJJ49496.1

Group3072: abra|OJJ73424.1 acar|OOG00628.1 acla|EAW07034.1 afis|EAW16660.1 afla|EED44893.1 afum|EAL89264.1 agla|OJJ78709.1 akaw|GAA83068.1 aluc|OJZ88619.1 anid|CBF82075.1 anig|EHA18310.1 aory|EIT83240.1 asyd|OJJ54250.1 ater|EAU39583.1 atub|OJI91204.1 aver|OJJ05204.1 awen|OJJ40053.1 azon|OJJ50109.1

Group3073: abra|OJJ73425.1 acar|OOG00629.1 acla|EAW07035.1 afis|EAW16661.1 afla|EED44894.1 afum|EAL89265.1 agla|OJJ78708.1 akaw|GAA83067.1 aluc|OJZ88618.1 anid|CBF82076.1 anig|EHA18309.1 aory|EIT83251.1 asyd|OJJ54251.1 ater|EAU39584.1 atub|OJI91203.1 aver|OJJ05205.1 awen|OJJ40052.1 azon|OJJ50116.1

Group3074: abra|OJJ73432.1 acar|OOG00639.1 acla|EAW06771.1 afis|EAW16322.1 afla|EED53560.1 afum|EAL88945.1 agla|OJJ88284.1 akaw|GAA83060.1 aluc|OJZ88609.1 anid|CBF89157.1 anig|EHA18302.1 aory|EIT75216.1 asyd|OJJ62563.1 ater|EAU34135.1 atub|OJI91194.1 aver|OJI96687.1 awen|OJJ37722.1 azon|OJJ44981.1

Group3075: abra|OJJ73437.1 acar|OOG00643.1 acla|EAW06775.1 afis|EAW16326.1 afla|EED53555.1 afum|EAL88950.1 agla|OJJ88266.1 akaw|GAA83056.1 aluc|OJZ88604.1 anid|CBF89164.1 anig|EHA18297.1 aory|EIT75038.1 asyd|OJJ62546.1 ater|EAU34131.1 atub|OJI91188.1 aver|OJI96672.1 awen|OJJ37726.1 azon|OJJ44986.1

Group3076: abra|OJJ73440.1 acar|OOG00646.1 acla|EAW06772.1 afis|EAW16323.1 afla|EED53559.1 afum|EAL88946.1 agla|OJJ88285.1 akaw|GAA83053.1 aluc|OJZ88600.1 anid|CBF89158.1 anig|EHA18294.1 aory|EIT74917.1 asyd|OJJ62560.1 ater|EAU34134.1 atub|OJI91185.1 aver|OJI96685.1 awen|OJJ37723.1 azon|OJJ44982.1

Group3077: abra|OJJ73442.1 acar|OOG00648.1 acla|EAW06777.1 afis|EAW16328.1 afla|EED53553.1 afum|EAL88952.1 agla|OJJ88264.1 akaw|GAA83052.1 aluc|OJZ88598.1 anid|CBF89168.1 anig|EHA18292.1 aory|EIT74949.1 asyd|OJJ62543.1 ater|EAU34129.1 atub|OJI91183.1 aver|OJI96670.1 awen|OJJ37729.1 azon|OJJ44988.1

Group3078: abra|OJJ73451.1 acar|OOG00654.1 acla|EAW06782.1 afis|EAW16332.1 afla|EED53545.1 afum|EAL88957.1 agla|OJJ88260.1 akaw|GAA83045.1 aluc|OJZ88590.1 anid|CBF89183.1 anig|EHA18285.1 aory|EIT75091.1 asyd|OJJ62537.1 ater|EAU34126.1 atub|OJI91176.1 aver|OJI96663.1 awen|OJJ37733.1 azon|OJJ44990.1

Group3079: abra|OJJ73456.1 acar|OOG00656.1 acla|EAW06783.1 afis|EAW16333.1 afla|EED53543.1 afum|EAL88958.1 agla|OJJ88259.1 akaw|GAA83042.1 aluc|OJZ88587.1 anid|CBF89188.1 anig|EHA18281.1

aory|EIT75083.1 asyd|OJJ62536.1 ater|EAU34125.1 atub|OJI91173.1 aver|OJI96661.1 awen|OJJ37734.1 azon|OJJ44993.1

Group3080: abra|OJJ73458.1 acar|OOG00659.1 acla|EAW06785.1 afis|EAW16335.1 afila|EED53541.1 afum|EAL88960.1 agla|OJJ88251.1 akaw|GAA83040.1 aluc|OJZ88585.1 anid|CBF89192.1 anig|EHA18280.1 aory|EIT74882.1 asyd|OJJ62534.1 ater|EAU34123.1 atub|OJI91171.1 aver|OJI96659.1 awen|OJJ37737.1 azon|OJJ44997.1

Group3081: abra|OJJ73460.1 acar|OOG00661.1 acla|EAW06787.1 afis|EAW16336.1 afila|EED53539.1 afum|EAL88962.1 agla|OJJ88254.1 akaw|GAA83038.1 aluc|OJZ88583.1 anid|CBF89196.1 anig|EHA18278.1 aory|EIT75013.1 asyd|OJJ62532.1 ater|EAU34121.1 atub|OJI91169.1 aver|OJI96657.1 awen|OJJ37739.1 azon|OJJ45000.1

Group3082: abra|OJJ73463.1 acar|OOG00664.1 acla|EAW06789.1 afis|EAW16339.1 afila|EED53536.1 afum|EAL88964.1 agla|OJJ88256.1 akaw|GAA83035.1 aluc|OJZ88581.1 anid|CBF89199.1 anig|EHA18277.1 aory|EIT74845.1 asyd|OJJ62530.1 ater|EAU34119.1 atub|OJI91167.1 aver|OJI96655.1 awen|OJJ37741.1 azon|OJJ45002.1

Group3083: abra|OJJ73464.1 acar|OOG00665.1 acla|EAW06790.1 afis|EAW16340.1 afila|EED53535.1 afum|EAL88965.1 agla|OJJ88257.1 akaw|GAA83034.1 aluc|OJZ88580.1 anid|CBF89201.1 anig|EHA18276.1 aory|EIT75162.1 asyd|OJJ62529.1 ater|EAU34117.1 atub|OJI91166.1 aver|OJI96654.1 awen|OJJ37742.1 azon|OJJ45003.1

Group3084: abra|OJJ73465.1 acar|OOG00666.1 acla|EAW06792.1 afis|EAW16341.1 afila|EED53534.1 afum|EAL88966.1 agla|OJJ88247.1 akaw|GAA83033.1 aluc|OJZ88579.1 anid|CBF89203.1 anig|EHA18275.1 aory|EIT75067.1 asyd|OJJ62528.1 ater|EAU34116.1 atub|OJI91165.1 aver|OJI96651.1 awen|OJJ37743.1 azon|OJJ45004.1

Group3085: abra|OJJ73466.1 acar|OOG00667.1 acla|EAW06793.1 afis|EAW16342.1 afila|EED53533.1 afum|EAL88967.1 agla|OJJ88246.1 akaw|GAA83032.1 aluc|OJZ88578.1 anid|CBF89205.1 anig|EHA18274.1 aory|EIT75133.1 asyd|OJJ62527.1 ater|EAU34115.1 atub|OJI91164.1 aver|OJI96650.1 awen|OJJ37744.1 azon|OJJ45005.1

Group3086: abra|OJJ73467.1 acar|OOG00668.1 acla|EAW06794.1 afis|EAW16343.1 afila|EED53532.1 afum|EAL88968.1 agla|OJJ88245.1 akaw|GAA83031.1 aluc|OJZ88577.1 anid|CBF89206.1 anig|EHA18273.1 aory|EIT74961.1 asyd|OJJ62526.1 ater|EAU34114.1 atub|OJI91163.1 aver|OJI96649.1 awen|OJJ37745.1 azon|OJJ45006.1

Group3087: abra|OJJ73470.1 acar|OOG00669.1 acla|EAW06795.1 afis|EAW16344.1 afila|EED53526.1 afum|EAL88969.1 agla|OJJ88244.1 akaw|GAA83030.1 aluc|OJZ88576.1 anid|CBF89217.1 anig|EHA18272.1 aory|EIT74890.1 asyd|OJJ62524.1 ater|EAU34113.1 atub|OJI91162.1 aver|OJI96645.1 awen|OJJ37747.1 azon|OJJ45008.1

Group3088: abra|OJJ73474.1 acar|OOG00670.1 acla|EAW06799.1 afis|EAW16348.1 afila|EED53523.1 afum|EAL88973.1 agla|OJJ88239.1 akaw|GAA83027.1 aluc|OJZ88573.1 anid|CBF89210.1 anig|EHA18271.1 aory|EIT75044.1 asyd|OJJ62522.1 ater|EAU34111.1 atub|OJI91159.1 aver|OJI96641.1 awen|OJJ37751.1 azon|OJJ45010.1

Group3089: abra|OJJ73476.1 acar|OOG00673.1 acla|EAW06802.1 afis|EAW16351.1 afila|EED53521.1 afum|EAL88976.1 agla|OJJ88249.1 akaw|GAA83025.1 aluc|OJZ88571.1 anid|CBF89221.1 anig|EHA18269.1 aory|EIT75100.1 asyd|OJJ62520.1 ater|EAU34110.1 atub|OJI91157.1 aver|OJI96639.1 awen|OJJ37754.1 azon|OJJ45013.1

Group3090: abra|OJJ73484.1 acar|OOG00678.1 acla|EAW06808.1 afis|EAW16357.1 afila|EED53513.1 afum|EAL88982.1 agla|OJJ88236.1 akaw|GAA87433.1 aluc|OJZ88564.1 anid|CBF89232.1 anig|EHA18261.1 aory|EIT75027.1 asyd|OJJ62514.1 ater|EAU34102.1 atub|OJI91150.1 aver|OJI96633.1 awen|OJJ37761.1 azon|OJJ45061.1

Group3091: abra|OJJ73485.1 acar|OOG00680.1 acla|EAW06809.1 afis|EAW16358.1 afila|EED53512.1 afum|EAL88983.1 agla|OJJ88235.1 akaw|GAA87434.1 aluc|OJZ88563.1 anid|CBF89234.1 anig|EHA18260.1 aory|EIT75048.1 asyd|OJJ62513.1 ater|EAU34101.1 atub|OJI91149.1 aver|OJI96632.1 awen|OJJ37762.1 azon|OJJ45062.1

Group3092: abra|OJJ73486.1 acar|OOG00679.1 acla|EAW06810.1 afis|EAW16359.1 afila|EED53510.1 afum|EAL88984.1 agla|OJJ88233.1 akaw|GAA87435.1 aluc|OJZ88562.1 anid|CBF89236.1 anig|EHA18259.1 aory|EIT75112.1 asyd|OJJ62512.1 ater|EAU34100.1 atub|OJI91147.1 aver|OJI96631.1 awen|OJJ37763.1 azon|OJJ45063.1

Group3093: abra|OJJ73487.1 acar|OOG00681.1 acla|EAW06811.1 afis|EAW16360.1 afila|EED53508.1 afum|EAL88985.1 agla|OJJ88232.1 akaw|GAA87436.1 aluc|OJZ88561.1 anid|CBF89237.1 anig|EHA18258.1 aory|EIT75230.1 asyd|OJJ62510.1 ater|EAU34092.1 atub|OJI91146.1 aver|OJI96630.1 awen|OJJ37764.1 azon|OJJ45064.1

Group3094: abra|OJJ73488.1 acar|OOG00682.1 acla|EAW06812.1 afis|EAW16361.1 afla|EED53507.1 afum|EAL88986.1 agla|OJJ88231.1 akaw|GAA87437.1 aluc|OJZ88560.1 anid|CBF89239.1 anig|EHA18257.1 aory|EIT75024.1 asyd|OJJ62509.1 ater|EAU34091.1 atub|OJI91145.1 aver|OJI96629.1 awen|OJJ37765.1 azon|OJJ45065.1

Group3095: abra|OJJ73496.1 acar|OOG00694.1 acla|EAW07430.1 afis|EAW22456.1 afla|EED54488.1 afum|EAL90735.1 agla|OJJ87568.1 akaw|GAA87445.1 aluc|OJZ88552.1 anid|CBF88921.1 anig|EHA18250.1 aory|EIT78863.1 asyd|OJJ62846.1 ater|EAU39249.1 atub|OJI91137.1 aver|OJI96890.1 awen|OJJ35081.1 azon|OJJ50026.1

Group3096: abra|OJJ73497.1 acar|OOG00693.1 acla|EAW07431.1 afis|EAW22457.1 afla|EED54487.1 afum|EAL90734.1 agla|OJJ87567.1 akaw|GAA87446.1 aluc|OJZ88551.1 anid|CBF88920.1 anig|EHA18249.1 aory|EIT78747.1 asyd|OJJ62845.1 ater|EAU39248.1 atub|OJI91136.1 aver|OJI96889.1 awen|OJJ35082.1 azon|OJJ50025.1

Group3097: abra|OJJ73507.1 acar|OOG00697.1 acla|EAW07440.1 afis|EAW22467.1 afla|EED54499.1 afum|EAL90724.1 agla|OJJ87557.1 akaw|GAA87455.1 aluc|OJZ88540.1 anid|CBF88903.1 anig|EHA18241.1 aory|EIT78913.1 asyd|OJJ62837.1 ater|EAU39241.1 atub|OJI91125.1 aver|OJI96880.1 awen|OJJ35093.1 azon|OJJ50016.1

Group3098: abra|OJJ73508.1 acar|OOG00698.1 acla|EAW07441.1 afis|EAW22468.1 afla|EED54500.1 afum|EAL90723.1 agla|OJJ87556.1 akaw|GAA87456.1 aluc|OJZ88539.1 anid|CBF88902.1 anig|EHA18240.1 aory|EIT78813.1 asyd|OJJ62836.1 ater|EAU39240.1 atub|OJI91124.1 aver|OJI96879.1 awen|OJJ35094.1 azon|OJJ50015.1

Group3099: abra|OJJ73510.1 acar|OOG00699.1 acla|EAW07443.1 afis|EAW22470.1 afla|EED54502.1 afum|EAL90721.1 agla|OJJ87554.1 akaw|GAA87458.1 aluc|OJZ88537.1 anid|CBF88900.1 anig|EHA18238.1 aory|EIT78910.1 asyd|OJJ62834.1 ater|EAU39238.1 atub|OJI91122.1 aver|OJI96877.1 awen|OJJ35096.1 azon|OJJ50013.1

Group3100: abra|OJJ73512.1 acar|OOG00701.1 acla|EAW07445.1 afis|EAW22472.1 afla|EED54504.1 afum|EAL90719.1 agla|OJJ87552.1 akaw|GAA87460.1 aluc|OJZ88535.1 anid|CBF88896.1 anig|EHA18236.1 aory|EIT78949.1 asyd|OJJ62832.1 ater|EAU39236.1 atub|OJI91120.1 aver|OJI96875.1 awen|OJJ35098.1 azon|OJJ50011.1

Group3101: abra|OJJ73513.1 acar|OOG00700.1 acla|EAW07447.1 afis|EAW22474.1 afla|EED54506.1 afum|EAL90717.1 agla|OJJ87550.1 akaw|GAA87462.1 aluc|OJZ88534.1 anid|CBF88892.1 anig|EHA18235.1 aory|EIT78850.1 asyd|OJJ62831.1 ater|EAU39235.1 atub|OJI91119.1 aver|OJI96874.1 awen|OJJ35099.1 azon|OJJ50010.1

Group3102: abra|OJJ73516.1 acar|OOG00706.1 acla|EAW07451.1 afis|EAW22483.1 afla|EED54509.1 afum|EAL90711.1 agla|OJJ87543.1 akaw|GAA87465.1 aluc|OJZ88531.1 anid|CBF88887.1 anig|EHA18232.1 aory|EIT78939.1 asyd|OJJ62826.1 ater|EAU39232.1 atub|OJI91116.1 aver|OJI96871.1 awen|OJJ35102.1 azon|OJJ50006.1

Group3103: abra|OJJ73529.1 acar|OOG00710.1 acla|EAW07454.1 afis|EAW22486.1 afla|EED54512.1 afum|EAL90707.1 agla|OJJ80863.1 akaw|GAA88617.1 aluc|OJZ88526.1 anid|CBF88942.1 anig|EHA18228.1 aory|EIT78750.1 asyd|OJJ62815.1 ater|EAU39228.1 atub|OJI91111.1 aver|OJI96859.1 awen|OJJ35105.1 azon|OJJ49989.1

Group3104: abra|OJJ73534.1 acar|OOG00712.1 acla|EAW07456.1 afis|EAW22487.1 afla|EED54516.1 afum|EAL90706.1 agla|OJJ80860.1 akaw|GAA88616.1 aluc|OJZ88525.1 anid|CBF88944.1 anig|EHA18227.1 aory|EIT78867.1 asyd|OJJ62814.1 ater|EAU39227.1 atub|OJI91110.1 aver|OJI96858.1 awen|OJJ35108.1 azon|OJJ49986.1

Group3105: abra|OJJ73537.1 acar|OOG00713.1 acla|EAW07459.1 afis|EAW22490.1 afla|EED54519.1 afum|EAL90703.1 agla|OJJ80856.1 akaw|GAA88613.1 aluc|OJZ88522.1 anid|CBF88950.1 anig|EHA18225.1 aory|EIT78823.1 asyd|OJJ62811.1 ater|EAU39225.1 atub|OJI91107.1 aver|OJI96857.1 awen|OJJ35110.1 azon|OJJ49983.1

Group3106: abra|OJJ73539.1 acar|OOG00715.1 acla|EAW07460.1 afis|EAW22491.1 afla|EED54520.1 afum|EAL90702.1 agla|OJJ80854.1 akaw|GAA88612.1 aluc|OJZ88520.1 anid|CBF88951.1 anig|EHA18224.1 aory|EIT78935.1 asyd|OJJ62809.1 ater|EAU39224.1 atub|OJI91105.1 aver|OJI96855.1 awen|OJJ35112.1 azon|OJJ49981.1

Group3107: abra|OJJ73541.1 acar|OOG00716.1 acla|EAW07461.1 afis|EAW22492.1 afla|EED54521.1 afum|EAL90701.1 agla|OJJ80853.1 akaw|GAA88610.1 aluc|OJZ88518.1 anid|CBF88953.1 anig|EHA18223.1 aory|EIT78920.1 asyd|OJJ62808.1 ater|EAU39223.1 atub|OJI91103.1 aver|OJI96854.1 awen|OJJ35113.1 azon|OJJ49980.1

Group3108: abra|OJJ73547.1 acar|OOG00721.1 acla|EAW07466.1 afis|EAW22499.1 afla|EED54526.1 afum|EAL90694.1 agla|OJJ80847.1 akaw|GAA88605.1 aluc|OJZ88513.1 anid|CBF88960.1 anig|EHA18219.1

aory|EIT78800.1 asyd|OJJ62804.1 ater|EAU39219.1 atub|OJI91098.1 aver|OJI96850.1 awen|OJJ35122.1 azon|OJJ49976.1

Group3109: abra|OJJ73549.1 acar|OOG00723.1 acla|EAW07468.1 afis|EAW22501.1 afla|EED54529.1 afum|EAL90692.1 agla|OJJ80851.1 akaw|GAA88603.1 aluc|OJZ88511.1 anid|CBF88962.1 anig|EHA18217.1 aory|EIT78773.1 asyd|OJJ62799.1 ater|EAU39217.1 atub|OJI91096.1 aver|OJI96846.1 awen|OJJ35124.1 azon|OJJ49974.1

Group3110: abra|OJJ73550.1 acar|OOG00724.1 acla|EAW07469.1 afis|EAW22502.1 afla|EED54530.1 afum|EAL90691.1 agla|OJJ80852.1 akaw|GAA88602.1 aluc|OJZ88510.1 anid|CBF88965.1 anig|EHA18216.1 aory|EIT78738.1 asyd|OJJ62798.1 ater|EAU39216.1 atub|OJI91095.1 aver|OJI96845.1 awen|OJJ35125.1 azon|OJJ49973.1

Group3111: abra|OJJ73555.1 acar|OOG00726.1 acla|EAW07473.1 afis|EAW22505.1 afla|EED54533.1 afum|EAL90688.1 agla|OJJ87536.1 akaw|GAA88598.1 aluc|OJZ88506.1 anid|CBF88970.1 anig|EHA18213.1 aory|EIT78812.1 asyd|OJJ62795.1 ater|EAU39210.1 atub|OJI91092.1 aver|OJI96842.1 awen|OJJ35130.1 azon|OJJ49969.1

Group3112: abra|OJJ73556.1 acar|OOG00728.1 acla|EAW07474.1 afis|EAW22506.1 afla|EED54534.1 afum|EAL90687.1 agla|OJJ87537.1 akaw|GAA88597.1 aluc|OJZ88505.1 anid|CBF88972.1 anig|EHA18212.1 aory|EIT78875.1 asyd|OJJ62794.1 ater|EAU39209.1 atub|OJI91091.1 aver|OJI96841.1 awen|OJJ35131.1 azon|OJJ49968.1

Group3113: abra|OJJ73560.1 acar|OOG00731.1 acla|EAW07477.1 afis|EAW22509.1 afla|EED54537.1 afum|EAL90684.1 agla|OJJ80867.1 akaw|GAA88594.1 aluc|OJZ88502.1 anid|CBF88977.1 anig|EHA18210.1 aory|EIT78879.1 asyd|OJJ62791.1 ater|EAU39205.1 atub|OJI91088.1 aver|OJI96838.1 awen|OJJ35134.1 azon|OJJ49964.1

Group3114: abra|OJJ73563.1 acar|OOG00746.1 acla|EAW07480.1 afis|EAW22512.1 afla|EED54540.1 afum|EAL90681.1 agla|OJJ80875.1 akaw|GAA88591.1 aluc|OJZ88498.1 anid|CBF88983.1 anig|EHA18207.1 aory|EIT78924.1 asyd|OJJ62788.1 ater|EAU39197.1 atub|OJI91085.1 aver|OJI96835.1 awen|OJJ35138.1 azon|OJJ49961.1

Group3115: abra|OJJ73566.1 acar|OOG00748.1 acla|EAW07482.1 afis|EAW22514.1 afla|EED54544.1 afum|EAL90679.1 agla|OJJ80873.1 akaw|GAA88589.1 aluc|OJZ88496.1 anid|CBF88984.1 anig|EHA18205.1 aory|EIT78876.1 asyd|OJJ62786.1 ater|EAU39195.1 atub|OJI91083.1 aver|OJI96833.1 awen|OJJ35140.1 azon|OJJ49959.1

Group3116: abra|OJJ73567.1 acar|OOG00745.1 acla|EAW07483.1 afis|EAW22515.1 afla|EED54545.1 afum|EAL90678.1 agla|OJJ80872.1 akaw|GAA88588.1 aluc|OJZ88495.1 anid|CBF88986.1 anig|EHA18204.1 aory|EIT78884.1 asyd|OJJ62785.1 ater|EAU39194.1 atub|OJI91082.1 aver|OJI96831.1 awen|OJJ35141.1 azon|OJJ49958.1

Group3117: abra|OJJ73568.1 acar|OOG00749.1 acla|EAW07484.1 afis|EAW22516.1 afla|EED54546.1 afum|EAL90677.1 agla|OJJ80877.1 akaw|GAA88587.1 aluc|OJZ88494.1 anid|CBF88988.1 anig|EHA18203.1 aory|EIT78756.1 asyd|OJJ62784.1 ater|EAU39193.1 atub|OJI91081.1 aver|OJI96830.1 awen|OJJ35142.1 azon|OJJ49957.1

Group3118: abra|OJJ73573.1 acar|OOG00754.1 acla|EAW07490.1 afis|EAW22523.1 afla|EED54548.1 afum|EAL90671.1 agla|OJJ80884.1 akaw|GAA88577.1 aluc|OJZ88480.1 anid|CBF89007.1 anig|EHA18196.1 aory|EIT78743.1 asyd|OJJ62776.1 ater|EAU39187.1 atub|OJI91074.1 aver|OJI96821.1 awen|OJJ35150.1 azon|OJJ49951.1

Group3119: abra|OJJ73574.1 acar|OOG00755.1 acla|EAW07491.1 afis|EAW22524.1 afla|EED54549.1 afum|EAL90670.1 agla|OJJ80885.1 akaw|GAA88576.1 aluc|OJZ88479.1 anid|CBF89009.1 anig|EHA18195.1 aory|EIT78837.1 asyd|OJJ62775.1 ater|EAU39186.1 atub|OJI91073.1 aver|OJI96820.1 awen|OJJ35151.1 azon|OJJ49950.1

Group3120: abra|OJJ73575.1 acar|OOG00756.1 acla|EAW07492.1 afis|EAW22525.1 afla|EED54553.1 afum|EAL90669.1 agla|OJJ80886.1 akaw|GAA88575.1 aluc|OJZ88477.1 anid|CBF89011.1 anig|EHA18194.1 aory|EIT78752.1 asyd|OJJ62774.1 ater|EAU39185.1 atub|OJI91072.1 aver|OJI96819.1 awen|OJJ35152.1 azon|OJJ49949.1

Group3121: abra|OJJ73578.1 acar|OOG00759.1 acla|EAW07496.1 afis|EAW22529.1 afla|EED54557.1 afum|EAL90665.1 agla|OJJ80890.1 akaw|GAA88573.1 aluc|OJZ88474.1 anid|CBF89014.1 anig|EHA18191.1 aory|EIT78796.1 asyd|OJJ62772.1 ater|EAU39182.1 atub|OJI91069.1 aver|OJI96817.1 awen|OJJ35156.1 azon|OJJ49945.1

Group3122: abra|OJJ73580.1 acar|OOG00761.1 acla|EAW07498.1 afis|EAW22531.1 afla|EED54559.1 afum|EAL90663.1 agla|OJJ80892.1 akaw|GAA88571.1 aluc|OJZ88472.1 anid|CBF89018.1 anig|EHA18189.1 aory|EIT78759.1 asyd|OJJ62770.1 ater|EAU39178.1 atub|OJI91067.1 aver|OJI96815.1 awen|OJJ35158.1 azon|OJJ49944.1



Group3123: abra|OJJ73581.1 acar|OOG00762.1 acla|EAW07499.1 afis|EAW22532.1 afla|EED54560.1 afum|EAL90662.1 agla|OJJ80893.1 akaw|GAA88570.1 aluc|OJZ88471.1 anid|CBF89020.1 anig|EHA18188.1 aory|EIT78827.1 asyd|OJJ62769.1 ater|EAU39177.1 atub|OJI91066.1 aver|OJI96814.1 awen|OJJ35159.1 azon|OJJ49943.1

Group3124: abra|OJJ73582.1 acar|OOG00763.1 acla|EAW07500.1 afis|EAW22533.1 afla|EED54561.1 afum|EAL90661.1 agla|OJJ80894.1 akaw|GAA88569.1 aluc|OJZ88470.1 anid|CBF89023.1 anig|EHA18187.1 aory|EIT78937.1 asyd|OJJ62768.1 ater|EAU39176.1 atub|OJI91065.1 aver|OJI96813.1 awen|OJJ35160.1 azon|OJJ49942.1

Group3125: abra|OJJ73583.1 acar|OOG00764.1 acla|EAW07501.1 afis|EAW22534.1 afla|EED54562.1 afum|EAL90660.1 agla|OJJ80895.1 akaw|GAA88568.1 aluc|OJZ88469.1 anid|CBF89025.1 anig|EHA18186.1 aory|EIT78784.1 asyd|OJJ62767.1 ater|EAU39175.1 atub|OJI91064.1 aver|OJI96812.1 awen|OJJ35161.1 azon|OJJ49941.1

Group3126: abra|OJJ73585.1 acar|OOG00766.1 acla|EAW07503.1 afis|EAW22536.1 afla|EED54564.1 afum|EAL90658.1 agla|OJJ80897.1 akaw|GAA88566.1 aluc|OJZ88467.1 anid|CBF89029.1 anig|EHA18184.1 aory|EIT78903.1 asyd|OJJ62765.1 ater|EAU39173.1 atub|OJI91062.1 aver|OJI96810.1 awen|OJJ35163.1 azon|OJJ49940.1

Group3127: abra|OJJ73586.1 acar|OOG00767.1 acla|EAW07504.1 afis|EAW22537.1 afla|EED54565.1 afum|EAL90657.1 agla|OJJ80898.1 akaw|GAA88565.1 aluc|OJZ88466.1 anid|CBF89031.1 anig|EHA18183.1 aory|EIT78873.1 asyd|OJJ62764.1 ater|EAU39172.1 atub|OJI91061.1 aver|OJI96809.1 awen|OJJ35165.1 azon|OJJ49939.1

Group3128: abra|OJJ73589.1 acar|OOG00771.1 acla|EAW07507.1 afis|EAW22539.1 afla|EED54568.1 afum|EAL90655.1 agla|OJJ80899.1 akaw|GAA88563.1 aluc|OJZ88461.1 anid|CBF89036.1 anig|EHA18181.1 aory|EIT78782.1 asyd|OJJ62762.1 ater|EAU39170.1 atub|OJI91059.1 aver|OJI96805.1 awen|OJJ35168.1 azon|OJJ49938.1

Group3129: abra|OJJ73592.1 acar|OOG00777.1 acla|EAW07511.1 afis|EAW22542.1 afla|EED54573.1 afum|EAL90652.1 agla|OJJ80904.1 akaw|GAA88560.1 aluc|OJZ88458.1 anid|CBF89040.1 anig|EHA18178.1 aory|EIT78776.1 asyd|OJJ62760.1 ater|EAU39166.1 atub|OJI91056.1 aver|OJI96803.1 awen|OJJ35171.1 azon|OJJ49936.1

Group3131: abra|OJJ73598.1 acar|OOG00784.1 acla|EAW07516.1 afis|EAW22546.1 afla|EED54578.1 afum|EAL90649.1 agla|OJJ80908.1 akaw|GAA88554.1 aluc|OJZ88452.1 anid|CBF89049.1 anig|EHA18173.1 aory|EIT78955.1 asyd|OJJ62755.1 ater|EAU39159.1 atub|OJI91050.1 aver|OJI96797.1 awen|OJJ35177.1 azon|OJJ49931.1

Group3132: abra|OJJ73599.1 acar|OOG00785.1 acla|EAW07517.1 afis|EAW22547.1 afla|EED54579.1 afum|EAL90648.1 agla|OJJ80909.1 akaw|GAA88553.1 aluc|OJZ88451.1 anid|CBF89051.1 anig|EHA18172.1 aory|EIT78753.1 asyd|OJJ62754.1 ater|EAU39158.1 atub|OJI91049.1 aver|OJI96796.1 awen|OJJ35178.1 azon|OJJ49930.1

Group3133: abra|OJJ73601.1 acar|OOG00786.1 acla|EAW07519.1 afis|EAW22549.1 afla|EED54582.1 afum|EAL90646.1 agla|OJJ80911.1 akaw|GAA88551.1 aluc|OJZ88447.1 anid|CBF89057.1 anig|EHA18170.1 aory|EIT78932.1 asyd|OJJ62752.1 ater|EAU39155.1 atub|OJI91046.1 aver|OJI96794.1 awen|OJJ35180.1 azon|OJJ49927.1

Group3134: abra|OJJ73606.1 acar|OOG00790.1 acla|EAW07523.1 afis|EAW22553.1 afla|EED54585.1 afum|EAL90642.1 agla|OJJ80915.1 akaw|GAA88547.1 aluc|OJZ88443.1 anid|CBF89062.1 anig|EHA18167.1 aory|EIT78786.1 asyd|OJJ62748.1 ater|EAU39151.1 atub|OJI91041.1 aver|OJI96788.1 awen|OJJ35184.1 azon|OJJ49924.1

Group3135: abra|OJJ73607.1 acar|OOG00791.1 acla|EAW07524.1 afis|EAW22554.1 afla|EED54586.1 afum|EAL90641.1 agla|OJJ80916.1 akaw|GAA88546.1 aluc|OJZ88442.1 anid|CBF89063.1 anig|EHA18166.1 aory|EIT78927.1 asyd|OJJ62747.1 ater|EAU39150.1 atub|OJI91040.1 aver|OJI96787.1 awen|OJJ35185.1 azon|OJJ49923.1

Group3136: abra|OJJ73609.1 acar|OOG00793.1 acla|EAW07526.1 afis|EAW22556.1 afla|EED54587.1 afum|EAL90639.1 agla|OJJ80917.1 akaw|GAA88544.1 aluc|OJZ88440.1 anid|CBF89065.1 anig|EHA18164.1 aory|EIT78856.1 asyd|OJJ62745.1 ater|EAU39148.1 atub|OJI91038.1 aver|OJI96785.1 awen|OJJ35187.1 azon|OJJ49921.1

Group3137: abra|OJJ73611.1 acar|OOG00794.1 acla|EAW07528.1 afis|EAW22558.1 afla|EED54589.1 afum|EAL90637.1 agla|OJJ80918.1 akaw|GAA88542.1 aluc|OJZ88439.1 anid|CBF89071.1 anig|EHA18162.1 aory|EIT78846.1 asyd|OJJ62743.1 ater|EAU39146.1 atub|OJI91036.1 aver|OJI96784.1 awen|OJJ35188.1 azon|OJJ49918.1

Group3138: abra|OJJ73612.1 acar|OOG00795.1 acla|EAW07529.1 afis|EAW22559.1 afla|EED54590.1 afum|EAL90636.1 agla|OJJ80919.1 akaw|GAA88541.1 aluc|OJZ88437.1 anid|CBF88377.1 anig|EHA18161.1

aory|EIT78952.1 asyd|OJJ63734.1 ater|EAU39145.1 atub|OJI91034.1 aver|OJI97206.1 awen|OJJ35189.1  
azon|OJJ49917.1

Group3139: abra|OJJ73616.1 acar|OOG00800.1 acla|EAW07531.1 afis|EAW22562.1 afla|EED54592.1  
afum|EAL90633.1 agla|OJJ80921.1 akaw|GAA88537.1 aluc|OJZ88433.1 anid|CBF88314.1 anig|EHA18157.1  
aory|EIT78915.1 asyd|OJJ63700.1 ater|EAU39142.1 atub|OJI91030.1 aver|OJI97239.1 awen|OJJ35191.1  
azon|OJJ49915.1

Group3140: abra|OJJ73617.1 acar|OOG00799.1 acla|EAW07532.1 afis|EAW22561.1 afla|EED54596.1  
afum|EAL90634.1 agla|OJJ80922.1 akaw|GAA88536.1 aluc|OJZ88432.1 anid|CBF88316.1 anig|EHA18156.1  
aory|EIT78857.1 asyd|OJJ63701.1 ater|EAU39141.1 atub|OJI91029.1 aver|OJI97238.1 awen|OJJ35192.1  
azon|OJJ49914.1

Group3141: abra|OJJ73618.1 acar|OOG00801.1 acla|EAW07533.1 afis|EAW22567.1 afla|EED54597.1  
afum|EAL90631.1 agla|OJJ80923.1 akaw|GAA88535.1 aluc|OJZ88431.1 anid|CBF88318.1 anig|EHA18155.1  
aory|EIT78761.1 asyd|OJJ63702.1 ater|EAU39140.1 atub|OJI91028.1 aver|OJI97237.1 awen|OJJ35193.1  
azon|OJJ49913.1

Group3142: abra|OJJ73619.1 acar|OOG00802.1 acla|EAW07534.1 afis|EAW22568.1 afla|EED54598.1  
afum|EAL90630.1 agla|OJJ80924.1 akaw|GAA88534.1 aluc|OJZ88430.1 anid|CBF88320.1 anig|EHA18154.1  
aory|EIT78762.1 asyd|OJJ63703.1 ater|EAU39139.1 atub|OJI91027.1 aver|OJI97236.1 awen|OJJ35194.1  
azon|OJJ49912.1

Group3143: abra|OJJ73621.1 acar|OOG00805.1 acla|EAW07536.1 afis|EAW22570.1 afla|EED54600.1  
afum|EAL90628.1 agla|OJJ80926.1 akaw|GAA88532.1 aluc|OJZ88427.1 anid|CBF88323.1 anig|EHA18152.1  
aory|EIT78841.1 asyd|OJJ63705.1 ater|EAU39137.1 atub|OJI91025.1 aver|OJI97234.1 awen|OJJ35196.1  
azon|OJJ49911.1

Group3144: abra|OJJ73622.1 acar|OOG00804.1 acla|EAW07537.1 afis|EAW22571.1 afla|EED54601.1  
afum|EAL90627.1 agla|OJJ80928.1 akaw|GAA88531.1 aluc|OJZ88426.1 anid|CBF88325.1 anig|EHA18151.1  
aory|EIT78890.1 asyd|OJJ63706.1 ater|EAU39136.1 atub|OJI91024.1 aver|OJI97233.1 awen|OJJ35198.1  
azon|OJJ49910.1

Group3145: abra|OJJ73624.1 acar|OOG00807.1 acla|EAW07539.1 afis|EAW22573.1 afla|EED54602.1  
afum|EAL90625.1 agla|OJJ80930.1 akaw|GAA88529.1 aluc|OJZ88424.1 anid|CBF88328.1 anig|EHA18149.1  
aory|EIT78905.1 asyd|OJJ63708.1 ater|EAU39134.1 atub|OJI91020.1 aver|OJI97230.1 awen|OJJ35200.1  
azon|OJJ49907.1

Group3146: abra|OJJ73627.1 acar|OOG00809.1 acla|EAW07541.1 afis|EAW22575.1 afla|EED54604.1  
afum|EAL90623.1 agla|OJJ80931.1 akaw|GAA88526.1 aluc|OJZ88422.1 anid|CBF88332.1 anig|EHA18147.1  
aory|EIT78895.1 asyd|OJJ63711.1 ater|EAU39129.1 atub|OJI91018.1 aver|OJI97228.1 awen|OJJ35203.1  
azon|OJJ49905.1

Group3147: abra|OJJ73632.1 acar|OOG00814.1 acla|EAW07546.1 afis|EAW22580.1 afla|EED54625.1  
afum|EAL90619.2 agla|OJJ80940.1 akaw|GAA88521.1 aluc|OJZ88417.1 anid|CBF88341.1 anig|EHA18143.1  
aory|EIT78840.1 asyd|OJJ63716.1 ater|EAU39124.1 atub|OJI91013.1 aver|OJI97224.1 awen|OJJ35208.1  
azon|OJJ49901.1

Group3148: abra|OJJ73633.1 acar|OOG00815.1 acla|EAW07547.1 afis|EAW22581.1 afla|EED54626.1  
afum|EAL90618.1 agla|OJJ80941.1 akaw|GAA88520.1 aluc|OJZ88416.1 anid|CBF88343.1 anig|EHA18142.1  
aory|EIT78811.1 asyd|OJJ63717.1 ater|EAU39123.1 atub|OJI91012.1 aver|OJI97223.1 awen|OJJ35209.1  
azon|OJJ49900.1

Group3149: abra|OJJ73637.1 acar|OOG00817.1 acla|EAW07549.1 afis|EAW22583.1 afla|EED54628.1  
afum|EAL90616.1 agla|OJJ80943.1 akaw|GAA88518.1 aluc|OJZ88413.1 anid|CBF88349.1 anig|EHA18140.1  
aory|EIT78801.1 asyd|OJJ63719.1 ater|EAU39121.1 atub|OJI91009.1 aver|OJI97221.1 awen|OJJ35211.1  
azon|OJJ49898.1

Group3150: abra|OJJ73638.1 acar|OOG00818.1 acla|EAW07550.1 afis|EAW22584.1 afla|EED54629.1  
afum|EAL90615.1 agla|OJJ80944.1 akaw|GAA88517.1 aluc|OJZ88412.1 anid|CBF88350.1 anig|EHA18139.1  
aory|EIT78791.1 asyd|OJJ63720.1 ater|EAU39120.1 atub|OJI91007.1 aver|OJI97220.1 awen|OJJ35212.1  
azon|OJJ49897.1

Group3151: abra|OJJ73640.1 acar|OOG00820.1 acla|EAW07553.1 afis|EAW22587.1 afla|EED54633.1  
afum|EAL90612.1 agla|OJJ80947.1 akaw|GAA88515.1 aluc|OJZ88410.1 anid|CBF88356.1 anig|EHA18137.1  
aory|EIT78894.1 asyd|OJJ63723.1 ater|EAU39113.1 atub|OJI91006.1 aver|OJI97217.1 awen|OJJ35215.1  
azon|OJJ49894.1

Group3152: abra|OJJ73641.1 acar|OOG00822.1 acla|EAW07554.1 afis|EAW22588.1 afla|EED54634.1  
afum|EAL90611.1 agla|OJJ80948.1 akaw|GAA88514.1 aluc|OJZ88409.1 anid|CBF88358.1 anig|EHA18136.1  
aory|EIT78862.1 asyd|OJJ63724.1 ater|EAU39112.1 atub|OJI91005.1 aver|OJI97216.1 awen|OJJ35216.1  
azon|OJJ49893.1

Group3153: abra|OJJ73643.1 acar|OOG00824.1 acla|EAW07556.1 afis|EAW22590.1 afla|EED54636.1 afum|EAL90609.1 agla|OJJ80950.1 akaw|GAA88512.1 aluc|OJZ88407.1 anid|CBF88360.1 anig|EHA18134.1 aory|EIT78889.1 asyd|OJJ63726.1 ater|EAU39119.1 atub|OJI91003.1 aver|OJI97214.1 awen|OJJ35218.1 azon|OJJ49890.1

Group3154: abra|OJJ73644.1 acar|OOG00825.1 acla|EAW07557.1 afis|EAW22591.1 afla|EED54641.1 afum|EAL90608.1 agla|OJJ80951.1 akaw|GAA88511.1 aluc|OJZ88406.1 anid|CBF88364.1 anig|EHA18133.1 aory|EIT78790.1 asyd|OJJ63727.1 ater|EAU39111.1 atub|OJI91002.1 aver|OJI97213.1 awen|OJJ35219.1 azon|OJJ49889.1

Group3155: abra|OJJ73645.1 acar|OOG00826.1 acla|EAW07558.1 afis|EAW22592.1 afla|EED54642.1 afum|EAL90607.1 agla|OJJ80952.1 akaw|GAA88510.1 aluc|OJZ88405.1 anid|CBF88365.1 anig|EHA18132.1 aory|EIT78880.1 asyd|OJJ63728.1 ater|EAU39110.1 atub|OJI91001.1 aver|OJI97212.1 awen|OJJ35220.1 azon|OJJ49888.1

Group3156: abra|OJJ73647.1 acar|OOG00829.1 acla|EAW07560.1 afis|EAW22594.1 afla|EED54644.1 afum|EAL90605.1 agla|OJJ80954.1 akaw|GAA88508.1 aluc|OJZ88403.1 anid|CBF88369.1 anig|EHA18131.1 aory|EIT78768.1 asyd|OJJ63730.1 ater|EAU39109.1 atub|OJI90999.1 aver|OJI97210.1 awen|OJJ35222.1 azon|OJJ49886.1

Group3157: abra|OJJ73654.1 acar|OOG00832.1 acla|EAW07564.1 afis|EAW22598.1 afla|EED54720.1 afum|EAL90600.1 agla|OJJ80966.1 akaw|GAA88504.1 aluc|OJZ88399.1 anid|CBF88312.1 anig|EHA18127.1 aory|EIT78821.1 asyd|OJJ63698.1 ater|EAU39105.1 atub|OJI90994.1 aver|OJI97241.1 awen|OJJ35226.1 azon|OJJ49884.1

Group3158: abra|OJJ73655.1 acar|OOG00833.1 acla|EAW07565.1 afis|EAW22599.1 afla|EED54719.1 afum|EAL90599.1 agla|OJJ80967.1 akaw|GAA88503.1 aluc|OJZ88398.1 anid|CBF88310.1 anig|EHA18126.1 aory|EIT78916.1 asyd|OJJ63697.1 ater|EAU39104.1 atub|OJI90993.1 aver|OJI97242.1 awen|OJJ35228.1 azon|OJJ49883.1

Group3159: abra|OJJ73656.1 acar|OOG00834.1 acla|EAW07566.1 afis|EAW22600.1 afla|EED54718.1 afum|EAL90598.1 agla|OJJ80968.1 akaw|GAA88502.1 aluc|OJZ88397.1 anid|CBF88308.1 anig|EHA18125.1 aory|EIT78770.1 asyd|OJJ63696.1 ater|EAU39103.1 atub|OJI90992.1 aver|OJI97243.1 awen|OJJ35229.1 azon|OJJ49882.1

Group3160: abra|OJJ73657.1 acar|OOG00835.1 acla|EAW07567.1 afis|EAW22601.1 afla|EED54717.1 afum|EAL90597.1 agla|OJJ80971.1 akaw|GAA88501.1 aluc|OJZ88396.1 anid|CBF88256.1 anig|EHA18124.1 aory|EIT78942.1 asyd|OJJ63672.1 ater|EAU39102.1 atub|OJI90991.1 aver|OJI97266.1 awen|OJJ35230.1 azon|OJJ49881.1

Group3161: abra|OJJ73658.1 acar|OOG00836.1 acla|EAW07568.1 afis|EAW22602.1 afla|EED54716.1 afum|EAL90596.1 agla|OJJ80972.1 akaw|GAA88500.1 aluc|OJZ88395.1 anid|CBF88257.1 anig|EHA18123.1 aory|EIT78742.1 asyd|OJJ63673.1 ater|EAU39101.1 atub|OJI90990.1 aver|OJI97265.1 awen|OJJ35231.1 azon|OJJ49880.1

Group3162: abra|OJJ73665.1 acar|OOG00843.1 acla|EAW07572.1 afis|EAW22606.1 afla|EED49514.1 afum|EAL90592.1 agla|OJJ80975.1 akaw|GAA88491.1 aluc|OJZ88387.1 anid|CBF88263.1 anig|EHA18114.1 aory|EIT82633.1 asyd|OJJ63677.1 ater|EAU39097.1 atub|OJI90982.1 aver|OJI97262.1 awen|OJJ35234.1 azon|OJJ49877.1

Group3163: abra|OJJ73667.1 acar|OOG00844.1 acla|EAW07573.1 afis|EAW22607.1 afla|EED49805.1 afum|EAL90591.1 agla|OJJ80977.1 akaw|GAA88490.1 aluc|OJZ88385.1 anid|CBF88265.1 anig|EHA18113.1 aory|EIT77683.1 asyd|OJJ63678.1 ater|EAU39096.1 atub|OJI90980.1 aver|OJI97261.1 awen|OJJ35235.1 azon|OJJ49876.1

Group3164: abra|OJJ73668.1 acar|OOG00845.1 acla|EAW07575.1 afis|EAW22609.1 afla|EED49807.1 afum|EAL90589.1 agla|OJJ81009.1 akaw|GAA88489.1 aluc|OJZ88384.1 anid|CBF88269.1 anig|EHA18112.1 aory|EIT77641.1 asyd|OJJ63680.1 ater|EAU39095.1 atub|OJI90979.1 aver|OJI97259.1 awen|OJJ35237.1 azon|OJJ49870.1

Group3165: abra|OJJ73671.1 acar|OOG00846.1 acla|EAW07583.1 afis|EAW22611.1 afla|EED49809.1 afum|EAL90587.1 agla|OJJ81005.1 akaw|GAA88486.1 aluc|OJZ88382.1 anid|CBF88281.1 anig|EHA18109.1 aory|EIT77633.1 asyd|OJJ63684.1 ater|EAU39092.1 atub|OJI90976.1 aver|OJI97255.1 awen|OJJ35239.1 azon|OJJ49868.1

Group3166: abra|OJJ73672.1 acar|OOG00847.1 acla|EAW07582.1 afis|EAW22612.1 afla|EED49810.1 afum|EAL90586.1 agla|OJJ81004.1 akaw|GAA88485.1 aluc|OJZ88381.1 anid|CBF88283.1 anig|EHA18108.1 aory|EIT77693.1 asyd|OJJ63685.1 ater|EAU39091.1 atub|OJI90975.1 aver|OJI97254.1 awen|OJJ35240.1 azon|OJJ49867.1

Group3167: abra|OJJ73673.1 acar|OOG00848.1 acla|EAW07581.1 afis|EAW22613.1 afla|EED49811.1 afum|EAL90585.1 agla|OJJ81003.1 akaw|GAA88484.1 aluc|OJZ88379.1 anid|CBF88287.1 anig|EHA18106.1

aory|EIT77666.1 asyd|OJJ63686.1 ater|EAU39090.1 atub|OJI90973.1 aver|OJI97253.1 awen|OJJ35241.1 azon|OJJ49866.1

Group3168: abra|OJJ73681.1 acar|OOG00853.1 acla|EAW07596.1 afis|EAW22627.1 afla|EED49827.1 afum|EAL90569.1 agla|OJJ80994.1 akaw|GAA88478.1 aluc|OJZ88368.1 anid|CBF88241.1 anig|EHA18101.1 aory|EIT77681.1 asyd|OJJ63662.1 ater|EAU39082.1 atub|OJI90966.1 aver|OJI97272.1 awen|OJJ35248.1 azon|OJJ49858.1

Group3169: abra|OJJ73684.1 acar|OOG00854.1 acla|EAW07599.1 afis|EAW22630.1 afla|EED49879.1 afum|EAL90565.1 agla|OJJ80990.1 akaw|GAA88475.1 aluc|OJZ88365.1 anid|CBF88236.1 anig|EHA18097.1 aory|EIT72464.1 asyd|OJJ63659.1 ater|EAU39078.1 atub|OJI90963.1 aver|OJI97275.1 awen|OJJ35251.1 azon|OJJ49855.1

Group3170: abra|OJJ73688.1 acar|OOG00860.1 acla|EAW07603.1 afis|EAW22634.1 afla|EED49884.1 afum|EAL90559.1 agla|OJJ80985.1 akaw|GAA88471.1 aluc|OJZ88361.1 anid|CBF88229.1 anig|EHA18093.1 aory|EIT72459.1 asyd|OJJ63655.1 ater|EAU39074.1 atub|OJI90957.1 aver|OJI97279.1 awen|OJJ35256.1 azon|OJJ49851.1

Group3171: abra|OJJ73689.1 acar|OOG00861.1 acla|EAW07604.1 afis|EAW22635.1 afum|EAL90558.2 akaw|GAA88470.1 aluc|OJZ88360.1 anid|CBF88227.1 anig|EHA18092.1 asyd|OJJ63654.1 ater|EAU39071.1 atub|OJI90956.1 aver|OJI97280.1 awen|OJJ35257.1 azon|OJJ49850.1 afla|EED49885.1 aory|EIT72467.1 agla|OJJ80984.1

Group3172: abra|OJJ73692.1 acar|OOG00863.1 acla|EAW07607.1 afis|EAW22637.1 afla|EED49888.1 afum|EAL90555.1 agla|OJJ80981.1 akaw|GAA88468.1 aluc|OJZ88357.1 anid|CBF88221.1 anig|EHA18090.1 aory|EIT72465.1 asyd|OJJ63652.1 ater|EAU39069.1 atub|OJI90952.1 aver|OJI97282.1 awen|OJJ35260.1 azon|OJJ49847.1

Group3173: abra|OJJ73724.1 acar|OOG00893.1 acla|EAW07613.1 afis|EAW22643.1 afla|EED49912.1 afum|EAL90549.2 agla|OJJ81025.1 akaw|GAA88438.1 aluc|OJZ88326.1 anid|CBF88175.1 anig|EHA18062.1 aory|EIT72277.1 asyd|OJJ63625.1 ater|EAU39064.1 atub|OJI90921.1 aver|OJI97311.1 awen|OJJ35281.1 azon|OJJ49845.1

Group3174: abra|OJJ73731.1 acar|OOG00897.1 acla|EAW07616.1 afis|EAW22645.1 afla|EED49914.1 afum|EAL90547.1 agla|OJJ81028.1 akaw|GAA88432.1 aluc|OJZ88319.1 anid|CBF88179.1 anig|EHA18055.1 aory|EIT72268.1 asyd|OJJ63627.1 ater|EAU39062.1 atub|OJI90914.1 aver|OJI97309.1 awen|OJJ35278.1 azon|OJJ49841.1

Group3175: abra|OJJ73733.1 acar|OOG00898.1 acla|EAW07617.1 afis|EAW22646.1 afla|EED49915.1 afum|EAL90546.1 agla|OJJ81029.1 akaw|GAA88431.1 aluc|OJZ88318.1 anid|CBF88180.1 anig|EHA18054.1 aory|EIT72267.1 asyd|OJJ63628.1 ater|EAU39061.1 atub|OJI90913.1 aver|OJI97308.1 awen|OJJ35277.1 azon|OJJ49840.1

Group3176: abra|OJJ73734.1 acar|OOG00899.1 acla|EAW07618.1 afis|EAW22647.1 afla|EED49916.1 afum|EAL90545.1 agla|OJJ81030.1 akaw|GAA88430.1 aluc|OJZ88317.1 anid|CBF88182.1 anig|EHA18053.1 aory|EIT72271.1 asyd|OJJ63629.1 ater|EAU39060.1 atub|OJI90912.1 aver|OJI97307.1 awen|OJJ35276.1 azon|OJJ49839.1

Group3177: abra|OJJ73735.1 acar|OOG00900.1 acla|EAW07619.1 afis|EAW22648.1 afla|EED49917.1 afum|EAL90544.1 agla|OJJ81031.1 akaw|GAA88429.1 aluc|OJZ88316.1 anid|CBF88184.1 anig|EHA18052.1 aory|EIT72269.1 asyd|OJJ63630.1 ater|EAU39059.1 atub|OJI90911.1 aver|OJI97306.1 awen|OJJ35275.1 azon|OJJ49832.1

Group3178: abra|OJJ73736.1 acar|OOG00901.1 acla|EAW07620.1 afis|EAW22649.1 afla|EED49918.1 afum|EAL90543.1 agla|OJJ81032.1 akaw|GAA88428.1 aluc|OJZ88315.1 anid|CBF88186.1 anig|EHA18051.1 aory|EIT72278.1 asyd|OJJ63631.1 ater|EAU39058.1 atub|OJI90910.1 aver|OJI97305.1 awen|OJJ35274.1 azon|OJJ49833.1

Group3179: abra|OJJ73739.1 acar|OOG00902.1 acla|EAW07633.1 afis|EAW22653.1 afla|EED49921.1 afum|EAL90539.1 agla|OJJ81036.1 akaw|GAA88425.1 aluc|OJZ88312.1 anid|CBF88197.1 anig|EHA18049.1 aory|EIT72265.1 asyd|OJJ63634.1 ater|EAU39053.1 atub|OJI90907.1 aver|OJI97302.1 awen|OJJ35270.1 azon|OJJ49837.1

Group3180: abra|OJJ73741.1 acar|OOG00904.1 acla|EAW07635.1 afis|EAW22655.1 afla|EED49923.1 afum|EAL90537.1 agla|OJJ81038.1 akaw|GAA88424.1 aluc|OJZ88311.1 anid|CBF88201.1 anig|EHA18048.1 aory|EIT72272.1 asyd|OJJ63637.1 ater|EAU39051.1 atub|OJI90906.1 aver|OJI97299.1 awen|OJJ35268.1 azon|OJJ49831.1

Group3181: abra|OJJ73744.1 acar|OOG00908.1 acla|EAW07640.1 afis|EAW22660.1 afla|EED49930.1 afum|EAL90532.1 agla|OJJ81041.1 akaw|GAA88421.1 aluc|OJZ88308.1 anid|CBF88218.1 anig|EHA18045.1 aory|EIT72279.1 asyd|OJJ63649.1 ater|EAU39048.1 atub|OJI90903.1 aver|OJI97284.1 awen|OJJ35265.1 azon|OJJ49828.1

Group3182: abra|OJJ73745.1 acar|OOG00909.1 acla|EAW07639.1 afis|EAW22659.1 afla|EED49931.1 afum|EAL90533.1 agla|OJJ81042.1 akaw|GAA88420.1 aluc|OJZ88307.1 anid|CBF88215.1 anig|EHA18044.1 aory|EIT72275.1 asyd|OJJ63648.1 ater|EAU39049.1 atub|OJI90902.1 aver|OJI97285.1 awen|OJJ35283.1 azon|OJJ49827.1

Group3183: abra|OJJ73751.1 acar|OOG00914.1 acla|EAW07642.1 afis|EAW22662.1 afla|EED49935.1 afum|EAL90530.1 agla|OJJ79062.1 akaw|GAA88416.1 aluc|OJZ88301.1 anid|CBF88168.1 anig|EHA18040.1 aory|EIT83423.1 asyd|OJJ63622.1 ater|EAU39046.1 atub|OJI90896.1 aver|OJI97315.1 awen|OJJ35287.1 azon|OJJ49826.1

Group3184: abra|OJJ73752.1 acar|OOG00915.1 acla|EAW07643.1 afis|EAW22663.1 afla|EED49937.1 afum|EAL90529.1 akaw|GAA88415.1 aluc|OJZ88300.1 anid|CBF88166.1 anig|EHA18039.1 aory|EIT83433.1 asyd|OJJ63621.1 ater|EAU39045.1 atub|OJI90894.1 aver|OJI97316.1 awen|OJJ35288.1 azon|OJJ49825.1 agla|OJJ79061.1

Group3185: abra|OJJ73753.1 acar|OOG00916.1 acla|EAW07644.1 afis|EAW22664.1 afla|EED49938.1 afum|EAL90528.1 agla|OJJ79060.1 akaw|GAA88414.1 aluc|OJZ88298.1 anid|CBF88164.1 anig|EHA18038.1 aory|EIT83434.1 asyd|OJJ63620.1 ater|EAU39044.1 atub|OJI90893.1 aver|OJI97318.1 awen|OJJ35290.1 azon|OJJ49824.1

Group3186: abra|OJJ73756.1 acar|OOG00918.1 acla|EAW07646.1 afis|EAW22666.1 afla|EED49940.1 afum|EAL90526.1 agla|OJJ79058.1 akaw|GAA88412.1 aluc|OJZ88296.1 anid|CBF88161.1 anig|EHA18036.1 aory|EIT83451.1 asyd|OJJ63619.1 ater|EAU39042.1 atub|OJI90892.1 aver|OJI97320.1 awen|OJJ35292.1 azon|OJJ49822.1

Group3187: abra|OJJ73757.1 acar|OOG00919.1 acla|EAW07647.1 afis|EAW22667.1 afla|EED49941.1 afum|EAL90525.1 agla|OJJ79057.1 akaw|GAA88411.1 aluc|OJZ88295.1 anid|CBF88159.1 anig|EHA18035.1 aory|EIT83456.1 asyd|OJJ63618.1 ater|EAU39041.1 atub|OJI90891.1 aver|OJI97321.1 awen|OJJ35293.1 azon|OJJ49821.1

Group3188: abra|OJJ73758.1 acar|OOG00920.1 acla|EAW07648.1 afis|EAW22668.1 afla|EED49942.1 afum|EAL90524.1 agla|OJJ79056.1 akaw|GAA88410.1 aluc|OJZ88294.1 anid|CBF88157.1 anig|EHA18034.1 aory|EIT83429.1 asyd|OJJ63617.1 ater|EAU39040.1 atub|OJI90890.1 aver|OJI97322.1 awen|OJJ35294.1 azon|OJJ49820.1

Group3189: abra|OJJ73766.1 acar|OOG00925.1 acla|EAW07652.1 afis|EAW22670.1 afla|EED49947.1 afum|EAL90522.1 agla|OJJ79049.1 akaw|GAA88408.1 aluc|OJZ88290.1 anid|CBF88155.1 anig|EHA18031.1 aory|EIT83455.1 asyd|OJJ63608.1 ater|EAU39038.1 atub|OJI90887.1 aver|OJI97329.1 awen|OJJ35298.1 azon|OJJ49817.1

Group3190: abra|OJJ73768.1 acar|OOG00927.1 acla|EAW07653.1 afis|EAW22671.1 afla|EED49949.1 afum|EAL90521.1 agla|OJJ79048.1 akaw|GAA88407.1 aluc|OJZ88289.1 anid|CBF88151.1 anig|EHA18030.1 aory|EIT83435.1 asyd|OJJ63607.1 ater|EAU39037.1 atub|OJI90886.1 aver|OJI97330.1 awen|OJJ35299.1 azon|OJJ49816.1

Group3191: abra|OJJ73769.1 acar|OOG00926.1 acla|EAW07654.1 afis|EAW22672.1 afla|EED49951.1 afum|EAL90520.1 agla|OJJ79046.1 akaw|GAA88406.1 aluc|OJZ88288.1 anid|CBF88145.1 anig|EHA18029.1 aory|EIT83454.1 asyd|OJJ63604.1 ater|EAU39036.1 atub|OJI90885.1 aver|OJI97332.1 awen|OJJ35300.1 azon|OJJ49815.1

Group3192: abra|OJJ73776.1 acar|OOG00933.1 acla|EAW07661.1 afis|EAW22678.1 afla|EED49959.1 afum|EAL90514.1 agla|OJJ79038.1 akaw|GAA88400.1 aluc|OJZ88278.1 anid|CBF88130.1 anig|EHA18023.1 aory|EIT83426.1 asyd|OJJ63588.1 ater|EAU39031.1 atub|OJI90878.1 aver|OJI97345.1 awen|OJJ35306.1 azon|OJJ49809.1

Group3193: abra|OJJ73778.1 acar|OOG00934.1 acla|EAW07662.1 afis|EAW22679.1 afla|EED49960.1 afum|EAL90513.1 agla|OJJ79037.1 akaw|GAA88399.1 aluc|OJZ88277.1 anid|CBF88128.1 anig|EHA18022.1 aory|EIT83445.1 asyd|OJJ63587.1 ater|EAU39030.1 atub|OJI90877.1 aver|OJI97347.1 awen|OJJ35307.1 azon|OJJ49806.1

Group3194: abra|OJJ73781.1 acar|OOG00937.1 acla|EAW07666.1 afis|EAW22683.1 afla|EED49967.1 afum|EAL90509.1 agla|OJJ79035.1 akaw|GAA88396.1 aluc|OJZ88274.1 anid|CBF88119.1 anig|EHA18019.1 aory|EIT83437.1 asyd|OJJ63583.1 ater|EAU39026.1 atub|OJI90874.1 aver|OJI97351.1 awen|OJJ35317.1 azon|OJJ49799.1

Group3195: abra|OJJ73783.1 acar|OOG00939.1 acla|EAW07668.1 afis|EAW22685.1 afla|EED49969.1 afum|EAL90508.1 agla|OJJ79032.1 akaw|GAA88394.1 aluc|OJZ88272.1 anid|CBF88111.1 anig|EHA18017.1 aory|EIT83432.1 asyd|OJJ63580.1 ater|EAU39019.1 atub|OJI90872.1 aver|OJI97356.1 awen|OJJ35318.1 azon|OJJ49798.1

Group3196: abra|OJJ73784.1 acar|OOG00940.1 acla|EAW07671.1 afis|EAW22686.1 afla|EED49971.1 afum|EAL90507.1 agla|OJJ79031.1 akaw|GAA88393.1 aluc|OJZ88271.1 anid|CBF88109.1 anig|EHA18016.1

aory|EIT74696.1 asyd|OJJ63578.1 ater|EAU39021.1 atub|OJI90871.1 aver|OJI97357.1 awen|OJJ35320.1 azon|OJJ49796.1

Group3197: abra|OJJ73785.1 acar|OOG00941.1 acla|EAW07672.1 afis|EAW22687.1 afila|EED49972.1 afum|EAL90506.1 agla|OJJ79029.1 akaw|GAA88392.1 aluc|OJZ88270.1 anid|CBF88107.1 anig|EHA18014.1 aory|EIT74698.1 asyd|OJJ63577.1 ater|EAU39022.1 atub|OJI90870.1 aver|OJI97359.1 awen|OJJ35321.1 azon|OJJ49794.1

Group3198: abra|OJJ73786.1 acar|OOG00942.1 acla|EAW07673.1 afis|EAW22688.1 afila|EED49973.1 afum|EAL90505.1 agla|OJJ79028.1 akaw|GAA88391.1 aluc|OJZ88269.1 anid|CBF88106.1 anig|EHA18013.1 aory|EIT74642.1 asyd|OJJ63576.1 ater|EAU39023.1 atub|OJI90869.1 aver|OJI97360.1 awen|OJJ35322.1 azon|OJJ49793.1

Group3199: abra|OJJ73787.1 acar|OOF90345.1 acla|EAW07674.1 afis|EAW22689.1 afila|EED49974.1 afum|EAL90504.1 agla|OJJ79024.1 akaw|GAA88390.1 aluc|OJZ88267.1 anid|CBF88104.1 anig|EHA18012.1 aory|EIT74677.1 asyd|OJJ63575.1 ater|EAU39024.1 atub|OJI90867.1 aver|OJI97361.1 awen|OJJ35323.1 azon|OJJ49792.1

Group3200: abra|OJJ73791.1 acar|OOF90347.1 acla|EAW07680.1 afis|EAW22695.1 afila|EED49977.1 afum|EAL90498.1 agla|OJJ79021.1 akaw|GAA89410.1 aluc|OJZ88263.1 anid|CBF88098.1 anig|EHA18009.1 aory|EIT74603.1 asyd|OJJ63570.1 ater|EAU39015.1 atub|OJI90862.1 aver|OJI97364.1 awen|OJJ35325.1 azon|OJJ49789.1

Group3201: abra|OJJ73801.1 acar|OOG00957.1 acla|EAW07683.1 afis|EAW22698.1 afila|EED49984.1 afum|EAL90494.1 agla|OJJ79012.1 akaw|GAA89421.1 aluc|OJZ88252.1 anid|CBF88087.1 anig|EHA17994.1 aory|EIT74667.1 asyd|OJJ63563.1 ater|EAU39008.1 atub|OJI90850.1 aver|OJI97370.1 awen|OJJ35334.1 azon|OJJ49783.1

Group3202: abra|OJJ73804.1 acar|OOG00959.1 acla|EAW07676.1 afis|EAW22691.1 afila|EED49982.1 afum|EAL90501.1 agla|OJJ79016.1 akaw|GAA89423.1 aluc|OJZ88249.1 anid|CBF88090.1 anig|EHA17992.1 aory|EIT74721.1 asyd|OJJ63565.1 ater|EAU39010.1 atub|OJI90848.1 aver|OJI97368.1 awen|OJJ35333.1 azon|OJJ49785.1

Group3203: abra|OJJ73805.1 acar|OOG00960.1 acla|EAW07677.1 afis|EAW22692.1 afila|EED49980.1 afum|EBA27409.1 agla|OJJ79018.1 akaw|GAA89425.1 aluc|OJZ88247.1 anid|CBF88095.1 anig|EHA17991.1 aory|EIT74734.1 asyd|OJJ63566.1 ater|EAU39012.1 atub|OJI90847.1 aver|OJI97367.1 awen|OJJ35332.1 azon|OJJ49786.1

Group3204: abra|OJJ73806.1 acar|OOG00961.1 acla|EAW07694.1 afis|EAW22709.1 afila|EED49996.1 afum|EAL90483.1 agla|OJJ79001.1 akaw|GAA89426.1 aluc|OJZ88246.1 anid|CBF88064.1 anig|EHA17990.1 aory|EIT74673.1 asyd|OJJ63549.1 ater|EAU38992.1 atub|OJI90846.1 aver|OJI97385.1 awen|OJJ35346.1 azon|OJJ49771.1

Group3205: abra|OJJ73807.1 acar|OOG00963.1 acla|EAW07695.1 afis|EAW22712.1 afila|EED49997.1 afum|EAL90482.1 agla|OJJ79000.1 akaw|GAA89427.1 aluc|OJZ88243.1 anid|CBF88062.1 anig|EHA17989.1 aory|EIT74610.1 asyd|OJJ63548.1 ater|EAU38993.1 atub|OJI90845.1 aver|OJI97386.1 awen|OJJ35347.1 azon|OJJ49770.1

Group3206: abra|OJJ73816.1 acar|OOG00970.1 acla|EAW07703.1 afis|EAW22721.1 afila|EED50006.1 afum|EAL90474.1 agla|OJJ83682.1 akaw|GAA89435.1 aluc|OJZ88234.1 anid|CBF88036.1 anig|EHA17980.1 aory|EIT74720.1 asyd|OJJ63535.1 ater|EAU38983.1 atub|OJI90836.1 aver|OJI97397.1 awen|OJJ35415.1 azon|OJJ49760.1

Group3207: abra|OJJ73821.1 acar|OOG00973.1 acla|EAW07710.1 afis|EAW22726.1 afila|EED50012.1 afum|EAL90469.1 agla|OJJ83676.1 akaw|GAA89440.1 aluc|OJZ88227.1 anid|CBF88028.1 anig|EHA17975.1 aory|EIT74707.1 asyd|OJJ63529.1 ater|EAU38978.1 atub|OJI90828.1 aver|OJI97402.1 awen|OJJ35421.1 azon|OJJ49755.1

Group3208: abra|OJJ73830.1 acar|OOG00981.1 acla|EAW07725.1 afis|EAW22757.1 afila|EED50018.1 afum|EAL90442.2 agla|OJJ83666.1 akaw|GAA89448.1 aluc|OJZ88219.1 anid|CBF88015.1 anig|EHA17966.1 aory|EIT74656.1 asyd|OJJ63519.1 ater|EAU38962.1 atub|OJI90819.1 aver|OJI97411.1 awen|OJJ35429.1 azon|OJJ49747.1

Group3210: abra|OJJ73832.1 acar|OOG00983.1 acla|EAW07727.1 afis|EAW22759.1 afila|EED50020.1 afum|EAL90440.1 agla|OJJ83661.1 akaw|GAA89450.1 aluc|OJZ88217.1 anid|CBF88013.1 anig|EHA17964.1 aory|EIT74627.1 asyd|OJJ63517.1 ater|EAU38960.1 atub|OJI90817.1 aver|OJI97413.1 awen|OJJ35431.1 azon|OJJ49745.1

Group3211: abra|OJJ73833.1 acar|OOG00984.1 acla|EAW07728.1 afis|EAW22760.1 afila|EED50021.1 afum|EAL90439.1 agla|OJJ83660.1 akaw|GAA89451.1 aluc|OJZ88216.1 anid|CBF88011.1 anig|EHA17963.1 aory|EIT74690.1 asyd|OJJ63516.1 ater|EAU38959.1 atub|OJI90816.1 aver|OJI97414.1 awen|OJJ35433.1 azon|OJJ49744.1

Group3212: abra|OJJ73834.1 acar|OOG00985.1 acla|EAW07729.1 afis|EAW22761.1 afla|EED50022.1 afum|EAL90438.1 agla|OJJ83659.1 akaw|GAA89452.1 aluc|OJZ88215.1 anid|CBF88009.1 anig|EHA17962.1 aory|EIT74638.1 asyd|OJJ63515.1 ater|EAU38958.1 atub|OJI90815.1 aver|OJI97415.1 awen|OJJ35434.1 azon|OJJ49743.1

Group3213: abra|OJJ73836.1 acar|OOG00987.1 acla|EAW07731.1 afis|EAW22763.1 afla|EED50025.1 afum|EAL90436.2 agla|OJJ83657.1 akaw|GAA89454.1 aluc|OJZ88213.1 anid|CBF88005.1 anig|EHA17961.1 aory|EIT74679.1 asyd|OJJ63513.1 ater|EAU38956.1 atub|OJI90813.1 aver|OJI97417.1 awen|OJJ35436.1 azon|OJJ49741.1

Group3214: abra|OJJ73837.1 acar|OOG00988.1 acla|EAW07732.1 afis|EAW22764.1 afla|EED50026.1 afum|EAL90435.1 agla|OJJ83656.1 akaw|GAA89455.1 aluc|OJZ88212.1 anid|CBF88003.1 anig|EHA17960.1 aory|EIT74726.1 asyd|OJJ63509.1 ater|EAU38953.1 atub|OJI90812.1 aver|OJI97421.1 awen|OJJ38969.1 azon|OJJ49740.1

Group3215: abra|OJJ73838.1 acar|OOG00989.1 acla|EAW07733.1 afis|EAW22765.1 afla|EED50027.1 afum|EAL90434.1 agla|OJJ83655.1 akaw|GAA89456.1 aluc|OJZ88211.1 anid|CBF88001.1 anig|EHA17958.1 aory|EIT74637.1 asyd|OJJ63508.1 ater|EAU38952.1 atub|OJI90811.1 aver|OJI97422.1 awen|OJJ38968.1 azon|OJJ49738.1

Group3216: abra|OJJ73841.1 acar|OOG00992.1 acla|EAW07736.1 afis|EAW22772.1 afla|EED50031.1 afum|EAL90426.1 agla|OJJ83602.1 akaw|GAA89459.1 aluc|OJZ88207.1 anid|CBF87996.1 anig|EHA17955.1 aory|EIT74633.1 asyd|OJJ63505.1 ater|EAU38941.1 atub|OJI90808.1 aver|OJI97425.1 awen|OJJ38965.1 azon|OJJ49736.1

Group3217: abra|OJJ73842.1 acar|OOG00993.1 acla|EAW07737.1 afis|EAW22773.1 afla|EED50032.1 afum|EAL90425.1 agla|OJJ83603.1 akaw|GAA89460.1 aluc|OJZ88206.1 anid|CBF87994.1 anig|EHA17954.1 aory|EIT74732.1 asyd|OJJ63504.1 ater|EAU38940.1 atub|OJI90807.1 aver|OJI97426.1 awen|OJJ38964.1 azon|OJJ49735.1

Group3218: abra|OJJ73843.1 acar|OOG00994.1 acla|EAW07738.1 afis|EAW22774.1 afla|EED50033.1 afum|EAL90424.1 agla|OJJ83604.1 akaw|GAA89461.1 aluc|OJZ88205.1 anid|CBF87992.1 anig|EHA17953.1 aory|EIT74665.1 asyd|OJJ63503.1 ater|EAU38939.1 atub|OJI90806.1 aver|OJI97427.1 awen|OJJ38963.1 azon|OJJ49734.1

Group3219: abra|OJJ73844.1 acar|OOG00995.1 acla|EAW07739.1 afis|EAW22775.1 afla|EED50034.1 afum|EAL90423.1 agla|OJJ83605.1 akaw|GAA89462.1 aluc|OJZ88204.1 anid|CBF87991.1 anig|EHA17952.1 aory|EIT74686.1 asyd|OJJ63502.1 ater|EAU38938.1 atub|OJI90805.1 aver|OJI97428.1 awen|OJJ38962.1 azon|OJJ49733.1

Group3220: abra|OJJ73846.1 acar|OOG00997.1 acla|EAW07741.1 afis|EAW22777.1 afla|EED50037.1 afum|EAL90421.1 agla|OJJ83628.1 akaw|GAA89464.1 aluc|OJZ88202.1 anid|CBF87987.1 anig|EHA17950.1 aory|EIT74713.1 asyd|OJJ63500.1 ater|EAU38937.1 atub|OJI90802.1 aver|OJI97430.1 awen|OJJ38960.1 azon|OJJ49731.1

Group3221: abra|OJJ73848.1 acar|OOG00998.1 acla|EAW07742.1 afis|EAW22778.1 afla|EED50038.1 afum|EAL90420.1 agla|OJJ83632.1 akaw|GAA89465.1 aluc|OJZ88201.1 anid|CBF87983.1 anig|EHA17949.1 aory|EIT74616.1 asyd|OJJ63497.1 ater|EAU38936.1 atub|OJI90799.1 aver|OJI97432.1 awen|OJJ38959.1 azon|OJJ49730.1

Group3222: abra|OJJ73850.1 acar|OOG01000.1 acla|EAW07743.1 afis|EAW22780.1 afla|EED50041.1 afum|EAL90419.1 agla|OJJ83633.1 akaw|GAA89467.1 aluc|OJZ88199.1 anid|CBF87970.1 anig|EHA17947.1 aory|EIT74714.1 asyd|OJJ63494.1 ater|EAU38932.1 atub|OJI90797.1 aver|OJI97435.1 awen|OJJ38957.1 azon|OJJ49729.1

Group3223: abra|OJJ73851.1 acar|OOG01001.1 acla|EAW07745.1 afis|EAW22782.1 afla|EED50044.1 afum|EAL90417.1 agla|OJJ83644.1 akaw|GAA89468.1 aluc|OJZ88197.1 anid|CBF87972.1 anig|EHA17946.1 aory|EIT74643.1 asyd|OJJ63493.1 ater|EAU38930.1 atub|OJI90796.1 aver|OJI97436.1 awen|OJJ38955.1 azon|OJJ49727.1

Group3224: abra|OJJ73854.1 acar|OOG01002.1 acla|EAW07746.1 afis|EAW22783.1 afla|EED50045.1 afum|EAL90416.1 agla|OJJ83653.1 akaw|GAA89470.1 aluc|OJZ88194.1 anid|CBF87974.1 anig|EHA17945.1 aory|EIT74701.1 asyd|OJJ63492.1 ater|EAU38926.1 atub|OJI90793.1 aver|OJI97437.1 awen|OJJ38954.1 azon|OJJ49726.1

Group3225: abra|OJJ73861.1 acar|OOG01007.1 acla|EAW07751.1 afis|EAW22788.1 afla|EED50052.1 afum|EAL90411.1 agla|OJJ83588.1 akaw|GAA89481.1 aluc|OJZ88182.1 anid|CBF87963.1 anig|EHA17934.1 aory|EIT74670.1 asyd|OJJ63484.1 ater|EAU38922.1 atub|OJI90781.1 aver|OJI97445.1 awen|OJJ38946.1 azon|OJJ49718.1

Group3226: abra|OJJ73864.1 acar|OOF89914.1 acla|EAW07754.1 afis|EAW22791.1 afla|EED50058.1 afum|EAL90408.1 agla|OJJ83567.1 akaw|GAA89478.1 aluc|OJZ88185.1 anid|CBF87957.1 anig|EHA17936.1

aory|EIT74695.1 asyd|OJJ63481.1 ater|EAU38920.1 atub|OJI90784.1 aver|OJI97449.1 awen|OJJ38943.1 azon|OJJ49716.1

Group3227: abra|OJJ73867.1 acar|OOF89912.1 acla|EAW07755.1 afis|EAW22792.1 afla|EED50059.1 afum|EAL90407.2 agla|OJJ83568.1 akaw|GAA89475.1 aluc|OJZ88188.1 anid|CBF87955.1 anig|EHA17939.1 aory|EIT74728.1 asyd|OJJ63480.1 ater|EAU38919.1 atub|OJI90787.1 aver|OJI97450.1 awen|OJJ38941.1 azon|OJJ49715.1

Group3228: abra|OJJ73869.1 acar|OOG01012.1 acla|EAW07757.1 afis|EAW22794.1 afla|EED50062.1 afum|EAL90405.1 agla|OJJ83570.1 akaw|GAA89473.1 aluc|OJZ88190.1 anid|CBF87952.1 anig|EHA17941.1 aory|EIT74606.1 asyd|OJJ63478.1 ater|EAU38917.1 atub|OJI90789.1 aver|OJI97452.1 awen|OJJ38939.1 azon|OJJ49713.1

Group3229: abra|OJJ73874.1 acar|OOG01014.1 acla|EAW07759.1 afis|EAW22795.1 afla|EED50063.1 afum|EAL90404.1 agla|OJJ83571.1 akaw|GAA89486.1 aluc|OJZ88176.1 anid|CBF87950.1 anig|EHA17928.1 aory|EIT74699.1 asyd|OJJ63477.1 ater|EAU38915.1 atub|OJI90774.1 aver|OJI97453.1 awen|OJJ38938.1 azon|OJJ49712.1

Group3230: abra|OJJ73876.1 acar|OOG01016.1 acla|EAW07761.1 afis|EAW22797.1 afla|EED50066.1 afum|EAL90402.1 agla|OJJ83574.1 akaw|GAA89488.1 aluc|OJZ88173.1 anid|CBF87946.1 anig|EHA17926.1 aory|EIT74703.1 asyd|OJJ63475.1 ater|EAU38913.1 atub|OJI90771.1 aver|OJI97455.1 awen|OJJ38932.1 azon|OJJ49708.1

Group3231: abra|OJJ73881.1 acar|OOG01020.1 acla|EAW07763.1 afis|EAW22799.1 afla|EED50069.1 afum|EAL90400.1 agla|OJJ83576.1 akaw|GAA89492.1 aluc|OJZ88169.1 anid|CBF87936.1 anig|EHA17923.1 aory|EIT74640.1 asyd|OJJ63466.1 ater|EAU38910.1 atub|OJI90767.1 aver|OJI97466.1 awen|OJJ38930.1 azon|OJJ49706.1

Group3232: abra|OJJ73882.1 acar|OOG01021.1 acla|EAW07764.1 afis|EAW22800.1 afla|EED50070.1 afum|EAL90399.1 agla|OJJ83577.1 akaw|GAA89493.1 aluc|OJZ88168.1 anid|CBF87934.1 anig|EHA17922.1 aory|EIT74735.1 asyd|OJJ63465.1 ater|EAU38909.1 atub|OJI90766.1 aver|OJI97467.1 awen|OJJ38929.1 azon|OJJ49705.1

Group3233: abra|OJJ73883.1 acar|OOG01022.1 acla|EAW07765.1 afis|EAW22801.1 afla|EED50071.1 afum|EAL90398.1 agla|OJJ83578.1 akaw|GAA89494.1 aluc|OJZ88167.1 anid|CBF87932.1 anig|EHA17921.1 aory|EIT74619.1 asyd|OJJ63464.1 ater|EAU38908.1 atub|OJI90765.1 aver|OJI97468.1 awen|OJJ38928.1 azon|OJJ49704.1

Group3234: abra|OJJ73884.1 acar|OOG01023.1 acla|EAW07766.1 afis|EAW22802.1 afla|EED50072.1 afum|EAL90397.1 agla|OJJ83579.1 akaw|GAA89495.1 aluc|OJZ88166.1 anid|CBF87930.1 anig|EHA17920.1 aory|EIT74719.1 asyd|OJJ63463.1 ater|EAU38907.1 atub|OJI90764.1 aver|OJI97469.1 awen|OJJ38927.1 azon|OJJ49703.1

Group3235: abra|OJJ73886.1 acar|OOG01024.1 acla|EAW07768.1 afis|EAW22804.1 afla|EED50074.1 afum|EAL90395.1 agla|OJJ83581.1 akaw|GAA89497.1 aluc|OJZ88164.1 anid|CBF87926.1 anig|EHA17918.1 aory|EIT74660.1 asyd|OJJ63461.1 ater|EAU38905.1 atub|OJI90762.1 aver|OJI97471.1 awen|OJJ38924.1 azon|OJJ49701.1

Group3236: abra|OJJ73889.1 acar|OOG01027.1 acla|EAW07773.1 afis|EAW22809.1 afla|EED50078.1 afum|EAL90392.1 agla|OJJ83584.1 akaw|GAA89501.1 aluc|OJZ88160.1 anid|CBF87904.1 anig|EHA17915.1 aory|EIT74748.1 asyd|OJJ63457.1 ater|EAU38902.1 atub|OJI90759.1 aver|OJI97475.1 awen|OJJ38921.1 azon|OJJ49698.1

Group3237: abra|OJJ73890.1 acar|OOG01030.1 acla|EAW07774.1 afis|EAW22810.1 afla|EED50079.1 afum|EAL90391.1 agla|OJJ83585.1 akaw|GAA89502.1 aluc|OJZ88159.1 anid|CBF87906.1 anig|EHA17914.1 aory|EIT74744.1 asyd|OJJ63456.1 ater|EAU38901.1 atub|OJI90758.1 aver|OJI97476.1 awen|OJJ38920.1 azon|OJJ49697.1

Group3238: abra|OJJ73891.1 acar|OOG01029.1 acla|EAW07775.1 afis|EAW22811.1 afla|EED50080.1 afum|EAL90390.1 agla|OJJ83566.1 akaw|GAA89503.1 aluc|OJZ88158.1 anid|CBF87908.1 anig|EHA17913.1 aory|EIT74652.1 asyd|OJJ63455.1 ater|EAU38900.1 atub|OJI90757.1 aver|OJI97477.1 awen|OJJ38915.1 azon|OJJ49696.1

Group3239: abra|OJJ73897.1 acar|OOG01034.1 acla|EAW07778.1 afis|EAW22815.1 afla|EED50088.1 afum|EAL90386.1 agla|OJJ83527.1 akaw|GAA89507.1 aluc|OJZ88149.1 anid|CBF87915.1 anig|EHA17910.1 aory|EIT74671.1 asyd|OJJ63448.1 ater|EAU38896.1 atub|OJI90752.1 aver|OJI97486.1 awen|OJJ38913.1 azon|OJJ49693.1

Group3240: abra|OJJ73901.1 acar|OOG01036.1 acla|EAW07780.1 afis|EAW22816.1 afla|EED50089.1 afum|EAL90385.1 agla|OJJ83524.1 akaw|GAA89508.1 aluc|OJZ88145.1 anid|CBF87918.1 anig|EHA17908.1 aory|EIT74605.1 asyd|OJJ63447.1 ater|EAU38895.1 atub|OJI90749.1 aver|OJI97489.1 awen|OJJ38911.1 azon|OJJ49692.1



Group3241: abra|OJJ73902.1 acar|OOG01037.1 acla|EAW07781.1 afis|EAW22817.1 afla|EED50090.1 afum|EAL90384.1 agla|OJJ83521.1 akaw|GAA89509.1 aluc|OJZ88144.1 anid|CBF87920.1 anig|EHA17907.1 aory|EIT74746.1 asyd|OJJ63446.1 ater|EAU38894.1 atub|OJI90748.1 aver|OJI97490.1 awen|OJJ38910.1 azon|OJJ49691.1

Group3242: abra|OJJ73904.1 acar|OOG01038.1 acla|EAW07783.1 afis|EAW22819.1 afla|EED50092.1 afum|EAL90382.1 agla|OJJ83519.1 akaw|GAA89511.1 aluc|OJZ88142.1 anid|CBF87899.1 anig|EHA17905.1 aory|EIT74751.1 asyd|OJJ63444.1 ater|EAU38891.1 atub|OJI90746.1 aver|OJI97492.1 awen|OJJ38908.1 azon|OJJ49689.1

Group3243: abra|OJJ73908.1 acar|OOG01041.1 acla|EAW07786.1 afis|EAW22822.1 afla|EED50097.1 afum|EAL90378.2 agla|OJJ83516.1 akaw|GAA89515.1 aluc|OJZ88139.1 anid|CBF87894.1 anig|EHA17903.1 aory|EIT74681.1 asyd|OJJ63441.1 ater|EAU38888.1 atub|OJI90742.1 aver|OJI97495.1 awen|OJJ38905.1 azon|OJJ49686.1

Group3244: abra|OJJ73909.1 acar|OOG01042.1 acla|EAW07787.1 afis|EAW22823.1 afla|EED50098.1 afum|EAL90377.1 agla|OJJ83515.1 akaw|GAA89516.1 aluc|OJZ88138.1 anid|CBF87892.1 anig|EHA17902.1 aory|EIT74745.1 asyd|OJJ63440.1 ater|EAU38887.1 atub|OJI90741.1 aver|OJI97496.1 awen|OJJ38904.1 azon|OJJ49685.1

Group3245: abra|OJJ73910.1 acar|OOG01043.1 acla|EAW07788.1 afis|EAW22824.1 afla|EED50099.1 afum|EAL90376.1 agla|OJJ83514.1 akaw|GAA89517.1 aluc|OJZ88137.1 anid|CBF87890.1 anig|EHA17901.1 aory|EIT74620.1 asyd|OJJ63439.1 ater|EAU38886.1 atub|OJI90740.1 aver|OJI97497.1 awen|OJJ38903.1 azon|OJJ49684.1

Group3246: abra|OJJ73912.1 acar|OOG01044.1 acla|EAW07789.1 afis|EAW22825.1 afla|EED50100.1 afum|EAL90375.2 agla|OJJ83513.1 akaw|GAA89518.1 aluc|OJZ88136.1 anid|CBF87888.1 anig|EHA17899.1 aory|EIT74685.1 asyd|OJJ63438.1 ater|EAU38885.1 atub|OJI90739.1 aver|OJI97499.1 awen|OJJ38902.1 azon|OJJ49683.1

Group3247: abra|OJJ73915.1 acar|OOG01047.1 acla|EAW07791.1 afis|EAW22829.1 afla|EED50104.1 afum|EAL90373.2 agla|OJJ83510.1 akaw|GAA89521.1 aluc|OJZ88133.1 anid|CBF87886.1 anig|EHA17897.1 aory|EIT74692.1 asyd|OJJ63437.1 ater|EAU38882.1 atub|OJI90737.1 aver|OJI97500.1 awen|OJJ38899.1 azon|OJJ49680.1

Group3248: abra|OJJ73916.1 acar|OOG01048.1 acla|EAW07792.1 afis|EAW22830.1 afla|EED50105.1 afum|EAL90372.2 agla|OJJ83509.1 akaw|GAA89522.1 aluc|OJZ88131.1 anid|CBF87883.1 anig|EHA17896.1 aory|EIT74639.1 asyd|OJJ63435.1 ater|EAU38881.1 atub|OJI90736.1 aver|OJI97502.1 awen|OJJ38898.1 azon|OJJ49679.1

Group3249: abra|OJJ73920.1 acar|OOG01051.1 acla|EAW07797.1 afis|EAW22834.1 afla|EED50109.1 afum|EAL90368.1 agla|OJJ83505.1 akaw|GAA89527.1 aluc|OJZ88126.1 anid|CBF87876.1 anig|EHA17892.1 aory|EIT74609.1 asyd|OJJ63432.1 ater|EAU38875.1 atub|OJI90733.1 aver|OJI97505.1 awen|OJJ38890.1 azon|OJJ49676.1

Group3250: abra|OJJ73923.1 acar|OOG01056.1 acla|EAW07800.1 afis|EAW22837.1 afla|EED50112.1 afum|EAL90365.2 agla|OJJ83504.1 akaw|GAA89530.1 aluc|OJZ88120.1 anid|CBF87867.1 anig|EHA17889.1 aory|EIT74684.1 asyd|OJJ63428.1 ater|EAU38873.1 atub|OJI90730.1 aver|OJI97509.1 awen|OJJ38887.1 azon|OJJ49675.1

Group3251: abra|OJJ73924.1 acar|OOG01057.1 acla|EAW07801.1 afis|EAW22838.1 afla|EED50113.1 afum|EAL90364.2 agla|OJJ83503.1 akaw|GAA89531.1 aluc|OJZ88119.1 anid|CBF87865.1 anig|EHA17888.1 aory|EIT74621.1 asyd|OJJ63427.1 ater|EAU38872.1 atub|OJI90729.1 aver|OJI97510.1 awen|OJJ38885.1 azon|OJJ49674.1

Group3252: abra|OJJ73926.1 acar|OOG01058.1 acla|EAW07803.1 afis|EAW22840.1 afla|EED50115.1 afum|EAL90363.1 agla|OJJ83501.1 akaw|GAA89533.1 aluc|OJZ88117.1 anid|CBF87861.1 anig|EHA17887.1 aory|EIT74702.1 asyd|OJJ63425.1 ater|EAU38870.1 atub|OJI90727.1 aver|OJI97512.1 awen|OJJ38883.1 azon|OJJ49672.1

Group3253: abra|OJJ73927.1 acar|OOG01060.1 acla|EAW07804.1 afis|EAW22841.1 afla|EED50116.1 afum|EAL90362.2 agla|OJJ83500.1 akaw|GAA89534.1 aluc|OJZ88116.1 anid|CBF87860.1 anig|EHA17886.1 aory|EIT74608.1 asyd|OJJ63424.1 ater|EAU38869.1 atub|OJI90725.1 aver|OJI97513.1 awen|OJJ38882.1 azon|OJJ49671.1

Group3254: abra|OJJ73928.1 acar|OOG01061.1 acla|EAW07805.1 afis|EAW22842.1 afla|EED50117.1 afum|EAL90361.1 agla|OJJ83496.1 akaw|GAA89535.1 aluc|OJZ88115.1 anid|CBF87858.1 anig|EHA17885.1 aory|EIT74650.1 asyd|OJJ63423.1 ater|EAU38868.1 atub|OJI90724.1 aver|OJI97514.1 awen|OJJ38881.1 azon|OJJ49670.1

Group3255: abra|OJJ73930.1 acar|OOG01062.1 acla|EAW07808.1 afis|EAW22845.1 afla|EED50120.1 afum|EAL90357.1 agla|OJJ83492.1 akaw|GAA89538.1 aluc|OJZ88112.1 anid|CBF87846.1 anig|EHA17882.1

aory|EIT74689.1 asyd|OJJ63421.1 ater|EAU38865.1 atub|OJI90720.1 aver|OJI97517.1 awen|OJJ38878.1 azon|OJJ49667.1

Group3256: abra|OJJ73931.1 acar|OOG01063.1 acla|EAW07809.1 afis|EAW22846.1 afla|EED50121.1 afum|EAL90356.1 agla|OJJ83485.1 akaw|GAA89539.1 aluc|OJZ88111.1 anid|CBF87848.1 anig|EHA17881.1 aory|EIT74731.1 asyd|OJJ63420.1 ater|EAU38864.1 atub|OJI90719.1 aver|OJI97518.1 awen|OJJ38877.1 azon|OJJ49666.1

Group3257: abra|OJJ73938.1 acar|OOG01069.1 afis|EAW22850.1 afla|EED50125.1 afum|EAL90350.1 agla|OJJ83473.1 akaw|GAA89543.1 aluc|OJZ88106.1 anid|CBF87855.1 anig|EHA17875.1 aory|EIT74705.1 asyd|OJJ63416.1 ater|EAU38859.1 atub|OJI90714.1 aver|OJI97522.1 awen|OJJ38871.1 azon|OJJ49663.1 acla|EAW07814.1

Group3258: abra|OJJ73939.1 acar|OOG01068.1 acla|EAW07816.1 afis|EAW22851.1 afla|EED50126.1 afum|EAL90349.1 agla|OJJ83471.1 akaw|GAA89544.1 aluc|OJZ88105.1 anid|CBF87841.1 anig|EHA17874.1 aory|EIT74661.1 asyd|OJJ63414.1 ater|EAU38858.1 atub|OJI90713.1 aver|OJI97524.1 awen|OJJ38867.1 azon|OJJ49661.1

Group3259: abra|OJJ73944.1 acar|OOG01072.1 acla|EAW07817.1 afis|EAW22852.1 afla|EED50132.1 afum|EAL90348.1 agla|OJJ83469.1 akaw|GAA89549.1 aluc|OJZ88100.1 anid|CBF87839.1 anig|EHA17869.1 aory|EIT74662.1 asyd|OJJ63413.1 ater|EAU38857.1 atub|OJI90708.1 aver|OJI97525.1 awen|OJJ38866.1 azon|OJJ49660.1

Group3260: abra|OJJ73945.1 acar|OOG01073.1 acla|EAW07818.1 afis|EAW22853.1 afla|EED50133.1 afum|EAL90347.1 agla|OJJ83468.1 akaw|GAA89550.1 aluc|OJZ88099.1 anid|CBF87838.1 anig|EHA17868.1 aory|EIT74757.1 asyd|OJJ63412.1 ater|EAU38856.1 atub|OJI90707.1 aver|OJI97526.1 awen|OJJ38865.1 azon|OJJ49659.1

Group3261: abra|OJJ73946.1 acar|OOG01074.1 acla|EAW07819.1 afis|EAW22854.1 afla|EED50134.1 afum|EAL90346.1 agla|OJJ83467.1 akaw|GAA89551.1 aluc|OJZ88098.1 anid|CBF87836.1 anig|EHA17867.1 aory|EIT74630.1 asyd|OJJ63410.1 atub|OJI90706.1 aver|OJI97527.1 awen|OJJ38864.1 azon|OJJ49658.1 ater|EAU38807.1

Group3262: abra|OJJ73949.1 acar|OOG01077.1 acla|EAW07823.1 afis|EAW22859.1 afla|EED50137.1 afum|EAL90341.1 agla|OJJ83465.1 akaw|GAA89554.1 aluc|OJZ88095.1 anid|CBF87833.1 anig|EHA17865.1 aory|EIT74739.1 asyd|OJJ63408.1 ater|EAU38809.1 atub|OJI90703.1 aver|OJI97529.1 awen|OJJ38861.1 azon|OJJ49655.1

Group3263: abra|OJJ73952.1 acar|OOG01080.1 acla|EAW07826.1 afis|EAW22862.1 afla|EED50146.1 afum|EAL90338.1 agla|OJJ83462.1 akaw|GAA89557.1 aluc|OJZ88092.1 anid|CBF87832.1 anig|EHA17862.1 aory|EIT74749.1 asyd|OJJ63407.1 ater|EAU38816.1 atub|OJI90700.1 aver|OJI97530.1 awen|OJJ38858.1 azon|OJJ49656.1

Group3264: abra|OJJ73959.1 acar|OOG01086.1 acla|EAW07828.1 afis|EAW22864.1 afla|EED50148.1 afum|EAL90336.1 agla|OJJ83460.1 akaw|GAA89562.1 aluc|OJZ88086.1 anid|CBF87829.1 anig|EHA17857.1 aory|EIT74755.1 asyd|OJJ63405.1 ater|EAU38824.1 atub|OJI90695.1 aver|OJI97531.1 awen|OJJ38856.1 azon|OJJ49654.1

Group3265: abra|OJJ73961.1 acar|OOG01087.1 acla|EAW07830.1 afis|EAW22866.1 afla|EED50150.1 afum|EAL90333.1 agla|OJJ83458.1 akaw|GAA89564.1 aluc|OJZ88084.1 anid|CBF87827.1 anig|EHA17855.1 aory|EIT74659.1 asyd|OJJ63403.1 ater|EAU38827.1 atub|OJI90693.1 aver|OJI97533.1 awen|OJJ38854.1 azon|OJJ49652.1

Group3266: abra|OJJ73962.1 acar|OOG01089.1 acla|EAW07831.1 afis|EAW22867.1 afla|EED50151.1 afum|EAL90332.1 agla|OJJ83457.1 akaw|GAA89565.1 aluc|OJZ88083.1 anid|CBF87826.1 anig|EHA17854.1 aory|EIT74722.1 asyd|OJJ63402.1 ater|EAU38828.1 atub|OJI90692.1 aver|OJI97534.1 awen|OJJ38853.1 azon|OJJ49651.1

Group3267: abra|OJJ73964.1 acar|OOG01090.1 acla|EAW07834.1 afis|EAW22871.1 afla|EED50154.1 afum|EAL90327.1 agla|OJJ83452.1 akaw|GAA89567.1 aluc|OJZ88080.1 anid|CBF87822.1 anig|EHA17852.1 aory|EIT76938.1 asyd|OJJ63400.1 ater|EAU38835.1 atub|OJI90689.1 aver|OJI97537.1 awen|OJJ38851.1 azon|OJJ49647.1

Group3268: abra|OJJ73967.1 acar|OOG01093.1 acla|EAW07837.1 afis|EAW22874.1 afla|EED50157.1 afum|EAL90324.1 agla|OJJ83443.1 akaw|GAA89570.1 aluc|OJZ88077.1 anid|CBF87816.1 anig|EHA17849.1 aory|EIT76898.1 asyd|OJJ63395.1 ater|EAU38838.1 atub|OJI90686.1 aver|OJI97541.1 awen|OJJ38848.1 azon|OJJ49644.1

Group3269: abra|OJJ73971.1 acar|OOG01097.1 acla|EAW07842.1 afis|EAW22878.1 afla|EED50183.1 afum|EAL90321.1 agla|OJJ83446.1 akaw|GAA89574.1 aluc|OJZ88073.1 anid|CBF87811.1 anig|EHA17846.1 aory|EIT77380.1 asyd|OJJ63390.1 ater|EAU38842.1 atub|OJI90682.1 aver|OJI97545.1 awen|OJJ38844.1 azon|OJJ49641.1

Group3270: abra|OJJ73976.1 acar|OOG01103.1 acla|EAW07847.1 afis|EAW22883.1 afla|EED50176.1 afum|EAL90316.1 agla|OJJ83441.1 akaw|GAA89579.1 aluc|OJZ88068.1 anid|CBF87803.1 anig|EHA17841.1 aory|EIT72282.1 asyd|OJJ63384.1 ater|EAU38846.1 atub|OJI90677.1 aver|OJI97551.1 awen|OJJ38839.1 azon|OJJ49636.1

Group3271: abra|OJJ73978.1 acar|OOG01104.1 acla|EAW07849.1 afis|EAW22885.1 afla|EED50174.1 afum|EAL90313.1 agla|OJJ83438.1 akaw|GAA89581.1 aluc|OJZ88066.1 anid|CBF87801.1 anig|EHA17839.1 aory|EIT72285.1 asyd|OJJ63382.1 ater|EAU35978.1 atub|OJI90675.1 aver|OJI97553.1 awen|OJJ38837.1 azon|OJJ49634.1

Group3272: abra|OJJ73980.1 acar|OOG01107.1 acla|EAW07851.1 afis|EAW22887.1 afla|EED50172.1 afum|EAL90311.1 agla|OJJ83436.1 akaw|GAA89583.1 aluc|OJZ88064.1 anid|CBF87798.1 anig|EHA17837.1 aory|EIT72283.1 asyd|OJJ63380.1 ater|EAU35985.1 atub|OJI90673.1 aver|OJI97555.1 awen|OJJ38835.1 azon|OJJ49632.1

Group3273: abra|OJJ73982.1 acar|OOG01109.1 acla|EAW07854.1 afis|EAW22890.1 afla|EED54859.1 afum|EAL90308.1 agla|OJJ83420.1 akaw|GAA89586.1 aluc|OJZ88062.1 anid|CBF87791.1 anig|EHA17835.1 aory|EIT79448.1 asyd|OJJ63377.1 ater|EAU35982.1 atub|OJI90671.1 aver|OJI97569.1 awen|OJJ38831.1 azon|OJJ49630.1

Group3274: abra|OJJ73983.1 acar|OOG01110.1 acla|EAW07855.1 afis|EAW22891.1 afla|EED54860.1 afum|EAL90307.1 agla|OJJ83407.1 akaw|GAA89587.1 aluc|OJZ88061.1 anid|CBF87790.1 anig|EHA17834.1 aory|EIT79392.1 asyd|OJJ63376.1 ater|EAU36000.1 atub|OJI90670.1 aver|OJI97570.1 awen|OJJ38830.1 azon|OJJ49629.1

Group3275: abra|OJJ73986.1 acar|OOG01111.1 acla|EAW07857.1 afis|EAW22893.1 afla|EED54862.1 afum|EAL90305.2 agla|OJJ83410.1 akaw|GAA87469.1 aluc|OJZ88059.1 anid|CBF87783.1 anig|EHA17831.1 aory|EIT79335.1 asyd|OJJ63374.1 ater|EAU35990.1 atub|OJI90667.1 aver|OJI97572.1 awen|OJJ38827.1 azon|OJJ49627.1

Group3276: abra|OJJ73989.1 acar|OOG01115.1 acla|EAW07860.1 afis|EAW22895.1 afla|EED54864.1 afum|EAL90303.1 agla|OJJ83415.1 akaw|GAA87472.1 aluc|OJZ88056.1 anid|CBF74977.1 anig|EHA17828.1 aory|EIT79412.1 asyd|OJJ60090.1 ater|EAU35987.1 atub|OJI90664.1 aver|OJJ04177.1 awen|OJJ38823.1 azon|OJJ49622.1

Group3277: abra|OJJ73991.1 acar|OOG01117.1 acla|EAW07862.1 afis|EAW22897.1 afla|EED54868.1 afum|EAL90301.1 agla|OJJ83417.1 akaw|GAA87474.1 aluc|OJZ88054.1 anid|CBF87775.1 anig|EHA17826.1 aory|EIT79359.1 asyd|OJJ63369.1 ater|EAU35981.1 atub|OJI90662.1 aver|OJI97577.1 awen|OJJ38820.1 azon|OJJ49620.1

Group3279: abra|OJJ73993.1 acar|OOG01118.1 acla|EAW07864.1 afis|EAW22899.1 afla|EED54870.1 afum|EAL90298.1 agla|OJJ83392.1 akaw|GAA87476.1 aluc|OJZ88052.1 anid|CBF87771.1 anig|EHA17824.1 aory|EIT79377.1 asyd|OJJ63367.1 ater|EAU36002.1 atub|OJI90660.1 aver|OJI97579.1 awen|OJJ38731.1 azon|OJJ49618.1

Group3280: abra|OJJ74000.1 acar|OOG01121.1 acla|EAW07866.1 afis|EAW22901.1 afla|EED54872.1 afum|EAL90296.1 agla|OJJ83389.1 akaw|GAA87482.1 aluc|OJZ88043.1 anid|CBF87767.1 anig|EHA17816.1 aory|EIT79383.1 asyd|OJJ63365.1 ater|EAU36006.1 atub|OJI90650.1 aver|OJI97582.1 awen|OJJ38729.1 azon|OJJ49615.1

Group3281: abra|OJJ74002.1 acar|OOG01122.1 acla|EAW07867.1 afis|EAW22902.1 afla|EED54873.1 afum|EAL90295.1 agla|OJJ83388.1 akaw|GAA87483.1 aluc|OJZ88042.1 anid|CBF87766.1 anig|EHA17815.1 aory|EIT79350.1 asyd|OJJ63364.1 ater|EAU36007.1 atub|OJI90649.1 aver|OJI97583.1 awen|OJJ38728.1 azon|OJJ49614.1

Group3282: abra|OJJ74003.1 acar|OOG01124.1 acla|EAW07868.1 afis|EAW22903.1 afla|EED54874.1 afum|EAL90294.1 agla|OJJ83387.1 akaw|GAA87484.1 aluc|OJZ88041.1 anid|CBF87764.1 anig|EHA17814.1 aory|EIT79433.1 asyd|OJJ63363.1 ater|EAU36010.1 atub|OJI90648.1 aver|OJI97584.1 awen|OJJ38727.1 azon|OJJ49613.1

Group3283: abra|OJJ74016.1 acar|OOG01137.1 acla|EAW07870.1 afis|EAW22905.1 afla|EED54897.1 afum|EAL90292.1 agla|OJJ83384.1 akaw|GAA87498.1 aluc|OJZ88024.1 anid|CBF87713.1 anig|EHA17801.1 aory|EIT80309.1 asyd|OJJ63338.1 ater|EAU36034.1 atub|OJI90632.1 aver|OJI97623.1 awen|OJJ38725.1 azon|OJJ49609.1

Group3284: abra|OJJ74017.1 acar|OOG01138.1 acla|EAW07871.1 afis|EAW22906.1 afla|EED54898.1 afum|EAL90291.1 agla|OJJ83383.1 akaw|GAA87499.1 aluc|OJZ88022.1 anid|CBF87712.1 anig|EHA17800.1 aory|EIT80293.1 asyd|OJJ63337.1 ater|EAU36033.1 atub|OJI90631.1 aver|OJI97625.1 awen|OJJ38724.1 azon|OJJ49608.1

Group3285: abra|OJJ74020.1 acar|OOG01139.1 acla|EAW07874.1 afis|EAW22909.1 afla|EED54901.1 afum|EAL90288.1 agla|OJJ83380.1 akaw|GAA87502.1 aluc|OJZ88019.1 anid|CBF87705.1 anig|EHA17798.1

aory|EIT80370.1 asyd|OJJ63332.1 ater|EAU36030.1 atub|OJI90628.1 aver|OJI97630.1 awen|OJJ38656.1 azon|OJJ49605.1

Group3286: abra|OJJ74021.1 acar|OOG01140.1 acla|EAW07875.1 afis|EAW22910.1 afla|EED54902.1 afum|EAL90287.1 agla|OJJ83379.1 akaw|GAA87503.1 aluc|OJZ88018.1 anid|CBF87703.1 anig|EHA17797.1 aory|EIT80365.1 asyd|OJJ63331.1 ater|EAU36029.1 atub|OJI90627.1 aver|OJI97631.1 awen|OJJ38655.1 azon|OJJ49604.1

Group3287: abra|OJJ74022.1 acar|OOG01141.1 acla|EAW07876.1 afis|EAW22911.1 afla|EED54904.1 afum|EAL90286.1 agla|OJJ83378.1 akaw|GAA87505.1 aluc|OJZ88015.1 anid|CBF87694.1 anig|EHA17796.1 aory|EIT80313.1 asyd|OJJ63326.1 ater|EAU36028.1 atub|OJI90625.1 aver|OJI97636.1 awen|OJJ38654.1 azon|OJJ49603.1

Group3288: abra|OJJ74023.1 acar|OOG01142.1 acla|EAW07877.1 afis|EAW22912.1 afla|EED54905.1 afum|EAL90285.1 agla|OJJ83377.1 akaw|GAA87504.1 aluc|OJZ88017.1 anid|CBF87695.1 anig|EHA17795.1 aory|EIT80317.1 asyd|OJJ63327.1 ater|EAU36027.1 atub|OJI90626.1 aver|OJI97635.1 awen|OJJ38653.1 azon|OJJ49602.1

Group3289: abra|OJJ74024.1 acar|OOG01143.1 acla|EAW07878.1 afis|EAW22913.1 afla|EED54906.1 afum|EAL90284.1 agla|OJJ83376.1 akaw|GAA87506.1 aluc|OJZ88014.1 anid|CBF87699.1 anig|EHA17794.1 aory|EIT80324.1 asyd|OJJ63329.1 ater|EAU36026.1 atub|OJI90623.1 aver|OJI97633.1 awen|OJJ38652.1 azon|OJJ49601.1

Group3290: abra|OJJ74027.1 acar|OOG01146.1 acla|EAW07879.1 afis|EAW22914.1 afla|EED54907.1 afum|EAL90283.1 agla|OJJ83375.1 akaw|GAA87510.1 aluc|OJZ88010.1 anid|CBF87697.1 anig|EHA17790.1 aory|EIT80315.1 asyd|OJJ63328.1 ater|EAU30708.1 atub|OJI90619.1 aver|OJI97634.1 awen|OJJ38651.1 azon|OJJ49599.1

Group3291: abra|OJJ74029.1 acar|OOG01147.1 acla|EAW07880.1 afis|EAW22915.1 afla|EED54911.1 afum|EAL90282.1 agla|OJJ83373.1 akaw|GAA87512.1 aluc|OJZ88008.1 anid|CBF87690.1 anig|EHA17788.1 aory|EIT80322.1 asyd|OJJ63325.1 ater|EAU30707.1 atub|OJI90617.1 aver|OJI97637.1 awen|OJJ38649.1 azon|OJJ49595.1

Group3292: abra|OJJ74032.1 acar|OOG01151.1 acla|EAW07883.1 afis|EAW22918.1 afla|EED54915.1 afum|EAL90279.1 agla|OJJ83371.1 akaw|GAA87516.1 aluc|OJZ88005.1 anid|CBF87687.1 anig|EHA17786.1 aory|EIT80289.1 asyd|OJJ63320.1 ater|EAU30705.1 atub|OJI90613.1 aver|OJI97639.1 awen|OJJ38646.1 azon|OJJ49588.1

Group3293: abra|OJJ74033.1 acar|OOG01152.1 acla|EAW07884.1 afis|EAW22919.1 afla|EED54916.1 afum|EAL90278.1 agla|OJJ83369.1 akaw|GAA87517.1 aluc|OJZ88004.1 anid|CBF87685.1 anig|EHA17785.1 aory|EIT80336.1 asyd|OJJ63319.1 ater|EAU30704.1 atub|OJI90612.1 aver|OJI97640.1 awen|OJJ38645.1 azon|OJJ49587.1

Group3294: abra|OJJ74035.1 acla|EAW07885.1 afis|EAW22920.1 afla|EED54917.1 afum|EAL90277.1 agla|OJJ83368.1 akaw|GAA87518.1 anid|CBF87683.1 aory|EIT80285.1 asyd|OJJ63318.1 ater|EAU30703.1 aver|OJI97641.1 awen|OJJ38644.1 azon|OJJ49586.1 acar|OOG01153.1 aluc|OJZ88003.1 anig|EHA17784.1 atub|OJI90611.1

Group3295: abra|OJJ74036.1 acar|OOG01155.1 acla|EAW07886.1 afis|EAW22921.1 afla|EED54918.1 afum|EAL90276.1 agla|OJJ83367.1 akaw|GAA87519.1 aluc|OJZ88000.1 anid|CBF87681.1 anig|EHA17782.1 aory|EIT80300.1 asyd|OJJ63317.1 ater|EAU30702.1 atub|OJI90609.1 aver|OJI97642.1 awen|OJJ38643.1 azon|OJJ49585.1

Group3296: abra|OJJ74037.1 acar|OOG01156.1 acla|EAW07887.1 afis|EAW22922.1 afla|EED54919.1 afum|EAL90275.1 agla|OJJ83366.1 akaw|GAA87520.1 aluc|OJZ87999.1 anid|CBF87680.1 anig|EHA17781.1 aory|EIT80390.1 asyd|OJJ63316.1 ater|EAU30701.1 atub|OJI90608.1 aver|OJI97643.1 awen|OJJ38642.1 azon|OJJ49584.1

Group3297: abra|OJJ74038.1 acar|OOG01157.1 acla|EAW07888.1 afis|EAW22923.1 afla|EED54920.1 afum|EAL90274.1 agla|OJJ83365.1 akaw|GAA87521.1 aluc|OJZ87998.1 anid|CBF87678.1 anig|EHA17780.1 aory|EIT80297.1 asyd|OJJ63315.1 ater|EAU30700.1 atub|OJI90607.1 aver|OJI97644.1 awen|OJJ38641.1 azon|OJJ49583.1

Group3298: abra|OJJ74039.1 acar|OOG01158.1 acla|EAW07889.1 afis|EAW22924.1 afla|EED54921.1 afum|EAL90273.1 agla|OJJ83364.1 akaw|GAA87522.1 aluc|OJZ87997.1 anid|CBF87676.1 anig|EHA17779.1 aory|EIT80292.1 asyd|OJJ63314.1 ater|EAU30699.1 atub|OJI90606.1 aver|OJI97645.1 awen|OJJ38640.1 azon|OJJ49582.1

Group3299: abra|OJJ74040.1 acar|OOG01159.1 acla|EAW07890.1 afis|EAW22925.1 afla|EED54922.1 afum|EAL90272.1 agla|OJJ83363.1 akaw|GAA87523.1 aluc|OJZ87996.1 anid|CBF87674.1 anig|EHA17778.1 aory|EIT80341.1 asyd|OJJ63313.1 ater|EAU30698.1 atub|OJI90605.1 aver|OJI97646.1 awen|OJJ38639.1 azon|OJJ49581.1

Group3300: abra|OJJ74043.1 acar|OOG01161.1 acla|EAW07892.1 afis|EAW22927.1 afla|EED54924.1 afum|EAL90270.1 agla|OJJ83361.1 akaw|GAA87525.1 aluc|OJZ87994.1 anid|CBF87671.1 anig|EHA17776.1 aory|EIT80287.1 asyd|OJJ63311.1 ater|EAU30696.1 atub|OJI90603.1 aver|OJI97648.1 awen|OJJ38637.1 azon|OJJ49579.1

Group3301: abra|OJJ74045.1 acar|OOG01164.1 acla|EAW07895.1 afis|EAW22930.1 afla|EED58123.1 afum|EAL90267.1 agla|OJJ83358.1 akaw|GAA87528.1 aluc|OJZ87990.1 anid|CBF87667.1 anig|EHA17773.1 aory|EIT79163.1 asyd|OJJ63308.1 ater|EAU30694.1 atub|OJI90600.1 aver|OJI97651.1 awen|OJJ38634.1 azon|OJJ49576.1

Group3302: abra|OJJ74048.1 acar|OOF89921.1 acla|EAW07897.1 afis|EAW22932.1 afla|EED58126.1 afum|EAL90264.1 agla|OJJ83355.1 akaw|GAA87530.1 aluc|OJZ87987.1 anid|CBF87662.1 anig|EHA17770.1 aory|EIT79157.1 asyd|OJJ63305.1 ater|EAU30692.1 atub|OJI90597.1 aver|OJI97654.1 awen|OJJ38631.1 azon|OJJ49573.1

Group3303: abra|OJJ74049.1 acar|OOF89922.1 acla|EAW07898.1 afis|EAW22934.1 afla|EED58127.1 afum|EAL90262.1 agla|OJJ83354.1 akaw|GAA87531.1 aluc|OJZ87986.1 anid|CBF87661.1 anig|EHA17769.1 aory|EIT79153.1 asyd|OJJ63304.1 ater|EAU30691.1 atub|OJI90596.1 aver|OJI97655.1 awen|OJJ38630.1 azon|OJJ49572.1

Group3304: abra|OJJ74050.1 acar|OOF89923.1 acla|EAW07899.1 afis|EAW22935.1 afla|EED58128.1 afum|EAL90261.1 agla|OJJ83353.1 akaw|GAA87532.1 aluc|OJZ87985.1 anid|CBF87659.1 anig|EHA17768.1 aory|EIT79137.1 asyd|OJJ63303.1 ater|EAU30690.1 atub|OJI90595.1 aver|OJI97656.1 awen|OJJ38629.1 azon|OJJ49571.1

Group3305: abra|OJJ74053.1 acar|OOG01166.1 acla|EAW07901.1 afis|EAW22938.1 afla|EED58131.1 afum|EAL90258.1 agla|OJJ83351.1 akaw|GAA87535.1 aluc|OJZ87982.1 anid|CBF87654.1 anig|EHA17765.1 aory|EIT79120.1 asyd|OJJ63299.1 ater|EAU30687.1 atub|OJI90592.1 aver|OJI97659.1 awen|OJJ38626.1 azon|OJJ49568.1

Group3306: abra|OJJ74054.1 acar|OOG01167.1 acla|EAW07902.1 afis|EAW22939.1 afla|EED58133.1 afum|EAL90257.1 agla|OJJ83349.1 akaw|GAA87536.1 aluc|OJZ87981.1 anid|CBF87652.1 anig|EHA17764.1 aory|EIT79138.1 asyd|OJJ63298.1 ater|EAU30686.1 atub|OJI90591.1 aver|OJI97660.1 awen|OJJ38625.1 azon|OJJ49567.1

Group3307: abra|OJJ74056.1 acar|OOG01169.1 acla|EAW07903.1 afis|EAW22940.1 afla|EED58154.1 afum|EAL90256.1 agla|OJJ83348.1 akaw|GAA87538.1 aluc|OJZ87979.1 anid|CBF87650.1 anig|EHA17762.1 aory|EIT79084.1 asyd|OJJ63297.1 ater|EAU30684.1 atub|OJI90589.1 aver|OJI97661.1 awen|OJJ38624.1 azon|OJJ49565.1

Group3308: abra|OJJ74060.1 acar|OOG01172.1 acla|EAW07905.1 afis|EAW22943.1 afla|EED58153.1 afum|EAL90254.1 agla|OJJ83345.1 akaw|GAA87541.1 aluc|OJZ87976.1 anid|CBF87646.1 anig|EHA17760.1 aory|EIT79073.1 asyd|OJJ63295.1 ater|EAU30681.1 atub|OJI90586.1 aver|OJI97663.1 awen|OJJ38621.1 azon|OJJ49562.1

Group3309: abra|OJJ74061.1 acar|OOG01173.1 acla|EAW07906.1 afis|EAW22944.1 afla|EED58151.1 afum|EAL90253.1 agla|OJJ83344.1 akaw|GAA87542.1 aluc|OJZ87975.1 anid|CBF87644.1 anig|EHA17759.1 aory|EIT79080.1 asyd|OJJ63294.1 ater|EAU30680.1 atub|OJI90585.1 aver|OJI97664.1 awen|OJJ38620.1 azon|OJJ49561.1

Group3310: abra|OJJ74062.1 acar|OOG01175.1 acla|EAW07907.1 afis|EAW22945.1 afla|EED58150.1 afum|EAL90252.1 agla|OJJ83343.1 akaw|GAA87543.1 aluc|OJZ87974.1 anid|CBF87642.1 anig|EHA17758.1 aory|EIT79097.1 asyd|OJJ63293.1 ater|EAU30679.1 atub|OJI90584.1 aver|OJI97665.1 awen|OJJ38619.1 azon|OJJ49560.1

Group3311: abra|OJJ74063.1 acar|OOG01176.1 acla|EAW07908.1 afis|EAW22946.1 afla|EED58149.1 afum|EAL90251.1 agla|OJJ83342.1 akaw|GAA87544.1 aluc|OJZ87973.1 anid|CBF87640.1 anig|EHA17757.1 aory|EIT79094.1 asyd|OJJ63292.1 ater|EAU30678.1 atub|OJI90583.1 aver|OJI97666.1 awen|OJJ38618.1 azon|OJJ49559.1

Group3312: abra|OJJ74064.1 acar|OOG01174.1 acla|EAW07909.1 afis|EAW22947.1 afla|EED58148.1 afum|EAL90250.1 agla|OJJ83341.1 akaw|GAA87545.1 aluc|OJZ87972.1 anid|CBF87639.1 anig|EHA17756.1 aory|EIT79089.1 asyd|OJJ63291.1 ater|EAU30677.1 atub|OJI90582.1 aver|OJI97667.1 awen|OJJ38617.1 azon|OJJ49558.1

Group3313: abra|OJJ74065.1 acar|OOG01177.1 acla|EAW07910.1 afis|EAW22948.1 afla|EED58147.1 afum|EAL90249.1 agla|OJJ83339.1 akaw|GAA87546.1 aluc|OJZ87971.1 anid|CBF87637.1 anig|EHA17755.1 aory|EIT79088.1 asyd|OJJ63290.1 ater|EAU30676.1 atub|OJI90581.1 aver|OJI97668.1 awen|OJJ38616.1 azon|OJJ49557.1

Group3314: abra|OJJ74066.1 acar|OOG01179.1 acla|EAW07911.1 afis|EAW22949.1 afla|EED58146.1 afum|EAL90248.1 agla|OJJ83338.1 akaw|GAA87547.1 aluc|OJZ87970.1 anid|CBF87636.1 anig|EHA17754.1

aory|EIT79070.1 asyd|OJJ63289.1 ater|EAU30675.1 atub|OJI90580.1 aver|OJI97669.1 awen|OJJ38615.1 azon|OJJ49556.1

Group3315: abra|OJJ74067.1 acar|OOG01178.1 acla|EAW07912.1 afis|EAW22950.1 afla|EED58145.1 afum|EAL90247.1 agla|OJJ83337.1 akaw|GAA87548.1 aluc|OJZ87969.1 anid|CBF87634.1 anig|EHA17753.1 aory|EIT79067.1 asyd|OJJ63288.1 ater|EAU30674.1 atub|OJI90579.1 aver|OJI97670.1 awen|OJJ38614.1 azon|OJJ49555.1

Group3316: abra|OJJ74068.1 acar|OOG01180.1 acla|EAW07913.1 afis|EAW22951.1 afla|EED58144.1 afum|EAL90246.1 agla|OJJ83336.1 akaw|GAA87549.1 aluc|OJZ87968.1 anid|CBF87632.1 anig|EHA17752.1 aory|EIT79092.1 asyd|OJJ63287.1 ater|EAU30673.1 atub|OJI90578.1 aver|OJI97671.1 awen|OJJ38613.1 azon|OJJ49554.1

Group3317: abra|OJJ74069.1 acar|OOG01181.1 acla|EAW07914.1 afis|EAW22952.1 afla|EED58143.1 afum|EAL90245.1 agla|OJJ83335.1 akaw|GAA87550.1 aluc|OJZ87967.1 anid|CBF87630.1 anig|EHA17751.1 aory|EIT79082.1 asyd|OJJ63286.1 ater|EAU30672.1 atub|OJI90577.1 aver|OJI97672.1 awen|OJJ38612.1 azon|OJJ49553.1

Group3318: abra|OJJ74070.1 acar|OOG01182.1 acla|EAW07915.1 afis|EAW22953.1 afla|EED58142.1 afum|EAL90244.1 agla|OJJ83334.1 akaw|GAA87551.1 aluc|OJZ87966.1 anid|CBF87629.1 anig|EHA17750.1 aory|EIT79065.1 asyd|OJJ63285.1 ater|EAU30671.1 atub|OJI90576.1 aver|OJI97673.1 awen|OJJ38611.1 azon|OJJ49552.1

Group3319: abra|OJJ74071.1 acar|OOG01183.1 acla|EAW07916.1 afis|EAW22954.1 afla|EED58141.1 afum|EAL90243.1 agla|OJJ83333.1 akaw|GAA87552.1 aluc|OJZ87965.1 anid|CBF87627.1 anig|EHA17749.1 aory|EIT79103.1 asyd|OJJ63284.1 ater|EAU30670.1 atub|OJI90575.1 aver|OJI97674.1 awen|OJJ38610.1 azon|OJJ49551.1

Group3320: abra|OJJ74072.1 acar|OOG01184.1 acla|EAW07917.1 afis|EAW22955.1 afla|EED58140.1 afum|EAL90242.1 agla|OJJ83332.1 akaw|GAA87553.1 aluc|OJZ87964.1 anid|CBF87625.1 anig|EHA17748.1 aory|EIT79149.1 asyd|OJJ63283.1 ater|EAU30669.1 atub|OJI90574.1 aver|OJI97675.1 awen|OJJ38608.1 azon|OJJ49550.1

Group3321: abra|OJJ74075.1 acar|OOG01187.1 acla|EAW07920.1 afis|EAW22958.1 afla|EED58138.1 afum|EAL90239.1 agla|OJJ83330.1 akaw|GAA87556.1 aluc|OJZ87961.1 anid|CBF87624.1 anig|EHA17745.1 aory|EIT79160.1 asyd|OJJ63281.1 ater|EAU30667.1 atub|OJI90571.1 aver|OJI97677.1 awen|OJJ38605.1 azon|OJJ49547.1

Group3322: abra|OJJ74076.1 acar|OOG01188.1 acla|EAW07921.1 afis|EAW22959.1 afla|EED58137.1 afum|EAL90238.1 agla|OJJ83329.1 akaw|GAA87557.1 aluc|OJZ87960.1 anid|CBF87622.1 anig|EHA17744.1 aory|EIT79140.1 asyd|OJJ63280.1 ater|EAU30666.1 atub|OJI90570.1 aver|OJI97678.1 awen|OJJ38604.1 azon|OJJ49546.1

Group3323: abra|OJJ74078.1 acar|OOG01190.1 acla|EAW07923.1 afis|EAW22961.1 afla|EED58135.1 afum|EAL90236.1 agla|OJJ83327.1 akaw|GAA87559.1 aluc|OJZ87957.1 anid|CBF87621.1 anig|EHA17742.1 aory|EIT79121.1 asyd|OJJ63278.1 ater|EAU30664.1 atub|OJI90568.1 aver|OJI97680.1 awen|OJJ38602.1 azon|OJJ49544.1

Group3324: abra|OJJ74079.1 acar|OOG01191.1 acla|EAW07924.1 afis|EAW22962.1 afla|EED58155.1 afum|EAL90235.1 agla|OJJ83326.1 akaw|GAA87560.1 aluc|OJZ87956.1 anid|CBF87619.1 anig|EHA17741.1 aory|EIT79083.1 asyd|OJJ63277.1 ater|EAU30663.1 atub|OJI90567.1 aver|OJI97681.1 awen|OJJ38601.1 azon|OJJ49543.1

Group3325: abra|OJJ74080.1 acar|OOG01192.1 acla|EAW07925.1 afis|EAW22963.1 afla|EED58156.1 afum|EAL90234.1 agla|OJJ83324.1 akaw|GAA87561.1 aluc|OJZ87955.1 anid|CBF87617.1 anig|EHA17740.1 aory|EIT79101.1 asyd|OJJ63276.1 ater|EAU30662.1 atub|OJI90566.1 aver|OJI97682.1 awen|OJJ38600.1 azon|OJJ49542.1

Group3326: abra|OJJ74081.1 acar|OOG01193.1 acla|EAW07926.1 afis|EAW22964.1 afla|EED58157.1 afum|EAL90233.1 agla|OJJ83323.1 akaw|GAA87562.1 aluc|OJZ87954.1 anid|CBF87615.1 anig|EHA17739.1 aory|EIT79095.1 asyd|OJJ63275.1 ater|EAU30661.1 atub|OJI90565.1 aver|OJI97683.1 awen|OJJ38599.1 azon|OJJ49541.1

Group3327: abra|OJJ74082.1 acar|OOG01194.1 acla|EAW07927.1 afis|EAW22965.1 afla|EED58158.1 afum|EAL90232.1 agla|OJJ83322.1 akaw|GAA87563.1 aluc|OJZ87953.1 anid|CBF87613.1 anig|EHA17738.1 aory|EIT79104.1 asyd|OJJ63274.1 ater|EAU30653.1 atub|OJI90564.1 aver|OJI97684.1 awen|OJJ38598.1 azon|OJJ49540.1

Group3328: abra|OJJ74084.1 acar|OOG01196.1 acla|EAW07928.1 afis|EAW22966.1 afla|EED58160.1 afum|EAL90231.1 agla|OJJ83321.1 akaw|GAA87564.1 aluc|OJZ87951.1 anid|CBF87612.1 anig|EHA17737.1 aory|EIT79091.1 asyd|OJJ63272.1 ater|EAU30654.1 atub|OJI90563.1 aver|OJI97685.1 awen|OJJ38597.1 azon|OJJ49538.1

Group3329: abra|OJJ74086.1 acar|OOG01197.1 acla|EAW07930.1 afis|EAW22968.1 afla|EED58161.1 afum|EAL90229.1 agla|OJJ83319.1 akaw|GAA87566.1 aluc|OJZ87949.1 anid|CBF87609.1 anig|EHA17735.1 aory|EIT79100.1 asyd|OJJ63270.1 ater|EAU30659.1 atub|OJI90560.1 aver|OJI97687.1 awen|OJJ38595.1 azon|OJJ49537.1

Group3330: abra|OJJ74089.1 acar|OOG01198.1 acla|EAW07932.1 afis|EAW22970.1 afla|EED58163.1 afum|EAL90227.2 agla|OJJ83317.1 akaw|GAA87568.1 aluc|OJZ87947.1 anid|CBF74548.1 anig|EHA17733.1 aory|EIT79078.1 asyd|OJJ57686.1 ater|EAU30652.1 atub|OJI90558.1 aver|OJJ05492.1 awen|OJJ38593.1 azon|OJJ49536.1

Group3331: abra|OJJ74090.1 acar|OOG01199.1 acla|EAW07933.1 afis|EAW22971.1 afla|EED58164.1 afum|EAL90226.1 agla|OJJ83316.1 akaw|GAA87569.1 aluc|OJZ87946.1 anid|CBF87607.1 anig|EHA17732.1 aory|EIT79076.1 asyd|OJJ63269.1 ater|EAU30651.1 atub|OJI90557.1 aver|OJI97688.1 awen|OJJ38591.1 azon|OJJ49535.1

Group3332: abra|OJJ74091.1 acar|OOG01200.1 acla|EAW07934.1 afis|EAW22972.1 afla|EED58166.1 afum|EAL90225.1 agla|OJJ83315.1 akaw|GAA87570.1 aluc|OJZ87945.1 anid|CBF87606.1 anig|EHA17731.1 aory|EIT79075.1 asyd|OJJ63268.1 ater|EAU30650.1 atub|OJI90556.1 aver|OJI97689.1 awen|OJJ38590.1 azon|OJJ49533.1

Group3333: abra|OJJ74093.1 acar|OOG01202.1 acla|EAW07936.1 afis|EAW22974.1 afla|EED58168.1 afum|EAL90223.1 agla|OJJ83313.1 akaw|GAA87572.1 aluc|OJZ87943.1 anid|CBF87602.1 anig|EHA17730.1 aory|EIT79071.1 asyd|OJJ63266.1 ater|EAU30647.1 atub|OJI90554.1 aver|OJI97691.1 awen|OJJ38589.1 azon|OJJ49532.1

Group3334: abra|OJJ74094.1 acar|OOG01204.1 acla|EAW07937.1 afis|EAW22975.1 afla|EED58169.1 afum|EAL90222.1 agla|OJJ83312.1 akaw|GAA87573.1 aluc|OJZ87942.1 anid|CBF87600.1 anig|EHA17729.1 aory|EIT79096.1 asyd|OJJ63265.1 ater|EAU30646.1 atub|OJI90553.1 aver|OJI97692.1 awen|OJJ38588.1 azon|OJJ49531.1

Group3335: abra|OJJ74095.1 acar|OOG01203.1 acla|EAW07938.1 afis|EAW22976.1 afla|EED58170.1 afum|EAL90221.1 agla|OJJ83311.1 akaw|GAA87574.1 aluc|OJZ87941.1 anid|CBF87598.1 anig|EHA17728.1 aory|EIT79085.1 asyd|OJJ63264.1 ater|EAU30645.1 atub|OJI90552.1 aver|OJI97693.1 awen|OJJ38587.1 azon|OJJ49530.1

Group3336: abra|OJJ74096.1 acar|OOG01205.1 acla|EAW07940.1 afis|EAW22978.1 afla|EED58171.1 afum|EAL90219.1 agla|OJJ83310.1 akaw|GAA87575.1 aluc|OJZ87940.1 anid|CBF87596.1 anig|EHA17727.1 aory|EIT79081.1 asyd|OJJ63262.1 ater|EAU30644.1 atub|OJI90551.1 aver|OJI97695.1 awen|OJJ38586.1 azon|OJJ49528.1

Group3337: abra|OJJ74100.1 acar|OOG01209.1 acla|EAW07943.1 afis|EAW22981.1 afla|EED58174.1 afum|EAL90216.1 agla|OJJ83306.1 akaw|GAA87578.1 aluc|OJZ87936.1 anid|CBF87589.1 anig|EHA17724.1 aory|EIT79069.1 asyd|OJJ63258.1 ater|EAU30640.1 atub|OJI90548.1 aver|OJI97699.1 awen|OJJ38582.1 azon|OJJ49524.1

Group3338: abra|OJJ74102.1 acar|OOG01211.1 acla|EAW07945.1 afis|EAW22983.1 afla|EED58176.1 afum|EAL90215.1 agla|OJJ83304.1 akaw|GAA87580.1 aluc|OJZ87934.1 anid|CBF87597.1 anig|EHA17723.1 aory|EIT79086.1 asyd|OJJ63263.1 ater|EAU30638.1 atub|OJI90546.1 aver|OJI97694.1 awen|OJJ38580.1 azon|OJJ49522.1

Group3339: abra|OJJ74103.1 acar|OOG01213.1 acla|EAW07946.1 afis|EAW22985.1 afla|EED58177.1 afum|EAL90214.1 agla|OJJ83302.1 akaw|GAA87581.1 aluc|OJZ87933.1 anid|CBF87584.1 anig|EHA17721.1 aory|EIT79072.1 asyd|OJJ63255.1 ater|EAU30637.1 atub|OJI90545.1 aver|OJI97702.1 awen|OJJ38579.1 azon|OJJ49520.1

Group3340: abra|OJJ74109.1 acar|OOG01217.1 acla|EAW07953.1 afis|EAW22990.1 afla|EED58182.1 afum|EAL90210.1 agla|OJJ83296.1 akaw|GAA87585.1 aluc|OJZ87925.1 anid|CBF87579.1 anig|EHA17717.1 aory|EIT79105.1 asyd|OJJ63251.1 ater|EAU30632.1 atub|OJI90537.1 aver|OJI97707.1 awen|OJJ38574.1 azon|OJJ49515.1

Group3341: abra|OJJ74116.1 acar|OOG01220.1 acla|EAW07958.1 afis|EAW22993.1 afla|EED58186.1 afum|EAL90208.1 agla|OJJ83291.1 akaw|GAA87589.1 aluc|OJZ87918.1 anid|CBF87570.1 anig|EHA17712.1 aory|EIT79074.1 asyd|OJJ63244.1 ater|EAU30627.1 atub|OJI90529.1 aver|OJI97712.1 awen|OJJ38568.1 azon|OJJ44834.1

Group3342: abra|OJJ74118.1 acar|OOG01223.1 acla|EAW07960.1 afis|EAW22995.1 afla|EED58188.1 afum|EAL90204.1 agla|OJJ83289.1 akaw|GAA87591.1 aluc|OJZ87914.1 anid|CBF87567.1 anig|EHA17708.1 aory|EIT79079.1 asyd|OJJ63242.1 ater|EAU30623.1 atub|OJI90526.1 aver|OJI97714.1 awen|OJJ38566.1 azon|OJJ50435.1

Group3345: abra|OJJ74188.1 acar|OOF95533.1 acla|EAW07238.1 afis|EAW22261.1 afla|EED57649.1 afum|EAL90919.1 agla|OJJ87796.1 akaw|GAA86829.1 aluc|OJZ89947.1 anid|CBF88508.1 anig|EHA27148.1

aory|EIT79898.1 asyd|OJJ63801.1 ater|EAU34268.1 atub|OJI84859.1 aver|OJI97138.1 awen|OJJ34833.1 azon|OJJ45713.1

Group3346: abra|OJJ74189.1 acar|OOF95532.1 acla|EAW07241.1 afis|EAW22262.1 afla|EED57651.1 afum|EAL90918.1 agla|OJJ87794.1 akaw|GAA86828.1 aluc|OJZ89946.1 anid|CBF88511.1 anig|EHA27145.1 aory|EIT79914.1 asyd|OJJ63803.1 ater|EAU34269.1 atub|OJI84860.1 aver|OJI97135.1 awen|OJJ34835.1 azon|OJJ45712.1

Group3347: abra|OJJ74190.1 acar|OOF95531.1 acla|EAW07242.1 afis|EAW22263.1 afla|EED57655.1 afum|EAL90917.1 agla|OJJ87792.1 akaw|GAA86827.1 aluc|OJZ89945.1 anid|CBF88513.1 anig|EHA27144.1 aory|EIT79925.1 asyd|OJJ63804.1 ater|EAU34273.1 atub|OJI84861.1 aver|OJI97134.1 awen|OJJ34836.1 azon|OJJ45711.1

Group3348: abra|OJJ74193.1 acar|OOF95529.1 acla|EAW07245.1 afis|EAW22266.1 afla|EED57658.1 afum|EAL90914.1 agla|OJJ87789.1 akaw|GAA86824.1 aluc|OJZ89942.1 anid|CBF88519.1 anig|EHA27141.1 aory|EIT79939.1 asyd|OJJ63807.1 ater|EAU34277.1 atub|OJI84864.1 aver|OJI97131.1 awen|OJJ34838.1 azon|OJJ45708.1

Group3349: abra|OJJ74194.1 acar|OOF95527.1 acla|EAW07247.1 afis|EAW22268.1 afla|EED57660.1 afum|EAL90912.1 agla|OJJ87787.1 akaw|GAA86823.1 aluc|OJZ89941.1 anid|CBF88523.1 anig|EHA27140.1 aory|EIT79938.1 asyd|OJJ63808.1 ater|EAU34279.1 atub|OJI84865.1 aver|OJI97129.1 awen|OJJ34841.1 azon|OJJ45706.1

Group3350: abra|OJJ74195.1 acar|OOF95526.1 acla|EAW07248.1 afis|EAW22269.1 afla|EED57661.1 afum|EAL90911.1 agla|OJJ87786.1 akaw|GAA86822.1 aluc|OJZ89939.1 anid|CBF88527.1 anig|EHA27139.1 aory|EIT79909.1 asyd|OJJ63810.1 ater|EAU34280.1 atub|OJI84866.1 aver|OJI97127.1 awen|OJJ34842.1 azon|OJJ45705.1

Group3351: abra|OJJ74196.1 acar|OOF95524.1 acla|EAW07249.1 afis|EAW22270.1 afla|EED57662.1 afum|EAL90910.1 agla|OJJ87785.1 akaw|GAA86821.1 aluc|OJZ89938.1 anid|CBF88528.1 anig|EHA27138.1 aory|EIT79867.1 asyd|OJJ63811.1 ater|EAU34281.1 atub|OJI84868.1 aver|OJI97126.1 awen|OJJ34843.1 azon|OJJ45704.1

Group3352: abra|OJJ74197.1 acar|OOF95523.1 acla|EAW07250.1 afis|EAW22271.1 afla|EED57663.1 afum|EAL90909.1 agla|OJJ87784.1 akaw|GAA86820.1 aluc|OJZ89937.1 anid|CBF88530.1 anig|EHA27137.1 aory|EIT79903.1 asyd|OJJ63812.1 ater|EAU34282.1 atub|OJI84869.1 aver|OJI97125.1 awen|OJJ34844.1 azon|OJJ45703.1

Group3353: abra|OJJ74198.1 acar|OOF95521.1 acla|EAW07252.1 afis|EAW22273.1 afla|EED57665.1 afum|EAL90908.1 agla|OJJ87781.1 akaw|GAA86819.1 aluc|OJZ89936.1 anid|CBF88536.1 anig|EHA27136.1 aory|EIT79943.1 asyd|OJJ63820.1 ater|EAU34283.1 atub|OJI84870.1 aver|OJI97118.1 awen|OJJ34846.1 azon|OJJ45702.1

Group3354: abra|OJJ74199.1 acar|OOF95520.1 acla|EAW07253.1 afis|EAW22274.1 afla|EED57666.1 afum|EAL90907.1 agla|OJJ87780.1 akaw|GAA86818.1 aluc|OJZ89935.1 anid|CBF88537.1 anig|EHA27135.1 aory|EIT79937.1 asyd|OJJ63821.1 ater|EAU34284.1 atub|OJI84871.1 aver|OJI97117.1 awen|OJJ34847.1 azon|OJJ45700.1

Group3355: abra|OJJ74201.1 acar|OOF95519.1 acla|EAW07254.1 afis|EAW22275.1 afla|EED57667.1 afum|EAL90906.1 agla|OJJ87779.1 akaw|GAA86817.1 aluc|OJZ89934.1 anid|CBF88539.1 anig|EHA27134.1 aory|EIT79875.1 asyd|OJJ63822.1 ater|EAU34285.1 atub|OJI84872.1 aver|OJI97116.1 awen|OJJ34848.1 azon|OJJ45699.1

Group3356: abra|OJJ74202.1 acar|OOF95518.1 afla|EED57668.1 afum|EAL90905.1 agla|OJJ87777.1 akaw|GAA86816.1 aluc|OJZ89933.1 anid|CBF88541.1 anig|EHA27133.1 aory|EIT79884.1 ater|EAU34286.1 atub|OJI84873.1 aver|OJI97115.1 azon|OJJ45698.1 acla|EAW07255.1 afis|EAW22276.1 asyd|OJJ63823.1 awen|OJJ34849.1

Group3357: abra|OJJ74203.1 acar|OOF95517.1 acla|EAW07256.1 afis|EAW22277.1 afla|EED57669.1 afum|EAL90904.1 agla|OJJ87776.1 akaw|GAA86815.1 aluc|OJZ89932.1 anid|CBF88543.1 anig|EHA27132.1 aory|EIT79926.1 asyd|OJJ63824.1 ater|EAU34287.1 atub|OJI84874.1 aver|OJI97114.1 awen|OJJ34850.1 azon|OJJ45697.1

Group3358: abra|OJJ74204.1 acar|OOF95516.1 acla|EAW07257.1 afis|EAW22278.1 afla|EED57671.1 afum|EAL90903.1 agla|OJJ87775.1 akaw|GAA86814.1 aluc|OJZ89931.1 anid|CBF88545.1 anig|EHA27131.1 aory|EIT79927.1 asyd|OJJ63825.1 ater|EAU34288.1 atub|OJI84875.1 aver|OJI97113.1 awen|OJJ34851.1 azon|OJJ45696.1

Group3359: abra|OJJ74206.1 acar|OOF95514.1 acla|EAW07259.1 afis|EAW22280.1 afla|EED57677.1 afum|EAL90901.1 agla|OJJ87773.1 akaw|GAA86812.1 aluc|OJZ89929.1 anid|CBF88548.1 anig|EHA27129.1 aory|EIT79874.1 asyd|OJJ63827.1 ater|EAU34290.1 atub|OJI84877.1 aver|OJI97111.1 awen|OJJ34853.1 azon|OJJ45677.1



Group3360: abra|OJJ74207.1 acar|OOF95513.1 acla|EAW07260.1 afis|EAW22281.1 afla|EED57678.1 afum|EAL90900.1 agla|OJJ87768.1 akaw|GAA86811.1 aluc|OJZ89928.1 anid|CBF88550.1 anig|EHA27128.1 aory|EIT79890.1 asyd|OJJ63828.1 ater|EAU34291.1 atub|OJI84878.1 aver|OJI97110.1 awen|OJJ34854.1 azon|OJJ45676.1

Group3361: abra|OJJ74208.1 acar|OOF95512.1 acla|EAW07261.1 afis|EAW22282.1 afla|EED57679.1 afum|EAL90899.1 agla|OJJ87767.1 akaw|GAA86810.1 aluc|OJZ89926.1 anid|CBF88552.1 anig|EHA27127.1 aory|EIT79907.1 asyd|OJJ63829.1 ater|EAU34292.1 atub|OJI84879.1 aver|OJI97109.1 awen|OJJ34855.1 azon|OJJ45674.1

Group3362: abra|OJJ74209.1 acar|OOF95511.1 acla|EAW07262.1 afis|EAW22283.1 afla|EED57680.1 afum|EAL90898.1 agla|OJJ87766.1 akaw|GAA86809.1 aluc|OJZ89925.1 anid|CBF88554.1 anig|EHA27126.1 aory|EIT79921.1 asyd|OJJ63830.1 ater|EAU34293.1 atub|OJI84880.1 aver|OJI97108.1 awen|OJJ34856.1 azon|OJJ45673.1

Group3363: abra|OJJ74210.1 acar|OOF95510.1 acla|EAW07263.1 afis|EAW22284.1 afla|EED57682.1 afum|EAL90897.1 agla|OJJ87764.1 akaw|GAA86808.1 aluc|OJZ89924.1 anid|CBF88556.1 anig|EHA27124.1 aory|EIT79901.1 asyd|OJJ63831.1 ater|EAU34296.1 atub|OJI84881.1 aver|OJI97107.1 awen|OJJ34857.1 azon|OJJ45671.1

Group3364: abra|OJJ74211.1 acar|OOF95509.1 acla|EAW07264.1 afis|EAW22285.1 afla|EED57685.1 afum|EAL90896.1 agla|OJJ87763.1 akaw|GAA86807.1 aluc|OJZ89923.1 anid|CBF88558.1 anig|EHA27123.1 aory|EIT79887.1 asyd|OJJ63832.1 ater|EAU34297.1 atub|OJI84882.1 aver|OJI97106.1 awen|OJJ34858.1 azon|OJJ45670.1

Group3365: abra|OJJ74218.1 acar|OOF95503.1 acla|EAW07273.1 afis|EAW22294.1 afla|EED57690.1 afum|EAL90887.1 agla|OJJ87758.1 akaw|GAA86800.1 aluc|OJZ89916.1 anid|CBF88569.1 anig|EHA27116.1 aory|EIT79904.1 asyd|OJJ63837.1 ater|EAU34303.1 atub|OJI84889.1 aver|OJI97100.1 awen|OJJ34864.1 azon|OJJ45665.1

Group3366: abra|OJJ74220.1 acar|OOF90433.1 acla|EAW07284.1 afis|EAW22315.1 afla|EED57695.1 afum|EAL90875.1 agla|OJJ87735.1 akaw|GAA86798.1 aluc|OJZ89914.1 anid|CBF88577.1 anig|EHA27114.1 aory|EIT79936.1 asyd|OJJ63841.1 ater|EAU34308.1 atub|OJI84891.1 aver|OJI97096.1 awen|OJJ34868.1 azon|OJJ50045.1

Group3367: abra|OJJ74223.1 acar|OOF90434.1 acla|EAW07282.1 afis|EAW22313.1 afla|EED57697.1 afum|EAL90877.1 agla|OJJ87737.1 akaw|GAA86796.1 aluc|OJZ89911.1 anid|CBF88580.1 anig|EHA27111.1 aory|EIT79934.1 asyd|OJJ63843.1 ater|EAU34310.1 atub|OJI84895.1 aver|OJI97094.1 awen|OJJ34872.1 azon|OJJ50047.1

Group3368: abra|OJJ74224.1 acar|OOF90435.1 acla|EAW07281.1 afis|EAW22312.1 afla|EED57698.1 afum|EAL90878.1 agla|OJJ87738.1 akaw|GAA86795.1 aluc|OJZ89910.1 anid|CBF88582.1 anig|EHA27110.1 aory|EIT79916.1 asyd|OJJ63844.1 ater|EAU34311.1 atub|OJI84896.1 aver|OJI97093.1 awen|OJJ34873.1 azon|OJJ50048.1

Group3369: abra|OJJ74225.1 acar|OOF95502.1 acla|EAW07280.1 afis|EAW22311.1 afla|EED57701.1 afum|EAL90879.1 agla|OJJ87739.1 akaw|GAA86794.1 aluc|OJZ89908.1 anid|CBF88584.1 anig|EHA27108.1 aory|EIT79931.1 asyd|OJJ63846.1 ater|EAU34313.1 atub|OJI84898.1 aver|OJI97090.1 awen|OJJ34876.1 azon|OJJ50049.1

Group3370: abra|OJJ74228.1 acar|OOF95498.1 acla|EAW07276.1 afis|EAW22297.1 afla|EED57705.1 afum|EAL90884.1 agla|OJJ87748.1 akaw|GAA86791.1 aluc|OJZ89905.1 anid|CBF88592.1 anig|EHA27105.1 aory|EIT79881.1 asyd|OJJ63850.1 ater|EAU34317.1 atub|OJI84901.1 aver|OJI97087.1 awen|OJJ34881.1 azon|OJJ50050.1

Group3371: abra|OJJ74231.1 acar|OOF95495.1 acla|EAW07286.1 afis|EAW22319.1 afla|EED57710.1 afum|EAL90871.1 agla|OJJ87745.1 akaw|GAA86788.1 aluc|OJZ89902.1 anid|CBF88599.1 anig|EHA27102.1 aory|EIT79923.1 asyd|OJJ63854.1 ater|EAU34320.1 atub|OJI84905.1 aver|OJI97084.1 awen|OJJ34885.1 azon|OJJ50053.1

Group3372: abra|OJJ74237.1 acar|OOF95492.1 acla|EAW07288.1 afis|EAW22321.1 afla|EED57718.1 afum|EAL90870.1 agla|OJJ87749.1 akaw|GAA86783.1 aluc|OJZ89895.1 anid|CBF88602.1 anig|EHA27094.1 aory|EIT79929.1 asyd|OJJ63855.1 ater|EAU34321.1 atub|OJI84912.1 aver|OJI97083.1 awen|OJJ34888.1 azon|OJJ50055.1

Group3373: abra|OJJ74242.1 acar|OOF95488.1 acla|EAW07291.1 afis|EAW22325.1 afla|EED57723.1 afum|EAL90867.1 agla|OJJ87721.1 akaw|GAA86778.1 aluc|OJZ89890.1 anid|CBF88609.1 anig|EHA27089.1 aory|EIT79878.1 asyd|OJJ63859.1 ater|EAU34324.1 atub|OJI84917.1 aver|OJI97080.1 awen|OJJ34896.1 azon|OJJ50065.1

Group3374: abra|OJJ74246.1 acar|OOF95484.1 acla|EAW07298.1 afis|EAW22347.1 afla|EED57735.1 afum|EAL90845.1 agla|OJJ87687.1 akaw|GAA86774.1 aluc|OJZ89886.1 anid|CBF88623.1 anig|EHA27085.1

aory|EIT79913.1 asyd|OJJ63868.1 ater|EAU39483.1 atub|OJI84921.1 aver|OJI97071.1 awen|OJJ34928.1 azon|OJJ50070.1

Group3375: abra|OJJ74249.1 acar|OOF95479.1 acla|EAW07293.1 afis|EAW22327.1 afla|EED57726.1 afum|EAL90865.1 agla|OJJ87723.1 akaw|GAA86772.1 aluc|OJZ89883.1 anid|CBF88613.1 anig|EHA27082.1 aory|EIT79866.1 asyd|OJJ63861.1 ater|EAU34326.1 atub|OJI84924.1 aver|OJI97078.1 awen|OJJ34894.1 azon|OJJ50063.1

Group3376: abra|OJJ74250.1 acar|OOF95480.1 acla|EAW07294.1 afis|EAW22328.1 afla|EED57727.1 afum|EAL90864.1 agla|OJJ87724.1 akaw|GAA86771.1 aluc|OJZ89882.1 anid|CBF88615.1 anig|EHA27081.1 aory|EIT79906.1 asyd|OJJ63862.1 ater|EAU34327.1 atub|OJI84925.1 aver|OJI97077.1 awen|OJJ34893.1 azon|OJJ50062.1

Group3377: abra|OJJ74252.1 acar|OOF95477.1 acla|EAW07296.1 afis|EAW22330.1 afla|EED57729.1 afum|EAL90862.1 agla|OJJ87752.1 akaw|GAA86769.1 aluc|OJZ89880.1 anid|CBF88619.1 anig|EHA27079.1 aory|EIT79894.1 asyd|OJJ63864.1 ater|EAU34331.1 atub|OJI84927.1 aver|OJI97075.1 awen|OJJ34891.1 azon|OJJ50060.1

Group3378: abra|OJJ74256.1 acar|OOF95472.1 acla|EAW07302.1 afis|EAW22343.1 afla|EED57738.1 afum|EAL90848.1 agla|OJJ87691.1 akaw|GAA86765.1 aluc|OJZ89876.1 anid|CBF88627.1 anig|EHA27075.1 aory|EIT79915.1 asyd|OJJ63870.1 ater|EAU39481.1 atub|OJI84931.1 aver|OJI97069.1 awen|OJJ34922.1 azon|OJJ50072.1

Group3379: abra|OJJ74257.1 acar|OOF95471.1 acla|EAW07303.1 afis|EAW22342.1 afla|EED57739.1 afum|EAL90849.1 agla|OJJ87692.1 akaw|GAA86764.1 aluc|OJZ89875.1 anid|CBF88628.1 anig|EHA27074.1 aory|EIT79892.1 asyd|OJJ63871.1 ater|EAU39480.1 atub|OJI84932.1 aver|OJI97068.1 awen|OJJ34921.1 azon|OJJ50073.1

Group3380: abra|OJJ74260.1 acar|OOF89900.1 acla|EAW07305.1 afis|EAW22340.1 afla|EED57741.1 afum|EAL90852.1 agla|OJJ87698.1 akaw|GAA86761.1 aluc|OJZ89871.1 anid|CBF88632.1 anig|EHA27071.1 aory|EIT79893.1 asyd|OJJ63874.1 ater|EAU39478.1 atub|OJI84936.1 aver|OJI97064.1 awen|OJJ34919.1 azon|OJJ50075.1

Group3381: abra|OJJ74261.1 acar|OOF89901.1 acla|EAW07306.1 afis|EAW22339.1 afla|EED57742.1 afum|EAL90853.1 agla|OJJ87699.1 akaw|GAA86760.1 aluc|OJZ89870.1 anid|CBF88634.1 anig|EHA27070.1 aory|EIT79922.1 asyd|OJJ63875.1 ater|EAU39477.1 atub|OJI84937.1 aver|OJI97063.1 awen|OJJ34918.1 azon|OJJ50076.1

Group3382: abra|OJJ74264.1 acar|OOF95466.1 acla|EAW07308.1 afis|EAW22338.1 afla|EED57743.1 afum|EAL90854.1 agla|OJJ87700.1 akaw|GAA86759.1 aluc|OJZ89869.1 anid|CBF88636.1 anig|EHA27069.1 aory|EIT81083.1 asyd|OJJ63877.1 ater|EAU39475.1 atub|OJI84939.1 aver|OJI97062.1 awen|OJJ34916.1 azon|OJJ50079.1

Group3383: abra|OJJ74265.1 acar|OOF95465.1 acla|EAW07309.1 afis|EAW22337.1 afla|EED57744.1 afum|EAL90855.1 agla|OJJ87701.1 akaw|GAA86758.1 aluc|OJZ89868.1 anid|CBF88638.1 anig|EHA27068.1 aory|EIT81047.1 asyd|OJJ63878.1 ater|EAU39474.1 atub|OJI84940.1 aver|OJI97061.1 awen|OJJ34915.1 azon|OJJ45569.1

Group3384: abra|OJJ74266.1 acar|OOF95464.1 acla|EAW07310.1 afis|EAW22336.1 afla|EED57746.1 afum|EAL90856.1 agla|OJJ87702.1 akaw|GAA86757.1 aluc|OJZ89867.1 anid|CBF88640.1 anig|EHA27067.1 aory|EIT81092.1 asyd|OJJ63879.1 ater|EAU39473.1 atub|OJI84941.1 aver|OJI97060.1 awen|OJJ34914.1 azon|OJJ45570.1

Group3385: abra|OJJ74267.1 acar|OOF89814.1 acla|EAW07311.1 afis|EAW22335.1 afla|EED57747.1 afum|EAL90857.2 agla|OJJ87715.1 akaw|GAA86756.1 aluc|OJZ89866.1 anid|CBF88641.1 anig|EHA27066.1 aory|EIT81022.1 asyd|OJJ63880.1 ater|EAU39472.1 atub|OJI84942.1 aver|OJI97059.1 awen|OJJ34913.1 azon|OJJ45571.1

Group3386: abra|OJJ74270.1 acar|OOF95460.1 acla|EAW07314.1 afis|EAW22332.1 afla|EED57751.1 afum|EAL90860.1 agla|OJJ87712.1 akaw|GAA86753.1 aluc|OJZ89863.1 anid|CBF88647.1 anig|EHA27063.1 aory|EIT81116.1 asyd|OJJ63882.1 ater|EAU39461.1 atub|OJI84945.1 aver|OJI97057.1 awen|OJJ34910.1 azon|OJJ45575.1

Group3387: abra|OJJ74272.1 acar|OOF95458.1 acla|EAW07317.1 afis|EAW22349.1 afla|EED57753.1 afum|EAL90843.1 agla|OJJ87710.1 akaw|GAA86751.1 aluc|OJZ89861.1 anid|CBF88651.1 anig|EHA27061.1 aory|EIT81051.1 asyd|OJJ63885.1 ater|EAU39459.1 atub|OJI84947.1 aver|OJI97055.1 awen|OJJ34905.1 azon|OJJ45577.1

Group3388: abra|OJJ74276.1 acar|OOF95455.1 acla|EAW07320.1 afis|EAW22352.1 afla|EED57756.1 afum|EAL90840.1 agla|OJJ87707.1 akaw|GAA86748.1 aluc|OJZ89857.1 anid|CBF88661.1 anig|EHA27058.1 aory|EIT81039.1 asyd|OJJ63889.1 ater|EAU39488.1 atub|OJI84949.1 aver|OJI97050.1 awen|OJJ34903.1 azon|OJJ45579.1

Group3389: abra|OJJ74277.1 acar|OOF95454.1 acla|EAW07321.1 afis|EAW22353.1 afla|EED57759.1 afum|EAL90839.1 agla|OJJ87716.1 akaw|GAA86747.1 aluc|OJZ89856.1 anid|CBF88662.1 anig|EHA27057.1 aory|EIT81042.1 asyd|OJJ63890.1 ater|EAU39487.1 atub|OJI84950.1 aver|OJI97049.1 awen|OJJ34902.1 azon|OJJ45580.1

Group3390: abra|OJJ74278.1 acar|OOF95453.1 acla|EAW07322.1 afis|EAW22354.1 afla|EED57760.1 afum|EAL90838.1 agla|OJJ87717.1 akaw|GAA86746.1 aluc|OJZ89855.1 anid|CBF88664.1 anig|EHA27056.1 aory|EIT81028.1 asyd|OJJ63891.1 ater|EAU39486.1 atub|OJI84951.1 aver|OJI97048.1 awen|OJJ34901.1 azon|OJJ45581.1

Group3391: abra|OJJ74280.1 acar|OOF95451.1 acla|EAW07324.1 afis|EAW22356.1 afla|EED57762.1 afum|EAL90835.1 agla|OJJ87598.1 akaw|GAA86744.1 aluc|OJZ89853.1 anid|CBF88668.1 anig|EHA27054.1 aory|EIT81074.1 asyd|OJJ63893.1 ater|EAU39490.1 atub|OJI84953.1 aver|OJI97046.1 awen|OJJ34930.1 azon|OJJ45583.1

Group3392: abra|OJJ74281.1 acar|OOF95450.1 acla|EAW07325.1 afis|EAW22357.1 afla|EED57763.1 afum|EAL90834.1 agla|OJJ87682.1 akaw|GAA86743.1 aluc|OJZ89852.1 anid|CBF88672.1 anig|EHA27053.1 aory|EIT81043.1 asyd|OJJ63895.1 ater|EAU39491.1 atub|OJI84954.1 aver|OJI97044.1 awen|OJJ34931.1 azon|OJJ45584.1

Group3393: abra|OJJ74282.1 acar|OOF95449.1 acla|EAW07326.1 afis|EAW22358.1 afla|EED57764.1 afum|EAL90833.1 agla|OJJ87683.1 akaw|GAA86742.1 aluc|OJZ89851.1 anid|CBF88674.1 anig|EHA27052.1 aory|EIT81053.1 asyd|OJJ63896.1 ater|EAU39492.1 atub|OJI84955.1 aver|OJI97043.1 awen|OJJ34932.1 azon|OJJ45585.1

Group3394: abra|OJJ74283.1 acar|OOF95447.1 acla|EAW07327.1 afis|EAW22359.1 afla|EED57765.1 afum|EAL90832.1 agla|OJJ87684.1 akaw|GAA86741.1 aluc|OJZ89850.1 anid|CBF88676.1 anig|EHA27051.1 aory|EIT81093.1 asyd|OJJ63897.1 ater|EAU39493.1 atub|OJI84956.1 aver|OJI97042.1 awen|OJJ34933.1 azon|OJJ45586.1

Group3395: abra|OJJ74290.1 acar|OOF95441.1 acla|EAW07334.1 afis|EAW22366.1 afla|EED57774.1 afum|EBA27415.1 agla|OJJ87624.1 akaw|GAA86734.1 aluc|OJZ89844.1 anid|CBF88692.1 anig|EHA27045.1 aory|EIT81109.1 asyd|OJJ63910.1 ater|EAU39501.1 atub|OJI84964.1 aver|OJI97031.1 awen|OJJ34940.1 azon|OJJ45592.1

Group3396: abra|OJJ74291.1 acar|OOF95440.1 acla|EAW07335.1 afis|EAW22367.1 afla|EED57775.1 afum|EAL90825.1 agla|OJJ87622.1 akaw|GAA86733.1 aluc|OJZ89843.1 anid|CBF88694.1 anig|EHA27044.1 aory|EIT81063.1 asyd|OJJ63911.1 ater|EAU39502.1 atub|OJI84965.1 aver|OJI97030.1 awen|OJJ34941.1 azon|OJJ45593.1

Group3397: abra|OJJ74292.1 acar|OOF95439.1 acla|EAW07336.1 afis|EAW22368.1 afla|EED57776.1 afum|EAL90824.1 akaw|GAA86732.1 aluc|OJZ89842.1 anid|CBF88695.1 anig|EHA27043.1 aory|EIT81045.1 asyd|OJJ63913.1 ater|EAU39503.1 atub|OJI84966.1 aver|OJI97029.1 awen|OJJ34942.1 azon|OJJ45594.1 agla|OJJ87621.1

Group3398: abra|OJJ74293.1 acar|OOF95438.1 acla|EAW07337.1 afis|EAW22369.1 afla|EED57777.1 afum|EAL90823.1 agla|OJJ87620.1 akaw|GAA86731.1 aluc|OJZ89841.1 anid|CBF88697.1 anig|EHA27042.1 aory|EIT81034.1 asyd|OJJ63914.1 ater|EAU39504.1 atub|OJI84967.1 aver|OJI97028.1 awen|OJJ34944.1 azon|OJJ45595.1

Group3399: abra|OJJ74294.1 acar|OOF95437.1 acla|EAW07339.1 afis|EAW22370.1 afla|EED57778.1 afum|EAL90822.2 agla|OJJ87619.1 akaw|GAA86730.1 aluc|OJZ89840.1 anid|CBF88699.1 anig|EHA27041.1 aory|EIT81037.1 asyd|OJJ63915.1 ater|EAU39505.1 atub|OJI84968.1 aver|OJI97027.1 awen|OJJ34945.1 azon|OJJ45596.1

Group3400: abra|OJJ74295.1 acar|OOF95436.1 acla|EAW07340.1 afis|EAW22372.1 afla|EED57779.1 afum|EAL90820.2 agla|OJJ87617.1 akaw|GAA86729.1 aluc|OJZ89839.1 anid|CBF88703.1 anig|EHA27040.1 aory|EIT81082.1 asyd|OJJ63919.1 ater|EAU39506.1 atub|OJI84969.1 aver|OJI97024.1 awen|OJJ34947.1 azon|OJJ45597.1

Group3401: abra|OJJ74296.1 acar|OOF95435.1 acla|EAW07341.1 afis|EAW22373.1 afla|EED57780.1 afum|EAL90819.1 agla|OJJ87626.1 akaw|GAA86728.1 aluc|OJZ89838.1 anid|CBF88705.1 anig|EHA27039.1 aory|EIT81056.1 asyd|OJJ63920.1 ater|EAU39507.1 atub|OJI84970.1 aver|OJI97023.1 awen|OJJ34948.1 azon|OJJ45598.1

Group3402: abra|OJJ74297.1 acar|OOF95434.1 acla|EAW07342.1 afis|EAW22374.1 afla|EED57781.1 afum|EAL90818.1 agla|OJJ87627.1 akaw|GAA86727.1 aluc|OJZ89837.1 anid|CBF88706.1 anig|EHA27038.1 aory|EIT81052.1 asyd|OJJ63923.1 ater|EAU39508.1 atub|OJI84971.1 aver|OJI97022.1 awen|OJJ34949.1 azon|OJJ45599.1

Group3403: abra|OJJ74298.1 acar|OOF95433.1 acla|EAW07343.1 afis|EAW22375.1 afum|EAL90817.1 agla|OJJ87628.1 akaw|GAA86726.1 aluc|OJZ89835.1 anid|CBF88710.1 anig|EHA27037.1 aory|EIT81071.1

asyd|OJJ63924.1 ater|EAU39509.1 atub|OJI84972.1 aver|OJI97020.1 awen|OJJ34950.1 azon|OJJ45600.1  
afla|EED57783.1

Group3404: abra|OJJ74299.1 acar|OOF95431.1 acla|EAW07344.1 afis|EAW22376.1 afila|EED57784.1  
afum|EAL90816.1 agla|OJJ87629.1 akaw|GAA86725.1 aluc|OJZ89834.1 anid|CBF88712.1 anig|EHA27036.1  
aory|EIT81070.1 asyd|OJJ63925.1 ater|EAU39510.1 atub|OJI84973.1 aver|OJI97019.1 awen|OJJ34951.1  
azon|OJJ45601.1

Group3405: abra|OJJ74301.1 acar|OOF95429.1 acla|EAW07346.1 afis|EAW22378.1 afila|EED57786.1  
afum|EAL90814.1 agla|OJJ87631.1 akaw|GAA86724.1 aluc|OJZ89832.1 anid|CBF88714.1 anig|EHA27034.1  
aory|EIT81069.1 asyd|OJJ63926.1 ater|EAU39512.1 atub|OJI84974.1 aver|OJI97018.1 awen|OJJ34952.1  
azon|OJJ45602.1

Group3406: abra|OJJ74302.1 acar|OOF95428.1 acla|EAW07349.1 afis|EAW22379.1 afila|EED57787.1  
afum|EAL90812.1 agla|OJJ87635.1 akaw|GAA86723.1 aluc|OJZ89830.1 anid|CBF88716.1 anig|EHA27033.1  
aory|EIT81084.1 asyd|OJJ63927.1 ater|EAU39513.1 atub|OJI84975.1 aver|OJI97017.1 awen|OJJ34953.1  
azon|OJJ45603.1

Group3407: abra|OJJ74304.1 acar|OOF95424.1 acla|EAW07352.1 afis|EAW22381.1 afila|EED57790.1  
afum|EAL90810.1 agla|OJJ87640.1 akaw|GAA86720.1 aluc|OJZ89824.1 anid|CBF88718.1 anig|EHA27031.1  
aory|EIT81089.1 asyd|OJJ63928.1 ater|EAU39515.1 atub|OJI84982.1 aver|OJI97016.1 awen|OJJ34956.1  
azon|OJJ45608.1

Group3408: abra|OJJ74305.1 acar|OOF95423.1 acla|EAW07353.1 afis|EAW22382.1 afila|EED56040.1  
afum|EAL90809.1 agla|OJJ87641.1 akaw|GAA86719.1 aluc|OJZ89822.1 anid|CBF88721.1 anig|EHA27030.1  
aory|EIT76582.1 asyd|OJJ63929.1 ater|EAU39516.1 atub|OJI84983.1 aver|OJI97014.1 awen|OJJ34957.1  
azon|OJJ45609.1

Group3409: abra|OJJ74306.1 acar|OOF95422.1 acla|EAW07354.1 afis|EAW22383.1 afila|EED56041.1  
afum|EAL90808.1 agla|OJJ87642.1 akaw|GAA86718.1 aluc|OJZ89821.1 anid|CBF88723.1 anig|EHA27029.1  
aory|EIT76563.1 asyd|OJJ63930.1 ater|EAU39517.1 atub|OJI84984.1 aver|OJI97013.1 awen|OJJ34958.1  
azon|OJJ45610.1

Group3410: abra|OJJ74307.1 acar|OOF95420.1 acla|EAW07355.1 afis|EAW22384.1 afila|EED56044.1  
afum|EAL90806.1 agla|OJJ87644.1 akaw|GAA86717.1 aluc|OJZ89820.1 anid|CBF88725.1 anig|EHA27028.1  
aory|EIT76594.1 asyd|OJJ63931.1 ater|EAU39337.1 atub|OJI84985.1 aver|OJI97012.1 awen|OJJ34959.1  
azon|OJJ45611.1

Group3411: abra|OJJ74310.1 acar|OOF95419.1 acla|EAW07357.1 afis|EAW22386.1 afila|EED56046.1  
afum|EAL90804.1 agla|OJJ87647.1 akaw|GAA86714.1 aluc|OJZ89816.1 anid|CBF88730.1 anig|EHA27025.1  
aory|EIT76610.1 asyd|OJJ63934.1 ater|EAU39335.1 atub|OJI84989.1 aver|OJI97008.1 awen|OJJ34961.1  
azon|OJJ45613.1

Group3412: abra|OJJ74311.1 acar|OOF95417.1 acla|EAW07358.1 afis|EAW22387.1 afila|EED56047.1  
afum|EAL90803.1 agla|OJJ87648.1 akaw|GAA86713.1 aluc|OJZ89815.1 anid|CBF88732.1 anig|EHA27024.1  
aory|EIT76591.1 asyd|OJJ63935.1 ater|EAU39334.1 atub|OJI84990.1 aver|OJI97007.1 awen|OJJ34962.1  
azon|OJJ45614.1

Group3413: abra|OJJ74315.1 acar|OOF95412.1 acla|EAW07366.1 afis|EAW22393.1 afila|EED56056.1  
afum|EAL90798.1 agla|OJJ87655.1 akaw|GAA86710.1 aluc|OJZ89811.1 anid|CBF88743.1 anig|EHA27021.1  
aory|EIT76567.1 asyd|OJJ63954.1 ater|EAU39325.1 atub|OJI84994.1 aver|OJI96987.1 awen|OJJ34970.1  
azon|OJJ45619.1

Group3414: abra|OJJ74316.1 acar|OOF95411.1 acla|EAW07367.1 afis|EAW22394.1 afila|EED56057.1  
afum|EAL90797.1 agla|OJJ87657.1 akaw|GAA86709.1 aluc|OJZ89810.1 anid|CBF88745.1 anig|EHA27020.1  
aory|EIT76865.1 asyd|OJJ63955.1 ater|EAU39324.1 atub|OJI84995.1 aver|OJI96986.1 awen|OJJ34971.1  
azon|OJJ45620.1

Group3415: abra|OJJ74320.1 acar|OOF95409.1 acla|EAW07372.1 afis|EAW22397.1 afila|EED56061.1  
afum|EAL90794.1 agla|OJJ87660.1 akaw|GAA86706.1 aluc|OJZ89808.1 anid|CBF88750.1 anig|EHA27018.1  
aory|EIT76888.1 asyd|OJJ63958.1 ater|EAU39320.1 atub|OJI84998.1 aver|OJI96983.1 awen|OJJ34975.1  
azon|OJJ45624.1

Group3416: abra|OJJ74325.1 acar|OOF95406.1 acla|EAW07377.1 afis|EAW22402.1 afila|EED56066.1  
afum|EAL90789.1 agla|OJJ87665.1 akaw|GAA86701.1 aluc|OJZ89803.1 anid|CBF88765.1 anig|EHA27016.1  
aory|EIT76819.1 asyd|OJJ63981.1 ater|EAU39306.1 atub|OJI85003.1 aver|OJI96972.1 awen|OJJ34981.1  
azon|OJJ45629.1

Group3417: abra|OJJ74326.1 acar|OOF95405.1 acla|EAW07378.1 afis|EAW22403.1 afila|EED56067.1  
afum|EAL90788.1 agla|OJJ87666.1 akaw|GAA86700.1 aluc|OJZ89802.1 anid|CBF88763.1 anig|EHA27015.1  
aory|EIT76544.1 asyd|OJJ63982.1 ater|EAU39305.1 atub|OJI85004.1 aver|OJI96971.1 awen|OJJ34982.1  
azon|OJJ45631.1

Group3418: abra|OJJ74329.1 acar|OOF95402.1 acla|EAW07379.1 afis|EAW22404.1 afla|EED56068.1 afum|EAL90787.1 agla|OJJ87667.1 akaw|GAA86699.1 aluc|OJZ89801.1 anid|CBF88785.1 anig|EHA27014.1 aory|EIT76781.1 asyd|OJJ62903.1 ater|EAU39304.1 atub|OJI85005.1 aver|OJI96957.1 awen|OJJ34983.1 azon|OJJ45633.1

Group3419: abra|OJJ74336.1 acar|OOF95391.1 acla|EAW07386.1 afis|EAW22411.1 afla|EED52491.1 afum|EAL90781.1 agla|OJJ87678.1 akaw|GAA86693.1 aluc|OJZ89794.1 anid|CBF88796.1 anig|EHA27007.1 aory|EIT82814.1 asyd|OJJ62897.1 ater|EAU39294.1 atub|OJI85012.1 aver|OJI96950.1 awen|OJJ34992.1 azon|OJJ45635.1

Group3420: abra|OJJ74340.1 acar|OOF89991.1 acla|EAW07391.1 afis|EAW22417.1 afla|EED52495.1 afum|EAL90775.1 agla|OJJ87599.1 akaw|GAA86690.1 aluc|OJZ89791.1 anid|CBF88802.1 anig|EHA27004.1 aory|EIT82790.1 asyd|OJJ62895.1 ater|EAU39289.1 atub|OJI85015.1 aver|OJI96947.1 awen|OJJ34996.1 azon|OJJ45639.1

Group3421: abra|OJJ74341.1 acar|OOF95389.1 acla|EAW07392.1 afis|EAW22418.1 afla|EED52496.1 afum|EAL90774.1 agla|OJJ87600.1 akaw|GAA86689.1 aluc|OJZ89790.1 anid|CBF88804.1 anig|EHA27003.1 aory|EIT82800.1 asyd|OJJ62894.1 ater|EAU39288.1 atub|OJI85016.1 aver|OJI96946.1 awen|OJJ34997.1 azon|OJJ45646.1

Group3422: abra|OJJ74343.1 acar|OOF95387.1 acla|EAW07397.1 afis|EAW22423.1 afla|EED52501.1 afum|EAL90768.2 agla|OJJ87605.1 akaw|GAA86687.1 aluc|OJZ89788.1 anid|CBF88813.1 anig|EHA27002.1 aory|EIT82762.1 asyd|OJJ62889.1 ater|EAU39284.1 atub|OJI85018.1 aver|OJI96941.1 awen|OJJ35002.1 azon|OJJ45642.1

Group3423: abra|OJJ74344.1 acar|OOF95386.1 acla|EAW07398.1 afis|EAW22424.1 afla|EED52502.1 afum|EAL90767.1 agla|OJJ87606.1 akaw|GAA86686.1 aluc|OJZ89787.1 anid|CBF75162.1 anig|EHA27001.1 aory|EIT82765.1 asyd|OJJ59961.1 ater|EAU39283.1 atub|OJI85019.1 aver|OJJ02329.1 awen|OJJ35003.1 azon|OJJ45641.1

Group3424: abra|OJJ74347.1 acar|OOF95382.1 acla|EAW07401.1 afis|EAW22427.1 afla|EED52505.1 afum|EAL90764.1 agla|OJJ87596.1 akaw|GAA86683.1 aluc|OJZ89783.1 anid|CBF88819.1 anig|EHA26998.1 aory|EIT82749.1 asyd|OJJ62886.1 ater|EAU39280.1 atub|OJI85022.1 aver|OJI96938.1 awen|OJJ35006.1 azon|OJJ45648.1

Group3425: abra|OJJ74348.1 acar|OOF95380.1 acla|EAW07402.1 afis|EAW22428.1 afla|EED52506.1 afum|EAL90763.1 agla|OJJ87595.1 akaw|GAA86682.1 aluc|OJZ89782.1 anid|CBF88822.1 anig|EHA26997.1 aory|EIT82757.1 asyd|OJJ62885.1 ater|EAU39279.1 atub|OJI85024.1 aver|OJI96937.1 awen|OJJ35007.1 azon|OJJ45649.1

Group3426: abra|OJJ74352.1 acar|OOF95378.1 acla|EAW07405.1 afis|EAW22431.1 afla|EED52510.1 afum|EAL90760.1 agla|OJJ87592.1 akaw|GAA86679.1 aluc|OJZ89776.1 anid|CBF88828.1 anig|EHA26994.1 aory|EIT82794.1 asyd|OJJ62882.1 ater|EAU39276.1 atub|OJI85027.1 aver|OJI96934.1 awen|OJJ35010.1 azon|OJJ45651.1

Group3427: abra|OJJ74353.1 acar|OOF95377.1 acla|EAW07406.1 afis|EAW22432.1 afla|EED52513.1 afum|EAL90759.1 agla|OJJ87590.1 akaw|GAA86678.1 aluc|OJZ89775.1 anid|CBF88832.1 anig|EHA26993.1 aory|EIT82776.1 asyd|OJJ62880.1 ater|EAU39275.1 atub|OJI85028.1 aver|OJI96932.1 awen|OJJ35011.1 azon|OJJ45652.1

Group3428: abra|OJJ74355.1 acar|OOF95375.1 acla|EAW07409.1 afis|EAW22435.1 afla|EED52515.1 afum|EAL90756.1 agla|OJJ87587.1 akaw|GAA86676.1 aluc|OJZ89773.1 anid|CBF88835.1 anig|EHA26991.1 aory|EIT82785.1 asyd|OJJ62878.1 ater|EAU39273.1 atub|OJI85030.1 aver|OJI96930.1 awen|OJJ35013.1 azon|OJJ45654.1

Group3429: abra|OJJ74359.1 acar|OOF95370.1 acla|EAW07410.1 afis|EAW22436.1 afla|EED54446.1 afum|EAL90755.1 agla|OJJ87586.1 akaw|GAA86672.1 aluc|OJZ89769.1 anid|CBF88882.1 anig|EHA26989.1 asyd|OJJ62877.1 ater|EAU39272.1 atub|OJI85034.1 aver|OJI96929.1 awen|OJJ35014.1 azon|OJJ45656.1 aory|EIT81137.1

Group3430: abra|OJJ74361.1 acar|OOF95368.1 acla|EAW07413.1 afis|EAW22439.1 afla|EED54449.1 afum|EAL90752.1 agla|OJJ87584.1 akaw|GAA86669.1 aluc|OJZ89766.1 anid|CBF88862.1 anig|EHA26986.1 aory|EIT81135.1 asyd|OJJ62874.1 ater|EAU39269.1 atub|OJI85036.1 aver|OJI96927.1 awen|OJJ35016.1 azon|OJJ45661.1

Group3431: abra|OJJ74364.1 acar|OOF95366.1 acla|EAW07414.1 afis|EAW22441.1 afla|EED54457.1 afum|EAL90750.1 agla|OJJ87583.1 akaw|GAA86666.1 aluc|OJZ89763.1 anid|CBF88845.1 anig|EHA26983.1 aory|EIT81148.1 asyd|OJJ62867.1 ater|EAU39263.1 atub|OJI85039.1 aver|OJI96920.1 awen|OJJ35018.1 azon|OJJ50043.1

Group3432: abra|OJJ74386.1 acar|OOF95352.1 acla|EAW07427.1 afis|EAW22453.1 afla|EED54469.1 afum|EAL90738.1 agla|OJJ87570.1 akaw|GAA87287.1 aluc|OJZ89732.1 anid|CBF88931.1 anig|EHA26958.1

aory|EIT81158.1 asyd|OJJ62850.1 ater|EAU39253.1 atub|OJI85069.1 aver|OJI96903.1 awen|OJJ35078.1 azon|OJJ50029.1

Group3433: abra|OJJ74395.1 acar|OOF95341.1 acla|EAW06819.1 afis|EAW16367.1 afla|EED53469.1 afum|EAL88992.2 agla|OJJ78588.1 akaw|GAA87293.1 aluc|OJZ89725.1 anid|CBF89350.1 anig|EHA26953.1 aory|EIT75003.1 asyd|OJJ62502.1 ater|EAU34081.1 atub|OJI85075.1 aver|OJI96623.1 awen|OJJ37772.1 azon|OJJ45083.1

Group3434: abra|OJJ74414.1 acar|OOF95329.1 acla|EAW06828.1 afis|EAW16378.1 afla|EED53458.1 afum|EAL89003.1 agla|OJJ78596.1 akaw|GAA87305.1 aluc|OJZ89712.1 anid|CBF88042.1 anig|EHA26943.1 aory|EIT75071.1 asyd|OJJ63543.1 ater|EAU34074.1 atub|OJI85090.1 aver|OJI97391.1 awen|OJJ37912.1 azon|OJJ45091.1

Group3435: abra|OJJ74417.1 acar|OOF95326.1 acla|EAW06832.1 afis|EAW16382.1 afla|EED53452.1 afum|EAL89007.1 agla|OJJ88205.1 akaw|GAA87308.1 aluc|OJZ89709.1 anid|CBF89369.1 anig|EHA26940.1 aory|EIT75129.1 asyd|OJJ62475.1 ater|EAU34070.1 atub|OJI85093.1 aver|OJI96611.1 awen|OJJ37915.1 azon|OJJ46177.1

Group3436: abra|OJJ74438.1 acar|OOF95308.1 acla|EAW12299.1 afis|EAW23841.1 afla|EED49145.1 afum|EAL87272.1 agla|OJJ79053.1 akaw|GAA87331.1 aluc|OJZ89683.1 anid|CBF89626.1 anig|EHA26919.1 aory|EIT78517.1 asyd|OJJ62298.1 ater|EAU29595.1 atub|OJI85117.1 aver|OJI96406.1 awen|OJJ35935.1 azon|OJJ49112.1

Group3437: abra|OJJ74456.1 acar|OOF95294.1 acla|EAW07237.1 afis|EAW22260.1 afla|EED57647.1 afum|EAL90920.1 agla|OJJ87795.1 akaw|GAA87350.1 aluc|OJZ89664.1 anid|CBF88509.1 anig|EHA26901.1 aory|EIT79886.1 asyd|OJJ63802.1 ater|EAU34263.1 atub|OJI85136.1 aver|OJI97136.1 awen|OJJ34832.1 azon|OJJ45714.1

Group3438: abra|OJJ74457.1 acar|OOF95293.1 acla|EAW07236.1 afis|EAW22259.1 afla|EED57646.1 afum|EAL90921.1 agla|OJJ87799.1 akaw|GAA87351.1 aluc|OJZ89663.1 anid|CBF88506.1 anig|EHA26900.1 aory|EIT79868.1 asyd|OJJ63799.1 ater|EAU34262.1 atub|OJI85137.1 aver|OJI97139.1 awen|OJJ34831.1 azon|OJJ45715.1

Group3439: abra|OJJ74463.1 acar|OOF95288.1 acla|EAW07235.1 afis|EAW22256.1 afla|EED57643.1 afum|EAL90922.1 agla|OJJ87800.1 akaw|GAA87355.1 aluc|OJZ89659.1 anid|CBF88504.1 anig|EHA26896.1 aory|EIT79873.1 asyd|OJJ63798.1 ater|EAU34257.1 atub|OJI85141.1 aver|OJI97140.1 awen|OJJ34828.1 azon|OJJ45720.1

Group3440: abra|OJJ74464.1 acar|OOF95286.1 acla|EAW07234.1 afis|EAW22255.1 afla|EED57641.1 afum|EAL90923.1 agla|OJJ87801.1 akaw|GAA87356.1 aluc|OJZ89658.1 anid|CBF88502.1 anig|EHA26895.1 aory|EIT82944.1 asyd|OJJ63796.1 ater|EAU34256.1 atub|OJI85143.1 aver|OJI97141.1 awen|OJJ34827.1 azon|OJJ45722.1

Group3441: abra|OJJ74466.1 acar|OOF95281.1 acla|EAW07231.1 afis|EAW22245.1 afla|EED57638.1 afum|EAL90948.1 agla|OJJ87805.1 akaw|GAA87359.1 aluc|OJZ89654.1 anid|CBF88496.1 anig|EHA26892.1 aory|EIT82948.1 asyd|OJJ63793.1 ater|EAU34253.1 atub|OJI85150.1 aver|OJI97144.1 awen|OJJ34823.1 azon|OJJ45727.1

Group3442: abra|OJJ74467.1 acar|OOF95280.1 acla|EAW07230.1 afis|EAW22244.1 afla|EED57637.1 afum|EAL90949.1 agla|OJJ87807.1 akaw|GAA87360.1 aluc|OJZ89653.1 anid|CBF88493.1 anig|EHA26891.1 aory|EIT82977.1 asyd|OJJ63792.1 ater|EAU34252.1 atub|OJI85151.1 aver|OJI97145.1 awen|OJJ34822.1 azon|OJJ45728.1

Group3443: abra|OJJ74468.1 acar|OOF95279.1 acla|EAW07229.1 afis|EAW22243.1 afla|EED57636.1 afum|EAL90950.1 agla|OJJ87808.1 akaw|GAA87361.1 aluc|OJZ89652.1 anid|CBF88491.1 anig|EHA26890.1 aory|EIT82978.1 asyd|OJJ63791.1 ater|EAU34251.1 atub|OJI85152.1 aver|OJI97146.1 awen|OJJ34821.1 azon|OJJ45729.1

Group3444: abra|OJJ74473.1 acar|OOF95271.1 acla|EAW07224.1 afis|EAW22238.1 afla|EED57627.1 afum|EAL90955.1 agla|OJJ87813.1 akaw|GAA87367.1 aluc|OJZ89645.1 anid|CBF88481.1 anig|EHA26884.1 aory|EIT82957.1 asyd|OJJ63785.1 ater|EAU34245.1 atub|OJI85158.1 aver|OJI97152.1 awen|OJJ34816.1 azon|OJJ45733.1

Group3445: abra|OJJ74477.1 acar|OOF95269.1 acla|EAW07223.1 afis|EAW22237.1 afla|EED57626.1 afum|EAL90956.1 agla|OJJ87814.1 akaw|GAA87370.1 aluc|OJZ89642.1 anid|CBF88479.1 anig|EHA26881.1 aory|EIT82989.1 asyd|OJJ63784.1 ater|EAU34244.1 atub|OJI85161.1 aver|OJI97153.1 awen|OJJ34815.1 azon|OJJ45734.1

Group3446: abra|OJJ74478.1 acar|OOF95268.1 acla|EAW07222.1 afis|EAW22236.1 afla|EED57625.1 afum|EAL90957.1 agla|OJJ87815.1 akaw|GAA87371.1 aluc|OJZ89641.1 anid|CBF88477.1 anig|EHA26880.1 aory|EIT82990.1 asyd|OJJ63783.1 ater|EAU34243.1 atub|OJI85162.1 aver|OJI97154.1 awen|OJJ34814.1 azon|OJJ45735.1

Group3447: abra|OJJ74481.1 acar|OOF95267.1 acla|EAW07220.1 afis|EAW22234.1 afla|EED57623.1 afum|EAL90959.1 agla|OJJ87817.1 akaw|GAA87374.1 aluc|OJZ89638.1 anid|CBF88474.1 anig|EHA26879.1 aory|EIT82951.1 asyd|OJJ63782.1 ater|EAU34237.1 atub|OJI85165.1 aver|OJI97155.1 awen|OJJ34813.1 azon|OJJ45736.1

Group3448: abra|OJJ74484.1 acar|OOF95266.1 acla|EAW07217.1 afis|EAW22231.1 afla|EED57620.1 afum|EAL90962.1 agla|OJJ87820.1 akaw|GAA87377.1 aluc|OJZ89635.1 anid|CBF88469.1 anig|EHA26877.1 aory|EIT82992.1 asyd|OJJ63780.1 ater|EAU34234.1 atub|OJI85168.1 aver|OJI97157.1 awen|OJJ34811.1 azon|OJJ45738.1

Group3449: abra|OJJ74489.1 acar|OOF95260.1 acla|EAW07206.1 afis|EAW22218.1 afla|EED57611.1 afum|EAL90976.1 agla|OJJ87826.1 akaw|GAA87383.1 aluc|OJZ89629.1 anid|CBF88456.1 anig|EHA26872.1 aory|EIT82939.1 asyd|OJJ63771.1 ater|EAU34228.1 atub|OJI85173.1 aver|OJI97167.1 awen|OJJ34804.1 azon|OJJ45749.1

Group3450: abra|OJJ74490.1 acar|OOF95259.1 acla|EAW07204.1 afis|EAW22216.1 afla|EED57610.1 afum|EAL90978.1 agla|OJJ87830.1 akaw|GAA87384.1 aluc|OJZ89628.1 anid|CBF88454.1 anig|EHA26871.1 aory|EIT82985.1 asyd|OJJ63770.1 ater|EAU34224.1 atub|OJI85174.1 aver|OJI97168.1 awen|OJJ34801.1 azon|OJJ45748.1

Group3451: abra|OJJ74491.1 acar|OOF95258.1 acla|EAW07203.1 afis|EAW22215.1 afla|EED57609.1 afum|EAL90979.1 agla|OJJ87829.1 akaw|GAA87385.1 aluc|OJZ89627.1 anid|CBF88452.1 anig|EHA26870.1 aory|EIT82971.1 asyd|OJJ63769.1 ater|EAU34223.1 atub|OJI85175.1 aver|OJI97169.1 awen|OJJ34800.1 azon|OJJ45747.1

Group3452: abra|OJJ74493.1 acar|OOF95256.1 acla|EAW07201.1 afis|EAW22213.1 afla|EED57607.1 afum|EAL90981.2 agla|OJJ87831.1 akaw|GAA87386.1 aluc|OJZ89625.1 anid|CBF88448.1 anig|EHA26869.1 aory|EIT82952.1 asyd|OJJ63768.1 ater|EAU34222.1 atub|OJI85177.1 aver|OJI97170.1 awen|OJJ34798.1 azon|OJJ45745.1

Group3453: abra|OJJ74494.1 acar|OOF95255.1 acla|EAW07200.1 afis|EAW22212.1 afla|EED57606.1 afum|EAL90982.1 agla|OJJ87832.1 akaw|GAA87387.1 aluc|OJZ89624.1 anid|CBF88446.1 anig|EHA26868.1 aory|EIT82953.1 asyd|OJJ63767.1 ater|EAU34221.1 atub|OJI85178.1 aver|OJI97171.1 awen|OJJ34797.1 azon|OJJ45744.1

Group3454: abra|OJJ74496.1 acar|OOF95254.1 acla|EAW07197.1 afis|EAW22209.1 afla|EED57603.1 afum|EAL90985.1 agla|OJJ87835.1 akaw|GAA87390.1 aluc|OJZ89622.1 anig|EHA26866.1 asyd|OJJ63765.1 ater|EAU34219.1 atub|OJI85180.1 aver|OJI97174.1 awen|OJJ34794.1 anid|CBF88442.1 aory|EIT82943.1 azon|OJJ45750.1

Group3455: abra|OJJ74497.1 acar|OOF95253.1 acla|EAW07195.1 afis|EAW22207.1 afla|EED57602.1 afum|EAL90986.2 agla|OJJ87837.1 akaw|GAA87392.1 aluc|OJZ89621.1 anid|CBF88439.1 anig|EHA26865.1 aory|EIT82955.1 asyd|OJJ63764.1 ater|EAU34218.1 atub|OJI85181.1 aver|OJI97176.1 awen|OJJ34793.1 azon|OJJ45753.1

Group3456: abra|OJJ74498.1 acar|OOF95252.1 acla|EAW13756.1 afis|EAW19810.1 afla|EED57601.1 afum|EAL85082.1 agla|OJJ87838.1 akaw|GAA87393.1 aluc|OJZ89620.1 anid|CBF88437.1 anig|EHA26864.1 aory|EIT82959.1 asyd|OJJ63763.1 ater|EAU34217.1 atub|OJI85182.1 aver|OJI97177.1 awen|OJJ34792.1 azon|OJJ45754.1

Group3457: abra|OJJ74503.1 acar|OOF95241.1 acla|EAW07189.1 afis|EAW22202.1 afla|EED57593.1 afum|EAL90990.1 agla|OJJ87842.1 akaw|GAA87397.1 aluc|OJZ89615.1 anid|CBF88430.1 anig|EHA26860.1 aory|EIT82963.1 asyd|OJJ63760.1 ater|EAU34212.1 atub|OJI85188.1 aver|OJI97180.1 awen|OJJ34787.1 azon|OJJ45771.1

Group3458: abra|OJJ74506.1 acar|OOF89839.1 acla|EAW07192.1 afis|EAW22205.1 afla|EED57588.1 afum|EAL90988.1 agla|OJJ87845.1 akaw|GAA88823.1 aluc|OJZ89611.1 anid|CBF88417.1 anig|EHA26856.1 aory|EIT82968.1 asyd|OJJ63756.1 ater|EAU34209.1 atub|OJI85192.1 aver|OJI97184.1 awen|OJJ34786.1 azon|OJJ45766.1

Group3459: abra|OJJ74508.1 acar|OOF95234.1 acla|EAW07184.1 afis|EAW22197.1 afla|EED57584.1 afum|EAL90994.1 agla|OJJ87848.1 akaw|GAA82091.1 aluc|OJZ92089.1 anid|CBF88409.1 anig|EHA26852.1 aory|EIT82932.1 asyd|OJJ63754.1 ater|EAU34207.1 atub|OJI86519.1 aver|OJI97187.1 awen|OJJ34780.1 azon|OJJ45761.1

Group3460: abra|OJJ74513.1 acar|OOF95230.1 acla|EAW07177.1 afis|EAW22191.1 afla|EED57575.1 afum|EAL91000.1 agla|OJJ87856.1 akaw|GAA82086.1 aluc|OJZ92094.1 anid|CBF88400.1 anig|EHA26847.1 aory|EIT82946.1 asyd|OJJ63748.1 ater|EAU34199.1 atub|OJI86527.1 aver|OJI97192.1 awen|OJJ34771.1 azon|OJJ45775.1

Group3461: abra|OJJ74519.1 acar|OOF95229.1 acla|EAW07174.1 afis|EAW22188.1 afla|EED57572.1 afum|EAL91002.1 agla|OJJ87861.1 akaw|GAA82081.1 aluc|OJZ92098.1 anid|CBF88395.1 anig|EHA26844.1

aory|EIT82984.1 asyd|OJJ63745.1 ater|EAU34195.1 atub|OJI86531.1 aver|OJI97195.1 awen|OJJ34768.1 azon|OJJ45778.1

Group3462: abra|OJJ74523.1 acar|OOF95226.1 acla|EAW07170.1 afis|EAW22185.1 afla|EED57563.1 afum|EAL91004.1 agla|OJJ87870.1 akaw|GAA82078.1 aluc|OJZ92102.1 anid|CBF88391.1 anig|EHA26841.1 aory|EIT81827.1 asyd|OJJ63742.1 ater|EAU34193.1 atub|OJI86536.1 aver|OJI97198.1 awen|OJJ34765.1 azon|OJJ45780.1

Group3463: abra|OJJ74524.1 acar|OOF95225.1 acla|EAW07169.1 afis|EAW22184.1 afla|EED57562.1 afum|EAL91005.1 agla|OJJ87869.1 akaw|GAA82077.1 aluc|OJZ92104.1 anid|CBF75419.1 anig|EHA26840.1 aory|EIT81846.1 asyd|OJJ59792.1 ater|EAU34188.1 atub|OJI86538.1 aver|OJJ02495.1 awen|OJJ34764.1 azon|OJJ45781.1

Group3464: abra|OJJ74527.1 acar|OOF95223.1 acla|EAW07164.1 afis|EAW22179.1 afla|EED57558.1 afum|EAL91010.1 agla|OJJ87876.1 akaw|GAA82074.1 aluc|OJZ92108.1 anid|CBF88384.1 anig|EHA26837.1 aory|EIT81836.1 asyd|OJJ63738.1 ater|EAU34184.1 atub|OJI86542.1 aver|OJI97202.1 awen|OJJ34760.1 azon|OJJ45791.1

Group3465: abra|OJJ74532.1 acar|OOF95220.1 acla|EAW07160.1 afis|EAW22175.1 afla|EED57554.1 afum|EAL91014.1 agla|OJJ87879.1 akaw|GAA82068.1 aluc|OJZ92114.1 anid|CBF89077.1 anig|EHA26831.1 aory|EIT81832.1 asyd|OJJ62739.1 ater|EAU34180.1 atub|OJI86547.1 aver|OJI96782.1 awen|OJJ39689.1 azon|OJJ45808.1

Group3466: abra|OJJ74533.1 acar|OOF95219.1 acla|EAW07159.1 afis|EAW22174.1 afla|EED57553.1 afum|EAL91015.1 agla|OJJ87880.1 akaw|GAA82067.1 aluc|OJZ92115.1 anid|CBF89079.1 anig|EHA26830.1 aory|EIT81853.1 asyd|OJJ62738.1 ater|EAU34179.1 atub|OJI86548.1 aver|OJI96781.1 awen|OJJ34749.1 azon|OJJ45810.1

Group3467: abra|OJJ74546.1 acar|OOF95210.1 acla|EAW07152.1 afis|EAW22166.1 afla|EED57536.1 afum|EAL91025.1 agla|OJJ87891.1 akaw|GAA82052.1 aluc|OJZ92128.1 anid|CBF89087.1 anig|EHA26820.1 aory|EIT81873.1 asyd|OJJ62734.1 ater|EAU34173.1 atub|OJI86560.1 aver|OJI96777.1 awen|OJJ34740.1 azon|OJJ45819.1

Group3468: abra|OJJ74548.1 acar|OOF95209.1 acla|EAW07150.1 afis|EAW22164.1 afla|EED57535.1 afum|EAL91027.1 agla|OJJ87893.1 akaw|GAA82050.1 aluc|OJZ92130.1 anid|CBF89090.1 anig|EHA26818.1 aory|EIT81851.1 asyd|OJJ62732.1 ater|EAU34171.1 atub|OJI86562.1 aver|OJI96775.1 awen|OJJ34738.1 azon|OJJ45821.1

Group3469: abra|OJJ74549.1 acar|OOF95208.1 acla|EAW07149.1 afis|EAW22163.1 afla|EED57534.1 afum|EAL91028.1 agla|OJJ87894.1 akaw|GAA82049.1 aluc|OJZ92131.1 anid|CBF89094.1 anig|EHA26817.1 aory|EIT81858.1 asyd|OJJ62731.1 ater|EAU34166.1 atub|OJI86563.1 aver|OJI96774.1 awen|OJJ34737.1 azon|OJJ45822.1

Group3470: abra|OJJ74553.1 acar|OOF95202.1 acla|EAW07145.1 afis|EAW22159.1 afla|EED57531.1 afum|EAL91031.1 agla|OJJ87905.1 akaw|GAA82044.1 aluc|OJZ92136.1 anid|CBF89101.1 anig|EHA26813.1 aory|EIT81829.1 asyd|OJJ62727.1 ater|EAU34162.1 atub|OJI86568.1 aver|OJI96770.1 awen|OJJ34733.1 azon|OJJ45826.1

Group3471: abra|OJJ74569.1 acar|OOF95192.1 acla|EAW07140.1 afis|EAW22153.1 afla|EED53614.1 afum|EAL91037.1 agla|OJJ87909.1 akaw|GAA82036.1 aluc|OJZ92147.1 anid|CBF89105.1 anig|EHA26802.1 aory|EIT75057.1 asyd|OJJ62725.1 ater|EAU34157.1 atub|OJI86575.1 aver|OJI96768.1 awen|OJJ34729.1 azon|OJJ45834.1

Group3472: abra|OJJ74571.1 acar|OOF95191.1 acla|EAW07138.1 afis|EAW22151.1 afla|EED53613.1 afum|EAL91039.1 agla|OJJ87911.1 akaw|GAA82034.1 aluc|OJZ92149.1 anid|CBF89108.1 anig|EHA26800.1 aory|EIT75195.1 asyd|OJJ62667.1 ater|EAU34156.1 atub|OJI86577.1 aver|OJI96765.1 awen|OJJ34727.1 azon|OJJ45835.1

Group3473: abra|OJJ74573.1 acar|OOF95189.1 acla|EAW07136.1 afis|EAW22149.1 afla|EED53610.1 afum|EAL91041.1 agla|OJJ87914.1 akaw|GAA82032.1 aluc|OJZ92151.1 anid|CBF89112.1 anig|EHA26798.1 aory|EIT74840.1 asyd|OJJ62665.1 ater|EAU34155.1 atub|OJI86579.1 aver|OJI96763.1 awen|OJJ34725.1 azon|OJJ45839.1

Group3474: abra|OJJ74577.1 acar|OOF95187.1 acla|EAW07133.1 afis|EAW22146.1 afla|EED45848.1 afum|EAL91044.1 agla|OJJ87922.1 akaw|GAA82028.1 aluc|OJZ92155.1 anid|CBF78365.1 anig|EHA26794.1 aory|EIT75625.1 asyd|OJJ57324.1 ater|EAU34149.1 atub|OJI86583.1 aver|OJJ05836.1 awen|OJJ34721.1 azon|OJJ46642.1

Group3475: abra|OJJ74578.1 acar|OOF95186.1 acla|EAW07132.1 afis|EAW22145.1 afla|EED45849.1 afum|EAL91045.1 agla|OJJ87923.1 akaw|GAA82027.1 aluc|OJZ92156.1 anid|CBF78367.1 anig|EHA26793.1 aory|EIT75756.1 asyd|OJJ57325.1 ater|EAU34148.1 atub|OJI86584.1 aver|OJJ05835.1 awen|OJJ34720.1 azon|OJJ46643.1



Group3476: abra|OJJ74581.1 acar|OOF95183.1 acla|EAW07131.1 afis|EAW22142.1 afla|EED53568.1 afum|EAL91048.2 agla|OJJ87932.1 akaw|GAA82024.1 aluc|OJZ92159.1 anid|CBF89555.1 anig|EHA26790.1 aory|EIT75148.1 asyd|OJJ62347.1 ater|EAU31752.1 atub|OJI86587.1 aver|OJI96453.1 awen|OJJ34717.1 azon|OJJ45846.1

Group3477: abra|OJJ74584.1 acar|OOF95182.1 acla|EAW10794.1 afis|EAW24782.1 afla|EED47203.1 afum|EAL89421.1 agla|OJJ82878.1 akaw|GAA82021.1 aluc|OJZ92162.1 anid|CBF81444.1 anig|EHA26787.1 aory|EIT79171.1 asyd|OJJ59430.1 ater|EAU36526.1 atub|OJI86590.1 aver|OJJ02841.1 awen|OJJ40368.1 azon|OJJ49217.1

Group3479: abra|OJJ74588.1 acar|OOF95178.1 acla|EAW10790.1 afis|EAW24786.1 afla|EED47199.1 afum|EAL89425.1 agla|OJJ82884.1 akaw|GAA82017.1 aluc|OJZ92165.1 anid|CBF81455.1 anig|EHA26784.1 aory|EIT79195.1 asyd|OJJ59435.1 ater|EAU36523.1 atub|OJI86595.1 aver|OJJ02836.1 awen|OJJ40370.1 azon|OJJ49220.1

Group3480: abra|OJJ74589.1 acar|OOF95177.1 acla|EAW10789.1 afis|EAW24787.1 afla|EED47197.1 afum|EAL89426.1 agla|OJJ82883.1 akaw|GAA82016.1 aluc|OJZ92167.1 anid|CBF81457.1 anig|EHA26782.1 aory|EIT79260.1 asyd|OJJ59437.1 ater|EAU36522.1 atub|OJI86598.1 aver|OJJ02834.1 awen|OJJ40371.1 azon|OJJ49221.1

Group3481: abra|OJJ74594.1 acar|OOF95175.1 acla|EAW10788.1 afis|EAW24791.1 afla|EED47195.1 afum|EAL89433.1 agla|OJJ82881.1 akaw|GAA82014.1 aluc|OJZ92169.1 anid|CBF81460.1 anig|EHA26780.1 aory|EIT79181.1 asyd|OJJ59439.1 ater|EAU36521.1 atub|OJI86601.1 aver|OJJ02833.1 awen|OJJ40372.1 azon|OJJ49223.1

Group3482: abra|OJJ74595.1 acar|OOF95174.1 acla|EAW10786.1 afis|EAW24792.1 afla|EED47194.1 afum|EAL89434.1 agla|OJJ82879.1 akaw|GAA82013.1 aluc|OJZ92170.1 anid|CBF81464.1 anig|EHA26779.1 aory|EIT79314.1 asyd|OJJ59442.1 ater|EAU36516.1 atub|OJI86602.1 aver|OJJ02831.1 awen|OJJ40373.1 azon|OJJ49224.1

Group3484: abra|OJJ74705.1 acar|OOF89903.1 acla|EAW10692.1 afis|EAW24878.1 afla|EED47088.1 afum|EAL89528.1 agla|OJJ82100.1 akaw|GAA81912.1 aluc|OJZ92285.1 anid|CBF75756.1 anig|EHA26683.1 aory|EIT72477.1 asyd|OJJ57526.1 ater|EAU36423.1 atub|OJI86716.1 aver|OJJ05652.1 awen|OJJ40468.1 azon|OJJ49332.1

Group3485: abra|OJJ74707.1 acar|OOF89905.1 acla|EAW10691.1 afis|EAW24879.1 afla|EED47087.1 afum|EAL89529.1 agla|OJJ82101.1 akaw|GAA81910.1 aluc|OJZ92288.1 anid|CBF75754.1 anig|EHA26681.1 aory|EIT72507.1 asyd|OJJ57525.1 ater|EAU36422.1 atub|OJI86718.1 aver|OJJ05653.1 awen|OJJ40469.1 azon|OJJ49333.1

Group3486: abra|OJJ74708.1 acar|OOF95718.1 acla|EAW10690.1 afis|EAW24880.1 afla|EED47086.1 afum|EAL89530.1 agla|OJJ82102.1 akaw|GAA81909.1 aluc|OJZ92289.1 anid|CBF75752.1 anig|EHA26680.1 aory|EIT72478.1 asyd|OJJ57524.1 ater|EAU36421.1 atub|OJI86719.1 aver|OJJ05654.1 awen|OJJ40470.1 azon|OJJ49334.1

Group3487: abra|OJJ74709.1 acar|OOF95719.1 acla|EAW10689.1 afis|EAW24881.1 afla|EED47085.1 afum|EAL89531.1 agla|OJJ82103.1 akaw|GAA81908.1 aluc|OJZ92290.1 anid|CBF75750.1 anig|EHA26679.1 aory|EIT72499.1 asyd|OJJ57523.1 ater|EAU36420.1 atub|OJI86720.1 aver|OJJ05655.1 awen|OJJ40471.1 azon|OJJ49335.1

Group3488: abra|OJJ74711.1 acar|OOF95722.1 acla|EAW10687.1 afis|EAW24883.1 afla|EED47083.1 afum|EAL89533.1 agla|OJJ82105.1 akaw|GAA81906.1 aluc|OJZ92292.1 anid|CBF75747.1 anig|EHA26677.1 aory|EIT72512.1 asyd|OJJ57521.1 ater|EAU36418.1 atub|OJI86722.1 aver|OJJ05657.1 awen|OJJ40473.1 azon|OJJ49337.1

Group3489: abra|OJJ74714.1 acar|OOF95723.1 acla|EAW10685.1 afis|EAW24885.1 afla|EED47081.1 afum|EAL89535.2 agla|OJJ82108.1 akaw|GAA81904.1 aluc|OJZ92294.1 anid|CBF75617.1 anig|EHA26675.1 aory|EIT72482.1 asyd|OJJ57452.1 ater|EAU36416.1 atub|OJI86724.1 aver|OJJ05726.1 awen|OJJ40475.1 azon|OJJ49339.1

Group3490: abra|OJJ74715.1 acar|OOF95724.1 acla|EAW10684.1 afis|EAW24886.1 afla|EED47080.1 afum|EAL89537.1 agla|OJJ82109.1 akaw|GAA81903.1 aluc|OJZ92295.1 anid|CBF75619.1 anig|EHA26674.1 aory|EIT72515.1 asyd|OJJ57453.1 ater|EAU36415.1 atub|OJI86725.1 aver|OJJ05725.1 awen|OJJ40476.1 azon|OJJ49340.1

Group3491: abra|OJJ74717.1 acar|OOF95728.1 acla|EAW10681.1 afis|EAW24889.1 afla|EED46965.1 afum|EAL89540.1 agla|OJJ82112.1 akaw|GAA81899.1 aluc|OJZ92299.1 anid|CBF75625.1 anig|EHA26672.1 aory|EIT72622.1 asyd|OJJ57456.1 ater|EAU36412.1 atub|OJI86728.1 aver|OJJ05723.1 awen|OJJ40479.1 azon|OJJ49343.1

Group3492: abra|OJJ74722.1 acar|OOF95731.1 acla|EAW10675.1 afis|EAW24891.1 afla|EED46970.1 afum|EAL89544.1 agla|OJJ82115.1 akaw|GAA81894.1 aluc|OJZ92306.1 anid|CBF75630.1 anig|EHA26662.1

aory|EIT72703.1 asyd|OJJ57459.1 ater|EAU36407.1 atub|OJI86736.1 aver|OJJ05721.1 awen|OJJ40484.1 azon|OJJ49346.1

Group3493: abra|OJJ74723.1 acar|OOF95732.1 acla|EAW10674.1 afis|EAW24892.1 afla|EED46971.1 afum|EAL89545.1 agla|OJJ82116.1 akaw|GAA81893.1 aluc|OJZ92307.1 anid|CBF75632.1 anig|EHA26661.1 aory|EIT72525.1 asyd|OJJ57460.1 ater|EAU36406.1 atub|OJI86737.1 aver|OJJ05720.1 awen|OJJ40485.1 azon|OJJ49347.1

Group3494: abra|OJJ74724.1 acar|OOF95733.1 acla|EAW10673.1 afis|EAW24893.1 afla|EED46972.1 afum|EAL89546.1 agla|OJJ82117.1 akaw|GAA81892.1 aluc|OJZ92308.1 anid|CBF75634.1 anig|EHA26660.1 aory|EIT72626.1 asyd|OJJ57461.1 ater|EAU36405.1 atub|OJI86738.1 aver|OJJ05719.1 awen|OJJ40486.1 azon|OJJ49348.1

Group3495: abra|OJJ74727.1 acar|OOF90030.1 acla|EAW10671.1 afis|EAW24895.1 afla|EED46975.1 afum|EAL89549.1 agla|OJJ82119.1 akaw|GAA81890.1 aluc|OJZ92311.1 anid|CBF75657.1 anig|EHA26658.1 aory|EIT72598.1 asyd|OJJ57463.1 ater|EAU36403.1 atub|OJI86740.1 aver|OJJ05717.1 awen|OJJ40488.1 azon|OJJ49351.1

Group3496: abra|OJJ74735.1 acar|OOF95734.1 acla|EAW10667.1 afis|EAW24899.1 afla|EED46978.1 afum|EAL89553.1 agla|OJJ82124.1 akaw|GAA83674.1 aluc|OJZ92317.1 anid|CBF75649.1 anig|EHA26654.1 aory|EIT72632.1 asyd|OJJ57470.1 ater|EAU36400.1 atub|OJI86746.1 aver|OJJ05712.1 awen|OJJ40493.1 azon|OJJ49355.1

Group3497: abra|OJJ74736.1 acar|OOF95735.1 acla|EAW10666.1 afis|EAW24900.1 afla|EED46980.1 afum|EAL89554.1 agla|OJJ82125.1 akaw|GAA83673.1 aluc|OJZ92318.1 anid|CBF75648.1 anig|EHA26653.1 aory|EIT72726.1 asyd|OJJ57472.1 ater|EAU36399.1 atub|OJI86747.1 aver|OJJ05711.1 awen|OJJ40494.1 azon|OJJ49356.1

Group3498: abra|OJJ74738.1 acar|OOF95736.1 acla|EAW10665.1 afis|EAW24901.1 afla|EED46981.1 afum|EAL89555.1 agla|OJJ82126.1 akaw|GAA83672.1 aluc|OJZ92319.1 anid|CBF75646.1 anig|EHA26651.1 aory|EIT72528.1 asyd|OJJ57473.1 ater|EAU36398.1 atub|OJI86748.1 aver|OJJ05710.1 awen|OJJ40495.1 azon|OJJ49357.1

Group3499: abra|OJJ74739.1 acar|OOF95737.1 acla|EAW10664.1 afis|EAW24902.1 afla|EED46982.1 afum|EAL89556.1 agla|OJJ82127.1 akaw|GAA83671.1 aluc|OJZ92320.1 anid|CBF75644.1 anig|EHA26650.1 aory|EIT72548.1 asyd|OJJ57474.1 ater|EAU36397.1 atub|OJI86749.1 aver|OJJ05707.1 awen|OJJ40496.1 azon|OJJ49358.1

Group3500: abra|OJJ74749.1 acar|OOF95742.1 acla|EAW10661.1 afis|EAW24906.1 afla|EED46989.1 afum|EAL89559.1 agla|OJJ82130.1 akaw|GAA83662.1 aluc|OJZ92330.1 anid|CBF75661.1 anig|EHA26641.1 aory|EIT72764.1 asyd|OJJ57478.1 ater|EAU36392.1 atub|OJI86759.1 aver|OJJ05703.1 awen|OJJ40499.1 azon|OJJ49361.1

Group3501: abra|OJJ74750.1 acar|OOF95743.1 acla|EAW10660.1 afis|EAW24907.1 afla|EED46991.1 afum|EAL89560.1 agla|OJJ82131.1 akaw|GAA83661.1 aluc|OJZ92331.1 anid|CBF75665.1 anig|EHA26640.1 aory|EIT72700.1 asyd|OJJ57479.1 ater|EAU36391.1 atub|OJI86760.1 aver|OJJ05702.1 awen|OJJ40500.1 azon|OJJ49362.1

Group3502: abra|OJJ74751.1 acar|OOF95744.1 acla|EAW10659.1 afis|EAW24908.1 afla|EED46992.1 afum|EAL89561.1 agla|OJJ82132.1 akaw|GAA83660.1 aluc|OJZ92332.1 anid|CBF75667.1 anig|EHA26639.1 aory|EIT72681.1 asyd|OJJ57480.1 ater|EAU36390.1 atub|OJI86761.1 aver|OJJ05701.1 awen|OJJ40501.1 azon|OJJ49363.1

Group3503: abra|OJJ74752.1 acar|OOF95745.1 acla|EAW10658.1 afis|EAW24909.1 afla|EED46994.1 afum|EAL89562.1 agla|OJJ82133.1 akaw|GAA83659.1 aluc|OJZ92333.1 anid|CBF75669.1 anig|EHA26638.1 aory|EIT72691.1 asyd|OJJ57481.1 ater|EAU36389.1 atub|OJI86762.1 aver|OJJ05700.1 awen|OJJ40503.1 azon|OJJ49364.1

Group3504: abra|OJJ74754.1 acar|OOF95747.1 acla|EAW10656.1 afis|EAW24911.1 afla|EED46996.1 afum|EAL89565.1 agla|OJJ82135.1 akaw|GAA83657.1 aluc|OJZ92335.1 anid|CBF75671.1 anig|EHA26636.1 aory|EIT72517.1 asyd|OJJ57483.1 ater|EAU36387.1 atub|OJI86764.1 aver|OJJ05698.1 awen|OJJ40506.1 azon|OJJ49366.1

Group3505: abra|OJJ74756.1 acar|OOF95749.1 acla|EAW10655.1 afis|EAW24912.1 afla|EED46997.1 afum|EAL89566.2 agla|OJJ82141.1 akaw|GAA83655.1 aluc|OJZ92338.1 anid|CBF75673.1 anig|EHA26634.1 aory|EIT72758.1 asyd|OJJ57484.1 ater|EAU36386.1 atub|OJI86766.1 aver|OJJ05697.1 awen|OJJ40508.1 azon|OJJ49367.1

Group3506: abra|OJJ74758.1 acar|OOF95751.1 acla|EAW10653.1 afis|EAW24914.1 afla|EED46999.1 afum|EAL89568.1 agla|OJJ82142.1 akaw|GAA83653.1 aluc|OJZ92342.1 anid|CBF75677.1 anig|EHA26632.1 aory|EIT72541.1 asyd|OJJ57486.1 ater|EAU36384.1 atub|OJI86768.1 aver|OJJ05694.1 awen|OJJ40510.1 azon|OJJ49369.1

Group3507: abra|OJJ74759.1 acar|OOF95752.1 acla|EAW10652.1 afis|EAW24915.1 afla|EED47000.1  
afum|EAL89569.1 agla|OJJ82143.1 akaw|GAA83652.1 aluc|OJZ92343.1 anid|CBF75679.1 anig|EHA26631.1  
aory|EIT72710.1 asyd|OJJ57487.1 ater|EAU36383.1 atub|OJI86769.1 aver|OJJ05693.1 awen|OJJ40511.1  
azon|OJJ49370.1

Group3508: abra|OJJ74760.1 acar|OOF95753.1 acla|EAW10651.1 afis|EAW24916.1 afla|EED47001.1  
afum|EAL89571.1 agla|OJJ82144.1 akaw|GAA83651.1 aluc|OJZ92344.1 anid|CBF75681.1 anig|EHA26630.1  
aory|EIT72621.1 asyd|OJJ57488.1 ater|EAU36382.1 atub|OJI86770.1 aver|OJJ05692.1 awen|OJJ40512.1  
azon|OJJ49371.1

Group3509: abra|OJJ74762.1 acar|OOF95755.1 acla|EAW10649.1 afis|EAW24918.1 afla|EED47003.1  
afum|EAL89573.1 agla|OJJ82147.1 akaw|GAA83649.1 aluc|OJZ92346.1 anid|CBF75687.1 anig|EHA26628.1  
aory|EIT72583.1 asyd|OJJ57490.1 ater|EAU36380.1 atub|OJI86773.1 aver|OJJ05690.1 awen|OJJ40515.1  
azon|OJJ49374.1

Group3510: abra|OJJ74763.1 acar|OOF95756.1 acla|EAW10647.1 afis|EAW24919.1 afla|EED47004.1  
afum|EAL89574.1 agla|OJJ82148.1 akaw|GAA83648.1 aluc|OJZ92347.1 anid|CBF75689.1 anig|EHA26627.1  
aory|EIT72654.1 asyd|OJJ57491.1 ater|EAU36379.1 atub|OJI86774.1 aver|OJJ05689.1 awen|OJJ40516.1  
azon|OJJ49375.1

Group3511: abra|OJJ74766.1 acar|OOF95758.1 acla|EAW10645.1 afis|EAW24921.1 afla|EED55552.1  
afum|EAL89576.1 agla|OJJ82150.1 akaw|GAA83646.1 aluc|OJZ92349.1 anid|CBF75693.1 anig|EHA26625.1  
aory|EIT82689.1 asyd|OJJ57493.1 ater|EAU35653.1 atub|OJI86777.1 aver|OJJ05687.1 awen|OJJ40518.1  
azon|OJJ49377.1

Group3512: abra|OJJ74767.1 acar|OOF95759.1 acla|EAW10644.1 afis|EAW24922.1 afla|EED55551.1  
afum|EAL89577.2 agla|OJJ82151.1 akaw|GAA83645.1 aluc|OJZ92350.1 anid|CBF75695.1 anig|EHA26624.1  
aory|EIT82687.1 asyd|OJJ57494.1 ater|EAU35654.1 atub|OJI86778.1 aver|OJJ05686.1 awen|OJJ40519.1  
azon|OJJ49378.1

Group3513: abra|OJJ74772.1 acar|OOF95762.1 acla|EAW10639.1 afis|EAW24927.1 afla|EED55546.1  
afum|EAL89583.1 agla|OJJ82155.1 akaw|GAA83640.1 aluc|OJZ92353.1 anid|CBF75704.1 anig|EHA26621.1  
aory|EIT82681.1 asyd|OJJ57497.1 ater|EAU35657.1 atub|OJI86783.1 aver|OJJ05681.1 awen|OJJ40523.1  
azon|OJJ49383.1

Group3514: abra|OJJ74774.1 acar|OOF95763.1 acla|EAW10637.1 afis|EAW24929.1 afla|EED55544.1  
afum|EAL89585.1 agla|OJJ82157.1 akaw|GAA83638.1 aluc|OJZ92355.1 anid|CBF75708.1 anig|EHA26619.1  
aory|EIT82710.1 asyd|OJJ57499.1 ater|EAU35659.1 atub|OJI86785.1 aver|OJJ05679.1 awen|OJJ40525.1  
azon|OJJ49385.1

Group3515: abra|OJJ74775.1 acar|OOF95764.1 acla|EAW10636.1 afis|EAW24930.1 afla|EED55543.1  
afum|EAL89586.1 agla|OJJ82158.1 akaw|GAA83637.1 aluc|OJZ92356.1 anid|CBF75710.1 anig|EHA26618.1  
aory|EIT82674.1 asyd|OJJ57500.1 ater|EAU35660.1 atub|OJI86786.1 aver|OJJ05678.1 awen|OJJ40526.1  
azon|OJJ49386.1

Group3516: abra|OJJ74776.1 acar|OOF95765.1 acla|EAW10635.1 afis|EAW24931.1 afla|EED55542.1  
afum|EAL89587.1 agla|OJJ82159.1 akaw|GAA83636.1 aluc|OJZ92357.1 anid|CBF75712.1 anig|EHA26617.1  
aory|EIT82695.1 asyd|OJJ57502.1 ater|EAU35661.1 atub|OJI86787.1 aver|OJJ05676.1 awen|OJJ40527.1  
azon|OJJ49387.1

Group3517: abra|OJJ74779.1 acar|OOF95769.1 acla|EAW10631.1 afis|EAW24936.1 afla|EED55536.1  
afum|EAL89593.1 agla|OJJ82163.1 akaw|GAA83633.1 aluc|OJZ92360.1 anid|CBF75723.1 anig|EHA26613.1  
aory|EIT80806.1 asyd|OJJ57506.1 ater|EAU35665.1 atub|OJI86790.1 aver|OJJ05672.1 awen|OJJ40531.1  
azon|OJJ49391.1

Group3518: abra|OJJ74780.1 acar|OOF95771.1 acla|EAW10630.1 afis|EAW24937.1 afla|EED55535.1  
afum|EAL89594.1 agla|OJJ82164.1 akaw|GAA83632.1 aluc|OJZ92361.1 anid|CBF75725.1 anig|EHA26612.1  
aory|EIT80813.1 asyd|OJJ57507.1 ater|EAU35666.1 atub|OJI86791.1 aver|OJJ05671.1 awen|OJJ40532.1  
azon|OJJ49392.1

Group3519: abra|OJJ74781.1 acar|OOF95772.1 acla|EAW10629.1 afis|EAW24938.1 afla|EED55534.1  
afum|EAL89595.1 agla|OJJ82165.1 akaw|GAA83631.1 aluc|OJZ92362.1 anid|CBF75727.1 anig|EHA26611.1  
aory|EIT80903.1 asyd|OJJ57508.1 ater|EAU35667.1 atub|OJI86792.1 aver|OJJ05670.1 awen|OJJ40533.1  
azon|OJJ49393.1

Group3520: abra|OJJ74784.1 acar|OOF95774.1 acla|EAW10627.1 afis|EAW24940.1 afla|EED55525.1  
afum|EAL89597.1 agla|OJJ82167.1 akaw|GAA83629.1 aluc|OJZ92364.1 anid|CBF75735.1 anig|EHA26609.1  
aory|EIT80775.1 asyd|OJJ57512.1 ater|EAU35669.1 atub|OJI86794.1 aver|OJJ05667.1 awen|OJJ40536.1  
azon|OJJ49395.1

Group3521: abra|OJJ74786.1 acar|OOF95776.1 acla|EAW10625.1 afis|EAW24942.1 afla|EED55523.1  
afum|EAL89599.1 agla|OJJ82169.1 akaw|GAA83627.1 aluc|OJZ92366.1 anid|CBF75741.1 anig|EHA26607.1

aory|EIT80928.1 asyd|OJJ57517.1 ater|EAU35674.1 atub|OJI86796.1 aver|OJJ05662.1 awen|OJJ40537.1 azon|OJJ49397.1

Group3522: abra|OJJ74788.1 acar|OOF95777.1 acla|EAW10623.1 afis|EAW24944.1 afla|EED55521.1 afum|EAL89601.1 agla|OJJ82171.1 akaw|GAA83625.1 aluc|OJZ92368.1 anid|CBF75743.1 anig|EHA26605.1 aory|EIT80857.1 asyd|OJJ57519.1 ater|EAU35675.1 atub|OJI86798.1 aver|OJJ05659.1 awen|OJJ40539.1 azon|OJJ49399.1

Group3523: abra|OJJ74789.1 acar|OOF95779.1 acla|EAW10622.1 afis|EAW24945.1 afla|EED55520.1 afum|EAL89602.1 agla|OJJ82173.1 akaw|GAA83624.1 aluc|OJZ92369.1 anid|CBF75615.1 anig|EHA26604.1 aory|EIT80768.1 asyd|OJJ57451.1 ater|EAU35676.1 atub|OJI86799.1 aver|OJJ05727.1 awen|OJJ40540.1 azon|OJJ49400.1

Group3524: abra|OJJ74790.1 acar|OOF95780.1 acla|EAW10621.1 afis|EAW24946.1 afla|EED55519.1 afum|EAL89603.1 agla|OJJ82174.1 akaw|GAA83623.1 aluc|OJZ92370.1 anid|CBF81729.1 anig|EHA26603.1 aory|EIT80898.1 asyd|OJJ59591.1 ater|EAU35678.1 atub|OJI86800.1 aver|OJJ02678.1 awen|OJJ40541.1 azon|OJJ49401.1

Group3525: abra|OJJ74791.1 acar|OOF95781.1 acla|EAW10620.1 afis|EAW24947.1 afla|EED55518.1 afum|EAL89604.1 agla|OJJ82175.1 akaw|GAA83622.1 aluc|OJZ92371.1 anid|CBF81728.1 anig|EHA26602.1 aory|EIT80815.1 asyd|OJJ59590.1 ater|EAU35679.1 atub|OJI86801.1 aver|OJJ02679.1 awen|OJJ40542.1 azon|OJJ49402.1

Group3526: abra|OJJ74792.1 acar|OOF95782.1 acla|EAW10619.1 afis|EAW24948.1 afla|EED55517.1 afum|EAL89605.1 agla|OJJ82176.1 akaw|GAA83621.1 aluc|OJZ92372.1 anid|CBF81726.1 anig|EHA26601.1 aory|EIT80913.1 asyd|OJJ59589.1 ater|EAU35680.1 atub|OJI86802.1 aver|OJJ02680.1 awen|OJJ40543.1 azon|OJJ49403.1

Group3527: abra|OJJ74797.1 acar|OOF95789.1 acla|EAW10609.1 afis|EAW24958.1 afla|EED55505.1 afum|EAL89616.1 agla|OJJ82189.1 akaw|GAA83615.1 aluc|OJZ92378.1 anid|CBF81663.1 anig|EHA26595.1 aory|EIT80867.1 asyd|OJJ59551.1 ater|EAU35697.1 atub|OJI86808.1 aver|OJJ02717.1 awen|OJJ40552.1 azon|OJJ49411.1

Group3528: abra|OJJ74802.1 acar|OOF95795.1 acla|EAW10614.1 afis|EAW24953.1 afla|EED55511.1 afum|EAL89610.1 agla|OJJ82184.1 akaw|GAA83611.1 aluc|OJZ92383.1 anid|CBF81717.1 anig|EHA26592.1 aory|EIT80894.1 asyd|OJJ59584.1 ater|EAU35685.1 atub|OJI86812.1 aver|OJJ02686.1 awen|OJJ40548.1 azon|OJJ49408.1

Group3529: abra|OJJ74804.1 acar|OOF95796.1 acla|EAW10616.1 afis|EAW24951.1 afla|EED55513.1 afum|EAL89608.1 agla|OJJ82187.1 akaw|GAA83609.1 aluc|OJZ92385.1 anid|CBF81721.1 anig|EHA26590.1 aory|EIT80836.1 asyd|OJJ59586.1 atub|OJI86814.1 aver|OJJ02683.1 awen|OJJ40546.1 azon|OJJ49406.1 ater|EAU35683.1

Group3530: abra|OJJ74805.1 acar|OOF95797.1 acla|EAW10617.1 afis|EAW24950.1 afla|EED55514.1 afum|EAL89607.1 agla|OJJ82179.1 akaw|GAA83608.1 aluc|OJZ92386.1 anid|CBF81722.1 anig|EHA26589.1 aory|EIT80921.1 asyd|OJJ59587.1 ater|EAU35682.1 atub|OJI86815.1 aver|OJJ02682.1 awen|OJJ40545.1 azon|OJJ49405.1

Group3531: abra|OJJ74806.1 acar|OOF95798.1 acla|EAW10618.1 afis|EAW24949.1 afla|EED55516.1 afum|EAL89606.1 agla|OJJ82177.1 akaw|GAA83606.1 aluc|OJZ92387.1 anid|CBF81724.1 anig|EHA26588.1 aory|EIT80820.1 asyd|OJJ59588.1 ater|EAU35681.1 atub|OJI86817.1 aver|OJJ02681.1 awen|OJJ40544.1 azon|OJJ49404.1

Group3532: abra|OJJ74808.1 acar|OOF95800.1 acla|EAW10606.1 afis|EAW24961.1 afla|EED55501.1 afum|EAL89619.1 agla|OJJ82196.1 akaw|GAA83604.1 aluc|OJZ92389.1 anid|CBF81658.1 anig|EHA26585.1 aory|EIT80766.1 asyd|OJJ59548.1 ater|EAU35694.1 atub|OJI86819.1 aver|OJJ02720.1 awen|OJJ40554.1 azon|OJJ49416.1

Group3533: abra|OJJ74830.1 acar|OOF95817.1 acla|EAW11373.1 afis|EAW18122.1 afla|EED58048.1 afum|EAL87480.1 agla|OJJ87016.1 akaw|GAA83590.1 aluc|OJZ92407.1 anid|CBF75358.1 anig|EHA26558.1 aory|EIT79720.1 asyd|OJJ59851.1 ater|EAU29689.1 atub|OJI86835.1 aver|OJJ02436.1 awen|OJJ35524.1 azon|OJJ46961.1

Group3534: abra|OJJ74831.1 acar|OOF95819.1 acla|EAW11372.1 afis|EAW18123.1 afla|EED58049.1 afum|EAL87481.1 agla|OJJ87017.1 akaw|GAA83589.1 aluc|OJZ92408.1 anid|CBF80348.1 anig|EHA26557.1 aory|EIT79773.1 asyd|OJJ54832.1 ater|EAU29688.1 atub|OJI86836.1 aver|OJJ07329.1 awen|OJJ35525.1 azon|OJJ46959.1

Group3535: abra|OJJ74840.1 acar|OOF95843.1 acla|EAW09369.1 afis|EAW21766.1 afla|EED46332.1 afum|EAL92796.1 agla|OJJ84385.1 akaw|GAA83581.1 aluc|OJZ92416.1 anid|CBF83756.1 anig|EHA26550.1 aory|EIT81192.1 asyd|OJJ60860.1 ater|EAU38449.1 atub|OJI86846.1 aver|OJJ00185.1 awen|OJJ34049.1 azon|OJJ48182.1

Group3536: abra|OJJ74841.1 acar|OOF94168.1 acla|EAW08544.1 afis|EAW23581.1 afla|EED57489.1 afum|EAL87884.1 agla|OJJ86848.1 akaw|GAA83580.1 aluc|OJZ92417.1 anid|CBF89912.1 anig|EHA26549.1 aory|EIT81889.1 asyd|OJJ62129.1 ater|EAU35371.1 atub|OJI86847.1 aver|OJI96238.1 awen|OJJ39909.1 azon|OJJ45885.1

Group3537: abra|OJJ74847.1 acar|OOF95848.1 acla|EAW08541.1 afis|EAW23578.1 afla|EED57477.1 afum|EAL87887.1 agla|OJJ86843.1 akaw|GAA83575.1 aluc|OJZ92422.1 anid|CBF89598.1 anig|EHA26545.1 aory|EIT80110.1 asyd|OJJ62311.1 ater|EAU35366.1 atub|OJI86852.1 aver|OJI96419.1 awen|OJJ39906.1 azon|OJJ45883.1

Group3538: abra|OJJ74848.1 acar|OOF95849.1 acla|EAW08540.1 afis|EAW23577.1 afla|EED57476.1 afum|EAL87888.1 agla|OJJ86838.1 akaw|GAA83574.1 aluc|OJZ92423.1 anid|CBF89600.1 anig|EHA26544.1 aory|EIT80147.1 asyd|OJJ62310.1 ater|EAU35367.1 atub|OJI86853.1 aver|OJI96418.1 awen|OJJ39905.1 azon|OJJ45882.1

Group3539: abra|OJJ74852.1 acar|OOF95851.1 acla|EAW08535.1 afis|EAW23573.1 afla|EED50962.1 afum|EAL87892.2 agla|OJJ86833.1 akaw|GAA83570.1 aluc|OJZ92428.1 anid|CBF89610.1 anig|EHA26539.1 aory|EIT77015.1 asyd|OJJ62305.1 ater|EAU35343.1 atub|OJI86858.1 aver|OJI96413.1 awen|OJJ39901.1 azon|OJJ42316.1

Group3540: abra|OJJ74854.1 acar|OOF95854.1 acla|EAW08531.1 afis|EAW23570.1 afla|EED57463.1 afum|EAL87897.2 agla|OJJ86831.1 akaw|GAA83568.1 aluc|OJZ92430.1 anid|CBF89617.1 anig|EHA26536.1 aory|EIT80101.1 asyd|OJJ62302.1 ater|EAU35346.1 atub|OJI86860.1 aver|OJI96411.1 awen|OJJ39899.1 azon|OJJ45876.1

Group3541: abra|OJJ74856.1 acar|OOF95857.1 acla|EAW08528.1 afis|EAW23568.1 afla|EED57459.1 afum|EAL87899.1 agla|OJJ86829.1 akaw|GAA83566.1 aluc|OJZ92432.1 anid|CBF89621.1 anig|EHA26534.1 aory|EIT80063.1 asyd|OJJ62300.1 ater|EAU35349.1 atub|OJI86862.1 aver|OJI96408.1 awen|OJJ39896.1 azon|OJJ45874.1

Group3542: abra|OJJ74859.1 acar|OOF95859.1 acla|EAW08521.1 afis|EAW23559.1 afla|EED57454.1 afum|EAL87907.1 agla|OJJ86825.1 akaw|GAA83561.1 aluc|OJZ92437.1 anid|CBF89634.1 anig|EHA26531.1 aory|EIT80133.1 asyd|OJJ62295.1 ater|EAU35342.1 atub|OJI86866.1 aver|OJI96402.1 awen|OJJ39893.1 azon|OJJ43217.1

Group3543: abra|OJJ74860.1 acar|OOF95860.1 acla|EAW08520.1 afis|EAW23558.1 afla|EED57453.1 afum|EAL87908.1 agla|OJJ86826.1 akaw|GAA83560.1 aluc|OJZ92438.1 anid|CBF89636.1 anig|EHA26530.1 aory|EIT80071.1 asyd|OJJ62294.1 ater|EAU35341.1 atub|OJI86867.1 aver|OJI96401.1 awen|OJJ39891.1 azon|OJJ43218.1

Group3544: abra|OJJ74862.1 acar|OOF95862.1 acla|EAW08519.1 afis|EAW23557.1 afla|EED57452.1 afum|EAL87909.1 agla|OJJ86819.1 akaw|GAA83558.1 aluc|OJZ92440.1 anid|CBF89638.1 anig|EHA26527.1 aory|EIT80146.1 asyd|OJJ62292.1 ater|EAU35340.1 atub|OJI86869.1 aver|OJI96400.1 awen|OJJ39888.1 azon|OJJ43219.1

Group3545: abra|OJJ74867.1 acar|OOF95868.1 acla|EAW08513.1 afis|EAW23551.1 afla|EED57446.1 afum|EAL87915.1 agla|OJJ86807.1 akaw|GAA83553.1 aluc|OJZ92445.1 anid|CBF89646.1 anig|EHA26523.1 aory|EIT80111.1 asyd|OJJ62286.1 ater|EAU35335.1 atub|OJI86873.1 aver|OJI96394.1 awen|OJJ39882.1 azon|OJJ43223.1

Group3546: abra|OJJ74869.1 acar|OOF95870.1 acla|EAW08511.1 afis|EAW23549.1 afla|EED57444.1 afum|EAL87917.2 agla|OJJ86805.1 akaw|GAA83551.1 aluc|OJZ92447.1 anid|CBF89650.1 anig|EHA26521.1 aory|EIT80076.1 asyd|OJJ62284.1 ater|EAU35334.1 atub|OJI86875.1 aver|OJI96392.1 awen|OJJ39880.1 azon|OJJ43224.1

Group3547: abra|OJJ74872.1 acar|OOF95873.1 acla|EAW08508.1 afis|EAW23546.1 afla|EED57441.1 afum|EAL87920.1 agla|OJJ86800.1 akaw|GAA83548.1 aluc|OJZ92450.1 anid|CBF89654.1 anig|EHA26518.1 aory|EIT80061.1 asyd|OJJ62282.1 ater|EAU35331.1 atub|OJI86878.1 aver|OJI96390.1 awen|OJJ39877.1 azon|OJJ43226.1

Group3548: abra|OJJ74874.1 acar|OOF95875.1 acla|EAW08498.1 afis|EAW23543.1 afla|EED57440.1 afum|EAL87923.2 agla|OJJ86797.1 akaw|GAA83546.1 aluc|OJZ92452.1 anid|CBF89657.1 anig|EHA26516.1 aory|EIT80096.1 asyd|OJJ62279.1 ater|EAU35329.1 atub|OJI86880.1 aver|OJI96388.1 awen|OJJ39875.1 azon|OJJ43227.1

Group3549: abra|OJJ74877.1 acar|OOF95880.1 acla|EAW08493.1 afis|EAW23539.1 afla|EED57437.1 afum|EAL87927.1 agla|OJJ86794.1 akaw|GAA83543.1 aluc|OJZ92454.1 anid|CBF89665.1 anig|EHA26513.1 aory|EIT80117.1 asyd|OJJ62275.1 ater|EAU35325.1 atub|OJI86883.1 aver|OJI96384.1 awen|OJJ39870.1 azon|OJJ43231.1

Group3550: abra|OJJ74879.1 acar|OOF95882.1 acla|EAW08491.1 afis|EAW23537.1 afla|EED57435.1 afum|EAL87929.1 agla|OJJ86792.1 akaw|GAA83541.1 aluc|OJZ92456.1 anid|CBF89668.1 anig|EHA26511.1

aory|EIT80166.1 asyd|OJJ62273.1 ater|EAU35323.1 atub|OJI86885.1 aver|OJI96382.1 awen|OJJ39867.1 azon|OJJ43233.1

Group3551: abra|OJJ74881.1 acar|OOF95884.1 acla|EAW08489.1 afis|EAW23535.1 afla|EED57432.1 afum|EAL87931.1 agla|OJJ86790.1 akaw|GAA83539.1 aluc|OJZ92458.1 anid|CBF89672.1 anig|EHA26509.1 aory|EIT80162.1 asyd|OJJ62271.1 ater|EAU35321.1 atub|OJI86887.1 aver|OJI96380.1 awen|OJJ39865.1 azon|OJJ43235.1

Group3552: abra|OJJ74882.1 acar|OOF95886.1 acla|EAW08487.1 afis|EAW23533.1 afla|EED57430.1 afum|EAL87933.1 agla|OJJ86782.1 akaw|GAA83537.1 aluc|OJZ92459.1 anid|CBF89678.1 anig|EHA26508.1 aory|EIT80077.1 asyd|OJJ62269.1 ater|EAU35319.1 atub|OJI86888.1 aver|OJI96378.1 awen|OJJ39862.1 azon|OJJ43236.1

Group3553: abra|OJJ74884.1 akaw|GAA83535.1 aluc|OJZ92461.1 anig|EHA26506.1 atub|OJI86890.1 acar|OOF95889.1 acla|EAW08483.1 afis|EAW23529.1 afla|EED57428.1 afum|EAL87937.1 agla|OJJ86778.1 anid|CBF89683.1 asyd|OJJ62266.1 ater|EAU35317.1 aver|OJI96375.1 awen|OJJ39858.1 azon|OJJ43239.1 aory|EIT80152.1

Group3554: abra|OJJ74888.1 acar|OOF95893.1 acla|EAW08479.1 afis|EAW23525.1 afla|EED57424.1 afum|EAL87940.1 agla|OJJ86774.1 akaw|GAA83531.1 aluc|OJZ92465.1 anid|CBF89691.1 anig|EHA26502.1 aory|EIT80080.1 asyd|OJJ62262.1 ater|EAU35313.1 atub|OJI86894.1 aver|OJI96371.1 awen|OJJ39854.1 azon|OJJ43245.1

Group3555: abra|OJJ74889.1 acar|OOF95892.1 acla|EAW08478.1 afis|EAW23524.1 afla|EED50993.1 afum|EAL87941.1 agla|OJJ86773.1 akaw|GAA83530.1 aluc|OJZ92466.1 anid|CBF76066.1 anig|EHA26501.1 aory|EIT76998.1 asyd|OJJ60396.1 ater|EAU31002.1 atub|OJI86895.1 aver|OJI99725.1 awen|OJJ39853.1 azon|OJJ50688.1

Group3556: abra|OJJ74897.1 acar|OOF95897.1 acla|EAW08475.1 afis|EAW23521.1 afum|EAL87943.1 agla|OJJ86768.1 akaw|GAA83524.1 aluc|OJZ92471.1 anig|EHA26497.1 ater|EAU35309.1 atub|OJI86901.1 awen|OJJ39846.1 afla|EED57421.1 aory|EIT80149.1 aver|OJI96367.1 azon|OJJ43248.1 anid|CBF89696.1 asyd|OJJ62258.1

Group3557: abra|OJJ74901.1 acar|OOF95900.1 acla|EAW08472.1 afis|EAW23518.1 afla|EED57418.1 afum|EAL87946.1 agla|OJJ86765.1 akaw|GAA83521.1 aluc|OJZ92474.1 anid|CBF89702.1 anig|EHA26495.1 aory|EIT80062.1 asyd|OJJ62254.1 atub|OJI86905.1 aver|OJI96364.1 awen|OJJ39843.1 azon|OJJ43250.1 ater|EAU35306.1

Group3558: abra|OJJ74905.1 acar|OOF90301.1 acla|EAW08467.1 afis|EAW23514.1 afla|EED57413.1 afum|EAL87949.1 agla|OJJ86762.1 akaw|GAA83517.1 aluc|OJZ92478.1 anig|EHA26492.1 aory|EIT80167.1 asyd|OJJ59973.1 ater|EAU35303.1 atub|OJI86909.1 aver|OJJ02318.1 awen|OJJ39839.1 azon|OJJ43253.1 anid|CBF75148.1

Group3559: abra|OJJ74907.1 acar|OOF90299.1 acla|EAW08465.1 afis|EAW23510.1 afla|EED57410.1 afum|EAL87951.1 agla|OJJ86760.1 akaw|GAA83515.1 aluc|OJZ92480.1 anid|CBF89718.1 anig|EHA26490.1 aory|EIT80124.1 asyd|OJJ62245.1 ater|EAU35298.1 atub|OJI86911.1 aver|OJI96355.1 awen|OJJ39836.1 azon|OJJ43256.1

Group3560: abra|OJJ74909.1 acar|OOF90294.1 acla|EAW08463.1 afis|EAW23508.1 afla|EED57408.1 afum|EAL87953.1 agla|OJJ86758.1 akaw|GAA83513.1 aluc|OJZ92482.1 anid|CBF89714.1 anig|EHA26489.1 aory|EIT80104.1 asyd|OJJ62247.1 ater|EAU35296.1 atub|OJI86913.1 aver|OJI96357.1 awen|OJJ39834.1 azon|OJJ43258.1

Group3561: abra|OJJ74910.1 acar|OOF90297.1 acla|EAW08462.1 afis|EAW23507.1 afla|EED57407.1 afum|EAL87954.1 agla|OJJ86757.1 akaw|GAA83512.1 aluc|OJZ92483.1 anid|CBF89712.1 anig|EHA26488.1 aory|EIT80089.1 asyd|OJJ62248.1 ater|EAU35295.1 atub|OJI86914.1 aver|OJI96358.1 awen|OJJ39833.1 azon|OJJ43259.1

Group3562: abra|OJJ74916.1 acar|OOF95908.1 acla|EAW08454.1 afis|EAW23501.1 afla|EED57399.1 afum|EAL87961.1 agla|OJJ86746.1 akaw|GAA83506.1 aluc|OJZ92488.1 anid|CBF89733.1 anig|EHA26484.1 aory|EIT80085.1 asyd|OJJ62233.1 ater|EAU35288.1 atub|OJI86921.1 aver|OJI96342.1 awen|OJJ39824.1 azon|OJJ47948.1

Group3563: abra|OJJ74919.1 acar|OOF95910.1 afis|EAW23497.1 afla|EED57397.1 afum|EAL87966.1 agla|OJJ86744.1 akaw|GAA83504.1 aluc|OJZ92490.1 anid|CBF89737.1 anig|EHA26482.1 aory|EIT80105.1 asyd|OJJ62231.1 ater|EAU35286.1 atub|OJI86923.1 aver|OJI96340.1 awen|OJJ39822.1 azon|OJJ47946.1 acla|EAW08452.1

Group3564: abra|OJJ74922.1 acar|OOF95912.1 acla|EAW08449.1 afis|EAW23494.1 afla|EED57394.1 afum|EAL87969.1 agla|OJJ86741.1 akaw|GAA83501.1 aluc|OJZ92493.1 anid|CBF89742.1 anig|EHA26479.1 aory|EIT80159.1 asyd|OJJ62228.1 ater|EAU35283.1 atub|OJI86926.1 aver|OJI96337.1 awen|OJJ39819.1 azon|OJJ47943.1

Group3565: abra|OJJ74923.1 acar|OOF95914.1 acla|EAW08448.1 afis|EAW23493.1 afla|EED57393.1 afum|EAL87970.1 agla|OJJ86740.1 akaw|GAA83500.1 aluc|OJZ92494.1 anid|CBF89744.1 anig|EHA26478.1 aory|EIT80132.1 asyd|OJJ62227.1 ater|EAU35282.1 atub|OJI86927.1 aver|OJI96336.1 awen|OJJ39818.1 azon|OJJ47941.1

Group3566: abra|OJJ74924.1 acar|OOF95915.1 acla|EAW08447.1 afis|EAW23492.1 afla|EED57391.1 afum|EAL87971.1 agla|OJJ86737.1 akaw|GAA83499.1 aluc|OJZ92495.1 anid|CBF89746.1 anig|EHA26477.1 aory|EIT80165.1 asyd|OJJ62225.1 ater|EAU35279.1 atub|OJI86928.1 aver|OJI96334.1 awen|OJJ39816.1 azon|OJJ47939.1

Group3567: abra|OJJ74925.1 acar|OOF95916.1 acla|EAW08446.1 afis|EAW23491.1 afla|EED57390.1 afum|EAL87972.1 agla|OJJ86736.1 akaw|GAA83498.1 aluc|OJZ92496.1 anid|CBF89747.1 anig|EHA26476.1 aory|EIT80058.1 asyd|OJJ62224.1 ater|EAU35278.1 atub|OJI86929.1 aver|OJI96333.1 awen|OJJ39815.1 azon|OJJ47938.1

Group3568: abra|OJJ74928.1 acar|OOF95917.1 acla|EAW08442.1 afis|EAW23487.1 afla|EED57386.1 afum|EAL87976.1 agla|OJJ86732.1 akaw|GAA83494.1 aluc|OJZ92499.1 anid|CBF89755.1 anig|EHA26473.1 aory|EIT80123.1 asyd|OJJ62220.1 ater|EAU35274.1 atub|OJI86932.1 aver|OJI96330.1 awen|OJJ39810.1 azon|OJJ47934.1

Group3569: abra|OJJ74930.1 acar|OOF95920.1 acla|EAW08439.1 afis|EAW23484.1 afla|EED57379.1 afum|EAL87979.1 agla|OJJ86720.1 akaw|GAA83491.1 aluc|OJZ92502.1 anid|CBF89760.1 anig|EHA26471.1 aory|EIT80056.1 asyd|OJJ62217.1 ater|EAU35271.1 atub|OJI86934.1 aver|OJI96328.1 awen|OJJ39808.1 azon|OJJ47929.1

Group3570: abra|OJJ74931.1 acar|OOF95921.1 acla|EAW08438.1 afis|EAW23483.1 afla|EED57378.1 afum|EAL87980.1 agla|OJJ86719.1 akaw|GAA83490.1 aluc|OJZ92503.1 anid|CBF89762.1 anig|EHA26470.1 aory|EIT80160.1 asyd|OJJ62216.1 ater|EAU36899.1 atub|OJI86935.1 aver|OJI96327.1 awen|OJJ39807.1 azon|OJJ47928.1

Group3571: abra|OJJ74932.1 acar|OOF95922.1 acla|EAW08437.1 afis|EAW23482.1 afla|EED57377.1 afum|EAL87982.1 agla|OJJ86718.1 akaw|GAA83488.1 aluc|OJZ92505.1 anid|CBF89764.1 anig|EHA26468.1 aory|EIT80168.1 asyd|OJJ62215.1 ater|EAU36900.1 atub|OJI86937.1 aver|OJI96326.1 awen|OJJ39806.1 azon|OJJ47927.1

Group3572: abra|OJJ74935.1 acar|OOF97377.1 acla|EAW08436.1 afis|EAW23481.1 afla|EED57376.1 afum|EAL87983.1 agla|OJJ86717.1 akaw|GAA83485.1 aluc|OJZ92508.1 anid|CBF89766.1 anig|EHA26465.1 aory|EIT80075.1 asyd|OJJ62214.1 ater|EAU36901.1 atub|OJI86941.1 aver|OJI96325.1 awen|OJJ39805.1 azon|OJJ47926.1

Group3573: abra|OJJ74938.1 acar|OOF97376.1 acla|EAW08433.1 afis|EAW23476.1 afla|EED57372.1 afum|EAL87989.2 agla|OJJ86715.1 akaw|GAA83482.1 aluc|OJZ92513.1 anid|CBF89771.1 anig|EHA26462.1 aory|EIT80114.1 asyd|OJJ62212.1 ater|EAU36904.1 atub|OJI86944.1 aver|OJI96323.1 awen|OJJ39802.1 azon|OJJ47923.1

Group3574: abra|OJJ74939.1 acar|OOF97375.1 acla|EAW08431.1 afis|EAW23474.1 afla|EED57370.1 afum|EAL87991.2 agla|OJJ86713.1 akaw|GAA83481.1 aluc|OJZ92514.1 anid|CBF89775.1 anig|EHA26461.1 aory|EIT80156.1 asyd|OJJ62209.1 ater|EAU36906.1 atub|OJI86945.1 aver|OJI96321.1 awen|OJJ39800.1 azon|OJJ47922.1

Group3575: abra|OJJ74941.1 acar|OOF97374.1 acla|EAW08429.1 afis|EAW23473.1 afla|EED57369.1 afum|EAL87993.1 agla|OJJ86712.1 akaw|GAA83480.1 aluc|OJZ92515.1 anid|CBF89777.1 anig|EHA26460.1 aory|EIT80066.1 asyd|OJJ62208.1 ater|EAU36907.1 atub|OJI86948.1 aver|OJI96320.1 awen|OJJ39799.1 azon|OJJ47920.1

Group3576: abra|OJJ74943.1 acar|OOF97372.1 acla|EAW08427.1 afis|EAW23471.1 afla|EED57367.1 afum|EAL87995.1 agla|OJJ86710.1 akaw|GAA83478.1 aluc|OJZ92517.1 anid|CBF89782.1 anig|EHA26458.1 aory|EIT80170.1 asyd|OJJ62205.1 ater|EAU36909.1 atub|OJI86950.1 aver|OJI96317.1 awen|OJJ39796.1 azon|OJJ47918.1

Group3577: abra|OJJ74945.1 acar|OOF97371.1 acla|EAW08426.1 afis|EAW23442.1 afla|EED57366.1 afum|EAL88021.1 agla|OJJ86709.1 akaw|GAA83477.1 aluc|OJZ92518.1 anid|CBF89784.1 anig|EHA26457.1 aory|EIT80053.1 asyd|OJJ62204.1 ater|EAU36910.1 atub|OJI86952.1 aver|OJI96316.1 awen|OJJ39790.1 azon|OJJ47917.1

Group3578: abra|OJJ74946.1 acar|OOF97370.1 acla|EAW08425.1 afis|EAW23444.1 afla|EED57365.1 afum|EAL88020.1 agla|OJJ86707.1 akaw|GAA83476.1 aluc|OJZ92519.1 anid|CBF89786.1 anig|EHA26456.1 aory|EIT80115.1 asyd|OJJ62203.1 ater|EAU36911.1 atub|OJI86953.1 aver|OJI96315.1 awen|OJJ39786.1 azon|OJJ47916.1

Group3579: abra|OJJ74947.1 acar|OOF97369.1 acla|EAW08424.1 afis|EAW23445.1 afla|EED57364.1 afum|EAL88019.1 agla|OJJ86706.1 akaw|GAA83475.1 aluc|OJZ92520.1 anid|CBF89788.1 anig|EHA26455.1

aory|EIT80057.1 asyd|OJJ62202.1 ater|EAU36912.1 atub|OJI86954.1 aver|OJI96314.1 awen|OJJ39785.1 azon|OJJ47915.1

Group3580: abra|OJJ74949.1 acar|OOF97367.1 acla|EAW08422.1 afis|EAW23447.1 afla|EED57362.1 afum|EAL88018.1 agla|OJJ86702.1 akaw|GAA83473.1 aluc|OJZ92522.1 anid|CBF89791.1 anig|EHA26453.1 aory|EIT80100.1 asyd|OJJ62200.1 ater|EAU36913.1 atub|OJI86956.1 aver|OJI96312.1 awen|OJJ39782.1 azon|OJJ47913.1

Group3581: abra|OJJ74952.1 acar|OOF97362.1 acla|EAW08421.1 afis|EAW23448.1 afla|EED57359.1 afum|EAL88017.1 agla|OJJ86701.1 akaw|GAA83471.1 aluc|OJZ92524.1 anid|CBF89793.1 anig|EHA26450.1 aory|EIT80142.1 asyd|OJJ62199.1 ater|EAU36914.1 atub|OJI86959.1 aver|OJI96311.1 awen|OJJ39781.1 azon|OJJ47912.1

Group3582: abra|OJJ74953.1 acar|OOF97360.1 acla|EAW08420.1 afis|EAW23449.1 afla|EED57358.1 afum|EBA27332.1 agla|OJJ86700.1 akaw|GAA83470.1 aluc|OJZ92525.1 anid|CBF89795.1 anig|EHA26449.1 aory|EIT80082.1 asyd|OJJ62198.1 ater|EAU36916.1 atub|OJI86961.1 awen|OJJ39780.1 azon|OJJ47911.1 aver|OJI96310.1

Group3583: abra|OJJ74954.1 acar|OOF97359.1 acla|EAW08418.1 afis|EAW23451.1 afla|EED57352.1 afum|EAL88015.1 agla|OJJ86699.1 akaw|GAA83469.1 aluc|OJZ92526.1 anid|CBF89799.1 anig|EHA26448.1 aory|EIT80134.1 asyd|OJJ62196.1 ater|EAU36917.1 atub|OJI86962.1 aver|OJI96308.1 awen|OJJ39778.1 azon|OJJ47908.1

Group3584: abra|OJJ74956.1 acar|OOF97357.1 acla|EAW08416.1 afis|EAW23453.1 afla|EED57350.1 afum|EAL88013.1 agla|OJJ86697.1 akaw|GAA83467.1 aluc|OJZ92528.1 anid|CBF89802.1 anig|EHA26447.1 aory|EIT80106.1 asyd|OJJ62194.1 ater|EAU36919.1 atub|OJI86964.1 aver|OJI96306.1 awen|OJJ39776.1 azon|OJJ47906.1

Group3585: abra|OJJ74958.1 acar|OOF97355.1 acla|EAW08413.1 afis|EAW23456.1 afla|EED57345.1 afum|EBA27330.1 akaw|GAA83464.1 aluc|OJZ92530.1 anid|CBF89808.1 anig|EHA26444.1 aory|EIT80113.1 asyd|OJJ62191.1 ater|EAU36922.1 atub|OJI86967.1 aver|OJI96301.1 awen|OJJ39773.1 azon|OJJ47902.1 agla|OJJ86693.1

Group3586: abra|OJJ74959.1 acar|OOF97354.1 acla|EAW08412.1 afis|EAW23457.1 afla|EED57344.1 afum|EBA27329.1 agla|OJJ86692.1 akaw|GAA83463.1 aluc|OJZ92531.1 anid|CBF89810.1 anig|EHA26443.1 aory|EIT80054.1 asyd|OJJ62190.1 ater|EAU36923.1 atub|OJI86968.1 aver|OJI96300.1 awen|OJJ39772.1 azon|OJJ47903.1

Group3587: abra|OJJ74965.1 acar|OOF97349.1 acla|EAW08409.1 afis|EAW23460.1 afla|EED57340.1 afum|EAL88006.1 agla|OJJ86689.1 akaw|GAA83461.1 aluc|OJZ92535.1 anid|CBF89820.1 anig|EHA26440.1 aory|EIT74102.1 asyd|OJJ62187.1 ater|EAU37473.1 atub|OJI86971.1 aver|OJI96296.1 awen|OJJ39770.1 azon|OJJ47900.1

Group3588: abra|OJJ74966.1 acar|OOF97348.1 acla|EAW08408.1 afis|EAW23461.1 afla|EED57339.1 afum|EAL88005.1 agla|OJJ86688.1 akaw|GAA83460.1 aluc|OJZ92536.1 anid|CBF89850.1 anig|EHA26439.1 aory|EIT74042.1 asyd|OJJ62186.1 ater|EAU37474.1 atub|OJI86972.1 aver|OJI96295.1 awen|OJJ39769.1 azon|OJJ47899.1

Group3589: abra|OJJ74967.1 acar|OOF97346.1 acla|EAW08407.1 afis|EAW23462.1 afla|EED57338.1 afum|EAL88004.1 agla|OJJ86687.1 akaw|GAA83459.1 aluc|OJZ92537.1 anid|CBF89848.1 anig|EHA26438.1 aory|EIT74136.1 asyd|OJJ62185.1 ater|EAU37475.1 atub|OJI86973.1 aver|OJI96294.1 awen|OJJ39768.1 azon|OJJ47898.1

Group3590: abra|OJJ74969.1 acar|OOF97345.1 acla|EAW08405.1 afis|EAW23464.1 afla|EED57335.1 afum|EAL88002.1 agla|OJJ86685.1 akaw|GAA83457.1 aluc|OJZ92539.1 anid|CBF89843.1 anig|EHA26437.1 aory|EIT74036.1 asyd|OJJ62183.1 ater|EAU37480.1 atub|OJI86975.1 aver|OJI96292.1 awen|OJJ39766.1 azon|OJJ47896.1

Group3591: abra|OJJ74975.1 acar|OOF97344.1 acla|EAW08404.1 afis|EAW23465.1 afla|EED57334.1 afum|EAL88001.1 agla|OJJ86684.1 akaw|GAA83456.1 aluc|OJZ92540.1 anid|CBF89841.1 anig|EHA26436.1 aory|EIT73981.1 asyd|OJJ62182.1 ater|EAU37481.1 atub|OJI86976.1 aver|OJI96291.1 awen|OJJ39765.1 azon|OJJ47895.1

Group3592: abra|OJJ74976.1 acar|OOF97343.1 acla|EAW08403.1 afis|EAW23466.1 afla|EED57333.1 afum|EAL88000.1 agla|OJJ86683.1 akaw|GAA83455.1 aluc|OJZ92541.1 anid|CBF89839.1 anig|EHA26435.1 aory|EIT74149.1 asyd|OJJ62181.1 ater|EAU37482.1 atub|OJI86977.1 aver|OJI96290.1 awen|OJJ39764.1 azon|OJJ47894.1

Group3593: abra|OJJ74980.1 acar|OOF97340.1 acla|EAW08400.1 afis|EAW23469.1 afla|EED57331.1 afum|EAL87997.1 agla|OJJ86680.1 akaw|GAA83452.1 aluc|OJZ92544.1 anid|CBF89833.1 anig|EHA26432.1 aory|EIT74122.1 asyd|OJJ62178.1 ater|EAU37485.1 atub|OJI86980.1 aver|OJI96287.1 awen|OJJ39760.1 azon|OJJ47889.1



Group3594: abra|OJJ74981.1 acar|OOF97339.1 acla|EAW08399.1 afis|EAW23470.1 afla|EED57330.1  
afum|EAL87996.1 agla|OJJ86679.1 akaw|GAA83451.1 aluc|OJZ92545.1 anid|CBF89831.1 anig|EHA26431.1  
aory|EIT74162.1 asyd|OJJ62177.1 ater|EAU37486.1 atub|OJI86981.1 aver|OJI96286.1 awen|OJJ39759.1  
azon|OJJ47888.1

Group3596: abra|OJJ74988.1 acar|OOF97333.1 acla|EAW08394.1 afis|EAW23437.1 afla|EED57327.1  
afum|EAL88025.1 agla|OJJ86674.1 akaw|GAA83446.1 aluc|OJZ92550.1 anid|CBF89852.1 anig|EHA26427.1  
aory|EIT74016.1 asyd|OJJ62176.1 ater|EAU37489.1 atub|OJI86987.1 aver|OJI96285.1 awen|OJJ39754.1  
azon|OJJ47881.1

Group3597: abra|OJJ74991.1 acar|OOF97329.1 acla|EAW08392.1 afis|EAW23423.1 afla|EED57322.1  
afum|EAL88033.1 agla|OJJ86673.1 akaw|GAA83444.1 aluc|OJZ92555.1 anid|CBF89824.1 anig|EHA26424.1  
aory|EIT74106.1 asyd|OJJ62171.1 ater|EAU37494.1 atub|OJI86991.1 aver|OJI96283.1 awen|OJJ39753.1  
azon|OJJ47880.1

Group3598: abra|OJJ74993.1 acar|OOF97326.1 acla|EAW08390.1 afis|EAW23419.1 afla|EED57321.1  
afum|EAL88050.1 agla|OJJ86644.1 akaw|GAA83442.1 aluc|OJZ92559.1 anid|CBF89854.1 anig|EHA26421.1  
aory|EIT74073.1 asyd|OJJ62161.1 ater|EAU37503.1 atub|OJI86995.1 aver|OJI96271.1 awen|OJJ39752.1  
azon|OJJ47878.1

Group3599: abra|OJJ74996.1 acar|OOF97324.1 acla|EAW08388.1 afis|EAW23417.1 afla|EED57318.1  
afum|EAL88052.2 agla|OJJ86634.1 akaw|GAA88620.1 aluc|OJZ92562.1 anid|CBF89861.1 anig|EHA26419.1  
aory|EIT73973.1 asyd|OJJ62158.1 ater|EAU37505.1 atub|OJI86998.1 aver|OJI96268.1 awen|OJJ39750.1  
azon|OJJ47876.1

Group3600: abra|OJJ74997.1 acar|OOF97323.1 acla|EAW08387.1 afis|EAW23416.1 afla|EED57317.1  
afum|EAL88053.2 agla|OJJ86633.1 akaw|GAA88621.1 aluc|OJZ92563.1 anid|CBF89862.1 anig|EHA26418.1  
aory|EIT74065.1 asyd|OJJ62157.1 ater|EAU37506.1 atub|OJI86999.1 aver|OJI96267.1 awen|OJJ39749.1  
azon|OJJ47875.1

Group3601: abra|OJJ74999.1 acar|OOF97322.1 acla|EAW08386.1 afis|EAW23415.1 afla|EED57316.1  
afum|EAL88054.1 agla|OJJ86632.1 akaw|GAA88622.1 aluc|OJZ92564.1 anid|CBF89864.1 anig|EHA26417.1  
aory|EIT73976.1 asyd|OJJ62156.1 ater|EAU37507.1 atub|OJI87000.1 aver|OJI96266.1 awen|OJJ39748.1  
azon|OJJ47874.1

Group3602: abra|OJJ75000.1 acar|OOF97321.1 acla|EAW08385.1 afis|EAW23414.1 afla|EED57315.1  
afum|EAL88055.1 agla|OJJ86631.1 akaw|GAA88623.1 aluc|OJZ92565.1 anid|CBF89865.1 anig|EHA26416.1  
aory|EIT74071.1 asyd|OJJ62155.1 ater|EAU37508.1 atub|OJI87001.1 aver|OJI96265.1 awen|OJJ39747.1  
azon|OJJ47873.1

Group3603: abra|OJJ75002.1 acar|OOF90037.1 acla|EAW08383.1 afis|EAW23412.1 afla|EED57313.1  
afum|EAL88057.1 agla|OJJ86629.1 akaw|GAA88625.1 aluc|OJZ92567.1 anid|CBF89869.1 anig|EHA26414.1  
aory|EIT74133.1 asyd|OJJ62153.1 ater|EAU37510.1 atub|OJI87003.1 aver|OJI96263.1 awen|OJJ39745.1  
azon|OJJ47871.1

Group3604: abra|OJJ75003.1 acar|OOF90036.1 acla|EAW08382.1 afis|EAW23411.1 afla|EED57312.1  
afum|EAL88058.1 agla|OJJ86628.1 akaw|GAA88626.1 aluc|OJZ92568.1 anid|CBF89871.1 anig|EHA26413.1  
aory|EIT74029.1 asyd|OJJ62152.1 ater|EAU37511.1 atub|OJI87004.1 aver|OJI96262.1 awen|OJJ39744.1  
azon|OJJ47870.1

Group3606: abra|OJJ75005.1 acar|OOF97320.1 acla|EAW08380.1 afis|EAW23409.1 afla|EED57309.1  
afum|EAL88061.2 agla|OJJ86625.1 akaw|GAA88628.1 aluc|OJZ92570.1 anid|CBF89873.1 anig|EHA26411.1  
aory|EIT74087.1 asyd|OJJ62150.1 ater|EAU37515.1 atub|OJI87006.1 aver|OJI96260.1 awen|OJJ39742.1  
azon|OJJ47868.1

Group3607: abra|OJJ75006.1 acar|OOF97319.1 acla|EAW08379.1 afis|EAW23408.1 afla|EED57308.1  
afum|EAL88062.1 agla|OJJ86624.1 akaw|GAA88629.1 aluc|OJZ92571.1 anid|CBF89874.1 anig|EHA26410.1  
aory|EIT74117.1 asyd|OJJ62149.1 ater|EAU37512.1 atub|OJI87007.1 aver|OJI96259.1 awen|OJJ39735.1  
azon|OJJ47867.1

Group3608: abra|OJJ75007.1 acar|OOF97318.1 acla|EAW08378.1 afis|EAW23407.1 afla|EED57307.1  
afum|EAL88063.2 agla|OJJ86623.1 akaw|GAA88630.1 aluc|OJZ92572.1 anid|CBF89876.1 anig|EHA26409.1  
aory|EIT74022.1 asyd|OJJ62148.1 ater|EAU37513.1 atub|OJI87008.1 aver|OJI96258.1 awen|OJJ39734.1  
azon|OJJ47866.1

Group3609: abra|OJJ75009.1 acar|OOF97317.1 acla|EAW08204.1 afis|EAW23238.1 afla|EED55718.1  
afum|EAL88244.1 agla|OJJ86622.1 akaw|GAA88632.1 aluc|OJZ92574.1 anid|CBF89882.1 anig|EHA26407.1  
aory|EIT83207.1 asyd|OJJ62146.1 ater|EAU37519.1 atub|OJI87010.1 aver|OJI96256.1 awen|OJJ39732.1  
azon|OJJ47864.1

Group3610: abra|OJJ75010.1 acar|OOF97316.1 acla|EAW08205.1 afis|EAW23239.1 afla|EED55719.1  
afum|EAL88243.1 agla|OJJ86620.1 akaw|GAA88633.1 aluc|OJZ92575.1 anid|CBF89884.1 anig|EHA26406.1

aory|EIT83209.1 asyd|OJJ62145.1 ater|EAU37520.1 atub|OJI87011.1 aver|OJI96255.1 awen|OJJ39731.1 azon|OJJ47863.1

Group3611: abra|OJJ75011.1 acar|OOF97315.1 acla|EAW08206.1 afis|EAW23240.1 afla|EED55720.1 afum|EAL88242.1 agla|OJJ86619.1 akaw|GAA88634.1 aluc|OJZ92576.1 anid|CBF89885.1 anig|EHA26405.1 aory|EIT83217.1 asyd|OJJ62144.1 ater|EAU37521.1 atub|OJI87012.1 aver|OJI96254.1 awen|OJJ39730.1 azon|OJJ47862.1

Group3612: abra|OJJ75012.1 acar|OOF97314.1 acla|EAW08207.1 afis|EAW23241.1 afla|EED55722.1 afum|EAL88241.1 agla|OJJ86618.1 akaw|GAA88635.1 aluc|OJZ92577.1 anid|CBF89887.1 anig|EHA26404.1 aory|EIT83231.1 asyd|OJJ62143.1 ater|EAU37522.1 atub|OJI87013.1 aver|OJI96253.1 awen|OJJ39729.1 azon|OJJ47861.1

Group3613: abra|OJJ75014.1 acar|OOF97312.1 acla|EAW08209.1 afis|EAW23243.1 afla|EED55724.1 afum|EAL88239.1 agla|OJJ86617.1 akaw|GAA88637.1 aluc|OJZ92579.1 anid|CBF89891.1 anig|EHA26402.1 aory|EIT83225.1 asyd|OJJ62140.1 ater|EAU37524.1 atub|OJI87015.1 aver|OJI96250.1 awen|OJJ39727.1 azon|OJJ47858.1

Group3614: abra|OJJ75022.1 acar|OOF89975.1 acla|EAW08214.1 afis|EAW23248.1 afla|EED55729.1 afum|EAL88233.1 agla|OJJ86609.1 akaw|GAA88642.1 aluc|OJZ92589.1 anid|CBF84108.1 anig|EHA26397.1 aory|EIT83221.1 asyd|OJJ57101.1 ater|EAU37530.1 atub|OJI87021.1 aver|OJJ03198.1 awen|OJJ39716.1 azon|OJJ47847.1

Group3615: abra|OJJ75025.1 acar|OOF97307.1 acla|EAW08217.1 afis|EAW23251.1 afla|EED55732.1 afum|EAL88230.1 agla|OJJ86603.1 akaw|GAA88645.1 aluc|OJZ92592.1 anid|CBF84103.1 anig|EHA26394.1 aory|EIT83210.1 asyd|OJJ57097.1 ater|EAU37549.1 atub|OJI87025.1 aver|OJJ03202.1 awen|OJJ39713.1 azon|OJJ47844.1

Group3616: abra|OJJ75026.1 acar|OOF97306.1 acla|EAW08218.1 afis|EAW23252.1 afla|EED55733.1 afum|EAL88229.1 agla|OJJ86602.1 akaw|GAA88646.1 aluc|OJZ92593.1 anid|CBF84101.1 anig|EHA26393.1 aory|EIT83216.1 asyd|OJJ57096.1 ater|EAU37548.1 atub|OJI87027.1 aver|OJJ03203.1 awen|OJJ39712.1 azon|OJJ47843.1

Group3617: abra|OJJ75027.1 acar|OOF97305.1 acla|EAW08219.1 afis|EAW23253.1 afla|EED55734.1 afum|EAL88228.1 agla|OJJ86601.1 akaw|GAA88647.1 aluc|OJZ92594.1 anid|CBF84100.1 anig|EHA26392.1 aory|EIT83226.1 asyd|OJJ57095.1 ater|EAU37547.1 atub|OJI87028.1 aver|OJJ03204.1 awen|OJJ39711.1 azon|OJJ47842.1

Group3618: abra|OJJ75030.1 acar|OOF97303.1 acla|EAW08221.1 afis|EAW23255.1 afla|EED55736.1 afum|EAL88226.1 agla|OJJ86599.1 akaw|GAA88649.1 aluc|OJZ92597.1 anid|CBF84096.1 anig|EHA26390.1 aory|EIT83204.1 asyd|OJJ57093.1 ater|EAU37544.1 atub|OJI87031.1 aver|OJJ03206.1 awen|OJJ39709.1 azon|OJJ47840.1

Group3619: abra|OJJ75031.1 acar|OOF97302.1 acla|EAW08222.1 afis|EAW23256.1 afla|EED55737.1 afum|EAL88225.1 agla|OJJ86598.1 akaw|GAA88650.1 aluc|OJZ92598.1 anid|CBF84092.1 anig|EHA26389.1 aory|EIT83229.1 asyd|OJJ57092.1 ater|EAU37543.1 atub|OJI87032.1 aver|OJJ03208.1 awen|OJJ39708.1 azon|OJJ47839.1

Group3620: abra|OJJ75032.1 acar|OOF97301.1 acla|EAW08223.1 afis|EAW23257.1 afla|EED55738.1 afum|EAL88224.1 agla|OJJ86597.1 akaw|GAA88651.1 aluc|OJZ92599.1 anid|CBF84094.1 anig|EHA26388.1 aory|EIT83202.1 asyd|OJJ57091.1 ater|EAU37542.1 atub|OJI87034.1 aver|OJJ03209.1 awen|OJJ39707.1 azon|OJJ47838.1

Group3621: abra|OJJ75033.1 acar|OOF97300.1 acla|EAW08224.1 afis|EAW23258.1 afla|EED55739.1 afum|EAL88223.1 agla|OJJ86596.1 akaw|GAA88652.1 aluc|OJZ92600.1 anid|CBF84116.1 anig|EHA26387.1 aory|EIT83200.1 asyd|OJJ57105.1 ater|EAU37541.1 atub|OJI87035.1 aver|OJJ03194.1 awen|OJJ39706.1 azon|OJJ47837.1

Group3622: abra|OJJ75034.1 acar|OOF97299.1 acla|EAW08225.1 afis|EAW23259.1 afla|EED55740.1 afum|EAL88222.1 agla|OJJ86595.1 akaw|GAA88653.1 aluc|OJZ92602.1 anid|CBF84117.1 anig|EHA26386.1 aory|EIT83218.1 asyd|OJJ57106.1 ater|EAU37540.1 atub|OJI87036.1 aver|OJJ03193.1 awen|OJJ39705.1 azon|OJJ47835.1

Group3623: abra|OJJ75035.1 acar|OOF97298.1 acla|EAW08226.1 afis|EAW23260.1 afla|EED55741.1 afum|EAL88221.1 agla|OJJ86594.1 akaw|GAA88654.1 aluc|OJZ92603.1 anid|CBF84119.1 anig|EHA26385.1 aory|EIT83223.1 asyd|OJJ57107.1 ater|EAU37539.1 atub|OJI87037.1 aver|OJJ03192.1 awen|OJJ39704.1 azon|OJJ47834.1

Group3624: abra|OJJ75036.1 acar|OOF97297.1 acla|EAW08231.1 afis|EAW23265.1 afla|EED55746.1 afum|EAL88215.1 agla|OJJ86587.1 akaw|GAA88655.1 aluc|OJZ92604.1 anid|CBF84128.1 anig|EHA26384.1 aory|EIT83198.1 asyd|OJJ57112.1 ater|EAU37536.1 atub|OJI87038.1 aver|OJJ03187.1 awen|OJJ39699.1 azon|OJJ47829.1

Group3625: abra|OJJ75038.1 acar|OOF97294.1 acla|EAW08229.1 afis|EAW23263.1 afla|EED55744.1 afum|EAL88217.1 agla|OJJ86589.1 akaw|GAA88657.1 aluc|OJZ92606.1 anid|CBF84124.1 anig|EHA26382.1 aory|EIT83214.1 asyd|OJJ57110.1 ater|EAU37534.1 atub|OJI87040.1 aver|OJJ03189.1 awen|OJJ39701.1 azon|OJJ47831.1

Group3626: abra|OJJ75039.1 acar|OOF97293.1 acla|EAW08227.1 afis|EAW23261.1 afla|EED55742.1 afum|EAL88219.1 agla|OJJ86591.1 akaw|GAA88658.1 aluc|OJZ92607.1 anid|CBF84123.1 anig|EHA26381.1 aory|EIT83212.1 asyd|OJJ57109.1 ater|EAU37538.1 atub|OJI87041.1 aver|OJJ03190.1 awen|OJJ39703.1 azon|OJJ47833.1

Group3627: abra|OJJ75040.1 acar|OOF97292.1 acla|EAW08228.1 afis|EAW23262.1 afla|EED55743.1 afum|EAL88218.1 agla|OJJ86590.1 akaw|GAA88659.1 aluc|OJZ92608.1 anid|CBF84121.1 anig|EHA26380.1 aory|EIT83233.1 asyd|OJJ57108.1 ater|EAU37537.1 atub|OJI87042.1 aver|OJJ03191.1 awen|OJJ39702.1 azon|OJJ47832.1

Group3628: abra|OJJ75046.1 acar|OOF89831.1 acla|EAW08235.1 afis|EAW23269.1 afla|EED55710.1 afum|EAL88210.2 agla|OJJ86583.1 akaw|GAA88663.1 aluc|OJZ92612.1 anid|CBF89550.1 anig|EHA26375.1 aory|EIT83205.1 asyd|OJJ62375.1 ater|EAU37553.1 atub|OJI87046.1 aver|OJI96509.1 awen|OJJ39692.1 azon|OJJ47825.1

Group3629: abra|OJJ75047.1 acar|OOF97288.1 acla|EAW08236.1 afis|EAW23270.1 afla|EED55709.1 afum|EAL88209.1 agla|OJJ86582.1 akaw|GAA88664.1 aluc|OJZ92613.1 anid|CBF89548.1 anig|EHA26374.1 aory|EIT83232.1 asyd|OJJ62376.1 ater|EAU37554.1 atub|OJI87047.1 aver|OJI96510.1 awen|OJJ39691.1 azon|OJJ47824.1

Group3630: abra|OJJ75048.1 acar|OOF97286.1 acla|EAW08237.1 afis|EAW23271.1 afla|EED55706.1 afum|EAL88208.1 agla|OJJ86578.1 akaw|GAA88665.1 aluc|OJZ92615.1 anid|CBF89546.1 anig|EHA26373.1 aory|EIT83206.1 asyd|OJJ62377.1 ater|EAU37556.1 atub|OJI87049.1 aver|OJI96511.1 awen|OJJ39687.1 azon|OJJ47823.1

Group3631: abra|OJJ75052.1 acar|OOF97284.1 acla|EAW08238.1 afis|EAW23272.1 afla|EED55705.1 afum|EAL88207.1 agla|OJJ86577.1 akaw|GAA88666.1 aluc|OJZ92618.1 anid|CBF89544.1 anig|EHA26370.1 aory|EIT77089.1 asyd|OJJ62379.1 ater|EAU37557.1 atub|OJI87052.1 aver|OJI96513.1 awen|OJJ39685.1 azon|OJJ47822.1

Group3632: abra|OJJ75056.1 acar|OOF97281.1 acla|EAW08241.1 afis|EAW23275.1 afla|EED55703.1 afum|EAL88204.1 agla|OJJ86573.1 akaw|GAA88669.1 aluc|OJZ92622.1 anid|CBF89539.1 anig|EHA26367.1 aory|EIT77072.1 asyd|OJJ62382.1 ater|EAU37560.1 atub|OJI87055.1 aver|OJI96516.1 awen|OJJ39682.1 azon|OJJ47819.1

Group3633: abra|OJJ75057.1 acar|OOF97279.1 acla|EAW08242.1 afis|EAW23276.1 afla|EED55701.1 afum|EAL88203.1 agla|OJJ86571.1 akaw|GAA88670.1 aluc|OJZ92626.1 anid|CBF89533.1 anig|EHA26364.1 aory|EIT77071.1 asyd|OJJ62384.1 ater|EAU37561.1 atub|OJI87056.1 aver|OJI96518.1 awen|OJJ39680.1 azon|OJJ47818.1

Group3634: abra|OJJ75064.1 acar|OOF97270.1 acla|EAW08245.1 afis|EAW23279.1 afla|EED55695.1 afum|EAL88200.1 agla|OJJ86566.1 akaw|GAA88676.1 aluc|OJZ92630.1 anid|CBF89527.1 anig|EHA26360.1 aory|EIT77073.1 asyd|OJJ62388.1 ater|EAU37592.1 atub|OJI87061.1 aver|OJI96521.1 awen|OJJ39676.1 azon|OJJ47816.1

Group3635: abra|OJJ75066.1 acar|OOF97268.1 acla|EAW08247.1 afis|EAW23281.1 afla|EED55694.1 afum|EAL88198.2 agla|OJJ86565.1 akaw|GAA88678.1 aluc|OJZ92632.1 anid|CBF89525.1 anig|EHA26359.1 aory|EIT77087.1 asyd|OJJ62389.1 ater|EAU37591.1 atub|OJI87063.1 aver|OJI96522.1 awen|OJJ39675.1 azon|OJJ47805.1

Group3636: abra|OJJ75069.1 acar|OOF97264.1 acla|EAW08250.1 afis|EAW23284.1 afla|EED55691.1 afum|EAL88195.1 agla|OJJ86562.1 akaw|GAA88681.1 aluc|OJZ92635.1 anid|CBF89520.1 anig|EHA26356.1 aory|EIT77082.1 asyd|OJJ62392.1 ater|EAU37588.1 atub|OJI87066.1 aver|OJI96525.1 awen|OJJ39672.1 azon|OJJ47802.1

Group3637: abra|OJJ75070.1 acar|OOF97265.1 acla|EAW08251.1 afis|EAW23285.1 afla|EED55690.1 afum|EAL88194.1 agla|OJJ86561.1 akaw|GAA88682.1 aluc|OJZ92636.1 anid|CBF89518.1 anig|EHA26355.1 aory|EIT77093.1 asyd|OJJ62393.1 ater|EAU37587.1 atub|OJI87067.1 aver|OJI96526.1 awen|OJJ39671.1 azon|OJJ47801.1

Group3638: abra|OJJ75077.1 acar|OOF97256.1 acla|EAW08287.1 afis|EAW23320.1 afla|EED55678.1 afum|EAL88156.2 agla|OJJ86545.1 akaw|GAA88690.1 aluc|OJZ92643.1 anid|CBF89504.1 anig|EHA26349.1 aory|EIT77070.1 asyd|OJJ62400.1 ater|EAU37581.1 atub|OJI87074.1 aver|OJI96533.1 awen|OJJ39665.1 azon|OJJ47793.1

Group3639: abra|OJJ75080.1 acar|OOF97253.1 acla|EAW08284.1 afis|EAW23317.1 afla|EED55676.1 afum|EBA27338.1 agla|OJJ86542.1 akaw|GAA88693.1 aluc|OJZ92646.1 anid|CBF89487.1 anig|EHA26346.1

aory|EIT77097.1 asyd|OJJ62404.1 ater|EAU35544.1 atub|OJI87077.1 aver|OJI96537.1 awen|OJJ39662.1 azon|OJJ47791.1

Group3640: abra|OJJ75081.1 acar|OOF97252.1 acla|EAW08283.1 afis|EAW23316.1 afla|EED55675.1 afum|EAL88161.2 agla|OJJ86541.1 akaw|GAA88694.1 aluc|OJZ92647.1 anid|CBF89489.1 anig|EHA26345.1 aory|EIT77095.1 asyd|OJJ62405.1 ater|EAU35545.1 atub|OJI87078.1 aver|OJI96538.1 awen|OJJ39661.1 azon|OJJ47789.1

Group3641: abra|OJJ75082.1 acar|OOF97251.1 acla|EAW08282.1 afis|EAW23315.1 afla|EED55674.1 afum|EAL88162.1 agla|OJJ86540.1 akaw|GAA88695.1 aluc|OJZ92648.1 anid|CBF89491.1 anig|EHA26344.1 aory|EIT77078.1 asyd|OJJ62406.1 ater|EAU35546.1 atub|OJI87079.1 aver|OJI96539.1 awen|OJJ39660.1 azon|OJJ47788.1

Group3642: abra|OJJ75084.1 acar|OOF97249.1 acla|EAW08280.1 afis|EAW23313.1 afla|EED55672.1 afum|EAL88164.1 agla|OJJ86538.1 akaw|GAA88697.1 aluc|OJZ92650.1 anid|CBF89495.1 anig|EHA26342.1 aory|EIT77083.1 asyd|OJJ62408.1 ater|EAU35548.1 atub|OJI87081.1 aver|OJI96541.1 awen|OJJ39658.1 azon|OJJ47786.1

Group3643: abra|OJJ75087.1 acar|OOF97246.1 acla|EAW08277.1 afis|EAW23310.1 afla|EED55665.1 afum|EAL88167.1 akaw|GAA88699.1 aluc|OJZ92653.1 anid|CBF89485.1 anig|EHA26341.1 asyd|OJJ62412.1 ater|EAU35551.1 atub|OJI87084.1 aver|OJI96546.1 awen|OJJ39655.1 azon|OJJ47783.1 agla|OJJ86535.1 aory|EIT81799.1

Group3644: abra|OJJ75089.1 acar|OOF97244.1 acla|EAW08275.1 afis|EAW23308.1 afla|EED55663.1 afum|EAL88169.1 agla|OJJ86533.1 akaw|GAA88701.1 aluc|OJZ92655.1 anid|CBF89482.1 anig|EHA26339.1 aory|EIT81804.1 asyd|OJJ62413.1 ater|EAU35553.1 atub|OJI87086.1 aver|OJI96548.1 awen|OJJ39653.1 azon|OJJ47781.1

Group3645: abra|OJJ75090.1 acar|OOF97243.1 acla|EAW08274.1 afis|EAW23307.1 afla|EED55662.1 afum|EAL88170.1 agla|OJJ86532.1 akaw|GAA88702.1 aluc|OJZ92656.1 anid|CBF89480.1 anig|EHA26338.1 aory|EIT81820.1 asyd|OJJ62414.1 ater|EAU35554.1 atub|OJI87087.1 aver|OJI96549.1 awen|OJJ39652.1 azon|OJJ47780.1

Group3646: abra|OJJ75091.1 acar|OOF97241.1 acla|EAW08273.1 afis|EAW23306.1 afla|EED55661.1 afum|EAL88171.1 agla|OJJ86531.1 akaw|GAA88703.1 aluc|OJZ92657.1 anid|CBF89478.1 anig|EHA26337.1 aory|EIT81795.1 asyd|OJJ62415.1 ater|EAU35569.1 atub|OJI87088.1 aver|OJI96550.1 awen|OJJ39590.1 azon|OJJ47779.1

Group3647: abra|OJJ75093.1 acar|OOF97239.1 acla|EAW08271.1 afis|EAW23304.1 afla|EED55659.1 afum|EAL88173.1 agla|OJJ86529.1 akaw|GAA88705.1 anid|CBF89474.1 anig|EHA26335.1 aory|EIT81791.1 asyd|OJJ62418.1 ater|EAU35568.1 atub|OJI87090.1 aver|OJI96553.1 awen|OJJ39586.1 azon|OJJ47766.1 aluc|OJZ92659.1

Group3648: abra|OJJ75094.1 acar|OOF97238.1 acla|EAW08270.1 afis|EAW23303.1 afla|EED55656.1 afum|EAL88175.1 agla|OJJ86528.1 akaw|GAA88706.1 aluc|OJZ92660.1 anid|CBF89472.1 anig|EHA26334.1 aory|EIT81787.1 asyd|OJJ62419.1 ater|EAU35567.1 atub|OJI87091.1 aver|OJI96555.1 awen|OJJ39585.1 azon|OJJ47767.1

Group3649: abra|OJJ75096.1 acar|OOF97236.1 acla|EAW08268.1 afis|EAW23301.1 afla|EED55653.1 afum|EAL88178.1 agla|OJJ86507.1 akaw|GAA88708.1 aluc|OJZ92662.1 anid|CBF89468.1 anig|EHA26332.1 aory|EIT81800.1 asyd|OJJ62421.1 ater|EAU35565.1 atub|OJI87093.1 aver|OJI96556.1 awen|OJJ39583.1 azon|OJJ47769.1

Group3650: abra|OJJ75102.1 acar|OOF97232.1 acla|EAW08266.1 afis|EAW23299.1 afla|EED55649.1 afum|EAL88180.1 agla|OJJ86511.1 akaw|GAA88711.1 aluc|OJZ92666.1 anid|CBF89465.1 anig|EHA26329.1 aory|EIT81776.1 asyd|OJJ62424.1 ater|EAU35561.1 atub|OJI87097.1 aver|OJI96561.1 awen|OJJ39581.1 azon|OJJ47771.1

Group3651: abra|OJJ75103.1 acar|OOF97231.1 acla|EAW08265.1 afis|EAW23298.1 afla|EED55648.1 afum|EAL88181.2 agla|OJJ86513.1 akaw|GAA88712.1 aluc|OJZ92668.1 anid|CBF89463.1 anig|EHA26328.1 aory|EIT81789.1 asyd|OJJ62425.1 ater|EAU35559.1 atub|OJI87098.1 aver|OJI96562.1 awen|OJJ39579.1 azon|OJJ47772.1

Group3652: abra|OJJ75106.1 acar|OOF97228.1 acla|EAW08262.1 afis|EAW23295.1 afla|EED55645.1 afum|EAL88183.1 agla|OJJ86516.1 akaw|GAA88715.1 aluc|OJZ92671.1 anid|CBF89459.1 anig|EHA26326.1 aory|EIT81783.1 asyd|OJJ62427.1 ater|EAU35558.1 atub|OJI87100.1 aver|OJI96564.1 awen|OJJ39576.1 azon|OJJ47775.1

Group3653: abra|OJJ75107.1 acar|OOF97227.1 acla|EAW08261.1 afis|EAW23294.1 afla|EED55644.1 afum|EAL88184.1 agla|OJJ86517.1 akaw|GAA88716.1 aluc|OJZ92672.1 anid|CBF89457.1 anig|EHA26325.1 aory|EIT81790.1 asyd|OJJ62428.1 ater|EAU35557.1 atub|OJI87101.1 aver|OJI96565.1 awen|OJJ39575.1 azon|OJJ47776.1

Group3654: abra|OJJ75109.1 acar|OOF97223.1 acla|EAW08315.1 afis|EAW23325.1 afla|EED55641.1 afum|EAL88154.1 agla|OJJ86520.1 akaw|GAA88718.1 aluc|OJZ92675.1 anid|CBF89453.1 anig|EHA26323.1 aory|EIT81818.1 asyd|OJJ62431.1 ater|EAU35573.1 atub|OJI87103.1 aver|OJI96567.1 awen|OJJ39569.1 azon|OJJ47762.1

Group3655: abra|OJJ75114.1 acar|OOF97217.1 acla|EAW08309.1 afis|EAW23330.1 afla|EED55637.1 afum|EAL88149.2 agla|OJJ86525.1 akaw|GAA88724.1 aluc|OJZ92681.1 anid|CBF89441.1 anig|EHA26318.1 aory|EIT81798.1 asyd|OJJ62439.1 ater|EAU35577.1 atub|OJI87109.1 aver|OJI96575.1 awen|OJJ39564.1 azon|OJJ47757.1

Group3656: abra|OJJ75115.1 acar|OOF97216.1 acla|EAW08308.1 afis|EAW23331.1 afla|EED55636.1 afum|EAL88148.1 agla|OJJ86503.1 akaw|GAA88725.1 aluc|OJZ92682.1 anid|CBF89439.1 anig|EHA26317.1 aory|EIT81819.1 asyd|OJJ62440.1 ater|EAU35578.1 atub|OJI87110.1 aver|OJI96576.1 awen|OJJ39563.1 azon|OJJ47756.1

Group3657: abra|OJJ75120.1 acar|OOF97213.1 acla|EAW08306.1 afis|EAW23332.1 afla|EED55634.1 afum|EAL88146.2 agla|OJJ86500.1 akaw|GAA88729.1 aluc|OJZ92687.1 anid|CBF89437.1 anig|EHA26313.1 aory|EIT81801.1 asyd|OJJ62442.1 ater|EAU35580.1 atub|OJI87115.1 aver|OJI96578.1 awen|OJJ39561.1 azon|OJJ47754.1

Group3658: abra|OJJ75122.1 acar|OOF97212.1 acla|EAW08305.1 afis|EAW23334.1 afla|EED55632.1 afum|EAL88144.1 agla|OJJ86499.1 akaw|GAA88730.1 aluc|OJZ92688.1 anid|CBF89435.1 anig|EHA26312.1 aory|EIT81824.1 asyd|OJJ62443.1 ater|EAU35581.1 atub|OJI87116.1 aver|OJI96579.1 awen|OJJ39560.1 azon|OJJ47753.1

Group3659: abra|OJJ75124.1 acar|OOF97210.1 acla|EAW08304.1 afis|EAW23336.1 afla|EED55630.1 afum|EAL88142.1 agla|OJJ86494.1 akaw|GAA88732.1 aluc|OJZ92690.1 anid|CBF89432.1 anig|EHA26310.1 aory|EIT81797.1 asyd|OJJ62444.1 ater|EAU35582.1 atub|OJI87118.1 aver|OJI96581.1 awen|OJJ39558.1 azon|OJJ47749.1

Group3660: abra|OJJ75126.1 acar|OOF97209.1 acla|EAW08303.1 afis|EAW23337.1 afla|EED55629.1 afum|EAL88141.1 agla|OJJ86493.1 akaw|GAA88733.1 aluc|OJZ92691.1 anid|CBF89430.1 anig|EHA26309.1 aory|EIT81788.1 asyd|OJJ62445.1 ater|EAU35583.1 atub|OJI87119.1 aver|OJI96582.1 awen|OJJ39557.1 azon|OJJ47750.1

Group3661: abra|OJJ75129.1 acar|OOF97207.1 acla|EAW08300.1 afis|EAW23340.1 afla|EED55626.1 afum|EAL88138.1 agla|OJJ86490.1 akaw|GAA88736.1 aluc|OJZ92694.1 anid|CBF89425.1 anig|EHA26306.1 aory|EIT81810.1 asyd|OJJ62448.1 ater|EAU35585.1 atub|OJI87122.1 aver|OJI96585.1 awen|OJJ39554.1 azon|OJJ47748.1

Group3662: abra|OJJ75130.1 acar|OOF97205.1 acla|EAW08298.1 afis|EAW23342.1 afla|EED55624.1 afum|EAL88136.2 agla|OJJ86486.1 akaw|GAA88737.1 aluc|OJZ92695.1 anid|CBF89422.1 anig|EHA26304.1 aory|EIT81811.1 asyd|OJJ62451.1 ater|EAU35586.1 atub|OJI87123.1 aver|OJI96586.1 awen|OJJ39552.1 azon|OJJ47747.1

Group3663: abra|OJJ75131.1 acar|OOF97204.1 acla|EAW08297.1 afis|EAW23343.1 afla|EED55623.1 afum|EAL88135.1 agla|OJJ86485.1 akaw|GAA88738.1 aluc|OJZ92696.1 anid|CBF89420.1 anig|EHA26302.1 aory|EIT81805.1 asyd|OJJ62452.1 ater|EAU35587.1 atub|OJI87124.1 aver|OJI96587.1 awen|OJJ39550.1 azon|OJJ47746.1

Group3664: abra|OJJ75133.1 acar|OOF97203.1 acla|EAW08294.1 afis|EAW23345.1 afla|EED55621.1 afum|EAL88132.1 agla|OJJ86482.1 akaw|GAA88740.1 aluc|OJZ92699.1 anid|CBF89412.1 anig|EHA26300.1 aory|EIT81825.1 asyd|OJJ62455.1 ater|EAU35589.1 atub|OJI87127.1 aver|OJI96590.1 awen|OJJ39547.1 azon|OJJ47744.1

Group3665: abra|OJJ75134.1 acar|OOF97202.1 acla|EAW08293.1 afis|EAW23346.1 afla|EED55620.1 afum|EAL88130.1 agla|OJJ86481.1 akaw|GAA88741.1 aluc|OJZ92700.1 anid|CBF74918.1 anig|EHA26299.1 aory|EIT81822.1 asyd|OJJ60098.1 ater|EAU35590.1 atub|OJI87128.1 aver|OJJ04164.1 awen|OJJ39545.1 azon|OJJ47743.1

Group3666: abra|OJJ75136.1 acar|OOF97201.1 acla|EAW08292.1 afis|EAW23347.1 afla|EED55619.1 afum|EAL88129.1 agla|OJJ86480.1 akaw|GAA88742.1 aluc|OJZ92702.1 anid|CBF74916.1 anig|EHA26298.1 aory|EIT81794.1 asyd|OJJ60099.1 ater|EAU35591.1 atub|OJI87129.1 aver|OJJ04163.1 awen|OJJ39544.1 azon|OJJ47742.1

Group3667: abra|OJJ75146.1 acar|OOF97192.1 acla|EAW08319.1 afis|EAW23354.1 afla|EED55604.1 afum|EAL88122.2 agla|OJJ86471.1 akaw|GAA88751.1 aluc|OJZ92711.1 anid|CBF74886.1 anig|EHA26288.1 aory|EIT82711.1 asyd|OJJ60107.1 ater|EAU35606.1 atub|OJI87137.1 aver|OJJ04155.1 awen|OJJ39532.1 azon|OJJ47729.1

Group3668: abra|OJJ75149.1 acar|OOF97188.1 acla|EAW08323.1 afis|EAW23358.1 afla|EED55608.1 afum|EAL88118.1 agla|OJJ86468.1 akaw|GAA88755.1 aluc|OJZ92715.1 anid|CBF74882.1 anig|EHA26285.1

aory|EIT81782.1 asyd|OJJ60110.1 ater|EAU35609.1 atub|OJI87141.1 aver|OJJ04152.1 awen|OJJ39529.1 azon|OJJ47725.1

Group3669: abra|OJJ75150.1 acar|OOF97187.1 acla|EAW08324.1 afis|EAW23359.1 afla|EED55610.1 afum|EBA27336.1 agla|OJJ86467.1 akaw|GAA88756.1 aluc|OJZ92716.1 anid|CBF74880.1 anig|EHA26283.1 aory|EIT81806.1 asyd|OJJ60111.1 ater|EAU35610.1 atub|OJI87142.1 aver|OJJ04151.1 awen|OJJ39528.1 azon|OJJ47724.1

Group3670: abra|OJJ75152.1 acar|OOF97185.1 acla|EAW08327.1 afis|EAW23362.1 afla|EED55596.1 afum|EAL88112.1 agla|OJJ86464.1 akaw|GAA88757.1 aluc|OJZ92720.1 anid|CBF74837.1 anig|EHA26280.1 aory|EIT82684.1 asyd|OJJ60134.1 ater|EAU35613.1 atub|OJI87145.1 aver|OJJ04128.1 awen|OJJ39525.1 azon|OJJ47721.1

Group3671: abra|OJJ75153.1 acar|OOF97184.1 acla|EAW08328.1 afis|EAW23363.1 afla|EED55595.1 afum|EBA27334.1 agla|OJJ86463.1 akaw|GAA88758.1 aluc|OJZ92721.1 anid|CBF74835.1 anig|EHA26279.1 aory|EIT82682.1 asyd|OJJ60135.1 ater|EAU35614.1 atub|OJI87146.1 aver|OJJ04127.1 awen|OJJ39524.1 azon|OJJ47720.1

Group3672: abra|OJJ75157.1 acar|OOF97182.1 acla|EAW08332.1 afis|EAW23367.1 afla|EED55590.1 afum|EAL88106.1 agla|OJJ86457.1 akaw|GAA88763.1 aluc|OJZ92727.1 anid|CBF74823.1 anig|EHA26274.1 aory|EIT82667.1 asyd|OJJ60140.1 ater|EAU35618.1 atub|OJI87151.1 aver|OJJ04122.1 awen|OJJ39520.1 azon|OJJ47716.1

Group3673: abra|OJJ75159.1 acar|OOF97179.1 acla|EAW08335.1 afis|EAW23370.1 afla|EED55587.1 afum|EAL88103.2 agla|OJJ86453.1 akaw|GAA88770.1 aluc|OJZ92729.1 anid|CBF74817.1 anig|EHA26272.1 aory|EIT82666.1 asyd|OJJ60143.1 ater|EAU35621.1 atub|OJI87153.1 aver|OJJ04120.1 awen|OJJ39513.1 azon|OJJ47712.1

Group3674: abra|OJJ75160.1 acar|OOF97178.1 acla|EAW08336.1 afis|EAW23371.1 afla|EED55586.1 afum|EAL88101.1 agla|OJJ86452.1 akaw|GAA88771.1 aluc|OJZ92730.1 anid|CBF74815.1 anig|EHA26271.1 aory|EIT82693.1 asyd|OJJ60144.1 ater|EAU35622.1 atub|OJI87154.1 aver|OJJ04119.1 awen|OJJ39512.1 azon|OJJ47711.1

Group3675: abra|OJJ75162.1 acar|OOF97176.1 acla|EAW08338.1 afis|EAW23373.1 afla|EED55585.1 afum|EAL88099.1 agla|OJJ86450.1 akaw|GAA88773.1 aluc|OJZ92732.1 anid|CBF74811.1 anig|EHA26269.1 aory|EIT82709.1 asyd|OJJ60146.1 ater|EAU35624.1 atub|OJI87156.1 aver|OJJ04117.1 awen|OJJ39510.1 azon|OJJ47709.1

Group3676: abra|OJJ75165.1 acar|OOF97173.1 acla|EAW08339.1 afis|EAW23374.1 afla|EED55584.1 afum|EAL88097.1 agla|OJJ86449.1 akaw|GAA88776.1 aluc|OJZ92736.1 anid|CBF74839.1 anig|EHA26266.1 aory|EIT82678.1 asyd|OJJ60133.1 ater|EAU35628.1 atub|OJI87160.1 aver|OJJ04129.1 awen|OJJ39509.1 azon|OJJ47708.1

Group3677: abra|OJJ75166.1 acar|OOF97172.1 acla|EAW08340.1 afis|EAW23375.1 afla|EED55583.1 afum|EAL88096.1 agla|OJJ86448.1 akaw|GAA88777.1 aluc|OJZ92737.1 anid|CBF74841.1 anig|EHA26265.1 aory|EIT82676.1 asyd|OJJ60132.1 ater|EAU35629.1 atub|OJI87161.1 aver|OJJ04130.1 awen|OJJ39508.1 azon|OJJ47707.1

Group3678: abra|OJJ75168.1 acar|OOF94606.1 acla|EAW08132.1 afis|EAW23169.1 afla|EED46952.1 afum|EAL88315.1 agla|OJJ89680.1 akaw|GAA88778.1 aluc|OJZ92738.1 anid|CBF74480.1 anig|EHA26264.1 aory|EIT72535.1 asyd|OJJ57708.1 ater|EAU36298.1 atub|OJI87163.1 aver|OJJ05456.1 awen|OJJ36614.1 azon|OJJ47599.1

Group3679: abra|OJJ75172.1 acar|OOF94604.1 acla|EAW13004.1 afis|EAW17664.1 afla|EED50493.1 afum|EAL91478.1 agla|OJJ79537.1 akaw|GAA88779.1 aluc|OJZ92740.1 anid|CBF90052.1 anig|EHA26263.1 aory|EIT82027.1 asyd|OJJ62053.1 ater|EAU31989.1 atub|OJI87165.1 aver|OJI96159.1 awen|OJJ37177.1 azon|OJJ50877.1

Group3680: abra|OJJ75177.1 acar|OOF94602.1 acla|EAW13001.1 afis|EAW17667.1 afla|EED50488.1 afum|EAL91481.1 agla|OJJ79539.1 akaw|GAA88782.1 aluc|OJZ92743.1 anid|CBF90043.1 anig|EHA26260.1 aory|EIT82124.1 asyd|OJJ62058.1 ater|EAU31980.1 atub|OJI87168.1 aver|OJI96164.1 awen|OJJ37174.1 azon|OJJ50873.1

Group3681: abra|OJJ75178.1 acar|OOF94601.1 acla|EAW13000.1 afis|EAW17668.1 afla|EED50487.1 afum|EAL91482.1 agla|OJJ79540.1 akaw|GAA88783.1 aluc|OJZ92744.1 anid|CBF90041.1 anig|EHA26259.1 aory|EIT82171.1 asyd|OJJ62059.1 ater|EAU31979.1 atub|OJI87169.1 aver|OJI96165.1 awen|OJJ37173.1 azon|OJJ50872.1

Group3682: abra|OJJ75179.1 acar|OOF94600.1 acla|EAW12999.1 afis|EAW17669.1 afla|EED50486.1 afum|EAL91483.1 agla|OJJ79541.1 akaw|GAA88784.1 aluc|OJZ92745.1 anid|CBF90039.1 anig|EHA26258.1 aory|EIT82129.1 asyd|OJJ62060.1 ater|EAU31978.1 atub|OJI87170.1 aver|OJI96166.1 awen|OJJ37172.1 azon|OJJ50871.1

Group3683: abra|OJJ75182.1 acar|OOF94598.1 acla|EAW12995.1 afis|EAW17671.1 afla|EED50482.1 afum|EAL91485.1 agla|OJJ79543.1 akaw|GAA88786.1 aluc|OJZ92746.1 anid|CBF90036.1 anig|EHA26257.1 aory|EIT82081.1 asyd|OJJ62061.1 ater|EAU31976.1 atub|OJI87173.1 aver|OJI96167.1 awen|OJJ37171.1 azon|OJJ50867.1

Group3684: abra|OJJ75186.1 acar|OOF94596.1 acla|EAW12991.1 afis|EAW17674.1 afla|EED50477.1 afum|EAL91487.1 agla|OJJ79515.1 akaw|GAA88788.1 aluc|OJZ92749.1 anid|CBF90029.1 anig|EHA26254.1 aory|EIT82056.1 asyd|OJJ62064.1 ater|EAU31972.1 atub|OJI87175.1 aver|OJI96170.1 awen|OJJ37167.1 azon|OJJ50863.1

Group3685: abra|OJJ75189.1 acar|OOF94594.1 acla|EAW12990.1 afis|EAW17675.1 afla|EED50476.1 afum|EAL91488.1 agla|OJJ79514.1 akaw|GAA88790.1 aluc|OJZ92752.1 anid|CBF90024.1 anig|EHA26252.1 aory|EIT82044.1 asyd|OJJ62067.1 ater|EAU31971.1 atub|OJI87177.1 aver|OJI96173.1 awen|OJJ37165.1 azon|OJJ50862.1

Group3686: abra|OJJ75190.1 acar|OOF94593.1 acla|EAW12989.1 afis|EAW17676.1 afla|EED50475.1 afum|EAL91489.1 agla|OJJ79500.1 akaw|GAA88791.1 aluc|OJZ92754.1 anid|CBF90022.1 anig|EHA26251.1 aory|EIT82153.1 asyd|OJJ62068.1 ater|EAU31970.1 atub|OJI87179.1 aver|OJI96174.1 awen|OJJ37164.1 azon|OJJ50860.1

Group3687: abra|OJJ75198.1 acar|OOF94588.1 acla|EAW12983.1 afis|EAW17681.1 afla|EED50470.1 afum|EAL91495.1 agla|OJJ79499.1 akaw|GAA91750.1 aluc|OJZ92761.1 anid|CBF90009.1 anig|EHA26245.1 aory|EIT82018.1 asyd|OJJ62073.1 ater|EAU31944.1 atub|OJI87205.1 aver|OJI96180.1 awen|OJJ37158.1 azon|OJJ50856.1

Group3688: abra|OJJ75199.1 acar|OOF94589.1 acla|EAW12982.1 afis|EAW17682.1 afla|EED50469.1 afum|EAL91496.1 agla|OJJ79498.1 akaw|GAA91751.1 aluc|OJZ92762.1 anid|CBF90007.1 anig|EHA26244.1 aory|EIT82107.1 asyd|OJJ62074.1 ater|EAU31945.1 atub|OJI87206.1 aver|OJI96181.1 awen|OJJ37157.1 azon|OJJ50855.1

Group3689: abra|OJJ75201.1 acar|OOF94587.1 acla|EAW12981.1 afis|EAW17683.1 afla|EED50468.1 afum|EAL91497.1 agla|OJJ79496.1 akaw|GAA91752.1 aluc|OJZ92763.1 anid|CBF90005.1 anig|EHA26243.1 aory|EIT82022.1 asyd|OJJ62075.1 ater|EAU31946.1 atub|OJI87207.1 aver|OJI96182.1 awen|OJJ37156.1 azon|OJJ50854.1

Group3690: abra|OJJ75203.1 acar|OOF94585.1 acla|EAW12979.1 afis|EAW17685.1 afla|EED50466.1 afum|EAL91499.1 agla|OJJ79494.1 akaw|GAA91754.1 aluc|OJZ92766.1 anid|CBF90002.1 anig|EHA26241.1 aory|EIT82013.1 asyd|OJJ62078.1 ater|EAU31948.1 atub|OJI87210.1 aver|OJI96185.1 awen|OJJ37154.1 azon|OJJ50852.1

Group3692: abra|OJJ75207.1 acar|OOF94582.1 acla|EAW12976.1 afis|EAW17688.1 afla|EED50463.1 afum|EAL91502.1 agla|OJJ79491.1 akaw|GAA91757.1 aluc|OJZ92769.1 anid|CBF89985.1 anig|EHA26238.1 aory|EIT82159.1 asyd|OJJ62086.1 ater|EAU31951.1 atub|OJI87213.1 aver|OJI96193.1 awen|OJJ37151.1 azon|OJJ50848.1

Group3693: abra|OJJ75208.1 acar|OOF94581.1 acla|EAW12975.1 afis|EAW17689.1 afla|EED50455.1 afum|EAL91503.1 agla|OJJ79490.1 akaw|GAA91758.1 aluc|OJZ92770.1 anid|CBF89984.1 anig|EHA26237.1 aory|EIT82021.1 asyd|OJJ62087.1 ater|EAU31952.1 atub|OJI87214.1 aver|OJI96194.1 awen|OJJ37147.1 azon|OJJ50847.1

Group3694: abra|OJJ75212.1 acar|OOF94572.1 acla|EAW13091.1 afis|EAW17572.1 afla|EED49249.1 afum|EAL91386.1 agla|OJJ81386.1 akaw|GAA91762.1 aluc|OJZ92776.1 anid|CBF90252.1 anig|EHA26234.1 aory|EIT82180.1 asyd|OJJ61946.1 ater|EAU37009.1 atub|OJI87218.1 aver|OJI96038.1 awen|OJJ37275.1 azon|OJJ50975.1

Group3695: abra|OJJ75213.1 acar|OOF94571.1 acla|EAW13092.1 afis|EAW17571.1 afla|EED49250.1 afum|EBA27432.1 agla|OJJ81387.1 akaw|GAA91763.1 aluc|OJZ92777.1 anid|CBF90254.1 anig|EHA26233.1 aory|EIT82196.1 asyd|OJJ61945.1 ater|EAU37008.1 atub|OJI87219.1 aver|OJI96037.1 awen|OJJ37278.1 azon|OJJ50976.1

Group3696: abra|OJJ75214.1 acar|OOF94570.1 acla|EAW13093.1 afis|EAW17570.1 afla|EED49251.1 afum|EAL91383.1 agla|OJJ81390.1 akaw|GAA91764.1 aluc|OJZ92778.1 anid|CBF90256.1 anig|EHA26232.1 aory|EIT82218.1 asyd|OJJ61944.1 ater|EAU37007.1 atub|OJI87220.1 aver|OJI96036.1 awen|OJJ37281.1 azon|OJJ50977.1

Group3697: abra|OJJ75215.1 acar|OOF94569.1 acla|EAW13094.1 afis|EAW17569.1 afla|EED49252.1 afum|EAL91382.1 agla|OJJ81395.1 akaw|GAA91765.1 aluc|OJZ92779.1 anid|CBF90258.1 anig|EHA26231.1 aory|EIT82201.1 asyd|OJJ61943.1 ater|EAU37006.1 atub|OJI87221.1 awen|OJJ37282.1 azon|OJJ50978.1 aver|OJI96035.1

Group3698: abra|OJJ75227.1 acar|OOF94562.1 acla|EAW12254.1 afis|EAW16982.1 afla|EED48301.1 afum|EAL86509.1 agla|OJJ79789.1 akaw|GAA91773.1 aluc|OJZ92788.1 anid|CBF86682.1 anig|EHA26219.1

aory|EIT76292.1 asyd|OJJ64757.1 ater|EAU31794.1 atub|OJI87231.1 aver|OJI98859.1 awen|OJJ35994.1 azon|OJJ50263.1

Group3699: abra|OJJ75272.1 acar|OOF94531.1 acla|EAW12236.1 afis|EAW16991.1 afla|EED48964.1 afum|EAL86515.1 agla|OJJ81058.1 akaw|GAA91810.1 aluc|OJZ92832.1 anid|CBF87436.1 anig|EHA26177.1 asyd|OJJ59098.1 ater|EAU31737.1 atub|OJI87289.1 aver|OJJ01689.1 awen|OJJ35979.1 azon|OJJ50286.1 aory|EIT80025.1

Group3700: abra|OJJ75274.1 acar|OOF94529.1 acla|EAW12235.1 afis|EAW16993.1 afla|EED48956.1 afum|EAL86517.1 agla|OJJ79819.1 akaw|GAA91812.1 aluc|OJZ92834.1 anid|CBF87472.1 anig|EHA26175.1 aory|EIT80048.1 asyd|OJJ52939.1 ater|EAU31735.1 atub|OJI87291.1 aver|OJJ08906.1 awen|OJJ35982.1 azon|OJJ50283.1

Group3702: abra|OJJ75284.1 acar|OOF94523.1 acla|EAW12234.1 afis|EAW16994.1 afla|EED48957.1 afum|EAL86518.2 agla|OJJ79820.1 akaw|GAA91822.1 aluc|OJZ92845.1 anid|CBF87470.1 anig|EHA26165.1 aory|EIT79980.1 asyd|OJJ52938.1 ater|EAU31734.1 atub|OJI87301.1 aver|OJJ08905.1 awen|OJJ35983.1 azon|OJJ50282.1

Group3703: abra|OJJ75307.1 acar|OOF94522.1 acla|EAW12233.1 afis|EAW16995.1 afla|EED48958.1 afum|EAL86519.2 agla|OJJ79822.1 akaw|GAA91991.1 aluc|OJZ92861.1 anid|CBF87468.1 anig|EHA26104.1 aory|EIT79977.1 asyd|OJJ52937.1 ater|EAU31733.1 atub|OJI87319.1 aver|OJJ08904.1 awen|OJJ35984.1 azon|OJJ50281.1

Group3704: abra|OJJ75309.1 acar|OOF94520.1 acla|EAW12231.1 afis|EAW16997.1 afla|EED48962.1 afum|EAL86522.2 agla|OJJ79824.1 akaw|GAA91993.1 aluc|OJZ92863.1 anid|CBF87465.1 anig|EHA26102.1 aory|EIT79990.1 asyd|OJJ52935.1 ater|EAU31731.1 atub|OJI87321.1 aver|OJJ08902.1 awen|OJJ35986.1 azon|OJJ42560.1

Group3705: abra|OJJ75310.1 acar|OOF94519.1 acla|EAW12230.1 afis|EAW16998.1 afla|EED48952.1 afum|EAL86523.1 agla|OJJ79825.1 akaw|GAA91994.1 aluc|OJZ92864.1 anid|CBF87476.1 anig|EHA26101.1 aory|EIT79981.1 asyd|OJJ52941.1 ater|EAU31729.1 atub|OJI87322.1 aver|OJJ08908.1 awen|OJJ35987.1 azon|OJJ50276.1

Group3706: abra|OJJ75314.1 acar|OOF94515.1 acla|EAW10816.1 afis|EAW24758.1 afla|EED56728.1 afum|EAL89400.1 agla|OJJ78831.1 akaw|GAA91998.1 aluc|OJZ92868.1 anid|CBF89399.1 anig|EHA26097.1 aory|EIT73833.1 asyd|OJJ62458.1 ater|EAU34827.1 atub|OJI87326.1 aver|OJI96593.1 awen|OJJ33340.1 azon|OJJ42602.1

Group3708: abra|OJJ75342.1 acar|OOF89833.1 afla|EED48926.1 agla|OJJ81063.1 akaw|GAA92035.1 aluc|OJZ92905.1 anid|CBF87500.1 anig|EHA26058.1 atub|OJI87364.1 aver|OJJ08935.1 awen|OJJ35965.1 azon|OJJ50308.1 acla|EAW12182.1 afis|EAW17116.1 afum|EAL86578.1 asyd|OJJ52969.1 ater|EAU36171.1 aory|EIT80020.1

Group3710: abra|OJJ75381.1 acar|OOF94466.1 acla|EAW12111.1 afis|EAW17274.1 afla|EED48845.1 afum|EAL86692.1 agla|OJJ81078.1 akaw|GAA92743.1 aluc|OJZ92951.1 anid|CBF87538.1 anig|EHA26024.1 aory|EIT81278.1 asyd|OJJ52990.1 ater|EAU34713.1 atub|OJI87410.1 aver|OJJ08959.1 awen|OJJ35760.1 azon|OJJ45524.1

Group3711: abra|OJJ75383.1 acar|OOF94464.1 acla|EAW12109.1 afis|EAW17276.1 afla|EED48843.1 afum|EAL86694.1 agla|OJJ81080.1 akaw|GAA92745.1 aluc|OJZ92953.1 anid|CBF87542.1 anig|EHA26022.1 aory|EIT81280.1 asyd|OJJ52992.1 ater|EAU34711.1 atub|OJI87412.1 aver|OJJ08961.1 awen|OJJ35758.1 azon|OJJ45526.1

Group3712: abra|OJJ75384.1 acar|OOF94463.1 acla|EAW12108.1 afis|EAW17277.1 afla|EED48842.1 afum|EAL86695.1 agla|OJJ81081.1 akaw|GAA92746.1 aluc|OJZ92954.1 anid|CBF87544.1 anig|EHA26021.1 aory|EIT81283.1 asyd|OJJ52993.1 ater|EAU34710.1 atub|OJI87413.1 aver|OJJ08962.1 awen|OJJ35757.1 azon|OJJ45527.1

Group3713: abra|OJJ75385.1 acar|OOF94461.1 acla|EAW12107.1 afis|EAW17278.1 afla|EED48841.1 afum|EAL86696.1 agla|OJJ81082.1 akaw|GAA92747.1 aluc|OJZ92955.1 anid|CBF87545.1 anig|EHA26020.1 aory|EIT81279.1 asyd|OJJ52994.1 ater|EAU34709.1 atub|OJI87414.1 aver|OJJ08963.1 awen|OJJ35756.1 azon|OJJ45528.1

Group3714: abra|OJJ75391.1 acar|OOF94456.1 acla|EAW12101.1 afis|EAW17287.1 afla|EED48833.1 afum|EAL86705.1 agla|OJJ81090.1 akaw|GAA92754.1 aluc|OJZ92962.1 anid|CBF87556.1 anig|EHA26013.1 aory|EIT81270.1 asyd|OJJ53001.1 ater|EAU34702.1 atub|OJI87420.1 aver|OJJ08970.1 awen|OJJ35750.1 azon|OJJ45536.1

Group3715: abra|OJJ75394.1 acar|OOF94455.1 acla|EAW12099.1 afis|EAW17285.1 afla|EED48831.1 afum|EAL86703.1 agla|OJJ81092.1 akaw|GAA92756.1 aluc|OJZ92965.1 anid|CBF87558.1 anig|EHA26010.1 aory|EIT81288.1 asyd|OJJ53003.1 ater|EAU34700.1 atub|OJI87423.1 aver|OJJ08971.1 awen|OJJ35749.1 azon|OJJ45542.1



Group3716: abra|OJJ75396.1 acar|OOF94453.1 acla|EAW12097.1 afis|EAW17289.1 afla|EED48829.1  
afum|EAL86709.1 agla|OJJ81094.1 akaw|GAA92758.1 aluc|OJZ92968.1 anid|CBF81166.1 anig|EHA26008.1  
aory|EIT81272.1 asyd|OJJ59287.1 ater|EAU34699.1 atub|OJI87425.1 aver|OJJ02988.1 awen|OJJ35747.1  
azon|OJJ45540.1

Group3717: abra|OJJ75397.1 acar|OOF94451.1 acla|EAW12096.1 afis|EAW17290.1 afla|EED48828.1  
afum|EAL86710.1 agla|OJJ81095.1 akaw|GAA92759.1 aluc|OJZ92969.1 anid|CBF74295.1 anig|EHA26007.1  
aory|EIT81266.1 asyd|OJJ51909.1 ater|EAU34698.1 atub|OJI87426.1 aver|OJJ05350.1 awen|OJJ35746.1  
azon|OJJ45539.1

Group3718: abra|OJJ75399.1 acar|OOF90746.1 acla|EAW13772.1 afis|EAW18360.1 afla|EED48826.1  
afum|EAL87724.1 agla|OJJ88025.1 akaw|GAA84178.1 aluc|OJZ88851.1 anid|CBF79349.1 anig|EHA23652.1  
aory|EIT72979.1 asyd|OJJ57798.1 ater|EAU34692.1 atub|OJI85939.1 aver|OJJ04589.1 awen|OJJ35744.1  
azon|OJJ49497.1

Group3719: abra|OJJ75400.1 acar|OOF90747.1 acla|EAW13773.1 afis|EAW18359.1 afla|EED48825.1  
afum|EAL87723.1 agla|OJJ88026.1 akaw|GAA84179.1 aluc|OJZ88852.1 anid|CBF79351.1 anig|EHA23651.1  
aory|EIT73008.1 asyd|OJJ57799.1 ater|EAU34691.1 atub|OJI85938.1 aver|OJJ04588.1 awen|OJJ35743.1  
azon|OJJ42023.1

Group3721: abra|OJJ75402.1 acar|OOF90749.1 acla|EAW13774.1 afis|EAW18358.1 afla|EED48823.1  
afum|EAL87722.1 agla|OJJ88027.1 akaw|GAA84181.1 aluc|OJZ88854.1 anid|CBF79353.1 anig|EHA23649.1  
aory|EIT72976.1 asyd|OJJ57800.1 ater|EAU34690.1 atub|OJI85936.1 aver|OJJ04587.1 awen|OJJ35742.1  
azon|OJJ43326.1

Group3722: abra|OJJ75404.1 acar|OOF90751.1 acla|EAW13776.1 afis|EAW18356.1 afum|EAL87719.1  
agla|OJJ88029.1 akaw|GAA84182.1 aluc|OJZ88856.1 anid|CBF79356.1 anig|EHA23647.1 aory|EIT72985.1  
asyd|OJJ57802.1 ater|EAU34689.1 atub|OJI85934.1 aver|OJJ04585.1 awen|OJJ35740.1 azon|OJJ43323.1  
afla|EED48821.1

Group3723: abra|OJJ75408.1 acar|OOF90754.1 acla|EAW13781.1 afis|EAW18351.1 afla|EED48816.1  
afum|EAL87714.1 agla|OJJ88033.1 akaw|GAA84184.1 aluc|OJZ88859.1 anid|CBF79365.1 anig|EHA23644.1  
aory|EIT72998.1 asyd|OJJ57807.1 ater|EAU34685.1 atub|OJI85931.1 aver|OJJ04581.1 awen|OJJ35735.1  
azon|OJJ43321.1

Group3724: abra|OJJ75409.1 acar|OOF90755.1 acla|EAW13780.1 afis|EAW18352.1 afla|EED48817.1  
afum|EAL87715.1 agla|OJJ88032.1 akaw|GAA84185.1 aluc|OJZ88860.1 anid|CBF79364.1 anig|EHA23643.1  
aory|EIT73011.1 asyd|OJJ57806.1 ater|EAU34686.1 atub|OJI85930.1 aver|OJJ04582.1 awen|OJJ35736.1  
azon|OJJ43322.1

Group3725: abra|OJJ75410.1 acar|OOF90756.1 acla|EAW13782.1 afis|EAW18350.1 afla|EED48815.1  
afum|EAL87713.1 agla|OJJ88034.1 akaw|GAA84186.1 aluc|OJZ88861.1 anid|CBF79367.1 anig|EHA23642.1  
aory|EIT73016.1 asyd|OJJ57808.1 ater|EAU34684.1 atub|OJI85929.1 aver|OJJ04580.1 awen|OJJ35734.1  
azon|OJJ43319.1

Group3726: abra|OJJ75413.1 acar|OOF90757.1 acla|EAW13785.1 afis|EAW18347.1 afla|EED48812.1  
afum|EAL87711.1 agla|OJJ88037.1 akaw|GAA84188.1 aluc|OJZ88864.1 anid|CBF79386.1 anig|EHA23639.1  
aory|EIT73027.1 asyd|OJJ57811.1 ater|EAU34682.1 atub|OJI85926.1 aver|OJJ04577.1 awen|OJJ35731.1  
azon|OJJ43318.1

Group3727: abra|OJJ75414.1 acar|OOF90760.1 acla|EAW13786.1 afis|EAW18346.1 afla|EED48811.1  
afum|EAL87710.1 agla|OJJ88038.1 akaw|GAA84189.1 aluc|OJZ88865.1 anid|CBF79384.1 anig|EHA23638.1  
aory|EIT73037.1 asyd|OJJ57812.1 ater|EAU34681.1 atub|OJI85925.1 aver|OJJ04576.1 awen|OJJ35730.1  
azon|OJJ43317.1

Group3728: abra|OJJ75415.1 acar|OOF90759.1 acla|EAW13787.1 afis|EAW18345.1 afla|EED48810.1  
afum|EAL87709.1 agla|OJJ88039.1 akaw|GAA84190.1 aluc|OJZ88866.1 anid|CBF79382.1 anig|EHA23637.1  
aory|EIT72992.1 asyd|OJJ57813.1 ater|EAU34680.1 atub|OJI85924.1 aver|OJJ04575.1 awen|OJJ35729.1  
azon|OJJ43316.1

Group3729: abra|OJJ75417.1 acar|OOF90762.1 acla|EAW13789.1 afis|EAW18343.1 afla|EED48808.1  
afum|EAL87706.1 agla|OJJ88041.1 akaw|GAA84192.1 aluc|OJZ88868.1 anid|CBF79378.1 anig|EHA23635.1  
aory|EIT73022.1 asyd|OJJ57815.1 ater|EAU34678.1 atub|OJI85922.1 aver|OJJ04573.1 awen|OJJ35727.1  
azon|OJJ43315.1

Group3730: abra|OJJ75421.1 acar|OOF90765.1 acla|EAW13793.1 afis|EAW18339.1 afla|EED48803.1  
afum|EAL87702.1 agla|OJJ88045.1 akaw|GAA84196.1 aluc|OJZ88873.1 anid|CBF79387.1 anig|EHA23632.1  
aory|EIT73019.1 asyd|OJJ57819.1 ater|EAU34674.1 atub|OJI85918.1 aver|OJJ04572.1 awen|OJJ35722.1  
azon|OJJ43312.1

Group3731: abra|OJJ75425.1 acar|OOF90770.1 acla|EAW13795.1 afis|EAW18337.1 afla|EED48801.1  
afum|EAL87701.1 agla|OJJ88047.1 akaw|GAA84200.1 aluc|OJZ88877.1 anid|CBF79391.1 anig|EHA23628.1

aory|EIT73024.1 asyd|OJJ57821.1 ater|EAU33350.1 atub|OJI85914.1 aver|OJJ04570.1 awen|OJJ35720.1 azon|OJJ43310.1

Group3732: abra|OJJ75426.1 acar|OOF90771.1 acla|EAW13796.1 afis|EAW18336.1 afla|EED48800.1 afum|EAL87700.1 agla|OJJ88049.1 akaw|GAA84201.1 aluc|OJZ88878.1 anid|CBF79395.1 anig|EHA23627.1 aory|EIT73005.1 asyd|OJJ57825.1 ater|EAU33349.1 atub|OJI85913.1 aver|OJJ04567.1 awen|OJJ30717.1 azon|OJJ43309.1

Group3733: abra|OJJ75427.1 acar|OOF90773.1 acla|EAW13798.1 afis|EAW18334.1 afla|EED48798.1 afum|EAL87699.1 agla|OJJ88051.1 akaw|GAA84203.1 aluc|OJZ88880.1 anid|CBF79393.1 anig|EHA23626.1 aory|EIT73035.1 asyd|OJJ57822.1 ater|EAU33347.1 atub|OJI85912.1 aver|OJJ04569.1 awen|OJJ30715.1 azon|OJJ43307.1

Group3734: abra|OJJ75428.1 acar|OOF90774.1 acla|EAW11898.1 afis|EAW19508.1 afla|EED56888.1 afum|EAL86986.1 agla|OJJ88052.1 akaw|GAA84204.1 aluc|OJZ88881.1 anid|CBF82976.1 anig|EHA23625.1 aory|EIT77571.1 asyd|OJJ61561.1 ater|EAU33346.1 atub|OJI85911.1 aver|OJJ00884.1 awen|OJJ30714.1 azon|OJJ45886.1

Group3735: abra|OJJ75429.1 acar|OOF90775.1 acla|EAW13799.1 afis|EAW18333.1 afla|EED48797.1 afum|EAL87698.1 agla|OJJ88053.1 akaw|GAA84205.1 aluc|OJZ88882.1 anid|CBF79397.1 anig|EHA23624.1 aory|EIT73004.1 asyd|OJJ57826.1 ater|EAU33345.1 atub|OJI85910.1 aver|OJJ04566.1 awen|OJJ30713.1 azon|OJJ43306.1

Group3736: abra|OJJ75432.1 acar|OOF90777.1 acla|EAW13804.1 afis|EAW18327.1 afla|EED48793.1 afum|EAL87693.1 agla|OJJ88056.1 akaw|GAA84208.1 aluc|OJZ88885.1 anid|CBF79406.1 anig|EHA23621.1 aory|EIT72996.1 asyd|OJJ57829.1 ater|EAU33336.1 atub|OJI85905.1 aver|OJJ04563.1 awen|OJJ30711.1 azon|OJJ43303.1

Group3737: abra|OJJ75433.1 acar|OOF90778.1 acla|EAW13805.1 afis|EAW18325.1 afla|EED48792.1 afum|EAL87691.1 agla|OJJ88066.1 akaw|GAA84209.1 aluc|OJZ88886.1 anid|CBF79408.1 anig|EHA23620.1 aory|EIT72982.1 asyd|OJJ57830.1 ater|EAU33334.1 atub|OJI85904.1 aver|OJJ04562.1 awen|OJJ30707.1 azon|OJJ43302.1

Group3738: abra|OJJ75435.1 acar|OOF90779.1 acla|EAW13827.1 afis|EAW18304.1 afla|EED48773.1 afum|EAL87670.1 agla|OJJ88119.1 akaw|GAA84210.1 aluc|OJZ88888.1 anid|CBF79447.1 anig|EHA23619.1 aory|EIT73020.1 asyd|OJJ57851.1 ater|EAU33311.1 atub|OJI85901.1 aver|OJJ04541.1 awen|OJJ30678.1 azon|OJJ43279.1

Group3739: abra|OJJ75436.1 acar|OOF90780.1 acla|EAW13826.1 afis|EAW18305.1 afla|EED48774.1 afum|EAL87671.1 agla|OJJ88118.1 akaw|GAA84211.1 aluc|OJZ88889.1 anid|CBF79445.1 anig|EHA23618.1 aory|EIT73030.1 asyd|OJJ57850.1 ater|EAU33312.1 atub|OJI85900.1 aver|OJJ04542.1 awen|OJJ30679.1 azon|OJJ43280.1

Group3740: abra|OJJ75438.1 acar|OOF90783.1 acla|EAW12400.1 afis|EAW16848.1 afla|EED51031.1 afum|EAL86394.1 agla|OJJ81486.1 akaw|GAA84213.1 aluc|OJZ88891.1 anid|CBF81652.1 anig|EHA23615.1 aory|EIT77036.1 asyd|OJJ59545.1 ater|EAU30241.1 atub|OJI85898.1 aver|OJJ02722.1 awen|OJJ30081.1 azon|OJJ44766.1

Group3741: abra|OJJ75442.1 acar|OOF90787.1 acla|EAW13821.1 afis|EAW18310.1 afla|EED48779.1 afum|EAL87676.1 agla|OJJ88079.1 akaw|GAA84217.1 aluc|OJZ88895.1 anid|CBF79434.1 anig|EHA23611.1 aory|EIT73023.1 asyd|OJJ57844.1 ater|EAU33320.1 atub|OJI85894.1 aver|OJJ04548.1 awen|OJJ30685.1 azon|OJJ43284.1

Group3742: abra|OJJ75443.1 acar|OOF90788.1 acla|EAW13820.1 afis|EAW18311.1 afla|EED48780.1 afum|EAL87677.1 agla|OJJ88080.1 akaw|GAA84218.1 aluc|OJZ88896.1 anid|CBF79432.1 anig|EHA23610.1 aory|EIT72999.1 asyd|OJJ57845.1 ater|EAU33321.1 atub|OJI85893.1 aver|OJJ04547.1 awen|OJJ30686.1 azon|OJJ43285.1

Group3743: abra|OJJ75445.1 acar|OOF90789.1 acla|EAW13818.1 afis|EAW18312.1 afla|EED48781.1 afum|EAL87679.1 agla|OJJ88081.1 akaw|GAA84220.1 aluc|OJZ88900.1 anid|CBF79430.1 anig|EHA23608.1 aory|EIT73002.1 asyd|OJJ57841.1 ater|EAU33322.1 atub|OJI85891.1 aver|OJJ04549.1 awen|OJJ30688.1 azon|OJJ43286.1

Group3744: abra|OJJ75446.1 acar|OOF90790.1 acla|EAW13817.1 afis|EAW18313.1 afla|EED48782.1 afum|EAL87680.1 agla|OJJ88082.1 akaw|GAA84221.1 aluc|OJZ88901.1 anid|CBF79428.1 anig|EHA23607.1 aory|EIT73015.1 asyd|OJJ57840.1 ater|EAU33323.1 atub|OJI85890.1 aver|OJJ04550.1 awen|OJJ30689.1 azon|OJJ43287.1

Group3745: abra|OJJ75447.1 acar|OOF90791.1 acla|EAW13816.1 afis|EAW18314.1 afla|EED48783.1 afum|EAL87681.1 agla|OJJ88083.1 akaw|GAA84222.1 aluc|OJZ88902.1 anid|CBF79427.1 anig|EHA23606.1 aory|EIT73014.1 asyd|OJJ57839.1 ater|EAU33324.1 atub|OJI85889.1 aver|OJJ04551.1 awen|OJJ30690.1 azon|OJJ43288.1

Group3746: abra|OJJ75448.1 acar|OOF90792.1 acla|EAW13815.1 afis|EAW18315.1 afla|EED48784.1 afum|EAL87682.1 agla|OJJ88084.1 akaw|GAA84223.1 aluc|OJZ88903.1 anid|CBF79423.1 anig|EHA23605.1 aory|EIT72980.1 asyd|OJJ57837.1 ater|EAU33325.1 atub|OJI85888.1 aver|OJJ04553.1 awen|OJJ30691.1 azon|OJJ43289.1

Group3747: abra|OJJ75450.1 acar|OOF90794.1 acla|EAW13813.1 afis|EAW18317.1 afla|EED48785.1 afum|EAL87684.1 agla|OJJ88101.1 akaw|GAA84225.1 aluc|OJZ88905.1 anid|CBF79421.1 anig|EHA23603.1 aory|EIT73000.1 asyd|OJJ57836.1 ater|EAU33326.1 atub|OJI85886.1 aver|OJJ04554.1 awen|OJJ30699.1 azon|OJJ43292.1

Group3748: abra|OJJ75452.1 acar|OOF90796.1 acla|EAW13811.1 afis|EAW18319.1 afla|EED48787.1 afum|EAL87686.1 agla|OJJ88073.1 akaw|GAA84227.1 aluc|OJZ88907.1 anid|CBF87726.1 anig|EHA23601.1 aory|EIT72981.1 asyd|OJJ63342.1 ater|EAU33329.1 atub|OJI85884.1 aver|OJI97619.1 awen|OJJ30701.1 azon|OJJ50771.1

Group3749: abra|OJJ75454.1 acar|OOF90798.1 acla|EAW13809.1 afis|EAW18321.1 afla|EED48789.1 afum|EAL87688.1 agla|OJJ88070.1 akaw|GAA84229.1 aluc|OJZ88909.1 anid|CBF79416.1 anig|EHA23599.1 aory|EIT73021.1 asyd|OJJ57833.1 ater|EAU33331.1 atub|OJI85882.1 aver|OJJ04557.1 awen|OJJ30703.1 azon|OJJ43296.1

Group3750: abra|OJJ75457.1 acar|OOF90802.1 acla|EAW13808.1 afis|EAW18322.1 afla|EED48790.1 afum|EAL87689.2 agla|OJJ88069.1 akaw|GAA84232.1 aluc|OJZ88913.1 anid|CBF79414.1 anig|EHA23597.1 aory|EIT73033.1 asyd|OJJ57832.1 ater|EAU33332.1 atub|OJI85878.1 aver|OJJ04558.1 awen|OJJ30704.1 azon|OJJ43297.1

Group3751: abra|OJJ75460.1 acar|OOF90279.1 acla|EAW13828.1 afis|EAW18303.1 afla|EED48772.1 afum|EAL87669.1 agla|OJJ88120.1 akaw|GAA84234.1 aluc|OJZ88917.1 anid|CBF79449.1 anig|EHA23595.1 aory|EIT72974.1 asyd|OJJ57852.1 ater|EAU33310.1 atub|OJI85875.1 aver|OJJ04540.1 awen|OJJ30677.1 azon|OJJ43278.1

Group3752: abra|OJJ75463.1 acar|OOF90277.1 acla|EAW13830.1 afis|EAW18301.1 afla|EED48770.1 afum|EAL87667.2 agla|OJJ88122.1 akaw|GAA84236.1 aluc|OJZ88919.1 anid|CBF79480.1 anig|EHA23593.1 aory|EIT72978.1 asyd|OJJ57871.1 ater|EAU33309.1 atub|OJI85873.1 aver|OJJ04523.1 awen|OJJ30676.1 azon|OJJ43276.1

Group3753: abra|OJJ75465.1 acar|OOF90275.1 acla|EAW13832.1 afis|EAW18299.1 afla|EED48768.1 afum|EAL87665.1 agla|OJJ88124.1 akaw|GAA84238.1 aluc|OJZ88921.1 anid|CBF79476.1 anig|EHA23591.1 aory|EIT73017.1 asyd|OJJ57869.1 ater|EAU33307.1 atub|OJI85871.1 aver|OJJ04525.1 awen|OJJ30673.1 azon|OJJ43274.1

Group3754: abra|OJJ75466.1 acar|OOF90803.1 acla|EAW13833.1 afis|EAW18298.1 afla|EED48767.1 afum|EAL87664.2 agla|OJJ88125.1 akaw|GAA84239.1 aluc|OJZ88922.1 anid|CBF79472.1 anig|EHA23590.1 aory|EIT73036.1 asyd|OJJ57867.1 ater|EAU33306.1 atub|OJI85870.1 aver|OJJ04526.1 awen|OJJ30672.1 azon|OJJ43272.1

Group3755: abra|OJJ75468.1 acar|OOF90805.1 acla|EAW13834.1 afis|EAW18297.1 afla|EED48763.1 afum|EAL87663.1 agla|OJJ88126.1 akaw|GAA84240.1 aluc|OJZ88925.1 anid|CBF79470.1 anig|EHA23588.1 aory|EIT73013.1 asyd|OJJ57865.1 ater|EAU33305.1 atub|OJI85867.1 aver|OJJ04528.1 awen|OJJ30671.1 azon|OJJ43271.1

Group3756: abra|OJJ75472.1 acar|OOF90809.1 acla|EAW13837.1 afis|EAW18294.1 afla|EED48761.1 afum|EAL87660.1 agla|OJJ88129.1 akaw|GAA84243.1 aluc|OJZ88931.1 anid|CBF79465.1 anig|EHA23585.1 aory|EIT73038.1 asyd|OJJ57861.1 ater|EAU33303.1 atub|OJI85861.1 aver|OJJ04531.1 awen|OJJ30669.1 azon|OJJ43268.1

Group3757: abra|OJJ75473.1 acar|OOF90810.1 acla|EAW13838.1 afis|EAW18293.1 afla|EED48760.1 afum|EAL87659.1 agla|OJJ88132.1 akaw|GAA84244.1 aluc|OJZ88932.1 anid|CBF79463.1 anig|EHA23584.1 aory|EIT72991.1 asyd|OJJ57860.1 ater|EAU33302.1 atub|OJI85860.1 aver|OJJ04532.1 awen|OJJ30668.1 azon|OJJ43267.1

Group3758: abra|OJJ75474.1 acar|OOF90811.1 acla|EAW13839.1 afis|EAW18292.1 afla|EED48759.1 afum|EAL87658.1 agla|OJJ88133.1 akaw|GAA84245.1 aluc|OJZ88933.1 anid|CBF79461.1 anig|EHA23583.1 aory|EIT72984.1 asyd|OJJ57859.1 ater|EAU33301.1 atub|OJI85859.1 aver|OJJ04534.1 awen|OJJ30667.1 azon|OJJ43265.1

Group3759: abra|OJJ75476.1 acar|OOF90812.1 acla|EAW13841.1 afis|EAW18291.1 afla|EED48758.1 afum|EAL87656.1 agla|OJJ88134.1 akaw|GAA84246.1 aluc|OJZ88935.1 anid|CBF79459.1 anig|EHA23582.1 aory|EIT73034.1 asyd|OJJ57858.1 ater|EAU33299.1 atub|OJI85857.1 aver|OJJ04535.1 awen|OJJ30666.1 azon|OJJ43263.1

Group3760: abra|OJJ75480.1 acar|OOF90816.1 acla|EAW11214.1 afis|EAW18288.1 afla|EED48756.1 afum|EAL87654.2 agla|OJJ88136.1 akaw|GAA84249.1 aluc|OJZ88939.1 anid|CBF79454.1 anig|EHA23579.1

aory|EIT73128.1 asyd|OJJ57856.1 ater|EAU33296.1 atub|OJI85851.1 aver|OJJ04538.1 awen|OJJ30661.1 azon|OJJ47954.1

Group3761: abra|OJJ75486.1 acar|OOF90818.1 acla|EAW11217.1 afis|EAW18286.1 afla|EED48753.1 afum|EAL87652.1 agla|OJJ88138.1 akaw|GAA84252.1 aluc|OJZ88945.1 anid|CBF79450.1 anig|EHA23576.1 aory|EIT73238.1 asyd|OJJ57853.1 ater|EAU33292.1 atub|OJI85844.1 aver|OJJ04539.1 awen|OJJ30658.1 azon|OJJ47956.1

Group3762: abra|OJJ75487.1 acar|OOF90820.1 acla|EAW11218.1 afis|EAW18285.1 afla|EED48752.1 afum|EAL87651.1 agla|OJJ88139.1 akaw|GAA84253.1 aluc|OJZ88946.1 anid|CBF79482.1 anig|EHA23575.1 aory|EIT73219.1 asyd|OJJ57872.1 ater|EAU33291.1 atub|OJI85843.1 aver|OJJ04522.1 awen|OJJ30657.1 azon|OJJ47957.1

Group3763: abra|OJJ75488.1 acar|OOF90819.1 acla|EAW11219.1 afis|EAW18284.1 afla|EED48751.1 afum|EAL87650.1 agla|OJJ88140.1 akaw|GAA84254.1 aluc|OJZ88947.1 anid|CBF79483.1 anig|EHA23574.1 aory|EIT73141.1 asyd|OJJ57873.1 ater|EAU33290.1 atub|OJI85842.1 aver|OJJ04521.1 awen|OJJ30655.1 azon|OJJ47959.1

Group3764: abra|OJJ75491.1 acar|OOF90823.1 acla|EAW11223.1 afis|EAW18280.1 afla|EED48747.1 afum|EAL87646.1 agla|OJJ88146.1 akaw|GAA84256.1 aluc|OJZ88950.1 anid|CBF79491.1 anig|EHA23571.1 aory|EIT73260.1 asyd|OJJ57876.1 ater|EAU33286.1 atub|OJI85839.1 aver|OJJ04518.1 awen|OJJ30652.1 azon|OJJ47963.1

Group3765: abra|OJJ75493.1 acar|OOF90826.1 acla|EAW11226.1 afis|EAW18277.1 afla|EED48744.1 afum|EAL87643.1 agla|OJJ88149.1 akaw|GAA84259.1 aluc|OJZ88952.1 anid|CBF79496.1 anig|EHA23568.1 aory|EIT73150.1 asyd|OJJ57878.1 ater|EAU33283.1 atub|OJI85837.1 aver|OJJ04516.1 awen|OJJ30650.1 azon|OJJ47965.1

Group3766: abra|OJJ75494.1 acar|OOF90827.1 acla|EAW09288.1 afis|EAW21859.1 afla|EED46451.1 afum|EAL92872.1 agla|OJJ84276.1 akaw|GAA84260.1 aluc|OJZ88953.1 anid|CBF76751.1 anig|EHA23567.1 aory|EIT72375.1 asyd|OJJ61260.1 ater|EAU30858.1 atub|OJI85836.1 aver|OJJ00583.1 awen|OJJ34143.1 azon|OJJ43483.1

Group3767: abra|OJJ75495.1 acar|OOF90828.1 acla|EAW09289.1 afis|EAW21858.1 afla|EED46452.1 afum|EAL92871.1 agla|OJJ84277.1 akaw|GAA84261.1 aluc|OJZ88954.1 anid|CBF76749.1 anig|EHA23566.1 aory|EIT72324.1 asyd|OJJ61259.1 ater|EAU30857.1 atub|OJI85835.1 aver|OJJ00582.1 awen|OJJ34142.1 azon|OJJ43484.1

Group3768: abra|OJJ75496.1 acar|OOF90829.1 acla|EAW09290.1 afis|EAW21857.1 afla|EED46453.1 afum|EAL92870.1 agla|OJJ84278.1 akaw|GAA84262.1 aluc|OJZ88955.1 anid|CBF76747.1 anig|EHA23565.1 aory|EIT72382.1 asyd|OJJ61258.1 ater|EAU30856.1 atub|OJI85834.1 aver|OJJ00581.1 awen|OJJ34141.1 azon|OJJ43485.1

Group3769: abra|OJJ75497.1 acar|OOF90830.1 acla|EAW09291.1 afis|EAW21856.1 afla|EED46454.1 afum|EAL92869.1 agla|OJJ84279.1 akaw|GAA84263.1 aluc|OJZ88956.1 anid|CBF76745.1 aory|EIT72446.1 asyd|OJJ61257.1 ater|EAU30855.1 atub|OJI85833.1 aver|OJJ00580.1 awen|OJJ34140.1 azon|OJJ43486.1 anig|EHA23564.1

Group3770: abra|OJJ75506.1 acar|OOF89956.1 acla|EAW09296.1 afis|EAW21851.1 afla|EED46459.1 afum|EAL92864.1 agla|OJJ84284.1 akaw|GAA84269.1 aluc|OJZ88962.1 anid|CBF76735.1 anig|EHA23559.1 aory|EIT72419.1 asyd|OJJ61252.1 ater|EAU30850.1 atub|OJI85828.1 aver|OJJ00576.1 awen|OJJ34134.1 azon|OJJ44210.1

Group3771: abra|OJJ75507.1 acar|OOF89955.1 acla|EAW09297.1 afis|EAW21850.1 afla|EED46460.1 afum|EAL92863.2 agla|OJJ84285.1 akaw|GAA84270.1 aluc|OJZ88963.1 anid|CBF76733.1 anig|EHA23558.1 aory|EIT72388.1 asyd|OJJ61251.1 ater|EAU30849.1 atub|OJI85827.1 aver|OJJ00575.1 awen|OJJ34133.1 azon|OJJ46409.1

Group3772: abra|OJJ75511.1 acar|OOF90837.1 acla|EAW09299.1 afis|EAW21848.1 afum|EAL92861.2 agla|OJJ84287.1 akaw|GAA84275.1 aluc|OJZ88968.1 anid|CBF76727.1 anig|EHA23555.1 asyd|OJJ61248.1 ater|EAU30847.1 atub|OJI85822.1 aver|OJJ00572.1 awen|OJJ34131.1 azon|OJJ44212.1 afla|EED46464.1 aory|EIT72335.1

Group3773: abra|OJJ75512.1 acar|OOF90839.1 acla|EAW09300.1 afis|EAW21847.1 afla|EED46468.1 afum|EAL92860.1 agla|OJJ84288.1 akaw|GAA84276.1 aluc|OJZ88969.1 anid|CBF76725.1 anig|EHA23554.1 aory|EIT72394.1 asyd|OJJ61246.1 ater|EAU30846.1 atub|OJI85821.1 aver|OJJ00570.1 awen|OJJ34130.1 azon|OJJ44213.1

Group3774: abra|OJJ75518.1 acar|OOF90845.1 acla|EAW09302.1 afis|EAW21844.1 afla|EED46526.1 afum|EAL92856.1 agla|OJJ84292.1 akaw|GAA84282.1 aluc|OJZ88975.1 anid|CBF76717.1 anig|EHA23550.1 aory|EIT72426.1 asyd|OJJ61242.1 ater|EAU38521.1 atub|OJI85814.1 aver|OJJ00565.1 awen|OJJ34128.1 azon|OJJ44215.1

Group3775: abra|OJJ75521.1 acar|OOF90848.1 acla|EAW09308.1 afis|EAW21837.1 afla|EED46538.1 afum|EAL92851.1 agla|OJJ84305.1 akaw|GAA84285.1 aluc|OJZ88978.1 anid|CBF76701.1 anig|EHA23547.1 aory|EIT72362.1 asyd|OJJ61233.1 ater|EAU38512.1 atub|OJI85811.1 aver|OJJ00556.1 awen|OJJ34113.1 azon|OJJ44227.1

Group3776: abra|OJJ75523.1 acar|OOF90850.1 acla|EAW09310.1 afis|EAW21835.1 afla|EED46540.1 afum|EAL92850.1 agla|OJJ84309.1 akaw|GAA84286.1 aluc|OJZ88980.1 anid|CBF76699.1 anig|EHA23546.1 aory|EIT72364.1 asyd|OJJ61232.1 ater|EAU38510.1 atub|OJI85809.1 aver|OJJ00555.1 awen|OJJ34109.1 azon|OJJ44232.1

Group3777: abra|OJJ75527.1 acar|OOF90854.1 acla|EAW09313.1 afis|EAW21832.1 afla|EED46544.1 afum|EAL92847.1 agla|OJJ84312.1 akaw|GAA84289.1 aluc|OJZ88983.1 anid|CBF76694.1 anig|EHA23543.1 aory|EIT77942.1 asyd|OJJ61229.1 ater|EAU38508.1 atub|OJI85806.1 aver|OJJ00552.1 awen|OJJ34105.1 azon|OJJ44236.1

Group3778: abra|OJJ75528.1 acar|OOF90855.1 acla|EAW09314.1 afis|EAW21831.1 afla|EED46545.1 afum|EAL92846.1 agla|OJJ84313.1 akaw|GAA84290.1 aluc|OJZ88984.1 anid|CBF76680.1 anig|EHA23542.1 aory|EIT77881.1 asyd|OJJ61223.1 ater|EAU38507.1 atub|OJI85804.1 aver|OJJ00546.1 awen|OJJ34104.1 azon|OJJ44238.1

Group3779: abra|OJJ75539.1 acar|OOF90858.1 acla|EAW09315.1 afis|EAW21830.1 afla|EED46546.1 afum|EAL92845.1 agla|OJJ84314.1 akaw|GAA84293.1 aluc|OJZ88987.1 anid|CBF76676.1 anig|EHA23539.1 aory|EIT77971.1 asyd|OJJ61221.1 ater|EAU38506.1 atub|OJI85801.1 aver|OJJ00545.1 awen|OJJ34103.1 azon|OJJ44239.1

Group3780: abra|OJJ75544.1 acar|OOF90864.1 acla|EAW09316.1 afis|EAW21829.1 afla|EED46547.1 afum|EAL92844.1 agla|OJJ84315.1 akaw|GAA84300.1 aluc|OJZ88994.1 anid|CBF76674.1 anig|EHA23533.1 aory|EIT77834.1 asyd|OJJ61220.1 ater|EAU38505.1 atub|OJI85794.1 aver|OJJ00544.1 awen|OJJ34102.1 azon|OJJ44242.1

Group3781: abra|OJJ75545.1 acar|OOF90866.1 acla|EAW09317.1 afis|EAW21828.1 afla|EED46548.1 afum|EAL92843.1 agla|OJJ84316.1 akaw|GAA84301.1 aluc|OJZ88996.1 anid|CBF76670.1 anig|EHA23532.1 aory|EIT77919.1 asyd|OJJ61219.1 ater|EAU38504.1 atub|OJI85793.1 aver|OJJ00543.1 awen|OJJ34101.1 azon|OJJ44243.1

Group3782: abra|OJJ75548.1 acar|OOF90868.1 acla|EAW09319.1 afis|EAW21826.1 afla|EED46553.1 afum|EAL92841.1 agla|OJJ84318.1 akaw|GAA84303.1 aluc|OJZ88998.1 anid|CBF76666.1 anig|EHA23530.1 aory|EIT77928.1 asyd|OJJ61217.1 ater|EAU38502.1 atub|OJI85791.1 aver|OJJ00541.1 awen|OJJ34099.1 azon|OJJ44245.1

Group3783: abra|OJJ75552.1 acar|OOF90870.1 acla|EAW09324.1 afis|EAW21821.1 afla|EED46558.1 afum|EAL92837.1 agla|OJJ84321.1 akaw|GAA84307.1 aluc|OJZ89002.1 anid|CBF76660.1 anig|EHA23526.1 aory|EIT77966.1 asyd|OJJ61212.1 ater|EAU38495.1 atub|OJI85787.1 aver|OJJ00537.1 awen|OJJ34095.1 azon|OJJ44249.1

Group3784: abra|OJJ75553.1 acar|OOF90872.1 acla|EAW09355.1 afis|EAW21820.1 afla|EED46559.1 afum|EAL92836.1 agla|OJJ84322.1 akaw|GAA84308.1 aluc|OJZ89003.1 anid|CBF76658.1 anig|EHA23525.1 aory|EIT77877.1 asyd|OJJ61211.1 ater|EAU38494.1 atub|OJI85786.1 aver|OJJ00535.1 awen|OJJ34094.1 azon|OJJ44252.1

Group3785: abra|OJJ75554.1 acar|OOF90873.1 acla|EAW09354.1 afis|EAW21819.1 afla|EED46564.1 afum|EAL92835.1 agla|OJJ84327.1 akaw|GAA84309.1 aluc|OJZ89004.1 anid|CBF76654.1 anig|EHA23524.1 aory|EIT77873.1 asyd|OJJ61210.1 ater|EAU38490.1 atub|OJI85785.1 aver|OJJ00534.1 awen|OJJ34093.1 azon|OJJ44253.1

Group3786: abra|OJJ75574.1 acar|OOF90890.1 acla|EAW09346.1 afis|EAW21799.1 afla|EED46590.1 afum|EAL92824.2 agla|OJJ84324.1 akaw|GAA84325.1 aluc|OJZ89022.1 anid|CBF76633.1 anig|EHA23509.1 aory|EIT77934.1 asyd|OJJ61197.1 ater|EAU38481.1 atub|OJI85767.1 aver|OJJ00521.1 awen|OJJ34086.1 azon|OJJ44256.1

Group3787: abra|OJJ75575.1 acar|OOF90893.1 acla|EAW09343.1 afis|EAW21797.1 afla|EED46598.1 afum|EAL92822.2 agla|OJJ84331.1 akaw|GAA84327.1 aluc|OJZ89024.1 anid|CBF76629.1 anig|EHA23508.1 aory|EIT77937.1 asyd|OJJ61196.1 ater|EAU38479.1 atub|OJI85766.1 aver|OJJ00520.1 awen|OJJ34082.1 azon|OJJ44260.1

Group3789: abra|OJJ75579.1 acar|OOF90896.1 acla|EAW09340.1 afis|EAW21795.1 afla|EED46600.1 afum|EAL92820.1 agla|OJJ84333.1 akaw|GAA84331.1 aluc|OJZ89030.1 anid|CBF76625.1 anig|EHA23504.1 aory|EIT77931.1 asyd|OJJ61194.1 ater|EAU38477.1 atub|OJI85761.1 aver|OJJ00518.1 azon|OJJ44262.1 awen|OJJ34079.1

Group3790: abra|OJJ75581.1 acar|OOF90899.1 acla|EAW09337.1 afis|EAW21791.1 afla|EED46604.1 afum|EAL92816.1 agla|OJJ88519.1 akaw|GAA84333.1 aluc|OJZ89032.1 anid|CBF76623.1 anig|EHA23502.1

aory|EIT77970.1 asyd|OJJ61193.1 ater|EAU38475.1 atub|OJI85758.1 aver|OJJ00517.1 awen|OJJ37963.1 azon|OJJ46824.1

Group3791: abra|OJJ75592.1 acar|OOG00236.1 acla|EAW09330.1 afis|EAW21786.1 afla|EED46610.1 afum|EAL92813.1 agla|OJJ84337.1 akaw|GAA84344.1 aluc|OJZ89044.1 anid|CBF76617.1 anig|EHA23491.1 aory|EIT77835.1 asyd|OJJ61189.1 ater|EAU38469.1 atub|OJI85743.1 aver|OJJ00513.1 awen|OJJ34072.1 azon|OJJ48155.1

Group3792: abra|OJJ75602.1 acar|OOG00235.1 acla|EAW09327.1 afis|EAW21784.1 afla|EED46611.1 afum|EAL92811.1 agla|OJJ84339.1 akaw|GAA84352.1 aluc|OJZ89052.1 anid|CBF76613.1 anig|EHA23486.1 aory|EIT77805.1 asyd|OJJ61188.1 ater|EAU38467.1 atub|OJI85735.1 aver|OJJ00511.1 awen|OJJ34071.1 azon|OJJ48157.1

Group3793: abra|OJJ75605.1 acar|OOG00232.1 acla|EAW09367.1 afis|EAW21770.1 afla|EED46330.1 afum|EAL92799.1 agla|OJJ84378.1 akaw|GAA84356.1 aluc|OJZ89058.1 anid|CBF83758.1 anig|EHA23484.1 aory|EIT81243.1 asyd|OJJ60861.1 ater|EAU38448.1 atub|OJI85728.1 aver|OJJ00187.1 awen|OJJ34057.1 azon|OJJ48175.1

Group3794: abra|OJJ75610.1 acar|OOG00228.1 acla|EAW09372.1 afis|EAW21763.1 afla|EED46336.1 afum|EAL92793.1 agla|OJJ84388.1 akaw|GAA84360.1 aluc|OJZ89062.1 anid|CBF83751.1 anig|EHA23476.1 aory|EIT81185.1 asyd|OJJ60857.1 ater|EAU38452.1 atub|OJI85724.1 aver|OJJ00181.1 awen|OJJ34046.1 azon|OJJ48185.1

Group3795: abra|OJJ75611.1 acar|OOG00227.1 acla|EAW09373.1 afis|EAW21762.1 afla|EED46337.1 afum|EAL92792.1 agla|OJJ84389.1 akaw|GAA84361.1 aluc|OJZ89063.1 anid|CBF83749.1 anig|EHA23475.1 aory|EIT81205.1 asyd|OJJ60856.1 ater|EAU38453.1 atub|OJI85723.1 aver|OJJ00180.1 awen|OJJ34045.1 azon|OJJ48186.1

Group3796: abra|OJJ75615.1 acar|OOG00215.1 acla|EAW09363.1 afis|EAW21774.1 afla|EED46340.1 afum|EAL92803.1 agla|OJJ84350.1 akaw|GAA84364.1 aluc|OJZ89068.1 anid|CBF76597.1 anig|EHA23468.1 aory|EIT81181.1 asyd|OJJ61178.1 ater|EAU38464.1 atub|OJI85720.1 aver|OJJ00504.1 awen|OJJ34062.1 azon|OJJ48170.1

Group3797: abra|OJJ75625.1 acar|OOG00211.1 acla|EAW09360.1 afis|EAW21777.1 afla|EED46344.1 afum|EAL92806.1 agla|OJJ84342.1 akaw|GAA84372.1 aluc|OJZ89076.1 anid|CBF76603.1 anig|EHA23461.1 aory|EIT81165.1 asyd|OJJ61182.1 ater|EAU38462.1 atub|OJI85709.1 aver|OJJ00507.1 awen|OJJ34066.1 azon|OJJ48165.1

Group3798: abra|OJJ75628.1 acar|OOG00210.1 acla|EAW09465.1 afis|EAW21671.1 afla|EED57935.1 afum|EAL92706.1 agla|OJJ79745.1 akaw|GAA84375.1 aluc|OJZ89079.1 anid|CBF83585.1 anig|EHA23458.1 aory|EIT82333.1 asyd|OJJ60779.1 ater|EAU38355.1 atub|OJI85706.1 aver|OJJ00112.1 awen|OJJ33935.1 azon|OJJ48642.1

Group3799: abra|OJJ75630.1 acar|OOG00205.1 acla|EAW09463.1 afis|EAW21674.1 afla|EED57936.1 afum|EAL92708.1 agla|OJJ79747.1 akaw|GAA84377.1 aluc|OJZ89081.1 anid|CBF83589.1 anig|EHA23456.1 aory|EIT82341.1 asyd|OJJ60776.1 ater|EAU38357.1 atub|OJI85703.1 aver|OJJ00110.1 awen|OJJ33940.1 azon|OJJ48629.1

Group3800: abra|OJJ75633.1 acar|OOG00202.1 acla|EAW09461.1 agla|OJJ79927.1 akaw|GAA84380.1 aluc|OJZ89084.1 anig|EHA23453.1 asyd|OJJ60773.1 ater|EAU38359.1 atub|OJI85700.1 aver|OJJ00107.1 awen|OJJ33943.1 afla|EED57941.1 anid|CBF83591.1 afis|EAW21676.1 afum|EAL92710.1 aory|EIT82327.1 azon|OJJ48627.1

Group3801: abra|OJJ75634.1 acar|OOG00201.1 acla|EAW09460.1 afis|EAW21677.1 afla|EED57942.1 afum|EAL92711.1 agla|OJJ79926.1 akaw|GAA84381.1 aluc|OJZ89085.1 anid|CBF83593.1 anig|EHA23452.1 aory|EIT82349.1 asyd|OJJ60772.1 ater|EAU38360.1 atub|OJI85699.1 aver|OJJ00106.1 awen|OJJ33944.1 azon|OJJ48626.1

Group3802: abra|OJJ75636.1 acar|OOG00200.1 acla|EAW09459.1 afis|EAW21678.1 afla|EED57943.1 afum|EAL92712.1 agla|OJJ79925.1 akaw|GAA84382.1 aluc|OJZ89086.1 anid|CBF83595.1 anig|EHA23451.1 aory|EIT82316.1 asyd|OJJ60771.1 ater|EAU38361.1 atub|OJI85698.1 aver|OJJ00105.1 awen|OJJ33945.1 azon|OJJ48625.1

Group3803: abra|OJJ75637.1 acar|OOG00199.1 acla|EAW09458.1 afis|EAW21679.1 afla|EED57944.1 afum|EAL92713.1 agla|OJJ79924.1 akaw|GAA84383.1 aluc|OJZ89087.1 anid|CBF83597.1 anig|EHA23450.1 aory|EIT82325.1 asyd|OJJ60770.1 ater|EAU38362.1 atub|OJI85697.1 aver|OJJ00104.1 awen|OJJ33946.1 azon|OJJ48624.1

Group3804: abra|OJJ75639.1 acar|OOG00198.1 acla|EAW09457.1 afis|EAW21680.1 afla|EED57945.1 afum|EAL92714.1 agla|OJJ79923.1 akaw|GAA84384.1 aluc|OJZ89088.1 anid|CBF83598.1 anig|EHA23449.1 aory|EIT82335.1 asyd|OJJ60769.1 ater|EAU38363.1 atub|OJI85694.1 aver|OJJ00103.1 awen|OJJ33947.1 azon|OJJ48623.1

Group3805: abra|OJJ75642.1 acar|OOG00196.1 acla|EAW09456.1 afis|EAW21681.1 afla|EED57946.1 afum|EAL92715.1 agla|OJJ79921.1 akaw|GAA84386.1 aluc|OJZ89091.1 anid|CBF83600.1 anig|EHA23447.1 aory|EIT82326.1 asyd|OJJ60768.1 ater|EAU38364.1 atub|OJI85692.1 aver|OJJ00102.1 awen|OJJ33948.1 azon|OJJ48622.1

Group3806: abra|OJJ75644.1 acar|OOG00195.1 acla|EAW09454.1 afis|EAW21683.1 afla|EED57950.1 afum|EAL92717.1 agla|OJJ79918.1 akaw|GAA84389.1 aluc|OJZ89093.1 anid|CBF83605.1 anig|EHA23444.1 aory|EIT82322.1 asyd|OJJ60766.1 ater|EAU38367.1 atub|OJI85688.1 aver|OJJ00100.1 awen|OJJ33950.1 azon|OJJ48620.1

Group3807: abra|OJJ75645.1 acar|OOG00194.1 acla|EAW09453.1 afis|EAW21684.1 afla|EED57951.1 afum|EAL92718.2 agla|OJJ79917.1 akaw|GAA84390.1 aluc|OJZ89094.1 anid|CBF83607.1 anig|EHA23443.1 aory|EIT82348.1 asyd|OJJ60765.1 ater|EAU38368.1 atub|OJI85687.1 aver|OJJ00099.1 awen|OJJ33951.1 azon|OJJ48619.1

Group3808: abra|OJJ75650.1 acar|OOG00190.1 acla|EAW09452.1 afis|EAW21685.1 afla|EED57956.1 afum|EAL92719.1 agla|OJJ79914.1 akaw|GAA84393.1 aluc|OJZ89098.1 anid|CBF83611.1 anig|EHA23440.1 aory|EIT79731.1 asyd|OJJ60762.1 ater|EAU38371.1 atub|OJI85683.1 aver|OJJ00096.1 awen|OJJ33955.1 azon|OJJ48615.1

Group3809: abra|OJJ75651.1 acar|OOG00189.1 acla|EAW09449.1 afis|EAW21687.1 afla|EED57957.1 afum|EAL92721.2 agla|OJJ79913.1 akaw|GAA84394.1 aluc|OJZ89099.1 anid|CBF83612.1 anig|EHA23439.1 aory|EIT79765.1 asyd|OJJ60761.1 ater|EAU38372.1 atub|OJI85682.1 aver|OJJ00095.1 awen|OJJ33956.1 azon|OJJ48612.1

Group3810: abra|OJJ75652.1 acar|OOG00188.1 acla|EAW09448.1 afis|EAW21688.1 afla|EED57958.1 afum|EAL92722.1 agla|OJJ79912.1 akaw|GAA84395.1 aluc|OJZ89100.1 anid|CBF83614.1 anig|EHA23438.1 aory|EIT79734.1 asyd|OJJ60760.1 ater|EAU38373.1 atub|OJI85681.1 aver|OJJ00094.1 awen|OJJ33957.1 azon|OJJ48611.1

Group3811: abra|OJJ75654.1 acar|OOG00187.1 acla|EAW09446.1 afis|EAW21690.1 afla|EED57960.1 afum|EAL92724.1 agla|OJJ79910.1 akaw|GAA84397.1 aluc|OJZ89103.1 anid|CBF83617.1 anig|EHA23436.1 aory|EIT79781.1 asyd|OJJ60758.1 ater|EAU38375.1 atub|OJI85678.1 aver|OJJ00092.1 awen|OJJ33959.1 azon|OJJ48609.1

Group3812: abra|OJJ75656.1 acar|OOG00186.1 acla|EAW09444.1 afis|EAW21692.1 afla|EED57962.1 afum|EAL92726.1 agla|OJJ79907.1 akaw|GAA84399.1 aluc|OJZ89106.1 anid|CBF83621.1 anig|EHA23434.1 aory|EIT79782.1 asyd|OJJ60756.1 ater|EAU38377.1 atub|OJI85676.1 aver|OJJ00090.1 awen|OJJ33961.1 azon|OJJ48607.1

Group3813: abra|OJJ75657.1 acar|OOG00185.1 acla|EAW09442.1 afis|EAW21694.1 afla|EED57963.1 afum|EAL92728.1 agla|OJJ79905.1 akaw|GAA84400.1 aluc|OJZ89107.1 anid|CBF83623.1 anig|EHA23433.1 aory|EIT79708.1 asyd|OJJ60755.1 ater|EAU38379.1 atub|OJI85675.1 aver|OJJ00089.1 awen|OJJ33963.1 azon|OJJ48605.1

Group3814: abra|OJJ75658.1 acar|OOG00184.1 acla|EAW09441.1 afis|EAW21695.1 afla|EED57964.1 afum|EAL92729.1 agla|OJJ79904.1 akaw|GAA84401.1 aluc|OJZ89109.1 anid|CBF83624.1 anig|EHA23432.1 aory|EIT79788.1 asyd|OJJ60754.1 ater|EAU38380.1 atub|OJI85674.1 aver|OJJ00088.1 awen|OJJ33964.1 azon|OJJ48603.1

Group3815: abra|OJJ75662.1 acar|OOG00181.1 acla|EAW09439.1 afis|EAW21697.1 afla|EED57966.1 afum|EAL92731.1 agla|OJJ79901.1 akaw|GAA84403.1 aluc|OJZ89113.1 anid|CBF83628.1 anig|EHA23430.1 aory|EIT79705.1 asyd|OJJ60752.1 ater|EAU38382.1 atub|OJI85671.1 aver|OJJ00085.1 awen|OJJ33966.1 azon|OJJ48600.1

Group3816: abra|OJJ75664.1 acar|OOG00180.1 acla|EAW09437.1 afis|EAW21699.1 afla|EED57968.1 afum|EAL92733.1 agla|OJJ79899.1 akaw|GAA84405.1 aluc|OJZ89115.1 anid|CBF83632.1 anig|EHA23428.1 aory|EIT79768.1 asyd|OJJ60750.1 ater|EAU38384.1 atub|OJI85669.1 aver|OJJ00083.1 awen|OJJ33968.1 azon|OJJ48598.1

Group3817: abra|OJJ75665.1 acar|OOG00179.1 acla|EAW09436.1 afis|EAW21700.1 afla|EED57969.1 afum|EAL92734.1 agla|OJJ79898.1 akaw|GAA84406.1 aluc|OJZ89116.1 anid|CBF83633.1 anig|EHA23427.1 aory|EIT79802.1 asyd|OJJ60782.1 ater|EAU38385.1 atub|OJI85668.1 aver|OJJ00115.1 awen|OJJ33970.1 azon|OJJ48589.1

Group3818: abra|OJJ75667.1 acar|OOG00177.1 acla|EAW09434.1 afis|EAW21702.1 afla|EED57971.1 afum|EAL92736.1 agla|OJJ79896.1 akaw|GAA84408.1 aluc|OJZ89118.1 anid|CBF83639.1 anig|EHA23425.1 aory|EIT79763.1 asyd|OJJ60785.1 ater|EAU38387.1 atub|OJI85666.1 aver|OJJ00118.1 awen|OJJ33972.1 azon|OJJ48587.1

Group3819: abra|OJJ75668.1 acar|OOG00176.1 acla|EAW09433.1 afis|EAW21703.1 afla|EED57972.1 afum|EAL92737.1 agla|OJJ84485.1 akaw|GAA84409.1 aluc|OJZ89119.1 anid|CBF83649.1 anig|EHA23424.1

aory|EIT79804.1 asyd|OJJ60792.1 ater|EAU38388.1 atub|OJI85665.1 aver|OJJ00125.1 awen|OJJ33973.1 azon|OJJ48586.1

Group3820: abra|OJJ75670.1 acar|OOG00175.1 acla|EAW09432.1 afis|EAW21704.1 afila|EED57973.1 afum|EAL92738.1 agla|OJJ79888.1 akaw|GAA84410.1 aluc|OJZ89120.1 anid|CBF83648.1 anig|EHA23423.1 aory|EIT79806.1 asyd|OJJ60791.1 ater|EAU38389.1 atub|OJI85664.1 aver|OJJ00124.1 awen|OJJ33975.1 azon|OJJ48581.1

Group3821: abra|OJJ75672.1 acar|OOG00173.1 acla|EAW09425.1 afis|EAW21711.1 afila|EED57975.1 afum|EAL92746.1 agla|OJJ79890.1 akaw|GAA84413.1 aluc|OJZ89122.1 anid|CBF83646.1 anig|EHA23421.1 aory|EIT79737.1 asyd|OJJ60789.1 ater|EAU38391.1 atub|OJI85662.1 aver|OJJ00122.1 awen|OJJ33977.1 azon|OJJ48583.1

Group3822: abra|OJJ75673.1 acar|OOG00172.1 acla|EAW09426.1 afis|EAW21710.1 afila|EED57976.1 afum|EAL92745.1 agla|OJJ79891.1 akaw|GAA84414.1 aluc|OJZ89123.1 anid|CBF83644.1 anig|EHA23420.1 aory|EIT79753.1 asyd|OJJ60788.1 ater|EAU38392.1 atub|OJI85661.1 aver|OJJ00121.1 awen|OJJ33980.1 azon|OJJ48575.1

Group3823: abra|OJJ75674.1 acar|OOG00171.1 acla|EAW09427.1 afis|EAW21709.1 afila|EED57977.1 afum|EAL92744.1 agla|OJJ79892.1 akaw|GAA84415.1 aluc|OJZ89124.1 anid|CBF83642.1 anig|EHA23419.1 aory|EIT79730.1 asyd|OJJ60787.1 ater|EAU38393.1 atub|OJI85660.1 aver|OJJ00120.1 awen|OJJ33981.1 azon|OJJ48574.1

Group3824: abra|OJJ75675.1 acar|OOG00170.1 acla|EAW09428.1 afis|EAW21708.1 afila|EED57978.1 afum|EAL92743.1 agla|OJJ79893.1 akaw|GAA84416.1 aluc|OJZ89125.1 anid|CBF83641.1 anig|EHA23418.1 aory|EIT79718.1 asyd|OJJ60786.1 ater|EAU38394.1 atub|OJI85659.1 aver|OJJ00119.1 awen|OJJ33982.1 azon|OJJ48573.1

Group3825: abra|OJJ75677.1 acar|OOG00169.1 acla|EAW09423.1 afis|EAW21712.1 afila|EED57980.1 afum|EAL92747.1 agla|OJJ79895.1 akaw|GAA84418.1 aluc|OJZ89127.1 anid|CBF83653.1 anig|EHA23416.1 aory|EIT79727.1 asyd|OJJ60794.1 ater|EAU38396.1 atub|OJI85657.1 aver|OJJ00127.1 awen|OJJ33984.1 azon|OJJ48570.1

Group3826: abra|OJJ75679.1 acar|OOG00168.1 acla|EAW09424.1 afis|EAW21713.1 afila|EED57981.1 afum|EAL92748.1 agla|OJJ79886.1 akaw|GAA84419.1 aluc|OJZ89129.1 anid|CBF83655.1 anig|EHA23415.1 aory|EIT79767.1 asyd|OJJ60795.1 ater|EAU38398.1 atub|OJI85656.1 aver|OJJ00128.1 awen|OJJ33985.1 azon|OJJ48568.1

Group3827: abra|OJJ75680.1 acar|OOG00166.1 acla|EAW09422.1 afis|EAW21714.1 afila|EED57984.1 afum|EAL92749.1 agla|OJJ79885.1 akaw|GAA84420.1 aluc|OJZ89130.1 anid|CBF83657.1 anig|EHA23414.1 aory|EIT79791.1 asyd|OJJ60796.1 ater|EAU38399.1 atub|OJI85655.1 aver|OJJ00129.1 awen|OJJ33986.1 azon|OJJ48567.1

Group3829: abra|OJJ75686.1 acar|OOG00164.1 acla|EAW09419.1 afis|EAW21717.1 afila|EED57987.1 afum|EAL92751.1 agla|OJJ79880.1 akaw|GAA84424.1 aluc|OJZ89137.1 anid|CBF83708.1 anig|EHA23410.1 aory|EIT79780.1 asyd|OJJ60831.1 ater|EAU38402.1 atub|OJI85648.1 aver|OJJ00156.1 awen|OJJ33990.1 azon|OJJ48563.1

Group3830: abra|OJJ75687.1 acar|OOG00163.1 acla|EAW09417.1 afis|EAW21719.1 afila|EED57990.1 afum|EAL92752.1 agla|OJJ79865.1 akaw|GAA84425.1 aluc|OJZ89138.1 anid|CBF83710.1 anig|EHA23407.1 aory|EIT79712.1 asyd|OJJ60833.1 ater|EAU38403.1 atub|OJI85647.1 aver|OJJ00157.1 awen|OJJ33992.1 azon|OJJ48561.1

Group3831: abra|OJJ75688.1 acar|OOG00162.1 acla|EAW09416.1 afis|EAW21720.1 afila|EED57989.1 afum|EAL92753.1 agla|OJJ79864.1 akaw|GAA84426.1 aluc|OJZ89139.1 anid|CBF83711.1 anig|EHA23406.1 aory|EIT79747.1 asyd|OJJ60834.1 ater|EAU38404.1 atub|OJI85646.1 aver|OJJ00158.1 awen|OJJ33993.1 azon|OJJ48560.1

Group3832: abra|OJJ75689.1 acar|OOG00161.1 acla|EAW09415.1 afis|EAW21721.1 afila|EED57988.1 afum|EAL92754.1 agla|OJJ79863.1 akaw|GAA84427.1 aluc|OJZ89140.1 anid|CBF83713.1 anig|EHA23405.1 aory|EIT79743.1 asyd|OJJ60835.1 ater|EAU38405.1 atub|OJI85645.1 aver|OJJ00159.1 awen|OJJ33994.1 azon|OJJ48559.1

Group3833: abra|OJJ75692.1 acar|OOG00160.1 acla|EAW09414.1 afis|EAW21722.1 afila|EED57991.1 afum|EAL92755.1 agla|OJJ79862.1 akaw|GAA84429.1 aluc|OJZ89143.1 anid|CBF83715.1 anig|EHA23404.1 aory|EIT79797.1 asyd|OJJ60836.1 ater|EAU38406.1 atub|OJI85644.1 aver|OJJ00160.1 awen|OJJ33995.1 azon|OJJ48558.1

Group3834: abra|OJJ75696.1 acar|OOG00158.1 acla|EAW09412.1 afis|EAW21724.1 afila|EED57993.1 afum|EAL92757.1 agla|OJJ79860.1 akaw|GAA84432.1 aluc|OJZ89147.1 anid|CBF83718.1 anig|EHA23401.1 aory|EIT79706.1 asyd|OJJ60838.1 ater|EAU38408.1 atub|OJI85641.1 aver|OJJ00162.1 awen|OJJ33997.1 azon|OJJ48555.1



Group3835: abra|OJJ75698.1 acar|OOG00155.1 acla|EAW09410.1 afis|EAW21726.1 afla|EED57995.1 afum|EAL92759.1 agla|OJJ79858.1 akaw|GAA84434.1 aluc|OJZ89149.1 anid|CBF83722.1 anig|EHA23399.1 aory|EIT79805.1 asyd|OJJ60840.1 ater|EAU38410.1 atub|OJI85639.1 aver|OJJ00164.1 awen|OJJ33999.1 azon|OJJ48553.1

Group3836: abra|OJJ75701.1 acar|OOG00153.1 acla|EAW09407.1 afis|EAW21729.1 afla|EED57998.1 afum|EAL92762.1 agla|OJJ79855.1 akaw|GAA84437.1 aluc|OJZ89152.1 anid|CBF83727.1 anig|EHA23397.1 aory|EIT79787.1 asyd|OJJ60843.1 ater|EAU38413.1 atub|OJI85636.1 aver|OJJ00168.1 awen|OJJ34002.1 azon|OJJ48550.1

Group3837: abra|OJJ75707.1 acar|OOG00151.1 acla|EAW09404.1 afis|EAW21732.1 afla|EED58001.1 afum|EAL92765.1 agla|OJJ79853.1 akaw|GAA84442.1 aluc|OJZ89158.1 anid|CBF83732.1 anig|EHA23395.1 aory|EIT79716.1 asyd|OJJ60846.1 ater|EAU38415.1 atub|OJI85632.1 aver|OJJ00171.1 awen|OJJ34005.1 azon|OJJ48546.1

Group3838: abra|OJJ75709.1 acar|OOG00149.1 acla|EAW09403.1 afis|EAW21733.1 afla|EED58002.1 afum|EAL92766.1 agla|OJJ79850.1 akaw|GAA84443.1 aluc|OJZ89160.1 anid|CBF83734.1 anig|EHA23394.1 aory|EIT79783.1 asyd|OJJ60848.1 ater|EAU38416.1 atub|OJI85630.1 aver|OJJ00174.1 awen|OJJ34006.1 azon|OJJ48545.1

Group3839: abra|OJJ75710.1 acar|OOG00150.1 acla|EAW09402.1 afis|EAW21734.1 afla|EED58006.1 afum|EAL92767.1 agla|OJJ79849.1 akaw|GAA84444.1 aluc|OJZ89161.1 anid|CBF83736.1 anig|EHA23393.1 aory|EIT79710.1 asyd|OJJ60850.1 ater|EAU36017.1 atub|OJI85629.1 aver|OJJ00172.1 awen|OJJ34007.1 azon|OJJ48544.1

Group3840: abra|OJJ75716.1 acar|OOG00143.1 acla|EAW09397.1 afis|EAW21737.1 afla|EED58011.1 afum|EAL92771.1 agla|OJJ84451.1 akaw|GAA84450.1 aluc|OJZ89168.1 anid|CBF83703.1 anig|EHA23387.1 aory|EIT79723.1 asyd|OJJ60826.1 ater|EAU38419.1 atub|OJI85623.1 aver|OJJ00152.1 awen|OJJ34019.1 azon|OJJ48539.1

Group3841: abra|OJJ75719.1 acar|OOG00137.1 acla|EAW09375.1 afis|EAW21760.1 afla|EED58018.1 afum|EAL92790.2 agla|OJJ84390.1 akaw|GAA84455.1 aluc|OJZ89171.1 anid|CBF83695.1 anig|EHA23384.1 aory|EIT79793.1 asyd|OJJ60824.1 ater|EAU38430.1 atub|OJI85619.1 aver|OJJ00150.1 awen|OJJ34044.1 azon|OJJ48187.1

Group3842: abra|OJJ75722.1 acar|OOG00136.1 acla|EAW09378.1 afis|EAW21757.1 afla|EED58020.1 afum|EAL92787.1 agla|OJJ84393.1 akaw|GAA84458.1 aluc|OJZ89174.1 anid|CBF83682.1 anig|EHA23381.1 aory|EIT79724.1 asyd|OJJ60821.1 ater|EAU38433.1 atub|OJI85616.1 aver|OJJ00147.1 awen|OJJ34041.1 azon|OJJ48198.1

Group3843: abra|OJJ75723.1 acar|OOG00135.1 acla|EAW09379.1 afis|EAW21756.1 afla|EED58022.1 afum|EAL92786.1 agla|OJJ84394.1 akaw|GAA84459.1 aluc|OJZ89175.1 anid|CBF83684.1 anig|EHA23380.1 asyd|OJJ60820.1 ater|EAU38434.1 atub|OJI85615.1 aver|OJJ00146.1 awen|OJJ34040.1 azon|OJJ48197.1 aory|EIT79736.1

Group3844: abra|OJJ75724.1 acar|OOG00134.1 acla|EAW09380.1 afis|EAW21755.1 afla|EED58023.1 afum|EAL92785.1 agla|OJJ84398.1 akaw|GAA84460.1 aluc|OJZ89176.1 anid|CBF83685.1 anig|EHA23379.1 aory|EIT79744.1 asyd|OJJ60819.1 ater|EAU38435.1 atub|OJI85613.1 aver|OJJ00145.1 awen|OJJ34039.1 azon|OJJ48196.1

Group3845: abra|OJJ75726.1 acar|OOG00132.1 acla|EAW09383.1 afis|EAW21752.1 afla|EED58026.1 afum|EAL92782.1 agla|OJJ84401.1 akaw|GAA84462.1 aluc|OJZ89178.1 anid|CBF83693.1 anig|EHA23377.1 aory|EIT79749.1 asyd|OJJ60816.1 ater|EAU38438.1 atub|OJI85611.1 aver|OJJ00142.1 awen|OJJ34035.1 azon|OJJ48207.1

Group3847: abra|OJJ75732.1 acar|OOF89927.1 acla|EAW14909.1 afis|EAW24430.1 afla|EED55243.1 afum|EAL86098.1 agla|OJJ79244.1 akaw|GAA84465.1 aluc|OJZ89183.1 anid|CBF73775.1 anig|EHA23373.1 aory|EIT83557.1 asyd|OJJ56594.1 ater|EAU30015.1 atub|OJI85606.1 aver|OJJ06131.1 awen|OJJ32772.1 azon|OJJ44003.1

Group3848: abra|OJJ75734.1 acar|OOF89928.1 acla|EAW14908.1 afis|EAW24429.1 afla|EED55249.1 afum|EAL86097.1 agla|OJJ79242.1 akaw|GAA84467.1 aluc|OJZ89185.1 anid|CBF73777.1 anig|EHA23372.1 aory|EIT83561.1 asyd|OJJ56596.1 ater|EAU30016.1 atub|OJI85604.1 aver|OJJ06129.1 awen|OJJ32774.1 azon|OJJ44004.1

Group3849: abra|OJJ75735.1 acar|OOF89929.1 acla|EAW14907.1 afis|EAW24428.1 afla|EED55250.1 afum|EAL86096.1 agla|OJJ79241.1 akaw|GAA84468.1 aluc|OJZ89186.1 anid|CBF73778.1 anig|EHA23371.1 aory|EIT83631.1 asyd|OJJ56597.1 ater|EAU30017.1 atub|OJI85603.1 aver|OJJ06128.1 awen|OJJ32775.1 azon|OJJ44005.1

Group3850: abra|OJJ75737.1 acar|OOF89931.1 acla|EAW14904.1 afis|EAW24425.1 afla|EED55254.1 afum|EAL86093.1 agla|OJJ79239.1 akaw|GAA84470.1 aluc|OJZ89189.1 anid|CBF73782.1 anig|EHA23368.1

aory|EIT83565.1 asyd|OJJ56599.1 ater|EAU30020.1 atub|OJI85601.1 aver|OJJ06126.1 awen|OJJ32781.1 azon|OJJ44007.1

Group3851: abra|OJJ75738.1 acar|OOG00131.1 acla|EAW14903.1 afis|EAW24424.1 afla|EED55258.1 afum|EAL86092.1 agla|OJJ79238.1 akaw|GAA84471.1 aluc|OJZ89191.1 anid|CBF73784.1 anig|EHA23367.1 aory|EIT83539.1 asyd|OJJ56600.1 ater|EAU30021.1 atub|OJI85599.1 aver|OJJ06125.1 awen|OJJ32780.1 azon|OJJ44009.1

Group3852: abra|OJJ75784.1 acar|OOG00104.1 acla|EAW14898.1 afis|EAW24420.1 afla|EED47748.1 afum|EAL86089.1 agla|OJJ79224.1 akaw|GAA84500.1 aluc|OJZ89227.1 anid|CBF73792.1 anig|EHA23335.1 aory|EIT77177.1 asyd|OJJ56604.1 ater|EAU30307.1 atub|OJI85565.1 aver|OJJ06119.1 awen|OJJ32789.1 azon|OJJ44022.1

Group3853: abra|OJJ75785.1 acar|OOG00103.1 acla|EAW14897.1 afis|EAW24419.1 afla|EED47749.1 afum|EAL86088.1 agla|OJJ79226.1 akaw|GAA84501.1 aluc|OJZ89229.1 anid|CBF73795.1 anig|EHA23334.1 aory|EIT77122.1 asyd|OJJ56605.1 ater|EAU30308.1 atub|OJI85564.1 aver|OJJ06118.1 awen|OJJ32790.1 azon|OJJ44021.1

Group3854: abra|OJJ75786.1 acar|OOG00102.1 acla|EAW14896.1 afis|EAW24418.1 afla|EED47750.1 afum|EAL86087.1 agla|OJJ79227.1 akaw|GAA84502.1 aluc|OJZ89230.1 anid|CBF73797.1 anig|EHA23333.1 aory|EIT77133.1 asyd|OJJ56607.1 ater|EAU30309.1 atub|OJI85563.1 aver|OJJ06117.1 awen|OJJ32791.1 azon|OJJ44020.1

Group3855: abra|OJJ75787.1 acar|OOG00101.1 acla|EAW14895.1 afis|EAW24417.1 afla|EED47751.1 afum|EAL86086.1 agla|OJJ79228.1 akaw|GAA84503.1 aluc|OJZ89231.1 anid|CBF73799.1 anig|EHA23332.1 aory|EIT77182.1 asyd|OJJ56608.1 ater|EAU30310.1 atub|OJI85562.1 aver|OJJ06116.1 awen|OJJ32792.1 azon|OJJ44019.1

Group3856: abra|OJJ75788.1 acar|OOG00099.1 acla|EAW14893.1 afis|EAW24415.1 afla|EED47766.1 afum|EAL86084.1 agla|OJJ79218.1 akaw|GAA84504.1 aluc|OJZ89232.1 anid|CBF73803.1 anig|EHA23331.1 aory|EIT77193.1 asyd|OJJ56615.1 ater|EAU30314.1 atub|OJI85561.1 aver|OJJ06109.1 awen|OJJ32794.1 azon|OJJ49041.1

Group3857: abra|OJJ75789.1 acar|OOG00098.1 acla|EAW14892.1 afis|EAW24414.1 afla|EED47765.1 afum|EAL86083.1 agla|OJJ79217.1 akaw|GAA84505.1 aluc|OJZ89233.1 anid|CBF73747.1 anig|EHA23330.1 aory|EIT77149.1 asyd|OJJ56622.1 ater|EAU30315.1 atub|OJI85560.1 aver|OJJ06104.1 awen|OJJ32795.1 azon|OJJ49038.1

Group3858: abra|OJJ75792.1 acar|OOG00086.1 acla|EAW14889.1 afis|EAW24411.1 afum|EAL86080.1 agla|OJJ79214.1 akaw|GAA84511.1 aluc|OJZ89240.1 anid|CBF73741.1 anig|EHA23327.1 aory|EIT77168.1 asyd|OJJ56625.1 ater|EAU30318.1 atub|OJI85558.1 aver|OJJ06101.1 awen|OJJ32799.1 azon|OJJ49033.1 afla|EED47762.1

Group3859: abra|OJJ75796.1 acar|OOG00085.1 acla|EAW14888.1 afis|EAW24410.1 afla|EED47761.1 afum|EAL86079.1 agla|OJJ79213.1 akaw|GAA84514.1 aluc|OJZ89243.1 anid|CBF73739.1 anig|EHA23322.1 aory|EIT77110.1 asyd|OJJ56626.1 ater|EAU30319.1 atub|OJI85552.1 aver|OJJ06100.1 awen|OJJ32800.1 azon|OJJ49032.1

Group3860: abra|OJJ75804.1 acar|OOG00071.1 acla|EAW14879.1 afis|EAW24396.1 afla|EED47814.1 afum|EAL86068.1 agla|OJJ78876.1 akaw|GAA84520.1 aluc|OJZ89252.1 anid|CBF73724.1 anig|EHA23315.1 aory|EIT77191.1 asyd|OJJ56638.1 ater|EAU30339.1 atub|OJI85546.1 aver|OJJ06088.1 awen|OJJ32809.1 azon|OJJ49030.1

Group3861: abra|OJJ75805.1 acar|OOG00070.1 acla|EAW14878.1 afis|EAW24395.1 afla|EED47815.1 afum|EAL86067.1 agla|OJJ78875.1 akaw|GAA84521.1 aluc|OJZ89253.1 anid|CBF73720.1 anig|EHA23314.1 aory|EIT77139.1 asyd|OJJ56639.1 ater|EAU30340.1 atub|OJI85545.1 aver|OJJ06087.1 awen|OJJ32810.1 azon|OJJ49031.1

Group3862: abra|OJJ75808.1 acar|OOG00068.1 acla|EAW14864.1 afis|EAW24392.1 afla|EED47818.1 afum|EAL86064.1 agla|OJJ78872.1 akaw|GAA84523.1 aluc|OJZ89256.1 anid|CBF73713.1 anig|EHA23312.1 aory|EIT77112.1 asyd|OJJ56642.1 ater|EAU30342.1 atub|OJI85543.1 aver|OJJ06084.1 awen|OJJ32812.1 azon|OJJ49020.1

Group3863: abra|OJJ75810.1 acar|OOG00067.1 acla|EAW14863.1 afis|EAW24391.1 afla|EED47819.1 afum|EAL86063.1 agla|OJJ78871.1 akaw|GAA84524.1 aluc|OJZ89257.1 anid|CBF73711.1 anig|EHA23311.1 aory|EIT77158.1 asyd|OJJ56643.1 ater|EAU30343.1 atub|OJI85542.1 aver|OJJ06083.1 awen|OJJ32813.1 azon|OJJ49019.1

Group3864: abra|OJJ75813.1 acar|OOG00062.1 acla|EAW14860.1 afis|EAW24388.1 afla|EED47821.1 afum|EAL86060.1 agla|OJJ83284.1 akaw|GAA84527.1 aluc|OJZ89260.1 anid|CBF73705.1 anig|EHA23308.1 aory|EIT77124.1 asyd|OJJ56646.1 ater|EAU30346.1 atub|OJI85539.1 aver|OJJ06080.1 awen|OJJ32817.1 azon|OJJ49015.1

Group3865: abra|OJJ75814.1 acar|OOG00061.1 acla|EAW14859.1 afis|EAW24387.1 afla|EED47822.1 afum|EAL86059.1 agla|OJJ83283.1 akaw|GAA84528.1 aluc|OJZ89261.1 anid|CBF73703.1 anig|EHA23307.1 aory|EIT77142.1 asyd|OJJ56647.1 ater|EAU30347.1 atub|OJI85538.1 aver|OJJ06079.1 awen|OJJ32818.1 azon|OJJ49014.1

Group3866: abra|OJJ75817.1 acar|OOG00058.1 acla|EAW14858.1 afis|EAW24385.1 afla|EED47824.1 afum|EAL86057.1 agla|OJJ83281.1 akaw|GAA84531.1 aluc|OJZ89264.1 anid|CBF73697.1 anig|EHA23304.1 aory|EIT77137.1 asyd|OJJ56650.1 ater|EAU30350.1 atub|OJI85535.1 aver|OJJ06075.1 awen|OJJ32825.1 azon|OJJ49011.1

Group3867: abra|OJJ75821.1 acar|OOG00055.1 acla|EAW14854.1 afis|EAW24381.1 afla|EED47829.1 afum|EAL86053.1 agla|OJJ83269.1 akaw|GAA84534.1 aluc|OJZ89267.1 anid|CBF73667.1 anig|EHA23301.1 aory|EIT77192.1 asyd|OJJ56666.1 ater|EAU30354.1 atub|OJI85532.1 aver|OJJ06057.1 awen|OJJ32831.1 azon|OJJ49005.1

Group3868: abra|OJJ75822.1 acar|OOG00054.1 acla|EAW14853.1 afis|EAW24380.1 afla|EED47830.1 afum|EAL86052.1 agla|OJJ83268.1 akaw|GAA84535.1 aluc|OJZ89268.1 anid|CBF73669.1 anig|EHA23300.1 aory|EIT77144.1 asyd|OJJ56665.1 ater|EAU30355.1 atub|OJI85531.1 aver|OJJ06058.1 awen|OJJ32832.1 azon|OJJ49004.1

Group3869: abra|OJJ75828.1 acar|OOG00052.1 acla|EAW14850.1 afis|EAW24377.1 afla|EED47834.1 afum|EAL86049.1 agla|OJJ83263.1 akaw|GAA84538.1 aluc|OJZ89271.1 anid|CBF73674.1 anig|EHA23298.1 aory|EIT77135.1 asyd|OJJ56662.1 ater|EAU30359.1 atub|OJI85528.1 aver|OJJ06062.1 awen|OJJ32835.1 azon|OJJ49000.1

Group3870: abra|OJJ75829.1 acar|OOG00051.1 acla|EAW14849.1 afis|EAW24376.1 afla|EED47835.1 afum|EAL86048.1 agla|OJJ83262.1 akaw|GAA84539.1 aluc|OJZ89272.1 anid|CBF73680.1 anig|EHA23297.1 aory|EIT77202.1 asyd|OJJ56659.1 ater|EAU30360.1 atub|OJI85527.1 aver|OJJ06066.1 awen|OJJ32836.1 azon|OJJ48998.1

Group3871: abra|OJJ75831.1 acar|OOG00049.1 acla|EAW14847.1 afis|EAW24374.1 afla|EED47837.1 afum|EAL86046.1 agla|OJJ83260.1 akaw|GAA84541.1 aluc|OJZ89274.1 anid|CBF73682.1 anig|EHA23295.1 aory|EIT77185.1 asyd|OJJ56657.1 ater|EAU30362.1 atub|OJI85525.1 aver|OJJ06068.1 awen|OJJ32838.1 azon|OJJ48996.1

Group3872: abra|OJJ75832.1 acar|OOG00048.1 acla|EAW14846.1 afis|EAW24373.1 afla|EED47838.1 afum|EAL86045.1 agla|OJJ83259.1 akaw|GAA84542.1 aluc|OJZ89275.1 anid|CBF73684.1 anig|EHA23294.1 aory|EIT77136.1 asyd|OJJ56656.1 ater|EAU30363.1 atub|OJI85524.1 aver|OJJ06069.1 awen|OJJ32839.1 azon|OJJ48995.1

Group3873: abra|OJJ75843.1 acar|OOG00045.1 acla|EAW14844.1 afis|EAW24371.1 afla|EED47846.1 afum|EAL86043.1 agla|OJJ83256.1 akaw|GAA84553.1 aluc|OJZ89285.1 anid|CBF73688.1 anig|EHA23281.1 aory|EIT77207.1 asyd|OJJ56654.1 ater|EAU30368.1 atub|OJI85514.1 aver|OJJ06071.1 awen|OJJ32844.1 azon|OJJ46816.1

Group3874: abra|OJJ75851.1 acar|OOG00042.1 acla|EAW14835.1 afis|EAW24364.1 afla|EED47849.1 afum|EBA27254.1 agla|OJJ83249.1 akaw|GAA84556.1 aluc|OJZ89288.1 anid|CBF73935.1 anig|EHA23273.1 aory|EIT77237.1 asyd|OJJ53672.1 ater|EAU30373.1 atub|OJI85511.1 aver|OJJ07779.1 awen|OJJ32869.1 azon|OJJ48991.1

Group3875: abra|OJJ75854.1 acar|OOG00041.1 acla|EAW14833.1 afis|EAW24362.1 afla|EED47851.1 afum|EAL86032.1 agla|OJJ83247.1 akaw|GAA84559.1 aluc|OJZ89291.1 anid|CBF73928.1 anig|EHA23271.1 aory|EIT77246.1 asyd|OJJ53677.1 ater|EAU30376.1 atub|OJI85508.1 aver|OJJ07793.1 awen|OJJ32865.1 azon|OJJ48989.1

Group3876: abra|OJJ75855.1 acar|OOG00040.1 acla|EAW14832.1 afis|EAW24361.1 afla|EED47852.1 afum|EAL86031.1 agla|OJJ83246.1 akaw|GAA84560.1 aluc|OJZ89293.1 anid|CBF73926.1 anig|EHA23270.1 aory|EIT77210.1 asyd|OJJ53678.1 ater|EAU30377.1 atub|OJI85507.1 aver|OJJ07794.1 awen|OJJ32864.1 azon|OJJ48988.1

Group3877: abra|OJJ75856.1 acar|OOG00038.1 acla|EAW14831.1 afis|EAW24360.1 afla|EED47853.1 afum|EAL86030.1 agla|OJJ83245.1 akaw|GAA84561.1 aluc|OJZ89294.1 anid|CBF73924.1 anig|EHA23269.1 aory|EIT77236.1 asyd|OJJ53679.1 ater|EAU30378.1 atub|OJI85506.1 aver|OJJ07795.1 awen|OJJ32863.1 azon|OJJ48987.1

Group3878: abra|OJJ75858.1 acar|OOG00037.1 acla|EAW14829.1 afis|EAW24358.1 afla|EED47856.1 afum|EAL86028.1 agla|OJJ83242.1 akaw|GAA84563.1 aluc|OJZ89296.1 anid|CBF73921.1 anig|EHA23267.1 aory|EIT77221.1 asyd|OJJ53681.1 ater|EAU30381.1 atub|OJI85503.1 aver|OJJ07797.1 awen|OJJ32861.1 azon|OJJ48985.1

Group3879: abra|OJJ75864.1 acar|OOG00032.1 acla|EAW14824.1 afis|EAW24353.1 afla|EED47910.1 afum|EAL86024.2 agla|OJJ83233.1 akaw|GAA84570.1 aluc|OJZ89306.1 anid|CBF73944.1 anig|EHA23260.1

aory|EIT83380.1 asyd|OJJ53698.1 ater|EAU30386.1 atub|OJI85493.1 aver|OJJ07816.1 awen|OJJ32872.1 azon|OJJ48973.1

Group3880: abra|OJJ75865.1 acar|OOG00029.1 acla|EAW09926.1 afis|EAW21174.1 afla|EED54761.1 afum|EAL92194.1 agla|OJJ80004.1 akaw|GAA84571.1 aluc|OJZ89307.1 anid|CBF83297.1 anig|EHA23259.1 aory|EIT79426.1 asyd|OJJ60558.1 ater|EAU35841.1 atub|OJI85491.1 aver|OJI99884.1 awen|OJJ36513.1 azon|OJJ44389.1

Group3881: abra|OJJ75867.1 acar|OOG00027.1 acla|EAW09928.1 afis|EAW21176.1 afla|EED54763.1 afum|EAL92196.1 agla|OJJ80001.1 akaw|GAA84573.1 aluc|OJZ89309.1 anid|CBF83306.1 anig|EHA23257.1 aory|EIT79399.1 asyd|OJJ60555.1 ater|EAU35843.1 atub|OJI85490.1 aver|OJI99881.1 awen|OJJ36515.1 azon|OJJ44391.1

Group3882: abra|OJJ75873.1 acar|OOG00022.1 acla|EAW09932.1 afis|EAW21179.1 afla|EED54769.1 afum|EAL92199.1 agla|OJJ79993.1 akaw|GAA84576.1 aluc|OJZ89317.1 anid|CBF83303.1 anig|EHA23254.1 aory|EIT79449.1 asyd|OJJ60552.1 ater|EAU35845.1 atub|OJI85480.1 aver|OJI99878.1 awen|OJJ36518.1 azon|OJJ44393.1

Group3883: abra|OJJ75875.1 acar|OOG00020.1 acla|EAW09935.1 afis|EAW21180.1 afla|EED54785.1 afum|EAL92201.1 agla|OJJ79997.1 akaw|GAA84577.1 aluc|OJZ89319.1 anid|CBF83301.1 anig|EHA23253.1 aory|EIT79362.1 asyd|OJJ60551.1 ater|EAU35846.1 atub|OJI85479.1 aver|OJI99877.1 awen|OJJ36519.1 azon|OJJ44395.1

Group3884: abra|OJJ75876.1 acar|OOG00017.1 acla|EAW09938.1 afis|EAW21183.1 afla|EED54776.1 afum|EAL92204.1 agla|OJJ79987.1 akaw|GAA84578.1 aluc|OJZ89320.1 anid|CBF83312.1 anig|EHA23252.1 aory|EIT79349.1 asyd|OJJ60548.1 ater|EAU35849.1 atub|OJI85478.1 aver|OJI99874.1 awen|OJJ36522.1 azon|OJJ44398.1

Group3885: abra|OJJ75879.1 acar|OOG00014.1 acla|EAW09940.1 afis|EAW21185.1 afla|EED54774.1 afum|EAL92207.1 agla|OJJ79982.1 akaw|GAA84582.1 aluc|OJZ89325.1 anid|CBF83315.1 anig|EHA23249.1 aory|EIT79429.1 asyd|OJJ60547.1 ater|EAU35850.1 atub|OJI85474.1 aver|OJI99873.1 awen|OJJ36526.1 azon|OJJ44399.1

Group3886: abra|OJJ75880.1 acar|OOG00013.1 acla|EAW09942.1 afis|EAW21187.1 afla|EED54773.1 afum|EAL92209.1 agla|OJJ79979.1 akaw|GAA84583.1 aluc|OJZ89326.1 anid|CBF83319.1 anig|EHA23248.1 aory|EIT79437.1 asyd|OJJ60546.1 ater|EAU35851.1 atub|OJI85473.1 aver|OJI99872.1 awen|OJJ36529.1 azon|OJJ44401.1

Group3887: abra|OJJ75884.1 acar|OOF90248.1 acla|EAW09944.1 afis|EAW21222.1 afla|EED54784.1 afum|EBA27454.1 agla|OJJ78510.1 akaw|GAA84592.1 aluc|OJZ89337.1 anid|CBF83295.1 anig|EHA23244.1 aory|EIT79434.1 asyd|OJJ60560.1 ater|EAU35852.1 atub|OJI85462.1 aver|OJI99886.1 awen|OJJ36530.1 azon|OJJ44404.1

Group3888: abra|OJJ75886.1 acar|OOF90247.1 acla|EAW09945.1 afis|EAW21223.1 afla|EED54783.1 afum|EAL92236.1 agla|OJJ78507.1 akaw|GAA84593.1 aluc|OJZ89338.1 anid|CBF83293.1 anig|EHA23243.1 aory|EIT79443.1 asyd|OJJ60561.1 ater|EAU35853.1 atub|OJI85461.1 aver|OJI99887.1 awen|OJJ36531.1 azon|OJJ44405.1

Group3889: abra|OJJ75888.1 acar|OOF90245.1 acla|EAW09946.1 afis|EAW21224.1 afla|EED54782.1 afum|EAL92237.1 agla|OJJ78506.1 akaw|GAA84594.1 aluc|OJZ89340.1 anid|CBF83291.1 anig|EHA23242.1 aory|EIT79409.1 asyd|OJJ60562.1 ater|EAU35854.1 atub|OJI85459.1 aver|OJI99888.1 awen|OJJ36532.1 azon|OJJ44406.1

Group3890: abra|OJJ75889.1 acar|OOF90244.1 acla|EAW09948.1 afis|EAW21226.1 afla|EED54779.1 afum|EBA27456.1 agla|OJJ78504.1 akaw|GAA84596.1 aluc|OJZ89341.1 anid|CBF83289.1 anig|EHA23241.1 aory|EIT79431.1 asyd|OJJ60563.1 ater|EAU35857.1 atub|OJI85458.1 aver|OJI99890.1 awen|OJJ36534.1 azon|OJJ44408.1

Group3891: abra|OJJ75890.1 acar|OOG00012.1 acla|EAW09898.1 afis|EAW21228.1 afla|EED54786.1 afum|EAL92240.1 agla|OJJ78502.1 akaw|GAA84597.1 aluc|OJZ89342.1 anid|CBF83280.1 anig|EHA23240.1 aory|EIT79332.1 asyd|OJJ60568.1 ater|EAU35859.1 atub|OJI85457.1 aver|OJI99893.1 awen|OJJ36537.1 azon|OJJ44351.1

Group3892: abra|OJJ75891.1 acar|OOG00011.1 acla|EAW09897.1 afis|EAW21229.1 afla|EED54787.1 afum|EAL92241.2 agla|OJJ78501.1 akaw|GAA84598.1 aluc|OJZ89343.1 anid|CBF83278.1 anig|EHA23239.1 aory|EIT79422.1 asyd|OJJ60569.1 ater|EAU35860.1 atub|OJI85456.1 aver|OJI99894.1 awen|OJJ36538.1 azon|OJJ44349.1

Group3893: abra|OJJ75892.1 acar|OOG00010.1 acla|EAW09896.1 afis|EAW21230.1 afla|EED54788.1 afum|EAL92242.1 agla|OJJ78492.1 akaw|GAA84599.1 aluc|OJZ89344.1 anid|CBF83277.1 anig|EHA23238.1 aory|EIT79453.1 asyd|OJJ60570.1 ater|EAU35863.1 atub|OJI85455.1 aver|OJI99895.1 awen|OJJ36539.1 azon|OJJ44348.1

Group3894: abra|OJJ75897.1 acar|OOG00007.1 acla|EAW09894.1 afis|EAW21232.1 afla|EED54793.1 afum|EAL92244.1 agla|OJJ78494.1 akaw|GAA84603.1 aluc|OJZ89347.1 anid|CBF83273.1 anig|EHA23234.1 aory|EIT79342.1 asyd|OJJ60573.1 ater|EAU35865.1 atub|OJI85451.1 aver|OJI99898.1 awen|OJJ36542.1 azon|OJJ44346.1

Group3895: abra|OJJ75898.1 acar|OOG00006.1 acla|EAW09893.1 afis|EAW21233.1 afla|EED54794.1 afum|EAL92245.1 agla|OJJ78495.1 akaw|GAA84604.1 aluc|OJZ89348.1 anid|CBF83271.1 anig|EHA23233.1 aory|EIT79361.1 asyd|OJJ60574.1 ater|EAU35866.1 atub|OJI85450.1 aver|OJI99899.1 awen|OJJ36543.1 azon|OJJ44345.1

Group3896: abra|OJJ75899.1 acar|OOG00005.1 acla|EAW09892.1 afis|EAW21234.1 afla|EED54795.1 afum|EAL92246.1 agla|OJJ78496.1 akaw|GAA84605.1 aluc|OJZ89349.1 anid|CBF83270.1 anig|EHA23232.1 aory|EIT79442.1 asyd|OJJ60575.1 ater|EAU35867.1 atub|OJI85449.1 aver|OJI99900.1 awen|OJJ36544.1 azon|OJJ44344.1

Group3897: abra|OJJ75902.1 acar|OOG00002.1 acla|EAW09888.1 afis|EAW21238.1 afla|EED54798.1 afum|EAL92250.1 agla|OJJ78500.1 akaw|GAA84608.1 aluc|OJZ89352.1 anid|CBF83266.1 anig|EHA23229.1 aory|EIT79394.1 asyd|OJJ60579.1 ater|EAU35879.1 atub|OJI85446.1 aver|OJI99904.1 awen|OJJ36549.1 azon|OJJ44340.1

Group3898: abra|OJJ75903.1 acar|OOG00001.1 acla|EAW09887.1 afis|EAW21239.1 afla|EED54799.1 afum|EAL92252.1 agla|OJJ78491.1 akaw|GAA84609.1 aluc|OJZ89353.1 anid|CBF83264.1 anig|EHA23228.1 aory|EIT79376.1 asyd|OJJ60580.1 ater|EAU35880.1 atub|OJI85445.1 aver|OJI99905.1 awen|OJJ36550.1 azon|OJJ44339.1

Group3899: abra|OJJ75904.1 acar|OOF99999.1 acla|EAW09886.1 afis|EAW21240.1 afla|EED54800.1 afum|EAL92253.1 agla|OJJ78490.1 akaw|GAA84610.1 aluc|OJZ89354.1 anid|CBF83262.1 anig|EHA23227.1 aory|EIT79341.1 asyd|OJJ60581.1 ater|EAU35881.1 atub|OJI85444.1 aver|OJI99906.1 awen|OJJ36551.1 azon|OJJ44338.1

Group3900: abra|OJJ75905.1 acar|OOF99998.1 acla|EAW09885.1 afis|EAW21241.1 afla|EED54802.1 afum|EAL92254.1 agla|OJJ78489.1 akaw|GAA84611.1 aluc|OJZ89355.1 anid|CBF83259.1 anig|EHA23226.1 aory|EIT79395.1 asyd|OJJ60584.1 ater|EAU35882.1 atub|OJI85443.1 aver|OJI99907.1 awen|OJJ36552.1 azon|OJJ44337.1

Group3901: abra|OJJ75906.1 acar|OOF99997.1 acla|EAW09883.1 afis|EAW21243.1 afla|EED54803.1 afum|EAL92256.1 agla|OJJ78487.1 akaw|GAA84612.1 aluc|OJZ89356.1 anid|CBF83255.1 anig|EHA23225.1 aory|EIT79348.1 asyd|OJJ60587.1 ater|EAU35883.1 atub|OJI85442.1 aver|OJI99910.1 awen|OJJ36554.1 azon|OJJ44335.1

Group3902: abra|OJJ75910.1 acar|OOF99993.1 acla|EAW09879.1 afis|EAW21247.1 afla|EED54807.1 afum|EAL92260.1 agla|OJJ87509.1 akaw|GAA84616.1 aluc|OJZ89360.1 anid|CBF83240.1 anig|EHA23221.1 aory|EIT79440.1 asyd|OJJ60598.1 ater|EAU35887.1 atub|OJI85438.1 aver|OJI99921.1 awen|OJJ36560.1 azon|OJJ44331.1

Group3903: abra|OJJ75911.1 acar|OOF99992.1 acla|EAW09878.1 afis|EAW21248.1 afla|EED54808.1 afum|EAL92261.1 agla|OJJ87508.1 akaw|GAA84617.1 aluc|OJZ89361.1 anid|CBF83242.1 anig|EHA23220.1 aory|EIT79438.1 asyd|OJJ60597.1 ater|EAU35888.1 atub|OJI85437.1 aver|OJI99920.1 awen|OJJ36561.1 azon|OJJ44327.1

Group3904: abra|OJJ75914.1 acar|OOF99989.1 acla|EAW09876.1 afis|EAW21250.1 afla|EED54810.1 afum|EAL92263.1 agla|OJJ87501.1 akaw|GAA84619.1 aluc|OJZ89363.1 anid|CBF83245.1 anig|EHA23219.1 aory|EIT79398.1 asyd|OJJ60594.1 ater|EAU35890.1 atub|OJI85435.1 aver|OJI99918.1 awen|OJJ36564.1 azon|OJJ44324.1

Group3905: abra|OJJ75916.1 acar|OOF90029.1 acla|EAW09874.1 afis|EAW21252.1 afla|EED54812.1 afum|EAL92266.1 agla|OJJ87495.1 akaw|GAA84621.1 aluc|OJZ89365.1 anid|CBF83247.1 anig|EHA23217.1 aory|EIT79364.1 asyd|OJJ60592.1 ater|EAU35892.1 atub|OJI85433.1 aver|OJI99916.1 awen|OJJ36567.1 azon|OJJ44321.1

Group3906: abra|OJJ75919.1 acar|OOF90028.1 acla|EAW09873.1 afis|EAW21253.1 afla|EED54815.1 afum|EAL92268.1 agla|OJJ87497.1 akaw|GAA84622.1 aluc|OJZ89368.1 anid|CBF83249.1 anig|EHA23215.1 aory|EIT79356.1 asyd|OJJ60590.1 ater|EAU35893.1 atub|OJI85430.1 aver|OJI99913.1 awen|OJJ36568.1 azon|OJJ44319.1

Group3907: abra|OJJ75920.1 acar|OOF99987.1 acla|EAW09872.1 afis|EAW21254.1 afla|EED54816.1 afum|EAL92269.1 agla|OJJ87498.1 akaw|GAA84623.1 aluc|OJZ89369.1 anid|CBF83251.1 anig|EHA23214.1 aory|EIT79384.1 asyd|OJJ60589.1 ater|EAU35894.1 atub|OJI85429.1 aver|OJI99912.1 awen|OJJ36569.1 azon|OJJ44318.1

Group3908: abra|OJJ75922.1 acar|OOF99986.1 acla|EAW09866.1 afis|EAW21259.1 afla|EED54818.1 afum|EAL92274.1 agla|OJJ87491.1 akaw|GAA84626.1 aluc|OJZ89372.1 anid|CBF83325.1 anig|EHA23212.1

aory|EIT79360.1 asyd|OJJ60601.1 ater|EAU35896.1 atub|OJI85426.1 aver|OJI99924.1 awen|OJJ36574.1  
azon|OJJ44315.1

Group3909: abra|OJJ75924.1 acar|OOF99984.1 acla|EAW09865.1 afis|EAW21260.1 afla|EED54819.1  
afum|EAL92275.1 agla|OJJ87490.1 akaw|GAA84627.1 aluc|OJZ89373.1 anid|CBF83329.1 anig|EHA23210.1  
aory|EIT79435.1 asyd|OJJ60605.1 ater|EAU35897.1 atub|OJI85425.1 aver|OJI99929.1 awen|OJJ36575.1  
azon|OJJ44314.1

Group3910: abra|OJJ75931.1 acar|OOF99979.1 acla|EAW09862.1 afis|EAW21264.1 afla|EED54823.1  
afum|EAL92279.1 agla|OJJ87471.1 akaw|GAA84632.1 aluc|OJZ89378.1 anid|CBF83340.1 anig|EHA23205.1  
aory|EIT79396.1 asyd|OJJ60609.1 ater|EAU35901.1 atub|OJI85420.1 aver|OJI99933.1 awen|OJJ36581.1  
azon|OJJ44309.1

Group3911: abra|OJJ75932.1 acar|OOF99978.1 acla|EAW09861.1 afis|EAW21265.1 afla|EED54824.1  
afum|EAL92280.1 agla|OJJ87472.1 akaw|GAA84633.1 aluc|OJZ89379.1 anid|CBF83342.1 anig|EHA23204.1  
aory|EIT79447.1 asyd|OJJ60610.1 ater|EAU35902.1 atub|OJI85419.1 aver|OJI99934.1 awen|OJJ36582.1  
azon|OJJ44308.1

Group3912: abra|OJJ75934.1 acar|OOF99976.1 acla|EAW09859.1 afis|EAW21267.1 afla|EED54826.1  
afum|EAL92282.1 agla|OJJ87474.1 akaw|GAA84635.1 aluc|OJZ89381.1 anid|CBF83345.1 anig|EHA23202.1  
aory|EIT79337.1 asyd|OJJ60612.1 ater|EAU35903.1 atub|OJI85417.1 aver|OJI99936.1 awen|OJJ36584.1  
azon|OJJ47371.1

Group3913: abra|OJJ75935.1 acar|OOF99975.1 acla|EAW09858.1 afis|EAW21268.1 afla|EED54827.1  
afum|EAL92283.1 agla|OJJ87475.1 akaw|GAA84636.1 aluc|OJZ89382.1 anid|CBF83347.1 anig|EHA23201.1  
aory|EIT79343.1 asyd|OJJ60613.1 ater|EAU35904.1 atub|OJI85416.1 aver|OJI99937.1 awen|OJJ39424.1  
azon|OJJ44306.1

Group3914: abra|OJJ75936.1 acar|OOF99974.1 acla|EAW09857.1 afis|EAW21269.1 afla|EED54829.1  
afum|EBA27457.1 agla|OJJ87476.1 akaw|GAA84637.1 aluc|OJZ89383.1 anid|CBF83349.1 anig|EHA23200.1  
aory|EIT79419.1 asyd|OJJ60614.1 ater|EAU35905.1 atub|OJI85415.1 aver|OJI99938.1 awen|OJJ39423.1  
azon|OJJ44305.1

Group3915: abra|OJJ75942.1 acar|OOF99968.1 acla|EAW09851.1 afis|EAW21284.1 afla|EED54835.1  
afum|EAL92301.1 agla|OJJ87479.1 akaw|GAA84644.1 aluc|OJZ89389.1 anid|CBF83363.1 anig|EHA23195.1  
aory|EIT79451.1 asyd|OJJ60620.1 ater|EAU35913.1 atub|OJI85408.1 aver|OJI99944.1 awen|OJJ39415.1  
azon|OJJ44298.1

Group3916: abra|OJJ75944.1 acar|OOF99967.1 acla|EAW09849.1 afis|EAW21286.1 afla|EED54837.1  
afum|EAL92303.1 agla|OJJ87468.1 akaw|GAA84646.1 aluc|OJZ89391.1 anid|CBF83367.1 anig|EHA23193.1  
aory|EIT79347.1 asyd|OJJ60622.1 ater|EAU35918.1 atub|OJI85406.1 aver|OJI99946.1 awen|OJJ39413.1  
azon|OJJ44296.1

Group3917: abra|OJJ75949.1 acar|OOF99964.1 acla|EAW09847.1 afis|EAW21288.1 afla|EED54839.1  
afum|EAL92305.1 agla|OJJ87466.1 akaw|GAA84652.1 aluc|OJZ89398.1 anid|CBF83371.1 anig|EHA23189.1  
aory|EIT79388.1 asyd|OJJ60624.1 ater|EAU35920.1 atub|OJI85399.1 aver|OJI99948.1 awen|OJJ39411.1  
azon|OJJ44294.1

Group3918: abra|OJJ75950.1 acar|OOF99962.1 acla|EAW09846.1 afis|EAW21289.1 afla|EED54840.1  
afum|EAL92306.1 agla|OJJ87464.1 akaw|GAA84653.1 aluc|OJZ89399.1 anid|CBF83372.1 anig|EHA23188.1  
aory|EIT79351.1 asyd|OJJ60625.1 ater|EAU35921.1 atub|OJI85398.1 aver|OJI99949.1 awen|OJJ39410.1  
azon|OJJ44293.1

Group3919: abra|OJJ75951.1 acar|OOF99961.1 acla|EAW09845.1 afis|EAW21290.1 afla|EED54842.1  
afum|EAL92307.1 agla|OJJ87463.1 akaw|GAA84654.1 aluc|OJZ89400.1 anid|CBF85245.1 anig|EHA23187.1  
aory|EIT79441.1 asyd|OJJ62975.1 ater|EAU35922.1 atub|OJI85397.1 aver|OJI97994.1 awen|OJJ35914.1  
azon|OJJ44292.1

Group3920: abra|OJJ75952.1 acar|OOF99960.1 acla|EAW09844.1 afis|EAW21291.1 afla|EED54843.1  
afum|EAL92308.1 agla|OJJ87462.1 akaw|GAA84655.1 aluc|OJZ89401.1 anid|CBF83374.1 anig|EHA23186.1  
aory|EIT79331.1 asyd|OJJ60626.1 ater|EAU35923.1 atub|OJI85396.1 aver|OJI99950.1 awen|OJJ39408.1  
azon|OJJ44291.1

Group3921: abra|OJJ75958.1 acar|OOF99956.1 acla|EAW09840.1 afis|EAW21295.1 afla|EED54846.1  
afum|EAL92312.1 agla|OJJ87444.1 akaw|GAA84659.1 aluc|OJZ89406.1 anid|CBF83381.1 anig|EHA23181.1  
aory|EIT79417.1 asyd|OJJ60629.1 ater|EAU35928.1 atub|OJI85391.1 aver|OJI99953.1 awen|OJJ39404.1  
azon|OJJ44288.1

Group3922: abra|OJJ75959.1 acar|OOF99955.1 acla|EAW09839.1 afis|EAW21296.1 afla|EED54847.1  
afum|EAL92313.1 agla|OJJ87443.1 akaw|GAA84660.1 aluc|OJZ89407.1 anid|CBF83383.1 anig|EHA23180.1  
aory|EIT79405.1 asyd|OJJ60630.1 ater|EAU35929.1 atub|OJI85388.1 aver|OJI99954.1 awen|OJJ39403.1  
azon|OJJ44287.1

Group3923: abra|OJJ75963.1 acar|OOF90049.1 acla|EAW09834.1 afis|EAW21299.1 afla|EED54851.1 afum|EAL92316.1 agla|OJJ87439.1 akaw|GAA84663.1 aluc|OJZ89411.1 anid|CBF83388.1 anig|EHA23176.1 aory|EIT79436.1 asyd|OJJ60634.1 ater|EAU35932.1 atub|OJI85385.1 aver|OJI99957.1 awen|OJJ39399.1 azon|OJJ44283.1

Group3924: abra|OJJ75965.1 acar|OOF90050.1 acla|EAW09833.1 afis|EAW21300.1 afla|EED54852.1 afum|EAL92317.1 agla|OJJ87438.1 akaw|GAA84664.1 aluc|OJZ89412.1 anid|CBF83392.1 anig|EHA23175.1 aory|EIT79390.1 asyd|OJJ60635.1 ater|EAU35933.1 atub|OJI85384.1 aver|OJI99958.1 awen|OJJ39398.1 azon|OJJ44282.1

Group3925: abra|OJJ75966.1 acar|OOF90052.1 acla|EAW09832.1 afis|EAW21301.1 afla|EED57261.1 afum|EAL92318.1 agla|OJJ87436.1 akaw|GAA84665.1 aluc|OJZ89413.1 anid|CBF83394.1 anig|EHA23174.1 aory|EIT73984.1 asyd|OJJ60636.1 ater|EAU35934.1 atub|OJI85382.1 aver|OJI99959.1 awen|OJJ39397.1 azon|OJJ44281.1

Group3926: abra|OJJ75973.1 acar|OOF99946.1 acla|EAW09823.1 afis|EAW21310.1 afla|EED57266.1 afum|EAL92326.1 agla|OJJ87432.1 akaw|GAA88983.1 aluc|OJZ89420.1 anid|CBF83404.1 anig|EHA23167.1 aory|EIT74110.1 asyd|OJJ60640.1 ater|EAU35940.1 atub|OJI85373.1 aver|OJI99961.1 awen|OJJ39390.1 azon|OJJ44278.1

Group3927: abra|OJJ75977.1 acar|OOF99943.1 acla|EAW09821.1 afis|EAW21313.1 afla|EED57270.1 afum|EAL92330.1 agla|OJJ87429.1 akaw|GAA88980.1 aluc|OJZ89423.1 anid|CBF83407.1 anig|EHA23164.1 aory|EIT74037.1 asyd|OJJ60647.1 ater|EAU35942.1 atub|OJI85370.1 aver|OJI99965.1 awen|OJJ39386.1 azon|OJJ44275.1

Group3928: abra|OJJ75978.1 acar|OOF99941.1 acla|EAW09820.1 afis|EAW21314.1 afla|EED57271.1 afum|EAL92331.1 agla|OJJ87426.1 akaw|GAA88979.1 aluc|OJZ89424.1 anid|CBF83408.1 anig|EHA23163.1 aory|EIT74076.1 asyd|OJJ60648.1 ater|EAU35943.1 atub|OJI85369.1 aver|OJI99968.1 awen|OJJ39383.1 azon|OJJ44273.1

Group3929: abra|OJJ75980.1 acar|OOF99939.1 acla|EAW09819.1 afis|EAW21315.1 afla|EED57273.1 afum|EAL92332.1 agla|OJJ87424.1 akaw|GAA88977.1 aluc|OJZ89426.1 anid|CBF83412.1 anig|EHA23160.1 aory|EIT74008.1 asyd|OJJ60650.1 ater|EAU35944.1 atub|OJI85367.1 aver|OJI99970.1 awen|OJJ39381.1 azon|OJJ44271.1

Group3930: abra|OJJ75982.1 acar|OOF99937.1 acla|EAW09817.1 afis|EAW21317.1 afla|EED57275.1 afum|EAL92334.1 agla|OJJ87422.1 akaw|GAA88975.1 aluc|OJZ89428.1 anid|CBF83416.1 anig|EHA23159.1 aory|EIT74079.1 asyd|OJJ60652.1 ater|EAU35945.1 atub|OJI85365.1 aver|OJI99972.1 awen|OJJ39379.1 azon|OJJ44269.1

Group3931: abra|OJJ75983.1 acar|OOF99936.1 acla|EAW09816.1 afis|EAW21318.1 afla|EED57276.1 afum|EAL92335.1 agla|OJJ87421.1 akaw|GAA88974.1 aluc|OJZ89429.1 anid|CBF83417.1 anig|EHA23158.1 aory|EIT74114.1 asyd|OJJ60653.1 ater|EAU35946.1 atub|OJI85364.1 aver|OJI99973.1 awen|OJJ39378.1 azon|OJJ44268.1

Group3932: abra|OJJ75984.1 acar|OOF99935.1 acla|EAW09815.1 afis|EAW21319.1 afla|EED57277.1 afum|EAL92336.1 agla|OJJ87420.1 akaw|GAA88973.1 aluc|OJZ89430.1 anid|CBF83419.1 anig|EHA23157.1 aory|EIT74055.1 asyd|OJJ60654.1 ater|EAU35947.1 atub|OJI85363.1 aver|OJI99974.1 awen|OJJ39377.1 azon|OJJ44267.1

Group3933: abra|OJJ75987.1 acar|OOF99934.1 acla|EAW09813.1 afis|EAW21321.1 afla|EED57279.1 afum|EAL92338.1 agla|OJJ87416.1 akaw|GAA88971.1 aluc|OJZ89432.1 anid|CBF83421.1 anig|EHA23155.1 aory|EIT74031.1 asyd|OJJ60655.1 ater|EAU35948.1 atub|OJI85361.1 aver|OJI99976.1 awen|OJJ39375.1 azon|OJJ44265.1

Group3934: abra|OJJ75988.1 acar|OOF99933.1 acla|EAW09812.1 afis|EAW21323.1 afla|EED57280.1 afum|EAL92340.1 agla|OJJ87415.1 akaw|GAA88970.1 aluc|OJZ89433.1 anid|CBF83423.1 anig|EHA23154.1 aory|EIT74009.1 asyd|OJJ60656.1 ater|EAU35949.1 atub|OJI85360.1 aver|OJI99977.1 awen|OJJ39374.1 azon|OJJ44264.1

Group3935: abra|OJJ75995.1 acar|OOF99930.1 acla|EAW09810.1 afis|EAW21325.1 afla|EED57283.1 afum|EAL92343.1 agla|OJJ87413.1 akaw|GAA88964.1 aluc|OJZ89441.1 anid|CBF83426.1 anig|EHA23145.1 aory|EIT74153.1 asyd|OJJ60658.1 ater|EAU35951.1 atub|OJI85352.1 aver|OJI99981.1 awen|OJJ39372.1 azon|OJJ51712.1

Group3936: abra|OJJ76003.1 acar|OOF99921.1 acla|EAW09802.1 afis|EAW21334.1 afla|EED57292.1 afum|EAL92352.1 agla|OJJ87399.1 akaw|GAA88957.1 aluc|OJZ89448.1 anid|CBF76279.1 anig|EHA23138.1 aory|EIT74027.1 asyd|OJJ60988.1 ater|EAU35959.1 atub|OJI85345.1 aver|OJJ00308.1 awen|OJJ39364.1 azon|OJJ51703.1

Group3937: abra|OJJ76004.1 acar|OOF99922.1 acla|EAW09801.1 afis|EAW21335.1 afla|EED57293.1 afum|EAL92353.1 agla|OJJ87398.1 akaw|GAA88956.1 aluc|OJZ89449.1 anid|CBF76277.1 anig|EHA23137.1

aory|EIT73971.1 asyd|OJJ60987.1 ater|EAU35960.1 atub|OJI85344.1 aver|OJJ00307.1 awen|OJJ39363.1 azon|OJJ51702.1

Group3938: abra|OJJ76005.1 acar|OOF99920.1 acla|EAW09800.1 afis|EAW21336.1 afla|EED57294.1 afum|EAL92354.1 agla|OJJ82541.1 akaw|GAA88955.1 aluc|OJZ89451.1 anid|CBF83881.1 anig|EHA23136.1 aory|EIT74083.1 asyd|OJJ60940.1 ater|EAU35961.1 atub|OJI85343.1 aver|OJJ00266.1 awen|OJJ39362.1 azon|OJJ51701.1

Group3939: abra|OJJ76007.1 acar|OOF99919.1 acla|EAW09798.1 afis|EAW21338.1 afla|EED57296.1 afum|EAL92356.1 agla|OJJ87396.1 akaw|GAA88953.1 aluc|OJZ89453.1 anid|CBF83884.1 anig|EHA23134.1 aory|EIT74155.1 asyd|OJJ60942.1 ater|EAU35963.1 atub|OJI85341.1 aver|OJJ00268.1 awen|OJJ39360.1 azon|OJJ51699.1

Group3940: abra|OJJ76008.1 acar|OOF99917.1 acla|EAW09797.1 afis|EAW21339.1 afla|EED55754.1 afum|EBA27459.1 agla|OJJ87395.1 akaw|GAA88952.1 aluc|OJZ89454.1 anid|CBF83886.1 anig|EHA23133.1 aory|EIT76828.1 asyd|OJJ60943.1 ater|EAU35964.1 atub|OJI85340.1 aver|OJJ00269.1 awen|OJJ39359.1 azon|OJJ51698.1

Group3941: abra|OJJ76010.1 acar|OOF99914.1 acla|EAW09795.1 afis|EAW21341.1 afla|EED55756.1 afum|EAL92358.1 agla|OJJ87391.1 akaw|GAA88950.1 aluc|OJZ89456.1 anid|CBF76183.1 anig|EHA23131.1 aory|EIT76602.1 asyd|OJJ60962.1 ater|EAU35965.1 atub|OJI85338.1 aver|OJJ00287.1 awen|OJJ39356.1 azon|OJJ51697.1

Group3942: abra|OJJ76023.1 acar|OOF99901.1 acla|EAW09785.1 afis|EAW21353.1 afla|EED55768.1 afum|EAL92368.1 agla|OJJ87381.1 akaw|GAA88934.1 aluc|OJZ89473.1 anid|CBF76255.1 anig|EHA23118.1 aory|EIT76752.1 asyd|OJJ60965.1 ater|EAU35974.1 atub|OJI85325.1 aver|OJJ00290.1 awen|OJJ39347.1 azon|OJJ51691.1

Group3943: abra|OJJ76025.1 acar|OOF99902.1 acla|EAW09784.1 afis|EAW21354.1 afla|EED55769.1 afum|EAL92369.1 agla|OJJ87375.1 akaw|GAA88933.1 aluc|OJZ89475.1 anid|CBF76253.1 anig|EHA23117.1 aory|EIT76709.1 asyd|OJJ60966.1 ater|EAU35204.1 atub|OJI85324.1 aver|OJJ00291.1 awen|OJJ39346.1 azon|OJJ51690.1

Group3944: abra|OJJ76035.1 acar|OOF99893.1 acla|EAW09768.1 afis|EAW21370.1 afla|EED55788.1 afum|EAL92387.1 agla|OJJ85492.1 akaw|GAA88929.1 aluc|OJZ89490.1 anid|CBF83869.1 anig|EHA23108.1 aory|EIT76876.1 asyd|OJJ60933.1 ater|EAU35186.1 atub|OJI85313.1 aver|OJJ00259.1 awen|OJJ39327.1 azon|OJJ51672.1

Group3945: abra|OJJ76037.1 acar|OOF99892.1 acla|EAW09769.1 afis|EAW21369.1 afla|EED55786.1 afum|EAL92386.1 agla|OJJ85493.1 akaw|GAA88928.1 aluc|OJZ89492.1 anid|CBF83867.1 anig|EHA23107.1 aory|EIT76715.1 asyd|OJJ60932.1 ater|EAU35187.1 atub|OJI85311.1 aver|OJJ00258.1 awen|OJJ39328.1 azon|OJJ51673.1

Group3946: abra|OJJ76039.1 acar|OOF99890.1 acla|EAW09770.1 afis|EAW21368.1 afla|EED55782.1 afum|EAL92385.2 agla|OJJ85494.1 akaw|GAA88926.1 aluc|OJZ89495.1 anid|CBF83874.1 anig|EHA23105.1 aory|EIT76864.1 asyd|OJJ60937.1 ater|EAU35189.1 atub|OJI85308.1 aver|OJJ00263.1 awen|OJJ39329.1 azon|OJJ51674.1

Group3947: abra|OJJ76040.1 acar|OOF99889.1 acla|EAW09771.1 afis|EAW21367.1 afla|EED55781.1 afum|EAL92384.1 agla|OJJ85495.1 akaw|GAA88925.1 aluc|OJZ89496.1 anid|CBF83872.1 anig|EHA23104.1 aory|EIT76541.1 asyd|OJJ60936.1 ater|EAU35190.1 atub|OJI85307.1 aver|OJJ00262.1 awen|OJJ39330.1 azon|OJJ51675.1

Group3948: abra|OJJ76044.1 acar|OOF99886.1 acla|EAW09774.1 afis|EAW21364.1 afla|EED55778.1 afum|EAL92380.1 agla|OJJ85485.1 akaw|GAA88921.1 aluc|OJZ89500.1 anid|CBF83875.1 anig|EHA23101.1 aory|EIT76770.1 asyd|OJJ60938.1 ater|EAU35196.1 atub|OJI85303.1 aver|OJJ00264.1 awen|OJJ39334.1 azon|OJJ51679.1

Group3949: abra|OJJ76046.1 acar|OOF99884.1 acla|EAW09777.1 afis|EAW21361.1 afla|EED55775.1 afum|EAL92377.1 agla|OJJ85480.1 akaw|GAA88919.1 aluc|OJZ89502.1 anid|CBF76267.1 anig|EHA23098.1 aory|EIT76605.1 asyd|OJJ60973.1 ater|EAU35199.1 atub|OJI85301.1 aver|OJJ00298.1 awen|OJJ39337.1 azon|OJJ51682.1

Group3950: abra|OJJ76048.1 acar|OOF99882.1 acla|EAW09779.1 afis|EAW21359.1 afla|EED55774.1 afum|EAL92375.1 agla|OJJ85478.1 akaw|GAA88917.1 aluc|OJZ89504.1 anid|CBF76265.1 anig|EHA23096.1 aory|EIT76598.1 asyd|OJJ60972.1 ater|EAU35200.1 atub|OJI85299.1 aver|OJJ00297.1 awen|OJJ39339.1 azon|OJJ51684.1

Group3951: abra|OJJ76056.1 acar|OOF99874.1 acla|EAW09762.1 afis|EAW21375.1 afla|EED55793.1 afum|EAL92392.1 agla|OJJ85508.1 akaw|GAA88910.1 aluc|OJZ89511.1 anid|CBF83860.1 anig|EHA23088.1 aory|EIT76584.1 asyd|OJJ60926.1 ater|EAU35182.1 atub|OJI85292.1 aver|OJJ00252.1 awen|OJJ39322.1 azon|OJJ51667.1



Group3952: abra|OJJ76057.1 acar|OOF99873.1 acla|EAW09763.1 afis|EAW21374.1 afla|EED55792.1  
afum|EAL92391.1 agla|OJJ85500.1 akaw|GAA88909.1 aluc|OJZ89512.1 anid|CBF83862.1 anig|EHA23087.1  
aory|EIT76633.1 asyd|OJJ60927.1 ater|EAU35183.1 atub|OJI85291.1 aver|OJJ00253.1 awen|OJJ39323.1  
azon|OJJ51668.1

Group3953: abra|OJJ76058.1 acar|OOF99872.1 acla|EAW09760.1 afis|EAW21381.1 afla|EED55795.1  
afum|EAL92396.1 agla|OJJ85505.1 akaw|GAA88908.1 aluc|OJZ89513.1 anid|CBF83856.1 anig|EHA23086.1  
aory|EIT76717.1 asyd|OJJ60924.1 ater|EAU35180.1 atub|OJI85290.1 aver|OJJ00250.1 awen|OJJ39320.1  
azon|OJJ51665.1

Group3954: abra|OJJ76059.1 acar|OOF99871.1 acla|EAW09759.1 afis|EAW21382.1 afla|EED55796.1  
afum|EAL92397.1 agla|OJJ85504.1 akaw|GAA88907.1 aluc|OJZ89514.1 anid|CBF83854.1 anig|EHA23085.1  
aory|EIT76703.1 asyd|OJJ60923.1 ater|EAU35179.1 atub|OJI85289.1 aver|OJJ00249.1 awen|OJJ39319.1  
azon|OJJ51664.1

Group3955: abra|OJJ76061.1 acar|OOF99870.1 acla|EAW09757.1 afis|EAW21384.1 afla|EED55798.1  
afum|EAL92399.1 agla|OJJ85509.1 akaw|GAA88905.1 aluc|OJZ89516.1 anid|CBF83847.1 anig|EHA23083.1  
aory|EIT76813.1 asyd|OJJ60919.1 ater|EAU35178.1 atub|OJI85287.1 aver|OJJ00245.1 awen|OJJ39317.1  
azon|OJJ51530.1

Group3956: abra|OJJ76062.1 acar|OOF99869.1 acla|EAW09756.1 afis|EAW21385.1 afla|EED55799.1  
afum|EAL92400.1 agla|OJJ85510.1 akaw|GAA88904.1 aluc|OJZ89517.1 anid|CBF83845.1 anig|EHA23082.1  
aory|EIT76797.1 asyd|OJJ60918.1 ater|EAU35171.1 atub|OJI85286.1 aver|OJJ00244.1 awen|OJJ39316.1  
azon|OJJ51531.1

Group3957: abra|OJJ76064.1 acar|OOF99865.1 acla|EAW09754.1 afis|EAW21387.1 afla|EED55801.1  
afum|EAL92402.1 agla|OJJ85512.1 akaw|GAA88902.1 aluc|OJZ89519.1 anid|CBF83842.1 anig|EHA23081.1  
aory|EIT76678.1 asyd|OJJ60916.1 ater|EAU35173.1 atub|OJI85284.1 aver|OJJ00243.1 awen|OJJ39314.1  
azon|OJJ51532.1

Group3958: abra|OJJ76069.1 acar|OOF99862.1 acla|EAW09751.1 afis|EAW21391.1 afla|EED55805.1  
afum|EAL92405.1 agla|OJJ85515.1 akaw|GAA88898.1 aluc|OJZ89523.1 anid|CBF83838.1 anig|EHA23078.1  
aory|EIT76825.1 asyd|OJJ60913.1 ater|EAU35176.1 atub|OJI85280.1 aver|OJJ00240.1 awen|OJJ39312.1  
azon|OJJ51538.1

Group3959: abra|OJJ76071.1 acar|OOF99857.1 acla|EAW09748.1 afis|EAW21394.1 afla|EED55811.1  
afum|EAL92408.1 agla|OJJ85518.1 akaw|GAA88896.1 aluc|OJZ89525.1 anid|CBF83826.1 anig|EHA23076.1  
aory|EIT76796.1 asyd|OJJ60904.1 ater|EAU35162.1 atub|OJI85278.1 aver|OJJ00230.1 awen|OJJ39310.1  
azon|OJJ51542.1

Group3960: abra|OJJ76079.1 acar|OOF99846.1 acla|EAW09742.1 afis|EAW21400.1 afla|EED55821.1  
afum|EAL92414.1 agla|OJJ85525.1 akaw|GAA88887.1 aluc|OJZ89536.1 anid|CBF83829.1 anig|EHA23068.1  
aory|EIT76664.1 asyd|OJJ60906.1 ater|EAU35150.1 atub|OJI85270.1 aver|OJJ00232.1 awen|OJJ39303.1  
azon|OJJ51549.1

Group3961: abra|OJJ76080.1 acar|OOF99845.1 acla|EAW09741.1 afis|EAW21401.1 afla|EED55822.1  
afum|EAL92415.1 agla|OJJ85528.1 akaw|GAA88886.1 aluc|OJZ89538.1 anid|CBF83820.1 anig|EHA23067.1  
aory|EIT76768.1 asyd|OJJ60901.1 ater|EAU35149.1 atub|OJI85269.1 aver|OJJ00227.1 awen|OJJ39302.1  
azon|OJJ51550.1

Group3962: abra|OJJ76082.1 acar|OOF99844.1 acla|EAW09739.1 afis|EAW21402.1 afla|EED55824.1  
afum|EAL92416.1 agla|OJJ85530.1 akaw|GAA88884.1 aluc|OJZ89540.1 anid|CBF83819.1 anig|EHA23066.1  
aory|EIT76826.1 asyd|OJJ60900.1 ater|EAU29588.1 atub|OJI85267.1 aver|OJJ00225.1 awen|OJJ30539.1  
azon|OJJ51552.1

Group3963: abra|OJJ76083.1 acar|OOF99843.1 acla|EAW09738.1 afis|EAW21403.1 afla|EED55825.1  
afum|EAL92417.1 agla|OJJ85531.1 akaw|GAA88883.1 aluc|OJZ89541.1 anid|CBF83817.1 anig|EHA23065.1  
aory|EIT76589.1 asyd|OJJ60899.1 ater|EAU35147.1 atub|OJI85266.1 aver|OJJ00224.1 awen|OJJ39300.1  
azon|OJJ51553.1

Group3964: abra|OJJ76084.1 acar|OOF99842.1 acla|EAW09737.1 afis|EAW21404.1 afla|EED55826.1  
afum|EAL92418.1 agla|OJJ85533.1 akaw|GAA88882.1 aluc|OJZ89542.1 anid|CBF83815.1 anig|EHA23064.1  
aory|EIT76656.1 asyd|OJJ60898.1 ater|EAU35146.1 atub|OJI85265.1 aver|OJJ00223.1 awen|OJJ39299.1  
azon|OJJ51554.1

Group3965: abra|OJJ76088.1 acar|OOF99837.1 acla|EAW09734.1 afis|EAW21407.1 afla|EED55829.1  
afum|EAL92421.1 agla|OJJ85537.1 akaw|GAA88879.1 aluc|OJZ89545.1 anid|CBF83810.1 anig|EHA23061.1  
aory|EIT76811.1 asyd|OJJ60895.1 ater|EAU35141.1 atub|OJI85261.1 aver|OJJ00220.1 awen|OJJ39294.1  
azon|OJJ51560.1

Group3966: abra|OJJ76090.1 acar|OOF99835.1 acla|EAW09731.1 afla|EED55831.1 agla|OJJ85541.1  
akaw|GAA88877.1 aluc|OJZ89547.1 anig|EHA23059.1 aory|EIT76755.1 atub|OJI85259.1 awen|OJJ39291.1

azon|OJJ51563.1 afis|EAW21410.1 afum|EAL92424.1 anid|CBF83805.1 asyd|OJJ60892.1 ater|EAU35136.1 aver|OJJ00216.1

Group3967: abra|OJJ76092.1 acar|OOF99833.1 acla|EAW09730.1 afis|EAW21411.1 afla|EED55834.1 afum|EAL92425.1 agla|OJJ85542.1 akaw|GAA88875.1 aluc|OJZ89548.1 anid|CBF83803.1 anig|EHA23058.1 aory|EIT76568.1 asyd|OJJ60891.1 ater|EAU35135.1 atub|OJI85258.1 aver|OJJ00215.1 awen|OJJ39290.1 azon|OJJ51564.1

Group3968: abra|OJJ76095.1 acar|OOF99829.1 acla|EAW09723.1 afis|EAW21418.1 afla|EED55843.1 afum|EAL92433.1 agla|OJJ85551.1 akaw|GAA88871.1 aluc|OJZ89551.1 anid|CBF83792.1 anig|EHA23055.1 aory|EIT76877.1 asyd|OJJ60881.1 ater|EAU35131.1 atub|OJI85254.1 aver|OJJ00207.1 awen|OJJ39285.1 azon|OJJ51569.1

Group3969: abra|OJJ76096.1 acar|OOF99828.1 acla|EAW09722.1 afis|EAW21419.1 afla|EED55844.1 afum|EAL92434.1 agla|OJJ85553.1 akaw|GAA88870.1 aluc|OJZ89552.1 anid|CBF83790.1 anig|EHA23054.1 aory|EIT76586.1 asyd|OJJ60880.1 ater|EAU35130.1 atub|OJI85253.1 aver|OJJ00206.1 awen|OJJ39284.1 azon|OJJ51570.1

Group3970: abra|OJJ76098.1 acar|OOF99827.1 acla|EAW09720.1 afis|EAW21421.1 afla|EED55846.1 afum|EAL92436.1 agla|OJJ85557.1 akaw|GAA88868.1 aluc|OJZ89554.1 anid|CBF83787.1 anig|EHA23052.1 aory|EIT76632.1 asyd|OJJ60878.1 ater|EAU35128.1 atub|OJI85251.1 aver|OJJ00203.1 awen|OJJ39280.1 azon|OJJ51572.1

Group3971: abra|OJJ76099.1 acar|OOF99825.1 acla|EAW09719.1 afis|EAW21422.1 afla|EED55847.1 afum|EAL92437.1 agla|OJJ85558.1 akaw|GAA88867.1 aluc|OJZ89555.1 anid|CBF83785.1 anig|EHA23051.1 aory|EIT76561.1 asyd|OJJ60877.1 ater|EAU35127.1 atub|OJI85249.1 aver|OJJ00202.1 awen|OJJ39279.1 azon|OJJ51573.1

Group3972: abra|OJJ76100.1 acar|OOF99824.1 acla|EAW09718.1 afis|EAW21423.1 afla|EED55848.1 afum|EAL92438.1 agla|OJJ85559.1 akaw|GAA88866.1 aluc|OJZ89556.1 anid|CBF83783.1 anig|EHA23050.1 aory|EIT76818.1 asyd|OJJ60876.1 ater|EAU35126.1 atub|OJI85248.1 aver|OJJ00201.1 awen|OJJ39278.1 azon|OJJ51574.1

Group3973: abra|OJJ76102.1 acar|OOF99823.1 acla|EAW09716.1 afis|EAW21425.1 afla|EED55850.1 afum|EAL92440.1 agla|OJJ85562.1 akaw|GAA88864.1 aluc|OJZ89558.1 anid|CBF83781.1 anig|EHA23048.1 aory|EIT76846.1 asyd|OJJ60874.1 ater|EAU35124.1 atub|OJI85246.1 aver|OJJ00199.1 awen|OJJ39276.1 azon|OJJ51576.1

Group3974: abra|OJJ76103.1 acar|OOF99822.1 acla|EAW09715.1 afis|EAW21426.1 afla|EED55853.1 afum|EAL92441.1 agla|OJJ85563.1 akaw|GAA88863.1 aluc|OJZ89559.1 anid|CBF83780.1 anig|EHA23047.1 aory|EIT76704.1 asyd|OJJ60873.1 ater|EAU35123.1 atub|OJI85245.1 aver|OJJ00198.1 awen|OJJ39275.1 azon|OJJ51577.1

Group3975: abra|OJJ76104.1 acar|OOF99821.1 acla|EAW09714.1 afis|EAW21427.1 afla|EED55854.1 afum|EAL92442.1 agla|OJJ85564.1 akaw|GAA88862.1 aluc|OJZ89560.1 anid|CBF83778.1 anig|EHA23046.1 aory|EIT76600.1 asyd|OJJ60871.1 ater|EAU35121.1 atub|OJI85244.1 aver|OJJ00197.1 awen|OJJ39274.1 azon|OJJ51579.1

Group3976: abra|OJJ76107.1 acar|OOF99819.1 acla|EAW09713.1 afis|EAW21428.1 afla|EED55855.1 afum|EAL92443.1 agla|OJJ85566.1 akaw|GAA88859.1 aluc|OJZ89563.1 anid|CBF83776.1 anig|EHA23043.1 aory|EIT76883.1 asyd|OJJ60870.1 ater|EAU35120.1 atub|OJI85241.1 aver|OJJ00195.1 awen|OJJ39273.1 azon|OJJ51582.1

Group3977: abra|OJJ76108.1 acar|OOF99818.1 acla|EAW09712.1 afis|EAW21429.1 afla|EED55856.1 afum|EAL92444.1 agla|OJJ85567.1 akaw|GAA88858.1 aluc|OJZ89564.1 anid|CBF83774.1 anig|EHA23042.1 aory|EIT76794.1 asyd|OJJ60869.1 ater|EAU35119.1 atub|OJI85240.1 aver|OJJ00194.1 awen|OJJ39271.1 azon|OJJ51583.1

Group3978: abra|OJJ76109.1 acar|OOF99817.1 acla|EAW09711.1 afis|EAW21430.1 afla|EED55857.1 afum|EAL92445.1 agla|OJJ85568.1 akaw|GAA88857.1 aluc|OJZ89565.1 anid|CBF83772.1 anig|EHA23041.1 aory|EIT76635.1 asyd|OJJ60868.1 ater|EAU35118.1 atub|OJI85239.1 aver|OJJ00193.1 awen|OJJ39270.1 azon|OJJ51584.1

Group3979: abra|OJJ76111.1 acar|OOF99815.1 acla|EAW09709.1 afis|EAW21431.1 afla|EED55859.1 afum|EAL92446.2 agla|OJJ85572.1 akaw|GAA88856.1 aluc|OJZ89567.1 anid|CBF83769.1 anig|EHA23040.1 aory|EIT76616.1 asyd|OJJ60865.1 ater|EAU35117.1 atub|OJI85237.1 aver|OJJ00191.1 awen|OJJ39269.1 azon|OJJ51587.1

Group3980: abra|OJJ76112.1 acar|OOF99813.1 acla|EAW09708.1 afis|EAW21432.1 afla|EED55860.1 afum|EAL92447.1 agla|OJJ85573.1 akaw|GAA88855.1 aluc|OJZ89568.1 anid|CBF83767.1 anig|EHA23039.1 aory|EIT76829.1 asyd|OJJ60864.1 ater|EAU35116.1 atub|OJI85236.1 aver|OJJ00190.1 awen|OJJ39267.1 azon|OJJ51588.1

Group3981: abra|OJJ76113.1 acar|OOF99812.1 acla|EAW09707.1 afis|EAW21433.1 afla|EED55862.1 afum|EAL92448.2 agla|OJJ85574.1 akaw|GAA88854.1 aluc|OJZ89569.1 anid|CBF83765.1 anig|EHA23037.1 aory|EIT76807.1 asyd|OJJ60863.1 ater|EAU35111.1 atub|OJI85234.1 aver|OJJ00189.1 awen|OJJ39266.1 azon|OJJ51589.1

Group3982: abra|OJJ76114.1 acar|OOF99811.1 acla|EAW09706.1 afis|EAW21434.1 afla|EED55863.1 afum|EAL92449.1 agla|OJJ85575.1 akaw|GAA88853.1 aluc|OJZ89571.1 anid|CBF76591.1 anig|EHA23036.1 aory|EIT76762.1 asyd|OJJ61175.1 ater|EAU35110.1 atub|OJI85233.1 aver|OJJ00501.1 awen|OJJ39265.1 azon|OJJ51590.1

Group3983: abra|OJJ76116.1 acar|OOF99810.1 acla|EAW09704.1 afis|EAW21436.1 afla|EED55864.1 afum|EAL92451.1 agla|OJJ85579.1 akaw|GAA88851.1 aluc|OJZ89573.1 anid|CBF76587.1 anig|EHA23034.1 aory|EIT76708.1 asyd|OJJ61173.1 ater|EAU35109.1 atub|OJI85231.1 aver|OJJ00499.1 awen|OJJ39263.1 azon|OJJ51592.1

Group3984: abra|OJJ76118.1 acar|OOF99807.1 acla|EAW09701.1 afis|EAW21438.1 afla|EED55866.1 afum|EAL92453.2 agla|OJJ85583.1 akaw|GAA88849.1 aluc|OJZ89575.1 anid|CBF76583.1 anig|EHA23032.1 aory|EIT76853.1 asyd|OJJ61171.1 ater|EAU35107.1 atub|OJI85229.1 aver|OJJ00496.1 awen|OJJ39260.1 azon|OJJ51595.1

Group3985: abra|OJJ76120.1 acar|OOF99805.1 acla|EAW09699.1 afis|EAW21440.1 afla|EED55868.1 afum|EAL92456.1 agla|OJJ85587.1 akaw|GAA88847.1 aluc|OJZ89577.1 anid|CBF76579.1 anig|EHA23031.1 aory|EIT76773.1 asyd|OJJ61169.1 ater|EAU35105.1 atub|OJI85227.1 aver|OJJ00494.1 awen|OJJ39258.1 azon|OJJ51598.1

Group3986: abra|OJJ76121.1 acar|OOF99804.1 acla|EAW09698.1 afis|EAW21441.1 afla|EED55869.1 afum|EAL92458.2 agla|OJJ85588.1 akaw|GAA88846.1 aluc|OJZ89578.1 anid|CBF76577.1 anig|EHA23030.1 aory|EIT76534.1 asyd|OJJ61168.1 ater|EAU35104.1 atub|OJI85226.1 aver|OJJ00493.1 awen|OJJ39257.1 azon|OJJ51599.1

Group3987: abra|OJJ76122.1 acar|OOF99803.1 acla|EAW09697.1 afis|EAW21442.1 afla|EED55870.1 afum|EAL92460.1 agla|OJJ85589.1 akaw|GAA88845.1 aluc|OJZ89579.1 anid|CBF76575.1 anig|EHA23029.1 aory|EIT76841.1 asyd|OJJ61167.1 ater|EAU35103.1 atub|OJI85225.1 aver|OJJ00492.1 awen|OJJ39256.1 azon|OJJ51600.1

Group3988: abra|OJJ76123.1 acar|OOF99802.1 acla|EAW09696.1 afis|EAW21443.1 afla|EED55871.1 afum|EAL92461.2 agla|OJJ85590.1 akaw|GAA88844.1 aluc|OJZ89580.1 anid|CBF76573.1 anig|EHA23028.1 aory|EIT76804.1 asyd|OJJ61166.1 ater|EAU35102.1 atub|OJI85224.1 aver|OJJ00491.1 awen|OJJ39255.1 azon|OJJ51601.1

Group3989: abra|OJJ76125.1 acar|OOF99800.1 acla|EAW09694.1 afis|EAW21445.1 afla|EED55873.1 afum|EAL92464.2 agla|OJJ85593.1 akaw|GAA88842.1 aluc|OJZ89583.1 anid|CBF76569.1 anig|EHA23026.1 aory|EIT76681.1 asyd|OJJ61164.1 ater|EAU35099.1 atub|OJI85220.1 aver|OJJ00488.1 awen|OJJ39253.1 azon|OJJ51602.1

Group3990: abra|OJJ76126.1 acar|OOF99798.1 acla|EAW09693.1 afis|EAW21446.1 afla|EED55874.1 afum|EAL92465.2 agla|OJJ85594.1 akaw|GAA88841.1 aluc|OJZ89587.1 anid|CBF76565.1 anig|EHA23024.1 aory|EIT76673.1 asyd|OJJ61162.1 ater|EAU35097.1 atub|OJI85216.1 aver|OJJ00486.1 awen|OJJ39252.1 azon|OJJ51603.1

Group3991: abra|OJJ76127.1 acar|OOF99796.1 acla|EAW09692.1 afis|EAW21447.1 afla|EED55876.1 afum|EAL92466.1 agla|OJJ85595.1 akaw|GAA88840.1 aluc|OJZ89588.1 anid|CBF76563.1 anig|EHA23023.1 aory|EIT76593.1 asyd|OJJ61161.1 ater|EAU35096.1 atub|OJI85214.1 aver|OJJ00483.1 awen|OJJ39251.1 azon|OJJ51604.1

Group3992: abra|OJJ76128.1 acar|OOF99795.1 acla|EAW09691.1 afis|EAW21448.1 afla|EED55877.1 afum|EAL92467.1 agla|OJJ85596.1 akaw|GAA88839.1 aluc|OJZ89589.1 anid|CBF76559.1 anig|EHA23022.1 aory|EIT76881.1 asyd|OJJ61159.1 ater|EAU35095.1 atub|OJI85213.1 aver|OJJ00481.1 awen|OJJ39250.1 azon|OJJ51605.1

Group3993: abra|OJJ76129.1 acar|OOF99794.1 acla|EAW09690.1 afis|EAW21449.1 afla|EED55878.1 afum|EAL92468.1 agla|OJJ85597.1 akaw|GAA88838.1 aluc|OJZ89590.1 anid|CBF76557.1 anig|EHA23021.1 aory|EIT76638.1 asyd|OJJ61158.1 ater|EAU35094.1 atub|OJI85212.1 aver|OJJ00480.1 awen|OJJ39249.1 azon|OJJ51606.1

Group3994: abra|OJJ76133.1 acar|OOF99790.1 acla|EAW09685.1 afis|EAW21454.1 afla|EED55884.1 afum|EAL92473.1 agla|OJJ85602.1 akaw|GAA88834.1 aluc|OJZ89594.1 anid|CBF76548.1 anig|EHA23017.1 aory|EIT76723.1 asyd|OJJ61155.1 ater|EAU35081.1 atub|OJI85208.1 aver|OJJ00477.1 awen|OJJ39246.1 azon|OJJ51609.1

Group3995: abra|OJJ76138.1 acar|OOF99786.1 acla|EAW09681.1 afis|EAW21458.1 afla|EED55888.1 afum|EAL92477.1 agla|OJJ85605.1 akaw|GAA88830.1 aluc|OJZ89601.1 anid|CBF76540.1 anig|EHA23014.1

aory|EIT76702.1 asyd|OJJ61151.1 ater|EAU35077.1 atub|OJI85203.1 aver|OJJ00473.1 awen|OJJ39242.1 azon|OJJ51613.1

Group3996: abra|OJJ76140.1 acar|OOF99785.1 acla|EAW09679.1 afis|EAW21460.1 afla|EED55891.1 afum|EAL92479.1 agla|OJJ85608.1 akaw|GAA88828.1 aluc|OJZ89603.1 anid|CBF76536.1 anig|EHA23012.1 aory|EIT76836.1 asyd|OJJ61149.1 ater|EAU35075.1 atub|OJI85201.1 aver|OJJ00471.1 awen|OJJ39239.1 azon|OJJ51615.1

Group3997: abra|OJJ76141.1 acar|OOF99784.1 acla|EAW09664.1 afis|EAW21473.1 afla|EED55908.1 afum|EAL92492.1 agla|OJJ85622.1 akaw|GAA88826.1 aluc|OJZ89605.1 anid|CBF76513.1 anig|EHA23011.1 aory|EIT76607.1 asyd|OJJ61136.1 ater|EAU35060.1 atub|OJI85198.1 aver|OJJ00458.1 awen|OJJ39224.1 azon|OJJ51630.1

Group3998: abra|OJJ76142.1 acar|OOF99783.1 acla|EAW09665.1 afis|EAW21472.1 afla|EED55902.1 afum|EAL92491.1 agla|OJJ85621.1 akaw|GAA88825.1 aluc|OJZ89606.1 anid|CBF76515.1 anig|EHA23010.1 aory|EIT76799.1 asyd|OJJ61137.1 ater|EAU35061.1 atub|OJI85197.1 aver|OJJ00459.1 awen|OJJ39225.1 azon|OJJ51629.1

Group3999: abra|OJJ76143.1 acar|OOF99782.1 acla|EAW09666.1 afis|EAW21471.1 afla|EED55904.1 afum|EAL92490.1 agla|OJJ85620.1 akaw|GAA88824.1 aluc|OJZ89607.1 anid|CBF76517.1 anig|EHA23009.1 aory|EIT76648.1 asyd|OJJ61138.1 ater|EAU35062.1 atub|OJI85196.1 aver|OJJ00460.1 awen|OJJ39227.1 azon|OJJ51628.1

Group4000: abra|OJJ76145.1 acar|OOF99781.1 acla|EAW09668.1 afis|EAW21469.1 afla|EED55907.1 afum|EAL92488.1 agla|OJJ85618.1 akaw|GAA82094.1 aluc|OJZ92086.1 anid|CBF76521.1 anig|EHA23008.1 aory|EIT76871.1 asyd|OJJ61140.1 ater|EAU35064.1 atub|OJI86515.1 aver|OJJ00462.1 awen|OJJ39229.1 azon|OJJ51626.1

Group4001: abra|OJJ76146.1 acar|OOF99780.1 acla|EAW09671.1 afis|EAW21467.1 afla|EED55900.1 afum|EAL92487.1 agla|OJJ85617.1 akaw|GAA82095.1 aluc|OJZ92084.1 anid|CBF76523.1 anig|EHA23007.1 aory|EIT76694.1 asyd|OJJ61141.1 ater|EAU35066.1 atub|OJI86514.1 aver|OJJ00463.1 awen|OJJ39230.1 azon|OJJ51625.1

Group4002: abra|OJJ76150.1 acar|OOF99777.1 acla|EAW09675.1 afis|EAW21464.1 afla|EED55896.1 afum|EAL92484.1 agla|OJJ85612.1 akaw|GAA82099.1 aluc|OJZ92079.1 anid|CBF76529.1 anig|EHA23005.1 aory|EIT76592.1 asyd|OJJ61145.1 ater|EAU35071.1 atub|OJI86509.1 aver|OJJ00467.1 awen|OJJ39235.1 azon|OJJ51620.1

Group4003: abra|OJJ76151.1 acar|OOF89898.1 acla|EAW09676.1 afis|EAW21463.1 afla|EED55895.1 afum|EAL92483.1 agla|OJJ85611.1 akaw|GAA82100.1 aluc|OJZ92078.1 anid|CBF76530.1 anig|EHA23004.1 aory|EIT76817.1 asyd|OJJ61146.1 ater|EAU35072.1 atub|OJI86508.1 aver|OJJ00468.1 awen|OJJ39236.1 azon|OJJ51619.1

Group4004: abra|OJJ76152.1 acar|OOF89899.1 acla|EAW09677.1 afis|EAW21462.1 afla|EED55894.1 afum|EAL92481.1 agla|OJJ85610.1 akaw|GAA82101.1 aluc|OJZ92077.1 anid|CBF76532.1 anig|EHA23003.1 aory|EIT76700.1 asyd|OJJ61147.1 ater|EAU35073.1 atub|OJI86507.1 aver|OJJ00469.1 awen|OJJ39237.1 azon|OJJ51618.1

Group4005: abra|OJJ76157.1 acar|OOF99775.1 acla|EAW09661.1 afis|EAW21478.1 afla|EED55910.1 afum|EAL92498.1 agla|OJJ85630.1 akaw|GAA82105.1 aluc|OJZ92071.1 anid|CBF76508.1 anig|EHA23000.1 aory|EIT76734.1 asyd|OJJ61133.1 ater|EAU35058.1 atub|OJI86503.1 aver|OJJ00454.1 awen|OJJ39221.1 azon|OJJ51635.1

Group4006: abra|OJJ76160.1 acar|OOF99772.1 acla|EAW09658.1 afis|EAW21481.1 afla|EED55913.1 afum|EAL92501.1 agla|OJJ85635.1 akaw|GAA82107.1 aluc|OJZ92069.1 anid|CBF76502.1 anig|EHA22997.1 aory|EIT76621.1 asyd|OJJ61130.1 ater|EAU35056.1 atub|OJI86500.1 aver|OJJ00451.1 awen|OJJ39216.1 azon|OJJ51638.1

Group4007: abra|OJJ76166.1 acar|OOF99771.1 acla|EAW09657.1 afis|EAW21482.1 afla|EED55914.1 afum|EAL92502.1 agla|OJJ85636.1 akaw|GAA82114.1 aluc|OJZ92062.1 anid|CBF76498.1 anig|EHA22991.1 aory|EIT76649.1 asyd|OJJ61128.1 ater|EAU35055.1 atub|OJI86494.1 aver|OJJ00449.1 awen|OJJ39215.1 azon|OJJ51640.1

Group4008: abra|OJJ76172.1 acar|OOF99767.1 acla|EAW09653.1 afis|EAW21486.1 afla|EED55919.1 afum|EAL92506.1 agla|OJJ85645.1 akaw|GAA82118.1 aluc|OJZ92058.1 anid|CBF76490.1 anig|EHA22987.1 aory|EIT76891.1 asyd|OJJ61124.1 ater|EAU35051.1 atub|OJI86490.1 aver|OJJ00445.1 awen|OJJ39211.1 azon|OJJ51643.1

Group4009: abra|OJJ76174.1 acar|OOF99766.1 acla|EAW09652.1 afis|EAW21488.1 afla|EED55923.1 afum|EAL92507.1 agla|OJJ85648.1 akaw|GAA82119.1 aluc|OJZ92056.1 anid|CBF76488.1 anig|EHA22985.1 aory|EIT76645.1 asyd|OJJ61123.1 ater|EAU35050.1 atub|OJI86487.1 aver|OJJ00441.1 awen|OJJ39207.1 azon|OJJ51645.1

Group4010: abra|OJJ76175.1 acar|OOF99765.1 acla|EAW09651.1 afis|EAW21489.1 afla|EED55924.1 afum|EAL92508.1 agla|OJJ85649.1 akaw|GAA82120.1 aluc|OJZ92055.1 anid|CBF76486.1 anig|EHA22984.1 aory|EIT76531.1 asyd|OJJ61122.1 ater|EAU35049.1 atub|OJI86486.1 aver|OJJ00440.1 awen|OJJ39206.1 azon|OJJ51646.1

Group4011: abra|OJJ76176.1 acar|OOF99764.1 acla|EAW09650.1 afis|EAW21490.1 afla|EED55925.1 afum|EAL92509.1 agla|OJJ85652.1 akaw|GAA82121.1 aluc|OJZ92054.1 anid|CBF76484.1 anig|EHA22983.1 aory|EIT76596.1 asyd|OJJ61121.1 ater|EAU35048.1 atub|OJI86485.1 aver|OJJ00439.1 awen|OJJ39205.1 azon|OJJ51647.1

Group4012: abra|OJJ76177.1 acar|OOF99762.1 acla|EAW09649.1 afis|EAW21491.1 afla|EED55926.1 afum|EAL92510.1 agla|OJJ85653.1 akaw|GAA82122.1 aluc|OJZ92053.1 anid|CBF76482.1 anig|EHA22982.1 aory|EIT76879.1 asyd|OJJ61120.1 ater|EAU35047.1 atub|OJI86484.1 aver|OJJ00438.1 awen|OJJ39204.1 azon|OJJ51648.1

Group4013: abra|OJJ76178.1 acar|OOF99763.1 acla|EAW09648.1 afis|EAW21492.1 afla|EED55927.1 afum|EAL92511.1 agla|OJJ85654.1 akaw|GAA82123.1 aluc|OJZ92052.1 anid|CBF76480.1 anig|EHA22981.1 aory|EIT76815.1 asyd|OJJ61119.1 ater|EAU35046.1 atub|OJI86483.1 aver|OJJ00437.1 awen|OJJ39203.1 azon|OJJ51649.1

Group4014: abra|OJJ76180.1 acar|OOF99760.1 acla|EAW09646.1 afis|EAW21494.1 afla|EED55929.1 afum|EAL92513.1 agla|OJJ85656.1 akaw|GAA82125.1 aluc|OJZ92049.1 anid|CBF76476.1 anig|EHA22979.1 aory|EIT76689.1 asyd|OJJ61117.1 ater|EAU35044.1 atub|OJI86481.1 aver|OJJ00435.1 awen|OJJ39201.1 azon|OJJ51526.1

Group4015: abra|OJJ76181.1 acar|OOF99759.1 acla|EAW09645.1 afis|EAW21495.1 afla|EED55930.1 afum|EAL92514.1 agla|OJJ85657.1 akaw|GAA82126.1 aluc|OJZ92048.1 anid|CBF76474.1 anig|EHA22978.1 aory|EIT76659.1 asyd|OJJ61116.1 ater|EAU35043.1 atub|OJI86480.1 aver|OJJ00434.1 awen|OJJ39200.1 azon|OJJ51525.1

Group4016: abra|OJJ76182.1 acar|OOF99758.1 acla|EAW09644.1 afis|EAW21496.1 afla|EED55931.1 afum|EAL92515.1 agla|OJJ85658.1 akaw|GAA82127.1 aluc|OJZ92047.1 anid|CBF76472.1 anig|EHA22977.1 aory|EIT76569.1 asyd|OJJ61115.1 ater|EAU35042.1 atub|OJI86479.1 aver|OJJ00433.1 awen|OJJ39199.1 azon|OJJ51524.1

Group4017: abra|OJJ76183.1 acar|OOF99757.1 acla|EAW09643.1 afis|EAW21497.1 afla|EED55933.1 afum|EAL92516.1 agla|OJJ85660.1 akaw|GAA82128.1 aluc|OJZ92046.1 anid|CBF76468.1 anig|EHA22976.1 aory|EIT76844.1 asyd|OJJ61114.1 ater|EAU35041.1 atub|OJI86478.1 aver|OJJ00430.1 awen|OJJ39198.1 azon|OJJ51523.1

Group4018: abra|OJJ76187.1 acar|OOF99755.1 acla|EAW09640.1 afis|EAW21500.1 afla|EED55936.1 afum|EAL92519.1 agla|OJJ85663.1 akaw|GAA82131.1 aluc|OJZ92042.1 anid|CBF76459.1 anig|EHA22974.1 aory|EIT76547.1 asyd|OJJ61111.1 ater|EAU35038.1 atub|OJI86475.1 aver|OJJ00427.1 awen|OJJ39195.1 azon|OJJ51522.1

Group4019: abra|OJJ76188.1 acar|OOF99754.1 acla|EAW09639.1 afis|EAW21501.1 afla|EED55937.1 afum|EAL92520.1 agla|OJJ85664.1 akaw|GAA82132.1 aluc|OJZ92041.1 anid|CBF76457.1 anig|EHA22973.1 aory|EIT76679.1 asyd|OJJ61110.1 ater|EAU35037.1 atub|OJI86474.1 aver|OJJ00426.1 awen|OJJ39194.1 azon|OJJ51519.1

Group4020: abra|OJJ76191.1 acar|OOF99751.1 acla|EAW13914.1 afis|EAW18625.1 afla|EED52717.1 afum|EAL93337.1 agla|OJJ81242.1 akaw|GAA82134.1 aluc|OJZ92038.1 anid|CBF70486.1 anig|EHA22970.1 aory|EIT78208.1 asyd|OJJ58585.1 ater|EAU34925.1 atub|OJI86472.1 aver|OJJ01189.1 awen|OJJ32090.1 azon|OJJ46667.1

Group4021: abra|OJJ76192.1 acar|OOF99752.1 acla|EAW13915.1 afis|EAW18626.1 afla|EED52716.1 afum|EAL93338.1 agla|OJJ81246.1 akaw|GAA82135.1 aluc|OJZ92037.1 anid|CBF70484.1 anig|EHA22969.1 aory|EIT78180.1 asyd|OJJ58586.1 ater|EAU34926.1 atub|OJI86470.1 aver|OJJ01190.1 awen|OJJ32092.1 azon|OJJ46669.1

Group4022: abra|OJJ76193.1 acar|OOF99750.1 acla|EAW13916.1 afis|EAW18627.1 afla|EED52715.1 afum|EAL93339.1 agla|OJJ81245.1 akaw|GAA82136.1 aluc|OJZ92036.1 anid|CBF70478.1 anig|EHA22968.1 aory|EIT78215.1 asyd|OJJ58587.1 ater|EAU38285.1 atub|OJI86469.1 aver|OJJ01191.1 awen|OJJ32093.1 azon|OJJ46670.1

Group4023: abra|OJJ76194.1 acar|OOF99749.1 acla|EAW13917.1 afis|EAW18628.1 afla|EED52714.1 afum|EAL93340.1 agla|OJJ81244.1 akaw|GAA82137.1 aluc|OJZ92035.1 anid|CBF70480.1 anig|EHA22967.1 aory|EIT78226.1 asyd|OJJ58588.1 ater|EAU38284.1 atub|OJI86468.1 aver|OJJ01192.1 awen|OJJ32094.1 azon|OJJ46671.1

Group4024: abra|OJJ76197.1 acar|OOF99747.1 acla|EAW13918.1 afis|EAW18629.1 afla|EED52712.1 afum|EAL93341.1 agla|OJJ81251.1 akaw|GAA82139.1 aluc|OJZ92032.1 anid|CBF70482.1 anig|EHA22965.1

aory|EIT78174.1 asyd|OJJ58592.1 ater|EAU38282.1 atub|OJI86465.1 aver|OJJ01194.1 awen|OJJ32096.1 azon|OJJ46675.1

Group4025: abra|OJJ76200.1 acar|OOF99744.1 acla|EAW13921.1 afis|EAW18632.1 afla|EED52709.1 afum|EAL93345.1 agla|OJJ82445.1 akaw|GAA82143.1 aluc|OJZ92028.1 anid|CBF70472.1 anig|EHA22962.1 aory|EIT74199.1 asyd|OJJ58595.1 ater|EAU38279.1 atub|OJI86462.1 aver|OJJ01197.1 awen|OJJ32099.1 azon|OJJ46681.1

Group4026: abra|OJJ76201.1 acar|OOF99743.1 acla|EAW13922.1 afis|EAW18633.1 afla|EED52708.1 afum|EAL93346.1 agla|OJJ82444.1 akaw|GAA82144.1 aluc|OJZ92027.1 anid|CBF70470.1 anig|EHA22961.1 aory|EIT74198.1 asyd|OJJ58596.1 ater|EAU38278.1 atub|OJI86461.1 aver|OJJ01198.1 awen|OJJ32100.1 azon|OJJ46682.1

Group4027: abra|OJJ76202.1 acar|OOF99742.1 acla|EAW13923.1 afis|EAW18634.1 afla|EED52707.1 afum|EAL93347.1 agla|OJJ82443.1 akaw|GAA82145.1 aluc|OJZ92026.1 anid|CBF70468.1 anig|EHA22960.1 aory|EIT74275.1 asyd|OJJ58597.1 ater|EAU38277.1 atub|OJI86460.1 aver|OJJ01199.1 awen|OJJ32101.1 azon|OJJ46683.1

Group4028: abra|OJJ76204.1 acar|OOF99741.1 acla|EAW13925.1 afis|EAW18636.1 afla|EED52705.1 afum|EAL93349.1 akaw|GAA82147.1 aluc|OJZ92024.1 anid|CBF70461.1 anig|EHA22958.1 aory|EIT74316.1 asyd|OJJ58600.1 atub|OJI86458.1 aver|OJJ01202.1 awen|OJJ32103.1 azon|OJJ46685.1 agla|OJJ82439.1 ater|EAU38275.1

Group4029: abra|OJJ76210.1 acar|OOF99739.1 acla|EAW13927.1 afis|EAW18638.1 afla|EED52702.1 afum|EAL93351.1 agla|OJJ82436.1 akaw|GAA82150.1 aluc|OJZ92018.1 anid|CBF70453.1 anig|EHA22956.1 aory|EIT74209.1 asyd|OJJ58604.1 ater|EAU38273.1 atub|OJI86453.1 aver|OJJ01207.1 awen|OJJ32106.1 azon|OJJ46687.1

Group4030: abra|OJJ76213.1 acar|OOF99737.1 acla|EAW13929.1 afis|EAW18640.1 afla|EED52700.1 afum|EAL93354.2 agla|OJJ82434.1 akaw|GAA82152.1 aluc|OJZ92016.1 anid|CBF70449.1 anig|EHA22955.1 aory|EIT74286.1 asyd|OJJ58606.1 ater|EAU38271.1 atub|OJI86451.1 aver|OJJ01210.1 awen|OJJ32108.1 azon|OJJ46689.1

Group4031: abra|OJJ76214.1 acar|OOF99736.1 acla|EAW13930.1 afis|EAW18641.1 afla|EED52699.1 afum|EAL93355.1 agla|OJJ82433.1 akaw|GAA82153.1 aluc|OJZ92015.1 anid|CBF70447.1 anig|EHA22954.1 aory|EIT74167.1 asyd|OJJ58607.1 ater|EAU38270.1 atub|OJI86450.1 aver|OJJ01211.1 awen|OJJ32109.1 azon|OJJ46690.1

Group4032: abra|OJJ76215.1 acar|OOF99735.1 acla|EAW13931.1 afis|EAW18642.1 afla|EED52698.1 afum|EAL93356.1 agla|OJJ82432.1 akaw|GAA82154.1 aluc|OJZ92014.1 anid|CBF70445.1 anig|EHA22953.1 aory|EIT74249.1 asyd|OJJ58608.1 ater|EAU38269.1 atub|OJI86449.1 aver|OJJ01212.1 awen|OJJ32110.1 azon|OJJ46691.1

Group4033: abra|OJJ76220.1 acar|OOF99731.1 acla|EAW13935.1 afis|EAW18646.1 afla|EED52696.1 afum|EAL93361.1 agla|OJJ82429.1 akaw|GAA82158.1 aluc|OJZ92010.1 anid|CBF70437.1 anig|EHA22950.1 aory|EIT74305.1 asyd|OJJ58611.1 ater|EAU38265.1 atub|OJI86445.1 aver|OJJ01217.1 awen|OJJ32114.1 azon|OJJ46695.1

Group4034: abra|OJJ76225.1 acar|OOF99472.1 acla|EAW14365.1 afis|EAW18915.1 afla|EED50899.1 afum|EBA27498.1 agla|OJJ81529.1 akaw|GAA82161.1 aluc|OJZ92006.1 anid|CBF69691.1 anig|EHA22946.1 aory|EIT78987.1 asyd|OJJ59055.1 ater|EAU38082.1 atub|OJI86441.1 aver|OJJ01649.1 awen|OJJ31508.1 azon|OJJ47227.1

Group4035: abra|OJJ76226.1 acar|OOF99473.1 acla|EAW14366.1 afis|EAW18916.1 afla|EED50900.1 afum|EAL93647.1 agla|OJJ81530.1 akaw|GAA82162.1 aluc|OJZ92005.1 anid|CBF69689.1 anig|EHA22945.1 aory|EIT79047.1 asyd|OJJ59056.1 ater|EAU38083.1 atub|OJI86440.1 aver|OJJ01650.1 awen|OJJ31509.1 azon|OJJ47228.1

Group4036: abra|OJJ76227.1 acar|OOF99474.1 acla|EAW14367.1 afis|EAW18917.1 afla|EED50901.1 afum|EAL93648.1 agla|OJJ81531.1 akaw|GAA82164.1 aluc|OJZ92002.1 anid|CBF69688.1 anig|EHA22943.1 aory|EIT79014.1 asyd|OJJ59057.1 ater|EAU38084.1 atub|OJI86438.1 aver|OJJ01651.1 awen|OJJ31510.1 azon|OJJ47229.1

Group4037: abra|OJJ76228.1 acar|OOF99475.1 acla|EAW14368.1 afis|EAW18918.1 afla|EED50902.1 afum|EAL93649.2 agla|OJJ81532.1 akaw|GAA82165.1 aluc|OJZ92001.1 anid|CBF69686.1 anig|EHA22942.1 aory|EIT78973.1 asyd|OJJ59058.1 ater|EAU38085.1 atub|OJI86437.1 aver|OJJ01652.1 awen|OJJ31511.1 azon|OJJ47230.1

Group4038: abra|OJJ76242.1 acar|OOF99487.1 acla|EAW14197.1 afis|EAW18925.1 afla|EED50914.1 afum|EBA27500.1 agla|OJJ85252.1 akaw|GAA82175.1 aluc|OJZ91989.1 anid|CBF81679.1 anig|EHA22936.1 aory|EIT79011.1 asyd|OJJ59560.1 ater|EAU38100.1 atub|OJI86424.1 aver|OJJ02708.1 awen|OJJ31519.1 azon|OJJ47235.1

Group4039: abra|OJJ76245.1 acar|OOF99491.1 acla|EAW14362.1 afis|EAW18927.1 afla|EED50920.1 afum|EAL93658.1 agla|OJJ85256.1 akaw|GAA82178.1 aluc|OJZ91986.1 anid|CBF69671.1 anig|EHA22932.1 aory|EIT78966.1 asyd|OJJ59063.1 ater|EAU38106.1 atub|OJI86421.1 aver|OJJ01657.1 awen|OJJ31521.1 azon|OJJ47237.1

Group4040: abra|OJJ76246.1 acar|OOF99492.1 acla|EAW14361.1 afis|EAW18928.1 afla|EED50921.1 afum|EAL93659.1 agla|OJJ85257.1 akaw|GAA82179.1 aluc|OJZ91985.1 anid|CBF69669.1 anig|EHA22931.1 aory|EIT79013.1 asyd|OJJ59062.1 ater|EAU38107.1 atub|OJI86420.1 aver|OJJ01656.1 awen|OJJ31522.1 azon|OJJ47238.1

Group4041: abra|OJJ76248.1 acar|OOF89844.1 acla|EAW14359.1 afis|EAW18931.1 afla|EED50936.1 afum|EAL93663.1 agla|OJJ85260.1 akaw|GAA82181.1 aluc|OJZ91982.1 anid|CBF86796.1 anig|EHA22929.1 aory|EIT78972.1 asyd|OJJ64670.1 ater|EAU38110.1 atub|OJI86418.1 aver|OJI98772.1 awen|OJJ31525.1 azon|OJJ47240.1

Group4042: abra|OJJ76250.1 acar|OOF99495.1 acla|EAW14357.1 afis|EAW18933.1 afla|EED50938.1 afum|EAL93666.2 agla|OJJ85262.1 akaw|GAA82183.1 aluc|OJZ91977.1 anid|CBF86800.1 anig|EHA22927.1 aory|EIT77014.1 asyd|OJJ64668.1 ater|EAU38112.1 atub|OJI86416.1 aver|OJI98770.1 awen|OJJ31527.1 azon|OJJ47242.1

Group4043: abra|OJJ76251.1 acar|OOF99496.1 acla|EAW14356.1 afis|EAW18934.1 afla|EED50939.1 afum|EAL93667.2 agla|OJJ85263.1 akaw|GAA82184.1 aluc|OJZ91976.1 anid|CBF86802.1 anig|EHA22926.1 aory|EIT77060.1 asyd|OJJ64667.1 ater|EAU38113.1 atub|OJI86415.1 aver|OJI98769.1 awen|OJJ31528.1 azon|OJJ47243.1

Group4044: abra|OJJ76252.1 acar|OOF99497.1 acla|EAW14355.1 afis|EAW18935.1 afla|EED50940.1 afum|EAL93668.2 agla|OJJ85264.1 akaw|GAA82185.1 aluc|OJZ91975.1 anid|CBF86804.1 anig|EHA22925.1 aory|EIT76996.1 asyd|OJJ64666.1 ater|EAU38114.1 atub|OJI86414.1 aver|OJI98768.1 awen|OJJ31529.1 azon|OJJ47244.1

Group4045: abra|OJJ76253.1 acar|OOF99498.1 acla|EAW14354.1 afis|EAW18936.1 afla|EED50941.1 afum|EAL93669.2 agla|OJJ85265.1 akaw|GAA82186.1 aluc|OJZ91974.1 anid|CBF86805.1 anig|EHA22924.1 aory|EIT77063.1 asyd|OJJ64665.1 ater|EAU38115.1 atub|OJI86413.1 aver|OJI98767.1 awen|OJJ31530.1 azon|OJJ47245.1

Group4046: abra|OJJ76254.1 acar|OOF99499.1 acla|EAW14353.1 afis|EAW18937.1 afla|EED50942.1 afum|EAL93670.1 agla|OJJ85270.1 akaw|GAA82188.1 aluc|OJZ91972.1 anid|CBF86807.1 anig|EHA22918.1 aory|EIT77016.1 asyd|OJJ64664.1 ater|EAU38116.1 atub|OJI86411.1 aver|OJI98766.1 awen|OJJ31532.1 azon|OJJ47246.1

Group4047: abra|OJJ76256.1 acar|OOF99501.1 acla|EAW14350.1 afis|EAW18940.1 afla|EED50966.1 afum|EAL93673.1 agla|OJJ85271.1 akaw|GAA82190.1 aluc|OJZ91970.1 anid|CBF86811.1 anig|EHA22920.1 aory|EIT76988.1 asyd|OJJ64661.1 ater|EAU38119.1 atub|OJI86409.1 aver|OJI98763.1 awen|OJJ31534.1 azon|OJJ47250.1

Group4048: abra|OJJ76259.1 acar|OOF99504.1 acla|EAW14351.1 afis|EAW18939.1 afla|EED50969.1 afum|EAL93672.1 agla|OJJ85268.1 akaw|GAA82192.1 aluc|OJZ91964.1 anid|CBF86815.1 anig|EHA22923.1 aory|EIT77055.1 asyd|OJJ64658.1 ater|EAU38120.1 atub|OJI86407.1 aver|OJI98761.1 awen|OJJ31535.1 azon|OJJ47249.1

Group4049: abra|OJJ76262.1 acar|OOF99506.1 acla|EAW14346.1 afis|EAW18944.1 afla|EED50978.1 afum|EAL93677.1 agla|OJJ85278.1 akaw|GAA82194.1 aluc|OJZ91960.1 anid|CBF86822.1 anig|EHA22916.1 aory|EIT77009.1 asyd|OJJ64655.1 ater|EAU38124.1 atub|OJI86404.1 aver|OJI98757.1 awen|OJJ31540.1 azon|OJJ47257.1

Group4050: abra|OJJ76266.1 afla|EED50981.1 afum|EAL93681.2 anid|CBF86829.1 aory|EIT76942.1 asyd|OJJ64651.1 atub|OJI86400.1 aver|OJI98752.1 acar|OOF99509.1 acla|EAW14343.1 afis|EAW18947.1 agla|OJJ85308.1 akaw|GAA82198.1 aluc|OJZ91954.1 anig|EHA22913.1 ater|EAU38127.1 awen|OJJ31543.1 azon|OJJ47260.1

Group4051: abra|OJJ76267.1 acar|OOF99511.1 acla|EAW14341.1 afis|EAW18949.1 afla|EED50985.1 afum|EAL93683.1 agla|OJJ85320.1 akaw|GAA82200.1 aluc|OJZ91953.1 anid|CBF86833.1 anig|EHA22912.1 aory|EIT77049.1 asyd|OJJ64649.1 ater|EAU38135.1 atub|OJI86398.1 aver|OJI98749.1 awen|OJJ31547.1 azon|OJJ47263.1

Group4052: abra|OJJ76269.1 acar|OOF99517.1 acla|EAW12851.1 afis|EAW18014.1 afla|EED51880.1 afum|EAL91826.1 agla|OJJ85368.1 akaw|GAA82202.1 aluc|OJZ91951.1 anid|CBF80042.1 anig|EHA22910.1 aory|EIT81710.1 asyd|OJJ58276.1 ater|EAU31530.1 atub|OJI86396.1 aver|OJJ02148.1 awen|OJJ41526.1 azon|OJJ48247.1

Group4053: abra|OJJ76288.1 acar|OOF99529.1 acla|EAW14328.1 afis|EAW18960.1 afla|EED51006.1 afum|EAL93693.1 agla|OJJ85342.1 akaw|GAA82217.1 aluc|OJZ91934.1 anid|CBF69600.1 anig|EHA22894.1

aory|EIT77056.1 asyd|OJJ59135.1 ater|EAU38143.1 atub|OJI86376.1 aver|OJJ01724.1 awen|OJJ31559.1 azon|OJJ47276.1

Group4054: abra|OJJ76290.1 acar|OOF99535.1 acla|EAW14325.1 afis|EAW18963.1 afla|EED51010.1 afum|EAL93695.1 agla|OJJ85344.1 akaw|GAA82219.1 aluc|OJZ91932.1 anid|CBF69605.1 anig|EHA22893.1 aory|EIT76961.1 asyd|OJJ59132.1 ater|EAU38148.1 atub|OJI86374.1 aver|OJJ01721.1 awen|OJJ31562.1 azon|OJJ47283.1

Group4055: abra|OJJ76292.1 acar|OOF99537.1 acla|EAW14324.1 afis|EAW18964.1 afla|EED51011.1 afum|EAL93696.1 agla|OJJ85346.1 akaw|GAA82220.1 aluc|OJZ91930.1 anid|CBF69607.1 anig|EHA22892.1 aory|EIT77048.1 asyd|OJJ59130.1 atub|OJI86373.1 aver|OJJ01720.1 awen|OJJ31564.1 azon|OJJ47282.1 ater|EAU38149.1

Group4056: abra|OJJ76296.1 acar|OOF99542.1 acla|EAW14322.1 afis|EAW18966.1 afla|EED51032.1 afum|EAL93698.2 agla|OJJ85352.1 akaw|GAA82223.1 aluc|OJZ91926.1 anid|CBF69611.1 anig|EHA22889.1 aory|EIT76971.1 asyd|OJJ59128.1 ater|EAU38151.1 atub|OJI86370.1 aver|OJJ01716.1 awen|OJJ31566.1 azon|OJJ47284.1

Group4057: abra|OJJ76297.1 acar|OOF99545.1 acla|EAW14321.1 afis|EAW18967.1 afla|EED51033.1 afum|EAL93699.1 agla|OJJ85353.1 akaw|GAA82224.1 aluc|OJZ91925.1 anid|CBF69613.1 anig|EHA22888.1 aory|EIT76951.1 asyd|OJJ59127.1 ater|EAU38153.1 atub|OJI86369.1 aver|OJJ01715.1 awen|OJJ31567.1 azon|OJJ47285.1

Group4058: abra|OJJ76299.1 acar|OOF99546.1 acla|EAW14319.1 afis|EAW18969.1 afla|EED51035.1 afum|EAL93702.1 agla|OJJ85355.1 akaw|GAA82226.1 aluc|OJZ91923.1 anid|CBF69617.1 anig|EHA22887.1 aory|EIT77006.1 asyd|OJJ59124.1 ater|EAU38155.1 atub|OJI86367.1 aver|OJJ01713.1 awen|OJJ31569.1 azon|OJJ47287.1

Group4059: abra|OJJ76300.1 acar|OOF99544.1 acla|EAW14318.1 afis|EAW18970.1 afla|EED51036.1 afum|EAL93703.1 agla|OJJ85356.1 akaw|GAA82227.1 aluc|OJZ91922.1 anid|CBF69619.1 anig|EHA22886.1 aory|EIT77012.1 asyd|OJJ59123.1 ater|EAU38156.1 atub|OJI86366.1 aver|OJJ01712.1 awen|OJJ31570.1 azon|OJJ47288.1

Group4060: abra|OJJ76301.1 acar|OOF99547.1 acla|EAW14317.1 afis|EAW18971.1 afla|EED51037.1 afum|EAL93704.1 agla|OJJ85357.1 akaw|GAA82228.1 aluc|OJZ91921.1 anid|CBF69621.1 anig|EHA22885.1 aory|EIT77040.1 asyd|OJJ59122.1 ater|EAU38157.1 atub|OJI86365.1 aver|OJJ01711.1 awen|OJJ31571.1 azon|OJJ47289.1

Group4061: abra|OJJ76302.1 acar|OOF99548.1 acla|EAW14316.1 afis|EAW18972.1 afla|EED51038.1 afum|EAL93705.1 agla|OJJ85360.1 akaw|GAA82232.1 aluc|OJZ91916.1 anid|CBF69627.1 anig|EHA22884.1 aory|EIT77044.1 asyd|OJJ59119.1 ater|EAU38158.1 atub|OJI86364.1 aver|OJJ01708.1 awen|OJJ31572.1 azon|OJJ47291.1

Group4062: abra|OJJ76303.1 acar|OOF99549.1 acla|EAW14315.1 afis|EAW18973.1 afla|EED51039.1 afum|EAL93706.1 agla|OJJ85361.1 akaw|GAA82233.1 aluc|OJZ91914.1 anid|CBF69629.1 anig|EHA22883.1 aory|EIT77038.1 asyd|OJJ59117.1 ater|EAU38159.1 atub|OJI86363.1 aver|OJJ01707.1 awen|OJJ31573.1 azon|OJJ47290.1

Group4063: abra|OJJ76307.1 acar|OOF99552.1 acla|EAW14108.1 afis|EAW18810.1 afla|EED50762.1 afum|EAL93546.1 agla|OJJ80543.1 akaw|GAA82238.1 aluc|OJZ91908.1 anid|CBF69793.1 anig|EHA22882.1 aory|EIT78035.1 asyd|OJJ58963.1 ater|EAU37962.1 atub|OJI86358.1 aver|OJJ01557.1 awen|OJJ32385.1 azon|OJJ47146.1

Group4064: abra|OJJ76314.1 acar|OOF99566.1 acla|EAW14101.1 afis|EAW18802.1 afla|EED50774.1 afum|EAL93538.1 agla|OJJ80532.1 akaw|GAA82245.1 aluc|OJZ91900.1 anid|CBF69784.1 anig|EHA22879.1 aory|EIT77990.1 asyd|OJJ58960.1 ater|EAU37940.1 atub|OJI86353.1 aver|OJJ01554.1 awen|OJJ32376.1 azon|OJJ47139.1

Group4065: abra|OJJ76323.1 acar|OOF99575.1 acla|EAW14092.1 afis|EAW18798.1 afla|EED50791.1 afum|EAL93534.1 agla|OJJ80527.1 akaw|GAA82252.1 aluc|OJZ91892.1 anid|CBF69777.1 anig|EHA22871.1 aory|EIT78043.1 asyd|OJJ58956.1 ater|EAU37930.1 atub|OJI86344.1 aver|OJJ01550.1 awen|OJJ32372.1 azon|OJJ47135.1

Group4066: abra|OJJ76325.1 acar|OOF99577.1 acla|EAW14090.1 afis|EAW18796.1 afla|EED50793.1 afum|EAL93532.1 agla|OJJ80525.1 akaw|GAA82254.1 aluc|OJZ91890.1 anid|CBF69773.1 anig|EHA22870.1 aory|EIT78128.1 asyd|OJJ58954.1 ater|EAU37927.1 atub|OJI86342.1 aver|OJJ01548.1 awen|OJJ32370.1 azon|OJJ47133.1

Group4067: abra|OJJ76326.1 acar|OOF99578.1 afis|EAW18795.1 afla|EED50794.1 afum|EAL93531.1 agla|OJJ80524.1 akaw|GAA82255.1 aluc|OJZ91889.1 anid|CBF69771.1 anig|EHA22869.1 aory|EIT78000.1 asyd|OJJ58953.1 ater|EAU37926.1 atub|OJI86341.1 aver|OJJ01547.1 awen|OJJ32369.1 azon|OJJ47132.1 acla|EAW14089.1



Group4068: abra|OJJ76327.1 acar|OOF99580.1 acla|EAW14088.1 afis|EAW18794.1 afla|EED50795.1 afum|EAL93530.1 agla|OJJ80523.1 akaw|GAA82256.1 aluc|OJZ91888.1 anid|CBF69769.1 anig|EHA22868.1 aory|EIT78079.1 asyd|OJJ58952.1 ater|EAU37925.1 atub|OJI86340.1 aver|OJJ01546.1 awen|OJJ32367.1 azon|OJJ47131.1

Group4069: abra|OJJ76332.1 acar|OOF99584.1 acla|EAW14083.1 afis|EAW18790.1 afla|EED50748.1 afum|EAL93525.1 agla|OJJ80519.1 akaw|GAA82260.1 aluc|OJZ91881.1 anid|CBF69761.1 anig|EHA22859.1 aory|EIT78056.1 asyd|OJJ58947.1 ater|EAU37921.1 atub|OJI86332.1 aver|OJJ01542.1 awen|OJJ32363.1 azon|OJJ47126.1

Group4070: abra|OJJ76334.1 acar|OOF99587.1 acla|EAW14079.1 afis|EAW18786.1 afla|EED50745.1 afum|EAL93519.1 agla|OJJ80509.1 akaw|GAA82262.1 aluc|OJZ91878.1 anid|CBF69752.1 anig|EHA22856.1 aory|EIT78009.1 asyd|OJJ58941.1 ater|EAU37918.1 atub|OJI86329.1 aver|OJJ01537.1 awen|OJJ32360.1 azon|OJJ47123.1

Group4071: abra|OJJ76336.1 acar|OOF99588.1 acla|EAW14078.1 afis|EAW18785.1 afla|EED50744.1 afum|EAL93517.2 agla|OJJ80507.1 akaw|GAA82264.1 aluc|OJZ91876.1 anid|CBF69748.1 anig|EHA22855.1 aory|EIT78137.1 asyd|OJJ58938.1 ater|EAU37917.1 atub|OJI86327.1 aver|OJJ01534.1 awen|OJJ32358.1 azon|OJJ47121.1

Group4072: abra|OJJ76337.1 acar|OOF99589.1 acla|EAW14077.1 afis|EAW18784.1 afla|EED50743.1 afum|EAL93516.2 agla|OJJ80506.1 akaw|GAA82265.1 aluc|OJZ91875.1 anid|CBF69746.1 anig|EHA22854.1 aory|EIT78027.1 asyd|OJJ58937.1 ater|EAU37916.1 atub|OJI86326.1 aver|OJJ01533.1 awen|OJJ32357.1 azon|OJJ47120.1

Group4073: abra|OJJ76338.1 acar|OOF99590.1 acla|EAW14076.1 afis|EAW18783.1 afla|EED50742.1 afum|EAL93515.1 agla|OJJ80504.1 akaw|GAA82266.1 aluc|OJZ91874.1 anid|CBF69744.1 anig|EHA22853.1 aory|EIT78012.1 asyd|OJJ58936.1 ater|EAU37915.1 atub|OJI86325.1 aver|OJJ01532.1 awen|OJJ32356.1 azon|OJJ47119.1

Group4074: abra|OJJ76340.1 acar|OOF99591.1 acla|EAW14075.1 afis|EAW18782.1 afla|EED50741.1 afum|EAL93514.1 agla|OJJ80502.1 akaw|GAA82267.1 aluc|OJZ91873.1 anid|CBF69742.1 anig|EHA22852.1 aory|EIT78041.1 asyd|OJJ58935.1 ater|EAU37914.1 atub|OJI86324.1 aver|OJJ01531.1 awen|OJJ32354.1 azon|OJJ47118.1

Group4075: abra|OJJ76342.1 acar|OOF99593.1 acla|EAW14073.1 afis|EAW18780.1 afla|EED50739.1 afum|EAL93512.1 agla|OJJ80500.1 akaw|GAA82269.1 aluc|OJZ91871.1 anid|CBF69738.1 anig|EHA22850.1 aory|EIT77981.1 asyd|OJJ58933.1 ater|EAU37912.1 atub|OJI86322.1 aver|OJJ01529.1 awen|OJJ32352.1 azon|OJJ47116.1

Group4076: abra|OJJ76344.1 acar|OOF99595.1 acla|EAW14071.1 afis|EAW18778.1 afla|EED50737.1 afum|EAL93510.1 agla|OJJ80495.1 akaw|GAA82271.1 aluc|OJZ91869.1 anid|CBF69734.1 anig|EHA22849.1 aory|EIT78123.1 asyd|OJJ58931.1 ater|EAU37910.1 atub|OJI86320.1 aver|OJJ01527.1 awen|OJJ32349.1 azon|OJJ47114.1

Group4077: abra|OJJ76345.1 acar|OOF99596.1 acla|EAW14070.1 afis|EAW18777.1 afla|EED50736.1 afum|EAL93509.1 agla|OJJ80494.1 akaw|GAA82272.1 aluc|OJZ91868.1 anid|CBF69732.1 anig|EHA22848.1 aory|EIT78071.1 asyd|OJJ58930.1 ater|EAU37909.1 atub|OJI86319.1 aver|OJJ01526.1 awen|OJJ32348.1 azon|OJJ47113.1

Group4078: abra|OJJ76346.1 acar|OOF99597.1 acla|EAW14069.1 afis|EAW18776.1 afla|EED50735.1 afum|EAL93508.1 agla|OJJ80493.1 akaw|GAA82273.1 aluc|OJZ91867.1 anid|CBF69730.1 anig|EHA22847.1 aory|EIT78130.1 asyd|OJJ58929.1 ater|EAU37908.1 atub|OJI86318.1 aver|OJJ01525.1 awen|OJJ32347.1 azon|OJJ47112.1

Group4079: abra|OJJ76347.1 acar|OOF99598.1 acla|EAW14068.1 afis|EAW18775.1 afla|EED50734.1 afum|EAL93507.1 agla|OJJ80491.1 akaw|GAA82274.1 aluc|OJZ91866.1 anid|CBF69728.1 anig|EHA22846.1 aory|EIT78021.1 asyd|OJJ58928.1 ater|EAU37906.1 atub|OJI86317.1 aver|OJJ01524.1 awen|OJJ32346.1 azon|OJJ47111.1

Group4080: abra|OJJ76349.1 acar|OOF99600.1 acla|EAW14066.1 afis|EAW18773.1 afla|EED50732.1 afum|EAL93505.1 agla|OJJ80489.1 akaw|GAA82276.1 aluc|OJZ91864.1 anid|CBF69724.1 anig|EHA22844.1 aory|EIT78029.1 asyd|OJJ58927.1 ater|EAU37904.1 atub|OJI86315.1 aver|OJJ01523.1 awen|OJJ32344.1 azon|OJJ47110.1

Group4081: abra|OJJ76351.1 acar|OOF99603.1 acla|EAW14064.1 afis|EAW18771.1 afla|EED50730.1 afum|EAL93502.1 agla|OJJ80467.1 akaw|GAA82278.1 aluc|OJZ91862.1 anid|CBF69934.1 anig|EHA22842.1 aory|EIT78074.1 asyd|OJJ58922.1 ater|EAU37902.1 atub|OJI86314.1 aver|OJJ01519.1 awen|OJJ32340.1 azon|OJJ47106.1

Group4082: abra|OJJ76353.1 acar|OOF99604.1 acla|EAW14062.1 afis|EAW18769.1 afla|EED50728.1 afum|EAL93500.2 agla|OJJ82285.1 akaw|GAA82279.1 aluc|OJZ91860.1 anid|CBF69938.1 anig|EHA22840.1

aory|EIT78133.1 asyd|OJJ58920.1 ater|EAU37900.1 atub|OJI86311.1 aver|OJJ01517.1 awen|OJJ32338.1 azon|OJJ47103.1

Group4083: abra|OJJ76354.1 acar|OOF99605.1 acla|EAW14061.1 afis|EAW18768.1 afla|EED50727.1 afum|EAL93499.1 agla|OJJ82284.1 akaw|GAA82280.1 aluc|OJZ91859.1 anid|CBF69940.1 anig|EHA22839.1 aory|EIT78038.1 asyd|OJJ58919.1 ater|EAU37899.1 atub|OJI86310.1 aver|OJJ01516.1 awen|OJJ32337.1 azon|OJJ47102.1

Group4084: abra|OJJ76356.1 acar|OOF99607.1 acla|EAW14059.1 afis|EAW18765.1 afla|EED50725.1 afum|EAL93497.1 agla|OJJ80456.1 akaw|GAA82282.1 aluc|OJZ91857.1 anid|CBF69944.1 anig|EHA22837.1 aory|EIT78144.1 asyd|OJJ58917.1 ater|EAU37895.1 atub|OJI86308.1 aver|OJJ01514.1 awen|OJJ32335.1 azon|OJJ47101.1

Group4085: abra|OJJ76358.1 acar|OOF99609.1 acla|EAW14058.1 afis|EAW18764.1 afla|EED50724.1 afum|EAL93496.2 agla|OJJ80457.1 akaw|GAA82284.1 aluc|OJZ91855.1 anid|CBF69945.1 anig|EHA22836.1 aory|EIT78031.1 asyd|OJJ58915.1 ater|EAU37894.1 atub|OJI86306.1 aver|OJJ01512.1 awen|OJJ32333.1 azon|OJJ47099.1

Group4086: abra|OJJ76359.1 acar|OOF99610.1 acla|EAW14057.1 afis|EAW18763.1 afla|EED50723.1 afum|EAL93495.1 agla|OJJ80458.1 akaw|GAA82285.1 aluc|OJZ91854.1 anid|CBF69947.1 anig|EHA22835.1 aory|EIT78108.1 asyd|OJJ58914.1 ater|EAU37893.1 atub|OJI86305.1 aver|OJJ01511.1 awen|OJJ32332.1 azon|OJJ47098.1

Group4087: abra|OJJ76362.1 acar|OOF99613.1 acla|EAW14054.1 afis|EAW18760.1 afla|EED50720.1 afum|EAL93491.1 agla|OJJ82333.1 akaw|GAA82288.1 aluc|OJZ91850.1 anid|CBF69953.1 anig|EHA22832.1 aory|EIT78011.1 asyd|OJJ58911.1 ater|EAU37891.1 atub|OJI86302.1 aver|OJJ01508.1 awen|OJJ32330.1 azon|OJJ47095.1

Group4088: abra|OJJ76363.1 acar|OOF99614.1 acla|EAW14053.1 afis|EAW18759.1 afla|EED50719.1 afum|EAL93489.1 agla|OJJ82332.1 akaw|GAA82289.1 aluc|OJZ91849.1 anid|CBF69955.1 anig|EHA22831.1 aory|EIT78126.1 asyd|OJJ58910.1 ater|EAU37928.1 atub|OJI86301.1 aver|OJJ01507.1 awen|OJJ32329.1 azon|OJJ47094.1

Group4089: abra|OJJ76364.1 acar|OOF99615.1 acla|EAW14052.1 afis|EAW18758.1 afla|EED50718.1 afum|EAL93488.2 agla|OJJ82331.1 akaw|GAA82290.1 aluc|OJZ91848.1 anid|CBF69957.1 anig|EHA22830.1 aory|EIT78109.1 asyd|OJJ58909.1 ater|EAU37890.1 atub|OJI86300.1 aver|OJJ01506.1 awen|OJJ32328.1 azon|OJJ47093.1

Group4090: abra|OJJ76366.1 acar|OOF89987.1 acla|EAW14050.1 afis|EAW18756.1 afla|EED50716.1 afum|EAL93484.1 agla|OJJ82324.1 akaw|GAA82292.1 aluc|OJZ91846.1 anid|CBF69963.1 anig|EHA22828.1 aory|EIT78115.1 asyd|OJJ58907.1 ater|EAU37887.1 atub|OJI86298.1 aver|OJJ01504.1 awen|OJJ32325.1 azon|OJJ47092.1

Group4091: abra|OJJ76368.1 acar|OOF99617.1 acla|EAW14048.1 afis|EAW18754.1 afla|EED50714.1 afum|EAL93481.1 agla|OJJ82322.1 akaw|GAA82294.1 aluc|OJZ91844.1 anid|CBF69971.1 anig|EHA22827.1 aory|EIT77980.1 asyd|OJJ58901.1 ater|EAU37885.1 atub|OJI86296.1 aver|OJJ01501.1 awen|OJJ32323.1 azon|OJJ47090.1

Group4092: abra|OJJ76370.1 acar|OOF99619.1 acla|EAW14047.1 afis|EAW18753.1 afla|EED50712.1 afum|EAL93480.1 agla|OJJ82321.1 akaw|GAA82296.1 aluc|OJZ91842.1 anid|CBF69973.1 anig|EHA22825.1 aory|EIT78076.1 asyd|OJJ58900.1 ater|EAU37884.1 atub|OJI86294.1 aver|OJJ01500.1 awen|OJJ32322.1 azon|OJJ47089.1

Group4093: abra|OJJ76378.1 acar|OOF99623.1 acla|EAW14044.1 afis|EAW18750.1 afla|EED50709.1 afum|EAL93477.1 agla|OJJ82317.1 akaw|GAA82299.1 aluc|OJZ91836.1 anid|CBF69979.1 anig|EHA22823.1 aory|EIT78032.1 asyd|OJJ58896.1 ater|EAU37879.1 atub|OJI86290.1 aver|OJJ01497.1 awen|OJJ32317.1 azon|OJJ47085.1

Group4094: abra|OJJ76379.1 acar|OOF99624.1 acla|EAW14043.1 afis|EAW18749.1 afla|EED50708.1 afum|EAL93475.1 agla|OJJ82316.1 akaw|GAA82300.1 aluc|OJZ91835.1 anid|CBF69983.1 anig|EHA22822.1 aory|EIT77996.1 asyd|OJJ58895.1 ater|EAU37878.1 atub|OJI86289.1 aver|OJJ01496.1 awen|OJJ32316.1 azon|OJJ47084.1

Group4095: abra|OJJ76381.1 acar|OOF89925.1 acla|EAW14041.1 afis|EAW18747.1 afla|EED50706.1 afum|EAL93473.1 agla|OJJ82314.1 akaw|GAA82302.1 aluc|OJZ91833.1 anid|CBF69987.1 anig|EHA22820.1 aory|EIT78116.1 asyd|OJJ58893.1 ater|EAU37876.1 atub|OJI86287.1 aver|OJJ01494.1 awen|OJJ32313.1 azon|OJJ47082.1

Group4096: abra|OJJ76382.1 acar|OOF89924.1 acla|EAW14040.1 afis|EAW18746.1 afla|EED50705.1 afum|EAL93472.1 agla|OJJ82313.1 akaw|GAA82303.1 aluc|OJZ91832.1 anid|CBF69992.1 anig|EHA22819.1 aory|EIT78094.1 asyd|OJJ58891.1 ater|EAU37875.1 atub|OJI86286.1 aver|OJJ01492.1 awen|OJJ32312.1 azon|OJJ42712.1

Group4097: abra|OJJ76387.1 acar|OOF99628.1 acla|EAW14036.1 afis|EAW18742.1 afla|EED50698.1 afum|EAL93468.1 agla|OJJ82308.1 akaw|GAA82307.1 aluc|OJZ91826.1 anid|CBF69998.1 anig|EHA22815.1 aory|EIT78061.1 asyd|OJJ58887.1 ater|EAU37869.1 atub|OJI86281.1 aver|OJJ01488.1 awen|OJJ32307.1 azon|OJJ42719.1

Group4098: abra|OJJ76389.1 acar|OOF99630.1 acla|EAW14035.1 afis|EAW18741.1 afla|EED50696.1 afum|EAL93467.1 agla|OJJ82307.1 akaw|GAA82308.1 aluc|OJZ91824.1 anid|CBF70000.1 anig|EHA22814.1 aory|EIT78051.1 asyd|OJJ58886.1 ater|EAU37864.1 atub|OJI86279.1 aver|OJJ01487.1 awen|OJJ32306.1 azon|OJJ42720.1

Group4099: abra|OJJ76390.1 acar|OOF99631.1 acla|EAW14034.1 afis|EAW18740.1 afla|EED50695.1 afum|EAL93466.1 agla|OJJ82306.1 akaw|GAA82309.1 aluc|OJZ91823.1 anid|CBF70002.1 anig|EHA22813.1 aory|EIT78073.1 asyd|OJJ58884.1 ater|EAU37863.1 atub|OJI86278.1 aver|OJJ01486.1 awen|OJJ32305.1 azon|OJJ42721.1

Group4100: abra|OJJ76392.1 acar|OOF99632.1 acla|EAW14032.1 afis|EAW18738.1 afla|EED50693.1 afum|EAL93464.1 agla|OJJ82304.1 akaw|GAA82311.1 aluc|OJZ91821.1 anid|CBF70006.1 anig|EHA22811.1 aory|EIT78112.1 asyd|OJJ58882.1 ater|EAU37861.1 atub|OJI86276.1 aver|OJJ01484.1 awen|OJJ32302.1 azon|OJJ42723.1

Group4101: abra|OJJ76393.1 acar|OOF99633.1 acla|EAW14031.1 afis|EAW18737.1 afla|EED50692.1 afum|EAL93462.1 agla|OJJ82303.1 akaw|GAA82312.1 aluc|OJZ91820.1 anid|CBF70008.1 anig|EHA22810.1 aory|EIT78068.1 asyd|OJJ58881.1 ater|EAU37860.1 atub|OJI86275.1 aver|OJJ01483.1 awen|OJJ32301.1 azon|OJJ42724.1

Group4102: abra|OJJ76395.1 acar|OOF99635.1 acla|EAW14029.1 afis|EAW18735.1 afla|EED50690.1 afum|EAL93460.1 agla|OJJ82301.1 akaw|GAA82314.1 aluc|OJZ91818.1 anid|CBF70012.1 anig|EHA22808.1 aory|EIT78132.1 asyd|OJJ58879.1 ater|EAU37858.1 atub|OJI86273.1 aver|OJJ01481.1 awen|OJJ32298.1 azon|OJJ42734.1

Group4103: abra|OJJ76396.1 acar|OOF99637.1 acla|EAW14027.1 afis|EAW18733.1 afla|EED50688.1 afum|EAL93458.1 agla|OJJ82299.1 akaw|GAA82316.1 aluc|OJZ91816.1 anid|CBF70014.1 anig|EHA22807.1 aory|EIT78099.1 asyd|OJJ58878.1 ater|EAU37848.1 atub|OJI86272.1 aver|OJJ01480.1 awen|OJJ32296.1 azon|OJJ42736.1

Group4104: abra|OJJ76404.1 acar|OOF99647.1 acla|EAW14017.1 afis|EAW18725.1 afla|EED50682.1 afum|EAL93450.1 agla|OJJ80475.1 akaw|GAA82324.1 aluc|OJZ91808.1 anid|CBF70021.1 anig|EHA22801.1 aory|EIT77978.1 asyd|OJJ58874.1 ater|EAU38179.1 atub|OJI86263.1 aver|OJJ01477.1 awen|OJJ32229.1 azon|OJJ46783.1

Group4105: abra|OJJ76406.1 acar|OOF99649.1 acla|EAW14019.1 afis|EAW18723.1 afla|EED50680.1 afum|EAL93448.1 agla|OJJ80477.1 akaw|GAA82326.1 aluc|OJZ91806.1 anid|CBF70688.1 anig|EHA22799.1 aory|EIT78149.1 asyd|OJJ58468.1 ater|EAU38180.1 atub|OJI86261.1 aver|OJJ01067.1 awen|OJJ32231.1 azon|OJJ46781.1

Group4106: abra|OJJ76409.1 acar|OOF99651.1 acla|EAW14015.1 afis|EAW18721.1 afla|EED50678.1 afum|EAL93445.1 agla|OJJ82334.1 akaw|GAA82328.1 aluc|OJZ91802.1 anid|CBF70681.1 anig|EHA22797.1 aory|EIT78078.1 asyd|OJJ58470.1 ater|EAU38183.1 atub|OJI86257.1 aver|OJJ01071.1 awen|OJJ32227.1 azon|OJJ46778.1

Group4107: abra|OJJ76411.1 acar|OOF99652.1 acla|EAW14014.1 afis|EAW18720.1 afla|EED50677.1 afum|EAL93444.1 agla|OJJ82335.1 akaw|GAA82329.1 aluc|OJZ91801.1 anid|CBF70679.1 anig|EHA22796.1 aory|EIT78134.1 asyd|OJJ58471.1 ater|EAU38184.1 atub|OJI86256.1 aver|OJJ01072.1 awen|OJJ32226.1 azon|OJJ46777.1

Group4108: abra|OJJ76417.1 acar|OOF99659.1 acla|EAW14009.1 afis|EAW18715.1 afla|EED50669.1 afum|EAL93440.1 agla|OJJ82344.1 akaw|GAA82332.1 aluc|OJZ91795.1 anid|CBF70670.1 anig|EHA22792.1 aory|EIT78070.1 asyd|OJJ58476.1 ater|EAU38192.1 atub|OJI86251.1 aver|OJJ01079.1 awen|OJJ32202.1 azon|OJJ46771.1

Group4109: abra|OJJ76418.1 acar|OOF99660.1 acla|EAW14008.1 afis|EAW18714.1 afla|EED50667.1 afum|EAL93439.1 agla|OJJ82345.1 akaw|GAA82333.1 aluc|OJZ91794.1 anid|CBF70668.1 anig|EHA22791.1 aory|EIT78037.1 asyd|OJJ58477.1 ater|EAU38193.1 atub|OJI86250.1 aver|OJJ01080.1 awen|OJJ32201.1 azon|OJJ46770.1

Group4110: abra|OJJ76419.1 acar|OOF99661.1 acla|EAW14007.1 afis|EAW18713.1 afla|EED50666.1 afum|EAL93438.1 agla|OJJ82346.1 akaw|GAA82334.1 aluc|OJZ91793.1 anid|CBF70666.1 anig|EHA22790.1 aory|EIT78088.1 asyd|OJJ58478.1 ater|EAU38194.1 atub|OJI86249.1 aver|OJJ01081.1 awen|OJJ32200.1 azon|OJJ46769.1

Group4111: abra|OJJ76420.1 acar|OOF99662.1 acla|EAW14006.1 afis|EAW18712.1 afla|EED50665.1 afum|EAL93437.1 agla|OJJ82347.1 akaw|GAA82335.1 aluc|OJZ91792.1 anid|CBF70665.1 anig|EHA22789.1

aory|EIT77998.1 asyd|OJJ58480.1 ater|EAU38195.1 atub|OJI86248.1 aver|OJJ01082.1 awen|OJJ32199.1 azon|OJJ46768.1

Group4112: abra|OJJ76422.1 acar|OOF99665.1 acla|EAW14003.1 afis|EAW18711.1 afla|EED50662.1 afum|EAL93434.1 agla|OJJ82348.1 akaw|GAA82337.1 aluc|OJZ91790.1 anid|CBF70661.1 anig|EHA22787.1 asyd|OJJ58481.1 ater|EAU38197.1 atub|OJI86246.1 aver|OJJ01083.1 awen|OJJ32197.1 azon|OJJ46766.1 aory|EIT77986.1

Group4113: abra|OJJ76423.1 acar|OOF99667.1 acla|EAW14002.1 afis|EAW18710.1 afla|EED50660.1 afum|EAL93433.1 agla|OJJ82349.1 akaw|GAA82338.1 aluc|OJZ91789.1 anid|CBF70657.1 anig|EHA22786.1 aory|EIT78084.1 asyd|OJJ58482.1 ater|EAU38198.1 atub|OJI86245.1 aver|OJJ01085.1 awen|OJJ32196.1 azon|OJJ46765.1

Group4114: abra|OJJ76429.1 acar|OOF99673.1 acla|EAW13996.1 afis|EAW18704.1 afla|EED50653.1 afum|EAL93427.2 agla|OJJ82354.1 akaw|GAA82344.1 aluc|OJZ91783.1 anid|CBF70646.1 anig|EHA22780.1 aory|EIT78100.1 asyd|OJJ58488.1 ater|EAU38202.1 atub|OJI86239.1 aver|OJJ01091.1 awen|OJJ32187.1 azon|OJJ46760.1

Group4115: abra|OJJ76430.1 acar|OOF99674.1 acla|EAW13995.1 afis|EAW18703.1 afla|EED50652.1 afum|EAL93426.1 agla|OJJ82355.1 akaw|GAA82345.1 aluc|OJZ91782.1 anid|CBF70644.1 anig|EHA22779.1 aory|EIT78020.1 asyd|OJJ58489.1 ater|EAU38203.1 atub|OJI86238.1 aver|OJJ01092.1 awen|OJJ32186.1 azon|OJJ46761.1

Group4116: abra|OJJ76431.1 acar|OOF99675.1 acla|EAW13994.1 afis|EAW18702.1 afla|EED50651.1 afum|EAL93425.1 agla|OJJ82359.1 akaw|GAA82346.1 aluc|OJZ91781.1 anid|CBF70642.1 anig|EHA22778.1 aory|EIT78030.1 asyd|OJJ58490.1 ater|EAU38204.1 atub|OJI86237.1 aver|OJJ01093.1 awen|OJJ32185.1 azon|OJJ46762.1

Group4117: abra|OJJ76433.1 acar|OOF99677.1 acla|EAW13991.1 afis|EAW18699.1 afla|EED50647.1 afum|EAL93421.1 agla|OJJ82362.1 akaw|GAA82348.1 aluc|OJZ91779.1 anid|CBF70635.1 anig|EHA22776.1 aory|EIT78093.1 asyd|OJJ58494.1 ater|EAU38207.1 atub|OJI86235.1 aver|OJJ01097.1 awen|OJJ32181.1 azon|OJJ46756.1

Group4118: abra|OJJ76434.1 acar|OOF99679.1 acla|EAW13989.1 afis|EAW18697.1 afla|EED50645.1 afum|EAL93419.1 agla|OJJ82371.1 akaw|GAA82349.1 aluc|OJZ91778.1 anid|CBF70631.1 anig|EHA22775.1 aory|EIT78142.1 asyd|OJJ58496.1 ater|EAU38209.1 atub|OJI86234.1 aver|OJJ01099.1 awen|OJJ32168.1 azon|OJJ46752.1

Group4119: abra|OJJ76440.1 acar|OOF99685.1 acla|EAW13984.1 afis|EAW18693.1 afla|EED50642.1 afum|EAL93414.1 agla|OJJ82368.1 akaw|GAA82354.1 aluc|OJZ91769.1 anid|CBF70618.1 anig|EHA22769.1 aory|EIT78025.1 asyd|OJJ58503.1 ater|EAU38215.1 atub|OJI86227.1 aver|OJJ01104.1 awen|OJJ32164.1 azon|OJJ46745.1

Group4120: abra|OJJ76441.1 acar|OOF99686.1 acla|EAW13983.1 afis|EAW18692.1 afla|EED50641.1 afum|EAL93413.2 agla|OJJ82366.1 akaw|GAA82355.1 aluc|OJZ91768.1 anid|CBF70620.1 anig|EHA22768.1 aory|EIT78095.1 asyd|OJJ58502.1 ater|EAU38216.1 atub|OJI86226.1 aver|OJJ01103.1 awen|OJJ32163.1 azon|OJJ46746.1

Group4121: abra|OJJ76446.1 acar|OOF99689.1 acla|EAW13982.1 afis|EAW18691.1 afla|EED50638.1 afum|EAL93412.1 agla|OJJ82381.1 akaw|GAA82358.1 aluc|OJZ91764.1 anid|CBF70624.1 anig|EHA22765.1 aory|EIT78085.1 asyd|OJJ58499.1 ater|EAU38217.1 atub|OJI86222.1 aver|OJJ01102.1 awen|OJJ32162.1 azon|OJJ46748.1

Group4122: abra|OJJ76448.1 acar|OOF99690.1 acla|EAW13980.1 afis|EAW18689.1 afla|EED50637.1 afum|EAL93410.1 agla|OJJ82383.1 akaw|GAA82360.1 aluc|OJZ91762.1 anid|CBF70616.1 anig|EHA22763.1 aory|EIT78124.1 asyd|OJJ58506.1 ater|EAU38219.1 atub|OJI86220.1 aver|OJJ01107.1 awen|OJJ32160.1 azon|OJJ46744.1

Group4123: abra|OJJ76449.1 acar|OOF99692.1 acla|EAW13979.1 afis|EAW18688.1 afla|EED50636.1 afum|EAL93409.1 agla|OJJ82384.1 akaw|GAA82361.1 aluc|OJZ91761.1 anid|CBF70612.1 anig|EHA22762.1 aory|EIT78146.1 asyd|OJJ58510.1 ater|EAU38220.1 atub|OJI86219.1 aver|OJJ01111.1 awen|OJJ32159.1 azon|OJJ46743.1

Group4124: abra|OJJ76455.1 acar|OOF99696.1 acla|EAW13975.1 afis|EAW18684.1 afla|EED50622.1 afum|EAL93405.1 agla|OJJ82387.1 akaw|GAA82367.1 aluc|OJZ91755.1 anid|CBF70607.1 anig|EHA22758.1 aory|EIT78141.1 asyd|OJJ58514.1 ater|EAU38226.1 atub|OJI86213.1 aver|OJJ01115.1 awen|OJJ32155.1 azon|OJJ46739.1

Group4125: abra|OJJ76456.1 acar|OOF99695.1 acla|EAW13974.1 afis|EAW18683.1 afla|EED50627.1 afum|EAL93404.1 agla|OJJ82392.1 akaw|GAA82368.1 aluc|OJZ91754.1 anid|CBF70605.1 anig|EHA22757.1 aory|EIT77985.1 asyd|OJJ58515.1 ater|EAU38227.1 atub|OJI86212.1 aver|OJJ01116.1 awen|OJJ32154.1 azon|OJJ46738.1

Group4126: abra|OJJ76460.1 acar|OOF99699.1 acla|EAW13970.1 afis|EAW18679.1 afla|EED50631.1  
afum|EAL93399.1 agla|OJJ82396.1 akaw|GAA82373.1 aluc|OJZ91749.1 anid|CBF70596.1 anig|EHA22752.1  
aory|EIT78016.1 asyd|OJJ58519.1 ater|EAU38232.1 atub|OJI86207.1 aver|OJJ01120.1 awen|OJJ32151.1  
azon|OJJ46735.1

Group4127: abra|OJJ76464.1 acar|OOF99702.1 acla|EAW13967.1 afis|EAW18676.1 afla|EED50634.1  
afum|EAL93396.1 agla|OJJ82400.1 akaw|GAA82376.1 aluc|OJZ91746.1 anid|CBF70590.1 anig|EHA22749.1  
aory|EIT78033.1 asyd|OJJ58522.1 ater|EAU38234.1 atub|OJI86204.1 aver|OJJ01123.1 awen|OJJ32148.1  
azon|OJJ46732.1

Group4128: abra|OJJ76467.1 acar|OOF99705.1 acla|EAW13964.1 afis|EAW18673.1 afla|EED50626.1  
afum|EAL93393.2 agla|OJJ82402.1 akaw|GAA82378.1 aluc|OJZ91743.1 anid|CBF70584.1 anig|EHA22746.1  
aory|EIT78060.1 asyd|OJJ58525.1 ater|EAU38237.1 atub|OJI86201.1 aver|OJJ01126.1 awen|OJJ32145.1  
azon|OJJ46729.1

Group4129: abra|OJJ76468.1 acar|OOF99706.1 acla|EAW13963.1 afis|EAW18672.1 afla|EED50621.1  
afum|EAL93391.1 agla|OJJ82403.1 akaw|GAA82379.1 aluc|OJZ91742.1 anid|CBF70583.1 anig|EHA22745.1  
aory|EIT78045.1 asyd|OJJ58526.1 ater|EAU38238.1 atub|OJI86200.1 aver|OJJ01127.1 awen|OJJ32144.1  
azon|OJJ46728.1

Group4130: abra|OJJ76472.1 acar|OOF99709.1 acla|EAW13961.1 afis|EAW18670.1 afla|EED52658.1  
afum|EAL93388.1 agla|OJJ82405.1 akaw|GAA82384.1 aluc|OJZ91737.1 anid|CBF70579.1 anig|EHA22743.1  
aory|EIT74274.1 asyd|OJJ58528.1 ater|EAU38241.1 atub|OJI86195.1 aver|OJJ01130.1 awen|OJJ32142.1  
azon|OJJ46723.1

Group4131: abra|OJJ76479.1 acar|OOF90192.1 acla|EAW13956.1 afis|EAW18666.1 afla|EED52663.1  
afum|EAL93384.1 agla|OJJ82411.1 akaw|GAA82392.1 aluc|OJZ91728.1 anid|CBF70569.1 anig|EHA22735.1  
aory|EIT74303.1 asyd|OJJ58533.1 ater|EAU38246.1 atub|OJI86186.1 aver|OJJ01135.1 awen|OJJ32134.1  
azon|OJJ46717.1

Group4132: acar|OOF90191.1 aluc|OJZ91727.1 anig|EHA22734.1 atub|OJI86185.1 abra|OJJ76481.1  
acla|EAW13954.1 afis|EAW18664.1 afla|EED52665.1 afum|EAL93382.1 agla|OJJ82412.1 akaw|GAA82394.1  
anid|CBF70567.1 aory|EIT74310.1 asyd|OJJ58535.1 ater|EAU38248.1 aver|OJJ01136.1 awen|OJJ32132.1  
azon|OJJ46715.1

Group4133: abra|OJJ76482.1 acar|OOF90190.1 acla|EAW13953.1 afis|EAW18663.1 afla|EED52666.1  
afum|EBA27491.1 agla|OJJ82413.1 akaw|GAA82395.1 aluc|OJZ91726.1 anid|CBF70565.1 anig|EHA22733.1  
aory|EIT74219.1 asyd|OJJ58536.1 ater|EAU38249.1 atub|OJI86184.1 aver|OJJ01137.1 awen|OJJ32131.1  
azon|OJJ46714.1

Group4134: abra|OJJ76483.1 acar|OOF99714.1 acla|EAW13951.1 afis|EAW18661.1 afla|EED52669.1  
afum|EAL93380.1 agla|OJJ82416.1 akaw|GAA82397.1 aluc|OJZ91725.1 anid|CBF70557.1 anig|EHA22732.1  
aory|EIT74184.1 asyd|OJJ58538.1 ater|EAU38251.1 atub|OJI86182.1 aver|OJJ01138.1 awen|OJJ32128.1  
azon|OJJ46711.1

Group4135: abra|OJJ76484.1 acar|OOF99715.1 acla|EAW13950.1 afis|EAW18659.1 afla|EED52670.1  
afum|EAL93377.1 agla|OJJ82417.1 akaw|GAA82398.1 aluc|OJZ91724.1 anid|CBF70556.1 anig|EHA22731.1  
aory|EIT74290.1 asyd|OJJ58539.1 ater|EAU38252.1 atub|OJI86181.1 aver|OJJ01139.1 awen|OJJ32127.1  
azon|OJJ46710.1

Group4136: abra|OJJ76485.1 acar|OOF99718.1 acla|EAW13948.1 afis|EAW18658.1 afla|EED52672.1  
afum|EAL93375.1 agla|OJJ82418.1 akaw|GAA82401.1 aluc|OJZ91721.1 anid|CBF70552.1 anig|EHA22728.1  
aory|EIT74194.1 asyd|OJJ58540.1 ater|EAU38254.1 atub|OJI86178.1 aver|OJJ01141.1 awen|OJJ32125.1  
azon|OJJ46709.1

Group4137: abra|OJJ76487.1 acar|OOF99720.1 acla|EAW13946.1 afis|EAW18656.1 afla|EED52674.1  
afum|EAL93372.1 agla|OJJ82419.1 akaw|GAA82403.1 aluc|OJZ91718.1 anid|CBF70546.1 anig|EHA22726.1  
aory|EIT74203.1 asyd|OJJ58543.1 ater|EAU38256.1 atub|OJI86175.1 aver|OJJ01143.1 awen|OJJ32123.1  
azon|OJJ46708.1

Group4138: abra|OJJ76501.1 acar|OOF99466.1 acla|EAW14195.1 afis|EAW18911.1 afla|EED50838.1  
afum|EAL93642.1 agla|OJJ81515.1 akaw|GAA82417.1 aluc|OJZ91701.1 anid|CBF69699.1 anig|EHA22715.1  
aory|EIT79018.1 asyd|OJJ59050.1 ater|EAU38078.1 atub|OJI86160.1 aver|OJJ01646.1 awen|OJJ31504.1  
azon|OJJ47224.1

Group4139: abra|OJJ76513.1 acar|OOF99459.1 acla|EAW14187.1 afis|EAW18902.1 afla|EED50846.1  
afum|EAL93634.1 agla|OJJ81507.1 akaw|GAA82426.1 aluc|OJZ91692.1 anid|CBF69923.1 anig|EHA22705.1  
aory|EIT79043.1 asyd|OJJ59039.1 ater|EAU38072.1 atub|OJI86145.1 aver|OJJ01634.1 awen|OJJ32459.1  
azon|OJJ47217.1

Group4140: abra|OJJ76516.1 acar|OOF99457.1 acla|EAW14186.1 afis|EAW18901.1 afla|EED50847.1  
afum|EAL93633.1 agla|OJJ81506.1 akaw|GAA82428.1 aluc|OJZ91690.1 anid|CBF69921.1 anig|EHA22703.1

aory|EIT79032.1 asyd|OJJ58987.1 ater|EAU38069.1 atub|OJI86143.1 aver|OJJ01629.1 awen|OJJ32458.1 azon|OJJ47216.1

Group4141: abra|OJJ76520.1 acar|OOF99453.1 acla|EAW14181.1 afis|EAW18896.1 afla|EED50867.1 afum|EAL93628.1 agla|OJJ81502.1 akaw|GAA82433.1 aluc|OJZ91688.1 anid|CBF69913.1 anig|EHA22700.1 aory|EIT79004.1 asyd|OJJ58992.1 ater|EAU38066.1 atub|OJI86139.1 aver|OJJ01623.1 awen|OJJ32454.1 azon|OJJ47211.1

Group4142: abra|OJJ76524.1 acar|OOF99445.1 acla|EAW14173.1 afis|EAW18887.1 afla|EED50878.1 afum|EAL93620.1 agla|OJJ81493.1 akaw|GAA82437.1 aluc|OJZ91684.1 anid|CBF69898.1 anig|EHA22696.1 aory|EIT79044.1 asyd|OJJ59000.1 ater|EAU38059.1 atub|OJI86136.1 aver|OJJ01615.1 awen|OJJ32445.1 azon|OJJ47203.1

Group4143: abra|OJJ76528.1 acar|OOF99447.1 acla|EAW14175.1 afis|EAW18889.1 afla|EED50874.1 afum|EAL93622.1 agla|OJJ81495.1 akaw|GAA82439.1 aluc|OJZ91677.1 anid|CBF69902.1 anig|EHA22694.1 aory|EIT78988.1 asyd|OJJ58998.1 ater|EAU38061.1 atub|OJI86132.1 aver|OJJ01617.1 awen|OJJ32448.1 azon|OJJ47206.1

Group4144: abra|OJJ76530.1 acar|OOF99443.1 acla|EAW14171.1 afis|EAW18885.1 afla|EED50880.1 afum|EAL93618.1 agla|OJJ80620.1 akaw|GAA82442.1 aluc|OJZ91674.1 anid|CBF69894.1 anig|EHA22692.1 aory|EIT78957.1 asyd|OJJ59002.1 ater|EAU38057.1 atub|OJI86129.1 aver|OJJ01613.1 awen|OJJ32443.1 azon|OJJ47201.1

Group4145: abra|OJJ76534.1 acar|OOF99440.1 acla|EAW14169.1 afis|EAW18883.1 afla|EED50882.1 afum|EAL93616.1 agla|OJJ80618.1 akaw|GAA82445.1 aluc|OJZ91671.1 anid|CBF69892.1 anig|EHA22689.1 aory|EIT79022.1 asyd|OJJ59005.1 ater|EAU38055.1 atub|OJI86126.1 aver|OJJ01611.1 awen|OJJ32440.1 azon|OJJ47199.1

Group4146: abra|OJJ76535.1 acar|OOF99439.1 acla|EAW14168.1 afis|EAW18882.1 afla|EED50883.1 afum|EAL93614.1 agla|OJJ80617.1 akaw|GAA82446.1 aluc|OJZ91670.1 anid|CBF70466.1 anig|EHA22688.1 aory|EIT78979.1 asyd|OJJ58598.1 ater|EAU38054.1 atub|OJI86125.1 aver|OJJ01200.1 awen|OJJ32441.1 azon|OJJ47198.1

Group4147: abra|OJJ76536.1 acar|OOF99432.1 acla|EAW14162.1 afis|EAW18875.1 afla|EED50892.1 afum|EAL93607.1 agla|OJJ80612.1 akaw|GAA82447.1 aluc|OJZ91669.1 anid|CBF69869.1 anig|EHA22687.1 aory|EIT79035.1 asyd|OJJ59019.1 ater|EAU38040.1 atub|OJI86124.1 aver|OJJ01597.1 awen|OJJ32434.1 azon|OJJ47192.1

Group4148: abra|OJJ76537.1 acar|OOF99433.1 acla|EAW14163.1 afis|EAW18876.1 afla|EED50891.1 afum|EAL93608.1 agla|OJJ80613.1 akaw|GAA82448.1 aluc|OJZ91667.1 anid|CBF69873.1 anig|EHA22686.1 aory|EIT79049.1 asyd|OJJ59018.1 ater|EAU38041.1 atub|OJI86122.1 aver|OJJ01598.1 awen|OJJ32435.1 azon|OJJ47191.1

Group4149: abra|OJJ76540.1 acar|OOF99435.1 acla|EAW14165.1 afis|EAW18878.1 afla|EED50888.1 afum|EAL93610.1 agla|OJJ80615.1 akaw|GAA82450.1 aluc|OJZ91663.1 anid|CBF69877.1 anig|EHA22683.1 aory|EIT79008.1 asyd|OJJ59015.1 ater|EAU38043.1 atub|OJI86120.1 aver|OJJ01600.1 awen|OJJ32437.1 azon|OJJ47196.1

Group4150: abra|OJJ76542.1 acar|OOF99437.1 acla|EAW12334.1 afis|EAW16888.1 afla|EED49676.1 afum|EAL86426.1 agla|OJJ79936.1 akaw|GAA82451.1 aluc|OJZ91661.1 anid|CBF84569.1 anig|EHA22681.1 aory|EIT80968.1 asyd|OJJ53441.1 ater|EAU39143.1 atub|OJI86117.1 aver|OJJ08310.1 awen|OJJ29756.1 azon|OJJ43187.1

Group4151: abra|OJJ76543.1 acar|OOF99431.1 acla|EAW14161.1 afis|EAW18874.1 afla|EED50893.1 afum|EAL93606.1 agla|OJJ80611.1 akaw|GAA82452.1 aluc|OJZ91660.1 anid|CBF69867.1 anig|EHA22680.1 aory|EIT79007.1 asyd|OJJ59020.1 ater|EAU38039.1 atub|OJI86116.1 aver|OJJ01596.1 awen|OJJ32433.1 azon|OJJ47193.1

Group4152: abra|OJJ76545.1 acar|OOF99429.1 acla|EAW14159.1 afis|EAW18872.1 afla|EED50895.1 afum|EAL93604.1 agla|OJJ80609.1 akaw|GAA82454.1 aluc|OJZ91658.1 anid|CBF69863.1 anig|EHA22678.1 aory|EIT79057.1 asyd|OJJ59023.1 ater|EAU38036.1 atub|OJI86114.1 aver|OJJ01594.1 awen|OJJ32431.1 azon|OJJ47188.1

Group4153: abra|OJJ76546.1 acar|OOF99428.1 acla|EAW14158.1 afis|EAW18871.1 afla|EED50831.1 afum|EAL93603.1 agla|OJJ80595.1 akaw|GAA82455.1 aluc|OJZ91657.1 anid|CBF69852.1 anig|EHA22677.1 aory|EIT79042.1 asyd|OJJ59028.1 ater|EAU38035.1 atub|OJI86112.1 aver|OJJ01588.1 awen|OJJ32430.1 azon|OJJ47185.1

Group4154: abra|OJJ76547.1 acar|OOF99427.1 acla|EAW14157.1 afis|EAW18870.1 afla|EED50832.1 afum|EAL93602.1 agla|OJJ80596.1 akaw|GAA82456.1 aluc|OJZ91656.1 anid|CBF69854.1 anig|EHA22676.1 aory|EIT79054.1 asyd|OJJ59027.1 ater|EAU38034.1 atub|OJI86111.1 aver|OJJ01589.1 awen|OJJ32429.1 azon|OJJ47184.1

Group4155: abra|OJJ76549.1 acar|OOF99426.1 acla|EAW14156.1 afis|EAW18869.1 afla|EED50833.1  
afum|EAL93601.1 agla|OJJ80600.1 akaw|GAA82457.1 aluc|OJZ91654.1 anid|CBF69856.1 anig|EHA22675.1  
aory|EIT78961.1 asyd|OJJ59026.1 ater|EAU38033.1 atub|OJI86108.1 aver|OJJ01591.1 awen|OJJ32428.1  
azon|OJJ47183.1

Group4156: abra|OJJ76550.1 acar|OOF89946.1 acla|EAW14155.1 afis|EAW18868.1 afla|EED50834.1  
afum|EAL93600.1 agla|OJJ80601.1 akaw|GAA82458.1 aluc|OJZ91653.1 anid|CBF69857.1 anig|EHA22674.1  
aory|EIT78982.1 asyd|OJJ59025.1 ater|EAU38032.1 atub|OJI86107.1 aver|OJJ01592.1 awen|OJJ32427.1  
azon|OJJ47182.1

Group4157: abra|OJJ76551.1 acar|OOF89945.1 acla|EAW14153.1 afis|EAW18866.1 afla|EED50897.1  
afum|EAL93598.1 agla|OJJ80603.1 akaw|GAA82459.1 aluc|OJZ91652.1 anid|CBF69861.1 anig|EHA22673.1  
aory|EIT79016.1 asyd|OJJ59024.1 ater|EAU38030.1 atub|OJI86106.1 aver|OJJ01593.1 awen|OJJ32425.1  
azon|OJJ47180.1

Group4158: abra|OJJ76554.1 acar|OOF99424.1 acla|EAW14150.1 afis|EAW18863.1 afla|EED50830.1  
afum|EAL93595.1 agla|OJJ80586.1 akaw|GAA82461.1 aluc|OJZ91650.1 anid|CBF69848.1 anig|EHA22671.1  
aory|EIT79053.1 asyd|OJJ59030.1 ater|EAU38025.1 atub|OJI86104.1 aver|OJJ01586.1 awen|OJJ32419.1  
azon|OJJ47176.1

Group4159: abra|OJJ76558.1 acar|OOF99421.1 acla|EAW14147.1 afis|EAW18860.1 afla|EED50827.1  
afum|EAL93592.1 agla|OJJ80583.1 akaw|GAA82464.1 aluc|OJZ91647.1 anid|CBF69842.1 anig|EHA22668.1  
aory|EIT78975.1 asyd|OJJ59033.1 ater|EAU38023.1 atub|OJI86101.1 aver|OJJ01583.1 awen|OJJ32416.1  
azon|OJJ47173.1

Group4160: abra|OJJ76563.1 acar|OOF99419.1 acla|EAW14144.1 afis|EAW18857.1 afla|EED50824.1  
afum|EAL93589.2 agla|OJJ80579.1 akaw|GAA82467.1 aluc|OJZ91643.1 anid|CBF69834.1 anig|EHA22665.1  
aory|EIT78963.1 asyd|OJJ58985.1 ater|EAU38020.1 atub|OJI86097.1 aver|OJJ01580.1 awen|OJJ32413.1  
azon|OJJ47170.1

Group4161: abra|OJJ76565.1 acar|OOF99418.1 acla|EAW14143.1 afis|EAW18856.1 afla|EED50823.1  
afum|EAL93587.1 akaw|GAA82469.1 aluc|OJZ91641.1 anid|CBF69831.1 anig|EHA22664.1 aory|EIT79024.1  
asyd|OJJ58983.1 ater|EAU38019.1 atub|OJI86095.1 aver|OJJ01578.1 awen|OJJ32411.1 azon|OJJ47168.1  
agla|OJJ80577.1

Group4162: abra|OJJ76566.1 acar|OOF99355.1 acla|EAW14142.1 afis|EAW18855.1 afla|EED50822.1  
afum|EAL93586.1 agla|OJJ80574.1 akaw|GAA82470.1 aluc|OJZ91640.1 anid|CBF69829.1 anig|EHA22663.1  
aory|EIT78993.1 asyd|OJJ58981.1 ater|EAU38013.1 atub|OJI86094.1 aver|OJJ01576.1 awen|OJJ32410.1  
azon|OJJ47167.1

Group4163: abra|OJJ76567.1 acar|OOF99417.1 acla|EAW14141.1 afis|EAW18854.1 afla|EED50821.1  
afum|EAL93585.1 agla|OJJ80573.1 akaw|GAA82471.1 aluc|OJZ91639.1 anid|CBF69827.1 anig|EHA22662.1  
aory|EIT78968.1 asyd|OJJ58980.1 ater|EAU38012.1 atub|OJI86093.1 aver|OJJ01575.1 awen|OJJ32409.1  
azon|OJJ47166.1

Group4164: abra|OJJ76569.1 acar|OOF99416.1 acla|EAW14139.1 afis|EAW18852.1 afla|EED50819.1  
afum|EAL93583.1 agla|OJJ80571.1 akaw|GAA82473.1 aluc|OJZ91636.1 anid|CBF89917.1 anig|EHA22660.1  
aory|EIT79009.1 asyd|OJJ62126.1 ater|EAU38005.1 atub|OJI86089.1 aver|OJI96234.1 awen|OJJ32406.1  
azon|OJJ47164.1

Group4165: abra|OJJ76570.1 acar|OOF99415.1 acla|EAW14138.1 afis|EAW18851.1 afla|EED50818.1  
afum|EAL93582.1 agla|OJJ80570.1 akaw|GAA82474.1 aluc|OJZ91635.1 anid|CBF69823.1 anig|EHA22659.1  
aory|EIT78969.1 asyd|OJJ58978.1 ater|EAU38004.1 atub|OJI86088.1 aver|OJJ01573.1 awen|OJJ32405.1  
azon|OJJ47163.1

Group4166: abra|OJJ76571.1 acar|OOF99414.1 acla|EAW14137.1 afis|EAW18850.1 afla|EED50817.1  
afum|EAL93581.1 agla|OJJ80569.1 akaw|GAA82475.1 aluc|OJZ91634.1 anid|CBF69821.1 anig|EHA22658.1  
aory|EIT79031.1 asyd|OJJ58977.1 ater|EAU38003.1 atub|OJI86087.1 aver|OJJ01572.1 awen|OJJ32404.1  
azon|OJJ47162.1

Group4167: abra|OJJ76572.1 acar|OOF99413.1 acla|EAW14136.1 afis|EAW18849.1 afla|EED50816.1  
afum|EAL93580.1 agla|OJJ80568.1 akaw|GAA82476.1 aluc|OJZ91633.1 anid|CBF69819.1 anig|EHA22657.1  
aory|EIT78989.1 asyd|OJJ58976.1 ater|EAU38002.1 atub|OJI86086.1 aver|OJJ01571.1 awen|OJJ32403.1  
azon|OJJ47161.1

Group4168: abra|OJJ76573.1 acar|OOF99412.1 acla|EAW14134.1 afis|EAW18847.1 afla|EED50814.1  
afum|EAL93579.1 agla|OJJ80567.1 akaw|GAA82478.1 aluc|OJZ91632.1 anid|CBF69817.1 anig|EHA22656.1  
aory|EIT79029.1 asyd|OJJ58975.1 ater|EAU38001.1 atub|OJI86085.1 aver|OJJ01570.1 awen|OJJ32402.1  
azon|OJJ47160.1

Group4169: abra|OJJ76576.1 acar|OOF99408.1 acla|EAW14117.1 afis|EAW18819.1 afla|EED50808.1  
afum|EAL93555.1 agla|OJJ80554.1 akaw|GAA82481.1 aluc|OJZ91629.1 anid|CBF69809.1 anig|EHA22653.1

aory|EIT78964.1 asyd|OJJ58971.1 ater|EAU37998.1 atub|OJI86082.1 aver|OJJ01566.1 awen|OJJ32395.1 azon|OJJ47157.1

Group4170: abra|OJJ76577.1 acar|OOF99407.1 acla|EAW14116.1 afis|EAW18818.1 afla|EED50809.1 afum|EAL93554.1 agla|OJJ80552.1 akaw|GAA82482.1 aluc|OJZ91628.1 anid|CBF69811.1 anig|EHA22652.1 aory|EIT78995.1 asyd|OJJ58972.1 ater|EAU37997.1 atub|OJI86081.1 aver|OJJ01567.1 awen|OJJ32394.1 azon|OJJ47156.1

Group4171: abra|OJJ76579.1 acar|OOF99405.1 acla|EAW14114.1 afis|EAW18816.1 afla|EED50804.1 afum|EAL93552.1 agla|OJJ80549.1 akaw|GAA82484.1 aluc|OJZ91626.1 anid|CBF69815.1 anig|EHA22650.1 aory|EIT78104.1 asyd|OJJ58974.1 ater|EAU37991.1 atub|OJI86079.1 aver|OJJ01569.1 awen|OJJ32392.1 azon|OJJ47153.1

Group4172: abra|OJJ76581.1 acar|OOF99404.1 acla|EAW14113.1 afis|EAW18815.1 afla|EED50802.1 afum|EAL93551.1 agla|OJJ80548.1 akaw|GAA82485.1 aluc|OJZ91624.1 anid|CBF69803.1 anig|EHA22649.1 aory|EIT77988.1 asyd|OJJ58968.1 ater|EAU37982.1 atub|OJI86077.1 aver|OJJ01563.1 awen|OJJ32391.1 azon|OJJ47152.1

Group4173: abra|OJJ76582.1 acar|OOF99403.1 acla|EAW14112.1 afis|EAW18814.1 afla|EED50800.1 afum|EAL93550.2 agla|OJJ80547.1 akaw|GAA82486.1 aluc|OJZ91623.1 anid|CBF69801.1 anig|EHA22648.1 aory|EIT78081.1 asyd|OJJ58967.1 ater|EAU37981.1 atub|OJI86076.1 aver|OJJ01562.1 awen|OJJ32390.1 azon|OJJ47151.1

Group4174: abra|OJJ76588.1 acar|OOF99398.1 acla|EAW14313.1 afis|EAW18974.1 afla|EED53230.1 afum|EAL93708.1 agla|OJJ82930.1 akaw|GAA82492.1 aluc|OJZ91618.1 anid|CBF69639.1 anig|EHA22645.1 aory|EIT74874.1 asyd|OJJ59084.1 ater|EAU38166.1 atub|OJI86071.1 aver|OJJ01677.1 awen|OJJ31576.1 azon|OJJ47293.1

Group4175: abra|OJJ76590.1 acar|OOF99397.1 acla|EAW14311.1 afis|EAW18975.1 afla|EED53222.1 afum|EAL93710.1 agla|OJJ82932.1 akaw|GAA82494.1 aluc|OJZ91616.1 anid|CBF69642.1 anig|EHA22644.1 aory|EIT74886.1 asyd|OJJ59081.1 ater|EAU38164.1 atub|OJI86069.1 aver|OJJ01674.1 awen|OJJ31580.1 azon|OJJ47295.1

Group4176: abra|OJJ76591.1 acar|OOF99396.1 acla|EAW14310.1 afis|EAW18976.1 afla|EED53221.1 afum|EAL93711.2 agla|OJJ82933.1 akaw|GAA82495.1 aluc|OJZ91615.1 anid|CBF69644.1 anig|EHA22643.1 aory|EIT74842.1 asyd|OJJ59080.1 ater|EAU38163.1 atub|OJI86068.1 aver|OJJ01673.1 awen|OJJ31581.1 azon|OJJ47296.1

Group4177: abra|OJJ76594.1 acar|OOF99393.1 acla|EAW14307.1 afis|EAW18978.1 afla|EED53192.1 afum|EAL93714.1 agla|OJJ82936.1 akaw|GAA82498.1 aluc|OJZ91612.1 anid|CBF69649.1 anig|EHA22641.1 aory|EIT75152.1 asyd|OJJ59077.1 ater|EAU38169.1 atub|OJI86065.1 aver|OJJ01670.1 awen|OJJ31584.1 azon|OJJ47299.1

Group4178: abra|OJJ76601.1 acar|OOF99390.1 acla|EAW14305.1 afis|EAW18979.1 afla|EED53188.1 afum|EAL93715.1 agla|OJJ82941.1 akaw|GAA82504.1 aluc|OJZ91607.1 anid|CBF69652.1 anig|EHA22636.1 aory|EIT74907.1 asyd|OJJ59076.1 ater|EAU37838.1 atub|OJI86059.1 aver|OJJ01669.1 awen|OJJ31587.1 azon|OJJ47303.1

Group4179: abra|OJJ76605.1 acar|OOF99386.1 acla|EAW14301.1 afis|EAW18983.1 afla|EED53161.1 afum|EAL93719.1 agla|OJJ82958.1 akaw|GAA82509.1 aluc|OJZ91603.1 anid|CBF69659.1 anig|EHA22632.1 aory|EIT74944.1 asyd|OJJ59072.1 ater|EAU37822.1 atub|OJI86055.1 aver|OJJ01665.1 awen|OJJ31600.1 azon|OJJ47307.1

Group4180: abra|OJJ76606.1 acar|OOF99384.1 acla|EAW14300.1 afis|EAW18984.1 afla|EED53162.1 afum|EAL93720.1 agla|OJJ82959.1 akaw|GAA82510.1 aluc|OJZ91602.1 anid|CBF69661.1 anig|EHA22631.1 aory|EIT74985.1 asyd|OJJ59071.1 ater|EAU37821.1 atub|OJI86054.1 aver|OJJ01664.1 awen|OJJ31604.1 azon|OJJ47308.1

Group4181: abra|OJJ76609.1 acar|OOF99383.1 acla|EAW14297.1 afis|EAW18986.1 afla|EED53164.1 afum|EAL93722.1 agla|OJJ82964.1 akaw|GAA82512.1 aluc|OJZ91599.1 anid|CBF69665.1 anig|EHA22629.1 aory|EIT75120.1 asyd|OJJ59069.1 ater|EAU37819.1 atub|OJI86050.1 aver|OJJ01662.1 awen|OJJ31606.1 azon|OJJ47310.1

Group4182: abra|OJJ76624.1 acar|OOF99374.1 acla|EAW14295.1 afis|EAW18988.1 afla|EED53173.1 afum|EAL93724.1 agla|OJJ82975.1 akaw|GAA92833.1 aluc|OJZ91588.1 anid|CBF86791.1 anig|EHA22612.1 aory|EIT75118.1 asyd|OJJ64674.1 ater|EAU37816.1 atub|OJI86037.1 aver|OJI98775.1 awen|OJJ31609.1 azon|OJJ47312.1

Group4183: abra|OJJ76631.1 acar|OOF99366.1 acla|EAW08624.1 afis|EAW15808.1 afla|EED53158.1 afum|EAL85543.1 agla|OJJ81974.1 akaw|GAA92825.1 aluc|OJZ91580.1 anid|CBF86787.1 anig|EHA22607.1 aory|EIT75169.1 asyd|OJJ64676.1 ater|EAU37812.1 atub|OJI86029.1 aver|OJI98777.1 awen|OJJ38519.1 azon|OJJ50132.1



Group4187: abra|OJJ76753.1 acar|OOF91249.1 acla|EAW13307.1 afis|EAW20421.1 afla|EED44850.1 afum|EAL84629.1 agla|OJJ84904.1 akaw|GAA87271.1 aluc|OJZ84156.1 anid|CBF79342.1 anig|EHA27518.1 aory|EIT77742.1 asyd|OJJ55796.1 ater|EAU37735.1 atub|OJI89928.1 aver|OJJ06885.1 awen|OJJ33114.1 azon|OJJ46330.1

Group4188: abra|OJJ76756.1 acar|OOF91251.1 acla|EAW13310.1 afis|EAW20424.1 afla|EED44846.1 afum|EAL84624.2 agla|OJJ84901.1 akaw|GAA87269.1 aluc|OJZ84159.1 anid|CBF79340.1 anig|EHA27521.1 aory|EIT77736.1 asyd|OJJ55792.1 ater|EAU37733.1 atub|OJI89925.1 aver|OJJ06882.1 awen|OJJ33117.1 azon|OJJ46333.1

Group4189: abra|OJJ76758.1 acar|OOF91253.1 acla|EAW13312.1 afis|EAW20426.1 afla|EED44842.1 afum|EAL84623.1 agla|OJJ84899.1 akaw|GAA87268.1 aluc|OJZ84161.1 anid|CBF79338.1 anig|EHA27522.1 aory|EIT77746.1 asyd|OJJ55790.1 ater|EAU37731.1 atub|OJI89923.1 aver|OJJ06880.1 awen|OJJ33119.1 azon|OJJ46335.1

Group4190: abra|OJJ76760.1 acar|OOF91255.1 acla|EAW13314.1 afis|EAW20428.1 afla|EED44840.1 afum|EAL84622.1 agla|OJJ84897.1 akaw|GAA87266.1 aluc|OJZ84163.1 anid|CBF79334.1 anig|EHA27524.1 aory|EIT77728.1 asyd|OJJ55788.1 ater|EAU37729.1 atub|OJI89921.1 aver|OJJ06878.1 awen|OJJ33121.1 azon|OJJ46337.1

Group4191: abra|OJJ76761.1 acar|OOF91256.1 acla|EAW13315.1 afis|EAW20429.1 afla|EED44839.1 afum|EAL84621.1 agla|OJJ84896.1 akaw|GAA87265.1 aluc|OJZ84164.1 anid|CBF79332.1 anig|EHA27525.1 aory|EIT77744.1 asyd|OJJ55787.1 ater|EAU37728.1 atub|OJI89920.1 aver|OJJ06877.1 awen|OJJ33122.1 azon|OJJ46338.1

Group4192: abra|OJJ76762.1 acar|OOF91257.1 acla|EAW13316.1 afis|EAW20430.1 afla|EED44838.1 afum|EAL84620.1 agla|OJJ84895.1 akaw|GAA87264.1 aluc|OJZ84165.1 anid|CBF79330.1 anig|EHA27526.1 aory|EIT77755.1 asyd|OJJ55786.1 ater|EAU37727.1 atub|OJI89919.1 aver|OJJ06876.1 awen|OJJ33123.1 azon|OJJ46339.1

Group4193: abra|OJJ76764.1 acar|OOF91259.1 acla|EAW13318.1 afis|EAW20432.1 afla|EED44836.1 afum|EAL84619.1 agla|OJJ84893.1 akaw|GAA87262.1 aluc|OJZ84168.1 anid|CBF79325.1 anig|EHA27528.1 aory|EIT77720.1 asyd|OJJ55784.1 ater|EAU37725.1 atub|OJI89916.1 aver|OJJ06874.1 awen|OJJ33125.1 azon|OJJ46341.1

Group4194: abra|OJJ76766.1 acar|OOF91260.1 acla|EAW13320.1 afis|EAW20435.1 afla|EED44835.1 afum|EAL84617.1 agla|OJJ84891.1 akaw|GAA87260.1 aluc|OJZ84169.1 anid|CBF79321.1 anig|EHA27530.1 aory|EIT77727.1 asyd|OJJ55783.1 ater|EAU37723.1 atub|OJI89915.1 aver|OJJ06872.1 awen|OJJ33126.1 azon|OJJ46342.1

Group4195: abra|OJJ76768.1 acar|OOF91262.1 acla|EAW13322.1 afis|EAW20437.1 afla|EED44833.1 afum|EAL84615.1 agla|OJJ84886.1 akaw|GAA87258.1 aluc|OJZ84171.1 anid|CBF79317.1 anig|EHA27532.1 aory|EIT77715.1 asyd|OJJ55781.1 ater|EAU37721.1 atub|OJI89913.1 aver|OJJ06870.1 awen|OJJ33128.1 azon|OJJ46344.1

Group4196: abra|OJJ76769.1 acar|OOF91263.1 acla|EAW13323.1 afis|EAW20438.1 afla|EED44832.1 afum|EAL84614.1 agla|OJJ84885.1 akaw|GAA87257.1 aluc|OJZ84172.1 anid|CBF79312.1 anig|EHA27533.1 aory|EIT77757.1 asyd|OJJ55780.1 ater|EAU37720.1 atub|OJI89912.1 aver|OJJ06869.1 awen|OJJ33129.1 azon|OJJ46345.1

Group4197: abra|OJJ76774.1 acar|OOF91269.1 acla|EAW13331.1 afis|EAW20446.1 afla|EED44824.1 afum|EAL84607.1 agla|OJJ84875.1 akaw|GAA87250.1 aluc|OJZ84178.1 anid|CBF79292.1 anig|EHA27537.1 aory|EIT77756.1 asyd|OJJ55775.1 ater|EAU37713.1 atub|OJI89905.1 aver|OJJ06864.1 awen|OJJ33136.1 azon|OJJ46349.1

Group4198: abra|OJJ76776.1 acar|OOF91271.1 acla|EAW13335.1 afis|EAW20450.1 afla|EED44818.1 afum|EAL84603.1 agla|OJJ84872.1 akaw|GAA87248.1 aluc|OJZ84180.1 anid|CBF79297.1 anig|EHA27540.1 aory|EIT77719.1 asyd|OJJ55773.1 ater|EAU37709.1 atub|OJI89903.1 aver|OJJ06860.1 awen|OJJ33140.1 azon|OJJ46351.1

Group4199: abra|OJJ76779.1 acar|OOF91275.1 acla|EAW13338.1 afis|EAW20453.1 afla|EED44815.1 afum|EAL84600.1 agla|OJJ84869.1 akaw|GAA87245.1 aluc|OJZ84183.1 anid|CBF79284.1 anig|EHA27543.1 aory|EIT77717.1 asyd|OJJ55770.1 ater|EAU37706.1 atub|OJI89900.1 aver|OJJ06856.1 awen|OJJ33143.1 azon|OJJ46354.1

Group4200: abra|OJJ76780.1 acar|OOF91276.1 acla|EAW13339.1 afis|EAW20454.1 afla|EED44814.1 afum|EAL84599.1 agla|OJJ84868.1 akaw|GAA87244.1 aluc|OJZ84184.1 anid|CBF79286.1 anig|EHA27544.1 aory|EIT77725.1 asyd|OJJ55769.1 ater|EAU37705.1 atub|OJI89899.1 aver|OJJ06855.1 awen|OJJ33144.1 azon|OJJ46355.1

Group4201: abra|OJJ76784.1 acar|OOF91279.1 acla|EAW13342.1 afis|EAW20457.1 afla|EED44810.1 afum|EAL84595.1 agla|OJJ84862.1 akaw|GAA87241.1 aluc|OJZ84187.1 anid|CBF79283.1 anig|EHA27547.1

aory|EIT77730.1 asyd|OJJ55766.1 ater|EAU37703.1 atub|OJI89896.1 aver|OJJ06852.1 awen|OJJ33149.1 azon|OJJ46359.1

Group4202: abra|OJJ76787.1 acar|OOF91281.1 acla|EAW13345.1 afis|EAW20460.1 afla|EED44808.1 afum|EAL84593.1 agla|OJJ84858.1 akaw|GAA87238.1 aluc|OJZ84189.1 anid|CBF79277.1 anig|EHA27549.1 aory|EIT77754.1 asyd|OJJ55763.1 ater|EAU37700.1 atub|OJI89893.1 aver|OJJ06849.1 awen|OJJ33153.1 azon|OJJ46362.1

Group4203: abra|OJJ76790.1 acar|OOF91284.1 acla|EAW13348.1 afis|EAW20463.1 afla|EED44805.1 afum|EAL84590.1 agla|OJJ84854.1 akaw|GAA87235.1 aluc|OJZ84193.1 anid|CBF79267.1 anig|EHA27552.1 aory|EIT77734.1 asyd|OJJ55760.1 ater|EAU37738.1 atub|OJI89890.1 aver|OJJ06845.1 awen|OJJ33157.1 azon|OJJ46366.1

Group4204: abra|OJJ76792.1 acar|OOF91283.1 acla|EAW13351.1 afis|EAW20465.1 afla|EED44802.1 afum|EAL84588.1 agla|OJJ84852.1 akaw|GAA87233.1 aluc|OJZ84196.1 anid|CBF79269.1 anig|EHA27553.1 aory|EIT77749.1 asyd|OJJ55759.1 ater|EAU37698.1 atub|OJI89888.1 aver|OJJ06844.1 awen|OJJ33159.1 azon|OJJ46367.1

Group4205: abra|OJJ76793.1 acar|OOF91286.1 acla|EAW13352.1 afis|EAW20466.1 afla|EED44801.1 afum|EAL84586.2 agla|OJJ84851.1 akaw|GAA87232.1 aluc|OJZ84197.1 anid|CBF79271.1 anig|EHA27554.1 aory|EIT77739.1 asyd|OJJ55758.1 ater|EAU37697.1 atub|OJI89887.1 aver|OJJ06843.1 awen|OJJ33160.1 azon|OJJ46368.1

Group4206: abra|OJJ76796.1 acar|OOF91289.1 acla|EAW13355.1 afis|EAW20469.1 afla|EED44799.1 afum|EAL84583.1 agla|OJJ84849.1 akaw|GAA87227.1 aluc|OJZ84203.1 anid|CBF79257.1 anig|EHA27557.1 aory|EIT77745.1 asyd|OJJ55748.1 ater|EAU37694.1 atub|OJI89881.1 aver|OJJ06835.1 awen|OJJ33163.1 azon|OJJ46370.1

Group4207: abra|OJJ76798.1 acar|OOF91291.1 acla|EAW13357.1 afis|EAW20471.1 afla|EED44797.1 afum|EAL84582.1 agla|OJJ84847.1 akaw|GAA87225.1 aluc|OJZ84205.1 anid|CBF79258.1 anig|EHA27558.1 aory|EIT77743.1 asyd|OJJ55750.1 ater|EAU37691.1 atub|OJI89879.1 aver|OJJ06837.1 awen|OJJ33165.1 azon|OJJ46372.1

Group4208: abra|OJJ76799.1 acar|OOF91292.1 acla|EAW13358.1 afis|EAW20472.1 afla|EED44796.1 afum|EAL84580.2 agla|OJJ84846.1 akaw|GAA87224.1 aluc|OJZ84206.1 anid|CBF79260.1 anig|EHA27559.1 aory|EIT77751.1 asyd|OJJ55751.1 ater|EAU37690.1 atub|OJI89878.1 aver|OJJ06838.1 awen|OJJ33166.1 azon|OJJ46373.1

Group4209: abra|OJJ76800.1 acar|OOF91294.1 acla|EAW13359.1 afis|EAW20473.1 afla|EED44794.1 afum|EAL84579.1 agla|OJJ84845.1 akaw|GAA87223.1 aluc|OJZ84207.1 anid|CBF79262.1 anig|EHA27561.1 aory|EIT77790.1 asyd|OJJ55754.1 ater|EAU37689.1 atub|OJI89877.1 aver|OJJ06839.1 awen|OJJ33167.1 azon|OJJ46375.1

Group4210: abra|OJJ76802.1 acar|OOF91296.1 acla|EAW13361.1 afis|EAW20475.1 afla|EED44793.1 afum|EAL84578.1 agla|OJJ84842.1 akaw|GAA87221.1 aluc|OJZ84209.1 anid|CBF79255.1 anig|EHA27563.1 aory|EIT77775.1 asyd|OJJ55747.1 ater|EAU37687.1 atub|OJI89874.1 aver|OJJ06834.1 awen|OJJ33170.1 azon|OJJ46377.1

Group4211: abra|OJJ76806.1 acar|OOF91300.1 acla|EAW13365.1 afis|EAW20479.1 afla|EED44789.1 afum|EAL84575.1 agla|OJJ84831.1 akaw|GAA87217.1 aluc|OJZ84213.1 anid|CBF79213.1 anig|EHA27566.1 aory|EIT77792.1 asyd|OJJ55738.1 ater|EAU29558.1 atub|OJI89870.1 aver|OJJ06824.1 awen|OJJ33174.1 azon|OJJ46381.1

Group4212: abra|OJJ76809.1 acar|OOF91305.1 acla|EAW13370.1 afis|EAW20484.1 afla|EED44784.1 afum|EAL84571.1 agla|OJJ84813.1 akaw|GAA87212.1 aluc|OJZ84218.1 anid|CBF79235.1 anig|EHA27569.1 aory|EIT77759.1 asyd|OJJ55742.1 ater|EAU29562.1 atub|OJI89866.1 aver|OJJ06829.1 awen|OJJ33185.1 azon|OJJ46384.1

Group4213: abra|OJJ76810.1 acar|OOF91306.1 acla|EAW13371.1 afis|EAW20485.1 afla|EED44782.1 afum|EAL84570.1 agla|OJJ84822.1 akaw|GAA87211.1 aluc|OJZ84221.1 anid|CBF79237.1 anig|EHA27570.1 aory|EIT77768.1 asyd|OJJ55743.1 ater|EAU29563.1 atub|OJI89865.1 aver|OJJ06830.1 awen|OJJ33186.1 azon|OJJ46388.1

Group4214: abra|OJJ76811.1 acar|OOF91307.1 acla|EAW13372.1 afis|EAW20486.1 afla|EED44781.1 afum|EAL84569.1 agla|OJJ84825.1 akaw|GAA87210.1 aluc|OJZ84222.1 anid|CBF79215.1 anig|EHA27571.1 aory|EIT77774.1 asyd|OJJ55737.1 ater|EAU29564.1 atub|OJI89864.1 aver|OJJ06823.1 awen|OJJ33187.1 azon|OJJ46389.1

Group4215: abra|OJJ76813.1 acar|OOF91309.1 acla|EAW13374.1 afis|EAW20488.1 afla|EED44776.1 afum|EAL84567.1 agla|OJJ84826.1 akaw|GAA87208.1 aluc|OJZ84224.1 anid|CBF79219.1 anig|EHA27573.1 aory|EIT77760.1 asyd|OJJ55736.1 ater|EAU29566.1 atub|OJI89861.1 aver|OJJ06822.1 awen|OJJ33188.1 azon|OJJ46390.1

Group4216: abra|OJJ76819.1 acar|OOF91315.1 acla|EAW13379.1 afis|EAW20493.1 afla|EED44737.1 afum|EAL84561.1 agla|OJJ84833.1 akaw|GAA87203.1 aluc|OJZ84229.1 anid|CBF79226.1 anig|EHA27578.1 aory|EIT77797.1 asyd|OJJ55732.1 ater|EAU29569.1 atub|OJI89855.1 aver|OJJ06818.1 awen|OJJ33193.1 azon|OJJ46403.1

Group4217: abra|OJJ76821.1 acar|OOF91316.1 acla|EAW13381.1 afis|EAW20495.1 afla|EED44771.1 afum|EAL84559.1 agla|OJJ84807.1 akaw|GAA87201.1 aluc|OJZ84232.1 anid|CBF79222.1 anig|EHA27579.1 aory|EIT77762.1 asyd|OJJ55734.1 ater|EAU37189.1 atub|OJI89853.1 aver|OJJ06820.1 awen|OJJ33195.1 azon|OJJ46401.1

Group4218: abra|OJJ76823.1 acar|OOF91319.1 acla|EAW13383.1 afis|EAW20497.1 afla|EED44739.1 afum|EAL84557.1 agla|OJJ84805.1 akaw|GAA87199.1 aluc|OJZ84234.1 anid|CBF79208.1 anig|EHA27581.1 aory|EIT77796.1 asyd|OJJ55729.1 ater|EAU37191.1 atub|OJI89851.1 aver|OJJ06815.1 awen|OJJ33197.1 azon|OJJ46399.1

Group4219: abra|OJJ76827.1 acar|OOF91321.1 acla|EAW13387.1 afis|EAW20501.1 afla|EED44744.1 afum|EAL84554.1 agla|OJJ84797.1 akaw|GAA87195.1 aluc|OJZ84239.1 anid|CBF79200.1 anig|EHA27586.1 aory|EIT77773.1 asyd|OJJ55725.1 ater|EAU37195.1 atub|OJI89844.1 aver|OJJ06811.1 awen|OJJ33202.1 azon|OJJ46396.1

Group4220: abra|OJJ76830.1 acar|OOF91324.1 acla|EAW13392.1 afis|EAW20504.1 afla|EED44747.1 afum|EAL84552.1 agla|OJJ84800.1 akaw|GAA87192.1 aluc|OJZ84242.1 anid|CBF79195.1 anig|EHA27587.1 aory|EIT77784.1 asyd|OJJ55722.1 ater|EAU37199.1 atub|OJI89841.1 aver|OJJ06808.1 awen|OJJ33205.1 azon|OJJ46478.1

Group4222: abra|OJJ76834.1 acar|OOF91327.1 acla|EAW13396.1 afis|EAW20507.1 afla|EED52448.1 afum|EAL84549.1 agla|OJJ84784.1 akaw|GAA87189.1 aluc|OJZ84245.1 anid|CBF79193.1 anig|EHA27590.1 aory|EIT82772.1 asyd|OJJ55719.1 ater|EAU37201.1 atub|OJI89838.1 aver|OJJ06805.1 awen|OJJ33208.1 azon|OJJ46481.1

Group4223: abra|OJJ76835.1 acar|OOF91328.1 acla|EAW13397.1 afis|EAW20508.1 afla|EED52449.1 afum|EAL84548.1 agla|OJJ84785.1 akaw|GAA87188.1 aluc|OJZ84246.1 anid|CBF79190.1 anig|EHA27591.1 aory|EIT82778.1 asyd|OJJ55718.1 ater|EAU37202.1 atub|OJI89837.1 aver|OJJ06804.1 awen|OJJ33209.1 azon|OJJ46482.1

Group4224: abra|OJJ76836.1 acar|OOF90072.1 acla|EAW13398.1 afis|EAW20509.1 afla|EED52450.1 afum|EAL84547.1 agla|OJJ84786.1 akaw|GAA87187.1 aluc|OJZ84247.1 anid|CBF79189.1 anig|EHA27592.1 aory|EIT82759.1 asyd|OJJ55717.1 ater|EAU37203.1 atub|OJI89836.1 aver|OJJ06803.1 awen|OJJ33210.1 azon|OJJ46483.1

Group4225: abra|OJJ76838.1 acar|OOF91330.1 acla|EAW13400.1 afis|EAW20511.1 afla|EED52452.1 afum|EAL84545.2 agla|OJJ84788.1 akaw|GAA87185.1 aluc|OJZ84249.1 anid|CBF79186.1 anig|EHA27594.1 aory|EIT82799.1 asyd|OJJ55715.1 ater|EAU37205.1 atub|OJI89834.1 aver|OJJ06801.1 awen|OJJ33213.1 azon|OJJ46485.1

Group4226: abra|OJJ76839.1 acar|OOF91331.1 acla|EAW13401.1 afis|EAW20512.1 afla|EED52453.1 afum|EBA27192.1 agla|OJJ84789.1 akaw|GAA87184.1 aluc|OJZ84250.1 anid|CBF79184.1 anig|EHA27595.1 aory|EIT82753.1 asyd|OJJ55714.1 ater|EAU37208.1 atub|OJI89833.1 aver|OJJ06800.1 awen|OJJ33214.1 azon|OJJ46486.1

Group4227: abra|OJJ76840.1 acar|OOF91333.1 acla|EAW13403.1 afis|EAW20514.1 afla|EED52468.1 afum|EAL84543.2 agla|OJJ84776.1 akaw|GAA87182.1 aluc|OJZ84251.1 anid|CBF79055.1 anig|EHA27596.1 aory|EIT82784.1 asyd|OJJ55710.1 ater|EAU37187.1 atub|OJI89832.1 aver|OJJ06796.1 awen|OJJ33220.1 azon|OJJ46488.1

Group4228: abra|OJJ76843.1 acar|OOF89969.1 acla|EAW13406.1 afis|EAW20517.1 afla|EED52458.1 afum|EAL84540.1 agla|OJJ84769.1 akaw|GAA87179.1 aluc|OJZ84254.1 anid|CBF88058.1 anig|EHA27599.1 aory|EIT82793.1 asyd|OJJ63541.1 ater|EAU37184.1 atub|OJI89829.1 aver|OJI97392.1 awen|OJJ33223.1 azon|OJJ46553.1

Group4229: abra|OJJ76844.1 acar|OOF89968.1 acla|EAW13407.1 afis|EAW20518.1 afla|EED52457.1 afum|EAL84539.1 agla|OJJ84768.1 akaw|GAA87177.1 aluc|OJZ84256.1 anid|CBF79061.1 anig|EHA27600.1 aory|EIT82769.1 asyd|OJJ55707.1 ater|EAU37183.1 atub|OJI89827.1 aver|OJJ06793.1 awen|OJJ33224.1 azon|OJJ46581.1

Group4230: abra|OJJ76845.1 acar|OOF91335.1 acla|EAW13408.1 afis|EAW20519.1 afla|EED52455.1 afum|EAL84538.1 agla|OJJ84767.1 akaw|GAA87176.1 aluc|OJZ84257.1 anid|CBF79067.1 anig|EHA27601.1 aory|EIT82798.1 asyd|OJJ55706.1 ater|EAU37182.1 atub|OJI89826.1 aver|OJJ06792.1 awen|OJJ33225.1 azon|OJJ46580.1

Group4231: abra|OJJ76847.1 acar|OOF91337.1 acla|EAW13410.1 afis|EAW20521.1 afla|EED52470.1 afum|EAL84536.1 agla|OJJ84765.1 akaw|GAA87174.1 aluc|OJZ84259.1 anid|CBF79070.1 anig|EHA27602.1

aory|EIT82770.1 asyd|OJJ55704.1 ater|EAU37167.1 atub|OJI89824.1 aver|OJJ06790.1 awen|OJJ33227.1 azon|OJJ46577.1

Group4232: abra|OJJ76849.1 acar|OOF91338.1 acla|EAW13412.1 afis|EAW20523.1 afla|EED52472.1 afum|EAL84534.1 agla|OJJ84740.1 akaw|GAA87172.1 aluc|OJZ84261.1 anid|CBF79074.1 anig|EHA27604.1 aory|EIT82821.1 asyd|OJJ55702.1 ater|EAU37165.1 atub|OJI89822.1 aver|OJJ06787.1 awen|OJJ33229.1 azon|OJJ46575.1

Group4233: abra|OJJ76851.1 acar|OOF91339.1 acla|EAW13413.1 afis|EAW20524.1 afla|EED52473.1 afum|EAL84533.1 agla|OJJ84742.1 akaw|GAA87171.1 aluc|OJZ84262.1 anid|CBF79076.1 anig|EHA27605.1 aory|EIT82758.1 asyd|OJJ55701.1 ater|EAU37164.1 atub|OJI89821.1 aver|OJJ06786.1 awen|OJJ33230.1 azon|OJJ46574.1

Group4234: abra|OJJ76852.1 acar|OOF91340.1 acla|EAW13414.1 afis|EAW20525.1 afla|EED52474.1 afum|EAL84532.1 agla|OJJ84743.1 akaw|GAA87170.1 aluc|OJZ84264.1 anid|CBF79078.1 anig|EHA27606.1 aory|EIT82817.1 asyd|OJJ55699.1 ater|EAU37163.1 atub|OJI89819.1 aver|OJJ06784.1 awen|OJJ33231.1 azon|OJJ46573.1

Group4235: abra|OJJ76855.1 acar|OOF91341.1 acla|EAW13416.1 afis|EAW20527.1 afla|EED52476.1 afum|EAL84530.1 agla|OJJ84745.1 akaw|GAA87167.1 aluc|OJZ84267.1 anid|CBF79081.1 anig|EHA27609.1 aory|EIT82771.1 asyd|OJJ55696.1 ater|EAU37161.1 atub|OJI89816.1 aver|OJJ06781.1 awen|OJJ33234.1 azon|OJJ46570.1

Group4236: abra|OJJ76857.1 acar|OOF91343.1 acla|EAW13418.1 afis|EAW20529.1 afla|EED52478.1 afum|EAL84528.1 agla|OJJ84706.1 akaw|GAA87165.1 aluc|OJZ84269.1 anid|CBF79006.1 anig|EHA27611.1 aory|EIT82803.1 asyd|OJJ55691.1 ater|EAU37159.1 atub|OJI89814.1 aver|OJJ06776.1 awen|OJJ33236.1 azon|OJJ50608.1

Group4237: abra|OJJ76903.1 acar|OOF91351.1 acla|EAW13425.1 afis|EAW20536.1 afla|EED52442.1 afum|EAL84522.1 agla|OJJ84695.1 akaw|GAA87135.1 aluc|OJZ84302.1 anid|CBF78995.1 anig|EHA27638.1 aory|EIT82797.1 asyd|OJJ55685.1 ater|EAU37143.1 atub|OJI89766.1 aver|OJJ06769.1 awen|OJJ33243.1 azon|OJJ50622.1

Group4238: abra|OJJ76916.1 acar|OOF91363.1 acla|EAW13428.1 afis|EAW20544.1 afla|EED52424.1 afum|EAL84514.1 agla|OJJ88753.1 akaw|GAA87122.1 aluc|OJZ84316.1 anid|CBF78988.1 anig|EHA27651.1 aory|EIT83288.1 asyd|OJJ55682.1 ater|EAU37137.1 atub|OJI89752.1 aver|OJJ06766.1 awen|OJJ33252.1 azon|OJJ50638.1

Group4239: abra|OJJ76917.1 acar|OOF91364.1 acla|EAW13429.1 afis|EAW20545.1 afla|EED52423.1 afum|EBA27188.1 agla|OJJ88752.1 akaw|GAA87121.1 aluc|OJZ84317.1 anid|CBF78986.1 anig|EHA27652.1 aory|EIT83281.1 asyd|OJJ55681.1 ater|EAU37136.1 atub|OJI89751.1 aver|OJJ06765.1 awen|OJJ33253.1 azon|OJJ50637.1

Group4240: abra|OJJ76918.1 acar|OOF91365.1 acla|EAW13430.1 afis|EAW20546.1 afla|EED52422.1 afum|EAL84513.1 agla|OJJ88751.1 akaw|GAA87120.1 aluc|OJZ84318.1 anid|CBF78985.1 anig|EHA27653.1 aory|EIT83315.1 asyd|OJJ55680.1 ater|EAU37135.1 atub|OJI89750.1 aver|OJJ06763.1 awen|OJJ33254.1 azon|OJJ50636.1

Group4241: abra|OJJ76919.1 acar|OOF91366.1 acla|EAW13431.1 afis|EAW20547.1 afla|EED52421.1 afum|EAL84512.1 agla|OJJ88750.1 akaw|GAA87119.1 aluc|OJZ84319.1 anid|CBF78983.1 anig|EHA27654.1 aory|EIT83284.1 asyd|OJJ55679.1 ater|EAU37134.1 atub|OJI89749.1 aver|OJJ06762.1 awen|OJJ33255.1 azon|OJJ50635.1

Group4244: abra|OJJ76950.1 acar|OOF91396.1 acla|EAW13470.1 afis|EAW20582.1 afla|EED52277.1 afum|EAL84482.1 agla|OJJ88700.1 akaw|GAA87091.1 aluc|OJZ84347.1 anid|CBF78946.1 anig|EHA27683.1 aory|EIT74415.1 asyd|OJJ55651.1 ater|EAU37100.1 atub|OJI89721.1 aver|OJJ06736.1 awen|OJJ33287.1 azon|OJJ50663.1

Group4245: abra|OJJ76954.1 acar|OOF91398.1 acla|EAW13476.1 afis|EAW20583.1 afla|EED52245.1 afum|EBA27180.1 agla|OJJ88686.1 akaw|GAA87088.1 aluc|OJZ84350.1 anid|CBF78930.1 anig|EHA27687.1 aory|EIT74502.1 asyd|OJJ55642.1 ater|EAU37097.1 atub|OJI89717.1 aver|OJJ06725.1 awen|OJJ33300.1 azon|OJJ50671.1

Group4246: abra|OJJ76970.1 acar|OOF91415.1 acla|EAW13495.1 afis|EAW20595.1 afla|EED52229.1 afum|EAL84466.1 agla|OJJ88661.1 akaw|GAA87074.1 aluc|OJZ84366.1 anid|CBF78911.1 anig|EHA27701.1 aory|EIT74324.1 asyd|OJJ55615.1 ater|EAU35241.1 atub|OJI89702.1 aver|OJJ06690.1 awen|OJJ33385.1 azon|OJJ50691.1

Group4247: abra|OJJ76971.1 acar|OOF91416.1 acla|EAW13496.1 afis|EAW20596.1 afla|EED52228.1 afum|EAL84465.1 agla|OJJ88660.1 akaw|GAA87073.1 aluc|OJZ84367.1 anid|CBF78909.1 anig|EHA27702.1 aory|EIT74434.1 asyd|OJJ55614.1 ater|EAU35242.1 atub|OJI89701.1 aver|OJJ06689.1 awen|OJJ33388.1 azon|OJJ50692.1

Group4248: abra|OJJ76972.1 acar|OOF91417.1 acla|EAW13498.1 afis|EAW20597.1 afla|EED52213.1 afum|EAL84464.1 agla|OJJ88659.1 akaw|GAA87072.1 aluc|OJZ84368.1 anid|CBF78908.1 anig|EHA27703.1 aory|EIT74430.1 asyd|OJJ55612.1 ater|EAU35243.1 atub|OJI89700.1 aver|OJJ06687.1 awen|OJJ33389.1 azon|OJJ50693.1

Group4249: abra|OJJ76976.1 acar|OOF91419.1 acla|EAW13502.1 afis|EAW20601.1 afla|EED47729.1 afum|EAL84460.1 agla|OJJ88650.1 akaw|GAA87069.1 aluc|OJZ84372.1 anid|CBF75136.1 anig|EHA27707.1 aory|EIT77171.1 asyd|OJJ59976.1 ater|EAU35246.1 atub|OJI89695.1 aver|OJJ02315.1 awen|OJJ33393.1 azon|OJJ50697.1

Group4250: abra|OJJ76977.1 acar|OOF91422.1 acla|EAW13504.1 afis|EAW20603.1 afla|EED47732.1 afum|EAL84458.1 agla|OJJ88646.1 akaw|GAA87068.1 aluc|OJZ84374.1 anid|CBF86930.1 anig|EHA27708.1 aory|EIT77153.1 asyd|OJJ55600.1 ater|EAU35248.1 atub|OJI89694.1 aver|OJJ06680.1 awen|OJJ33395.1 azon|OJJ50698.1

Group4251: abra|OJJ76978.1 acar|OOF91424.1 acla|EAW13505.1 afis|EAW20604.1 afla|EED47733.1 afum|EAL84457.1 agla|OJJ88645.1 akaw|GAA87067.1 aluc|OJZ84376.1 anid|CBF86928.1 anig|EHA27709.1 aory|EIT77125.1 asyd|OJJ55601.1 ater|EAU35250.1 atub|OJI89693.1 aver|OJJ06681.1 awen|OJJ33396.1 azon|OJJ50394.1

Group4252: abra|OJJ76981.1 acar|OOF91427.1 acla|EAW12964.1 afis|EAW17699.1 afla|EED45692.1 afum|EAL91514.1 agla|OJJ79475.1 akaw|GAA87064.1 aluc|OJZ84381.1 anid|CBF89963.1 anig|EHA27712.1 aory|EIT75518.1 asyd|OJJ62104.1 ater|EAU31915.1 atub|OJI89690.1 aver|OJI96210.1 awen|OJJ37134.1 azon|OJJ50834.1

Group4253: abra|OJJ76984.1 acar|OOF91429.1 acla|EAW12966.1 afis|EAW17697.1 afla|EED50445.1 afum|EAL91511.1 agla|OJJ79478.1 akaw|GAA87062.1 aluc|OJZ84383.1 anid|CBF89965.1 anig|EHA27714.1 aory|EIT82014.1 asyd|OJJ62100.1 ater|EAU31918.1 atub|OJI89688.1 aver|OJI96206.1 awen|OJJ37137.1 azon|OJJ50836.1

Group4254: abra|OJJ76985.1 acar|OOF91430.1 acla|EAW12967.1 afis|EAW17696.1 afla|EED50446.1 afum|EAL91510.1 agla|OJJ79479.1 akaw|GAA87061.1 aluc|OJZ84384.1 anid|CBF89966.1 anig|EHA27715.1 aory|EIT82098.1 asyd|OJJ62099.1 ater|EAU31919.1 atub|OJI89687.1 aver|OJI96205.1 awen|OJJ37139.1 azon|OJJ50839.1

Group4255: abra|OJJ76986.1 acar|OOF92639.1 acla|EAW12968.1 afis|EAW17695.1 afla|EED50447.1 afum|EAL91509.1 agla|OJJ79483.1 akaw|GAA87060.1 aluc|OJZ84385.1 anid|CBF89968.1 anig|EHA27716.1 aory|EIT82034.1 asyd|OJJ62098.1 ater|EAU31920.1 atub|OJI89686.1 aver|OJI96204.1 awen|OJJ37140.1 azon|OJJ50840.1

Group4256: abra|OJJ76987.1 acar|OOF91431.1 acla|EAW12969.1 afis|EAW17694.1 afla|EED50448.1 afum|EAL91508.1 agla|OJJ79485.1 akaw|GAA87059.1 aluc|OJZ84386.1 anid|CBF89970.1 anig|EHA27717.1 aory|EIT82134.1 asyd|OJJ62097.1 ater|EAU31961.1 atub|OJI89685.1 aver|OJI96203.1 awen|OJJ37141.1 azon|OJJ50841.1

Group4257: abra|OJJ76993.1 acar|OOF91438.1 acla|EAW13455.1 afis|EAW20563.1 afum|EAL84498.1 agla|OJJ88728.1 akaw|GAA87053.1 aluc|OJZ84393.1 anid|CBF78959.1 anig|EHA27722.1 aory|EIT74501.1 asyd|OJJ55658.1 ater|EAU37112.1 atub|OJI89678.1 aver|OJJ06742.1 awen|OJJ33269.1 azon|OJJ50641.1 afla|EED52341.1

Group4258: abra|OJJ76996.1 acar|OOF91443.1 acla|EAW13460.1 afis|EAW20566.1 afla|EED52324.1 afum|EAL84495.1 agla|OJJ88727.1 akaw|GAA87050.1 aluc|OJZ84396.1 anid|CBF78935.1 anig|EHA27726.1 aory|EIT74477.1 asyd|OJJ55644.1 ater|EAU37111.1 atub|OJI89676.1 aver|OJJ06728.1 awen|OJJ33271.1 azon|OJJ50646.1

Group4259: abra|OJJ77016.1 acar|OOF95265.1 acla|EAW07210.1 afis|EAW22222.1 afla|EED57616.1 afum|EAL90972.1 agla|OJJ87822.1 akaw|GAA87034.1 aluc|OJZ84418.1 anid|CBF88465.1 anig|EHA27740.1 aory|EIT82988.1 asyd|OJJ63777.1 ater|EAU34232.1 atub|OJI89656.1 aver|OJI97160.1 awen|OJJ34809.1 azon|OJJ45741.1

Group4260: abra|OJJ77024.1 acar|OOF91461.1 acla|EAW12057.1 afis|EAW19698.1 afla|EED54134.1 afum|EAL86829.1 agla|OJJ80810.1 akaw|GAA87028.1 aluc|OJZ84424.1 anid|CBF81131.1 anig|EHA27746.1 aory|EIT76042.1 asyd|OJJ56500.1 ater|EAU32171.1 atub|OJI89649.1 aver|OJJ06219.1 awen|OJJ41934.1 azon|OJJ48232.1

Group4261: abra|OJJ77043.1 acar|OOF90273.1 acla|EAW13554.1 afis|EAW20631.1 afla|EED49762.1 afum|EAL84436.1 agla|OJJ80447.1 akaw|GAA87010.1 aluc|OJZ84445.1 anid|CBF83219.1 anig|EHA27763.1 aory|EIT77598.1 asyd|OJJ55568.1 ater|EAU32166.1 atub|OJI89629.1 aver|OJJ06647.1 awen|OJJ33600.1 azon|OJJ50722.1

Group4262: abra|OJJ77049.1 acar|OOF92938.1 acla|EAW13549.1 afis|EAW20628.1 afla|EED49778.1 afum|EAL84442.1 agla|OJJ88595.1 akaw|GAA87004.1 aluc|OJZ84453.1 anid|CBF83230.1 anig|EHA27768.1

aory|EIT77696.1 asyd|OJJ55582.1 ater|EAU32163.1 atub|OJI89623.1 aver|OJJ06661.1 awen|OJJ33461.1 azon|OJJ50717.1

Group4263: abra|OJJ77050.1 acar|OOF92939.1 acla|EAW13544.1 afis|EAW20616.1 afla|EED54198.1 afum|EAL84445.1 agla|OJJ88594.1 akaw|GAA87003.1 aluc|OJZ84454.1 anid|CBF86935.1 anig|EHA27769.1 aory|EIT75987.1 asyd|OJJ55584.1 ater|EAU35262.1 atub|OJI89621.1 aver|OJJ06663.1 awen|OJJ33460.1 azon|OJJ50716.1

Group4264: abra|OJJ77064.1 acar|OOF92948.1 acla|EAW13511.1 afis|EAW20609.1 afla|EED54207.1 afum|EAL84451.1 agla|OJJ88630.1 akaw|GAA86988.1 aluc|OJZ84472.1 anid|CBF86951.1 anig|EHA27781.1 aory|EIT76020.1 asyd|OJJ55594.1 ater|EAU35257.1 atub|OJI89606.1 aver|OJJ06673.1 awen|OJJ33452.1 azon|OJJ50709.1

Group4265: abra|OJJ77068.1 acar|OOF92951.1 acla|EAW13508.1 afis|EAW20606.1 afla|EED47725.1 afum|EAL84454.1 agla|OJJ88635.1 akaw|GAA86985.1 aluc|OJZ84476.1 anid|CBF86946.1 anig|EHA27784.1 aory|EIT77120.1 asyd|OJJ55591.1 ater|EAU35260.1 atub|OJI89603.1 aver|OJJ06670.1 awen|OJJ33449.1 azon|OJJ50706.1

Group4266: abra|OJJ77076.1 acar|OOF92958.1 acla|EAW11204.1 afis|EAW15934.1 afla|EED54927.1 afum|EAL88570.1 agla|OJJ89373.1 akaw|GAA86977.1 aluc|OJZ84486.1 anid|CBF86351.1 anig|EHA27790.1 aory|EIT80330.1 asyd|OJJ64980.1 ater|EAU35519.1 atub|OJI89594.1 aver|OJI99102.1 awen|OJJ35645.1 azon|OJJ46891.1

Group4267: abra|OJJ77079.1 acar|OOF92961.1 acla|EAW12041.1 afis|EAW19690.1 afla|EED57010.1 afum|EAL86836.1 agla|OJJ80804.1 akaw|GAA86974.1 aluc|OJZ84489.1 anid|CBF75140.1 anig|EHA27793.1 aory|EIT82303.1 asyd|OJJ59969.1 atub|OJI89591.1 aver|OJJ02322.1 awen|OJJ41917.1 azon|OJJ42689.1 ater|EAU32856.1

Group4268: abra|OJJ77090.1 acar|OOF92974.1 acla|EAW08632.1 afis|EAW15799.1 afla|EED51246.1 afum|EAL85551.1 agla|OJJ81963.1 akaw|GAA86965.1 aluc|OJZ84499.1 anid|CBF70921.1 anig|EHA27799.1 aory|EIT83184.1 asyd|OJJ52607.1 ater|EAU32343.1 atub|OJI89581.1 aver|OJJ04634.1 awen|OJJ38507.1 azon|OJJ43744.1

Group4269: abra|OJJ77091.1 acar|OOF92976.1 acla|EAW10011.1 afis|EAW21045.1 afla|EED51625.1 afum|EAL92081.1 agla|OJJ82363.1 akaw|GAA86964.1 aluc|OJZ84500.1 anid|CBF87097.1 anig|EHA27800.1 aory|EIT80549.1 asyd|OJJ60392.1 ater|EAU36817.1 atub|OJI89580.1 aver|OJI99721.1 awen|OJJ32179.1 azon|OJJ46755.1

Group4270: abra|OJJ77094.1 acar|OOF92977.1 acla|EAW10918.1 afis|EAW20940.1 afla|EED50295.1 afum|EAL84694.1 agla|OJJ83947.1 akaw|GAA86961.1 aluc|OJZ84503.1 anid|CBF82521.1 anig|EHA27803.1 aory|EIT77252.1 asyd|OJJ54070.1 ater|EAU38585.1 atub|OJI89577.1 aver|OJJ08672.1 awen|OJJ34377.1 azon|OJJ48111.1

Group4271: abra|OJJ77095.1 acar|OOF92978.1 acla|EAW10919.1 afis|EAW20939.1 afla|EED50294.1 afum|EAL84695.1 agla|OJJ83948.1 akaw|GAA86960.1 aluc|OJZ84504.1 anid|CBF82523.1 anig|EHA27804.1 aory|EIT77268.1 asyd|OJJ54071.1 ater|EAU38584.1 atub|OJI89576.1 aver|OJJ08671.1 awen|OJJ34378.1 azon|OJJ48112.1

Group4272: abra|OJJ77106.1 acar|OOF92991.1 acla|EAW11608.1 afis|EAW23840.1 afla|EED52551.1 afum|EAL87271.1 agla|OJJ82489.1 akaw|GAA86950.1 aluc|OJZ84515.1 anid|CBF77077.1 anig|EHA27813.1 aory|EIT74221.1 asyd|OJJ56983.1 ater|EAU33507.1 atub|OJI89566.1 aver|OJJ03304.1 awen|OJJ33810.1 azon|OJJ48724.1

Group4273: abra|OJJ77111.1 acar|OOF93001.1 acla|EAW07270.1 afis|EAW22291.1 afla|EED57693.1 afum|EAL90890.1 agla|OJJ87755.1 akaw|GAA90817.1 aluc|OJZ84520.1 anid|CBF88575.1 anig|EHA27818.1 aory|EIT79896.1 asyd|OJJ63840.1 ater|EAU34306.1 atub|OJI89560.1 aver|OJI97097.1 awen|OJJ34867.1 azon|OJJ50044.1

Group4274: abra|OJJ77116.1 acar|OOF93005.1 acla|EAW12952.1 afis|EAW17704.1 afla|EED45696.1 afum|EAL91519.2 agla|OJJ81740.1 akaw|GAA90813.1 aluc|OJZ84526.1 anid|CBF89929.1 anig|EHA27823.1 aory|EIT75367.1 asyd|OJJ62119.1 ater|EAU31912.1 atub|OJI89554.1 aver|OJI96226.1 awen|OJJ37131.1 azon|OJJ50830.1

Group4275: abra|OJJ77120.1 acar|OOF93007.1 acla|EAW12932.1 afis|EAW17709.1 afla|EED45711.1 afum|EAL91524.2 agla|OJJ81738.1 akaw|GAA90809.1 aluc|OJZ84530.1 anid|CBF89906.1 anig|EHA27827.1 aory|EIT75650.1 asyd|OJJ62132.1 ater|EAU31903.1 atub|OJI89550.1 aver|OJI96241.1 awen|OJJ37127.1 azon|OJJ50826.1

Group4276: abra|OJJ77123.1 acar|OOF93009.1 acla|EAW12936.1 afis|EAW17712.1 afla|EED45714.1 afum|EAL91527.1 agla|OJJ81736.1 akaw|GAA90805.1 aluc|OJZ84533.1 anid|CBF76920.1 anig|EHA27831.1 aory|EIT75661.1 asyd|OJJ57072.1 ater|EAU31891.1 atub|OJI89547.1 aver|OJJ03226.1 awen|OJJ37124.1 azon|OJJ50823.1

Group4277: abra|OJJ77125.1 acar|OOF93011.1 acla|EAW12938.1 afis|EAW17714.1 afla|EED45716.1  
afum|EAL91529.1 agla|OJJ81734.1 akaw|GAA90803.1 aluc|OJZ84535.1 anid|CBF76916.1 anig|EHA27833.1  
aory|EIT75429.1 asyd|OJJ57079.1 ater|EAU31892.1 atub|OJI89545.1 aver|OJJ03224.1 awen|OJJ37122.1  
azon|OJJ50821.1

Group4278: abra|OJJ77126.1 acar|OOF93012.1 acla|EAW12939.1 afis|EAW17715.1 afla|EED45717.1  
afum|EAL91530.1 agla|OJJ81733.1 akaw|GAA90802.1 aluc|OJZ84536.1 anid|CBF76914.1 anig|EHA27834.1  
aory|EIT75816.1 asyd|OJJ57080.1 ater|EAU31893.1 atub|OJI89544.1 aver|OJJ03223.1 awen|OJJ37121.1  
azon|OJJ50820.1

Group4279: abra|OJJ77130.1 acar|OOF93018.1 acla|EAW12941.1 afis|EAW17717.1 afla|EED45719.1  
afum|EAL91532.1 agla|OJJ81731.1 akaw|GAA90798.1 aluc|OJZ84540.1 anid|CBF84088.1 anig|EHA27838.1  
aory|EIT75412.1 asyd|OJJ57082.1 ater|EAU31895.1 atub|OJI89540.1 aver|OJJ03220.1 awen|OJJ37119.1  
azon|OJJ50818.1

Group4280: abra|OJJ77131.1 acar|OOF93019.1 acla|EAW12942.1 afis|EAW17718.1 afla|EED45720.1  
afum|EAL91533.1 agla|OJJ81728.1 akaw|GAA90797.1 aluc|OJZ84541.1 anid|CBF76908.1 anig|EHA27839.1  
aory|EIT75617.1 asyd|OJJ57083.1 ater|EAU31896.1 atub|OJI89539.1 aver|OJJ03219.1 awen|OJJ37118.1  
azon|OJJ50817.1

Group4281: abra|OJJ77133.1 acar|OOF93021.1 acla|EAW12944.1 afis|EAW17720.1 afla|EED45722.1  
afum|EAL91535.2 agla|OJJ81730.1 akaw|GAA90795.1 aluc|OJZ84543.1 anid|CBF76904.1 anig|EHA27841.1  
aory|EIT75737.1 asyd|OJJ57085.1 ater|EAU31898.1 atub|OJI89537.1 aver|OJJ03217.1 awen|OJJ37116.1  
azon|OJJ50815.1

Group4282: abra|OJJ77138.1 acar|OOF90283.1 acla|EAW12948.1 afis|EAW17723.1 afla|EED45725.1  
afum|EAL91538.1 agla|OJJ81727.1 akaw|GAA90791.1 aluc|OJZ84549.1 anid|CBF86584.1 anig|EHA27845.1  
aory|EIT75656.1 asyd|OJJ64839.1 ater|EAU31901.1 atub|OJI89531.1 aver|OJI98950.1 awen|OJJ37115.1  
azon|OJJ50813.1

Group4283: abra|OJJ77139.1 acar|OOF90282.1 acla|EAW12950.1 afis|EAW17725.1 afla|EED45726.1  
afum|EAL91540.1 agla|OJJ81726.1 akaw|GAA90790.1 aluc|OJZ84552.1 anid|CBF86583.1 anig|EHA27846.1  
aory|EIT75496.1 asyd|OJJ64840.1 ater|EAU31881.1 atub|OJI89530.1 aver|OJI98951.1 awen|OJJ37113.1  
azon|OJJ50812.1

Group4284: abra|OJJ77141.1 acar|OOF93027.1 acla|EAW12927.1 afis|EAW17728.1 afla|EED45728.1  
afum|EAL91543.1 agla|OJJ81723.1 akaw|GAA90788.1 aluc|OJZ84555.1 anid|CBF86577.1 anig|EHA27849.1  
aory|EIT75836.1 asyd|OJJ64842.1 ater|EAU31879.1 atub|OJI89527.1 aver|OJI98953.1 awen|OJJ37110.1  
azon|OJJ50809.1

Group4285: abra|OJJ77142.1 acar|OOF93028.1 acla|EAW12926.1 afis|EAW17729.1 afla|EED45729.1  
afum|EAL91544.1 agla|OJJ81722.1 akaw|GAA90787.1 aluc|OJZ84556.1 anid|CBF86575.1 anig|EHA27850.1  
aory|EIT75504.1 asyd|OJJ64843.1 ater|EAU31878.1 atub|OJI89526.1 aver|OJI98954.1 awen|OJJ37109.1  
azon|OJJ50808.1

Group4286: abra|OJJ77143.1 acar|OOF93029.1 acla|EAW12925.1 afis|EAW17730.1 afla|EED45730.1  
afum|EAL91545.1 agla|OJJ81721.1 akaw|GAA90786.1 aluc|OJZ84558.1 anid|CBF86573.1 anig|EHA27851.1  
aory|EIT75486.1 asyd|OJJ64844.1 ater|EAU31877.1 atub|OJI89525.1 aver|OJI98955.1 awen|OJJ37108.1  
azon|OJJ50807.1

Group4287: abra|OJJ77144.1 acar|OOF93030.1 acla|EAW12924.1 afis|EAW17731.1 afla|EED45731.1  
afum|EAL91546.1 agla|OJJ81720.1 akaw|GAA90785.1 aluc|OJZ84559.1 anid|CBF86588.1 anig|EHA27852.1  
aory|EIT75623.1 asyd|OJJ64838.1 ater|EAU31876.1 atub|OJI89524.1 aver|OJI98948.1 awen|OJJ37107.1  
azon|OJJ50806.1

Group4288: abra|OJJ77145.1 acar|OOF93031.1 acla|EAW12923.1 afis|EAW17732.1 afla|EED45732.1  
afum|EAL91547.1 agla|OJJ81719.1 akaw|GAA90784.1 aluc|OJZ84560.1 anid|CBF86586.1 anig|EHA27853.1  
aory|EIT75469.1 asyd|OJJ64837.1 ater|EAU31875.1 atub|OJI89523.1 aver|OJI98947.1 awen|OJJ37105.1  
azon|OJJ50805.1

Group4289: abra|OJJ77146.1 acar|OOF93032.1 acla|EAW12922.1 afis|EAW17733.1 afla|EED45734.1  
afum|EAL91548.1 agla|OJJ81718.1 akaw|GAA90783.1 aluc|OJZ84561.1 anid|CBF86597.1 anig|EHA27855.1  
aory|EIT75719.1 asyd|OJJ64833.1 ater|EAU31874.1 atub|OJI89521.1 aver|OJI98946.1 awen|OJJ37104.1  
azon|OJJ50804.1

Group4290: abra|OJJ77148.1 acar|OOF93034.1 acla|EAW12921.1 afis|EAW17734.1 afla|EED45735.1  
afum|EAL91549.1 agla|OJJ81716.1 akaw|GAA90782.1 aluc|OJZ84562.1 anid|CBF86595.1 anig|EHA27856.1  
aory|EIT75759.1 asyd|OJJ64832.1 ater|EAU31873.1 atub|OJI89520.1 aver|OJI98945.1 azon|OJJ50802.1  
awen|OJJ37101.1

Group4291: abra|OJJ77149.1 acar|OOF93035.1 acla|EAW12920.1 afis|EAW17735.1 afla|EED45736.1  
afum|EAL91550.1 agla|OJJ81715.1 akaw|GAA90781.1 aluc|OJZ84563.1 anid|CBF86593.1 anig|EHA27857.1

aory|EIT75423.1 asyd|OJJ64831.1 ater|EAU31872.1 atub|OJI89519.1 aver|OJI98944.1 awen|OJJ37100.1 azon|OJJ50801.1

Group4292: abra|OJJ77157.1 acar|OOF93044.1 acla|EAW12915.1 afis|EAW17745.1 afla|EED45745.1 afum|EAL91557.1 agla|OJJ81708.1 akaw|GAA90773.1 aluc|OJZ84571.1 anid|CBF86614.1 anig|EHA27866.1 aory|EIT75582.1 asyd|OJJ64818.1 ater|EAU31862.1 atub|OJI89511.1 aver|OJI98931.1 awen|OJJ37092.1 azon|OJJ50796.1

Group4293: abra|OJJ77164.1 acar|OOF93050.1 acla|EAW12910.1 afis|EAW17754.1 afla|EED45758.1 afum|EAL91567.1 agla|OJJ81699.1 akaw|GAA90768.1 aluc|OJZ84577.1 anid|CBF86624.1 anig|EHA27870.1 aory|EIT75538.1 asyd|OJJ64811.1 ater|EAU31854.1 atub|OJI89504.1 aver|OJI98924.1 awen|OJJ37082.1 azon|OJJ50787.1

Group4294: abra|OJJ77165.1 acar|OOF93054.1 acla|EAW12901.1 afis|EAW17764.1 afla|EED45766.1 afum|EAL91574.1 agla|OJJ81698.1 akaw|GAA90767.1 aluc|OJZ84578.1 anid|CBF86628.1 anig|EHA27871.1 aory|EIT75559.1 asyd|OJJ64809.1 ater|EAU31853.1 atub|OJI89503.1 aver|OJI98922.1 awen|OJJ37081.1 azon|OJJ50784.1

Group4295: abra|OJJ77166.1 acar|OOF93055.1 acla|EAW12900.1 afis|EAW17765.1 afla|EED45767.1 afum|EAL91575.1 agla|OJJ81697.1 akaw|GAA90766.1 aluc|OJZ84579.1 anid|CBF86630.1 anig|EHA27872.1 aory|EIT75709.1 asyd|OJJ64808.1 ater|EAU31852.1 atub|OJI89502.1 aver|OJI98921.1 awen|OJJ37080.1 azon|OJJ50783.1

Group4296: abra|OJJ77176.1 acar|OOF93064.1 acla|EAW13174.1 afis|EAW17464.1 afla|EED49356.1 afum|EAL91293.1 agla|OJJ80340.1 akaw|GAA90759.1 aluc|OJZ84587.1 anid|CBF71650.1 anig|EHA27880.1 aory|EIT79568.1 asyd|OJJ61840.1 ater|EAU33949.1 atub|OJI89491.1 aver|OJI95939.1 awen|OJJ37381.1 azon|OJJ51055.1

Group4297: abra|OJJ77177.1 acar|OOF93065.1 acla|EAW13175.1 afis|EAW17463.1 afla|EED49357.1 afum|EAL91292.1 agla|OJJ80342.1 akaw|GAA90758.1 aluc|OJZ84589.1 anid|CBF71651.1 anig|EHA27881.1 aory|EIT79484.1 asyd|OJJ61839.1 ater|EAU33948.1 atub|OJI89490.1 aver|OJI95938.1 awen|OJJ37382.1 azon|OJJ51056.1

Group4298: abra|OJJ77186.1 acar|OOF93074.1 acla|EAW13176.1 afis|EAW17462.1 afla|EED49360.1 afum|EAL91291.1 agla|OJJ80343.1 akaw|GAA90753.1 aluc|OJZ84595.1 anid|CBF71661.1 anig|EHA27884.1 aory|EIT79468.1 asyd|OJJ61834.1 ater|EAU33947.1 atub|OJI89484.1 aver|OJI95933.1 awen|OJJ37384.1 azon|OJJ51059.1

Group4299: abra|OJJ77188.1 acar|OOF92641.1 acla|EAW13178.1 afis|EAW17461.1 afla|EED49361.1 afum|EAL91289.1 agla|OJJ80344.1 akaw|GAA90752.1 aluc|OJZ84596.1 anid|CBF71663.1 anig|EHA27885.1 aory|EIT79490.1 asyd|OJJ61833.1 ater|EAU33946.1 atub|OJI89483.1 aver|OJI95932.1 awen|OJJ37385.1 azon|OJJ51060.1

Group4300: abra|OJJ77190.1 acar|OOF93076.1 acla|EAW13179.1 afis|EAW17460.1 afla|EED49362.1 afum|EAL91288.1 agla|OJJ80345.1 akaw|GAA90750.1 aluc|OJZ84598.1 anid|CBF71665.1 anig|EHA27887.1 aory|EIT79506.1 asyd|OJJ61832.1 ater|EAU33945.1 atub|OJI89481.1 aver|OJI95931.1 awen|OJJ37386.1 azon|OJJ51061.1

Group4301: abra|OJJ77193.1 acar|OOF93078.1 acla|EAW13183.1 afis|EAW17457.1 afla|EED49365.1 afum|EAL91285.1 agla|OJJ80354.1 akaw|GAA90748.1 aluc|OJZ84600.1 anid|CBF71668.1 anig|EHA27890.1 aory|EIT79576.1 asyd|OJJ61829.1 ater|EAU33944.1 atub|OJI89479.1 aver|OJI95929.1 awen|OJJ37390.1 azon|OJJ51063.1

Group4302: abra|OJJ77194.1 acar|OOF93079.1 acla|EAW13184.1 afis|EAW17456.1 afla|EED49366.1 afum|EAL91284.1 agla|OJJ80353.1 akaw|GAA90747.1 aluc|OJZ84601.1 anid|CBF71670.1 anig|EHA27891.1 aory|EIT79508.1 asyd|OJJ61828.1 ater|EAU33936.1 atub|OJI89478.1 aver|OJI95928.1 awen|OJJ37391.1 azon|OJJ51064.1

Group4303: abra|OJJ77195.1 acar|OOF93080.1 acla|EAW13186.1 afis|EAW17455.1 afla|EED49367.1 afum|EAL91283.1 agla|OJJ80352.1 akaw|GAA90746.1 aluc|OJZ84602.1 anid|CBF71671.1 anig|EHA27892.1 aory|EIT79573.1 asyd|OJJ61827.1 ater|EAU33935.1 atub|OJI89477.1 aver|OJI95927.1 awen|OJJ37392.1 azon|OJJ51065.1

Group4304: abra|OJJ77198.1 acar|OOF93081.1 acla|EAW13187.1 afis|EAW17454.1 afla|EED49368.1 afum|EAL91282.1 agla|OJJ80351.1 akaw|GAA90743.1 aluc|OJZ84605.1 anid|CBF71673.1 anig|EHA27894.1 aory|EIT79544.1 asyd|OJJ61826.1 ater|EAU33934.1 atub|OJI89474.1 aver|OJI95926.1 awen|OJJ37393.1 azon|OJJ51066.1

Group4305: abra|OJJ77201.1 acar|OOF93089.1 acla|EAW13192.1 afis|EAW17449.1 afla|EED49373.1 afum|EBA27429.1 akaw|GAA90737.1 aluc|OJZ84611.1 anid|CBF71685.1 anig|EHA27900.1 aory|EIT79520.1 asyd|OJJ61821.1 ater|EAU33929.1 atub|OJI89470.1 aver|OJI95921.1 awen|OJJ37397.1 azon|OJJ51070.1 agla|OJJ80368.1



Group4306: abra|OJJ77202.1 acar|OOF93090.1 acla|EAW13193.1 afis|EAW17448.1 afla|EED49374.1 afum|EAL91275.2 agla|OJJ80369.1 akaw|GAA90736.1 aluc|OJZ84612.1 anid|CBF71687.1 anig|EHA27901.1 aory|EIT79525.1 asyd|OJJ61820.1 ater|EAU33928.1 atub|OJI89469.1 aver|OJI95920.1 awen|OJJ37398.1 azon|OJJ51071.1

Group4307: abra|OJJ77204.1 acar|OOF93092.1 acla|EAW13196.1 akaw|GAA90734.1 aluc|OJZ84615.1 anid|CBF71688.1 anig|EHA27903.1 aory|EIT79511.1 asyd|OJJ61819.1 ater|EAU33925.1 atub|OJI89466.1 aver|OJI95919.1 awen|OJJ37400.1 afis|EAW17446.1 afla|EED49381.1 afum|EAL91272.1 agla|OJJ80371.1 azon|OJJ51074.1

Group4308: abra|OJJ77205.1 acar|OOF93094.1 acla|EAW13197.1 afis|EAW17445.1 afla|EED49382.1 afum|EAL91271.1 agla|OJJ80372.1 akaw|GAA90733.1 aluc|OJZ84616.1 anid|CBF71690.1 anig|EHA27904.1 aory|EIT79527.1 asyd|OJJ61818.1 ater|EAU33924.1 atub|OJI89465.1 aver|OJI95918.1 awen|OJJ37401.1 azon|OJJ51075.1

Group4309: abra|OJJ77206.1 acar|OOF93093.1 acla|EAW13198.1 afis|EAW17444.1 afla|EED49383.1 afum|EAL91270.1 agla|OJJ80373.1 akaw|GAA90732.1 aluc|OJZ84617.1 anid|CBF71692.1 anig|EHA27905.1 aory|EIT79499.1 asyd|OJJ61817.1 ater|EAU33923.1 atub|OJI89464.1 aver|OJI95917.1 awen|OJJ37402.1 azon|OJJ51076.1

Group4310: abra|OJJ77207.1 acar|OOF93095.1 acla|EAW13199.1 afis|EAW17443.1 afla|EED49384.1 afum|EAL91269.1 agla|OJJ80374.1 akaw|GAA90731.1 aluc|OJZ84618.1 anid|CBF71694.1 anig|EHA27906.1 aory|EIT79562.1 asyd|OJJ61816.1 ater|EAU33922.1 atub|OJI89463.1 aver|OJI95916.1 awen|OJJ37403.1 azon|OJJ51077.1

Group4311: abra|OJJ77209.1 acar|OOF93096.1 acla|EAW13201.1 afis|EAW17441.1 afla|EED49386.1 afum|EAL91267.1 agla|OJJ80376.1 akaw|GAA90729.1 aluc|OJZ84620.1 anid|CBF71698.1 anig|EHA27908.1 aory|EIT79558.1 asyd|OJJ61814.1 ater|EAU33920.1 atub|OJI89461.1 aver|OJI95913.1 awen|OJJ37405.1 azon|OJJ51079.1

Group4312: abra|OJJ77210.1 acar|OOF93098.1 acla|EAW13202.1 afis|EAW17440.1 afla|EED49387.1 afum|EAL91266.1 agla|OJJ80377.1 akaw|GAA90728.1 aluc|OJZ84621.1 anid|CBF71700.1 anig|EHA27909.1 aory|EIT79563.1 asyd|OJJ61813.1 ater|EAU33919.1 atub|OJI89460.1 aver|OJI95912.1 awen|OJJ37406.1 azon|OJJ51080.1

Group4313: abra|OJJ77211.1 acar|OOF93097.1 acla|EAW13203.1 afis|EAW17439.1 afla|EED49388.1 afum|EAL91265.1 agla|OJJ80378.1 akaw|GAA90727.1 aluc|OJZ84622.1 anid|CBF71702.1 anig|EHA27910.1 aory|EIT79503.1 asyd|OJJ61812.1 ater|EAU33918.1 atub|OJI89459.1 aver|OJI95911.1 awen|OJJ37407.1 azon|OJJ51081.1

Group4315: abra|OJJ77214.1 acar|OOF93101.1 acla|EAW13206.1 afis|EAW17436.1 afla|EED49392.1 afum|EAL91263.1 agla|OJJ80381.1 akaw|GAA90724.1 aluc|OJZ84625.1 anid|CBF71706.1 anig|EHA27912.1 aory|EIT79513.1 asyd|OJJ61809.1 ater|EAU33915.1 atub|OJI89456.1 aver|OJI95908.1 awen|OJJ37410.1 azon|OJJ51084.1

Group4316: abra|OJJ77215.1 acar|OOF93102.1 acla|EAW13207.1 afis|EAW17435.1 afla|EED49409.1 afum|EAL91262.1 agla|OJJ80383.1 akaw|GAA90723.1 aluc|OJZ84626.1 anid|CBF71708.1 anig|EHA27913.1 aory|EIT79458.1 asyd|OJJ61808.1 ater|EAU33914.1 atub|OJI89455.1 aver|OJI95907.1 awen|OJJ37411.1 azon|OJJ51085.1

Group4317: abra|OJJ77216.1 acar|OOF93103.1 acla|EAW13209.1 afis|EAW17432.1 afla|EED49408.1 afum|EAL91260.1 agla|OJJ80384.1 akaw|GAA90722.1 aluc|OJZ84627.1 anid|CBF71710.1 anig|EHA27914.1 aory|EIT79545.1 asyd|OJJ61807.1 ater|EAU33913.1 atub|OJI89452.1 aver|OJI95906.1 awen|OJJ37412.1 azon|OJJ51086.1

Group4318: abra|OJJ77220.1 acar|OOF93105.1 acla|EAW13210.1 afis|EAW17431.1 afla|EED49407.1 afum|EAL91259.1 agla|OJJ80387.1 akaw|GAA90719.1 aluc|OJZ84630.1 anid|CBF71712.1 anig|EHA27918.1 aory|EIT79560.1 asyd|OJJ61806.1 ater|EAU33912.1 atub|OJI89449.1 aver|OJI95905.1 awen|OJJ37413.1 azon|OJJ51087.1

Group4319: abra|OJJ77223.1 acar|OOF93108.1 acla|EAW13214.1 afis|EAW17428.1 afla|EED49402.1 afum|EAL91256.1 agla|OJJ80396.1 akaw|GAA90716.1 aluc|OJZ84633.1 anid|CBF71716.1 anig|EHA27921.1 aory|EIT79534.1 asyd|OJJ61804.1 ater|EAU33909.1 atub|OJI89446.1 aver|OJI95903.1 awen|OJJ37415.1 azon|OJJ51089.1

Group4320: abra|OJJ77225.1 acar|OOF93110.1 acla|EAW13216.1 afis|EAW17426.1 afla|EED49400.1 afum|EAL91254.1 agla|OJJ80398.1 akaw|GAA90714.1 aluc|OJZ84635.1 anid|CBF71720.1 anig|EHA27923.1 aory|EIT79524.1 asyd|OJJ61802.1 ater|EAU33908.1 atub|OJI89444.1 aver|OJI95901.1 awen|OJJ37417.1 azon|OJJ51091.1

Group4321: abra|OJJ77226.1 acar|OOF93111.1 acla|EAW13217.1 afis|EAW17425.1 afla|EED49399.1 afum|EAL91253.1 agla|OJJ80399.1 akaw|GAA90713.1 aluc|OJZ84636.1 anid|CBF71722.1 anig|EHA27924.1

aory|EIT79475.1 asyd|OJJ61801.1 ater|EAU33907.1 atub|OJI89443.1 aver|OJI95900.1 awen|OJJ37418.1 azon|OJJ51092.1

Group4322: abra|OJJ77230.1 acar|OOF93113.1 acla|EAW13219.1 afis|EAW17423.1 afla|EED49397.1 afum|EAL91251.1 agla|OJJ80401.1 akaw|GAA90711.1 aluc|OJZ84640.1 anid|CBF71729.1 anig|EHA27926.1 aory|EIT79564.1 asyd|OJJ61799.1 ater|EAU33905.1 atub|OJI89440.1 aver|OJI95898.1 awen|OJJ37421.1 azon|OJJ51094.1

Group4323: abra|OJJ77238.1 acar|OOF93119.1 acla|EAW13245.1 afis|EAW17391.1 afla|EED49477.1 afum|EAL91228.1 agla|OJJ80406.1 akaw|GAA90705.1 aluc|OJZ84648.1 anid|CBF71739.1 anig|EHA27932.1 aory|EIT79509.1 asyd|OJJ61792.1 ater|EAU33896.1 atub|OJI89432.1 aver|OJI95892.1 awen|OJJ37424.1 azon|OJJ51104.1

Group4324: abra|OJJ77240.1 acar|OOF93121.1 acla|EAW13247.1 afis|EAW17389.1 afla|EED49481.1 afum|EAL91225.1 agla|OJJ80408.1 akaw|GAA90703.1 aluc|OJZ84650.1 anid|CBF71743.1 anig|EHA27933.1 aory|EIT79553.1 asyd|OJJ61790.1 ater|EAU33894.1 atub|OJI89430.1 aver|OJI95890.1 awen|OJJ37426.1 azon|OJJ51102.1

Group4326: abra|OJJ77244.1 acar|OOF93125.1 acla|EAW13248.1 afis|EAW17388.1 afla|EED49482.1 afum|EAL91224.1 agla|OJJ80409.1 akaw|GAA90699.1 aluc|OJZ84654.1 anid|CBF71787.1 anig|EHA27937.1 aory|EIT79464.1 asyd|OJJ61746.1 ater|EAU33893.1 atub|OJI89426.1 aver|OJI95843.1 awen|OJJ37427.1 azon|OJJ51101.1

Group4327: abra|OJJ77247.1 acar|OOF90006.1 acla|EAW13252.1 afis|EAW17384.1 afla|EED49501.1 afum|EAL91219.1 agla|OJJ80419.1 akaw|GAA90695.1 aluc|OJZ84658.1 anid|CBF84196.1 anig|EHA27940.1 aory|EIT82601.1 asyd|OJJ57160.1 ater|EAU33890.1 atub|OJI89422.1 aver|OJJ03153.1 awen|OJJ33371.1 azon|OJJ51109.1

Group4328: abra|OJJ77250.1 acar|OOF90005.1 acla|EAW13253.1 afis|EAW17383.1 afla|EED49504.1 afum|EAL91218.1 agla|OJJ80420.1 akaw|GAA90693.1 aluc|OJZ84661.1 anid|CBF84198.1 anig|EHA27943.1 aory|EIT82610.1 asyd|OJJ57161.1 ater|EAU33880.1 atub|OJI89419.1 aver|OJJ03152.1 awen|OJJ37433.1 azon|OJJ51112.1

Group4329: abra|OJJ77260.1 acar|OOF93128.1 afla|EED49508.1 akaw|GAA90687.1 aluc|OJZ84667.1 anig|EHA27946.1 aory|EIT82587.1 asyd|OJJ57166.1 ater|EAU33878.1 atub|OJI89413.1 awen|OJJ37439.1 azon|OJJ51115.1 acla|EAW13256.1 afis|EAW17380.1 afum|EAL91215.1 agla|OJJ80422.1 anid|CBF84207.1 aver|OJJ03148.1

Group4330: abra|OJJ77261.1 acar|OOF93130.1 acla|EAW13257.1 afis|EAW17379.1 afla|EED49509.1 afum|EAL91214.1 agla|OJJ80423.1 akaw|GAA90686.1 aluc|OJZ84668.1 anid|CBF84209.1 anig|EHA27947.1 aory|EIT82656.1 asyd|OJJ57167.1 ater|EAU33877.1 atub|OJI89412.1 aver|OJJ03147.1 awen|OJJ37441.1 azon|OJJ51117.1

Group4331: abra|OJJ77262.1 acar|OOF93132.1 acla|EAW13258.1 afis|EAW17378.1 afla|EED49510.1 afum|EAL91213.1 agla|OJJ80424.1 akaw|GAA90685.1 aluc|OJZ84669.1 anid|CBF84210.1 anig|EHA27948.1 aory|EIT82657.1 asyd|OJJ57168.1 ater|EAU33876.1 atub|OJI89411.1 aver|OJJ03146.1 awen|OJJ37442.1 azon|OJJ51120.1

Group4332: abra|OJJ77263.1 acar|OOF93131.1 acla|EAW13259.1 afis|EAW17377.1 afla|EED49511.1 afum|EAL91212.1 agla|OJJ80425.1 akaw|GAA90684.1 aluc|OJZ84671.1 anid|CBF84212.1 anig|EHA27949.1 aory|EIT82654.1 asyd|OJJ57169.1 ater|EAU33875.1 atub|OJI89409.1 aver|OJJ03145.1 awen|OJJ37443.1 azon|OJJ51121.1

Group4333: abra|OJJ77275.1 acar|OOF93150.1 acla|EAW13275.1 afis|EAW17342.1 afla|EED49781.1 afum|EBA27424.1 agla|OJJ79342.1 akaw|GAA90674.1 aluc|OJZ84684.1 anid|CBF84217.1 anig|EHA27960.1 aory|EIT77695.1 asyd|OJJ57179.1 ater|EAU33855.1 atub|OJI89397.1 aver|OJJ03135.1 awen|OJJ29675.1 azon|OJJ45994.1

Group4334: abra|OJJ77289.1 acar|OOF93167.1 acla|EAW13173.1 afis|EAW17465.1 afla|EED49355.1 afum|EAL91294.1 agla|OJJ80339.1 akaw|GAA90660.1 aluc|OJZ84700.1 anid|CBF71646.1 anig|EHA27975.1 aory|EIT79489.1 asyd|OJJ61841.1 ater|EAU33950.1 atub|OJI89382.1 aver|OJI95941.1 awen|OJJ37380.1 azon|OJJ51054.1

Group4335: abra|OJJ77290.1 acar|OOF93168.1 acla|EAW13172.1 afis|EAW17466.1 afla|EED49354.1 afum|EAL91295.1 agla|OJJ80338.1 akaw|GAA90659.1 aluc|OJZ84701.1 anid|CBF71638.1 anig|EHA27976.1 aory|EIT79580.1 asyd|OJJ61844.1 ater|EAU33951.1 atub|OJI89381.1 aver|OJI95944.1 awen|OJJ37379.1 azon|OJJ51053.1

Group4336: abra|OJJ77291.1 acar|OOF93169.1 acla|EAW13171.1 afis|EAW17468.1 afla|EED49353.1 afum|EAL91297.1 agla|OJJ80336.1 akaw|GAA90658.1 aluc|OJZ84702.1 anid|CBF71640.1 anig|EHA27977.1 aory|EIT79590.1 asyd|OJJ61843.1 ater|EAU33952.1 atub|OJI89380.1 aver|OJI95943.1 awen|OJJ37378.1 azon|OJJ51052.1

Group4337: abra|OJJ77295.1 acar|OOF93172.1 acla|EAW13169.1 afis|EAW17470.1 afla|EED49348.1 afum|EAL91299.1 agla|OJJ78440.1 akaw|GAA91456.1 aluc|OJZ84707.1 anid|CBF71630.1 anig|EHA27981.1 aory|EIT79461.1 asyd|OJJ61849.1 ater|EAU33954.1 atub|OJI89376.1 aver|OJI95948.1 awen|OJJ37372.1 azon|OJJ51050.1

Group4338: abra|OJJ77297.1 acar|OOF93177.1 acla|EAW13167.1 afis|EAW17472.1 afla|EED49343.1 akaw|GAA91454.1 aluc|OJZ84709.1 anid|CBF71626.1 anig|EHA27983.1 asyd|OJJ61851.1 ater|EAU33956.1 atub|OJI89374.1 aver|OJI95950.1 afum|EAL91301.1 agla|OJJ81490.1 aory|EIT79471.1 awen|OJJ37370.1 azon|OJJ51049.1

Group4339: abra|OJJ77300.1 acar|OOF93179.1 acla|EAW13165.1 afis|EAW17474.1 afla|EED49340.1 afum|EAL91303.1 agla|OJJ81488.1 akaw|GAA91452.1 aluc|OJZ84712.1 anid|CBF71622.1 anig|EHA27985.1 aory|EIT79516.1 asyd|OJJ61854.1 ater|EAU33958.1 atub|OJI89371.1 aver|OJI95953.1 awen|OJJ37368.1 azon|OJJ51047.1

Group4340: abra|OJJ77301.1 acar|OOF93180.1 acla|EAW13164.1 afis|EAW17475.1 afla|EED49339.1 afum|EAL91304.1 agla|OJJ81487.1 akaw|GAA91451.1 aluc|OJZ84713.1 anid|CBF71620.1 anig|EHA27986.1 aory|EIT79565.1 asyd|OJJ61855.1 ater|EAU33959.1 atub|OJI89370.1 aver|OJI95954.1 awen|OJJ37367.1 azon|OJJ51046.1

Group4341: abra|OJJ77303.1 acar|OOF93183.1 acla|EAW13163.1 afis|EAW17477.1 afla|EED49337.1 afum|EAL91306.1 agla|OJJ81480.1 akaw|GAA91448.1 aluc|OJZ84716.1 anid|CBF71603.1 anig|EHA27988.1 aory|EIT79497.1 asyd|OJJ61857.1 ater|EAU33693.1 atub|OJI89367.1 aver|OJI95956.1 awen|OJJ37365.1 azon|OJJ51045.1

Group4342: abra|OJJ77304.1 acar|OOF93182.1 acla|EAW13162.1 afis|EAW17478.1 afla|EED49336.1 afum|EAL91307.1 agla|OJJ81479.1 akaw|GAA91447.1 aluc|OJZ84717.1 anid|CBF71605.1 anig|EHA27989.1 aory|EIT79535.1 asyd|OJJ61858.1 ater|EAU33694.1 atub|OJI89366.1 aver|OJI95957.1 awen|OJJ37364.1 azon|OJJ51044.1

Group4343: abra|OJJ77305.1 acar|OOF93184.1 acla|EAW13161.1 afis|EAW17479.1 afla|EED49335.1 afum|EAL91308.1 agla|OJJ81478.1 akaw|GAA91446.1 aluc|OJZ84718.1 anid|CBF71607.1 anig|EHA27990.1 aory|EIT79462.1 asyd|OJJ61859.1 ater|EAU33695.1 atub|OJI89365.1 aver|OJI95958.1 awen|OJJ37362.1 azon|OJJ51043.1

Group4344: abra|OJJ77306.1 acar|OOF93185.1 acla|EAW13160.1 afis|EAW17481.1 afla|EED49334.1 afum|EAL91309.1 agla|OJJ81477.1 akaw|GAA91445.1 aluc|OJZ84720.1 anid|CBF71609.1 anig|EHA27991.1 aory|EIT79526.1 asyd|OJJ61860.1 ater|EAU33692.1 atub|OJI89363.1 aver|OJI95959.1 awen|OJJ37357.1 azon|OJJ51041.1

Group4345: abra|OJJ77315.1 acar|OOF93191.1 acla|EAW13157.1 afis|EAW17489.1 afla|EED49327.1 afum|EAL91311.1 agla|OJJ81467.1 akaw|GAA91440.1 aluc|OJZ84725.1 anid|CBF71617.1 anig|EHA27999.1 aory|EIT79549.1 asyd|OJJ61864.1 ater|EAU33693.1 atub|OJI89357.1 aver|OJI95962.1 awen|OJJ37352.1 azon|OJJ51038.1

Group4346: abra|OJJ77318.1 acar|OOF93194.1 acla|EAW13154.1 afis|EAW17492.1 afla|EED49324.1 afum|EAL91314.1 agla|OJJ81464.1 akaw|GAA91438.1 aluc|OJZ84728.1 anid|CBF71599.1 anig|EHA28001.1 aory|EIT79543.1 asyd|OJJ61866.1 ater|EAU33693.1 atub|OJI89354.1 aver|OJI95964.1 awen|OJJ37349.1 azon|OJJ51035.1

Group4347: abra|OJJ77319.1 acar|OOF93195.1 acla|EAW13153.1 afis|EAW17493.1 afla|EED49323.1 afum|EAL91315.1 agla|OJJ81463.1 akaw|GAA91437.1 aluc|OJZ84729.1 anid|CBF71595.1 anig|EHA28002.1 aory|EIT79479.1 asyd|OJJ61868.1 ater|EAU33693.1 atub|OJI89353.1 aver|OJI95966.1 awen|OJJ37348.1 azon|OJJ51034.1

Group4348: abra|OJJ77320.1 acar|OOF93196.1 acla|EAW13152.1 afis|EAW17494.1 afla|EED49322.1 afum|EAL91316.1 agla|OJJ81460.1 akaw|GAA91436.1 aluc|OJZ84730.1 anid|CBF71589.1 anig|EHA28003.1 aory|EIT79493.1 asyd|OJJ61870.1 ater|EAU33693.1 atub|OJI89352.1 aver|OJI95968.1 awen|OJJ37347.1 azon|OJJ51033.1

Group4349: abra|OJJ77326.1 acar|OOF93202.1 acla|EAW13146.1 afis|EAW17518.1 afla|EED49315.1 afum|EAL91336.1 agla|OJJ81452.1 akaw|GAA91430.1 aluc|OJZ84736.1 anid|CBF71576.1 anig|EHA28009.1 aory|EIT82190.1 asyd|OJJ61877.1 ater|EAU33694.1 atub|OJI89345.1 aver|OJI95975.1 awen|OJJ37339.1 azon|OJJ51025.1

Group4350: abra|OJJ77328.1 acar|OOF93203.1 acla|EAW13145.1 afis|EAW17517.1 afla|EED49314.1 afum|EAL91335.1 agla|OJJ81451.1 akaw|GAA91429.1 aluc|OJZ84737.1 anid|CBF71574.1 anig|EHA28010.1 aory|EIT82219.1 asyd|OJJ61878.1 ater|EAU33694.1 atub|OJI89344.1 aver|OJI95976.1 awen|OJJ37338.1 azon|OJJ51024.1

Group4351: abra|OJJ77329.1 acar|OOF93204.1 acla|EAW13144.1 afis|EAW17516.1 afla|EED49313.1 afum|EAL91334.1 agla|OJJ81450.1 akaw|GAA91428.1 aluc|OJZ84738.1 anid|CBF71572.1 anig|EHA28011.1

aory|EIT82242.1 asyd|OJJ61879.1 ater|EAU36950.1 atub|OJI89343.1 aver|OJI95977.1 awen|OJJ37337.1 azon|OJJ51023.1

Group4352: abra|OJJ77334.1 acar|OOF89885.1 acla|EAW13138.1 afis|EAW17507.1 afla|EED49308.1 afum|EAL91329.1 agla|OJJ81445.1 akaw|GAA91424.1 aluc|OJZ84742.1 anid|CBF71533.1 anig|EHA28016.1 aory|EIT82210.1 asyd|OJJ61892.1 ater|EAU36953.1 atub|OJI89339.1 aver|OJI95988.1 awen|OJJ37332.1 azon|OJJ51019.1

Group4353: abra|OJJ77338.1 acar|OOF93209.1 acla|EAW13137.1 afis|EAW17506.1 afla|EED49306.1 afum|EAL91328.2 agla|OJJ81444.1 akaw|GAA91423.1 aluc|OJZ84747.1 anid|CBF71535.1 anig|EHA28017.1 aory|EIT82204.1 asyd|OJJ61889.1 ater|EAU36955.1 atub|OJI89335.1 aver|OJI95986.1 awen|OJJ37329.1 azon|OJJ51018.1

Group4354: abra|OJJ77339.1 acar|OOF93210.1 acla|EAW13136.1 afis|EAW17505.1 afla|EED49305.1 afum|EAL91327.1 agla|OJJ81443.1 akaw|GAA91422.1 aluc|OJZ84748.1 anid|CBF71537.1 anig|EHA28018.1 aory|EIT82207.1 asyd|OJJ61894.1 ater|EAU36956.1 atub|OJI89334.1 aver|OJI95990.1 awen|OJJ37328.1 azon|OJJ51017.1

Group4355: abra|OJJ77341.1 acar|OOF93211.1 acla|EAW13134.1 afis|EAW17503.1 afla|EED49301.1 afum|EBA27430.1 agla|OJJ81441.1 akaw|GAA91420.1 aluc|OJZ84750.1 anid|CBF71541.1 anig|EHA28020.1 aory|EIT82193.1 asyd|OJJ61896.1 ater|EAU36958.1 atub|OJI89332.1 aver|OJI95992.1 awen|OJJ37326.1 azon|OJJ51015.1

Group4356: abra|OJJ77342.1 acar|OOF93212.1 acla|EAW13133.1 afis|EAW17502.1 afla|EED49300.1 afum|EAL91325.1 agla|OJJ81440.1 akaw|GAA91419.1 aluc|OJZ84751.1 anid|CBF71543.1 anig|EHA28021.1 aory|EIT82195.1 asyd|OJJ61897.1 ater|EAU36959.1 atub|OJI89331.1 aver|OJI95993.1 awen|OJJ37325.1 azon|OJJ51014.1

Group4357: abra|OJJ77343.1 acar|OOF93213.1 acla|EAW13132.1 afis|EAW17501.1 afla|EED49299.1 afum|EAL91324.1 agla|OJJ81439.1 akaw|GAA91418.1 aluc|OJZ84753.1 anid|CBF85589.1 anig|EHA28022.1 aory|EIT82233.1 asyd|OJJ64171.1 ater|EAU36960.1 atub|OJI89330.1 aver|OJI98246.1 awen|OJJ37324.1 azon|OJJ51013.1

Group4358: abra|OJJ77344.1 acar|OOF93214.1 acla|EAW13131.1 afis|EAW17532.1 afla|EED49298.1 afum|EAL91346.1 agla|OJJ81438.1 akaw|GAA91417.1 aluc|OJZ84754.1 anid|CBF90335.1 anig|EHA28023.1 aory|EIT82183.1 asyd|OJJ61898.1 ater|EAU36961.1 atub|OJI89329.1 aver|OJI95994.1 awen|OJJ37320.1 azon|OJJ51012.1

Group4359: abra|OJJ77346.1 acar|OOF93216.1 acla|EAW13128.1 afis|EAW17535.1 afla|EED49294.1 afum|EAL91349.1 agla|OJJ81436.1 akaw|GAA91414.1 aluc|OJZ84757.1 anid|CBF90326.1 anig|EHA28026.1 aory|EIT82178.1 asyd|OJJ61907.1 ater|EAU36964.1 atub|OJI89327.1 aver|OJI96000.1 awen|OJJ37318.1 azon|OJJ51010.1

Group4360: abra|OJJ77347.1 acar|OOF93217.1 acla|EAW13127.1 afis|EAW17536.1 afla|EED49293.1 afum|EAL91350.1 agla|OJJ81433.1 akaw|GAA91413.1 aluc|OJZ84758.1 anid|CBF90324.1 anig|EHA28027.1 aory|EIT82228.1 asyd|OJJ61908.1 ater|EAU36965.1 atub|OJI89326.1 aver|OJI96001.1 awen|OJJ37317.1 azon|OJJ51009.1

Group4361: abra|OJJ77348.1 acar|OOF93218.1 acla|EAW13126.1 afis|EAW17537.1 afla|EED49290.1 afum|EAL91351.1 agla|OJJ81432.1 akaw|GAA91412.1 aluc|OJZ84759.1 anid|CBF90322.1 anig|EHA28028.1 aory|EIT82241.1 asyd|OJJ61909.1 ater|EAU36967.1 atub|OJI89325.1 aver|OJI96002.1 awen|OJJ37315.1 azon|OJJ51007.1

Group4362: abra|OJJ77350.1 acar|OOF93220.1 acla|EAW13125.1 afis|EAW17539.1 afla|EED49288.1 afum|EAL91353.1 agla|OJJ81430.1 akaw|GAA91411.1 aluc|OJZ84761.1 anid|CBF90317.1 anig|EHA28030.1 aory|EIT82231.1 asyd|OJJ61911.1 ater|EAU36969.1 atub|OJI89323.1 aver|OJI96004.1 awen|OJJ37314.1 azon|OJJ51006.1

Group4363: abra|OJJ77353.1 acar|OOF93223.1 acla|EAW13121.1 afis|EAW17543.1 afla|EED49284.1 afum|EAL91357.1 agla|OJJ81426.1 akaw|GAA91408.1 aluc|OJZ84764.1 anid|CBF90308.1 anig|EHA28033.1 aory|EIT82220.1 asyd|OJJ61932.1 ater|EAU36973.1 atub|OJI89320.1 aver|OJI96024.1 awen|OJJ37310.1 azon|OJJ51002.1

Group4364: abra|OJJ77355.1 acar|OOF93225.1 acla|EAW13119.1 afis|EAW17545.1 afla|EED49282.1 afum|EAL91359.1 agla|OJJ81424.1 akaw|GAA91406.1 aluc|OJZ84765.1 anid|CBF90305.1 anig|EHA28034.1 aory|EIT82244.1 asyd|OJJ61930.1 ater|EAU36975.1 atub|OJI89319.1 aver|OJI96022.1 awen|OJJ37309.1 azon|OJJ51001.1

Group4365: abra|OJJ77356.1 acar|OOF93226.1 acla|EAW13118.1 afis|EAW17546.1 afla|EED49281.1 afum|EAL91360.1 agla|OJJ81423.1 akaw|GAA91405.1 aluc|OJZ84766.1 anid|CBF90303.1 anig|EHA28035.1 aory|EIT82243.1 asyd|OJJ61929.1 ater|EAU36976.1 atub|OJI89318.1 aver|OJI96021.1 awen|OJJ37308.1 azon|OJJ51000.1

Group4366: abra|OJJ77359.1 acar|OOF93228.1 acla|EAW13117.1 afis|EAW17547.1 afla|EED49278.1 afum|EAL91361.1 agla|OJJ81421.1 akaw|GAA91404.1 aluc|OJZ84767.1 anid|CBF90290.1 anig|EHA28037.1 aory|EIT82197.1 asyd|OJJ61921.1 ater|EAU36977.1 atub|OJI89315.1 aver|OJI96013.1 awen|OJJ37307.1 azon|OJJ50999.1

Group4367: abra|OJJ77361.1 acar|OOF93230.1 acla|EAW13115.1 afis|EAW17549.1 afla|EED49276.1 afum|EAL91363.1 agla|OJJ81419.1 akaw|GAA91402.1 aluc|OJZ84769.1 anid|CBF90294.1 anig|EHA28038.1 aory|EIT82240.1 asyd|OJJ61923.1 ater|EAU36985.1 atub|OJI89312.1 aver|OJI96015.1 awen|OJJ37305.1 azon|OJJ50997.1

Group4368: abra|OJJ77362.1 acar|OOF93231.1 acla|EAW13114.1 afis|EAW17550.1 afla|EED49275.1 afum|EAL91364.1 agla|OJJ81418.1 akaw|GAA91400.1 aluc|OJZ84771.1 anid|CBF90296.1 anig|EHA28039.1 aory|EIT82229.1 asyd|OJJ61924.1 ater|EAU36984.1 atub|OJI89310.1 aver|OJI96016.1 awen|OJJ37303.1 azon|OJJ50996.1

Group4369: abra|OJJ77365.1 acar|OOF93235.1 acla|EAW13111.1 afis|EAW17553.1 afla|EED49272.1 afum|EAL91367.1 agla|OJJ81415.1 akaw|GAA91397.1 aluc|OJZ84774.1 anid|CBF90299.1 anig|EHA28042.1 aory|EIT82208.1 asyd|OJJ61926.1 ater|EAU36981.1 atub|OJI89307.1 aver|OJI96018.1 awen|OJJ37300.1 azon|OJJ50993.1

Group4370: abra|OJJ77366.1 acar|OOF93236.1 acla|EAW13110.1 afis|EAW17554.1 afla|EED49271.1 afum|EAL91368.1 agla|OJJ81414.1 akaw|GAA91396.1 aluc|OJZ84775.1 anid|CBF90301.1 anig|EHA28043.1 aory|EIT82221.1 asyd|OJJ61927.1 ater|EAU36980.1 atub|OJI89306.1 aver|OJI96019.1 awen|OJJ37299.1 azon|OJJ50992.1

Group4371: abra|OJJ77368.1 acar|OOF93238.1 acla|EAW13108.1 afis|EAW17556.1 afla|EED49268.1 afum|EAL91370.1 agla|OJJ81412.1 akaw|GAA91394.1 aluc|OJZ84777.1 anid|CBF90282.1 anig|EHA28045.1 aory|EIT82203.1 asyd|OJJ61918.1 ater|EAU36988.1 atub|OJI89304.1 aver|OJI96010.1 awen|OJJ37297.1 azon|OJJ50990.1

Group4372: abra|OJJ77370.1 acar|OOF93241.1 acla|EAW13105.1 afis|EAW17559.1 afla|EED49265.1 afum|EAL91373.1 agla|OJJ81409.1 akaw|GAA91391.1 aluc|OJZ84780.1 anid|CBF90277.1 anig|EHA28047.1 aory|EIT82185.1 asyd|OJJ61933.1 ater|EAU36990.1 atub|OJI89302.1 aver|OJI96025.1 awen|OJJ37295.1 azon|OJJ50988.1

Group4373: abra|OJJ77371.1 acar|OOF93240.1 acla|EAW13104.1 afis|EAW17560.1 afla|EED49264.1 afum|EAL91374.1 agla|OJJ81408.1 akaw|GAA91390.1 aluc|OJZ84781.1 anid|CBF90275.1 anig|EHA28048.1 aory|EIT82187.1 asyd|OJJ61934.1 ater|EAU36991.1 atub|OJI89301.1 aver|OJI96026.1 awen|OJJ37294.1 azon|OJJ50987.1

Group4374: abra|OJJ77372.1 acar|OOF93242.1 acla|EAW13103.1 afis|EAW17561.1 afla|EED49263.1 afum|EAL91375.1 agla|OJJ81407.1 akaw|GAA91389.1 aluc|OJZ84782.1 anid|CBF90273.1 anig|EHA28049.1 aory|EIT82191.1 asyd|OJJ61935.1 ater|EAU36992.1 atub|OJI89300.1 aver|OJI96027.1 awen|OJJ37293.1 azon|OJJ50986.1

Group4375: abra|OJJ77373.1 acar|OOF93244.1 acla|EAW13102.1 afis|EAW17562.1 afla|EED49259.1 afum|EAL91376.1 agla|OJJ81406.1 akaw|GAA91387.1 aluc|OJZ84783.1 anid|CBF90271.1 anig|EHA28050.1 aory|EIT82238.1 asyd|OJJ61936.1 ater|EAU37000.1 atub|OJI89299.1 aver|OJI96028.1 awen|OJJ37292.1 azon|OJJ50985.1

Group4376: abra|OJJ77374.1 acar|OOF93243.1 acla|EAW13101.1 afis|EAW17563.1 afla|EED49258.1 afum|EAL91377.1 agla|OJJ81405.1 akaw|GAA91386.1 aluc|OJZ84784.1 anid|CBF90269.1 anig|EHA28051.1 aory|EIT82186.1 asyd|OJJ61937.1 ater|EAU37001.1 atub|OJI89298.1 aver|OJI96029.1 awen|OJJ37291.1 azon|OJJ50984.1

Group4377: abra|OJJ77375.1 acar|OOF93245.1 acla|EAW13100.1 afis|EAW17564.1 afla|EED49257.1 afum|EAL91378.1 agla|OJJ81402.1 akaw|GAA91385.1 aluc|OJZ84785.1 anid|CBF90267.1 anig|EHA28052.1 aory|EIT82246.1 asyd|OJJ61938.1 ater|EAU37002.1 atub|OJI89297.1 aver|OJI96030.1 awen|OJJ37290.1 azon|OJJ50983.1

Group4378: abra|OJJ77376.1 acar|OOF93246.1 acla|EAW13098.1 afis|EAW17565.1 afla|EED49256.1 afum|EAL91379.1 agla|OJJ81401.1 akaw|GAA91384.1 aluc|OJZ84786.1 anid|CBF90266.1 anig|EHA28053.1 aory|EIT82227.1 asyd|OJJ61939.1 ater|EAU37003.1 atub|OJI89296.1 aver|OJI96031.1 awen|OJJ37288.1 azon|OJJ50982.1

Group4379: abra|OJJ77378.1 acar|OOF93247.1 acla|EAW13096.1 afis|EAW17567.1 afla|EED49254.1 afum|EAL91381.1 agla|OJJ81398.1 akaw|GAA91382.1 aluc|OJZ84787.1 anid|CBF90262.1 anig|EHA28055.1 aory|EIT82184.1 asyd|OJJ61941.1 ater|EAU37004.1 atub|OJI89295.1 aver|OJI96033.1 awen|OJJ37286.1 azon|OJJ50980.1

Group4380: abra|OJJ77476.1 acar|OOF99249.1 acla|EAW06738.1 afis|EAW16288.1 afla|EED53265.1 afum|EAL88910.1 agla|OJJ88310.1 akaw|GAA84142.1 aluc|OJZ81062.1 anid|CBF86860.1 anig|EHA19306.1

aory|EIT75107.1 asyd|OJJ64634.1 ater|EAU37333.1 atub|OJI82523.1 aver|OJI98733.1 awen|OJJ37692.1 azon|OJJ44952.1

Group4381: abra|OJJ77477.1 acar|OOF99248.1 acla|EAW06739.1 afis|EAW16289.1 afla|EED53264.1 afum|EAL88911.1 agla|OJJ88311.1 akaw|GAA84141.1 aluc|OJZ81061.1 anid|CBF86858.1 anig|EHA19307.1 aory|EIT74825.1 asyd|OJJ64635.1 ater|EAU37334.1 atub|OJI82524.1 aver|OJI98734.1 awen|OJJ37691.1 azon|OJJ44951.1

Group4382: abra|OJJ77478.1 acar|OOF99247.1 acla|EAW06740.1 afis|EAW16290.1 afla|EED53263.1 afum|EAL88912.1 agla|OJJ88312.1 akaw|GAA84140.1 aluc|OJZ81060.1 anid|CBF86856.1 anig|EHA19308.1 aory|EIT75015.1 asyd|OJJ64636.1 ater|EAU37335.1 atub|OJI82525.1 aver|OJI98735.1 awen|OJJ37690.1 azon|OJJ44950.1

Group4383: abra|OJJ77479.1 acar|OOF99246.1 acla|EAW06741.1 afis|EAW16291.1 afla|EED53262.1 afum|EAL88913.1 agla|OJJ88313.1 akaw|GAA84139.1 aluc|OJZ81059.1 anid|CBF86854.1 anig|EHA19309.1 aory|EIT74947.1 asyd|OJJ64637.1 ater|EAU37336.1 atub|OJI82526.1 aver|OJI98736.1 awen|OJJ37689.1 azon|OJJ44949.1

Group4384: abra|OJJ77485.1 acar|OOF99240.1 acla|EAW06746.1 afis|EAW16296.1 afla|EED53258.1 afum|EAL88918.1 agla|OJJ88303.1 akaw|GAA84133.1 aluc|OJZ81051.1 anid|CBF86847.1 anig|EHA19316.1 aory|EIT75226.1 asyd|OJJ64642.1 ater|EAU29340.1 atub|OJI82533.1 aver|OJI98742.1 awen|OJJ37695.1 azon|OJJ44956.1

Group4385: abra|OJJ77489.1 acar|OOF99236.1 acla|EAW06751.1 afis|EAW16301.1 afla|EED53253.1 afum|EAL88923.1 agla|OJJ88293.1 akaw|GAA84130.1 aluc|OJZ81047.1 anid|CBF86841.1 anig|EHA19320.1 aory|EIT74998.1 asyd|OJJ64646.1 ater|EAU37346.1 atub|OJI82537.1 aver|OJI98746.1 awen|OJJ37700.1 azon|OJJ44961.1

Group4386: abra|OJJ77490.1 acar|OOF99235.1 acla|EAW06752.1 afis|EAW16302.1 afla|EED53252.1 afum|EAL88924.1 agla|OJJ88292.1 akaw|GAA84129.1 aluc|OJZ81046.1 anid|CBF86839.1 anig|EHA19321.1 aory|EIT75063.1 asyd|OJJ64647.1 ater|EAU37345.1 atub|OJI82538.1 aver|OJI98747.1 awen|OJJ37701.1 azon|OJJ44962.1

Group4387: abra|OJJ77493.1 acar|OOF99233.1 acla|EAW06754.1 afis|EAW16304.1 afla|EED53250.1 afum|EAL88926.1 agla|OJJ88290.1 akaw|GAA84127.1 aluc|OJZ81044.1 anid|CBF69582.1 anig|EHA19323.1 aory|EIT75043.1 asyd|OJJ59144.1 ater|EAU29332.1 atub|OJI82540.1 aver|OJJ01734.1 awen|OJJ37704.1 azon|OJJ44964.1

Group4388: abra|OJJ77494.1 acar|OOF99232.1 acla|EAW06755.1 afis|EAW16305.1 afla|EED53249.1 afum|EAL88927.1 agla|OJJ88267.1 akaw|GAA84126.1 aluc|OJZ81043.1 anid|CBF69583.1 anig|EHA19324.1 aory|EIT75153.1 asyd|OJJ59145.1 ater|EAU29333.1 atub|OJI82541.1 aver|OJJ01735.1 awen|OJJ37705.1 azon|OJJ44965.1

Group4390: abra|OJJ77499.1 acar|OOF99227.1 acla|EAW06736.1 afis|EAW16287.1 afla|EED53269.1 afum|EAL88909.1 agla|OJJ88309.1 akaw|GAA84122.1 aluc|OJZ81039.1 anid|CBF86861.1 anig|EHA19328.1 aory|EIT74855.1 asyd|OJJ64633.1 ater|EAU37332.1 atub|OJI82545.1 aver|OJI98732.1 awen|OJJ37682.1 azon|OJJ44954.1

Group4391: abra|OJJ77502.1 acar|OOF99225.1 acla|EAW06734.1 afis|EAW16285.1 afla|EED53271.1 afum|EAL88906.1 agla|OJJ88306.1 akaw|GAA84119.1 aluc|OJZ81035.1 anid|CBF86869.1 anig|EHA19331.1 aory|EIT75236.1 asyd|OJJ64631.1 ater|EAU37329.1 atub|OJI82548.1 aver|OJI98729.1 awen|OJJ37679.1 azon|OJJ44945.1

Group4392: abra|OJJ77503.1 acar|OOF99224.1 acla|EAW06732.1 afis|EAW16284.1 afla|EED53272.1 afum|EAL88905.1 agla|OJJ88305.1 akaw|GAA84118.1 aluc|OJZ81034.1 anid|CBF86871.1 anig|EHA19332.1 aory|EIT75050.1 asyd|OJJ64630.1 ater|EAU37328.1 atub|OJI82549.1 aver|OJI98728.1 awen|OJJ37677.1 azon|OJJ44942.1

Group4393: abra|OJJ77504.1 acar|OOF99222.1 acla|EAW06730.1 afis|EAW16283.1 afla|EED53273.1 afum|EAL88904.1 agla|OJJ88318.1 akaw|GAA84116.1 aluc|OJZ81032.1 anid|CBF86876.1 anig|EHA19333.1 aory|EIT75123.1 asyd|OJJ64627.1 ater|EAU37327.1 atub|OJI82551.1 aver|OJI98725.1 awen|OJJ37675.1 azon|OJJ44940.1

Group4394: abra|OJJ77507.1 acar|OOF99219.1 acla|EAW06727.1 afis|EAW16280.1 afla|EED53276.1 afum|EAL88901.1 agla|OJJ88324.1 akaw|GAA84113.1 aluc|OJZ81029.1 anid|CBF86880.1 anig|EHA19336.1 aory|EIT74958.1 asyd|OJJ64626.1 ater|EAU37325.1 atub|OJI82554.1 aver|OJI98722.1 awen|OJJ37672.1 azon|OJJ44937.1

Group4395: abra|OJJ77508.1 acar|OOF99218.1 acla|EAW06726.1 afis|EAW16279.1 afla|EED53277.1 afum|EAL88900.1 agla|OJJ88323.1 akaw|GAA84112.1 aluc|OJZ81028.1 anid|CBF86882.1 anig|EHA19337.1 aory|EIT74848.1 asyd|OJJ64625.1 ater|EAU37324.1 atub|OJI82555.1 aver|OJI98721.1 awen|OJJ37671.1 azon|OJJ44936.1

Group4396: abra|OJJ77509.1 acar|OOF99217.1 acla|EAW06725.1 afis|EAW16278.1 afla|EED53279.1 afum|EAL88899.1 agla|OJJ88321.1 akaw|GAA84111.1 aluc|OJZ81027.1 anid|CBF86883.1 anig|EHA19338.1 aory|EIT74824.1 asyd|OJJ64624.1 ater|EAU37323.1 atub|OJI82556.1 aver|OJI98720.1 awen|OJJ37670.1 azon|OJJ44935.1

Group4397: abra|OJJ77510.1 acar|OOF99216.1 acla|EAW06724.1 afis|EAW16277.1 afla|EED53280.1 afum|EAL88898.1 agla|OJJ88328.1 akaw|GAA84110.1 aluc|OJZ81026.1 anid|CBF86885.1 anig|EHA19339.1 aory|EIT75207.1 asyd|OJJ64623.1 ater|EAU37322.1 atub|OJI82557.1 aver|OJI98719.1 awen|OJJ37669.1 azon|OJJ44934.1

Group4398: abra|OJJ77511.1 acar|OOF99214.1 acla|EAW06723.1 afis|EAW16276.1 afla|EED53281.1 afum|EAL88897.1 agla|OJJ88329.1 akaw|GAA84109.1 aluc|OJZ81025.1 anid|CBF86892.1 anig|EHA18669.1 aory|EIT75064.1 asyd|OJJ64622.1 ater|EAU37321.1 atub|OJI82558.1 aver|OJI98718.1 awen|OJJ37668.1 azon|OJJ44933.1

Group4399: abra|OJJ77513.1 acar|OOF99211.1 acla|EAW06722.1 afis|EAW16265.1 afla|EED53285.1 afum|EAL88886.1 agla|OJJ88330.1 akaw|GAA84107.1 aluc|OJZ81022.1 anid|CBF86894.1 anig|EHA19341.1 aory|EIT74876.1 asyd|OJJ64621.1 ater|EAU37438.1 atub|OJI82561.1 aver|OJI98717.1 awen|OJJ37667.1 azon|OJJ44930.1

Group4400: abra|OJJ77514.1 acar|OOF99210.1 acla|EAW06721.1 afis|EAW16266.1 afla|EED53284.1 afum|EAL88887.1 agla|OJJ88331.1 akaw|GAA84106.1 aluc|OJZ81021.1 anid|CBF86895.1 anig|EHA19342.1 aory|EIT75173.1 asyd|OJJ64620.1 ater|EAU37439.1 atub|OJI82562.1 aver|OJI98716.1 awen|OJJ37666.1 azon|OJJ44931.1

Group4401: abra|OJJ77516.1 acar|OOF99207.1 acla|EAW06720.1 afis|EAW16267.1 afla|EED53282.1 afum|EAL88888.1 agla|OJJ88333.1 akaw|GAA84104.1 aluc|OJZ81019.1 anid|CBF86897.1 anig|EHA19343.1 aory|EIT75090.1 asyd|OJJ64618.1 ater|EAU37440.1 atub|OJI82564.1 aver|OJI98714.1 awen|OJJ37664.1 azon|OJJ44923.1

Group4402: abra|OJJ77517.1 acar|OOF99208.1 acla|EAW06719.1 afis|EAW16268.1 afla|EED53288.1 afum|EAL88889.1 agla|OJJ88337.1 akaw|GAA84103.1 aluc|OJZ81018.1 anid|CBF86899.1 anig|EHA19344.1 aory|EIT74865.1 asyd|OJJ64617.1 ater|EAU37443.1 atub|OJI82565.1 aver|OJI98713.1 awen|OJJ37663.1 azon|OJJ44924.1

Group4403: abra|OJJ77520.1 acar|OOF99203.1 acla|EAW06715.1 afla|EED53293.1 afum|EAL88893.1 akaw|GAA84100.1 aluc|OJZ81016.1 anid|CBF86904.1 anig|EHA19346.1 aory|EIT74861.1 asyd|OJJ64613.1 atub|OJI82568.1 aver|OJI98709.1 awen|OJJ37656.1 azon|OJJ44929.1 afis|EAW16272.1 agla|OJJ88342.1 ater|EAU37447.1

Group4404: abra|OJJ77522.1 acar|OOF99202.1 acla|EAW06717.1 afis|EAW16270.1 afla|EED53295.1 afum|EAL88891.1 agla|OJJ88339.1 akaw|GAA84098.1 aluc|OJZ81014.1 anid|CBF86903.1 anig|EHA19347.1 aory|EIT74914.1 asyd|OJJ64615.1 ater|EAU37445.1 atub|OJI82570.1 aver|OJI98711.1 awen|OJJ37660.1 azon|OJJ44927.1

Group4405: abra|OJJ77524.1 acar|OOF99200.1 acla|EAW06718.1 afis|EAW16269.1 afla|EED53289.1 afum|EAL88890.1 agla|OJJ88338.1 akaw|GAA84095.1 aluc|OJZ81011.1 anid|CBF86901.1 anig|EHA19350.1 aory|EIT74922.1 asyd|OJJ64616.1 ater|EAU37444.1 atub|OJI82573.1 aver|OJI98712.1 awen|OJJ37661.1 azon|OJJ44926.1

Group4406: abra|OJJ77526.1 acar|OOF99198.1 acla|EAW06712.1 afis|EAW16275.1 afla|EED53297.1 afum|EAL88896.1 agla|OJJ88345.1 akaw|GAA84094.1 aluc|OJZ81009.1 anid|CBF86909.1 anig|EHA19351.1 aory|EIT75079.1 asyd|OJJ64610.1 ater|EAU37450.1 atub|OJI82575.1 aver|OJI98706.1 awen|OJJ37658.1 azon|OJJ44920.1

Group4407: abra|OJJ77535.1 acar|OOF99189.1 acla|EAW06704.1 afis|EAW16249.1 afla|EED53313.1 afum|EAL88877.1 agla|OJJ86260.1 akaw|GAA84085.1 aluc|OJZ81000.1 anid|CBF78891.1 anig|EHA19359.1 aory|EIT74965.1 asyd|OJJ64597.1 ater|EAU37466.1 atub|OJI82585.1 aver|OJI98694.1 awen|OJJ30206.1 azon|OJJ43931.1

Group4408: abra|OJJ77554.1 acar|OOF99173.1 acla|EAW06523.1 afis|EAW16239.1 afla|EED53338.1 afum|EAL88860.1 agla|OJJ86246.1 akaw|GAA84069.1 aluc|OJZ80983.1 anid|CBF78863.1 anig|EHA19377.1 aory|EIT75140.1 asyd|OJJ64574.1 ater|EAU33704.1 atub|OJI82603.1 aver|OJI98671.1 awen|OJJ30218.1 azon|OJJ43940.1

Group4410: abra|OJJ77561.1 acar|OOF99169.1 acla|EAW06694.1 afis|EAW16072.1 afla|EED48591.1 afum|EAL88704.1 agla|OJJ86096.1 akaw|GAA84064.1 aluc|OJZ80977.1 anid|CBF75113.1 anig|EHA19382.1 aory|EIT73146.1 asyd|OJJ59998.1 ater|EAU33559.1 atub|OJI82608.1 aver|OJJ02293.1 awen|OJJ30362.1 azon|OJJ45381.1

Group4411: abra|OJJ77566.1 acar|OOF99164.1 acla|EAW06531.1 afis|EAW16064.1 afla|EED48578.1 afum|EAL88696.1 agla|OJJ86101.1 akaw|GAA84060.1 aluc|OJZ80972.1 anid|CBF75092.1 anig|EHA19387.1

aory|EIT73042.1 asyd|OJJ60011.1 ater|EAU33571.1 atub|OJI82613.1 aver|OJJ02274.1 awen|OJJ30375.1 azon|OJJ45391.1

Group4412: abra|OJJ77567.1 acar|OOF99162.1 acla|EAW06532.1 afis|EAW16063.1 afla|EED48577.1 afum|EAL88695.1 agla|OJJ86102.1 akaw|GAA84059.1 aluc|OJZ80971.1 anid|CBF75090.1 anig|EHA19388.1 aory|EIT73179.1 asyd|OJJ60012.1 ater|EAU33572.1 atub|OJI82614.1 aver|OJJ02273.1 awen|OJJ30376.1 azon|OJJ45392.1

Group4413: abra|OJJ77568.1 acar|OOF99163.1 acla|EAW06533.1 afis|EAW16062.1 afla|EED48576.1 afum|EAL88694.1 agla|OJJ86103.1 akaw|GAA84058.1 aluc|OJZ80970.1 anid|CBF75088.1 anig|EHA19389.1 aory|EIT73163.1 asyd|OJJ60013.1 ater|EAU33573.1 atub|OJI82615.1 aver|OJJ02272.1 awen|OJJ30377.1 azon|OJJ45393.1

Group4414: abra|OJJ77572.1 acar|OOF99157.1 acla|EAW06539.1 afis|EAW16056.1 afla|EED56442.1 afum|EAL88688.1 agla|OJJ86089.1 akaw|GAA84054.1 aluc|OJZ80966.1 anid|CBF75076.1 anig|EHA19392.1 aory|EIT72786.1 asyd|OJJ60016.1 ater|EAU33578.1 atub|OJI82620.1 aver|OJJ02269.1 awen|OJJ30383.1 azon|OJJ45400.1

Group4415: abra|OJJ77573.1 acar|OOF99156.1 acla|EAW06538.1 afis|EAW16057.1 afla|EED56441.1 afum|EAL88689.1 agla|OJJ86090.1 akaw|GAA84053.1 aluc|OJZ80965.1 anid|CBF75078.1 anig|EHA19393.1 aory|EIT72787.1 asyd|OJJ60017.1 ater|EAU33577.1 atub|OJI82621.1 aver|OJJ02268.1 awen|OJJ30382.1 azon|OJJ45399.1

Group4416: abra|OJJ77574.1 acar|OOF99155.1 acla|EAW06537.1 afis|EAW16058.1 afla|EED48572.1 afum|EAL88690.2 agla|OJJ86107.1 akaw|GAA84051.1 aluc|OJZ80963.1 anid|CBF75080.1 anig|EHA19394.1 aory|EIT73249.1 asyd|OJJ60018.1 ater|EAU33576.1 atub|OJI82623.1 aver|OJJ02267.1 awen|OJJ30381.1 azon|OJJ45398.1

Group4417: abra|OJJ77577.1 acar|OOF99150.1 acla|EAW06543.1 afis|EAW16052.1 afla|EED56446.1 afum|EAL88684.1 agla|OJJ86086.1 akaw|GAA84048.1 aluc|OJZ80959.1 anid|CBF75068.1 anig|EHA19397.1 aory|EIT72800.1 asyd|OJJ60022.1 ater|EAU33581.1 atub|OJI82626.1 aver|OJJ02262.1 awen|OJJ30390.1 azon|OJJ45402.1

Group4418: abra|OJJ77579.1 acar|OOF99148.1 acla|EAW06545.1 afis|EAW16049.1 afla|EED56438.1 afum|EAL88682.1 agla|OJJ86083.1 akaw|GAA84046.1 aluc|OJZ80956.1 anid|CBF75064.1 anig|EHA19399.1 aory|EIT72808.1 asyd|OJJ60024.1 ater|EAU33587.1 atub|OJI82628.1 aver|OJJ02260.1 awen|OJJ30394.1 azon|OJJ45404.1

Group4419: abra|OJJ77580.1 acar|OOF99147.1 acla|EAW06546.1 afis|EAW16048.1 afla|EED56437.1 afum|EAL88681.1 agla|OJJ86082.1 akaw|GAA84045.1 aluc|OJZ80955.1 anid|CBF75062.1 anig|EHA19400.1 aory|EIT72865.1 asyd|OJJ60025.1 ater|EAU33588.1 atub|OJI82629.1 aver|OJJ02259.1 awen|OJJ30396.1 azon|OJJ45405.1

Group4420: abra|OJJ77581.1 acar|OOF99146.1 acla|EAW06547.1 afis|EAW16047.1 afla|EED56436.1 afum|EAL88680.1 agla|OJJ86081.1 akaw|GAA84044.1 aluc|OJZ80954.1 anid|CBF75060.1 anig|EHA19401.1 aory|EIT72831.1 asyd|OJJ60026.1 ater|EAU33590.1 atub|OJI82630.1 aver|OJJ02258.1 awen|OJJ30398.1 azon|OJJ45406.1

Group4421: abra|OJJ77585.1 acar|OOF92640.1 acla|EAW06551.1 afis|EAW16044.1 afla|EED56433.1 afum|EAL88676.1 agla|OJJ86077.1 akaw|GAA84041.1 aluc|OJZ80950.1 anid|CBF75054.1 anig|EHA19404.1 aory|EIT72801.1 asyd|OJJ60029.1 ater|EAU33593.1 atub|OJI82633.1 aver|OJJ02255.1 awen|OJJ30402.1 azon|OJJ45410.1

Group4422: abra|OJJ77586.1 acar|OOF99144.1 acla|EAW06552.1 afis|EAW16043.1 afla|EED56432.1 afum|EAL88675.1 agla|OJJ86076.1 akaw|GAA84040.1 aluc|OJZ80949.1 anid|CBF75052.1 anig|EHA19405.1 aory|EIT72860.1 asyd|OJJ60030.1 ater|EAU33594.1 atub|OJI82634.1 aver|OJJ02254.1 awen|OJJ30403.1 azon|OJJ45411.1

Group4423: abra|OJJ77588.1 acar|OOF99143.1 acla|EAW06554.1 afis|EAW16041.1 afla|EED56430.1 afum|EAL88673.1 agla|OJJ86074.1 akaw|GAA84038.1 aluc|OJZ80947.1 anid|CBF75050.1 anig|EHA19407.1 aory|EIT72854.1 asyd|OJJ60032.1 ater|EAU33596.1 atub|OJI82636.1 aver|OJJ02252.1 awen|OJJ30405.1 azon|OJJ45413.1

Group4424: abra|OJJ77590.1 acar|OOF99141.1 acla|EAW06556.1 afis|EAW16039.1 afla|EED56427.1 afum|EAL88671.1 agla|OJJ86072.1 akaw|GAA84036.1 aluc|OJZ80945.1 anid|CBF75046.1 anig|EHA19409.1 aory|EIT72877.1 asyd|OJJ60034.1 ater|EAU33599.1 atub|OJI82638.1 aver|OJJ02250.1 awen|OJJ30407.1 azon|OJJ45415.1

Group4425: abra|OJJ77598.1 acar|OOF99128.1 acla|EAW06562.1 afis|EAW16034.1 afla|EED56420.1 afum|EAL88665.1 agla|OJJ86066.1 akaw|GAA84030.1 aluc|OJZ80935.1 anid|CBF75036.1 anig|EHA19415.1 aory|EIT72883.1 asyd|OJJ60049.1 ater|EAU33606.1 atub|OJI82645.1 aver|OJJ02240.1 awen|OJJ30413.1 azon|OJJ45421.1



Group4426: abra|OJJ77601.1 acar|OOF99126.1 acla|EAW06565.1 afis|EAW16031.1 afla|EED56413.1 afum|EAL88662.1 agla|OJJ86059.1 akaw|GAA84027.1 aluc|OJZ80932.1 anid|CBF75030.1 anig|EHA19418.1 aory|EIT72887.1 asyd|OJJ60052.1 ater|EAU33610.1 atub|OJI82648.1 aver|OJJ02237.1 awen|OJJ30417.1 azon|OJJ45424.1

Group4427: abra|OJJ77602.1 acar|OOF99124.1 acla|EAW06567.1 afis|EAW16029.1 afla|EED56412.1 afum|EAL88660.1 agla|OJJ86057.1 akaw|GAA84026.1 aluc|OJZ80931.1 anid|CBF75016.1 anig|EHA19419.1 aory|EIT72882.1 asyd|OJJ60070.1 ater|EAU33611.1 atub|OJI82649.1 aver|OJJ04192.1 awen|OJJ30419.1 azon|OJJ45426.1

Group4428: abra|OJJ77603.1 acar|OOF99123.1 acla|EAW06568.1 afis|EAW16028.1 afla|EED56411.1 afum|EAL88658.1 agla|OJJ86056.1 akaw|GAA84025.1 aluc|OJZ80930.1 anid|CBF75018.1 anig|EHA19420.1 aory|EIT72881.1 asyd|OJJ60069.1 ater|EAU33612.1 atub|OJI82650.1 aver|OJJ02226.1 awen|OJJ30420.1 azon|OJJ45427.1

Group4429: abra|OJJ77605.1 acar|OOF99122.1 acla|EAW06569.1 afis|EAW16027.1 afla|EED56410.1 afum|EAL88657.1 agla|OJJ86055.1 akaw|GAA84024.1 aluc|OJZ80928.1 anid|CBF75020.1 anig|EHA19421.1 aory|EIT83014.1 asyd|OJJ60068.1 ater|EAU33613.1 atub|OJI82651.1 aver|OJJ02227.1 awen|OJJ30421.1 azon|OJJ45428.1

Group4430: abra|OJJ77613.1 acar|OOF99115.1 acla|EAW06571.1 afis|EAW16025.1 afla|EED56406.1 afum|EAL88654.1 agla|OJJ86053.1 akaw|GAA84018.1 aluc|OJZ80921.1 anid|CBF75014.1 anig|EHA19426.1 aory|EIT83006.1 asyd|OJJ60057.1 ater|EAU33616.1 atub|OJI82659.1 aver|OJJ02232.1 awen|OJJ30432.1 azon|OJJ45431.1

Group4431: abra|OJJ77614.1 acar|OOF90324.1 acla|EAW11334.1 afis|EAW18161.1 afla|EED56332.1 afum|EAL87521.1 agla|OJJ85965.1 akaw|GAA84017.1 aluc|OJZ80920.1 anid|CBF85769.1 anig|EHA19427.1 aory|EIT73455.1 asyd|OJJ64306.1 ater|EAU33688.1 atub|OJI82660.1 aver|OJI98399.1 awen|OJJ30506.1 azon|OJJ45495.1

Group4432: abra|OJJ77615.1 acar|OOF90323.1 acla|EAW11335.1 afis|EAW18160.1 afla|EED56333.1 afum|EBA27314.1 agla|OJJ85966.1 akaw|GAA84016.1 aluc|OJZ80919.1 anid|CBF85772.1 anig|EHA19428.1 aory|EIT73306.1 asyd|OJJ64308.1 ater|EAU33687.1 atub|OJI82661.1 aver|OJI98400.1 awen|OJJ30505.1 azon|OJJ45494.1

Group4433: abra|OJJ77616.1 acar|OOF90325.1 acla|EAW11336.1 afis|EAW18159.1 afla|EED56335.1 afum|EAL87518.1 agla|OJJ85968.1 akaw|GAA84015.1 aluc|OJZ80918.1 anid|CBF85776.1 anig|EHA19429.1 aory|EIT73326.1 asyd|OJJ64310.1 ater|EAU33686.1 atub|OJI82662.1 aver|OJI98403.1 awen|OJJ30504.1 azon|OJJ45493.1

Group4434: abra|OJJ77617.1 acar|OOF90326.1 acla|EAW11337.1 afis|EAW18158.1 afla|EED56336.1 afum|EAL87517.1 agla|OJJ85969.1 akaw|GAA84014.1 aluc|OJZ80917.1 anid|CBF85777.1 anig|EHA19430.1 aory|EIT73425.1 asyd|OJJ64311.1 ater|EAU33685.1 atub|OJI82663.1 aver|OJI98404.1 awen|OJJ30503.1 azon|OJJ45492.1

Group4435: abra|OJJ77618.1 acar|OOF90327.1 acla|EAW11338.1 afis|EAW18157.1 afla|EED56337.1 afum|EAL87516.1 agla|OJJ85970.1 akaw|GAA84013.1 aluc|OJZ80916.1 anid|CBF85779.1 anig|EHA19431.1 aory|EIT73376.1 asyd|OJJ64312.1 ater|EAU33684.1 atub|OJI82664.1 aver|OJI98405.1 awen|OJJ30502.1 azon|OJJ45491.1

Group4436: abra|OJJ77619.1 acar|OOF90328.1 acla|EAW11339.1 afis|EAW18156.1 afla|EED56338.1 afum|EAL87515.1 agla|OJJ85971.1 akaw|GAA84012.1 aluc|OJZ80915.1 anid|CBF85781.1 anig|EHA19432.1 aory|EIT73330.1 asyd|OJJ64313.1 ater|EAU33683.1 atub|OJI82665.1 aver|OJI98406.1 awen|OJJ30500.1 azon|OJJ45490.1

Group4437: abra|OJJ77620.1 acar|OOF90329.1 acla|EAW11340.1 afis|EAW18155.1 afla|EED56339.1 afum|EAL87514.1 agla|OJJ85972.1 akaw|GAA84011.1 aluc|OJZ80914.1 anid|CBF85783.1 anig|EHA19433.1 aory|EIT73446.1 asyd|OJJ64314.1 ater|EAU33682.1 atub|OJI82666.1 aver|OJI98407.1 awen|OJJ30499.1 azon|OJJ45489.1

Group4438: abra|OJJ77621.1 acar|OOF99114.1 acla|EAW11341.1 afis|EAW18154.1 afla|EED56340.1 afum|EAL87513.1 agla|OJJ85973.1 akaw|GAA84010.1 aluc|OJZ80913.1 anid|CBF85784.1 anig|EHA19434.1 aory|EIT73328.1 asyd|OJJ64316.1 ater|EAU33681.1 atub|OJI82667.1 aver|OJI98409.1 awen|OJJ30498.1 azon|OJJ45488.1

Group4439: abra|OJJ77626.1 acar|OOF99112.1 acla|EAW11342.1 afis|EAW18152.1 afla|EED56342.1 afum|EAL87511.1 agla|OJJ85975.1 akaw|GAA84007.1 aluc|OJZ80905.1 anid|CBF85790.1 anig|EHA19436.1 aory|EIT73287.1 asyd|OJJ64325.1 ater|EAU33677.1 atub|OJI82672.1 aver|OJI98419.1 awen|OJJ30495.1 azon|OJJ45487.1

Group4440: abra|OJJ77629.1 acar|OOF99097.1 acla|EAW06480.1 afis|EAW15975.1 afla|EED56345.1 afum|EAL88607.1 agla|OJJ85980.1 akaw|GAA84005.1 aluc|OJZ80901.1 anid|CBF85795.1 anig|EHA19438.1

aory|EIT73353.1 asyd|OJJ64330.1 ater|EAU33676.1 atub|OJI82678.1 aver|OJI98423.1 awen|OJJ30494.1 azon|OJJ45485.1

Group4441: abra|OJJ77630.1 acar|OOF99098.1 acla|EAW06481.1 afis|EAW15976.1 afla|EED56346.1 afum|EAL88608.1 agla|OJJ85981.1 akaw|GAA84004.1 aluc|OJZ80900.1 anid|CBF85797.1 anig|EHA19439.1 aory|EIT73314.1 asyd|OJJ64331.1 ater|EAU33675.1 atub|OJI82679.1 aver|OJI98424.1 awen|OJJ30493.1 azon|OJJ45484.1

Group4442: abra|OJJ77631.1 acar|OOF99099.1 acla|EAW06482.1 afis|EAW15977.1 afla|EED56347.1 afum|EAL88609.1 agla|OJJ85982.1 akaw|GAA84003.1 aluc|OJZ80898.1 anid|CBF85799.1 anig|EHA19440.1 aory|EIT73397.1 asyd|OJJ64332.1 ater|EAU33674.1 atub|OJI82680.1 aver|OJI98425.1 awen|OJJ30492.1 azon|OJJ45483.1

Group4443: abra|OJJ77632.1 acar|OOF99100.1 acla|EAW06484.1 afis|EAW15979.1 afla|EED56349.1 afum|EAL88611.1 agla|OJJ85984.1 akaw|GAA84001.1 aluc|OJZ80897.1 anid|CBF85803.1 anig|EHA19442.1 aory|EIT73329.1 asyd|OJJ64334.1 ater|EAU33672.1 atub|OJI82681.1 aver|OJI98427.1 awen|OJJ30491.1 azon|OJJ45482.1

Group4444: abra|OJJ77637.1 acar|OOF99105.1 acla|EAW06487.1 afis|EAW15982.1 afla|EED56352.1 afum|EAL88614.1 agla|OJJ85985.1 akaw|GAA83997.1 aluc|OJZ80893.1 anid|CBF85806.1 anig|EHA19445.1 aory|EIT73461.1 asyd|OJJ64337.1 ater|EAU33670.1 atub|OJI82685.1 aver|OJI98430.1 awen|OJJ30488.1 azon|OJJ45479.1

Group4445: abra|OJJ77638.1 acar|OOF99106.1 acla|EAW06488.1 afis|EAW15983.1 afla|EED56353.1 afum|EAL88615.1 agla|OJJ85986.1 akaw|GAA83996.1 aluc|OJZ80892.1 anid|CBF85808.1 anig|EHA19446.1 aory|EIT73319.1 asyd|OJJ64339.1 ater|EAU33669.1 atub|OJI82686.1 aver|OJI98432.1 awen|OJJ30487.1 azon|OJJ45478.1

Group4446: abra|OJJ77640.1 acar|OOF99108.1 acla|EAW06490.1 afis|EAW15985.1 afla|EED56355.1 afum|EAL88617.1 agla|OJJ85988.1 akaw|GAA83994.1 aluc|OJZ80890.1 anid|CBF85812.1 anig|EHA19448.1 aory|EIT73389.1 asyd|OJJ64341.1 ater|EAU33667.1 atub|OJI82688.1 aver|OJI98434.1 awen|OJJ30485.1 azon|OJJ45476.1

Group4447: abra|OJJ77642.1 acar|OOF99094.1 acla|EAW06492.1 afis|EAW15988.1 afla|EED56360.1 afum|EAL88620.1 agla|OJJ85990.1 akaw|GAA83992.1 aluc|OJZ80888.1 anid|CBF85815.1 anig|EHA19450.1 aory|EIT73300.1 asyd|OJJ64342.1 ater|EAU33661.1 atub|OJI82690.1 aver|OJI98435.1 awen|OJJ30482.1 azon|OJJ45473.1

Group4449: abra|OJJ77652.1 acar|OOF99084.1 acla|EAW06494.1 afis|EAW15990.1 afla|EED56362.1 afum|EAL88622.1 agla|OJJ85992.1 akaw|GAA83983.1 aluc|OJZ80877.1 anid|CBF85819.1 anig|EHA19459.1 aory|EIT73339.1 asyd|OJJ64343.1 ater|EAU33658.1 atub|OJI82700.1 aver|OJI98440.1 awen|OJJ30480.1 azon|OJJ45471.1

Group4450: abra|OJJ77654.1 acar|OOF99083.1 acla|EAW06496.1 afis|EAW15992.1 afla|EED56364.1 afum|EAL88624.2 agla|OJJ86003.1 akaw|GAA83981.1 aluc|OJZ80875.1 anid|CBF85823.1 anig|EHA19460.1 aory|EIT73404.1 asyd|OJJ64344.1 ater|EAU33657.1 atub|OJI82702.1 aver|OJI98442.1 awen|OJJ30478.1 azon|OJJ45470.1

Group4451: abra|OJJ77655.1 acar|OOF99081.1 acla|EAW06497.1 afis|EAW15993.1 afla|EED56365.1 afum|EAL88625.1 agla|OJJ86004.1 akaw|GAA83980.1 aluc|OJZ80874.1 anid|CBF85824.1 anig|EHA19462.1 aory|EIT73307.1 asyd|OJJ64345.1 ater|EAU33656.1 atub|OJI82704.1 aver|OJI98443.1 awen|OJJ30477.1 azon|OJJ45469.1

Group4452: abra|OJJ77656.1 acar|OOF99080.1 acla|EAW06498.1 afis|EAW15994.1 afla|EED56367.1 afum|EAL88626.1 agla|OJJ86008.1 akaw|GAA83979.1 aluc|OJZ80872.1 anid|CBF85828.1 anig|EHA19463.1 asyd|OJJ64348.1 ater|EAU33654.1 atub|OJI82705.1 aver|OJI98445.1 awen|OJJ30475.1 azon|OJJ45467.1 aory|EIT73315.1

Group4453: abra|OJJ77657.1 acar|OOF99079.1 acla|EAW06499.1 afis|EAW15995.1 afla|EED56369.1 afum|EAL88627.1 agla|OJJ86009.1 akaw|GAA83978.1 aluc|OJZ80871.1 anid|CBF85830.1 anig|EHA19464.1 aory|EIT73436.1 asyd|OJJ64349.1 ater|EAU33652.1 atub|OJI82706.1 aver|OJI98446.1 awen|OJJ30474.1 azon|OJJ45466.1

Group4454: abra|OJJ77659.1 acar|OOF99076.1 acla|EAW06501.1 afis|EAW15997.1 afla|EED56371.1 afum|EAL88629.1 agla|OJJ86017.1 akaw|GAA83976.1 aluc|OJZ80869.1 anid|CBF85832.1 anig|EHA19466.1 aory|EIT73442.1 asyd|OJJ64350.1 ater|EAU33649.1 atub|OJI82708.1 aver|OJI98447.1 awen|OJJ30472.1 azon|OJJ45464.1

Group4455: abra|OJJ77660.1 acar|OOF99075.1 acla|EAW06504.1 afis|EAW15998.1 afla|EED56372.1 afum|EAL88630.1 agla|OJJ86013.1 akaw|GAA83975.1 aluc|OJZ80868.1 anid|CBF85834.1 anig|EHA19467.1 aory|EIT73360.1 asyd|OJJ64351.1 ater|EAU33648.1 atub|OJI82709.1 aver|OJI98448.1 awen|OJJ30471.1 azon|OJJ45463.1

Group4456: abra|OJJ77661.1 acar|OOF99073.1 acla|EAW06598.1 afis|EAW16006.1 afla|EED56380.1 afum|EAL88638.2 agla|OJJ86025.1 akaw|GAA83974.1 aluc|OJZ80867.1 anid|CBF85868.1 anig|EHA19468.1 aory|EIT73448.1 asyd|OJJ64371.1 ater|EAU33637.1 atub|OJI82710.1 aver|OJI98467.1 awen|OJJ30461.1 azon|OJJ45451.1

Group4457: abra|OJJ77665.1 acar|OOF99070.1 acla|EAW06507.1 afis|EAW16002.1 afla|EED56376.1 afum|EAL88634.1 agla|OJJ86024.1 akaw|GAA83970.1 aluc|OJZ80863.1 anid|CBF85844.1 anig|EHA19472.1 aory|EIT73423.1 asyd|OJJ64356.1 ater|EAU33643.1 atub|OJI82714.1 aver|OJI98452.1 awen|OJJ30466.1 azon|OJJ45457.1

Group4458: abra|OJJ77667.1 acar|OOF99068.1 acla|EAW06506.1 afis|EAW16000.1 afla|EED56375.1 afum|EAL88633.1 agla|OJJ86020.1 akaw|GAA83962.1 aluc|OJZ80850.1 anid|CBF85840.1 anig|EHA19474.1 aory|EIT73310.1 asyd|OJJ64354.1 ater|EAU33645.1 atub|OJI82718.1 aver|OJI98450.1 awen|OJJ30469.1 azon|OJJ45461.1

Group4459: abra|OJJ77671.1 acar|OOF99066.1 acla|EAW06505.1 afis|EAW15999.1 afla|EED56374.1 afum|EAL88631.1 agla|OJJ86019.1 akaw|GAA83961.1 aluc|OJZ80848.1 anid|CBF85835.1 anig|EHA19475.1 aory|EIT73377.1 asyd|OJJ64352.1 ater|EAU33647.1 atub|OJI82719.1 aver|OJI98449.1 awen|OJJ30470.1 azon|OJJ45462.1

Group4460: abra|OJJ77680.1 acar|OOF99060.1 acla|EAW06591.1 afis|EAW16014.1 afla|EED56391.1 afum|EAL88643.1 agla|OJJ86040.1 akaw|GAA83954.1 aluc|OJZ80838.1 anid|CBF74562.1 anig|EHA19482.1 aory|EIT83009.1 asyd|OJJ57647.1 ater|EAU33630.1 atub|OJI82730.1 aver|OJJ05504.1 awen|OJJ30450.1 azon|OJJ45442.1

Group4461: abra|OJJ77681.1 acar|OOF99058.1 acla|EAW06592.1 afis|EAW16015.1 afla|EED56392.1 afum|EAL88644.1 agla|OJJ86041.1 akaw|GAA83952.1 aluc|OJZ80836.1 anid|CBF74560.1 anig|EHA19483.1 aory|EIT83002.1 asyd|OJJ57646.1 ater|EAU33629.1 atub|OJI82732.1 aver|OJJ05503.1 awen|OJJ30449.1 azon|OJJ45441.1

Group4462: abra|OJJ77682.1 acar|OOF99059.1 acla|EAW06594.1 afis|EAW16017.1 afla|EED56393.1 afum|EAL88646.1 agla|OJJ86042.1 akaw|GAA83951.1 aluc|OJZ80835.1 anid|CBF74558.1 anig|EHA19484.1 aory|EIT83003.1 asyd|OJJ57645.1 ater|EAU33628.1 atub|OJI82733.1 aver|OJJ05502.1 awen|OJJ30447.1 azon|OJJ45439.1

Group4463: abra|OJJ77683.1 acar|OOF99057.1 acla|EAW06595.1 afis|EAW16018.1 afla|EED56394.1 afum|EAL88647.1 agla|OJJ86045.1 akaw|GAA83950.1 aluc|OJZ80834.1 anid|CBF74555.1 anig|EHA19485.1 aory|EIT83010.1 asyd|OJJ57644.1 ater|EAU33627.1 atub|OJI82734.1 aver|OJJ05501.1 awen|OJJ30446.1 azon|OJJ45438.1

Group4464: abra|OJJ77684.1 acar|OOF99056.1 acla|EAW06596.1 afis|EAW16019.1 afla|EED56396.1 afum|EAL88648.1 agla|OJJ86046.1 akaw|GAA83949.1 aluc|OJZ80833.1 anid|CBF74553.1 anig|EHA19486.1 aory|EIT83017.1 asyd|OJJ57642.1 ater|EAU33626.1 atub|OJI82735.1 aver|OJJ05499.1 awen|OJJ30445.1 azon|OJJ45437.1

Group4465: abra|OJJ77690.1 acar|OOF99049.1 acla|EAW06575.1 afis|EAW16021.1 afla|EED56399.1 afum|EAL88650.1 agla|OJJ86048.1 akaw|GAA83944.1 aluc|OJZ80825.1 anid|CBF74538.1 anig|EHA19490.1 aory|EIT83016.1 asyd|OJJ57695.1 ater|EAU33619.1 atub|OJI82740.1 aver|OJJ05471.1 awen|OJJ30443.1 azon|OJJ45435.1

Group4466: abra|OJJ77691.1 acar|OOF99048.1 acla|EAW06574.1 afis|EAW16022.1 afla|EED56401.1 afum|EAL88651.1 agla|OJJ86051.1 akaw|GAA83939.1 aluc|OJZ80821.1 anid|CBF74540.1 anig|EHA19491.1 aory|EIT83005.1 asyd|OJJ57694.1 ater|EAU33618.1 atub|OJI82741.1 aver|OJJ05472.1 awen|OJJ30439.1 azon|OJJ45434.1

Group4467: abra|OJJ77695.1 acar|OOF99044.1 acla|EAW11326.1 afis|EAW18169.1 afla|EED56325.1 afum|EBA27315.1 agla|OJJ85948.1 akaw|GAA83935.1 aluc|OJZ90758.1 anid|CBF85744.1 anig|EHA19495.1 aory|EIT73371.1 asyd|OJJ64290.1 ater|EAU33835.1 atub|OJI82745.1 aver|OJI98383.1 awen|OJJ30516.1 azon|OJJ50197.1

Group4468: abra|OJJ77697.1 acar|OOF99043.1 acla|EAW11327.1 afis|EAW18168.1 afla|EED56326.1 afum|EAL87529.2 agla|OJJ85949.1 akaw|GAA83934.1 aluc|OJZ90761.1 anid|CBF85746.1 anig|EHA19496.1 aory|EIT73447.1 asyd|OJJ64291.1 ater|EAU33836.1 atub|OJI82748.1 aver|OJI98384.1 awen|OJJ30514.1 azon|OJJ50195.1

Group4469: abra|OJJ77699.1 acar|OOF99040.1 acla|EAW11324.1 afis|EAW18171.1 afla|EED56322.1 afum|EAL87533.1 agla|OJJ85935.1 akaw|GAA83931.1 aluc|OJZ90764.1 anid|CBF85742.1 anig|EHA19498.1 aory|EIT73405.1 asyd|OJJ64289.1 ater|EAU33833.1 atub|OJI82752.1 aver|OJI98382.1 awen|OJJ30518.1 azon|OJJ50199.1

Group4470: abra|OJJ77704.1 acar|OOF99036.1 acla|EAW11315.1 afis|EAW18183.1 afla|EED56304.1 afum|EAL87545.1 agla|OJJ85903.1 akaw|GAA83926.1 aluc|OJZ90769.1 anid|CBF85723.1 anig|EHA19504.1

aory|EIT73331.1 asyd|OJJ64277.1 ater|EAU33819.1 atub|OJI82757.1 aver|OJI98369.1 awen|OJJ30531.1 azon|OJJ50212.1

Group4471: abra|OJJ77708.1 acar|OOF99032.1 acla|EAW11317.1 afis|EAW18179.1 afla|EED56307.1 afum|EAL87540.1 agla|OJJ85910.1 akaw|GAA83922.1 aluc|OJZ90773.1 anid|CBF85729.1 anig|EHA19507.1 aory|EIT73380.1 asyd|OJJ64280.1 ater|EAU33821.1 atub|OJI82760.1 aver|OJI98372.1 awen|OJJ30527.1 azon|OJJ50208.1

Group4472: abra|OJJ77709.1 acar|OOF99031.1 acla|EAW11318.1 afis|EAW18178.1 afla|EED56306.1 afum|EAL87539.1 agla|OJJ85912.1 akaw|GAA83921.1 aluc|OJZ90775.1 anid|CBF85732.1 anig|EHA19508.1 aory|EIT73415.1 asyd|OJJ64283.1 ater|EAU33827.1 atub|OJI82761.1 aver|OJI98375.1 awen|OJJ30526.1 azon|OJJ50207.1

Group4473: abra|OJJ77710.1 acar|OOF99030.1 acla|EAW11319.1 afis|EAW18177.1 afla|EED56312.1 afum|EAL87538.1 agla|OJJ85913.1 akaw|GAA83920.1 aluc|OJZ90776.1 anid|CBF85733.1 anig|EHA19509.1 aory|EIT73345.1 asyd|OJJ64284.1 ater|EAU33828.1 atub|OJI82762.1 aver|OJI98376.1 awen|OJJ30525.1 azon|OJJ50206.1

Group4474: abra|OJJ77717.1 acar|OOF99022.1 acla|EAW11320.1 afis|EAW18176.1 afla|EED56313.1 afum|EAL87537.1 agla|OJJ85914.1 akaw|GAA83915.1 aluc|OJZ90782.1 anid|CBF85735.1 anig|EHA19515.1 aory|EIT73299.1 asyd|OJJ64285.1 ater|EAU33829.1 atub|OJI82769.1 aver|OJI98377.1 awen|OJJ30524.1 azon|OJJ50205.1

Group4475: abra|OJJ77718.1 acar|OOF99019.1 acla|EAW11321.1 afis|EAW18175.1 afla|EED56314.1 afum|EAL87536.1 agla|OJJ85915.1 akaw|GAA83914.1 aluc|OJZ90783.1 anid|CBF85737.1 anig|EHA19516.1 aory|EIT73381.1 asyd|OJJ64286.1 ater|EAU33830.1 atub|OJI82770.1 aver|OJI98378.1 awen|OJJ30523.1 azon|OJJ50204.1

Group4476: abra|OJJ77810.1 acar|OOF98957.1 acla|EAW11307.1 afis|EAW18194.1 afla|EED56284.1 afum|EBA27318.1 agla|OJJ85895.1 akaw|GAA83839.1 aluc|OJZ90877.1 anid|CBF86104.1 anig|EHA19597.1 aory|EIT73433.1 asyd|OJJ64482.1 ater|EAU33799.1 atub|OJI82874.1 aver|OJI98583.1 awen|OJJ30558.1 azon|OJJ45509.1

Group4477: abra|OJJ77811.1 acar|OOF98956.1 acla|EAW11306.1 afis|EAW18193.1 afla|EED56283.1 afum|EAL87559.1 agla|OJJ85893.1 akaw|GAA83838.1 aluc|OJZ90878.1 anid|CBF86108.1 anig|EHA19599.1 aory|EIT73325.1 asyd|OJJ64487.1 ater|EAU33798.1 atub|OJI82875.1 aver|OJI98588.1 awen|OJJ30559.1 azon|OJJ45508.1

Group4478: abra|OJJ77819.1 acar|OOF98949.1 acla|EAW11304.1 afis|EAW18191.1 afla|EED56281.1 afum|EAL87562.2 agla|OJJ85884.1 akaw|GAA83827.1 aluc|OJZ90891.1 anid|CBF86111.1 anig|EHA19610.1 aory|EIT73396.1 asyd|OJJ64489.1 ater|EAU33796.1 atub|OJI82885.1 aver|OJI98590.1 awen|OJJ30565.1 azon|OJJ45506.1

Group4479: abra|OJJ77821.1 acar|OOF98945.1 acla|EAW11303.1 afis|EAW18199.1 afla|EED56279.1 afum|EAL87564.1 agla|OJJ85883.1 akaw|GAA83824.1 aluc|OJZ90894.1 anid|CBF86115.1 anig|EHA19613.1 aory|EIT73401.1 asyd|OJJ64491.1 ater|EAU33795.1 atub|OJI82887.1 aver|OJI98593.1 awen|OJJ30567.1 azon|OJJ45505.1

Group4480: abra|OJJ77824.1 acar|OOF98944.1 acla|EAW11301.1 afis|EAW18201.1 afla|EED56277.1 afum|EAL87566.1 agla|OJJ85881.1 akaw|GAA83822.1 aluc|OJZ90897.1 anid|CBF86122.1 anig|EHA19615.1 aory|EIT73449.1 asyd|OJJ64496.1 ater|EAU33793.1 atub|OJI82889.1 aver|OJI98598.1 awen|OJJ30569.1 azon|OJJ45503.1

Group4481: abra|OJJ77826.1 acar|OOF98942.1 acla|EAW11299.1 afis|EAW18203.1 afla|EED56269.1 afum|EAL87568.1 agla|OJJ85879.1 akaw|GAA83820.1 aluc|OJZ90900.1 anid|CBF86119.1 anig|EHA19616.1 aory|EIT73413.1 asyd|OJJ64494.1 ater|EAU33786.1 atub|OJI82893.1 aver|OJI98596.1 awen|OJJ30571.1 azon|OJJ45501.1

Group4482: abra|OJJ77827.1 acar|OOF98941.1 acla|EAW11298.1 afis|EAW18204.1 afla|EED56268.1 afum|EAL87569.1 agla|OJJ85878.1 akaw|GAA83819.1 aluc|OJZ90901.1 anid|CBF86124.1 anig|EHA19617.1 aory|EIT73341.1 asyd|OJJ64497.1 ater|EAU33785.1 atub|OJI82894.1 aver|OJI98599.1 awen|OJJ30572.1 azon|OJJ45500.1

Group4483: abra|OJJ77830.1 acar|OOF98940.1 acla|EAW11296.1 afis|EAW18206.1 afla|EED56265.1 afum|EAL87571.1 agla|OJJ85876.1 akaw|GAA83817.1 aluc|OJZ90904.1 anid|CBF86132.1 anig|EHA19619.1 aory|EIT73429.1 asyd|OJJ64502.1 ater|EAU33783.1 atub|OJI82897.1 aver|OJI98601.1 awen|OJJ30578.1 azon|OJJ45498.1

Group4484: abra|OJJ77834.1 acar|OOF98937.1 acla|EAW11289.1 afis|EAW18210.1 afla|EED56260.1 afum|EAL87576.2 agla|OJJ85872.1 akaw|GAA83813.1 aluc|OJZ90908.1 anid|CBF86139.1 anig|EHA19623.1 aory|EIT73444.1 asyd|OJJ64506.1 ater|EAU33778.1 atub|OJI82901.1 aver|OJI98605.1 awen|OJJ30588.1 azon|OJJ50189.1

Group4485: abra|OJJ77841.1 acar|OOF98930.1 acla|EAW11282.1 afis|EAW18218.1 afla|EED56252.1  
afum|EAL87584.1 agla|OJJ85864.1 akaw|GAA83806.1 aluc|OJZ90916.1 anid|CBF86148.1 anig|EHA19628.1  
aory|EIT73348.1 asyd|OJJ64512.1 ater|EAU33773.1 atub|OJI82908.1 aver|OJI98610.1 awen|OJJ30596.1  
azon|OJJ50172.1

Group4486: abra|OJJ77844.1 acar|OOF98928.1 acla|EAW11279.1 afis|EAW18221.1 afla|EED56249.1  
afum|EAL87587.1 agla|OJJ85861.1 akaw|GAA83803.1 aluc|OJZ90919.1 anid|CBF86155.1 anig|EHA19631.1  
aory|EIT73362.1 asyd|OJJ64515.1 ater|EAU33770.1 atub|OJI82911.1 aver|OJI98613.1 awen|OJJ30599.1  
azon|OJJ50169.1

Group4487: abra|OJJ77845.1 acar|OOF98927.1 acla|EAW11278.1 afis|EAW18222.1 afla|EED56247.1  
afum|EAL87588.1 agla|OJJ85860.1 akaw|GAA83802.1 aluc|OJZ90920.1 anid|CBF86153.1 anig|EHA19632.1  
aory|EIT73414.1 asyd|OJJ64516.1 ater|EAU33769.1 atub|OJI82912.1 aver|OJI98614.1 awen|OJJ30600.1  
azon|OJJ50168.1

Group4488: abra|OJJ77847.1 acar|OOF98925.1 acla|EAW11276.1 afis|EAW18224.1 afla|EED56245.1  
afum|EAL87590.1 agla|OJJ85858.1 akaw|GAA83800.1 aluc|OJZ90922.1 anid|CBF86159.1 anig|EHA19634.1  
aory|EIT73297.1 asyd|OJJ64518.1 ater|EAU33767.1 atub|OJI82914.1 aver|OJI98616.1 awen|OJJ30602.1  
azon|OJJ50166.1

Group4489: abra|OJJ77851.1 acar|OOF98922.1 acla|EAW11275.1 afis|EAW18225.1 afla|EED56244.1  
afum|EAL87591.1 agla|OJJ85857.1 akaw|GAA83797.1 aluc|OJZ90925.1 anid|CBF86161.1 anig|EHA19637.1  
aory|EIT73369.1 asyd|OJJ64519.1 ater|EAU33766.1 atub|OJI82917.1 aver|OJI98617.1 awen|OJJ30603.1  
azon|OJJ50165.1

Group4490: abra|OJJ77852.1 acar|OOF98921.1 acla|EAW11274.1 afis|EAW18226.1 afla|EED56243.1  
afum|EAL87593.2 agla|OJJ85856.1 akaw|GAA83796.1 aluc|OJZ90926.1 anid|CBF86162.1 anig|EHA19638.1  
aory|EIT73293.1 asyd|OJJ64520.1 ater|EAU33765.1 atub|OJI82918.1 aver|OJI98618.1 awen|OJJ30604.1  
azon|OJJ50164.1

Group4491: abra|OJJ77853.1 acar|OOF98920.1 acla|EAW11273.1 afis|EAW18227.1 afla|EED56242.1  
afum|EAL87594.1 agla|OJJ85855.1 akaw|GAA83795.1 aluc|OJZ90927.1 anid|CBF86164.1 anig|EHA19639.1  
aory|EIT73313.1 asyd|OJJ64521.1 ater|EAU33764.1 atub|OJI82919.1 aver|OJI98619.1 awen|OJJ30605.1  
azon|OJJ50163.1

Group4492: abra|OJJ77854.1 acar|OOF98919.1 acla|EAW11272.1 afis|EAW18228.1 afla|EED56241.1  
afum|EAL87595.1 agla|OJJ85854.1 akaw|GAA83794.1 aluc|OJZ90928.1 anid|CBF86166.1 anig|EHA19640.1  
aory|EIT73375.1 asyd|OJJ64522.1 ater|EAU33763.1 atub|OJI82920.1 aver|OJI98620.1 awen|OJJ30606.1  
azon|OJJ50162.1

Group4493: abra|OJJ77857.1 acar|OOF98917.1 acla|EAW11269.1 afis|EAW18230.1 afla|EED56238.1  
afum|EAL87597.1 agla|OJJ85844.1 akaw|GAA83792.1 aluc|OJZ90931.1 anid|CBF86172.1 anig|EHA19642.1  
aory|EIT73450.1 asyd|OJJ64525.1 ater|EAU33761.1 atub|OJI82923.1 aver|OJI98623.1 awen|OJJ30609.1  
azon|OJJ50159.1

Group4494: abra|OJJ77862.1 acar|OOF98911.1 acla|EAW11264.1 afis|EAW18234.1 afla|EED56232.1  
afum|EBA27319.1 agla|OJJ85850.1 akaw|GAA83787.1 aluc|OJZ90937.1 anid|CBF86182.1 anig|EHA19645.1  
aory|EIT73318.1 asyd|OJJ64530.1 ater|EAU33752.1 atub|OJI82928.1 aver|OJI98628.1 awen|OJJ30614.1  
azon|OJJ48003.1

Group4495: abra|OJJ77864.1 acar|OOF98909.1 acla|EAW11262.1 afis|EAW18236.1 afla|EED56230.1  
afum|EAL87603.1 agla|OJJ85838.1 akaw|GAA83785.1 aluc|OJZ90939.1 anid|CBF86185.1 anig|EHA19647.1  
aory|EIT73458.1 asyd|OJJ64532.1 ater|EAU33749.1 atub|OJI82930.1 aver|OJI98630.1 awen|OJJ30616.1  
azon|OJJ48001.1

Group4496: abra|OJJ77865.1 acar|OOF98907.1 acla|EAW11261.1 afis|EAW18237.1 afla|EED56229.1  
afum|EAL87604.2 agla|OJJ85837.1 akaw|GAA83784.1 aluc|OJZ90940.1 anid|CBF86187.1 anig|EHA19648.1  
aory|EIT73322.1 asyd|OJJ64534.1 ater|EAU33748.1 atub|OJI82931.1 aver|OJI98631.1 awen|OJJ30617.1  
azon|OJJ48000.1

Group4497: abra|OJJ77866.1 acar|OOF98906.1 acla|EAW11259.1 afis|EAW18239.1 afla|EED56227.1  
afum|EBA27321.1 agla|OJJ85831.1 akaw|GAA83782.1 aluc|OJZ90942.1 anid|CBF86191.1 anig|EHA19650.1  
aory|EIT73427.1 asyd|OJJ64536.1 ater|EAU33744.1 atub|OJI82933.1 aver|OJI98633.1 awen|OJJ30619.1  
azon|OJJ47998.1

Group4498: abra|OJJ77876.1 acar|OOF98895.1 acla|EAW06509.1 afis|EAW16222.1 afla|EED50188.1  
afum|EAL88850.1 agla|OJJ86234.1 akaw|GAA83776.1 aluc|OJZ90951.1 anid|CBF86216.1 anig|EHA19657.1  
aory|EIT77385.1 asyd|OJJ64558.1 ater|EAU33719.1 atub|OJI82942.1 aver|OJI98655.1 awen|OJJ30248.1  
azon|OJJ43951.1

Group4499: abra|OJJ77878.1 acar|OOF98894.1 acla|EAW06602.1 afis|EAW16221.1 afla|EED50189.1  
afum|EAL88849.1 agla|OJJ86233.1 akaw|GAA83775.1 aluc|OJZ90952.1 anid|CBF86215.1 anig|EHA19658.1

aory|EIT77381.1 asyd|OJJ64557.1 ater|EAU33720.1 atub|OJI82943.1 aver|OJI98654.1 awen|OJJ30250.1 azon|OJJ43952.1

Group4501: abra|OJJ77890.1 acar|OOF98890.1 acla|EAW11245.1 afis|EAW18255.1 afla|EED56196.1 afum|EAL87618.1 agla|OJJ88189.1 akaw|GAA83768.1 aluc|OJZ90960.1 anid|CBF86206.1 anig|EHA19665.1 aory|EIT73437.1 asyd|OJJ64546.1 ater|EAU33727.1 atub|OJI82951.1 aver|OJI98642.1 awen|OJJ30629.1 azon|OJJ46567.1

Group4502: abra|OJJ77893.1 acar|OOF98889.1 acla|EAW11246.1 afis|EAW18254.1 afla|EED56198.1 afum|EAL87617.1 agla|OJJ88190.1 akaw|GAA83767.1 aluc|OJZ90963.1 anid|CBF86205.1 anig|EHA19667.1 aory|EIT73303.1 asyd|OJJ64545.1 ater|EAU33726.1 atub|OJI82954.1 aver|OJI98641.1 awen|OJJ30628.1 azon|OJJ47987.1

Group4503: abra|OJJ77897.1 acar|OOF98887.1 acla|EAW11248.1 afis|EAW18249.1 afla|EED56215.1 afum|EAL87614.1 agla|OJJ85821.1 akaw|GAA83765.1 aluc|OJZ90967.1 anid|CBF86200.1 anig|EHA19669.1 aory|EIT73361.1 asyd|OJJ64542.1 ater|EAU33731.1 atub|OJI82957.1 aver|OJI98638.1 awen|OJJ30625.1 azon|OJJ47993.1

Group4504: abra|OJJ77898.1 acar|OOF98886.1 acla|EAW11249.1 afis|EAW18248.1 afla|EED56216.1 afum|EAL87613.1 agla|OJJ85822.1 akaw|GAA83764.1 aluc|OJZ90968.1 anid|CBF86198.1 anig|EHA19670.1 aory|EIT73459.1 asyd|OJJ64541.1 ater|EAU33732.1 atub|OJI82958.1 aver|OJI98637.1 awen|OJJ30624.1 azon|OJJ47994.1

Group4505: abra|OJJ77902.1 acar|OOF98881.1 acla|EAW06512.1 afis|EAW16230.1 afla|EED53351.1 afum|EAL88853.1 agla|OJJ86245.1 akaw|GAA83760.1 aluc|OJZ90971.1 anid|CBF86223.1 anig|EHA19673.1 aory|EIT75232.1 asyd|OJJ64563.1 ater|EAU33714.1 atub|OJI82962.1 aver|OJI98660.1 awen|OJJ30232.1 azon|OJJ43949.1

Group4506: abra|OJJ77903.1 acar|OOF98879.1 acla|EAW06513.1 afis|EAW16231.1 afla|EED53350.1 afum|EAL88854.1 agla|OJJ86244.1 akaw|GAA83759.1 aluc|OJZ90972.1 anid|CBF86224.1 anig|EHA19674.1 aory|EIT74926.1 asyd|OJJ64564.1 ater|EAU33713.1 atub|OJI82963.1 aver|OJI98661.1 awen|OJJ30231.1 azon|OJJ43948.1

Group4507: abra|OJJ77910.1 acar|OOF98875.1 acla|EAW06518.1 afis|EAW16236.1 afla|EED53345.1 afum|EAL88857.1 agla|OJJ86239.1 akaw|GAA83749.1 aluc|OJZ90982.1 anid|CBF86232.1 anig|EHA19687.1 aory|EIT74884.1 asyd|OJJ64566.1 ater|EAU33708.1 atub|OJI82973.1 aver|OJI98663.1 awen|OJJ30224.1 azon|OJJ43944.1

Group4508: anig|EHA19693.1 abra|OJJ77921.1 acar|OOF98864.1 acla|EAW06687.1 afis|EAW16078.1 afla|EED48598.1 afum|EAL88710.1 agla|OJJ86111.1 akaw|GAA83742.1 aluc|OJZ90989.1 anid|CBF75119.1 aory|EIT73211.1 asyd|OJJ59993.1 ater|EAU33144.1 atub|OJI82980.1 aver|OJJ02298.1 awen|OJJ30355.1 azon|OJJ45377.1

Group4509: abra|OJJ77936.1 acar|OOF98872.1 acla|EAW06678.1 afis|EAW16087.1 afla|EED48608.1 afum|EAL88719.1 agla|OJJ86119.1 akaw|GAA83727.1 aluc|OJZ91004.1 anid|CBF75125.1 anig|EHA19709.1 aory|EIT73213.1 asyd|OJJ59984.1 ater|EAU33157.1 atub|OJI82995.1 aver|OJJ02307.1 awen|OJJ30344.1 azon|OJJ45369.1

Group4510: abra|OJJ77937.1 acar|OOF98873.1 acla|EAW06677.1 afis|EAW16088.1 afla|EED48609.1 afum|EAL88720.1 agla|OJJ86120.1 akaw|GAA83726.1 aluc|OJZ91005.1 anid|CBF75127.1 anig|EHA19710.1 aory|EIT73207.1 asyd|OJJ59983.1 ater|EAU33159.1 atub|OJI82996.1 aver|OJJ02308.1 awen|OJJ30343.1 azon|OJJ45368.1

Group4511: abra|OJJ77968.1 acar|OOF98847.1 acla|EAW06672.1 afis|EAW16093.1 afla|EED48629.1 afum|EAL88725.1 akaw|GAA83694.1 aluc|OJZ91038.1 anid|CBF85460.1 anig|EHA19737.1 aory|EIT73172.1 asyd|OJJ64101.1 ater|EAU33165.1 atub|OJI83034.1 aver|OJI98184.1 awen|OJJ30337.1 azon|OJJ45367.1 agla|OJJ86128.1

Group4512: abra|OJJ77971.1 acar|OOF98843.1 acla|EAW06670.1 afis|EAW16095.1 afla|EED48631.1 afum|EAL88727.1 agla|OJJ86126.1 akaw|GAA83691.1 aluc|OJZ91041.1 anid|CBF85455.1 anig|EHA19740.1 aory|EIT73094.1 asyd|OJJ64098.1 ater|EAU33171.1 atub|OJI83037.1 aver|OJI98181.1 awen|OJJ30335.1 azon|OJJ45363.1

Group4513: abra|OJJ77972.1 acar|OOF98842.1 acla|EAW06667.1 afis|EAW16098.1 afla|EED48633.1 afum|EAL88730.1 agla|OJJ86124.1 akaw|GAA83689.1 aluc|OJZ91043.1 anid|CBF85451.1 anig|EHA19742.1 aory|EIT73279.1 asyd|OJJ64096.1 ater|EAU33173.1 atub|OJI83039.1 aver|OJI98179.1 awen|OJJ30333.1 azon|OJJ45362.1

Group4514: abra|OJJ77973.1 acar|OOF98841.1 acla|EAW06665.1 afis|EAW16100.1 afla|EED48635.1 afum|EAL88732.1 agla|OJJ86122.1 anid|CBF85447.1 anig|EHA19743.1 aory|EIT73131.1 asyd|OJJ64095.1 ater|EAU33174.1 aver|OJI98177.1 awen|OJJ30332.1 azon|OJJ45360.1 akaw|GAA83687.1 aluc|OJZ91045.1 atub|OJI83041.1

Group4515: abra|OJJ77988.1 acar|OOF98835.1 acla|EAW06661.1 afis|EAW16104.1 afla|EED48640.1 afum|EAL88736.1 agla|OJJ86133.1 akaw|GAA85992.1 aluc|OJZ91063.1 anid|CBF85480.1 anig|EHA19767.1 aory|EIT73283.1 asyd|OJJ64108.1 ater|EAU33183.1 atub|OJI83059.1 aver|OJI98190.1 awen|OJJ30328.1 azon|OJJ45345.1

Group4516: abra|OJJ77989.1 acar|OOF98834.1 acla|EAW06660.1 afis|EAW16105.1 afla|EED48641.1 afum|EAL88737.1 agla|OJJ86134.1 akaw|GAA85991.1 aluc|OJZ91064.1 anid|CBF85482.1 anig|EHA19768.1 aory|EIT73197.1 asyd|OJJ64109.1 ater|EAU33184.1 atub|OJI83060.1 aver|OJI98191.1 awen|OJJ30327.1 azon|OJJ45344.1

Group4517: abra|OJJ77990.1 acar|OOF98833.1 acla|EAW06659.1 afis|EAW16106.1 afla|EED48642.1 afum|EAL88738.1 agla|OJJ86135.1 akaw|GAA85990.1 aluc|OJZ91066.1 anid|CBF85484.1 anig|EHA19769.1 aory|EIT73122.1 asyd|OJJ64110.1 ater|EAU33185.1 atub|OJI83061.1 aver|OJI98192.1 awen|OJJ30325.1 azon|OJJ45343.1

Group4518: abra|OJJ77991.1 acar|OOF98831.1 acla|EAW06658.1 afis|EAW16107.1 afla|EED48643.1 afum|EAL88739.2 agla|OJJ86136.1 akaw|GAA85989.1 aluc|OJZ91067.1 anid|CBF85486.1 anig|EHA19770.1 aory|EIT73085.1 asyd|OJJ64111.1 ater|EAU33190.1 atub|OJI83062.1 aver|OJI98193.1 awen|OJJ30324.1 azon|OJJ45342.1

Group4519: abra|OJJ77992.1 acar|OOF98830.1 acla|EAW06657.1 afis|EAW16108.1 afla|EED48644.1 afum|EAL88740.1 agla|OJJ86137.1 akaw|GAA85988.1 aluc|OJZ91068.1 anid|CBF85487.1 anig|EHA19771.1 aory|EIT73264.1 asyd|OJJ64112.1 ater|EAU33191.1 atub|OJI83063.1 aver|OJI98194.1 awen|OJJ30323.1 azon|OJJ45341.1

Group4520: abra|OJJ77993.1 acar|OOF98829.1 acla|EAW06655.1 afis|EAW16110.1 afla|EED48650.1 afum|EAL88741.1 agla|OJJ86145.1 akaw|GAA85987.1 aluc|OJZ91069.1 anid|CBF85492.1 anig|EHA19772.1 aory|EIT73074.1 asyd|OJJ64113.1 ater|EAU33193.1 atub|OJI83064.1 aver|OJI98196.1 awen|OJJ30320.1 azon|OJJ45339.1

Group4521: abra|OJJ77994.1 acar|OOF98828.1 acla|EAW06654.1 afis|EAW16111.1 afla|EED48651.1 afum|EAL88742.1 agla|OJJ86146.1 akaw|GAA85986.1 aluc|OJZ91070.1 anid|CBF85494.1 anig|EHA19773.1 aory|EIT73265.1 asyd|OJJ64114.1 ater|EAU33194.1 atub|OJI83065.1 aver|OJI98197.1 awen|OJJ30319.1 azon|OJJ45338.1

Group4522: abra|OJJ77995.1 acar|OOF98827.1 acla|EAW06653.1 afis|EAW16112.1 afla|EED48652.1 afum|EAL88743.1 agla|OJJ86151.1 akaw|GAA85985.1 aluc|OJZ91071.1 anid|CBF85496.1 anig|EHA19774.1 aory|EIT73201.1 asyd|OJJ64115.1 ater|EAU33195.1 atub|OJI83066.1 aver|OJI98198.1 awen|OJJ30318.1 azon|OJJ45337.1

Group4523: abra|OJJ78001.1 acar|OOF98821.1 acla|EAW06649.1 afis|EAW16116.1 afla|EED48657.1 afum|EAL88747.1 agla|OJJ86155.1 akaw|GAA85982.1 aluc|OJZ91077.1 anid|CBF85505.1 anig|EHA19778.1 aory|EIT73053.1 asyd|OJJ64119.1 ater|EAU33199.1 atub|OJI83072.1 aver|OJI98202.1 awen|OJJ30314.1 azon|OJJ45331.1

Group4524: abra|OJJ78004.1 acar|OOF98819.1 acla|EAW06646.1 afis|EAW16119.1 afla|EED48660.1 afum|EAL88750.1 agla|OJJ86160.1 akaw|GAA85979.1 aluc|OJZ91080.1 anid|CBF85543.1 anig|EHA19781.1 aory|EIT73098.1 asyd|OJJ64143.1 ater|EAU33202.1 atub|OJI83075.1 aver|OJI98224.1 awen|OJJ30311.1 azon|OJJ45328.1

Group4525: abra|OJJ78005.1 acar|OOF98818.1 acla|EAW06645.1 afis|EAW16120.1 afla|EED48661.1 afum|EAL88751.1 agla|OJJ86161.1 akaw|GAA85978.1 aluc|OJZ91081.1 anid|CBF85541.1 anig|EHA19782.1 aory|EIT73067.1 asyd|OJJ64142.1 ater|EAU33203.1 atub|OJI83077.1 aver|OJI98223.1 awen|OJJ30310.1 azon|OJJ45327.1

Group4526: abra|OJJ78008.1 acar|OOF98815.1 acla|EAW06642.1 afis|EAW16123.1 afla|EED48663.1 afum|EAL88753.1 agla|OJJ86164.1 akaw|GAA85975.1 aluc|OJZ91084.1 anid|CBF85534.1 anig|EHA19785.1 aory|EIT73192.1 asyd|OJJ64136.1 ater|EAU33206.1 atub|OJI83080.1 aver|OJI98219.1 awen|OJJ30307.1 azon|OJJ45310.1

Group4527: abra|OJJ78010.1 acar|OOF98813.1 acla|EAW06639.1 afis|EAW16126.1 afla|EED48666.1 afum|EAL88756.1 agla|OJJ86168.1 akaw|GAA85973.1 aluc|OJZ91086.1 anid|CBF85529.1 anig|EHA19787.1 aory|EIT73204.1 asyd|OJJ64133.1 ater|EAU33209.1 atub|OJI83082.1 aver|OJI98216.1 awen|OJJ30303.1 azon|OJJ45304.1

Group4528: abra|OJJ78011.1 acar|OOF98812.1 acla|EAW06638.1 afis|EAW16127.1 afla|EED48667.1 afum|EAL88757.1 agla|OJJ86169.1 akaw|GAA85972.1 aluc|OJZ91087.1 anid|CBF85527.1 anig|EHA19788.1 aory|EIT73187.1 asyd|OJJ64132.1 ater|EAU33210.1 atub|OJI83083.1 aver|OJI98215.1 awen|OJJ30302.1 azon|OJJ45303.1

Group4529: abra|OJJ78012.1 acar|OOF98811.1 acla|EAW06637.1 afis|EAW16128.1 afla|EED48668.1 afum|EAL88758.1 agla|OJJ86174.1 akaw|GAA85971.1 aluc|OJZ91088.1 anid|CBF85525.1 anig|EHA19789.1

aory|EIT73230.1 asyd|OJJ64131.1 ater|EAU33211.1 atub|OJI83085.1 aver|OJI98214.1 awen|OJJ30301.1 azon|OJJ45302.1

Group4530: abra|OJJ78013.1 acar|OOF98810.1 acla|EAW06635.1 afis|EAW16130.1 afla|EED48670.1 afum|EAL88760.1 agla|OJJ86175.1 akaw|GAA85970.1 aluc|OJZ91089.1 anid|CBF85523.1 anig|EHA19790.1 aory|EIT73154.1 asyd|OJJ64130.1 ater|EAU33212.1 atub|OJI83086.1 aver|OJI98213.1 awen|OJJ30299.1 azon|OJJ43987.1

Group4531: abra|OJJ78014.1 acar|OOF98809.1 acla|EAW06634.1 afis|EAW16131.1 afla|EED48669.1 afum|EAL88761.1 agla|OJJ86176.1 akaw|GAA85969.1 aluc|OJZ91090.1 anid|CBF85521.1 anig|EHA19791.1 aory|EIT73222.1 asyd|OJJ64128.1 ater|EAU33213.1 atub|OJI83087.1 aver|OJI98211.1 awen|OJJ30298.1 azon|OJJ43986.1

Group4532: abra|OJJ78018.1 acar|OOF98805.1 acla|EAW06629.1 afis|EAW16136.1 afla|EED48676.1 afum|EAL88766.2 agla|OJJ86181.1 akaw|GAA85965.1 aluc|OJZ91094.1 anid|CBF85512.1 anig|EHA19795.1 aory|EIT73051.1 asyd|OJJ64123.1 ater|EAU33218.1 atub|OJI83091.1 aver|OJI98206.1 awen|OJJ30292.1 azon|OJJ43981.1

Group4533: abra|OJJ78021.1 acar|OOF98803.1 acla|EAW06627.1 afis|EAW16138.1 afla|EED48678.1 afum|EAL88767.1 agla|OJJ86183.1 akaw|GAA85964.1 aluc|OJZ91096.1 anid|CBF85545.1 anig|EHA19797.1 aory|EIT73188.1 asyd|OJJ64144.1 ater|EAU33219.1 atub|OJI83094.1 aver|OJI98225.1 awen|OJJ30290.1 azon|OJJ43979.1

Group4534: abra|OJJ78023.1 acar|OOF98802.1 acla|EAW06626.1 afis|EAW16139.1 afla|EED48679.1 afum|EAL88768.1 agla|OJJ86185.1 akaw|GAA85963.1 aluc|OJZ91098.1 anid|CBF85546.1 anig|EHA19798.1 aory|EIT73152.1 asyd|OJJ64148.1 ater|EAU33220.1 atub|OJI83095.1 aver|OJI98228.1 awen|OJJ30289.1 azon|OJJ43978.1

Group4535: abra|OJJ78024.1 acar|OOF98801.1 acla|EAW06625.1 afis|EAW16140.1 afla|EED48681.1 afum|EAL88769.2 agla|OJJ86189.1 akaw|GAA85962.1 aluc|OJZ91099.1 anid|CBF85548.1 anig|EHA19799.1 aory|EIT73077.1 asyd|OJJ64149.1 ater|EAU33225.1 atub|OJI83096.1 aver|OJI98229.1 awen|OJJ30288.1 azon|OJJ43977.1

Group4536: abra|OJJ78026.1 acar|OOF98799.1 acla|EAW06623.1 afis|EAW16142.1 afla|EED48683.1 afum|EAL88771.1 agla|OJJ86190.1 akaw|GAA85960.1 aluc|OJZ91101.1 anid|CBF85551.1 anig|EHA19801.1 aory|EIT73175.1 asyd|OJJ64151.1 ater|EAU33227.1 atub|OJI83098.1 aver|OJI98231.1 awen|OJJ30286.1 azon|OJJ43975.1

Group4537: abra|OJJ78027.1 acar|OOF98796.1 acla|EAW06622.1 afis|EAW16143.1 afla|EED48684.1 afum|EAL88772.1 agla|OJJ86191.1 akaw|GAA85959.1 aluc|OJZ91102.1 anid|CBF79592.1 anig|EHA19802.1 aory|EIT73194.1 asyd|OJJ57983.1 ater|EAU33228.1 atub|OJI83099.1 aver|OJJ04418.1 awen|OJJ30285.1 azon|OJJ43974.1

Group4539: abra|OJJ78062.1 acar|OOF98792.1 acla|EAW06621.1 afis|EAW16144.1 afla|EED48686.1 afum|EAL88773.1 agla|OJJ86192.1 akaw|GAA85931.1 aluc|OJZ91133.1 anid|CBF79590.1 anig|EHA19832.1 aory|EIT73255.1 asyd|OJJ57981.1 ater|EAU33229.1 atub|OJI83143.1 aver|OJJ04419.1 awen|OJJ30283.1 azon|OJJ43973.1

Group4540: abra|OJJ78073.1 acar|OOF98790.1 acla|EAW15356.1 afis|EAW20356.1 afla|EED46131.1 afum|EAL85473.1 agla|OJJ81763.1 akaw|GAA85921.1 aluc|OJZ91146.1 anid|CBF74973.1 anig|EHA19844.1 aory|EIT76365.1 asyd|OJJ60088.1 ater|EAU34035.1 atub|OJI83160.1 aver|OJJ04175.1 awen|OJJ38942.1 azon|OJJ45059.1

Group4541: abra|OJJ78074.1 acar|OOF98789.1 afis|EAW16145.1 afla|EED48687.1 agla|OJJ86198.1 akaw|GAA85920.1 aluc|OJZ91147.1 anid|CBF79583.1 anig|EHA19845.1 aory|EIT73058.1 asyd|OJJ57977.1 ater|EAU33230.1 atub|OJI83161.1 aver|OJJ04423.1 awen|OJJ30281.1 azon|OJJ43972.1 acla|EAW06620.1 afum|EAL88774.1

Group4542: abra|OJJ78078.1 acar|OOF98786.1 acla|EAW06611.1 afis|EAW16204.1 afla|EED48697.1 afum|EAL88832.1 agla|OJJ86215.1 akaw|GAA85916.1 aluc|OJZ91150.1 anid|CBF79563.1 anig|EHA19848.1 aory|EIT73216.1 asyd|OJJ57913.1 ater|EAU33246.1 atub|OJI83164.1 aver|OJJ04480.1 awen|OJJ30268.1 azon|OJJ43964.1

Group4543: abra|OJJ78083.1 acar|OOF98783.1 acla|EAW06613.1 afis|EAW16177.1 afla|EED54377.1 afum|EAL88810.1 agla|OJJ86213.1 akaw|GAA85909.1 aluc|OJZ91157.1 anid|CBF79566.1 anig|EHA19853.1 aory|EIT75854.1 asyd|OJJ57917.1 ater|EAU33243.1 atub|OJI83172.1 aver|OJJ04474.1 awen|OJJ30272.1 azon|OJJ43966.1

Group4545: abra|OJJ78110.1 acar|OOF98756.1 acla|EAW06606.1 afis|EAW16217.1 afla|EED48711.1 afum|EAL88844.1 agla|OJJ86227.1 akaw|GAA85896.1 aluc|OJZ91175.1 anid|CBF79538.1 anig|EHA19867.1 aory|EIT73084.1 asyd|OJJ57899.1 ater|EAU33261.1 atub|OJI83188.1 aver|OJJ04496.1 awen|OJJ30255.1 azon|OJJ43955.1



Group4546: abra|OJJ78112.1 acar|OOF98755.1 acla|EAW06605.1 afis|EAW16218.1 afla|EED48712.1 afum|EAL88846.1 agla|OJJ86225.1 akaw|GAA85895.1 aluc|OJZ91177.1 anid|CBF79536.1 anig|EHA19868.1 aory|EIT73123.1 asyd|OJJ57898.1 ater|EAU33262.1 atub|OJI83189.1 aver|OJJ04497.1 awen|OJJ30254.1 azon|OJJ43957.1

Group4548: abra|OJJ78189.1 acar|OOF98670.1 acla|EAW06798.1 afis|EAW16347.1 afla|EED51752.1 afum|EAL88972.1 agla|OJJ88241.1 akaw|GAA85840.1 aluc|OJZ91260.1 anid|CBF89212.1 anig|EHA19948.1 aory|EIT80660.1 asyd|OJJ62523.1 ater|EAU36051.1 atub|OJI83249.1 aver|OJI96642.1 awen|OJJ37750.1 azon|OJJ47558.1

Group4550: abra|OJJ78206.1 acar|OOF98648.1 acla|EAW11242.1 afis|EAW18261.1 afla|EED48720.1 afum|EAL87625.1 agla|OJJ88165.1 akaw|GAA85820.1 aluc|OJZ91279.1 anid|CBF79529.1 anig|EHA19964.1 aory|EIT73088.1 asyd|OJJ57894.1 ater|EAU33269.1 atub|OJI83269.1 aver|OJJ04501.1 awen|OJJ30635.1 azon|OJJ47983.1

Group4551: abra|OJJ78213.1 acar|OOF98642.1 acla|EAW11237.1 afis|EAW18268.1 afla|EED48733.1 afum|EAL87633.1 agla|OJJ88159.1 akaw|GAA85814.1 aluc|OJZ91285.1 anid|CBF79516.1 anig|EHA19970.1 aory|EIT73048.1 asyd|OJJ57888.1 ater|EAU33275.1 atub|OJI83275.1 aver|OJJ04506.1 awen|OJJ30642.1 azon|OJJ47973.1

Group4552: abra|OJJ78216.1 acar|OOF98640.1 acla|EAW11234.1 afis|EAW18271.1 afla|EED48737.1 afum|EAL87636.1 agla|OJJ88156.1 akaw|GAA85811.1 aluc|OJZ91288.1 anid|CBF79510.1 anig|EHA19973.1 aory|EIT73125.1 asyd|OJJ57885.1 ater|EAU33277.1 atub|OJI83278.1 aver|OJJ04509.1 awen|OJJ30644.1 azon|OJJ47971.1

Group4553: abra|OJJ78217.1 acar|OOF98639.1 acla|EAW11232.1 afis|EAW18272.1 afla|EED48738.1 afum|EAL87637.1 agla|OJJ88155.1 akaw|GAA85807.1 aluc|OJZ91291.1 anid|CBF79508.1 anig|EHA19974.1 aory|EIT73235.1 asyd|OJJ57884.1 ater|EAU33278.1 atub|OJI83282.1 aver|OJJ04510.1 awen|OJJ30645.1 azon|OJJ47970.1

Group4554: abra|OJJ78218.1 acar|OOF98638.1 acla|EAW11231.1 afis|EAW18273.1 afla|EED48739.1 afum|EAL87638.1 agla|OJJ88154.1 akaw|GAA85806.1 aluc|OJZ91292.1 anid|CBF79507.1 anig|EHA19975.1 aory|EIT73224.1 asyd|OJJ57883.1 ater|EAU33279.1 atub|OJI83283.1 aver|OJJ04511.1 awen|OJJ30646.1 azon|OJJ47969.1

Group4555: abra|OJJ78220.1 acar|OOF98636.1 acla|EAW11229.1 afis|EAW18274.1 afla|EED48741.1 afum|EAL87640.1 agla|OJJ88152.1 akaw|GAA85805.1 aluc|OJZ91294.1 anid|CBF79503.1 anig|EHA19977.1 aory|EIT73281.1 asyd|OJJ57881.1 ater|EAU33280.1 atub|OJI83285.1 aver|OJJ04513.1 awen|OJJ30647.1 azon|OJJ47968.1

Group4556: abra|OJJ78221.1 acar|OOF98635.1 acla|EAW11228.1 afis|EAW18275.1 afla|EED48742.1 afum|EAL87641.1 agla|OJJ88151.1 akaw|GAA85804.1 aluc|OJZ91296.1 anid|CBF79499.1 anig|EHA19978.1 aory|EIT73223.1 asyd|OJJ57880.1 ater|EAU33281.1 atub|OJI83286.1 aver|OJJ04514.1 awen|OJJ30648.1 azon|OJJ47967.1

Group4557: abra|OJJ78226.1 acar|OOF98632.1 acla|EAW09284.1 afis|EAW21863.1 afla|EED46448.1 afum|EAL92877.2 agla|OJJ84270.1 akaw|GAA85799.1 aluc|OJZ91301.1 anid|CBF76755.1 anig|EHA19983.1 aory|EIT72377.1 asyd|OJJ61262.1 ater|EAU30861.1 atub|OJI83292.1 aver|OJJ00588.1 awen|OJJ34153.1 azon|OJJ43475.1

Group4558: abra|OJJ78229.1 acar|OOF98630.1 acla|EAW09280.1 afis|EAW21867.1 afla|EED46442.1 afum|EAL92881.1 agla|OJJ84268.1 akaw|GAA85795.1 aluc|OJZ91304.1 anid|CBF76763.1 anig|EHA19986.1 aory|EIT72329.1 asyd|OJJ61265.1 ater|EAU30864.1 atub|OJI83295.1 aver|OJJ00592.1 awen|OJJ34156.1 azon|OJJ43473.1

Group4559: abra|OJJ78230.1 acar|OOF98629.1 acla|EAW09279.1 afis|EAW21868.1 afla|EED46441.1 afum|EAL92882.1 agla|OJJ84267.1 akaw|GAA85794.1 aluc|OJZ91305.1 anid|CBF76765.1 anig|EHA19987.1 aory|EIT72366.1 asyd|OJJ61266.1 ater|EAU30866.1 atub|OJI83296.1 aver|OJJ00593.1 awen|OJJ34157.1 azon|OJJ43472.1

Group4560: abra|OJJ78231.1 acar|OOF98628.1 acla|EAW09278.1 afis|EAW21869.1 afla|EED46440.1 afum|EAL92883.1 agla|OJJ84264.1 akaw|GAA85793.1 aluc|OJZ91306.1 anid|CBF76767.1 anig|EHA19988.1 aory|EIT72428.1 asyd|OJJ61267.1 ater|EAU30867.1 atub|OJI83297.1 aver|OJJ00594.1 awen|OJJ34158.1 azon|OJJ43471.1

Group4561: abra|OJJ78233.1 acar|OOF98627.1 acla|EAW09277.1 afis|EAW21870.1 afla|EED46438.1 afum|EAL92884.1 agla|OJJ84262.1 akaw|GAA85792.1 aluc|OJZ91307.1 anid|CBF76769.1 anig|EHA19991.1 aory|EIT72393.1 asyd|OJJ61268.1 ater|EAU30868.1 atub|OJI83300.1 aver|OJJ00597.1 awen|OJJ34159.1 azon|OJJ43470.1

Group4562: abra|OJJ78234.1 acar|OOF98626.1 acla|EAW09276.1 afis|EAW21871.1 afla|EED46437.1 afum|EAL92885.1 agla|OJJ84261.1 akaw|GAA85791.1 aluc|OJZ91308.1 anid|CBF76771.1 anig|EHA19992.1

aory|EIT72319.1 asyd|OJJ61269.1 ater|EAU30869.1 atub|OJI83301.1 aver|OJJ00598.1 awen|OJJ34160.1 azon|OJJ43469.1

Group4563: abra|OJJ78237.1 acar|OOF98623.1 acla|EAW09273.1 afis|EAW21875.1 afla|EED46433.1 afum|EAL92889.2 agla|OJJ84257.1 akaw|GAA85788.1 aluc|OJZ91311.1 anid|CBF76776.1 anig|EHA19995.1 aory|EIT72389.1 asyd|OJJ61273.1 ater|EAU30874.1 atub|OJI83304.1 aver|OJJ00601.1 awen|OJJ34164.1 azon|OJJ43466.1

Group4564: abra|OJJ78238.1 acar|OOF98622.1 acla|EAW09272.1 afis|EAW21876.1 afla|EED46432.1 afum|EAL92890.1 agla|OJJ84256.1 akaw|GAA85787.1 aluc|OJZ91312.1 anid|CBF76778.1 anig|EHA19996.1 aory|EIT72368.1 asyd|OJJ61274.1 ater|EAU30875.1 atub|OJI83305.1 aver|OJJ00602.1 awen|OJJ34165.1 azon|OJJ43465.1

Group4565: abra|OJJ78239.1 acar|OOF98621.1 acla|EAW09271.1 afis|EAW21877.1 afla|EED46431.1 afum|EAL92891.2 agla|OJJ84255.1 akaw|GAA85786.1 aluc|OJZ91313.1 anid|CBF76780.1 anig|EHA19997.1 aory|EIT72420.1 asyd|OJJ61275.1 ater|EAU30876.1 atub|OJI83306.1 aver|OJJ00603.1 awen|OJJ34166.1 azon|OJJ43464.1

Group4566: abra|OJJ78241.1 acar|OOF98619.1 acla|EAW09269.1 afis|EAW21879.1 afla|EED46429.1 afum|EAL92893.1 agla|OJJ84253.1 akaw|GAA85783.1 aluc|OJZ91315.1 anid|CBF76784.1 anig|EHA19998.1 aory|EIT72355.1 asyd|OJJ61277.1 ater|EAU30877.1 atub|OJI83309.1 aver|OJJ00605.1 awen|OJJ34168.1 azon|OJJ43462.1

Group4567: abra|OJJ78242.1 acar|OOF98618.1 acla|EAW09268.1 afis|EAW21880.1 afla|EED46428.1 afum|EAL92894.2 agla|OJJ84252.1 akaw|GAA85782.1 aluc|OJZ91316.1 anid|CBF76786.1 anig|EHA19999.1 aory|EIT72330.1 asyd|OJJ61278.1 ater|EAU30878.1 atub|OJI83310.1 aver|OJJ00606.1 awen|OJJ34169.1 azon|OJJ43461.1

Group4568: abra|OJJ78244.1 acar|OOF98616.1 acla|EAW09265.1 afis|EAW21883.1 afla|EED46424.1 afum|EAL92897.1 agla|OJJ84251.1 akaw|GAA85780.1 aluc|OJZ91318.1 anid|CBF76788.1 anig|EHA20001.1 aory|EIT72383.1 asyd|OJJ61280.1 ater|EAU30881.1 atub|OJI83312.1 aver|OJJ00607.1 awen|OJJ34172.1 azon|OJJ43460.1

Group4569: abra|OJJ78247.1 acar|OOF98615.1 acla|EAW09263.1 afis|EAW21884.1 afla|EED46423.1 afum|EAL92898.1 agla|OJJ84249.1 akaw|GAA85779.1 aluc|OJZ91321.1 anid|CBF76790.1 anig|EHA20003.1 aory|EIT72443.1 asyd|OJJ61281.1 ater|EAU30882.1 atub|OJI83314.1 aver|OJJ00608.1 awen|OJJ34173.1 azon|OJJ43459.1

Group4570: abra|OJJ78249.1 acar|OOF98614.1 acla|EAW09262.1 afis|EAW21885.1 afla|EED46422.1 afum|EAL92899.1 agla|OJJ84248.1 akaw|GAA85778.1 aluc|OJZ91322.1 anid|CBF76792.1 anig|EHA20004.1 aory|EIT72353.1 asyd|OJJ61282.1 ater|EAU30883.1 atub|OJI83315.1 aver|OJJ00609.1 awen|OJJ34174.1 azon|OJJ43458.1

Group4571: abra|OJJ78250.1 acar|OOF98612.1 acla|EAW09261.1 afis|EAW21886.1 afla|EED46421.1 afum|EAL92900.1 agla|OJJ84247.1 akaw|GAA85777.1 aluc|OJZ91323.1 anid|CBF76794.1 anig|EHA20005.1 aory|EIT72442.1 asyd|OJJ61283.1 ater|EAU30884.1 atub|OJI83316.1 aver|OJJ00610.1 awen|OJJ34175.1 azon|OJJ43457.1

Group4572: abra|OJJ78252.1 acar|OOF98611.1 acla|EAW09259.1 afis|EAW21888.1 afla|EED46419.1 afum|EAL92902.1 agla|OJJ84245.1 akaw|GAA85775.1 aluc|OJZ91325.1 anid|CBF76798.1 anig|EHA20007.1 aory|EIT72406.1 asyd|OJJ61285.1 ater|EAU30885.1 atub|OJI83318.1 aver|OJJ00611.1 awen|OJJ34177.1 azon|OJJ43455.1

Group4573: abra|OJJ78253.1 acar|OOF98610.1 acla|EAW09258.1 afis|EAW21889.1 afla|EED46418.1 afum|EAL92903.1 agla|OJJ84244.1 akaw|GAA85774.1 aluc|OJZ91326.1 anid|CBF76800.1 anig|EHA20008.1 aory|EIT72432.1 asyd|OJJ61286.1 ater|EAU30886.1 atub|OJI83319.1 aver|OJJ00612.1 awen|OJJ34178.1 azon|OJJ43454.1

Group4574: abra|OJJ78255.1 acar|OOF98607.1 acla|EAW09254.1 afis|EAW21893.1 afla|EED46415.1 afum|EAL92907.1 agla|OJJ84239.1 akaw|GAA85771.1 aluc|OJZ91329.1 anid|CBF76806.1 anig|EHA20011.1 aory|EIT72313.1 asyd|OJJ61289.1 ater|EAU30889.1 atub|OJI83322.1 aver|OJJ00615.1 awen|OJJ34182.1 azon|OJJ43450.1

Group4575: abra|OJJ78256.1 acar|OOF98606.1 acla|EAW09253.1 afis|EAW21894.1 afla|EED46414.1 afum|EAL92908.1 agla|OJJ84238.1 akaw|GAA85770.1 aluc|OJZ91330.1 anid|CBF76808.1 anig|EHA20012.1 aory|EIT72378.1 asyd|OJJ61290.1 ater|EAU30890.1 atub|OJI83323.1 aver|OJJ00616.1 awen|OJJ34183.1 azon|OJJ43449.1

Group4576: abra|OJJ78260.1 acar|OOF98600.1 acla|EAW09250.1 afis|EAW21897.1 afla|EED46411.1 afum|EAL92910.1 agla|OJJ84227.1 akaw|GAA85765.1 aluc|OJZ91335.1 anid|CBF76814.1 anig|EHA20016.1 aory|EIT72440.1 asyd|OJJ61293.1 ater|EAU30892.1 atub|OJI83327.1 aver|OJJ00619.1 awen|OJJ34186.1 azon|OJJ43447.1

Group4577: abra|OJJ78261.1 acar|OOF98599.1 acla|EAW09249.1 afis|EAW21898.1 afla|EED46408.1 afum|EAL92911.2 agla|OJJ84228.1 akaw|GAA85764.1 aluc|OJZ91336.1 anid|CBF76816.1 anig|EHA20017.1 aory|EIT72346.1 asyd|OJJ61294.1 ater|EAU30893.1 atub|OJI83328.1 aver|OJJ00620.1 awen|OJJ34187.1 azon|OJJ43446.1

Group4578: abra|OJJ78263.1 acar|OOF98598.1 acla|EAW09248.1 afis|EAW21899.1 afla|EED46407.1 afum|EAL92912.1 agla|OJJ84229.1 akaw|GAA85762.1 aluc|OJZ91338.1 anid|CBF76818.1 anig|EHA20018.1 aory|EIT72328.1 asyd|OJJ61295.1 ater|EAU30894.1 atub|OJI83330.1 aver|OJJ00621.1 awen|OJJ34188.1 azon|OJJ43445.1

Group4579: abra|OJJ78264.1 acar|OOF98597.1 acla|EAW09247.1 afis|EAW21900.1 afla|EED46406.1 afum|EAL92913.1 agla|OJJ84230.1 akaw|GAA85761.1 aluc|OJZ91339.1 anid|CBF76820.1 anig|EHA20019.1 aory|EIT72352.1 asyd|OJJ61296.1 ater|EAU30895.1 atub|OJI83331.1 aver|OJJ00622.1 awen|OJJ34189.1 azon|OJJ43444.1

Group4580: abra|OJJ78266.1 acar|OOF98596.1 acla|EAW09246.1 afis|EAW21901.1 afla|EED46405.1 afum|EAL92914.1 agla|OJJ84231.1 akaw|GAA85760.1 aluc|OJZ91340.1 anid|CBF76822.1 anig|EHA20020.1 aory|EIT72444.1 asyd|OJJ61297.1 ater|EAU30896.1 atub|OJI83332.1 aver|OJJ00623.1 awen|OJJ34190.1 azon|OJJ43443.1

Group4581: abra|OJJ78267.1 acar|OOF98595.1 acla|EAW09245.1 afis|EAW21902.1 afla|EED46403.1 afum|EAL92915.1 agla|OJJ84232.1 akaw|GAA85759.1 aluc|OJZ91341.1 anid|CBF76824.1 anig|EHA20021.1 aory|EIT72339.1 asyd|OJJ61298.1 ater|EAU30897.1 atub|OJI83333.1 aver|OJJ00624.1 awen|OJJ34191.1 azon|OJJ43442.1

Group4582: abra|OJJ78268.1 acar|OOF98594.1 acla|EAW09244.1 afis|EAW21903.1 afla|EED46402.1 afum|EAL92916.1 agla|OJJ84233.1 akaw|GAA85758.1 aluc|OJZ91342.1 anid|CBF76826.1 anig|EHA20022.1 aory|EIT72439.1 asyd|OJJ61299.1 ater|EAU30898.1 atub|OJI83334.1 aver|OJJ00625.1 awen|OJJ34192.1 azon|OJJ43441.1

Group4583: abra|OJJ78275.1 acar|OOF98592.1 acla|EAW09239.1 afis|EAW21909.1 afla|EED46641.1 afum|EAL92921.1 agla|OJJ84222.1 akaw|GAA85751.1 aluc|OJZ91350.1 anid|CBF76837.1 anig|EHA20028.1 aory|EIT77855.1 asyd|OJJ61305.1 ater|EAU30909.1 atub|OJI83342.1 aver|OJJ00630.1 awen|OJJ34199.1 azon|OJJ43435.1

Group4584: abra|OJJ78277.1 acar|OOF98590.1 acla|EAW09237.1 afis|EAW21911.1 afla|EED46639.1 afum|EAL92923.1 agla|OJJ84220.1 akaw|GAA85749.1 aluc|OJZ91352.1 anid|CBF76842.1 anig|EHA20030.1 aory|EIT77915.1 asyd|OJJ61307.1 ater|EAU30911.1 atub|OJI83344.1 aver|OJJ00632.1 awen|OJJ34201.1 azon|OJJ43433.1

Group4585: abra|OJJ78278.1 acar|OOF98588.1 acla|EAW09236.1 afis|EAW21912.1 afla|EED46638.1 afum|EAL92924.1 agla|OJJ84219.1 akaw|GAA85748.1 aluc|OJZ91353.1 anid|CBF76844.1 anig|EHA20031.1 aory|EIT77829.1 asyd|OJJ61308.1 ater|EAU30912.1 atub|OJI83345.1 aver|OJJ00633.1 awen|OJJ34202.1 azon|OJJ43432.1

Group4586: abra|OJJ78280.1 acar|OOF98589.1 acla|EAW09235.1 afis|EAW21913.1 afla|EED46637.1 afum|EAL92925.1 agla|OJJ84210.1 akaw|GAA85747.1 aluc|OJZ91354.1 anid|CBF76846.1 anig|EHA20032.1 aory|EIT77951.1 asyd|OJJ61309.1 ater|EAU30914.1 atub|OJI83347.1 aver|OJJ00634.1 awen|OJJ34203.1 azon|OJJ43431.1

Group4587: abra|OJJ78282.1 acar|OOF98586.1 acla|EAW09233.1 afis|EAW21915.1 afla|EED46634.1 afum|EAL92927.1 agla|OJJ84208.1 akaw|GAA85745.1 aluc|OJZ91356.1 anid|CBF76850.1 anig|EHA20034.1 aory|EIT77867.1 asyd|OJJ61311.1 ater|EAU30916.1 atub|OJI83349.1 aver|OJJ00636.1 awen|OJJ34205.1 azon|OJJ43429.1

Group4588: abra|OJJ78284.1 acar|OOF98584.1 acla|EAW09231.1 afis|EAW21917.1 afla|EED46632.1 afum|EAL92929.1 agla|OJJ84206.1 akaw|GAA85743.1 aluc|OJZ91358.1 anid|CBF76854.1 anig|EHA20036.1 aory|EIT77843.1 asyd|OJJ61313.1 ater|EAU30919.1 atub|OJI83351.1 aver|OJJ00638.1 awen|OJJ34207.1 azon|OJJ43427.1

Group4589: abra|OJJ78285.1 acar|OOF98583.1 acla|EAW09230.1 afis|EAW21918.1 afum|EAL92930.1 agla|OJJ84205.1 akaw|GAA85742.1 aluc|OJZ91359.1 anid|CBF76856.1 anig|EHA20037.1 asyd|OJJ61314.1 ater|EAU30920.1 atub|OJI83352.1 aver|OJJ00639.1 awen|OJJ34208.1 azon|OJJ43426.1 afla|EED46631.1 aory|EIT77816.1

Group4590: abra|OJJ78287.1 acar|OOF98581.1 acla|EAW09228.1 afis|EAW21920.1 afla|EED46630.1 afum|EAL92932.1 agla|OJJ84203.1 akaw|GAA85740.1 aluc|OJZ91361.1 anid|CBF76860.1 anig|EHA20039.1 aory|EIT77823.1 asyd|OJJ61316.1 ater|EAU30925.1 atub|OJI83354.1 aver|OJJ00641.1 awen|OJJ34210.1 azon|OJJ43424.1

Group4591: abra|OJJ78288.1 acar|OOF98579.1 acla|EAW09227.1 afis|EAW21921.1 afla|EED46629.1 afum|EAL92934.1 agla|OJJ84202.1 akaw|GAA85739.1 aluc|OJZ91362.1 anid|CBF76862.1 anig|EHA20040.1

aory|EIT77918.1 asyd|OJJ61317.1 ater|EAU30926.1 atub|OJI83355.1 aver|OJJ00642.1 awen|OJJ34211.1 azon|OJJ43423.1

Group4592: abra|OJJ78289.1 acar|OOF98580.1 acla|EAW09226.1 afis|EAW21922.1 afla|EED46628.1 afum|EAL92935.1 agla|OJJ84201.1 akaw|GAA85738.1 aluc|OJZ91363.1 anid|CBF76864.1 anig|EHA20041.1 aory|EIT77831.1 asyd|OJJ61318.1 ater|EAU30927.1 atub|OJI83356.1 aver|OJJ00643.1 awen|OJJ34212.1 azon|OJJ43422.1

Group4593: abra|OJJ78290.1 acar|OOF98578.1 acla|EAW09225.1 afis|EAW21923.1 afla|EED46627.1 afum|EAL92936.1 agla|OJJ84200.1 akaw|GAA85737.1 aluc|OJZ91364.1 anid|CBF76866.1 anig|EHA20042.1 aory|EIT77896.1 asyd|OJJ61319.1 ater|EAU30928.1 atub|OJI83357.1 aver|OJJ00644.1 awen|OJJ34213.1 azon|OJJ43421.1

Group4594: abra|OJJ78292.1 acar|OOF98576.1 afis|EAW21924.1 afla|EED46615.1 afum|EAL92937.1 akaw|GAA85735.1 aluc|OJZ91366.1 anig|EHA20044.1 aory|EIT77890.1 ater|EAU30929.1 atub|OJI83359.1 aver|OJJ00647.1 azon|OJJ43420.1 acla|EAW09224.1 agla|OJJ84199.1 anid|CBF76872.1 asyd|OJJ61322.1 awen|OJJ34214.1

Group4595: abra|OJJ78293.1 acar|OOF98575.1 acla|EAW09223.1 afis|EAW21925.1 afla|EED46616.1 afum|EAL92938.1 agla|OJJ84198.1 akaw|GAA85734.1 aluc|OJZ91367.1 anid|CBF76882.1 anig|EHA20045.1 aory|EIT77869.1 asyd|OJJ61327.1 ater|EAU30930.1 atub|OJI83360.1 aver|OJJ00652.1 awen|OJJ34215.1 azon|OJJ43419.1

Group4596: abra|OJJ78298.1 acar|OOF98571.1 acla|EAW09218.1 afis|EAW21930.1 afla|EED46623.1 afum|EAL92942.1 agla|OJJ84191.1 akaw|GAA85729.1 aluc|OJZ91372.1 anid|CBF76884.1 anig|EHA20050.1 aory|EIT77852.1 asyd|OJJ61328.1 ater|EAU30936.1 atub|OJI83365.1 aver|OJJ00654.1 awen|OJJ34220.1 azon|OJJ43414.1

Group4597: abra|OJJ78299.1 acar|OOF98567.1 acla|EAW09216.1 afis|EAW21931.1 afla|EED46626.1 afum|EAL92943.2 agla|OJJ84190.1 akaw|GAA85727.1 aluc|OJZ91376.1 anid|CBF76885.1 anig|EHA20051.1 aory|EIT77815.1 asyd|OJJ61330.1 ater|EAU30937.1 atub|OJI83366.1 aver|OJJ00655.1 awen|OJJ34222.1 azon|OJJ43413.1

Group4598: abra|OJJ78301.1 acar|OOF98565.1 acla|EAW09214.1 afis|EAW21933.1 afla|EED46353.1 afum|EAL92946.1 agla|OJJ84187.1 akaw|GAA85725.1 aluc|OJZ91378.1 anid|CBF76887.1 anig|EHA20053.1 aory|EIT81186.1 asyd|OJJ61333.1 ater|EAU30938.1 atub|OJI83371.1 aver|OJJ00657.1 awen|OJJ34224.1 azon|OJJ43411.1

Group4599: abra|OJJ78302.1 acar|OOF98564.1 acla|EAW09213.1 afis|EAW21934.1 afla|EED46354.1 afum|EAL92947.1 agla|OJJ84186.1 akaw|GAA85724.1 aluc|OJZ91379.1 anid|CBF76889.1 anig|EHA20054.1 aory|EIT81211.1 asyd|OJJ61334.1 ater|EAU30939.1 atub|OJI83372.1 aver|OJJ00658.1 awen|OJJ34225.1 azon|OJJ43410.1

Group4600: abra|OJJ78308.1 acar|OOF98558.1 acla|EAW09212.1 afis|EAW21935.1 afla|EED46652.1 afum|EAL92948.2 agla|OJJ84185.1 akaw|GAA85721.1 aluc|OJZ91383.1 anid|CBF76899.1 anig|EHA20060.1 aory|EIT77952.1 asyd|OJJ61338.1 ater|EAU30941.1 atub|OJI83376.1 aver|OJJ00662.1 awen|OJJ34226.1 azon|OJJ43409.1

Group4601: abra|OJJ78319.1 acar|OOF98556.1 acla|EAW09206.1 afis|EAW21941.1 afla|EED46658.1 afum|EAL92955.1 agla|OJJ84182.1 akaw|GAA85711.1 aluc|OJZ91392.1 anid|CBF84078.1 anig|EHA20070.1 aory|EIT77820.1 asyd|OJJ61342.1 ater|EAU30946.1 atub|OJI83385.1 aver|OJJ00666.1 awen|OJJ34232.1 azon|OJJ43403.1

Group4602: abra|OJJ78323.1 acar|OOF98551.1 acla|EAW09202.1 afis|EAW21945.1 afla|EED46662.1 afum|EAL92959.1 agla|OJJ84179.1 akaw|GAA85705.1 aluc|OJZ91398.1 anid|CBF84050.1 anig|EHA20075.1 aory|EIT77962.1 asyd|OJJ61343.1 ater|EAU30993.1 atub|OJI83390.1 aver|OJJ00667.1 awen|OJJ34236.1 azon|OJJ43400.1

Group4603: abra|OJJ78325.1 acar|OOF98550.1 acla|EAW09201.1 afis|EAW21946.1 afla|EED46663.1 afum|EAL92960.1 agla|OJJ84174.1 akaw|GAA85704.1 aluc|OJZ91399.1 anid|CBF84059.1 anig|EHA20076.1 aory|EIT77808.1 asyd|OJJ61345.1 ater|EAU30994.1 atub|OJI83391.1 aver|OJJ00670.1 awen|OJJ34237.1 azon|OJJ43399.1

Group4604: abra|OJJ78327.1 acar|OOF98548.1 acla|EAW09199.1 afis|EAW21948.1 afla|EED46666.1 afum|EAL92962.1 agla|OJJ84172.1 akaw|GAA85702.1 aluc|OJZ91401.1 anid|CBF84062.1 anig|EHA20078.1 aory|EIT77953.1 asyd|OJJ61347.1 ater|EAU30996.1 atub|OJI83393.1 aver|OJJ00674.1 awen|OJJ34240.1 azon|OJJ43397.1

Group4605: abra|OJJ78328.1 acar|OOF98547.1 acla|EAW09198.1 afis|EAW21949.1 afum|EAL92963.1 agla|OJJ84171.1 akaw|GAA85701.1 aluc|OJZ91402.1 anid|CBF84064.1 anig|EHA20079.1 aory|EIT77849.1 asyd|OJJ61348.1 ater|EAU30997.1 atub|OJI83395.1 aver|OJJ00675.1 awen|OJJ34241.1 azon|OJJ43396.1 afla|EED46667.1

Group4606: abra|OJJ78329.1 acar|OOF98546.1 acla|EAW09197.1 afis|EAW21950.1 afla|EED46668.1 afum|EAL92964.1 agla|OJJ84170.1 akaw|GAA85700.1 aluc|OJZ91403.1 anid|CBF84066.1 anig|EHA20080.1 aory|EIT77926.1 asyd|OJJ61349.1 ater|EAU30998.1 atub|OJI83396.1 aver|OJJ00676.1 awen|OJJ34242.1 azon|OJJ43395.1

Group4607: abra|OJJ78334.1 acar|OOF98544.1 acla|EAW09194.1 afis|EAW21952.1 afla|EED46669.1 afum|EAL92966.1 agla|OJJ84159.1 akaw|GAA85696.1 aluc|OJZ91407.1 anid|CBF84069.1 anig|EHA20083.1 aory|EIT77916.1 asyd|OJJ61351.1 ater|EAU31000.1 atub|OJI83400.1 aver|OJJ00678.1 awen|OJJ34244.1 azon|OJJ43394.1

Group4608: abra|OJJ78337.1 acar|OOF98543.1 acla|EAW09193.1 afis|EAW21953.1 afla|EED46671.1 afum|EAL92967.1 agla|OJJ84160.1 akaw|GAA85695.1 aluc|OJZ91409.1 anid|CBF84070.1 anig|EHA20084.1 aory|EIT77807.1 asyd|OJJ61352.1 ater|EAU31001.1 atub|OJI83403.1 aver|OJJ00679.1 awen|OJJ34245.1 azon|OJJ43393.1

Group4609: abra|OJJ78339.1 acar|OOF98541.1 acla|EAW09192.1 afis|EAW21954.1 afla|EED46672.1 afum|EAL92968.1 agla|OJJ84161.1 akaw|GAA85694.1 aluc|OJZ91411.1 anid|CBF84074.1 anig|EHA20085.1 aory|EIT77806.1 asyd|OJJ61353.1 ater|EAU31060.1 atub|OJI83404.1 aver|OJJ00680.1 awen|OJJ34246.1 azon|OJJ43392.1

Group4610: abra|OJJ78345.1 acar|OOF90269.1 acla|EAW09189.1 afis|EAW21957.1 afla|EED46676.1 afum|EAL92971.1 agla|OJJ84164.1 akaw|GAA85688.1 aluc|OJZ91418.1 anid|CBF84037.1 anig|EHA20090.1 aory|EIT77863.1 asyd|OJJ61362.1 ater|EAU31063.1 atub|OJI83412.1 aver|OJJ00689.1 awen|OJJ34249.1 azon|OJJ43389.1

Group4611: abra|OJJ78346.1 acar|OOF90268.1 acla|EAW09188.1 afis|EAW21958.1 afla|EED46678.1 afum|EAL92972.1 agla|OJJ84158.1 akaw|GAA85687.1 aluc|OJZ91420.1 anid|CBF84041.1 anig|EHA20091.1 aory|EIT77880.1 asyd|OJJ61360.1 ater|EAU31078.1 atub|OJI83413.1 aver|OJJ00687.1 awen|OJJ34251.1 azon|OJJ43387.1

Group4612: abra|OJJ78347.1 acar|OOF90267.1 acla|EAW09187.1 afis|EAW21959.1 afla|EED46679.1 afum|EAL92973.1 agla|OJJ84157.1 akaw|GAA85686.1 aluc|OJZ91421.1 anid|CBF84043.1 anig|EHA20092.1 aory|EIT77956.1 asyd|OJJ61359.1 ater|EAU31079.1 atub|OJI83414.1 aver|OJJ00686.1 awen|OJJ34252.1 azon|OJJ43386.1

Group4613: abra|OJJ78351.1 acar|OOF98536.1 acla|EAW09184.1 afis|EAW21962.1 afla|EED46683.1 afum|EAL92976.1 agla|OJJ84141.1 akaw|GAA85683.1 aluc|OJZ91425.1 anid|CBF82742.1 anig|EHA20095.1 aory|EIT77876.1 asyd|OJJ61622.1 ater|EAU31082.1 atub|OJI83418.1 aver|OJJ00946.1 awen|OJJ34256.1 azon|OJJ43383.1

Group4614: abra|OJJ78353.1 acar|OOF98535.1 acla|EAW09182.1 afis|EAW21964.1 afla|EED46685.1 afum|EAL92978.2 agla|OJJ84139.1 akaw|GAA85681.1 aluc|OJZ91428.1 anid|CBF82738.1 anig|EHA20097.1 aory|EIT77960.1 asyd|OJJ61624.1 ater|EAU31084.1 atub|OJI83421.1 aver|OJJ00949.1 awen|OJJ34258.1 azon|OJJ43381.1

Group4615: abra|OJJ78354.1 acar|OOF98534.1 acla|EAW09181.1 afis|EAW21965.1 afla|EED46686.1 afum|EAL92979.1 agla|OJJ84138.1 akaw|GAA85680.1 aluc|OJZ91429.1 anid|CBF82736.1 anig|EHA20098.1 aory|EIT77854.1 asyd|OJJ61625.1 ater|EAU31085.1 atub|OJI83422.1 aver|OJJ00950.1 awen|OJJ34259.1 azon|OJJ43378.1

Group4616: abra|OJJ78356.1 acar|OOF98533.1 acla|EAW09178.1 afis|EAW21968.1 afla|EED46689.1 afum|EAL92982.1 agla|OJJ84131.1 akaw|GAA85677.1 aluc|OJZ91431.1 anid|CBF82731.1 anig|EHA20100.1 aory|EIT77885.1 asyd|OJJ61628.1 ater|EAU31088.1 atub|OJI83424.1 aver|OJJ00952.1 awen|OJJ34261.1 azon|OJJ43376.1

Group4617: abra|OJJ78363.1 acar|OOF98524.1 acla|EAW09172.1 afis|EAW21974.1 afla|EED46697.1 afum|EAL92989.1 agla|OJJ84128.1 akaw|GAA85670.1 aluc|OJZ91438.1 anid|CBF82716.1 anig|EHA20103.1 aory|EIT77925.1 asyd|OJJ61637.1 ater|EAU31092.1 atub|OJI83432.1 aver|OJJ00960.1 awen|OJJ34267.1 azon|OJJ43369.1

Group4618: abra|OJJ78365.1 acar|OOF98521.1 acla|EAW09170.1 afis|EAW21976.1 afla|EED46699.1 afum|EAL92991.1 agla|OJJ84125.1 akaw|GAA85668.1 aluc|OJZ91442.1 anid|CBF82720.1 anig|EHA20106.1 aory|EIT77848.1 asyd|OJJ61635.1 ater|EAU31094.1 atub|OJI83436.1 aver|OJJ00958.1 awen|OJJ34269.1 azon|OJJ43368.1

Group4619: abra|OJJ78366.1 acar|OOF98520.1 acla|EAW09169.1 afis|EAW21977.1 afla|EED46700.1 afum|EAL92992.1 agla|OJJ84124.1 akaw|GAA85667.1 aluc|OJZ91443.1 anid|CBF82722.1 anig|EHA20107.1 aory|EIT77809.1 asyd|OJJ61634.1 ater|EAU31095.1 atub|OJI83437.1 aver|OJJ00957.1 awen|OJJ34270.1 azon|OJJ43366.1

Group4620: abra|OJJ78368.1 acar|OOF98518.1 acla|EAW09167.1 afis|EAW21979.1 afla|EED46702.1 afum|EAL92994.1 agla|OJJ84120.1 akaw|GAA85665.1 aluc|OJZ91445.1 anid|CBF82711.1 anig|EHA20109.1

aory|EIT77847.1 asyd|OJJ61640.1 ater|EAU31097.1 atub|OJI83439.1 aver|OJJ00963.1 awen|OJJ34272.1 azon|OJJ43364.1

Group4621: abra|OJJ78369.1 acar|OOF90130.1 acla|EAW09166.1 afis|EAW21980.1 afla|EED46704.1 afum|EAL92995.1 agla|OJJ84119.1 akaw|GAA85664.1 aluc|OJZ91446.1 anid|CBF82709.1 anig|EHA20110.1 aory|EIT77845.1 asyd|OJJ61641.1 ater|EAU31100.1 atub|OJI83440.1 aver|OJJ00964.1 awen|OJJ34274.1 azon|OJJ43363.1

Group4622: abra|OJJ78371.1 acar|OOF90128.1 acla|EAW09164.1 afis|EAW21982.1 afla|EED46706.1 afum|EAL92997.1 agla|OJJ84118.1 akaw|GAA85662.1 aluc|OJZ91448.1 anid|CBF82705.1 anig|EHA20112.1 aory|EIT77874.1 asyd|OJJ61643.1 ater|EAU31101.1 atub|OJI83441.1 aver|OJJ00965.1 awen|OJJ34276.1 azon|OJJ43361.1

Group4623: abra|OJJ78372.1 acar|OOF90125.1 acla|EAW09163.1 afis|EAW21983.1 afla|EED46707.1 afum|EAL92998.1 agla|OJJ84115.1 akaw|GAA85661.1 aluc|OJZ91449.1 anid|CBF82703.1 anig|EHA20113.1 aory|EIT77859.1 asyd|OJJ61644.1 ater|EAU31102.1 atub|OJI83442.1 aver|OJJ00966.1 awen|OJJ34280.1 azon|OJJ43360.1

Group4624: abra|OJJ78374.1 acar|OOF98515.1 acla|EAW09161.1 afis|EAW21985.1 afla|EED46709.1 afum|EAL93000.1 agla|OJJ84113.1 akaw|GAA85659.1 aluc|OJZ91451.1 anid|CBF82698.1 anig|EHA20115.1 aory|EIT77948.1 asyd|OJJ61646.1 ater|EAU31104.1 atub|OJI83444.1 aver|OJJ00968.1 awen|OJJ34282.1 azon|OJJ43358.1

Group4625: abra|OJJ78375.1 acar|OOF98514.1 acla|EAW09160.1 afis|EAW21986.1 afla|EED46710.1 afum|EAL93002.1 agla|OJJ84112.1 akaw|GAA85658.1 aluc|OJZ91452.1 anid|CBF82696.1 anig|EHA20116.1 aory|EIT77888.1 asyd|OJJ61647.1 ater|EAU31106.1 atub|OJI83445.1 aver|OJJ00969.1 awen|OJJ34283.1 azon|OJJ43357.1

Group4626: abra|OJJ78378.1 acar|OOF98510.1 acla|EAW09155.1 afis|EAW21991.1 afla|EED46715.1 afum|EAL93006.2 agla|OJJ84107.1 akaw|GAA85654.1 aluc|OJZ91457.1 anid|CBF82687.1 anig|EHA20120.1 aory|EIT77887.1 asyd|OJJ61652.1 ater|EAU31110.1 atub|OJI83450.1 aver|OJJ00973.1 awen|OJJ34287.1 azon|OJJ43351.1

Group4627: abra|OJJ78380.1 acar|OOF98508.1 acla|EAW09153.1 afis|EAW21993.1 afla|EED46717.1 afum|EAL93008.1 agla|OJJ84104.1 akaw|GAA85652.1 aluc|OJZ91459.1 anid|CBF82683.1 anig|EHA20122.1 aory|EIT77842.1 asyd|OJJ61655.1 ater|EAU31112.1 atub|OJI83452.1 aver|OJJ00976.1 awen|OJJ34289.1 azon|OJJ43349.1

Group4628: abra|OJJ78381.1 acar|OOF98507.1 acla|EAW09152.1 afis|EAW21994.1 afla|EED46718.1 afum|EAL93009.1 agla|OJJ84103.1 akaw|GAA85651.1 aluc|OJZ91460.1 anid|CBF82681.1 anig|EHA20123.1 aory|EIT77902.1 asyd|OJJ61656.1 ater|EAU31113.1 atub|OJI83453.1 aver|OJJ00977.1 awen|OJJ34290.1 azon|OJJ43348.1

Group4629: abra|OJJ78382.1 acar|OOF98506.1 acla|EAW09151.1 afis|EAW21995.1 afla|EED46719.1 afum|EAL93010.1 agla|OJJ84102.1 akaw|GAA85650.1 aluc|OJZ91461.1 anid|CBF82679.1 anig|EHA20124.1 aory|EIT77906.1 asyd|OJJ61657.1 ater|EAU31114.1 atub|OJI83454.1 aver|OJJ00978.1 awen|OJJ34291.1 azon|OJJ43347.1

Group4630: abra|OJJ78383.1 acar|OOF98505.1 acla|EAW09150.1 afis|EAW21996.1 afla|EED46720.1 afum|EAL93011.1 agla|OJJ84101.1 akaw|GAA85649.1 aluc|OJZ91462.1 anid|CBF82677.1 anig|EHA20125.1 aory|EIT77812.1 asyd|OJJ61658.1 ater|EAU31115.1 atub|OJI83455.1 aver|OJJ00979.1 awen|OJJ34292.1 azon|OJJ43346.1

Group4631: abra|OJJ78384.1 acar|OOF98504.1 acla|EAW09149.1 afis|EAW21997.1 afla|EED46721.1 afum|EAL93012.1 agla|OJJ84100.1 akaw|GAA85648.1 aluc|OJZ91463.1 anid|CBF82675.1 anig|EHA20126.1 aory|EIT77875.1 asyd|OJJ61659.1 ater|EAU31116.1 atub|OJI83456.1 aver|OJJ00980.1 awen|OJJ34293.1 azon|OJJ43345.1

Group4632: abra|OJJ78385.1 acar|OOF98503.1 acla|EAW09148.1 afis|EAW21998.1 afla|EED46722.1 afum|EAL93013.1 agla|OJJ84099.1 akaw|GAA85647.1 aluc|OJZ91464.1 anid|CBF82674.1 anig|EHA20127.1 aory|EIT77891.1 asyd|OJJ61660.1 ater|EAU31117.1 atub|OJI83457.1 aver|OJJ00981.1 awen|OJJ34294.1 azon|OJJ43344.1

Group4633: abra|OJJ78386.1 acar|OOF98502.1 acla|EAW09147.1 afis|EAW21999.1 afla|EED46723.1 afum|EAL93014.1 agla|OJJ84098.1 akaw|GAA85646.1 aluc|OJZ91465.1 anid|CBF82672.1 anig|EHA20128.1 aory|EIT77907.1 asyd|OJJ61661.1 ater|EAU31118.1 atub|OJI83458.1 aver|OJJ00982.1 awen|OJJ34295.1 azon|OJJ43343.1

Group4634: abra|OJJ78388.1 acar|OOF98500.1 acla|EAW09145.1 afis|EAW22002.1 afla|EED46727.1 afum|EAL93017.1 agla|OJJ84096.1 akaw|GAA85644.1 aluc|OJZ91467.1 anid|CBF82666.1 anig|EHA20129.1 aory|EIT77844.1 asyd|OJJ61664.1 ater|EAU31121.1 atub|OJI83460.1 aver|OJJ00985.1 awen|OJJ34297.1 azon|OJJ43341.1

**Additional data file 3:** *A. fumigatus* and *A. fischeri* orthology analysis (Inparanoid output).

#####

Group summary

one\_to\_one: 8536

one\_to\_many: 10

many\_to\_one: 14

many\_to\_many: 2

Total groups of orthologs: 8562

-----  
8581 in-paralogs from *A. fumigatus*

8579 in-paralogs from *A. fischeri*

#####

---

Group of orthologs #1. Best score 14205 bits

Score difference with first non-orthologous sequence - *A. fumigatus*:11599 *A. fischeri*:12414

afum|EAL90366.1      100.00%                      afis|EAW22836.1      100.00%

Bootstrap support for afum|EAL90366.1 as seed ortholog is 100%.

Bootstrap support for afis|EAW22836.1 as seed ortholog is 100%.

---

Group of orthologs #2. Best score 11940 bits

Score difference with first non-orthologous sequence - *A. fumigatus*:11940 *A. fischeri*:11940

afum|EAL93103.1      100.00%                      afis|EAW18419.1      100.00%

Bootstrap support for afum|EAL93103.1 as seed ortholog is 100%.

Bootstrap support for afis|EAW18419.1 as seed ortholog is 100%.

---

Group of orthologs #3. Best score 11375 bits

Score difference with first non-orthologous sequence - *A. fumigatus*:11375 *A. fischeri*:11375

afum|EAL93509.1      100.00%                      afis|EAW18777.1      100.00%

Bootstrap support for afum|EAL93509.1 as seed ortholog is 100%.

Bootstrap support for afis|EAW18777.1 as seed ortholog is 100%.

---

Group of orthologs #4. Best score 10648 bits

Score difference with first non-orthologous sequence - *A. fumigatus*:10648 *A. fischeri*:10078

afum|EAL91050.1      100.00%                      afis|EAW22140.1      100.00%

Bootstrap support for afum|EAL91050.1 as seed ortholog is 100%.

Bootstrap support for afis|EAW22140.1 as seed ortholog is 100%.

---

Group of orthologs #5. Best score 10326 bits

Score difference with first non-orthologous sequence - *A. fumigatus*:10326 *A. fischeri*:10326

afum|EAL91432.1      100.00%                      afis|EAW17619.1      100.00%

Bootstrap support for afum|EAL91432.1 as seed ortholog is 100%.

Bootstrap support for afis|EAW17619.1 as seed ortholog is 100%.

---

Group of orthologs #6. Best score 9512 bits

Score difference with first non-orthologous sequence - *A. fumigatus*:9512 *A. fischeri*:9512

afum|EAL89711.1      100.00%                      afis|EAW25043.1      100.00%

Bootstrap support for afum|EAL89711.1 as seed ortholog is 100%.

Bootstrap support for afis|EAW25043.1 as seed ortholog is 100%.

---

Group of orthologs #7. Best score 9397 bits

Score difference with first non-orthologous sequence - *A. fumigatus*:9397 *A. fischeri*:9397

afum|EAL86047.1      100.00%                      afis|EAW24375.1      100.00%

Bootstrap support for afum|EAL86047.1 as seed ortholog is 100%.  
Bootstrap support for afis|EAW24375.1 as seed ortholog is 100%.

---

Group of orthologs #8. Best score 7433 bits

Score difference with first non-orthologous sequence - *A. fumigatus*:7433 *A. fischeri*:7433

|                 |         |                 |         |
|-----------------|---------|-----------------|---------|
| afum EAL89636.1 | 100.00% | afis EAW24976.1 | 100.00% |
|-----------------|---------|-----------------|---------|

Bootstrap support for afum|EAL89636.1 as seed ortholog is 100%.

Bootstrap support for afis|EAW24976.1 as seed ortholog is 100%.

---

Group of orthologs #9. Best score 7236 bits

Score difference with first non-orthologous sequence - *A. fumigatus*:7236 *A. fischeri*:7236

|                 |         |                 |         |
|-----------------|---------|-----------------|---------|
| afum EAL93647.1 | 100.00% | afis EAW18916.1 | 100.00% |
|-----------------|---------|-----------------|---------|

Bootstrap support for afum|EAL93647.1 as seed ortholog is 100%.

Bootstrap support for afis|EAW18916.1 as seed ortholog is 100%.

---

Group of orthologs #10. Best score 6785 bits

Score difference with first non-orthologous sequence - *A. fumigatus*:6785 *A. fischeri*:6785

|                 |         |                 |         |
|-----------------|---------|-----------------|---------|
| afum EAL93940.1 | 100.00% | afis EAW19210.1 | 100.00% |
|-----------------|---------|-----------------|---------|

Bootstrap support for afum|EAL93940.1 as seed ortholog is 100%.

Bootstrap support for afis|EAW19210.1 as seed ortholog is 100%.

---

Group of orthologs #11. Best score 6674 bits

Score difference with first non-orthologous sequence - *A. fumigatus*:6674 *A. fischeri*:6674

|                 |         |                 |         |
|-----------------|---------|-----------------|---------|
| afum EAL92789.1 | 100.00% | afis EAW21759.1 | 100.00% |
|-----------------|---------|-----------------|---------|

Bootstrap support for afum|EAL92789.1 as seed ortholog is 100%.

Bootstrap support for afis|EAW21759.1 as seed ortholog is 100%.

---

Group of orthologs #12. Best score 6583 bits

Score difference with first non-orthologous sequence - *A. fumigatus*:6583 *A. fischeri*:6583

|                 |         |                 |         |
|-----------------|---------|-----------------|---------|
| afum EAL87400.1 | 100.00% | afis EAW23970.1 | 100.00% |
|-----------------|---------|-----------------|---------|

Bootstrap support for afum|EAL87400.1 as seed ortholog is 100%.

Bootstrap support for afis|EAW23970.1 as seed ortholog is 100%.

---

Group of orthologs #13. Best score 6522 bits

Score difference with first non-orthologous sequence - *A. fumigatus*:6522 *A. fischeri*:6522

|                 |         |                 |         |
|-----------------|---------|-----------------|---------|
| afum EAL89387.1 | 100.00% | afis EAW24741.1 | 100.00% |
|-----------------|---------|-----------------|---------|

Bootstrap support for afum|EAL89387.1 as seed ortholog is 100%.

Bootstrap support for afis|EAW24741.1 as seed ortholog is 100%.

---

Group of orthologs #14. Best score 6417 bits

Score difference with first non-orthologous sequence - *A. fumigatus*:6417 *A. fischeri*:6417

|                 |         |                 |         |
|-----------------|---------|-----------------|---------|
| afum EAL91349.1 | 100.00% | afis EAW17535.1 | 100.00% |
|-----------------|---------|-----------------|---------|

Bootstrap support for afum|EAL91349.1 as seed ortholog is 100%.

Bootstrap support for afis|EAW17535.1 as seed ortholog is 100%.

---

Group of orthologs #15. Best score 6185 bits

Score difference with first non-orthologous sequence - *A. fumigatus*:6185 *A. fischeri*:6185

|                 |         |                 |         |
|-----------------|---------|-----------------|---------|
| afum EAL88949.1 | 100.00% | afis EAW16325.1 | 100.00% |
|-----------------|---------|-----------------|---------|

Bootstrap support for afum|EAL88949.1 as seed ortholog is 100%.

Bootstrap support for afis|EAW16325.1 as seed ortholog is 100%.

---

Group of orthologs #16. Best score 6172 bits

Score difference with first non-orthologous sequence - *A. fumigatus*:6172 *A. fischeri*:6172

|                 |         |                 |         |
|-----------------|---------|-----------------|---------|
| afum EAL93093.2 | 100.00% | afis EAW18413.1 | 100.00% |
|-----------------|---------|-----------------|---------|

Bootstrap support for afum|EAL93093.2 as seed ortholog is 100%.

Bootstrap support for afis|EAW18413.1 as seed ortholog is 100%.



---

Group of orthologs #17. Best score 5983 bits

Score difference with first non-orthologous sequence - *A. fumigatus*:5983 *A. fischeri*:5983

afum|EAL88675.1 100.00% afis|EAW16043.1 100.00%

Bootstrap support for afum|EAL88675.1 as seed ortholog is 100%.

Bootstrap support for afis|EAW16043.1 as seed ortholog is 100%.

---

Group of orthologs #18. Best score 5929 bits

Score difference with first non-orthologous sequence - *A. fumigatus*:5002 *A. fischeri*:4763

afum|EAL87227.2 100.00% afis|EAW23793.1 100.00%

Bootstrap support for afum|EAL87227.2 as seed ortholog is 100%.

Bootstrap support for afis|EAW23793.1 as seed ortholog is 100%.

---

Group of orthologs #19. Best score 5911 bits

Score difference with first non-orthologous sequence - *A. fumigatus*:5911 *A. fischeri*:5911

afum|EAL86374.1 100.00% afis|EAW16823.1 100.00%

Bootstrap support for afum|EAL86374.1 as seed ortholog is 100%.

Bootstrap support for afis|EAW16823.1 as seed ortholog is 100%.

---

Group of orthologs #20. Best score 5871 bits

Score difference with first non-orthologous sequence - *A. fumigatus*:5871 *A. fischeri*:5871

afum|EAL93422.1 100.00% afis|EAW18700.1 100.00%

Bootstrap support for afum|EAL93422.1 as seed ortholog is 100%.

Bootstrap support for afis|EAW18700.1 as seed ortholog is 100%.

---

Group of orthologs #21. Best score 5870 bits

Score difference with first non-orthologous sequence - *A. fumigatus*:5870 *A. fischeri*:5870

afum|EBA27443.1 100.00% afis|EAW18066.1 100.00%

Bootstrap support for afum|EBA27443.1 as seed ortholog is 100%.

Bootstrap support for afis|EAW18066.1 as seed ortholog is 100%.

---

Group of orthologs #22. Best score 5866 bits

Score difference with first non-orthologous sequence - *A. fumigatus*:5866 *A. fischeri*:5866

afum|EAL90874.1 100.00% afis|EAW22316.1 100.00%

Bootstrap support for afum|EAL90874.1 as seed ortholog is 100%.

Bootstrap support for afis|EAW22316.1 as seed ortholog is 100%.

---

Group of orthologs #23. Best score 5864 bits

Score difference with first non-orthologous sequence - *A. fumigatus*:5864 *A. fischeri*:5864

afum|EAL91679.1 100.00% afis|EAW17871.1 100.00%

Bootstrap support for afum|EAL91679.1 as seed ortholog is 100%.

Bootstrap support for afis|EAW17871.1 as seed ortholog is 100%.

---

Group of orthologs #24. Best score 5859 bits

Score difference with first non-orthologous sequence - *A. fumigatus*:5859 *A. fischeri*:5859

afum|EAL93140.1 100.00% afis|EAW18455.1 100.00%

Bootstrap support for afum|EAL93140.1 as seed ortholog is 100%.

Bootstrap support for afis|EAW18455.1 as seed ortholog is 100%.

---

Group of orthologs #25. Best score 5799 bits

Score difference with first non-orthologous sequence - *A. fumigatus*:5799 *A. fischeri*:5799

afum|EAL88599.1 100.00% afis|EAW15966.1 100.00%

Bootstrap support for afum|EAL88599.1 as seed ortholog is 100%.

Bootstrap support for afis|EAW15966.1 as seed ortholog is 100%.

---

Group of orthologs #26. Best score 5759 bits

Score difference with first non-orthologous sequence - *A. fumigatus*:4173 *A. fischeri*:3893  
afum|EAL92117.1 100.00% afis|EAW21094.1 100.00%  
Bootstrap support for afum|EAL92117.1 as seed ortholog is 100%.  
Bootstrap support for afis|EAW21094.1 as seed ortholog is 100%.

---

Group of orthologs #27. Best score 5743 bits

Score difference with first non-orthologous sequence - *A. fumigatus*:5743 *A. fischeri*:5743  
afum|EAL93322.1 100.00% afis|EAW18612.1 100.00%  
Bootstrap support for afum|EAL93322.1 as seed ortholog is 100%.  
Bootstrap support for afis|EAW18612.1 as seed ortholog is 100%.

---

Group of orthologs #28. Best score 5634 bits

Score difference with first non-orthologous sequence - *A. fumigatus*:5634 *A. fischeri*:5634  
afum|EAL91729.1 100.00% afis|EAW17918.1 100.00%  
Bootstrap support for afum|EAL91729.1 as seed ortholog is 100%.  
Bootstrap support for afis|EAW17918.1 as seed ortholog is 100%.

---

Group of orthologs #29. Best score 5572 bits

Score difference with first non-orthologous sequence - *A. fumigatus*:4603 *A. fischeri*:4524  
afum|EAL86424.2 100.00% afis|EAW16886.1 100.00%  
Bootstrap support for afum|EAL86424.2 as seed ortholog is 100%.  
Bootstrap support for afis|EAW16886.1 as seed ortholog is 100%.

---

Group of orthologs #30. Best score 5531 bits

Score difference with first non-orthologous sequence - *A. fumigatus*:5531 *A. fischeri*:4010  
afum|EAL92328.1 100.00% afis|EAW21312.1 100.00%  
Bootstrap support for afum|EAL92328.1 as seed ortholog is 100%.  
Bootstrap support for afis|EAW21312.1 as seed ortholog is 100%.

---

Group of orthologs #31. Best score 5498 bits

Score difference with first non-orthologous sequence - *A. fumigatus*:5498 *A. fischeri*:5498  
afum|EAL93163.1 100.00% afis|EAW18476.1 100.00%  
Bootstrap support for afum|EAL93163.1 as seed ortholog is 100%.  
Bootstrap support for afis|EAW18476.1 as seed ortholog is 100%.

---

Group of orthologs #32. Best score 5455 bits

Score difference with first non-orthologous sequence - *A. fumigatus*:5455 *A. fischeri*:5455  
afum|EAL92557.1 100.00% afis|EAW21537.1 100.00%  
Bootstrap support for afum|EAL92557.1 as seed ortholog is 100%.  
Bootstrap support for afis|EAW21537.1 as seed ortholog is 100%.

---

Group of orthologs #33. Best score 5388 bits

Score difference with first non-orthologous sequence - *A. fumigatus*:5388 *A. fischeri*:5388  
afum|EAL92625.1 100.00% afis|EAW21606.1 100.00%  
Bootstrap support for afum|EAL92625.1 as seed ortholog is 100%.  
Bootstrap support for afis|EAW21606.1 as seed ortholog is 100%.

---

Group of orthologs #34. Best score 5339 bits

Score difference with first non-orthologous sequence - *A. fumigatus*:4350 *A. fischeri*:4671  
afum|EAL89230.2 100.00% afis|EAW20415.1 100.00%  
Bootstrap support for afum|EAL89230.2 as seed ortholog is 100%.  
Bootstrap support for afis|EAW20415.1 as seed ortholog is 100%.

---

Group of orthologs #35. Best score 5327 bits

Score difference with first non-orthologous sequence - *A. fumigatus*:5327 *A. fischeri*:5327  
afum|EAL85242.1 100.00% afis|EAW20124.1 100.00%

Bootstrap support for afum|EAL85242.1 as seed ortholog is 100%.  
Bootstrap support for afis|EAW20124.1 as seed ortholog is 100%.

---

Group of orthologs #36. Best score 5312 bits

Score difference with first non-orthologous sequence - *A. fumigatus*:5312 *A. fischeri*:5312

|                 |         |                 |         |
|-----------------|---------|-----------------|---------|
| afum EAL88977.1 | 100.00% | afis EAW16352.1 | 100.00% |
|-----------------|---------|-----------------|---------|

Bootstrap support for afum|EAL88977.1 as seed ortholog is 100%.

Bootstrap support for afis|EAW16352.1 as seed ortholog is 100%.

---

Group of orthologs #37. Best score 5179 bits

Score difference with first non-orthologous sequence - *A. fumigatus*:5179 *A. fischeri*:5179

|                 |         |                 |         |
|-----------------|---------|-----------------|---------|
| afum EAL88447.1 | 100.00% | afis EAW23034.1 | 100.00% |
|-----------------|---------|-----------------|---------|

Bootstrap support for afum|EAL88447.1 as seed ortholog is 100%.

Bootstrap support for afis|EAW23034.1 as seed ortholog is 100%.

---

Group of orthologs #38. Best score 5163 bits

Score difference with first non-orthologous sequence - *A. fumigatus*:5163 *A. fischeri*:4549

|                 |         |                 |         |
|-----------------|---------|-----------------|---------|
| afum EAL92059.1 | 100.00% | afis EAW21021.1 | 100.00% |
|-----------------|---------|-----------------|---------|

Bootstrap support for afum|EAL92059.1 as seed ortholog is 100%.

Bootstrap support for afis|EAW21021.1 as seed ortholog is 100%.

---

Group of orthologs #39. Best score 5140 bits

Score difference with first non-orthologous sequence - *A. fumigatus*:5140 *A. fischeri*:5140

|                 |         |                 |         |
|-----------------|---------|-----------------|---------|
| afum EAL88693.1 | 100.00% | afis EAW16060.1 | 100.00% |
|-----------------|---------|-----------------|---------|

Bootstrap support for afum|EAL88693.1 as seed ortholog is 100%.

Bootstrap support for afis|EAW16060.1 as seed ortholog is 100%.

---

Group of orthologs #40. Best score 5109 bits

Score difference with first non-orthologous sequence - *A. fumigatus*:5109 *A. fischeri*:5109

|                 |         |                 |         |
|-----------------|---------|-----------------|---------|
| afum EAL88703.2 | 100.00% | afis EAW16071.1 | 100.00% |
|-----------------|---------|-----------------|---------|

Bootstrap support for afum|EAL88703.2 as seed ortholog is 100%.

Bootstrap support for afis|EAW16071.1 as seed ortholog is 100%.

---

Group of orthologs #41. Best score 5097 bits

Score difference with first non-orthologous sequence - *A. fumigatus*:5097 *A. fischeri*:3680

|                 |         |                 |         |
|-----------------|---------|-----------------|---------|
| afum EAL94057.1 | 100.00% | afis EAW19338.1 | 100.00% |
|-----------------|---------|-----------------|---------|

Bootstrap support for afum|EAL94057.1 as seed ortholog is 100%.

Bootstrap support for afis|EAW19338.1 as seed ortholog is 100%.

---

Group of orthologs #42. Best score 5084 bits

Score difference with first non-orthologous sequence - *A. fumigatus*:5084 *A. fischeri*:5084

|                 |         |                 |         |
|-----------------|---------|-----------------|---------|
| afum EAL93587.1 | 100.00% | afis EAW18856.1 | 100.00% |
|-----------------|---------|-----------------|---------|

Bootstrap support for afum|EAL93587.1 as seed ortholog is 100%.

Bootstrap support for afis|EAW18856.1 as seed ortholog is 100%.

---

Group of orthologs #43. Best score 5040 bits

Score difference with first non-orthologous sequence - *A. fumigatus*:5040 *A. fischeri*:5040

|                 |         |                 |         |
|-----------------|---------|-----------------|---------|
| afum EAL86701.1 | 100.00% | afis EAW17283.1 | 100.00% |
|-----------------|---------|-----------------|---------|

Bootstrap support for afum|EAL86701.1 as seed ortholog is 100%.

Bootstrap support for afis|EAW17283.1 as seed ortholog is 100%.

---

Group of orthologs #44. Best score 5025 bits

Score difference with first non-orthologous sequence - *A. fumigatus*:5025 *A. fischeri*:5025

|                 |         |                 |         |
|-----------------|---------|-----------------|---------|
| afum EAL90438.1 | 100.00% | afis EAW22761.1 | 100.00% |
|-----------------|---------|-----------------|---------|

Bootstrap support for afum|EAL90438.1 as seed ortholog is 100%.

Bootstrap support for afis|EAW22761.1 as seed ortholog is 100%.

---

Group of orthologs #45. Best score 4986 bits

Score difference with first non-orthologous sequence - *A. fumigatus*:4986 *A. fischeri*:4568

afum|EAL92291.2 100.00% afis|EAW21276.1 100.00%

Bootstrap support for afum|EAL92291.2 as seed ortholog is 100%.

Bootstrap support for afis|EAW21276.1 as seed ortholog is 100%.

---

Group of orthologs #46. Best score 4921 bits

Score difference with first non-orthologous sequence - *A. fumigatus*:4921 *A. fischeri*:4546

afum|EAL88817.1 100.00% afis|EAW16186.1 100.00%

Bootstrap support for afum|EAL88817.1 as seed ortholog is 100%.

Bootstrap support for afis|EAW16186.1 as seed ortholog is 100%.

---

Group of orthologs #47. Best score 4900 bits

Score difference with first non-orthologous sequence - *A. fumigatus*:4900 *A. fischeri*:4900

afum|EAL85833.1 100.00% afis|EAW15490.1 100.00%

Bootstrap support for afum|EAL85833.1 as seed ortholog is 100%.

Bootstrap support for afis|EAW15490.1 as seed ortholog is 100%.

---

Group of orthologs #48. Best score 4899 bits

Score difference with first non-orthologous sequence - *A. fumigatus*:4899 *A. fischeri*:4899

afum|EAL88144.1 100.00% afis|EAW23334.1 100.00%

Bootstrap support for afum|EAL88144.1 as seed ortholog is 100%.

Bootstrap support for afis|EAW23334.1 as seed ortholog is 100%.

---

Group of orthologs #49. Best score 4897 bits

Score difference with first non-orthologous sequence - *A. fumigatus*:4897 *A. fischeri*:4897

afum|EAL93796.1 100.00% afis|EAW19067.1 100.00%

Bootstrap support for afum|EAL93796.1 as seed ortholog is 100%.

Bootstrap support for afis|EAW19067.1 as seed ortholog is 100%.

---

Group of orthologs #50. Best score 4859 bits

Score difference with first non-orthologous sequence - *A. fumigatus*:4859 *A. fischeri*:4256

afum|EAL86616.2 100.00% afis|EAW17190.1 100.00%

Bootstrap support for afum|EAL86616.2 as seed ortholog is 100%.

Bootstrap support for afis|EAW17190.1 as seed ortholog is 100%.

---

Group of orthologs #51. Best score 4833 bits

Score difference with first non-orthologous sequence - *A. fumigatus*:4833 *A. fischeri*:4833

afum|EAL86131.1 100.00% afis|EAW24461.1 100.00%

Bootstrap support for afum|EAL86131.1 as seed ortholog is 100%.

Bootstrap support for afis|EAW24461.1 as seed ortholog is 100%.

---

Group of orthologs #52. Best score 4831 bits

Score difference with first non-orthologous sequence - *A. fumigatus*:4831 *A. fischeri*:4831

afum|EAL92973.1 100.00% afis|EAW21959.1 100.00%

Bootstrap support for afum|EAL92973.1 as seed ortholog is 100%.

Bootstrap support for afis|EAW21959.1 as seed ortholog is 100%.

---

Group of orthologs #53. Best score 4781 bits

Score difference with first non-orthologous sequence - *A. fumigatus*:4781 *A. fischeri*:4781

afum|EAL93208.1 100.00% afis|EAW18513.1 100.00%

Bootstrap support for afum|EAL93208.1 as seed ortholog is 100%.

Bootstrap support for afis|EAW18513.1 as seed ortholog is 100%.

---

Group of orthologs #54. Best score 4771 bits

Score difference with first non-orthologous sequence - *A. fumigatus*:4771 *A. fischeri*:4771  
afum|EAL84455.1 100.00% afis|EAW20605.1 100.00%  
Bootstrap support for afum|EAL84455.1 as seed ortholog is 100%.  
Bootstrap support for afis|EAW20605.1 as seed ortholog is 100%.

---

Group of orthologs #55. Best score 4762 bits

Score difference with first non-orthologous sequence - *A. fumigatus*:4762 *A. fischeri*:4762  
afum|EAL85631.1 100.00% afis|EAW15717.1 100.00%  
Bootstrap support for afum|EAL85631.1 as seed ortholog is 100%.  
Bootstrap support for afis|EAW15717.1 as seed ortholog is 100%.

---

Group of orthologs #56. Best score 4759 bits

Score difference with first non-orthologous sequence - *A. fumigatus*:4759 *A. fischeri*:4759  
afum|EAL90472.1 100.00% afis|EAW22724.1 100.00%  
Bootstrap support for afum|EAL90472.1 as seed ortholog is 100%.  
Bootstrap support for afis|EAW22724.1 as seed ortholog is 100%.

---

Group of orthologs #57. Best score 4753 bits

Score difference with first non-orthologous sequence - *A. fumigatus*:4753 *A. fischeri*:4753  
afum|EAL89662.1 100.00% afis|EAW25032.1 100.00%  
Bootstrap support for afum|EAL89662.1 as seed ortholog is 100%.  
Bootstrap support for afis|EAW25032.1 as seed ortholog is 100%.

---

Group of orthologs #58. Best score 4751 bits

Score difference with first non-orthologous sequence - *A. fumigatus*:4751 *A. fischeri*:4751  
afum|EAL89159.1 100.00% afis|EAW16561.1 100.00%  
Bootstrap support for afum|EAL89159.1 as seed ortholog is 100%.  
Bootstrap support for afis|EAW16561.1 as seed ortholog is 100%.

---

Group of orthologs #59. Best score 4742 bits

Score difference with first non-orthologous sequence - *A. fumigatus*:4742 *A. fischeri*:4742  
afum|EAL92302.1 100.00% afis|EAW21285.1 100.00%  
Bootstrap support for afum|EAL92302.1 as seed ortholog is 100%.  
Bootstrap support for afis|EAW21285.1 as seed ortholog is 100%.

---

Group of orthologs #60. Best score 4729 bits

Score difference with first non-orthologous sequence - *A. fumigatus*:4729 *A. fischeri*:4729  
afum|EAL91630.1 100.00% afis|EAW17820.1 100.00%  
Bootstrap support for afum|EAL91630.1 as seed ortholog is 100%.  
Bootstrap support for afis|EAW17820.1 as seed ortholog is 100%.

---

Group of orthologs #61. Best score 4716 bits

Score difference with first non-orthologous sequence - *A. fumigatus*:4247 *A. fischeri*:3701  
afum|EAL86624.1 100.00% afis|EAW17196.1 100.00%  
Bootstrap support for afum|EAL86624.1 as seed ortholog is 100%.  
Bootstrap support for afis|EAW17196.1 as seed ortholog is 100%.

---

Group of orthologs #62. Best score 4707 bits

Score difference with first non-orthologous sequence - *A. fumigatus*:4707 *A. fischeri*:4707  
afum|EAL89080.1 100.00% afis|EAW16486.1 100.00%  
Bootstrap support for afum|EAL89080.1 as seed ortholog is 100%.  
Bootstrap support for afis|EAW16486.1 as seed ortholog is 100%.

---

Group of orthologs #63. Best score 4704 bits

Score difference with first non-orthologous sequence - *A. fumigatus*:4704 *A. fischeri*:4704  
afum|EAL86902.1 100.00% afis|EAW19620.1 100.00%

Bootstrap support for afum|EAL86902.1 as seed ortholog is 100%.  
Bootstrap support for afis|EAW19620.1 as seed ortholog is 100%.

---

Group of orthologs #64. Best score 4703 bits

Score difference with first non-orthologous sequence - *A. fumigatus*:4211 *A. fischeri*:3368

afum|EAL85149.1 100.00% afis|EAW19749.1 100.00%

Bootstrap support for afum|EAL85149.1 as seed ortholog is 100%.

Bootstrap support for afis|EAW19749.1 as seed ortholog is 100%.

---

Group of orthologs #65. Best score 4676 bits

Score difference with first non-orthologous sequence - *A. fumigatus*:4676 *A. fischeri*:4676

afum|EAL84624.2 100.00% afis|EAW20424.1 100.00%

Bootstrap support for afum|EAL84624.2 as seed ortholog is 100%.

Bootstrap support for afis|EAW20424.1 as seed ortholog is 100%.

---

Group of orthologs #66. Best score 4655 bits

Score difference with first non-orthologous sequence - *A. fumigatus*:4655 *A. fischeri*:4655

afum|EAL89683.1 100.00% afis|EAW25013.1 100.00%

Bootstrap support for afum|EAL89683.1 as seed ortholog is 100%.

Bootstrap support for afis|EAW25013.1 as seed ortholog is 100%.

---

Group of orthologs #67. Best score 4641 bits

Score difference with first non-orthologous sequence - *A. fumigatus*:4641 *A. fischeri*:4641

afum|EAL89151.2 100.00% afis|EAW16553.1 100.00%

Bootstrap support for afum|EAL89151.2 as seed ortholog is 100%.

Bootstrap support for afis|EAW16553.1 as seed ortholog is 100%.

---

Group of orthologs #68. Best score 4635 bits

Score difference with first non-orthologous sequence - *A. fumigatus*:4635 *A. fischeri*:2814

afum|EAL87273.1 100.00% afis|EAW23842.1 100.00%

Bootstrap support for afum|EAL87273.1 as seed ortholog is 100%.

Bootstrap support for afis|EAW23842.1 as seed ortholog is 100%.

---

Group of orthologs #69. Best score 4622 bits

Score difference with first non-orthologous sequence - *A. fumigatus*:4622 *A. fischeri*:4622

afum|EAL88344.1 100.00% afis|EAW23137.1 100.00%

Bootstrap support for afum|EAL88344.1 as seed ortholog is 100%.

Bootstrap support for afis|EAW23137.1 as seed ortholog is 100%.

---

Group of orthologs #70. Best score 4506 bits

Score difference with first non-orthologous sequence - *A. fumigatus*:3735 *A. fischeri*:2592

afum|EAL85129.1 100.00% afis|EAW19771.1 100.00%

Bootstrap support for afum|EAL85129.1 as seed ortholog is 100%.

Bootstrap support for afis|EAW19771.1 as seed ortholog is 100%.

---

Group of orthologs #71. Best score 4479 bits

Score difference with first non-orthologous sequence - *A. fumigatus*:4479 *A. fischeri*:4479

afum|EAL90832.1 100.00% afis|EAW22359.1 100.00%

Bootstrap support for afum|EAL90832.1 as seed ortholog is 100%.

Bootstrap support for afis|EAW22359.1 as seed ortholog is 100%.

---

Group of orthologs #72. Best score 4468 bits

Score difference with first non-orthologous sequence - *A. fumigatus*:4468 *A. fischeri*:4468

afum|EAL92330.1 100.00% afis|EAW21313.1 100.00%

Bootstrap support for afum|EAL92330.1 as seed ortholog is 100%.

Bootstrap support for afis|EAW21313.1 as seed ortholog is 100%.

---

Group of orthologs #73. Best score 4462 bits

Score difference with first non-orthologous sequence - *A. fumigatus*:4462 *A. fischeri*:4462

afum|EAL88295.1 100.00% afis|EAW23188.1 100.00%

Bootstrap support for afum|EAL88295.1 as seed ortholog is 100%.

Bootstrap support for afis|EAW23188.1 as seed ortholog is 100%.

---

Group of orthologs #74. Best score 4451 bits

Score difference with first non-orthologous sequence - *A. fumigatus*:4451 *A. fischeri*:4451

afum|EAL86700.1 100.00% afis|EAW17282.1 100.00%

Bootstrap support for afum|EAL86700.1 as seed ortholog is 100%.

Bootstrap support for afis|EAW17282.1 as seed ortholog is 100%.

---

Group of orthologs #75. Best score 4438 bits

Score difference with first non-orthologous sequence - *A. fumigatus*:4438 *A. fischeri*:4438

afum|EAL87610.1 100.00% afis|EAW18245.1 100.00%

Bootstrap support for afum|EAL87610.1 as seed ortholog is 100%.

Bootstrap support for afis|EAW18245.1 as seed ortholog is 100%.

---

Group of orthologs #76. Best score 4419 bits

Score difference with first non-orthologous sequence - *A. fumigatus*:4419 *A. fischeri*:4151

afum|EAL87861.1 100.00% afis|EAW23605.1 100.00%

Bootstrap support for afum|EAL87861.1 as seed ortholog is 100%.

Bootstrap support for afis|EAW23605.1 as seed ortholog is 100%.

---

Group of orthologs #77. Best score 4407 bits

Score difference with first non-orthologous sequence - *A. fumigatus*:4407 *A. fischeri*:4407

afum|EAL87012.1 100.00% afis|EAW19483.1 100.00%

Bootstrap support for afum|EAL87012.1 as seed ortholog is 100%.

Bootstrap support for afis|EAW19483.1 as seed ortholog is 100%.

---

Group of orthologs #78. Best score 4400 bits

Score difference with first non-orthologous sequence - *A. fumigatus*:4400 *A. fischeri*:4400

afum|EAL93639.1 100.00% afis|EAW18907.1 100.00%

Bootstrap support for afum|EAL93639.1 as seed ortholog is 100%.

Bootstrap support for afis|EAW18907.1 as seed ortholog is 100%.

---

Group of orthologs #79. Best score 4394 bits

Score difference with first non-orthologous sequence - *A. fumigatus*:4394 *A. fischeri*:4394

afum|EAL87631.1 100.00% afis|EAW18266.1 100.00%

Bootstrap support for afum|EAL87631.1 as seed ortholog is 100%.

Bootstrap support for afis|EAW18266.1 as seed ortholog is 100%.

---

Group of orthologs #80. Best score 4392 bits

Score difference with first non-orthologous sequence - *A. fumigatus*:4392 *A. fischeri*:4392

afum|EBA27403.1 100.00% afis|EAW22870.1 100.00%

Bootstrap support for afum|EBA27403.1 as seed ortholog is 100%.

Bootstrap support for afis|EAW22870.1 as seed ortholog is 100%.

---

Group of orthologs #81. Best score 4385 bits

Score difference with first non-orthologous sequence - *A. fumigatus*:4385 *A. fischeri*:4385

afum|EAL91853.1 100.00% afis|EAW18042.1 100.00%

Bootstrap support for afum|EAL91853.1 as seed ortholog is 100%.

Bootstrap support for afis|EAW18042.1 as seed ortholog is 100%.

---

Group of orthologs #82. Best score 4315 bits

Score difference with first non-orthologous sequence - *A. fumigatus*:4315 *A. fischeri*:4315  
afum|EAL93000.1 100.00% afis|EAW21985.1 100.00%  
Bootstrap support for afum|EAL93000.1 as seed ortholog is 100%.  
Bootstrap support for afis|EAW21985.1 as seed ortholog is 100%.

---

Group of orthologs #83. Best score 4305 bits

Score difference with first non-orthologous sequence - *A. fumigatus*:4305 *A. fischeri*:4305  
afum|EBA27508.1 100.00% afis|EAW19212.1 100.00%  
Bootstrap support for afum|EBA27508.1 as seed ortholog is 100%.  
Bootstrap support for afis|EAW19212.1 as seed ortholog is 100%.

---

Group of orthologs #84. Best score 4275 bits

Score difference with first non-orthologous sequence - *A. fumigatus*:4275 *A. fischeri*:4275  
afum|EAL90799.1 100.00% afis|EAW22392.1 100.00%  
Bootstrap support for afum|EAL90799.1 as seed ortholog is 100%.  
Bootstrap support for afis|EAW22392.1 as seed ortholog is 100%.

---

Group of orthologs #85. Best score 4256 bits

Score difference with first non-orthologous sequence - *A. fumigatus*:4256 *A. fischeri*:4256  
afum|EAL93638.1 100.00% afis|EAW18906.1 100.00%  
Bootstrap support for afum|EAL93638.1 as seed ortholog is 100%.  
Bootstrap support for afis|EAW18906.1 as seed ortholog is 100%.

---

Group of orthologs #86. Best score 4236 bits

Score difference with first non-orthologous sequence - *A. fumigatus*:4236 *A. fischeri*:4236  
afum|EAL85643.1 100.00% afis|EAW15704.1 100.00%  
Bootstrap support for afum|EAL85643.1 as seed ortholog is 100%.  
Bootstrap support for afis|EAW15704.1 as seed ortholog is 100%.

---

Group of orthologs #87. Best score 4202 bits

Score difference with first non-orthologous sequence - *A. fumigatus*:4202 *A. fischeri*:4202  
afum|EAL88739.2 100.00% afis|EAW16107.1 100.00%  
Bootstrap support for afum|EAL88739.2 as seed ortholog is 100%.  
Bootstrap support for afis|EAW16107.1 as seed ortholog is 100%.

---

Group of orthologs #88. Best score 4184 bits

Score difference with first non-orthologous sequence - *A. fumigatus*:4184 *A. fischeri*:4184  
afum|EAL85962.1 100.00% afis|EAW24294.1 100.00%  
Bootstrap support for afum|EAL85962.1 as seed ortholog is 100%.  
Bootstrap support for afis|EAW24294.1 as seed ortholog is 100%.

---

Group of orthologs #89. Best score 4183 bits

Score difference with first non-orthologous sequence - *A. fumigatus*:4183 *A. fischeri*:2404  
afum|EAL84875.1 100.00% afis|EAW20700.1 100.00%  
Bootstrap support for afum|EAL84875.1 as seed ortholog is 100%.  
Bootstrap support for afis|EAW20700.1 as seed ortholog is 100%.

---

Group of orthologs #90. Best score 4175 bits

Score difference with first non-orthologous sequence - *A. fumigatus*:4175 *A. fischeri*:4175  
afum|EAL93901.1 100.00% afis|EAW19171.1 100.00%  
Bootstrap support for afum|EAL93901.1 as seed ortholog is 100%.  
Bootstrap support for afis|EAW19171.1 as seed ortholog is 100%.

---

Group of orthologs #91. Best score 4165 bits

Score difference with first non-orthologous sequence - *A. fumigatus*:4165 *A. fischeri*:4165  
afum|EAL90642.1 100.00% afis|EAW22553.1 100.00%



Bootstrap support for afum|EAL90642.1 as seed ortholog is 100%.  
Bootstrap support for afis|EAW22553.1 as seed ortholog is 100%.

---

Group of orthologs #92. Best score 4157 bits

Score difference with first non-orthologous sequence - *A. fumigatus*:4157 *A. fischeri*:4157

|                 |         |                 |         |
|-----------------|---------|-----------------|---------|
| afum EAL88235.1 | 100.00% | afis EAW23246.1 | 100.00% |
|-----------------|---------|-----------------|---------|

Bootstrap support for afum|EAL88235.1 as seed ortholog is 100%.

Bootstrap support for afis|EAW23246.1 as seed ortholog is 100%.

---

Group of orthologs #93. Best score 4131 bits

Score difference with first non-orthologous sequence - *A. fumigatus*:4131 *A. fischeri*:4131

|                 |         |                 |         |
|-----------------|---------|-----------------|---------|
| afum EAL85546.1 | 100.00% | afis EAW15804.1 | 100.00% |
|-----------------|---------|-----------------|---------|

Bootstrap support for afum|EAL85546.1 as seed ortholog is 100%.

Bootstrap support for afis|EAW15804.1 as seed ortholog is 100%.

---

Group of orthologs #94. Best score 4113 bits

Score difference with first non-orthologous sequence - *A. fumigatus*:4113 *A. fischeri*:4113

|                 |         |                 |         |
|-----------------|---------|-----------------|---------|
| afum EAL88889.1 | 100.00% | afis EAW16268.1 | 100.00% |
|-----------------|---------|-----------------|---------|

Bootstrap support for afum|EAL88889.1 as seed ortholog is 100%.

Bootstrap support for afis|EAW16268.1 as seed ortholog is 100%.

---

Group of orthologs #95. Best score 4097 bits

Score difference with first non-orthologous sequence - *A. fumigatus*:4097 *A. fischeri*:4097

|                 |         |                 |         |
|-----------------|---------|-----------------|---------|
| afum EAL87638.1 | 100.00% | afis EAW18273.1 | 100.00% |
|-----------------|---------|-----------------|---------|

Bootstrap support for afum|EAL87638.1 as seed ortholog is 100%.

Bootstrap support for afis|EAW18273.1 as seed ortholog is 100%.

---

Group of orthologs #96. Best score 4094 bits

Score difference with first non-orthologous sequence - *A. fumigatus*:4094 *A. fischeri*:1469

|                 |         |                 |         |
|-----------------|---------|-----------------|---------|
| afum EAL89339.1 | 100.00% | afis EAW24697.1 | 100.00% |
|-----------------|---------|-----------------|---------|

Bootstrap support for afum|EAL89339.1 as seed ortholog is 100%.

Bootstrap support for afis|EAW24697.1 as seed ortholog is 100%.

---

Group of orthologs #97. Best score 4086 bits

Score difference with first non-orthologous sequence - *A. fumigatus*:4086 *A. fischeri*:4086

|                 |         |                 |         |
|-----------------|---------|-----------------|---------|
| afum EAL88508.1 | 100.00% | afis EAW15874.1 | 100.00% |
|-----------------|---------|-----------------|---------|

Bootstrap support for afum|EAL88508.1 as seed ortholog is 100%.

Bootstrap support for afis|EAW15874.1 as seed ortholog is 100%.

---

Group of orthologs #98. Best score 4084 bits

Score difference with first non-orthologous sequence - *A. fumigatus*:4084 *A. fischeri*:4084

|                 |         |                 |         |
|-----------------|---------|-----------------|---------|
| afum EAL91969.1 | 100.00% | afis EAW24115.1 | 100.00% |
|-----------------|---------|-----------------|---------|

Bootstrap support for afum|EAL91969.1 as seed ortholog is 100%.

Bootstrap support for afis|EAW24115.1 as seed ortholog is 100%.

---

Group of orthologs #99. Best score 4083 bits

Score difference with first non-orthologous sequence - *A. fumigatus*:4083 *A. fischeri*:4083

|                 |         |                 |         |
|-----------------|---------|-----------------|---------|
| afum EAL89175.1 | 100.00% | afis EAW16579.1 | 100.00% |
|-----------------|---------|-----------------|---------|

Bootstrap support for afum|EAL89175.1 as seed ortholog is 100%.

Bootstrap support for afis|EAW16579.1 as seed ortholog is 100%.

---

Group of orthologs #100. Best score 4063 bits

Score difference with first non-orthologous sequence - *A. fumigatus*:4063 *A. fischeri*:4063

|                 |         |                 |         |
|-----------------|---------|-----------------|---------|
| afum EAL94019.1 | 100.00% | afis EAW19300.1 | 100.00% |
|-----------------|---------|-----------------|---------|

Bootstrap support for afum|EAL94019.1 as seed ortholog is 100%.

Bootstrap support for afis|EAW19300.1 as seed ortholog is 100%.

---

Group of orthologs #101. Best score 4049 bits

Score difference with first non-orthologous sequence - *A. fumigatus*:4049 *A. fischeri*:4049

afum|EAL85557.1 100.00% afis|EAW15793.1 100.00%

Bootstrap support for afum|EAL85557.1 as seed ortholog is 100%.

Bootstrap support for afis|EAW15793.1 as seed ortholog is 100%.

---

Group of orthologs #102. Best score 4031 bits

Score difference with first non-orthologous sequence - *A. fumigatus*:4031 *A. fischeri*:2093

afum|EAL84397.1 100.00% afis|EAW25724.1 100.00%

Bootstrap support for afum|EAL84397.1 as seed ortholog is 100%.

Bootstrap support for afis|EAW25724.1 as seed ortholog is 100%.

---

Group of orthologs #103. Best score 4025 bits

Score difference with first non-orthologous sequence - *A. fumigatus*:4025 *A. fischeri*:4025

afum|EBA27477.1 100.00% afis|EAW21862.1 100.00%

Bootstrap support for afum|EBA27477.1 as seed ortholog is 100%.

Bootstrap support for afis|EAW21862.1 as seed ortholog is 100%.

---

Group of orthologs #104. Best score 4017 bits

Score difference with first non-orthologous sequence - *A. fumigatus*:4017 *A. fischeri*:4017

afum|EAL90842.1 100.00% afis|EAW22350.1 100.00%

Bootstrap support for afum|EAL90842.1 as seed ortholog is 100%.

Bootstrap support for afis|EAW22350.1 as seed ortholog is 100%.

---

Group of orthologs #105. Best score 4015 bits

Score difference with first non-orthologous sequence - *A. fumigatus*:4015 *A. fischeri*:4015

afum|EAL90722.1 100.00% afis|EAW22469.1 100.00%

Bootstrap support for afum|EAL90722.1 as seed ortholog is 100%.

Bootstrap support for afis|EAW22469.1 as seed ortholog is 100%.

---

Group of orthologs #106. Best score 4002 bits

Score difference with first non-orthologous sequence - *A. fumigatus*:4002 *A. fischeri*:4002

afum|EAL91935.1 100.00% afis|EAW24080.1 100.00%

Bootstrap support for afum|EAL91935.1 as seed ortholog is 100%.

Bootstrap support for afis|EAW24080.1 as seed ortholog is 100%.

---

Group of orthologs #107. Best score 3995 bits

Score difference with first non-orthologous sequence - *A. fumigatus*:3995 *A. fischeri*:3995

afum|EAL85196.1 100.00% afis|EAW20078.1 100.00%

Bootstrap support for afum|EAL85196.1 as seed ortholog is 100%.

Bootstrap support for afis|EAW20078.1 as seed ortholog is 100%.

---

Group of orthologs #108. Best score 3983 bits

Score difference with first non-orthologous sequence - *A. fumigatus*:3983 *A. fischeri*:3983

afum|EAL91297.1 100.00% afis|EAW17468.1 100.00%

Bootstrap support for afum|EAL91297.1 as seed ortholog is 100%.

Bootstrap support for afis|EAW17468.1 as seed ortholog is 100%.

---

Group of orthologs #109. Best score 3948 bits

Score difference with first non-orthologous sequence - *A. fumigatus*:3948 *A. fischeri*:3948

afum|EAL90017.1 100.00% afis|EAW25355.1 100.00%

Bootstrap support for afum|EAL90017.1 as seed ortholog is 100%.

Bootstrap support for afis|EAW25355.1 as seed ortholog is 100%.

---

Group of orthologs #110. Best score 3945 bits

Score difference with first non-orthologous sequence - *A. fumigatus*:3945 *A. fischeri*:3945  
afum|EAL84261.1 100.00% afis|EAW25543.1 100.00%  
Bootstrap support for afum|EAL84261.1 as seed ortholog is 100%.  
Bootstrap support for afis|EAW25543.1 as seed ortholog is 100%.

---

Group of orthologs #111. Best score 3937 bits

Score difference with first non-orthologous sequence - *A. fumigatus*:3937 *A. fischeri*:3937  
afum|EAL84657.1 100.00% afis|EAW20976.1 100.00%  
Bootstrap support for afum|EAL84657.1 as seed ortholog is 100%.  
Bootstrap support for afis|EAW20976.1 as seed ortholog is 100%.

---

Group of orthologs #112. Best score 3937 bits

Score difference with first non-orthologous sequence - *A. fumigatus*:3937 *A. fischeri*:3937  
afum|EAL87094.1 100.00% afis|EAW19400.1 100.00%  
Bootstrap support for afum|EAL87094.1 as seed ortholog is 100%.  
Bootstrap support for afis|EAW19400.1 as seed ortholog is 100%.

---

Group of orthologs #113. Best score 3936 bits

Score difference with first non-orthologous sequence - *A. fumigatus*:3936 *A. fischeri*:3936  
afum|EAL88050.1 100.00% afis|EAW23419.1 100.00%  
Bootstrap support for afum|EAL88050.1 as seed ortholog is 100%.  
Bootstrap support for afis|EAW23419.1 as seed ortholog is 100%.

---

Group of orthologs #114. Best score 3909 bits

Score difference with first non-orthologous sequence - *A. fumigatus*:3651 *A. fischeri*:3611  
afum|EAL84933.1 100.00% afis|EAW19983.1 100.00%  
Bootstrap support for afum|EAL84933.1 as seed ortholog is 100%.  
Bootstrap support for afis|EAW19983.1 as seed ortholog is 100%.

---

Group of orthologs #115. Best score 3892 bits

Score difference with first non-orthologous sequence - *A. fumigatus*:3892 *A. fischeri*:3892  
afum|EAL89207.1 100.00% afis|EAW16611.1 100.00%  
Bootstrap support for afum|EAL89207.1 as seed ortholog is 100%.  
Bootstrap support for afis|EAW16611.1 as seed ortholog is 100%.

---

Group of orthologs #116. Best score 3861 bits

Score difference with first non-orthologous sequence - *A. fumigatus*:3861 *A. fischeri*:3861  
afum|EAL93767.1 100.00% afis|EAW19038.1 100.00%  
Bootstrap support for afum|EAL93767.1 as seed ortholog is 100%.  
Bootstrap support for afis|EAW19038.1 as seed ortholog is 100%.

---

Group of orthologs #117. Best score 3858 bits

Score difference with first non-orthologous sequence - *A. fumigatus*:3858 *A. fischeri*:3858  
afum|EAL92473.1 100.00% afis|EAW21454.1 100.00%  
Bootstrap support for afum|EAL92473.1 as seed ortholog is 100%.  
Bootstrap support for afis|EAW21454.1 as seed ortholog is 100%.

---

Group of orthologs #118. Best score 3841 bits

Score difference with first non-orthologous sequence - *A. fumigatus*:3841 *A. fischeri*:3841  
afum|EAL87459.1 100.00% afis|EAW24028.1 100.00%  
Bootstrap support for afum|EAL87459.1 as seed ortholog is 100%.  
Bootstrap support for afis|EAW24028.1 as seed ortholog is 100%.

---

Group of orthologs #119. Best score 3840 bits

Score difference with first non-orthologous sequence - *A. fumigatus*:3840 *A. fischeri*:3840  
afum|EAL93708.1 100.00% afis|EAW18974.1 100.00%

Bootstrap support for afum|EAL93708.1 as seed ortholog is 100%.  
Bootstrap support for afis|EAW18974.1 as seed ortholog is 100%.

---

Group of orthologs #120. Best score 3832 bits

Score difference with first non-orthologous sequence - *A. fumigatus*:3832 *A. fischeri*:3832

|                 |         |                 |         |
|-----------------|---------|-----------------|---------|
| afum EAL91827.1 | 100.00% | afis EAW18015.1 | 100.00% |
|-----------------|---------|-----------------|---------|

Bootstrap support for afum|EAL91827.1 as seed ortholog is 100%.

Bootstrap support for afis|EAW18015.1 as seed ortholog is 100%.

---

Group of orthologs #121. Best score 3814 bits

Score difference with first non-orthologous sequence - *A. fumigatus*:3389 *A. fischeri*:3305

|                 |         |                 |         |
|-----------------|---------|-----------------|---------|
| afum EAL91682.1 | 100.00% | afis EAW17874.1 | 100.00% |
|-----------------|---------|-----------------|---------|

Bootstrap support for afum|EAL91682.1 as seed ortholog is 100%.

Bootstrap support for afis|EAW17874.1 as seed ortholog is 100%.

---

Group of orthologs #122. Best score 3813 bits

Score difference with first non-orthologous sequence - *A. fumigatus*:3813 *A. fischeri*:3813

|                 |         |                 |         |
|-----------------|---------|-----------------|---------|
| afum EAL89461.1 | 100.00% | afis EAW24817.1 | 100.00% |
|-----------------|---------|-----------------|---------|

Bootstrap support for afum|EAL89461.1 as seed ortholog is 100%.

Bootstrap support for afis|EAW24817.1 as seed ortholog is 100%.

---

Group of orthologs #123. Best score 3804 bits

Score difference with first non-orthologous sequence - *A. fumigatus*:3804 *A. fischeri*:3804

|                 |         |                 |         |
|-----------------|---------|-----------------|---------|
| afum EAL89903.1 | 100.00% | afis EAW25241.1 | 100.00% |
|-----------------|---------|-----------------|---------|

Bootstrap support for afum|EAL89903.1 as seed ortholog is 100%.

Bootstrap support for afis|EAW25241.1 as seed ortholog is 100%.

---

Group of orthologs #124. Best score 3796 bits

Score difference with first non-orthologous sequence - *A. fumigatus*:3796 *A. fischeri*:3796

|                 |         |                 |         |
|-----------------|---------|-----------------|---------|
| afum EAL92890.1 | 100.00% | afis EAW21876.1 | 100.00% |
|-----------------|---------|-----------------|---------|

Bootstrap support for afum|EAL92890.1 as seed ortholog is 100%.

Bootstrap support for afis|EAW21876.1 as seed ortholog is 100%.

---

Group of orthologs #125. Best score 3796 bits

Score difference with first non-orthologous sequence - *A. fumigatus*:3796 *A. fischeri*:3796

|                 |         |                 |         |
|-----------------|---------|-----------------|---------|
| afum EAL92993.1 | 100.00% | afis EAW21978.1 | 100.00% |
|-----------------|---------|-----------------|---------|

Bootstrap support for afum|EAL92993.1 as seed ortholog is 100%.

Bootstrap support for afis|EAW21978.1 as seed ortholog is 100%.

---

Group of orthologs #126. Best score 3787 bits

Score difference with first non-orthologous sequence - *A. fumigatus*:3787 *A. fischeri*:3787

|                 |         |                 |         |
|-----------------|---------|-----------------|---------|
| afum EAL91920.1 | 100.00% | afis EAW24065.1 | 100.00% |
|-----------------|---------|-----------------|---------|

Bootstrap support for afum|EAL91920.1 as seed ortholog is 100%.

Bootstrap support for afis|EAW24065.1 as seed ortholog is 100%.

---

Group of orthologs #127. Best score 3758 bits

Score difference with first non-orthologous sequence - *A. fumigatus*:3758 *A. fischeri*:3758

|                 |         |                 |         |
|-----------------|---------|-----------------|---------|
| afum EAL88965.1 | 100.00% | afis EAW16340.1 | 100.00% |
|-----------------|---------|-----------------|---------|

Bootstrap support for afum|EAL88965.1 as seed ortholog is 100%.

Bootstrap support for afis|EAW16340.1 as seed ortholog is 100%.

---

Group of orthologs #128. Best score 3751 bits

Score difference with first non-orthologous sequence - *A. fumigatus*:3751 *A. fischeri*:3751

|                 |         |                 |         |
|-----------------|---------|-----------------|---------|
| afum EAL90706.1 | 100.00% | afis EAW22487.1 | 100.00% |
|-----------------|---------|-----------------|---------|

Bootstrap support for afum|EAL90706.1 as seed ortholog is 100%.

Bootstrap support for afis|EAW22487.1 as seed ortholog is 100%.

---

Group of orthologs #129. Best score 3749 bits

Score difference with first non-orthologous sequence - *A. fumigatus*:3749 *A. fischeri*:3749

afum|EAL91423.1 100.00% afis|EAW17610.1 100.00%

Bootstrap support for afum|EAL91423.1 as seed ortholog is 100%.

Bootstrap support for afis|EAW17610.1 as seed ortholog is 100%.

---

Group of orthologs #130. Best score 3737 bits

Score difference with first non-orthologous sequence - *A. fumigatus*:3737 *A. fischeri*:3737

afum|EAL93245.1 100.00% afis|EAW18545.1 100.00%

Bootstrap support for afum|EAL93245.1 as seed ortholog is 100%.

Bootstrap support for afis|EAW18545.1 as seed ortholog is 100%.

---

Group of orthologs #131. Best score 3724 bits

Score difference with first non-orthologous sequence - *A. fumigatus*:3724 *A. fischeri*:3724

afum|EAL91221.2 100.00% afis|EAW17387.1 100.00%

Bootstrap support for afum|EAL91221.2 as seed ortholog is 100%.

Bootstrap support for afis|EAW17387.1 as seed ortholog is 100%.

---

Group of orthologs #132. Best score 3712 bits

Score difference with first non-orthologous sequence - *A. fumigatus*:3712 *A. fischeri*:3712

afum|EAL87569.1 100.00% afis|EAW18204.1 100.00%

Bootstrap support for afum|EAL87569.1 as seed ortholog is 100%.

Bootstrap support for afis|EAW18204.1 as seed ortholog is 100%.

---

Group of orthologs #133. Best score 3704 bits

Score difference with first non-orthologous sequence - *A. fumigatus*:3704 *A. fischeri*:3704

afum|EAL90827.1 100.00% afis|EAW22364.1 100.00%

Bootstrap support for afum|EAL90827.1 as seed ortholog is 100%.

Bootstrap support for afis|EAW22364.1 as seed ortholog is 100%.

---

Group of orthologs #134. Best score 3703 bits

Score difference with first non-orthologous sequence - *A. fumigatus*:3703 *A. fischeri*:3703

afum|EAL88239.1 100.00% afis|EAW23243.1 100.00%

Bootstrap support for afum|EAL88239.1 as seed ortholog is 100%.

Bootstrap support for afis|EAW23243.1 as seed ortholog is 100%.

---

Group of orthologs #135. Best score 3694 bits

Score difference with first non-orthologous sequence - *A. fumigatus*:3694 *A. fischeri*:3694

afum|EAL93161.1 100.00% afis|EAW18474.1 100.00%

Bootstrap support for afum|EAL93161.1 as seed ortholog is 100%.

Bootstrap support for afis|EAW18474.1 as seed ortholog is 100%.

---

Group of orthologs #136. Best score 3684 bits

Score difference with first non-orthologous sequence - *A. fumigatus*:3684 *A. fischeri*:3684

afum|EAL85320.1 100.00% afis|EAW20200.1 100.00%

Bootstrap support for afum|EAL85320.1 as seed ortholog is 100%.

Bootstrap support for afis|EAW20200.1 as seed ortholog is 100%.

---

Group of orthologs #137. Best score 3674 bits

Score difference with first non-orthologous sequence - *A. fumigatus*:3674 *A. fischeri*:3674

afum|EBA27495.1 100.00% afis|EAW18891.1 100.00%

Bootstrap support for afum|EBA27495.1 as seed ortholog is 100%.

Bootstrap support for afis|EAW18891.1 as seed ortholog is 100%.

---

Group of orthologs #138. Best score 3673 bits

Score difference with first non-orthologous sequence - *A. fumigatus*:3673 *A. fischeri*:3673  
afum|EAL93713.2 100.00% afis|EAW18977.1 100.00%  
Bootstrap support for afum|EAL93713.2 as seed ortholog is 100%.  
Bootstrap support for afis|EAW18977.1 as seed ortholog is 100%.

---

Group of orthologs #139. Best score 3672 bits

Score difference with first non-orthologous sequence - *A. fumigatus*:3672 *A. fischeri*:3672  
afum|EAL92943.2 100.00% afis|EAW21931.1 100.00%  
Bootstrap support for afum|EAL92943.2 as seed ortholog is 100%.  
Bootstrap support for afis|EAW21931.1 as seed ortholog is 100%.

---

Group of orthologs #140. Best score 3670 bits

Score difference with first non-orthologous sequence - *A. fumigatus*:3670 *A. fischeri*:2800  
afum|EAL84837.1 100.00% afis|EAW20787.1 100.00%  
Bootstrap support for afum|EAL84837.1 as seed ortholog is 100%.  
Bootstrap support for afis|EAW20787.1 as seed ortholog is 100%.

---

Group of orthologs #141. Best score 3664 bits

Score difference with first non-orthologous sequence - *A. fumigatus*:3664 *A. fischeri*:3664  
afum|EAL90724.1 100.00% afis|EAW22467.1 100.00%  
Bootstrap support for afum|EAL90724.1 as seed ortholog is 100%.  
Bootstrap support for afis|EAW22467.1 as seed ortholog is 100%.

---

Group of orthologs #142. Best score 3662 bits

Score difference with first non-orthologous sequence - *A. fumigatus*:3662 *A. fischeri*:3662  
afum|EAL85639.1 100.00% afis|EAW15708.1 100.00%  
Bootstrap support for afum|EAL85639.1 as seed ortholog is 100%.  
Bootstrap support for afis|EAW15708.1 as seed ortholog is 100%.

---

Group of orthologs #143. Best score 3658 bits

Score difference with first non-orthologous sequence - *A. fumigatus*:3658 *A. fischeri*:3658  
afum|EAL92340.1 100.00% afis|EAW21323.1 100.00%  
Bootstrap support for afum|EAL92340.1 as seed ortholog is 100%.  
Bootstrap support for afis|EAW21323.1 as seed ortholog is 100%.

---

Group of orthologs #144. Best score 3656 bits

Score difference with first non-orthologous sequence - *A. fumigatus*:3656 *A. fischeri*:3656  
afum|EAL88733.1 100.00% afis|EAW16101.1 100.00%  
Bootstrap support for afum|EAL88733.1 as seed ortholog is 100%.  
Bootstrap support for afis|EAW16101.1 as seed ortholog is 100%.

---

Group of orthologs #145. Best score 3655 bits

Score difference with first non-orthologous sequence - *A. fumigatus*:3655 *A. fischeri*:2550  
afum|EAL85604.1 100.00% afis|EAW15744.1 100.00%  
Bootstrap support for afum|EAL85604.1 as seed ortholog is 100%.  
Bootstrap support for afis|EAW15744.1 as seed ortholog is 100%.

---

Group of orthologs #146. Best score 3651 bits

Score difference with first non-orthologous sequence - *A. fumigatus*:3651 *A. fischeri*:3651  
afum|EAL87595.1 100.00% afis|EAW18228.1 100.00%  
Bootstrap support for afum|EAL87595.1 as seed ortholog is 100%.  
Bootstrap support for afis|EAW18228.1 as seed ortholog is 100%.

---

Group of orthologs #147. Best score 3651 bits

Score difference with first non-orthologous sequence - *A. fumigatus*:3651 *A. fischeri*:3651  
afum|EAL87926.1 100.00% afis|EAW23540.1 100.00%

Bootstrap support for afum|EAL87926.1 as seed ortholog is 100%.  
Bootstrap support for afis|EAW23540.1 as seed ortholog is 100%.

---

Group of orthologs #148. Best score 3636 bits

Score difference with first non-orthologous sequence - *A. fumigatus*:3636 *A. fischeri*:3636

afum|EAL85832.1 100.00% afis|EAW15491.1 100.00%

Bootstrap support for afum|EAL85832.1 as seed ortholog is 100%.

Bootstrap support for afis|EAW15491.1 as seed ortholog is 100%.

---

Group of orthologs #149. Best score 3633 bits

Score difference with first non-orthologous sequence - *A. fumigatus*:3633 *A. fischeri*:3633

afum|EAL91653.1 100.00% afis|EAW17844.1 100.00%

Bootstrap support for afum|EAL91653.1 as seed ortholog is 100%.

Bootstrap support for afis|EAW17844.1 as seed ortholog is 100%.

---

Group of orthologs #150. Best score 3624 bits

Score difference with first non-orthologous sequence - *A. fumigatus*:3624 *A. fischeri*:3624

afum|EAL89586.1 100.00% afis|EAW24930.1 100.00%

Bootstrap support for afum|EAL89586.1 as seed ortholog is 100%.

Bootstrap support for afis|EAW24930.1 as seed ortholog is 100%.

---

Group of orthologs #151. Best score 3622 bits

Score difference with first non-orthologous sequence - *A. fumigatus*:3622 *A. fischeri*:3622

afum|EAL88318.1 100.00% afis|EAW23166.1 100.00%

Bootstrap support for afum|EAL88318.1 as seed ortholog is 100%.

Bootstrap support for afis|EAW23166.1 as seed ortholog is 100%.

---

Group of orthologs #152. Best score 3618 bits

Score difference with first non-orthologous sequence - *A. fumigatus*:3618 *A. fischeri*:3618

afum|EAL90357.1 100.00% afis|EAW22845.1 100.00%

Bootstrap support for afum|EAL90357.1 as seed ortholog is 100%.

Bootstrap support for afis|EAW22845.1 as seed ortholog is 100%.

---

Group of orthologs #153. Best score 3611 bits

Score difference with first non-orthologous sequence - *A. fumigatus*:3611 *A. fischeri*:1776

afum|EAL93809.1 100.00% afis|EAW19080.1 100.00%

Bootstrap support for afum|EAL93809.1 as seed ortholog is 100%.

Bootstrap support for afis|EAW19080.1 as seed ortholog is 100%.

---

Group of orthologs #154. Best score 3608 bits

Score difference with first non-orthologous sequence - *A. fumigatus*:3608 *A. fischeri*:3608

afum|EAL91348.1 100.00% afis|EAW17534.1 100.00%

Bootstrap support for afum|EAL91348.1 as seed ortholog is 100%.

Bootstrap support for afis|EAW17534.1 as seed ortholog is 100%.

---

Group of orthologs #155. Best score 3606 bits

Score difference with first non-orthologous sequence - *A. fumigatus*:3606 *A. fischeri*:3606

afum|EAL91424.1 100.00% afis|EAW17611.1 100.00%

Bootstrap support for afum|EAL91424.1 as seed ortholog is 100%.

Bootstrap support for afis|EAW17611.1 as seed ortholog is 100%.

---

Group of orthologs #156. Best score 3600 bits

Score difference with first non-orthologous sequence - *A. fumigatus*:3600 *A. fischeri*:3600

afum|EAL84710.1 100.00% afis|EAW20924.1 100.00%

Bootstrap support for afum|EAL84710.1 as seed ortholog is 100%.

Bootstrap support for afis|EAW20924.1 as seed ortholog is 100%.

---

Group of orthologs #157. Best score 3600 bits

Score difference with first non-orthologous sequence - *A. fumigatus*:3203 *A. fischeri*:3092

|                 |         |                 |         |
|-----------------|---------|-----------------|---------|
| afum EAL91801.1 | 100.00% | afis EAW17991.1 | 100.00% |
|-----------------|---------|-----------------|---------|

Bootstrap support for afum|EAL91801.1 as seed ortholog is 100%.

Bootstrap support for afis|EAW17991.1 as seed ortholog is 100%.

---

Group of orthologs #158. Best score 3599 bits

Score difference with first non-orthologous sequence - *A. fumigatus*:3599 *A. fischeri*:3599

|                 |         |                 |         |
|-----------------|---------|-----------------|---------|
| afum EAL84891.1 | 100.00% | afis EAW20026.1 | 100.00% |
|-----------------|---------|-----------------|---------|

Bootstrap support for afum|EAL84891.1 as seed ortholog is 100%.

Bootstrap support for afis|EAW20026.1 as seed ortholog is 100%.

---

Group of orthologs #159. Best score 3582 bits

Score difference with first non-orthologous sequence - *A. fumigatus*:3582 *A. fischeri*:3582

|                 |         |                 |         |
|-----------------|---------|-----------------|---------|
| afum EAL87349.1 | 100.00% | afis EAW23924.1 | 100.00% |
|-----------------|---------|-----------------|---------|

Bootstrap support for afum|EAL87349.1 as seed ortholog is 100%.

Bootstrap support for afis|EAW23924.1 as seed ortholog is 100%.

---

Group of orthologs #160. Best score 3581 bits

Score difference with first non-orthologous sequence - *A. fumigatus*:3581 *A. fischeri*:1671

|                 |         |                 |         |
|-----------------|---------|-----------------|---------|
| afum EAL90765.1 | 100.00% | afis EAW22426.1 | 100.00% |
|-----------------|---------|-----------------|---------|

Bootstrap support for afum|EAL90765.1 as seed ortholog is 100%.

Bootstrap support for afis|EAW22426.1 as seed ortholog is 100%.

---

Group of orthologs #161. Best score 3579 bits

Score difference with first non-orthologous sequence - *A. fumigatus*:3579 *A. fischeri*:3579

|                 |         |                 |         |
|-----------------|---------|-----------------|---------|
| afum EAL93856.1 | 100.00% | afis EAW19124.1 | 100.00% |
|-----------------|---------|-----------------|---------|

Bootstrap support for afum|EAL93856.1 as seed ortholog is 100%.

Bootstrap support for afis|EAW19124.1 as seed ortholog is 100%.

---

Group of orthologs #162. Best score 3562 bits

Score difference with first non-orthologous sequence - *A. fumigatus*:3562 *A. fischeri*:3562

|                 |         |                 |         |
|-----------------|---------|-----------------|---------|
| afum EAL89572.2 | 100.00% | afis EAW24917.1 | 100.00% |
|-----------------|---------|-----------------|---------|

Bootstrap support for afum|EAL89572.2 as seed ortholog is 100%.

Bootstrap support for afis|EAW24917.1 as seed ortholog is 100%.

---

Group of orthologs #163. Best score 3541 bits

Score difference with first non-orthologous sequence - *A. fumigatus*:3541 *A. fischeri*:3541

|                 |         |                 |         |
|-----------------|---------|-----------------|---------|
| afum EAL85935.1 | 100.00% | afis EAW24267.1 | 100.00% |
|-----------------|---------|-----------------|---------|

Bootstrap support for afum|EAL85935.1 as seed ortholog is 100%.

Bootstrap support for afis|EAW24267.1 as seed ortholog is 100%.

---

Group of orthologs #164. Best score 3539 bits

Score difference with first non-orthologous sequence - *A. fumigatus*:3539 *A. fischeri*:3539

|                 |         |                 |         |
|-----------------|---------|-----------------|---------|
| afum EAL87589.2 | 100.00% | afis EAW18223.1 | 100.00% |
|-----------------|---------|-----------------|---------|

Bootstrap support for afum|EAL87589.2 as seed ortholog is 100%.

Bootstrap support for afis|EAW18223.1 as seed ortholog is 100%.

---

Group of orthologs #165. Best score 3535 bits

Score difference with first non-orthologous sequence - *A. fumigatus*:3535 *A. fischeri*:3535

|                 |         |                 |         |
|-----------------|---------|-----------------|---------|
| afum EAL89767.1 | 100.00% | afis EAW25096.1 | 100.00% |
|-----------------|---------|-----------------|---------|

Bootstrap support for afum|EAL89767.1 as seed ortholog is 100%.

Bootstrap support for afis|EAW25096.1 as seed ortholog is 100%.

---

Group of orthologs #166. Best score 3528 bits



Score difference with first non-orthologous sequence - *A. fumigatus*:3528 *A. fischeri*:3528  
afum|EAL88418.1 100.00% afis|EAW23061.1 100.00%  
Bootstrap support for afum|EAL88418.1 as seed ortholog is 100%.  
Bootstrap support for afis|EAW23061.1 as seed ortholog is 100%.

---

Group of orthologs #167. Best score 3512 bits

Score difference with first non-orthologous sequence - *A. fumigatus*:3512 *A. fischeri*:3512  
afum|EAL87348.1 100.00% afis|EAW23923.1 100.00%  
Bootstrap support for afum|EAL87348.1 as seed ortholog is 100%.  
Bootstrap support for afis|EAW23923.1 as seed ortholog is 100%.

---

Group of orthologs #168. Best score 3510 bits

Score difference with first non-orthologous sequence - *A. fumigatus*:3510 *A. fischeri*:3510  
afum|EAL93368.1 100.00% afis|EAW18652.1 100.00%  
Bootstrap support for afum|EAL93368.1 as seed ortholog is 100%.  
Bootstrap support for afis|EAW18652.1 as seed ortholog is 100%.

---

Group of orthologs #169. Best score 3508 bits

Score difference with first non-orthologous sequence - *A. fumigatus*:3508 *A. fischeri*:3508  
afum|EAL87508.1 100.00% afis|EAW18150.1 100.00%  
Bootstrap support for afum|EAL87508.1 as seed ortholog is 100%.  
Bootstrap support for afis|EAW18150.1 as seed ortholog is 100%.

---

Group of orthologs #170. Best score 3508 bits

Score difference with first non-orthologous sequence - *A. fumigatus*:3508 *A. fischeri*:2433  
afum|EAL91655.1 100.00% afis|EAW17846.1 100.00%  
Bootstrap support for afum|EAL91655.1 as seed ortholog is 100%.  
Bootstrap support for afis|EAW17846.1 as seed ortholog is 100%.

---

Group of orthologs #171. Best score 3505 bits

Score difference with first non-orthologous sequence - *A. fumigatus*:3505 *A. fischeri*:3505  
afum|EAL89449.1 100.00% afis|EAW24807.1 100.00%  
Bootstrap support for afum|EAL89449.1 as seed ortholog is 100%.  
Bootstrap support for afis|EAW24807.1 as seed ortholog is 100%.

---

Group of orthologs #172. Best score 3497 bits

Score difference with first non-orthologous sequence - *A. fumigatus*:3497 *A. fischeri*:3497  
afum|EAL84448.1 100.00% afis|EAW20613.1 100.00%  
Bootstrap support for afum|EAL84448.1 as seed ortholog is 100%.  
Bootstrap support for afis|EAW20613.1 as seed ortholog is 100%.

---

Group of orthologs #173. Best score 3497 bits

Score difference with first non-orthologous sequence - *A. fumigatus*:3497 *A. fischeri*:3497  
afum|EAL92151.1 100.00% afis|EAW21133.1 100.00%  
Bootstrap support for afum|EAL92151.1 as seed ortholog is 100%.  
Bootstrap support for afis|EAW21133.1 as seed ortholog is 100%.

---

Group of orthologs #174. Best score 3495 bits

Score difference with first non-orthologous sequence - *A. fumigatus*:3495 *A. fischeri*:3495  
afum|EAL90031.1 100.00% afis|EAW25371.1 100.00%  
Bootstrap support for afum|EAL90031.1 as seed ortholog is 100%.  
Bootstrap support for afis|EAW25371.1 as seed ortholog is 100%.

---

Group of orthologs #175. Best score 3487 bits

Score difference with first non-orthologous sequence - *A. fumigatus*:3487 *A. fischeri*:3487  
afum|EAL87083.1 100.00% afis|EAW19411.1 100.00%

Bootstrap support for afum|EAL87083.1 as seed ortholog is 100%.  
Bootstrap support for afis|EAW19411.1 as seed ortholog is 100%.

---

Group of orthologs #176. Best score 3485 bits

Score difference with first non-orthologous sequence - *A. fumigatus*:3485 *A. fischeri*:3485

afum|EAL88146.2 100.00% afis|EAW23332.1 100.00%

Bootstrap support for afum|EAL88146.2 as seed ortholog is 100%.

Bootstrap support for afis|EAW23332.1 as seed ortholog is 100%.

---

Group of orthologs #177. Best score 3483 bits

Score difference with first non-orthologous sequence - *A. fumigatus*:3483 *A. fischeri*:1933

afum|EAL92840.1 100.00% afis|EAW21824.1 100.00%

Bootstrap support for afum|EAL92840.1 as seed ortholog is 100%.

Bootstrap support for afis|EAW21824.1 as seed ortholog is 100%.

---

Group of orthologs #178. Best score 3482 bits

Score difference with first non-orthologous sequence - *A. fumigatus*:3482 *A. fischeri*:2322

afum|EAL88655.1 100.00% afis|EAW16026.1 100.00%

Bootstrap support for afum|EAL88655.1 as seed ortholog is 100%.

Bootstrap support for afis|EAW16026.1 as seed ortholog is 100%.

---

Group of orthologs #179. Best score 3480 bits

Score difference with first non-orthologous sequence - *A. fumigatus*:3480 *A. fischeri*:3480

afum|EAL91433.2 100.00% afis|EAW17620.1 100.00%

Bootstrap support for afum|EAL91433.2 as seed ortholog is 100%.

Bootstrap support for afis|EAW17620.1 as seed ortholog is 100%.

---

Group of orthologs #180. Best score 3479 bits

Score difference with first non-orthologous sequence - *A. fumigatus*:3479 *A. fischeri*:3479

afum|EAL87333.1 100.00% afis|EAW23905.1 100.00%

Bootstrap support for afum|EAL87333.1 as seed ortholog is 100%.

Bootstrap support for afis|EAW23905.1 as seed ortholog is 100%.

---

Group of orthologs #181. Best score 3465 bits

Score difference with first non-orthologous sequence - *A. fumigatus*:3465 *A. fischeri*:3465

afum|EBA27410.1 100.00% afis|EAW22631.1 100.00%

Bootstrap support for afum|EBA27410.1 as seed ortholog is 100%.

Bootstrap support for afis|EAW22631.1 as seed ortholog is 100%.

---

Group of orthologs #182. Best score 3463 bits

Score difference with first non-orthologous sequence - *A. fumigatus*:3463 *A. fischeri*:3463

afum|EAL93984.1 100.00% afis|EAW19257.1 100.00%

Bootstrap support for afum|EAL93984.1 as seed ortholog is 100%.

Bootstrap support for afis|EAW19257.1 as seed ortholog is 100%.

---

Group of orthologs #183. Best score 3449 bits

Score difference with first non-orthologous sequence - *A. fumigatus*:3449 *A. fischeri*:3449

afum|EAL92994.1 100.00% afis|EAW21979.1 100.00%

Bootstrap support for afum|EAL92994.1 as seed ortholog is 100%.

Bootstrap support for afis|EAW21979.1 as seed ortholog is 100%.

---

Group of orthologs #184. Best score 3447 bits

Score difference with first non-orthologous sequence - *A. fumigatus*:3447 *A. fischeri*:3447

afum|EAL92431.1 100.00% afis|EAW21416.1 100.00%

Bootstrap support for afum|EAL92431.1 as seed ortholog is 100%.

Bootstrap support for afis|EAW21416.1 as seed ortholog is 100%.

---

Group of orthologs #185. Best score 3443 bits

Score difference with first non-orthologous sequence - *A. fumigatus*:3443 *A. fischeri*:1633

afum|EAL86223.1 100.00% afis|EAW24562.1 100.00%

Bootstrap support for afum|EAL86223.1 as seed ortholog is 100%.

Bootstrap support for afis|EAW24562.1 as seed ortholog is 100%.

---

Group of orthologs #186. Best score 3431 bits

Score difference with first non-orthologous sequence - *A. fumigatus*:3258 *A. fischeri*:3431

afum|EAL88509.2 100.00% afis|EAW15875.1 100.00%

Bootstrap support for afum|EAL88509.2 as seed ortholog is 100%.

Bootstrap support for afis|EAW15875.1 as seed ortholog is 100%.

---

Group of orthologs #187. Best score 3430 bits

Score difference with first non-orthologous sequence - *A. fumigatus*:3430 *A. fischeri*:3430

afum|EAL85798.1 100.00% afis|EAW15530.1 100.00%

Bootstrap support for afum|EAL85798.1 as seed ortholog is 100%.

Bootstrap support for afis|EAW15530.1 as seed ortholog is 100%.

---

Group of orthologs #188. Best score 3425 bits

Score difference with first non-orthologous sequence - *A. fumigatus*:3080 *A. fischeri*:3017

afum|EAL91018.1 100.00% afis|EAW22171.1 100.00%

Bootstrap support for afum|EAL91018.1 as seed ortholog is 100%.

Bootstrap support for afis|EAW22171.1 as seed ortholog is 100%.

---

Group of orthologs #189. Best score 3424 bits

Score difference with first non-orthologous sequence - *A. fumigatus*:3424 *A. fischeri*:3424

afum|EAL92038.1 100.00% afis|EAW24176.1 100.00%

Bootstrap support for afum|EAL92038.1 as seed ortholog is 100%.

Bootstrap support for afis|EAW24176.1 as seed ortholog is 100%.

---

Group of orthologs #190. Best score 3420 bits

Score difference with first non-orthologous sequence - *A. fumigatus*:3420 *A. fischeri*:3420

afum|EAL85993.1 100.00% afis|EAW24323.1 100.00%

Bootstrap support for afum|EAL85993.1 as seed ortholog is 100%.

Bootstrap support for afis|EAW24323.1 as seed ortholog is 100%.

---

Group of orthologs #191. Best score 3420 bits

Score difference with first non-orthologous sequence - *A. fumigatus*:3420 *A. fischeri*:3420

afum|EAL93092.1 100.00% afis|EAW18412.1 100.00%

Bootstrap support for afum|EAL93092.1 as seed ortholog is 100%.

Bootstrap support for afis|EAW18412.1 as seed ortholog is 100%.

---

Group of orthologs #192. Best score 3419 bits

Score difference with first non-orthologous sequence - *A. fumigatus*:3419 *A. fischeri*:3419

afum|EAL92977.1 100.00% afis|EAW21963.1 100.00%

Bootstrap support for afum|EAL92977.1 as seed ortholog is 100%.

Bootstrap support for afis|EAW21963.1 as seed ortholog is 100%.

---

Group of orthologs #193. Best score 3416 bits

Score difference with first non-orthologous sequence - *A. fumigatus*:3416 *A. fischeri*:1873

afum|EAL86078.1 100.00% afis|EAW24409.1 100.00%

Bootstrap support for afum|EAL86078.1 as seed ortholog is 100%.

Bootstrap support for afis|EAW24409.1 as seed ortholog is 100%.

---

Group of orthologs #194. Best score 3411 bits

Score difference with first non-orthologous sequence - *A. fumigatus*:3411 *A. fischeri*:3176  
afum|EAL89667.1 100.00% afis|EAW25028.1 100.00%  
Bootstrap support for afum|EAL89667.1 as seed ortholog is 100%.  
Bootstrap support for afis|EAW25028.1 as seed ortholog is 100%.

---

Group of orthologs #195. Best score 3403 bits

Score difference with first non-orthologous sequence - *A. fumigatus*:3403 *A. fischeri*:3403  
afum|EAL92776.1 100.00% afis|EAW21743.1 100.00%  
Bootstrap support for afum|EAL92776.1 as seed ortholog is 100%.  
Bootstrap support for afis|EAW21743.1 as seed ortholog is 100%.

---

Group of orthologs #196. Best score 3378 bits

Score difference with first non-orthologous sequence - *A. fumigatus*:3378 *A. fischeri*:3378  
afum|EAL87585.1 100.00% afis|EAW18219.1 100.00%  
Bootstrap support for afum|EAL87585.1 as seed ortholog is 100%.  
Bootstrap support for afis|EAW18219.1 as seed ortholog is 100%.

---

Group of orthologs #197. Best score 3377 bits

Score difference with first non-orthologous sequence - *A. fumigatus*:3377 *A. fischeri*:1251  
afum|EAL86423.2 100.00% afis|EAW16885.1 100.00%  
Bootstrap support for afum|EAL86423.2 as seed ortholog is 100%.  
Bootstrap support for afis|EAW16885.1 as seed ortholog is 100%.

---

Group of orthologs #198. Best score 3376 bits

Score difference with first non-orthologous sequence - *A. fumigatus*:3023 *A. fischeri*:2999  
afum|EAL87248.1 100.00% afis|EAW23813.1 100.00%  
Bootstrap support for afum|EAL87248.1 as seed ortholog is 100%.  
Bootstrap support for afis|EAW23813.1 as seed ortholog is 100%.

---

Group of orthologs #199. Best score 3362 bits

Score difference with first non-orthologous sequence - *A. fumigatus*:3362 *A. fischeri*:3362  
afum|EAL91962.1 100.00% afis|EAW24108.1 100.00%  
Bootstrap support for afum|EAL91962.1 as seed ortholog is 100%.  
Bootstrap support for afis|EAW24108.1 as seed ortholog is 100%.

---

Group of orthologs #200. Best score 3359 bits

Score difference with first non-orthologous sequence - *A. fumigatus*:3359 *A. fischeri*:3359  
afum|EAL87314.2 100.00% afis|EAW23887.1 100.00%  
Bootstrap support for afum|EAL87314.2 as seed ortholog is 100%.  
Bootstrap support for afis|EAW23887.1 as seed ortholog is 100%.

---

Group of orthologs #201. Best score 3356 bits

Score difference with first non-orthologous sequence - *A. fumigatus*:3356 *A. fischeri*:1461  
afum|EAL91073.1 100.00% afis|EAW22112.1 100.00%  
Bootstrap support for afum|EAL91073.1 as seed ortholog is 100%.  
Bootstrap support for afis|EAW22112.1 as seed ortholog is 100%.

---

Group of orthologs #202. Best score 3351 bits

Score difference with first non-orthologous sequence - *A. fumigatus*:3351 *A. fischeri*:3351  
afum|EAL84582.1 100.00% afis|EAW20471.1 100.00%  
Bootstrap support for afum|EAL84582.1 as seed ortholog is 100%.  
Bootstrap support for afis|EAW20471.1 as seed ortholog is 100%.

---

Group of orthologs #203. Best score 3351 bits

Score difference with first non-orthologous sequence - *A. fumigatus*:3351 *A. fischeri*:3154  
afum|EAL85691.1 100.00% afis|EAW22082.1 100.00%

Bootstrap support for afum|EAL85691.1 as seed ortholog is 100%.  
Bootstrap support for afis|EAW22082.1 as seed ortholog is 100%.

---

Group of orthologs #204. Best score 3346 bits

Score difference with first non-orthologous sequence - *A. fumigatus*:3346 *A. fischeri*:3346

afum|EAL87688.1 100.00% afis|EAW18321.1 100.00%

Bootstrap support for afum|EAL87688.1 as seed ortholog is 100%.

Bootstrap support for afis|EAW18321.1 as seed ortholog is 100%.

---

Group of orthologs #205. Best score 3345 bits

Score difference with first non-orthologous sequence - *A. fumigatus*:3014 *A. fischeri*:3000

afum|EAL91783.1 100.00% afis|EAW17974.1 100.00%

Bootstrap support for afum|EAL91783.1 as seed ortholog is 100%.

Bootstrap support for afis|EAW17974.1 as seed ortholog is 100%.

---

Group of orthologs #206. Best score 3337 bits

Score difference with first non-orthologous sequence - *A. fumigatus*:2977 *A. fischeri*:2954

afum|EAL91555.1 100.00% afis|EAW17741.1 100.00%

Bootstrap support for afum|EAL91555.1 as seed ortholog is 100%.

Bootstrap support for afis|EAW17741.1 as seed ortholog is 100%.

---

Group of orthologs #207. Best score 3335 bits

Score difference with first non-orthologous sequence - *A. fumigatus*:3335 *A. fischeri*:2018

afum|EAL90415.1 100.00% afis|EAW22784.1 100.00%

Bootstrap support for afum|EAL90415.1 as seed ortholog is 100%.

Bootstrap support for afis|EAW22784.1 as seed ortholog is 100%.

---

Group of orthologs #208. Best score 3332 bits

Score difference with first non-orthologous sequence - *A. fumigatus*:3332 *A. fischeri*:3332

afum|EAL90652.1 100.00% afis|EAW22542.1 100.00%

Bootstrap support for afum|EAL90652.1 as seed ortholog is 100%.

Bootstrap support for afis|EAW22542.1 as seed ortholog is 100%.

---

Group of orthologs #209. Best score 3331 bits

Score difference with first non-orthologous sequence - *A. fumigatus*:3331 *A. fischeri*:3331

afum|EBA27486.1 100.00% afis|EAW18485.1 100.00%

Bootstrap support for afum|EBA27486.1 as seed ortholog is 100%.

Bootstrap support for afis|EAW18485.1 as seed ortholog is 100%.

---

Group of orthologs #210. Best score 3325 bits

Score difference with first non-orthologous sequence - *A. fumigatus*:3325 *A. fischeri*:3325

afum|EAL90586.1 100.00% afis|EAW22612.1 100.00%

Bootstrap support for afum|EAL90586.1 as seed ortholog is 100%.

Bootstrap support for afis|EAW22612.1 as seed ortholog is 100%.

---

Group of orthologs #211. Best score 3323 bits

Score difference with first non-orthologous sequence - *A. fumigatus*:2480 *A. fischeri*:3323

afum|EAL85910.2 100.00% afis|EAW24242.1 100.00%

Bootstrap support for afum|EAL85910.2 as seed ortholog is 100%.

Bootstrap support for afis|EAW24242.1 as seed ortholog is 100%.

---

Group of orthologs #212. Best score 3323 bits

Score difference with first non-orthologous sequence - *A. fumigatus*:3323 *A. fischeri*:3323

afum|EAL86032.1 100.00% afis|EAW24362.1 100.00%

Bootstrap support for afum|EAL86032.1 as seed ortholog is 100%.

Bootstrap support for afis|EAW24362.1 as seed ortholog is 100%.

---

Group of orthologs #213. Best score 3321 bits

Score difference with first non-orthologous sequence - *A. fumigatus*:3321 *A. fischeri*:3321

afum|EAL92697.1 100.00% afis|EAW21662.1 100.00%

Bootstrap support for afum|EAL92697.1 as seed ortholog is 100%.

Bootstrap support for afis|EAW21662.1 as seed ortholog is 100%.

---

Group of orthologs #214. Best score 3319 bits

Score difference with first non-orthologous sequence - *A. fumigatus*:3319 *A. fischeri*:3319

afum|EAL89913.1 100.00% afis|EAW25251.1 100.00%

Bootstrap support for afum|EAL89913.1 as seed ortholog is 100%.

Bootstrap support for afis|EAW25251.1 as seed ortholog is 100%.

---

Group of orthologs #215. Best score 3318 bits

Score difference with first non-orthologous sequence - *A. fumigatus*:3318 *A. fischeri*:3318

afum|EAL88494.1 100.00% afis|EAW15858.1 100.00%

Bootstrap support for afum|EAL88494.1 as seed ortholog is 100%.

Bootstrap support for afis|EAW15858.1 as seed ortholog is 100%.

---

Group of orthologs #216. Best score 3317 bits

Score difference with first non-orthologous sequence - *A. fumigatus*:3317 *A. fischeri*:3317

afum|EAL85556.1 100.00% afis|EAW15794.1 100.00%

Bootstrap support for afum|EAL85556.1 as seed ortholog is 100%.

Bootstrap support for afis|EAW15794.1 as seed ortholog is 100%.

---

Group of orthologs #217. Best score 3312 bits

Score difference with first non-orthologous sequence - *A. fumigatus*:3312 *A. fischeri*:3312

afum|EAL90469.1 100.00% afis|EAW22726.1 100.00%

Bootstrap support for afum|EAL90469.1 as seed ortholog is 100%.

Bootstrap support for afis|EAW22726.1 as seed ortholog is 100%.

---

Group of orthologs #218. Best score 3296 bits

Score difference with first non-orthologous sequence - *A. fumigatus*:3296 *A. fischeri*:3296

afum|EAL87319.1 100.00% afis|EAW23891.1 100.00%

Bootstrap support for afum|EAL87319.1 as seed ortholog is 100%.

Bootstrap support for afis|EAW23891.1 as seed ortholog is 100%.

---

Group of orthologs #219. Best score 3294 bits

Score difference with first non-orthologous sequence - *A. fumigatus*:3294 *A. fischeri*:2339

afum|EAL84904.1 100.00% afis|EAW20014.1 100.00%

Bootstrap support for afum|EAL84904.1 as seed ortholog is 100%.

Bootstrap support for afis|EAW20014.1 as seed ortholog is 100%.

---

Group of orthologs #220. Best score 3284 bits

Score difference with first non-orthologous sequence - *A. fumigatus*:3284 *A. fischeri*:3284

afum|EAL90421.1 100.00% afis|EAW22777.1 100.00%

Bootstrap support for afum|EAL90421.1 as seed ortholog is 100%.

Bootstrap support for afis|EAW22777.1 as seed ortholog is 100%.

---

Group of orthologs #221. Best score 3283 bits

Score difference with first non-orthologous sequence - *A. fumigatus*:2353 *A. fischeri*:2271

afum|EAL90367.2 100.00% afis|EAW22835.1 100.00%

Bootstrap support for afum|EAL90367.2 as seed ortholog is 100%.

Bootstrap support for afis|EAW22835.1 as seed ortholog is 100%.

---

Group of orthologs #222. Best score 3278 bits

Score difference with first non-orthologous sequence - *A. fumigatus*:3278 *A. fischeri*:3278  
afum|EAL93678.1 100.00% afis|EAW18945.1 100.00%  
Bootstrap support for afum|EAL93678.1 as seed ortholog is 100%.  
Bootstrap support for afis|EAW18945.1 as seed ortholog is 100%.

---

Group of orthologs #223. Best score 3268 bits

Score difference with first non-orthologous sequence - *A. fumigatus*:3268 *A. fischeri*:3268  
afum|EAL89495.1 100.00% afis|EAW24849.1 100.00%  
Bootstrap support for afum|EAL89495.1 as seed ortholog is 100%.  
Bootstrap support for afis|EAW24849.1 as seed ortholog is 100%.

---

Group of orthologs #224. Best score 3259 bits

Score difference with first non-orthologous sequence - *A. fumigatus*:3259 *A. fischeri*:3259  
afum|EAL90587.1 100.00% afis|EAW22611.1 100.00%  
Bootstrap support for afum|EAL90587.1 as seed ortholog is 100%.  
Bootstrap support for afis|EAW22611.1 as seed ortholog is 100%.

---

Group of orthologs #225. Best score 3251 bits

Score difference with first non-orthologous sequence - *A. fumigatus*:3251 *A. fischeri*:3251  
afum|EAL88253.1 100.00% afis|EAW23230.1 100.00%  
Bootstrap support for afum|EAL88253.1 as seed ortholog is 100%.  
Bootstrap support for afis|EAW23230.1 as seed ortholog is 100%.

---

Group of orthologs #226. Best score 3245 bits

Score difference with first non-orthologous sequence - *A. fumigatus*:3245 *A. fischeri*:3245  
afum|EAL84659.1 100.00% afis|EAW20974.1 100.00%  
Bootstrap support for afum|EAL84659.1 as seed ortholog is 100%.  
Bootstrap support for afis|EAW20974.1 as seed ortholog is 100%.

---

Group of orthologs #227. Best score 3244 bits

Score difference with first non-orthologous sequence - *A. fumigatus*:3244 *A. fischeri*:3244  
afum|EAL85640.1 100.00% afis|EAW15707.1 100.00%  
Bootstrap support for afum|EAL85640.1 as seed ortholog is 100%.  
Bootstrap support for afis|EAW15707.1 as seed ortholog is 100%.

---

Group of orthologs #228. Best score 3243 bits

Score difference with first non-orthologous sequence - *A. fumigatus*:3243 *A. fischeri*:3243  
afum|EAL87572.1 100.00% afis|EAW18207.1 100.00%  
Bootstrap support for afum|EAL87572.1 as seed ortholog is 100%.  
Bootstrap support for afis|EAW18207.1 as seed ortholog is 100%.

---

Group of orthologs #229. Best score 3243 bits

Score difference with first non-orthologous sequence - *A. fumigatus*:3243 *A. fischeri*:3243  
afum|EAL93181.1 100.00% afis|EAW18491.1 100.00%  
Bootstrap support for afum|EAL93181.1 as seed ortholog is 100%.  
Bootstrap support for afis|EAW18491.1 as seed ortholog is 100%.

---

Group of orthologs #230. Best score 3243 bits

Score difference with first non-orthologous sequence - *A. fumigatus*:3243 *A. fischeri*:3243  
afum|EAL87405.1 100.00% afis|EAW23975.1 100.00%  
Bootstrap support for afum|EAL87405.1 as seed ortholog is 100%.  
Bootstrap support for afis|EAW23975.1 as seed ortholog is 100%.

---

Group of orthologs #231. Best score 3242 bits

Score difference with first non-orthologous sequence - *A. fumigatus*:3242 *A. fischeri*:3242  
afum|EAL87643.1 100.00% afis|EAW18277.1 100.00%

Bootstrap support for afum|EAL87643.1 as seed ortholog is 100%.  
Bootstrap support for afis|EAW18277.1 as seed ortholog is 100%.

---

Group of orthologs #232. Best score 3240 bits

Score difference with first non-orthologous sequence - *A. fumigatus*:2872 *A. fischeri*:2782

|                 |         |                 |         |
|-----------------|---------|-----------------|---------|
| afum EAL89872.1 | 100.00% | afis EAW25211.1 | 100.00% |
|-----------------|---------|-----------------|---------|

Bootstrap support for afum|EAL89872.1 as seed ortholog is 100%.

Bootstrap support for afis|EAW25211.1 as seed ortholog is 100%.

---

Group of orthologs #233. Best score 3238 bits

Score difference with first non-orthologous sequence - *A. fumigatus*:3238 *A. fischeri*:1622

|                 |         |                 |         |
|-----------------|---------|-----------------|---------|
| afum EAL89669.1 | 100.00% | afis EAW25026.1 | 100.00% |
|-----------------|---------|-----------------|---------|

Bootstrap support for afum|EAL89669.1 as seed ortholog is 100%.

Bootstrap support for afis|EAW25026.1 as seed ortholog is 100%.

---

Group of orthologs #234. Best score 3233 bits

Score difference with first non-orthologous sequence - *A. fumigatus*:3233 *A. fischeri*:3233

|                 |         |                 |         |
|-----------------|---------|-----------------|---------|
| afum EAL86870.1 | 100.00% | afis EAW19652.1 | 100.00% |
|-----------------|---------|-----------------|---------|

Bootstrap support for afum|EAL86870.1 as seed ortholog is 100%.

Bootstrap support for afis|EAW19652.1 as seed ortholog is 100%.

---

Group of orthologs #235. Best score 3226 bits

Score difference with first non-orthologous sequence - *A. fumigatus*:3226 *A. fischeri*:3226

|                 |         |                 |         |
|-----------------|---------|-----------------|---------|
| afum EAL93858.1 | 100.00% | afis EAW19126.1 | 100.00% |
|-----------------|---------|-----------------|---------|

Bootstrap support for afum|EAL93858.1 as seed ortholog is 100%.

Bootstrap support for afis|EAW19126.1 as seed ortholog is 100%.

---

Group of orthologs #236. Best score 3226 bits

Score difference with first non-orthologous sequence - *A. fumigatus*:3226 *A. fischeri*:3226

|                 |         |                 |         |
|-----------------|---------|-----------------|---------|
| afum EAL90602.1 | 100.00% | afis EAW22596.1 | 100.00% |
|-----------------|---------|-----------------|---------|

Bootstrap support for afum|EAL90602.1 as seed ortholog is 100%.

Bootstrap support for afis|EAW22596.1 as seed ortholog is 100%.

---

Group of orthologs #237. Best score 3226 bits

Score difference with first non-orthologous sequence - *A. fumigatus*:3226 *A. fischeri*:3226

|                 |         |                 |         |
|-----------------|---------|-----------------|---------|
| afum EAL92889.2 | 100.00% | afis EAW21875.1 | 100.00% |
|-----------------|---------|-----------------|---------|

Bootstrap support for afum|EAL92889.2 as seed ortholog is 100%.

Bootstrap support for afis|EAW21875.1 as seed ortholog is 100%.

---

Group of orthologs #238. Best score 3220 bits

Score difference with first non-orthologous sequence - *A. fumigatus*:3220 *A. fischeri*:1817

|                 |         |                 |         |
|-----------------|---------|-----------------|---------|
| afum EAL84314.2 | 100.00% | afis EAW25626.1 | 100.00% |
|-----------------|---------|-----------------|---------|

Bootstrap support for afum|EAL84314.2 as seed ortholog is 100%.

Bootstrap support for afis|EAW25626.1 as seed ortholog is 100%.

---

Group of orthologs #239. Best score 3218 bits

Score difference with first non-orthologous sequence - *A. fumigatus*:3218 *A. fischeri*:3218

|                 |         |                 |         |
|-----------------|---------|-----------------|---------|
| afum EAL93143.1 | 100.00% | afis EAW18458.1 | 100.00% |
|-----------------|---------|-----------------|---------|

Bootstrap support for afum|EAL93143.1 as seed ortholog is 100%.

Bootstrap support for afis|EAW18458.1 as seed ortholog is 100%.

---

Group of orthologs #240. Best score 3200 bits

Score difference with first non-orthologous sequence - *A. fumigatus*:3200 *A. fischeri*:3200

|                 |         |                 |         |
|-----------------|---------|-----------------|---------|
| afum EAL85173.2 | 100.00% | afis EAW20053.1 | 100.00% |
|-----------------|---------|-----------------|---------|

Bootstrap support for afum|EAL85173.2 as seed ortholog is 100%.

Bootstrap support for afis|EAW20053.1 as seed ortholog is 100%.



---

Group of orthologs #241. Best score 3199 bits

Score difference with first non-orthologous sequence - *A. fumigatus*:3199 *A. fischeri*:3199

|                 |         |                 |         |
|-----------------|---------|-----------------|---------|
| afum EAL85016.1 | 100.00% | afis EAW19882.1 | 100.00% |
|-----------------|---------|-----------------|---------|

Bootstrap support for afum|EAL85016.1 as seed ortholog is 100%.

Bootstrap support for afis|EAW19882.1 as seed ortholog is 100%.

---

Group of orthologs #242. Best score 3186 bits

Score difference with first non-orthologous sequence - *A. fumigatus*:3186 *A. fischeri*:3186

|                 |         |                 |         |
|-----------------|---------|-----------------|---------|
| afum EAL89147.1 | 100.00% | afis EAW16549.1 | 100.00% |
|-----------------|---------|-----------------|---------|

Bootstrap support for afum|EAL89147.1 as seed ortholog is 100%.

Bootstrap support for afis|EAW16549.1 as seed ortholog is 100%.

---

Group of orthologs #243. Best score 3167 bits

Score difference with first non-orthologous sequence - *A. fumigatus*:3167 *A. fischeri*:3167

|                 |         |                 |         |
|-----------------|---------|-----------------|---------|
| afum EAL93640.1 | 100.00% | afis EAW18908.1 | 100.00% |
|-----------------|---------|-----------------|---------|

Bootstrap support for afum|EAL93640.1 as seed ortholog is 100%.

Bootstrap support for afis|EAW18908.1 as seed ortholog is 100%.

---

Group of orthologs #244. Best score 3151 bits

Score difference with first non-orthologous sequence - *A. fumigatus*:3151 *A. fischeri*:3151

|                 |         |                 |         |
|-----------------|---------|-----------------|---------|
| afum EAL84438.1 | 100.00% | afis EAW20629.1 | 100.00% |
|-----------------|---------|-----------------|---------|

Bootstrap support for afum|EAL84438.1 as seed ortholog is 100%.

Bootstrap support for afis|EAW20629.1 as seed ortholog is 100%.

---

Group of orthologs #245. Best score 3149 bits

Score difference with first non-orthologous sequence - *A. fumigatus*:3149 *A. fischeri*:3149

|                 |         |                 |         |
|-----------------|---------|-----------------|---------|
| afum EAL89164.1 | 100.00% | afis EAW16567.1 | 100.00% |
|-----------------|---------|-----------------|---------|

Bootstrap support for afum|EAL89164.1 as seed ortholog is 100%.

Bootstrap support for afis|EAW16567.1 as seed ortholog is 100%.

---

Group of orthologs #246. Best score 3147 bits

Score difference with first non-orthologous sequence - *A. fumigatus*:3147 *A. fischeri*:3147

|                 |         |                 |         |
|-----------------|---------|-----------------|---------|
| afum EAL93911.1 | 100.00% | afis EAW19181.1 | 100.00% |
|-----------------|---------|-----------------|---------|

Bootstrap support for afum|EAL93911.1 as seed ortholog is 100%.

Bootstrap support for afis|EAW19181.1 as seed ortholog is 100%.

---

Group of orthologs #247. Best score 3131 bits

Score difference with first non-orthologous sequence - *A. fumigatus*:3131 *A. fischeri*:3131

|                 |         |                 |         |
|-----------------|---------|-----------------|---------|
| afum EAL87451.1 | 100.00% | afis EAW24021.1 | 100.00% |
|-----------------|---------|-----------------|---------|

Bootstrap support for afum|EAL87451.1 as seed ortholog is 100%.

Bootstrap support for afis|EAW24021.1 as seed ortholog is 100%.

---

Group of orthologs #248. Best score 3124 bits

Score difference with first non-orthologous sequence - *A. fumigatus*:3124 *A. fischeri*:3124

|                 |         |                 |         |
|-----------------|---------|-----------------|---------|
| afum EAL91292.1 | 100.00% | afis EAW17463.1 | 100.00% |
|-----------------|---------|-----------------|---------|

Bootstrap support for afum|EAL91292.1 as seed ortholog is 100%.

Bootstrap support for afis|EAW17463.1 as seed ortholog is 100%.

---

Group of orthologs #249. Best score 3117 bits

Score difference with first non-orthologous sequence - *A. fumigatus*:3117 *A. fischeri*:3117

|                 |         |                 |         |
|-----------------|---------|-----------------|---------|
| afum EAL93341.1 | 100.00% | afis EAW18629.1 | 100.00% |
|-----------------|---------|-----------------|---------|

Bootstrap support for afum|EAL93341.1 as seed ortholog is 100%.

Bootstrap support for afis|EAW18629.1 as seed ortholog is 100%.

---

Group of orthologs #250. Best score 3111 bits

Score difference with first non-orthologous sequence - *A. fumigatus*:3111 *A. fischeri*:3111  
afum|EAL87538.1 100.00% afis|EAW18177.1 100.00%  
Bootstrap support for afum|EAL87538.1 as seed ortholog is 100%.  
Bootstrap support for afis|EAW18177.1 as seed ortholog is 100%.

---

Group of orthologs #251. Best score 3110 bits

Score difference with first non-orthologous sequence - *A. fumigatus*:3110 *A. fischeri*:3110  
afum|EAL91658.1 100.00% afis|EAW17849.1 100.00%  
Bootstrap support for afum|EAL91658.1 as seed ortholog is 100%.  
Bootstrap support for afis|EAW17849.1 as seed ortholog is 100%.

---

Group of orthologs #252. Best score 3101 bits

Score difference with first non-orthologous sequence - *A. fumigatus*:3101 *A. fischeri*:3101  
afum|EAL90368.1 100.00% afis|EAW22834.1 100.00%  
Bootstrap support for afum|EAL90368.1 as seed ortholog is 100%.  
Bootstrap support for afis|EAW22834.1 as seed ortholog is 100%.

---

Group of orthologs #253. Best score 3101 bits

Score difference with first non-orthologous sequence - *A. fumigatus*:2811 *A. fischeri*:2741  
afum|EAL92361.1 100.00% afis|EAW21344.1 100.00%  
Bootstrap support for afum|EAL92361.1 as seed ortholog is 100%.  
Bootstrap support for afis|EAW21344.1 as seed ortholog is 100%.

---

Group of orthologs #254. Best score 3095 bits

Score difference with first non-orthologous sequence - *A. fumigatus*:3095 *A. fischeri*:3095  
afum|EAL92207.1 100.00% afis|EAW21185.1 100.00%  
Bootstrap support for afum|EAL92207.1 as seed ortholog is 100%.  
Bootstrap support for afis|EAW21185.1 as seed ortholog is 100%.

---

Group of orthologs #255. Best score 3094 bits

Score difference with first non-orthologous sequence - *A. fumigatus*:3094 *A. fischeri*:3094  
afum|EAL85569.1 100.00% afis|EAW15781.1 100.00%  
Bootstrap support for afum|EAL85569.1 as seed ortholog is 100%.  
Bootstrap support for afis|EAW15781.1 as seed ortholog is 100%.

---

Group of orthologs #256. Best score 3094 bits

Score difference with first non-orthologous sequence - *A. fumigatus*:3094 *A. fischeri*:3094  
afum|EAL87564.1 100.00% afis|EAW18199.1 100.00%  
Bootstrap support for afum|EAL87564.1 as seed ortholog is 100%.  
Bootstrap support for afis|EAW18199.1 as seed ortholog is 100%.

---

Group of orthologs #257. Best score 3087 bits

Score difference with first non-orthologous sequence - *A. fumigatus*:2208 *A. fischeri*:2861  
afum|EAL89365.2 100.00% afis|EAW19928.1 100.00%  
Bootstrap support for afum|EAL89365.2 as seed ortholog is 100%.  
Bootstrap support for afis|EAW19928.1 as seed ortholog is 100%.

---

Group of orthologs #258. Best score 3085 bits

Score difference with first non-orthologous sequence - *A. fumigatus*:2907 *A. fischeri*:1211  
afum|EAL91987.1 100.00% afis|EAW24131.1 100.00%  
Bootstrap support for afum|EAL91987.1 as seed ortholog is 100%.  
Bootstrap support for afis|EAW24131.1 as seed ortholog is 100%.

---

Group of orthologs #259. Best score 3080 bits

Score difference with first non-orthologous sequence - *A. fumigatus*:3080 *A. fischeri*:3080  
afum|EAL87250.1 100.00% afis|EAW23815.1 100.00%

Bootstrap support for afum|EAL87250.1 as seed ortholog is 100%.  
Bootstrap support for afis|EAW23815.1 as seed ortholog is 100%.

---

Group of orthologs #260. Best score 3073 bits

Score difference with first non-orthologous sequence - *A. fumigatus*:3073 *A. fischeri*:3073

|                 |         |                 |         |
|-----------------|---------|-----------------|---------|
| afum EAL87279.1 | 100.00% | afis EAW23851.1 | 100.00% |
|-----------------|---------|-----------------|---------|

Bootstrap support for afum|EAL87279.1 as seed ortholog is 100%.

Bootstrap support for afis|EAW23851.1 as seed ortholog is 100%.

---

Group of orthologs #261. Best score 3073 bits

Score difference with first non-orthologous sequence - *A. fumigatus*:3073 *A. fischeri*:3073

|                 |         |                 |         |
|-----------------|---------|-----------------|---------|
| afum EAL93295.2 | 100.00% | afis EAW18588.1 | 100.00% |
|-----------------|---------|-----------------|---------|

Bootstrap support for afum|EAL93295.2 as seed ortholog is 100%.

Bootstrap support for afis|EAW18588.1 as seed ortholog is 100%.

---

Group of orthologs #262. Best score 3070 bits

Score difference with first non-orthologous sequence - *A. fumigatus*:3070 *A. fischeri*:3070

|                 |         |                 |         |
|-----------------|---------|-----------------|---------|
| afum EAL84441.1 | 100.00% | afis EAW20627.1 | 100.00% |
|-----------------|---------|-----------------|---------|

Bootstrap support for afum|EAL84441.1 as seed ortholog is 100%.

Bootstrap support for afis|EAW20627.1 as seed ortholog is 100%.

---

Group of orthologs #263. Best score 3069 bits

Score difference with first non-orthologous sequence - *A. fumigatus*:3069 *A. fischeri*:2790

|                 |         |                 |         |
|-----------------|---------|-----------------|---------|
| afum EAL89269.1 | 100.00% | afis EAW16665.1 | 100.00% |
|-----------------|---------|-----------------|---------|

Bootstrap support for afum|EAL89269.1 as seed ortholog is 100%.

Bootstrap support for afis|EAW16665.1 as seed ortholog is 100%.

---

Group of orthologs #264. Best score 3068 bits

Score difference with first non-orthologous sequence - *A. fumigatus*:3068 *A. fischeri*:3068

|                 |         |                 |         |
|-----------------|---------|-----------------|---------|
| afum EAL90316.1 | 100.00% | afis EAW22883.1 | 100.00% |
|-----------------|---------|-----------------|---------|

Bootstrap support for afum|EAL90316.1 as seed ortholog is 100%.

Bootstrap support for afis|EAW22883.1 as seed ortholog is 100%.

---

Group of orthologs #265. Best score 3064 bits

Score difference with first non-orthologous sequence - *A. fumigatus*:3064 *A. fischeri*:2087

|                 |         |                 |         |
|-----------------|---------|-----------------|---------|
| afum EAL86806.1 | 100.00% | afis EAW19720.1 | 100.00% |
|-----------------|---------|-----------------|---------|

Bootstrap support for afum|EAL86806.1 as seed ortholog is 100%.

Bootstrap support for afis|EAW19720.1 as seed ortholog is 100%.

---

Group of orthologs #266. Best score 3064 bits

Score difference with first non-orthologous sequence - *A. fumigatus*:3064 *A. fischeri*:3064

|                 |         |                 |         |
|-----------------|---------|-----------------|---------|
| afum EAL93162.1 | 100.00% | afis EAW18475.1 | 100.00% |
|-----------------|---------|-----------------|---------|

Bootstrap support for afum|EAL93162.1 as seed ortholog is 100%.

Bootstrap support for afis|EAW18475.1 as seed ortholog is 100%.

---

Group of orthologs #267. Best score 3059 bits

Score difference with first non-orthologous sequence - *A. fumigatus*:3059 *A. fischeri*:3059

|                 |         |                 |         |
|-----------------|---------|-----------------|---------|
| afum EAL93591.1 | 100.00% | afis EAW18859.1 | 100.00% |
|-----------------|---------|-----------------|---------|

Bootstrap support for afum|EAL93591.1 as seed ortholog is 100%.

Bootstrap support for afis|EAW18859.1 as seed ortholog is 100%.

---

Group of orthologs #268. Best score 3053 bits

Score difference with first non-orthologous sequence - *A. fumigatus*:3053 *A. fischeri*:3053

|                 |         |                 |         |
|-----------------|---------|-----------------|---------|
| afum EAL85904.1 | 100.00% | afis EAW24235.1 | 100.00% |
|-----------------|---------|-----------------|---------|

Bootstrap support for afum|EAL85904.1 as seed ortholog is 100%.

Bootstrap support for afis|EAW24235.1 as seed ortholog is 100%.

---

Group of orthologs #269. Best score 3050 bits

Score difference with first non-orthologous sequence - *A. fumigatus*:3050 *A. fischeri*:3050

afum|EAL84702.1 100.00% afis|EAW20932.1 100.00%

Bootstrap support for afum|EAL84702.1 as seed ortholog is 100%.

Bootstrap support for afis|EAW20932.1 as seed ortholog is 100%.

---

Group of orthologs #270. Best score 3046 bits

Score difference with first non-orthologous sequence - *A. fumigatus*:3046 *A. fischeri*:3046

afum|EAL90701.1 100.00% afis|EAW22492.1 100.00%

Bootstrap support for afum|EAL90701.1 as seed ortholog is 100%.

Bootstrap support for afis|EAW22492.1 as seed ortholog is 100%.

---

Group of orthologs #271. Best score 3038 bits

Score difference with first non-orthologous sequence - *A. fumigatus*:3038 *A. fischeri*:3038

afum|EAL86129.1 100.00% afis|EAW24459.1 100.00%

Bootstrap support for afum|EAL86129.1 as seed ortholog is 100%.

Bootstrap support for afis|EAW24459.1 as seed ortholog is 100%.

---

Group of orthologs #272. Best score 3032 bits

Score difference with first non-orthologous sequence - *A. fumigatus*:3032 *A. fischeri*:3032

afum|EAL89074.1 100.00% afis|EAW16480.1 100.00%

Bootstrap support for afum|EAL89074.1 as seed ortholog is 100%.

Bootstrap support for afis|EAW16480.1 as seed ortholog is 100%.

---

Group of orthologs #273. Best score 3024 bits

Score difference with first non-orthologous sequence - *A. fumigatus*:3024 *A. fischeri*:2726

afum|EAL92613.1 100.00% afis|EAW21595.1 100.00%

Bootstrap support for afum|EAL92613.1 as seed ortholog is 100%.

Bootstrap support for afis|EAW21595.1 as seed ortholog is 100%.

---

Group of orthologs #274. Best score 3021 bits

Score difference with first non-orthologous sequence - *A. fumigatus*:3021 *A. fischeri*:3021

afum|EAL86709.1 100.00% afis|EAW17289.1 100.00%

Bootstrap support for afum|EAL86709.1 as seed ortholog is 100%.

Bootstrap support for afis|EAW17289.1 as seed ortholog is 100%.

---

Group of orthologs #275. Best score 3021 bits

Score difference with first non-orthologous sequence - *A. fumigatus*:3021 *A. fischeri*:3021

afum|EAL85329.1 100.00% afis|EAW20212.1 100.00%

Bootstrap support for afum|EAL85329.1 as seed ortholog is 100%.

Bootstrap support for afis|EAW20212.1 as seed ortholog is 100%.

---

Group of orthologs #276. Best score 3020 bits

Score difference with first non-orthologous sequence - *A. fumigatus*:3020 *A. fischeri*:3020

afum|EAL85965.1 100.00% afis|EAW24297.1 100.00%

Bootstrap support for afum|EAL85965.1 as seed ortholog is 100%.

Bootstrap support for afis|EAW24297.1 as seed ortholog is 100%.

---

Group of orthologs #277. Best score 3018 bits

Score difference with first non-orthologous sequence - *A. fumigatus*:3018 *A. fischeri*:3018

afum|EAL89526.1 100.00% afis|EAW24876.1 100.00%

Bootstrap support for afum|EAL89526.1 as seed ortholog is 100%.

Bootstrap support for afis|EAW24876.1 as seed ortholog is 100%.

---

Group of orthologs #278. Best score 3013 bits

Score difference with first non-orthologous sequence - *A. fumigatus*:2825 *A. fischeri*:2179  
afum|EAL86625.1 100.00% afis|EAW17197.1 100.00%  
Bootstrap support for afum|EAL86625.1 as seed ortholog is 100%.  
Bootstrap support for afis|EAW17197.1 as seed ortholog is 100%.

---

Group of orthologs #279. Best score 3008 bits

Score difference with first non-orthologous sequence - *A. fumigatus*:3008 *A. fischeri*:3008  
afum|EAL88681.1 100.00% afis|EAW16048.1 100.00%  
Bootstrap support for afum|EAL88681.1 as seed ortholog is 100%.  
Bootstrap support for afis|EAW16048.1 as seed ortholog is 100%.

---

Group of orthologs #280. Best score 3006 bits

Score difference with first non-orthologous sequence - *A. fumigatus*:3006 *A. fischeri*:3006  
afum|EAL93922.1 100.00% afis|EAW19191.1 100.00%  
Bootstrap support for afum|EAL93922.1 as seed ortholog is 100%.  
Bootstrap support for afis|EAW19191.1 as seed ortholog is 100%.

---

Group of orthologs #281. Best score 2996 bits

Score difference with first non-orthologous sequence - *A. fumigatus*:2996 *A. fischeri*:2996  
afum|EAL88105.1 100.00% afis|EAW23368.1 100.00%  
Bootstrap support for afum|EAL88105.1 as seed ortholog is 100%.  
Bootstrap support for afis|EAW23368.1 as seed ortholog is 100%.

---

Group of orthologs #282. Best score 2993 bits

Score difference with first non-orthologous sequence - *A. fumigatus*:2993 *A. fischeri*:2993  
afum|EAL93475.1 100.00% afis|EAW18749.1 100.00%  
Bootstrap support for afum|EAL93475.1 as seed ortholog is 100%.  
Bootstrap support for afis|EAW18749.1 as seed ortholog is 100%.

---

Group of orthologs #283. Best score 2991 bits

Score difference with first non-orthologous sequence - *A. fumigatus*:2991 *A. fischeri*:2702  
afum|EAL91592.1 100.00% afis|EAW17784.1 100.00%  
Bootstrap support for afum|EAL91592.1 as seed ortholog is 100%.  
Bootstrap support for afis|EAW17784.1 as seed ortholog is 100%.

---

Group of orthologs #284. Best score 2989 bits

Score difference with first non-orthologous sequence - *A. fumigatus*:2989 *A. fischeri*:2989  
afum|EAL88849.1 100.00% afis|EAW16221.1 100.00%  
Bootstrap support for afum|EAL88849.1 as seed ortholog is 100%.  
Bootstrap support for afis|EAW16221.1 as seed ortholog is 100%.

---

Group of orthologs #285. Best score 2983 bits

Score difference with first non-orthologous sequence - *A. fumigatus*:2983 *A. fischeri*:2983  
afum|EAL92501.1 100.00% afis|EAW21481.1 100.00%  
Bootstrap support for afum|EAL92501.1 as seed ortholog is 100%.  
Bootstrap support for afis|EAW21481.1 as seed ortholog is 100%.

---

Group of orthologs #286. Best score 2982 bits

Score difference with first non-orthologous sequence - *A. fumigatus*:2982 *A. fischeri*:2982  
afum|EAL90113.1 100.00% afis|EAW25454.1 100.00%  
Bootstrap support for afum|EAL90113.1 as seed ortholog is 100%.  
Bootstrap support for afis|EAW25454.1 as seed ortholog is 100%.

---

Group of orthologs #287. Best score 2978 bits

Score difference with first non-orthologous sequence - *A. fumigatus*:2978 *A. fischeri*:2978  
afum|EAL89680.1 100.00% afis|EAW25016.1 100.00%

Bootstrap support for afum|EAL89680.1 as seed ortholog is 100%.  
Bootstrap support for afis|EAW25016.1 as seed ortholog is 100%.

---

Group of orthologs #288. Best score 2975 bits

Score difference with first non-orthologous sequence - *A. fumigatus*:2975 *A. fischeri*:2975

|                 |         |                 |         |
|-----------------|---------|-----------------|---------|
| afum EAL91540.1 | 100.00% | afis EAW17725.1 | 100.00% |
|-----------------|---------|-----------------|---------|

Bootstrap support for afum|EAL91540.1 as seed ortholog is 100%.

Bootstrap support for afis|EAW17725.1 as seed ortholog is 100%.

---

Group of orthologs #289. Best score 2972 bits

Score difference with first non-orthologous sequence - *A. fumigatus*:2972 *A. fischeri*:2972

|                 |         |                 |         |
|-----------------|---------|-----------------|---------|
| afum EAL88506.1 | 100.00% | afis EAW15872.1 | 100.00% |
|-----------------|---------|-----------------|---------|

Bootstrap support for afum|EAL88506.1 as seed ortholog is 100%.

Bootstrap support for afis|EAW15872.1 as seed ortholog is 100%.

---

Group of orthologs #290. Best score 2966 bits

Score difference with first non-orthologous sequence - *A. fumigatus*:2966 *A. fischeri*:2966

|                 |         |                 |         |
|-----------------|---------|-----------------|---------|
| afum EAL85644.1 | 100.00% | afis EAW15703.1 | 100.00% |
|-----------------|---------|-----------------|---------|

Bootstrap support for afum|EAL85644.1 as seed ortholog is 100%.

Bootstrap support for afis|EAW15703.1 as seed ortholog is 100%.

---

Group of orthologs #291. Best score 2966 bits

Score difference with first non-orthologous sequence - *A. fumigatus*:2966 *A. fischeri*:2966

|                 |         |                 |         |
|-----------------|---------|-----------------|---------|
| afum EAL91717.2 | 100.00% | afis EAW17908.1 | 100.00% |
|-----------------|---------|-----------------|---------|

Bootstrap support for afum|EAL91717.2 as seed ortholog is 100%.

Bootstrap support for afis|EAW17908.1 as seed ortholog is 100%.

---

Group of orthologs #292. Best score 2965 bits

Score difference with first non-orthologous sequence - *A. fumigatus*:2965 *A. fischeri*:2965

|                 |         |                 |         |
|-----------------|---------|-----------------|---------|
| afum EAL93070.1 | 100.00% | afis EAW18394.1 | 100.00% |
|-----------------|---------|-----------------|---------|

Bootstrap support for afum|EAL93070.1 as seed ortholog is 100%.

Bootstrap support for afis|EAW18394.1 as seed ortholog is 100%.

---

Group of orthologs #293. Best score 2963 bits

Score difference with first non-orthologous sequence - *A. fumigatus*:2963 *A. fischeri*:2963

|                 |         |                 |         |
|-----------------|---------|-----------------|---------|
| afum EAL92461.2 | 100.00% | afis EAW21443.1 | 100.00% |
|-----------------|---------|-----------------|---------|

Bootstrap support for afum|EAL92461.2 as seed ortholog is 100%.

Bootstrap support for afis|EAW21443.1 as seed ortholog is 100%.

---

Group of orthologs #294. Best score 2962 bits

Score difference with first non-orthologous sequence - *A. fumigatus*:2962 *A. fischeri*:2962

|                 |         |                 |         |
|-----------------|---------|-----------------|---------|
| afum EAL93673.1 | 100.00% | afis EAW18940.1 | 100.00% |
|-----------------|---------|-----------------|---------|

Bootstrap support for afum|EAL93673.1 as seed ortholog is 100%.

Bootstrap support for afis|EAW18940.1 as seed ortholog is 100%.

---

Group of orthologs #295. Best score 2957 bits

Score difference with first non-orthologous sequence - *A. fumigatus*:2957 *A. fischeri*:2957

|                 |         |                 |         |
|-----------------|---------|-----------------|---------|
| afum EAL92750.1 | 100.00% | afis EAW21716.1 | 100.00% |
|-----------------|---------|-----------------|---------|

Bootstrap support for afum|EAL92750.1 as seed ortholog is 100%.

Bootstrap support for afis|EAW21716.1 as seed ortholog is 100%.

---

Group of orthologs #296. Best score 2956 bits

Score difference with first non-orthologous sequence - *A. fumigatus*:2956 *A. fischeri*:2956

|                 |         |                 |         |
|-----------------|---------|-----------------|---------|
| afum EAL89204.1 | 100.00% | afis EAW16608.1 | 100.00% |
|-----------------|---------|-----------------|---------|

Bootstrap support for afum|EAL89204.1 as seed ortholog is 100%.

Bootstrap support for afis|EAW16608.1 as seed ortholog is 100%.

---

Group of orthologs #297. Best score 2952 bits

Score difference with first non-orthologous sequence - *A. fumigatus*:2952 *A. fischeri*:2952

|                 |         |                 |         |
|-----------------|---------|-----------------|---------|
| afum EAL91525.1 | 100.00% | afis EAW17710.1 | 100.00% |
|-----------------|---------|-----------------|---------|

Bootstrap support for afum|EAL91525.1 as seed ortholog is 100%.

Bootstrap support for afis|EAW17710.1 as seed ortholog is 100%.

---

Group of orthologs #298. Best score 2951 bits

Score difference with first non-orthologous sequence - *A. fumigatus*:2951 *A. fischeri*:2951

|                 |         |                 |         |
|-----------------|---------|-----------------|---------|
| afum EAL93327.1 | 100.00% | afis EAW18617.1 | 100.00% |
|-----------------|---------|-----------------|---------|

Bootstrap support for afum|EAL93327.1 as seed ortholog is 100%.

Bootstrap support for afis|EAW18617.1 as seed ortholog is 100%.

---

Group of orthologs #299. Best score 2950 bits

Score difference with first non-orthologous sequence - *A. fumigatus*:2950 *A. fischeri*:2950

|                 |         |                 |         |
|-----------------|---------|-----------------|---------|
| afum EAL91886.1 | 100.00% | afis EAW18074.1 | 100.00% |
|-----------------|---------|-----------------|---------|

Bootstrap support for afum|EAL91886.1 as seed ortholog is 100%.

Bootstrap support for afis|EAW18074.1 as seed ortholog is 100%.

---

Group of orthologs #300. Best score 2944 bits

Score difference with first non-orthologous sequence - *A. fumigatus*:2944 *A. fischeri*:2944

|                 |         |                 |         |
|-----------------|---------|-----------------|---------|
| afum EAL85809.1 | 100.00% | afis EAW15520.1 | 100.00% |
|-----------------|---------|-----------------|---------|

Bootstrap support for afum|EAL85809.1 as seed ortholog is 100%.

Bootstrap support for afis|EAW15520.1 as seed ortholog is 100%.

---

Group of orthologs #301. Best score 2939 bits

Score difference with first non-orthologous sequence - *A. fumigatus*:2750 *A. fischeri*:1304

|                 |         |                 |         |
|-----------------|---------|-----------------|---------|
| afum EAL89381.1 | 100.00% | afis EAW24734.1 | 100.00% |
|-----------------|---------|-----------------|---------|

Bootstrap support for afum|EAL89381.1 as seed ortholog is 100%.

Bootstrap support for afis|EAW24734.1 as seed ortholog is 100%.

---

Group of orthologs #302. Best score 2938 bits

Score difference with first non-orthologous sequence - *A. fumigatus*:2938 *A. fischeri*:2938

|                 |         |                 |         |
|-----------------|---------|-----------------|---------|
| afum EAL91744.1 | 100.00% | afis EAW17933.1 | 100.00% |
|-----------------|---------|-----------------|---------|

Bootstrap support for afum|EAL91744.1 as seed ortholog is 100%.

Bootstrap support for afis|EAW17933.1 as seed ortholog is 100%.

---

Group of orthologs #303. Best score 2936 bits

Score difference with first non-orthologous sequence - *A. fumigatus*:2936 *A. fischeri*:2936

|                 |         |                 |         |
|-----------------|---------|-----------------|---------|
| afum EAL93800.1 | 100.00% | afis EAW19072.1 | 100.00% |
|-----------------|---------|-----------------|---------|

Bootstrap support for afum|EAL93800.1 as seed ortholog is 100%.

Bootstrap support for afis|EAW19072.1 as seed ortholog is 100%.

---

Group of orthologs #304. Best score 2935 bits

Score difference with first non-orthologous sequence - *A. fumigatus*:2935 *A. fischeri*:2935

|                 |         |                 |         |
|-----------------|---------|-----------------|---------|
| afum EAL92254.1 | 100.00% | afis EAW21241.1 | 100.00% |
|-----------------|---------|-----------------|---------|

Bootstrap support for afum|EAL92254.1 as seed ortholog is 100%.

Bootstrap support for afis|EAW21241.1 as seed ortholog is 100%.

---

Group of orthologs #305. Best score 2929 bits

Score difference with first non-orthologous sequence - *A. fumigatus*:2929 *A. fischeri*:2929

|                 |         |                 |         |
|-----------------|---------|-----------------|---------|
| afum EAL87966.1 | 100.00% | afis EAW23497.1 | 100.00% |
|-----------------|---------|-----------------|---------|

Bootstrap support for afum|EAL87966.1 as seed ortholog is 100%.

Bootstrap support for afis|EAW23497.1 as seed ortholog is 100%.

---

Group of orthologs #306. Best score 2925 bits

Score difference with first non-orthologous sequence - *A. fumigatus*:2781 *A. fischeri*:2118  
afum|EAL86649.1 100.00% afis|EAW17227.1 100.00%  
Bootstrap support for afum|EAL86649.1 as seed ortholog is 100%.  
Bootstrap support for afis|EAW17227.1 as seed ortholog is 100%.

---

Group of orthologs #307. Best score 2919 bits

Score difference with first non-orthologous sequence - *A. fumigatus*:2919 *A. fischeri*:2919  
afum|EAL88403.1 100.00% afis|EAW23076.1 100.00%  
Bootstrap support for afum|EAL88403.1 as seed ortholog is 100%.  
Bootstrap support for afis|EAW23076.1 as seed ortholog is 100%.

---

Group of orthologs #308. Best score 2919 bits

Score difference with first non-orthologous sequence - *A. fumigatus*:2779 *A. fischeri*:2477  
afum|EAL89906.1 100.00% afis|EAW25244.1 100.00%  
Bootstrap support for afum|EAL89906.1 as seed ortholog is 100%.  
Bootstrap support for afis|EAW25244.1 as seed ortholog is 100%.

---

Group of orthologs #309. Best score 2916 bits

Score difference with first non-orthologous sequence - *A. fumigatus*:2916 *A. fischeri*:2916  
afum|EAL92694.1 100.00% afis|EAW21659.1 100.00%  
Bootstrap support for afum|EAL92694.1 as seed ortholog is 100%.  
Bootstrap support for afis|EAW21659.1 as seed ortholog is 100%.

---

Group of orthologs #310. Best score 2914 bits

Score difference with first non-orthologous sequence - *A. fumigatus*:2776 *A. fischeri*:2117  
afum|EAL90601.1 100.00% afis|EAW22597.1 100.00%  
Bootstrap support for afum|EAL90601.1 as seed ortholog is 100%.  
Bootstrap support for afis|EAW22597.1 as seed ortholog is 100%.

---

Group of orthologs #311. Best score 2914 bits

Score difference with first non-orthologous sequence - *A. fumigatus*:2914 *A. fischeri*:2914  
afum|EAL92422.1 100.00% afis|EAW21408.1 100.00%  
Bootstrap support for afum|EAL92422.1 as seed ortholog is 100%.  
Bootstrap support for afis|EAW21408.1 as seed ortholog is 100%.

---

Group of orthologs #312. Best score 2911 bits

Score difference with first non-orthologous sequence - *A. fumigatus*:2911 *A. fischeri*:2911  
afum|EAL88486.1 100.00% afis|EAW15850.1 100.00%  
Bootstrap support for afum|EAL88486.1 as seed ortholog is 100%.  
Bootstrap support for afis|EAW15850.1 as seed ortholog is 100%.

---

Group of orthologs #313. Best score 2907 bits

Score difference with first non-orthologous sequence - *A. fumigatus*:2907 *A. fischeri*:2907  
afum|EBA27439.1 100.00% afis|EAW17917.1 100.00%  
Bootstrap support for afum|EBA27439.1 as seed ortholog is 100%.  
Bootstrap support for afis|EAW17917.1 as seed ortholog is 100%.

---

Group of orthologs #314. Best score 2900 bits

Score difference with first non-orthologous sequence - *A. fumigatus*:2900 *A. fischeri*:2900  
afum|EAL88260.1 100.00% afis|EAW23224.1 100.00%  
Bootstrap support for afum|EAL88260.1 as seed ortholog is 100%.  
Bootstrap support for afis|EAW23224.1 as seed ortholog is 100%.

---

Group of orthologs #315. Best score 2899 bits

Score difference with first non-orthologous sequence - *A. fumigatus*:2461 *A. fischeri*:2517  
afum|EAL89388.1 100.00% afis|EAW24742.1 100.00%



Bootstrap support for afum|EAL89388.1 as seed ortholog is 100%.  
Bootstrap support for afis|EAW24742.1 as seed ortholog is 100%.

---

Group of orthologs #316. Best score 2898 bits

Score difference with first non-orthologous sequence - *A. fumigatus*:2898 *A. fischeri*:2898

afum|EAL86090.1 100.00% afis|EAW24422.1 100.00%

Bootstrap support for afum|EAL86090.1 as seed ortholog is 100%.

Bootstrap support for afis|EAW24422.1 as seed ortholog is 100%.

---

Group of orthologs #317. Best score 2897 bits

Score difference with first non-orthologous sequence - *A. fumigatus*:2897 *A. fischeri*:2897

afum|EAL86946.1 100.00% afis|EAW19571.1 100.00%

Bootstrap support for afum|EAL86946.1 as seed ortholog is 100%.

Bootstrap support for afis|EAW19571.1 as seed ortholog is 100%.

---

Group of orthologs #318. Best score 2897 bits

Score difference with first non-orthologous sequence - *A. fumigatus*:2604 *A. fischeri*:2897

afum|EAL91355.1 100.00% afis|EAW17541.1 100.00%

Bootstrap support for afum|EAL91355.1 as seed ortholog is 100%.

Bootstrap support for afis|EAW17541.1 as seed ortholog is 100%.

---

Group of orthologs #319. Best score 2897 bits

Score difference with first non-orthologous sequence - *A. fumigatus*:2897 *A. fischeri*:2897

afum|EAL87958.1 100.00% afis|EAW23503.1 100.00%

Bootstrap support for afum|EAL87958.1 as seed ortholog is 100%.

Bootstrap support for afis|EAW23503.1 as seed ortholog is 100%.

---

Group of orthologs #320. Best score 2894 bits

Score difference with first non-orthologous sequence - *A. fumigatus*:2894 *A. fischeri*:2894

afum|EAL85968.1 100.00% afis|EAW24300.1 100.00%

Bootstrap support for afum|EAL85968.1 as seed ortholog is 100%.

Bootstrap support for afis|EAW24300.1 as seed ortholog is 100%.

---

Group of orthologs #321. Best score 2891 bits

Score difference with first non-orthologous sequence - *A. fumigatus*:2891 *A. fischeri*:2891

afum|EAL87288.1 100.00% afis|EAW23860.1 100.00%

Bootstrap support for afum|EAL87288.1 as seed ortholog is 100%.

Bootstrap support for afis|EAW23860.1 as seed ortholog is 100%.

---

Group of orthologs #322. Best score 2891 bits

Score difference with first non-orthologous sequence - *A. fumigatus*:2891 *A. fischeri*:2891

afum|EAL88130.1 100.00% afis|EAW23346.1 100.00%

Bootstrap support for afum|EAL88130.1 as seed ortholog is 100%.

Bootstrap support for afis|EAW23346.1 as seed ortholog is 100%.

---

Group of orthologs #323. Best score 2887 bits

Score difference with first non-orthologous sequence - *A. fumigatus*:2887 *A. fischeri*:2887

afum|EAL90074.1 100.00% afis|EAW25415.1 100.00%

Bootstrap support for afum|EAL90074.1 as seed ortholog is 100%.

Bootstrap support for afis|EAW25415.1 as seed ortholog is 100%.

---

Group of orthologs #324. Best score 2885 bits

Score difference with first non-orthologous sequence - *A. fumigatus*:2885 *A. fischeri*:2885

afum|EAL85326.1 100.00% afis|EAW20209.1 100.00%

Bootstrap support for afum|EAL85326.1 as seed ortholog is 100%.

Bootstrap support for afis|EAW20209.1 as seed ortholog is 100%.

---

Group of orthologs #325. Best score 2885 bits

Score difference with first non-orthologous sequence - *A. fumigatus*:2885 *A. fischeri*:2885

|                 |         |                 |         |
|-----------------|---------|-----------------|---------|
| afum EAL93203.1 | 100.00% | afis EAW18508.1 | 100.00% |
|-----------------|---------|-----------------|---------|

Bootstrap support for afum|EAL93203.1 as seed ortholog is 100%.

Bootstrap support for afis|EAW18508.1 as seed ortholog is 100%.

---

Group of orthologs #326. Best score 2882 bits

Score difference with first non-orthologous sequence - *A. fumigatus*:2882 *A. fischeri*:2882

|                 |         |                 |         |
|-----------------|---------|-----------------|---------|
| afum EAL88664.1 | 100.00% | afis EAW16033.1 | 100.00% |
|-----------------|---------|-----------------|---------|

Bootstrap support for afum|EAL88664.1 as seed ortholog is 100%.

Bootstrap support for afis|EAW16033.1 as seed ortholog is 100%.

---

Group of orthologs #327. Best score 2880 bits

Score difference with first non-orthologous sequence - *A. fumigatus*:2880 *A. fischeri*:2880

|                 |         |                 |         |
|-----------------|---------|-----------------|---------|
| afum EAL88775.1 | 100.00% | afis EAW16146.1 | 100.00% |
|-----------------|---------|-----------------|---------|

Bootstrap support for afum|EAL88775.1 as seed ortholog is 100%.

Bootstrap support for afis|EAW16146.1 as seed ortholog is 100%.

---

Group of orthologs #328. Best score 2877 bits

Score difference with first non-orthologous sequence - *A. fumigatus*:549 *A. fischeri*:2877

|                 |         |                 |         |
|-----------------|---------|-----------------|---------|
| afum EAL92855.1 | 100.00% | afis EAW21843.1 | 100.00% |
|-----------------|---------|-----------------|---------|

Bootstrap support for afum|EAL92855.1 as seed ortholog is 100%.

Bootstrap support for afis|EAW21843.1 as seed ortholog is 100%.

---

Group of orthologs #329. Best score 2877 bits

Score difference with first non-orthologous sequence - *A. fumigatus*:2877 *A. fischeri*:2877

|                 |         |                 |         |
|-----------------|---------|-----------------|---------|
| afum EAL89957.1 | 100.00% | afis EAW25294.1 | 100.00% |
|-----------------|---------|-----------------|---------|

Bootstrap support for afum|EAL89957.1 as seed ortholog is 100%.

Bootstrap support for afis|EAW25294.1 as seed ortholog is 100%.

---

Group of orthologs #330. Best score 2876 bits

Score difference with first non-orthologous sequence - *A. fumigatus*:2876 *A. fischeri*:1609

|                 |         |                 |         |
|-----------------|---------|-----------------|---------|
| afum EAL85730.1 | 100.00% | afis EAW15603.1 | 100.00% |
|-----------------|---------|-----------------|---------|

Bootstrap support for afum|EAL85730.1 as seed ortholog is 100%.

Bootstrap support for afis|EAW15603.1 as seed ortholog is 100%.

---

Group of orthologs #331. Best score 2873 bits

Score difference with first non-orthologous sequence - *A. fumigatus*:2716 *A. fischeri*:1669

|                 |         |                 |         |
|-----------------|---------|-----------------|---------|
| afum EAL85692.1 | 100.00% | afis EAW22083.1 | 100.00% |
|-----------------|---------|-----------------|---------|

Bootstrap support for afum|EAL85692.1 as seed ortholog is 100%.

Bootstrap support for afis|EAW22083.1 as seed ortholog is 100%.

---

Group of orthologs #332. Best score 2866 bits

Score difference with first non-orthologous sequence - *A. fumigatus*:2866 *A. fischeri*:1751

|                 |         |                 |         |
|-----------------|---------|-----------------|---------|
| afum EAL89841.1 | 100.00% | afis EAW25168.1 | 100.00% |
|-----------------|---------|-----------------|---------|

Bootstrap support for afum|EAL89841.1 as seed ortholog is 100%.

Bootstrap support for afis|EAW25168.1 as seed ortholog is 100%.

---

Group of orthologs #333. Best score 2864 bits

Score difference with first non-orthologous sequence - *A. fumigatus*:2864 *A. fischeri*:2864

|                 |         |                 |         |
|-----------------|---------|-----------------|---------|
| afum EAL84533.1 | 100.00% | afis EAW20524.1 | 100.00% |
|-----------------|---------|-----------------|---------|

Bootstrap support for afum|EAL84533.1 as seed ortholog is 100%.

Bootstrap support for afis|EAW20524.1 as seed ortholog is 100%.

---

Group of orthologs #334. Best score 2863 bits

Score difference with first non-orthologous sequence - *A. fumigatus*:2863 *A. fischeri*:2863  
afum|EAL94018.1 100.00% afis|EAW19299.1 100.00%  
Bootstrap support for afum|EAL94018.1 as seed ortholog is 100%.  
Bootstrap support for afis|EAW19299.1 as seed ortholog is 100%.

---

Group of orthologs #335. Best score 2863 bits

Score difference with first non-orthologous sequence - *A. fumigatus*:2863 *A. fischeri*:2863  
afum|EAL93013.1 100.00% afis|EAW21998.1 100.00%  
Bootstrap support for afum|EAL93013.1 as seed ortholog is 100%.  
Bootstrap support for afis|EAW21998.1 as seed ortholog is 100%.

---

Group of orthologs #336. Best score 2855 bits

Score difference with first non-orthologous sequence - *A. fumigatus*:2855 *A. fischeri*:2855  
afum|EAL90016.1 100.00% afis|EAW25354.1 100.00%  
Bootstrap support for afum|EAL90016.1 as seed ortholog is 100%.  
Bootstrap support for afis|EAW25354.1 as seed ortholog is 100%.

---

Group of orthologs #337. Best score 2850 bits

Score difference with first non-orthologous sequence - *A. fumigatus*:2850 *A. fischeri*:2850  
afum|EAL89179.1 100.00% afis|EAW16584.1 100.00%  
Bootstrap support for afum|EAL89179.1 as seed ortholog is 100%.  
Bootstrap support for afis|EAW16584.1 as seed ortholog is 100%.

---

Group of orthologs #338. Best score 2848 bits

Score difference with first non-orthologous sequence - *A. fumigatus*:2848 *A. fischeri*:2848  
afum|EAL93652.1 100.00% afis|EAW18921.1 100.00%  
Bootstrap support for afum|EAL93652.1 as seed ortholog is 100%.  
Bootstrap support for afis|EAW18921.1 as seed ortholog is 100%.

---

Group of orthologs #339. Best score 2847 bits

Score difference with first non-orthologous sequence - *A. fumigatus*:2847 *A. fischeri*:2847  
afum|EAL91325.1 100.00% afis|EAW17502.1 100.00%  
Bootstrap support for afum|EAL91325.1 as seed ortholog is 100%.  
Bootstrap support for afis|EAW17502.1 as seed ortholog is 100%.

---

Group of orthologs #340. Best score 2845 bits

Score difference with first non-orthologous sequence - *A. fumigatus*:2659 *A. fischeri*:1183  
afum|EAL86560.1 100.00% afis|EAW17072.1 100.00%  
Bootstrap support for afum|EAL86560.1 as seed ortholog is 100%.  
Bootstrap support for afis|EAW17072.1 as seed ortholog is 100%.

---

Group of orthologs #341. Best score 2845 bits

Score difference with first non-orthologous sequence - *A. fumigatus*:2845 *A. fischeri*:2845  
afum|EAL87001.1 100.00% afis|EAW19493.1 100.00%  
Bootstrap support for afum|EAL87001.1 as seed ortholog is 100%.  
Bootstrap support for afis|EAW19493.1 as seed ortholog is 100%.

---

Group of orthologs #342. Best score 2844 bits

Score difference with first non-orthologous sequence - *A. fumigatus*:2844 *A. fischeri*:2844  
afum|EAL90758.1 100.00% afis|EAW22433.1 100.00%  
Bootstrap support for afum|EAL90758.1 as seed ortholog is 100%.  
Bootstrap support for afis|EAW22433.1 as seed ortholog is 100%.

---

Group of orthologs #343. Best score 2843 bits

Score difference with first non-orthologous sequence - *A. fumigatus*:2843 *A. fischeri*:2843  
afum|EAL87633.1 100.00% afis|EAW18268.1 100.00%

Bootstrap support for afum|EAL87633.1 as seed ortholog is 100%.  
Bootstrap support for afis|EAW18268.1 as seed ortholog is 100%.

---

Group of orthologs #344. Best score 2842 bits

Score difference with first non-orthologous sequence - *A. fumigatus*:2842 *A. fischeri*:2842

|                 |         |                 |         |
|-----------------|---------|-----------------|---------|
| afum EAL85607.1 | 100.00% | afis EAW15741.1 | 100.00% |
|-----------------|---------|-----------------|---------|

Bootstrap support for afum|EAL85607.1 as seed ortholog is 100%.

Bootstrap support for afis|EAW15741.1 as seed ortholog is 100%.

---

Group of orthologs #345. Best score 2842 bits

Score difference with first non-orthologous sequence - *A. fumigatus*:2842 *A. fischeri*:2842

|                 |         |                 |         |
|-----------------|---------|-----------------|---------|
| afum EAL93310.1 | 100.00% | afis EAW18602.1 | 100.00% |
|-----------------|---------|-----------------|---------|

Bootstrap support for afum|EAL93310.1 as seed ortholog is 100%.

Bootstrap support for afis|EAW18602.1 as seed ortholog is 100%.

---

Group of orthologs #346. Best score 2841 bits

Score difference with first non-orthologous sequence - *A. fumigatus*:2841 *A. fischeri*:2841

|                 |         |                 |         |
|-----------------|---------|-----------------|---------|
| afum EAL89067.1 | 100.00% | afis EAW16473.1 | 100.00% |
|-----------------|---------|-----------------|---------|

Bootstrap support for afum|EAL89067.1 as seed ortholog is 100%.

Bootstrap support for afis|EAW16473.1 as seed ortholog is 100%.

---

Group of orthologs #347. Best score 2838 bits

Score difference with first non-orthologous sequence - *A. fumigatus*:2838 *A. fischeri*:2838

|                 |         |                 |         |
|-----------------|---------|-----------------|---------|
| afum EAL85713.2 | 100.00% | afis EAW15621.1 | 100.00% |
|-----------------|---------|-----------------|---------|

Bootstrap support for afum|EAL85713.2 as seed ortholog is 100%.

Bootstrap support for afis|EAW15621.1 as seed ortholog is 100%.

---

Group of orthologs #348. Best score 2838 bits

Score difference with first non-orthologous sequence - *A. fumigatus*:2838 *A. fischeri*:2838

|                 |         |                 |         |
|-----------------|---------|-----------------|---------|
| afum EAL84688.1 | 100.00% | afis EAW20946.1 | 100.00% |
|-----------------|---------|-----------------|---------|

Bootstrap support for afum|EAL84688.1 as seed ortholog is 100%.

Bootstrap support for afis|EAW20946.1 as seed ortholog is 100%.

---

Group of orthologs #349. Best score 2831 bits

Score difference with first non-orthologous sequence - *A. fumigatus*:2831 *A. fischeri*:2831

|                 |         |                 |         |
|-----------------|---------|-----------------|---------|
| afum EAL87013.2 | 100.00% | afis EAW19482.1 | 100.00% |
|-----------------|---------|-----------------|---------|

Bootstrap support for afum|EAL87013.2 as seed ortholog is 100%.

Bootstrap support for afis|EAW19482.1 as seed ortholog is 100%.

---

Group of orthologs #350. Best score 2830 bits

Score difference with first non-orthologous sequence - *A. fumigatus*:2119 *A. fischeri*:2830

|                 |         |                 |         |
|-----------------|---------|-----------------|---------|
| afum EAL89167.1 | 100.00% | afis EAW16570.1 | 100.00% |
|-----------------|---------|-----------------|---------|

Bootstrap support for afum|EAL89167.1 as seed ortholog is 100%.

Bootstrap support for afis|EAW16570.1 as seed ortholog is 100%.

---

Group of orthologs #351. Best score 2827 bits

Score difference with first non-orthologous sequence - *A. fumigatus*:2827 *A. fischeri*:2827

|                 |         |                 |         |
|-----------------|---------|-----------------|---------|
| afum EAL90233.1 | 100.00% | afis EAW22964.1 | 100.00% |
|-----------------|---------|-----------------|---------|

Bootstrap support for afum|EAL90233.1 as seed ortholog is 100%.

Bootstrap support for afis|EAW22964.1 as seed ortholog is 100%.

---

Group of orthologs #352. Best score 2820 bits

Score difference with first non-orthologous sequence - *A. fumigatus*:2068 *A. fischeri*:2079

|                 |         |                 |         |
|-----------------|---------|-----------------|---------|
| afum EAL86268.1 | 100.00% | afis EAW22323.1 | 100.00% |
|-----------------|---------|-----------------|---------|

|                 |        |
|-----------------|--------|
| afis EAW21065.1 | 60.37% |
|-----------------|--------|

Bootstrap support for afum|EAL86268.1 as seed ortholog is 100%.

Bootstrap support for afis|EAW22323.1 as seed ortholog is 100%.

---

Group of orthologs #353. Best score 2820 bits

Score difference with first non-orthologous sequence - *A. fumigatus*:2820 *A. fischeri*:2820

|                 |         |                 |         |
|-----------------|---------|-----------------|---------|
| afum EAL87652.1 | 100.00% | afis EAW18286.1 | 100.00% |
|-----------------|---------|-----------------|---------|

Bootstrap support for afum|EAL87652.1 as seed ortholog is 100%.

Bootstrap support for afis|EAW18286.1 as seed ortholog is 100%.

---

Group of orthologs #354. Best score 2819 bits

Score difference with first non-orthologous sequence - *A. fumigatus*:2819 *A. fischeri*:2819

|                 |         |                 |         |
|-----------------|---------|-----------------|---------|
| afum EAL91453.1 | 100.00% | afis EAW17638.1 | 100.00% |
|-----------------|---------|-----------------|---------|

Bootstrap support for afum|EAL91453.1 as seed ortholog is 100%.

Bootstrap support for afis|EAW17638.1 as seed ortholog is 100%.

---

Group of orthologs #355. Best score 2819 bits

Score difference with first non-orthologous sequence - *A. fumigatus*:2819 *A. fischeri*:2819

|                 |         |                 |         |
|-----------------|---------|-----------------|---------|
| afum EAL92481.1 | 100.00% | afis EAW21462.1 | 100.00% |
|-----------------|---------|-----------------|---------|

Bootstrap support for afum|EAL92481.1 as seed ortholog is 100%.

Bootstrap support for afis|EAW21462.1 as seed ortholog is 100%.

---

Group of orthologs #356. Best score 2819 bits

Score difference with first non-orthologous sequence - *A. fumigatus*:2819 *A. fischeri*:2819

|                 |         |                 |         |
|-----------------|---------|-----------------|---------|
| afum EAL92007.1 | 100.00% | afis EAW24152.1 | 100.00% |
|-----------------|---------|-----------------|---------|

Bootstrap support for afum|EAL92007.1 as seed ortholog is 100%.

Bootstrap support for afis|EAW24152.1 as seed ortholog is 100%.

---

Group of orthologs #357. Best score 2814 bits

Score difference with first non-orthologous sequence - *A. fumigatus*:2814 *A. fischeri*:2814

|                 |         |                 |         |
|-----------------|---------|-----------------|---------|
| afum EAL93703.1 | 100.00% | afis EAW18970.1 | 100.00% |
|-----------------|---------|-----------------|---------|

Bootstrap support for afum|EAL93703.1 as seed ortholog is 100%.

Bootstrap support for afis|EAW18970.1 as seed ortholog is 100%.

---

Group of orthologs #358. Best score 2813 bits

Score difference with first non-orthologous sequence - *A. fumigatus*:2813 *A. fischeri*:2813

|                 |         |                 |         |
|-----------------|---------|-----------------|---------|
| afum EAL93905.1 | 100.00% | afis EAW19175.1 | 100.00% |
|-----------------|---------|-----------------|---------|

Bootstrap support for afum|EAL93905.1 as seed ortholog is 100%.

Bootstrap support for afis|EAW19175.1 as seed ortholog is 100%.

---

Group of orthologs #359. Best score 2812 bits

Score difference with first non-orthologous sequence - *A. fumigatus*:2604 *A. fischeri*:2812

|                 |         |                 |         |
|-----------------|---------|-----------------|---------|
| afum EAL93631.1 | 100.00% | afis EAW18899.1 | 100.00% |
|-----------------|---------|-----------------|---------|

Bootstrap support for afum|EAL93631.1 as seed ortholog is 100%.

Bootstrap support for afis|EAW18899.1 as seed ortholog is 100%.

---

Group of orthologs #360. Best score 2811 bits

Score difference with first non-orthologous sequence - *A. fumigatus*:2811 *A. fischeri*:2811

|                 |         |                 |         |
|-----------------|---------|-----------------|---------|
| afum EAL87031.2 | 100.00% | afis EAW19465.1 | 100.00% |
|-----------------|---------|-----------------|---------|

Bootstrap support for afum|EAL87031.2 as seed ortholog is 100%.

Bootstrap support for afis|EAW19465.1 as seed ortholog is 100%.

---

Group of orthologs #361. Best score 2810 bits

Score difference with first non-orthologous sequence - *A. fumigatus*:2810 *A. fischeri*:2154

|                 |         |                 |         |
|-----------------|---------|-----------------|---------|
| afum EAL93746.1 | 100.00% | afis EAW19012.1 | 100.00% |
|-----------------|---------|-----------------|---------|

Bootstrap support for afum|EAL93746.1 as seed ortholog is 100%.

Bootstrap support for afis|EAW19012.1 as seed ortholog is 100%.

---

Group of orthologs #362. Best score 2809 bits

Score difference with first non-orthologous sequence - *A. fumigatus*:2429 *A. fischeri*:2809

afum|EAL84386.2 100.00% afis|EAW25714.1 100.00%

Bootstrap support for afum|EAL84386.2 as seed ortholog is 100%.

Bootstrap support for afis|EAW25714.1 as seed ortholog is 100%.

---

Group of orthologs #363. Best score 2805 bits

Score difference with first non-orthologous sequence - *A. fumigatus*:2805 *A. fischeri*:2805

afum|EAL85262.1 100.00% afis|EAW20147.1 100.00%

Bootstrap support for afum|EAL85262.1 as seed ortholog is 100%.

Bootstrap support for afis|EAW20147.1 as seed ortholog is 100%.

---

Group of orthologs #364. Best score 2803 bits

Score difference with first non-orthologous sequence - *A. fumigatus*:2803 *A. fischeri*:2803

afum|EAL90622.2 100.00% afis|EAW22576.1 100.00%

Bootstrap support for afum|EAL90622.2 as seed ortholog is 100%.

Bootstrap support for afis|EAW22576.1 as seed ortholog is 100%.

---

Group of orthologs #365. Best score 2802 bits

Score difference with first non-orthologous sequence - *A. fumigatus*:2802 *A. fischeri*:2802

afum|EAL84646.1 100.00% afis|EAW20984.1 100.00%

Bootstrap support for afum|EAL84646.1 as seed ortholog is 100%.

Bootstrap support for afis|EAW20984.1 as seed ortholog is 100%.

---

Group of orthologs #366. Best score 2800 bits

Score difference with first non-orthologous sequence - *A. fumigatus*:2800 *A. fischeri*:2800

afum|EAL85221.1 100.00% afis|EAW20104.1 100.00%

Bootstrap support for afum|EAL85221.1 as seed ortholog is 100%.

Bootstrap support for afis|EAW20104.1 as seed ortholog is 100%.

---

Group of orthologs #367. Best score 2797 bits

Score difference with first non-orthologous sequence - *A. fumigatus*:2797 *A. fischeri*:2797

afum|EAL87559.1 100.00% afis|EAW18193.1 100.00%

Bootstrap support for afum|EAL87559.1 as seed ortholog is 100%.

Bootstrap support for afis|EAW18193.1 as seed ortholog is 100%.

---

Group of orthologs #368. Best score 2793 bits

Score difference with first non-orthologous sequence - *A. fumigatus*:2793 *A. fischeri*:2793

afum|EAL90333.1 100.00% afis|EAW22866.1 100.00%

Bootstrap support for afum|EAL90333.1 as seed ortholog is 100%.

Bootstrap support for afis|EAW22866.1 as seed ortholog is 100%.

---

Group of orthologs #369. Best score 2782 bits

Score difference with first non-orthologous sequence - *A. fumigatus*:2782 *A. fischeri*:2782

afum|EAL84839.2 100.00% afis|EAW20783.1 100.00%

Bootstrap support for afum|EAL84839.2 as seed ortholog is 100%.

Bootstrap support for afis|EAW20783.1 as seed ortholog is 100%.

---

Group of orthologs #370. Best score 2778 bits

Score difference with first non-orthologous sequence - *A. fumigatus*:2778 *A. fischeri*:2778

afum|EAL93302.1 100.00% afis|EAW18594.1 100.00%

Bootstrap support for afum|EAL93302.1 as seed ortholog is 100%.

Bootstrap support for afis|EAW18594.1 as seed ortholog is 100%.

---

Group of orthologs #371. Best score 2777 bits

Score difference with first non-orthologous sequence - *A. fumigatus*:2777 *A. fischeri*:2777

|                 |         |                 |         |
|-----------------|---------|-----------------|---------|
| afum EAL92579.1 | 100.00% | afis EAW21560.1 | 100.00% |
|-----------------|---------|-----------------|---------|

Bootstrap support for afum|EAL92579.1 as seed ortholog is 100%.

Bootstrap support for afis|EAW21560.1 as seed ortholog is 100%.

---

Group of orthologs #372. Best score 2774 bits

Score difference with first non-orthologous sequence - *A. fumigatus*:2774 *A. fischeri*:2774

|                 |         |                 |         |
|-----------------|---------|-----------------|---------|
| afum EAL90010.2 | 100.00% | afis EAW25347.1 | 100.00% |
|-----------------|---------|-----------------|---------|

Bootstrap support for afum|EAL90010.2 as seed ortholog is 100%.

Bootstrap support for afis|EAW25347.1 as seed ortholog is 100%.

---

Group of orthologs #373. Best score 2773 bits

Score difference with first non-orthologous sequence - *A. fumigatus*:2773 *A. fischeri*:2773

|                 |         |                 |         |
|-----------------|---------|-----------------|---------|
| afum EAL86937.1 | 100.00% | afis EAW19581.1 | 100.00% |
|-----------------|---------|-----------------|---------|

Bootstrap support for afum|EAL86937.1 as seed ortholog is 100%.

Bootstrap support for afis|EAW19581.1 as seed ortholog is 100%.

---

Group of orthologs #374. Best score 2772 bits

Score difference with first non-orthologous sequence - *A. fumigatus*:2772 *A. fischeri*:2772

|                 |         |                 |         |
|-----------------|---------|-----------------|---------|
| afum EAL91794.1 | 100.00% | afis EAW17985.1 | 100.00% |
|-----------------|---------|-----------------|---------|

Bootstrap support for afum|EAL91794.1 as seed ortholog is 100%.

Bootstrap support for afis|EAW17985.1 as seed ortholog is 100%.

---

Group of orthologs #375. Best score 2771 bits

Score difference with first non-orthologous sequence - *A. fumigatus*:2771 *A. fischeri*:2771

|                 |         |                 |         |
|-----------------|---------|-----------------|---------|
| afum EAL85199.1 | 100.00% | afis EAW20080.1 | 100.00% |
|-----------------|---------|-----------------|---------|

Bootstrap support for afum|EAL85199.1 as seed ortholog is 100%.

Bootstrap support for afis|EAW20080.1 as seed ortholog is 100%.

---

Group of orthologs #376. Best score 2771 bits

Score difference with first non-orthologous sequence - *A. fumigatus*:2771 *A. fischeri*:2771

|                 |         |                 |         |
|-----------------|---------|-----------------|---------|
| afum EAL92546.1 | 100.00% | afis EAW21525.1 | 100.00% |
|-----------------|---------|-----------------|---------|

Bootstrap support for afum|EAL92546.1 as seed ortholog is 100%.

Bootstrap support for afis|EAW21525.1 as seed ortholog is 100%.

---

Group of orthologs #377. Best score 2766 bits

Score difference with first non-orthologous sequence - *A. fumigatus*:2766 *A. fischeri*:2766

|                 |         |                 |         |
|-----------------|---------|-----------------|---------|
| afum EAL92644.1 | 100.00% | afis EAW21610.1 | 100.00% |
|-----------------|---------|-----------------|---------|

Bootstrap support for afum|EAL92644.1 as seed ortholog is 100%.

Bootstrap support for afis|EAW21610.1 as seed ortholog is 100%.

---

Group of orthologs #378. Best score 2762 bits

Score difference with first non-orthologous sequence - *A. fumigatus*:2481 *A. fischeri*:2762

|                 |         |                 |         |
|-----------------|---------|-----------------|---------|
| afum EAL92309.1 | 100.00% | afis EAW21292.1 | 100.00% |
|-----------------|---------|-----------------|---------|

Bootstrap support for afum|EAL92309.1 as seed ortholog is 100%.

Bootstrap support for afis|EAW21292.1 as seed ortholog is 100%.

---

Group of orthologs #379. Best score 2761 bits

Score difference with first non-orthologous sequence - *A. fumigatus*:2761 *A. fischeri*:2761

|                 |         |                 |         |
|-----------------|---------|-----------------|---------|
| afum EAL90131.1 | 100.00% | afis EAW25467.1 | 100.00% |
|-----------------|---------|-----------------|---------|

Bootstrap support for afum|EAL90131.1 as seed ortholog is 100%.

Bootstrap support for afis|EAW25467.1 as seed ortholog is 100%.

---

Group of orthologs #380. Best score 2759 bits

Score difference with first non-orthologous sequence - *A. fumigatus*:2759 *A. fischeri*:2759

|                 |         |                 |         |
|-----------------|---------|-----------------|---------|
| afum EAL86296.2 | 100.00% | afis EAW16722.1 | 100.00% |
|-----------------|---------|-----------------|---------|

Bootstrap support for afum|EAL86296.2 as seed ortholog is 100%.

Bootstrap support for afis|EAW16722.1 as seed ortholog is 100%.

---

Group of orthologs #381. Best score 2755 bits

Score difference with first non-orthologous sequence - *A. fumigatus*:2755 *A. fischeri*:2755

|                 |         |                 |         |
|-----------------|---------|-----------------|---------|
| afum EAL92825.2 | 100.00% | afis EAW21800.1 | 100.00% |
|-----------------|---------|-----------------|---------|

Bootstrap support for afum|EAL92825.2 as seed ortholog is 100%.

Bootstrap support for afis|EAW21800.1 as seed ortholog is 100%.

---

Group of orthologs #382. Best score 2753 bits

Score difference with first non-orthologous sequence - *A. fumigatus*:2753 *A. fischeri*:2753

|                 |         |                 |         |
|-----------------|---------|-----------------|---------|
| afum EAL93377.1 | 100.00% | afis EAW18659.1 | 100.00% |
|-----------------|---------|-----------------|---------|

Bootstrap support for afum|EAL93377.1 as seed ortholog is 100%.

Bootstrap support for afis|EAW18659.1 as seed ortholog is 100%.

---

Group of orthologs #383. Best score 2752 bits

Score difference with first non-orthologous sequence - *A. fumigatus*:2752 *A. fischeri*:2752

|                 |         |                 |         |
|-----------------|---------|-----------------|---------|
| afum EBA27334.1 | 100.00% | afis EAW23363.1 | 100.00% |
|-----------------|---------|-----------------|---------|

Bootstrap support for afum|EBA27334.1 as seed ortholog is 100%.

Bootstrap support for afis|EAW23363.1 as seed ortholog is 100%.

---

Group of orthologs #384. Best score 2749 bits

Score difference with first non-orthologous sequence - *A. fumigatus*:2749 *A. fischeri*:2749

|                 |         |                 |         |
|-----------------|---------|-----------------|---------|
| afum EAL93314.1 | 100.00% | afis EAW18605.1 | 100.00% |
|-----------------|---------|-----------------|---------|

Bootstrap support for afum|EAL93314.1 as seed ortholog is 100%.

Bootstrap support for afis|EAW18605.1 as seed ortholog is 100%.

---

Group of orthologs #385. Best score 2747 bits

Score difference with first non-orthologous sequence - *A. fumigatus*:2747 *A. fischeri*:2747

|                 |         |                 |         |
|-----------------|---------|-----------------|---------|
| afum EAL87884.1 | 100.00% | afis EAW23581.1 | 100.00% |
|-----------------|---------|-----------------|---------|

Bootstrap support for afum|EAL87884.1 as seed ortholog is 100%.

Bootstrap support for afis|EAW23581.1 as seed ortholog is 100%.

---

Group of orthologs #386. Best score 2740 bits

Score difference with first non-orthologous sequence - *A. fumigatus*:2740 *A. fischeri*:2740

|                 |         |                 |         |
|-----------------|---------|-----------------|---------|
| afum EAL84754.1 | 100.00% | afis EAW20878.1 | 100.00% |
|-----------------|---------|-----------------|---------|

Bootstrap support for afum|EAL84754.1 as seed ortholog is 100%.

Bootstrap support for afis|EAW20878.1 as seed ortholog is 100%.

---

Group of orthologs #387. Best score 2740 bits

Score difference with first non-orthologous sequence - *A. fumigatus*:2740 *A. fischeri*:2740

|                 |         |                 |         |
|-----------------|---------|-----------------|---------|
| afum EAL93773.1 | 100.00% | afis EAW19044.1 | 100.00% |
|-----------------|---------|-----------------|---------|

Bootstrap support for afum|EAL93773.1 as seed ortholog is 100%.

Bootstrap support for afis|EAW19044.1 as seed ortholog is 100%.

---

Group of orthologs #388. Best score 2740 bits

Score difference with first non-orthologous sequence - *A. fumigatus*:2740 *A. fischeri*:2740

|                 |         |                 |         |
|-----------------|---------|-----------------|---------|
| afum EAL90881.1 | 100.00% | afis EAW22309.1 | 100.00% |
|-----------------|---------|-----------------|---------|

Bootstrap support for afum|EAL90881.1 as seed ortholog is 100%.

Bootstrap support for afis|EAW22309.1 as seed ortholog is 100%.

---

Group of orthologs #389. Best score 2739 bits

Score difference with first non-orthologous sequence - *A. fumigatus*:2739 *A. fischeri*:2739

|                 |         |                 |         |
|-----------------|---------|-----------------|---------|
| afum EAL86103.1 | 100.00% | afis EAW24435.1 | 100.00% |
|-----------------|---------|-----------------|---------|

Bootstrap support for afum|EAL86103.1 as seed ortholog is 100%.

Bootstrap support for afis|EAW24435.1 as seed ortholog is 100%.

---



Group of orthologs #390. Best score 2735 bits

Score difference with first non-orthologous sequence - *A. fumigatus*:2735 *A. fischeri*:2735

afum|EAL88224.1 100.00% afis|EAW23257.1 100.00%

Bootstrap support for afum|EAL88224.1 as seed ortholog is 100%.

Bootstrap support for afis|EAW23257.1 as seed ortholog is 100%.

---

Group of orthologs #391. Best score 2734 bits

Score difference with first non-orthologous sequence - *A. fumigatus*:2734 *A. fischeri*:2734

afum|EAL89103.1 100.00% afis|EAW16508.1 100.00%

Bootstrap support for afum|EAL89103.1 as seed ortholog is 100%.

Bootstrap support for afis|EAW16508.1 as seed ortholog is 100%.

---

Group of orthologs #392. Best score 2734 bits

Score difference with first non-orthologous sequence - *A. fumigatus*:2734 *A. fischeri*:1410

afum|EAL92512.1 100.00% afis|EAW21493.1 100.00%

Bootstrap support for afum|EAL92512.1 as seed ortholog is 100%.

Bootstrap support for afis|EAW21493.1 as seed ortholog is 100%.

---

Group of orthologs #393. Best score 2734 bits

Score difference with first non-orthologous sequence - *A. fumigatus*:2734 *A. fischeri*:2734

afum|EAL89706.1 100.00% afis|EAW25038.1 100.00%

Bootstrap support for afum|EAL89706.1 as seed ortholog is 100%.

Bootstrap support for afis|EAW25038.1 as seed ortholog is 100%.

---

Group of orthologs #394. Best score 2729 bits

Score difference with first non-orthologous sequence - *A. fumigatus*:2729 *A. fischeri*:2729

afum|EAL86917.1 100.00% afis|EAW19601.1 100.00%

Bootstrap support for afum|EAL86917.1 as seed ortholog is 100%.

Bootstrap support for afis|EAW19601.1 as seed ortholog is 100%.

---

Group of orthologs #395. Best score 2727 bits

Score difference with first non-orthologous sequence - *A. fumigatus*:568 *A. fischeri*:378

afum|EAL93101.1 100.00% afis|EAW18417.1 100.00%

Bootstrap support for afum|EAL93101.1 as seed ortholog is 100%.

Bootstrap support for afis|EAW18417.1 as seed ortholog is 100%.

---

Group of orthologs #396. Best score 2721 bits

Score difference with first non-orthologous sequence - *A. fumigatus*:2721 *A. fischeri*:2721

afum|EAL84586.2 100.00% afis|EAW20466.1 100.00%

Bootstrap support for afum|EAL84586.2 as seed ortholog is 100%.

Bootstrap support for afis|EAW20466.1 as seed ortholog is 100%.

---

Group of orthologs #397. Best score 2715 bits

Score difference with first non-orthologous sequence - *A. fumigatus*:2715 *A. fischeri*:2715

afum|EAL91416.1 100.00% afis|EAW17603.1 100.00%

Bootstrap support for afum|EAL91416.1 as seed ortholog is 100%.

Bootstrap support for afis|EAW17603.1 as seed ortholog is 100%.

---

Group of orthologs #398. Best score 2714 bits

Score difference with first non-orthologous sequence - *A. fumigatus*:2714 *A. fischeri*:2714

afum|EAL85980.1 100.00% afis|EAW24312.1 100.00%

Bootstrap support for afum|EAL85980.1 as seed ortholog is 100%.

Bootstrap support for afis|EAW24312.1 as seed ortholog is 100%.

---

Group of orthologs #399. Best score 2713 bits

Score difference with first non-orthologous sequence - *A. fumigatus*:2713 *A. fischeri*:2713

afum|EAL85768.1 100.00% afis|EAW15565.1 100.00%

Bootstrap support for afum|EAL85768.1 as seed ortholog is 100%.

Bootstrap support for afis|EAW15565.1 as seed ortholog is 100%.

---

Group of orthologs #400. Best score 2712 bits

Score difference with first non-orthologous sequence - *A. fumigatus*:2712 *A. fischeri*:2712

afum|EAL91798.1 100.00% afis|EAW17989.1 100.00%

Bootstrap support for afum|EAL91798.1 as seed ortholog is 100%.

Bootstrap support for afis|EAW17989.1 as seed ortholog is 100%.

---

Group of orthologs #401. Best score 2710 bits

Score difference with first non-orthologous sequence - *A. fumigatus*:2710 *A. fischeri*:2710

afum|EAL85769.1 100.00% afis|EAW15563.1 100.00%

Bootstrap support for afum|EAL85769.1 as seed ortholog is 100%.

Bootstrap support for afis|EAW15563.1 as seed ortholog is 100%.

---

Group of orthologs #402. Best score 2705 bits

Score difference with first non-orthologous sequence - *A. fumigatus*:2705 *A. fischeri*:2705

afum|EAL88175.1 100.00% afis|EAW23303.1 100.00%

Bootstrap support for afum|EAL88175.1 as seed ortholog is 100%.

Bootstrap support for afis|EAW23303.1 as seed ortholog is 100%.

---

Group of orthologs #403. Best score 2703 bits

Score difference with first non-orthologous sequence - *A. fumigatus*:2703 *A. fischeri*:2703

afum|EAL90140.1 100.00% afis|EAW25477.1 100.00%

Bootstrap support for afum|EAL90140.1 as seed ortholog is 100%.

Bootstrap support for afis|EAW25477.1 as seed ortholog is 100%.

---

Group of orthologs #404. Best score 2695 bits

Score difference with first non-orthologous sequence - *A. fumigatus*:2695 *A. fischeri*:2695

afum|EAL89473.1 100.00% afis|EAW24828.1 100.00%

Bootstrap support for afum|EAL89473.1 as seed ortholog is 100%.

Bootstrap support for afis|EAW24828.1 as seed ortholog is 100%.

---

Group of orthologs #405. Best score 2693 bits

Score difference with first non-orthologous sequence - *A. fumigatus*:2693 *A. fischeri*:2693

afum|EAL93951.2 100.00% afis|EAW19218.1 100.00%

Bootstrap support for afum|EAL93951.2 as seed ortholog is 100%.

Bootstrap support for afis|EAW19218.1 as seed ortholog is 100%.

---

Group of orthologs #406. Best score 2690 bits

Score difference with first non-orthologous sequence - *A. fumigatus*:2690 *A. fischeri*:2690

afum|EAL91852.1 100.00% afis|EAW18041.1 100.00%

Bootstrap support for afum|EAL91852.1 as seed ortholog is 100%.

Bootstrap support for afis|EAW18041.1 as seed ortholog is 100%.

---

Group of orthologs #407. Best score 2689 bits

Score difference with first non-orthologous sequence - *A. fumigatus*:2689 *A. fischeri*:1755

afum|EAL84400.2 100.00% afis|EAW25729.1 100.00%

Bootstrap support for afum|EAL84400.2 as seed ortholog is 100%.

Bootstrap support for afis|EAW25729.1 as seed ortholog is 100%.

---

Group of orthologs #408. Best score 2689 bits

Score difference with first non-orthologous sequence - *A. fumigatus*:2689 *A. fischeri*:2689

afum|EAL92261.1 100.00% afis|EAW21248.1 100.00%

Bootstrap support for afum|EAL92261.1 as seed ortholog is 100%.

Bootstrap support for afis|EAW21248.1 as seed ortholog is 100%.

---

Group of orthologs #409. Best score 2689 bits

Score difference with first non-orthologous sequence - *A. fumigatus*:2689 *A. fischeri*:2689

afum|EAL89940.1 100.00% afis|EAW25277.1 100.00%

Bootstrap support for afum|EAL89940.1 as seed ortholog is 100%.

Bootstrap support for afis|EAW25277.1 as seed ortholog is 100%.

---

Group of orthologs #410. Best score 2688 bits

Score difference with first non-orthologous sequence - *A. fumigatus*:2688 *A. fischeri*:1747

afum|EAL92660.1 100.00% afis|EAW21624.1 100.00%

Bootstrap support for afum|EAL92660.1 as seed ortholog is 100%.

Bootstrap support for afis|EAW21624.1 as seed ortholog is 100%.

---

Group of orthologs #411. Best score 2687 bits

Score difference with first non-orthologous sequence - *A. fumigatus*:2687 *A. fischeri*:2687

afum|EAL89174.1 100.00% afis|EAW16578.1 100.00%

Bootstrap support for afum|EAL89174.1 as seed ortholog is 100%.

Bootstrap support for afis|EAW16578.1 as seed ortholog is 100%.

---

Group of orthologs #412. Best score 2687 bits

Score difference with first non-orthologous sequence - *A. fumigatus*:2687 *A. fischeri*:2687

afum|EAL90812.1 100.00% afis|EAW22379.1 100.00%

Bootstrap support for afum|EAL90812.1 as seed ortholog is 100%.

Bootstrap support for afis|EAW22379.1 as seed ortholog is 100%.

---

Group of orthologs #413. Best score 2686 bits

Score difference with first non-orthologous sequence - *A. fumigatus*:2686 *A. fischeri*:2686

afum|EAL84576.1 100.00% afis|EAW20478.1 100.00%

Bootstrap support for afum|EAL84576.1 as seed ortholog is 100%.

Bootstrap support for afis|EAW20478.1 as seed ortholog is 100%.

---

Group of orthologs #414. Best score 2685 bits

Score difference with first non-orthologous sequence - *A. fumigatus*:2685 *A. fischeri*:2685

afum|EAL87566.1 100.00% afis|EAW18201.1 100.00%

Bootstrap support for afum|EAL87566.1 as seed ortholog is 100%.

Bootstrap support for afis|EAW18201.1 as seed ortholog is 100%.

---

Group of orthologs #415. Best score 2685 bits

Score difference with first non-orthologous sequence - *A. fumigatus*:2685 *A. fischeri*:2685

afum|EAL92517.1 100.00% afis|EAW21498.1 100.00%

Bootstrap support for afum|EAL92517.1 as seed ortholog is 100%.

Bootstrap support for afis|EAW21498.1 as seed ortholog is 100%.

---

Group of orthologs #416. Best score 2684 bits

Score difference with first non-orthologous sequence - *A. fumigatus*:2684 *A. fischeri*:2684

afum|EAL92736.1 100.00% afis|EAW21702.1 100.00%

Bootstrap support for afum|EAL92736.1 as seed ortholog is 100%.

Bootstrap support for afis|EAW21702.1 as seed ortholog is 100%.

---

Group of orthologs #417. Best score 2683 bits

Score difference with first non-orthologous sequence - *A. fumigatus*:2329 *A. fischeri*:2683

afum|EAL89531.1 100.00% afis|EAW24881.1 100.00%

Bootstrap support for afum|EAL89531.1 as seed ortholog is 100%.

Bootstrap support for afis|EAW24881.1 as seed ortholog is 100%.

---

Group of orthologs #418. Best score 2677 bits

Score difference with first non-orthologous sequence - *A. fumigatus*:2677 *A. fischeri*:2677

afum|EAL88946.1 100.00% afis|EAW16323.1 100.00%

Bootstrap support for afum|EAL88946.1 as seed ortholog is 100%.

Bootstrap support for afis|EAW16323.1 as seed ortholog is 100%.

---

Group of orthologs #419. Best score 2674 bits

Score difference with first non-orthologous sequence - *A. fumigatus*:2674 *A. fischeri*:2674

afum|EAL93068.1 100.00% afis|EAW18392.1 100.00%

Bootstrap support for afum|EAL93068.1 as seed ortholog is 100%.

Bootstrap support for afis|EAW18392.1 as seed ortholog is 100%.

---

Group of orthologs #420. Best score 2673 bits

Score difference with first non-orthologous sequence - *A. fumigatus*:2673 *A. fischeri*:2673

afum|EAL87091.1 100.00% afis|EAW19404.1 100.00%

Bootstrap support for afum|EAL87091.1 as seed ortholog is 100%.

Bootstrap support for afis|EAW19404.1 as seed ortholog is 100%.

---

Group of orthologs #421. Best score 2671 bits

Score difference with first non-orthologous sequence - *A. fumigatus*:2671 *A. fischeri*:2671

afum|EAL90657.1 100.00% afis|EAW22537.1 100.00%

Bootstrap support for afum|EAL90657.1 as seed ortholog is 100%.

Bootstrap support for afis|EAW22537.1 as seed ortholog is 100%.

---

Group of orthologs #422. Best score 2669 bits

Score difference with first non-orthologous sequence - *A. fumigatus*:2669 *A. fischeri*:2669

afum|EAL84734.2 100.00% afis|EAW20898.1 100.00%

Bootstrap support for afum|EAL84734.2 as seed ortholog is 100%.

Bootstrap support for afis|EAW20898.1 as seed ortholog is 100%.

---

Group of orthologs #423. Best score 2665 bits

Score difference with first non-orthologous sequence - *A. fumigatus*:2665 *A. fischeri*:2665

afum|EAL87102.1 100.00% afis|EAW19392.1 100.00%

Bootstrap support for afum|EAL87102.1 as seed ortholog is 100%.

Bootstrap support for afis|EAW19392.1 as seed ortholog is 100%.

---

Group of orthologs #424. Best score 2664 bits

Score difference with first non-orthologous sequence - *A. fumigatus*:2664 *A. fischeri*:2664

afum|EAL90616.1 100.00% afis|EAW22583.1 100.00%

Bootstrap support for afum|EAL90616.1 as seed ortholog is 100%.

Bootstrap support for afis|EAW22583.1 as seed ortholog is 100%.

---

Group of orthologs #425. Best score 2655 bits

Score difference with first non-orthologous sequence - *A. fumigatus*:2655 *A. fischeri*:2655

afum|EAL84700.1 100.00% afis|EAW20934.1 100.00%

Bootstrap support for afum|EAL84700.1 as seed ortholog is 100%.

Bootstrap support for afis|EAW20934.1 as seed ortholog is 100%.

---

Group of orthologs #426. Best score 2654 bits

Score difference with first non-orthologous sequence - *A. fumigatus*:2654 *A. fischeri*:2654

afum|EAL89659.2 100.00% afis|EAW25035.1 100.00%

Bootstrap support for afum|EAL89659.2 as seed ortholog is 100%.

Bootstrap support for afis|EAW25035.1 as seed ortholog is 100%.

---

Group of orthologs #427. Best score 2652 bits

Score difference with first non-orthologous sequence - *A. fumigatus*:2459 *A. fischeri*:1810

|                 |         |                 |         |
|-----------------|---------|-----------------|---------|
| afum EAL84844.1 | 100.00% | afis EAW20776.1 | 100.00% |
|-----------------|---------|-----------------|---------|

Bootstrap support for afum|EAL84844.1 as seed ortholog is 100%.

Bootstrap support for afis|EAW20776.1 as seed ortholog is 100%.

---

Group of orthologs #428. Best score 2648 bits

Score difference with first non-orthologous sequence - *A. fumigatus*:2307 *A. fischeri*:2648

|                 |         |                 |         |
|-----------------|---------|-----------------|---------|
| afum EAL88772.1 | 100.00% | afis EAW16143.1 | 100.00% |
|-----------------|---------|-----------------|---------|

Bootstrap support for afum|EAL88772.1 as seed ortholog is 100%.

Bootstrap support for afis|EAW16143.1 as seed ortholog is 100%.

---

Group of orthologs #429. Best score 2645 bits

Score difference with first non-orthologous sequence - *A. fumigatus*:2645 *A. fischeri*:2645

|                 |         |                 |         |
|-----------------|---------|-----------------|---------|
| afum EAL88583.1 | 100.00% | afis EAW15950.1 | 100.00% |
|-----------------|---------|-----------------|---------|

Bootstrap support for afum|EAL88583.1 as seed ortholog is 100%.

Bootstrap support for afis|EAW15950.1 as seed ortholog is 100%.

---

Group of orthologs #430. Best score 2644 bits

Score difference with first non-orthologous sequence - *A. fumigatus*:2644 *A. fischeri*:2644

|                 |         |                 |         |
|-----------------|---------|-----------------|---------|
| afum EAL86928.1 | 100.00% | afis EAW19590.1 | 100.00% |
|-----------------|---------|-----------------|---------|

Bootstrap support for afum|EAL86928.1 as seed ortholog is 100%.

Bootstrap support for afis|EAW19590.1 as seed ortholog is 100%.

---

Group of orthologs #431. Best score 2643 bits

Score difference with first non-orthologous sequence - *A. fumigatus*:2643 *A. fischeri*:2643

|                 |         |                 |         |
|-----------------|---------|-----------------|---------|
| afum EAL89447.1 | 100.00% | afis EAW24805.1 | 100.00% |
|-----------------|---------|-----------------|---------|

Bootstrap support for afum|EAL89447.1 as seed ortholog is 100%.

Bootstrap support for afis|EAW24805.1 as seed ortholog is 100%.

---

Group of orthologs #432. Best score 2640 bits

Score difference with first non-orthologous sequence - *A. fumigatus*:2640 *A. fischeri*:2640

|                 |         |                 |         |
|-----------------|---------|-----------------|---------|
| afum EAL88603.1 | 100.00% | afis EAW15971.1 | 100.00% |
|-----------------|---------|-----------------|---------|

Bootstrap support for afum|EAL88603.1 as seed ortholog is 100%.

Bootstrap support for afis|EAW15971.1 as seed ortholog is 100%.

---

Group of orthologs #433. Best score 2640 bits

Score difference with first non-orthologous sequence - *A. fumigatus*:2640 *A. fischeri*:2640

|                 |         |                 |         |
|-----------------|---------|-----------------|---------|
| afum EAL88708.1 | 100.00% | afis EAW16076.1 | 100.00% |
|-----------------|---------|-----------------|---------|

Bootstrap support for afum|EAL88708.1 as seed ortholog is 100%.

Bootstrap support for afis|EAW16076.1 as seed ortholog is 100%.

---

Group of orthologs #434. Best score 2640 bits

Score difference with first non-orthologous sequence - *A. fumigatus*:2640 *A. fischeri*:2640

|                 |         |                 |         |
|-----------------|---------|-----------------|---------|
| afum EAL90638.1 | 100.00% | afis EAW22557.1 | 100.00% |
|-----------------|---------|-----------------|---------|

Bootstrap support for afum|EAL90638.1 as seed ortholog is 100%.

Bootstrap support for afis|EAW22557.1 as seed ortholog is 100%.

---

Group of orthologs #435. Best score 2640 bits

Score difference with first non-orthologous sequence - *A. fumigatus*:2640 *A. fischeri*:2640

|                 |         |                 |         |
|-----------------|---------|-----------------|---------|
| afum EAL92756.1 | 100.00% | afis EAW21723.1 | 100.00% |
|-----------------|---------|-----------------|---------|

Bootstrap support for afum|EAL92756.1 as seed ortholog is 100%.

Bootstrap support for afis|EAW21723.1 as seed ortholog is 100%.

---

Group of orthologs #436. Best score 2639 bits

Score difference with first non-orthologous sequence - *A. fumigatus*:2288 *A. fischeri*:2639

|                 |         |                 |         |
|-----------------|---------|-----------------|---------|
| afum EAL84352.1 | 100.00% | afis EAW25682.1 | 100.00% |
|-----------------|---------|-----------------|---------|

Bootstrap support for afum|EAL84352.1 as seed ortholog is 100%.

Bootstrap support for afis|EAW25682.1 as seed ortholog is 100%.

---

Group of orthologs #437. Best score 2634 bits

Score difference with first non-orthologous sequence - *A. fumigatus*:2634 *A. fischeri*:2634

|                 |         |                 |         |
|-----------------|---------|-----------------|---------|
| afum EAL87464.1 | 100.00% | afis EAW24033.1 | 100.00% |
|-----------------|---------|-----------------|---------|

Bootstrap support for afum|EAL87464.1 as seed ortholog is 100%.

Bootstrap support for afis|EAW24033.1 as seed ortholog is 100%.

---

Group of orthologs #438. Best score 2631 bits

Score difference with first non-orthologous sequence - *A. fumigatus*:2631 *A. fischeri*:2631

|                 |         |                 |         |
|-----------------|---------|-----------------|---------|
| afum EAL88586.1 | 100.00% | afis EAW15953.1 | 100.00% |
|-----------------|---------|-----------------|---------|

Bootstrap support for afum|EAL88586.1 as seed ortholog is 100%.

Bootstrap support for afis|EAW15953.1 as seed ortholog is 100%.

---

Group of orthologs #439. Best score 2631 bits

Score difference with first non-orthologous sequence - *A. fumigatus*:2631 *A. fischeri*:2631

|                 |         |                 |         |
|-----------------|---------|-----------------|---------|
| afum EAL93045.1 | 100.00% | afis EAW18370.1 | 100.00% |
|-----------------|---------|-----------------|---------|

Bootstrap support for afum|EAL93045.1 as seed ortholog is 100%.

Bootstrap support for afis|EAW18370.1 as seed ortholog is 100%.

---

Group of orthologs #440. Best score 2630 bits

Score difference with first non-orthologous sequence - *A. fumigatus*:2630 *A. fischeri*:2630

|                 |         |                 |         |
|-----------------|---------|-----------------|---------|
| afum EAL85681.1 | 100.00% | afis EAW15667.1 | 100.00% |
|-----------------|---------|-----------------|---------|

Bootstrap support for afum|EAL85681.1 as seed ortholog is 100%.

Bootstrap support for afis|EAW15667.1 as seed ortholog is 100%.

---

Group of orthologs #441. Best score 2629 bits

Score difference with first non-orthologous sequence - *A. fumigatus*:2629 *A. fischeri*:2629

|                 |         |                 |         |
|-----------------|---------|-----------------|---------|
| afum EAL85989.1 | 100.00% | afis EAW24319.1 | 100.00% |
|-----------------|---------|-----------------|---------|

Bootstrap support for afum|EAL85989.1 as seed ortholog is 100%.

Bootstrap support for afis|EAW24319.1 as seed ortholog is 100%.

---

Group of orthologs #442. Best score 2626 bits

Score difference with first non-orthologous sequence - *A. fumigatus*:2626 *A. fischeri*:2626

|                 |         |                 |         |
|-----------------|---------|-----------------|---------|
| afum EAL84615.1 | 100.00% | afis EAW20437.1 | 100.00% |
|-----------------|---------|-----------------|---------|

Bootstrap support for afum|EAL84615.1 as seed ortholog is 100%.

Bootstrap support for afis|EAW20437.1 as seed ortholog is 100%.

---

Group of orthologs #443. Best score 2626 bits

Score difference with first non-orthologous sequence - *A. fumigatus*:2626 *A. fischeri*:2626

|                 |         |                 |         |
|-----------------|---------|-----------------|---------|
| afum EAL86087.1 | 100.00% | afis EAW24418.1 | 100.00% |
|-----------------|---------|-----------------|---------|

Bootstrap support for afum|EAL86087.1 as seed ortholog is 100%.

Bootstrap support for afis|EAW24418.1 as seed ortholog is 100%.

---

Group of orthologs #444. Best score 2626 bits

Score difference with first non-orthologous sequence - *A. fumigatus*:2626 *A. fischeri*:2626

|                 |         |                 |         |
|-----------------|---------|-----------------|---------|
| afum EAL93010.1 | 100.00% | afis EAW21995.1 | 100.00% |
|-----------------|---------|-----------------|---------|

Bootstrap support for afum|EAL93010.1 as seed ortholog is 100%.

Bootstrap support for afis|EAW21995.1 as seed ortholog is 100%.

---

Group of orthologs #445. Best score 2624 bits

Score difference with first non-orthologous sequence - *A. fumigatus*:2624 *A. fischeri*:2624

|                 |         |                 |         |
|-----------------|---------|-----------------|---------|
| afum EAL91524.2 | 100.00% | afis EAW17709.1 | 100.00% |
|-----------------|---------|-----------------|---------|

Bootstrap support for afum|EAL91524.2 as seed ortholog is 100%.

Bootstrap support for afis|EAW17709.1 as seed ortholog is 100%.

---

Group of orthologs #446. Best score 2622 bits

Score difference with first non-orthologous sequence - *A. fumigatus*:2622 *A. fischeri*:2622

afum|EAL84733.1 100.00% afis|EAW20899.1 100.00%

Bootstrap support for afum|EAL84733.1 as seed ortholog is 100%.

Bootstrap support for afis|EAW20899.1 as seed ortholog is 100%.

---

Group of orthologs #447. Best score 2622 bits

Score difference with first non-orthologous sequence - *A. fumigatus*:2622 *A. fischeri*:2622

afum|EAL93959.1 100.00% afis|EAW19230.1 100.00%

Bootstrap support for afum|EAL93959.1 as seed ortholog is 100%.

Bootstrap support for afis|EAW19230.1 as seed ortholog is 100%.

---

Group of orthologs #448. Best score 2618 bits

Score difference with first non-orthologous sequence - *A. fumigatus*:2618 *A. fischeri*:2618

afum|EAL90202.1 100.00% afis|EAW25539.1 100.00%

Bootstrap support for afum|EAL90202.1 as seed ortholog is 100%.

Bootstrap support for afis|EAW25539.1 as seed ortholog is 100%.

---

Group of orthologs #449. Best score 2617 bits

Score difference with first non-orthologous sequence - *A. fumigatus*:2617 *A. fischeri*:2617

afum|EAL87691.1 100.00% afis|EAW18325.1 100.00%

Bootstrap support for afum|EAL87691.1 as seed ortholog is 100%.

Bootstrap support for afis|EAW18325.1 as seed ortholog is 100%.

---

Group of orthologs #450. Best score 2615 bits

Score difference with first non-orthologous sequence - *A. fumigatus*:2615 *A. fischeri*:2615

afum|EAL93066.1 100.00% afis|EAW18391.1 100.00%

Bootstrap support for afum|EAL93066.1 as seed ortholog is 100%.

Bootstrap support for afis|EAW18391.1 as seed ortholog is 100%.

---

Group of orthologs #451. Best score 2614 bits

Score difference with first non-orthologous sequence - *A. fumigatus*:2614 *A. fischeri*:2614

afum|EAL85200.1 100.00% afis|EAW20081.1 100.00%

Bootstrap support for afum|EAL85200.1 as seed ortholog is 100%.

Bootstrap support for afis|EAW20081.1 as seed ortholog is 100%.

---

Group of orthologs #452. Best score 2613 bits

Score difference with first non-orthologous sequence - *A. fumigatus*:2613 *A. fischeri*:2613

afum|EAL89986.1 100.00% afis|EAW25325.1 100.00%

Bootstrap support for afum|EAL89986.1 as seed ortholog is 100%.

Bootstrap support for afis|EAW25325.1 as seed ortholog is 100%.

---

Group of orthologs #453. Best score 2612 bits

Score difference with first non-orthologous sequence - *A. fumigatus*:2612 *A. fischeri*:2612

afum|EAL85722.1 100.00% afis|EAW15613.1 100.00%

Bootstrap support for afum|EAL85722.1 as seed ortholog is 100%.

Bootstrap support for afis|EAW15613.1 as seed ortholog is 100%.

---

Group of orthologs #454. Best score 2612 bits

Score difference with first non-orthologous sequence - *A. fumigatus*:2612 *A. fischeri*:2028

afum|EAL84566.1 100.00% afis|EAW20489.1 100.00%

Bootstrap support for afum|EAL84566.1 as seed ortholog is 100%.

Bootstrap support for afis|EAW20489.1 as seed ortholog is 100%.

---

Group of orthologs #455. Best score 2611 bits

Score difference with first non-orthologous sequence - *A. fumigatus*:2611 *A. fischeri*:2611

|                 |         |                 |         |
|-----------------|---------|-----------------|---------|
| afum EAL88390.1 | 100.00% | afis EAW23089.1 | 100.00% |
|-----------------|---------|-----------------|---------|

Bootstrap support for afum|EAL88390.1 as seed ortholog is 100%.

Bootstrap support for afis|EAW23089.1 as seed ortholog is 100%.

---

Group of orthologs #456. Best score 2611 bits

Score difference with first non-orthologous sequence - *A. fumigatus*:2611 *A. fischeri*:1685

|                 |         |                 |         |
|-----------------|---------|-----------------|---------|
| afum EAL92371.2 | 100.00% | afis EAW21356.1 | 100.00% |
|-----------------|---------|-----------------|---------|

Bootstrap support for afum|EAL92371.2 as seed ortholog is 100%.

Bootstrap support for afis|EAW21356.1 as seed ortholog is 100%.

---

Group of orthologs #457. Best score 2609 bits

Score difference with first non-orthologous sequence - *A. fumigatus*:2609 *A. fischeri*:2609

|                 |         |                 |         |
|-----------------|---------|-----------------|---------|
| afum EAL92040.1 | 100.00% | afis EAW24178.1 | 100.00% |
|-----------------|---------|-----------------|---------|

Bootstrap support for afum|EAL92040.1 as seed ortholog is 100%.

Bootstrap support for afis|EAW24178.1 as seed ortholog is 100%.

---

Group of orthologs #458. Best score 2608 bits

Score difference with first non-orthologous sequence - *A. fumigatus*:2608 *A. fischeri*:2608

|                 |         |                 |         |
|-----------------|---------|-----------------|---------|
| afum EAL93468.1 | 100.00% | afis EAW18742.1 | 100.00% |
|-----------------|---------|-----------------|---------|

Bootstrap support for afum|EAL93468.1 as seed ortholog is 100%.

Bootstrap support for afis|EAW18742.1 as seed ortholog is 100%.

---

Group of orthologs #459. Best score 2607 bits

Score difference with first non-orthologous sequence - *A. fumigatus*:2607 *A. fischeri*:2607

|                 |         |                 |         |
|-----------------|---------|-----------------|---------|
| afum EAL85331.1 | 100.00% | afis EAW20214.1 | 100.00% |
|-----------------|---------|-----------------|---------|

Bootstrap support for afum|EAL85331.1 as seed ortholog is 100%.

Bootstrap support for afis|EAW20214.1 as seed ortholog is 100%.

---

Group of orthologs #460. Best score 2605 bits

Score difference with first non-orthologous sequence - *A. fumigatus*:2605 *A. fischeri*:2605

|                 |         |                 |         |
|-----------------|---------|-----------------|---------|
| afum EAL85302.2 | 100.00% | afis EAW20184.1 | 100.00% |
|-----------------|---------|-----------------|---------|

Bootstrap support for afum|EAL85302.2 as seed ortholog is 100%.

Bootstrap support for afis|EAW20184.1 as seed ortholog is 100%.

---

Group of orthologs #461. Best score 2604 bits

Score difference with first non-orthologous sequence - *A. fumigatus*:2604 *A. fischeri*:2604

|                 |         |                 |         |
|-----------------|---------|-----------------|---------|
| afum EAL93406.1 | 100.00% | afis EAW18685.1 | 100.00% |
|-----------------|---------|-----------------|---------|

Bootstrap support for afum|EAL93406.1 as seed ortholog is 100%.

Bootstrap support for afis|EAW18685.1 as seed ortholog is 100%.

---

Group of orthologs #462. Best score 2602 bits

Score difference with first non-orthologous sequence - *A. fumigatus*:2602 *A. fischeri*:2602

|                 |         |                 |         |
|-----------------|---------|-----------------|---------|
| afum EAL88850.1 | 100.00% | afis EAW16222.1 | 100.00% |
|-----------------|---------|-----------------|---------|

Bootstrap support for afum|EAL88850.1 as seed ortholog is 100%.

Bootstrap support for afis|EAW16222.1 as seed ortholog is 100%.

---

Group of orthologs #463. Best score 2601 bits

Score difference with first non-orthologous sequence - *A. fumigatus*:2601 *A. fischeri*:2601

|                 |         |                 |         |
|-----------------|---------|-----------------|---------|
| afum EAL89627.1 | 100.00% | afis EAW24968.1 | 100.00% |
|-----------------|---------|-----------------|---------|

Bootstrap support for afum|EAL89627.1 as seed ortholog is 100%.

Bootstrap support for afis|EAW24968.1 as seed ortholog is 100%.

---

Group of orthologs #464. Best score 2598 bits

Score difference with first non-orthologous sequence - *A. fumigatus*:2598 *A. fischeri*:2598

|                 |         |                 |         |
|-----------------|---------|-----------------|---------|
| afum EAL91940.1 | 100.00% | afis EAW24085.1 | 100.00% |
|-----------------|---------|-----------------|---------|

Bootstrap support for afum|EAL91940.1 as seed ortholog is 100%.



Bootstrap support for afis|EAW24085.1 as seed ortholog is 100%.

---

Group of orthologs #465. Best score 2594 bits

Score difference with first non-orthologous sequence - *A. fumigatus*:2594 *A. fischeri*:2594

|                 |         |                 |         |
|-----------------|---------|-----------------|---------|
| afum EAL90793.1 | 100.00% | afis EAW22398.1 | 100.00% |
|-----------------|---------|-----------------|---------|

Bootstrap support for afum|EAL90793.1 as seed ortholog is 100%.

Bootstrap support for afis|EAW22398.1 as seed ortholog is 100%.

---

Group of orthologs #466. Best score 2593 bits

Score difference with first non-orthologous sequence - *A. fumigatus*:2593 *A. fischeri*:2593

|                 |         |                 |         |
|-----------------|---------|-----------------|---------|
| afum EAL90435.1 | 100.00% | afis EAW22764.1 | 100.00% |
|-----------------|---------|-----------------|---------|

Bootstrap support for afum|EAL90435.1 as seed ortholog is 100%.

Bootstrap support for afis|EAW22764.1 as seed ortholog is 100%.

---

Group of orthologs #467. Best score 2592 bits

Score difference with first non-orthologous sequence - *A. fumigatus*:2592 *A. fischeri*:2592

|                 |         |                 |         |
|-----------------|---------|-----------------|---------|
| afum EAL88711.1 | 100.00% | afis EAW16079.1 | 100.00% |
|-----------------|---------|-----------------|---------|

Bootstrap support for afum|EAL88711.1 as seed ortholog is 100%.

Bootstrap support for afis|EAW16079.1 as seed ortholog is 100%.

---

Group of orthologs #468. Best score 2589 bits

Score difference with first non-orthologous sequence - *A. fumigatus*:2589 *A. fischeri*:2589

|                 |         |                 |         |
|-----------------|---------|-----------------|---------|
| afum EAL90072.1 | 100.00% | afis EAW25413.1 | 100.00% |
|-----------------|---------|-----------------|---------|

Bootstrap support for afum|EAL90072.1 as seed ortholog is 100%.

Bootstrap support for afis|EAW25413.1 as seed ortholog is 100%.

---

Group of orthologs #469. Best score 2588 bits

Score difference with first non-orthologous sequence - *A. fumigatus*:2588 *A. fischeri*:2588

|                 |         |                 |         |
|-----------------|---------|-----------------|---------|
| afum EAL90208.1 | 100.00% | afis EAW22993.1 | 100.00% |
|-----------------|---------|-----------------|---------|

Bootstrap support for afum|EAL90208.1 as seed ortholog is 100%.

Bootstrap support for afis|EAW22993.1 as seed ortholog is 100%.

---

Group of orthologs #470. Best score 2587 bits

Score difference with first non-orthologous sequence - *A. fumigatus*:2587 *A. fischeri*:2587

|                 |         |                 |         |
|-----------------|---------|-----------------|---------|
| afum EAL88209.1 | 100.00% | afis EAW23270.1 | 100.00% |
|-----------------|---------|-----------------|---------|

Bootstrap support for afum|EAL88209.1 as seed ortholog is 100%.

Bootstrap support for afis|EAW23270.1 as seed ortholog is 100%.

---

Group of orthologs #471. Best score 2587 bits

Score difference with first non-orthologous sequence - *A. fumigatus*:2587 *A. fischeri*:2587

|                 |         |                 |         |
|-----------------|---------|-----------------|---------|
| afum EAL90705.1 | 100.00% | afis EAW22488.1 | 100.00% |
|-----------------|---------|-----------------|---------|

Bootstrap support for afum|EAL90705.1 as seed ortholog is 100%.

Bootstrap support for afis|EAW22488.1 as seed ortholog is 100%.

---

Group of orthologs #472. Best score 2580 bits

Score difference with first non-orthologous sequence - *A. fumigatus*:2580 *A. fischeri*:2580

|                 |         |                 |         |
|-----------------|---------|-----------------|---------|
| afum EAL85248.1 | 100.00% | afis EAW20132.1 | 100.00% |
|-----------------|---------|-----------------|---------|

Bootstrap support for afum|EAL85248.1 as seed ortholog is 100%.

Bootstrap support for afis|EAW20132.1 as seed ortholog is 100%.

---

Group of orthologs #473. Best score 2580 bits

Score difference with first non-orthologous sequence - *A. fumigatus*:2580 *A. fischeri*:2580

|                 |         |                 |         |
|-----------------|---------|-----------------|---------|
| afum EAL93196.2 | 100.00% | afis EAW18503.1 | 100.00% |
|-----------------|---------|-----------------|---------|

Bootstrap support for afum|EAL93196.2 as seed ortholog is 100%.

Bootstrap support for afis|EAW18503.1 as seed ortholog is 100%.

---

Group of orthologs #474. Best score 2578 bits

Score difference with first non-orthologous sequence - *A. fumigatus*:2578 *A. fischeri*:2578

afum|EAL88604.1 100.00% afis|EAW15972.1 100.00%

Bootstrap support for afum|EAL88604.1 as seed ortholog is 100%.

Bootstrap support for afis|EAW15972.1 as seed ortholog is 100%.

---

Group of orthologs #475. Best score 2578 bits

Score difference with first non-orthologous sequence - *A. fumigatus*:2578 *A. fischeri*:2578

afum|EAL88088.1 100.00% afis|EAW23383.1 100.00%

Bootstrap support for afum|EAL88088.1 as seed ortholog is 100%.

Bootstrap support for afis|EAW23383.1 as seed ortholog is 100%.

---

Group of orthologs #476. Best score 2568 bits

Score difference with first non-orthologous sequence - *A. fumigatus*:2568 *A. fischeri*:2568

afum|EAL87930.1 100.00% afis|EAW23536.1 100.00%

Bootstrap support for afum|EAL87930.1 as seed ortholog is 100%.

Bootstrap support for afis|EAW23536.1 as seed ortholog is 100%.

---

Group of orthologs #477. Best score 2566 bits

Score difference with first non-orthologous sequence - *A. fumigatus*:2566 *A. fischeri*:2566

afum|EAL87024.1 100.00% afis|EAW19472.1 100.00%

Bootstrap support for afum|EAL87024.1 as seed ortholog is 100%.

Bootstrap support for afis|EAW19472.1 as seed ortholog is 100%.

---

Group of orthologs #478. Best score 2566 bits

Score difference with first non-orthologous sequence - *A. fumigatus*:2566 *A. fischeri*:2566

afum|EAL91351.1 100.00% afis|EAW17537.1 100.00%

Bootstrap support for afum|EAL91351.1 as seed ortholog is 100%.

Bootstrap support for afis|EAW17537.1 as seed ortholog is 100%.

---

Group of orthologs #479. Best score 2565 bits

Score difference with first non-orthologous sequence - *A. fumigatus*:2565 *A. fischeri*:2565

afum|EAL93014.1 100.00% afis|EAW21999.1 100.00%

Bootstrap support for afum|EAL93014.1 as seed ortholog is 100%.

Bootstrap support for afis|EAW21999.1 as seed ortholog is 100%.

---

Group of orthologs #480. Best score 2563 bits

Score difference with first non-orthologous sequence - *A. fumigatus*:2563 *A. fischeri*:2563

afum|EAL90703.1 100.00% afis|EAW22490.1 100.00%

Bootstrap support for afum|EAL90703.1 as seed ortholog is 100%.

Bootstrap support for afis|EAW22490.1 as seed ortholog is 100%.

---

Group of orthologs #481. Best score 2562 bits

Score difference with first non-orthologous sequence - *A. fumigatus*:2562 *A. fischeri*:2562

afum|EAL89143.1 100.00% afis|EAW16545.1 100.00%

Bootstrap support for afum|EAL89143.1 as seed ortholog is 100%.

Bootstrap support for afis|EAW16545.1 as seed ortholog is 100%.

---

Group of orthologs #482. Best score 2561 bits

Score difference with first non-orthologous sequence - *A. fumigatus*:2561 *A. fischeri*:2561

afum|EAL86513.1 100.00% afis|EAW16989.1 100.00%

Bootstrap support for afum|EAL86513.1 as seed ortholog is 100%.

Bootstrap support for afis|EAW16989.1 as seed ortholog is 100%.

---

Group of orthologs #483. Best score 2561 bits

Score difference with first non-orthologous sequence - *A. fumigatus*:2561 *A. fischeri*:2561

|                 |         |                 |         |
|-----------------|---------|-----------------|---------|
| afum EAL88011.1 | 100.00% | afis EAW23455.1 | 100.00% |
|-----------------|---------|-----------------|---------|

Bootstrap support for afum|EAL88011.1 as seed ortholog is 100%.

Bootstrap support for afis|EAW23455.1 as seed ortholog is 100%.

---

Group of orthologs #484. Best score 2560 bits

Score difference with first non-orthologous sequence - *A. fumigatus*:2560 *A. fischeri*:2325

|                 |         |                 |         |
|-----------------|---------|-----------------|---------|
| afum EAL87015.1 | 100.00% | afis EAW19480.1 | 100.00% |
|-----------------|---------|-----------------|---------|

Bootstrap support for afum|EAL87015.1 as seed ortholog is 100%.

Bootstrap support for afis|EAW19480.1 as seed ortholog is 100%.

---

Group of orthologs #485. Best score 2559 bits

Score difference with first non-orthologous sequence - *A. fumigatus*:2559 *A. fischeri*:2559

|                 |         |                 |         |
|-----------------|---------|-----------------|---------|
| afum EAL90054.1 | 100.00% | afis EAW25395.1 | 100.00% |
|-----------------|---------|-----------------|---------|

Bootstrap support for afum|EAL90054.1 as seed ortholog is 100%.

Bootstrap support for afis|EAW25395.1 as seed ortholog is 100%.

---

Group of orthologs #486. Best score 2558 bits

Score difference with first non-orthologous sequence - *A. fumigatus*:2558 *A. fischeri*:2431

|                 |         |                 |         |
|-----------------|---------|-----------------|---------|
| afum EAL84665.1 | 100.00% | afis EAW20969.1 | 100.00% |
|-----------------|---------|-----------------|---------|

Bootstrap support for afum|EAL84665.1 as seed ortholog is 100%.

Bootstrap support for afis|EAW20969.1 as seed ortholog is 100%.

---

Group of orthologs #487. Best score 2558 bits

Score difference with first non-orthologous sequence - *A. fumigatus*:2558 *A. fischeri*:2558

|                 |         |                 |         |
|-----------------|---------|-----------------|---------|
| afum EAL89493.1 | 100.00% | afis EAW24847.1 | 100.00% |
|-----------------|---------|-----------------|---------|

Bootstrap support for afum|EAL89493.1 as seed ortholog is 100%.

Bootstrap support for afis|EAW24847.1 as seed ortholog is 100%.

---

Group of orthologs #488. Best score 2557 bits

Score difference with first non-orthologous sequence - *A. fumigatus*:2557 *A. fischeri*:2557

|                 |         |                 |         |
|-----------------|---------|-----------------|---------|
| afum EAL90782.1 | 100.00% | afis EAW22410.1 | 100.00% |
|-----------------|---------|-----------------|---------|

Bootstrap support for afum|EAL90782.1 as seed ortholog is 100%.

Bootstrap support for afis|EAW22410.1 as seed ortholog is 100%.

---

Group of orthologs #489. Best score 2553 bits

Score difference with first non-orthologous sequence - *A. fumigatus*:2553 *A. fischeri*:2553

|                 |         |                 |         |
|-----------------|---------|-----------------|---------|
| afum EAL90403.1 | 100.00% | afis EAW22796.1 | 100.00% |
|-----------------|---------|-----------------|---------|

Bootstrap support for afum|EAL90403.1 as seed ortholog is 100%.

Bootstrap support for afis|EAW22796.1 as seed ortholog is 100%.

---

Group of orthologs #490. Best score 2553 bits

Score difference with first non-orthologous sequence - *A. fumigatus*:2553 *A. fischeri*:1567

|                 |         |                 |         |
|-----------------|---------|-----------------|---------|
| afum EAL89712.1 | 100.00% | afis EAW25044.1 | 100.00% |
|-----------------|---------|-----------------|---------|

Bootstrap support for afum|EAL89712.1 as seed ortholog is 100%.

Bootstrap support for afis|EAW25044.1 as seed ortholog is 100%.

---

Group of orthologs #491. Best score 2552 bits

Score difference with first non-orthologous sequence - *A. fumigatus*:2552 *A. fischeri*:2552

|                 |         |                 |         |
|-----------------|---------|-----------------|---------|
| afum EAL94013.1 | 100.00% | afis EAW19294.1 | 100.00% |
|-----------------|---------|-----------------|---------|

Bootstrap support for afum|EAL94013.1 as seed ortholog is 100%.

Bootstrap support for afis|EAW19294.1 as seed ortholog is 100%.

---

Group of orthologs #492. Best score 2551 bits

Score difference with first non-orthologous sequence - *A. fumigatus*:2551 *A. fischeri*:2551

|                 |         |                 |         |
|-----------------|---------|-----------------|---------|
| afum EAL90975.1 | 100.00% | afis EAW22219.1 | 100.00% |
|-----------------|---------|-----------------|---------|

Bootstrap support for afum|EAL90975.1 as seed ortholog is 100%.

Bootstrap support for afis|EAW22219.1 as seed ortholog is 100%.

---

Group of orthologs #493. Best score 2548 bits

Score difference with first non-orthologous sequence - *A. fumigatus*:2548 *A. fischeri*:2548

|                 |         |                 |         |
|-----------------|---------|-----------------|---------|
| afum EAL93213.1 | 100.00% | afis EAW18518.1 | 100.00% |
|-----------------|---------|-----------------|---------|

Bootstrap support for afum|EAL93213.1 as seed ortholog is 100%.

Bootstrap support for afis|EAW18518.1 as seed ortholog is 100%.

---

Group of orthologs #494. Best score 2547 bits

Score difference with first non-orthologous sequence - *A. fumigatus*:2547 *A. fischeri*:2547

|                 |         |                 |         |
|-----------------|---------|-----------------|---------|
| afum EAL84525.1 | 100.00% | afis EAW20532.1 | 100.00% |
|-----------------|---------|-----------------|---------|

Bootstrap support for afum|EAL84525.1 as seed ortholog is 100%.

Bootstrap support for afis|EAW20532.1 as seed ortholog is 100%.

---

Group of orthologs #495. Best score 2544 bits

Score difference with first non-orthologous sequence - *A. fumigatus*:2544 *A. fischeri*:2544

|                 |         |                 |         |
|-----------------|---------|-----------------|---------|
| afum EAL91264.1 | 100.00% | afis EAW17437.1 | 100.00% |
|-----------------|---------|-----------------|---------|

Bootstrap support for afum|EAL91264.1 as seed ortholog is 100%.

Bootstrap support for afis|EAW17437.1 as seed ortholog is 100%.

---

Group of orthologs #496. Best score 2540 bits

Score difference with first non-orthologous sequence - *A. fumigatus*:2540 *A. fischeri*:2540

|                 |         |                 |         |
|-----------------|---------|-----------------|---------|
| afum EAL93296.2 | 100.00% | afis EAW18589.1 | 100.00% |
|-----------------|---------|-----------------|---------|

Bootstrap support for afum|EAL93296.2 as seed ortholog is 100%.

Bootstrap support for afis|EAW18589.1 as seed ortholog is 100%.

---

Group of orthologs #497. Best score 2539 bits

Score difference with first non-orthologous sequence - *A. fumigatus*:2539 *A. fischeri*:2539

|                 |         |                 |         |
|-----------------|---------|-----------------|---------|
| afum EAL85615.2 | 100.00% | afis EAW15732.1 | 100.00% |
|-----------------|---------|-----------------|---------|

Bootstrap support for afum|EAL85615.2 as seed ortholog is 100%.

Bootstrap support for afis|EAW15732.1 as seed ortholog is 100%.

---

Group of orthologs #498. Best score 2534 bits

Score difference with first non-orthologous sequence - *A. fumigatus*:2390 *A. fischeri*:2396

|                 |         |                 |         |
|-----------------|---------|-----------------|---------|
| afum EAL92384.1 | 100.00% | afis EAW21367.1 | 100.00% |
|-----------------|---------|-----------------|---------|

Bootstrap support for afum|EAL92384.1 as seed ortholog is 100%.

Bootstrap support for afis|EAW21367.1 as seed ortholog is 100%.

---

Group of orthologs #499. Best score 2532 bits

Score difference with first non-orthologous sequence - *A. fumigatus*:2532 *A. fischeri*:2532

|                 |         |                 |         |
|-----------------|---------|-----------------|---------|
| afum EAL93546.1 | 100.00% | afis EAW18810.1 | 100.00% |
|-----------------|---------|-----------------|---------|

Bootstrap support for afum|EAL93546.1 as seed ortholog is 100%.

Bootstrap support for afis|EAW18810.1 as seed ortholog is 100%.

---

Group of orthologs #500. Best score 2520 bits

Score difference with first non-orthologous sequence - *A. fumigatus*:2520 *A. fischeri*:2520

|                 |         |                 |         |
|-----------------|---------|-----------------|---------|
| afum EAL90877.1 | 100.00% | afis EAW22313.1 | 100.00% |
|-----------------|---------|-----------------|---------|

Bootstrap support for afum|EAL90877.1 as seed ortholog is 100%.

Bootstrap support for afis|EAW22313.1 as seed ortholog is 100%.

---

Group of orthologs #501. Best score 2518 bits

Score difference with first non-orthologous sequence - *A. fumigatus*:2518 *A. fischeri*:2518

|                 |         |                 |         |
|-----------------|---------|-----------------|---------|
| afum EAL89938.1 | 100.00% | afis EAW25275.1 | 100.00% |
|-----------------|---------|-----------------|---------|

Bootstrap support for afum|EAL89938.1 as seed ortholog is 100%.

Bootstrap support for afis|EAW25275.1 as seed ortholog is 100%.

---

Group of orthologs #502. Best score 2517 bits

Score difference with first non-orthologous sequence - *A. fumigatus*:2517 *A. fischeri*:2517

afum|EAL88242.1 100.00% afis|EAW23240.1 100.00%

Bootstrap support for afum|EAL88242.1 as seed ortholog is 100%.

Bootstrap support for afis|EAW23240.1 as seed ortholog is 100%.

---

Group of orthologs #503. Best score 2515 bits

Score difference with first non-orthologous sequence - *A. fumigatus*:2515 *A. fischeri*:2232

afum|EAL85670.1 100.00% afis|EAW15677.1 100.00%

Bootstrap support for afum|EAL85670.1 as seed ortholog is 100%.

Bootstrap support for afis|EAW15677.1 as seed ortholog is 100%.

---

Group of orthologs #504. Best score 2514 bits

Score difference with first non-orthologous sequence - *A. fumigatus*:2514 *A. fischeri*:2514

afum|EAL90308.1 100.00% afis|EAW22890.1 100.00%

Bootstrap support for afum|EAL90308.1 as seed ortholog is 100%.

Bootstrap support for afis|EAW22890.1 as seed ortholog is 100%.

---

Group of orthologs #505. Best score 2514 bits

Score difference with first non-orthologous sequence - *A. fumigatus*:2514 *A. fischeri*:2514

afum|EAL92700.1 100.00% afis|EAW21665.1 100.00%

Bootstrap support for afum|EAL92700.1 as seed ortholog is 100%.

Bootstrap support for afis|EAW21665.1 as seed ortholog is 100%.

---

Group of orthologs #506. Best score 2513 bits

Score difference with first non-orthologous sequence - *A. fumigatus*:2513 *A. fischeri*:1141

afum|EAL89306.1 100.00% afis|EAW17294.1 100.00%

afis|EAW19388.1 9.12%

Bootstrap support for afum|EAL89306.1 as seed ortholog is 100%.

Bootstrap support for afis|EAW17294.1 as seed ortholog is 100%.

---

Group of orthologs #507. Best score 2512 bits

Score difference with first non-orthologous sequence - *A. fumigatus*:2512 *A. fischeri*:2512

afum|EAL86026.2 100.00% afis|EAW24356.1 100.00%

Bootstrap support for afum|EAL86026.2 as seed ortholog is 100%.

Bootstrap support for afis|EAW24356.1 as seed ortholog is 100%.

---

Group of orthologs #508. Best score 2512 bits

Score difference with first non-orthologous sequence - *A. fumigatus*:2512 *A. fischeri*:2512

afum|EAL88017.1 100.00% afis|EAW23448.1 100.00%

Bootstrap support for afum|EAL88017.1 as seed ortholog is 100%.

Bootstrap support for afis|EAW23448.1 as seed ortholog is 100%.

---

Group of orthologs #509. Best score 2511 bits

Score difference with first non-orthologous sequence - *A. fumigatus*:2511 *A. fischeri*:2511

afum|EAL90413.1 100.00% afis|EAW22786.1 100.00%

Bootstrap support for afum|EAL90413.1 as seed ortholog is 100%.

Bootstrap support for afis|EAW22786.1 as seed ortholog is 100%.

---

Group of orthologs #510. Best score 2511 bits

Score difference with first non-orthologous sequence - *A. fumigatus*:2511 *A. fischeri*:2511

afum|EAL89400.1 100.00% afis|EAW24758.1 100.00%

Bootstrap support for afum|EAL89400.1 as seed ortholog is 100%.

Bootstrap support for afis|EAW24758.1 as seed ortholog is 100%.

---

Group of orthologs #511. Best score 2510 bits

Score difference with first non-orthologous sequence - *A. fumigatus*:2510 *A. fischeri*:2510  
afum|EAL89996.1 100.00% afis|EAW25333.1 100.00%  
Bootstrap support for afum|EAL89996.1 as seed ortholog is 100%.  
Bootstrap support for afis|EAW25333.1 as seed ortholog is 100%.

---

Group of orthologs #512. Best score 2509 bits

Score difference with first non-orthologous sequence - *A. fumigatus*:2509 *A. fischeri*:2509  
afum|EAL86876.1 100.00% afis|EAW19646.1 100.00%  
Bootstrap support for afum|EAL86876.1 as seed ortholog is 100%.  
Bootstrap support for afis|EAW19646.1 as seed ortholog is 100%.

---

Group of orthologs #513. Best score 2507 bits

Score difference with first non-orthologous sequence - *A. fumigatus*:2507 *A. fischeri*:2507  
afum|EAL90600.1 100.00% afis|EAW22598.1 100.00%  
Bootstrap support for afum|EAL90600.1 as seed ortholog is 100%.  
Bootstrap support for afis|EAW22598.1 as seed ortholog is 100%.

---

Group of orthologs #514. Best score 2504 bits

Score difference with first non-orthologous sequence - *A. fumigatus*:2504 *A. fischeri*:2504  
afum|EAL88717.1 100.00% afis|EAW16085.1 100.00%  
Bootstrap support for afum|EAL88717.1 as seed ortholog is 100%.  
Bootstrap support for afis|EAW16085.1 as seed ortholog is 100%.

---

Group of orthologs #515. Best score 2504 bits

Score difference with first non-orthologous sequence - *A. fumigatus*:2504 *A. fischeri*:2504  
afum|EAL87432.1 100.00% afis|EAW24002.1 100.00%  
Bootstrap support for afum|EAL87432.1 as seed ortholog is 100%.  
Bootstrap support for afis|EAW24002.1 as seed ortholog is 100%.

---

Group of orthologs #516. Best score 2502 bits

Score difference with first non-orthologous sequence - *A. fumigatus*:2502 *A. fischeri*:2502  
afum|EAL90311.1 100.00% afis|EAW22887.1 100.00%  
Bootstrap support for afum|EAL90311.1 as seed ortholog is 100%.  
Bootstrap support for afis|EAW22887.1 as seed ortholog is 100%.

---

Group of orthologs #517. Best score 2500 bits

Score difference with first non-orthologous sequence - *A. fumigatus*:2500 *A. fischeri*:2500  
afum|EAL87709.1 100.00% afis|EAW18345.1 100.00%  
Bootstrap support for afum|EAL87709.1 as seed ortholog is 100%.  
Bootstrap support for afis|EAW18345.1 as seed ortholog is 100%.

---

Group of orthologs #518. Best score 2500 bits

Score difference with first non-orthologous sequence - *A. fumigatus*:2246 *A. fischeri*:2500  
afum|EAL91285.1 100.00% afis|EAW17457.1 100.00%  
Bootstrap support for afum|EAL91285.1 as seed ortholog is 100%.  
Bootstrap support for afis|EAW17457.1 as seed ortholog is 100%.

---

Group of orthologs #519. Best score 2496 bits

Score difference with first non-orthologous sequence - *A. fumigatus*:2496 *A. fischeri*:2496  
afum|EAL86905.1 100.00% afis|EAW19617.1 100.00%  
Bootstrap support for afum|EAL86905.1 as seed ortholog is 100%.  
Bootstrap support for afis|EAW19617.1 as seed ortholog is 100%.

---

Group of orthologs #520. Best score 2496 bits

Score difference with first non-orthologous sequence - *A. fumigatus*:2496 *A. fischeri*:2496  
afum|EAL91812.1 100.00% afis|EAW18001.1 100.00%

Bootstrap support for afum|EAL91812.1 as seed ortholog is 100%.  
Bootstrap support for afis|EAW18001.1 as seed ortholog is 100%.

---

Group of orthologs #521. Best score 2492 bits

Score difference with first non-orthologous sequence - *A. fumigatus*:2492 *A. fischeri*:2492

|                 |         |                 |         |
|-----------------|---------|-----------------|---------|
| afum EAL87601.2 | 100.00% | afis EAW18233.1 | 100.00% |
|-----------------|---------|-----------------|---------|

Bootstrap support for afum|EAL87601.2 as seed ortholog is 100%.

Bootstrap support for afis|EAW18233.1 as seed ortholog is 100%.

---

Group of orthologs #522. Best score 2490 bits

Score difference with first non-orthologous sequence - *A. fumigatus*:2490 *A. fischeri*:2490

|                 |         |                 |         |
|-----------------|---------|-----------------|---------|
| afum EAL88985.1 | 100.00% | afis EAW16360.1 | 100.00% |
|-----------------|---------|-----------------|---------|

Bootstrap support for afum|EAL88985.1 as seed ortholog is 100%.

Bootstrap support for afis|EAW16360.1 as seed ortholog is 100%.

---

Group of orthologs #523. Best score 2490 bits

Score difference with first non-orthologous sequence - *A. fumigatus*:2490 *A. fischeri*:2490

|                 |         |                 |         |
|-----------------|---------|-----------------|---------|
| afum EAL94015.1 | 100.00% | afis EAW19296.1 | 100.00% |
|-----------------|---------|-----------------|---------|

Bootstrap support for afum|EAL94015.1 as seed ortholog is 100%.

Bootstrap support for afis|EAW19296.1 as seed ortholog is 100%.

---

Group of orthologs #524. Best score 2488 bits

Score difference with first non-orthologous sequence - *A. fumigatus*:2488 *A. fischeri*:2488

|                 |         |                 |         |
|-----------------|---------|-----------------|---------|
| afum EAL91164.1 | 100.00% | afis EAW17327.1 | 100.00% |
|-----------------|---------|-----------------|---------|

Bootstrap support for afum|EAL91164.1 as seed ortholog is 100%.

Bootstrap support for afis|EAW17327.1 as seed ortholog is 100%.

---

Group of orthologs #525. Best score 2484 bits

Score difference with first non-orthologous sequence - *A. fumigatus*:2484 *A. fischeri*:2484

|                 |         |                 |         |
|-----------------|---------|-----------------|---------|
| afum EAL84620.1 | 100.00% | afis EAW20430.1 | 100.00% |
|-----------------|---------|-----------------|---------|

Bootstrap support for afum|EAL84620.1 as seed ortholog is 100%.

Bootstrap support for afis|EAW20430.1 as seed ortholog is 100%.

---

Group of orthologs #526. Best score 2483 bits

Score difference with first non-orthologous sequence - *A. fumigatus*:2483 *A. fischeri*:2483

|                 |         |                 |         |
|-----------------|---------|-----------------|---------|
| afum EAL90236.1 | 100.00% | afis EAW22961.1 | 100.00% |
|-----------------|---------|-----------------|---------|

Bootstrap support for afum|EAL90236.1 as seed ortholog is 100%.

Bootstrap support for afis|EAW22961.1 as seed ortholog is 100%.

---

Group of orthologs #527. Best score 2482 bits

Score difference with first non-orthologous sequence - *A. fumigatus*:2482 *A. fischeri*:2482

|                 |         |                 |         |
|-----------------|---------|-----------------|---------|
| afum EAL88109.1 | 100.00% | afis EAW23364.1 | 100.00% |
|-----------------|---------|-----------------|---------|

Bootstrap support for afum|EAL88109.1 as seed ortholog is 100%.

Bootstrap support for afis|EAW23364.1 as seed ortholog is 100%.

---

Group of orthologs #528. Best score 2481 bits

Score difference with first non-orthologous sequence - *A. fumigatus*:2481 *A. fischeri*:2481

|                 |         |                 |         |
|-----------------|---------|-----------------|---------|
| afum EAL91382.1 | 100.00% | afis EAW17569.1 | 100.00% |
|-----------------|---------|-----------------|---------|

Bootstrap support for afum|EAL91382.1 as seed ortholog is 100%.

Bootstrap support for afis|EAW17569.1 as seed ortholog is 100%.

---

Group of orthologs #529. Best score 2476 bits

Score difference with first non-orthologous sequence - *A. fumigatus*:2476 *A. fischeri*:2476

|                 |         |                 |         |
|-----------------|---------|-----------------|---------|
| afum EAL88071.1 | 100.00% | afis EAW23399.1 | 100.00% |
|-----------------|---------|-----------------|---------|

Bootstrap support for afum|EAL88071.1 as seed ortholog is 100%.

Bootstrap support for afis|EAW23399.1 as seed ortholog is 100%.

---

Group of orthologs #530. Best score 2476 bits

Score difference with first non-orthologous sequence - *A. fumigatus*:2476 *A. fischeri*:2476

|                 |         |                 |         |
|-----------------|---------|-----------------|---------|
| afum EAL90026.1 | 100.00% | afis EAW25364.1 | 100.00% |
|-----------------|---------|-----------------|---------|

Bootstrap support for afum|EAL90026.1 as seed ortholog is 100%.

Bootstrap support for afis|EAW25364.1 as seed ortholog is 100%.

---

Group of orthologs #531. Best score 2475 bits

Score difference with first non-orthologous sequence - *A. fumigatus*:2475 *A. fischeri*:2475

|                 |         |                 |         |
|-----------------|---------|-----------------|---------|
| afum EAL91426.1 | 100.00% | afis EAW17613.1 | 100.00% |
|-----------------|---------|-----------------|---------|

Bootstrap support for afum|EAL91426.1 as seed ortholog is 100%.

Bootstrap support for afis|EAW17613.1 as seed ortholog is 100%.

---

Group of orthologs #532. Best score 2475 bits

Score difference with first non-orthologous sequence - *A. fumigatus*:2475 *A. fischeri*:2475

|                 |         |                 |         |
|-----------------|---------|-----------------|---------|
| afum EAL93516.2 | 100.00% | afis EAW18784.1 | 100.00% |
|-----------------|---------|-----------------|---------|

Bootstrap support for afum|EAL93516.2 as seed ortholog is 100%.

Bootstrap support for afis|EAW18784.1 as seed ortholog is 100%.

---

Group of orthologs #533. Best score 2473 bits

Score difference with first non-orthologous sequence - *A. fumigatus*:2473 *A. fischeri*:2473

|                 |         |                 |         |
|-----------------|---------|-----------------|---------|
| afum EAL87963.1 | 100.00% | afis EAW23499.1 | 100.00% |
|-----------------|---------|-----------------|---------|

Bootstrap support for afum|EAL87963.1 as seed ortholog is 100%.

Bootstrap support for afis|EAW23499.1 as seed ortholog is 100%.

---

Group of orthologs #534. Best score 2471 bits

Score difference with first non-orthologous sequence - *A. fumigatus*:2471 *A. fischeri*:2471

|                 |         |                 |         |
|-----------------|---------|-----------------|---------|
| afum EAL93160.2 | 100.00% | afis EAW18473.1 | 100.00% |
|-----------------|---------|-----------------|---------|

Bootstrap support for afum|EAL93160.2 as seed ortholog is 100%.

Bootstrap support for afis|EAW18473.1 as seed ortholog is 100%.

---

Group of orthologs #535. Best score 2468 bits

Score difference with first non-orthologous sequence - *A. fumigatus*:2468 *A. fischeri*:2468

|                 |         |                 |         |
|-----------------|---------|-----------------|---------|
| afum EAL88231.2 | 100.00% | afis EAW23250.1 | 100.00% |
|-----------------|---------|-----------------|---------|

Bootstrap support for afum|EAL88231.2 as seed ortholog is 100%.

Bootstrap support for afis|EAW23250.1 as seed ortholog is 100%.

---

Group of orthologs #536. Best score 2467 bits

Score difference with first non-orthologous sequence - *A. fumigatus*:2467 *A. fischeri*:2467

|                 |         |                 |         |
|-----------------|---------|-----------------|---------|
| afum EAL92953.1 | 100.00% | afis EAW21940.1 | 100.00% |
|-----------------|---------|-----------------|---------|

Bootstrap support for afum|EAL92953.1 as seed ortholog is 100%.

Bootstrap support for afis|EAW21940.1 as seed ortholog is 100%.

---

Group of orthologs #537. Best score 2464 bits

Score difference with first non-orthologous sequence - *A. fumigatus*:2464 *A. fischeri*:2464

|                 |         |                 |         |
|-----------------|---------|-----------------|---------|
| afum EAL89203.1 | 100.00% | afis EAW16606.1 | 100.00% |
|-----------------|---------|-----------------|---------|

Bootstrap support for afum|EAL89203.1 as seed ortholog is 100%.

Bootstrap support for afis|EAW16606.1 as seed ortholog is 100%.

---

Group of orthologs #538. Best score 2464 bits

Score difference with first non-orthologous sequence - *A. fumigatus*:2464 *A. fischeri*:2464

|                 |         |                 |         |
|-----------------|---------|-----------------|---------|
| afum EAL93963.1 | 100.00% | afis EAW19235.1 | 100.00% |
|-----------------|---------|-----------------|---------|

Bootstrap support for afum|EAL93963.1 as seed ortholog is 100%.

Bootstrap support for afis|EAW19235.1 as seed ortholog is 100%.

---

Group of orthologs #539. Best score 2464 bits



Score difference with first non-orthologous sequence - *A. fumigatus*:2464 *A. fischeri*:2464  
afum|EAL92611.1 100.00% afis|EAW21593.1 100.00%  
Bootstrap support for afum|EAL92611.1 as seed ortholog is 100%.  
Bootstrap support for afis|EAW21593.1 as seed ortholog is 100%.

---

Group of orthologs #540. Best score 2464 bits

Score difference with first non-orthologous sequence - *A. fumigatus*:2464 *A. fischeri*:2464  
afum|EAL89568.1 100.00% afis|EAW24914.1 100.00%  
Bootstrap support for afum|EAL89568.1 as seed ortholog is 100%.  
Bootstrap support for afis|EAW24914.1 as seed ortholog is 100%.

---

Group of orthologs #541. Best score 2463 bits

Score difference with first non-orthologous sequence - *A. fumigatus*:2463 *A. fischeri*:2463  
afum|EAL91407.1 100.00% afis|EAW17594.1 100.00%  
Bootstrap support for afum|EAL91407.1 as seed ortholog is 100%.  
Bootstrap support for afis|EAW17594.1 as seed ortholog is 100%.

---

Group of orthologs #542. Best score 2463 bits

Score difference with first non-orthologous sequence - *A. fumigatus*:2463 *A. fischeri*:2463  
afum|EAL93873.1 100.00% afis|EAW19142.1 100.00%  
Bootstrap support for afum|EAL93873.1 as seed ortholog is 100%.  
Bootstrap support for afis|EAW19142.1 as seed ortholog is 100%.

---

Group of orthologs #543. Best score 2461 bits

Score difference with first non-orthologous sequence - *A. fumigatus*:2461 *A. fischeri*:2191  
afum|EAL87677.1 100.00% afis|EAW18311.1 100.00%  
Bootstrap support for afum|EAL87677.1 as seed ortholog is 100%.  
Bootstrap support for afis|EAW18311.1 as seed ortholog is 100%.

---

Group of orthologs #544. Best score 2461 bits

Score difference with first non-orthologous sequence - *A. fumigatus*:2461 *A. fischeri*:2169  
afum|EAL87230.1 100.00% afis|EAW23796.1 100.00%  
Bootstrap support for afum|EAL87230.1 as seed ortholog is 100%.  
Bootstrap support for afis|EAW23796.1 as seed ortholog is 100%.

---

Group of orthologs #545. Best score 2460 bits

Score difference with first non-orthologous sequence - *A. fumigatus*:2460 *A. fischeri*:2460  
afum|EAL90702.1 100.00% afis|EAW22491.1 100.00%  
Bootstrap support for afum|EAL90702.1 as seed ortholog is 100%.  
Bootstrap support for afis|EAW22491.1 as seed ortholog is 100%.

---

Group of orthologs #546. Best score 2460 bits

Score difference with first non-orthologous sequence - *A. fumigatus*:2276 *A. fischeri*:2460  
afum|EBA27302.1 100.00% afis|EAW23728.1 100.00%  
Bootstrap support for afum|EBA27302.1 as seed ortholog is 100%.  
Bootstrap support for afis|EAW23728.1 as seed ortholog is 100%.

---

Group of orthologs #547. Best score 2458 bits

Score difference with first non-orthologous sequence - *A. fumigatus*:2458 *A. fischeri*:2458  
afum|EAL85649.1 100.00% afis|EAW15699.1 100.00%  
Bootstrap support for afum|EAL85649.1 as seed ortholog is 100%.  
Bootstrap support for afis|EAW15699.1 as seed ortholog is 100%.

---

Group of orthologs #548. Best score 2458 bits

Score difference with first non-orthologous sequence - *A. fumigatus*:2458 *A. fischeri*:2458  
afum|EAL93535.1 100.00% afis|EAW18799.1 100.00%

Bootstrap support for afum|EAL93535.1 as seed ortholog is 100%.  
Bootstrap support for afis|EAW18799.1 as seed ortholog is 100%.

---

Group of orthologs #549. Best score 2455 bits

Score difference with first non-orthologous sequence - *A. fumigatus*:2455 *A. fischeri*:2455

|                 |         |                 |         |
|-----------------|---------|-----------------|---------|
| afum EAL93644.1 | 100.00% | afis EAW18913.1 | 100.00% |
|-----------------|---------|-----------------|---------|

Bootstrap support for afum|EAL93644.1 as seed ortholog is 100%.

Bootstrap support for afis|EAW18913.1 as seed ortholog is 100%.

---

Group of orthologs #550. Best score 2453 bits

Score difference with first non-orthologous sequence - *A. fumigatus*:2453 *A. fischeri*:2453

|                 |         |                 |         |
|-----------------|---------|-----------------|---------|
| afum EAL91563.1 | 100.00% | afis EAW17749.1 | 100.00% |
|-----------------|---------|-----------------|---------|

Bootstrap support for afum|EAL91563.1 as seed ortholog is 100%.

Bootstrap support for afis|EAW17749.1 as seed ortholog is 100%.

---

Group of orthologs #551. Best score 2450 bits

Score difference with first non-orthologous sequence - *A. fumigatus*:2450 *A. fischeri*:2450

|                 |         |                 |         |
|-----------------|---------|-----------------|---------|
| afum EAL88968.1 | 100.00% | afis EAW16343.1 | 100.00% |
|-----------------|---------|-----------------|---------|

Bootstrap support for afum|EAL88968.1 as seed ortholog is 100%.

Bootstrap support for afis|EAW16343.1 as seed ortholog is 100%.

---

Group of orthologs #552. Best score 2449 bits

Score difference with first non-orthologous sequence - *A. fumigatus*:2449 *A. fischeri*:2449

|                 |         |                 |         |
|-----------------|---------|-----------------|---------|
| afum EAL90999.1 | 100.00% | afis EAW22192.1 | 100.00% |
|-----------------|---------|-----------------|---------|

Bootstrap support for afum|EAL90999.1 as seed ortholog is 100%.

Bootstrap support for afis|EAW22192.1 as seed ortholog is 100%.

---

Group of orthologs #553. Best score 2447 bits

Score difference with first non-orthologous sequence - *A. fumigatus*:2447 *A. fischeri*:2447

|                 |         |                 |         |
|-----------------|---------|-----------------|---------|
| afum EAL88600.1 | 100.00% | afis EAW15967.1 | 100.00% |
|-----------------|---------|-----------------|---------|

Bootstrap support for afum|EAL88600.1 as seed ortholog is 100%.

Bootstrap support for afis|EAW15967.1 as seed ortholog is 100%.

---

Group of orthologs #554. Best score 2446 bits

Score difference with first non-orthologous sequence - *A. fumigatus*:2446 *A. fischeri*:2446

|                 |         |                 |         |
|-----------------|---------|-----------------|---------|
| afum EAL85260.1 | 100.00% | afis EAW20145.1 | 100.00% |
|-----------------|---------|-----------------|---------|

Bootstrap support for afum|EAL85260.1 as seed ortholog is 100%.

Bootstrap support for afis|EAW20145.1 as seed ortholog is 100%.

---

Group of orthologs #555. Best score 2445 bits

Score difference with first non-orthologous sequence - *A. fumigatus*:2445 *A. fischeri*:2445

|                 |         |                 |         |
|-----------------|---------|-----------------|---------|
| afum EAL84739.1 | 100.00% | afis EAW20894.1 | 100.00% |
|-----------------|---------|-----------------|---------|

Bootstrap support for afum|EAL84739.1 as seed ortholog is 100%.

Bootstrap support for afis|EAW20894.1 as seed ortholog is 100%.

---

Group of orthologs #556. Best score 2445 bits

Score difference with first non-orthologous sequence - *A. fumigatus*:2445 *A. fischeri*:2445

|                 |         |                 |         |
|-----------------|---------|-----------------|---------|
| afum EAL91013.1 | 100.00% | afis EAW22176.1 | 100.00% |
|-----------------|---------|-----------------|---------|

Bootstrap support for afum|EAL91013.1 as seed ortholog is 100%.

Bootstrap support for afis|EAW22176.1 as seed ortholog is 100%.

---

Group of orthologs #557. Best score 2445 bits

Score difference with first non-orthologous sequence - *A. fumigatus*:2445 *A. fischeri*:2445

|                 |         |                 |         |
|-----------------|---------|-----------------|---------|
| afum EAL92479.1 | 100.00% | afis EAW21460.1 | 100.00% |
|-----------------|---------|-----------------|---------|

Bootstrap support for afum|EAL92479.1 as seed ortholog is 100%.

Bootstrap support for afis|EAW21460.1 as seed ortholog is 100%.

---

Group of orthologs #558. Best score 2441 bits

Score difference with first non-orthologous sequence - *A. fumigatus*:2441 *A. fischeri*:2441

afum|EAL91419.1 100.00% afis|EAW17606.1 100.00%

Bootstrap support for afum|EAL91419.1 as seed ortholog is 100%.

Bootstrap support for afis|EAW17606.1 as seed ortholog is 100%.

---

Group of orthologs #559. Best score 2440 bits

Score difference with first non-orthologous sequence - *A. fumigatus*:2440 *A. fischeri*:2440

afum|EAL93787.1 100.00% afis|EAW19058.1 100.00%

Bootstrap support for afum|EAL93787.1 as seed ortholog is 100%.

Bootstrap support for afis|EAW19058.1 as seed ortholog is 100%.

---

Group of orthologs #560. Best score 2435 bits

Score difference with first non-orthologous sequence - *A. fumigatus*:2435 *A. fischeri*:2435

afum|EAL89515.1 100.00% afis|EAW24865.1 100.00%

Bootstrap support for afum|EAL89515.1 as seed ortholog is 100%.

Bootstrap support for afis|EAW24865.1 as seed ortholog is 100%.

---

Group of orthologs #561. Best score 2434 bits

Score difference with first non-orthologous sequence - *A. fumigatus*:2434 *A. fischeri*:2434

afum|EAL88743.1 100.00% afis|EAW16112.1 100.00%

Bootstrap support for afum|EAL88743.1 as seed ortholog is 100%.

Bootstrap support for afis|EAW16112.1 as seed ortholog is 100%.

---

Group of orthologs #562. Best score 2434 bits

Score difference with first non-orthologous sequence - *A. fumigatus*:2434 *A. fischeri*:2434

afum|EAL88480.1 100.00% afis|EAW23000.1 100.00%

Bootstrap support for afum|EAL88480.1 as seed ortholog is 100%.

Bootstrap support for afis|EAW23000.1 as seed ortholog is 100%.

---

Group of orthologs #563. Best score 2433 bits

Score difference with first non-orthologous sequence - *A. fumigatus*:2433 *A. fischeri*:2433

afum|EAL93201.1 100.00% afis|EAW18507.1 100.00%

Bootstrap support for afum|EAL93201.1 as seed ortholog is 100%.

Bootstrap support for afis|EAW18507.1 as seed ortholog is 100%.

---

Group of orthologs #564. Best score 2431 bits

Score difference with first non-orthologous sequence - *A. fumigatus*:2431 *A. fischeri*:2431

afum|EAL90611.1 100.00% afis|EAW22588.1 100.00%

Bootstrap support for afum|EAL90611.1 as seed ortholog is 100%.

Bootstrap support for afis|EAW22588.1 as seed ortholog is 100%.

---

Group of orthologs #565. Best score 2429 bits

Score difference with first non-orthologous sequence - *A. fumigatus*:2429 *A. fischeri*:2429

afum|EAL84752.1 100.00% afis|EAW20880.1 100.00%

Bootstrap support for afum|EAL84752.1 as seed ortholog is 100%.

Bootstrap support for afis|EAW20880.1 as seed ortholog is 100%.

---

Group of orthologs #566. Best score 2428 bits

Score difference with first non-orthologous sequence - *A. fumigatus*:2428 *A. fischeri*:2428

afum|EAL93440.1 100.00% afis|EAW18715.1 100.00%

Bootstrap support for afum|EAL93440.1 as seed ortholog is 100%.

Bootstrap support for afis|EAW18715.1 as seed ortholog is 100%.

---

Group of orthologs #567. Best score 2418 bits

Score difference with first non-orthologous sequence - *A. fumigatus*:2418 *A. fischeri*:2418  
afum|EAL90704.1 100.00% afis|EAW22489.1 100.00%  
Bootstrap support for afum|EAL90704.1 as seed ortholog is 100%.  
Bootstrap support for afis|EAW22489.1 as seed ortholog is 100%.

---

Group of orthologs #568. Best score 2417 bits

Score difference with first non-orthologous sequence - *A. fumigatus*:2417 *A. fischeri*:2417  
afum|EAL88554.1 100.00% afis|EAW15918.1 100.00%  
Bootstrap support for afum|EAL88554.1 as seed ortholog is 100%.  
Bootstrap support for afis|EAW15918.1 as seed ortholog is 100%.

---

Group of orthologs #569. Best score 2416 bits

Score difference with first non-orthologous sequence - *A. fumigatus*:2416 *A. fischeri*:1300  
afum|EAL84790.1 100.00% afis|EAW20842.1 100.00%  
Bootstrap support for afum|EAL84790.1 as seed ortholog is 100%.  
Bootstrap support for afis|EAW20842.1 as seed ortholog is 100%.

---

Group of orthologs #570. Best score 2414 bits

Score difference with first non-orthologous sequence - *A. fumigatus*:2414 *A. fischeri*:2414  
afum|EAL90293.1 100.00% afis|EAW22904.1 100.00%  
Bootstrap support for afum|EAL90293.1 as seed ortholog is 100%.  
Bootstrap support for afis|EAW22904.1 as seed ortholog is 100%.

---

Group of orthologs #571. Best score 2413 bits

Score difference with first non-orthologous sequence - *A. fumigatus*:2413 *A. fischeri*:2279  
afum|EAL88812.1 100.00% afis|EAW16180.1 100.00%  
Bootstrap support for afum|EAL88812.1 as seed ortholog is 100%.  
Bootstrap support for afis|EAW16180.1 as seed ortholog is 100%.

---

Group of orthologs #572. Best score 2409 bits

Score difference with first non-orthologous sequence - *A. fumigatus*:2228 *A. fischeri*:1821  
afum|EAL85682.1 100.00% afis|EAW15666.1 100.00%  
Bootstrap support for afum|EAL85682.1 as seed ortholog is 100%.  
Bootstrap support for afis|EAW15666.1 as seed ortholog is 100%.

---

Group of orthologs #573. Best score 2409 bits

Score difference with first non-orthologous sequence - *A. fumigatus*:2409 *A. fischeri*:2409  
afum|EAL90749.1 100.00% afis|EAW22442.1 100.00%  
Bootstrap support for afum|EAL90749.1 as seed ortholog is 100%.  
Bootstrap support for afis|EAW22442.1 as seed ortholog is 100%.

---

Group of orthologs #574. Best score 2409 bits

Score difference with first non-orthologous sequence - *A. fumigatus*:2409 *A. fischeri*:2409  
afum|EAL92181.1 100.00% afis|EAW21162.1 100.00%  
Bootstrap support for afum|EAL92181.1 as seed ortholog is 100%.  
Bootstrap support for afis|EAW21162.1 as seed ortholog is 100%.

---

Group of orthologs #575. Best score 2407 bits

Score difference with first non-orthologous sequence - *A. fumigatus*:2407 *A. fischeri*:2407  
afum|EAL85544.1 100.00% afis|EAW15807.1 100.00%  
Bootstrap support for afum|EAL85544.1 as seed ortholog is 100%.  
Bootstrap support for afis|EAW15807.1 as seed ortholog is 100%.

---

Group of orthologs #576. Best score 2404 bits

Score difference with first non-orthologous sequence - *A. fumigatus*:2404 *A. fischeri*:2226  
afum|EAL85951.1 100.00% afis|EAW24282.1 100.00%

Bootstrap support for afum|EAL85951.1 as seed ortholog is 100%.  
Bootstrap support for afis|EAW24282.1 as seed ortholog is 100%.

---

Group of orthologs #577. Best score 2400 bits

Score difference with first non-orthologous sequence - *A. fumigatus*:2400 *A. fischeri*:2400

|                 |         |                 |         |
|-----------------|---------|-----------------|---------|
| afum EAL86893.1 | 100.00% | afis EAW19629.1 | 100.00% |
|-----------------|---------|-----------------|---------|

Bootstrap support for afum|EAL86893.1 as seed ortholog is 100%.

Bootstrap support for afis|EAW19629.1 as seed ortholog is 100%.

---

Group of orthologs #578. Best score 2399 bits

Score difference with first non-orthologous sequence - *A. fumigatus*:2399 *A. fischeri*:2399

|                 |         |                 |         |
|-----------------|---------|-----------------|---------|
| afum EAL87469.1 | 100.00% | afis EAW18112.1 | 100.00% |
|-----------------|---------|-----------------|---------|

Bootstrap support for afum|EAL87469.1 as seed ortholog is 100%.

Bootstrap support for afis|EAW18112.1 as seed ortholog is 100%.

---

Group of orthologs #579. Best score 2399 bits

Score difference with first non-orthologous sequence - *A. fumigatus*:2399 *A. fischeri*:2399

|                 |         |                 |         |
|-----------------|---------|-----------------|---------|
| afum EAL88015.1 | 100.00% | afis EAW23451.1 | 100.00% |
|-----------------|---------|-----------------|---------|

Bootstrap support for afum|EAL88015.1 as seed ortholog is 100%.

Bootstrap support for afis|EAW23451.1 as seed ortholog is 100%.

---

Group of orthologs #580. Best score 2398 bits

Score difference with first non-orthologous sequence - *A. fumigatus*:2398 *A. fischeri*:2398

|                 |         |                 |         |
|-----------------|---------|-----------------|---------|
| afum EAL88305.1 | 100.00% | afis EAW23178.1 | 100.00% |
|-----------------|---------|-----------------|---------|

Bootstrap support for afum|EAL88305.1 as seed ortholog is 100%.

Bootstrap support for afis|EAW23178.1 as seed ortholog is 100%.

---

Group of orthologs #581. Best score 2394 bits

Score difference with first non-orthologous sequence - *A. fumigatus*:2394 *A. fischeri*:2394

|                 |         |                 |         |
|-----------------|---------|-----------------|---------|
| afum EAL88888.1 | 100.00% | afis EAW16267.1 | 100.00% |
|-----------------|---------|-----------------|---------|

Bootstrap support for afum|EAL88888.1 as seed ortholog is 100%.

Bootstrap support for afis|EAW16267.1 as seed ortholog is 100%.

---

Group of orthologs #582. Best score 2394 bits

Score difference with first non-orthologous sequence - *A. fumigatus*:2394 *A. fischeri*:2394

|                 |         |                 |         |
|-----------------|---------|-----------------|---------|
| afum EAL85301.1 | 100.00% | afis EAW20183.1 | 100.00% |
|-----------------|---------|-----------------|---------|

Bootstrap support for afum|EAL85301.1 as seed ortholog is 100%.

Bootstrap support for afis|EAW20183.1 as seed ortholog is 100%.

---

Group of orthologs #583. Best score 2394 bits

Score difference with first non-orthologous sequence - *A. fumigatus*:2394 *A. fischeri*:2394

|                 |         |                 |         |
|-----------------|---------|-----------------|---------|
| afum EAL93884.1 | 100.00% | afis EAW19153.1 | 100.00% |
|-----------------|---------|-----------------|---------|

Bootstrap support for afum|EAL93884.1 as seed ortholog is 100%.

Bootstrap support for afis|EAW19153.1 as seed ortholog is 100%.

---

Group of orthologs #584. Best score 2392 bits

Score difference with first non-orthologous sequence - *A. fumigatus*:2392 *A. fischeri*:2392

|                 |         |                 |         |
|-----------------|---------|-----------------|---------|
| afum EAL90893.1 | 100.00% | afis EAW22288.1 | 100.00% |
|-----------------|---------|-----------------|---------|

Bootstrap support for afum|EAL90893.1 as seed ortholog is 100%.

Bootstrap support for afis|EAW22288.1 as seed ortholog is 100%.

---

Group of orthologs #585. Best score 2392 bits

Score difference with first non-orthologous sequence - *A. fumigatus*:2392 *A. fischeri*:2392

|                 |         |                 |         |
|-----------------|---------|-----------------|---------|
| afum EAL90292.1 | 100.00% | afis EAW22905.1 | 100.00% |
|-----------------|---------|-----------------|---------|

Bootstrap support for afum|EAL90292.1 as seed ortholog is 100%.

Bootstrap support for afis|EAW22905.1 as seed ortholog is 100%.

---

Group of orthologs #586. Best score 2391 bits

Score difference with first non-orthologous sequence - *A. fumigatus*:2391 *A. fischeri*:2391

|                 |         |                 |         |
|-----------------|---------|-----------------|---------|
| afum EAL91792.1 | 100.00% | afis EAW17983.1 | 100.00% |
|-----------------|---------|-----------------|---------|

Bootstrap support for afum|EAL91792.1 as seed ortholog is 100%.

Bootstrap support for afis|EAW17983.1 as seed ortholog is 100%.

---

Group of orthologs #587. Best score 2390 bits

Score difference with first non-orthologous sequence - *A. fumigatus*:2390 *A. fischeri*:2390

|                 |         |                 |         |
|-----------------|---------|-----------------|---------|
| afum EAL87696.1 | 100.00% | afis EAW18331.1 | 100.00% |
|-----------------|---------|-----------------|---------|

Bootstrap support for afum|EAL87696.1 as seed ortholog is 100%.

Bootstrap support for afis|EAW18331.1 as seed ortholog is 100%.

---

Group of orthologs #588. Best score 2386 bits

Score difference with first non-orthologous sequence - *A. fumigatus*:2386 *A. fischeri*:2386

|                 |         |                 |         |
|-----------------|---------|-----------------|---------|
| afum EAL87412.1 | 100.00% | afis EAW23982.1 | 100.00% |
|-----------------|---------|-----------------|---------|

Bootstrap support for afum|EAL87412.1 as seed ortholog is 100%.

Bootstrap support for afis|EAW23982.1 as seed ortholog is 100%.

---

Group of orthologs #589. Best score 2385 bits

Score difference with first non-orthologous sequence - *A. fumigatus*:2385 *A. fischeri*:2385

|                 |         |                 |         |
|-----------------|---------|-----------------|---------|
| afum EAL92443.1 | 100.00% | afis EAW21428.1 | 100.00% |
|-----------------|---------|-----------------|---------|

Bootstrap support for afum|EAL92443.1 as seed ortholog is 100%.

Bootstrap support for afis|EAW21428.1 as seed ortholog is 100%.

---

Group of orthologs #590. Best score 2385 bits

Score difference with first non-orthologous sequence - *A. fumigatus*:2385 *A. fischeri*:2385

|                 |         |                 |         |
|-----------------|---------|-----------------|---------|
| afum EBA27407.1 | 100.00% | afis EAW22807.1 | 100.00% |
|-----------------|---------|-----------------|---------|

Bootstrap support for afum|EBA27407.1 as seed ortholog is 100%.

Bootstrap support for afis|EAW22807.1 as seed ortholog is 100%.

---

Group of orthologs #591. Best score 2384 bits

Score difference with first non-orthologous sequence - *A. fumigatus*:2384 *A. fischeri*:2290

|                 |         |                 |         |
|-----------------|---------|-----------------|---------|
| afum EAL88707.1 | 100.00% | afis EAW16075.1 | 100.00% |
|-----------------|---------|-----------------|---------|

Bootstrap support for afum|EAL88707.1 as seed ortholog is 100%.

Bootstrap support for afis|EAW16075.1 as seed ortholog is 100%.

---

Group of orthologs #592. Best score 2384 bits

Score difference with first non-orthologous sequence - *A. fumigatus*:2384 *A. fischeri*:2384

|                 |         |                 |         |
|-----------------|---------|-----------------|---------|
| afum EAL89699.1 | 100.00% | afis EAW24999.1 | 100.00% |
|-----------------|---------|-----------------|---------|

Bootstrap support for afum|EAL89699.1 as seed ortholog is 100%.

Bootstrap support for afis|EAW24999.1 as seed ortholog is 100%.

---

Group of orthologs #593. Best score 2382 bits

Score difference with first non-orthologous sequence - *A. fumigatus*:2382 *A. fischeri*:2382

|                 |         |                 |         |
|-----------------|---------|-----------------|---------|
| afum EAL92609.1 | 100.00% | afis EAW21591.1 | 100.00% |
|-----------------|---------|-----------------|---------|

Bootstrap support for afum|EAL92609.1 as seed ortholog is 100%.

Bootstrap support for afis|EAW21591.1 as seed ortholog is 100%.

---

Group of orthologs #594. Best score 2381 bits

Score difference with first non-orthologous sequence - *A. fumigatus*:2381 *A. fischeri*:2381

|                 |         |                 |         |
|-----------------|---------|-----------------|---------|
| afum EAL87922.1 | 100.00% | afis EAW23544.1 | 100.00% |
|-----------------|---------|-----------------|---------|

Bootstrap support for afum|EAL87922.1 as seed ortholog is 100%.

Bootstrap support for afis|EAW23544.1 as seed ortholog is 100%.

---

Group of orthologs #595. Best score 2373 bits

Score difference with first non-orthologous sequence - *A. fumigatus*:2373 *A. fischeri*:2373  
afum|EAL87004.1 100.00% afis|EAW19490.1 100.00%  
Bootstrap support for afum|EAL87004.1 as seed ortholog is 100%.  
Bootstrap support for afis|EAW19490.1 as seed ortholog is 100%.

---

Group of orthologs #596. Best score 2373 bits

Score difference with first non-orthologous sequence - *A. fumigatus*:2373 *A. fischeri*:1985  
afum|EAL87141.1 100.00% afis|EAW23700.1 100.00%  
Bootstrap support for afum|EAL87141.1 as seed ortholog is 100%.  
Bootstrap support for afis|EAW23700.1 as seed ortholog is 100%.

---

Group of orthologs #597. Best score 2372 bits

Score difference with first non-orthologous sequence - *A. fumigatus*:2372 *A. fischeri*:2372  
afum|EAL88520.1 100.00% afis|EAW15886.1 100.00%  
Bootstrap support for afum|EAL88520.1 as seed ortholog is 100%.  
Bootstrap support for afis|EAW15886.1 as seed ortholog is 100%.

---

Group of orthologs #598. Best score 2372 bits

Score difference with first non-orthologous sequence - *A. fumigatus*:2372 *A. fischeri*:1046  
afum|EAL84546.1 100.00% afis|EAW20510.1 100.00%  
Bootstrap support for afum|EAL84546.1 as seed ortholog is 100%.  
Bootstrap support for afis|EAW20510.1 as seed ortholog is 100%.

---

Group of orthologs #599. Best score 2372 bits

Score difference with first non-orthologous sequence - *A. fumigatus*:2372 *A. fischeri*:2372  
afum|EAL88234.2 100.00% afis|EAW23247.1 100.00%  
Bootstrap support for afum|EAL88234.2 as seed ortholog is 100%.  
Bootstrap support for afis|EAW23247.1 as seed ortholog is 100%.

---

Group of orthologs #600. Best score 2372 bits

Score difference with first non-orthologous sequence - *A. fumigatus*:2372 *A. fischeri*:2372  
afum|EAL92477.1 100.00% afis|EAW21458.1 100.00%  
Bootstrap support for afum|EAL92477.1 as seed ortholog is 100%.  
Bootstrap support for afis|EAW21458.1 as seed ortholog is 100%.

---

Group of orthologs #601. Best score 2371 bits

Score difference with first non-orthologous sequence - *A. fumigatus*:2371 *A. fischeri*:2371  
afum|EAL92565.1 100.00% afis|EAW21545.1 100.00%  
Bootstrap support for afum|EAL92565.1 as seed ortholog is 100%.  
Bootstrap support for afis|EAW21545.1 as seed ortholog is 100%.

---

Group of orthologs #602. Best score 2369 bits

Score difference with first non-orthologous sequence - *A. fumigatus*:2369 *A. fischeri*:2369  
afum|EAL91807.2 100.00% afis|EAW17997.1 100.00%  
Bootstrap support for afum|EAL91807.2 as seed ortholog is 100%.  
Bootstrap support for afis|EAW17997.1 as seed ortholog is 100%.

---

Group of orthologs #603. Best score 2368 bits

Score difference with first non-orthologous sequence - *A. fumigatus*:2368 *A. fischeri*:2368  
afum|EAL91669.2 100.00% afis|EAW17861.1 100.00%  
Bootstrap support for afum|EAL91669.2 as seed ortholog is 100%.  
Bootstrap support for afis|EAW17861.1 as seed ortholog is 100%.

---

Group of orthologs #604. Best score 2368 bits

Score difference with first non-orthologous sequence - *A. fumigatus*:2368 *A. fischeri*:2368  
afum|EAL93530.1 100.00% afis|EAW18794.1 100.00%

Bootstrap support for afum|EAL93530.1 as seed ortholog is 100%.  
Bootstrap support for afis|EAW18794.1 as seed ortholog is 100%.

---

Group of orthologs #605. Best score 2368 bits

Score difference with first non-orthologous sequence - *A. fumigatus*:2368 *A. fischeri*:831

afum|EAL89773.1 100.00% afis|EAW25102.1 100.00%

Bootstrap support for afum|EAL89773.1 as seed ortholog is 100%.

Bootstrap support for afis|EAW25102.1 as seed ortholog is 100%.

---

Group of orthologs #606. Best score 2364 bits

Score difference with first non-orthologous sequence - *A. fumigatus*:2364 *A. fischeri*:2364

afum|EAL87533.1 100.00% afis|EAW18171.1 100.00%

Bootstrap support for afum|EAL87533.1 as seed ortholog is 100%.

Bootstrap support for afis|EAW18171.1 as seed ortholog is 100%.

---

Group of orthologs #607. Best score 2363 bits

Score difference with first non-orthologous sequence - *A. fumigatus*:2363 *A. fischeri*:2363

afum|EAL89628.1 100.00% afis|EAW24969.1 100.00%

Bootstrap support for afum|EAL89628.1 as seed ortholog is 100%.

Bootstrap support for afis|EAW24969.1 as seed ortholog is 100%.

---

Group of orthologs #608. Best score 2362 bits

Score difference with first non-orthologous sequence - *A. fumigatus*:2362 *A. fischeri*:2362

afum|EAL91215.1 100.00% afis|EAW17380.1 100.00%

Bootstrap support for afum|EAL91215.1 as seed ortholog is 100%.

Bootstrap support for afis|EAW17380.1 as seed ortholog is 100%.

---

Group of orthologs #609. Best score 2361 bits

Score difference with first non-orthologous sequence - *A. fumigatus*:2361 *A. fischeri*:2361

afum|EAL86322.1 100.00% afis|EAW16747.1 100.00%

Bootstrap support for afum|EAL86322.1 as seed ortholog is 100%.

Bootstrap support for afis|EAW16747.1 as seed ortholog is 100%.

---

Group of orthologs #610. Best score 2360 bits

Score difference with first non-orthologous sequence - *A. fumigatus*:2360 *A. fischeri*:2360

afum|EAL85168.2 100.00% afis|EAW20047.1 100.00%

Bootstrap support for afum|EAL85168.2 as seed ortholog is 100%.

Bootstrap support for afis|EAW20047.1 as seed ortholog is 100%.

---

Group of orthologs #611. Best score 2360 bits

Score difference with first non-orthologous sequence - *A. fumigatus*:2360 *A. fischeri*:2360

afum|EAL93636.1 100.00% afis|EAW18904.1 100.00%

Bootstrap support for afum|EAL93636.1 as seed ortholog is 100%.

Bootstrap support for afis|EAW18904.1 as seed ortholog is 100%.

---

Group of orthologs #612. Best score 2358 bits

Score difference with first non-orthologous sequence - *A. fumigatus*:2358 *A. fischeri*:2293

afum|EAL86551.2 100.00% afis|EAW17054.1 100.00%

Bootstrap support for afum|EAL86551.2 as seed ortholog is 100%.

Bootstrap support for afis|EAW17054.1 as seed ortholog is 100%.

---

Group of orthologs #613. Best score 2356 bits

Score difference with first non-orthologous sequence - *A. fumigatus*:2356 *A. fischeri*:2356

afum|EAL84393.2 100.00% afis|EAW25718.1 100.00%

Bootstrap support for afum|EAL84393.2 as seed ortholog is 100%.

Bootstrap support for afis|EAW25718.1 as seed ortholog is 100%.



---

Group of orthologs #614. Best score 2354 bits

Score difference with first non-orthologous sequence - *A. fumigatus*:2354 *A. fischeri*:2354

|                 |         |                 |         |
|-----------------|---------|-----------------|---------|
| afum EAL85243.1 | 100.00% | afis EAW20125.1 | 100.00% |
|-----------------|---------|-----------------|---------|

Bootstrap support for afum|EAL85243.1 as seed ortholog is 100%.

Bootstrap support for afis|EAW20125.1 as seed ortholog is 100%.

---

Group of orthologs #615. Best score 2352 bits

Score difference with first non-orthologous sequence - *A. fumigatus*:2352 *A. fischeri*:2352

|                 |         |                 |         |
|-----------------|---------|-----------------|---------|
| afum EAL86053.1 | 100.00% | afis EAW24381.1 | 100.00% |
|-----------------|---------|-----------------|---------|

Bootstrap support for afum|EAL86053.1 as seed ortholog is 100%.

Bootstrap support for afis|EAW24381.1 as seed ortholog is 100%.

---

Group of orthologs #616. Best score 2349 bits

Score difference with first non-orthologous sequence - *A. fumigatus*:2349 *A. fischeri*:2061

|                 |         |                 |         |
|-----------------|---------|-----------------|---------|
| afum EAL89843.1 | 100.00% | afis EAW25170.1 | 100.00% |
|-----------------|---------|-----------------|---------|

Bootstrap support for afum|EAL89843.1 as seed ortholog is 100%.

Bootstrap support for afis|EAW25170.1 as seed ortholog is 100%.

---

Group of orthologs #617. Best score 2348 bits

Score difference with first non-orthologous sequence - *A. fumigatus*:2348 *A. fischeri*:2075

|                 |         |                 |         |
|-----------------|---------|-----------------|---------|
| afum EAL85956.1 | 100.00% | afis EAW24287.1 | 100.00% |
|-----------------|---------|-----------------|---------|

Bootstrap support for afum|EAL85956.1 as seed ortholog is 100%.

Bootstrap support for afis|EAW24287.1 as seed ortholog is 100%.

---

Group of orthologs #618. Best score 2347 bits

Score difference with first non-orthologous sequence - *A. fumigatus*:2347 *A. fischeri*:2347

|                 |         |                 |         |
|-----------------|---------|-----------------|---------|
| afum EAL84365.1 | 100.00% | afis EAW21006.1 | 100.00% |
|-----------------|---------|-----------------|---------|

Bootstrap support for afum|EAL84365.1 as seed ortholog is 100%.

Bootstrap support for afis|EAW21006.1 as seed ortholog is 100%.

---

Group of orthologs #619. Best score 2343 bits

Score difference with first non-orthologous sequence - *A. fumigatus*:2343 *A. fischeri*:2343

|                 |         |                 |         |
|-----------------|---------|-----------------|---------|
| afum EAL87485.1 | 100.00% | afis EAW18127.1 | 100.00% |
|-----------------|---------|-----------------|---------|

Bootstrap support for afum|EAL87485.1 as seed ortholog is 100%.

Bootstrap support for afis|EAW18127.1 as seed ortholog is 100%.

---

Group of orthologs #620. Best score 2343 bits

Score difference with first non-orthologous sequence - *A. fumigatus*:2343 *A. fischeri*:2343

|                 |         |                 |         |
|-----------------|---------|-----------------|---------|
| afum EAL93470.1 | 100.00% | afis EAW18744.1 | 100.00% |
|-----------------|---------|-----------------|---------|

Bootstrap support for afum|EAL93470.1 as seed ortholog is 100%.

Bootstrap support for afis|EAW18744.1 as seed ortholog is 100%.

---

Group of orthologs #621. Best score 2343 bits

Score difference with first non-orthologous sequence - *A. fumigatus*:2343 *A. fischeri*:2343

|                 |         |                 |         |
|-----------------|---------|-----------------|---------|
| afum EAL92189.2 | 100.00% | afis EAW21170.1 | 100.00% |
|-----------------|---------|-----------------|---------|

Bootstrap support for afum|EAL92189.2 as seed ortholog is 100%.

Bootstrap support for afis|EAW21170.1 as seed ortholog is 100%.

---

Group of orthologs #622. Best score 2342 bits

Score difference with first non-orthologous sequence - *A. fumigatus*:2342 *A. fischeri*:2182

|                 |         |                 |         |
|-----------------|---------|-----------------|---------|
| afum EAL92809.1 | 100.00% | afis EAW21780.1 | 100.00% |
|-----------------|---------|-----------------|---------|

Bootstrap support for afum|EAL92809.1 as seed ortholog is 100%.

Bootstrap support for afis|EAW21780.1 as seed ortholog is 100%.

---

Group of orthologs #623. Best score 2336 bits

Score difference with first non-orthologous sequence - *A. fumigatus*:2336 *A. fischeri*:2336  
afum|EAL85844.1 100.00% afis|EAW15477.1 100.00%  
Bootstrap support for afum|EAL85844.1 as seed ortholog is 100%.  
Bootstrap support for afis|EAW15477.1 as seed ortholog is 100%.

---

Group of orthologs #624. Best score 2334 bits

Score difference with first non-orthologous sequence - *A. fumigatus*:988 *A. fischeri*:1457  
afum|EAL85113.2 100.00% afis|EAW16804.1 100.00%  
Bootstrap support for afum|EAL85113.2 as seed ortholog is 100%.  
Bootstrap support for afis|EAW16804.1 as seed ortholog is 100%.

---

Group of orthologs #625. Best score 2332 bits

Score difference with first non-orthologous sequence - *A. fumigatus*:2332 *A. fischeri*:2332  
afum|EAL87382.1 100.00% afis|EAW23954.1 100.00%  
Bootstrap support for afum|EAL87382.1 as seed ortholog is 100%.  
Bootstrap support for afis|EAW23954.1 as seed ortholog is 100%.

---

Group of orthologs #626. Best score 2324 bits

Score difference with first non-orthologous sequence - *A. fumigatus*:2324 *A. fischeri*:2324  
afum|EAL87224.1 100.00% afis|EAW23790.1 100.00%  
Bootstrap support for afum|EAL87224.1 as seed ortholog is 100%.  
Bootstrap support for afis|EAW23790.1 as seed ortholog is 100%.

---

Group of orthologs #627. Best score 2321 bits

Score difference with first non-orthologous sequence - *A. fumigatus*:2321 *A. fischeri*:2321  
afum|EBA27405.1 100.00% afis|EAW22820.1 100.00%  
Bootstrap support for afum|EBA27405.1 as seed ortholog is 100%.  
Bootstrap support for afis|EAW22820.1 as seed ortholog is 100%.

---

Group of orthologs #628. Best score 2320 bits

Score difference with first non-orthologous sequence - *A. fumigatus*:2320 *A. fischeri*:2320  
afum|EAL92278.1 100.00% afis|EAW21263.1 100.00%  
Bootstrap support for afum|EAL92278.1 as seed ortholog is 100%.  
Bootstrap support for afis|EAW21263.1 as seed ortholog is 100%.

---

Group of orthologs #629. Best score 2319 bits

Score difference with first non-orthologous sequence - *A. fumigatus*:2319 *A. fischeri*:2319  
afum|EAL87623.1 100.00% afis|EAW18260.1 100.00%  
Bootstrap support for afum|EAL87623.1 as seed ortholog is 100%.  
Bootstrap support for afis|EAW18260.1 as seed ortholog is 100%.

---

Group of orthologs #630. Best score 2319 bits

Score difference with first non-orthologous sequence - *A. fumigatus*:2319 *A. fischeri*:2319  
afum|EAL88415.1 100.00% afis|EAW23064.1 100.00%  
Bootstrap support for afum|EAL88415.1 as seed ortholog is 100%.  
Bootstrap support for afis|EAW23064.1 as seed ortholog is 100%.

---

Group of orthologs #631. Best score 2319 bits

Score difference with first non-orthologous sequence - *A. fumigatus*:2319 *A. fischeri*:2319  
afum|EAL91994.1 100.00% afis|EAW24139.1 100.00%  
Bootstrap support for afum|EAL91994.1 as seed ortholog is 100%.  
Bootstrap support for afis|EAW24139.1 as seed ortholog is 100%.

---

Group of orthologs #632. Best score 2318 bits

Score difference with first non-orthologous sequence - *A. fumigatus*:2318 *A. fischeri*:2318  
afum|EAL92726.1 100.00% afis|EAW21692.1 100.00%

Bootstrap support for afum|EAL92726.1 as seed ortholog is 100%.  
Bootstrap support for afis|EAW21692.1 as seed ortholog is 100%.

---

Group of orthologs #633. Best score 2317 bits

Score difference with first non-orthologous sequence - *A. fumigatus*:2317 *A. fischeri*:2317

|                 |         |                 |         |
|-----------------|---------|-----------------|---------|
| afum EAL91408.1 | 100.00% | afis EAW17595.1 | 100.00% |
|-----------------|---------|-----------------|---------|

Bootstrap support for afum|EAL91408.1 as seed ortholog is 100%.

Bootstrap support for afis|EAW17595.1 as seed ortholog is 100%.

---

Group of orthologs #634. Best score 2317 bits

Score difference with first non-orthologous sequence - *A. fumigatus*:2317 *A. fischeri*:2317

|                 |         |                 |         |
|-----------------|---------|-----------------|---------|
| afum EBA27217.1 | 100.00% | afis EAW19848.1 | 100.00% |
|-----------------|---------|-----------------|---------|

Bootstrap support for afum|EBA27217.1 as seed ortholog is 100%.

Bootstrap support for afis|EAW19848.1 as seed ortholog is 100%.

---

Group of orthologs #635. Best score 2316 bits

Score difference with first non-orthologous sequence - *A. fumigatus*:2316 *A. fischeri*:2316

|                 |         |                 |         |
|-----------------|---------|-----------------|---------|
| afum EAL91617.1 | 100.00% | afis EAW17809.1 | 100.00% |
|-----------------|---------|-----------------|---------|

Bootstrap support for afum|EAL91617.1 as seed ortholog is 100%.

Bootstrap support for afis|EAW17809.1 as seed ortholog is 100%.

---

Group of orthologs #636. Best score 2314 bits

Score difference with first non-orthologous sequence - *A. fumigatus*:2314 *A. fischeri*:2314

|                 |         |                 |         |
|-----------------|---------|-----------------|---------|
| afum EAL87385.1 | 100.00% | afis EAW23957.1 | 100.00% |
|-----------------|---------|-----------------|---------|

Bootstrap support for afum|EAL87385.1 as seed ortholog is 100%.

Bootstrap support for afis|EAW23957.1 as seed ortholog is 100%.

---

Group of orthologs #637. Best score 2306 bits

Score difference with first non-orthologous sequence - *A. fumigatus*:2306 *A. fischeri*:2306

|                 |         |                 |         |
|-----------------|---------|-----------------|---------|
| afum EAL92998.1 | 100.00% | afis EAW21983.1 | 100.00% |
|-----------------|---------|-----------------|---------|

Bootstrap support for afum|EAL92998.1 as seed ortholog is 100%.

Bootstrap support for afis|EAW21983.1 as seed ortholog is 100%.

---

Group of orthologs #638. Best score 2305 bits

Score difference with first non-orthologous sequence - *A. fumigatus*:2305 *A. fischeri*:2305

|                 |         |                 |         |
|-----------------|---------|-----------------|---------|
| afum EBA27293.1 | 100.00% | afis EAW19625.1 | 100.00% |
|-----------------|---------|-----------------|---------|

Bootstrap support for afum|EBA27293.1 as seed ortholog is 100%.

Bootstrap support for afis|EAW19625.1 as seed ortholog is 100%.

---

Group of orthologs #639. Best score 2304 bits

Score difference with first non-orthologous sequence - *A. fumigatus*:2304 *A. fischeri*:2304

|                 |         |                 |         |
|-----------------|---------|-----------------|---------|
| afum EAL93817.1 | 100.00% | afis EAW19087.1 | 100.00% |
|-----------------|---------|-----------------|---------|

Bootstrap support for afum|EAL93817.1 as seed ortholog is 100%.

Bootstrap support for afis|EAW19087.1 as seed ortholog is 100%.

---

Group of orthologs #640. Best score 2303 bits

Score difference with first non-orthologous sequence - *A. fumigatus*:2303 *A. fischeri*:2303

|                 |         |                 |         |
|-----------------|---------|-----------------|---------|
| afum EAL87487.1 | 100.00% | afis EAW18130.1 | 100.00% |
|-----------------|---------|-----------------|---------|

Bootstrap support for afum|EAL87487.1 as seed ortholog is 100%.

Bootstrap support for afis|EAW18130.1 as seed ortholog is 100%.

---

Group of orthologs #641. Best score 2303 bits

Score difference with first non-orthologous sequence - *A. fumigatus*:2303 *A. fischeri*:2303

|                 |         |                 |         |
|-----------------|---------|-----------------|---------|
| afum EAL92203.1 | 100.00% | afis EAW21182.1 | 100.00% |
|-----------------|---------|-----------------|---------|

Bootstrap support for afum|EAL92203.1 as seed ortholog is 100%.

Bootstrap support for afis|EAW21182.1 as seed ortholog is 100%.

---

Group of orthologs #642. Best score 2302 bits

Score difference with first non-orthologous sequence - *A. fumigatus*:2302 *A. fischeri*:2302

|                 |         |                 |         |
|-----------------|---------|-----------------|---------|
| afum EAL85157.1 | 100.00% | afis EAW20036.1 | 100.00% |
|-----------------|---------|-----------------|---------|

Bootstrap support for afum|EAL85157.1 as seed ortholog is 100%.

Bootstrap support for afis|EAW20036.1 as seed ortholog is 100%.

---

Group of orthologs #643. Best score 2302 bits

Score difference with first non-orthologous sequence - *A. fumigatus*:2302 *A. fischeri*:2302

|                 |         |                 |         |
|-----------------|---------|-----------------|---------|
| afum EAL91519.2 | 100.00% | afis EAW17704.1 | 100.00% |
|-----------------|---------|-----------------|---------|

Bootstrap support for afum|EAL91519.2 as seed ortholog is 100%.

Bootstrap support for afis|EAW17704.1 as seed ortholog is 100%.

---

Group of orthologs #644. Best score 2300 bits

Score difference with first non-orthologous sequence - *A. fumigatus*:2300 *A. fischeri*:2300

|                 |         |                 |         |
|-----------------|---------|-----------------|---------|
| afum EBA27469.1 | 100.00% | afis EAW21652.1 | 100.00% |
|-----------------|---------|-----------------|---------|

Bootstrap support for afum|EBA27469.1 as seed ortholog is 100%.

Bootstrap support for afis|EAW21652.1 as seed ortholog is 100%.

---

Group of orthologs #645. Best score 2299 bits

Score difference with first non-orthologous sequence - *A. fumigatus*:2299 *A. fischeri*:2299

|                 |         |                 |         |
|-----------------|---------|-----------------|---------|
| afum EAL92923.1 | 100.00% | afis EAW21911.1 | 100.00% |
|-----------------|---------|-----------------|---------|

Bootstrap support for afum|EAL92923.1 as seed ortholog is 100%.

Bootstrap support for afis|EAW21911.1 as seed ortholog is 100%.

---

Group of orthologs #646. Best score 2298 bits

Score difference with first non-orthologous sequence - *A. fumigatus*:2298 *A. fischeri*:2298

|                 |         |                 |         |
|-----------------|---------|-----------------|---------|
| afum EAL88285.1 | 100.00% | afis EAW23198.1 | 100.00% |
|-----------------|---------|-----------------|---------|

Bootstrap support for afum|EAL88285.1 as seed ortholog is 100%.

Bootstrap support for afis|EAW23198.1 as seed ortholog is 100%.

---

Group of orthologs #647. Best score 2298 bits

Score difference with first non-orthologous sequence - *A. fumigatus*:2298 *A. fischeri*:2298

|                 |         |                 |         |
|-----------------|---------|-----------------|---------|
| afum EAL92415.1 | 100.00% | afis EAW21401.1 | 100.00% |
|-----------------|---------|-----------------|---------|

Bootstrap support for afum|EAL92415.1 as seed ortholog is 100%.

Bootstrap support for afis|EAW21401.1 as seed ortholog is 100%.

---

Group of orthologs #648. Best score 2298 bits

Score difference with first non-orthologous sequence - *A. fumigatus*:2298 *A. fischeri*:2298

|                 |         |                 |         |
|-----------------|---------|-----------------|---------|
| afum EAL91953.2 | 100.00% | afis EAW24099.1 | 100.00% |
|-----------------|---------|-----------------|---------|

Bootstrap support for afum|EAL91953.2 as seed ortholog is 100%.

Bootstrap support for afis|EAW24099.1 as seed ortholog is 100%.

---

Group of orthologs #649. Best score 2296 bits

Score difference with first non-orthologous sequence - *A. fumigatus*:2296 *A. fischeri*:2296

|                 |         |                 |         |
|-----------------|---------|-----------------|---------|
| afum EAL91950.1 | 100.00% | afis EAW24096.1 | 100.00% |
|-----------------|---------|-----------------|---------|

Bootstrap support for afum|EAL91950.1 as seed ortholog is 100%.

Bootstrap support for afis|EAW24096.1 as seed ortholog is 100%.

---

Group of orthologs #650. Best score 2295 bits

Score difference with first non-orthologous sequence - *A. fumigatus*:2295 *A. fischeri*:2295

|                 |         |                 |         |
|-----------------|---------|-----------------|---------|
| afum EAL84592.1 | 100.00% | afis EAW20461.1 | 100.00% |
|-----------------|---------|-----------------|---------|

Bootstrap support for afum|EAL84592.1 as seed ortholog is 100%.

Bootstrap support for afis|EAW20461.1 as seed ortholog is 100%.

---

Group of orthologs #651. Best score 2294 bits

Score difference with first non-orthologous sequence - *A. fumigatus*:2294 *A. fischeri*:2294  
afum|EAL92449.1 100.00% afis|EAW21434.1 100.00%  
Bootstrap support for afum|EAL92449.1 as seed ortholog is 100%.  
Bootstrap support for afis|EAW21434.1 as seed ortholog is 100%.

---

Group of orthologs #652. Best score 2294 bits

Score difference with first non-orthologous sequence - *A. fumigatus*:2294 *A. fischeri*:2294  
afum|EAL92607.1 100.00% afis|EAW21589.1 100.00%  
Bootstrap support for afum|EAL92607.1 as seed ortholog is 100%.  
Bootstrap support for afis|EAW21589.1 as seed ortholog is 100%.

---

Group of orthologs #653. Best score 2291 bits

Score difference with first non-orthologous sequence - *A. fumigatus*:2291 *A. fischeri*:2291  
afum|EAL93851.1 100.00% afis|EAW19119.1 100.00%  
Bootstrap support for afum|EAL93851.1 as seed ortholog is 100%.  
Bootstrap support for afis|EAW19119.1 as seed ortholog is 100%.

---

Group of orthologs #654. Best score 2291 bits

Score difference with first non-orthologous sequence - *A. fumigatus*:2291 *A. fischeri*:2291  
afum|EAL89909.1 100.00% afis|EAW25247.1 100.00%  
Bootstrap support for afum|EAL89909.1 as seed ortholog is 100%.  
Bootstrap support for afis|EAW25247.1 as seed ortholog is 100%.

---

Group of orthologs #655. Best score 2288 bits

Score difference with first non-orthologous sequence - *A. fumigatus*:2288 *A. fischeri*:2288  
afum|EAL85787.1 100.00% afis|EAW15544.1 100.00%  
Bootstrap support for afum|EAL85787.1 as seed ortholog is 100%.  
Bootstrap support for afis|EAW15544.1 as seed ortholog is 100%.

---

Group of orthologs #656. Best score 2288 bits

Score difference with first non-orthologous sequence - *A. fumigatus*:2288 *A. fischeri*:2288  
afum|EAL90867.1 100.00% afis|EAW22325.1 100.00%  
Bootstrap support for afum|EAL90867.1 as seed ortholog is 100%.  
Bootstrap support for afis|EAW22325.1 as seed ortholog is 100%.

---

Group of orthologs #657. Best score 2286 bits

Score difference with first non-orthologous sequence - *A. fumigatus*:2286 *A. fischeri*:2286  
afum|EAL92556.2 100.00% afis|EAW21536.1 100.00%  
Bootstrap support for afum|EAL92556.2 as seed ortholog is 100%.  
Bootstrap support for afis|EAW21536.1 as seed ortholog is 100%.

---

Group of orthologs #658. Best score 2285 bits

Score difference with first non-orthologous sequence - *A. fumigatus*:2285 *A. fischeri*:2285  
afum|EAL90987.2 100.00% afis|EAW22206.1 100.00%  
Bootstrap support for afum|EAL90987.2 as seed ortholog is 100%.  
Bootstrap support for afis|EAW22206.1 as seed ortholog is 100%.

---

Group of orthologs #659. Best score 2281 bits

Score difference with first non-orthologous sequence - *A. fumigatus*:2281 *A. fischeri*:2281  
afum|EAL87882.1 100.00% afis|EAW23582.1 100.00%  
Bootstrap support for afum|EAL87882.1 as seed ortholog is 100%.  
Bootstrap support for afis|EAW23582.1 as seed ortholog is 100%.

---

Group of orthologs #660. Best score 2278 bits

Score difference with first non-orthologous sequence - *A. fumigatus*:2278 *A. fischeri*:2278  
afum|EAL90221.1 100.00% afis|EAW22976.1 100.00%

Bootstrap support for afum|EAL90221.1 as seed ortholog is 100%.  
Bootstrap support for afis|EAW22976.1 as seed ortholog is 100%.

---

Group of orthologs #661. Best score 2276 bits

Score difference with first non-orthologous sequence - *A. fumigatus*:2276 *A. fischeri*:2276

|                 |         |                 |         |
|-----------------|---------|-----------------|---------|
| afum EAL85866.1 | 100.00% | afis EAW24194.1 | 100.00% |
|-----------------|---------|-----------------|---------|

Bootstrap support for afum|EAL85866.1 as seed ortholog is 100%.

Bootstrap support for afis|EAW24194.1 as seed ortholog is 100%.

---

Group of orthologs #662. Best score 2274 bits

Score difference with first non-orthologous sequence - *A. fumigatus*:2274 *A. fischeri*:2274

|                 |         |                 |         |
|-----------------|---------|-----------------|---------|
| afum EAL85549.2 | 100.00% | afis EAW15801.1 | 100.00% |
|-----------------|---------|-----------------|---------|

Bootstrap support for afum|EAL85549.2 as seed ortholog is 100%.

Bootstrap support for afis|EAW15801.1 as seed ortholog is 100%.

---

Group of orthologs #663. Best score 2272 bits

Score difference with first non-orthologous sequence - *A. fumigatus*:2272 *A. fischeri*:2272

|                 |         |                 |         |
|-----------------|---------|-----------------|---------|
| afum EAL87969.1 | 100.00% | afis EAW23494.1 | 100.00% |
|-----------------|---------|-----------------|---------|

Bootstrap support for afum|EAL87969.1 as seed ortholog is 100%.

Bootstrap support for afis|EAW23494.1 as seed ortholog is 100%.

---

Group of orthologs #664. Best score 2272 bits

Score difference with first non-orthologous sequence - *A. fumigatus*:2272 *A. fischeri*:2272

|                 |         |                 |         |
|-----------------|---------|-----------------|---------|
| afum EAL93765.2 | 100.00% | afis EAW19036.1 | 100.00% |
|-----------------|---------|-----------------|---------|

Bootstrap support for afum|EAL93765.2 as seed ortholog is 100%.

Bootstrap support for afis|EAW19036.1 as seed ortholog is 100%.

---

Group of orthologs #665. Best score 2271 bits

Score difference with first non-orthologous sequence - *A. fumigatus*:2271 *A. fischeri*:2271

|                 |         |                 |         |
|-----------------|---------|-----------------|---------|
| afum EBA27315.1 | 100.00% | afis EAW18169.1 | 100.00% |
|-----------------|---------|-----------------|---------|

Bootstrap support for afum|EBA27315.1 as seed ortholog is 100%.

Bootstrap support for afis|EAW18169.1 as seed ortholog is 100%.

---

Group of orthologs #666. Best score 2269 bits

Score difference with first non-orthologous sequence - *A. fumigatus*:2026 *A. fischeri*:2269

|                 |         |                 |         |
|-----------------|---------|-----------------|---------|
| afum EAL84317.1 | 100.00% | afis EAW25629.1 | 100.00% |
|-----------------|---------|-----------------|---------|

Bootstrap support for afum|EAL84317.1 as seed ortholog is 100%.

Bootstrap support for afis|EAW25629.1 as seed ortholog is 100%.

---

Group of orthologs #667. Best score 2266 bits

Score difference with first non-orthologous sequence - *A. fumigatus*:2266 *A. fischeri*:2266

|                 |         |                 |         |
|-----------------|---------|-----------------|---------|
| afum EAL85638.1 | 100.00% | afis EAW15709.1 | 100.00% |
|-----------------|---------|-----------------|---------|

Bootstrap support for afum|EAL85638.1 as seed ortholog is 100%.

Bootstrap support for afis|EAW15709.1 as seed ortholog is 100%.

---

Group of orthologs #668. Best score 2265 bits

Score difference with first non-orthologous sequence - *A. fumigatus*:2265 *A. fischeri*:2265

|                 |         |                 |         |
|-----------------|---------|-----------------|---------|
| afum EAL91819.1 | 100.00% | afis EAW18007.1 | 100.00% |
|-----------------|---------|-----------------|---------|

Bootstrap support for afum|EAL91819.1 as seed ortholog is 100%.

Bootstrap support for afis|EAW18007.1 as seed ortholog is 100%.

---

Group of orthologs #669. Best score 2265 bits

Score difference with first non-orthologous sequence - *A. fumigatus*:2265 *A. fischeri*:2265

|                 |         |                 |         |
|-----------------|---------|-----------------|---------|
| afum EAL92978.2 | 100.00% | afis EAW21964.1 | 100.00% |
|-----------------|---------|-----------------|---------|

Bootstrap support for afum|EAL92978.2 as seed ortholog is 100%.

Bootstrap support for afis|EAW21964.1 as seed ortholog is 100%.

---

Group of orthologs #670. Best score 2263 bits

Score difference with first non-orthologous sequence - *A. fumigatus*:2263 *A. fischeri*:2263

|                 |         |                 |         |
|-----------------|---------|-----------------|---------|
| afum EAL93977.1 | 100.00% | afis EAW19248.1 | 100.00% |
|-----------------|---------|-----------------|---------|

Bootstrap support for afum|EAL93977.1 as seed ortholog is 100%.

Bootstrap support for afis|EAW19248.1 as seed ortholog is 100%.

---

Group of orthologs #671. Best score 2262 bits

Score difference with first non-orthologous sequence - *A. fumigatus*:2262 *A. fischeri*:2262

|                 |         |                 |         |
|-----------------|---------|-----------------|---------|
| afum EAL85611.1 | 100.00% | afis EAW15737.1 | 100.00% |
|-----------------|---------|-----------------|---------|

Bootstrap support for afum|EAL85611.1 as seed ortholog is 100%.

Bootstrap support for afis|EAW15737.1 as seed ortholog is 100%.

---

Group of orthologs #672. Best score 2262 bits

Score difference with first non-orthologous sequence - *A. fumigatus*:2262 *A. fischeri*:2262

|                 |         |                 |         |
|-----------------|---------|-----------------|---------|
| afum EAL87980.1 | 100.00% | afis EAW23483.1 | 100.00% |
|-----------------|---------|-----------------|---------|

Bootstrap support for afum|EAL87980.1 as seed ortholog is 100%.

Bootstrap support for afis|EAW23483.1 as seed ortholog is 100%.

---

Group of orthologs #673. Best score 2260 bits

Score difference with first non-orthologous sequence - *A. fumigatus*:2260 *A. fischeri*:2029

|                 |         |                 |         |
|-----------------|---------|-----------------|---------|
| afum EAL86228.1 | 100.00% | afis EAW24565.1 | 100.00% |
|-----------------|---------|-----------------|---------|

Bootstrap support for afum|EAL86228.1 as seed ortholog is 100%.

Bootstrap support for afis|EAW24565.1 as seed ortholog is 100%.

---

Group of orthologs #674. Best score 2259 bits

Score difference with first non-orthologous sequence - *A. fumigatus*:2259 *A. fischeri*:2259

|                 |         |                 |         |
|-----------------|---------|-----------------|---------|
| afum EAL90918.1 | 100.00% | afis EAW22262.1 | 100.00% |
|-----------------|---------|-----------------|---------|

Bootstrap support for afum|EAL90918.1 as seed ortholog is 100%.

Bootstrap support for afis|EAW22262.1 as seed ortholog is 100%.

---

Group of orthologs #675. Best score 2259 bits

Score difference with first non-orthologous sequence - *A. fumigatus*:2259 *A. fischeri*:2259

|                 |         |                 |         |
|-----------------|---------|-----------------|---------|
| afum EAL89963.2 | 100.00% | afis EAW25300.1 | 100.00% |
|-----------------|---------|-----------------|---------|

Bootstrap support for afum|EAL89963.2 as seed ortholog is 100%.

Bootstrap support for afis|EAW25300.1 as seed ortholog is 100%.

---

Group of orthologs #676. Best score 2256 bits

Score difference with first non-orthologous sequence - *A. fumigatus*:2256 *A. fischeri*:2256

|                 |         |                 |         |
|-----------------|---------|-----------------|---------|
| afum EAL91210.1 | 100.00% | afis EAW17374.1 | 100.00% |
|-----------------|---------|-----------------|---------|

Bootstrap support for afum|EAL91210.1 as seed ortholog is 100%.

Bootstrap support for afis|EAW17374.1 as seed ortholog is 100%.

---

Group of orthologs #677. Best score 2256 bits

Score difference with first non-orthologous sequence - *A. fumigatus*:2256 *A. fischeri*:2256

|                 |         |                 |         |
|-----------------|---------|-----------------|---------|
| afum EAL90450.1 | 100.00% | afis EAW22749.1 | 100.00% |
|-----------------|---------|-----------------|---------|

Bootstrap support for afum|EAL90450.1 as seed ortholog is 100%.

Bootstrap support for afis|EAW22749.1 as seed ortholog is 100%.

---

Group of orthologs #678. Best score 2255 bits

Score difference with first non-orthologous sequence - *A. fumigatus*:2255 *A. fischeri*:2255

|                 |         |                 |         |
|-----------------|---------|-----------------|---------|
| afum EAL88976.1 | 100.00% | afis EAW16351.1 | 100.00% |
|-----------------|---------|-----------------|---------|

Bootstrap support for afum|EAL88976.1 as seed ortholog is 100%.

Bootstrap support for afis|EAW16351.1 as seed ortholog is 100%.

---

Group of orthologs #679. Best score 2254 bits

Score difference with first non-orthologous sequence - *A. fumigatus*:2254 *A. fischeri*:2254  
afum|EAL87374.1 100.00% afis|EAW23948.1 100.00%  
Bootstrap support for afum|EAL87374.1 as seed ortholog is 100%.  
Bootstrap support for afis|EAW23948.1 as seed ortholog is 100%.

---

Group of orthologs #680. Best score 2253 bits

Score difference with first non-orthologous sequence - *A. fumigatus*:2253 *A. fischeri*:1901  
afum|EAL88529.1 100.00% afis|EAW15894.1 100.00%  
Bootstrap support for afum|EAL88529.1 as seed ortholog is 100%.  
Bootstrap support for afis|EAW15894.1 as seed ortholog is 100%.

---

Group of orthologs #681. Best score 2253 bits

Score difference with first non-orthologous sequence - *A. fumigatus*:2253 *A. fischeri*:2253  
afum|EAL90033.1 100.00% afis|EAW25373.1 100.00%  
Bootstrap support for afum|EAL90033.1 as seed ortholog is 100%.  
Bootstrap support for afis|EAW25373.1 as seed ortholog is 100%.

---

Group of orthologs #682. Best score 2252 bits

Score difference with first non-orthologous sequence - *A. fumigatus*:2252 *A. fischeri*:2252  
afum|EAL92216.1 100.00% afis|EAW21205.1 100.00%  
Bootstrap support for afum|EAL92216.1 as seed ortholog is 100%.  
Bootstrap support for afis|EAW21205.1 as seed ortholog is 100%.

---

Group of orthologs #683. Best score 2251 bits

Score difference with first non-orthologous sequence - *A. fumigatus*:2251 *A. fischeri*:2251  
afum|EBA27384.1 100.00% afis|EAW24972.1 100.00%  
Bootstrap support for afum|EBA27384.1 as seed ortholog is 100%.  
Bootstrap support for afis|EAW24972.1 as seed ortholog is 100%.

---

Group of orthologs #684. Best score 2250 bits

Score difference with first non-orthologous sequence - *A. fumigatus*:2250 *A. fischeri*:2250  
afum|EAL92520.1 100.00% afis|EAW21501.1 100.00%  
Bootstrap support for afum|EAL92520.1 as seed ortholog is 100%.  
Bootstrap support for afis|EAW21501.1 as seed ortholog is 100%.

---

Group of orthologs #685. Best score 2250 bits

Score difference with first non-orthologous sequence - *A. fumigatus*:2250 *A. fischeri*:2250  
afum|EAL89549.1 100.00% afis|EAW24895.1 100.00%  
Bootstrap support for afum|EAL89549.1 as seed ortholog is 100%.  
Bootstrap support for afis|EAW24895.1 as seed ortholog is 100%.

---

Group of orthologs #686. Best score 2245 bits

Score difference with first non-orthologous sequence - *A. fumigatus*:2245 *A. fischeri*:2245  
afum|EAL89075.1 100.00% afis|EAW16481.1 100.00%  
Bootstrap support for afum|EAL89075.1 as seed ortholog is 100%.  
Bootstrap support for afis|EAW16481.1 as seed ortholog is 100%.

---

Group of orthologs #687. Best score 2244 bits

Score difference with first non-orthologous sequence - *A. fumigatus*:2244 *A. fischeri*:2244  
afum|EAL86875.1 100.00% afis|EAW19647.1 100.00%  
Bootstrap support for afum|EAL86875.1 as seed ortholog is 100%.  
Bootstrap support for afis|EAW19647.1 as seed ortholog is 100%.

---

Group of orthologs #688. Best score 2244 bits

Score difference with first non-orthologous sequence - *A. fumigatus*:2244 *A. fischeri*:2244  
afum|EAL88308.1 100.00% afis|EAW23175.1 100.00%



Bootstrap support for afum|EAL88308.1 as seed ortholog is 100%.  
Bootstrap support for afis|EAW23175.1 as seed ortholog is 100%.

---

Group of orthologs #689. Best score 2242 bits

Score difference with first non-orthologous sequence - *A. fumigatus*:2242 *A. fischeri*:2242

|                 |         |                 |         |
|-----------------|---------|-----------------|---------|
| afum EAL84578.1 | 100.00% | afis EAW20475.1 | 100.00% |
|-----------------|---------|-----------------|---------|

Bootstrap support for afum|EAL84578.1 as seed ortholog is 100%.

Bootstrap support for afis|EAW20475.1 as seed ortholog is 100%.

---

Group of orthologs #690. Best score 2242 bits

Score difference with first non-orthologous sequence - *A. fumigatus*:2242 *A. fischeri*:2242

|                 |         |                 |         |
|-----------------|---------|-----------------|---------|
| afum EAL93007.1 | 100.00% | afis EAW21992.1 | 100.00% |
|-----------------|---------|-----------------|---------|

Bootstrap support for afum|EAL93007.1 as seed ortholog is 100%.

Bootstrap support for afis|EAW21992.1 as seed ortholog is 100%.

---

Group of orthologs #691. Best score 2239 bits

Score difference with first non-orthologous sequence - *A. fumigatus*:2239 *A. fischeri*:2239

|                 |         |                 |         |
|-----------------|---------|-----------------|---------|
| afum EAL90424.1 | 100.00% | afis EAW22774.1 | 100.00% |
|-----------------|---------|-----------------|---------|

Bootstrap support for afum|EAL90424.1 as seed ortholog is 100%.

Bootstrap support for afis|EAW22774.1 as seed ortholog is 100%.

---

Group of orthologs #692. Best score 2238 bits

Score difference with first non-orthologous sequence - *A. fumigatus*:2238 *A. fischeri*:2238

|                 |         |                 |         |
|-----------------|---------|-----------------|---------|
| afum EAL89123.2 | 100.00% | afis EAW16527.1 | 100.00% |
|-----------------|---------|-----------------|---------|

Bootstrap support for afum|EAL89123.2 as seed ortholog is 100%.

Bootstrap support for afis|EAW16527.1 as seed ortholog is 100%.

---

Group of orthologs #693. Best score 2237 bits

Score difference with first non-orthologous sequence - *A. fumigatus*:2237 *A. fischeri*:2237

|                 |         |                 |         |
|-----------------|---------|-----------------|---------|
| afum EAL90836.1 | 100.00% | afis EAW22355.1 | 100.00% |
|-----------------|---------|-----------------|---------|

Bootstrap support for afum|EAL90836.1 as seed ortholog is 100%.

Bootstrap support for afis|EAW22355.1 as seed ortholog is 100%.

---

Group of orthologs #694. Best score 2237 bits

Score difference with first non-orthologous sequence - *A. fumigatus*:2237 *A. fischeri*:886

|                 |         |                 |         |
|-----------------|---------|-----------------|---------|
| afum EAL92146.1 | 100.00% | afis EAW21123.1 | 100.00% |
|-----------------|---------|-----------------|---------|

Bootstrap support for afum|EAL92146.1 as seed ortholog is 100%.

Bootstrap support for afis|EAW21123.1 as seed ortholog is 100%.

---

Group of orthologs #695. Best score 2237 bits

Score difference with first non-orthologous sequence - *A. fumigatus*:2237 *A. fischeri*:2237

|                 |         |                 |         |
|-----------------|---------|-----------------|---------|
| afum EAL92712.1 | 100.00% | afis EAW21678.1 | 100.00% |
|-----------------|---------|-----------------|---------|

Bootstrap support for afum|EAL92712.1 as seed ortholog is 100%.

Bootstrap support for afis|EAW21678.1 as seed ortholog is 100%.

---

Group of orthologs #696. Best score 2237 bits

Score difference with first non-orthologous sequence - *A. fumigatus*:2237 *A. fischeri*:2237

|                 |         |                 |         |
|-----------------|---------|-----------------|---------|
| afum EAL90062.1 | 100.00% | afis EAW25403.1 | 100.00% |
|-----------------|---------|-----------------|---------|

Bootstrap support for afum|EAL90062.1 as seed ortholog is 100%.

Bootstrap support for afis|EAW25403.1 as seed ortholog is 100%.

---

Group of orthologs #697. Best score 2236 bits

Score difference with first non-orthologous sequence - *A. fumigatus*:2236 *A. fischeri*:2236

|                 |         |                 |         |
|-----------------|---------|-----------------|---------|
| afum EAL88669.1 | 100.00% | afis EAW16038.1 | 100.00% |
|-----------------|---------|-----------------|---------|

Bootstrap support for afum|EAL88669.1 as seed ortholog is 100%.

Bootstrap support for afis|EAW16038.1 as seed ortholog is 100%.

---

Group of orthologs #698. Best score 2234 bits

Score difference with first non-orthologous sequence - *A. fumigatus*:2234 *A. fischeri*:2234

|                 |         |                 |         |
|-----------------|---------|-----------------|---------|
| afum EAL88611.1 | 100.00% | afis EAW15979.1 | 100.00% |
|-----------------|---------|-----------------|---------|

Bootstrap support for afum|EAL88611.1 as seed ortholog is 100%.

Bootstrap support for afis|EAW15979.1 as seed ortholog is 100%.

---

Group of orthologs #699. Best score 2234 bits

Score difference with first non-orthologous sequence - *A. fumigatus*:2234 *A. fischeri*:2234

|                 |         |                 |         |
|-----------------|---------|-----------------|---------|
| afum EAL93669.2 | 100.00% | afis EAW18936.1 | 100.00% |
|-----------------|---------|-----------------|---------|

Bootstrap support for afum|EAL93669.2 as seed ortholog is 100%.

Bootstrap support for afis|EAW18936.1 as seed ortholog is 100%.

---

Group of orthologs #700. Best score 2234 bits

Score difference with first non-orthologous sequence - *A. fumigatus*:2234 *A. fischeri*:1484

|                 |         |                 |         |
|-----------------|---------|-----------------|---------|
| afum EAL90777.1 | 100.00% | afis EAW22415.1 | 100.00% |
|-----------------|---------|-----------------|---------|

Bootstrap support for afum|EAL90777.1 as seed ortholog is 100%.

Bootstrap support for afis|EAW22415.1 as seed ortholog is 100%.

---

Group of orthologs #701. Best score 2233 bits

Score difference with first non-orthologous sequence - *A. fumigatus*:2233 *A. fischeri*:2233

|                 |         |                 |         |
|-----------------|---------|-----------------|---------|
| afum EAL84534.1 | 100.00% | afis EAW20523.1 | 100.00% |
|-----------------|---------|-----------------|---------|

Bootstrap support for afum|EAL84534.1 as seed ortholog is 100%.

Bootstrap support for afis|EAW20523.1 as seed ortholog is 100%.

---

Group of orthologs #702. Best score 2233 bits

Score difference with first non-orthologous sequence - *A. fumigatus*:2233 *A. fischeri*:2233

|                 |         |                 |         |
|-----------------|---------|-----------------|---------|
| afum EAL85175.2 | 100.00% | afis EAW20055.1 | 100.00% |
|-----------------|---------|-----------------|---------|

Bootstrap support for afum|EAL85175.2 as seed ortholog is 100%.

Bootstrap support for afis|EAW20055.1 as seed ortholog is 100%.

---

Group of orthologs #703. Best score 2232 bits

Score difference with first non-orthologous sequence - *A. fumigatus*:2232 *A. fischeri*:2232

|                 |         |                 |         |
|-----------------|---------|-----------------|---------|
| afum EAL90184.1 | 100.00% | afis EAW25519.1 | 100.00% |
|-----------------|---------|-----------------|---------|

Bootstrap support for afum|EAL90184.1 as seed ortholog is 100%.

Bootstrap support for afis|EAW25519.1 as seed ortholog is 100%.

---

Group of orthologs #704. Best score 2231 bits

Score difference with first non-orthologous sequence - *A. fumigatus*:2231 *A. fischeri*:1583

|                 |         |                 |         |
|-----------------|---------|-----------------|---------|
| afum EAL87284.1 | 100.00% | afis EAW23856.1 | 100.00% |
|-----------------|---------|-----------------|---------|

Bootstrap support for afum|EAL87284.1 as seed ortholog is 100%.

Bootstrap support for afis|EAW23856.1 as seed ortholog is 100%.

---

Group of orthologs #705. Best score 2229 bits

Score difference with first non-orthologous sequence - *A. fumigatus*:2229 *A. fischeri*:2229

|                 |         |                 |         |
|-----------------|---------|-----------------|---------|
| afum EAL89194.1 | 100.00% | afis EAW16598.1 | 100.00% |
|-----------------|---------|-----------------|---------|

Bootstrap support for afum|EAL89194.1 as seed ortholog is 100%.

Bootstrap support for afis|EAW16598.1 as seed ortholog is 100%.

---

Group of orthologs #706. Best score 2229 bits

Score difference with first non-orthologous sequence - *A. fumigatus*:2229 *A. fischeri*:2229

|                 |         |                 |         |
|-----------------|---------|-----------------|---------|
| afum EAL87570.1 | 100.00% | afis EAW18205.1 | 100.00% |
|-----------------|---------|-----------------|---------|

Bootstrap support for afum|EAL87570.1 as seed ortholog is 100%.

Bootstrap support for afis|EAW18205.1 as seed ortholog is 100%.

---

Group of orthologs #707. Best score 2229 bits

Score difference with first non-orthologous sequence - *A. fumigatus*:2229 *A. fischeri*:2229  
afum|EAL93894.1 100.00% afis|EAW19164.1 100.00%  
Bootstrap support for afum|EAL93894.1 as seed ortholog is 100%.  
Bootstrap support for afis|EAW19164.1 as seed ortholog is 100%.

---

Group of orthologs #708. Best score 2225 bits

Score difference with first non-orthologous sequence - *A. fumigatus*:2225 *A. fischeri*:2225  
afum|EAL85435.2 100.00% afis|EAW20307.1 100.00%  
Bootstrap support for afum|EAL85435.2 as seed ortholog is 100%.  
Bootstrap support for afis|EAW20307.1 as seed ortholog is 100%.

---

Group of orthologs #709. Best score 2225 bits

Score difference with first non-orthologous sequence - *A. fumigatus*:2225 *A. fischeri*:2225  
afum|EAL88363.1 100.00% afis|EAW23117.1 100.00%  
Bootstrap support for afum|EAL88363.1 as seed ortholog is 100%.  
Bootstrap support for afis|EAW23117.1 as seed ortholog is 100%.

---

Group of orthologs #710. Best score 2221 bits

Score difference with first non-orthologous sequence - *A. fumigatus*:2221 *A. fischeri*:2221  
afum|EAL87076.1 100.00% afis|EAW19418.1 100.00%  
Bootstrap support for afum|EAL87076.1 as seed ortholog is 100%.  
Bootstrap support for afis|EAW19418.1 as seed ortholog is 100%.

---

Group of orthologs #711. Best score 2221 bits

Score difference with first non-orthologous sequence - *A. fumigatus*:2221 *A. fischeri*:2221  
afum|EAL88138.1 100.00% afis|EAW23340.1 100.00%  
Bootstrap support for afum|EAL88138.1 as seed ortholog is 100%.  
Bootstrap support for afis|EAW23340.1 as seed ortholog is 100%.

---

Group of orthologs #712. Best score 2221 bits

Score difference with first non-orthologous sequence - *A. fumigatus*:2221 *A. fischeri*:2221  
afum|EAL93795.1 100.00% afis|EAW19066.1 100.00%  
Bootstrap support for afum|EAL93795.1 as seed ortholog is 100%.  
Bootstrap support for afis|EAW19066.1 as seed ortholog is 100%.

---

Group of orthologs #713. Best score 2221 bits

Score difference with first non-orthologous sequence - *A. fumigatus*:2221 *A. fischeri*:2221  
afum|EAL93980.1 100.00% afis|EAW19251.1 100.00%  
Bootstrap support for afum|EAL93980.1 as seed ortholog is 100%.  
Bootstrap support for afis|EAW19251.1 as seed ortholog is 100%.

---

Group of orthologs #714. Best score 2221 bits

Score difference with first non-orthologous sequence - *A. fumigatus*:2221 *A. fischeri*:2221  
afum|EAL92596.1 100.00% afis|EAW21578.1 100.00%  
Bootstrap support for afum|EAL92596.1 as seed ortholog is 100%.  
Bootstrap support for afis|EAW21578.1 as seed ortholog is 100%.

---

Group of orthologs #715. Best score 2221 bits

Score difference with first non-orthologous sequence - *A. fumigatus*:2221 *A. fischeri*:2221  
afum|EAL89882.1 100.00% afis|EAW25221.1 100.00%  
Bootstrap support for afum|EAL89882.1 as seed ortholog is 100%.  
Bootstrap support for afis|EAW25221.1 as seed ortholog is 100%.

---

Group of orthologs #716. Best score 2220 bits

Score difference with first non-orthologous sequence - *A. fumigatus*:1926 *A. fischeri*:2220  
afum|EAL87088.1 100.00% afis|EAW19406.1 100.00%

Bootstrap support for afum|EAL87088.1 as seed ortholog is 100%.  
Bootstrap support for afis|EAW19406.1 as seed ortholog is 100%.

---

Group of orthologs #717. Best score 2218 bits

Score difference with first non-orthologous sequence - *A. fumigatus*:2218 *A. fischeri*:2218

afum|EAL87082.1 100.00% afis|EAW19412.1 100.00%

Bootstrap support for afum|EAL87082.1 as seed ortholog is 100%.

Bootstrap support for afis|EAW19412.1 as seed ortholog is 100%.

---

Group of orthologs #718. Best score 2218 bits

Score difference with first non-orthologous sequence - *A. fumigatus*:2218 *A. fischeri*:2218

afum|EAL93585.1 100.00% afis|EAW18854.1 100.00%

Bootstrap support for afum|EAL93585.1 as seed ortholog is 100%.

Bootstrap support for afis|EAW18854.1 as seed ortholog is 100%.

---

Group of orthologs #719. Best score 2212 bits

Score difference with first non-orthologous sequence - *A. fumigatus*:2212 *A. fischeri*:2212

afum|EAL88133.1 100.00% afis|EAW23344.1 100.00%

Bootstrap support for afum|EAL88133.1 as seed ortholog is 100%.

Bootstrap support for afis|EAW23344.1 as seed ortholog is 100%.

---

Group of orthologs #720. Best score 2212 bits

Score difference with first non-orthologous sequence - *A. fumigatus*:2212 *A. fischeri*:2212

afum|EAL92434.1 100.00% afis|EAW21419.1 100.00%

Bootstrap support for afum|EAL92434.1 as seed ortholog is 100%.

Bootstrap support for afis|EAW21419.1 as seed ortholog is 100%.

---

Group of orthologs #721. Best score 2211 bits

Score difference with first non-orthologous sequence - *A. fumigatus*:2211 *A. fischeri*:2211

afum|EAL91842.1 100.00% afis|EAW18031.1 100.00%

Bootstrap support for afum|EAL91842.1 as seed ortholog is 100%.

Bootstrap support for afis|EAW18031.1 as seed ortholog is 100%.

---

Group of orthologs #722. Best score 2211 bits

Score difference with first non-orthologous sequence - *A. fumigatus*:2211 *A. fischeri*:2211

afum|EAL87465.1 100.00% afis|EAW24034.1 100.00%

Bootstrap support for afum|EAL87465.1 as seed ortholog is 100%.

Bootstrap support for afis|EAW24034.1 as seed ortholog is 100%.

---

Group of orthologs #723. Best score 2210 bits

Score difference with first non-orthologous sequence - *A. fumigatus*:2210 *A. fischeri*:2210

afum|EAL91992.1 100.00% afis|EAW24137.1 100.00%

Bootstrap support for afum|EAL91992.1 as seed ortholog is 100%.

Bootstrap support for afis|EAW24137.1 as seed ortholog is 100%.

---

Group of orthologs #724. Best score 2209 bits

Score difference with first non-orthologous sequence - *A. fumigatus*:2209 *A. fischeri*:2209

afum|EAL88966.1 100.00% afis|EAW16341.1 100.00%

Bootstrap support for afum|EAL88966.1 as seed ortholog is 100%.

Bootstrap support for afis|EAW16341.1 as seed ortholog is 100%.

---

Group of orthologs #725. Best score 2209 bits

Score difference with first non-orthologous sequence - *A. fumigatus*:2209 *A. fischeri*:2209

afum|EAL90491.1 100.00% afis|EAW22701.1 100.00%

Bootstrap support for afum|EAL90491.1 as seed ortholog is 100%.

Bootstrap support for afis|EAW22701.1 as seed ortholog is 100%.

---

Group of orthologs #726. Best score 2208 bits

Score difference with first non-orthologous sequence - *A. fumigatus*:2208 *A. fischeri*:2208

|                 |         |                 |         |
|-----------------|---------|-----------------|---------|
| afum EAL92409.1 | 100.00% | afis EAW21395.1 | 100.00% |
|-----------------|---------|-----------------|---------|

Bootstrap support for afum|EAL92409.1 as seed ortholog is 100%.

Bootstrap support for afis|EAW21395.1 as seed ortholog is 100%.

---

Group of orthologs #727. Best score 2207 bits

Score difference with first non-orthologous sequence - *A. fumigatus*:2207 *A. fischeri*:2207

|                 |         |                 |         |
|-----------------|---------|-----------------|---------|
| afum EAL91674.1 | 100.00% | afis EAW17866.1 | 100.00% |
|-----------------|---------|-----------------|---------|

Bootstrap support for afum|EAL91674.1 as seed ortholog is 100%.

Bootstrap support for afis|EAW17866.1 as seed ortholog is 100%.

---

Group of orthologs #728. Best score 2206 bits

Score difference with first non-orthologous sequence - *A. fumigatus*:2206 *A. fischeri*:2206

|                 |         |                 |         |
|-----------------|---------|-----------------|---------|
| afum EAL84447.1 | 100.00% | afis EAW20614.1 | 100.00% |
|-----------------|---------|-----------------|---------|

Bootstrap support for afum|EAL84447.1 as seed ortholog is 100%.

Bootstrap support for afis|EAW20614.1 as seed ortholog is 100%.

---

Group of orthologs #729. Best score 2205 bits

Score difference with first non-orthologous sequence - *A. fumigatus*:2205 *A. fischeri*:2205

|                 |         |                 |         |
|-----------------|---------|-----------------|---------|
| afum EAL88735.1 | 100.00% | afis EAW16103.1 | 100.00% |
|-----------------|---------|-----------------|---------|

Bootstrap support for afum|EAL88735.1 as seed ortholog is 100%.

Bootstrap support for afis|EAW16103.1 as seed ortholog is 100%.

---

Group of orthologs #730. Best score 2203 bits

Score difference with first non-orthologous sequence - *A. fumigatus*:2203 *A. fischeri*:2203

|                 |         |                 |         |
|-----------------|---------|-----------------|---------|
| afum EAL85292.1 | 100.00% | afis EAW20174.1 | 100.00% |
|-----------------|---------|-----------------|---------|

Bootstrap support for afum|EAL85292.1 as seed ortholog is 100%.

Bootstrap support for afis|EAW20174.1 as seed ortholog is 100%.

---

Group of orthologs #731. Best score 2203 bits

Score difference with first non-orthologous sequence - *A. fumigatus*:2203 *A. fischeri*:2203

|                 |         |                 |         |
|-----------------|---------|-----------------|---------|
| afum EAL92604.1 | 100.00% | afis EAW21586.1 | 100.00% |
|-----------------|---------|-----------------|---------|

Bootstrap support for afum|EAL92604.1 as seed ortholog is 100%.

Bootstrap support for afis|EAW21586.1 as seed ortholog is 100%.

---

Group of orthologs #732. Best score 2200 bits

Score difference with first non-orthologous sequence - *A. fumigatus*:2200 *A. fischeri*:2200

|                 |         |                 |         |
|-----------------|---------|-----------------|---------|
| afum EAL87030.1 | 100.00% | afis EAW19466.1 | 100.00% |
|-----------------|---------|-----------------|---------|

Bootstrap support for afum|EAL87030.1 as seed ortholog is 100%.

Bootstrap support for afis|EAW19466.1 as seed ortholog is 100%.

---

Group of orthologs #733. Best score 2200 bits

Score difference with first non-orthologous sequence - *A. fumigatus*:2200 *A. fischeri*:2200

|                 |         |                 |         |
|-----------------|---------|-----------------|---------|
| afum EAL92516.1 | 100.00% | afis EAW21497.1 | 100.00% |
|-----------------|---------|-----------------|---------|

Bootstrap support for afum|EAL92516.1 as seed ortholog is 100%.

Bootstrap support for afis|EAW21497.1 as seed ortholog is 100%.

---

Group of orthologs #734. Best score 2197 bits

Score difference with first non-orthologous sequence - *A. fumigatus*:2197 *A. fischeri*:2197

|                 |         |                 |         |
|-----------------|---------|-----------------|---------|
| afum EAL88094.1 | 100.00% | afis EAW23377.1 | 100.00% |
|-----------------|---------|-----------------|---------|

Bootstrap support for afum|EAL88094.1 as seed ortholog is 100%.

Bootstrap support for afis|EAW23377.1 as seed ortholog is 100%.

---

Group of orthologs #735. Best score 2197 bits

Score difference with first non-orthologous sequence - *A. fumigatus*:2197 *A. fischeri*:2197  
afum|EAL93416.1 100.00% afis|EAW18694.1 100.00%  
Bootstrap support for afum|EAL93416.1 as seed ortholog is 100%.  
Bootstrap support for afis|EAW18694.1 as seed ortholog is 100%.

---

Group of orthologs #736. Best score 2193 bits

Score difference with first non-orthologous sequence - *A. fumigatus*:2193 *A. fischeri*:2193  
afum|EAL93478.1 100.00% afis|EAW18751.1 100.00%  
Bootstrap support for afum|EAL93478.1 as seed ortholog is 100%.  
Bootstrap support for afis|EAW18751.1 as seed ortholog is 100%.

---

Group of orthologs #737. Best score 2191 bits

Score difference with first non-orthologous sequence - *A. fumigatus*:2191 *A. fischeri*:2191  
afum|EAL88710.1 100.00% afis|EAW16078.1 100.00%  
Bootstrap support for afum|EAL88710.1 as seed ortholog is 100%.  
Bootstrap support for afis|EAW16078.1 as seed ortholog is 100%.

---

Group of orthologs #738. Best score 2191 bits

Score difference with first non-orthologous sequence - *A. fumigatus*:2191 *A. fischeri*:2191  
afum|EAL89647.1 100.00% afis|EAW24987.1 100.00%  
Bootstrap support for afum|EAL89647.1 as seed ortholog is 100%.  
Bootstrap support for afis|EAW24987.1 as seed ortholog is 100%.

---

Group of orthologs #739. Best score 2190 bits

Score difference with first non-orthologous sequence - *A. fumigatus*:2190 *A. fischeri*:2190  
afum|EAL90843.1 100.00% afis|EAW22349.1 100.00%  
Bootstrap support for afum|EAL90843.1 as seed ortholog is 100%.  
Bootstrap support for afis|EAW22349.1 as seed ortholog is 100%.

---

Group of orthologs #740. Best score 2184 bits

Score difference with first non-orthologous sequence - *A. fumigatus*:2184 *A. fischeri*:2184  
afum|EAL88237.1 100.00% afis|EAW23245.1 100.00%  
Bootstrap support for afum|EAL88237.1 as seed ortholog is 100%.  
Bootstrap support for afis|EAW23245.1 as seed ortholog is 100%.

---

Group of orthologs #741. Best score 2184 bits

Score difference with first non-orthologous sequence - *A. fumigatus*:1863 *A. fischeri*:2184  
afum|EAL91936.1 100.00% afis|EAW24081.1 100.00%  
Bootstrap support for afum|EAL91936.1 as seed ortholog is 100%.  
Bootstrap support for afis|EAW24081.1 as seed ortholog is 100%.

---

Group of orthologs #742. Best score 2181 bits

Score difference with first non-orthologous sequence - *A. fumigatus*:2181 *A. fischeri*:2181  
afum|EAL87099.1 100.00% afis|EAW19395.1 100.00%  
Bootstrap support for afum|EAL87099.1 as seed ortholog is 100%.  
Bootstrap support for afis|EAW19395.1 as seed ortholog is 100%.

---

Group of orthologs #743. Best score 2181 bits

Score difference with first non-orthologous sequence - *A. fumigatus*:2181 *A. fischeri*:2181  
afum|EAL93460.1 100.00% afis|EAW18735.1 100.00%  
Bootstrap support for afum|EAL93460.1 as seed ortholog is 100%.  
Bootstrap support for afis|EAW18735.1 as seed ortholog is 100%.

---

Group of orthologs #744. Best score 2181 bits

Score difference with first non-orthologous sequence - *A. fumigatus*:2181 *A. fischeri*:1227  
afum|EAL92480.1 100.00% afis|EAW21461.1 100.00%

Bootstrap support for afum|EAL92480.1 as seed ortholog is 100%.  
Bootstrap support for afis|EAW21461.1 as seed ortholog is 100%.

---

Group of orthologs #745. Best score 2180 bits

Score difference with first non-orthologous sequence - *A. fumigatus*:2180 *A. fischeri*:2180

afum|EAL91821.1 100.00% afis|EAW18009.1 100.00%

Bootstrap support for afum|EAL91821.1 as seed ortholog is 100%.

Bootstrap support for afis|EAW18009.1 as seed ortholog is 100%.

---

Group of orthologs #746. Best score 2180 bits

Score difference with first non-orthologous sequence - *A. fumigatus*:2180 *A. fischeri*:2180

afum|EAL90858.1 100.00% afis|EAW22334.1 100.00%

Bootstrap support for afum|EAL90858.1 as seed ortholog is 100%.

Bootstrap support for afis|EAW22334.1 as seed ortholog is 100%.

---

Group of orthologs #747. Best score 2179 bits

Score difference with first non-orthologous sequence - *A. fumigatus*:2179 *A. fischeri*:2179

afum|EAL87362.1 100.00% afis|EAW23937.1 100.00%

Bootstrap support for afum|EAL87362.1 as seed ortholog is 100%.

Bootstrap support for afis|EAW23937.1 as seed ortholog is 100%.

---

Group of orthologs #748. Best score 2179 bits

Score difference with first non-orthologous sequence - *A. fumigatus*:2179 *A. fischeri*:2179

afum|EAL92790.2 100.00% afis|EAW21760.1 100.00%

Bootstrap support for afum|EAL92790.2 as seed ortholog is 100%.

Bootstrap support for afis|EAW21760.1 as seed ortholog is 100%.

---

Group of orthologs #749. Best score 2178 bits

Score difference with first non-orthologous sequence - *A. fumigatus*:2178 *A. fischeri*:2178

afum|EAL93859.1 100.00% afis|EAW19127.1 100.00%

Bootstrap support for afum|EAL93859.1 as seed ortholog is 100%.

Bootstrap support for afis|EAW19127.1 as seed ortholog is 100%.

---

Group of orthologs #750. Best score 2177 bits

Score difference with first non-orthologous sequence - *A. fumigatus*:2177 *A. fischeri*:2177

afum|EBA27429.1 100.00% afis|EAW17449.1 100.00%

Bootstrap support for afum|EBA27429.1 as seed ortholog is 100%.

Bootstrap support for afis|EAW17449.1 as seed ortholog is 100%.

---

Group of orthologs #751. Best score 2175 bits

Score difference with first non-orthologous sequence - *A. fumigatus*:2175 *A. fischeri*:2175

afum|EAL92955.1 100.00% afis|EAW21941.1 100.00%

Bootstrap support for afum|EAL92955.1 as seed ortholog is 100%.

Bootstrap support for afis|EAW21941.1 as seed ortholog is 100%.

---

Group of orthologs #752. Best score 2173 bits

Score difference with first non-orthologous sequence - *A. fumigatus*:2173 *A. fischeri*:2173

afum|EAL88891.1 100.00% afis|EAW16270.1 100.00%

Bootstrap support for afum|EAL88891.1 as seed ortholog is 100%.

Bootstrap support for afis|EAW16270.1 as seed ortholog is 100%.

---

Group of orthologs #753. Best score 2171 bits

Score difference with first non-orthologous sequence - *A. fumigatus*:2171 *A. fischeri*:2171

afum|EAL92619.1 100.00% afis|EAW21600.1 100.00%

Bootstrap support for afum|EAL92619.1 as seed ortholog is 100%.

Bootstrap support for afis|EAW21600.1 as seed ortholog is 100%.

---

Group of orthologs #754. Best score 2170 bits

Score difference with first non-orthologous sequence - *A. fumigatus*:2170 *A. fischeri*:2170

|                 |         |                 |         |
|-----------------|---------|-----------------|---------|
| afum EAL91954.1 | 100.00% | afis EAW24100.1 | 100.00% |
|-----------------|---------|-----------------|---------|

Bootstrap support for afum|EAL91954.1 as seed ortholog is 100%.

Bootstrap support for afis|EAW24100.1 as seed ortholog is 100%.

---

Group of orthologs #755. Best score 2169 bits

Score difference with first non-orthologous sequence - *A. fumigatus*:2169 *A. fischeri*:2169

|                 |         |                 |         |
|-----------------|---------|-----------------|---------|
| afum EAL89138.1 | 100.00% | afis EAW16541.1 | 100.00% |
|-----------------|---------|-----------------|---------|

Bootstrap support for afum|EAL89138.1 as seed ortholog is 100%.

Bootstrap support for afis|EAW16541.1 as seed ortholog is 100%.

---

Group of orthologs #756. Best score 2168 bits

Score difference with first non-orthologous sequence - *A. fumigatus*:2168 *A. fischeri*:2168

|                 |         |                 |         |
|-----------------|---------|-----------------|---------|
| afum EAL91732.1 | 100.00% | afis EAW17921.1 | 100.00% |
|-----------------|---------|-----------------|---------|

Bootstrap support for afum|EAL91732.1 as seed ortholog is 100%.

Bootstrap support for afis|EAW17921.1 as seed ortholog is 100%.

---

Group of orthologs #757. Best score 2167 bits

Score difference with first non-orthologous sequence - *A. fumigatus*:2167 *A. fischeri*:2167

|                 |         |                 |         |
|-----------------|---------|-----------------|---------|
| afum EAL91882.1 | 100.00% | afis EAW18070.1 | 100.00% |
|-----------------|---------|-----------------|---------|

Bootstrap support for afum|EAL91882.1 as seed ortholog is 100%.

Bootstrap support for afis|EAW18070.1 as seed ortholog is 100%.

---

Group of orthologs #758. Best score 2166 bits

Score difference with first non-orthologous sequence - *A. fumigatus*:2166 *A. fischeri*:2003

|                 |         |                 |         |
|-----------------|---------|-----------------|---------|
| afum EAL87959.1 | 100.00% | afis EAW23502.1 | 100.00% |
|-----------------|---------|-----------------|---------|

Bootstrap support for afum|EAL87959.1 as seed ortholog is 100%.

Bootstrap support for afis|EAW23502.1 as seed ortholog is 100%.

---

Group of orthologs #759. Best score 2166 bits

Score difference with first non-orthologous sequence - *A. fumigatus*:2166 *A. fischeri*:2166

|                 |         |                 |         |
|-----------------|---------|-----------------|---------|
| afum EAL93253.1 | 100.00% | afis EAW18553.1 | 100.00% |
|-----------------|---------|-----------------|---------|

Bootstrap support for afum|EAL93253.1 as seed ortholog is 100%.

Bootstrap support for afis|EAW18553.1 as seed ortholog is 100%.

---

Group of orthologs #760. Best score 2165 bits

Score difference with first non-orthologous sequence - *A. fumigatus*:2165 *A. fischeri*:2165

|                 |         |                 |         |
|-----------------|---------|-----------------|---------|
| afum EAL90750.1 | 100.00% | afis EAW22441.1 | 100.00% |
|-----------------|---------|-----------------|---------|

Bootstrap support for afum|EAL90750.1 as seed ortholog is 100%.

Bootstrap support for afis|EAW22441.1 as seed ortholog is 100%.

---

Group of orthologs #761. Best score 2165 bits

Score difference with first non-orthologous sequence - *A. fumigatus*:2165 *A. fischeri*:2165

|                 |         |                 |         |
|-----------------|---------|-----------------|---------|
| afum EAL90041.1 | 100.00% | afis EAW25383.1 | 100.00% |
|-----------------|---------|-----------------|---------|

Bootstrap support for afum|EAL90041.1 as seed ortholog is 100%.

Bootstrap support for afis|EAW25383.1 as seed ortholog is 100%.

---

Group of orthologs #762. Best score 2163 bits

Score difference with first non-orthologous sequence - *A. fumigatus*:2163 *A. fischeri*:2163

|                 |         |                 |         |
|-----------------|---------|-----------------|---------|
| afum EAL87698.1 | 100.00% | afis EAW18333.1 | 100.00% |
|-----------------|---------|-----------------|---------|

Bootstrap support for afum|EAL87698.1 as seed ortholog is 100%.

Bootstrap support for afis|EAW18333.1 as seed ortholog is 100%.

---

Group of orthologs #763. Best score 2162 bits



Score difference with first non-orthologous sequence - *A. fumigatus*:2162 *A. fischeri*:2162  
afum|EAL85747.1 100.00% afis|EAW15585.1 100.00%  
Bootstrap support for afum|EAL85747.1 as seed ortholog is 100%.  
Bootstrap support for afis|EAW15585.1 as seed ortholog is 100%.

---

Group of orthologs #764. Best score 2159 bits

Score difference with first non-orthologous sequence - *A. fumigatus*:2159 *A. fischeri*:2159  
afum|EAL85191.1 100.00% afis|EAW20073.1 100.00%  
Bootstrap support for afum|EAL85191.1 as seed ortholog is 100%.  
Bootstrap support for afis|EAW20073.1 as seed ortholog is 100%.

---

Group of orthologs #765. Best score 2157 bits

Score difference with first non-orthologous sequence - *A. fumigatus*:2157 *A. fischeri*:2157  
afum|EAL90525.1 100.00% afis|EAW22667.1 100.00%  
Bootstrap support for afum|EAL90525.1 as seed ortholog is 100%.  
Bootstrap support for afis|EAW22667.1 as seed ortholog is 100%.

---

Group of orthologs #766. Best score 2156 bits

Score difference with first non-orthologous sequence - *A. fumigatus*:2156 *A. fischeri*:2156  
afum|EAL86923.1 100.00% afis|EAW19595.1 100.00%  
Bootstrap support for afum|EAL86923.1 as seed ortholog is 100%.  
Bootstrap support for afis|EAW19595.1 as seed ortholog is 100%.

---

Group of orthologs #767. Best score 2156 bits

Score difference with first non-orthologous sequence - *A. fumigatus*:2156 *A. fischeri*:2156  
afum|EAL93019.1 100.00% afis|EAW22004.1 100.00%  
Bootstrap support for afum|EAL93019.1 as seed ortholog is 100%.  
Bootstrap support for afis|EAW22004.1 as seed ortholog is 100%.

---

Group of orthologs #768. Best score 2153 bits

Score difference with first non-orthologous sequence - *A. fumigatus*:2153 *A. fischeri*:2153  
afum|EAL84539.1 100.00% afis|EAW20518.1 100.00%  
Bootstrap support for afum|EAL84539.1 as seed ortholog is 100%.  
Bootstrap support for afis|EAW20518.1 as seed ortholog is 100%.

---

Group of orthologs #769. Best score 2153 bits

Score difference with first non-orthologous sequence - *A. fumigatus*:2153 *A. fischeri*:2153  
afum|EAL90917.1 100.00% afis|EAW22263.1 100.00%  
Bootstrap support for afum|EAL90917.1 as seed ortholog is 100%.  
Bootstrap support for afis|EAW22263.1 as seed ortholog is 100%.

---

Group of orthologs #770. Best score 2153 bits

Score difference with first non-orthologous sequence - *A. fumigatus*:2153 *A. fischeri*:674  
afum|EAL89049.1 100.00% afis|EAW25605.1 100.00%  
Bootstrap support for afum|EAL89049.1 as seed ortholog is 100%.  
Bootstrap support for afis|EAW25605.1 as seed ortholog is 99%.

---

Group of orthologs #771. Best score 2149 bits

Score difference with first non-orthologous sequence - *A. fumigatus*:2149 *A. fischeri*:2149  
afum|EAL91437.1 100.00% afis|EAW17623.1 100.00%  
Bootstrap support for afum|EAL91437.1 as seed ortholog is 100%.  
Bootstrap support for afis|EAW17623.1 as seed ortholog is 100%.

---

Group of orthologs #772. Best score 2148 bits

Score difference with first non-orthologous sequence - *A. fumigatus*:2148 *A. fischeri*:2148  
afum|EAL92067.2 100.00% afis|EAW21029.1 100.00%

Bootstrap support for afum|EAL92067.2 as seed ortholog is 100%.  
Bootstrap support for afis|EAW21029.1 as seed ortholog is 100%.

---

Group of orthologs #773. Best score 2146 bits

Score difference with first non-orthologous sequence - *A. fumigatus*:2146 *A. fischeri*:2146

|                 |         |                 |         |
|-----------------|---------|-----------------|---------|
| afum EAL85609.1 | 100.00% | afis EAW15739.1 | 100.00% |
|-----------------|---------|-----------------|---------|

Bootstrap support for afum|EAL85609.1 as seed ortholog is 100%.

Bootstrap support for afis|EAW15739.1 as seed ortholog is 100%.

---

Group of orthologs #774. Best score 2144 bits

Score difference with first non-orthologous sequence - *A. fumigatus*:2144 *A. fischeri*:2144

|                 |         |                 |         |
|-----------------|---------|-----------------|---------|
| afum EAL93186.1 | 100.00% | afis EAW18496.1 | 100.00% |
|-----------------|---------|-----------------|---------|

Bootstrap support for afum|EAL93186.1 as seed ortholog is 100%.

Bootstrap support for afis|EAW18496.1 as seed ortholog is 100%.

---

Group of orthologs #775. Best score 2143 bits

Score difference with first non-orthologous sequence - *A. fumigatus*:2143 *A. fischeri*:2143

|                 |         |                 |         |
|-----------------|---------|-----------------|---------|
| afum EAL85996.1 | 100.00% | afis EAW24326.1 | 100.00% |
|-----------------|---------|-----------------|---------|

Bootstrap support for afum|EAL85996.1 as seed ortholog is 100%.

Bootstrap support for afis|EAW24326.1 as seed ortholog is 100%.

---

Group of orthologs #776. Best score 2143 bits

Score difference with first non-orthologous sequence - *A. fumigatus*:2143 *A. fischeri*:2143

|                 |         |                 |         |
|-----------------|---------|-----------------|---------|
| afum EAL88404.1 | 100.00% | afis EAW23075.1 | 100.00% |
|-----------------|---------|-----------------|---------|

Bootstrap support for afum|EAL88404.1 as seed ortholog is 100%.

Bootstrap support for afis|EAW23075.1 as seed ortholog is 100%.

---

Group of orthologs #777. Best score 2143 bits

Score difference with first non-orthologous sequence - *A. fumigatus*:2143 *A. fischeri*:2143

|                 |         |                 |         |
|-----------------|---------|-----------------|---------|
| afum EBA27333.1 | 100.00% | afis EAW23422.1 | 100.00% |
|-----------------|---------|-----------------|---------|

Bootstrap support for afum|EBA27333.1 as seed ortholog is 100%.

Bootstrap support for afis|EAW23422.1 as seed ortholog is 100%.

---

Group of orthologs #778. Best score 2142 bits

Score difference with first non-orthologous sequence - *A. fumigatus*:2142 *A. fischeri*:2142

|                 |         |                 |         |
|-----------------|---------|-----------------|---------|
| afum EAL87353.1 | 100.00% | afis EAW23928.1 | 100.00% |
|-----------------|---------|-----------------|---------|

Bootstrap support for afum|EAL87353.1 as seed ortholog is 100%.

Bootstrap support for afis|EAW23928.1 as seed ortholog is 100%.

---

Group of orthologs #779. Best score 2138 bits

Score difference with first non-orthologous sequence - *A. fumigatus*:2138 *A. fischeri*:2138

|                 |         |                 |         |
|-----------------|---------|-----------------|---------|
| afum EAL88566.1 | 100.00% | afis EAW15930.1 | 100.00% |
|-----------------|---------|-----------------|---------|

Bootstrap support for afum|EAL88566.1 as seed ortholog is 100%.

Bootstrap support for afis|EAW15930.1 as seed ortholog is 100%.

---

Group of orthologs #780. Best score 2138 bits

Score difference with first non-orthologous sequence - *A. fumigatus*:2138 *A. fischeri*:2138

|                 |         |                 |         |
|-----------------|---------|-----------------|---------|
| afum EAL90624.2 | 100.00% | afis EAW22574.1 | 100.00% |
|-----------------|---------|-----------------|---------|

Bootstrap support for afum|EAL90624.2 as seed ortholog is 100%.

Bootstrap support for afis|EAW22574.1 as seed ortholog is 100%.

---

Group of orthologs #781. Best score 2137 bits

Score difference with first non-orthologous sequence - *A. fumigatus*:2137 *A. fischeri*:2137

|                 |         |                 |         |
|-----------------|---------|-----------------|---------|
| afum EAL89932.1 | 100.00% | afis EAW25269.1 | 100.00% |
|-----------------|---------|-----------------|---------|

Bootstrap support for afum|EAL89932.1 as seed ortholog is 100%.

Bootstrap support for afis|EAW25269.1 as seed ortholog is 100%.

---

Group of orthologs #782. Best score 2136 bits

Score difference with first non-orthologous sequence - *A. fumigatus*:1948 *A. fischeri*:1500

afum|EAL88289.1 100.00% afis|EAW23194.1 100.00%

Bootstrap support for afum|EAL88289.1 as seed ortholog is 100%.

Bootstrap support for afis|EAW23194.1 as seed ortholog is 100%.

---

Group of orthologs #783. Best score 2135 bits

Score difference with first non-orthologous sequence - *A. fumigatus*:2135 *A. fischeri*:2135

afum|EAL90781.1 100.00% afis|EAW22411.1 100.00%

Bootstrap support for afum|EAL90781.1 as seed ortholog is 100%.

Bootstrap support for afis|EAW22411.1 as seed ortholog is 100%.

---

Group of orthologs #784. Best score 2132 bits

Score difference with first non-orthologous sequence - *A. fumigatus*:2132 *A. fischeri*:2132

afum|EAL89129.1 100.00% afis|EAW16532.1 100.00%

Bootstrap support for afum|EAL89129.1 as seed ortholog is 100%.

Bootstrap support for afis|EAW16532.1 as seed ortholog is 100%.

---

Group of orthologs #785. Best score 2129 bits

Score difference with first non-orthologous sequence - *A. fumigatus*:2129 *A. fischeri*:2129

afum|EAL90390.1 100.00% afis|EAW22811.1 100.00%

Bootstrap support for afum|EAL90390.1 as seed ortholog is 100%.

Bootstrap support for afis|EAW22811.1 as seed ortholog is 100%.

---

Group of orthologs #786. Best score 2128 bits

Score difference with first non-orthologous sequence - *A. fumigatus*:2128 *A. fischeri*:2128

afum|EAL88527.1 100.00% afis|EAW15892.1 100.00%

Bootstrap support for afum|EAL88527.1 as seed ortholog is 100%.

Bootstrap support for afis|EAW15892.1 as seed ortholog is 100%.

---

Group of orthologs #787. Best score 2128 bits

Score difference with first non-orthologous sequence - *A. fumigatus*:2128 *A. fischeri*:2128

afum|EAL86968.1 100.00% afis|EAW19539.1 100.00%

Bootstrap support for afum|EAL86968.1 as seed ortholog is 100%.

Bootstrap support for afis|EAW19539.1 as seed ortholog is 100%.

---

Group of orthologs #788. Best score 2127 bits

Score difference with first non-orthologous sequence - *A. fumigatus*:2127 *A. fischeri*:2127

afum|EAL91445.1 100.00% afis|EAW17630.1 100.00%

Bootstrap support for afum|EAL91445.1 as seed ortholog is 100%.

Bootstrap support for afis|EAW17630.1 as seed ortholog is 100%.

---

Group of orthologs #789. Best score 2125 bits

Score difference with first non-orthologous sequence - *A. fumigatus*:2125 *A. fischeri*:2125

afum|EAL88293.1 100.00% afis|EAW23190.1 100.00%

Bootstrap support for afum|EAL88293.1 as seed ortholog is 100%.

Bootstrap support for afis|EAW23190.1 as seed ortholog is 100%.

---

Group of orthologs #790. Best score 2124 bits

Score difference with first non-orthologous sequence - *A. fumigatus*:2124 *A. fischeri*:884

afum|EAL86742.1 100.00% afis|EAW20667.1 100.00%

Bootstrap support for afum|EAL86742.1 as seed ortholog is 100%.

Bootstrap support for afis|EAW20667.1 as seed ortholog is 100%.

---

Group of orthologs #791. Best score 2123 bits

Score difference with first non-orthologous sequence - *A. fumigatus*:2123 *A. fischeri*:2123  
afum|EAL90615.1 100.00% afis|EAW22584.1 100.00%  
Bootstrap support for afum|EAL90615.1 as seed ortholog is 100%.  
Bootstrap support for afis|EAW22584.1 as seed ortholog is 100%.

---

Group of orthologs #792. Best score 2122 bits

Score difference with first non-orthologous sequence - *A. fumigatus*:2122 *A. fischeri*:2122  
afum|EAL85842.1 100.00% afis|EAW15479.1 100.00%  
Bootstrap support for afum|EAL85842.1 as seed ortholog is 100%.  
Bootstrap support for afis|EAW15479.1 as seed ortholog is 100%.

---

Group of orthologs #793. Best score 2121 bits

Score difference with first non-orthologous sequence - *A. fumigatus*:2121 *A. fischeri*:2121  
afum|EAL88062.1 100.00% afis|EAW23408.1 100.00%  
Bootstrap support for afum|EAL88062.1 as seed ortholog is 100%.  
Bootstrap support for afis|EAW23408.1 as seed ortholog is 100%.

---

Group of orthologs #794. Best score 2120 bits

Score difference with first non-orthologous sequence - *A. fumigatus*:2120 *A. fischeri*:1578  
afum|EAL90953.1 100.00% afis|EAW22239.1 100.00%  
Bootstrap support for afum|EAL90953.1 as seed ortholog is 100%.  
Bootstrap support for afis|EAW22239.1 as seed ortholog is 100%.

---

Group of orthologs #795. Best score 2119 bits

Score difference with first non-orthologous sequence - *A. fumigatus*:2119 *A. fischeri*:2119  
afum|EAL86530.1 100.00% afis|EAW17010.1 100.00%  
Bootstrap support for afum|EAL86530.1 as seed ortholog is 100%.  
Bootstrap support for afis|EAW17010.1 as seed ortholog is 100%.

---

Group of orthologs #796. Best score 2119 bits

Score difference with first non-orthologous sequence - *A. fumigatus*:2119 *A. fischeri*:2119  
afum|EAL87496.1 100.00% afis|EAW18139.1 100.00%  
Bootstrap support for afum|EAL87496.1 as seed ortholog is 100%.  
Bootstrap support for afis|EAW18139.1 as seed ortholog is 100%.

---

Group of orthologs #797. Best score 2119 bits

Score difference with first non-orthologous sequence - *A. fumigatus*:2119 *A. fischeri*:2119  
afum|EAL89648.1 100.00% afis|EAW24988.1 100.00%  
Bootstrap support for afum|EAL89648.1 as seed ortholog is 100%.  
Bootstrap support for afis|EAW24988.1 as seed ortholog is 100%.

---

Group of orthologs #798. Best score 2118 bits

Score difference with first non-orthologous sequence - *A. fumigatus*:2118 *A. fischeri*:2118  
afum|EAL85966.1 100.00% afis|EAW24298.1 100.00%  
Bootstrap support for afum|EAL85966.1 as seed ortholog is 100%.  
Bootstrap support for afis|EAW24298.1 as seed ortholog is 100%.

---

Group of orthologs #799. Best score 2118 bits

Score difference with first non-orthologous sequence - *A. fumigatus*:2118 *A. fischeri*:2118  
afum|EAL88178.1 100.00% afis|EAW23301.1 100.00%  
Bootstrap support for afum|EAL88178.1 as seed ortholog is 100%.  
Bootstrap support for afis|EAW23301.1 as seed ortholog is 100%.

---

Group of orthologs #800. Best score 2116 bits

Score difference with first non-orthologous sequence - *A. fumigatus*:2116 *A. fischeri*:2116  
afum|EAL93437.1 100.00% afis|EAW18712.1 100.00%

Bootstrap support for afum|EAL93437.1 as seed ortholog is 100%.  
Bootstrap support for afis|EAW18712.1 as seed ortholog is 100%.

---

Group of orthologs #801. Best score 2115 bits

Score difference with first non-orthologous sequence - *A. fumigatus*:2115 *A. fischeri*:2115

afum|EAL91440.1 100.00% afis|EAW17626.1 100.00%

Bootstrap support for afum|EAL91440.1 as seed ortholog is 100%.

Bootstrap support for afis|EAW17626.1 as seed ortholog is 100%.

---

Group of orthologs #802. Best score 2113 bits

Score difference with first non-orthologous sequence - *A. fumigatus*:2021 *A. fischeri*:1859

afum|EAL84730.1 100.00% afis|EAW20901.1 100.00%

Bootstrap support for afum|EAL84730.1 as seed ortholog is 100%.

Bootstrap support for afis|EAW20901.1 as seed ortholog is 100%.

---

Group of orthologs #803. Best score 2113 bits

Score difference with first non-orthologous sequence - *A. fumigatus*:2113 *A. fischeri*:2113

afum|EBA27321.1 100.00% afis|EAW18239.1 100.00%

Bootstrap support for afum|EBA27321.1 as seed ortholog is 100%.

Bootstrap support for afis|EAW18239.1 as seed ortholog is 100%.

---

Group of orthologs #804. Best score 2112 bits

Score difference with first non-orthologous sequence - *A. fumigatus*:2112 *A. fischeri*:1359

afum|EAL89297.1 100.00% afis|EAW16700.1 100.00%

Bootstrap support for afum|EAL89297.1 as seed ortholog is 100%.

Bootstrap support for afis|EAW16700.1 as seed ortholog is 100%.

---

Group of orthologs #805. Best score 2112 bits

Score difference with first non-orthologous sequence - *A. fumigatus*:2112 *A. fischeri*:2112

afum|EAL93105.1 100.00% afis|EAW18421.1 100.00%

Bootstrap support for afum|EAL93105.1 as seed ortholog is 100%.

Bootstrap support for afis|EAW18421.1 as seed ortholog is 100%.

---

Group of orthologs #806. Best score 2112 bits

Score difference with first non-orthologous sequence - *A. fumigatus*:2112 *A. fischeri*:2112

afum|EAL90614.1 100.00% afis|EAW22585.1 100.00%

Bootstrap support for afum|EAL90614.1 as seed ortholog is 100%.

Bootstrap support for afis|EAW22585.1 as seed ortholog is 100%.

---

Group of orthologs #807. Best score 2112 bits

Score difference with first non-orthologous sequence - *A. fumigatus*:2112 *A. fischeri*:2112

afum|EAL89629.1 100.00% afis|EAW24970.1 100.00%

Bootstrap support for afum|EAL89629.1 as seed ortholog is 100%.

Bootstrap support for afis|EAW24970.1 as seed ortholog is 100%.

---

Group of orthologs #808. Best score 2111 bits

Score difference with first non-orthologous sequence - *A. fumigatus*:2111 *A. fischeri*:2111

afum|EAL92865.1 100.00% afis|EAW21852.1 100.00%

Bootstrap support for afum|EAL92865.1 as seed ortholog is 100%.

Bootstrap support for afis|EAW21852.1 as seed ortholog is 100%.

---

Group of orthologs #809. Best score 2110 bits

Score difference with first non-orthologous sequence - *A. fumigatus*:2110 *A. fischeri*:2110

afum|EAL89884.1 100.00% afis|EAW25223.1 100.00%

Bootstrap support for afum|EAL89884.1 as seed ortholog is 100%.

Bootstrap support for afis|EAW25223.1 as seed ortholog is 100%.

---

Group of orthologs #810. Best score 2109 bits

Score difference with first non-orthologous sequence - *A. fumigatus*:2109 *A. fischeri*:1901

afum|EAL91411.1 100.00% afis|EAW17598.1 100.00%

Bootstrap support for afum|EAL91411.1 as seed ortholog is 100%.

Bootstrap support for afis|EAW17598.1 as seed ortholog is 100%.

---

Group of orthologs #811. Best score 2108 bits

Score difference with first non-orthologous sequence - *A. fumigatus*:2108 *A. fischeri*:2108

afum|EAL94058.1 100.00% afis|EAW19339.1 100.00%

Bootstrap support for afum|EAL94058.1 as seed ortholog is 100%.

Bootstrap support for afis|EAW19339.1 as seed ortholog is 100%.

---

Group of orthologs #812. Best score 2108 bits

Score difference with first non-orthologous sequence - *A. fumigatus*:2108 *A. fischeri*:2108

afum|EBA27387.1 100.00% afis|EAW25008.1 100.00%

Bootstrap support for afum|EBA27387.1 as seed ortholog is 100%.

Bootstrap support for afis|EAW25008.1 as seed ortholog is 100%.

---

Group of orthologs #813. Best score 2107 bits

Score difference with first non-orthologous sequence - *A. fumigatus*:2107 *A. fischeri*:2107

afum|EAL92500.1 100.00% afis|EAW21480.1 100.00%

Bootstrap support for afum|EAL92500.1 as seed ortholog is 100%.

Bootstrap support for afis|EAW21480.1 as seed ortholog is 100%.

---

Group of orthologs #814. Best score 2106 bits

Score difference with first non-orthologous sequence - *A. fumigatus*:2106 *A. fischeri*:2106

afum|EAL85812.1 100.00% afis|EAW15517.1 100.00%

Bootstrap support for afum|EAL85812.1 as seed ortholog is 100%.

Bootstrap support for afis|EAW15517.1 as seed ortholog is 100%.

---

Group of orthologs #815. Best score 2106 bits

Score difference with first non-orthologous sequence - *A. fumigatus*:2106 *A. fischeri*:2106

afum|EAL91638.1 100.00% afis|EAW17828.1 100.00%

Bootstrap support for afum|EAL91638.1 as seed ortholog is 100%.

Bootstrap support for afis|EAW17828.1 as seed ortholog is 100%.

---

Group of orthologs #816. Best score 2105 bits

Score difference with first non-orthologous sequence - *A. fumigatus*:2105 *A. fischeri*:2105

afum|EAL90048.2 100.00% afis|EAW25389.1 100.00%

Bootstrap support for afum|EAL90048.2 as seed ortholog is 100%.

Bootstrap support for afis|EAW25389.1 as seed ortholog is 100%.

---

Group of orthologs #817. Best score 2104 bits

Score difference with first non-orthologous sequence - *A. fumigatus*:2104 *A. fischeri*:2104

afum|EAL87414.1 100.00% afis|EAW23985.1 100.00%

Bootstrap support for afum|EAL87414.1 as seed ortholog is 100%.

Bootstrap support for afis|EAW23985.1 as seed ortholog is 100%.

---

Group of orthologs #818. Best score 2104 bits

Score difference with first non-orthologous sequence - *A. fumigatus*:2104 *A. fischeri*:2104

afum|EAL88104.2 100.00% afis|EAW23369.1 100.00%

Bootstrap support for afum|EAL88104.2 as seed ortholog is 100%.

Bootstrap support for afis|EAW23369.1 as seed ortholog is 100%.

---

Group of orthologs #819. Best score 2103 bits

Score difference with first non-orthologous sequence - *A. fumigatus*:2103 *A. fischeri*:2103  
afum|EAL93467.1 100.00% afis|EAW18741.1 100.00%  
Bootstrap support for afum|EAL93467.1 as seed ortholog is 100%.  
Bootstrap support for afis|EAW18741.1 as seed ortholog is 100%.

---

Group of orthologs #820. Best score 2103 bits

Score difference with first non-orthologous sequence - *A. fumigatus*:2103 *A. fischeri*:2103  
afum|EBA27297.1 100.00% afis|EAW19500.1 100.00%  
Bootstrap support for afum|EBA27297.1 as seed ortholog is 100%.  
Bootstrap support for afis|EAW19500.1 as seed ortholog is 100%.

---

Group of orthologs #821. Best score 2102 bits

Score difference with first non-orthologous sequence - *A. fumigatus*:2102 *A. fischeri*:2102  
afum|EAL87081.1 100.00% afis|EAW19413.1 100.00%  
Bootstrap support for afum|EAL87081.1 as seed ortholog is 100%.  
Bootstrap support for afis|EAW19413.1 as seed ortholog is 100%.

---

Group of orthologs #822. Best score 2102 bits

Score difference with first non-orthologous sequence - *A. fumigatus*:2102 *A. fischeri*:2102  
afum|EAL91493.1 100.00% afis|EAW17679.1 100.00%  
Bootstrap support for afum|EAL91493.1 as seed ortholog is 100%.  
Bootstrap support for afis|EAW17679.1 as seed ortholog is 100%.

---

Group of orthologs #823. Best score 2102 bits

Score difference with first non-orthologous sequence - *A. fumigatus*:2102 *A. fischeri*:2102  
afum|EAL87365.1 100.00% afis|EAW23940.1 100.00%  
Bootstrap support for afum|EAL87365.1 as seed ortholog is 100%.  
Bootstrap support for afis|EAW23940.1 as seed ortholog is 100%.

---

Group of orthologs #824. Best score 2099 bits

Score difference with first non-orthologous sequence - *A. fumigatus*:2099 *A. fischeri*:2099  
afum|EAL86703.1 100.00% afis|EAW17285.1 100.00%  
Bootstrap support for afum|EAL86703.1 as seed ortholog is 100%.  
Bootstrap support for afis|EAW17285.1 as seed ortholog is 100%.

---

Group of orthologs #825. Best score 2097 bits

Score difference with first non-orthologous sequence - *A. fumigatus*:2097 *A. fischeri*:2097  
afum|EAL85872.1 100.00% afis|EAW24202.1 100.00%  
Bootstrap support for afum|EAL85872.1 as seed ortholog is 100%.  
Bootstrap support for afis|EAW24202.1 as seed ortholog is 100%.

---

Group of orthologs #826. Best score 2097 bits

Score difference with first non-orthologous sequence - *A. fumigatus*:2097 *A. fischeri*:2097  
afum|EAL90876.1 100.00% afis|EAW22314.1 100.00%  
Bootstrap support for afum|EAL90876.1 as seed ortholog is 100%.  
Bootstrap support for afis|EAW22314.1 as seed ortholog is 100%.

---

Group of orthologs #827. Best score 2096 bits

Score difference with first non-orthologous sequence - *A. fumigatus*:2096 *A. fischeri*:1768  
afum|EAL85182.2 100.00% afis|EAW20062.1 100.00%  
Bootstrap support for afum|EAL85182.2 as seed ortholog is 100%.  
Bootstrap support for afis|EAW20062.1 as seed ortholog is 100%.

---

Group of orthologs #828. Best score 2096 bits

Score difference with first non-orthologous sequence - *A. fumigatus*:2096 *A. fischeri*:2096  
afum|EAL91676.1 100.00% afis|EAW17868.1 100.00%

Bootstrap support for afum|EAL91676.1 as seed ortholog is 100%.  
Bootstrap support for afis|EAW17868.1 as seed ortholog is 100%.

---

Group of orthologs #829. Best score 2096 bits

Score difference with first non-orthologous sequence - *A. fumigatus*:2096 *A. fischeri*:2096

|                 |         |                 |         |
|-----------------|---------|-----------------|---------|
| afum EAL93659.1 | 100.00% | afis EAW18928.1 | 100.00% |
|-----------------|---------|-----------------|---------|

Bootstrap support for afum|EAL93659.1 as seed ortholog is 100%.

Bootstrap support for afis|EAW18928.1 as seed ortholog is 100%.

---

Group of orthologs #830. Best score 2096 bits

Score difference with first non-orthologous sequence - *A. fumigatus*:2096 *A. fischeri*:2096

|                 |         |                 |         |
|-----------------|---------|-----------------|---------|
| afum EAL92435.1 | 100.00% | afis EAW21420.1 | 100.00% |
|-----------------|---------|-----------------|---------|

Bootstrap support for afum|EAL92435.1 as seed ortholog is 100%.

Bootstrap support for afis|EAW21420.1 as seed ortholog is 100%.

---

Group of orthologs #831. Best score 2095 bits

Score difference with first non-orthologous sequence - *A. fumigatus*:1859 *A. fischeri*:1512

|                 |         |                 |         |
|-----------------|---------|-----------------|---------|
| afum EBA27423.1 | 100.00% | afis EAW17324.1 | 100.00% |
|-----------------|---------|-----------------|---------|

Bootstrap support for afum|EBA27423.1 as seed ortholog is 100%.

Bootstrap support for afis|EAW17324.1 as seed ortholog is 100%.

---

Group of orthologs #832. Best score 2095 bits

Score difference with first non-orthologous sequence - *A. fumigatus*:2095 *A. fischeri*:2095

|                 |         |                 |         |
|-----------------|---------|-----------------|---------|
| afum EAL94016.1 | 100.00% | afis EAW19297.1 | 100.00% |
|-----------------|---------|-----------------|---------|

Bootstrap support for afum|EAL94016.1 as seed ortholog is 100%.

Bootstrap support for afis|EAW19297.1 as seed ortholog is 100%.

---

Group of orthologs #833. Best score 2095 bits

Score difference with first non-orthologous sequence - *A. fumigatus*:2095 *A. fischeri*:2095

|                 |         |                 |         |
|-----------------|---------|-----------------|---------|
| afum EAL90125.1 | 100.00% | afis EAW25462.1 | 100.00% |
|-----------------|---------|-----------------|---------|

Bootstrap support for afum|EAL90125.1 as seed ortholog is 100%.

Bootstrap support for afis|EAW25462.1 as seed ortholog is 100%.

---

Group of orthologs #834. Best score 2093 bits

Score difference with first non-orthologous sequence - *A. fumigatus*:2093 *A. fischeri*:2093

|                 |         |                 |         |
|-----------------|---------|-----------------|---------|
| afum EAL84762.1 | 100.00% | afis EAW20872.1 | 100.00% |
|-----------------|---------|-----------------|---------|

Bootstrap support for afum|EAL84762.1 as seed ortholog is 100%.

Bootstrap support for afis|EAW20872.1 as seed ortholog is 100%.

---

Group of orthologs #835. Best score 2093 bits

Score difference with first non-orthologous sequence - *A. fumigatus*:2093 *A. fischeri*:2093

|                 |         |                 |         |
|-----------------|---------|-----------------|---------|
| afum EAL91690.1 | 100.00% | afis EAW17882.1 | 100.00% |
|-----------------|---------|-----------------|---------|

Bootstrap support for afum|EAL91690.1 as seed ortholog is 100%.

Bootstrap support for afis|EAW17882.1 as seed ortholog is 100%.

---

Group of orthologs #836. Best score 2093 bits

Score difference with first non-orthologous sequence - *A. fumigatus*:2093 *A. fischeri*:2093

|                 |         |                 |         |
|-----------------|---------|-----------------|---------|
| afum EAL93152.1 | 100.00% | afis EAW18466.1 | 100.00% |
|-----------------|---------|-----------------|---------|

Bootstrap support for afum|EAL93152.1 as seed ortholog is 100%.

Bootstrap support for afis|EAW18466.1 as seed ortholog is 100%.

---

Group of orthologs #837. Best score 2092 bits

Score difference with first non-orthologous sequence - *A. fumigatus*:2092 *A. fischeri*:2092

|                 |         |                 |         |
|-----------------|---------|-----------------|---------|
| afum EAL90884.1 | 100.00% | afis EAW22297.1 | 100.00% |
|-----------------|---------|-----------------|---------|

Bootstrap support for afum|EAL90884.1 as seed ortholog is 100%.

Bootstrap support for afis|EAW22297.1 as seed ortholog is 100%.



---

Group of orthologs #838. Best score 2091 bits

Score difference with first non-orthologous sequence - *A. fumigatus*:2091 *A. fischeri*:2091

|                 |         |                 |         |
|-----------------|---------|-----------------|---------|
| afum EAL90180.1 | 100.00% | afis EAW25515.1 | 100.00% |
|-----------------|---------|-----------------|---------|

Bootstrap support for afum|EAL90180.1 as seed ortholog is 100%.

Bootstrap support for afis|EAW25515.1 as seed ortholog is 100%.

---

Group of orthologs #839. Best score 2089 bits

Score difference with first non-orthologous sequence - *A. fumigatus*:2089 *A. fischeri*:2089

|                 |         |                 |         |
|-----------------|---------|-----------------|---------|
| afum EAL88909.1 | 100.00% | afis EAW16287.1 | 100.00% |
|-----------------|---------|-----------------|---------|

Bootstrap support for afum|EAL88909.1 as seed ortholog is 100%.

Bootstrap support for afis|EAW16287.1 as seed ortholog is 100%.

---

Group of orthologs #840. Best score 2089 bits

Score difference with first non-orthologous sequence - *A. fumigatus*:2089 *A. fischeri*:2089

|                 |         |                 |         |
|-----------------|---------|-----------------|---------|
| afum EBA27345.1 | 100.00% | afis EAW23092.1 | 100.00% |
|-----------------|---------|-----------------|---------|

Bootstrap support for afum|EBA27345.1 as seed ortholog is 100%.

Bootstrap support for afis|EAW23092.1 as seed ortholog is 100%.

---

Group of orthologs #841. Best score 2088 bits

Score difference with first non-orthologous sequence - *A. fumigatus*:2088 *A. fischeri*:2088

|                 |         |                 |         |
|-----------------|---------|-----------------|---------|
| afum EAL87086.1 | 100.00% | afis EAW19408.1 | 100.00% |
|-----------------|---------|-----------------|---------|

Bootstrap support for afum|EAL87086.1 as seed ortholog is 100%.

Bootstrap support for afis|EAW19408.1 as seed ortholog is 100%.

---

Group of orthologs #842. Best score 2088 bits

Score difference with first non-orthologous sequence - *A. fumigatus*:2088 *A. fischeri*:2088

|                 |         |                 |         |
|-----------------|---------|-----------------|---------|
| afum EAL90119.1 | 100.00% | afis EAW25459.1 | 100.00% |
|-----------------|---------|-----------------|---------|

Bootstrap support for afum|EAL90119.1 as seed ortholog is 100%.

Bootstrap support for afis|EAW25459.1 as seed ortholog is 100%.

---

Group of orthologs #843. Best score 2086 bits

Score difference with first non-orthologous sequence - *A. fumigatus*:2086 *A. fischeri*:2086

|                 |         |                 |         |
|-----------------|---------|-----------------|---------|
| afum EAL85575.1 | 100.00% | afis EAW15774.1 | 100.00% |
|-----------------|---------|-----------------|---------|

Bootstrap support for afum|EAL85575.1 as seed ortholog is 100%.

Bootstrap support for afis|EAW15774.1 as seed ortholog is 100%.

---

Group of orthologs #844. Best score 2086 bits

Score difference with first non-orthologous sequence - *A. fumigatus*:2086 *A. fischeri*:2086

|                 |         |                 |         |
|-----------------|---------|-----------------|---------|
| afum EAL94000.1 | 100.00% | afis EAW19274.1 | 100.00% |
|-----------------|---------|-----------------|---------|

Bootstrap support for afum|EAL94000.1 as seed ortholog is 100%.

Bootstrap support for afis|EAW19274.1 as seed ortholog is 100%.

---

Group of orthologs #845. Best score 2085 bits

Score difference with first non-orthologous sequence - *A. fumigatus*:2085 *A. fischeri*:2085

|                 |         |                 |         |
|-----------------|---------|-----------------|---------|
| afum EAL90900.1 | 100.00% | afis EAW22281.1 | 100.00% |
|-----------------|---------|-----------------|---------|

Bootstrap support for afum|EAL90900.1 as seed ortholog is 100%.

Bootstrap support for afis|EAW22281.1 as seed ortholog is 100%.

---

Group of orthologs #846. Best score 2084 bits

Score difference with first non-orthologous sequence - *A. fumigatus*:2084 *A. fischeri*:2084

|                 |         |                 |         |
|-----------------|---------|-----------------|---------|
| afum EAL87613.1 | 100.00% | afis EAW18248.1 | 100.00% |
|-----------------|---------|-----------------|---------|

Bootstrap support for afum|EAL87613.1 as seed ortholog is 100%.

Bootstrap support for afis|EAW18248.1 as seed ortholog is 100%.

---

Group of orthologs #847. Best score 2084 bits

Score difference with first non-orthologous sequence - *A. fumigatus*:2084 *A. fischeri*:2084  
afum|EAL88351.1 100.00% afis|EAW23129.1 100.00%  
Bootstrap support for afum|EAL88351.1 as seed ortholog is 100%.  
Bootstrap support for afis|EAW23129.1 as seed ortholog is 100%.

---

Group of orthologs #848. Best score 2082 bits

Score difference with first non-orthologous sequence - *A. fumigatus*:2082 *A. fischeri*:2082  
afum|EAL91815.2 100.00% afis|EAW18004.1 100.00%  
Bootstrap support for afum|EAL91815.2 as seed ortholog is 100%.  
Bootstrap support for afis|EAW18004.1 as seed ortholog is 100%.

---

Group of orthologs #849. Best score 2082 bits

Score difference with first non-orthologous sequence - *A. fumigatus*:2082 *A. fischeri*:2082  
afum|EAL87433.1 100.00% afis|EAW24003.1 100.00%  
Bootstrap support for afum|EAL87433.1 as seed ortholog is 100%.  
Bootstrap support for afis|EAW24003.1 as seed ortholog is 100%.

---

Group of orthologs #850. Best score 2081 bits

Score difference with first non-orthologous sequence - *A. fumigatus*:2081 *A. fischeri*:2081  
afum|EAL89223.1 100.00% afis|EAW16613.1 100.00%  
Bootstrap support for afum|EAL89223.1 as seed ortholog is 100%.  
Bootstrap support for afis|EAW16613.1 as seed ortholog is 100%.

---

Group of orthologs #851. Best score 2081 bits

Score difference with first non-orthologous sequence - *A. fumigatus*:2081 *A. fischeri*:2081  
afum|EAL84303.1 100.00% afis|EAW25597.1 100.00%  
Bootstrap support for afum|EAL84303.1 as seed ortholog is 100%.  
Bootstrap support for afis|EAW25597.1 as seed ortholog is 100%.

---

Group of orthologs #852. Best score 2081 bits

Score difference with first non-orthologous sequence - *A. fumigatus*:2081 *A. fischeri*:2081  
afum|EAL92545.1 100.00% afis|EAW21524.1 100.00%  
Bootstrap support for afum|EAL92545.1 as seed ortholog is 100%.  
Bootstrap support for afis|EAW21524.1 as seed ortholog is 100%.

---

Group of orthologs #853. Best score 2080 bits

Score difference with first non-orthologous sequence - *A. fumigatus*:2080 *A. fischeri*:2080  
afum|EAL88750.1 100.00% afis|EAW16119.1 100.00%  
Bootstrap support for afum|EAL88750.1 as seed ortholog is 100%.  
Bootstrap support for afis|EAW16119.1 as seed ortholog is 100%.

---

Group of orthologs #854. Best score 2080 bits

Score difference with first non-orthologous sequence - *A. fumigatus*:2080 *A. fischeri*:2080  
afum|EAL84545.2 100.00% afis|EAW20511.1 100.00%  
Bootstrap support for afum|EAL84545.2 as seed ortholog is 100%.  
Bootstrap support for afis|EAW20511.1 as seed ortholog is 100%.

---

Group of orthologs #855. Best score 2077 bits

Score difference with first non-orthologous sequence - *A. fumigatus*:2077 *A. fischeri*:1531  
afum|EAL89076.1 100.00% afis|EAW16482.1 100.00%  
Bootstrap support for afum|EAL89076.1 as seed ortholog is 100%.  
Bootstrap support for afis|EAW16482.1 as seed ortholog is 100%.

---

Group of orthologs #856. Best score 2076 bits

Score difference with first non-orthologous sequence - *A. fumigatus*:2076 *A. fischeri*:1594  
afum|EAL92566.1 100.00% afis|EAW21546.1 100.00%

Bootstrap support for afum|EAL92566.1 as seed ortholog is 100%.  
Bootstrap support for afis|EAW21546.1 as seed ortholog is 100%.

---

Group of orthologs #857. Best score 2076 bits

Score difference with first non-orthologous sequence - *A. fumigatus*:2076 *A. fischeri*:2076

|                 |         |                 |         |
|-----------------|---------|-----------------|---------|
| afum EAL92960.1 | 100.00% | afis EAW21946.1 | 100.00% |
|-----------------|---------|-----------------|---------|

Bootstrap support for afum|EAL92960.1 as seed ortholog is 100%.

Bootstrap support for afis|EAW21946.1 as seed ortholog is 100%.

---

Group of orthologs #858. Best score 2074 bits

Score difference with first non-orthologous sequence - *A. fumigatus*:2074 *A. fischeri*:2074

|                 |         |                 |         |
|-----------------|---------|-----------------|---------|
| afum EAL90548.1 | 100.00% | afis EAW22644.1 | 100.00% |
|-----------------|---------|-----------------|---------|

Bootstrap support for afum|EAL90548.1 as seed ortholog is 100%.

Bootstrap support for afis|EAW22644.1 as seed ortholog is 100%.

---

Group of orthologs #859. Best score 2073 bits

Score difference with first non-orthologous sequence - *A. fumigatus*:2073 *A. fischeri*:2073

|                 |         |                 |         |
|-----------------|---------|-----------------|---------|
| afum EAL87106.1 | 100.00% | afis EAW19389.1 | 100.00% |
|-----------------|---------|-----------------|---------|

Bootstrap support for afum|EAL87106.1 as seed ortholog is 100%.

Bootstrap support for afis|EAW19389.1 as seed ortholog is 100%.

---

Group of orthologs #860. Best score 2073 bits

Score difference with first non-orthologous sequence - *A. fumigatus*:2073 *A. fischeri*:2073

|                 |         |                 |         |
|-----------------|---------|-----------------|---------|
| afum EAL90677.1 | 100.00% | afis EAW22516.1 | 100.00% |
|-----------------|---------|-----------------|---------|

Bootstrap support for afum|EAL90677.1 as seed ortholog is 100%.

Bootstrap support for afis|EAW22516.1 as seed ortholog is 100%.

---

Group of orthologs #861. Best score 2072 bits

Score difference with first non-orthologous sequence - *A. fumigatus*:2072 *A. fischeri*:2072

|                 |         |                 |         |
|-----------------|---------|-----------------|---------|
| afum EAL89661.1 | 100.00% | afis EAW25033.1 | 100.00% |
|-----------------|---------|-----------------|---------|

Bootstrap support for afum|EAL89661.1 as seed ortholog is 100%.

Bootstrap support for afis|EAW25033.1 as seed ortholog is 100%.

---

Group of orthologs #862. Best score 2071 bits

Score difference with first non-orthologous sequence - *A. fumigatus*:2071 *A. fischeri*:2071

|                 |         |                 |         |
|-----------------|---------|-----------------|---------|
| afum EAL87021.1 | 100.00% | afis EAW19475.1 | 100.00% |
|-----------------|---------|-----------------|---------|

Bootstrap support for afum|EAL87021.1 as seed ortholog is 100%.

Bootstrap support for afis|EAW19475.1 as seed ortholog is 100%.

---

Group of orthologs #863. Best score 2071 bits

Score difference with first non-orthologous sequence - *A. fumigatus*:2071 *A. fischeri*:2071

|                 |         |                 |         |
|-----------------|---------|-----------------|---------|
| afum EAL91381.1 | 100.00% | afis EAW17567.1 | 100.00% |
|-----------------|---------|-----------------|---------|

Bootstrap support for afum|EAL91381.1 as seed ortholog is 100%.

Bootstrap support for afis|EAW17567.1 as seed ortholog is 100%.

---

Group of orthologs #864. Best score 2070 bits

Score difference with first non-orthologous sequence - *A. fumigatus*:2070 *A. fischeri*:2070

|                 |         |                 |         |
|-----------------|---------|-----------------|---------|
| afum EAL92774.1 | 100.00% | afis EAW21741.1 | 100.00% |
|-----------------|---------|-----------------|---------|

Bootstrap support for afum|EAL92774.1 as seed ortholog is 100%.

Bootstrap support for afis|EAW21741.1 as seed ortholog is 100%.

---

Group of orthologs #865. Best score 2069 bits

Score difference with first non-orthologous sequence - *A. fumigatus*:2069 *A. fischeri*:2069

|                 |         |                 |         |
|-----------------|---------|-----------------|---------|
| afum EAL90862.1 | 100.00% | afis EAW22330.1 | 100.00% |
|-----------------|---------|-----------------|---------|

Bootstrap support for afum|EAL90862.1 as seed ortholog is 100%.

Bootstrap support for afis|EAW22330.1 as seed ortholog is 100%.

---

Group of orthologs #866. Best score 2068 bits

Score difference with first non-orthologous sequence - *A. fumigatus*:1962 *A. fischeri*:1761

afum|EAL85291.1 100.00% afis|EAW20173.1 100.00%

Bootstrap support for afum|EAL85291.1 as seed ortholog is 100%.

Bootstrap support for afis|EAW20173.1 as seed ortholog is 100%.

---

Group of orthologs #867. Best score 2067 bits

Score difference with first non-orthologous sequence - *A. fumigatus*:2067 *A. fischeri*:2067

afum|EAL91451.2 100.00% afis|EAW17636.1 100.00%

Bootstrap support for afum|EAL91451.2 as seed ortholog is 100%.

Bootstrap support for afis|EAW17636.1 as seed ortholog is 100%.

---

Group of orthologs #868. Best score 2066 bits

Score difference with first non-orthologous sequence - *A. fumigatus*:2066 *A. fischeri*:1948

afum|EAL90655.1 100.00% afis|EAW22539.1 100.00%

Bootstrap support for afum|EAL90655.1 as seed ortholog is 100%.

Bootstrap support for afis|EAW22539.1 as seed ortholog is 100%.

---

Group of orthologs #869. Best score 2066 bits

Score difference with first non-orthologous sequence - *A. fumigatus*:2066 *A. fischeri*:1980

afum|EAL90490.1 100.00% afis|EAW22702.1 100.00%

Bootstrap support for afum|EAL90490.1 as seed ortholog is 100%.

Bootstrap support for afis|EAW22702.1 as seed ortholog is 100%.

---

Group of orthologs #870. Best score 2065 bits

Score difference with first non-orthologous sequence - *A. fumigatus*:2065 *A. fischeri*:2065

afum|EAL91517.1 100.00% afis|EAW17702.1 100.00%

Bootstrap support for afum|EAL91517.1 as seed ortholog is 100%.

Bootstrap support for afis|EAW17702.1 as seed ortholog is 100%.

---

Group of orthologs #871. Best score 2063 bits

Score difference with first non-orthologous sequence - *A. fumigatus*:2063 *A. fischeri*:2063

afum|EAL88425.1 100.00% afis|EAW23055.1 100.00%

Bootstrap support for afum|EAL88425.1 as seed ortholog is 100%.

Bootstrap support for afis|EAW23055.1 as seed ortholog is 100%.

---

Group of orthologs #872. Best score 2062 bits

Score difference with first non-orthologous sequence - *A. fumigatus*:2062 *A. fischeri*:2062

afum|EAL87406.1 100.00% afis|EAW23976.1 100.00%

Bootstrap support for afum|EAL87406.1 as seed ortholog is 100%.

Bootstrap support for afis|EAW23976.1 as seed ortholog is 100%.

---

Group of orthologs #873. Best score 2062 bits

Score difference with first non-orthologous sequence - *A. fumigatus*:2062 *A. fischeri*:2062

afum|EAL87917.2 100.00% afis|EAW23549.1 100.00%

Bootstrap support for afum|EAL87917.2 as seed ortholog is 100%.

Bootstrap support for afis|EAW23549.1 as seed ortholog is 100%.

---

Group of orthologs #874. Best score 2062 bits

Score difference with first non-orthologous sequence - *A. fumigatus*:2062 *A. fischeri*:2062

afum|EAL93356.1 100.00% afis|EAW18642.1 100.00%

Bootstrap support for afum|EAL93356.1 as seed ortholog is 100%.

Bootstrap support for afis|EAW18642.1 as seed ortholog is 100%.

---

Group of orthologs #875. Best score 2061 bits

Score difference with first non-orthologous sequence - *A. fumigatus*:2061 *A. fischeri*:2061  
afum|EAL91347.1 100.00% afis|EAW17533.1 100.00%  
Bootstrap support for afum|EAL91347.1 as seed ortholog is 100%.  
Bootstrap support for afis|EAW17533.1 as seed ortholog is 100%.

---

Group of orthologs #876. Best score 2061 bits

Score difference with first non-orthologous sequence - *A. fumigatus*:2061 *A. fischeri*:2061  
afum|EAL89881.1 100.00% afis|EAW25220.1 100.00%  
Bootstrap support for afum|EAL89881.1 as seed ortholog is 100%.  
Bootstrap support for afis|EAW25220.1 as seed ortholog is 100%.

---

Group of orthologs #877. Best score 2058 bits

Score difference with first non-orthologous sequence - *A. fumigatus*:2058 *A. fischeri*:2058  
afum|EAL87276.2 100.00% afis|EAW23848.1 100.00%  
Bootstrap support for afum|EAL87276.2 as seed ortholog is 100%.  
Bootstrap support for afis|EAW23848.1 as seed ortholog is 100%.

---

Group of orthologs #878. Best score 2058 bits

Score difference with first non-orthologous sequence - *A. fumigatus*:2058 *A. fischeri*:2058  
afum|EAL94091.1 100.00% afis|EAW19373.1 100.00%  
Bootstrap support for afum|EAL94091.1 as seed ortholog is 100%.  
Bootstrap support for afis|EAW19373.1 as seed ortholog is 100%.

---

Group of orthologs #879. Best score 2058 bits

Score difference with first non-orthologous sequence - *A. fumigatus*:2058 *A. fischeri*:2058  
afum|EAL92888.1 100.00% afis|EAW21874.1 100.00%  
Bootstrap support for afum|EAL92888.1 as seed ortholog is 100%.  
Bootstrap support for afis|EAW21874.1 as seed ortholog is 100%.

---

Group of orthologs #880. Best score 2056 bits

Score difference with first non-orthologous sequence - *A. fumigatus*:1823 *A. fischeri*:1485  
afum|EAL88721.1 100.00% afis|EAW16089.1 100.00%  
Bootstrap support for afum|EAL88721.1 as seed ortholog is 100%.  
Bootstrap support for afis|EAW16089.1 as seed ortholog is 100%.

---

Group of orthologs #881. Best score 2056 bits

Score difference with first non-orthologous sequence - *A. fumigatus*:2056 *A. fischeri*:661  
afum|EAL86225.1 100.00% afis|EAW24564.1 100.00%  
Bootstrap support for afum|EAL86225.1 as seed ortholog is 100%.  
Bootstrap support for afis|EAW24564.1 as seed ortholog is 100%.

---

Group of orthologs #882. Best score 2055 bits

Score difference with first non-orthologous sequence - *A. fumigatus*:2055 *A. fischeri*:2055  
afum|EAL85089.1 100.00% afis|EAW19804.1 100.00%  
Bootstrap support for afum|EAL85089.1 as seed ortholog is 100%.  
Bootstrap support for afis|EAW19804.1 as seed ortholog is 100%.

---

Group of orthologs #883. Best score 2055 bits

Score difference with first non-orthologous sequence - *A. fumigatus*:2055 *A. fischeri*:2055  
afum|EAL87441.1 100.00% afis|EAW24011.1 100.00%  
Bootstrap support for afum|EAL87441.1 as seed ortholog is 100%.  
Bootstrap support for afis|EAW24011.1 as seed ortholog is 100%.

---

Group of orthologs #884. Best score 2054 bits

Score difference with first non-orthologous sequence - *A. fumigatus*:2054 *A. fischeri*:2054  
afum|EAL86909.1 100.00% afis|EAW19613.1 100.00%

Bootstrap support for afum|EAL86909.1 as seed ortholog is 100%.  
Bootstrap support for afis|EAW19613.1 as seed ortholog is 100%.

---

Group of orthologs #885. Best score 2053 bits

Score difference with first non-orthologous sequence - *A. fumigatus*:2053 *A. fischeri*:2053

|                 |         |                 |         |
|-----------------|---------|-----------------|---------|
| afum EAL84379.1 | 100.00% | afis EAW25706.1 | 100.00% |
|-----------------|---------|-----------------|---------|

Bootstrap support for afum|EAL84379.1 as seed ortholog is 100%.

Bootstrap support for afis|EAW25706.1 as seed ortholog is 100%.

---

Group of orthologs #886. Best score 2052 bits

Score difference with first non-orthologous sequence - *A. fumigatus*:2052 *A. fischeri*:2052

|                 |         |                 |         |
|-----------------|---------|-----------------|---------|
| afum EAL86913.1 | 100.00% | afis EAW19609.1 | 100.00% |
|-----------------|---------|-----------------|---------|

Bootstrap support for afum|EAL86913.1 as seed ortholog is 100%.

Bootstrap support for afis|EAW19609.1 as seed ortholog is 100%.

---

Group of orthologs #887. Best score 2050 bits

Score difference with first non-orthologous sequence - *A. fumigatus*:2050 *A. fischeri*:2050

|                 |         |                 |         |
|-----------------|---------|-----------------|---------|
| afum EAL93104.1 | 100.00% | afis EAW18420.1 | 100.00% |
|-----------------|---------|-----------------|---------|

Bootstrap support for afum|EAL93104.1 as seed ortholog is 100%.

Bootstrap support for afis|EAW18420.1 as seed ortholog is 100%.

---

Group of orthologs #888. Best score 2049 bits

Score difference with first non-orthologous sequence - *A. fumigatus*:2049 *A. fischeri*:2049

|                 |         |                 |         |
|-----------------|---------|-----------------|---------|
| afum EAL87579.1 | 100.00% | afis EAW18213.1 | 100.00% |
|-----------------|---------|-----------------|---------|

Bootstrap support for afum|EAL87579.1 as seed ortholog is 100%.

Bootstrap support for afis|EAW18213.1 as seed ortholog is 100%.

---

Group of orthologs #889. Best score 2049 bits

Score difference with first non-orthologous sequence - *A. fumigatus*:2049 *A. fischeri*:2049

|                 |         |                 |         |
|-----------------|---------|-----------------|---------|
| afum EAL89562.1 | 100.00% | afis EAW24909.1 | 100.00% |
|-----------------|---------|-----------------|---------|

Bootstrap support for afum|EAL89562.1 as seed ortholog is 100%.

Bootstrap support for afis|EAW24909.1 as seed ortholog is 100%.

---

Group of orthologs #890. Best score 2049 bits

Score difference with first non-orthologous sequence - *A. fumigatus*:2049 *A. fischeri*:2049

|                 |         |                 |         |
|-----------------|---------|-----------------|---------|
| afum EAL89979.1 | 100.00% | afis EAW25318.1 | 100.00% |
|-----------------|---------|-----------------|---------|

Bootstrap support for afum|EAL89979.1 as seed ortholog is 100%.

Bootstrap support for afis|EAW25318.1 as seed ortholog is 100%.

---

Group of orthologs #891. Best score 2049 bits

Score difference with first non-orthologous sequence - *A. fumigatus*:2049 *A. fischeri*:2049

|                 |         |                 |         |
|-----------------|---------|-----------------|---------|
| afum EAL90171.1 | 100.00% | afis EAW25505.1 | 100.00% |
|-----------------|---------|-----------------|---------|

Bootstrap support for afum|EAL90171.1 as seed ortholog is 100%.

Bootstrap support for afis|EAW25505.1 as seed ortholog is 100%.

---

Group of orthologs #892. Best score 2048 bits

Score difference with first non-orthologous sequence - *A. fumigatus*:2048 *A. fischeri*:2048

|                 |         |                 |         |
|-----------------|---------|-----------------|---------|
| afum EAL84535.1 | 100.00% | afis EAW20522.1 | 100.00% |
|-----------------|---------|-----------------|---------|

Bootstrap support for afum|EAL84535.1 as seed ortholog is 100%.

Bootstrap support for afis|EAW20522.1 as seed ortholog is 100%.

---

Group of orthologs #893. Best score 2048 bits

Score difference with first non-orthologous sequence - *A. fumigatus*:2048 *A. fischeri*:2048

|                 |         |                 |         |
|-----------------|---------|-----------------|---------|
| afum EAL91543.1 | 100.00% | afis EAW17728.1 | 100.00% |
|-----------------|---------|-----------------|---------|

Bootstrap support for afum|EAL91543.1 as seed ortholog is 100%.

Bootstrap support for afis|EAW17728.1 as seed ortholog is 100%.

---

Group of orthologs #894. Best score 2047 bits

Score difference with first non-orthologous sequence - *A. fumigatus*:2047 *A. fischeri*:2047

|                 |         |                 |         |
|-----------------|---------|-----------------|---------|
| afum EAL87871.1 | 100.00% | afis EAW23596.1 | 100.00% |
|-----------------|---------|-----------------|---------|

Bootstrap support for afum|EAL87871.1 as seed ortholog is 100%.

Bootstrap support for afis|EAW23596.1 as seed ortholog is 100%.

---

Group of orthologs #895. Best score 2046 bits

Score difference with first non-orthologous sequence - *A. fumigatus*:2046 *A. fischeri*:2046

|                 |         |                 |         |
|-----------------|---------|-----------------|---------|
| afum EAL88367.1 | 100.00% | afis EAW23112.1 | 100.00% |
|-----------------|---------|-----------------|---------|

Bootstrap support for afum|EAL88367.1 as seed ortholog is 100%.

Bootstrap support for afis|EAW23112.1 as seed ortholog is 100%.

---

Group of orthologs #896. Best score 2045 bits

Score difference with first non-orthologous sequence - *A. fumigatus*:2045 *A. fischeri*:2045

|                 |         |                 |         |
|-----------------|---------|-----------------|---------|
| afum EAL89258.1 | 100.00% | afis EAW16654.1 | 100.00% |
|-----------------|---------|-----------------|---------|

Bootstrap support for afum|EAL89258.1 as seed ortholog is 100%.

Bootstrap support for afis|EAW16654.1 as seed ortholog is 100%.

---

Group of orthologs #897. Best score 2043 bits

Score difference with first non-orthologous sequence - *A. fumigatus*:2043 *A. fischeri*:2043

|                 |         |                 |         |
|-----------------|---------|-----------------|---------|
| afum EAL93106.1 | 100.00% | afis EAW18422.1 | 100.00% |
|-----------------|---------|-----------------|---------|

Bootstrap support for afum|EAL93106.1 as seed ortholog is 100%.

Bootstrap support for afis|EAW18422.1 as seed ortholog is 100%.

---

Group of orthologs #898. Best score 2042 bits

Score difference with first non-orthologous sequence - *A. fumigatus*:2042 *A. fischeri*:2042

|                 |         |                 |         |
|-----------------|---------|-----------------|---------|
| afum EAL90256.1 | 100.00% | afis EAW22940.1 | 100.00% |
|-----------------|---------|-----------------|---------|

Bootstrap support for afum|EAL90256.1 as seed ortholog is 100%.

Bootstrap support for afis|EAW22940.1 as seed ortholog is 100%.

---

Group of orthologs #899. Best score 2042 bits

Score difference with first non-orthologous sequence - *A. fumigatus*:2042 *A. fischeri*:2042

|                 |         |                 |         |
|-----------------|---------|-----------------|---------|
| afum EAL92380.1 | 100.00% | afis EAW21364.1 | 100.00% |
|-----------------|---------|-----------------|---------|

Bootstrap support for afum|EAL92380.1 as seed ortholog is 100%.

Bootstrap support for afis|EAW21364.1 as seed ortholog is 100%.

---

Group of orthologs #900. Best score 2041 bits

Score difference with first non-orthologous sequence - *A. fumigatus*:2041 *A. fischeri*:2041

|                 |         |                 |         |
|-----------------|---------|-----------------|---------|
| afum EAL91010.1 | 100.00% | afis EAW22179.1 | 100.00% |
|-----------------|---------|-----------------|---------|

Bootstrap support for afum|EAL91010.1 as seed ortholog is 100%.

Bootstrap support for afis|EAW22179.1 as seed ortholog is 100%.

---

Group of orthologs #901. Best score 2040 bits

Score difference with first non-orthologous sequence - *A. fumigatus*:2040 *A. fischeri*:2040

|                 |         |                 |         |
|-----------------|---------|-----------------|---------|
| afum EAL86911.1 | 100.00% | afis EAW19611.1 | 100.00% |
|-----------------|---------|-----------------|---------|

Bootstrap support for afum|EAL86911.1 as seed ortholog is 100%.

Bootstrap support for afis|EAW19611.1 as seed ortholog is 100%.

---

Group of orthologs #902. Best score 2040 bits

Score difference with first non-orthologous sequence - *A. fumigatus*:2040 *A. fischeri*:2040

|                 |         |                 |         |
|-----------------|---------|-----------------|---------|
| afum EAL87326.1 | 100.00% | afis EAW23899.1 | 100.00% |
|-----------------|---------|-----------------|---------|

Bootstrap support for afum|EAL87326.1 as seed ortholog is 100%.

Bootstrap support for afis|EAW23899.1 as seed ortholog is 100%.

---

Group of orthologs #903. Best score 2040 bits

Score difference with first non-orthologous sequence - *A. fumigatus*:2040 *A. fischeri*:2040  
afum|EAL89728.1 100.00% afis|EAW25060.1 100.00%  
Bootstrap support for afum|EAL89728.1 as seed ortholog is 100%.  
Bootstrap support for afis|EAW25060.1 as seed ortholog is 100%.

---

Group of orthologs #904. Best score 2039 bits

Score difference with first non-orthologous sequence - *A. fumigatus*:2039 *A. fischeri*:2039  
afum|EAL85453.1 100.00% afis|EAW20327.1 100.00%  
Bootstrap support for afum|EAL85453.1 as seed ortholog is 100%.  
Bootstrap support for afis|EAW20327.1 as seed ortholog is 100%.

---

Group of orthologs #905. Best score 2039 bits

Score difference with first non-orthologous sequence - *A. fumigatus*:2039 *A. fischeri*:2039  
afum|EAL91559.1 100.00% afis|EAW17747.1 100.00%  
Bootstrap support for afum|EAL91559.1 as seed ortholog is 100%.  
Bootstrap support for afis|EAW17747.1 as seed ortholog is 100%.

---

Group of orthologs #906. Best score 2039 bits

Score difference with first non-orthologous sequence - *A. fumigatus*:2039 *A. fischeri*:2039  
afum|EAL93537.1 100.00% afis|EAW18801.1 100.00%  
Bootstrap support for afum|EAL93537.1 as seed ortholog is 100%.  
Bootstrap support for afis|EAW18801.1 as seed ortholog is 100%.

---

Group of orthologs #907. Best score 2039 bits

Score difference with first non-orthologous sequence - *A. fumigatus*:2039 *A. fischeri*:2039  
afum|EAL89537.1 100.00% afis|EAW24886.1 100.00%  
Bootstrap support for afum|EAL89537.1 as seed ortholog is 100%.  
Bootstrap support for afis|EAW24886.1 as seed ortholog is 100%.

---

Group of orthologs #908. Best score 2037 bits

Score difference with first non-orthologous sequence - *A. fumigatus*:2037 *A. fischeri*:2037  
afum|EAL93862.1 100.00% afis|EAW19130.1 100.00%  
Bootstrap support for afum|EAL93862.1 as seed ortholog is 100%.  
Bootstrap support for afis|EAW19130.1 as seed ortholog is 100%.

---

Group of orthologs #909. Best score 2037 bits

Score difference with first non-orthologous sequence - *A. fumigatus*:2037 *A. fischeri*:2037  
afum|EAL92338.1 100.00% afis|EAW21321.1 100.00%  
Bootstrap support for afum|EAL92338.1 as seed ortholog is 100%.  
Bootstrap support for afis|EAW21321.1 as seed ortholog is 100%.

---

Group of orthologs #910. Best score 2037 bits

Score difference with first non-orthologous sequence - *A. fumigatus*:2037 *A. fischeri*:2037  
afum|EAL89379.1 100.00% afis|EAW24732.1 100.00%  
Bootstrap support for afum|EAL89379.1 as seed ortholog is 100%.  
Bootstrap support for afis|EAW24732.1 as seed ortholog is 100%.

---

Group of orthologs #911. Best score 2036 bits

Score difference with first non-orthologous sequence - *A. fumigatus*:2036 *A. fischeri*:2036  
afum|EAL93515.1 100.00% afis|EAW18783.1 100.00%  
Bootstrap support for afum|EAL93515.1 as seed ortholog is 100%.  
Bootstrap support for afis|EAW18783.1 as seed ortholog is 100%.

---

Group of orthologs #912. Best score 2033 bits

Score difference with first non-orthologous sequence - *A. fumigatus*:2033 *A. fischeri*:2033  
afum|EAL87037.1 100.00% afis|EAW19459.1 100.00%



Bootstrap support for afum|EAL87037.1 as seed ortholog is 100%.  
Bootstrap support for afis|EAW19459.1 as seed ortholog is 100%.

---

Group of orthologs #913. Best score 2033 bits

Score difference with first non-orthologous sequence - *A. fumigatus*:1840 *A. fischeri*:2033

|                 |         |                 |         |
|-----------------|---------|-----------------|---------|
| afum EAL90633.1 | 100.00% | afis EAW22562.1 | 100.00% |
|-----------------|---------|-----------------|---------|

Bootstrap support for afum|EAL90633.1 as seed ortholog is 100%.

Bootstrap support for afis|EAW22562.1 as seed ortholog is 100%.

---

Group of orthologs #914. Best score 2032 bits

Score difference with first non-orthologous sequence - *A. fumigatus*:2032 *A. fischeri*:2032

|                 |         |                 |         |
|-----------------|---------|-----------------|---------|
| afum EAL88774.1 | 100.00% | afis EAW16145.1 | 100.00% |
|-----------------|---------|-----------------|---------|

Bootstrap support for afum|EAL88774.1 as seed ortholog is 100%.

Bootstrap support for afis|EAW16145.1 as seed ortholog is 100%.

---

Group of orthologs #915. Best score 2032 bits

Score difference with first non-orthologous sequence - *A. fumigatus*:2032 *A. fischeri*:2032

|                 |         |                 |         |
|-----------------|---------|-----------------|---------|
| afum EAL89693.1 | 100.00% | afis EAW25005.1 | 100.00% |
|-----------------|---------|-----------------|---------|

Bootstrap support for afum|EAL89693.1 as seed ortholog is 100%.

Bootstrap support for afis|EAW25005.1 as seed ortholog is 100%.

---

Group of orthologs #916. Best score 2031 bits

Score difference with first non-orthologous sequence - *A. fumigatus*:2031 *A. fischeri*:2031

|                 |         |                 |         |
|-----------------|---------|-----------------|---------|
| afum EAL88550.2 | 100.00% | afis EAW15915.1 | 100.00% |
|-----------------|---------|-----------------|---------|

Bootstrap support for afum|EAL88550.2 as seed ortholog is 100%.

Bootstrap support for afis|EAW15915.1 as seed ortholog is 100%.

---

Group of orthologs #917. Best score 2029 bits

Score difference with first non-orthologous sequence - *A. fumigatus*:2029 *A. fischeri*:2029

|                 |         |                 |         |
|-----------------|---------|-----------------|---------|
| afum EAL87658.1 | 100.00% | afis EAW18292.1 | 100.00% |
|-----------------|---------|-----------------|---------|

Bootstrap support for afum|EAL87658.1 as seed ortholog is 100%.

Bootstrap support for afis|EAW18292.1 as seed ortholog is 100%.

---

Group of orthologs #918. Best score 2029 bits

Score difference with first non-orthologous sequence - *A. fumigatus*:2029 *A. fischeri*:2029

|                 |         |                 |         |
|-----------------|---------|-----------------|---------|
| afum EAL89731.2 | 100.00% | afis EAW25062.1 | 100.00% |
|-----------------|---------|-----------------|---------|

Bootstrap support for afum|EAL89731.2 as seed ortholog is 100%.

Bootstrap support for afis|EAW25062.1 as seed ortholog is 100%.

---

Group of orthologs #919. Best score 2028 bits

Score difference with first non-orthologous sequence - *A. fumigatus*:2028 *A. fischeri*:2028

|                 |         |                 |         |
|-----------------|---------|-----------------|---------|
| afum EAL88181.2 | 100.00% | afis EAW23298.1 | 100.00% |
|-----------------|---------|-----------------|---------|

Bootstrap support for afum|EAL88181.2 as seed ortholog is 100%.

Bootstrap support for afis|EAW23298.1 as seed ortholog is 100%.

---

Group of orthologs #920. Best score 2027 bits

Score difference with first non-orthologous sequence - *A. fumigatus*:2027 *A. fischeri*:2027

|                 |         |                 |         |
|-----------------|---------|-----------------|---------|
| afum EAL86919.1 | 100.00% | afis EAW19599.1 | 100.00% |
|-----------------|---------|-----------------|---------|

Bootstrap support for afum|EAL86919.1 as seed ortholog is 100%.

Bootstrap support for afis|EAW19599.1 as seed ortholog is 100%.

---

Group of orthologs #921. Best score 2027 bits

Score difference with first non-orthologous sequence - *A. fumigatus*:2027 *A. fischeri*:1836

|                 |         |                 |         |
|-----------------|---------|-----------------|---------|
| afum EAL92854.1 | 100.00% | afis EAW21842.1 | 100.00% |
|-----------------|---------|-----------------|---------|

Bootstrap support for afum|EAL92854.1 as seed ortholog is 100%.

Bootstrap support for afis|EAW21842.1 as seed ortholog is 100%.

---

Group of orthologs #922. Best score 2025 bits

Score difference with first non-orthologous sequence - *A. fumigatus*:2025 *A. fischeri*:641

|                 |         |                 |         |
|-----------------|---------|-----------------|---------|
| afum EAL88803.1 | 100.00% | afis EAW16169.1 | 100.00% |
|-----------------|---------|-----------------|---------|

Bootstrap support for afum|EAL88803.1 as seed ortholog is 100%.

Bootstrap support for afis|EAW16169.1 as seed ortholog is 100%.

---

Group of orthologs #923. Best score 2025 bits

Score difference with first non-orthologous sequence - *A. fumigatus*:2025 *A. fischeri*:2025

|                 |         |                 |         |
|-----------------|---------|-----------------|---------|
| afum EAL91422.1 | 100.00% | afis EAW17609.1 | 100.00% |
|-----------------|---------|-----------------|---------|

Bootstrap support for afum|EAL91422.1 as seed ortholog is 100%.

Bootstrap support for afis|EAW17609.1 as seed ortholog is 100%.

---

Group of orthologs #924. Best score 2025 bits

Score difference with first non-orthologous sequence - *A. fumigatus*:2025 *A. fischeri*:2025

|                 |         |                 |         |
|-----------------|---------|-----------------|---------|
| afum EAL90788.1 | 100.00% | afis EAW22403.1 | 100.00% |
|-----------------|---------|-----------------|---------|

Bootstrap support for afum|EAL90788.1 as seed ortholog is 100%.

Bootstrap support for afis|EAW22403.1 as seed ortholog is 100%.

---

Group of orthologs #925. Best score 2024 bits

Score difference with first non-orthologous sequence - *A. fumigatus*:2024 *A. fischeri*:2024

|                 |         |                 |         |
|-----------------|---------|-----------------|---------|
| afum EAL89496.1 | 100.00% | afis EAW24850.1 | 100.00% |
|-----------------|---------|-----------------|---------|

Bootstrap support for afum|EAL89496.1 as seed ortholog is 100%.

Bootstrap support for afis|EAW24850.1 as seed ortholog is 100%.

---

Group of orthologs #926. Best score 2023 bits

Score difference with first non-orthologous sequence - *A. fumigatus*:2023 *A. fischeri*:2023

|                 |         |                 |         |
|-----------------|---------|-----------------|---------|
| afum EAL93426.1 | 100.00% | afis EAW18703.1 | 100.00% |
|-----------------|---------|-----------------|---------|

Bootstrap support for afum|EAL93426.1 as seed ortholog is 100%.

Bootstrap support for afis|EAW18703.1 as seed ortholog is 100%.

---

Group of orthologs #927. Best score 2022 bits

Score difference with first non-orthologous sequence - *A. fumigatus*:2022 *A. fischeri*:2022

|                 |         |                 |         |
|-----------------|---------|-----------------|---------|
| afum EAL88441.1 | 100.00% | afis EAW23040.1 | 100.00% |
|-----------------|---------|-----------------|---------|

Bootstrap support for afum|EAL88441.1 as seed ortholog is 100%.

Bootstrap support for afis|EAW23040.1 as seed ortholog is 100%.

---

Group of orthologs #928. Best score 2021 bits

Score difference with first non-orthologous sequence - *A. fumigatus*:2021 *A. fischeri*:2021

|                 |         |                 |         |
|-----------------|---------|-----------------|---------|
| afum EAL85327.1 | 100.00% | afis EAW20210.1 | 100.00% |
|-----------------|---------|-----------------|---------|

Bootstrap support for afum|EAL85327.1 as seed ortholog is 100%.

Bootstrap support for afis|EAW20210.1 as seed ortholog is 100%.

---

Group of orthologs #929. Best score 2021 bits

Score difference with first non-orthologous sequence - *A. fumigatus*:2021 *A. fischeri*:2021

|                 |         |                 |         |
|-----------------|---------|-----------------|---------|
| afum EAL92192.1 | 100.00% | afis EAW21172.1 | 100.00% |
|-----------------|---------|-----------------|---------|

Bootstrap support for afum|EAL92192.1 as seed ortholog is 100%.

Bootstrap support for afis|EAW21172.1 as seed ortholog is 100%.

---

Group of orthologs #930. Best score 2020 bits

Score difference with first non-orthologous sequence - *A. fumigatus*:2020 *A. fischeri*:2020

|                 |         |                 |         |
|-----------------|---------|-----------------|---------|
| afum EAL92185.1 | 100.00% | afis EAW21166.1 | 100.00% |
|-----------------|---------|-----------------|---------|

Bootstrap support for afum|EAL92185.1 as seed ortholog is 100%.

Bootstrap support for afis|EAW21166.1 as seed ortholog is 100%.

---

Group of orthologs #931. Best score 2019 bits

Score difference with first non-orthologous sequence - *A. fumigatus*:2019 *A. fischeri*:2019  
afum|EAL92336.1 100.00% afis|EAW21319.1 100.00%  
Bootstrap support for afum|EAL92336.1 as seed ortholog is 100%.  
Bootstrap support for afis|EAW21319.1 as seed ortholog is 100%.

---

Group of orthologs #932. Best score 2018 bits

Score difference with first non-orthologous sequence - *A. fumigatus*:1916 *A. fischeri*:2018  
afum|EAL90683.1 100.00% afis|EAW22510.1 100.00%  
Bootstrap support for afum|EAL90683.1 as seed ortholog is 100%.  
Bootstrap support for afis|EAW22510.1 as seed ortholog is 100%.

---

Group of orthologs #933. Best score 2016 bits

Score difference with first non-orthologous sequence - *A. fumigatus*:2016 *A. fischeri*:2016  
afum|EAL88213.1 100.00% afis|EAW23266.1 100.00%  
Bootstrap support for afum|EAL88213.1 as seed ortholog is 100%.  
Bootstrap support for afis|EAW23266.1 as seed ortholog is 100%.

---

Group of orthologs #934. Best score 2016 bits

Score difference with first non-orthologous sequence - *A. fumigatus*:2016 *A. fischeri*:2016  
afum|EAL89534.1 100.00% afis|EAW24884.1 100.00%  
Bootstrap support for afum|EAL89534.1 as seed ortholog is 100%.  
Bootstrap support for afis|EAW24884.1 as seed ortholog is 100%.

---

Group of orthologs #935. Best score 2014 bits

Score difference with first non-orthologous sequence - *A. fumigatus*:2014 *A. fischeri*:2014  
afum|EAL85619.1 100.00% afis|EAW15728.1 100.00%  
Bootstrap support for afum|EAL85619.1 as seed ortholog is 100%.  
Bootstrap support for afis|EAW15728.1 as seed ortholog is 100%.

---

Group of orthologs #936. Best score 2014 bits

Score difference with first non-orthologous sequence - *A. fumigatus*:2014 *A. fischeri*:2014  
afum|EAL92004.1 100.00% afis|EAW24149.1 100.00%  
Bootstrap support for afum|EAL92004.1 as seed ortholog is 100%.  
Bootstrap support for afis|EAW24149.1 as seed ortholog is 100%.

---

Group of orthologs #937. Best score 2013 bits

Score difference with first non-orthologous sequence - *A. fumigatus*:2013 *A. fischeri*:2013  
afum|EAL88221.1 100.00% afis|EAW23260.1 100.00%  
Bootstrap support for afum|EAL88221.1 as seed ortholog is 100%.  
Bootstrap support for afis|EAW23260.1 as seed ortholog is 100%.

---

Group of orthologs #938. Best score 2011 bits

Score difference with first non-orthologous sequence - *A. fumigatus*:2011 *A. fischeri*:2011  
afum|EAL85194.1 100.00% afis|EAW20076.1 100.00%  
Bootstrap support for afum|EAL85194.1 as seed ortholog is 100%.  
Bootstrap support for afis|EAW20076.1 as seed ortholog is 100%.

---

Group of orthologs #939. Best score 2011 bits

Score difference with first non-orthologous sequence - *A. fumigatus*:2011 *A. fischeri*:1854  
afum|EAL88797.1 100.00% afis|EAW20720.1 100.00%  
Bootstrap support for afum|EAL88797.1 as seed ortholog is 100%.  
Bootstrap support for afis|EAW20720.1 as seed ortholog is 100%.

---

Group of orthologs #940. Best score 2011 bits

Score difference with first non-orthologous sequence - *A. fumigatus*:2011 *A. fischeri*:2011  
afum|EAL88122.2 100.00% afis|EAW23354.1 100.00%

Bootstrap support for afum|EAL88122.2 as seed ortholog is 100%.  
Bootstrap support for afis|EAW23354.1 as seed ortholog is 100%.

---

Group of orthologs #941. Best score 2010 bits

Score difference with first non-orthologous sequence - *A. fumigatus*:2010 *A. fischeri*:2010

|                 |         |                 |         |
|-----------------|---------|-----------------|---------|
| afum EAL91181.1 | 100.00% | afis EAW17337.1 | 100.00% |
|-----------------|---------|-----------------|---------|

Bootstrap support for afum|EAL91181.1 as seed ortholog is 100%.

Bootstrap support for afis|EAW17337.1 as seed ortholog is 100%.

---

Group of orthologs #942. Best score 2009 bits

Score difference with first non-orthologous sequence - *A. fumigatus*:2009 *A. fischeri*:1932

|                 |         |                 |         |
|-----------------|---------|-----------------|---------|
| afum EBA27220.1 | 100.00% | afis EAW19769.1 | 100.00% |
|-----------------|---------|-----------------|---------|

Bootstrap support for afum|EBA27220.1 as seed ortholog is 100%.

Bootstrap support for afis|EAW19769.1 as seed ortholog is 100%.

---

Group of orthologs #943. Best score 2008 bits

Score difference with first non-orthologous sequence - *A. fumigatus*:2008 *A. fischeri*:2008

|                 |         |                 |         |
|-----------------|---------|-----------------|---------|
| afum EAL89553.1 | 100.00% | afis EAW24899.1 | 100.00% |
|-----------------|---------|-----------------|---------|

Bootstrap support for afum|EAL89553.1 as seed ortholog is 100%.

Bootstrap support for afis|EAW24899.1 as seed ortholog is 100%.

---

Group of orthologs #944. Best score 2006 bits

Score difference with first non-orthologous sequence - *A. fumigatus*:2006 *A. fischeri*:2006

|                 |         |                 |         |
|-----------------|---------|-----------------|---------|
| afum EAL88650.1 | 100.00% | afis EAW16021.1 | 100.00% |
|-----------------|---------|-----------------|---------|

Bootstrap support for afum|EAL88650.1 as seed ortholog is 100%.

Bootstrap support for afis|EAW16021.1 as seed ortholog is 100%.

---

Group of orthologs #945. Best score 2006 bits

Score difference with first non-orthologous sequence - *A. fumigatus*:2006 *A. fischeri*:2006

|                 |         |                 |         |
|-----------------|---------|-----------------|---------|
| afum EAL85166.1 | 100.00% | afis EAW20045.1 | 100.00% |
|-----------------|---------|-----------------|---------|

Bootstrap support for afum|EAL85166.1 as seed ortholog is 100%.

Bootstrap support for afis|EAW20045.1 as seed ortholog is 100%.

---

Group of orthologs #946. Best score 2006 bits

Score difference with first non-orthologous sequence - *A. fumigatus*:2006 *A. fischeri*:2006

|                 |         |                 |         |
|-----------------|---------|-----------------|---------|
| afum EAL87925.1 | 100.00% | afis EAW23541.1 | 100.00% |
|-----------------|---------|-----------------|---------|

Bootstrap support for afum|EAL87925.1 as seed ortholog is 100%.

Bootstrap support for afis|EAW23541.1 as seed ortholog is 100%.

---

Group of orthologs #947. Best score 2005 bits

Score difference with first non-orthologous sequence - *A. fumigatus*:2005 *A. fischeri*:2005

|                 |         |                 |         |
|-----------------|---------|-----------------|---------|
| afum EAL90739.1 | 100.00% | afis EAW22452.1 | 100.00% |
|-----------------|---------|-----------------|---------|

Bootstrap support for afum|EAL90739.1 as seed ortholog is 100%.

Bootstrap support for afis|EAW22452.1 as seed ortholog is 100%.

---

Group of orthologs #948. Best score 2004 bits

Score difference with first non-orthologous sequence - *A. fumigatus*:2004 *A. fischeri*:2004

|                 |         |                 |         |
|-----------------|---------|-----------------|---------|
| afum EAL93390.1 | 100.00% | afis EAW18671.1 | 100.00% |
|-----------------|---------|-----------------|---------|

Bootstrap support for afum|EAL93390.1 as seed ortholog is 100%.

Bootstrap support for afis|EAW18671.1 as seed ortholog is 100%.

---

Group of orthologs #949. Best score 2004 bits

Score difference with first non-orthologous sequence - *A. fumigatus*:2004 *A. fischeri*:2004

|                 |         |                 |         |
|-----------------|---------|-----------------|---------|
| afum EAL93643.1 | 100.00% | afis EAW18912.1 | 100.00% |
|-----------------|---------|-----------------|---------|

Bootstrap support for afum|EAL93643.1 as seed ortholog is 100%.

Bootstrap support for afis|EAW18912.1 as seed ortholog is 100%.

---

Group of orthologs #950. Best score 2003 bits

Score difference with first non-orthologous sequence - *A. fumigatus*:2003 *A. fischeri*:2003

|                 |         |                 |         |
|-----------------|---------|-----------------|---------|
| afum EAL86951.1 | 100.00% | afis EAW19560.1 | 100.00% |
|-----------------|---------|-----------------|---------|

Bootstrap support for afum|EAL86951.1 as seed ortholog is 100%.

Bootstrap support for afis|EAW19560.1 as seed ortholog is 100%.

---

Group of orthologs #951. Best score 2003 bits

Score difference with first non-orthologous sequence - *A. fumigatus*:2003 *A. fischeri*:2003

|                 |         |                 |         |
|-----------------|---------|-----------------|---------|
| afum EAL91845.1 | 100.00% | afis EAW18034.1 | 100.00% |
|-----------------|---------|-----------------|---------|

Bootstrap support for afum|EAL91845.1 as seed ortholog is 100%.

Bootstrap support for afis|EAW18034.1 as seed ortholog is 100%.

---

Group of orthologs #952. Best score 2002 bits

Score difference with first non-orthologous sequence - *A. fumigatus*:2002 *A. fischeri*:2002

|                 |         |                 |         |
|-----------------|---------|-----------------|---------|
| afum EAL91684.1 | 100.00% | afis EAW17876.1 | 100.00% |
|-----------------|---------|-----------------|---------|

Bootstrap support for afum|EAL91684.1 as seed ortholog is 100%.

Bootstrap support for afis|EAW17876.1 as seed ortholog is 100%.

---

Group of orthologs #953. Best score 2002 bits

Score difference with first non-orthologous sequence - *A. fumigatus*:2002 *A. fischeri*:2002

|                 |         |                 |         |
|-----------------|---------|-----------------|---------|
| afum EAL92490.1 | 100.00% | afis EAW21471.1 | 100.00% |
|-----------------|---------|-----------------|---------|

Bootstrap support for afum|EAL92490.1 as seed ortholog is 100%.

Bootstrap support for afis|EAW21471.1 as seed ortholog is 100%.

---

Group of orthologs #954. Best score 2000 bits

Score difference with first non-orthologous sequence - *A. fumigatus*:2000 *A. fischeri*:2000

|                 |         |                 |         |
|-----------------|---------|-----------------|---------|
| afum EBA27413.1 | 100.00% | afis EAW22391.1 | 100.00% |
|-----------------|---------|-----------------|---------|

Bootstrap support for afum|EBA27413.1 as seed ortholog is 100%.

Bootstrap support for afis|EAW22391.1 as seed ortholog is 100%.

---

Group of orthologs #955. Best score 1999 bits

Score difference with first non-orthologous sequence - *A. fumigatus*:1999 *A. fischeri*:1999

|                 |         |                 |         |
|-----------------|---------|-----------------|---------|
| afum EAL89069.1 | 100.00% | afis EAW16475.1 | 100.00% |
|-----------------|---------|-----------------|---------|

Bootstrap support for afum|EAL89069.1 as seed ortholog is 100%.

Bootstrap support for afis|EAW16475.1 as seed ortholog is 100%.

---

Group of orthologs #956. Best score 1999 bits

Score difference with first non-orthologous sequence - *A. fumigatus*:1999 *A. fischeri*:1999

|                 |         |                 |         |
|-----------------|---------|-----------------|---------|
| afum EAL90305.2 | 100.00% | afis EAW22893.1 | 100.00% |
|-----------------|---------|-----------------|---------|

Bootstrap support for afum|EAL90305.2 as seed ortholog is 100%.

Bootstrap support for afis|EAW22893.1 as seed ortholog is 100%.

---

Group of orthologs #957. Best score 1998 bits

Score difference with first non-orthologous sequence - *A. fumigatus*:1221 *A. fischeri*:1472

|                 |         |                 |         |
|-----------------|---------|-----------------|---------|
| afum EAL91877.1 | 100.00% | afis EAW18065.1 | 100.00% |
|-----------------|---------|-----------------|---------|

Bootstrap support for afum|EAL91877.1 as seed ortholog is 100%.

Bootstrap support for afis|EAW18065.1 as seed ortholog is 100%.

---

Group of orthologs #958. Best score 1997 bits

Score difference with first non-orthologous sequence - *A. fumigatus*:1997 *A. fischeri*:1997

|                 |         |                 |         |
|-----------------|---------|-----------------|---------|
| afum EAL86002.1 | 100.00% | afis EAW24332.1 | 100.00% |
|-----------------|---------|-----------------|---------|

Bootstrap support for afum|EAL86002.1 as seed ortholog is 100%.

Bootstrap support for afis|EAW24332.1 as seed ortholog is 100%.

---

Group of orthologs #959. Best score 1997 bits

Score difference with first non-orthologous sequence - *A. fumigatus*:1997 *A. fischeri*:1997  
afum|EAL87204.1 100.00% afis|EAW23770.1 100.00%  
Bootstrap support for afum|EAL87204.1 as seed ortholog is 100%.  
Bootstrap support for afis|EAW23770.1 as seed ortholog is 100%.

---

Group of orthologs #960. Best score 1997 bits

Score difference with first non-orthologous sequence - *A. fumigatus*:1997 *A. fischeri*:1997  
afum|EAL87332.1 100.00% afis|EAW23904.1 100.00%  
Bootstrap support for afum|EAL87332.1 as seed ortholog is 100%.  
Bootstrap support for afis|EAW23904.1 as seed ortholog is 100%.

---

Group of orthologs #961. Best score 1997 bits

Score difference with first non-orthologous sequence - *A. fumigatus*:1997 *A. fischeri*:1997  
afum|EAL93999.2 100.00% afis|EAW19273.1 100.00%  
Bootstrap support for afum|EAL93999.2 as seed ortholog is 100%.  
Bootstrap support for afis|EAW19273.1 as seed ortholog is 100%.

---

Group of orthologs #962. Best score 1997 bits

Score difference with first non-orthologous sequence - *A. fumigatus*:1997 *A. fischeri*:1997  
afum|EAL92316.1 100.00% afis|EAW21299.1 100.00%  
Bootstrap support for afum|EAL92316.1 as seed ortholog is 100%.  
Bootstrap support for afis|EAW21299.1 as seed ortholog is 100%.

---

Group of orthologs #963. Best score 1995 bits

Score difference with first non-orthologous sequence - *A. fumigatus*:1995 *A. fischeri*:1995  
afum|EAL90298.1 100.00% afis|EAW22899.1 100.00%  
Bootstrap support for afum|EAL90298.1 as seed ortholog is 100%.  
Bootstrap support for afis|EAW22899.1 as seed ortholog is 100%.

---

Group of orthologs #964. Best score 1994 bits

Score difference with first non-orthologous sequence - *A. fumigatus*:1994 *A. fischeri*:1994  
afum|EAL90146.1 100.00% afis|EAW25481.1 100.00%  
Bootstrap support for afum|EAL90146.1 as seed ortholog is 100%.  
Bootstrap support for afis|EAW25481.1 as seed ortholog is 100%.

---

Group of orthologs #965. Best score 1993 bits

Score difference with first non-orthologous sequence - *A. fumigatus*:1993 *A. fischeri*:1993  
afum|EAL92766.1 100.00% afis|EAW21733.1 100.00%  
Bootstrap support for afum|EAL92766.1 as seed ortholog is 100%.  
Bootstrap support for afis|EAW21733.1 as seed ortholog is 100%.

---

Group of orthologs #966. Best score 1993 bits

Score difference with first non-orthologous sequence - *A. fumigatus*:1993 *A. fischeri*:1993  
afum|EAL89601.1 100.00% afis|EAW24944.1 100.00%  
Bootstrap support for afum|EAL89601.1 as seed ortholog is 100%.  
Bootstrap support for afis|EAW24944.1 as seed ortholog is 100%.

---

Group of orthologs #967. Best score 1992 bits

Score difference with first non-orthologous sequence - *A. fumigatus*:1992 *A. fischeri*:1992  
afum|EAL92775.1 100.00% afis|EAW21742.1 100.00%  
Bootstrap support for afum|EAL92775.1 as seed ortholog is 100%.  
Bootstrap support for afis|EAW21742.1 as seed ortholog is 100%.

---

Group of orthologs #968. Best score 1991 bits

Score difference with first non-orthologous sequence - *A. fumigatus*:1991 *A. fischeri*:1991  
afum|EAL88521.2 100.00% afis|EAW15887.1 100.00%

Bootstrap support for afum|EAL88521.2 as seed ortholog is 100%.  
Bootstrap support for afis|EAW15887.1 as seed ortholog is 100%.

---

Group of orthologs #969. Best score 1991 bits

Score difference with first non-orthologous sequence - *A. fumigatus*:1991 *A. fischeri*:1991

|                 |         |                 |         |
|-----------------|---------|-----------------|---------|
| afum EAL88958.1 | 100.00% | afis EAW16333.1 | 100.00% |
|-----------------|---------|-----------------|---------|

Bootstrap support for afum|EAL88958.1 as seed ortholog is 100%.

Bootstrap support for afis|EAW16333.1 as seed ortholog is 100%.

---

Group of orthologs #970. Best score 1989 bits

Score difference with first non-orthologous sequence - *A. fumigatus*:1989 *A. fischeri*:1581

|                 |         |                 |         |
|-----------------|---------|-----------------|---------|
| afum EAL90406.1 | 100.00% | afis EAW22793.1 | 100.00% |
|-----------------|---------|-----------------|---------|

Bootstrap support for afum|EAL90406.1 as seed ortholog is 100%.

Bootstrap support for afis|EAW22793.1 as seed ortholog is 100%.

---

Group of orthologs #971. Best score 1988 bits

Score difference with first non-orthologous sequence - *A. fumigatus*:1988 *A. fischeri*:1988

|                 |         |                 |         |
|-----------------|---------|-----------------|---------|
| afum EAL87562.2 | 100.00% | afis EAW18191.1 | 100.00% |
|-----------------|---------|-----------------|---------|

Bootstrap support for afum|EAL87562.2 as seed ortholog is 100%.

Bootstrap support for afis|EAW18191.1 as seed ortholog is 100%.

---

Group of orthologs #972. Best score 1988 bits

Score difference with first non-orthologous sequence - *A. fumigatus*:1988 *A. fischeri*:1988

|                 |         |                 |         |
|-----------------|---------|-----------------|---------|
| afum EAL84637.1 | 100.00% | afis EAW20992.1 | 100.00% |
|-----------------|---------|-----------------|---------|

Bootstrap support for afum|EAL84637.1 as seed ortholog is 100%.

Bootstrap support for afis|EAW20992.1 as seed ortholog is 100%.

---

Group of orthologs #973. Best score 1988 bits

Score difference with first non-orthologous sequence - *A. fumigatus*:1988 *A. fischeri*:1988

|                 |         |                 |         |
|-----------------|---------|-----------------|---------|
| afum EAL90565.1 | 100.00% | afis EAW22630.1 | 100.00% |
|-----------------|---------|-----------------|---------|

Bootstrap support for afum|EAL90565.1 as seed ortholog is 100%.

Bootstrap support for afis|EAW22630.1 as seed ortholog is 100%.

---

Group of orthologs #974. Best score 1988 bits

Score difference with first non-orthologous sequence - *A. fumigatus*:1988 *A. fischeri*:1988

|                 |         |                 |         |
|-----------------|---------|-----------------|---------|
| afum EAL90396.1 | 100.00% | afis EAW22803.1 | 100.00% |
|-----------------|---------|-----------------|---------|

Bootstrap support for afum|EAL90396.1 as seed ortholog is 100%.

Bootstrap support for afis|EAW22803.1 as seed ortholog is 100%.

---

Group of orthologs #975. Best score 1987 bits

Score difference with first non-orthologous sequence - *A. fumigatus*:1618 *A. fischeri*:1987

|                 |         |                 |         |
|-----------------|---------|-----------------|---------|
| afum EAL90494.1 | 100.00% | afis EAW22698.1 | 100.00% |
|-----------------|---------|-----------------|---------|

Bootstrap support for afum|EAL90494.1 as seed ortholog is 100%.

Bootstrap support for afis|EAW22698.1 as seed ortholog is 100%.

---

Group of orthologs #976. Best score 1986 bits

Score difference with first non-orthologous sequence - *A. fumigatus*:1986 *A. fischeri*:1986

|                 |         |                 |         |
|-----------------|---------|-----------------|---------|
| afum EAL86427.2 | 100.00% | afis EAW16889.1 | 100.00% |
|-----------------|---------|-----------------|---------|

Bootstrap support for afum|EAL86427.2 as seed ortholog is 100%.

Bootstrap support for afis|EAW16889.1 as seed ortholog is 100%.

---

Group of orthologs #977. Best score 1984 bits

Score difference with first non-orthologous sequence - *A. fumigatus*:1984 *A. fischeri*:1984

|                 |         |                 |         |
|-----------------|---------|-----------------|---------|
| afum EAL92424.1 | 100.00% | afis EAW21410.1 | 100.00% |
|-----------------|---------|-----------------|---------|

Bootstrap support for afum|EAL92424.1 as seed ortholog is 100%.

Bootstrap support for afis|EAW21410.1 as seed ortholog is 100%.

---

Group of orthologs #978. Best score 1983 bits

Score difference with first non-orthologous sequence - *A. fumigatus*:1983 *A. fischeri*:1983

|                 |         |                 |         |
|-----------------|---------|-----------------|---------|
| afum EAL93648.1 | 100.00% | afis EAW18917.1 | 100.00% |
|-----------------|---------|-----------------|---------|

Bootstrap support for afum|EAL93648.1 as seed ortholog is 100%.

Bootstrap support for afis|EAW18917.1 as seed ortholog is 100%.

---

Group of orthologs #979. Best score 1982 bits

Score difference with first non-orthologous sequence - *A. fumigatus*:1982 *A. fischeri*:1982

|                 |         |                 |         |
|-----------------|---------|-----------------|---------|
| afum EAL90279.1 | 100.00% | afis EAW22918.1 | 100.00% |
|-----------------|---------|-----------------|---------|

Bootstrap support for afum|EAL90279.1 as seed ortholog is 100%.

Bootstrap support for afis|EAW22918.1 as seed ortholog is 100%.

---

Group of orthologs #980. Best score 1982 bits

Score difference with first non-orthologous sequence - *A. fumigatus*:1929 *A. fischeri*:1982

|                 |         |                 |         |
|-----------------|---------|-----------------|---------|
| afum EAL89575.1 | 100.00% | afis EAW24920.1 | 100.00% |
|-----------------|---------|-----------------|---------|

Bootstrap support for afum|EAL89575.1 as seed ortholog is 100%.

Bootstrap support for afis|EAW24920.1 as seed ortholog is 100%.

---

Group of orthologs #981. Best score 1981 bits

Score difference with first non-orthologous sequence - *A. fumigatus*:1981 *A. fischeri*:1981

|                 |         |                 |         |
|-----------------|---------|-----------------|---------|
| afum EAL88189.1 | 100.00% | afis EAW23290.1 | 100.00% |
|-----------------|---------|-----------------|---------|

Bootstrap support for afum|EAL88189.1 as seed ortholog is 100%.

Bootstrap support for afis|EAW23290.1 as seed ortholog is 100%.

---

Group of orthologs #982. Best score 1979 bits

Score difference with first non-orthologous sequence - *A. fumigatus*:1979 *A. fischeri*:1979

|                 |         |                 |         |
|-----------------|---------|-----------------|---------|
| afum EAL85875.1 | 100.00% | afis EAW24205.1 | 100.00% |
|-----------------|---------|-----------------|---------|

Bootstrap support for afum|EAL85875.1 as seed ortholog is 100%.

Bootstrap support for afis|EAW24205.1 as seed ortholog is 100%.

---

Group of orthologs #983. Best score 1979 bits

Score difference with first non-orthologous sequence - *A. fumigatus*:1979 *A. fischeri*:1979

|                 |         |                 |         |
|-----------------|---------|-----------------|---------|
| afum EAL89733.1 | 100.00% | afis EAW25064.1 | 100.00% |
|-----------------|---------|-----------------|---------|

Bootstrap support for afum|EAL89733.1 as seed ortholog is 100%.

Bootstrap support for afis|EAW25064.1 as seed ortholog is 100%.

---

Group of orthologs #984. Best score 1978 bits

Score difference with first non-orthologous sequence - *A. fumigatus*:1978 *A. fischeri*:1978

|                 |         |                 |         |
|-----------------|---------|-----------------|---------|
| afum EAL91464.1 | 100.00% | afis EAW17648.1 | 100.00% |
|-----------------|---------|-----------------|---------|

Bootstrap support for afum|EAL91464.1 as seed ortholog is 100%.

Bootstrap support for afis|EAW17648.1 as seed ortholog is 100%.

---

Group of orthologs #985. Best score 1977 bits

Score difference with first non-orthologous sequence - *A. fumigatus*:1133 *A. fischeri*:1469

|                 |         |                 |         |
|-----------------|---------|-----------------|---------|
| afum EAL89285.1 | 100.00% | afis EAW16681.1 | 100.00% |
|-----------------|---------|-----------------|---------|

Bootstrap support for afum|EAL89285.1 as seed ortholog is 100%.

Bootstrap support for afis|EAW16681.1 as seed ortholog is 100%.

---

Group of orthologs #986. Best score 1977 bits

Score difference with first non-orthologous sequence - *A. fumigatus*:1977 *A. fischeri*:1977

|                 |         |                 |         |
|-----------------|---------|-----------------|---------|
| afum EAL93881.1 | 100.00% | afis EAW19150.1 | 100.00% |
|-----------------|---------|-----------------|---------|

Bootstrap support for afum|EAL93881.1 as seed ortholog is 100%.

Bootstrap support for afis|EAW19150.1 as seed ortholog is 100%.

---

Group of orthologs #987. Best score 1977 bits



Score difference with first non-orthologous sequence - *A. fumigatus*:1977 *A. fischeri*:1977  
afum|EAL92861.2 100.00% afis|EAW21848.1 100.00%  
Bootstrap support for afum|EAL92861.2 as seed ortholog is 100%.  
Bootstrap support for afis|EAW21848.1 as seed ortholog is 100%.

---

Group of orthologs #988. Best score 1976 bits

Score difference with first non-orthologous sequence - *A. fumigatus*:1976 *A. fischeri*:1976  
afum|EAL91372.1 100.00% afis|EAW17558.1 100.00%  
Bootstrap support for afum|EAL91372.1 as seed ortholog is 100%.  
Bootstrap support for afis|EAW17558.1 as seed ortholog is 100%.

---

Group of orthologs #989. Best score 1976 bits

Score difference with first non-orthologous sequence - *A. fumigatus*:1976 *A. fischeri*:1976  
afum|EAL92301.1 100.00% afis|EAW21284.1 100.00%  
Bootstrap support for afum|EAL92301.1 as seed ortholog is 100%.  
Bootstrap support for afis|EAW21284.1 as seed ortholog is 100%.

---

Group of orthologs #990. Best score 1975 bits

Score difference with first non-orthologous sequence - *A. fumigatus*:1975 *A. fischeri*:1975  
afum|EAL86321.1 100.00% afis|EAW16746.1 100.00%  
Bootstrap support for afum|EAL86321.1 as seed ortholog is 100%.  
Bootstrap support for afis|EAW16746.1 as seed ortholog is 100%.

---

Group of orthologs #991. Best score 1975 bits

Score difference with first non-orthologous sequence - *A. fumigatus*:1975 *A. fischeri*:1975  
afum|EAL85410.1 100.00% afis|EAW20276.1 100.00%  
Bootstrap support for afum|EAL85410.1 as seed ortholog is 100%.  
Bootstrap support for afis|EAW20276.1 as seed ortholog is 100%.

---

Group of orthologs #992. Best score 1975 bits

Score difference with first non-orthologous sequence - *A. fumigatus*:1975 *A. fischeri*:1975  
afum|EAL85973.1 100.00% afis|EAW24305.1 100.00%  
Bootstrap support for afum|EAL85973.1 as seed ortholog is 100%.  
Bootstrap support for afis|EAW24305.1 as seed ortholog is 100%.

---

Group of orthologs #993. Best score 1975 bits

Score difference with first non-orthologous sequence - *A. fumigatus*:1975 *A. fischeri*:1975  
afum|EAL90128.2 100.00% afis|EAW25465.1 100.00%  
Bootstrap support for afum|EAL90128.2 as seed ortholog is 100%.  
Bootstrap support for afis|EAW25465.1 as seed ortholog is 100%.

---

Group of orthologs #994. Best score 1974 bits

Score difference with first non-orthologous sequence - *A. fumigatus*:1974 *A. fischeri*:1974  
afum|EAL85645.1 100.00% afis|EAW15702.1 100.00%  
Bootstrap support for afum|EAL85645.1 as seed ortholog is 100%.  
Bootstrap support for afis|EAW15702.1 as seed ortholog is 100%.

---

Group of orthologs #995. Best score 1974 bits

Score difference with first non-orthologous sequence - *A. fumigatus*:1201 *A. fischeri*:1495  
afum|EAL89033.1 100.00% afis|EAW16409.1 100.00%  
Bootstrap support for afum|EAL89033.1 as seed ortholog is 100%.  
Bootstrap support for afis|EAW16409.1 as seed ortholog is 100%.

---

Group of orthologs #996. Best score 1974 bits

Score difference with first non-orthologous sequence - *A. fumigatus*:1863 *A. fischeri*:1888  
afum|EAL93921.1 100.00% afis|EAW19189.1 100.00%

Bootstrap support for afum|EAL93921.1 as seed ortholog is 100%.  
Bootstrap support for afis|EAW19189.1 as seed ortholog is 100%.

---

Group of orthologs #997. Best score 1974 bits

Score difference with first non-orthologous sequence - *A. fumigatus*:1974 *A. fischeri*:1974

|                 |         |                 |         |
|-----------------|---------|-----------------|---------|
| afum EBA27208.1 | 100.00% | afis EAW20802.1 | 100.00% |
|-----------------|---------|-----------------|---------|

Bootstrap support for afum|EBA27208.1 as seed ortholog is 100%.

Bootstrap support for afis|EAW20802.1 as seed ortholog is 100%.

---

Group of orthologs #998. Best score 1974 bits

Score difference with first non-orthologous sequence - *A. fumigatus*:1974 *A. fischeri*:1974

|                 |         |                 |         |
|-----------------|---------|-----------------|---------|
| afum EAL92984.1 | 100.00% | afis EAW21970.1 | 100.00% |
|-----------------|---------|-----------------|---------|

Bootstrap support for afum|EAL92984.1 as seed ortholog is 100%.

Bootstrap support for afis|EAW21970.1 as seed ortholog is 100%.

---

Group of orthologs #999. Best score 1973 bits

Score difference with first non-orthologous sequence - *A. fumigatus*:1973 *A. fischeri*:1973

|                 |         |                 |         |
|-----------------|---------|-----------------|---------|
| afum EAL84668.1 | 100.00% | afis EAW20965.1 | 100.00% |
|-----------------|---------|-----------------|---------|

Bootstrap support for afum|EAL84668.1 as seed ortholog is 100%.

Bootstrap support for afis|EAW20965.1 as seed ortholog is 100%.

---

Group of orthologs #1000. Best score 1972 bits

Score difference with first non-orthologous sequence - *A. fumigatus*:1972 *A. fischeri*:1214

|                 |         |                 |         |
|-----------------|---------|-----------------|---------|
| afum EAL85004.1 | 100.00% | afis EAW19900.1 | 100.00% |
|-----------------|---------|-----------------|---------|

Bootstrap support for afum|EAL85004.1 as seed ortholog is 100%.

Bootstrap support for afis|EAW19900.1 as seed ortholog is 100%.

---

Group of orthologs #1001. Best score 1972 bits

Score difference with first non-orthologous sequence - *A. fumigatus*:1972 *A. fischeri*:1972

|                 |         |                 |         |
|-----------------|---------|-----------------|---------|
| afum EBA27491.1 | 100.00% | afis EAW18663.1 | 100.00% |
|-----------------|---------|-----------------|---------|

Bootstrap support for afum|EBA27491.1 as seed ortholog is 100%.

Bootstrap support for afis|EAW18663.1 as seed ortholog is 100%.

---

Group of orthologs #1002. Best score 1970 bits

Score difference with first non-orthologous sequence - *A. fumigatus*:1970 *A. fischeri*:1970

|                 |         |                 |         |
|-----------------|---------|-----------------|---------|
| afum EAL90139.1 | 100.00% | afis EAW25476.1 | 100.00% |
|-----------------|---------|-----------------|---------|

Bootstrap support for afum|EAL90139.1 as seed ortholog is 100%.

Bootstrap support for afis|EAW25476.1 as seed ortholog is 100%.

---

Group of orthologs #1003. Best score 1970 bits

Score difference with first non-orthologous sequence - *A. fumigatus*:1970 *A. fischeri*:1970

|                 |         |                 |         |
|-----------------|---------|-----------------|---------|
| afum EBA27300.1 | 100.00% | afis EAW23683.1 | 100.00% |
|-----------------|---------|-----------------|---------|

Bootstrap support for afum|EBA27300.1 as seed ortholog is 100%.

Bootstrap support for afis|EAW23683.1 as seed ortholog is 100%.

---

Group of orthologs #1004. Best score 1968 bits

Score difference with first non-orthologous sequence - *A. fumigatus*:1968 *A. fischeri*:1968

|                 |         |                 |         |
|-----------------|---------|-----------------|---------|
| afum EAL92919.2 | 100.00% | afis EAW21907.1 | 100.00% |
|-----------------|---------|-----------------|---------|

Bootstrap support for afum|EAL92919.2 as seed ortholog is 100%.

Bootstrap support for afis|EAW21907.1 as seed ortholog is 100%.

---

Group of orthologs #1005. Best score 1967 bits

Score difference with first non-orthologous sequence - *A. fumigatus*:1967 *A. fischeri*:1967

|                 |         |                 |         |
|-----------------|---------|-----------------|---------|
| afum EAL91759.1 | 100.00% | afis EAW17949.1 | 100.00% |
|-----------------|---------|-----------------|---------|

Bootstrap support for afum|EAL91759.1 as seed ortholog is 100%.

Bootstrap support for afis|EAW17949.1 as seed ortholog is 100%.

---

Group of orthologs #1006. Best score 1967 bits

Score difference with first non-orthologous sequence - *A. fumigatus*:1967 *A. fischeri*:1967

|                 |         |                 |         |
|-----------------|---------|-----------------|---------|
| afum EAL87445.1 | 100.00% | afis EAW24015.1 | 100.00% |
|-----------------|---------|-----------------|---------|

Bootstrap support for afum|EAL87445.1 as seed ortholog is 100%.

Bootstrap support for afis|EAW24015.1 as seed ortholog is 100%.

---

Group of orthologs #1007. Best score 1966 bits

Score difference with first non-orthologous sequence - *A. fumigatus*:1966 *A. fischeri*:1966

|                 |         |                 |         |
|-----------------|---------|-----------------|---------|
| afum EAL91092.1 | 100.00% | afis EAW22078.1 | 100.00% |
|-----------------|---------|-----------------|---------|

Bootstrap support for afum|EAL91092.1 as seed ortholog is 100%.

Bootstrap support for afis|EAW22078.1 as seed ortholog is 100%.

---

Group of orthologs #1008. Best score 1966 bits

Score difference with first non-orthologous sequence - *A. fumigatus*:1966 *A. fischeri*:1966

|                 |         |                 |         |
|-----------------|---------|-----------------|---------|
| afum EAL89650.1 | 100.00% | afis EAW24990.1 | 100.00% |
|-----------------|---------|-----------------|---------|

Bootstrap support for afum|EAL89650.1 as seed ortholog is 100%.

Bootstrap support for afis|EAW24990.1 as seed ortholog is 100%.

---

Group of orthologs #1009. Best score 1965 bits

Score difference with first non-orthologous sequence - *A. fumigatus*:1402 *A. fischeri*:1491

|                 |         |                 |         |
|-----------------|---------|-----------------|---------|
| afum EAL86307.1 | 100.00% | afis EAW16731.1 | 100.00% |
|-----------------|---------|-----------------|---------|

Bootstrap support for afum|EAL86307.1 as seed ortholog is 100%.

Bootstrap support for afis|EAW16731.1 as seed ortholog is 100%.

---

Group of orthologs #1010. Best score 1963 bits

Score difference with first non-orthologous sequence - *A. fumigatus*:1963 *A. fischeri*:1963

|                 |         |                 |         |
|-----------------|---------|-----------------|---------|
| afum EAL89734.1 | 100.00% | afis EAW25065.1 | 100.00% |
|-----------------|---------|-----------------|---------|

Bootstrap support for afum|EAL89734.1 as seed ortholog is 100%.

Bootstrap support for afis|EAW25065.1 as seed ortholog is 100%.

---

Group of orthologs #1011. Best score 1962 bits

Score difference with first non-orthologous sequence - *A. fumigatus*:1962 *A. fischeri*:1962

|                 |         |                 |         |
|-----------------|---------|-----------------|---------|
| afum EAL93491.1 | 100.00% | afis EAW18760.1 | 100.00% |
|-----------------|---------|-----------------|---------|

Bootstrap support for afum|EAL93491.1 as seed ortholog is 100%.

Bootstrap support for afis|EAW18760.1 as seed ortholog is 100%.

---

Group of orthologs #1012. Best score 1961 bits

Score difference with first non-orthologous sequence - *A. fumigatus*:1961 *A. fischeri*:1961

|                 |         |                 |         |
|-----------------|---------|-----------------|---------|
| afum EBA27357.1 | 100.00% | afis EAW16148.1 | 100.00% |
|-----------------|---------|-----------------|---------|

Bootstrap support for afum|EBA27357.1 as seed ortholog is 100%.

Bootstrap support for afis|EAW16148.1 as seed ortholog is 100%.

---

Group of orthologs #1013. Best score 1958 bits

Score difference with first non-orthologous sequence - *A. fumigatus*:1958 *A. fischeri*:1958

|                 |         |                 |         |
|-----------------|---------|-----------------|---------|
| afum EAL87344.1 | 100.00% | afis EAW23918.1 | 100.00% |
|-----------------|---------|-----------------|---------|

Bootstrap support for afum|EAL87344.1 as seed ortholog is 100%.

Bootstrap support for afis|EAW23918.1 as seed ortholog is 100%.

---

Group of orthologs #1014. Best score 1958 bits

Score difference with first non-orthologous sequence - *A. fumigatus*:1958 *A. fischeri*:1958

|                 |         |                 |         |
|-----------------|---------|-----------------|---------|
| afum EAL94007.1 | 100.00% | afis EAW19281.1 | 100.00% |
|-----------------|---------|-----------------|---------|

Bootstrap support for afum|EAL94007.1 as seed ortholog is 100%.

Bootstrap support for afis|EAW19281.1 as seed ortholog is 100%.

---

Group of orthologs #1015. Best score 1957 bits

Score difference with first non-orthologous sequence - *A. fumigatus*:1957 *A. fischeri*:1957  
afum|EAL93683.1 100.00% afis|EAW18949.1 100.00%  
Bootstrap support for afum|EAL93683.1 as seed ortholog is 100%.  
Bootstrap support for afis|EAW18949.1 as seed ortholog is 100%.

---

Group of orthologs #1016. Best score 1956 bits

Score difference with first non-orthologous sequence - *A. fumigatus*:1956 *A. fischeri*:1956  
afum|EAL84483.1 100.00% afis|EAW20581.1 100.00%  
Bootstrap support for afum|EAL84483.1 as seed ortholog is 100%.  
Bootstrap support for afis|EAW20581.1 as seed ortholog is 100%.

---

Group of orthologs #1017. Best score 1954 bits

Score difference with first non-orthologous sequence - *A. fumigatus*:1954 *A. fischeri*:1954  
afum|EAL93197.1 100.00% afis|EAW18504.1 100.00%  
Bootstrap support for afum|EAL93197.1 as seed ortholog is 100%.  
Bootstrap support for afis|EAW18504.1 as seed ortholog is 100%.

---

Group of orthologs #1018. Best score 1953 bits

Score difference with first non-orthologous sequence - *A. fumigatus*:1953 *A. fischeri*:1953  
afum|EAL86031.1 100.00% afis|EAW24361.1 100.00%  
Bootstrap support for afum|EAL86031.1 as seed ortholog is 100%.  
Bootstrap support for afis|EAW24361.1 as seed ortholog is 100%.

---

Group of orthologs #1019. Best score 1951 bits

Score difference with first non-orthologous sequence - *A. fumigatus*:1951 *A. fischeri*:1951  
afum|EAL92467.1 100.00% afis|EAW21448.1 100.00%  
Bootstrap support for afum|EAL92467.1 as seed ortholog is 100%.  
Bootstrap support for afis|EAW21448.1 as seed ortholog is 100%.

---

Group of orthologs #1020. Best score 1950 bits

Score difference with first non-orthologous sequence - *A. fumigatus*:1950 *A. fischeri*:1950  
afum|EAL91831.1 100.00% afis|EAW18019.1 100.00%  
Bootstrap support for afum|EAL91831.1 as seed ortholog is 100%.  
Bootstrap support for afis|EAW18019.1 as seed ortholog is 100%.

---

Group of orthologs #1021. Best score 1949 bits

Score difference with first non-orthologous sequence - *A. fumigatus*:1949 *A. fischeri*:783  
afum|EAL88616.1 100.00% afis|EAW15984.1 100.00%  
Bootstrap support for afum|EAL88616.1 as seed ortholog is 100%.  
Bootstrap support for afis|EAW15984.1 as seed ortholog is 100%.

---

Group of orthologs #1022. Best score 1949 bits

Score difference with first non-orthologous sequence - *A. fumigatus*:1949 *A. fischeri*:1949  
afum|EAL88158.1 100.00% afis|EAW23318.1 100.00%  
Bootstrap support for afum|EAL88158.1 as seed ortholog is 100%.  
Bootstrap support for afis|EAW23318.1 as seed ortholog is 100%.

---

Group of orthologs #1023. Best score 1948 bits

Score difference with first non-orthologous sequence - *A. fumigatus*:1948 *A. fischeri*:1948  
afum|EAL91531.1 100.00% afis|EAW17716.1 100.00%  
Bootstrap support for afum|EAL91531.1 as seed ortholog is 100%.  
Bootstrap support for afis|EAW17716.1 as seed ortholog is 100%.

---

Group of orthologs #1024. Best score 1947 bits

Score difference with first non-orthologous sequence - *A. fumigatus*:1947 *A. fischeri*:1947  
afum|EAL92440.1 100.00% afis|EAW21425.1 100.00%

Bootstrap support for afum|EAL92440.1 as seed ortholog is 100%.  
Bootstrap support for afis|EAW21425.1 as seed ortholog is 100%.

---

Group of orthologs #1025. Best score 1947 bits

Score difference with first non-orthologous sequence - *A. fumigatus*:1947 *A. fischeri*:1947

|                 |         |                 |         |
|-----------------|---------|-----------------|---------|
| afum EAL92917.1 | 100.00% | afis EAW21904.1 | 100.00% |
|-----------------|---------|-----------------|---------|

Bootstrap support for afum|EAL92917.1 as seed ortholog is 100%.

Bootstrap support for afis|EAW21904.1 as seed ortholog is 100%.

---

Group of orthologs #1026. Best score 1946 bits

Score difference with first non-orthologous sequence - *A. fumigatus*:1946 *A. fischeri*:1946

|                 |         |                 |         |
|-----------------|---------|-----------------|---------|
| afum EAL86894.1 | 100.00% | afis EAW19627.1 | 100.00% |
|-----------------|---------|-----------------|---------|

Bootstrap support for afum|EAL86894.1 as seed ortholog is 100%.

Bootstrap support for afis|EAW19627.1 as seed ortholog is 100%.

---

Group of orthologs #1027. Best score 1946 bits

Score difference with first non-orthologous sequence - *A. fumigatus*:1946 *A. fischeri*:1946

|                 |         |                 |         |
|-----------------|---------|-----------------|---------|
| afum EAL92536.1 | 100.00% | afis EAW21516.1 | 100.00% |
|-----------------|---------|-----------------|---------|

Bootstrap support for afum|EAL92536.1 as seed ortholog is 100%.

Bootstrap support for afis|EAW21516.1 as seed ortholog is 100%.

---

Group of orthologs #1028. Best score 1945 bits

Score difference with first non-orthologous sequence - *A. fumigatus*:1945 *A. fischeri*:1945

|                 |         |                 |         |
|-----------------|---------|-----------------|---------|
| afum EAL87680.1 | 100.00% | afis EAW18313.1 | 100.00% |
|-----------------|---------|-----------------|---------|

Bootstrap support for afum|EAL87680.1 as seed ortholog is 100%.

Bootstrap support for afis|EAW18313.1 as seed ortholog is 100%.

---

Group of orthologs #1029. Best score 1945 bits

Score difference with first non-orthologous sequence - *A. fumigatus*:1945 *A. fischeri*:1945

|                 |         |                 |         |
|-----------------|---------|-----------------|---------|
| afum EAL91404.1 | 100.00% | afis EAW17591.1 | 100.00% |
|-----------------|---------|-----------------|---------|

Bootstrap support for afum|EAL91404.1 as seed ortholog is 100%.

Bootstrap support for afis|EAW17591.1 as seed ortholog is 100%.

---

Group of orthologs #1030. Best score 1945 bits

Score difference with first non-orthologous sequence - *A. fumigatus*:1945 *A. fischeri*:1945

|                 |         |                 |         |
|-----------------|---------|-----------------|---------|
| afum EAL84368.2 | 100.00% | afis EAW25694.1 | 100.00% |
|-----------------|---------|-----------------|---------|

Bootstrap support for afum|EAL84368.2 as seed ortholog is 100%.

Bootstrap support for afis|EAW25694.1 as seed ortholog is 100%.

---

Group of orthologs #1031. Best score 1945 bits

Score difference with first non-orthologous sequence - *A. fumigatus*:1945 *A. fischeri*:1945

|                 |         |                 |         |
|-----------------|---------|-----------------|---------|
| afum EAL87135.1 | 100.00% | afis EAW23690.1 | 100.00% |
|-----------------|---------|-----------------|---------|

Bootstrap support for afum|EAL87135.1 as seed ortholog is 100%.

Bootstrap support for afis|EAW23690.1 as seed ortholog is 100%.

---

Group of orthologs #1032. Best score 1945 bits

Score difference with first non-orthologous sequence - *A. fumigatus*:1945 *A. fischeri*:1945

|                 |         |                 |         |
|-----------------|---------|-----------------|---------|
| afum EAL88194.1 | 100.00% | afis EAW23285.1 | 100.00% |
|-----------------|---------|-----------------|---------|

Bootstrap support for afum|EAL88194.1 as seed ortholog is 100%.

Bootstrap support for afis|EAW23285.1 as seed ortholog is 100%.

---

Group of orthologs #1033. Best score 1945 bits

Score difference with first non-orthologous sequence - *A. fumigatus*:1945 *A. fischeri*:1945

|                 |         |                 |         |
|-----------------|---------|-----------------|---------|
| afum EAL91955.1 | 100.00% | afis EAW24101.1 | 100.00% |
|-----------------|---------|-----------------|---------|

Bootstrap support for afum|EAL91955.1 as seed ortholog is 100%.

Bootstrap support for afis|EAW24101.1 as seed ortholog is 100%.

---

Group of orthologs #1034. Best score 1944 bits

Score difference with first non-orthologous sequence - *A. fumigatus*:1944 *A. fischeri*:1944

|                 |         |                 |         |
|-----------------|---------|-----------------|---------|
| afum EAL93983.1 | 100.00% | afis EAW19254.1 | 100.00% |
|-----------------|---------|-----------------|---------|

Bootstrap support for afum|EAL93983.1 as seed ortholog is 100%.

Bootstrap support for afis|EAW19254.1 as seed ortholog is 100%.

---

Group of orthologs #1035. Best score 1942 bits

Score difference with first non-orthologous sequence - *A. fumigatus*:1942 *A. fischeri*:1942

|                 |         |                 |         |
|-----------------|---------|-----------------|---------|
| afum EAL91640.1 | 100.00% | afis EAW17830.1 | 100.00% |
|-----------------|---------|-----------------|---------|

Bootstrap support for afum|EAL91640.1 as seed ortholog is 100%.

Bootstrap support for afis|EAW17830.1 as seed ortholog is 100%.

---

Group of orthologs #1036. Best score 1939 bits

Score difference with first non-orthologous sequence - *A. fumigatus*:1939 *A. fischeri*:1939

|                 |         |                 |         |
|-----------------|---------|-----------------|---------|
| afum EAL91662.1 | 100.00% | afis EAW17854.1 | 100.00% |
|-----------------|---------|-----------------|---------|

Bootstrap support for afum|EAL91662.1 as seed ortholog is 100%.

Bootstrap support for afis|EAW17854.1 as seed ortholog is 100%.

---

Group of orthologs #1037. Best score 1939 bits

Score difference with first non-orthologous sequence - *A. fumigatus*:1939 *A. fischeri*:1939

|                 |         |                 |         |
|-----------------|---------|-----------------|---------|
| afum EAL87295.1 | 100.00% | afis EAW23867.1 | 100.00% |
|-----------------|---------|-----------------|---------|

Bootstrap support for afum|EAL87295.1 as seed ortholog is 100%.

Bootstrap support for afis|EAW23867.1 as seed ortholog is 100%.

---

Group of orthologs #1038. Best score 1939 bits

Score difference with first non-orthologous sequence - *A. fumigatus*:1939 *A. fischeri*:1939

|                 |         |                 |         |
|-----------------|---------|-----------------|---------|
| afum EAL92822.2 | 100.00% | afis EAW21797.1 | 100.00% |
|-----------------|---------|-----------------|---------|

Bootstrap support for afum|EAL92822.2 as seed ortholog is 100%.

Bootstrap support for afis|EAW21797.1 as seed ortholog is 100%.

---

Group of orthologs #1039. Best score 1938 bits

Score difference with first non-orthologous sequence - *A. fumigatus*:1938 *A. fischeri*:1422

|                 |         |                 |         |
|-----------------|---------|-----------------|---------|
| afum EAL88648.1 | 100.00% | afis EAW16019.1 | 100.00% |
|-----------------|---------|-----------------|---------|

Bootstrap support for afum|EAL88648.1 as seed ortholog is 100%.

Bootstrap support for afis|EAW16019.1 as seed ortholog is 100%.

---

Group of orthologs #1040. Best score 1938 bits

Score difference with first non-orthologous sequence - *A. fumigatus*:1828 *A. fischeri*:1320

|                 |         |                 |         |
|-----------------|---------|-----------------|---------|
| afum EAL88730.1 | 100.00% | afis EAW16098.1 | 100.00% |
|-----------------|---------|-----------------|---------|

Bootstrap support for afum|EAL88730.1 as seed ortholog is 100%.

Bootstrap support for afis|EAW16098.1 as seed ortholog is 100%.

---

Group of orthologs #1041. Best score 1938 bits

Score difference with first non-orthologous sequence - *A. fumigatus*:1938 *A. fischeri*:1938

|                 |         |                 |         |
|-----------------|---------|-----------------|---------|
| afum EAL87836.1 | 100.00% | afis EAW23624.1 | 100.00% |
|-----------------|---------|-----------------|---------|

Bootstrap support for afum|EAL87836.1 as seed ortholog is 100%.

Bootstrap support for afis|EAW23624.1 as seed ortholog is 100%.

---

Group of orthologs #1042. Best score 1938 bits

Score difference with first non-orthologous sequence - *A. fumigatus*:1938 *A. fischeri*:1938

|                 |         |                 |         |
|-----------------|---------|-----------------|---------|
| afum EAL93532.1 | 100.00% | afis EAW18796.1 | 100.00% |
|-----------------|---------|-----------------|---------|

Bootstrap support for afum|EAL93532.1 as seed ortholog is 100%.

Bootstrap support for afis|EAW18796.1 as seed ortholog is 100%.

---

Group of orthologs #1043. Best score 1937 bits

Score difference with first non-orthologous sequence - *A. fumigatus*:1937 *A. fischeri*:1937  
afum|EAL90538.1 100.00% afis|EAW22654.1 100.00%  
Bootstrap support for afum|EAL90538.1 as seed ortholog is 100%.  
Bootstrap support for afis|EAW22654.1 as seed ortholog is 100%.

---

Group of orthologs #1044. Best score 1936 bits

Score difference with first non-orthologous sequence - *A. fumigatus*:1936 *A. fischeri*:1936  
afum|EAL88444.1 100.00% afis|EAW23037.1 100.00%  
Bootstrap support for afum|EAL88444.1 as seed ortholog is 100%.  
Bootstrap support for afis|EAW23037.1 as seed ortholog is 100%.

---

Group of orthologs #1045. Best score 1936 bits

Score difference with first non-orthologous sequence - *A. fumigatus*:1936 *A. fischeri*:1936  
afum|EBA27467.1 100.00% afis|EAW21569.1 100.00%  
Bootstrap support for afum|EBA27467.1 as seed ortholog is 100%.  
Bootstrap support for afis|EAW21569.1 as seed ortholog is 100%.

---

Group of orthologs #1046. Best score 1934 bits

Score difference with first non-orthologous sequence - *A. fumigatus*:1934 *A. fischeri*:1934  
afum|EAL86943.1 100.00% afis|EAW19574.1 100.00%  
Bootstrap support for afum|EAL86943.1 as seed ortholog is 100%.  
Bootstrap support for afis|EAW19574.1 as seed ortholog is 100%.

---

Group of orthologs #1047. Best score 1934 bits

Score difference with first non-orthologous sequence - *A. fumigatus*:1934 *A. fischeri*:1934  
afum|EAL93719.1 100.00% afis|EAW18983.1 100.00%  
Bootstrap support for afum|EAL93719.1 as seed ortholog is 100%.  
Bootstrap support for afis|EAW18983.1 as seed ortholog is 100%.

---

Group of orthologs #1048. Best score 1934 bits

Score difference with first non-orthologous sequence - *A. fumigatus*:1934 *A. fischeri*:1934  
afum|EAL89566.2 100.00% afis|EAW24912.1 100.00%  
Bootstrap support for afum|EAL89566.2 as seed ortholog is 100%.  
Bootstrap support for afis|EAW24912.1 as seed ortholog is 100%.

---

Group of orthologs #1049. Best score 1933 bits

Score difference with first non-orthologous sequence - *A. fumigatus*:1780 *A. fischeri*:1933  
afum|EAL89130.2 100.00% afis|EAW16533.1 100.00%  
Bootstrap support for afum|EAL89130.2 as seed ortholog is 100%.  
Bootstrap support for afis|EAW16533.1 as seed ortholog is 100%.

---

Group of orthologs #1050. Best score 1933 bits

Score difference with first non-orthologous sequence - *A. fumigatus*:1933 *A. fischeri*:1933  
afum|EBA27309.1 100.00% afis|EAW23889.1 100.00%  
Bootstrap support for afum|EBA27309.1 as seed ortholog is 100%.  
Bootstrap support for afis|EAW23889.1 as seed ortholog is 100%.

---

Group of orthologs #1051. Best score 1932 bits

Score difference with first non-orthologous sequence - *A. fumigatus*:1932 *A. fischeri*:1932  
afum|EAL85621.1 100.00% afis|EAW15726.1 100.00%  
Bootstrap support for afum|EAL85621.1 as seed ortholog is 100%.  
Bootstrap support for afis|EAW15726.1 as seed ortholog is 100%.

---

Group of orthologs #1052. Best score 1931 bits

Score difference with first non-orthologous sequence - *A. fumigatus*:1931 *A. fischeri*:1931  
afum|EAL84890.1 100.00% afis|EAW20027.1 100.00%

Bootstrap support for afum|EAL84890.1 as seed ortholog is 100%.  
Bootstrap support for afis|EAW20027.1 as seed ortholog is 100%.

---

Group of orthologs #1053. Best score 1930 bits

Score difference with first non-orthologous sequence - *A. fumigatus*:1930 *A. fischeri*:1930

|                 |         |                 |         |
|-----------------|---------|-----------------|---------|
| afum EAL84899.2 | 100.00% | afis EAW20018.1 | 100.00% |
|-----------------|---------|-----------------|---------|

Bootstrap support for afum|EAL84899.2 as seed ortholog is 100%.

Bootstrap support for afis|EAW20018.1 as seed ortholog is 100%.

---

Group of orthologs #1054. Best score 1929 bits

Score difference with first non-orthologous sequence - *A. fumigatus*:1929 *A. fischeri*:1297

|                 |         |                 |         |
|-----------------|---------|-----------------|---------|
| afum EAL89165.1 | 100.00% | afis EAW16568.1 | 100.00% |
|-----------------|---------|-----------------|---------|

Bootstrap support for afum|EAL89165.1 as seed ortholog is 100%.

Bootstrap support for afis|EAW16568.1 as seed ortholog is 100%.

---

Group of orthologs #1055. Best score 1929 bits

Score difference with first non-orthologous sequence - *A. fumigatus*:1929 *A. fischeri*:1521

|                 |         |                 |         |
|-----------------|---------|-----------------|---------|
| afum EAL87000.1 | 100.00% | afis EAW19494.1 | 100.00% |
|-----------------|---------|-----------------|---------|

Bootstrap support for afum|EAL87000.1 as seed ortholog is 100%.

Bootstrap support for afis|EAW19494.1 as seed ortholog is 100%.

---

Group of orthologs #1056. Best score 1929 bits

Score difference with first non-orthologous sequence - *A. fumigatus*:1929 *A. fischeri*:1929

|                 |         |                 |         |
|-----------------|---------|-----------------|---------|
| afum EAL91429.1 | 100.00% | afis EAW17616.1 | 100.00% |
|-----------------|---------|-----------------|---------|

Bootstrap support for afum|EAL91429.1 as seed ortholog is 100%.

Bootstrap support for afis|EAW17616.1 as seed ortholog is 100%.

---

Group of orthologs #1057. Best score 1929 bits

Score difference with first non-orthologous sequence - *A. fumigatus*:1929 *A. fischeri*:1929

|                 |         |                 |         |
|-----------------|---------|-----------------|---------|
| afum EAL88392.1 | 100.00% | afis EAW23087.1 | 100.00% |
|-----------------|---------|-----------------|---------|

Bootstrap support for afum|EAL88392.1 as seed ortholog is 100%.

Bootstrap support for afis|EAW23087.1 as seed ortholog is 100%.

---

Group of orthologs #1058. Best score 1929 bits

Score difference with first non-orthologous sequence - *A. fumigatus*:1929 *A. fischeri*:1929

|                 |         |                 |         |
|-----------------|---------|-----------------|---------|
| afum EAL93571.1 | 100.00% | afis EAW18837.1 | 100.00% |
|-----------------|---------|-----------------|---------|

Bootstrap support for afum|EAL93571.1 as seed ortholog is 100%.

Bootstrap support for afis|EAW18837.1 as seed ortholog is 100%.

---

Group of orthologs #1059. Best score 1929 bits

Score difference with first non-orthologous sequence - *A. fumigatus*:1929 *A. fischeri*:1929

|                 |         |                 |         |
|-----------------|---------|-----------------|---------|
| afum EAL92988.1 | 100.00% | afis EAW21973.1 | 100.00% |
|-----------------|---------|-----------------|---------|

Bootstrap support for afum|EAL92988.1 as seed ortholog is 100%.

Bootstrap support for afis|EAW21973.1 as seed ortholog is 100%.

---

Group of orthologs #1060. Best score 1928 bits

Score difference with first non-orthologous sequence - *A. fumigatus*:1928 *A. fischeri*:1928

|                 |         |                 |         |
|-----------------|---------|-----------------|---------|
| afum EAL91475.1 | 100.00% | afis EAW17660.1 | 100.00% |
|-----------------|---------|-----------------|---------|

Bootstrap support for afum|EAL91475.1 as seed ortholog is 100%.

Bootstrap support for afis|EAW17660.1 as seed ortholog is 100%.

---

Group of orthologs #1061. Best score 1928 bits

Score difference with first non-orthologous sequence - *A. fumigatus*:1928 *A. fischeri*:681

|                 |         |                 |         |
|-----------------|---------|-----------------|---------|
| afum EAL88166.1 | 100.00% | afis EAW23311.1 | 100.00% |
|-----------------|---------|-----------------|---------|

Bootstrap support for afum|EAL88166.1 as seed ortholog is 100%.

Bootstrap support for afis|EAW23311.1 as seed ortholog is 100%.



---

Group of orthologs #1062. Best score 1927 bits

Score difference with first non-orthologous sequence - *A. fumigatus*:1927 *A. fischeri*:1927

afum|EAL92703.1 100.00% afis|EAW21668.1 100.00%

Bootstrap support for afum|EAL92703.1 as seed ortholog is 100%.

Bootstrap support for afis|EAW21668.1 as seed ortholog is 100%.

---

Group of orthologs #1063. Best score 1926 bits

Score difference with first non-orthologous sequence - *A. fumigatus*:1926 *A. fischeri*:1926

afum|EAL92529.1 100.00% afis|EAW21509.1 100.00%

Bootstrap support for afum|EAL92529.1 as seed ortholog is 100%.

Bootstrap support for afis|EAW21509.1 as seed ortholog is 100%.

---

Group of orthologs #1064. Best score 1925 bits

Score difference with first non-orthologous sequence - *A. fumigatus*:1925 *A. fischeri*:1925

afum|EAL88057.1 100.00% afis|EAW23412.1 100.00%

Bootstrap support for afum|EAL88057.1 as seed ortholog is 100%.

Bootstrap support for afis|EAW23412.1 as seed ortholog is 100%.

---

Group of orthologs #1065. Best score 1925 bits

Score difference with first non-orthologous sequence - *A. fumigatus*:1925 *A. fischeri*:1925

afum|EAL89885.1 100.00% afis|EAW25224.1 100.00%

Bootstrap support for afum|EAL89885.1 as seed ortholog is 100%.

Bootstrap support for afis|EAW25224.1 as seed ortholog is 100%.

---

Group of orthologs #1066. Best score 1924 bits

Score difference with first non-orthologous sequence - *A. fumigatus*:1740 *A. fischeri*:1327

afum|EAL84958.1 100.00% afis|EAW19956.1 100.00%

Bootstrap support for afum|EAL84958.1 as seed ortholog is 100%.

Bootstrap support for afis|EAW19956.1 as seed ortholog is 100%.

---

Group of orthologs #1067. Best score 1924 bits

Score difference with first non-orthologous sequence - *A. fumigatus*:1924 *A. fischeri*:1924

afum|EAL92138.1 100.00% afis|EAW21115.1 100.00%

Bootstrap support for afum|EAL92138.1 as seed ortholog is 100%.

Bootstrap support for afis|EAW21115.1 as seed ortholog is 100%.

---

Group of orthologs #1068. Best score 1922 bits

Score difference with first non-orthologous sequence - *A. fumigatus*:1922 *A. fischeri*:1922

afum|EAL88715.1 100.00% afis|EAW16083.1 100.00%

Bootstrap support for afum|EAL88715.1 as seed ortholog is 100%.

Bootstrap support for afis|EAW16083.1 as seed ortholog is 100%.

---

Group of orthologs #1069. Best score 1920 bits

Score difference with first non-orthologous sequence - *A. fumigatus*:1920 *A. fischeri*:1920

afum|EAL85567.1 100.00% afis|EAW15783.1 100.00%

Bootstrap support for afum|EAL85567.1 as seed ortholog is 100%.

Bootstrap support for afis|EAW15783.1 as seed ortholog is 100%.

---

Group of orthologs #1070. Best score 1920 bits

Score difference with first non-orthologous sequence - *A. fumigatus*:1920 *A. fischeri*:1920

afum|EAL87198.1 100.00% afis|EAW23765.1 100.00%

Bootstrap support for afum|EAL87198.1 as seed ortholog is 100%.

Bootstrap support for afis|EAW23765.1 as seed ortholog is 100%.

---

Group of orthologs #1071. Best score 1920 bits

Score difference with first non-orthologous sequence - *A. fumigatus*:1920 *A. fischeri*:1920  
afum|EAL93819.1 100.00% afis|EAW19089.1 100.00%  
Bootstrap support for afum|EAL93819.1 as seed ortholog is 100%.  
Bootstrap support for afis|EAW19089.1 as seed ortholog is 100%.

---

Group of orthologs #1072. Best score 1920 bits

Score difference with first non-orthologous sequence - *A. fumigatus*:1920 *A. fischeri*:1920  
afum|EAL91982.1 100.00% afis|EAW24126.1 100.00%  
Bootstrap support for afum|EAL91982.1 as seed ortholog is 100%.  
Bootstrap support for afis|EAW24126.1 as seed ortholog is 100%.

---

Group of orthologs #1073. Best score 1919 bits

Score difference with first non-orthologous sequence - *A. fumigatus*:1919 *A. fischeri*:1919  
afum|EAL93200.1 100.00% afis|EAW18506.1 100.00%  
Bootstrap support for afum|EAL93200.1 as seed ortholog is 100%.  
Bootstrap support for afis|EAW18506.1 as seed ortholog is 100%.

---

Group of orthologs #1074. Best score 1918 bits

Score difference with first non-orthologous sequence - *A. fumigatus*:1918 *A. fischeri*:1918  
afum|EAL85187.1 100.00% afis|EAW20069.1 100.00%  
Bootstrap support for afum|EAL85187.1 as seed ortholog is 100%.  
Bootstrap support for afis|EAW20069.1 as seed ortholog is 100%.

---

Group of orthologs #1075. Best score 1917 bits

Score difference with first non-orthologous sequence - *A. fumigatus*:1499 *A. fischeri*:1723  
afum|EAL88092.1 100.00% afis|EAW23379.1 100.00%  
Bootstrap support for afum|EAL88092.1 as seed ortholog is 100%.  
Bootstrap support for afis|EAW23379.1 as seed ortholog is 100%.

---

Group of orthologs #1076. Best score 1917 bits

Score difference with first non-orthologous sequence - *A. fumigatus*:1917 *A. fischeri*:1917  
afum|EAL90568.1 100.00% afis|EAW22628.1 100.00%  
Bootstrap support for afum|EAL90568.1 as seed ortholog is 100%.  
Bootstrap support for afis|EAW22628.1 as seed ortholog is 100%.

---

Group of orthologs #1077. Best score 1917 bits

Score difference with first non-orthologous sequence - *A. fumigatus*:1917 *A. fischeri*:1917  
afum|EAL92920.1 100.00% afis|EAW21908.1 100.00%  
Bootstrap support for afum|EAL92920.1 as seed ortholog is 100%.  
Bootstrap support for afis|EAW21908.1 as seed ortholog is 100%.

---

Group of orthologs #1078. Best score 1916 bits

Score difference with first non-orthologous sequence - *A. fumigatus*:1916 *A. fischeri*:1916  
afum|EAL92975.1 100.00% afis|EAW21961.1 100.00%  
Bootstrap support for afum|EAL92975.1 as seed ortholog is 100%.  
Bootstrap support for afis|EAW21961.1 as seed ortholog is 100%.

---

Group of orthologs #1079. Best score 1914 bits

Score difference with first non-orthologous sequence - *A. fumigatus*:1914 *A. fischeri*:1914  
afum|EAL85219.1 100.00% afis|EAW20102.1 100.00%  
Bootstrap support for afum|EAL85219.1 as seed ortholog is 100%.  
Bootstrap support for afis|EAW20102.1 as seed ortholog is 100%.

---

Group of orthologs #1080. Best score 1914 bits

Score difference with first non-orthologous sequence - *A. fumigatus*:1914 *A. fischeri*:1914  
afum|EAL85911.1 100.00% afis|EAW24243.1 100.00%

Bootstrap support for afum|EAL85911.1 as seed ortholog is 100%.  
Bootstrap support for afis|EAW24243.1 as seed ortholog is 100%.

---

Group of orthologs #1081. Best score 1913 bits

Score difference with first non-orthologous sequence - *A. fumigatus*:1913 *A. fischeri*:1913

|                 |         |                 |         |
|-----------------|---------|-----------------|---------|
| afum EAL87267.1 | 100.00% | afis EAW23836.1 | 100.00% |
|-----------------|---------|-----------------|---------|

Bootstrap support for afum|EAL87267.1 as seed ortholog is 100%.

Bootstrap support for afis|EAW23836.1 as seed ortholog is 100%.

---

Group of orthologs #1082. Best score 1913 bits

Score difference with first non-orthologous sequence - *A. fumigatus*:1913 *A. fischeri*:1913

|                 |         |                 |         |
|-----------------|---------|-----------------|---------|
| afum EAL88203.1 | 100.00% | afis EAW23276.1 | 100.00% |
|-----------------|---------|-----------------|---------|

Bootstrap support for afum|EAL88203.1 as seed ortholog is 100%.

Bootstrap support for afis|EAW23276.1 as seed ortholog is 100%.

---

Group of orthologs #1083. Best score 1913 bits

Score difference with first non-orthologous sequence - *A. fumigatus*:1913 *A. fischeri*:1913

|                 |         |                 |         |
|-----------------|---------|-----------------|---------|
| afum EAL93821.1 | 100.00% | afis EAW19091.1 | 100.00% |
|-----------------|---------|-----------------|---------|

Bootstrap support for afum|EAL93821.1 as seed ortholog is 100%.

Bootstrap support for afis|EAW19091.1 as seed ortholog is 100%.

---

Group of orthologs #1084. Best score 1911 bits

Score difference with first non-orthologous sequence - *A. fumigatus*:1911 *A. fischeri*:1911

|                 |         |                 |         |
|-----------------|---------|-----------------|---------|
| afum EAL86114.1 | 100.00% | afis EAW24445.1 | 100.00% |
|-----------------|---------|-----------------|---------|

Bootstrap support for afum|EAL86114.1 as seed ortholog is 100%.

Bootstrap support for afis|EAW24445.1 as seed ortholog is 100%.

---

Group of orthologs #1085. Best score 1911 bits

Score difference with first non-orthologous sequence - *A. fumigatus*:1911 *A. fischeri*:1911

|                 |         |                 |         |
|-----------------|---------|-----------------|---------|
| afum EAL91024.1 | 100.00% | afis EAW22167.1 | 100.00% |
|-----------------|---------|-----------------|---------|

Bootstrap support for afum|EAL91024.1 as seed ortholog is 100%.

Bootstrap support for afis|EAW22167.1 as seed ortholog is 100%.

---

Group of orthologs #1086. Best score 1911 bits

Score difference with first non-orthologous sequence - *A. fumigatus*:1911 *A. fischeri*:1911

|                 |         |                 |         |
|-----------------|---------|-----------------|---------|
| afum EAL89977.2 | 100.00% | afis EAW25316.1 | 100.00% |
|-----------------|---------|-----------------|---------|

Bootstrap support for afum|EAL89977.2 as seed ortholog is 100%.

Bootstrap support for afis|EAW25316.1 as seed ortholog is 100%.

---

Group of orthologs #1087. Best score 1909 bits

Score difference with first non-orthologous sequence - *A. fumigatus*:1909 *A. fischeri*:1909

|                 |         |                 |         |
|-----------------|---------|-----------------|---------|
| afum EAL85558.1 | 100.00% | afis EAW15792.1 | 100.00% |
|-----------------|---------|-----------------|---------|

Bootstrap support for afum|EAL85558.1 as seed ortholog is 100%.

Bootstrap support for afis|EAW15792.1 as seed ortholog is 100%.

---

Group of orthologs #1088. Best score 1908 bits

Score difference with first non-orthologous sequence - *A. fumigatus*:1908 *A. fischeri*:1908

|                 |         |                 |         |
|-----------------|---------|-----------------|---------|
| afum EAL89937.1 | 100.00% | afis EAW25274.1 | 100.00% |
|-----------------|---------|-----------------|---------|

Bootstrap support for afum|EAL89937.1 as seed ortholog is 100%.

Bootstrap support for afis|EAW25274.1 as seed ortholog is 100%.

---

Group of orthologs #1089. Best score 1907 bits

Score difference with first non-orthologous sequence - *A. fumigatus*:1907 *A. fischeri*:1907

|                 |         |                 |         |
|-----------------|---------|-----------------|---------|
| afum EAL84323.1 | 100.00% | afis EAW25635.1 | 100.00% |
|-----------------|---------|-----------------|---------|

Bootstrap support for afum|EAL84323.1 as seed ortholog is 100%.

Bootstrap support for afis|EAW25635.1 as seed ortholog is 100%.

---

Group of orthologs #1090. Best score 1907 bits

Score difference with first non-orthologous sequence - *A. fumigatus*:1907 *A. fischeri*:1907

afum|EAL88052.2 100.00% afis|EAW23417.1 100.00%

Bootstrap support for afum|EAL88052.2 as seed ortholog is 100%.

Bootstrap support for afis|EAW23417.1 as seed ortholog is 100%.

---

Group of orthologs #1091. Best score 1906 bits

Score difference with first non-orthologous sequence - *A. fumigatus*:1906 *A. fischeri*:1906

afum|EAL93581.1 100.00% afis|EAW18850.1 100.00%

Bootstrap support for afum|EAL93581.1 as seed ortholog is 100%.

Bootstrap support for afis|EAW18850.1 as seed ortholog is 100%.

---

Group of orthologs #1092. Best score 1905 bits

Score difference with first non-orthologous sequence - *A. fumigatus*:1905 *A. fischeri*:1905

afum|EAL88642.1 100.00% afis|EAW16012.1 100.00%

Bootstrap support for afum|EAL88642.1 as seed ortholog is 100%.

Bootstrap support for afis|EAW16012.1 as seed ortholog is 100%.

---

Group of orthologs #1093. Best score 1904 bits

Score difference with first non-orthologous sequence - *A. fumigatus*:1904 *A. fischeri*:1904

afum|EAL86710.1 100.00% afis|EAW17290.1 100.00%

Bootstrap support for afum|EAL86710.1 as seed ortholog is 100%.

Bootstrap support for afis|EAW17290.1 as seed ortholog is 100%.

---

Group of orthologs #1094. Best score 1904 bits

Score difference with first non-orthologous sequence - *A. fumigatus*:1904 *A. fischeri*:1534

afum|EAL89214.1 100.00% afis|EAW16623.1 100.00%

Bootstrap support for afum|EAL89214.1 as seed ortholog is 100%.

Bootstrap support for afis|EAW16623.1 as seed ortholog is 100%.

---

Group of orthologs #1095. Best score 1904 bits

Score difference with first non-orthologous sequence - *A. fumigatus*:1904 *A. fischeri*:1904

afum|EAL86061.1 100.00% afis|EAW24389.1 100.00%

Bootstrap support for afum|EAL86061.1 as seed ortholog is 100%.

Bootstrap support for afis|EAW24389.1 as seed ortholog is 100%.

---

Group of orthologs #1096. Best score 1903 bits

Score difference with first non-orthologous sequence - *A. fumigatus*:1903 *A. fischeri*:1903

afum|EAL91308.1 100.00% afis|EAW17479.1 100.00%

Bootstrap support for afum|EAL91308.1 as seed ortholog is 100%.

Bootstrap support for afis|EAW17479.1 as seed ortholog is 100%.

---

Group of orthologs #1097. Best score 1903 bits

Score difference with first non-orthologous sequence - *A. fumigatus*:1903 *A. fischeri*:1903

afum|EAL90249.1 100.00% afis|EAW22948.1 100.00%

Bootstrap support for afum|EAL90249.1 as seed ortholog is 100%.

Bootstrap support for afis|EAW22948.1 as seed ortholog is 100%.

---

Group of orthologs #1098. Best score 1903 bits

Score difference with first non-orthologous sequence - *A. fumigatus*:1903 *A. fischeri*:1903

afum|EAL92296.1 100.00% afis|EAW21280.1 100.00%

Bootstrap support for afum|EAL92296.1 as seed ortholog is 100%.

Bootstrap support for afis|EAW21280.1 as seed ortholog is 100%.

---

Group of orthologs #1099. Best score 1902 bits

Score difference with first non-orthologous sequence - *A. fumigatus*:1902 *A. fischeri*:1902  
afum|EAL85530.1 100.00% afis|EAW15821.1 100.00%  
Bootstrap support for afum|EAL85530.1 as seed ortholog is 100%.  
Bootstrap support for afis|EAW15821.1 as seed ortholog is 100%.

---

Group of orthologs #1100. Best score 1902 bits

Score difference with first non-orthologous sequence - *A. fumigatus*:1902 *A. fischeri*:1902  
afum|EAL89184.1 100.00% afis|EAW16589.1 100.00%  
Bootstrap support for afum|EAL89184.1 as seed ortholog is 100%.  
Bootstrap support for afis|EAW16589.1 as seed ortholog is 100%.

---

Group of orthologs #1101. Best score 1902 bits

Score difference with first non-orthologous sequence - *A. fumigatus*:1902 *A. fischeri*:1902  
afum|EAL94036.1 100.00% afis|EAW19319.1 100.00%  
Bootstrap support for afum|EAL94036.1 as seed ortholog is 100%.  
Bootstrap support for afis|EAW19319.1 as seed ortholog is 100%.

---

Group of orthologs #1102. Best score 1902 bits

Score difference with first non-orthologous sequence - *A. fumigatus*:1902 *A. fischeri*:1902  
afum|EAL89888.1 100.00% afis|EAW25227.1 100.00%  
Bootstrap support for afum|EAL89888.1 as seed ortholog is 100%.  
Bootstrap support for afis|EAW25227.1 as seed ortholog is 100%.

---

Group of orthologs #1103. Best score 1899 bits

Score difference with first non-orthologous sequence - *A. fumigatus*:1899 *A. fischeri*:1899  
afum|EAL85924.1 100.00% afis|EAW24256.1 100.00%  
Bootstrap support for afum|EAL85924.1 as seed ortholog is 100%.  
Bootstrap support for afis|EAW24256.1 as seed ortholog is 100%.

---

Group of orthologs #1104. Best score 1899 bits

Score difference with first non-orthologous sequence - *A. fumigatus*:1899 *A. fischeri*:1899  
afum|EAL89704.1 100.00% afis|EAW24997.1 100.00%  
Bootstrap support for afum|EAL89704.1 as seed ortholog is 100%.  
Bootstrap support for afis|EAW24997.1 as seed ortholog is 100%.

---

Group of orthologs #1105. Best score 1898 bits

Score difference with first non-orthologous sequence - *A. fumigatus*:1898 *A. fischeri*:1898  
afum|EAL89133.1 100.00% afis|EAW16536.1 100.00%  
Bootstrap support for afum|EAL89133.1 as seed ortholog is 100%.  
Bootstrap support for afis|EAW16536.1 as seed ortholog is 100%.

---

Group of orthologs #1106. Best score 1898 bits

Score difference with first non-orthologous sequence - *A. fumigatus*:1898 *A. fischeri*:1898  
afum|EAL91452.1 100.00% afis|EAW17637.1 100.00%  
Bootstrap support for afum|EAL91452.1 as seed ortholog is 100%.  
Bootstrap support for afis|EAW17637.1 as seed ortholog is 100%.

---

Group of orthologs #1107. Best score 1898 bits

Score difference with first non-orthologous sequence - *A. fumigatus*:1898 *A. fischeri*:1898  
afum|EAL87913.1 100.00% afis|EAW23553.1 100.00%  
Bootstrap support for afum|EAL87913.1 as seed ortholog is 100%.  
Bootstrap support for afis|EAW23553.1 as seed ortholog is 100%.

---

Group of orthologs #1108. Best score 1896 bits

Score difference with first non-orthologous sequence - *A. fumigatus*:1896 *A. fischeri*:1896  
afum|EAL88886.1 100.00% afis|EAW16265.1 100.00%

Bootstrap support for afum|EAL88886.1 as seed ortholog is 100%.  
Bootstrap support for afis|EAW16265.1 as seed ortholog is 100%.

---

Group of orthologs #1109. Best score 1896 bits

Score difference with first non-orthologous sequence - *A. fumigatus*:1896 *A. fischeri*:1896

afum|EAL87041.1 100.00% afis|EAW19455.1 100.00%

Bootstrap support for afum|EAL87041.1 as seed ortholog is 100%.

Bootstrap support for afis|EAW19455.1 as seed ortholog is 100%.

---

Group of orthologs #1110. Best score 1896 bits

Score difference with first non-orthologous sequence - *A. fumigatus*:1896 *A. fischeri*:1896

afum|EAL86079.1 100.00% afis|EAW24410.1 100.00%

Bootstrap support for afum|EAL86079.1 as seed ortholog is 100%.

Bootstrap support for afis|EAW24410.1 as seed ortholog is 100%.

---

Group of orthologs #1111. Best score 1895 bits

Score difference with first non-orthologous sequence - *A. fumigatus*:1895 *A. fischeri*:1895

afum|EAL87645.1 100.00% afis|EAW18279.1 100.00%

Bootstrap support for afum|EAL87645.1 as seed ortholog is 100%.

Bootstrap support for afis|EAW18279.1 as seed ortholog is 100%.

---

Group of orthologs #1112. Best score 1895 bits

Score difference with first non-orthologous sequence - *A. fumigatus*:1895 *A. fischeri*:1895

afum|EAL86126.1 100.00% afis|EAW24456.1 100.00%

Bootstrap support for afum|EAL86126.1 as seed ortholog is 100%.

Bootstrap support for afis|EAW24456.1 as seed ortholog is 100%.

---

Group of orthologs #1113. Best score 1895 bits

Score difference with first non-orthologous sequence - *A. fumigatus*:1895 *A. fischeri*:1895

afum|EAL93219.1 100.00% afis|EAW18524.1 100.00%

Bootstrap support for afum|EAL93219.1 as seed ortholog is 100%.

Bootstrap support for afis|EAW18524.1 as seed ortholog is 100%.

---

Group of orthologs #1114. Best score 1894 bits

Score difference with first non-orthologous sequence - *A. fumigatus*:1814 *A. fischeri*:1480

afum|EAL84713.1 100.00% afis|EAW20921.1 100.00%

Bootstrap support for afum|EAL84713.1 as seed ortholog is 100%.

Bootstrap support for afis|EAW20921.1 as seed ortholog is 100%.

---

Group of orthologs #1115. Best score 1893 bits

Score difference with first non-orthologous sequence - *A. fumigatus*:1893 *A. fischeri*:1893

afum|EAL92405.1 100.00% afis|EAW21391.1 100.00%

Bootstrap support for afum|EAL92405.1 as seed ortholog is 100%.

Bootstrap support for afis|EAW21391.1 as seed ortholog is 100%.

---

Group of orthologs #1116. Best score 1889 bits

Score difference with first non-orthologous sequence - *A. fumigatus*:1140 *A. fischeri*:1533

afum|EAL87814.1 100.00% afis|EAW16772.1 100.00%

Bootstrap support for afum|EAL87814.1 as seed ortholog is 100%.

Bootstrap support for afis|EAW16772.1 as seed ortholog is 100%.

---

Group of orthologs #1117. Best score 1888 bits

Score difference with first non-orthologous sequence - *A. fumigatus*:1888 *A. fischeri*:1888

afum|EAL91522.2 100.00% afis|EAW17708.1 100.00%

Bootstrap support for afum|EAL91522.2 as seed ortholog is 100%.

Bootstrap support for afis|EAW17708.1 as seed ortholog is 100%.

---

Group of orthologs #1118. Best score 1887 bits

Score difference with first non-orthologous sequence - *A. fumigatus*:1887 *A. fischeri*:1887

afum|EAL85777.1 100.00% afis|EAW15555.1 100.00%

Bootstrap support for afum|EAL85777.1 as seed ortholog is 100%.

Bootstrap support for afis|EAW15555.1 as seed ortholog is 100%.

---

Group of orthologs #1119. Best score 1886 bits

Score difference with first non-orthologous sequence - *A. fumigatus*:1886 *A. fischeri*:1886

afum|EAL92468.1 100.00% afis|EAW21449.1 100.00%

Bootstrap support for afum|EAL92468.1 as seed ortholog is 100%.

Bootstrap support for afis|EAW21449.1 as seed ortholog is 100%.

---

Group of orthologs #1120. Best score 1885 bits

Score difference with first non-orthologous sequence - *A. fumigatus*:1885 *A. fischeri*:1885

afum|EAL84885.1 100.00% afis|EAW20031.1 100.00%

Bootstrap support for afum|EAL84885.1 as seed ortholog is 100%.

Bootstrap support for afis|EAW20031.1 as seed ortholog is 100%.

---

Group of orthologs #1121. Best score 1885 bits

Score difference with first non-orthologous sequence - *A. fumigatus*:1885 *A. fischeri*:1885

afum|EAL92696.1 100.00% afis|EAW21661.1 100.00%

Bootstrap support for afum|EAL92696.1 as seed ortholog is 100%.

Bootstrap support for afis|EAW21661.1 as seed ortholog is 100%.

---

Group of orthologs #1122. Best score 1885 bits

Score difference with first non-orthologous sequence - *A. fumigatus*:1885 *A. fischeri*:1885

afum|EAL89607.1 100.00% afis|EAW24950.1 100.00%

Bootstrap support for afum|EAL89607.1 as seed ortholog is 100%.

Bootstrap support for afis|EAW24950.1 as seed ortholog is 100%.

---

Group of orthologs #1123. Best score 1884 bits

Score difference with first non-orthologous sequence - *A. fumigatus*:1884 *A. fischeri*:1704

afum|EAL94039.1 100.00% afis|EAW19321.1 100.00%

Bootstrap support for afum|EAL94039.1 as seed ortholog is 100%.

Bootstrap support for afis|EAW19321.1 as seed ortholog is 100%.

---

Group of orthologs #1124. Best score 1883 bits

Score difference with first non-orthologous sequence - *A. fumigatus*:1883 *A. fischeri*:1883

afum|EAL93309.1 100.00% afis|EAW18601.1 100.00%

Bootstrap support for afum|EAL93309.1 as seed ortholog is 100%.

Bootstrap support for afis|EAW18601.1 as seed ortholog is 100%.

---

Group of orthologs #1125. Best score 1883 bits

Score difference with first non-orthologous sequence - *A. fumigatus*:1883 *A. fischeri*:1883

afum|EAL90830.1 100.00% afis|EAW22361.1 100.00%

Bootstrap support for afum|EAL90830.1 as seed ortholog is 100%.

Bootstrap support for afis|EAW22361.1 as seed ortholog is 100%.

---

Group of orthologs #1126. Best score 1881 bits

Score difference with first non-orthologous sequence - *A. fumigatus*:1881 *A. fischeri*:1881

afum|EAL90020.1 100.00% afis|EAW25358.1 100.00%

Bootstrap support for afum|EAL90020.1 as seed ortholog is 100%.

Bootstrap support for afis|EAW25358.1 as seed ortholog is 100%.

---

Group of orthologs #1127. Best score 1879 bits

Score difference with first non-orthologous sequence - *A. fumigatus*:1879 *A. fischeri*:1879  
afum|EAL88939.1 100.00% afis|EAW16316.1 100.00%  
Bootstrap support for afum|EAL88939.1 as seed ortholog is 100%.  
Bootstrap support for afis|EAW16316.1 as seed ortholog is 100%.

---

Group of orthologs #1128. Best score 1879 bits

Score difference with first non-orthologous sequence - *A. fumigatus*:1879 *A. fischeri*:1879  
afum|EAL93508.1 100.00% afis|EAW18776.1 100.00%  
Bootstrap support for afum|EAL93508.1 as seed ortholog is 100%.  
Bootstrap support for afis|EAW18776.1 as seed ortholog is 100%.

---

Group of orthologs #1129. Best score 1878 bits

Score difference with first non-orthologous sequence - *A. fumigatus*:1878 *A. fischeri*:1878  
afum|EAL88195.1 100.00% afis|EAW23284.1 100.00%  
Bootstrap support for afum|EAL88195.1 as seed ortholog is 100%.  
Bootstrap support for afis|EAW23284.1 as seed ortholog is 100%.

---

Group of orthologs #1130. Best score 1878 bits

Score difference with first non-orthologous sequence - *A. fumigatus*:1878 *A. fischeri*:1878  
afum|EAL87952.1 100.00% afis|EAW23509.1 100.00%  
Bootstrap support for afum|EAL87952.1 as seed ortholog is 100%.  
Bootstrap support for afis|EAW23509.1 as seed ortholog is 100%.

---

Group of orthologs #1131. Best score 1878 bits

Score difference with first non-orthologous sequence - *A. fumigatus*:1878 *A. fischeri*:1878  
afum|EAL92813.1 100.00% afis|EAW21786.1 100.00%  
Bootstrap support for afum|EAL92813.1 as seed ortholog is 100%.  
Bootstrap support for afis|EAW21786.1 as seed ortholog is 100%.

---

Group of orthologs #1132. Best score 1877 bits

Score difference with first non-orthologous sequence - *A. fumigatus*:1877 *A. fischeri*:1877  
afum|EAL86595.1 100.00% afis|EAW17237.1 100.00%  
Bootstrap support for afum|EAL86595.1 as seed ortholog is 100%.  
Bootstrap support for afis|EAW17237.1 as seed ortholog is 100%.

---

Group of orthologs #1133. Best score 1874 bits

Score difference with first non-orthologous sequence - *A. fumigatus*:1793 *A. fischeri*:1732  
afum|EAL88097.1 100.00% afis|EAW23374.1 100.00%  
Bootstrap support for afum|EAL88097.1 as seed ortholog is 100%.  
Bootstrap support for afis|EAW23374.1 as seed ortholog is 100%.

---

Group of orthologs #1134. Best score 1873 bits

Score difference with first non-orthologous sequence - *A. fumigatus*:1873 *A. fischeri*:1873  
afum|EAL91776.1 100.00% afis|EAW17967.1 100.00%  
Bootstrap support for afum|EAL91776.1 as seed ortholog is 100%.  
Bootstrap support for afis|EAW17967.1 as seed ortholog is 100%.

---

Group of orthologs #1135. Best score 1873 bits

Score difference with first non-orthologous sequence - *A. fumigatus*:1873 *A. fischeri*:1873  
afum|EAL93924.1 100.00% afis|EAW19193.1 100.00%  
Bootstrap support for afum|EAL93924.1 as seed ortholog is 100%.  
Bootstrap support for afis|EAW19193.1 as seed ortholog is 100%.

---

Group of orthologs #1136. Best score 1872 bits

Score difference with first non-orthologous sequence - *A. fumigatus*:1872 *A. fischeri*:1872  
afum|EAL86984.1 100.00% afis|EAW19512.1 100.00%



Bootstrap support for afum|EAL86984.1 as seed ortholog is 100%.  
Bootstrap support for afis|EAW19512.1 as seed ortholog is 100%.

---

Group of orthologs #1137. Best score 1872 bits

Score difference with first non-orthologous sequence - *A. fumigatus*:1872 *A. fischeri*:1872

|                 |         |                 |         |
|-----------------|---------|-----------------|---------|
| afum EBA27298.1 | 100.00% | afis EAW19499.1 | 100.00% |
|-----------------|---------|-----------------|---------|

Bootstrap support for afum|EBA27298.1 as seed ortholog is 100%.

Bootstrap support for afis|EAW19499.1 as seed ortholog is 100%.

---

Group of orthologs #1138. Best score 1872 bits

Score difference with first non-orthologous sequence - *A. fumigatus*:1872 *A. fischeri*:1872

|                 |         |                 |         |
|-----------------|---------|-----------------|---------|
| afum EAL92874.1 | 100.00% | afis EAW21861.1 | 100.00% |
|-----------------|---------|-----------------|---------|

Bootstrap support for afum|EAL92874.1 as seed ortholog is 100%.

Bootstrap support for afis|EAW21861.1 as seed ortholog is 100%.

---

Group of orthologs #1139. Best score 1870 bits

Score difference with first non-orthologous sequence - *A. fumigatus*:1870 *A. fischeri*:1870

|                 |         |                 |         |
|-----------------|---------|-----------------|---------|
| afum EAL88327.2 | 100.00% | afis EAW23154.1 | 100.00% |
|-----------------|---------|-----------------|---------|

Bootstrap support for afum|EAL88327.2 as seed ortholog is 100%.

Bootstrap support for afis|EAW23154.1 as seed ortholog is 100%.

---

Group of orthologs #1140. Best score 1870 bits

Score difference with first non-orthologous sequence - *A. fumigatus*:1870 *A. fischeri*:1870

|                 |         |                 |         |
|-----------------|---------|-----------------|---------|
| afum EBA27318.1 | 100.00% | afis EAW18194.1 | 100.00% |
|-----------------|---------|-----------------|---------|

Bootstrap support for afum|EBA27318.1 as seed ortholog is 100%.

Bootstrap support for afis|EAW18194.1 as seed ortholog is 100%.

---

Group of orthologs #1141. Best score 1869 bits

Score difference with first non-orthologous sequence - *A. fumigatus*:1869 *A. fischeri*:1869

|                 |         |                 |         |
|-----------------|---------|-----------------|---------|
| afum EAL91403.1 | 100.00% | afis EAW17590.1 | 100.00% |
|-----------------|---------|-----------------|---------|

Bootstrap support for afum|EAL91403.1 as seed ortholog is 100%.

Bootstrap support for afis|EAW17590.1 as seed ortholog is 100%.

---

Group of orthologs #1142. Best score 1869 bits

Score difference with first non-orthologous sequence - *A. fumigatus*:1869 *A. fischeri*:1727

|                 |         |                 |         |
|-----------------|---------|-----------------|---------|
| afum EAL94059.1 | 100.00% | afis EAW19340.1 | 100.00% |
|-----------------|---------|-----------------|---------|

Bootstrap support for afum|EAL94059.1 as seed ortholog is 100%.

Bootstrap support for afis|EAW19340.1 as seed ortholog is 100%.

---

Group of orthologs #1143. Best score 1869 bits

Score difference with first non-orthologous sequence - *A. fumigatus*:1869 *A. fischeri*:1251

|                 |         |                 |         |
|-----------------|---------|-----------------|---------|
| afum EBA27254.1 | 100.00% | afis EAW24364.1 | 100.00% |
|-----------------|---------|-----------------|---------|

Bootstrap support for afum|EBA27254.1 as seed ortholog is 100%.

Bootstrap support for afis|EAW24364.1 as seed ortholog is 100%.

---

Group of orthologs #1144. Best score 1865 bits

Score difference with first non-orthologous sequence - *A. fumigatus*:1865 *A. fischeri*:1865

|                 |         |                 |         |
|-----------------|---------|-----------------|---------|
| afum EAL84898.1 | 100.00% | afis EAW20019.1 | 100.00% |
|-----------------|---------|-----------------|---------|

Bootstrap support for afum|EAL84898.1 as seed ortholog is 100%.

Bootstrap support for afis|EAW20019.1 as seed ortholog is 100%.

---

Group of orthologs #1145. Best score 1865 bits

Score difference with first non-orthologous sequence - *A. fumigatus*:1865 *A. fischeri*:1865

|                 |         |                 |         |
|-----------------|---------|-----------------|---------|
| afum EAL93632.1 | 100.00% | afis EAW18900.1 | 100.00% |
|-----------------|---------|-----------------|---------|

Bootstrap support for afum|EAL93632.1 as seed ortholog is 100%.

Bootstrap support for afis|EAW18900.1 as seed ortholog is 100%.

---

Group of orthologs #1146. Best score 1865 bits

Score difference with first non-orthologous sequence - *A. fumigatus*:1865 *A. fischeri*:1865

afum|EAL90052.1 100.00% afis|EAW25393.1 100.00%

Bootstrap support for afum|EAL90052.1 as seed ortholog is 100%.

Bootstrap support for afis|EAW25393.1 as seed ortholog is 100%.

---

Group of orthologs #1147. Best score 1864 bits

Score difference with first non-orthologous sequence - *A. fumigatus*:1864 *A. fischeri*:1864

afum|EAL93421.1 100.00% afis|EAW18699.1 100.00%

Bootstrap support for afum|EAL93421.1 as seed ortholog is 100%.

Bootstrap support for afis|EAW18699.1 as seed ortholog is 100%.

---

Group of orthologs #1148. Best score 1864 bits

Score difference with first non-orthologous sequence - *A. fumigatus*:1864 *A. fischeri*:1864

afum|EAL90445.1 100.00% afis|EAW22754.1 100.00%

Bootstrap support for afum|EAL90445.1 as seed ortholog is 100%.

Bootstrap support for afis|EAW22754.1 as seed ortholog is 100%.

---

Group of orthologs #1149. Best score 1863 bits

Score difference with first non-orthologous sequence - *A. fumigatus*:1863 *A. fischeri*:1760

afum|EAL87632.1 100.00% afis|EAW18267.1 100.00%

Bootstrap support for afum|EAL87632.1 as seed ortholog is 100%.

Bootstrap support for afis|EAW18267.1 as seed ortholog is 100%.

---

Group of orthologs #1150. Best score 1863 bits

Score difference with first non-orthologous sequence - *A. fumigatus*:1863 *A. fischeri*:1863

afum|EAL91649.1 100.00% afis|EAW17839.1 100.00%

Bootstrap support for afum|EAL91649.1 as seed ortholog is 100%.

Bootstrap support for afis|EAW17839.1 as seed ortholog is 100%.

---

Group of orthologs #1151. Best score 1862 bits

Score difference with first non-orthologous sequence - *A. fumigatus*:1862 *A. fischeri*:1862

afum|EAL88457.1 100.00% afis|EAW23025.1 100.00%

Bootstrap support for afum|EAL88457.1 as seed ortholog is 100%.

Bootstrap support for afis|EAW23025.1 as seed ortholog is 100%.

---

Group of orthologs #1152. Best score 1862 bits

Score difference with first non-orthologous sequence - *A. fumigatus*:1862 *A. fischeri*:1862

afum|EAL89754.1 100.00% afis|EAW25085.1 100.00%

Bootstrap support for afum|EAL89754.1 as seed ortholog is 100%.

Bootstrap support for afis|EAW25085.1 as seed ortholog is 100%.

---

Group of orthologs #1153. Best score 1861 bits

Score difference with first non-orthologous sequence - *A. fumigatus*:1861 *A. fischeri*:1861

afum|EAL86001.1 100.00% afis|EAW24331.1 100.00%

Bootstrap support for afum|EAL86001.1 as seed ortholog is 100%.

Bootstrap support for afis|EAW24331.1 as seed ortholog is 100%.

---

Group of orthologs #1154. Best score 1861 bits

Score difference with first non-orthologous sequence - *A. fumigatus*:1861 *A. fischeri*:1861

afum|EAL88207.1 100.00% afis|EAW23272.1 100.00%

Bootstrap support for afum|EAL88207.1 as seed ortholog is 100%.

Bootstrap support for afis|EAW23272.1 as seed ortholog is 100%.

---

Group of orthologs #1155. Best score 1860 bits

Score difference with first non-orthologous sequence - *A. fumigatus*:1860 *A. fischeri*:1860  
afum|EAL88086.2 100.00% afis|EAW23385.1 100.00%  
Bootstrap support for afum|EAL88086.2 as seed ortholog is 100%.  
Bootstrap support for afis|EAW23385.1 as seed ortholog is 100%.

---

Group of orthologs #1156. Best score 1860 bits

Score difference with first non-orthologous sequence - *A. fumigatus*:1860 *A. fischeri*:1860  
afum|EAL87912.2 100.00% afis|EAW23554.1 100.00%  
Bootstrap support for afum|EAL87912.2 as seed ortholog is 100%.  
Bootstrap support for afis|EAW23554.1 as seed ortholog is 100%.

---

Group of orthologs #1157. Best score 1859 bits

Score difference with first non-orthologous sequence - *A. fumigatus*:1720 *A. fischeri*:1859  
afum|EAL86489.1 100.00% afis|EAW16962.1 100.00%  
Bootstrap support for afum|EAL86489.1 as seed ortholog is 100%.  
Bootstrap support for afis|EAW16962.1 as seed ortholog is 100%.

---

Group of orthologs #1158. Best score 1859 bits

Score difference with first non-orthologous sequence - *A. fumigatus*:1859 *A. fischeri*:1859  
afum|EAL90723.1 100.00% afis|EAW22468.1 100.00%  
Bootstrap support for afum|EAL90723.1 as seed ortholog is 100%.  
Bootstrap support for afis|EAW22468.1 as seed ortholog is 100%.

---

Group of orthologs #1159. Best score 1858 bits

Score difference with first non-orthologous sequence - *A. fumigatus*:1858 *A. fischeri*:1858  
afum|EAL85346.1 100.00% afis|EAW20229.1 100.00%  
Bootstrap support for afum|EAL85346.1 as seed ortholog is 100%.  
Bootstrap support for afis|EAW20229.1 as seed ortholog is 100%.

---

Group of orthologs #1160. Best score 1857 bits

Score difference with first non-orthologous sequence - *A. fumigatus*:1857 *A. fischeri*:1857  
afum|EAL91710.1 100.00% afis|EAW17902.1 100.00%  
Bootstrap support for afum|EAL91710.1 as seed ortholog is 100%.  
Bootstrap support for afis|EAW17902.1 as seed ortholog is 100%.

---

Group of orthologs #1161. Best score 1857 bits

Score difference with first non-orthologous sequence - *A. fumigatus*:1857 *A. fischeri*:1857  
afum|EAL85930.1 100.00% afis|EAW24262.1 100.00%  
Bootstrap support for afum|EAL85930.1 as seed ortholog is 100%.  
Bootstrap support for afis|EAW24262.1 as seed ortholog is 100%.

---

Group of orthologs #1162. Best score 1855 bits

Score difference with first non-orthologous sequence - *A. fumigatus*:1855 *A. fischeri*:1855  
afum|EAL87939.1 100.00% afis|EAW23526.1 100.00%  
Bootstrap support for afum|EAL87939.1 as seed ortholog is 100%.  
Bootstrap support for afis|EAW23526.1 as seed ortholog is 100%.

---

Group of orthologs #1163. Best score 1855 bits

Score difference with first non-orthologous sequence - *A. fumigatus*:1855 *A. fischeri*:1855  
afum|EAL93551.1 100.00% afis|EAW18815.1 100.00%  
Bootstrap support for afum|EAL93551.1 as seed ortholog is 100%.  
Bootstrap support for afis|EAW18815.1 as seed ortholog is 100%.

---

Group of orthologs #1164. Best score 1854 bits

Score difference with first non-orthologous sequence - *A. fumigatus*:1719 *A. fischeri*:1701  
afum|EAL87216.1 100.00% afis|EAW23782.1 100.00%

Bootstrap support for afum|EAL87216.1 as seed ortholog is 100%.  
Bootstrap support for afis|EAW23782.1 as seed ortholog is 100%.

---

Group of orthologs #1165. Best score 1854 bits

Score difference with first non-orthologous sequence - *A. fumigatus*:1854 *A. fischeri*:1854

afum|EAL93041.1 100.00% afis|EAW18367.1 100.00%

Bootstrap support for afum|EAL93041.1 as seed ortholog is 100%.

Bootstrap support for afis|EAW18367.1 as seed ortholog is 100%.

---

Group of orthologs #1166. Best score 1854 bits

Score difference with first non-orthologous sequence - *A. fumigatus*:1854 *A. fischeri*:1854

afum|EAL92008.1 100.00% afis|EAW24153.1 100.00%

Bootstrap support for afum|EAL92008.1 as seed ortholog is 100%.

Bootstrap support for afis|EAW24153.1 as seed ortholog is 100%.

---

Group of orthologs #1167. Best score 1851 bits

Score difference with first non-orthologous sequence - *A. fumigatus*:1851 *A. fischeri*:1851

afum|EAL85030.1 100.00% afis|EAW19866.1 100.00%

Bootstrap support for afum|EAL85030.1 as seed ortholog is 100%.

Bootstrap support for afis|EAW19866.1 as seed ortholog is 100%.

---

Group of orthologs #1168. Best score 1851 bits

Score difference with first non-orthologous sequence - *A. fumigatus*:1851 *A. fischeri*:1851

afum|EAL91947.2 100.00% afis|EAW24092.1 100.00%

Bootstrap support for afum|EAL91947.2 as seed ortholog is 100%.

Bootstrap support for afis|EAW24092.1 as seed ortholog is 100%.

---

Group of orthologs #1169. Best score 1850 bits

Score difference with first non-orthologous sequence - *A. fumigatus*:1850 *A. fischeri*:1850

afum|EAL91289.1 100.00% afis|EAW17461.1 100.00%

Bootstrap support for afum|EAL91289.1 as seed ortholog is 100%.

Bootstrap support for afis|EAW17461.1 as seed ortholog is 100%.

---

Group of orthologs #1170. Best score 1850 bits

Score difference with first non-orthologous sequence - *A. fumigatus*:1850 *A. fischeri*:1850

afum|EAL92456.1 100.00% afis|EAW21440.1 100.00%

Bootstrap support for afum|EAL92456.1 as seed ortholog is 100%.

Bootstrap support for afis|EAW21440.1 as seed ortholog is 100%.

---

Group of orthologs #1171. Best score 1849 bits

Score difference with first non-orthologous sequence - *A. fumigatus*:1849 *A. fischeri*:1849

afum|EAL85744.1 100.00% afis|EAW15588.1 100.00%

Bootstrap support for afum|EAL85744.1 as seed ortholog is 100%.

Bootstrap support for afis|EAW15588.1 as seed ortholog is 100%.

---

Group of orthologs #1172. Best score 1849 bits

Score difference with first non-orthologous sequence - *A. fumigatus*:1849 *A. fischeri*:1849

afum|EAL89855.1 100.00% afis|EAW25181.1 100.00%

Bootstrap support for afum|EAL89855.1 as seed ortholog is 100%.

Bootstrap support for afis|EAW25181.1 as seed ortholog is 100%.

---

Group of orthologs #1173. Best score 1849 bits

Score difference with first non-orthologous sequence - *A. fumigatus*:1849 *A. fischeri*:1849

afum|EAL90144.1 100.00% afis|EAW25479.1 100.00%

Bootstrap support for afum|EAL90144.1 as seed ortholog is 100%.

Bootstrap support for afis|EAW25479.1 as seed ortholog is 100%.

---

Group of orthologs #1174. Best score 1848 bits

Score difference with first non-orthologous sequence - *A. fumigatus*:1848 *A. fischeri*:1848

afum|EAL85001.1 100.00% afis|EAW19906.1 100.00%

Bootstrap support for afum|EAL85001.1 as seed ortholog is 100%.

Bootstrap support for afis|EAW19906.1 as seed ortholog is 100%.

---

Group of orthologs #1175. Best score 1848 bits

Score difference with first non-orthologous sequence - *A. fumigatus*:1848 *A. fischeri*:1848

afum|EAL84612.1 100.00% afis|EAW20440.1 100.00%

Bootstrap support for afum|EAL84612.1 as seed ortholog is 100%.

Bootstrap support for afis|EAW20440.1 as seed ortholog is 100%.

---

Group of orthologs #1176. Best score 1848 bits

Score difference with first non-orthologous sequence - *A. fumigatus*:1848 *A. fischeri*:1848

afum|EAL88019.1 100.00% afis|EAW23445.1 100.00%

Bootstrap support for afum|EAL88019.1 as seed ortholog is 100%.

Bootstrap support for afis|EAW23445.1 as seed ortholog is 100%.

---

Group of orthologs #1177. Best score 1847 bits

Score difference with first non-orthologous sequence - *A. fumigatus*:1847 *A. fischeri*:1847

afum|EAL86572.1 100.00% afis|EAW17098.1 100.00%

Bootstrap support for afum|EAL86572.1 as seed ortholog is 100%.

Bootstrap support for afis|EAW17098.1 as seed ortholog is 100%.

---

Group of orthologs #1178. Best score 1847 bits

Score difference with first non-orthologous sequence - *A. fumigatus*:1847 *A. fischeri*:1847

afum|EAL89922.1 100.00% afis|EAW25260.1 100.00%

Bootstrap support for afum|EAL89922.1 as seed ortholog is 100%.

Bootstrap support for afis|EAW25260.1 as seed ortholog is 100%.

---

Group of orthologs #1179. Best score 1846 bits

Score difference with first non-orthologous sequence - *A. fumigatus*:1846 *A. fischeri*:1846

afum|EAL88986.1 100.00% afis|EAW16361.1 100.00%

Bootstrap support for afum|EAL88986.1 as seed ortholog is 100%.

Bootstrap support for afis|EAW16361.1 as seed ortholog is 100%.

---

Group of orthologs #1180. Best score 1846 bits

Score difference with first non-orthologous sequence - *A. fumigatus*:1846 *A. fischeri*:1846

afum|EAL88474.1 100.00% afis|EAW23006.1 100.00%

Bootstrap support for afum|EAL88474.1 as seed ortholog is 100%.

Bootstrap support for afis|EAW23006.1 as seed ortholog is 100%.

---

Group of orthologs #1181. Best score 1845 bits

Score difference with first non-orthologous sequence - *A. fumigatus*:1845 *A. fischeri*:1845

afum|EAL84555.1 100.00% afis|EAW20500.1 100.00%

Bootstrap support for afum|EAL84555.1 as seed ortholog is 100%.

Bootstrap support for afis|EAW20500.1 as seed ortholog is 100%.

---

Group of orthologs #1182. Best score 1845 bits

Score difference with first non-orthologous sequence - *A. fumigatus*:1845 *A. fischeri*:1845

afum|EAL87509.1 100.00% afis|EAW18151.1 100.00%

Bootstrap support for afum|EAL87509.1 as seed ortholog is 100%.

Bootstrap support for afis|EAW18151.1 as seed ortholog is 100%.

---

Group of orthologs #1183. Best score 1845 bits

Score difference with first non-orthologous sequence - *A. fumigatus*:1845 *A. fischeri*:1845  
afum|EAL90854.1 100.00% afis|EAW22338.1 100.00%  
Bootstrap support for afum|EAL90854.1 as seed ortholog is 100%.  
Bootstrap support for afis|EAW22338.1 as seed ortholog is 100%.

---

Group of orthologs #1184. Best score 1844 bits

Score difference with first non-orthologous sequence - *A. fumigatus*:1844 *A. fischeri*:1844  
afum|EAL91450.1 100.00% afis|EAW17635.1 100.00%  
Bootstrap support for afum|EAL91450.1 as seed ortholog is 100%.  
Bootstrap support for afis|EAW17635.1 as seed ortholog is 100%.

---

Group of orthologs #1185. Best score 1844 bits

Score difference with first non-orthologous sequence - *A. fumigatus*:1844 *A. fischeri*:1844  
afum|EAL90188.2 100.00% afis|EAW25523.1 100.00%  
Bootstrap support for afum|EAL90188.2 as seed ortholog is 100%.  
Bootstrap support for afis|EAW25523.1 as seed ortholog is 100%.

---

Group of orthologs #1186. Best score 1843 bits

Score difference with first non-orthologous sequence - *A. fumigatus*:1843 *A. fischeri*:1843  
afum|EAL85724.1 100.00% afis|EAW15610.1 100.00%  
Bootstrap support for afum|EAL85724.1 as seed ortholog is 100%.  
Bootstrap support for afis|EAW15610.1 as seed ortholog is 100%.

---

Group of orthologs #1187. Best score 1842 bits

Score difference with first non-orthologous sequence - *A. fumigatus*:1842 *A. fischeri*:1842  
afum|EAL88633.1 100.00% afis|EAW16000.1 100.00%  
Bootstrap support for afum|EAL88633.1 as seed ortholog is 100%.  
Bootstrap support for afis|EAW16000.1 as seed ortholog is 100%.

---

Group of orthologs #1188. Best score 1841 bits

Score difference with first non-orthologous sequence - *A. fumigatus*:1664 *A. fischeri*:1601  
afum|EAL91888.1 100.00% afis|EAW18076.1 100.00%  
Bootstrap support for afum|EAL91888.1 as seed ortholog is 100%.  
Bootstrap support for afis|EAW18076.1 as seed ortholog is 100%.

---

Group of orthologs #1189. Best score 1841 bits

Score difference with first non-orthologous sequence - *A. fumigatus*:1841 *A. fischeri*:1841  
afum|EAL92591.2 100.00% afis|EAW21573.1 100.00%  
Bootstrap support for afum|EAL92591.2 as seed ortholog is 100%.  
Bootstrap support for afis|EAW21573.1 as seed ortholog is 100%.

---

Group of orthologs #1190. Best score 1840 bits

Score difference with first non-orthologous sequence - *A. fumigatus*:1840 *A. fischeri*:1425  
afum|EAL84484.1 100.00% afis|EAW20580.1 100.00%  
Bootstrap support for afum|EAL84484.1 as seed ortholog is 100%.  
Bootstrap support for afis|EAW20580.1 as seed ortholog is 100%.

---

Group of orthologs #1191. Best score 1840 bits

Score difference with first non-orthologous sequence - *A. fumigatus*:1840 *A. fischeri*:1840  
afum|EAL89635.1 100.00% afis|EAW24975.1 100.00%  
Bootstrap support for afum|EAL89635.1 as seed ortholog is 100%.  
Bootstrap support for afis|EAW24975.1 as seed ortholog is 100%.

---

Group of orthologs #1192. Best score 1839 bits

Score difference with first non-orthologous sequence - *A. fumigatus*:1839 *A. fischeri*:1839  
afum|EAL89874.1 100.00% afis|EAW25213.1 100.00%

Bootstrap support for afum|EAL89874.1 as seed ortholog is 100%.  
Bootstrap support for afis|EAW25213.1 as seed ortholog is 100%.

---

Group of orthologs #1193. Best score 1838 bits

Score difference with first non-orthologous sequence - *A. fumigatus*:1704 *A. fischeri*:1838

afum|EAL85898.1 100.00% afis|EAW24229.1 100.00%

Bootstrap support for afum|EAL85898.1 as seed ortholog is 100%.

Bootstrap support for afis|EAW24229.1 as seed ortholog is 100%.

---

Group of orthologs #1194. Best score 1838 bits

Score difference with first non-orthologous sequence - *A. fumigatus*:1838 *A. fischeri*:1241

afum|EAL86075.1 100.00% afis|EAW24404.1 100.00%

Bootstrap support for afum|EAL86075.1 as seed ortholog is 100%.

Bootstrap support for afis|EAW24404.1 as seed ortholog is 100%.

---

Group of orthologs #1195. Best score 1838 bits

Score difference with first non-orthologous sequence - *A. fumigatus*:1838 *A. fischeri*:1838

afum|EAL90025.1 100.00% afis|EAW25363.1 100.00%

Bootstrap support for afum|EAL90025.1 as seed ortholog is 100%.

Bootstrap support for afis|EAW25363.1 as seed ortholog is 100%.

---

Group of orthologs #1196. Best score 1837 bits

Score difference with first non-orthologous sequence - *A. fumigatus*:1837 *A. fischeri*:1837

afum|EAL85673.1 100.00% afis|EAW15674.1 100.00%

Bootstrap support for afum|EAL85673.1 as seed ortholog is 100%.

Bootstrap support for afis|EAW15674.1 as seed ortholog is 100%.

---

Group of orthologs #1197. Best score 1835 bits

Score difference with first non-orthologous sequence - *A. fumigatus*:1835 *A. fischeri*:1835

afum|EAL90269.1 100.00% afis|EAW22928.1 100.00%

Bootstrap support for afum|EAL90269.1 as seed ortholog is 100%.

Bootstrap support for afis|EAW22928.1 as seed ortholog is 100%.

---

Group of orthologs #1198. Best score 1835 bits

Score difference with first non-orthologous sequence - *A. fumigatus*:1835 *A. fischeri*:1835

afum|EAL92553.1 100.00% afis|EAW21532.1 100.00%

Bootstrap support for afum|EAL92553.1 as seed ortholog is 100%.

Bootstrap support for afis|EAW21532.1 as seed ortholog is 100%.

---

Group of orthologs #1199. Best score 1834 bits

Score difference with first non-orthologous sequence - *A. fumigatus*:1834 *A. fischeri*:1202

afum|EAL89039.1 100.00% afis|EAW16415.1 100.00%

Bootstrap support for afum|EAL89039.1 as seed ortholog is 100%.

Bootstrap support for afis|EAW16415.1 as seed ortholog is 100%.

---

Group of orthologs #1200. Best score 1833 bits

Score difference with first non-orthologous sequence - *A. fumigatus*:1833 *A. fischeri*:1833

afum|EBA27274.1 100.00% afis|EAW16942.1 100.00%

Bootstrap support for afum|EBA27274.1 as seed ortholog is 100%.

Bootstrap support for afis|EAW16942.1 as seed ortholog is 100%.

---

Group of orthologs #1201. Best score 1831 bits

Score difference with first non-orthologous sequence - *A. fumigatus*:1831 *A. fischeri*:1831

afum|EAL88954.1 100.00% afis|EAW16330.1 100.00%

Bootstrap support for afum|EAL88954.1 as seed ortholog is 100%.

Bootstrap support for afis|EAW16330.1 as seed ortholog is 100%.

---

Group of orthologs #1202. Best score 1831 bits

Score difference with first non-orthologous sequence - *A. fumigatus*:1831 *A. fischeri*:1831

afum|EAL90306.1 100.00% afis|EAW22892.1 100.00%

Bootstrap support for afum|EAL90306.1 as seed ortholog is 100%.

Bootstrap support for afis|EAW22892.1 as seed ortholog is 100%.

---

Group of orthologs #1203. Best score 1830 bits

Score difference with first non-orthologous sequence - *A. fumigatus*:1830 *A. fischeri*:1830

afum|EAL88996.1 100.00% afis|EAW16371.1 100.00%

Bootstrap support for afum|EAL88996.1 as seed ortholog is 100%.

Bootstrap support for afis|EAW16371.1 as seed ortholog is 100%.

---

Group of orthologs #1204. Best score 1830 bits

Score difference with first non-orthologous sequence - *A. fumigatus*:1830 *A. fischeri*:1830

afum|EAL87897.2 100.00% afis|EAW23570.1 100.00%

Bootstrap support for afum|EAL87897.2 as seed ortholog is 100%.

Bootstrap support for afis|EAW23570.1 as seed ortholog is 100%.

---

Group of orthologs #1205. Best score 1829 bits

Score difference with first non-orthologous sequence - *A. fumigatus*:1829 *A. fischeri*:1829

afum|EAL89430.1 100.00% afis|EAW24790.1 100.00%

Bootstrap support for afum|EAL89430.1 as seed ortholog is 100%.

Bootstrap support for afis|EAW24790.1 as seed ortholog is 100%.

---

Group of orthologs #1206. Best score 1828 bits

Score difference with first non-orthologous sequence - *A. fumigatus*:1828 *A. fischeri*:1828

afum|EAL89639.1 100.00% afis|EAW24979.1 100.00%

Bootstrap support for afum|EAL89639.1 as seed ortholog is 100%.

Bootstrap support for afis|EAW24979.1 as seed ortholog is 100%.

---

Group of orthologs #1207. Best score 1827 bits

Score difference with first non-orthologous sequence - *A. fumigatus*:1827 *A. fischeri*:1827

afum|EAL88856.1 100.00% afis|EAW16233.1 100.00%

Bootstrap support for afum|EAL88856.1 as seed ortholog is 100%.

Bootstrap support for afis|EAW16233.1 as seed ortholog is 100%.

---

Group of orthologs #1208. Best score 1827 bits

Score difference with first non-orthologous sequence - *A. fumigatus*:1827 *A. fischeri*:1827

afum|EAL90915.1 100.00% afis|EAW22265.1 100.00%

Bootstrap support for afum|EAL90915.1 as seed ortholog is 100%.

Bootstrap support for afis|EAW22265.1 as seed ortholog is 100%.

---

Group of orthologs #1209. Best score 1826 bits

Score difference with first non-orthologous sequence - *A. fumigatus*:1826 *A. fischeri*:1826

afum|EAL90961.1 100.00% afis|EAW22232.1 100.00%

Bootstrap support for afum|EAL90961.1 as seed ortholog is 100%.

Bootstrap support for afis|EAW22232.1 as seed ortholog is 100%.

---

Group of orthologs #1210. Best score 1825 bits

Score difference with first non-orthologous sequence - *A. fumigatus*:1825 *A. fischeri*:1825

afum|EAL91231.1 100.00% afis|EAW17393.1 100.00%

Bootstrap support for afum|EAL91231.1 as seed ortholog is 100%.

Bootstrap support for afis|EAW17393.1 as seed ortholog is 100%.

---

Group of orthologs #1211. Best score 1825 bits



Score difference with first non-orthologous sequence - *A. fumigatus*:1825 *A. fischeri*:1825  
afum|EAL88004.1 100.00% afis|EAW23462.1 100.00%  
Bootstrap support for afum|EAL88004.1 as seed ortholog is 100%.  
Bootstrap support for afis|EAW23462.1 as seed ortholog is 100%.

---

Group of orthologs #1212. Best score 1824 bits

Score difference with first non-orthologous sequence - *A. fumigatus*:1824 *A. fischeri*:1438  
afum|EAL92821.1 100.00% afis|EAW21796.1 100.00%  
Bootstrap support for afum|EAL92821.1 as seed ortholog is 100%.  
Bootstrap support for afis|EAW21796.1 as seed ortholog is 100%.

---

Group of orthologs #1213. Best score 1823 bits

Score difference with first non-orthologous sequence - *A. fumigatus*:1823 *A. fischeri*:1823  
afum|EAL86120.1 100.00% afis|EAW24451.1 100.00%  
Bootstrap support for afum|EAL86120.1 as seed ortholog is 100%.  
Bootstrap support for afis|EAW24451.1 as seed ortholog is 100%.

---

Group of orthologs #1214. Best score 1823 bits

Score difference with first non-orthologous sequence - *A. fumigatus*:1823 *A. fischeri*:1823  
afum|EAL88401.1 100.00% afis|EAW23078.1 100.00%  
Bootstrap support for afum|EAL88401.1 as seed ortholog is 100%.  
Bootstrap support for afis|EAW23078.1 as seed ortholog is 100%.

---

Group of orthologs #1215. Best score 1823 bits

Score difference with first non-orthologous sequence - *A. fumigatus*:1823 *A. fischeri*:1823  
afum|EAL90444.2 100.00% afis|EAW22755.1 100.00%  
Bootstrap support for afum|EAL90444.2 as seed ortholog is 100%.  
Bootstrap support for afis|EAW22755.1 as seed ortholog is 100%.

---

Group of orthologs #1216. Best score 1821 bits

Score difference with first non-orthologous sequence - *A. fumigatus*:1821 *A. fischeri*:1821  
afum|EAL85650.1 100.00% afis|EAW15698.1 100.00%  
Bootstrap support for afum|EAL85650.1 as seed ortholog is 100%.  
Bootstrap support for afis|EAW15698.1 as seed ortholog is 100%.

---

Group of orthologs #1217. Best score 1821 bits

Score difference with first non-orthologous sequence - *A. fumigatus*:1821 *A. fischeri*:1821  
afum|EAL90373.2 100.00% afis|EAW22829.1 100.00%  
Bootstrap support for afum|EAL90373.2 as seed ortholog is 100%.  
Bootstrap support for afis|EAW22829.1 as seed ortholog is 100%.

---

Group of orthologs #1218. Best score 1819 bits

Score difference with first non-orthologous sequence - *A. fumigatus*:1819 *A. fischeri*:1819  
afum|EAL89096.1 100.00% afis|EAW16501.1 100.00%  
Bootstrap support for afum|EAL89096.1 as seed ortholog is 100%.  
Bootstrap support for afis|EAW16501.1 as seed ortholog is 100%.

---

Group of orthologs #1219. Best score 1819 bits

Score difference with first non-orthologous sequence - *A. fumigatus*:1819 *A. fischeri*:1819  
afum|EAL88358.1 100.00% afis|EAW23122.1 100.00%  
Bootstrap support for afum|EAL88358.1 as seed ortholog is 100%.  
Bootstrap support for afis|EAW23122.1 as seed ortholog is 100%.

---

Group of orthologs #1220. Best score 1819 bits

Score difference with first non-orthologous sequence - *A. fumigatus*:1819 *A. fischeri*:1819  
afum|EAL93584.1 100.00% afis|EAW18853.1 100.00%

Bootstrap support for afum|EAL93584.1 as seed ortholog is 100%.  
Bootstrap support for afis|EAW18853.1 as seed ortholog is 100%.

---

Group of orthologs #1221. Best score 1819 bits

Score difference with first non-orthologous sequence - *A. fumigatus*:1819 *A. fischeri*:1819

|                 |         |                 |         |
|-----------------|---------|-----------------|---------|
| afum EAL92258.1 | 100.00% | afis EAW21245.1 | 100.00% |
|-----------------|---------|-----------------|---------|

Bootstrap support for afum|EAL92258.1 as seed ortholog is 100%.

Bootstrap support for afis|EAW21245.1 as seed ortholog is 100%.

---

Group of orthologs #1222. Best score 1819 bits

Score difference with first non-orthologous sequence - *A. fumigatus*:1819 *A. fischeri*:1819

|                 |         |                 |         |
|-----------------|---------|-----------------|---------|
| afum EAL92465.2 | 100.00% | afis EAW21446.1 | 100.00% |
|-----------------|---------|-----------------|---------|

Bootstrap support for afum|EAL92465.2 as seed ortholog is 100%.

Bootstrap support for afis|EAW21446.1 as seed ortholog is 100%.

---

Group of orthologs #1223. Best score 1818 bits

Score difference with first non-orthologous sequence - *A. fumigatus*:1818 *A. fischeri*:1818

|                 |         |                 |         |
|-----------------|---------|-----------------|---------|
| afum EAL88129.1 | 100.00% | afis EAW23347.1 | 100.00% |
|-----------------|---------|-----------------|---------|

Bootstrap support for afum|EAL88129.1 as seed ortholog is 100%.

Bootstrap support for afis|EAW23347.1 as seed ortholog is 100%.

---

Group of orthologs #1224. Best score 1816 bits

Score difference with first non-orthologous sequence - *A. fumigatus*:1816 *A. fischeri*:1816

|                 |         |                 |         |
|-----------------|---------|-----------------|---------|
| afum EAL91951.2 | 100.00% | afis EAW24097.1 | 100.00% |
|-----------------|---------|-----------------|---------|

Bootstrap support for afum|EAL91951.2 as seed ortholog is 100%.

Bootstrap support for afis|EAW24097.1 as seed ortholog is 100%.

---

Group of orthologs #1225. Best score 1813 bits

Score difference with first non-orthologous sequence - *A. fumigatus*:1813 *A. fischeri*:1813

|                 |         |                 |         |
|-----------------|---------|-----------------|---------|
| afum EAL87366.1 | 100.00% | afis EAW23941.1 | 100.00% |
|-----------------|---------|-----------------|---------|

Bootstrap support for afum|EAL87366.1 as seed ortholog is 100%.

Bootstrap support for afis|EAW23941.1 as seed ortholog is 100%.

---

Group of orthologs #1226. Best score 1813 bits

Score difference with first non-orthologous sequence - *A. fumigatus*:1813 *A. fischeri*:1813

|                 |         |                 |         |
|-----------------|---------|-----------------|---------|
| afum EAL89944.1 | 100.00% | afis EAW25281.1 | 100.00% |
|-----------------|---------|-----------------|---------|

Bootstrap support for afum|EAL89944.1 as seed ortholog is 100%.

Bootstrap support for afis|EAW25281.1 as seed ortholog is 100%.

---

Group of orthologs #1227. Best score 1812 bits

Score difference with first non-orthologous sequence - *A. fumigatus*:1812 *A. fischeri*:1812

|                 |         |                 |         |
|-----------------|---------|-----------------|---------|
| afum EAL87915.1 | 100.00% | afis EAW23551.1 | 100.00% |
|-----------------|---------|-----------------|---------|

Bootstrap support for afum|EAL87915.1 as seed ortholog is 100%.

Bootstrap support for afis|EAW23551.1 as seed ortholog is 100%.

---

Group of orthologs #1228. Best score 1812 bits

Score difference with first non-orthologous sequence - *A. fumigatus*:1291 *A. fischeri*:1812

|                 |         |                 |         |
|-----------------|---------|-----------------|---------|
| afum EBA27314.1 | 100.00% | afis EAW18160.1 | 100.00% |
|-----------------|---------|-----------------|---------|

Bootstrap support for afum|EBA27314.1 as seed ortholog is 100%.

Bootstrap support for afis|EAW18160.1 as seed ortholog is 100%.

---

Group of orthologs #1229. Best score 1812 bits

Score difference with first non-orthologous sequence - *A. fumigatus*:1812 *A. fischeri*:1812

|                 |         |                 |         |
|-----------------|---------|-----------------|---------|
| afum EAL90237.1 | 100.00% | afis EAW22960.1 | 100.00% |
|-----------------|---------|-----------------|---------|

Bootstrap support for afum|EAL90237.1 as seed ortholog is 100%.

Bootstrap support for afis|EAW22960.1 as seed ortholog is 100%.

---

Group of orthologs #1230. Best score 1812 bits

Score difference with first non-orthologous sequence - *A. fumigatus*:1812 *A. fischeri*:1812

afum|EAL89739.1 100.00% afis|EAW25070.1 100.00%

Bootstrap support for afum|EAL89739.1 as seed ortholog is 100%.

Bootstrap support for afis|EAW25070.1 as seed ortholog is 100%.

---

Group of orthologs #1231. Best score 1810 bits

Score difference with first non-orthologous sequence - *A. fumigatus*:1810 *A. fischeri*:1810

afum|EAL88077.1 100.00% afis|EAW23393.1 100.00%

Bootstrap support for afum|EAL88077.1 as seed ortholog is 100%.

Bootstrap support for afis|EAW23393.1 as seed ortholog is 100%.

---

Group of orthologs #1232. Best score 1810 bits

Score difference with first non-orthologous sequence - *A. fumigatus*:1810 *A. fischeri*:1810

afum|EAL93872.1 100.00% afis|EAW19141.1 100.00%

Bootstrap support for afum|EAL93872.1 as seed ortholog is 100%.

Bootstrap support for afis|EAW19141.1 as seed ortholog is 100%.

---

Group of orthologs #1233. Best score 1808 bits

Score difference with first non-orthologous sequence - *A. fumigatus*:1808 *A. fischeri*:1808

afum|EAL92464.2 100.00% afis|EAW21445.1 100.00%

Bootstrap support for afum|EAL92464.2 as seed ortholog is 100%.

Bootstrap support for afis|EAW21445.1 as seed ortholog is 100%.

---

Group of orthologs #1234. Best score 1808 bits

Score difference with first non-orthologous sequence - *A. fumigatus*:1808 *A. fischeri*:1808

afum|EAL89823.1 100.00% afis|EAW25148.1 100.00%

Bootstrap support for afum|EAL89823.1 as seed ortholog is 100%.

Bootstrap support for afis|EAW25148.1 as seed ortholog is 100%.

---

Group of orthologs #1235. Best score 1807 bits

Score difference with first non-orthologous sequence - *A. fumigatus*:972 *A. fischeri*:1567

afum|EAL86491.1 100.00% afis|EAW16964.1 100.00%

Bootstrap support for afum|EAL86491.1 as seed ortholog is 100%.

Bootstrap support for afis|EAW16964.1 as seed ortholog is 100%.

---

Group of orthologs #1236. Best score 1806 bits

Score difference with first non-orthologous sequence - *A. fumigatus*:1806 *A. fischeri*:1806

afum|EAL91480.2 100.00% afis|EAW17666.1 100.00%

Bootstrap support for afum|EAL91480.2 as seed ortholog is 100%.

Bootstrap support for afis|EAW17666.1 as seed ortholog is 100%.

---

Group of orthologs #1237. Best score 1804 bits

Score difference with first non-orthologous sequence - *A. fumigatus*:1804 *A. fischeri*:1804

afum|EAL92559.2 100.00% afis|EAW21539.1 100.00%

Bootstrap support for afum|EAL92559.2 as seed ortholog is 100%.

Bootstrap support for afis|EAW21539.1 as seed ortholog is 100%.

---

Group of orthologs #1238. Best score 1804 bits

Score difference with first non-orthologous sequence - *A. fumigatus*:1646 *A. fischeri*:1804

afum|EAL89318.1 100.00% afis|EAW24652.1 100.00%

Bootstrap support for afum|EAL89318.1 as seed ortholog is 100%.

Bootstrap support for afis|EAW24652.1 as seed ortholog is 100%.

---

Group of orthologs #1239. Best score 1804 bits

Score difference with first non-orthologous sequence - *A. fumigatus*:1804 *A. fischeri*:1804  
afum|EAL89423.1 100.00% afis|EAW24784.1 100.00%  
Bootstrap support for afum|EAL89423.1 as seed ortholog is 100%.  
Bootstrap support for afis|EAW24784.1 as seed ortholog is 100%.

---

Group of orthologs #1240. Best score 1803 bits

Score difference with first non-orthologous sequence - *A. fumigatus*:1803 *A. fischeri*:1803  
afum|EAL84450.1 100.00% afis|EAW20611.1 100.00%  
Bootstrap support for afum|EAL84450.1 as seed ortholog is 100%.  
Bootstrap support for afis|EAW20611.1 as seed ortholog is 100%.

---

Group of orthologs #1241. Best score 1803 bits

Score difference with first non-orthologous sequence - *A. fumigatus*:1803 *A. fischeri*:1803  
afum|EAL85252.1 100.00% afis|EAW20137.1 100.00%  
Bootstrap support for afum|EAL85252.1 as seed ortholog is 100%.  
Bootstrap support for afis|EAW20137.1 as seed ortholog is 100%.

---

Group of orthologs #1242. Best score 1803 bits

Score difference with first non-orthologous sequence - *A. fumigatus*:1604 *A. fischeri*:1109  
afum|EAL91070.1 100.00% afis|EAW22115.1 100.00%  
Bootstrap support for afum|EAL91070.1 as seed ortholog is 100%.  
Bootstrap support for afis|EAW22115.1 as seed ortholog is 100%.

---

Group of orthologs #1243. Best score 1802 bits

Score difference with first non-orthologous sequence - *A. fumigatus*:1802 *A. fischeri*:1802  
afum|EAL88546.2 100.00% afis|EAW15911.1 100.00%  
Bootstrap support for afum|EAL88546.2 as seed ortholog is 100%.  
Bootstrap support for afis|EAW15911.1 as seed ortholog is 100%.

---

Group of orthologs #1244. Best score 1802 bits

Score difference with first non-orthologous sequence - *A. fumigatus*:1802 *A. fischeri*:1802  
afum|EAL89828.1 100.00% afis|EAW25153.1 100.00%  
Bootstrap support for afum|EAL89828.1 as seed ortholog is 100%.  
Bootstrap support for afis|EAW25153.1 as seed ortholog is 100%.

---

Group of orthologs #1245. Best score 1801 bits

Score difference with first non-orthologous sequence - *A. fumigatus*:1626 *A. fischeri*:1604  
afum|EAL84954.1 100.00% afis|EAW19961.1 100.00%  
Bootstrap support for afum|EAL84954.1 as seed ortholog is 100%.  
Bootstrap support for afis|EAW19961.1 as seed ortholog is 100%.

---

Group of orthologs #1246. Best score 1801 bits

Score difference with first non-orthologous sequence - *A. fumigatus*:1801 *A. fischeri*:1801  
afum|EAL91889.1 100.00% afis|EAW18077.1 100.00%  
Bootstrap support for afum|EAL91889.1 as seed ortholog is 100%.  
Bootstrap support for afis|EAW18077.1 as seed ortholog is 100%.

---

Group of orthologs #1247. Best score 1801 bits

Score difference with first non-orthologous sequence - *A. fumigatus*:1801 *A. fischeri*:1801  
afum|EAL93723.1 100.00% afis|EAW18987.1 100.00%  
Bootstrap support for afum|EAL93723.1 as seed ortholog is 100%.  
Bootstrap support for afis|EAW18987.1 as seed ortholog is 100%.

---

Group of orthologs #1248. Best score 1800 bits

Score difference with first non-orthologous sequence - *A. fumigatus*:1800 *A. fischeri*:1800  
afum|EAL85212.1 100.00% afis|EAW20094.1 100.00%

Bootstrap support for afum|EAL85212.1 as seed ortholog is 100%.  
Bootstrap support for afis|EAW20094.1 as seed ortholog is 100%.

---

Group of orthologs #1249. Best score 1800 bits

Score difference with first non-orthologous sequence - *A. fumigatus*:1800 *A. fischeri*:1800

|                 |         |                 |         |
|-----------------|---------|-----------------|---------|
| afum EAL90375.2 | 100.00% | afis EAW22825.1 | 100.00% |
|-----------------|---------|-----------------|---------|

Bootstrap support for afum|EAL90375.2 as seed ortholog is 100%.

Bootstrap support for afis|EAW22825.1 as seed ortholog is 100%.

---

Group of orthologs #1250. Best score 1799 bits

Score difference with first non-orthologous sequence - *A. fumigatus*:1381 *A. fischeri*:1698

|                 |         |                 |         |
|-----------------|---------|-----------------|---------|
| afum EAL88706.2 | 100.00% | afis EAW16074.1 | 100.00% |
|-----------------|---------|-----------------|---------|

Bootstrap support for afum|EAL88706.2 as seed ortholog is 100%.

Bootstrap support for afis|EAW16074.1 as seed ortholog is 100%.

---

Group of orthologs #1251. Best score 1797 bits

Score difference with first non-orthologous sequence - *A. fumigatus*:1797 *A. fischeri*:1797

|                 |         |                 |         |
|-----------------|---------|-----------------|---------|
| afum EAL88673.1 | 100.00% | afis EAW16041.1 | 100.00% |
|-----------------|---------|-----------------|---------|

Bootstrap support for afum|EAL88673.1 as seed ortholog is 100%.

Bootstrap support for afis|EAW16041.1 as seed ortholog is 100%.

---

Group of orthologs #1252. Best score 1797 bits

Score difference with first non-orthologous sequence - *A. fumigatus*:1797 *A. fischeri*:1797

|                 |         |                 |         |
|-----------------|---------|-----------------|---------|
| afum EAL90792.1 | 100.00% | afis EAW22399.1 | 100.00% |
|-----------------|---------|-----------------|---------|

Bootstrap support for afum|EAL90792.1 as seed ortholog is 100%.

Bootstrap support for afis|EAW22399.1 as seed ortholog is 100%.

---

Group of orthologs #1253. Best score 1796 bits

Score difference with first non-orthologous sequence - *A. fumigatus*:1796 *A. fischeri*:1796

|                 |         |                 |         |
|-----------------|---------|-----------------|---------|
| afum EAL91396.1 | 100.00% | afis EAW17583.1 | 100.00% |
|-----------------|---------|-----------------|---------|

Bootstrap support for afum|EAL91396.1 as seed ortholog is 100%.

Bootstrap support for afis|EAW17583.1 as seed ortholog is 100%.

---

Group of orthologs #1254. Best score 1796 bits

Score difference with first non-orthologous sequence - *A. fumigatus*:1796 *A. fischeri*:1796

|                 |         |                 |         |
|-----------------|---------|-----------------|---------|
| afum EAL92836.1 | 100.00% | afis EAW21820.1 | 100.00% |
|-----------------|---------|-----------------|---------|

Bootstrap support for afum|EAL92836.1 as seed ortholog is 100%.

Bootstrap support for afis|EAW21820.1 as seed ortholog is 100%.

---

Group of orthologs #1255. Best score 1794 bits

Score difference with first non-orthologous sequence - *A. fumigatus*:1794 *A. fischeri*:1794

|                 |         |                 |         |
|-----------------|---------|-----------------|---------|
| afum EAL93790.1 | 100.00% | afis EAW19061.1 | 100.00% |
|-----------------|---------|-----------------|---------|

Bootstrap support for afum|EAL93790.1 as seed ortholog is 100%.

Bootstrap support for afis|EAW19061.1 as seed ortholog is 100%.

---

Group of orthologs #1256. Best score 1794 bits

Score difference with first non-orthologous sequence - *A. fumigatus*:1794 *A. fischeri*:1794

|                 |         |                 |         |
|-----------------|---------|-----------------|---------|
| afum EAL92812.1 | 100.00% | afis EAW21785.1 | 100.00% |
|-----------------|---------|-----------------|---------|

Bootstrap support for afum|EAL92812.1 as seed ortholog is 100%.

Bootstrap support for afis|EAW21785.1 as seed ortholog is 100%.

---

Group of orthologs #1257. Best score 1792 bits

Score difference with first non-orthologous sequence - *A. fumigatus*:1792 *A. fischeri*:1792

|                 |         |                 |         |
|-----------------|---------|-----------------|---------|
| afum EAL91478.1 | 100.00% | afis EAW17664.1 | 100.00% |
|-----------------|---------|-----------------|---------|

Bootstrap support for afum|EAL91478.1 as seed ortholog is 100%.

Bootstrap support for afis|EAW17664.1 as seed ortholog is 100%.

---

Group of orthologs #1258. Best score 1791 bits

Score difference with first non-orthologous sequence - *A. fumigatus*:1791 *A. fischeri*:1791

afum|EAL91505.1 100.00% afis|EAW17691.1 100.00%

Bootstrap support for afum|EAL91505.1 as seed ortholog is 100%.

Bootstrap support for afis|EAW17691.1 as seed ortholog is 100%.

---

Group of orthologs #1259. Best score 1790 bits

Score difference with first non-orthologous sequence - *A. fumigatus*:1790 *A. fischeri*:1790

afum|EAL87014.1 100.00% afis|EAW19481.1 100.00%

Bootstrap support for afum|EAL87014.1 as seed ortholog is 100%.

Bootstrap support for afis|EAW19481.1 as seed ortholog is 100%.

---

Group of orthologs #1260. Best score 1790 bits

Score difference with first non-orthologous sequence - *A. fumigatus*:1790 *A. fischeri*:1790

afum|EAL91041.1 100.00% afis|EAW22149.1 100.00%

Bootstrap support for afum|EAL91041.1 as seed ortholog is 100%.

Bootstrap support for afis|EAW22149.1 as seed ortholog is 100%.

---

Group of orthologs #1261. Best score 1790 bits

Score difference with first non-orthologous sequence - *A. fumigatus*:1790 *A. fischeri*:1790

afum|EAL89480.1 100.00% afis|EAW24835.1 100.00%

Bootstrap support for afum|EAL89480.1 as seed ortholog is 100%.

Bootstrap support for afis|EAW24835.1 as seed ortholog is 100%.

---

Group of orthologs #1262. Best score 1789 bits

Score difference with first non-orthologous sequence - *A. fumigatus*:1789 *A. fischeri*:1789

afum|EAL90291.1 100.00% afis|EAW22906.1 100.00%

Bootstrap support for afum|EAL90291.1 as seed ortholog is 100%.

Bootstrap support for afis|EAW22906.1 as seed ortholog is 100%.

---

Group of orthologs #1263. Best score 1788 bits

Score difference with first non-orthologous sequence - *A. fumigatus*:1788 *A. fischeri*:1788

afum|EAL84801.1 100.00% afis|EAW20831.1 100.00%

Bootstrap support for afum|EAL84801.1 as seed ortholog is 100%.

Bootstrap support for afis|EAW20831.1 as seed ortholog is 100%.

---

Group of orthologs #1264. Best score 1788 bits

Score difference with first non-orthologous sequence - *A. fumigatus*:1788 *A. fischeri*:1788

afum|EAL92273.1 100.00% afis|EAW21258.1 100.00%

Bootstrap support for afum|EAL92273.1 as seed ortholog is 100%.

Bootstrap support for afis|EAW21258.1 as seed ortholog is 100%.

---

Group of orthologs #1265. Best score 1788 bits

Score difference with first non-orthologous sequence - *A. fumigatus*:1667 *A. fischeri*:1610

afum|EAL92289.2 100.00% afis|EAW21274.1 100.00%

Bootstrap support for afum|EAL92289.2 as seed ortholog is 100%.

Bootstrap support for afis|EAW21274.1 as seed ortholog is 100%.

---

Group of orthologs #1266. Best score 1788 bits

Score difference with first non-orthologous sequence - *A. fumigatus*:1788 *A. fischeri*:1788

afum|EAL89491.1 100.00% afis|EAW24845.1 100.00%

Bootstrap support for afum|EAL89491.1 as seed ortholog is 100%.

Bootstrap support for afis|EAW24845.1 as seed ortholog is 100%.

---

Group of orthologs #1267. Best score 1787 bits

Score difference with first non-orthologous sequence - *A. fumigatus*:1787 *A. fischeri*:1787  
afum|EAL88304.1 100.00% afis|EAW23179.1 100.00%  
Bootstrap support for afum|EAL88304.1 as seed ortholog is 100%.  
Bootstrap support for afis|EAW23179.1 as seed ortholog is 100%.

---

Group of orthologs #1268. Best score 1785 bits

Score difference with first non-orthologous sequence - *A. fumigatus*:1785 *A. fischeri*:1785  
afum|EAL85652.2 100.00% afis|EAW15696.1 100.00%  
Bootstrap support for afum|EAL85652.2 as seed ortholog is 100%.  
Bootstrap support for afis|EAW15696.1 as seed ortholog is 100%.

---

Group of orthologs #1269. Best score 1785 bits

Score difference with first non-orthologous sequence - *A. fumigatus*:1785 *A. fischeri*:1785  
afum|EAL93966.1 100.00% afis|EAW19238.1 100.00%  
Bootstrap support for afum|EAL93966.1 as seed ortholog is 100%.  
Bootstrap support for afis|EAW19238.1 as seed ortholog is 100%.

---

Group of orthologs #1270. Best score 1785 bits

Score difference with first non-orthologous sequence - *A. fumigatus*:1785 *A. fischeri*:1785  
afum|EAL90707.1 100.00% afis|EAW22486.1 100.00%  
Bootstrap support for afum|EAL90707.1 as seed ortholog is 100%.  
Bootstrap support for afis|EAW22486.1 as seed ortholog is 100%.

---

Group of orthologs #1271. Best score 1785 bits

Score difference with first non-orthologous sequence - *A. fumigatus*:1785 *A. fischeri*:1547  
afum|EAL92667.1 100.00% afis|EAW21634.1 100.00%  
Bootstrap support for afum|EAL92667.1 as seed ortholog is 100%.  
Bootstrap support for afis|EAW21634.1 as seed ortholog is 100%.

---

Group of orthologs #1272. Best score 1785 bits

Score difference with first non-orthologous sequence - *A. fumigatus*:1785 *A. fischeri*:1785  
afum|EAL90090.1 100.00% afis|EAW25432.1 100.00%  
Bootstrap support for afum|EAL90090.1 as seed ortholog is 100%.  
Bootstrap support for afis|EAW25432.1 as seed ortholog is 100%.

---

Group of orthologs #1273. Best score 1784 bits

Score difference with first non-orthologous sequence - *A. fumigatus*:1784 *A. fischeri*:1208  
afum|EAL87630.1 100.00% afis|EAW18265.1 100.00%  
Bootstrap support for afum|EAL87630.1 as seed ortholog is 100%.  
Bootstrap support for afis|EAW18265.1 as seed ortholog is 100%.

---

Group of orthologs #1274. Best score 1784 bits

Score difference with first non-orthologous sequence - *A. fumigatus*:1784 *A. fischeri*:1784  
afum|EAL91939.1 100.00% afis|EAW24084.1 100.00%  
Bootstrap support for afum|EAL91939.1 as seed ortholog is 100%.  
Bootstrap support for afis|EAW24084.1 as seed ortholog is 100%.

---

Group of orthologs #1275. Best score 1783 bits

Score difference with first non-orthologous sequence - *A. fumigatus*:1783 *A. fischeri*:1783  
afum|EAL90388.2 100.00% afis|EAW22813.1 100.00%  
Bootstrap support for afum|EAL90388.2 as seed ortholog is 100%.  
Bootstrap support for afis|EAW22813.1 as seed ortholog is 100%.

---

Group of orthologs #1276. Best score 1782 bits

Score difference with first non-orthologous sequence - *A. fumigatus*:1782 *A. fischeri*:1060  
afum|EAL85241.2 100.00% afis|EAW20123.1 100.00%

Bootstrap support for afum|EAL85241.2 as seed ortholog is 100%.  
Bootstrap support for afis|EAW20123.1 as seed ortholog is 100%.

---

Group of orthologs #1277. Best score 1782 bits

Score difference with first non-orthologous sequence - *A. fumigatus*:1782 *A. fischeri*:1782

|                 |         |                 |         |
|-----------------|---------|-----------------|---------|
| afum EAL92324.1 | 100.00% | afis EAW21308.1 | 100.00% |
|-----------------|---------|-----------------|---------|

Bootstrap support for afum|EAL92324.1 as seed ortholog is 100%.

Bootstrap support for afis|EAW21308.1 as seed ortholog is 100%.

---

Group of orthologs #1278. Best score 1781 bits

Score difference with first non-orthologous sequence - *A. fumigatus*:1781 *A. fischeri*:1781

|                 |         |                 |         |
|-----------------|---------|-----------------|---------|
| afum EAL85822.1 | 100.00% | afis EAW15502.1 | 100.00% |
|-----------------|---------|-----------------|---------|

Bootstrap support for afum|EAL85822.1 as seed ortholog is 100%.

Bootstrap support for afis|EAW15502.1 as seed ortholog is 100%.

---

Group of orthologs #1279. Best score 1780 bits

Score difference with first non-orthologous sequence - *A. fumigatus*:1780 *A. fischeri*:1780

|                 |         |                 |         |
|-----------------|---------|-----------------|---------|
| afum EAL87988.1 | 100.00% | afis EAW23477.1 | 100.00% |
|-----------------|---------|-----------------|---------|

Bootstrap support for afum|EAL87988.1 as seed ortholog is 100%.

Bootstrap support for afis|EAW23477.1 as seed ortholog is 100%.

---

Group of orthologs #1280. Best score 1780 bits

Score difference with first non-orthologous sequence - *A. fumigatus*:1780 *A. fischeri*:1780

|                 |         |                 |         |
|-----------------|---------|-----------------|---------|
| afum EAL92332.1 | 100.00% | afis EAW21315.1 | 100.00% |
|-----------------|---------|-----------------|---------|

Bootstrap support for afum|EAL92332.1 as seed ortholog is 100%.

Bootstrap support for afis|EAW21315.1 as seed ortholog is 100%.

---

Group of orthologs #1281. Best score 1779 bits

Score difference with first non-orthologous sequence - *A. fumigatus*:1779 *A. fischeri*:1779

|                 |         |                 |         |
|-----------------|---------|-----------------|---------|
| afum EAL91256.1 | 100.00% | afis EAW17428.1 | 100.00% |
|-----------------|---------|-----------------|---------|

Bootstrap support for afum|EAL91256.1 as seed ortholog is 100%.

Bootstrap support for afis|EAW17428.1 as seed ortholog is 100%.

---

Group of orthologs #1282. Best score 1778 bits

Score difference with first non-orthologous sequence - *A. fumigatus*:1778 *A. fischeri*:1778

|                 |         |                 |         |
|-----------------|---------|-----------------|---------|
| afum EAL93649.2 | 100.00% | afis EAW18918.1 | 100.00% |
|-----------------|---------|-----------------|---------|

Bootstrap support for afum|EAL93649.2 as seed ortholog is 100%.

Bootstrap support for afis|EAW18918.1 as seed ortholog is 100%.

---

Group of orthologs #1283. Best score 1778 bits

Score difference with first non-orthologous sequence - *A. fumigatus*:1778 *A. fischeri*:1778

|                 |         |                 |         |
|-----------------|---------|-----------------|---------|
| afum EAL90851.1 | 100.00% | afis EAW22341.1 | 100.00% |
|-----------------|---------|-----------------|---------|

Bootstrap support for afum|EAL90851.1 as seed ortholog is 100%.

Bootstrap support for afis|EAW22341.1 as seed ortholog is 100%.

---

Group of orthologs #1284. Best score 1777 bits

Score difference with first non-orthologous sequence - *A. fumigatus*:1777 *A. fischeri*:1777

|                 |         |                 |         |
|-----------------|---------|-----------------|---------|
| afum EAL93354.2 | 100.00% | afis EAW18640.1 | 100.00% |
|-----------------|---------|-----------------|---------|

Bootstrap support for afum|EAL93354.2 as seed ortholog is 100%.

Bootstrap support for afis|EAW18640.1 as seed ortholog is 100%.

---

Group of orthologs #1285. Best score 1777 bits

Score difference with first non-orthologous sequence - *A. fumigatus*:1777 *A. fischeri*:1777

|                 |         |                 |         |
|-----------------|---------|-----------------|---------|
| afum EAL90179.1 | 100.00% | afis EAW25514.1 | 100.00% |
|-----------------|---------|-----------------|---------|

Bootstrap support for afum|EAL90179.1 as seed ortholog is 100%.

Bootstrap support for afis|EAW25514.1 as seed ortholog is 100%.



---

Group of orthologs #1286. Best score 1776 bits

Score difference with first non-orthologous sequence - *A. fumigatus*:1776 *A. fischeri*:1776

|                 |         |                 |         |
|-----------------|---------|-----------------|---------|
| afum EAL91469.1 | 100.00% | afis EAW17654.1 | 100.00% |
|-----------------|---------|-----------------|---------|

Bootstrap support for afum|EAL91469.1 as seed ortholog is 100%.

Bootstrap support for afis|EAW17654.1 as seed ortholog is 100%.

---

Group of orthologs #1287. Best score 1776 bits

Score difference with first non-orthologous sequence - *A. fumigatus*:1776 *A. fischeri*:1776

|                 |         |                 |         |
|-----------------|---------|-----------------|---------|
| afum EAL92593.1 | 100.00% | afis EAW21575.1 | 100.00% |
|-----------------|---------|-----------------|---------|

Bootstrap support for afum|EAL92593.1 as seed ortholog is 100%.

Bootstrap support for afis|EAW21575.1 as seed ortholog is 100%.

---

Group of orthologs #1288. Best score 1775 bits

Score difference with first non-orthologous sequence - *A. fumigatus*:1775 *A. fischeri*:1775

|                 |         |                 |         |
|-----------------|---------|-----------------|---------|
| afum EAL88921.1 | 100.00% | afis EAW16299.1 | 100.00% |
|-----------------|---------|-----------------|---------|

Bootstrap support for afum|EAL88921.1 as seed ortholog is 100%.

Bootstrap support for afis|EAW16299.1 as seed ortholog is 100%.

---

Group of orthologs #1289. Best score 1775 bits

Score difference with first non-orthologous sequence - *A. fumigatus*:1775 *A. fischeri*:1775

|                 |         |                 |         |
|-----------------|---------|-----------------|---------|
| afum EAL89880.1 | 100.00% | afis EAW25219.1 | 100.00% |
|-----------------|---------|-----------------|---------|

Bootstrap support for afum|EAL89880.1 as seed ortholog is 100%.

Bootstrap support for afis|EAW25219.1 as seed ortholog is 100%.

---

Group of orthologs #1290. Best score 1774 bits

Score difference with first non-orthologous sequence - *A. fumigatus*:1774 *A. fischeri*:1774

|                 |         |                 |         |
|-----------------|---------|-----------------|---------|
| afum EAL90997.1 | 100.00% | afis EAW22194.1 | 100.00% |
|-----------------|---------|-----------------|---------|

Bootstrap support for afum|EAL90997.1 as seed ortholog is 100%.

Bootstrap support for afis|EAW22194.1 as seed ortholog is 100%.

---

Group of orthologs #1291. Best score 1773 bits

Score difference with first non-orthologous sequence - *A. fumigatus*:1773 *A. fischeri*:1075

|                 |         |                 |         |
|-----------------|---------|-----------------|---------|
| afum EAL84245.1 | 100.00% | afis EAW15402.1 | 100.00% |
|-----------------|---------|-----------------|---------|

Bootstrap support for afum|EAL84245.1 as seed ortholog is 100%.

Bootstrap support for afis|EAW15402.1 as seed ortholog is 100%.

---

Group of orthologs #1292. Best score 1773 bits

Score difference with first non-orthologous sequence - *A. fumigatus*:1773 *A. fischeri*:1773

|                 |         |                 |         |
|-----------------|---------|-----------------|---------|
| afum EAL91507.1 | 100.00% | afis EAW17693.1 | 100.00% |
|-----------------|---------|-----------------|---------|

Bootstrap support for afum|EAL91507.1 as seed ortholog is 100%.

Bootstrap support for afis|EAW17693.1 as seed ortholog is 100%.

---

Group of orthologs #1293. Best score 1769 bits

Score difference with first non-orthologous sequence - *A. fumigatus*:1769 *A. fischeri*:1769

|                 |         |                 |         |
|-----------------|---------|-----------------|---------|
| afum EAL88887.1 | 100.00% | afis EAW16266.1 | 100.00% |
|-----------------|---------|-----------------|---------|

Bootstrap support for afum|EAL88887.1 as seed ortholog is 100%.

Bootstrap support for afis|EAW16266.1 as seed ortholog is 100%.

---

Group of orthologs #1294. Best score 1768 bits

Score difference with first non-orthologous sequence - *A. fumigatus*:1768 *A. fischeri*:1768

|                 |         |                 |         |
|-----------------|---------|-----------------|---------|
| afum EAL86185.1 | 100.00% | afis EAW24519.1 | 100.00% |
|-----------------|---------|-----------------|---------|

Bootstrap support for afum|EAL86185.1 as seed ortholog is 100%.

Bootstrap support for afis|EAW24519.1 as seed ortholog is 100%.

---

Group of orthologs #1295. Best score 1768 bits

Score difference with first non-orthologous sequence - *A. fumigatus*:1768 *A. fischeri*:1768  
afum|EAL93608.1 100.00% afis|EAW18876.1 100.00%  
Bootstrap support for afum|EAL93608.1 as seed ortholog is 100%.  
Bootstrap support for afis|EAW18876.1 as seed ortholog is 100%.

---

Group of orthologs #1296. Best score 1768 bits

Score difference with first non-orthologous sequence - *A. fumigatus*:1653 *A. fischeri*:1768  
afum|EAL89589.1 100.00% afis|EAW24933.1 100.00%  
Bootstrap support for afum|EAL89589.1 as seed ortholog is 100%.  
Bootstrap support for afis|EAW24933.1 as seed ortholog is 100%.

---

Group of orthologs #1297. Best score 1768 bits

Score difference with first non-orthologous sequence - *A. fumigatus*:1768 *A. fischeri*:1768  
afum|EAL89655.1 100.00% afis|EAW24994.1 100.00%  
Bootstrap support for afum|EAL89655.1 as seed ortholog is 100%.  
Bootstrap support for afis|EAW24994.1 as seed ortholog is 100%.

---

Group of orthologs #1298. Best score 1767 bits

Score difference with first non-orthologous sequence - *A. fumigatus*:1767 *A. fischeri*:1767  
afum|EAL90011.1 100.00% afis|EAW25348.1 100.00%  
Bootstrap support for afum|EAL90011.1 as seed ortholog is 100%.  
Bootstrap support for afis|EAW25348.1 as seed ortholog is 100%.

---

Group of orthologs #1299. Best score 1766 bits

Score difference with first non-orthologous sequence - *A. fumigatus*:1766 *A. fischeri*:1766  
afum|EAL88741.1 100.00% afis|EAW16110.1 100.00%  
Bootstrap support for afum|EAL88741.1 as seed ortholog is 100%.  
Bootstrap support for afis|EAW16110.1 as seed ortholog is 100%.

---

Group of orthologs #1300. Best score 1766 bits

Score difference with first non-orthologous sequence - *A. fumigatus*:1766 *A. fischeri*:1766  
afum|EAL88975.1 100.00% afis|EAW16350.1 100.00%  
Bootstrap support for afum|EAL88975.1 as seed ortholog is 100%.  
Bootstrap support for afis|EAW16350.1 as seed ortholog is 100%.

---

Group of orthologs #1301. Best score 1766 bits

Score difference with first non-orthologous sequence - *A. fumigatus*:1766 *A. fischeri*:1766  
afum|EAL84540.1 100.00% afis|EAW20517.1 100.00%  
Bootstrap support for afum|EAL84540.1 as seed ortholog is 100%.  
Bootstrap support for afis|EAW20517.1 as seed ortholog is 100%.

---

Group of orthologs #1302. Best score 1766 bits

Score difference with first non-orthologous sequence - *A. fumigatus*:1766 *A. fischeri*:1766  
afum|EAL88435.1 100.00% afis|EAW23046.1 100.00%  
Bootstrap support for afum|EAL88435.1 as seed ortholog is 100%.  
Bootstrap support for afis|EAW23046.1 as seed ortholog is 100%.

---

Group of orthologs #1303. Best score 1766 bits

Score difference with first non-orthologous sequence - *A. fumigatus*:1766 *A. fischeri*:1766  
afum|EAL92387.1 100.00% afis|EAW21370.1 100.00%  
Bootstrap support for afum|EAL92387.1 as seed ortholog is 100%.  
Bootstrap support for afis|EAW21370.1 as seed ortholog is 100%.

---

Group of orthologs #1304. Best score 1765 bits

Score difference with first non-orthologous sequence - *A. fumigatus*:1765 *A. fischeri*:1765  
afum|EAL84445.1 100.00% afis|EAW20616.1 100.00%

Bootstrap support for afum|EAL84445.1 as seed ortholog is 100%.  
Bootstrap support for afis|EAW20616.1 as seed ortholog is 100%.

---

Group of orthologs #1305. Best score 1765 bits

Score difference with first non-orthologous sequence - *A. fumigatus*:1549 *A. fischeri*:1120

|                 |         |                 |         |
|-----------------|---------|-----------------|---------|
| afum EAL86858.1 | 100.00% | afis EAW19665.1 | 100.00% |
|-----------------|---------|-----------------|---------|

Bootstrap support for afum|EAL86858.1 as seed ortholog is 100%.

Bootstrap support for afis|EAW19665.1 as seed ortholog is 100%.

---

Group of orthologs #1306. Best score 1765 bits

Score difference with first non-orthologous sequence - *A. fumigatus*:1765 *A. fischeri*:1443

|                 |         |                 |         |
|-----------------|---------|-----------------|---------|
| afum EAL93199.1 | 100.00% | afis EAW18505.1 | 100.00% |
|-----------------|---------|-----------------|---------|

Bootstrap support for afum|EAL93199.1 as seed ortholog is 100%.

Bootstrap support for afis|EAW18505.1 as seed ortholog is 100%.

---

Group of orthologs #1307. Best score 1762 bits

Score difference with first non-orthologous sequence - *A. fumigatus*:1762 *A. fischeri*:1762

|                 |         |                 |         |
|-----------------|---------|-----------------|---------|
| afum EAL85019.1 | 100.00% | afis EAW19879.1 | 100.00% |
|-----------------|---------|-----------------|---------|

Bootstrap support for afum|EAL85019.1 as seed ortholog is 100%.

Bootstrap support for afis|EAW19879.1 as seed ortholog is 100%.

---

Group of orthologs #1308. Best score 1762 bits

Score difference with first non-orthologous sequence - *A. fumigatus*:1762 *A. fischeri*:1762

|                 |         |                 |         |
|-----------------|---------|-----------------|---------|
| afum EAL92543.1 | 100.00% | afis EAW21522.1 | 100.00% |
|-----------------|---------|-----------------|---------|

Bootstrap support for afum|EAL92543.1 as seed ortholog is 100%.

Bootstrap support for afis|EAW21522.1 as seed ortholog is 100%.

---

Group of orthologs #1309. Best score 1762 bits

Score difference with first non-orthologous sequence - *A. fumigatus*:1762 *A. fischeri*:1762

|                 |         |                 |         |
|-----------------|---------|-----------------|---------|
| afum EAL92681.1 | 100.00% | afis EAW21647.1 | 100.00% |
|-----------------|---------|-----------------|---------|

Bootstrap support for afum|EAL92681.1 as seed ortholog is 100%.

Bootstrap support for afis|EAW21647.1 as seed ortholog is 100%.

---

Group of orthologs #1310. Best score 1760 bits

Score difference with first non-orthologous sequence - *A. fumigatus*:1760 *A. fischeri*:1760

|                 |         |                 |         |
|-----------------|---------|-----------------|---------|
| afum EAL93886.1 | 100.00% | afis EAW19155.1 | 100.00% |
|-----------------|---------|-----------------|---------|

Bootstrap support for afum|EAL93886.1 as seed ortholog is 100%.

Bootstrap support for afis|EAW19155.1 as seed ortholog is 100%.

---

Group of orthologs #1311. Best score 1760 bits

Score difference with first non-orthologous sequence - *A. fumigatus*:1760 *A. fischeri*:1760

|                 |         |                 |         |
|-----------------|---------|-----------------|---------|
| afum EAL90641.1 | 100.00% | afis EAW22554.1 | 100.00% |
|-----------------|---------|-----------------|---------|

Bootstrap support for afum|EAL90641.1 as seed ortholog is 100%.

Bootstrap support for afis|EAW22554.1 as seed ortholog is 100%.

---

Group of orthologs #1312. Best score 1760 bits

Score difference with first non-orthologous sequence - *A. fumigatus*:1760 *A. fischeri*:1760

|                 |         |                 |         |
|-----------------|---------|-----------------|---------|
| afum EAL92824.2 | 100.00% | afis EAW21799.1 | 100.00% |
|-----------------|---------|-----------------|---------|

Bootstrap support for afum|EAL92824.2 as seed ortholog is 100%.

Bootstrap support for afis|EAW21799.1 as seed ortholog is 100%.

---

Group of orthologs #1313. Best score 1759 bits

Score difference with first non-orthologous sequence - *A. fumigatus*:1759 *A. fischeri*:1759

|                 |         |                 |         |
|-----------------|---------|-----------------|---------|
| afum EAL92310.1 | 100.00% | afis EAW21293.1 | 100.00% |
|-----------------|---------|-----------------|---------|

Bootstrap support for afum|EAL92310.1 as seed ortholog is 100%.

Bootstrap support for afis|EAW21293.1 as seed ortholog is 100%.

---

Group of orthologs #1314. Best score 1758 bits

Score difference with first non-orthologous sequence - *A. fumigatus*:1758 *A. fischeri*:1758

afum|EAL89170.2 100.00% afis|EAW16573.1 100.00%

Bootstrap support for afum|EAL89170.2 as seed ortholog is 100%.

Bootstrap support for afis|EAW16573.1 as seed ortholog is 100%.

---

Group of orthologs #1315. Best score 1757 bits

Score difference with first non-orthologous sequence - *A. fumigatus*:1757 *A. fischeri*:1044

afum|EAL91554.1 100.00% afis|EAW17740.1 100.00%

Bootstrap support for afum|EAL91554.1 as seed ortholog is 100%.

Bootstrap support for afis|EAW17740.1 as seed ortholog is 100%.

---

Group of orthologs #1316. Best score 1756 bits

Score difference with first non-orthologous sequence - *A. fumigatus*:1756 *A. fischeri*:1756

afum|EAL88315.1 100.00% afis|EAW23169.1 100.00%

Bootstrap support for afum|EAL88315.1 as seed ortholog is 100%.

Bootstrap support for afis|EAW23169.1 as seed ortholog is 100%.

---

Group of orthologs #1317. Best score 1754 bits

Score difference with first non-orthologous sequence - *A. fumigatus*:1754 *A. fischeri*:1754

afum|EAL85990.1 100.00% afis|EAW24320.1 100.00%

Bootstrap support for afum|EAL85990.1 as seed ortholog is 100%.

Bootstrap support for afis|EAW24320.1 as seed ortholog is 100%.

---

Group of orthologs #1318. Best score 1754 bits

Score difference with first non-orthologous sequence - *A. fumigatus*:1754 *A. fischeri*:1754

afum|EAL87218.2 100.00% afis|EAW23784.1 100.00%

Bootstrap support for afum|EAL87218.2 as seed ortholog is 100%.

Bootstrap support for afis|EAW23784.1 as seed ortholog is 100%.

---

Group of orthologs #1319. Best score 1753 bits

Score difference with first non-orthologous sequence - *A. fumigatus*:1753 *A. fischeri*:1753

afum|EAL86445.1 100.00% afis|EAW16909.1 100.00%

Bootstrap support for afum|EAL86445.1 as seed ortholog is 100%.

Bootstrap support for afis|EAW16909.1 as seed ortholog is 100%.

---

Group of orthologs #1320. Best score 1753 bits

Score difference with first non-orthologous sequence - *A. fumigatus*:1753 *A. fischeri*:1753

afum|EAL86038.2 100.00% afis|EAW24366.1 100.00%

Bootstrap support for afum|EAL86038.2 as seed ortholog is 100%.

Bootstrap support for afis|EAW24366.1 as seed ortholog is 100%.

---

Group of orthologs #1321. Best score 1752 bits

Score difference with first non-orthologous sequence - *A. fumigatus*:1752 *A. fischeri*:1752

afum|EAL86644.1 100.00% afis|EAW17219.1 100.00%

Bootstrap support for afum|EAL86644.1 as seed ortholog is 100%.

Bootstrap support for afis|EAW17219.1 as seed ortholog is 100%.

---

Group of orthologs #1322. Best score 1752 bits

Score difference with first non-orthologous sequence - *A. fumigatus*:1752 *A. fischeri*:1752

afum|EAL87606.1 100.00% afis|EAW18242.1 100.00%

Bootstrap support for afum|EAL87606.1 as seed ortholog is 100%.

Bootstrap support for afis|EAW18242.1 as seed ortholog is 100%.

---

Group of orthologs #1323. Best score 1751 bits

Score difference with first non-orthologous sequence - *A. fumigatus*:1751 *A. fischeri*:1751  
afum|EAL88873.1 100.00% afis|EAW16245.1 100.00%  
Bootstrap support for afum|EAL88873.1 as seed ortholog is 100%.  
Bootstrap support for afis|EAW16245.1 as seed ortholog is 100%.

---

Group of orthologs #1324. Best score 1750 bits

Score difference with first non-orthologous sequence - *A. fumigatus*:1750 *A. fischeri*:1750  
afum|EAL93543.1 100.00% afis|EAW18807.1 100.00%  
Bootstrap support for afum|EAL93543.1 as seed ortholog is 100%.  
Bootstrap support for afis|EAW18807.1 as seed ortholog is 100%.

---

Group of orthologs #1325. Best score 1750 bits

Score difference with first non-orthologous sequence - *A. fumigatus*:1750 *A. fischeri*:1750  
afum|EAL90756.1 100.00% afis|EAW22435.1 100.00%  
Bootstrap support for afum|EAL90756.1 as seed ortholog is 100%.  
Bootstrap support for afis|EAW22435.1 as seed ortholog is 100%.

---

Group of orthologs #1326. Best score 1750 bits

Score difference with first non-orthologous sequence - *A. fumigatus*:1750 *A. fischeri*:1750  
afum|EAL92472.1 100.00% afis|EAW21453.1 100.00%  
Bootstrap support for afum|EAL92472.1 as seed ortholog is 100%.  
Bootstrap support for afis|EAW21453.1 as seed ortholog is 100%.

---

Group of orthologs #1327. Best score 1749 bits

Score difference with first non-orthologous sequence - *A. fumigatus*:1749 *A. fischeri*:1749  
afum|EAL91279.1 100.00% afis|EAW17451.1 100.00%  
Bootstrap support for afum|EAL91279.1 as seed ortholog is 100%.  
Bootstrap support for afis|EAW17451.1 as seed ortholog is 100%.

---

Group of orthologs #1328. Best score 1749 bits

Score difference with first non-orthologous sequence - *A. fumigatus*:1749 *A. fischeri*:1749  
afum|EAL87443.1 100.00% afis|EAW24013.1 100.00%  
Bootstrap support for afum|EAL87443.1 as seed ortholog is 100%.  
Bootstrap support for afis|EAW24013.1 as seed ortholog is 100%.

---

Group of orthologs #1329. Best score 1749 bits

Score difference with first non-orthologous sequence - *A. fumigatus*:1749 *A. fischeri*:1749  
afum|EAL93805.2 100.00% afis|EAW19077.1 100.00%  
Bootstrap support for afum|EAL93805.2 as seed ortholog is 100%.  
Bootstrap support for afis|EAW19077.1 as seed ortholog is 100%.

---

Group of orthologs #1330. Best score 1749 bits

Score difference with first non-orthologous sequence - *A. fumigatus*:1749 *A. fischeri*:1749  
afum|EAL90808.1 100.00% afis|EAW22383.1 100.00%  
Bootstrap support for afum|EAL90808.1 as seed ortholog is 100%.  
Bootstrap support for afis|EAW22383.1 as seed ortholog is 100%.

---

Group of orthologs #1331. Best score 1748 bits

Score difference with first non-orthologous sequence - *A. fumigatus*:1748 *A. fischeri*:1748  
afum|EAL88208.1 100.00% afis|EAW23271.1 100.00%  
Bootstrap support for afum|EAL88208.1 as seed ortholog is 100%.  
Bootstrap support for afis|EAW23271.1 as seed ortholog is 100%.

---

Group of orthologs #1332. Best score 1747 bits

Score difference with first non-orthologous sequence - *A. fumigatus*:1747 *A. fischeri*:1747  
afum|EAL85183.1 100.00% afis|EAW20063.1 100.00%

Bootstrap support for afum|EAL85183.1 as seed ortholog is 100%.  
Bootstrap support for afis|EAW20063.1 as seed ortholog is 100%.

---

Group of orthologs #1333. Best score 1747 bits

Score difference with first non-orthologous sequence - *A. fumigatus*:1747 *A. fischeri*:1747

|                 |         |                 |         |
|-----------------|---------|-----------------|---------|
| afum EAL93004.1 | 100.00% | afis EAW21988.1 | 100.00% |
|-----------------|---------|-----------------|---------|

Bootstrap support for afum|EAL93004.1 as seed ortholog is 100%.

Bootstrap support for afis|EAW21988.1 as seed ortholog is 100%.

---

Group of orthologs #1334. Best score 1747 bits

Score difference with first non-orthologous sequence - *A. fumigatus*:1747 *A. fischeri*:1747

|                 |         |                 |         |
|-----------------|---------|-----------------|---------|
| afum EAL89800.1 | 100.00% | afis EAW25129.1 | 100.00% |
|-----------------|---------|-----------------|---------|

Bootstrap support for afum|EAL89800.1 as seed ortholog is 100%.

Bootstrap support for afis|EAW25129.1 as seed ortholog is 100%.

---

Group of orthologs #1335. Best score 1746 bits

Score difference with first non-orthologous sequence - *A. fumigatus*:1356 *A. fischeri*:1286

|                 |         |                 |         |
|-----------------|---------|-----------------|---------|
| afum EAL86540.1 | 100.00% | afis EAW17018.1 | 100.00% |
|-----------------|---------|-----------------|---------|

Bootstrap support for afum|EAL86540.1 as seed ortholog is 100%.

Bootstrap support for afis|EAW17018.1 as seed ortholog is 100%.

---

Group of orthologs #1336. Best score 1746 bits

Score difference with first non-orthologous sequence - *A. fumigatus*:1746 *A. fischeri*:1746

|                 |         |                 |         |
|-----------------|---------|-----------------|---------|
| afum EAL90899.1 | 100.00% | afis EAW22282.1 | 100.00% |
|-----------------|---------|-----------------|---------|

Bootstrap support for afum|EAL90899.1 as seed ortholog is 100%.

Bootstrap support for afis|EAW22282.1 as seed ortholog is 100%.

---

Group of orthologs #1337. Best score 1744 bits

Score difference with first non-orthologous sequence - *A. fumigatus*:1744 *A. fischeri*:1744

|                 |         |                 |         |
|-----------------|---------|-----------------|---------|
| afum EAL87671.1 | 100.00% | afis EAW18305.1 | 100.00% |
|-----------------|---------|-----------------|---------|

Bootstrap support for afum|EAL87671.1 as seed ortholog is 100%.

Bootstrap support for afis|EAW18305.1 as seed ortholog is 100%.

---

Group of orthologs #1338. Best score 1742 bits

Score difference with first non-orthologous sequence - *A. fumigatus*:1742 *A. fischeri*:1742

|                 |         |                 |         |
|-----------------|---------|-----------------|---------|
| afum EAL87583.1 | 100.00% | afis EAW18217.1 | 100.00% |
|-----------------|---------|-----------------|---------|

Bootstrap support for afum|EAL87583.1 as seed ortholog is 100%.

Bootstrap support for afis|EAW18217.1 as seed ortholog is 100%.

---

Group of orthologs #1339. Best score 1742 bits

Score difference with first non-orthologous sequence - *A. fumigatus*:1742 *A. fischeri*:1742

|                 |         |                 |         |
|-----------------|---------|-----------------|---------|
| afum EAL90694.1 | 100.00% | afis EAW22499.1 | 100.00% |
|-----------------|---------|-----------------|---------|

Bootstrap support for afum|EAL90694.1 as seed ortholog is 100%.

Bootstrap support for afis|EAW22499.1 as seed ortholog is 100%.

---

Group of orthologs #1340. Best score 1741 bits

Score difference with first non-orthologous sequence - *A. fumigatus*:1741 *A. fischeri*:1741

|                 |         |                 |         |
|-----------------|---------|-----------------|---------|
| afum EAL86920.1 | 100.00% | afis EAW19598.1 | 100.00% |
|-----------------|---------|-----------------|---------|

Bootstrap support for afum|EAL86920.1 as seed ortholog is 100%.

Bootstrap support for afis|EAW19598.1 as seed ortholog is 100%.

---

Group of orthologs #1341. Best score 1741 bits

Score difference with first non-orthologous sequence - *A. fumigatus*:1741 *A. fischeri*:1741

|                 |         |                 |         |
|-----------------|---------|-----------------|---------|
| afum EAL89544.1 | 100.00% | afis EAW24891.1 | 100.00% |
|-----------------|---------|-----------------|---------|

Bootstrap support for afum|EAL89544.1 as seed ortholog is 100%.

Bootstrap support for afis|EAW24891.1 as seed ortholog is 100%.

---

Group of orthologs #1342. Best score 1740 bits

Score difference with first non-orthologous sequence - *A. fumigatus*:1740 *A. fischeri*:1740

afum|EAL86879.1 100.00% afis|EAW19643.1 100.00%

Bootstrap support for afum|EAL86879.1 as seed ortholog is 100%.

Bootstrap support for afis|EAW19643.1 as seed ortholog is 100%.

---

Group of orthologs #1343. Best score 1740 bits

Score difference with first non-orthologous sequence - *A. fumigatus*:1740 *A. fischeri*:1740

afum|EAL93961.1 100.00% afis|EAW19232.1 100.00%

Bootstrap support for afum|EAL93961.1 as seed ortholog is 100%.

Bootstrap support for afis|EAW19232.1 as seed ortholog is 100%.

---

Group of orthologs #1344. Best score 1739 bits

Score difference with first non-orthologous sequence - *A. fumigatus*:1739 *A. fischeri*:1739

afum|EAL87567.1 100.00% afis|EAW18202.1 100.00%

Bootstrap support for afum|EAL87567.1 as seed ortholog is 100%.

Bootstrap support for afis|EAW18202.1 as seed ortholog is 100%.

---

Group of orthologs #1345. Best score 1739 bits

Score difference with first non-orthologous sequence - *A. fumigatus*:1739 *A. fischeri*:1739

afum|EAL86128.1 100.00% afis|EAW24458.1 100.00%

Bootstrap support for afum|EAL86128.1 as seed ortholog is 100%.

Bootstrap support for afis|EAW24458.1 as seed ortholog is 100%.

---

Group of orthologs #1346. Best score 1739 bits

Score difference with first non-orthologous sequence - *A. fumigatus*:1739 *A. fischeri*:1739

afum|EAL92963.1 100.00% afis|EAW21949.1 100.00%

Bootstrap support for afum|EAL92963.1 as seed ortholog is 100%.

Bootstrap support for afis|EAW21949.1 as seed ortholog is 100%.

---

Group of orthologs #1347. Best score 1738 bits

Score difference with first non-orthologous sequence - *A. fumigatus*:1738 *A. fischeri*:1738

afum|EAL91526.1 100.00% afis|EAW17711.1 100.00%

Bootstrap support for afum|EAL91526.1 as seed ortholog is 100%.

Bootstrap support for afis|EAW17711.1 as seed ortholog is 100%.

---

Group of orthologs #1348. Best score 1738 bits

Score difference with first non-orthologous sequence - *A. fumigatus*:1738 *A. fischeri*:1738

afum|EAL93394.1 100.00% afis|EAW18674.1 100.00%

Bootstrap support for afum|EAL93394.1 as seed ortholog is 100%.

Bootstrap support for afis|EAW18674.1 as seed ortholog is 100%.

---

Group of orthologs #1349. Best score 1738 bits

Score difference with first non-orthologous sequence - *A. fumigatus*:1738 *A. fischeri*:1738

afum|EAL92948.2 100.00% afis|EAW21935.1 100.00%

Bootstrap support for afum|EAL92948.2 as seed ortholog is 100%.

Bootstrap support for afis|EAW21935.1 as seed ortholog is 100%.

---

Group of orthologs #1350. Best score 1737 bits

Score difference with first non-orthologous sequence - *A. fumigatus*:1737 *A. fischeri*:1737

afum|EAL86512.1 100.00% afis|EAW16988.1 100.00%

Bootstrap support for afum|EAL86512.1 as seed ortholog is 100%.

Bootstrap support for afis|EAW16988.1 as seed ortholog is 100%.

---

Group of orthologs #1351. Best score 1737 bits

Score difference with first non-orthologous sequence - *A. fumigatus*:1737 *A. fischeri*:1737  
afum|EAL88410.1 100.00% afis|EAW23069.1 100.00%  
Bootstrap support for afum|EAL88410.1 as seed ortholog is 100%.  
Bootstrap support for afis|EAW23069.1 as seed ortholog is 100%.

---

Group of orthologs #1352. Best score 1737 bits

Score difference with first non-orthologous sequence - *A. fumigatus*:1737 *A. fischeri*:1737  
afum|EAL90064.1 100.00% afis|EAW25405.1 100.00%  
Bootstrap support for afum|EAL90064.1 as seed ortholog is 100%.  
Bootstrap support for afis|EAW25405.1 as seed ortholog is 100%.

---

Group of orthologs #1353. Best score 1735 bits

Score difference with first non-orthologous sequence - *A. fumigatus*:1735 *A. fischeri*:1735  
afum|EAL88596.1 100.00% afis|EAW15963.1 100.00%  
Bootstrap support for afum|EAL88596.1 as seed ortholog is 100%.  
Bootstrap support for afis|EAW15963.1 as seed ortholog is 100%.

---

Group of orthologs #1354. Best score 1735 bits

Score difference with first non-orthologous sequence - *A. fumigatus*:1735 *A. fischeri*:1735  
afum|EAL85325.1 100.00% afis|EAW20208.1 100.00%  
Bootstrap support for afum|EAL85325.1 as seed ortholog is 100%.  
Bootstrap support for afis|EAW20208.1 as seed ortholog is 100%.

---

Group of orthologs #1355. Best score 1735 bits

Score difference with first non-orthologous sequence - *A. fumigatus*:1735 *A. fischeri*:1735  
afum|EAL84641.1 100.00% afis|EAW20988.1 100.00%  
Bootstrap support for afum|EAL84641.1 as seed ortholog is 100%.  
Bootstrap support for afis|EAW20988.1 as seed ortholog is 100%.

---

Group of orthologs #1356. Best score 1735 bits

Score difference with first non-orthologous sequence - *A. fumigatus*:1735 *A. fischeri*:1735  
afum|EAL86056.1 100.00% afis|EAW24384.1 100.00%  
Bootstrap support for afum|EAL86056.1 as seed ortholog is 100%.  
Bootstrap support for afis|EAW24384.1 as seed ortholog is 100%.

---

Group of orthologs #1357. Best score 1734 bits

Score difference with first non-orthologous sequence - *A. fumigatus*:1734 *A. fischeri*:1734  
afum|EAL90250.1 100.00% afis|EAW22947.1 100.00%  
Bootstrap support for afum|EAL90250.1 as seed ortholog is 100%.  
Bootstrap support for afis|EAW22947.1 as seed ortholog is 100%.

---

Group of orthologs #1358. Best score 1733 bits

Score difference with first non-orthologous sequence - *A. fumigatus*:1502 *A. fischeri*:1583  
afum|EAL92856.1 100.00% afis|EAW21844.1 100.00%  
Bootstrap support for afum|EAL92856.1 as seed ortholog is 100%.  
Bootstrap support for afis|EAW21844.1 as seed ortholog is 100%.

---

Group of orthologs #1359. Best score 1732 bits

Score difference with first non-orthologous sequence - *A. fumigatus*:1732 *A. fischeri*:1732  
afum|EAL87710.1 100.00% afis|EAW18346.1 100.00%  
Bootstrap support for afum|EAL87710.1 as seed ortholog is 100%.  
Bootstrap support for afis|EAW18346.1 as seed ortholog is 100%.

---

Group of orthologs #1360. Best score 1731 bits

Score difference with first non-orthologous sequence - *A. fumigatus*:1731 *A. fischeri*:1459  
afum|EAL84705.1 100.00% afis|EAW20929.1 100.00%



Bootstrap support for afum|EAL84705.1 as seed ortholog is 100%.  
Bootstrap support for afis|EAW20929.1 as seed ortholog is 100%.

---

Group of orthologs #1361. Best score 1731 bits

Score difference with first non-orthologous sequence - *A. fumigatus*:1624 *A. fischeri*:1622

|                 |         |                 |         |
|-----------------|---------|-----------------|---------|
| afum EAL93120.1 | 100.00% | afis EAW18438.1 | 100.00% |
|-----------------|---------|-----------------|---------|

Bootstrap support for afum|EAL93120.1 as seed ortholog is 100%.

Bootstrap support for afis|EAW18438.1 as seed ortholog is 100%.

---

Group of orthologs #1362. Best score 1731 bits

Score difference with first non-orthologous sequence - *A. fumigatus*:1731 *A. fischeri*:1731

|                 |         |                 |         |
|-----------------|---------|-----------------|---------|
| afum EAL89503.2 | 100.00% | afis EAW24855.1 | 100.00% |
|-----------------|---------|-----------------|---------|

Bootstrap support for afum|EAL89503.2 as seed ortholog is 100%.

Bootstrap support for afis|EAW24855.1 as seed ortholog is 100%.

---

Group of orthologs #1363. Best score 1730 bits

Score difference with first non-orthologous sequence - *A. fumigatus*:1730 *A. fischeri*:1730

|                 |         |                 |         |
|-----------------|---------|-----------------|---------|
| afum EAL88082.1 | 100.00% | afis EAW23389.1 | 100.00% |
|-----------------|---------|-----------------|---------|

Bootstrap support for afum|EAL88082.1 as seed ortholog is 100%.

Bootstrap support for afis|EAW23389.1 as seed ortholog is 100%.

---

Group of orthologs #1364. Best score 1729 bits

Score difference with first non-orthologous sequence - *A. fumigatus*:1729 *A. fischeri*:1729

|                 |         |                 |         |
|-----------------|---------|-----------------|---------|
| afum EAL94014.1 | 100.00% | afis EAW19295.1 | 100.00% |
|-----------------|---------|-----------------|---------|

Bootstrap support for afum|EAL94014.1 as seed ortholog is 100%.

Bootstrap support for afis|EAW19295.1 as seed ortholog is 100%.

---

Group of orthologs #1365. Best score 1728 bits

Score difference with first non-orthologous sequence - *A. fumigatus*:1728 *A. fischeri*:1728

|                 |         |                 |         |
|-----------------|---------|-----------------|---------|
| afum EAL87575.2 | 100.00% | afis EAW18209.1 | 100.00% |
|-----------------|---------|-----------------|---------|

Bootstrap support for afum|EAL87575.2 as seed ortholog is 100%.

Bootstrap support for afis|EAW18209.1 as seed ortholog is 100%.

---

Group of orthologs #1366. Best score 1728 bits

Score difference with first non-orthologous sequence - *A. fumigatus*:1728 *A. fischeri*:1728

|                 |         |                 |         |
|-----------------|---------|-----------------|---------|
| afum EAL85950.1 | 100.00% | afis EAW24281.1 | 100.00% |
|-----------------|---------|-----------------|---------|

Bootstrap support for afum|EAL85950.1 as seed ortholog is 100%.

Bootstrap support for afis|EAW24281.1 as seed ortholog is 100%.

---

Group of orthologs #1367. Best score 1728 bits

Score difference with first non-orthologous sequence - *A. fumigatus*:1582 *A. fischeri*:1728

|                 |         |                 |         |
|-----------------|---------|-----------------|---------|
| afum EAL86122.1 | 100.00% | afis EAW24453.1 | 100.00% |
|-----------------|---------|-----------------|---------|

Bootstrap support for afum|EAL86122.1 as seed ortholog is 100%.

Bootstrap support for afis|EAW24453.1 as seed ortholog is 100%.

---

Group of orthologs #1368. Best score 1728 bits

Score difference with first non-orthologous sequence - *A. fumigatus*:1728 *A. fischeri*:1728

|                 |         |                 |         |
|-----------------|---------|-----------------|---------|
| afum EAL88424.1 | 100.00% | afis EAW23056.1 | 100.00% |
|-----------------|---------|-----------------|---------|

Bootstrap support for afum|EAL88424.1 as seed ortholog is 100%.

Bootstrap support for afis|EAW23056.1 as seed ortholog is 100%.

---

Group of orthologs #1369. Best score 1728 bits

Score difference with first non-orthologous sequence - *A. fumigatus*:1728 *A. fischeri*:1728

|                 |         |                 |         |
|-----------------|---------|-----------------|---------|
| afum EAL93005.2 | 100.00% | afis EAW21989.1 | 100.00% |
|-----------------|---------|-----------------|---------|

Bootstrap support for afum|EAL93005.2 as seed ortholog is 100%.

Bootstrap support for afis|EAW21989.1 as seed ortholog is 100%.

---

Group of orthologs #1370. Best score 1727 bits

Score difference with first non-orthologous sequence - *A. fumigatus*:1727 *A. fischeri*:1727

|                 |         |                 |         |
|-----------------|---------|-----------------|---------|
| afum EAL91115.2 | 100.00% | afis EAW15512.1 | 100.00% |
|-----------------|---------|-----------------|---------|

|                 |        |
|-----------------|--------|
| afum EAL90946.1 | 87.50% |
|-----------------|--------|

Bootstrap support for afum|EAL91115.2 as seed ortholog is 100%.

Bootstrap support for afis|EAW15512.1 as seed ortholog is 100%.

---

Group of orthologs #1371. Best score 1727 bits

Score difference with first non-orthologous sequence - *A. fumigatus*:1727 *A. fischeri*:1518

|                 |         |                 |         |
|-----------------|---------|-----------------|---------|
| afum EAL88534.1 | 100.00% | afis EAW15899.1 | 100.00% |
|-----------------|---------|-----------------|---------|

Bootstrap support for afum|EAL88534.1 as seed ortholog is 100%.

Bootstrap support for afis|EAW15899.1 as seed ortholog is 100%.

---

Group of orthologs #1372. Best score 1727 bits

Score difference with first non-orthologous sequence - *A. fumigatus*:1618 *A. fischeri*:1727

|                 |         |                 |         |
|-----------------|---------|-----------------|---------|
| afum EAL88865.1 | 100.00% | afis EAW16243.1 | 100.00% |
|-----------------|---------|-----------------|---------|

Bootstrap support for afum|EAL88865.1 as seed ortholog is 100%.

Bootstrap support for afis|EAW16243.1 as seed ortholog is 100%.

---

Group of orthologs #1373. Best score 1727 bits

Score difference with first non-orthologous sequence - *A. fumigatus*:1727 *A. fischeri*:1727

|                 |         |                 |         |
|-----------------|---------|-----------------|---------|
| afum EAL87383.1 | 100.00% | afis EAW23955.1 | 100.00% |
|-----------------|---------|-----------------|---------|

Bootstrap support for afum|EAL87383.1 as seed ortholog is 100%.

Bootstrap support for afis|EAW23955.1 as seed ortholog is 100%.

---

Group of orthologs #1374. Best score 1727 bits

Score difference with first non-orthologous sequence - *A. fumigatus*:1727 *A. fischeri*:1727

|                 |         |                 |         |
|-----------------|---------|-----------------|---------|
| afum EAL93237.1 | 100.00% | afis EAW18539.1 | 100.00% |
|-----------------|---------|-----------------|---------|

Bootstrap support for afum|EAL93237.1 as seed ortholog is 100%.

Bootstrap support for afis|EAW18539.1 as seed ortholog is 100%.

---

Group of orthologs #1375. Best score 1726 bits

Score difference with first non-orthologous sequence - *A. fumigatus*:1726 *A. fischeri*:1726

|                 |         |                 |         |
|-----------------|---------|-----------------|---------|
| afum EAL87535.1 | 100.00% | afis EAW18174.1 | 100.00% |
|-----------------|---------|-----------------|---------|

Bootstrap support for afum|EAL87535.1 as seed ortholog is 100%.

Bootstrap support for afis|EAW18174.1 as seed ortholog is 100%.

---

Group of orthologs #1376. Best score 1726 bits

Score difference with first non-orthologous sequence - *A. fumigatus*:1726 *A. fischeri*:1726

|                 |         |                 |         |
|-----------------|---------|-----------------|---------|
| afum EAL88135.1 | 100.00% | afis EAW23343.1 | 100.00% |
|-----------------|---------|-----------------|---------|

Bootstrap support for afum|EAL88135.1 as seed ortholog is 100%.

Bootstrap support for afis|EAW23343.1 as seed ortholog is 100%.

---

Group of orthologs #1377. Best score 1725 bits

Score difference with first non-orthologous sequence - *A. fumigatus*:1725 *A. fischeri*:1725

|                 |         |                 |         |
|-----------------|---------|-----------------|---------|
| afum EAL85886.1 | 100.00% | afis EAW24217.1 | 100.00% |
|-----------------|---------|-----------------|---------|

Bootstrap support for afum|EAL85886.1 as seed ortholog is 100%.

Bootstrap support for afis|EAW24217.1 as seed ortholog is 100%.

---

Group of orthologs #1378. Best score 1723 bits

Score difference with first non-orthologous sequence - *A. fumigatus*:1723 *A. fischeri*:1723

|                 |         |                 |         |
|-----------------|---------|-----------------|---------|
| afum EAL88704.1 | 100.00% | afis EAW16072.1 | 100.00% |
|-----------------|---------|-----------------|---------|

Bootstrap support for afum|EAL88704.1 as seed ortholog is 100%.

Bootstrap support for afis|EAW16072.1 as seed ortholog is 100%.

---

Group of orthologs #1379. Best score 1723 bits

Score difference with first non-orthologous sequence - *A. fumigatus*:1723 *A. fischeri*:1723

afum|EAL93275.1 100.00% afis|EAW18572.1 100.00%

Bootstrap support for afum|EAL93275.1 as seed ortholog is 100%.

Bootstrap support for afis|EAW18572.1 as seed ortholog is 100%.

---

Group of orthologs #1380. Best score 1722 bits

Score difference with first non-orthologous sequence - *A. fumigatus*:1722 *A. fischeri*:1722

afum|EAL85834.1 100.00% afis|EAW15489.1 100.00%

Bootstrap support for afum|EAL85834.1 as seed ortholog is 100%.

Bootstrap support for afis|EAW15489.1 as seed ortholog is 100%.

---

Group of orthologs #1381. Best score 1722 bits

Score difference with first non-orthologous sequence - *A. fumigatus*:1722 *A. fischeri*:1722

afum|EAL85568.1 100.00% afis|EAW15782.1 100.00%

Bootstrap support for afum|EAL85568.1 as seed ortholog is 100%.

Bootstrap support for afis|EAW15782.1 as seed ortholog is 100%.

---

Group of orthologs #1382. Best score 1722 bits

Score difference with first non-orthologous sequence - *A. fumigatus*:1722 *A. fischeri*:1722

afum|EAL85887.1 100.00% afis|EAW24218.1 100.00%

Bootstrap support for afum|EAL85887.1 as seed ortholog is 100%.

Bootstrap support for afis|EAW24218.1 as seed ortholog is 100%.

---

Group of orthologs #1383. Best score 1721 bits

Score difference with first non-orthologous sequence - *A. fumigatus*:1721 *A. fischeri*:1721

afum|EAL85055.2 100.00% afis|EAW19838.1 100.00%

Bootstrap support for afum|EAL85055.2 as seed ortholog is 100%.

Bootstrap support for afis|EAW19838.1 as seed ortholog is 100%.

---

Group of orthologs #1384. Best score 1721 bits

Score difference with first non-orthologous sequence - *A. fumigatus*:1721 *A. fischeri*:1721

afum|EAL85474.1 100.00% afis|EAW20357.1 100.00%

Bootstrap support for afum|EAL85474.1 as seed ortholog is 100%.

Bootstrap support for afis|EAW20357.1 as seed ortholog is 100%.

---

Group of orthologs #1385. Best score 1720 bits

Score difference with first non-orthologous sequence - *A. fumigatus*:1720 *A. fischeri*:1720

afum|EAL84884.1 100.00% afis|EAW20032.1 100.00%

Bootstrap support for afum|EAL84884.1 as seed ortholog is 100%.

Bootstrap support for afis|EAW20032.1 as seed ortholog is 100%.

---

Group of orthologs #1386. Best score 1719 bits

Score difference with first non-orthologous sequence - *A. fumigatus*:1591 *A. fischeri*:1633

afum|EAL91057.2 100.00% afis|EAW22133.1 100.00%

Bootstrap support for afum|EAL91057.2 as seed ortholog is 100%.

Bootstrap support for afis|EAW22133.1 as seed ortholog is 100%.

---

Group of orthologs #1387. Best score 1718 bits

Score difference with first non-orthologous sequence - *A. fumigatus*:1718 *A. fischeri*:1718

afum|EAL88477.1 100.00% afis|EAW23003.1 100.00%

Bootstrap support for afum|EAL88477.1 as seed ortholog is 100%.

Bootstrap support for afis|EAW23003.1 as seed ortholog is 100%.

---

Group of orthologs #1388. Best score 1717 bits

Score difference with first non-orthologous sequence - *A. fumigatus*:1717 *A. fischeri*:1717

|                 |         |                 |         |
|-----------------|---------|-----------------|---------|
| afum EAL85058.1 | 100.00% | afis EAW19834.1 | 100.00% |
|-----------------|---------|-----------------|---------|

Bootstrap support for afum|EAL85058.1 as seed ortholog is 100%.

Bootstrap support for afis|EAW19834.1 as seed ortholog is 100%.

---

Group of orthologs #1389. Best score 1717 bits

Score difference with first non-orthologous sequence - *A. fumigatus*:1717 *A. fischeri*:1717

|                 |         |                 |         |
|-----------------|---------|-----------------|---------|
| afum EAL84806.1 | 100.00% | afis EAW20823.1 | 100.00% |
|-----------------|---------|-----------------|---------|

Bootstrap support for afum|EAL84806.1 as seed ortholog is 100%.

Bootstrap support for afis|EAW20823.1 as seed ortholog is 100%.

---

Group of orthologs #1390. Best score 1716 bits

Score difference with first non-orthologous sequence - *A. fumigatus*:1716 *A. fischeri*:1716

|                 |         |                 |         |
|-----------------|---------|-----------------|---------|
| afum EAL87571.1 | 100.00% | afis EAW18206.1 | 100.00% |
|-----------------|---------|-----------------|---------|

Bootstrap support for afum|EAL87571.1 as seed ortholog is 100%.

Bootstrap support for afis|EAW18206.1 as seed ortholog is 100%.

---

Group of orthologs #1391. Best score 1716 bits

Score difference with first non-orthologous sequence - *A. fumigatus*:1716 *A. fischeri*:1716

|                 |         |                 |         |
|-----------------|---------|-----------------|---------|
| afum EAL85497.1 | 100.00% | afis EAW20398.1 | 100.00% |
|-----------------|---------|-----------------|---------|

Bootstrap support for afum|EAL85497.1 as seed ortholog is 100%.

Bootstrap support for afis|EAW20398.1 as seed ortholog is 100%.

---

Group of orthologs #1392. Best score 1716 bits

Score difference with first non-orthologous sequence - *A. fumigatus*:1716 *A. fischeri*:1716

|                 |         |                 |         |
|-----------------|---------|-----------------|---------|
| afum EAL91552.1 | 100.00% | afis EAW17737.1 | 100.00% |
|-----------------|---------|-----------------|---------|

Bootstrap support for afum|EAL91552.1 as seed ortholog is 100%.

Bootstrap support for afis|EAW17737.1 as seed ortholog is 100%.

---

Group of orthologs #1393. Best score 1716 bits

Score difference with first non-orthologous sequence - *A. fumigatus*:1716 *A. fischeri*:1716

|                 |         |                 |         |
|-----------------|---------|-----------------|---------|
| afum EAL92157.2 | 100.00% | afis EAW21138.1 | 100.00% |
|-----------------|---------|-----------------|---------|

Bootstrap support for afum|EAL92157.2 as seed ortholog is 100%.

Bootstrap support for afis|EAW21138.1 as seed ortholog is 100%.

---

Group of orthologs #1394. Best score 1716 bits

Score difference with first non-orthologous sequence - *A. fumigatus*:1716 *A. fischeri*:1716

|                 |         |                 |         |
|-----------------|---------|-----------------|---------|
| afum EAL92237.1 | 100.00% | afis EAW21224.1 | 100.00% |
|-----------------|---------|-----------------|---------|

Bootstrap support for afum|EAL92237.1 as seed ortholog is 100%.

Bootstrap support for afis|EAW21224.1 as seed ortholog is 100%.

---

Group of orthologs #1395. Best score 1715 bits

Score difference with first non-orthologous sequence - *A. fumigatus*:1715 *A. fischeri*:1715

|                 |         |                 |         |
|-----------------|---------|-----------------|---------|
| afum EAL89609.1 | 100.00% | afis EAW24952.1 | 100.00% |
|-----------------|---------|-----------------|---------|

Bootstrap support for afum|EAL89609.1 as seed ortholog is 100%.

Bootstrap support for afis|EAW24952.1 as seed ortholog is 100%.

---

Group of orthologs #1396. Best score 1714 bits

Score difference with first non-orthologous sequence - *A. fumigatus*:1714 *A. fischeri*:1714

|                 |         |                 |         |
|-----------------|---------|-----------------|---------|
| afum EAL86052.1 | 100.00% | afis EAW24380.1 | 100.00% |
|-----------------|---------|-----------------|---------|

Bootstrap support for afum|EAL86052.1 as seed ortholog is 100%.

Bootstrap support for afis|EAW24380.1 as seed ortholog is 100%.

---

Group of orthologs #1397. Best score 1714 bits

Score difference with first non-orthologous sequence - *A. fumigatus*:1714 *A. fischeri*:1637

|                 |         |                 |         |
|-----------------|---------|-----------------|---------|
| afum EAL87440.1 | 100.00% | afis EAW24010.1 | 100.00% |
|-----------------|---------|-----------------|---------|

Bootstrap support for afum|EAL87440.1 as seed ortholog is 100%.

Bootstrap support for afis|EAW24010.1 as seed ortholog is 100%.

---

Group of orthologs #1398. Best score 1714 bits

Score difference with first non-orthologous sequence - *A. fumigatus*:1714 *A. fischeri*:1714

afum|EAL92505.1 100.00% afis|EAW21485.1 100.00%

Bootstrap support for afum|EAL92505.1 as seed ortholog is 100%.

Bootstrap support for afis|EAW21485.1 as seed ortholog is 100%.

---

Group of orthologs #1399. Best score 1713 bits

Score difference with first non-orthologous sequence - *A. fumigatus*:1713 *A. fischeri*:1713

afum|EAL84723.1 100.00% afis|EAW20911.1 100.00%

Bootstrap support for afum|EAL84723.1 as seed ortholog is 100%.

Bootstrap support for afis|EAW20911.1 as seed ortholog is 100%.

---

Group of orthologs #1400. Best score 1713 bits

Score difference with first non-orthologous sequence - *A. fumigatus*:1713 *A. fischeri*:1713

afum|EAL93380.1 100.00% afis|EAW18661.1 100.00%

Bootstrap support for afum|EAL93380.1 as seed ortholog is 100%.

Bootstrap support for afis|EAW18661.1 as seed ortholog is 100%.

---

Group of orthologs #1401. Best score 1712 bits

Score difference with first non-orthologous sequence - *A. fumigatus*:1712 *A. fischeri*:1712

afum|EAL86273.1 100.00% afis|EAW20691.1 100.00%

Bootstrap support for afum|EAL86273.1 as seed ortholog is 100%.

Bootstrap support for afis|EAW20691.1 as seed ortholog is 100%.

---

Group of orthologs #1402. Best score 1712 bits

Score difference with first non-orthologous sequence - *A. fumigatus*:1712 *A. fischeri*:1712

afum|EAL87339.1 100.00% afis|EAW23910.1 100.00%

Bootstrap support for afum|EAL87339.1 as seed ortholog is 100%.

Bootstrap support for afis|EAW23910.1 as seed ortholog is 100%.

---

Group of orthologs #1403. Best score 1711 bits

Score difference with first non-orthologous sequence - *A. fumigatus*:1711 *A. fischeri*:1711

afum|EAL88981.1 100.00% afis|EAW16356.1 100.00%

Bootstrap support for afum|EAL88981.1 as seed ortholog is 100%.

Bootstrap support for afis|EAW16356.1 as seed ortholog is 100%.

---

Group of orthologs #1404. Best score 1711 bits

Score difference with first non-orthologous sequence - *A. fumigatus*:1711 *A. fischeri*:1711

afum|EAL93900.1 100.00% afis|EAW19170.1 100.00%

Bootstrap support for afum|EAL93900.1 as seed ortholog is 100%.

Bootstrap support for afis|EAW19170.1 as seed ortholog is 100%.

---

Group of orthologs #1405. Best score 1710 bits

Score difference with first non-orthologous sequence - *A. fumigatus*:1710 *A. fischeri*:1250

afum|EAL87190.2 100.00% afis|EAW23754.1 100.00%

Bootstrap support for afum|EAL87190.2 as seed ortholog is 100%.

Bootstrap support for afis|EAW23754.1 as seed ortholog is 100%.

---

Group of orthologs #1406. Best score 1710 bits

Score difference with first non-orthologous sequence - *A. fumigatus*:1710 *A. fischeri*:1710

afum|EAL93085.1 100.00% afis|EAW18405.1 100.00%

Bootstrap support for afum|EAL93085.1 as seed ortholog is 100%.

Bootstrap support for afis|EAW18405.1 as seed ortholog is 100%.

---

Group of orthologs #1407. Best score 1710 bits

Score difference with first non-orthologous sequence - *A. fumigatus*:1710 *A. fischeri*:1710

afum|EAL93125.1 100.00% afis|EAW18442.1 100.00%

Bootstrap support for afum|EAL93125.1 as seed ortholog is 100%.

Bootstrap support for afis|EAW18442.1 as seed ortholog is 100%.

---

Group of orthologs #1408. Best score 1710 bits

Score difference with first non-orthologous sequence - *A. fumigatus*:1710 *A. fischeri*:1710

afum|EAL88280.1 100.00% afis|EAW23203.1 100.00%

Bootstrap support for afum|EAL88280.1 as seed ortholog is 100%.

Bootstrap support for afis|EAW23203.1 as seed ortholog is 100%.

---

Group of orthologs #1409. Best score 1710 bits

Score difference with first non-orthologous sequence - *A. fumigatus*:1710 *A. fischeri*:1710

afum|EAL90161.1 100.00% afis|EAW25495.1 100.00%

Bootstrap support for afum|EAL90161.1 as seed ortholog is 100%.

Bootstrap support for afis|EAW25495.1 as seed ortholog is 100%.

---

Group of orthologs #1410. Best score 1709 bits

Score difference with first non-orthologous sequence - *A. fumigatus*:1709 *A. fischeri*:1709

afum|EAL89043.1 100.00% afis|EAW16442.1 100.00%

Bootstrap support for afum|EAL89043.1 as seed ortholog is 100%.

Bootstrap support for afis|EAW16442.1 as seed ortholog is 100%.

---

Group of orthologs #1411. Best score 1709 bits

Score difference with first non-orthologous sequence - *A. fumigatus*:1559 *A. fischeri*:1579

afum|EAL84877.1 100.00% afis|EAW20702.1 100.00%

Bootstrap support for afum|EAL84877.1 as seed ortholog is 100%.

Bootstrap support for afis|EAW20702.1 as seed ortholog is 100%.

---

Group of orthologs #1412. Best score 1709 bits

Score difference with first non-orthologous sequence - *A. fumigatus*:1589 *A. fischeri*:1592

afum|EAL84763.1 100.00% afis|EAW20871.1 100.00%

Bootstrap support for afum|EAL84763.1 as seed ortholog is 100%.

Bootstrap support for afis|EAW20871.1 as seed ortholog is 100%.

---

Group of orthologs #1413. Best score 1709 bits

Score difference with first non-orthologous sequence - *A. fumigatus*:1709 *A. fischeri*:1709

afum|EAL88396.1 100.00% afis|EAW23083.1 100.00%

Bootstrap support for afum|EAL88396.1 as seed ortholog is 100%.

Bootstrap support for afis|EAW23083.1 as seed ortholog is 100%.

---

Group of orthologs #1414. Best score 1709 bits

Score difference with first non-orthologous sequence - *A. fumigatus*:1709 *A. fischeri*:1709

afum|EAL88432.1 100.00% afis|EAW23048.1 100.00%

Bootstrap support for afum|EAL88432.1 as seed ortholog is 100%.

Bootstrap support for afis|EAW23048.1 as seed ortholog is 100%.

---

Group of orthologs #1415. Best score 1708 bits

Score difference with first non-orthologous sequence - *A. fumigatus*:1708 *A. fischeri*:1708

afum|EAL89670.1 100.00% afis|EAW25025.1 100.00%

Bootstrap support for afum|EAL89670.1 as seed ortholog is 100%.

Bootstrap support for afis|EAW25025.1 as seed ortholog is 100%.

---

Group of orthologs #1416. Best score 1706 bits

Score difference with first non-orthologous sequence - *A. fumigatus*:1706 *A. fischeri*:1706

|                 |         |                 |         |
|-----------------|---------|-----------------|---------|
| afum EAL84682.1 | 100.00% | afis EAW20952.1 | 100.00% |
|-----------------|---------|-----------------|---------|

Bootstrap support for afum|EAL84682.1 as seed ortholog is 100%.

Bootstrap support for afis|EAW20952.1 as seed ortholog is 100%.

---

Group of orthologs #1417. Best score 1706 bits

Score difference with first non-orthologous sequence - *A. fumigatus*:1706 *A. fischeri*:1706

|                 |         |                 |         |
|-----------------|---------|-----------------|---------|
| afum EAL88204.1 | 100.00% | afis EAW23275.1 | 100.00% |
|-----------------|---------|-----------------|---------|

Bootstrap support for afum|EAL88204.1 as seed ortholog is 100%.

Bootstrap support for afis|EAW23275.1 as seed ortholog is 100%.

---

Group of orthologs #1418. Best score 1706 bits

Score difference with first non-orthologous sequence - *A. fumigatus*:1706 *A. fischeri*:1706

|                 |         |                 |         |
|-----------------|---------|-----------------|---------|
| afum EAL90219.1 | 100.00% | afis EAW22978.1 | 100.00% |
|-----------------|---------|-----------------|---------|

Bootstrap support for afum|EAL90219.1 as seed ortholog is 100%.

Bootstrap support for afis|EAW22978.1 as seed ortholog is 100%.

---

Group of orthologs #1419. Best score 1705 bits

Score difference with first non-orthologous sequence - *A. fumigatus*:1705 *A. fischeri*:521

|                 |         |                 |         |
|-----------------|---------|-----------------|---------|
| afum EAL93619.1 | 100.00% | afis EAW18886.1 | 100.00% |
|-----------------|---------|-----------------|---------|

Bootstrap support for afum|EAL93619.1 as seed ortholog is 100%.

Bootstrap support for afis|EAW18886.1 as seed ortholog is 100%.

---

Group of orthologs #1420. Best score 1703 bits

Score difference with first non-orthologous sequence - *A. fumigatus*:1703 *A. fischeri*:1703

|                 |         |                 |         |
|-----------------|---------|-----------------|---------|
| afum EAL85552.1 | 100.00% | afis EAW15798.1 | 100.00% |
|-----------------|---------|-----------------|---------|

Bootstrap support for afum|EAL85552.1 as seed ortholog is 100%.

Bootstrap support for afis|EAW15798.1 as seed ortholog is 100%.

---

Group of orthologs #1421. Best score 1703 bits

Score difference with first non-orthologous sequence - *A. fumigatus*:1618 *A. fischeri*:1703

|                 |         |                 |         |
|-----------------|---------|-----------------|---------|
| afum EAL90516.1 | 100.00% | afis EAW22676.1 | 100.00% |
|-----------------|---------|-----------------|---------|

Bootstrap support for afum|EAL90516.1 as seed ortholog is 100%.

Bootstrap support for afis|EAW22676.1 as seed ortholog is 100%.

---

Group of orthologs #1422. Best score 1702 bits

Score difference with first non-orthologous sequence - *A. fumigatus*:1702 *A. fischeri*:1702

|                 |         |                 |         |
|-----------------|---------|-----------------|---------|
| afum EAL85215.1 | 100.00% | afis EAW20097.1 | 100.00% |
|-----------------|---------|-----------------|---------|

Bootstrap support for afum|EAL85215.1 as seed ortholog is 100%.

Bootstrap support for afis|EAW20097.1 as seed ortholog is 100%.

---

Group of orthologs #1423. Best score 1702 bits

Score difference with first non-orthologous sequence - *A. fumigatus*:1702 *A. fischeri*:1702

|                 |         |                 |         |
|-----------------|---------|-----------------|---------|
| afum EAL91301.1 | 100.00% | afis EAW17472.1 | 100.00% |
|-----------------|---------|-----------------|---------|

Bootstrap support for afum|EAL91301.1 as seed ortholog is 100%.

Bootstrap support for afis|EAW17472.1 as seed ortholog is 100%.

---

Group of orthologs #1424. Best score 1702 bits

Score difference with first non-orthologous sequence - *A. fumigatus*:1702 *A. fischeri*:1702

|                 |         |                 |         |
|-----------------|---------|-----------------|---------|
| afum EBA27341.1 | 100.00% | afis EAW23208.1 | 100.00% |
|-----------------|---------|-----------------|---------|

Bootstrap support for afum|EBA27341.1 as seed ortholog is 100%.

Bootstrap support for afis|EAW23208.1 as seed ortholog is 100%.

---

Group of orthologs #1425. Best score 1701 bits

Score difference with first non-orthologous sequence - *A. fumigatus*:1701 *A. fischeri*:1701

|                 |         |                 |         |
|-----------------|---------|-----------------|---------|
| afum EAL85878.1 | 100.00% | afis EAW24208.1 | 100.00% |
|-----------------|---------|-----------------|---------|

Bootstrap support for afum|EAL85878.1 as seed ortholog is 100%.

Bootstrap support for afis|EAW24208.1 as seed ortholog is 100%.

---

Group of orthologs #1426. Best score 1700 bits

Score difference with first non-orthologous sequence - *A. fumigatus*:1700 *A. fischeri*:1700

|                 |         |                 |         |
|-----------------|---------|-----------------|---------|
| afum EAL84341.1 | 100.00% | afis EAW25669.1 | 100.00% |
|-----------------|---------|-----------------|---------|

Bootstrap support for afum|EAL84341.1 as seed ortholog is 100%.

Bootstrap support for afis|EAW25669.1 as seed ortholog is 100%.

---

Group of orthologs #1427. Best score 1699 bits

Score difference with first non-orthologous sequence - *A. fumigatus*:1699 *A. fischeri*:1699

|                 |         |                 |         |
|-----------------|---------|-----------------|---------|
| afum EAL92263.1 | 100.00% | afis EAW21250.1 | 100.00% |
|-----------------|---------|-----------------|---------|

Bootstrap support for afum|EAL92263.1 as seed ortholog is 100%.

Bootstrap support for afis|EAW21250.1 as seed ortholog is 100%.

---

Group of orthologs #1428. Best score 1699 bits

Score difference with first non-orthologous sequence - *A. fumigatus*:1699 *A. fischeri*:1699

|                 |         |                 |         |
|-----------------|---------|-----------------|---------|
| afum EAL92033.1 | 100.00% | afis EAW24171.1 | 100.00% |
|-----------------|---------|-----------------|---------|

Bootstrap support for afum|EAL92033.1 as seed ortholog is 100%.

Bootstrap support for afis|EAW24171.1 as seed ortholog is 100%.

---

Group of orthologs #1429. Best score 1697 bits

Score difference with first non-orthologous sequence - *A. fumigatus*:1697 *A. fischeri*:1697

|                 |         |                 |         |
|-----------------|---------|-----------------|---------|
| afum EAL91509.1 | 100.00% | afis EAW17695.1 | 100.00% |
|-----------------|---------|-----------------|---------|

Bootstrap support for afum|EAL91509.1 as seed ortholog is 100%.

Bootstrap support for afis|EAW17695.1 as seed ortholog is 100%.

---

Group of orthologs #1430. Best score 1696 bits

Score difference with first non-orthologous sequence - *A. fumigatus*:1696 *A. fischeri*:1696

|                 |         |                 |         |
|-----------------|---------|-----------------|---------|
| afum EAL87971.1 | 100.00% | afis EAW23492.1 | 100.00% |
|-----------------|---------|-----------------|---------|

Bootstrap support for afum|EAL87971.1 as seed ortholog is 100%.

Bootstrap support for afis|EAW23492.1 as seed ortholog is 100%.

---

Group of orthologs #1431. Best score 1694 bits

Score difference with first non-orthologous sequence - *A. fumigatus*:1694 *A. fischeri*:1694

|                 |         |                 |         |
|-----------------|---------|-----------------|---------|
| afum EAL84272.1 | 100.00% | afis EAW25549.1 | 100.00% |
|-----------------|---------|-----------------|---------|

Bootstrap support for afum|EAL84272.1 as seed ortholog is 100%.

Bootstrap support for afis|EAW25549.1 as seed ortholog is 100%.

---

Group of orthologs #1432. Best score 1694 bits

Score difference with first non-orthologous sequence - *A. fumigatus*:1694 *A. fischeri*:1694

|                 |         |                 |         |
|-----------------|---------|-----------------|---------|
| afum EAL85958.1 | 100.00% | afis EAW24290.1 | 100.00% |
|-----------------|---------|-----------------|---------|

Bootstrap support for afum|EAL85958.1 as seed ortholog is 100%.

Bootstrap support for afis|EAW24290.1 as seed ortholog is 100%.

---

Group of orthologs #1433. Best score 1694 bits

Score difference with first non-orthologous sequence - *A. fumigatus*:1694 *A. fischeri*:1647

|                 |         |                 |         |
|-----------------|---------|-----------------|---------|
| afum EAL92771.1 | 100.00% | afis EAW21737.1 | 100.00% |
|-----------------|---------|-----------------|---------|

Bootstrap support for afum|EAL92771.1 as seed ortholog is 100%.

Bootstrap support for afis|EAW21737.1 as seed ortholog is 100%.

---

Group of orthologs #1434. Best score 1693 bits

Score difference with first non-orthologous sequence - *A. fumigatus*:1693 *A. fischeri*:1693

|                 |         |                 |         |
|-----------------|---------|-----------------|---------|
| afum EAL85210.1 | 100.00% | afis EAW20091.1 | 100.00% |
|-----------------|---------|-----------------|---------|

Bootstrap support for afum|EAL85210.1 as seed ortholog is 100%.

Bootstrap support for afis|EAW20091.1 as seed ortholog is 100%.

---



Group of orthologs #1435. Best score 1692 bits

Score difference with first non-orthologous sequence - *A. fumigatus*:1692 *A. fischeri*:1692

afum|EAL85602.1 100.00% afis|EAW15746.1 100.00%

Bootstrap support for afum|EAL85602.1 as seed ortholog is 100%.

Bootstrap support for afis|EAW15746.1 as seed ortholog is 100%.

---

Group of orthologs #1436. Best score 1692 bits

Score difference with first non-orthologous sequence - *A. fumigatus*:1692 *A. fischeri*:1692

afum|EAL90210.1 100.00% afis|EAW22990.1 100.00%

Bootstrap support for afum|EAL90210.1 as seed ortholog is 100%.

Bootstrap support for afis|EAW22990.1 as seed ortholog is 100%.

---

Group of orthologs #1437. Best score 1691 bits

Score difference with first non-orthologous sequence - *A. fumigatus*:1691 *A. fischeri*:1691

afum|EAL87701.1 100.00% afis|EAW18337.1 100.00%

Bootstrap support for afum|EAL87701.1 as seed ortholog is 100%.

Bootstrap support for afis|EAW18337.1 as seed ortholog is 100%.

---

Group of orthologs #1438. Best score 1691 bits

Score difference with first non-orthologous sequence - *A. fumigatus*:1691 *A. fischeri*:1691

afum|EAL87940.1 100.00% afis|EAW23525.1 100.00%

Bootstrap support for afum|EAL87940.1 as seed ortholog is 100%.

Bootstrap support for afis|EAW23525.1 as seed ortholog is 100%.

---

Group of orthologs #1439. Best score 1691 bits

Score difference with first non-orthologous sequence - *A. fumigatus*:1691 *A. fischeri*:1691

afum|EAL90592.1 100.00% afis|EAW22606.1 100.00%

Bootstrap support for afum|EAL90592.1 as seed ortholog is 100%.

Bootstrap support for afis|EAW22606.1 as seed ortholog is 100%.

---

Group of orthologs #1440. Best score 1691 bits

Score difference with first non-orthologous sequence - *A. fumigatus*:1691 *A. fischeri*:1691

afum|EAL90593.1 100.00% afis|EAW22605.1 100.00%

Bootstrap support for afum|EAL90593.1 as seed ortholog is 100%.

Bootstrap support for afis|EAW22605.1 as seed ortholog is 100%.

---

Group of orthologs #1441. Best score 1690 bits

Score difference with first non-orthologous sequence - *A. fumigatus*:1690 *A. fischeri*:1690

afum|EAL91503.1 100.00% afis|EAW17689.1 100.00%

Bootstrap support for afum|EAL91503.1 as seed ortholog is 100%.

Bootstrap support for afis|EAW17689.1 as seed ortholog is 100%.

---

Group of orthologs #1442. Best score 1690 bits

Score difference with first non-orthologous sequence - *A. fumigatus*:1690 *A. fischeri*:1690

afum|EAL91004.1 100.00% afis|EAW22185.1 100.00%

Bootstrap support for afum|EAL91004.1 as seed ortholog is 100%.

Bootstrap support for afis|EAW22185.1 as seed ortholog is 100%.

---

Group of orthologs #1443. Best score 1690 bits

Score difference with first non-orthologous sequence - *A. fumigatus*:1690 *A. fischeri*:1690

afum|EAL90957.1 100.00% afis|EAW22236.1 100.00%

Bootstrap support for afum|EAL90957.1 as seed ortholog is 100%.

Bootstrap support for afis|EAW22236.1 as seed ortholog is 100%.

---

Group of orthologs #1444. Best score 1688 bits

Score difference with first non-orthologous sequence - *A. fumigatus*:1688 *A. fischeri*:1688

|                 |         |                 |         |
|-----------------|---------|-----------------|---------|
| afum EAL85772.1 | 100.00% | afis EAW15560.1 | 100.00% |
|-----------------|---------|-----------------|---------|

Bootstrap support for afum|EAL85772.1 as seed ortholog is 100%.

Bootstrap support for afis|EAW15560.1 as seed ortholog is 100%.

---

Group of orthologs #1445. Best score 1688 bits

Score difference with first non-orthologous sequence - *A. fumigatus*:1114 *A. fischeri*:1688

|                 |         |                 |         |
|-----------------|---------|-----------------|---------|
| afum EAL91860.1 | 100.00% | afis EAW18048.1 | 100.00% |
|-----------------|---------|-----------------|---------|

Bootstrap support for afum|EAL91860.1 as seed ortholog is 100%.

Bootstrap support for afis|EAW18048.1 as seed ortholog is 100%.

---

Group of orthologs #1446. Best score 1688 bits

Score difference with first non-orthologous sequence - *A. fumigatus*:1688 *A. fischeri*:1688

|                 |         |                 |         |
|-----------------|---------|-----------------|---------|
| afum EAL93721.1 | 100.00% | afis EAW18985.1 | 100.00% |
|-----------------|---------|-----------------|---------|

Bootstrap support for afum|EAL93721.1 as seed ortholog is 100%.

Bootstrap support for afis|EAW18985.1 as seed ortholog is 100%.

---

Group of orthologs #1447. Best score 1688 bits

Score difference with first non-orthologous sequence - *A. fumigatus*:1595 *A. fischeri*:1281

|                 |         |                 |         |
|-----------------|---------|-----------------|---------|
| afum EAL90913.1 | 100.00% | afis EAW22267.1 | 100.00% |
|-----------------|---------|-----------------|---------|

Bootstrap support for afum|EAL90913.1 as seed ortholog is 100%.

Bootstrap support for afis|EAW22267.1 as seed ortholog is 100%.

---

Group of orthologs #1448. Best score 1688 bits

Score difference with first non-orthologous sequence - *A. fumigatus*:1688 *A. fischeri*:1688

|                 |         |                 |         |
|-----------------|---------|-----------------|---------|
| afum EAL89519.1 | 100.00% | afis EAW24869.1 | 100.00% |
|-----------------|---------|-----------------|---------|

Bootstrap support for afum|EAL89519.1 as seed ortholog is 100%.

Bootstrap support for afis|EAW24869.1 as seed ortholog is 100%.

---

Group of orthologs #1449. Best score 1687 bits

Score difference with first non-orthologous sequence - *A. fumigatus*:1687 *A. fischeri*:1687

|                 |         |                 |         |
|-----------------|---------|-----------------|---------|
| afum EAL85737.2 | 100.00% | afis EAW15594.1 | 100.00% |
|-----------------|---------|-----------------|---------|

Bootstrap support for afum|EAL85737.2 as seed ortholog is 100%.

Bootstrap support for afis|EAW15594.1 as seed ortholog is 100%.

---

Group of orthologs #1450. Best score 1687 bits

Score difference with first non-orthologous sequence - *A. fumigatus*:1687 *A. fischeri*:1048

|                 |         |                 |         |
|-----------------|---------|-----------------|---------|
| afum EAL86575.1 | 100.00% | afis EAW17111.1 | 100.00% |
|-----------------|---------|-----------------|---------|

Bootstrap support for afum|EAL86575.1 as seed ortholog is 100%.

Bootstrap support for afis|EAW17111.1 as seed ortholog is 100%.

---

Group of orthologs #1451. Best score 1687 bits

Score difference with first non-orthologous sequence - *A. fumigatus*:1687 *A. fischeri*:1687

|                 |         |                 |         |
|-----------------|---------|-----------------|---------|
| afum EAL84482.1 | 100.00% | afis EAW20582.1 | 100.00% |
|-----------------|---------|-----------------|---------|

Bootstrap support for afum|EAL84482.1 as seed ortholog is 100%.

Bootstrap support for afis|EAW20582.1 as seed ortholog is 100%.

---

Group of orthologs #1452. Best score 1686 bits

Score difference with first non-orthologous sequence - *A. fumigatus*:1686 *A. fischeri*:1686

|                 |         |                 |         |
|-----------------|---------|-----------------|---------|
| afum EAL87417.2 | 100.00% | afis EAW23988.1 | 100.00% |
|-----------------|---------|-----------------|---------|

Bootstrap support for afum|EAL87417.2 as seed ortholog is 100%.

Bootstrap support for afis|EAW23988.1 as seed ortholog is 100%.

---

Group of orthologs #1453. Best score 1684 bits

Score difference with first non-orthologous sequence - *A. fumigatus*:1684 *A. fischeri*:1684

|                 |         |                 |         |
|-----------------|---------|-----------------|---------|
| afum EAL86060.1 | 100.00% | afis EAW24388.1 | 100.00% |
|-----------------|---------|-----------------|---------|

Bootstrap support for afum|EAL86060.1 as seed ortholog is 100%.

Bootstrap support for afis|EAW24388.1 as seed ortholog is 100%.

---

Group of orthologs #1454. Best score 1684 bits

Score difference with first non-orthologous sequence - *A. fumigatus*:1684 *A. fischeri*:1684

afum|EAL93413.2 100.00% afis|EAW18692.1 100.00%

Bootstrap support for afum|EAL93413.2 as seed ortholog is 100%.

Bootstrap support for afis|EAW18692.1 as seed ortholog is 100%.

---

Group of orthologs #1455. Best score 1681 bits

Score difference with first non-orthologous sequence - *A. fumigatus*:1681 *A. fischeri*:1681

afum|EAL90690.1 100.00% afis|EAW22503.1 100.00%

Bootstrap support for afum|EAL90690.1 as seed ortholog is 100%.

Bootstrap support for afis|EAW22503.1 as seed ortholog is 100%.

---

Group of orthologs #1456. Best score 1681 bits

Score difference with first non-orthologous sequence - *A. fumigatus*:1681 *A. fischeri*:1681

afum|EAL90290.1 100.00% afis|EAW22907.1 100.00%

Bootstrap support for afum|EAL90290.1 as seed ortholog is 100%.

Bootstrap support for afis|EAW22907.1 as seed ortholog is 100%.

---

Group of orthologs #1457. Best score 1681 bits

Score difference with first non-orthologous sequence - *A. fumigatus*:1681 *A. fischeri*:1681

afum|EAL90364.2 100.00% afis|EAW22838.1 100.00%

Bootstrap support for afum|EAL90364.2 as seed ortholog is 100%.

Bootstrap support for afis|EAW22838.1 as seed ortholog is 100%.

---

Group of orthologs #1458. Best score 1681 bits

Score difference with first non-orthologous sequence - *A. fumigatus*:1681 *A. fischeri*:1681

afum|EAL89676.1 100.00% afis|EAW25019.1 100.00%

Bootstrap support for afum|EAL89676.1 as seed ortholog is 100%.

Bootstrap support for afis|EAW25019.1 as seed ortholog is 100%.

---

Group of orthologs #1459. Best score 1680 bits

Score difference with first non-orthologous sequence - *A. fumigatus*:1680 *A. fischeri*:1680

afum|EAL87653.1 100.00% afis|EAW18287.1 100.00%

Bootstrap support for afum|EAL87653.1 as seed ortholog is 100%.

Bootstrap support for afis|EAW18287.1 as seed ortholog is 100%.

---

Group of orthologs #1460. Best score 1679 bits

Score difference with first non-orthologous sequence - *A. fumigatus*:1679 *A. fischeri*:1679

afum|EAL87373.1 100.00% afis|EAW23947.1 100.00%

Bootstrap support for afum|EAL87373.1 as seed ortholog is 100%.

Bootstrap support for afis|EAW23947.1 as seed ortholog is 100%.

---

Group of orthologs #1461. Best score 1679 bits

Score difference with first non-orthologous sequence - *A. fumigatus*:1679 *A. fischeri*:1679

afum|EAL90360.1 100.00% afis|EAW22843.1 100.00%

Bootstrap support for afum|EAL90360.1 as seed ortholog is 100%.

Bootstrap support for afis|EAW22843.1 as seed ortholog is 100%.

---

Group of orthologs #1462. Best score 1678 bits

Score difference with first non-orthologous sequence - *A. fumigatus*:1678 *A. fischeri*:1678

afum|EAL93228.1 100.00% afis|EAW18531.1 100.00%

Bootstrap support for afum|EAL93228.1 as seed ortholog is 100%.

Bootstrap support for afis|EAW18531.1 as seed ortholog is 100%.

---

Group of orthologs #1463. Best score 1678 bits

Score difference with first non-orthologous sequence - *A. fumigatus*:1678 *A. fischeri*:1678

afum|EAL93384.1 100.00% afis|EAW18666.1 100.00%

Bootstrap support for afum|EAL93384.1 as seed ortholog is 100%.

Bootstrap support for afis|EAW18666.1 as seed ortholog is 100%.

---

Group of orthologs #1464. Best score 1678 bits

Score difference with first non-orthologous sequence - *A. fumigatus*:1587 *A. fischeri*:675

afum|EAL92550.1 100.00% afis|EAW21529.1 100.00%

Bootstrap support for afum|EAL92550.1 as seed ortholog is 100%.

Bootstrap support for afis|EAW21529.1 as seed ortholog is 100%.

---

Group of orthologs #1465. Best score 1678 bits

Score difference with first non-orthologous sequence - *A. fumigatus*:1678 *A. fischeri*:1678

afum|EBA27225.1 100.00% afis|EAW20135.1 100.00%

Bootstrap support for afum|EBA27225.1 as seed ortholog is 100%.

Bootstrap support for afis|EAW20135.1 as seed ortholog is 100%.

---

Group of orthologs #1466. Best score 1678 bits

Score difference with first non-orthologous sequence - *A. fumigatus*:1678 *A. fischeri*:1678

afum|EAL89752.1 100.00% afis|EAW25083.1 100.00%

Bootstrap support for afum|EAL89752.1 as seed ortholog is 100%.

Bootstrap support for afis|EAW25083.1 as seed ortholog is 100%.

---

Group of orthologs #1467. Best score 1677 bits

Score difference with first non-orthologous sequence - *A. fumigatus*:1677 *A. fischeri*:1677

afum|EAL93158.1 100.00% afis|EAW18471.1 100.00%

Bootstrap support for afum|EAL93158.1 as seed ortholog is 100%.

Bootstrap support for afis|EAW18471.1 as seed ortholog is 100%.

---

Group of orthologs #1468. Best score 1677 bits

Score difference with first non-orthologous sequence - *A. fumigatus*:1677 *A. fischeri*:1677

afum|EAL90623.1 100.00% afis|EAW22575.1 100.00%

Bootstrap support for afum|EAL90623.1 as seed ortholog is 100%.

Bootstrap support for afis|EAW22575.1 as seed ortholog is 100%.

---

Group of orthologs #1469. Best score 1676 bits

Score difference with first non-orthologous sequence - *A. fumigatus*:1676 *A. fischeri*:1676

afum|EAL90348.1 100.00% afis|EAW22852.1 100.00%

Bootstrap support for afum|EAL90348.1 as seed ortholog is 100%.

Bootstrap support for afis|EAW22852.1 as seed ortholog is 100%.

---

Group of orthologs #1470. Best score 1675 bits

Score difference with first non-orthologous sequence - *A. fumigatus*:1675 *A. fischeri*:1675

afum|EAL88496.1 100.00% afis|EAW15861.1 100.00%

Bootstrap support for afum|EAL88496.1 as seed ortholog is 100%.

Bootstrap support for afis|EAW15861.1 as seed ortholog is 100%.

---

Group of orthologs #1471. Best score 1675 bits

Score difference with first non-orthologous sequence - *A. fumigatus*:1675 *A. fischeri*:1675

afum|EAL93771.1 100.00% afis|EAW19042.1 100.00%

Bootstrap support for afum|EAL93771.1 as seed ortholog is 100%.

Bootstrap support for afis|EAW19042.1 as seed ortholog is 100%.

---

Group of orthologs #1472. Best score 1675 bits

Score difference with first non-orthologous sequence - *A. fumigatus*:1675 *A. fischeri*:1675

|                 |         |                 |         |
|-----------------|---------|-----------------|---------|
| afum EAL90282.1 | 100.00% | afis EAW22915.1 | 100.00% |
|-----------------|---------|-----------------|---------|

Bootstrap support for afum|EAL90282.1 as seed ortholog is 100%.

Bootstrap support for afis|EAW22915.1 as seed ortholog is 100%.

---

Group of orthologs #1473. Best score 1675 bits

Score difference with first non-orthologous sequence - *A. fumigatus*:1675 *A. fischeri*:1675

|                 |         |                 |         |
|-----------------|---------|-----------------|---------|
| afum EAL89459.1 | 100.00% | afis EAW24815.1 | 100.00% |
|-----------------|---------|-----------------|---------|

Bootstrap support for afum|EAL89459.1 as seed ortholog is 100%.

Bootstrap support for afis|EAW24815.1 as seed ortholog is 100%.

---

Group of orthologs #1474. Best score 1674 bits

Score difference with first non-orthologous sequence - *A. fumigatus*:1674 *A. fischeri*:1674

|                 |         |                 |         |
|-----------------|---------|-----------------|---------|
| afum EAL87057.1 | 100.00% | afis EAW19439.1 | 100.00% |
|-----------------|---------|-----------------|---------|

Bootstrap support for afum|EAL87057.1 as seed ortholog is 100%.

Bootstrap support for afis|EAW19439.1 as seed ortholog is 100%.

---

Group of orthologs #1475. Best score 1674 bits

Score difference with first non-orthologous sequence - *A. fumigatus*:1674 *A. fischeri*:1674

|                 |         |                 |         |
|-----------------|---------|-----------------|---------|
| afum EAL93064.1 | 100.00% | afis EAW18389.1 | 100.00% |
|-----------------|---------|-----------------|---------|

Bootstrap support for afum|EAL93064.1 as seed ortholog is 100%.

Bootstrap support for afis|EAW18389.1 as seed ortholog is 100%.

---

Group of orthologs #1476. Best score 1673 bits

Score difference with first non-orthologous sequence - *A. fumigatus*:1673 *A. fischeri*:1673

|                 |         |                 |         |
|-----------------|---------|-----------------|---------|
| afum EAL87359.1 | 100.00% | afis EAW23934.1 | 100.00% |
|-----------------|---------|-----------------|---------|

Bootstrap support for afum|EAL87359.1 as seed ortholog is 100%.

Bootstrap support for afis|EAW23934.1 as seed ortholog is 100%.

---

Group of orthologs #1477. Best score 1672 bits

Score difference with first non-orthologous sequence - *A. fumigatus*:1672 *A. fischeri*:1672

|                 |         |                 |         |
|-----------------|---------|-----------------|---------|
| afum EAL93443.2 | 100.00% | afis EAW18719.1 | 100.00% |
|-----------------|---------|-----------------|---------|

Bootstrap support for afum|EAL93443.2 as seed ortholog is 100%.

Bootstrap support for afis|EAW18719.1 as seed ortholog is 100%.

---

Group of orthologs #1478. Best score 1671 bits

Score difference with first non-orthologous sequence - *A. fumigatus*:1671 *A. fischeri*:1671

|                 |         |                 |         |
|-----------------|---------|-----------------|---------|
| afum EAL88842.1 | 100.00% | afis EAW16215.1 | 100.00% |
|-----------------|---------|-----------------|---------|

Bootstrap support for afum|EAL88842.1 as seed ortholog is 100%.

Bootstrap support for afis|EAW16215.1 as seed ortholog is 100%.

---

Group of orthologs #1479. Best score 1671 bits

Score difference with first non-orthologous sequence - *A. fumigatus*:1671 *A. fischeri*:1671

|                 |         |                 |         |
|-----------------|---------|-----------------|---------|
| afum EAL84273.1 | 100.00% | afis EAW25550.1 | 100.00% |
|-----------------|---------|-----------------|---------|

Bootstrap support for afum|EAL84273.1 as seed ortholog is 100%.

Bootstrap support for afis|EAW25550.1 as seed ortholog is 100%.

---

Group of orthologs #1480. Best score 1671 bits

Score difference with first non-orthologous sequence - *A. fumigatus*:1671 *A. fischeri*:1671

|                 |         |                 |         |
|-----------------|---------|-----------------|---------|
| afum EAL91002.1 | 100.00% | afis EAW22188.1 | 100.00% |
|-----------------|---------|-----------------|---------|

Bootstrap support for afum|EAL91002.1 as seed ortholog is 100%.

Bootstrap support for afis|EAW22188.1 as seed ortholog is 100%.

---

Group of orthologs #1481. Best score 1670 bits

Score difference with first non-orthologous sequence - *A. fumigatus*:1670 *A. fischeri*:1670

|                 |         |                 |         |
|-----------------|---------|-----------------|---------|
| afum EAL89440.1 | 100.00% | afis EAW24798.1 | 100.00% |
|-----------------|---------|-----------------|---------|

Bootstrap support for afum|EAL89440.1 as seed ortholog is 100%.

Bootstrap support for afis|EAW24798.1 as seed ortholog is 100%.

---

Group of orthologs #1482. Best score 1669 bits

Score difference with first non-orthologous sequence - *A. fumigatus*:1669 *A. fischeri*:1064

|                 |         |                 |         |
|-----------------|---------|-----------------|---------|
| afum EAL86763.1 | 100.00% | afis EAW16767.1 | 100.00% |
|-----------------|---------|-----------------|---------|

Bootstrap support for afum|EAL86763.1 as seed ortholog is 100%.

Bootstrap support for afis|EAW16767.1 as seed ortholog is 100%.

---

Group of orthologs #1483. Best score 1669 bits

Score difference with first non-orthologous sequence - *A. fumigatus*:1669 *A. fischeri*:1669

|                 |         |                 |         |
|-----------------|---------|-----------------|---------|
| afum EAL88487.1 | 100.00% | afis EAW15851.1 | 100.00% |
|-----------------|---------|-----------------|---------|

Bootstrap support for afum|EAL88487.1 as seed ortholog is 100%.

Bootstrap support for afis|EAW15851.1 as seed ortholog is 100%.

---

Group of orthologs #1484. Best score 1669 bits

Score difference with first non-orthologous sequence - *A. fumigatus*:1669 *A. fischeri*:1669

|                 |         |                 |         |
|-----------------|---------|-----------------|---------|
| afum EAL90400.1 | 100.00% | afis EAW22799.1 | 100.00% |
|-----------------|---------|-----------------|---------|

Bootstrap support for afum|EAL90400.1 as seed ortholog is 100%.

Bootstrap support for afis|EAW22799.1 as seed ortholog is 100%.

---

Group of orthologs #1485. Best score 1669 bits

Score difference with first non-orthologous sequence - *A. fumigatus*:1669 *A. fischeri*:1669

|                 |         |                 |         |
|-----------------|---------|-----------------|---------|
| afum EAL92390.1 | 100.00% | afis EAW21373.1 | 100.00% |
|-----------------|---------|-----------------|---------|

Bootstrap support for afum|EAL92390.1 as seed ortholog is 100%.

Bootstrap support for afis|EAW21373.1 as seed ortholog is 100%.

---

Group of orthologs #1486. Best score 1669 bits

Score difference with first non-orthologous sequence - *A. fumigatus*:1669 *A. fischeri*:1669

|                 |         |                 |         |
|-----------------|---------|-----------------|---------|
| afum EAL89707.1 | 100.00% | afis EAW25039.1 | 100.00% |
|-----------------|---------|-----------------|---------|

Bootstrap support for afum|EAL89707.1 as seed ortholog is 100%.

Bootstrap support for afis|EAW25039.1 as seed ortholog is 100%.

---

Group of orthologs #1487. Best score 1668 bits

Score difference with first non-orthologous sequence - *A. fumigatus*:671 *A. fischeri*:1668

|                 |         |                 |         |
|-----------------|---------|-----------------|---------|
| afum EAL93075.1 | 100.00% | afis EAW18398.1 | 100.00% |
|-----------------|---------|-----------------|---------|

Bootstrap support for afum|EAL93075.1 as seed ortholog is 100%.

Bootstrap support for afis|EAW18398.1 as seed ortholog is 100%.

---

Group of orthologs #1488. Best score 1668 bits

Score difference with first non-orthologous sequence - *A. fumigatus*:1159 *A. fischeri*:1668

|                 |         |                 |         |
|-----------------|---------|-----------------|---------|
| afum EAL92373.1 | 100.00% | afis EAW21358.1 | 100.00% |
|-----------------|---------|-----------------|---------|

Bootstrap support for afum|EAL92373.1 as seed ortholog is 100%.

Bootstrap support for afis|EAW21358.1 as seed ortholog is 100%.

---

Group of orthologs #1489. Best score 1667 bits

Score difference with first non-orthologous sequence - *A. fumigatus*:1667 *A. fischeri*:1667

|                 |         |                 |         |
|-----------------|---------|-----------------|---------|
| afum EAL87536.1 | 100.00% | afis EAW18175.1 | 100.00% |
|-----------------|---------|-----------------|---------|

Bootstrap support for afum|EAL87536.1 as seed ortholog is 100%.

Bootstrap support for afis|EAW18175.1 as seed ortholog is 100%.

---

Group of orthologs #1490. Best score 1667 bits

Score difference with first non-orthologous sequence - *A. fumigatus*:1667 *A. fischeri*:1667

|                 |         |                 |         |
|-----------------|---------|-----------------|---------|
| afum EAL92156.1 | 100.00% | afis EAW21137.1 | 100.00% |
|-----------------|---------|-----------------|---------|

Bootstrap support for afum|EAL92156.1 as seed ortholog is 100%.

Bootstrap support for afis|EAW21137.1 as seed ortholog is 100%.

---

Group of orthologs #1491. Best score 1666 bits

Score difference with first non-orthologous sequence - *A. fumigatus*:1666 *A. fischeri*:1666

afum|EAL89093.1 100.00% afis|EAW16498.1 100.00%

Bootstrap support for afum|EAL89093.1 as seed ortholog is 100%.

Bootstrap support for afis|EAW16498.1 as seed ortholog is 100%.

---

Group of orthologs #1492. Best score 1666 bits

Score difference with first non-orthologous sequence - *A. fumigatus*:1291 *A. fischeri*:1666

afum|EAL87052.1 100.00% afis|EAW19443.1 100.00%

Bootstrap support for afum|EAL87052.1 as seed ortholog is 100%.

Bootstrap support for afis|EAW19443.1 as seed ortholog is 100%.

---

Group of orthologs #1493. Best score 1666 bits

Score difference with first non-orthologous sequence - *A. fumigatus*:1666 *A. fischeri*:1666

afum|EAL86949.1 100.00% afis|EAW19563.1 100.00%

Bootstrap support for afum|EAL86949.1 as seed ortholog is 100%.

Bootstrap support for afis|EAW19563.1 as seed ortholog is 100%.

---

Group of orthologs #1494. Best score 1666 bits

Score difference with first non-orthologous sequence - *A. fumigatus*:1666 *A. fischeri*:1666

afum|EAL90971.1 100.00% afis|EAW22223.1 100.00%

Bootstrap support for afum|EAL90971.1 as seed ortholog is 100%.

Bootstrap support for afis|EAW22223.1 as seed ortholog is 100%.

---

Group of orthologs #1495. Best score 1666 bits

Score difference with first non-orthologous sequence - *A. fumigatus*:1666 *A. fischeri*:1666

afum|EAL92864.1 100.00% afis|EAW21851.1 100.00%

Bootstrap support for afum|EAL92864.1 as seed ortholog is 100%.

Bootstrap support for afis|EAW21851.1 as seed ortholog is 100%.

---

Group of orthologs #1496. Best score 1665 bits

Score difference with first non-orthologous sequence - *A. fumigatus*:1665 *A. fischeri*:1665

afum|EAL86304.2 100.00% afis|EAW16729.1 100.00%

Bootstrap support for afum|EAL86304.2 as seed ortholog is 100%.

Bootstrap support for afis|EAW16729.1 as seed ortholog is 100%.

---

Group of orthologs #1497. Best score 1665 bits

Score difference with first non-orthologous sequence - *A. fumigatus*:1665 *A. fischeri*:1665

afum|EAL88634.1 100.00% afis|EAW16002.1 100.00%

Bootstrap support for afum|EAL88634.1 as seed ortholog is 100%.

Bootstrap support for afis|EAW16002.1 as seed ortholog is 100%.

---

Group of orthologs #1498. Best score 1665 bits

Score difference with first non-orthologous sequence - *A. fumigatus*:1665 *A. fischeri*:1305

afum|EAL88828.1 100.00% afis|EAW16201.1 100.00%

Bootstrap support for afum|EAL88828.1 as seed ortholog is 100%.

Bootstrap support for afis|EAW16201.1 as seed ortholog is 100%.

---

Group of orthologs #1499. Best score 1665 bits

Score difference with first non-orthologous sequence - *A. fumigatus*:1665 *A. fischeri*:1665

afum|EAL87947.2 100.00% afis|EAW23516.1 100.00%

Bootstrap support for afum|EAL87947.2 as seed ortholog is 100%.

Bootstrap support for afis|EAW23516.1 as seed ortholog is 100%.

---

Group of orthologs #1500. Best score 1665 bits

Score difference with first non-orthologous sequence - *A. fumigatus*:1665 *A. fischeri*:1665

afum|EAL93706.1      100.00%                      afis|EAW18973.1      100.00%

Bootstrap support for afum|EAL93706.1 as seed ortholog is 100%.

Bootstrap support for afis|EAW18973.1 as seed ortholog is 100%.

---

Group of orthologs #1501. Best score 1665 bits

Score difference with first non-orthologous sequence - *A. fumigatus*:1665    *A. fischeri*:1665

afum|EAL92539.1      100.00%                      afis|EAW21518.1      100.00%

Bootstrap support for afum|EAL92539.1 as seed ortholog is 100%.

Bootstrap support for afis|EAW21518.1 as seed ortholog is 100%.

---

Group of orthologs #1502. Best score 1665 bits

Score difference with first non-orthologous sequence - *A. fumigatus*:1665    *A. fischeri*:1665

afum|EAL89854.1      100.00%                      afis|EAW25180.1      100.00%

Bootstrap support for afum|EAL89854.1 as seed ortholog is 100%.

Bootstrap support for afis|EAW25180.1 as seed ortholog is 100%.

---

Group of orthologs #1503. Best score 1664 bits

Score difference with first non-orthologous sequence - *A. fumigatus*:1275    *A. fischeri*:1025

afum|EAL85490.1      100.00%                      afis|EAW20376.1      100.00%

Bootstrap support for afum|EAL85490.1 as seed ortholog is 100%.

Bootstrap support for afis|EAW20376.1 as seed ortholog is 100%.

---

Group of orthologs #1504. Best score 1664 bits

Score difference with first non-orthologous sequence - *A. fumigatus*:1664    *A. fischeri*:379

afum|EAL90682.1      100.00%                      afis|EAW22511.1      100.00%

Bootstrap support for afum|EAL90682.1 as seed ortholog is 100%.

Bootstrap support for afis|EAW22511.1 as seed ortholog is 100%.

---

Group of orthologs #1505. Best score 1663 bits

Score difference with first non-orthologous sequence - *A. fumigatus*:1663    *A. fischeri*:1663

afum|EAL90172.1      100.00%                      afis|EAW25506.1      100.00%

Bootstrap support for afum|EAL90172.1 as seed ortholog is 100%.

Bootstrap support for afis|EAW25506.1 as seed ortholog is 100%.

---

Group of orthologs #1506. Best score 1662 bits

Score difference with first non-orthologous sequence - *A. fumigatus*:1662    *A. fischeri*:1662

afum|EAL93913.1      100.00%                      afis|EAW19183.1      100.00%

Bootstrap support for afum|EAL93913.1 as seed ortholog is 100%.

Bootstrap support for afis|EAW19183.1 as seed ortholog is 100%.

---

Group of orthologs #1507. Best score 1662 bits

Score difference with first non-orthologous sequence - *A. fumigatus*:1662    *A. fischeri*:1662

afum|EAL90386.1      100.00%                      afis|EAW22815.1      100.00%

Bootstrap support for afum|EAL90386.1 as seed ortholog is 100%.

Bootstrap support for afis|EAW22815.1 as seed ortholog is 100%.

---

Group of orthologs #1508. Best score 1661 bits

Score difference with first non-orthologous sequence - *A. fumigatus*:1661    *A. fischeri*:1661

afum|EAL85629.2      100.00%                      afis|EAW15719.1      100.00%

Bootstrap support for afum|EAL85629.2 as seed ortholog is 100%.

Bootstrap support for afis|EAW15719.1 as seed ortholog is 100%.

---

Group of orthologs #1509. Best score 1661 bits

Score difference with first non-orthologous sequence - *A. fumigatus*:1661    *A. fischeri*:1661

afum|EAL89144.1      100.00%                      afis|EAW16546.1      100.00%

Bootstrap support for afum|EAL89144.1 as seed ortholog is 100%.



Bootstrap support for afis|EAW16546.1 as seed ortholog is 100%.

---

Group of orthologs #1510. Best score 1661 bits

Score difference with first non-orthologous sequence - *A. fumigatus*:1661 *A. fischeri*:1661

|                 |         |                 |         |
|-----------------|---------|-----------------|---------|
| afum EAL93286.1 | 100.00% | afis EAW18582.1 | 100.00% |
|-----------------|---------|-----------------|---------|

Bootstrap support for afum|EAL93286.1 as seed ortholog is 100%.

Bootstrap support for afis|EAW18582.1 as seed ortholog is 100%.

---

Group of orthologs #1511. Best score 1661 bits

Score difference with first non-orthologous sequence - *A. fumigatus*:1661 *A. fischeri*:1661

|                 |         |                 |         |
|-----------------|---------|-----------------|---------|
| afum EAL93610.1 | 100.00% | afis EAW18878.1 | 100.00% |
|-----------------|---------|-----------------|---------|

Bootstrap support for afum|EAL93610.1 as seed ortholog is 100%.

Bootstrap support for afis|EAW18878.1 as seed ortholog is 100%.

---

Group of orthologs #1512. Best score 1661 bits

Score difference with first non-orthologous sequence - *A. fumigatus*:1661 *A. fischeri*:1661

|                 |         |                 |         |
|-----------------|---------|-----------------|---------|
| afum EAL92386.1 | 100.00% | afis EAW21369.1 | 100.00% |
|-----------------|---------|-----------------|---------|

Bootstrap support for afum|EAL92386.1 as seed ortholog is 100%.

Bootstrap support for afis|EAW21369.1 as seed ortholog is 100%.

---

Group of orthologs #1513. Best score 1660 bits

Score difference with first non-orthologous sequence - *A. fumigatus*:1660 *A. fischeri*:1660

|                 |         |                 |         |
|-----------------|---------|-----------------|---------|
| afum EAL85888.1 | 100.00% | afis EAW24219.1 | 100.00% |
|-----------------|---------|-----------------|---------|

Bootstrap support for afum|EAL85888.1 as seed ortholog is 100%.

Bootstrap support for afis|EAW24219.1 as seed ortholog is 100%.

---

Group of orthologs #1514. Best score 1660 bits

Score difference with first non-orthologous sequence - *A. fumigatus*:1660 *A. fischeri*:1660

|                 |         |                 |         |
|-----------------|---------|-----------------|---------|
| afum EAL87163.1 | 100.00% | afis EAW23723.1 | 100.00% |
|-----------------|---------|-----------------|---------|

Bootstrap support for afum|EAL87163.1 as seed ortholog is 100%.

Bootstrap support for afis|EAW23723.1 as seed ortholog is 100%.

---

Group of orthologs #1515. Best score 1660 bits

Score difference with first non-orthologous sequence - *A. fumigatus*:1660 *A. fischeri*:1660

|                 |         |                 |         |
|-----------------|---------|-----------------|---------|
| afum EAL90349.1 | 100.00% | afis EAW22851.1 | 100.00% |
|-----------------|---------|-----------------|---------|

Bootstrap support for afum|EAL90349.1 as seed ortholog is 100%.

Bootstrap support for afis|EAW22851.1 as seed ortholog is 100%.

---

Group of orthologs #1516. Best score 1660 bits

Score difference with first non-orthologous sequence - *A. fumigatus*:1660 *A. fischeri*:1660

|                 |         |                 |         |
|-----------------|---------|-----------------|---------|
| afum EAL90242.1 | 100.00% | afis EAW22955.1 | 100.00% |
|-----------------|---------|-----------------|---------|

Bootstrap support for afum|EAL90242.1 as seed ortholog is 100%.

Bootstrap support for afis|EAW22955.1 as seed ortholog is 100%.

---

Group of orthologs #1517. Best score 1659 bits

Score difference with first non-orthologous sequence - *A. fumigatus*:1659 *A. fischeri*:1503

|                 |         |                 |         |
|-----------------|---------|-----------------|---------|
| afum EAL88947.1 | 100.00% | afis EAW16324.1 | 100.00% |
|-----------------|---------|-----------------|---------|

Bootstrap support for afum|EAL88947.1 as seed ortholog is 100%.

Bootstrap support for afis|EAW16324.1 as seed ortholog is 100%.

---

Group of orthologs #1518. Best score 1659 bits

Score difference with first non-orthologous sequence - *A. fumigatus*:1659 *A. fischeri*:1659

|                 |         |                 |         |
|-----------------|---------|-----------------|---------|
| afum EAL89127.1 | 100.00% | afis EAW16530.1 | 100.00% |
|-----------------|---------|-----------------|---------|

Bootstrap support for afum|EAL89127.1 as seed ortholog is 100%.

Bootstrap support for afis|EAW16530.1 as seed ortholog is 100%.

---

Group of orthologs #1519. Best score 1659 bits

Score difference with first non-orthologous sequence - *A. fumigatus*:1659 *A. fischeri*:1659

afum|EAL84683.2 100.00% afis|EAW20951.1 100.00%

Bootstrap support for afum|EAL84683.2 as seed ortholog is 100%.

Bootstrap support for afis|EAW20951.1 as seed ortholog is 100%.

---

Group of orthologs #1520. Best score 1659 bits

Score difference with first non-orthologous sequence - *A. fumigatus*:1659 *A. fischeri*:1659

afum|EAL86068.1 100.00% afis|EAW24396.1 100.00%

Bootstrap support for afum|EAL86068.1 as seed ortholog is 100%.

Bootstrap support for afis|EAW24396.1 as seed ortholog is 100%.

---

Group of orthologs #1521. Best score 1659 bits

Score difference with first non-orthologous sequence - *A. fumigatus*:1659 *A. fischeri*:1659

afum|EAL90628.1 100.00% afis|EAW22570.1 100.00%

Bootstrap support for afum|EAL90628.1 as seed ortholog is 100%.

Bootstrap support for afis|EAW22570.1 as seed ortholog is 100%.

---

Group of orthologs #1522. Best score 1658 bits

Score difference with first non-orthologous sequence - *A. fumigatus*:1658 *A. fischeri*:1658

afum|EAL85510.1 100.00% afis|EAW15841.1 100.00%

Bootstrap support for afum|EAL85510.1 as seed ortholog is 100%.

Bootstrap support for afis|EAW15841.1 as seed ortholog is 100%.

---

Group of orthologs #1523. Best score 1657 bits

Score difference with first non-orthologous sequence - *A. fumigatus*:1657 *A. fischeri*:1657

afum|EAL87674.1 100.00% afis|EAW18308.1 100.00%

Bootstrap support for afum|EAL87674.1 as seed ortholog is 100%.

Bootstrap support for afis|EAW18308.1 as seed ortholog is 100%.

---

Group of orthologs #1524. Best score 1657 bits

Score difference with first non-orthologous sequence - *A. fumigatus*:1657 *A. fischeri*:1561

afum|EAL86792.1 100.00% afis|EAW19737.1 100.00%

Bootstrap support for afum|EAL86792.1 as seed ortholog is 100%.

Bootstrap support for afis|EAW19737.1 as seed ortholog is 100%.

---

Group of orthologs #1525. Best score 1656 bits

Score difference with first non-orthologous sequence - *A. fumigatus*:1656 *A. fischeri*:1656

afum|EAL93374.1 100.00% afis|EAW18657.1 100.00%

Bootstrap support for afum|EAL93374.1 as seed ortholog is 100%.

Bootstrap support for afis|EAW18657.1 as seed ortholog is 100%.

---

Group of orthologs #1526. Best score 1655 bits

Score difference with first non-orthologous sequence - *A. fumigatus*:1655 *A. fischeri*:1655

afum|EAL88925.1 100.00% afis|EAW16303.1 100.00%

Bootstrap support for afum|EAL88925.1 as seed ortholog is 100%.

Bootstrap support for afis|EAW16303.1 as seed ortholog is 100%.

---

Group of orthologs #1527. Best score 1654 bits

Score difference with first non-orthologous sequence - *A. fumigatus*:1654 *A. fischeri*:1654

afum|EAL93620.1 100.00% afis|EAW18887.1 100.00%

Bootstrap support for afum|EAL93620.1 as seed ortholog is 100%.

Bootstrap support for afis|EAW18887.1 as seed ortholog is 100%.

---

Group of orthologs #1528. Best score 1653 bits

Score difference with first non-orthologous sequence - *A. fumigatus*:1653 *A. fischeri*:1653

|                 |         |                 |         |
|-----------------|---------|-----------------|---------|
| afum EAL91708.1 | 100.00% | afis EAW17900.1 | 100.00% |
|-----------------|---------|-----------------|---------|

Bootstrap support for afum|EAL91708.1 as seed ortholog is 100%.

Bootstrap support for afis|EAW17900.1 as seed ortholog is 100%.

---

Group of orthologs #1529. Best score 1652 bits

Score difference with first non-orthologous sequence - *A. fumigatus*:1652 *A. fischeri*:1652

|                 |         |                 |         |
|-----------------|---------|-----------------|---------|
| afum EAL86067.1 | 100.00% | afis EAW24395.1 | 100.00% |
|-----------------|---------|-----------------|---------|

Bootstrap support for afum|EAL86067.1 as seed ortholog is 100%.

Bootstrap support for afis|EAW24395.1 as seed ortholog is 100%.

---

Group of orthologs #1530. Best score 1652 bits

Score difference with first non-orthologous sequence - *A. fumigatus*:1652 *A. fischeri*:1471

|                 |         |                 |         |
|-----------------|---------|-----------------|---------|
| afum EAL93091.1 | 100.00% | afis EAW18411.1 | 100.00% |
|-----------------|---------|-----------------|---------|

Bootstrap support for afum|EAL93091.1 as seed ortholog is 100%.

Bootstrap support for afis|EAW18411.1 as seed ortholog is 100%.

---

Group of orthologs #1531. Best score 1652 bits

Score difference with first non-orthologous sequence - *A. fumigatus*:1395 *A. fischeri*:1574

|                 |         |                 |         |
|-----------------|---------|-----------------|---------|
| afum EAL92894.2 | 100.00% | afis EAW21880.1 | 100.00% |
|-----------------|---------|-----------------|---------|

Bootstrap support for afum|EAL92894.2 as seed ortholog is 100%.

Bootstrap support for afis|EAW21880.1 as seed ortholog is 100%.

---

Group of orthologs #1532. Best score 1651 bits

Score difference with first non-orthologous sequence - *A. fumigatus*:1651 *A. fischeri*:1442

|                 |         |                 |         |
|-----------------|---------|-----------------|---------|
| afum EAL86480.1 | 100.00% | afis EAW16952.1 | 100.00% |
|-----------------|---------|-----------------|---------|

Bootstrap support for afum|EAL86480.1 as seed ortholog is 100%.

Bootstrap support for afis|EAW16952.1 as seed ortholog is 100%.

---

Group of orthologs #1533. Best score 1651 bits

Score difference with first non-orthologous sequence - *A. fumigatus*:1651 *A. fischeri*:1028

|                 |         |                 |         |
|-----------------|---------|-----------------|---------|
| afum EAL86791.1 | 100.00% | afis EAW19738.1 | 100.00% |
|-----------------|---------|-----------------|---------|

Bootstrap support for afum|EAL86791.1 as seed ortholog is 100%.

Bootstrap support for afis|EAW19738.1 as seed ortholog is 100%.

---

Group of orthologs #1534. Best score 1651 bits

Score difference with first non-orthologous sequence - *A. fumigatus*:1651 *A. fischeri*:1651

|                 |         |                 |         |
|-----------------|---------|-----------------|---------|
| afum EAL93043.1 | 100.00% | afis EAW18368.1 | 100.00% |
|-----------------|---------|-----------------|---------|

Bootstrap support for afum|EAL93043.1 as seed ortholog is 100%.

Bootstrap support for afis|EAW18368.1 as seed ortholog is 100%.

---

Group of orthologs #1535. Best score 1651 bits

Score difference with first non-orthologous sequence - *A. fumigatus*:1651 *A. fischeri*:1651

|                 |         |                 |         |
|-----------------|---------|-----------------|---------|
| afum EAL93852.1 | 100.00% | afis EAW19120.1 | 100.00% |
|-----------------|---------|-----------------|---------|

Bootstrap support for afum|EAL93852.1 as seed ortholog is 100%.

Bootstrap support for afis|EAW19120.1 as seed ortholog is 100%.

---

Group of orthologs #1536. Best score 1650 bits

Score difference with first non-orthologous sequence - *A. fumigatus*:1650 *A. fischeri*:1527

|                 |         |                 |         |
|-----------------|---------|-----------------|---------|
| afum EAL84712.1 | 100.00% | afis EAW20922.1 | 100.00% |
|-----------------|---------|-----------------|---------|

Bootstrap support for afum|EAL84712.1 as seed ortholog is 100%.

Bootstrap support for afis|EAW20922.1 as seed ortholog is 100%.

---

Group of orthologs #1537. Best score 1650 bits

Score difference with first non-orthologous sequence - *A. fumigatus*:1650 *A. fischeri*:1650

|                 |         |                 |         |
|-----------------|---------|-----------------|---------|
| afum EAL91721.1 | 100.00% | afis EAW17912.1 | 100.00% |
|-----------------|---------|-----------------|---------|

Bootstrap support for afum|EAL91721.1 as seed ortholog is 100%.

Bootstrap support for afis|EAW17912.1 as seed ortholog is 100%.

---

Group of orthologs #1538. Best score 1650 bits

Score difference with first non-orthologous sequence - *A. fumigatus*:1650 *A. fischeri*:1650

|                 |         |                 |         |
|-----------------|---------|-----------------|---------|
| afum EAL92983.1 | 100.00% | afis EAW21969.1 | 100.00% |
|-----------------|---------|-----------------|---------|

Bootstrap support for afum|EAL92983.1 as seed ortholog is 100%.

Bootstrap support for afis|EAW21969.1 as seed ortholog is 100%.

---

Group of orthologs #1539. Best score 1649 bits

Score difference with first non-orthologous sequence - *A. fumigatus*:1649 *A. fischeri*:1649

|                 |         |                 |         |
|-----------------|---------|-----------------|---------|
| afum EAL90825.1 | 100.00% | afis EAW22367.1 | 100.00% |
|-----------------|---------|-----------------|---------|

Bootstrap support for afum|EAL90825.1 as seed ortholog is 100%.

Bootstrap support for afis|EAW22367.1 as seed ortholog is 100%.

---

Group of orthologs #1540. Best score 1649 bits

Score difference with first non-orthologous sequence - *A. fumigatus*:1649 *A. fischeri*:1649

|                 |         |                 |         |
|-----------------|---------|-----------------|---------|
| afum EAL90021.1 | 100.00% | afis EAW25359.1 | 100.00% |
|-----------------|---------|-----------------|---------|

Bootstrap support for afum|EAL90021.1 as seed ortholog is 100%.

Bootstrap support for afis|EAW25359.1 as seed ortholog is 100%.

---

Group of orthologs #1541. Best score 1648 bits

Score difference with first non-orthologous sequence - *A. fumigatus*:1648 *A. fischeri*:1648

|                 |         |                 |         |
|-----------------|---------|-----------------|---------|
| afum EAL87634.1 | 100.00% | afis EAW18269.1 | 100.00% |
|-----------------|---------|-----------------|---------|

Bootstrap support for afum|EAL87634.1 as seed ortholog is 100%.

Bootstrap support for afis|EAW18269.1 as seed ortholog is 100%.

---

Group of orthologs #1542. Best score 1648 bits

Score difference with first non-orthologous sequence - *A. fumigatus*:1648 *A. fischeri*:1648

|                 |         |                 |         |
|-----------------|---------|-----------------|---------|
| afum EAL90729.1 | 100.00% | afis EAW22462.1 | 100.00% |
|-----------------|---------|-----------------|---------|

Bootstrap support for afum|EAL90729.1 as seed ortholog is 100%.

Bootstrap support for afis|EAW22462.1 as seed ortholog is 100%.

---

Group of orthologs #1543. Best score 1647 bits

Score difference with first non-orthologous sequence - *A. fumigatus*:1647 *A. fischeri*:1647

|                 |         |                 |         |
|-----------------|---------|-----------------|---------|
| afum EAL88884.1 | 100.00% | afis EAW16263.1 | 100.00% |
|-----------------|---------|-----------------|---------|

Bootstrap support for afum|EAL88884.1 as seed ortholog is 100%.

Bootstrap support for afis|EAW16263.1 as seed ortholog is 100%.

---

Group of orthologs #1544. Best score 1647 bits

Score difference with first non-orthologous sequence - *A. fumigatus*:1647 *A. fischeri*:1647

|                 |         |                 |         |
|-----------------|---------|-----------------|---------|
| afum EAL87590.1 | 100.00% | afis EAW18224.1 | 100.00% |
|-----------------|---------|-----------------|---------|

Bootstrap support for afum|EAL87590.1 as seed ortholog is 100%.

Bootstrap support for afis|EAW18224.1 as seed ortholog is 100%.

---

Group of orthologs #1545. Best score 1647 bits

Score difference with first non-orthologous sequence - *A. fumigatus*:1550 *A. fischeri*:1647

|                 |         |                 |         |
|-----------------|---------|-----------------|---------|
| afum EAL91190.1 | 100.00% | afis EAW17346.1 | 100.00% |
|-----------------|---------|-----------------|---------|

Bootstrap support for afum|EAL91190.1 as seed ortholog is 100%.

Bootstrap support for afis|EAW17346.1 as seed ortholog is 100%.

---

Group of orthologs #1546. Best score 1647 bits

Score difference with first non-orthologous sequence - *A. fumigatus*:1647 *A. fischeri*:1647

|                 |         |                 |         |
|-----------------|---------|-----------------|---------|
| afum EAL93680.1 | 100.00% | afis EAW18946.1 | 100.00% |
|-----------------|---------|-----------------|---------|

Bootstrap support for afum|EAL93680.1 as seed ortholog is 100%.

Bootstrap support for afis|EAW18946.1 as seed ortholog is 100%.

---

Group of orthologs #1547. Best score 1646 bits

Score difference with first non-orthologous sequence - *A. fumigatus*:1646 *A. fischeri*:1646

afum|EAL85029.1 100.00% afis|EAW19868.1 100.00%

Bootstrap support for afum|EAL85029.1 as seed ortholog is 100%.

Bootstrap support for afis|EAW19868.1 as seed ortholog is 100%.

---

Group of orthologs #1548. Best score 1646 bits

Score difference with first non-orthologous sequence - *A. fumigatus*:1646 *A. fischeri*:1646

afum|EAL85245.1 100.00% afis|EAW20127.1 100.00%

Bootstrap support for afum|EAL85245.1 as seed ortholog is 100%.

Bootstrap support for afis|EAW20127.1 as seed ortholog is 100%.

---

Group of orthologs #1549. Best score 1646 bits

Score difference with first non-orthologous sequence - *A. fumigatus*:1646 *A. fischeri*:1646

afum|EAL92104.2 100.00% afis|EAW21083.1 100.00%

Bootstrap support for afum|EAL92104.2 as seed ortholog is 100%.

Bootstrap support for afis|EAW21083.1 as seed ortholog is 100%.

---

Group of orthologs #1550. Best score 1645 bits

Score difference with first non-orthologous sequence - *A. fumigatus*:1645 *A. fischeri*:1645

afum|EAL86518.2 100.00% afis|EAW16994.1 100.00%

Bootstrap support for afum|EAL86518.2 as seed ortholog is 100%.

Bootstrap support for afis|EAW16994.1 as seed ortholog is 100%.

---

Group of orthologs #1551. Best score 1645 bits

Score difference with first non-orthologous sequence - *A. fumigatus*:1645 *A. fischeri*:1645

afum|EAL84766.2 100.00% afis|EAW20868.1 100.00%

Bootstrap support for afum|EAL84766.2 as seed ortholog is 100%.

Bootstrap support for afis|EAW20868.1 as seed ortholog is 100%.

---

Group of orthologs #1552. Best score 1645 bits

Score difference with first non-orthologous sequence - *A. fumigatus*:1645 *A. fischeri*:1645

afum|EAL87038.1 100.00% afis|EAW19458.1 100.00%

Bootstrap support for afum|EAL87038.1 as seed ortholog is 100%.

Bootstrap support for afis|EAW19458.1 as seed ortholog is 100%.

---

Group of orthologs #1553. Best score 1645 bits

Score difference with first non-orthologous sequence - *A. fumigatus*:1645 *A. fischeri*:1645

afum|EAL90693.1 100.00% afis|EAW22500.1 100.00%

Bootstrap support for afum|EAL90693.1 as seed ortholog is 100%.

Bootstrap support for afis|EAW22500.1 as seed ortholog is 100%.

---

Group of orthologs #1554. Best score 1643 bits

Score difference with first non-orthologous sequence - *A. fumigatus*:1643 *A. fischeri*:1643

afum|EAL89087.1 100.00% afis|EAW16493.1 100.00%

Bootstrap support for afum|EAL89087.1 as seed ortholog is 100%.

Bootstrap support for afis|EAW16493.1 as seed ortholog is 100%.

---

Group of orthologs #1555. Best score 1643 bits

Score difference with first non-orthologous sequence - *A. fumigatus*:1643 *A. fischeri*:1643

afum|EAL93329.1 100.00% afis|EAW18619.1 100.00%

Bootstrap support for afum|EAL93329.1 as seed ortholog is 100%.

Bootstrap support for afis|EAW18619.1 as seed ortholog is 100%.

---

Group of orthologs #1556. Best score 1643 bits

Score difference with first non-orthologous sequence - *A. fumigatus*:1296 *A. fischeri*:1643

|                 |         |                 |         |
|-----------------|---------|-----------------|---------|
| afum EAL92129.1 | 100.00% | afis EAW21108.1 | 100.00% |
|-----------------|---------|-----------------|---------|

Bootstrap support for afum|EAL92129.1 as seed ortholog is 100%.

Bootstrap support for afis|EAW21108.1 as seed ortholog is 100%.

---

Group of orthologs #1557. Best score 1641 bits

Score difference with first non-orthologous sequence - *A. fumigatus*:1641 *A. fischeri*:1641

|                 |         |                 |         |
|-----------------|---------|-----------------|---------|
| afum EAL84607.1 | 100.00% | afis EAW20446.1 | 100.00% |
|-----------------|---------|-----------------|---------|

Bootstrap support for afum|EAL84607.1 as seed ortholog is 100%.

Bootstrap support for afis|EAW20446.1 as seed ortholog is 100%.

---

Group of orthologs #1558. Best score 1641 bits

Score difference with first non-orthologous sequence - *A. fumigatus*:1641 *A. fischeri*:1641

|                 |         |                 |         |
|-----------------|---------|-----------------|---------|
| afum EAL87436.1 | 100.00% | afis EAW24006.1 | 100.00% |
|-----------------|---------|-----------------|---------|

Bootstrap support for afum|EAL87436.1 as seed ortholog is 100%.

Bootstrap support for afis|EAW24006.1 as seed ortholog is 100%.

---

Group of orthologs #1559. Best score 1641 bits

Score difference with first non-orthologous sequence - *A. fumigatus*:1641 *A. fischeri*:1641

|                 |         |                 |         |
|-----------------|---------|-----------------|---------|
| afum EAL92971.1 | 100.00% | afis EAW21957.1 | 100.00% |
|-----------------|---------|-----------------|---------|

Bootstrap support for afum|EAL92971.1 as seed ortholog is 100%.

Bootstrap support for afis|EAW21957.1 as seed ortholog is 100%.

---

Group of orthologs #1560. Best score 1641 bits

Score difference with first non-orthologous sequence - *A. fumigatus*:1641 *A. fischeri*:1641

|                 |         |                 |         |
|-----------------|---------|-----------------|---------|
| afum EAL90141.1 | 100.00% | afis EAW25478.1 | 100.00% |
|-----------------|---------|-----------------|---------|

Bootstrap support for afum|EAL90141.1 as seed ortholog is 100%.

Bootstrap support for afis|EAW25478.1 as seed ortholog is 100%.

---

Group of orthologs #1561. Best score 1640 bits

Score difference with first non-orthologous sequence - *A. fumigatus*:1640 *A. fischeri*:1640

|                 |         |                 |         |
|-----------------|---------|-----------------|---------|
| afum EAL85053.1 | 100.00% | afis EAW19842.1 | 100.00% |
|-----------------|---------|-----------------|---------|

Bootstrap support for afum|EAL85053.1 as seed ortholog is 100%.

Bootstrap support for afis|EAW19842.1 as seed ortholog is 100%.

---

Group of orthologs #1562. Best score 1640 bits

Score difference with first non-orthologous sequence - *A. fumigatus*:1640 *A. fischeri*:1640

|                 |         |                 |         |
|-----------------|---------|-----------------|---------|
| afum EAL90806.1 | 100.00% | afis EAW22384.1 | 100.00% |
|-----------------|---------|-----------------|---------|

Bootstrap support for afum|EAL90806.1 as seed ortholog is 100%.

Bootstrap support for afis|EAW22384.1 as seed ortholog is 100%.

---

Group of orthologs #1563. Best score 1640 bits

Score difference with first non-orthologous sequence - *A. fumigatus*:1640 *A. fischeri*:1640

|                 |         |                 |         |
|-----------------|---------|-----------------|---------|
| afum EAL92563.1 | 100.00% | afis EAW21543.1 | 100.00% |
|-----------------|---------|-----------------|---------|

Bootstrap support for afum|EAL92563.1 as seed ortholog is 100%.

Bootstrap support for afis|EAW21543.1 as seed ortholog is 100%.

---

Group of orthologs #1564. Best score 1640 bits

Score difference with first non-orthologous sequence - *A. fumigatus*:1640 *A. fischeri*:1640

|                 |         |                 |         |
|-----------------|---------|-----------------|---------|
| afum EAL89894.1 | 100.00% | afis EAW25233.1 | 100.00% |
|-----------------|---------|-----------------|---------|

Bootstrap support for afum|EAL89894.1 as seed ortholog is 100%.

Bootstrap support for afis|EAW25233.1 as seed ortholog is 100%.

---

Group of orthologs #1565. Best score 1639 bits

Score difference with first non-orthologous sequence - *A. fumigatus*:1639 *A. fischeri*:1639

|                 |         |                 |         |
|-----------------|---------|-----------------|---------|
| afum EAL89253.1 | 100.00% | afis EAW16649.1 | 100.00% |
|-----------------|---------|-----------------|---------|

Bootstrap support for afum|EAL89253.1 as seed ortholog is 100%.

Bootstrap support for afis|EAW16649.1 as seed ortholog is 100%.

---

Group of orthologs #1566. Best score 1639 bits

Score difference with first non-orthologous sequence - *A. fumigatus*:1639 *A. fischeri*:1639

|                 |         |                 |         |
|-----------------|---------|-----------------|---------|
| afum EAL86008.1 | 100.00% | afis EAW24337.1 | 100.00% |
|-----------------|---------|-----------------|---------|

Bootstrap support for afum|EAL86008.1 as seed ortholog is 100%.

Bootstrap support for afis|EAW24337.1 as seed ortholog is 100%.

---

Group of orthologs #1567. Best score 1639 bits

Score difference with first non-orthologous sequence - *A. fumigatus*:854 *A. fischeri*:919

|                 |         |                 |         |
|-----------------|---------|-----------------|---------|
| afum EAL89817.2 | 100.00% | afis EAW25144.1 | 100.00% |
|-----------------|---------|-----------------|---------|

Bootstrap support for afum|EAL89817.2 as seed ortholog is 100%.

Bootstrap support for afis|EAW25144.1 as seed ortholog is 100%.

---

Group of orthologs #1568. Best score 1638 bits

Score difference with first non-orthologous sequence - *A. fumigatus*:1638 *A. fischeri*:1638

|                 |         |                 |         |
|-----------------|---------|-----------------|---------|
| afum EAL91442.1 | 100.00% | afis EAW17628.1 | 100.00% |
|-----------------|---------|-----------------|---------|

Bootstrap support for afum|EAL91442.1 as seed ortholog is 100%.

Bootstrap support for afis|EAW17628.1 as seed ortholog is 100%.

---

Group of orthologs #1569. Best score 1638 bits

Score difference with first non-orthologous sequence - *A. fumigatus*:1638 *A. fischeri*:1638

|                 |         |                 |         |
|-----------------|---------|-----------------|---------|
| afum EAL88302.1 | 100.00% | afis EAW23181.1 | 100.00% |
|-----------------|---------|-----------------|---------|

Bootstrap support for afum|EAL88302.1 as seed ortholog is 100%.

Bootstrap support for afis|EAW23181.1 as seed ortholog is 100%.

---

Group of orthologs #1570. Best score 1638 bits

Score difference with first non-orthologous sequence - *A. fumigatus*:1638 *A. fischeri*:1638

|                 |         |                 |         |
|-----------------|---------|-----------------|---------|
| afum EAL87924.1 | 100.00% | afis EAW23542.1 | 100.00% |
|-----------------|---------|-----------------|---------|

Bootstrap support for afum|EAL87924.1 as seed ortholog is 100%.

Bootstrap support for afis|EAW23542.1 as seed ortholog is 100%.

---

Group of orthologs #1571. Best score 1637 bits

Score difference with first non-orthologous sequence - *A. fumigatus*:1637 *A. fischeri*:1637

|                 |         |                 |         |
|-----------------|---------|-----------------|---------|
| afum EAL88684.1 | 100.00% | afis EAW16052.1 | 100.00% |
|-----------------|---------|-----------------|---------|

Bootstrap support for afum|EAL88684.1 as seed ortholog is 100%.

Bootstrap support for afis|EAW16052.1 as seed ortholog is 100%.

---

Group of orthologs #1572. Best score 1637 bits

Score difference with first non-orthologous sequence - *A. fumigatus*:1637 *A. fischeri*:1259

|                 |         |                 |         |
|-----------------|---------|-----------------|---------|
| afum EAL88026.1 | 100.00% | afis EAW23436.1 | 100.00% |
|-----------------|---------|-----------------|---------|

Bootstrap support for afum|EAL88026.1 as seed ortholog is 100%.

Bootstrap support for afis|EAW23436.1 as seed ortholog is 100%.

---

Group of orthologs #1573. Best score 1637 bits

Score difference with first non-orthologous sequence - *A. fumigatus*:1637 *A. fischeri*:1637

|                 |         |                 |         |
|-----------------|---------|-----------------|---------|
| afum EAL91973.1 | 100.00% | afis EAW24118.1 | 100.00% |
|-----------------|---------|-----------------|---------|

Bootstrap support for afum|EAL91973.1 as seed ortholog is 100%.

Bootstrap support for afis|EAW24118.1 as seed ortholog is 100%.

---

Group of orthologs #1574. Best score 1636 bits

Score difference with first non-orthologous sequence - *A. fumigatus*:1636 *A. fischeri*:1636

|                 |         |                 |         |
|-----------------|---------|-----------------|---------|
| afum EAL86699.1 | 100.00% | afis EAW17281.1 | 100.00% |
|-----------------|---------|-----------------|---------|

Bootstrap support for afum|EAL86699.1 as seed ortholog is 100%.

Bootstrap support for afis|EAW17281.1 as seed ortholog is 100%.

---

Group of orthologs #1575. Best score 1636 bits

Score difference with first non-orthologous sequence - *A. fumigatus*:1636 *A. fischeri*:1636

afum|EAL85092.1 100.00% afis|EAW19798.1 100.00%

Bootstrap support for afum|EAL85092.1 as seed ortholog is 100%.

Bootstrap support for afis|EAW19798.1 as seed ortholog is 100%.

---

Group of orthologs #1576. Best score 1636 bits

Score difference with first non-orthologous sequence - *A. fumigatus*:1279 *A. fischeri*:1636

afum|EAL90676.1 100.00% afis|EAW22517.1 100.00%

Bootstrap support for afum|EAL90676.1 as seed ortholog is 100%.

Bootstrap support for afis|EAW22517.1 as seed ortholog is 100%.

---

Group of orthologs #1577. Best score 1635 bits

Score difference with first non-orthologous sequence - *A. fumigatus*:1635 *A. fischeri*:1635

afum|EAL85837.1 100.00% afis|EAW15486.1 100.00%

Bootstrap support for afum|EAL85837.1 as seed ortholog is 100%.

Bootstrap support for afis|EAW15486.1 as seed ortholog is 100%.

---

Group of orthologs #1578. Best score 1635 bits

Score difference with first non-orthologous sequence - *A. fumigatus*:1635 *A. fischeri*:1560

afum|EAL93364.1 100.00% afis|EAW18648.1 100.00%

Bootstrap support for afum|EAL93364.1 as seed ortholog is 100%.

Bootstrap support for afis|EAW18648.1 as seed ortholog is 100%.

---

Group of orthologs #1579. Best score 1634 bits

Score difference with first non-orthologous sequence - *A. fumigatus*:1634 *A. fischeri*:1634

afum|EAL87724.1 100.00% afis|EAW18360.1 100.00%

Bootstrap support for afum|EAL87724.1 as seed ortholog is 100%.

Bootstrap support for afis|EAW18360.1 as seed ortholog is 100%.

---

Group of orthologs #1580. Best score 1634 bits

Score difference with first non-orthologous sequence - *A. fumigatus*:1634 *A. fischeri*:1634

afum|EAL90517.1 100.00% afis|EAW22675.1 100.00%

Bootstrap support for afum|EAL90517.1 as seed ortholog is 100%.

Bootstrap support for afis|EAW22675.1 as seed ortholog is 100%.

---

Group of orthologs #1581. Best score 1634 bits

Score difference with first non-orthologous sequence - *A. fumigatus*:1634 *A. fischeri*:1634

afum|EAL91975.1 100.00% afis|EAW24120.1 100.00%

Bootstrap support for afum|EAL91975.1 as seed ortholog is 100%.

Bootstrap support for afis|EAW24120.1 as seed ortholog is 100%.

---

Group of orthologs #1582. Best score 1633 bits

Score difference with first non-orthologous sequence - *A. fumigatus*:1633 *A. fischeri*:1633

afum|EAL88475.1 100.00% afis|EAW23005.1 100.00%

Bootstrap support for afum|EAL88475.1 as seed ortholog is 100%.

Bootstrap support for afis|EAW23005.1 as seed ortholog is 100%.

---

Group of orthologs #1583. Best score 1633 bits

Score difference with first non-orthologous sequence - *A. fumigatus*:1633 *A. fischeri*:1633

afum|EAL93481.1 100.00% afis|EAW18754.1 100.00%

Bootstrap support for afum|EAL93481.1 as seed ortholog is 100%.

Bootstrap support for afis|EAW18754.1 as seed ortholog is 100%.

---

Group of orthologs #1584. Best score 1633 bits

Score difference with first non-orthologous sequence - *A. fumigatus*:1633 *A. fischeri*:1633



|                 |         |                 |         |
|-----------------|---------|-----------------|---------|
| afum EAL90834.1 | 100.00% | afis EAW22357.1 | 100.00% |
|-----------------|---------|-----------------|---------|

Bootstrap support for afum|EAL90834.1 as seed ortholog is 100%.

Bootstrap support for afis|EAW22357.1 as seed ortholog is 100%.

---

Group of orthologs #1585. Best score 1632 bits

Score difference with first non-orthologous sequence - *A. fumigatus*:1632 *A. fischeri*:1545

|                 |         |                 |         |
|-----------------|---------|-----------------|---------|
| afum EAL86938.1 | 100.00% | afis EAW19580.1 | 100.00% |
|-----------------|---------|-----------------|---------|

Bootstrap support for afum|EAL86938.1 as seed ortholog is 100%.

Bootstrap support for afis|EAW19580.1 as seed ortholog is 100%.

---

Group of orthologs #1586. Best score 1631 bits

Score difference with first non-orthologous sequence - *A. fumigatus*:1631 *A. fischeri*:1631

|                 |         |                 |         |
|-----------------|---------|-----------------|---------|
| afum EAL85596.1 | 100.00% | afis EAW15753.1 | 100.00% |
|-----------------|---------|-----------------|---------|

Bootstrap support for afum|EAL85596.1 as seed ortholog is 100%.

Bootstrap support for afis|EAW15753.1 as seed ortholog is 100%.

---

Group of orthologs #1587. Best score 1631 bits

Score difference with first non-orthologous sequence - *A. fumigatus*:1631 *A. fischeri*:1631

|                 |         |                 |         |
|-----------------|---------|-----------------|---------|
| afum EAL84888.1 | 100.00% | afis EAW20029.1 | 100.00% |
|-----------------|---------|-----------------|---------|

Bootstrap support for afum|EAL84888.1 as seed ortholog is 100%.

Bootstrap support for afis|EAW20029.1 as seed ortholog is 100%.

---

Group of orthologs #1588. Best score 1631 bits

Score difference with first non-orthologous sequence - *A. fumigatus*:1631 *A. fischeri*:1631

|                 |         |                 |         |
|-----------------|---------|-----------------|---------|
| afum EAL91278.2 | 100.00% | afis EAW17450.1 | 100.00% |
|-----------------|---------|-----------------|---------|

Bootstrap support for afum|EAL91278.2 as seed ortholog is 100%.

Bootstrap support for afis|EAW17450.1 as seed ortholog is 100%.

---

Group of orthologs #1589. Best score 1631 bits

Score difference with first non-orthologous sequence - *A. fumigatus*:1631 *A. fischeri*:1631

|                 |         |                 |         |
|-----------------|---------|-----------------|---------|
| afum EAL91921.1 | 100.00% | afis EAW24066.1 | 100.00% |
|-----------------|---------|-----------------|---------|

Bootstrap support for afum|EAL91921.1 as seed ortholog is 100%.

Bootstrap support for afis|EAW24066.1 as seed ortholog is 100%.

---

Group of orthologs #1590. Best score 1629 bits

Score difference with first non-orthologous sequence - *A. fumigatus*:1629 *A. fischeri*:1629

|                 |         |                 |         |
|-----------------|---------|-----------------|---------|
| afum EAL89215.1 | 100.00% | afis EAW16622.1 | 100.00% |
|-----------------|---------|-----------------|---------|

Bootstrap support for afum|EAL89215.1 as seed ortholog is 100%.

Bootstrap support for afis|EAW16622.1 as seed ortholog is 100%.

---

Group of orthologs #1591. Best score 1629 bits

Score difference with first non-orthologous sequence - *A. fumigatus*:1432 *A. fischeri*:1513

|                 |         |                 |         |
|-----------------|---------|-----------------|---------|
| afum EAL84833.1 | 100.00% | afis EAW20796.1 | 100.00% |
|-----------------|---------|-----------------|---------|

Bootstrap support for afum|EAL84833.1 as seed ortholog is 100%.

Bootstrap support for afis|EAW20796.1 as seed ortholog is 100%.

---

Group of orthologs #1592. Best score 1629 bits

Score difference with first non-orthologous sequence - *A. fumigatus*:1629 *A. fischeri*:1629

|                 |         |                 |         |
|-----------------|---------|-----------------|---------|
| afum EAL91280.1 | 100.00% | afis EAW17452.1 | 100.00% |
|-----------------|---------|-----------------|---------|

Bootstrap support for afum|EAL91280.1 as seed ortholog is 100%.

Bootstrap support for afis|EAW17452.1 as seed ortholog is 100%.

---

Group of orthologs #1593. Best score 1628 bits

Score difference with first non-orthologous sequence - *A. fumigatus*:1262 *A. fischeri*:1101

|                 |         |                 |         |
|-----------------|---------|-----------------|---------|
| afum EAL87255.1 | 100.00% | afis EAW23820.1 | 100.00% |
|-----------------|---------|-----------------|---------|

Bootstrap support for afum|EAL87255.1 as seed ortholog is 100%.

Bootstrap support for afis|EAW23820.1 as seed ortholog is 100%.

---

Group of orthologs #1594. Best score 1628 bits

Score difference with first non-orthologous sequence - *A. fumigatus*:1628 *A. fischeri*:1628

|                 |         |                 |         |
|-----------------|---------|-----------------|---------|
| afum EAL90757.1 | 100.00% | afis EAW22434.1 | 100.00% |
|-----------------|---------|-----------------|---------|

Bootstrap support for afum|EAL90757.1 as seed ortholog is 100%.

Bootstrap support for afis|EAW22434.1 as seed ortholog is 100%.

---

Group of orthologs #1595. Best score 1628 bits

Score difference with first non-orthologous sequence - *A. fumigatus*:1628 *A. fischeri*:1314

|                 |         |                 |         |
|-----------------|---------|-----------------|---------|
| afum EAL90530.1 | 100.00% | afis EAW22662.1 | 100.00% |
|-----------------|---------|-----------------|---------|

Bootstrap support for afum|EAL90530.1 as seed ortholog is 100%.

Bootstrap support for afis|EAW22662.1 as seed ortholog is 100%.

---

Group of orthologs #1596. Best score 1627 bits

Score difference with first non-orthologous sequence - *A. fumigatus*:1271 *A. fischeri*:811

|                 |         |                 |         |
|-----------------|---------|-----------------|---------|
| afum EAL86253.1 | 100.00% | afis EAW24627.1 | 100.00% |
|-----------------|---------|-----------------|---------|

Bootstrap support for afum|EAL86253.1 as seed ortholog is 100%.

Bootstrap support for afis|EAW24627.1 as seed ortholog is 100%.

---

Group of orthologs #1597. Best score 1627 bits

Score difference with first non-orthologous sequence - *A. fumigatus*:1627 *A. fischeri*:1627

|                 |         |                 |         |
|-----------------|---------|-----------------|---------|
| afum EBA27180.1 | 100.00% | afis EAW20583.1 | 100.00% |
|-----------------|---------|-----------------|---------|

Bootstrap support for afum|EBA27180.1 as seed ortholog is 100%.

Bootstrap support for afis|EAW20583.1 as seed ortholog is 100%.

---

Group of orthologs #1598. Best score 1626 bits

Score difference with first non-orthologous sequence - *A. fumigatus*:1626 *A. fischeri*:1626

|                 |         |                 |         |
|-----------------|---------|-----------------|---------|
| afum EAL88875.1 | 100.00% | afis EAW16247.1 | 100.00% |
|-----------------|---------|-----------------|---------|

Bootstrap support for afum|EAL88875.1 as seed ortholog is 100%.

Bootstrap support for afis|EAW16247.1 as seed ortholog is 100%.

---

Group of orthologs #1599. Best score 1624 bits

Score difference with first non-orthologous sequence - *A. fumigatus*:1123 *A. fischeri*:1624

|                 |         |                 |         |
|-----------------|---------|-----------------|---------|
| afum EAL88829.2 | 100.00% | afis EAW21809.1 | 100.00% |
|-----------------|---------|-----------------|---------|

Bootstrap support for afum|EAL88829.2 as seed ortholog is 100%.

Bootstrap support for afis|EAW21809.1 as seed ortholog is 100%.

---

Group of orthologs #1600. Best score 1624 bits

Score difference with first non-orthologous sequence - *A. fumigatus*:1417 *A. fischeri*:1580

|                 |         |                 |         |
|-----------------|---------|-----------------|---------|
| afum EAL89364.1 | 100.00% | afis EAW24716.1 | 100.00% |
|-----------------|---------|-----------------|---------|

Bootstrap support for afum|EAL89364.1 as seed ortholog is 100%.

Bootstrap support for afis|EAW24716.1 as seed ortholog is 100%.

---

Group of orthologs #1601. Best score 1624 bits

Score difference with first non-orthologous sequence - *A. fumigatus*:1624 *A. fischeri*:1624

|                 |         |                 |         |
|-----------------|---------|-----------------|---------|
| afum EAL92788.2 | 100.00% | afis EAW21758.1 | 100.00% |
|-----------------|---------|-----------------|---------|

Bootstrap support for afum|EAL92788.2 as seed ortholog is 100%.

Bootstrap support for afis|EAW21758.1 as seed ortholog is 100%.

---

Group of orthologs #1602. Best score 1624 bits

Score difference with first non-orthologous sequence - *A. fumigatus*:1490 *A. fischeri*:1501

|                 |         |                 |         |
|-----------------|---------|-----------------|---------|
| afum EAL91949.1 | 100.00% | afis EAW24095.1 | 100.00% |
|-----------------|---------|-----------------|---------|

Bootstrap support for afum|EAL91949.1 as seed ortholog is 100%.

Bootstrap support for afis|EAW24095.1 as seed ortholog is 100%.

---

Group of orthologs #1603. Best score 1623 bits

Score difference with first non-orthologous sequence - *A. fumigatus*:1623 *A. fischeri*:1623

afum|EAL85868.1 100.00% afis|EAW24196.1 100.00%

Bootstrap support for afum|EAL85868.1 as seed ortholog is 100%.

Bootstrap support for afis|EAW24196.1 as seed ortholog is 100%.

---

Group of orthologs #1604. Best score 1622 bits

Score difference with first non-orthologous sequence - *A. fumigatus*:1622 *A. fischeri*:1622

afum|EAL88188.1 100.00% afis|EAW23291.1 100.00%

Bootstrap support for afum|EAL88188.1 as seed ortholog is 100%.

Bootstrap support for afis|EAW23291.1 as seed ortholog is 100%.

---

Group of orthologs #1605. Best score 1622 bits

Score difference with first non-orthologous sequence - *A. fumigatus*:1622 *A. fischeri*:1622

afum|EAL94001.1 100.00% afis|EAW19275.1 100.00%

Bootstrap support for afum|EAL94001.1 as seed ortholog is 100%.

Bootstrap support for afis|EAW19275.1 as seed ortholog is 100%.

---

Group of orthologs #1606. Best score 1621 bits

Score difference with first non-orthologous sequence - *A. fumigatus*:1621 *A. fischeri*:1506

afum|EAL85753.2 100.00% afis|EAW15581.1 100.00%

Bootstrap support for afum|EAL85753.2 as seed ortholog is 100%.

Bootstrap support for afis|EAW15581.1 as seed ortholog is 100%.

---

Group of orthologs #1607. Best score 1621 bits

Score difference with first non-orthologous sequence - *A. fumigatus*:1621 *A. fischeri*:1621

afum|EAL89082.1 100.00% afis|EAW16488.1 100.00%

Bootstrap support for afum|EAL89082.1 as seed ortholog is 100%.

Bootstrap support for afis|EAW16488.1 as seed ortholog is 100%.

---

Group of orthologs #1608. Best score 1621 bits

Score difference with first non-orthologous sequence - *A. fumigatus*:1541 *A. fischeri*:910

afum|EAL86238.1 100.00% afis|EAW24608.1 100.00%

Bootstrap support for afum|EAL86238.1 as seed ortholog is 100%.

Bootstrap support for afis|EAW24608.1 as seed ortholog is 100%.

---

Group of orthologs #1609. Best score 1621 bits

Score difference with first non-orthologous sequence - *A. fumigatus*:1621 *A. fischeri*:1621

afum|EAL90434.1 100.00% afis|EAW22765.1 100.00%

Bootstrap support for afum|EAL90434.1 as seed ortholog is 100%.

Bootstrap support for afis|EAW22765.1 as seed ortholog is 100%.

---

Group of orthologs #1610. Best score 1619 bits

Score difference with first non-orthologous sequence - *A. fumigatus*:1619 *A. fischeri*:1619

afum|EAL92303.1 100.00% afis|EAW21286.1 100.00%

Bootstrap support for afum|EAL92303.1 as seed ortholog is 100%.

Bootstrap support for afis|EAW21286.1 as seed ortholog is 100%.

---

Group of orthologs #1611. Best score 1619 bits

Score difference with first non-orthologous sequence - *A. fumigatus*:1619 *A. fischeri*:1619

afum|EAL89615.2 100.00% afis|EAW24957.1 100.00%

Bootstrap support for afum|EAL89615.2 as seed ortholog is 100%.

Bootstrap support for afis|EAW24957.1 as seed ortholog is 100%.

---

Group of orthologs #1612. Best score 1618 bits

Score difference with first non-orthologous sequence - *A. fumigatus*:1243 *A. fischeri*:1618

|                 |         |                 |         |
|-----------------|---------|-----------------|---------|
| afum EAL86351.1 | 100.00% | afis EAW16780.1 | 100.00% |
|-----------------|---------|-----------------|---------|

Bootstrap support for afum|EAL86351.1 as seed ortholog is 100%.

Bootstrap support for afis|EAW16780.1 as seed ortholog is 100%.

---

Group of orthologs #1613. Best score 1618 bits

Score difference with first non-orthologous sequence - *A. fumigatus*:1618 *A. fischeri*:1618

|                 |         |                 |         |
|-----------------|---------|-----------------|---------|
| afum EAL85871.1 | 100.00% | afis EAW24199.1 | 100.00% |
|-----------------|---------|-----------------|---------|

Bootstrap support for afum|EAL85871.1 as seed ortholog is 100%.

Bootstrap support for afis|EAW24199.1 as seed ortholog is 100%.

---

Group of orthologs #1614. Best score 1618 bits

Score difference with first non-orthologous sequence - *A. fumigatus*:1618 *A. fischeri*:1618

|                 |         |                 |         |
|-----------------|---------|-----------------|---------|
| afum EAL88324.1 | 100.00% | afis EAW23159.1 | 100.00% |
|-----------------|---------|-----------------|---------|

Bootstrap support for afum|EAL88324.1 as seed ortholog is 100%.

Bootstrap support for afis|EAW23159.1 as seed ortholog is 100%.

---

Group of orthologs #1615. Best score 1618 bits

Score difference with first non-orthologous sequence - *A. fumigatus*:1618 *A. fischeri*:1618

|                 |         |                 |         |
|-----------------|---------|-----------------|---------|
| afum EAL92305.1 | 100.00% | afis EAW21288.1 | 100.00% |
|-----------------|---------|-----------------|---------|

Bootstrap support for afum|EAL92305.1 as seed ortholog is 100%.

Bootstrap support for afis|EAW21288.1 as seed ortholog is 100%.

---

Group of orthologs #1616. Best score 1618 bits

Score difference with first non-orthologous sequence - *A. fumigatus*:1618 *A. fischeri*:1618

|                 |         |                 |         |
|-----------------|---------|-----------------|---------|
| afum EAL89748.1 | 100.00% | afis EAW25079.1 | 100.00% |
|-----------------|---------|-----------------|---------|

Bootstrap support for afum|EAL89748.1 as seed ortholog is 100%.

Bootstrap support for afis|EAW25079.1 as seed ortholog is 100%.

---

Group of orthologs #1617. Best score 1618 bits

Score difference with first non-orthologous sequence - *A. fumigatus*:1618 *A. fischeri*:1510

|                 |         |                 |         |
|-----------------|---------|-----------------|---------|
| afum EAL89860.2 | 100.00% | afis EAW25186.1 | 100.00% |
|-----------------|---------|-----------------|---------|

Bootstrap support for afum|EAL89860.2 as seed ortholog is 100%.

Bootstrap support for afis|EAW25186.1 as seed ortholog is 100%.

---

Group of orthologs #1618. Best score 1617 bits

Score difference with first non-orthologous sequence - *A. fumigatus*:1617 *A. fischeri*:1617

|                 |         |                 |         |
|-----------------|---------|-----------------|---------|
| afum EAL87428.1 | 100.00% | afis EAW23998.1 | 100.00% |
|-----------------|---------|-----------------|---------|

Bootstrap support for afum|EAL87428.1 as seed ortholog is 100%.

Bootstrap support for afis|EAW23998.1 as seed ortholog is 100%.

---

Group of orthologs #1619. Best score 1616 bits

Score difference with first non-orthologous sequence - *A. fumigatus*:1616 *A. fischeri*:1616

|                 |         |                 |         |
|-----------------|---------|-----------------|---------|
| afum EAL86576.1 | 100.00% | afis EAW17112.1 | 100.00% |
|-----------------|---------|-----------------|---------|

Bootstrap support for afum|EAL86576.1 as seed ortholog is 100%.

Bootstrap support for afis|EAW17112.1 as seed ortholog is 100%.

---

Group of orthologs #1620. Best score 1616 bits

Score difference with first non-orthologous sequence - *A. fumigatus*:1616 *A. fischeri*:1616

|                 |         |                 |         |
|-----------------|---------|-----------------|---------|
| afum EBA27513.1 | 100.00% | afis EAW19327.1 | 100.00% |
|-----------------|---------|-----------------|---------|

Bootstrap support for afum|EBA27513.1 as seed ortholog is 100%.

Bootstrap support for afis|EAW19327.1 as seed ortholog is 100%.

---

Group of orthologs #1621. Best score 1615 bits

Score difference with first non-orthologous sequence - *A. fumigatus*:1615 *A. fischeri*:1615

|                 |         |                 |         |
|-----------------|---------|-----------------|---------|
| afum EAL87289.1 | 100.00% | afis EAW23861.1 | 100.00% |
|-----------------|---------|-----------------|---------|

Bootstrap support for afum|EAL87289.1 as seed ortholog is 100%.

Bootstrap support for afis|EAW23861.1 as seed ortholog is 100%.

---

Group of orthologs #1622. Best score 1615 bits

Score difference with first non-orthologous sequence - *A. fumigatus*:1615 *A. fischeri*:1615

afum|EAL87311.1 100.00% afis|EAW23883.1 100.00%

Bootstrap support for afum|EAL87311.1 as seed ortholog is 100%.

Bootstrap support for afis|EAW23883.1 as seed ortholog is 100%.

---

Group of orthologs #1623. Best score 1615 bits

Score difference with first non-orthologous sequence - *A. fumigatus*:1615 *A. fischeri*:1615

afum|EAL92396.1 100.00% afis|EAW21381.1 100.00%

Bootstrap support for afum|EAL92396.1 as seed ortholog is 100%.

Bootstrap support for afis|EAW21381.1 as seed ortholog is 100%.

---

Group of orthologs #1624. Best score 1614 bits

Score difference with first non-orthologous sequence - *A. fumigatus*:1614 *A. fischeri*:1614

afum|EAL85234.1 100.00% afis|EAW20117.1 100.00%

Bootstrap support for afum|EAL85234.1 as seed ortholog is 100%.

Bootstrap support for afis|EAW20117.1 as seed ortholog is 100%.

---

Group of orthologs #1625. Best score 1614 bits

Score difference with first non-orthologous sequence - *A. fumigatus*:1614 *A. fischeri*:1614

afum|EAL93412.1 100.00% afis|EAW18691.1 100.00%

Bootstrap support for afum|EAL93412.1 as seed ortholog is 100%.

Bootstrap support for afis|EAW18691.1 as seed ortholog is 100%.

---

Group of orthologs #1626. Best score 1614 bits

Score difference with first non-orthologous sequence - *A. fumigatus*:1247 *A. fischeri*:1614

afum|EAL89682.1 100.00% afis|EAW25014.1 100.00%

Bootstrap support for afum|EAL89682.1 as seed ortholog is 100%.

Bootstrap support for afis|EAW25014.1 as seed ortholog is 100%.

---

Group of orthologs #1627. Best score 1613 bits

Score difference with first non-orthologous sequence - *A. fumigatus*:1613 *A. fischeri*:1613

afum|EAL92595.1 100.00% afis|EAW21576.1 100.00%

Bootstrap support for afum|EAL92595.1 as seed ortholog is 100%.

Bootstrap support for afis|EAW21576.1 as seed ortholog is 100%.

---

Group of orthologs #1628. Best score 1613 bits

Score difference with first non-orthologous sequence - *A. fumigatus*:1613 *A. fischeri*:1613

afum|EAL92820.1 100.00% afis|EAW21795.1 100.00%

Bootstrap support for afum|EAL92820.1 as seed ortholog is 100%.

Bootstrap support for afis|EAW21795.1 as seed ortholog is 100%.

---

Group of orthologs #1629. Best score 1613 bits

Score difference with first non-orthologous sequence - *A. fumigatus*:1613 *A. fischeri*:1613

afum|EAL92940.1 100.00% afis|EAW21927.1 100.00%

Bootstrap support for afum|EAL92940.1 as seed ortholog is 100%.

Bootstrap support for afis|EAW21927.1 as seed ortholog is 100%.

---

Group of orthologs #1630. Best score 1612 bits

Score difference with first non-orthologous sequence - *A. fumigatus*:1553 *A. fischeri*:1612

afum|EAL85757.1 100.00% afis|EAW15577.1 100.00%

Bootstrap support for afum|EAL85757.1 as seed ortholog is 100%.

Bootstrap support for afis|EAW15577.1 as seed ortholog is 100%.

---

Group of orthologs #1631. Best score 1612 bits

Score difference with first non-orthologous sequence - *A. fumigatus*:1612 *A. fischeri*:1612

afum|EAL85205.1 100.00% afis|EAW20086.1 100.00%

Bootstrap support for afum|EAL85205.1 as seed ortholog is 100%.

Bootstrap support for afis|EAW20086.1 as seed ortholog is 100%.

---

Group of orthologs #1632. Best score 1612 bits

Score difference with first non-orthologous sequence - *A. fumigatus*:1612 *A. fischeri*:1612

afum|EAL88170.1 100.00% afis|EAW23307.1 100.00%

Bootstrap support for afum|EAL88170.1 as seed ortholog is 100%.

Bootstrap support for afis|EAW23307.1 as seed ortholog is 100%.

---

Group of orthologs #1633. Best score 1612 bits

Score difference with first non-orthologous sequence - *A. fumigatus*:1612 *A. fischeri*:1494

afum|EAL90950.1 100.00% afis|EAW22243.1 100.00%

Bootstrap support for afum|EAL90950.1 as seed ortholog is 100%.

Bootstrap support for afis|EAW22243.1 as seed ortholog is 100%.

---

Group of orthologs #1634. Best score 1612 bits

Score difference with first non-orthologous sequence - *A. fumigatus*:1612 *A. fischeri*:1612

afum|EAL90399.1 100.00% afis|EAW22800.1 100.00%

Bootstrap support for afum|EAL90399.1 as seed ortholog is 100%.

Bootstrap support for afis|EAW22800.1 as seed ortholog is 100%.

---

Group of orthologs #1635. Best score 1610 bits

Score difference with first non-orthologous sequence - *A. fumigatus*:1610 *A. fischeri*:1610

afum|EAL88552.1 100.00% afis|EAW15917.1 100.00%

Bootstrap support for afum|EAL88552.1 as seed ortholog is 100%.

Bootstrap support for afis|EAW15917.1 as seed ortholog is 100%.

---

Group of orthologs #1636. Best score 1610 bits

Score difference with first non-orthologous sequence - *A. fumigatus*:1610 *A. fischeri*:1610

afum|EAL90520.1 100.00% afis|EAW22672.1 100.00%

Bootstrap support for afum|EAL90520.1 as seed ortholog is 100%.

Bootstrap support for afis|EAW22672.1 as seed ortholog is 100%.

---

Group of orthologs #1637. Best score 1609 bits

Score difference with first non-orthologous sequence - *A. fumigatus*:1609 *A. fischeri*:1609

afum|EAL87716.1 100.00% afis|EAW18353.1 100.00%

Bootstrap support for afum|EAL87716.1 as seed ortholog is 100%.

Bootstrap support for afis|EAW18353.1 as seed ortholog is 100%.

---

Group of orthologs #1638. Best score 1609 bits

Score difference with first non-orthologous sequence - *A. fumigatus*:1609 *A. fischeri*:1609

afum|EAL92363.1 100.00% afis|EAW21346.1 100.00%

Bootstrap support for afum|EAL92363.1 as seed ortholog is 100%.

Bootstrap support for afis|EAW21346.1 as seed ortholog is 100%.

---

Group of orthologs #1639. Best score 1608 bits

Score difference with first non-orthologous sequence - *A. fumigatus*:1483 *A. fischeri*:1493

afum|EAL85499.2 100.00% afis|EAW20400.1 100.00%

Bootstrap support for afum|EAL85499.2 as seed ortholog is 100%.

Bootstrap support for afis|EAW20400.1 as seed ortholog is 100%.

---

Group of orthologs #1640. Best score 1608 bits

Score difference with first non-orthologous sequence - *A. fumigatus*:1608 *A. fischeri*:1608

|                 |         |                 |         |
|-----------------|---------|-----------------|---------|
| afum EAL92493.1 | 100.00% | afis EAW21474.1 | 100.00% |
|-----------------|---------|-----------------|---------|

Bootstrap support for afum|EAL92493.1 as seed ortholog is 100%.

Bootstrap support for afis|EAW21474.1 as seed ortholog is 100%.

---

Group of orthologs #1641. Best score 1607 bits

Score difference with first non-orthologous sequence - *A. fumigatus*:1607 *A. fischeri*:1607

|                 |         |                 |         |
|-----------------|---------|-----------------|---------|
| afum EAL89686.1 | 100.00% | afis EAW25010.1 | 100.00% |
|-----------------|---------|-----------------|---------|

Bootstrap support for afum|EAL89686.1 as seed ortholog is 100%.

Bootstrap support for afis|EAW25010.1 as seed ortholog is 100%.

---

Group of orthologs #1642. Best score 1606 bits

Score difference with first non-orthologous sequence - *A. fumigatus*:1606 *A. fischeri*:1606

|                 |         |                 |         |
|-----------------|---------|-----------------|---------|
| afum EAL88982.1 | 100.00% | afis EAW16357.1 | 100.00% |
|-----------------|---------|-----------------|---------|

Bootstrap support for afum|EAL88982.1 as seed ortholog is 100%.

Bootstrap support for afis|EAW16357.1 as seed ortholog is 100%.

---

Group of orthologs #1643. Best score 1606 bits

Score difference with first non-orthologous sequence - *A. fumigatus*:1606 *A. fischeri*:1606

|                 |         |                 |         |
|-----------------|---------|-----------------|---------|
| afum EAL93696.1 | 100.00% | afis EAW18964.1 | 100.00% |
|-----------------|---------|-----------------|---------|

Bootstrap support for afum|EAL93696.1 as seed ortholog is 100%.

Bootstrap support for afis|EAW18964.1 as seed ortholog is 100%.

---

Group of orthologs #1644. Best score 1606 bits

Score difference with first non-orthologous sequence - *A. fumigatus*:1606 *A. fischeri*:1606

|                 |         |                 |         |
|-----------------|---------|-----------------|---------|
| afum EAL91053.1 | 100.00% | afis EAW22137.1 | 100.00% |
|-----------------|---------|-----------------|---------|

Bootstrap support for afum|EAL91053.1 as seed ortholog is 100%.

Bootstrap support for afis|EAW22137.1 as seed ortholog is 100%.

---

Group of orthologs #1645. Best score 1605 bits

Score difference with first non-orthologous sequence - *A. fumigatus*:1605 *A. fischeri*:1605

|                 |         |                 |         |
|-----------------|---------|-----------------|---------|
| afum EAL92470.1 | 100.00% | afis EAW21451.1 | 100.00% |
|-----------------|---------|-----------------|---------|

Bootstrap support for afum|EAL92470.1 as seed ortholog is 100%.

Bootstrap support for afis|EAW21451.1 as seed ortholog is 100%.

---

Group of orthologs #1646. Best score 1604 bits

Score difference with first non-orthologous sequence - *A. fumigatus*:1509 *A. fischeri*:1171

|                 |         |                 |         |
|-----------------|---------|-----------------|---------|
| afum EAL85460.1 | 100.00% | afis EAW20343.1 | 100.00% |
|-----------------|---------|-----------------|---------|

Bootstrap support for afum|EAL85460.1 as seed ortholog is 100%.

Bootstrap support for afis|EAW20343.1 as seed ortholog is 100%.

---

Group of orthologs #1647. Best score 1604 bits

Score difference with first non-orthologous sequence - *A. fumigatus*:1604 *A. fischeri*:1604

|                 |         |                 |         |
|-----------------|---------|-----------------|---------|
| afum EAL86963.1 | 100.00% | afis EAW19546.1 | 100.00% |
|-----------------|---------|-----------------|---------|

Bootstrap support for afum|EAL86963.1 as seed ortholog is 100%.

Bootstrap support for afis|EAW19546.1 as seed ortholog is 100%.

---

Group of orthologs #1648. Best score 1604 bits

Score difference with first non-orthologous sequence - *A. fumigatus*:1604 *A. fischeri*:1604

|                 |         |                 |         |
|-----------------|---------|-----------------|---------|
| afum EAL93752.1 | 100.00% | afis EAW19021.1 | 100.00% |
|-----------------|---------|-----------------|---------|

Bootstrap support for afum|EAL93752.1 as seed ortholog is 100%.

Bootstrap support for afis|EAW19021.1 as seed ortholog is 100%.

---

Group of orthologs #1649. Best score 1604 bits

Score difference with first non-orthologous sequence - *A. fumigatus*:1604 *A. fischeri*:1604

|                 |         |                 |         |
|-----------------|---------|-----------------|---------|
| afum EAL89969.1 | 100.00% | afis EAW25306.1 | 100.00% |
|-----------------|---------|-----------------|---------|

Bootstrap support for afum|EAL89969.1 as seed ortholog is 100%.

Bootstrap support for afis|EAW25306.1 as seed ortholog is 100%.

---

Group of orthologs #1650. Best score 1603 bits

Score difference with first non-orthologous sequence - *A. fumigatus*:1547 *A. fischeri*:1039

afum|EAL89057.2 100.00% afis|EAW16461.1 100.00%

Bootstrap support for afum|EAL89057.2 as seed ortholog is 100%.

Bootstrap support for afis|EAW16461.1 as seed ortholog is 100%.

---

Group of orthologs #1651. Best score 1603 bits

Score difference with first non-orthologous sequence - *A. fumigatus*:1603 *A. fischeri*:1603

afum|EAL90220.2 100.00% afis|EAW22977.1 100.00%

Bootstrap support for afum|EAL90220.2 as seed ortholog is 100%.

Bootstrap support for afis|EAW22977.1 as seed ortholog is 100%.

---

Group of orthologs #1652. Best score 1603 bits

Score difference with first non-orthologous sequence - *A. fumigatus*:1603 *A. fischeri*:1603

afum|EAL92153.1 100.00% afis|EAW21134.1 100.00%

Bootstrap support for afum|EAL92153.1 as seed ortholog is 100%.

Bootstrap support for afis|EAW21134.1 as seed ortholog is 100%.

---

Group of orthologs #1653. Best score 1601 bits

Score difference with first non-orthologous sequence - *A. fumigatus*:1601 *A. fischeri*:1601

afum|EAL84883.1 100.00% afis|EAW20033.1 100.00%

Bootstrap support for afum|EAL84883.1 as seed ortholog is 100%.

Bootstrap support for afis|EAW20033.1 as seed ortholog is 100%.

---

Group of orthologs #1654. Best score 1601 bits

Score difference with first non-orthologous sequence - *A. fumigatus*:1601 *A. fischeri*:1601

afum|EAL87637.1 100.00% afis|EAW18272.1 100.00%

Bootstrap support for afum|EAL87637.1 as seed ortholog is 100%.

Bootstrap support for afis|EAW18272.1 as seed ortholog is 100%.

---

Group of orthologs #1655. Best score 1601 bits

Score difference with first non-orthologous sequence - *A. fumigatus*:769 *A. fischeri*:1601

afum|EAL86157.1 100.00% afis|EAW24488.1 100.00%

Bootstrap support for afum|EAL86157.1 as seed ortholog is 100%.

Bootstrap support for afis|EAW24488.1 as seed ortholog is 100%.

---

Group of orthologs #1656. Best score 1600 bits

Score difference with first non-orthologous sequence - *A. fumigatus*:1600 *A. fischeri*:1600

afum|EAL85786.1 100.00% afis|EAW15546.1 100.00%

Bootstrap support for afum|EAL85786.1 as seed ortholog is 100%.

Bootstrap support for afis|EAW15546.1 as seed ortholog is 100%.

---

Group of orthologs #1657. Best score 1600 bits

Score difference with first non-orthologous sequence - *A. fumigatus*:1529 *A. fischeri*:1600

afum|EAL91008.1 100.00% afis|EAW22181.1 100.00%

Bootstrap support for afum|EAL91008.1 as seed ortholog is 100%.

Bootstrap support for afis|EAW22181.1 as seed ortholog is 100%.

---

Group of orthologs #1658. Best score 1597 bits

Score difference with first non-orthologous sequence - *A. fumigatus*:1597 *A. fischeri*:1479

afum|EAL89271.2 100.00% afis|EAW16667.1 100.00%

Bootstrap support for afum|EAL89271.2 as seed ortholog is 100%.

Bootstrap support for afis|EAW16667.1 as seed ortholog is 100%.

---



Group of orthologs #1659. Best score 1597 bits

Score difference with first non-orthologous sequence - *A. fumigatus*:1597 *A. fischeri*:1597

afum|EAL89603.1 100.00% afis|EAW24946.1 100.00%

Bootstrap support for afum|EAL89603.1 as seed ortholog is 100%.

Bootstrap support for afis|EAW24946.1 as seed ortholog is 100%.

---

Group of orthologs #1660. Best score 1596 bits

Score difference with first non-orthologous sequence - *A. fumigatus*:1596 *A. fischeri*:1596

afum|EAL91761.1 100.00% afis|EAW17951.1 100.00%

Bootstrap support for afum|EAL91761.1 as seed ortholog is 100%.

Bootstrap support for afis|EAW17951.1 as seed ortholog is 100%.

---

Group of orthologs #1661. Best score 1596 bits

Score difference with first non-orthologous sequence - *A. fumigatus*:1596 *A. fischeri*:1596

afum|EAL88470.1 100.00% afis|EAW23011.1 100.00%

Bootstrap support for afum|EAL88470.1 as seed ortholog is 100%.

Bootstrap support for afis|EAW23011.1 as seed ortholog is 100%.

---

Group of orthologs #1662. Best score 1596 bits

Score difference with first non-orthologous sequence - *A. fumigatus*:1596 *A. fischeri*:1596

afum|EAL93617.1 100.00% afis|EAW18884.1 100.00%

Bootstrap support for afum|EAL93617.1 as seed ortholog is 100%.

Bootstrap support for afis|EAW18884.1 as seed ortholog is 100%.

---

Group of orthologs #1663. Best score 1596 bits

Score difference with first non-orthologous sequence - *A. fumigatus*:1596 *A. fischeri*:1341

afum|EAL93928.1 100.00% afis|EAW19196.1 100.00%

Bootstrap support for afum|EAL93928.1 as seed ortholog is 100%.

Bootstrap support for afis|EAW19196.1 as seed ortholog is 100%.

---

Group of orthologs #1664. Best score 1596 bits

Score difference with first non-orthologous sequence - *A. fumigatus*:1596 *A. fischeri*:1596

afum|EAL90509.1 100.00% afis|EAW22683.1 100.00%

Bootstrap support for afum|EAL90509.1 as seed ortholog is 100%.

Bootstrap support for afis|EAW22683.1 as seed ortholog is 100%.

---

Group of orthologs #1665. Best score 1593 bits

Score difference with first non-orthologous sequence - *A. fumigatus*:1593 *A. fischeri*:1593

afum|EAL93897.1 100.00% afis|EAW19167.1 100.00%

Bootstrap support for afum|EAL93897.1 as seed ortholog is 100%.

Bootstrap support for afis|EAW19167.1 as seed ortholog is 100%.

---

Group of orthologs #1666. Best score 1593 bits

Score difference with first non-orthologous sequence - *A. fumigatus*:1593 *A. fischeri*:1593

afum|EAL90720.1 100.00% afis|EAW22471.1 100.00%

Bootstrap support for afum|EAL90720.1 as seed ortholog is 100%.

Bootstrap support for afis|EAW22471.1 as seed ortholog is 100%.

---

Group of orthologs #1667. Best score 1592 bits

Score difference with first non-orthologous sequence - *A. fumigatus*:919 *A. fischeri*:1592

afum|EAL84865.1 100.00% afis|EAW20752.1 100.00%

Bootstrap support for afum|EAL84865.1 as seed ortholog is 100%.

Bootstrap support for afis|EAW20752.1 as seed ortholog is 100%.

---

Group of orthologs #1668. Best score 1591 bits

Score difference with first non-orthologous sequence - *A. fumigatus*:1591 *A. fischeri*:1591

afum|EAL91944.1      100.00%                      afis|EAW24089.1      100.00%

Bootstrap support for afum|EAL91944.1 as seed ortholog is 100%.

Bootstrap support for afis|EAW24089.1 as seed ortholog is 100%.

---

Group of orthologs #1669. Best score 1591 bits

Score difference with first non-orthologous sequence - *A. fumigatus*:1591    *A. fischeri*:1591

afum|EBA27343.1      100.00%                      afis|EAW23165.1      100.00%

Bootstrap support for afum|EBA27343.1 as seed ortholog is 100%.

Bootstrap support for afis|EAW23165.1 as seed ortholog is 100%.

---

Group of orthologs #1670. Best score 1590 bits

Score difference with first non-orthologous sequence - *A. fumigatus*:1590    *A. fischeri*:1590

afum|EAL88119.2      100.00%                      afis|EAW23357.1      100.00%

Bootstrap support for afum|EAL88119.2 as seed ortholog is 100%.

Bootstrap support for afis|EAW23357.1 as seed ortholog is 100%.

---

Group of orthologs #1671. Best score 1590 bits

Score difference with first non-orthologous sequence - *A. fumigatus*:1590    *A. fischeri*:1590

afum|EAL87995.1      100.00%                      afis|EAW23471.1      100.00%

Bootstrap support for afum|EAL87995.1 as seed ortholog is 100%.

Bootstrap support for afis|EAW23471.1 as seed ortholog is 100%.

---

Group of orthologs #1672. Best score 1590 bits

Score difference with first non-orthologous sequence - *A. fumigatus*:1590    *A. fischeri*:1590

afum|EAL93715.1      100.00%                      afis|EAW18979.1      100.00%

Bootstrap support for afum|EAL93715.1 as seed ortholog is 100%.

Bootstrap support for afis|EAW18979.1 as seed ortholog is 100%.

---

Group of orthologs #1673. Best score 1590 bits

Score difference with first non-orthologous sequence - *A. fumigatus*:1590    *A. fischeri*:1590

afum|EAL90768.2      100.00%                      afis|EAW22423.1      100.00%

Bootstrap support for afum|EAL90768.2 as seed ortholog is 100%.

Bootstrap support for afis|EAW22423.1 as seed ortholog is 100%.

---

Group of orthologs #1674. Best score 1589 bits

Score difference with first non-orthologous sequence - *A. fumigatus*:1589    *A. fischeri*:1589

afum|EAL87693.1      100.00%                      afis|EAW18327.1      100.00%

Bootstrap support for afum|EAL87693.1 as seed ortholog is 100%.

Bootstrap support for afis|EAW18327.1 as seed ortholog is 100%.

---

Group of orthologs #1675. Best score 1589 bits

Score difference with first non-orthologous sequence - *A. fumigatus*:1589    *A. fischeri*:1589

afum|EAL93950.1      100.00%                      afis|EAW19217.1      100.00%

Bootstrap support for afum|EAL93950.1 as seed ortholog is 100%.

Bootstrap support for afis|EAW19217.1 as seed ortholog is 100%.

---

Group of orthologs #1676. Best score 1589 bits

Score difference with first non-orthologous sequence - *A. fumigatus*:1589    *A. fischeri*:1589

afum|EAL90923.1      100.00%                      afis|EAW22255.1      100.00%

Bootstrap support for afum|EAL90923.1 as seed ortholog is 100%.

Bootstrap support for afis|EAW22255.1 as seed ortholog is 100%.

---

Group of orthologs #1677. Best score 1589 bits

Score difference with first non-orthologous sequence - *A. fumigatus*:1589    *A. fischeri*:1589

afum|EAL92011.1      100.00%                      afis|EAW24156.1      100.00%

Bootstrap support for afum|EAL92011.1 as seed ortholog is 100%.

Bootstrap support for afis|EAW24156.1 as seed ortholog is 100%.

---

Group of orthologs #1678. Best score 1588 bits

Score difference with first non-orthologous sequence - *A. fumigatus*:1588 *A. fischeri*:1588

|                 |         |                 |         |
|-----------------|---------|-----------------|---------|
| afum EAL89267.1 | 100.00% | afis EAW16663.1 | 100.00% |
|-----------------|---------|-----------------|---------|

Bootstrap support for afum|EAL89267.1 as seed ortholog is 100%.

Bootstrap support for afis|EAW16663.1 as seed ortholog is 100%.

---

Group of orthologs #1679. Best score 1588 bits

Score difference with first non-orthologous sequence - *A. fumigatus*:1588 *A. fischeri*:1588

|                 |         |                 |         |
|-----------------|---------|-----------------|---------|
| afum EAL92877.2 | 100.00% | afis EAW21863.1 | 100.00% |
|-----------------|---------|-----------------|---------|

Bootstrap support for afum|EAL92877.2 as seed ortholog is 100%.

Bootstrap support for afis|EAW21863.1 as seed ortholog is 100%.

---

Group of orthologs #1680. Best score 1587 bits

Score difference with first non-orthologous sequence - *A. fumigatus*:1538 *A. fischeri*:1125

|                 |         |                 |         |
|-----------------|---------|-----------------|---------|
| afum EAL86559.2 | 100.00% | afis EAW17071.1 | 100.00% |
|-----------------|---------|-----------------|---------|

Bootstrap support for afum|EAL86559.2 as seed ortholog is 100%.

Bootstrap support for afis|EAW17071.1 as seed ortholog is 100%.

---

Group of orthologs #1681. Best score 1587 bits

Score difference with first non-orthologous sequence - *A. fumigatus*:1587 *A. fischeri*:1587

|                 |         |                 |         |
|-----------------|---------|-----------------|---------|
| afum EAL86244.1 | 100.00% | afis EAW24615.1 | 100.00% |
|-----------------|---------|-----------------|---------|

Bootstrap support for afum|EAL86244.1 as seed ortholog is 100%.

Bootstrap support for afis|EAW24615.1 as seed ortholog is 100%.

---

Group of orthologs #1682. Best score 1587 bits

Score difference with first non-orthologous sequence - *A. fumigatus*:1587 *A. fischeri*:1587

|                 |         |                 |         |
|-----------------|---------|-----------------|---------|
| afum EAL88198.2 | 100.00% | afis EAW23281.1 | 100.00% |
|-----------------|---------|-----------------|---------|

Bootstrap support for afum|EAL88198.2 as seed ortholog is 100%.

Bootstrap support for afis|EAW23281.1 as seed ortholog is 100%.

---

Group of orthologs #1683. Best score 1587 bits

Score difference with first non-orthologous sequence - *A. fumigatus*:1587 *A. fischeri*:1587

|                 |         |                 |         |
|-----------------|---------|-----------------|---------|
| afum EAL90230.1 | 100.00% | afis EAW22967.1 | 100.00% |
|-----------------|---------|-----------------|---------|

Bootstrap support for afum|EAL90230.1 as seed ortholog is 100%.

Bootstrap support for afis|EAW22967.1 as seed ortholog is 100%.

---

Group of orthologs #1684. Best score 1587 bits

Score difference with first non-orthologous sequence - *A. fumigatus*:1587 *A. fischeri*:1587

|                 |         |                 |         |
|-----------------|---------|-----------------|---------|
| afum EAL92172.1 | 100.00% | afis EAW21154.1 | 100.00% |
|-----------------|---------|-----------------|---------|

Bootstrap support for afum|EAL92172.1 as seed ortholog is 100%.

Bootstrap support for afis|EAW21154.1 as seed ortholog is 100%.

---

Group of orthologs #1685. Best score 1586 bits

Score difference with first non-orthologous sequence - *A. fumigatus*:1586 *A. fischeri*:1586

|                 |         |                 |         |
|-----------------|---------|-----------------|---------|
| afum EAL92194.1 | 100.00% | afis EAW21174.1 | 100.00% |
|-----------------|---------|-----------------|---------|

Bootstrap support for afum|EAL92194.1 as seed ortholog is 100%.

Bootstrap support for afis|EAW21174.1 as seed ortholog is 100%.

---

Group of orthologs #1686. Best score 1585 bits

Score difference with first non-orthologous sequence - *A. fumigatus*:1585 *A. fischeri*:1585

|                 |         |                 |         |
|-----------------|---------|-----------------|---------|
| afum EAL85539.1 | 100.00% | afis EAW15812.1 | 100.00% |
|-----------------|---------|-----------------|---------|

Bootstrap support for afum|EAL85539.1 as seed ortholog is 100%.

Bootstrap support for afis|EAW15812.1 as seed ortholog is 100%.

---

Group of orthologs #1687. Best score 1584 bits

Score difference with first non-orthologous sequence - *A. fumigatus*:1492 *A. fischeri*:1584

afum|EAL87628.1 100.00% afis|EAW18264.1 100.00%

Bootstrap support for afum|EAL87628.1 as seed ortholog is 100%.

Bootstrap support for afis|EAW18264.1 as seed ortholog is 100%.

---

Group of orthologs #1688. Best score 1584 bits

Score difference with first non-orthologous sequence - *A. fumigatus*:1584 *A. fischeri*:1584

afum|EAL90921.1 100.00% afis|EAW22259.1 100.00%

Bootstrap support for afum|EAL90921.1 as seed ortholog is 100%.

Bootstrap support for afis|EAW22259.1 as seed ortholog is 100%.

---

Group of orthologs #1689. Best score 1583 bits

Score difference with first non-orthologous sequence - *A. fumigatus*:1583 *A. fischeri*:1583

afum|EAL91388.1 100.00% afis|EAW17575.1 100.00%

Bootstrap support for afum|EAL91388.1 as seed ortholog is 100%.

Bootstrap support for afis|EAW17575.1 as seed ortholog is 100%.

---

Group of orthologs #1690. Best score 1583 bits

Score difference with first non-orthologous sequence - *A. fumigatus*:1583 *A. fischeri*:1583

afum|EAL93251.1 100.00% afis|EAW18551.1 100.00%

Bootstrap support for afum|EAL93251.1 as seed ortholog is 100%.

Bootstrap support for afis|EAW18551.1 as seed ortholog is 100%.

---

Group of orthologs #1691. Best score 1582 bits

Score difference with first non-orthologous sequence - *A. fumigatus*:1582 *A. fischeri*:1582

afum|EAL92794.1 100.00% afis|EAW21764.1 100.00%

Bootstrap support for afum|EAL92794.1 as seed ortholog is 100%.

Bootstrap support for afis|EAW21764.1 as seed ortholog is 100%.

---

Group of orthologs #1692. Best score 1582 bits

Score difference with first non-orthologous sequence - *A. fumigatus*:1582 *A. fischeri*:1582

afum|EAL92811.1 100.00% afis|EAW21784.1 100.00%

Bootstrap support for afum|EAL92811.1 as seed ortholog is 100%.

Bootstrap support for afis|EAW21784.1 as seed ortholog is 100%.

---

Group of orthologs #1693. Best score 1581 bits

Score difference with first non-orthologous sequence - *A. fumigatus*:1581 *A. fischeri*:1581

afum|EAL93500.2 100.00% afis|EAW18769.1 100.00%

Bootstrap support for afum|EAL93500.2 as seed ortholog is 100%.

Bootstrap support for afis|EAW18769.1 as seed ortholog is 100%.

---

Group of orthologs #1694. Best score 1581 bits

Score difference with first non-orthologous sequence - *A. fumigatus*:1581 *A. fischeri*:1581

afum|EAL90868.1 100.00% afis|EAW22324.1 100.00%

Bootstrap support for afum|EAL90868.1 as seed ortholog is 100%.

Bootstrap support for afis|EAW22324.1 as seed ortholog is 100%.

---

Group of orthologs #1695. Best score 1581 bits

Score difference with first non-orthologous sequence - *A. fumigatus*:1581 *A. fischeri*:1581

afum|EAL89788.1 100.00% afis|EAW25117.1 100.00%

Bootstrap support for afum|EAL89788.1 as seed ortholog is 100%.

Bootstrap support for afis|EAW25117.1 as seed ortholog is 100%.

---

Group of orthologs #1696. Best score 1581 bits

Score difference with first non-orthologous sequence - *A. fumigatus*:1581 *A. fischeri*:1581

|                 |         |                 |         |
|-----------------|---------|-----------------|---------|
| afum EAL90167.1 | 100.00% | afis EAW25501.1 | 100.00% |
|-----------------|---------|-----------------|---------|

Bootstrap support for afum|EAL90167.1 as seed ortholog is 100%.

Bootstrap support for afis|EAW25501.1 as seed ortholog is 100%.

---

Group of orthologs #1697. Best score 1579 bits

Score difference with first non-orthologous sequence - *A. fumigatus*:1579 *A. fischeri*:1579

|                 |         |                 |         |
|-----------------|---------|-----------------|---------|
| afum EAL91865.1 | 100.00% | afis EAW18054.1 | 100.00% |
|-----------------|---------|-----------------|---------|

Bootstrap support for afum|EAL91865.1 as seed ortholog is 100%.

Bootstrap support for afis|EAW18054.1 as seed ortholog is 100%.

---

Group of orthologs #1698. Best score 1579 bits

Score difference with first non-orthologous sequence - *A. fumigatus*:1579 *A. fischeri*:1579

|                 |         |                 |         |
|-----------------|---------|-----------------|---------|
| afum EAL88459.1 | 100.00% | afis EAW23023.1 | 100.00% |
|-----------------|---------|-----------------|---------|

Bootstrap support for afum|EAL88459.1 as seed ortholog is 100%.

Bootstrap support for afis|EAW23023.1 as seed ortholog is 100%.

---

Group of orthologs #1699. Best score 1579 bits

Score difference with first non-orthologous sequence - *A. fumigatus*:1579 *A. fischeri*:1579

|                 |         |                 |         |
|-----------------|---------|-----------------|---------|
| afum EAL93495.1 | 100.00% | afis EAW18763.1 | 100.00% |
|-----------------|---------|-----------------|---------|

Bootstrap support for afum|EAL93495.1 as seed ortholog is 100%.

Bootstrap support for afis|EAW18763.1 as seed ortholog is 100%.

---

Group of orthologs #1700. Best score 1579 bits

Score difference with first non-orthologous sequence - *A. fumigatus*:1579 *A. fischeri*:1579

|                 |         |                 |         |
|-----------------|---------|-----------------|---------|
| afum EAL89420.1 | 100.00% | afis EAW24781.1 | 100.00% |
|-----------------|---------|-----------------|---------|

Bootstrap support for afum|EAL89420.1 as seed ortholog is 100%.

Bootstrap support for afis|EAW24781.1 as seed ortholog is 100%.

---

Group of orthologs #1701. Best score 1578 bits

Score difference with first non-orthologous sequence - *A. fumigatus*:1578 *A. fischeri*:1578

|                 |         |                 |         |
|-----------------|---------|-----------------|---------|
| afum EAL89154.1 | 100.00% | afis EAW16556.1 | 100.00% |
|-----------------|---------|-----------------|---------|

Bootstrap support for afum|EAL89154.1 as seed ortholog is 100%.

Bootstrap support for afis|EAW16556.1 as seed ortholog is 100%.

---

Group of orthologs #1702. Best score 1578 bits

Score difference with first non-orthologous sequence - *A. fumigatus*:1366 *A. fischeri*:1316

|                 |         |                 |         |
|-----------------|---------|-----------------|---------|
| afum EBA27239.1 | 100.00% | afis EAW15597.1 | 100.00% |
|-----------------|---------|-----------------|---------|

Bootstrap support for afum|EBA27239.1 as seed ortholog is 100%.

Bootstrap support for afis|EAW15597.1 as seed ortholog is 100%.

---

Group of orthologs #1703. Best score 1577 bits

Score difference with first non-orthologous sequence - *A. fumigatus*:1577 *A. fischeri*:1577

|                 |         |                 |         |
|-----------------|---------|-----------------|---------|
| afum EAL91527.1 | 100.00% | afis EAW17712.1 | 100.00% |
|-----------------|---------|-----------------|---------|

Bootstrap support for afum|EAL91527.1 as seed ortholog is 100%.

Bootstrap support for afis|EAW17712.1 as seed ortholog is 100%.

---

Group of orthologs #1704. Best score 1577 bits

Score difference with first non-orthologous sequence - *A. fumigatus*:1577 *A. fischeri*:1577

|                 |         |                 |         |
|-----------------|---------|-----------------|---------|
| afum EAL87207.1 | 100.00% | afis EAW23773.1 | 100.00% |
|-----------------|---------|-----------------|---------|

Bootstrap support for afum|EAL87207.1 as seed ortholog is 100%.

Bootstrap support for afis|EAW23773.1 as seed ortholog is 100%.

---

Group of orthologs #1705. Best score 1576 bits

Score difference with first non-orthologous sequence - *A. fumigatus*:1576 *A. fischeri*:1576

|                 |         |                 |         |
|-----------------|---------|-----------------|---------|
| afum EAL87556.1 | 100.00% | afis EAW18195.1 | 100.00% |
|-----------------|---------|-----------------|---------|

Bootstrap support for afum|EAL87556.1 as seed ortholog is 100%.

Bootstrap support for afis|EAW18195.1 as seed ortholog is 100%.

---

Group of orthologs #1706. Best score 1576 bits

Score difference with first non-orthologous sequence - *A. fumigatus*:1576 *A. fischeri*:1576

|                 |         |                 |         |
|-----------------|---------|-----------------|---------|
| afum EAL93137.1 | 100.00% | afis EAW18452.1 | 100.00% |
|-----------------|---------|-----------------|---------|

Bootstrap support for afum|EAL93137.1 as seed ortholog is 100%.

Bootstrap support for afis|EAW18452.1 as seed ortholog is 100%.

---

Group of orthologs #1707. Best score 1576 bits

Score difference with first non-orthologous sequence - *A. fumigatus*:1576 *A. fischeri*:1202

|                 |         |                 |         |
|-----------------|---------|-----------------|---------|
| afum EAL93814.1 | 100.00% | afis EAW19084.1 | 100.00% |
|-----------------|---------|-----------------|---------|

Bootstrap support for afum|EAL93814.1 as seed ortholog is 100%.

Bootstrap support for afis|EAW19084.1 as seed ortholog is 100%.

---

Group of orthologs #1708. Best score 1576 bits

Score difference with first non-orthologous sequence - *A. fumigatus*:1576 *A. fischeri*:1576

|                 |         |                 |         |
|-----------------|---------|-----------------|---------|
| afum EAL92183.1 | 100.00% | afis EAW21164.1 | 100.00% |
|-----------------|---------|-----------------|---------|

Bootstrap support for afum|EAL92183.1 as seed ortholog is 100%.

Bootstrap support for afis|EAW21164.1 as seed ortholog is 100%.

---

Group of orthologs #1709. Best score 1574 bits

Score difference with first non-orthologous sequence - *A. fumigatus*:1574 *A. fischeri*:1574

|                 |         |                 |         |
|-----------------|---------|-----------------|---------|
| afum EAL91449.1 | 100.00% | afis EAW17634.1 | 100.00% |
|-----------------|---------|-----------------|---------|

Bootstrap support for afum|EAL91449.1 as seed ortholog is 100%.

Bootstrap support for afis|EAW17634.1 as seed ortholog is 100%.

---

Group of orthologs #1710. Best score 1574 bits

Score difference with first non-orthologous sequence - *A. fumigatus*:1574 *A. fischeri*:1574

|                 |         |                 |         |
|-----------------|---------|-----------------|---------|
| afum EAL88167.1 | 100.00% | afis EAW23310.1 | 100.00% |
|-----------------|---------|-----------------|---------|

Bootstrap support for afum|EAL88167.1 as seed ortholog is 100%.

Bootstrap support for afis|EAW23310.1 as seed ortholog is 100%.

---

Group of orthologs #1711. Best score 1574 bits

Score difference with first non-orthologous sequence - *A. fumigatus*:1574 *A. fischeri*:1574

|                 |         |                 |         |
|-----------------|---------|-----------------|---------|
| afum EAL89746.1 | 100.00% | afis EAW25077.1 | 100.00% |
|-----------------|---------|-----------------|---------|

Bootstrap support for afum|EAL89746.1 as seed ortholog is 100%.

Bootstrap support for afis|EAW25077.1 as seed ortholog is 100%.

---

Group of orthologs #1712. Best score 1573 bits

Score difference with first non-orthologous sequence - *A. fumigatus*:1573 *A. fischeri*:1573

|                 |         |                 |         |
|-----------------|---------|-----------------|---------|
| afum EAL86918.1 | 100.00% | afis EAW19600.1 | 100.00% |
|-----------------|---------|-----------------|---------|

Bootstrap support for afum|EAL86918.1 as seed ortholog is 100%.

Bootstrap support for afis|EAW19600.1 as seed ortholog is 100%.

---

Group of orthologs #1713. Best score 1573 bits

Score difference with first non-orthologous sequence - *A. fumigatus*:1573 *A. fischeri*:1573

|                 |         |                 |         |
|-----------------|---------|-----------------|---------|
| afum EAL90760.1 | 100.00% | afis EAW22431.1 | 100.00% |
|-----------------|---------|-----------------|---------|

Bootstrap support for afum|EAL90760.1 as seed ortholog is 100%.

Bootstrap support for afis|EAW22431.1 as seed ortholog is 100%.

---

Group of orthologs #1714. Best score 1572 bits

Score difference with first non-orthologous sequence - *A. fumigatus*:1572 *A. fischeri*:1572

|                 |         |                 |         |
|-----------------|---------|-----------------|---------|
| afum EAL88622.1 | 100.00% | afis EAW15990.1 | 100.00% |
|-----------------|---------|-----------------|---------|

Bootstrap support for afum|EAL88622.1 as seed ortholog is 100%.

Bootstrap support for afis|EAW15990.1 as seed ortholog is 100%.

---

Group of orthologs #1715. Best score 1571 bits

Score difference with first non-orthologous sequence - *A. fumigatus*:1571 *A. fischeri*:1571

afum|EAL91793.1 100.00% afis|EAW17984.1 100.00%

Bootstrap support for afum|EAL91793.1 as seed ortholog is 100%.

Bootstrap support for afis|EAW17984.1 as seed ortholog is 100%.

---

Group of orthologs #1716. Best score 1571 bits

Score difference with first non-orthologous sequence - *A. fumigatus*:1571 *A. fischeri*:1571

afum|EAL93087.1 100.00% afis|EAW18407.1 100.00%

Bootstrap support for afum|EAL93087.1 as seed ortholog is 100%.

Bootstrap support for afis|EAW18407.1 as seed ortholog is 100%.

---

Group of orthologs #1717. Best score 1571 bits

Score difference with first non-orthologous sequence - *A. fumigatus*:1571 *A. fischeri*:1571

afum|EAL90359.1 100.00% afis|EAW22844.1 100.00%

Bootstrap support for afum|EAL90359.1 as seed ortholog is 100%.

Bootstrap support for afis|EAW22844.1 as seed ortholog is 100%.

---

Group of orthologs #1718. Best score 1569 bits

Score difference with first non-orthologous sequence - *A. fumigatus*:1569 *A. fischeri*:1569

afum|EAL91311.1 100.00% afis|EAW17489.1 100.00%

Bootstrap support for afum|EAL91311.1 as seed ortholog is 100%.

Bootstrap support for afis|EAW17489.1 as seed ortholog is 100%.

---

Group of orthologs #1719. Best score 1569 bits

Score difference with first non-orthologous sequence - *A. fumigatus*:1569 *A. fischeri*:1569

afum|EAL92196.1 100.00% afis|EAW21176.1 100.00%

Bootstrap support for afum|EAL92196.1 as seed ortholog is 100%.

Bootstrap support for afis|EAW21176.1 as seed ortholog is 100%.

---

Group of orthologs #1720. Best score 1569 bits

Score difference with first non-orthologous sequence - *A. fumigatus*:1569 *A. fischeri*:812

afum|EAL92370.2 100.00% afis|EAW21355.1 100.00%

Bootstrap support for afum|EAL92370.2 as seed ortholog is 100%.

Bootstrap support for afis|EAW21355.1 as seed ortholog is 100%.

---

Group of orthologs #1721. Best score 1569 bits

Score difference with first non-orthologous sequence - *A. fumigatus*:1569 *A. fischeri*:1569

afum|EAL90198.1 100.00% afis|EAW25534.1 100.00%

Bootstrap support for afum|EAL90198.1 as seed ortholog is 100%.

Bootstrap support for afis|EAW25534.1 as seed ortholog is 100%.

---

Group of orthologs #1722. Best score 1568 bits

Score difference with first non-orthologous sequence - *A. fumigatus*:1568 *A. fischeri*:1568

afum|EAL88389.1 100.00% afis|EAW23090.1 100.00%

Bootstrap support for afum|EAL88389.1 as seed ortholog is 100%.

Bootstrap support for afis|EAW23090.1 as seed ortholog is 100%.

---

Group of orthologs #1723. Best score 1568 bits

Score difference with first non-orthologous sequence - *A. fumigatus*:1568 *A. fischeri*:1568

afum|EAL89749.1 100.00% afis|EAW25080.1 100.00%

Bootstrap support for afum|EAL89749.1 as seed ortholog is 100%.

Bootstrap support for afis|EAW25080.1 as seed ortholog is 100%.

---

Group of orthologs #1724. Best score 1567 bits

Score difference with first non-orthologous sequence - *A. fumigatus*:1567 *A. fischeri*:1567

|                 |         |                 |         |
|-----------------|---------|-----------------|---------|
| afum EAL88661.1 | 100.00% | afis EAW16030.1 | 100.00% |
|-----------------|---------|-----------------|---------|

Bootstrap support for afum|EAL88661.1 as seed ortholog is 100%.

Bootstrap support for afis|EAW16030.1 as seed ortholog is 100%.

---

Group of orthologs #1725. Best score 1567 bits

Score difference with first non-orthologous sequence - *A. fumigatus*:1567 *A. fischeri*:1567

|                 |         |                 |         |
|-----------------|---------|-----------------|---------|
| afum EAL84887.1 | 100.00% | afis EAW20030.1 | 100.00% |
|-----------------|---------|-----------------|---------|

Bootstrap support for afum|EAL84887.1 as seed ortholog is 100%.

Bootstrap support for afis|EAW20030.1 as seed ortholog is 100%.

---

Group of orthologs #1726. Best score 1566 bits

Score difference with first non-orthologous sequence - *A. fumigatus*:1566 *A. fischeri*:1566

|                 |         |                 |         |
|-----------------|---------|-----------------|---------|
| afum EAL86048.1 | 100.00% | afis EAW24376.1 | 100.00% |
|-----------------|---------|-----------------|---------|

Bootstrap support for afum|EAL86048.1 as seed ortholog is 100%.

Bootstrap support for afis|EAW24376.1 as seed ortholog is 100%.

---

Group of orthologs #1727. Best score 1566 bits

Score difference with first non-orthologous sequence - *A. fumigatus*:1566 *A. fischeri*:1566

|                 |         |                 |         |
|-----------------|---------|-----------------|---------|
| afum EAL93547.1 | 100.00% | afis EAW18811.1 | 100.00% |
|-----------------|---------|-----------------|---------|

Bootstrap support for afum|EAL93547.1 as seed ortholog is 100%.

Bootstrap support for afis|EAW18811.1 as seed ortholog is 100%.

---

Group of orthologs #1728. Best score 1566 bits

Score difference with first non-orthologous sequence - *A. fumigatus*:1566 *A. fischeri*:1566

|                 |         |                 |         |
|-----------------|---------|-----------------|---------|
| afum EAL90266.1 | 100.00% | afis EAW22931.1 | 100.00% |
|-----------------|---------|-----------------|---------|

Bootstrap support for afum|EAL90266.1 as seed ortholog is 100%.

Bootstrap support for afis|EAW22931.1 as seed ortholog is 100%.

---

Group of orthologs #1729. Best score 1565 bits

Score difference with first non-orthologous sequence - *A. fumigatus*:1565 *A. fischeri*:1565

|                 |         |                 |         |
|-----------------|---------|-----------------|---------|
| afum EAL85719.1 | 100.00% | afis EAW15616.1 | 100.00% |
|-----------------|---------|-----------------|---------|

Bootstrap support for afum|EAL85719.1 as seed ortholog is 100%.

Bootstrap support for afis|EAW15616.1 as seed ortholog is 100%.

---

Group of orthologs #1730. Best score 1565 bits

Score difference with first non-orthologous sequence - *A. fumigatus*:1565 *A. fischeri*:1414

|                 |         |                 |         |
|-----------------|---------|-----------------|---------|
| afum EAL86674.1 | 100.00% | afis EAW17256.1 | 100.00% |
|-----------------|---------|-----------------|---------|

Bootstrap support for afum|EAL86674.1 as seed ortholog is 100%.

Bootstrap support for afis|EAW17256.1 as seed ortholog is 100%.

---

Group of orthologs #1731. Best score 1565 bits

Score difference with first non-orthologous sequence - *A. fumigatus*:1565 *A. fischeri*:1565

|                 |         |                 |         |
|-----------------|---------|-----------------|---------|
| afum EAL91864.1 | 100.00% | afis EAW18053.1 | 100.00% |
|-----------------|---------|-----------------|---------|

Bootstrap support for afum|EAL91864.1 as seed ortholog is 100%.

Bootstrap support for afis|EAW18053.1 as seed ortholog is 100%.

---

Group of orthologs #1732. Best score 1565 bits

Score difference with first non-orthologous sequence - *A. fumigatus*:997 *A. fischeri*:1565

|                 |         |                 |         |
|-----------------|---------|-----------------|---------|
| afum EAL89591.1 | 100.00% | afis EAW24934.1 | 100.00% |
|-----------------|---------|-----------------|---------|

Bootstrap support for afum|EAL89591.1 as seed ortholog is 100%.

Bootstrap support for afis|EAW24934.1 as seed ortholog is 100%.

---

Group of orthologs #1733. Best score 1565 bits

Score difference with first non-orthologous sequence - *A. fumigatus*:1565 *A. fischeri*:1565

|                 |         |                 |         |
|-----------------|---------|-----------------|---------|
| afum EAL92002.1 | 100.00% | afis EAW24147.1 | 100.00% |
|-----------------|---------|-----------------|---------|

Bootstrap support for afum|EAL92002.1 as seed ortholog is 100%.



Bootstrap support for afis|EAW24147.1 as seed ortholog is 100%.

---

Group of orthologs #1734. Best score 1564 bits

Score difference with first non-orthologous sequence - *A. fumigatus*:1564 *A. fischeri*:1494

|                 |         |                 |         |
|-----------------|---------|-----------------|---------|
| afum EAL85755.1 | 100.00% | afis EAW15579.1 | 100.00% |
|-----------------|---------|-----------------|---------|

Bootstrap support for afum|EAL85755.1 as seed ortholog is 100%.

Bootstrap support for afis|EAW15579.1 as seed ortholog is 100%.

---

Group of orthologs #1735. Best score 1564 bits

Score difference with first non-orthologous sequence - *A. fumigatus*:1564 *A. fischeri*:1564

|                 |         |                 |         |
|-----------------|---------|-----------------|---------|
| afum EAL87027.1 | 100.00% | afis EAW19469.1 | 100.00% |
|-----------------|---------|-----------------|---------|

Bootstrap support for afum|EAL87027.1 as seed ortholog is 100%.

Bootstrap support for afis|EAW19469.1 as seed ortholog is 100%.

---

Group of orthologs #1736. Best score 1564 bits

Score difference with first non-orthologous sequence - *A. fumigatus*:1564 *A. fischeri*:1564

|                 |         |                 |         |
|-----------------|---------|-----------------|---------|
| afum EAL89983.1 | 100.00% | afis EAW25322.1 | 100.00% |
|-----------------|---------|-----------------|---------|

Bootstrap support for afum|EAL89983.1 as seed ortholog is 100%.

Bootstrap support for afis|EAW25322.1 as seed ortholog is 100%.

---

Group of orthologs #1737. Best score 1563 bits

Score difference with first non-orthologous sequence - *A. fumigatus*:1563 *A. fischeri*:1563

|                 |         |                 |         |
|-----------------|---------|-----------------|---------|
| afum EAL88222.1 | 100.00% | afis EAW23259.1 | 100.00% |
|-----------------|---------|-----------------|---------|

Bootstrap support for afum|EAL88222.1 as seed ortholog is 100%.

Bootstrap support for afis|EAW23259.1 as seed ortholog is 100%.

---

Group of orthologs #1738. Best score 1563 bits

Score difference with first non-orthologous sequence - *A. fumigatus*:1563 *A. fischeri*:1563

|                 |         |                 |         |
|-----------------|---------|-----------------|---------|
| afum EAL90216.1 | 100.00% | afis EAW22981.1 | 100.00% |
|-----------------|---------|-----------------|---------|

Bootstrap support for afum|EAL90216.1 as seed ortholog is 100%.

Bootstrap support for afis|EAW22981.1 as seed ortholog is 100%.

---

Group of orthologs #1739. Best score 1562 bits

Score difference with first non-orthologous sequence - *A. fumigatus*:1562 *A. fischeri*:1562

|                 |         |                 |         |
|-----------------|---------|-----------------|---------|
| afum EAL92614.1 | 100.00% | afis EAW21596.1 | 100.00% |
|-----------------|---------|-----------------|---------|

Bootstrap support for afum|EAL92614.1 as seed ortholog is 100%.

Bootstrap support for afis|EAW21596.1 as seed ortholog is 100%.

---

Group of orthologs #1740. Best score 1561 bits

Score difference with first non-orthologous sequence - *A. fumigatus*:1561 *A. fischeri*:1561

|                 |         |                 |         |
|-----------------|---------|-----------------|---------|
| afum EAL88665.1 | 100.00% | afis EAW16034.1 | 100.00% |
|-----------------|---------|-----------------|---------|

Bootstrap support for afum|EAL88665.1 as seed ortholog is 100%.

Bootstrap support for afis|EAW16034.1 as seed ortholog is 100%.

---

Group of orthologs #1741. Best score 1561 bits

Score difference with first non-orthologous sequence - *A. fumigatus*:695 *A. fischeri*:1561

|                 |         |                 |         |
|-----------------|---------|-----------------|---------|
| afum EAL91515.2 | 100.00% | afis EAW17700.1 | 100.00% |
|-----------------|---------|-----------------|---------|

Bootstrap support for afum|EAL91515.2 as seed ortholog is 100%.

Bootstrap support for afis|EAW17700.1 as seed ortholog is 100%.

---

Group of orthologs #1742. Best score 1559 bits

Score difference with first non-orthologous sequence - *A. fumigatus*:1559 *A. fischeri*:1279

|                 |         |                 |         |
|-----------------|---------|-----------------|---------|
| afum EAL86889.1 | 100.00% | afis EAW19633.1 | 100.00% |
|-----------------|---------|-----------------|---------|

Bootstrap support for afum|EAL86889.1 as seed ortholog is 100%.

Bootstrap support for afis|EAW19633.1 as seed ortholog is 100%.

---

Group of orthologs #1743. Best score 1558 bits

Score difference with first non-orthologous sequence - *A. fumigatus*:1558 *A. fischeri*:1558

afum|EAL90261.1 100.00% afis|EAW22935.1 100.00%

Bootstrap support for afum|EAL90261.1 as seed ortholog is 100%.

Bootstrap support for afis|EAW22935.1 as seed ortholog is 100%.

---

Group of orthologs #1744. Best score 1558 bits

Score difference with first non-orthologous sequence - *A. fumigatus*:1558 *A. fischeri*:1558

afum|EAL92209.1 100.00% afis|EAW21187.1 100.00%

Bootstrap support for afum|EAL92209.1 as seed ortholog is 100%.

Bootstrap support for afis|EAW21187.1 as seed ortholog is 100%.

---

Group of orthologs #1745. Best score 1557 bits

Score difference with first non-orthologous sequence - *A. fumigatus*:1557 *A. fischeri*:1557

afum|EAL87079.1 100.00% afis|EAW19415.1 100.00%

Bootstrap support for afum|EAL87079.1 as seed ortholog is 100%.

Bootstrap support for afis|EAW19415.1 as seed ortholog is 100%.

---

Group of orthologs #1746. Best score 1557 bits

Score difference with first non-orthologous sequence - *A. fumigatus*:1557 *A. fischeri*:1557

afum|EAL90223.1 100.00% afis|EAW22974.1 100.00%

Bootstrap support for afum|EAL90223.1 as seed ortholog is 100%.

Bootstrap support for afis|EAW22974.1 as seed ortholog is 100%.

---

Group of orthologs #1747. Best score 1555 bits

Score difference with first non-orthologous sequence - *A. fumigatus*:1555 *A. fischeri*:1555

afum|EAL90372.2 100.00% afis|EAW22830.1 100.00%

Bootstrap support for afum|EAL90372.2 as seed ortholog is 100%.

Bootstrap support for afis|EAW22830.1 as seed ortholog is 100%.

---

Group of orthologs #1748. Best score 1554 bits

Score difference with first non-orthologous sequence - *A. fumigatus*:1554 *A. fischeri*:1554

afum|EAL88582.1 100.00% afis|EAW15949.1 100.00%

Bootstrap support for afum|EAL88582.1 as seed ortholog is 100%.

Bootstrap support for afis|EAW15949.1 as seed ortholog is 100%.

---

Group of orthologs #1749. Best score 1554 bits

Score difference with first non-orthologous sequence - *A. fumigatus*:1554 *A. fischeri*:1554

afum|EAL90831.1 100.00% afis|EAW22360.1 100.00%

Bootstrap support for afum|EAL90831.1 as seed ortholog is 100%.

Bootstrap support for afis|EAW22360.1 as seed ortholog is 100%.

---

Group of orthologs #1750. Best score 1554 bits

Score difference with first non-orthologous sequence - *A. fumigatus*:1554 *A. fischeri*:1554

afum|EAL90068.1 100.00% afis|EAW25409.1 100.00%

Bootstrap support for afum|EAL90068.1 as seed ortholog is 100%.

Bootstrap support for afis|EAW25409.1 as seed ortholog is 100%.

---

Group of orthologs #1751. Best score 1553 bits

Score difference with first non-orthologous sequence - *A. fumigatus*:1553 *A. fischeri*:1553

afum|EAL85193.2 100.00% afis|EAW20075.1 100.00%

Bootstrap support for afum|EAL85193.2 as seed ortholog is 100%.

Bootstrap support for afis|EAW20075.1 as seed ortholog is 100%.

---

Group of orthologs #1752. Best score 1553 bits

Score difference with first non-orthologous sequence - *A. fumigatus*:1553 *A. fischeri*:1553

|                 |         |                 |         |
|-----------------|---------|-----------------|---------|
| afum EAL89124.1 | 100.00% | afis EAW16528.1 | 100.00% |
|-----------------|---------|-----------------|---------|

Bootstrap support for afum|EAL89124.1 as seed ortholog is 100%.

Bootstrap support for afis|EAW16528.1 as seed ortholog is 100%.

---

Group of orthologs #1753. Best score 1552 bits

Score difference with first non-orthologous sequence - *A. fumigatus*:1552 *A. fischeri*:1480

|                 |         |                 |         |
|-----------------|---------|-----------------|---------|
| afum EAL86598.1 | 100.00% | afis EAW17161.1 | 100.00% |
|-----------------|---------|-----------------|---------|

Bootstrap support for afum|EAL86598.1 as seed ortholog is 100%.

Bootstrap support for afis|EAW17161.1 as seed ortholog is 100%.

---

Group of orthologs #1754. Best score 1552 bits

Score difference with first non-orthologous sequence - *A. fumigatus*:1552 *A. fischeri*:1552

|                 |         |                 |         |
|-----------------|---------|-----------------|---------|
| afum EAL85066.1 | 100.00% | afis EAW19826.1 | 100.00% |
|-----------------|---------|-----------------|---------|

Bootstrap support for afum|EAL85066.1 as seed ortholog is 100%.

Bootstrap support for afis|EAW19826.1 as seed ortholog is 100%.

---

Group of orthologs #1755. Best score 1552 bits

Score difference with first non-orthologous sequence - *A. fumigatus*:1552 *A. fischeri*:1552

|                 |         |                 |         |
|-----------------|---------|-----------------|---------|
| afum EAL88892.1 | 100.00% | afis EAW16271.1 | 100.00% |
|-----------------|---------|-----------------|---------|

Bootstrap support for afum|EAL88892.1 as seed ortholog is 100%.

Bootstrap support for afis|EAW16271.1 as seed ortholog is 100%.

---

Group of orthologs #1756. Best score 1552 bits

Score difference with first non-orthologous sequence - *A. fumigatus*:1552 *A. fischeri*:1552

|                 |         |                 |         |
|-----------------|---------|-----------------|---------|
| afum EAL87233.1 | 100.00% | afis EAW23798.1 | 100.00% |
|-----------------|---------|-----------------|---------|

Bootstrap support for afum|EAL87233.1 as seed ortholog is 100%.

Bootstrap support for afis|EAW23798.1 as seed ortholog is 100%.

---

Group of orthologs #1757. Best score 1552 bits

Score difference with first non-orthologous sequence - *A. fumigatus*:1552 *A. fischeri*:1552

|                 |         |                 |         |
|-----------------|---------|-----------------|---------|
| afum EAL88066.1 | 100.00% | afis EAW23404.1 | 100.00% |
|-----------------|---------|-----------------|---------|

Bootstrap support for afum|EAL88066.1 as seed ortholog is 100%.

Bootstrap support for afis|EAW23404.1 as seed ortholog is 100%.

---

Group of orthologs #1758. Best score 1552 bits

Score difference with first non-orthologous sequence - *A. fumigatus*:1552 *A. fischeri*:1552

|                 |         |                 |         |
|-----------------|---------|-----------------|---------|
| afum EAL93357.1 | 100.00% | afis EAW18643.1 | 100.00% |
|-----------------|---------|-----------------|---------|

Bootstrap support for afum|EAL93357.1 as seed ortholog is 100%.

Bootstrap support for afis|EAW18643.1 as seed ortholog is 100%.

---

Group of orthologs #1759. Best score 1552 bits

Score difference with first non-orthologous sequence - *A. fumigatus*:1552 *A. fischeri*:1552

|                 |         |                 |         |
|-----------------|---------|-----------------|---------|
| afum EAL90580.1 | 100.00% | afis EAW22617.1 | 100.00% |
|-----------------|---------|-----------------|---------|

Bootstrap support for afum|EAL90580.1 as seed ortholog is 100%.

Bootstrap support for afis|EAW22617.1 as seed ortholog is 100%.

---

Group of orthologs #1760. Best score 1552 bits

Score difference with first non-orthologous sequence - *A. fumigatus*:1552 *A. fischeri*:1552

|                 |         |                 |         |
|-----------------|---------|-----------------|---------|
| afum EAL90609.1 | 100.00% | afis EAW22590.1 | 100.00% |
|-----------------|---------|-----------------|---------|

Bootstrap support for afum|EAL90609.1 as seed ortholog is 100%.

Bootstrap support for afis|EAW22590.1 as seed ortholog is 100%.

---

Group of orthologs #1761. Best score 1550 bits

Score difference with first non-orthologous sequence - *A. fumigatus*:1550 *A. fischeri*:1550

|                 |         |                 |         |
|-----------------|---------|-----------------|---------|
| afum EAL85456.1 | 100.00% | afis EAW20329.1 | 100.00% |
|-----------------|---------|-----------------|---------|

Bootstrap support for afum|EAL85456.1 as seed ortholog is 100%.

Bootstrap support for afis|EAW20329.1 as seed ortholog is 100%.

---

Group of orthologs #1762. Best score 1549 bits

Score difference with first non-orthologous sequence - *A. fumigatus*:1549 *A. fischeri*:1549

|                 |         |                 |         |
|-----------------|---------|-----------------|---------|
| afum EAL91768.1 | 100.00% | afis EAW17957.1 | 100.00% |
|-----------------|---------|-----------------|---------|

Bootstrap support for afum|EAL91768.1 as seed ortholog is 100%.

Bootstrap support for afis|EAW17957.1 as seed ortholog is 100%.

---

Group of orthologs #1763. Best score 1549 bits

Score difference with first non-orthologous sequence - *A. fumigatus*:1549 *A. fischeri*:1549

|                 |         |                 |         |
|-----------------|---------|-----------------|---------|
| afum EAL91835.1 | 100.00% | afis EAW18023.1 | 100.00% |
|-----------------|---------|-----------------|---------|

Bootstrap support for afum|EAL91835.1 as seed ortholog is 100%.

Bootstrap support for afis|EAW18023.1 as seed ortholog is 100%.

---

Group of orthologs #1764. Best score 1549 bits

Score difference with first non-orthologous sequence - *A. fumigatus*:1549 *A. fischeri*:1549

|                 |         |                 |         |
|-----------------|---------|-----------------|---------|
| afum EAL93579.1 | 100.00% | afis EAW18847.1 | 100.00% |
|-----------------|---------|-----------------|---------|

Bootstrap support for afum|EAL93579.1 as seed ortholog is 100%.

Bootstrap support for afis|EAW18847.1 as seed ortholog is 100%.

---

Group of orthologs #1765. Best score 1547 bits

Score difference with first non-orthologous sequence - *A. fumigatus*:1547 *A. fischeri*:1547

|                 |         |                 |         |
|-----------------|---------|-----------------|---------|
| afum EAL89261.1 | 100.00% | afis EAW16657.1 | 100.00% |
|-----------------|---------|-----------------|---------|

Bootstrap support for afum|EAL89261.1 as seed ortholog is 100%.

Bootstrap support for afis|EAW16657.1 as seed ortholog is 100%.

---

Group of orthologs #1766. Best score 1547 bits

Score difference with first non-orthologous sequence - *A. fumigatus*:1547 *A. fischeri*:1547

|                 |         |                 |         |
|-----------------|---------|-----------------|---------|
| afum EAL91699.1 | 100.00% | afis EAW17890.1 | 100.00% |
|-----------------|---------|-----------------|---------|

Bootstrap support for afum|EAL91699.1 as seed ortholog is 100%.

Bootstrap support for afis|EAW17890.1 as seed ortholog is 100%.

---

Group of orthologs #1767. Best score 1547 bits

Score difference with first non-orthologous sequence - *A. fumigatus*:1272 *A. fischeri*:1140

|                 |         |                 |         |
|-----------------|---------|-----------------|---------|
| afum EAL90698.1 | 100.00% | afis EAW22495.1 | 100.00% |
|-----------------|---------|-----------------|---------|

Bootstrap support for afum|EAL90698.1 as seed ortholog is 100%.

Bootstrap support for afis|EAW22495.1 as seed ortholog is 100%.

---

Group of orthologs #1768. Best score 1546 bits

Score difference with first non-orthologous sequence - *A. fumigatus*:1546 *A. fischeri*:1546

|                 |         |                 |         |
|-----------------|---------|-----------------|---------|
| afum EAL88768.1 | 100.00% | afis EAW16139.1 | 100.00% |
|-----------------|---------|-----------------|---------|

Bootstrap support for afum|EAL88768.1 as seed ortholog is 100%.

Bootstrap support for afis|EAW16139.1 as seed ortholog is 100%.

---

Group of orthologs #1769. Best score 1546 bits

Score difference with first non-orthologous sequence - *A. fumigatus*:1546 *A. fischeri*:1546

|                 |         |                 |         |
|-----------------|---------|-----------------|---------|
| afum EAL86088.1 | 100.00% | afis EAW24419.1 | 100.00% |
|-----------------|---------|-----------------|---------|

Bootstrap support for afum|EAL86088.1 as seed ortholog is 100%.

Bootstrap support for afis|EAW24419.1 as seed ortholog is 100%.

---

Group of orthologs #1770. Best score 1546 bits

Score difference with first non-orthologous sequence - *A. fumigatus*:1546 *A. fischeri*:1546

|                 |         |                 |         |
|-----------------|---------|-----------------|---------|
| afum EBA27500.1 | 100.00% | afis EAW18925.1 | 100.00% |
|-----------------|---------|-----------------|---------|

Bootstrap support for afum|EBA27500.1 as seed ortholog is 100%.

Bootstrap support for afis|EAW18925.1 as seed ortholog is 100%.

---

Group of orthologs #1771. Best score 1545 bits

Score difference with first non-orthologous sequence - *A. fumigatus*:1545 *A. fischeri*:1545

afum|EAL88640.1 100.00% afis|EAW16010.1 100.00%

Bootstrap support for afum|EAL88640.1 as seed ortholog is 100%.

Bootstrap support for afis|EAW16010.1 as seed ortholog is 100%.

---

Group of orthologs #1772. Best score 1545 bits

Score difference with first non-orthologous sequence - *A. fumigatus*:1545 *A. fischeri*:1545

afum|EAL88013.1 100.00% afis|EAW23453.1 100.00%

Bootstrap support for afum|EAL88013.1 as seed ortholog is 100%.

Bootstrap support for afis|EAW23453.1 as seed ortholog is 100%.

---

Group of orthologs #1773. Best score 1545 bits

Score difference with first non-orthologous sequence - *A. fumigatus*:1545 *A. fischeri*:1545

afum|EAL93385.1 100.00% afis|EAW18667.1 100.00%

Bootstrap support for afum|EAL93385.1 as seed ortholog is 100%.

Bootstrap support for afis|EAW18667.1 as seed ortholog is 100%.

---

Group of orthologs #1774. Best score 1545 bits

Score difference with first non-orthologous sequence - *A. fumigatus*:1545 *A. fischeri*:1545

afum|EAL92673.1 100.00% afis|EAW21639.1 100.00%

Bootstrap support for afum|EAL92673.1 as seed ortholog is 100%.

Bootstrap support for afis|EAW21639.1 as seed ortholog is 100%.

---

Group of orthologs #1775. Best score 1544 bits

Score difference with first non-orthologous sequence - *A. fumigatus*:1337 *A. fischeri*:1384

afum|EAL91095.1 100.00% afis|EAW22075.1 100.00%

Bootstrap support for afum|EAL91095.1 as seed ortholog is 100%.

Bootstrap support for afis|EAW22075.1 as seed ortholog is 100%.

---

Group of orthologs #1776. Best score 1543 bits

Score difference with first non-orthologous sequence - *A. fumigatus*:1543 *A. fischeri*:1543

afum|EAL92274.1 100.00% afis|EAW21259.1 100.00%

Bootstrap support for afum|EAL92274.1 as seed ortholog is 100%.

Bootstrap support for afis|EAW21259.1 as seed ortholog is 100%.

---

Group of orthologs #1777. Best score 1542 bits

Score difference with first non-orthologous sequence - *A. fumigatus*:1542 *A. fischeri*:1542

afum|EAL85920.2 100.00% afis|EAW24251.1 100.00%

Bootstrap support for afum|EAL85920.2 as seed ortholog is 100%.

Bootstrap support for afis|EAW24251.1 as seed ortholog is 100%.

---

Group of orthologs #1778. Best score 1541 bits

Score difference with first non-orthologous sequence - *A. fumigatus*:1391 *A. fischeri*:1541

afum|EAL84369.1 100.00% afis|EAW25695.1 100.00%

Bootstrap support for afum|EAL84369.1 as seed ortholog is 100%.

Bootstrap support for afis|EAW25695.1 as seed ortholog is 100%.

---

Group of orthologs #1779. Best score 1540 bits

Score difference with first non-orthologous sequence - *A. fumigatus*:1540 *A. fischeri*:1540

afum|EAL90521.1 100.00% afis|EAW22671.1 100.00%

Bootstrap support for afum|EAL90521.1 as seed ortholog is 100%.

Bootstrap support for afis|EAW22671.1 as seed ortholog is 100%.

---

Group of orthologs #1780. Best score 1540 bits

Score difference with first non-orthologous sequence - *A. fumigatus*:1540 *A. fischeri*:1540

|                 |         |                 |         |
|-----------------|---------|-----------------|---------|
| afum EAL89622.1 | 100.00% | afis EAW24964.1 | 100.00% |
|-----------------|---------|-----------------|---------|

Bootstrap support for afum|EAL89622.1 as seed ortholog is 100%.

Bootstrap support for afis|EAW24964.1 as seed ortholog is 100%.

---

Group of orthologs #1781. Best score 1539 bits

Score difference with first non-orthologous sequence - *A. fumigatus*:1539 *A. fischeri*:1539

|                 |         |                 |         |
|-----------------|---------|-----------------|---------|
| afum EAL85783.1 | 100.00% | afis EAW15549.1 | 100.00% |
|-----------------|---------|-----------------|---------|

Bootstrap support for afum|EAL85783.1 as seed ortholog is 100%.

Bootstrap support for afis|EAW15549.1 as seed ortholog is 100%.

---

Group of orthologs #1782. Best score 1539 bits

Score difference with first non-orthologous sequence - *A. fumigatus*:1539 *A. fischeri*:1539

|                 |         |                 |         |
|-----------------|---------|-----------------|---------|
| afum EAL89104.2 | 100.00% | afis EAW16509.1 | 100.00% |
|-----------------|---------|-----------------|---------|

Bootstrap support for afum|EAL89104.2 as seed ortholog is 100%.

Bootstrap support for afis|EAW16509.1 as seed ortholog is 100%.

---

Group of orthologs #1783. Best score 1539 bits

Score difference with first non-orthologous sequence - *A. fumigatus*:1539 *A. fischeri*:1539

|                 |         |                 |         |
|-----------------|---------|-----------------|---------|
| afum EAL91824.1 | 100.00% | afis EAW18012.1 | 100.00% |
|-----------------|---------|-----------------|---------|

Bootstrap support for afum|EAL91824.1 as seed ortholog is 100%.

Bootstrap support for afis|EAW18012.1 as seed ortholog is 100%.

---

Group of orthologs #1784. Best score 1539 bits

Score difference with first non-orthologous sequence - *A. fumigatus*:1539 *A. fischeri*:1539

|                 |         |                 |         |
|-----------------|---------|-----------------|---------|
| afum EAL93040.1 | 100.00% | afis EAW18366.1 | 100.00% |
|-----------------|---------|-----------------|---------|

Bootstrap support for afum|EAL93040.1 as seed ortholog is 100%.

Bootstrap support for afis|EAW18366.1 as seed ortholog is 100%.

---

Group of orthologs #1785. Best score 1538 bits

Score difference with first non-orthologous sequence - *A. fumigatus*:1313 *A. fischeri*:1208

|                 |         |                 |         |
|-----------------|---------|-----------------|---------|
| afum EAL93849.1 | 100.00% | afis EAW19117.1 | 100.00% |
|-----------------|---------|-----------------|---------|

Bootstrap support for afum|EAL93849.1 as seed ortholog is 100%.

Bootstrap support for afis|EAW19117.1 as seed ortholog is 100%.

---

Group of orthologs #1786. Best score 1537 bits

Score difference with first non-orthologous sequence - *A. fumigatus*:1537 *A. fischeri*:1537

|                 |         |                 |         |
|-----------------|---------|-----------------|---------|
| afum EAL85601.1 | 100.00% | afis EAW15748.1 | 100.00% |
|-----------------|---------|-----------------|---------|

Bootstrap support for afum|EAL85601.1 as seed ortholog is 100%.

Bootstrap support for afis|EAW15748.1 as seed ortholog is 100%.

---

Group of orthologs #1787. Best score 1537 bits

Score difference with first non-orthologous sequence - *A. fumigatus*:1537 *A. fischeri*:1537

|                 |         |                 |         |
|-----------------|---------|-----------------|---------|
| afum EAL88379.1 | 100.00% | afis EAW23099.1 | 100.00% |
|-----------------|---------|-----------------|---------|

Bootstrap support for afum|EAL88379.1 as seed ortholog is 100%.

Bootstrap support for afis|EAW23099.1 as seed ortholog is 100%.

---

Group of orthologs #1788. Best score 1537 bits

Score difference with first non-orthologous sequence - *A. fumigatus*:1537 *A. fischeri*:1537

|                 |         |                 |         |
|-----------------|---------|-----------------|---------|
| afum EAL91085.1 | 100.00% | afis EAW22106.1 | 100.00% |
|-----------------|---------|-----------------|---------|

Bootstrap support for afum|EAL91085.1 as seed ortholog is 100%.

Bootstrap support for afis|EAW22106.1 as seed ortholog is 100%.

---

Group of orthologs #1789. Best score 1536 bits

Score difference with first non-orthologous sequence - *A. fumigatus*:1536 *A. fischeri*:1536

|                 |         |                 |         |
|-----------------|---------|-----------------|---------|
| afum EAL85065.1 | 100.00% | afis EAW19827.1 | 100.00% |
|-----------------|---------|-----------------|---------|

Bootstrap support for afum|EAL85065.1 as seed ortholog is 100%.

Bootstrap support for afis|EAW19827.1 as seed ortholog is 100%.

---

Group of orthologs #1790. Best score 1536 bits

Score difference with first non-orthologous sequence - *A. fumigatus*:1536 *A. fischeri*:1536

|                 |         |                 |         |
|-----------------|---------|-----------------|---------|
| afum EAL93456.1 | 100.00% | afis EAW18731.1 | 100.00% |
|-----------------|---------|-----------------|---------|

Bootstrap support for afum|EAL93456.1 as seed ortholog is 100%.

Bootstrap support for afis|EAW18731.1 as seed ortholog is 100%.

---

Group of orthologs #1791. Best score 1536 bits

Score difference with first non-orthologous sequence - *A. fumigatus*:1536 *A. fischeri*:1536

|                 |         |                 |         |
|-----------------|---------|-----------------|---------|
| afum EAL92413.1 | 100.00% | afis EAW21399.1 | 100.00% |
|-----------------|---------|-----------------|---------|

Bootstrap support for afum|EAL92413.1 as seed ortholog is 100%.

Bootstrap support for afis|EAW21399.1 as seed ortholog is 100%.

---

Group of orthologs #1792. Best score 1535 bits

Score difference with first non-orthologous sequence - *A. fumigatus*:1535 *A. fischeri*:1535

|                 |         |                 |         |
|-----------------|---------|-----------------|---------|
| afum EAL86686.1 | 100.00% | afis EAW17269.1 | 100.00% |
|-----------------|---------|-----------------|---------|

Bootstrap support for afum|EAL86686.1 as seed ortholog is 100%.

Bootstrap support for afis|EAW17269.1 as seed ortholog is 100%.

---

Group of orthologs #1793. Best score 1535 bits

Score difference with first non-orthologous sequence - *A. fumigatus*:1535 *A. fischeri*:1535

|                 |         |                 |         |
|-----------------|---------|-----------------|---------|
| afum EAL88876.1 | 100.00% | afis EAW16248.1 | 100.00% |
|-----------------|---------|-----------------|---------|

Bootstrap support for afum|EAL88876.1 as seed ortholog is 100%.

Bootstrap support for afis|EAW16248.1 as seed ortholog is 100%.

---

Group of orthologs #1794. Best score 1535 bits

Score difference with first non-orthologous sequence - *A. fumigatus*:1535 *A. fischeri*:1535

|                 |         |                 |         |
|-----------------|---------|-----------------|---------|
| afum EAL91948.1 | 100.00% | afis EAW24093.1 | 100.00% |
|-----------------|---------|-----------------|---------|

Bootstrap support for afum|EAL91948.1 as seed ortholog is 100%.

Bootstrap support for afis|EAW24093.1 as seed ortholog is 100%.

---

Group of orthologs #1795. Best score 1534 bits

Score difference with first non-orthologous sequence - *A. fumigatus*:1534 *A. fischeri*:1534

|                 |         |                 |         |
|-----------------|---------|-----------------|---------|
| afum EAL91867.1 | 100.00% | afis EAW18056.1 | 100.00% |
|-----------------|---------|-----------------|---------|

Bootstrap support for afum|EAL91867.1 as seed ortholog is 100%.

Bootstrap support for afis|EAW18056.1 as seed ortholog is 100%.

---

Group of orthologs #1796. Best score 1534 bits

Score difference with first non-orthologous sequence - *A. fumigatus*:1534 *A. fischeri*:1534

|                 |         |                 |         |
|-----------------|---------|-----------------|---------|
| afum EAL93290.1 | 100.00% | afis EAW18586.1 | 100.00% |
|-----------------|---------|-----------------|---------|

Bootstrap support for afum|EAL93290.1 as seed ortholog is 100%.

Bootstrap support for afis|EAW18586.1 as seed ortholog is 100%.

---

Group of orthologs #1797. Best score 1534 bits

Score difference with first non-orthologous sequence - *A. fumigatus*:1534 *A. fischeri*:1534

|                 |         |                 |         |
|-----------------|---------|-----------------|---------|
| afum EAL93698.2 | 100.00% | afis EAW18966.1 | 100.00% |
|-----------------|---------|-----------------|---------|

Bootstrap support for afum|EAL93698.2 as seed ortholog is 100%.

Bootstrap support for afis|EAW18966.1 as seed ortholog is 100%.

---

Group of orthologs #1798. Best score 1534 bits

Score difference with first non-orthologous sequence - *A. fumigatus*:1534 *A. fischeri*:1534

|                 |         |                 |         |
|-----------------|---------|-----------------|---------|
| afum EAL92509.1 | 100.00% | afis EAW21490.1 | 100.00% |
|-----------------|---------|-----------------|---------|

Bootstrap support for afum|EAL92509.1 as seed ortholog is 100%.

Bootstrap support for afis|EAW21490.1 as seed ortholog is 100%.

---

Group of orthologs #1799. Best score 1533 bits

Score difference with first non-orthologous sequence - *A. fumigatus*:1533 *A. fischeri*:1533

afum|EAL85628.1 100.00% afis|EAW15720.1 100.00%

Bootstrap support for afum|EAL85628.1 as seed ortholog is 100%.

Bootstrap support for afis|EAW15720.1 as seed ortholog is 100%.

---

Group of orthologs #1800. Best score 1533 bits

Score difference with first non-orthologous sequence - *A. fumigatus*:1533 *A. fischeri*:1533

afum|EAL86016.1 100.00% afis|EAW24346.1 100.00%

Bootstrap support for afum|EAL86016.1 as seed ortholog is 100%.

Bootstrap support for afis|EAW24346.1 as seed ortholog is 100%.

---

Group of orthologs #1801. Best score 1533 bits

Score difference with first non-orthologous sequence - *A. fumigatus*:1533 *A. fischeri*:1533

afum|EAL88275.1 100.00% afis|EAW23209.1 100.00%

Bootstrap support for afum|EAL88275.1 as seed ortholog is 100%.

Bootstrap support for afis|EAW23209.1 as seed ortholog is 100%.

---

Group of orthologs #1802. Best score 1531 bits

Score difference with first non-orthologous sequence - *A. fumigatus*:1531 *A. fischeri*:1531

afum|EAL93670.1 100.00% afis|EAW18937.1 100.00%

Bootstrap support for afum|EAL93670.1 as seed ortholog is 100%.

Bootstrap support for afis|EAW18937.1 as seed ortholog is 100%.

---

Group of orthologs #1803. Best score 1531 bits

Score difference with first non-orthologous sequence - *A. fumigatus*:1531 *A. fischeri*:1531

afum|EAL92045.1 100.00% afis|EAW24185.1 100.00%

Bootstrap support for afum|EAL92045.1 as seed ortholog is 100%.

Bootstrap support for afis|EAW24185.1 as seed ortholog is 100%.

---

Group of orthologs #1804. Best score 1530 bits

Score difference with first non-orthologous sequence - *A. fumigatus*:1530 *A. fischeri*:1530

afum|EAL90627.1 100.00% afis|EAW22571.1 100.00%

Bootstrap support for afum|EAL90627.1 as seed ortholog is 100%.

Bootstrap support for afis|EAW22571.1 as seed ortholog is 100%.

---

Group of orthologs #1805. Best score 1530 bits

Score difference with first non-orthologous sequence - *A. fumigatus*:1530 *A. fischeri*:1530

afum|EAL92514.1 100.00% afis|EAW21495.1 100.00%

Bootstrap support for afum|EAL92514.1 as seed ortholog is 100%.

Bootstrap support for afis|EAW21495.1 as seed ortholog is 100%.

---

Group of orthologs #1806. Best score 1529 bits

Score difference with first non-orthologous sequence - *A. fumigatus*:1529 *A. fischeri*:1529

afum|EAL84580.2 100.00% afis|EAW20472.1 100.00%

Bootstrap support for afum|EAL84580.2 as seed ortholog is 100%.

Bootstrap support for afis|EAW20472.1 as seed ortholog is 100%.

---

Group of orthologs #1807. Best score 1526 bits

Score difference with first non-orthologous sequence - *A. fumigatus*:1526 *A. fischeri*:1526

afum|EAL92307.1 100.00% afis|EAW21290.1 100.00%

Bootstrap support for afum|EAL92307.1 as seed ortholog is 100%.

Bootstrap support for afis|EAW21290.1 as seed ortholog is 100%.

---

Group of orthologs #1808. Best score 1526 bits

Score difference with first non-orthologous sequence - *A. fumigatus*:1526 *A. fischeri*:1526



|                 |         |                 |         |
|-----------------|---------|-----------------|---------|
| afum EAL91996.1 | 100.00% | afis EAW24141.1 | 100.00% |
|-----------------|---------|-----------------|---------|

Bootstrap support for afum|EAL91996.1 as seed ortholog is 100%.

Bootstrap support for afis|EAW24141.1 as seed ortholog is 100%.

---

Group of orthologs #1809. Best score 1525 bits

Score difference with first non-orthologous sequence - *A. fumigatus*:1525 *A. fischeri*:1437

|                 |         |                 |         |
|-----------------|---------|-----------------|---------|
| afum EAL86271.1 | 100.00% | afis EAW20695.1 | 100.00% |
|-----------------|---------|-----------------|---------|

Bootstrap support for afum|EAL86271.1 as seed ortholog is 100%.

Bootstrap support for afis|EAW20695.1 as seed ortholog is 100%.

---

Group of orthologs #1810. Best score 1525 bits

Score difference with first non-orthologous sequence - *A. fumigatus*:1525 *A. fischeri*:1525

|                 |         |                 |         |
|-----------------|---------|-----------------|---------|
| afum EBA27442.1 | 100.00% | afis EAW18058.1 | 100.00% |
|-----------------|---------|-----------------|---------|

Bootstrap support for afum|EBA27442.1 as seed ortholog is 100%.

Bootstrap support for afis|EAW18058.1 as seed ortholog is 100%.

---

Group of orthologs #1811. Best score 1525 bits

Score difference with first non-orthologous sequence - *A. fumigatus*:1525 *A. fischeri*:1525

|                 |         |                 |         |
|-----------------|---------|-----------------|---------|
| afum EBA27184.1 | 100.00% | afis EAW20554.1 | 100.00% |
|-----------------|---------|-----------------|---------|

Bootstrap support for afum|EBA27184.1 as seed ortholog is 100%.

Bootstrap support for afis|EAW20554.1 as seed ortholog is 100%.

---

Group of orthologs #1812. Best score 1525 bits

Score difference with first non-orthologous sequence - *A. fumigatus*:1525 *A. fischeri*:1525

|                 |         |                 |         |
|-----------------|---------|-----------------|---------|
| afum EAL89721.1 | 100.00% | afis EAW25053.1 | 100.00% |
|-----------------|---------|-----------------|---------|

Bootstrap support for afum|EAL89721.1 as seed ortholog is 100%.

Bootstrap support for afis|EAW25053.1 as seed ortholog is 100%.

---

Group of orthologs #1813. Best score 1525 bits

Score difference with first non-orthologous sequence - *A. fumigatus*:1525 *A. fischeri*:1525

|                 |         |                 |         |
|-----------------|---------|-----------------|---------|
| afum EAL91968.1 | 100.00% | afis EAW24114.1 | 100.00% |
|-----------------|---------|-----------------|---------|

Bootstrap support for afum|EAL91968.1 as seed ortholog is 100%.

Bootstrap support for afis|EAW24114.1 as seed ortholog is 100%.

---

Group of orthologs #1814. Best score 1524 bits

Score difference with first non-orthologous sequence - *A. fumigatus*:1524 *A. fischeri*:1524

|                 |         |                 |         |
|-----------------|---------|-----------------|---------|
| afum EAL93455.2 | 100.00% | afis EAW18730.1 | 100.00% |
|-----------------|---------|-----------------|---------|

Bootstrap support for afum|EAL93455.2 as seed ortholog is 100%.

Bootstrap support for afis|EAW18730.1 as seed ortholog is 100%.

---

Group of orthologs #1815. Best score 1524 bits

Score difference with first non-orthologous sequence - *A. fumigatus*:1524 *A. fischeri*:1524

|                 |         |                 |         |
|-----------------|---------|-----------------|---------|
| afum EAL93711.2 | 100.00% | afis EAW18976.1 | 100.00% |
|-----------------|---------|-----------------|---------|

Bootstrap support for afum|EAL93711.2 as seed ortholog is 100%.

Bootstrap support for afis|EAW18976.1 as seed ortholog is 100%.

---

Group of orthologs #1816. Best score 1524 bits

Score difference with first non-orthologous sequence - *A. fumigatus*:1524 *A. fischeri*:1524

|                 |         |                 |         |
|-----------------|---------|-----------------|---------|
| afum EAL92725.1 | 100.00% | afis EAW21691.1 | 100.00% |
|-----------------|---------|-----------------|---------|

Bootstrap support for afum|EAL92725.1 as seed ortholog is 100%.

Bootstrap support for afis|EAW21691.1 as seed ortholog is 100%.

---

Group of orthologs #1817. Best score 1524 bits

Score difference with first non-orthologous sequence - *A. fumigatus*:1524 *A. fischeri*:1524

|                 |         |                 |         |
|-----------------|---------|-----------------|---------|
| afum EAL92782.1 | 100.00% | afis EAW21752.1 | 100.00% |
|-----------------|---------|-----------------|---------|

Bootstrap support for afum|EAL92782.1 as seed ortholog is 100%.

Bootstrap support for afis|EAW21752.1 as seed ortholog is 100%.

---

Group of orthologs #1818. Best score 1524 bits

Score difference with first non-orthologous sequence - *A. fumigatus*:1524 *A. fischeri*:1524

|                 |         |                 |         |
|-----------------|---------|-----------------|---------|
| afum EAL92972.1 | 100.00% | afis EAW21958.1 | 100.00% |
|-----------------|---------|-----------------|---------|

Bootstrap support for afum|EAL92972.1 as seed ortholog is 100%.

Bootstrap support for afis|EAW21958.1 as seed ortholog is 100%.

---

Group of orthologs #1819. Best score 1523 bits

Score difference with first non-orthologous sequence - *A. fumigatus*:1523 *A. fischeri*:1523

|                 |         |                 |         |
|-----------------|---------|-----------------|---------|
| afum EAL87713.1 | 100.00% | afis EAW18350.1 | 100.00% |
|-----------------|---------|-----------------|---------|

Bootstrap support for afum|EAL87713.1 as seed ortholog is 100%.

Bootstrap support for afis|EAW18350.1 as seed ortholog is 100%.

---

Group of orthologs #1820. Best score 1523 bits

Score difference with first non-orthologous sequence - *A. fumigatus*:1523 *A. fischeri*:1523

|                 |         |                 |         |
|-----------------|---------|-----------------|---------|
| afum EAL92242.1 | 100.00% | afis EAW21230.1 | 100.00% |
|-----------------|---------|-----------------|---------|

Bootstrap support for afum|EAL92242.1 as seed ortholog is 100%.

Bootstrap support for afis|EAW21230.1 as seed ortholog is 100%.

---

Group of orthologs #1821. Best score 1522 bits

Score difference with first non-orthologous sequence - *A. fumigatus*:1522 *A. fischeri*:1522

|                 |         |                 |         |
|-----------------|---------|-----------------|---------|
| afum EAL85881.1 | 100.00% | afis EAW24212.1 | 100.00% |
|-----------------|---------|-----------------|---------|

Bootstrap support for afum|EAL85881.1 as seed ortholog is 100%.

Bootstrap support for afis|EAW24212.1 as seed ortholog is 100%.

---

Group of orthologs #1822. Best score 1522 bits

Score difference with first non-orthologous sequence - *A. fumigatus*:1522 *A. fischeri*:1522

|                 |         |                 |         |
|-----------------|---------|-----------------|---------|
| afum EAL93084.1 | 100.00% | afis EAW18404.1 | 100.00% |
|-----------------|---------|-----------------|---------|

Bootstrap support for afum|EAL93084.1 as seed ortholog is 100%.

Bootstrap support for afis|EAW18404.1 as seed ortholog is 100%.

---

Group of orthologs #1823. Best score 1522 bits

Score difference with first non-orthologous sequence - *A. fumigatus*:1522 *A. fischeri*:1522

|                 |         |                 |         |
|-----------------|---------|-----------------|---------|
| afum EAL93812.1 | 100.00% | afis EAW19083.1 | 100.00% |
|-----------------|---------|-----------------|---------|

Bootstrap support for afum|EAL93812.1 as seed ortholog is 100%.

Bootstrap support for afis|EAW19083.1 as seed ortholog is 100%.

---

Group of orthologs #1824. Best score 1521 bits

Score difference with first non-orthologous sequence - *A. fumigatus*:1521 *A. fischeri*:1521

|                 |         |                 |         |
|-----------------|---------|-----------------|---------|
| afum EAL88296.1 | 100.00% | afis EAW23187.1 | 100.00% |
|-----------------|---------|-----------------|---------|

Bootstrap support for afum|EAL88296.1 as seed ortholog is 100%.

Bootstrap support for afis|EAW23187.1 as seed ortholog is 100%.

---

Group of orthologs #1825. Best score 1521 bits

Score difference with first non-orthologous sequence - *A. fumigatus*:1521 *A. fischeri*:1521

|                 |         |                 |         |
|-----------------|---------|-----------------|---------|
| afum EAL92925.1 | 100.00% | afis EAW21913.1 | 100.00% |
|-----------------|---------|-----------------|---------|

Bootstrap support for afum|EAL92925.1 as seed ortholog is 100%.

Bootstrap support for afis|EAW21913.1 as seed ortholog is 100%.

---

Group of orthologs #1826. Best score 1520 bits

Score difference with first non-orthologous sequence - *A. fumigatus*:1520 *A. fischeri*:1520

|                 |         |                 |         |
|-----------------|---------|-----------------|---------|
| afum EAL90476.1 | 100.00% | afis EAW22718.1 | 100.00% |
|-----------------|---------|-----------------|---------|

Bootstrap support for afum|EAL90476.1 as seed ortholog is 100%.

Bootstrap support for afis|EAW22718.1 as seed ortholog is 100%.

---

Group of orthologs #1827. Best score 1519 bits

Score difference with first non-orthologous sequence - *A. fumigatus*:1519 *A. fischeri*:1519

afum|EAL85310.1 100.00% afis|EAW20191.1 100.00%

Bootstrap support for afum|EAL85310.1 as seed ortholog is 100%.

Bootstrap support for afis|EAW20191.1 as seed ortholog is 100%.

---

Group of orthologs #1828. Best score 1518 bits

Score difference with first non-orthologous sequence - *A. fumigatus*:1518 *A. fischeri*:1518

afum|EAL85654.1 100.00% afis|EAW15694.1 100.00%

Bootstrap support for afum|EAL85654.1 as seed ortholog is 100%.

Bootstrap support for afis|EAW15694.1 as seed ortholog is 100%.

---

Group of orthologs #1829. Best score 1518 bits

Score difference with first non-orthologous sequence - *A. fumigatus*:1518 *A. fischeri*:1518

afum|EAL89265.1 100.00% afis|EAW16661.1 100.00%

Bootstrap support for afum|EAL89265.1 as seed ortholog is 100%.

Bootstrap support for afis|EAW16661.1 as seed ortholog is 100%.

---

Group of orthologs #1830. Best score 1518 bits

Score difference with first non-orthologous sequence - *A. fumigatus*:1518 *A. fischeri*:1518

afum|EAL87257.1 100.00% afis|EAW23824.1 100.00%

Bootstrap support for afum|EAL87257.1 as seed ortholog is 100%.

Bootstrap support for afis|EAW23824.1 as seed ortholog is 100%.

---

Group of orthologs #1831. Best score 1518 bits

Score difference with first non-orthologous sequence - *A. fumigatus*:1518 *A. fischeri*:1368

afum|EAL93929.2 100.00% afis|EAW19197.1 100.00%

Bootstrap support for afum|EAL93929.2 as seed ortholog is 100%.

Bootstrap support for afis|EAW19197.1 as seed ortholog is 100%.

---

Group of orthologs #1832. Best score 1518 bits

Score difference with first non-orthologous sequence - *A. fumigatus*:1518 *A. fischeri*:1518

afum|EAL93986.1 100.00% afis|EAW19259.1 100.00%

Bootstrap support for afum|EAL93986.1 as seed ortholog is 100%.

Bootstrap support for afis|EAW19259.1 as seed ortholog is 100%.

---

Group of orthologs #1833. Best score 1518 bits

Score difference with first non-orthologous sequence - *A. fumigatus*:1518 *A. fischeri*:1167

afum|EAL90124.1 100.00% afis|EAW25461.1 100.00%

Bootstrap support for afum|EAL90124.1 as seed ortholog is 100%.

Bootstrap support for afis|EAW25461.1 as seed ortholog is 100%.

---

Group of orthologs #1834. Best score 1516 bits

Score difference with first non-orthologous sequence - *A. fumigatus*:1516 *A. fischeri*:1516

afum|EAL91322.1 100.00% afis|EAW17499.1 100.00%

Bootstrap support for afum|EAL91322.1 as seed ortholog is 100%.

Bootstrap support for afis|EAW17499.1 as seed ortholog is 100%.

---

Group of orthologs #1835. Best score 1516 bits

Score difference with first non-orthologous sequence - *A. fumigatus*:1516 *A. fischeri*:1516

afum|EAL93425.1 100.00% afis|EAW18702.1 100.00%

Bootstrap support for afum|EAL93425.1 as seed ortholog is 100%.

Bootstrap support for afis|EAW18702.1 as seed ortholog is 100%.

---

Group of orthologs #1836. Best score 1516 bits

Score difference with first non-orthologous sequence - *A. fumigatus*:1516 *A. fischeri*:1516

|                 |         |                 |         |
|-----------------|---------|-----------------|---------|
| afum EAL90078.1 | 100.00% | afis EAW25419.1 | 100.00% |
|-----------------|---------|-----------------|---------|

Bootstrap support for afum|EAL90078.1 as seed ortholog is 100%.

Bootstrap support for afis|EAW25419.1 as seed ortholog is 100%.

---

Group of orthologs #1837. Best score 1514 bits

Score difference with first non-orthologous sequence - *A. fumigatus*:1514 *A. fischeri*:1514

|                 |         |                 |         |
|-----------------|---------|-----------------|---------|
| afum EAL88452.1 | 100.00% | afis EAW23030.1 | 100.00% |
|-----------------|---------|-----------------|---------|

Bootstrap support for afum|EAL88452.1 as seed ortholog is 100%.

Bootstrap support for afis|EAW23030.1 as seed ortholog is 100%.

---

Group of orthologs #1838. Best score 1513 bits

Score difference with first non-orthologous sequence - *A. fumigatus*:1513 *A. fischeri*:1513

|                 |         |                 |         |
|-----------------|---------|-----------------|---------|
| afum EAL91460.1 | 100.00% | afis EAW17645.1 | 100.00% |
|-----------------|---------|-----------------|---------|

Bootstrap support for afum|EAL91460.1 as seed ortholog is 100%.

Bootstrap support for afis|EAW17645.1 as seed ortholog is 100%.

---

Group of orthologs #1839. Best score 1513 bits

Score difference with first non-orthologous sequence - *A. fumigatus*:1513 *A. fischeri*:1513

|                 |         |                 |         |
|-----------------|---------|-----------------|---------|
| afum EAL89623.1 | 100.00% | afis EAW24965.1 | 100.00% |
|-----------------|---------|-----------------|---------|

Bootstrap support for afum|EAL89623.1 as seed ortholog is 100%.

Bootstrap support for afis|EAW24965.1 as seed ortholog is 100%.

---

Group of orthologs #1840. Best score 1512 bits

Score difference with first non-orthologous sequence - *A. fumigatus*:1512 *A. fischeri*:1512

|                 |         |                 |         |
|-----------------|---------|-----------------|---------|
| afum EAL88960.1 | 100.00% | afis EAW16335.1 | 100.00% |
|-----------------|---------|-----------------|---------|

Bootstrap support for afum|EAL88960.1 as seed ortholog is 100%.

Bootstrap support for afis|EAW16335.1 as seed ortholog is 100%.

---

Group of orthologs #1841. Best score 1512 bits

Score difference with first non-orthologous sequence - *A. fumigatus*:1512 *A. fischeri*:1512

|                 |         |                 |         |
|-----------------|---------|-----------------|---------|
| afum EAL87568.1 | 100.00% | afis EAW18203.1 | 100.00% |
|-----------------|---------|-----------------|---------|

Bootstrap support for afum|EAL87568.1 as seed ortholog is 100%.

Bootstrap support for afis|EAW18203.1 as seed ortholog is 100%.

---

Group of orthologs #1842. Best score 1512 bits

Score difference with first non-orthologous sequence - *A. fumigatus*:1512 *A. fischeri*:1512

|                 |         |                 |         |
|-----------------|---------|-----------------|---------|
| afum EAL90443.1 | 100.00% | afis EAW22756.1 | 100.00% |
|-----------------|---------|-----------------|---------|

Bootstrap support for afum|EAL90443.1 as seed ortholog is 100%.

Bootstrap support for afis|EAW22756.1 as seed ortholog is 100%.

---

Group of orthologs #1843. Best score 1512 bits

Score difference with first non-orthologous sequence - *A. fumigatus*:1512 *A. fischeri*:1512

|                 |         |                 |         |
|-----------------|---------|-----------------|---------|
| afum EAL92349.1 | 100.00% | afis EAW21331.1 | 100.00% |
|-----------------|---------|-----------------|---------|

Bootstrap support for afum|EAL92349.1 as seed ortholog is 100%.

Bootstrap support for afis|EAW21331.1 as seed ortholog is 100%.

---

Group of orthologs #1844. Best score 1512 bits

Score difference with first non-orthologous sequence - *A. fumigatus*:1512 *A. fischeri*:1512

|                 |         |                 |         |
|-----------------|---------|-----------------|---------|
| afum EAL92599.2 | 100.00% | afis EAW21581.1 | 100.00% |
|-----------------|---------|-----------------|---------|

Bootstrap support for afum|EAL92599.2 as seed ortholog is 100%.

Bootstrap support for afis|EAW21581.1 as seed ortholog is 100%.

---

Group of orthologs #1845. Best score 1511 bits

Score difference with first non-orthologous sequence - *A. fumigatus*:1511 *A. fischeri*:1511

|                 |         |                 |         |
|-----------------|---------|-----------------|---------|
| afum EAL85526.1 | 100.00% | afis EAW15825.1 | 100.00% |
|-----------------|---------|-----------------|---------|

Bootstrap support for afum|EAL85526.1 as seed ortholog is 100%.

Bootstrap support for afis|EAW15825.1 as seed ortholog is 100%.

---

Group of orthologs #1846. Best score 1511 bits

Score difference with first non-orthologous sequence - *A. fumigatus*:1511 *A. fischeri*:1511

|                 |         |                 |         |
|-----------------|---------|-----------------|---------|
| afum EAL91288.1 | 100.00% | afis EAW17460.1 | 100.00% |
|-----------------|---------|-----------------|---------|

Bootstrap support for afum|EAL91288.1 as seed ortholog is 100%.

Bootstrap support for afis|EAW17460.1 as seed ortholog is 100%.

---

Group of orthologs #1847. Best score 1511 bits

Score difference with first non-orthologous sequence - *A. fumigatus*:1511 *A. fischeri*:1511

|                 |         |                 |         |
|-----------------|---------|-----------------|---------|
| afum EAL89778.1 | 100.00% | afis EAW25107.1 | 100.00% |
|-----------------|---------|-----------------|---------|

Bootstrap support for afum|EAL89778.1 as seed ortholog is 100%.

Bootstrap support for afis|EAW25107.1 as seed ortholog is 100%.

---

Group of orthologs #1848. Best score 1510 bits

Score difference with first non-orthologous sequence - *A. fumigatus*:1510 *A. fischeri*:1510

|                 |         |                 |         |
|-----------------|---------|-----------------|---------|
| afum EAL92358.1 | 100.00% | afis EAW21341.1 | 100.00% |
|-----------------|---------|-----------------|---------|

Bootstrap support for afum|EAL92358.1 as seed ortholog is 100%.

Bootstrap support for afis|EAW21341.1 as seed ortholog is 100%.

---

Group of orthologs #1849. Best score 1509 bits

Score difference with first non-orthologous sequence - *A. fumigatus*:1509 *A. fischeri*:1509

|                 |         |                 |         |
|-----------------|---------|-----------------|---------|
| afum EAL85665.1 | 100.00% | afis EAW15683.1 | 100.00% |
|-----------------|---------|-----------------|---------|

Bootstrap support for afum|EAL85665.1 as seed ortholog is 100%.

Bootstrap support for afis|EAW15683.1 as seed ortholog is 100%.

---

Group of orthologs #1850. Best score 1509 bits

Score difference with first non-orthologous sequence - *A. fumigatus*:1509 *A. fischeri*:1509

|                 |         |                 |         |
|-----------------|---------|-----------------|---------|
| afum EAL85211.1 | 100.00% | afis EAW20092.1 | 100.00% |
|-----------------|---------|-----------------|---------|

Bootstrap support for afum|EAL85211.1 as seed ortholog is 100%.

Bootstrap support for afis|EAW20092.1 as seed ortholog is 100%.

---

Group of orthologs #1851. Best score 1509 bits

Score difference with first non-orthologous sequence - *A. fumigatus*:1509 *A. fischeri*:1509

|                 |         |                 |         |
|-----------------|---------|-----------------|---------|
| afum EAL89268.1 | 100.00% | afis EAW16664.1 | 100.00% |
|-----------------|---------|-----------------|---------|

Bootstrap support for afum|EAL89268.1 as seed ortholog is 100%.

Bootstrap support for afis|EAW16664.1 as seed ortholog is 100%.

---

Group of orthologs #1852. Best score 1508 bits

Score difference with first non-orthologous sequence - *A. fumigatus*:1508 *A. fischeri*:1508

|                 |         |                 |         |
|-----------------|---------|-----------------|---------|
| afum EAL85617.1 | 100.00% | afis EAW15730.1 | 100.00% |
|-----------------|---------|-----------------|---------|

Bootstrap support for afum|EAL85617.1 as seed ortholog is 100%.

Bootstrap support for afis|EAW15730.1 as seed ortholog is 100%.

---

Group of orthologs #1853. Best score 1508 bits

Score difference with first non-orthologous sequence - *A. fumigatus*:1508 *A. fischeri*:1508

|                 |         |                 |         |
|-----------------|---------|-----------------|---------|
| afum EAL87446.1 | 100.00% | afis EAW24016.1 | 100.00% |
|-----------------|---------|-----------------|---------|

Bootstrap support for afum|EAL87446.1 as seed ortholog is 100%.

Bootstrap support for afis|EAW24016.1 as seed ortholog is 100%.

---

Group of orthologs #1854. Best score 1507 bits

Score difference with first non-orthologous sequence - *A. fumigatus*:1507 *A. fischeri*:1507

|                 |         |                 |         |
|-----------------|---------|-----------------|---------|
| afum EAL88128.1 | 100.00% | afis EAW23348.1 | 100.00% |
|-----------------|---------|-----------------|---------|

Bootstrap support for afum|EAL88128.1 as seed ortholog is 100%.

Bootstrap support for afis|EAW23348.1 as seed ortholog is 100%.

---

Group of orthologs #1855. Best score 1507 bits

Score difference with first non-orthologous sequence - *A. fumigatus*:1507 *A. fischeri*:1507

afum|EAL93431.1 100.00% afis|EAW18708.1 100.00%

Bootstrap support for afum|EAL93431.1 as seed ortholog is 100%.

Bootstrap support for afis|EAW18708.1 as seed ortholog is 100%.

---

Group of orthologs #1856. Best score 1507 bits

Score difference with first non-orthologous sequence - *A. fumigatus*:1507 *A. fischeri*:1507

afum|EBA27488.1 100.00% afis|EAW18606.1 100.00%

Bootstrap support for afum|EBA27488.1 as seed ortholog is 100%.

Bootstrap support for afis|EAW18606.1 as seed ortholog is 100%.

---

Group of orthologs #1857. Best score 1507 bits

Score difference with first non-orthologous sequence - *A. fumigatus*:1507 *A. fischeri*:1507

afum|EAL92675.1 100.00% afis|EAW21641.1 100.00%

Bootstrap support for afum|EAL92675.1 as seed ortholog is 100%.

Bootstrap support for afis|EAW21641.1 as seed ortholog is 100%.

---

Group of orthologs #1858. Best score 1506 bits

Score difference with first non-orthologous sequence - *A. fumigatus*:1347 *A. fischeri*:1415

afum|EAL89054.1 100.00% afis|EAW16458.1 100.00%

Bootstrap support for afum|EAL89054.1 as seed ortholog is 100%.

Bootstrap support for afis|EAW16458.1 as seed ortholog is 100%.

---

Group of orthologs #1859. Best score 1506 bits

Score difference with first non-orthologous sequence - *A. fumigatus*:1506 *A. fischeri*:1506

afum|EAL87887.1 100.00% afis|EAW23578.1 100.00%

Bootstrap support for afum|EAL87887.1 as seed ortholog is 100%.

Bootstrap support for afis|EAW23578.1 as seed ortholog is 100%.

---

Group of orthologs #1860. Best score 1506 bits

Score difference with first non-orthologous sequence - *A. fumigatus*:1506 *A. fischeri*:1506

afum|EAL93754.1 100.00% afis|EAW19023.1 100.00%

Bootstrap support for afum|EAL93754.1 as seed ortholog is 100%.

Bootstrap support for afis|EAW19023.1 as seed ortholog is 100%.

---

Group of orthologs #1861. Best score 1506 bits

Score difference with first non-orthologous sequence - *A. fumigatus*:1506 *A. fischeri*:1506

afum|EAL92959.1 100.00% afis|EAW21945.1 100.00%

Bootstrap support for afum|EAL92959.1 as seed ortholog is 100%.

Bootstrap support for afis|EAW21945.1 as seed ortholog is 100%.

---

Group of orthologs #1862. Best score 1506 bits

Score difference with first non-orthologous sequence - *A. fumigatus*:1506 *A. fischeri*:1506

afum|EAL89914.1 100.00% afis|EAW25252.1 100.00%

Bootstrap support for afum|EAL89914.1 as seed ortholog is 100%.

Bootstrap support for afis|EAW25252.1 as seed ortholog is 100%.

---

Group of orthologs #1863. Best score 1505 bits

Score difference with first non-orthologous sequence - *A. fumigatus*:1505 *A. fischeri*:1505

afum|EAL90589.1 100.00% afis|EAW22609.1 100.00%

Bootstrap support for afum|EAL90589.1 as seed ortholog is 100%.

Bootstrap support for afis|EAW22609.1 as seed ortholog is 100%.

---

Group of orthologs #1864. Best score 1505 bits

Score difference with first non-orthologous sequence - *A. fumigatus*:1505 *A. fischeri*:1505

|                 |         |                 |         |
|-----------------|---------|-----------------|---------|
| afum EAL92341.1 | 100.00% | afis EAW21324.1 | 100.00% |
|-----------------|---------|-----------------|---------|

Bootstrap support for afum|EAL92341.1 as seed ortholog is 100%.

Bootstrap support for afis|EAW21324.1 as seed ortholog is 100%.

---

Group of orthologs #1865. Best score 1504 bits

Score difference with first non-orthologous sequence - *A. fumigatus*:1345 *A. fischeri*:1327

|                 |         |                 |         |
|-----------------|---------|-----------------|---------|
| afum EAL85662.1 | 100.00% | afis EAW15686.1 | 100.00% |
|-----------------|---------|-----------------|---------|

Bootstrap support for afum|EAL85662.1 as seed ortholog is 100%.

Bootstrap support for afis|EAW15686.1 as seed ortholog is 100%.

---

Group of orthologs #1866. Best score 1503 bits

Score difference with first non-orthologous sequence - *A. fumigatus*:1503 *A. fischeri*:1503

|                 |         |                 |         |
|-----------------|---------|-----------------|---------|
| afum EAL91715.1 | 100.00% | afis EAW17906.1 | 100.00% |
|-----------------|---------|-----------------|---------|

Bootstrap support for afum|EAL91715.1 as seed ortholog is 100%.

Bootstrap support for afis|EAW17906.1 as seed ortholog is 100%.

---

Group of orthologs #1867. Best score 1503 bits

Score difference with first non-orthologous sequence - *A. fumigatus*:1503 *A. fischeri*:1503

|                 |         |                 |         |
|-----------------|---------|-----------------|---------|
| afum EAL93215.1 | 100.00% | afis EAW18520.1 | 100.00% |
|-----------------|---------|-----------------|---------|

Bootstrap support for afum|EAL93215.1 as seed ortholog is 100%.

Bootstrap support for afis|EAW18520.1 as seed ortholog is 100%.

---

Group of orthologs #1868. Best score 1502 bits

Score difference with first non-orthologous sequence - *A. fumigatus*:1502 *A. fischeri*:1502

|                 |         |                 |         |
|-----------------|---------|-----------------|---------|
| afum EAL86569.1 | 100.00% | afis EAW17092.1 | 100.00% |
|-----------------|---------|-----------------|---------|

Bootstrap support for afum|EAL86569.1 as seed ortholog is 100%.

Bootstrap support for afis|EAW17092.1 as seed ortholog is 100%.

---

Group of orthologs #1869. Best score 1502 bits

Score difference with first non-orthologous sequence - *A. fumigatus*:1502 *A. fischeri*:1502

|                 |         |                 |         |
|-----------------|---------|-----------------|---------|
| afum EAL85317.1 | 100.00% | afis EAW20197.1 | 100.00% |
|-----------------|---------|-----------------|---------|

Bootstrap support for afum|EAL85317.1 as seed ortholog is 100%.

Bootstrap support for afis|EAW20197.1 as seed ortholog is 100%.

---

Group of orthologs #1870. Best score 1502 bits

Score difference with first non-orthologous sequence - *A. fumigatus*:1502 *A. fischeri*:1502

|                 |         |                 |         |
|-----------------|---------|-----------------|---------|
| afum EAL87597.1 | 100.00% | afis EAW18230.1 | 100.00% |
|-----------------|---------|-----------------|---------|

Bootstrap support for afum|EAL87597.1 as seed ortholog is 100%.

Bootstrap support for afis|EAW18230.1 as seed ortholog is 100%.

---

Group of orthologs #1871. Best score 1502 bits

Score difference with first non-orthologous sequence - *A. fumigatus*:1502 *A. fischeri*:1502

|                 |         |                 |         |
|-----------------|---------|-----------------|---------|
| afum EAL85468.1 | 100.00% | afis EAW20350.1 | 100.00% |
|-----------------|---------|-----------------|---------|

Bootstrap support for afum|EAL85468.1 as seed ortholog is 100%.

Bootstrap support for afis|EAW20350.1 as seed ortholog is 100%.

---

Group of orthologs #1872. Best score 1502 bits

Score difference with first non-orthologous sequence - *A. fumigatus*:1502 *A. fischeri*:1502

|                 |         |                 |         |
|-----------------|---------|-----------------|---------|
| afum EAL89671.1 | 100.00% | afis EAW25024.1 | 100.00% |
|-----------------|---------|-----------------|---------|

Bootstrap support for afum|EAL89671.1 as seed ortholog is 100%.

Bootstrap support for afis|EAW25024.1 as seed ortholog is 100%.

---

Group of orthologs #1873. Best score 1502 bits

Score difference with first non-orthologous sequence - *A. fumigatus*:1502 *A. fischeri*:1502

|                 |         |                 |         |
|-----------------|---------|-----------------|---------|
| afum EBA27454.1 | 100.00% | afis EAW21222.1 | 100.00% |
|-----------------|---------|-----------------|---------|

Bootstrap support for afum|EBA27454.1 as seed ortholog is 100%.

Bootstrap support for afis|EAW21222.1 as seed ortholog is 100%.

---

Group of orthologs #1874. Best score 1501 bits

Score difference with first non-orthologous sequence - *A. fumigatus*:1501 *A. fischeri*:1424

afum|EAL85676.2 100.00% afis|EAW15671.1 100.00%

Bootstrap support for afum|EAL85676.2 as seed ortholog is 100%.

Bootstrap support for afis|EAW15671.1 as seed ortholog is 100%.

---

Group of orthologs #1875. Best score 1501 bits

Score difference with first non-orthologous sequence - *A. fumigatus*:1501 *A. fischeri*:1501

afum|EAL91765.1 100.00% afis|EAW17954.1 100.00%

Bootstrap support for afum|EAL91765.1 as seed ortholog is 100%.

Bootstrap support for afis|EAW17954.1 as seed ortholog is 100%.

---

Group of orthologs #1876. Best score 1501 bits

Score difference with first non-orthologous sequence - *A. fumigatus*:1501 *A. fischeri*:1501

afum|EAL92256.1 100.00% afis|EAW21243.1 100.00%

Bootstrap support for afum|EAL92256.1 as seed ortholog is 100%.

Bootstrap support for afis|EAW21243.1 as seed ortholog is 100%.

---

Group of orthologs #1877. Best score 1501 bits

Score difference with first non-orthologous sequence - *A. fumigatus*:1501 *A. fischeri*:1501

afum|EAL89468.1 100.00% afis|EAW24824.1 100.00%

Bootstrap support for afum|EAL89468.1 as seed ortholog is 100%.

Bootstrap support for afis|EAW24824.1 as seed ortholog is 100%.

---

Group of orthologs #1878. Best score 1500 bits

Score difference with first non-orthologous sequence - *A. fumigatus*:1500 *A. fischeri*:1500

afum|EAL86702.1 100.00% afis|EAW17284.1 100.00%

Bootstrap support for afum|EAL86702.1 as seed ortholog is 100%.

Bootstrap support for afis|EAW17284.1 as seed ortholog is 100%.

---

Group of orthologs #1879. Best score 1500 bits

Score difference with first non-orthologous sequence - *A. fumigatus*:1500 *A. fischeri*:1500

afum|EAL88760.1 100.00% afis|EAW16130.1 100.00%

Bootstrap support for afum|EAL88760.1 as seed ortholog is 100%.

Bootstrap support for afis|EAW16130.1 as seed ortholog is 100%.

---

Group of orthologs #1880. Best score 1500 bits

Score difference with first non-orthologous sequence - *A. fumigatus*:1435 *A. fischeri*:1500

afum|EAL88852.1 100.00% afis|EAW16229.1 100.00%

Bootstrap support for afum|EAL88852.1 as seed ortholog is 100%.

Bootstrap support for afis|EAW16229.1 as seed ortholog is 100%.

---

Group of orthologs #1881. Best score 1500 bits

Score difference with first non-orthologous sequence - *A. fumigatus*:1500 *A. fischeri*:1500

afum|EAL87252.1 100.00% afis|EAW23817.1 100.00%

Bootstrap support for afum|EAL87252.1 as seed ortholog is 100%.

Bootstrap support for afis|EAW23817.1 as seed ortholog is 100%.

---

Group of orthologs #1882. Best score 1499 bits

Score difference with first non-orthologous sequence - *A. fumigatus*:1073 *A. fischeri*:1499

afum|EAL91863.1 100.00% afis|EAW18052.1 100.00%

Bootstrap support for afum|EAL91863.1 as seed ortholog is 100%.

Bootstrap support for afis|EAW18052.1 as seed ortholog is 100%.

---



Group of orthologs #1883. Best score 1499 bits

Score difference with first non-orthologous sequence - *A. fumigatus*:1499 *A. fischeri*:1499

afum|EAL87304.1 100.00% afis|EAW23876.1 100.00%

Bootstrap support for afum|EAL87304.1 as seed ortholog is 100%.

Bootstrap support for afis|EAW23876.1 as seed ortholog is 100%.

---

Group of orthologs #1884. Best score 1498 bits

Score difference with first non-orthologous sequence - *A. fumigatus*:1498 *A. fischeri*:1498

afum|EAL86692.1 100.00% afis|EAW17274.1 100.00%

Bootstrap support for afum|EAL86692.1 as seed ortholog is 100%.

Bootstrap support for afis|EAW17274.1 as seed ortholog is 100%.

---

Group of orthologs #1885. Best score 1496 bits

Score difference with first non-orthologous sequence - *A. fumigatus*:1496 *A. fischeri*:1496

afum|EAL87689.2 100.00% afis|EAW18322.1 100.00%

Bootstrap support for afum|EAL87689.2 as seed ortholog is 100%.

Bootstrap support for afis|EAW18322.1 as seed ortholog is 100%.

---

Group of orthologs #1886. Best score 1496 bits

Score difference with first non-orthologous sequence - *A. fumigatus*:1496 *A. fischeri*:1496

afum|EBA27367.1 100.00% afis|EAW16497.1 100.00%

Bootstrap support for afum|EBA27367.1 as seed ortholog is 100%.

Bootstrap support for afis|EAW16497.1 as seed ortholog is 100%.

---

Group of orthologs #1887. Best score 1496 bits

Score difference with first non-orthologous sequence - *A. fumigatus*:1496 *A. fischeri*:1496

afum|EAL93912.1 100.00% afis|EAW19182.1 100.00%

Bootstrap support for afum|EAL93912.1 as seed ortholog is 100%.

Bootstrap support for afis|EAW19182.1 as seed ortholog is 100%.

---

Group of orthologs #1888. Best score 1496 bits

Score difference with first non-orthologous sequence - *A. fumigatus*:1496 *A. fischeri*:1315

afum|EAL94048.2 100.00% afis|EAW19331.1 100.00%

Bootstrap support for afum|EAL94048.2 as seed ortholog is 100%.

Bootstrap support for afis|EAW19331.1 as seed ortholog is 100%.

---

Group of orthologs #1889. Best score 1496 bits

Score difference with first non-orthologous sequence - *A. fumigatus*:1496 *A. fischeri*:1496

afum|EAL90803.1 100.00% afis|EAW22387.1 100.00%

Bootstrap support for afum|EAL90803.1 as seed ortholog is 100%.

Bootstrap support for afis|EAW22387.1 as seed ortholog is 100%.

---

Group of orthologs #1890. Best score 1495 bits

Score difference with first non-orthologous sequence - *A. fumigatus*:1495 *A. fischeri*:1495

afum|EAL84250.1 100.00% afis|EAW15398.1 100.00%

Bootstrap support for afum|EAL84250.1 as seed ortholog is 100%.

Bootstrap support for afis|EAW15398.1 as seed ortholog is 100%.

---

Group of orthologs #1891. Best score 1494 bits

Score difference with first non-orthologous sequence - *A. fumigatus*:1494 *A. fischeri*:1494

afum|EAL92957.1 100.00% afis|EAW21943.1 100.00%

Bootstrap support for afum|EAL92957.1 as seed ortholog is 100%.

Bootstrap support for afis|EAW21943.1 as seed ortholog is 100%.

---

Group of orthologs #1892. Best score 1493 bits

Score difference with first non-orthologous sequence - *A. fumigatus*:1493 *A. fischeri*:1493

|                 |         |                 |         |
|-----------------|---------|-----------------|---------|
| afum EAL85223.1 | 100.00% | afis EAW20106.1 | 100.00% |
|-----------------|---------|-----------------|---------|

Bootstrap support for afum|EAL85223.1 as seed ortholog is 100%.

Bootstrap support for afis|EAW20106.1 as seed ortholog is 100%.

---

Group of orthologs #1893. Best score 1493 bits

Score difference with first non-orthologous sequence - *A. fumigatus*:1493 *A. fischeri*:1493

|                 |         |                 |         |
|-----------------|---------|-----------------|---------|
| afum EAL89213.1 | 100.00% | afis EAW16624.1 | 100.00% |
|-----------------|---------|-----------------|---------|

Bootstrap support for afum|EAL89213.1 as seed ortholog is 100%.

Bootstrap support for afis|EAW16624.1 as seed ortholog is 100%.

---

Group of orthologs #1894. Best score 1493 bits

Score difference with first non-orthologous sequence - *A. fumigatus*:1493 *A. fischeri*:1493

|                 |         |                 |         |
|-----------------|---------|-----------------|---------|
| afum EAL90804.1 | 100.00% | afis EAW22386.1 | 100.00% |
|-----------------|---------|-----------------|---------|

Bootstrap support for afum|EAL90804.1 as seed ortholog is 100%.

Bootstrap support for afis|EAW22386.1 as seed ortholog is 100%.

---

Group of orthologs #1895. Best score 1492 bits

Score difference with first non-orthologous sequence - *A. fumigatus*:1492 *A. fischeri*:1492

|                 |         |                 |         |
|-----------------|---------|-----------------|---------|
| afum EAL87139.1 | 100.00% | afis EAW23695.1 | 100.00% |
|-----------------|---------|-----------------|---------|

Bootstrap support for afum|EAL87139.1 as seed ortholog is 100%.

Bootstrap support for afis|EAW23695.1 as seed ortholog is 100%.

---

Group of orthologs #1896. Best score 1491 bits

Score difference with first non-orthologous sequence - *A. fumigatus*:1491 *A. fischeri*:1491

|                 |         |                 |         |
|-----------------|---------|-----------------|---------|
| afum EAL84628.1 | 100.00% | afis EAW20422.1 | 100.00% |
|-----------------|---------|-----------------|---------|

Bootstrap support for afum|EAL84628.1 as seed ortholog is 100%.

Bootstrap support for afis|EAW20422.1 as seed ortholog is 100%.

---

Group of orthologs #1897. Best score 1490 bits

Score difference with first non-orthologous sequence - *A. fumigatus*:1490 *A. fischeri*:1490

|                 |         |                 |         |
|-----------------|---------|-----------------|---------|
| afum EAL85273.1 | 100.00% | afis EAW20157.1 | 100.00% |
|-----------------|---------|-----------------|---------|

Bootstrap support for afum|EAL85273.1 as seed ortholog is 100%.

Bootstrap support for afis|EAW20157.1 as seed ortholog is 100%.

---

Group of orthologs #1898. Best score 1490 bits

Score difference with first non-orthologous sequence - *A. fumigatus*:1490 *A. fischeri*:1490

|                 |         |                 |         |
|-----------------|---------|-----------------|---------|
| afum EAL88269.1 | 100.00% | afis EAW23215.1 | 100.00% |
|-----------------|---------|-----------------|---------|

Bootstrap support for afum|EAL88269.1 as seed ortholog is 100%.

Bootstrap support for afis|EAW23215.1 as seed ortholog is 100%.

---

Group of orthologs #1899. Best score 1490 bits

Score difference with first non-orthologous sequence - *A. fumigatus*:1490 *A. fischeri*:1490

|                 |         |                 |         |
|-----------------|---------|-----------------|---------|
| afum EAL90035.1 | 100.00% | afis EAW25376.1 | 100.00% |
|-----------------|---------|-----------------|---------|

Bootstrap support for afum|EAL90035.1 as seed ortholog is 100%.

Bootstrap support for afis|EAW25376.1 as seed ortholog is 100%.

---

Group of orthologs #1900. Best score 1489 bits

Score difference with first non-orthologous sequence - *A. fumigatus*:1489 *A. fischeri*:1489

|                 |         |                 |         |
|-----------------|---------|-----------------|---------|
| afum EAL88722.1 | 100.00% | afis EAW16090.1 | 100.00% |
|-----------------|---------|-----------------|---------|

Bootstrap support for afum|EAL88722.1 as seed ortholog is 100%.

Bootstrap support for afis|EAW16090.1 as seed ortholog is 100%.

---

Group of orthologs #1901. Best score 1487 bits

Score difference with first non-orthologous sequence - *A. fumigatus*:1487 *A. fischeri*:1487

|                 |         |                 |         |
|-----------------|---------|-----------------|---------|
| afum EAL88843.1 | 100.00% | afis EAW16216.1 | 100.00% |
|-----------------|---------|-----------------|---------|

Bootstrap support for afum|EAL88843.1 as seed ortholog is 100%.

Bootstrap support for afis|EAW16216.1 as seed ortholog is 100%.

---

Group of orthologs #1902. Best score 1487 bits

Score difference with first non-orthologous sequence - *A. fumigatus*:1487 *A. fischeri*:1487

|                 |         |                 |         |
|-----------------|---------|-----------------|---------|
| afum EAL90479.1 | 100.00% | afis EAW22715.1 | 100.00% |
|-----------------|---------|-----------------|---------|

Bootstrap support for afum|EAL90479.1 as seed ortholog is 100%.

Bootstrap support for afis|EAW22715.1 as seed ortholog is 100%.

---

Group of orthologs #1903. Best score 1487 bits

Score difference with first non-orthologous sequence - *A. fumigatus*:1487 *A. fischeri*:1487

|                 |         |                 |         |
|-----------------|---------|-----------------|---------|
| afum EAL90037.1 | 100.00% | afis EAW25378.1 | 100.00% |
|-----------------|---------|-----------------|---------|

Bootstrap support for afum|EAL90037.1 as seed ortholog is 100%.

Bootstrap support for afis|EAW25378.1 as seed ortholog is 100%.

---

Group of orthologs #1904. Best score 1487 bits

Score difference with first non-orthologous sequence - *A. fumigatus*:1487 *A. fischeri*:1487

|                 |         |                 |         |
|-----------------|---------|-----------------|---------|
| afum EAL90182.1 | 100.00% | afis EAW25517.1 | 100.00% |
|-----------------|---------|-----------------|---------|

Bootstrap support for afum|EAL90182.1 as seed ortholog is 100%.

Bootstrap support for afis|EAW25517.1 as seed ortholog is 100%.

---

Group of orthologs #1905. Best score 1486 bits

Score difference with first non-orthologous sequence - *A. fumigatus*:1486 *A. fischeri*:1486

|                 |         |                 |         |
|-----------------|---------|-----------------|---------|
| afum EAL85540.1 | 100.00% | afis EAW15811.1 | 100.00% |
|-----------------|---------|-----------------|---------|

Bootstrap support for afum|EAL85540.1 as seed ortholog is 100%.

Bootstrap support for afis|EAW15811.1 as seed ortholog is 100%.

---

Group of orthologs #1906. Best score 1486 bits

Score difference with first non-orthologous sequence - *A. fumigatus*:1486 *A. fischeri*:1486

|                 |         |                 |         |
|-----------------|---------|-----------------|---------|
| afum EAL93973.1 | 100.00% | afis EAW19244.1 | 100.00% |
|-----------------|---------|-----------------|---------|

Bootstrap support for afum|EAL93973.1 as seed ortholog is 100%.

Bootstrap support for afis|EAW19244.1 as seed ortholog is 100%.

---

Group of orthologs #1907. Best score 1486 bits

Score difference with first non-orthologous sequence - *A. fumigatus*:1486 *A. fischeri*:1486

|                 |         |                 |         |
|-----------------|---------|-----------------|---------|
| afum EAL92381.1 | 100.00% | afis EAW21365.1 | 100.00% |
|-----------------|---------|-----------------|---------|

Bootstrap support for afum|EAL92381.1 as seed ortholog is 100%.

Bootstrap support for afis|EAW21365.1 as seed ortholog is 100%.

---

Group of orthologs #1908. Best score 1485 bits

Score difference with first non-orthologous sequence - *A. fumigatus*:1485 *A. fischeri*:1485

|                 |         |                 |         |
|-----------------|---------|-----------------|---------|
| afum EAL91885.1 | 100.00% | afis EAW18073.1 | 100.00% |
|-----------------|---------|-----------------|---------|

Bootstrap support for afum|EAL91885.1 as seed ortholog is 100%.

Bootstrap support for afis|EAW18073.1 as seed ortholog is 100%.

---

Group of orthologs #1909. Best score 1484 bits

Score difference with first non-orthologous sequence - *A. fumigatus*:1484 *A. fischeri*:1484

|                 |         |                 |         |
|-----------------|---------|-----------------|---------|
| afum EAL84549.1 | 100.00% | afis EAW20507.1 | 100.00% |
|-----------------|---------|-----------------|---------|

Bootstrap support for afum|EAL84549.1 as seed ortholog is 100%.

Bootstrap support for afis|EAW20507.1 as seed ortholog is 100%.

---

Group of orthologs #1910. Best score 1484 bits

Score difference with first non-orthologous sequence - *A. fumigatus*:1484 *A. fischeri*:1484

|                 |         |                 |         |
|-----------------|---------|-----------------|---------|
| afum EAL89770.1 | 100.00% | afis EAW25099.1 | 100.00% |
|-----------------|---------|-----------------|---------|

Bootstrap support for afum|EAL89770.1 as seed ortholog is 100%.

Bootstrap support for afis|EAW25099.1 as seed ortholog is 100%.

---

Group of orthologs #1911. Best score 1483 bits

Score difference with first non-orthologous sequence - *A. fumigatus*:1483 *A. fischeri*:1483

afum|EAL91359.1 100.00% afis|EAW17545.1 100.00%

Bootstrap support for afum|EAL91359.1 as seed ortholog is 100%.

Bootstrap support for afis|EAW17545.1 as seed ortholog is 100%.

---

Group of orthologs #1912. Best score 1483 bits

Score difference with first non-orthologous sequence - *A. fumigatus*:1333 *A. fischeri*:1435

afum|EAL92317.1 100.00% afis|EAW21300.1 100.00%

Bootstrap support for afum|EAL92317.1 as seed ortholog is 100%.

Bootstrap support for afis|EAW21300.1 as seed ortholog is 100%.

---

Group of orthologs #1913. Best score 1483 bits

Score difference with first non-orthologous sequence - *A. fumigatus*:1483 *A. fischeri*:1483

afum|EAL89768.1 100.00% afis|EAW25097.1 100.00%

Bootstrap support for afum|EAL89768.1 as seed ortholog is 100%.

Bootstrap support for afis|EAW25097.1 as seed ortholog is 100%.

---

Group of orthologs #1914. Best score 1482 bits

Score difference with first non-orthologous sequence - *A. fumigatus*:1482 *A. fischeri*:1482

afum|EAL91802.1 100.00% afis|EAW17992.1 100.00%

Bootstrap support for afum|EAL91802.1 as seed ortholog is 100%.

Bootstrap support for afis|EAW17992.1 as seed ortholog is 100%.

---

Group of orthologs #1915. Best score 1482 bits

Score difference with first non-orthologous sequence - *A. fumigatus*:1482 *A. fischeri*:1482

afum|EAL93731.1 100.00% afis|EAW18996.1 100.00%

Bootstrap support for afum|EAL93731.1 as seed ortholog is 100%.

Bootstrap support for afis|EAW18996.1 as seed ortholog is 100%.

---

Group of orthologs #1916. Best score 1482 bits

Score difference with first non-orthologous sequence - *A. fumigatus*:1482 *A. fischeri*:1482

afum|EAL90819.1 100.00% afis|EAW22373.1 100.00%

Bootstrap support for afum|EAL90819.1 as seed ortholog is 100%.

Bootstrap support for afis|EAW22373.1 as seed ortholog is 100%.

---

Group of orthologs #1917. Best score 1481 bits

Score difference with first non-orthologous sequence - *A. fumigatus*:1481 *A. fischeri*:1481

afum|EAL93165.1 100.00% afis|EAW18477.1 100.00%

Bootstrap support for afum|EAL93165.1 as seed ortholog is 100%.

Bootstrap support for afis|EAW18477.1 as seed ortholog is 100%.

---

Group of orthologs #1918. Best score 1481 bits

Score difference with first non-orthologous sequence - *A. fumigatus*:1481 *A. fischeri*:1481

afum|EAL89618.1 100.00% afis|EAW24960.1 100.00%

Bootstrap support for afum|EAL89618.1 as seed ortholog is 100%.

Bootstrap support for afis|EAW24960.1 as seed ortholog is 100%.

---

Group of orthologs #1919. Best score 1481 bits

Score difference with first non-orthologous sequence - *A. fumigatus*:1481 *A. fischeri*:1481

afum|EBA27400.1 100.00% afis|EAW22992.1 100.00%

Bootstrap support for afum|EBA27400.1 as seed ortholog is 100%.

Bootstrap support for afis|EAW22992.1 as seed ortholog is 100%.

---

Group of orthologs #1920. Best score 1480 bits

Score difference with first non-orthologous sequence - *A. fumigatus*:1480 *A. fischeri*:1149

|                 |         |                 |         |
|-----------------|---------|-----------------|---------|
| afum EAL86652.1 | 100.00% | afis EAW17232.1 | 100.00% |
|-----------------|---------|-----------------|---------|

Bootstrap support for afum|EAL86652.1 as seed ortholog is 100%.

Bootstrap support for afis|EAW17232.1 as seed ortholog is 100%.

---

Group of orthologs #1921. Best score 1480 bits

Score difference with first non-orthologous sequence - *A. fumigatus*:1480 *A. fischeri*:1480

|                 |         |                 |         |
|-----------------|---------|-----------------|---------|
| afum EAL84324.1 | 100.00% | afis EAW25636.1 | 100.00% |
|-----------------|---------|-----------------|---------|

Bootstrap support for afum|EAL84324.1 as seed ortholog is 100%.

Bootstrap support for afis|EAW25636.1 as seed ortholog is 100%.

---

Group of orthologs #1922. Best score 1480 bits

Score difference with first non-orthologous sequence - *A. fumigatus*:1480 *A. fischeri*:1480

|                 |         |                 |         |
|-----------------|---------|-----------------|---------|
| afum EAL93180.1 | 100.00% | afis EAW18490.1 | 100.00% |
|-----------------|---------|-----------------|---------|

Bootstrap support for afum|EAL93180.1 as seed ortholog is 100%.

Bootstrap support for afis|EAW18490.1 as seed ortholog is 100%.

---

Group of orthologs #1923. Best score 1480 bits

Score difference with first non-orthologous sequence - *A. fumigatus*:1424 *A. fischeri*:1480

|                 |         |                 |         |
|-----------------|---------|-----------------|---------|
| afum EAL92128.1 | 100.00% | afis EAW21107.1 | 100.00% |
|-----------------|---------|-----------------|---------|

Bootstrap support for afum|EAL92128.1 as seed ortholog is 100%.

Bootstrap support for afis|EAW21107.1 as seed ortholog is 100%.

---

Group of orthologs #1924. Best score 1479 bits

Score difference with first non-orthologous sequence - *A. fumigatus*:1479 *A. fischeri*:1479

|                 |         |                 |         |
|-----------------|---------|-----------------|---------|
| afum EAL93898.1 | 100.00% | afis EAW19168.1 | 100.00% |
|-----------------|---------|-----------------|---------|

Bootstrap support for afum|EAL93898.1 as seed ortholog is 100%.

Bootstrap support for afis|EAW19168.1 as seed ortholog is 100%.

---

Group of orthologs #1925. Best score 1478 bits

Score difference with first non-orthologous sequence - *A. fumigatus*:1478 *A. fischeri*:1478

|                 |         |                 |         |
|-----------------|---------|-----------------|---------|
| afum EAL87684.1 | 100.00% | afis EAW18317.1 | 100.00% |
|-----------------|---------|-----------------|---------|

Bootstrap support for afum|EAL87684.1 as seed ortholog is 100%.

Bootstrap support for afis|EAW18317.1 as seed ortholog is 100%.

---

Group of orthologs #1926. Best score 1478 bits

Score difference with first non-orthologous sequence - *A. fumigatus*:1478 *A. fischeri*:1478

|                 |         |                 |         |
|-----------------|---------|-----------------|---------|
| afum EAL91894.1 | 100.00% | afis EAW18082.1 | 100.00% |
|-----------------|---------|-----------------|---------|

Bootstrap support for afum|EAL91894.1 as seed ortholog is 100%.

Bootstrap support for afis|EAW18082.1 as seed ortholog is 100%.

---

Group of orthologs #1927. Best score 1478 bits

Score difference with first non-orthologous sequence - *A. fumigatus*:1478 *A. fischeri*:1478

|                 |         |                 |         |
|-----------------|---------|-----------------|---------|
| afum EAL87263.1 | 100.00% | afis EAW23831.1 | 100.00% |
|-----------------|---------|-----------------|---------|

Bootstrap support for afum|EAL87263.1 as seed ortholog is 100%.

Bootstrap support for afis|EAW23831.1 as seed ortholog is 100%.

---

Group of orthologs #1928. Best score 1478 bits

Score difference with first non-orthologous sequence - *A. fumigatus*:1478 *A. fischeri*:1478

|                 |         |                 |         |
|-----------------|---------|-----------------|---------|
| afum EAL93697.2 | 100.00% | afis EAW18965.1 | 100.00% |
|-----------------|---------|-----------------|---------|

Bootstrap support for afum|EAL93697.2 as seed ortholog is 100%.

Bootstrap support for afis|EAW18965.1 as seed ortholog is 100%.

---

Group of orthologs #1929. Best score 1478 bits

Score difference with first non-orthologous sequence - *A. fumigatus*:1478 *A. fischeri*:1478

|                 |         |                 |         |
|-----------------|---------|-----------------|---------|
| afum EAL90382.1 | 100.00% | afis EAW22819.1 | 100.00% |
|-----------------|---------|-----------------|---------|

Bootstrap support for afum|EAL90382.1 as seed ortholog is 100%.

Bootstrap support for afis|EAW22819.1 as seed ortholog is 100%.

---

Group of orthologs #1930. Best score 1477 bits

Score difference with first non-orthologous sequence - *A. fumigatus*:1477 *A. fischeri*:1477

|                 |         |                 |         |
|-----------------|---------|-----------------|---------|
| afum EAL88625.1 | 100.00% | afis EAW15993.1 | 100.00% |
|-----------------|---------|-----------------|---------|

Bootstrap support for afum|EAL88625.1 as seed ortholog is 100%.

Bootstrap support for afis|EAW15993.1 as seed ortholog is 100%.

---

Group of orthologs #1931. Best score 1477 bits

Score difference with first non-orthologous sequence - *A. fumigatus*:1263 *A. fischeri*:1124

|                 |         |                 |         |
|-----------------|---------|-----------------|---------|
| afum EAL84913.1 | 100.00% | afis EAW20005.1 | 100.00% |
|-----------------|---------|-----------------|---------|

Bootstrap support for afum|EAL84913.1 as seed ortholog is 100%.

Bootstrap support for afis|EAW20005.1 as seed ortholog is 100%.

---

Group of orthologs #1932. Best score 1477 bits

Score difference with first non-orthologous sequence - *A. fumigatus*:1477 *A. fischeri*:1477

|                 |         |                 |         |
|-----------------|---------|-----------------|---------|
| afum EAL86837.2 | 100.00% | afis EAW19689.1 | 100.00% |
|-----------------|---------|-----------------|---------|

Bootstrap support for afum|EAL86837.2 as seed ortholog is 100%.

Bootstrap support for afis|EAW19689.1 as seed ortholog is 100%.

---

Group of orthologs #1933. Best score 1477 bits

Score difference with first non-orthologous sequence - *A. fumigatus*:1477 *A. fischeri*:1477

|                 |         |                 |         |
|-----------------|---------|-----------------|---------|
| afum EAL93050.1 | 100.00% | afis EAW18375.1 | 100.00% |
|-----------------|---------|-----------------|---------|

Bootstrap support for afum|EAL93050.1 as seed ortholog is 100%.

Bootstrap support for afis|EAW18375.1 as seed ortholog is 100%.

---

Group of orthologs #1934. Best score 1477 bits

Score difference with first non-orthologous sequence - *A. fumigatus*:1477 *A. fischeri*:1477

|                 |         |                 |         |
|-----------------|---------|-----------------|---------|
| afum EAL93489.1 | 100.00% | afis EAW18759.1 | 100.00% |
|-----------------|---------|-----------------|---------|

Bootstrap support for afum|EAL93489.1 as seed ortholog is 100%.

Bootstrap support for afis|EAW18759.1 as seed ortholog is 100%.

---

Group of orthologs #1935. Best score 1477 bits

Score difference with first non-orthologous sequence - *A. fumigatus*:1477 *A. fischeri*:1477

|                 |         |                 |         |
|-----------------|---------|-----------------|---------|
| afum EAL90253.1 | 100.00% | afis EAW22944.1 | 100.00% |
|-----------------|---------|-----------------|---------|

Bootstrap support for afum|EAL90253.1 as seed ortholog is 100%.

Bootstrap support for afis|EAW22944.1 as seed ortholog is 100%.

---

Group of orthologs #1936. Best score 1477 bits

Score difference with first non-orthologous sequence - *A. fumigatus*:1477 *A. fischeri*:1477

|                 |         |                 |         |
|-----------------|---------|-----------------|---------|
| afum EAL92881.1 | 100.00% | afis EAW21867.1 | 100.00% |
|-----------------|---------|-----------------|---------|

Bootstrap support for afum|EAL92881.1 as seed ortholog is 100%.

Bootstrap support for afis|EAW21867.1 as seed ortholog is 100%.

---

Group of orthologs #1937. Best score 1477 bits

Score difference with first non-orthologous sequence - *A. fumigatus*:1477 *A. fischeri*:1477

|                 |         |                 |         |
|-----------------|---------|-----------------|---------|
| afum EAL92921.1 | 100.00% | afis EAW21909.1 | 100.00% |
|-----------------|---------|-----------------|---------|

Bootstrap support for afum|EAL92921.1 as seed ortholog is 100%.

Bootstrap support for afis|EAW21909.1 as seed ortholog is 100%.

---

Group of orthologs #1938. Best score 1476 bits

Score difference with first non-orthologous sequence - *A. fumigatus*:1476 *A. fischeri*:1476

|                 |         |                 |         |
|-----------------|---------|-----------------|---------|
| afum EAL86220.1 | 100.00% | afis EAW24556.1 | 100.00% |
|-----------------|---------|-----------------|---------|

Bootstrap support for afum|EAL86220.1 as seed ortholog is 100%.

Bootstrap support for afis|EAW24556.1 as seed ortholog is 100%.

---

Group of orthologs #1939. Best score 1476 bits

Score difference with first non-orthologous sequence - *A. fumigatus*:1476 *A. fischeri*:1476

afum|EAL88210.2 100.00% afis|EAW23269.1 100.00%

Bootstrap support for afum|EAL88210.2 as seed ortholog is 100%.

Bootstrap support for afis|EAW23269.1 as seed ortholog is 100%.

---

Group of orthologs #1940. Best score 1476 bits

Score difference with first non-orthologous sequence - *A. fumigatus*:1476 *A. fischeri*:1476

afum|EAL90972.1 100.00% afis|EAW22222.1 100.00%

Bootstrap support for afum|EAL90972.1 as seed ortholog is 100%.

Bootstrap support for afis|EAW22222.1 as seed ortholog is 100%.

---

Group of orthologs #1941. Best score 1476 bits

Score difference with first non-orthologous sequence - *A. fumigatus*:1476 *A. fischeri*:1476

afum|EAL89465.1 100.00% afis|EAW24821.1 100.00%

Bootstrap support for afum|EAL89465.1 as seed ortholog is 100%.

Bootstrap support for afis|EAW24821.1 as seed ortholog is 100%.

---

Group of orthologs #1942. Best score 1476 bits

Score difference with first non-orthologous sequence - *A. fumigatus*:1322 *A. fischeri*:1083

afum|EAL90166.1 100.00% afis|EAW25500.1 100.00%

Bootstrap support for afum|EAL90166.1 as seed ortholog is 100%.

Bootstrap support for afis|EAW25500.1 as seed ortholog is 100%.

---

Group of orthologs #1943. Best score 1475 bits

Score difference with first non-orthologous sequence - *A. fumigatus*:1475 *A. fischeri*:1475

afum|EAL85268.1 100.00% afis|EAW20153.1 100.00%

Bootstrap support for afum|EAL85268.1 as seed ortholog is 100%.

Bootstrap support for afis|EAW20153.1 as seed ortholog is 100%.

---

Group of orthologs #1944. Best score 1475 bits

Score difference with first non-orthologous sequence - *A. fumigatus*:1399 *A. fischeri*:1384

afum|EAL85459.1 100.00% afis|EAW20338.1 100.00%

Bootstrap support for afum|EAL85459.1 as seed ortholog is 100%.

Bootstrap support for afis|EAW20338.1 as seed ortholog is 100%.

---

Group of orthologs #1945. Best score 1475 bits

Score difference with first non-orthologous sequence - *A. fumigatus*:1475 *A. fischeri*:1411

afum|EAL91321.1 100.00% afis|EAW17498.1 100.00%

Bootstrap support for afum|EAL91321.1 as seed ortholog is 100%.

Bootstrap support for afis|EAW17498.1 as seed ortholog is 100%.

---

Group of orthologs #1946. Best score 1475 bits

Score difference with first non-orthologous sequence - *A. fumigatus*:1475 *A. fischeri*:1475

afum|EAL86049.1 100.00% afis|EAW24377.1 100.00%

Bootstrap support for afum|EAL86049.1 as seed ortholog is 100%.

Bootstrap support for afis|EAW24377.1 as seed ortholog is 100%.

---

Group of orthologs #1947. Best score 1475 bits

Score difference with first non-orthologous sequence - *A. fumigatus*:1475 *A. fischeri*:1475

afum|EAL88467.2 100.00% afis|EAW23014.1 100.00%

Bootstrap support for afum|EAL88467.2 as seed ortholog is 100%.

Bootstrap support for afis|EAW23014.1 as seed ortholog is 100%.

---

Group of orthologs #1948. Best score 1474 bits

Score difference with first non-orthologous sequence - *A. fumigatus*:1474 *A. fischeri*:1474

afum|EAL91604.2      100.00%                      afis|EAW17796.1      100.00%

Bootstrap support for afum|EAL91604.2 as seed ortholog is 100%.

Bootstrap support for afis|EAW17796.1 as seed ortholog is 100%.

---

Group of orthologs #1949. Best score 1474 bits

Score difference with first non-orthologous sequence - *A. fumigatus*:1474    *A. fischeri*:1474

afum|EAL85970.1      100.00%                      afis|EAW24302.1      100.00%

Bootstrap support for afum|EAL85970.1 as seed ortholog is 100%.

Bootstrap support for afis|EAW24302.1 as seed ortholog is 100%.

---

Group of orthologs #1950. Best score 1474 bits

Score difference with first non-orthologous sequence - *A. fumigatus*:1474    *A. fischeri*:1351

afum|EAL86137.2      100.00%                      afis|EAW24466.1      100.00%

Bootstrap support for afum|EAL86137.2 as seed ortholog is 100%.

Bootstrap support for afis|EAW24466.1 as seed ortholog is 100%.

---

Group of orthologs #1951. Best score 1474 bits

Score difference with first non-orthologous sequence - *A. fumigatus*:1474    *A. fischeri*:1474

afum|EAL87442.1      100.00%                      afis|EAW24012.1      100.00%

Bootstrap support for afum|EAL87442.1 as seed ortholog is 100%.

Bootstrap support for afis|EAW24012.1 as seed ortholog is 100%.

---

Group of orthologs #1952. Best score 1474 bits

Score difference with first non-orthologous sequence - *A. fumigatus*:1474    *A. fischeri*:1474

afum|EAL92249.1      100.00%                      afis|EAW21237.1      100.00%

Bootstrap support for afum|EAL92249.1 as seed ortholog is 100%.

Bootstrap support for afis|EAW21237.1 as seed ortholog is 100%.

---

Group of orthologs #1953. Best score 1474 bits

Score difference with first non-orthologous sequence - *A. fumigatus*:1474    *A. fischeri*:1474

afum|EAL89625.2      100.00%                      afis|EAW24967.1      100.00%

Bootstrap support for afum|EAL89625.2 as seed ortholog is 100%.

Bootstrap support for afis|EAW24967.1 as seed ortholog is 100%.

---

Group of orthologs #1954. Best score 1474 bits

Score difference with first non-orthologous sequence - *A. fumigatus*:1474    *A. fischeri*:1474

afum|EAL92911.2      100.00%                      afis|EAW21898.1      100.00%

Bootstrap support for afum|EAL92911.2 as seed ortholog is 100%.

Bootstrap support for afis|EAW21898.1 as seed ortholog is 100%.

---

Group of orthologs #1955. Best score 1473 bits

Score difference with first non-orthologous sequence - *A. fumigatus*:1473    *A. fischeri*:1473

afum|EAL88617.1      100.00%                      afis|EAW15985.1      100.00%

Bootstrap support for afum|EAL88617.1 as seed ortholog is 100%.

Bootstrap support for afis|EAW15985.1 as seed ortholog is 100%.

---

Group of orthologs #1956. Best score 1473 bits

Score difference with first non-orthologous sequence - *A. fumigatus*:1473    *A. fischeri*:1473

afum|EAL87069.1      100.00%                      afis|EAW19425.1      100.00%

Bootstrap support for afum|EAL87069.1 as seed ortholog is 100%.

Bootstrap support for afis|EAW19425.1 as seed ortholog is 100%.

---

Group of orthologs #1957. Best score 1473 bits

Score difference with first non-orthologous sequence - *A. fumigatus*:1261    *A. fischeri*:1331

afum|EAL86983.1      100.00%                      afis|EAW19513.1      100.00%

Bootstrap support for afum|EAL86983.1 as seed ortholog is 100%.



Bootstrap support for afis|EAW19513.1 as seed ortholog is 100%.

---

Group of orthologs #1958. Best score 1473 bits

Score difference with first non-orthologous sequence - *A. fumigatus*:1473 *A. fischeri*:1473

|                 |         |                 |         |
|-----------------|---------|-----------------|---------|
| afum EAL92352.1 | 100.00% | afis EAW21334.1 | 100.00% |
|-----------------|---------|-----------------|---------|

Bootstrap support for afum|EAL92352.1 as seed ortholog is 100%.

Bootstrap support for afis|EAW21334.1 as seed ortholog is 100%.

---

Group of orthologs #1959. Best score 1473 bits

Score difference with first non-orthologous sequence - *A. fumigatus*:1473 *A. fischeri*:1473

|                 |         |                 |         |
|-----------------|---------|-----------------|---------|
| afum EAL92748.1 | 100.00% | afis EAW21713.1 | 100.00% |
|-----------------|---------|-----------------|---------|

Bootstrap support for afum|EAL92748.1 as seed ortholog is 100%.

Bootstrap support for afis|EAW21713.1 as seed ortholog is 100%.

---

Group of orthologs #1960. Best score 1473 bits

Score difference with first non-orthologous sequence - *A. fumigatus*:1473 *A. fischeri*:1473

|                 |         |                 |         |
|-----------------|---------|-----------------|---------|
| afum EAL89935.1 | 100.00% | afis EAW25272.1 | 100.00% |
|-----------------|---------|-----------------|---------|

Bootstrap support for afum|EAL89935.1 as seed ortholog is 100%.

Bootstrap support for afis|EAW25272.1 as seed ortholog is 100%.

---

Group of orthologs #1961. Best score 1472 bits

Score difference with first non-orthologous sequence - *A. fumigatus*:1472 *A. fischeri*:1472

|                 |         |                 |         |
|-----------------|---------|-----------------|---------|
| afum EAL84621.1 | 100.00% | afis EAW20429.1 | 100.00% |
|-----------------|---------|-----------------|---------|

Bootstrap support for afum|EAL84621.1 as seed ortholog is 100%.

Bootstrap support for afis|EAW20429.1 as seed ortholog is 100%.

---

Group of orthologs #1962. Best score 1472 bits

Score difference with first non-orthologous sequence - *A. fumigatus*:1404 *A. fischeri*:1365

|                 |         |                 |         |
|-----------------|---------|-----------------|---------|
| afum EAL90766.1 | 100.00% | afis EAW22425.1 | 100.00% |
|-----------------|---------|-----------------|---------|

Bootstrap support for afum|EAL90766.1 as seed ortholog is 100%.

Bootstrap support for afis|EAW22425.1 as seed ortholog is 100%.

---

Group of orthologs #1963. Best score 1471 bits

Score difference with first non-orthologous sequence - *A. fumigatus*:1471 *A. fischeri*:1471

|                 |         |                 |         |
|-----------------|---------|-----------------|---------|
| afum EAL93554.1 | 100.00% | afis EAW18818.1 | 100.00% |
|-----------------|---------|-----------------|---------|

Bootstrap support for afum|EAL93554.1 as seed ortholog is 100%.

Bootstrap support for afis|EAW18818.1 as seed ortholog is 100%.

---

Group of orthologs #1964. Best score 1471 bits

Score difference with first non-orthologous sequence - *A. fumigatus*:1292 *A. fischeri*:1252

|                 |         |                 |         |
|-----------------|---------|-----------------|---------|
| afum EAL92081.1 | 100.00% | afis EAW21045.1 | 100.00% |
|-----------------|---------|-----------------|---------|

Bootstrap support for afum|EAL92081.1 as seed ortholog is 100%.

Bootstrap support for afis|EAW21045.1 as seed ortholog is 100%.

---

Group of orthologs #1965. Best score 1470 bits

Score difference with first non-orthologous sequence - *A. fumigatus*:1470 *A. fischeri*:1470

|                 |         |                 |         |
|-----------------|---------|-----------------|---------|
| afum EAL91293.1 | 100.00% | afis EAW17464.1 | 100.00% |
|-----------------|---------|-----------------|---------|

Bootstrap support for afum|EAL91293.1 as seed ortholog is 100%.

Bootstrap support for afis|EAW17464.1 as seed ortholog is 100%.

---

Group of orthologs #1966. Best score 1470 bits

Score difference with first non-orthologous sequence - *A. fumigatus*:1470 *A. fischeri*:1470

|                 |         |                 |         |
|-----------------|---------|-----------------|---------|
| afum EAL91754.1 | 100.00% | afis EAW17943.1 | 100.00% |
|-----------------|---------|-----------------|---------|

Bootstrap support for afum|EAL91754.1 as seed ortholog is 100%.

Bootstrap support for afis|EAW17943.1 as seed ortholog is 100%.

---

Group of orthologs #1967. Best score 1470 bits

Score difference with first non-orthologous sequence - *A. fumigatus*:1470 *A. fischeri*:1470

afum|EAL86110.1 100.00% afis|EAW24442.1 100.00%

Bootstrap support for afum|EAL86110.1 as seed ortholog is 100%.

Bootstrap support for afis|EAW24442.1 as seed ortholog is 100%.

---

Group of orthologs #1968. Best score 1470 bits

Score difference with first non-orthologous sequence - *A. fumigatus*:1470 *A. fischeri*:1470

afum|EAL93145.1 100.00% afis|EAW18459.1 100.00%

Bootstrap support for afum|EAL93145.1 as seed ortholog is 100%.

Bootstrap support for afis|EAW18459.1 as seed ortholog is 100%.

---

Group of orthologs #1969. Best score 1470 bits

Score difference with first non-orthologous sequence - *A. fumigatus*:1470 *A. fischeri*:1470

afum|EAL91974.1 100.00% afis|EAW24119.1 100.00%

Bootstrap support for afum|EAL91974.1 as seed ortholog is 100%.

Bootstrap support for afis|EAW24119.1 as seed ortholog is 100%.

---

Group of orthologs #1970. Best score 1469 bits

Score difference with first non-orthologous sequence - *A. fumigatus*:1469 *A. fischeri*:1469

afum|EAL84318.1 100.00% afis|EAW25630.1 100.00%

Bootstrap support for afum|EAL84318.1 as seed ortholog is 100%.

Bootstrap support for afis|EAW25630.1 as seed ortholog is 100%.

---

Group of orthologs #1971. Best score 1469 bits

Score difference with first non-orthologous sequence - *A. fumigatus*:1469 *A. fischeri*:1469

afum|EAL93867.1 100.00% afis|EAW19135.1 100.00%

Bootstrap support for afum|EAL93867.1 as seed ortholog is 100%.

Bootstrap support for afis|EAW19135.1 as seed ortholog is 100%.

---

Group of orthologs #1972. Best score 1469 bits

Score difference with first non-orthologous sequence - *A. fumigatus*:1145 *A. fischeri*:1096

afum|EAL90712.1 100.00% afis|EAW22482.1 100.00%

Bootstrap support for afum|EAL90712.1 as seed ortholog is 100%.

Bootstrap support for afis|EAW22482.1 as seed ortholog is 100%.

---

Group of orthologs #1973. Best score 1469 bits

Score difference with first non-orthologous sequence - *A. fumigatus*:1373 *A. fischeri*:1074

afum|EAL92404.2 100.00% afis|EAW21390.1 100.00%

Bootstrap support for afum|EAL92404.2 as seed ortholog is 100%.

Bootstrap support for afis|EAW21390.1 as seed ortholog is 100%.

---

Group of orthologs #1974. Best score 1468 bits

Score difference with first non-orthologous sequence - *A. fumigatus*:1468 *A. fischeri*:1468

afum|EAL89064.1 100.00% afis|EAW16470.1 100.00%

Bootstrap support for afum|EAL89064.1 as seed ortholog is 100%.

Bootstrap support for afis|EAW16470.1 as seed ortholog is 100%.

---

Group of orthologs #1975. Best score 1467 bits

Score difference with first non-orthologous sequence - *A. fumigatus*:1467 *A. fischeri*:1467

afum|EAL84765.1 100.00% afis|EAW20869.1 100.00%

Bootstrap support for afum|EAL84765.1 as seed ortholog is 100%.

Bootstrap support for afis|EAW20869.1 as seed ortholog is 100%.

---

Group of orthologs #1976. Best score 1467 bits

Score difference with first non-orthologous sequence - *A. fumigatus*:1467 *A. fischeri*:1467

|                 |         |                 |         |
|-----------------|---------|-----------------|---------|
| afum EAL87424.1 | 100.00% | afis EAW23994.1 | 100.00% |
|-----------------|---------|-----------------|---------|

Bootstrap support for afum|EAL87424.1 as seed ortholog is 100%.

Bootstrap support for afis|EAW23994.1 as seed ortholog is 100%.

---

Group of orthologs #1977. Best score 1467 bits

Score difference with first non-orthologous sequence - *A. fumigatus*:1467 *A. fischeri*:1467

|                 |         |                 |         |
|-----------------|---------|-----------------|---------|
| afum EAL93925.2 | 100.00% | afis EAW19194.1 | 100.00% |
|-----------------|---------|-----------------|---------|

Bootstrap support for afum|EAL93925.2 as seed ortholog is 100%.

Bootstrap support for afis|EAW19194.1 as seed ortholog is 100%.

---

Group of orthologs #1978. Best score 1466 bits

Score difference with first non-orthologous sequence - *A. fumigatus*:1370 *A. fischeri*:1185

|                 |         |                 |         |
|-----------------|---------|-----------------|---------|
| afum EAL84905.1 | 100.00% | afis EAW20013.1 | 100.00% |
|-----------------|---------|-----------------|---------|

Bootstrap support for afum|EAL84905.1 as seed ortholog is 100%.

Bootstrap support for afis|EAW20013.1 as seed ortholog is 100%.

---

Group of orthologs #1979. Best score 1466 bits

Score difference with first non-orthologous sequence - *A. fumigatus*:1466 *A. fischeri*:1466

|                 |         |                 |         |
|-----------------|---------|-----------------|---------|
| afum EAL89158.1 | 100.00% | afis EAW16560.1 | 100.00% |
|-----------------|---------|-----------------|---------|

Bootstrap support for afum|EAL89158.1 as seed ortholog is 100%.

Bootstrap support for afis|EAW16560.1 as seed ortholog is 100%.

---

Group of orthologs #1980. Best score 1466 bits

Score difference with first non-orthologous sequence - *A. fumigatus*:1466 *A. fischeri*:1466

|                 |         |                 |         |
|-----------------|---------|-----------------|---------|
| afum EAL89181.2 | 100.00% | afis EAW16586.1 | 100.00% |
|-----------------|---------|-----------------|---------|

Bootstrap support for afum|EAL89181.2 as seed ortholog is 100%.

Bootstrap support for afis|EAW16586.1 as seed ortholog is 100%.

---

Group of orthologs #1981. Best score 1466 bits

Score difference with first non-orthologous sequence - *A. fumigatus*:1466 *A. fischeri*:1466

|                 |         |                 |         |
|-----------------|---------|-----------------|---------|
| afum EAL91294.1 | 100.00% | afis EAW17465.1 | 100.00% |
|-----------------|---------|-----------------|---------|

Bootstrap support for afum|EAL91294.1 as seed ortholog is 100%.

Bootstrap support for afis|EAW17465.1 as seed ortholog is 100%.

---

Group of orthologs #1982. Best score 1466 bits

Score difference with first non-orthologous sequence - *A. fumigatus*:1466 *A. fischeri*:1466

|                 |         |                 |         |
|-----------------|---------|-----------------|---------|
| afum EAL91390.1 | 100.00% | afis EAW17577.1 | 100.00% |
|-----------------|---------|-----------------|---------|

Bootstrap support for afum|EAL91390.1 as seed ortholog is 100%.

Bootstrap support for afis|EAW17577.1 as seed ortholog is 100%.

---

Group of orthologs #1983. Best score 1466 bits

Score difference with first non-orthologous sequence - *A. fumigatus*:1466 *A. fischeri*:1466

|                 |         |                 |         |
|-----------------|---------|-----------------|---------|
| afum EAL86171.1 | 100.00% | afis EAW24501.1 | 100.00% |
|-----------------|---------|-----------------|---------|

Bootstrap support for afum|EAL86171.1 as seed ortholog is 100%.

Bootstrap support for afis|EAW24501.1 as seed ortholog is 100%.

---

Group of orthologs #1984. Best score 1464 bits

Score difference with first non-orthologous sequence - *A. fumigatus*:1464 *A. fischeri*:1464

|                 |         |                 |         |
|-----------------|---------|-----------------|---------|
| afum EAL85771.1 | 100.00% | afis EAW15561.1 | 100.00% |
|-----------------|---------|-----------------|---------|

Bootstrap support for afum|EAL85771.1 as seed ortholog is 100%.

Bootstrap support for afis|EAW15561.1 as seed ortholog is 100%.

---

Group of orthologs #1985. Best score 1464 bits

Score difference with first non-orthologous sequence - *A. fumigatus*:1464 *A. fischeri*:1464

|                 |         |                 |         |
|-----------------|---------|-----------------|---------|
| afum EAL85633.1 | 100.00% | afis EAW15715.1 | 100.00% |
|-----------------|---------|-----------------|---------|

Bootstrap support for afum|EAL85633.1 as seed ortholog is 100%.

Bootstrap support for afis|EAW15715.1 as seed ortholog is 100%.

---

Group of orthologs #1986. Best score 1464 bits

Score difference with first non-orthologous sequence - *A. fumigatus*:1464 *A. fischeri*:1464

afum|EAL88890.1 100.00% afis|EAW16269.1 100.00%

Bootstrap support for afum|EAL88890.1 as seed ortholog is 100%.

Bootstrap support for afis|EAW16269.1 as seed ortholog is 100%.

---

Group of orthologs #1987. Best score 1464 bits

Score difference with first non-orthologous sequence - *A. fumigatus*:1243 *A. fischeri*:1105

afum|EAL90554.2 100.00% afis|EAW22638.1 100.00%

Bootstrap support for afum|EAL90554.2 as seed ortholog is 100%.

Bootstrap support for afis|EAW22638.1 as seed ortholog is 100%.

---

Group of orthologs #1988. Best score 1463 bits

Score difference with first non-orthologous sequence - *A. fumigatus*:1463 *A. fischeri*:1463

afum|EAL88915.1 100.00% afis|EAW16293.1 100.00%

Bootstrap support for afum|EAL88915.1 as seed ortholog is 100%.

Bootstrap support for afis|EAW16293.1 as seed ortholog is 100%.

---

Group of orthologs #1989. Best score 1463 bits

Score difference with first non-orthologous sequence - *A. fumigatus*:1422 *A. fischeri*:1400

afum|EAL93657.1 100.00% afis|EAW18926.1 100.00%

Bootstrap support for afum|EAL93657.1 as seed ortholog is 100%.

Bootstrap support for afis|EAW18926.1 as seed ortholog is 100%.

---

Group of orthologs #1990. Best score 1463 bits

Score difference with first non-orthologous sequence - *A. fumigatus*:1463 *A. fischeri*:1463

afum|EAL89444.1 100.00% afis|EAW24803.1 100.00%

Bootstrap support for afum|EAL89444.1 as seed ortholog is 100%.

Bootstrap support for afis|EAW24803.1 as seed ortholog is 100%.

---

Group of orthologs #1991. Best score 1462 bits

Score difference with first non-orthologous sequence - *A. fumigatus*:1462 *A. fischeri*:1462

afum|EAL86695.1 100.00% afis|EAW17277.1 100.00%

Bootstrap support for afum|EAL86695.1 as seed ortholog is 100%.

Bootstrap support for afis|EAW17277.1 as seed ortholog is 100%.

---

Group of orthologs #1992. Best score 1462 bits

Score difference with first non-orthologous sequence - *A. fumigatus*:1462 *A. fischeri*:1462

afum|EAL92571.1 100.00% afis|EAW21551.1 100.00%

Bootstrap support for afum|EAL92571.1 as seed ortholog is 100%.

Bootstrap support for afis|EAW21551.1 as seed ortholog is 100%.

---

Group of orthologs #1993. Best score 1462 bits

Score difference with first non-orthologous sequence - *A. fumigatus*:1462 *A. fischeri*:1462

afum|EAL92010.1 100.00% afis|EAW24155.1 100.00%

Bootstrap support for afum|EAL92010.1 as seed ortholog is 100%.

Bootstrap support for afis|EAW24155.1 as seed ortholog is 100%.

---

Group of orthologs #1994. Best score 1461 bits

Score difference with first non-orthologous sequence - *A. fumigatus*:1461 *A. fischeri*:1461

afum|EAL85099.1 100.00% afis|EAW19792.1 100.00%

Bootstrap support for afum|EAL85099.1 as seed ortholog is 100%.

Bootstrap support for afis|EAW19792.1 as seed ortholog is 100%.

---

Group of orthologs #1995. Best score 1461 bits

Score difference with first non-orthologous sequence - *A. fumigatus*:1461 *A. fischeri*:1461

afum|EAL84966.1 100.00% afis|EAW19949.1 100.00%

Bootstrap support for afum|EAL84966.1 as seed ortholog is 100%.

Bootstrap support for afis|EAW19949.1 as seed ortholog is 100%.

---

Group of orthologs #1996. Best score 1461 bits

Score difference with first non-orthologous sequence - *A. fumigatus*:1461 *A. fischeri*:1461

afum|EAL87578.1 100.00% afis|EAW18212.1 100.00%

Bootstrap support for afum|EAL87578.1 as seed ortholog is 100%.

Bootstrap support for afis|EAW18212.1 as seed ortholog is 100%.

---

Group of orthologs #1997. Best score 1461 bits

Score difference with first non-orthologous sequence - *A. fumigatus*:1461 *A. fischeri*:1461

afum|EAL90890.1 100.00% afis|EAW22291.1 100.00%

Bootstrap support for afum|EAL90890.1 as seed ortholog is 100%.

Bootstrap support for afis|EAW22291.1 as seed ortholog is 100%.

---

Group of orthologs #1998. Best score 1460 bits

Score difference with first non-orthologous sequence - *A. fumigatus*:1460 *A. fischeri*:1460

afum|EAL90974.1 100.00% afis|EAW22220.1 100.00%

Bootstrap support for afum|EAL90974.1 as seed ortholog is 100%.

Bootstrap support for afis|EAW22220.1 as seed ortholog is 100%.

---

Group of orthologs #1999. Best score 1460 bits

Score difference with first non-orthologous sequence - *A. fumigatus*:1460 *A. fischeri*:1372

afum|EAL90493.1 100.00% afis|EAW22699.1 100.00%

Bootstrap support for afum|EAL90493.1 as seed ortholog is 100%.

Bootstrap support for afis|EAW22699.1 as seed ortholog is 100%.

---

Group of orthologs #2000. Best score 1459 bits

Score difference with first non-orthologous sequence - *A. fumigatus*:1459 *A. fischeri*:1459

afum|EAL85269.1 100.00% afis|EAW20154.1 100.00%

Bootstrap support for afum|EAL85269.1 as seed ortholog is 100%.

Bootstrap support for afis|EAW20154.1 as seed ortholog is 100%.

---

Group of orthologs #2001. Best score 1459 bits

Score difference with first non-orthologous sequence - *A. fumigatus*:1459 *A. fischeri*:1459

afum|EAL87704.1 100.00% afis|EAW18341.1 100.00%

Bootstrap support for afum|EAL87704.1 as seed ortholog is 100%.

Bootstrap support for afis|EAW18341.1 as seed ortholog is 100%.

---

Group of orthologs #2002. Best score 1459 bits

Score difference with first non-orthologous sequence - *A. fumigatus*:1459 *A. fischeri*:1459

afum|EAL91872.1 100.00% afis|EAW18061.1 100.00%

Bootstrap support for afum|EAL91872.1 as seed ortholog is 100%.

Bootstrap support for afis|EAW18061.1 as seed ortholog is 100%.

---

Group of orthologs #2003. Best score 1459 bits

Score difference with first non-orthologous sequence - *A. fumigatus*:1459 *A. fischeri*:1459

afum|EAL91064.1 100.00% afis|EAW22123.1 100.00%

Bootstrap support for afum|EAL91064.1 as seed ortholog is 100%.

Bootstrap support for afis|EAW22123.1 as seed ortholog is 100%.

---

Group of orthologs #2004. Best score 1459 bits

Score difference with first non-orthologous sequence - *A. fumigatus*:1459 *A. fischeri*:1459

afum|EAL92497.1 100.00% afis|EAW21477.1 100.00%

Bootstrap support for afum|EAL92497.1 as seed ortholog is 100%.

Bootstrap support for afis|EAW21477.1 as seed ortholog is 100%.

---

Group of orthologs #2005. Best score 1458 bits

Score difference with first non-orthologous sequence - *A. fumigatus*:1458 *A. fischeri*:1458

afum|EAL93722.1 100.00% afis|EAW18986.1 100.00%

Bootstrap support for afum|EAL93722.1 as seed ortholog is 100%.

Bootstrap support for afis|EAW18986.1 as seed ortholog is 100%.

---

Group of orthologs #2006. Best score 1457 bits

Score difference with first non-orthologous sequence - *A. fumigatus*:1457 *A. fischeri*:1457

afum|EAL87264.2 100.00% afis|EAW23832.1 100.00%

Bootstrap support for afum|EAL87264.2 as seed ortholog is 100%.

Bootstrap support for afis|EAW23832.1 as seed ortholog is 100%.

---

Group of orthologs #2007. Best score 1457 bits

Score difference with first non-orthologous sequence - *A. fumigatus*:1457 *A. fischeri*:1457

afum|EAL90730.1 100.00% afis|EAW22461.1 100.00%

Bootstrap support for afum|EAL90730.1 as seed ortholog is 100%.

Bootstrap support for afis|EAW22461.1 as seed ortholog is 100%.

---

Group of orthologs #2008. Best score 1456 bits

Score difference with first non-orthologous sequence - *A. fumigatus*:1456 *A. fischeri*:1456

afum|EAL84832.1 100.00% afis|EAW20797.1 100.00%

Bootstrap support for afum|EAL84832.1 as seed ortholog is 100%.

Bootstrap support for afis|EAW20797.1 as seed ortholog is 100%.

---

Group of orthologs #2009. Best score 1456 bits

Score difference with first non-orthologous sequence - *A. fumigatus*:1456 *A. fischeri*:1456

afum|EAL88272.1 100.00% afis|EAW23212.1 100.00%

Bootstrap support for afum|EAL88272.1 as seed ortholog is 100%.

Bootstrap support for afis|EAW23212.1 as seed ortholog is 100%.

---

Group of orthologs #2010. Best score 1455 bits

Score difference with first non-orthologous sequence - *A. fumigatus*:1455 *A. fischeri*:1455

afum|EAL88951.1 100.00% afis|EAW16327.1 100.00%

Bootstrap support for afum|EAL88951.1 as seed ortholog is 100%.

Bootstrap support for afis|EAW16327.1 as seed ortholog is 100%.

---

Group of orthologs #2011. Best score 1455 bits

Score difference with first non-orthologous sequence - *A. fumigatus*:1455 *A. fischeri*:1455

afum|EAL87505.1 100.00% afis|EAW18147.1 100.00%

Bootstrap support for afum|EAL87505.1 as seed ortholog is 100%.

Bootstrap support for afis|EAW18147.1 as seed ortholog is 100%.

---

Group of orthologs #2012. Best score 1455 bits

Score difference with first non-orthologous sequence - *A. fumigatus*:1286 *A. fischeri*:938

afum|EAL92769.1 100.00% afis|EAW21736.1 100.00%

Bootstrap support for afum|EAL92769.1 as seed ortholog is 100%.

Bootstrap support for afis|EAW21736.1 as seed ortholog is 100%.

---

Group of orthologs #2013. Best score 1454 bits

Score difference with first non-orthologous sequence - *A. fumigatus*:1454 *A. fischeri*:1454

afum|EAL91666.1 100.00% afis|EAW17858.1 100.00%

Bootstrap support for afum|EAL91666.1 as seed ortholog is 100%.

Bootstrap support for afis|EAW17858.1 as seed ortholog is 100%.

---

Group of orthologs #2014. Best score 1454 bits

Score difference with first non-orthologous sequence - *A. fumigatus*:1454 *A. fischeri*:1454

|                 |         |                 |         |
|-----------------|---------|-----------------|---------|
| afum EAL93693.1 | 100.00% | afis EAW18960.1 | 100.00% |
|-----------------|---------|-----------------|---------|

Bootstrap support for afum|EAL93693.1 as seed ortholog is 100%.

Bootstrap support for afis|EAW18960.1 as seed ortholog is 100%.

---

Group of orthologs #2015. Best score 1453 bits

Score difference with first non-orthologous sequence - *A. fumigatus*:1222 *A. fischeri*:1453

|                 |         |                 |         |
|-----------------|---------|-----------------|---------|
| afum EAL85524.1 | 100.00% | afis EAW15827.1 | 100.00% |
|-----------------|---------|-----------------|---------|

Bootstrap support for afum|EAL85524.1 as seed ortholog is 100%.

Bootstrap support for afis|EAW15827.1 as seed ortholog is 100%.

---

Group of orthologs #2016. Best score 1453 bits

Score difference with first non-orthologous sequence - *A. fumigatus*:1453 *A. fischeri*:1453

|                 |         |                 |         |
|-----------------|---------|-----------------|---------|
| afum EAL85934.1 | 100.00% | afis EAW24266.1 | 100.00% |
|-----------------|---------|-----------------|---------|

Bootstrap support for afum|EAL85934.1 as seed ortholog is 100%.

Bootstrap support for afis|EAW24266.1 as seed ortholog is 100%.

---

Group of orthologs #2017. Best score 1452 bits

Score difference with first non-orthologous sequence - *A. fumigatus*:1452 *A. fischeri*:1452

|                 |         |                 |         |
|-----------------|---------|-----------------|---------|
| afum EAL84235.1 | 100.00% | afis EAW15411.1 | 100.00% |
|-----------------|---------|-----------------|---------|

Bootstrap support for afum|EAL84235.1 as seed ortholog is 100%.

Bootstrap support for afis|EAW15411.1 as seed ortholog is 100%.

---

Group of orthologs #2018. Best score 1452 bits

Score difference with first non-orthologous sequence - *A. fumigatus*:1452 *A. fischeri*:1452

|                 |         |                 |         |
|-----------------|---------|-----------------|---------|
| afum EAL87576.2 | 100.00% | afis EAW18210.1 | 100.00% |
|-----------------|---------|-----------------|---------|

Bootstrap support for afum|EAL87576.2 as seed ortholog is 100%.

Bootstrap support for afis|EAW18210.1 as seed ortholog is 100%.

---

Group of orthologs #2019. Best score 1452 bits

Score difference with first non-orthologous sequence - *A. fumigatus*:1452 *A. fischeri*:1221

|                 |         |                 |         |
|-----------------|---------|-----------------|---------|
| afum EAL91180.1 | 100.00% | afis EAW17336.1 | 100.00% |
|-----------------|---------|-----------------|---------|

Bootstrap support for afum|EAL91180.1 as seed ortholog is 100%.

Bootstrap support for afis|EAW17336.1 as seed ortholog is 100%.

---

Group of orthologs #2020. Best score 1452 bits

Score difference with first non-orthologous sequence - *A. fumigatus*:1452 *A. fischeri*:1452

|                 |         |                 |         |
|-----------------|---------|-----------------|---------|
| afum EAL88472.1 | 100.00% | afis EAW23008.1 | 100.00% |
|-----------------|---------|-----------------|---------|

Bootstrap support for afum|EAL88472.1 as seed ortholog is 100%.

Bootstrap support for afis|EAW23008.1 as seed ortholog is 100%.

---

Group of orthologs #2021. Best score 1452 bits

Score difference with first non-orthologous sequence - *A. fumigatus*:1452 *A. fischeri*:1452

|                 |         |                 |         |
|-----------------|---------|-----------------|---------|
| afum EAL93445.1 | 100.00% | afis EAW18721.1 | 100.00% |
|-----------------|---------|-----------------|---------|

Bootstrap support for afum|EAL93445.1 as seed ortholog is 100%.

Bootstrap support for afis|EAW18721.1 as seed ortholog is 100%.

---

Group of orthologs #2022. Best score 1452 bits

Score difference with first non-orthologous sequence - *A. fumigatus*:1452 *A. fischeri*:1452

|                 |         |                 |         |
|-----------------|---------|-----------------|---------|
| afum EAL92833.1 | 100.00% | afis EAW21817.1 | 100.00% |
|-----------------|---------|-----------------|---------|

Bootstrap support for afum|EAL92833.1 as seed ortholog is 100%.

Bootstrap support for afis|EAW21817.1 as seed ortholog is 100%.

---

Group of orthologs #2023. Best score 1452 bits

Score difference with first non-orthologous sequence - *A. fumigatus*:1452 *A. fischeri*:1452

afum|EAL89879.1 100.00% afis|EAW25218.1 100.00%

Bootstrap support for afum|EAL89879.1 as seed ortholog is 100%.

Bootstrap support for afis|EAW25218.1 as seed ortholog is 100%.

---

Group of orthologs #2024. Best score 1451 bits

Score difference with first non-orthologous sequence - *A. fumigatus*:1451 *A. fischeri*:1451

afum|EAL88844.1 100.00% afis|EAW16217.1 100.00%

Bootstrap support for afum|EAL88844.1 as seed ortholog is 100%.

Bootstrap support for afis|EAW16217.1 as seed ortholog is 100%.

---

Group of orthologs #2025. Best score 1451 bits

Score difference with first non-orthologous sequence - *A. fumigatus*:1451 *A. fischeri*:1451

afum|EAL84498.1 100.00% afis|EAW20563.1 100.00%

Bootstrap support for afum|EAL84498.1 as seed ortholog is 100%.

Bootstrap support for afis|EAW20563.1 as seed ortholog is 100%.

---

Group of orthologs #2026. Best score 1451 bits

Score difference with first non-orthologous sequence - *A. fumigatus*:1451 *A. fischeri*:1451

afum|EAL84689.2 100.00% afis|EAW20945.1 100.00%

Bootstrap support for afum|EAL84689.2 as seed ortholog is 100%.

Bootstrap support for afis|EAW20945.1 as seed ortholog is 100%.

---

Group of orthologs #2027. Best score 1450 bits

Score difference with first non-orthologous sequence - *A. fumigatus*:996 *A. fischeri*:980

afum|EAL89031.1 100.00% afis|EAW16392.1 100.00%

Bootstrap support for afum|EAL89031.1 as seed ortholog is 100%.

Bootstrap support for afis|EAW16392.1 as seed ortholog is 100%.

---

Group of orthologs #2028. Best score 1450 bits

Score difference with first non-orthologous sequence - *A. fumigatus*:1450 *A. fischeri*:1450

afum|EAL86805.2 100.00% afis|EAW19721.1 100.00%

Bootstrap support for afum|EAL86805.2 as seed ortholog is 100%.

Bootstrap support for afis|EAW19721.1 as seed ortholog is 100%.

---

Group of orthologs #2029. Best score 1450 bits

Score difference with first non-orthologous sequence - *A. fumigatus*:1450 *A. fischeri*:1450

afum|EAL93747.2 100.00% afis|EAW19013.1 100.00%

Bootstrap support for afum|EAL93747.2 as seed ortholog is 100%.

Bootstrap support for afis|EAW19013.1 as seed ortholog is 100%.

---

Group of orthologs #2030. Best score 1450 bits

Score difference with first non-orthologous sequence - *A. fumigatus*:1450 *A. fischeri*:1450

afum|EAL92178.1 100.00% afis|EAW21160.1 100.00%

Bootstrap support for afum|EAL92178.1 as seed ortholog is 100%.

Bootstrap support for afis|EAW21160.1 as seed ortholog is 100%.

---

Group of orthologs #2031. Best score 1450 bits

Score difference with first non-orthologous sequence - *A. fumigatus*:1450 *A. fischeri*:1450

afum|EAL89772.1 100.00% afis|EAW25101.1 100.00%

Bootstrap support for afum|EAL89772.1 as seed ortholog is 100%.

Bootstrap support for afis|EAW25101.1 as seed ortholog is 100%.

---

Group of orthologs #2032. Best score 1450 bits

Score difference with first non-orthologous sequence - *A. fumigatus*:1450 *A. fischeri*:1450



|                 |         |                 |         |
|-----------------|---------|-----------------|---------|
| afum EAL89886.1 | 100.00% | afis EAW25225.1 | 100.00% |
|-----------------|---------|-----------------|---------|

Bootstrap support for afum|EAL89886.1 as seed ortholog is 100%.

Bootstrap support for afis|EAW25225.1 as seed ortholog is 100%.

---

Group of orthologs #2033. Best score 1449 bits

Score difference with first non-orthologous sequence - *A. fumigatus*:1449 *A. fischeri*:1449

|                 |         |                 |         |
|-----------------|---------|-----------------|---------|
| afum EAL86514.1 | 100.00% | afis EAW16990.1 | 100.00% |
|-----------------|---------|-----------------|---------|

Bootstrap support for afum|EAL86514.1 as seed ortholog is 100%.

Bootstrap support for afis|EAW16990.1 as seed ortholog is 100%.

---

Group of orthologs #2034. Best score 1449 bits

Score difference with first non-orthologous sequence - *A. fumigatus*:1449 *A. fischeri*:1377

|                 |         |                 |         |
|-----------------|---------|-----------------|---------|
| afum EAL89182.1 | 100.00% | afis EAW16587.1 | 100.00% |
|-----------------|---------|-----------------|---------|

Bootstrap support for afum|EAL89182.1 as seed ortholog is 100%.

Bootstrap support for afis|EAW16587.1 as seed ortholog is 100%.

---

Group of orthologs #2035. Best score 1449 bits

Score difference with first non-orthologous sequence - *A. fumigatus*:1449 *A. fischeri*:1449

|                 |         |                 |         |
|-----------------|---------|-----------------|---------|
| afum EAL88273.1 | 100.00% | afis EAW23211.1 | 100.00% |
|-----------------|---------|-----------------|---------|

Bootstrap support for afum|EAL88273.1 as seed ortholog is 100%.

Bootstrap support for afis|EAW23211.1 as seed ortholog is 100%.

---

Group of orthologs #2036. Best score 1449 bits

Score difference with first non-orthologous sequence - *A. fumigatus*:1449 *A. fischeri*:1449

|                 |         |                 |         |
|-----------------|---------|-----------------|---------|
| afum EAL90691.1 | 100.00% | afis EAW22502.1 | 100.00% |
|-----------------|---------|-----------------|---------|

Bootstrap support for afum|EAL90691.1 as seed ortholog is 100%.

Bootstrap support for afis|EAW22502.1 as seed ortholog is 100%.

---

Group of orthologs #2037. Best score 1449 bits

Score difference with first non-orthologous sequence - *A. fumigatus*:1449 *A. fischeri*:1449

|                 |         |                 |         |
|-----------------|---------|-----------------|---------|
| afum EAL90410.2 | 100.00% | afis EAW22789.1 | 100.00% |
|-----------------|---------|-----------------|---------|

Bootstrap support for afum|EAL90410.2 as seed ortholog is 100%.

Bootstrap support for afis|EAW22789.1 as seed ortholog is 100%.

---

Group of orthologs #2038. Best score 1449 bits

Score difference with first non-orthologous sequence - *A. fumigatus*:1449 *A. fischeri*:1449

|                 |         |                 |         |
|-----------------|---------|-----------------|---------|
| afum EAL89865.1 | 100.00% | afis EAW25202.1 | 100.00% |
|-----------------|---------|-----------------|---------|

Bootstrap support for afum|EAL89865.1 as seed ortholog is 100%.

Bootstrap support for afis|EAW25202.1 as seed ortholog is 100%.

---

Group of orthologs #2039. Best score 1448 bits

Score difference with first non-orthologous sequence - *A. fumigatus*:1448 *A. fischeri*:1448

|                 |         |                 |         |
|-----------------|---------|-----------------|---------|
| afum EAL89293.1 | 100.00% | afis EAW16696.1 | 100.00% |
|-----------------|---------|-----------------|---------|

Bootstrap support for afum|EAL89293.1 as seed ortholog is 100%.

Bootstrap support for afis|EAW16696.1 as seed ortholog is 100%.

---

Group of orthologs #2040. Best score 1447 bits

Score difference with first non-orthologous sequence - *A. fumigatus*:1447 *A. fischeri*:1447

|                 |         |                 |         |
|-----------------|---------|-----------------|---------|
| afum EAL90717.1 | 100.00% | afis EAW22474.1 | 100.00% |
|-----------------|---------|-----------------|---------|

Bootstrap support for afum|EAL90717.1 as seed ortholog is 100%.

Bootstrap support for afis|EAW22474.1 as seed ortholog is 100%.

---

Group of orthologs #2041. Best score 1447 bits

Score difference with first non-orthologous sequence - *A. fumigatus*:1285 *A. fischeri*:1015

|                 |         |                 |         |
|-----------------|---------|-----------------|---------|
| afum EAL90464.2 | 100.00% | afis EAW22731.1 | 100.00% |
|-----------------|---------|-----------------|---------|

Bootstrap support for afum|EAL90464.2 as seed ortholog is 100%.

Bootstrap support for afis|EAW22731.1 as seed ortholog is 100%.

---

Group of orthologs #2042. Best score 1446 bits

Score difference with first non-orthologous sequence - *A. fumigatus*:1446 *A. fischeri*:1446

afum|EAL91284.1 100.00% afis|EAW17456.1 100.00%

Bootstrap support for afum|EAL91284.1 as seed ortholog is 100%.

Bootstrap support for afis|EAW17456.1 as seed ortholog is 100%.

---

Group of orthologs #2043. Best score 1445 bits

Score difference with first non-orthologous sequence - *A. fumigatus*:1445 *A. fischeri*:1445

afum|EAL84560.2 100.00% afis|EAW20494.1 100.00%

Bootstrap support for afum|EAL84560.2 as seed ortholog is 100%.

Bootstrap support for afis|EAW20494.1 as seed ortholog is 100%.

---

Group of orthologs #2044. Best score 1445 bits

Score difference with first non-orthologous sequence - *A. fumigatus*:1445 *A. fischeri*:1445

afum|EAL91357.1 100.00% afis|EAW17543.1 100.00%

Bootstrap support for afum|EAL91357.1 as seed ortholog is 100%.

Bootstrap support for afis|EAW17543.1 as seed ortholog is 100%.

---

Group of orthologs #2045. Best score 1445 bits

Score difference with first non-orthologous sequence - *A. fumigatus*:1445 *A. fischeri*:1445

afum|EAL91724.1 100.00% afis|EAW17914.1 100.00%

Bootstrap support for afum|EAL91724.1 as seed ortholog is 100%.

Bootstrap support for afis|EAW17914.1 as seed ortholog is 100%.

---

Group of orthologs #2046. Best score 1445 bits

Score difference with first non-orthologous sequence - *A. fumigatus*:1150 *A. fischeri*:1045

afum|EAL87112.1 100.00% afis|EAW23667.1 100.00%

Bootstrap support for afum|EAL87112.1 as seed ortholog is 100%.

Bootstrap support for afis|EAW23667.1 as seed ortholog is 100%.

---

Group of orthologs #2047. Best score 1445 bits

Score difference with first non-orthologous sequence - *A. fumigatus*:1127 *A. fischeri*:691

afum|EAL87168.1 100.00% afis|EAW23730.1 100.00%

Bootstrap support for afum|EAL87168.1 as seed ortholog is 100%.

Bootstrap support for afis|EAW23730.1 as seed ortholog is 100%.

---

Group of orthologs #2048. Best score 1445 bits

Score difference with first non-orthologous sequence - *A. fumigatus*:1445 *A. fischeri*:1445

afum|EAL87408.1 100.00% afis|EAW23978.1 100.00%

Bootstrap support for afum|EAL87408.1 as seed ortholog is 100%.

Bootstrap support for afis|EAW23978.1 as seed ortholog is 100%.

---

Group of orthologs #2049. Best score 1445 bits

Score difference with first non-orthologous sequence - *A. fumigatus*:1200 *A. fischeri*:1445

afum|EAL88241.1 100.00% afis|EAW23241.1 100.00%

Bootstrap support for afum|EAL88241.1 as seed ortholog is 100%.

Bootstrap support for afis|EAW23241.1 as seed ortholog is 100%.

---

Group of orthologs #2050. Best score 1444 bits

Score difference with first non-orthologous sequence - *A. fumigatus*:1444 *A. fischeri*:1444

afum|EAL89116.1 100.00% afis|EAW16521.1 100.00%

Bootstrap support for afum|EAL89116.1 as seed ortholog is 100%.

Bootstrap support for afis|EAW16521.1 as seed ortholog is 100%.

---

Group of orthologs #2051. Best score 1444 bits

Score difference with first non-orthologous sequence - *A. fumigatus*:951 *A. fischeri*:650

afum|EAL87170.1 100.00% afis|EAW23731.1 100.00%

Bootstrap support for afum|EAL87170.1 as seed ortholog is 100%.

Bootstrap support for afis|EAW23731.1 as seed ortholog is 100%.

---

Group of orthologs #2052. Best score 1444 bits

Score difference with first non-orthologous sequence - *A. fumigatus*:1444 *A. fischeri*:1444

afum|EAL93123.1 100.00% afis|EAW18441.1 100.00%

Bootstrap support for afum|EAL93123.1 as seed ortholog is 100%.

Bootstrap support for afis|EAW18441.1 as seed ortholog is 100%.

---

Group of orthologs #2053. Best score 1444 bits

Score difference with first non-orthologous sequence - *A. fumigatus*:1444 *A. fischeri*:1444

afum|EAL93147.1 100.00% afis|EAW18461.1 100.00%

Bootstrap support for afum|EAL93147.1 as seed ortholog is 100%.

Bootstrap support for afis|EAW18461.1 as seed ortholog is 100%.

---

Group of orthologs #2054. Best score 1444 bits

Score difference with first non-orthologous sequence - *A. fumigatus*:1444 *A. fischeri*:1444

afum|EAL87878.1 100.00% afis|EAW23586.1 100.00%

Bootstrap support for afum|EAL87878.1 as seed ortholog is 100%.

Bootstrap support for afis|EAW23586.1 as seed ortholog is 100%.

---

Group of orthologs #2055. Best score 1444 bits

Score difference with first non-orthologous sequence - *A. fumigatus*:1444 *A. fischeri*:1444

afum|EBA27487.1 100.00% afis|EAW18527.1 100.00%

Bootstrap support for afum|EBA27487.1 as seed ortholog is 100%.

Bootstrap support for afis|EAW18527.1 as seed ortholog is 100%.

---

Group of orthologs #2056. Best score 1443 bits

Score difference with first non-orthologous sequence - *A. fumigatus*:1344 *A. fischeri*:1217

afum|EAL84492.1 100.00% afis|EAW20573.1 100.00%

Bootstrap support for afum|EAL84492.1 as seed ortholog is 100%.

Bootstrap support for afis|EAW20573.1 as seed ortholog is 100%.

---

Group of orthologs #2057. Best score 1443 bits

Score difference with first non-orthologous sequence - *A. fumigatus*:1388 *A. fischeri*:1374

afum|EAL86999.1 100.00% afis|EAW19495.1 100.00%

Bootstrap support for afum|EAL86999.1 as seed ortholog is 100%.

Bootstrap support for afis|EAW19495.1 as seed ortholog is 100%.

---

Group of orthologs #2058. Best score 1443 bits

Score difference with first non-orthologous sequence - *A. fumigatus*:1443 *A. fischeri*:1443

afum|EAL88252.1 100.00% afis|EAW23231.1 100.00%

Bootstrap support for afum|EAL88252.1 as seed ortholog is 100%.

Bootstrap support for afis|EAW23231.1 as seed ortholog is 100%.

---

Group of orthologs #2059. Best score 1443 bits

Score difference with first non-orthologous sequence - *A. fumigatus*:1443 *A. fischeri*:1443

afum|EAL89668.1 100.00% afis|EAW25027.1 100.00%

Bootstrap support for afum|EAL89668.1 as seed ortholog is 100%.

Bootstrap support for afis|EAW25027.1 as seed ortholog is 100%.

---

Group of orthologs #2060. Best score 1443 bits

Score difference with first non-orthologous sequence - *A. fumigatus*:1443 *A. fischeri*:1443

|                 |         |                 |         |
|-----------------|---------|-----------------|---------|
| afum EAL89766.2 | 100.00% | afis EAW25095.1 | 100.00% |
|-----------------|---------|-----------------|---------|

Bootstrap support for afum|EAL89766.2 as seed ortholog is 100%.

Bootstrap support for afis|EAW25095.1 as seed ortholog is 100%.

---

Group of orthologs #2061. Best score 1442 bits

Score difference with first non-orthologous sequence - *A. fumigatus*:1442 *A. fischeri*:1442

|                 |         |                 |         |
|-----------------|---------|-----------------|---------|
| afum EAL85541.1 | 100.00% | afis EAW15810.1 | 100.00% |
|-----------------|---------|-----------------|---------|

Bootstrap support for afum|EAL85541.1 as seed ortholog is 100%.

Bootstrap support for afis|EAW15810.1 as seed ortholog is 100%.

---

Group of orthologs #2062. Best score 1442 bits

Score difference with first non-orthologous sequence - *A. fumigatus*:1442 *A. fischeri*:1442

|                 |         |                 |         |
|-----------------|---------|-----------------|---------|
| afum EAL88510.1 | 100.00% | afis EAW15876.1 | 100.00% |
|-----------------|---------|-----------------|---------|

Bootstrap support for afum|EAL88510.1 as seed ortholog is 100%.

Bootstrap support for afis|EAW15876.1 as seed ortholog is 100%.

---

Group of orthologs #2063. Best score 1442 bits

Score difference with first non-orthologous sequence - *A. fumigatus*:1442 *A. fischeri*:1442

|                 |         |                 |         |
|-----------------|---------|-----------------|---------|
| afum EAL87560.1 | 100.00% | afis EAW18192.1 | 100.00% |
|-----------------|---------|-----------------|---------|

Bootstrap support for afum|EAL87560.1 as seed ortholog is 100%.

Bootstrap support for afis|EAW18192.1 as seed ortholog is 100%.

---

Group of orthologs #2064. Best score 1442 bits

Score difference with first non-orthologous sequence - *A. fumigatus*:1442 *A. fischeri*:1442

|                 |         |                 |         |
|-----------------|---------|-----------------|---------|
| afum EAL90350.1 | 100.00% | afis EAW22850.1 | 100.00% |
|-----------------|---------|-----------------|---------|

Bootstrap support for afum|EAL90350.1 as seed ortholog is 100%.

Bootstrap support for afis|EAW22850.1 as seed ortholog is 100%.

---

Group of orthologs #2065. Best score 1442 bits

Score difference with first non-orthologous sequence - *A. fumigatus*:1442 *A. fischeri*:1169

|                 |         |                 |         |
|-----------------|---------|-----------------|---------|
| afum EAL92365.1 | 100.00% | afis EAW21348.1 | 100.00% |
|-----------------|---------|-----------------|---------|

Bootstrap support for afum|EAL92365.1 as seed ortholog is 100%.

Bootstrap support for afis|EAW21348.1 as seed ortholog is 100%.

---

Group of orthologs #2066. Best score 1441 bits

Score difference with first non-orthologous sequence - *A. fumigatus*:1441 *A. fischeri*:1441

|                 |         |                 |         |
|-----------------|---------|-----------------|---------|
| afum EAL87736.1 | 100.00% | afis EAW17067.1 | 100.00% |
|-----------------|---------|-----------------|---------|

Bootstrap support for afum|EAL87736.1 as seed ortholog is 100%.

Bootstrap support for afis|EAW17067.1 as seed ortholog is 100%.

---

Group of orthologs #2067. Best score 1441 bits

Score difference with first non-orthologous sequence - *A. fumigatus*:1441 *A. fischeri*:1441

|                 |         |                 |         |
|-----------------|---------|-----------------|---------|
| afum EAL93907.1 | 100.00% | afis EAW19177.1 | 100.00% |
|-----------------|---------|-----------------|---------|

Bootstrap support for afum|EAL93907.1 as seed ortholog is 100%.

Bootstrap support for afis|EAW19177.1 as seed ortholog is 100%.

---

Group of orthologs #2068. Best score 1441 bits

Score difference with first non-orthologous sequence - *A. fumigatus*:1441 *A. fischeri*:1381

|                 |         |                 |         |
|-----------------|---------|-----------------|---------|
| afum EAL89866.2 | 100.00% | afis EAW25205.1 | 100.00% |
|-----------------|---------|-----------------|---------|

Bootstrap support for afum|EAL89866.2 as seed ortholog is 100%.

Bootstrap support for afis|EAW25205.1 as seed ortholog is 100%.

---

Group of orthologs #2069. Best score 1440 bits

Score difference with first non-orthologous sequence - *A. fumigatus*:1440 *A. fischeri*:1440

|                 |         |                 |         |
|-----------------|---------|-----------------|---------|
| afum EAL90523.1 | 100.00% | afis EAW22669.1 | 100.00% |
|-----------------|---------|-----------------|---------|

Bootstrap support for afum|EAL90523.1 as seed ortholog is 100%.

Bootstrap support for afis|EAW22669.1 as seed ortholog is 100%.

---

Group of orthologs #2070. Best score 1440 bits

Score difference with first non-orthologous sequence - *A. fumigatus*:1440 *A. fischeri*:1440

|                 |         |                 |         |
|-----------------|---------|-----------------|---------|
| afum EAL89955.1 | 100.00% | afis EAW25292.1 | 100.00% |
|-----------------|---------|-----------------|---------|

Bootstrap support for afum|EAL89955.1 as seed ortholog is 100%.

Bootstrap support for afis|EAW25292.1 as seed ortholog is 100%.

---

Group of orthologs #2071. Best score 1440 bits

Score difference with first non-orthologous sequence - *A. fumigatus*:1440 *A. fischeri*:1440

|                 |         |                 |         |
|-----------------|---------|-----------------|---------|
| afum EAL89980.2 | 100.00% | afis EAW25319.1 | 100.00% |
|-----------------|---------|-----------------|---------|

Bootstrap support for afum|EAL89980.2 as seed ortholog is 100%.

Bootstrap support for afis|EAW25319.1 as seed ortholog is 100%.

---

Group of orthologs #2072. Best score 1439 bits

Score difference with first non-orthologous sequence - *A. fumigatus*:1357 *A. fischeri*:1113

|                 |         |                 |         |
|-----------------|---------|-----------------|---------|
| afum EAL88578.2 | 100.00% | afis EAW15944.1 | 100.00% |
|-----------------|---------|-----------------|---------|

Bootstrap support for afum|EAL88578.2 as seed ortholog is 100%.

Bootstrap support for afis|EAW15944.1 as seed ortholog is 100%.

---

Group of orthologs #2073. Best score 1439 bits

Score difference with first non-orthologous sequence - *A. fumigatus*:1362 *A. fischeri*:1439

|                 |         |                 |         |
|-----------------|---------|-----------------|---------|
| afum EAL85467.1 | 100.00% | afis EAW20347.1 | 100.00% |
|-----------------|---------|-----------------|---------|

Bootstrap support for afum|EAL85467.1 as seed ortholog is 100%.

Bootstrap support for afis|EAW20347.1 as seed ortholog is 100%.

---

Group of orthologs #2074. Best score 1439 bits

Score difference with first non-orthologous sequence - *A. fumigatus*:1439 *A. fischeri*:1439

|                 |         |                 |         |
|-----------------|---------|-----------------|---------|
| afum EAL91045.1 | 100.00% | afis EAW22145.1 | 100.00% |
|-----------------|---------|-----------------|---------|

Bootstrap support for afum|EAL91045.1 as seed ortholog is 100%.

Bootstrap support for afis|EAW22145.1 as seed ortholog is 100%.

---

Group of orthologs #2075. Best score 1438 bits

Score difference with first non-orthologous sequence - *A. fumigatus*:1033 *A. fischeri*:862

|                 |         |                 |         |
|-----------------|---------|-----------------|---------|
| afum EAL85734.1 | 100.00% | afis EAW15598.1 | 100.00% |
|-----------------|---------|-----------------|---------|

Bootstrap support for afum|EAL85734.1 as seed ortholog is 100%.

Bootstrap support for afis|EAW15598.1 as seed ortholog is 100%.

---

Group of orthologs #2076. Best score 1438 bits

Score difference with first non-orthologous sequence - *A. fumigatus*:1290 *A. fischeri*:1230

|                 |         |                 |         |
|-----------------|---------|-----------------|---------|
| afum EAL86567.1 | 100.00% | afis EAW17089.1 | 100.00% |
|-----------------|---------|-----------------|---------|

Bootstrap support for afum|EAL86567.1 as seed ortholog is 100%.

Bootstrap support for afis|EAW17089.1 as seed ortholog is 100%.

---

Group of orthologs #2077. Best score 1438 bits

Score difference with first non-orthologous sequence - *A. fumigatus*:1438 *A. fischeri*:1438

|                 |         |                 |         |
|-----------------|---------|-----------------|---------|
| afum EAL88148.1 | 100.00% | afis EAW23331.1 | 100.00% |
|-----------------|---------|-----------------|---------|

Bootstrap support for afum|EAL88148.1 as seed ortholog is 100%.

Bootstrap support for afis|EAW23331.1 as seed ortholog is 100%.

---

Group of orthologs #2078. Best score 1438 bits

Score difference with first non-orthologous sequence - *A. fumigatus*:1237 *A. fischeri*:1237

|                 |         |                 |         |
|-----------------|---------|-----------------|---------|
| afum EAL89507.1 | 100.00% | afis EAW24859.1 | 100.00% |
|-----------------|---------|-----------------|---------|

Bootstrap support for afum|EAL89507.1 as seed ortholog is 100%.

Bootstrap support for afis|EAW24859.1 as seed ortholog is 100%.

---

Group of orthologs #2079. Best score 1437 bits

Score difference with first non-orthologous sequence - *A. fumigatus*:1294 *A. fischeri*:1259

afum|EAL91502.1 100.00% afis|EAW17688.1 100.00%

Bootstrap support for afum|EAL91502.1 as seed ortholog is 100%.

Bootstrap support for afis|EAW17688.1 as seed ortholog is 100%.

---

Group of orthologs #2080. Best score 1436 bits

Score difference with first non-orthologous sequence - *A. fumigatus*:1436 *A. fischeri*:1306

afum|EAL91182.1 100.00% afis|EAW17338.1 100.00%

Bootstrap support for afum|EAL91182.1 as seed ortholog is 100%.

Bootstrap support for afis|EAW17338.1 as seed ortholog is 100%.

---

Group of orthologs #2081. Best score 1436 bits

Score difference with first non-orthologous sequence - *A. fumigatus*:1436 *A. fischeri*:1436

afum|EAL88397.1 100.00% afis|EAW23082.1 100.00%

Bootstrap support for afum|EAL88397.1 as seed ortholog is 100%.

Bootstrap support for afis|EAW23082.1 as seed ortholog is 100%.

---

Group of orthologs #2082. Best score 1436 bits

Score difference with first non-orthologous sequence - *A. fumigatus*:1436 *A. fischeri*:1436

afum|EAL93258.1 100.00% afis|EAW18558.1 100.00%

Bootstrap support for afum|EAL93258.1 as seed ortholog is 100%.

Bootstrap support for afis|EAW18558.1 as seed ortholog is 100%.

---

Group of orthologs #2083. Best score 1436 bits

Score difference with first non-orthologous sequence - *A. fumigatus*:1436 *A. fischeri*:1436

afum|EAL93403.1 100.00% afis|EAW18682.1 100.00%

Bootstrap support for afum|EAL93403.1 as seed ortholog is 100%.

Bootstrap support for afis|EAW18682.1 as seed ortholog is 100%.

---

Group of orthologs #2084. Best score 1436 bits

Score difference with first non-orthologous sequence - *A. fumigatus*:1436 *A. fischeri*:1436

afum|EBA27485.1 100.00% afis|EAW18484.1 100.00%

Bootstrap support for afum|EBA27485.1 as seed ortholog is 100%.

Bootstrap support for afis|EAW18484.1 as seed ortholog is 100%.

---

Group of orthologs #2085. Best score 1436 bits

Score difference with first non-orthologous sequence - *A. fumigatus*:1436 *A. fischeri*:1436

afum|EAL93965.2 100.00% afis|EAW19237.1 100.00%

Bootstrap support for afum|EAL93965.2 as seed ortholog is 100%.

Bootstrap support for afis|EAW19237.1 as seed ortholog is 100%.

---

Group of orthologs #2086. Best score 1436 bits

Score difference with first non-orthologous sequence - *A. fumigatus*:1436 *A. fischeri*:1436

afum|EAL91032.1 100.00% afis|EAW22158.1 100.00%

Bootstrap support for afum|EAL91032.1 as seed ortholog is 100%.

Bootstrap support for afis|EAW22158.1 as seed ortholog is 100%.

---

Group of orthologs #2087. Best score 1436 bits

Score difference with first non-orthologous sequence - *A. fumigatus*:1436 *A. fischeri*:1436

afum|EAL89460.2 100.00% afis|EAW24816.1 100.00%

Bootstrap support for afum|EAL89460.2 as seed ortholog is 100%.

Bootstrap support for afis|EAW24816.1 as seed ortholog is 100%.

---

Group of orthologs #2088. Best score 1436 bits

Score difference with first non-orthologous sequence - *A. fumigatus*:1436 *A. fischeri*:1436

afum|EAL92950.2      100.00%                      afis|EAW21937.1      100.00%

Bootstrap support for afum|EAL92950.2 as seed ortholog is 100%.

Bootstrap support for afis|EAW21937.1 as seed ortholog is 100%.

---

Group of orthologs #2089. Best score 1435 bits

Score difference with first non-orthologous sequence - *A. fumigatus*:1169 *A. fischeri*:912

afum|EAL92724.1      100.00%                      afis|EAW21690.1      100.00%

Bootstrap support for afum|EAL92724.1 as seed ortholog is 100%.

Bootstrap support for afis|EAW21690.1 as seed ortholog is 100%.

---

Group of orthologs #2090. Best score 1434 bits

Score difference with first non-orthologous sequence - *A. fumigatus*:1327 *A. fischeri*:1296

afum|EAL85288.1      100.00%                      afis|EAW20170.1      100.00%

Bootstrap support for afum|EAL85288.1 as seed ortholog is 100%.

Bootstrap support for afis|EAW20170.1 as seed ortholog is 100%.

---

Group of orthologs #2091. Best score 1434 bits

Score difference with first non-orthologous sequence - *A. fumigatus*:1434 *A. fischeri*:1434

afum|EAL87287.1      100.00%                      afis|EAW23859.1      100.00%

Bootstrap support for afum|EAL87287.1 as seed ortholog is 100%.

Bootstrap support for afis|EAW23859.1 as seed ortholog is 100%.

---

Group of orthologs #2092. Best score 1434 bits

Score difference with first non-orthologous sequence - *A. fumigatus*:1131 *A. fischeri*:1065

afum|EAL91937.1      100.00%                      afis|EAW24082.1      100.00%

Bootstrap support for afum|EAL91937.1 as seed ortholog is 100%.

Bootstrap support for afis|EAW24082.1 as seed ortholog is 100%.

---

Group of orthologs #2093. Best score 1433 bits

Score difference with first non-orthologous sequence - *A. fumigatus*:1433 *A. fischeri*:1433

afum|EAL85803.1      100.00%                      afis|EAW15525.1      100.00%

Bootstrap support for afum|EAL85803.1 as seed ortholog is 100%.

Bootstrap support for afis|EAW15525.1 as seed ortholog is 100%.

---

Group of orthologs #2094. Best score 1433 bits

Score difference with first non-orthologous sequence - *A. fumigatus*:1268 *A. fischeri*:1239

afum|EAL85140.1      100.00%                      afis|EAW19757.1      100.00%

Bootstrap support for afum|EAL85140.1 as seed ortholog is 100%.

Bootstrap support for afis|EAW19757.1 as seed ortholog is 100%.

---

Group of orthologs #2095. Best score 1433 bits

Score difference with first non-orthologous sequence - *A. fumigatus*:1433 *A. fischeri*:1433

afum|EAL87676.1      100.00%                      afis|EAW18310.1      100.00%

Bootstrap support for afum|EAL87676.1 as seed ortholog is 100%.

Bootstrap support for afis|EAW18310.1 as seed ortholog is 100%.

---

Group of orthologs #2096. Best score 1433 bits

Score difference with first non-orthologous sequence - *A. fumigatus*:1433 *A. fischeri*:1433

afum|EAL88352.1      100.00%                      afis|EAW23128.1      100.00%

Bootstrap support for afum|EAL88352.1 as seed ortholog is 100%.

Bootstrap support for afis|EAW23128.1 as seed ortholog is 100%.

---

Group of orthologs #2097. Best score 1433 bits

Score difference with first non-orthologous sequence - *A. fumigatus*:1433 *A. fischeri*:1433

afum|EAL89435.1      100.00%                      afis|EAW24793.1      100.00%

Bootstrap support for afum|EAL89435.1 as seed ortholog is 100%.

Bootstrap support for afis|EAW24793.1 as seed ortholog is 100%.

---

Group of orthologs #2098. Best score 1432 bits

Score difference with first non-orthologous sequence - *A. fumigatus*:1432 *A. fischeri*:1432

|                 |         |                 |         |
|-----------------|---------|-----------------|---------|
| afum EAL85162.1 | 100.00% | afis EAW20042.1 | 100.00% |
|-----------------|---------|-----------------|---------|

Bootstrap support for afum|EAL85162.1 as seed ortholog is 100%.

Bootstrap support for afis|EAW20042.1 as seed ortholog is 100%.

---

Group of orthologs #2099. Best score 1432 bits

Score difference with first non-orthologous sequence - *A. fumigatus*:1133 *A. fischeri*:1432

|                 |         |                 |         |
|-----------------|---------|-----------------|---------|
| afum EAL84861.1 | 100.00% | afis EAW20759.1 | 100.00% |
|-----------------|---------|-----------------|---------|

Bootstrap support for afum|EAL84861.1 as seed ortholog is 100%.

Bootstrap support for afis|EAW20759.1 as seed ortholog is 100%.

---

Group of orthologs #2100. Best score 1432 bits

Score difference with first non-orthologous sequence - *A. fumigatus*:1263 *A. fischeri*:999

|                 |         |                 |         |
|-----------------|---------|-----------------|---------|
| afum EAL93797.1 | 100.00% | afis EAW19068.1 | 100.00% |
|-----------------|---------|-----------------|---------|

Bootstrap support for afum|EAL93797.1 as seed ortholog is 100%.

Bootstrap support for afis|EAW19068.1 as seed ortholog is 100%.

---

Group of orthologs #2101. Best score 1432 bits

Score difference with first non-orthologous sequence - *A. fumigatus*:1432 *A. fischeri*:1432

|                 |         |                 |         |
|-----------------|---------|-----------------|---------|
| afum EAL89985.1 | 100.00% | afis EAW25324.1 | 100.00% |
|-----------------|---------|-----------------|---------|

Bootstrap support for afum|EAL89985.1 as seed ortholog is 100%.

Bootstrap support for afis|EAW25324.1 as seed ortholog is 100%.

---

Group of orthologs #2102. Best score 1431 bits

Score difference with first non-orthologous sequence - *A. fumigatus*:1431 *A. fischeri*:1243

|                 |         |                 |         |
|-----------------|---------|-----------------|---------|
| afum EAL85927.2 | 100.00% | afis EAW24259.1 | 100.00% |
|-----------------|---------|-----------------|---------|

Bootstrap support for afum|EAL85927.2 as seed ortholog is 100%.

Bootstrap support for afis|EAW24259.1 as seed ortholog is 100%.

---

Group of orthologs #2103. Best score 1431 bits

Score difference with first non-orthologous sequence - *A. fumigatus*:1431 *A. fischeri*:1087

|                 |         |                 |         |
|-----------------|---------|-----------------|---------|
| afum EAL89346.1 | 100.00% | afis EAW24704.1 | 100.00% |
|-----------------|---------|-----------------|---------|

Bootstrap support for afum|EAL89346.1 as seed ortholog is 100%.

Bootstrap support for afis|EAW24704.1 as seed ortholog is 100%.

---

Group of orthologs #2104. Best score 1430 bits

Score difference with first non-orthologous sequence - *A. fumigatus*:1430 *A. fischeri*:1430

|                 |         |                 |         |
|-----------------|---------|-----------------|---------|
| afum EAL88752.1 | 100.00% | afis EAW16121.1 | 100.00% |
|-----------------|---------|-----------------|---------|

Bootstrap support for afum|EAL88752.1 as seed ortholog is 100%.

Bootstrap support for afis|EAW16121.1 as seed ortholog is 100%.

---

Group of orthologs #2105. Best score 1429 bits

Score difference with first non-orthologous sequence - *A. fumigatus*:1429 *A. fischeri*:1244

|                 |         |                 |         |
|-----------------|---------|-----------------|---------|
| afum EAL86418.1 | 100.00% | afis EAW16882.1 | 100.00% |
|-----------------|---------|-----------------|---------|

Bootstrap support for afum|EAL86418.1 as seed ortholog is 100%.

Bootstrap support for afis|EAW16882.1 as seed ortholog is 100%.

---

Group of orthologs #2106. Best score 1429 bits

Score difference with first non-orthologous sequence - *A. fumigatus*:1429 *A. fischeri*:1429

|                 |         |                 |         |
|-----------------|---------|-----------------|---------|
| afum EAL84767.1 | 100.00% | afis EAW20867.1 | 100.00% |
|-----------------|---------|-----------------|---------|

Bootstrap support for afum|EAL84767.1 as seed ortholog is 100%.

Bootstrap support for afis|EAW20867.1 as seed ortholog is 100%.

---



Group of orthologs #2107. Best score 1428 bits

Score difference with first non-orthologous sequence - *A. fumigatus*:1428 *A. fischeri*:1428

afum|EAL89278.1 100.00% afis|EAW16673.1 100.00%

Bootstrap support for afum|EAL89278.1 as seed ortholog is 100%.

Bootstrap support for afis|EAW16673.1 as seed ortholog is 100%.

---

Group of orthologs #2108. Best score 1428 bits

Score difference with first non-orthologous sequence - *A. fumigatus*:1428 *A. fischeri*:1428

afum|EAL88278.1 100.00% afis|EAW23205.1 100.00%

Bootstrap support for afum|EAL88278.1 as seed ortholog is 100%.

Bootstrap support for afis|EAW23205.1 as seed ortholog is 100%.

---

Group of orthologs #2109. Best score 1428 bits

Score difference with first non-orthologous sequence - *A. fumigatus*:1108 *A. fischeri*:1044

afum|EAL93452.1 100.00% afis|EAW18727.1 100.00%

Bootstrap support for afum|EAL93452.1 as seed ortholog is 100%.

Bootstrap support for afis|EAW18727.1 as seed ortholog is 100%.

---

Group of orthologs #2110. Best score 1428 bits

Score difference with first non-orthologous sequence - *A. fumigatus*:1428 *A. fischeri*:1428

afum|EAL90286.1 100.00% afis|EAW22911.1 100.00%

Bootstrap support for afum|EAL90286.1 as seed ortholog is 100%.

Bootstrap support for afis|EAW22911.1 as seed ortholog is 100%.

---

Group of orthologs #2111. Best score 1428 bits

Score difference with first non-orthologous sequence - *A. fumigatus*:1428 *A. fischeri*:1428

afum|EBA27416.1 100.00% afis|EAW22365.1 100.00%

Bootstrap support for afum|EBA27416.1 as seed ortholog is 100%.

Bootstrap support for afis|EAW22365.1 as seed ortholog is 100%.

---

Group of orthologs #2112. Best score 1427 bits

Score difference with first non-orthologous sequence - *A. fumigatus*:1221 *A. fischeri*:1274

afum|EAL85727.1 100.00% afis|EAW15606.1 100.00%

Bootstrap support for afum|EAL85727.1 as seed ortholog is 100%.

Bootstrap support for afis|EAW15606.1 as seed ortholog is 100%.

---

Group of orthologs #2113. Best score 1427 bits

Score difference with first non-orthologous sequence - *A. fumigatus*:1427 *A. fischeri*:1427

afum|EAL84616.1 100.00% afis|EAW20436.1 100.00%

Bootstrap support for afum|EAL84616.1 as seed ortholog is 100%.

Bootstrap support for afis|EAW20436.1 as seed ortholog is 100%.

---

Group of orthologs #2114. Best score 1427 bits

Score difference with first non-orthologous sequence - *A. fumigatus*:1427 *A. fischeri*:1427

afum|EAL92123.1 100.00% afis|EAW21102.1 100.00%

Bootstrap support for afum|EAL92123.1 as seed ortholog is 100%.

Bootstrap support for afis|EAW21102.1 as seed ortholog is 100%.

---

Group of orthologs #2115. Best score 1427 bits

Score difference with first non-orthologous sequence - *A. fumigatus*:1427 *A. fischeri*:1427

afum|EAL90635.1 100.00% afis|EAW22560.1 100.00%

Bootstrap support for afum|EAL90635.1 as seed ortholog is 100%.

Bootstrap support for afis|EAW22560.1 as seed ortholog is 100%.

---

Group of orthologs #2116. Best score 1426 bits

Score difference with first non-orthologous sequence - *A. fumigatus*:1302 *A. fischeri*:1426

|                 |         |                 |         |
|-----------------|---------|-----------------|---------|
| afum EAL92057.1 | 100.00% | afis EAW21019.1 | 100.00% |
|-----------------|---------|-----------------|---------|

Bootstrap support for afum|EAL92057.1 as seed ortholog is 100%.

Bootstrap support for afis|EAW21019.1 as seed ortholog is 100%.

---

Group of orthologs #2117. Best score 1425 bits

Score difference with first non-orthologous sequence - *A. fumigatus*:1425 *A. fischeri*:1425

|                 |         |                 |         |
|-----------------|---------|-----------------|---------|
| afum EAL85748.2 | 100.00% | afis EAW15584.1 | 100.00% |
|-----------------|---------|-----------------|---------|

Bootstrap support for afum|EAL85748.2 as seed ortholog is 100%.

Bootstrap support for afis|EAW15584.1 as seed ortholog is 100%.

---

Group of orthologs #2118. Best score 1425 bits

Score difference with first non-orthologous sequence - *A. fumigatus*:1224 *A. fischeri*:1425

|                 |         |                 |         |
|-----------------|---------|-----------------|---------|
| afum EAL84496.1 | 100.00% | afis EAW20565.1 | 100.00% |
|-----------------|---------|-----------------|---------|

Bootstrap support for afum|EAL84496.1 as seed ortholog is 100%.

Bootstrap support for afis|EAW20565.1 as seed ortholog is 100%.

---

Group of orthologs #2119. Best score 1425 bits

Score difference with first non-orthologous sequence - *A. fumigatus*:1425 *A. fischeri*:1425

|                 |         |                 |         |
|-----------------|---------|-----------------|---------|
| afum EAL86817.2 | 100.00% | afis EAW19710.1 | 100.00% |
|-----------------|---------|-----------------|---------|

Bootstrap support for afum|EAL86817.2 as seed ortholog is 100%.

Bootstrap support for afis|EAW19710.1 as seed ortholog is 100%.

---

Group of orthologs #2120. Best score 1425 bits

Score difference with first non-orthologous sequence - *A. fumigatus*:1425 *A. fischeri*:1425

|                 |         |                 |         |
|-----------------|---------|-----------------|---------|
| afum EAL86006.1 | 100.00% | afis EAW24336.1 | 100.00% |
|-----------------|---------|-----------------|---------|

Bootstrap support for afum|EAL86006.1 as seed ortholog is 100%.

Bootstrap support for afis|EAW24336.1 as seed ortholog is 100%.

---

Group of orthologs #2121. Best score 1425 bits

Score difference with first non-orthologous sequence - *A. fumigatus*:1287 *A. fischeri*:1279

|                 |         |                 |         |
|-----------------|---------|-----------------|---------|
| afum EAL92499.1 | 100.00% | afis EAW21479.1 | 100.00% |
|-----------------|---------|-----------------|---------|

Bootstrap support for afum|EAL92499.1 as seed ortholog is 100%.

Bootstrap support for afis|EAW21479.1 as seed ortholog is 100%.

---

Group of orthologs #2122. Best score 1424 bits

Score difference with first non-orthologous sequence - *A. fumigatus*:1424 *A. fischeri*:1424

|                 |         |                 |         |
|-----------------|---------|-----------------|---------|
| afum EAL84882.1 | 100.00% | afis EAW20034.1 | 100.00% |
|-----------------|---------|-----------------|---------|

Bootstrap support for afum|EAL84882.1 as seed ortholog is 100%.

Bootstrap support for afis|EAW20034.1 as seed ortholog is 100%.

---

Group of orthologs #2123. Best score 1423 bits

Score difference with first non-orthologous sequence - *A. fumigatus*:1423 *A. fischeri*:1423

|                 |         |                 |         |
|-----------------|---------|-----------------|---------|
| afum EAL86431.1 | 100.00% | afis EAW16893.1 | 100.00% |
|-----------------|---------|-----------------|---------|

Bootstrap support for afum|EAL86431.1 as seed ortholog is 100%.

Bootstrap support for afis|EAW16893.1 as seed ortholog is 100%.

---

Group of orthologs #2124. Best score 1423 bits

Score difference with first non-orthologous sequence - *A. fumigatus*:1423 *A. fischeri*:1423

|                 |         |                 |         |
|-----------------|---------|-----------------|---------|
| afum EAL88940.1 | 100.00% | afis EAW16317.1 | 100.00% |
|-----------------|---------|-----------------|---------|

Bootstrap support for afum|EAL88940.1 as seed ortholog is 100%.

Bootstrap support for afis|EAW16317.1 as seed ortholog is 100%.

---

Group of orthologs #2125. Best score 1423 bits

Score difference with first non-orthologous sequence - *A. fumigatus*:1423 *A. fischeri*:1423

|                 |         |                 |         |
|-----------------|---------|-----------------|---------|
| afum EAL91077.1 | 100.00% | afis EAW22107.1 | 100.00% |
|-----------------|---------|-----------------|---------|

Bootstrap support for afum|EAL91077.1 as seed ortholog is 100%.

Bootstrap support for afis|EAW22107.1 as seed ortholog is 100%.

---

Group of orthologs #2126. Best score 1423 bits

Score difference with first non-orthologous sequence - *A. fumigatus*:1423 *A. fischeri*:1423

|                 |         |                 |         |
|-----------------|---------|-----------------|---------|
| afum EAL92268.1 | 100.00% | afis EAW21253.1 | 100.00% |
|-----------------|---------|-----------------|---------|

Bootstrap support for afum|EAL92268.1 as seed ortholog is 100%.

Bootstrap support for afis|EAW21253.1 as seed ortholog is 100%.

---

Group of orthologs #2127. Best score 1423 bits

Score difference with first non-orthologous sequence - *A. fumigatus*:1423 *A. fischeri*:1423

|                 |         |                 |         |
|-----------------|---------|-----------------|---------|
| afum EAL92643.1 | 100.00% | afis EAW21609.1 | 100.00% |
|-----------------|---------|-----------------|---------|

Bootstrap support for afum|EAL92643.1 as seed ortholog is 100%.

Bootstrap support for afis|EAW21609.1 as seed ortholog is 100%.

---

Group of orthologs #2128. Best score 1423 bits

Score difference with first non-orthologous sequence - *A. fumigatus*:1423 *A. fischeri*:1423

|                 |         |                 |         |
|-----------------|---------|-----------------|---------|
| afum EAL89875.1 | 100.00% | afis EAW25214.1 | 100.00% |
|-----------------|---------|-----------------|---------|

Bootstrap support for afum|EAL89875.1 as seed ortholog is 100%.

Bootstrap support for afis|EAW25214.1 as seed ortholog is 100%.

---

Group of orthologs #2129. Best score 1422 bits

Score difference with first non-orthologous sequence - *A. fumigatus*:1192 *A. fischeri*:1236

|                 |         |                 |         |
|-----------------|---------|-----------------|---------|
| afum EAL84462.1 | 100.00% | afis EAW20599.1 | 100.00% |
|-----------------|---------|-----------------|---------|

Bootstrap support for afum|EAL84462.1 as seed ortholog is 100%.

Bootstrap support for afis|EAW20599.1 as seed ortholog is 100%.

---

Group of orthologs #2130. Best score 1421 bits

Score difference with first non-orthologous sequence - *A. fumigatus*:1421 *A. fischeri*:1421

|                 |         |                 |         |
|-----------------|---------|-----------------|---------|
| afum EAL92437.1 | 100.00% | afis EAW21422.1 | 100.00% |
|-----------------|---------|-----------------|---------|

Bootstrap support for afum|EAL92437.1 as seed ortholog is 100%.

Bootstrap support for afis|EAW21422.1 as seed ortholog is 100%.

---

Group of orthologs #2131. Best score 1421 bits

Score difference with first non-orthologous sequence - *A. fumigatus*:1421 *A. fischeri*:1421

|                 |         |                 |         |
|-----------------|---------|-----------------|---------|
| afum EBA27196.1 | 100.00% | afis EAW20455.1 | 100.00% |
|-----------------|---------|-----------------|---------|

Bootstrap support for afum|EBA27196.1 as seed ortholog is 100%.

Bootstrap support for afis|EAW20455.1 as seed ortholog is 100%.

---

Group of orthologs #2132. Best score 1421 bits

Score difference with first non-orthologous sequence - *A. fumigatus*:1421 *A. fischeri*:1421

|                 |         |                 |         |
|-----------------|---------|-----------------|---------|
| afum EAL93030.1 | 100.00% | afis EAW22015.1 | 100.00% |
|-----------------|---------|-----------------|---------|

Bootstrap support for afum|EAL93030.1 as seed ortholog is 100%.

Bootstrap support for afis|EAW22015.1 as seed ortholog is 100%.

---

Group of orthologs #2133. Best score 1420 bits

Score difference with first non-orthologous sequence - *A. fumigatus*:1420 *A. fischeri*:1316

|                 |         |                 |         |
|-----------------|---------|-----------------|---------|
| afum EAL84726.1 | 100.00% | afis EAW20907.1 | 100.00% |
|-----------------|---------|-----------------|---------|

Bootstrap support for afum|EAL84726.1 as seed ortholog is 100%.

Bootstrap support for afis|EAW20907.1 as seed ortholog is 100%.

---

Group of orthologs #2134. Best score 1420 bits

Score difference with first non-orthologous sequence - *A. fumigatus*:1420 *A. fischeri*:1420

|                 |         |                 |         |
|-----------------|---------|-----------------|---------|
| afum EAL91177.1 | 100.00% | afis EAW17334.1 | 100.00% |
|-----------------|---------|-----------------|---------|

Bootstrap support for afum|EAL91177.1 as seed ortholog is 100%.

Bootstrap support for afis|EAW17334.1 as seed ortholog is 100%.

---

Group of orthologs #2135. Best score 1420 bits

Score difference with first non-orthologous sequence - *A. fumigatus*:1420 *A. fischeri*:1420

afum|EAL90919.1 100.00% afis|EAW22261.1 100.00%

Bootstrap support for afum|EAL90919.1 as seed ortholog is 100%.

Bootstrap support for afis|EAW22261.1 as seed ortholog is 100%.

---

Group of orthologs #2136. Best score 1420 bits

Score difference with first non-orthologous sequence - *A. fumigatus*:1420 *A. fischeri*:1278

afum|EAL94050.2 100.00% afis|EAW19333.1 100.00%

Bootstrap support for afum|EAL94050.2 as seed ortholog is 100%.

Bootstrap support for afis|EAW19333.1 as seed ortholog is 100%.

---

Group of orthologs #2137. Best score 1420 bits

Score difference with first non-orthologous sequence - *A. fumigatus*:1420 *A. fischeri*:1239

afum|EAL94051.2 100.00% afis|EAW19334.1 100.00%

Bootstrap support for afum|EAL94051.2 as seed ortholog is 100%.

Bootstrap support for afis|EAW19334.1 as seed ortholog is 100%.

---

Group of orthologs #2138. Best score 1419 bits

Score difference with first non-orthologous sequence - *A. fumigatus*:1196 *A. fischeri*:1419

afum|EAL86434.1 100.00% afis|EAW16899.1 100.00%

Bootstrap support for afum|EAL86434.1 as seed ortholog is 100%.

Bootstrap support for afis|EAW16899.1 as seed ortholog is 100%.

---

Group of orthologs #2139. Best score 1418 bits

Score difference with first non-orthologous sequence - *A. fumigatus*:1418 *A. fischeri*:1106

afum|EAL84263.1 100.00% afis|EAW25545.1 100.00%

Bootstrap support for afum|EAL84263.1 as seed ortholog is 100%.

Bootstrap support for afis|EAW25545.1 as seed ortholog is 100%.

---

Group of orthologs #2140. Best score 1418 bits

Score difference with first non-orthologous sequence - *A. fumigatus*:1418 *A. fischeri*:1418

afum|EAL92586.1 100.00% afis|EAW21567.1 100.00%

Bootstrap support for afum|EAL92586.1 as seed ortholog is 100%.

Bootstrap support for afis|EAW21567.1 as seed ortholog is 100%.

---

Group of orthologs #2141. Best score 1417 bits

Score difference with first non-orthologous sequence - *A. fumigatus*:1417 *A. fischeri*:1417

afum|EAL89113.1 100.00% afis|EAW16518.1 100.00%

Bootstrap support for afum|EAL89113.1 as seed ortholog is 100%.

Bootstrap support for afis|EAW16518.1 as seed ortholog is 100%.

---

Group of orthologs #2142. Best score 1417 bits

Score difference with first non-orthologous sequence - *A. fumigatus*:1417 *A. fischeri*:1417

afum|EAL86950.1 100.00% afis|EAW19562.1 100.00%

Bootstrap support for afum|EAL86950.1 as seed ortholog is 100%.

Bootstrap support for afis|EAW19562.1 as seed ortholog is 100%.

---

Group of orthologs #2143. Best score 1417 bits

Score difference with first non-orthologous sequence - *A. fumigatus*:1417 *A. fischeri*:1417

afum|EAL85442.1 100.00% afis|EAW22025.1 100.00%

Bootstrap support for afum|EAL85442.1 as seed ortholog is 100%.

Bootstrap support for afis|EAW22025.1 as seed ortholog is 100%.

---

Group of orthologs #2144. Best score 1417 bits

Score difference with first non-orthologous sequence - *A. fumigatus*:1417 *A. fischeri*:1417

afum|EAL91839.1      100.00%                      afis|EAW18028.1      100.00%

Bootstrap support for afum|EAL91839.1 as seed ortholog is 100%.

Bootstrap support for afis|EAW18028.1 as seed ortholog is 100%.

---

Group of orthologs #2145. Best score 1417 bits

Score difference with first non-orthologous sequence - *A. fumigatus*:1417    *A. fischeri*:1417

afum|EAL90721.1      100.00%                      afis|EAW22470.1      100.00%

Bootstrap support for afum|EAL90721.1 as seed ortholog is 100%.

Bootstrap support for afis|EAW22470.1 as seed ortholog is 100%.

---

Group of orthologs #2146. Best score 1417 bits

Score difference with first non-orthologous sequence - *A. fumigatus*:1417    *A. fischeri*:1417

afum|EAL89501.1      100.00%                      afis|EAW24854.1      100.00%

Bootstrap support for afum|EAL89501.1 as seed ortholog is 100%.

Bootstrap support for afis|EAW24854.1 as seed ortholog is 100%.

---

Group of orthologs #2147. Best score 1416 bits

Score difference with first non-orthologous sequence - *A. fumigatus*:1416    *A. fischeri*:1324

afum|EAL84741.1      100.00%                      afis|EAW20892.1      100.00%

Bootstrap support for afum|EAL84741.1 as seed ortholog is 100%.

Bootstrap support for afis|EAW20892.1 as seed ortholog is 100%.

---

Group of orthologs #2148. Best score 1416 bits

Score difference with first non-orthologous sequence - *A. fumigatus*:1416    *A. fischeri*:1416

afum|EAL87381.1      100.00%                      afis|EAW23953.1      100.00%

Bootstrap support for afum|EAL87381.1 as seed ortholog is 100%.

Bootstrap support for afis|EAW23953.1 as seed ortholog is 100%.

---

Group of orthologs #2149. Best score 1416 bits

Score difference with first non-orthologous sequence - *A. fumigatus*:1416    *A. fischeri*:1416

afum|EAL92402.1      100.00%                      afis|EAW21387.1      100.00%

Bootstrap support for afum|EAL92402.1 as seed ortholog is 100%.

Bootstrap support for afis|EAW21387.1 as seed ortholog is 100%.

---

Group of orthologs #2150. Best score 1415 bits

Score difference with first non-orthologous sequence - *A. fumigatus*:1415    *A. fischeri*:1415

afum|EAL89157.1      100.00%                      afis|EAW16559.1      100.00%

Bootstrap support for afum|EAL89157.1 as seed ortholog is 100%.

Bootstrap support for afis|EAW16559.1 as seed ortholog is 100%.

---

Group of orthologs #2151. Best score 1415 bits

Score difference with first non-orthologous sequence - *A. fumigatus*:1415    *A. fischeri*:1415

afum|EAL90376.1      100.00%                      afis|EAW22824.1      100.00%

Bootstrap support for afum|EAL90376.1 as seed ortholog is 100%.

Bootstrap support for afis|EAW22824.1 as seed ortholog is 100%.

---

Group of orthologs #2152. Best score 1414 bits

Score difference with first non-orthologous sequence - *A. fumigatus*:1084    *A. fischeri*:1128

afum|EAL86141.1      100.00%                      afis|EAW24469.1      100.00%

Bootstrap support for afum|EAL86141.1 as seed ortholog is 100%.

Bootstrap support for afis|EAW24469.1 as seed ortholog is 100%.

---

Group of orthologs #2153. Best score 1414 bits

Score difference with first non-orthologous sequence - *A. fumigatus*:1141    *A. fischeri*:1414

afum|EBA27340.1      100.00%                      afis|EAW23213.1      100.00%

Bootstrap support for afum|EBA27340.1 as seed ortholog is 100%.

Bootstrap support for afis|EAW23213.1 as seed ortholog is 100%.

---

Group of orthologs #2154. Best score 1413 bits

Score difference with first non-orthologous sequence - *A. fumigatus*:1176 *A. fischeri*:797

|                 |         |                 |         |
|-----------------|---------|-----------------|---------|
| afum EAL86343.2 | 100.00% | afis EAW16774.1 | 100.00% |
|-----------------|---------|-----------------|---------|

Bootstrap support for afum|EAL86343.2 as seed ortholog is 100%.

Bootstrap support for afis|EAW16774.1 as seed ortholog is 100%.

---

Group of orthologs #2155. Best score 1413 bits

Score difference with first non-orthologous sequence - *A. fumigatus*:1413 *A. fischeri*:1335

|                 |         |                 |         |
|-----------------|---------|-----------------|---------|
| afum EAL87664.2 | 100.00% | afis EAW18298.1 | 100.00% |
|-----------------|---------|-----------------|---------|

Bootstrap support for afum|EAL87664.2 as seed ortholog is 100%.

Bootstrap support for afis|EAW18298.1 as seed ortholog is 100%.

---

Group of orthologs #2156. Best score 1413 bits

Score difference with first non-orthologous sequence - *A. fumigatus*:1413 *A. fischeri*:1413

|                 |         |                 |         |
|-----------------|---------|-----------------|---------|
| afum EAL91461.1 | 100.00% | afis EAW17646.1 | 100.00% |
|-----------------|---------|-----------------|---------|

Bootstrap support for afum|EAL91461.1 as seed ortholog is 100%.

Bootstrap support for afis|EAW17646.1 as seed ortholog is 100%.

---

Group of orthologs #2157. Best score 1413 bits

Score difference with first non-orthologous sequence - *A. fumigatus*:1057 *A. fischeri*:1077

|                 |         |                 |         |
|-----------------|---------|-----------------|---------|
| afum EAL90181.1 | 100.00% | afis EAW25516.1 | 100.00% |
|-----------------|---------|-----------------|---------|

Bootstrap support for afum|EAL90181.1 as seed ortholog is 100%.

Bootstrap support for afis|EAW25516.1 as seed ortholog is 100%.

---

Group of orthologs #2158. Best score 1412 bits

Score difference with first non-orthologous sequence - *A. fumigatus*:1412 *A. fischeri*:1412

|                 |         |                 |         |
|-----------------|---------|-----------------|---------|
| afum EAL88585.1 | 100.00% | afis EAW15952.1 | 100.00% |
|-----------------|---------|-----------------|---------|

Bootstrap support for afum|EAL88585.1 as seed ortholog is 100%.

Bootstrap support for afis|EAW15952.1 as seed ortholog is 100%.

---

Group of orthologs #2159. Best score 1412 bits

Score difference with first non-orthologous sequence - *A. fumigatus*:1412 *A. fischeri*:1412

|                 |         |                 |         |
|-----------------|---------|-----------------|---------|
| afum EAL88901.1 | 100.00% | afis EAW16280.1 | 100.00% |
|-----------------|---------|-----------------|---------|

Bootstrap support for afum|EAL88901.1 as seed ortholog is 100%.

Bootstrap support for afis|EAW16280.1 as seed ortholog is 100%.

---

Group of orthologs #2160. Best score 1412 bits

Score difference with first non-orthologous sequence - *A. fumigatus*:1412 *A. fischeri*:1412

|                 |         |                 |         |
|-----------------|---------|-----------------|---------|
| afum EAL87499.1 | 100.00% | afis EAW18142.1 | 100.00% |
|-----------------|---------|-----------------|---------|

Bootstrap support for afum|EAL87499.1 as seed ortholog is 100%.

Bootstrap support for afis|EAW18142.1 as seed ortholog is 100%.

---

Group of orthologs #2161. Best score 1412 bits

Score difference with first non-orthologous sequence - *A. fumigatus*:1412 *A. fischeri*:1412

|                 |         |                 |         |
|-----------------|---------|-----------------|---------|
| afum EAL87040.1 | 100.00% | afis EAW19456.1 | 100.00% |
|-----------------|---------|-----------------|---------|

Bootstrap support for afum|EAL87040.1 as seed ortholog is 100%.

Bootstrap support for afis|EAW19456.1 as seed ortholog is 100%.

---

Group of orthologs #2162. Best score 1412 bits

Score difference with first non-orthologous sequence - *A. fumigatus*:1412 *A. fischeri*:1412

|                 |         |                 |         |
|-----------------|---------|-----------------|---------|
| afum EAL91980.1 | 100.00% | afis EAW24124.1 | 100.00% |
|-----------------|---------|-----------------|---------|

Bootstrap support for afum|EAL91980.1 as seed ortholog is 100%.

Bootstrap support for afis|EAW24124.1 as seed ortholog is 100%.

---

Group of orthologs #2163. Best score 1412 bits

Score difference with first non-orthologous sequence - *A. fumigatus*:1412 *A. fischeri*:1412

afum|EAL92003.1 100.00% afis|EAW24148.1 100.00%

Bootstrap support for afum|EAL92003.1 as seed ortholog is 100%.

Bootstrap support for afis|EAW24148.1 as seed ortholog is 100%.

---

Group of orthologs #2164. Best score 1411 bits

Score difference with first non-orthologous sequence - *A. fumigatus*:1411 *A. fischeri*:1411

afum|EAL85554.1 100.00% afis|EAW15796.1 100.00%

Bootstrap support for afum|EAL85554.1 as seed ortholog is 100%.

Bootstrap support for afis|EAW15796.1 as seed ortholog is 100%.

---

Group of orthologs #2165. Best score 1411 bits

Score difference with first non-orthologous sequence - *A. fumigatus*:1411 *A. fischeri*:1411

afum|EAL84543.2 100.00% afis|EAW20514.1 100.00%

Bootstrap support for afum|EAL84543.2 as seed ortholog is 100%.

Bootstrap support for afis|EAW20514.1 as seed ortholog is 100%.

---

Group of orthologs #2166. Best score 1411 bits

Score difference with first non-orthologous sequence - *A. fumigatus*:1411 *A. fischeri*:1411

afum|EAL91890.1 100.00% afis|EAW18078.1 100.00%

Bootstrap support for afum|EAL91890.1 as seed ortholog is 100%.

Bootstrap support for afis|EAW18078.1 as seed ortholog is 100%.

---

Group of orthologs #2167. Best score 1411 bits

Score difference with first non-orthologous sequence - *A. fumigatus*:1411 *A. fischeri*:1411

afum|EAL92119.1 100.00% afis|EAW21096.1 100.00%

Bootstrap support for afum|EAL92119.1 as seed ortholog is 100%.

Bootstrap support for afis|EAW21096.1 as seed ortholog is 100%.

---

Group of orthologs #2168. Best score 1411 bits

Score difference with first non-orthologous sequence - *A. fumigatus*:1411 *A. fischeri*:1411

afum|EAL92803.1 100.00% afis|EAW21774.1 100.00%

Bootstrap support for afum|EAL92803.1 as seed ortholog is 100%.

Bootstrap support for afis|EAW21774.1 as seed ortholog is 100%.

---

Group of orthologs #2169. Best score 1411 bits

Score difference with first non-orthologous sequence - *A. fumigatus*:1411 *A. fischeri*:1411

afum|EAL92916.1 100.00% afis|EAW21903.1 100.00%

Bootstrap support for afum|EAL92916.1 as seed ortholog is 100%.

Bootstrap support for afis|EAW21903.1 as seed ortholog is 100%.

---

Group of orthologs #2170. Best score 1411 bits

Score difference with first non-orthologous sequence - *A. fumigatus*:1411 *A. fischeri*:804

afum|EAL89781.1 100.00% afis|EAW25110.1 100.00%

Bootstrap support for afum|EAL89781.1 as seed ortholog is 100%.

Bootstrap support for afis|EAW25110.1 as seed ortholog is 100%.

---

Group of orthologs #2171. Best score 1411 bits

Score difference with first non-orthologous sequence - *A. fumigatus*:1411 *A. fischeri*:1411

afum|EBA27457.1 100.00% afis|EAW21269.1 100.00%

Bootstrap support for afum|EBA27457.1 as seed ortholog is 100%.

Bootstrap support for afis|EAW21269.1 as seed ortholog is 100%.

---

Group of orthologs #2172. Best score 1411 bits

Score difference with first non-orthologous sequence - *A. fumigatus*:1411 *A. fischeri*:1411

|                 |         |                 |         |
|-----------------|---------|-----------------|---------|
| afum EAL90060.1 | 100.00% | afis EAW25401.1 | 100.00% |
|-----------------|---------|-----------------|---------|

Bootstrap support for afum|EAL90060.1 as seed ortholog is 100%.

Bootstrap support for afis|EAW25401.1 as seed ortholog is 100%.

---

Group of orthologs #2173. Best score 1410 bits

Score difference with first non-orthologous sequence - *A. fumigatus*:1410 *A. fischeri*:1410

|                 |         |                 |         |
|-----------------|---------|-----------------|---------|
| afum EAL85094.1 | 100.00% | afis EAW19796.1 | 100.00% |
|-----------------|---------|-----------------|---------|

Bootstrap support for afum|EAL85094.1 as seed ortholog is 100%.

Bootstrap support for afis|EAW19796.1 as seed ortholog is 100%.

---

Group of orthologs #2174. Best score 1410 bits

Score difference with first non-orthologous sequence - *A. fumigatus*:1410 *A. fischeri*:1410

|                 |         |                 |         |
|-----------------|---------|-----------------|---------|
| afum EAL86000.1 | 100.00% | afis EAW24330.1 | 100.00% |
|-----------------|---------|-----------------|---------|

Bootstrap support for afum|EAL86000.1 as seed ortholog is 100%.

Bootstrap support for afis|EAW24330.1 as seed ortholog is 100%.

---

Group of orthologs #2175. Best score 1410 bits

Score difference with first non-orthologous sequence - *A. fumigatus*:1410 *A. fischeri*:1410

|                 |         |                 |         |
|-----------------|---------|-----------------|---------|
| afum EAL89791.1 | 100.00% | afis EAW25120.1 | 100.00% |
|-----------------|---------|-----------------|---------|

Bootstrap support for afum|EAL89791.1 as seed ortholog is 100%.

Bootstrap support for afis|EAW25120.1 as seed ortholog is 100%.

---

Group of orthologs #2176. Best score 1410 bits

Score difference with first non-orthologous sequence - *A. fumigatus*:1410 *A. fischeri*:1410

|                 |         |                 |         |
|-----------------|---------|-----------------|---------|
| afum EAL90079.1 | 100.00% | afis EAW25420.1 | 100.00% |
|-----------------|---------|-----------------|---------|

Bootstrap support for afum|EAL90079.1 as seed ortholog is 100%.

Bootstrap support for afis|EAW25420.1 as seed ortholog is 100%.

---

Group of orthologs #2177. Best score 1409 bits

Score difference with first non-orthologous sequence - *A. fumigatus*:1409 *A. fischeri*:1409

|                 |         |                 |         |
|-----------------|---------|-----------------|---------|
| afum EAL85885.1 | 100.00% | afis EAW24216.1 | 100.00% |
|-----------------|---------|-----------------|---------|

Bootstrap support for afum|EAL85885.1 as seed ortholog is 100%.

Bootstrap support for afis|EAW24216.1 as seed ortholog is 100%.

---

Group of orthologs #2178. Best score 1409 bits

Score difference with first non-orthologous sequence - *A. fumigatus*:1409 *A. fischeri*:1409

|                 |         |                 |         |
|-----------------|---------|-----------------|---------|
| afum EAL93761.1 | 100.00% | afis EAW19032.1 | 100.00% |
|-----------------|---------|-----------------|---------|

Bootstrap support for afum|EAL93761.1 as seed ortholog is 100%.

Bootstrap support for afis|EAW19032.1 as seed ortholog is 100%.

---

Group of orthologs #2179. Best score 1408 bits

Score difference with first non-orthologous sequence - *A. fumigatus*:1408 *A. fischeri*:1408

|                 |         |                 |         |
|-----------------|---------|-----------------|---------|
| afum EAL85664.1 | 100.00% | afis EAW15684.1 | 100.00% |
|-----------------|---------|-----------------|---------|

Bootstrap support for afum|EAL85664.1 as seed ortholog is 100%.

Bootstrap support for afis|EAW15684.1 as seed ortholog is 100%.

---

Group of orthologs #2180. Best score 1408 bits

Score difference with first non-orthologous sequence - *A. fumigatus*:1408 *A. fischeri*:1408

|                 |         |                 |         |
|-----------------|---------|-----------------|---------|
| afum EAL93834.1 | 100.00% | afis EAW19102.1 | 100.00% |
|-----------------|---------|-----------------|---------|

Bootstrap support for afum|EAL93834.1 as seed ortholog is 100%.

Bootstrap support for afis|EAW19102.1 as seed ortholog is 100%.

---

Group of orthologs #2181. Best score 1408 bits

Score difference with first non-orthologous sequence - *A. fumigatus*:1408 *A. fischeri*:1311

|                 |         |                 |         |
|-----------------|---------|-----------------|---------|
| afum EAL91049.1 | 100.00% | afis EAW22141.1 | 100.00% |
|-----------------|---------|-----------------|---------|

Bootstrap support for afum|EAL91049.1 as seed ortholog is 100%.



Bootstrap support for afis|EAW22141.1 as seed ortholog is 100%.

---

Group of orthologs #2182. Best score 1407 bits

Score difference with first non-orthologous sequence - *A. fumigatus*:355 *A. fischeri*:1407

afum|EAL85174.2 100.00% afis|EAW20054.1 100.00%

Bootstrap support for afum|EAL85174.2 as seed ortholog is 100%.

Bootstrap support for afis|EAW20054.1 as seed ortholog is 100%.

---

Group of orthologs #2183. Best score 1407 bits

Score difference with first non-orthologous sequence - *A. fumigatus*:1407 *A. fischeri*:1407

afum|EAL86058.1 100.00% afis|EAW24386.1 100.00%

Bootstrap support for afum|EAL86058.1 as seed ortholog is 100%.

Bootstrap support for afis|EAW24386.1 as seed ortholog is 100%.

---

Group of orthologs #2184. Best score 1405 bits

Score difference with first non-orthologous sequence - *A. fumigatus*:1405 *A. fischeri*:1405

afum|EAL88662.1 100.00% afis|EAW16031.1 100.00%

Bootstrap support for afum|EAL88662.1 as seed ortholog is 100%.

Bootstrap support for afis|EAW16031.1 as seed ortholog is 100%.

---

Group of orthologs #2185. Best score 1405 bits

Score difference with first non-orthologous sequence - *A. fumigatus*:1405 *A. fischeri*:1405

afum|EAL88695.1 100.00% afis|EAW16063.1 100.00%

Bootstrap support for afum|EAL88695.1 as seed ortholog is 100%.

Bootstrap support for afis|EAW16063.1 as seed ortholog is 100%.

---

Group of orthologs #2186. Best score 1405 bits

Score difference with first non-orthologous sequence - *A. fumigatus*:1405 *A. fischeri*:1405

afum|EAL88314.1 100.00% afis|EAW23170.1 100.00%

Bootstrap support for afum|EAL88314.1 as seed ortholog is 100%.

Bootstrap support for afis|EAW23170.1 as seed ortholog is 100%.

---

Group of orthologs #2187. Best score 1405 bits

Score difference with first non-orthologous sequence - *A. fumigatus*:1405 *A. fischeri*:1405

afum|EAL88202.1 100.00% afis|EAW23277.1 100.00%

Bootstrap support for afum|EAL88202.1 as seed ortholog is 100%.

Bootstrap support for afis|EAW23277.1 as seed ortholog is 100%.

---

Group of orthologs #2188. Best score 1405 bits

Score difference with first non-orthologous sequence - *A. fumigatus*:1405 *A. fischeri*:1405

afum|EAL93806.2 100.00% afis|EAW19078.1 100.00%

Bootstrap support for afum|EAL93806.2 as seed ortholog is 100%.

Bootstrap support for afis|EAW19078.1 as seed ortholog is 100%.

---

Group of orthologs #2189. Best score 1404 bits

Score difference with first non-orthologous sequence - *A. fumigatus*:1404 *A. fischeri*:1404

afum|EAL88987.1 100.00% afis|EAW16362.1 100.00%

Bootstrap support for afum|EAL88987.1 as seed ortholog is 100%.

Bootstrap support for afis|EAW16362.1 as seed ortholog is 100%.

---

Group of orthologs #2190. Best score 1404 bits

Score difference with first non-orthologous sequence - *A. fumigatus*:1404 *A. fischeri*:1404

afum|EAL92837.1 100.00% afis|EAW21821.1 100.00%

Bootstrap support for afum|EAL92837.1 as seed ortholog is 100%.

Bootstrap support for afis|EAW21821.1 as seed ortholog is 100%.

---

Group of orthologs #2191. Best score 1404 bits

Score difference with first non-orthologous sequence - *A. fumigatus*:1404 *A. fischeri*:1404

afum|EAL90018.1 100.00% afis|EAW25356.1 100.00%

Bootstrap support for afum|EAL90018.1 as seed ortholog is 100%.

Bootstrap support for afis|EAW25356.1 as seed ortholog is 100%.

---

Group of orthologs #2192. Best score 1403 bits

Score difference with first non-orthologous sequence - *A. fumigatus*:1403 *A. fischeri*:1058

afum|EAL88969.1 100.00% afis|EAW16344.1 100.00%

Bootstrap support for afum|EAL88969.1 as seed ortholog is 100%.

Bootstrap support for afis|EAW16344.1 as seed ortholog is 100%.

---

Group of orthologs #2193. Best score 1403 bits

Score difference with first non-orthologous sequence - *A. fumigatus*:1403 *A. fischeri*:1074

afum|EAL85409.1 100.00% afis|EAW20275.1 100.00%

Bootstrap support for afum|EAL85409.1 as seed ortholog is 100%.

Bootstrap support for afis|EAW20275.1 as seed ortholog is 100%.

---

Group of orthologs #2194. Best score 1402 bits

Score difference with first non-orthologous sequence - *A. fumigatus*:1402 *A. fischeri*:1175

afum|EAL85855.1 100.00% afis|EAW15467.1 100.00%

Bootstrap support for afum|EAL85855.1 as seed ortholog is 100%.

Bootstrap support for afis|EAW15467.1 as seed ortholog is 100%.

---

Group of orthologs #2195. Best score 1402 bits

Score difference with first non-orthologous sequence - *A. fumigatus*:1402 *A. fischeri*:1119

afum|EAL85448.1 100.00% afis|EAW20323.1 100.00%

Bootstrap support for afum|EAL85448.1 as seed ortholog is 100%.

Bootstrap support for afis|EAW20323.1 as seed ortholog is 100%.

---

Group of orthologs #2196. Best score 1402 bits

Score difference with first non-orthologous sequence - *A. fumigatus*:1307 *A. fischeri*:1402

afum|EAL87656.1 100.00% afis|EAW18291.1 100.00%

Bootstrap support for afum|EAL87656.1 as seed ortholog is 100%.

Bootstrap support for afis|EAW18291.1 as seed ortholog is 100%.

---

Group of orthologs #2197. Best score 1402 bits

Score difference with first non-orthologous sequence - *A. fumigatus*:1402 *A. fischeri*:1402

afum|EAL84328.2 100.00% afis|EAW25641.1 100.00%

Bootstrap support for afum|EAL84328.2 as seed ortholog is 100%.

Bootstrap support for afis|EAW25641.1 as seed ortholog is 100%.

---

Group of orthologs #2198. Best score 1402 bits

Score difference with first non-orthologous sequence - *A. fumigatus*:1402 *A. fischeri*:1402

afum|EAL87269.1 100.00% afis|EAW23838.1 100.00%

Bootstrap support for afum|EAL87269.1 as seed ortholog is 100%.

Bootstrap support for afis|EAW23838.1 as seed ortholog is 100%.

---

Group of orthologs #2199. Best score 1402 bits

Score difference with first non-orthologous sequence - *A. fumigatus*:1402 *A. fischeri*:398

afum|EAL93716.2 100.00% afis|EAW18980.1 100.00%

Bootstrap support for afum|EAL93716.2 as seed ortholog is 100%.

Bootstrap support for afis|EAW18980.1 as seed ortholog is 100%.

---

Group of orthologs #2200. Best score 1401 bits

Score difference with first non-orthologous sequence - *A. fumigatus*:1264 *A. fischeri*:1146

|                 |         |                 |         |
|-----------------|---------|-----------------|---------|
| afum EAL85736.2 | 100.00% | afis EAW15595.1 | 100.00% |
|-----------------|---------|-----------------|---------|

Bootstrap support for afum|EAL85736.2 as seed ortholog is 100%.

Bootstrap support for afis|EAW15595.1 as seed ortholog is 100%.

---

Group of orthologs #2201. Best score 1401 bits

Score difference with first non-orthologous sequence - *A. fumigatus*:1401 *A. fischeri*:1317

|                 |         |                 |         |
|-----------------|---------|-----------------|---------|
| afum EAL86626.2 | 100.00% | afis EAW17198.1 | 100.00% |
|-----------------|---------|-----------------|---------|

Bootstrap support for afum|EAL86626.2 as seed ortholog is 100%.

Bootstrap support for afis|EAW17198.1 as seed ortholog is 100%.

---

Group of orthologs #2202. Best score 1401 bits

Score difference with first non-orthologous sequence - *A. fumigatus*:1401 *A. fischeri*:1401

|                 |         |                 |         |
|-----------------|---------|-----------------|---------|
| afum EAL87511.1 | 100.00% | afis EAW18152.1 | 100.00% |
|-----------------|---------|-----------------|---------|

Bootstrap support for afum|EAL87511.1 as seed ortholog is 100%.

Bootstrap support for afis|EAW18152.1 as seed ortholog is 100%.

---

Group of orthologs #2203. Best score 1401 bits

Score difference with first non-orthologous sequence - *A. fumigatus*:584 *A. fischeri*:1401

|                 |         |                 |         |
|-----------------|---------|-----------------|---------|
| afum EAL84638.1 | 100.00% | afis EAW20991.1 | 100.00% |
|-----------------|---------|-----------------|---------|

Bootstrap support for afum|EAL84638.1 as seed ortholog is 100%.

Bootstrap support for afis|EAW20991.1 as seed ortholog is 100%.

---

Group of orthologs #2204. Best score 1401 bits

Score difference with first non-orthologous sequence - *A. fumigatus*:1401 *A. fischeri*:1401

|                 |         |                 |         |
|-----------------|---------|-----------------|---------|
| afum EAL93604.1 | 100.00% | afis EAW18872.1 | 100.00% |
|-----------------|---------|-----------------|---------|

Bootstrap support for afum|EAL93604.1 as seed ortholog is 100%.

Bootstrap support for afis|EAW18872.1 as seed ortholog is 100%.

---

Group of orthologs #2205. Best score 1401 bits

Score difference with first non-orthologous sequence - *A. fumigatus*:1401 *A. fischeri*:1401

|                 |         |                 |         |
|-----------------|---------|-----------------|---------|
| afum EAL92103.1 | 100.00% | afis EAW21082.1 | 100.00% |
|-----------------|---------|-----------------|---------|

Bootstrap support for afum|EAL92103.1 as seed ortholog is 100%.

Bootstrap support for afis|EAW21082.1 as seed ortholog is 100%.

---

Group of orthologs #2206. Best score 1401 bits

Score difference with first non-orthologous sequence - *A. fumigatus*:1401 *A. fischeri*:1401

|                 |         |                 |         |
|-----------------|---------|-----------------|---------|
| afum EAL89912.1 | 100.00% | afis EAW25250.1 | 100.00% |
|-----------------|---------|-----------------|---------|

Bootstrap support for afum|EAL89912.1 as seed ortholog is 100%.

Bootstrap support for afis|EAW25250.1 as seed ortholog is 100%.

---

Group of orthologs #2207. Best score 1400 bits

Score difference with first non-orthologous sequence - *A. fumigatus*:1203 *A. fischeri*:1093

|                 |         |                 |         |
|-----------------|---------|-----------------|---------|
| afum EAL88478.1 | 100.00% | afis EAW23002.1 | 100.00% |
|-----------------|---------|-----------------|---------|

Bootstrap support for afum|EAL88478.1 as seed ortholog is 100%.

Bootstrap support for afis|EAW23002.1 as seed ortholog is 100%.

---

Group of orthologs #2208. Best score 1400 bits

Score difference with first non-orthologous sequence - *A. fumigatus*:1400 *A. fischeri*:1400

|                 |         |                 |         |
|-----------------|---------|-----------------|---------|
| afum EAL89970.1 | 100.00% | afis EAW25307.1 | 100.00% |
|-----------------|---------|-----------------|---------|

Bootstrap support for afum|EAL89970.1 as seed ortholog is 100%.

Bootstrap support for afis|EAW25307.1 as seed ortholog is 100%.

---

Group of orthologs #2209. Best score 1399 bits

Score difference with first non-orthologous sequence - *A. fumigatus*:1292 *A. fischeri*:1318

|                 |         |                 |         |
|-----------------|---------|-----------------|---------|
| afum EAL85799.1 | 100.00% | afis EAW15529.1 | 100.00% |
|-----------------|---------|-----------------|---------|

Bootstrap support for afum|EAL85799.1 as seed ortholog is 100%.

Bootstrap support for afis|EAW15529.1 as seed ortholog is 100%.

---

Group of orthologs #2210. Best score 1399 bits

Score difference with first non-orthologous sequence - *A. fumigatus*:29 *A. fischeri*:1399

|                 |         |                 |         |
|-----------------|---------|-----------------|---------|
| afum EAL89358.1 | 100.00% | afis EAW18029.1 | 100.00% |
|-----------------|---------|-----------------|---------|

Bootstrap support for afum|EAL89358.1 as seed ortholog is 79%.

Bootstrap support for afis|EAW18029.1 as seed ortholog is 100%.

---

Group of orthologs #2211. Best score 1399 bits

Score difference with first non-orthologous sequence - *A. fumigatus*:1399 *A. fischeri*:1399

|                 |         |                 |         |
|-----------------|---------|-----------------|---------|
| afum EAL84283.1 | 100.00% | afis EAW25559.1 | 100.00% |
|-----------------|---------|-----------------|---------|

Bootstrap support for afum|EAL84283.1 as seed ortholog is 100%.

Bootstrap support for afis|EAW25559.1 as seed ortholog is 100%.

---

Group of orthologs #2212. Best score 1398 bits

Score difference with first non-orthologous sequence - *A. fumigatus*:1087 *A. fischeri*:1398

|                 |         |                 |         |
|-----------------|---------|-----------------|---------|
| afum EAL87042.1 | 100.00% | afis EAW19454.1 | 100.00% |
|-----------------|---------|-----------------|---------|

Bootstrap support for afum|EAL87042.1 as seed ortholog is 100%.

Bootstrap support for afis|EAW19454.1 as seed ortholog is 100%.

---

Group of orthologs #2213. Best score 1398 bits

Score difference with first non-orthologous sequence - *A. fumigatus*:1398 *A. fischeri*:1398

|                 |         |                 |         |
|-----------------|---------|-----------------|---------|
| afum EAL90581.1 | 100.00% | afis EAW22616.1 | 100.00% |
|-----------------|---------|-----------------|---------|

Bootstrap support for afum|EAL90581.1 as seed ortholog is 100%.

Bootstrap support for afis|EAW22616.1 as seed ortholog is 100%.

---

Group of orthologs #2214. Best score 1398 bits

Score difference with first non-orthologous sequence - *A. fumigatus*:1398 *A. fischeri*:1225

|                 |         |                 |         |
|-----------------|---------|-----------------|---------|
| afum EAL91915.1 | 100.00% | afis EAW24060.1 | 100.00% |
|-----------------|---------|-----------------|---------|

Bootstrap support for afum|EAL91915.1 as seed ortholog is 100%.

Bootstrap support for afis|EAW24060.1 as seed ortholog is 100%.

---

Group of orthologs #2215. Best score 1397 bits

Score difference with first non-orthologous sequence - *A. fumigatus*:1397 *A. fischeri*:1397

|                 |         |                 |         |
|-----------------|---------|-----------------|---------|
| afum EAL87310.1 | 100.00% | afis EAW23882.1 | 100.00% |
|-----------------|---------|-----------------|---------|

Bootstrap support for afum|EAL87310.1 as seed ortholog is 100%.

Bootstrap support for afis|EAW23882.1 as seed ortholog is 100%.

---

Group of orthologs #2216. Best score 1396 bits

Score difference with first non-orthologous sequence - *A. fumigatus*:1396 *A. fischeri*:1396

|                 |         |                 |         |
|-----------------|---------|-----------------|---------|
| afum EAL88718.1 | 100.00% | afis EAW16086.1 | 100.00% |
|-----------------|---------|-----------------|---------|

Bootstrap support for afum|EAL88718.1 as seed ortholog is 100%.

Bootstrap support for afis|EAW16086.1 as seed ortholog is 100%.

---

Group of orthologs #2217. Best score 1396 bits

Score difference with first non-orthologous sequence - *A. fumigatus*:1396 *A. fischeri*:1396

|                 |         |                 |         |
|-----------------|---------|-----------------|---------|
| afum EAL85281.1 | 100.00% | afis EAW20163.1 | 100.00% |
|-----------------|---------|-----------------|---------|

Bootstrap support for afum|EAL85281.1 as seed ortholog is 100%.

Bootstrap support for afis|EAW20163.1 as seed ortholog is 100%.

---

Group of orthologs #2218. Best score 1395 bits

Score difference with first non-orthologous sequence - *A. fumigatus*:1395 *A. fischeri*:1395

|                 |         |                 |         |
|-----------------|---------|-----------------|---------|
| afum EAL88698.1 | 100.00% | afis EAW16066.1 | 100.00% |
|-----------------|---------|-----------------|---------|

Bootstrap support for afum|EAL88698.1 as seed ortholog is 100%.

Bootstrap support for afis|EAW16066.1 as seed ortholog is 100%.

---

Group of orthologs #2219. Best score 1395 bits

Score difference with first non-orthologous sequence - *A. fumigatus*:1010 *A. fischeri*:870

afum|EAL84745.1 100.00% afis|EAW20888.1 100.00%

Bootstrap support for afum|EAL84745.1 as seed ortholog is 100%.

Bootstrap support for afis|EAW20888.1 as seed ortholog is 100%.

---

Group of orthologs #2220. Best score 1395 bits

Score difference with first non-orthologous sequence - *A. fumigatus*:1395 *A. fischeri*:1395

afum|EAL84634.1 100.00% afis|EAW20994.1 100.00%

Bootstrap support for afum|EAL84634.1 as seed ortholog is 100%.

Bootstrap support for afis|EAW20994.1 as seed ortholog is 100%.

---

Group of orthologs #2221. Best score 1395 bits

Score difference with first non-orthologous sequence - *A. fumigatus*:1395 *A. fischeri*:1395

afum|EAL90839.1 100.00% afis|EAW22353.1 100.00%

Bootstrap support for afum|EAL90839.1 as seed ortholog is 100%.

Bootstrap support for afis|EAW22353.1 as seed ortholog is 100%.

---

Group of orthologs #2222. Best score 1395 bits

Score difference with first non-orthologous sequence - *A. fumigatus*:1395 *A. fischeri*:1395

afum|EAL92193.1 100.00% afis|EAW21173.1 100.00%

Bootstrap support for afum|EAL92193.1 as seed ortholog is 100%.

Bootstrap support for afis|EAW21173.1 as seed ortholog is 100%.

---

Group of orthologs #2223. Best score 1394 bits

Score difference with first non-orthologous sequence - *A. fumigatus*:1394 *A. fischeri*:1394

afum|EAL86174.1 100.00% afis|EAW24506.1 100.00%

Bootstrap support for afum|EAL86174.1 as seed ortholog is 100%.

Bootstrap support for afis|EAW24506.1 as seed ortholog is 100%.

---

Group of orthologs #2224. Best score 1394 bits

Score difference with first non-orthologous sequence - *A. fumigatus*:1323 *A. fischeri*:1394

afum|EAL90969.1 100.00% afis|EAW22225.1 100.00%

Bootstrap support for afum|EAL90969.1 as seed ortholog is 100%.

Bootstrap support for afis|EAW22225.1 as seed ortholog is 100%.

---

Group of orthologs #2225. Best score 1394 bits

Score difference with first non-orthologous sequence - *A. fumigatus*:1394 *A. fischeri*:1394

afum|EAL90240.1 100.00% afis|EAW22957.1 100.00%

Bootstrap support for afum|EAL90240.1 as seed ortholog is 100%.

Bootstrap support for afis|EAW22957.1 as seed ortholog is 100%.

---

Group of orthologs #2226. Best score 1393 bits

Score difference with first non-orthologous sequence - *A. fumigatus*:1214 *A. fischeri*:1202

afum|EAL84421.1 100.00% afis|EAW20651.1 100.00%

Bootstrap support for afum|EAL84421.1 as seed ortholog is 100%.

Bootstrap support for afis|EAW20651.1 as seed ortholog is 100%.

---

Group of orthologs #2227. Best score 1393 bits

Score difference with first non-orthologous sequence - *A. fumigatus*:1393 *A. fischeri*:1393

afum|EAL87708.1 100.00% afis|EAW18344.1 100.00%

Bootstrap support for afum|EAL87708.1 as seed ortholog is 100%.

Bootstrap support for afis|EAW18344.1 as seed ortholog is 100%.

---

Group of orthologs #2228. Best score 1393 bits

Score difference with first non-orthologous sequence - *A. fumigatus*:1393 *A. fischeri*:1393

|                 |         |                 |         |
|-----------------|---------|-----------------|---------|
| afum EAL88169.1 | 100.00% | afis EAW23308.1 | 100.00% |
|-----------------|---------|-----------------|---------|

Bootstrap support for afum|EAL88169.1 as seed ortholog is 100%.

Bootstrap support for afis|EAW23308.1 as seed ortholog is 100%.

---

Group of orthologs #2229. Best score 1392 bits

Score difference with first non-orthologous sequence - *A. fumigatus*:1392 *A. fischeri*:1392

|                 |         |                 |         |
|-----------------|---------|-----------------|---------|
| afum EAL88309.1 | 100.00% | afis EAW23174.1 | 100.00% |
|-----------------|---------|-----------------|---------|

Bootstrap support for afum|EAL88309.1 as seed ortholog is 100%.

Bootstrap support for afis|EAW23174.1 as seed ortholog is 100%.

---

Group of orthologs #2230. Best score 1392 bits

Score difference with first non-orthologous sequence - *A. fumigatus*:1392 *A. fischeri*:1392

|                 |         |                 |         |
|-----------------|---------|-----------------|---------|
| afum EAL92077.2 | 100.00% | afis EAW21038.1 | 100.00% |
|-----------------|---------|-----------------|---------|

Bootstrap support for afum|EAL92077.2 as seed ortholog is 100%.

Bootstrap support for afis|EAW21038.1 as seed ortholog is 100%.

---

Group of orthologs #2231. Best score 1392 bits

Score difference with first non-orthologous sequence - *A. fumigatus*:1392 *A. fischeri*:1392

|                 |         |                 |         |
|-----------------|---------|-----------------|---------|
| afum EAL92841.1 | 100.00% | afis EAW21826.1 | 100.00% |
|-----------------|---------|-----------------|---------|

Bootstrap support for afum|EAL92841.1 as seed ortholog is 100%.

Bootstrap support for afis|EAW21826.1 as seed ortholog is 100%.

---

Group of orthologs #2232. Best score 1392 bits

Score difference with first non-orthologous sequence - *A. fumigatus*:1392 *A. fischeri*:1392

|                 |         |                 |         |
|-----------------|---------|-----------------|---------|
| afum EAL92915.1 | 100.00% | afis EAW21902.1 | 100.00% |
|-----------------|---------|-----------------|---------|

Bootstrap support for afum|EAL92915.1 as seed ortholog is 100%.

Bootstrap support for afis|EAW21902.1 as seed ortholog is 100%.

---

Group of orthologs #2233. Best score 1391 bits

Score difference with first non-orthologous sequence - *A. fumigatus*:1310 *A. fischeri*:1391

|                 |         |                 |         |
|-----------------|---------|-----------------|---------|
| afum EAL86834.1 | 100.00% | afis EAW19692.1 | 100.00% |
|-----------------|---------|-----------------|---------|

Bootstrap support for afum|EAL86834.1 as seed ortholog is 100%.

Bootstrap support for afis|EAW19692.1 as seed ortholog is 100%.

---

Group of orthologs #2234. Best score 1391 bits

Score difference with first non-orthologous sequence - *A. fumigatus*:1391 *A. fischeri*:1063

|                 |         |                 |         |
|-----------------|---------|-----------------|---------|
| afum EAL91600.1 | 100.00% | afis EAW17791.1 | 100.00% |
|-----------------|---------|-----------------|---------|

Bootstrap support for afum|EAL91600.1 as seed ortholog is 100%.

Bootstrap support for afis|EAW17791.1 as seed ortholog is 100%.

---

Group of orthologs #2235. Best score 1391 bits

Score difference with first non-orthologous sequence - *A. fumigatus*:1391 *A. fischeri*:1391

|                 |         |                 |         |
|-----------------|---------|-----------------|---------|
| afum EAL89870.1 | 100.00% | afis EAW25209.1 | 100.00% |
|-----------------|---------|-----------------|---------|

Bootstrap support for afum|EAL89870.1 as seed ortholog is 100%.

Bootstrap support for afis|EAW25209.1 as seed ortholog is 100%.

---

Group of orthologs #2236. Best score 1390 bits

Score difference with first non-orthologous sequence - *A. fumigatus*:1390 *A. fischeri*:1390

|                 |         |                 |         |
|-----------------|---------|-----------------|---------|
| afum EAL88773.1 | 100.00% | afis EAW16144.1 | 100.00% |
|-----------------|---------|-----------------|---------|

Bootstrap support for afum|EAL88773.1 as seed ortholog is 100%.

Bootstrap support for afis|EAW16144.1 as seed ortholog is 100%.

---

Group of orthologs #2237. Best score 1390 bits

Score difference with first non-orthologous sequence - *A. fumigatus*:1390 *A. fischeri*:1390

|                 |         |                 |         |
|-----------------|---------|-----------------|---------|
| afum EAL89509.1 | 100.00% | afis EAW24860.1 | 100.00% |
|-----------------|---------|-----------------|---------|

Bootstrap support for afum|EAL89509.1 as seed ortholog is 100%.

Bootstrap support for afis|EAW24860.1 as seed ortholog is 100%.

---

Group of orthologs #2238. Best score 1389 bits

Score difference with first non-orthologous sequence - *A. fumigatus*:1389 *A. fischeri*:1389

|                 |         |                 |         |
|-----------------|---------|-----------------|---------|
| afum EAL85545.1 | 100.00% | afis EAW15805.1 | 100.00% |
|-----------------|---------|-----------------|---------|

Bootstrap support for afum|EAL85545.1 as seed ortholog is 100%.

Bootstrap support for afis|EAW15805.1 as seed ortholog is 100%.

---

Group of orthologs #2239. Best score 1389 bits

Score difference with first non-orthologous sequence - *A. fumigatus*:1389 *A. fischeri*:1389

|                 |         |                 |         |
|-----------------|---------|-----------------|---------|
| afum EAL88643.1 | 100.00% | afis EAW16014.1 | 100.00% |
|-----------------|---------|-----------------|---------|

Bootstrap support for afum|EAL88643.1 as seed ortholog is 100%.

Bootstrap support for afis|EAW16014.1 as seed ortholog is 100%.

---

Group of orthologs #2240. Best score 1389 bits

Score difference with first non-orthologous sequence - *A. fumigatus*:1389 *A. fischeri*:1389

|                 |         |                 |         |
|-----------------|---------|-----------------|---------|
| afum EAL86881.1 | 100.00% | afis EAW19641.1 | 100.00% |
|-----------------|---------|-----------------|---------|

Bootstrap support for afum|EAL86881.1 as seed ortholog is 100%.

Bootstrap support for afis|EAW19641.1 as seed ortholog is 100%.

---

Group of orthologs #2241. Best score 1388 bits

Score difference with first non-orthologous sequence - *A. fumigatus*:1388 *A. fischeri*:1388

|                 |         |                 |         |
|-----------------|---------|-----------------|---------|
| afum EAL84725.1 | 100.00% | afis EAW20908.1 | 100.00% |
|-----------------|---------|-----------------|---------|

Bootstrap support for afum|EAL84725.1 as seed ortholog is 100%.

Bootstrap support for afis|EAW20908.1 as seed ortholog is 100%.

---

Group of orthologs #2242. Best score 1388 bits

Score difference with first non-orthologous sequence - *A. fumigatus*:1388 *A. fischeri*:1388

|                 |         |                 |         |
|-----------------|---------|-----------------|---------|
| afum EAL90909.1 | 100.00% | afis EAW22271.1 | 100.00% |
|-----------------|---------|-----------------|---------|

Bootstrap support for afum|EAL90909.1 as seed ortholog is 100%.

Bootstrap support for afis|EAW22271.1 as seed ortholog is 100%.

---

Group of orthologs #2243. Best score 1388 bits

Score difference with first non-orthologous sequence - *A. fumigatus*:1388 *A. fischeri*:1388

|                 |         |                 |         |
|-----------------|---------|-----------------|---------|
| afum EAL92574.1 | 100.00% | afis EAW21554.1 | 100.00% |
|-----------------|---------|-----------------|---------|

Bootstrap support for afum|EAL92574.1 as seed ortholog is 100%.

Bootstrap support for afis|EAW21554.1 as seed ortholog is 100%.

---

Group of orthologs #2244. Best score 1388 bits

Score difference with first non-orthologous sequence - *A. fumigatus*:1388 *A. fischeri*:1388

|                 |         |                 |         |
|-----------------|---------|-----------------|---------|
| afum EBA27465.1 | 100.00% | afis EAW21555.1 | 100.00% |
|-----------------|---------|-----------------|---------|

Bootstrap support for afum|EBA27465.1 as seed ortholog is 100%.

Bootstrap support for afis|EAW21555.1 as seed ortholog is 100%.

---

Group of orthologs #2245. Best score 1387 bits

Score difference with first non-orthologous sequence - *A. fumigatus*:1387 *A. fischeri*:1387

|                 |         |                 |         |
|-----------------|---------|-----------------|---------|
| afum EAL85226.1 | 100.00% | afis EAW20109.1 | 100.00% |
|-----------------|---------|-----------------|---------|

Bootstrap support for afum|EAL85226.1 as seed ortholog is 100%.

Bootstrap support for afis|EAW20109.1 as seed ortholog is 100%.

---

Group of orthologs #2246. Best score 1387 bits

Score difference with first non-orthologous sequence - *A. fumigatus*:1387 *A. fischeri*:1136

|                 |         |                 |         |
|-----------------|---------|-----------------|---------|
| afum EAL88442.1 | 100.00% | afis EAW23039.1 | 100.00% |
|-----------------|---------|-----------------|---------|

Bootstrap support for afum|EAL88442.1 as seed ortholog is 100%.

Bootstrap support for afis|EAW23039.1 as seed ortholog is 100%.

---

Group of orthologs #2247. Best score 1387 bits

Score difference with first non-orthologous sequence - *A. fumigatus*:1387 *A. fischeri*:1387

afum|EAL90995.1 100.00% afis|EAW22196.1 100.00%

Bootstrap support for afum|EAL90995.1 as seed ortholog is 100%.

Bootstrap support for afis|EAW22196.1 as seed ortholog is 100%.

---

Group of orthologs #2248. Best score 1387 bits

Score difference with first non-orthologous sequence - *A. fumigatus*:1387 *A. fischeri*:1387

afum|EAL90864.1 100.00% afis|EAW22328.1 100.00%

Bootstrap support for afum|EAL90864.1 as seed ortholog is 100%.

Bootstrap support for afis|EAW22328.1 as seed ortholog is 100%.

---

Group of orthologs #2249. Best score 1386 bits

Score difference with first non-orthologous sequence - *A. fumigatus*:1323 *A. fischeri*:1250

afum|EAL91363.1 100.00% afis|EAW17549.1 100.00%

Bootstrap support for afum|EAL91363.1 as seed ortholog is 100%.

Bootstrap support for afis|EAW17549.1 as seed ortholog is 100%.

---

Group of orthologs #2250. Best score 1386 bits

Score difference with first non-orthologous sequence - *A. fumigatus*:1386 *A. fischeri*:1386

afum|EAL91618.1 100.00% afis|EAW17810.1 100.00%

Bootstrap support for afum|EAL91618.1 as seed ortholog is 100%.

Bootstrap support for afis|EAW17810.1 as seed ortholog is 100%.

---

Group of orthologs #2251. Best score 1386 bits

Score difference with first non-orthologous sequence - *A. fumigatus*:1386 *A. fischeri*:1386

afum|EAL93875.1 100.00% afis|EAW19144.1 100.00%

Bootstrap support for afum|EAL93875.1 as seed ortholog is 100%.

Bootstrap support for afis|EAW19144.1 as seed ortholog is 100%.

---

Group of orthologs #2252. Best score 1386 bits

Score difference with first non-orthologous sequence - *A. fumigatus*:1386 *A. fischeri*:1386

afum|EAL90515.1 100.00% afis|EAW22677.1 100.00%

Bootstrap support for afum|EAL90515.1 as seed ortholog is 100%.

Bootstrap support for afis|EAW22677.1 as seed ortholog is 100%.

---

Group of orthologs #2253. Best score 1385 bits

Score difference with first non-orthologous sequence - *A. fumigatus*:1385 *A. fischeri*:1385

afum|EAL85037.1 100.00% afis|EAW19858.1 100.00%

Bootstrap support for afum|EAL85037.1 as seed ortholog is 100%.

Bootstrap support for afis|EAW19858.1 as seed ortholog is 100%.

---

Group of orthologs #2254. Best score 1385 bits

Score difference with first non-orthologous sequence - *A. fumigatus*:1385 *A. fischeri*:1385

afum|EAL84425.1 100.00% afis|EAW20648.1 100.00%

Bootstrap support for afum|EAL84425.1 as seed ortholog is 100%.

Bootstrap support for afis|EAW20648.1 as seed ortholog is 100%.

---

Group of orthologs #2255. Best score 1385 bits

Score difference with first non-orthologous sequence - *A. fumigatus*:1094 *A. fischeri*:1173

afum|EAL84357.1 100.00% afis|EAW25688.1 100.00%

Bootstrap support for afum|EAL84357.1 as seed ortholog is 100%.

Bootstrap support for afis|EAW25688.1 as seed ortholog is 100%.

---

Group of orthologs #2256. Best score 1385 bits

Score difference with first non-orthologous sequence - *A. fumigatus*:1385 *A. fischeri*:1385



|                 |         |                 |         |
|-----------------|---------|-----------------|---------|
| afum EAL86045.1 | 100.00% | afis EAW24373.1 | 100.00% |
|-----------------|---------|-----------------|---------|

Bootstrap support for afum|EAL86045.1 as seed ortholog is 100%.

Bootstrap support for afis|EAW24373.1 as seed ortholog is 100%.

---

Group of orthologs #2257. Best score 1385 bits

Score difference with first non-orthologous sequence - *A. fumigatus*:1385 *A. fischeri*:1385

|                 |         |                 |         |
|-----------------|---------|-----------------|---------|
| afum EAL88190.1 | 100.00% | afis EAW23289.1 | 100.00% |
|-----------------|---------|-----------------|---------|

Bootstrap support for afum|EAL88190.1 as seed ortholog is 100%.

Bootstrap support for afis|EAW23289.1 as seed ortholog is 100%.

---

Group of orthologs #2258. Best score 1385 bits

Score difference with first non-orthologous sequence - *A. fumigatus*:1385 *A. fischeri*:1385

|                 |         |                 |         |
|-----------------|---------|-----------------|---------|
| afum EAL90584.1 | 100.00% | afis EAW22614.1 | 100.00% |
|-----------------|---------|-----------------|---------|

Bootstrap support for afum|EAL90584.1 as seed ortholog is 100%.

Bootstrap support for afis|EAW22614.1 as seed ortholog is 100%.

---

Group of orthologs #2259. Best score 1385 bits

Score difference with first non-orthologous sequence - *A. fumigatus*:1385 *A. fischeri*:1385

|                 |         |                 |         |
|-----------------|---------|-----------------|---------|
| afum EAL89310.1 | 100.00% | afis EAW24660.1 | 100.00% |
|-----------------|---------|-----------------|---------|

Bootstrap support for afum|EAL89310.1 as seed ortholog is 100%.

Bootstrap support for afis|EAW24660.1 as seed ortholog is 100%.

---

Group of orthologs #2260. Best score 1384 bits

Score difference with first non-orthologous sequence - *A. fumigatus*:1384 *A. fischeri*:1384

|                 |         |                 |         |
|-----------------|---------|-----------------|---------|
| afum EAL85587.1 | 100.00% | afis EAW15761.1 | 100.00% |
|-----------------|---------|-----------------|---------|

Bootstrap support for afum|EAL85587.1 as seed ortholog is 100%.

Bootstrap support for afis|EAW15761.1 as seed ortholog is 100%.

---

Group of orthologs #2261. Best score 1384 bits

Score difference with first non-orthologous sequence - *A. fumigatus*:1384 *A. fischeri*:502

|                 |         |                 |         |
|-----------------|---------|-----------------|---------|
| afum EAL84916.1 | 100.00% | afis EAW20003.1 | 100.00% |
|-----------------|---------|-----------------|---------|

Bootstrap support for afum|EAL84916.1 as seed ortholog is 100%.

Bootstrap support for afis|EAW20003.1 as seed ortholog is 100%.

---

Group of orthologs #2262. Best score 1384 bits

Score difference with first non-orthologous sequence - *A. fumigatus*:1384 *A. fischeri*:1384

|                 |         |                 |         |
|-----------------|---------|-----------------|---------|
| afum EAL92308.1 | 100.00% | afis EAW21291.1 | 100.00% |
|-----------------|---------|-----------------|---------|

Bootstrap support for afum|EAL92308.1 as seed ortholog is 100%.

Bootstrap support for afis|EAW21291.1 as seed ortholog is 100%.

---

Group of orthologs #2263. Best score 1383 bits

Score difference with first non-orthologous sequence - *A. fumigatus*:1220 *A. fischeri*:1192

|                 |         |                 |         |
|-----------------|---------|-----------------|---------|
| afum EAL84776.1 | 100.00% | afis EAW20859.1 | 100.00% |
|-----------------|---------|-----------------|---------|

Bootstrap support for afum|EAL84776.1 as seed ortholog is 100%.

Bootstrap support for afis|EAW20859.1 as seed ortholog is 100%.

---

Group of orthologs #2264. Best score 1383 bits

Score difference with first non-orthologous sequence - *A. fumigatus*:1383 *A. fischeri*:1383

|                 |         |                 |         |
|-----------------|---------|-----------------|---------|
| afum EAL91691.1 | 100.00% | afis EAW17883.1 | 100.00% |
|-----------------|---------|-----------------|---------|

Bootstrap support for afum|EAL91691.1 as seed ortholog is 100%.

Bootstrap support for afis|EAW17883.1 as seed ortholog is 100%.

---

Group of orthologs #2265. Best score 1383 bits

Score difference with first non-orthologous sequence - *A. fumigatus*:1383 *A. fischeri*:1383

|                 |         |                 |         |
|-----------------|---------|-----------------|---------|
| afum EAL87363.1 | 100.00% | afis EAW23938.1 | 100.00% |
|-----------------|---------|-----------------|---------|

Bootstrap support for afum|EAL87363.1 as seed ortholog is 100%.

Bootstrap support for afis|EAW23938.1 as seed ortholog is 100%.

---

Group of orthologs #2266. Best score 1383 bits

Score difference with first non-orthologous sequence - *A. fumigatus*:1383 *A. fischeri*:862

|                 |         |                 |         |
|-----------------|---------|-----------------|---------|
| afum EAL88049.1 | 100.00% | afis EAW23420.1 | 100.00% |
|-----------------|---------|-----------------|---------|

Bootstrap support for afum|EAL88049.1 as seed ortholog is 100%.

Bootstrap support for afis|EAW23420.1 as seed ortholog is 100%.

---

Group of orthologs #2267. Best score 1382 bits

Score difference with first non-orthologous sequence - *A. fumigatus*:1382 *A. fischeri*:1382

|                 |         |                 |         |
|-----------------|---------|-----------------|---------|
| afum EAL86935.2 | 100.00% | afis EAW19583.1 | 100.00% |
|-----------------|---------|-----------------|---------|

Bootstrap support for afum|EAL86935.2 as seed ortholog is 100%.

Bootstrap support for afis|EAW19583.1 as seed ortholog is 100%.

---

Group of orthologs #2268. Best score 1382 bits

Score difference with first non-orthologous sequence - *A. fumigatus*:1382 *A. fischeri*:1382

|                 |         |                 |         |
|-----------------|---------|-----------------|---------|
| afum EAL88310.1 | 100.00% | afis EAW23173.1 | 100.00% |
|-----------------|---------|-----------------|---------|

Bootstrap support for afum|EAL88310.1 as seed ortholog is 100%.

Bootstrap support for afis|EAW23173.1 as seed ortholog is 100%.

---

Group of orthologs #2269. Best score 1382 bits

Score difference with first non-orthologous sequence - *A. fumigatus*:1382 *A. fischeri*:1382

|                 |         |                 |         |
|-----------------|---------|-----------------|---------|
| afum EAL89394.1 | 100.00% | afis EAW24747.1 | 100.00% |
|-----------------|---------|-----------------|---------|

Bootstrap support for afum|EAL89394.1 as seed ortholog is 100%.

Bootstrap support for afis|EAW24747.1 as seed ortholog is 100%.

---

Group of orthologs #2270. Best score 1381 bits

Score difference with first non-orthologous sequence - *A. fumigatus*:1381 *A. fischeri*:1155

|                 |         |                 |         |
|-----------------|---------|-----------------|---------|
| afum EAL86822.1 | 100.00% | afis EAW19704.1 | 100.00% |
|-----------------|---------|-----------------|---------|

Bootstrap support for afum|EAL86822.1 as seed ortholog is 100%.

Bootstrap support for afis|EAW19704.1 as seed ortholog is 100%.

---

Group of orthologs #2271. Best score 1381 bits

Score difference with first non-orthologous sequence - *A. fumigatus*:1142 *A. fischeri*:1078

|                 |         |                 |         |
|-----------------|---------|-----------------|---------|
| afum EAL92830.1 | 100.00% | afis EAW21804.1 | 100.00% |
|-----------------|---------|-----------------|---------|

Bootstrap support for afum|EAL92830.1 as seed ortholog is 100%.

Bootstrap support for afis|EAW21804.1 as seed ortholog is 100%.

---

Group of orthologs #2272. Best score 1380 bits

Score difference with first non-orthologous sequence - *A. fumigatus*:1380 *A. fischeri*:942

|                 |         |                 |         |
|-----------------|---------|-----------------|---------|
| afum EAL84550.1 | 100.00% | afis EAW20506.1 | 100.00% |
|-----------------|---------|-----------------|---------|

Bootstrap support for afum|EAL84550.1 as seed ortholog is 100%.

Bootstrap support for afis|EAW20506.1 as seed ortholog is 100%.

---

Group of orthologs #2273. Best score 1380 bits

Score difference with first non-orthologous sequence - *A. fumigatus*:1249 *A. fischeri*:646

|                 |         |                 |         |
|-----------------|---------|-----------------|---------|
| afum EAL89216.2 | 100.00% | afis EAW16621.1 | 100.00% |
|-----------------|---------|-----------------|---------|

Bootstrap support for afum|EAL89216.2 as seed ortholog is 100%.

Bootstrap support for afis|EAW16621.1 as seed ortholog is 100%.

---

Group of orthologs #2274. Best score 1379 bits

Score difference with first non-orthologous sequence - *A. fumigatus*:1379 *A. fischeri*:1379

|                 |         |                 |         |
|-----------------|---------|-----------------|---------|
| afum EAL89097.1 | 100.00% | afis EAW16502.1 | 100.00% |
|-----------------|---------|-----------------|---------|

Bootstrap support for afum|EAL89097.1 as seed ortholog is 100%.

Bootstrap support for afis|EAW16502.1 as seed ortholog is 100%.

---

Group of orthologs #2275. Best score 1379 bits

Score difference with first non-orthologous sequence - *A. fumigatus*:1379 *A. fischeri*:1379

afum|EAL91281.2 100.00% afis|EAW17453.1 100.00%

Bootstrap support for afum|EAL91281.2 as seed ortholog is 100%.

Bootstrap support for afis|EAW17453.1 as seed ortholog is 100%.

---

Group of orthologs #2276. Best score 1379 bits

Score difference with first non-orthologous sequence - *A. fumigatus*:1379 *A. fischeri*:1379

afum|EAL93175.1 100.00% afis|EAW18486.1 100.00%

Bootstrap support for afum|EAL93175.1 as seed ortholog is 100%.

Bootstrap support for afis|EAW18486.1 as seed ortholog is 100%.

---

Group of orthologs #2277. Best score 1379 bits

Score difference with first non-orthologous sequence - *A. fumigatus*:789 *A. fischeri*:1221

afum|EAL90667.1 100.00% afis|EAW22527.1 100.00%

Bootstrap support for afum|EAL90667.1 as seed ortholog is 100%.

Bootstrap support for afis|EAW22527.1 as seed ortholog is 100%.

---

Group of orthologs #2278. Best score 1378 bits

Score difference with first non-orthologous sequence - *A. fumigatus*:1378 *A. fischeri*:1378

afum|EAL91274.1 100.00% afis|EAW17447.1 100.00%

Bootstrap support for afum|EAL91274.1 as seed ortholog is 100%.

Bootstrap support for afis|EAW17447.1 as seed ortholog is 100%.

---

Group of orthologs #2279. Best score 1378 bits

Score difference with first non-orthologous sequence - *A. fumigatus*:1256 *A. fischeri*:1228

afum|EAL88212.1 100.00% afis|EAW23267.1 100.00%

Bootstrap support for afum|EAL88212.1 as seed ortholog is 100%.

Bootstrap support for afis|EAW23267.1 as seed ortholog is 100%.

---

Group of orthologs #2280. Best score 1378 bits

Score difference with first non-orthologous sequence - *A. fumigatus*:1378 *A. fischeri*:1378

afum|EAL93692.1 100.00% afis|EAW18959.1 100.00%

Bootstrap support for afum|EAL93692.1 as seed ortholog is 100%.

Bootstrap support for afis|EAW18959.1 as seed ortholog is 100%.

---

Group of orthologs #2281. Best score 1378 bits

Score difference with first non-orthologous sequence - *A. fumigatus*:1378 *A. fischeri*:1378

afum|EAL93915.1 100.00% afis|EAW19184.1 100.00%

Bootstrap support for afum|EAL93915.1 as seed ortholog is 100%.

Bootstrap support for afis|EAW19184.1 as seed ortholog is 100%.

---

Group of orthologs #2282. Best score 1377 bits

Score difference with first non-orthologous sequence - *A. fumigatus*:1267 *A. fischeri*:1248

afum|EAL88726.1 100.00% afis|EAW16094.1 100.00%

Bootstrap support for afum|EAL88726.1 as seed ortholog is 100%.

Bootstrap support for afis|EAW16094.1 as seed ortholog is 100%.

---

Group of orthologs #2283. Best score 1377 bits

Score difference with first non-orthologous sequence - *A. fumigatus*:1377 *A. fischeri*:1377

afum|EAL91843.1 100.00% afis|EAW18032.1 100.00%

Bootstrap support for afum|EAL91843.1 as seed ortholog is 100%.

Bootstrap support for afis|EAW18032.1 as seed ortholog is 100%.

---

Group of orthologs #2284. Best score 1377 bits

Score difference with first non-orthologous sequence - *A. fumigatus*:1377 *A. fischeri*:1377

|                 |         |                 |         |
|-----------------|---------|-----------------|---------|
| afum EAL87309.1 | 100.00% | afis EAW23881.1 | 100.00% |
|-----------------|---------|-----------------|---------|

Bootstrap support for afum|EAL87309.1 as seed ortholog is 100%.

Bootstrap support for afis|EAW23881.1 as seed ortholog is 100%.

---

Group of orthologs #2285. Best score 1377 bits

Score difference with first non-orthologous sequence - *A. fumigatus*:1377 *A. fischeri*:1377

|                 |         |                 |         |
|-----------------|---------|-----------------|---------|
| afum EAL92471.1 | 100.00% | afis EAW21452.1 | 100.00% |
|-----------------|---------|-----------------|---------|

Bootstrap support for afum|EAL92471.1 as seed ortholog is 100%.

Bootstrap support for afis|EAW21452.1 as seed ortholog is 100%.

---

Group of orthologs #2286. Best score 1376 bits

Score difference with first non-orthologous sequence - *A. fumigatus*:1376 *A. fischeri*:1376

|                 |         |                 |         |
|-----------------|---------|-----------------|---------|
| afum EAL87679.1 | 100.00% | afis EAW18312.1 | 100.00% |
|-----------------|---------|-----------------|---------|

Bootstrap support for afum|EAL87679.1 as seed ortholog is 100%.

Bootstrap support for afis|EAW18312.1 as seed ortholog is 100%.

---

Group of orthologs #2287. Best score 1376 bits

Score difference with first non-orthologous sequence - *A. fumigatus*:1376 *A. fischeri*:1376

|                 |         |                 |         |
|-----------------|---------|-----------------|---------|
| afum EAL91803.1 | 100.00% | afis EAW17993.1 | 100.00% |
|-----------------|---------|-----------------|---------|

Bootstrap support for afum|EAL91803.1 as seed ortholog is 100%.

Bootstrap support for afis|EAW17993.1 as seed ortholog is 100%.

---

Group of orthologs #2288. Best score 1376 bits

Score difference with first non-orthologous sequence - *A. fumigatus*:1376 *A. fischeri*:1376

|                 |         |                 |         |
|-----------------|---------|-----------------|---------|
| afum EAL86119.1 | 100.00% | afis EAW24450.1 | 100.00% |
|-----------------|---------|-----------------|---------|

Bootstrap support for afum|EAL86119.1 as seed ortholog is 100%.

Bootstrap support for afis|EAW24450.1 as seed ortholog is 100%.

---

Group of orthologs #2289. Best score 1376 bits

Score difference with first non-orthologous sequence - *A. fumigatus*:1376 *A. fischeri*:1376

|                 |         |                 |         |
|-----------------|---------|-----------------|---------|
| afum EAL93142.1 | 100.00% | afis EAW18457.1 | 100.00% |
|-----------------|---------|-----------------|---------|

Bootstrap support for afum|EAL93142.1 as seed ortholog is 100%.

Bootstrap support for afis|EAW18457.1 as seed ortholog is 100%.

---

Group of orthologs #2290. Best score 1376 bits

Score difference with first non-orthologous sequence - *A. fumigatus*:1376 *A. fischeri*:1376

|                 |         |                 |         |
|-----------------|---------|-----------------|---------|
| afum EAL93553.1 | 100.00% | afis EAW18817.1 | 100.00% |
|-----------------|---------|-----------------|---------|

Bootstrap support for afum|EAL93553.1 as seed ortholog is 100%.

Bootstrap support for afis|EAW18817.1 as seed ortholog is 100%.

---

Group of orthologs #2291. Best score 1375 bits

Score difference with first non-orthologous sequence - *A. fumigatus*:1375 *A. fischeri*:1375

|                 |         |                 |         |
|-----------------|---------|-----------------|---------|
| afum EAL93492.2 | 100.00% | afis EAW18761.1 | 100.00% |
|-----------------|---------|-----------------|---------|

Bootstrap support for afum|EAL93492.2 as seed ortholog is 100%.

Bootstrap support for afis|EAW18761.1 as seed ortholog is 100%.

---

Group of orthologs #2292. Best score 1375 bits

Score difference with first non-orthologous sequence - *A. fumigatus*:1375 *A. fischeri*:1235

|                 |         |                 |         |
|-----------------|---------|-----------------|---------|
| afum EAL90895.1 | 100.00% | afis EAW22286.1 | 100.00% |
|-----------------|---------|-----------------|---------|

Bootstrap support for afum|EAL90895.1 as seed ortholog is 100%.

Bootstrap support for afis|EAW22286.1 as seed ortholog is 100%.

---

Group of orthologs #2293. Best score 1375 bits

Score difference with first non-orthologous sequence - *A. fumigatus*:1375 *A. fischeri*:1375

|                 |         |                 |         |
|-----------------|---------|-----------------|---------|
| afum EAL92661.1 | 100.00% | afis EAW21625.1 | 100.00% |
|-----------------|---------|-----------------|---------|

Bootstrap support for afum|EAL92661.1 as seed ortholog is 100%.

Bootstrap support for afis|EAW21625.1 as seed ortholog is 100%.

---

Group of orthologs #2294. Best score 1375 bits

Score difference with first non-orthologous sequence - *A. fumigatus*:1375 *A. fischeri*:1375

|                 |         |                 |         |
|-----------------|---------|-----------------|---------|
| afum EBA27195.1 | 100.00% | afis EAW20458.1 | 100.00% |
|-----------------|---------|-----------------|---------|

Bootstrap support for afum|EBA27195.1 as seed ortholog is 100%.

Bootstrap support for afis|EAW20458.1 as seed ortholog is 100%.

---

Group of orthologs #2295. Best score 1375 bits

Score difference with first non-orthologous sequence - *A. fumigatus*:1375 *A. fischeri*:1375

|                 |         |                 |         |
|-----------------|---------|-----------------|---------|
| afum EAL89597.1 | 100.00% | afis EAW24940.1 | 100.00% |
|-----------------|---------|-----------------|---------|

Bootstrap support for afum|EAL89597.1 as seed ortholog is 100%.

Bootstrap support for afis|EAW24940.1 as seed ortholog is 100%.

---

Group of orthologs #2296. Best score 1374 bits

Score difference with first non-orthologous sequence - *A. fumigatus*:1374 *A. fischeri*:1374

|                 |         |                 |         |
|-----------------|---------|-----------------|---------|
| afum EAL88573.1 | 100.00% | afis EAW15937.1 | 100.00% |
|-----------------|---------|-----------------|---------|

Bootstrap support for afum|EAL88573.1 as seed ortholog is 100%.

Bootstrap support for afis|EAW15937.1 as seed ortholog is 100%.

---

Group of orthologs #2297. Best score 1374 bits

Score difference with first non-orthologous sequence - *A. fumigatus*:1374 *A. fischeri*:1374

|                 |         |                 |         |
|-----------------|---------|-----------------|---------|
| afum EAL91314.1 | 100.00% | afis EAW17492.1 | 100.00% |
|-----------------|---------|-----------------|---------|

Bootstrap support for afum|EAL91314.1 as seed ortholog is 100%.

Bootstrap support for afis|EAW17492.1 as seed ortholog is 100%.

---

Group of orthologs #2298. Best score 1373 bits

Score difference with first non-orthologous sequence - *A. fumigatus*:1166 *A. fischeri*:1309

|                 |         |                 |         |
|-----------------|---------|-----------------|---------|
| afum EAL84191.1 | 100.00% | afis EAW15454.1 | 100.00% |
|-----------------|---------|-----------------|---------|

Bootstrap support for afum|EAL84191.1 as seed ortholog is 100%.

Bootstrap support for afis|EAW15454.1 as seed ortholog is 100%.

---

Group of orthologs #2299. Best score 1373 bits

Score difference with first non-orthologous sequence - *A. fumigatus*:1373 *A. fischeri*:1373

|                 |         |                 |         |
|-----------------|---------|-----------------|---------|
| afum EAL88654.1 | 100.00% | afis EAW16025.1 | 100.00% |
|-----------------|---------|-----------------|---------|

Bootstrap support for afum|EAL88654.1 as seed ortholog is 100%.

Bootstrap support for afis|EAW16025.1 as seed ortholog is 100%.

---

Group of orthologs #2300. Best score 1373 bits

Score difference with first non-orthologous sequence - *A. fumigatus*:1069 *A. fischeri*:1074

|                 |         |                 |         |
|-----------------|---------|-----------------|---------|
| afum EAL85049.1 | 100.00% | afis EAW19845.1 | 100.00% |
|-----------------|---------|-----------------|---------|

Bootstrap support for afum|EAL85049.1 as seed ortholog is 100%.

Bootstrap support for afis|EAW19845.1 as seed ortholog is 100%.

---

Group of orthologs #2301. Best score 1373 bits

Score difference with first non-orthologous sequence - *A. fumigatus*:1373 *A. fischeri*:1373

|                 |         |                 |         |
|-----------------|---------|-----------------|---------|
| afum EAL91705.1 | 100.00% | afis EAW17897.1 | 100.00% |
|-----------------|---------|-----------------|---------|

Bootstrap support for afum|EAL91705.1 as seed ortholog is 100%.

Bootstrap support for afis|EAW17897.1 as seed ortholog is 100%.

---

Group of orthologs #2302. Best score 1373 bits

Score difference with first non-orthologous sequence - *A. fumigatus*:1373 *A. fischeri*:1373

|                 |         |                 |         |
|-----------------|---------|-----------------|---------|
| afum EAL91881.2 | 100.00% | afis EAW18069.1 | 100.00% |
|-----------------|---------|-----------------|---------|

Bootstrap support for afum|EAL91881.2 as seed ortholog is 100%.

Bootstrap support for afis|EAW18069.1 as seed ortholog is 100%.

---

Group of orthologs #2303. Best score 1373 bits

Score difference with first non-orthologous sequence - *A. fumigatus*:1287 *A. fischeri*:1315

afum|EAL94076.1 100.00% afis|EAW19356.1 100.00%

Bootstrap support for afum|EAL94076.1 as seed ortholog is 100%.

Bootstrap support for afis|EAW19356.1 as seed ortholog is 100%.

---

Group of orthologs #2304. Best score 1372 bits

Score difference with first non-orthologous sequence - *A. fumigatus*:1244 *A. fischeri*:1225

afum|EAL86470.1 100.00% afis|EAW16943.1 100.00%

Bootstrap support for afum|EAL86470.1 as seed ortholog is 100%.

Bootstrap support for afis|EAW16943.1 as seed ortholog is 100%.

---

Group of orthologs #2305. Best score 1372 bits

Score difference with first non-orthologous sequence - *A. fumigatus*:1372 *A. fischeri*:1372

afum|EAL88106.1 100.00% afis|EAW23367.1 100.00%

Bootstrap support for afum|EAL88106.1 as seed ortholog is 100%.

Bootstrap support for afis|EAW23367.1 as seed ortholog is 100%.

---

Group of orthologs #2306. Best score 1372 bits

Score difference with first non-orthologous sequence - *A. fumigatus*:1124 *A. fischeri*:1310

afum|EAL92474.1 100.00% afis|EAW21455.1 100.00%

Bootstrap support for afum|EAL92474.1 as seed ortholog is 100%.

Bootstrap support for afis|EAW21455.1 as seed ortholog is 100%.

---

Group of orthologs #2307. Best score 1372 bits

Score difference with first non-orthologous sequence - *A. fumigatus*:1372 *A. fischeri*:1372

afum|EAL90051.1 100.00% afis|EAW25392.1 100.00%

Bootstrap support for afum|EAL90051.1 as seed ortholog is 100%.

Bootstrap support for afis|EAW25392.1 as seed ortholog is 100%.

---

Group of orthologs #2308. Best score 1371 bits

Score difference with first non-orthologous sequence - *A. fumigatus*:1297 *A. fischeri*:1318

afum|EAL89013.2 100.00% afis|EAW16385.1 100.00%

Bootstrap support for afum|EAL89013.2 as seed ortholog is 100%.

Bootstrap support for afis|EAW16385.1 as seed ortholog is 100%.

---

Group of orthologs #2309. Best score 1371 bits

Score difference with first non-orthologous sequence - *A. fumigatus*:1371 *A. fischeri*:1371

afum|EAL92244.1 100.00% afis|EAW21232.1 100.00%

Bootstrap support for afum|EAL92244.1 as seed ortholog is 100%.

Bootstrap support for afis|EAW21232.1 as seed ortholog is 100%.

---

Group of orthologs #2310. Best score 1370 bits

Score difference with first non-orthologous sequence - *A. fumigatus*:1370 *A. fischeri*:1132

afum|EAL85850.1 100.00% afis|EAW15471.1 100.00%

Bootstrap support for afum|EAL85850.1 as seed ortholog is 100%.

Bootstrap support for afis|EAW15471.1 as seed ortholog is 100%.

---

Group of orthologs #2311. Best score 1370 bits

Score difference with first non-orthologous sequence - *A. fumigatus*:1370 *A. fischeri*:1370

afum|EAL86391.1 100.00% afis|EAW16845.1 100.00%

Bootstrap support for afum|EAL86391.1 as seed ortholog is 100%.

Bootstrap support for afis|EAW16845.1 as seed ortholog is 100%.

---

Group of orthologs #2312. Best score 1370 bits

Score difference with first non-orthologous sequence - *A. fumigatus*:1370 *A. fischeri*:1323

|                 |         |                 |         |
|-----------------|---------|-----------------|---------|
| afum EAL89173.1 | 100.00% | afis EAW16577.1 | 100.00% |
|-----------------|---------|-----------------|---------|

Bootstrap support for afum|EAL89173.1 as seed ortholog is 100%.

Bootstrap support for afis|EAW16577.1 as seed ortholog is 100%.

---

Group of orthologs #2313. Best score 1370 bits

Score difference with first non-orthologous sequence - *A. fumigatus*:1370 *A. fischeri*:598

|                 |         |                 |         |
|-----------------|---------|-----------------|---------|
| afum EAL93446.1 | 100.00% | afis EAW18722.1 | 100.00% |
|-----------------|---------|-----------------|---------|

Bootstrap support for afum|EAL93446.1 as seed ortholog is 100%.

Bootstrap support for afis|EAW18722.1 as seed ortholog is 100%.

---

Group of orthologs #2314. Best score 1370 bits

Score difference with first non-orthologous sequence - *A. fumigatus*:1370 *A. fischeri*:1370

|                 |         |                 |         |
|-----------------|---------|-----------------|---------|
| afum EAL92150.1 | 100.00% | afis EAW21132.1 | 100.00% |
|-----------------|---------|-----------------|---------|

Bootstrap support for afum|EAL92150.1 as seed ortholog is 100%.

Bootstrap support for afis|EAW21132.1 as seed ortholog is 100%.

---

Group of orthologs #2315. Best score 1369 bits

Score difference with first non-orthologous sequence - *A. fumigatus*:1369 *A. fischeri*:1369

|                 |         |                 |         |
|-----------------|---------|-----------------|---------|
| afum EAL88748.1 | 100.00% | afis EAW16117.1 | 100.00% |
|-----------------|---------|-----------------|---------|

Bootstrap support for afum|EAL88748.1 as seed ortholog is 100%.

Bootstrap support for afis|EAW16117.1 as seed ortholog is 100%.

---

Group of orthologs #2316. Best score 1369 bits

Score difference with first non-orthologous sequence - *A. fumigatus*:1369 *A. fischeri*:1369

|                 |         |                 |         |
|-----------------|---------|-----------------|---------|
| afum EAL89050.1 | 100.00% | afis EAW16455.1 | 100.00% |
|-----------------|---------|-----------------|---------|

Bootstrap support for afum|EAL89050.1 as seed ortholog is 100%.

Bootstrap support for afis|EAW16455.1 as seed ortholog is 100%.

---

Group of orthologs #2317. Best score 1369 bits

Score difference with first non-orthologous sequence - *A. fumigatus*:1369 *A. fischeri*:1369

|                 |         |                 |         |
|-----------------|---------|-----------------|---------|
| afum EAL91254.1 | 100.00% | afis EAW17426.1 | 100.00% |
|-----------------|---------|-----------------|---------|

Bootstrap support for afum|EAL91254.1 as seed ortholog is 100%.

Bootstrap support for afis|EAW17426.1 as seed ortholog is 100%.

---

Group of orthologs #2318. Best score 1369 bits

Score difference with first non-orthologous sequence - *A. fumigatus*:1257 *A. fischeri*:1369

|                 |         |                 |         |
|-----------------|---------|-----------------|---------|
| afum EAL93351.1 | 100.00% | afis EAW18638.1 | 100.00% |
|-----------------|---------|-----------------|---------|

Bootstrap support for afum|EAL93351.1 as seed ortholog is 100%.

Bootstrap support for afis|EAW18638.1 as seed ortholog is 100%.

---

Group of orthologs #2319. Best score 1369 bits

Score difference with first non-orthologous sequence - *A. fumigatus*:1369 *A. fischeri*:1369

|                 |         |                 |         |
|-----------------|---------|-----------------|---------|
| afum EAL93395.2 | 100.00% | afis EAW18675.1 | 100.00% |
|-----------------|---------|-----------------|---------|

Bootstrap support for afum|EAL93395.2 as seed ortholog is 100%.

Bootstrap support for afis|EAW18675.1 as seed ortholog is 100%.

---

Group of orthologs #2320. Best score 1368 bits

Score difference with first non-orthologous sequence - *A. fumigatus*:1368 *A. fischeri*:1368

|                 |         |                 |         |
|-----------------|---------|-----------------|---------|
| afum EAL85752.1 | 100.00% | afis EAW15582.1 | 100.00% |
|-----------------|---------|-----------------|---------|

Bootstrap support for afum|EAL85752.1 as seed ortholog is 100%.

Bootstrap support for afis|EAW15582.1 as seed ortholog is 100%.

---

Group of orthologs #2321. Best score 1368 bits

Score difference with first non-orthologous sequence - *A. fumigatus*:1368 *A. fischeri*:1368

|                 |         |                 |         |
|-----------------|---------|-----------------|---------|
| afum EAL89148.1 | 100.00% | afis EAW16550.1 | 100.00% |
|-----------------|---------|-----------------|---------|

Bootstrap support for afum|EAL89148.1 as seed ortholog is 100%.

Bootstrap support for afis|EAW16550.1 as seed ortholog is 100%.

---

Group of orthologs #2322. Best score 1367 bits

Score difference with first non-orthologous sequence - *A. fumigatus*:1185 *A. fischeri*:1367

|                 |         |                 |         |
|-----------------|---------|-----------------|---------|
| afum EAL86554.1 | 100.00% | afis EAW17058.1 | 100.00% |
|-----------------|---------|-----------------|---------|

Bootstrap support for afum|EAL86554.1 as seed ortholog is 100%.

Bootstrap support for afis|EAW17058.1 as seed ortholog is 100%.

---

Group of orthologs #2323. Best score 1367 bits

Score difference with first non-orthologous sequence - *A. fumigatus*:1367 *A. fischeri*:1138

|                 |         |                 |         |
|-----------------|---------|-----------------|---------|
| afum EAL84969.1 | 100.00% | afis EAW19946.1 | 100.00% |
|-----------------|---------|-----------------|---------|

Bootstrap support for afum|EAL84969.1 as seed ortholog is 100%.

Bootstrap support for afis|EAW19946.1 as seed ortholog is 100%.

---

Group of orthologs #2324. Best score 1367 bits

Score difference with first non-orthologous sequence - *A. fumigatus*:1367 *A. fischeri*:1367

|                 |         |                 |         |
|-----------------|---------|-----------------|---------|
| afum EAL84285.2 | 100.00% | afis EAW25575.1 | 100.00% |
|-----------------|---------|-----------------|---------|

Bootstrap support for afum|EAL84285.2 as seed ortholog is 100%.

Bootstrap support for afis|EAW25575.1 as seed ortholog is 100%.

---

Group of orthologs #2325. Best score 1367 bits

Score difference with first non-orthologous sequence - *A. fumigatus*:1367 *A. fischeri*:1367

|                 |         |                 |         |
|-----------------|---------|-----------------|---------|
| afum EBA27283.1 | 100.00% | afis EAW17242.1 | 100.00% |
|-----------------|---------|-----------------|---------|

Bootstrap support for afum|EBA27283.1 as seed ortholog is 100%.

Bootstrap support for afis|EAW17242.1 as seed ortholog is 100%.

---

Group of orthologs #2326. Best score 1367 bits

Score difference with first non-orthologous sequence - *A. fumigatus*:1367 *A. fischeri*:1367

|                 |         |                 |         |
|-----------------|---------|-----------------|---------|
| afum EAL88226.1 | 100.00% | afis EAW23255.1 | 100.00% |
|-----------------|---------|-----------------|---------|

Bootstrap support for afum|EAL88226.1 as seed ortholog is 100%.

Bootstrap support for afis|EAW23255.1 as seed ortholog is 100%.

---

Group of orthologs #2327. Best score 1367 bits

Score difference with first non-orthologous sequence - *A. fumigatus*:1367 *A. fischeri*:1367

|                 |         |                 |         |
|-----------------|---------|-----------------|---------|
| afum EAL93294.2 | 100.00% | afis EAW18587.1 | 100.00% |
|-----------------|---------|-----------------|---------|

Bootstrap support for afum|EAL93294.2 as seed ortholog is 100%.

Bootstrap support for afis|EAW18587.1 as seed ortholog is 100%.

---

Group of orthologs #2328. Best score 1367 bits

Score difference with first non-orthologous sequence - *A. fumigatus*:1367 *A. fischeri*:1367

|                 |         |                 |         |
|-----------------|---------|-----------------|---------|
| afum EAL90719.1 | 100.00% | afis EAW22472.1 | 100.00% |
|-----------------|---------|-----------------|---------|

Bootstrap support for afum|EAL90719.1 as seed ortholog is 100%.

Bootstrap support for afis|EAW22472.1 as seed ortholog is 100%.

---

Group of orthologs #2329. Best score 1366 bits

Score difference with first non-orthologous sequence - *A. fumigatus*:1366 *A. fischeri*:1366

|                 |         |                 |         |
|-----------------|---------|-----------------|---------|
| afum EAL94010.1 | 100.00% | afis EAW19284.1 | 100.00% |
|-----------------|---------|-----------------|---------|

Bootstrap support for afum|EAL94010.1 as seed ortholog is 100%.

Bootstrap support for afis|EAW19284.1 as seed ortholog is 100%.

---

Group of orthologs #2330. Best score 1366 bits

Score difference with first non-orthologous sequence - *A. fumigatus*:1366 *A. fischeri*:1366

|                 |         |                 |         |
|-----------------|---------|-----------------|---------|
| afum EAL89741.1 | 100.00% | afis EAW25072.1 | 100.00% |
|-----------------|---------|-----------------|---------|

Bootstrap support for afum|EAL89741.1 as seed ortholog is 100%.

Bootstrap support for afis|EAW25072.1 as seed ortholog is 100%.

---



Group of orthologs #2331. Best score 1365 bits

Score difference with first non-orthologous sequence - *A. fumigatus*:1365 *A. fischeri*:1365

afum|EAL84703.2 100.00% afis|EAW20931.1 100.00%

Bootstrap support for afum|EAL84703.2 as seed ortholog is 100%.

Bootstrap support for afis|EAW20931.1 as seed ortholog is 100%.

---

Group of orthologs #2332. Best score 1365 bits

Score difference with first non-orthologous sequence - *A. fumigatus*:1308 *A. fischeri*:1269

afum|EAL92219.1 100.00% afis|EAW21208.1 100.00%

Bootstrap support for afum|EAL92219.1 as seed ortholog is 100%.

Bootstrap support for afis|EAW21208.1 as seed ortholog is 100%.

---

Group of orthologs #2333. Best score 1364 bits

Score difference with first non-orthologous sequence - *A. fumigatus*:1364 *A. fischeri*:1364

afum|EAL85785.1 100.00% afis|EAW15547.1 100.00%

Bootstrap support for afum|EAL85785.1 as seed ortholog is 100%.

Bootstrap support for afis|EAW15547.1 as seed ortholog is 100%.

---

Group of orthologs #2334. Best score 1364 bits

Score difference with first non-orthologous sequence - *A. fumigatus*:1364 *A. fischeri*:1364

afum|EAL84651.2 100.00% afis|EAW20980.1 100.00%

Bootstrap support for afum|EAL84651.2 as seed ortholog is 100%.

Bootstrap support for afis|EAW20980.1 as seed ortholog is 100%.

---

Group of orthologs #2335. Best score 1364 bits

Score difference with first non-orthologous sequence - *A. fumigatus*:1364 *A. fischeri*:1364

afum|EAL85976.1 100.00% afis|EAW24308.1 100.00%

Bootstrap support for afum|EAL85976.1 as seed ortholog is 100%.

Bootstrap support for afis|EAW24308.1 as seed ortholog is 100%.

---

Group of orthologs #2336. Best score 1364 bits

Score difference with first non-orthologous sequence - *A. fumigatus*:1364 *A. fischeri*:1364

afum|EAL85985.1 100.00% afis|EAW24317.1 100.00%

Bootstrap support for afum|EAL85985.1 as seed ortholog is 100%.

Bootstrap support for afis|EAW24317.1 as seed ortholog is 100%.

---

Group of orthologs #2337. Best score 1364 bits

Score difference with first non-orthologous sequence - *A. fumigatus*:1364 *A. fischeri*:1364

afum|EAL93218.1 100.00% afis|EAW18523.1 100.00%

Bootstrap support for afum|EAL93218.1 as seed ortholog is 100%.

Bootstrap support for afis|EAW18523.1 as seed ortholog is 100%.

---

Group of orthologs #2338. Best score 1364 bits

Score difference with first non-orthologous sequence - *A. fumigatus*:1364 *A. fischeri*:1364

afum|EAL93775.1 100.00% afis|EAW19046.1 100.00%

Bootstrap support for afum|EAL93775.1 as seed ortholog is 100%.

Bootstrap support for afis|EAW19046.1 as seed ortholog is 100%.

---

Group of orthologs #2339. Best score 1364 bits

Score difference with first non-orthologous sequence - *A. fumigatus*:1364 *A. fischeri*:1364

afum|EAL91009.1 100.00% afis|EAW22180.1 100.00%

Bootstrap support for afum|EAL91009.1 as seed ortholog is 100%.

Bootstrap support for afis|EAW22180.1 as seed ortholog is 100%.

---

Group of orthologs #2340. Best score 1364 bits

Score difference with first non-orthologous sequence - *A. fumigatus*:1364 *A. fischeri*:1364

|                 |         |                 |         |
|-----------------|---------|-----------------|---------|
| afum EAL94062.1 | 100.00% | afis EAW19343.1 | 100.00% |
|-----------------|---------|-----------------|---------|

Bootstrap support for afum|EAL94062.1 as seed ortholog is 100%.

Bootstrap support for afis|EAW19343.1 as seed ortholog is 100%.

---

Group of orthologs #2341. Best score 1363 bits

Score difference with first non-orthologous sequence - *A. fumigatus*:1130 *A. fischeri*:1124

|                 |         |                 |         |
|-----------------|---------|-----------------|---------|
| afum EAL84798.1 | 100.00% | afis EAW20834.1 | 100.00% |
|-----------------|---------|-----------------|---------|

Bootstrap support for afum|EAL84798.1 as seed ortholog is 100%.

Bootstrap support for afis|EAW20834.1 as seed ortholog is 100%.

---

Group of orthologs #2342. Best score 1363 bits

Score difference with first non-orthologous sequence - *A. fumigatus*:1016 *A. fischeri*:1071

|                 |         |                 |         |
|-----------------|---------|-----------------|---------|
| afum EAL86169.1 | 100.00% | afis EAW24499.1 | 100.00% |
|-----------------|---------|-----------------|---------|

Bootstrap support for afum|EAL86169.1 as seed ortholog is 100%.

Bootstrap support for afis|EAW24499.1 as seed ortholog is 100%.

---

Group of orthologs #2343. Best score 1363 bits

Score difference with first non-orthologous sequence - *A. fumigatus*:1363 *A. fischeri*:1291

|                 |         |                 |         |
|-----------------|---------|-----------------|---------|
| afum EAL93613.1 | 100.00% | afis EAW18881.1 | 100.00% |
|-----------------|---------|-----------------|---------|

Bootstrap support for afum|EAL93613.1 as seed ortholog is 100%.

Bootstrap support for afis|EAW18881.1 as seed ortholog is 100%.

---

Group of orthologs #2344. Best score 1362 bits

Score difference with first non-orthologous sequence - *A. fumigatus*:1362 *A. fischeri*:1362

|                 |         |                 |         |
|-----------------|---------|-----------------|---------|
| afum EAL87872.1 | 100.00% | afis EAW23595.1 | 100.00% |
|-----------------|---------|-----------------|---------|

Bootstrap support for afum|EAL87872.1 as seed ortholog is 100%.

Bootstrap support for afis|EAW23595.1 as seed ortholog is 100%.

---

Group of orthologs #2345. Best score 1361 bits

Score difference with first non-orthologous sequence - *A. fumigatus*:1154 *A. fischeri*:1163

|                 |         |                 |         |
|-----------------|---------|-----------------|---------|
| afum EAL86440.1 | 100.00% | afis EAW16904.1 | 100.00% |
|-----------------|---------|-----------------|---------|

Bootstrap support for afum|EAL86440.1 as seed ortholog is 100%.

Bootstrap support for afis|EAW16904.1 as seed ortholog is 100%.

---

Group of orthologs #2346. Best score 1361 bits

Score difference with first non-orthologous sequence - *A. fumigatus*:1361 *A. fischeri*:1229

|                 |         |                 |         |
|-----------------|---------|-----------------|---------|
| afum EAL91855.2 | 100.00% | afis EAW18044.1 | 100.00% |
|-----------------|---------|-----------------|---------|

Bootstrap support for afum|EAL91855.2 as seed ortholog is 100%.

Bootstrap support for afis|EAW18044.1 as seed ortholog is 100%.

---

Group of orthologs #2347. Best score 1361 bits

Score difference with first non-orthologous sequence - *A. fumigatus*:1361 *A. fischeri*:1361

|                 |         |                 |         |
|-----------------|---------|-----------------|---------|
| afum EAL89638.1 | 100.00% | afis EAW24978.1 | 100.00% |
|-----------------|---------|-----------------|---------|

Bootstrap support for afum|EAL89638.1 as seed ortholog is 100%.

Bootstrap support for afis|EAW24978.1 as seed ortholog is 100%.

---

Group of orthologs #2348. Best score 1360 bits

Score difference with first non-orthologous sequence - *A. fumigatus*:1360 *A. fischeri*:1360

|                 |         |                 |         |
|-----------------|---------|-----------------|---------|
| afum EAL85085.1 | 100.00% | afis EAW19807.1 | 100.00% |
|-----------------|---------|-----------------|---------|

Bootstrap support for afum|EAL85085.1 as seed ortholog is 100%.

Bootstrap support for afis|EAW19807.1 as seed ortholog is 100%.

---

Group of orthologs #2349. Best score 1360 bits

Score difference with first non-orthologous sequence - *A. fumigatus*:1360 *A. fischeri*:1360

|                 |         |                 |         |
|-----------------|---------|-----------------|---------|
| afum EAL86070.1 | 100.00% | afis EAW24399.1 | 100.00% |
|-----------------|---------|-----------------|---------|

Bootstrap support for afum|EAL86070.1 as seed ortholog is 100%.

Bootstrap support for afis|EAW24399.1 as seed ortholog is 100%.

---

Group of orthologs #2350. Best score 1360 bits

Score difference with first non-orthologous sequence - *A. fumigatus*:1360 *A. fischeri*:1360

|                 |         |                 |         |
|-----------------|---------|-----------------|---------|
| afum EAL87134.1 | 100.00% | afis EAW23688.1 | 100.00% |
|-----------------|---------|-----------------|---------|

Bootstrap support for afum|EAL87134.1 as seed ortholog is 100%.

Bootstrap support for afis|EAW23688.1 as seed ortholog is 100%.

---

Group of orthologs #2351. Best score 1360 bits

Score difference with first non-orthologous sequence - *A. fumigatus*:1360 *A. fischeri*:1360

|                 |         |                 |         |
|-----------------|---------|-----------------|---------|
| afum EAL90880.1 | 100.00% | afis EAW22310.1 | 100.00% |
|-----------------|---------|-----------------|---------|

Bootstrap support for afum|EAL90880.1 as seed ortholog is 100%.

Bootstrap support for afis|EAW22310.1 as seed ortholog is 100%.

---

Group of orthologs #2352. Best score 1359 bits

Score difference with first non-orthologous sequence - *A. fumigatus*:1165 *A. fischeri*:1359

|                 |         |                 |         |
|-----------------|---------|-----------------|---------|
| afum EAL89192.1 | 100.00% | afis EAW16596.1 | 100.00% |
|-----------------|---------|-----------------|---------|

Bootstrap support for afum|EAL89192.1 as seed ortholog is 100%.

Bootstrap support for afis|EAW16596.1 as seed ortholog is 100%.

---

Group of orthologs #2353. Best score 1359 bits

Score difference with first non-orthologous sequence - *A. fumigatus*:1359 *A. fischeri*:1359

|                 |         |                 |         |
|-----------------|---------|-----------------|---------|
| afum EAL90898.1 | 100.00% | afis EAW22283.1 | 100.00% |
|-----------------|---------|-----------------|---------|

Bootstrap support for afum|EAL90898.1 as seed ortholog is 100%.

Bootstrap support for afis|EAW22283.1 as seed ortholog is 100%.

---

Group of orthologs #2354. Best score 1359 bits

Score difference with first non-orthologous sequence - *A. fumigatus*:1359 *A. fischeri*:1359

|                 |         |                 |         |
|-----------------|---------|-----------------|---------|
| afum EAL90859.1 | 100.00% | afis EAW22333.1 | 100.00% |
|-----------------|---------|-----------------|---------|

Bootstrap support for afum|EAL90859.1 as seed ortholog is 100%.

Bootstrap support for afis|EAW22333.1 as seed ortholog is 100%.

---

Group of orthologs #2355. Best score 1358 bits

Score difference with first non-orthologous sequence - *A. fumigatus*:1358 *A. fischeri*:1358

|                 |         |                 |         |
|-----------------|---------|-----------------|---------|
| afum EAL91262.1 | 100.00% | afis EAW17435.1 | 100.00% |
|-----------------|---------|-----------------|---------|

Bootstrap support for afum|EAL91262.1 as seed ortholog is 100%.

Bootstrap support for afis|EAW17435.1 as seed ortholog is 100%.

---

Group of orthologs #2356. Best score 1358 bits

Score difference with first non-orthologous sequence - *A. fumigatus*:1358 *A. fischeri*:1358

|                 |         |                 |         |
|-----------------|---------|-----------------|---------|
| afum EAL90653.1 | 100.00% | afis EAW22541.1 | 100.00% |
|-----------------|---------|-----------------|---------|

Bootstrap support for afum|EAL90653.1 as seed ortholog is 100%.

Bootstrap support for afis|EAW22541.1 as seed ortholog is 100%.

---

Group of orthologs #2357. Best score 1357 bits

Score difference with first non-orthologous sequence - *A. fumigatus*:1039 *A. fischeri*:1357

|                 |         |                 |         |
|-----------------|---------|-----------------|---------|
| afum EAL87118.1 | 100.00% | afis EAW23675.1 | 100.00% |
|-----------------|---------|-----------------|---------|

Bootstrap support for afum|EAL87118.1 as seed ortholog is 100%.

Bootstrap support for afis|EAW23675.1 as seed ortholog is 100%.

---

Group of orthologs #2358. Best score 1357 bits

Score difference with first non-orthologous sequence - *A. fumigatus*:1357 *A. fischeri*:1357

|                 |         |                 |         |
|-----------------|---------|-----------------|---------|
| afum EAL93225.1 | 100.00% | afis EAW18528.1 | 100.00% |
|-----------------|---------|-----------------|---------|

Bootstrap support for afum|EAL93225.1 as seed ortholog is 100%.

Bootstrap support for afis|EAW18528.1 as seed ortholog is 100%.

---

Group of orthologs #2359. Best score 1357 bits

Score difference with first non-orthologous sequence - *A. fumigatus*:1357 *A. fischeri*:1357

afum|EAL93947.1 100.00% afis|EAW19214.1 100.00%

Bootstrap support for afum|EAL93947.1 as seed ortholog is 100%.

Bootstrap support for afis|EAW19214.1 as seed ortholog is 100%.

---

Group of orthologs #2360. Best score 1357 bits

Score difference with first non-orthologous sequence - *A. fumigatus*:1357 *A. fischeri*:1357

afum|EAL90829.1 100.00% afis|EAW22362.1 100.00%

Bootstrap support for afum|EAL90829.1 as seed ortholog is 100%.

Bootstrap support for afis|EAW22362.1 as seed ortholog is 100%.

---

Group of orthologs #2361. Best score 1357 bits

Score difference with first non-orthologous sequence - *A. fumigatus*:1357 *A. fischeri*:1357

afum|EAL92910.1 100.00% afis|EAW21897.1 100.00%

Bootstrap support for afum|EAL92910.1 as seed ortholog is 100%.

Bootstrap support for afis|EAW21897.1 as seed ortholog is 100%.

---

Group of orthologs #2362. Best score 1357 bits

Score difference with first non-orthologous sequence - *A. fumigatus*:1357 *A. fischeri*:1357

afum|EAL90091.1 100.00% afis|EAW25433.1 100.00%

Bootstrap support for afum|EAL90091.1 as seed ortholog is 100%.

Bootstrap support for afis|EAW25433.1 as seed ortholog is 100%.

---

Group of orthologs #2363. Best score 1356 bits

Score difference with first non-orthologous sequence - *A. fumigatus*:1356 *A. fischeri*:467

afum|EAL84562.1 100.00% afis|EAW20492.1 100.00%

Bootstrap support for afum|EAL84562.1 as seed ortholog is 100%.

Bootstrap support for afis|EAW20492.1 as seed ortholog is 100%.

---

Group of orthologs #2364. Best score 1356 bits

Score difference with first non-orthologous sequence - *A. fumigatus*:1356 *A. fischeri*:1356

afum|EAL91751.1 100.00% afis|EAW17940.1 100.00%

Bootstrap support for afum|EAL91751.1 as seed ortholog is 100%.

Bootstrap support for afis|EAW17940.1 as seed ortholog is 100%.

---

Group of orthologs #2365. Best score 1356 bits

Score difference with first non-orthologous sequence - *A. fumigatus*:1356 *A. fischeri*:1356

afum|EAL93207.1 100.00% afis|EAW18512.1 100.00%

Bootstrap support for afum|EAL93207.1 as seed ortholog is 100%.

Bootstrap support for afis|EAW18512.1 as seed ortholog is 100%.

---

Group of orthologs #2366. Best score 1356 bits

Score difference with first non-orthologous sequence - *A. fumigatus*:1356 *A. fischeri*:1356

afum|EBA27432.1 100.00% afis|EAW17571.1 100.00%

Bootstrap support for afum|EBA27432.1 as seed ortholog is 100%.

Bootstrap support for afis|EAW17571.1 as seed ortholog is 100%.

---

Group of orthologs #2367. Best score 1356 bits

Score difference with first non-orthologous sequence - *A. fumigatus*:1356 *A. fischeri*:1356

afum|EAL93461.1 100.00% afis|EAW18736.1 100.00%

Bootstrap support for afum|EAL93461.1 as seed ortholog is 100%.

Bootstrap support for afis|EAW18736.1 as seed ortholog is 100%.

---

Group of orthologs #2368. Best score 1355 bits

Score difference with first non-orthologous sequence - *A. fumigatus*:1060 *A. fischeri*:1355

afum|EAL86439.1 100.00% afis|EAW16903.1 100.00%

Bootstrap support for afum|EAL86439.1 as seed ortholog is 100%.

Bootstrap support for afis|EAW16903.1 as seed ortholog is 100%.

---

Group of orthologs #2369. Best score 1355 bits

Score difference with first non-orthologous sequence - *A. fumigatus*:1355 *A. fischeri*:1355

afum|EAL84708.1 100.00% afis|EAW20926.1 100.00%

Bootstrap support for afum|EAL84708.1 as seed ortholog is 100%.

Bootstrap support for afis|EAW20926.1 as seed ortholog is 100%.

---

Group of orthologs #2370. Best score 1355 bits

Score difference with first non-orthologous sequence - *A. fumigatus*:1047 *A. fischeri*:1051

afum|EAL86815.1 100.00% afis|EAW19712.1 100.00%

Bootstrap support for afum|EAL86815.1 as seed ortholog is 100%.

Bootstrap support for afis|EAW19712.1 as seed ortholog is 100%.

---

Group of orthologs #2371. Best score 1355 bits

Score difference with first non-orthologous sequence - *A. fumigatus*:1355 *A. fischeri*:1355

afum|EAL88247.1 100.00% afis|EAW23235.1 100.00%

Bootstrap support for afum|EAL88247.1 as seed ortholog is 100%.

Bootstrap support for afis|EAW23235.1 as seed ortholog is 100%.

---

Group of orthologs #2372. Best score 1354 bits

Score difference with first non-orthologous sequence - *A. fumigatus*:1354 *A. fischeri*:1354

afum|EAL91698.1 100.00% afis|EAW17889.1 100.00%

Bootstrap support for afum|EAL91698.1 as seed ortholog is 100%.

Bootstrap support for afis|EAW17889.1 as seed ortholog is 100%.

---

Group of orthologs #2373. Best score 1354 bits

Score difference with first non-orthologous sequence - *A. fumigatus*:1354 *A. fischeri*:1354

afum|EAL90570.1 100.00% afis|EAW22626.1 100.00%

Bootstrap support for afum|EAL90570.1 as seed ortholog is 100%.

Bootstrap support for afis|EAW22626.1 as seed ortholog is 100%.

---

Group of orthologs #2374. Best score 1354 bits

Score difference with first non-orthologous sequence - *A. fumigatus*:1354 *A. fischeri*:1243

afum|EAL92659.1 100.00% afis|EAW21623.1 100.00%

Bootstrap support for afum|EAL92659.1 as seed ortholog is 100%.

Bootstrap support for afis|EAW21623.1 as seed ortholog is 100%.

---

Group of orthologs #2375. Best score 1354 bits

Score difference with first non-orthologous sequence - *A. fumigatus*:770 *A. fischeri*:1354

afum|EAL92886.1 100.00% afis|EAW21872.1 100.00%

Bootstrap support for afum|EAL92886.1 as seed ortholog is 100%.

Bootstrap support for afis|EAW21872.1 as seed ortholog is 100%.

---

Group of orthologs #2376. Best score 1353 bits

Score difference with first non-orthologous sequence - *A. fumigatus*:1353 *A. fischeri*:1175

afum|EAL84983.1 100.00% afis|EAW19926.1 100.00%

Bootstrap support for afum|EAL84983.1 as seed ortholog is 100%.

Bootstrap support for afis|EAW19926.1 as seed ortholog is 100%.

---

Group of orthologs #2377. Best score 1353 bits

Score difference with first non-orthologous sequence - *A. fumigatus*:1353 *A. fischeri*:1353

afum|EAL92966.1 100.00% afis|EAW21952.1 100.00%

Bootstrap support for afum|EAL92966.1 as seed ortholog is 100%.

Bootstrap support for afis|EAW21952.1 as seed ortholog is 100%.

---

Group of orthologs #2378. Best score 1353 bits

Score difference with first non-orthologous sequence - *A. fumigatus*:1353 *A. fischeri*:1353

|                 |         |                 |         |
|-----------------|---------|-----------------|---------|
| afum EAL90050.1 | 100.00% | afis EAW25391.1 | 100.00% |
|-----------------|---------|-----------------|---------|

Bootstrap support for afum|EAL90050.1 as seed ortholog is 100%.

Bootstrap support for afis|EAW25391.1 as seed ortholog is 100%.

---

Group of orthologs #2379. Best score 1352 bits

Score difference with first non-orthologous sequence - *A. fumigatus*:1352 *A. fischeri*:1352

|                 |         |                 |         |
|-----------------|---------|-----------------|---------|
| afum EAL91714.1 | 100.00% | afis EAW17905.1 | 100.00% |
|-----------------|---------|-----------------|---------|

Bootstrap support for afum|EAL91714.1 as seed ortholog is 100%.

Bootstrap support for afis|EAW17905.1 as seed ortholog is 100%.

---

Group of orthologs #2380. Best score 1352 bits

Score difference with first non-orthologous sequence - *A. fumigatus*:1352 *A. fischeri*:1352

|                 |         |                 |         |
|-----------------|---------|-----------------|---------|
| afum EAL85863.1 | 100.00% | afis EAW24190.1 | 100.00% |
|-----------------|---------|-----------------|---------|

Bootstrap support for afum|EAL85863.1 as seed ortholog is 100%.

Bootstrap support for afis|EAW24190.1 as seed ortholog is 100%.

---

Group of orthologs #2381. Best score 1352 bits

Score difference with first non-orthologous sequence - *A. fumigatus*:1352 *A. fischeri*:1261

|                 |         |                 |         |
|-----------------|---------|-----------------|---------|
| afum EAL86134.1 | 100.00% | afis EAW24463.1 | 100.00% |
|-----------------|---------|-----------------|---------|

Bootstrap support for afum|EAL86134.1 as seed ortholog is 100%.

Bootstrap support for afis|EAW24463.1 as seed ortholog is 100%.

---

Group of orthologs #2382. Best score 1352 bits

Score difference with first non-orthologous sequence - *A. fumigatus*:1352 *A. fischeri*:1352

|                 |         |                 |         |
|-----------------|---------|-----------------|---------|
| afum EAL91072.1 | 100.00% | afis EAW22113.1 | 100.00% |
|-----------------|---------|-----------------|---------|

Bootstrap support for afum|EAL91072.1 as seed ortholog is 100%.

Bootstrap support for afis|EAW22113.1 as seed ortholog is 100%.

---

Group of orthologs #2383. Best score 1352 bits

Score difference with first non-orthologous sequence - *A. fumigatus*:1242 *A. fischeri*:943

|                 |         |                 |         |
|-----------------|---------|-----------------|---------|
| afum EAL89328.1 | 100.00% | afis EAW24687.1 | 100.00% |
|-----------------|---------|-----------------|---------|

Bootstrap support for afum|EAL89328.1 as seed ortholog is 100%.

Bootstrap support for afis|EAW24687.1 as seed ortholog is 100%.

---

Group of orthologs #2384. Best score 1351 bits

Score difference with first non-orthologous sequence - *A. fumigatus*:1351 *A. fischeri*:1218

|                 |         |                 |         |
|-----------------|---------|-----------------|---------|
| afum EAL86585.1 | 100.00% | afis EAW17124.1 | 100.00% |
|-----------------|---------|-----------------|---------|

Bootstrap support for afum|EAL86585.1 as seed ortholog is 100%.

Bootstrap support for afis|EAW17124.1 as seed ortholog is 100%.

---

Group of orthologs #2385. Best score 1351 bits

Score difference with first non-orthologous sequence - *A. fumigatus*:1351 *A. fischeri*:1351

|                 |         |                 |         |
|-----------------|---------|-----------------|---------|
| afum EAL85457.1 | 100.00% | afis EAW20331.1 | 100.00% |
|-----------------|---------|-----------------|---------|

Bootstrap support for afum|EAL85457.1 as seed ortholog is 100%.

Bootstrap support for afis|EAW20331.1 as seed ortholog is 100%.

---

Group of orthologs #2386. Best score 1351 bits

Score difference with first non-orthologous sequence - *A. fumigatus*:1351 *A. fischeri*:1351

|                 |         |                 |         |
|-----------------|---------|-----------------|---------|
| afum EAL87025.1 | 100.00% | afis EAW19471.1 | 100.00% |
|-----------------|---------|-----------------|---------|

Bootstrap support for afum|EAL87025.1 as seed ortholog is 100%.

Bootstrap support for afis|EAW19471.1 as seed ortholog is 100%.

---

Group of orthologs #2387. Best score 1351 bits

Score difference with first non-orthologous sequence - *A. fumigatus*:1351 *A. fischeri*:1351

afum|EAL91346.1 100.00% afis|EAW17532.1 100.00%

Bootstrap support for afum|EAL91346.1 as seed ortholog is 100%.

Bootstrap support for afis|EAW17532.1 as seed ortholog is 100%.

---

Group of orthologs #2388. Best score 1351 bits

Score difference with first non-orthologous sequence - *A. fumigatus*:1028 *A. fischeri*:1042

afum|EAL84375.1 100.00% afis|EAW25702.1 100.00%

Bootstrap support for afum|EAL84375.1 as seed ortholog is 100%.

Bootstrap support for afis|EAW25702.1 as seed ortholog is 100%.

---

Group of orthologs #2389. Best score 1351 bits

Score difference with first non-orthologous sequence - *A. fumigatus*:1351 *A. fischeri*:1269

afum|EAL93402.1 100.00% afis|EAW18681.1 100.00%

Bootstrap support for afum|EAL93402.1 as seed ortholog is 100%.

Bootstrap support for afis|EAW18681.1 as seed ortholog is 100%.

---

Group of orthologs #2390. Best score 1351 bits

Score difference with first non-orthologous sequence - *A. fumigatus*:1351 *A. fischeri*:1351

afum|EAL90244.1 100.00% afis|EAW22953.1 100.00%

Bootstrap support for afum|EAL90244.1 as seed ortholog is 100%.

Bootstrap support for afis|EAW22953.1 as seed ortholog is 100%.

---

Group of orthologs #2391. Best score 1350 bits

Score difference with first non-orthologous sequence - *A. fumigatus*:1350 *A. fischeri*:1350

afum|EAL89954.1 100.00% afis|EAW25291.1 100.00%

Bootstrap support for afum|EAL89954.1 as seed ortholog is 100%.

Bootstrap support for afis|EAW25291.1 as seed ortholog is 100%.

---

Group of orthologs #2392. Best score 1349 bits

Score difference with first non-orthologous sequence - *A. fumigatus*:1349 *A. fischeri*:1349

afum|EAL85666.1 100.00% afis|EAW15682.1 100.00%

Bootstrap support for afum|EAL85666.1 as seed ortholog is 100%.

Bootstrap support for afis|EAW15682.1 as seed ortholog is 100%.

---

Group of orthologs #2393. Best score 1349 bits

Score difference with first non-orthologous sequence - *A. fumigatus*:1349 *A. fischeri*:1349

afum|EAL91258.1 100.00% afis|EAW17430.1 100.00%

Bootstrap support for afum|EAL91258.1 as seed ortholog is 100%.

Bootstrap support for afis|EAW17430.1 as seed ortholog is 100%.

---

Group of orthologs #2394. Best score 1349 bits

Score difference with first non-orthologous sequence - *A. fumigatus*:1349 *A. fischeri*:1349

afum|EAL88337.2 100.00% afis|EAW23144.1 100.00%

Bootstrap support for afum|EAL88337.2 as seed ortholog is 100%.

Bootstrap support for afis|EAW23144.1 as seed ortholog is 100%.

---

Group of orthologs #2395. Best score 1348 bits

Score difference with first non-orthologous sequence - *A. fumigatus*:1348 *A. fischeri*:1348

afum|EAL85582.1 100.00% afis|EAW15766.1 100.00%

Bootstrap support for afum|EAL85582.1 as seed ortholog is 100%.

Bootstrap support for afis|EAW15766.1 as seed ortholog is 100%.

---

Group of orthologs #2396. Best score 1348 bits

Score difference with first non-orthologous sequence - *A. fumigatus*:1348 *A. fischeri*:1348

|                 |         |                 |         |
|-----------------|---------|-----------------|---------|
| afum EAL84993.2 | 100.00% | afis EAW19913.1 | 100.00% |
|-----------------|---------|-----------------|---------|

Bootstrap support for afum|EAL84993.2 as seed ortholog is 100%.

Bootstrap support for afis|EAW19913.1 as seed ortholog is 100%.

---

Group of orthologs #2397. Best score 1348 bits

Score difference with first non-orthologous sequence - *A. fumigatus*:1292 *A. fischeri*:1348

|                 |         |                 |         |
|-----------------|---------|-----------------|---------|
| afum EAL86975.1 | 100.00% | afis EAW19531.1 | 100.00% |
|-----------------|---------|-----------------|---------|

Bootstrap support for afum|EAL86975.1 as seed ortholog is 100%.

Bootstrap support for afis|EAW19531.1 as seed ortholog is 100%.

---

Group of orthologs #2398. Best score 1348 bits

Score difference with first non-orthologous sequence - *A. fumigatus*:1348 *A. fischeri*:1348

|                 |         |                 |         |
|-----------------|---------|-----------------|---------|
| afum EAL91850.1 | 100.00% | afis EAW18039.1 | 100.00% |
|-----------------|---------|-----------------|---------|

Bootstrap support for afum|EAL91850.1 as seed ortholog is 100%.

Bootstrap support for afis|EAW18039.1 as seed ortholog is 100%.

---

Group of orthologs #2399. Best score 1348 bits

Score difference with first non-orthologous sequence - *A. fumigatus*:1348 *A. fischeri*:1348

|                 |         |                 |         |
|-----------------|---------|-----------------|---------|
| afum EAL88365.1 | 100.00% | afis EAW23115.1 | 100.00% |
|-----------------|---------|-----------------|---------|

Bootstrap support for afum|EAL88365.1 as seed ortholog is 100%.

Bootstrap support for afis|EAW23115.1 as seed ortholog is 100%.

---

Group of orthologs #2400. Best score 1348 bits

Score difference with first non-orthologous sequence - *A. fumigatus*:1258 *A. fischeri*:1213

|                 |         |                 |         |
|-----------------|---------|-----------------|---------|
| afum EAL93311.1 | 100.00% | afis EAW18603.1 | 100.00% |
|-----------------|---------|-----------------|---------|

Bootstrap support for afum|EAL93311.1 as seed ortholog is 100%.

Bootstrap support for afis|EAW18603.1 as seed ortholog is 100%.

---

Group of orthologs #2401. Best score 1348 bits

Score difference with first non-orthologous sequence - *A. fumigatus*:918 *A. fischeri*:959

|                 |         |                 |         |
|-----------------|---------|-----------------|---------|
| afum EBA27325.1 | 100.00% | afis EAW23630.1 | 100.00% |
|-----------------|---------|-----------------|---------|

Bootstrap support for afum|EBA27325.1 as seed ortholog is 100%.

Bootstrap support for afis|EAW23630.1 as seed ortholog is 100%.

---

Group of orthologs #2402. Best score 1347 bits

Score difference with first non-orthologous sequence - *A. fumigatus*:1347 *A. fischeri*:1347

|                 |         |                 |         |
|-----------------|---------|-----------------|---------|
| afum EBA27303.1 | 100.00% | afis EAW23760.1 | 100.00% |
|-----------------|---------|-----------------|---------|

Bootstrap support for afum|EBA27303.1 as seed ortholog is 100%.

Bootstrap support for afis|EAW23760.1 as seed ortholog is 100%.

---

Group of orthologs #2403. Best score 1346 bits

Score difference with first non-orthologous sequence - *A. fumigatus*:1280 *A. fischeri*:1346

|                 |         |                 |         |
|-----------------|---------|-----------------|---------|
| afum EAL86680.1 | 100.00% | afis EAW17263.1 | 100.00% |
|-----------------|---------|-----------------|---------|

Bootstrap support for afum|EAL86680.1 as seed ortholog is 100%.

Bootstrap support for afis|EAW17263.1 as seed ortholog is 100%.

---

Group of orthologs #2404. Best score 1346 bits

Score difference with first non-orthologous sequence - *A. fumigatus*:1143 *A. fischeri*:1346

|                 |         |                 |         |
|-----------------|---------|-----------------|---------|
| afum EAL86801.1 | 100.00% | afis EAW19725.1 | 100.00% |
|-----------------|---------|-----------------|---------|

Bootstrap support for afum|EAL86801.1 as seed ortholog is 100%.

Bootstrap support for afis|EAW19725.1 as seed ortholog is 100%.

---

Group of orthologs #2405. Best score 1346 bits

Score difference with first non-orthologous sequence - *A. fumigatus*:1346 *A. fischeri*:1346

|                 |         |                 |         |
|-----------------|---------|-----------------|---------|
| afum EAL88423.2 | 100.00% | afis EAW23057.1 | 100.00% |
|-----------------|---------|-----------------|---------|

Bootstrap support for afum|EAL88423.2 as seed ortholog is 100%.



Bootstrap support for afis|EAW23057.1 as seed ortholog is 100%.

---

Group of orthologs #2406. Best score 1346 bits

Score difference with first non-orthologous sequence - *A. fumigatus*:604 *A. fischeri*:1346

afum|EAL93846.1 100.00% afis|EAW19114.1 100.00%

Bootstrap support for afum|EAL93846.1 as seed ortholog is 100%.

Bootstrap support for afis|EAW19114.1 as seed ortholog is 100%.

---

Group of orthologs #2407. Best score 1345 bits

Score difference with first non-orthologous sequence - *A. fumigatus*:1345 *A. fischeri*:1345

afum|EAL86121.1 100.00% afis|EAW24452.1 100.00%

Bootstrap support for afum|EAL86121.1 as seed ortholog is 100%.

Bootstrap support for afis|EAW24452.1 as seed ortholog is 100%.

---

Group of orthologs #2408. Best score 1345 bits

Score difference with first non-orthologous sequence - *A. fumigatus*:1194 *A. fischeri*:1139

afum|EAL91061.1 100.00% afis|EAW22127.1 100.00%

Bootstrap support for afum|EAL91061.1 as seed ortholog is 100%.

Bootstrap support for afis|EAW22127.1 as seed ortholog is 100%.

---

Group of orthologs #2409. Best score 1345 bits

Score difference with first non-orthologous sequence - *A. fumigatus*:1228 *A. fischeri*:1345

afum|EAL89324.1 100.00% afis|EAW24671.1 100.00%

Bootstrap support for afum|EAL89324.1 as seed ortholog is 100%.

Bootstrap support for afis|EAW24671.1 as seed ortholog is 100%.

---

Group of orthologs #2410. Best score 1344 bits

Score difference with first non-orthologous sequence - *A. fumigatus*:948 *A. fischeri*:898

afum|EAL85677.1 100.00% afis|EAW15670.1 100.00%

Bootstrap support for afum|EAL85677.1 as seed ortholog is 100%.

Bootstrap support for afis|EAW15670.1 as seed ortholog is 100%.

---

Group of orthologs #2411. Best score 1344 bits

Score difference with first non-orthologous sequence - *A. fumigatus*:1344 *A. fischeri*:1344

afum|EAL86012.1 100.00% afis|EAW24341.1 100.00%

Bootstrap support for afum|EAL86012.1 as seed ortholog is 100%.

Bootstrap support for afis|EAW24341.1 as seed ortholog is 100%.

---

Group of orthologs #2412. Best score 1344 bits

Score difference with first non-orthologous sequence - *A. fumigatus*:1200 *A. fischeri*:860

afum|EBA27373.1 100.00% afis|EAW16675.1 100.00%

Bootstrap support for afum|EBA27373.1 as seed ortholog is 100%.

Bootstrap support for afis|EAW16675.1 as seed ortholog is 100%.

---

Group of orthologs #2413. Best score 1344 bits

Score difference with first non-orthologous sequence - *A. fumigatus*:1300 *A. fischeri*:1344

afum|EAL87129.1 100.00% afis|EAW23684.1 100.00%

Bootstrap support for afum|EAL87129.1 as seed ortholog is 100%.

Bootstrap support for afis|EAW23684.1 as seed ortholog is 100%.

---

Group of orthologs #2414. Best score 1344 bits

Score difference with first non-orthologous sequence - *A. fumigatus*:1344 *A. fischeri*:1344

afum|EAL90524.1 100.00% afis|EAW22668.1 100.00%

Bootstrap support for afum|EAL90524.1 as seed ortholog is 100%.

Bootstrap support for afis|EAW22668.1 as seed ortholog is 100%.

---

Group of orthologs #2415. Best score 1344 bits

Score difference with first non-orthologous sequence - *A. fumigatus*:1344 *A. fischeri*:1344

afum|EAL89893.1 100.00% afis|EAW25232.1 100.00%

Bootstrap support for afum|EAL89893.1 as seed ortholog is 100%.

Bootstrap support for afis|EAW25232.1 as seed ortholog is 100%.

---

Group of orthologs #2416. Best score 1343 bits

Score difference with first non-orthologous sequence - *A. fumigatus*:1343 *A. fischeri*:1343

afum|EAL84523.1 100.00% afis|EAW20535.1 100.00%

Bootstrap support for afum|EAL84523.1 as seed ortholog is 100%.

Bootstrap support for afis|EAW20535.1 as seed ortholog is 100%.

---

Group of orthologs #2417. Best score 1343 bits

Score difference with first non-orthologous sequence - *A. fumigatus*:1343 *A. fischeri*:1283

afum|EAL84510.1 100.00% afis|EAW20550.1 100.00%

Bootstrap support for afum|EAL84510.1 as seed ortholog is 100%.

Bootstrap support for afis|EAW20550.1 as seed ortholog is 100%.

---

Group of orthologs #2418. Best score 1343 bits

Score difference with first non-orthologous sequence - *A. fumigatus*:1343 *A. fischeri*:1343

afum|EAL89522.1 100.00% afis|EAW24872.1 100.00%

Bootstrap support for afum|EAL89522.1 as seed ortholog is 100%.

Bootstrap support for afis|EAW24872.1 as seed ortholog is 100%.

---

Group of orthologs #2419. Best score 1343 bits

Score difference with first non-orthologous sequence - *A. fumigatus*:1343 *A. fischeri*:1343

afum|EAL89533.1 100.00% afis|EAW24883.1 100.00%

Bootstrap support for afum|EAL89533.1 as seed ortholog is 100%.

Bootstrap support for afis|EAW24883.1 as seed ortholog is 100%.

---

Group of orthologs #2420. Best score 1342 bits

Score difference with first non-orthologous sequence - *A. fumigatus*:1342 *A. fischeri*:1342

afum|EAL91441.1 100.00% afis|EAW17627.1 100.00%

Bootstrap support for afum|EAL91441.1 as seed ortholog is 100%.

Bootstrap support for afis|EAW17627.1 as seed ortholog is 100%.

---

Group of orthologs #2421. Best score 1342 bits

Score difference with first non-orthologous sequence - *A. fumigatus*:1342 *A. fischeri*:1342

afum|EAL86115.1 100.00% afis|EAW24446.1 100.00%

Bootstrap support for afum|EAL86115.1 as seed ortholog is 100%.

Bootstrap support for afis|EAW24446.1 as seed ortholog is 100%.

---

Group of orthologs #2422. Best score 1342 bits

Score difference with first non-orthologous sequence - *A. fumigatus*:1342 *A. fischeri*:1342

afum|EAL92908.1 100.00% afis|EAW21894.1 100.00%

Bootstrap support for afum|EAL92908.1 as seed ortholog is 100%.

Bootstrap support for afis|EAW21894.1 as seed ortholog is 100%.

---

Group of orthologs #2423. Best score 1341 bits

Score difference with first non-orthologous sequence - *A. fumigatus*:1341 *A. fischeri*:1341

afum|EAL88636.1 100.00% afis|EAW16004.1 100.00%

Bootstrap support for afum|EAL88636.1 as seed ortholog is 100%.

Bootstrap support for afis|EAW16004.1 as seed ortholog is 100%.

---

Group of orthologs #2424. Best score 1341 bits

Score difference with first non-orthologous sequence - *A. fumigatus*:65 *A. fischeri*:1341

afum|EAL85181.2      100.00%                      afis|EAW20061.1      100.00%

Bootstrap support for afum|EAL85181.2 as seed ortholog is 98%.

Bootstrap support for afis|EAW20061.1 as seed ortholog is 100%.

---

Group of orthologs #2425. Best score 1341 bits

Score difference with first non-orthologous sequence - *A. fumigatus*:1341    *A. fischeri*:1005

afum|EAL85348.1      100.00%                      afis|EAW20231.1      100.00%

Bootstrap support for afum|EAL85348.1 as seed ortholog is 100%.

Bootstrap support for afis|EAW20231.1 as seed ortholog is 100%.

---

Group of orthologs #2426. Best score 1341 bits

Score difference with first non-orthologous sequence - *A. fumigatus*:1341    *A. fischeri*:1341

afum|EAL86092.1      100.00%                      afis|EAW24424.1      100.00%

Bootstrap support for afum|EAL86092.1 as seed ortholog is 100%.

Bootstrap support for afis|EAW24424.1 as seed ortholog is 100%.

---

Group of orthologs #2427. Best score 1341 bits

Score difference with first non-orthologous sequence - *A. fumigatus*:960    *A. fischeri*:1341

afum|EAL93176.1      100.00%                      afis|EAW18487.1      100.00%

Bootstrap support for afum|EAL93176.1 as seed ortholog is 100%.

Bootstrap support for afis|EAW18487.1 as seed ortholog is 100%.

---

Group of orthologs #2428. Best score 1341 bits

Score difference with first non-orthologous sequence - *A. fumigatus*:1341    *A. fischeri*:1341

afum|EAL93906.1      100.00%                      afis|EAW19176.1      100.00%

Bootstrap support for afum|EAL93906.1 as seed ortholog is 100%.

Bootstrap support for afis|EAW19176.1 as seed ortholog is 100%.

---

Group of orthologs #2429. Best score 1340 bits

Score difference with first non-orthologous sequence - *A. fumigatus*:1340    *A. fischeri*:1272

afum|EAL86646.1      100.00%                      afis|EAW17224.1      100.00%

Bootstrap support for afum|EAL86646.1 as seed ortholog is 100%.

Bootstrap support for afis|EAW17224.1 as seed ortholog is 100%.

---

Group of orthologs #2430. Best score 1340 bits

Score difference with first non-orthologous sequence - *A. fumigatus*:1340    *A. fischeri*:1340

afum|EAL86940.2      100.00%                      afis|EAW19578.1      100.00%

Bootstrap support for afum|EAL86940.2 as seed ortholog is 100%.

Bootstrap support for afis|EAW19578.1 as seed ortholog is 100%.

---

Group of orthologs #2431. Best score 1340 bits

Score difference with first non-orthologous sequence - *A. fumigatus*:1080    *A. fischeri*:950

afum|EAL85690.1      100.00%                      afis|EAW22081.1      100.00%

Bootstrap support for afum|EAL85690.1 as seed ortholog is 100%.

Bootstrap support for afis|EAW22081.1 as seed ortholog is 100%.

---

Group of orthologs #2432. Best score 1340 bits

Score difference with first non-orthologous sequence - *A. fumigatus*:1340    *A. fischeri*:1057

afum|EAL91627.1      100.00%                      afis|EAW17817.1      100.00%

Bootstrap support for afum|EAL91627.1 as seed ortholog is 100%.

Bootstrap support for afis|EAW17817.1 as seed ortholog is 100%.

---

Group of orthologs #2433. Best score 1340 bits

Score difference with first non-orthologous sequence - *A. fumigatus*:1340    *A. fischeri*:1340

afum|EAL94030.1      100.00%                      afis|EAW19314.1      100.00%

Bootstrap support for afum|EAL94030.1 as seed ortholog is 100%.

Bootstrap support for afis|EAW19314.1 as seed ortholog is 100%.

---

Group of orthologs #2434. Best score 1340 bits

Score difference with first non-orthologous sequence - *A. fumigatus*:1340 *A. fischeri*:1340

|                 |         |                 |         |
|-----------------|---------|-----------------|---------|
| afum EAL92513.1 | 100.00% | afis EAW21494.1 | 100.00% |
|-----------------|---------|-----------------|---------|

Bootstrap support for afum|EAL92513.1 as seed ortholog is 100%.

Bootstrap support for afis|EAW21494.1 as seed ortholog is 100%.

---

Group of orthologs #2435. Best score 1339 bits

Score difference with first non-orthologous sequence - *A. fumigatus*:1339 *A. fischeri*:1339

|                 |         |                 |         |
|-----------------|---------|-----------------|---------|
| afum EAL85801.1 | 100.00% | afis EAW15527.1 | 100.00% |
|-----------------|---------|-----------------|---------|

Bootstrap support for afum|EAL85801.1 as seed ortholog is 100%.

Bootstrap support for afis|EAW15527.1 as seed ortholog is 100%.

---

Group of orthologs #2436. Best score 1339 bits

Score difference with first non-orthologous sequence - *A. fumigatus*:1244 *A. fischeri*:1238

|                 |         |                 |         |
|-----------------|---------|-----------------|---------|
| afum EAL86641.1 | 100.00% | afis EAW17215.1 | 100.00% |
|-----------------|---------|-----------------|---------|

Bootstrap support for afum|EAL86641.1 as seed ortholog is 100%.

Bootstrap support for afis|EAW17215.1 as seed ortholog is 100%.

---

Group of orthologs #2437. Best score 1339 bits

Score difference with first non-orthologous sequence - *A. fumigatus*:1339 *A. fischeri*:1339

|                 |         |                 |         |
|-----------------|---------|-----------------|---------|
| afum EAL88565.1 | 100.00% | afis EAW15929.1 | 100.00% |
|-----------------|---------|-----------------|---------|

Bootstrap support for afum|EAL88565.1 as seed ortholog is 100%.

Bootstrap support for afis|EAW15929.1 as seed ortholog is 100%.

---

Group of orthologs #2438. Best score 1339 bits

Score difference with first non-orthologous sequence - *A. fumigatus*:1339 *A. fischeri*:1339

|                 |         |                 |         |
|-----------------|---------|-----------------|---------|
| afum EAL84768.1 | 100.00% | afis EAW20866.1 | 100.00% |
|-----------------|---------|-----------------|---------|

Bootstrap support for afum|EAL84768.1 as seed ortholog is 100%.

Bootstrap support for afis|EAW20866.1 as seed ortholog is 100%.

---

Group of orthologs #2439. Best score 1339 bits

Score difference with first non-orthologous sequence - *A. fumigatus*:1339 *A. fischeri*:1154

|                 |         |                 |         |
|-----------------|---------|-----------------|---------|
| afum EAL91405.1 | 100.00% | afis EAW17592.1 | 100.00% |
|-----------------|---------|-----------------|---------|

Bootstrap support for afum|EAL91405.1 as seed ortholog is 100%.

Bootstrap support for afis|EAW17592.1 as seed ortholog is 100%.

---

Group of orthologs #2440. Best score 1339 bits

Score difference with first non-orthologous sequence - *A. fumigatus*:1063 *A. fischeri*:695

|                 |         |                 |         |
|-----------------|---------|-----------------|---------|
| afum EAL88355.1 | 100.00% | afis EAW23125.1 | 100.00% |
|-----------------|---------|-----------------|---------|

Bootstrap support for afum|EAL88355.1 as seed ortholog is 100%.

Bootstrap support for afis|EAW23125.1 as seed ortholog is 100%.

---

Group of orthologs #2441. Best score 1339 bits

Score difference with first non-orthologous sequence - *A. fumigatus*:1339 *A. fischeri*:1339

|                 |         |                 |         |
|-----------------|---------|-----------------|---------|
| afum EAL89545.1 | 100.00% | afis EAW24892.1 | 100.00% |
|-----------------|---------|-----------------|---------|

Bootstrap support for afum|EAL89545.1 as seed ortholog is 100%.

Bootstrap support for afis|EAW24892.1 as seed ortholog is 100%.

---

Group of orthologs #2442. Best score 1338 bits

Score difference with first non-orthologous sequence - *A. fumigatus*:1338 *A. fischeri*:1338

|                 |         |                 |         |
|-----------------|---------|-----------------|---------|
| afum EAL84454.1 | 100.00% | afis EAW20606.1 | 100.00% |
|-----------------|---------|-----------------|---------|

Bootstrap support for afum|EAL84454.1 as seed ortholog is 100%.

Bootstrap support for afis|EAW20606.1 as seed ortholog is 100%.

---

Group of orthologs #2443. Best score 1338 bits

Score difference with first non-orthologous sequence - *A. fumigatus*:1338 *A. fischeri*:1338

afum|EAL87087.1 100.00% afis|EAW19407.1 100.00%

Bootstrap support for afum|EAL87087.1 as seed ortholog is 100%.

Bootstrap support for afis|EAW19407.1 as seed ortholog is 100%.

---

Group of orthologs #2444. Best score 1337 bits

Score difference with first non-orthologous sequence - *A. fumigatus*:1337 *A. fischeri*:1337

afum|EAL92400.1 100.00% afis|EAW21385.1 100.00%

Bootstrap support for afum|EAL92400.1 as seed ortholog is 100%.

Bootstrap support for afis|EAW21385.1 as seed ortholog is 100%.

---

Group of orthologs #2445. Best score 1337 bits

Score difference with first non-orthologous sequence - *A. fumigatus*:1337 *A. fischeri*:1337

afum|EAL92469.1 100.00% afis|EAW21450.1 100.00%

Bootstrap support for afum|EAL92469.1 as seed ortholog is 100%.

Bootstrap support for afis|EAW21450.1 as seed ortholog is 100%.

---

Group of orthologs #2446. Best score 1337 bits

Score difference with first non-orthologous sequence - *A. fumigatus*:1337 *A. fischeri*:1337

afum|EAL89974.1 100.00% afis|EAW25313.1 100.00%

Bootstrap support for afum|EAL89974.1 as seed ortholog is 100%.

Bootstrap support for afis|EAW25313.1 as seed ortholog is 100%.

---

Group of orthologs #2447. Best score 1336 bits

Score difference with first non-orthologous sequence - *A. fumigatus*:1264 *A. fischeri*:1240

afum|EAL86024.2 100.00% afis|EAW24353.1 100.00%

Bootstrap support for afum|EAL86024.2 as seed ortholog is 100%.

Bootstrap support for afis|EAW24353.1 as seed ortholog is 100%.

---

Group of orthologs #2448. Best score 1336 bits

Score difference with first non-orthologous sequence - *A. fumigatus*:1336 *A. fischeri*:1336

afum|EAL93563.1 100.00% afis|EAW18829.1 100.00%

Bootstrap support for afum|EAL93563.1 as seed ortholog is 100%.

Bootstrap support for afis|EAW18829.1 as seed ortholog is 100%.

---

Group of orthologs #2449. Best score 1335 bits

Score difference with first non-orthologous sequence - *A. fumigatus*:1335 *A. fischeri*:1335

afum|EAL84631.1 100.00% afis|EAW20997.1 100.00%

Bootstrap support for afum|EAL84631.1 as seed ortholog is 100%.

Bootstrap support for afis|EAW20997.1 as seed ortholog is 100%.

---

Group of orthologs #2450. Best score 1335 bits

Score difference with first non-orthologous sequence - *A. fumigatus*:1335 *A. fischeri*:1335

afum|EAL91665.1 100.00% afis|EAW17857.1 100.00%

Bootstrap support for afum|EAL91665.1 as seed ortholog is 100%.

Bootstrap support for afis|EAW17857.1 as seed ortholog is 100%.

---

Group of orthologs #2451. Best score 1335 bits

Score difference with first non-orthologous sequence - *A. fumigatus*:1335 *A. fischeri*:1335

afum|EAL91838.1 100.00% afis|EAW18027.1 100.00%

Bootstrap support for afum|EAL91838.1 as seed ortholog is 100%.

Bootstrap support for afis|EAW18027.1 as seed ortholog is 100%.

---

Group of orthologs #2452. Best score 1335 bits

Score difference with first non-orthologous sequence - *A. fumigatus*:1188 *A. fischeri*:823

|                 |         |                 |         |
|-----------------|---------|-----------------|---------|
| afum EAL88065.2 | 100.00% | afis EAW23405.1 | 100.00% |
|-----------------|---------|-----------------|---------|

Bootstrap support for afum|EAL88065.2 as seed ortholog is 100%.

Bootstrap support for afis|EAW23405.1 as seed ortholog is 100%.

---

Group of orthologs #2453. Best score 1335 bits

Score difference with first non-orthologous sequence - *A. fumigatus*:1335 *A. fischeri*:1335

|                 |         |                 |         |
|-----------------|---------|-----------------|---------|
| afum EAL93704.1 | 100.00% | afis EAW18971.1 | 100.00% |
|-----------------|---------|-----------------|---------|

Bootstrap support for afum|EAL93704.1 as seed ortholog is 100%.

Bootstrap support for afis|EAW18971.1 as seed ortholog is 100%.

---

Group of orthologs #2454. Best score 1335 bits

Score difference with first non-orthologous sequence - *A. fumigatus*:1335 *A. fischeri*:1335

|                 |         |                 |         |
|-----------------|---------|-----------------|---------|
| afum EAL90878.1 | 100.00% | afis EAW22312.1 | 100.00% |
|-----------------|---------|-----------------|---------|

Bootstrap support for afum|EAL90878.1 as seed ortholog is 100%.

Bootstrap support for afis|EAW22312.1 as seed ortholog is 100%.

---

Group of orthologs #2455. Best score 1333 bits

Score difference with first non-orthologous sequence - *A. fumigatus*:1145 *A. fischeri*:894

|                 |         |                 |         |
|-----------------|---------|-----------------|---------|
| afum EAL87611.1 | 100.00% | afis EAW18246.1 | 100.00% |
|-----------------|---------|-----------------|---------|

Bootstrap support for afum|EAL87611.1 as seed ortholog is 100%.

Bootstrap support for afis|EAW18246.1 as seed ortholog is 100%.

---

Group of orthologs #2456. Best score 1333 bits

Score difference with first non-orthologous sequence - *A. fumigatus*:1333 *A. fischeri*:1333

|                 |         |                 |         |
|-----------------|---------|-----------------|---------|
| afum EAL88400.1 | 100.00% | afis EAW23079.1 | 100.00% |
|-----------------|---------|-----------------|---------|

Bootstrap support for afum|EAL88400.1 as seed ortholog is 100%.

Bootstrap support for afis|EAW23079.1 as seed ortholog is 100%.

---

Group of orthologs #2457. Best score 1333 bits

Score difference with first non-orthologous sequence - *A. fumigatus*:1333 *A. fischeri*:1333

|                 |         |                 |         |
|-----------------|---------|-----------------|---------|
| afum EAL91958.1 | 100.00% | afis EAW24104.1 | 100.00% |
|-----------------|---------|-----------------|---------|

Bootstrap support for afum|EAL91958.1 as seed ortholog is 100%.

Bootstrap support for afis|EAW24104.1 as seed ortholog is 100%.

---

Group of orthologs #2458. Best score 1332 bits

Score difference with first non-orthologous sequence - *A. fumigatus*:1332 *A. fischeri*:1332

|                 |         |                 |         |
|-----------------|---------|-----------------|---------|
| afum EAL85653.1 | 100.00% | afis EAW15695.1 | 100.00% |
|-----------------|---------|-----------------|---------|

Bootstrap support for afum|EAL85653.1 as seed ortholog is 100%.

Bootstrap support for afis|EAW15695.1 as seed ortholog is 100%.

---

Group of orthologs #2459. Best score 1332 bits

Score difference with first non-orthologous sequence - *A. fumigatus*:386 *A. fischeri*:1332

|                 |         |                 |         |
|-----------------|---------|-----------------|---------|
| afum EAL86308.1 | 100.00% | afis EAW16734.1 | 100.00% |
|-----------------|---------|-----------------|---------|

Bootstrap support for afum|EAL86308.1 as seed ortholog is 100%.

Bootstrap support for afis|EAW16734.1 as seed ortholog is 100%.

---

Group of orthologs #2460. Best score 1332 bits

Score difference with first non-orthologous sequence - *A. fumigatus*:1332 *A. fischeri*:504

|                 |         |                 |         |
|-----------------|---------|-----------------|---------|
| afum EAL86188.1 | 100.00% | afis EAW24523.1 | 100.00% |
|-----------------|---------|-----------------|---------|

Bootstrap support for afum|EAL86188.1 as seed ortholog is 100%.

Bootstrap support for afis|EAW24523.1 as seed ortholog is 100%.

---

Group of orthologs #2461. Best score 1332 bits

Score difference with first non-orthologous sequence - *A. fumigatus*:1332 *A. fischeri*:1332

|                 |         |                 |         |
|-----------------|---------|-----------------|---------|
| afum EAL88382.2 | 100.00% | afis EAW23096.1 | 100.00% |
|-----------------|---------|-----------------|---------|

Bootstrap support for afum|EAL88382.2 as seed ortholog is 100%.

Bootstrap support for afis|EAW23096.1 as seed ortholog is 100%.

---

Group of orthologs #2462. Best score 1332 bits

Score difference with first non-orthologous sequence - *A. fumigatus*:1332 *A. fischeri*:1332

|                 |         |                 |         |
|-----------------|---------|-----------------|---------|
| afum EAL88320.1 | 100.00% | afis EAW23163.1 | 100.00% |
|-----------------|---------|-----------------|---------|

Bootstrap support for afum|EAL88320.1 as seed ortholog is 100%.

Bootstrap support for afis|EAW23163.1 as seed ortholog is 100%.

---

Group of orthologs #2463. Best score 1332 bits

Score difference with first non-orthologous sequence - *A. fumigatus*:1332 *A. fischeri*:1332

|                 |         |                 |         |
|-----------------|---------|-----------------|---------|
| afum EAL90904.1 | 100.00% | afis EAW22277.1 | 100.00% |
|-----------------|---------|-----------------|---------|

Bootstrap support for afum|EAL90904.1 as seed ortholog is 100%.

Bootstrap support for afis|EAW22277.1 as seed ortholog is 100%.

---

Group of orthologs #2464. Best score 1332 bits

Score difference with first non-orthologous sequence - *A. fumigatus*:1332 *A. fischeri*:1175

|                 |         |                 |         |
|-----------------|---------|-----------------|---------|
| afum EAL92226.1 | 100.00% | afis EAW21215.1 | 100.00% |
|-----------------|---------|-----------------|---------|

Bootstrap support for afum|EAL92226.1 as seed ortholog is 100%.

Bootstrap support for afis|EAW21215.1 as seed ortholog is 100%.

---

Group of orthologs #2465. Best score 1331 bits

Score difference with first non-orthologous sequence - *A. fumigatus*:1331 *A. fischeri*:1331

|                 |         |                 |         |
|-----------------|---------|-----------------|---------|
| afum EAL88676.1 | 100.00% | afis EAW16044.1 | 100.00% |
|-----------------|---------|-----------------|---------|

Bootstrap support for afum|EAL88676.1 as seed ortholog is 100%.

Bootstrap support for afis|EAW16044.1 as seed ortholog is 100%.

---

Group of orthologs #2466. Best score 1330 bits

Score difference with first non-orthologous sequence - *A. fumigatus*:1330 *A. fischeri*:1330

|                 |         |                 |         |
|-----------------|---------|-----------------|---------|
| afum EAL84516.1 | 100.00% | afis EAW20542.1 | 100.00% |
|-----------------|---------|-----------------|---------|

Bootstrap support for afum|EAL84516.1 as seed ortholog is 100%.

Bootstrap support for afis|EAW20542.1 as seed ortholog is 100%.

---

Group of orthologs #2467. Best score 1330 bits

Score difference with first non-orthologous sequence - *A. fumigatus*:1330 *A. fischeri*:1330

|                 |         |                 |         |
|-----------------|---------|-----------------|---------|
| afum EAL84724.2 | 100.00% | afis EAW20910.1 | 100.00% |
|-----------------|---------|-----------------|---------|

Bootstrap support for afum|EAL84724.2 as seed ortholog is 100%.

Bootstrap support for afis|EAW20910.1 as seed ortholog is 100%.

---

Group of orthologs #2468. Best score 1330 bits

Score difference with first non-orthologous sequence - *A. fumigatus*:1330 *A. fischeri*:1330

|                 |         |                 |         |
|-----------------|---------|-----------------|---------|
| afum EAL93274.1 | 100.00% | afis EAW18571.1 | 100.00% |
|-----------------|---------|-----------------|---------|

Bootstrap support for afum|EAL93274.1 as seed ortholog is 100%.

Bootstrap support for afis|EAW18571.1 as seed ortholog is 100%.

---

Group of orthologs #2469. Best score 1330 bits

Score difference with first non-orthologous sequence - *A. fumigatus*:1330 *A. fischeri*:1154

|                 |         |                 |         |
|-----------------|---------|-----------------|---------|
| afum EAL90643.1 | 100.00% | afis EAW22552.1 | 100.00% |
|-----------------|---------|-----------------|---------|

Bootstrap support for afum|EAL90643.1 as seed ortholog is 100%.

Bootstrap support for afis|EAW22552.1 as seed ortholog is 100%.

---

Group of orthologs #2470. Best score 1329 bits

Score difference with first non-orthologous sequence - *A. fumigatus*:1329 *A. fischeri*:1329

|                 |         |                 |         |
|-----------------|---------|-----------------|---------|
| afum EAL85553.2 | 100.00% | afis EAW15797.1 | 100.00% |
|-----------------|---------|-----------------|---------|

Bootstrap support for afum|EAL85553.2 as seed ortholog is 100%.

Bootstrap support for afis|EAW15797.1 as seed ortholog is 100%.

---

Group of orthologs #2471. Best score 1329 bits

Score difference with first non-orthologous sequence - *A. fumigatus*:1329 *A. fischeri*:1017

afum|EAL86453.1 100.00% afis|EAW16927.1 100.00%

Bootstrap support for afum|EAL86453.1 as seed ortholog is 100%.

Bootstrap support for afis|EAW16927.1 as seed ortholog is 100%.

---

Group of orthologs #2472. Best score 1329 bits

Score difference with first non-orthologous sequence - *A. fumigatus*:1164 *A. fischeri*:1040

afum|EAL84915.1 100.00% afis|EAW20004.1 100.00%

Bootstrap support for afum|EAL84915.1 as seed ortholog is 100%.

Bootstrap support for afis|EAW20004.1 as seed ortholog is 100%.

---

Group of orthologs #2473. Best score 1329 bits

Score difference with first non-orthologous sequence - *A. fumigatus*:1122 *A. fischeri*:1126

afum|EAL85178.1 100.00% afis|EAW20058.1 100.00%

Bootstrap support for afum|EAL85178.1 as seed ortholog is 100%.

Bootstrap support for afis|EAW20058.1 as seed ortholog is 100%.

---

Group of orthologs #2474. Best score 1328 bits

Score difference with first non-orthologous sequence - *A. fumigatus*:1328 *A. fischeri*:1328

afum|EAL91626.1 100.00% afis|EAW17816.1 100.00%

Bootstrap support for afum|EAL91626.1 as seed ortholog is 100%.

Bootstrap support for afis|EAW17816.1 as seed ortholog is 100%.

---

Group of orthologs #2475. Best score 1328 bits

Score difference with first non-orthologous sequence - *A. fumigatus*:1328 *A. fischeri*:1328

afum|EAL86077.1 100.00% afis|EAW24408.1 100.00%

Bootstrap support for afum|EAL86077.1 as seed ortholog is 100%.

Bootstrap support for afis|EAW24408.1 as seed ortholog is 100%.

---

Group of orthologs #2476. Best score 1328 bits

Score difference with first non-orthologous sequence - *A. fumigatus*:1328 *A. fischeri*:1328

afum|EAL87434.1 100.00% afis|EAW24004.1 100.00%

Bootstrap support for afum|EAL87434.1 as seed ortholog is 100%.

Bootstrap support for afis|EAW24004.1 as seed ortholog is 100%.

---

Group of orthologs #2477. Best score 1328 bits

Score difference with first non-orthologous sequence - *A. fumigatus*:1328 *A. fischeri*:940

afum|EAL93386.1 100.00% afis|EAW18668.1 100.00%

Bootstrap support for afum|EAL93386.1 as seed ortholog is 100%.

Bootstrap support for afis|EAW18668.1 as seed ortholog is 100%.

---

Group of orthologs #2478. Best score 1328 bits

Score difference with first non-orthologous sequence - *A. fumigatus*:1328 *A. fischeri*:1328

afum|EAL92367.1 100.00% afis|EAW21352.1 100.00%

Bootstrap support for afum|EAL92367.1 as seed ortholog is 100%.

Bootstrap support for afis|EAW21352.1 as seed ortholog is 100%.

---

Group of orthologs #2479. Best score 1327 bits

Score difference with first non-orthologous sequence - *A. fumigatus*:1327 *A. fischeri*:1327

afum|EAL85600.1 100.00% afis|EAW15749.1 100.00%

Bootstrap support for afum|EAL85600.1 as seed ortholog is 100%.

Bootstrap support for afis|EAW15749.1 as seed ortholog is 100%.

---

Group of orthologs #2480. Best score 1327 bits

Score difference with first non-orthologous sequence - *A. fumigatus*:1327 *A. fischeri*:1327



|                 |         |                 |         |
|-----------------|---------|-----------------|---------|
| afum EAL91520.2 | 100.00% | afis EAW17705.1 | 100.00% |
|-----------------|---------|-----------------|---------|

Bootstrap support for afum|EAL91520.2 as seed ortholog is 100%.

Bootstrap support for afis|EAW17705.1 as seed ortholog is 100%.

---

Group of orthologs #2481. Best score 1327 bits

Score difference with first non-orthologous sequence - *A. fumigatus*:995 *A. fischeri*:1327

|                 |         |                 |         |
|-----------------|---------|-----------------|---------|
| afum EAL85879.1 | 100.00% | afis EAW24209.1 | 100.00% |
|-----------------|---------|-----------------|---------|

Bootstrap support for afum|EAL85879.1 as seed ortholog is 100%.

Bootstrap support for afis|EAW24209.1 as seed ortholog is 100%.

---

Group of orthologs #2482. Best score 1327 bits

Score difference with first non-orthologous sequence - *A. fumigatus*:1164 *A. fischeri*:1327

|                 |         |                 |         |
|-----------------|---------|-----------------|---------|
| afum EAL86025.2 | 100.00% | afis EAW24354.1 | 100.00% |
|-----------------|---------|-----------------|---------|

Bootstrap support for afum|EAL86025.2 as seed ortholog is 100%.

Bootstrap support for afis|EAW24354.1 as seed ortholog is 100%.

---

Group of orthologs #2483. Best score 1327 bits

Score difference with first non-orthologous sequence - *A. fumigatus*:1327 *A. fischeri*:1327

|                 |         |                 |         |
|-----------------|---------|-----------------|---------|
| afum EAL89450.2 | 100.00% | afis EAW24808.1 | 100.00% |
|-----------------|---------|-----------------|---------|

Bootstrap support for afum|EAL89450.2 as seed ortholog is 100%.

Bootstrap support for afis|EAW24808.1 as seed ortholog is 100%.

---

Group of orthologs #2484. Best score 1327 bits

Score difference with first non-orthologous sequence - *A. fumigatus*:1327 *A. fischeri*:1327

|                 |         |                 |         |
|-----------------|---------|-----------------|---------|
| afum EAL89895.1 | 100.00% | afis EAW25234.1 | 100.00% |
|-----------------|---------|-----------------|---------|

Bootstrap support for afum|EAL89895.1 as seed ortholog is 100%.

Bootstrap support for afis|EAW25234.1 as seed ortholog is 100%.

---

Group of orthologs #2485. Best score 1326 bits

Score difference with first non-orthologous sequence - *A. fumigatus*:1061 *A. fischeri*:1227

|                 |         |                 |         |
|-----------------|---------|-----------------|---------|
| afum EAL84908.1 | 100.00% | afis EAW20010.1 | 100.00% |
|-----------------|---------|-----------------|---------|

Bootstrap support for afum|EAL84908.1 as seed ortholog is 100%.

Bootstrap support for afis|EAW20010.1 as seed ortholog is 100%.

---

Group of orthologs #2486. Best score 1326 bits

Score difference with first non-orthologous sequence - *A. fumigatus*:1326 *A. fischeri*:1326

|                 |         |                 |         |
|-----------------|---------|-----------------|---------|
| afum EAL91597.1 | 100.00% | afis EAW17788.1 | 100.00% |
|-----------------|---------|-----------------|---------|

Bootstrap support for afum|EAL91597.1 as seed ortholog is 100%.

Bootstrap support for afis|EAW17788.1 as seed ortholog is 100%.

---

Group of orthologs #2487. Best score 1326 bits

Score difference with first non-orthologous sequence - *A. fumigatus*:1326 *A. fischeri*:989

|                 |         |                 |         |
|-----------------|---------|-----------------|---------|
| afum EAL87957.1 | 100.00% | afis EAW23504.1 | 100.00% |
|-----------------|---------|-----------------|---------|

Bootstrap support for afum|EAL87957.1 as seed ortholog is 100%.

Bootstrap support for afis|EAW23504.1 as seed ortholog is 100%.

---

Group of orthologs #2488. Best score 1326 bits

Score difference with first non-orthologous sequence - *A. fumigatus*:1326 *A. fischeri*:1326

|                 |         |                 |         |
|-----------------|---------|-----------------|---------|
| afum EAL87929.1 | 100.00% | afis EAW23537.1 | 100.00% |
|-----------------|---------|-----------------|---------|

Bootstrap support for afum|EAL87929.1 as seed ortholog is 100%.

Bootstrap support for afis|EAW23537.1 as seed ortholog is 100%.

---

Group of orthologs #2489. Best score 1326 bits

Score difference with first non-orthologous sequence - *A. fumigatus*:1326 *A. fischeri*:1326

|                 |         |                 |         |
|-----------------|---------|-----------------|---------|
| afum EAL92849.1 | 100.00% | afis EAW21834.1 | 100.00% |
|-----------------|---------|-----------------|---------|

Bootstrap support for afum|EAL92849.1 as seed ortholog is 100%.

Bootstrap support for afis|EAW21834.1 as seed ortholog is 100%.

---

Group of orthologs #2490. Best score 1325 bits

Score difference with first non-orthologous sequence - *A. fumigatus*:1325 *A. fischeri*:1325

|                 |         |                 |         |
|-----------------|---------|-----------------|---------|
| afum EAL87329.1 | 100.00% | afis EAW23902.1 | 100.00% |
|-----------------|---------|-----------------|---------|

Bootstrap support for afum|EAL87329.1 as seed ortholog is 100%.

Bootstrap support for afis|EAW23902.1 as seed ortholog is 100%.

---

Group of orthologs #2491. Best score 1325 bits

Score difference with first non-orthologous sequence - *A. fumigatus*:1182 *A. fischeri*:1106

|                 |         |                 |         |
|-----------------|---------|-----------------|---------|
| afum EAL92115.1 | 100.00% | afis EAW21092.1 | 100.00% |
|-----------------|---------|-----------------|---------|

Bootstrap support for afum|EAL92115.1 as seed ortholog is 100%.

Bootstrap support for afis|EAW21092.1 as seed ortholog is 100%.

---

Group of orthologs #2492. Best score 1325 bits

Score difference with first non-orthologous sequence - *A. fumigatus*:1325 *A. fischeri*:1325

|                 |         |                 |         |
|-----------------|---------|-----------------|---------|
| afum EAL89691.2 | 100.00% | afis EAW25006.1 | 100.00% |
|-----------------|---------|-----------------|---------|

Bootstrap support for afum|EAL89691.2 as seed ortholog is 100%.

Bootstrap support for afis|EAW25006.1 as seed ortholog is 100%.

---

Group of orthologs #2493. Best score 1324 bits

Score difference with first non-orthologous sequence - *A. fumigatus*:1107 *A. fischeri*:1187

|                 |         |                 |         |
|-----------------|---------|-----------------|---------|
| afum EAL88366.1 | 100.00% | afis EAW23113.1 | 100.00% |
|-----------------|---------|-----------------|---------|

Bootstrap support for afum|EAL88366.1 as seed ortholog is 100%.

Bootstrap support for afis|EAW23113.1 as seed ortholog is 100%.

---

Group of orthologs #2494. Best score 1324 bits

Score difference with first non-orthologous sequence - *A. fumigatus*:1324 *A. fischeri*:1324

|                 |         |                 |         |
|-----------------|---------|-----------------|---------|
| afum EAL93789.1 | 100.00% | afis EAW19060.1 | 100.00% |
|-----------------|---------|-----------------|---------|

Bootstrap support for afum|EAL93789.1 as seed ortholog is 100%.

Bootstrap support for afis|EAW19060.1 as seed ortholog is 100%.

---

Group of orthologs #2495. Best score 1324 bits

Score difference with first non-orthologous sequence - *A. fumigatus*:1324 *A. fischeri*:1171

|                 |         |                 |         |
|-----------------|---------|-----------------|---------|
| afum EAL92212.1 | 100.00% | afis EAW21202.1 | 100.00% |
|-----------------|---------|-----------------|---------|

Bootstrap support for afum|EAL92212.1 as seed ortholog is 100%.

Bootstrap support for afis|EAW21202.1 as seed ortholog is 100%.

---

Group of orthologs #2496. Best score 1324 bits

Score difference with first non-orthologous sequence - *A. fumigatus*:1324 *A. fischeri*:1324

|                 |         |                 |         |
|-----------------|---------|-----------------|---------|
| afum EAL89939.1 | 100.00% | afis EAW25276.1 | 100.00% |
|-----------------|---------|-----------------|---------|

Bootstrap support for afum|EAL89939.1 as seed ortholog is 100%.

Bootstrap support for afis|EAW25276.1 as seed ortholog is 100%.

---

Group of orthologs #2497. Best score 1324 bits

Score difference with first non-orthologous sequence - *A. fumigatus*:1223 *A. fischeri*:1197

|                 |         |                 |         |
|-----------------|---------|-----------------|---------|
| afum EBA27381.1 | 100.00% | afis EAW24765.1 | 100.00% |
|-----------------|---------|-----------------|---------|

Bootstrap support for afum|EBA27381.1 as seed ortholog is 100%.

Bootstrap support for afis|EAW24765.1 as seed ortholog is 100%.

---

Group of orthologs #2498. Best score 1323 bits

Score difference with first non-orthologous sequence - *A. fumigatus*:1323 *A. fischeri*:1323

|                 |         |                 |         |
|-----------------|---------|-----------------|---------|
| afum EAL88560.2 | 100.00% | afis EAW15923.1 | 100.00% |
|-----------------|---------|-----------------|---------|

Bootstrap support for afum|EAL88560.2 as seed ortholog is 100%.

Bootstrap support for afis|EAW15923.1 as seed ortholog is 100%.

---

Group of orthologs #2499. Best score 1323 bits

Score difference with first non-orthologous sequence - *A. fumigatus*:1323 *A. fischeri*:1323

afum|EAL89504.1 100.00% afis|EAW24856.1 100.00%

Bootstrap support for afum|EAL89504.1 as seed ortholog is 100%.

Bootstrap support for afis|EAW24856.1 as seed ortholog is 100%.

---

Group of orthologs #2500. Best score 1322 bits

Score difference with first non-orthologous sequence - *A. fumigatus*:1322 *A. fischeri*:1322

afum|EAL85289.1 100.00% afis|EAW20171.1 100.00%

Bootstrap support for afum|EAL85289.1 as seed ortholog is 100%.

Bootstrap support for afis|EAW20171.1 as seed ortholog is 100%.

---

Group of orthologs #2501. Best score 1322 bits

Score difference with first non-orthologous sequence - *A. fumigatus*:1322 *A. fischeri*:1322

afum|EAL89470.1 100.00% afis|EAW24826.1 100.00%

Bootstrap support for afum|EAL89470.1 as seed ortholog is 100%.

Bootstrap support for afis|EAW24826.1 as seed ortholog is 100%.

---

Group of orthologs #2502. Best score 1321 bits

Score difference with first non-orthologous sequence - *A. fumigatus*:1321 *A. fischeri*:1321

afum|EAL84584.1 100.00% afis|EAW20468.1 100.00%

Bootstrap support for afum|EAL84584.1 as seed ortholog is 100%.

Bootstrap support for afis|EAW20468.1 as seed ortholog is 100%.

---

Group of orthologs #2503. Best score 1321 bits

Score difference with first non-orthologous sequence - *A. fumigatus*:1110 *A. fischeri*:1148

afum|EAL93718.1 100.00% afis|EAW18982.1 100.00%

Bootstrap support for afum|EAL93718.1 as seed ortholog is 100%.

Bootstrap support for afis|EAW18982.1 as seed ortholog is 100%.

---

Group of orthologs #2504. Best score 1321 bits

Score difference with first non-orthologous sequence - *A. fumigatus*:1321 *A. fischeri*:1321

afum|EAL93899.1 100.00% afis|EAW19169.1 100.00%

Bootstrap support for afum|EAL93899.1 as seed ortholog is 100%.

Bootstrap support for afis|EAW19169.1 as seed ortholog is 100%.

---

Group of orthologs #2505. Best score 1321 bits

Score difference with first non-orthologous sequence - *A. fumigatus*:1321 *A. fischeri*:1321

afum|EBA27212.1 100.00% afis|EAW19979.1 100.00%

Bootstrap support for afum|EBA27212.1 as seed ortholog is 100%.

Bootstrap support for afis|EAW19979.1 as seed ortholog is 100%.

---

Group of orthologs #2506. Best score 1321 bits

Score difference with first non-orthologous sequence - *A. fumigatus*:1321 *A. fischeri*:1321

afum|EAL89792.1 100.00% afis|EAW25121.1 100.00%

Bootstrap support for afum|EAL89792.1 as seed ortholog is 100%.

Bootstrap support for afis|EAW25121.1 as seed ortholog is 100%.

---

Group of orthologs #2507. Best score 1320 bits

Score difference with first non-orthologous sequence - *A. fumigatus*:1059 *A. fischeri*:1320

afum|EAL88956.1 100.00% afis|EAW16331.1 100.00%

Bootstrap support for afum|EAL88956.1 as seed ortholog is 100%.

Bootstrap support for afis|EAW16331.1 as seed ortholog is 100%.

---

Group of orthologs #2508. Best score 1320 bits

Score difference with first non-orthologous sequence - *A. fumigatus*:1234 *A. fischeri*:1320

|                 |         |                 |         |
|-----------------|---------|-----------------|---------|
| afum EAL91599.1 | 100.00% | afis EAW17790.1 | 100.00% |
|-----------------|---------|-----------------|---------|

Bootstrap support for afum|EAL91599.1 as seed ortholog is 100%.

Bootstrap support for afis|EAW17790.1 as seed ortholog is 100%.

---

Group of orthologs #2509. Best score 1320 bits

Score difference with first non-orthologous sequence - *A. fumigatus*:1320 *A. fischeri*:1320

|                 |         |                 |         |
|-----------------|---------|-----------------|---------|
| afum EAL92618.1 | 100.00% | afis EAW21599.1 | 100.00% |
|-----------------|---------|-----------------|---------|

Bootstrap support for afum|EAL92618.1 as seed ortholog is 100%.

Bootstrap support for afis|EAW21599.1 as seed ortholog is 100%.

---

Group of orthologs #2510. Best score 1320 bits

Score difference with first non-orthologous sequence - *A. fumigatus*:1320 *A. fischeri*:1320

|                 |         |                 |         |
|-----------------|---------|-----------------|---------|
| afum EBA27203.1 | 100.00% | afis EAW20900.1 | 100.00% |
|-----------------|---------|-----------------|---------|

Bootstrap support for afum|EBA27203.1 as seed ortholog is 100%.

Bootstrap support for afis|EAW20900.1 as seed ortholog is 100%.

---

Group of orthologs #2511. Best score 1319 bits

Score difference with first non-orthologous sequence - *A. fumigatus*:1319 *A. fischeri*:1319

|                 |         |                 |         |
|-----------------|---------|-----------------|---------|
| afum EAL91425.1 | 100.00% | afis EAW17612.1 | 100.00% |
|-----------------|---------|-----------------|---------|

Bootstrap support for afum|EAL91425.1 as seed ortholog is 100%.

Bootstrap support for afis|EAW17612.1 as seed ortholog is 100%.

---

Group of orthologs #2512. Best score 1319 bits

Score difference with first non-orthologous sequence - *A. fumigatus*:1319 *A. fischeri*:1319

|                 |         |                 |         |
|-----------------|---------|-----------------|---------|
| afum EAL91462.1 | 100.00% | afis EAW17647.1 | 100.00% |
|-----------------|---------|-----------------|---------|

Bootstrap support for afum|EAL91462.1 as seed ortholog is 100%.

Bootstrap support for afis|EAW17647.1 as seed ortholog is 100%.

---

Group of orthologs #2513. Best score 1319 bits

Score difference with first non-orthologous sequence - *A. fumigatus*:760 *A. fischeri*:1120

|                 |         |                 |         |
|-----------------|---------|-----------------|---------|
| afum EAL92781.2 | 100.00% | afis EAW21750.1 | 100.00% |
|-----------------|---------|-----------------|---------|

Bootstrap support for afum|EAL92781.2 as seed ortholog is 100%.

Bootstrap support for afis|EAW21750.1 as seed ortholog is 100%.

---

Group of orthologs #2514. Best score 1318 bits

Score difference with first non-orthologous sequence - *A. fumigatus*:1318 *A. fischeri*:1318

|                 |         |                 |         |
|-----------------|---------|-----------------|---------|
| afum EAL93770.1 | 100.00% | afis EAW19041.1 | 100.00% |
|-----------------|---------|-----------------|---------|

Bootstrap support for afum|EAL93770.1 as seed ortholog is 100%.

Bootstrap support for afis|EAW19041.1 as seed ortholog is 100%.

---

Group of orthologs #2515. Best score 1318 bits

Score difference with first non-orthologous sequence - *A. fumigatus*:1133 *A. fischeri*:819

|                 |         |                 |         |
|-----------------|---------|-----------------|---------|
| afum EAL89427.1 | 100.00% | afis EAW24788.1 | 100.00% |
|-----------------|---------|-----------------|---------|

Bootstrap support for afum|EAL89427.1 as seed ortholog is 100%.

Bootstrap support for afis|EAW24788.1 as seed ortholog is 100%.

---

Group of orthologs #2516. Best score 1317 bits

Score difference with first non-orthologous sequence - *A. fumigatus*:1317 *A. fischeri*:1317

|                 |         |                 |         |
|-----------------|---------|-----------------|---------|
| afum EAL88991.1 | 100.00% | afis EAW16366.1 | 100.00% |
|-----------------|---------|-----------------|---------|

Bootstrap support for afum|EAL88991.1 as seed ortholog is 100%.

Bootstrap support for afis|EAW16366.1 as seed ortholog is 100%.

---

Group of orthologs #2517. Best score 1317 bits

Score difference with first non-orthologous sequence - *A. fumigatus*:1128 *A. fischeri*:1317

|                 |         |                 |         |
|-----------------|---------|-----------------|---------|
| afum EAL84394.2 | 100.00% | afis EAW25719.1 | 100.00% |
|-----------------|---------|-----------------|---------|

Bootstrap support for afum|EAL84394.2 as seed ortholog is 100%.

Bootstrap support for afis|EAW25719.1 as seed ortholog is 100%.

---

Group of orthologs #2518. Best score 1317 bits

Score difference with first non-orthologous sequence - *A. fumigatus*:1048 *A. fischeri*:1317

afum|EAL87356.1 100.00% afis|EAW23931.1 100.00%

Bootstrap support for afum|EAL87356.1 as seed ortholog is 100%.

Bootstrap support for afis|EAW23931.1 as seed ortholog is 100%.

---

Group of orthologs #2519. Best score 1317 bits

Score difference with first non-orthologous sequence - *A. fumigatus*:1317 *A. fischeri*:1250

afum|EAL91998.1 100.00% afis|EAW24143.1 100.00%

Bootstrap support for afum|EAL91998.1 as seed ortholog is 100%.

Bootstrap support for afis|EAW24143.1 as seed ortholog is 100%.

---

Group of orthologs #2520. Best score 1316 bits

Score difference with first non-orthologous sequence - *A. fumigatus*:1316 *A. fischeri*:1048

afum|EAL89217.1 100.00% afis|EAW16620.1 100.00%

Bootstrap support for afum|EAL89217.1 as seed ortholog is 100%.

Bootstrap support for afis|EAW16620.1 as seed ortholog is 100%.

---

Group of orthologs #2521. Best score 1316 bits

Score difference with first non-orthologous sequence - *A. fumigatus*:1220 *A. fischeri*:1316

afum|EAL87695.1 100.00% afis|EAW18330.1 100.00%

Bootstrap support for afum|EAL87695.1 as seed ortholog is 100%.

Bootstrap support for afis|EAW18330.1 as seed ortholog is 100%.

---

Group of orthologs #2522. Best score 1316 bits

Score difference with first non-orthologous sequence - *A. fumigatus*:1316 *A. fischeri*:1222

afum|EAL89372.1 100.00% afis|EAW24723.1 100.00%

Bootstrap support for afum|EAL89372.1 as seed ortholog is 100%.

Bootstrap support for afis|EAW24723.1 as seed ortholog is 100%.

---

Group of orthologs #2523. Best score 1315 bits

Score difference with first non-orthologous sequence - *A. fumigatus*:1315 *A. fischeri*:1315

afum|EAL88593.1 100.00% afis|EAW15960.1 100.00%

Bootstrap support for afum|EAL88593.1 as seed ortholog is 100%.

Bootstrap support for afis|EAW15960.1 as seed ortholog is 100%.

---

Group of orthologs #2524. Best score 1315 bits

Score difference with first non-orthologous sequence - *A. fumigatus*:960 *A. fischeri*:1031

afum|EAL91624.1 100.00% afis|EAW17815.1 100.00%

Bootstrap support for afum|EAL91624.1 as seed ortholog is 100%.

Bootstrap support for afis|EAW17815.1 as seed ortholog is 100%.

---

Group of orthologs #2525. Best score 1315 bits

Score difference with first non-orthologous sequence - *A. fumigatus*:1315 *A. fischeri*:1315

afum|EAL92752.1 100.00% afis|EAW21719.1 100.00%

Bootstrap support for afum|EAL92752.1 as seed ortholog is 100%.

Bootstrap support for afis|EAW21719.1 as seed ortholog is 100%.

---

Group of orthologs #2526. Best score 1315 bits

Score difference with first non-orthologous sequence - *A. fumigatus*:1040 *A. fischeri*:873

afum|EAL89485.1 100.00% afis|EAW24839.1 100.00%

Bootstrap support for afum|EAL89485.1 as seed ortholog is 100%.

Bootstrap support for afis|EAW24839.1 as seed ortholog is 100%.

---

Group of orthologs #2527. Best score 1315 bits

Score difference with first non-orthologous sequence - *A. fumigatus*:1315 *A. fischeri*:1315

afum|EAL89936.1 100.00% afis|EAW25273.1 100.00%

Bootstrap support for afum|EAL89936.1 as seed ortholog is 100%.

Bootstrap support for afis|EAW25273.1 as seed ortholog is 100%.

---

Group of orthologs #2528. Best score 1314 bits

Score difference with first non-orthologous sequence - *A. fumigatus*:1314 *A. fischeri*:1314

afum|EAL84561.1 100.00% afis|EAW20493.1 100.00%

Bootstrap support for afum|EAL84561.1 as seed ortholog is 100%.

Bootstrap support for afis|EAW20493.1 as seed ortholog is 100%.

---

Group of orthologs #2529. Best score 1314 bits

Score difference with first non-orthologous sequence - *A. fumigatus*:1241 *A. fischeri*:1078

afum|EAL84320.1 100.00% afis|EAW25632.1 100.00%

Bootstrap support for afum|EAL84320.1 as seed ortholog is 100%.

Bootstrap support for afis|EAW25632.1 as seed ortholog is 100%.

---

Group of orthologs #2530. Best score 1314 bits

Score difference with first non-orthologous sequence - *A. fumigatus*:863 *A. fischeri*:1164

afum|EAL87274.1 100.00% afis|EAW23843.1 100.00%

Bootstrap support for afum|EAL87274.1 as seed ortholog is 100%.

Bootstrap support for afis|EAW23843.1 as seed ortholog is 100%.

---

Group of orthologs #2531. Best score 1314 bits

Score difference with first non-orthologous sequence - *A. fumigatus*:1314 *A. fischeri*:1314

afum|EAL88012.1 100.00% afis|EAW23454.1 100.00%

Bootstrap support for afum|EAL88012.1 as seed ortholog is 100%.

Bootstrap support for afis|EAW23454.1 as seed ortholog is 100%.

---

Group of orthologs #2532. Best score 1314 bits

Score difference with first non-orthologous sequence - *A. fumigatus*:928 *A. fischeri*:974

afum|EAL93985.1 100.00% afis|EAW19258.1 100.00%

Bootstrap support for afum|EAL93985.1 as seed ortholog is 100%.

Bootstrap support for afis|EAW19258.1 as seed ortholog is 100%.

---

Group of orthologs #2533. Best score 1313 bits

Score difference with first non-orthologous sequence - *A. fumigatus*:1261 *A. fischeri*:1313

afum|EAL84687.1 100.00% afis|EAW20947.1 100.00%

Bootstrap support for afum|EAL84687.1 as seed ortholog is 100%.

Bootstrap support for afis|EAW20947.1 as seed ortholog is 100%.

---

Group of orthologs #2534. Best score 1313 bits

Score difference with first non-orthologous sequence - *A. fumigatus*:1313 *A. fischeri*:1313

afum|EAL91302.1 100.00% afis|EAW17473.1 100.00%

Bootstrap support for afum|EAL91302.1 as seed ortholog is 100%.

Bootstrap support for afis|EAW17473.1 as seed ortholog is 100%.

---

Group of orthologs #2535. Best score 1313 bits

Score difference with first non-orthologous sequence - *A. fumigatus*:1313 *A. fischeri*:1313

afum|EAL92318.1 100.00% afis|EAW21301.1 100.00%

Bootstrap support for afum|EAL92318.1 as seed ortholog is 100%.

Bootstrap support for afis|EAW21301.1 as seed ortholog is 100%.

---

Group of orthologs #2536. Best score 1313 bits

Score difference with first non-orthologous sequence - *A. fumigatus*:1313 *A. fischeri*:1313

|                 |         |                 |         |
|-----------------|---------|-----------------|---------|
| afum EAL89442.1 | 100.00% | afis EAW24801.1 | 100.00% |
|-----------------|---------|-----------------|---------|

Bootstrap support for afum|EAL89442.1 as seed ortholog is 100%.

Bootstrap support for afis|EAW24801.1 as seed ortholog is 100%.

---

Group of orthologs #2537. Best score 1313 bits

Score difference with first non-orthologous sequence - *A. fumigatus*:1313 *A. fischeri*:1313

|                 |         |                 |         |
|-----------------|---------|-----------------|---------|
| afum EAL89814.1 | 100.00% | afis EAW25142.1 | 100.00% |
|-----------------|---------|-----------------|---------|

Bootstrap support for afum|EAL89814.1 as seed ortholog is 100%.

Bootstrap support for afis|EAW25142.1 as seed ortholog is 100%.

---

Group of orthologs #2538. Best score 1313 bits

Score difference with first non-orthologous sequence - *A. fumigatus*:964 *A. fischeri*:864

|                 |         |                 |         |
|-----------------|---------|-----------------|---------|
| afum EAL89929.1 | 100.00% | afis EAW25266.1 | 100.00% |
|-----------------|---------|-----------------|---------|

Bootstrap support for afum|EAL89929.1 as seed ortholog is 100%.

Bootstrap support for afis|EAW25266.1 as seed ortholog is 100%.

---

Group of orthologs #2539. Best score 1312 bits

Score difference with first non-orthologous sequence - *A. fumigatus*:1312 *A. fischeri*:1312

|                 |         |                 |         |
|-----------------|---------|-----------------|---------|
| afum EAL87714.1 | 100.00% | afis EAW18351.1 | 100.00% |
|-----------------|---------|-----------------|---------|

Bootstrap support for afum|EAL87714.1 as seed ortholog is 100%.

Bootstrap support for afis|EAW18351.1 as seed ortholog is 100%.

---

Group of orthologs #2540. Best score 1312 bits

Score difference with first non-orthologous sequence - *A. fumigatus*:1312 *A. fischeri*:1312

|                 |         |                 |         |
|-----------------|---------|-----------------|---------|
| afum EAL91485.1 | 100.00% | afis EAW17671.1 | 100.00% |
|-----------------|---------|-----------------|---------|

Bootstrap support for afum|EAL91485.1 as seed ortholog is 100%.

Bootstrap support for afis|EAW17671.1 as seed ortholog is 100%.

---

Group of orthologs #2541. Best score 1312 bits

Score difference with first non-orthologous sequence - *A. fumigatus*:1127 *A. fischeri*:1031

|                 |         |                 |         |
|-----------------|---------|-----------------|---------|
| afum EAL84335.1 | 100.00% | afis EAW25663.1 | 100.00% |
|-----------------|---------|-----------------|---------|

Bootstrap support for afum|EAL84335.1 as seed ortholog is 100%.

Bootstrap support for afis|EAW25663.1 as seed ortholog is 100%.

---

Group of orthologs #2542. Best score 1312 bits

Score difference with first non-orthologous sequence - *A. fumigatus*:1312 *A. fischeri*:1312

|                 |         |                 |         |
|-----------------|---------|-----------------|---------|
| afum EAL91000.1 | 100.00% | afis EAW22191.1 | 100.00% |
|-----------------|---------|-----------------|---------|

Bootstrap support for afum|EAL91000.1 as seed ortholog is 100%.

Bootstrap support for afis|EAW22191.1 as seed ortholog is 100%.

---

Group of orthologs #2543. Best score 1312 bits

Score difference with first non-orthologous sequence - *A. fumigatus*:1312 *A. fischeri*:1312

|                 |         |                 |         |
|-----------------|---------|-----------------|---------|
| afum EAL92685.2 | 100.00% | afis EAW21651.1 | 100.00% |
|-----------------|---------|-----------------|---------|

Bootstrap support for afum|EAL92685.2 as seed ortholog is 100%.

Bootstrap support for afis|EAW21651.1 as seed ortholog is 100%.

---

Group of orthologs #2544. Best score 1311 bits

Score difference with first non-orthologous sequence - *A. fumigatus*:1311 *A. fischeri*:1311

|                 |         |                 |         |
|-----------------|---------|-----------------|---------|
| afum EAL84619.1 | 100.00% | afis EAW20432.1 | 100.00% |
|-----------------|---------|-----------------|---------|

Bootstrap support for afum|EAL84619.1 as seed ortholog is 100%.

Bootstrap support for afis|EAW20432.1 as seed ortholog is 100%.

---

Group of orthologs #2545. Best score 1311 bits

Score difference with first non-orthologous sequence - *A. fumigatus*:1311 *A. fischeri*:507

|                 |         |                 |         |
|-----------------|---------|-----------------|---------|
| afum EAL84797.1 | 100.00% | afis EAW20837.1 | 100.00% |
|-----------------|---------|-----------------|---------|

Bootstrap support for afum|EAL84797.1 as seed ortholog is 100%.

Bootstrap support for afis|EAW20837.1 as seed ortholog is 100%.

---

Group of orthologs #2546. Best score 1311 bits

Score difference with first non-orthologous sequence - *A. fumigatus*:1311 *A. fischeri*:1311

|                 |         |                 |         |
|-----------------|---------|-----------------|---------|
| afum EAL91252.1 | 100.00% | afis EAW17424.1 | 100.00% |
|-----------------|---------|-----------------|---------|

Bootstrap support for afum|EAL91252.1 as seed ortholog is 100%.

Bootstrap support for afis|EAW17424.1 as seed ortholog is 100%.

---

Group of orthologs #2547. Best score 1311 bits

Score difference with first non-orthologous sequence - *A. fumigatus*:1311 *A. fischeri*:1311

|                 |         |                 |         |
|-----------------|---------|-----------------|---------|
| afum EAL86234.1 | 100.00% | afis EAW24571.1 | 100.00% |
|-----------------|---------|-----------------|---------|

Bootstrap support for afum|EAL86234.1 as seed ortholog is 100%.

Bootstrap support for afis|EAW24571.1 as seed ortholog is 100%.

---

Group of orthologs #2548. Best score 1311 bits

Score difference with first non-orthologous sequence - *A. fumigatus*:1311 *A. fischeri*:1311

|                 |         |                 |         |
|-----------------|---------|-----------------|---------|
| afum EAL92063.1 | 100.00% | afis EAW21024.1 | 100.00% |
|-----------------|---------|-----------------|---------|

Bootstrap support for afum|EAL92063.1 as seed ortholog is 100%.

Bootstrap support for afis|EAW21024.1 as seed ortholog is 100%.

---

Group of orthologs #2549. Best score 1311 bits

Score difference with first non-orthologous sequence - *A. fumigatus*:1311 *A. fischeri*:1311

|                 |         |                 |         |
|-----------------|---------|-----------------|---------|
| afum EAL90784.1 | 100.00% | afis EAW22408.1 | 100.00% |
|-----------------|---------|-----------------|---------|

Bootstrap support for afum|EAL90784.1 as seed ortholog is 100%.

Bootstrap support for afis|EAW22408.1 as seed ortholog is 100%.

---

Group of orthologs #2550. Best score 1310 bits

Score difference with first non-orthologous sequence - *A. fumigatus*:1310 *A. fischeri*:1310

|                 |         |                 |         |
|-----------------|---------|-----------------|---------|
| afum EAL87489.1 | 100.00% | afis EAW18132.1 | 100.00% |
|-----------------|---------|-----------------|---------|

Bootstrap support for afum|EAL87489.1 as seed ortholog is 100%.

Bootstrap support for afis|EAW18132.1 as seed ortholog is 100%.

---

Group of orthologs #2551. Best score 1310 bits

Score difference with first non-orthologous sequence - *A. fumigatus*:1310 *A. fischeri*:1310

|                 |         |                 |         |
|-----------------|---------|-----------------|---------|
| afum EAL87497.1 | 100.00% | afis EAW18140.1 | 100.00% |
|-----------------|---------|-----------------|---------|

Bootstrap support for afum|EAL87497.1 as seed ortholog is 100%.

Bootstrap support for afis|EAW18140.1 as seed ortholog is 100%.

---

Group of orthologs #2552. Best score 1310 bits

Score difference with first non-orthologous sequence - *A. fumigatus*:1310 *A. fischeri*:1310

|                 |         |                 |         |
|-----------------|---------|-----------------|---------|
| afum EAL88426.1 | 100.00% | afis EAW23054.1 | 100.00% |
|-----------------|---------|-----------------|---------|

Bootstrap support for afum|EAL88426.1 as seed ortholog is 100%.

Bootstrap support for afis|EAW23054.1 as seed ortholog is 100%.

---

Group of orthologs #2553. Best score 1310 bits

Score difference with first non-orthologous sequence - *A. fumigatus*:1310 *A. fischeri*:1310

|                 |         |                 |         |
|-----------------|---------|-----------------|---------|
| afum EBA27452.1 | 100.00% | afis EAW21171.1 | 100.00% |
|-----------------|---------|-----------------|---------|

Bootstrap support for afum|EBA27452.1 as seed ortholog is 100%.

Bootstrap support for afis|EAW21171.1 as seed ortholog is 100%.

---

Group of orthologs #2554. Best score 1309 bits

Score difference with first non-orthologous sequence - *A. fumigatus*:1309 *A. fischeri*:1309

|                 |         |                 |         |
|-----------------|---------|-----------------|---------|
| afum EAL93108.1 | 100.00% | afis EAW18427.1 | 100.00% |
|-----------------|---------|-----------------|---------|

Bootstrap support for afum|EAL93108.1 as seed ortholog is 100%.

Bootstrap support for afis|EAW18427.1 as seed ortholog is 100%.

---



Group of orthologs #2555. Best score 1309 bits

Score difference with first non-orthologous sequence - *A. fumigatus*:1309 *A. fischeri*:1309

afum|EAL87975.1 100.00% afis|EAW23488.1 100.00%

Bootstrap support for afum|EAL87975.1 as seed ortholog is 100%.

Bootstrap support for afis|EAW23488.1 as seed ortholog is 100%.

---

Group of orthologs #2556. Best score 1309 bits

Score difference with first non-orthologous sequence - *A. fumigatus*:1309 *A. fischeri*:1309

afum|EAL91028.1 100.00% afis|EAW22163.1 100.00%

Bootstrap support for afum|EAL91028.1 as seed ortholog is 100%.

Bootstrap support for afis|EAW22163.1 as seed ortholog is 100%.

---

Group of orthologs #2557. Best score 1308 bits

Score difference with first non-orthologous sequence - *A. fumigatus*:1308 *A. fischeri*:1308

afum|EAL88686.1 100.00% afis|EAW16054.1 100.00%

Bootstrap support for afum|EAL88686.1 as seed ortholog is 100%.

Bootstrap support for afis|EAW16054.1 as seed ortholog is 100%.

---

Group of orthologs #2558. Best score 1308 bits

Score difference with first non-orthologous sequence - *A. fumigatus*:1308 *A. fischeri*:1308

afum|EAL89002.1 100.00% afis|EAW16377.1 100.00%

Bootstrap support for afum|EAL89002.1 as seed ortholog is 100%.

Bootstrap support for afis|EAW16377.1 as seed ortholog is 100%.

---

Group of orthologs #2559. Best score 1308 bits

Score difference with first non-orthologous sequence - *A. fumigatus*:1308 *A. fischeri*:1308

afum|EAL93370.1 100.00% afis|EAW18654.1 100.00%

Bootstrap support for afum|EAL93370.1 as seed ortholog is 100%.

Bootstrap support for afis|EAW18654.1 as seed ortholog is 100%.

---

Group of orthologs #2560. Best score 1308 bits

Score difference with first non-orthologous sequence - *A. fumigatus*:1308 *A. fischeri*:1308

afum|EAL92502.1 100.00% afis|EAW21482.1 100.00%

Bootstrap support for afum|EAL92502.1 as seed ortholog is 100%.

Bootstrap support for afis|EAW21482.1 as seed ortholog is 100%.

---

Group of orthologs #2561. Best score 1308 bits

Score difference with first non-orthologous sequence - *A. fumigatus*:958 *A. fischeri*:1164

afum|EAL89684.1 100.00% afis|EAW25012.1 100.00%

Bootstrap support for afum|EAL89684.1 as seed ortholog is 100%.

Bootstrap support for afis|EAW25012.1 as seed ortholog is 100%.

---

Group of orthologs #2562. Best score 1308 bits

Score difference with first non-orthologous sequence - *A. fumigatus*:1308 *A. fischeri*:1308

afum|EAL93006.2 100.00% afis|EAW21991.1 100.00%

Bootstrap support for afum|EAL93006.2 as seed ortholog is 100%.

Bootstrap support for afis|EAW21991.1 as seed ortholog is 100%.

---

Group of orthologs #2563. Best score 1307 bits

Score difference with first non-orthologous sequence - *A. fumigatus*:1307 *A. fischeri*:1307

afum|EAL84216.1 100.00% afis|EAW15427.1 100.00%

Bootstrap support for afum|EAL84216.1 as seed ortholog is 100%.

Bootstrap support for afis|EAW15427.1 as seed ortholog is 100%.

---

Group of orthologs #2564. Best score 1307 bits

Score difference with first non-orthologous sequence - *A. fumigatus*:1307 *A. fischeri*:1307

|                 |         |                 |         |
|-----------------|---------|-----------------|---------|
| afum EAL85839.1 | 100.00% | afis EAW15483.1 | 100.00% |
|-----------------|---------|-----------------|---------|

Bootstrap support for afum|EAL85839.1 as seed ortholog is 100%.

Bootstrap support for afis|EAW15483.1 as seed ortholog is 100%.

---

Group of orthologs #2565. Best score 1307 bits

Score difference with first non-orthologous sequence - *A. fumigatus*:1307 *A. fischeri*:1307

|                 |         |                 |         |
|-----------------|---------|-----------------|---------|
| afum EAL84779.1 | 100.00% | afis EAW20853.1 | 100.00% |
|-----------------|---------|-----------------|---------|

Bootstrap support for afum|EAL84779.1 as seed ortholog is 100%.

Bootstrap support for afis|EAW20853.1 as seed ortholog is 100%.

---

Group of orthologs #2566. Best score 1307 bits

Score difference with first non-orthologous sequence - *A. fumigatus*:1307 *A. fischeri*:1307

|                 |         |                 |         |
|-----------------|---------|-----------------|---------|
| afum EAL84727.1 | 100.00% | afis EAW20906.1 | 100.00% |
|-----------------|---------|-----------------|---------|

Bootstrap support for afum|EAL84727.1 as seed ortholog is 100%.

Bootstrap support for afis|EAW20906.1 as seed ortholog is 100%.

---

Group of orthologs #2567. Best score 1307 bits

Score difference with first non-orthologous sequence - *A. fumigatus*:1307 *A. fischeri*:1244

|                 |         |                 |         |
|-----------------|---------|-----------------|---------|
| afum EAL86866.1 | 100.00% | afis EAW19657.1 | 100.00% |
|-----------------|---------|-----------------|---------|

Bootstrap support for afum|EAL86866.1 as seed ortholog is 100%.

Bootstrap support for afis|EAW19657.1 as seed ortholog is 100%.

---

Group of orthologs #2568. Best score 1307 bits

Score difference with first non-orthologous sequence - *A. fumigatus*:1307 *A. fischeri*:1307

|                 |         |                 |         |
|-----------------|---------|-----------------|---------|
| afum EAL85901.2 | 100.00% | afis EAW24232.1 | 100.00% |
|-----------------|---------|-----------------|---------|

Bootstrap support for afum|EAL85901.2 as seed ortholog is 100%.

Bootstrap support for afis|EAW24232.1 as seed ortholog is 100%.

---

Group of orthologs #2569. Best score 1307 bits

Score difference with first non-orthologous sequence - *A. fumigatus*:949 *A. fischeri*:995

|                 |         |                 |         |
|-----------------|---------|-----------------|---------|
| afum EAL90365.2 | 100.00% | afis EAW22837.1 | 100.00% |
|-----------------|---------|-----------------|---------|

Bootstrap support for afum|EAL90365.2 as seed ortholog is 100%.

Bootstrap support for afis|EAW22837.1 as seed ortholog is 100%.

---

Group of orthologs #2570. Best score 1307 bits

Score difference with first non-orthologous sequence - *A. fumigatus*:1141 *A. fischeri*:877

|                 |         |                 |         |
|-----------------|---------|-----------------|---------|
| afum EAL92198.1 | 100.00% | afis EAW21178.1 | 100.00% |
|-----------------|---------|-----------------|---------|

Bootstrap support for afum|EAL92198.1 as seed ortholog is 100%.

Bootstrap support for afis|EAW21178.1 as seed ortholog is 100%.

---

Group of orthologs #2571. Best score 1306 bits

Score difference with first non-orthologous sequence - *A. fumigatus*:1306 *A. fischeri*:1306

|                 |         |                 |         |
|-----------------|---------|-----------------|---------|
| afum EAL85685.1 | 100.00% | afis EAW15663.1 | 100.00% |
|-----------------|---------|-----------------|---------|

Bootstrap support for afum|EAL85685.1 as seed ortholog is 100%.

Bootstrap support for afis|EAW15663.1 as seed ortholog is 100%.

---

Group of orthologs #2572. Best score 1306 bits

Score difference with first non-orthologous sequence - *A. fumigatus*:1306 *A. fischeri*:1306

|                 |         |                 |         |
|-----------------|---------|-----------------|---------|
| afum EAL85296.1 | 100.00% | afis EAW20178.1 | 100.00% |
|-----------------|---------|-----------------|---------|

Bootstrap support for afum|EAL85296.1 as seed ortholog is 100%.

Bootstrap support for afis|EAW20178.1 as seed ortholog is 100%.

---

Group of orthologs #2573. Best score 1306 bits

Score difference with first non-orthologous sequence - *A. fumigatus*:1306 *A. fischeri*:1306

|                 |         |                 |         |
|-----------------|---------|-----------------|---------|
| afum EAL91887.1 | 100.00% | afis EAW18075.1 | 100.00% |
|-----------------|---------|-----------------|---------|

Bootstrap support for afum|EAL91887.1 as seed ortholog is 100%.

Bootstrap support for afis|EAW18075.1 as seed ortholog is 100%.

---

Group of orthologs #2574. Best score 1306 bits

Score difference with first non-orthologous sequence - *A. fumigatus*:1101 *A. fischeri*:1152

afum|EAL93146.1 100.00% afis|EAW18460.1 100.00%

Bootstrap support for afum|EAL93146.1 as seed ortholog is 100%.

Bootstrap support for afis|EAW18460.1 as seed ortholog is 100%.

---

Group of orthologs #2575. Best score 1305 bits

Score difference with first non-orthologous sequence - *A. fumigatus*:1305 *A. fischeri*:917

afum|EAL86833.1 100.00% afis|EAW19693.1 100.00%

Bootstrap support for afum|EAL86833.1 as seed ortholog is 100%.

Bootstrap support for afis|EAW19693.1 as seed ortholog is 100%.

---

Group of orthologs #2576. Best score 1305 bits

Score difference with first non-orthologous sequence - *A. fumigatus*:1305 *A. fischeri*:1305

afum|EAL89677.1 100.00% afis|EAW25018.1 100.00%

Bootstrap support for afum|EAL89677.1 as seed ortholog is 100%.

Bootstrap support for afis|EAW25018.1 as seed ortholog is 100%.

---

Group of orthologs #2577. Best score 1304 bits

Score difference with first non-orthologous sequence - *A. fumigatus*:1304 *A. fischeri*:1304

afum|EAL91282.1 100.00% afis|EAW17454.1 100.00%

Bootstrap support for afum|EAL91282.1 as seed ortholog is 100%.

Bootstrap support for afis|EAW17454.1 as seed ortholog is 100%.

---

Group of orthologs #2578. Best score 1304 bits

Score difference with first non-orthologous sequence - *A. fumigatus*:1304 *A. fischeri*:1304

afum|EAL93220.1 100.00% afis|EAW18525.1 100.00%

Bootstrap support for afum|EAL93220.1 as seed ortholog is 100%.

Bootstrap support for afis|EAW18525.1 as seed ortholog is 100%.

---

Group of orthologs #2579. Best score 1304 bits

Score difference with first non-orthologous sequence - *A. fumigatus*:1304 *A. fischeri*:733

afum|EAL94046.1 100.00% afis|EAW19329.1 100.00%

Bootstrap support for afum|EAL94046.1 as seed ortholog is 100%.

Bootstrap support for afis|EAW19329.1 as seed ortholog is 100%.

---

Group of orthologs #2580. Best score 1304 bits

Score difference with first non-orthologous sequence - *A. fumigatus*:1220 *A. fischeri*:1144

afum|EAL89484.1 100.00% afis|EAW24838.1 100.00%

Bootstrap support for afum|EAL89484.1 as seed ortholog is 100%.

Bootstrap support for afis|EAW24838.1 as seed ortholog is 100%.

---

Group of orthologs #2581. Best score 1303 bits

Score difference with first non-orthologous sequence - *A. fumigatus*:1303 *A. fischeri*:1303

afum|EAL93964.1 100.00% afis|EAW19236.1 100.00%

Bootstrap support for afum|EAL93964.1 as seed ortholog is 100%.

Bootstrap support for afis|EAW19236.1 as seed ortholog is 100%.

---

Group of orthologs #2582. Best score 1302 bits

Score difference with first non-orthologous sequence - *A. fumigatus*:1302 *A. fischeri*:579

afum|EAL88067.1 100.00% afis|EAW23403.1 100.00%

Bootstrap support for afum|EAL88067.1 as seed ortholog is 100%.

Bootstrap support for afis|EAW23403.1 as seed ortholog is 100%.

---

Group of orthologs #2583. Best score 1301 bits

Score difference with first non-orthologous sequence - *A. fumigatus*:915 *A. fischeri*:1301

afum|EAL84785.1 100.00% afis|EAW20848.1 100.00%

Bootstrap support for afum|EAL84785.1 as seed ortholog is 100%.

Bootstrap support for afis|EAW20848.1 as seed ortholog is 100%.

---

Group of orthologs #2584. Best score 1301 bits

Score difference with first non-orthologous sequence - *A. fumigatus*:1301 *A. fischeri*:1223

afum|EAL86861.1 100.00% afis|EAW19661.1 100.00%

Bootstrap support for afum|EAL86861.1 as seed ortholog is 100%.

Bootstrap support for afis|EAW19661.1 as seed ortholog is 100%.

---

Group of orthologs #2585. Best score 1301 bits

Score difference with first non-orthologous sequence - *A. fumigatus*:1301 *A. fischeri*:1301

afum|EAL92866.1 100.00% afis|EAW21853.1 100.00%

Bootstrap support for afum|EAL92866.1 as seed ortholog is 100%.

Bootstrap support for afis|EAW21853.1 as seed ortholog is 100%.

---

Group of orthologs #2586. Best score 1300 bits

Score difference with first non-orthologous sequence - *A. fumigatus*:543 *A. fischeri*:819

afum|EAL86373.1 100.00% afis|EAW16822.1 100.00%

Bootstrap support for afum|EAL86373.1 as seed ortholog is 100%.

Bootstrap support for afis|EAW16822.1 as seed ortholog is 100%.

---

Group of orthologs #2587. Best score 1300 bits

Score difference with first non-orthologous sequence - *A. fumigatus*:1300 *A. fischeri*:1300

afum|EAL91787.1 100.00% afis|EAW17978.1 100.00%

Bootstrap support for afum|EAL91787.1 as seed ortholog is 100%.

Bootstrap support for afis|EAW17978.1 as seed ortholog is 100%.

---

Group of orthologs #2588. Best score 1300 bits

Score difference with first non-orthologous sequence - *A. fumigatus*:1300 *A. fischeri*:1300

afum|EAL90663.1 100.00% afis|EAW22531.1 100.00%

Bootstrap support for afum|EAL90663.1 as seed ortholog is 100%.

Bootstrap support for afis|EAW22531.1 as seed ortholog is 100%.

---

Group of orthologs #2589. Best score 1300 bits

Score difference with first non-orthologous sequence - *A. fumigatus*:1300 *A. fischeri*:1300

afum|EAL90458.2 100.00% afis|EAW22737.1 100.00%

Bootstrap support for afum|EAL90458.2 as seed ortholog is 100%.

Bootstrap support for afis|EAW22737.1 as seed ortholog is 100%.

---

Group of orthologs #2590. Best score 1299 bits

Score difference with first non-orthologous sequence - *A. fumigatus*:1183 *A. fischeri*:1299

afum|EAL85228.2 100.00% afis|EAW20111.1 100.00%

Bootstrap support for afum|EAL85228.2 as seed ortholog is 100%.

Bootstrap support for afis|EAW20111.1 as seed ortholog is 100%.

---

Group of orthologs #2591. Best score 1299 bits

Score difference with first non-orthologous sequence - *A. fumigatus*:1299 *A. fischeri*:1299

afum|EAL87542.1 100.00% afis|EAW18181.1 100.00%

Bootstrap support for afum|EAL87542.1 as seed ortholog is 100%.

Bootstrap support for afis|EAW18181.1 as seed ortholog is 100%.

---

Group of orthologs #2592. Best score 1299 bits

Score difference with first non-orthologous sequence - *A. fumigatus*:1299 *A. fischeri*:1139

|                 |         |                 |         |
|-----------------|---------|-----------------|---------|
| afum EAL86991.2 | 100.00% | afis EAW19502.1 | 100.00% |
|-----------------|---------|-----------------|---------|

Bootstrap support for afum|EAL86991.2 as seed ortholog is 100%.

Bootstrap support for afis|EAW19502.1 as seed ortholog is 100%.

---

Group of orthologs #2593. Best score 1299 bits

Score difference with first non-orthologous sequence - *A. fumigatus*:1299 *A. fischeri*:1040

|                 |         |                 |         |
|-----------------|---------|-----------------|---------|
| afum EAL85693.1 | 100.00% | afis EAW22084.1 | 100.00% |
|-----------------|---------|-----------------|---------|

Bootstrap support for afum|EAL85693.1 as seed ortholog is 100%.

Bootstrap support for afis|EAW22084.1 as seed ortholog is 100%.

---

Group of orthologs #2594. Best score 1299 bits

Score difference with first non-orthologous sequence - *A. fumigatus*:1299 *A. fischeri*:1112

|                 |         |                 |         |
|-----------------|---------|-----------------|---------|
| afum EBA27236.1 | 100.00% | afis EAW15735.1 | 100.00% |
|-----------------|---------|-----------------|---------|

Bootstrap support for afum|EBA27236.1 as seed ortholog is 100%.

Bootstrap support for afis|EAW15735.1 as seed ortholog is 100%.

---

Group of orthologs #2595. Best score 1299 bits

Score difference with first non-orthologous sequence - *A. fumigatus*:1299 *A. fischeri*:1299

|                 |         |                 |         |
|-----------------|---------|-----------------|---------|
| afum EAL88383.1 | 100.00% | afis EAW23095.1 | 100.00% |
|-----------------|---------|-----------------|---------|

Bootstrap support for afum|EAL88383.1 as seed ortholog is 100%.

Bootstrap support for afis|EAW23095.1 as seed ortholog is 100%.

---

Group of orthologs #2596. Best score 1298 bits

Score difference with first non-orthologous sequence - *A. fumigatus*:1152 *A. fischeri*:1058

|                 |         |                 |         |
|-----------------|---------|-----------------|---------|
| afum EAL85853.1 | 100.00% | afis EAW15469.1 | 100.00% |
|-----------------|---------|-----------------|---------|

Bootstrap support for afum|EAL85853.1 as seed ortholog is 100%.

Bootstrap support for afis|EAW15469.1 as seed ortholog is 100%.

---

Group of orthologs #2597. Best score 1298 bits

Score difference with first non-orthologous sequence - *A. fumigatus*:1298 *A. fischeri*:1298

|                 |         |                 |         |
|-----------------|---------|-----------------|---------|
| afum EAL91901.1 | 100.00% | afis EAW18092.1 | 100.00% |
|-----------------|---------|-----------------|---------|

Bootstrap support for afum|EAL91901.1 as seed ortholog is 100%.

Bootstrap support for afis|EAW18092.1 as seed ortholog is 100%.

---

Group of orthologs #2598. Best score 1298 bits

Score difference with first non-orthologous sequence - *A. fumigatus*:1298 *A. fischeri*:1298

|                 |         |                 |         |
|-----------------|---------|-----------------|---------|
| afum EAL93948.1 | 100.00% | afis EAW19215.1 | 100.00% |
|-----------------|---------|-----------------|---------|

Bootstrap support for afum|EAL93948.1 as seed ortholog is 100%.

Bootstrap support for afis|EAW19215.1 as seed ortholog is 100%.

---

Group of orthologs #2599. Best score 1298 bits

Score difference with first non-orthologous sequence - *A. fumigatus*:1069 *A. fischeri*:989

|                 |         |                 |         |
|-----------------|---------|-----------------|---------|
| afum EAL92061.1 | 100.00% | afis EAW21022.1 | 100.00% |
|-----------------|---------|-----------------|---------|

Bootstrap support for afum|EAL92061.1 as seed ortholog is 100%.

Bootstrap support for afis|EAW21022.1 as seed ortholog is 100%.

---

Group of orthologs #2600. Best score 1298 bits

Score difference with first non-orthologous sequence - *A. fumigatus*:1298 *A. fischeri*:1298

|                 |         |                 |         |
|-----------------|---------|-----------------|---------|
| afum EAL92976.1 | 100.00% | afis EAW21962.1 | 100.00% |
|-----------------|---------|-----------------|---------|

Bootstrap support for afum|EAL92976.1 as seed ortholog is 100%.

Bootstrap support for afis|EAW21962.1 as seed ortholog is 100%.

---

Group of orthologs #2601. Best score 1297 bits

Score difference with first non-orthologous sequence - *A. fumigatus*:1297 *A. fischeri*:978

|                 |         |                 |         |
|-----------------|---------|-----------------|---------|
| afum EAL85034.1 | 100.00% | afis EAW19861.1 | 100.00% |
|-----------------|---------|-----------------|---------|

Bootstrap support for afum|EAL85034.1 as seed ortholog is 100%.

Bootstrap support for afis|EAW19861.1 as seed ortholog is 100%.

---

Group of orthologs #2602. Best score 1297 bits

Score difference with first non-orthologous sequence - *A. fumigatus*:1297 *A. fischeri*:1190

|                 |         |                 |         |
|-----------------|---------|-----------------|---------|
| afum EAL84729.2 | 100.00% | afis EAW20902.1 | 100.00% |
|-----------------|---------|-----------------|---------|

Bootstrap support for afum|EAL84729.2 as seed ortholog is 100%.

Bootstrap support for afis|EAW20902.1 as seed ortholog is 100%.

---

Group of orthologs #2603. Best score 1297 bits

Score difference with first non-orthologous sequence - *A. fumigatus*:1297 *A. fischeri*:1297

|                 |         |                 |         |
|-----------------|---------|-----------------|---------|
| afum EAL93625.1 | 100.00% | afis EAW18893.1 | 100.00% |
|-----------------|---------|-----------------|---------|

Bootstrap support for afum|EAL93625.1 as seed ortholog is 100%.

Bootstrap support for afis|EAW18893.1 as seed ortholog is 100%.

---

Group of orthologs #2604. Best score 1297 bits

Score difference with first non-orthologous sequence - *A. fumigatus*:1297 *A. fischeri*:1297

|                 |         |                 |         |
|-----------------|---------|-----------------|---------|
| afum EAL90879.1 | 100.00% | afis EAW22311.1 | 100.00% |
|-----------------|---------|-----------------|---------|

Bootstrap support for afum|EAL90879.1 as seed ortholog is 100%.

Bootstrap support for afis|EAW22311.1 as seed ortholog is 100%.

---

Group of orthologs #2605. Best score 1296 bits

Score difference with first non-orthologous sequence - *A. fumigatus*:1296 *A. fischeri*:1296

|                 |         |                 |         |
|-----------------|---------|-----------------|---------|
| afum EAL89100.1 | 100.00% | afis EAW16505.1 | 100.00% |
|-----------------|---------|-----------------|---------|

Bootstrap support for afum|EAL89100.1 as seed ortholog is 100%.

Bootstrap support for afis|EAW16505.1 as seed ortholog is 100%.

---

Group of orthologs #2606. Best score 1296 bits

Score difference with first non-orthologous sequence - *A. fumigatus*:1296 *A. fischeri*:1296

|                 |         |                 |         |
|-----------------|---------|-----------------|---------|
| afum EAL93934.1 | 100.00% | afis EAW19204.1 | 100.00% |
|-----------------|---------|-----------------|---------|

Bootstrap support for afum|EAL93934.1 as seed ortholog is 100%.

Bootstrap support for afis|EAW19204.1 as seed ortholog is 100%.

---

Group of orthologs #2607. Best score 1296 bits

Score difference with first non-orthologous sequence - *A. fumigatus*:1296 *A. fischeri*:1296

|                 |         |                 |         |
|-----------------|---------|-----------------|---------|
| afum EAL90922.1 | 100.00% | afis EAW22256.1 | 100.00% |
|-----------------|---------|-----------------|---------|

Bootstrap support for afum|EAL90922.1 as seed ortholog is 100%.

Bootstrap support for afis|EAW22256.1 as seed ortholog is 100%.

---

Group of orthologs #2608. Best score 1295 bits

Score difference with first non-orthologous sequence - *A. fumigatus*:1295 *A. fischeri*:1295

|                 |         |                 |         |
|-----------------|---------|-----------------|---------|
| afum EAL91471.1 | 100.00% | afis EAW17656.1 | 100.00% |
|-----------------|---------|-----------------|---------|

Bootstrap support for afum|EAL91471.1 as seed ortholog is 100%.

Bootstrap support for afis|EAW17656.1 as seed ortholog is 100%.

---

Group of orthologs #2609. Best score 1295 bits

Score difference with first non-orthologous sequence - *A. fumigatus*:1024 *A. fischeri*:1015

|                 |         |                 |         |
|-----------------|---------|-----------------|---------|
| afum EAL91091.2 | 100.00% | afis EAW22098.1 | 100.00% |
|-----------------|---------|-----------------|---------|

Bootstrap support for afum|EAL91091.2 as seed ortholog is 100%.

Bootstrap support for afis|EAW22098.1 as seed ortholog is 100%.

---

Group of orthologs #2610. Best score 1295 bits

Score difference with first non-orthologous sequence - *A. fumigatus*:1295 *A. fischeri*:1095

|                 |         |                 |         |
|-----------------|---------|-----------------|---------|
| afum EAL90778.1 | 100.00% | afis EAW22414.1 | 100.00% |
|-----------------|---------|-----------------|---------|

Bootstrap support for afum|EAL90778.1 as seed ortholog is 100%.

Bootstrap support for afis|EAW22414.1 as seed ortholog is 100%.

---

Group of orthologs #2611. Best score 1295 bits

Score difference with first non-orthologous sequence - *A. fumigatus*:1295 *A. fischeri*:1295

afum|EAL90243.1 100.00% afis|EAW22954.1 100.00%

Bootstrap support for afum|EAL90243.1 as seed ortholog is 100%.

Bootstrap support for afis|EAW22954.1 as seed ortholog is 100%.

---

Group of orthologs #2612. Best score 1294 bits

Score difference with first non-orthologous sequence - *A. fumigatus*:1294 *A. fischeri*:1294

afum|EAL85184.1 100.00% afis|EAW20064.1 100.00%

Bootstrap support for afum|EAL85184.1 as seed ortholog is 100%.

Bootstrap support for afis|EAW20064.1 as seed ortholog is 100%.

---

Group of orthologs #2613. Best score 1294 bits

Score difference with first non-orthologous sequence - *A. fumigatus*:1294 *A. fischeri*:1294

afum|EAL85321.1 100.00% afis|EAW20201.1 100.00%

Bootstrap support for afum|EAL85321.1 as seed ortholog is 100%.

Bootstrap support for afis|EAW20201.1 as seed ortholog is 100%.

---

Group of orthologs #2614. Best score 1294 bits

Score difference with first non-orthologous sequence - *A. fumigatus*:1294 *A. fischeri*:1294

afum|EAL87343.1 100.00% afis|EAW23916.1 100.00%

Bootstrap support for afum|EAL87343.1 as seed ortholog is 100%.

Bootstrap support for afis|EAW23916.1 as seed ortholog is 100%.

---

Group of orthologs #2615. Best score 1293 bits

Score difference with first non-orthologous sequence - *A. fumigatus*:1293 *A. fischeri*:1293

afum|EAL85538.1 100.00% afis|EAW15813.1 100.00%

Bootstrap support for afum|EAL85538.1 as seed ortholog is 100%.

Bootstrap support for afis|EAW15813.1 as seed ortholog is 100%.

---

Group of orthologs #2616. Best score 1293 bits

Score difference with first non-orthologous sequence - *A. fumigatus*:1293 *A. fischeri*:1293

afum|EAL85198.1 100.00% afis|EAW20079.1 100.00%

Bootstrap support for afum|EAL85198.1 as seed ortholog is 100%.

Bootstrap support for afis|EAW20079.1 as seed ortholog is 100%.

---

Group of orthologs #2617. Best score 1293 bits

Score difference with first non-orthologous sequence - *A. fumigatus*:1293 *A. fischeri*:797

afum|EAL85334.1 100.00% afis|EAW20219.1 100.00%

Bootstrap support for afum|EAL85334.1 as seed ortholog is 100%.

Bootstrap support for afis|EAW20219.1 as seed ortholog is 100%.

---

Group of orthologs #2618. Best score 1293 bits

Score difference with first non-orthologous sequence - *A. fumigatus*:1293 *A. fischeri*:1293

afum|EAL85484.1 100.00% afis|EAW20370.1 100.00%

Bootstrap support for afum|EAL85484.1 as seed ortholog is 100%.

Bootstrap support for afis|EAW20370.1 as seed ortholog is 100%.

---

Group of orthologs #2619. Best score 1293 bits

Score difference with first non-orthologous sequence - *A. fumigatus*:1293 *A. fischeri*:1293

afum|EAL87066.1 100.00% afis|EAW19428.1 100.00%

Bootstrap support for afum|EAL87066.1 as seed ortholog is 100%.

Bootstrap support for afis|EAW19428.1 as seed ortholog is 100%.

---

Group of orthologs #2620. Best score 1293 bits

Score difference with first non-orthologous sequence - *A. fumigatus*:1293 *A. fischeri*:1293

|                 |         |                 |         |
|-----------------|---------|-----------------|---------|
| afum EAL92286.1 | 100.00% | afis EAW21271.1 | 100.00% |
|-----------------|---------|-----------------|---------|

Bootstrap support for afum|EAL92286.1 as seed ortholog is 100%.

Bootstrap support for afis|EAW21271.1 as seed ortholog is 100%.

---

Group of orthologs #2621. Best score 1292 bits

Score difference with first non-orthologous sequence - *A. fumigatus*:644 *A. fischeri*:1292

|                 |         |                 |         |
|-----------------|---------|-----------------|---------|
| afum EAL85087.1 | 100.00% | afis EAW19806.1 | 100.00% |
|-----------------|---------|-----------------|---------|

Bootstrap support for afum|EAL85087.1 as seed ortholog is 100%.

Bootstrap support for afis|EAW19806.1 as seed ortholog is 100%.

---

Group of orthologs #2622. Best score 1292 bits

Score difference with first non-orthologous sequence - *A. fumigatus*:1292 *A. fischeri*:1292

|                 |         |                 |         |
|-----------------|---------|-----------------|---------|
| afum EAL86964.1 | 100.00% | afis EAW19545.1 | 100.00% |
|-----------------|---------|-----------------|---------|

Bootstrap support for afum|EAL86964.1 as seed ortholog is 100%.

Bootstrap support for afis|EAW19545.1 as seed ortholog is 100%.

---

Group of orthologs #2623. Best score 1292 bits

Score difference with first non-orthologous sequence - *A. fumigatus*:1292 *A. fischeri*:1292

|                 |         |                 |         |
|-----------------|---------|-----------------|---------|
| afum EAL87403.1 | 100.00% | afis EAW23973.1 | 100.00% |
|-----------------|---------|-----------------|---------|

Bootstrap support for afum|EAL87403.1 as seed ortholog is 100%.

Bootstrap support for afis|EAW23973.1 as seed ortholog is 100%.

---

Group of orthologs #2624. Best score 1292 bits

Score difference with first non-orthologous sequence - *A. fumigatus*:1292 *A. fischeri*:1292

|                 |         |                 |         |
|-----------------|---------|-----------------|---------|
| afum EAL87460.1 | 100.00% | afis EAW24029.1 | 100.00% |
|-----------------|---------|-----------------|---------|

Bootstrap support for afum|EAL87460.1 as seed ortholog is 100%.

Bootstrap support for afis|EAW24029.1 as seed ortholog is 100%.

---

Group of orthologs #2625. Best score 1292 bits

Score difference with first non-orthologous sequence - *A. fumigatus*:1292 *A. fischeri*:1292

|                 |         |                 |         |
|-----------------|---------|-----------------|---------|
| afum EAL90908.1 | 100.00% | afis EAW22273.1 | 100.00% |
|-----------------|---------|-----------------|---------|

Bootstrap support for afum|EAL90908.1 as seed ortholog is 100%.

Bootstrap support for afis|EAW22273.1 as seed ortholog is 100%.

---

Group of orthologs #2626. Best score 1291 bits

Score difference with first non-orthologous sequence - *A. fumigatus*:1142 *A. fischeri*:1054

|                 |         |                 |         |
|-----------------|---------|-----------------|---------|
| afum EAL84967.1 | 100.00% | afis EAW19948.1 | 100.00% |
|-----------------|---------|-----------------|---------|

Bootstrap support for afum|EAL84967.1 as seed ortholog is 100%.

Bootstrap support for afis|EAW19948.1 as seed ortholog is 100%.

---

Group of orthologs #2627. Best score 1291 bits

Score difference with first non-orthologous sequence - *A. fumigatus*:1291 *A. fischeri*:1291

|                 |         |                 |         |
|-----------------|---------|-----------------|---------|
| afum EAL84695.1 | 100.00% | afis EAW20939.1 | 100.00% |
|-----------------|---------|-----------------|---------|

Bootstrap support for afum|EAL84695.1 as seed ortholog is 100%.

Bootstrap support for afis|EAW20939.1 as seed ortholog is 100%.

---

Group of orthologs #2628. Best score 1291 bits

Score difference with first non-orthologous sequence - *A. fumigatus*:1180 *A. fischeri*:1175

|                 |         |                 |         |
|-----------------|---------|-----------------|---------|
| afum EAL91166.1 | 100.00% | afis EAW17329.1 | 100.00% |
|-----------------|---------|-----------------|---------|

Bootstrap support for afum|EAL91166.1 as seed ortholog is 100%.

Bootstrap support for afis|EAW17329.1 as seed ortholog is 100%.

---

Group of orthologs #2629. Best score 1291 bits

Score difference with first non-orthologous sequence - *A. fumigatus*:1166 *A. fischeri*:860

|                 |         |                 |         |
|-----------------|---------|-----------------|---------|
| afum EAL90486.1 | 100.00% | afis EAW22706.1 | 100.00% |
|-----------------|---------|-----------------|---------|

Bootstrap support for afum|EAL90486.1 as seed ortholog is 100%.



Bootstrap support for afis|EAW22706.1 as seed ortholog is 100%.

---

Group of orthologs #2630. Best score 1291 bits

Score difference with first non-orthologous sequence - *A. fumigatus*:1291 *A. fischeri*:1190

|                 |         |                 |         |
|-----------------|---------|-----------------|---------|
| afum EBA27198.1 | 100.00% | afis EAW20444.1 | 100.00% |
|-----------------|---------|-----------------|---------|

Bootstrap support for afum|EBA27198.1 as seed ortholog is 100%.

Bootstrap support for afis|EAW20444.1 as seed ortholog is 100%.

---

Group of orthologs #2631. Best score 1290 bits

Score difference with first non-orthologous sequence - *A. fumigatus*:1290 *A. fischeri*:1290

|                 |         |                 |         |
|-----------------|---------|-----------------|---------|
| afum EAL88910.1 | 100.00% | afis EAW16288.1 | 100.00% |
|-----------------|---------|-----------------|---------|

Bootstrap support for afum|EAL88910.1 as seed ortholog is 100%.

Bootstrap support for afis|EAW16288.1 as seed ortholog is 100%.

---

Group of orthologs #2632. Best score 1290 bits

Score difference with first non-orthologous sequence - *A. fumigatus*:1290 *A. fischeri*:1290

|                 |         |                 |         |
|-----------------|---------|-----------------|---------|
| afum EAL84622.1 | 100.00% | afis EAW20428.1 | 100.00% |
|-----------------|---------|-----------------|---------|

Bootstrap support for afum|EAL84622.1 as seed ortholog is 100%.

Bootstrap support for afis|EAW20428.1 as seed ortholog is 100%.

---

Group of orthologs #2633. Best score 1290 bits

Score difference with first non-orthologous sequence - *A. fumigatus*:1290 *A. fischeri*:1290

|                 |         |                 |         |
|-----------------|---------|-----------------|---------|
| afum EAL87275.1 | 100.00% | afis EAW23844.1 | 100.00% |
|-----------------|---------|-----------------|---------|

Bootstrap support for afum|EAL87275.1 as seed ortholog is 100%.

Bootstrap support for afis|EAW23844.1 as seed ortholog is 100%.

---

Group of orthologs #2634. Best score 1290 bits

Score difference with first non-orthologous sequence - *A. fumigatus*:1290 *A. fischeri*:1290

|                 |         |                 |         |
|-----------------|---------|-----------------|---------|
| afum EAL87448.1 | 100.00% | afis EAW24018.1 | 100.00% |
|-----------------|---------|-----------------|---------|

Bootstrap support for afum|EAL87448.1 as seed ortholog is 100%.

Bootstrap support for afis|EAW24018.1 as seed ortholog is 100%.

---

Group of orthologs #2635. Best score 1289 bits

Score difference with first non-orthologous sequence - *A. fumigatus*:1289 *A. fischeri*:1289

|                 |         |                 |         |
|-----------------|---------|-----------------|---------|
| afum EAL92280.1 | 100.00% | afis EAW21265.1 | 100.00% |
|-----------------|---------|-----------------|---------|

Bootstrap support for afum|EAL92280.1 as seed ortholog is 100%.

Bootstrap support for afis|EAW21265.1 as seed ortholog is 100%.

---

Group of orthologs #2636. Best score 1288 bits

Score difference with first non-orthologous sequence - *A. fumigatus*:1288 *A. fischeri*:1288

|                 |         |                 |         |
|-----------------|---------|-----------------|---------|
| afum EAL85827.1 | 100.00% | afis EAW15496.1 | 100.00% |
|-----------------|---------|-----------------|---------|

Bootstrap support for afum|EAL85827.1 as seed ortholog is 100%.

Bootstrap support for afis|EAW15496.1 as seed ortholog is 100%.

---

Group of orthologs #2637. Best score 1288 bits

Score difference with first non-orthologous sequence - *A. fumigatus*:1288 *A. fischeri*:1288

|                 |         |                 |         |
|-----------------|---------|-----------------|---------|
| afum EAL85792.1 | 100.00% | afis EAW15538.1 | 100.00% |
|-----------------|---------|-----------------|---------|

Bootstrap support for afum|EAL85792.1 as seed ortholog is 100%.

Bootstrap support for afis|EAW15538.1 as seed ortholog is 100%.

---

Group of orthologs #2638. Best score 1288 bits

Score difference with first non-orthologous sequence - *A. fumigatus*:1288 *A. fischeri*:1137

|                 |         |                 |         |
|-----------------|---------|-----------------|---------|
| afum EAL89295.1 | 100.00% | afis EAW16698.1 | 100.00% |
|-----------------|---------|-----------------|---------|

Bootstrap support for afum|EAL89295.1 as seed ortholog is 100%.

Bootstrap support for afis|EAW16698.1 as seed ortholog is 100%.

---

Group of orthologs #2639. Best score 1288 bits

Score difference with first non-orthologous sequence - *A. fumigatus*:1288 *A. fischeri*:1288

afum|EAL93098.1 100.00% afis|EAW18416.1 100.00%

Bootstrap support for afum|EAL93098.1 as seed ortholog is 100%.

Bootstrap support for afis|EAW18416.1 as seed ortholog is 100%.

---

Group of orthologs #2640. Best score 1288 bits

Score difference with first non-orthologous sequence - *A. fumigatus*:773 *A. fischeri*:910

afum|EAL93641.1 100.00% afis|EAW18909.1 100.00%

Bootstrap support for afum|EAL93641.1 as seed ortholog is 100%.

Bootstrap support for afis|EAW18909.1 as seed ortholog is 100%.

---

Group of orthologs #2641. Best score 1288 bits

Score difference with first non-orthologous sequence - *A. fumigatus*:1288 *A. fischeri*:1288

afum|EAL93658.1 100.00% afis|EAW18927.1 100.00%

Bootstrap support for afum|EAL93658.1 as seed ortholog is 100%.

Bootstrap support for afis|EAW18927.1 as seed ortholog is 100%.

---

Group of orthologs #2642. Best score 1287 bits

Score difference with first non-orthologous sequence - *A. fumigatus*:1287 *A. fischeri*:1287

afum|EAL91443.1 100.00% afis|EAW17629.1 100.00%

Bootstrap support for afum|EAL91443.1 as seed ortholog is 100%.

Bootstrap support for afis|EAW17629.1 as seed ortholog is 100%.

---

Group of orthologs #2643. Best score 1287 bits

Score difference with first non-orthologous sequence - *A. fumigatus*:1077 *A. fischeri*:1033

afum|EAL91570.1 100.00% afis|EAW17760.1 100.00%

Bootstrap support for afum|EAL91570.1 as seed ortholog is 100%.

Bootstrap support for afis|EAW17760.1 as seed ortholog is 100%.

---

Group of orthologs #2644. Best score 1287 bits

Score difference with first non-orthologous sequence - *A. fumigatus*:1287 *A. fischeri*:1287

afum|EAL91650.1 100.00% afis|EAW17841.1 100.00%

Bootstrap support for afum|EAL91650.1 as seed ortholog is 100%.

Bootstrap support for afis|EAW17841.1 as seed ortholog is 100%.

---

Group of orthologs #2645. Best score 1287 bits

Score difference with first non-orthologous sequence - *A. fumigatus*:1287 *A. fischeri*:1287

afum|EAL92577.1 100.00% afis|EAW21558.1 100.00%

Bootstrap support for afum|EAL92577.1 as seed ortholog is 100%.

Bootstrap support for afis|EAW21558.1 as seed ortholog is 100%.

---

Group of orthologs #2646. Best score 1286 bits

Score difference with first non-orthologous sequence - *A. fumigatus*:1286 *A. fischeri*:1286

afum|EAL85869.1 100.00% afis|EAW24197.1 100.00%

Bootstrap support for afum|EAL85869.1 as seed ortholog is 100%.

Bootstrap support for afis|EAW24197.1 as seed ortholog is 100%.

---

Group of orthologs #2647. Best score 1286 bits

Score difference with first non-orthologous sequence - *A. fumigatus*:1286 *A. fischeri*:1286

afum|EAL92259.1 100.00% afis|EAW21246.1 100.00%

Bootstrap support for afum|EAL92259.1 as seed ortholog is 100%.

Bootstrap support for afis|EAW21246.1 as seed ortholog is 100%.

---

Group of orthologs #2648. Best score 1285 bits

Score difference with first non-orthologous sequence - *A. fumigatus*:1121 *A. fischeri*:1285

|                 |         |                 |         |
|-----------------|---------|-----------------|---------|
| afum EAL88689.1 | 100.00% | afis EAW16057.1 | 100.00% |
|-----------------|---------|-----------------|---------|

Bootstrap support for afum|EAL88689.1 as seed ortholog is 100%.

Bootstrap support for afis|EAW16057.1 as seed ortholog is 100%.

---

Group of orthologs #2649. Best score 1285 bits

Score difference with first non-orthologous sequence - *A. fumigatus*:1134 *A. fischeri*:1196

|                 |         |                 |         |
|-----------------|---------|-----------------|---------|
| afum EAL91096.1 | 100.00% | afis EAW22074.1 | 100.00% |
|-----------------|---------|-----------------|---------|

Bootstrap support for afum|EAL91096.1 as seed ortholog is 100%.

Bootstrap support for afis|EAW22074.1 as seed ortholog is 100%.

---

Group of orthologs #2650. Best score 1285 bits

Score difference with first non-orthologous sequence - *A. fumigatus*:1285 *A. fischeri*:1285

|                 |         |                 |         |
|-----------------|---------|-----------------|---------|
| afum EAL89883.1 | 100.00% | afis EAW25222.1 | 100.00% |
|-----------------|---------|-----------------|---------|

Bootstrap support for afum|EAL89883.1 as seed ortholog is 100%.

Bootstrap support for afis|EAW25222.1 as seed ortholog is 100%.

---

Group of orthologs #2651. Best score 1284 bits

Score difference with first non-orthologous sequence - *A. fumigatus*:1284 *A. fischeri*:1284

|                 |         |                 |         |
|-----------------|---------|-----------------|---------|
| afum EAL87415.2 | 100.00% | afis EAW23986.1 | 100.00% |
|-----------------|---------|-----------------|---------|

Bootstrap support for afum|EAL87415.2 as seed ortholog is 100%.

Bootstrap support for afis|EAW23986.1 as seed ortholog is 100%.

---

Group of orthologs #2652. Best score 1284 bits

Score difference with first non-orthologous sequence - *A. fumigatus*:1284 *A. fischeri*:1284

|                 |         |                 |         |
|-----------------|---------|-----------------|---------|
| afum EBA27307.1 | 100.00% | afis EAW23885.1 | 100.00% |
|-----------------|---------|-----------------|---------|

Bootstrap support for afum|EBA27307.1 as seed ortholog is 100%.

Bootstrap support for afis|EAW23885.1 as seed ortholog is 100%.

---

Group of orthologs #2653. Best score 1283 bits

Score difference with first non-orthologous sequence - *A. fumigatus*:1283 *A. fischeri*:1283

|                 |         |                 |         |
|-----------------|---------|-----------------|---------|
| afum EAL84955.1 | 100.00% | afis EAW19960.1 | 100.00% |
|-----------------|---------|-----------------|---------|

Bootstrap support for afum|EAL84955.1 as seed ortholog is 100%.

Bootstrap support for afis|EAW19960.1 as seed ortholog is 100%.

---

Group of orthologs #2654. Best score 1283 bits

Score difference with first non-orthologous sequence - *A. fumigatus*:1283 *A. fischeri*:1283

|                 |         |                 |         |
|-----------------|---------|-----------------|---------|
| afum EAL84528.1 | 100.00% | afis EAW20529.1 | 100.00% |
|-----------------|---------|-----------------|---------|

Bootstrap support for afum|EAL84528.1 as seed ortholog is 100%.

Bootstrap support for afis|EAW20529.1 as seed ortholog is 100%.

---

Group of orthologs #2655. Best score 1282 bits

Score difference with first non-orthologous sequence - *A. fumigatus*:1282 *A. fischeri*:653

|                 |         |                 |         |
|-----------------|---------|-----------------|---------|
| afum EAL84526.1 | 100.00% | afis EAW20531.1 | 100.00% |
|-----------------|---------|-----------------|---------|

Bootstrap support for afum|EAL84526.1 as seed ortholog is 100%.

Bootstrap support for afis|EAW20531.1 as seed ortholog is 100%.

---

Group of orthologs #2656. Best score 1282 bits

Score difference with first non-orthologous sequence - *A. fumigatus*:1282 *A. fischeri*:1282

|                 |         |                 |         |
|-----------------|---------|-----------------|---------|
| afum EAL89077.1 | 100.00% | afis EAW16483.1 | 100.00% |
|-----------------|---------|-----------------|---------|

Bootstrap support for afum|EAL89077.1 as seed ortholog is 100%.

Bootstrap support for afis|EAW16483.1 as seed ortholog is 100%.

---

Group of orthologs #2657. Best score 1282 bits

Score difference with first non-orthologous sequence - *A. fumigatus*:1282 *A. fischeri*:1282

|                 |         |                 |         |
|-----------------|---------|-----------------|---------|
| afum EAL87090.1 | 100.00% | afis EAW19405.1 | 100.00% |
|-----------------|---------|-----------------|---------|

Bootstrap support for afum|EAL87090.1 as seed ortholog is 100%.

Bootstrap support for afis|EAW19405.1 as seed ortholog is 100%.

---

Group of orthologs #2658. Best score 1282 bits

Score difference with first non-orthologous sequence - *A. fumigatus*:1282 *A. fischeri*:1282

|                 |         |                 |         |
|-----------------|---------|-----------------|---------|
| afum EAL88107.1 | 100.00% | afis EAW23366.1 | 100.00% |
|-----------------|---------|-----------------|---------|

Bootstrap support for afum|EAL88107.1 as seed ortholog is 100%.

Bootstrap support for afis|EAW23366.1 as seed ortholog is 100%.

---

Group of orthologs #2659. Best score 1282 bits

Score difference with first non-orthologous sequence - *A. fumigatus*:1282 *A. fischeri*:1282

|                 |         |                 |         |
|-----------------|---------|-----------------|---------|
| afum EAL93469.1 | 100.00% | afis EAW18743.1 | 100.00% |
|-----------------|---------|-----------------|---------|

Bootstrap support for afum|EAL93469.1 as seed ortholog is 100%.

Bootstrap support for afis|EAW18743.1 as seed ortholog is 100%.

---

Group of orthologs #2660. Best score 1282 bits

Score difference with first non-orthologous sequence - *A. fumigatus*:1282 *A. fischeri*:1282

|                 |         |                 |         |
|-----------------|---------|-----------------|---------|
| afum EAL93736.1 | 100.00% | afis EAW19002.1 | 100.00% |
|-----------------|---------|-----------------|---------|

Bootstrap support for afum|EAL93736.1 as seed ortholog is 100%.

Bootstrap support for afis|EAW19002.1 as seed ortholog is 100%.

---

Group of orthologs #2661. Best score 1281 bits

Score difference with first non-orthologous sequence - *A. fumigatus*:1281 *A. fischeri*:1281

|                 |         |                 |         |
|-----------------|---------|-----------------|---------|
| afum EAL85307.1 | 100.00% | afis EAW20188.1 | 100.00% |
|-----------------|---------|-----------------|---------|

Bootstrap support for afum|EAL85307.1 as seed ortholog is 100%.

Bootstrap support for afis|EAW20188.1 as seed ortholog is 100%.

---

Group of orthologs #2662. Best score 1281 bits

Score difference with first non-orthologous sequence - *A. fumigatus*:1281 *A. fischeri*:1281

|                 |         |                 |         |
|-----------------|---------|-----------------|---------|
| afum EAL84647.2 | 100.00% | afis EAW20983.1 | 100.00% |
|-----------------|---------|-----------------|---------|

Bootstrap support for afum|EAL84647.2 as seed ortholog is 100%.

Bootstrap support for afis|EAW20983.1 as seed ortholog is 100%.

---

Group of orthologs #2663. Best score 1281 bits

Score difference with first non-orthologous sequence - *A. fumigatus*:1281 *A. fischeri*:1209

|                 |         |                 |         |
|-----------------|---------|-----------------|---------|
| afum EAL91752.1 | 100.00% | afis EAW17941.1 | 100.00% |
|-----------------|---------|-----------------|---------|

Bootstrap support for afum|EAL91752.1 as seed ortholog is 100%.

Bootstrap support for afis|EAW17941.1 as seed ortholog is 100%.

---

Group of orthologs #2664. Best score 1281 bits

Score difference with first non-orthologous sequence - *A. fumigatus*:1281 *A. fischeri*:1281

|                 |         |                 |         |
|-----------------|---------|-----------------|---------|
| afum EAL85889.1 | 100.00% | afis EAW24220.1 | 100.00% |
|-----------------|---------|-----------------|---------|

Bootstrap support for afum|EAL85889.1 as seed ortholog is 100%.

Bootstrap support for afis|EAW24220.1 as seed ortholog is 100%.

---

Group of orthologs #2665. Best score 1281 bits

Score difference with first non-orthologous sequence - *A. fumigatus*:1281 *A. fischeri*:1281

|                 |         |                 |         |
|-----------------|---------|-----------------|---------|
| afum EAL93078.1 | 100.00% | afis EAW18400.1 | 100.00% |
|-----------------|---------|-----------------|---------|

Bootstrap support for afum|EAL93078.1 as seed ortholog is 100%.

Bootstrap support for afis|EAW18400.1 as seed ortholog is 100%.

---

Group of orthologs #2666. Best score 1281 bits

Score difference with first non-orthologous sequence - *A. fumigatus*:1281 *A. fischeri*:1281

|                 |         |                 |         |
|-----------------|---------|-----------------|---------|
| afum EAL89990.1 | 100.00% | afis EAW25329.1 | 100.00% |
|-----------------|---------|-----------------|---------|

Bootstrap support for afum|EAL89990.1 as seed ortholog is 100%.

Bootstrap support for afis|EAW25329.1 as seed ortholog is 100%.

---

Group of orthologs #2667. Best score 1280 bits

Score difference with first non-orthologous sequence - *A. fumigatus*:1280 *A. fischeri*:1280

afum|EAL85324.1 100.00% afis|EAW20206.1 100.00%

Bootstrap support for afum|EAL85324.1 as seed ortholog is 100%.

Bootstrap support for afis|EAW20206.1 as seed ortholog is 100%.

---

Group of orthologs #2668. Best score 1280 bits

Score difference with first non-orthologous sequence - *A. fumigatus*:1280 *A. fischeri*:667

afum|EAL84403.1 100.00% afis|EAW25732.1 100.00%

Bootstrap support for afum|EAL84403.1 as seed ortholog is 100%.

Bootstrap support for afis|EAW25732.1 as seed ortholog is 100%.

---

Group of orthologs #2669. Best score 1280 bits

Score difference with first non-orthologous sequence - *A. fumigatus*:1280 *A. fischeri*:1280

afum|EAL92860.1 100.00% afis|EAW21847.1 100.00%

Bootstrap support for afum|EAL92860.1 as seed ortholog is 100%.

Bootstrap support for afis|EAW21847.1 as seed ortholog is 100%.

---

Group of orthologs #2670. Best score 1279 bits

Score difference with first non-orthologous sequence - *A. fumigatus*:1149 *A. fischeri*:922

afum|EAL86325.1 100.00% afis|EAW16753.1 100.00%

Bootstrap support for afum|EAL86325.1 as seed ortholog is 100%.

Bootstrap support for afis|EAW16753.1 as seed ortholog is 100%.

---

Group of orthologs #2671. Best score 1279 bits

Score difference with first non-orthologous sequence - *A. fumigatus*:1139 *A. fischeri*:1184

afum|EAL88522.2 100.00% afis|EAW15888.1 100.00%

Bootstrap support for afum|EAL88522.2 as seed ortholog is 100%.

Bootstrap support for afis|EAW15888.1 as seed ortholog is 100%.

---

Group of orthologs #2672. Best score 1279 bits

Score difference with first non-orthologous sequence - *A. fumigatus*:1279 *A. fischeri*:1279

afum|EAL88663.1 100.00% afis|EAW16032.1 100.00%

Bootstrap support for afum|EAL88663.1 as seed ortholog is 100%.

Bootstrap support for afis|EAW16032.1 as seed ortholog is 100%.

---

Group of orthologs #2673. Best score 1279 bits

Score difference with first non-orthologous sequence - *A. fumigatus*:1279 *A. fischeri*:355

afum|EAL89006.1 100.00% afis|EAW16381.1 100.00%

Bootstrap support for afum|EAL89006.1 as seed ortholog is 100%.

Bootstrap support for afis|EAW16381.1 as seed ortholog is 100%.

---

Group of orthologs #2674. Best score 1279 bits

Score difference with first non-orthologous sequence - *A. fumigatus*:1279 *A. fischeri*:1279

afum|EAL87723.1 100.00% afis|EAW18359.1 100.00%

Bootstrap support for afum|EAL87723.1 as seed ortholog is 100%.

Bootstrap support for afis|EAW18359.1 as seed ortholog is 100%.

---

Group of orthologs #2675. Best score 1279 bits

Score difference with first non-orthologous sequence - *A. fumigatus*:1138 *A. fischeri*:1034

afum|EAL91165.1 100.00% afis|EAW17328.1 100.00%

Bootstrap support for afum|EAL91165.1 as seed ortholog is 100%.

Bootstrap support for afis|EAW17328.1 as seed ortholog is 100%.

---

Group of orthologs #2676. Best score 1279 bits

Score difference with first non-orthologous sequence - *A. fumigatus*:1279 *A. fischeri*:1279

|                 |         |                 |         |
|-----------------|---------|-----------------|---------|
| afum EAL91397.1 | 100.00% | afis EAW17584.1 | 100.00% |
|-----------------|---------|-----------------|---------|

Bootstrap support for afum|EAL91397.1 as seed ortholog is 100%.

Bootstrap support for afis|EAW17584.1 as seed ortholog is 100%.

---

Group of orthologs #2677. Best score 1279 bits

Score difference with first non-orthologous sequence - *A. fumigatus*:1279 *A. fischeri*:1279

|                 |         |                 |         |
|-----------------|---------|-----------------|---------|
| afum EAL93971.2 | 100.00% | afis EAW19242.1 | 100.00% |
|-----------------|---------|-----------------|---------|

Bootstrap support for afum|EAL93971.2 as seed ortholog is 100%.

Bootstrap support for afis|EAW19242.1 as seed ortholog is 100%.

---

Group of orthologs #2678. Best score 1279 bits

Score difference with first non-orthologous sequence - *A. fumigatus*:1279 *A. fischeri*:1279

|                 |         |                 |         |
|-----------------|---------|-----------------|---------|
| afum EAL93974.1 | 100.00% | afis EAW19245.1 | 100.00% |
|-----------------|---------|-----------------|---------|

Bootstrap support for afum|EAL93974.1 as seed ortholog is 100%.

Bootstrap support for afis|EAW19245.1 as seed ortholog is 100%.

---

Group of orthologs #2679. Best score 1279 bits

Score difference with first non-orthologous sequence - *A. fumigatus*:1279 *A. fischeri*:1279

|                 |         |                 |         |
|-----------------|---------|-----------------|---------|
| afum EAL92765.1 | 100.00% | afis EAW21732.1 | 100.00% |
|-----------------|---------|-----------------|---------|

Bootstrap support for afum|EAL92765.1 as seed ortholog is 100%.

Bootstrap support for afis|EAW21732.1 as seed ortholog is 100%.

---

Group of orthologs #2680. Best score 1279 bits

Score difference with first non-orthologous sequence - *A. fumigatus*:820 *A. fischeri*:1279

|                 |         |                 |         |
|-----------------|---------|-----------------|---------|
| afum EAL90163.1 | 100.00% | afis EAW25497.1 | 100.00% |
|-----------------|---------|-----------------|---------|

Bootstrap support for afum|EAL90163.1 as seed ortholog is 100%.

Bootstrap support for afis|EAW25497.1 as seed ortholog is 100%.

---

Group of orthologs #2681. Best score 1279 bits

Score difference with first non-orthologous sequence - *A. fumigatus*:1279 *A. fischeri*:1279

|                 |         |                 |         |
|-----------------|---------|-----------------|---------|
| afum EAL91989.2 | 100.00% | afis EAW24134.1 | 100.00% |
|-----------------|---------|-----------------|---------|

Bootstrap support for afum|EAL91989.2 as seed ortholog is 100%.

Bootstrap support for afis|EAW24134.1 as seed ortholog is 100%.

---

Group of orthologs #2682. Best score 1278 bits

Score difference with first non-orthologous sequence - *A. fumigatus*:1278 *A. fischeri*:1278

|                 |         |                 |         |
|-----------------|---------|-----------------|---------|
| afum EAL86394.1 | 100.00% | afis EAW16848.1 | 100.00% |
|-----------------|---------|-----------------|---------|

Bootstrap support for afum|EAL86394.1 as seed ortholog is 100%.

Bootstrap support for afis|EAW16848.1 as seed ortholog is 100%.

---

Group of orthologs #2683. Best score 1278 bits

Score difference with first non-orthologous sequence - *A. fumigatus*:1278 *A. fischeri*:1278

|                 |         |                 |         |
|-----------------|---------|-----------------|---------|
| afum EAL88653.1 | 100.00% | afis EAW16024.1 | 100.00% |
|-----------------|---------|-----------------|---------|

Bootstrap support for afum|EAL88653.1 as seed ortholog is 100%.

Bootstrap support for afis|EAW16024.1 as seed ortholog is 100%.

---

Group of orthologs #2684. Best score 1278 bits

Score difference with first non-orthologous sequence - *A. fumigatus*:940 *A. fischeri*:847

|                 |         |                 |         |
|-----------------|---------|-----------------|---------|
| afum EAL85074.1 | 100.00% | afis EAW19817.1 | 100.00% |
|-----------------|---------|-----------------|---------|

Bootstrap support for afum|EAL85074.1 as seed ortholog is 100%.

Bootstrap support for afis|EAW19817.1 as seed ortholog is 100%.

---

Group of orthologs #2685. Best score 1278 bits

Score difference with first non-orthologous sequence - *A. fumigatus*:1278 *A. fischeri*:1278

|                 |         |                 |         |
|-----------------|---------|-----------------|---------|
| afum EAL87051.1 | 100.00% | afis EAW19444.1 | 100.00% |
|-----------------|---------|-----------------|---------|

Bootstrap support for afum|EAL87051.1 as seed ortholog is 100%.

Bootstrap support for afis|EAW19444.1 as seed ortholog is 100%.

---

Group of orthologs #2686. Best score 1277 bits

Score difference with first non-orthologous sequence - *A. fumigatus*:1111 *A. fischeri*:1073

afum|EAL85147.2 100.00% afis|EAW19750.1 100.00%

Bootstrap support for afum|EAL85147.2 as seed ortholog is 100%.

Bootstrap support for afis|EAW19750.1 as seed ortholog is 100%.

---

Group of orthologs #2687. Best score 1277 bits

Score difference with first non-orthologous sequence - *A. fumigatus*:1277 *A. fischeri*:1277

afum|EAL91739.1 100.00% afis|EAW17928.1 100.00%

Bootstrap support for afum|EAL91739.1 as seed ortholog is 100%.

Bootstrap support for afis|EAW17928.1 as seed ortholog is 100%.

---

Group of orthologs #2688. Best score 1277 bits

Score difference with first non-orthologous sequence - *A. fumigatus*:1277 *A. fischeri*:1277

afum|EAL89467.1 100.00% afis|EAW24823.1 100.00%

Bootstrap support for afum|EAL89467.1 as seed ortholog is 100%.

Bootstrap support for afis|EAW24823.1 as seed ortholog is 100%.

---

Group of orthologs #2689. Best score 1276 bits

Score difference with first non-orthologous sequence - *A. fumigatus*:1276 *A. fischeri*:1276

afum|EAL84557.1 100.00% afis|EAW20497.1 100.00%

Bootstrap support for afum|EAL84557.1 as seed ortholog is 100%.

Bootstrap support for afis|EAW20497.1 as seed ortholog is 100%.

---

Group of orthologs #2690. Best score 1276 bits

Score difference with first non-orthologous sequence - *A. fumigatus*:1276 *A. fischeri*:1276

afum|EAL91312.1 100.00% afis|EAW17490.1 100.00%

Bootstrap support for afum|EAL91312.1 as seed ortholog is 100%.

Bootstrap support for afis|EAW17490.1 as seed ortholog is 100%.

---

Group of orthologs #2691. Best score 1276 bits

Score difference with first non-orthologous sequence - *A. fumigatus*:1178 *A. fischeri*:1276

afum|EAL91686.1 100.00% afis|EAW17878.1 100.00%

Bootstrap support for afum|EAL91686.1 as seed ortholog is 100%.

Bootstrap support for afis|EAW17878.1 as seed ortholog is 100%.

---

Group of orthologs #2692. Best score 1276 bits

Score difference with first non-orthologous sequence - *A. fumigatus*:1276 *A. fischeri*:1153

afum|EAL89229.1 100.00% afis|EAW20416.1 100.00%

Bootstrap support for afum|EAL89229.1 as seed ortholog is 100%.

Bootstrap support for afis|EAW20416.1 as seed ortholog is 100%.

---

Group of orthologs #2693. Best score 1276 bits

Score difference with first non-orthologous sequence - *A. fumigatus*:1276 *A. fischeri*:1276

afum|EAL93522.2 100.00% afis|EAW18788.1 100.00%

Bootstrap support for afum|EAL93522.2 as seed ortholog is 100%.

Bootstrap support for afis|EAW18788.1 as seed ortholog is 100%.

---

Group of orthologs #2694. Best score 1276 bits

Score difference with first non-orthologous sequence - *A. fumigatus*:1276 *A. fischeri*:1276

afum|EAL92419.1 100.00% afis|EAW21405.1 100.00%

Bootstrap support for afum|EAL92419.1 as seed ortholog is 100%.

Bootstrap support for afis|EAW21405.1 as seed ortholog is 100%.

---

Group of orthologs #2695. Best score 1276 bits

Score difference with first non-orthologous sequence - *A. fumigatus*:1276 *A. fischeri*:1276

afum|EAL90061.1 100.00% afis|EAW25402.1 100.00%

Bootstrap support for afum|EAL90061.1 as seed ortholog is 100%.

Bootstrap support for afis|EAW25402.1 as seed ortholog is 100%.

---

Group of orthologs #2696. Best score 1275 bits

Score difference with first non-orthologous sequence - *A. fumigatus*:1275 *A. fischeri*:1275

afum|EAL84558.1 100.00% afis|EAW20496.1 100.00%

Bootstrap support for afum|EAL84558.1 as seed ortholog is 100%.

Bootstrap support for afis|EAW20496.1 as seed ortholog is 100%.

---

Group of orthologs #2697. Best score 1275 bits

Score difference with first non-orthologous sequence - *A. fumigatus*:1275 *A. fischeri*:856

afum|EAL85486.1 100.00% afis|EAW20372.1 100.00%

Bootstrap support for afum|EAL85486.1 as seed ortholog is 100%.

Bootstrap support for afis|EAW20372.1 as seed ortholog is 100%.

---

Group of orthologs #2698. Best score 1275 bits

Score difference with first non-orthologous sequence - *A. fumigatus*:1275 *A. fischeri*:1275

afum|EAL88408.1 100.00% afis|EAW23071.1 100.00%

Bootstrap support for afum|EAL88408.1 as seed ortholog is 100%.

Bootstrap support for afis|EAW23071.1 as seed ortholog is 100%.

---

Group of orthologs #2699. Best score 1275 bits

Score difference with first non-orthologous sequence - *A. fumigatus*:1275 *A. fischeri*:1275

afum|EAL90783.1 100.00% afis|EAW22409.1 100.00%

Bootstrap support for afum|EAL90783.1 as seed ortholog is 100%.

Bootstrap support for afis|EAW22409.1 as seed ortholog is 100%.

---

Group of orthologs #2700. Best score 1274 bits

Score difference with first non-orthologous sequence - *A. fumigatus*:1274 *A. fischeri*:1274

afum|EAL84329.1 100.00% afis|EAW25642.1 100.00%

Bootstrap support for afum|EAL84329.1 as seed ortholog is 100%.

Bootstrap support for afis|EAW25642.1 as seed ortholog is 100%.

---

Group of orthologs #2701. Best score 1274 bits

Score difference with first non-orthologous sequence - *A. fumigatus*:1155 *A. fischeri*:1077

afum|EAL92325.1 100.00% afis|EAW21309.1 100.00%

Bootstrap support for afum|EAL92325.1 as seed ortholog is 100%.

Bootstrap support for afis|EAW21309.1 as seed ortholog is 100%.

---

Group of orthologs #2702. Best score 1273 bits

Score difference with first non-orthologous sequence - *A. fumigatus*:1273 *A. fischeri*:1273

afum|EAL87659.1 100.00% afis|EAW18293.1 100.00%

Bootstrap support for afum|EAL87659.1 as seed ortholog is 100%.

Bootstrap support for afis|EAW18293.1 as seed ortholog is 100%.

---

Group of orthologs #2703. Best score 1273 bits

Score difference with first non-orthologous sequence - *A. fumigatus*:1044 *A. fischeri*:427

afum|EAL91537.1 100.00% afis|EAW17722.1 100.00%

Bootstrap support for afum|EAL91537.1 as seed ortholog is 100%.

Bootstrap support for afis|EAW17722.1 as seed ortholog is 100%.

---

Group of orthologs #2704. Best score 1273 bits

Score difference with first non-orthologous sequence - *A. fumigatus*:1273 *A. fischeri*:1273



afum|EAL87199.1 100.00% afis|EAW23766.1 100.00%

Bootstrap support for afum|EAL87199.1 as seed ortholog is 100%.

Bootstrap support for afis|EAW23766.1 as seed ortholog is 100%.

---

Group of orthologs #2705. Best score 1273 bits

Score difference with first non-orthologous sequence - *A. fumigatus*:1273 *A. fischeri*:1273

afum|EAL87206.1 100.00% afis|EAW23772.1 100.00%

Bootstrap support for afum|EAL87206.1 as seed ortholog is 100%.

Bootstrap support for afis|EAW23772.1 as seed ortholog is 100%.

---

Group of orthologs #2706. Best score 1273 bits

Score difference with first non-orthologous sequence - *A. fumigatus*:1273 *A. fischeri*:1273

afum|EAL93582.1 100.00% afis|EAW18851.1 100.00%

Bootstrap support for afum|EAL93582.1 as seed ortholog is 100%.

Bootstrap support for afis|EAW18851.1 as seed ortholog is 100%.

---

Group of orthologs #2707. Best score 1272 bits

Score difference with first non-orthologous sequence - *A. fumigatus*:1067 *A. fischeri*:981

afum|EAL85706.1 100.00% afis|EAW15628.1 100.00%

Bootstrap support for afum|EAL85706.1 as seed ortholog is 100%.

Bootstrap support for afis|EAW15628.1 as seed ortholog is 100%.

---

Group of orthologs #2708. Best score 1272 bits

Score difference with first non-orthologous sequence - *A. fumigatus*:1272 *A. fischeri*:1272

afum|EAL91647.1 100.00% afis|EAW17837.1 100.00%

Bootstrap support for afum|EAL91647.1 as seed ortholog is 100%.

Bootstrap support for afis|EAW17837.1 as seed ortholog is 100%.

---

Group of orthologs #2709. Best score 1272 bits

Score difference with first non-orthologous sequence - *A. fumigatus*:1272 *A. fischeri*:1272

afum|EAL92622.1 100.00% afis|EAW21603.1 100.00%

Bootstrap support for afum|EAL92622.1 as seed ortholog is 100%.

Bootstrap support for afis|EAW21603.1 as seed ortholog is 100%.

---

Group of orthologs #2710. Best score 1272 bits

Score difference with first non-orthologous sequence - *A. fumigatus*:1272 *A. fischeri*:1272

afum|EAL90009.1 100.00% afis|EAW25346.1 100.00%

Bootstrap support for afum|EAL90009.1 as seed ortholog is 100%.

Bootstrap support for afis|EAW25346.1 as seed ortholog is 100%.

---

Group of orthologs #2711. Best score 1272 bits

Score difference with first non-orthologous sequence - *A. fumigatus*:1272 *A. fischeri*:1272

afum|EAL91942.1 100.00% afis|EAW24087.1 100.00%

Bootstrap support for afum|EAL91942.1 as seed ortholog is 100%.

Bootstrap support for afis|EAW24087.1 as seed ortholog is 100%.

---

Group of orthologs #2712. Best score 1271 bits

Score difference with first non-orthologous sequence - *A. fumigatus*:1112 *A. fischeri*:946

afum|EAL85818.1 100.00% afis|EAW15506.1 100.00%

Bootstrap support for afum|EAL85818.1 as seed ortholog is 100%.

Bootstrap support for afis|EAW15506.1 as seed ortholog is 100%.

---

Group of orthologs #2713. Best score 1271 bits

Score difference with first non-orthologous sequence - *A. fumigatus*:1271 *A. fischeri*:1271

afum|EAL89094.1 100.00% afis|EAW16499.1 100.00%

Bootstrap support for afum|EAL89094.1 as seed ortholog is 100%.

Bootstrap support for afis|EAW16499.1 as seed ortholog is 100%.

---

Group of orthologs #2714. Best score 1271 bits

Score difference with first non-orthologous sequence - *A. fumigatus*:1271 *A. fischeri*:1271

|                 |         |                 |         |
|-----------------|---------|-----------------|---------|
| afum EAL91457.1 | 100.00% | afis EAW17642.1 | 100.00% |
|-----------------|---------|-----------------|---------|

Bootstrap support for afum|EAL91457.1 as seed ortholog is 100%.

Bootstrap support for afis|EAW17642.1 as seed ortholog is 100%.

---

Group of orthologs #2715. Best score 1271 bits

Score difference with first non-orthologous sequence - *A. fumigatus*:1025 *A. fischeri*:932

|                 |         |                 |         |
|-----------------|---------|-----------------|---------|
| afum EAL84305.1 | 100.00% | afis EAW25600.1 | 100.00% |
|-----------------|---------|-----------------|---------|

Bootstrap support for afum|EAL84305.1 as seed ortholog is 100%.

Bootstrap support for afis|EAW25600.1 as seed ortholog is 100%.

---

Group of orthologs #2716. Best score 1271 bits

Score difference with first non-orthologous sequence - *A. fumigatus*:737 *A. fischeri*:742

|                 |         |                 |         |
|-----------------|---------|-----------------|---------|
| afum EAL93089.1 | 100.00% | afis EAW18409.1 | 100.00% |
|-----------------|---------|-----------------|---------|

Bootstrap support for afum|EAL93089.1 as seed ortholog is 100%.

Bootstrap support for afis|EAW18409.1 as seed ortholog is 100%.

---

Group of orthologs #2717. Best score 1271 bits

Score difference with first non-orthologous sequence - *A. fumigatus*:1271 *A. fischeri*:1271

|                 |         |                 |         |
|-----------------|---------|-----------------|---------|
| afum EAL87962.2 | 100.00% | afis EAW23500.1 | 100.00% |
|-----------------|---------|-----------------|---------|

Bootstrap support for afum|EAL87962.2 as seed ortholog is 100%.

Bootstrap support for afis|EAW23500.1 as seed ortholog is 100%.

---

Group of orthologs #2718. Best score 1271 bits

Score difference with first non-orthologous sequence - *A. fumigatus*:1271 *A. fischeri*:1271

|                 |         |                 |         |
|-----------------|---------|-----------------|---------|
| afum EAL92399.1 | 100.00% | afis EAW21384.1 | 100.00% |
|-----------------|---------|-----------------|---------|

Bootstrap support for afum|EAL92399.1 as seed ortholog is 100%.

Bootstrap support for afis|EAW21384.1 as seed ortholog is 100%.

---

Group of orthologs #2719. Best score 1271 bits

Score difference with first non-orthologous sequence - *A. fumigatus*:1271 *A. fischeri*:1271

|                 |         |                 |         |
|-----------------|---------|-----------------|---------|
| afum EAL89511.1 | 100.00% | afis EAW24862.1 | 100.00% |
|-----------------|---------|-----------------|---------|

Bootstrap support for afum|EAL89511.1 as seed ortholog is 100%.

Bootstrap support for afis|EAW24862.1 as seed ortholog is 100%.

---

Group of orthologs #2720. Best score 1270 bits

Score difference with first non-orthologous sequence - *A. fumigatus*:1270 *A. fischeri*:1224

|                 |         |                 |         |
|-----------------|---------|-----------------|---------|
| afum EAL87096.1 | 100.00% | afis EAW19398.1 | 100.00% |
|-----------------|---------|-----------------|---------|

Bootstrap support for afum|EAL87096.1 as seed ortholog is 100%.

Bootstrap support for afis|EAW19398.1 as seed ortholog is 100%.

---

Group of orthologs #2721. Best score 1270 bits

Score difference with first non-orthologous sequence - *A. fumigatus*:1116 *A. fischeri*:1270

|                 |         |                 |         |
|-----------------|---------|-----------------|---------|
| afum EAL86081.1 | 100.00% | afis EAW24412.1 | 100.00% |
|-----------------|---------|-----------------|---------|

Bootstrap support for afum|EAL86081.1 as seed ortholog is 100%.

Bootstrap support for afis|EAW24412.1 as seed ortholog is 100%.

---

Group of orthologs #2722. Best score 1270 bits

Score difference with first non-orthologous sequence - *A. fumigatus*:1270 *A. fischeri*:1270

|                 |         |                 |         |
|-----------------|---------|-----------------|---------|
| afum EAL91938.1 | 100.00% | afis EAW24083.1 | 100.00% |
|-----------------|---------|-----------------|---------|

Bootstrap support for afum|EAL91938.1 as seed ortholog is 100%.

Bootstrap support for afis|EAW24083.1 as seed ortholog is 100%.

---

Group of orthologs #2723. Best score 1269 bits

Score difference with first non-orthologous sequence - *A. fumigatus*:1269 *A. fischeri*:1269

afum|EAL85715.1 100.00% afis|EAW15620.1 100.00%

Bootstrap support for afum|EAL85715.1 as seed ortholog is 100%.

Bootstrap support for afis|EAW15620.1 as seed ortholog is 100%.

---

Group of orthologs #2724. Best score 1269 bits

Score difference with first non-orthologous sequence - *A. fumigatus*:1269 *A. fischeri*:1269

afum|EAL91361.1 100.00% afis|EAW17547.1 100.00%

Bootstrap support for afum|EAL91361.1 as seed ortholog is 100%.

Bootstrap support for afis|EAW17547.1 as seed ortholog is 100%.

---

Group of orthologs #2725. Best score 1269 bits

Score difference with first non-orthologous sequence - *A. fumigatus*:1269 *A. fischeri*:1269

afum|EAL88064.1 100.00% afis|EAW23406.1 100.00%

Bootstrap support for afum|EAL88064.1 as seed ortholog is 100%.

Bootstrap support for afis|EAW23406.1 as seed ortholog is 100%.

---

Group of orthologs #2726. Best score 1269 bits

Score difference with first non-orthologous sequence - *A. fumigatus*:1269 *A. fischeri*:1269

afum|EAL87456.1 100.00% afis|EAW24025.1 100.00%

Bootstrap support for afum|EAL87456.1 as seed ortholog is 100%.

Bootstrap support for afis|EAW24025.1 as seed ortholog is 100%.

---

Group of orthologs #2727. Best score 1269 bits

Score difference with first non-orthologous sequence - *A. fumigatus*:1111 *A. fischeri*:1062

afum|EAL89334.1 100.00% afis|EAW24692.1 100.00%

Bootstrap support for afum|EAL89334.1 as seed ortholog is 100%.

Bootstrap support for afis|EAW24692.1 as seed ortholog is 100%.

---

Group of orthologs #2728. Best score 1269 bits

Score difference with first non-orthologous sequence - *A. fumigatus*:1269 *A. fischeri*:1269

afum|EAL92753.1 100.00% afis|EAW21720.1 100.00%

Bootstrap support for afum|EAL92753.1 as seed ortholog is 100%.

Bootstrap support for afis|EAW21720.1 as seed ortholog is 100%.

---

Group of orthologs #2729. Best score 1269 bits

Score difference with first non-orthologous sequence - *A. fumigatus*:1269 *A. fischeri*:1269

afum|EAL89605.1 100.00% afis|EAW24948.1 100.00%

Bootstrap support for afum|EAL89605.1 as seed ortholog is 100%.

Bootstrap support for afis|EAW24948.1 as seed ortholog is 100%.

---

Group of orthologs #2730. Best score 1269 bits

Score difference with first non-orthologous sequence - *A. fumigatus*:1269 *A. fischeri*:1269

afum|EAL89673.1 100.00% afis|EAW25022.1 100.00%

Bootstrap support for afum|EAL89673.1 as seed ortholog is 100%.

Bootstrap support for afis|EAW25022.1 as seed ortholog is 100%.

---

Group of orthologs #2731. Best score 1268 bits

Score difference with first non-orthologous sequence - *A. fumigatus*:1268 *A. fischeri*:1268

afum|EAL88639.1 100.00% afis|EAW16009.1 100.00%

Bootstrap support for afum|EAL88639.1 as seed ortholog is 100%.

Bootstrap support for afis|EAW16009.1 as seed ortholog is 100%.

---

Group of orthologs #2732. Best score 1268 bits

Score difference with first non-orthologous sequence - *A. fumigatus*:1268 *A. fischeri*:1268

|                 |         |                 |         |
|-----------------|---------|-----------------|---------|
| afum EAL91376.1 | 100.00% | afis EAW17562.1 | 100.00% |
|-----------------|---------|-----------------|---------|

Bootstrap support for afum|EAL91376.1 as seed ortholog is 100%.

Bootstrap support for afis|EAW17562.1 as seed ortholog is 100%.

---

Group of orthologs #2733. Best score 1268 bits

Score difference with first non-orthologous sequence - *A. fumigatus*:1268 *A. fischeri*:1268

|                 |         |                 |         |
|-----------------|---------|-----------------|---------|
| afum EAL87223.2 | 100.00% | afis EAW23789.1 | 100.00% |
|-----------------|---------|-----------------|---------|

Bootstrap support for afum|EAL87223.2 as seed ortholog is 100%.

Bootstrap support for afis|EAW23789.1 as seed ortholog is 100%.

---

Group of orthologs #2734. Best score 1267 bits

Score difference with first non-orthologous sequence - *A. fumigatus*:1198 *A. fischeri*:838

|                 |         |                 |         |
|-----------------|---------|-----------------|---------|
| afum EAL88551.2 | 100.00% | afis EAW15916.1 | 100.00% |
|-----------------|---------|-----------------|---------|

Bootstrap support for afum|EAL88551.2 as seed ortholog is 100%.

Bootstrap support for afis|EAW15916.1 as seed ortholog is 100%.

---

Group of orthologs #2735. Best score 1267 bits

Score difference with first non-orthologous sequence - *A. fumigatus*:1267 *A. fischeri*:1267

|                 |         |                 |         |
|-----------------|---------|-----------------|---------|
| afum EAL84277.1 | 100.00% | afis EAW25553.1 | 100.00% |
|-----------------|---------|-----------------|---------|

Bootstrap support for afum|EAL84277.1 as seed ortholog is 100%.

Bootstrap support for afis|EAW25553.1 as seed ortholog is 100%.

---

Group of orthologs #2736. Best score 1267 bits

Score difference with first non-orthologous sequence - *A. fumigatus*:1267 *A. fischeri*:1267

|                 |         |                 |         |
|-----------------|---------|-----------------|---------|
| afum EAL86254.1 | 100.00% | afis EAW24632.1 | 100.00% |
|-----------------|---------|-----------------|---------|

Bootstrap support for afum|EAL86254.1 as seed ortholog is 100%.

Bootstrap support for afis|EAW24632.1 as seed ortholog is 100%.

---

Group of orthologs #2737. Best score 1267 bits

Score difference with first non-orthologous sequence - *A. fumigatus*:1267 *A. fischeri*:1267

|                 |         |                 |         |
|-----------------|---------|-----------------|---------|
| afum EAL88332.1 | 100.00% | afis EAW23149.1 | 100.00% |
|-----------------|---------|-----------------|---------|

Bootstrap support for afum|EAL88332.1 as seed ortholog is 100%.

Bootstrap support for afis|EAW23149.1 as seed ortholog is 100%.

---

Group of orthologs #2738. Best score 1266 bits

Score difference with first non-orthologous sequence - *A. fumigatus*:1266 *A. fischeri*:1266

|                 |         |                 |         |
|-----------------|---------|-----------------|---------|
| afum EAL84542.1 | 100.00% | afis EAW20515.1 | 100.00% |
|-----------------|---------|-----------------|---------|

Bootstrap support for afum|EAL84542.1 as seed ortholog is 100%.

Bootstrap support for afis|EAW20515.1 as seed ortholog is 100%.

---

Group of orthologs #2739. Best score 1266 bits

Score difference with first non-orthologous sequence - *A. fumigatus*:1135 *A. fischeri*:1266

|                 |         |                 |         |
|-----------------|---------|-----------------|---------|
| afum EAL84486.2 | 100.00% | afis EAW20578.1 | 100.00% |
|-----------------|---------|-----------------|---------|

Bootstrap support for afum|EAL84486.2 as seed ortholog is 100%.

Bootstrap support for afis|EAW20578.1 as seed ortholog is 100%.

---

Group of orthologs #2740. Best score 1266 bits

Score difference with first non-orthologous sequence - *A. fumigatus*:1266 *A. fischeri*:1266

|                 |         |                 |         |
|-----------------|---------|-----------------|---------|
| afum EAL87534.1 | 100.00% | afis EAW18172.1 | 100.00% |
|-----------------|---------|-----------------|---------|

Bootstrap support for afum|EAL87534.1 as seed ortholog is 100%.

Bootstrap support for afis|EAW18172.1 as seed ortholog is 100%.

---

Group of orthologs #2741. Best score 1266 bits

Score difference with first non-orthologous sequence - *A. fumigatus*:1266 *A. fischeri*:922

|                 |         |                 |         |
|-----------------|---------|-----------------|---------|
| afum EAL89292.1 | 100.00% | afis EAW16694.1 | 100.00% |
|-----------------|---------|-----------------|---------|

Bootstrap support for afum|EAL89292.1 as seed ortholog is 100%.

Bootstrap support for afis|EAW16694.1 as seed ortholog is 100%.

---

Group of orthologs #2742. Best score 1266 bits

Score difference with first non-orthologous sequence - *A. fumigatus*:1113 *A. fischeri*:808

afum|EAL92895.1 100.00% afis|EAW21881.1 100.00%

Bootstrap support for afum|EAL92895.1 as seed ortholog is 100%.

Bootstrap support for afis|EAW21881.1 as seed ortholog is 100%.

---

Group of orthologs #2743. Best score 1265 bits

Score difference with first non-orthologous sequence - *A. fumigatus*:1265 *A. fischeri*:1265

afum|EAL85709.1 100.00% afis|EAW15625.1 100.00%

Bootstrap support for afum|EAL85709.1 as seed ortholog is 100%.

Bootstrap support for afis|EAW15625.1 as seed ortholog is 100%.

---

Group of orthologs #2744. Best score 1265 bits

Score difference with first non-orthologous sequence - *A. fumigatus*:940 *A. fischeri*:914

afum|EAL86556.1 100.00% afis|EAW17060.1 100.00%

Bootstrap support for afum|EAL86556.1 as seed ortholog is 100%.

Bootstrap support for afis|EAW17060.1 as seed ortholog is 100%.

---

Group of orthologs #2745. Best score 1265 bits

Score difference with first non-orthologous sequence - *A. fumigatus*:1087 *A. fischeri*:983

afum|EAL89286.1 100.00% afis|EAW16682.1 100.00%

Bootstrap support for afum|EAL89286.1 as seed ortholog is 100%.

Bootstrap support for afis|EAW16682.1 as seed ortholog is 100%.

---

Group of orthologs #2746. Best score 1265 bits

Score difference with first non-orthologous sequence - *A. fumigatus*:1265 *A. fischeri*:1265

afum|EAL90608.1 100.00% afis|EAW22591.1 100.00%

Bootstrap support for afum|EAL90608.1 as seed ortholog is 100%.

Bootstrap support for afis|EAW22591.1 as seed ortholog is 100%.

---

Group of orthologs #2747. Best score 1264 bits

Score difference with first non-orthologous sequence - *A. fumigatus*:1264 *A. fischeri*:1264

afum|EAL88644.1 100.00% afis|EAW16015.1 100.00%

Bootstrap support for afum|EAL88644.1 as seed ortholog is 100%.

Bootstrap support for afis|EAW16015.1 as seed ortholog is 100%.

---

Group of orthologs #2748. Best score 1264 bits

Score difference with first non-orthologous sequence - *A. fumigatus*:1264 *A. fischeri*:1264

afum|EAL92017.1 100.00% afis|EAW24161.1 100.00%

Bootstrap support for afum|EAL92017.1 as seed ortholog is 100%.

Bootstrap support for afis|EAW24161.1 as seed ortholog is 100%.

---

Group of orthologs #2749. Best score 1263 bits

Score difference with first non-orthologous sequence - *A. fumigatus*:1263 *A. fischeri*:1263

afum|EAL89073.1 100.00% afis|EAW16479.1 100.00%

Bootstrap support for afum|EAL89073.1 as seed ortholog is 100%.

Bootstrap support for afis|EAW16479.1 as seed ortholog is 100%.

---

Group of orthologs #2750. Best score 1263 bits

Score difference with first non-orthologous sequence - *A. fumigatus*:1096 *A. fischeri*:1047

afum|EAL84286.1 100.00% afis|EAW25576.1 100.00%

Bootstrap support for afum|EAL84286.1 as seed ortholog is 100%.

Bootstrap support for afis|EAW25576.1 as seed ortholog is 100%.

---

Group of orthologs #2751. Best score 1263 bits

Score difference with first non-orthologous sequence - *A. fumigatus*:1263 *A. fischeri*:1263

afum|EAL86083.1 100.00% afis|EAW24414.1 100.00%

Bootstrap support for afum|EAL86083.1 as seed ortholog is 100%.

Bootstrap support for afis|EAW24414.1 as seed ortholog is 100%.

---

Group of orthologs #2752. Best score 1263 bits

Score difference with first non-orthologous sequence - *A. fumigatus*:1263 *A. fischeri*:1263

afum|EAL90098.1 100.00% afis|EAW25440.1 100.00%

Bootstrap support for afum|EAL90098.1 as seed ortholog is 100%.

Bootstrap support for afis|EAW25440.1 as seed ortholog is 100%.

---

Group of orthologs #2753. Best score 1262 bits

Score difference with first non-orthologous sequence - *A. fumigatus*:1262 *A. fischeri*:1262

afum|EAL86934.1 100.00% afis|EAW19584.1 100.00%

Bootstrap support for afum|EAL86934.1 as seed ortholog is 100%.

Bootstrap support for afis|EAW19584.1 as seed ortholog is 100%.

---

Group of orthologs #2754. Best score 1262 bits

Score difference with first non-orthologous sequence - *A. fumigatus*:1262 *A. fischeri*:1262

afum|EAL90982.1 100.00% afis|EAW22212.1 100.00%

Bootstrap support for afum|EAL90982.1 as seed ortholog is 100%.

Bootstrap support for afis|EAW22212.1 as seed ortholog is 100%.

---

Group of orthologs #2755. Best score 1261 bits

Score difference with first non-orthologous sequence - *A. fumigatus*:1261 *A. fischeri*:1261

afum|EAL86673.2 100.00% afis|EAW17255.1 100.00%

Bootstrap support for afum|EAL86673.2 as seed ortholog is 100%.

Bootstrap support for afis|EAW17255.1 as seed ortholog is 100%.

---

Group of orthologs #2756. Best score 1261 bits

Score difference with first non-orthologous sequence - *A. fumigatus*:1261 *A. fischeri*:1261

afum|EAL93751.1 100.00% afis|EAW19020.1 100.00%

Bootstrap support for afum|EAL93751.1 as seed ortholog is 100%.

Bootstrap support for afis|EAW19020.1 as seed ortholog is 100%.

---

Group of orthologs #2757. Best score 1261 bits

Score difference with first non-orthologous sequence - *A. fumigatus*:1261 *A. fischeri*:1147

afum|EAL94088.1 100.00% afis|EAW19369.1 100.00%

Bootstrap support for afum|EAL94088.1 as seed ortholog is 100%.

Bootstrap support for afis|EAW19369.1 as seed ortholog is 100%.

---

Group of orthologs #2758. Best score 1260 bits

Score difference with first non-orthologous sequence - *A. fumigatus*:825 *A. fischeri*:956

afum|EAL88697.1 100.00% afis|EAW16065.1 100.00%

Bootstrap support for afum|EAL88697.1 as seed ortholog is 100%.

Bootstrap support for afis|EAW16065.1 as seed ortholog is 100%.

---

Group of orthologs #2759. Best score 1260 bits

Score difference with first non-orthologous sequence - *A. fumigatus*:1260 *A. fischeri*:1260

afum|EAL87855.2 100.00% afis|EAW23609.1 100.00%

Bootstrap support for afum|EAL87855.2 as seed ortholog is 100%.

Bootstrap support for afis|EAW23609.1 as seed ortholog is 100%.

---

Group of orthologs #2760. Best score 1260 bits

Score difference with first non-orthologous sequence - *A. fumigatus*:1260 *A. fischeri*:1260

afum|EAL90949.1 100.00% afis|EAW22244.1 100.00%

Bootstrap support for afum|EAL90949.1 as seed ortholog is 100%.

Bootstrap support for afis|EAW22244.1 as seed ortholog is 100%.

---

Group of orthologs #2761. Best score 1260 bits

Score difference with first non-orthologous sequence - *A. fumigatus*:1260 *A. fischeri*:1260

afum|EAL90740.1 100.00% afis|EAW22451.1 100.00%

Bootstrap support for afum|EAL90740.1 as seed ortholog is 100%.

Bootstrap support for afis|EAW22451.1 as seed ortholog is 100%.

---

Group of orthologs #2762. Best score 1259 bits

Score difference with first non-orthologous sequence - *A. fumigatus*:1259 *A. fischeri*:1259

afum|EAL88833.1 100.00% afis|EAW16205.1 100.00%

Bootstrap support for afum|EAL88833.1 as seed ortholog is 100%.

Bootstrap support for afis|EAW16205.1 as seed ortholog is 100%.

---

Group of orthologs #2763. Best score 1259 bits

Score difference with first non-orthologous sequence - *A. fumigatus*:1259 *A. fischeri*:1259

afum|EAL93342.1 100.00% afis|EAW18630.1 100.00%

Bootstrap support for afum|EAL93342.1 as seed ortholog is 100%.

Bootstrap support for afis|EAW18630.1 as seed ortholog is 100%.

---

Group of orthologs #2764. Best score 1259 bits

Score difference with first non-orthologous sequence - *A. fumigatus*:1259 *A. fischeri*:1259

afum|EAL89390.1 100.00% afis|EAW24744.1 100.00%

Bootstrap support for afum|EAL89390.1 as seed ortholog is 100%.

Bootstrap support for afis|EAW24744.1 as seed ortholog is 100%.

---

Group of orthologs #2765. Best score 1259 bits

Score difference with first non-orthologous sequence - *A. fumigatus*:571 *A. fischeri*:451

afum|EAL89971.1 100.00% afis|EAW25308.1 100.00%

Bootstrap support for afum|EAL89971.1 as seed ortholog is 100%.

Bootstrap support for afis|EAW25308.1 as seed ortholog is 100%.

---

Group of orthologs #2766. Best score 1259 bits

Score difference with first non-orthologous sequence - *A. fumigatus*:1259 *A. fischeri*:1163

afum|EAL90015.1 100.00% afis|EAW25353.1 100.00%

Bootstrap support for afum|EAL90015.1 as seed ortholog is 100%.

Bootstrap support for afis|EAW25353.1 as seed ortholog is 100%.

---

Group of orthologs #2767. Best score 1258 bits

Score difference with first non-orthologous sequence - *A. fumigatus*:899 *A. fischeri*:681

afum|EAL93236.1 100.00% afis|EAW18538.1 100.00%

Bootstrap support for afum|EAL93236.1 as seed ortholog is 100%.

Bootstrap support for afis|EAW18538.1 as seed ortholog is 100%.

---

Group of orthologs #2768. Best score 1258 bits

Score difference with first non-orthologous sequence - *A. fumigatus*:1258 *A. fischeri*:1258

afum|EAL91039.1 100.00% afis|EAW22151.1 100.00%

Bootstrap support for afum|EAL91039.1 as seed ortholog is 100%.

Bootstrap support for afis|EAW22151.1 as seed ortholog is 100%.

---

Group of orthologs #2769. Best score 1258 bits

Score difference with first non-orthologous sequence - *A. fumigatus*:1258 *A. fischeri*:1258

afum|EAL89809.2 100.00% afis|EAW25138.1 100.00%

Bootstrap support for afum|EAL89809.2 as seed ortholog is 100%.

Bootstrap support for afis|EAW25138.1 as seed ortholog is 100%.

---

Group of orthologs #2770. Best score 1257 bits

Score difference with first non-orthologous sequence - *A. fumigatus*:1078 *A. fischeri*:1189

|                 |         |                 |         |
|-----------------|---------|-----------------|---------|
| afum EAL89226.2 | 100.00% | afis EAW16630.1 | 100.00% |
|-----------------|---------|-----------------|---------|

Bootstrap support for afum|EAL89226.2 as seed ortholog is 100%.

Bootstrap support for afis|EAW16630.1 as seed ortholog is 100%.

---

Group of orthologs #2771. Best score 1257 bits

Score difference with first non-orthologous sequence - *A. fumigatus*:1257 *A. fischeri*:1257

|                 |         |                 |         |
|-----------------|---------|-----------------|---------|
| afum EAL87039.1 | 100.00% | afis EAW19457.1 | 100.00% |
|-----------------|---------|-----------------|---------|

Bootstrap support for afum|EAL87039.1 as seed ortholog is 100%.

Bootstrap support for afis|EAW19457.1 as seed ortholog is 100%.

---

Group of orthologs #2772. Best score 1257 bits

Score difference with first non-orthologous sequence - *A. fumigatus*:1128 *A. fischeri*:1166

|                 |         |                 |         |
|-----------------|---------|-----------------|---------|
| afum EAL86794.1 | 100.00% | afis EAW19735.1 | 100.00% |
|-----------------|---------|-----------------|---------|

Bootstrap support for afum|EAL86794.1 as seed ortholog is 100%.

Bootstrap support for afis|EAW19735.1 as seed ortholog is 100%.

---

Group of orthologs #2773. Best score 1257 bits

Score difference with first non-orthologous sequence - *A. fumigatus*:1257 *A. fischeri*:1257

|                 |         |                 |         |
|-----------------|---------|-----------------|---------|
| afum EAL91773.1 | 100.00% | afis EAW17963.1 | 100.00% |
|-----------------|---------|-----------------|---------|

Bootstrap support for afum|EAL91773.1 as seed ortholog is 100%.

Bootstrap support for afis|EAW17963.1 as seed ortholog is 100%.

---

Group of orthologs #2774. Best score 1257 bits

Score difference with first non-orthologous sequence - *A. fumigatus*:840 *A. fischeri*:463

|                 |         |                 |         |
|-----------------|---------|-----------------|---------|
| afum EAL86150.1 | 100.00% | afis EAW24479.1 | 100.00% |
|-----------------|---------|-----------------|---------|

Bootstrap support for afum|EAL86150.1 as seed ortholog is 100%.

Bootstrap support for afis|EAW24479.1 as seed ortholog is 100%.

---

Group of orthologs #2775. Best score 1257 bits

Score difference with first non-orthologous sequence - *A. fumigatus*:1257 *A. fischeri*:1257

|                 |         |                 |         |
|-----------------|---------|-----------------|---------|
| afum EAL93597.1 | 100.00% | afis EAW18865.1 | 100.00% |
|-----------------|---------|-----------------|---------|

Bootstrap support for afum|EAL93597.1 as seed ortholog is 100%.

Bootstrap support for afis|EAW18865.1 as seed ortholog is 100%.

---

Group of orthologs #2776. Best score 1256 bits

Score difference with first non-orthologous sequence - *A. fumigatus*:1256 *A. fischeri*:1256

|                 |         |                 |         |
|-----------------|---------|-----------------|---------|
| afum EAL87002.1 | 100.00% | afis EAW19492.1 | 100.00% |
|-----------------|---------|-----------------|---------|

Bootstrap support for afum|EAL87002.1 as seed ortholog is 100%.

Bootstrap support for afis|EAW19492.1 as seed ortholog is 100%.

---

Group of orthologs #2777. Best score 1256 bits

Score difference with first non-orthologous sequence - *A. fumigatus*:1042 *A. fischeri*:774

|                 |         |                 |         |
|-----------------|---------|-----------------|---------|
| afum EAL91170.2 | 100.00% | afis EAW17333.1 | 100.00% |
|-----------------|---------|-----------------|---------|

Bootstrap support for afum|EAL91170.2 as seed ortholog is 100%.

Bootstrap support for afis|EAW17333.1 as seed ortholog is 100%.

---

Group of orthologs #2778. Best score 1256 bits

Score difference with first non-orthologous sequence - *A. fumigatus*:1256 *A. fischeri*:1256

|                 |         |                 |         |
|-----------------|---------|-----------------|---------|
| afum EAL93303.1 | 100.00% | afis EAW18595.1 | 100.00% |
|-----------------|---------|-----------------|---------|

Bootstrap support for afum|EAL93303.1 as seed ortholog is 100%.

Bootstrap support for afis|EAW18595.1 as seed ortholog is 100%.

---



Group of orthologs #2779. Best score 1256 bits

Score difference with first non-orthologous sequence - *A. fumigatus*:1022 *A. fischeri*:1256

afum|EAL90708.1 100.00% afis|EAW22485.1 100.00%

Bootstrap support for afum|EAL90708.1 as seed ortholog is 100%.

Bootstrap support for afis|EAW22485.1 as seed ortholog is 100%.

---

Group of orthologs #2780. Best score 1255 bits

Score difference with first non-orthologous sequence - *A. fumigatus*:1255 *A. fischeri*:1255

afum|EAL85819.1 100.00% afis|EAW15505.1 100.00%

Bootstrap support for afum|EAL85819.1 as seed ortholog is 100%.

Bootstrap support for afis|EAW15505.1 as seed ortholog is 100%.

---

Group of orthologs #2781. Best score 1255 bits

Score difference with first non-orthologous sequence - *A. fumigatus*:1255 *A. fischeri*:1255

afum|EAL88598.1 100.00% afis|EAW15965.1 100.00%

Bootstrap support for afum|EAL88598.1 as seed ortholog is 100%.

Bootstrap support for afis|EAW15965.1 as seed ortholog is 100%.

---

Group of orthologs #2782. Best score 1255 bits

Score difference with first non-orthologous sequence - *A. fumigatus*:1255 *A. fischeri*:1255

afum|EAL89135.1 100.00% afis|EAW16538.1 100.00%

Bootstrap support for afum|EAL89135.1 as seed ortholog is 100%.

Bootstrap support for afis|EAW16538.1 as seed ortholog is 100%.

---

Group of orthologs #2783. Best score 1255 bits

Score difference with first non-orthologous sequence - *A. fumigatus*:1255 *A. fischeri*:1255

afum|EAL87429.1 100.00% afis|EAW23999.1 100.00%

Bootstrap support for afum|EAL87429.1 as seed ortholog is 100%.

Bootstrap support for afis|EAW23999.1 as seed ortholog is 100%.

---

Group of orthologs #2784. Best score 1255 bits

Score difference with first non-orthologous sequence - *A. fumigatus*:1255 *A. fischeri*:1255

afum|EAL93396.1 100.00% afis|EAW18676.1 100.00%

Bootstrap support for afum|EAL93396.1 as seed ortholog is 100%.

Bootstrap support for afis|EAW18676.1 as seed ortholog is 100%.

---

Group of orthologs #2785. Best score 1255 bits

Score difference with first non-orthologous sequence - *A. fumigatus*:1167 *A. fischeri*:458

afum|EAL93753.1 100.00% afis|EAW19022.1 100.00%

Bootstrap support for afum|EAL93753.1 as seed ortholog is 100%.

Bootstrap support for afis|EAW19022.1 as seed ortholog is 100%.

---

Group of orthologs #2786. Best score 1254 bits

Score difference with first non-orthologous sequence - *A. fumigatus*:1254 *A. fischeri*:1185

afum|EAL86315.1 100.00% afis|EAW16740.1 100.00%

Bootstrap support for afum|EAL86315.1 as seed ortholog is 100%.

Bootstrap support for afis|EAW16740.1 as seed ortholog is 100%.

---

Group of orthologs #2787. Best score 1254 bits

Score difference with first non-orthologous sequence - *A. fumigatus*:1254 *A. fischeri*:1254

afum|EAL88724.1 100.00% afis|EAW16092.1 100.00%

Bootstrap support for afum|EAL88724.1 as seed ortholog is 100%.

Bootstrap support for afis|EAW16092.1 as seed ortholog is 100%.

---

Group of orthologs #2788. Best score 1254 bits

Score difference with first non-orthologous sequence - *A. fumigatus*:1078 *A. fischeri*:1254

|                 |         |                 |         |
|-----------------|---------|-----------------|---------|
| afum EAL84500.1 | 100.00% | afis EAW20561.1 | 100.00% |
|-----------------|---------|-----------------|---------|

Bootstrap support for afum|EAL84500.1 as seed ortholog is 100%.

Bootstrap support for afis|EAW20561.1 as seed ortholog is 100%.

---

Group of orthologs #2789. Best score 1254 bits

Score difference with first non-orthologous sequence - *A. fumigatus*:1254 *A. fischeri*:1254

|                 |         |                 |         |
|-----------------|---------|-----------------|---------|
| afum EAL93705.1 | 100.00% | afis EAW18972.1 | 100.00% |
|-----------------|---------|-----------------|---------|

Bootstrap support for afum|EAL93705.1 as seed ortholog is 100%.

Bootstrap support for afis|EAW18972.1 as seed ortholog is 100%.

---

Group of orthologs #2790. Best score 1254 bits

Score difference with first non-orthologous sequence - *A. fumigatus*:1117 *A. fischeri*:1075

|                 |         |                 |         |
|-----------------|---------|-----------------|---------|
| afum EAL93810.1 | 100.00% | afis EAW19081.1 | 100.00% |
|-----------------|---------|-----------------|---------|

Bootstrap support for afum|EAL93810.1 as seed ortholog is 100%.

Bootstrap support for afis|EAW19081.1 as seed ortholog is 100%.

---

Group of orthologs #2791. Best score 1253 bits

Score difference with first non-orthologous sequence - *A. fumigatus*:139 *A. fischeri*:1050

|                 |         |                 |         |
|-----------------|---------|-----------------|---------|
| afum EAL91800.1 | 100.00% | afis EAW17990.1 | 100.00% |
|-----------------|---------|-----------------|---------|

|                 |        |
|-----------------|--------|
| afis EAW20711.1 | 40.96% |
|-----------------|--------|

Bootstrap support for afum|EAL91800.1 as seed ortholog is 99%.

Bootstrap support for afis|EAW17990.1 as seed ortholog is 100%.

---

Group of orthologs #2792. Best score 1253 bits

Score difference with first non-orthologous sequence - *A. fumigatus*:1253 *A. fischeri*:1253

|                 |         |                 |         |
|-----------------|---------|-----------------|---------|
| afum EAL85688.2 | 100.00% | afis EAW15658.1 | 100.00% |
|-----------------|---------|-----------------|---------|

Bootstrap support for afum|EAL85688.2 as seed ortholog is 100%.

Bootstrap support for afis|EAW15658.1 as seed ortholog is 100%.

---

Group of orthologs #2793. Best score 1253 bits

Score difference with first non-orthologous sequence - *A. fumigatus*:1253 *A. fischeri*:1253

|                 |         |                 |         |
|-----------------|---------|-----------------|---------|
| afum EAL87827.2 | 100.00% | afis EAW23633.1 | 100.00% |
|-----------------|---------|-----------------|---------|

Bootstrap support for afum|EAL87827.2 as seed ortholog is 100%.

Bootstrap support for afis|EAW23633.1 as seed ortholog is 100%.

---

Group of orthologs #2794. Best score 1253 bits

Score difference with first non-orthologous sequence - *A. fumigatus*:1253 *A. fischeri*:1253

|                 |         |                 |         |
|-----------------|---------|-----------------|---------|
| afum EAL92652.1 | 100.00% | afis EAW21617.1 | 100.00% |
|-----------------|---------|-----------------|---------|

Bootstrap support for afum|EAL92652.1 as seed ortholog is 100%.

Bootstrap support for afis|EAW21617.1 as seed ortholog is 100%.

---

Group of orthologs #2795. Best score 1252 bits

Score difference with first non-orthologous sequence - *A. fumigatus*:1058 *A. fischeri*:1252

|                 |         |                 |         |
|-----------------|---------|-----------------|---------|
| afum EAL88754.1 | 100.00% | afis EAW16124.1 | 100.00% |
|-----------------|---------|-----------------|---------|

Bootstrap support for afum|EAL88754.1 as seed ortholog is 100%.

Bootstrap support for afis|EAW16124.1 as seed ortholog is 100%.

---

Group of orthologs #2796. Best score 1252 bits

Score difference with first non-orthologous sequence - *A. fumigatus*:1252 *A. fischeri*:1252

|                 |         |                 |         |
|-----------------|---------|-----------------|---------|
| afum EAL88244.1 | 100.00% | afis EAW23238.1 | 100.00% |
|-----------------|---------|-----------------|---------|

Bootstrap support for afum|EAL88244.1 as seed ortholog is 100%.

Bootstrap support for afis|EAW23238.1 as seed ortholog is 100%.

---

Group of orthologs #2797. Best score 1251 bits

Score difference with first non-orthologous sequence - *A. fumigatus*:1251 *A. fischeri*:1109

|                 |         |                 |         |
|-----------------|---------|-----------------|---------|
| afum EAL85044.1 | 100.00% | afis EAW19849.1 | 100.00% |
|-----------------|---------|-----------------|---------|

Bootstrap support for afum|EAL85044.1 as seed ortholog is 100%.  
Bootstrap support for afis|EAW19849.1 as seed ortholog is 100%.

---

Group of orthologs #2798. Best score 1251 bits

Score difference with first non-orthologous sequence - *A. fumigatus*:1251 *A. fischeri*:1251

|                 |         |                 |         |
|-----------------|---------|-----------------|---------|
| afum EAL87008.1 | 100.00% | afis EAW19486.1 | 100.00% |
|-----------------|---------|-----------------|---------|

Bootstrap support for afum|EAL87008.1 as seed ortholog is 100%.

Bootstrap support for afis|EAW19486.1 as seed ortholog is 100%.

---

Group of orthologs #2799. Best score 1251 bits

Score difference with first non-orthologous sequence - *A. fumigatus*:944 *A. fischeri*:1251

|                 |         |                 |         |
|-----------------|---------|-----------------|---------|
| afum EAL86230.1 | 100.00% | afis EAW24567.1 | 100.00% |
|-----------------|---------|-----------------|---------|

Bootstrap support for afum|EAL86230.1 as seed ortholog is 100%.

Bootstrap support for afis|EAW24567.1 as seed ortholog is 100%.

---

Group of orthologs #2800. Best score 1251 bits

Score difference with first non-orthologous sequence - *A. fumigatus*:1141 *A. fischeri*:1251

|                 |         |                 |         |
|-----------------|---------|-----------------|---------|
| afum EAL93135.1 | 100.00% | afis EAW18450.1 | 100.00% |
|-----------------|---------|-----------------|---------|

Bootstrap support for afum|EAL93135.1 as seed ortholog is 100%.

Bootstrap support for afis|EAW18450.1 as seed ortholog is 100%.

---

Group of orthologs #2801. Best score 1251 bits

Score difference with first non-orthologous sequence - *A. fumigatus*:1094 *A. fischeri*:1251

|                 |         |                 |         |
|-----------------|---------|-----------------|---------|
| afum EAL90241.1 | 100.00% | afis EAW22956.1 | 100.00% |
|-----------------|---------|-----------------|---------|

Bootstrap support for afum|EAL90241.1 as seed ortholog is 100%.

Bootstrap support for afis|EAW22956.1 as seed ortholog is 100%.

---

Group of orthologs #2802. Best score 1251 bits

Score difference with first non-orthologous sequence - *A. fumigatus*:1251 *A. fischeri*:1251

|                 |         |                 |         |
|-----------------|---------|-----------------|---------|
| afum EAL92705.1 | 100.00% | afis EAW21670.1 | 100.00% |
|-----------------|---------|-----------------|---------|

Bootstrap support for afum|EAL92705.1 as seed ortholog is 100%.

Bootstrap support for afis|EAW21670.1 as seed ortholog is 100%.

---

Group of orthologs #2803. Best score 1250 bits

Score difference with first non-orthologous sequence - *A. fumigatus*:1020 *A. fischeri*:414

|                 |         |                 |         |
|-----------------|---------|-----------------|---------|
| afum EAL84459.1 | 100.00% | afis EAW20602.1 | 100.00% |
|-----------------|---------|-----------------|---------|

Bootstrap support for afum|EAL84459.1 as seed ortholog is 100%.

Bootstrap support for afis|EAW20602.1 as seed ortholog is 100%.

---

Group of orthologs #2804. Best score 1250 bits

Score difference with first non-orthologous sequence - *A. fumigatus*:1250 *A. fischeri*:1250

|                 |         |                 |         |
|-----------------|---------|-----------------|---------|
| afum EAL87342.1 | 100.00% | afis EAW23913.1 | 100.00% |
|-----------------|---------|-----------------|---------|

Bootstrap support for afum|EAL87342.1 as seed ortholog is 100%.

Bootstrap support for afis|EAW23913.1 as seed ortholog is 100%.

---

Group of orthologs #2805. Best score 1250 bits

Score difference with first non-orthologous sequence - *A. fumigatus*:1250 *A. fischeri*:1250

|                 |         |                 |         |
|-----------------|---------|-----------------|---------|
| afum EAL88021.1 | 100.00% | afis EAW23442.1 | 100.00% |
|-----------------|---------|-----------------|---------|

Bootstrap support for afum|EAL88021.1 as seed ortholog is 100%.

Bootstrap support for afis|EAW23442.1 as seed ortholog is 100%.

---

Group of orthologs #2806. Best score 1250 bits

Score difference with first non-orthologous sequence - *A. fumigatus*:1250 *A. fischeri*:1250

|                 |         |                 |         |
|-----------------|---------|-----------------|---------|
| afum EAL93350.1 | 100.00% | afis EAW18637.1 | 100.00% |
|-----------------|---------|-----------------|---------|

Bootstrap support for afum|EAL93350.1 as seed ortholog is 100%.

Bootstrap support for afis|EAW18637.1 as seed ortholog is 100%.

---

Group of orthologs #2807. Best score 1250 bits

Score difference with first non-orthologous sequence - *A. fumigatus*:798 *A. fischeri*:1056

afum|EAL91046.1 100.00% afis|EAW22144.1 100.00%

Bootstrap support for afum|EAL91046.1 as seed ortholog is 100%.

Bootstrap support for afis|EAW22144.1 as seed ortholog is 100%.

---

Group of orthologs #2808. Best score 1249 bits

Score difference with first non-orthologous sequence - *A. fumigatus*:1106 *A. fischeri*:1119

afum|EAL90466.1 100.00% afis|EAW22729.1 100.00%

Bootstrap support for afum|EAL90466.1 as seed ortholog is 100%.

Bootstrap support for afis|EAW22729.1 as seed ortholog is 100%.

---

Group of orthologs #2809. Best score 1249 bits

Score difference with first non-orthologous sequence - *A. fumigatus*:1249 *A. fischeri*:1249

afum|EAL90471.1 100.00% afis|EAW22725.1 100.00%

Bootstrap support for afum|EAL90471.1 as seed ortholog is 100%.

Bootstrap support for afis|EAW22725.1 as seed ortholog is 100%.

---

Group of orthologs #2810. Best score 1248 bits

Score difference with first non-orthologous sequence - *A. fumigatus*:1107 *A. fischeri*:731

afum|EAL85732.1 100.00% afis|EAW15601.1 100.00%

Bootstrap support for afum|EAL85732.1 as seed ortholog is 100%.

Bootstrap support for afis|EAW15601.1 as seed ortholog is 100%.

---

Group of orthologs #2811. Best score 1248 bits

Score difference with first non-orthologous sequence - *A. fumigatus*:1248 *A. fischeri*:1248

afum|EAL88342.1 100.00% afis|EAW23139.1 100.00%

Bootstrap support for afum|EAL88342.1 as seed ortholog is 100%.

Bootstrap support for afis|EAW23139.1 as seed ortholog is 100%.

---

Group of orthologs #2812. Best score 1248 bits

Score difference with first non-orthologous sequence - *A. fumigatus*:1248 *A. fischeri*:1248

afum|EBA27409.1 100.00% afis|EAW22692.1 100.00%

Bootstrap support for afum|EBA27409.1 as seed ortholog is 100%.

Bootstrap support for afis|EAW22692.1 as seed ortholog is 100%.

---

Group of orthologs #2813. Best score 1247 bits

Score difference with first non-orthologous sequence - *A. fumigatus*:1247 *A. fischeri*:1247

afum|EAL91857.1 100.00% afis|EAW18045.1 100.00%

Bootstrap support for afum|EAL91857.1 as seed ortholog is 100%.

Bootstrap support for afis|EAW18045.1 as seed ortholog is 100%.

---

Group of orthologs #2814. Best score 1247 bits

Score difference with first non-orthologous sequence - *A. fumigatus*:982 *A. fischeri*:1247

afum|EAL84297.2 100.00% afis|EAW25589.1 100.00%

Bootstrap support for afum|EAL84297.2 as seed ortholog is 100%.

Bootstrap support for afis|EAW25589.1 as seed ortholog is 100%.

---

Group of orthologs #2815. Best score 1247 bits

Score difference with first non-orthologous sequence - *A. fumigatus*:1247 *A. fischeri*:1247

afum|EAL93059.1 100.00% afis|EAW18384.1 100.00%

Bootstrap support for afum|EAL93059.1 as seed ortholog is 100%.

Bootstrap support for afis|EAW18384.1 as seed ortholog is 100%.

---

Group of orthologs #2816. Best score 1247 bits

Score difference with first non-orthologous sequence - *A. fumigatus*:1115 *A. fischeri*:1040  
afum|EAL93119.1 100.00% afis|EAW18437.1 100.00%  
Bootstrap support for afum|EAL93119.1 as seed ortholog is 100%.  
Bootstrap support for afis|EAW18437.1 as seed ortholog is 100%.

---

Group of orthologs #2817. Best score 1247 bits

Score difference with first non-orthologous sequence - *A. fumigatus*:1247 *A. fischeri*:1247  
afum|EAL93190.1 100.00% afis|EAW18499.1 100.00%  
Bootstrap support for afum|EAL93190.1 as seed ortholog is 100%.  
Bootstrap support for afis|EAW18499.1 as seed ortholog is 100%.

---

Group of orthologs #2818. Best score 1247 bits

Score difference with first non-orthologous sequence - *A. fumigatus*:967 *A. fischeri*:1112  
afum|EAL87838.2 100.00% afis|EAW23622.1 100.00%  
Bootstrap support for afum|EAL87838.2 as seed ortholog is 100%.  
Bootstrap support for afis|EAW23622.1 as seed ortholog is 100%.

---

Group of orthologs #2819. Best score 1247 bits

Score difference with first non-orthologous sequence - *A. fumigatus*:860 *A. fischeri*:1164  
afum|EAL92111.1 100.00% afis|EAW21088.1 100.00%  
Bootstrap support for afum|EAL92111.1 as seed ortholog is 100%.  
Bootstrap support for afis|EAW21088.1 as seed ortholog is 100%.

---

Group of orthologs #2820. Best score 1247 bits

Score difference with first non-orthologous sequence - *A. fumigatus*:747 *A. fischeri*:716  
afum|EAL90594.1 100.00% afis|EAW22604.1 100.00%  
Bootstrap support for afum|EAL90594.1 as seed ortholog is 100%.  
Bootstrap support for afis|EAW22604.1 as seed ortholog is 100%.

---

Group of orthologs #2821. Best score 1246 bits

Score difference with first non-orthologous sequence - *A. fumigatus*:1246 *A. fischeri*:1246  
afum|EAL85515.1 100.00% afis|EAW15836.1 100.00%  
Bootstrap support for afum|EAL85515.1 as seed ortholog is 100%.  
Bootstrap support for afis|EAW15836.1 as seed ortholog is 100%.

---

Group of orthologs #2822. Best score 1246 bits

Score difference with first non-orthologous sequence - *A. fumigatus*:1246 *A. fischeri*:1246  
afum|EAL86509.1 100.00% afis|EAW16982.1 100.00%  
Bootstrap support for afum|EAL86509.1 as seed ortholog is 100%.  
Bootstrap support for afis|EAW16982.1 as seed ortholog is 100%.

---

Group of orthologs #2823. Best score 1246 bits

Score difference with first non-orthologous sequence - *A. fumigatus*:1246 *A. fischeri*:1246  
afum|EAL88638.2 100.00% afis|EAW16006.1 100.00%  
Bootstrap support for afum|EAL88638.2 as seed ortholog is 100%.  
Bootstrap support for afis|EAW16006.1 as seed ortholog is 100%.

---

Group of orthologs #2824. Best score 1246 bits

Score difference with first non-orthologous sequence - *A. fumigatus*:1246 *A. fischeri*:1246  
afum|EAL88938.1 100.00% afis|EAW16315.1 100.00%  
Bootstrap support for afum|EAL88938.1 as seed ortholog is 100%.  
Bootstrap support for afis|EAW16315.1 as seed ortholog is 100%.

---

Group of orthologs #2825. Best score 1246 bits

Score difference with first non-orthologous sequence - *A. fumigatus*:1246 *A. fischeri*:1246  
afum|EAL86156.1 100.00% afis|EAW24487.1 100.00%

Bootstrap support for afum|EAL86156.1 as seed ortholog is 100%.  
Bootstrap support for afis|EAW24487.1 as seed ortholog is 100%.

---

Group of orthologs #2826. Best score 1246 bits

Score difference with first non-orthologous sequence - *A. fumigatus*:1246 *A. fischeri*:1246

afum|EAL93505.1 100.00% afis|EAW18773.1 100.00%

Bootstrap support for afum|EAL93505.1 as seed ortholog is 100%.

Bootstrap support for afis|EAW18773.1 as seed ortholog is 100%.

---

Group of orthologs #2827. Best score 1246 bits

Score difference with first non-orthologous sequence - *A. fumigatus*:1246 *A. fischeri*:1246

afum|EAL92112.1 100.00% afis|EAW21089.1 100.00%

Bootstrap support for afum|EAL92112.1 as seed ortholog is 100%.

Bootstrap support for afis|EAW21089.1 as seed ortholog is 100%.

---

Group of orthologs #2828. Best score 1246 bits

Score difference with first non-orthologous sequence - *A. fumigatus*:1246 *A. fischeri*:1246

afum|EAL89755.1 100.00% afis|EAW25086.1 100.00%

Bootstrap support for afum|EAL89755.1 as seed ortholog is 100%.

Bootstrap support for afis|EAW25086.1 as seed ortholog is 100%.

---

Group of orthologs #2829. Best score 1245 bits

Score difference with first non-orthologous sequence - *A. fumigatus*:1245 *A. fischeri*:1245

afum|EAL89081.1 100.00% afis|EAW16487.1 100.00%

Bootstrap support for afum|EAL89081.1 as seed ortholog is 100%.

Bootstrap support for afis|EAW16487.1 as seed ortholog is 100%.

---

Group of orthologs #2830. Best score 1245 bits

Score difference with first non-orthologous sequence - *A. fumigatus*:1079 *A. fischeri*:1005

afum|EAL86021.1 100.00% afis|EAW24351.1 100.00%

Bootstrap support for afum|EAL86021.1 as seed ortholog is 100%.

Bootstrap support for afis|EAW24351.1 as seed ortholog is 100%.

---

Group of orthologs #2831. Best score 1245 bits

Score difference with first non-orthologous sequence - *A. fumigatus*:771 *A. fischeri*:1094

afum|EAL86152.1 100.00% afis|EAW24483.1 100.00%

Bootstrap support for afum|EAL86152.1 as seed ortholog is 100%.

Bootstrap support for afis|EAW24483.1 as seed ortholog is 100%.

---

Group of orthologs #2832. Best score 1245 bits

Score difference with first non-orthologous sequence - *A. fumigatus*:1085 *A. fischeri*:1135

afum|EBA27224.1 100.00% afis|EAW20120.1 100.00%

Bootstrap support for afum|EBA27224.1 as seed ortholog is 100%.

Bootstrap support for afis|EAW20120.1 as seed ortholog is 100%.

---

Group of orthologs #2833. Best score 1244 bits

Score difference with first non-orthologous sequence - *A. fumigatus*:1244 *A. fischeri*:1244

afum|EAL87513.1 100.00% afis|EAW18154.1 100.00%

Bootstrap support for afum|EAL87513.1 as seed ortholog is 100%.

Bootstrap support for afis|EAW18154.1 as seed ortholog is 100%.

---

Group of orthologs #2834. Best score 1244 bits

Score difference with first non-orthologous sequence - *A. fumigatus*:1244 *A. fischeri*:1015

afum|EAL85365.2 100.00% afis|EAW20247.1 100.00%

Bootstrap support for afum|EAL85365.2 as seed ortholog is 100%.

Bootstrap support for afis|EAW20247.1 as seed ortholog is 100%.

---

Group of orthologs #2835. Best score 1244 bits

Score difference with first non-orthologous sequence - *A. fumigatus*:1131 *A. fischeri*:1135

afum|EAL86133.1 100.00% afis|EAW24462.1 100.00%

Bootstrap support for afum|EAL86133.1 as seed ortholog is 100%.

Bootstrap support for afis|EAW24462.1 as seed ortholog is 100%.

---

Group of orthologs #2836. Best score 1244 bits

Score difference with first non-orthologous sequence - *A. fumigatus*:1244 *A. fischeri*:1244

afum|EAL88292.1 100.00% afis|EAW23191.1 100.00%

Bootstrap support for afum|EAL88292.1 as seed ortholog is 100%.

Bootstrap support for afis|EAW23191.1 as seed ortholog is 100%.

---

Group of orthologs #2837. Best score 1244 bits

Score difference with first non-orthologous sequence - *A. fumigatus*:1244 *A. fischeri*:1244

afum|EAL90296.1 100.00% afis|EAW22901.1 100.00%

Bootstrap support for afum|EAL90296.1 as seed ortholog is 100%.

Bootstrap support for afis|EAW22901.1 as seed ortholog is 100%.

---

Group of orthologs #2838. Best score 1244 bits

Score difference with first non-orthologous sequence - *A. fumigatus*:1244 *A. fischeri*:1244

afum|EAL92334.1 100.00% afis|EAW21317.1 100.00%

Bootstrap support for afum|EAL92334.1 as seed ortholog is 100%.

Bootstrap support for afis|EAW21317.1 as seed ortholog is 100%.

---

Group of orthologs #2839. Best score 1244 bits

Score difference with first non-orthologous sequence - *A. fumigatus*:1244 *A. fischeri*:1244

afum|EAL92398.1 100.00% afis|EAW21383.1 100.00%

Bootstrap support for afum|EAL92398.1 as seed ortholog is 100%.

Bootstrap support for afis|EAW21383.1 as seed ortholog is 100%.

---

Group of orthologs #2840. Best score 1244 bits

Score difference with first non-orthologous sequence - *A. fumigatus*:1244 *A. fischeri*:1244

afum|EAL92792.1 100.00% afis|EAW21762.1 100.00%

Bootstrap support for afum|EAL92792.1 as seed ortholog is 100%.

Bootstrap support for afis|EAW21762.1 as seed ortholog is 100%.

---

Group of orthologs #2841. Best score 1243 bits

Score difference with first non-orthologous sequence - *A. fumigatus*:1243 *A. fischeri*:1243

afum|EAL84819.1 100.00% afis|EAW20809.1 100.00%

Bootstrap support for afum|EAL84819.1 as seed ortholog is 100%.

Bootstrap support for afis|EAW20809.1 as seed ortholog is 100%.

---

Group of orthologs #2842. Best score 1243 bits

Score difference with first non-orthologous sequence - *A. fumigatus*:948 *A. fischeri*:1089

afum|EAL91654.1 100.00% afis|EAW17845.1 100.00%

Bootstrap support for afum|EAL91654.1 as seed ortholog is 100%.

Bootstrap support for afis|EAW17845.1 as seed ortholog is 100%.

---

Group of orthologs #2843. Best score 1243 bits

Score difference with first non-orthologous sequence - *A. fumigatus*:1243 *A. fischeri*:1243

afum|EAL88101.1 100.00% afis|EAW23371.1 100.00%

Bootstrap support for afum|EAL88101.1 as seed ortholog is 100%.

Bootstrap support for afis|EAW23371.1 as seed ortholog is 100%.

---

Group of orthologs #2844. Best score 1243 bits

Score difference with first non-orthologous sequence - *A. fumigatus*:1243 *A. fischeri*:1243  
afum|EAL93995.1 100.00% afis|EAW19268.1 100.00%  
Bootstrap support for afum|EAL93995.1 as seed ortholog is 100%.  
Bootstrap support for afis|EAW19268.1 as seed ortholog is 100%.

---

Group of orthologs #2845. Best score 1242 bits

Score difference with first non-orthologous sequence - *A. fumigatus*:1242 *A. fischeri*:1242  
afum|EAL84527.1 100.00% afis|EAW20530.1 100.00%  
Bootstrap support for afum|EAL84527.1 as seed ortholog is 100%.  
Bootstrap support for afis|EAW20530.1 as seed ortholog is 100%.

---

Group of orthologs #2846. Best score 1242 bits

Score difference with first non-orthologous sequence - *A. fumigatus*:1040 *A. fischeri*:774  
afum|EAL88999.1 100.00% afis|EAW16375.1 100.00%  
Bootstrap support for afum|EAL88999.1 as seed ortholog is 100%.  
Bootstrap support for afis|EAW16375.1 as seed ortholog is 100%.

---

Group of orthologs #2847. Best score 1242 bits

Score difference with first non-orthologous sequence - *A. fumigatus*:1242 *A. fischeri*:1242  
afum|EAL91859.1 100.00% afis|EAW18047.1 100.00%  
Bootstrap support for afum|EAL91859.1 as seed ortholog is 100%.  
Bootstrap support for afis|EAW18047.1 as seed ortholog is 100%.

---

Group of orthologs #2848. Best score 1241 bits

Score difference with first non-orthologous sequence - *A. fumigatus*:1241 *A. fischeri*:1165  
afum|EAL89264.1 100.00% afis|EAW16660.1 100.00%  
Bootstrap support for afum|EAL89264.1 as seed ortholog is 100%.  
Bootstrap support for afis|EAW16660.1 as seed ortholog is 100%.

---

Group of orthologs #2849. Best score 1241 bits

Score difference with first non-orthologous sequence - *A. fumigatus*:1241 *A. fischeri*:1241  
afum|EAL87397.1 100.00% afis|EAW23967.1 100.00%  
Bootstrap support for afum|EAL87397.1 as seed ortholog is 100%.  
Bootstrap support for afis|EAW23967.1 as seed ortholog is 100%.

---

Group of orthologs #2850. Best score 1241 bits

Score difference with first non-orthologous sequence - *A. fumigatus*:1241 *A. fischeri*:1045  
afum|EAL93820.1 100.00% afis|EAW19090.1 100.00%  
Bootstrap support for afum|EAL93820.1 as seed ortholog is 100%.  
Bootstrap support for afis|EAW19090.1 as seed ortholog is 100%.

---

Group of orthologs #2851. Best score 1241 bits

Score difference with first non-orthologous sequence - *A. fumigatus*:1241 *A. fischeri*:1241  
afum|EAL90820.2 100.00% afis|EAW22372.1 100.00%  
Bootstrap support for afum|EAL90820.2 as seed ortholog is 100%.  
Bootstrap support for afis|EAW22372.1 as seed ortholog is 100%.

---

Group of orthologs #2852. Best score 1241 bits

Score difference with first non-orthologous sequence - *A. fumigatus*:1241 *A. fischeri*:1241  
afum|EAL90361.1 100.00% afis|EAW22842.1 100.00%  
Bootstrap support for afum|EAL90361.1 as seed ortholog is 100%.  
Bootstrap support for afis|EAW22842.1 as seed ortholog is 100%.

---

Group of orthologs #2853. Best score 1241 bits

Score difference with first non-orthologous sequence - *A. fumigatus*:1130 *A. fischeri*:1144  
afum|EAL90209.1 100.00% afis|EAW22991.1 100.00%



Bootstrap support for afum|EAL90209.1 as seed ortholog is 100%.  
Bootstrap support for afis|EAW22991.1 as seed ortholog is 100%.

---

Group of orthologs #2854. Best score 1241 bits

Score difference with first non-orthologous sequence - *A. fumigatus*:1241 *A. fischeri*:1241

|                 |         |                 |         |
|-----------------|---------|-----------------|---------|
| afum EAL90029.2 | 100.00% | afis EAW25369.1 | 100.00% |
|-----------------|---------|-----------------|---------|

Bootstrap support for afum|EAL90029.2 as seed ortholog is 100%.

Bootstrap support for afis|EAW25369.1 as seed ortholog is 100%.

---

Group of orthologs #2855. Best score 1241 bits

Score difference with first non-orthologous sequence - *A. fumigatus*:1241 *A. fischeri*:1241

|                 |         |                 |         |
|-----------------|---------|-----------------|---------|
| afum EAL90174.1 | 100.00% | afis EAW25508.1 | 100.00% |
|-----------------|---------|-----------------|---------|

Bootstrap support for afum|EAL90174.1 as seed ortholog is 100%.

Bootstrap support for afis|EAW25508.1 as seed ortholog is 100%.

---

Group of orthologs #2856. Best score 1240 bits

Score difference with first non-orthologous sequence - *A. fumigatus*:1033 *A. fischeri*:1160

|                 |         |                 |         |
|-----------------|---------|-----------------|---------|
| afum EAL87911.1 | 100.00% | afis EAW23555.1 | 100.00% |
|-----------------|---------|-----------------|---------|

Bootstrap support for afum|EAL87911.1 as seed ortholog is 100%.

Bootstrap support for afis|EAW23555.1 as seed ortholog is 100%.

---

Group of orthologs #2857. Best score 1240 bits

Score difference with first non-orthologous sequence - *A. fumigatus*:962 *A. fischeri*:813

|                 |         |                 |         |
|-----------------|---------|-----------------|---------|
| afum EAL93250.1 | 100.00% | afis EAW18550.1 | 100.00% |
|-----------------|---------|-----------------|---------|

Bootstrap support for afum|EAL93250.1 as seed ortholog is 100%.

Bootstrap support for afis|EAW18550.1 as seed ortholog is 100%.

---

Group of orthologs #2858. Best score 1240 bits

Score difference with first non-orthologous sequence - *A. fumigatus*:1240 *A. fischeri*:1184

|                 |         |                 |         |
|-----------------|---------|-----------------|---------|
| afum EAL90099.1 | 100.00% | afis EAW25441.1 | 100.00% |
|-----------------|---------|-----------------|---------|

Bootstrap support for afum|EAL90099.1 as seed ortholog is 100%.

Bootstrap support for afis|EAW25441.1 as seed ortholog is 100%.

---

Group of orthologs #2859. Best score 1239 bits

Score difference with first non-orthologous sequence - *A. fumigatus*:1239 *A. fischeri*:1239

|                 |         |                 |         |
|-----------------|---------|-----------------|---------|
| afum EAL84613.1 | 100.00% | afis EAW20439.1 | 100.00% |
|-----------------|---------|-----------------|---------|

Bootstrap support for afum|EAL84613.1 as seed ortholog is 100%.

Bootstrap support for afis|EAW20439.1 as seed ortholog is 100%.

---

Group of orthologs #2860. Best score 1239 bits

Score difference with first non-orthologous sequence - *A. fumigatus*:971 *A. fischeri*:1104

|                 |         |                 |         |
|-----------------|---------|-----------------|---------|
| afum EAL84435.1 | 100.00% | afis EAW20633.1 | 100.00% |
|-----------------|---------|-----------------|---------|

Bootstrap support for afum|EAL84435.1 as seed ortholog is 100%.

Bootstrap support for afis|EAW20633.1 as seed ortholog is 100%.

---

Group of orthologs #2861. Best score 1239 bits

Score difference with first non-orthologous sequence - *A. fumigatus*:1239 *A. fischeri*:1239

|                 |         |                 |         |
|-----------------|---------|-----------------|---------|
| afum EAL93774.1 | 100.00% | afis EAW19045.1 | 100.00% |
|-----------------|---------|-----------------|---------|

Bootstrap support for afum|EAL93774.1 as seed ortholog is 100%.

Bootstrap support for afis|EAW19045.1 as seed ortholog is 100%.

---

Group of orthologs #2862. Best score 1239 bits

Score difference with first non-orthologous sequence - *A. fumigatus*:1066 *A. fischeri*:1239

|                 |         |                 |         |
|-----------------|---------|-----------------|---------|
| afum EAL90561.1 | 100.00% | afis EAW22632.1 | 100.00% |
|-----------------|---------|-----------------|---------|

Bootstrap support for afum|EAL90561.1 as seed ortholog is 100%.

Bootstrap support for afis|EAW22632.1 as seed ortholog is 100%.

---

Group of orthologs #2863. Best score 1239 bits

Score difference with first non-orthologous sequence - *A. fumigatus*:1189 *A. fischeri*:1083

afum|EAL90178.1 100.00% afis|EAW25513.1 100.00%

Bootstrap support for afum|EAL90178.1 as seed ortholog is 100%.

Bootstrap support for afis|EAW25513.1 as seed ortholog is 100%.

---

Group of orthologs #2864. Best score 1238 bits

Score difference with first non-orthologous sequence - *A. fumigatus*:1238 *A. fischeri*:1238

afum|EAL84749.1 100.00% afis|EAW20883.1 100.00%

Bootstrap support for afum|EAL84749.1 as seed ortholog is 100%.

Bootstrap support for afis|EAW20883.1 as seed ortholog is 100%.

---

Group of orthologs #2865. Best score 1238 bits

Score difference with first non-orthologous sequence - *A. fumigatus*:1238 *A. fischeri*:1238

afum|EAL92314.1 100.00% afis|EAW21297.1 100.00%

Bootstrap support for afum|EAL92314.1 as seed ortholog is 100%.

Bootstrap support for afis|EAW21297.1 as seed ortholog is 100%.

---

Group of orthologs #2866. Best score 1237 bits

Score difference with first non-orthologous sequence - *A. fumigatus*:1237 *A. fischeri*:1237

afum|EAL88658.1 100.00% afis|EAW16028.1 100.00%

Bootstrap support for afum|EAL88658.1 as seed ortholog is 100%.

Bootstrap support for afis|EAW16028.1 as seed ortholog is 100%.

---

Group of orthologs #2867. Best score 1237 bits

Score difference with first non-orthologous sequence - *A. fumigatus*:1237 *A. fischeri*:1237

afum|EAL88990.1 100.00% afis|EAW16365.1 100.00%

Bootstrap support for afum|EAL88990.1 as seed ortholog is 100%.

Bootstrap support for afis|EAW16365.1 as seed ortholog is 100%.

---

Group of orthologs #2868. Best score 1237 bits

Score difference with first non-orthologous sequence - *A. fumigatus*:1237 *A. fischeri*:1237

afum|EAL92164.1 100.00% afis|EAW21145.1 100.00%

Bootstrap support for afum|EAL92164.1 as seed ortholog is 100%.

Bootstrap support for afis|EAW21145.1 as seed ortholog is 100%.

---

Group of orthologs #2869. Best score 1236 bits

Score difference with first non-orthologous sequence - *A. fumigatus*:627 *A. fischeri*:709

afum|EAL88822.1 100.00% afis|EAW16191.1 100.00%

Bootstrap support for afum|EAL88822.1 as seed ortholog is 100%.

Bootstrap support for afis|EAW16191.1 as seed ortholog is 100%.

---

Group of orthologs #2870. Best score 1236 bits

Score difference with first non-orthologous sequence - *A. fumigatus*:1028 *A. fischeri*:978

afum|EAL85050.1 100.00% afis|EAW19844.1 100.00%

Bootstrap support for afum|EAL85050.1 as seed ortholog is 100%.

Bootstrap support for afis|EAW19844.1 as seed ortholog is 100%.

---

Group of orthologs #2871. Best score 1236 bits

Score difference with first non-orthologous sequence - *A. fumigatus*:1236 *A. fischeri*:1236

afum|EAL84610.2 100.00% afis|EAW20442.1 100.00%

Bootstrap support for afum|EAL84610.2 as seed ortholog is 100%.

Bootstrap support for afis|EAW20442.1 as seed ortholog is 100%.

---

Group of orthologs #2872. Best score 1236 bits

Score difference with first non-orthologous sequence - *A. fumigatus*:1236 *A. fischeri*:1236  
afum|EAL91934.1 100.00% afis|EAW24079.1 100.00%  
Bootstrap support for afum|EAL91934.1 as seed ortholog is 100%.  
Bootstrap support for afis|EAW24079.1 as seed ortholog is 100%.

---

Group of orthologs #2873. Best score 1235 bits

Score difference with first non-orthologous sequence - *A. fumigatus*:1053 *A. fischeri*:1235  
afum|EAL87222.1 100.00% afis|EAW23788.1 100.00%  
Bootstrap support for afum|EAL87222.1 as seed ortholog is 100%.  
Bootstrap support for afis|EAW23788.1 as seed ortholog is 100%.

---

Group of orthologs #2874. Best score 1235 bits

Score difference with first non-orthologous sequence - *A. fumigatus*:1235 *A. fischeri*:1235  
afum|EAL87453.1 100.00% afis|EAW24022.1 100.00%  
Bootstrap support for afum|EAL87453.1 as seed ortholog is 100%.  
Bootstrap support for afis|EAW24022.1 as seed ortholog is 100%.

---

Group of orthologs #2875. Best score 1235 bits

Score difference with first non-orthologous sequence - *A. fumigatus*:1235 *A. fischeri*:1235  
afum|EAL88042.1 100.00% afis|EAW24585.1 100.00%  
Bootstrap support for afum|EAL88042.1 as seed ortholog is 100%.  
Bootstrap support for afis|EAW24585.1 as seed ortholog is 100%.

---

Group of orthologs #2876. Best score 1235 bits

Score difference with first non-orthologous sequence - *A. fumigatus*:1235 *A. fischeri*:1235  
afum|EAL90764.1 100.00% afis|EAW22427.1 100.00%  
Bootstrap support for afum|EAL90764.1 as seed ortholog is 100%.  
Bootstrap support for afis|EAW22427.1 as seed ortholog is 100%.

---

Group of orthologs #2877. Best score 1234 bits

Score difference with first non-orthologous sequence - *A. fumigatus*:1080 *A. fischeri*:1234  
afum|EAL85083.1 100.00% afis|EAW19809.1 100.00%  
Bootstrap support for afum|EAL85083.1 as seed ortholog is 100%.  
Bootstrap support for afis|EAW19809.1 as seed ortholog is 100%.

---

Group of orthologs #2878. Best score 1234 bits

Score difference with first non-orthologous sequence - *A. fumigatus*:1234 *A. fischeri*:1234  
afum|EAL84559.1 100.00% afis|EAW20495.1 100.00%  
Bootstrap support for afum|EAL84559.1 as seed ortholog is 100%.  
Bootstrap support for afis|EAW20495.1 as seed ortholog is 100%.

---

Group of orthologs #2879. Best score 1234 bits

Score difference with first non-orthologous sequence - *A. fumigatus*:1234 *A. fischeri*:1234  
afum|EAL89066.1 100.00% afis|EAW16472.1 100.00%  
Bootstrap support for afum|EAL89066.1 as seed ortholog is 100%.  
Bootstrap support for afis|EAW16472.1 as seed ortholog is 100%.

---

Group of orthologs #2880. Best score 1234 bits

Score difference with first non-orthologous sequence - *A. fumigatus*:1234 *A. fischeri*:1234  
afum|EAL87059.1 100.00% afis|EAW19436.1 100.00%  
Bootstrap support for afum|EAL87059.1 as seed ortholog is 100%.  
Bootstrap support for afis|EAW19436.1 as seed ortholog is 100%.

---

Group of orthologs #2881. Best score 1234 bits

Score difference with first non-orthologous sequence - *A. fumigatus*:1234 *A. fischeri*:1234  
afum|EAL85919.1 100.00% afis|EAW24250.1 100.00%

Bootstrap support for afum|EAL85919.1 as seed ortholog is 100%.  
Bootstrap support for afis|EAW24250.1 as seed ortholog is 100%.

---

Group of orthologs #2882. Best score 1234 bits

Score difference with first non-orthologous sequence - *A. fumigatus*:1234 *A. fischeri*:1234

|                 |         |                 |         |
|-----------------|---------|-----------------|---------|
| afum EAL92084.1 | 100.00% | afis EAW21048.1 | 100.00% |
|-----------------|---------|-----------------|---------|

Bootstrap support for afum|EAL92084.1 as seed ortholog is 100%.

Bootstrap support for afis|EAW21048.1 as seed ortholog is 100%.

---

Group of orthologs #2883. Best score 1234 bits

Score difference with first non-orthologous sequence - *A. fumigatus*:1234 *A. fischeri*:1234

|                 |         |                 |         |
|-----------------|---------|-----------------|---------|
| afum EAL90319.1 | 100.00% | afis EAW22880.1 | 100.00% |
|-----------------|---------|-----------------|---------|

Bootstrap support for afum|EAL90319.1 as seed ortholog is 100%.

Bootstrap support for afis|EAW22880.1 as seed ortholog is 100%.

---

Group of orthologs #2884. Best score 1234 bits

Score difference with first non-orthologous sequence - *A. fumigatus*:1112 *A. fischeri*:1099

|                 |         |                 |         |
|-----------------|---------|-----------------|---------|
| afum EAL89443.1 | 100.00% | afis EAW24802.1 | 100.00% |
|-----------------|---------|-----------------|---------|

Bootstrap support for afum|EAL89443.1 as seed ortholog is 100%.

Bootstrap support for afis|EAW24802.1 as seed ortholog is 100%.

---

Group of orthologs #2885. Best score 1234 bits

Score difference with first non-orthologous sequence - *A. fumigatus*:1234 *A. fischeri*:1234

|                 |         |                 |         |
|-----------------|---------|-----------------|---------|
| afum EAL90005.2 | 100.00% | afis EAW25342.1 | 100.00% |
|-----------------|---------|-----------------|---------|

Bootstrap support for afum|EAL90005.2 as seed ortholog is 100%.

Bootstrap support for afis|EAW25342.1 as seed ortholog is 100%.

---

Group of orthologs #2886. Best score 1233 bits

Score difference with first non-orthologous sequence - *A. fumigatus*:1030 *A. fischeri*:957

|                 |         |                 |         |
|-----------------|---------|-----------------|---------|
| afum EAL86487.2 | 100.00% | afis EAW16961.1 | 100.00% |
|-----------------|---------|-----------------|---------|

Bootstrap support for afum|EAL86487.2 as seed ortholog is 100%.

Bootstrap support for afis|EAW16961.1 as seed ortholog is 100%.

---

Group of orthologs #2887. Best score 1233 bits

Score difference with first non-orthologous sequence - *A. fumigatus*:1233 *A. fischeri*:1140

|                 |         |                 |         |
|-----------------|---------|-----------------|---------|
| afum EAL86840.1 | 100.00% | afis EAW19682.1 | 100.00% |
|-----------------|---------|-----------------|---------|

Bootstrap support for afum|EAL86840.1 as seed ortholog is 100%.

Bootstrap support for afis|EAW19682.1 as seed ortholog is 100%.

---

Group of orthologs #2888. Best score 1233 bits

Score difference with first non-orthologous sequence - *A. fumigatus*:1233 *A. fischeri*:1233

|                 |         |                 |         |
|-----------------|---------|-----------------|---------|
| afum EAL92851.1 | 100.00% | afis EAW21837.1 | 100.00% |
|-----------------|---------|-----------------|---------|

Bootstrap support for afum|EAL92851.1 as seed ortholog is 100%.

Bootstrap support for afis|EAW21837.1 as seed ortholog is 100%.

---

Group of orthologs #2889. Best score 1232 bits

Score difference with first non-orthologous sequence - *A. fumigatus*:1232 *A. fischeri*:1232

|                 |         |                 |         |
|-----------------|---------|-----------------|---------|
| afum EAL88589.1 | 100.00% | afis EAW15956.1 | 100.00% |
|-----------------|---------|-----------------|---------|

Bootstrap support for afum|EAL88589.1 as seed ortholog is 100%.

Bootstrap support for afis|EAW15956.1 as seed ortholog is 100%.

---

Group of orthologs #2890. Best score 1232 bits

Score difference with first non-orthologous sequence - *A. fumigatus*:1232 *A. fischeri*:1232

|                 |         |                 |         |
|-----------------|---------|-----------------|---------|
| afum EAL88692.1 | 100.00% | afis EAW16059.1 | 100.00% |
|-----------------|---------|-----------------|---------|

Bootstrap support for afum|EAL88692.1 as seed ortholog is 100%.

Bootstrap support for afis|EAW16059.1 as seed ortholog is 100%.

---

Group of orthologs #2891. Best score 1232 bits

Score difference with first non-orthologous sequence - *A. fumigatus*:1232 *A. fischeri*:1232

|                 |         |                 |         |
|-----------------|---------|-----------------|---------|
| afum EAL89098.1 | 100.00% | afis EAW16503.1 | 100.00% |
|-----------------|---------|-----------------|---------|

Bootstrap support for afum|EAL89098.1 as seed ortholog is 100%.

Bootstrap support for afis|EAW16503.1 as seed ortholog is 100%.

---

Group of orthologs #2892. Best score 1232 bits

Score difference with first non-orthologous sequence - *A. fumigatus*:1163 *A. fischeri*:1135

|                 |         |                 |         |
|-----------------|---------|-----------------|---------|
| afum EAL91074.1 | 100.00% | afis EAW22110.1 | 100.00% |
|-----------------|---------|-----------------|---------|

Bootstrap support for afum|EAL91074.1 as seed ortholog is 100%.

Bootstrap support for afis|EAW22110.1 as seed ortholog is 100%.

---

Group of orthologs #2893. Best score 1232 bits

Score difference with first non-orthologous sequence - *A. fumigatus*:1232 *A. fischeri*:1232

|                 |         |                 |         |
|-----------------|---------|-----------------|---------|
| afum EAL90545.1 | 100.00% | afis EAW22647.1 | 100.00% |
|-----------------|---------|-----------------|---------|

Bootstrap support for afum|EAL90545.1 as seed ortholog is 100%.

Bootstrap support for afis|EAW22647.1 as seed ortholog is 100%.

---

Group of orthologs #2894. Best score 1232 bits

Score difference with first non-orthologous sequence - *A. fumigatus*:1232 *A. fischeri*:1232

|                 |         |                 |         |
|-----------------|---------|-----------------|---------|
| afum EAL92492.1 | 100.00% | afis EAW21473.1 | 100.00% |
|-----------------|---------|-----------------|---------|

Bootstrap support for afum|EAL92492.1 as seed ortholog is 100%.

Bootstrap support for afis|EAW21473.1 as seed ortholog is 100%.

---

Group of orthologs #2895. Best score 1232 bits

Score difference with first non-orthologous sequence - *A. fumigatus*:1232 *A. fischeri*:1232

|                 |         |                 |         |
|-----------------|---------|-----------------|---------|
| afum EAL89685.1 | 100.00% | afis EAW25011.1 | 100.00% |
|-----------------|---------|-----------------|---------|

Bootstrap support for afum|EAL89685.1 as seed ortholog is 100%.

Bootstrap support for afis|EAW25011.1 as seed ortholog is 100%.

---

Group of orthologs #2896. Best score 1231 bits

Score difference with first non-orthologous sequence - *A. fumigatus*:1231 *A. fischeri*:1231

|                 |         |                 |         |
|-----------------|---------|-----------------|---------|
| afum EAL85076.1 | 100.00% | afis EAW19815.1 | 100.00% |
|-----------------|---------|-----------------|---------|

Bootstrap support for afum|EAL85076.1 as seed ortholog is 100%.

Bootstrap support for afis|EAW19815.1 as seed ortholog is 100%.

---

Group of orthologs #2897. Best score 1231 bits

Score difference with first non-orthologous sequence - *A. fumigatus*:869 *A. fischeri*:1231

|                 |         |                 |         |
|-----------------|---------|-----------------|---------|
| afum EAL86153.1 | 100.00% | afis EAW24484.1 | 100.00% |
|-----------------|---------|-----------------|---------|

Bootstrap support for afum|EAL86153.1 as seed ortholog is 100%.

Bootstrap support for afis|EAW24484.1 as seed ortholog is 100%.

---

Group of orthologs #2898. Best score 1230 bits

Score difference with first non-orthologous sequence - *A. fumigatus*:1230 *A. fischeri*:1230

|                 |         |                 |         |
|-----------------|---------|-----------------|---------|
| afum EAL84907.1 | 100.00% | afis EAW20011.1 | 100.00% |
|-----------------|---------|-----------------|---------|

Bootstrap support for afum|EAL84907.1 as seed ortholog is 100%.

Bootstrap support for afis|EAW20011.1 as seed ortholog is 100%.

---

Group of orthologs #2899. Best score 1230 bits

Score difference with first non-orthologous sequence - *A. fumigatus*:986 *A. fischeri*:947

|                 |         |                 |         |
|-----------------|---------|-----------------|---------|
| afum EAL88993.1 | 100.00% | afis EAW16368.1 | 100.00% |
|-----------------|---------|-----------------|---------|

Bootstrap support for afum|EAL88993.1 as seed ortholog is 100%.

Bootstrap support for afis|EAW16368.1 as seed ortholog is 100%.

---

Group of orthologs #2900. Best score 1230 bits

Score difference with first non-orthologous sequence - *A. fumigatus*:1067 *A. fischeri*:1230  
afum|EAL89277.1 100.00% afis|EAW16672.1 100.00%  
Bootstrap support for afum|EAL89277.1 as seed ortholog is 100%.  
Bootstrap support for afis|EAW16672.1 as seed ortholog is 100%.

---

Group of orthologs #2901. Best score 1230 bits

Score difference with first non-orthologous sequence - *A. fumigatus*:1230 *A. fischeri*:1230  
afum|EAL87662.1 100.00% afis|EAW18296.1 100.00%  
Bootstrap support for afum|EAL87662.1 as seed ortholog is 100%.  
Bootstrap support for afis|EAW18296.1 as seed ortholog is 100%.

---

Group of orthologs #2902. Best score 1230 bits

Score difference with first non-orthologous sequence - *A. fumigatus*:1230 *A. fischeri*:1230  
afum|EAL86927.1 100.00% afis|EAW19591.1 100.00%  
Bootstrap support for afum|EAL86927.1 as seed ortholog is 100%.  
Bootstrap support for afis|EAW19591.1 as seed ortholog is 100%.

---

Group of orthologs #2903. Best score 1230 bits

Score difference with first non-orthologous sequence - *A. fumigatus*:1230 *A. fischeri*:1230  
afum|EAL91233.1 100.00% afis|EAW17395.1 100.00%  
Bootstrap support for afum|EAL91233.1 as seed ortholog is 100%.  
Bootstrap support for afis|EAW17395.1 as seed ortholog is 100%.

---

Group of orthologs #2904. Best score 1230 bits

Score difference with first non-orthologous sequence - *A. fumigatus*:1230 *A. fischeri*:1230  
afum|EAL91749.1 100.00% afis|EAW17938.1 100.00%  
Bootstrap support for afum|EAL91749.1 as seed ortholog is 100%.  
Bootstrap support for afis|EAW17938.1 as seed ortholog is 100%.

---

Group of orthologs #2905. Best score 1230 bits

Score difference with first non-orthologous sequence - *A. fumigatus*:1230 *A. fischeri*:1230  
afum|EAL93408.2 100.00% afis|EAW18687.1 100.00%  
Bootstrap support for afum|EAL93408.2 as seed ortholog is 100%.  
Bootstrap support for afis|EAW18687.1 as seed ortholog is 100%.

---

Group of orthologs #2906. Best score 1230 bits

Score difference with first non-orthologous sequence - *A. fumigatus*:1230 *A. fischeri*:1230  
afum|EAL92678.1 100.00% afis|EAW21644.1 100.00%  
Bootstrap support for afum|EAL92678.1 as seed ortholog is 100%.  
Bootstrap support for afis|EAW21644.1 as seed ortholog is 100%.

---

Group of orthologs #2907. Best score 1229 bits

Score difference with first non-orthologous sequence - *A. fumigatus*:1050 *A. fischeri*:1229  
afum|EAL84220.1 100.00% afis|EAW15424.1 100.00%  
Bootstrap support for afum|EAL84220.1 as seed ortholog is 100%.  
Bootstrap support for afis|EAW15424.1 as seed ortholog is 100%.

---

Group of orthologs #2908. Best score 1229 bits

Score difference with first non-orthologous sequence - *A. fumigatus*:1229 *A. fischeri*:1229  
afum|EAL84897.1 100.00% afis|EAW20020.1 100.00%  
Bootstrap support for afum|EAL84897.1 as seed ortholog is 100%.  
Bootstrap support for afis|EAW20020.1 as seed ortholog is 100%.

---

Group of orthologs #2909. Best score 1229 bits

Score difference with first non-orthologous sequence - *A. fumigatus*:929 *A. fischeri*:1229  
afum|EAL86210.1 100.00% afis|EAW24546.1 100.00%

Bootstrap support for afum|EAL86210.1 as seed ortholog is 100%.  
Bootstrap support for afis|EAW24546.1 as seed ortholog is 100%.

---

Group of orthologs #2910. Best score 1229 bits

Score difference with first non-orthologous sequence - *A. fumigatus*:1110 *A. fischeri*:1140

|                 |         |                 |         |
|-----------------|---------|-----------------|---------|
| afum EAL87948.1 | 100.00% | afis EAW23515.1 | 100.00% |
|-----------------|---------|-----------------|---------|

Bootstrap support for afum|EAL87948.1 as seed ortholog is 100%.

Bootstrap support for afis|EAW23515.1 as seed ortholog is 100%.

---

Group of orthologs #2911. Best score 1229 bits

Score difference with first non-orthologous sequence - *A. fumigatus*:1229 *A. fischeri*:1229

|                 |         |                 |         |
|-----------------|---------|-----------------|---------|
| afum EAL92269.1 | 100.00% | afis EAW21254.1 | 100.00% |
|-----------------|---------|-----------------|---------|

Bootstrap support for afum|EAL92269.1 as seed ortholog is 100%.

Bootstrap support for afis|EAW21254.1 as seed ortholog is 100%.

---

Group of orthologs #2912. Best score 1228 bits

Score difference with first non-orthologous sequence - *A. fumigatus*:1228 *A. fischeri*:1228

|                 |         |                 |         |
|-----------------|---------|-----------------|---------|
| afum EAL88053.2 | 100.00% | afis EAW23416.1 | 100.00% |
|-----------------|---------|-----------------|---------|

Bootstrap support for afum|EAL88053.2 as seed ortholog is 100%.

Bootstrap support for afis|EAW23416.1 as seed ortholog is 100%.

---

Group of orthologs #2913. Best score 1228 bits

Score difference with first non-orthologous sequence - *A. fumigatus*:1228 *A. fischeri*:1228

|                 |         |                 |         |
|-----------------|---------|-----------------|---------|
| afum EAL92389.1 | 100.00% | afis EAW21372.1 | 100.00% |
|-----------------|---------|-----------------|---------|

Bootstrap support for afum|EAL92389.1 as seed ortholog is 100%.

Bootstrap support for afis|EAW21372.1 as seed ortholog is 100%.

---

Group of orthologs #2914. Best score 1227 bits

Score difference with first non-orthologous sequence - *A. fumigatus*:1227 *A. fischeri*:1227

|                 |         |                 |         |
|-----------------|---------|-----------------|---------|
| afum EAL89187.1 | 100.00% | afis EAW16591.1 | 100.00% |
|-----------------|---------|-----------------|---------|

Bootstrap support for afum|EAL89187.1 as seed ortholog is 100%.

Bootstrap support for afis|EAW16591.1 as seed ortholog is 100%.

---

Group of orthologs #2915. Best score 1227 bits

Score difference with first non-orthologous sequence - *A. fumigatus*:993 *A. fischeri*:858

|                 |         |                 |         |
|-----------------|---------|-----------------|---------|
| afum EAL86961.1 | 100.00% | afis EAW19548.1 | 100.00% |
|-----------------|---------|-----------------|---------|

Bootstrap support for afum|EAL86961.1 as seed ortholog is 100%.

Bootstrap support for afis|EAW19548.1 as seed ortholog is 100%.

---

Group of orthologs #2916. Best score 1227 bits

Score difference with first non-orthologous sequence - *A. fumigatus*:796 *A. fischeri*:807

|                 |         |                 |         |
|-----------------|---------|-----------------|---------|
| afum EAL87905.1 | 100.00% | afis EAW23563.1 | 100.00% |
|-----------------|---------|-----------------|---------|

Bootstrap support for afum|EAL87905.1 as seed ortholog is 100%.

Bootstrap support for afis|EAW23563.1 as seed ortholog is 100%.

---

Group of orthologs #2917. Best score 1227 bits

Score difference with first non-orthologous sequence - *A. fumigatus*:1227 *A. fischeri*:1227

|                 |         |                 |         |
|-----------------|---------|-----------------|---------|
| afum EAL92802.1 | 100.00% | afis EAW21773.1 | 100.00% |
|-----------------|---------|-----------------|---------|

Bootstrap support for afum|EAL92802.1 as seed ortholog is 100%.

Bootstrap support for afis|EAW21773.1 as seed ortholog is 100%.

---

Group of orthologs #2918. Best score 1226 bits

Score difference with first non-orthologous sequence - *A. fumigatus*:1226 *A. fischeri*:1226

|                 |         |                 |         |
|-----------------|---------|-----------------|---------|
| afum EAL91646.1 | 100.00% | afis EAW17836.1 | 100.00% |
|-----------------|---------|-----------------|---------|

Bootstrap support for afum|EAL91646.1 as seed ortholog is 100%.

Bootstrap support for afis|EAW17836.1 as seed ortholog is 100%.

---

Group of orthologs #2919. Best score 1226 bits

Score difference with first non-orthologous sequence - *A. fumigatus*:1226 *A. fischeri*:1226

afum|EAL91738.1 100.00% afis|EAW17927.1 100.00%

Bootstrap support for afum|EAL91738.1 as seed ortholog is 100%.

Bootstrap support for afis|EAW17927.1 as seed ortholog is 100%.

---

Group of orthologs #2920. Best score 1226 bits

Score difference with first non-orthologous sequence - *A. fumigatus*:1226 *A. fischeri*:966

afum|EAL84284.1 100.00% afis|EAW25560.1 100.00%

Bootstrap support for afum|EAL84284.1 as seed ortholog is 100%.

Bootstrap support for afis|EAW25560.1 as seed ortholog is 100%.

---

Group of orthologs #2921. Best score 1226 bits

Score difference with first non-orthologous sequence - *A. fumigatus*:1226 *A. fischeri*:1226

afum|EAL92608.1 100.00% afis|EAW21590.1 100.00%

Bootstrap support for afum|EAL92608.1 as seed ortholog is 100%.

Bootstrap support for afis|EAW21590.1 as seed ortholog is 100%.

---

Group of orthologs #2922. Best score 1225 bits

Score difference with first non-orthologous sequence - *A. fumigatus*:957 *A. fischeri*:1078

afum|EAL86490.1 100.00% afis|EAW16963.1 100.00%

Bootstrap support for afum|EAL86490.1 as seed ortholog is 100%.

Bootstrap support for afis|EAW16963.1 as seed ortholog is 100%.

---

Group of orthologs #2923. Best score 1225 bits

Score difference with first non-orthologous sequence - *A. fumigatus*:34 *A. fischeri*:1225

afum|EAL85180.1 100.00% afis|EAW20060.1 100.00%

Bootstrap support for afum|EAL85180.1 as seed ortholog is 91%.

Bootstrap support for afis|EAW20060.1 as seed ortholog is 100%.

---

Group of orthologs #2924. Best score 1225 bits

Score difference with first non-orthologous sequence - *A. fumigatus*:1225 *A. fischeri*:1225

afum|EAL84676.1 100.00% afis|EAW20957.1 100.00%

Bootstrap support for afum|EAL84676.1 as seed ortholog is 100%.

Bootstrap support for afis|EAW20957.1 as seed ortholog is 100%.

---

Group of orthologs #2925. Best score 1225 bits

Score difference with first non-orthologous sequence - *A. fumigatus*:1225 *A. fischeri*:1225

afum|EAL93359.1 100.00% afis|EAW18644.1 100.00%

Bootstrap support for afum|EAL93359.1 as seed ortholog is 100%.

Bootstrap support for afis|EAW18644.1 as seed ortholog is 100%.

---

Group of orthologs #2926. Best score 1225 bits

Score difference with first non-orthologous sequence - *A. fumigatus*:1074 *A. fischeri*:1225

afum|EAL90861.1 100.00% afis|EAW22331.1 100.00%

Bootstrap support for afum|EAL90861.1 as seed ortholog is 100%.

Bootstrap support for afis|EAW22331.1 as seed ortholog is 100%.

---

Group of orthologs #2927. Best score 1225 bits

Score difference with first non-orthologous sequence - *A. fumigatus*:1225 *A. fischeri*:1225

afum|EAL90275.1 100.00% afis|EAW22922.1 100.00%

Bootstrap support for afum|EAL90275.1 as seed ortholog is 100%.

Bootstrap support for afis|EAW22922.1 as seed ortholog is 100%.

---

Group of orthologs #2928. Best score 1225 bits



Score difference with first non-orthologous sequence - *A. fumigatus*:1225 *A. fischeri*:1067  
afum|EAL89317.1 100.00% afis|EAW24653.1 100.00%  
Bootstrap support for afum|EAL89317.1 as seed ortholog is 100%.  
Bootstrap support for afis|EAW24653.1 as seed ortholog is 100%.

---

Group of orthologs #2929. Best score 1225 bits

Score difference with first non-orthologous sequence - *A. fumigatus*:1225 *A. fischeri*:1225  
afum|EAL89674.1 100.00% afis|EAW25021.1 100.00%  
Bootstrap support for afum|EAL89674.1 as seed ortholog is 100%.  
Bootstrap support for afis|EAW25021.1 as seed ortholog is 100%.

---

Group of orthologs #2930. Best score 1223 bits

Score difference with first non-orthologous sequence - *A. fumigatus*:1223 *A. fischeri*:1223  
afum|EAL85209.1 100.00% afis|EAW20090.1 100.00%  
Bootstrap support for afum|EAL85209.1 as seed ortholog is 100%.  
Bootstrap support for afis|EAW20090.1 as seed ortholog is 100%.

---

Group of orthologs #2931. Best score 1223 bits

Score difference with first non-orthologous sequence - *A. fumigatus*:1223 *A. fischeri*:1223  
afum|EAL87626.1 100.00% afis|EAW18262.1 100.00%  
Bootstrap support for afum|EAL87626.1 as seed ortholog is 100%.  
Bootstrap support for afis|EAW18262.1 as seed ortholog is 100%.

---

Group of orthologs #2932. Best score 1223 bits

Score difference with first non-orthologous sequence - *A. fumigatus*:1223 *A. fischeri*:1223  
afum|EAL91326.1 100.00% afis|EAW17504.1 100.00%  
Bootstrap support for afum|EAL91326.1 as seed ortholog is 100%.  
Bootstrap support for afis|EAW17504.1 as seed ortholog is 100%.

---

Group of orthologs #2933. Best score 1223 bits

Score difference with first non-orthologous sequence - *A. fumigatus*:1223 *A. fischeri*:1223  
afum|EAL91551.1 100.00% afis|EAW17736.1 100.00%  
Bootstrap support for afum|EAL91551.1 as seed ortholog is 100%.  
Bootstrap support for afis|EAW17736.1 as seed ortholog is 100%.

---

Group of orthologs #2934. Best score 1223 bits

Score difference with first non-orthologous sequence - *A. fumigatus*:1223 *A. fischeri*:1223  
afum|EAL91639.1 100.00% afis|EAW17829.1 100.00%  
Bootstrap support for afum|EAL91639.1 as seed ortholog is 100%.  
Bootstrap support for afis|EAW17829.1 as seed ortholog is 100%.

---

Group of orthologs #2935. Best score 1223 bits

Score difference with first non-orthologous sequence - *A. fumigatus*:1096 *A. fischeri*:1095  
afum|EAL93187.1 100.00% afis|EAW18497.1 100.00%  
Bootstrap support for afum|EAL93187.1 as seed ortholog is 100%.  
Bootstrap support for afis|EAW18497.1 as seed ortholog is 100%.

---

Group of orthologs #2936. Best score 1223 bits

Score difference with first non-orthologous sequence - *A. fumigatus*:1223 *A. fischeri*:1223  
afum|EAL92186.1 100.00% afis|EAW21167.1 100.00%  
Bootstrap support for afum|EAL92186.1 as seed ortholog is 100%.  
Bootstrap support for afis|EAW21167.1 as seed ortholog is 100%.

---

Group of orthologs #2937. Best score 1223 bits

Score difference with first non-orthologous sequence - *A. fumigatus*:1223 *A. fischeri*:1223  
afum|EAL92199.1 100.00% afis|EAW21179.1 100.00%

Bootstrap support for afum|EAL92199.1 as seed ortholog is 100%.  
Bootstrap support for afis|EAW21179.1 as seed ortholog is 100%.

---

Group of orthologs #2938. Best score 1223 bits

Score difference with first non-orthologous sequence - *A. fumigatus*:1223 *A. fischeri*:1223

|                 |         |                 |         |
|-----------------|---------|-----------------|---------|
| afum EAL92729.1 | 100.00% | afis EAW21695.1 | 100.00% |
|-----------------|---------|-----------------|---------|

Bootstrap support for afum|EAL92729.1 as seed ortholog is 100%.

Bootstrap support for afis|EAW21695.1 as seed ortholog is 100%.

---

Group of orthologs #2939. Best score 1223 bits

Score difference with first non-orthologous sequence - *A. fumigatus*:1223 *A. fischeri*:1223

|                 |         |                 |         |
|-----------------|---------|-----------------|---------|
| afum EAL93023.1 | 100.00% | afis EAW22008.1 | 100.00% |
|-----------------|---------|-----------------|---------|

Bootstrap support for afum|EAL93023.1 as seed ortholog is 100%.

Bootstrap support for afis|EAW22008.1 as seed ortholog is 100%.

---

Group of orthologs #2940. Best score 1222 bits

Score difference with first non-orthologous sequence - *A. fumigatus*:996 *A. fischeri*:949

|                 |         |                 |         |
|-----------------|---------|-----------------|---------|
| afum EAL86562.1 | 100.00% | afis EAW17076.1 | 100.00% |
|-----------------|---------|-----------------|---------|

Bootstrap support for afum|EAL86562.1 as seed ortholog is 100%.

Bootstrap support for afis|EAW17076.1 as seed ortholog is 100%.

---

Group of orthologs #2941. Best score 1222 bits

Score difference with first non-orthologous sequence - *A. fumigatus*:832 *A. fischeri*:1137

|                 |         |                 |         |
|-----------------|---------|-----------------|---------|
| afum EAL87523.1 | 100.00% | afis EAW18163.1 | 100.00% |
|-----------------|---------|-----------------|---------|

Bootstrap support for afum|EAL87523.1 as seed ortholog is 100%.

Bootstrap support for afis|EAW18163.1 as seed ortholog is 100%.

---

Group of orthologs #2942. Best score 1222 bits

Score difference with first non-orthologous sequence - *A. fumigatus*:855 *A. fischeri*:1222

|                 |         |                 |         |
|-----------------|---------|-----------------|---------|
| afum EAL85421.1 | 100.00% | afis EAW20290.1 | 100.00% |
|-----------------|---------|-----------------|---------|

Bootstrap support for afum|EAL85421.1 as seed ortholog is 100%.

Bootstrap support for afis|EAW20290.1 as seed ortholog is 100%.

---

Group of orthologs #2943. Best score 1222 bits

Score difference with first non-orthologous sequence - *A. fumigatus*:1222 *A. fischeri*:1222

|                 |         |                 |         |
|-----------------|---------|-----------------|---------|
| afum EAL87706.1 | 100.00% | afis EAW18343.1 | 100.00% |
|-----------------|---------|-----------------|---------|

Bootstrap support for afum|EAL87706.1 as seed ortholog is 100%.

Bootstrap support for afis|EAW18343.1 as seed ortholog is 100%.

---

Group of orthologs #2944. Best score 1222 bits

Score difference with first non-orthologous sequence - *A. fumigatus*:1222 *A. fischeri*:1222

|                 |         |                 |         |
|-----------------|---------|-----------------|---------|
| afum EAL90914.1 | 100.00% | afis EAW22266.1 | 100.00% |
|-----------------|---------|-----------------|---------|

Bootstrap support for afum|EAL90914.1 as seed ortholog is 100%.

Bootstrap support for afis|EAW22266.1 as seed ortholog is 100%.

---

Group of orthologs #2945. Best score 1222 bits

Score difference with first non-orthologous sequence - *A. fumigatus*:1222 *A. fischeri*:1222

|                 |         |                 |         |
|-----------------|---------|-----------------|---------|
| afum EAL92551.1 | 100.00% | afis EAW21530.1 | 100.00% |
|-----------------|---------|-----------------|---------|

Bootstrap support for afum|EAL92551.1 as seed ortholog is 100%.

Bootstrap support for afis|EAW21530.1 as seed ortholog is 100%.

---

Group of orthologs #2946. Best score 1222 bits

Score difference with first non-orthologous sequence - *A. fumigatus*:1222 *A. fischeri*:1222

|                 |         |                 |         |
|-----------------|---------|-----------------|---------|
| afum EAL89633.1 | 100.00% | afis EAW24973.1 | 100.00% |
|-----------------|---------|-----------------|---------|

Bootstrap support for afum|EAL89633.1 as seed ortholog is 100%.

Bootstrap support for afis|EAW24973.1 as seed ortholog is 100%.

---

Group of orthologs #2947. Best score 1221 bits

Score difference with first non-orthologous sequence - *A. fumigatus*:1221 *A. fischeri*:1138

afum|EAL88571.1 100.00% afis|EAW15935.1 100.00%

Bootstrap support for afum|EAL88571.1 as seed ortholog is 100%.

Bootstrap support for afis|EAW15935.1 as seed ortholog is 100%.

---

Group of orthologs #2948. Best score 1221 bits

Score difference with first non-orthologous sequence - *A. fumigatus*:1221 *A. fischeri*:897

afum|EAL88818.2 100.00% afis|EAW16187.1 100.00%

Bootstrap support for afum|EAL88818.2 as seed ortholog is 100%.

Bootstrap support for afis|EAW16187.1 as seed ortholog is 100%.

---

Group of orthologs #2949. Best score 1221 bits

Score difference with first non-orthologous sequence - *A. fumigatus*:1221 *A. fischeri*:1221

afum|EAL89012.1 100.00% afis|EAW16384.1 100.00%

Bootstrap support for afum|EAL89012.1 as seed ortholog is 100%.

Bootstrap support for afis|EAW16384.1 as seed ortholog is 100%.

---

Group of orthologs #2950. Best score 1221 bits

Score difference with first non-orthologous sequence - *A. fumigatus*:1030 *A. fischeri*:999

afum|EAL87308.1 100.00% afis|EAW23880.1 100.00%

Bootstrap support for afum|EAL87308.1 as seed ortholog is 100%.

Bootstrap support for afis|EAW23880.1 as seed ortholog is 100%.

---

Group of orthologs #2951. Best score 1221 bits

Score difference with first non-orthologous sequence - *A. fumigatus*:1118 *A. fischeri*:1105

afum|EAL92132.1 100.00% afis|EAW21110.1 100.00%

Bootstrap support for afum|EAL92132.1 as seed ortholog is 100%.

Bootstrap support for afis|EAW21110.1 as seed ortholog is 100%.

---

Group of orthologs #2952. Best score 1221 bits

Score difference with first non-orthologous sequence - *A. fumigatus*:1016 *A. fischeri*:1176

afum|EAL94082.1 100.00% afis|EAW19362.1 100.00%

Bootstrap support for afum|EAL94082.1 as seed ortholog is 100%.

Bootstrap support for afis|EAW19362.1 as seed ortholog is 100%.

---

Group of orthologs #2953. Best score 1220 bits

Score difference with first non-orthologous sequence - *A. fumigatus*:1220 *A. fischeri*:1048

afum|EAL86609.1 100.00% afis|EAW17179.1 100.00%

Bootstrap support for afum|EAL86609.1 as seed ortholog is 100%.

Bootstrap support for afis|EAW17179.1 as seed ortholog is 100%.

---

Group of orthologs #2954. Best score 1220 bits

Score difference with first non-orthologous sequence - *A. fumigatus*:1167 *A. fischeri*:1028

afum|EAL93088.1 100.00% afis|EAW18408.1 100.00%

Bootstrap support for afum|EAL93088.1 as seed ortholog is 100%.

Bootstrap support for afis|EAW18408.1 as seed ortholog is 100%.

---

Group of orthologs #2955. Best score 1220 bits

Score difference with first non-orthologous sequence - *A. fumigatus*:1220 *A. fischeri*:1220

afum|EAL93241.1 100.00% afis|EAW18541.1 100.00%

Bootstrap support for afum|EAL93241.1 as seed ortholog is 100%.

Bootstrap support for afis|EAW18541.1 as seed ortholog is 100%.

---

Group of orthologs #2956. Best score 1220 bits

Score difference with first non-orthologous sequence - *A. fumigatus*:1220 *A. fischeri*:1220  
afum|EAL93453.1 100.00% afis|EAW18728.1 100.00%  
Bootstrap support for afum|EAL93453.1 as seed ortholog is 100%.  
Bootstrap support for afis|EAW18728.1 as seed ortholog is 100%.

---

Group of orthologs #2957. Best score 1220 bits

Score difference with first non-orthologous sequence - *A. fumigatus*:1220 *A. fischeri*:1220  
afum|EAL90822.2 100.00% afis|EAW22370.1 100.00%  
Bootstrap support for afum|EAL90822.2 as seed ortholog is 100%.  
Bootstrap support for afis|EAW22370.1 as seed ortholog is 100%.

---

Group of orthologs #2958. Best score 1220 bits

Score difference with first non-orthologous sequence - *A. fumigatus*:1220 *A. fischeri*:1220  
afum|EAL92319.1 100.00% afis|EAW21302.1 100.00%  
Bootstrap support for afum|EAL92319.1 as seed ortholog is 100%.  
Bootstrap support for afis|EAW21302.1 as seed ortholog is 100%.

---

Group of orthologs #2959. Best score 1220 bits

Score difference with first non-orthologous sequence - *A. fumigatus*:1220 *A. fischeri*:1220  
afum|EAL89500.1 100.00% afis|EAW24853.1 100.00%  
Bootstrap support for afum|EAL89500.1 as seed ortholog is 100%.  
Bootstrap support for afis|EAW24853.1 as seed ortholog is 100%.

---

Group of orthologs #2960. Best score 1219 bits

Score difference with first non-orthologous sequence - *A. fumigatus*:1028 *A. fischeri*:875  
afum|EAL86627.2 100.00% afis|EAW17200.1 100.00%  
Bootstrap support for afum|EAL86627.2 as seed ortholog is 100%.  
Bootstrap support for afis|EAW17200.1 as seed ortholog is 100%.

---

Group of orthologs #2961. Best score 1219 bits

Score difference with first non-orthologous sequence - *A. fumigatus*:1219 *A. fischeri*:1219  
afum|EAL85090.1 100.00% afis|EAW19800.1 100.00%  
Bootstrap support for afum|EAL85090.1 as seed ortholog is 100%.  
Bootstrap support for afis|EAW19800.1 as seed ortholog is 100%.

---

Group of orthologs #2962. Best score 1219 bits

Score difference with first non-orthologous sequence - *A. fumigatus*:1219 *A. fischeri*:1219  
afum|EAL84579.1 100.00% afis|EAW20473.1 100.00%  
Bootstrap support for afum|EAL84579.1 as seed ortholog is 100%.  
Bootstrap support for afis|EAW20473.1 as seed ortholog is 100%.

---

Group of orthologs #2963. Best score 1219 bits

Score difference with first non-orthologous sequence - *A. fumigatus*:1219 *A. fischeri*:1219  
afum|EAL89111.2 100.00% afis|EAW16516.1 100.00%  
Bootstrap support for afum|EAL89111.2 as seed ortholog is 100%.  
Bootstrap support for afis|EAW16516.1 as seed ortholog is 100%.

---

Group of orthologs #2964. Best score 1219 bits

Score difference with first non-orthologous sequence - *A. fumigatus*:1219 *A. fischeri*:1219  
afum|EAL86082.1 100.00% afis|EAW24413.1 100.00%  
Bootstrap support for afum|EAL86082.1 as seed ortholog is 100%.  
Bootstrap support for afis|EAW24413.1 as seed ortholog is 100%.

---

Group of orthologs #2965. Best score 1219 bits

Score difference with first non-orthologous sequence - *A. fumigatus*:974 *A. fischeri*:1219  
afum|EAL87235.2 100.00% afis|EAW23801.1 100.00%

Bootstrap support for afum|EAL87235.2 as seed ortholog is 100%.  
Bootstrap support for afis|EAW23801.1 as seed ortholog is 100%.

---

Group of orthologs #2966. Best score 1219 bits

Score difference with first non-orthologous sequence - *A. fumigatus*:1219 *A. fischeri*:1219

|                 |         |                 |         |
|-----------------|---------|-----------------|---------|
| afum EAL90968.1 | 100.00% | afis EAW22226.1 | 100.00% |
|-----------------|---------|-----------------|---------|

Bootstrap support for afum|EAL90968.1 as seed ortholog is 100%.

Bootstrap support for afis|EAW22226.1 as seed ortholog is 100%.

---

Group of orthologs #2967. Best score 1219 bits

Score difference with first non-orthologous sequence - *A. fumigatus*:1219 *A. fischeri*:1219

|                 |         |                 |         |
|-----------------|---------|-----------------|---------|
| afum EAL90235.1 | 100.00% | afis EAW22962.1 | 100.00% |
|-----------------|---------|-----------------|---------|

Bootstrap support for afum|EAL90235.1 as seed ortholog is 100%.

Bootstrap support for afis|EAW22962.1 as seed ortholog is 100%.

---

Group of orthologs #2968. Best score 1218 bits

Score difference with first non-orthologous sequence - *A. fumigatus*:1218 *A. fischeri*:1218

|                 |         |                 |         |
|-----------------|---------|-----------------|---------|
| afum EAL86582.1 | 100.00% | afis EAW17121.1 | 100.00% |
|-----------------|---------|-----------------|---------|

Bootstrap support for afum|EAL86582.1 as seed ortholog is 100%.

Bootstrap support for afis|EAW17121.1 as seed ortholog is 100%.

---

Group of orthologs #2969. Best score 1218 bits

Score difference with first non-orthologous sequence - *A. fumigatus*:1218 *A. fischeri*:1218

|                 |         |                 |         |
|-----------------|---------|-----------------|---------|
| afum EAL88607.1 | 100.00% | afis EAW15975.1 | 100.00% |
|-----------------|---------|-----------------|---------|

Bootstrap support for afum|EAL88607.1 as seed ortholog is 100%.

Bootstrap support for afis|EAW15975.1 as seed ortholog is 100%.

---

Group of orthologs #2970. Best score 1218 bits

Score difference with first non-orthologous sequence - *A. fumigatus*:1218 *A. fischeri*:1218

|                 |         |                 |         |
|-----------------|---------|-----------------|---------|
| afum EAL89298.1 | 100.00% | afis EAW16707.1 | 100.00% |
|-----------------|---------|-----------------|---------|

Bootstrap support for afum|EAL89298.1 as seed ortholog is 100%.

Bootstrap support for afis|EAW16707.1 as seed ortholog is 100%.

---

Group of orthologs #2971. Best score 1218 bits

Score difference with first non-orthologous sequence - *A. fumigatus*:1218 *A. fischeri*:1218

|                 |         |                 |         |
|-----------------|---------|-----------------|---------|
| afum EAL93259.1 | 100.00% | afis EAW18559.1 | 100.00% |
|-----------------|---------|-----------------|---------|

Bootstrap support for afum|EAL93259.1 as seed ortholog is 100%.

Bootstrap support for afis|EAW18559.1 as seed ortholog is 100%.

---

Group of orthologs #2972. Best score 1218 bits

Score difference with first non-orthologous sequence - *A. fumigatus*:1218 *A. fischeri*:1218

|                 |         |                 |         |
|-----------------|---------|-----------------|---------|
| afum EAL90896.1 | 100.00% | afis EAW22285.1 | 100.00% |
|-----------------|---------|-----------------|---------|

Bootstrap support for afum|EAL90896.1 as seed ortholog is 100%.

Bootstrap support for afis|EAW22285.1 as seed ortholog is 100%.

---

Group of orthologs #2973. Best score 1218 bits

Score difference with first non-orthologous sequence - *A. fumigatus*:1218 *A. fischeri*:1218

|                 |         |                 |         |
|-----------------|---------|-----------------|---------|
| afum EAL90617.1 | 100.00% | afis EAW22582.1 | 100.00% |
|-----------------|---------|-----------------|---------|

Bootstrap support for afum|EAL90617.1 as seed ortholog is 100%.

Bootstrap support for afis|EAW22582.1 as seed ortholog is 100%.

---

Group of orthologs #2974. Best score 1218 bits

Score difference with first non-orthologous sequence - *A. fumigatus*:1218 *A. fischeri*:1218

|                 |         |                 |         |
|-----------------|---------|-----------------|---------|
| afum EAL89548.1 | 100.00% | afis EAW24894.1 | 100.00% |
|-----------------|---------|-----------------|---------|

Bootstrap support for afum|EAL89548.1 as seed ortholog is 100%.

Bootstrap support for afis|EAW24894.1 as seed ortholog is 100%.

---

Group of orthologs #2975. Best score 1217 bits

Score difference with first non-orthologous sequence - *A. fumigatus*:937 *A. fischeri*:808

afum|EAL86573.1 100.00% afis|EAW17109.1 100.00%

Bootstrap support for afum|EAL86573.1 as seed ortholog is 100%.

Bootstrap support for afis|EAW17109.1 as seed ortholog is 100%.

---

Group of orthologs #2976. Best score 1217 bits

Score difference with first non-orthologous sequence - *A. fumigatus*:1217 *A. fischeri*:1217

afum|EAL90970.1 100.00% afis|EAW22224.1 100.00%

Bootstrap support for afum|EAL90970.1 as seed ortholog is 100%.

Bootstrap support for afis|EAW22224.1 as seed ortholog is 100%.

---

Group of orthologs #2977. Best score 1217 bits

Score difference with first non-orthologous sequence - *A. fumigatus*:1126 *A. fischeri*:1016

afum|EAL90511.1 100.00% afis|EAW22681.1 100.00%

Bootstrap support for afum|EAL90511.1 as seed ortholog is 100%.

Bootstrap support for afis|EAW22681.1 as seed ortholog is 100%.

---

Group of orthologs #2978. Best score 1217 bits

Score difference with first non-orthologous sequence - *A. fumigatus*:1217 *A. fischeri*:873

afum|EAL90462.1 100.00% afis|EAW22733.1 100.00%

Bootstrap support for afum|EAL90462.1 as seed ortholog is 100%.

Bootstrap support for afis|EAW22733.1 as seed ortholog is 100%.

---

Group of orthologs #2979. Best score 1216 bits

Score difference with first non-orthologous sequence - *A. fumigatus*:1216 *A. fischeri*:1216

afum|EAL91830.1 100.00% afis|EAW18018.1 100.00%

Bootstrap support for afum|EAL91830.1 as seed ortholog is 100%.

Bootstrap support for afis|EAW18018.1 as seed ortholog is 100%.

---

Group of orthologs #2980. Best score 1216 bits

Score difference with first non-orthologous sequence - *A. fumigatus*:880 *A. fischeri*:1069

afum|EAL93131.1 100.00% afis|EAW18446.1 100.00%

Bootstrap support for afum|EAL93131.1 as seed ortholog is 100%.

Bootstrap support for afis|EAW18446.1 as seed ortholog is 100%.

---

Group of orthologs #2981. Best score 1216 bits

Score difference with first non-orthologous sequence - *A. fumigatus*:1216 *A. fischeri*:1216

afum|EAL93301.1 100.00% afis|EAW18593.1 100.00%

Bootstrap support for afum|EAL93301.1 as seed ortholog is 100%.

Bootstrap support for afis|EAW18593.1 as seed ortholog is 100%.

---

Group of orthologs #2982. Best score 1216 bits

Score difference with first non-orthologous sequence - *A. fumigatus*:1216 *A. fischeri*:1216

afum|EAL92759.1 100.00% afis|EAW21726.1 100.00%

Bootstrap support for afum|EAL92759.1 as seed ortholog is 100%.

Bootstrap support for afis|EAW21726.1 as seed ortholog is 100%.

---

Group of orthologs #2983. Best score 1216 bits

Score difference with first non-orthologous sequence - *A. fumigatus*:1216 *A. fischeri*:150

afum|EAL89552.2 100.00% afis|EAW24898.1 100.00%

Bootstrap support for afum|EAL89552.2 as seed ortholog is 100%.

Bootstrap support for afis|EAW24898.1 as seed ortholog is 100%.

---

Group of orthologs #2984. Best score 1215 bits

Score difference with first non-orthologous sequence - *A. fumigatus*:807 *A. fischeri*:1215  
afum|EAL91605.2 100.00% afis|EAW17797.1 100.00%  
Bootstrap support for afum|EAL91605.2 as seed ortholog is 100%.  
Bootstrap support for afis|EAW17797.1 as seed ortholog is 100%.

---

Group of orthologs #2985. Best score 1215 bits

Score difference with first non-orthologous sequence - *A. fumigatus*:1215 *A. fischeri*:1215  
afum|EAL87297.1 100.00% afis|EAW23869.1 100.00%  
Bootstrap support for afum|EAL87297.1 as seed ortholog is 100%.  
Bootstrap support for afis|EAW23869.1 as seed ortholog is 100%.

---

Group of orthologs #2986. Best score 1215 bits

Score difference with first non-orthologous sequence - *A. fumigatus*:1215 *A. fischeri*:1215  
afum|EAL90454.1 100.00% afis|EAW22741.1 100.00%  
Bootstrap support for afum|EAL90454.1 as seed ortholog is 100%.  
Bootstrap support for afis|EAW22741.1 as seed ortholog is 100%.

---

Group of orthologs #2987. Best score 1214 bits

Score difference with first non-orthologous sequence - *A. fumigatus*:1214 *A. fischeri*:1214  
afum|EAL88262.1 100.00% afis|EAW23222.1 100.00%  
Bootstrap support for afum|EAL88262.1 as seed ortholog is 100%.  
Bootstrap support for afis|EAW23222.1 as seed ortholog is 100%.

---

Group of orthologs #2988. Best score 1214 bits

Score difference with first non-orthologous sequence - *A. fumigatus*:1214 *A. fischeri*:1214  
afum|EAL93432.1 100.00% afis|EAW18709.1 100.00%  
Bootstrap support for afum|EAL93432.1 as seed ortholog is 100%.  
Bootstrap support for afis|EAW18709.1 as seed ortholog is 100%.

---

Group of orthologs #2989. Best score 1214 bits

Score difference with first non-orthologous sequence - *A. fumigatus*:1214 *A. fischeri*:1214  
afum|EAL93439.1 100.00% afis|EAW18714.1 100.00%  
Bootstrap support for afum|EAL93439.1 as seed ortholog is 100%.  
Bootstrap support for afis|EAW18714.1 as seed ortholog is 100%.

---

Group of orthologs #2990. Best score 1214 bits

Score difference with first non-orthologous sequence - *A. fumigatus*:1214 *A. fischeri*:1066  
afum|EAL89314.2 100.00% afis|EAW24656.1 100.00%  
Bootstrap support for afum|EAL89314.2 as seed ortholog is 100%.  
Bootstrap support for afis|EAW24656.1 as seed ortholog is 100%.

---

Group of orthologs #2991. Best score 1214 bits

Score difference with first non-orthologous sequence - *A. fumigatus*:1214 *A. fischeri*:1214  
afum|EAL92691.1 100.00% afis|EAW21656.1 100.00%  
Bootstrap support for afum|EAL92691.1 as seed ortholog is 100%.  
Bootstrap support for afis|EAW21656.1 as seed ortholog is 100%.

---

Group of orthologs #2992. Best score 1213 bits

Score difference with first non-orthologous sequence - *A. fumigatus*:1213 *A. fischeri*:1213  
afum|EAL87475.1 100.00% afis|EAW18117.1 100.00%  
Bootstrap support for afum|EAL87475.1 as seed ortholog is 100%.  
Bootstrap support for afis|EAW18117.1 as seed ortholog is 100%.

---

Group of orthologs #2993. Best score 1213 bits

Score difference with first non-orthologous sequence - *A. fumigatus*:924 *A. fischeri*:1213  
afum|EAL91553.1 100.00% afis|EAW17738.1 100.00%

Bootstrap support for afum|EAL91553.1 as seed ortholog is 100%.  
Bootstrap support for afis|EAW17738.1 as seed ortholog is 100%.

---

Group of orthologs #2994. Best score 1213 bits

Score difference with first non-orthologous sequence - *A. fumigatus*:1213 *A. fischeri*:1213

afum|EAL85907.1 100.00% afis|EAW24239.1 100.00%

Bootstrap support for afum|EAL85907.1 as seed ortholog is 100%.

Bootstrap support for afis|EAW24239.1 as seed ortholog is 100%.

---

Group of orthologs #2995. Best score 1213 bits

Score difference with first non-orthologous sequence - *A. fumigatus*:1213 *A. fischeri*:1067

afum|EAL86149.1 100.00% afis|EAW24476.1 100.00%

Bootstrap support for afum|EAL86149.1 as seed ortholog is 100%.

Bootstrap support for afis|EAW24476.1 as seed ortholog is 100%.

---

Group of orthologs #2996. Best score 1213 bits

Score difference with first non-orthologous sequence - *A. fumigatus*:1213 *A. fischeri*:1213

afum|EAL93281.1 100.00% afis|EAW18578.1 100.00%

Bootstrap support for afum|EAL93281.1 as seed ortholog is 100%.

Bootstrap support for afis|EAW18578.1 as seed ortholog is 100%.

---

Group of orthologs #2997. Best score 1213 bits

Score difference with first non-orthologous sequence - *A. fumigatus*:1213 *A. fischeri*:1213

afum|EAL93618.1 100.00% afis|EAW18885.1 100.00%

Bootstrap support for afum|EAL93618.1 as seed ortholog is 100%.

Bootstrap support for afis|EAW18885.1 as seed ortholog is 100%.

---

Group of orthologs #2998. Best score 1213 bits

Score difference with first non-orthologous sequence - *A. fumigatus*:1213 *A. fischeri*:1213

afum|EAL93020.1 100.00% afis|EAW22005.1 100.00%

Bootstrap support for afum|EAL93020.1 as seed ortholog is 100%.

Bootstrap support for afis|EAW22005.1 as seed ortholog is 100%.

---

Group of orthologs #2999. Best score 1212 bits

Score difference with first non-orthologous sequence - *A. fumigatus*:1212 *A. fischeri*:1212

afum|EAL87103.1 100.00% afis|EAW19391.1 100.00%

Bootstrap support for afum|EAL87103.1 as seed ortholog is 100%.

Bootstrap support for afis|EAW19391.1 as seed ortholog is 100%.

---

Group of orthologs #3000. Best score 1212 bits

Score difference with first non-orthologous sequence - *A. fumigatus*:1005 *A. fischeri*:1120

afum|EAL87301.1 100.00% afis|EAW23873.1 100.00%

Bootstrap support for afum|EAL87301.1 as seed ortholog is 100%.

Bootstrap support for afis|EAW23873.1 as seed ortholog is 100%.

---

Group of orthologs #3001. Best score 1212 bits

Score difference with first non-orthologous sequence - *A. fumigatus*:1212 *A. fischeri*:1212

afum|EAL87322.1 100.00% afis|EAW23894.1 100.00%

Bootstrap support for afum|EAL87322.1 as seed ortholog is 100%.

Bootstrap support for afis|EAW23894.1 as seed ortholog is 100%.

---

Group of orthologs #3002. Best score 1212 bits

Score difference with first non-orthologous sequence - *A. fumigatus*:1212 *A. fischeri*:1212

afum|EAL92843.1 100.00% afis|EAW21828.1 100.00%

Bootstrap support for afum|EAL92843.1 as seed ortholog is 100%.

Bootstrap support for afis|EAW21828.1 as seed ortholog is 100%.



---

Group of orthologs #3003. Best score 1211 bits

Score difference with first non-orthologous sequence - *A. fumigatus*:926 *A. fischeri*:762

afum|EAL84529.1 100.00% afis|EAW20528.1 100.00%

Bootstrap support for afum|EAL84529.1 as seed ortholog is 100%.

Bootstrap support for afis|EAW20528.1 as seed ortholog is 100%.

---

Group of orthologs #3004. Best score 1211 bits

Score difference with first non-orthologous sequence - *A. fumigatus*:997 *A. fischeri*:976

afum|EAL84541.1 100.00% afis|EAW20516.1 100.00%

Bootstrap support for afum|EAL84541.1 as seed ortholog is 100%.

Bootstrap support for afis|EAW20516.1 as seed ortholog is 100%.

---

Group of orthologs #3005. Best score 1211 bits

Score difference with first non-orthologous sequence - *A. fumigatus*:1211 *A. fischeri*:1211

afum|EAL85253.1 100.00% afis|EAW20138.1 100.00%

Bootstrap support for afum|EAL85253.1 as seed ortholog is 100%.

Bootstrap support for afis|EAW20138.1 as seed ortholog is 100%.

---

Group of orthologs #3006. Best score 1211 bits

Score difference with first non-orthologous sequence - *A. fumigatus*:1211 *A. fischeri*:1211

afum|EAL87307.1 100.00% afis|EAW23879.1 100.00%

Bootstrap support for afum|EAL87307.1 as seed ortholog is 100%.

Bootstrap support for afis|EAW23879.1 as seed ortholog is 100%.

---

Group of orthologs #3007. Best score 1211 bits

Score difference with first non-orthologous sequence - *A. fumigatus*:1211 *A. fischeri*:1211

afum|EAL87886.1 100.00% afis|EAW23579.1 100.00%

Bootstrap support for afum|EAL87886.1 as seed ortholog is 100%.

Bootstrap support for afis|EAW23579.1 as seed ortholog is 100%.

---

Group of orthologs #3008. Best score 1211 bits

Score difference with first non-orthologous sequence - *A. fumigatus*:1211 *A. fischeri*:1211

afum|EAL87439.1 100.00% afis|EAW24009.1 100.00%

Bootstrap support for afum|EAL87439.1 as seed ortholog is 100%.

Bootstrap support for afis|EAW24009.1 as seed ortholog is 100%.

---

Group of orthologs #3009. Best score 1211 bits

Score difference with first non-orthologous sequence - *A. fumigatus*:1048 *A. fischeri*:957

afum|EAL90998.1 100.00% afis|EAW22193.1 100.00%

Bootstrap support for afum|EAL90998.1 as seed ortholog is 100%.

Bootstrap support for afis|EAW22193.1 as seed ortholog is 100%.

---

Group of orthologs #3010. Best score 1211 bits

Score difference with first non-orthologous sequence - *A. fumigatus*:1211 *A. fischeri*:1211

afum|EAL90347.1 100.00% afis|EAW22853.1 100.00%

Bootstrap support for afum|EAL90347.1 as seed ortholog is 100%.

Bootstrap support for afis|EAW22853.1 as seed ortholog is 100%.

---

Group of orthologs #3011. Best score 1211 bits

Score difference with first non-orthologous sequence - *A. fumigatus*:1055 *A. fischeri*:1050

afum|EAL92407.1 100.00% afis|EAW21393.1 100.00%

Bootstrap support for afum|EAL92407.1 as seed ortholog is 100%.

Bootstrap support for afis|EAW21393.1 as seed ortholog is 100%.

---

Group of orthologs #3012. Best score 1211 bits

Score difference with first non-orthologous sequence - *A. fumigatus*:1211 *A. fischeri*:1211  
afum|EAL92898.1 100.00% afis|EAW21884.1 100.00%  
Bootstrap support for afum|EAL92898.1 as seed ortholog is 100%.  
Bootstrap support for afis|EAW21884.1 as seed ortholog is 100%.

---

Group of orthologs #3013. Best score 1210 bits

Score difference with first non-orthologous sequence - *A. fumigatus*:1210 *A. fischeri*:1210  
afum|EAL88882.1 100.00% afis|EAW16261.1 100.00%  
Bootstrap support for afum|EAL88882.1 as seed ortholog is 100%.  
Bootstrap support for afis|EAW16261.1 as seed ortholog is 100%.

---

Group of orthologs #3014. Best score 1210 bits

Score difference with first non-orthologous sequence - *A. fumigatus*:1003 *A. fischeri*:775  
afum|EAL87892.2 100.00% afis|EAW23573.1 100.00%  
Bootstrap support for afum|EAL87892.2 as seed ortholog is 100%.  
Bootstrap support for afis|EAW23573.1 as seed ortholog is 100%.

---

Group of orthologs #3015. Best score 1210 bits

Score difference with first non-orthologous sequence - *A. fumigatus*:1210 *A. fischeri*:1210  
afum|EAL94009.1 100.00% afis|EAW19283.1 100.00%  
Bootstrap support for afum|EAL94009.1 as seed ortholog is 100%.  
Bootstrap support for afis|EAW19283.1 as seed ortholog is 100%.

---

Group of orthologs #3016. Best score 1209 bits

Score difference with first non-orthologous sequence - *A. fumigatus*:1209 *A. fischeri*:1209  
afum|EAL86672.2 100.00% afis|EAW17253.1 100.00%  
Bootstrap support for afum|EAL86672.2 as seed ortholog is 100%.  
Bootstrap support for afis|EAW17253.1 as seed ortholog is 100%.

---

Group of orthologs #3017. Best score 1209 bits

Score difference with first non-orthologous sequence - *A. fumigatus*:1209 *A. fischeri*:1115  
afum|EAL84770.1 100.00% afis|EAW20865.1 100.00%  
Bootstrap support for afum|EAL84770.1 as seed ortholog is 100%.  
Bootstrap support for afis|EAW20865.1 as seed ortholog is 100%.

---

Group of orthologs #3018. Best score 1209 bits

Score difference with first non-orthologous sequence - *A. fumigatus*:1209 *A. fischeri*:1209  
afum|EAL91637.1 100.00% afis|EAW17827.1 100.00%  
Bootstrap support for afum|EAL91637.1 as seed ortholog is 100%.  
Bootstrap support for afis|EAW17827.1 as seed ortholog is 100%.

---

Group of orthologs #3019. Best score 1209 bits

Score difference with first non-orthologous sequence - *A. fumigatus*:1209 *A. fischeri*:580  
afum|EAL87192.1 100.00% afis|EAW23756.1 100.00%  
Bootstrap support for afum|EAL87192.1 as seed ortholog is 100%.  
Bootstrap support for afis|EAW23756.1 as seed ortholog is 100%.

---

Group of orthologs #3020. Best score 1209 bits

Score difference with first non-orthologous sequence - *A. fumigatus*:1209 *A. fischeri*:1209  
afum|EAL88371.1 100.00% afis|EAW23108.1 100.00%  
Bootstrap support for afum|EAL88371.1 as seed ortholog is 100%.  
Bootstrap support for afis|EAW23108.1 as seed ortholog is 100%.

---

Group of orthologs #3021. Best score 1209 bits

Score difference with first non-orthologous sequence - *A. fumigatus*:1209 *A. fischeri*:1209  
afum|EAL88316.1 100.00% afis|EAW23168.1 100.00%

Bootstrap support for afum|EAL88316.1 as seed ortholog is 100%.  
Bootstrap support for afis|EAW23168.1 as seed ortholog is 100%.

---

Group of orthologs #3022. Best score 1209 bits

Score difference with first non-orthologous sequence - *A. fumigatus*:1056 *A. fischeri*:927

afum|EAL92170.1 100.00% afis|EAW21151.1 100.00%

Bootstrap support for afum|EAL92170.1 as seed ortholog is 100%.

Bootstrap support for afis|EAW21151.1 as seed ortholog is 100%.

---

Group of orthologs #3023. Best score 1208 bits

Score difference with first non-orthologous sequence - *A. fumigatus*:1208 *A. fischeri*:1208

afum|EAL85222.1 100.00% afis|EAW20105.1 100.00%

Bootstrap support for afum|EAL85222.1 as seed ortholog is 100%.

Bootstrap support for afis|EAW20105.1 as seed ortholog is 100%.

---

Group of orthologs #3024. Best score 1208 bits

Score difference with first non-orthologous sequence - *A. fumigatus*:1208 *A. fischeri*:1208

afum|EAL91217.1 100.00% afis|EAW17382.1 100.00%

Bootstrap support for afum|EAL91217.1 as seed ortholog is 100%.

Bootstrap support for afis|EAW17382.1 as seed ortholog is 100%.

---

Group of orthologs #3025. Best score 1208 bits

Score difference with first non-orthologous sequence - *A. fumigatus*:1119 *A. fischeri*:934

afum|EAL91320.1 100.00% afis|EAW17497.1 100.00%

Bootstrap support for afum|EAL91320.1 as seed ortholog is 100%.

Bootstrap support for afis|EAW17497.1 as seed ortholog is 100%.

---

Group of orthologs #3026. Best score 1208 bits

Score difference with first non-orthologous sequence - *A. fumigatus*:1208 *A. fischeri*:1208

afum|EAL86062.1 100.00% afis|EAW24390.1 100.00%

Bootstrap support for afum|EAL86062.1 as seed ortholog is 100%.

Bootstrap support for afis|EAW24390.1 as seed ortholog is 100%.

---

Group of orthologs #3027. Best score 1208 bits

Score difference with first non-orthologous sequence - *A. fumigatus*:981 *A. fischeri*:1055

afum|EAL90801.1 100.00% afis|EAW22389.1 100.00%

Bootstrap support for afum|EAL90801.1 as seed ortholog is 100%.

Bootstrap support for afis|EAW22389.1 as seed ortholog is 100%.

---

Group of orthologs #3028. Best score 1207 bits

Score difference with first non-orthologous sequence - *A. fumigatus*:1103 *A. fischeri*:1075

afum|EBA27218.1 100.00% afis|EAW19822.1 100.00%

Bootstrap support for afum|EBA27218.1 as seed ortholog is 100%.

Bootstrap support for afis|EAW19822.1 as seed ortholog is 100%.

---

Group of orthologs #3029. Best score 1207 bits

Score difference with first non-orthologous sequence - *A. fumigatus*:1207 *A. fischeri*:1207

afum|EAL89558.1 100.00% afis|EAW24905.1 100.00%

Bootstrap support for afum|EAL89558.1 as seed ortholog is 100%.

Bootstrap support for afis|EAW24905.1 as seed ortholog is 100%.

---

Group of orthologs #3030. Best score 1206 bits

Score difference with first non-orthologous sequence - *A. fumigatus*:1003 *A. fischeri*:1110

afum|EAL87492.1 100.00% afis|EAW18135.1 100.00%

Bootstrap support for afum|EAL87492.1 as seed ortholog is 100%.

Bootstrap support for afis|EAW18135.1 as seed ortholog is 100%.

---

Group of orthologs #3031. Best score 1206 bits

Score difference with first non-orthologous sequence - *A. fumigatus*:1206 *A. fischeri*:1206

afum|EAL93383.1 100.00% afis|EAW18665.1 100.00%

Bootstrap support for afum|EAL93383.1 as seed ortholog is 100%.

Bootstrap support for afis|EAW18665.1 as seed ortholog is 100%.

---

Group of orthologs #3032. Best score 1206 bits

Score difference with first non-orthologous sequence - *A. fumigatus*:1206 *A. fischeri*:1206

afum|EAL90802.1 100.00% afis|EAW22388.1 100.00%

Bootstrap support for afum|EAL90802.1 as seed ortholog is 100%.

Bootstrap support for afis|EAW22388.1 as seed ortholog is 100%.

---

Group of orthologs #3033. Best score 1206 bits

Score difference with first non-orthologous sequence - *A. fumigatus*:1206 *A. fischeri*:1206

afum|EAL92567.1 100.00% afis|EAW21547.1 100.00%

Bootstrap support for afum|EAL92567.1 as seed ortholog is 100%.

Bootstrap support for afis|EAW21547.1 as seed ortholog is 100%.

---

Group of orthologs #3034. Best score 1206 bits

Score difference with first non-orthologous sequence - *A. fumigatus*:1206 *A. fischeri*:1206

afum|EAL90104.1 100.00% afis|EAW25446.1 100.00%

Bootstrap support for afum|EAL90104.1 as seed ortholog is 100%.

Bootstrap support for afis|EAW25446.1 as seed ortholog is 100%.

---

Group of orthologs #3035. Best score 1205 bits

Score difference with first non-orthologous sequence - *A. fumigatus*:1051 *A. fischeri*:842

afum|EAL86168.1 100.00% afis|EAW24498.1 100.00%

Bootstrap support for afum|EAL86168.1 as seed ortholog is 100%.

Bootstrap support for afis|EAW24498.1 as seed ortholog is 100%.

---

Group of orthologs #3036. Best score 1205 bits

Score difference with first non-orthologous sequence - *A. fumigatus*:1205 *A. fischeri*:1205

afum|EAL90742.1 100.00% afis|EAW22449.1 100.00%

Bootstrap support for afum|EAL90742.1 as seed ortholog is 100%.

Bootstrap support for afis|EAW22449.1 as seed ortholog is 100%.

---

Group of orthologs #3037. Best score 1205 bits

Score difference with first non-orthologous sequence - *A. fumigatus*:1066 *A. fischeri*:979

afum|EAL89840.1 100.00% afis|EAW25167.1 100.00%

Bootstrap support for afum|EAL89840.1 as seed ortholog is 100%.

Bootstrap support for afis|EAW25167.1 as seed ortholog is 100%.

---

Group of orthologs #3038. Best score 1205 bits

Score difference with first non-orthologous sequence - *A. fumigatus*:934 *A. fischeri*:921

afum|EAL89982.1 100.00% afis|EAW25321.1 100.00%

Bootstrap support for afum|EAL89982.1 as seed ortholog is 100%.

Bootstrap support for afis|EAW25321.1 as seed ortholog is 100%.

---

Group of orthologs #3039. Best score 1204 bits

Score difference with first non-orthologous sequence - *A. fumigatus*:975 *A. fischeri*:1060

afum|EAL86466.1 100.00% afis|EAW16939.1 100.00%

Bootstrap support for afum|EAL86466.1 as seed ortholog is 100%.

Bootstrap support for afis|EAW16939.1 as seed ortholog is 100%.

---

Group of orthologs #3040. Best score 1204 bits

Score difference with first non-orthologous sequence - *A. fumigatus*:988 *A. fischeri*:1028  
afum|EAL85190.1 100.00% afis|EAW20072.1 100.00%  
Bootstrap support for afum|EAL85190.1 as seed ortholog is 100%.  
Bootstrap support for afis|EAW20072.1 as seed ortholog is 100%.

---

Group of orthologs #3041. Best score 1204 bits

Score difference with first non-orthologous sequence - *A. fumigatus*:1204 *A. fischeri*:1204  
afum|EAL85319.1 100.00% afis|EAW20199.1 100.00%  
Bootstrap support for afum|EAL85319.1 as seed ortholog is 100%.  
Bootstrap support for afis|EAW20199.1 as seed ortholog is 100%.

---

Group of orthologs #3042. Best score 1204 bits

Score difference with first non-orthologous sequence - *A. fumigatus*:1012 *A. fischeri*:909  
afum|EAL90967.1 100.00% afis|EAW22227.1 100.00%  
Bootstrap support for afum|EAL90967.1 as seed ortholog is 100%.  
Bootstrap support for afis|EAW22227.1 as seed ortholog is 100%.

---

Group of orthologs #3043. Best score 1204 bits

Score difference with first non-orthologous sequence - *A. fumigatus*:1204 *A. fischeri*:1204  
afum|EAL89350.1 100.00% afis|EAW24708.1 100.00%  
Bootstrap support for afum|EAL89350.1 as seed ortholog is 100%.  
Bootstrap support for afis|EAW24708.1 as seed ortholog is 100%.

---

Group of orthologs #3044. Best score 1203 bits

Score difference with first non-orthologous sequence - *A. fumigatus*:861 *A. fischeri*:768  
afum|EAL88988.1 100.00% afis|EAW16363.1 100.00%  
Bootstrap support for afum|EAL88988.1 as seed ortholog is 100%.  
Bootstrap support for afis|EAW16363.1 as seed ortholog is 100%.

---

Group of orthologs #3045. Best score 1203 bits

Score difference with first non-orthologous sequence - *A. fumigatus*:1203 *A. fischeri*:1203  
afum|EAL93497.1 100.00% afis|EAW18765.1 100.00%  
Bootstrap support for afum|EAL93497.1 as seed ortholog is 100%.  
Bootstrap support for afis|EAW18765.1 as seed ortholog is 100%.

---

Group of orthologs #3046. Best score 1203 bits

Score difference with first non-orthologous sequence - *A. fumigatus*:1203 *A. fischeri*:949  
afum|EAL92287.1 100.00% afis|EAW21272.1 100.00%  
Bootstrap support for afum|EAL92287.1 as seed ortholog is 100%.  
Bootstrap support for afis|EAW21272.1 as seed ortholog is 100%.

---

Group of orthologs #3047. Best score 1203 bits

Score difference with first non-orthologous sequence - *A. fumigatus*:1203 *A. fischeri*:1203  
afum|EAL91965.1 100.00% afis|EAW24111.1 100.00%  
Bootstrap support for afum|EAL91965.1 as seed ortholog is 100%.  
Bootstrap support for afis|EAW24111.1 as seed ortholog is 100%.

---

Group of orthologs #3048. Best score 1202 bits

Score difference with first non-orthologous sequence - *A. fumigatus*:1202 *A. fischeri*:1202  
afum|EAL84234.1 100.00% afis|EAW15412.1 100.00%  
Bootstrap support for afum|EAL84234.1 as seed ortholog is 100%.  
Bootstrap support for afis|EAW15412.1 as seed ortholog is 100%.

---

Group of orthologs #3049. Best score 1202 bits

Score difference with first non-orthologous sequence - *A. fumigatus*:1202 *A. fischeri*:1202  
afum|EAL88931.1 100.00% afis|EAW16309.1 100.00%

Bootstrap support for afum|EAL88931.1 as seed ortholog is 100%.  
Bootstrap support for afis|EAW16309.1 as seed ortholog is 100%.

---

Group of orthologs #3050. Best score 1202 bits

Score difference with first non-orthologous sequence - *A. fumigatus*:1202 *A. fischeri*:1202

|                 |         |                 |         |
|-----------------|---------|-----------------|---------|
| afum EAL86916.1 | 100.00% | afis EAW19602.1 | 100.00% |
|-----------------|---------|-----------------|---------|

Bootstrap support for afum|EAL86916.1 as seed ortholog is 100%.

Bootstrap support for afis|EAW19602.1 as seed ortholog is 100%.

---

Group of orthologs #3051. Best score 1202 bits

Score difference with first non-orthologous sequence - *A. fumigatus*:1202 *A. fischeri*:1202

|                 |         |                 |         |
|-----------------|---------|-----------------|---------|
| afum EAL92323.1 | 100.00% | afis EAW21307.1 | 100.00% |
|-----------------|---------|-----------------|---------|

Bootstrap support for afum|EAL92323.1 as seed ortholog is 100%.

Bootstrap support for afis|EAW21307.1 as seed ortholog is 100%.

---

Group of orthologs #3052. Best score 1202 bits

Score difference with first non-orthologous sequence - *A. fumigatus*:1202 *A. fischeri*:1057

|                 |         |                 |         |
|-----------------|---------|-----------------|---------|
| afum EAL89316.1 | 100.00% | afis EAW24654.1 | 100.00% |
|-----------------|---------|-----------------|---------|

Bootstrap support for afum|EAL89316.1 as seed ortholog is 100%.

Bootstrap support for afis|EAW24654.1 as seed ortholog is 100%.

---

Group of orthologs #3053. Best score 1201 bits

Score difference with first non-orthologous sequence - *A. fumigatus*:1201 *A. fischeri*:1201

|                 |         |                 |         |
|-----------------|---------|-----------------|---------|
| afum EAL85591.1 | 100.00% | afis EAW15757.1 | 100.00% |
|-----------------|---------|-----------------|---------|

Bootstrap support for afum|EAL85591.1 as seed ortholog is 100%.

Bootstrap support for afis|EAW15757.1 as seed ortholog is 100%.

---

Group of orthologs #3054. Best score 1201 bits

Score difference with first non-orthologous sequence - *A. fumigatus*:1201 *A. fischeri*:1201

|                 |         |                 |         |
|-----------------|---------|-----------------|---------|
| afum EAL93269.2 | 100.00% | afis EAW18567.1 | 100.00% |
|-----------------|---------|-----------------|---------|

Bootstrap support for afum|EAL93269.2 as seed ortholog is 100%.

Bootstrap support for afis|EAW18567.1 as seed ortholog is 100%.

---

Group of orthologs #3055. Best score 1201 bits

Score difference with first non-orthologous sequence - *A. fumigatus*:1201 *A. fischeri*:1201

|                 |         |                 |         |
|-----------------|---------|-----------------|---------|
| afum EAL92578.1 | 100.00% | afis EAW21559.1 | 100.00% |
|-----------------|---------|-----------------|---------|

Bootstrap support for afum|EAL92578.1 as seed ortholog is 100%.

Bootstrap support for afis|EAW21559.1 as seed ortholog is 100%.

---

Group of orthologs #3056. Best score 1200 bits

Score difference with first non-orthologous sequence - *A. fumigatus*:1039 *A. fischeri*:1200

|                 |         |                 |         |
|-----------------|---------|-----------------|---------|
| afum EAL84460.1 | 100.00% | afis EAW20601.1 | 100.00% |
|-----------------|---------|-----------------|---------|

Bootstrap support for afum|EAL84460.1 as seed ortholog is 100%.

Bootstrap support for afis|EAW20601.1 as seed ortholog is 100%.

---

Group of orthologs #3057. Best score 1200 bits

Score difference with first non-orthologous sequence - *A. fumigatus*:1200 *A. fischeri*:1200

|                 |         |                 |         |
|-----------------|---------|-----------------|---------|
| afum EAL88384.2 | 100.00% | afis EAW23094.1 | 100.00% |
|-----------------|---------|-----------------|---------|

Bootstrap support for afum|EAL88384.2 as seed ortholog is 100%.

Bootstrap support for afis|EAW23094.1 as seed ortholog is 100%.

---

Group of orthologs #3058. Best score 1200 bits

Score difference with first non-orthologous sequence - *A. fumigatus*:1200 *A. fischeri*:1200

|                 |         |                 |         |
|-----------------|---------|-----------------|---------|
| afum EAL88123.1 | 100.00% | afis EAW23353.1 | 100.00% |
|-----------------|---------|-----------------|---------|

Bootstrap support for afum|EAL88123.1 as seed ortholog is 100%.

Bootstrap support for afis|EAW23353.1 as seed ortholog is 100%.

---

Group of orthologs #3059. Best score 1200 bits

Score difference with first non-orthologous sequence - *A. fumigatus*:1200 *A. fischeri*:1200

afum|EAL93555.1 100.00% afis|EAW18819.1 100.00%

Bootstrap support for afum|EAL93555.1 as seed ortholog is 100%.

Bootstrap support for afis|EAW18819.1 as seed ortholog is 100%.

---

Group of orthologs #3060. Best score 1200 bits

Score difference with first non-orthologous sequence - *A. fumigatus*:1200 *A. fischeri*:1200

afum|EAL90416.1 100.00% afis|EAW22783.1 100.00%

Bootstrap support for afum|EAL90416.1 as seed ortholog is 100%.

Bootstrap support for afis|EAW22783.1 as seed ortholog is 100%.

---

Group of orthologs #3061. Best score 1200 bits

Score difference with first non-orthologous sequence - *A. fumigatus*:1200 *A. fischeri*:1200

afum|EAL89850.1 100.00% afis|EAW25177.1 100.00%

Bootstrap support for afum|EAL89850.1 as seed ortholog is 100%.

Bootstrap support for afis|EAW25177.1 as seed ortholog is 100%.

---

Group of orthologs #3062. Best score 1200 bits

Score difference with first non-orthologous sequence - *A. fumigatus*:1200 *A. fischeri*:522

afum|EAL91927.1 100.00% afis|EAW24071.1 100.00%

Bootstrap support for afum|EAL91927.1 as seed ortholog is 100%.

Bootstrap support for afis|EAW24071.1 as seed ortholog is 100%.

---

Group of orthologs #3063. Best score 1199 bits

Score difference with first non-orthologous sequence - *A. fumigatus*:863 *A. fischeri*:909

afum|EAL88685.1 100.00% afis|EAW16053.1 100.00%

Bootstrap support for afum|EAL88685.1 as seed ortholog is 100%.

Bootstrap support for afis|EAW16053.1 as seed ortholog is 100%.

---

Group of orthologs #3064. Best score 1199 bits

Score difference with first non-orthologous sequence - *A. fumigatus*:881 *A. fischeri*:1080

afum|EAL85491.1 100.00% afis|EAW20377.1 100.00%

Bootstrap support for afum|EAL85491.1 as seed ortholog is 100%.

Bootstrap support for afis|EAW20377.1 as seed ortholog is 100%.

---

Group of orthologs #3065. Best score 1199 bits

Score difference with first non-orthologous sequence - *A. fumigatus*:1086 *A. fischeri*:1053

afum|EAL93046.1 100.00% afis|EAW18371.1 100.00%

Bootstrap support for afum|EAL93046.1 as seed ortholog is 100%.

Bootstrap support for afis|EAW18371.1 as seed ortholog is 100%.

---

Group of orthologs #3066. Best score 1199 bits

Score difference with first non-orthologous sequence - *A. fumigatus*:867 *A. fischeri*:649

afum|EAL87881.1 100.00% afis|EAW23583.1 100.00%

Bootstrap support for afum|EAL87881.1 as seed ortholog is 100%.

Bootstrap support for afis|EAW23583.1 as seed ortholog is 100%.

---

Group of orthologs #3067. Best score 1199 bits

Score difference with first non-orthologous sequence - *A. fumigatus*:1199 *A. fischeri*:1199

afum|EAL90744.1 100.00% afis|EAW22447.1 100.00%

Bootstrap support for afum|EAL90744.1 as seed ortholog is 100%.

Bootstrap support for afis|EAW22447.1 as seed ortholog is 100%.

---

Group of orthologs #3068. Best score 1198 bits

Score difference with first non-orthologous sequence - *A. fumigatus*:891 *A. fischeri*:1089  
afum|EAL85857.1 100.00% afis|EAW15465.1 100.00%  
Bootstrap support for afum|EAL85857.1 as seed ortholog is 100%.  
Bootstrap support for afis|EAW15465.1 as seed ortholog is 100%.

---

Group of orthologs #3069. Best score 1198 bits

Score difference with first non-orthologous sequence - *A. fumigatus*:1198 *A. fischeri*:1198  
afum|EAL91603.1 100.00% afis|EAW17795.1 100.00%  
Bootstrap support for afum|EAL91603.1 as seed ortholog is 100%.  
Bootstrap support for afis|EAW17795.1 as seed ortholog is 100%.

---

Group of orthologs #3070. Best score 1198 bits

Score difference with first non-orthologous sequence - *A. fumigatus*:1120 *A. fischeri*:1198  
afum|EAL91629.1 100.00% afis|EAW17819.1 100.00%  
Bootstrap support for afum|EAL91629.1 as seed ortholog is 100%.  
Bootstrap support for afis|EAW17819.1 as seed ortholog is 100%.

---

Group of orthologs #3071. Best score 1198 bits

Score difference with first non-orthologous sequence - *A. fumigatus*:1198 *A. fischeri*:1198  
afum|EAL85971.1 100.00% afis|EAW24303.1 100.00%  
Bootstrap support for afum|EAL85971.1 as seed ortholog is 100%.  
Bootstrap support for afis|EAW24303.1 as seed ortholog is 100%.

---

Group of orthologs #3072. Best score 1197 bits

Score difference with first non-orthologous sequence - *A. fumigatus*:880 *A. fischeri*:1067  
afum|EAL84775.2 100.00% afis|EAW20860.1 100.00%  
Bootstrap support for afum|EAL84775.2 as seed ortholog is 100%.  
Bootstrap support for afis|EAW20860.1 as seed ortholog is 100%.

---

Group of orthologs #3073. Best score 1197 bits

Score difference with first non-orthologous sequence - *A. fumigatus*:1197 *A. fischeri*:1197  
afum|EAL87600.1 100.00% afis|EAW18232.1 100.00%  
Bootstrap support for afum|EAL87600.1 as seed ortholog is 100%.  
Bootstrap support for afis|EAW18232.1 as seed ortholog is 100%.

---

Group of orthologs #3074. Best score 1197 bits

Score difference with first non-orthologous sequence - *A. fumigatus*:891 *A. fischeri*:543  
afum|EAL87675.1 100.00% afis|EAW18309.1 100.00%  
Bootstrap support for afum|EAL87675.1 as seed ortholog is 100%.  
Bootstrap support for afis|EAW18309.1 as seed ortholog is 100%.

---

Group of orthologs #3075. Best score 1197 bits

Score difference with first non-orthologous sequence - *A. fumigatus*:1197 *A. fischeri*:1197  
afum|EAL86106.1 100.00% afis|EAW24438.1 100.00%  
Bootstrap support for afum|EAL86106.1 as seed ortholog is 100%.  
Bootstrap support for afis|EAW24438.1 as seed ortholog is 100%.

---

Group of orthologs #3076. Best score 1197 bits

Score difference with first non-orthologous sequence - *A. fumigatus*:1197 *A. fischeri*:1197  
afum|EBA27498.1 100.00% afis|EAW18915.1 100.00%  
Bootstrap support for afum|EBA27498.1 as seed ortholog is 100%.  
Bootstrap support for afis|EAW18915.1 as seed ortholog is 100%.

---

Group of orthologs #3077. Best score 1197 bits

Score difference with first non-orthologous sequence - *A. fumigatus*:1197 *A. fischeri*:1197  
afum|EAL90313.1 100.00% afis|EAW22885.1 100.00%



Bootstrap support for afum|EAL90313.1 as seed ortholog is 100%.  
Bootstrap support for afis|EAW22885.1 as seed ortholog is 100%.

---

Group of orthologs #3078. Best score 1197 bits

Score difference with first non-orthologous sequence - *A. fumigatus*:1197 *A. fischeri*:1197

afum|EAL92283.1 100.00% afis|EAW21268.1 100.00%

Bootstrap support for afum|EAL92283.1 as seed ortholog is 100%.

Bootstrap support for afis|EAW21268.1 as seed ortholog is 100%.

---

Group of orthologs #3079. Best score 1197 bits

Score difference with first non-orthologous sequence - *A. fumigatus*:1197 *A. fischeri*:1197

afum|EAL92819.1 100.00% afis|EAW21794.1 100.00%

Bootstrap support for afum|EAL92819.1 as seed ortholog is 100%.

Bootstrap support for afis|EAW21794.1 as seed ortholog is 100%.

---

Group of orthologs #3080. Best score 1197 bits

Score difference with first non-orthologous sequence - *A. fumigatus*:744 *A. fischeri*:446

afum|EAL92853.1 100.00% afis|EAW21841.1 100.00%

Bootstrap support for afum|EAL92853.1 as seed ortholog is 100%.

Bootstrap support for afis|EAW21841.1 as seed ortholog is 100%.

---

Group of orthologs #3081. Best score 1197 bits

Score difference with first non-orthologous sequence - *A. fumigatus*:983 *A. fischeri*:384

afum|EAL91966.1 100.00% afis|EAW24112.1 100.00%

Bootstrap support for afum|EAL91966.1 as seed ortholog is 100%.

Bootstrap support for afis|EAW24112.1 as seed ortholog is 100%.

---

Group of orthologs #3082. Best score 1196 bits

Score difference with first non-orthologous sequence - *A. fumigatus*:1149 *A. fischeri*:1003

afum|EAL89045.1 100.00% afis|EAW16444.1 100.00%

Bootstrap support for afum|EAL89045.1 as seed ortholog is 100%.

Bootstrap support for afis|EAW16444.1 as seed ortholog is 100%.

---

Group of orthologs #3083. Best score 1196 bits

Score difference with first non-orthologous sequence - *A. fumigatus*:1196 *A. fischeri*:1196

afum|EAL84693.1 100.00% afis|EAW20941.1 100.00%

Bootstrap support for afum|EAL84693.1 as seed ortholog is 100%.

Bootstrap support for afis|EAW20941.1 as seed ortholog is 100%.

---

Group of orthologs #3084. Best score 1196 bits

Score difference with first non-orthologous sequence - *A. fumigatus*:982 *A. fischeri*:933

afum|EAL87449.1 100.00% afis|EAW24019.1 100.00%

Bootstrap support for afum|EAL87449.1 as seed ortholog is 100%.

Bootstrap support for afis|EAW24019.1 as seed ortholog is 100%.

---

Group of orthologs #3085. Best score 1196 bits

Score difference with first non-orthologous sequence - *A. fumigatus*:1011 *A. fischeri*:1196

afum|EAL92432.2 100.00% afis|EAW21417.1 100.00%

Bootstrap support for afum|EAL92432.2 as seed ortholog is 100%.

Bootstrap support for afis|EAW21417.1 as seed ortholog is 100%.

---

Group of orthologs #3086. Best score 1196 bits

Score difference with first non-orthologous sequence - *A. fumigatus*:1196 *A. fischeri*:1196

afum|EAL92621.1 100.00% afis|EAW21602.1 100.00%

Bootstrap support for afum|EAL92621.1 as seed ortholog is 100%.

Bootstrap support for afis|EAW21602.1 as seed ortholog is 100%.

---

Group of orthologs #3087. Best score 1195 bits

Score difference with first non-orthologous sequence - *A. fumigatus*:1034 *A. fischeri*:980

afum|EAL86420.1 100.00% afis|EAW16884.1 100.00%

Bootstrap support for afum|EAL86420.1 as seed ortholog is 100%.

Bootstrap support for afis|EAW16884.1 as seed ortholog is 100%.

---

Group of orthologs #3088. Best score 1195 bits

Score difference with first non-orthologous sequence - *A. fumigatus*:1195 *A. fischeri*:1195

afum|EAL88155.1 100.00% afis|EAW23324.1 100.00%

Bootstrap support for afum|EAL88155.1 as seed ortholog is 100%.

Bootstrap support for afis|EAW23324.1 as seed ortholog is 100%.

---

Group of orthologs #3089. Best score 1194 bits

Score difference with first non-orthologous sequence - *A. fumigatus*:1194 *A. fischeri*:1194

afum|EAL85826.1 100.00% afis|EAW15497.1 100.00%

Bootstrap support for afum|EAL85826.1 as seed ortholog is 100%.

Bootstrap support for afis|EAW15497.1 as seed ortholog is 100%.

---

Group of orthologs #3090. Best score 1194 bits

Score difference with first non-orthologous sequence - *A. fumigatus*:889 *A. fischeri*:264

afum|EAL86664.2 100.00% afis|EAW17245.1 100.00%

Bootstrap support for afum|EAL86664.2 as seed ortholog is 100%.

Bootstrap support for afis|EAW17245.1 as seed ortholog is 100%.

---

Group of orthologs #3091. Best score 1194 bits

Score difference with first non-orthologous sequence - *A. fumigatus*:1194 *A. fischeri*:1194

afum|EAL88942.1 100.00% afis|EAW16318.1 100.00%

Bootstrap support for afum|EAL88942.1 as seed ortholog is 100%.

Bootstrap support for afis|EAW16318.1 as seed ortholog is 100%.

---

Group of orthologs #3092. Best score 1194 bits

Score difference with first non-orthologous sequence - *A. fumigatus*:1194 *A. fischeri*:874

afum|EAL84413.1 100.00% afis|EAW20685.1 100.00%

Bootstrap support for afum|EAL84413.1 as seed ortholog is 100%.

Bootstrap support for afis|EAW20685.1 as seed ortholog is 100%.

---

Group of orthologs #3093. Best score 1194 bits

Score difference with first non-orthologous sequence - *A. fumigatus*:1194 *A. fischeri*:1194

afum|EAL89079.1 100.00% afis|EAW16485.1 100.00%

Bootstrap support for afum|EAL89079.1 as seed ortholog is 100%.

Bootstrap support for afis|EAW16485.1 as seed ortholog is 100%.

---

Group of orthologs #3094. Best score 1194 bits

Score difference with first non-orthologous sequence - *A. fumigatus*:1194 *A. fischeri*:1194

afum|EAL87473.1 100.00% afis|EAW18116.1 100.00%

Bootstrap support for afum|EAL87473.1 as seed ortholog is 100%.

Bootstrap support for afis|EAW18116.1 as seed ortholog is 100%.

---

Group of orthologs #3095. Best score 1194 bits

Score difference with first non-orthologous sequence - *A. fumigatus*:1194 *A. fischeri*:1194

afum|EAL85366.1 100.00% afis|EAW20248.1 100.00%

Bootstrap support for afum|EAL85366.1 as seed ortholog is 100%.

Bootstrap support for afis|EAW20248.1 as seed ortholog is 100%.

---

Group of orthologs #3096. Best score 1194 bits

Score difference with first non-orthologous sequence - *A. fumigatus*:1194 *A. fischeri*:1194  
afum|EAL87080.2 100.00% afis|EAW19414.1 100.00%  
Bootstrap support for afum|EAL87080.2 as seed ortholog is 100%.  
Bootstrap support for afis|EAW19414.1 as seed ortholog is 100%.

---

Group of orthologs #3097. Best score 1194 bits

Score difference with first non-orthologous sequence - *A. fumigatus*:1194 *A. fischeri*:1194  
afum|EAL84381.1 100.00% afis|EAW25708.1 100.00%  
Bootstrap support for afum|EAL84381.1 as seed ortholog is 100%.  
Bootstrap support for afis|EAW25708.1 as seed ortholog is 100%.

---

Group of orthologs #3098. Best score 1194 bits

Score difference with first non-orthologous sequence - *A. fumigatus*:1194 *A. fischeri*:1194  
afum|EAL86180.1 100.00% afis|EAW24514.1 100.00%  
Bootstrap support for afum|EAL86180.1 as seed ortholog is 100%.  
Bootstrap support for afis|EAW24514.1 as seed ortholog is 100%.

---

Group of orthologs #3099. Best score 1194 bits

Score difference with first non-orthologous sequence - *A. fumigatus*:1194 *A. fischeri*:1103  
afum|EAL94077.1 100.00% afis|EAW19357.1 100.00%  
Bootstrap support for afum|EAL94077.1 as seed ortholog is 100%.  
Bootstrap support for afis|EAW19357.1 as seed ortholog is 100%.

---

Group of orthologs #3100. Best score 1194 bits

Score difference with first non-orthologous sequence - *A. fumigatus*:1116 *A. fischeri*:1050  
afum|EAL89312.1 100.00% afis|EAW24658.1 100.00%  
Bootstrap support for afum|EAL89312.1 as seed ortholog is 100%.  
Bootstrap support for afis|EAW24658.1 as seed ortholog is 100%.

---

Group of orthologs #3101. Best score 1194 bits

Score difference with first non-orthologous sequence - *A. fumigatus*:1125 *A. fischeri*:1045  
afum|EAL89411.1 100.00% afis|EAW24770.1 100.00%  
Bootstrap support for afum|EAL89411.1 as seed ortholog is 100%.  
Bootstrap support for afis|EAW24770.1 as seed ortholog is 100%.

---

Group of orthologs #3102. Best score 1194 bits

Score difference with first non-orthologous sequence - *A. fumigatus*:1194 *A. fischeri*:1194  
afum|EAL92863.2 100.00% afis|EAW21850.1 100.00%  
Bootstrap support for afum|EAL92863.2 as seed ortholog is 100%.  
Bootstrap support for afis|EAW21850.1 as seed ortholog is 100%.

---

Group of orthologs #3103. Best score 1194 bits

Score difference with first non-orthologous sequence - *A. fumigatus*:1194 *A. fischeri*:1194  
afum|EAL89981.1 100.00% afis|EAW25320.1 100.00%  
Bootstrap support for afum|EAL89981.1 as seed ortholog is 100%.  
Bootstrap support for afis|EAW25320.1 as seed ortholog is 100%.

---

Group of orthologs #3104. Best score 1193 bits

Score difference with first non-orthologous sequence - *A. fumigatus*:1049 *A. fischeri*:969  
afum|EAL88824.1 100.00% afis|EAW16193.1 100.00%  
Bootstrap support for afum|EAL88824.1 as seed ortholog is 100%.  
Bootstrap support for afis|EAW16193.1 as seed ortholog is 100%.

---

Group of orthologs #3105. Best score 1193 bits

Score difference with first non-orthologous sequence - *A. fumigatus*:1193 *A. fischeri*:1193  
afum|EAL87670.1 100.00% afis|EAW18304.1 100.00%

Bootstrap support for afum|EAL87670.1 as seed ortholog is 100%.  
Bootstrap support for afis|EAW18304.1 as seed ortholog is 100%.

---

Group of orthologs #3106. Best score 1193 bits

Score difference with first non-orthologous sequence - *A. fumigatus*:1193 *A. fischeri*:1193

|                 |         |                 |         |
|-----------------|---------|-----------------|---------|
| afum EAL93784.1 | 100.00% | afis EAW19055.1 | 100.00% |
|-----------------|---------|-----------------|---------|

Bootstrap support for afum|EAL93784.1 as seed ortholog is 100%.

Bootstrap support for afis|EAW19055.1 as seed ortholog is 100%.

---

Group of orthologs #3107. Best score 1193 bits

Score difference with first non-orthologous sequence - *A. fumigatus*:1193 *A. fischeri*:1193

|                 |         |                 |         |
|-----------------|---------|-----------------|---------|
| afum EAL92448.2 | 100.00% | afis EAW21433.1 | 100.00% |
|-----------------|---------|-----------------|---------|

Bootstrap support for afum|EAL92448.2 as seed ortholog is 100%.

Bootstrap support for afis|EAW21433.1 as seed ortholog is 100%.

---

Group of orthologs #3108. Best score 1193 bits

Score difference with first non-orthologous sequence - *A. fumigatus*:1193 *A. fischeri*:1193

|                 |         |                 |         |
|-----------------|---------|-----------------|---------|
| afum EAL89498.1 | 100.00% | afis EAW24851.1 | 100.00% |
|-----------------|---------|-----------------|---------|

Bootstrap support for afum|EAL89498.1 as seed ortholog is 100%.

Bootstrap support for afis|EAW24851.1 as seed ortholog is 100%.

---

Group of orthologs #3109. Best score 1192 bits

Score difference with first non-orthologous sequence - *A. fumigatus*:914 *A. fischeri*:850

|                 |         |                 |         |
|-----------------|---------|-----------------|---------|
| afum EAL86471.1 | 100.00% | afis EAW16944.1 | 100.00% |
|-----------------|---------|-----------------|---------|

Bootstrap support for afum|EAL86471.1 as seed ortholog is 100%.

Bootstrap support for afis|EAW16944.1 as seed ortholog is 100%.

---

Group of orthologs #3110. Best score 1192 bits

Score difference with first non-orthologous sequence - *A. fumigatus*:1192 *A. fischeri*:1192

|                 |         |                 |         |
|-----------------|---------|-----------------|---------|
| afum EAL88581.1 | 100.00% | afis EAW15948.1 | 100.00% |
|-----------------|---------|-----------------|---------|

Bootstrap support for afum|EAL88581.1 as seed ortholog is 100%.

Bootstrap support for afis|EAW15948.1 as seed ortholog is 100%.

---

Group of orthologs #3111. Best score 1192 bits

Score difference with first non-orthologous sequence - *A. fumigatus*:1192 *A. fischeri*:1192

|                 |         |                 |         |
|-----------------|---------|-----------------|---------|
| afum EAL88957.1 | 100.00% | afis EAW16332.1 | 100.00% |
|-----------------|---------|-----------------|---------|

Bootstrap support for afum|EAL88957.1 as seed ortholog is 100%.

Bootstrap support for afis|EAW16332.1 as seed ortholog is 100%.

---

Group of orthologs #3112. Best score 1192 bits

Score difference with first non-orthologous sequence - *A. fumigatus*:26 *A. fischeri*:917

|                 |         |                 |         |
|-----------------|---------|-----------------|---------|
| afum EAL85177.1 | 100.00% | afis EAW20057.1 | 100.00% |
|-----------------|---------|-----------------|---------|

Bootstrap support for afum|EAL85177.1 as seed ortholog is 87%.

Bootstrap support for afis|EAW20057.1 as seed ortholog is 100%.

---

Group of orthologs #3113. Best score 1192 bits

Score difference with first non-orthologous sequence - *A. fumigatus*:1192 *A. fischeri*:1044

|                 |         |                 |         |
|-----------------|---------|-----------------|---------|
| afum EAL91192.2 | 100.00% | afis EAW17349.1 | 100.00% |
|-----------------|---------|-----------------|---------|

Bootstrap support for afum|EAL91192.2 as seed ortholog is 100%.

Bootstrap support for afis|EAW17349.1 as seed ortholog is 100%.

---

Group of orthologs #3114. Best score 1192 bits

Score difference with first non-orthologous sequence - *A. fumigatus*:1192 *A. fischeri*:1192

|                 |         |                 |         |
|-----------------|---------|-----------------|---------|
| afum EAL91307.1 | 100.00% | afis EAW17478.1 | 100.00% |
|-----------------|---------|-----------------|---------|

Bootstrap support for afum|EAL91307.1 as seed ortholog is 100%.

Bootstrap support for afis|EAW17478.1 as seed ortholog is 100%.

---

Group of orthologs #3115. Best score 1192 bits

Score difference with first non-orthologous sequence - *A. fumigatus*:1192 *A. fischeri*:768

afum|EAL91608.1 100.00% afis|EAW17800.1 100.00%

Bootstrap support for afum|EAL91608.1 as seed ortholog is 100%.

Bootstrap support for afis|EAW17800.1 as seed ortholog is 100%.

---

Group of orthologs #3116. Best score 1192 bits

Score difference with first non-orthologous sequence - *A. fumigatus*:1050 *A. fischeri*:934

afum|EAL84319.1 100.00% afis|EAW25631.1 100.00%

Bootstrap support for afum|EAL84319.1 as seed ortholog is 100%.

Bootstrap support for afis|EAW25631.1 as seed ortholog is 100%.

---

Group of orthologs #3117. Best score 1192 bits

Score difference with first non-orthologous sequence - *A. fumigatus*:1089 *A. fischeri*:1007

afum|EAL91054.1 100.00% afis|EAW22136.1 100.00%

Bootstrap support for afum|EAL91054.1 as seed ortholog is 100%.

Bootstrap support for afis|EAW22136.1 as seed ortholog is 100%.

---

Group of orthologs #3118. Best score 1191 bits

Score difference with first non-orthologous sequence - *A. fumigatus*:1191 *A. fischeri*:1191

afum|EAL88630.1 100.00% afis|EAW15998.1 100.00%

Bootstrap support for afum|EAL88630.1 as seed ortholog is 100%.

Bootstrap support for afis|EAW15998.1 as seed ortholog is 100%.

---

Group of orthologs #3119. Best score 1191 bits

Score difference with first non-orthologous sequence - *A. fumigatus*:1191 *A. fischeri*:1191

afum|EAL85033.1 100.00% afis|EAW19862.1 100.00%

Bootstrap support for afum|EAL85033.1 as seed ortholog is 100%.

Bootstrap support for afis|EAW19862.1 as seed ortholog is 100%.

---

Group of orthologs #3120. Best score 1191 bits

Score difference with first non-orthologous sequence - *A. fumigatus*:1011 *A. fischeri*:986

afum|EAL84361.1 100.00% afis|EAW25691.1 100.00%

Bootstrap support for afum|EAL84361.1 as seed ortholog is 100%.

Bootstrap support for afis|EAW25691.1 as seed ortholog is 100%.

---

Group of orthologs #3121. Best score 1191 bits

Score difference with first non-orthologous sequence - *A. fumigatus*:1191 *A. fischeri*:1191

afum|EAL88282.1 100.00% afis|EAW23201.1 100.00%

Bootstrap support for afum|EAL88282.1 as seed ortholog is 100%.

Bootstrap support for afis|EAW23201.1 as seed ortholog is 100%.

---

Group of orthologs #3122. Best score 1191 bits

Score difference with first non-orthologous sequence - *A. fumigatus*:1191 *A. fischeri*:1191

afum|EAL88080.1 100.00% afis|EAW23391.1 100.00%

Bootstrap support for afum|EAL88080.1 as seed ortholog is 100%.

Bootstrap support for afis|EAW23391.1 as seed ortholog is 100%.

---

Group of orthologs #3123. Best score 1191 bits

Score difference with first non-orthologous sequence - *A. fumigatus*:803 *A. fischeri*:1078

afum|EAL89567.1 100.00% afis|EAW24913.1 100.00%

Bootstrap support for afum|EAL89567.1 as seed ortholog is 100%.

Bootstrap support for afis|EAW24913.1 as seed ortholog is 100%.

---

Group of orthologs #3124. Best score 1191 bits

Score difference with first non-orthologous sequence - *A. fumigatus*:1191 *A. fischeri*:1191  
afum|EBA27336.1 100.00% afis|EAW23359.1 100.00%  
Bootstrap support for afum|EBA27336.1 as seed ortholog is 100%.  
Bootstrap support for afis|EAW23359.1 as seed ortholog is 100%.

---

Group of orthologs #3125. Best score 1190 bits

Score difference with first non-orthologous sequence - *A. fumigatus*:1190 *A. fischeri*:1190  
afum|EAL85108.1 100.00% afis|EAW19784.1 100.00%  
Bootstrap support for afum|EAL85108.1 as seed ortholog is 100%.  
Bootstrap support for afis|EAW19784.1 as seed ortholog is 100%.

---

Group of orthologs #3126. Best score 1190 bits

Score difference with first non-orthologous sequence - *A. fumigatus*:1190 *A. fischeri*:1190  
afum|EAL91967.1 100.00% afis|EAW24113.1 100.00%  
Bootstrap support for afum|EAL91967.1 as seed ortholog is 100%.  
Bootstrap support for afis|EAW24113.1 as seed ortholog is 100%.

---

Group of orthologs #3127. Best score 1189 bits

Score difference with first non-orthologous sequence - *A. fumigatus*:1189 *A. fischeri*:1189  
afum|EAL88628.2 100.00% afis|EAW15996.1 100.00%  
Bootstrap support for afum|EAL88628.2 as seed ortholog is 100%.  
Bootstrap support for afis|EAW15996.1 as seed ortholog is 100%.

---

Group of orthologs #3128. Best score 1189 bits

Score difference with first non-orthologous sequence - *A. fumigatus*:1189 *A. fischeri*:1022  
afum|EAL88980.1 100.00% afis|EAW16355.1 100.00%  
Bootstrap support for afum|EAL88980.1 as seed ortholog is 100%.  
Bootstrap support for afis|EAW16355.1 as seed ortholog is 100%.

---

Group of orthologs #3129. Best score 1189 bits

Score difference with first non-orthologous sequence - *A. fumigatus*:992 *A. fischeri*:889  
afum|EAL93838.1 100.00% afis|EAW19107.1 100.00%  
Bootstrap support for afum|EAL93838.1 as seed ortholog is 100%.  
Bootstrap support for afis|EAW19107.1 as seed ortholog is 100%.

---

Group of orthologs #3130. Best score 1189 bits

Score difference with first non-orthologous sequence - *A. fumigatus*:1099 *A. fischeri*:1012  
afum|EAL90951.1 100.00% afis|EAW22242.1 100.00%  
Bootstrap support for afum|EAL90951.1 as seed ortholog is 100%.  
Bootstrap support for afis|EAW22242.1 as seed ortholog is 100%.

---

Group of orthologs #3131. Best score 1188 bits

Score difference with first non-orthologous sequence - *A. fumigatus*:1188 *A. fischeri*:1188  
afum|EAL88769.2 100.00% afis|EAW16140.1 100.00%  
Bootstrap support for afum|EAL88769.2 as seed ortholog is 100%.  
Bootstrap support for afis|EAW16140.1 as seed ortholog is 100%.

---

Group of orthologs #3132. Best score 1188 bits

Score difference with first non-orthologous sequence - *A. fumigatus*:1188 *A. fischeri*:1188  
afum|EAL85914.1 100.00% afis|EAW24246.1 100.00%  
Bootstrap support for afum|EAL85914.1 as seed ortholog is 100%.  
Bootstrap support for afis|EAW24246.1 as seed ortholog is 100%.

---

Group of orthologs #3133. Best score 1188 bits

Score difference with first non-orthologous sequence - *A. fumigatus*:1188 *A. fischeri*:1188  
afum|EAL85939.1 100.00% afis|EAW24271.1 100.00%

Bootstrap support for afum|EAL85939.1 as seed ortholog is 100%.  
Bootstrap support for afis|EAW24271.1 as seed ortholog is 100%.

---

Group of orthologs #3134. Best score 1188 bits

Score difference with first non-orthologous sequence - *A. fumigatus*:923 *A. fischeri*:968

afum|EAL93870.1 100.00% afis|EAW19138.1 100.00%

Bootstrap support for afum|EAL93870.1 as seed ortholog is 100%.

Bootstrap support for afis|EAW19138.1 as seed ortholog is 100%.

---

Group of orthologs #3135. Best score 1188 bits

Score difference with first non-orthologous sequence - *A. fumigatus*:937 *A. fischeri*:1188

afum|EAL92777.1 100.00% afis|EAW21744.1 100.00%

Bootstrap support for afum|EAL92777.1 as seed ortholog is 100%.

Bootstrap support for afis|EAW21744.1 as seed ortholog is 100%.

---

Group of orthologs #3136. Best score 1188 bits

Score difference with first non-orthologous sequence - *A. fumigatus*:1046 *A. fischeri*:1188

afum|EAL90086.1 100.00% afis|EAW25427.1 100.00%

Bootstrap support for afum|EAL90086.1 as seed ortholog is 100%.

Bootstrap support for afis|EAW25427.1 as seed ortholog is 100%.

---

Group of orthologs #3137. Best score 1187 bits

Score difference with first non-orthologous sequence - *A. fumigatus*:1187 *A. fischeri*:1187

afum|EAL88696.1 100.00% afis|EAW16064.1 100.00%

Bootstrap support for afum|EAL88696.1 as seed ortholog is 100%.

Bootstrap support for afis|EAW16064.1 as seed ortholog is 100%.

---

Group of orthologs #3138. Best score 1187 bits

Score difference with first non-orthologous sequence - *A. fumigatus*:1187 *A. fischeri*:1187

afum|EAL84547.1 100.00% afis|EAW20509.1 100.00%

Bootstrap support for afum|EAL84547.1 as seed ortholog is 100%.

Bootstrap support for afis|EAW20509.1 as seed ortholog is 100%.

---

Group of orthologs #3139. Best score 1187 bits

Score difference with first non-orthologous sequence - *A. fumigatus*:587 *A. fischeri*:1187

afum|EAL85419.1 100.00% afis|EAW20287.1 100.00%

Bootstrap support for afum|EAL85419.1 as seed ortholog is 100%.

Bootstrap support for afis|EAW20287.1 as seed ortholog is 100%.

---

Group of orthologs #3140. Best score 1187 bits

Score difference with first non-orthologous sequence - *A. fumigatus*:1187 *A. fischeri*:1187

afum|EAL91350.1 100.00% afis|EAW17536.1 100.00%

Bootstrap support for afum|EAL91350.1 as seed ortholog is 100%.

Bootstrap support for afis|EAW17536.1 as seed ortholog is 100%.

---

Group of orthologs #3141. Best score 1187 bits

Score difference with first non-orthologous sequence - *A. fumigatus*:1187 *A. fischeri*:1187

afum|EAL93577.1 100.00% afis|EAW18846.1 100.00%

Bootstrap support for afum|EAL93577.1 as seed ortholog is 100%.

Bootstrap support for afis|EAW18846.1 as seed ortholog is 100%.

---

Group of orthologs #3142. Best score 1187 bits

Score difference with first non-orthologous sequence - *A. fumigatus*:1187 *A. fischeri*:1187

afum|EAL90871.1 100.00% afis|EAW22319.1 100.00%

Bootstrap support for afum|EAL90871.1 as seed ortholog is 100%.

Bootstrap support for afis|EAW22319.1 as seed ortholog is 100%.

---

Group of orthologs #3143. Best score 1186 bits

Score difference with first non-orthologous sequence - *A. fumigatus*:1186 *A. fischeri*:1186

|                 |         |                 |         |
|-----------------|---------|-----------------|---------|
| afum EAL88688.1 | 100.00% | afis EAW16056.1 | 100.00% |
|-----------------|---------|-----------------|---------|

Bootstrap support for afum|EAL88688.1 as seed ortholog is 100%.

Bootstrap support for afis|EAW16056.1 as seed ortholog is 100%.

---

Group of orthologs #3144. Best score 1186 bits

Score difference with first non-orthologous sequence - *A. fumigatus*:1186 *A. fischeri*:1186

|                 |         |                 |         |
|-----------------|---------|-----------------|---------|
| afum EAL90838.1 | 100.00% | afis EAW22354.1 | 100.00% |
|-----------------|---------|-----------------|---------|

Bootstrap support for afum|EAL90838.1 as seed ortholog is 100%.

Bootstrap support for afis|EAW22354.1 as seed ortholog is 100%.

---

Group of orthologs #3145. Best score 1186 bits

Score difference with first non-orthologous sequence - *A. fumigatus*:1186 *A. fischeri*:1186

|                 |         |                 |         |
|-----------------|---------|-----------------|---------|
| afum EAL92549.1 | 100.00% | afis EAW21528.1 | 100.00% |
|-----------------|---------|-----------------|---------|

Bootstrap support for afum|EAL92549.1 as seed ortholog is 100%.

Bootstrap support for afis|EAW21528.1 as seed ortholog is 100%.

---

Group of orthologs #3146. Best score 1186 bits

Score difference with first non-orthologous sequence - *A. fumigatus*:1186 *A. fischeri*:1186

|                 |         |                 |         |
|-----------------|---------|-----------------|---------|
| afum EAL90045.1 | 100.00% | afis EAW25386.1 | 100.00% |
|-----------------|---------|-----------------|---------|

Bootstrap support for afum|EAL90045.1 as seed ortholog is 100%.

Bootstrap support for afis|EAW25386.1 as seed ortholog is 100%.

---

Group of orthologs #3147. Best score 1185 bits

Score difference with first non-orthologous sequence - *A. fumigatus*:843 *A. fischeri*:1020

|                 |         |                 |         |
|-----------------|---------|-----------------|---------|
| afum EAL86476.1 | 100.00% | afis EAW16949.1 | 100.00% |
|-----------------|---------|-----------------|---------|

Bootstrap support for afum|EAL86476.1 as seed ortholog is 100%.

Bootstrap support for afis|EAW16949.1 as seed ortholog is 100%.

---

Group of orthologs #3148. Best score 1185 bits

Score difference with first non-orthologous sequence - *A. fumigatus*:1185 *A. fischeri*:1185

|                 |         |                 |         |
|-----------------|---------|-----------------|---------|
| afum EAL87029.1 | 100.00% | afis EAW19467.1 | 100.00% |
|-----------------|---------|-----------------|---------|

Bootstrap support for afum|EAL87029.1 as seed ortholog is 100%.

Bootstrap support for afis|EAW19467.1 as seed ortholog is 100%.

---

Group of orthologs #3149. Best score 1185 bits

Score difference with first non-orthologous sequence - *A. fumigatus*:1185 *A. fischeri*:1185

|                 |         |                 |         |
|-----------------|---------|-----------------|---------|
| afum EAL91402.1 | 100.00% | afis EAW17589.1 | 100.00% |
|-----------------|---------|-----------------|---------|

Bootstrap support for afum|EAL91402.1 as seed ortholog is 100%.

Bootstrap support for afis|EAW17589.1 as seed ortholog is 100%.

---

Group of orthologs #3150. Best score 1185 bits

Score difference with first non-orthologous sequence - *A. fumigatus*:1185 *A. fischeri*:1185

|                 |         |                 |         |
|-----------------|---------|-----------------|---------|
| afum EAL93065.1 | 100.00% | afis EAW18390.1 | 100.00% |
|-----------------|---------|-----------------|---------|

Bootstrap support for afum|EAL93065.1 as seed ortholog is 100%.

Bootstrap support for afis|EAW18390.1 as seed ortholog is 100%.

---

Group of orthologs #3151. Best score 1185 bits

Score difference with first non-orthologous sequence - *A. fumigatus*:984 *A. fischeri*:1034

|                 |         |                 |         |
|-----------------|---------|-----------------|---------|
| afum EAL90404.1 | 100.00% | afis EAW22795.1 | 100.00% |
|-----------------|---------|-----------------|---------|

Bootstrap support for afum|EAL90404.1 as seed ortholog is 100%.

Bootstrap support for afis|EAW22795.1 as seed ortholog is 100%.

---

Group of orthologs #3152. Best score 1185 bits



Score difference with first non-orthologous sequence - *A. fumigatus*:1185 *A. fischeri*:1185  
afum|EAL92163.1 100.00% afis|EAW21144.1 100.00%  
Bootstrap support for afum|EAL92163.1 as seed ortholog is 100%.  
Bootstrap support for afis|EAW21144.1 as seed ortholog is 100%.

---

Group of orthologs #3153. Best score 1184 bits

Score difference with first non-orthologous sequence - *A. fumigatus*:1184 *A. fischeri*:1184  
afum|EAL88893.1 100.00% afis|EAW16272.1 100.00%  
Bootstrap support for afum|EAL88893.1 as seed ortholog is 100%.  
Bootstrap support for afis|EAW16272.1 as seed ortholog is 100%.

---

Group of orthologs #3154. Best score 1184 bits

Score difference with first non-orthologous sequence - *A. fumigatus*:1184 *A. fischeri*:1184  
afum|EAL84972.1 100.00% afis|EAW19940.1 100.00%  
Bootstrap support for afum|EAL84972.1 as seed ortholog is 100%.  
Bootstrap support for afis|EAW19940.1 as seed ortholog is 100%.

---

Group of orthologs #3155. Best score 1184 bits

Score difference with first non-orthologous sequence - *A. fumigatus*:1184 *A. fischeri*:1184  
afum|EAL87682.1 100.00% afis|EAW18315.1 100.00%  
Bootstrap support for afum|EAL87682.1 as seed ortholog is 100%.  
Bootstrap support for afis|EAW18315.1 as seed ortholog is 100%.

---

Group of orthologs #3156. Best score 1184 bits

Score difference with first non-orthologous sequence - *A. fumigatus*:732 *A. fischeri*:814  
afum|EAL91169.1 100.00% afis|EAW17332.1 100.00%  
Bootstrap support for afum|EAL91169.1 as seed ortholog is 100%.  
Bootstrap support for afis|EAW17332.1 as seed ortholog is 100%.

---

Group of orthologs #3157. Best score 1184 bits

Score difference with first non-orthologous sequence - *A. fumigatus*:1184 *A. fischeri*:1184  
afum|EAL91680.1 100.00% afis|EAW17872.1 100.00%  
Bootstrap support for afum|EAL91680.1 as seed ortholog is 100%.  
Bootstrap support for afis|EAW17872.1 as seed ortholog is 100%.

---

Group of orthologs #3158. Best score 1184 bits

Score difference with first non-orthologous sequence - *A. fumigatus*:1041 *A. fischeri*:939  
afum|EAL87183.1 100.00% afis|EAW23749.1 100.00%  
Bootstrap support for afum|EAL87183.1 as seed ortholog is 100%.  
Bootstrap support for afis|EAW23749.1 as seed ortholog is 100%.

---

Group of orthologs #3159. Best score 1183 bits

Score difference with first non-orthologous sequence - *A. fumigatus*:1183 *A. fischeri*:1183  
afum|EAL88620.1 100.00% afis|EAW15988.1 100.00%  
Bootstrap support for afum|EAL88620.1 as seed ortholog is 100%.  
Bootstrap support for afis|EAW15988.1 as seed ortholog is 100%.

---

Group of orthologs #3160. Best score 1183 bits

Score difference with first non-orthologous sequence - *A. fumigatus*:1183 *A. fischeri*:1183  
afum|EAL91659.1 100.00% afis|EAW17850.1 100.00%  
Bootstrap support for afum|EAL91659.1 as seed ortholog is 100%.  
Bootstrap support for afis|EAW17850.1 as seed ortholog is 100%.

---

Group of orthologs #3161. Best score 1182 bits

Score difference with first non-orthologous sequence - *A. fumigatus*:1182 *A. fischeri*:1182  
afum|EAL84218.1 100.00% afis|EAW15426.1 100.00%

Bootstrap support for afum|EAL84218.1 as seed ortholog is 100%.  
Bootstrap support for afis|EAW15426.1 as seed ortholog is 100%.

---

Group of orthologs #3162. Best score 1182 bits

Score difference with first non-orthologous sequence - *A. fumigatus*:1182 *A. fischeri*:1035

|                 |         |                 |         |
|-----------------|---------|-----------------|---------|
| afum EAL84911.1 | 100.00% | afis EAW20007.1 | 100.00% |
|-----------------|---------|-----------------|---------|

Bootstrap support for afum|EAL84911.1 as seed ortholog is 100%.

Bootstrap support for afis|EAW20007.1 as seed ortholog is 100%.

---

Group of orthologs #3163. Best score 1182 bits

Score difference with first non-orthologous sequence - *A. fumigatus*:1182 *A. fischeri*:1182

|                 |         |                 |         |
|-----------------|---------|-----------------|---------|
| afum EAL87607.1 | 100.00% | afis EAW18243.1 | 100.00% |
|-----------------|---------|-----------------|---------|

Bootstrap support for afum|EAL87607.1 as seed ortholog is 100%.

Bootstrap support for afis|EAW18243.1 as seed ortholog is 100%.

---

Group of orthologs #3164. Best score 1182 bits

Score difference with first non-orthologous sequence - *A. fumigatus*:1182 *A. fischeri*:1182

|                 |         |                 |         |
|-----------------|---------|-----------------|---------|
| afum EAL91875.1 | 100.00% | afis EAW18063.1 | 100.00% |
|-----------------|---------|-----------------|---------|

Bootstrap support for afum|EAL91875.1 as seed ortholog is 100%.

Bootstrap support for afis|EAW18063.1 as seed ortholog is 100%.

---

Group of orthologs #3165. Best score 1182 bits

Score difference with first non-orthologous sequence - *A. fumigatus*:1182 *A. fischeri*:1182

|                 |         |                 |         |
|-----------------|---------|-----------------|---------|
| afum EAL93192.1 | 100.00% | afis EAW18501.1 | 100.00% |
|-----------------|---------|-----------------|---------|

Bootstrap support for afum|EAL93192.1 as seed ortholog is 100%.

Bootstrap support for afis|EAW18501.1 as seed ortholog is 100%.

---

Group of orthologs #3166. Best score 1181 bits

Score difference with first non-orthologous sequence - *A. fumigatus*:1181 *A. fischeri*:1181

|                 |         |                 |         |
|-----------------|---------|-----------------|---------|
| afum EAL84221.1 | 100.00% | afis EAW15423.1 | 100.00% |
|-----------------|---------|-----------------|---------|

Bootstrap support for afum|EAL84221.1 as seed ortholog is 100%.

Bootstrap support for afis|EAW15423.1 as seed ortholog is 100%.

---

Group of orthologs #3167. Best score 1181 bits

Score difference with first non-orthologous sequence - *A. fumigatus*:1181 *A. fischeri*:1181

|                 |         |                 |         |
|-----------------|---------|-----------------|---------|
| afum EAL86691.1 | 100.00% | afis EAW17273.1 | 100.00% |
|-----------------|---------|-----------------|---------|

Bootstrap support for afum|EAL86691.1 as seed ortholog is 100%.

Bootstrap support for afis|EAW17273.1 as seed ortholog is 100%.

---

Group of orthologs #3168. Best score 1181 bits

Score difference with first non-orthologous sequence - *A. fumigatus*:1181 *A. fischeri*:1181

|                 |         |                 |         |
|-----------------|---------|-----------------|---------|
| afum EAL84556.1 | 100.00% | afis EAW20498.1 | 100.00% |
|-----------------|---------|-----------------|---------|

Bootstrap support for afum|EAL84556.1 as seed ortholog is 100%.

Bootstrap support for afis|EAW20498.1 as seed ortholog is 100%.

---

Group of orthologs #3169. Best score 1181 bits

Score difference with first non-orthologous sequence - *A. fumigatus*:299 *A. fischeri*:1181

|                 |         |                 |         |
|-----------------|---------|-----------------|---------|
| afum EAL85171.1 | 100.00% | afis EAW20050.1 | 100.00% |
|-----------------|---------|-----------------|---------|

Bootstrap support for afum|EAL85171.1 as seed ortholog is 100%.

Bootstrap support for afis|EAW20050.1 as seed ortholog is 100%.

---

Group of orthologs #3170. Best score 1181 bits

Score difference with first non-orthologous sequence - *A. fumigatus*:1181 *A. fischeri*:1181

|                 |         |                 |         |
|-----------------|---------|-----------------|---------|
| afum EAL85284.1 | 100.00% | afis EAW20166.1 | 100.00% |
|-----------------|---------|-----------------|---------|

Bootstrap support for afum|EAL85284.1 as seed ortholog is 100%.

Bootstrap support for afis|EAW20166.1 as seed ortholog is 100%.

---

Group of orthologs #3171. Best score 1181 bits

Score difference with first non-orthologous sequence - *A. fumigatus*:1181 *A. fischeri*:1181

afum|EAL84706.1 100.00% afis|EAW20928.1 100.00%

Bootstrap support for afum|EAL84706.1 as seed ortholog is 100%.

Bootstrap support for afis|EAW20928.1 as seed ortholog is 100%.

---

Group of orthologs #3172. Best score 1181 bits

Score difference with first non-orthologous sequence - *A. fumigatus*:1119 *A. fischeri*:1132

afum|EAL85436.1 100.00% afis|EAW20313.1 100.00%

Bootstrap support for afum|EAL85436.1 as seed ortholog is 100%.

Bootstrap support for afis|EAW20313.1 as seed ortholog is 100%.

---

Group of orthologs #3173. Best score 1181 bits

Score difference with first non-orthologous sequence - *A. fumigatus*:1064 *A. fischeri*:1030

afum|EAL84292.1 100.00% afis|EAW25582.1 100.00%

Bootstrap support for afum|EAL84292.1 as seed ortholog is 100%.

Bootstrap support for afis|EAW25582.1 as seed ortholog is 100%.

---

Group of orthologs #3174. Best score 1181 bits

Score difference with first non-orthologous sequence - *A. fumigatus*:1035 *A. fischeri*:546

afum|EAL93549.1 100.00% afis|EAW18813.1 100.00%

Bootstrap support for afum|EAL93549.1 as seed ortholog is 100%.

Bootstrap support for afis|EAW18813.1 as seed ortholog is 100%.

---

Group of orthologs #3175. Best score 1180 bits

Score difference with first non-orthologous sequence - *A. fumigatus*:806 *A. fischeri*:781

afum|EAL84937.1 100.00% afis|EAW19973.1 100.00%

Bootstrap support for afum|EAL84937.1 as seed ortholog is 100%.

Bootstrap support for afis|EAW19973.1 as seed ortholog is 100%.

---

Group of orthologs #3176. Best score 1180 bits

Score difference with first non-orthologous sequence - *A. fumigatus*:1180 *A. fischeri*:1180

afum|EAL93938.2 100.00% afis|EAW19208.1 100.00%

Bootstrap support for afum|EAL93938.2 as seed ortholog is 100%.

Bootstrap support for afis|EAW19208.1 as seed ortholog is 100%.

---

Group of orthologs #3177. Best score 1180 bits

Score difference with first non-orthologous sequence - *A. fumigatus*:1180 *A. fischeri*:1124

afum|EAL89646.1 100.00% afis|EAW24986.1 100.00%

Bootstrap support for afum|EAL89646.1 as seed ortholog is 100%.

Bootstrap support for afis|EAW24986.1 as seed ortholog is 100%.

---

Group of orthologs #3178. Best score 1180 bits

Score difference with first non-orthologous sequence - *A. fumigatus*:1180 *A. fischeri*:1180

afum|EAL89953.1 100.00% afis|EAW25290.1 100.00%

Bootstrap support for afum|EAL89953.1 as seed ortholog is 100%.

Bootstrap support for afis|EAW25290.1 as seed ortholog is 100%.

---

Group of orthologs #3179. Best score 1179 bits

Score difference with first non-orthologous sequence - *A. fumigatus*:1179 *A. fischeri*:1179

afum|EAL86436.1 100.00% afis|EAW16901.1 100.00%

Bootstrap support for afum|EAL86436.1 as seed ortholog is 100%.

Bootstrap support for afis|EAW16901.1 as seed ortholog is 100%.

---

Group of orthologs #3180. Best score 1179 bits

Score difference with first non-orthologous sequence - *A. fumigatus*:1179 *A. fischeri*:1179  
afum|EAL85172.1 100.00% afis|EAW20052.1 100.00%  
Bootstrap support for afum|EAL85172.1 as seed ortholog is 100%.  
Bootstrap support for afis|EAW20052.1 as seed ortholog is 100%.

---

Group of orthologs #3181. Best score 1179 bits

Score difference with first non-orthologous sequence - *A. fumigatus*:1179 *A. fischeri*:1179  
afum|EAL87545.1 100.00% afis|EAW18183.1 100.00%  
Bootstrap support for afum|EAL87545.1 as seed ortholog is 100%.  
Bootstrap support for afis|EAW18183.1 as seed ortholog is 100%.

---

Group of orthologs #3182. Best score 1179 bits

Score difference with first non-orthologous sequence - *A. fumigatus*:1179 *A. fischeri*:1179  
afum|EAL84670.1 100.00% afis|EAW20963.1 100.00%  
Bootstrap support for afum|EAL84670.1 as seed ortholog is 100%.  
Bootstrap support for afis|EAW20963.1 as seed ortholog is 100%.

---

Group of orthologs #3183. Best score 1179 bits

Score difference with first non-orthologous sequence - *A. fumigatus*:1179 *A. fischeri*:957  
afum|EAL91069.1 100.00% afis|EAW22117.1 100.00%  
Bootstrap support for afum|EAL91069.1 as seed ortholog is 100%.  
Bootstrap support for afis|EAW22117.1 as seed ortholog is 100%.

---

Group of orthologs #3184. Best score 1179 bits

Score difference with first non-orthologous sequence - *A. fumigatus*:1179 *A. fischeri*:1179  
afum|EAL92706.1 100.00% afis|EAW21671.1 100.00%  
Bootstrap support for afum|EAL92706.1 as seed ortholog is 100%.  
Bootstrap support for afis|EAW21671.1 as seed ortholog is 100%.

---

Group of orthologs #3185. Best score 1179 bits

Score difference with first non-orthologous sequence - *A. fumigatus*:1179 *A. fischeri*:1179  
afum|EAL89664.1 100.00% afis|EAW25031.1 100.00%  
Bootstrap support for afum|EAL89664.1 as seed ortholog is 100%.  
Bootstrap support for afis|EAW25031.1 as seed ortholog is 100%.

---

Group of orthologs #3186. Best score 1179 bits

Score difference with first non-orthologous sequence - *A. fumigatus*:1179 *A. fischeri*:1179  
afum|EAL92999.1 100.00% afis|EAW21984.1 100.00%  
Bootstrap support for afum|EAL92999.1 as seed ortholog is 100%.  
Bootstrap support for afis|EAW21984.1 as seed ortholog is 100%.

---

Group of orthologs #3187. Best score 1178 bits

Score difference with first non-orthologous sequence - *A. fumigatus*:1178 *A. fischeri*:1178  
afum|EAL88728.1 100.00% afis|EAW16096.1 100.00%  
Bootstrap support for afum|EAL88728.1 as seed ortholog is 100%.  
Bootstrap support for afis|EAW16096.1 as seed ortholog is 100%.

---

Group of orthologs #3188. Best score 1178 bits

Score difference with first non-orthologous sequence - *A. fumigatus*:1019 *A. fischeri*:970  
afum|EAL88761.1 100.00% afis|EAW16131.1 100.00%  
Bootstrap support for afum|EAL88761.1 as seed ortholog is 100%.  
Bootstrap support for afis|EAW16131.1 as seed ortholog is 100%.

---

Group of orthologs #3189. Best score 1178 bits

Score difference with first non-orthologous sequence - *A. fumigatus*:1178 *A. fischeri*:1178  
afum|EAL89176.1 100.00% afis|EAW16580.1 100.00%

Bootstrap support for afum|EAL89176.1 as seed ortholog is 100%.  
Bootstrap support for afis|EAW16580.1 as seed ortholog is 100%.

---

Group of orthologs #3190. Best score 1178 bits

Score difference with first non-orthologous sequence - *A. fumigatus*:1178 *A. fischeri*:1178

|                 |         |                 |         |
|-----------------|---------|-----------------|---------|
| afum EAL87996.1 | 100.00% | afis EAW23470.1 | 100.00% |
|-----------------|---------|-----------------|---------|

Bootstrap support for afum|EAL87996.1 as seed ortholog is 100%.

Bootstrap support for afis|EAW23470.1 as seed ortholog is 100%.

---

Group of orthologs #3191. Best score 1178 bits

Score difference with first non-orthologous sequence - *A. fumigatus*:829 *A. fischeri*:412

|                 |         |                 |         |
|-----------------|---------|-----------------|---------|
| afum EAL87859.1 | 100.00% | afis EAW23606.1 | 100.00% |
|-----------------|---------|-----------------|---------|

Bootstrap support for afum|EAL87859.1 as seed ortholog is 100%.

Bootstrap support for afis|EAW23606.1 as seed ortholog is 100%.

---

Group of orthologs #3192. Best score 1178 bits

Score difference with first non-orthologous sequence - *A. fumigatus*:1178 *A. fischeri*:1178

|                 |         |                 |         |
|-----------------|---------|-----------------|---------|
| afum EAL90456.1 | 100.00% | afis EAW22739.1 | 100.00% |
|-----------------|---------|-----------------|---------|

Bootstrap support for afum|EAL90456.1 as seed ortholog is 100%.

Bootstrap support for afis|EAW22739.1 as seed ortholog is 100%.

---

Group of orthologs #3193. Best score 1178 bits

Score difference with first non-orthologous sequence - *A. fumigatus*:1178 *A. fischeri*:1178

|                 |         |                 |         |
|-----------------|---------|-----------------|---------|
| afum EAL92617.1 | 100.00% | afis EAW21598.1 | 100.00% |
|-----------------|---------|-----------------|---------|

Bootstrap support for afum|EAL92617.1 as seed ortholog is 100%.

Bootstrap support for afis|EAW21598.1 as seed ortholog is 100%.

---

Group of orthologs #3194. Best score 1177 bits

Score difference with first non-orthologous sequence - *A. fumigatus*:1177 *A. fischeri*:1177

|                 |         |                 |         |
|-----------------|---------|-----------------|---------|
| afum EAL85669.1 | 100.00% | afis EAW15679.1 | 100.00% |
|-----------------|---------|-----------------|---------|

Bootstrap support for afum|EAL85669.1 as seed ortholog is 100%.

Bootstrap support for afis|EAW15679.1 as seed ortholog is 100%.

---

Group of orthologs #3195. Best score 1177 bits

Score difference with first non-orthologous sequence - *A. fumigatus*:1177 *A. fischeri*:1177

|                 |         |                 |         |
|-----------------|---------|-----------------|---------|
| afum EAL84661.1 | 100.00% | afis EAW20972.1 | 100.00% |
|-----------------|---------|-----------------|---------|

Bootstrap support for afum|EAL84661.1 as seed ortholog is 100%.

Bootstrap support for afis|EAW20972.1 as seed ortholog is 100%.

---

Group of orthologs #3196. Best score 1177 bits

Score difference with first non-orthologous sequence - *A. fumigatus*:1177 *A. fischeri*:1177

|                 |         |                 |         |
|-----------------|---------|-----------------|---------|
| afum EAL86941.2 | 100.00% | afis EAW19577.1 | 100.00% |
|-----------------|---------|-----------------|---------|

Bootstrap support for afum|EAL86941.2 as seed ortholog is 100%.

Bootstrap support for afis|EAW19577.1 as seed ortholog is 100%.

---

Group of orthologs #3197. Best score 1177 bits

Score difference with first non-orthologous sequence - *A. fumigatus*:1177 *A. fischeri*:1177

|                 |         |                 |         |
|-----------------|---------|-----------------|---------|
| afum EAL93369.1 | 100.00% | afis EAW18653.1 | 100.00% |
|-----------------|---------|-----------------|---------|

Bootstrap support for afum|EAL93369.1 as seed ortholog is 100%.

Bootstrap support for afis|EAW18653.1 as seed ortholog is 100%.

---

Group of orthologs #3198. Best score 1177 bits

Score difference with first non-orthologous sequence - *A. fumigatus*:1177 *A. fischeri*:1177

|                 |         |                 |         |
|-----------------|---------|-----------------|---------|
| afum EAL89580.1 | 100.00% | afis EAW24925.1 | 100.00% |
|-----------------|---------|-----------------|---------|

Bootstrap support for afum|EAL89580.1 as seed ortholog is 100%.

Bootstrap support for afis|EAW24925.1 as seed ortholog is 100%.

---

Group of orthologs #3199. Best score 1176 bits

Score difference with first non-orthologous sequence - *A. fumigatus*:986 *A. fischeri*:1103

afum|EAL86367.1 100.00% afis|EAW16816.1 100.00%

Bootstrap support for afum|EAL86367.1 as seed ortholog is 100%.

Bootstrap support for afis|EAW16816.1 as seed ortholog is 100%.

---

Group of orthologs #3200. Best score 1176 bits

Score difference with first non-orthologous sequence - *A. fumigatus*:1176 *A. fischeri*:1176

afum|EAL88719.1 100.00% afis|EAW16087.1 100.00%

Bootstrap support for afum|EAL88719.1 as seed ortholog is 100%.

Bootstrap support for afis|EAW16087.1 as seed ortholog is 100%.

---

Group of orthologs #3201. Best score 1176 bits

Score difference with first non-orthologous sequence - *A. fumigatus*:1176 *A. fischeri*:1176

afum|EAL91898.1 100.00% afis|EAW18086.1 100.00%

Bootstrap support for afum|EAL91898.1 as seed ortholog is 100%.

Bootstrap support for afis|EAW18086.1 as seed ortholog is 100%.

---

Group of orthologs #3202. Best score 1176 bits

Score difference with first non-orthologous sequence - *A. fumigatus*:1176 *A. fischeri*:1176

afum|EAL86010.1 100.00% afis|EAW24339.1 100.00%

Bootstrap support for afum|EAL86010.1 as seed ortholog is 100%.

Bootstrap support for afis|EAW24339.1 as seed ortholog is 100%.

---

Group of orthologs #3203. Best score 1176 bits

Score difference with first non-orthologous sequence - *A. fumigatus*:1176 *A. fischeri*:1176

afum|EAL91025.1 100.00% afis|EAW22166.1 100.00%

Bootstrap support for afum|EAL91025.1 as seed ortholog is 100%.

Bootstrap support for afis|EAW22166.1 as seed ortholog is 100%.

---

Group of orthologs #3204. Best score 1176 bits

Score difference with first non-orthologous sequence - *A. fumigatus*:1176 *A. fischeri*:1176

afum|EAL90258.1 100.00% afis|EAW22938.1 100.00%

Bootstrap support for afum|EAL90258.1 as seed ortholog is 100%.

Bootstrap support for afis|EAW22938.1 as seed ortholog is 100%.

---

Group of orthologs #3205. Best score 1176 bits

Score difference with first non-orthologous sequence - *A. fumigatus*:1176 *A. fischeri*:1176

afum|EAL92773.1 100.00% afis|EAW21739.1 100.00%

Bootstrap support for afum|EAL92773.1 as seed ortholog is 100%.

Bootstrap support for afis|EAW21739.1 as seed ortholog is 100%.

---

Group of orthologs #3206. Best score 1176 bits

Score difference with first non-orthologous sequence - *A. fumigatus*:1176 *A. fischeri*:1176

afum|EAL90030.1 100.00% afis|EAW25370.1 100.00%

Bootstrap support for afum|EAL90030.1 as seed ortholog is 100%.

Bootstrap support for afis|EAW25370.1 as seed ortholog is 100%.

---

Group of orthologs #3207. Best score 1175 bits

Score difference with first non-orthologous sequence - *A. fumigatus*:1175 *A. fischeri*:1175

afum|EAL85186.1 100.00% afis|EAW20068.1 100.00%

Bootstrap support for afum|EAL85186.1 as seed ortholog is 100%.

Bootstrap support for afis|EAW20068.1 as seed ortholog is 100%.

---

Group of orthologs #3208. Best score 1175 bits

Score difference with first non-orthologous sequence - *A. fumigatus*:1104 *A. fischeri*:1071  
afum|EAL91562.1 100.00% afis|EAW17748.1 100.00%  
Bootstrap support for afum|EAL91562.1 as seed ortholog is 100%.  
Bootstrap support for afis|EAW17748.1 as seed ortholog is 100%.

---

Group of orthologs #3209. Best score 1175 bits

Score difference with first non-orthologous sequence - *A. fumigatus*:1175 *A. fischeri*:925  
afum|EAL92114.1 100.00% afis|EAW21091.1 100.00%  
Bootstrap support for afum|EAL92114.1 as seed ortholog is 100%.  
Bootstrap support for afis|EAW21091.1 as seed ortholog is 100%.

---

Group of orthologs #3210. Best score 1175 bits

Score difference with first non-orthologous sequence - *A. fumigatus*:1175 *A. fischeri*:1175  
afum|EAL92670.1 100.00% afis|EAW21636.1 100.00%  
Bootstrap support for afum|EAL92670.1 as seed ortholog is 100%.  
Bootstrap support for afis|EAW21636.1 as seed ortholog is 100%.

---

Group of orthologs #3211. Best score 1175 bits

Score difference with first non-orthologous sequence - *A. fumigatus*:1175 *A. fischeri*:1175  
afum|EAL91943.1 100.00% afis|EAW24088.1 100.00%  
Bootstrap support for afum|EAL91943.1 as seed ortholog is 100%.  
Bootstrap support for afis|EAW24088.1 as seed ortholog is 100%.

---

Group of orthologs #3212. Best score 1174 bits

Score difference with first non-orthologous sequence - *A. fumigatus*:833 *A. fischeri*:832  
afum|EAL88666.2 100.00% afis|EAW16035.1 100.00%  
Bootstrap support for afum|EAL88666.2 as seed ortholog is 100%.  
Bootstrap support for afis|EAW16035.1 as seed ortholog is 100%.

---

Group of orthologs #3213. Best score 1174 bits

Score difference with first non-orthologous sequence - *A. fumigatus*:1174 *A. fischeri*:1174  
afum|EAL89266.1 100.00% afis|EAW16662.1 100.00%  
Bootstrap support for afum|EAL89266.1 as seed ortholog is 100%.  
Bootstrap support for afis|EAW16662.1 as seed ortholog is 100%.

---

Group of orthologs #3214. Best score 1174 bits

Score difference with first non-orthologous sequence - *A. fumigatus*:1174 *A. fischeri*:1174  
afum|EAL93738.1 100.00% afis|EAW19004.1 100.00%  
Bootstrap support for afum|EAL93738.1 as seed ortholog is 100%.  
Bootstrap support for afis|EAW19004.1 as seed ortholog is 100%.

---

Group of orthologs #3215. Best score 1174 bits

Score difference with first non-orthologous sequence - *A. fumigatus*:1007 *A. fischeri*:546  
afum|EAL89790.1 100.00% afis|EAW25119.1 100.00%  
Bootstrap support for afum|EAL89790.1 as seed ortholog is 100%.  
Bootstrap support for afis|EAW25119.1 as seed ortholog is 100%.

---

Group of orthologs #3216. Best score 1173 bits

Score difference with first non-orthologous sequence - *A. fumigatus*:1173 *A. fischeri*:1173  
afum|EAL85686.1 100.00% afis|EAW15662.1 100.00%  
Bootstrap support for afum|EAL85686.1 as seed ortholog is 100%.  
Bootstrap support for afis|EAW15662.1 as seed ortholog is 100%.

---

Group of orthologs #3217. Best score 1172 bits

Score difference with first non-orthologous sequence - *A. fumigatus*:1172 *A. fischeri*:1172  
afum|EAL89296.1 100.00% afis|EAW16699.1 100.00%

Bootstrap support for afum|EAL89296.1 as seed ortholog is 100%.  
Bootstrap support for afis|EAW16699.1 as seed ortholog is 100%.

---

Group of orthologs #3218. Best score 1172 bits

Score difference with first non-orthologous sequence - *A. fumigatus*:948 *A. fischeri*:770

|                 |         |                 |         |
|-----------------|---------|-----------------|---------|
| afum EAL86860.2 | 100.00% | afis EAW19662.1 | 100.00% |
|-----------------|---------|-----------------|---------|

Bootstrap support for afum|EAL86860.2 as seed ortholog is 100%.

Bootstrap support for afis|EAW19662.1 as seed ortholog is 100%.

---

Group of orthologs #3219. Best score 1172 bits

Score difference with first non-orthologous sequence - *A. fumigatus*:1172 *A. fischeri*:1172

|                 |         |                 |         |
|-----------------|---------|-----------------|---------|
| afum EAL93514.1 | 100.00% | afis EAW18782.1 | 100.00% |
|-----------------|---------|-----------------|---------|

Bootstrap support for afum|EAL93514.1 as seed ortholog is 100%.

Bootstrap support for afis|EAW18782.1 as seed ortholog is 100%.

---

Group of orthologs #3220. Best score 1172 bits

Score difference with first non-orthologous sequence - *A. fumigatus*:1172 *A. fischeri*:1172

|                 |         |                 |         |
|-----------------|---------|-----------------|---------|
| afum EAL89487.1 | 100.00% | afis EAW24841.1 | 100.00% |
|-----------------|---------|-----------------|---------|

Bootstrap support for afum|EAL89487.1 as seed ortholog is 100%.

Bootstrap support for afis|EAW24841.1 as seed ortholog is 100%.

---

Group of orthologs #3221. Best score 1172 bits

Score difference with first non-orthologous sequence - *A. fumigatus*:1172 *A. fischeri*:1172

|                 |         |                 |         |
|-----------------|---------|-----------------|---------|
| afum EAL93015.1 | 100.00% | afis EAW22000.1 | 100.00% |
|-----------------|---------|-----------------|---------|

Bootstrap support for afum|EAL93015.1 as seed ortholog is 100%.

Bootstrap support for afis|EAW22000.1 as seed ortholog is 100%.

---

Group of orthologs #3222. Best score 1171 bits

Score difference with first non-orthologous sequence - *A. fumigatus*:1171 *A. fischeri*:1171

|                 |         |                 |         |
|-----------------|---------|-----------------|---------|
| afum EAL88916.1 | 100.00% | afis EAW16294.1 | 100.00% |
|-----------------|---------|-----------------|---------|

Bootstrap support for afum|EAL88916.1 as seed ortholog is 100%.

Bootstrap support for afis|EAW16294.1 as seed ortholog is 100%.

---

Group of orthologs #3223. Best score 1171 bits

Score difference with first non-orthologous sequence - *A. fumigatus*:918 *A. fischeri*:226

|                 |         |                 |         |
|-----------------|---------|-----------------|---------|
| afum EAL84311.1 | 100.00% | afis EAW25623.1 | 100.00% |
|-----------------|---------|-----------------|---------|

Bootstrap support for afum|EAL84311.1 as seed ortholog is 100%.

Bootstrap support for afis|EAW25623.1 as seed ortholog is 100%.

---

Group of orthologs #3224. Best score 1171 bits

Score difference with first non-orthologous sequence - *A. fumigatus*:1171 *A. fischeri*:1171

|                 |         |                 |         |
|-----------------|---------|-----------------|---------|
| afum EAL91985.1 | 100.00% | afis EAW24129.1 | 100.00% |
|-----------------|---------|-----------------|---------|

Bootstrap support for afum|EAL91985.1 as seed ortholog is 100%.

Bootstrap support for afis|EAW24129.1 as seed ortholog is 100%.

---

Group of orthologs #3225. Best score 1170 bits

Score difference with first non-orthologous sequence - *A. fumigatus*:1170 *A. fischeri*:1170

|                 |         |                 |         |
|-----------------|---------|-----------------|---------|
| afum EAL86482.2 | 100.00% | afis EAW16955.1 | 100.00% |
|-----------------|---------|-----------------|---------|

Bootstrap support for afum|EAL86482.2 as seed ortholog is 100%.

Bootstrap support for afis|EAW16955.1 as seed ortholog is 100%.

---

Group of orthologs #3226. Best score 1170 bits

Score difference with first non-orthologous sequence - *A. fumigatus*:1170 *A. fischeri*:1031

|                 |         |                 |         |
|-----------------|---------|-----------------|---------|
| afum EAL85230.1 | 100.00% | afis EAW20113.1 | 100.00% |
|-----------------|---------|-----------------|---------|

Bootstrap support for afum|EAL85230.1 as seed ortholog is 100%.

Bootstrap support for afis|EAW20113.1 as seed ortholog is 100%.



---

Group of orthologs #3227. Best score 1170 bits

Score difference with first non-orthologous sequence - *A. fumigatus*:1170 *A. fischeri*:497

afum|EAL84738.2 100.00% afis|EAW20895.1 100.00%

Bootstrap support for afum|EAL84738.2 as seed ortholog is 100%.

Bootstrap support for afis|EAW20895.1 as seed ortholog is 100%.

---

Group of orthologs #3228. Best score 1170 bits

Score difference with first non-orthologous sequence - *A. fumigatus*:1170 *A. fischeri*:1170

afum|EAL91694.1 100.00% afis|EAW17886.1 100.00%

Bootstrap support for afum|EAL91694.1 as seed ortholog is 100%.

Bootstrap support for afis|EAW17886.1 as seed ortholog is 100%.

---

Group of orthologs #3229. Best score 1170 bits

Score difference with first non-orthologous sequence - *A. fumigatus*:972 *A. fischeri*:1170

afum|EAL93811.1 100.00% afis|EAW19082.1 100.00%

Bootstrap support for afum|EAL93811.1 as seed ortholog is 100%.

Bootstrap support for afis|EAW19082.1 as seed ortholog is 100%.

---

Group of orthologs #3230. Best score 1170 bits

Score difference with first non-orthologous sequence - *A. fumigatus*:1170 *A. fischeri*:1067

afum|EAL90991.1 100.00% afis|EAW22201.1 100.00%

Bootstrap support for afum|EAL90991.1 as seed ortholog is 100%.

Bootstrap support for afis|EAW22201.1 as seed ortholog is 100%.

---

Group of orthologs #3231. Best score 1170 bits

Score difference with first non-orthologous sequence - *A. fumigatus*:1170 *A. fischeri*:1170

afum|EAL92658.1 100.00% afis|EAW21622.1 100.00%

Bootstrap support for afum|EAL92658.1 as seed ortholog is 100%.

Bootstrap support for afis|EAW21622.1 as seed ortholog is 100%.

---

Group of orthologs #3232. Best score 1169 bits

Score difference with first non-orthologous sequence - *A. fumigatus*:1169 *A. fischeri*:989

afum|EAL85858.1 100.00% afis|EAW15463.1 100.00%

Bootstrap support for afum|EAL85858.1 as seed ortholog is 100%.

Bootstrap support for afis|EAW15463.1 as seed ortholog is 100%.

---

Group of orthologs #3233. Best score 1169 bits

Score difference with first non-orthologous sequence - *A. fumigatus*:1169 *A. fischeri*:1169

afum|EAL85710.1 100.00% afis|EAW15624.1 100.00%

Bootstrap support for afum|EAL85710.1 as seed ortholog is 100%.

Bootstrap support for afis|EAW15624.1 as seed ortholog is 100%.

---

Group of orthologs #3234. Best score 1169 bits

Score difference with first non-orthologous sequence - *A. fumigatus*:1169 *A. fischeri*:1169

afum|EAL85595.1 100.00% afis|EAW15754.1 100.00%

Bootstrap support for afum|EAL85595.1 as seed ortholog is 100%.

Bootstrap support for afis|EAW15754.1 as seed ortholog is 100%.

---

Group of orthologs #3235. Best score 1169 bits

Score difference with first non-orthologous sequence - *A. fumigatus*:1003 *A. fischeri*:960

afum|EAL85144.1 100.00% afis|EAW19753.1 100.00%

Bootstrap support for afum|EAL85144.1 as seed ortholog is 100%.

Bootstrap support for afis|EAW19753.1 as seed ortholog is 100%.

---

Group of orthologs #3236. Best score 1169 bits

Score difference with first non-orthologous sequence - *A. fumigatus*:1169 *A. fischeri*:1169  
afum|EAL84599.1 100.00% afis|EAW20454.1 100.00%  
Bootstrap support for afum|EAL84599.1 as seed ortholog is 100%.  
Bootstrap support for afis|EAW20454.1 as seed ortholog is 100%.

---

Group of orthologs #3237. Best score 1169 bits

Score difference with first non-orthologous sequence - *A. fumigatus*:1169 *A. fischeri*:1169  
afum|EAL89155.1 100.00% afis|EAW16557.1 100.00%  
Bootstrap support for afum|EAL89155.1 as seed ortholog is 100%.  
Bootstrap support for afis|EAW16557.1 as seed ortholog is 100%.

---

Group of orthologs #3238. Best score 1169 bits

Score difference with first non-orthologous sequence - *A. fumigatus*:1169 *A. fischeri*:1169  
afum|EAL85472.1 100.00% afis|EAW20355.1 100.00%  
Bootstrap support for afum|EAL85472.1 as seed ortholog is 100%.  
Bootstrap support for afis|EAW20355.1 as seed ortholog is 100%.

---

Group of orthologs #3239. Best score 1169 bits

Score difference with first non-orthologous sequence - *A. fumigatus*:1169 *A. fischeri*:1169  
afum|EAL91362.1 100.00% afis|EAW17548.1 100.00%  
Bootstrap support for afum|EAL91362.1 as seed ortholog is 100%.  
Bootstrap support for afis|EAW17548.1 as seed ortholog is 100%.

---

Group of orthologs #3240. Best score 1169 bits

Score difference with first non-orthologous sequence - *A. fumigatus*:1169 *A. fischeri*:1169  
afum|EAL90903.1 100.00% afis|EAW22278.1 100.00%  
Bootstrap support for afum|EAL90903.1 as seed ortholog is 100%.  
Bootstrap support for afis|EAW22278.1 as seed ortholog is 100%.

---

Group of orthologs #3241. Best score 1168 bits

Score difference with first non-orthologous sequence - *A. fumigatus*:1168 *A. fischeri*:996  
afum|EAL85695.1 100.00% afis|EAW22086.1 100.00%  
Bootstrap support for afum|EAL85695.1 as seed ortholog is 100%.  
Bootstrap support for afis|EAW22086.1 as seed ortholog is 100%.

---

Group of orthologs #3242. Best score 1168 bits

Score difference with first non-orthologous sequence - *A. fumigatus*:1168 *A. fischeri*:1168  
afum|EAL86246.1 100.00% afis|EAW24618.1 100.00%  
Bootstrap support for afum|EAL86246.1 as seed ortholog is 100%.  
Bootstrap support for afis|EAW24618.1 as seed ortholog is 100%.

---

Group of orthologs #3243. Best score 1168 bits

Score difference with first non-orthologous sequence - *A. fumigatus*:1168 *A. fischeri*:1168  
afum|EBA27317.1 100.00% afis|EAW18184.1 100.00%  
Bootstrap support for afum|EBA27317.1 as seed ortholog is 100%.  
Bootstrap support for afis|EAW18184.1 as seed ortholog is 100%.

---

Group of orthologs #3244. Best score 1168 bits

Score difference with first non-orthologous sequence - *A. fumigatus*:888 *A. fischeri*:865  
afum|EAL94043.1 100.00% afis|EAW19325.1 100.00%  
Bootstrap support for afum|EAL94043.1 as seed ortholog is 100%.  
Bootstrap support for afis|EAW19325.1 as seed ortholog is 100%.

---

Group of orthologs #3245. Best score 1167 bits

Score difference with first non-orthologous sequence - *A. fumigatus*:1167 *A. fischeri*:1167  
afum|EAL85816.1 100.00% afis|EAW15515.1 100.00%

Bootstrap support for afum|EAL85816.1 as seed ortholog is 100%.  
Bootstrap support for afis|EAW15515.1 as seed ortholog is 100%.

---

Group of orthologs #3246. Best score 1167 bits

Score difference with first non-orthologous sequence - *A. fumigatus*:1167 *A. fischeri*:1167

afum|EAL87644.1 100.00% afis|EAW18278.1 100.00%

Bootstrap support for afum|EAL87644.1 as seed ortholog is 100%.

Bootstrap support for afis|EAW18278.1 as seed ortholog is 100%.

---

Group of orthologs #3247. Best score 1166 bits

Score difference with first non-orthologous sequence - *A. fumigatus*:974 *A. fischeri*:1000

afum|EAL85093.1 100.00% afis|EAW19797.1 100.00%

Bootstrap support for afum|EAL85093.1 as seed ortholog is 100%.

Bootstrap support for afis|EAW19797.1 as seed ortholog is 100%.

---

Group of orthologs #3248. Best score 1166 bits

Score difference with first non-orthologous sequence - *A. fumigatus*:1166 *A. fischeri*:630

afum|EAL86910.1 100.00% afis|EAW19612.1 100.00%

Bootstrap support for afum|EAL86910.1 as seed ortholog is 100%.

Bootstrap support for afis|EAW19612.1 as seed ortholog is 100%.

---

Group of orthologs #3249. Best score 1166 bits

Score difference with first non-orthologous sequence - *A. fumigatus*:1166 *A. fischeri*:1166

afum|EAL91409.1 100.00% afis|EAW17596.1 100.00%

Bootstrap support for afum|EAL91409.1 as seed ortholog is 100%.

Bootstrap support for afis|EAW17596.1 as seed ortholog is 100%.

---

Group of orthologs #3250. Best score 1166 bits

Score difference with first non-orthologous sequence - *A. fumigatus*:970 *A. fischeri*:1166

afum|EAL86011.1 100.00% afis|EAW24340.1 100.00%

Bootstrap support for afum|EAL86011.1 as seed ortholog is 100%.

Bootstrap support for afis|EAW24340.1 as seed ortholog is 100%.

---

Group of orthologs #3251. Best score 1166 bits

Score difference with first non-orthologous sequence - *A. fumigatus*:1166 *A. fischeri*:1166

afum|EAL93782.1 100.00% afis|EAW19053.1 100.00%

Bootstrap support for afum|EAL93782.1 as seed ortholog is 100%.

Bootstrap support for afis|EAW19053.1 as seed ortholog is 100%.

---

Group of orthologs #3252. Best score 1166 bits

Score difference with first non-orthologous sequence - *A. fumigatus*:1166 *A. fischeri*:976

afum|EAL90962.1 100.00% afis|EAW22231.1 100.00%

Bootstrap support for afum|EAL90962.1 as seed ortholog is 100%.

Bootstrap support for afis|EAW22231.1 as seed ortholog is 100%.

---

Group of orthologs #3253. Best score 1166 bits

Score difference with first non-orthologous sequence - *A. fumigatus*:1166 *A. fischeri*:1166

afum|EAL92747.1 100.00% afis|EAW21712.1 100.00%

Bootstrap support for afum|EAL92747.1 as seed ortholog is 100%.

Bootstrap support for afis|EAW21712.1 as seed ortholog is 100%.

---

Group of orthologs #3254. Best score 1165 bits

Score difference with first non-orthologous sequence - *A. fumigatus*:1165 *A. fischeri*:1165

afum|EAL89038.1 100.00% afis|EAW16414.1 100.00%

Bootstrap support for afum|EAL89038.1 as seed ortholog is 100%.

Bootstrap support for afis|EAW16414.1 as seed ortholog is 100%.

---

Group of orthologs #3255. Best score 1165 bits

Score difference with first non-orthologous sequence - *A. fumigatus*:1165 *A. fischeri*:1165

afum|EAL93333.1 100.00% afis|EAW18623.1 100.00%

Bootstrap support for afum|EAL93333.1 as seed ortholog is 100%.

Bootstrap support for afis|EAW18623.1 as seed ortholog is 100%.

---

Group of orthologs #3256. Best score 1165 bits

Score difference with first non-orthologous sequence - *A. fumigatus*:1165 *A. fischeri*:1165

afum|EAL89593.1 100.00% afis|EAW24936.1 100.00%

Bootstrap support for afum|EAL89593.1 as seed ortholog is 100%.

Bootstrap support for afis|EAW24936.1 as seed ortholog is 100%.

---

Group of orthologs #3257. Best score 1164 bits

Score difference with first non-orthologous sequence - *A. fumigatus*:1164 *A. fischeri*:1164

afum|EAL88377.1 100.00% afis|EAW23101.1 100.00%

Bootstrap support for afum|EAL88377.1 as seed ortholog is 100%.

Bootstrap support for afis|EAW23101.1 as seed ortholog is 100%.

---

Group of orthologs #3258. Best score 1164 bits

Score difference with first non-orthologous sequence - *A. fumigatus*:1164 *A. fischeri*:1102

afum|EAL89327.1 100.00% afis|EAW24686.1 100.00%

Bootstrap support for afum|EAL89327.1 as seed ortholog is 100%.

Bootstrap support for afis|EAW24686.1 as seed ortholog is 100%.

---

Group of orthologs #3259. Best score 1163 bits

Score difference with first non-orthologous sequence - *A. fumigatus*:1163 *A. fischeri*:1163

afum|EAL84711.1 100.00% afis|EAW20923.1 100.00%

Bootstrap support for afum|EAL84711.1 as seed ortholog is 100%.

Bootstrap support for afis|EAW20923.1 as seed ortholog is 100%.

---

Group of orthologs #3260. Best score 1163 bits

Score difference with first non-orthologous sequence - *A. fumigatus*:937 *A. fischeri*:817

afum|EAL86034.1 100.00% afis|EAW24363.1 100.00%

Bootstrap support for afum|EAL86034.1 as seed ortholog is 100%.

Bootstrap support for afis|EAW24363.1 as seed ortholog is 100%.

---

Group of orthologs #3261. Best score 1163 bits

Score difference with first non-orthologous sequence - *A. fumigatus*:1163 *A. fischeri*:1078

afum|EAL86042.1 100.00% afis|EAW24370.1 100.00%

Bootstrap support for afum|EAL86042.1 as seed ortholog is 100%.

Bootstrap support for afis|EAW24370.1 as seed ortholog is 100%.

---

Group of orthologs #3262. Best score 1163 bits

Score difference with first non-orthologous sequence - *A. fumigatus*:846 *A. fischeri*:739

afum|EAL87171.1 100.00% afis|EAW23733.1 100.00%

Bootstrap support for afum|EAL87171.1 as seed ortholog is 100%.

Bootstrap support for afis|EAW23733.1 as seed ortholog is 100%.

---

Group of orthologs #3263. Best score 1163 bits

Score difference with first non-orthologous sequence - *A. fumigatus*:1163 *A. fischeri*:1163

afum|EAL88087.1 100.00% afis|EAW23384.1 100.00%

Bootstrap support for afum|EAL88087.1 as seed ortholog is 100%.

Bootstrap support for afis|EAW23384.1 as seed ortholog is 100%.

---

Group of orthologs #3264. Best score 1163 bits

Score difference with first non-orthologous sequence - *A. fumigatus*:1163 *A. fischeri*:1163  
afum|EAL87837.1 100.00% afis|EAW23623.1 100.00%  
Bootstrap support for afum|EAL87837.1 as seed ortholog is 100%.  
Bootstrap support for afis|EAW23623.1 as seed ortholog is 100%.

---

Group of orthologs #3265. Best score 1163 bits

Score difference with first non-orthologous sequence - *A. fumigatus*:1163 *A. fischeri*:1163  
afum|EAL93527.1 100.00% afis|EAW18792.1 100.00%  
Bootstrap support for afum|EAL93527.1 as seed ortholog is 100%.  
Bootstrap support for afis|EAW18792.1 as seed ortholog is 100%.

---

Group of orthologs #3266. Best score 1162 bits

Score difference with first non-orthologous sequence - *A. fumigatus*:352 *A. fischeri*:1162  
afum|EAL89177.1 100.00% afis|EAW16582.1 100.00%  
Bootstrap support for afum|EAL89177.1 as seed ortholog is 100%.  
Bootstrap support for afis|EAW16582.1 as seed ortholog is 100%.

---

Group of orthologs #3267. Best score 1162 bits

Score difference with first non-orthologous sequence - *A. fumigatus*:838 *A. fischeri*:736  
afum|EAL84793.1 100.00% afis|EAW20840.1 100.00%  
Bootstrap support for afum|EAL84793.1 as seed ortholog is 100%.  
Bootstrap support for afis|EAW20840.1 as seed ortholog is 100%.

---

Group of orthologs #3268. Best score 1162 bits

Score difference with first non-orthologous sequence - *A. fumigatus*:850 *A. fischeri*:750  
afum|EAL89300.1 100.00% afis|EAW16712.1 100.00%  
Bootstrap support for afum|EAL89300.1 as seed ortholog is 100%.  
Bootstrap support for afis|EAW16712.1 as seed ortholog is 100%.

---

Group of orthologs #3269. Best score 1162 bits

Score difference with first non-orthologous sequence - *A. fumigatus*:1021 *A. fischeri*:797  
afum|EAL85995.1 100.00% afis|EAW24325.1 100.00%  
Bootstrap support for afum|EAL85995.1 as seed ortholog is 100%.  
Bootstrap support for afis|EAW24325.1 as seed ortholog is 100%.

---

Group of orthologs #3270. Best score 1162 bits

Score difference with first non-orthologous sequence - *A. fumigatus*:1162 *A. fischeri*:1162  
afum|EAL88359.1 100.00% afis|EAW23121.1 100.00%  
Bootstrap support for afum|EAL88359.1 as seed ortholog is 100%.  
Bootstrap support for afis|EAW23121.1 as seed ortholog is 100%.

---

Group of orthologs #3271. Best score 1162 bits

Score difference with first non-orthologous sequence - *A. fumigatus*:1162 *A. fischeri*:1162  
afum|EAL93972.1 100.00% afis|EAW19243.1 100.00%  
Bootstrap support for afum|EAL93972.1 as seed ortholog is 100%.  
Bootstrap support for afis|EAW19243.1 as seed ortholog is 100%.

---

Group of orthologs #3272. Best score 1162 bits

Score difference with first non-orthologous sequence - *A. fumigatus*:1162 *A. fischeri*:1162  
afum|EAL92533.1 100.00% afis|EAW21513.1 100.00%  
Bootstrap support for afum|EAL92533.1 as seed ortholog is 100%.  
Bootstrap support for afis|EAW21513.1 as seed ortholog is 100%.

---

Group of orthologs #3273. Best score 1161 bits

Score difference with first non-orthologous sequence - *A. fumigatus*:988 *A. fischeri*:904  
afum|EAL86450.1 100.00% afis|EAW16925.1 100.00%

Bootstrap support for afum|EAL86450.1 as seed ortholog is 100%.  
Bootstrap support for afis|EAW16925.1 as seed ortholog is 100%.

---

Group of orthologs #3274. Best score 1161 bits

Score difference with first non-orthologous sequence - *A. fumigatus*:1161 *A. fischeri*:717

afum|EAL88027.1 100.00% afis|EAW16155.1 100.00%

Bootstrap support for afum|EAL88027.1 as seed ortholog is 100%.

Bootstrap support for afis|EAW16155.1 as seed ortholog is 100%.

---

Group of orthologs #3275. Best score 1161 bits

Score difference with first non-orthologous sequence - *A. fumigatus*:1047 *A. fischeri*:1161

afum|EAL86538.1 100.00% afis|EAW20678.1 100.00%

Bootstrap support for afum|EAL86538.1 as seed ortholog is 100%.

Bootstrap support for afis|EAW20678.1 as seed ortholog is 100%.

---

Group of orthologs #3276. Best score 1161 bits

Score difference with first non-orthologous sequence - *A. fumigatus*:1161 *A. fischeri*:1161

afum|EAL91415.1 100.00% afis|EAW17602.1 100.00%

Bootstrap support for afum|EAL91415.1 as seed ortholog is 100%.

Bootstrap support for afis|EAW17602.1 as seed ortholog is 100%.

---

Group of orthologs #3277. Best score 1161 bits

Score difference with first non-orthologous sequence - *A. fumigatus*:1161 *A. fischeri*:1161

afum|EAL87120.1 100.00% afis|EAW23677.1 100.00%

Bootstrap support for afum|EAL87120.1 as seed ortholog is 100%.

Bootstrap support for afis|EAW23677.1 as seed ortholog is 100%.

---

Group of orthologs #3278. Best score 1161 bits

Score difference with first non-orthologous sequence - *A. fumigatus*:1161 *A. fischeri*:1161

afum|EAL89403.2 100.00% afis|EAW24761.1 100.00%

Bootstrap support for afum|EAL89403.2 as seed ortholog is 100%.

Bootstrap support for afis|EAW24761.1 as seed ortholog is 100%.

---

Group of orthologs #3279. Best score 1160 bits

Score difference with first non-orthologous sequence - *A. fumigatus*:774 *A. fischeri*:921

afum|EAL85316.1 100.00% afis|EAW20196.1 100.00%

Bootstrap support for afum|EAL85316.1 as seed ortholog is 100%.

Bootstrap support for afis|EAW20196.1 as seed ortholog is 100%.

---

Group of orthologs #3280. Best score 1160 bits

Score difference with first non-orthologous sequence - *A. fumigatus*:1160 *A. fischeri*:1160

afum|EAL91299.1 100.00% afis|EAW17470.1 100.00%

Bootstrap support for afum|EAL91299.1 as seed ortholog is 100%.

Bootstrap support for afis|EAW17470.1 as seed ortholog is 100%.

---

Group of orthologs #3281. Best score 1160 bits

Score difference with first non-orthologous sequence - *A. fumigatus*:1160 *A. fischeri*:1160

afum|EAL85915.1 100.00% afis|EAW24247.1 100.00%

Bootstrap support for afum|EAL85915.1 as seed ortholog is 100%.

Bootstrap support for afis|EAW24247.1 as seed ortholog is 100%.

---

Group of orthologs #3282. Best score 1160 bits

Score difference with first non-orthologous sequence - *A. fumigatus*:1160 *A. fischeri*:1160

afum|EAL87219.2 100.00% afis|EAW23785.1 100.00%

Bootstrap support for afum|EAL87219.2 as seed ortholog is 100%.

Bootstrap support for afis|EAW23785.1 as seed ortholog is 100%.

---

Group of orthologs #3283. Best score 1160 bits

Score difference with first non-orthologous sequence - *A. fumigatus*:1160 *A. fischeri*:1160

afum|EAL87977.1 100.00% afis|EAW23486.1 100.00%

Bootstrap support for afum|EAL87977.1 as seed ortholog is 100%.

Bootstrap support for afis|EAW23486.1 as seed ortholog is 100%.

---

Group of orthologs #3284. Best score 1160 bits

Score difference with first non-orthologous sequence - *A. fumigatus*:1160 *A. fischeri*:1160

afum|EAL90814.1 100.00% afis|EAW22378.1 100.00%

Bootstrap support for afum|EAL90814.1 as seed ortholog is 100%.

Bootstrap support for afis|EAW22378.1 as seed ortholog is 100%.

---

Group of orthologs #3285. Best score 1160 bits

Score difference with first non-orthologous sequence - *A. fumigatus*:1160 *A. fischeri*:1160

afum|EBA27189.1 100.00% afis|EAW20538.1 100.00%

Bootstrap support for afum|EBA27189.1 as seed ortholog is 100%.

Bootstrap support for afis|EAW20538.1 as seed ortholog is 100%.

---

Group of orthologs #3286. Best score 1160 bits

Score difference with first non-orthologous sequence - *A. fumigatus*:1160 *A. fischeri*:1160

afum|EAL89620.1 100.00% afis|EAW24962.1 100.00%

Bootstrap support for afum|EAL89620.1 as seed ortholog is 100%.

Bootstrap support for afis|EAW24962.1 as seed ortholog is 100%.

---

Group of orthologs #3287. Best score 1160 bits

Score difference with first non-orthologous sequence - *A. fumigatus*:1160 *A. fischeri*:1160

afum|EAL92023.1 100.00% afis|EAW24166.1 100.00%

Bootstrap support for afum|EAL92023.1 as seed ortholog is 100%.

Bootstrap support for afis|EAW24166.1 as seed ortholog is 100%.

---

Group of orthologs #3288. Best score 1160 bits

Score difference with first non-orthologous sequence - *A. fumigatus*:1160 *A. fischeri*:1160

afum|EBA27171.1 100.00% afis|EAW25557.1 100.00%

Bootstrap support for afum|EBA27171.1 as seed ortholog is 100%.

Bootstrap support for afis|EAW25557.1 as seed ortholog is 100%.

---

Group of orthologs #3289. Best score 1159 bits

Score difference with first non-orthologous sequence - *A. fumigatus*:1159 *A. fischeri*:1159

afum|EAL85511.2 100.00% afis|EAW15840.1 100.00%

Bootstrap support for afum|EAL85511.2 as seed ortholog is 100%.

Bootstrap support for afis|EAW15840.1 as seed ortholog is 100%.

---

Group of orthologs #3290. Best score 1159 bits

Score difference with first non-orthologous sequence - *A. fumigatus*:663 *A. fischeri*:729

afum|EAL86395.1 100.00% afis|EAW16849.1 100.00%

Bootstrap support for afum|EAL86395.1 as seed ortholog is 100%.

Bootstrap support for afis|EAW16849.1 as seed ortholog is 100%.

---

Group of orthologs #3291. Best score 1159 bits

Score difference with first non-orthologous sequence - *A. fumigatus*:1159 *A. fischeri*:1159

afum|EAL88629.1 100.00% afis|EAW15997.1 100.00%

Bootstrap support for afum|EAL88629.1 as seed ortholog is 100%.

Bootstrap support for afis|EAW15997.1 as seed ortholog is 100%.

---

Group of orthologs #3292. Best score 1159 bits

Score difference with first non-orthologous sequence - *A. fumigatus*:1159 *A. fischeri*:1159  
afum|EAL93488.2 100.00% afis|EAW18758.1 100.00%  
Bootstrap support for afum|EAL93488.2 as seed ortholog is 100%.  
Bootstrap support for afis|EAW18758.1 as seed ortholog is 100%.

---

Group of orthologs #3293. Best score 1159 bits

Score difference with first non-orthologous sequence - *A. fumigatus*:1159 *A. fischeri*:1159  
afum|EAL90912.1 100.00% afis|EAW22268.1 100.00%  
Bootstrap support for afum|EAL90912.1 as seed ortholog is 100%.  
Bootstrap support for afis|EAW22268.1 as seed ortholog is 100%.

---

Group of orthologs #3294. Best score 1158 bits

Score difference with first non-orthologous sequence - *A. fumigatus*:1158 *A. fischeri*:1158  
afum|EAL85580.1 100.00% afis|EAW15768.1 100.00%  
Bootstrap support for afum|EAL85580.1 as seed ortholog is 100%.  
Bootstrap support for afis|EAW15768.1 as seed ortholog is 100%.

---

Group of orthologs #3295. Best score 1158 bits

Score difference with first non-orthologous sequence - *A. fumigatus*:1158 *A. fischeri*:454  
afum|EAL89034.1 100.00% afis|EAW16410.1 100.00%  
Bootstrap support for afum|EAL89034.1 as seed ortholog is 100%.  
Bootstrap support for afis|EAW16410.1 as seed ortholog is 100%.

---

Group of orthologs #3296. Best score 1158 bits

Score difference with first non-orthologous sequence - *A. fumigatus*:1158 *A. fischeri*:1158  
afum|EAL91673.1 100.00% afis|EAW17865.1 100.00%  
Bootstrap support for afum|EAL91673.1 as seed ortholog is 100%.  
Bootstrap support for afis|EAW17865.1 as seed ortholog is 100%.

---

Group of orthologs #3297. Best score 1158 bits

Score difference with first non-orthologous sequence - *A. fumigatus*:1158 *A. fischeri*:1158  
afum|EAL93724.1 100.00% afis|EAW18988.1 100.00%  
Bootstrap support for afum|EAL93724.1 as seed ortholog is 100%.  
Bootstrap support for afis|EAW18988.1 as seed ortholog is 100%.

---

Group of orthologs #3298. Best score 1157 bits

Score difference with first non-orthologous sequence - *A. fumigatus*:1157 *A. fischeri*:1157  
afum|EAL92082.1 100.00% afis|EAW21046.1 100.00%  
Bootstrap support for afum|EAL92082.1 as seed ortholog is 100%.  
Bootstrap support for afis|EAW21046.1 as seed ortholog is 100%.

---

Group of orthologs #3299. Best score 1157 bits

Score difference with first non-orthologous sequence - *A. fumigatus*:1012 *A. fischeri*:1050  
afum|EAL89410.1 100.00% afis|EAW24769.1 100.00%  
Bootstrap support for afum|EAL89410.1 as seed ortholog is 100%.  
Bootstrap support for afis|EAW24769.1 as seed ortholog is 100%.

---

Group of orthologs #3300. Best score 1156 bits

Score difference with first non-orthologous sequence - *A. fumigatus*:949 *A. fischeri*:1156  
afum|EAL85259.1 100.00% afis|EAW20144.1 100.00%  
Bootstrap support for afum|EAL85259.1 as seed ortholog is 100%.  
Bootstrap support for afis|EAW20144.1 as seed ortholog is 100%.

---

Group of orthologs #3301. Best score 1156 bits

Score difference with first non-orthologous sequence - *A. fumigatus*:1156 *A. fischeri*:1156  
afum|EAL85967.1 100.00% afis|EAW24299.1 100.00%



Bootstrap support for afum|EAL85967.1 as seed ortholog is 100%.  
Bootstrap support for afis|EAW24299.1 as seed ortholog is 100%.

---

Group of orthologs #3302. Best score 1156 bits

Score difference with first non-orthologous sequence - *A. fumigatus*:1156 *A. fischeri*:1156

|                 |         |                 |         |
|-----------------|---------|-----------------|---------|
| afum EAL92425.1 | 100.00% | afis EAW21411.1 | 100.00% |
|-----------------|---------|-----------------|---------|

Bootstrap support for afum|EAL92425.1 as seed ortholog is 100%.

Bootstrap support for afis|EAW21411.1 as seed ortholog is 100%.

---

Group of orthologs #3303. Best score 1156 bits

Score difference with first non-orthologous sequence - *A. fumigatus*:1156 *A. fischeri*:1156

|                 |         |                 |         |
|-----------------|---------|-----------------|---------|
| afum EAL89776.1 | 100.00% | afis EAW25105.1 | 100.00% |
|-----------------|---------|-----------------|---------|

Bootstrap support for afum|EAL89776.1 as seed ortholog is 100%.

Bootstrap support for afis|EAW25105.1 as seed ortholog is 100%.

---

Group of orthologs #3304. Best score 1155 bits

Score difference with first non-orthologous sequence - *A. fumigatus*:1155 *A. fischeri*:835

|                 |         |                 |         |
|-----------------|---------|-----------------|---------|
| afum EAL84720.1 | 100.00% | afis EAW20914.1 | 100.00% |
|-----------------|---------|-----------------|---------|

Bootstrap support for afum|EAL84720.1 as seed ortholog is 100%.

Bootstrap support for afis|EAW20914.1 as seed ortholog is 100%.

---

Group of orthologs #3305. Best score 1155 bits

Score difference with first non-orthologous sequence - *A. fumigatus*:1155 *A. fischeri*:1155

|                 |         |                 |         |
|-----------------|---------|-----------------|---------|
| afum EAL91722.1 | 100.00% | afis EAW17913.1 | 100.00% |
|-----------------|---------|-----------------|---------|

Bootstrap support for afum|EAL91722.1 as seed ortholog is 100%.

Bootstrap support for afis|EAW17913.1 as seed ortholog is 100%.

---

Group of orthologs #3306. Best score 1155 bits

Score difference with first non-orthologous sequence - *A. fumigatus*:1155 *A. fischeri*:1155

|                 |         |                 |         |
|-----------------|---------|-----------------|---------|
| afum EAL92891.2 | 100.00% | afis EAW21877.1 | 100.00% |
|-----------------|---------|-----------------|---------|

Bootstrap support for afum|EAL92891.2 as seed ortholog is 100%.

Bootstrap support for afis|EAW21877.1 as seed ortholog is 100%.

---

Group of orthologs #3307. Best score 1155 bits

Score difference with first non-orthologous sequence - *A. fumigatus*:1155 *A. fischeri*:1155

|                 |         |                 |         |
|-----------------|---------|-----------------|---------|
| afum EAL92935.1 | 100.00% | afis EAW21922.1 | 100.00% |
|-----------------|---------|-----------------|---------|

Bootstrap support for afum|EAL92935.1 as seed ortholog is 100%.

Bootstrap support for afis|EAW21922.1 as seed ortholog is 100%.

---

Group of orthologs #3308. Best score 1155 bits

Score difference with first non-orthologous sequence - *A. fumigatus*:1155 *A. fischeri*:1155

|                 |         |                 |         |
|-----------------|---------|-----------------|---------|
| afum EAL89787.1 | 100.00% | afis EAW25116.1 | 100.00% |
|-----------------|---------|-----------------|---------|

Bootstrap support for afum|EAL89787.1 as seed ortholog is 100%.

Bootstrap support for afis|EAW25116.1 as seed ortholog is 100%.

---

Group of orthologs #3309. Best score 1154 bits

Score difference with first non-orthologous sequence - *A. fumigatus*:939 *A. fischeri*:792

|                 |         |                 |         |
|-----------------|---------|-----------------|---------|
| afum EAL85766.1 | 100.00% | afis EAW15567.1 | 100.00% |
|-----------------|---------|-----------------|---------|

Bootstrap support for afum|EAL85766.1 as seed ortholog is 100%.

Bootstrap support for afis|EAW15567.1 as seed ortholog is 100%.

---

Group of orthologs #3310. Best score 1154 bits

Score difference with first non-orthologous sequence - *A. fumigatus*:1154 *A. fischeri*:1154

|                 |         |                 |         |
|-----------------|---------|-----------------|---------|
| afum EAL84633.1 | 100.00% | afis EAW20995.1 | 100.00% |
|-----------------|---------|-----------------|---------|

Bootstrap support for afum|EAL84633.1 as seed ortholog is 100%.

Bootstrap support for afis|EAW20995.1 as seed ortholog is 100%.

---

Group of orthologs #3311. Best score 1154 bits

Score difference with first non-orthologous sequence - *A. fumigatus*:1154 *A. fischeri*:1154

afum|EAL91375.1 100.00% afis|EAW17561.1 100.00%

Bootstrap support for afum|EAL91375.1 as seed ortholog is 100%.

Bootstrap support for afis|EAW17561.1 as seed ortholog is 100%.

---

Group of orthologs #3312. Best score 1154 bits

Score difference with first non-orthologous sequence - *A. fumigatus*:1154 *A. fischeri*:1154

afum|EAL92924.1 100.00% afis|EAW21912.1 100.00%

Bootstrap support for afum|EAL92924.1 as seed ortholog is 100%.

Bootstrap support for afis|EAW21912.1 as seed ortholog is 100%.

---

Group of orthologs #3313. Best score 1154 bits

Score difference with first non-orthologous sequence - *A. fumigatus*:1154 *A. fischeri*:1154

afum|EAL92974.1 100.00% afis|EAW21960.1 100.00%

Bootstrap support for afum|EAL92974.1 as seed ortholog is 100%.

Bootstrap support for afis|EAW21960.1 as seed ortholog is 100%.

---

Group of orthologs #3314. Best score 1154 bits

Score difference with first non-orthologous sequence - *A. fumigatus*:1154 *A. fischeri*:1154

afum|EAL89771.1 100.00% afis|EAW25100.1 100.00%

Bootstrap support for afum|EAL89771.1 as seed ortholog is 100%.

Bootstrap support for afis|EAW25100.1 as seed ortholog is 100%.

---

Group of orthologs #3315. Best score 1153 bits

Score difference with first non-orthologous sequence - *A. fumigatus*:1153 *A. fischeri*:1059

afum|EAL86419.1 100.00% afis|EAW16883.1 100.00%

Bootstrap support for afum|EAL86419.1 as seed ortholog is 100%.

Bootstrap support for afis|EAW16883.1 as seed ortholog is 100%.

---

Group of orthologs #3316. Best score 1153 bits

Score difference with first non-orthologous sequence - *A. fumigatus*:772 *A. fischeri*:536

afum|EAL86435.1 100.00% afis|EAW16900.1 100.00%

Bootstrap support for afum|EAL86435.1 as seed ortholog is 100%.

Bootstrap support for afis|EAW16900.1 as seed ortholog is 100%.

---

Group of orthologs #3317. Best score 1153 bits

Score difference with first non-orthologous sequence - *A. fumigatus*:1153 *A. fischeri*:1153

afum|EAL86835.1 100.00% afis|EAW19691.1 100.00%

Bootstrap support for afum|EAL86835.1 as seed ortholog is 100%.

Bootstrap support for afis|EAW19691.1 as seed ortholog is 100%.

---

Group of orthologs #3318. Best score 1153 bits

Score difference with first non-orthologous sequence - *A. fumigatus*:1002 *A. fischeri*:929

afum|EAL91287.1 100.00% afis|EAW17459.1 100.00%

Bootstrap support for afum|EAL91287.1 as seed ortholog is 100%.

Bootstrap support for afis|EAW17459.1 as seed ortholog is 100%.

---

Group of orthologs #3319. Best score 1153 bits

Score difference with first non-orthologous sequence - *A. fumigatus*:1153 *A. fischeri*:1153

afum|EAL90212.1 100.00% afis|EAW22987.1 100.00%

Bootstrap support for afum|EAL90212.1 as seed ortholog is 100%.

Bootstrap support for afis|EAW22987.1 as seed ortholog is 100%.

---

Group of orthologs #3320. Best score 1153 bits

Score difference with first non-orthologous sequence - *A. fumigatus*:1153 *A. fischeri*:1153  
afum|EBA27214.1 100.00% afis|EAW19924.1 100.00%  
Bootstrap support for afum|EBA27214.1 as seed ortholog is 100%.  
Bootstrap support for afis|EAW19924.1 as seed ortholog is 100%.

---

Group of orthologs #3321. Best score 1153 bits

Score difference with first non-orthologous sequence - *A. fumigatus*:1153 *A. fischeri*:1153  
afum|EAL92043.1 100.00% afis|EAW24183.1 100.00%  
Bootstrap support for afum|EAL92043.1 as seed ortholog is 100%.  
Bootstrap support for afis|EAW24183.1 as seed ortholog is 100%.

---

Group of orthologs #3322. Best score 1152 bits

Score difference with first non-orthologous sequence - *A. fumigatus*:981 *A. fischeri*:617  
afum|EAL92382.2 100.00% afis|EAW21366.1 100.00%  
Bootstrap support for afum|EAL92382.2 as seed ortholog is 100%.  
Bootstrap support for afis|EAW21366.1 as seed ortholog is 100%.

---

Group of orthologs #3323. Best score 1152 bits

Score difference with first non-orthologous sequence - *A. fumigatus*:1152 *A. fischeri*:1152  
afum|EAL89651.1 100.00% afis|EAW24991.1 100.00%  
Bootstrap support for afum|EAL89651.1 as seed ortholog is 100%.  
Bootstrap support for afis|EAW24991.1 as seed ortholog is 100%.

---

Group of orthologs #3324. Best score 1152 bits

Score difference with first non-orthologous sequence - *A. fumigatus*:1019 *A. fischeri*:1152  
afum|EAL91972.2 100.00% afis|EAW24117.1 100.00%  
Bootstrap support for afum|EAL91972.2 as seed ortholog is 100%.  
Bootstrap support for afis|EAW24117.1 as seed ortholog is 100%.

---

Group of orthologs #3325. Best score 1151 bits

Score difference with first non-orthologous sequence - *A. fumigatus*:1027 *A. fischeri*:998  
afum|EAL86675.1 100.00% afis|EAW17258.1 100.00%  
Bootstrap support for afum|EAL86675.1 as seed ortholog is 100%.  
Bootstrap support for afis|EAW17258.1 as seed ortholog is 100%.

---

Group of orthologs #3326. Best score 1151 bits

Score difference with first non-orthologous sequence - *A. fumigatus*:1151 *A. fischeri*:1151  
afum|EBA27207.1 100.00% afis|EAW20815.1 100.00%  
Bootstrap support for afum|EBA27207.1 as seed ortholog is 100%.  
Bootstrap support for afis|EAW20815.1 as seed ortholog is 100%.

---

Group of orthologs #3327. Best score 1150 bits

Score difference with first non-orthologous sequence - *A. fumigatus*:1150 *A. fischeri*:1150  
afum|EAL85287.1 100.00% afis|EAW20169.1 100.00%  
Bootstrap support for afum|EAL85287.1 as seed ortholog is 100%.  
Bootstrap support for afis|EAW20169.1 as seed ortholog is 100%.

---

Group of orthologs #3328. Best score 1150 bits

Score difference with first non-orthologous sequence - *A. fumigatus*:1150 *A. fischeri*:1150  
afum|EAL87591.1 100.00% afis|EAW18225.1 100.00%  
Bootstrap support for afum|EAL87591.1 as seed ortholog is 100%.  
Bootstrap support for afis|EAW18225.1 as seed ortholog is 100%.

---

Group of orthologs #3329. Best score 1150 bits

Score difference with first non-orthologous sequence - *A. fumigatus*:1150 *A. fischeri*:1150  
afum|EAL93786.1 100.00% afis|EAW19057.1 100.00%

Bootstrap support for afum|EAL93786.1 as seed ortholog is 100%.  
Bootstrap support for afis|EAW19057.1 as seed ortholog is 100%.

---

Group of orthologs #3330. Best score 1150 bits

Score difference with first non-orthologous sequence - *A. fumigatus*:1150 *A. fischeri*:1150

|                 |         |                 |         |
|-----------------|---------|-----------------|---------|
| afum EAL90752.1 | 100.00% | afis EAW22439.1 | 100.00% |
|-----------------|---------|-----------------|---------|

Bootstrap support for afum|EAL90752.1 as seed ortholog is 100%.

Bootstrap support for afis|EAW22439.1 as seed ortholog is 100%.

---

Group of orthologs #3331. Best score 1150 bits

Score difference with first non-orthologous sequence - *A. fumigatus*:1150 *A. fischeri*:1150

|                 |         |                 |         |
|-----------------|---------|-----------------|---------|
| afum EAL90585.1 | 100.00% | afis EAW22613.1 | 100.00% |
|-----------------|---------|-----------------|---------|

Bootstrap support for afum|EAL90585.1 as seed ortholog is 100%.

Bootstrap support for afis|EAW22613.1 as seed ortholog is 100%.

---

Group of orthologs #3332. Best score 1149 bits

Score difference with first non-orthologous sequence - *A. fumigatus*:864 *A. fischeri*:892

|                 |         |                 |         |
|-----------------|---------|-----------------|---------|
| afum EAL85145.1 | 100.00% | afis EAW19752.1 | 100.00% |
|-----------------|---------|-----------------|---------|

Bootstrap support for afum|EAL85145.1 as seed ortholog is 100%.

Bootstrap support for afis|EAW19752.1 as seed ortholog is 100%.

---

Group of orthologs #3333. Best score 1149 bits

Score difference with first non-orthologous sequence - *A. fumigatus*:1149 *A. fischeri*:1149

|                 |         |                 |         |
|-----------------|---------|-----------------|---------|
| afum EAL87495.1 | 100.00% | afis EAW18138.1 | 100.00% |
|-----------------|---------|-----------------|---------|

Bootstrap support for afum|EAL87495.1 as seed ortholog is 100%.

Bootstrap support for afis|EAW18138.1 as seed ortholog is 100%.

---

Group of orthologs #3334. Best score 1149 bits

Score difference with first non-orthologous sequence - *A. fumigatus*:1149 *A. fischeri*:258

|                 |         |                 |         |
|-----------------|---------|-----------------|---------|
| afum EAL84338.1 | 100.00% | afis EAW25668.1 | 100.00% |
|-----------------|---------|-----------------|---------|

Bootstrap support for afum|EAL84338.1 as seed ortholog is 100%.

Bootstrap support for afis|EAW25668.1 as seed ortholog is 100%.

---

Group of orthologs #3335. Best score 1149 bits

Score difference with first non-orthologous sequence - *A. fumigatus*:1149 *A. fischeri*:1149

|                 |         |                 |         |
|-----------------|---------|-----------------|---------|
| afum EAL85905.1 | 100.00% | afis EAW24236.1 | 100.00% |
|-----------------|---------|-----------------|---------|

Bootstrap support for afum|EAL85905.1 as seed ortholog is 100%.

Bootstrap support for afis|EAW24236.1 as seed ortholog is 100%.

---

Group of orthologs #3336. Best score 1148 bits

Score difference with first non-orthologous sequence - *A. fumigatus*:1148 *A. fischeri*:1148

|                 |         |                 |         |
|-----------------|---------|-----------------|---------|
| afum EAL86348.2 | 100.00% | afis EAW16778.1 | 100.00% |
|-----------------|---------|-----------------|---------|

Bootstrap support for afum|EAL86348.2 as seed ortholog is 100%.

Bootstrap support for afis|EAW16778.1 as seed ortholog is 100%.

---

Group of orthologs #3337. Best score 1148 bits

Score difference with first non-orthologous sequence - *A. fumigatus*:1148 *A. fischeri*:1148

|                 |         |                 |         |
|-----------------|---------|-----------------|---------|
| afum EAL91546.1 | 100.00% | afis EAW17731.1 | 100.00% |
|-----------------|---------|-----------------|---------|

Bootstrap support for afum|EAL91546.1 as seed ortholog is 100%.

Bootstrap support for afis|EAW17731.1 as seed ortholog is 100%.

---

Group of orthologs #3338. Best score 1148 bits

Score difference with first non-orthologous sequence - *A. fumigatus*:1148 *A. fischeri*:1030

|                 |         |                 |         |
|-----------------|---------|-----------------|---------|
| afum EAL92188.2 | 100.00% | afis EAW21169.1 | 100.00% |
|-----------------|---------|-----------------|---------|

Bootstrap support for afum|EAL92188.2 as seed ortholog is 100%.

Bootstrap support for afis|EAW21169.1 as seed ortholog is 100%.

---

Group of orthologs #3339. Best score 1148 bits

Score difference with first non-orthologous sequence - *A. fumigatus*:1148 *A. fischeri*:1148

afum|EAL92034.1 100.00% afis|EAW24172.1 100.00%

Bootstrap support for afum|EAL92034.1 as seed ortholog is 100%.

Bootstrap support for afis|EAW24172.1 as seed ortholog is 100%.

---

Group of orthologs #3340. Best score 1147 bits

Score difference with first non-orthologous sequence - *A. fumigatus*:1147 *A. fischeri*:1147

afum|EAL88897.1 100.00% afis|EAW16276.1 100.00%

Bootstrap support for afum|EAL88897.1 as seed ortholog is 100%.

Bootstrap support for afis|EAW16276.1 as seed ortholog is 100%.

---

Group of orthologs #3341. Best score 1147 bits

Score difference with first non-orthologous sequence - *A. fumigatus*:629 *A. fischeri*:1147

afum|EAL85367.1 100.00% afis|EAW20249.1 100.00%

Bootstrap support for afum|EAL85367.1 as seed ortholog is 100%.

Bootstrap support for afis|EAW20249.1 as seed ortholog is 100%.

---

Group of orthologs #3342. Best score 1147 bits

Score difference with first non-orthologous sequence - *A. fumigatus*:1147 *A. fischeri*:350

afum|EAL86880.1 100.00% afis|EAW19642.1 100.00%

Bootstrap support for afum|EAL86880.1 as seed ortholog is 100%.

Bootstrap support for afis|EAW19642.1 as seed ortholog is 100%.

---

Group of orthologs #3343. Best score 1147 bits

Score difference with first non-orthologous sequence - *A. fumigatus*:1147 *A. fischeri*:1147

afum|EAL85891.2 100.00% afis|EAW24222.1 100.00%

Bootstrap support for afum|EAL85891.2 as seed ortholog is 100%.

Bootstrap support for afis|EAW24222.1 as seed ortholog is 100%.

---

Group of orthologs #3344. Best score 1147 bits

Score difference with first non-orthologous sequence - *A. fumigatus*:1147 *A. fischeri*:1147

afum|EAL93666.2 100.00% afis|EAW18933.1 100.00%

Bootstrap support for afum|EAL93666.2 as seed ortholog is 100%.

Bootstrap support for afis|EAW18933.1 as seed ortholog is 100%.

---

Group of orthologs #3345. Best score 1147 bits

Score difference with first non-orthologous sequence - *A. fumigatus*:846 *A. fischeri*:1028

afum|EAL93829.1 100.00% afis|EAW19097.1 100.00%

Bootstrap support for afum|EAL93829.1 as seed ortholog is 100%.

Bootstrap support for afis|EAW19097.1 as seed ortholog is 100%.

---

Group of orthologs #3346. Best score 1146 bits

Score difference with first non-orthologous sequence - *A. fumigatus*:1146 *A. fischeri*:1146

afum|EAL87617.1 100.00% afis|EAW18254.1 100.00%

Bootstrap support for afum|EAL87617.1 as seed ortholog is 100%.

Bootstrap support for afis|EAW18254.1 as seed ortholog is 100%.

---

Group of orthologs #3347. Best score 1146 bits

Score difference with first non-orthologous sequence - *A. fumigatus*:1146 *A. fischeri*:1146

afum|EAL93267.2 100.00% afis|EAW18565.1 100.00%

Bootstrap support for afum|EAL93267.2 as seed ortholog is 100%.

Bootstrap support for afis|EAW18565.1 as seed ortholog is 100%.

---

Group of orthologs #3348. Best score 1146 bits

Score difference with first non-orthologous sequence - *A. fumigatus*:1146 *A. fischeri*:1146  
afum|EAL91075.1 100.00% afis|EAW22109.1 100.00%  
Bootstrap support for afum|EAL91075.1 as seed ortholog is 100%.  
Bootstrap support for afis|EAW22109.1 as seed ortholog is 100%.

---

Group of orthologs #3349. Best score 1146 bits

Score difference with first non-orthologous sequence - *A. fumigatus*:1146 *A. fischeri*:958  
afum|EAL90787.1 100.00% afis|EAW22404.1 100.00%  
Bootstrap support for afum|EAL90787.1 as seed ortholog is 100%.  
Bootstrap support for afis|EAW22404.1 as seed ortholog is 100%.

---

Group of orthologs #3350. Best score 1145 bits

Score difference with first non-orthologous sequence - *A. fumigatus*:1145 *A. fischeri*:1145  
afum|EAL87722.1 100.00% afis|EAW18358.1 100.00%  
Bootstrap support for afum|EAL87722.1 as seed ortholog is 100%.  
Bootstrap support for afis|EAW18358.1 as seed ortholog is 100%.

---

Group of orthologs #3351. Best score 1145 bits

Score difference with first non-orthologous sequence - *A. fumigatus*:1145 *A. fischeri*:1145  
afum|EAL85882.1 100.00% afis|EAW24213.1 100.00%  
Bootstrap support for afum|EAL85882.1 as seed ortholog is 100%.  
Bootstrap support for afis|EAW24213.1 as seed ortholog is 100%.

---

Group of orthologs #3352. Best score 1145 bits

Score difference with first non-orthologous sequence - *A. fumigatus*:894 *A. fischeri*:846  
afum|EAL92997.1 100.00% afis|EAW21982.1 100.00%  
Bootstrap support for afum|EAL92997.1 as seed ortholog is 100%.  
Bootstrap support for afis|EAW21982.1 as seed ortholog is 100%.

---

Group of orthologs #3353. Best score 1144 bits

Score difference with first non-orthologous sequence - *A. fumigatus*:1083 *A. fischeri*:769  
afum|EAL86952.1 100.00% afis|EAW19559.1 100.00%  
Bootstrap support for afum|EAL86952.1 as seed ortholog is 100%.  
Bootstrap support for afis|EAW19559.1 as seed ortholog is 100%.

---

Group of orthologs #3354. Best score 1144 bits

Score difference with first non-orthologous sequence - *A. fumigatus*:1144 *A. fischeri*:1144  
afum|EAL88417.1 100.00% afis|EAW23062.1 100.00%  
Bootstrap support for afum|EAL88417.1 as seed ortholog is 100%.  
Bootstrap support for afis|EAW23062.1 as seed ortholog is 100%.

---

Group of orthologs #3355. Best score 1144 bits

Score difference with first non-orthologous sequence - *A. fumigatus*:1144 *A. fischeri*:1144  
afum|EBA27330.1 100.00% afis|EAW23456.1 100.00%  
Bootstrap support for afum|EBA27330.1 as seed ortholog is 100%.  
Bootstrap support for afis|EAW23456.1 as seed ortholog is 100%.

---

Group of orthologs #3356. Best score 1143 bits

Score difference with first non-orthologous sequence - *A. fumigatus*:881 *A. fischeri*:903  
afum|EAL86606.1 100.00% afis|EAW17176.1 100.00%  
Bootstrap support for afum|EAL86606.1 as seed ortholog is 100%.  
Bootstrap support for afis|EAW17176.1 as seed ortholog is 100%.

---

Group of orthologs #3357. Best score 1143 bits

Score difference with first non-orthologous sequence - *A. fumigatus*:1143 *A. fischeri*:1143  
afum|EAL86622.1 100.00% afis|EAW17194.1 100.00%

Bootstrap support for afum|EAL86622.1 as seed ortholog is 100%.  
Bootstrap support for afis|EAW17194.1 as seed ortholog is 100%.

---

Group of orthologs #3358. Best score 1143 bits

Score difference with first non-orthologous sequence - *A. fumigatus*:1143 *A. fischeri*:1143

afum|EAL86685.1 100.00% afis|EAW17268.1 100.00%

Bootstrap support for afum|EAL86685.1 as seed ortholog is 100%.

Bootstrap support for afis|EAW17268.1 as seed ortholog is 100%.

---

Group of orthologs #3359. Best score 1143 bits

Score difference with first non-orthologous sequence - *A. fumigatus*:1143 *A. fischeri*:1062

afum|EAL87835.1 100.00% afis|EAW23625.1 100.00%

Bootstrap support for afum|EAL87835.1 as seed ortholog is 100%.

Bootstrap support for afis|EAW23625.1 as seed ortholog is 100%.

---

Group of orthologs #3360. Best score 1143 bits

Score difference with first non-orthologous sequence - *A. fumigatus*:1143 *A. fischeri*:893

afum|EAL93266.1 100.00% afis|EAW18564.1 100.00%

Bootstrap support for afum|EAL93266.1 as seed ortholog is 100%.

Bootstrap support for afis|EAW18564.1 as seed ortholog is 100%.

---

Group of orthologs #3361. Best score 1143 bits

Score difference with first non-orthologous sequence - *A. fumigatus*:957 *A. fischeri*:1079

afum|EAL89371.1 100.00% afis|EAW24722.1 100.00%

Bootstrap support for afum|EAL89371.1 as seed ortholog is 100%.

Bootstrap support for afis|EAW24722.1 as seed ortholog is 100%.

---

Group of orthologs #3362. Best score 1142 bits

Score difference with first non-orthologous sequence - *A. fumigatus*:1142 *A. fischeri*:1142

afum|EAL84772.1 100.00% afis|EAW20863.1 100.00%

Bootstrap support for afum|EAL84772.1 as seed ortholog is 100%.

Bootstrap support for afis|EAW20863.1 as seed ortholog is 100%.

---

Group of orthologs #3363. Best score 1142 bits

Score difference with first non-orthologous sequence - *A. fumigatus*:1142 *A. fischeri*:1142

afum|EAL88360.1 100.00% afis|EAW23120.1 100.00%

Bootstrap support for afum|EAL88360.1 as seed ortholog is 100%.

Bootstrap support for afis|EAW23120.1 as seed ortholog is 100%.

---

Group of orthologs #3364. Best score 1142 bits

Score difference with first non-orthologous sequence - *A. fumigatus*:1027 *A. fischeri*:999

afum|EAL90654.2 100.00% afis|EAW22540.1 100.00%

Bootstrap support for afum|EAL90654.2 as seed ortholog is 100%.

Bootstrap support for afis|EAW22540.1 as seed ortholog is 100%.

---

Group of orthologs #3365. Best score 1142 bits

Score difference with first non-orthologous sequence - *A. fumigatus*:1142 *A. fischeri*:1142

afum|EAL90405.1 100.00% afis|EAW22794.1 100.00%

Bootstrap support for afum|EAL90405.1 as seed ortholog is 100%.

Bootstrap support for afis|EAW22794.1 as seed ortholog is 100%.

---

Group of orthologs #3366. Best score 1142 bits

Score difference with first non-orthologous sequence - *A. fumigatus*:762 *A. fischeri*:819

afum|EBA27371.1 100.00% afis|EAW20414.1 100.00%

Bootstrap support for afum|EBA27371.1 as seed ortholog is 100%.

Bootstrap support for afis|EAW20414.1 as seed ortholog is 100%.

---

Group of orthologs #3367. Best score 1141 bits

Score difference with first non-orthologous sequence - *A. fumigatus*:1141 *A. fischeri*:1141

afum|EAL89188.1 100.00% afis|EAW16592.1 100.00%

Bootstrap support for afum|EAL89188.1 as seed ortholog is 100%.

Bootstrap support for afis|EAW16592.1 as seed ortholog is 100%.

---

Group of orthologs #3368. Best score 1141 bits

Score difference with first non-orthologous sequence - *A. fumigatus*:1141 *A. fischeri*:1141

afum|EAL87587.1 100.00% afis|EAW18221.1 100.00%

Bootstrap support for afum|EAL87587.1 as seed ortholog is 100%.

Bootstrap support for afis|EAW18221.1 as seed ortholog is 100%.

---

Group of orthologs #3369. Best score 1141 bits

Score difference with first non-orthologous sequence - *A. fumigatus*:1141 *A. fischeri*:1141

afum|EAL89291.1 100.00% afis|EAW16693.1 100.00%

Bootstrap support for afum|EAL89291.1 as seed ortholog is 100%.

Bootstrap support for afis|EAW16693.1 as seed ortholog is 100%.

---

Group of orthologs #3370. Best score 1141 bits

Score difference with first non-orthologous sequence - *A. fumigatus*:1141 *A. fischeri*:1141

afum|EAL91196.1 100.00% afis|EAW17359.1 100.00%

Bootstrap support for afum|EAL91196.1 as seed ortholog is 100%.

Bootstrap support for afis|EAW17359.1 as seed ortholog is 100%.

---

Group of orthologs #3371. Best score 1141 bits

Score difference with first non-orthologous sequence - *A. fumigatus*:1141 *A. fischeri*:1141

afum|EAL86027.1 100.00% afis|EAW24357.1 100.00%

Bootstrap support for afum|EAL86027.1 as seed ortholog is 100%.

Bootstrap support for afis|EAW24357.1 as seed ortholog is 100%.

---

Group of orthologs #3372. Best score 1141 bits

Score difference with first non-orthologous sequence - *A. fumigatus*:1141 *A. fischeri*:667

afum|EAL88283.1 100.00% afis|EAW23200.1 100.00%

Bootstrap support for afum|EAL88283.1 as seed ortholog is 100%.

Bootstrap support for afis|EAW23200.1 as seed ortholog is 100%.

---

Group of orthologs #3373. Best score 1141 bits

Score difference with first non-orthologous sequence - *A. fumigatus*:1141 *A. fischeri*:1141

afum|EAL90425.1 100.00% afis|EAW22773.1 100.00%

Bootstrap support for afum|EAL90425.1 as seed ortholog is 100%.

Bootstrap support for afis|EAW22773.1 as seed ortholog is 100%.

---

Group of orthologs #3374. Best score 1141 bits

Score difference with first non-orthologous sequence - *A. fumigatus*:950 *A. fischeri*:952

afum|EAL89614.2 100.00% afis|EAW24956.1 100.00%

Bootstrap support for afum|EAL89614.2 as seed ortholog is 100%.

Bootstrap support for afis|EAW24956.1 as seed ortholog is 100%.

---

Group of orthologs #3375. Best score 1141 bits

Score difference with first non-orthologous sequence - *A. fumigatus*:1141 *A. fischeri*:1141

afum|EAL92907.1 100.00% afis|EAW21893.1 100.00%

Bootstrap support for afum|EAL92907.1 as seed ortholog is 100%.

Bootstrap support for afis|EAW21893.1 as seed ortholog is 100%.

---

Group of orthologs #3376. Best score 1141 bits



Score difference with first non-orthologous sequence - *A. fumigatus*:1141 *A. fischeri*:1141  
afum|EAL89847.1 100.00% afis|EAW25174.1 100.00%  
Bootstrap support for afum|EAL89847.1 as seed ortholog is 100%.  
Bootstrap support for afis|EAW25174.1 as seed ortholog is 100%.

---

Group of orthologs #3377. Best score 1140 bits

Score difference with first non-orthologous sequence - *A. fumigatus*:1140 *A. fischeri*:1140  
afum|EAL86586.1 100.00% afis|EAW17126.1 100.00%  
Bootstrap support for afum|EAL86586.1 as seed ortholog is 100%.  
Bootstrap support for afis|EAW17126.1 as seed ortholog is 100%.

---

Group of orthologs #3378. Best score 1140 bits

Score difference with first non-orthologous sequence - *A. fumigatus*:1140 *A. fischeri*:1140  
afum|EAL88971.1 100.00% afis|EAW16346.1 100.00%  
Bootstrap support for afum|EAL88971.1 as seed ortholog is 100%.  
Bootstrap support for afis|EAW16346.1 as seed ortholog is 100%.

---

Group of orthologs #3379. Best score 1140 bits

Score difference with first non-orthologous sequence - *A. fumigatus*:1140 *A. fischeri*:1140  
afum|EAL84392.2 100.00% afis|EAW25717.1 100.00%  
Bootstrap support for afum|EAL84392.2 as seed ortholog is 100%.  
Bootstrap support for afis|EAW25717.1 as seed ortholog is 100%.

---

Group of orthologs #3380. Best score 1140 bits

Score difference with first non-orthologous sequence - *A. fumigatus*:1140 *A. fischeri*:1140  
afum|EAL93831.1 100.00% afis|EAW19099.1 100.00%  
Bootstrap support for afum|EAL93831.1 as seed ortholog is 100%.  
Bootstrap support for afis|EAW19099.1 as seed ortholog is 100%.

---

Group of orthologs #3381. Best score 1139 bits

Score difference with first non-orthologous sequence - *A. fumigatus*:1139 *A. fischeri*:1139  
afum|EAL88592.1 100.00% afis|EAW15959.1 100.00%  
Bootstrap support for afum|EAL88592.1 as seed ortholog is 100%.  
Bootstrap support for afis|EAW15959.1 as seed ortholog is 100%.

---

Group of orthologs #3382. Best score 1139 bits

Score difference with first non-orthologous sequence - *A. fumigatus*:877 *A. fischeri*:746  
afum|EAL85217.1 100.00% afis|EAW20100.1 100.00%  
Bootstrap support for afum|EAL85217.1 as seed ortholog is 100%.  
Bootstrap support for afis|EAW20100.1 as seed ortholog is 100%.

---

Group of orthologs #3383. Best score 1139 bits

Score difference with first non-orthologous sequence - *A. fumigatus*:1139 *A. fischeri*:1139  
afum|EAL87516.1 100.00% afis|EAW18157.1 100.00%  
Bootstrap support for afum|EAL87516.1 as seed ortholog is 100%.  
Bootstrap support for afis|EAW18157.1 as seed ortholog is 100%.

---

Group of orthologs #3384. Best score 1139 bits

Score difference with first non-orthologous sequence - *A. fumigatus*:1139 *A. fischeri*:1139  
afum|EAL89848.1 100.00% afis|EAW25175.1 100.00%  
Bootstrap support for afum|EAL89848.1 as seed ortholog is 100%.  
Bootstrap support for afis|EAW25175.1 as seed ortholog is 100%.

---

Group of orthologs #3385. Best score 1139 bits

Score difference with first non-orthologous sequence - *A. fumigatus*:1139 *A. fischeri*:1139  
afum|EAL90112.1 100.00% afis|EAW25453.1 100.00%

Bootstrap support for afum|EAL90112.1 as seed ortholog is 100%.  
Bootstrap support for afis|EAW25453.1 as seed ortholog is 100%.

---

Group of orthologs #3386. Best score 1138 bits

Score difference with first non-orthologous sequence - *A. fumigatus*:890 *A. fischeri*:942

afum|EAL84203.1 100.00% afis|EAW15444.1 100.00%

Bootstrap support for afum|EAL84203.1 as seed ortholog is 100%.

Bootstrap support for afis|EAW15444.1 as seed ortholog is 100%.

---

Group of orthologs #3387. Best score 1138 bits

Score difference with first non-orthologous sequence - *A. fumigatus*:811 *A. fischeri*:1138

afum|EAL91153.1 100.00% afis|EAW17317.1 100.00%

Bootstrap support for afum|EAL91153.1 as seed ortholog is 100%.

Bootstrap support for afis|EAW17317.1 as seed ortholog is 100%.

---

Group of orthologs #3388. Best score 1138 bits

Score difference with first non-orthologous sequence - *A. fumigatus*:1138 *A. fischeri*:1138

afum|EAL91538.1 100.00% afis|EAW17723.1 100.00%

Bootstrap support for afum|EAL91538.1 as seed ortholog is 100%.

Bootstrap support for afis|EAW17723.1 as seed ortholog is 100%.

---

Group of orthologs #3389. Best score 1138 bits

Score difference with first non-orthologous sequence - *A. fumigatus*:1138 *A. fischeri*:1138

afum|EAL88068.1 100.00% afis|EAW23402.1 100.00%

Bootstrap support for afum|EAL88068.1 as seed ortholog is 100%.

Bootstrap support for afis|EAW23402.1 as seed ortholog is 100%.

---

Group of orthologs #3390. Best score 1138 bits

Score difference with first non-orthologous sequence - *A. fumigatus*:1138 *A. fischeri*:964

afum|EAL93541.1 100.00% afis|EAW18805.1 100.00%

Bootstrap support for afum|EAL93541.1 as seed ortholog is 100%.

Bootstrap support for afis|EAW18805.1 as seed ortholog is 100%.

---

Group of orthologs #3391. Best score 1138 bits

Score difference with first non-orthologous sequence - *A. fumigatus*:923 *A. fischeri*:913

afum|EAL94070.1 100.00% afis|EAW19351.1 100.00%

Bootstrap support for afum|EAL94070.1 as seed ortholog is 100%.

Bootstrap support for afis|EAW19351.1 as seed ortholog is 100%.

---

Group of orthologs #3392. Best score 1138 bits

Score difference with first non-orthologous sequence - *A. fumigatus*:968 *A. fischeri*:1138

afum|EAL89899.1 100.00% afis|EAW25238.1 100.00%

Bootstrap support for afum|EAL89899.1 as seed ortholog is 100%.

Bootstrap support for afis|EAW25238.1 as seed ortholog is 100%.

---

Group of orthologs #3393. Best score 1138 bits

Score difference with first non-orthologous sequence - *A. fumigatus*:1048 *A. fischeri*:1034

afum|EAL90103.1 100.00% afis|EAW25445.1 100.00%

Bootstrap support for afum|EAL90103.1 as seed ortholog is 100%.

Bootstrap support for afis|EAW25445.1 as seed ortholog is 100%.

---

Group of orthologs #3394. Best score 1137 bits

Score difference with first non-orthologous sequence - *A. fumigatus*:959 *A. fischeri*:817

afum|EAL84195.2 100.00% afis|EAW15451.1 100.00%

Bootstrap support for afum|EAL84195.2 as seed ortholog is 100%.

Bootstrap support for afis|EAW15451.1 as seed ortholog is 100%.

---

Group of orthologs #3395. Best score 1137 bits

Score difference with first non-orthologous sequence - *A. fumigatus*:1137 *A. fischeri*:1137

afum|EAL84771.1 100.00% afis|EAW20864.1 100.00%

Bootstrap support for afum|EAL84771.1 as seed ortholog is 100%.

Bootstrap support for afis|EAW20864.1 as seed ortholog is 100%.

---

Group of orthologs #3396. Best score 1137 bits

Score difference with first non-orthologous sequence - *A. fumigatus*:1137 *A. fischeri*:1137

afum|EAL86887.1 100.00% afis|EAW19635.1 100.00%

Bootstrap support for afum|EAL86887.1 as seed ortholog is 100%.

Bootstrap support for afis|EAW19635.1 as seed ortholog is 100%.

---

Group of orthologs #3397. Best score 1137 bits

Score difference with first non-orthologous sequence - *A. fumigatus*:1137 *A. fischeri*:1137

afum|EAL91871.1 100.00% afis|EAW18060.1 100.00%

Bootstrap support for afum|EAL91871.1 as seed ortholog is 100%.

Bootstrap support for afis|EAW18060.1 as seed ortholog is 100%.

---

Group of orthologs #3398. Best score 1137 bits

Score difference with first non-orthologous sequence - *A. fumigatus*:1137 *A. fischeri*:1137

afum|EAL93134.1 100.00% afis|EAW18449.1 100.00%

Bootstrap support for afum|EAL93134.1 as seed ortholog is 100%.

Bootstrap support for afis|EAW18449.1 as seed ortholog is 100%.

---

Group of orthologs #3399. Best score 1137 bits

Score difference with first non-orthologous sequence - *A. fumigatus*:842 *A. fischeri*:843

afum|EBA27372.1 100.00% afis|EAW20413.1 100.00%

Bootstrap support for afum|EBA27372.1 as seed ortholog is 100%.

Bootstrap support for afis|EAW20413.1 as seed ortholog is 100%.

---

Group of orthologs #3400. Best score 1137 bits

Score difference with first non-orthologous sequence - *A. fumigatus*:1137 *A. fischeri*:1137

afum|EAL89738.1 100.00% afis|EAW25069.1 100.00%

Bootstrap support for afum|EAL89738.1 as seed ortholog is 100%.

Bootstrap support for afis|EAW25069.1 as seed ortholog is 100%.

---

Group of orthologs #3401. Best score 1136 bits

Score difference with first non-orthologous sequence - *A. fumigatus*:1136 *A. fischeri*:1136

afum|EAL86448.1 100.00% afis|EAW16921.1 100.00%

Bootstrap support for afum|EAL86448.1 as seed ortholog is 100%.

Bootstrap support for afis|EAW16921.1 as seed ortholog is 100%.

---

Group of orthologs #3402. Best score 1136 bits

Score difference with first non-orthologous sequence - *A. fumigatus*:1136 *A. fischeri*:1136

afum|EAL84522.1 100.00% afis|EAW20536.1 100.00%

Bootstrap support for afum|EAL84522.1 as seed ortholog is 100%.

Bootstrap support for afis|EAW20536.1 as seed ortholog is 100%.

---

Group of orthologs #3403. Best score 1136 bits

Score difference with first non-orthologous sequence - *A. fumigatus*:993 *A. fischeri*:831

afum|EAL87549.1 100.00% afis|EAW18186.1 100.00%

Bootstrap support for afum|EAL87549.1 as seed ortholog is 100%.

Bootstrap support for afis|EAW18186.1 as seed ortholog is 100%.

---

Group of orthologs #3404. Best score 1136 bits

Score difference with first non-orthologous sequence - *A. fumigatus*:1136 *A. fischeri*:1136  
afum|EAL91785.1 100.00% afis|EAW17976.1 100.00%  
Bootstrap support for afum|EAL91785.1 as seed ortholog is 100%.  
Bootstrap support for afis|EAW17976.1 as seed ortholog is 100%.

---

Group of orthologs #3405. Best score 1136 bits

Score difference with first non-orthologous sequence - *A. fumigatus*:574 *A. fischeri*:512  
afum|EAL86044.1 100.00% afis|EAW24372.1 100.00%  
Bootstrap support for afum|EAL86044.1 as seed ortholog is 100%.  
Bootstrap support for afis|EAW24372.1 as seed ortholog is 100%.

---

Group of orthologs #3406. Best score 1136 bits

Score difference with first non-orthologous sequence - *A. fumigatus*:914 *A. fischeri*:860  
afum|EAL86195.1 100.00% afis|EAW24530.1 100.00%  
Bootstrap support for afum|EAL86195.1 as seed ortholog is 100%.  
Bootstrap support for afis|EAW24530.1 as seed ortholog is 100%.

---

Group of orthologs #3407. Best score 1136 bits

Score difference with first non-orthologous sequence - *A. fumigatus*:1002 *A. fischeri*:1136  
afum|EAL88430.1 100.00% afis|EAW23050.1 100.00%  
Bootstrap support for afum|EAL88430.1 as seed ortholog is 100%.  
Bootstrap support for afis|EAW23050.1 as seed ortholog is 100%.

---

Group of orthologs #3408. Best score 1136 bits

Score difference with first non-orthologous sequence - *A. fumigatus*:1136 *A. fischeri*:1136  
afum|EAL93465.1 100.00% afis|EAW18739.1 100.00%  
Bootstrap support for afum|EAL93465.1 as seed ortholog is 100%.  
Bootstrap support for afis|EAW18739.1 as seed ortholog is 100%.

---

Group of orthologs #3409. Best score 1136 bits

Score difference with first non-orthologous sequence - *A. fumigatus*:1057 *A. fischeri*:1136  
afum|EAL90024.1 100.00% afis|EAW25362.1 100.00%  
Bootstrap support for afum|EAL90024.1 as seed ortholog is 100%.  
Bootstrap support for afis|EAW25362.1 as seed ortholog is 100%.

---

Group of orthologs #3410. Best score 1136 bits

Score difference with first non-orthologous sequence - *A. fumigatus*:1136 *A. fischeri*:1136  
afum|EAL90089.1 100.00% afis|EAW25431.1 100.00%  
Bootstrap support for afum|EAL90089.1 as seed ortholog is 100%.  
Bootstrap support for afis|EAW25431.1 as seed ortholog is 100%.

---

Group of orthologs #3411. Best score 1135 bits

Score difference with first non-orthologous sequence - *A. fumigatus*:823 *A. fischeri*:955  
afum|EAL91688.1 100.00% afis|EAW17880.1 100.00%  
Bootstrap support for afum|EAL91688.1 as seed ortholog is 100%.  
Bootstrap support for afis|EAW17880.1 as seed ortholog is 100%.

---

Group of orthologs #3412. Best score 1135 bits

Score difference with first non-orthologous sequence - *A. fumigatus*:1135 *A. fischeri*:1135  
afum|EAL91784.1 100.00% afis|EAW17975.1 100.00%  
Bootstrap support for afum|EAL91784.1 as seed ortholog is 100%.  
Bootstrap support for afis|EAW17975.1 as seed ortholog is 100%.

---

Group of orthologs #3413. Best score 1135 bits

Score difference with first non-orthologous sequence - *A. fumigatus*:1067 *A. fischeri*:949  
afum|EBA27281.1 100.00% afis|EAW17185.1 100.00%

Bootstrap support for afum|EBA27281.1 as seed ortholog is 100%.  
Bootstrap support for afis|EAW17185.1 as seed ortholog is 100%.

---

Group of orthologs #3414. Best score 1135 bits

Score difference with first non-orthologous sequence - *A. fumigatus*:1135 *A. fischeri*:1135

afum|EAL89337.1 100.00% afis|EAW24695.1 100.00%

Bootstrap support for afum|EAL89337.1 as seed ortholog is 100%.

Bootstrap support for afis|EAW24695.1 as seed ortholog is 100%.

---

Group of orthologs #3415. Best score 1134 bits

Score difference with first non-orthologous sequence - *A. fumigatus*:1134 *A. fischeri*:1134

afum|EAL85847.1 100.00% afis|EAW15474.1 100.00%

Bootstrap support for afum|EAL85847.1 as seed ortholog is 100%.

Bootstrap support for afis|EAW15474.1 as seed ortholog is 100%.

---

Group of orthologs #3416. Best score 1134 bits

Score difference with first non-orthologous sequence - *A. fumigatus*:920 *A. fischeri*:892

afum|EAL85091.1 100.00% afis|EAW19799.1 100.00%

Bootstrap support for afum|EAL85091.1 as seed ortholog is 100%.

Bootstrap support for afis|EAW19799.1 as seed ortholog is 100%.

---

Group of orthologs #3417. Best score 1134 bits

Score difference with first non-orthologous sequence - *A. fumigatus*:1134 *A. fischeri*:1134

afum|EAL91820.1 100.00% afis|EAW18008.1 100.00%

Bootstrap support for afum|EAL91820.1 as seed ortholog is 100%.

Bootstrap support for afis|EAW18008.1 as seed ortholog is 100%.

---

Group of orthologs #3418. Best score 1134 bits

Score difference with first non-orthologous sequence - *A. fumigatus*:1134 *A. fischeri*:1134

afum|EAL87209.1 100.00% afis|EAW23775.1 100.00%

Bootstrap support for afum|EAL87209.1 as seed ortholog is 100%.

Bootstrap support for afis|EAW23775.1 as seed ortholog is 100%.

---

Group of orthologs #3419. Best score 1134 bits

Score difference with first non-orthologous sequence - *A. fumigatus*:1134 *A. fischeri*:1134

afum|EAL93414.1 100.00% afis|EAW18693.1 100.00%

Bootstrap support for afum|EAL93414.1 as seed ortholog is 100%.

Bootstrap support for afis|EAW18693.1 as seed ortholog is 100%.

---

Group of orthologs #3420. Best score 1134 bits

Score difference with first non-orthologous sequence - *A. fumigatus*:1134 *A. fischeri*:1134

afum|EAL92764.1 100.00% afis|EAW21731.1 100.00%

Bootstrap support for afum|EAL92764.1 as seed ortholog is 100%.

Bootstrap support for afis|EAW21731.1 as seed ortholog is 100%.

---

Group of orthologs #3421. Best score 1134 bits

Score difference with first non-orthologous sequence - *A. fumigatus*:1134 *A. fischeri*:1134

afum|EAL89757.1 100.00% afis|EAW25088.1 100.00%

Bootstrap support for afum|EAL89757.1 as seed ortholog is 100%.

Bootstrap support for afis|EAW25088.1 as seed ortholog is 100%.

---

Group of orthologs #3422. Best score 1134 bits

Score difference with first non-orthologous sequence - *A. fumigatus*:1134 *A. fischeri*:1134

afum|EAL89812.1 100.00% afis|EAW25140.1 100.00%

Bootstrap support for afum|EAL89812.1 as seed ortholog is 100%.

Bootstrap support for afis|EAW25140.1 as seed ortholog is 100%.

---

Group of orthologs #3423. Best score 1134 bits

Score difference with first non-orthologous sequence - *A. fumigatus*:1134 *A. fischeri*:1134

afum|EAL91925.1 100.00% afis|EAW24069.1 100.00%

Bootstrap support for afum|EAL91925.1 as seed ortholog is 100%.

Bootstrap support for afis|EAW24069.1 as seed ortholog is 100%.

---

Group of orthologs #3424. Best score 1133 bits

Score difference with first non-orthologous sequence - *A. fumigatus*:1133 *A. fischeri*:1133

afum|EAL90823.1 100.00% afis|EAW22369.1 100.00%

Bootstrap support for afum|EAL90823.1 as seed ortholog is 100%.

Bootstrap support for afis|EAW22369.1 as seed ortholog is 100%.

---

Group of orthologs #3425. Best score 1133 bits

Score difference with first non-orthologous sequence - *A. fumigatus*:1133 *A. fischeri*:1133

afum|EAL92649.1 100.00% afis|EAW21615.1 100.00%

Bootstrap support for afum|EAL92649.1 as seed ortholog is 100%.

Bootstrap support for afis|EAW21615.1 as seed ortholog is 100%.

---

Group of orthologs #3426. Best score 1133 bits

Score difference with first non-orthologous sequence - *A. fumigatus*:1133 *A. fischeri*:1133

afum|EAL89927.1 100.00% afis|EAW25264.1 100.00%

Bootstrap support for afum|EAL89927.1 as seed ortholog is 100%.

Bootstrap support for afis|EAW25264.1 as seed ortholog is 100%.

---

Group of orthologs #3427. Best score 1133 bits

Score difference with first non-orthologous sequence - *A. fumigatus*:1133 *A. fischeri*:1133

afum|EAL91929.1 100.00% afis|EAW24073.1 100.00%

Bootstrap support for afum|EAL91929.1 as seed ortholog is 100%.

Bootstrap support for afis|EAW24073.1 as seed ortholog is 100%.

---

Group of orthologs #3428. Best score 1132 bits

Score difference with first non-orthologous sequence - *A. fumigatus*:1132 *A. fischeri*:1132

afum|EAL84467.1 100.00% afis|EAW20594.1 100.00%

Bootstrap support for afum|EAL84467.1 as seed ortholog is 100%.

Bootstrap support for afis|EAW20594.1 as seed ortholog is 100%.

---

Group of orthologs #3429. Best score 1132 bits

Score difference with first non-orthologous sequence - *A. fumigatus*:1132 *A. fischeri*:1132

afum|EAL89239.1 100.00% afis|EAW16637.1 100.00%

Bootstrap support for afum|EAL89239.1 as seed ortholog is 100%.

Bootstrap support for afis|EAW16637.1 as seed ortholog is 100%.

---

Group of orthologs #3430. Best score 1132 bits

Score difference with first non-orthologous sequence - *A. fumigatus*:1132 *A. fischeri*:1132

afum|EAL91353.1 100.00% afis|EAW17539.1 100.00%

Bootstrap support for afum|EAL91353.1 as seed ortholog is 100%.

Bootstrap support for afis|EAW17539.1 as seed ortholog is 100%.

---

Group of orthologs #3431. Best score 1132 bits

Score difference with first non-orthologous sequence - *A. fumigatus*:1132 *A. fischeri*:1132

afum|EAL93061.1 100.00% afis|EAW18386.1 100.00%

Bootstrap support for afum|EAL93061.1 as seed ortholog is 100%.

Bootstrap support for afis|EAW18386.1 as seed ortholog is 100%.

---

Group of orthologs #3432. Best score 1132 bits

Score difference with first non-orthologous sequence - *A. fumigatus*:1132 *A. fischeri*:1132  
afum|EAL90762.1 100.00% afis|EAW22429.1 100.00%  
Bootstrap support for afum|EAL90762.1 as seed ortholog is 100%.  
Bootstrap support for afis|EAW22429.1 as seed ortholog is 100%.

---

Group of orthologs #3433. Best score 1131 bits

Score difference with first non-orthologous sequence - *A. fumigatus*:1131 *A. fischeri*:1131  
afum|EAL89180.1 100.00% afis|EAW16585.1 100.00%  
Bootstrap support for afum|EAL89180.1 as seed ortholog is 100%.  
Bootstrap support for afis|EAW16585.1 as seed ortholog is 100%.

---

Group of orthologs #3434. Best score 1131 bits

Score difference with first non-orthologous sequence - *A. fumigatus*:815 *A. fischeri*:1131  
afum|EAL84848.1 100.00% afis|EAW20771.1 100.00%  
Bootstrap support for afum|EAL84848.1 as seed ortholog is 100%.  
Bootstrap support for afis|EAW20771.1 as seed ortholog is 100%.

---

Group of orthologs #3435. Best score 1131 bits

Score difference with first non-orthologous sequence - *A. fumigatus*:1131 *A. fischeri*:1131  
afum|EAL87370.1 100.00% afis|EAW23945.1 100.00%  
Bootstrap support for afum|EAL87370.1 as seed ortholog is 100%.  
Bootstrap support for afis|EAW23945.1 as seed ortholog is 100%.

---

Group of orthologs #3436. Best score 1131 bits

Score difference with first non-orthologous sequence - *A. fumigatus*:1131 *A. fischeri*:1131  
afum|EAL87404.1 100.00% afis|EAW23974.1 100.00%  
Bootstrap support for afum|EAL87404.1 as seed ortholog is 100%.  
Bootstrap support for afis|EAW23974.1 as seed ortholog is 100%.

---

Group of orthologs #3437. Best score 1131 bits

Score difference with first non-orthologous sequence - *A. fumigatus*:1131 *A. fischeri*:841  
afum|EAL87447.1 100.00% afis|EAW24017.1 100.00%  
Bootstrap support for afum|EAL87447.1 as seed ortholog is 100%.  
Bootstrap support for afis|EAW24017.1 as seed ortholog is 100%.

---

Group of orthologs #3438. Best score 1131 bits

Score difference with first non-orthologous sequence - *A. fumigatus*:1131 *A. fischeri*:1131  
afum|EAL93331.1 100.00% afis|EAW18621.1 100.00%  
Bootstrap support for afum|EAL93331.1 as seed ortholog is 100%.  
Bootstrap support for afis|EAW18621.1 as seed ortholog is 100%.

---

Group of orthologs #3439. Best score 1131 bits

Score difference with first non-orthologous sequence - *A. fumigatus*:1131 *A. fischeri*:1131  
afum|EAL90924.1 100.00% afis|EAW22254.1 100.00%  
Bootstrap support for afum|EAL90924.1 as seed ortholog is 100%.  
Bootstrap support for afis|EAW22254.1 as seed ortholog is 100%.

---

Group of orthologs #3440. Best score 1131 bits

Score difference with first non-orthologous sequence - *A. fumigatus*:1131 *A. fischeri*:1131  
afum|EAL90818.1 100.00% afis|EAW22374.1 100.00%  
Bootstrap support for afum|EAL90818.1 as seed ortholog is 100%.  
Bootstrap support for afis|EAW22374.1 as seed ortholog is 100%.

---

Group of orthologs #3441. Best score 1131 bits

Score difference with first non-orthologous sequence - *A. fumigatus*:954 *A. fischeri*:879  
afum|EAL92663.1 100.00% afis|EAW21628.1 100.00%

Bootstrap support for afum|EAL92663.1 as seed ortholog is 100%.  
Bootstrap support for afis|EAW21628.1 as seed ortholog is 100%.

---

Group of orthologs #3442. Best score 1130 bits

Score difference with first non-orthologous sequence - *A. fumigatus*:1130 *A. fischeri*:1130

|                 |         |                 |         |
|-----------------|---------|-----------------|---------|
| afum EAL86382.2 | 100.00% | afis EAW16835.1 | 100.00% |
|-----------------|---------|-----------------|---------|

Bootstrap support for afum|EAL86382.2 as seed ortholog is 100%.

Bootstrap support for afis|EAW16835.1 as seed ortholog is 100%.

---

Group of orthologs #3443. Best score 1130 bits

Score difference with first non-orthologous sequence - *A. fumigatus*:1130 *A. fischeri*:731

|                 |         |                 |         |
|-----------------|---------|-----------------|---------|
| afum EAL85042.1 | 100.00% | afis EAW19851.1 | 100.00% |
|-----------------|---------|-----------------|---------|

Bootstrap support for afum|EAL85042.1 as seed ortholog is 100%.

Bootstrap support for afis|EAW19851.1 as seed ortholog is 100%.

---

Group of orthologs #3444. Best score 1130 bits

Score difference with first non-orthologous sequence - *A. fumigatus*:1130 *A. fischeri*:1130

|                 |         |                 |         |
|-----------------|---------|-----------------|---------|
| afum EAL87540.1 | 100.00% | afis EAW18179.1 | 100.00% |
|-----------------|---------|-----------------|---------|

Bootstrap support for afum|EAL87540.1 as seed ortholog is 100%.

Bootstrap support for afis|EAW18179.1 as seed ortholog is 100%.

---

Group of orthologs #3445. Best score 1130 bits

Score difference with first non-orthologous sequence - *A. fumigatus*:1015 *A. fischeri*:1038

|                 |         |                 |         |
|-----------------|---------|-----------------|---------|
| afum EAL89270.1 | 100.00% | afis EAW16666.1 | 100.00% |
|-----------------|---------|-----------------|---------|

Bootstrap support for afum|EAL89270.1 as seed ortholog is 100%.

Bootstrap support for afis|EAW16666.1 as seed ortholog is 100%.

---

Group of orthologs #3446. Best score 1130 bits

Score difference with first non-orthologous sequence - *A. fumigatus*:956 *A. fischeri*:1130

|                 |         |                 |         |
|-----------------|---------|-----------------|---------|
| afum EAL85488.1 | 100.00% | afis EAW20374.1 | 100.00% |
|-----------------|---------|-----------------|---------|

Bootstrap support for afum|EAL85488.1 as seed ortholog is 100%.

Bootstrap support for afis|EAW20374.1 as seed ortholog is 100%.

---

Group of orthologs #3447. Best score 1130 bits

Score difference with first non-orthologous sequence - *A. fumigatus*:1130 *A. fischeri*:1130

|                 |         |                 |         |
|-----------------|---------|-----------------|---------|
| afum EAL88323.1 | 100.00% | afis EAW23160.1 | 100.00% |
|-----------------|---------|-----------------|---------|

Bootstrap support for afum|EAL88323.1 as seed ortholog is 100%.

Bootstrap support for afis|EAW23160.1 as seed ortholog is 100%.

---

Group of orthologs #3448. Best score 1130 bits

Score difference with first non-orthologous sequence - *A. fumigatus*:1130 *A. fischeri*:1130

|                 |         |                 |         |
|-----------------|---------|-----------------|---------|
| afum EAL88218.1 | 100.00% | afis EAW23262.1 | 100.00% |
|-----------------|---------|-----------------|---------|

Bootstrap support for afum|EAL88218.1 as seed ortholog is 100%.

Bootstrap support for afis|EAW23262.1 as seed ortholog is 100%.

---

Group of orthologs #3449. Best score 1130 bits

Score difference with first non-orthologous sequence - *A. fumigatus*:1130 *A. fischeri*:1051

|                 |         |                 |         |
|-----------------|---------|-----------------|---------|
| afum EAL90553.2 | 100.00% | afis EAW22639.1 | 100.00% |
|-----------------|---------|-----------------|---------|

Bootstrap support for afum|EAL90553.2 as seed ortholog is 100%.

Bootstrap support for afis|EAW22639.1 as seed ortholog is 100%.

---

Group of orthologs #3450. Best score 1130 bits

Score difference with first non-orthologous sequence - *A. fumigatus*:986 *A. fischeri*:815

|                 |         |                 |         |
|-----------------|---------|-----------------|---------|
| afum EAL90572.1 | 100.00% | afis EAW22624.1 | 100.00% |
|-----------------|---------|-----------------|---------|

Bootstrap support for afum|EAL90572.1 as seed ortholog is 100%.

Bootstrap support for afis|EAW22624.1 as seed ortholog is 100%.



---

Group of orthologs #3451. Best score 1130 bits

Score difference with first non-orthologous sequence - *A. fumigatus*:872 *A. fischeri*:835

|                 |         |                 |         |
|-----------------|---------|-----------------|---------|
| afum EAL92311.1 | 100.00% | afis EAW21294.1 | 100.00% |
|-----------------|---------|-----------------|---------|

Bootstrap support for afum|EAL92311.1 as seed ortholog is 100%.

Bootstrap support for afis|EAW21294.1 as seed ortholog is 100%.

---

Group of orthologs #3452. Best score 1130 bits

Score difference with first non-orthologous sequence - *A. fumigatus*:1130 *A. fischeri*:1130

|                 |         |                 |         |
|-----------------|---------|-----------------|---------|
| afum EAL89422.1 | 100.00% | afis EAW24783.1 | 100.00% |
|-----------------|---------|-----------------|---------|

Bootstrap support for afum|EAL89422.1 as seed ortholog is 100%.

Bootstrap support for afis|EAW24783.1 as seed ortholog is 100%.

---

Group of orthologs #3453. Best score 1130 bits

Score difference with first non-orthologous sequence - *A. fumigatus*:1130 *A. fischeri*:1130

|                 |         |                 |         |
|-----------------|---------|-----------------|---------|
| afum EAL92913.1 | 100.00% | afis EAW21900.1 | 100.00% |
|-----------------|---------|-----------------|---------|

Bootstrap support for afum|EAL92913.1 as seed ortholog is 100%.

Bootstrap support for afis|EAW21900.1 as seed ortholog is 100%.

---

Group of orthologs #3454. Best score 1130 bits

Score difference with first non-orthologous sequence - *A. fumigatus*:1130 *A. fischeri*:1130

|                 |         |                 |         |
|-----------------|---------|-----------------|---------|
| afum EAL92979.1 | 100.00% | afis EAW21965.1 | 100.00% |
|-----------------|---------|-----------------|---------|

Bootstrap support for afum|EAL92979.1 as seed ortholog is 100%.

Bootstrap support for afis|EAW21965.1 as seed ortholog is 100%.

---

Group of orthologs #3455. Best score 1129 bits

Score difference with first non-orthologous sequence - *A. fumigatus*:1129 *A. fischeri*:1129

|                 |         |                 |         |
|-----------------|---------|-----------------|---------|
| afum EAL85593.1 | 100.00% | afis EAW15756.1 | 100.00% |
|-----------------|---------|-----------------|---------|

Bootstrap support for afum|EAL85593.1 as seed ortholog is 100%.

Bootstrap support for afis|EAW15756.1 as seed ortholog is 100%.

---

Group of orthologs #3456. Best score 1129 bits

Score difference with first non-orthologous sequence - *A. fumigatus*:981 *A. fischeri*:1129

|                 |         |                 |         |
|-----------------|---------|-----------------|---------|
| afum EAL86900.1 | 100.00% | afis EAW19621.1 | 100.00% |
|-----------------|---------|-----------------|---------|

Bootstrap support for afum|EAL86900.1 as seed ortholog is 100%.

Bootstrap support for afis|EAW19621.1 as seed ortholog is 100%.

---

Group of orthologs #3457. Best score 1129 bits

Score difference with first non-orthologous sequence - *A. fumigatus*:1129 *A. fischeri*:1129

|                 |         |                 |         |
|-----------------|---------|-----------------|---------|
| afum EAL86043.1 | 100.00% | afis EAW24371.1 | 100.00% |
|-----------------|---------|-----------------|---------|

Bootstrap support for afum|EAL86043.1 as seed ortholog is 100%.

Bootstrap support for afis|EAW24371.1 as seed ortholog is 100%.

---

Group of orthologs #3458. Best score 1129 bits

Score difference with first non-orthologous sequence - *A. fumigatus*:1129 *A. fischeri*:1129

|                 |         |                 |         |
|-----------------|---------|-----------------|---------|
| afum EAL91924.1 | 100.00% | afis EAW24068.1 | 100.00% |
|-----------------|---------|-----------------|---------|

Bootstrap support for afum|EAL91924.1 as seed ortholog is 100%.

Bootstrap support for afis|EAW24068.1 as seed ortholog is 100%.

---

Group of orthologs #3459. Best score 1128 bits

Score difference with first non-orthologous sequence - *A. fumigatus*:1128 *A. fischeri*:1128

|                 |         |                 |         |
|-----------------|---------|-----------------|---------|
| afum EAL85293.1 | 100.00% | afis EAW20175.1 | 100.00% |
|-----------------|---------|-----------------|---------|

Bootstrap support for afum|EAL85293.1 as seed ortholog is 100%.

Bootstrap support for afis|EAW20175.1 as seed ortholog is 100%.

---

Group of orthologs #3460. Best score 1128 bits

Score difference with first non-orthologous sequence - *A. fumigatus*:1128 *A. fischeri*:1128  
afum|EAL87291.1 100.00% afis|EAW23863.1 100.00%  
Bootstrap support for afum|EAL87291.1 as seed ortholog is 100%.  
Bootstrap support for afis|EAW23863.1 as seed ortholog is 100%.

---

Group of orthologs #3461. Best score 1128 bits

Score difference with first non-orthologous sequence - *A. fumigatus*:1128 *A. fischeri*:1128  
afum|EAL88025.1 100.00% afis|EAW23437.1 100.00%  
Bootstrap support for afum|EAL88025.1 as seed ortholog is 100%.  
Bootstrap support for afis|EAW23437.1 as seed ortholog is 100%.

---

Group of orthologs #3462. Best score 1128 bits

Score difference with first non-orthologous sequence - *A. fumigatus*:1128 *A. fischeri*:1128  
afum|EAL88103.2 100.00% afis|EAW23370.1 100.00%  
Bootstrap support for afum|EAL88103.2 as seed ortholog is 100%.  
Bootstrap support for afis|EAW23370.1 as seed ortholog is 100%.

---

Group of orthologs #3463. Best score 1128 bits

Score difference with first non-orthologous sequence - *A. fumigatus*:929 *A. fischeri*:933  
afum|EAL92290.2 100.00% afis|EAW21275.1 100.00%  
Bootstrap support for afum|EAL92290.2 as seed ortholog is 100%.  
Bootstrap support for afis|EAW21275.1 as seed ortholog is 100%.

---

Group of orthologs #3464. Best score 1128 bits

Score difference with first non-orthologous sequence - *A. fumigatus*:1128 *A. fischeri*:1128  
afum|EAL89804.1 100.00% afis|EAW25133.1 100.00%  
Bootstrap support for afum|EAL89804.1 as seed ortholog is 100%.  
Bootstrap support for afis|EAW25133.1 as seed ortholog is 100%.

---

Group of orthologs #3465. Best score 1128 bits

Score difference with first non-orthologous sequence - *A. fumigatus*:1128 *A. fischeri*:1128  
afum|EAL89933.1 100.00% afis|EAW25270.1 100.00%  
Bootstrap support for afum|EAL89933.1 as seed ortholog is 100%.  
Bootstrap support for afis|EAW25270.1 as seed ortholog is 100%.

---

Group of orthologs #3466. Best score 1127 bits

Score difference with first non-orthologous sequence - *A. fumigatus*:1127 *A. fischeri*:1022  
afum|EAL88928.1 100.00% afis|EAW16306.1 100.00%  
Bootstrap support for afum|EAL88928.1 as seed ortholog is 100%.  
Bootstrap support for afis|EAW16306.1 as seed ortholog is 100%.

---

Group of orthologs #3467. Best score 1127 bits

Score difference with first non-orthologous sequence - *A. fumigatus*:1127 *A. fischeri*:1127  
afum|EAL85256.1 100.00% afis|EAW20141.1 100.00%  
Bootstrap support for afum|EAL85256.1 as seed ortholog is 100%.  
Bootstrap support for afis|EAW20141.1 as seed ortholog is 100%.

---

Group of orthologs #3468. Best score 1127 bits

Score difference with first non-orthologous sequence - *A. fumigatus*:1127 *A. fischeri*:1005  
afum|EAL91183.1 100.00% afis|EAW17339.1 100.00%  
Bootstrap support for afum|EAL91183.1 as seed ortholog is 100%.  
Bootstrap support for afis|EAW17339.1 as seed ortholog is 100%.

---

Group of orthologs #3469. Best score 1127 bits

Score difference with first non-orthologous sequence - *A. fumigatus*:1127 *A. fischeri*:1127  
afum|EAL91736.1 100.00% afis|EAW17925.1 100.00%

Bootstrap support for afum|EAL91736.1 as seed ortholog is 100%.  
Bootstrap support for afis|EAW17925.1 as seed ortholog is 100%.

---

Group of orthologs #3470. Best score 1127 bits

Score difference with first non-orthologous sequence - *A. fumigatus*:1127 *A. fischeri*:1127

|                 |         |                 |         |
|-----------------|---------|-----------------|---------|
| afum EAL91891.1 | 100.00% | afis EAW18079.1 | 100.00% |
|-----------------|---------|-----------------|---------|

Bootstrap support for afum|EAL91891.1 as seed ortholog is 100%.

Bootstrap support for afis|EAW18079.1 as seed ortholog is 100%.

---

Group of orthologs #3471. Best score 1127 bits

Score difference with first non-orthologous sequence - *A. fumigatus*:732 *A. fischeri*:879

|                 |         |                 |         |
|-----------------|---------|-----------------|---------|
| afum EAL88074.1 | 100.00% | afis EAW23396.1 | 100.00% |
|-----------------|---------|-----------------|---------|

Bootstrap support for afum|EAL88074.1 as seed ortholog is 100%.

Bootstrap support for afis|EAW23396.1 as seed ortholog is 100%.

---

Group of orthologs #3472. Best score 1127 bits

Score difference with first non-orthologous sequence - *A. fumigatus*:1127 *A. fischeri*:1127

|                 |         |                 |         |
|-----------------|---------|-----------------|---------|
| afum EAL93634.1 | 100.00% | afis EAW18902.1 | 100.00% |
|-----------------|---------|-----------------|---------|

Bootstrap support for afum|EAL93634.1 as seed ortholog is 100%.

Bootstrap support for afis|EAW18902.1 as seed ortholog is 100%.

---

Group of orthologs #3473. Best score 1126 bits

Score difference with first non-orthologous sequence - *A. fumigatus*:1126 *A. fischeri*:810

|                 |         |                 |         |
|-----------------|---------|-----------------|---------|
| afum EAL86784.2 | 100.00% | afis EAW19742.1 | 100.00% |
|-----------------|---------|-----------------|---------|

Bootstrap support for afum|EAL86784.2 as seed ortholog is 100%.

Bootstrap support for afis|EAW19742.1 as seed ortholog is 100%.

---

Group of orthologs #3474. Best score 1126 bits

Score difference with first non-orthologous sequence - *A. fumigatus*:1126 *A. fischeri*:1126

|                 |         |                 |         |
|-----------------|---------|-----------------|---------|
| afum EAL91260.1 | 100.00% | afis EAW17432.1 | 100.00% |
|-----------------|---------|-----------------|---------|

Bootstrap support for afum|EAL91260.1 as seed ortholog is 100%.

Bootstrap support for afis|EAW17432.1 as seed ortholog is 100%.

---

Group of orthologs #3475. Best score 1126 bits

Score difference with first non-orthologous sequence - *A. fumigatus*:1126 *A. fischeri*:1126

|                 |         |                 |         |
|-----------------|---------|-----------------|---------|
| afum EAL91829.1 | 100.00% | afis EAW18017.1 | 100.00% |
|-----------------|---------|-----------------|---------|

Bootstrap support for afum|EAL91829.1 as seed ortholog is 100%.

Bootstrap support for afis|EAW18017.1 as seed ortholog is 100%.

---

Group of orthologs #3476. Best score 1125 bits

Score difference with first non-orthologous sequence - *A. fumigatus*:1125 *A. fischeri*:1125

|                 |         |                 |         |
|-----------------|---------|-----------------|---------|
| afum EAL88528.1 | 100.00% | afis EAW15893.1 | 100.00% |
|-----------------|---------|-----------------|---------|

Bootstrap support for afum|EAL88528.1 as seed ortholog is 100%.

Bootstrap support for afis|EAW15893.1 as seed ortholog is 100%.

---

Group of orthologs #3477. Best score 1125 bits

Score difference with first non-orthologous sequence - *A. fumigatus*:1125 *A. fischeri*:1125

|                 |         |                 |         |
|-----------------|---------|-----------------|---------|
| afum EAL88727.1 | 100.00% | afis EAW16095.1 | 100.00% |
|-----------------|---------|-----------------|---------|

Bootstrap support for afum|EAL88727.1 as seed ortholog is 100%.

Bootstrap support for afis|EAW16095.1 as seed ortholog is 100%.

---

Group of orthologs #3478. Best score 1125 bits

Score difference with first non-orthologous sequence - *A. fumigatus*:1125 *A. fischeri*:1125

|                 |         |                 |         |
|-----------------|---------|-----------------|---------|
| afum EAL87494.1 | 100.00% | afis EAW18137.1 | 100.00% |
|-----------------|---------|-----------------|---------|

Bootstrap support for afum|EAL87494.1 as seed ortholog is 100%.

Bootstrap support for afis|EAW18137.1 as seed ortholog is 100%.

---

Group of orthologs #3479. Best score 1125 bits

Score difference with first non-orthologous sequence - *A. fumigatus*:990 *A. fischeri*:842

afum|EAL86136.1 100.00% afis|EAW24465.1 100.00%

Bootstrap support for afum|EAL86136.1 as seed ortholog is 100%.

Bootstrap support for afis|EAW24465.1 as seed ortholog is 100%.

---

Group of orthologs #3480. Best score 1125 bits

Score difference with first non-orthologous sequence - *A. fumigatus*:1125 *A. fischeri*:1125

afum|EAL86144.1 100.00% afis|EAW24471.1 100.00%

Bootstrap support for afum|EAL86144.1 as seed ortholog is 100%.

Bootstrap support for afis|EAW24471.1 as seed ortholog is 100%.

---

Group of orthologs #3481. Best score 1125 bits

Score difference with first non-orthologous sequence - *A. fumigatus*:1125 *A. fischeri*:1125

afum|EAL92078.1 100.00% afis|EAW21039.1 100.00%

Bootstrap support for afum|EAL92078.1 as seed ortholog is 100%.

Bootstrap support for afis|EAW21039.1 as seed ortholog is 100%.

---

Group of orthologs #3482. Best score 1125 bits

Score difference with first non-orthologous sequence - *A. fumigatus*:1125 *A. fischeri*:954

afum|EAL89351.1 100.00% afis|EAW24710.1 100.00%

Bootstrap support for afum|EAL89351.1 as seed ortholog is 100%.

Bootstrap support for afis|EAW24710.1 as seed ortholog is 100%.

---

Group of orthologs #3483. Best score 1125 bits

Score difference with first non-orthologous sequence - *A. fumigatus*:1125 *A. fischeri*:1125

afum|EAL92680.1 100.00% afis|EAW21646.1 100.00%

Bootstrap support for afum|EAL92680.1 as seed ortholog is 100%.

Bootstrap support for afis|EAW21646.1 as seed ortholog is 100%.

---

Group of orthologs #3484. Best score 1124 bits

Score difference with first non-orthologous sequence - *A. fumigatus*:1124 *A. fischeri*:1124

afum|EAL84294.1 100.00% afis|EAW25587.1 100.00%

Bootstrap support for afum|EAL84294.1 as seed ortholog is 100%.

Bootstrap support for afis|EAW25587.1 as seed ortholog is 100%.

---

Group of orthologs #3485. Best score 1124 bits

Score difference with first non-orthologous sequence - *A. fumigatus*:1124 *A. fischeri*:1124

afum|EAL91914.1 100.00% afis|EAW24059.1 100.00%

Bootstrap support for afum|EAL91914.1 as seed ortholog is 100%.

Bootstrap support for afis|EAW24059.1 as seed ortholog is 100%.

---

Group of orthologs #3486. Best score 1123 bits

Score difference with first non-orthologous sequence - *A. fumigatus*:790 *A. fischeri*:680

afum|EAL86982.1 100.00% afis|EAW19514.1 100.00%

Bootstrap support for afum|EAL86982.1 as seed ortholog is 100%.

Bootstrap support for afis|EAW19514.1 as seed ortholog is 100%.

---

Group of orthologs #3487. Best score 1123 bits

Score difference with first non-orthologous sequence - *A. fumigatus*:1123 *A. fischeri*:1123

afum|EAL85999.1 100.00% afis|EAW24329.1 100.00%

Bootstrap support for afum|EAL85999.1 as seed ortholog is 100%.

Bootstrap support for afis|EAW24329.1 as seed ortholog is 100%.

---

Group of orthologs #3488. Best score 1123 bits

Score difference with first non-orthologous sequence - *A. fumigatus*:1123 *A. fischeri*:1123  
afum|EAL90395.1 100.00% afis|EAW22804.1 100.00%  
Bootstrap support for afum|EAL90395.1 as seed ortholog is 100%.  
Bootstrap support for afis|EAW22804.1 as seed ortholog is 100%.

---

Group of orthologs #3489. Best score 1122 bits

Score difference with first non-orthologous sequence - *A. fumigatus*:1122 *A. fischeri*:1122  
afum|EAL88536.1 100.00% afis|EAW15901.1 100.00%  
Bootstrap support for afum|EAL88536.1 as seed ortholog is 100%.  
Bootstrap support for afis|EAW15901.1 as seed ortholog is 100%.

---

Group of orthologs #3490. Best score 1122 bits

Score difference with first non-orthologous sequence - *A. fumigatus*:1122 *A. fischeri*:1122  
afum|EAL88623.1 100.00% afis|EAW15991.1 100.00%  
Bootstrap support for afum|EAL88623.1 as seed ortholog is 100%.  
Bootstrap support for afis|EAW15991.1 as seed ortholog is 100%.

---

Group of orthologs #3491. Best score 1122 bits

Score difference with first non-orthologous sequence - *A. fumigatus*:1122 *A. fischeri*:1122  
afum|EAL88930.1 100.00% afis|EAW16308.1 100.00%  
Bootstrap support for afum|EAL88930.1 as seed ortholog is 100%.  
Bootstrap support for afis|EAW16308.1 as seed ortholog is 100%.

---

Group of orthologs #3492. Best score 1122 bits

Score difference with first non-orthologous sequence - *A. fumigatus*:1029 *A. fischeri*:1018  
afum|EAL84326.1 100.00% afis|EAW25639.1 100.00%  
Bootstrap support for afum|EAL84326.1 as seed ortholog is 100%.  
Bootstrap support for afis|EAW25639.1 as seed ortholog is 100%.

---

Group of orthologs #3493. Best score 1121 bits

Score difference with first non-orthologous sequence - *A. fumigatus*:1121 *A. fischeri*:1121  
afum|EAL85598.1 100.00% afis|EAW15751.1 100.00%  
Bootstrap support for afum|EAL85598.1 as seed ortholog is 100%.  
Bootstrap support for afis|EAW15751.1 as seed ortholog is 100%.

---

Group of orthologs #3494. Best score 1121 bits

Score difference with first non-orthologous sequence - *A. fumigatus*:1121 *A. fischeri*:1121  
afum|EAL92337.1 100.00% afis|EAW21320.1 100.00%  
Bootstrap support for afum|EAL92337.1 as seed ortholog is 100%.  
Bootstrap support for afis|EAW21320.1 as seed ortholog is 100%.

---

Group of orthologs #3495. Best score 1121 bits

Score difference with first non-orthologous sequence - *A. fumigatus*:1121 *A. fischeri*:1121  
afum|EAL89448.1 100.00% afis|EAW24806.1 100.00%  
Bootstrap support for afum|EAL89448.1 as seed ortholog is 100%.  
Bootstrap support for afis|EAW24806.1 as seed ortholog is 100%.

---

Group of orthologs #3496. Best score 1121 bits

Score difference with first non-orthologous sequence - *A. fumigatus*:1121 *A. fischeri*:1121  
afum|EAL89831.1 100.00% afis|EAW25156.1 100.00%  
Bootstrap support for afum|EAL89831.1 as seed ortholog is 100%.  
Bootstrap support for afis|EAW25156.1 as seed ortholog is 100%.

---

Group of orthologs #3497. Best score 1120 bits

Score difference with first non-orthologous sequence - *A. fumigatus*:1120 *A. fischeri*:1120  
afum|EAL87702.1 100.00% afis|EAW18339.1 100.00%

Bootstrap support for afum|EAL87702.1 as seed ortholog is 100%.  
Bootstrap support for afis|EAW18339.1 as seed ortholog is 100%.

---

Group of orthologs #3498. Best score 1120 bits

Score difference with first non-orthologous sequence - *A. fumigatus*:1120 *A. fischeri*:1120

|                 |         |                 |         |
|-----------------|---------|-----------------|---------|
| afum EAL86904.1 | 100.00% | afis EAW19618.1 | 100.00% |
|-----------------|---------|-----------------|---------|

Bootstrap support for afum|EAL86904.1 as seed ortholog is 100%.

Bootstrap support for afis|EAW19618.1 as seed ortholog is 100%.

---

Group of orthologs #3499. Best score 1120 bits

Score difference with first non-orthologous sequence - *A. fumigatus*:972 *A. fischeri*:1120

|                 |         |                 |         |
|-----------------|---------|-----------------|---------|
| afum EAL90398.1 | 100.00% | afis EAW22801.1 | 100.00% |
|-----------------|---------|-----------------|---------|

Bootstrap support for afum|EAL90398.1 as seed ortholog is 100%.

Bootstrap support for afis|EAW22801.1 as seed ortholog is 100%.

---

Group of orthologs #3500. Best score 1119 bits

Score difference with first non-orthologous sequence - *A. fumigatus*:1119 *A. fischeri*:1119

|                 |         |                 |         |
|-----------------|---------|-----------------|---------|
| afum EAL85576.1 | 100.00% | afis EAW15772.1 | 100.00% |
|-----------------|---------|-----------------|---------|

Bootstrap support for afum|EAL85576.1 as seed ortholog is 100%.

Bootstrap support for afis|EAW15772.1 as seed ortholog is 100%.

---

Group of orthologs #3501. Best score 1119 bits

Score difference with first non-orthologous sequence - *A. fumigatus*:729 *A. fischeri*:779

|                 |         |                 |         |
|-----------------|---------|-----------------|---------|
| afum EAL86486.1 | 100.00% | afis EAW16959.1 | 100.00% |
|-----------------|---------|-----------------|---------|

Bootstrap support for afum|EAL86486.1 as seed ortholog is 100%.

Bootstrap support for afis|EAW16959.1 as seed ortholog is 100%.

---

Group of orthologs #3502. Best score 1119 bits

Score difference with first non-orthologous sequence - *A. fumigatus*:1119 *A. fischeri*:1119

|                 |         |                 |         |
|-----------------|---------|-----------------|---------|
| afum EAL88409.1 | 100.00% | afis EAW23070.1 | 100.00% |
|-----------------|---------|-----------------|---------|

Bootstrap support for afum|EAL88409.1 as seed ortholog is 100%.

Bootstrap support for afis|EAW23070.1 as seed ortholog is 100%.

---

Group of orthologs #3503. Best score 1119 bits

Score difference with first non-orthologous sequence - *A. fumigatus*:1119 *A. fischeri*:1119

|                 |         |                 |         |
|-----------------|---------|-----------------|---------|
| afum EAL88443.1 | 100.00% | afis EAW23038.1 | 100.00% |
|-----------------|---------|-----------------|---------|

Bootstrap support for afum|EAL88443.1 as seed ortholog is 100%.

Bootstrap support for afis|EAW23038.1 as seed ortholog is 100%.

---

Group of orthologs #3504. Best score 1119 bits

Score difference with first non-orthologous sequence - *A. fumigatus*:1119 *A. fischeri*:1119

|                 |         |                 |         |
|-----------------|---------|-----------------|---------|
| afum EAL92359.1 | 100.00% | afis EAW21342.1 | 100.00% |
|-----------------|---------|-----------------|---------|

Bootstrap support for afum|EAL92359.1 as seed ortholog is 100%.

Bootstrap support for afis|EAW21342.1 as seed ortholog is 100%.

---

Group of orthologs #3505. Best score 1118 bits

Score difference with first non-orthologous sequence - *A. fumigatus*:1118 *A. fischeri*:1118

|                 |         |                 |         |
|-----------------|---------|-----------------|---------|
| afum EAL86962.1 | 100.00% | afis EAW19547.1 | 100.00% |
|-----------------|---------|-----------------|---------|

Bootstrap support for afum|EAL86962.1 as seed ortholog is 100%.

Bootstrap support for afis|EAW19547.1 as seed ortholog is 100%.

---

Group of orthologs #3506. Best score 1118 bits

Score difference with first non-orthologous sequence - *A. fumigatus*:1118 *A. fischeri*:1118

|                 |         |                 |         |
|-----------------|---------|-----------------|---------|
| afum EAL91703.1 | 100.00% | afis EAW17895.1 | 100.00% |
|-----------------|---------|-----------------|---------|

Bootstrap support for afum|EAL91703.1 as seed ortholog is 100%.

Bootstrap support for afis|EAW17895.1 as seed ortholog is 100%.

---

Group of orthologs #3507. Best score 1118 bits

Score difference with first non-orthologous sequence - *A. fumigatus*:1118 *A. fischeri*:1118

afum|EAL88356.1 100.00% afis|EAW23124.1 100.00%

Bootstrap support for afum|EAL88356.1 as seed ortholog is 100%.

Bootstrap support for afis|EAW23124.1 as seed ortholog is 100%.

---

Group of orthologs #3508. Best score 1117 bits

Score difference with first non-orthologous sequence - *A. fumigatus*:1117 *A. fischeri*:1117

afum|EAL88024.1 100.00% afis|EAW23438.1 100.00%

Bootstrap support for afum|EAL88024.1 as seed ortholog is 100%.

Bootstrap support for afis|EAW23438.1 as seed ortholog is 100%.

---

Group of orthologs #3509. Best score 1117 bits

Score difference with first non-orthologous sequence - *A. fumigatus*:1117 *A. fischeri*:1117

afum|EAL90151.1 100.00% afis|EAW25486.1 100.00%

Bootstrap support for afum|EAL90151.1 as seed ortholog is 100%.

Bootstrap support for afis|EAW25486.1 as seed ortholog is 100%.

---

Group of orthologs #3510. Best score 1116 bits

Score difference with first non-orthologous sequence - *A. fumigatus*:1116 *A. fischeri*:1116

afum|EAL86793.1 100.00% afis|EAW19736.1 100.00%

Bootstrap support for afum|EAL86793.1 as seed ortholog is 100%.

Bootstrap support for afis|EAW19736.1 as seed ortholog is 100%.

---

Group of orthologs #3511. Best score 1116 bits

Score difference with first non-orthologous sequence - *A. fumigatus*:1116 *A. fischeri*:1116

afum|EAL91406.1 100.00% afis|EAW17593.1 100.00%

Bootstrap support for afum|EAL91406.1 as seed ortholog is 100%.

Bootstrap support for afis|EAW17593.1 as seed ortholog is 100%.

---

Group of orthologs #3512. Best score 1116 bits

Score difference with first non-orthologous sequence - *A. fumigatus*:1116 *A. fischeri*:1116

afum|EAL88297.1 100.00% afis|EAW23186.1 100.00%

Bootstrap support for afum|EAL88297.1 as seed ortholog is 100%.

Bootstrap support for afis|EAW23186.1 as seed ortholog is 100%.

---

Group of orthologs #3513. Best score 1116 bits

Score difference with first non-orthologous sequence - *A. fumigatus*:1116 *A. fischeri*:1116

afum|EAL93324.1 100.00% afis|EAW18614.1 100.00%

Bootstrap support for afum|EAL93324.1 as seed ortholog is 100%.

Bootstrap support for afis|EAW18614.1 as seed ortholog is 100%.

---

Group of orthologs #3514. Best score 1116 bits

Score difference with first non-orthologous sequence - *A. fumigatus*:940 *A. fischeri*:1116

afum|EAL93417.1 100.00% afis|EAW18695.1 100.00%

Bootstrap support for afum|EAL93417.1 as seed ortholog is 100%.

Bootstrap support for afis|EAW18695.1 as seed ortholog is 100%.

---

Group of orthologs #3515. Best score 1116 bits

Score difference with first non-orthologous sequence - *A. fumigatus*:1116 *A. fischeri*:1116

afum|EAL92672.2 100.00% afis|EAW21638.1 100.00%

Bootstrap support for afum|EAL92672.2 as seed ortholog is 100%.

Bootstrap support for afis|EAW21638.1 as seed ortholog is 100%.

---

Group of orthologs #3516. Best score 1116 bits

Score difference with first non-orthologous sequence - *A. fumigatus*:1116 *A. fischeri*:1116  
afum|EAL92969.1 100.00% afis|EAW21955.1 100.00%  
Bootstrap support for afum|EAL92969.1 as seed ortholog is 100%.  
Bootstrap support for afis|EAW21955.1 as seed ortholog is 100%.

---

Group of orthologs #3517. Best score 1116 bits

Score difference with first non-orthologous sequence - *A. fumigatus*:1116 *A. fischeri*:1116  
afum|EAL89742.1 100.00% afis|EAW25073.1 100.00%  
Bootstrap support for afum|EAL89742.1 as seed ortholog is 100%.  
Bootstrap support for afis|EAW25073.1 as seed ortholog is 100%.

---

Group of orthologs #3518. Best score 1115 bits

Score difference with first non-orthologous sequence - *A. fumigatus*:1115 *A. fischeri*:1115  
afum|EAL85680.1 100.00% afis|EAW15668.1 100.00%  
Bootstrap support for afum|EAL85680.1 as seed ortholog is 100%.  
Bootstrap support for afis|EAW15668.1 as seed ortholog is 100%.

---

Group of orthologs #3519. Best score 1115 bits

Score difference with first non-orthologous sequence - *A. fumigatus*:1115 *A. fischeri*:1115  
afum|EAL90863.1 100.00% afis|EAW22329.1 100.00%  
Bootstrap support for afum|EAL90863.1 as seed ortholog is 100%.  
Bootstrap support for afis|EAW22329.1 as seed ortholog is 100%.

---

Group of orthologs #3520. Best score 1115 bits

Score difference with first non-orthologous sequence - *A. fumigatus*:1115 *A. fischeri*:1115  
afum|EAL90496.1 100.00% afis|EAW22696.1 100.00%  
Bootstrap support for afum|EAL90496.1 as seed ortholog is 100%.  
Bootstrap support for afis|EAW22696.1 as seed ortholog is 100%.

---

Group of orthologs #3521. Best score 1114 bits

Score difference with first non-orthologous sequence - *A. fumigatus*:1039 *A. fischeri*:1114  
afum|EAL85846.1 100.00% afis|EAW15475.1 100.00%  
Bootstrap support for afum|EAL85846.1 as seed ortholog is 100%.  
Bootstrap support for afis|EAW15475.1 as seed ortholog is 100%.

---

Group of orthologs #3522. Best score 1114 bits

Score difference with first non-orthologous sequence - *A. fumigatus*:1114 *A. fischeri*:1114  
afum|EAL87967.1 100.00% afis|EAW23496.1 100.00%  
Bootstrap support for afum|EAL87967.1 as seed ortholog is 100%.  
Bootstrap support for afis|EAW23496.1 as seed ortholog is 100%.

---

Group of orthologs #3523. Best score 1114 bits

Score difference with first non-orthologous sequence - *A. fumigatus*:1114 *A. fischeri*:1114  
afum|EAL90247.1 100.00% afis|EAW22950.1 100.00%  
Bootstrap support for afum|EAL90247.1 as seed ortholog is 100%.  
Bootstrap support for afis|EAW22950.1 as seed ortholog is 100%.

---

Group of orthologs #3524. Best score 1114 bits

Score difference with first non-orthologous sequence - *A. fumigatus*:1015 *A. fischeri*:1114  
afum|EAL92368.1 100.00% afis|EAW21353.1 100.00%  
Bootstrap support for afum|EAL92368.1 as seed ortholog is 100%.  
Bootstrap support for afis|EAW21353.1 as seed ortholog is 100%.

---

Group of orthologs #3525. Best score 1113 bits

Score difference with first non-orthologous sequence - *A. fumigatus*:852 *A. fischeri*:688  
afum|EAL84572.1 100.00% afis|EAW20482.1 100.00%



Bootstrap support for afum|EAL84572.1 as seed ortholog is 100%.  
Bootstrap support for afis|EAW20482.1 as seed ortholog is 100%.

---

Group of orthologs #3526. Best score 1113 bits

Score difference with first non-orthologous sequence - *A. fumigatus*:1113 *A. fischeri*:1113

afum|EAL89107.2 100.00% afis|EAW16512.1 100.00%

Bootstrap support for afum|EAL89107.2 as seed ortholog is 100%.

Bootstrap support for afis|EAW16512.1 as seed ortholog is 100%.

---

Group of orthologs #3527. Best score 1113 bits

Score difference with first non-orthologous sequence - *A. fumigatus*:1113 *A. fischeri*:1113

afum|EAL87983.1 100.00% afis|EAW23481.1 100.00%

Bootstrap support for afum|EAL87983.1 as seed ortholog is 100%.

Bootstrap support for afis|EAW23481.1 as seed ortholog is 100%.

---

Group of orthologs #3528. Best score 1113 bits

Score difference with first non-orthologous sequence - *A. fumigatus*:1113 *A. fischeri*:1113

afum|EAL92118.1 100.00% afis|EAW21095.1 100.00%

Bootstrap support for afum|EAL92118.1 as seed ortholog is 100%.

Bootstrap support for afis|EAW21095.1 as seed ortholog is 100%.

---

Group of orthologs #3529. Best score 1113 bits

Score difference with first non-orthologous sequence - *A. fumigatus*:933 *A. fischeri*:728

afum|EAL92366.1 100.00% afis|EAW21351.1 100.00%

Bootstrap support for afum|EAL92366.1 as seed ortholog is 100%.

Bootstrap support for afis|EAW21351.1 as seed ortholog is 100%.

---

Group of orthologs #3530. Best score 1112 bits

Score difference with first non-orthologous sequence - *A. fumigatus*:869 *A. fischeri*:727

afum|EAL86306.2 100.00% afis|EAW16730.1 100.00%

Bootstrap support for afum|EAL86306.2 as seed ortholog is 100%.

Bootstrap support for afis|EAW16730.1 as seed ortholog is 100%.

---

Group of orthologs #3531. Best score 1112 bits

Score difference with first non-orthologous sequence - *A. fumigatus*:847 *A. fischeri*:808

afum|EAL84778.1 100.00% afis|EAW20856.1 100.00%

Bootstrap support for afum|EAL84778.1 as seed ortholog is 100%.

Bootstrap support for afis|EAW20856.1 as seed ortholog is 100%.

---

Group of orthologs #3532. Best score 1112 bits

Score difference with first non-orthologous sequence - *A. fumigatus*:1112 *A. fischeri*:1112

afum|EAL91476.2 100.00% afis|EAW17662.1 100.00%

Bootstrap support for afum|EAL91476.2 as seed ortholog is 100%.

Bootstrap support for afis|EAW17662.1 as seed ortholog is 100%.

---

Group of orthologs #3533. Best score 1112 bits

Score difference with first non-orthologous sequence - *A. fumigatus*:1112 *A. fischeri*:1004

afum|EAL84287.2 100.00% afis|EAW25577.1 100.00%

Bootstrap support for afum|EAL84287.2 as seed ortholog is 100%.

Bootstrap support for afis|EAW25577.1 as seed ortholog is 100%.

---

Group of orthologs #3534. Best score 1112 bits

Score difference with first non-orthologous sequence - *A. fumigatus*:782 *A. fischeri*:1112

afum|EAL86184.1 100.00% afis|EAW24518.1 100.00%

Bootstrap support for afum|EAL86184.1 as seed ortholog is 100%.

Bootstrap support for afis|EAW24518.1 as seed ortholog is 100%.

---

Group of orthologs #3535. Best score 1112 bits

Score difference with first non-orthologous sequence - *A. fumigatus*:1112 *A. fischeri*:1112

|                 |         |                 |         |
|-----------------|---------|-----------------|---------|
| afum EAL93048.1 | 100.00% | afis EAW18373.1 | 100.00% |
|-----------------|---------|-----------------|---------|

Bootstrap support for afum|EAL93048.1 as seed ortholog is 100%.

Bootstrap support for afis|EAW18373.1 as seed ortholog is 100%.

---

Group of orthologs #3536. Best score 1112 bits

Score difference with first non-orthologous sequence - *A. fumigatus*:901 *A. fischeri*:902

|                 |         |                 |         |
|-----------------|---------|-----------------|---------|
| afum EAL93863.1 | 100.00% | afis EAW19131.1 | 100.00% |
|-----------------|---------|-----------------|---------|

Bootstrap support for afum|EAL93863.1 as seed ortholog is 100%.

Bootstrap support for afis|EAW19131.1 as seed ortholog is 100%.

---

Group of orthologs #3537. Best score 1112 bits

Score difference with first non-orthologous sequence - *A. fumigatus*:1112 *A. fischeri*:1112

|                 |         |                 |         |
|-----------------|---------|-----------------|---------|
| afum EAL91086.1 | 100.00% | afis EAW22105.1 | 100.00% |
|-----------------|---------|-----------------|---------|

Bootstrap support for afum|EAL91086.1 as seed ortholog is 100%.

Bootstrap support for afis|EAW22105.1 as seed ortholog is 100%.

---

Group of orthologs #3538. Best score 1111 bits

Score difference with first non-orthologous sequence - *A. fumigatus*:1111 *A. fischeri*:1111

|                 |         |                 |         |
|-----------------|---------|-----------------|---------|
| afum EAL86679.1 | 100.00% | afis EAW17262.1 | 100.00% |
|-----------------|---------|-----------------|---------|

Bootstrap support for afum|EAL86679.1 as seed ortholog is 100%.

Bootstrap support for afis|EAW17262.1 as seed ortholog is 100%.

---

Group of orthologs #3539. Best score 1111 bits

Score difference with first non-orthologous sequence - *A. fumigatus*:902 *A. fischeri*:1111

|                 |         |                 |         |
|-----------------|---------|-----------------|---------|
| afum EAL84950.2 | 100.00% | afis EAW19968.1 | 100.00% |
|-----------------|---------|-----------------|---------|

Bootstrap support for afum|EAL84950.2 as seed ortholog is 100%.

Bootstrap support for afis|EAW19968.1 as seed ortholog is 100%.

---

Group of orthologs #3540. Best score 1110 bits

Score difference with first non-orthologous sequence - *A. fumigatus*:1110 *A. fischeri*:1110

|                 |         |                 |         |
|-----------------|---------|-----------------|---------|
| afum EAL88631.1 | 100.00% | afis EAW15999.1 | 100.00% |
|-----------------|---------|-----------------|---------|

Bootstrap support for afum|EAL88631.1 as seed ortholog is 100%.

Bootstrap support for afis|EAW15999.1 as seed ortholog is 100%.

---

Group of orthologs #3541. Best score 1110 bits

Score difference with first non-orthologous sequence - *A. fumigatus*:1110 *A. fischeri*:939

|                 |         |                 |         |
|-----------------|---------|-----------------|---------|
| afum EAL88979.1 | 100.00% | afis EAW16354.1 | 100.00% |
|-----------------|---------|-----------------|---------|

Bootstrap support for afum|EAL88979.1 as seed ortholog is 100%.

Bootstrap support for afis|EAW16354.1 as seed ortholog is 100%.

---

Group of orthologs #3542. Best score 1110 bits

Score difference with first non-orthologous sequence - *A. fumigatus*:1110 *A. fischeri*:1110

|                 |         |                 |         |
|-----------------|---------|-----------------|---------|
| afum EAL89145.1 | 100.00% | afis EAW16547.1 | 100.00% |
|-----------------|---------|-----------------|---------|

Bootstrap support for afum|EAL89145.1 as seed ortholog is 100%.

Bootstrap support for afis|EAW16547.1 as seed ortholog is 100%.

---

Group of orthologs #3543. Best score 1110 bits

Score difference with first non-orthologous sequence - *A. fumigatus*:1110 *A. fischeri*:1110

|                 |         |                 |         |
|-----------------|---------|-----------------|---------|
| afum EAL85959.1 | 100.00% | afis EAW24291.1 | 100.00% |
|-----------------|---------|-----------------|---------|

Bootstrap support for afum|EAL85959.1 as seed ortholog is 100%.

Bootstrap support for afis|EAW24291.1 as seed ortholog is 100%.

---

Group of orthologs #3544. Best score 1110 bits

Score difference with first non-orthologous sequence - *A. fumigatus*:1110 *A. fischeri*:1110  
afum|EAL87953.1 100.00% afis|EAW23508.1 100.00%  
Bootstrap support for afum|EAL87953.1 as seed ortholog is 100%.  
Bootstrap support for afis|EAW23508.1 as seed ortholog is 100%.

---

Group of orthologs #3545. Best score 1110 bits

Score difference with first non-orthologous sequence - *A. fumigatus*:689 *A. fischeri*:785  
afum|EAL87885.1 100.00% afis|EAW23580.1 100.00%  
Bootstrap support for afum|EAL87885.1 as seed ortholog is 100%.  
Bootstrap support for afis|EAW23580.1 as seed ortholog is 100%.

---

Group of orthologs #3546. Best score 1110 bits

Score difference with first non-orthologous sequence - *A. fumigatus*:1110 *A. fischeri*:758  
afum|EAL93735.1 100.00% afis|EAW19000.1 100.00%  
Bootstrap support for afum|EAL93735.1 as seed ortholog is 100%.  
Bootstrap support for afis|EAW19000.1 as seed ortholog is 100%.

---

Group of orthologs #3547. Best score 1110 bits

Score difference with first non-orthologous sequence - *A. fumigatus*:1110 *A. fischeri*:1110  
afum|EBA27499.1 100.00% afis|EAW18924.1 100.00%  
Bootstrap support for afum|EBA27499.1 as seed ortholog is 100%.  
Bootstrap support for afis|EAW18924.1 as seed ortholog is 100%.

---

Group of orthologs #3548. Best score 1110 bits

Score difference with first non-orthologous sequence - *A. fumigatus*:1110 *A. fischeri*:1110  
afum|EAL92360.1 100.00% afis|EAW21343.1 100.00%  
Bootstrap support for afum|EAL92360.1 as seed ortholog is 100%.  
Bootstrap support for afis|EAW21343.1 as seed ortholog is 100%.

---

Group of orthologs #3549. Best score 1110 bits

Score difference with first non-orthologous sequence - *A. fumigatus*:1110 *A. fischeri*:1110  
afum|EAL92515.1 100.00% afis|EAW21496.1 100.00%  
Bootstrap support for afum|EAL92515.1 as seed ortholog is 100%.  
Bootstrap support for afis|EAW21496.1 as seed ortholog is 100%.

---

Group of orthologs #3550. Best score 1109 bits

Score difference with first non-orthologous sequence - *A. fumigatus*:334 *A. fischeri*:516  
afum|EAL86318.1 100.00% afis|EAW16743.1 100.00%  
Bootstrap support for afum|EAL86318.1 as seed ortholog is 100%.  
Bootstrap support for afis|EAW16743.1 as seed ortholog is 100%.

---

Group of orthologs #3551. Best score 1109 bits

Score difference with first non-orthologous sequence - *A. fumigatus*:1109 *A. fischeri*:346  
afum|EAL88562.1 100.00% afis|EAW15926.1 100.00%  
Bootstrap support for afum|EAL88562.1 as seed ortholog is 100%.  
Bootstrap support for afis|EAW15926.1 as seed ortholog is 100%.

---

Group of orthologs #3552. Best score 1109 bits

Score difference with first non-orthologous sequence - *A. fumigatus*:764 *A. fischeri*:1109  
afum|EAL85373.1 100.00% afis|EAW20265.1 100.00%  
Bootstrap support for afum|EAL85373.1 as seed ortholog is 100%.  
Bootstrap support for afis|EAW20265.1 as seed ortholog is 100%.

---

Group of orthologs #3553. Best score 1109 bits

Score difference with first non-orthologous sequence - *A. fumigatus*:1109 *A. fischeri*:1109  
afum|EAL88350.2 100.00% afis|EAW23131.1 100.00%

Bootstrap support for afum|EAL88350.2 as seed ortholog is 100%.  
Bootstrap support for afis|EAW23131.1 as seed ortholog is 100%.

---

Group of orthologs #3554. Best score 1109 bits

Score difference with first non-orthologous sequence - *A. fumigatus*:1109 *A. fischeri*:1109

|                 |         |                 |         |
|-----------------|---------|-----------------|---------|
| afum EAL90028.2 | 100.00% | afis EAW25368.1 | 100.00% |
|-----------------|---------|-----------------|---------|

Bootstrap support for afum|EAL90028.2 as seed ortholog is 100%.

Bootstrap support for afis|EAW25368.1 as seed ortholog is 100%.

---

Group of orthologs #3555. Best score 1108 bits

Score difference with first non-orthologous sequence - *A. fumigatus*:1108 *A. fischeri*:1108

|                 |         |                 |         |
|-----------------|---------|-----------------|---------|
| afum EAL86892.1 | 100.00% | afis EAW19630.1 | 100.00% |
|-----------------|---------|-----------------|---------|

Bootstrap support for afum|EAL86892.1 as seed ortholog is 100%.

Bootstrap support for afis|EAW19630.1 as seed ortholog is 100%.

---

Group of orthologs #3556. Best score 1108 bits

Score difference with first non-orthologous sequence - *A. fumigatus*:907 *A. fischeri*:703

|                 |         |                 |         |
|-----------------|---------|-----------------|---------|
| afum EAL90510.1 | 100.00% | afis EAW22682.1 | 100.00% |
|-----------------|---------|-----------------|---------|

Bootstrap support for afum|EAL90510.1 as seed ortholog is 100%.

Bootstrap support for afis|EAW22682.1 as seed ortholog is 100%.

---

Group of orthologs #3557. Best score 1108 bits

Score difference with first non-orthologous sequence - *A. fumigatus*:1108 *A. fischeri*:1108

|                 |         |                 |         |
|-----------------|---------|-----------------|---------|
| afum EAL92217.1 | 100.00% | afis EAW21206.1 | 100.00% |
|-----------------|---------|-----------------|---------|

Bootstrap support for afum|EAL92217.1 as seed ortholog is 100%.

Bootstrap support for afis|EAW21206.1 as seed ortholog is 100%.

---

Group of orthologs #3558. Best score 1108 bits

Score difference with first non-orthologous sequence - *A. fumigatus*:1108 *A. fischeri*:1108

|                 |         |                 |         |
|-----------------|---------|-----------------|---------|
| afum EAL92616.1 | 100.00% | afis EAW21597.1 | 100.00% |
|-----------------|---------|-----------------|---------|

Bootstrap support for afum|EAL92616.1 as seed ortholog is 100%.

Bootstrap support for afis|EAW21597.1 as seed ortholog is 100%.

---

Group of orthologs #3559. Best score 1107 bits

Score difference with first non-orthologous sequence - *A. fumigatus*:1107 *A. fischeri*:1107

|                 |         |                 |         |
|-----------------|---------|-----------------|---------|
| afum EAL84593.1 | 100.00% | afis EAW20460.1 | 100.00% |
|-----------------|---------|-----------------|---------|

Bootstrap support for afum|EAL84593.1 as seed ortholog is 100%.

Bootstrap support for afis|EAW20460.1 as seed ortholog is 100%.

---

Group of orthologs #3560. Best score 1107 bits

Score difference with first non-orthologous sequence - *A. fumigatus*:824 *A. fischeri*:890

|                 |         |                 |         |
|-----------------|---------|-----------------|---------|
| afum EAL85480.2 | 100.00% | afis EAW20364.1 | 100.00% |
|-----------------|---------|-----------------|---------|

Bootstrap support for afum|EAL85480.2 as seed ortholog is 100%.

Bootstrap support for afis|EAW20364.1 as seed ortholog is 100%.

---

Group of orthologs #3561. Best score 1107 bits

Score difference with first non-orthologous sequence - *A. fumigatus*:1107 *A. fischeri*:1032

|                 |         |                 |         |
|-----------------|---------|-----------------|---------|
| afum EAL91696.1 | 100.00% | afis EAW17887.1 | 100.00% |
|-----------------|---------|-----------------|---------|

Bootstrap support for afum|EAL91696.1 as seed ortholog is 100%.

Bootstrap support for afis|EAW17887.1 as seed ortholog is 100%.

---

Group of orthologs #3562. Best score 1107 bits

Score difference with first non-orthologous sequence - *A. fumigatus*:1107 *A. fischeri*:600

|                 |         |                 |         |
|-----------------|---------|-----------------|---------|
| afum EAL84290.1 | 100.00% | afis EAW25579.1 | 100.00% |
|-----------------|---------|-----------------|---------|

Bootstrap support for afum|EAL84290.1 as seed ortholog is 100%.

Bootstrap support for afis|EAW25579.1 as seed ortholog is 100%.

---

Group of orthologs #3563. Best score 1106 bits

Score difference with first non-orthologous sequence - *A. fumigatus*:1106 *A. fischeri*:1106

afum|EAL84466.1 100.00% afis|EAW20595.1 100.00%

Bootstrap support for afum|EAL84466.1 as seed ortholog is 100%.

Bootstrap support for afis|EAW20595.1 as seed ortholog is 100%.

---

Group of orthologs #3564. Best score 1106 bits

Score difference with first non-orthologous sequence - *A. fumigatus*:853 *A. fischeri*:835

afum|EAL84431.1 100.00% afis|EAW20637.1 100.00%

Bootstrap support for afum|EAL84431.1 as seed ortholog is 100%.

Bootstrap support for afis|EAW20637.1 as seed ortholog is 100%.

---

Group of orthologs #3565. Best score 1106 bits

Score difference with first non-orthologous sequence - *A. fumigatus*:1106 *A. fischeri*:1106

afum|EAL86981.2 100.00% afis|EAW19515.1 100.00%

Bootstrap support for afum|EAL86981.2 as seed ortholog is 100%.

Bootstrap support for afis|EAW19515.1 as seed ortholog is 100%.

---

Group of orthologs #3566. Best score 1106 bits

Score difference with first non-orthologous sequence - *A. fumigatus*:1106 *A. fischeri*:1106

afum|EAL91158.1 100.00% afis|EAW17322.1 100.00%

Bootstrap support for afum|EAL91158.1 as seed ortholog is 100%.

Bootstrap support for afis|EAW17322.1 as seed ortholog is 100%.

---

Group of orthologs #3567. Best score 1106 bits

Score difference with first non-orthologous sequence - *A. fumigatus*:1040 *A. fischeri*:662

afum|EAL87965.1 100.00% afis|EAW23498.1 100.00%

Bootstrap support for afum|EAL87965.1 as seed ortholog is 100%.

Bootstrap support for afis|EAW23498.1 as seed ortholog is 100%.

---

Group of orthologs #3568. Best score 1106 bits

Score difference with first non-orthologous sequence - *A. fumigatus*:1106 *A. fischeri*:1106

afum|EAL92100.1 100.00% afis|EAW21077.1 100.00%

Bootstrap support for afum|EAL92100.1 as seed ortholog is 100%.

Bootstrap support for afis|EAW21077.1 as seed ortholog is 100%.

---

Group of orthologs #3569. Best score 1106 bits

Score difference with first non-orthologous sequence - *A. fumigatus*:1106 *A. fischeri*:1106

afum|EAL92755.1 100.00% afis|EAW21722.1 100.00%

Bootstrap support for afum|EAL92755.1 as seed ortholog is 100%.

Bootstrap support for afis|EAW21722.1 as seed ortholog is 100%.

---

Group of orthologs #3570. Best score 1106 bits

Score difference with first non-orthologous sequence - *A. fumigatus*:1106 *A. fischeri*:1106

afum|EAL89910.1 100.00% afis|EAW25248.1 100.00%

Bootstrap support for afum|EAL89910.1 as seed ortholog is 100%.

Bootstrap support for afis|EAW25248.1 as seed ortholog is 100%.

---

Group of orthologs #3571. Best score 1106 bits

Score difference with first non-orthologous sequence - *A. fumigatus*:1106 *A. fischeri*:1106

afum|EAL92042.1 100.00% afis|EAW24182.1 100.00%

Bootstrap support for afum|EAL92042.1 as seed ortholog is 100%.

Bootstrap support for afis|EAW24182.1 as seed ortholog is 100%.

---

Group of orthologs #3572. Best score 1105 bits

Score difference with first non-orthologous sequence - *A. fumigatus*:961 *A. fischeri*:886  
afum|EAL85079.1 100.00% afis|EAW19812.1 100.00%  
Bootstrap support for afum|EAL85079.1 as seed ortholog is 100%.  
Bootstrap support for afis|EAW19812.1 as seed ortholog is 100%.

---

Group of orthologs #3573. Best score 1105 bits

Score difference with first non-orthologous sequence - *A. fumigatus*:1105 *A. fischeri*:1105  
afum|EAL89084.1 100.00% afis|EAW16490.1 100.00%  
Bootstrap support for afum|EAL89084.1 as seed ortholog is 100%.  
Bootstrap support for afis|EAW16490.1 as seed ortholog is 100%.

---

Group of orthologs #3574. Best score 1105 bits

Score difference with first non-orthologous sequence - *A. fumigatus*:1105 *A. fischeri*:1105  
afum|EAL91548.1 100.00% afis|EAW17733.1 100.00%  
Bootstrap support for afum|EAL91548.1 as seed ortholog is 100%.  
Bootstrap support for afis|EAW17733.1 as seed ortholog is 100%.

---

Group of orthologs #3575. Best score 1105 bits

Score difference with first non-orthologous sequence - *A. fumigatus*:844 *A. fischeri*:910  
afum|EAL84356.1 100.00% afis|EAW25687.1 100.00%  
Bootstrap support for afum|EAL84356.1 as seed ortholog is 100%.  
Bootstrap support for afis|EAW25687.1 as seed ortholog is 100%.

---

Group of orthologs #3576. Best score 1105 bits

Score difference with first non-orthologous sequence - *A. fumigatus*:1105 *A. fischeri*:1105  
afum|EAL90148.1 100.00% afis|EAW25483.1 100.00%  
Bootstrap support for afum|EAL90148.1 as seed ortholog is 100%.  
Bootstrap support for afis|EAW25483.1 as seed ortholog is 100%.

---

Group of orthologs #3577. Best score 1104 bits

Score difference with first non-orthologous sequence - *A. fumigatus*:1104 *A. fischeri*:906  
afum|EAL86561.1 100.00% afis|EAW17073.1 100.00%  
Bootstrap support for afum|EAL86561.1 as seed ortholog is 100%.  
Bootstrap support for afis|EAW17073.1 as seed ortholog is 100%.

---

Group of orthologs #3578. Best score 1104 bits

Score difference with first non-orthologous sequence - *A. fumigatus*:1104 *A. fischeri*:1104  
afum|EAL86250.1 100.00% afis|EAW24622.1 100.00%  
Bootstrap support for afum|EAL86250.1 as seed ortholog is 100%.  
Bootstrap support for afis|EAW24622.1 as seed ortholog is 100%.

---

Group of orthologs #3579. Best score 1104 bits

Score difference with first non-orthologous sequence - *A. fumigatus*:1104 *A. fischeri*:1104  
afum|EAL87844.1 100.00% afis|EAW23618.1 100.00%  
Bootstrap support for afum|EAL87844.1 as seed ortholog is 100%.  
Bootstrap support for afis|EAW23618.1 as seed ortholog is 100%.

---

Group of orthologs #3580. Best score 1103 bits

Score difference with first non-orthologous sequence - *A. fumigatus*:926 *A. fischeri*:968  
afum|EAL88587.1 100.00% afis|EAW15954.1 100.00%  
Bootstrap support for afum|EAL88587.1 as seed ortholog is 100%.  
Bootstrap support for afis|EAW15954.1 as seed ortholog is 100%.

---

Group of orthologs #3581. Best score 1103 bits

Score difference with first non-orthologous sequence - *A. fumigatus*:1103 *A. fischeri*:1103  
afum|EAL84979.1 100.00% afis|EAW19929.1 100.00%

Bootstrap support for afum|EAL84979.1 as seed ortholog is 100%.  
Bootstrap support for afis|EAW19929.1 as seed ortholog is 100%.

---

Group of orthologs #3582. Best score 1103 bits

Score difference with first non-orthologous sequence - *A. fumigatus*:1103 *A. fischeri*:1103

|                 |         |                 |         |
|-----------------|---------|-----------------|---------|
| afum EAL84604.1 | 100.00% | afis EAW20448.1 | 100.00% |
|-----------------|---------|-----------------|---------|

Bootstrap support for afum|EAL84604.1 as seed ortholog is 100%.

Bootstrap support for afis|EAW20448.1 as seed ortholog is 100%.

---

Group of orthologs #3583. Best score 1103 bits

Score difference with first non-orthologous sequence - *A. fumigatus*:1103 *A. fischeri*:1103

|                 |         |                 |         |
|-----------------|---------|-----------------|---------|
| afum EAL85312.2 | 100.00% | afis EAW20192.1 | 100.00% |
|-----------------|---------|-----------------|---------|

Bootstrap support for afum|EAL85312.2 as seed ortholog is 100%.

Bootstrap support for afis|EAW20192.1 as seed ortholog is 100%.

---

Group of orthologs #3584. Best score 1103 bits

Score difference with first non-orthologous sequence - *A. fumigatus*:1103 *A. fischeri*:1103

|                 |         |                 |         |
|-----------------|---------|-----------------|---------|
| afum EAL87187.2 | 100.00% | afis EAW23750.1 | 100.00% |
|-----------------|---------|-----------------|---------|

Bootstrap support for afum|EAL87187.2 as seed ortholog is 100%.

Bootstrap support for afis|EAW23750.1 as seed ortholog is 100%.

---

Group of orthologs #3585. Best score 1103 bits

Score difference with first non-orthologous sequence - *A. fumigatus*:1103 *A. fischeri*:1103

|                 |         |                 |         |
|-----------------|---------|-----------------|---------|
| afum EAL93032.2 | 100.00% | afis EAW18361.1 | 100.00% |
|-----------------|---------|-----------------|---------|

Bootstrap support for afum|EAL93032.2 as seed ortholog is 100%.

Bootstrap support for afis|EAW18361.1 as seed ortholog is 100%.

---

Group of orthologs #3586. Best score 1103 bits

Score difference with first non-orthologous sequence - *A. fumigatus*:1103 *A. fischeri*:1103

|                 |         |                 |         |
|-----------------|---------|-----------------|---------|
| afum EAL92554.1 | 100.00% | afis EAW21533.1 | 100.00% |
|-----------------|---------|-----------------|---------|

Bootstrap support for afum|EAL92554.1 as seed ortholog is 100%.

Bootstrap support for afis|EAW21533.1 as seed ortholog is 100%.

---

Group of orthologs #3587. Best score 1103 bits

Score difference with first non-orthologous sequence - *A. fumigatus*:1103 *A. fischeri*:1103

|                 |         |                 |         |
|-----------------|---------|-----------------|---------|
| afum EAL90126.1 | 100.00% | afis EAW25463.1 | 100.00% |
|-----------------|---------|-----------------|---------|

Bootstrap support for afum|EAL90126.1 as seed ortholog is 100%.

Bootstrap support for afis|EAW25463.1 as seed ortholog is 100%.

---

Group of orthologs #3588. Best score 1102 bits

Score difference with first non-orthologous sequence - *A. fumigatus*:1102 *A. fischeri*:1102

|                 |         |                 |         |
|-----------------|---------|-----------------|---------|
| afum EAL85588.1 | 100.00% | afis EAW15760.1 | 100.00% |
|-----------------|---------|-----------------|---------|

Bootstrap support for afum|EAL85588.1 as seed ortholog is 100%.

Bootstrap support for afis|EAW15760.1 as seed ortholog is 100%.

---

Group of orthologs #3589. Best score 1102 bits

Score difference with first non-orthologous sequence - *A. fumigatus*:1102 *A. fischeri*:1102

|                 |         |                 |         |
|-----------------|---------|-----------------|---------|
| afum EAL89070.1 | 100.00% | afis EAW16476.1 | 100.00% |
|-----------------|---------|-----------------|---------|

Bootstrap support for afum|EAL89070.1 as seed ortholog is 100%.

Bootstrap support for afis|EAW16476.1 as seed ortholog is 100%.

---

Group of orthologs #3590. Best score 1102 bits

Score difference with first non-orthologous sequence - *A. fumigatus*:1102 *A. fischeri*:1102

|                 |         |                 |         |
|-----------------|---------|-----------------|---------|
| afum EAL86996.1 | 100.00% | afis EAW19497.1 | 100.00% |
|-----------------|---------|-----------------|---------|

Bootstrap support for afum|EAL86996.1 as seed ortholog is 100%.

Bootstrap support for afis|EAW19497.1 as seed ortholog is 100%.

---

Group of orthologs #3591. Best score 1102 bits

Score difference with first non-orthologous sequence - *A. fumigatus*:1102 *A. fischeri*:1102

|                 |         |                 |         |
|-----------------|---------|-----------------|---------|
| afum EAL93794.1 | 100.00% | afis EAW19065.1 | 100.00% |
|-----------------|---------|-----------------|---------|

Bootstrap support for afum|EAL93794.1 as seed ortholog is 100%.

Bootstrap support for afis|EAW19065.1 as seed ortholog is 100%.

---

Group of orthologs #3592. Best score 1102 bits

Score difference with first non-orthologous sequence - *A. fumigatus*:1102 *A. fischeri*:1102

|                 |         |                 |         |
|-----------------|---------|-----------------|---------|
| afum EAL92131.1 | 100.00% | afis EAW21109.1 | 100.00% |
|-----------------|---------|-----------------|---------|

Bootstrap support for afum|EAL92131.1 as seed ortholog is 100%.

Bootstrap support for afis|EAW21109.1 as seed ortholog is 100%.

---

Group of orthologs #3593. Best score 1102 bits

Score difference with first non-orthologous sequence - *A. fumigatus*:1102 *A. fischeri*:1102

|                 |         |                 |         |
|-----------------|---------|-----------------|---------|
| afum EAL90776.1 | 100.00% | afis EAW22416.1 | 100.00% |
|-----------------|---------|-----------------|---------|

Bootstrap support for afum|EAL90776.1 as seed ortholog is 100%.

Bootstrap support for afis|EAW22416.1 as seed ortholog is 100%.

---

Group of orthologs #3594. Best score 1102 bits

Score difference with first non-orthologous sequence - *A. fumigatus*:1102 *A. fischeri*:1102

|                 |         |                 |         |
|-----------------|---------|-----------------|---------|
| afum EAL91932.1 | 100.00% | afis EAW24077.1 | 100.00% |
|-----------------|---------|-----------------|---------|

Bootstrap support for afum|EAL91932.1 as seed ortholog is 100%.

Bootstrap support for afis|EAW24077.1 as seed ortholog is 100%.

---

Group of orthologs #3595. Best score 1101 bits

Score difference with first non-orthologous sequence - *A. fumigatus*:1101 *A. fischeri*:1101

|                 |         |                 |         |
|-----------------|---------|-----------------|---------|
| afum EAL88984.1 | 100.00% | afis EAW16359.1 | 100.00% |
|-----------------|---------|-----------------|---------|

Bootstrap support for afum|EAL88984.1 as seed ortholog is 100%.

Bootstrap support for afis|EAW16359.1 as seed ortholog is 100%.

---

Group of orthologs #3596. Best score 1101 bits

Score difference with first non-orthologous sequence - *A. fumigatus*:1101 *A. fischeri*:1101

|                 |         |                 |         |
|-----------------|---------|-----------------|---------|
| afum EAL84590.1 | 100.00% | afis EAW20463.1 | 100.00% |
|-----------------|---------|-----------------|---------|

Bootstrap support for afum|EAL84590.1 as seed ortholog is 100%.

Bootstrap support for afis|EAW20463.1 as seed ortholog is 100%.

---

Group of orthologs #3597. Best score 1101 bits

Score difference with first non-orthologous sequence - *A. fumigatus*:1101 *A. fischeri*:1101

|                 |         |                 |         |
|-----------------|---------|-----------------|---------|
| afum EAL93263.1 | 100.00% | afis EAW18562.1 | 100.00% |
|-----------------|---------|-----------------|---------|

Bootstrap support for afum|EAL93263.1 as seed ortholog is 100%.

Bootstrap support for afis|EAW18562.1 as seed ortholog is 100%.

---

Group of orthologs #3598. Best score 1101 bits

Score difference with first non-orthologous sequence - *A. fumigatus*:827 *A. fischeri*:717

|                 |         |                 |         |
|-----------------|---------|-----------------|---------|
| afum EAL89987.1 | 100.00% | afis EAW25326.1 | 100.00% |
|-----------------|---------|-----------------|---------|

Bootstrap support for afum|EAL89987.1 as seed ortholog is 100%.

Bootstrap support for afis|EAW25326.1 as seed ortholog is 100%.

---

Group of orthologs #3599. Best score 1100 bits

Score difference with first non-orthologous sequence - *A. fumigatus*:1100 *A. fischeri*:1100

|                 |         |                 |         |
|-----------------|---------|-----------------|---------|
| afum EAL84583.1 | 100.00% | afis EAW20469.1 | 100.00% |
|-----------------|---------|-----------------|---------|

Bootstrap support for afum|EAL84583.1 as seed ortholog is 100%.

Bootstrap support for afis|EAW20469.1 as seed ortholog is 100%.

---

Group of orthologs #3600. Best score 1100 bits



Score difference with first non-orthologous sequence - *A. fumigatus*:717 *A. fischeri*:1100  
afum|EAL85912.1 100.00% afis|EAW24244.1 100.00%  
Bootstrap support for afum|EAL85912.1 as seed ortholog is 100%.  
Bootstrap support for afis|EAW24244.1 as seed ortholog is 100%.

---

Group of orthologs #3601. Best score 1100 bits

Score difference with first non-orthologous sequence - *A. fumigatus*:1100 *A. fischeri*:1100  
afum|EAL85925.1 100.00% afis|EAW24257.1 100.00%  
Bootstrap support for afum|EAL85925.1 as seed ortholog is 100%.  
Bootstrap support for afis|EAW24257.1 as seed ortholog is 100%.

---

Group of orthologs #3602. Best score 1100 bits

Score difference with first non-orthologous sequence - *A. fumigatus*:1100 *A. fischeri*:1100  
afum|EAL88328.1 100.00% afis|EAW23153.1 100.00%  
Bootstrap support for afum|EAL88328.1 as seed ortholog is 100%.  
Bootstrap support for afis|EAW23153.1 as seed ortholog is 100%.

---

Group of orthologs #3603. Best score 1100 bits

Score difference with first non-orthologous sequence - *A. fumigatus*:1100 *A. fischeri*:1100  
afum|EAL88162.1 100.00% afis|EAW23315.1 100.00%  
Bootstrap support for afum|EAL88162.1 as seed ortholog is 100%.  
Bootstrap support for afis|EAW23315.1 as seed ortholog is 100%.

---

Group of orthologs #3604. Best score 1100 bits

Score difference with first non-orthologous sequence - *A. fumigatus*:1100 *A. fischeri*:763  
afum|EAL93260.1 100.00% afis|EAW18560.1 100.00%  
Bootstrap support for afum|EAL93260.1 as seed ortholog is 100%.  
Bootstrap support for afis|EAW18560.1 as seed ortholog is 100%.

---

Group of orthologs #3605. Best score 1100 bits

Score difference with first non-orthologous sequence - *A. fumigatus*:1100 *A. fischeri*:1100  
afum|EAL93338.1 100.00% afis|EAW18626.1 100.00%  
Bootstrap support for afum|EAL93338.1 as seed ortholog is 100%.  
Bootstrap support for afis|EAW18626.1 as seed ortholog is 100%.

---

Group of orthologs #3606. Best score 1100 bits

Score difference with first non-orthologous sequence - *A. fumigatus*:1100 *A. fischeri*:1100  
afum|EAL90539.1 100.00% afis|EAW22653.1 100.00%  
Bootstrap support for afum|EAL90539.1 as seed ortholog is 100%.  
Bootstrap support for afis|EAW22653.1 as seed ortholog is 100%.

---

Group of orthologs #3607. Best score 1100 bits

Score difference with first non-orthologous sequence - *A. fumigatus*:1000 *A. fischeri*:838  
afum|EAL90320.1 100.00% afis|EAW22879.1 100.00%  
Bootstrap support for afum|EAL90320.1 as seed ortholog is 100%.  
Bootstrap support for afis|EAW22879.1 as seed ortholog is 100%.

---

Group of orthologs #3608. Best score 1100 bits

Score difference with first non-orthologous sequence - *A. fumigatus*:1100 *A. fischeri*:1100  
afum|EAL92850.1 100.00% afis|EAW21835.1 100.00%  
Bootstrap support for afum|EAL92850.1 as seed ortholog is 100%.  
Bootstrap support for afis|EAW21835.1 as seed ortholog is 100%.

---

Group of orthologs #3609. Best score 1100 bits

Score difference with first non-orthologous sequence - *A. fumigatus*:1100 *A. fischeri*:1100  
afum|EBA27468.1 100.00% afis|EAW21570.1 100.00%

Bootstrap support for afum|EBA27468.1 as seed ortholog is 100%.  
Bootstrap support for afis|EAW21570.1 as seed ortholog is 100%.

---

Group of orthologs #3610. Best score 1099 bits

Score difference with first non-orthologous sequence - *A. fumigatus*:700 *A. fischeri*:1099

afum|EAL91076.2 100.00% afis|EAW22108.1 100.00%

Bootstrap support for afum|EAL91076.2 as seed ortholog is 100%.

Bootstrap support for afis|EAW22108.1 as seed ortholog is 100%.

---

Group of orthologs #3611. Best score 1098 bits

Score difference with first non-orthologous sequence - *A. fumigatus*:1098 *A. fischeri*:1098

afum|EAL87699.1 100.00% afis|EAW18334.1 100.00%

Bootstrap support for afum|EAL87699.1 as seed ortholog is 100%.

Bootstrap support for afis|EAW18334.1 as seed ortholog is 100%.

---

Group of orthologs #3612. Best score 1098 bits

Score difference with first non-orthologous sequence - *A. fumigatus*:1098 *A. fischeri*:1098

afum|EAL91675.1 100.00% afis|EAW17867.1 100.00%

Bootstrap support for afum|EAL91675.1 as seed ortholog is 100%.

Bootstrap support for afis|EAW17867.1 as seed ortholog is 100%.

---

Group of orthologs #3613. Best score 1098 bits

Score difference with first non-orthologous sequence - *A. fumigatus*:1098 *A. fischeri*:1098

afum|EAL87315.1 100.00% afis|EAW23888.1 100.00%

Bootstrap support for afum|EAL87315.1 as seed ortholog is 100%.

Bootstrap support for afis|EAW23888.1 as seed ortholog is 100%.

---

Group of orthologs #3614. Best score 1097 bits

Score difference with first non-orthologous sequence - *A. fumigatus*:1097 *A. fischeri*:842

afum|EAL88872.1 100.00% afis|EAW16244.1 100.00%

Bootstrap support for afum|EAL88872.1 as seed ortholog is 100%.

Bootstrap support for afis|EAW16244.1 as seed ortholog is 100%.

---

Group of orthologs #3615. Best score 1097 bits

Score difference with first non-orthologous sequence - *A. fumigatus*:940 *A. fischeri*:950

afum|EAL85349.1 100.00% afis|EAW20232.1 100.00%

Bootstrap support for afum|EAL85349.1 as seed ortholog is 100%.

Bootstrap support for afis|EAW20232.1 as seed ortholog is 100%.

---

Group of orthologs #3616. Best score 1097 bits

Score difference with first non-orthologous sequence - *A. fumigatus*:907 *A. fischeri*:952

afum|EAL85404.1 100.00% afis|EAW20270.1 100.00%

Bootstrap support for afum|EAL85404.1 as seed ortholog is 100%.

Bootstrap support for afis|EAW20270.1 as seed ortholog is 100%.

---

Group of orthologs #3617. Best score 1097 bits

Score difference with first non-orthologous sequence - *A. fumigatus*:1097 *A. fischeri*:1097

afum|EAL91265.1 100.00% afis|EAW17439.1 100.00%

Bootstrap support for afum|EAL91265.1 as seed ortholog is 100%.

Bootstrap support for afis|EAW17439.1 as seed ortholog is 100%.

---

Group of orthologs #3618. Best score 1097 bits

Score difference with first non-orthologous sequence - *A. fumigatus*:1097 *A. fischeri*:1097

afum|EAL91702.1 100.00% afis|EAW17893.1 100.00%

Bootstrap support for afum|EAL91702.1 as seed ortholog is 100%.

Bootstrap support for afis|EAW17893.1 as seed ortholog is 100%.

---

Group of orthologs #3619. Best score 1097 bits

Score difference with first non-orthologous sequence - *A. fumigatus*:975 *A. fischeri*:887

|                 |         |                 |         |
|-----------------|---------|-----------------|---------|
| afum EAL93109.1 | 100.00% | afis EAW18429.1 | 100.00% |
|-----------------|---------|-----------------|---------|

Bootstrap support for afum|EAL93109.1 as seed ortholog is 100%.

Bootstrap support for afis|EAW18429.1 as seed ortholog is 100%.

---

Group of orthologs #3620. Best score 1097 bits

Score difference with first non-orthologous sequence - *A. fumigatus*:1097 *A. fischeri*:1097

|                 |         |                 |         |
|-----------------|---------|-----------------|---------|
| afum EAL93410.1 | 100.00% | afis EAW18689.1 | 100.00% |
|-----------------|---------|-----------------|---------|

Bootstrap support for afum|EAL93410.1 as seed ortholog is 100%.

Bootstrap support for afis|EAW18689.1 as seed ortholog is 100%.

---

Group of orthologs #3621. Best score 1097 bits

Score difference with first non-orthologous sequence - *A. fumigatus*:1097 *A. fischeri*:1097

|                 |         |                 |         |
|-----------------|---------|-----------------|---------|
| afum EAL92072.2 | 100.00% | afis EAW21034.1 | 100.00% |
|-----------------|---------|-----------------|---------|

Bootstrap support for afum|EAL92072.2 as seed ortholog is 100%.

Bootstrap support for afis|EAW21034.1 as seed ortholog is 100%.

---

Group of orthologs #3622. Best score 1097 bits

Score difference with first non-orthologous sequence - *A. fumigatus*:1097 *A. fischeri*:1097

|                 |         |                 |         |
|-----------------|---------|-----------------|---------|
| afum EAL90660.1 | 100.00% | afis EAW22534.1 | 100.00% |
|-----------------|---------|-----------------|---------|

Bootstrap support for afum|EAL90660.1 as seed ortholog is 100%.

Bootstrap support for afis|EAW22534.1 as seed ortholog is 100%.

---

Group of orthologs #3623. Best score 1097 bits

Score difference with first non-orthologous sequence - *A. fumigatus*:1097 *A. fischeri*:1097

|                 |         |                 |         |
|-----------------|---------|-----------------|---------|
| afum EAL92009.1 | 100.00% | afis EAW24154.1 | 100.00% |
|-----------------|---------|-----------------|---------|

Bootstrap support for afum|EAL92009.1 as seed ortholog is 100%.

Bootstrap support for afis|EAW24154.1 as seed ortholog is 100%.

---

Group of orthologs #3624. Best score 1096 bits

Score difference with first non-orthologous sequence - *A. fumigatus*:1096 *A. fischeri*:1096

|                 |         |                 |         |
|-----------------|---------|-----------------|---------|
| afum EAL86797.1 | 100.00% | afis EAW19731.1 | 100.00% |
|-----------------|---------|-----------------|---------|

Bootstrap support for afum|EAL86797.1 as seed ortholog is 100%.

Bootstrap support for afis|EAW19731.1 as seed ortholog is 100%.

---

Group of orthologs #3625. Best score 1096 bits

Score difference with first non-orthologous sequence - *A. fumigatus*:1096 *A. fischeri*:1096

|                 |         |                 |         |
|-----------------|---------|-----------------|---------|
| afum EAL85897.1 | 100.00% | afis EAW24228.1 | 100.00% |
|-----------------|---------|-----------------|---------|

Bootstrap support for afum|EAL85897.1 as seed ortholog is 100%.

Bootstrap support for afis|EAW24228.1 as seed ortholog is 100%.

---

Group of orthologs #3626. Best score 1096 bits

Score difference with first non-orthologous sequence - *A. fumigatus*:1096 *A. fischeri*:1096

|                 |         |                 |         |
|-----------------|---------|-----------------|---------|
| afum EAL88156.2 | 100.00% | afis EAW23320.1 | 100.00% |
|-----------------|---------|-----------------|---------|

Bootstrap support for afum|EAL88156.2 as seed ortholog is 100%.

Bootstrap support for afis|EAW23320.1 as seed ortholog is 100%.

---

Group of orthologs #3627. Best score 1096 bits

Score difference with first non-orthologous sequence - *A. fumigatus*:1096 *A. fischeri*:1096

|                 |         |                 |         |
|-----------------|---------|-----------------|---------|
| afum EAL93931.1 | 100.00% | afis EAW19200.1 | 100.00% |
|-----------------|---------|-----------------|---------|

Bootstrap support for afum|EAL93931.1 as seed ortholog is 100%.

Bootstrap support for afis|EAW19200.1 as seed ortholog is 100%.

---

Group of orthologs #3628. Best score 1096 bits

Score difference with first non-orthologous sequence - *A. fumigatus*:1096 *A. fischeri*:1096  
afum|EAL91917.1 100.00% afis|EAW24062.1 100.00%  
Bootstrap support for afum|EAL91917.1 as seed ortholog is 100%.  
Bootstrap support for afis|EAW24062.1 as seed ortholog is 100%.

---

Group of orthologs #3629. Best score 1096 bits

Score difference with first non-orthologous sequence - *A. fumigatus*:1096 *A. fischeri*:1096  
afum|EBA27339.1 100.00% afis|EAW23214.1 100.00%  
Bootstrap support for afum|EBA27339.1 as seed ortholog is 100%.  
Bootstrap support for afis|EAW23214.1 as seed ortholog is 100%.

---

Group of orthologs #3630. Best score 1095 bits

Score difference with first non-orthologous sequence - *A. fumigatus*:1095 *A. fischeri*:1095  
afum|EAL91556.1 100.00% afis|EAW17744.1 100.00%  
Bootstrap support for afum|EAL91556.1 as seed ortholog is 100%.  
Bootstrap support for afis|EAW17744.1 as seed ortholog is 100%.

---

Group of orthologs #3631. Best score 1095 bits

Score difference with first non-orthologous sequence - *A. fumigatus*:1095 *A. fischeri*:1095  
afum|EAL93684.1 100.00% afis|EAW18950.1 100.00%  
Bootstrap support for afum|EAL93684.1 as seed ortholog is 100%.  
Bootstrap support for afis|EAW18950.1 as seed ortholog is 100%.

---

Group of orthologs #3632. Best score 1095 bits

Score difference with first non-orthologous sequence - *A. fumigatus*:1095 *A. fischeri*:1095  
afum|EAL90066.1 100.00% afis|EAW25407.1 100.00%  
Bootstrap support for afum|EAL90066.1 as seed ortholog is 100%.  
Bootstrap support for afis|EAW25407.1 as seed ortholog is 100%.

---

Group of orthologs #3633. Best score 1094 bits

Score difference with first non-orthologous sequence - *A. fumigatus*:1094 *A. fischeri*:1094  
afum|EAL85532.1 100.00% afis|EAW15819.1 100.00%  
Bootstrap support for afum|EAL85532.1 as seed ortholog is 100%.  
Bootstrap support for afis|EAW15819.1 as seed ortholog is 100%.

---

Group of orthologs #3634. Best score 1094 bits

Score difference with first non-orthologous sequence - *A. fumigatus*:1094 *A. fischeri*:421  
afum|EAL86473.1 100.00% afis|EAW16946.1 100.00%  
Bootstrap support for afum|EAL86473.1 as seed ortholog is 100%.  
Bootstrap support for afis|EAW16946.1 as seed ortholog is 100%.

---

Group of orthologs #3635. Best score 1094 bits

Score difference with first non-orthologous sequence - *A. fumigatus*:1094 *A. fischeri*:1094  
afum|EAL88542.1 100.00% afis|EAW15907.1 100.00%  
Bootstrap support for afum|EAL88542.1 as seed ortholog is 100%.  
Bootstrap support for afis|EAW15907.1 as seed ortholog is 100%.

---

Group of orthologs #3636. Best score 1094 bits

Score difference with first non-orthologous sequence - *A. fumigatus*:1094 *A. fischeri*:1094  
afum|EAL85432.1 100.00% afis|EAW20302.1 100.00%  
Bootstrap support for afum|EAL85432.1 as seed ortholog is 100%.  
Bootstrap support for afis|EAW20302.1 as seed ortholog is 100%.

---

Group of orthologs #3637. Best score 1094 bits

Score difference with first non-orthologous sequence - *A. fumigatus*:1094 *A. fischeri*:1094  
afum|EAL91822.1 100.00% afis|EAW18010.1 100.00%

Bootstrap support for afum|EAL91822.1 as seed ortholog is 100%.  
Bootstrap support for afis|EAW18010.1 as seed ortholog is 100%.

---

Group of orthologs #3638. Best score 1094 bits

Score difference with first non-orthologous sequence - *A. fumigatus*:1094 *A. fischeri*:1094

afum|EAL90726.1 100.00% afis|EAW22465.1 100.00%

Bootstrap support for afum|EAL90726.1 as seed ortholog is 100%.

Bootstrap support for afis|EAW22465.1 as seed ortholog is 100%.

---

Group of orthologs #3639. Best score 1094 bits

Score difference with first non-orthologous sequence - *A. fumigatus*:1094 *A. fischeri*:1094

afum|EAL90418.1 100.00% afis|EAW22781.1 100.00%

Bootstrap support for afum|EAL90418.1 as seed ortholog is 100%.

Bootstrap support for afis|EAW22781.1 as seed ortholog is 100%.

---

Group of orthologs #3640. Best score 1094 bits

Score difference with first non-orthologous sequence - *A. fumigatus*:989 *A. fischeri*:929

afum|EAL92288.1 100.00% afis|EAW21273.1 100.00%

Bootstrap support for afum|EAL92288.1 as seed ortholog is 100%.

Bootstrap support for afis|EAW21273.1 as seed ortholog is 100%.

---

Group of orthologs #3641. Best score 1093 bits

Score difference with first non-orthologous sequence - *A. fumigatus*:1093 *A. fischeri*:1093

afum|EAL88904.1 100.00% afis|EAW16283.1 100.00%

Bootstrap support for afum|EAL88904.1 as seed ortholog is 100%.

Bootstrap support for afis|EAW16283.1 as seed ortholog is 100%.

---

Group of orthologs #3642. Best score 1093 bits

Score difference with first non-orthologous sequence - *A. fumigatus*:901 *A. fischeri*:876

afum|EAL84518.2 100.00% afis|EAW20540.1 100.00%

Bootstrap support for afum|EAL84518.2 as seed ortholog is 100%.

Bootstrap support for afis|EAW20540.1 as seed ortholog is 100%.

---

Group of orthologs #3643. Best score 1093 bits

Score difference with first non-orthologous sequence - *A. fumigatus*:1093 *A. fischeri*:1093

afum|EAL89072.1 100.00% afis|EAW16478.1 100.00%

Bootstrap support for afum|EAL89072.1 as seed ortholog is 100%.

Bootstrap support for afis|EAW16478.1 as seed ortholog is 100%.

---

Group of orthologs #3644. Best score 1093 bits

Score difference with first non-orthologous sequence - *A. fumigatus*:1093 *A. fischeri*:1093

afum|EAL89109.1 100.00% afis|EAW16514.1 100.00%

Bootstrap support for afum|EAL89109.1 as seed ortholog is 100%.

Bootstrap support for afis|EAW16514.1 as seed ortholog is 100%.

---

Group of orthologs #3645. Best score 1093 bits

Score difference with first non-orthologous sequence - *A. fumigatus*:1093 *A. fischeri*:1093

afum|EAL84856.1 100.00% afis|EAW20763.1 100.00%

Bootstrap support for afum|EAL84856.1 as seed ortholog is 100%.

Bootstrap support for afis|EAW20763.1 as seed ortholog is 100%.

---

Group of orthologs #3646. Best score 1093 bits

Score difference with first non-orthologous sequence - *A. fumigatus*:1093 *A. fischeri*:1093

afum|EAL85481.2 100.00% afis|EAW20365.1 100.00%

Bootstrap support for afum|EAL85481.2 as seed ortholog is 100%.

Bootstrap support for afis|EAW20365.1 as seed ortholog is 100%.

---

Group of orthologs #3647. Best score 1093 bits

Score difference with first non-orthologous sequence - *A. fumigatus*:1093 *A. fischeri*:1093

afum|EAL85964.1 100.00% afis|EAW24296.1 100.00%

Bootstrap support for afum|EAL85964.1 as seed ortholog is 100%.

Bootstrap support for afis|EAW24296.1 as seed ortholog is 100%.

---

Group of orthologs #3648. Best score 1093 bits

Score difference with first non-orthologous sequence - *A. fumigatus*:1093 *A. fischeri*:1093

afum|EAL88333.1 100.00% afis|EAW23148.1 100.00%

Bootstrap support for afum|EAL88333.1 as seed ortholog is 100%.

Bootstrap support for afis|EAW23148.1 as seed ortholog is 100%.

---

Group of orthologs #3649. Best score 1093 bits

Score difference with first non-orthologous sequence - *A. fumigatus*:1018 *A. fischeri*:1093

afum|EAL88340.1 100.00% afis|EAW23141.1 100.00%

Bootstrap support for afum|EAL88340.1 as seed ortholog is 100%.

Bootstrap support for afis|EAW23141.1 as seed ortholog is 100%.

---

Group of orthologs #3650. Best score 1093 bits

Score difference with first non-orthologous sequence - *A. fumigatus*:1093 *A. fischeri*:1093

afum|EAL88154.1 100.00% afis|EAW23325.1 100.00%

Bootstrap support for afum|EAL88154.1 as seed ortholog is 100%.

Bootstrap support for afis|EAW23325.1 as seed ortholog is 100%.

---

Group of orthologs #3651. Best score 1093 bits

Score difference with first non-orthologous sequence - *A. fumigatus*:1093 *A. fischeri*:1093

afum|EAL93279.1 100.00% afis|EAW18576.1 100.00%

Bootstrap support for afum|EAL93279.1 as seed ortholog is 100%.

Bootstrap support for afis|EAW18576.1 as seed ortholog is 100%.

---

Group of orthologs #3652. Best score 1092 bits

Score difference with first non-orthologous sequence - *A. fumigatus*:1092 *A. fischeri*:1092

afum|EAL84903.1 100.00% afis|EAW20015.1 100.00%

Bootstrap support for afum|EAL84903.1 as seed ortholog is 100%.

Bootstrap support for afis|EAW20015.1 as seed ortholog is 100%.

---

Group of orthologs #3653. Best score 1092 bits

Score difference with first non-orthologous sequence - *A. fumigatus*:1092 *A. fischeri*:1092

afum|EAL92264.1 100.00% afis|EAW21251.1 100.00%

Bootstrap support for afum|EAL92264.1 as seed ortholog is 100%.

Bootstrap support for afis|EAW21251.1 as seed ortholog is 100%.

---

Group of orthologs #3654. Best score 1091 bits

Score difference with first non-orthologous sequence - *A. fumigatus*:1091 *A. fischeri*:1091

afum|EAL87544.1 100.00% afis|EAW18182.1 100.00%

Bootstrap support for afum|EAL87544.1 as seed ortholog is 100%.

Bootstrap support for afis|EAW18182.1 as seed ortholog is 100%.

---

Group of orthologs #3655. Best score 1091 bits

Score difference with first non-orthologous sequence - *A. fumigatus*:1091 *A. fischeri*:1091

afum|EAL87072.1 100.00% afis|EAW19422.1 100.00%

Bootstrap support for afum|EAL87072.1 as seed ortholog is 100%.

Bootstrap support for afis|EAW19422.1 as seed ortholog is 100%.

---

Group of orthologs #3656. Best score 1091 bits

Score difference with first non-orthologous sequence - *A. fumigatus*:1091 *A. fischeri*:1091  
afum|EAL87335.1 100.00% afis|EAW23907.1 100.00%  
Bootstrap support for afum|EAL87335.1 as seed ortholog is 100%.  
Bootstrap support for afis|EAW23907.1 as seed ortholog is 100%.

---

Group of orthologs #3657. Best score 1091 bits

Score difference with first non-orthologous sequence - *A. fumigatus*:1091 *A. fischeri*:1025  
afum|EAL90084.1 100.00% afis|EAW25425.1 100.00%  
Bootstrap support for afum|EAL90084.1 as seed ortholog is 100%.  
Bootstrap support for afis|EAW25425.1 as seed ortholog is 100%.

---

Group of orthologs #3658. Best score 1090 bits

Score difference with first non-orthologous sequence - *A. fumigatus*:1090 *A. fischeri*:1090  
afum|EAL85286.1 100.00% afis|EAW20168.1 100.00%  
Bootstrap support for afum|EAL85286.1 as seed ortholog is 100%.  
Bootstrap support for afis|EAW20168.1 as seed ortholog is 100%.

---

Group of orthologs #3659. Best score 1090 bits

Score difference with first non-orthologous sequence - *A. fumigatus*:1090 *A. fischeri*:1090  
afum|EAL84866.1 100.00% afis|EAW20748.1 100.00%  
Bootstrap support for afum|EAL84866.1 as seed ortholog is 100%.  
Bootstrap support for afis|EAW20748.1 as seed ortholog is 100%.

---

Group of orthologs #3660. Best score 1090 bits

Score difference with first non-orthologous sequence - *A. fumigatus*:1090 *A. fischeri*:1090  
afum|EAL91270.1 100.00% afis|EAW17444.1 100.00%  
Bootstrap support for afum|EAL91270.1 as seed ortholog is 100%.  
Bootstrap support for afis|EAW17444.1 as seed ortholog is 100%.

---

Group of orthologs #3661. Best score 1090 bits

Score difference with first non-orthologous sequence - *A. fumigatus*:1003 *A. fischeri*:897  
afum|EAL89233.1 100.00% afis|EAW20411.1 100.00%  
Bootstrap support for afum|EAL89233.1 as seed ortholog is 100%.  
Bootstrap support for afis|EAW20411.1 as seed ortholog is 100%.

---

Group of orthologs #3662. Best score 1090 bits

Score difference with first non-orthologous sequence - *A. fumigatus*:923 *A. fischeri*:596  
afum|EAL94029.1 100.00% afis|EAW19313.1 100.00%  
Bootstrap support for afum|EAL94029.1 as seed ortholog is 100%.  
Bootstrap support for afis|EAW19313.1 as seed ortholog is 100%.

---

Group of orthologs #3663. Best score 1090 bits

Score difference with first non-orthologous sequence - *A. fumigatus*:1090 *A. fischeri*:1090  
afum|EAL90222.1 100.00% afis|EAW22975.1 100.00%  
Bootstrap support for afum|EAL90222.1 as seed ortholog is 100%.  
Bootstrap support for afis|EAW22975.1 as seed ortholog is 100%.

---

Group of orthologs #3664. Best score 1090 bits

Score difference with first non-orthologous sequence - *A. fumigatus*:1090 *A. fischeri*:1090  
afum|EAL89313.1 100.00% afis|EAW24657.1 100.00%  
Bootstrap support for afum|EAL89313.1 as seed ortholog is 100%.  
Bootstrap support for afis|EAW24657.1 as seed ortholog is 100%.

---

Group of orthologs #3665. Best score 1090 bits

Score difference with first non-orthologous sequence - *A. fumigatus*:1090 *A. fischeri*:1090  
afum|EAL92600.1 100.00% afis|EAW21582.1 100.00%

Bootstrap support for afum|EAL92600.1 as seed ortholog is 100%.  
Bootstrap support for afis|EAW21582.1 as seed ortholog is 100%.

---

Group of orthologs #3666. Best score 1090 bits

Score difference with first non-orthologous sequence - *A. fumigatus*:1090 *A. fischeri*:398

afum|EAL89873.1 100.00% afis|EAW25212.1 100.00%

Bootstrap support for afum|EAL89873.1 as seed ortholog is 100%.

Bootstrap support for afis|EAW25212.1 as seed ortholog is 100%.

---

Group of orthologs #3667. Best score 1089 bits

Score difference with first non-orthologous sequence - *A. fumigatus*:1089 *A. fischeri*:1089

afum|EAL85020.1 100.00% afis|EAW19877.1 100.00%

Bootstrap support for afum|EAL85020.1 as seed ortholog is 100%.

Bootstrap support for afis|EAW19877.1 as seed ortholog is 100%.

---

Group of orthologs #3668. Best score 1089 bits

Score difference with first non-orthologous sequence - *A. fumigatus*:1089 *A. fischeri*:1089

afum|EAL91557.1 100.00% afis|EAW17745.1 100.00%

Bootstrap support for afum|EAL91557.1 as seed ortholog is 100%.

Bootstrap support for afis|EAW17745.1 as seed ortholog is 100%.

---

Group of orthologs #3669. Best score 1089 bits

Score difference with first non-orthologous sequence - *A. fumigatus*:1089 *A. fischeri*:1089

afum|EAL93047.1 100.00% afis|EAW18372.1 100.00%

Bootstrap support for afum|EAL93047.1 as seed ortholog is 100%.

Bootstrap support for afis|EAW18372.1 as seed ortholog is 100%.

---

Group of orthologs #3670. Best score 1089 bits

Score difference with first non-orthologous sequence - *A. fumigatus*:1089 *A. fischeri*:1089

afum|EAL93170.1 100.00% afis|EAW18481.1 100.00%

Bootstrap support for afum|EAL93170.1 as seed ortholog is 100%.

Bootstrap support for afis|EAW18481.1 as seed ortholog is 100%.

---

Group of orthologs #3671. Best score 1089 bits

Score difference with first non-orthologous sequence - *A. fumigatus*:1089 *A. fischeri*:1089

afum|EAL90192.1 100.00% afis|EAW25527.1 100.00%

Bootstrap support for afum|EAL90192.1 as seed ortholog is 100%.

Bootstrap support for afis|EAW25527.1 as seed ortholog is 100%.

---

Group of orthologs #3672. Best score 1088 bits

Score difference with first non-orthologous sequence - *A. fumigatus*:1088 *A. fischeri*:1088

afum|EAL88734.1 100.00% afis|EAW16102.1 100.00%

Bootstrap support for afum|EAL88734.1 as seed ortholog is 100%.

Bootstrap support for afis|EAW16102.1 as seed ortholog is 100%.

---

Group of orthologs #3673. Best score 1088 bits

Score difference with first non-orthologous sequence - *A. fumigatus*:1088 *A. fischeri*:1088

afum|EAL87143.1 100.00% afis|EAW23702.1 100.00%

Bootstrap support for afum|EAL87143.1 as seed ortholog is 100%.

Bootstrap support for afis|EAW23702.1 as seed ortholog is 100%.

---

Group of orthologs #3674. Best score 1088 bits

Score difference with first non-orthologous sequence - *A. fumigatus*:1088 *A. fischeri*:1088

afum|EAL87954.1 100.00% afis|EAW23507.1 100.00%

Bootstrap support for afum|EAL87954.1 as seed ortholog is 100%.

Bootstrap support for afis|EAW23507.1 as seed ortholog is 100%.



---

Group of orthologs #3675. Best score 1088 bits

Score difference with first non-orthologous sequence - *A. fumigatus*:1088 *A. fischeri*:1088

afum|EAL93542.1 100.00% afis|EAW18806.1 100.00%

Bootstrap support for afum|EAL93542.1 as seed ortholog is 100%.

Bootstrap support for afis|EAW18806.1 as seed ortholog is 100%.

---

Group of orthologs #3676. Best score 1088 bits

Score difference with first non-orthologous sequence - *A. fumigatus*:1088 *A. fischeri*:1088

afum|EAL89336.1 100.00% afis|EAW24694.1 100.00%

Bootstrap support for afum|EAL89336.1 as seed ortholog is 100%.

Bootstrap support for afis|EAW24694.1 as seed ortholog is 100%.

---

Group of orthologs #3677. Best score 1088 bits

Score difference with first non-orthologous sequence - *A. fumigatus*:1088 *A. fischeri*:1088

afum|EAL89401.1 100.00% afis|EAW24759.1 100.00%

Bootstrap support for afum|EAL89401.1 as seed ortholog is 100%.

Bootstrap support for afis|EAW24759.1 as seed ortholog is 100%.

---

Group of orthologs #3678. Best score 1087 bits

Score difference with first non-orthologous sequence - *A. fumigatus*:1087 *A. fischeri*:1087

afum|EAL87554.1 100.00% afis|EAW18197.1 100.00%

Bootstrap support for afum|EAL87554.1 as seed ortholog is 100%.

Bootstrap support for afis|EAW18197.1 as seed ortholog is 100%.

---

Group of orthologs #3679. Best score 1087 bits

Score difference with first non-orthologous sequence - *A. fumigatus*:1087 *A. fischeri*:1087

afum|EAL91189.2 100.00% afis|EAW17345.1 100.00%

Bootstrap support for afum|EAL91189.2 as seed ortholog is 100%.

Bootstrap support for afis|EAW17345.1 as seed ortholog is 100%.

---

Group of orthologs #3680. Best score 1087 bits

Score difference with first non-orthologous sequence - *A. fumigatus*:1000 *A. fischeri*:1087

afum|EAL85992.1 100.00% afis|EAW24322.1 100.00%

Bootstrap support for afum|EAL85992.1 as seed ortholog is 100%.

Bootstrap support for afis|EAW24322.1 as seed ortholog is 100%.

---

Group of orthologs #3681. Best score 1087 bits

Score difference with first non-orthologous sequence - *A. fumigatus*:1087 *A. fischeri*:1087

afum|EAL87868.1 100.00% afis|EAW23598.1 100.00%

Bootstrap support for afum|EAL87868.1 as seed ortholog is 100%.

Bootstrap support for afis|EAW23598.1 as seed ortholog is 100%.

---

Group of orthologs #3682. Best score 1087 bits

Score difference with first non-orthologous sequence - *A. fumigatus*:1087 *A. fischeri*:1087

afum|EAL89331.1 100.00% afis|EAW24690.1 100.00%

Bootstrap support for afum|EAL89331.1 as seed ortholog is 100%.

Bootstrap support for afis|EAW24690.1 as seed ortholog is 100%.

---

Group of orthologs #3683. Best score 1087 bits

Score difference with first non-orthologous sequence - *A. fumigatus*:1087 *A. fischeri*:1087

afum|EAL89672.1 100.00% afis|EAW25023.1 100.00%

Bootstrap support for afum|EAL89672.1 as seed ortholog is 100%.

Bootstrap support for afis|EAW25023.1 as seed ortholog is 100%.

---

Group of orthologs #3684. Best score 1086 bits

Score difference with first non-orthologous sequence - *A. fumigatus*:1086 *A. fischeri*:1086  
afum|EAL85590.1 100.00% afis|EAW15758.1 100.00%  
Bootstrap support for afum|EAL85590.1 as seed ortholog is 100%.  
Bootstrap support for afis|EAW15758.1 as seed ortholog is 100%.

---

Group of orthologs #3685. Best score 1086 bits

Score difference with first non-orthologous sequence - *A. fumigatus*:1086 *A. fischeri*:1086  
afum|EAL84677.1 100.00% afis|EAW20956.1 100.00%  
Bootstrap support for afum|EAL84677.1 as seed ortholog is 100%.  
Bootstrap support for afis|EAW20956.1 as seed ortholog is 100%.

---

Group of orthologs #3686. Best score 1085 bits

Score difference with first non-orthologous sequence - *A. fumigatus*:1085 *A. fischeri*:1085  
afum|EAL87056.1 100.00% afis|EAW19440.1 100.00%  
Bootstrap support for afum|EAL87056.1 as seed ortholog is 100%.  
Bootstrap support for afis|EAW19440.1 as seed ortholog is 100%.

---

Group of orthologs #3687. Best score 1085 bits

Score difference with first non-orthologous sequence - *A. fumigatus*:554 *A. fischeri*:632  
afum|EAL92453.2 100.00% afis|EAW21438.1 100.00%  
Bootstrap support for afum|EAL92453.2 as seed ortholog is 100%.  
Bootstrap support for afis|EAW21438.1 as seed ortholog is 100%.

---

Group of orthologs #3688. Best score 1084 bits

Score difference with first non-orthologous sequence - *A. fumigatus*:1084 *A. fischeri*:638  
afum|EAL85859.1 100.00% afis|EAW15460.1 100.00%  
Bootstrap support for afum|EAL85859.1 as seed ortholog is 100%.  
Bootstrap support for afis|EAW15460.1 as seed ortholog is 100%.

---

Group of orthologs #3689. Best score 1084 bits

Score difference with first non-orthologous sequence - *A. fumigatus*:1084 *A. fischeri*:1084  
afum|EAL86693.1 100.00% afis|EAW17275.1 100.00%  
Bootstrap support for afum|EAL86693.1 as seed ortholog is 100%.  
Bootstrap support for afis|EAW17275.1 as seed ortholog is 100%.

---

Group of orthologs #3690. Best score 1084 bits

Score difference with first non-orthologous sequence - *A. fumigatus*:1011 *A. fischeri*:995  
afum|EAL84874.1 100.00% afis|EAW20699.1 100.00%  
Bootstrap support for afum|EAL84874.1 as seed ortholog is 100%.  
Bootstrap support for afis|EAW20699.1 as seed ortholog is 100%.

---

Group of orthologs #3691. Best score 1084 bits

Score difference with first non-orthologous sequence - *A. fumigatus*:1084 *A. fischeri*:1084  
afum|EAL91295.1 100.00% afis|EAW17466.1 100.00%  
Bootstrap support for afum|EAL91295.1 as seed ortholog is 100%.  
Bootstrap support for afis|EAW17466.1 as seed ortholog is 100%.

---

Group of orthologs #3692. Best score 1084 bits

Score difference with first non-orthologous sequence - *A. fumigatus*:1084 *A. fischeri*:1084  
afum|EAL91786.1 100.00% afis|EAW17977.1 100.00%  
Bootstrap support for afum|EAL91786.1 as seed ortholog is 100%.  
Bootstrap support for afis|EAW17977.1 as seed ortholog is 100%.

---

Group of orthologs #3693. Best score 1084 bits

Score difference with first non-orthologous sequence - *A. fumigatus*:1084 *A. fischeri*:1084  
afum|EAL90558.2 100.00% afis|EAW22635.1 100.00%

Bootstrap support for afum|EAL90558.2 as seed ortholog is 100%.  
Bootstrap support for afis|EAW22635.1 as seed ortholog is 100%.

---

Group of orthologs #3694. Best score 1084 bits

Score difference with first non-orthologous sequence - *A. fumigatus*:1084 *A. fischeri*:1084

afum|EAL89657.1 100.00% afis|EAW25037.1 100.00%

Bootstrap support for afum|EAL89657.1 as seed ortholog is 100%.

Bootstrap support for afis|EAW25037.1 as seed ortholog is 100%.

---

Group of orthologs #3695. Best score 1083 bits

Score difference with first non-orthologous sequence - *A. fumigatus*:1083 *A. fischeri*:1083

afum|EAL86116.1 100.00% afis|EAW24447.1 100.00%

Bootstrap support for afum|EAL86116.1 as seed ortholog is 100%.

Bootstrap support for afis|EAW24447.1 as seed ortholog is 100%.

---

Group of orthologs #3696. Best score 1083 bits

Score difference with first non-orthologous sequence - *A. fumigatus*:549 *A. fischeri*:583

afum|EAL87116.1 100.00% afis|EAW23673.1 100.00%

Bootstrap support for afum|EAL87116.1 as seed ortholog is 100%.

Bootstrap support for afis|EAW23673.1 as seed ortholog is 100%.

---

Group of orthologs #3697. Best score 1083 bits

Score difference with first non-orthologous sequence - *A. fumigatus*:1083 *A. fischeri*:1083

afum|EAL87220.2 100.00% afis|EAW23786.1 100.00%

Bootstrap support for afum|EAL87220.2 as seed ortholog is 100%.

Bootstrap support for afis|EAW23786.1 as seed ortholog is 100%.

---

Group of orthologs #3698. Best score 1083 bits

Score difference with first non-orthologous sequence - *A. fumigatus*:831 *A. fischeri*:1083

afum|EAL92847.1 100.00% afis|EAW21832.1 100.00%

Bootstrap support for afum|EAL92847.1 as seed ortholog is 100%.

Bootstrap support for afis|EAW21832.1 as seed ortholog is 100%.

---

Group of orthologs #3699. Best score 1082 bits

Score difference with first non-orthologous sequence - *A. fumigatus*:1082 *A. fischeri*:715

afum|EAL85504.1 100.00% afis|EAW15847.1 100.00%

Bootstrap support for afum|EAL85504.1 as seed ortholog is 100%.

Bootstrap support for afis|EAW15847.1 as seed ortholog is 100%.

---

Group of orthologs #3700. Best score 1082 bits

Score difference with first non-orthologous sequence - *A. fumigatus*:1082 *A. fischeri*:1082

afum|EAL88223.1 100.00% afis|EAW23258.1 100.00%

Bootstrap support for afum|EAL88223.1 as seed ortholog is 100%.

Bootstrap support for afis|EAW23258.1 as seed ortholog is 100%.

---

Group of orthologs #3701. Best score 1082 bits

Score difference with first non-orthologous sequence - *A. fumigatus*:1082 *A. fischeri*:908

afum|EAL93742.1 100.00% afis|EAW19008.1 100.00%

Bootstrap support for afum|EAL93742.1 as seed ortholog is 100%.

Bootstrap support for afis|EAW19008.1 as seed ortholog is 100%.

---

Group of orthologs #3702. Best score 1082 bits

Score difference with first non-orthologous sequence - *A. fumigatus*:939 *A. fischeri*:1082

afum|EAL92086.1 100.00% afis|EAW21050.1 100.00%

Bootstrap support for afum|EAL92086.1 as seed ortholog is 100%.

Bootstrap support for afis|EAW21050.1 as seed ortholog is 100%.

---

Group of orthologs #3703. Best score 1082 bits

Score difference with first non-orthologous sequence - *A. fumigatus*:1082 *A. fischeri*:1082

afum|EAL90905.1 100.00% afis|EAW22276.1 100.00%

Bootstrap support for afum|EAL90905.1 as seed ortholog is 100%.

Bootstrap support for afis|EAW22276.1 as seed ortholog is 100%.

---

Group of orthologs #3704. Best score 1082 bits

Score difference with first non-orthologous sequence - *A. fumigatus*:1082 *A. fischeri*:1082

afum|EAL89716.1 100.00% afis|EAW25048.1 100.00%

Bootstrap support for afum|EAL89716.1 as seed ortholog is 100%.

Bootstrap support for afis|EAW25048.1 as seed ortholog is 100%.

---

Group of orthologs #3705. Best score 1082 bits

Score difference with first non-orthologous sequence - *A. fumigatus*:1082 *A. fischeri*:997

afum|EAL93009.1 100.00% afis|EAW21994.1 100.00%

Bootstrap support for afum|EAL93009.1 as seed ortholog is 100%.

Bootstrap support for afis|EAW21994.1 as seed ortholog is 100%.

---

Group of orthologs #3706. Best score 1081 bits

Score difference with first non-orthologous sequence - *A. fumigatus*:1081 *A. fischeri*:396

afum|EAL85407.1 100.00% afis|EAW20273.1 100.00%

Bootstrap support for afum|EAL85407.1 as seed ortholog is 100%.

Bootstrap support for afis|EAW20273.1 as seed ortholog is 100%.

---

Group of orthologs #3707. Best score 1081 bits

Score difference with first non-orthologous sequence - *A. fumigatus*:1081 *A. fischeri*:1081

afum|EAL91467.1 100.00% afis|EAW17652.1 100.00%

Bootstrap support for afum|EAL91467.1 as seed ortholog is 100%.

Bootstrap support for afis|EAW17652.1 as seed ortholog is 100%.

---

Group of orthologs #3708. Best score 1081 bits

Score difference with first non-orthologous sequence - *A. fumigatus*:1081 *A. fischeri*:1081

afum|EAL87148.1 100.00% afis|EAW23704.1 100.00%

Bootstrap support for afum|EAL87148.1 as seed ortholog is 100%.

Bootstrap support for afis|EAW23704.1 as seed ortholog is 100%.

---

Group of orthologs #3709. Best score 1081 bits

Score difference with first non-orthologous sequence - *A. fumigatus*:1081 *A. fischeri*:1081

afum|EAL92436.1 100.00% afis|EAW21421.1 100.00%

Bootstrap support for afum|EAL92436.1 as seed ortholog is 100%.

Bootstrap support for afis|EAW21421.1 as seed ortholog is 100%.

---

Group of orthologs #3710. Best score 1081 bits

Score difference with first non-orthologous sequence - *A. fumigatus*:1081 *A. fischeri*:1081

afum|EAL92648.1 100.00% afis|EAW21614.1 100.00%

Bootstrap support for afum|EAL92648.1 as seed ortholog is 100%.

Bootstrap support for afis|EAW21614.1 as seed ortholog is 100%.

---

Group of orthologs #3711. Best score 1081 bits

Score difference with first non-orthologous sequence - *A. fumigatus*:945 *A. fischeri*:880

afum|EAL89404.1 100.00% afis|EAW24762.1 100.00%

Bootstrap support for afum|EAL89404.1 as seed ortholog is 100%.

Bootstrap support for afis|EAW24762.1 as seed ortholog is 100%.

---

Group of orthologs #3712. Best score 1080 bits

Score difference with first non-orthologous sequence - *A. fumigatus*:1080 *A. fischeri*:1080  
afum|EAL88671.1 100.00% afis|EAW16039.1 100.00%  
Bootstrap support for afum|EAL88671.1 as seed ortholog is 100%.  
Bootstrap support for afis|EAW16039.1 as seed ortholog is 100%.

---

Group of orthologs #3713. Best score 1080 bits

Score difference with first non-orthologous sequence - *A. fumigatus*:1080 *A. fischeri*:1080  
afum|EAL87529.2 100.00% afis|EAW18168.1 100.00%  
Bootstrap support for afum|EAL87529.2 as seed ortholog is 100%.  
Bootstrap support for afis|EAW18168.1 as seed ortholog is 100%.

---

Group of orthologs #3714. Best score 1080 bits

Score difference with first non-orthologous sequence - *A. fumigatus*:1080 *A. fischeri*:1080  
afum|EAL93233.1 100.00% afis|EAW18535.1 100.00%  
Bootstrap support for afum|EAL93233.1 as seed ortholog is 100%.  
Bootstrap support for afis|EAW18535.1 as seed ortholog is 100%.

---

Group of orthologs #3715. Best score 1080 bits

Score difference with first non-orthologous sequence - *A. fumigatus*:1080 *A. fischeri*:1080  
afum|EAL92585.1 100.00% afis|EAW21566.1 100.00%  
Bootstrap support for afum|EAL92585.1 as seed ortholog is 100%.  
Bootstrap support for afis|EAW21566.1 as seed ortholog is 100%.

---

Group of orthologs #3716. Best score 1080 bits

Score difference with first non-orthologous sequence - *A. fumigatus*:1080 *A. fischeri*:881  
afum|EAL89380.1 100.00% afis|EAW24733.1 100.00%  
Bootstrap support for afum|EAL89380.1 as seed ortholog is 100%.  
Bootstrap support for afis|EAW24733.1 as seed ortholog is 100%.

---

Group of orthologs #3717. Best score 1079 bits

Score difference with first non-orthologous sequence - *A. fumigatus*:1079 *A. fischeri*:1079  
afum|EAL90384.1 100.00% afis|EAW22817.1 100.00%  
Bootstrap support for afum|EAL90384.1 as seed ortholog is 100%.  
Bootstrap support for afis|EAW22817.1 as seed ortholog is 100%.

---

Group of orthologs #3718. Best score 1079 bits

Score difference with first non-orthologous sequence - *A. fumigatus*:1079 *A. fischeri*:1079  
afum|EAL89561.1 100.00% afis|EAW24908.1 100.00%  
Bootstrap support for afum|EAL89561.1 as seed ortholog is 100%.  
Bootstrap support for afis|EAW24908.1 as seed ortholog is 100%.

---

Group of orthologs #3719. Best score 1078 bits

Score difference with first non-orthologous sequence - *A. fumigatus*:1078 *A. fischeri*:1078  
afum|EAL84514.1 100.00% afis|EAW20544.1 100.00%  
Bootstrap support for afum|EAL84514.1 as seed ortholog is 100%.  
Bootstrap support for afis|EAW20544.1 as seed ortholog is 100%.

---

Group of orthologs #3720. Best score 1078 bits

Score difference with first non-orthologous sequence - *A. fumigatus*:1078 *A. fischeri*:1078  
afum|EAL87635.1 100.00% afis|EAW18270.1 100.00%  
Bootstrap support for afum|EAL87635.1 as seed ortholog is 100%.  
Bootstrap support for afis|EAW18270.1 as seed ortholog is 100%.

---

Group of orthologs #3721. Best score 1078 bits

Score difference with first non-orthologous sequence - *A. fumigatus*:1078 *A. fischeri*:963  
afum|EAL86789.1 100.00% afis|EAW19740.1 100.00%

Bootstrap support for afum|EAL86789.1 as seed ortholog is 100%.  
Bootstrap support for afis|EAW19740.1 as seed ortholog is 100%.

---

Group of orthologs #3722. Best score 1078 bits

Score difference with first non-orthologous sequence - *A. fumigatus*:877 *A. fischeri*:967

|                 |         |                 |         |
|-----------------|---------|-----------------|---------|
| afum EAL89235.1 | 100.00% | afis EAW20409.1 | 100.00% |
|-----------------|---------|-----------------|---------|

Bootstrap support for afum|EAL89235.1 as seed ortholog is 100%.

Bootstrap support for afis|EAW20409.1 as seed ortholog is 100%.

---

Group of orthologs #3723. Best score 1078 bits

Score difference with first non-orthologous sequence - *A. fumigatus*:1078 *A. fischeri*:1078

|                 |         |                 |         |
|-----------------|---------|-----------------|---------|
| afum EAL85981.1 | 100.00% | afis EAW24313.1 | 100.00% |
|-----------------|---------|-----------------|---------|

Bootstrap support for afum|EAL85981.1 as seed ortholog is 100%.

Bootstrap support for afis|EAW24313.1 as seed ortholog is 100%.

---

Group of orthologs #3724. Best score 1078 bits

Score difference with first non-orthologous sequence - *A. fumigatus*:1078 *A. fischeri*:1078

|                 |         |                 |         |
|-----------------|---------|-----------------|---------|
| afum EAL93289.1 | 100.00% | afis EAW18585.1 | 100.00% |
|-----------------|---------|-----------------|---------|

Bootstrap support for afum|EAL93289.1 as seed ortholog is 100%.

Bootstrap support for afis|EAW18585.1 as seed ortholog is 100%.

---

Group of orthologs #3725. Best score 1078 bits

Score difference with first non-orthologous sequence - *A. fumigatus*:1078 *A. fischeri*:1078

|                 |         |                 |         |
|-----------------|---------|-----------------|---------|
| afum EAL89505.2 | 100.00% | afis EAW24857.1 | 100.00% |
|-----------------|---------|-----------------|---------|

Bootstrap support for afum|EAL89505.2 as seed ortholog is 100%.

Bootstrap support for afis|EAW24857.1 as seed ortholog is 100%.

---

Group of orthologs #3726. Best score 1077 bits

Score difference with first non-orthologous sequence - *A. fumigatus*:988 *A. fischeri*:1077

|                 |         |                 |         |
|-----------------|---------|-----------------|---------|
| afum EAL91205.2 | 100.00% | afis EAW17368.1 | 100.00% |
|-----------------|---------|-----------------|---------|

Bootstrap support for afum|EAL91205.2 as seed ortholog is 100%.

Bootstrap support for afis|EAW17368.1 as seed ortholog is 100%.

---

Group of orthologs #3727. Best score 1077 bits

Score difference with first non-orthologous sequence - *A. fumigatus*:1077 *A. fischeri*:1077

|                 |         |                 |         |
|-----------------|---------|-----------------|---------|
| afum EAL91365.1 | 100.00% | afis EAW17551.1 | 100.00% |
|-----------------|---------|-----------------|---------|

Bootstrap support for afum|EAL91365.1 as seed ortholog is 100%.

Bootstrap support for afis|EAW17551.1 as seed ortholog is 100%.

---

Group of orthologs #3728. Best score 1077 bits

Score difference with first non-orthologous sequence - *A. fumigatus*:1077 *A. fischeri*:1077

|                 |         |                 |         |
|-----------------|---------|-----------------|---------|
| afum EAL91598.1 | 100.00% | afis EAW17789.1 | 100.00% |
|-----------------|---------|-----------------|---------|

Bootstrap support for afum|EAL91598.1 as seed ortholog is 100%.

Bootstrap support for afis|EAW17789.1 as seed ortholog is 100%.

---

Group of orthologs #3729. Best score 1077 bits

Score difference with first non-orthologous sequence - *A. fumigatus*:1077 *A. fischeri*:1077

|                 |         |                 |         |
|-----------------|---------|-----------------|---------|
| afum EAL91087.1 | 100.00% | afis EAW22104.1 | 100.00% |
|-----------------|---------|-----------------|---------|

Bootstrap support for afum|EAL91087.1 as seed ortholog is 100%.

Bootstrap support for afis|EAW22104.1 as seed ortholog is 100%.

---

Group of orthologs #3730. Best score 1077 bits

Score difference with first non-orthologous sequence - *A. fumigatus*:1077 *A. fischeri*:1077

|                 |         |                 |         |
|-----------------|---------|-----------------|---------|
| afum EAL90661.1 | 100.00% | afis EAW22533.1 | 100.00% |
|-----------------|---------|-----------------|---------|

Bootstrap support for afum|EAL90661.1 as seed ortholog is 100%.

Bootstrap support for afis|EAW22533.1 as seed ortholog is 100%.

---

Group of orthologs #3731. Best score 1077 bits

Score difference with first non-orthologous sequence - *A. fumigatus*:1077 *A. fischeri*:1077

|                 |         |                 |         |
|-----------------|---------|-----------------|---------|
| afum EBA27509.1 | 100.00% | afis EAW19239.1 | 100.00% |
|-----------------|---------|-----------------|---------|

Bootstrap support for afum|EBA27509.1 as seed ortholog is 100%.

Bootstrap support for afis|EAW19239.1 as seed ortholog is 100%.

---

Group of orthologs #3732. Best score 1076 bits

Score difference with first non-orthologous sequence - *A. fumigatus*:834 *A. fischeri*:693

|                 |         |                 |         |
|-----------------|---------|-----------------|---------|
| afum EAL86303.2 | 100.00% | afis EAW16728.1 | 100.00% |
|-----------------|---------|-----------------|---------|

Bootstrap support for afum|EAL86303.2 as seed ortholog is 100%.

Bootstrap support for afis|EAW16728.1 as seed ortholog is 100%.

---

Group of orthologs #3733. Best score 1076 bits

Score difference with first non-orthologous sequence - *A. fumigatus*:1076 *A. fischeri*:1076

|                 |         |                 |         |
|-----------------|---------|-----------------|---------|
| afum EAL90988.1 | 100.00% | afis EAW22205.1 | 100.00% |
|-----------------|---------|-----------------|---------|

Bootstrap support for afum|EAL90988.1 as seed ortholog is 100%.

Bootstrap support for afis|EAW22205.1 as seed ortholog is 100%.

---

Group of orthologs #3734. Best score 1076 bits

Score difference with first non-orthologous sequence - *A. fumigatus*:1076 *A. fischeri*:1076

|                 |         |                 |         |
|-----------------|---------|-----------------|---------|
| afum EAL89577.2 | 100.00% | afis EAW24922.1 | 100.00% |
|-----------------|---------|-----------------|---------|

Bootstrap support for afum|EAL89577.2 as seed ortholog is 100%.

Bootstrap support for afis|EAW24922.1 as seed ortholog is 100%.

---

Group of orthologs #3735. Best score 1075 bits

Score difference with first non-orthologous sequence - *A. fumigatus*:1075 *A. fischeri*:1075

|                 |         |                 |         |
|-----------------|---------|-----------------|---------|
| afum EAL84233.1 | 100.00% | afis EAW15413.1 | 100.00% |
|-----------------|---------|-----------------|---------|

Bootstrap support for afum|EAL84233.1 as seed ortholog is 100%.

Bootstrap support for afis|EAW15413.1 as seed ortholog is 100%.

---

Group of orthologs #3736. Best score 1075 bits

Score difference with first non-orthologous sequence - *A. fumigatus*:1075 *A. fischeri*:735

|                 |         |                 |         |
|-----------------|---------|-----------------|---------|
| afum EAL86353.1 | 100.00% | afis EAW16782.1 | 100.00% |
|-----------------|---------|-----------------|---------|

Bootstrap support for afum|EAL86353.1 as seed ortholog is 100%.

Bootstrap support for afis|EAW16782.1 as seed ortholog is 100%.

---

Group of orthologs #3737. Best score 1075 bits

Score difference with first non-orthologous sequence - *A. fumigatus*:842 *A. fischeri*:1075

|                 |         |                 |         |
|-----------------|---------|-----------------|---------|
| afum EAL84470.1 | 100.00% | afis EAW20591.1 | 100.00% |
|-----------------|---------|-----------------|---------|

Bootstrap support for afum|EAL84470.1 as seed ortholog is 100%.

Bootstrap support for afis|EAW20591.1 as seed ortholog is 100%.

---

Group of orthologs #3738. Best score 1075 bits

Score difference with first non-orthologous sequence - *A. fumigatus*:1075 *A. fischeri*:1075

|                 |         |                 |         |
|-----------------|---------|-----------------|---------|
| afum EAL91456.1 | 100.00% | afis EAW17641.1 | 100.00% |
|-----------------|---------|-----------------|---------|

Bootstrap support for afum|EAL91456.1 as seed ortholog is 100%.

Bootstrap support for afis|EAW17641.1 as seed ortholog is 100%.

---

Group of orthologs #3739. Best score 1075 bits

Score difference with first non-orthologous sequence - *A. fumigatus*:1075 *A. fischeri*:1075

|                 |         |                 |         |
|-----------------|---------|-----------------|---------|
| afum EAL93682.1 | 100.00% | afis EAW18948.1 | 100.00% |
|-----------------|---------|-----------------|---------|

Bootstrap support for afum|EAL93682.1 as seed ortholog is 100%.

Bootstrap support for afis|EAW18948.1 as seed ortholog is 100%.

---

Group of orthologs #3740. Best score 1075 bits

Score difference with first non-orthologous sequence - *A. fumigatus*:1075 *A. fischeri*:1075  
afum|EAL90513.1 100.00% afis|EAW22679.1 100.00%  
Bootstrap support for afum|EAL90513.1 as seed ortholog is 100%.  
Bootstrap support for afis|EAW22679.1 as seed ortholog is 100%.

---

Group of orthologs #3741. Best score 1074 bits

Score difference with first non-orthologous sequence - *A. fumigatus*:1074 *A. fischeri*:1074  
afum|EAL86447.1 100.00% afis|EAW16911.1 100.00%  
Bootstrap support for afum|EAL86447.1 as seed ortholog is 100%.  
Bootstrap support for afis|EAW16911.1 as seed ortholog is 100%.

---

Group of orthologs #3742. Best score 1074 bits

Score difference with first non-orthologous sequence - *A. fumigatus*:785 *A. fischeri*:791  
afum|EAL85142.1 100.00% afis|EAW19755.1 100.00%  
Bootstrap support for afum|EAL85142.1 as seed ortholog is 100%.  
Bootstrap support for afis|EAW19755.1 as seed ortholog is 100%.

---

Group of orthologs #3743. Best score 1074 bits

Score difference with first non-orthologous sequence - *A. fumigatus*:1074 *A. fischeri*:1074  
afum|EAL87593.2 100.00% afis|EAW18226.1 100.00%  
Bootstrap support for afum|EAL87593.2 as seed ortholog is 100%.  
Bootstrap support for afis|EAW18226.1 as seed ortholog is 100%.

---

Group of orthologs #3744. Best score 1074 bits

Score difference with first non-orthologous sequence - *A. fumigatus*:1074 *A. fischeri*:1074  
afum|EAL87215.1 100.00% afis|EAW23781.1 100.00%  
Bootstrap support for afum|EAL87215.1 as seed ortholog is 100%.  
Bootstrap support for afis|EAW23781.1 as seed ortholog is 100%.

---

Group of orthologs #3745. Best score 1074 bits

Score difference with first non-orthologous sequence - *A. fumigatus*:1074 *A. fischeri*:1074  
afum|EAL87854.1 100.00% afis|EAW23610.1 100.00%  
Bootstrap support for afum|EAL87854.1 as seed ortholog is 100%.  
Bootstrap support for afis|EAW23610.1 as seed ortholog is 100%.

---

Group of orthologs #3746. Best score 1074 bits

Score difference with first non-orthologous sequence - *A. fumigatus*:1074 *A. fischeri*:1074  
afum|EAL93807.1 100.00% afis|EAW19079.1 100.00%  
Bootstrap support for afum|EAL93807.1 as seed ortholog is 100%.  
Bootstrap support for afis|EAW19079.1 as seed ortholog is 100%.

---

Group of orthologs #3747. Best score 1073 bits

Score difference with first non-orthologous sequence - *A. fumigatus*:1073 *A. fischeri*:1073  
afum|EAL85283.1 100.00% afis|EAW20165.1 100.00%  
Bootstrap support for afum|EAL85283.1 as seed ortholog is 100%.  
Bootstrap support for afis|EAW20165.1 as seed ortholog is 100%.

---

Group of orthologs #3748. Best score 1073 bits

Score difference with first non-orthologous sequence - *A. fumigatus*:1073 *A. fischeri*:1073  
afum|EAL91162.1 100.00% afis|EAW17325.1 100.00%  
Bootstrap support for afum|EAL91162.1 as seed ortholog is 100%.  
Bootstrap support for afis|EAW17325.1 as seed ortholog is 100%.

---

Group of orthologs #3749. Best score 1073 bits

Score difference with first non-orthologous sequence - *A. fumigatus*:1073 *A. fischeri*:1073  
afum|EAL93372.1 100.00% afis|EAW18656.1 100.00%



Bootstrap support for afum|EAL93372.1 as seed ortholog is 100%.  
Bootstrap support for afis|EAW18656.1 as seed ortholog is 100%.

---

Group of orthologs #3750. Best score 1072 bits

Score difference with first non-orthologous sequence - *A. fumigatus*:975 *A. fischeri*:870

|                 |         |                 |         |
|-----------------|---------|-----------------|---------|
| afum EAL89241.1 | 100.00% | afis EAW16639.1 | 100.00% |
|-----------------|---------|-----------------|---------|

Bootstrap support for afum|EAL89241.1 as seed ortholog is 100%.

Bootstrap support for afis|EAW16639.1 as seed ortholog is 100%.

---

Group of orthologs #3751. Best score 1072 bits

Score difference with first non-orthologous sequence - *A. fumigatus*:1072 *A. fischeri*:1072

|                 |         |                 |         |
|-----------------|---------|-----------------|---------|
| afum EAL84717.1 | 100.00% | afis EAW20917.1 | 100.00% |
|-----------------|---------|-----------------|---------|

Bootstrap support for afum|EAL84717.1 as seed ortholog is 100%.

Bootstrap support for afis|EAW20917.1 as seed ortholog is 100%.

---

Group of orthologs #3752. Best score 1072 bits

Score difference with first non-orthologous sequence - *A. fumigatus*:1072 *A. fischeri*:1072

|                 |         |                 |         |
|-----------------|---------|-----------------|---------|
| afum EAL91412.2 | 100.00% | afis EAW17599.1 | 100.00% |
|-----------------|---------|-----------------|---------|

Bootstrap support for afum|EAL91412.2 as seed ortholog is 100%.

Bootstrap support for afis|EAW17599.1 as seed ortholog is 100%.

---

Group of orthologs #3753. Best score 1072 bits

Score difference with first non-orthologous sequence - *A. fumigatus*:1072 *A. fischeri*:1072

|                 |         |                 |         |
|-----------------|---------|-----------------|---------|
| afum EAL87272.1 | 100.00% | afis EAW23841.1 | 100.00% |
|-----------------|---------|-----------------|---------|

Bootstrap support for afum|EAL87272.1 as seed ortholog is 100%.

Bootstrap support for afis|EAW23841.1 as seed ortholog is 100%.

---

Group of orthologs #3754. Best score 1072 bits

Score difference with first non-orthologous sequence - *A. fumigatus*:1072 *A. fischeri*:1072

|                 |         |                 |         |
|-----------------|---------|-----------------|---------|
| afum EAL88243.1 | 100.00% | afis EAW23239.1 | 100.00% |
|-----------------|---------|-----------------|---------|

Bootstrap support for afum|EAL88243.1 as seed ortholog is 100%.

Bootstrap support for afis|EAW23239.1 as seed ortholog is 100%.

---

Group of orthologs #3755. Best score 1072 bits

Score difference with first non-orthologous sequence - *A. fumigatus*:1072 *A. fischeri*:1072

|                 |         |                 |         |
|-----------------|---------|-----------------|---------|
| afum EAL93427.2 | 100.00% | afis EAW18704.1 | 100.00% |
|-----------------|---------|-----------------|---------|

Bootstrap support for afum|EAL93427.2 as seed ortholog is 100%.

Bootstrap support for afis|EAW18704.1 as seed ortholog is 100%.

---

Group of orthologs #3756. Best score 1072 bits

Score difference with first non-orthologous sequence - *A. fumigatus*:1072 *A. fischeri*:1072

|                 |         |                 |         |
|-----------------|---------|-----------------|---------|
| afum EAL93538.1 | 100.00% | afis EAW18802.1 | 100.00% |
|-----------------|---------|-----------------|---------|

Bootstrap support for afum|EAL93538.1 as seed ortholog is 100%.

Bootstrap support for afis|EAW18802.1 as seed ortholog is 100%.

---

Group of orthologs #3757. Best score 1072 bits

Score difference with first non-orthologous sequence - *A. fumigatus*:517 *A. fischeri*:521

|                 |         |                 |         |
|-----------------|---------|-----------------|---------|
| afum EAL94045.1 | 100.00% | afis EAW19328.1 | 100.00% |
|-----------------|---------|-----------------|---------|

Bootstrap support for afum|EAL94045.1 as seed ortholog is 100%.

Bootstrap support for afis|EAW19328.1 as seed ortholog is 100%.

---

Group of orthologs #3758. Best score 1072 bits

Score difference with first non-orthologous sequence - *A. fumigatus*:1072 *A. fischeri*:1072

|                 |         |                 |         |
|-----------------|---------|-----------------|---------|
| afum EAL90323.1 | 100.00% | afis EAW22876.1 | 100.00% |
|-----------------|---------|-----------------|---------|

Bootstrap support for afum|EAL90323.1 as seed ortholog is 100%.

Bootstrap support for afis|EAW22876.1 as seed ortholog is 100%.

---

Group of orthologs #3759. Best score 1072 bits

Score difference with first non-orthologous sequence - *A. fumigatus*:1072 *A. fischeri*:1072

|                 |         |                 |         |
|-----------------|---------|-----------------|---------|
| afum EAL92350.1 | 100.00% | afis EAW21332.1 | 100.00% |
|-----------------|---------|-----------------|---------|

Bootstrap support for afum|EAL92350.1 as seed ortholog is 100%.

Bootstrap support for afis|EAW21332.1 as seed ortholog is 100%.

---

Group of orthologs #3760. Best score 1072 bits

Score difference with first non-orthologous sequence - *A. fumigatus*:1072 *A. fischeri*:1072

|                 |         |                 |         |
|-----------------|---------|-----------------|---------|
| afum EAL92016.1 | 100.00% | afis EAW24160.1 | 100.00% |
|-----------------|---------|-----------------|---------|

Bootstrap support for afum|EAL92016.1 as seed ortholog is 100%.

Bootstrap support for afis|EAW24160.1 as seed ortholog is 100%.

---

Group of orthologs #3761. Best score 1071 bits

Score difference with first non-orthologous sequence - *A. fumigatus*:1071 *A. fischeri*:1071

|                 |         |                 |         |
|-----------------|---------|-----------------|---------|
| afum EAL86803.1 | 100.00% | afis EAW19723.1 | 100.00% |
|-----------------|---------|-----------------|---------|

Bootstrap support for afum|EAL86803.1 as seed ortholog is 100%.

Bootstrap support for afis|EAW19723.1 as seed ortholog is 100%.

---

Group of orthologs #3762. Best score 1071 bits

Score difference with first non-orthologous sequence - *A. fumigatus*:1071 *A. fischeri*:1071

|                 |         |                 |         |
|-----------------|---------|-----------------|---------|
| afum EAL91336.1 | 100.00% | afis EAW17518.1 | 100.00% |
|-----------------|---------|-----------------|---------|

Bootstrap support for afum|EAL91336.1 as seed ortholog is 100%.

Bootstrap support for afis|EAW17518.1 as seed ortholog is 100%.

---

Group of orthologs #3763. Best score 1071 bits

Score difference with first non-orthologous sequence - *A. fumigatus*:1071 *A. fischeri*:904

|                 |         |                 |         |
|-----------------|---------|-----------------|---------|
| afum EAL87300.1 | 100.00% | afis EAW23872.1 | 100.00% |
|-----------------|---------|-----------------|---------|

Bootstrap support for afum|EAL87300.1 as seed ortholog is 100%.

Bootstrap support for afis|EAW23872.1 as seed ortholog is 100%.

---

Group of orthologs #3764. Best score 1071 bits

Score difference with first non-orthologous sequence - *A. fumigatus*:1071 *A. fischeri*:1071

|                 |         |                 |         |
|-----------------|---------|-----------------|---------|
| afum EAL93484.1 | 100.00% | afis EAW18756.1 | 100.00% |
|-----------------|---------|-----------------|---------|

Bootstrap support for afum|EAL93484.1 as seed ortholog is 100%.

Bootstrap support for afis|EAW18756.1 as seed ortholog is 100%.

---

Group of orthologs #3765. Best score 1071 bits

Score difference with first non-orthologous sequence - *A. fumigatus*:1071 *A. fischeri*:1071

|                 |         |                 |         |
|-----------------|---------|-----------------|---------|
| afum EAL90684.1 | 100.00% | afis EAW22509.1 | 100.00% |
|-----------------|---------|-----------------|---------|

Bootstrap support for afum|EAL90684.1 as seed ortholog is 100%.

Bootstrap support for afis|EAW22509.1 as seed ortholog is 100%.

---

Group of orthologs #3766. Best score 1071 bits

Score difference with first non-orthologous sequence - *A. fumigatus*:943 *A. fischeri*:892

|                 |         |                 |         |
|-----------------|---------|-----------------|---------|
| afum EAL90137.1 | 100.00% | afis EAW25474.1 | 100.00% |
|-----------------|---------|-----------------|---------|

Bootstrap support for afum|EAL90137.1 as seed ortholog is 100%.

Bootstrap support for afis|EAW25474.1 as seed ortholog is 100%.

---

Group of orthologs #3767. Best score 1070 bits

Score difference with first non-orthologous sequence - *A. fumigatus*:1070 *A. fischeri*:1070

|                 |         |                 |         |
|-----------------|---------|-----------------|---------|
| afum EAL85784.1 | 100.00% | afis EAW15548.1 | 100.00% |
|-----------------|---------|-----------------|---------|

Bootstrap support for afum|EAL85784.1 as seed ortholog is 100%.

Bootstrap support for afis|EAW15548.1 as seed ortholog is 100%.

---

Group of orthologs #3768. Best score 1070 bits

Score difference with first non-orthologous sequence - *A. fumigatus*:777 *A. fischeri*:551  
afum|EAL85729.1 100.00% afis|EAW15604.1 100.00%  
Bootstrap support for afum|EAL85729.1 as seed ortholog is 100%.  
Bootstrap support for afis|EAW15604.1 as seed ortholog is 100%.

---

Group of orthologs #3769. Best score 1070 bits

Score difference with first non-orthologous sequence - *A. fumigatus*:1070 *A. fischeri*:1070  
afum|EAL87462.1 100.00% afis|EAW24031.1 100.00%  
Bootstrap support for afum|EAL87462.1 as seed ortholog is 100%.  
Bootstrap support for afis|EAW24031.1 as seed ortholog is 100%.

---

Group of orthologs #3770. Best score 1070 bits

Score difference with first non-orthologous sequence - *A. fumigatus*:1070 *A. fischeri*:1070  
afum|EAL90846.1 100.00% afis|EAW22346.1 100.00%  
Bootstrap support for afum|EAL90846.1 as seed ortholog is 100%.  
Bootstrap support for afis|EAW22346.1 as seed ortholog is 100%.

---

Group of orthologs #3771. Best score 1069 bits

Score difference with first non-orthologous sequence - *A. fumigatus*:1069 *A. fischeri*:1069  
afum|EAL84468.1 100.00% afis|EAW20593.1 100.00%  
Bootstrap support for afum|EAL84468.1 as seed ortholog is 100%.  
Bootstrap support for afis|EAW20593.1 as seed ortholog is 100%.

---

Group of orthologs #3772. Best score 1069 bits

Score difference with first non-orthologous sequence - *A. fumigatus*:1069 *A. fischeri*:1069  
afum|EAL93169.1 100.00% afis|EAW18480.1 100.00%  
Bootstrap support for afum|EAL93169.1 as seed ortholog is 100%.  
Bootstrap support for afis|EAW18480.1 as seed ortholog is 100%.

---

Group of orthologs #3773. Best score 1068 bits

Score difference with first non-orthologous sequence - *A. fumigatus*:1068 *A. fischeri*:1068  
afum|EAL89238.1 100.00% afis|EAW16636.1 100.00%  
Bootstrap support for afum|EAL89238.1 as seed ortholog is 100%.  
Bootstrap support for afis|EAW16636.1 as seed ortholog is 100%.

---

Group of orthologs #3774. Best score 1068 bits

Score difference with first non-orthologous sequence - *A. fumigatus*:1068 *A. fischeri*:1068  
afum|EAL89254.1 100.00% afis|EAW16650.1 100.00%  
Bootstrap support for afum|EAL89254.1 as seed ortholog is 100%.  
Bootstrap support for afis|EAW16650.1 as seed ortholog is 100%.

---

Group of orthologs #3775. Best score 1068 bits

Score difference with first non-orthologous sequence - *A. fumigatus*:1068 *A. fischeri*:523  
afum|EAL93248.1 100.00% afis|EAW18548.1 100.00%  
Bootstrap support for afum|EAL93248.1 as seed ortholog is 100%.  
Bootstrap support for afis|EAW18548.1 as seed ortholog is 100%.

---

Group of orthologs #3776. Best score 1068 bits

Score difference with first non-orthologous sequence - *A. fumigatus*:1068 *A. fischeri*:1068  
afum|EAL91931.2 100.00% afis|EAW24076.1 100.00%  
Bootstrap support for afum|EAL91931.2 as seed ortholog is 100%.  
Bootstrap support for afis|EAW24076.1 as seed ortholog is 100%.

---

Group of orthologs #3777. Best score 1067 bits

Score difference with first non-orthologous sequence - *A. fumigatus*:987 *A. fischeri*:933  
afum|EAL85913.2 100.00% afis|EAW24245.1 100.00%

Bootstrap support for afum|EAL85913.2 as seed ortholog is 100%.  
Bootstrap support for afis|EAW24245.1 as seed ortholog is 100%.

---

Group of orthologs #3778. Best score 1066 bits

Score difference with first non-orthologous sequence - *A. fumigatus*:1066 *A. fischeri*:1066

|                 |         |                 |         |
|-----------------|---------|-----------------|---------|
| afum EAL86863.1 | 100.00% | afis EAW19660.1 | 100.00% |
|-----------------|---------|-----------------|---------|

Bootstrap support for afum|EAL86863.1 as seed ortholog is 100%.

Bootstrap support for afis|EAW19660.1 as seed ortholog is 100%.

---

Group of orthologs #3779. Best score 1066 bits

Score difference with first non-orthologous sequence - *A. fumigatus*:1066 *A. fischeri*:1066

|                 |         |                 |         |
|-----------------|---------|-----------------|---------|
| afum EAL90341.1 | 100.00% | afis EAW22859.1 | 100.00% |
|-----------------|---------|-----------------|---------|

Bootstrap support for afum|EAL90341.1 as seed ortholog is 100%.

Bootstrap support for afis|EAW22859.1 as seed ortholog is 100%.

---

Group of orthologs #3780. Best score 1065 bits

Score difference with first non-orthologous sequence - *A. fumigatus*:1065 *A. fischeri*:1065

|                 |         |                 |         |
|-----------------|---------|-----------------|---------|
| afum EAL91854.1 | 100.00% | afis EAW18043.1 | 100.00% |
|-----------------|---------|-----------------|---------|

Bootstrap support for afum|EAL91854.1 as seed ortholog is 100%.

Bootstrap support for afis|EAW18043.1 as seed ortholog is 100%.

---

Group of orthologs #3781. Best score 1065 bits

Score difference with first non-orthologous sequence - *A. fumigatus*:1065 *A. fischeri*:731

|                 |         |                 |         |
|-----------------|---------|-----------------|---------|
| afum EAL88127.1 | 100.00% | afis EAW23349.1 | 100.00% |
|-----------------|---------|-----------------|---------|

Bootstrap support for afum|EAL88127.1 as seed ortholog is 100%.

Bootstrap support for afis|EAW23349.1 as seed ortholog is 100%.

---

Group of orthologs #3782. Best score 1064 bits

Score difference with first non-orthologous sequence - *A. fumigatus*:930 *A. fischeri*:977

|                 |         |                 |         |
|-----------------|---------|-----------------|---------|
| afum EAL87618.1 | 100.00% | afis EAW18255.1 | 100.00% |
|-----------------|---------|-----------------|---------|

Bootstrap support for afum|EAL87618.1 as seed ortholog is 100%.

Bootstrap support for afis|EAW18255.1 as seed ortholog is 100%.

---

Group of orthologs #3783. Best score 1064 bits

Score difference with first non-orthologous sequence - *A. fumigatus*:1064 *A. fischeri*:1064

|                 |         |                 |         |
|-----------------|---------|-----------------|---------|
| afum EAL93880.1 | 100.00% | afis EAW19149.1 | 100.00% |
|-----------------|---------|-----------------|---------|

Bootstrap support for afum|EAL93880.1 as seed ortholog is 100%.

Bootstrap support for afis|EAW19149.1 as seed ortholog is 100%.

---

Group of orthologs #3784. Best score 1064 bits

Score difference with first non-orthologous sequence - *A. fumigatus*:843 *A. fischeri*:775

|                 |         |                 |         |
|-----------------|---------|-----------------|---------|
| afum EAL92293.2 | 100.00% | afis EAW21278.1 | 100.00% |
|-----------------|---------|-----------------|---------|

Bootstrap support for afum|EAL92293.2 as seed ortholog is 100%.

Bootstrap support for afis|EAW21278.1 as seed ortholog is 100%.

---

Group of orthologs #3785. Best score 1064 bits

Score difference with first non-orthologous sequence - *A. fumigatus*:1064 *A. fischeri*:1064

|                 |         |                 |         |
|-----------------|---------|-----------------|---------|
| afum EAL92445.1 | 100.00% | afis EAW21430.1 | 100.00% |
|-----------------|---------|-----------------|---------|

Bootstrap support for afum|EAL92445.1 as seed ortholog is 100%.

Bootstrap support for afis|EAW21430.1 as seed ortholog is 100%.

---

Group of orthologs #3786. Best score 1063 bits

Score difference with first non-orthologous sequence - *A. fumigatus*:1063 *A. fischeri*:959

|                 |         |                 |         |
|-----------------|---------|-----------------|---------|
| afum EAL86814.1 | 100.00% | afis EAW19713.1 | 100.00% |
|-----------------|---------|-----------------|---------|

Bootstrap support for afum|EAL86814.1 as seed ortholog is 100%.

Bootstrap support for afis|EAW19713.1 as seed ortholog is 100%.

---

Group of orthologs #3787. Best score 1063 bits

Score difference with first non-orthologous sequence - *A. fumigatus*:1063 *A. fischeri*:1063

afum|EAL92793.1 100.00% afis|EAW21763.1 100.00%

Bootstrap support for afum|EAL92793.1 as seed ortholog is 100%.

Bootstrap support for afis|EAW21763.1 as seed ortholog is 100%.

---

Group of orthologs #3788. Best score 1062 bits

Score difference with first non-orthologous sequence - *A. fumigatus*:1062 *A. fischeri*:1062

afum|EAL85625.2 100.00% afis|EAW15722.1 100.00%

Bootstrap support for afum|EAL85625.2 as seed ortholog is 100%.

Bootstrap support for afis|EAW15722.1 as seed ortholog is 100%.

---

Group of orthologs #3789. Best score 1062 bits

Score difference with first non-orthologous sequence - *A. fumigatus*:1062 *A. fischeri*:1062

afum|EAL84963.1 100.00% afis|EAW19952.1 100.00%

Bootstrap support for afum|EAL84963.1 as seed ortholog is 100%.

Bootstrap support for afis|EAW19952.1 as seed ortholog is 100%.

---

Group of orthologs #3790. Best score 1062 bits

Score difference with first non-orthologous sequence - *A. fumigatus*:1062 *A. fischeri*:1062

afum|EAL89206.1 100.00% afis|EAW16610.1 100.00%

Bootstrap support for afum|EAL89206.1 as seed ortholog is 100%.

Bootstrap support for afis|EAW16610.1 as seed ortholog is 100%.

---

Group of orthologs #3791. Best score 1062 bits

Score difference with first non-orthologous sequence - *A. fumigatus*:751 *A. fischeri*:1062

afum|EAL85350.1 100.00% afis|EAW20233.1 100.00%

Bootstrap support for afum|EAL85350.1 as seed ortholog is 100%.

Bootstrap support for afis|EAW20233.1 as seed ortholog is 100%.

---

Group of orthologs #3792. Best score 1062 bits

Score difference with first non-orthologous sequence - *A. fumigatus*:1062 *A. fischeri*:1062

afum|EAL87249.1 100.00% afis|EAW23814.1 100.00%

Bootstrap support for afum|EAL87249.1 as seed ortholog is 100%.

Bootstrap support for afis|EAW23814.1 as seed ortholog is 100%.

---

Group of orthologs #3793. Best score 1062 bits

Score difference with first non-orthologous sequence - *A. fumigatus*:1062 *A. fischeri*:1062

afum|EAL93626.1 100.00% afis|EAW18894.1 100.00%

Bootstrap support for afum|EAL93626.1 as seed ortholog is 100%.

Bootstrap support for afis|EAW18894.1 as seed ortholog is 100%.

---

Group of orthologs #3794. Best score 1062 bits

Score difference with first non-orthologous sequence - *A. fumigatus*:1062 *A. fischeri*:1062

afum|EAL90459.1 100.00% afis|EAW22736.1 100.00%

Bootstrap support for afum|EAL90459.1 as seed ortholog is 100%.

Bootstrap support for afis|EAW22736.1 as seed ortholog is 100%.

---

Group of orthologs #3795. Best score 1062 bits

Score difference with first non-orthologous sequence - *A. fumigatus*:1062 *A. fischeri*:1062

afum|EAL90226.1 100.00% afis|EAW22971.1 100.00%

Bootstrap support for afum|EAL90226.1 as seed ortholog is 100%.

Bootstrap support for afis|EAW22971.1 as seed ortholog is 100%.

---

Group of orthologs #3796. Best score 1061 bits

Score difference with first non-orthologous sequence - *A. fumigatus*:1061 *A. fischeri*:938  
afum|EAL93845.1 100.00% afis|EAW19113.1 100.00%  
Bootstrap support for afum|EAL93845.1 as seed ortholog is 100%.  
Bootstrap support for afis|EAW19113.1 as seed ortholog is 100%.

---

Group of orthologs #3797. Best score 1060 bits

Score difference with first non-orthologous sequence - *A. fumigatus*:1060 *A. fischeri*:1060  
afum|EAL90006.1 100.00% afis|EAW25343.1 100.00%  
Bootstrap support for afum|EAL90006.1 as seed ortholog is 100%.  
Bootstrap support for afis|EAW25343.1 as seed ortholog is 100%.

---

Group of orthologs #3798. Best score 1059 bits

Score difference with first non-orthologous sequence - *A. fumigatus*:1059 *A. fischeri*:1059  
afum|EAL88626.1 100.00% afis|EAW15994.1 100.00%  
Bootstrap support for afum|EAL88626.1 as seed ortholog is 100%.  
Bootstrap support for afis|EAW15994.1 as seed ortholog is 100%.

---

Group of orthologs #3799. Best score 1059 bits

Score difference with first non-orthologous sequence - *A. fumigatus*:1059 *A. fischeri*:881  
afum|EAL88855.1 100.00% afis|EAW16232.1 100.00%  
Bootstrap support for afum|EAL88855.1 as seed ortholog is 100%.  
Bootstrap support for afis|EAW16232.1 as seed ortholog is 100%.

---

Group of orthologs #3800. Best score 1059 bits

Score difference with first non-orthologous sequence - *A. fumigatus*:1059 *A. fischeri*:1059  
afum|EAL87537.1 100.00% afis|EAW18176.1 100.00%  
Bootstrap support for afum|EAL87537.1 as seed ortholog is 100%.  
Bootstrap support for afis|EAW18176.1 as seed ortholog is 100%.

---

Group of orthologs #3801. Best score 1059 bits

Score difference with first non-orthologous sequence - *A. fumigatus*:1059 *A. fischeri*:1059  
afum|EAL91504.1 100.00% afis|EAW17690.1 100.00%  
Bootstrap support for afum|EAL91504.1 as seed ortholog is 100%.  
Bootstrap support for afis|EAW17690.1 as seed ortholog is 100%.

---

Group of orthologs #3802. Best score 1059 bits

Score difference with first non-orthologous sequence - *A. fumigatus*:1059 *A. fischeri*:1059  
afum|EAL93501.2 100.00% afis|EAW18770.1 100.00%  
Bootstrap support for afum|EAL93501.2 as seed ortholog is 100%.  
Bootstrap support for afis|EAW18770.1 as seed ortholog is 100%.

---

Group of orthologs #3803. Best score 1059 bits

Score difference with first non-orthologous sequence - *A. fumigatus*:983 *A. fischeri*:797  
afum|EBA27209.1 100.00% afis|EAW19985.1 100.00%  
Bootstrap support for afum|EBA27209.1 as seed ortholog is 100%.  
Bootstrap support for afis|EAW19985.1 as seed ortholog is 100%.

---

Group of orthologs #3804. Best score 1059 bits

Score difference with first non-orthologous sequence - *A. fumigatus*:1059 *A. fischeri*:1059  
afum|EAL92576.1 100.00% afis|EAW21557.1 100.00%  
Bootstrap support for afum|EAL92576.1 as seed ortholog is 100%.  
Bootstrap support for afis|EAW21557.1 as seed ortholog is 100%.

---

Group of orthologs #3805. Best score 1059 bits

Score difference with first non-orthologous sequence - *A. fumigatus*:1059 *A. fischeri*:987  
afum|EBA27192.1 100.00% afis|EAW20512.1 100.00%

Bootstrap support for afum|EBA27192.1 as seed ortholog is 100%.  
Bootstrap support for afis|EAW20512.1 as seed ortholog is 100%.

---

Group of orthologs #3806. Best score 1059 bits

Score difference with first non-orthologous sequence - *A. fumigatus*:1059 *A. fischeri*:1059

|                 |         |                 |         |
|-----------------|---------|-----------------|---------|
| afum EAL89642.1 | 100.00% | afis EAW24982.1 | 100.00% |
|-----------------|---------|-----------------|---------|

Bootstrap support for afum|EAL89642.1 as seed ortholog is 100%.

Bootstrap support for afis|EAW24982.1 as seed ortholog is 100%.

---

Group of orthologs #3807. Best score 1059 bits

Score difference with first non-orthologous sequence - *A. fumigatus*:1059 *A. fischeri*:968

|                 |         |                 |         |
|-----------------|---------|-----------------|---------|
| afum EAL89926.2 | 100.00% | afis EAW25263.1 | 100.00% |
|-----------------|---------|-----------------|---------|

Bootstrap support for afum|EAL89926.2 as seed ortholog is 100%.

Bootstrap support for afis|EAW25263.1 as seed ortholog is 100%.

---

Group of orthologs #3808. Best score 1058 bits

Score difference with first non-orthologous sequence - *A. fumigatus*:1058 *A. fischeri*:1058

|                 |         |                 |         |
|-----------------|---------|-----------------|---------|
| afum EAL86682.1 | 100.00% | afis EAW17265.1 | 100.00% |
|-----------------|---------|-----------------|---------|

Bootstrap support for afum|EAL86682.1 as seed ortholog is 100%.

Bootstrap support for afis|EAW17265.1 as seed ortholog is 100%.

---

Group of orthologs #3809. Best score 1058 bits

Score difference with first non-orthologous sequence - *A. fumigatus*:1058 *A. fischeri*:1058

|                 |         |                 |         |
|-----------------|---------|-----------------|---------|
| afum EAL84671.1 | 100.00% | afis EAW20962.1 | 100.00% |
|-----------------|---------|-----------------|---------|

Bootstrap support for afum|EAL84671.1 as seed ortholog is 100%.

Bootstrap support for afis|EAW20962.1 as seed ortholog is 100%.

---

Group of orthologs #3810. Best score 1058 bits

Score difference with first non-orthologous sequence - *A. fumigatus*:1058 *A. fischeri*:1058

|                 |         |                 |         |
|-----------------|---------|-----------------|---------|
| afum EAL91671.1 | 100.00% | afis EAW17863.1 | 100.00% |
|-----------------|---------|-----------------|---------|

Bootstrap support for afum|EAL91671.1 as seed ortholog is 100%.

Bootstrap support for afis|EAW17863.1 as seed ortholog is 100%.

---

Group of orthologs #3811. Best score 1058 bits

Score difference with first non-orthologous sequence - *A. fumigatus*:1058 *A. fischeri*:1058

|                 |         |                 |         |
|-----------------|---------|-----------------|---------|
| afum EAL87409.1 | 100.00% | afis EAW23979.1 | 100.00% |
|-----------------|---------|-----------------|---------|

Bootstrap support for afum|EAL87409.1 as seed ortholog is 100%.

Bootstrap support for afis|EAW23979.1 as seed ortholog is 100%.

---

Group of orthologs #3812. Best score 1058 bits

Score difference with first non-orthologous sequence - *A. fumigatus*:1058 *A. fischeri*:1058

|                 |         |                 |         |
|-----------------|---------|-----------------|---------|
| afum EAL87846.1 | 100.00% | afis EAW23616.1 | 100.00% |
|-----------------|---------|-----------------|---------|

Bootstrap support for afum|EAL87846.1 as seed ortholog is 100%.

Bootstrap support for afis|EAW23616.1 as seed ortholog is 100%.

---

Group of orthologs #3813. Best score 1058 bits

Score difference with first non-orthologous sequence - *A. fumigatus*:1058 *A. fischeri*:1058

|                 |         |                 |         |
|-----------------|---------|-----------------|---------|
| afum EAL93891.1 | 100.00% | afis EAW19161.1 | 100.00% |
|-----------------|---------|-----------------|---------|

Bootstrap support for afum|EAL93891.1 as seed ortholog is 100%.

Bootstrap support for afis|EAW19161.1 as seed ortholog is 100%.

---

Group of orthologs #3814. Best score 1058 bits

Score difference with first non-orthologous sequence - *A. fumigatus*:1058 *A. fischeri*:1058

|                 |         |                 |         |
|-----------------|---------|-----------------|---------|
| afum EAL91033.1 | 100.00% | afis EAW22157.1 | 100.00% |
|-----------------|---------|-----------------|---------|

Bootstrap support for afum|EAL91033.1 as seed ortholog is 100%.

Bootstrap support for afis|EAW22157.1 as seed ortholog is 100%.

---

Group of orthologs #3815. Best score 1058 bits

Score difference with first non-orthologous sequence - *A. fumigatus*:1058 *A. fischeri*:1058

afum|EAL90981.2 100.00% afis|EAW22213.1 100.00%

Bootstrap support for afum|EAL90981.2 as seed ortholog is 100%.

Bootstrap support for afis|EAW22213.1 as seed ortholog is 100%.

---

Group of orthologs #3816. Best score 1058 bits

Score difference with first non-orthologous sequence - *A. fumigatus*:1058 *A. fischeri*:1058

afum|EAL92737.1 100.00% afis|EAW21703.1 100.00%

Bootstrap support for afum|EAL92737.1 as seed ortholog is 100%.

Bootstrap support for afis|EAW21703.1 as seed ortholog is 100%.

---

Group of orthologs #3817. Best score 1058 bits

Score difference with first non-orthologous sequence - *A. fumigatus*:1058 *A. fischeri*:1011

afum|EAL91945.1 100.00% afis|EAW24090.1 100.00%

Bootstrap support for afum|EAL91945.1 as seed ortholog is 100%.

Bootstrap support for afis|EAW24090.1 as seed ortholog is 100%.

---

Group of orthologs #3818. Best score 1057 bits

Score difference with first non-orthologous sequence - *A. fumigatus*:1057 *A. fischeri*:1057

afum|EAL85661.1 100.00% afis|EAW15687.1 100.00%

Bootstrap support for afum|EAL85661.1 as seed ortholog is 100%.

Bootstrap support for afis|EAW15687.1 as seed ortholog is 100%.

---

Group of orthologs #3819. Best score 1057 bits

Score difference with first non-orthologous sequence - *A. fumigatus*:1057 *A. fischeri*:1057

afum|EAL85663.1 100.00% afis|EAW15685.1 100.00%

Bootstrap support for afum|EAL85663.1 as seed ortholog is 100%.

Bootstrap support for afis|EAW15685.1 as seed ortholog is 100%.

---

Group of orthologs #3820. Best score 1057 bits

Score difference with first non-orthologous sequence - *A. fumigatus*:502 *A. fischeri*:900

afum|EAL87749.2 100.00% afis|EAW20715.1 100.00%

Bootstrap support for afum|EAL87749.2 as seed ortholog is 100%.

Bootstrap support for afis|EAW20715.1 as seed ortholog is 100%.

---

Group of orthologs #3821. Best score 1057 bits

Score difference with first non-orthologous sequence - *A. fumigatus*:1057 *A. fischeri*:1057

afum|EAL93340.1 100.00% afis|EAW18628.1 100.00%

Bootstrap support for afum|EAL93340.1 as seed ortholog is 100%.

Bootstrap support for afis|EAW18628.1 as seed ortholog is 100%.

---

Group of orthologs #3822. Best score 1057 bits

Score difference with first non-orthologous sequence - *A. fumigatus*:1057 *A. fischeri*:1057

afum|EAL89602.1 100.00% afis|EAW24945.1 100.00%

Bootstrap support for afum|EAL89602.1 as seed ortholog is 100%.

Bootstrap support for afis|EAW24945.1 as seed ortholog is 100%.

---

Group of orthologs #3823. Best score 1057 bits

Score difference with first non-orthologous sequence - *A. fumigatus*:1057 *A. fischeri*:1057

afum|EAL90134.1 100.00% afis|EAW25470.1 100.00%

Bootstrap support for afum|EAL90134.1 as seed ortholog is 100%.

Bootstrap support for afis|EAW25470.1 as seed ortholog is 100%.

---

Group of orthologs #3824. Best score 1056 bits



Score difference with first non-orthologous sequence - *A. fumigatus*:1056 *A. fischeri*:1056  
afum|EAL88896.1 100.00% afis|EAW16275.1 100.00%  
Bootstrap support for afum|EAL88896.1 as seed ortholog is 100%.  
Bootstrap support for afis|EAW16275.1 as seed ortholog is 100%.

---

Group of orthologs #3825. Best score 1056 bits

Score difference with first non-orthologous sequence - *A. fumigatus*:1056 *A. fischeri*:1056  
afum|EAL87672.1 100.00% afis|EAW18306.1 100.00%  
Bootstrap support for afum|EAL87672.1 as seed ortholog is 100%.  
Bootstrap support for afis|EAW18306.1 as seed ortholog is 100%.

---

Group of orthologs #3826. Best score 1056 bits

Score difference with first non-orthologous sequence - *A. fumigatus*:1056 *A. fischeri*:1056  
afum|EAL87266.1 100.00% afis|EAW23835.1 100.00%  
Bootstrap support for afum|EAL87266.1 as seed ortholog is 100%.  
Bootstrap support for afis|EAW23835.1 as seed ortholog is 100%.

---

Group of orthologs #3827. Best score 1056 bits

Score difference with first non-orthologous sequence - *A. fumigatus*:882 *A. fischeri*:793  
afum|EAL93348.2 100.00% afis|EAW18635.1 100.00%  
Bootstrap support for afum|EAL93348.2 as seed ortholog is 100%.  
Bootstrap support for afis|EAW18635.1 as seed ortholog is 100%.

---

Group of orthologs #3828. Best score 1056 bits

Score difference with first non-orthologous sequence - *A. fumigatus*:1056 *A. fischeri*:897  
afum|EAL92127.1 100.00% afis|EAW21106.1 100.00%  
Bootstrap support for afum|EAL92127.1 as seed ortholog is 100%.  
Bootstrap support for afis|EAW21106.1 as seed ortholog is 100%.

---

Group of orthologs #3829. Best score 1056 bits

Score difference with first non-orthologous sequence - *A. fumigatus*:1056 *A. fischeri*:1056  
afum|EAL90556.2 100.00% afis|EAW22636.1 100.00%  
Bootstrap support for afum|EAL90556.2 as seed ortholog is 100%.  
Bootstrap support for afis|EAW22636.1 as seed ortholog is 100%.

---

Group of orthologs #3830. Best score 1055 bits

Score difference with first non-orthologous sequence - *A. fumigatus*:1055 *A. fischeri*:1055  
afum|EAL85848.1 100.00% afis|EAW15473.1 100.00%  
Bootstrap support for afum|EAL85848.1 as seed ortholog is 100%.  
Bootstrap support for afis|EAW15473.1 as seed ortholog is 100%.

---

Group of orthologs #3831. Best score 1055 bits

Score difference with first non-orthologous sequence - *A. fumigatus*:1055 *A. fischeri*:1055  
afum|EAL85796.2 100.00% afis|EAW15532.1 100.00%  
Bootstrap support for afum|EAL85796.2 as seed ortholog is 100%.  
Bootstrap support for afis|EAW15532.1 as seed ortholog is 100%.

---

Group of orthologs #3832. Best score 1055 bits

Score difference with first non-orthologous sequence - *A. fumigatus*:1055 *A. fischeri*:1055  
afum|EAL85523.1 100.00% afis|EAW15828.1 100.00%  
Bootstrap support for afum|EAL85523.1 as seed ortholog is 100%.  
Bootstrap support for afis|EAW15828.1 as seed ortholog is 100%.

---

Group of orthologs #3833. Best score 1055 bits

Score difference with first non-orthologous sequence - *A. fumigatus*:1055 *A. fischeri*:1055  
afum|EAL88543.1 100.00% afis|EAW15908.1 100.00%

Bootstrap support for afum|EAL88543.1 as seed ortholog is 100%.  
Bootstrap support for afis|EAW15908.1 as seed ortholog is 100%.

---

Group of orthologs #3834. Best score 1055 bits

Score difference with first non-orthologous sequence - *A. fumigatus*:1055 *A. fischeri*:354

|                 |         |                 |         |
|-----------------|---------|-----------------|---------|
| afum EBA27496.1 | 100.00% | afis EAW18892.1 | 100.00% |
|-----------------|---------|-----------------|---------|

Bootstrap support for afum|EBA27496.1 as seed ortholog is 100%.

Bootstrap support for afis|EAW18892.1 as seed ortholog is 100%.

---

Group of orthologs #3835. Best score 1055 bits

Score difference with first non-orthologous sequence - *A. fumigatus*:1055 *A. fischeri*:1055

|                 |         |                 |         |
|-----------------|---------|-----------------|---------|
| afum EAL90532.1 | 100.00% | afis EAW22660.1 | 100.00% |
|-----------------|---------|-----------------|---------|

Bootstrap support for afum|EAL90532.1 as seed ortholog is 100%.

Bootstrap support for afis|EAW22660.1 as seed ortholog is 100%.

---

Group of orthologs #3836. Best score 1055 bits

Score difference with first non-orthologous sequence - *A. fumigatus*:1055 *A. fischeri*:1055

|                 |         |                 |         |
|-----------------|---------|-----------------|---------|
| afum EAL90460.1 | 100.00% | afis EAW22735.1 | 100.00% |
|-----------------|---------|-----------------|---------|

Bootstrap support for afum|EAL90460.1 as seed ortholog is 100%.

Bootstrap support for afis|EAW22735.1 as seed ortholog is 100%.

---

Group of orthologs #3837. Best score 1054 bits

Score difference with first non-orthologous sequence - *A. fumigatus*:1054 *A. fischeri*:1054

|                 |         |                 |         |
|-----------------|---------|-----------------|---------|
| afum EAL91369.1 | 100.00% | afis EAW17555.1 | 100.00% |
|-----------------|---------|-----------------|---------|

Bootstrap support for afum|EAL91369.1 as seed ortholog is 100%.

Bootstrap support for afis|EAW17555.1 as seed ortholog is 100%.

---

Group of orthologs #3838. Best score 1054 bits

Score difference with first non-orthologous sequence - *A. fumigatus*:1054 *A. fischeri*:1054

|                 |         |                 |         |
|-----------------|---------|-----------------|---------|
| afum EAL86158.1 | 100.00% | afis EAW24489.1 | 100.00% |
|-----------------|---------|-----------------|---------|

Bootstrap support for afum|EAL86158.1 as seed ortholog is 100%.

Bootstrap support for afis|EAW24489.1 as seed ortholog is 100%.

---

Group of orthologs #3839. Best score 1054 bits

Score difference with first non-orthologous sequence - *A. fumigatus*:1054 *A. fischeri*:1054

|                 |         |                 |         |
|-----------------|---------|-----------------|---------|
| afum EAL93018.1 | 100.00% | afis EAW22003.1 | 100.00% |
|-----------------|---------|-----------------|---------|

Bootstrap support for afum|EAL93018.1 as seed ortholog is 100%.

Bootstrap support for afis|EAW22003.1 as seed ortholog is 100%.

---

Group of orthologs #3840. Best score 1053 bits

Score difference with first non-orthologous sequence - *A. fumigatus*:1053 *A. fischeri*:1053

|                 |         |                 |         |
|-----------------|---------|-----------------|---------|
| afum EAL85282.1 | 100.00% | afis EAW20164.1 | 100.00% |
|-----------------|---------|-----------------|---------|

Bootstrap support for afum|EAL85282.1 as seed ortholog is 100%.

Bootstrap support for afis|EAW20164.1 as seed ortholog is 100%.

---

Group of orthologs #3841. Best score 1053 bits

Score difference with first non-orthologous sequence - *A. fumigatus*:1053 *A. fischeri*:1053

|                 |         |                 |         |
|-----------------|---------|-----------------|---------|
| afum EAL87068.1 | 100.00% | afis EAW19426.1 | 100.00% |
|-----------------|---------|-----------------|---------|

Bootstrap support for afum|EAL87068.1 as seed ortholog is 100%.

Bootstrap support for afis|EAW19426.1 as seed ortholog is 100%.

---

Group of orthologs #3842. Best score 1053 bits

Score difference with first non-orthologous sequence - *A. fumigatus*:1053 *A. fischeri*:1053

|                 |         |                 |         |
|-----------------|---------|-----------------|---------|
| afum EAL85884.1 | 100.00% | afis EAW24215.1 | 100.00% |
|-----------------|---------|-----------------|---------|

Bootstrap support for afum|EAL85884.1 as seed ortholog is 100%.

Bootstrap support for afis|EAW24215.1 as seed ortholog is 100%.

---

Group of orthologs #3843. Best score 1053 bits

Score difference with first non-orthologous sequence - *A. fumigatus*:1053 *A. fischeri*:1053

afum|EAL88230.1 100.00% afis|EAW23251.1 100.00%

Bootstrap support for afum|EAL88230.1 as seed ortholog is 100%.

Bootstrap support for afis|EAW23251.1 as seed ortholog is 100%.

---

Group of orthologs #3844. Best score 1053 bits

Score difference with first non-orthologous sequence - *A. fumigatus*:1053 *A. fischeri*:1053

afum|EAL93635.1 100.00% afis|EAW18903.1 100.00%

Bootstrap support for afum|EAL93635.1 as seed ortholog is 100%.

Bootstrap support for afis|EAW18903.1 as seed ortholog is 100%.

---

Group of orthologs #3845. Best score 1053 bits

Score difference with first non-orthologous sequence - *A. fumigatus*:1053 *A. fischeri*:1053

afum|EAL92690.1 100.00% afis|EAW21655.1 100.00%

Bootstrap support for afum|EAL92690.1 as seed ortholog is 100%.

Bootstrap support for afis|EAW21655.1 as seed ortholog is 100%.

---

Group of orthologs #3846. Best score 1053 bits

Score difference with first non-orthologous sequence - *A. fumigatus*:1053 *A. fischeri*:1053

afum|EAL90008.2 100.00% afis|EAW25345.1 100.00%

Bootstrap support for afum|EAL90008.2 as seed ortholog is 100%.

Bootstrap support for afis|EAW25345.1 as seed ortholog is 100%.

---

Group of orthologs #3847. Best score 1052 bits

Score difference with first non-orthologous sequence - *A. fumigatus*:1052 *A. fischeri*:1052

afum|EAL86640.1 100.00% afis|EAW17213.1 100.00%

Bootstrap support for afum|EAL86640.1 as seed ortholog is 100%.

Bootstrap support for afis|EAW17213.1 as seed ortholog is 100%.

---

Group of orthologs #3848. Best score 1052 bits

Score difference with first non-orthologous sequence - *A. fumigatus*:1052 *A. fischeri*:1052

afum|EAL91811.1 100.00% afis|EAW18000.1 100.00%

Bootstrap support for afum|EAL91811.1 as seed ortholog is 100%.

Bootstrap support for afis|EAW18000.1 as seed ortholog is 100%.

---

Group of orthologs #3849. Best score 1051 bits

Score difference with first non-orthologous sequence - *A. fumigatus*:1051 *A. fischeri*:1051

afum|EAL85482.1 100.00% afis|EAW20366.1 100.00%

Bootstrap support for afum|EAL85482.1 as seed ortholog is 100%.

Bootstrap support for afis|EAW20366.1 as seed ortholog is 100%.

---

Group of orthologs #3850. Best score 1051 bits

Score difference with first non-orthologous sequence - *A. fumigatus*:1051 *A. fischeri*:1051

afum|EAL89527.1 100.00% afis|EAW24877.1 100.00%

Bootstrap support for afum|EAL89527.1 as seed ortholog is 100%.

Bootstrap support for afis|EAW24877.1 as seed ortholog is 100%.

---

Group of orthologs #3851. Best score 1050 bits

Score difference with first non-orthologous sequence - *A. fumigatus*:1050 *A. fischeri*:1050

afum|EAL88151.1 100.00% afis|EAW23328.1 100.00%

Bootstrap support for afum|EAL88151.1 as seed ortholog is 100%.

Bootstrap support for afis|EAW23328.1 as seed ortholog is 100%.

---

Group of orthologs #3852. Best score 1050 bits

Score difference with first non-orthologous sequence - *A. fumigatus*:1050 *A. fischeri*:1050  
afum|EAL93655.1 100.00% afis|EAW18923.1 100.00%  
Bootstrap support for afum|EAL93655.1 as seed ortholog is 100%.  
Bootstrap support for afis|EAW18923.1 as seed ortholog is 100%.

---

Group of orthologs #3853. Best score 1050 bits

Score difference with first non-orthologous sequence - *A. fumigatus*:1050 *A. fischeri*:926  
afum|EAL91011.1 100.00% afis|EAW22178.1 100.00%  
Bootstrap support for afum|EAL91011.1 as seed ortholog is 100%.  
Bootstrap support for afis|EAW22178.1 as seed ortholog is 100%.

---

Group of orthologs #3854. Best score 1049 bits

Score difference with first non-orthologous sequence - *A. fumigatus*:1049 *A. fischeri*:967  
afum|EAL85054.2 100.00% afis|EAW19839.1 100.00%  
Bootstrap support for afum|EAL85054.2 as seed ortholog is 100%.  
Bootstrap support for afis|EAW19839.1 as seed ortholog is 100%.

---

Group of orthologs #3855. Best score 1049 bits

Score difference with first non-orthologous sequence - *A. fumigatus*:1049 *A. fischeri*:1049  
afum|EAL84289.1 100.00% afis|EAW25578.1 100.00%  
Bootstrap support for afum|EAL84289.1 as seed ortholog is 100%.  
Bootstrap support for afis|EAW25578.1 as seed ortholog is 100%.

---

Group of orthologs #3856. Best score 1049 bits

Score difference with first non-orthologous sequence - *A. fumigatus*:1049 *A. fischeri*:1049  
afum|EAL90810.1 100.00% afis|EAW22381.1 100.00%  
Bootstrap support for afum|EAL90810.1 as seed ortholog is 100%.  
Bootstrap support for afis|EAW22381.1 as seed ortholog is 100%.

---

Group of orthologs #3857. Best score 1048 bits

Score difference with first non-orthologous sequence - *A. fumigatus*:1048 *A. fischeri*:1048  
afum|EAL85776.1 100.00% afis|EAW15556.1 100.00%  
Bootstrap support for afum|EAL85776.1 as seed ortholog is 100%.  
Bootstrap support for afis|EAW15556.1 as seed ortholog is 100%.

---

Group of orthologs #3858. Best score 1048 bits

Score difference with first non-orthologous sequence - *A. fumigatus*:1048 *A. fischeri*:1048  
afum|EAL85347.2 100.00% afis|EAW20230.1 100.00%  
Bootstrap support for afum|EAL85347.2 as seed ortholog is 100%.  
Bootstrap support for afis|EAW20230.1 as seed ortholog is 100%.

---

Group of orthologs #3859. Best score 1048 bits

Score difference with first non-orthologous sequence - *A. fumigatus*:906 *A. fischeri*:422  
afum|EAL86183.1 100.00% afis|EAW24517.1 100.00%  
Bootstrap support for afum|EAL86183.1 as seed ortholog is 100%.  
Bootstrap support for afis|EAW24517.1 as seed ortholog is 100%.

---

Group of orthologs #3860. Best score 1048 bits

Score difference with first non-orthologous sequence - *A. fumigatus*:1048 *A. fischeri*:1048  
afum|EAL88411.1 100.00% afis|EAW23068.1 100.00%  
Bootstrap support for afum|EAL88411.1 as seed ortholog is 100%.  
Bootstrap support for afis|EAW23068.1 as seed ortholog is 100%.

---

Group of orthologs #3861. Best score 1048 bits

Score difference with first non-orthologous sequence - *A. fumigatus*:1048 *A. fischeri*:1048  
afum|EAL87946.1 100.00% afis|EAW23518.1 100.00%

Bootstrap support for afum|EAL87946.1 as seed ortholog is 100%.  
Bootstrap support for afis|EAW23518.1 as seed ortholog is 100%.

---

Group of orthologs #3862. Best score 1048 bits

Score difference with first non-orthologous sequence - *A. fumigatus*:1048 *A. fischeri*:1048

|                 |         |                 |         |
|-----------------|---------|-----------------|---------|
| afum EAL90994.1 | 100.00% | afis EAW22197.1 | 100.00% |
|-----------------|---------|-----------------|---------|

Bootstrap support for afum|EAL90994.1 as seed ortholog is 100%.

Bootstrap support for afis|EAW22197.1 as seed ortholog is 100%.

---

Group of orthologs #3863. Best score 1048 bits

Score difference with first non-orthologous sequence - *A. fumigatus*:1048 *A. fischeri*:1048

|                 |         |                 |         |
|-----------------|---------|-----------------|---------|
| afum EAL92645.1 | 100.00% | afis EAW21611.1 | 100.00% |
|-----------------|---------|-----------------|---------|

Bootstrap support for afum|EAL92645.1 as seed ortholog is 100%.

Bootstrap support for afis|EAW21611.1 as seed ortholog is 100%.

---

Group of orthologs #3864. Best score 1047 bits

Score difference with first non-orthologous sequence - *A. fumigatus*:852 *A. fischeri*:1047

|                 |         |                 |         |
|-----------------|---------|-----------------|---------|
| afum EAL89137.1 | 100.00% | afis EAW16540.1 | 100.00% |
|-----------------|---------|-----------------|---------|

Bootstrap support for afum|EAL89137.1 as seed ortholog is 100%.

Bootstrap support for afis|EAW16540.1 as seed ortholog is 100%.

---

Group of orthologs #3865. Best score 1047 bits

Score difference with first non-orthologous sequence - *A. fumigatus*:1047 *A. fischeri*:632

|                 |         |                 |         |
|-----------------|---------|-----------------|---------|
| afum EAL89190.1 | 100.00% | afis EAW16594.1 | 100.00% |
|-----------------|---------|-----------------|---------|

Bootstrap support for afum|EAL89190.1 as seed ortholog is 100%.

Bootstrap support for afis|EAW16594.1 as seed ortholog is 100%.

---

Group of orthologs #3866. Best score 1047 bits

Score difference with first non-orthologous sequence - *A. fumigatus*:1047 *A. fischeri*:861

|                 |         |                 |         |
|-----------------|---------|-----------------|---------|
| afum EAL86810.1 | 100.00% | afis EAW19717.1 | 100.00% |
|-----------------|---------|-----------------|---------|

Bootstrap support for afum|EAL86810.1 as seed ortholog is 100%.

Bootstrap support for afis|EAW19717.1 as seed ortholog is 100%.

---

Group of orthologs #3867. Best score 1047 bits

Score difference with first non-orthologous sequence - *A. fumigatus*:1047 *A. fischeri*:1047

|                 |         |                 |         |
|-----------------|---------|-----------------|---------|
| afum EAL89793.1 | 100.00% | afis EAW25122.1 | 100.00% |
|-----------------|---------|-----------------|---------|

Bootstrap support for afum|EAL89793.1 as seed ortholog is 100%.

Bootstrap support for afis|EAW25122.1 as seed ortholog is 100%.

---

Group of orthologs #3868. Best score 1046 bits

Score difference with first non-orthologous sequence - *A. fumigatus*:1046 *A. fischeri*:1046

|                 |         |                 |         |
|-----------------|---------|-----------------|---------|
| afum EAL86528.2 | 100.00% | afis EAW17009.1 | 100.00% |
|-----------------|---------|-----------------|---------|

Bootstrap support for afum|EAL86528.2 as seed ortholog is 100%.

Bootstrap support for afis|EAW17009.1 as seed ortholog is 100%.

---

Group of orthologs #3869. Best score 1046 bits

Score difference with first non-orthologous sequence - *A. fumigatus*:1046 *A. fischeri*:1046

|                 |         |                 |         |
|-----------------|---------|-----------------|---------|
| afum EAL86965.1 | 100.00% | afis EAW19544.1 | 100.00% |
|-----------------|---------|-----------------|---------|

Bootstrap support for afum|EAL86965.1 as seed ortholog is 100%.

Bootstrap support for afis|EAW19544.1 as seed ortholog is 100%.

---

Group of orthologs #3870. Best score 1046 bits

Score difference with first non-orthologous sequence - *A. fumigatus*:1046 *A. fischeri*:1046

|                 |         |                 |         |
|-----------------|---------|-----------------|---------|
| afum EAL93115.1 | 100.00% | afis EAW18434.1 | 100.00% |
|-----------------|---------|-----------------|---------|

Bootstrap support for afum|EAL93115.1 as seed ortholog is 100%.

Bootstrap support for afis|EAW18434.1 as seed ortholog is 100%.

---

Group of orthologs #3871. Best score 1046 bits

Score difference with first non-orthologous sequence - *A. fumigatus*:1046 *A. fischeri*:1046

afum|EAL88083.1 100.00% afis|EAW23388.1 100.00%

Bootstrap support for afum|EAL88083.1 as seed ortholog is 100%.

Bootstrap support for afis|EAW23388.1 as seed ortholog is 100%.

---

Group of orthologs #3872. Best score 1046 bits

Score difference with first non-orthologous sequence - *A. fumigatus*:1046 *A. fischeri*:1046

afum|EAL93328.1 100.00% afis|EAW18618.1 100.00%

Bootstrap support for afum|EAL93328.1 as seed ortholog is 100%.

Bootstrap support for afis|EAW18618.1 as seed ortholog is 100%.

---

Group of orthologs #3873. Best score 1046 bits

Score difference with first non-orthologous sequence - *A. fumigatus*:1046 *A. fischeri*:1046

afum|EAL90547.1 100.00% afis|EAW22645.1 100.00%

Bootstrap support for afum|EAL90547.1 as seed ortholog is 100%.

Bootstrap support for afis|EAW22645.1 as seed ortholog is 100%.

---

Group of orthologs #3874. Best score 1046 bits

Score difference with first non-orthologous sequence - *A. fumigatus*:1046 *A. fischeri*:1046

afum|EAL90288.1 100.00% afis|EAW22909.1 100.00%

Bootstrap support for afum|EAL90288.1 as seed ortholog is 100%.

Bootstrap support for afis|EAW22909.1 as seed ortholog is 100%.

---

Group of orthologs #3875. Best score 1046 bits

Score difference with first non-orthologous sequence - *A. fumigatus*:1046 *A. fischeri*:1046

afum|EAL92956.1 100.00% afis|EAW21942.1 100.00%

Bootstrap support for afum|EAL92956.1 as seed ortholog is 100%.

Bootstrap support for afis|EAW21942.1 as seed ortholog is 100%.

---

Group of orthologs #3876. Best score 1045 bits

Score difference with first non-orthologous sequence - *A. fumigatus*:1045 *A. fischeri*:1045

afum|EAL88709.1 100.00% afis|EAW16077.1 100.00%

Bootstrap support for afum|EAL88709.1 as seed ortholog is 100%.

Bootstrap support for afis|EAW16077.1 as seed ortholog is 100%.

---

Group of orthologs #3877. Best score 1045 bits

Score difference with first non-orthologous sequence - *A. fumigatus*:1045 *A. fischeri*:1045

afum|EAL91447.1 100.00% afis|EAW17632.1 100.00%

Bootstrap support for afum|EAL91447.1 as seed ortholog is 100%.

Bootstrap support for afis|EAW17632.1 as seed ortholog is 100%.

---

Group of orthologs #3878. Best score 1045 bits

Score difference with first non-orthologous sequence - *A. fumigatus*:1045 *A. fischeri*:1045

afum|EAL91823.1 100.00% afis|EAW18011.1 100.00%

Bootstrap support for afum|EAL91823.1 as seed ortholog is 100%.

Bootstrap support for afis|EAW18011.1 as seed ortholog is 100%.

---

Group of orthologs #3879. Best score 1045 bits

Score difference with first non-orthologous sequence - *A. fumigatus*:1045 *A. fischeri*:1045

afum|EAL93141.1 100.00% afis|EAW18456.1 100.00%

Bootstrap support for afum|EAL93141.1 as seed ortholog is 100%.

Bootstrap support for afis|EAW18456.1 as seed ortholog is 100%.

---

Group of orthologs #3880. Best score 1045 bits

Score difference with first non-orthologous sequence - *A. fumigatus*:1045 *A. fischeri*:1045  
afum|EAL88069.1 100.00% afis|EAW23401.1 100.00%  
Bootstrap support for afum|EAL88069.1 as seed ortholog is 100%.  
Bootstrap support for afis|EAW23401.1 as seed ortholog is 100%.

---

Group of orthologs #3881. Best score 1045 bits

Score difference with first non-orthologous sequence - *A. fumigatus*:939 *A. fischeri*:1045  
afum|EAL91097.1 100.00% afis|EAW22073.1 100.00%  
Bootstrap support for afum|EAL91097.1 as seed ortholog is 100%.  
Bootstrap support for afis|EAW22073.1 as seed ortholog is 100%.

---

Group of orthologs #3882. Best score 1045 bits

Score difference with first non-orthologous sequence - *A. fumigatus*:939 *A. fischeri*:813  
afum|EAL89332.1 100.00% afis|EAW24691.1 100.00%  
Bootstrap support for afum|EAL89332.1 as seed ortholog is 100%.  
Bootstrap support for afis|EAW24691.1 as seed ortholog is 100%.

---

Group of orthologs #3883. Best score 1045 bits

Score difference with first non-orthologous sequence - *A. fumigatus*:1045 *A. fischeri*:937  
afum|EAL92709.1 100.00% afis|EAW21675.1 100.00%  
Bootstrap support for afum|EAL92709.1 as seed ortholog is 100%.  
Bootstrap support for afis|EAW21675.1 as seed ortholog is 100%.

---

Group of orthologs #3884. Best score 1044 bits

Score difference with first non-orthologous sequence - *A. fumigatus*:1044 *A. fischeri*:1044  
afum|EAL85227.1 100.00% afis|EAW20110.1 100.00%  
Bootstrap support for afum|EAL85227.1 as seed ortholog is 100%.  
Bootstrap support for afis|EAW20110.1 as seed ortholog is 100%.

---

Group of orthologs #3885. Best score 1044 bits

Score difference with first non-orthologous sequence - *A. fumigatus*:890 *A. fischeri*:813  
afum|EAL91844.1 100.00% afis|EAW18033.1 100.00%  
Bootstrap support for afum|EAL91844.1 as seed ortholog is 100%.  
Bootstrap support for afis|EAW18033.1 as seed ortholog is 100%.

---

Group of orthologs #3886. Best score 1044 bits

Score difference with first non-orthologous sequence - *A. fumigatus*:713 *A. fischeri*:628  
afum|EAL91847.1 100.00% afis|EAW18036.1 100.00%  
Bootstrap support for afum|EAL91847.1 as seed ortholog is 100%.  
Bootstrap support for afis|EAW18036.1 as seed ortholog is 100%.

---

Group of orthologs #3887. Best score 1044 bits

Score difference with first non-orthologous sequence - *A. fumigatus*:1044 *A. fischeri*:1044  
afum|EAL85938.1 100.00% afis|EAW24270.1 100.00%  
Bootstrap support for afum|EAL85938.1 as seed ortholog is 100%.  
Bootstrap support for afis|EAW24270.1 as seed ortholog is 100%.

---

Group of orthologs #3888. Best score 1044 bits

Score difference with first non-orthologous sequence - *A. fumigatus*:1044 *A. fischeri*:1044  
afum|EAL88406.1 100.00% afis|EAW23073.1 100.00%  
Bootstrap support for afum|EAL88406.1 as seed ortholog is 100%.  
Bootstrap support for afis|EAW23073.1 as seed ortholog is 100%.

---

Group of orthologs #3889. Best score 1044 bits

Score difference with first non-orthologous sequence - *A. fumigatus*:1044 *A. fischeri*:1044  
afum|EAL88006.1 100.00% afis|EAW23460.1 100.00%

Bootstrap support for afum|EAL88006.1 as seed ortholog is 100%.  
Bootstrap support for afis|EAW23460.1 as seed ortholog is 100%.

---

Group of orthologs #3890. Best score 1044 bits

Score difference with first non-orthologous sequence - *A. fumigatus*:1044 *A. fischeri*:1044

afum|EAL90436.2 100.00% afis|EAW22763.1 100.00%

Bootstrap support for afum|EAL90436.2 as seed ortholog is 100%.

Bootstrap support for afis|EAW22763.1 as seed ortholog is 100%.

---

Group of orthologs #3891. Best score 1044 bits

Score difference with first non-orthologous sequence - *A. fumigatus*:1044 *A. fischeri*:1044

afum|EAL92897.1 100.00% afis|EAW21883.1 100.00%

Bootstrap support for afum|EAL92897.1 as seed ortholog is 100%.

Bootstrap support for afis|EAW21883.1 as seed ortholog is 100%.

---

Group of orthologs #3892. Best score 1043 bits

Score difference with first non-orthologous sequence - *A. fumigatus*:908 *A. fischeri*:867

afum|EAL85216.1 100.00% afis|EAW20098.1 100.00%

Bootstrap support for afum|EAL85216.1 as seed ortholog is 100%.

Bootstrap support for afis|EAW20098.1 as seed ortholog is 100%.

---

Group of orthologs #3893. Best score 1043 bits

Score difference with first non-orthologous sequence - *A. fumigatus*:1043 *A. fischeri*:662

afum|EAL91204.1 100.00% afis|EAW17367.1 100.00%

Bootstrap support for afum|EAL91204.1 as seed ortholog is 100%.

Bootstrap support for afis|EAW17367.1 as seed ortholog is 100%.

---

Group of orthologs #3894. Best score 1043 bits

Score difference with first non-orthologous sequence - *A. fumigatus*:1043 *A. fischeri*:1043

afum|EAL91733.1 100.00% afis|EAW17922.1 100.00%

Bootstrap support for afum|EAL91733.1 as seed ortholog is 100%.

Bootstrap support for afis|EAW17922.1 as seed ortholog is 100%.

---

Group of orthologs #3895. Best score 1043 bits

Score difference with first non-orthologous sequence - *A. fumigatus*:1043 *A. fischeri*:1043

afum|EAL91817.1 100.00% afis|EAW18005.1 100.00%

Bootstrap support for afum|EAL91817.1 as seed ortholog is 100%.

Bootstrap support for afis|EAW18005.1 as seed ortholog is 100%.

---

Group of orthologs #3896. Best score 1043 bits

Score difference with first non-orthologous sequence - *A. fumigatus*:722 *A. fischeri*:615

afum|EAL93436.2 100.00% afis|EAW17486.1 100.00%

Bootstrap support for afum|EAL93436.2 as seed ortholog is 100%.

Bootstrap support for afis|EAW17486.1 as seed ortholog is 100%.

---

Group of orthologs #3897. Best score 1043 bits

Score difference with first non-orthologous sequence - *A. fumigatus*:1043 *A. fischeri*:1043

afum|EAL87369.1 100.00% afis|EAW23944.1 100.00%

Bootstrap support for afum|EAL87369.1 as seed ortholog is 100%.

Bootstrap support for afis|EAW23944.1 as seed ortholog is 100%.

---

Group of orthologs #3898. Best score 1043 bits

Score difference with first non-orthologous sequence - *A. fumigatus*:1043 *A. fischeri*:1043

afum|EAL88225.1 100.00% afis|EAW23256.1 100.00%

Bootstrap support for afum|EAL88225.1 as seed ortholog is 100%.

Bootstrap support for afis|EAW23256.1 as seed ortholog is 100%.



---

Group of orthologs #3899. Best score 1043 bits

Score difference with first non-orthologous sequence - *A. fumigatus*:1043 *A. fischeri*:1043

afum|EAL90678.1 100.00% afis|EAW22515.1 100.00%

Bootstrap support for afum|EAL90678.1 as seed ortholog is 100%.

Bootstrap support for afis|EAW22515.1 as seed ortholog is 100%.

---

Group of orthologs #3900. Best score 1043 bits

Score difference with first non-orthologous sequence - *A. fumigatus*:1043 *A. fischeri*:1043

afum|EAL90666.2 100.00% afis|EAW22528.1 100.00%

Bootstrap support for afum|EAL90666.2 as seed ortholog is 100%.

Bootstrap support for afis|EAW22528.1 as seed ortholog is 100%.

---

Group of orthologs #3901. Best score 1043 bits

Score difference with first non-orthologous sequence - *A. fumigatus*:1043 *A. fischeri*:1043

afum|EAL90651.1 100.00% afis|EAW22544.1 100.00%

Bootstrap support for afum|EAL90651.1 as seed ortholog is 100%.

Bootstrap support for afis|EAW22544.1 as seed ortholog is 100%.

---

Group of orthologs #3902. Best score 1043 bits

Score difference with first non-orthologous sequence - *A. fumigatus*:1043 *A. fischeri*:1043

afum|EAL92597.1 100.00% afis|EAW21579.1 100.00%

Bootstrap support for afum|EAL92597.1 as seed ortholog is 100%.

Bootstrap support for afis|EAW21579.1 as seed ortholog is 100%.

---

Group of orthologs #3903. Best score 1043 bits

Score difference with first non-orthologous sequence - *A. fumigatus*:1043 *A. fischeri*:866

afum|EAL89421.1 100.00% afis|EAW24782.1 100.00%

Bootstrap support for afum|EAL89421.1 as seed ortholog is 100%.

Bootstrap support for afis|EAW24782.1 as seed ortholog is 100%.

---

Group of orthologs #3904. Best score 1043 bits

Score difference with first non-orthologous sequence - *A. fumigatus*:1043 *A. fischeri*:279

afum|EAL89439.1 100.00% afis|EAW24797.1 100.00%

Bootstrap support for afum|EAL89439.1 as seed ortholog is 100%.

Bootstrap support for afis|EAW24797.1 as seed ortholog is 100%.

---

Group of orthologs #3905. Best score 1042 bits

Score difference with first non-orthologous sequence - *A. fumigatus*:1042 *A. fischeri*:750

afum|EAL84906.1 100.00% afis|EAW20012.1 100.00%

Bootstrap support for afum|EAL84906.1 as seed ortholog is 100%.

Bootstrap support for afis|EAW20012.1 as seed ortholog is 100%.

---

Group of orthologs #3906. Best score 1042 bits

Score difference with first non-orthologous sequence - *A. fumigatus*:1042 *A. fischeri*:1042

afum|EAL93033.1 100.00% afis|EAW18362.1 100.00%

Bootstrap support for afum|EAL93033.1 as seed ortholog is 100%.

Bootstrap support for afis|EAW18362.1 as seed ortholog is 100%.

---

Group of orthologs #3907. Best score 1042 bits

Score difference with first non-orthologous sequence - *A. fumigatus*:843 *A. fischeri*:821

afum|EAL93572.1 100.00% afis|EAW18838.1 100.00%

Bootstrap support for afum|EAL93572.1 as seed ortholog is 100%.

Bootstrap support for afis|EAW18838.1 as seed ortholog is 100%.

---

Group of orthologs #3908. Best score 1042 bits

Score difference with first non-orthologous sequence - *A. fumigatus*:1042 *A. fischeri*:1042  
afum|EAL90551.1 100.00% afis|EAW22641.1 100.00%  
Bootstrap support for afum|EAL90551.1 as seed ortholog is 100%.  
Bootstrap support for afis|EAW22641.1 as seed ortholog is 100%.

---

Group of orthologs #3909. Best score 1042 bits

Score difference with first non-orthologous sequence - *A. fumigatus*:1042 *A. fischeri*:1042  
afum|EAL92796.1 100.00% afis|EAW21766.1 100.00%  
Bootstrap support for afum|EAL92796.1 as seed ortholog is 100%.  
Bootstrap support for afis|EAW21766.1 as seed ortholog is 100%.

---

Group of orthologs #3910. Best score 1041 bits

Score difference with first non-orthologous sequence - *A. fumigatus*:1041 *A. fischeri*:1041  
afum|EAL87478.1 100.00% afis|EAW18120.1 100.00%  
Bootstrap support for afum|EAL87478.1 as seed ortholog is 100%.  
Bootstrap support for afis|EAW18120.1 as seed ortholog is 100%.

---

Group of orthologs #3911. Best score 1041 bits

Score difference with first non-orthologous sequence - *A. fumigatus*:1041 *A. fischeri*:1041  
afum|EAL91007.1 100.00% afis|EAW22182.1 100.00%  
Bootstrap support for afum|EAL91007.1 as seed ortholog is 100%.  
Bootstrap support for afis|EAW22182.1 as seed ortholog is 100%.

---

Group of orthologs #3912. Best score 1040 bits

Score difference with first non-orthologous sequence - *A. fumigatus*:1040 *A. fischeri*:1040  
afum|EAL93276.1 100.00% afis|EAW18573.1 100.00%  
Bootstrap support for afum|EAL93276.1 as seed ortholog is 100%.  
Bootstrap support for afis|EAW18573.1 as seed ortholog is 100%.

---

Group of orthologs #3913. Best score 1040 bits

Score difference with first non-orthologous sequence - *A. fumigatus*:1040 *A. fischeri*:1040  
afum|EAL93472.1 100.00% afis|EAW18746.1 100.00%  
Bootstrap support for afum|EAL93472.1 as seed ortholog is 100%.  
Bootstrap support for afis|EAW18746.1 as seed ortholog is 100%.

---

Group of orthologs #3914. Best score 1040 bits

Score difference with first non-orthologous sequence - *A. fumigatus*:1040 *A. fischeri*:766  
afum|EAL92569.1 100.00% afis|EAW21549.1 100.00%  
Bootstrap support for afum|EAL92569.1 as seed ortholog is 100%.  
Bootstrap support for afis|EAW21549.1 as seed ortholog is 100%.

---

Group of orthologs #3915. Best score 1040 bits

Score difference with first non-orthologous sequence - *A. fumigatus*:1040 *A. fischeri*:1040  
afum|EAL92848.1 100.00% afis|EAW21833.1 100.00%  
Bootstrap support for afum|EAL92848.1 as seed ortholog is 100%.  
Bootstrap support for afis|EAW21833.1 as seed ortholog is 100%.

---

Group of orthologs #3916. Best score 1040 bits

Score difference with first non-orthologous sequence - *A. fumigatus*:1040 *A. fischeri*:1040  
afum|EAL92945.2 100.00% afis|EAW21932.1 100.00%  
Bootstrap support for afum|EAL92945.2 as seed ortholog is 100%.  
Bootstrap support for afis|EAW21932.1 as seed ortholog is 100%.

---

Group of orthologs #3917. Best score 1039 bits

Score difference with first non-orthologous sequence - *A. fumigatus*:1039 *A. fischeri*:1039  
afum|EAL87517.1 100.00% afis|EAW18158.1 100.00%

Bootstrap support for afum|EAL87517.1 as seed ortholog is 100%.  
Bootstrap support for afis|EAW18158.1 as seed ortholog is 100%.

---

Group of orthologs #3918. Best score 1039 bits

Score difference with first non-orthologous sequence - *A. fumigatus*:1039 *A. fischeri*:1039

|                 |         |                 |         |
|-----------------|---------|-----------------|---------|
| afum EAL93246.1 | 100.00% | afis EAW18546.1 | 100.00% |
|-----------------|---------|-----------------|---------|

Bootstrap support for afum|EAL93246.1 as seed ortholog is 100%.

Bootstrap support for afis|EAW18546.1 as seed ortholog is 100%.

---

Group of orthologs #3919. Best score 1039 bits

Score difference with first non-orthologous sequence - *A. fumigatus*:1039 *A. fischeri*:1039

|                 |         |                 |         |
|-----------------|---------|-----------------|---------|
| afum EAL90780.1 | 100.00% | afis EAW22412.1 | 100.00% |
|-----------------|---------|-----------------|---------|

Bootstrap support for afum|EAL90780.1 as seed ortholog is 100%.

Bootstrap support for afis|EAW22412.1 as seed ortholog is 100%.

---

Group of orthologs #3920. Best score 1039 bits

Score difference with first non-orthologous sequence - *A. fumigatus*:1039 *A. fischeri*:1039

|                 |         |                 |         |
|-----------------|---------|-----------------|---------|
| afum EAL90274.1 | 100.00% | afis EAW22923.1 | 100.00% |
|-----------------|---------|-----------------|---------|

Bootstrap support for afum|EAL90274.1 as seed ortholog is 100%.

Bootstrap support for afis|EAW22923.1 as seed ortholog is 100%.

---

Group of orthologs #3921. Best score 1038 bits

Score difference with first non-orthologous sequence - *A. fumigatus*:1038 *A. fischeri*:1038

|                 |         |                 |         |
|-----------------|---------|-----------------|---------|
| afum EAL84508.1 | 100.00% | afis EAW20553.1 | 100.00% |
|-----------------|---------|-----------------|---------|

Bootstrap support for afum|EAL84508.1 as seed ortholog is 100%.

Bootstrap support for afis|EAW20553.1 as seed ortholog is 100%.

---

Group of orthologs #3922. Best score 1038 bits

Score difference with first non-orthologous sequence - *A. fumigatus*:1038 *A. fischeri*:1038

|                 |         |                 |         |
|-----------------|---------|-----------------|---------|
| afum EAL85225.1 | 100.00% | afis EAW20108.1 | 100.00% |
|-----------------|---------|-----------------|---------|

Bootstrap support for afum|EAL85225.1 as seed ortholog is 100%.

Bootstrap support for afis|EAW20108.1 as seed ortholog is 100%.

---

Group of orthologs #3923. Best score 1038 bits

Score difference with first non-orthologous sequence - *A. fumigatus*:1038 *A. fischeri*:1038

|                 |         |                 |         |
|-----------------|---------|-----------------|---------|
| afum EAL88334.1 | 100.00% | afis EAW23147.1 | 100.00% |
|-----------------|---------|-----------------|---------|

Bootstrap support for afum|EAL88334.1 as seed ortholog is 100%.

Bootstrap support for afis|EAW23147.1 as seed ortholog is 100%.

---

Group of orthologs #3924. Best score 1038 bits

Score difference with first non-orthologous sequence - *A. fumigatus*:1038 *A. fischeri*:1038

|                 |         |                 |         |
|-----------------|---------|-----------------|---------|
| afum EBA27226.1 | 100.00% | afis EAW20136.1 | 100.00% |
|-----------------|---------|-----------------|---------|

Bootstrap support for afum|EBA27226.1 as seed ortholog is 100%.

Bootstrap support for afis|EAW20136.1 as seed ortholog is 100%.

---

Group of orthologs #3925. Best score 1037 bits

Score difference with first non-orthologous sequence - *A. fumigatus*:1037 *A. fischeri*:1037

|                 |         |                 |         |
|-----------------|---------|-----------------|---------|
| afum EAL84600.1 | 100.00% | afis EAW20453.1 | 100.00% |
|-----------------|---------|-----------------|---------|

Bootstrap support for afum|EAL84600.1 as seed ortholog is 100%.

Bootstrap support for afis|EAW20453.1 as seed ortholog is 100%.

---

Group of orthologs #3926. Best score 1037 bits

Score difference with first non-orthologous sequence - *A. fumigatus*:852 *A. fischeri*:876

|                 |         |                 |         |
|-----------------|---------|-----------------|---------|
| afum EAL87292.1 | 100.00% | afis EAW23864.1 | 100.00% |
|-----------------|---------|-----------------|---------|

Bootstrap support for afum|EAL87292.1 as seed ortholog is 100%.

Bootstrap support for afis|EAW23864.1 as seed ortholog is 100%.

---

Group of orthologs #3927. Best score 1037 bits

Score difference with first non-orthologous sequence - *A. fumigatus*:1037 *A. fischeri*:1037

afum|EAL93382.1 100.00% afis|EAW18664.1 100.00%

Bootstrap support for afum|EAL93382.1 as seed ortholog is 100%.

Bootstrap support for afis|EAW18664.1 as seed ortholog is 100%.

---

Group of orthologs #3928. Best score 1037 bits

Score difference with first non-orthologous sequence - *A. fumigatus*:731 *A. fischeri*:732

afum|EAL93544.1 100.00% afis|EAW18808.1 100.00%

Bootstrap support for afum|EAL93544.1 as seed ortholog is 100%.

Bootstrap support for afis|EAW18808.1 as seed ortholog is 100%.

---

Group of orthologs #3929. Best score 1037 bits

Score difference with first non-orthologous sequence - *A. fumigatus*:1037 *A. fischeri*:1037

afum|EAL90483.1 100.00% afis|EAW22709.1 100.00%

Bootstrap support for afum|EAL90483.1 as seed ortholog is 100%.

Bootstrap support for afis|EAW22709.1 as seed ortholog is 100%.

---

Group of orthologs #3930. Best score 1037 bits

Score difference with first non-orthologous sequence - *A. fumigatus*:1037 *A. fischeri*:1037

afum|EAL90417.1 100.00% afis|EAW22782.1 100.00%

Bootstrap support for afum|EAL90417.1 as seed ortholog is 100%.

Bootstrap support for afis|EAW22782.1 as seed ortholog is 100%.

---

Group of orthologs #3931. Best score 1037 bits

Score difference with first non-orthologous sequence - *A. fumigatus*:1037 *A. fischeri*:1037

afum|EAL89997.1 100.00% afis|EAW25334.1 100.00%

Bootstrap support for afum|EAL89997.1 as seed ortholog is 100%.

Bootstrap support for afis|EAW25334.1 as seed ortholog is 100%.

---

Group of orthologs #3932. Best score 1036 bits

Score difference with first non-orthologous sequence - *A. fumigatus*:369 *A. fischeri*:421

afum|EAL85027.1 100.00% afis|EAW19870.1 100.00%

Bootstrap support for afum|EAL85027.1 as seed ortholog is 100%.

Bootstrap support for afis|EAW19870.1 as seed ortholog is 100%.

---

Group of orthologs #3933. Best score 1036 bits

Score difference with first non-orthologous sequence - *A. fumigatus*:1036 *A. fischeri*:1036

afum|EAL91508.1 100.00% afis|EAW17694.1 100.00%

Bootstrap support for afum|EAL91508.1 as seed ortholog is 100%.

Bootstrap support for afis|EAW17694.1 as seed ortholog is 100%.

---

Group of orthologs #3934. Best score 1036 bits

Score difference with first non-orthologous sequence - *A. fumigatus*:970 *A. fischeri*:1036

afum|EAL87176.1 100.00% afis|EAW23739.1 100.00%

Bootstrap support for afum|EAL87176.1 as seed ortholog is 100%.

Bootstrap support for afis|EAW23739.1 as seed ortholog is 100%.

---

Group of orthologs #3935. Best score 1036 bits

Score difference with first non-orthologous sequence - *A. fumigatus*:1036 *A. fischeri*:1036

afum|EAL88336.1 100.00% afis|EAW23145.1 100.00%

Bootstrap support for afum|EAL88336.1 as seed ortholog is 100%.

Bootstrap support for afis|EAW23145.1 as seed ortholog is 100%.

---

Group of orthologs #3936. Best score 1036 bits

Score difference with first non-orthologous sequence - *A. fumigatus*:1036 *A. fischeri*:1036  
afum|EAL90157.1 100.00% afis|EAW25492.1 100.00%  
Bootstrap support for afum|EAL90157.1 as seed ortholog is 100%.  
Bootstrap support for afis|EAW25492.1 as seed ortholog is 100%.

---

Group of orthologs #3937. Best score 1035 bits

Score difference with first non-orthologous sequence - *A. fumigatus*:1035 *A. fischeri*:1035  
afum|EAL93962.1 100.00% afis|EAW19233.1 100.00%  
Bootstrap support for afum|EAL93962.1 as seed ortholog is 100%.  
Bootstrap support for afis|EAW19233.1 as seed ortholog is 100%.

---

Group of orthologs #3938. Best score 1035 bits

Score difference with first non-orthologous sequence - *A. fumigatus*:1035 *A. fischeri*:1035  
afum|EAL90402.1 100.00% afis|EAW22797.1 100.00%  
Bootstrap support for afum|EAL90402.1 as seed ortholog is 100%.  
Bootstrap support for afis|EAW22797.1 as seed ortholog is 100%.

---

Group of orthologs #3939. Best score 1035 bits

Score difference with first non-orthologous sequence - *A. fumigatus*:1035 *A. fischeri*:1035  
afum|EAL89649.1 100.00% afis|EAW24989.1 100.00%  
Bootstrap support for afum|EAL89649.1 as seed ortholog is 100%.  
Bootstrap support for afis|EAW24989.1 as seed ortholog is 100%.

---

Group of orthologs #3940. Best score 1035 bits

Score difference with first non-orthologous sequence - *A. fumigatus*:1035 *A. fischeri*:772  
afum|EAL89747.1 100.00% afis|EAW25078.1 100.00%  
Bootstrap support for afum|EAL89747.1 as seed ortholog is 100%.  
Bootstrap support for afis|EAW25078.1 as seed ortholog is 100%.

---

Group of orthologs #3941. Best score 1034 bits

Score difference with first non-orthologous sequence - *A. fumigatus*:1034 *A. fischeri*:905  
afum|EAL86671.2 100.00% afis|EAW17252.1 100.00%  
Bootstrap support for afum|EAL86671.2 as seed ortholog is 100%.  
Bootstrap support for afis|EAW17252.1 as seed ortholog is 100%.

---

Group of orthologs #3942. Best score 1034 bits

Score difference with first non-orthologous sequence - *A. fumigatus*:1034 *A. fischeri*:1034  
afum|EAL88532.1 100.00% afis|EAW15897.1 100.00%  
Bootstrap support for afum|EAL88532.1 as seed ortholog is 100%.  
Bootstrap support for afis|EAW15897.1 as seed ortholog is 100%.

---

Group of orthologs #3943. Best score 1034 bits

Score difference with first non-orthologous sequence - *A. fumigatus*:875 *A. fischeri*:851  
afum|EAL84524.1 100.00% afis|EAW20534.1 100.00%  
Bootstrap support for afum|EAL84524.1 as seed ortholog is 100%.  
Bootstrap support for afis|EAW20534.1 as seed ortholog is 100%.

---

Group of orthologs #3944. Best score 1034 bits

Score difference with first non-orthologous sequence - *A. fumigatus*:1034 *A. fischeri*:1034  
afum|EAL91805.1 100.00% afis|EAW17995.1 100.00%  
Bootstrap support for afum|EAL91805.1 as seed ortholog is 100%.  
Bootstrap support for afis|EAW17995.1 as seed ortholog is 100%.

---

Group of orthologs #3945. Best score 1034 bits

Score difference with first non-orthologous sequence - *A. fumigatus*:731 *A. fischeri*:692  
afum|EAL93768.1 100.00% afis|EAW19039.1 100.00%

Bootstrap support for afum|EAL93768.1 as seed ortholog is 100%.  
Bootstrap support for afis|EAW19039.1 as seed ortholog is 100%.

---

Group of orthologs #3946. Best score 1034 bits

Score difference with first non-orthologous sequence - *A. fumigatus*:1034 *A. fischeri*:1034

afum|EAL92351.1 100.00% afis|EAW21333.1 100.00%

Bootstrap support for afum|EAL92351.1 as seed ortholog is 100%.

Bootstrap support for afis|EAW21333.1 as seed ortholog is 100%.

---

Group of orthologs #3947. Best score 1034 bits

Score difference with first non-orthologous sequence - *A. fumigatus*:1034 *A. fischeri*:1034

afum|EAL92647.1 100.00% afis|EAW21613.1 100.00%

Bootstrap support for afum|EAL92647.1 as seed ortholog is 100%.

Bootstrap support for afis|EAW21613.1 as seed ortholog is 100%.

---

Group of orthologs #3948. Best score 1034 bits

Score difference with first non-orthologous sequence - *A. fumigatus*:1034 *A. fischeri*:1034

afum|EAL90095.1 100.00% afis|EAW25437.1 100.00%

Bootstrap support for afum|EAL90095.1 as seed ortholog is 100%.

Bootstrap support for afis|EAW25437.1 as seed ortholog is 100%.

---

Group of orthologs #3949. Best score 1033 bits

Score difference with first non-orthologous sequence - *A. fumigatus*:1033 *A. fischeri*:1033

afum|EAL84917.1 100.00% afis|EAW20002.1 100.00%

Bootstrap support for afum|EAL84917.1 as seed ortholog is 100%.

Bootstrap support for afis|EAW20002.1 as seed ortholog is 100%.

---

Group of orthologs #3950. Best score 1033 bits

Score difference with first non-orthologous sequence - *A. fumigatus*:1033 *A. fischeri*:725

afum|EAL85478.2 100.00% afis|EAW20362.1 100.00%

Bootstrap support for afum|EAL85478.2 as seed ortholog is 100%.

Bootstrap support for afis|EAW20362.1 as seed ortholog is 100%.

---

Group of orthologs #3951. Best score 1033 bits

Score difference with first non-orthologous sequence - *A. fumigatus*:918 *A. fischeri*:1033

afum|EAL86159.1 100.00% afis|EAW24490.1 100.00%

Bootstrap support for afum|EAL86159.1 as seed ortholog is 100%.

Bootstrap support for afis|EAW24490.1 as seed ortholog is 100%.

---

Group of orthologs #3952. Best score 1033 bits

Score difference with first non-orthologous sequence - *A. fumigatus*:1033 *A. fischeri*:1033

afum|EAL90816.1 100.00% afis|EAW22376.1 100.00%

Bootstrap support for afum|EAL90816.1 as seed ortholog is 100%.

Bootstrap support for afis|EAW22376.1 as seed ortholog is 100%.

---

Group of orthologs #3953. Best score 1033 bits

Score difference with first non-orthologous sequence - *A. fumigatus*:1033 *A. fischeri*:1033

afum|EAL89941.1 100.00% afis|EAW25278.1 100.00%

Bootstrap support for afum|EAL89941.1 as seed ortholog is 100%.

Bootstrap support for afis|EAW25278.1 as seed ortholog is 100%.

---

Group of orthologs #3954. Best score 1032 bits

Score difference with first non-orthologous sequence - *A. fumigatus*:1032 *A. fischeri*:1032

afum|EAL86687.1 100.00% afis|EAW17270.1 100.00%

Bootstrap support for afum|EAL86687.1 as seed ortholog is 100%.

Bootstrap support for afis|EAW17270.1 as seed ortholog is 100%.

---

Group of orthologs #3955. Best score 1032 bits

Score difference with first non-orthologous sequence - *A. fumigatus*:1032 *A. fischeri*:959

afum|EAL84951.2 100.00% afis|EAW19969.1 100.00%

Bootstrap support for afum|EAL84951.2 as seed ortholog is 100%.

Bootstrap support for afis|EAW19969.1 as seed ortholog is 100%.

---

Group of orthologs #3956. Best score 1032 bits

Score difference with first non-orthologous sequence - *A. fumigatus*:1032 *A. fischeri*:1032

afum|EAL93221.1 100.00% afis|EAW18526.1 100.00%

Bootstrap support for afum|EAL93221.1 as seed ortholog is 100%.

Bootstrap support for afis|EAW18526.1 as seed ortholog is 100%.

---

Group of orthologs #3957. Best score 1032 bits

Score difference with first non-orthologous sequence - *A. fumigatus*:1032 *A. fischeri*:1032

afum|EAL90420.1 100.00% afis|EAW22778.1 100.00%

Bootstrap support for afum|EAL90420.1 as seed ortholog is 100%.

Bootstrap support for afis|EAW22778.1 as seed ortholog is 100%.

---

Group of orthologs #3958. Best score 1031 bits

Score difference with first non-orthologous sequence - *A. fumigatus*:1031 *A. fischeri*:1031

afum|EAL84998.1 100.00% afis|EAW19908.1 100.00%

Bootstrap support for afum|EAL84998.1 as seed ortholog is 100%.

Bootstrap support for afis|EAW19908.1 as seed ortholog is 100%.

---

Group of orthologs #3959. Best score 1031 bits

Score difference with first non-orthologous sequence - *A. fumigatus*:1031 *A. fischeri*:747

afum|EAL84721.1 100.00% afis|EAW20913.1 100.00%

Bootstrap support for afum|EAL84721.1 as seed ortholog is 100%.

Bootstrap support for afis|EAW20913.1 as seed ortholog is 100%.

---

Group of orthologs #3960. Best score 1031 bits

Score difference with first non-orthologous sequence - *A. fumigatus*:1031 *A. fischeri*:1031

afum|EAL86091.1 100.00% afis|EAW24423.1 100.00%

Bootstrap support for afum|EAL86091.1 as seed ortholog is 100%.

Bootstrap support for afis|EAW24423.1 as seed ortholog is 100%.

---

Group of orthologs #3961. Best score 1031 bits

Score difference with first non-orthologous sequence - *A. fumigatus*:1031 *A. fischeri*:1031

afum|EAL93927.2 100.00% afis|EAW19195.1 100.00%

Bootstrap support for afum|EAL93927.2 as seed ortholog is 100%.

Bootstrap support for afis|EAW19195.1 as seed ortholog is 100%.

---

Group of orthologs #3962. Best score 1031 bits

Score difference with first non-orthologous sequence - *A. fumigatus*:1031 *A. fischeri*:1031

afum|EAL90911.1 100.00% afis|EAW22269.1 100.00%

Bootstrap support for afum|EAL90911.1 as seed ortholog is 100%.

Bootstrap support for afis|EAW22269.1 as seed ortholog is 100%.

---

Group of orthologs #3963. Best score 1030 bits

Score difference with first non-orthologous sequence - *A. fumigatus*:1030 *A. fischeri*:1030

afum|EAL86821.1 100.00% afis|EAW19705.1 100.00%

Bootstrap support for afum|EAL86821.1 as seed ortholog is 100%.

Bootstrap support for afis|EAW19705.1 as seed ortholog is 100%.

---

Group of orthologs #3964. Best score 1030 bits

Score difference with first non-orthologous sequence - *A. fumigatus*:1030 *A. fischeri*:1030  
afum|EAL91575.1 100.00% afis|EAW17765.1 100.00%  
Bootstrap support for afum|EAL91575.1 as seed ortholog is 100%.  
Bootstrap support for afis|EAW17765.1 as seed ortholog is 100%.

---

Group of orthologs #3965. Best score 1030 bits

Score difference with first non-orthologous sequence - *A. fumigatus*:1030 *A. fischeri*:1030  
afum|EAL93321.1 100.00% afis|EAW18611.1 100.00%  
Bootstrap support for afum|EAL93321.1 as seed ortholog is 100%.  
Bootstrap support for afis|EAW18611.1 as seed ortholog is 100%.

---

Group of orthologs #3966. Best score 1029 bits

Score difference with first non-orthologous sequence - *A. fumigatus*:1029 *A. fischeri*:1029  
afum|EAL86743.1 100.00% afis|EAW16809.1 100.00%  
Bootstrap support for afum|EAL86743.1 as seed ortholog is 100%.  
Bootstrap support for afis|EAW16809.1 as seed ortholog is 100%.

---

Group of orthologs #3967. Best score 1029 bits

Score difference with first non-orthologous sequence - *A. fumigatus*:1029 *A. fischeri*:1029  
afum|EAL87669.1 100.00% afis|EAW18303.1 100.00%  
Bootstrap support for afum|EAL87669.1 as seed ortholog is 100%.  
Bootstrap support for afis|EAW18303.1 as seed ortholog is 100%.

---

Group of orthologs #3968. Best score 1029 bits

Score difference with first non-orthologous sequence - *A. fumigatus*:1029 *A. fischeri*:1029  
afum|EAL91216.1 100.00% afis|EAW17381.1 100.00%  
Bootstrap support for afum|EAL91216.1 as seed ortholog is 100%.  
Bootstrap support for afis|EAW17381.1 as seed ortholog is 100%.

---

Group of orthologs #3969. Best score 1029 bits

Score difference with first non-orthologous sequence - *A. fumigatus*:1029 *A. fischeri*:1029  
afum|EAL91893.1 100.00% afis|EAW18081.1 100.00%  
Bootstrap support for afum|EAL91893.1 as seed ortholog is 100%.  
Bootstrap support for afis|EAW18081.1 as seed ortholog is 100%.

---

Group of orthologs #3970. Best score 1029 bits

Score difference with first non-orthologous sequence - *A. fumigatus*:1029 *A. fischeri*:968  
afum|EAL92785.1 100.00% afis|EAW21755.1 100.00%  
Bootstrap support for afum|EAL92785.1 as seed ortholog is 100%.  
Bootstrap support for afis|EAW21755.1 as seed ortholog is 100%.

---

Group of orthologs #3971. Best score 1029 bits

Score difference with first non-orthologous sequence - *A. fumigatus*:1029 *A. fischeri*:1029  
afum|EAL92026.1 100.00% afis|EAW24168.1 100.00%  
Bootstrap support for afum|EAL92026.1 as seed ortholog is 100%.  
Bootstrap support for afis|EAW24168.1 as seed ortholog is 100%.

---

Group of orthologs #3972. Best score 1028 bits

Score difference with first non-orthologous sequence - *A. fumigatus*:1028 *A. fischeri*:1028  
afum|EAL86474.1 100.00% afis|EAW16947.1 100.00%  
Bootstrap support for afum|EAL86474.1 as seed ortholog is 100%.  
Bootstrap support for afis|EAW16947.1 as seed ortholog is 100%.

---

Group of orthologs #3973. Best score 1028 bits

Score difference with first non-orthologous sequence - *A. fumigatus*:1028 *A. fischeri*:1028  
afum|EAL88731.1 100.00% afis|EAW16099.1 100.00%



Bootstrap support for afum|EAL88731.1 as seed ortholog is 100%.  
Bootstrap support for afis|EAW16099.1 as seed ortholog is 100%.

---

Group of orthologs #3974. Best score 1028 bits

Score difference with first non-orthologous sequence - *A. fumigatus*:816 *A. fischeri*:933

|                 |         |                 |         |
|-----------------|---------|-----------------|---------|
| afum EAL85500.2 | 100.00% | afis EAW20401.1 | 100.00% |
|-----------------|---------|-----------------|---------|

Bootstrap support for afum|EAL85500.2 as seed ortholog is 100%.

Bootstrap support for afis|EAW20401.1 as seed ortholog is 100%.

---

Group of orthologs #3975. Best score 1028 bits

Score difference with first non-orthologous sequence - *A. fumigatus*:1028 *A. fischeri*:1028

|                 |         |                 |         |
|-----------------|---------|-----------------|---------|
| afum EAL93126.1 | 100.00% | afis EAW18443.1 | 100.00% |
|-----------------|---------|-----------------|---------|

Bootstrap support for afum|EAL93126.1 as seed ortholog is 100%.

Bootstrap support for afis|EAW18443.1 as seed ortholog is 100%.

---

Group of orthologs #3976. Best score 1028 bits

Score difference with first non-orthologous sequence - *A. fumigatus*:1028 *A. fischeri*:1028

|                 |         |                 |         |
|-----------------|---------|-----------------|---------|
| afum EAL87876.1 | 100.00% | afis EAW23590.1 | 100.00% |
|-----------------|---------|-----------------|---------|

Bootstrap support for afum|EAL87876.1 as seed ortholog is 100%.

Bootstrap support for afis|EAW23590.1 as seed ortholog is 100%.

---

Group of orthologs #3977. Best score 1028 bits

Score difference with first non-orthologous sequence - *A. fumigatus*:1028 *A. fischeri*:1028

|                 |         |                 |         |
|-----------------|---------|-----------------|---------|
| afum EAL93566.1 | 100.00% | afis EAW18832.1 | 100.00% |
|-----------------|---------|-----------------|---------|

Bootstrap support for afum|EAL93566.1 as seed ortholog is 100%.

Bootstrap support for afis|EAW18832.1 as seed ortholog is 100%.

---

Group of orthologs #3978. Best score 1028 bits

Score difference with first non-orthologous sequence - *A. fumigatus*:1028 *A. fischeri*:1028

|                 |         |                 |         |
|-----------------|---------|-----------------|---------|
| afum EAL92246.1 | 100.00% | afis EAW21234.1 | 100.00% |
|-----------------|---------|-----------------|---------|

Bootstrap support for afum|EAL92246.1 as seed ortholog is 100%.

Bootstrap support for afis|EAW21234.1 as seed ortholog is 100%.

---

Group of orthologs #3979. Best score 1027 bits

Score difference with first non-orthologous sequence - *A. fumigatus*:901 *A. fischeri*:1027

|                 |         |                 |         |
|-----------------|---------|-----------------|---------|
| afum EAL86830.1 | 100.00% | afis EAW19697.1 | 100.00% |
|-----------------|---------|-----------------|---------|

Bootstrap support for afum|EAL86830.1 as seed ortholog is 100%.

Bootstrap support for afis|EAW19697.1 as seed ortholog is 100%.

---

Group of orthologs #3980. Best score 1027 bits

Score difference with first non-orthologous sequence - *A. fumigatus*:1027 *A. fischeri*:940

|                 |         |                 |         |
|-----------------|---------|-----------------|---------|
| afum EAL91529.1 | 100.00% | afis EAW17714.1 | 100.00% |
|-----------------|---------|-----------------|---------|

Bootstrap support for afum|EAL91529.1 as seed ortholog is 100%.

Bootstrap support for afis|EAW17714.1 as seed ortholog is 100%.

---

Group of orthologs #3981. Best score 1027 bits

Score difference with first non-orthologous sequence - *A. fumigatus*:1027 *A. fischeri*:1027

|                 |         |                 |         |
|-----------------|---------|-----------------|---------|
| afum EAL89595.1 | 100.00% | afis EAW24938.1 | 100.00% |
|-----------------|---------|-----------------|---------|

Bootstrap support for afum|EAL89595.1 as seed ortholog is 100%.

Bootstrap support for afis|EAW24938.1 as seed ortholog is 100%.

---

Group of orthologs #3982. Best score 1026 bits

Score difference with first non-orthologous sequence - *A. fumigatus*:819 *A. fischeri*:535

|                 |         |                 |         |
|-----------------|---------|-----------------|---------|
| afum EAL85105.2 | 100.00% | afis EAW19789.1 | 100.00% |
|-----------------|---------|-----------------|---------|

Bootstrap support for afum|EAL85105.2 as seed ortholog is 100%.

Bootstrap support for afis|EAW19789.1 as seed ortholog is 100%.

---

Group of orthologs #3983. Best score 1026 bits

Score difference with first non-orthologous sequence - *A. fumigatus*:1026 *A. fischeri*:1026

afum|EAL87299.1 100.00% afis|EAW23871.1 100.00%

Bootstrap support for afum|EAL87299.1 as seed ortholog is 100%.

Bootstrap support for afis|EAW23871.1 as seed ortholog is 100%.

---

Group of orthologs #3984. Best score 1026 bits

Score difference with first non-orthologous sequence - *A. fumigatus*:1026 *A. fischeri*:1026

afum|EAL88439.1 100.00% afis|EAW23042.1 100.00%

Bootstrap support for afum|EAL88439.1 as seed ortholog is 100%.

Bootstrap support for afis|EAW23042.1 as seed ortholog is 100%.

---

Group of orthologs #3985. Best score 1026 bits

Score difference with first non-orthologous sequence - *A. fumigatus*:1026 *A. fischeri*:1026

afum|EAL91015.1 100.00% afis|EAW22174.1 100.00%

Bootstrap support for afum|EAL91015.1 as seed ortholog is 100%.

Bootstrap support for afis|EAW22174.1 as seed ortholog is 100%.

---

Group of orthologs #3986. Best score 1025 bits

Score difference with first non-orthologous sequence - *A. fumigatus*:1025 *A. fischeri*:1025

afum|EAL84418.2 100.00% afis|EAW20679.1 100.00%

Bootstrap support for afum|EAL84418.2 as seed ortholog is 100%.

Bootstrap support for afis|EAW20679.1 as seed ortholog is 100%.

---

Group of orthologs #3987. Best score 1025 bits

Score difference with first non-orthologous sequence - *A. fumigatus*:1025 *A. fischeri*:1025

afum|EAL87522.1 100.00% afis|EAW18162.1 100.00%

Bootstrap support for afum|EAL87522.1 as seed ortholog is 100%.

Bootstrap support for afis|EAW18162.1 as seed ortholog is 100%.

---

Group of orthologs #3988. Best score 1025 bits

Score difference with first non-orthologous sequence - *A. fumigatus*:1025 *A. fischeri*:1025

afum|EAL93668.2 100.00% afis|EAW18935.1 100.00%

Bootstrap support for afum|EAL93668.2 as seed ortholog is 100%.

Bootstrap support for afis|EAW18935.1 as seed ortholog is 100%.

---

Group of orthologs #3989. Best score 1024 bits

Score difference with first non-orthologous sequence - *A. fumigatus*:1024 *A. fischeri*:1024

afum|EAL88597.1 100.00% afis|EAW15964.1 100.00%

Bootstrap support for afum|EAL88597.1 as seed ortholog is 100%.

Bootstrap support for afis|EAW15964.1 as seed ortholog is 100%.

---

Group of orthologs #3990. Best score 1024 bits

Score difference with first non-orthologous sequence - *A. fumigatus*:1024 *A. fischeri*:1024

afum|EAL85266.1 100.00% afis|EAW20151.1 100.00%

Bootstrap support for afum|EAL85266.1 as seed ortholog is 100%.

Bootstrap support for afis|EAW20151.1 as seed ortholog is 100%.

---

Group of orthologs #3991. Best score 1024 bits

Score difference with first non-orthologous sequence - *A. fumigatus*:917 *A. fischeri*:1024

afum|EAL87526.1 100.00% afis|EAW18166.1 100.00%

Bootstrap support for afum|EAL87526.1 as seed ortholog is 100%.

Bootstrap support for afis|EAW18166.1 as seed ortholog is 100%.

---

Group of orthologs #3992. Best score 1024 bits

Score difference with first non-orthologous sequence - *A. fumigatus*:793 *A. fischeri*:771  
afum|EAL84821.1 100.00% afis|EAW20807.1 100.00%  
Bootstrap support for afum|EAL84821.1 as seed ortholog is 100%.  
Bootstrap support for afis|EAW20807.1 as seed ortholog is 100%.

---

Group of orthologs #3993. Best score 1024 bits

Score difference with first non-orthologous sequence - *A. fumigatus*:1024 *A. fischeri*:1024  
afum|EAL86992.2 100.00% afis|EAW19501.1 100.00%  
Bootstrap support for afum|EAL86992.2 as seed ortholog is 100%.  
Bootstrap support for afis|EAW19501.1 as seed ortholog is 100%.

---

Group of orthologs #3994. Best score 1024 bits

Score difference with first non-orthologous sequence - *A. fumigatus*:1024 *A. fischeri*:646  
afum|EAL86838.1 100.00% afis|EAW19686.1 100.00%  
Bootstrap support for afum|EAL86838.1 as seed ortholog is 100%.  
Bootstrap support for afis|EAW19686.1 as seed ortholog is 100%.

---

Group of orthologs #3995. Best score 1024 bits

Score difference with first non-orthologous sequence - *A. fumigatus*:1024 *A. fischeri*:1024  
afum|EAL85909.2 100.00% afis|EAW24241.1 100.00%  
Bootstrap support for afum|EAL85909.2 as seed ortholog is 100%.  
Bootstrap support for afis|EAW24241.1 as seed ortholog is 100%.

---

Group of orthologs #3996. Best score 1024 bits

Score difference with first non-orthologous sequence - *A. fumigatus*:1024 *A. fischeri*:1024  
afum|EAL93179.1 100.00% afis|EAW18489.1 100.00%  
Bootstrap support for afum|EAL93179.1 as seed ortholog is 100%.  
Bootstrap support for afis|EAW18489.1 as seed ortholog is 100%.

---

Group of orthologs #3997. Best score 1024 bits

Score difference with first non-orthologous sequence - *A. fumigatus*:1024 *A. fischeri*:927  
afum|EAL92292.1 100.00% afis|EAW21277.1 100.00%  
Bootstrap support for afum|EAL92292.1 as seed ortholog is 100%.  
Bootstrap support for afis|EAW21277.1 as seed ortholog is 100%.

---

Group of orthologs #3998. Best score 1024 bits

Score difference with first non-orthologous sequence - *A. fumigatus*:1024 *A. fischeri*:1024  
afum|EAL92964.1 100.00% afis|EAW21950.1 100.00%  
Bootstrap support for afum|EAL92964.1 as seed ortholog is 100%.  
Bootstrap support for afis|EAW21950.1 as seed ortholog is 100%.

---

Group of orthologs #3999. Best score 1024 bits

Score difference with first non-orthologous sequence - *A. fumigatus*:1024 *A. fischeri*:1024  
afum|EAL89962.2 100.00% afis|EAW25299.1 100.00%  
Bootstrap support for afum|EAL89962.2 as seed ortholog is 100%.  
Bootstrap support for afis|EAW25299.1 as seed ortholog is 100%.

---

Group of orthologs #4000. Best score 1023 bits

Score difference with first non-orthologous sequence - *A. fumigatus*:1023 *A. fischeri*:421  
afum|EAL86472.2 100.00% afis|EAW16945.1 100.00%  
Bootstrap support for afum|EAL86472.2 as seed ortholog is 100%.  
Bootstrap support for afis|EAW16945.1 as seed ortholog is 100%.

---

Group of orthologs #4001. Best score 1023 bits

Score difference with first non-orthologous sequence - *A. fumigatus*:764 *A. fischeri*:587  
afum|EAL86614.1 100.00% afis|EAW17188.1 100.00%

Bootstrap support for afum|EAL86614.1 as seed ortholog is 100%.  
Bootstrap support for afis|EAW17188.1 as seed ortholog is 100%.

---

Group of orthologs #4002. Best score 1023 bits

Score difference with first non-orthologous sequence - *A. fumigatus*:1023 *A. fischeri*:1023

|                 |         |                 |         |
|-----------------|---------|-----------------|---------|
| afum EAL87681.1 | 100.00% | afis EAW18314.1 | 100.00% |
|-----------------|---------|-----------------|---------|

Bootstrap support for afum|EAL87681.1 as seed ortholog is 100%.

Bootstrap support for afis|EAW18314.1 as seed ortholog is 100%.

---

Group of orthologs #4003. Best score 1023 bits

Score difference with first non-orthologous sequence - *A. fumigatus*:1023 *A. fischeri*:1023

|                 |         |                 |         |
|-----------------|---------|-----------------|---------|
| afum EAL87050.1 | 100.00% | afis EAW19445.1 | 100.00% |
|-----------------|---------|-----------------|---------|

Bootstrap support for afum|EAL87050.1 as seed ortholog is 100%.

Bootstrap support for afis|EAW19445.1 as seed ortholog is 100%.

---

Group of orthologs #4004. Best score 1023 bits

Score difference with first non-orthologous sequence - *A. fumigatus*:815 *A. fischeri*:1023

|                 |         |                 |         |
|-----------------|---------|-----------------|---------|
| afum EAL91186.1 | 100.00% | afis EAW17341.1 | 100.00% |
|-----------------|---------|-----------------|---------|

Bootstrap support for afum|EAL91186.1 as seed ortholog is 100%.

Bootstrap support for afis|EAW17341.1 as seed ortholog is 100%.

---

Group of orthologs #4005. Best score 1023 bits

Score difference with first non-orthologous sequence - *A. fumigatus*:1023 *A. fischeri*:1023

|                 |         |                 |         |
|-----------------|---------|-----------------|---------|
| afum EAL87918.2 | 100.00% | afis EAW23548.1 | 100.00% |
|-----------------|---------|-----------------|---------|

Bootstrap support for afum|EAL87918.2 as seed ortholog is 100%.

Bootstrap support for afis|EAW23548.1 as seed ortholog is 100%.

---

Group of orthologs #4006. Best score 1023 bits

Score difference with first non-orthologous sequence - *A. fumigatus*:230 *A. fischeri*:207

|                 |         |                 |         |
|-----------------|---------|-----------------|---------|
| afum EBA27475.1 | 100.00% | afis EAW21838.1 | 100.00% |
|-----------------|---------|-----------------|---------|

Bootstrap support for afum|EBA27475.1 as seed ortholog is 100%.

Bootstrap support for afis|EAW21838.1 as seed ortholog is 100%.

---

Group of orthologs #4007. Best score 1022 bits

Score difference with first non-orthologous sequence - *A. fumigatus*:801 *A. fischeri*:783

|                 |         |                 |         |
|-----------------|---------|-----------------|---------|
| afum EAL84952.1 | 100.00% | afis EAW19970.1 | 100.00% |
|-----------------|---------|-----------------|---------|

Bootstrap support for afum|EAL84952.1 as seed ortholog is 100%.

Bootstrap support for afis|EAW19970.1 as seed ortholog is 100%.

---

Group of orthologs #4008. Best score 1022 bits

Score difference with first non-orthologous sequence - *A. fumigatus*:1022 *A. fischeri*:1022

|                 |         |                 |         |
|-----------------|---------|-----------------|---------|
| afum EAL87711.1 | 100.00% | afis EAW18347.1 | 100.00% |
|-----------------|---------|-----------------|---------|

Bootstrap support for afum|EAL87711.1 as seed ortholog is 100%.

Bootstrap support for afis|EAW18347.1 as seed ortholog is 100%.

---

Group of orthologs #4009. Best score 1022 bits

Score difference with first non-orthologous sequence - *A. fumigatus*:740 *A. fischeri*:879

|                 |         |                 |         |
|-----------------|---------|-----------------|---------|
| afum EAL92049.1 | 100.00% | afis EAW19748.1 | 100.00% |
|-----------------|---------|-----------------|---------|

Bootstrap support for afum|EAL92049.1 as seed ortholog is 100%.

Bootstrap support for afis|EAW19748.1 as seed ortholog is 100%.

---

Group of orthologs #4010. Best score 1022 bits

Score difference with first non-orthologous sequence - *A. fumigatus*:1022 *A. fischeri*:1022

|                 |         |                 |         |
|-----------------|---------|-----------------|---------|
| afum EAL93671.1 | 100.00% | afis EAW18938.1 | 100.00% |
|-----------------|---------|-----------------|---------|

Bootstrap support for afum|EAL93671.1 as seed ortholog is 100%.

Bootstrap support for afis|EAW18938.1 as seed ortholog is 100%.

---

Group of orthologs #4011. Best score 1022 bits

Score difference with first non-orthologous sequence - *A. fumigatus*:1022 *A. fischeri*:845

afum|EBA27258.1 100.00% afis|EAW24508.1 100.00%

Bootstrap support for afum|EBA27258.1 as seed ortholog is 100%.

Bootstrap support for afis|EAW24508.1 as seed ortholog is 100%.

---

Group of orthologs #4012. Best score 1021 bits

Score difference with first non-orthologous sequence - *A. fumigatus*:1021 *A. fischeri*:1021

afum|EAL85179.1 100.00% afis|EAW20059.1 100.00%

afum|EAL87759.1 20.00%

Bootstrap support for afum|EAL85179.1 as seed ortholog is 100%.

Bootstrap support for afis|EAW20059.1 as seed ortholog is 100%.

---

Group of orthologs #4013. Best score 1021 bits

Score difference with first non-orthologous sequence - *A. fumigatus*:1021 *A. fischeri*:1021

afum|EAL86388.1 100.00% afis|EAW16841.1 100.00%

Bootstrap support for afum|EAL86388.1 as seed ortholog is 100%.

Bootstrap support for afis|EAW16841.1 as seed ortholog is 100%.

---

Group of orthologs #4014. Best score 1021 bits

Score difference with first non-orthologous sequence - *A. fumigatus*:1021 *A. fischeri*:1021

afum|EAL85235.1 100.00% afis|EAW20118.1 100.00%

Bootstrap support for afum|EAL85235.1 as seed ortholog is 100%.

Bootstrap support for afis|EAW20118.1 as seed ortholog is 100%.

---

Group of orthologs #4015. Best score 1021 bits

Score difference with first non-orthologous sequence - *A. fumigatus*:1021 *A. fischeri*:1021

afum|EAL87646.1 100.00% afis|EAW18280.1 100.00%

Bootstrap support for afum|EAL87646.1 as seed ortholog is 100%.

Bootstrap support for afis|EAW18280.1 as seed ortholog is 100%.

---

Group of orthologs #4016. Best score 1021 bits

Score difference with first non-orthologous sequence - *A. fumigatus*:1021 *A. fischeri*:1021

afum|EAL87651.1 100.00% afis|EAW18285.1 100.00%

Bootstrap support for afum|EAL87651.1 as seed ortholog is 100%.

Bootstrap support for afis|EAW18285.1 as seed ortholog is 100%.

---

Group of orthologs #4017. Best score 1021 bits

Score difference with first non-orthologous sequence - *A. fumigatus*:1021 *A. fischeri*:1021

afum|EAL87700.1 100.00% afis|EAW18336.1 100.00%

Bootstrap support for afum|EAL87700.1 as seed ortholog is 100%.

Bootstrap support for afis|EAW18336.1 as seed ortholog is 100%.

---

Group of orthologs #4018. Best score 1021 bits

Score difference with first non-orthologous sequence - *A. fumigatus*:1021 *A. fischeri*:1021

afum|EAL91309.1 100.00% afis|EAW17481.1 100.00%

Bootstrap support for afum|EAL91309.1 as seed ortholog is 100%.

Bootstrap support for afis|EAW17481.1 as seed ortholog is 100%.

---

Group of orthologs #4019. Best score 1021 bits

Score difference with first non-orthologous sequence - *A. fumigatus*:1021 *A. fischeri*:1021

afum|EAL91370.1 100.00% afis|EAW17556.1 100.00%

Bootstrap support for afum|EAL91370.1 as seed ortholog is 100%.

Bootstrap support for afis|EAW17556.1 as seed ortholog is 100%.

---

Group of orthologs #4020. Best score 1021 bits

Score difference with first non-orthologous sequence - *A. fumigatus*:1021 *A. fischeri*:1021

afum|EAL93212.1 100.00% afis|EAW18517.1 100.00%

Bootstrap support for afum|EAL93212.1 as seed ortholog is 100%.

Bootstrap support for afis|EAW18517.1 as seed ortholog is 100%.

---

Group of orthologs #4021. Best score 1021 bits

Score difference with first non-orthologous sequence - *A. fumigatus*:1021 *A. fischeri*:1021

afum|EBA27492.1 100.00% afis|EAW18716.1 100.00%

Bootstrap support for afum|EBA27492.1 as seed ortholog is 100%.

Bootstrap support for afis|EAW18716.1 as seed ortholog is 100%.

---

Group of orthologs #4022. Best score 1021 bits

Score difference with first non-orthologous sequence - *A. fumigatus*:1021 *A. fischeri*:1021

afum|EAL90966.1 100.00% afis|EAW22228.1 100.00%

Bootstrap support for afum|EAL90966.1 as seed ortholog is 100%.

Bootstrap support for afis|EAW22228.1 as seed ortholog is 100%.

---

Group of orthologs #4023. Best score 1021 bits

Score difference with first non-orthologous sequence - *A. fumigatus*:1021 *A. fischeri*:1021

afum|EAL90094.1 100.00% afis|EAW25436.1 100.00%

Bootstrap support for afum|EAL90094.1 as seed ortholog is 100%.

Bootstrap support for afis|EAW25436.1 as seed ortholog is 100%.

---

Group of orthologs #4024. Best score 1021 bits

Score difference with first non-orthologous sequence - *A. fumigatus*:1021 *A. fischeri*:1021

afum|EAL90136.2 100.00% afis|EAW25473.1 100.00%

Bootstrap support for afum|EAL90136.2 as seed ortholog is 100%.

Bootstrap support for afis|EAW25473.1 as seed ortholog is 100%.

---

Group of orthologs #4025. Best score 1020 bits

Score difference with first non-orthologous sequence - *A. fumigatus*:1020 *A. fischeri*:1020

afum|EAL91328.2 100.00% afis|EAW17506.1 100.00%

Bootstrap support for afum|EAL91328.2 as seed ortholog is 100%.

Bootstrap support for afis|EAW17506.1 as seed ortholog is 100%.

---

Group of orthologs #4026. Best score 1020 bits

Score difference with first non-orthologous sequence - *A. fumigatus*:1020 *A. fischeri*:1020

afum|EAL91635.1 100.00% afis|EAW17825.1 100.00%

Bootstrap support for afum|EAL91635.1 as seed ortholog is 100%.

Bootstrap support for afis|EAW17825.1 as seed ortholog is 100%.

---

Group of orthologs #4027. Best score 1020 bits

Score difference with first non-orthologous sequence - *A. fumigatus*:1020 *A. fischeri*:1020

afum|EAL87132.1 100.00% afis|EAW23687.1 100.00%

Bootstrap support for afum|EAL87132.1 as seed ortholog is 100%.

Bootstrap support for afis|EAW23687.1 as seed ortholog is 100%.

---

Group of orthologs #4028. Best score 1020 bits

Score difference with first non-orthologous sequence - *A. fumigatus*:1020 *A. fischeri*:1020

afum|EAL90461.1 100.00% afis|EAW22734.1 100.00%

Bootstrap support for afum|EAL90461.1 as seed ortholog is 100%.

Bootstrap support for afis|EAW22734.1 as seed ortholog is 100%.

---

Group of orthologs #4029. Best score 1020 bits

Score difference with first non-orthologous sequence - *A. fumigatus*:741 *A. fischeri*:737

|                 |         |                 |         |
|-----------------|---------|-----------------|---------|
| afum EAL91923.1 | 100.00% | afis EAW24067.1 | 100.00% |
|-----------------|---------|-----------------|---------|

Bootstrap support for afum|EAL91923.1 as seed ortholog is 100%.

Bootstrap support for afis|EAW24067.1 as seed ortholog is 100%.

---

Group of orthologs #4030. Best score 1019 bits

Score difference with first non-orthologous sequence - *A. fumigatus*:1019 *A. fischeri*:1019

|                 |         |                 |         |
|-----------------|---------|-----------------|---------|
| afum EAL91238.1 | 100.00% | afis EAW17400.1 | 100.00% |
|-----------------|---------|-----------------|---------|

Bootstrap support for afum|EAL91238.1 as seed ortholog is 100%.

Bootstrap support for afis|EAW17400.1 as seed ortholog is 100%.

---

Group of orthologs #4031. Best score 1019 bits

Score difference with first non-orthologous sequence - *A. fumigatus*:1019 *A. fischeri*:1019

|                 |         |                 |         |
|-----------------|---------|-----------------|---------|
| afum EAL86186.1 | 100.00% | afis EAW24521.1 | 100.00% |
|-----------------|---------|-----------------|---------|

Bootstrap support for afum|EAL86186.1 as seed ortholog is 100%.

Bootstrap support for afis|EAW24521.1 as seed ortholog is 100%.

---

Group of orthologs #4032. Best score 1019 bits

Score difference with first non-orthologous sequence - *A. fumigatus*:1019 *A. fischeri*:878

|                 |         |                 |         |
|-----------------|---------|-----------------|---------|
| afum EAL93836.1 | 100.00% | afis EAW19104.1 | 100.00% |
|-----------------|---------|-----------------|---------|

Bootstrap support for afum|EAL93836.1 as seed ortholog is 100%.

Bootstrap support for afis|EAW19104.1 as seed ortholog is 100%.

---

Group of orthologs #4033. Best score 1019 bits

Score difference with first non-orthologous sequence - *A. fumigatus*:1019 *A. fischeri*:1019

|                 |         |                 |         |
|-----------------|---------|-----------------|---------|
| afum EAL91094.1 | 100.00% | afis EAW22076.1 | 100.00% |
|-----------------|---------|-----------------|---------|

Bootstrap support for afum|EAL91094.1 as seed ortholog is 100%.

Bootstrap support for afis|EAW22076.1 as seed ortholog is 100%.

---

Group of orthologs #4034. Best score 1019 bits

Score difference with first non-orthologous sequence - *A. fumigatus*:1019 *A. fischeri*:1019

|                 |         |                 |         |
|-----------------|---------|-----------------|---------|
| afum EAL89311.1 | 100.00% | afis EAW24659.1 | 100.00% |
|-----------------|---------|-----------------|---------|

Bootstrap support for afum|EAL89311.1 as seed ortholog is 100%.

Bootstrap support for afis|EAW24659.1 as seed ortholog is 100%.

---

Group of orthologs #4035. Best score 1018 bits

Score difference with first non-orthologous sequence - *A. fumigatus*:766 *A. fischeri*:1018

|                 |         |                 |         |
|-----------------|---------|-----------------|---------|
| afum EAL84213.1 | 100.00% | afis EAW15430.1 | 100.00% |
|-----------------|---------|-----------------|---------|

Bootstrap support for afum|EAL84213.1 as seed ortholog is 100%.

Bootstrap support for afis|EAW15430.1 as seed ortholog is 100%.

---

Group of orthologs #4036. Best score 1018 bits

Score difference with first non-orthologous sequence - *A. fumigatus*:1018 *A. fischeri*:1018

|                 |         |                 |         |
|-----------------|---------|-----------------|---------|
| afum EAL91446.1 | 100.00% | afis EAW17631.1 | 100.00% |
|-----------------|---------|-----------------|---------|

Bootstrap support for afum|EAL91446.1 as seed ortholog is 100%.

Bootstrap support for afis|EAW17631.1 as seed ortholog is 100%.

---

Group of orthologs #4037. Best score 1018 bits

Score difference with first non-orthologous sequence - *A. fumigatus*:1018 *A. fischeri*:1018

|                 |         |                 |         |
|-----------------|---------|-----------------|---------|
| afum EAL91532.1 | 100.00% | afis EAW17717.1 | 100.00% |
|-----------------|---------|-----------------|---------|

Bootstrap support for afum|EAL91532.1 as seed ortholog is 100%.

Bootstrap support for afis|EAW17717.1 as seed ortholog is 100%.

---

Group of orthologs #4038. Best score 1018 bits

Score difference with first non-orthologous sequence - *A. fumigatus*:1018 *A. fischeri*:1018

|                 |         |                 |         |
|-----------------|---------|-----------------|---------|
| afum EAL91711.1 | 100.00% | afis EAW17903.1 | 100.00% |
|-----------------|---------|-----------------|---------|

Bootstrap support for afum|EAL91711.1 as seed ortholog is 100%.

Bootstrap support for afis|EAW17903.1 as seed ortholog is 100%.

---

Group of orthologs #4039. Best score 1018 bits

Score difference with first non-orthologous sequence - *A. fumigatus*:1018 *A. fischeri*:1018

|                 |         |                 |         |
|-----------------|---------|-----------------|---------|
| afum EAL84362.1 | 100.00% | afis EAW25692.1 | 100.00% |
|-----------------|---------|-----------------|---------|

Bootstrap support for afum|EAL84362.1 as seed ortholog is 100%.

Bootstrap support for afis|EAW25692.1 as seed ortholog is 100%.

---

Group of orthologs #4040. Best score 1018 bits

Score difference with first non-orthologous sequence - *A. fumigatus*:1018 *A. fischeri*:1018

|                 |         |                 |         |
|-----------------|---------|-----------------|---------|
| afum EAL90875.1 | 100.00% | afis EAW22315.1 | 100.00% |
|-----------------|---------|-----------------|---------|

Bootstrap support for afum|EAL90875.1 as seed ortholog is 100%.

Bootstrap support for afis|EAW22315.1 as seed ortholog is 100%.

---

Group of orthologs #4041. Best score 1018 bits

Score difference with first non-orthologous sequence - *A. fumigatus*:1018 *A. fischeri*:1018

|                 |         |                 |         |
|-----------------|---------|-----------------|---------|
| afum EAL90671.1 | 100.00% | afis EAW22523.1 | 100.00% |
|-----------------|---------|-----------------|---------|

Bootstrap support for afum|EAL90671.1 as seed ortholog is 100%.

Bootstrap support for afis|EAW22523.1 as seed ortholog is 100%.

---

Group of orthologs #4042. Best score 1016 bits

Score difference with first non-orthologous sequence - *A. fumigatus*:1016 *A. fischeri*:1016

|                 |         |                 |         |
|-----------------|---------|-----------------|---------|
| afum EAL85789.1 | 100.00% | afis EAW15541.1 | 100.00% |
|-----------------|---------|-----------------|---------|

Bootstrap support for afum|EAL85789.1 as seed ortholog is 100%.

Bootstrap support for afis|EAW15541.1 as seed ortholog is 100%.

---

Group of orthologs #4043. Best score 1016 bits

Score difference with first non-orthologous sequence - *A. fumigatus*:1016 *A. fischeri*:1016

|                 |         |                 |         |
|-----------------|---------|-----------------|---------|
| afum EAL89059.1 | 100.00% | afis EAW16463.1 | 100.00% |
|-----------------|---------|-----------------|---------|

Bootstrap support for afum|EAL89059.1 as seed ortholog is 100%.

Bootstrap support for afis|EAW16463.1 as seed ortholog is 100%.

---

Group of orthologs #4044. Best score 1016 bits

Score difference with first non-orthologous sequence - *A. fumigatus*:1016 *A. fischeri*:1016

|                 |         |                 |         |
|-----------------|---------|-----------------|---------|
| afum EAL86882.1 | 100.00% | afis EAW19640.1 | 100.00% |
|-----------------|---------|-----------------|---------|

Bootstrap support for afum|EAL86882.1 as seed ortholog is 100%.

Bootstrap support for afis|EAW19640.1 as seed ortholog is 100%.

---

Group of orthologs #4045. Best score 1015 bits

Score difference with first non-orthologous sequence - *A. fumigatus*:1015 *A. fischeri*:1015

|                 |         |                 |         |
|-----------------|---------|-----------------|---------|
| afum EAL85723.1 | 100.00% | afis EAW15612.1 | 100.00% |
|-----------------|---------|-----------------|---------|

Bootstrap support for afum|EAL85723.1 as seed ortholog is 100%.

Bootstrap support for afis|EAW15612.1 as seed ortholog is 100%.

---

Group of orthologs #4046. Best score 1015 bits

Score difference with first non-orthologous sequence - *A. fumigatus*:1015 *A. fischeri*:877

|                 |         |                 |         |
|-----------------|---------|-----------------|---------|
| afum EAL88819.2 | 100.00% | afis EAW16188.1 | 100.00% |
|-----------------|---------|-----------------|---------|

Bootstrap support for afum|EAL88819.2 as seed ortholog is 100%.

Bootstrap support for afis|EAW16188.1 as seed ortholog is 100%.

---

Group of orthologs #4047. Best score 1015 bits

Score difference with first non-orthologous sequence - *A. fumigatus*:816 *A. fischeri*:1015

|                 |         |                 |         |
|-----------------|---------|-----------------|---------|
| afum EAL91340.1 | 100.00% | afis EAW17525.1 | 100.00% |
|-----------------|---------|-----------------|---------|

Bootstrap support for afum|EAL91340.1 as seed ortholog is 100%.

Bootstrap support for afis|EAW17525.1 as seed ortholog is 100%.

---



Group of orthologs #4048. Best score 1015 bits

Score difference with first non-orthologous sequence - *A. fumigatus*:1015 *A. fischeri*:1015

afum|EAL86030.1 100.00% afis|EAW24360.1 100.00%

Bootstrap support for afum|EAL86030.1 as seed ortholog is 100%.

Bootstrap support for afis|EAW24360.1 as seed ortholog is 100%.

---

Group of orthologs #4049. Best score 1015 bits

Score difference with first non-orthologous sequence - *A. fumigatus*:944 *A. fischeri*:861

afum|EAL87115.1 100.00% afis|EAW23670.1 100.00%

Bootstrap support for afum|EAL87115.1 as seed ortholog is 100%.

Bootstrap support for afis|EAW23670.1 as seed ortholog is 100%.

---

Group of orthologs #4050. Best score 1015 bits

Score difference with first non-orthologous sequence - *A. fumigatus*:1015 *A. fischeri*:1015

afum|EAL88405.1 100.00% afis|EAW23074.1 100.00%

Bootstrap support for afum|EAL88405.1 as seed ortholog is 100%.

Bootstrap support for afis|EAW23074.1 as seed ortholog is 100%.

---

Group of orthologs #4051. Best score 1015 bits

Score difference with first non-orthologous sequence - *A. fumigatus*:1015 *A. fischeri*:1015

afum|EAL88381.2 100.00% afis|EAW23097.1 100.00%

Bootstrap support for afum|EAL88381.2 as seed ortholog is 100%.

Bootstrap support for afis|EAW23097.1 as seed ortholog is 100%.

---

Group of orthologs #4052. Best score 1015 bits

Score difference with first non-orthologous sequence - *A. fumigatus*:1015 *A. fischeri*:1015

afum|EAL90674.1 100.00% afis|EAW22519.1 100.00%

Bootstrap support for afum|EAL90674.1 as seed ortholog is 100%.

Bootstrap support for afis|EAW22519.1 as seed ortholog is 100%.

---

Group of orthologs #4053. Best score 1015 bits

Score difference with first non-orthologous sequence - *A. fumigatus*:1015 *A. fischeri*:815

afum|EAL94084.2 100.00% afis|EAW19365.1 100.00%

Bootstrap support for afum|EAL94084.2 as seed ortholog is 100%.

Bootstrap support for afis|EAW19365.1 as seed ortholog is 100%.

---

Group of orthologs #4054. Best score 1014 bits

Score difference with first non-orthologous sequence - *A. fumigatus*:1014 *A. fischeri*:1014

afum|EAL86552.2 100.00% afis|EAW17055.1 100.00%

Bootstrap support for afum|EAL86552.2 as seed ortholog is 100%.

Bootstrap support for afis|EAW17055.1 as seed ortholog is 100%.

---

Group of orthologs #4055. Best score 1014 bits

Score difference with first non-orthologous sequence - *A. fumigatus*:1014 *A. fischeri*:1014

afum|EAL85125.1 100.00% afis|EAW19774.1 100.00%

Bootstrap support for afum|EAL85125.1 as seed ortholog is 100%.

Bootstrap support for afis|EAW19774.1 as seed ortholog is 100%.

---

Group of orthologs #4056. Best score 1014 bits

Score difference with first non-orthologous sequence - *A. fumigatus*:1014 *A. fischeri*:1014

afum|EAL87982.1 100.00% afis|EAW23482.1 100.00%

Bootstrap support for afum|EAL87982.1 as seed ortholog is 100%.

Bootstrap support for afis|EAW23482.1 as seed ortholog is 100%.

---

Group of orthologs #4057. Best score 1014 bits

Score difference with first non-orthologous sequence - *A. fumigatus*:1014 *A. fischeri*:1014

|                 |         |                 |         |
|-----------------|---------|-----------------|---------|
| afum EAL88007.2 | 100.00% | afis EAW23459.1 | 100.00% |
|-----------------|---------|-----------------|---------|

Bootstrap support for afum|EAL88007.2 as seed ortholog is 100%.

Bootstrap support for afis|EAW23459.1 as seed ortholog is 100%.

---

Group of orthologs #4058. Best score 1014 bits

Score difference with first non-orthologous sequence - *A. fumigatus*:1014 *A. fischeri*:1014

|                 |         |                 |         |
|-----------------|---------|-----------------|---------|
| afum EAL88085.1 | 100.00% | afis EAW23386.1 | 100.00% |
|-----------------|---------|-----------------|---------|

Bootstrap support for afum|EAL88085.1 as seed ortholog is 100%.

Bootstrap support for afis|EAW23386.1 as seed ortholog is 100%.

---

Group of orthologs #4059. Best score 1014 bits

Score difference with first non-orthologous sequence - *A. fumigatus*:1014 *A. fischeri*:1014

|                 |         |                 |         |
|-----------------|---------|-----------------|---------|
| afum EAL93651.2 | 100.00% | afis EAW18920.1 | 100.00% |
|-----------------|---------|-----------------|---------|

Bootstrap support for afum|EAL93651.2 as seed ortholog is 100%.

Bootstrap support for afis|EAW18920.1 as seed ortholog is 100%.

---

Group of orthologs #4060. Best score 1013 bits

Score difference with first non-orthologous sequence - *A. fumigatus*:1013 *A. fischeri*:1013

|                 |         |                 |         |
|-----------------|---------|-----------------|---------|
| afum EAL85906.1 | 100.00% | afis EAW24238.1 | 100.00% |
|-----------------|---------|-----------------|---------|

Bootstrap support for afum|EAL85906.1 as seed ortholog is 100%.

Bootstrap support for afis|EAW24238.1 as seed ortholog is 100%.

---

Group of orthologs #4061. Best score 1013 bits

Score difference with first non-orthologous sequence - *A. fumigatus*:1013 *A. fischeri*:1013

|                 |         |                 |         |
|-----------------|---------|-----------------|---------|
| afum EAL87357.1 | 100.00% | afis EAW23932.1 | 100.00% |
|-----------------|---------|-----------------|---------|

Bootstrap support for afum|EAL87357.1 as seed ortholog is 100%.

Bootstrap support for afis|EAW23932.1 as seed ortholog is 100%.

---

Group of orthologs #4062. Best score 1013 bits

Score difference with first non-orthologous sequence - *A. fumigatus*:1013 *A. fischeri*:1013

|                 |         |                 |         |
|-----------------|---------|-----------------|---------|
| afum EAL88186.1 | 100.00% | afis EAW23293.1 | 100.00% |
|-----------------|---------|-----------------|---------|

Bootstrap support for afum|EAL88186.1 as seed ortholog is 100%.

Bootstrap support for afis|EAW23293.1 as seed ortholog is 100%.

---

Group of orthologs #4063. Best score 1013 bits

Score difference with first non-orthologous sequence - *A. fumigatus*:1013 *A. fischeri*:1013

|                 |         |                 |         |
|-----------------|---------|-----------------|---------|
| afum EAL88215.1 | 100.00% | afis EAW23265.1 | 100.00% |
|-----------------|---------|-----------------|---------|

Bootstrap support for afum|EAL88215.1 as seed ortholog is 100%.

Bootstrap support for afis|EAW23265.1 as seed ortholog is 100%.

---

Group of orthologs #4064. Best score 1013 bits

Score difference with first non-orthologous sequence - *A. fumigatus*:1013 *A. fischeri*:1013

|                 |         |                 |         |
|-----------------|---------|-----------------|---------|
| afum EAL92531.1 | 100.00% | afis EAW21511.1 | 100.00% |
|-----------------|---------|-----------------|---------|

Bootstrap support for afum|EAL92531.1 as seed ortholog is 100%.

Bootstrap support for afis|EAW21511.1 as seed ortholog is 100%.

---

Group of orthologs #4065. Best score 1013 bits

Score difference with first non-orthologous sequence - *A. fumigatus*:1013 *A. fischeri*:1013

|                 |         |                 |         |
|-----------------|---------|-----------------|---------|
| afum EAL92006.1 | 100.00% | afis EAW24151.1 | 100.00% |
|-----------------|---------|-----------------|---------|

Bootstrap support for afum|EAL92006.1 as seed ortholog is 100%.

Bootstrap support for afis|EAW24151.1 as seed ortholog is 100%.

---

Group of orthologs #4066. Best score 1012 bits

Score difference with first non-orthologous sequence - *A. fumigatus*:1012 *A. fischeri*:1012

|                 |         |                 |         |
|-----------------|---------|-----------------|---------|
| afum EAL85543.1 | 100.00% | afis EAW15808.1 | 100.00% |
|-----------------|---------|-----------------|---------|

Bootstrap support for afum|EAL85543.1 as seed ortholog is 100%.

Bootstrap support for afis|EAW15808.1 as seed ortholog is 100%.

---

Group of orthologs #4067. Best score 1012 bits

Score difference with first non-orthologous sequence - *A. fumigatus*:1012 *A. fischeri*:1012

|                 |         |                 |         |
|-----------------|---------|-----------------|---------|
| afum EAL89198.1 | 100.00% | afis EAW16602.1 | 100.00% |
|-----------------|---------|-----------------|---------|

Bootstrap support for afum|EAL89198.1 as seed ortholog is 100%.

Bootstrap support for afis|EAW16602.1 as seed ortholog is 100%.

---

Group of orthologs #4068. Best score 1012 bits

Score difference with first non-orthologous sequence - *A. fumigatus*:1012 *A. fischeri*:942

|                 |         |                 |         |
|-----------------|---------|-----------------|---------|
| afum EAL91706.1 | 100.00% | afis EAW17898.1 | 100.00% |
|-----------------|---------|-----------------|---------|

Bootstrap support for afum|EAL91706.1 as seed ortholog is 100%.

Bootstrap support for afis|EAW17898.1 as seed ortholog is 100%.

---

Group of orthologs #4069. Best score 1012 bits

Score difference with first non-orthologous sequence - *A. fumigatus*:1012 *A. fischeri*:664

|                 |         |                 |         |
|-----------------|---------|-----------------|---------|
| afum EAL86066.1 | 100.00% | afis EAW24394.1 | 100.00% |
|-----------------|---------|-----------------|---------|

Bootstrap support for afum|EAL86066.1 as seed ortholog is 100%.

Bootstrap support for afis|EAW24394.1 as seed ortholog is 100%.

---

Group of orthologs #4070. Best score 1012 bits

Score difference with first non-orthologous sequence - *A. fumigatus*:1012 *A. fischeri*:1012

|                 |         |                 |         |
|-----------------|---------|-----------------|---------|
| afum EAL91016.1 | 100.00% | afis EAW22173.1 | 100.00% |
|-----------------|---------|-----------------|---------|

Bootstrap support for afum|EAL91016.1 as seed ortholog is 100%.

Bootstrap support for afis|EAW22173.1 as seed ortholog is 100%.

---

Group of orthologs #4071. Best score 1012 bits

Score difference with first non-orthologous sequence - *A. fumigatus*:1012 *A. fischeri*:1012

|                 |         |                 |         |
|-----------------|---------|-----------------|---------|
| afum EAL90518.1 | 100.00% | afis EAW22674.1 | 100.00% |
|-----------------|---------|-----------------|---------|

Bootstrap support for afum|EAL90518.1 as seed ortholog is 100%.

Bootstrap support for afis|EAW22674.1 as seed ortholog is 100%.

---

Group of orthologs #4072. Best score 1011 bits

Score difference with first non-orthologous sequence - *A. fumigatus*:1011 *A. fischeri*:1011

|                 |         |                 |         |
|-----------------|---------|-----------------|---------|
| afum EAL84974.1 | 100.00% | afis EAW19936.1 | 100.00% |
|-----------------|---------|-----------------|---------|

Bootstrap support for afum|EAL84974.1 as seed ortholog is 100%.

Bootstrap support for afis|EAW19936.1 as seed ortholog is 100%.

---

Group of orthologs #4073. Best score 1011 bits

Score difference with first non-orthologous sequence - *A. fumigatus*:1011 *A. fischeri*:1011

|                 |         |                 |         |
|-----------------|---------|-----------------|---------|
| afum EAL87486.1 | 100.00% | afis EAW18129.1 | 100.00% |
|-----------------|---------|-----------------|---------|

Bootstrap support for afum|EAL87486.1 as seed ortholog is 100%.

Bootstrap support for afis|EAW18129.1 as seed ortholog is 100%.

---

Group of orthologs #4074. Best score 1011 bits

Score difference with first non-orthologous sequence - *A. fumigatus*:1011 *A. fischeri*:1011

|                 |         |                 |         |
|-----------------|---------|-----------------|---------|
| afum EAL92408.1 | 100.00% | afis EAW21394.1 | 100.00% |
|-----------------|---------|-----------------|---------|

Bootstrap support for afum|EAL92408.1 as seed ortholog is 100%.

Bootstrap support for afis|EAW21394.1 as seed ortholog is 100%.

---

Group of orthologs #4075. Best score 1010 bits

Score difference with first non-orthologous sequence - *A. fumigatus*:1010 *A. fischeri*:1010

|                 |         |                 |         |
|-----------------|---------|-----------------|---------|
| afum EAL88317.2 | 100.00% | afis EAW23167.1 | 100.00% |
|-----------------|---------|-----------------|---------|

Bootstrap support for afum|EAL88317.2 as seed ortholog is 100%.

Bootstrap support for afis|EAW23167.1 as seed ortholog is 100%.

---

Group of orthologs #4076. Best score 1010 bits

Score difference with first non-orthologous sequence - *A. fumigatus*:1010 *A. fischeri*:1010

afum|EAL88136.2 100.00% afis|EAW23342.1 100.00%

Bootstrap support for afum|EAL88136.2 as seed ortholog is 100%.

Bootstrap support for afis|EAW23342.1 as seed ortholog is 100%.

---

Group of orthologs #4077. Best score 1010 bits

Score difference with first non-orthologous sequence - *A. fumigatus*:1010 *A. fischeri*:1010

afum|EAL92403.2 100.00% afis|EAW21388.1 100.00%

Bootstrap support for afum|EAL92403.2 as seed ortholog is 100%.

Bootstrap support for afis|EAW21388.1 as seed ortholog is 100%.

---

Group of orthologs #4078. Best score 1009 bits

Score difference with first non-orthologous sequence - *A. fumigatus*:1009 *A. fischeri*:1009

afum|EAL87866.1 100.00% afis|EAW23601.1 100.00%

Bootstrap support for afum|EAL87866.1 as seed ortholog is 100%.

Bootstrap support for afis|EAW23601.1 as seed ortholog is 100%.

---

Group of orthologs #4079. Best score 1009 bits

Score difference with first non-orthologous sequence - *A. fumigatus*:1009 *A. fischeri*:1009

afum|EAL93969.1 100.00% afis|EAW19240.1 100.00%

Bootstrap support for afum|EAL93969.1 as seed ortholog is 100%.

Bootstrap support for afis|EAW19240.1 as seed ortholog is 100%.

---

Group of orthologs #4080. Best score 1009 bits

Score difference with first non-orthologous sequence - *A. fumigatus*:1009 *A. fischeri*:1009

afum|EAL90599.1 100.00% afis|EAW22599.1 100.00%

Bootstrap support for afum|EAL90599.1 as seed ortholog is 100%.

Bootstrap support for afis|EAW22599.1 as seed ortholog is 100%.

---

Group of orthologs #4081. Best score 1009 bits

Score difference with first non-orthologous sequence - *A. fumigatus*:1009 *A. fischeri*:1009

afum|EAL90452.1 100.00% afis|EAW22744.1 100.00%

Bootstrap support for afum|EAL90452.1 as seed ortholog is 100%.

Bootstrap support for afis|EAW22744.1 as seed ortholog is 100%.

---

Group of orthologs #4082. Best score 1008 bits

Score difference with first non-orthologous sequence - *A. fumigatus*:1008 *A. fischeri*:1008

afum|EAL85067.1 100.00% afis|EAW19825.1 100.00%

Bootstrap support for afum|EAL85067.1 as seed ortholog is 100%.

Bootstrap support for afis|EAW19825.1 as seed ortholog is 100%.

---

Group of orthologs #4083. Best score 1008 bits

Score difference with first non-orthologous sequence - *A. fumigatus*:1008 *A. fischeri*:1008

afum|EAL89256.1 100.00% afis|EAW16652.1 100.00%

Bootstrap support for afum|EAL89256.1 as seed ortholog is 100%.

Bootstrap support for afis|EAW16652.1 as seed ortholog is 100%.

---

Group of orthologs #4084. Best score 1008 bits

Score difference with first non-orthologous sequence - *A. fumigatus*:1008 *A. fischeri*:925

afum|EAL91147.1 100.00% afis|EAW17312.1 100.00%

Bootstrap support for afum|EAL91147.1 as seed ortholog is 100%.

Bootstrap support for afis|EAW17312.1 as seed ortholog is 100%.

---

Group of orthologs #4085. Best score 1008 bits

Score difference with first non-orthologous sequence - *A. fumigatus*:1008 *A. fischeri*:1008

|                 |         |                 |         |
|-----------------|---------|-----------------|---------|
| afum EAL93919.1 | 100.00% | afis EAW19188.1 | 100.00% |
|-----------------|---------|-----------------|---------|

Bootstrap support for afum|EAL93919.1 as seed ortholog is 100%.

Bootstrap support for afis|EAW19188.1 as seed ortholog is 100%.

---

Group of orthologs #4086. Best score 1008 bits

Score difference with first non-orthologous sequence - *A. fumigatus*:1008 *A. fischeri*:516

|                 |         |                 |         |
|-----------------|---------|-----------------|---------|
| afum EAL89345.1 | 100.00% | afis EAW24703.1 | 100.00% |
|-----------------|---------|-----------------|---------|

Bootstrap support for afum|EAL89345.1 as seed ortholog is 100%.

Bootstrap support for afis|EAW24703.1 as seed ortholog is 100%.

---

Group of orthologs #4087. Best score 1007 bits

Score difference with first non-orthologous sequence - *A. fumigatus*:1007 *A. fischeri*:641

|                 |         |                 |         |
|-----------------|---------|-----------------|---------|
| afum EAL85790.1 | 100.00% | afis EAW15540.1 | 100.00% |
|-----------------|---------|-----------------|---------|

Bootstrap support for afum|EAL85790.1 as seed ortholog is 100%.

Bootstrap support for afis|EAW15540.1 as seed ortholog is 100%.

---

Group of orthologs #4088. Best score 1007 bits

Score difference with first non-orthologous sequence - *A. fumigatus*:713 *A. fischeri*:788

|                 |         |                 |         |
|-----------------|---------|-----------------|---------|
| afum EAL86352.1 | 100.00% | afis EAW16781.1 | 100.00% |
|-----------------|---------|-----------------|---------|

Bootstrap support for afum|EAL86352.1 as seed ortholog is 100%.

Bootstrap support for afis|EAW16781.1 as seed ortholog is 100%.

---

Group of orthologs #4089. Best score 1007 bits

Score difference with first non-orthologous sequence - *A. fumigatus*:1007 *A. fischeri*:1007

|                 |         |                 |         |
|-----------------|---------|-----------------|---------|
| afum EAL88742.1 | 100.00% | afis EAW16111.1 | 100.00% |
|-----------------|---------|-----------------|---------|

Bootstrap support for afum|EAL88742.1 as seed ortholog is 100%.

Bootstrap support for afis|EAW16111.1 as seed ortholog is 100%.

---

Group of orthologs #4090. Best score 1007 bits

Score difference with first non-orthologous sequence - *A. fumigatus*:1007 *A. fischeri*:1007

|                 |         |                 |         |
|-----------------|---------|-----------------|---------|
| afum EAL84707.1 | 100.00% | afis EAW20927.1 | 100.00% |
|-----------------|---------|-----------------|---------|

Bootstrap support for afum|EAL84707.1 as seed ortholog is 100%.

Bootstrap support for afis|EAW20927.1 as seed ortholog is 100%.

---

Group of orthologs #4091. Best score 1007 bits

Score difference with first non-orthologous sequence - *A. fumigatus*:1007 *A. fischeri*:1007

|                 |         |                 |         |
|-----------------|---------|-----------------|---------|
| afum EAL87032.1 | 100.00% | afis EAW19464.1 | 100.00% |
|-----------------|---------|-----------------|---------|

Bootstrap support for afum|EAL87032.1 as seed ortholog is 100%.

Bootstrap support for afis|EAW19464.1 as seed ortholog is 100%.

---

Group of orthologs #4092. Best score 1007 bits

Score difference with first non-orthologous sequence - *A. fumigatus*:1007 *A. fischeri*:1007

|                 |         |                 |         |
|-----------------|---------|-----------------|---------|
| afum EAL87271.1 | 100.00% | afis EAW23840.1 | 100.00% |
|-----------------|---------|-----------------|---------|

Bootstrap support for afum|EAL87271.1 as seed ortholog is 100%.

Bootstrap support for afis|EAW23840.1 as seed ortholog is 100%.

---

Group of orthologs #4093. Best score 1007 bits

Score difference with first non-orthologous sequence - *A. fumigatus*:597 *A. fischeri*:550

|                 |         |                 |         |
|-----------------|---------|-----------------|---------|
| afum EAL93930.1 | 100.00% | afis EAW19198.1 | 100.00% |
|-----------------|---------|-----------------|---------|

Bootstrap support for afum|EAL93930.1 as seed ortholog is 100%.

Bootstrap support for afis|EAW19198.1 as seed ortholog is 100%.

---

Group of orthologs #4094. Best score 1006 bits

Score difference with first non-orthologous sequence - *A. fumigatus*:1006 *A. fischeri*:1006

|                 |         |                 |         |
|-----------------|---------|-----------------|---------|
| afum EAL86355.1 | 100.00% | afis EAW16785.1 | 100.00% |
|-----------------|---------|-----------------|---------|

Bootstrap support for afum|EAL86355.1 as seed ortholog is 100%.

Bootstrap support for afis|EAW16785.1 as seed ortholog is 100%.

---

Group of orthologs #4095. Best score 1006 bits

Score difference with first non-orthologous sequence - *A. fumigatus*:1006 *A. fischeri*:1006

|                 |         |                 |         |
|-----------------|---------|-----------------|---------|
| afum EAL85159.1 | 100.00% | afis EAW20038.1 | 100.00% |
|-----------------|---------|-----------------|---------|

Bootstrap support for afum|EAL85159.1 as seed ortholog is 100%.

Bootstrap support for afis|EAW20038.1 as seed ortholog is 100%.

---

Group of orthologs #4096. Best score 1006 bits

Score difference with first non-orthologous sequence - *A. fumigatus*:1006 *A. fischeri*:1006

|                 |         |                 |         |
|-----------------|---------|-----------------|---------|
| afum EAL87666.1 | 100.00% | afis EAW18300.1 | 100.00% |
|-----------------|---------|-----------------|---------|

Bootstrap support for afum|EAL87666.1 as seed ortholog is 100%.

Bootstrap support for afis|EAW18300.1 as seed ortholog is 100%.

---

Group of orthologs #4097. Best score 1006 bits

Score difference with first non-orthologous sequence - *A. fumigatus*:1006 *A. fischeri*:1006

|                 |         |                 |         |
|-----------------|---------|-----------------|---------|
| afum EAL86820.1 | 100.00% | afis EAW19706.1 | 100.00% |
|-----------------|---------|-----------------|---------|

Bootstrap support for afum|EAL86820.1 as seed ortholog is 100%.

Bootstrap support for afis|EAW19706.1 as seed ortholog is 100%.

---

Group of orthologs #4098. Best score 1006 bits

Score difference with first non-orthologous sequence - *A. fumigatus*:1006 *A. fischeri*:1006

|                 |         |                 |         |
|-----------------|---------|-----------------|---------|
| afum EBA27244.1 | 100.00% | afis EAW15522.1 | 100.00% |
|-----------------|---------|-----------------|---------|

Bootstrap support for afum|EBA27244.1 as seed ortholog is 100%.

Bootstrap support for afis|EAW15522.1 as seed ortholog is 100%.

---

Group of orthologs #4099. Best score 1006 bits

Score difference with first non-orthologous sequence - *A. fumigatus*:1006 *A. fischeri*:1006

|                 |         |                 |         |
|-----------------|---------|-----------------|---------|
| afum EAL91777.1 | 100.00% | afis EAW17968.1 | 100.00% |
|-----------------|---------|-----------------|---------|

Bootstrap support for afum|EAL91777.1 as seed ortholog is 100%.

Bootstrap support for afis|EAW17968.1 as seed ortholog is 100%.

---

Group of orthologs #4100. Best score 1006 bits

Score difference with first non-orthologous sequence - *A. fumigatus*:1006 *A. fischeri*:895

|                 |         |                 |         |
|-----------------|---------|-----------------|---------|
| afum EAL86040.1 | 100.00% | afis EAW24368.1 | 100.00% |
|-----------------|---------|-----------------|---------|

Bootstrap support for afum|EAL86040.1 as seed ortholog is 100%.

Bootstrap support for afis|EAW24368.1 as seed ortholog is 100%.

---

Group of orthologs #4101. Best score 1006 bits

Score difference with first non-orthologous sequence - *A. fumigatus*:1006 *A. fischeri*:1006

|                 |         |                 |         |
|-----------------|---------|-----------------|---------|
| afum EBA27506.1 | 100.00% | afis EAW19158.1 | 100.00% |
|-----------------|---------|-----------------|---------|

Bootstrap support for afum|EBA27506.1 as seed ortholog is 100%.

Bootstrap support for afis|EAW19158.1 as seed ortholog is 100%.

---

Group of orthologs #4102. Best score 1006 bits

Score difference with first non-orthologous sequence - *A. fumigatus*:1006 *A. fischeri*:1006

|                 |         |                 |         |
|-----------------|---------|-----------------|---------|
| afum EAL89890.2 | 100.00% | afis EAW25229.1 | 100.00% |
|-----------------|---------|-----------------|---------|

Bootstrap support for afum|EAL89890.2 as seed ortholog is 100%.

Bootstrap support for afis|EAW25229.1 as seed ortholog is 100%.

---

Group of orthologs #4103. Best score 1005 bits

Score difference with first non-orthologous sequence - *A. fumigatus*:773 *A. fischeri*:566

|                 |         |                 |         |
|-----------------|---------|-----------------|---------|
| afum EAL94033.1 | 100.00% | afis EAW19316.1 | 100.00% |
|-----------------|---------|-----------------|---------|

Bootstrap support for afum|EAL94033.1 as seed ortholog is 100%.

Bootstrap support for afis|EAW19316.1 as seed ortholog is 100%.

---

Group of orthologs #4104. Best score 1005 bits

Score difference with first non-orthologous sequence - *A. fumigatus*:1005 *A. fischeri*:1005

afum|EAL90307.1 100.00% afis|EAW22891.1 100.00%

Bootstrap support for afum|EAL90307.1 as seed ortholog is 100%.

Bootstrap support for afis|EAW22891.1 as seed ortholog is 100%.

---

Group of orthologs #4105. Best score 1005 bits

Score difference with first non-orthologous sequence - *A. fumigatus*:665 *A. fischeri*:1005

afum|EAL90083.1 100.00% afis|EAW25424.1 100.00%

Bootstrap support for afum|EAL90083.1 as seed ortholog is 100%.

Bootstrap support for afis|EAW25424.1 as seed ortholog is 100%.

---

Group of orthologs #4106. Best score 1004 bits

Score difference with first non-orthologous sequence - *A. fumigatus*:1004 *A. fischeri*:1004

afum|EAL85712.1 100.00% afis|EAW15622.1 100.00%

Bootstrap support for afum|EAL85712.1 as seed ortholog is 100%.

Bootstrap support for afis|EAW15622.1 as seed ortholog is 100%.

---

Group of orthologs #4107. Best score 1004 bits

Score difference with first non-orthologous sequence - *A. fumigatus*:1004 *A. fischeri*:1004

afum|EAL87697.1 100.00% afis|EAW18332.1 100.00%

Bootstrap support for afum|EAL87697.1 as seed ortholog is 100%.

Bootstrap support for afis|EAW18332.1 as seed ortholog is 100%.

---

Group of orthologs #4108. Best score 1004 bits

Score difference with first non-orthologous sequence - *A. fumigatus*:1004 *A. fischeri*:1004

afum|EAL87210.1 100.00% afis|EAW23776.1 100.00%

Bootstrap support for afum|EAL87210.1 as seed ortholog is 100%.

Bootstrap support for afis|EAW23776.1 as seed ortholog is 100%.

---

Group of orthologs #4109. Best score 1004 bits

Score difference with first non-orthologous sequence - *A. fumigatus*:1004 *A. fischeri*:1004

afum|EAL93525.1 100.00% afis|EAW18790.1 100.00%

Bootstrap support for afum|EAL93525.1 as seed ortholog is 100%.

Bootstrap support for afis|EAW18790.1 as seed ortholog is 100%.

---

Group of orthologs #4110. Best score 1004 bits

Score difference with first non-orthologous sequence - *A. fumigatus*:1004 *A. fischeri*:1004

afum|EAL89805.1 100.00% afis|EAW25134.1 100.00%

Bootstrap support for afum|EAL89805.1 as seed ortholog is 100%.

Bootstrap support for afis|EAW25134.1 as seed ortholog is 100%.

---

Group of orthologs #4111. Best score 1003 bits

Score difference with first non-orthologous sequence - *A. fumigatus*:909 *A. fischeri*:1003

afum|EAL85408.1 100.00% afis|EAW20274.1 100.00%

Bootstrap support for afum|EAL85408.1 as seed ortholog is 100%.

Bootstrap support for afis|EAW20274.1 as seed ortholog is 100%.

---

Group of orthologs #4112. Best score 1003 bits

Score difference with first non-orthologous sequence - *A. fumigatus*:792 *A. fischeri*:1003

afum|EAL91657.1 100.00% afis|EAW17848.1 100.00%

Bootstrap support for afum|EAL91657.1 as seed ortholog is 100%.

Bootstrap support for afis|EAW17848.1 as seed ortholog is 100%.

---

Group of orthologs #4113. Best score 1003 bits

Score difference with first non-orthologous sequence - *A. fumigatus*:1003 *A. fischeri*:1003

|                 |         |                 |         |
|-----------------|---------|-----------------|---------|
| afum EAL87927.1 | 100.00% | afis EAW23539.1 | 100.00% |
|-----------------|---------|-----------------|---------|

Bootstrap support for afum|EAL87927.1 as seed ortholog is 100%.

Bootstrap support for afis|EAW23539.1 as seed ortholog is 100%.

---

Group of orthologs #4114. Best score 1003 bits

Score difference with first non-orthologous sequence - *A. fumigatus*:1003 *A. fischeri*:1003

|                 |         |                 |         |
|-----------------|---------|-----------------|---------|
| afum EAL91961.1 | 100.00% | afis EAW24107.1 | 100.00% |
|-----------------|---------|-----------------|---------|

Bootstrap support for afum|EAL91961.1 as seed ortholog is 100%.

Bootstrap support for afis|EAW24107.1 as seed ortholog is 100%.

---

Group of orthologs #4115. Best score 1002 bits

Score difference with first non-orthologous sequence - *A. fumigatus*:1002 *A. fischeri*:1002

|                 |         |                 |         |
|-----------------|---------|-----------------|---------|
| afum EAL86689.1 | 100.00% | afis EAW17272.1 | 100.00% |
|-----------------|---------|-----------------|---------|

Bootstrap support for afum|EAL86689.1 as seed ortholog is 100%.

Bootstrap support for afis|EAW17272.1 as seed ortholog is 100%.

---

Group of orthologs #4116. Best score 1002 bits

Score difference with first non-orthologous sequence - *A. fumigatus*:1002 *A. fischeri*:1002

|                 |         |                 |         |
|-----------------|---------|-----------------|---------|
| afum EAL84548.1 | 100.00% | afis EAW20508.1 | 100.00% |
|-----------------|---------|-----------------|---------|

Bootstrap support for afum|EAL84548.1 as seed ortholog is 100%.

Bootstrap support for afis|EAW20508.1 as seed ortholog is 100%.

---

Group of orthologs #4117. Best score 1002 bits

Score difference with first non-orthologous sequence - *A. fumigatus*:1002 *A. fischeri*:1002

|                 |         |                 |         |
|-----------------|---------|-----------------|---------|
| afum EAL84753.1 | 100.00% | afis EAW20879.1 | 100.00% |
|-----------------|---------|-----------------|---------|

Bootstrap support for afum|EAL84753.1 as seed ortholog is 100%.

Bootstrap support for afis|EAW20879.1 as seed ortholog is 100%.

---

Group of orthologs #4118. Best score 1002 bits

Score difference with first non-orthologous sequence - *A. fumigatus*:1002 *A. fischeri*:1002

|                 |         |                 |         |
|-----------------|---------|-----------------|---------|
| afum EAL93994.1 | 100.00% | afis EAW19267.1 | 100.00% |
|-----------------|---------|-----------------|---------|

Bootstrap support for afum|EAL93994.1 as seed ortholog is 100%.

Bootstrap support for afis|EAW19267.1 as seed ortholog is 100%.

---

Group of orthologs #4119. Best score 1002 bits

Score difference with first non-orthologous sequence - *A. fumigatus*:1002 *A. fischeri*:243

|                 |         |                 |         |
|-----------------|---------|-----------------|---------|
| afum EAL89335.1 | 100.00% | afis EAW24693.1 | 100.00% |
|-----------------|---------|-----------------|---------|

Bootstrap support for afum|EAL89335.1 as seed ortholog is 100%.

Bootstrap support for afis|EAW24693.1 as seed ortholog is 100%.

---

Group of orthologs #4120. Best score 1001 bits

Score difference with first non-orthologous sequence - *A. fumigatus*:1001 *A. fischeri*:1001

|                 |         |                 |         |
|-----------------|---------|-----------------|---------|
| afum EAL88899.1 | 100.00% | afis EAW16278.1 | 100.00% |
|-----------------|---------|-----------------|---------|

Bootstrap support for afum|EAL88899.1 as seed ortholog is 100%.

Bootstrap support for afis|EAW16278.1 as seed ortholog is 100%.

---

Group of orthologs #4121. Best score 1001 bits

Score difference with first non-orthologous sequence - *A. fumigatus*:1001 *A. fischeri*:1001

|                 |         |                 |         |
|-----------------|---------|-----------------|---------|
| afum EAL91753.1 | 100.00% | afis EAW17942.1 | 100.00% |
|-----------------|---------|-----------------|---------|

Bootstrap support for afum|EAL91753.1 as seed ortholog is 100%.

Bootstrap support for afis|EAW17942.1 as seed ortholog is 100%.

---

Group of orthologs #4122. Best score 1001 bits

Score difference with first non-orthologous sequence - *A. fumigatus*:1001 *A. fischeri*:1001

|                 |         |                 |         |
|-----------------|---------|-----------------|---------|
| afum EAL87380.1 | 100.00% | afis EAW23952.1 | 100.00% |
|-----------------|---------|-----------------|---------|

Bootstrap support for afum|EAL87380.1 as seed ortholog is 100%.



Bootstrap support for afis|EAW23952.1 as seed ortholog is 100%.

---

Group of orthologs #4123. Best score 1001 bits

Score difference with first non-orthologous sequence - *A. fumigatus*:1001 *A. fischeri*:1001

afum|EAL87903.1 100.00% afis|EAW23565.1 100.00%

Bootstrap support for afum|EAL87903.1 as seed ortholog is 100%.

Bootstrap support for afis|EAW23565.1 as seed ortholog is 100%.

---

Group of orthologs #4124. Best score 1001 bits

Score difference with first non-orthologous sequence - *A. fumigatus*:1001 *A. fischeri*:828

afum|EAL93743.1 100.00% afis|EAW19009.1 100.00%

Bootstrap support for afum|EAL93743.1 as seed ortholog is 100%.

Bootstrap support for afis|EAW19009.1 as seed ortholog is 100%.

---

Group of orthologs #4125. Best score 1001 bits

Score difference with first non-orthologous sequence - *A. fumigatus*:1001 *A. fischeri*:1001

afum|EAL92391.1 100.00% afis|EAW21374.1 100.00%

Bootstrap support for afum|EAL92391.1 as seed ortholog is 100%.

Bootstrap support for afis|EAW21374.1 as seed ortholog is 100%.

---

Group of orthologs #4126. Best score 1000 bits

Score difference with first non-orthologous sequence - *A. fumigatus*:1000 *A. fischeri*:1000

afum|EAL85634.1 100.00% afis|EAW15714.1 100.00%

Bootstrap support for afum|EAL85634.1 as seed ortholog is 100%.

Bootstrap support for afis|EAW15714.1 as seed ortholog is 100%.

---

Group of orthologs #4127. Best score 1000 bits

Score difference with first non-orthologous sequence - *A. fumigatus*:1000 *A. fischeri*:1000

afum|EAL87525.2 100.00% afis|EAW18165.1 100.00%

Bootstrap support for afum|EAL87525.2 as seed ortholog is 100%.

Bootstrap support for afis|EAW18165.1 as seed ortholog is 100%.

---

Group of orthologs #4128. Best score 1000 bits

Score difference with first non-orthologous sequence - *A. fumigatus*:139 *A. fischeri*:604

afum|EAL90432.1 100.00% afis|EAW16867.1 100.00%

Bootstrap support for afum|EAL90432.1 as seed ortholog is 99%.

Bootstrap support for afis|EAW16867.1 as seed ortholog is 100%.

---

Group of orthologs #4129. Best score 1000 bits

Score difference with first non-orthologous sequence - *A. fumigatus*:1000 *A. fischeri*:1000

afum|EAL93204.1 100.00% afis|EAW18509.1 100.00%

Bootstrap support for afum|EAL93204.1 as seed ortholog is 100%.

Bootstrap support for afis|EAW18509.1 as seed ortholog is 100%.

---

Group of orthologs #4130. Best score 1000 bits

Score difference with first non-orthologous sequence - *A. fumigatus*:1000 *A. fischeri*:1000

afum|EAL88438.1 100.00% afis|EAW23043.1 100.00%

Bootstrap support for afum|EAL88438.1 as seed ortholog is 100%.

Bootstrap support for afis|EAW23043.1 as seed ortholog is 100%.

---

Group of orthologs #4131. Best score 1000 bits

Score difference with first non-orthologous sequence - *A. fumigatus*:1000 *A. fischeri*:1000

afum|EAL88182.1 100.00% afis|EAW23296.1 100.00%

Bootstrap support for afum|EAL88182.1 as seed ortholog is 100%.

Bootstrap support for afis|EAW23296.1 as seed ortholog is 100%.

---

Group of orthologs #4132. Best score 1000 bits

Score difference with first non-orthologous sequence - *A. fumigatus*:1000 *A. fischeri*:1000

afum|EAL93799.1 100.00% afis|EAW19071.1 100.00%

Bootstrap support for afum|EAL93799.1 as seed ortholog is 100%.

Bootstrap support for afis|EAW19071.1 as seed ortholog is 100%.

---

Group of orthologs #4133. Best score 1000 bits

Score difference with first non-orthologous sequence - *A. fumigatus*:1000 *A. fischeri*:1000

afum|EAL92528.1 100.00% afis|EAW21508.1 100.00%

Bootstrap support for afum|EAL92528.1 as seed ortholog is 100%.

Bootstrap support for afis|EAW21508.1 as seed ortholog is 100%.

---

Group of orthologs #4134. Best score 1000 bits

Score difference with first non-orthologous sequence - *A. fumigatus*:1000 *A. fischeri*:1000

afum|EAL89492.1 100.00% afis|EAW24846.1 100.00%

Bootstrap support for afum|EAL89492.1 as seed ortholog is 100%.

Bootstrap support for afis|EAW24846.1 as seed ortholog is 100%.

---

Group of orthologs #4135. Best score 1000 bits

Score difference with first non-orthologous sequence - *A. fumigatus*:1000 *A. fischeri*:332

afum|EAL90047.1 100.00% afis|EAW25388.1 100.00%

Bootstrap support for afum|EAL90047.1 as seed ortholog is 100%.

Bootstrap support for afis|EAW25388.1 as seed ortholog is 100%.

---

Group of orthologs #4136. Best score 999 bits

Score difference with first non-orthologous sequence - *A. fumigatus*:999 *A. fischeri*:442

afum|EAL85740.1 100.00% afis|EAW15592.1 100.00%

Bootstrap support for afum|EAL85740.1 as seed ortholog is 100%.

Bootstrap support for afis|EAW15592.1 as seed ortholog is 100%.

---

Group of orthologs #4137. Best score 999 bits

Score difference with first non-orthologous sequence - *A. fumigatus*:999 *A. fischeri*:999

afum|EAL88588.1 100.00% afis|EAW15955.1 100.00%

Bootstrap support for afum|EAL88588.1 as seed ortholog is 100%.

Bootstrap support for afis|EAW15955.1 as seed ortholog is 100%.

---

Group of orthologs #4138. Best score 999 bits

Score difference with first non-orthologous sequence - *A. fumigatus*:999 *A. fischeri*:826

afum|EAL84879.1 100.00% afis|EAW20729.1 100.00%

Bootstrap support for afum|EAL84879.1 as seed ortholog is 100%.

Bootstrap support for afis|EAW20729.1 as seed ortholog is 100%.

---

Group of orthologs #4139. Best score 999 bits

Score difference with first non-orthologous sequence - *A. fumigatus*:999 *A. fischeri*:999

afum|EAL87667.2 100.00% afis|EAW18301.1 100.00%

Bootstrap support for afum|EAL87667.2 as seed ortholog is 100%.

Bootstrap support for afis|EAW18301.1 as seed ortholog is 100%.

---

Group of orthologs #4140. Best score 999 bits

Score difference with first non-orthologous sequence - *A. fumigatus*:999 *A. fischeri*:999

afum|EAL86947.1 100.00% afis|EAW19569.1 100.00%

Bootstrap support for afum|EAL86947.1 as seed ortholog is 100%.

Bootstrap support for afis|EAW19569.1 as seed ortholog is 100%.

---

Group of orthologs #4141. Best score 999 bits

Score difference with first non-orthologous sequence - *A. fumigatus*:999 *A. fischeri*:999

|                 |         |                 |         |
|-----------------|---------|-----------------|---------|
| afum EAL87111.1 | 100.00% | afis EAW23666.1 | 100.00% |
|-----------------|---------|-----------------|---------|

Bootstrap support for afum|EAL87111.1 as seed ortholog is 100%.

Bootstrap support for afis|EAW23666.1 as seed ortholog is 100%.

---

Group of orthologs #4142. Best score 999 bits

Score difference with first non-orthologous sequence - *A. fumigatus*:999 *A. fischeri*:999

|                 |         |                 |         |
|-----------------|---------|-----------------|---------|
| afum EAL87181.1 | 100.00% | afis EAW23746.1 | 100.00% |
|-----------------|---------|-----------------|---------|

Bootstrap support for afum|EAL87181.1 as seed ortholog is 100%.

Bootstrap support for afis|EAW23746.1 as seed ortholog is 100%.

---

Group of orthologs #4143. Best score 999 bits

Score difference with first non-orthologous sequence - *A. fumigatus*:999 *A. fischeri*:999

|                 |         |                 |         |
|-----------------|---------|-----------------|---------|
| afum EAL92147.1 | 100.00% | afis EAW21124.1 | 100.00% |
|-----------------|---------|-----------------|---------|

Bootstrap support for afum|EAL92147.1 as seed ortholog is 100%.

Bootstrap support for afis|EAW21124.1 as seed ortholog is 100%.

---

Group of orthologs #4144. Best score 999 bits

Score difference with first non-orthologous sequence - *A. fumigatus*:999 *A. fischeri*:999

|                 |         |                 |         |
|-----------------|---------|-----------------|---------|
| afum EAL92169.1 | 100.00% | afis EAW21150.1 | 100.00% |
|-----------------|---------|-----------------|---------|

Bootstrap support for afum|EAL92169.1 as seed ortholog is 100%.

Bootstrap support for afis|EAW21150.1 as seed ortholog is 100%.

---

Group of orthologs #4145. Best score 999 bits

Score difference with first non-orthologous sequence - *A. fumigatus*:911 *A. fischeri*:999

|                 |         |                 |         |
|-----------------|---------|-----------------|---------|
| afum EAL92260.1 | 100.00% | afis EAW21247.1 | 100.00% |
|-----------------|---------|-----------------|---------|

Bootstrap support for afum|EAL92260.1 as seed ortholog is 100%.

Bootstrap support for afis|EAW21247.1 as seed ortholog is 100%.

---

Group of orthologs #4146. Best score 999 bits

Score difference with first non-orthologous sequence - *A. fumigatus*:999 *A. fischeri*:999

|                 |         |                 |         |
|-----------------|---------|-----------------|---------|
| afum EAL91906.2 | 100.00% | afis EAW24046.1 | 100.00% |
|-----------------|---------|-----------------|---------|

Bootstrap support for afum|EAL91906.2 as seed ortholog is 100%.

Bootstrap support for afis|EAW24046.1 as seed ortholog is 100%.

---

Group of orthologs #4147. Best score 999 bits

Score difference with first non-orthologous sequence - *A. fumigatus*:999 *A. fischeri*:999

|                 |         |                 |         |
|-----------------|---------|-----------------|---------|
| afum EAL91919.1 | 100.00% | afis EAW24064.1 | 100.00% |
|-----------------|---------|-----------------|---------|

Bootstrap support for afum|EAL91919.1 as seed ortholog is 100%.

Bootstrap support for afis|EAW24064.1 as seed ortholog is 100%.

---

Group of orthologs #4148. Best score 998 bits

Score difference with first non-orthologous sequence - *A. fumigatus*:998 *A. fischeri*:998

|                 |         |                 |         |
|-----------------|---------|-----------------|---------|
| afum EAL85583.1 | 100.00% | afis EAW15765.1 | 100.00% |
|-----------------|---------|-----------------|---------|

Bootstrap support for afum|EAL85583.1 as seed ortholog is 100%.

Bootstrap support for afis|EAW15765.1 as seed ortholog is 100%.

---

Group of orthologs #4149. Best score 998 bits

Score difference with first non-orthologous sequence - *A. fumigatus*:998 *A. fischeri*:998

|                 |         |                 |         |
|-----------------|---------|-----------------|---------|
| afum EAL91458.1 | 100.00% | afis EAW17643.1 | 100.00% |
|-----------------|---------|-----------------|---------|

Bootstrap support for afum|EAL91458.1 as seed ortholog is 100%.

Bootstrap support for afis|EAW17643.1 as seed ortholog is 100%.

---

Group of orthologs #4150. Best score 997 bits

Score difference with first non-orthologous sequence - *A. fumigatus*:997 *A. fischeri*:997

|                 |         |                 |         |
|-----------------|---------|-----------------|---------|
| afum EAL88535.1 | 100.00% | afis EAW15900.1 | 100.00% |
|-----------------|---------|-----------------|---------|

Bootstrap support for afum|EAL88535.1 as seed ortholog is 100%.

Bootstrap support for afis|EAW15900.1 as seed ortholog is 100%.

---

Group of orthologs #4151. Best score 997 bits

Score difference with first non-orthologous sequence - *A. fumigatus*:997 *A. fischeri*:997

|                 |         |                 |         |
|-----------------|---------|-----------------|---------|
| afum EAL87668.2 | 100.00% | afis EAW18302.1 | 100.00% |
|-----------------|---------|-----------------|---------|

Bootstrap support for afum|EAL87668.2 as seed ortholog is 100%.

Bootstrap support for afis|EAW18302.1 as seed ortholog is 100%.

---

Group of orthologs #4152. Best score 997 bits

Score difference with first non-orthologous sequence - *A. fumigatus*:997 *A. fischeri*:803

|                 |         |                 |         |
|-----------------|---------|-----------------|---------|
| afum EAL86990.1 | 100.00% | afis EAW19503.1 | 100.00% |
|-----------------|---------|-----------------|---------|

Bootstrap support for afum|EAL86990.1 as seed ortholog is 100%.

Bootstrap support for afis|EAW19503.1 as seed ortholog is 100%.

---

Group of orthologs #4153. Best score 997 bits

Score difference with first non-orthologous sequence - *A. fumigatus*:997 *A. fischeri*:997

|                 |         |                 |         |
|-----------------|---------|-----------------|---------|
| afum EBA27427.1 | 100.00% | afis EAW17386.1 | 100.00% |
|-----------------|---------|-----------------|---------|

Bootstrap support for afum|EBA27427.1 as seed ortholog is 100%.

Bootstrap support for afis|EAW17386.1 as seed ortholog is 100%.

---

Group of orthologs #4154. Best score 997 bits

Score difference with first non-orthologous sequence - *A. fumigatus*:997 *A. fischeri*:997

|                 |         |                 |         |
|-----------------|---------|-----------------|---------|
| afum EAL93755.1 | 100.00% | afis EAW19024.1 | 100.00% |
|-----------------|---------|-----------------|---------|

Bootstrap support for afum|EAL93755.1 as seed ortholog is 100%.

Bootstrap support for afis|EAW19024.1 as seed ortholog is 100%.

---

Group of orthologs #4155. Best score 997 bits

Score difference with first non-orthologous sequence - *A. fumigatus*:997 *A. fischeri*:997

|                 |         |                 |         |
|-----------------|---------|-----------------|---------|
| afum EAL92683.1 | 100.00% | afis EAW21649.1 | 100.00% |
|-----------------|---------|-----------------|---------|

Bootstrap support for afum|EAL92683.1 as seed ortholog is 100%.

Bootstrap support for afis|EAW21649.1 as seed ortholog is 100%.

---

Group of orthologs #4156. Best score 996 bits

Score difference with first non-orthologous sequence - *A. fumigatus*:996 *A. fischeri*:996

|                 |         |                 |         |
|-----------------|---------|-----------------|---------|
| afum EAL88737.1 | 100.00% | afis EAW16105.1 | 100.00% |
|-----------------|---------|-----------------|---------|

Bootstrap support for afum|EAL88737.1 as seed ortholog is 100%.

Bootstrap support for afis|EAW16105.1 as seed ortholog is 100%.

---

Group of orthologs #4157. Best score 996 bits

Score difference with first non-orthologous sequence - *A. fumigatus*:996 *A. fischeri*:996

|                 |         |                 |         |
|-----------------|---------|-----------------|---------|
| afum EAL84750.1 | 100.00% | afis EAW20882.1 | 100.00% |
|-----------------|---------|-----------------|---------|

Bootstrap support for afum|EAL84750.1 as seed ortholog is 100%.

Bootstrap support for afis|EAW20882.1 as seed ortholog is 100%.

---

Group of orthologs #4158. Best score 996 bits

Score difference with first non-orthologous sequence - *A. fumigatus*:996 *A. fischeri*:996

|                 |         |                 |         |
|-----------------|---------|-----------------|---------|
| afum EAL91770.1 | 100.00% | afis EAW17959.1 | 100.00% |
|-----------------|---------|-----------------|---------|

Bootstrap support for afum|EAL91770.1 as seed ortholog is 100%.

Bootstrap support for afis|EAW17959.1 as seed ortholog is 100%.

---

Group of orthologs #4159. Best score 996 bits

Score difference with first non-orthologous sequence - *A. fumigatus*:996 *A. fischeri*:855

|                 |         |                 |         |
|-----------------|---------|-----------------|---------|
| afum EAL88149.2 | 100.00% | afis EAW23330.1 | 100.00% |
|-----------------|---------|-----------------|---------|

Bootstrap support for afum|EAL88149.2 as seed ortholog is 100%.

Bootstrap support for afis|EAW23330.1 as seed ortholog is 100%.

---

Group of orthologs #4160. Best score 996 bits

Score difference with first non-orthologous sequence - *A. fumigatus*:996 *A. fischeri*:996

afum|EAL92173.1 100.00% afis|EAW21155.1 100.00%

Bootstrap support for afum|EAL92173.1 as seed ortholog is 100%.

Bootstrap support for afis|EAW21155.1 as seed ortholog is 100%.

---

Group of orthologs #4161. Best score 996 bits

Score difference with first non-orthologous sequence - *A. fumigatus*:893 *A. fischeri*:920

afum|EAL89408.2 100.00% afis|EAW24766.1 100.00%

Bootstrap support for afum|EAL89408.2 as seed ortholog is 100%.

Bootstrap support for afis|EAW24766.1 as seed ortholog is 100%.

---

Group of orthologs #4162. Best score 996 bits

Score difference with first non-orthologous sequence - *A. fumigatus*:996 *A. fischeri*:996

afum|EAL89576.1 100.00% afis|EAW24921.1 100.00%

Bootstrap support for afum|EAL89576.1 as seed ortholog is 100%.

Bootstrap support for afis|EAW24921.1 as seed ortholog is 100%.

---

Group of orthologs #4163. Best score 996 bits

Score difference with first non-orthologous sequence - *A. fumigatus*:996 *A. fischeri*:996

afum|EAL89978.2 100.00% afis|EAW25317.1 100.00%

Bootstrap support for afum|EAL89978.2 as seed ortholog is 100%.

Bootstrap support for afis|EAW25317.1 as seed ortholog is 100%.

---

Group of orthologs #4164. Best score 996 bits

Score difference with first non-orthologous sequence - *A. fumigatus*:996 *A. fischeri*:996

afum|EAL90115.2 100.00% afis|EAW25456.1 100.00%

Bootstrap support for afum|EAL90115.2 as seed ortholog is 100%.

Bootstrap support for afis|EAW25456.1 as seed ortholog is 100%.

---

Group of orthologs #4165. Best score 995 bits

Score difference with first non-orthologous sequence - *A. fumigatus*:995 *A. fischeri*:876

afum|EAL85107.2 100.00% afis|EAW19787.1 100.00%

Bootstrap support for afum|EAL85107.2 as seed ortholog is 100%.

Bootstrap support for afis|EAW19787.1 as seed ortholog is 100%.

---

Group of orthologs #4166. Best score 995 bits

Score difference with first non-orthologous sequence - *A. fumigatus*:995 *A. fischeri*:821

afum|EAL91737.1 100.00% afis|EAW17926.1 100.00%

Bootstrap support for afum|EAL91737.1 as seed ortholog is 100%.

Bootstrap support for afis|EAW17926.1 as seed ortholog is 100%.

---

Group of orthologs #4167. Best score 995 bits

Score difference with first non-orthologous sequence - *A. fumigatus*:767 *A. fischeri*:535

afum|EAL88228.1 100.00% afis|EAW23253.1 100.00%

Bootstrap support for afum|EAL88228.1 as seed ortholog is 100%.

Bootstrap support for afis|EAW23253.1 as seed ortholog is 100%.

---

Group of orthologs #4168. Best score 995 bits

Score difference with first non-orthologous sequence - *A. fumigatus*:995 *A. fischeri*:927

afum|EAL93892.2 100.00% afis|EAW19162.1 100.00%

Bootstrap support for afum|EAL93892.2 as seed ortholog is 100%.

Bootstrap support for afis|EAW19162.1 as seed ortholog is 100%.

---

Group of orthologs #4169. Best score 995 bits

Score difference with first non-orthologous sequence - *A. fumigatus*:995 *A. fischeri*:995

|                 |         |                 |         |
|-----------------|---------|-----------------|---------|
| afum EAL92142.2 | 100.00% | afis EAW21118.1 | 100.00% |
|-----------------|---------|-----------------|---------|

Bootstrap support for afum|EAL92142.2 as seed ortholog is 100%.

Bootstrap support for afis|EAW21118.1 as seed ortholog is 100%.

---

Group of orthologs #4170. Best score 995 bits

Score difference with first non-orthologous sequence - *A. fumigatus*:995 *A. fischeri*:995

|                 |         |                 |         |
|-----------------|---------|-----------------|---------|
| afum EAL89695.1 | 100.00% | afis EAW25003.1 | 100.00% |
|-----------------|---------|-----------------|---------|

Bootstrap support for afum|EAL89695.1 as seed ortholog is 100%.

Bootstrap support for afis|EAW25003.1 as seed ortholog is 100%.

---

Group of orthologs #4171. Best score 994 bits

Score difference with first non-orthologous sequence - *A. fumigatus*:994 *A. fischeri*:994

|                 |         |                 |         |
|-----------------|---------|-----------------|---------|
| afum EAL93195.1 | 100.00% | afis EAW18502.1 | 100.00% |
|-----------------|---------|-----------------|---------|

Bootstrap support for afum|EAL93195.1 as seed ortholog is 100%.

Bootstrap support for afis|EAW18502.1 as seed ortholog is 100%.

---

Group of orthologs #4172. Best score 994 bits

Score difference with first non-orthologous sequence - *A. fumigatus*:994 *A. fischeri*:994

|                 |         |                 |         |
|-----------------|---------|-----------------|---------|
| afum EAL92001.1 | 100.00% | afis EAW24146.1 | 100.00% |
|-----------------|---------|-----------------|---------|

Bootstrap support for afum|EAL92001.1 as seed ortholog is 100%.

Bootstrap support for afis|EAW24146.1 as seed ortholog is 100%.

---

Group of orthologs #4173. Best score 993 bits

Score difference with first non-orthologous sequence - *A. fumigatus*:993 *A. fischeri*:993

|                 |         |                 |         |
|-----------------|---------|-----------------|---------|
| afum EAL86311.1 | 100.00% | afis EAW16736.1 | 100.00% |
|-----------------|---------|-----------------|---------|

Bootstrap support for afum|EAL86311.1 as seed ortholog is 100%.

Bootstrap support for afis|EAW16736.1 as seed ortholog is 100%.

---

Group of orthologs #4174. Best score 993 bits

Score difference with first non-orthologous sequence - *A. fumigatus*:993 *A. fischeri*:993

|                 |         |                 |         |
|-----------------|---------|-----------------|---------|
| afum EAL89065.1 | 100.00% | afis EAW16471.1 | 100.00% |
|-----------------|---------|-----------------|---------|

Bootstrap support for afum|EAL89065.1 as seed ortholog is 100%.

Bootstrap support for afis|EAW16471.1 as seed ortholog is 100%.

---

Group of orthologs #4175. Best score 993 bits

Score difference with first non-orthologous sequence - *A. fumigatus*:993 *A. fischeri*:993

|                 |         |                 |         |
|-----------------|---------|-----------------|---------|
| afum EAL91791.1 | 100.00% | afis EAW17982.1 | 100.00% |
|-----------------|---------|-----------------|---------|

Bootstrap support for afum|EAL91791.1 as seed ortholog is 100%.

Bootstrap support for afis|EAW17982.1 as seed ortholog is 100%.

---

Group of orthologs #4176. Best score 993 bits

Score difference with first non-orthologous sequence - *A. fumigatus*:993 *A. fischeri*:993

|                 |         |                 |         |
|-----------------|---------|-----------------|---------|
| afum EAL88322.1 | 100.00% | afis EAW23161.1 | 100.00% |
|-----------------|---------|-----------------|---------|

Bootstrap support for afum|EAL88322.1 as seed ortholog is 100%.

Bootstrap support for afis|EAW23161.1 as seed ortholog is 100%.

---

Group of orthologs #4177. Best score 993 bits

Score difference with first non-orthologous sequence - *A. fumigatus*:993 *A. fischeri*:993

|                 |         |                 |         |
|-----------------|---------|-----------------|---------|
| afum EAL92484.1 | 100.00% | afis EAW21464.1 | 100.00% |
|-----------------|---------|-----------------|---------|

Bootstrap support for afum|EAL92484.1 as seed ortholog is 100%.

Bootstrap support for afis|EAW21464.1 as seed ortholog is 100%.

---

Group of orthologs #4178. Best score 992 bits

Score difference with first non-orthologous sequence - *A. fumigatus*:992 *A. fischeri*:992

|                 |         |                 |         |
|-----------------|---------|-----------------|---------|
| afum EAL84515.1 | 100.00% | afis EAW20543.1 | 100.00% |
|-----------------|---------|-----------------|---------|

Bootstrap support for afum|EAL84515.1 as seed ortholog is 100%.

Bootstrap support for afis|EAW20543.1 as seed ortholog is 100%.

---

Group of orthologs #4179. Best score 992 bits

Score difference with first non-orthologous sequence - *A. fumigatus*:992 *A. fischeri*:992

|                 |         |                 |         |
|-----------------|---------|-----------------|---------|
| afum EAL89183.1 | 100.00% | afis EAW16588.1 | 100.00% |
|-----------------|---------|-----------------|---------|

Bootstrap support for afum|EAL89183.1 as seed ortholog is 100%.

Bootstrap support for afis|EAW16588.1 as seed ortholog is 100%.

---

Group of orthologs #4180. Best score 992 bits

Score difference with first non-orthologous sequence - *A. fumigatus*:910 *A. fischeri*:992

|                 |         |                 |         |
|-----------------|---------|-----------------|---------|
| afum EAL89287.1 | 100.00% | afis EAW16683.1 | 100.00% |
|-----------------|---------|-----------------|---------|

Bootstrap support for afum|EAL89287.1 as seed ortholog is 100%.

Bootstrap support for afis|EAW16683.1 as seed ortholog is 100%.

---

Group of orthologs #4181. Best score 992 bits

Score difference with first non-orthologous sequence - *A. fumigatus*:992 *A. fischeri*:992

|                 |         |                 |         |
|-----------------|---------|-----------------|---------|
| afum EAL86970.2 | 100.00% | afis EAW19536.1 | 100.00% |
|-----------------|---------|-----------------|---------|

Bootstrap support for afum|EAL86970.2 as seed ortholog is 100%.

Bootstrap support for afis|EAW19536.1 as seed ortholog is 100%.

---

Group of orthologs #4182. Best score 992 bits

Score difference with first non-orthologous sequence - *A. fumigatus*:992 *A. fischeri*:992

|                 |         |                 |         |
|-----------------|---------|-----------------|---------|
| afum EAL91472.1 | 100.00% | afis EAW17657.1 | 100.00% |
|-----------------|---------|-----------------|---------|

Bootstrap support for afum|EAL91472.1 as seed ortholog is 100%.

Bootstrap support for afis|EAW17657.1 as seed ortholog is 100%.

---

Group of orthologs #4183. Best score 992 bits

Score difference with first non-orthologous sequence - *A. fumigatus*:992 *A. fischeri*:992

|                 |         |                 |         |
|-----------------|---------|-----------------|---------|
| afum EAL87261.1 | 100.00% | afis EAW23829.1 | 100.00% |
|-----------------|---------|-----------------|---------|

Bootstrap support for afum|EAL87261.1 as seed ortholog is 100%.

Bootstrap support for afis|EAW23829.1 as seed ortholog is 100%.

---

Group of orthologs #4184. Best score 992 bits

Score difference with first non-orthologous sequence - *A. fumigatus*:992 *A. fischeri*:992

|                 |         |                 |         |
|-----------------|---------|-----------------|---------|
| afum EAL88265.1 | 100.00% | afis EAW23219.1 | 100.00% |
|-----------------|---------|-----------------|---------|

Bootstrap support for afum|EAL88265.1 as seed ortholog is 100%.

Bootstrap support for afis|EAW23219.1 as seed ortholog is 100%.

---

Group of orthologs #4185. Best score 992 bits

Score difference with first non-orthologous sequence - *A. fumigatus*:992 *A. fischeri*:992

|                 |         |                 |         |
|-----------------|---------|-----------------|---------|
| afum EAL92711.1 | 100.00% | afis EAW21677.1 | 100.00% |
|-----------------|---------|-----------------|---------|

Bootstrap support for afum|EAL92711.1 as seed ortholog is 100%.

Bootstrap support for afis|EAW21677.1 as seed ortholog is 100%.

---

Group of orthologs #4186. Best score 991 bits

Score difference with first non-orthologous sequence - *A. fumigatus*:991 *A. fischeri*:844

|                 |         |                 |         |
|-----------------|---------|-----------------|---------|
| afum EAL85041.1 | 100.00% | afis EAW19854.1 | 100.00% |
|                 |         | afis EAW24644.1 | 6.03%   |

Bootstrap support for afum|EAL85041.1 as seed ortholog is 100%.

Bootstrap support for afis|EAW19854.1 as seed ortholog is 100%.

---

Group of orthologs #4187. Best score 991 bits

Score difference with first non-orthologous sequence - *A. fumigatus*:991 *A. fischeri*:991

|                 |         |                 |         |
|-----------------|---------|-----------------|---------|
| afum EAL85765.1 | 100.00% | afis EAW15568.1 | 100.00% |
|-----------------|---------|-----------------|---------|

Bootstrap support for afum|EAL85765.1 as seed ortholog is 100%.

Bootstrap support for afis|EAW15568.1 as seed ortholog is 100%.

---

Group of orthologs #4188. Best score 991 bits

Score difference with first non-orthologous sequence - *A. fumigatus*:991 *A. fischeri*:782

afum|EAL86251.1 100.00% afis|EAW24623.1 100.00%

Bootstrap support for afum|EAL86251.1 as seed ortholog is 100%.

Bootstrap support for afis|EAW24623.1 as seed ortholog is 100%.

---

Group of orthologs #4189. Best score 991 bits

Score difference with first non-orthologous sequence - *A. fumigatus*:991 *A. fischeri*:991

afum|EAL93798.1 100.00% afis|EAW19070.1 100.00%

Bootstrap support for afum|EAL93798.1 as seed ortholog is 100%.

Bootstrap support for afis|EAW19070.1 as seed ortholog is 100%.

---

Group of orthologs #4190. Best score 991 bits

Score difference with first non-orthologous sequence - *A. fumigatus*:991 *A. fischeri*:991

afum|EAL91048.2 100.00% afis|EAW22142.1 100.00%

Bootstrap support for afum|EAL91048.2 as seed ortholog is 100%.

Bootstrap support for afis|EAW22142.1 as seed ortholog is 100%.

---

Group of orthologs #4191. Best score 990 bits

Score difference with first non-orthologous sequence - *A. fumigatus*:990 *A. fischeri*:497

afum|EAL85513.1 100.00% afis|EAW15838.1 100.00%

Bootstrap support for afum|EAL85513.1 as seed ortholog is 100%.

Bootstrap support for afis|EAW15838.1 as seed ortholog is 100%.

---

Group of orthologs #4192. Best score 990 bits

Score difference with first non-orthologous sequence - *A. fumigatus*:905 *A. fischeri*:584

afum|EAL86483.2 100.00% afis|EAW16956.1 100.00%

Bootstrap support for afum|EAL86483.2 as seed ortholog is 100%.

Bootstrap support for afis|EAW16956.1 as seed ortholog is 100%.

---

Group of orthologs #4193. Best score 990 bits

Score difference with first non-orthologous sequence - *A. fumigatus*:990 *A. fischeri*:871

afum|EAL88838.1 100.00% afis|EAW16211.1 100.00%

Bootstrap support for afum|EAL88838.1 as seed ortholog is 100%.

Bootstrap support for afis|EAW16211.1 as seed ortholog is 100%.

---

Group of orthologs #4194. Best score 990 bits

Score difference with first non-orthologous sequence - *A. fumigatus*:832 *A. fischeri*:736

afum|EAL89035.1 100.00% afis|EAW16411.1 100.00%

Bootstrap support for afum|EAL89035.1 as seed ortholog is 100%.

Bootstrap support for afis|EAW16411.1 as seed ortholog is 100%.

---

Group of orthologs #4195. Best score 990 bits

Score difference with first non-orthologous sequence - *A. fumigatus*:990 *A. fischeri*:990

afum|EAL85170.2 100.00% afis|EAW20049.1 100.00%

Bootstrap support for afum|EAL85170.2 as seed ortholog is 100%.

Bootstrap support for afis|EAW20049.1 as seed ortholog is 100%.

---

Group of orthologs #4196. Best score 990 bits

Score difference with first non-orthologous sequence - *A. fumigatus*:990 *A. fischeri*:990

afum|EAL90498.1 100.00% afis|EAW22695.1 100.00%

Bootstrap support for afum|EAL90498.1 as seed ortholog is 100%.

Bootstrap support for afis|EAW22695.1 as seed ortholog is 100%.

---

Group of orthologs #4197. Best score 990 bits



Score difference with first non-orthologous sequence - *A. fumigatus*:990 *A. fischeri*:876  
afum|EBA27456.1 100.00% afis|EAW21226.1 100.00%  
Bootstrap support for afum|EBA27456.1 as seed ortholog is 100%.  
Bootstrap support for afis|EAW21226.1 as seed ortholog is 100%.

---

Group of orthologs #4198. Best score 990 bits

Score difference with first non-orthologous sequence - *A. fumigatus*:990 *A. fischeri*:990  
afum|EAL90170.1 100.00% afis|EAW25504.1 100.00%  
Bootstrap support for afum|EAL90170.1 as seed ortholog is 100%.  
Bootstrap support for afis|EAW25504.1 as seed ortholog is 100%.

---

Group of orthologs #4199. Best score 989 bits

Score difference with first non-orthologous sequence - *A. fumigatus*:989 *A. fischeri*:989  
afum|EAL88649.1 100.00% afis|EAW16020.1 100.00%  
Bootstrap support for afum|EAL88649.1 as seed ortholog is 100%.  
Bootstrap support for afis|EAW16020.1 as seed ortholog is 100%.

---

Group of orthologs #4200. Best score 989 bits

Score difference with first non-orthologous sequence - *A. fumigatus*:989 *A. fischeri*:989  
afum|EAL84322.1 100.00% afis|EAW25634.1 100.00%  
Bootstrap support for afum|EAL84322.1 as seed ortholog is 100%.  
Bootstrap support for afis|EAW25634.1 as seed ortholog is 100%.

---

Group of orthologs #4201. Best score 989 bits

Score difference with first non-orthologous sequence - *A. fumigatus*:701 *A. fischeri*:640  
afum|EAL86205.2 100.00% afis|EAW24543.1 100.00%  
Bootstrap support for afum|EAL86205.2 as seed ortholog is 100%.  
Bootstrap support for afis|EAW24543.1 as seed ortholog is 100%.

---

Group of orthologs #4202. Best score 989 bits

Score difference with first non-orthologous sequence - *A. fumigatus*:791 *A. fischeri*:815  
afum|EAL87843.1 100.00% afis|EAW23619.1 100.00%  
Bootstrap support for afum|EAL87843.1 as seed ortholog is 100%.  
Bootstrap support for afis|EAW23619.1 as seed ortholog is 100%.

---

Group of orthologs #4203. Best score 989 bits

Score difference with first non-orthologous sequence - *A. fumigatus*:989 *A. fischeri*:989  
afum|EAL94052.1 100.00% afis|EAW19335.1 100.00%  
Bootstrap support for afum|EAL94052.1 as seed ortholog is 100%.  
Bootstrap support for afis|EAW19335.1 as seed ortholog is 100%.

---

Group of orthologs #4204. Best score 989 bits

Score difference with first non-orthologous sequence - *A. fumigatus*:989 *A. fischeri*:989  
afum|EAL92458.2 100.00% afis|EAW21441.1 100.00%  
Bootstrap support for afum|EAL92458.2 as seed ortholog is 100%.  
Bootstrap support for afis|EAW21441.1 as seed ortholog is 100%.

---

Group of orthologs #4205. Best score 989 bits

Score difference with first non-orthologous sequence - *A. fumigatus*:989 *A. fischeri*:989  
afum|EBA27388.1 100.00% afis|EAW25193.1 100.00%  
Bootstrap support for afum|EBA27388.1 as seed ortholog is 100%.  
Bootstrap support for afis|EAW25193.1 as seed ortholog is 100%.

---

Group of orthologs #4206. Best score 989 bits

Score difference with first non-orthologous sequence - *A. fumigatus*:989 *A. fischeri*:989  
afum|EBA27395.1 100.00% afis|EAW25512.1 100.00%

Bootstrap support for afum|EBA27395.1 as seed ortholog is 100%.  
Bootstrap support for afis|EAW25512.1 as seed ortholog is 100%.

---

Group of orthologs #4207. Best score 988 bits

Score difference with first non-orthologous sequence - *A. fumigatus*:988 *A. fischeri*:988

afum|EAL85805.1 100.00% afis|EAW15523.1 100.00%

Bootstrap support for afum|EAL85805.1 as seed ortholog is 100%.

Bootstrap support for afis|EAW15523.1 as seed ortholog is 100%.

---

Group of orthologs #4208. Best score 988 bits

Score difference with first non-orthologous sequence - *A. fumigatus*:730 *A. fischeri*:554

afum|EAL88978.1 100.00% afis|EAW16353.1 100.00%

Bootstrap support for afum|EAL88978.1 as seed ortholog is 100%.

Bootstrap support for afis|EAW16353.1 as seed ortholog is 100%.

---

Group of orthologs #4209. Best score 988 bits

Score difference with first non-orthologous sequence - *A. fumigatus*:988 *A. fischeri*:988

afum|EAL84342.1 100.00% afis|EAW25670.1 100.00%

Bootstrap support for afum|EAL84342.1 as seed ortholog is 100%.

Bootstrap support for afis|EAW25670.1 as seed ortholog is 100%.

---

Group of orthologs #4210. Best score 988 bits

Score difference with first non-orthologous sequence - *A. fumigatus*:988 *A. fischeri*:988

afum|EAL86004.1 100.00% afis|EAW24334.1 100.00%

Bootstrap support for afum|EAL86004.1 as seed ortholog is 100%.

Bootstrap support for afis|EAW24334.1 as seed ortholog is 100%.

---

Group of orthologs #4211. Best score 988 bits

Score difference with first non-orthologous sequence - *A. fumigatus*:988 *A. fischeri*:988

afum|EAL88482.1 100.00% afis|EAW22998.1 100.00%

Bootstrap support for afum|EAL88482.1 as seed ortholog is 100%.

Bootstrap support for afis|EAW22998.1 as seed ortholog is 100%.

---

Group of orthologs #4212. Best score 988 bits

Score difference with first non-orthologous sequence - *A. fumigatus*:988 *A. fischeri*:988

afum|EAL93792.1 100.00% afis|EAW19063.1 100.00%

Bootstrap support for afum|EAL93792.1 as seed ortholog is 100%.

Bootstrap support for afis|EAW19063.1 as seed ortholog is 100%.

---

Group of orthologs #4213. Best score 988 bits

Score difference with first non-orthologous sequence - *A. fumigatus*:988 *A. fischeri*:988

afum|EAL92442.1 100.00% afis|EAW21427.1 100.00%

Bootstrap support for afum|EAL92442.1 as seed ortholog is 100%.

Bootstrap support for afis|EAW21427.1 as seed ortholog is 100%.

---

Group of orthologs #4214. Best score 987 bits

Score difference with first non-orthologous sequence - *A. fumigatus*:987 *A. fischeri*:987

afum|EAL85548.1 100.00% afis|EAW15802.1 100.00%

Bootstrap support for afum|EAL85548.1 as seed ortholog is 100%.

Bootstrap support for afis|EAW15802.1 as seed ortholog is 100%.

---

Group of orthologs #4215. Best score 987 bits

Score difference with first non-orthologous sequence - *A. fumigatus*:987 *A. fischeri*:987

afum|EAL89276.1 100.00% afis|EAW16671.1 100.00%

Bootstrap support for afum|EAL89276.1 as seed ortholog is 100%.

Bootstrap support for afis|EAW16671.1 as seed ortholog is 100%.

---

Group of orthologs #4216. Best score 987 bits

Score difference with first non-orthologous sequence - *A. fumigatus*:987 *A. fischeri*:937

afum|EAL91168.1 100.00% afis|EAW17331.1 100.00%

Bootstrap support for afum|EAL91168.1 as seed ortholog is 100%.

Bootstrap support for afis|EAW17331.1 as seed ortholog is 100%.

---

Group of orthologs #4217. Best score 987 bits

Score difference with first non-orthologous sequence - *A. fumigatus*:987 *A. fischeri*:987

afum|EAL88341.1 100.00% afis|EAW23140.1 100.00%

Bootstrap support for afum|EAL88341.1 as seed ortholog is 100%.

Bootstrap support for afis|EAW23140.1 as seed ortholog is 100%.

---

Group of orthologs #4218. Best score 987 bits

Score difference with first non-orthologous sequence - *A. fumigatus*:987 *A. fischeri*:987

afum|EAL88020.1 100.00% afis|EAW23444.1 100.00%

Bootstrap support for afum|EAL88020.1 as seed ortholog is 100%.

Bootstrap support for afis|EAW23444.1 as seed ortholog is 100%.

---

Group of orthologs #4219. Best score 987 bits

Score difference with first non-orthologous sequence - *A. fumigatus*:987 *A. fischeri*:987

afum|EAL93430.1 100.00% afis|EAW18707.1 100.00%

Bootstrap support for afum|EAL93430.1 as seed ortholog is 100%.

Bootstrap support for afis|EAW18707.1 as seed ortholog is 100%.

---

Group of orthologs #4220. Best score 987 bits

Score difference with first non-orthologous sequence - *A. fumigatus*:987 *A. fischeri*:987

afum|EAL92488.1 100.00% afis|EAW21469.1 100.00%

Bootstrap support for afum|EAL92488.1 as seed ortholog is 100%.

Bootstrap support for afis|EAW21469.1 as seed ortholog is 100%.

---

Group of orthologs #4221. Best score 987 bits

Score difference with first non-orthologous sequence - *A. fumigatus*:987 *A. fischeri*:987

afum|EAL92581.1 100.00% afis|EAW21562.1 100.00%

Bootstrap support for afum|EAL92581.1 as seed ortholog is 100%.

Bootstrap support for afis|EAW21562.1 as seed ortholog is 100%.

---

Group of orthologs #4222. Best score 987 bits

Score difference with first non-orthologous sequence - *A. fumigatus*:790 *A. fischeri*:987

afum|EAL92751.1 100.00% afis|EAW21717.1 100.00%

Bootstrap support for afum|EAL92751.1 as seed ortholog is 100%.

Bootstrap support for afis|EAW21717.1 as seed ortholog is 100%.

---

Group of orthologs #4223. Best score 987 bits

Score difference with first non-orthologous sequence - *A. fumigatus*:741 *A. fischeri*:987

afum|EAL92929.1 100.00% afis|EAW21917.1 100.00%

Bootstrap support for afum|EAL92929.1 as seed ortholog is 100%.

Bootstrap support for afis|EAW21917.1 as seed ortholog is 100%.

---

Group of orthologs #4224. Best score 987 bits

Score difference with first non-orthologous sequence - *A. fumigatus*:987 *A. fischeri*:987

afum|EBA27466.1 100.00% afis|EAW21556.1 100.00%

Bootstrap support for afum|EBA27466.1 as seed ortholog is 100%.

Bootstrap support for afis|EAW21556.1 as seed ortholog is 100%.

---

Group of orthologs #4225. Best score 986 bits

Score difference with first non-orthologous sequence - *A. fumigatus*:886 *A. fischeri*:986  
afum|EAL86399.1 100.00% afis|EAW16856.1 100.00%  
Bootstrap support for afum|EAL86399.1 as seed ortholog is 100%.  
Bootstrap support for afis|EAW16856.1 as seed ortholog is 100%.

---

Group of orthologs #4226. Best score 986 bits

Score difference with first non-orthologous sequence - *A. fumigatus*:986 *A. fischeri*:986  
afum|EAL87661.2 100.00% afis|EAW18295.1 100.00%  
Bootstrap support for afum|EAL87661.2 as seed ortholog is 100%.  
Bootstrap support for afis|EAW18295.1 as seed ortholog is 100%.

---

Group of orthologs #4227. Best score 986 bits

Score difference with first non-orthologous sequence - *A. fumigatus*:986 *A. fischeri*:986  
afum|EAL91833.1 100.00% afis|EAW18021.1 100.00%  
Bootstrap support for afum|EAL91833.1 as seed ortholog is 100%.  
Bootstrap support for afis|EAW18021.1 as seed ortholog is 100%.

---

Group of orthologs #4228. Best score 986 bits

Score difference with first non-orthologous sequence - *A. fumigatus*:459 *A. fischeri*:986  
afum|EAL84372.1 100.00% afis|EAW25697.1 100.00%  
Bootstrap support for afum|EAL84372.1 as seed ortholog is 100%.  
Bootstrap support for afis|EAW25697.1 as seed ortholog is 100%.

---

Group of orthologs #4229. Best score 985 bits

Score difference with first non-orthologous sequence - *A. fumigatus*:985 *A. fischeri*:985  
afum|EAL85823.1 100.00% afis|EAW15500.1 100.00%  
Bootstrap support for afum|EAL85823.1 as seed ortholog is 100%.  
Bootstrap support for afis|EAW15500.1 as seed ortholog is 100%.

---

Group of orthologs #4230. Best score 985 bits

Score difference with first non-orthologous sequence - *A. fumigatus*:985 *A. fischeri*:985  
afum|EAL88153.1 100.00% afis|EAW23326.1 100.00%  
Bootstrap support for afum|EAL88153.1 as seed ortholog is 100%.  
Bootstrap support for afis|EAW23326.1 as seed ortholog is 100%.

---

Group of orthologs #4231. Best score 985 bits

Score difference with first non-orthologous sequence - *A. fumigatus*:985 *A. fischeri*:985  
afum|EAL92582.1 100.00% afis|EAW21563.1 100.00%  
Bootstrap support for afum|EAL92582.1 as seed ortholog is 100%.  
Bootstrap support for afis|EAW21563.1 as seed ortholog is 100%.

---

Group of orthologs #4232. Best score 984 bits

Score difference with first non-orthologous sequence - *A. fumigatus*:742 *A. fischeri*:800  
afum|EAL88922.1 100.00% afis|EAW16300.1 100.00%  
Bootstrap support for afum|EAL88922.1 as seed ortholog is 100%.  
Bootstrap support for afis|EAW16300.1 as seed ortholog is 100%.

---

Group of orthologs #4233. Best score 984 bits

Score difference with first non-orthologous sequence - *A. fumigatus*:984 *A. fischeri*:849  
afum|EAL85203.1 100.00% afis|EAW20084.1 100.00%  
Bootstrap support for afum|EAL85203.1 as seed ortholog is 100%.  
Bootstrap support for afis|EAW20084.1 as seed ortholog is 100%.

---

Group of orthologs #4234. Best score 984 bits

Score difference with first non-orthologous sequence - *A. fumigatus*:984 *A. fischeri*:984  
afum|EAL92688.1 100.00% afis|EAW21653.1 100.00%

Bootstrap support for afum|EAL92688.1 as seed ortholog is 100%.  
Bootstrap support for afis|EAW21653.1 as seed ortholog is 100%.

---

Group of orthologs #4235. Best score 984 bits

Score difference with first non-orthologous sequence - *A. fumigatus*:984 *A. fischeri*:984

afum|EAL92879.1 100.00% afis|EAW21865.1 100.00%

Bootstrap support for afum|EAL92879.1 as seed ortholog is 100%.

Bootstrap support for afis|EAW21865.1 as seed ortholog is 100%.

---

Group of orthologs #4236. Best score 983 bits

Score difference with first non-orthologous sequence - *A. fumigatus*:983 *A. fischeri*:983

afum|EAL85760.1 100.00% afis|EAW15574.1 100.00%

Bootstrap support for afum|EAL85760.1 as seed ortholog is 100%.

Bootstrap support for afis|EAW15574.1 as seed ortholog is 100%.

---

Group of orthologs #4237. Best score 983 bits

Score difference with first non-orthologous sequence - *A. fumigatus*:983 *A. fischeri*:983

afum|EAL86522.2 100.00% afis|EAW16997.1 100.00%

Bootstrap support for afum|EAL86522.2 as seed ortholog is 100%.

Bootstrap support for afis|EAW16997.1 as seed ortholog is 100%.

---

Group of orthologs #4238. Best score 983 bits

Score difference with first non-orthologous sequence - *A. fumigatus*:983 *A. fischeri*:983

afum|EAL85969.1 100.00% afis|EAW24301.1 100.00%

Bootstrap support for afum|EAL85969.1 as seed ortholog is 100%.

Bootstrap support for afis|EAW24301.1 as seed ortholog is 100%.

---

Group of orthologs #4239. Best score 983 bits

Score difference with first non-orthologous sequence - *A. fumigatus*:983 *A. fischeri*:983

afum|EAL86170.1 100.00% afis|EAW24500.1 100.00%

Bootstrap support for afum|EAL86170.1 as seed ortholog is 100%.

Bootstrap support for afis|EAW24500.1 as seed ortholog is 100%.

---

Group of orthologs #4240. Best score 983 bits

Score difference with first non-orthologous sequence - *A. fumigatus*:983 *A. fischeri*:983

afum|EAL87834.1 100.00% afis|EAW23626.1 100.00%

Bootstrap support for afum|EAL87834.1 as seed ortholog is 100%.

Bootstrap support for afis|EAW23626.1 as seed ortholog is 100%.

---

Group of orthologs #4241. Best score 983 bits

Score difference with first non-orthologous sequence - *A. fumigatus*:549 *A. fischeri*:430

afum|EAL89775.1 100.00% afis|EAW25104.1 100.00%

Bootstrap support for afum|EAL89775.1 as seed ortholog is 100%.

Bootstrap support for afis|EAW25104.1 as seed ortholog is 100%.

---

Group of orthologs #4242. Best score 982 bits

Score difference with first non-orthologous sequence - *A. fumigatus*:982 *A. fischeri*:982

afum|EAL94086.1 100.00% afis|EAW19367.1 100.00%

Bootstrap support for afum|EAL94086.1 as seed ortholog is 100%.

Bootstrap support for afis|EAW19367.1 as seed ortholog is 100%.

---

Group of orthologs #4243. Best score 982 bits

Score difference with first non-orthologous sequence - *A. fumigatus*:982 *A. fischeri*:982

afum|EAL92450.1 100.00% afis|EAW21435.1 100.00%

Bootstrap support for afum|EAL92450.1 as seed ortholog is 100%.

Bootstrap support for afis|EAW21435.1 as seed ortholog is 100%.

---

Group of orthologs #4244. Best score 982 bits

Score difference with first non-orthologous sequence - *A. fumigatus*:982 *A. fischeri*:982

afum|EAL89968.2 100.00% afis|EAW25305.1 100.00%

Bootstrap support for afum|EAL89968.2 as seed ortholog is 100%.

Bootstrap support for afis|EAW25305.1 as seed ortholog is 100%.

---

Group of orthologs #4245. Best score 981 bits

Score difference with first non-orthologous sequence - *A. fumigatus*:981 *A. fischeri*:981

afum|EAL88540.1 100.00% afis|EAW15905.1 100.00%

Bootstrap support for afum|EAL88540.1 as seed ortholog is 100%.

Bootstrap support for afis|EAW15905.1 as seed ortholog is 100%.

---

Group of orthologs #4246. Best score 981 bits

Score difference with first non-orthologous sequence - *A. fumigatus*:981 *A. fischeri*:908

afum|EAL89146.1 100.00% afis|EAW16548.1 100.00%

Bootstrap support for afum|EAL89146.1 as seed ortholog is 100%.

Bootstrap support for afis|EAW16548.1 as seed ortholog is 100%.

---

Group of orthologs #4247. Best score 981 bits

Score difference with first non-orthologous sequence - *A. fumigatus*:981 *A. fischeri*:981

afum|EAL91334.1 100.00% afis|EAW17516.1 100.00%

Bootstrap support for afum|EAL91334.1 as seed ortholog is 100%.

Bootstrap support for afis|EAW17516.1 as seed ortholog is 100%.

---

Group of orthologs #4248. Best score 981 bits

Score difference with first non-orthologous sequence - *A. fumigatus*:981 *A. fischeri*:981

afum|EAL88427.1 100.00% afis|EAW23053.1 100.00%

Bootstrap support for afum|EAL88427.1 as seed ortholog is 100%.

Bootstrap support for afis|EAW23053.1 as seed ortholog is 100%.

---

Group of orthologs #4249. Best score 981 bits

Score difference with first non-orthologous sequence - *A. fumigatus*:981 *A. fischeri*:913

afum|EAL92778.1 100.00% afis|EAW21746.1 100.00%

Bootstrap support for afum|EAL92778.1 as seed ortholog is 100%.

Bootstrap support for afis|EAW21746.1 as seed ortholog is 100%.

---

Group of orthologs #4250. Best score 981 bits

Score difference with first non-orthologous sequence - *A. fumigatus*:981 *A. fischeri*:981

afum|EBA27471.1 100.00% afis|EAW21747.1 100.00%

Bootstrap support for afum|EBA27471.1 as seed ortholog is 100%.

Bootstrap support for afis|EAW21747.1 as seed ortholog is 100%.

---

Group of orthologs #4251. Best score 980 bits

Score difference with first non-orthologous sequence - *A. fumigatus*:980 *A. fischeri*:980

afum|EAL86365.1 100.00% afis|EAW16796.1 100.00%

Bootstrap support for afum|EAL86365.1 as seed ortholog is 100%.

Bootstrap support for afis|EAW16796.1 as seed ortholog is 100%.

---

Group of orthologs #4252. Best score 980 bits

Score difference with first non-orthologous sequence - *A. fumigatus*:678 *A. fischeri*:980

afum|EAL91237.1 100.00% afis|EAW17399.1 100.00%

Bootstrap support for afum|EAL91237.1 as seed ortholog is 100%.

Bootstrap support for afis|EAW17399.1 as seed ortholog is 100%.

---

Group of orthologs #4253. Best score 980 bits

Score difference with first non-orthologous sequence - *A. fumigatus*:980 *A. fischeri*:884  
afum|EAL88072.1 100.00% afis|EAW23398.1 100.00%  
Bootstrap support for afum|EAL88072.1 as seed ortholog is 100%.  
Bootstrap support for afis|EAW23398.1 as seed ortholog is 100%.

---

Group of orthologs #4254. Best score 980 bits

Score difference with first non-orthologous sequence - *A. fumigatus*:980 *A. fischeri*:980  
afum|EAL93763.1 100.00% afis|EAW19034.1 100.00%  
Bootstrap support for afum|EAL93763.1 as seed ortholog is 100%.  
Bootstrap support for afis|EAW19034.1 as seed ortholog is 100%.

---

Group of orthologs #4255. Best score 980 bits

Score difference with first non-orthologous sequence - *A. fumigatus*:980 *A. fischeri*:980  
afum|EAL90507.1 100.00% afis|EAW22686.1 100.00%  
Bootstrap support for afum|EAL90507.1 as seed ortholog is 100%.  
Bootstrap support for afis|EAW22686.1 as seed ortholog is 100%.

---

Group of orthologs #4256. Best score 980 bits

Score difference with first non-orthologous sequence - *A. fumigatus*:980 *A. fischeri*:980  
afum|EAL90228.1 100.00% afis|EAW22969.1 100.00%  
Bootstrap support for afum|EAL90228.1 as seed ortholog is 100%.  
Bootstrap support for afis|EAW22969.1 as seed ortholog is 100%.

---

Group of orthologs #4257. Best score 980 bits

Score difference with first non-orthologous sequence - *A. fumigatus*:980 *A. fischeri*:980  
afum|EAL89908.1 100.00% afis|EAW25246.1 100.00%  
Bootstrap support for afum|EAL89908.1 as seed ortholog is 100%.  
Bootstrap support for afis|EAW25246.1 as seed ortholog is 100%.

---

Group of orthologs #4258. Best score 979 bits

Score difference with first non-orthologous sequence - *A. fumigatus*:917 *A. fischeri*:979  
afum|EAL84511.1 100.00% afis|EAW20548.1 100.00%  
Bootstrap support for afum|EAL84511.1 as seed ortholog is 100%.  
Bootstrap support for afis|EAW20548.1 as seed ortholog is 100%.

---

Group of orthologs #4259. Best score 979 bits

Score difference with first non-orthologous sequence - *A. fumigatus*:979 *A. fischeri*:979  
afum|EAL93663.1 100.00% afis|EAW18931.1 100.00%  
Bootstrap support for afum|EAL93663.1 as seed ortholog is 100%.  
Bootstrap support for afis|EAW18931.1 as seed ortholog is 100%.

---

Group of orthologs #4260. Best score 979 bits

Score difference with first non-orthologous sequence - *A. fumigatus*:979 *A. fischeri*:979  
afum|EAL90741.1 100.00% afis|EAW22450.1 100.00%  
Bootstrap support for afum|EAL90741.1 as seed ortholog is 100%.  
Bootstrap support for afis|EAW22450.1 as seed ortholog is 100%.

---

Group of orthologs #4261. Best score 979 bits

Score difference with first non-orthologous sequence - *A. fumigatus*:979 *A. fischeri*:979  
afum|EBA27338.1 100.00% afis|EAW23317.1 100.00%  
Bootstrap support for afum|EBA27338.1 as seed ortholog is 100%.  
Bootstrap support for afis|EAW23317.1 as seed ortholog is 100%.

---

Group of orthologs #4262. Best score 978 bits

Score difference with first non-orthologous sequence - *A. fumigatus*:978 *A. fischeri*:978  
afum|EAL86867.1 100.00% afis|EAW19655.1 100.00%

Bootstrap support for afum|EAL86867.1 as seed ortholog is 100%.  
Bootstrap support for afis|EAW19655.1 as seed ortholog is 100%.

---

Group of orthologs #4263. Best score 978 bits

Score difference with first non-orthologous sequence - *A. fumigatus*:978 *A. fischeri*:978

|                 |         |                 |         |
|-----------------|---------|-----------------|---------|
| afum EAL91017.1 | 100.00% | afis EAW22172.1 | 100.00% |
|-----------------|---------|-----------------|---------|

Bootstrap support for afum|EAL91017.1 as seed ortholog is 100%.

Bootstrap support for afis|EAW22172.1 as seed ortholog is 100%.

---

Group of orthologs #4264. Best score 978 bits

Score difference with first non-orthologous sequence - *A. fumigatus*:978 *A. fischeri*:978

|                 |         |                 |         |
|-----------------|---------|-----------------|---------|
| afum EAL90034.1 | 100.00% | afis EAW25375.1 | 100.00% |
|-----------------|---------|-----------------|---------|

Bootstrap support for afum|EAL90034.1 as seed ortholog is 100%.

Bootstrap support for afis|EAW25375.1 as seed ortholog is 100%.

---

Group of orthologs #4265. Best score 977 bits

Score difference with first non-orthologous sequence - *A. fumigatus*:977 *A. fischeri*:931

|                 |         |                 |         |
|-----------------|---------|-----------------|---------|
| afum EAL88815.1 | 100.00% | afis EAW16184.1 | 100.00% |
|-----------------|---------|-----------------|---------|

Bootstrap support for afum|EAL88815.1 as seed ortholog is 100%.

Bootstrap support for afis|EAW16184.1 as seed ortholog is 100%.

---

Group of orthologs #4266. Best score 977 bits

Score difference with first non-orthologous sequence - *A. fumigatus*:977 *A. fischeri*:803

|                 |         |                 |         |
|-----------------|---------|-----------------|---------|
| afum EAL86831.1 | 100.00% | afis EAW19696.1 | 100.00% |
|-----------------|---------|-----------------|---------|

Bootstrap support for afum|EAL86831.1 as seed ortholog is 100%.

Bootstrap support for afis|EAW19696.1 as seed ortholog is 100%.

---

Group of orthologs #4267. Best score 977 bits

Score difference with first non-orthologous sequence - *A. fumigatus*:977 *A. fischeri*:917

|                 |         |                 |         |
|-----------------|---------|-----------------|---------|
| afum EAL86193.1 | 100.00% | afis EAW24528.1 | 100.00% |
|-----------------|---------|-----------------|---------|

Bootstrap support for afum|EAL86193.1 as seed ortholog is 100%.

Bootstrap support for afis|EAW24528.1 as seed ortholog is 100%.

---

Group of orthologs #4268. Best score 977 bits

Score difference with first non-orthologous sequence - *A. fumigatus*:977 *A. fischeri*:977

|                 |         |                 |         |
|-----------------|---------|-----------------|---------|
| afum EAL93376.1 | 100.00% | afis EAW18660.1 | 100.00% |
|-----------------|---------|-----------------|---------|

Bootstrap support for afum|EAL93376.1 as seed ortholog is 100%.

Bootstrap support for afis|EAW18660.1 as seed ortholog is 100%.

---

Group of orthologs #4269. Best score 977 bits

Score difference with first non-orthologous sequence - *A. fumigatus*:977 *A. fischeri*:977

|                 |         |                 |         |
|-----------------|---------|-----------------|---------|
| afum EAL90634.1 | 100.00% | afis EAW22561.1 | 100.00% |
|-----------------|---------|-----------------|---------|

Bootstrap support for afum|EAL90634.1 as seed ortholog is 100%.

Bootstrap support for afis|EAW22561.1 as seed ortholog is 100%.

---

Group of orthologs #4270. Best score 977 bits

Score difference with first non-orthologous sequence - *A. fumigatus*:977 *A. fischeri*:977

|                 |         |                 |         |
|-----------------|---------|-----------------|---------|
| afum EAL90110.1 | 100.00% | afis EAW25451.1 | 100.00% |
|-----------------|---------|-----------------|---------|

Bootstrap support for afum|EAL90110.1 as seed ortholog is 100%.

Bootstrap support for afis|EAW25451.1 as seed ortholog is 100%.

---

Group of orthologs #4271. Best score 976 bits

Score difference with first non-orthologous sequence - *A. fumigatus*:976 *A. fischeri*:976

|                 |         |                 |         |
|-----------------|---------|-----------------|---------|
| afum EAL86926.1 | 100.00% | afis EAW19592.1 | 100.00% |
|-----------------|---------|-----------------|---------|

Bootstrap support for afum|EAL86926.1 as seed ortholog is 100%.

Bootstrap support for afis|EAW19592.1 as seed ortholog is 100%.



---

Group of orthologs #4272. Best score 976 bits

Score difference with first non-orthologous sequence - *A. fumigatus*:976 *A. fischeri*:976

afum|EAL91200.1 100.00% afis|EAW17363.1 100.00%

Bootstrap support for afum|EAL91200.1 as seed ortholog is 100%.

Bootstrap support for afis|EAW17363.1 as seed ortholog is 100%.

---

Group of orthologs #4273. Best score 976 bits

Score difference with first non-orthologous sequence - *A. fumigatus*:976 *A. fischeri*:976

afum|EAL91779.1 100.00% afis|EAW17970.1 100.00%

Bootstrap support for afum|EAL91779.1 as seed ortholog is 100%.

Bootstrap support for afis|EAW17970.1 as seed ortholog is 100%.

---

Group of orthologs #4274. Best score 976 bits

Score difference with first non-orthologous sequence - *A. fumigatus*:976 *A. fischeri*:553

afum|EAL86017.1 100.00% afis|EAW24347.1 100.00%

Bootstrap support for afum|EAL86017.1 as seed ortholog is 100%.

Bootstrap support for afis|EAW24347.1 as seed ortholog is 100%.

---

Group of orthologs #4275. Best score 976 bits

Score difference with first non-orthologous sequence - *A. fumigatus*:976 *A. fischeri*:976

afum|EAL89946.1 100.00% afis|EAW25283.1 100.00%

Bootstrap support for afum|EAL89946.1 as seed ortholog is 100%.

Bootstrap support for afis|EAW25283.1 as seed ortholog is 100%.

---

Group of orthologs #4276. Best score 976 bits

Score difference with first non-orthologous sequence - *A. fumigatus*:976 *A. fischeri*:976

afum|EAL90082.1 100.00% afis|EAW25423.1 100.00%

Bootstrap support for afum|EAL90082.1 as seed ortholog is 100%.

Bootstrap support for afis|EAW25423.1 as seed ortholog is 100%.

---

Group of orthologs #4277. Best score 976 bits

Score difference with first non-orthologous sequence - *A. fumigatus*:976 *A. fischeri*:879

afum|EAL90114.1 100.00% afis|EAW25455.1 100.00%

Bootstrap support for afum|EAL90114.1 as seed ortholog is 100%.

Bootstrap support for afis|EAW25455.1 as seed ortholog is 100%.

---

Group of orthologs #4278. Best score 975 bits

Score difference with first non-orthologous sequence - *A. fumigatus*:975 *A. fischeri*:975

afum|EAL85668.1 100.00% afis|EAW15680.1 100.00%

Bootstrap support for afum|EAL85668.1 as seed ortholog is 100%.

Bootstrap support for afis|EAW15680.1 as seed ortholog is 100%.

---

Group of orthologs #4279. Best score 975 bits

Score difference with first non-orthologous sequence - *A. fumigatus*:975 *A. fischeri*:975

afum|EAL93694.1 100.00% afis|EAW18962.1 100.00%

Bootstrap support for afum|EAL93694.1 as seed ortholog is 100%.

Bootstrap support for afis|EAW18962.1 as seed ortholog is 100%.

---

Group of orthologs #4280. Best score 974 bits

Score difference with first non-orthologous sequence - *A. fumigatus*:746 *A. fischeri*:815

afum|EAL86443.2 100.00% afis|EAW16906.1 100.00%

Bootstrap support for afum|EAL86443.2 as seed ortholog is 100%.

Bootstrap support for afis|EAW16906.1 as seed ortholog is 100%.

---

Group of orthologs #4281. Best score 974 bits

Score difference with first non-orthologous sequence - *A. fumigatus*:974 *A. fischeri*:974  
afum|EAL86678.1 100.00% afis|EAW17261.1 100.00%  
Bootstrap support for afum|EAL86678.1 as seed ortholog is 100%.  
Bootstrap support for afis|EAW17261.1 as seed ortholog is 100%.

---

Group of orthologs #4282. Best score 974 bits

Score difference with first non-orthologous sequence - *A. fumigatus*:974 *A. fischeri*:974  
afum|EAL88563.1 100.00% afis|EAW15927.1 100.00%  
Bootstrap support for afum|EAL88563.1 as seed ortholog is 100%.  
Bootstrap support for afis|EAW15927.1 as seed ortholog is 100%.

---

Group of orthologs #4283. Best score 974 bits

Score difference with first non-orthologous sequence - *A. fumigatus*:974 *A. fischeri*:610  
afum|EAL84740.1 100.00% afis|EAW20893.1 100.00%  
Bootstrap support for afum|EAL84740.1 as seed ortholog is 100%.  
Bootstrap support for afis|EAW20893.1 as seed ortholog is 100%.

---

Group of orthologs #4284. Best score 974 bits

Score difference with first non-orthologous sequence - *A. fumigatus*:974 *A. fischeri*:974  
afum|EAL91883.1 100.00% afis|EAW18071.1 100.00%  
Bootstrap support for afum|EAL91883.1 as seed ortholog is 100%.  
Bootstrap support for afis|EAW18071.1 as seed ortholog is 100%.

---

Group of orthologs #4285. Best score 974 bits

Score difference with first non-orthologous sequence - *A. fumigatus*:974 *A. fischeri*:974  
afum|EAL89726.1 100.00% afis|EAW25058.1 100.00%  
Bootstrap support for afum|EAL89726.1 as seed ortholog is 100%.  
Bootstrap support for afis|EAW25058.1 as seed ortholog is 100%.

---

Group of orthologs #4286. Best score 973 bits

Score difference with first non-orthologous sequence - *A. fumigatus*:973 *A. fischeri*:973  
afum|EAL85446.1 100.00% afis|EAW20318.1 100.00%  
Bootstrap support for afum|EAL85446.1 as seed ortholog is 100%.  
Bootstrap support for afis|EAW20318.1 as seed ortholog is 100%.

---

Group of orthologs #4287. Best score 973 bits

Score difference with first non-orthologous sequence - *A. fumigatus*:973 *A. fischeri*:973  
afum|EAL91607.1 100.00% afis|EAW17799.1 100.00%  
Bootstrap support for afum|EAL91607.1 as seed ortholog is 100%.  
Bootstrap support for afis|EAW17799.1 as seed ortholog is 100%.

---

Group of orthologs #4288. Best score 973 bits

Score difference with first non-orthologous sequence - *A. fumigatus*:973 *A. fischeri*:973  
afum|EAL90597.1 100.00% afis|EAW22601.1 100.00%  
Bootstrap support for afum|EAL90597.1 as seed ortholog is 100%.  
Bootstrap support for afis|EAW22601.1 as seed ortholog is 100%.

---

Group of orthologs #4289. Best score 973 bits

Score difference with first non-orthologous sequence - *A. fumigatus*:973 *A. fischeri*:973  
afum|EAL89478.1 100.00% afis|EAW24833.1 100.00%  
Bootstrap support for afum|EAL89478.1 as seed ortholog is 100%.  
Bootstrap support for afis|EAW24833.1 as seed ortholog is 100%.

---

Group of orthologs #4290. Best score 972 bits

Score difference with first non-orthologous sequence - *A. fumigatus*:972 *A. fischeri*:972  
afum|EAL85314.1 100.00% afis|EAW20194.1 100.00%

Bootstrap support for afum|EAL85314.1 as seed ortholog is 100%.  
Bootstrap support for afis|EAW20194.1 as seed ortholog is 100%.

---

Group of orthologs #4291. Best score 972 bits

Score difference with first non-orthologous sequence - *A. fumigatus*:972 *A. fischeri*:639

afum|EAL84304.1 100.00% afis|EAW25598.1 100.00%

Bootstrap support for afum|EAL84304.1 as seed ortholog is 100%.

Bootstrap support for afis|EAW25598.1 as seed ortholog is 100%.

---

Group of orthologs #4292. Best score 972 bits

Score difference with first non-orthologous sequence - *A. fumigatus*:972 *A. fischeri*:972

afum|EBA27273.1 100.00% afis|EAW16941.1 100.00%

Bootstrap support for afum|EBA27273.1 as seed ortholog is 100%.

Bootstrap support for afis|EAW16941.1 as seed ortholog is 100%.

---

Group of orthologs #4293. Best score 972 bits

Score difference with first non-orthologous sequence - *A. fumigatus*:972 *A. fischeri*:972

afum|EAL90189.1 100.00% afis|EAW25524.1 100.00%

Bootstrap support for afum|EAL90189.1 as seed ortholog is 100%.

Bootstrap support for afis|EAW25524.1 as seed ortholog is 100%.

---

Group of orthologs #4294. Best score 971 bits

Score difference with first non-orthologous sequence - *A. fumigatus*:870 *A. fischeri*:884

afum|EAL86429.1 100.00% afis|EAW16891.1 100.00%

Bootstrap support for afum|EAL86429.1 as seed ortholog is 100%.

Bootstrap support for afis|EAW16891.1 as seed ortholog is 100%.

---

Group of orthologs #4295. Best score 971 bits

Score difference with first non-orthologous sequence - *A. fumigatus*:971 *A. fischeri*:927

afum|EAL86694.1 100.00% afis|EAW17276.1 100.00%

Bootstrap support for afum|EAL86694.1 as seed ortholog is 100%.

Bootstrap support for afis|EAW17276.1 as seed ortholog is 100%.

---

Group of orthologs #4296. Best score 971 bits

Score difference with first non-orthologous sequence - *A. fumigatus*:729 *A. fischeri*:971

afum|EAL88561.1 100.00% afis|EAW15925.1 100.00%

Bootstrap support for afum|EAL88561.1 as seed ortholog is 100%.

Bootstrap support for afis|EAW15925.1 as seed ortholog is 100%.

---

Group of orthologs #4297. Best score 971 bits

Score difference with first non-orthologous sequence - *A. fumigatus*:971 *A. fischeri*:971

afum|EAL88814.1 100.00% afis|EAW16183.1 100.00%

Bootstrap support for afum|EAL88814.1 as seed ortholog is 100%.

Bootstrap support for afis|EAW16183.1 as seed ortholog is 100%.

---

Group of orthologs #4298. Best score 971 bits

Score difference with first non-orthologous sequence - *A. fumigatus*:971 *A. fischeri*:971

afum|EAL91379.1 100.00% afis|EAW17565.1 100.00%

Bootstrap support for afum|EAL91379.1 as seed ortholog is 100%.

Bootstrap support for afis|EAW17565.1 as seed ortholog is 100%.

---

Group of orthologs #4299. Best score 971 bits

Score difference with first non-orthologous sequence - *A. fumigatus*:971 *A. fischeri*:922

afum|EAL84355.1 100.00% afis|EAW25686.1 100.00%

Bootstrap support for afum|EAL84355.1 as seed ortholog is 100%.

Bootstrap support for afis|EAW25686.1 as seed ortholog is 100%.

---

Group of orthologs #4300. Best score 971 bits

Score difference with first non-orthologous sequence - *A. fumigatus*:971 *A. fischeri*:971  
afum|EAL88303.1 100.00% afis|EAW23180.1 100.00%  
Bootstrap support for afum|EAL88303.1 as seed ortholog is 100%.  
Bootstrap support for afis|EAW23180.1 as seed ortholog is 100%.

---

Group of orthologs #4301. Best score 971 bits

Score difference with first non-orthologous sequence - *A. fumigatus*:971 *A. fischeri*:971  
afum|EAL93337.1 100.00% afis|EAW18625.1 100.00%  
Bootstrap support for afum|EAL93337.1 as seed ortholog is 100%.  
Bootstrap support for afis|EAW18625.1 as seed ortholog is 100%.

---

Group of orthologs #4302. Best score 971 bits

Score difference with first non-orthologous sequence - *A. fumigatus*:971 *A. fischeri*:971  
afum|EAL93442.2 100.00% afis|EAW18718.1 100.00%  
Bootstrap support for afum|EAL93442.2 as seed ortholog is 100%.  
Bootstrap support for afis|EAW18718.1 as seed ortholog is 100%.

---

Group of orthologs #4303. Best score 971 bits

Score difference with first non-orthologous sequence - *A. fumigatus*:971 *A. fischeri*:971  
afum|EAL93887.1 100.00% afis|EAW19156.1 100.00%  
Bootstrap support for afum|EAL93887.1 as seed ortholog is 100%.  
Bootstrap support for afis|EAW19156.1 as seed ortholog is 100%.

---

Group of orthologs #4304. Best score 971 bits

Score difference with first non-orthologous sequence - *A. fumigatus*:971 *A. fischeri*:971  
afum|EAL93978.1 100.00% afis|EAW19249.1 100.00%  
Bootstrap support for afum|EAL93978.1 as seed ortholog is 100%.  
Bootstrap support for afis|EAW19249.1 as seed ortholog is 100%.

---

Group of orthologs #4305. Best score 970 bits

Score difference with first non-orthologous sequence - *A. fumigatus*:970 *A. fischeri*:970  
afum|EAL85689.1 100.00% afis|EAW15657.1 100.00%  
Bootstrap support for afum|EAL85689.1 as seed ortholog is 100%.  
Bootstrap support for afis|EAW15657.1 as seed ortholog is 100%.

---

Group of orthologs #4306. Best score 970 bits

Score difference with first non-orthologous sequence - *A. fumigatus*:970 *A. fischeri*:970  
afum|EAL85647.2 100.00% afis|EAW15701.1 100.00%  
Bootstrap support for afum|EAL85647.2 as seed ortholog is 100%.  
Bootstrap support for afis|EAW15701.1 as seed ortholog is 100%.

---

Group of orthologs #4307. Best score 970 bits

Score difference with first non-orthologous sequence - *A. fumigatus*:970 *A. fischeri*:970  
afum|EAL91398.2 100.00% afis|EAW17585.1 100.00%  
Bootstrap support for afum|EAL91398.2 as seed ortholog is 100%.  
Bootstrap support for afis|EAW17585.1 as seed ortholog is 100%.

---

Group of orthologs #4308. Best score 970 bits

Score difference with first non-orthologous sequence - *A. fumigatus*:970 *A. fischeri*:970  
afum|EAL89523.1 100.00% afis|EAW24873.1 100.00%  
Bootstrap support for afum|EAL89523.1 as seed ortholog is 100%.  
Bootstrap support for afis|EAW24873.1 as seed ortholog is 100%.

---

Group of orthologs #4309. Best score 970 bits

Score difference with first non-orthologous sequence - *A. fumigatus*:970 *A. fischeri*:970  
afum|EBA27386.1 100.00% afis|EAW24985.1 100.00%  
Bootstrap support for afum|EBA27386.1 as seed ortholog is 100%.  
Bootstrap support for afis|EAW24985.1 as seed ortholog is 100%.

---

Group of orthologs #4310. Best score 969 bits

Score difference with first non-orthologous sequence - *A. fumigatus*:969 *A. fischeri*:969  
afum|EAL87514.1 100.00% afis|EAW18155.1 100.00%  
Bootstrap support for afum|EAL87514.1 as seed ortholog is 100%.  
Bootstrap support for afis|EAW18155.1 as seed ortholog is 100%.

---

Group of orthologs #4311. Best score 969 bits

Score difference with first non-orthologous sequence - *A. fumigatus*:969 *A. fischeri*:969  
afum|EBA27504.1 100.00% afis|EAW19096.1 100.00%  
Bootstrap support for afum|EBA27504.1 as seed ortholog is 100%.  
Bootstrap support for afis|EAW19096.1 as seed ortholog is 100%.

---

Group of orthologs #4312. Best score 969 bits

Score difference with first non-orthologous sequence - *A. fumigatus*:969 *A. fischeri*:969  
afum|EAL89826.2 100.00% afis|EAW25151.1 100.00%  
Bootstrap support for afum|EAL89826.2 as seed ortholog is 100%.  
Bootstrap support for afis|EAW25151.1 as seed ortholog is 100%.

---

Group of orthologs #4313. Best score 968 bits

Score difference with first non-orthologous sequence - *A. fumigatus*:968 *A. fischeri*:920  
afum|EAL86405.2 100.00% afis|EAW16866.1 100.00%  
Bootstrap support for afum|EAL86405.2 as seed ortholog is 100%.  
Bootstrap support for afis|EAW16866.1 as seed ortholog is 100%.

---

Group of orthologs #4314. Best score 968 bits

Score difference with first non-orthologous sequence - *A. fumigatus*:686 *A. fischeri*:752  
afum|EAL87527.2 100.00% afis|EAW18167.1 100.00%  
Bootstrap support for afum|EAL87527.2 as seed ortholog is 100%.  
Bootstrap support for afis|EAW18167.1 as seed ortholog is 100%.

---

Group of orthologs #4315. Best score 968 bits

Score difference with first non-orthologous sequence - *A. fumigatus*:968 *A. fischeri*:968  
afum|EAL86240.1 100.00% afis|EAW24610.1 100.00%  
Bootstrap support for afum|EAL86240.1 as seed ortholog is 100%.  
Bootstrap support for afis|EAW24610.1 as seed ortholog is 100%.

---

Group of orthologs #4316. Best score 968 bits

Score difference with first non-orthologous sequence - *A. fumigatus*:968 *A. fischeri*:968  
afum|EAL90528.1 100.00% afis|EAW22664.1 100.00%  
Bootstrap support for afum|EAL90528.1 as seed ortholog is 100%.  
Bootstrap support for afis|EAW22664.1 as seed ortholog is 100%.

---

Group of orthologs #4317. Best score 968 bits

Score difference with first non-orthologous sequence - *A. fumigatus*:968 *A. fischeri*:968  
afum|EAL90340.1 100.00% afis|EAW22860.1 100.00%  
Bootstrap support for afum|EAL90340.1 as seed ortholog is 100%.  
Bootstrap support for afis|EAW22860.1 as seed ortholog is 100%.

---

Group of orthologs #4318. Best score 968 bits

Score difference with first non-orthologous sequence - *A. fumigatus*:968 *A. fischeri*:968  
afum|EAL90363.1 100.00% afis|EAW22840.1 100.00%

Bootstrap support for afum|EAL90363.1 as seed ortholog is 100%.  
Bootstrap support for afis|EAW22840.1 as seed ortholog is 100%.

---

Group of orthologs #4319. Best score 968 bits

Score difference with first non-orthologous sequence - *A. fumigatus*:968 *A. fischeri*:968

afum|EAL89414.2 100.00% afis|EAW24772.1 100.00%

Bootstrap support for afum|EAL89414.2 as seed ortholog is 100%.

Bootstrap support for afis|EAW24772.1 as seed ortholog is 100%.

---

Group of orthologs #4320. Best score 968 bits

Score difference with first non-orthologous sequence - *A. fumigatus*:968 *A. fischeri*:968

afum|EAL92805.1 100.00% afis|EAW21776.1 100.00%

Bootstrap support for afum|EAL92805.1 as seed ortholog is 100%.

Bootstrap support for afis|EAW21776.1 as seed ortholog is 100%.

---

Group of orthologs #4321. Best score 968 bits

Score difference with first non-orthologous sequence - *A. fumigatus*:968 *A. fischeri*:968

afum|EAL92846.1 100.00% afis|EAW21831.1 100.00%

Bootstrap support for afum|EAL92846.1 as seed ortholog is 100%.

Bootstrap support for afis|EAW21831.1 as seed ortholog is 100%.

---

Group of orthologs #4322. Best score 968 bits

Score difference with first non-orthologous sequence - *A. fumigatus*:968 *A. fischeri*:968

afum|EAL89750.1 100.00% afis|EAW25081.1 100.00%

Bootstrap support for afum|EAL89750.1 as seed ortholog is 100%.

Bootstrap support for afis|EAW25081.1 as seed ortholog is 100%.

---

Group of orthologs #4323. Best score 968 bits

Score difference with first non-orthologous sequence - *A. fumigatus*:968 *A. fischeri*:968

afum|EAL89785.1 100.00% afis|EAW25114.1 100.00%

Bootstrap support for afum|EAL89785.1 as seed ortholog is 100%.

Bootstrap support for afis|EAW25114.1 as seed ortholog is 100%.

---

Group of orthologs #4324. Best score 968 bits

Score difference with first non-orthologous sequence - *A. fumigatus*:868 *A. fischeri*:968

afum|EBA27264.1 100.00% afis|EAW21064.1 100.00%

Bootstrap support for afum|EBA27264.1 as seed ortholog is 100%.

Bootstrap support for afis|EAW21064.1 as seed ortholog is 100%.

---

Group of orthologs #4325. Best score 967 bits

Score difference with first non-orthologous sequence - *A. fumigatus*:967 *A. fischeri*:967

afum|EAL85751.1 100.00% afis|EAW15583.1 100.00%

Bootstrap support for afum|EAL85751.1 as seed ortholog is 100%.

Bootstrap support for afis|EAW15583.1 as seed ortholog is 100%.

---

Group of orthologs #4326. Best score 967 bits

Score difference with first non-orthologous sequence - *A. fumigatus*:967 *A. fischeri*:967

afum|EAL87393.1 100.00% afis|EAW23963.1 100.00%

Bootstrap support for afum|EAL87393.1 as seed ortholog is 100%.

Bootstrap support for afis|EAW23963.1 as seed ortholog is 100%.

---

Group of orthologs #4327. Best score 967 bits

Score difference with first non-orthologous sequence - *A. fumigatus*:967 *A. fischeri*:967

afum|EAL90468.2 100.00% afis|EAW22727.1 100.00%

Bootstrap support for afum|EAL90468.2 as seed ortholog is 100%.

Bootstrap support for afis|EAW22727.1 as seed ortholog is 100%.

---

Group of orthologs #4328. Best score 967 bits

Score difference with first non-orthologous sequence - *A. fumigatus*:967 *A. fischeri*:967

afum|EAL90260.1 100.00% afis|EAW22936.1 100.00%

Bootstrap support for afum|EAL90260.1 as seed ortholog is 100%.

Bootstrap support for afis|EAW22936.1 as seed ortholog is 100%.

---

Group of orthologs #4329. Best score 967 bits

Score difference with first non-orthologous sequence - *A. fumigatus*:967 *A. fischeri*:967

afum|EAL92377.1 100.00% afis|EAW21361.1 100.00%

Bootstrap support for afum|EAL92377.1 as seed ortholog is 100%.

Bootstrap support for afis|EAW21361.1 as seed ortholog is 100%.

---

Group of orthologs #4330. Best score 967 bits

Score difference with first non-orthologous sequence - *A. fumigatus*:967 *A. fischeri*:967

afum|EAL92912.1 100.00% afis|EAW21899.1 100.00%

Bootstrap support for afum|EAL92912.1 as seed ortholog is 100%.

Bootstrap support for afis|EAW21899.1 as seed ortholog is 100%.

---

Group of orthologs #4331. Best score 966 bits

Score difference with first non-orthologous sequence - *A. fumigatus*:966 *A. fischeri*:966

afum|EAL88641.1 100.00% afis|EAW16011.1 100.00%

Bootstrap support for afum|EAL88641.1 as seed ortholog is 100%.

Bootstrap support for afis|EAW16011.1 as seed ortholog is 100%.

---

Group of orthologs #4332. Best score 966 bits

Score difference with first non-orthologous sequence - *A. fumigatus*:966 *A. fischeri*:966

afum|EAL87577.1 100.00% afis|EAW18211.1 100.00%

Bootstrap support for afum|EAL87577.1 as seed ortholog is 100%.

Bootstrap support for afis|EAW18211.1 as seed ortholog is 100%.

---

Group of orthologs #4333. Best score 966 bits

Score difference with first non-orthologous sequence - *A. fumigatus*:966 *A. fischeri*:708

afum|EAL87098.1 100.00% afis|EAW19396.1 100.00%

Bootstrap support for afum|EAL87098.1 as seed ortholog is 100%.

Bootstrap support for afis|EAW19396.1 as seed ortholog is 100%.

---

Group of orthologs #4334. Best score 966 bits

Score difference with first non-orthologous sequence - *A. fumigatus*:966 *A. fischeri*:966

afum|EAL91466.1 100.00% afis|EAW17651.1 100.00%

Bootstrap support for afum|EAL91466.1 as seed ortholog is 100%.

Bootstrap support for afis|EAW17651.1 as seed ortholog is 100%.

---

Group of orthologs #4335. Best score 966 bits

Score difference with first non-orthologous sequence - *A. fumigatus*:966 *A. fischeri*:826

afum|EAL89236.1 100.00% afis|EAW20408.1 100.00%

Bootstrap support for afum|EAL89236.1 as seed ortholog is 100%.

Bootstrap support for afis|EAW20408.1 as seed ortholog is 100%.

---

Group of orthologs #4336. Best score 965 bits

Score difference with first non-orthologous sequence - *A. fumigatus*:965 *A. fischeri*:965

afum|EAL84440.1 100.00% afis|EAW20626.1 100.00%

Bootstrap support for afum|EAL84440.1 as seed ortholog is 100%.

Bootstrap support for afis|EAW20626.1 as seed ortholog is 100%.

---

Group of orthologs #4337. Best score 965 bits

Score difference with first non-orthologous sequence - *A. fumigatus*:965 *A. fischeri*:965  
afum|EAL85232.1 100.00% afis|EAW20115.1 100.00%  
Bootstrap support for afum|EAL85232.1 as seed ortholog is 100%.  
Bootstrap support for afis|EAW20115.1 as seed ortholog is 100%.

---

Group of orthologs #4338. Best score 965 bits

Score difference with first non-orthologous sequence - *A. fumigatus*:965 *A. fischeri*:965  
afum|EAL91836.1 100.00% afis|EAW18024.1 100.00%  
Bootstrap support for afum|EAL91836.1 as seed ortholog is 100%.  
Bootstrap support for afis|EAW18024.1 as seed ortholog is 100%.

---

Group of orthologs #4339. Best score 965 bits

Score difference with first non-orthologous sequence - *A. fumigatus*:965 *A. fischeri*:965  
afum|EAL85942.1 100.00% afis|EAW24274.1 100.00%  
Bootstrap support for afum|EAL85942.1 as seed ortholog is 100%.  
Bootstrap support for afis|EAW24274.1 as seed ortholog is 100%.

---

Group of orthologs #4340. Best score 965 bits

Score difference with first non-orthologous sequence - *A. fumigatus*:965 *A. fischeri*:965  
afum|EAL88436.1 100.00% afis|EAW23045.1 100.00%  
Bootstrap support for afum|EAL88436.1 as seed ortholog is 100%.  
Bootstrap support for afis|EAW23045.1 as seed ortholog is 100%.

---

Group of orthologs #4341. Best score 965 bits

Score difference with first non-orthologous sequence - *A. fumigatus*:965 *A. fischeri*:965  
afum|EAL88120.2 100.00% afis|EAW23356.1 100.00%  
Bootstrap support for afum|EAL88120.2 as seed ortholog is 100%.  
Bootstrap support for afis|EAW23356.1 as seed ortholog is 100%.

---

Group of orthologs #4342. Best score 965 bits

Score difference with first non-orthologous sequence - *A. fumigatus*:965 *A. fischeri*:965  
afum|EAL88255.1 100.00% afis|EAW23228.1 100.00%  
Bootstrap support for afum|EAL88255.1 as seed ortholog is 100%.  
Bootstrap support for afis|EAW23228.1 as seed ortholog is 100%.

---

Group of orthologs #4343. Best score 965 bits

Score difference with first non-orthologous sequence - *A. fumigatus*:965 *A. fischeri*:965  
afum|EAL90948.1 100.00% afis|EAW22245.1 100.00%  
Bootstrap support for afum|EAL90948.1 as seed ortholog is 100%.  
Bootstrap support for afis|EAW22245.1 as seed ortholog is 100%.

---

Group of orthologs #4344. Best score 965 bits

Score difference with first non-orthologous sequence - *A. fumigatus*:965 *A. fischeri*:965  
afum|EAL92165.1 100.00% afis|EAW21146.1 100.00%  
Bootstrap support for afum|EAL92165.1 as seed ortholog is 100%.  
Bootstrap support for afis|EAW21146.1 as seed ortholog is 100%.

---

Group of orthologs #4345. Best score 964 bits

Score difference with first non-orthologous sequence - *A. fumigatus*:964 *A. fischeri*:650  
afum|EAL86377.1 100.00% afis|EAW16829.1 100.00%  
Bootstrap support for afum|EAL86377.1 as seed ortholog is 100%.  
Bootstrap support for afis|EAW16829.1 as seed ortholog is 100%.

---

Group of orthologs #4346. Best score 964 bits

Score difference with first non-orthologous sequence - *A. fumigatus*:964 *A. fischeri*:964  
afum|EAL84932.1 100.00% afis|EAW19984.1 100.00%



Bootstrap support for afum|EAL84932.1 as seed ortholog is 100%.  
Bootstrap support for afis|EAW19984.1 as seed ortholog is 100%.

---

Group of orthologs #4347. Best score 964 bits

Score difference with first non-orthologous sequence - *A. fumigatus*:964 *A. fischeri*:964

afum|EAL89011.1 100.00% afis|EAW16383.1 100.00%

Bootstrap support for afum|EAL89011.1 as seed ortholog is 100%.

Bootstrap support for afis|EAW16383.1 as seed ortholog is 100%.

---

Group of orthologs #4348. Best score 964 bits

Score difference with first non-orthologous sequence - *A. fumigatus*:835 *A. fischeri*:800

afum|EAL86243.1 100.00% afis|EAW24613.1 100.00%

Bootstrap support for afum|EAL86243.1 as seed ortholog is 100%.

Bootstrap support for afis|EAW24613.1 as seed ortholog is 100%.

---

Group of orthologs #4349. Best score 964 bits

Score difference with first non-orthologous sequence - *A. fumigatus*:964 *A. fischeri*:964

afum|EAL92177.1 100.00% afis|EAW21159.1 100.00%

Bootstrap support for afum|EAL92177.1 as seed ortholog is 100%.

Bootstrap support for afis|EAW21159.1 as seed ortholog is 100%.

---

Group of orthologs #4350. Best score 963 bits

Score difference with first non-orthologous sequence - *A. fumigatus*:963 *A. fischeri*:963

afum|EAL85632.1 100.00% afis|EAW15716.1 100.00%

Bootstrap support for afum|EAL85632.1 as seed ortholog is 100%.

Bootstrap support for afis|EAW15716.1 as seed ortholog is 100%.

---

Group of orthologs #4351. Best score 963 bits

Score difference with first non-orthologous sequence - *A. fumigatus*:963 *A. fischeri*:963

afum|EAL87062.1 100.00% afis|EAW19433.1 100.00%

Bootstrap support for afum|EAL87062.1 as seed ortholog is 100%.

Bootstrap support for afis|EAW19433.1 as seed ortholog is 100%.

---

Group of orthologs #4352. Best score 963 bits

Score difference with first non-orthologous sequence - *A. fumigatus*:963 *A. fischeri*:963

afum|EAL92410.1 100.00% afis|EAW21396.1 100.00%

Bootstrap support for afum|EAL92410.1 as seed ortholog is 100%.

Bootstrap support for afis|EAW21396.1 as seed ortholog is 100%.

---

Group of orthologs #4353. Best score 962 bits

Score difference with first non-orthologous sequence - *A. fumigatus*:859 *A. fischeri*:878

afum|EAL91300.1 100.00% afis|EAW17471.1 100.00%

Bootstrap support for afum|EAL91300.1 as seed ortholog is 100%.

Bootstrap support for afis|EAW17471.1 as seed ortholog is 100%.

---

Group of orthologs #4354. Best score 962 bits

Score difference with first non-orthologous sequence - *A. fumigatus*:962 *A. fischeri*:962

afum|EAL92091.1 100.00% afis|EAW21055.1 100.00%

Bootstrap support for afum|EAL92091.1 as seed ortholog is 100%.

Bootstrap support for afis|EAW21055.1 as seed ortholog is 100%.

---

Group of orthologs #4355. Best score 962 bits

Score difference with first non-orthologous sequence - *A. fumigatus*:962 *A. fischeri*:962

afum|EAL91059.1 100.00% afis|EAW22131.1 100.00%

Bootstrap support for afum|EAL91059.1 as seed ortholog is 100%.

Bootstrap support for afis|EAW22131.1 as seed ortholog is 100%.

---

Group of orthologs #4356. Best score 962 bits

Score difference with first non-orthologous sequence - *A. fumigatus*:962 *A. fischeri*:962

afum|EAL90857.2 100.00% afis|EAW22335.1 100.00%

Bootstrap support for afum|EAL90857.2 as seed ortholog is 100%.

Bootstrap support for afis|EAW22335.1 as seed ortholog is 100%.

---

Group of orthologs #4357. Best score 962 bits

Score difference with first non-orthologous sequence - *A. fumigatus*:962 *A. fischeri*:962

afum|EAL90662.1 100.00% afis|EAW22532.1 100.00%

Bootstrap support for afum|EAL90662.1 as seed ortholog is 100%.

Bootstrap support for afis|EAW22532.1 as seed ortholog is 100%.

---

Group of orthologs #4358. Best score 961 bits

Score difference with first non-orthologous sequence - *A. fumigatus*:961 *A. fischeri*:961

afum|EAL85255.1 100.00% afis|EAW20140.1 100.00%

Bootstrap support for afum|EAL85255.1 as seed ortholog is 100%.

Bootstrap support for afis|EAW20140.1 as seed ortholog is 100%.

---

Group of orthologs #4359. Best score 961 bits

Score difference with first non-orthologous sequence - *A. fumigatus*:961 *A. fischeri*:961

afum|EAL85696.1 100.00% afis|EAW22087.1 100.00%

Bootstrap support for afum|EAL85696.1 as seed ortholog is 100%.

Bootstrap support for afis|EAW22087.1 as seed ortholog is 100%.

---

Group of orthologs #4360. Best score 961 bits

Score difference with first non-orthologous sequence - *A. fumigatus*:961 *A. fischeri*:961

afum|EAL91716.2 100.00% afis|EAW17907.1 100.00%

Bootstrap support for afum|EAL91716.2 as seed ortholog is 100%.

Bootstrap support for afis|EAW17907.1 as seed ortholog is 100%.

---

Group of orthologs #4361. Best score 961 bits

Score difference with first non-orthologous sequence - *A. fumigatus*:961 *A. fischeri*:961

afum|EAL87355.1 100.00% afis|EAW23930.1 100.00%

Bootstrap support for afum|EAL87355.1 as seed ortholog is 100%.

Bootstrap support for afis|EAW23930.1 as seed ortholog is 100%.

---

Group of orthologs #4362. Best score 961 bits

Score difference with first non-orthologous sequence - *A. fumigatus*:961 *A. fischeri*:961

afum|EAL93172.1 100.00% afis|EAW18483.1 100.00%

Bootstrap support for afum|EAL93172.1 as seed ortholog is 100%.

Bootstrap support for afis|EAW18483.1 as seed ortholog is 100%.

---

Group of orthologs #4363. Best score 961 bits

Score difference with first non-orthologous sequence - *A. fumigatus*:961 *A. fischeri*:961

afum|EAL88479.2 100.00% afis|EAW23001.1 100.00%

Bootstrap support for afum|EAL88479.2 as seed ortholog is 100%.

Bootstrap support for afis|EAW23001.1 as seed ortholog is 100%.

---

Group of orthologs #4364. Best score 961 bits

Score difference with first non-orthologous sequence - *A. fumigatus*:961 *A. fischeri*:961

afum|EAL88378.2 100.00% afis|EAW23100.1 100.00%

Bootstrap support for afum|EAL88378.2 as seed ortholog is 100%.

Bootstrap support for afis|EAW23100.1 as seed ortholog is 100%.

---

Group of orthologs #4365. Best score 961 bits

Score difference with first non-orthologous sequence - *A. fumigatus*:961 *A. fischeri*:961  
afum|EAL93257.1 100.00% afis|EAW18557.1 100.00%  
Bootstrap support for afum|EAL93257.1 as seed ortholog is 100%.  
Bootstrap support for afis|EAW18557.1 as seed ortholog is 100%.

---

Group of orthologs #4366. Best score 961 bits

Score difference with first non-orthologous sequence - *A. fumigatus*:961 *A. fischeri*:961  
afum|EAL93552.1 100.00% afis|EAW18816.1 100.00%  
Bootstrap support for afum|EAL93552.1 as seed ortholog is 100%.  
Bootstrap support for afis|EAW18816.1 as seed ortholog is 100%.

---

Group of orthologs #4367. Best score 961 bits

Score difference with first non-orthologous sequence - *A. fumigatus*:961 *A. fischeri*:961  
afum|EAL94041.1 100.00% afis|EAW19323.1 100.00%  
Bootstrap support for afum|EAL94041.1 as seed ortholog is 100%.  
Bootstrap support for afis|EAW19323.1 as seed ortholog is 100%.

---

Group of orthologs #4368. Best score 961 bits

Score difference with first non-orthologous sequence - *A. fumigatus*:961 *A. fischeri*:961  
afum|EAL90805.1 100.00% afis|EAW22385.1 100.00%  
Bootstrap support for afum|EAL90805.1 as seed ortholog is 100%.  
Bootstrap support for afis|EAW22385.1 as seed ortholog is 100%.

---

Group of orthologs #4369. Best score 961 bits

Score difference with first non-orthologous sequence - *A. fumigatus*:730 *A. fischeri*:652  
afum|EAL90771.1 100.00% afis|EAW22421.1 100.00%  
Bootstrap support for afum|EAL90771.1 as seed ortholog is 100%.  
Bootstrap support for afis|EAW22421.1 as seed ortholog is 100%.

---

Group of orthologs #4370. Best score 961 bits

Score difference with first non-orthologous sequence - *A. fumigatus*:961 *A. fischeri*:961  
afum|EAL90576.1 100.00% afis|EAW22620.1 100.00%  
Bootstrap support for afum|EAL90576.1 as seed ortholog is 100%.  
Bootstrap support for afis|EAW22620.1 as seed ortholog is 100%.

---

Group of orthologs #4371. Best score 961 bits

Score difference with first non-orthologous sequence - *A. fumigatus*:842 *A. fischeri*:961  
afum|EAL90285.1 100.00% afis|EAW22912.1 100.00%  
Bootstrap support for afum|EAL90285.1 as seed ortholog is 100%.  
Bootstrap support for afis|EAW22912.1 as seed ortholog is 100%.

---

Group of orthologs #4372. Best score 960 bits

Score difference with first non-orthologous sequence - *A. fumigatus*:960 *A. fischeri*:960  
afum|EAL85641.1 100.00% afis|EAW15706.1 100.00%  
Bootstrap support for afum|EAL85641.1 as seed ortholog is 100%.  
Bootstrap support for afis|EAW15706.1 as seed ortholog is 100%.

---

Group of orthologs #4373. Best score 960 bits

Score difference with first non-orthologous sequence - *A. fumigatus*:960 *A. fischeri*:960  
afum|EAL84513.1 100.00% afis|EAW20546.1 100.00%  
Bootstrap support for afum|EAL84513.1 as seed ortholog is 100%.  
Bootstrap support for afis|EAW20546.1 as seed ortholog is 100%.

---

Group of orthologs #4374. Best score 960 bits

Score difference with first non-orthologous sequence - *A. fumigatus*:960 *A. fischeri*:960  
afum|EAL93981.1 100.00% afis|EAW19252.1 100.00%

Bootstrap support for afum|EAL93981.1 as seed ortholog is 100%.  
Bootstrap support for afis|EAW19252.1 as seed ortholog is 100%.

---

Group of orthologs #4375. Best score 960 bits

Score difference with first non-orthologous sequence - *A. fumigatus*:960 *A. fischeri*:960

afum|EAL90257.1 100.00% afis|EAW22939.1 100.00%

Bootstrap support for afum|EAL90257.1 as seed ortholog is 100%.

Bootstrap support for afis|EAW22939.1 as seed ortholog is 100%.

---

Group of orthologs #4376. Best score 960 bits

Score difference with first non-orthologous sequence - *A. fumigatus*:960 *A. fischeri*:960

afum|EAL89656.1 100.00% afis|EAW24995.1 100.00%

Bootstrap support for afum|EAL89656.1 as seed ortholog is 100%.

Bootstrap support for afis|EAW24995.1 as seed ortholog is 100%.

---

Group of orthologs #4377. Best score 959 bits

Score difference with first non-orthologous sequence - *A. fumigatus*:828 *A. fischeri*:866

afum|EAL85369.1 100.00% afis|EAW20251.1 100.00%

Bootstrap support for afum|EAL85369.1 as seed ortholog is 100%.

Bootstrap support for afis|EAW20251.1 as seed ortholog is 100%.

---

Group of orthologs #4378. Best score 959 bits

Score difference with first non-orthologous sequence - *A. fumigatus*:959 *A. fischeri*:959

afum|EAL84385.1 100.00% afis|EAW25713.1 100.00%

Bootstrap support for afum|EAL84385.1 as seed ortholog is 100%.

Bootstrap support for afis|EAW25713.1 as seed ortholog is 100%.

---

Group of orthologs #4379. Best score 959 bits

Score difference with first non-orthologous sequence - *A. fumigatus*:959 *A. fischeri*:421

afum|EAL84398.1 100.00% afis|EAW25725.1 100.00%

Bootstrap support for afum|EAL84398.1 as seed ortholog is 100%.

Bootstrap support for afis|EAW25725.1 as seed ortholog is 100%.

---

Group of orthologs #4380. Best score 959 bits

Score difference with first non-orthologous sequence - *A. fumigatus*:959 *A. fischeri*:513

afum|EAL86194.1 100.00% afis|EAW24529.1 100.00%

Bootstrap support for afum|EAL86194.1 as seed ortholog is 100%.

Bootstrap support for afis|EAW24529.1 as seed ortholog is 100%.

---

Group of orthologs #4381. Best score 959 bits

Score difference with first non-orthologous sequence - *A. fumigatus*:959 *A. fischeri*:959

afum|EAL88412.1 100.00% afis|EAW23067.1 100.00%

Bootstrap support for afum|EAL88412.1 as seed ortholog is 100%.

Bootstrap support for afis|EAW23067.1 as seed ortholog is 100%.

---

Group of orthologs #4382. Best score 959 bits

Score difference with first non-orthologous sequence - *A. fumigatus*:959 *A. fischeri*:832

afum|EAL93335.1 100.00% afis|EAW18624.1 100.00%

Bootstrap support for afum|EAL93335.1 as seed ortholog is 100%.

Bootstrap support for afis|EAW18624.1 as seed ortholog is 100%.

---

Group of orthologs #4383. Best score 959 bits

Score difference with first non-orthologous sequence - *A. fumigatus*:959 *A. fischeri*:959

afum|EAL91058.1 100.00% afis|EAW22132.1 100.00%

Bootstrap support for afum|EAL91058.1 as seed ortholog is 100%.

Bootstrap support for afis|EAW22132.1 as seed ortholog is 100%.

---

Group of orthologs #4384. Best score 959 bits

Score difference with first non-orthologous sequence - *A. fumigatus*:959 *A. fischeri*:959

afum|EAL92460.1 100.00% afis|EAW21442.1 100.00%

Bootstrap support for afum|EAL92460.1 as seed ortholog is 100%.

Bootstrap support for afis|EAW21442.1 as seed ortholog is 100%.

---

Group of orthologs #4385. Best score 959 bits

Score difference with first non-orthologous sequence - *A. fumigatus*:959 *A. fischeri*:959

afum|EAL89329.1 100.00% afis|EAW24688.1 100.00%

Bootstrap support for afum|EAL89329.1 as seed ortholog is 100%.

Bootstrap support for afis|EAW24688.1 as seed ortholog is 100%.

---

Group of orthologs #4386. Best score 959 bits

Score difference with first non-orthologous sequence - *A. fumigatus*:868 *A. fischeri*:959

afum|EAL89780.2 100.00% afis|EAW25109.1 100.00%

Bootstrap support for afum|EAL89780.2 as seed ortholog is 100%.

Bootstrap support for afis|EAW25109.1 as seed ortholog is 100%.

---

Group of orthologs #4387. Best score 958 bits

Score difference with first non-orthologous sequence - *A. fumigatus*:958 *A. fischeri*:958

afum|EAL88811.1 100.00% afis|EAW16178.1 100.00%

Bootstrap support for afum|EAL88811.1 as seed ortholog is 100%.

Bootstrap support for afis|EAW16178.1 as seed ortholog is 100%.

---

Group of orthologs #4388. Best score 958 bits

Score difference with first non-orthologous sequence - *A. fumigatus*:958 *A. fischeri*:373

afum|EAL84505.1 100.00% afis|EAW20556.1 100.00%

Bootstrap support for afum|EAL84505.1 as seed ortholog is 100%.

Bootstrap support for afis|EAW20556.1 as seed ortholog is 100%.

---

Group of orthologs #4389. Best score 958 bits

Score difference with first non-orthologous sequence - *A. fumigatus*:702 *A. fischeri*:699

afum|EAL84852.1 100.00% afis|EAW20767.1 100.00%

Bootstrap support for afum|EAL84852.1 as seed ortholog is 100%.

Bootstrap support for afis|EAW20767.1 as seed ortholog is 100%.

---

Group of orthologs #4390. Best score 958 bits

Score difference with first non-orthologous sequence - *A. fumigatus*:958 *A. fischeri*:958

afum|EAL86828.1 100.00% afis|EAW19699.1 100.00%

Bootstrap support for afum|EAL86828.1 as seed ortholog is 100%.

Bootstrap support for afis|EAW19699.1 as seed ortholog is 100%.

---

Group of orthologs #4391. Best score 958 bits

Score difference with first non-orthologous sequence - *A. fumigatus*:958 *A. fischeri*:958

afum|EAL86076.1 100.00% afis|EAW24405.1 100.00%

Bootstrap support for afum|EAL86076.1 as seed ortholog is 100%.

Bootstrap support for afis|EAW24405.1 as seed ortholog is 100%.

---

Group of orthologs #4392. Best score 958 bits

Score difference with first non-orthologous sequence - *A. fumigatus*:958 *A. fischeri*:958

afum|EAL93486.1 100.00% afis|EAW18757.1 100.00%

Bootstrap support for afum|EAL93486.1 as seed ortholog is 100%.

Bootstrap support for afis|EAW18757.1 as seed ortholog is 100%.

---

Group of orthologs #4393. Best score 958 bits

Score difference with first non-orthologous sequence - *A. fumigatus*:958 *A. fischeri*:958  
afum|EAL90844.1 100.00% afis|EAW22348.1 100.00%  
Bootstrap support for afum|EAL90844.1 as seed ortholog is 100%.  
Bootstrap support for afis|EAW22348.1 as seed ortholog is 100%.

---

Group of orthologs #4394. Best score 958 bits

Score difference with first non-orthologous sequence - *A. fumigatus*:958 *A. fischeri*:958  
afum|EAL89610.1 100.00% afis|EAW24953.1 100.00%  
Bootstrap support for afum|EAL89610.1 as seed ortholog is 100%.  
Bootstrap support for afis|EAW24953.1 as seed ortholog is 100%.

---

Group of orthologs #4395. Best score 957 bits

Score difference with first non-orthologous sequence - *A. fumigatus*:957 *A. fischeri*:957  
afum|EAL85487.1 100.00% afis|EAW20373.1 100.00%  
Bootstrap support for afum|EAL85487.1 as seed ortholog is 100%.  
Bootstrap support for afis|EAW20373.1 as seed ortholog is 100%.

---

Group of orthologs #4396. Best score 957 bits

Score difference with first non-orthologous sequence - *A. fumigatus*:957 *A. fischeri*:957  
afum|EAL91417.1 100.00% afis|EAW17604.1 100.00%  
Bootstrap support for afum|EAL91417.1 as seed ortholog is 100%.  
Bootstrap support for afis|EAW17604.1 as seed ortholog is 100%.

---

Group of orthologs #4397. Best score 957 bits

Score difference with first non-orthologous sequence - *A. fumigatus*:957 *A. fischeri*:957  
afum|EAL87999.1 100.00% afis|EAW23467.1 100.00%  
Bootstrap support for afum|EAL87999.1 as seed ortholog is 100%.  
Bootstrap support for afis|EAW23467.1 as seed ortholog is 100%.

---

Group of orthologs #4398. Best score 956 bits

Score difference with first non-orthologous sequence - *A. fumigatus*:956 *A. fischeri*:956  
afum|EAL89299.1 100.00% afis|EAW16711.1 100.00%  
Bootstrap support for afum|EAL89299.1 as seed ortholog is 100%.  
Bootstrap support for afis|EAW16711.1 as seed ortholog is 100%.

---

Group of orthologs #4399. Best score 956 bits

Score difference with first non-orthologous sequence - *A. fumigatus*:956 *A. fischeri*:956  
afum|EAL91876.1 100.00% afis|EAW18064.1 100.00%  
Bootstrap support for afum|EAL91876.1 as seed ortholog is 100%.  
Bootstrap support for afis|EAW18064.1 as seed ortholog is 100%.

---

Group of orthologs #4400. Best score 956 bits

Score difference with first non-orthologous sequence - *A. fumigatus*:956 *A. fischeri*:956  
afum|EAL87119.1 100.00% afis|EAW23676.1 100.00%  
Bootstrap support for afum|EAL87119.1 as seed ortholog is 100%.  
Bootstrap support for afis|EAW23676.1 as seed ortholog is 100%.

---

Group of orthologs #4401. Best score 956 bits

Score difference with first non-orthologous sequence - *A. fumigatus*:956 *A. fischeri*:956  
afum|EAL92218.1 100.00% afis|EAW21207.1 100.00%  
Bootstrap support for afum|EAL92218.1 as seed ortholog is 100%.  
Bootstrap support for afis|EAW21207.1 as seed ortholog is 100%.

---

Group of orthologs #4402. Best score 956 bits

Score difference with first non-orthologous sequence - *A. fumigatus*:956 *A. fischeri*:897  
afum|EAL92626.1 100.00% afis|EAW21607.1 100.00%

Bootstrap support for afum|EAL92626.1 as seed ortholog is 100%.  
Bootstrap support for afis|EAW21607.1 as seed ortholog is 100%.

---

Group of orthologs #4403. Best score 955 bits

Score difference with first non-orthologous sequence - *A. fumigatus*:955 *A. fischeri*:798

afum|EAL85527.1 100.00% afis|EAW15824.1 100.00%

Bootstrap support for afum|EAL85527.1 as seed ortholog is 100%.

Bootstrap support for afis|EAW15824.1 as seed ortholog is 100%.

---

Group of orthologs #4404. Best score 955 bits

Score difference with first non-orthologous sequence - *A. fumigatus*:701 *A. fischeri*:770

afum|EAL86384.1 100.00% afis|EAW16836.1 100.00%

Bootstrap support for afum|EAL86384.1 as seed ortholog is 100%.

Bootstrap support for afis|EAW16836.1 as seed ortholog is 100%.

---

Group of orthologs #4405. Best score 955 bits

Score difference with first non-orthologous sequence - *A. fumigatus*:886 *A. fischeri*:833

afum|EAL86437.1 100.00% afis|EAW16902.1 100.00%

Bootstrap support for afum|EAL86437.1 as seed ortholog is 100%.

Bootstrap support for afis|EAW16902.1 as seed ortholog is 100%.

---

Group of orthologs #4406. Best score 955 bits

Score difference with first non-orthologous sequence - *A. fumigatus*:955 *A. fischeri*:955

afum|EAL88992.2 100.00% afis|EAW16367.1 100.00%

Bootstrap support for afum|EAL88992.2 as seed ortholog is 100%.

Bootstrap support for afis|EAW16367.1 as seed ortholog is 100%.

---

Group of orthologs #4407. Best score 955 bits

Score difference with first non-orthologous sequence - *A. fumigatus*:538 *A. fischeri*:955

afum|EAL84490.1 100.00% afis|EAW20575.1 100.00%

Bootstrap support for afum|EAL84490.1 as seed ortholog is 100%.

Bootstrap support for afis|EAW20575.1 as seed ortholog is 100%.

---

Group of orthologs #4408. Best score 955 bits

Score difference with first non-orthologous sequence - *A. fumigatus*:692 *A. fischeri*:694

afum|EAL91584.2 100.00% afis|EAW17776.1 100.00%

Bootstrap support for afum|EAL91584.2 as seed ortholog is 100%.

Bootstrap support for afis|EAW17776.1 as seed ortholog is 100%.

---

Group of orthologs #4409. Best score 955 bits

Score difference with first non-orthologous sequence - *A. fumigatus*:882 *A. fischeri*:955

afum|EAL93053.1 100.00% afis|EAW18378.1 100.00%

Bootstrap support for afum|EAL93053.1 as seed ortholog is 100%.

Bootstrap support for afis|EAW18378.1 as seed ortholog is 100%.

---

Group of orthologs #4410. Best score 955 bits

Score difference with first non-orthologous sequence - *A. fumigatus*:955 *A. fischeri*:955

afum|EAL88171.1 100.00% afis|EAW23306.1 100.00%

Bootstrap support for afum|EAL88171.1 as seed ortholog is 100%.

Bootstrap support for afis|EAW23306.1 as seed ortholog is 100%.

---

Group of orthologs #4411. Best score 955 bits

Score difference with first non-orthologous sequence - *A. fumigatus*:955 *A. fischeri*:955

afum|EAL93479.1 100.00% afis|EAW18752.1 100.00%

Bootstrap support for afum|EAL93479.1 as seed ortholog is 100%.

Bootstrap support for afis|EAW18752.1 as seed ortholog is 100%.

---

Group of orthologs #4412. Best score 955 bits

Score difference with first non-orthologous sequence - *A. fumigatus*:955 *A. fischeri*:955

|                 |         |                 |         |
|-----------------|---------|-----------------|---------|
| afum EAL89520.1 | 100.00% | afis EAW24870.1 | 100.00% |
|-----------------|---------|-----------------|---------|

Bootstrap support for afum|EAL89520.1 as seed ortholog is 100%.

Bootstrap support for afis|EAW24870.1 as seed ortholog is 100%.

---

Group of orthologs #4413. Best score 955 bits

Score difference with first non-orthologous sequence - *A. fumigatus*:955 *A. fischeri*:955

|                 |         |                 |         |
|-----------------|---------|-----------------|---------|
| afum EAL89934.1 | 100.00% | afis EAW25271.1 | 100.00% |
|-----------------|---------|-----------------|---------|

Bootstrap support for afum|EAL89934.1 as seed ortholog is 100%.

Bootstrap support for afis|EAW25271.1 as seed ortholog is 100%.

---

Group of orthologs #4414. Best score 955 bits

Score difference with first non-orthologous sequence - *A. fumigatus*:955 *A. fischeri*:955

|                 |         |                 |         |
|-----------------|---------|-----------------|---------|
| afum EAL92021.1 | 100.00% | afis EAW24164.1 | 100.00% |
|-----------------|---------|-----------------|---------|

Bootstrap support for afum|EAL92021.1 as seed ortholog is 100%.

Bootstrap support for afis|EAW24164.1 as seed ortholog is 100%.

---

Group of orthologs #4415. Best score 954 bits

Score difference with first non-orthologous sequence - *A. fumigatus*:954 *A. fischeri*:954

|                 |         |                 |         |
|-----------------|---------|-----------------|---------|
| afum EAL88758.1 | 100.00% | afis EAW16128.1 | 100.00% |
|-----------------|---------|-----------------|---------|

Bootstrap support for afum|EAL88758.1 as seed ortholog is 100%.

Bootstrap support for afis|EAW16128.1 as seed ortholog is 100%.

---

Group of orthologs #4416. Best score 954 bits

Score difference with first non-orthologous sequence - *A. fumigatus*:954 *A. fischeri*:954

|                 |         |                 |         |
|-----------------|---------|-----------------|---------|
| afum EAL92139.1 | 100.00% | afis EAW21116.1 | 100.00% |
|-----------------|---------|-----------------|---------|

Bootstrap support for afum|EAL92139.1 as seed ortholog is 100%.

Bootstrap support for afis|EAW21116.1 as seed ortholog is 100%.

---

Group of orthologs #4417. Best score 954 bits

Score difference with first non-orthologous sequence - *A. fumigatus*:668 *A. fischeri*:954

|                 |         |                 |         |
|-----------------|---------|-----------------|---------|
| afum EAL89779.1 | 100.00% | afis EAW25108.1 | 100.00% |
|-----------------|---------|-----------------|---------|

Bootstrap support for afum|EAL89779.1 as seed ortholog is 100%.

Bootstrap support for afis|EAW25108.1 as seed ortholog is 100%.

---

Group of orthologs #4418. Best score 953 bits

Score difference with first non-orthologous sequence - *A. fumigatus*:953 *A. fischeri*:953

|                 |         |                 |         |
|-----------------|---------|-----------------|---------|
| afum EAL84686.1 | 100.00% | afis EAW20948.1 | 100.00% |
|-----------------|---------|-----------------|---------|

Bootstrap support for afum|EAL84686.1 as seed ortholog is 100%.

Bootstrap support for afis|EAW20948.1 as seed ortholog is 100%.

---

Group of orthologs #4419. Best score 953 bits

Score difference with first non-orthologous sequence - *A. fumigatus*:953 *A. fischeri*:953

|                 |         |                 |         |
|-----------------|---------|-----------------|---------|
| afum EAL88416.1 | 100.00% | afis EAW23063.1 | 100.00% |
|-----------------|---------|-----------------|---------|

Bootstrap support for afum|EAL88416.1 as seed ortholog is 100%.

Bootstrap support for afis|EAW23063.1 as seed ortholog is 100%.

---

Group of orthologs #4420. Best score 953 bits

Score difference with first non-orthologous sequence - *A. fumigatus*:953 *A. fischeri*:953

|                 |         |                 |         |
|-----------------|---------|-----------------|---------|
| afum EAL92069.1 | 100.00% | afis EAW21030.1 | 100.00% |
|-----------------|---------|-----------------|---------|

Bootstrap support for afum|EAL92069.1 as seed ortholog is 100%.

Bootstrap support for afis|EAW21030.1 as seed ortholog is 100%.

---

Group of orthologs #4421. Best score 953 bits



Score difference with first non-orthologous sequence - *A. fumigatus*:953 *A. fischeri*:853  
afum|EAL92441.1 100.00% afis|EAW21426.1 100.00%  
Bootstrap support for afum|EAL92441.1 as seed ortholog is 100%.  
Bootstrap support for afis|EAW21426.1 as seed ortholog is 100%.

---

Group of orthologs #4422. Best score 952 bits

Score difference with first non-orthologous sequence - *A. fumigatus*:952 *A. fischeri*:952  
afum|EAL84876.1 100.00% afis|EAW20701.1 100.00%  
Bootstrap support for afum|EAL84876.1 as seed ortholog is 100%.  
Bootstrap support for afis|EAW20701.1 as seed ortholog is 100%.

---

Group of orthologs #4423. Best score 952 bits

Score difference with first non-orthologous sequence - *A. fumigatus*:952 *A. fischeri*:952  
afum|EAL93458.1 100.00% afis|EAW18733.1 100.00%  
Bootstrap support for afum|EAL93458.1 as seed ortholog is 100%.  
Bootstrap support for afis|EAW18733.1 as seed ortholog is 100%.

---

Group of orthologs #4424. Best score 952 bits

Score difference with first non-orthologous sequence - *A. fumigatus*:952 *A. fischeri*:952  
afum|EAL93466.1 100.00% afis|EAW18740.1 100.00%  
Bootstrap support for afum|EAL93466.1 as seed ortholog is 100%.  
Bootstrap support for afis|EAW18740.1 as seed ortholog is 100%.

---

Group of orthologs #4425. Best score 952 bits

Score difference with first non-orthologous sequence - *A. fumigatus*:952 *A. fischeri*:952  
afum|EAL90254.1 100.00% afis|EAW22943.1 100.00%  
Bootstrap support for afum|EAL90254.1 as seed ortholog is 100%.  
Bootstrap support for afis|EAW22943.1 as seed ortholog is 100%.

---

Group of orthologs #4426. Best score 952 bits

Score difference with first non-orthologous sequence - *A. fumigatus*:952 *A. fischeri*:952  
afum|EAL92552.1 100.00% afis|EAW21531.1 100.00%  
Bootstrap support for afum|EAL92552.1 as seed ortholog is 100%.  
Bootstrap support for afis|EAW21531.1 as seed ortholog is 100%.

---

Group of orthologs #4427. Best score 951 bits

Score difference with first non-orthologous sequence - *A. fumigatus*:951 *A. fischeri*:951  
afum|EAL85733.1 100.00% afis|EAW15599.1 100.00%  
Bootstrap support for afum|EAL85733.1 as seed ortholog is 100%.  
Bootstrap support for afis|EAW15599.1 as seed ortholog is 100%.

---

Group of orthologs #4428. Best score 951 bits

Score difference with first non-orthologous sequence - *A. fumigatus*:577 *A. fischeri*:525  
afum|EAL86605.1 100.00% afis|EAW17175.1 100.00%  
Bootstrap support for afum|EAL86605.1 as seed ortholog is 100%.  
Bootstrap support for afis|EAW17175.1 as seed ortholog is 100%.

---

Group of orthologs #4429. Best score 951 bits

Score difference with first non-orthologous sequence - *A. fumigatus*:951 *A. fischeri*:951  
afum|EAL84759.1 100.00% afis|EAW20875.1 100.00%  
Bootstrap support for afum|EAL84759.1 as seed ortholog is 100%.  
Bootstrap support for afis|EAW20875.1 as seed ortholog is 100%.

---

Group of orthologs #4430. Best score 951 bits

Score difference with first non-orthologous sequence - *A. fumigatus*:951 *A. fischeri*:951  
afum|EAL87191.1 100.00% afis|EAW23755.1 100.00%

Bootstrap support for afum|EAL87191.1 as seed ortholog is 100%.  
Bootstrap support for afis|EAW23755.1 as seed ortholog is 100%.

---

Group of orthologs #4431. Best score 951 bits

Score difference with first non-orthologous sequence - *A. fumigatus*:951 *A. fischeri*:785

afum|EAL90797.1 100.00% afis|EAW22394.1 100.00%

Bootstrap support for afum|EAL90797.1 as seed ortholog is 100%.

Bootstrap support for afis|EAW22394.1 as seed ortholog is 100%.

---

Group of orthologs #4432. Best score 951 bits

Score difference with first non-orthologous sequence - *A. fumigatus*:951 *A. fischeri*:951

afum|EAL92738.1 100.00% afis|EAW21704.1 100.00%

Bootstrap support for afum|EAL92738.1 as seed ortholog is 100%.

Bootstrap support for afis|EAW21704.1 as seed ortholog is 100%.

---

Group of orthologs #4433. Best score 951 bits

Score difference with first non-orthologous sequence - *A. fumigatus*:951 *A. fischeri*:951

afum|EAL90075.1 100.00% afis|EAW25416.1 100.00%

Bootstrap support for afum|EAL90075.1 as seed ortholog is 100%.

Bootstrap support for afis|EAW25416.1 as seed ortholog is 100%.

---

Group of orthologs #4434. Best score 951 bits

Score difference with first non-orthologous sequence - *A. fumigatus*:951 *A. fischeri*:951

afum|EAL92039.1 100.00% afis|EAW24177.1 100.00%

Bootstrap support for afum|EAL92039.1 as seed ortholog is 100%.

Bootstrap support for afis|EAW24177.1 as seed ortholog is 100%.

---

Group of orthologs #4435. Best score 950 bits

Score difference with first non-orthologous sequence - *A. fumigatus*:950 *A. fischeri*:950

afum|EAL92808.1 100.00% afis|EAW21779.1 100.00%

Bootstrap support for afum|EAL92808.1 as seed ortholog is 100%.

Bootstrap support for afis|EAW21779.1 as seed ortholog is 100%.

---

Group of orthologs #4436. Best score 949 bits

Score difference with first non-orthologous sequence - *A. fumigatus*:949 *A. fischeri*:877

afum|EAL91718.1 100.00% afis|EAW17909.1 100.00%

Bootstrap support for afum|EAL91718.1 as seed ortholog is 100%.

Bootstrap support for afis|EAW17909.1 as seed ortholog is 100%.

---

Group of orthologs #4437. Best score 949 bits

Score difference with first non-orthologous sequence - *A. fumigatus*:949 *A. fischeri*:949

afum|EAL91742.1 100.00% afis|EAW17931.1 100.00%

Bootstrap support for afum|EAL91742.1 as seed ortholog is 100%.

Bootstrap support for afis|EAW17931.1 as seed ortholog is 100%.

---

Group of orthologs #4438. Best score 949 bits

Score difference with first non-orthologous sequence - *A. fumigatus*:949 *A. fischeri*:949

afum|EAL93121.2 100.00% afis|EAW18439.1 100.00%

Bootstrap support for afum|EAL93121.2 as seed ortholog is 100%.

Bootstrap support for afis|EAW18439.1 as seed ortholog is 100%.

---

Group of orthologs #4439. Best score 949 bits

Score difference with first non-orthologous sequence - *A. fumigatus*:949 *A. fischeri*:949

afum|EAL89477.1 100.00% afis|EAW24832.1 100.00%

Bootstrap support for afum|EAL89477.1 as seed ortholog is 100%.

Bootstrap support for afis|EAW24832.1 as seed ortholog is 100%.

---

Group of orthologs #4440. Best score 949 bits

Score difference with first non-orthologous sequence - *A. fumigatus*:949 *A. fischeri*:949

afum|EAL89579.1 100.00% afis|EAW24924.1 100.00%

Bootstrap support for afum|EAL89579.1 as seed ortholog is 100%.

Bootstrap support for afis|EAW24924.1 as seed ortholog is 100%.

---

Group of orthologs #4441. Best score 949 bits

Score difference with first non-orthologous sequence - *A. fumigatus*:949 *A. fischeri*:949

afum|EAL89868.1 100.00% afis|EAW25207.1 100.00%

Bootstrap support for afum|EAL89868.1 as seed ortholog is 100%.

Bootstrap support for afis|EAW25207.1 as seed ortholog is 100%.

---

Group of orthologs #4442. Best score 948 bits

Score difference with first non-orthologous sequence - *A. fumigatus*:948 *A. fischeri*:948

afum|EAL84228.1 100.00% afis|EAW15417.1 100.00%

Bootstrap support for afum|EAL84228.1 as seed ortholog is 100%.

Bootstrap support for afis|EAW15417.1 as seed ortholog is 100%.

---

Group of orthologs #4443. Best score 948 bits

Score difference with first non-orthologous sequence - *A. fumigatus*:948 *A. fischeri*:948

afum|EAL91497.1 100.00% afis|EAW17683.1 100.00%

Bootstrap support for afum|EAL91497.1 as seed ortholog is 100%.

Bootstrap support for afis|EAW17683.1 as seed ortholog is 100%.

---

Group of orthologs #4444. Best score 948 bits

Score difference with first non-orthologous sequence - *A. fumigatus*:948 *A. fischeri*:948

afum|EAL91619.1 100.00% afis|EAW17811.1 100.00%

Bootstrap support for afum|EAL91619.1 as seed ortholog is 100%.

Bootstrap support for afis|EAW17811.1 as seed ortholog is 100%.

---

Group of orthologs #4445. Best score 948 bits

Score difference with first non-orthologous sequence - *A. fumigatus*:948 *A. fischeri*:948

afum|EBA27436.1 100.00% afis|EAW17672.1 100.00%

Bootstrap support for afum|EBA27436.1 as seed ortholog is 100%.

Bootstrap support for afis|EAW17672.1 as seed ortholog is 100%.

---

Group of orthologs #4446. Best score 948 bits

Score difference with first non-orthologous sequence - *A. fumigatus*:948 *A. fischeri*:948

afum|EAL90356.1 100.00% afis|EAW22846.1 100.00%

Bootstrap support for afum|EAL90356.1 as seed ortholog is 100%.

Bootstrap support for afis|EAW22846.1 as seed ortholog is 100%.

---

Group of orthologs #4447. Best score 947 bits

Score difference with first non-orthologous sequence - *A. fumigatus*:947 *A. fischeri*:947

afum|EAL89228.1 100.00% afis|EAW16632.1 100.00%

Bootstrap support for afum|EAL89228.1 as seed ortholog is 100%.

Bootstrap support for afis|EAW16632.1 as seed ortholog is 100%.

---

Group of orthologs #4448. Best score 947 bits

Score difference with first non-orthologous sequence - *A. fumigatus*:687 *A. fischeri*:947

afum|EBA27170.1 100.00% afis|EAW15420.1 100.00%

Bootstrap support for afum|EBA27170.1 as seed ortholog is 100%.

Bootstrap support for afis|EAW15420.1 as seed ortholog is 100%.

---

Group of orthologs #4449. Best score 947 bits

Score difference with first non-orthologous sequence - *A. fumigatus*:947 *A. fischeri*:947  
afum|EAL88112.1 100.00% afis|EAW23362.1 100.00%  
Bootstrap support for afum|EAL88112.1 as seed ortholog is 100%.  
Bootstrap support for afis|EAW23362.1 as seed ortholog is 100%.

---

Group of orthologs #4450. Best score 947 bits

Score difference with first non-orthologous sequence - *A. fumigatus*:947 *A. fischeri*:947  
afum|EAL87832.1 100.00% afis|EAW23628.1 100.00%  
Bootstrap support for afum|EAL87832.1 as seed ortholog is 100%.  
Bootstrap support for afis|EAW23628.1 as seed ortholog is 100%.

---

Group of orthologs #4451. Best score 947 bits

Score difference with first non-orthologous sequence - *A. fumigatus*:947 *A. fischeri*:947  
afum|EAL90065.1 100.00% afis|EAW25406.1 100.00%  
Bootstrap support for afum|EAL90065.1 as seed ortholog is 100%.  
Bootstrap support for afis|EAW25406.1 as seed ortholog is 100%.

---

Group of orthologs #4452. Best score 946 bits

Score difference with first non-orthologous sequence - *A. fumigatus*:946 *A. fischeri*:946  
afum|EAL88615.1 100.00% afis|EAW15983.1 100.00%  
Bootstrap support for afum|EAL88615.1 as seed ortholog is 100%.  
Bootstrap support for afis|EAW15983.1 as seed ortholog is 100%.

---

Group of orthologs #4453. Best score 946 bits

Score difference with first non-orthologous sequence - *A. fumigatus*:946 *A. fischeri*:946  
afum|EAL89199.1 100.00% afis|EAW16603.1 100.00%  
Bootstrap support for afum|EAL89199.1 as seed ortholog is 100%.  
Bootstrap support for afis|EAW16603.1 as seed ortholog is 100%.

---

Group of orthologs #4454. Best score 946 bits

Score difference with first non-orthologous sequence - *A. fumigatus*:946 *A. fischeri*:946  
afum|EAL85945.1 100.00% afis|EAW24276.1 100.00%  
Bootstrap support for afum|EAL85945.1 as seed ortholog is 100%.  
Bootstrap support for afis|EAW24276.1 as seed ortholog is 100%.

---

Group of orthologs #4455. Best score 946 bits

Score difference with first non-orthologous sequence - *A. fumigatus*:946 *A. fischeri*:946  
afum|EAL88263.1 100.00% afis|EAW23221.1 100.00%  
Bootstrap support for afum|EAL88263.1 as seed ortholog is 100%.  
Bootstrap support for afis|EAW23221.1 as seed ortholog is 100%.

---

Group of orthologs #4456. Best score 946 bits

Score difference with first non-orthologous sequence - *A. fumigatus*:946 *A. fischeri*:946  
afum|EAL90798.1 100.00% afis|EAW22393.1 100.00%  
Bootstrap support for afum|EAL90798.1 as seed ortholog is 100%.  
Bootstrap support for afis|EAW22393.1 as seed ortholog is 100%.

---

Group of orthologs #4457. Best score 946 bits

Score difference with first non-orthologous sequence - *A. fumigatus*:946 *A. fischeri*:946  
afum|EAL92707.1 100.00% afis|EAW21672.1 100.00%  
Bootstrap support for afum|EAL92707.1 as seed ortholog is 100%.  
Bootstrap support for afis|EAW21672.1 as seed ortholog is 100%.

---

Group of orthologs #4458. Best score 946 bits

Score difference with first non-orthologous sequence - *A. fumigatus*:946 *A. fischeri*:946  
afum|EBA27348.1 100.00% afis|EAW23010.1 100.00%

Bootstrap support for afum|EBA27348.1 as seed ortholog is 100%.  
Bootstrap support for afis|EAW23010.1 as seed ortholog is 100%.

---

Group of orthologs #4459. Best score 945 bits

Score difference with first non-orthologous sequence - *A. fumigatus*:945 *A. fischeri*:945

afum|EAL93558.1 100.00% afis|EAW18821.1 100.00%

Bootstrap support for afum|EAL93558.1 as seed ortholog is 100%.

Bootstrap support for afis|EAW18821.1 as seed ortholog is 100%.

---

Group of orthologs #4460. Best score 945 bits

Score difference with first non-orthologous sequence - *A. fumigatus*:890 *A. fischeri*:945

afum|EAL90394.1 100.00% afis|EAW22805.1 100.00%

Bootstrap support for afum|EAL90394.1 as seed ortholog is 100%.

Bootstrap support for afis|EAW22805.1 as seed ortholog is 100%.

---

Group of orthologs #4461. Best score 945 bits

Score difference with first non-orthologous sequence - *A. fumigatus*:945 *A. fischeri*:945

afum|EAL89518.1 100.00% afis|EAW24868.1 100.00%

Bootstrap support for afum|EAL89518.1 as seed ortholog is 100%.

Bootstrap support for afis|EAW24868.1 as seed ortholog is 100%.

---

Group of orthologs #4462. Best score 945 bits

Score difference with first non-orthologous sequence - *A. fumigatus*:945 *A. fischeri*:945

afum|EAL90183.1 100.00% afis|EAW25518.1 100.00%

Bootstrap support for afum|EAL90183.1 as seed ortholog is 100%.

Bootstrap support for afis|EAW25518.1 as seed ortholog is 100%.

---

Group of orthologs #4463. Best score 944 bits

Score difference with first non-orthologous sequence - *A. fumigatus*:944 *A. fischeri*:944

afum|EAL84735.1 100.00% afis|EAW20897.1 100.00%

Bootstrap support for afum|EAL84735.1 as seed ortholog is 100%.

Bootstrap support for afis|EAW20897.1 as seed ortholog is 100%.

---

Group of orthologs #4464. Best score 944 bits

Score difference with first non-orthologous sequence - *A. fumigatus*:944 *A. fischeri*:944

afum|EAL87046.1 100.00% afis|EAW19450.1 100.00%

Bootstrap support for afum|EAL87046.1 as seed ortholog is 100%.

Bootstrap support for afis|EAW19450.1 as seed ortholog is 100%.

---

Group of orthologs #4465. Best score 944 bits

Score difference with first non-orthologous sequence - *A. fumigatus*:944 *A. fischeri*:944

afum|EAL87294.1 100.00% afis|EAW23866.1 100.00%

Bootstrap support for afum|EAL87294.1 as seed ortholog is 100%.

Bootstrap support for afis|EAW23866.1 as seed ortholog is 100%.

---

Group of orthologs #4466. Best score 944 bits

Score difference with first non-orthologous sequence - *A. fumigatus*:944 *A. fischeri*:944

afum|EAL92801.1 100.00% afis|EAW21772.1 100.00%

Bootstrap support for afum|EAL92801.1 as seed ortholog is 100%.

Bootstrap support for afis|EAW21772.1 as seed ortholog is 100%.

---

Group of orthologs #4467. Best score 944 bits

Score difference with first non-orthologous sequence - *A. fumigatus*:944 *A. fischeri*:944

afum|EAL92902.1 100.00% afis|EAW21888.1 100.00%

Bootstrap support for afum|EAL92902.1 as seed ortholog is 100%.

Bootstrap support for afis|EAW21888.1 as seed ortholog is 100%.

---

Group of orthologs #4468. Best score 943 bits

Score difference with first non-orthologous sequence - *A. fumigatus*:943 *A. fischeri*:943

afum|EAL86454.1 100.00% afis|EAW16929.1 100.00%

Bootstrap support for afum|EAL86454.1 as seed ortholog is 100%.

Bootstrap support for afis|EAW16929.1 as seed ortholog is 100%.

---

Group of orthologs #4469. Best score 943 bits

Score difference with first non-orthologous sequence - *A. fumigatus*:943 *A. fischeri*:943

afum|EAL84805.1 100.00% afis|EAW20824.1 100.00%

Bootstrap support for afum|EAL84805.1 as seed ortholog is 100%.

Bootstrap support for afis|EAW20824.1 as seed ortholog is 100%.

---

Group of orthologs #4470. Best score 943 bits

Score difference with first non-orthologous sequence - *A. fumigatus*:943 *A. fischeri*:943

afum|EAL87036.1 100.00% afis|EAW19460.1 100.00%

Bootstrap support for afum|EAL87036.1 as seed ortholog is 100%.

Bootstrap support for afis|EAW19460.1 as seed ortholog is 100%.

---

Group of orthologs #4471. Best score 943 bits

Score difference with first non-orthologous sequence - *A. fumigatus*:943 *A. fischeri*:943

afum|EAL91542.1 100.00% afis|EAW17727.1 100.00%

Bootstrap support for afum|EAL91542.1 as seed ortholog is 100%.

Bootstrap support for afis|EAW17727.1 as seed ortholog is 100%.

---

Group of orthologs #4472. Best score 943 bits

Score difference with first non-orthologous sequence - *A. fumigatus*:943 *A. fischeri*:943

afum|EAL87121.1 100.00% afis|EAW23678.1 100.00%

Bootstrap support for afum|EAL87121.1 as seed ortholog is 100%.

Bootstrap support for afis|EAW23678.1 as seed ortholog is 100%.

---

Group of orthologs #4473. Best score 943 bits

Score difference with first non-orthologous sequence - *A. fumigatus*:943 *A. fischeri*:943

afum|EAL89409.1 100.00% afis|EAW24768.1 100.00%

Bootstrap support for afum|EAL89409.1 as seed ortholog is 100%.

Bootstrap support for afis|EAW24768.1 as seed ortholog is 100%.

---

Group of orthologs #4474. Best score 942 bits

Score difference with first non-orthologous sequence - *A. fumigatus*:942 *A. fischeri*:942

afum|EAL85672.1 100.00% afis|EAW15675.1 100.00%

Bootstrap support for afum|EAL85672.1 as seed ortholog is 100%.

Bootstrap support for afis|EAW15675.1 as seed ortholog is 100%.

---

Group of orthologs #4475. Best score 942 bits

Score difference with first non-orthologous sequence - *A. fumigatus*:781 *A. fischeri*:792

afum|EAL86613.2 100.00% afis|EAW17187.1 100.00%

Bootstrap support for afum|EAL86613.2 as seed ortholog is 100%.

Bootstrap support for afis|EAW17187.1 as seed ortholog is 100%.

---

Group of orthologs #4476. Best score 942 bits

Score difference with first non-orthologous sequence - *A. fumigatus*:886 *A. fischeri*:545

afum|EAL84862.1 100.00% afis|EAW20757.1 100.00%

Bootstrap support for afum|EAL84862.1 as seed ortholog is 100%.

Bootstrap support for afis|EAW20757.1 as seed ortholog is 100%.

---

Group of orthologs #4477. Best score 942 bits

Score difference with first non-orthologous sequence - *A. fumigatus*:942 *A. fischeri*:942  
afum|EAL91383.1 100.00% afis|EAW17570.1 100.00%  
Bootstrap support for afum|EAL91383.1 as seed ortholog is 100%.  
Bootstrap support for afis|EAW17570.1 as seed ortholog is 100%.

---

Group of orthologs #4478. Best score 942 bits

Score difference with first non-orthologous sequence - *A. fumigatus*:942 *A. fischeri*:942  
afum|EAL91414.1 100.00% afis|EAW17600.1 100.00%  
Bootstrap support for afum|EAL91414.1 as seed ortholog is 100%.  
Bootstrap support for afis|EAW17600.1 as seed ortholog is 100%.

---

Group of orthologs #4479. Best score 942 bits

Score difference with first non-orthologous sequence - *A. fumigatus*:942 *A. fischeri*:942  
afum|EAL85937.1 100.00% afis|EAW24269.1 100.00%  
Bootstrap support for afum|EAL85937.1 as seed ortholog is 100%.  
Bootstrap support for afis|EAW24269.1 as seed ortholog is 100%.

---

Group of orthologs #4480. Best score 942 bits

Score difference with first non-orthologous sequence - *A. fumigatus*:942 *A. fischeri*:942  
afum|EAL93114.1 100.00% afis|EAW18433.1 100.00%  
Bootstrap support for afum|EAL93114.1 as seed ortholog is 100%.  
Bootstrap support for afis|EAW18433.1 as seed ortholog is 100%.

---

Group of orthologs #4481. Best score 942 bits

Score difference with first non-orthologous sequence - *A. fumigatus*:942 *A. fischeri*:942  
afum|EAL93850.1 100.00% afis|EAW19118.1 100.00%  
Bootstrap support for afum|EAL93850.1 as seed ortholog is 100%.  
Bootstrap support for afis|EAW19118.1 as seed ortholog is 100%.

---

Group of orthologs #4482. Best score 942 bits

Score difference with first non-orthologous sequence - *A. fumigatus*:942 *A. fischeri*:942  
afum|EAL90419.1 100.00% afis|EAW22780.1 100.00%  
Bootstrap support for afum|EAL90419.1 as seed ortholog is 100%.  
Bootstrap support for afis|EAW22780.1 as seed ortholog is 100%.

---

Group of orthologs #4483. Best score 942 bits

Score difference with first non-orthologous sequence - *A. fumigatus*:942 *A. fischeri*:942  
afum|EAL89582.1 100.00% afis|EAW24926.1 100.00%  
Bootstrap support for afum|EAL89582.1 as seed ortholog is 100%.  
Bootstrap support for afis|EAW24926.1 as seed ortholog is 100%.

---

Group of orthologs #4484. Best score 941 bits

Score difference with first non-orthologous sequence - *A. fumigatus*:488 *A. fischeri*:941  
afum|EAL85767.2 100.00% afis|EAW15566.1 100.00%  
Bootstrap support for afum|EAL85767.2 as seed ortholog is 100%.  
Bootstrap support for afis|EAW15566.1 as seed ortholog is 100%.

---

Group of orthologs #4485. Best score 941 bits

Score difference with first non-orthologous sequence - *A. fumigatus*:941 *A. fischeri*:941  
afum|EAL85675.1 100.00% afis|EAW15673.1 100.00%  
Bootstrap support for afum|EAL85675.1 as seed ortholog is 100%.  
Bootstrap support for afis|EAW15673.1 as seed ortholog is 100%.

---

Group of orthologs #4486. Best score 941 bits

Score difference with first non-orthologous sequence - *A. fumigatus*:941 *A. fischeri*:941  
afum|EAL86796.1 100.00% afis|EAW19732.1 100.00%

Bootstrap support for afum|EAL86796.1 as seed ortholog is 100%.  
Bootstrap support for afis|EAW19732.1 as seed ortholog is 100%.

---

Group of orthologs #4487. Best score 941 bits

Score difference with first non-orthologous sequence - *A. fumigatus*:941 *A. fischeri*:941

afum|EAL91218.1 100.00% afis|EAW17383.1 100.00%

Bootstrap support for afum|EAL91218.1 as seed ortholog is 100%.

Bootstrap support for afis|EAW17383.1 as seed ortholog is 100%.

---

Group of orthologs #4488. Best score 941 bits

Score difference with first non-orthologous sequence - *A. fumigatus*:941 *A. fischeri*:941

afum|EAL93510.1 100.00% afis|EAW18778.1 100.00%

Bootstrap support for afum|EAL93510.1 as seed ortholog is 100%.

Bootstrap support for afis|EAW18778.1 as seed ortholog is 100%.

---

Group of orthologs #4489. Best score 941 bits

Score difference with first non-orthologous sequence - *A. fumigatus*:941 *A. fischeri*:941

afum|EAL90665.1 100.00% afis|EAW22529.1 100.00%

Bootstrap support for afum|EAL90665.1 as seed ortholog is 100%.

Bootstrap support for afis|EAW22529.1 as seed ortholog is 100%.

---

Group of orthologs #4490. Best score 941 bits

Score difference with first non-orthologous sequence - *A. fumigatus*:941 *A. fischeri*:941

afum|EAL92294.1 100.00% afis|EAW21279.1 100.00%

Bootstrap support for afum|EAL92294.1 as seed ortholog is 100%.

Bootstrap support for afis|EAW21279.1 as seed ortholog is 100%.

---

Group of orthologs #4491. Best score 941 bits

Score difference with first non-orthologous sequence - *A. fumigatus*:941 *A. fischeri*:941

afum|EAL92760.1 100.00% afis|EAW21727.1 100.00%

Bootstrap support for afum|EAL92760.1 as seed ortholog is 100%.

Bootstrap support for afis|EAW21727.1 as seed ortholog is 100%.

---

Group of orthologs #4492. Best score 940 bits

Score difference with first non-orthologous sequence - *A. fumigatus*:823 *A. fischeri*:813

afum|EAL88861.1 100.00% afis|EAW16240.1 100.00%

Bootstrap support for afum|EAL88861.1 as seed ortholog is 100%.

Bootstrap support for afis|EAW16240.1 as seed ortholog is 100%.

---

Group of orthologs #4493. Best score 940 bits

Score difference with first non-orthologous sequence - *A. fumigatus*:940 *A. fischeri*:698

afum|EAL89802.1 100.00% afis|EAW25131.1 100.00%

Bootstrap support for afum|EAL89802.1 as seed ortholog is 100%.

Bootstrap support for afis|EAW25131.1 as seed ortholog is 100%.

---

Group of orthologs #4494. Best score 939 bits

Score difference with first non-orthologous sequence - *A. fumigatus*:939 *A. fischeri*:708

afum|EAL86463.1 100.00% afis|EAW16938.1 100.00%

Bootstrap support for afum|EAL86463.1 as seed ortholog is 100%.

Bootstrap support for afis|EAW16938.1 as seed ortholog is 100%.

---

Group of orthologs #4495. Best score 939 bits

Score difference with first non-orthologous sequence - *A. fumigatus*:939 *A. fischeri*:883

afum|EAL86615.1 100.00% afis|EAW17189.1 100.00%

Bootstrap support for afum|EAL86615.1 as seed ortholog is 100%.

Bootstrap support for afis|EAW17189.1 as seed ortholog is 100%.



---

Group of orthologs #4496. Best score 939 bits

Score difference with first non-orthologous sequence - *A. fumigatus*:939 *A. fischeri*:939

afum|EAL87061.1 100.00% afis|EAW19434.1 100.00%

Bootstrap support for afum|EAL87061.1 as seed ortholog is 100%.

Bootstrap support for afis|EAW19434.1 as seed ortholog is 100%.

---

Group of orthologs #4497. Best score 939 bits

Score difference with first non-orthologous sequence - *A. fumigatus*:939 *A. fischeri*:939

afum|EAL88460.1 100.00% afis|EAW23022.1 100.00%

Bootstrap support for afum|EAL88460.1 as seed ortholog is 100%.

Bootstrap support for afis|EAW23022.1 as seed ortholog is 100%.

---

Group of orthologs #4498. Best score 939 bits

Score difference with first non-orthologous sequence - *A. fumigatus*:939 *A. fischeri*:939

afum|EBA27497.1 100.00% afis|EAW18914.1 100.00%

Bootstrap support for afum|EBA27497.1 as seed ortholog is 100%.

Bootstrap support for afis|EAW18914.1 as seed ortholog is 100%.

---

Group of orthologs #4499. Best score 939 bits

Score difference with first non-orthologous sequence - *A. fumigatus*:939 *A. fischeri*:939

afum|EAL92968.1 100.00% afis|EAW21954.1 100.00%

Bootstrap support for afum|EAL92968.1 as seed ortholog is 100%.

Bootstrap support for afis|EAW21954.1 as seed ortholog is 100%.

---

Group of orthologs #4500. Best score 938 bits

Score difference with first non-orthologous sequence - *A. fumigatus*:938 *A. fischeri*:938

afum|EAL85529.1 100.00% afis|EAW15822.1 100.00%

Bootstrap support for afum|EAL85529.1 as seed ortholog is 100%.

Bootstrap support for afis|EAW15822.1 as seed ortholog is 100%.

---

Group of orthologs #4501. Best score 938 bits

Score difference with first non-orthologous sequence - *A. fumigatus*:938 *A. fischeri*:649

afum|EAL86390.1 100.00% afis|EAW16844.1 100.00%

Bootstrap support for afum|EAL86390.1 as seed ortholog is 100%.

Bootstrap support for afis|EAW16844.1 as seed ortholog is 100%.

---

Group of orthologs #4502. Best score 938 bits

Score difference with first non-orthologous sequence - *A. fumigatus*:938 *A. fischeri*:938

afum|EAL84764.1 100.00% afis|EAW20870.1 100.00%

Bootstrap support for afum|EAL84764.1 as seed ortholog is 100%.

Bootstrap support for afis|EAW20870.1 as seed ortholog is 100%.

---

Group of orthologs #4503. Best score 938 bits

Score difference with first non-orthologous sequence - *A. fumigatus*:938 *A. fischeri*:938

afum|EAL92282.1 100.00% afis|EAW21267.1 100.00%

Bootstrap support for afum|EAL92282.1 as seed ortholog is 100%.

Bootstrap support for afis|EAW21267.1 as seed ortholog is 100%.

---

Group of orthologs #4504. Best score 937 bits

Score difference with first non-orthologous sequence - *A. fumigatus*:937 *A. fischeri*:937

afum|EAL91316.1 100.00% afis|EAW17494.1 100.00%

Bootstrap support for afum|EAL91316.1 as seed ortholog is 100%.

Bootstrap support for afis|EAW17494.1 as seed ortholog is 100%.

---

Group of orthologs #4505. Best score 937 bits

Score difference with first non-orthologous sequence - *A. fumigatus*:937 *A. fischeri*:937  
afum|EAL93130.1 100.00% afis|EAW18445.1 100.00%  
Bootstrap support for afum|EAL93130.1 as seed ortholog is 100%.  
Bootstrap support for afis|EAW18445.1 as seed ortholog is 100%.

---

Group of orthologs #4506. Best score 937 bits

Score difference with first non-orthologous sequence - *A. fumigatus*:496 *A. fischeri*:706  
afum|EAL90955.1 100.00% afis|EAW22238.1 100.00%  
Bootstrap support for afum|EAL90955.1 as seed ortholog is 100%.  
Bootstrap support for afis|EAW22238.1 as seed ortholog is 100%.

---

Group of orthologs #4507. Best score 937 bits

Score difference with first non-orthologous sequence - *A. fumigatus*:937 *A. fischeri*:937  
afum|EAL89374.1 100.00% afis|EAW24726.1 100.00%  
Bootstrap support for afum|EAL89374.1 as seed ortholog is 100%.  
Bootstrap support for afis|EAW24726.1 as seed ortholog is 100%.

---

Group of orthologs #4508. Best score 936 bits

Score difference with first non-orthologous sequence - *A. fumigatus*:787 *A. fischeri*:787  
afum|EAL87627.1 100.00% afis|EAW18263.1 100.00%  
Bootstrap support for afum|EAL87627.1 as seed ortholog is 100%.  
Bootstrap support for afis|EAW18263.1 as seed ortholog is 100%.

---

Group of orthologs #4509. Best score 936 bits

Score difference with first non-orthologous sequence - *A. fumigatus*:936 *A. fischeri*:936  
afum|EAL88307.2 100.00% afis|EAW23176.1 100.00%  
Bootstrap support for afum|EAL88307.2 as seed ortholog is 100%.  
Bootstrap support for afis|EAW23176.1 as seed ortholog is 100%.

---

Group of orthologs #4510. Best score 936 bits

Score difference with first non-orthologous sequence - *A. fumigatus*:936 *A. fischeri*:936  
afum|EAL88099.1 100.00% afis|EAW23373.1 100.00%  
Bootstrap support for afum|EAL88099.1 as seed ortholog is 100%.  
Bootstrap support for afis|EAW23373.1 as seed ortholog is 100%.

---

Group of orthologs #4511. Best score 936 bits

Score difference with first non-orthologous sequence - *A. fumigatus*:936 *A. fischeri*:936  
afum|EAL93450.1 100.00% afis|EAW18725.1 100.00%  
Bootstrap support for afum|EAL93450.1 as seed ortholog is 100%.  
Bootstrap support for afis|EAW18725.1 as seed ortholog is 100%.

---

Group of orthologs #4512. Best score 936 bits

Score difference with first non-orthologous sequence - *A. fumigatus*:936 *A. fischeri*:936  
afum|EAL89454.1 100.00% afis|EAW24811.1 100.00%  
Bootstrap support for afum|EAL89454.1 as seed ortholog is 100%.  
Bootstrap support for afis|EAW24811.1 as seed ortholog is 100%.

---

Group of orthologs #4513. Best score 936 bits

Score difference with first non-orthologous sequence - *A. fumigatus*:936 *A. fischeri*:936  
afum|EAL89554.1 100.00% afis|EAW24900.1 100.00%  
Bootstrap support for afum|EAL89554.1 as seed ortholog is 100%.  
Bootstrap support for afis|EAW24900.1 as seed ortholog is 100%.

---

Group of orthologs #4514. Best score 935 bits

Score difference with first non-orthologous sequence - *A. fumigatus*:935 *A. fischeri*:935  
afum|EAL85005.1 100.00% afis|EAW19896.1 100.00%

Bootstrap support for afum|EAL85005.1 as seed ortholog is 100%.  
Bootstrap support for afis|EAW19896.1 as seed ortholog is 100%.

---

Group of orthologs #4515. Best score 935 bits

Score difference with first non-orthologous sequence - *A. fumigatus*:935 *A. fischeri*:755

afum|EAL84953.1 100.00% afis|EAW19971.1 100.00%

Bootstrap support for afum|EAL84953.1 as seed ortholog is 100%.

Bootstrap support for afis|EAW19971.1 as seed ortholog is 100%.

---

Group of orthologs #4516. Best score 935 bits

Score difference with first non-orthologous sequence - *A. fumigatus*:935 *A. fischeri*:935

afum|EAL86065.1 100.00% afis|EAW24393.1 100.00%

Bootstrap support for afum|EAL86065.1 as seed ortholog is 100%.

Bootstrap support for afis|EAW24393.1 as seed ortholog is 100%.

---

Group of orthologs #4517. Best score 935 bits

Score difference with first non-orthologous sequence - *A. fumigatus*:935 *A. fischeri*:935

afum|EAL87131.1 100.00% afis|EAW23686.1 100.00%

Bootstrap support for afum|EAL87131.1 as seed ortholog is 100%.

Bootstrap support for afis|EAW23686.1 as seed ortholog is 100%.

---

Group of orthologs #4518. Best score 935 bits

Score difference with first non-orthologous sequence - *A. fumigatus*:935 *A. fischeri*:935

afum|EAL87955.1 100.00% afis|EAW23506.1 100.00%

Bootstrap support for afum|EAL87955.1 as seed ortholog is 100%.

Bootstrap support for afis|EAW23506.1 as seed ortholog is 100%.

---

Group of orthologs #4519. Best score 935 bits

Score difference with first non-orthologous sequence - *A. fumigatus*:935 *A. fischeri*:935

afum|EAL93695.1 100.00% afis|EAW18963.1 100.00%

Bootstrap support for afum|EAL93695.1 as seed ortholog is 100%.

Bootstrap support for afis|EAW18963.1 as seed ortholog is 100%.

---

Group of orthologs #4520. Best score 934 bits

Score difference with first non-orthologous sequence - *A. fumigatus*:934 *A. fischeri*:934

afum|EAL88613.1 100.00% afis|EAW15981.1 100.00%

Bootstrap support for afum|EAL88613.1 as seed ortholog is 100%.

Bootstrap support for afis|EAW15981.1 as seed ortholog is 100%.

---

Group of orthologs #4521. Best score 934 bits

Score difference with first non-orthologous sequence - *A. fumigatus*:934 *A. fischeri*:265

afum|EAL89005.1 100.00% afis|EAW16380.1 100.00%

Bootstrap support for afum|EAL89005.1 as seed ortholog is 100%.

Bootstrap support for afis|EAW16380.1 as seed ortholog is 100%.

---

Group of orthologs #4522. Best score 934 bits

Score difference with first non-orthologous sequence - *A. fumigatus*:934 *A. fischeri*:934

afum|EAL89252.1 100.00% afis|EAW16648.1 100.00%

Bootstrap support for afum|EAL89252.1 as seed ortholog is 100%.

Bootstrap support for afis|EAW16648.1 as seed ortholog is 100%.

---

Group of orthologs #4523. Best score 934 bits

Score difference with first non-orthologous sequence - *A. fumigatus*:934 *A. fischeri*:934

afum|EAL91272.1 100.00% afis|EAW17446.1 100.00%

Bootstrap support for afum|EAL91272.1 as seed ortholog is 100%.

Bootstrap support for afis|EAW17446.1 as seed ortholog is 100%.

---

Group of orthologs #4524. Best score 934 bits

Score difference with first non-orthologous sequence - *A. fumigatus*:934 *A. fischeri*:661  
afum|EAL86632.1 100.00% afis|EAW23637.1 100.00%

Bootstrap support for afum|EAL86632.1 as seed ortholog is 100%.

Bootstrap support for afis|EAW23637.1 as seed ortholog is 100%.

---

Group of orthologs #4525. Best score 934 bits

Score difference with first non-orthologous sequence - *A. fumigatus*:934 *A. fischeri*:934  
afum|EAL85997.1 100.00% afis|EAW24327.1 100.00%

Bootstrap support for afum|EAL85997.1 as seed ortholog is 100%.

Bootstrap support for afis|EAW24327.1 as seed ortholog is 100%.

---

Group of orthologs #4526. Best score 934 bits

Score difference with first non-orthologous sequence - *A. fumigatus*:934 *A. fischeri*:934  
afum|EAL90591.1 100.00% afis|EAW22607.1 100.00%

Bootstrap support for afum|EAL90591.1 as seed ortholog is 100%.

Bootstrap support for afis|EAW22607.1 as seed ortholog is 100%.

---

Group of orthologs #4527. Best score 934 bits

Score difference with first non-orthologous sequence - *A. fumigatus*:455 *A. fischeri*:934  
afum|EAL94074.2 100.00% afis|EAW19354.1 100.00%

Bootstrap support for afum|EAL94074.2 as seed ortholog is 100%.

Bootstrap support for afis|EAW19354.1 as seed ortholog is 100%.

---

Group of orthologs #4528. Best score 933 bits

Score difference with first non-orthologous sequence - *A. fumigatus*:933 *A. fischeri*:933  
afum|EAL88621.1 100.00% afis|EAW15989.1 100.00%

Bootstrap support for afum|EAL88621.1 as seed ortholog is 100%.

Bootstrap support for afis|EAW15989.1 as seed ortholog is 100%.

---

Group of orthologs #4529. Best score 933 bits

Score difference with first non-orthologous sequence - *A. fumigatus*:933 *A. fischeri*:933  
afum|EAL85231.1 100.00% afis|EAW20114.1 100.00%

Bootstrap support for afum|EAL85231.1 as seed ortholog is 100%.

Bootstrap support for afis|EAW20114.1 as seed ortholog is 100%.

---

Group of orthologs #4530. Best score 933 bits

Score difference with first non-orthologous sequence - *A. fumigatus*:933 *A. fischeri*:933  
afum|EAL86955.2 100.00% afis|EAW19556.1 100.00%

Bootstrap support for afum|EAL86955.2 as seed ortholog is 100%.

Bootstrap support for afis|EAW19556.1 as seed ortholog is 100%.

---

Group of orthologs #4531. Best score 933 bits

Score difference with first non-orthologous sequence - *A. fumigatus*:933 *A. fischeri*:933  
afum|EAL91268.1 100.00% afis|EAW17442.1 100.00%

Bootstrap support for afum|EAL91268.1 as seed ortholog is 100%.

Bootstrap support for afis|EAW17442.1 as seed ortholog is 100%.

---

Group of orthologs #4532. Best score 933 bits

Score difference with first non-orthologous sequence - *A. fumigatus*:933 *A. fischeri*:634  
afum|EAL85972.1 100.00% afis|EAW24304.1 100.00%

Bootstrap support for afum|EAL85972.1 as seed ortholog is 100%.

Bootstrap support for afis|EAW24304.1 as seed ortholog is 100%.

---

Group of orthologs #4533. Best score 933 bits

Score difference with first non-orthologous sequence - *A. fumigatus*:933 *A. fischeri*:933  
afum|EAL93953.1 100.00% afis|EAW19220.1 100.00%  
Bootstrap support for afum|EAL93953.1 as seed ortholog is 100%.  
Bootstrap support for afis|EAW19220.1 as seed ortholog is 100%.

---

Group of orthologs #4534. Best score 933 bits

Score difference with first non-orthologous sequence - *A. fumigatus*:933 *A. fischeri*:933  
afum|EAL90542.1 100.00% afis|EAW22650.1 100.00%  
Bootstrap support for afum|EAL90542.1 as seed ortholog is 100%.  
Bootstrap support for afis|EAW22650.1 as seed ortholog is 100%.

---

Group of orthologs #4535. Best score 933 bits

Score difference with first non-orthologous sequence - *A. fumigatus*:933 *A. fischeri*:933  
afum|EAL90309.1 100.00% afis|EAW22889.1 100.00%  
Bootstrap support for afum|EAL90309.1 as seed ortholog is 100%.  
Bootstrap support for afis|EAW22889.1 as seed ortholog is 100%.

---

Group of orthologs #4536. Best score 933 bits

Score difference with first non-orthologous sequence - *A. fumigatus*:464 *A. fischeri*:807  
afum|EAL92780.2 100.00% afis|EAW21749.1 100.00%  
Bootstrap support for afum|EAL92780.2 as seed ortholog is 100%.  
Bootstrap support for afis|EAW21749.1 as seed ortholog is 100%.

---

Group of orthologs #4537. Best score 932 bits

Score difference with first non-orthologous sequence - *A. fumigatus*:398 *A. fischeri*:390  
afum|EAL85095.2 100.00% afis|EAW19795.1 100.00%  
Bootstrap support for afum|EAL85095.2 as seed ortholog is 100%.  
Bootstrap support for afis|EAW19795.1 as seed ortholog is 100%.

---

Group of orthologs #4538. Best score 932 bits

Score difference with first non-orthologous sequence - *A. fumigatus*:932 *A. fischeri*:932  
afum|EAL85169.1 100.00% afis|EAW20048.1 100.00%  
Bootstrap support for afum|EAL85169.1 as seed ortholog is 100%.  
Bootstrap support for afis|EAW20048.1 as seed ortholog is 100%.

---

Group of orthologs #4539. Best score 932 bits

Score difference with first non-orthologous sequence - *A. fumigatus*:932 *A. fischeri*:932  
afum|EAL89275.1 100.00% afis|EAW16670.1 100.00%  
Bootstrap support for afum|EAL89275.1 as seed ortholog is 100%.  
Bootstrap support for afis|EAW16670.1 as seed ortholog is 100%.

---

Group of orthologs #4540. Best score 932 bits

Score difference with first non-orthologous sequence - *A. fumigatus*:579 *A. fischeri*:932  
afum|EAL86117.1 100.00% afis|EAW24448.1 100.00%  
Bootstrap support for afum|EAL86117.1 as seed ortholog is 100%.  
Bootstrap support for afis|EAW24448.1 as seed ortholog is 100%.

---

Group of orthologs #4541. Best score 932 bits

Score difference with first non-orthologous sequence - *A. fumigatus*:932 *A. fischeri*:932  
afum|EAL88343.1 100.00% afis|EAW23138.1 100.00%  
Bootstrap support for afum|EAL88343.1 as seed ortholog is 100%.  
Bootstrap support for afis|EAW23138.1 as seed ortholog is 100%.

---

Group of orthologs #4542. Best score 932 bits

Score difference with first non-orthologous sequence - *A. fumigatus*:932 *A. fischeri*:932  
afum|EAL90686.1 100.00% afis|EAW22507.1 100.00%

Bootstrap support for afum|EAL90686.1 as seed ortholog is 100%.  
Bootstrap support for afis|EAW22507.1 as seed ortholog is 100%.

---

Group of orthologs #4543. Best score 931 bits

Score difference with first non-orthologous sequence - *A. fumigatus*:931 *A. fischeri*:931

afum|EAL88533.1 100.00% afis|EAW15898.1 100.00%

Bootstrap support for afum|EAL88533.1 as seed ortholog is 100%.

Bootstrap support for afis|EAW15898.1 as seed ortholog is 100%.

---

Group of orthologs #4544. Best score 931 bits

Score difference with first non-orthologous sequence - *A. fumigatus*:931 *A. fischeri*:931

afum|EAL87614.1 100.00% afis|EAW18249.1 100.00%

Bootstrap support for afum|EAL87614.1 as seed ortholog is 100%.

Bootstrap support for afis|EAW18249.1 as seed ortholog is 100%.

---

Group of orthologs #4545. Best score 931 bits

Score difference with first non-orthologous sequence - *A. fumigatus*:931 *A. fischeri*:931

afum|EAL85463.1 100.00% afis|EAW20341.1 100.00%

Bootstrap support for afum|EAL85463.1 as seed ortholog is 100%.

Bootstrap support for afis|EAW20341.1 as seed ortholog is 100%.

---

Group of orthologs #4546. Best score 931 bits

Score difference with first non-orthologous sequence - *A. fumigatus*:931 *A. fischeri*:931

afum|EAL93730.1 100.00% afis|EAW18995.1 100.00%

Bootstrap support for afum|EAL93730.1 as seed ortholog is 100%.

Bootstrap support for afis|EAW18995.1 as seed ortholog is 100%.

---

Group of orthologs #4547. Best score 931 bits

Score difference with first non-orthologous sequence - *A. fumigatus*:854 *A. fischeri*:814

afum|EAL89368.2 100.00% afis|EAW24719.1 100.00%

Bootstrap support for afum|EAL89368.2 as seed ortholog is 100%.

Bootstrap support for afis|EAW24719.1 as seed ortholog is 100%.

---

Group of orthologs #4548. Best score 931 bits

Score difference with first non-orthologous sequence - *A. fumigatus*:931 *A. fischeri*:931

afum|EAL92858.1 100.00% afis|EAW21846.1 100.00%

Bootstrap support for afum|EAL92858.1 as seed ortholog is 100%.

Bootstrap support for afis|EAW21846.1 as seed ortholog is 100%.

---

Group of orthologs #4549. Best score 930 bits

Score difference with first non-orthologous sequence - *A. fumigatus*:930 *A. fischeri*:930

afum|EAL91399.1 100.00% afis|EAW17586.1 100.00%

Bootstrap support for afum|EAL91399.1 as seed ortholog is 100%.

Bootstrap support for afis|EAW17586.1 as seed ortholog is 100%.

---

Group of orthologs #4550. Best score 930 bits

Score difference with first non-orthologous sequence - *A. fumigatus*:930 *A. fischeri*:930

afum|EAL87906.1 100.00% afis|EAW23562.1 100.00%

Bootstrap support for afum|EAL87906.1 as seed ortholog is 100%.

Bootstrap support for afis|EAW23562.1 as seed ortholog is 100%.

---

Group of orthologs #4551. Best score 930 bits

Score difference with first non-orthologous sequence - *A. fumigatus*:930 *A. fischeri*:930

afum|EAL93367.1 100.00% afis|EAW18651.1 100.00%

Bootstrap support for afum|EAL93367.1 as seed ortholog is 100%.

Bootstrap support for afis|EAW18651.1 as seed ortholog is 100%.

---

Group of orthologs #4552. Best score 930 bits

Score difference with first non-orthologous sequence - *A. fumigatus*:930 *A. fischeri*:930

|                 |         |                 |         |
|-----------------|---------|-----------------|---------|
| afum EAL94005.1 | 100.00% | afis EAW19279.1 | 100.00% |
|-----------------|---------|-----------------|---------|

Bootstrap support for afum|EAL94005.1 as seed ortholog is 100%.

Bootstrap support for afis|EAW19279.1 as seed ortholog is 100%.

---

Group of orthologs #4553. Best score 930 bits

Score difference with first non-orthologous sequence - *A. fumigatus*:930 *A. fischeri*:930

|                 |         |                 |         |
|-----------------|---------|-----------------|---------|
| afum EAL90504.1 | 100.00% | afis EAW22689.1 | 100.00% |
|-----------------|---------|-----------------|---------|

Bootstrap support for afum|EAL90504.1 as seed ortholog is 100%.

Bootstrap support for afis|EAW22689.1 as seed ortholog is 100%.

---

Group of orthologs #4554. Best score 930 bits

Score difference with first non-orthologous sequence - *A. fumigatus*:930 *A. fischeri*:930

|                 |         |                 |         |
|-----------------|---------|-----------------|---------|
| afum EAL90408.1 | 100.00% | afis EAW22791.1 | 100.00% |
|-----------------|---------|-----------------|---------|

Bootstrap support for afum|EAL90408.1 as seed ortholog is 100%.

Bootstrap support for afis|EAW22791.1 as seed ortholog is 100%.

---

Group of orthologs #4555. Best score 930 bits

Score difference with first non-orthologous sequence - *A. fumigatus*:930 *A. fischeri*:930

|                 |         |                 |         |
|-----------------|---------|-----------------|---------|
| afum EAL92313.1 | 100.00% | afis EAW21296.1 | 100.00% |
|-----------------|---------|-----------------|---------|

Bootstrap support for afum|EAL92313.1 as seed ortholog is 100%.

Bootstrap support for afis|EAW21296.1 as seed ortholog is 100%.

---

Group of orthologs #4556. Best score 929 bits

Score difference with first non-orthologous sequence - *A. fumigatus*:929 *A. fischeri*:929

|                 |         |                 |         |
|-----------------|---------|-----------------|---------|
| afum EAL93231.1 | 100.00% | afis EAW18533.1 | 100.00% |
|-----------------|---------|-----------------|---------|

Bootstrap support for afum|EAL93231.1 as seed ortholog is 100%.

Bootstrap support for afis|EAW18533.1 as seed ortholog is 100%.

---

Group of orthologs #4557. Best score 929 bits

Score difference with first non-orthologous sequence - *A. fumigatus*:929 *A. fischeri*:929

|                 |         |                 |         |
|-----------------|---------|-----------------|---------|
| afum EAL90619.2 | 100.00% | afis EAW22580.1 | 100.00% |
|-----------------|---------|-----------------|---------|

Bootstrap support for afum|EAL90619.2 as seed ortholog is 100%.

Bootstrap support for afis|EAW22580.1 as seed ortholog is 100%.

---

Group of orthologs #4558. Best score 928 bits

Score difference with first non-orthologous sequence - *A. fumigatus*:928 *A. fischeri*:928

|                 |         |                 |         |
|-----------------|---------|-----------------|---------|
| afum EAL84512.1 | 100.00% | afis EAW20547.1 | 100.00% |
|-----------------|---------|-----------------|---------|

Bootstrap support for afum|EAL84512.1 as seed ortholog is 100%.

Bootstrap support for afis|EAW20547.1 as seed ortholog is 100%.

---

Group of orthologs #4559. Best score 928 bits

Score difference with first non-orthologous sequence - *A. fumigatus*:928 *A. fischeri*:928

|                 |         |                 |         |
|-----------------|---------|-----------------|---------|
| afum EAL85313.1 | 100.00% | afis EAW20193.1 | 100.00% |
|-----------------|---------|-----------------|---------|

Bootstrap support for afum|EAL85313.1 as seed ortholog is 100%.

Bootstrap support for afis|EAW20193.1 as seed ortholog is 100%.

---

Group of orthologs #4560. Best score 928 bits

Score difference with first non-orthologous sequence - *A. fumigatus*:928 *A. fischeri*:928

|                 |         |                 |         |
|-----------------|---------|-----------------|---------|
| afum EAL93418.1 | 100.00% | afis EAW18696.1 | 100.00% |
|-----------------|---------|-----------------|---------|

Bootstrap support for afum|EAL93418.1 as seed ortholog is 100%.

Bootstrap support for afis|EAW18696.1 as seed ortholog is 100%.

---

Group of orthologs #4561. Best score 928 bits

Score difference with first non-orthologous sequence - *A. fumigatus*:928 *A. fischeri*:928  
afum|EAL92903.1 100.00% afis|EAW21889.1 100.00%  
Bootstrap support for afum|EAL92903.1 as seed ortholog is 100%.  
Bootstrap support for afis|EAW21889.1 as seed ortholog is 100%.

---

Group of orthologs #4562. Best score 927 bits

Score difference with first non-orthologous sequence - *A. fumigatus*:712 *A. fischeri*:534  
afum|EAL88929.1 100.00% afis|EAW16307.1 100.00%  
Bootstrap support for afum|EAL88929.1 as seed ortholog is 100%.  
Bootstrap support for afis|EAW16307.1 as seed ortholog is 100%.

---

Group of orthologs #4563. Best score 927 bits

Score difference with first non-orthologous sequence - *A. fumigatus*:927 *A. fischeri*:927  
afum|EAL87616.1 100.00% afis|EAW18253.1 100.00%  
Bootstrap support for afum|EAL87616.1 as seed ortholog is 100%.  
Bootstrap support for afis|EAW18253.1 as seed ortholog is 100%.

---

Group of orthologs #4564. Best score 927 bits

Score difference with first non-orthologous sequence - *A. fumigatus*:927 *A. fischeri*:927  
afum|EAL93607.1 100.00% afis|EAW18875.1 100.00%  
Bootstrap support for afum|EAL93607.1 as seed ortholog is 100%.  
Bootstrap support for afis|EAW18875.1 as seed ortholog is 100%.

---

Group of orthologs #4565. Best score 927 bits

Score difference with first non-orthologous sequence - *A. fumigatus*:927 *A. fischeri*:927  
afum|EAL93762.2 100.00% afis|EAW19033.1 100.00%  
Bootstrap support for afum|EAL93762.2 as seed ortholog is 100%.  
Bootstrap support for afis|EAW19033.1 as seed ortholog is 100%.

---

Group of orthologs #4566. Best score 927 bits

Score difference with first non-orthologous sequence - *A. fumigatus*:927 *A. fischeri*:927  
afum|EAL93970.2 100.00% afis|EAW19241.1 100.00%  
Bootstrap support for afum|EAL93970.2 as seed ortholog is 100%.  
Bootstrap support for afis|EAW19241.1 as seed ortholog is 100%.

---

Group of orthologs #4567. Best score 927 bits

Score difference with first non-orthologous sequence - *A. fumigatus*:927 *A. fischeri*:927  
afum|EAL89613.1 100.00% afis|EAW24955.1 100.00%  
Bootstrap support for afum|EAL89613.1 as seed ortholog is 100%.  
Bootstrap support for afis|EAW24955.1 as seed ortholog is 100%.

---

Group of orthologs #4568. Best score 926 bits

Score difference with first non-orthologous sequence - *A. fumigatus*:926 *A. fischeri*:926  
afum|EAL88502.1 100.00% afis|EAW15868.1 100.00%  
Bootstrap support for afum|EAL88502.1 as seed ortholog is 100%.  
Bootstrap support for afis|EAW15868.1 as seed ortholog is 100%.

---

Group of orthologs #4569. Best score 926 bits

Score difference with first non-orthologous sequence - *A. fumigatus*:859 *A. fischeri*:734  
afum|EAL89001.1 100.00% afis|EAW16376.1 100.00%  
Bootstrap support for afum|EAL89001.1 as seed ortholog is 100%.  
Bootstrap support for afis|EAW16376.1 as seed ortholog is 100%.

---

Group of orthologs #4570. Best score 926 bits

Score difference with first non-orthologous sequence - *A. fumigatus*:926 *A. fischeri*:717  
afum|EAL84871.1 100.00% afis|EAW20697.1 100.00%



Bootstrap support for afum|EAL84871.1 as seed ortholog is 100%.  
Bootstrap support for afis|EAW20697.1 as seed ortholog is 100%.

---

Group of orthologs #4571. Best score 926 bits

Score difference with first non-orthologous sequence - *A. fumigatus*:926 *A. fischeri*:926

|                 |         |                 |         |
|-----------------|---------|-----------------|---------|
| afum EAL86925.1 | 100.00% | afis EAW19593.1 | 100.00% |
|-----------------|---------|-----------------|---------|

Bootstrap support for afum|EAL86925.1 as seed ortholog is 100%.

Bootstrap support for afis|EAW19593.1 as seed ortholog is 100%.

---

Group of orthologs #4572. Best score 926 bits

Score difference with first non-orthologous sequence - *A. fumigatus*:926 *A. fischeri*:926

|                 |         |                 |         |
|-----------------|---------|-----------------|---------|
| afum EAL91235.1 | 100.00% | afis EAW17397.1 | 100.00% |
|-----------------|---------|-----------------|---------|

Bootstrap support for afum|EAL91235.1 as seed ortholog is 100%.

Bootstrap support for afis|EAW17397.1 as seed ortholog is 100%.

---

Group of orthologs #4573. Best score 926 bits

Score difference with first non-orthologous sequence - *A. fumigatus*:688 *A. fischeri*:803

|                 |         |                 |         |
|-----------------|---------|-----------------|---------|
| afum EAL84363.1 | 100.00% | afis EAW25693.1 | 100.00% |
|-----------------|---------|-----------------|---------|

Bootstrap support for afum|EAL84363.1 as seed ortholog is 100%.

Bootstrap support for afis|EAW25693.1 as seed ortholog is 100%.

---

Group of orthologs #4574. Best score 926 bits

Score difference with first non-orthologous sequence - *A. fumigatus*:807 *A. fischeri*:926

|                 |         |                 |         |
|-----------------|---------|-----------------|---------|
| afum EAL87225.1 | 100.00% | afis EAW23791.1 | 100.00% |
|-----------------|---------|-----------------|---------|

Bootstrap support for afum|EAL87225.1 as seed ortholog is 100%.

Bootstrap support for afis|EAW23791.1 as seed ortholog is 100%.

---

Group of orthologs #4575. Best score 925 bits

Score difference with first non-orthologous sequence - *A. fumigatus*:925 *A. fischeri*:925

|                 |         |                 |         |
|-----------------|---------|-----------------|---------|
| afum EAL86986.1 | 100.00% | afis EAW19508.1 | 100.00% |
|-----------------|---------|-----------------|---------|

Bootstrap support for afum|EAL86986.1 as seed ortholog is 100%.

Bootstrap support for afis|EAW19508.1 as seed ortholog is 100%.

---

Group of orthologs #4576. Best score 925 bits

Score difference with first non-orthologous sequence - *A. fumigatus*:925 *A. fischeri*:925

|                 |         |                 |         |
|-----------------|---------|-----------------|---------|
| afum EAL91354.1 | 100.00% | afis EAW17540.1 | 100.00% |
|-----------------|---------|-----------------|---------|

Bootstrap support for afum|EAL91354.1 as seed ortholog is 100%.

Bootstrap support for afis|EAW17540.1 as seed ortholog is 100%.

---

Group of orthologs #4577. Best score 925 bits

Score difference with first non-orthologous sequence - *A. fumigatus*:925 *A. fischeri*:925

|                 |         |                 |         |
|-----------------|---------|-----------------|---------|
| afum EAL87180.1 | 100.00% | afis EAW23744.1 | 100.00% |
|-----------------|---------|-----------------|---------|

Bootstrap support for afum|EAL87180.1 as seed ortholog is 100%.

Bootstrap support for afis|EAW23744.1 as seed ortholog is 100%.

---

Group of orthologs #4578. Best score 925 bits

Score difference with first non-orthologous sequence - *A. fumigatus*:925 *A. fischeri*:491

|                 |         |                 |         |
|-----------------|---------|-----------------|---------|
| afum EAL87193.2 | 100.00% | afis EAW23759.1 | 100.00% |
|-----------------|---------|-----------------|---------|

Bootstrap support for afum|EAL87193.2 as seed ortholog is 100%.

Bootstrap support for afis|EAW23759.1 as seed ortholog is 100%.

---

Group of orthologs #4579. Best score 924 bits

Score difference with first non-orthologous sequence - *A. fumigatus*:924 *A. fischeri*:924

|                 |         |                 |         |
|-----------------|---------|-----------------|---------|
| afum EAL85542.1 | 100.00% | afis EAW15809.1 | 100.00% |
|-----------------|---------|-----------------|---------|

Bootstrap support for afum|EAL85542.1 as seed ortholog is 100%.

Bootstrap support for afis|EAW15809.1 as seed ortholog is 100%.

---

Group of orthologs #4580. Best score 924 bits

Score difference with first non-orthologous sequence - *A. fumigatus*:924 *A. fischeri*:924

afum|EAL88515.1 100.00% afis|EAW15881.1 100.00%

Bootstrap support for afum|EAL88515.1 as seed ortholog is 100%.

Bootstrap support for afis|EAW15881.1 as seed ortholog is 100%.

---

Group of orthologs #4581. Best score 924 bits

Score difference with first non-orthologous sequence - *A. fumigatus*:814 *A. fischeri*:823

afum|EAL85462.1 100.00% afis|EAW20342.1 100.00%

Bootstrap support for afum|EAL85462.1 as seed ortholog is 100%.

Bootstrap support for afis|EAW20342.1 as seed ortholog is 100%.

---

Group of orthologs #4582. Best score 924 bits

Score difference with first non-orthologous sequence - *A. fumigatus*:924 *A. fischeri*:924

afum|EAL91454.1 100.00% afis|EAW17639.1 100.00%

Bootstrap support for afum|EAL91454.1 as seed ortholog is 100%.

Bootstrap support for afis|EAW17639.1 as seed ortholog is 100%.

---

Group of orthologs #4583. Best score 924 bits

Score difference with first non-orthologous sequence - *A. fumigatus*:924 *A. fischeri*:924

afum|EAL90032.1 100.00% afis|EAW25372.1 100.00%

Bootstrap support for afum|EAL90032.1 as seed ortholog is 100%.

Bootstrap support for afis|EAW25372.1 as seed ortholog is 100%.

---

Group of orthologs #4584. Best score 923 bits

Score difference with first non-orthologous sequence - *A. fumigatus*:851 *A. fischeri*:809

afum|EAL85070.1 100.00% afis|EAW19823.1 100.00%

Bootstrap support for afum|EAL85070.1 as seed ortholog is 100%.

Bootstrap support for afis|EAW19823.1 as seed ortholog is 100%.

---

Group of orthologs #4585. Best score 923 bits

Score difference with first non-orthologous sequence - *A. fumigatus*:923 *A. fischeri*:923

afum|EAL89119.1 100.00% afis|EAW16524.1 100.00%

Bootstrap support for afum|EAL89119.1 as seed ortholog is 100%.

Bootstrap support for afis|EAW16524.1 as seed ortholog is 100%.

---

Group of orthologs #4586. Best score 923 bits

Score difference with first non-orthologous sequence - *A. fumigatus*:923 *A. fischeri*:923

afum|EAL91163.1 100.00% afis|EAW17326.1 100.00%

Bootstrap support for afum|EAL91163.1 as seed ortholog is 100%.

Bootstrap support for afis|EAW17326.1 as seed ortholog is 100%.

---

Group of orthologs #4587. Best score 923 bits

Score difference with first non-orthologous sequence - *A. fumigatus*:923 *A. fischeri*:923

afum|EAL91586.1 100.00% afis|EAW17777.1 100.00%

Bootstrap support for afum|EAL91586.1 as seed ortholog is 100%.

Bootstrap support for afis|EAW17777.1 as seed ortholog is 100%.

---

Group of orthologs #4588. Best score 923 bits

Score difference with first non-orthologous sequence - *A. fumigatus*:923 *A. fischeri*:923

afum|EAL93757.1 100.00% afis|EAW19026.1 100.00%

Bootstrap support for afum|EAL93757.1 as seed ortholog is 100%.

Bootstrap support for afis|EAW19026.1 as seed ortholog is 100%.

---

Group of orthologs #4589. Best score 923 bits

Score difference with first non-orthologous sequence - *A. fumigatus*:923 *A. fischeri*:923  
afum|EAL92873.1 100.00% afis|EAW21860.1 100.00%  
Bootstrap support for afum|EAL92873.1 as seed ortholog is 100%.  
Bootstrap support for afis|EAW21860.1 as seed ortholog is 100%.

---

Group of orthologs #4590. Best score 922 bits

Score difference with first non-orthologous sequence - *A. fumigatus*:922 *A. fischeri*:922  
afum|EAL85843.1 100.00% afis|EAW15478.1 100.00%  
Bootstrap support for afum|EAL85843.1 as seed ortholog is 100%.  
Bootstrap support for afis|EAW15478.1 as seed ortholog is 100%.

---

Group of orthologs #4591. Best score 922 bits

Score difference with first non-orthologous sequence - *A. fumigatus*:922 *A. fischeri*:922  
afum|EAL86459.1 100.00% afis|EAW16934.1 100.00%  
Bootstrap support for afum|EAL86459.1 as seed ortholog is 100%.  
Bootstrap support for afis|EAW16934.1 as seed ortholog is 100%.

---

Group of orthologs #4592. Best score 922 bits

Score difference with first non-orthologous sequence - *A. fumigatus*:922 *A. fischeri*:922  
afum|EAL84614.1 100.00% afis|EAW20438.1 100.00%  
Bootstrap support for afum|EAL84614.1 as seed ortholog is 100%.  
Bootstrap support for afis|EAW20438.1 as seed ortholog is 100%.

---

Group of orthologs #4593. Best score 922 bits

Score difference with first non-orthologous sequence - *A. fumigatus*:922 *A. fischeri*:922  
afum|EBA27365.1 100.00% afis|EAW16400.1 100.00%  
Bootstrap support for afum|EBA27365.1 as seed ortholog is 100%.  
Bootstrap support for afis|EAW16400.1 as seed ortholog is 100%.

---

Group of orthologs #4594. Best score 922 bits

Score difference with first non-orthologous sequence - *A. fumigatus*:922 *A. fischeri*:922  
afum|EAL88469.1 100.00% afis|EAW23012.1 100.00%  
Bootstrap support for afum|EAL88469.1 as seed ortholog is 100%.  
Bootstrap support for afis|EAW23012.1 as seed ortholog is 100%.

---

Group of orthologs #4595. Best score 922 bits

Score difference with first non-orthologous sequence - *A. fumigatus*:922 *A. fischeri*:922  
afum|EAL93590.2 100.00% afis|EAW18858.1 100.00%  
Bootstrap support for afum|EAL93590.2 as seed ortholog is 100%.  
Bootstrap support for afis|EAW18858.1 as seed ortholog is 100%.

---

Group of orthologs #4596. Best score 922 bits

Score difference with first non-orthologous sequence - *A. fumigatus*:922 *A. fischeri*:922  
afum|EAL90508.1 100.00% afis|EAW22685.1 100.00%  
Bootstrap support for afum|EAL90508.1 as seed ortholog is 100%.  
Bootstrap support for afis|EAW22685.1 as seed ortholog is 100%.

---

Group of orthologs #4597. Best score 922 bits

Score difference with first non-orthologous sequence - *A. fumigatus*:922 *A. fischeri*:922  
afum|EAL90607.1 100.00% afis|EAW22592.1 100.00%  
Bootstrap support for afum|EAL90607.1 as seed ortholog is 100%.  
Bootstrap support for afis|EAW22592.1 as seed ortholog is 100%.

---

Group of orthologs #4598. Best score 922 bits

Score difference with first non-orthologous sequence - *A. fumigatus*:922 *A. fischeri*:922  
afum|EAL90391.1 100.00% afis|EAW22810.1 100.00%

Bootstrap support for afum|EAL90391.1 as seed ortholog is 100%.  
Bootstrap support for afis|EAW22810.1 as seed ortholog is 100%.

---

Group of orthologs #4599. Best score 922 bits

Score difference with first non-orthologous sequence - *A. fumigatus*:922 *A. fischeri*:535

|                 |         |                 |         |
|-----------------|---------|-----------------|---------|
| afum EAL92682.2 | 100.00% | afis EAW21648.1 | 100.00% |
|-----------------|---------|-----------------|---------|

Bootstrap support for afum|EAL92682.2 as seed ortholog is 100%.

Bootstrap support for afis|EAW21648.1 as seed ortholog is 100%.

---

Group of orthologs #4600. Best score 921 bits

Score difference with first non-orthologous sequence - *A. fumigatus*:921 *A. fischeri*:921

|                 |         |                 |         |
|-----------------|---------|-----------------|---------|
| afum EAL84229.2 | 100.00% | afis EAW15416.1 | 100.00% |
|-----------------|---------|-----------------|---------|

Bootstrap support for afum|EAL84229.2 as seed ortholog is 100%.

Bootstrap support for afis|EAW15416.1 as seed ortholog is 100%.

---

Group of orthologs #4601. Best score 921 bits

Score difference with first non-orthologous sequence - *A. fumigatus*:921 *A. fischeri*:921

|                 |         |                 |         |
|-----------------|---------|-----------------|---------|
| afum EAL86972.1 | 100.00% | afis EAW19534.1 | 100.00% |
|-----------------|---------|-----------------|---------|

Bootstrap support for afum|EAL86972.1 as seed ortholog is 100%.

Bootstrap support for afis|EAW19534.1 as seed ortholog is 100%.

---

Group of orthologs #4602. Best score 921 bits

Score difference with first non-orthologous sequence - *A. fumigatus*:921 *A. fischeri*:921

|                 |         |                 |         |
|-----------------|---------|-----------------|---------|
| afum EAL91368.1 | 100.00% | afis EAW17554.1 | 100.00% |
|-----------------|---------|-----------------|---------|

Bootstrap support for afum|EAL91368.1 as seed ortholog is 100%.

Bootstrap support for afis|EAW17554.1 as seed ortholog is 100%.

---

Group of orthologs #4603. Best score 921 bits

Score difference with first non-orthologous sequence - *A. fumigatus*:921 *A. fischeri*:921

|                 |         |                 |         |
|-----------------|---------|-----------------|---------|
| afum EAL86063.1 | 100.00% | afis EAW24391.1 | 100.00% |
|-----------------|---------|-----------------|---------|

Bootstrap support for afum|EAL86063.1 as seed ortholog is 100%.

Bootstrap support for afis|EAW24391.1 as seed ortholog is 100%.

---

Group of orthologs #4604. Best score 921 bits

Score difference with first non-orthologous sequence - *A. fumigatus*:921 *A. fischeri*:921

|                 |         |                 |         |
|-----------------|---------|-----------------|---------|
| afum EAL87450.1 | 100.00% | afis EAW24020.1 | 100.00% |
|-----------------|---------|-----------------|---------|

Bootstrap support for afum|EAL87450.1 as seed ortholog is 100%.

Bootstrap support for afis|EAW24020.1 as seed ortholog is 100%.

---

Group of orthologs #4605. Best score 921 bits

Score difference with first non-orthologous sequence - *A. fumigatus*:921 *A. fischeri*:921

|                 |         |                 |         |
|-----------------|---------|-----------------|---------|
| afum EAL93667.2 | 100.00% | afis EAW18934.1 | 100.00% |
|-----------------|---------|-----------------|---------|

Bootstrap support for afum|EAL93667.2 as seed ortholog is 100%.

Bootstrap support for afis|EAW18934.1 as seed ortholog is 100%.

---

Group of orthologs #4606. Best score 921 bits

Score difference with first non-orthologous sequence - *A. fumigatus*:921 *A. fischeri*:921

|                 |         |                 |         |
|-----------------|---------|-----------------|---------|
| afum EAL90331.1 | 100.00% | afis EAW22868.1 | 100.00% |
|-----------------|---------|-----------------|---------|

Bootstrap support for afum|EAL90331.1 as seed ortholog is 100%.

Bootstrap support for afis|EAW22868.1 as seed ortholog is 100%.

---

Group of orthologs #4607. Best score 921 bits

Score difference with first non-orthologous sequence - *A. fumigatus*:921 *A. fischeri*:611

|                 |         |                 |         |
|-----------------|---------|-----------------|---------|
| afum EAL89340.1 | 100.00% | afis EAW24698.1 | 100.00% |
|-----------------|---------|-----------------|---------|

Bootstrap support for afum|EAL89340.1 as seed ortholog is 100%.

Bootstrap support for afis|EAW24698.1 as seed ortholog is 100%.

---

Group of orthologs #4608. Best score 921 bits

Score difference with first non-orthologous sequence - *A. fumigatus*:921 *A. fischeri*:921  
afum|EAL92939.1 100.00% afis|EAW21926.1 100.00%  
Bootstrap support for afum|EAL92939.1 as seed ortholog is 100%.  
Bootstrap support for afis|EAW21926.1 as seed ortholog is 100%.

---

Group of orthologs #4609. Best score 920 bits

Score difference with first non-orthologous sequence - *A. fumigatus*:920 *A. fischeri*:920  
afum|EAL85932.1 100.00% afis|EAW24264.1 100.00%  
Bootstrap support for afum|EAL85932.1 as seed ortholog is 100%.  
Bootstrap support for afis|EAW24264.1 as seed ortholog is 100%.

---

Group of orthologs #4610. Best score 920 bits

Score difference with first non-orthologous sequence - *A. fumigatus*:920 *A. fischeri*:920  
afum|EAL93122.1 100.00% afis|EAW18440.1 100.00%  
Bootstrap support for afum|EAL93122.1 as seed ortholog is 100%.  
Bootstrap support for afis|EAW18440.1 as seed ortholog is 100%.

---

Group of orthologs #4611. Best score 920 bits

Score difference with first non-orthologous sequence - *A. fumigatus*:920 *A. fischeri*:879  
afum|EAL88009.1 100.00% afis|EAW23458.1 100.00%  
Bootstrap support for afum|EAL88009.1 as seed ortholog is 100%.  
Bootstrap support for afis|EAW23458.1 as seed ortholog is 100%.

---

Group of orthologs #4612. Best score 920 bits

Score difference with first non-orthologous sequence - *A. fumigatus*:920 *A. fischeri*:920  
afum|EAL87857.1 100.00% afis|EAW23608.1 100.00%  
Bootstrap support for afum|EAL87857.1 as seed ortholog is 100%.  
Bootstrap support for afis|EAW23608.1 as seed ortholog is 100%.

---

Group of orthologs #4613. Best score 920 bits

Score difference with first non-orthologous sequence - *A. fumigatus*:380 *A. fischeri*:483  
afum|EAL93420.1 100.00% afis|EAW18698.1 100.00%  
Bootstrap support for afum|EAL93420.1 as seed ortholog is 100%.  
Bootstrap support for afis|EAW18698.1 as seed ortholog is 100%.

---

Group of orthologs #4614. Best score 920 bits

Score difference with first non-orthologous sequence - *A. fumigatus*:920 *A. fischeri*:920  
afum|EAL93766.1 100.00% afis|EAW19037.1 100.00%  
Bootstrap support for afum|EAL93766.1 as seed ortholog is 100%.  
Bootstrap support for afis|EAW19037.1 as seed ortholog is 100%.

---

Group of orthologs #4615. Best score 919 bits

Score difference with first non-orthologous sequence - *A. fumigatus*:919 *A. fischeri*:919  
afum|EAL88702.1 100.00% afis|EAW16070.1 100.00%  
Bootstrap support for afum|EAL88702.1 as seed ortholog is 100%.  
Bootstrap support for afis|EAW16070.1 as seed ortholog is 100%.

---

Group of orthologs #4616. Best score 919 bits

Score difference with first non-orthologous sequence - *A. fumigatus*:919 *A. fischeri*:919  
afum|EAL88456.1 100.00% afis|EAW23026.1 100.00%  
Bootstrap support for afum|EAL88456.1 as seed ortholog is 100%.  
Bootstrap support for afis|EAW23026.1 as seed ortholog is 100%.

---

Group of orthologs #4617. Best score 919 bits

Score difference with first non-orthologous sequence - *A. fumigatus*:919 *A. fischeri*:919  
afum|EAL87842.1 100.00% afis|EAW23620.1 100.00%  
Bootstrap support for afum|EAL87842.1 as seed ortholog is 100%.  
Bootstrap support for afis|EAW23620.1 as seed ortholog is 100%.

---

Group of orthologs #4618. Best score 919 bits

Score difference with first non-orthologous sequence - *A. fumigatus*:919 *A. fischeri*:919  
afum|EAL90725.1 100.00% afis|EAW22466.1 100.00%  
Bootstrap support for afum|EAL90725.1 as seed ortholog is 100%.  
Bootstrap support for afis|EAW22466.1 as seed ortholog is 100%.

---

Group of orthologs #4619. Best score 919 bits

Score difference with first non-orthologous sequence - *A. fumigatus*:919 *A. fischeri*:919  
afum|EAL90276.1 100.00% afis|EAW22921.1 100.00%  
Bootstrap support for afum|EAL90276.1 as seed ortholog is 100%.  
Bootstrap support for afis|EAW22921.1 as seed ortholog is 100%.

---

Group of orthologs #4620. Best score 919 bits

Score difference with first non-orthologous sequence - *A. fumigatus*:831 *A. fischeri*:875  
afum|EAL89574.1 100.00% afis|EAW24919.1 100.00%  
Bootstrap support for afum|EAL89574.1 as seed ortholog is 100%.  
Bootstrap support for afis|EAW24919.1 as seed ortholog is 100%.

---

Group of orthologs #4621. Best score 919 bits

Score difference with first non-orthologous sequence - *A. fumigatus*:919 *A. fischeri*:919  
afum|EAL90100.1 100.00% afis|EAW25442.1 100.00%  
Bootstrap support for afum|EAL90100.1 as seed ortholog is 100%.  
Bootstrap support for afis|EAW25442.1 as seed ortholog is 100%.

---

Group of orthologs #4622. Best score 918 bits

Score difference with first non-orthologous sequence - *A. fumigatus*:828 *A. fischeri*:918  
afum|EAL88505.1 100.00% afis|EAW15871.1 100.00%  
Bootstrap support for afum|EAL88505.1 as seed ortholog is 100%.  
Bootstrap support for afis|EAW15871.1 as seed ortholog is 100%.

---

Group of orthologs #4623. Best score 918 bits

Score difference with first non-orthologous sequence - *A. fumigatus*:663 *A. fischeri*:733  
afum|EAL85141.1 100.00% afis|EAW19756.1 100.00%  
Bootstrap support for afum|EAL85141.1 as seed ortholog is 100%.  
Bootstrap support for afis|EAW19756.1 as seed ortholog is 100%.

---

Group of orthologs #4624. Best score 918 bits

Score difference with first non-orthologous sequence - *A. fumigatus*:918 *A. fischeri*:857  
afum|EAL91286.1 100.00% afis|EAW17458.1 100.00%  
Bootstrap support for afum|EAL91286.1 as seed ortholog is 100%.  
Bootstrap support for afis|EAW17458.1 as seed ortholog is 100%.

---

Group of orthologs #4625. Best score 918 bits

Score difference with first non-orthologous sequence - *A. fumigatus*:918 *A. fischeri*:918  
afum|EAL92987.1 100.00% afis|EAW21972.1 100.00%  
Bootstrap support for afum|EAL92987.1 as seed ortholog is 100%.  
Bootstrap support for afis|EAW21972.1 as seed ortholog is 100%.

---

Group of orthologs #4626. Best score 918 bits

Score difference with first non-orthologous sequence - *A. fumigatus*:918 *A. fischeri*:918  
afum|EAL89960.1 100.00% afis|EAW25297.1 100.00%

Bootstrap support for afum|EAL89960.1 as seed ortholog is 100%.  
Bootstrap support for afis|EAW25297.1 as seed ortholog is 100%.

---

Group of orthologs #4627. Best score 917 bits

Score difference with first non-orthologous sequence - *A. fumigatus*:917 *A. fischeri*:917

afum|EAL84644.1 100.00% afis|EAW20986.1 100.00%

Bootstrap support for afum|EAL84644.1 as seed ortholog is 100%.

Bootstrap support for afis|EAW20986.1 as seed ortholog is 100%.

---

Group of orthologs #4628. Best score 917 bits

Score difference with first non-orthologous sequence - *A. fumigatus*:917 *A. fischeri*:917

afum|EAL91214.1 100.00% afis|EAW17379.1 100.00%

Bootstrap support for afum|EAL91214.1 as seed ortholog is 100%.

Bootstrap support for afis|EAW17379.1 as seed ortholog is 100%.

---

Group of orthologs #4629. Best score 917 bits

Score difference with first non-orthologous sequence - *A. fumigatus*:917 *A. fischeri*:917

afum|EAL84325.1 100.00% afis|EAW25638.1 100.00%

Bootstrap support for afum|EAL84325.1 as seed ortholog is 100%.

Bootstrap support for afis|EAW25638.1 as seed ortholog is 100%.

---

Group of orthologs #4630. Best score 917 bits

Score difference with first non-orthologous sequence - *A. fumigatus*:917 *A. fischeri*:917

afum|EAL90916.1 100.00% afis|EAW22264.1 100.00%

Bootstrap support for afum|EAL90916.1 as seed ortholog is 100%.

Bootstrap support for afis|EAW22264.1 as seed ortholog is 100%.

---

Group of orthologs #4631. Best score 916 bits

Score difference with first non-orthologous sequence - *A. fumigatus*:916 *A. fischeri*:495

afum|EAL85880.1 100.00% afis|EAW24211.1 100.00%

Bootstrap support for afum|EAL85880.1 as seed ortholog is 100%.

Bootstrap support for afis|EAW24211.1 as seed ortholog is 100%.

---

Group of orthologs #4632. Best score 916 bits

Score difference with first non-orthologous sequence - *A. fumigatus*:916 *A. fischeri*:916

afum|EAL88266.1 100.00% afis|EAW23218.1 100.00%

Bootstrap support for afum|EAL88266.1 as seed ortholog is 100%.

Bootstrap support for afis|EAW23218.1 as seed ortholog is 100%.

---

Group of orthologs #4633. Best score 916 bits

Score difference with first non-orthologous sequence - *A. fumigatus*:804 *A. fischeri*:916

afum|EAL93026.1 100.00% afis|EAW22011.1 100.00%

Bootstrap support for afum|EAL93026.1 as seed ortholog is 100%.

Bootstrap support for afis|EAW22011.1 as seed ortholog is 100%.

---

Group of orthologs #4634. Best score 915 bits

Score difference with first non-orthologous sequence - *A. fumigatus*:915 *A. fischeri*:915

afum|EAL86400.1 100.00% afis|EAW16857.1 100.00%

Bootstrap support for afum|EAL86400.1 as seed ortholog is 100%.

Bootstrap support for afis|EAW16857.1 as seed ortholog is 100%.

---

Group of orthologs #4635. Best score 915 bits

Score difference with first non-orthologous sequence - *A. fumigatus*:722 *A. fischeri*:637

afum|EAL86211.1 100.00% afis|EAW24547.1 100.00%

Bootstrap support for afum|EAL86211.1 as seed ortholog is 100%.

Bootstrap support for afis|EAW24547.1 as seed ortholog is 100%.

---

Group of orthologs #4636. Best score 915 bits

Score difference with first non-orthologous sequence - *A. fumigatus*:915 *A. fischeri*:915

afum|EAL92098.1 100.00% afis|EAW21075.1 100.00%

Bootstrap support for afum|EAL92098.1 as seed ortholog is 100%.

Bootstrap support for afis|EAW21075.1 as seed ortholog is 100%.

---

Group of orthologs #4637. Best score 914 bits

Score difference with first non-orthologous sequence - *A. fumigatus*:914 *A. fischeri*:826

afum|EAL86807.2 100.00% afis|EAW19719.1 100.00%

Bootstrap support for afum|EAL86807.2 as seed ortholog is 100%.

Bootstrap support for afis|EAW19719.1 as seed ortholog is 100%.

---

Group of orthologs #4638. Best score 913 bits

Score difference with first non-orthologous sequence - *A. fumigatus*:913 *A. fischeri*:913

afum|EAL84434.1 100.00% afis|EAW20634.1 100.00%

Bootstrap support for afum|EAL84434.1 as seed ortholog is 100%.

Bootstrap support for afis|EAW20634.1 as seed ortholog is 100%.

---

Group of orthologs #4639. Best score 913 bits

Score difference with first non-orthologous sequence - *A. fumigatus*:913 *A. fischeri*:913

afum|EAL91541.1 100.00% afis|EAW17726.1 100.00%

Bootstrap support for afum|EAL91541.1 as seed ortholog is 100%.

Bootstrap support for afis|EAW17726.1 as seed ortholog is 100%.

---

Group of orthologs #4640. Best score 913 bits

Score difference with first non-orthologous sequence - *A. fumigatus*:913 *A. fischeri*:913

afum|EAL91870.1 100.00% afis|EAW18059.1 100.00%

Bootstrap support for afum|EAL91870.1 as seed ortholog is 100%.

Bootstrap support for afis|EAW18059.1 as seed ortholog is 100%.

---

Group of orthologs #4641. Best score 912 bits

Score difference with first non-orthologous sequence - *A. fumigatus*:912 *A. fischeri*:912

afum|EAL86064.1 100.00% afis|EAW24392.1 100.00%

Bootstrap support for afum|EAL86064.1 as seed ortholog is 100%.

Bootstrap support for afis|EAW24392.1 as seed ortholog is 100%.

---

Group of orthologs #4642. Best score 912 bits

Score difference with first non-orthologous sequence - *A. fumigatus*:912 *A. fischeri*:912

afum|EAL88338.1 100.00% afis|EAW23143.1 100.00%

Bootstrap support for afum|EAL88338.1 as seed ortholog is 100%.

Bootstrap support for afis|EAW23143.1 as seed ortholog is 100%.

---

Group of orthologs #4643. Best score 912 bits

Score difference with first non-orthologous sequence - *A. fumigatus*:912 *A. fischeri*:912

afum|EAL93361.1 100.00% afis|EAW18646.1 100.00%

Bootstrap support for afum|EAL93361.1 as seed ortholog is 100%.

Bootstrap support for afis|EAW18646.1 as seed ortholog is 100%.

---

Group of orthologs #4644. Best score 912 bits

Score difference with first non-orthologous sequence - *A. fumigatus*:912 *A. fischeri*:912

afum|EAL92744.1 100.00% afis|EAW21709.1 100.00%

Bootstrap support for afum|EAL92744.1 as seed ortholog is 100%.

Bootstrap support for afis|EAW21709.1 as seed ortholog is 100%.

---

Group of orthologs #4645. Best score 912 bits



Score difference with first non-orthologous sequence - *A. fumigatus*:912 *A. fischeri*:912  
afum|EBA27344.1 100.00% afis|EAW23164.1 100.00%  
Bootstrap support for afum|EBA27344.1 as seed ortholog is 100%.  
Bootstrap support for afis|EAW23164.1 as seed ortholog is 100%.

---

Group of orthologs #4646. Best score 911 bits

Score difference with first non-orthologous sequence - *A. fumigatus*:911 *A. fischeri*:911  
afum|EAL89117.1 100.00% afis|EAW16522.1 100.00%  
Bootstrap support for afum|EAL89117.1 as seed ortholog is 100%.  
Bootstrap support for afis|EAW16522.1 as seed ortholog is 100%.

---

Group of orthologs #4647. Best score 911 bits

Score difference with first non-orthologous sequence - *A. fumigatus*:797 *A. fischeri*:860  
afum|EAL91392.1 100.00% afis|EAW17579.1 100.00%  
Bootstrap support for afum|EAL91392.1 as seed ortholog is 100%.  
Bootstrap support for afis|EAW17579.1 as seed ortholog is 100%.

---

Group of orthologs #4648. Best score 911 bits

Score difference with first non-orthologous sequence - *A. fumigatus*:911 *A. fischeri*:481  
afum|EAL85952.1 100.00% afis|EAW24283.1 100.00%  
Bootstrap support for afum|EAL85952.1 as seed ortholog is 100%.  
Bootstrap support for afis|EAW24283.1 as seed ortholog is 100%.

---

Group of orthologs #4649. Best score 911 bits

Score difference with first non-orthologous sequence - *A. fumigatus*:911 *A. fischeri*:911  
afum|EAL87243.1 100.00% afis|EAW23809.1 100.00%  
Bootstrap support for afum|EAL87243.1 as seed ortholog is 100%.  
Bootstrap support for afis|EAW23809.1 as seed ortholog is 100%.

---

Group of orthologs #4650. Best score 911 bits

Score difference with first non-orthologous sequence - *A. fumigatus*:911 *A. fischeri*:911  
afum|EAL93097.1 100.00% afis|EAW18415.1 100.00%  
Bootstrap support for afum|EAL93097.1 as seed ortholog is 100%.  
Bootstrap support for afis|EAW18415.1 as seed ortholog is 100%.

---

Group of orthologs #4651. Best score 911 bits

Score difference with first non-orthologous sequence - *A. fumigatus*:911 *A. fischeri*:911  
afum|EAL88391.1 100.00% afis|EAW23088.1 100.00%  
Bootstrap support for afum|EAL88391.1 as seed ortholog is 100%.  
Bootstrap support for afis|EAW23088.1 as seed ortholog is 100%.

---

Group of orthologs #4652. Best score 911 bits

Score difference with first non-orthologous sequence - *A. fumigatus*:911 *A. fischeri*:911  
afum|EBA27505.1 100.00% afis|EAW19157.1 100.00%  
Bootstrap support for afum|EBA27505.1 as seed ortholog is 100%.  
Bootstrap support for afis|EAW19157.1 as seed ortholog is 100%.

---

Group of orthologs #4653. Best score 911 bits

Score difference with first non-orthologous sequence - *A. fumigatus*:911 *A. fischeri*:911  
afum|EAL93031.1 100.00% afis|EAW22016.1 100.00%  
Bootstrap support for afum|EAL93031.1 as seed ortholog is 100%.  
Bootstrap support for afis|EAW22016.1 as seed ortholog is 100%.

---

Group of orthologs #4654. Best score 910 bits

Score difference with first non-orthologous sequence - *A. fumigatus*:910 *A. fischeri*:910  
afum|EAL85038.1 100.00% afis|EAW19857.1 100.00%

Bootstrap support for afum|EAL85038.1 as seed ortholog is 100%.  
Bootstrap support for afis|EAW19857.1 as seed ortholog is 100%.

---

Group of orthologs #4655. Best score 910 bits

Score difference with first non-orthologous sequence - *A. fumigatus*:910 *A. fischeri*:910

afum|EAL84461.1 100.00% afis|EAW20600.1 100.00%

Bootstrap support for afum|EAL84461.1 as seed ortholog is 100%.

Bootstrap support for afis|EAW20600.1 as seed ortholog is 100%.

---

Group of orthologs #4656. Best score 910 bits

Score difference with first non-orthologous sequence - *A. fumigatus*:910 *A. fischeri*:803

afum|EAL87350.1 100.00% afis|EAW23925.1 100.00%

Bootstrap support for afum|EAL87350.1 as seed ortholog is 100%.

Bootstrap support for afis|EAW23925.1 as seed ortholog is 100%.

---

Group of orthologs #4657. Best score 910 bits

Score difference with first non-orthologous sequence - *A. fumigatus*:910 *A. fischeri*:910

afum|EAL88448.1 100.00% afis|EAW23033.1 100.00%

Bootstrap support for afum|EAL88448.1 as seed ortholog is 100%.

Bootstrap support for afis|EAW23033.1 as seed ortholog is 100%.

---

Group of orthologs #4658. Best score 910 bits

Score difference with first non-orthologous sequence - *A. fumigatus*:910 *A. fischeri*:861

afum|EAL89385.1 100.00% afis|EAW24738.1 100.00%

Bootstrap support for afum|EAL89385.1 as seed ortholog is 100%.

Bootstrap support for afis|EAW24738.1 as seed ortholog is 100%.

---

Group of orthologs #4659. Best score 910 bits

Score difference with first non-orthologous sequence - *A. fumigatus*:910 *A. fischeri*:910

afum|EAL89452.1 100.00% afis|EAW24809.1 100.00%

Bootstrap support for afum|EAL89452.1 as seed ortholog is 100%.

Bootstrap support for afis|EAW24809.1 as seed ortholog is 100%.

---

Group of orthologs #4660. Best score 910 bits

Score difference with first non-orthologous sequence - *A. fumigatus*:910 *A. fischeri*:910

afum|EAL89821.1 100.00% afis|EAW25146.1 100.00%

Bootstrap support for afum|EAL89821.1 as seed ortholog is 100%.

Bootstrap support for afis|EAW25146.1 as seed ortholog is 100%.

---

Group of orthologs #4661. Best score 910 bits

Score difference with first non-orthologous sequence - *A. fumigatus*:910 *A. fischeri*:910

afum|EAL90055.1 100.00% afis|EAW25396.1 100.00%

Bootstrap support for afum|EAL90055.1 as seed ortholog is 100%.

Bootstrap support for afis|EAW25396.1 as seed ortholog is 100%.

---

Group of orthologs #4662. Best score 909 bits

Score difference with first non-orthologous sequence - *A. fumigatus*:909 *A. fischeri*:909

afum|EAL84655.1 100.00% afis|EAW20978.1 100.00%

Bootstrap support for afum|EAL84655.1 as seed ortholog is 100%.

Bootstrap support for afis|EAW20978.1 as seed ortholog is 100%.

---

Group of orthologs #4663. Best score 909 bits

Score difference with first non-orthologous sequence - *A. fumigatus*:909 *A. fischeri*:718

afum|EAL90612.1 100.00% afis|EAW22587.1 100.00%

Bootstrap support for afum|EAL90612.1 as seed ortholog is 100%.

Bootstrap support for afis|EAW22587.1 as seed ortholog is 100%.

---

Group of orthologs #4664. Best score 908 bits

Score difference with first non-orthologous sequence - *A. fumigatus*:908 *A. fischeri*:908

afum|EAL85821.1 100.00% afis|EAW15503.1 100.00%

Bootstrap support for afum|EAL85821.1 as seed ortholog is 100%.

Bootstrap support for afis|EAW15503.1 as seed ortholog is 100%.

---

Group of orthologs #4665. Best score 908 bits

Score difference with first non-orthologous sequence - *A. fumigatus*:835 *A. fischeri*:799

afum|EAL84696.1 100.00% afis|EAW20938.1 100.00%

Bootstrap support for afum|EAL84696.1 as seed ortholog is 100%.

Bootstrap support for afis|EAW20938.1 as seed ortholog is 100%.

---

Group of orthologs #4666. Best score 908 bits

Score difference with first non-orthologous sequence - *A. fumigatus*:908 *A. fischeri*:908

afum|EAL89052.1 100.00% afis|EAW17167.1 100.00%

Bootstrap support for afum|EAL89052.1 as seed ortholog is 100%.

Bootstrap support for afis|EAW17167.1 as seed ortholog is 100%.

---

Group of orthologs #4667. Best score 908 bits

Score difference with first non-orthologous sequence - *A. fumigatus*:908 *A. fischeri*:908

afum|EAL91455.1 100.00% afis|EAW17640.1 100.00%

Bootstrap support for afum|EAL91455.1 as seed ortholog is 100%.

Bootstrap support for afis|EAW17640.1 as seed ortholog is 100%.

---

Group of orthologs #4668. Best score 908 bits

Score difference with first non-orthologous sequence - *A. fumigatus*:908 *A. fischeri*:908

afum|EAL91775.1 100.00% afis|EAW17966.1 100.00%

Bootstrap support for afum|EAL91775.1 as seed ortholog is 100%.

Bootstrap support for afis|EAW17966.1 as seed ortholog is 100%.

---

Group of orthologs #4669. Best score 908 bits

Score difference with first non-orthologous sequence - *A. fumigatus*:908 *A. fischeri*:908

afum|EAL87920.1 100.00% afis|EAW23546.1 100.00%

Bootstrap support for afum|EAL87920.1 as seed ortholog is 100%.

Bootstrap support for afis|EAW23546.1 as seed ortholog is 100%.

---

Group of orthologs #4670. Best score 908 bits

Score difference with first non-orthologous sequence - *A. fumigatus*:908 *A. fischeri*:908

afum|EAL93419.1 100.00% afis|EAW18697.1 100.00%

Bootstrap support for afum|EAL93419.1 as seed ortholog is 100%.

Bootstrap support for afis|EAW18697.1 as seed ortholog is 100%.

---

Group of orthologs #4671. Best score 907 bits

Score difference with first non-orthologous sequence - *A. fumigatus*:907 *A. fischeri*:907

afum|EAL85555.1 100.00% afis|EAW15795.1 100.00%

Bootstrap support for afum|EAL85555.1 as seed ortholog is 100%.

Bootstrap support for afis|EAW15795.1 as seed ortholog is 100%.

---

Group of orthologs #4672. Best score 907 bits

Score difference with first non-orthologous sequence - *A. fumigatus*:907 *A. fischeri*:907

afum|EAL86645.1 100.00% afis|EAW17223.1 100.00%

Bootstrap support for afum|EAL86645.1 as seed ortholog is 100%.

Bootstrap support for afis|EAW17223.1 as seed ortholog is 100%.

---

Group of orthologs #4673. Best score 907 bits

Score difference with first non-orthologous sequence - *A. fumigatus*:907 *A. fischeri*:907  
afum|EAL84444.1 100.00% afis|EAW20617.1 100.00%  
Bootstrap support for afum|EAL84444.1 as seed ortholog is 100%.  
Bootstrap support for afis|EAW20617.1 as seed ortholog is 100%.

---

Group of orthologs #4674. Best score 907 bits

Score difference with first non-orthologous sequence - *A. fumigatus*:708 *A. fischeri*:590  
afum|EAL84423.1 100.00% afis|EAW20650.1 100.00%  
Bootstrap support for afum|EAL84423.1 as seed ortholog is 100%.  
Bootstrap support for afis|EAW20650.1 as seed ortholog is 100%.

---

Group of orthologs #4675. Best score 907 bits

Score difference with first non-orthologous sequence - *A. fumigatus*:907 *A. fischeri*:907  
afum|EAL89240.1 100.00% afis|EAW16638.1 100.00%  
Bootstrap support for afum|EAL89240.1 as seed ortholog is 100%.  
Bootstrap support for afis|EAW16638.1 as seed ortholog is 100%.

---

Group of orthologs #4676. Best score 907 bits

Score difference with first non-orthologous sequence - *A. fumigatus*:907 *A. fischeri*:907  
afum|EAL91566.1 100.00% afis|EAW17753.1 100.00%  
Bootstrap support for afum|EAL91566.1 as seed ortholog is 100%.  
Bootstrap support for afis|EAW17753.1 as seed ortholog is 100%.

---

Group of orthologs #4677. Best score 907 bits

Score difference with first non-orthologous sequence - *A. fumigatus*:907 *A. fischeri*:907  
afum|EAL90870.1 100.00% afis|EAW22321.1 100.00%  
Bootstrap support for afum|EAL90870.1 as seed ortholog is 100%.  
Bootstrap support for afis|EAW22321.1 as seed ortholog is 100%.

---

Group of orthologs #4678. Best score 907 bits

Score difference with first non-orthologous sequence - *A. fumigatus*:907 *A. fischeri*:907  
afum|EAL92257.1 100.00% afis|EAW21244.1 100.00%  
Bootstrap support for afum|EAL92257.1 as seed ortholog is 100%.  
Bootstrap support for afis|EAW21244.1 as seed ortholog is 100%.

---

Group of orthologs #4679. Best score 907 bits

Score difference with first non-orthologous sequence - *A. fumigatus*:907 *A. fischeri*:756  
afum|EBA27190.1 100.00% afis|EAW20537.1 100.00%  
Bootstrap support for afum|EBA27190.1 as seed ortholog is 100%.  
Bootstrap support for afis|EAW20537.1 as seed ortholog is 100%.

---

Group of orthologs #4680. Best score 907 bits

Score difference with first non-orthologous sequence - *A. fumigatus*:907 *A. fischeri*:907  
afum|EAL92980.1 100.00% afis|EAW21966.1 100.00%  
Bootstrap support for afum|EAL92980.1 as seed ortholog is 100%.  
Bootstrap support for afis|EAW21966.1 as seed ortholog is 100%.

---

Group of orthologs #4681. Best score 907 bits

Score difference with first non-orthologous sequence - *A. fumigatus*:907 *A. fischeri*:833  
afum|EAL89897.1 100.00% afis|EAW25236.1 100.00%  
Bootstrap support for afum|EAL89897.1 as seed ortholog is 100%.  
Bootstrap support for afis|EAW25236.1 as seed ortholog is 100%.

---

Group of orthologs #4682. Best score 906 bits

Score difference with first non-orthologous sequence - *A. fumigatus*:906 *A. fischeri*:906  
afum|EAL86696.1 100.00% afis|EAW17278.1 100.00%

Bootstrap support for afum|EAL86696.1 as seed ortholog is 100%.  
Bootstrap support for afis|EAW17278.1 as seed ortholog is 100%.

---

Group of orthologs #4683. Best score 906 bits

Score difference with first non-orthologous sequence - *A. fumigatus*:906 *A. fischeri*:906

afum|EAL85961.1 100.00% afis|EAW24293.1 100.00%

Bootstrap support for afum|EAL85961.1 as seed ortholog is 100%.

Bootstrap support for afis|EAW24293.1 as seed ortholog is 100%.

---

Group of orthologs #4684. Best score 905 bits

Score difference with first non-orthologous sequence - *A. fumigatus*:905 *A. fischeri*:710

afum|EAL86368.2 100.00% afis|EAW16817.1 100.00%

Bootstrap support for afum|EAL86368.2 as seed ortholog is 100%.

Bootstrap support for afis|EAW16817.1 as seed ortholog is 100%.

---

Group of orthologs #4685. Best score 905 bits

Score difference with first non-orthologous sequence - *A. fumigatus*:905 *A. fischeri*:905

afum|EAL86604.2 100.00% afis|EAW17174.1 100.00%

Bootstrap support for afum|EAL86604.2 as seed ortholog is 100%.

Bootstrap support for afis|EAW17174.1 as seed ortholog is 100%.

---

Group of orthologs #4686. Best score 905 bits

Score difference with first non-orthologous sequence - *A. fumigatus*:905 *A. fischeri*:905

afum|EAL91623.1 100.00% afis|EAW17814.1 100.00%

Bootstrap support for afum|EAL91623.1 as seed ortholog is 100%.

Bootstrap support for afis|EAW17814.1 as seed ortholog is 100%.

---

Group of orthologs #4687. Best score 905 bits

Score difference with first non-orthologous sequence - *A. fumigatus*:905 *A. fischeri*:905

afum|EAL86130.1 100.00% afis|EAW24460.1 100.00%

Bootstrap support for afum|EAL86130.1 as seed ortholog is 100%.

Bootstrap support for afis|EAW24460.1 as seed ortholog is 100%.

---

Group of orthologs #4688. Best score 905 bits

Score difference with first non-orthologous sequence - *A. fumigatus*:905 *A. fischeri*:905

afum|EAL92141.1 100.00% afis|EAW21117.1 100.00%

Bootstrap support for afum|EAL92141.1 as seed ortholog is 100%.

Bootstrap support for afis|EAW21117.1 as seed ortholog is 100%.

---

Group of orthologs #4689. Best score 905 bits

Score difference with first non-orthologous sequence - *A. fumigatus*:905 *A. fischeri*:905

afum|EAL90204.1 100.00% afis|EAW22995.1 100.00%

Bootstrap support for afum|EAL90204.1 as seed ortholog is 100%.

Bootstrap support for afis|EAW22995.1 as seed ortholog is 100%.

---

Group of orthologs #4690. Best score 905 bits

Score difference with first non-orthologous sequence - *A. fumigatus*:905 *A. fischeri*:760

afum|EAL94080.1 100.00% afis|EAW19360.1 100.00%

Bootstrap support for afum|EAL94080.1 as seed ortholog is 100%.

Bootstrap support for afis|EAW19360.1 as seed ortholog is 100%.

---

Group of orthologs #4691. Best score 905 bits

Score difference with first non-orthologous sequence - *A. fumigatus*:705 *A. fischeri*:905

afum|EAL92746.1 100.00% afis|EAW21711.1 100.00%

Bootstrap support for afum|EAL92746.1 as seed ortholog is 100%.

Bootstrap support for afis|EAW21711.1 as seed ortholog is 100%.

---

Group of orthologs #4692. Best score 904 bits

Score difference with first non-orthologous sequence - *A. fumigatus*:904 *A. fischeri*:904

afum|EAL85618.1 100.00% afis|EAW15729.1 100.00%

Bootstrap support for afum|EAL85618.1 as seed ortholog is 100%.

Bootstrap support for afis|EAW15729.1 as seed ortholog is 100%.

---

Group of orthologs #4693. Best score 904 bits

Score difference with first non-orthologous sequence - *A. fumigatus*:904 *A. fischeri*:904

afum|EAL84964.1 100.00% afis|EAW19951.1 100.00%

Bootstrap support for afum|EAL84964.1 as seed ortholog is 100%.

Bootstrap support for afis|EAW19951.1 as seed ortholog is 100%.

---

Group of orthologs #4694. Best score 904 bits

Score difference with first non-orthologous sequence - *A. fumigatus*:738 *A. fischeri*:675

afum|EAL85416.1 100.00% afis|EAW20282.1 100.00%

Bootstrap support for afum|EAL85416.1 as seed ortholog is 100%.

Bootstrap support for afis|EAW20282.1 as seed ortholog is 100%.

---

Group of orthologs #4695. Best score 904 bits

Score difference with first non-orthologous sequence - *A. fumigatus*:904 *A. fischeri*:904

afum|EAL86932.1 100.00% afis|EAW19586.1 100.00%

Bootstrap support for afum|EAL86932.1 as seed ortholog is 100%.

Bootstrap support for afis|EAW19586.1 as seed ortholog is 100%.

---

Group of orthologs #4696. Best score 904 bits

Score difference with first non-orthologous sequence - *A. fumigatus*:904 *A. fischeri*:904

afum|EAL91431.1 100.00% afis|EAW17618.1 100.00%

Bootstrap support for afum|EAL91431.1 as seed ortholog is 100%.

Bootstrap support for afis|EAW17618.1 as seed ortholog is 100%.

---

Group of orthologs #4697. Best score 904 bits

Score difference with first non-orthologous sequence - *A. fumigatus*:904 *A. fischeri*:904

afum|EAL85963.1 100.00% afis|EAW24295.1 100.00%

Bootstrap support for afum|EAL85963.1 as seed ortholog is 100%.

Bootstrap support for afis|EAW24295.1 as seed ortholog is 100%.

---

Group of orthologs #4698. Best score 904 bits

Score difference with first non-orthologous sequence - *A. fumigatus*:904 *A. fischeri*:724

afum|EAL87202.1 100.00% afis|EAW23768.1 100.00%

Bootstrap support for afum|EAL87202.1 as seed ortholog is 100%.

Bootstrap support for afis|EAW23768.1 as seed ortholog is 100%.

---

Group of orthologs #4699. Best score 904 bits

Score difference with first non-orthologous sequence - *A. fumigatus*:904 *A. fischeri*:904

afum|EAL88000.1 100.00% afis|EAW23466.1 100.00%

Bootstrap support for afum|EAL88000.1 as seed ortholog is 100%.

Bootstrap support for afis|EAW23466.1 as seed ortholog is 100%.

---

Group of orthologs #4700. Best score 903 bits

Score difference with first non-orthologous sequence - *A. fumigatus*:903 *A. fischeri*:680

afum|EAL84239.1 100.00% afis|EAW15408.1 100.00%

Bootstrap support for afum|EAL84239.1 as seed ortholog is 100%.

Bootstrap support for afis|EAW15408.1 as seed ortholog is 100%.

---

Group of orthologs #4701. Best score 903 bits

Score difference with first non-orthologous sequence - *A. fumigatus*:903 *A. fischeri*:903  
afum|EAL88483.1 100.00% afis|EAW22997.1 100.00%  
Bootstrap support for afum|EAL88483.1 as seed ortholog is 100%.  
Bootstrap support for afis|EAW22997.1 as seed ortholog is 100%.

---

Group of orthologs #4702. Best score 902 bits

Score difference with first non-orthologous sequence - *A. fumigatus*:902 *A. fischeri*:796  
afum|EAL84226.1 100.00% afis|EAW15418.1 100.00%  
Bootstrap support for afum|EAL84226.1 as seed ortholog is 100%.  
Bootstrap support for afis|EAW15418.1 as seed ortholog is 100%.

---

Group of orthologs #4703. Best score 902 bits

Score difference with first non-orthologous sequence - *A. fumigatus*:902 *A. fischeri*:902  
afum|EAL88753.1 100.00% afis|EAW16123.1 100.00%  
Bootstrap support for afum|EAL88753.1 as seed ortholog is 100%.  
Bootstrap support for afis|EAW16123.1 as seed ortholog is 100%.

---

Group of orthologs #4704. Best score 902 bits

Score difference with first non-orthologous sequence - *A. fumigatus*:902 *A. fischeri*:902  
afum|EAL91167.2 100.00% afis|EAW17330.1 100.00%  
Bootstrap support for afum|EAL91167.2 as seed ortholog is 100%.  
Bootstrap support for afis|EAW17330.1 as seed ortholog is 100%.

---

Group of orthologs #4705. Best score 902 bits

Score difference with first non-orthologous sequence - *A. fumigatus*:902 *A. fischeri*:902  
afum|EAL91851.1 100.00% afis|EAW18040.1 100.00%  
Bootstrap support for afum|EAL91851.1 as seed ortholog is 100%.  
Bootstrap support for afis|EAW18040.1 as seed ortholog is 100%.

---

Group of orthologs #4706. Best score 902 bits

Score difference with first non-orthologous sequence - *A. fumigatus*:902 *A. fischeri*:902  
afum|EAL87880.1 100.00% afis|EAW23584.1 100.00%  
Bootstrap support for afum|EAL87880.1 as seed ortholog is 100%.  
Bootstrap support for afis|EAW23584.1 as seed ortholog is 100%.

---

Group of orthologs #4707. Best score 902 bits

Score difference with first non-orthologous sequence - *A. fumigatus*:902 *A. fischeri*:834  
afum|EAL92053.1 100.00% afis|EAW21015.1 100.00%  
Bootstrap support for afum|EAL92053.1 as seed ortholog is 100%.  
Bootstrap support for afis|EAW21015.1 as seed ortholog is 100%.

---

Group of orthologs #4708. Best score 902 bits

Score difference with first non-orthologous sequence - *A. fumigatus*:902 *A. fischeri*:902  
afum|EAL90910.1 100.00% afis|EAW22270.1 100.00%  
Bootstrap support for afum|EAL90910.1 as seed ortholog is 100%.  
Bootstrap support for afis|EAW22270.1 as seed ortholog is 100%.

---

Group of orthologs #4709. Best score 902 bits

Score difference with first non-orthologous sequence - *A. fumigatus*:902 *A. fischeri*:902  
afum|EAL90106.1 100.00% afis|EAW25448.1 100.00%  
Bootstrap support for afum|EAL90106.1 as seed ortholog is 100%.  
Bootstrap support for afis|EAW25448.1 as seed ortholog is 100%.

---

Group of orthologs #4710. Best score 901 bits

Score difference with first non-orthologous sequence - *A. fumigatus*:901 *A. fischeri*:901  
afum|EAL88061.2 100.00% afis|EAW23409.1 100.00%

Bootstrap support for afum|EAL88061.2 as seed ortholog is 100%.  
Bootstrap support for afis|EAW23409.1 as seed ortholog is 100%.

---

Group of orthologs #4711. Best score 901 bits

Score difference with first non-orthologous sequence - *A. fumigatus*:901 *A. fischeri*:575

afum|EAL90648.1 100.00% afis|EAW22547.1 100.00%

Bootstrap support for afum|EAL90648.1 as seed ortholog is 100%.

Bootstrap support for afis|EAW22547.1 as seed ortholog is 100%.

---

Group of orthologs #4712. Best score 901 bits

Score difference with first non-orthologous sequence - *A. fumigatus*:901 *A. fischeri*:901

afum|EAL92412.1 100.00% afis|EAW21398.1 100.00%

Bootstrap support for afum|EAL92412.1 as seed ortholog is 100%.

Bootstrap support for afis|EAW21398.1 as seed ortholog is 100%.

---

Group of orthologs #4713. Best score 900 bits

Score difference with first non-orthologous sequence - *A. fumigatus*:900 *A. fischeri*:900

afum|EAL89200.1 100.00% afis|EAW16604.1 100.00%

Bootstrap support for afum|EAL89200.1 as seed ortholog is 100%.

Bootstrap support for afis|EAW16604.1 as seed ortholog is 100%.

---

Group of orthologs #4714. Best score 900 bits

Score difference with first non-orthologous sequence - *A. fumigatus*:900 *A. fischeri*:598

afum|EAL84309.2 100.00% afis|EAW25621.1 100.00%

Bootstrap support for afum|EAL84309.2 as seed ortholog is 100%.

Bootstrap support for afis|EAW25621.1 as seed ortholog is 100%.

---

Group of orthologs #4715. Best score 900 bits

Score difference with first non-orthologous sequence - *A. fumigatus*:900 *A. fischeri*:900

afum|EAL85894.1 100.00% afis|EAW24226.1 100.00%

Bootstrap support for afum|EAL85894.1 as seed ortholog is 100%.

Bootstrap support for afis|EAW24226.1 as seed ortholog is 100%.

---

Group of orthologs #4716. Best score 900 bits

Score difference with first non-orthologous sequence - *A. fumigatus*:900 *A. fischeri*:900

afum|EAL90053.1 100.00% afis|EAW25394.1 100.00%

Bootstrap support for afum|EAL90053.1 as seed ortholog is 100%.

Bootstrap support for afis|EAW25394.1 as seed ortholog is 100%.

---

Group of orthologs #4717. Best score 899 bits

Score difference with first non-orthologous sequence - *A. fumigatus*:899 *A. fischeri*:899

afum|EAL86362.1 100.00% afis|EAW16793.1 100.00%

Bootstrap support for afum|EAL86362.1 as seed ortholog is 100%.

Bootstrap support for afis|EAW16793.1 as seed ortholog is 100%.

---

Group of orthologs #4718. Best score 899 bits

Score difference with first non-orthologous sequence - *A. fumigatus*:820 *A. fischeri*:657

afum|EAL86461.1 100.00% afis|EAW16936.1 100.00%

Bootstrap support for afum|EAL86461.1 as seed ortholog is 100%.

Bootstrap support for afis|EAW16936.1 as seed ortholog is 100%.

---

Group of orthologs #4719. Best score 899 bits

Score difference with first non-orthologous sequence - *A. fumigatus*:899 *A. fischeri*:899

afum|EAL88504.1 100.00% afis|EAW15870.1 100.00%

Bootstrap support for afum|EAL88504.1 as seed ortholog is 100%.

Bootstrap support for afis|EAW15870.1 as seed ortholog is 100%.



---

Group of orthologs #4720. Best score 899 bits

Score difference with first non-orthologous sequence - *A. fumigatus*:899 *A. fischeri*:745

afum|EAL88816.2 100.00% afis|EAW16185.1 100.00%

Bootstrap support for afum|EAL88816.2 as seed ortholog is 100%.

Bootstrap support for afis|EAW16185.1 as seed ortholog is 100%.

---

Group of orthologs #4721. Best score 899 bits

Score difference with first non-orthologous sequence - *A. fumigatus*:899 *A. fischeri*:899

afum|EAL84570.1 100.00% afis|EAW20485.1 100.00%

Bootstrap support for afum|EAL84570.1 as seed ortholog is 100%.

Bootstrap support for afis|EAW20485.1 as seed ortholog is 100%.

---

Group of orthologs #4722. Best score 899 bits

Score difference with first non-orthologous sequence - *A. fumigatus*:899 *A. fischeri*:899

afum|EAL89053.1 100.00% afis|EAW16456.1 100.00%

Bootstrap support for afum|EAL89053.1 as seed ortholog is 100%.

Bootstrap support for afis|EAW16456.1 as seed ortholog is 100%.

---

Group of orthologs #4723. Best score 899 bits

Score difference with first non-orthologous sequence - *A. fumigatus*:899 *A. fischeri*:899

afum|EAL84820.1 100.00% afis|EAW20808.1 100.00%

Bootstrap support for afum|EAL84820.1 as seed ortholog is 100%.

Bootstrap support for afis|EAW20808.1 as seed ortholog is 100%.

---

Group of orthologs #4724. Best score 899 bits

Score difference with first non-orthologous sequence - *A. fumigatus*:899 *A. fischeri*:899

afum|EAL90506.1 100.00% afis|EAW22687.1 100.00%

Bootstrap support for afum|EAL90506.1 as seed ortholog is 100%.

Bootstrap support for afis|EAW22687.1 as seed ortholog is 100%.

---

Group of orthologs #4725. Best score 899 bits

Score difference with first non-orthologous sequence - *A. fumigatus*:899 *A. fischeri*:899

afum|EAL90231.1 100.00% afis|EAW22966.1 100.00%

Bootstrap support for afum|EAL90231.1 as seed ortholog is 100%.

Bootstrap support for afis|EAW22966.1 as seed ortholog is 100%.

---

Group of orthologs #4726. Best score 899 bits

Score difference with first non-orthologous sequence - *A. fumigatus*:899 *A. fischeri*:899

afum|EAL92327.1 100.00% afis|EAW21311.1 100.00%

Bootstrap support for afum|EAL92327.1 as seed ortholog is 100%.

Bootstrap support for afis|EAW21311.1 as seed ortholog is 100%.

---

Group of orthologs #4727. Best score 898 bits

Score difference with first non-orthologous sequence - *A. fumigatus*:898 *A. fischeri*:690

afum|EAL89009.2 100.00% afis|EAW20386.1 100.00%

Bootstrap support for afum|EAL89009.2 as seed ortholog is 100%.

Bootstrap support for afis|EAW20386.1 as seed ortholog is 100%.

---

Group of orthologs #4728. Best score 898 bits

Score difference with first non-orthologous sequence - *A. fumigatus*:898 *A. fischeri*:898

afum|EAL88380.2 100.00% afis|EAW23098.1 100.00%

Bootstrap support for afum|EAL88380.2 as seed ortholog is 100%.

Bootstrap support for afis|EAW23098.1 as seed ortholog is 100%.

---

Group of orthologs #4729. Best score 898 bits

Score difference with first non-orthologous sequence - *A. fumigatus*:898 *A. fischeri*:898  
afum|EAL87909.1 100.00% afis|EAW23557.1 100.00%  
Bootstrap support for afum|EAL87909.1 as seed ortholog is 100%.  
Bootstrap support for afis|EAW23557.1 as seed ortholog is 100%.

---

Group of orthologs #4730. Best score 898 bits

Score difference with first non-orthologous sequence - *A. fumigatus*:898 *A. fischeri*:898  
afum|EAL92335.1 100.00% afis|EAW21318.1 100.00%  
Bootstrap support for afum|EAL92335.1 as seed ortholog is 100%.  
Bootstrap support for afis|EAW21318.1 as seed ortholog is 100%.

---

Group of orthologs #4731. Best score 897 bits

Score difference with first non-orthologous sequence - *A. fumigatus*:897 *A. fischeri*:897  
afum|EAL93166.1 100.00% afis|EAW18478.1 100.00%  
Bootstrap support for afum|EAL93166.1 as seed ortholog is 100%.  
Bootstrap support for afis|EAW18478.1 as seed ortholog is 100%.

---

Group of orthologs #4732. Best score 897 bits

Score difference with first non-orthologous sequence - *A. fumigatus*:897 *A. fischeri*:897  
afum|EAL88217.1 100.00% afis|EAW23263.1 100.00%  
Bootstrap support for afum|EAL88217.1 as seed ortholog is 100%.  
Bootstrap support for afis|EAW23263.1 as seed ortholog is 100%.

---

Group of orthologs #4733. Best score 897 bits

Score difference with first non-orthologous sequence - *A. fumigatus*:814 *A. fischeri*:721  
afum|EAL90626.1 100.00% afis|EAW22572.1 100.00%  
Bootstrap support for afum|EAL90626.1 as seed ortholog is 100%.  
Bootstrap support for afis|EAW22572.1 as seed ortholog is 100%.

---

Group of orthologs #4734. Best score 896 bits

Score difference with first non-orthologous sequence - *A. fumigatus*:896 *A. fischeri*:896  
afum|EAL86653.1 100.00% afis|EAW17236.1 100.00%  
Bootstrap support for afum|EAL86653.1 as seed ortholog is 100%.  
Bootstrap support for afis|EAW17236.1 as seed ortholog is 100%.

---

Group of orthologs #4735. Best score 896 bits

Score difference with first non-orthologous sequence - *A. fumigatus*:896 *A. fischeri*:896  
afum|EAL89030.2 100.00% afis|EAW16397.1 100.00%  
Bootstrap support for afum|EAL89030.2 as seed ortholog is 100%.  
Bootstrap support for afis|EAW16397.1 as seed ortholog is 100%.

---

Group of orthologs #4736. Best score 896 bits

Score difference with first non-orthologous sequence - *A. fumigatus*:896 *A. fischeri*:849  
afum|EAL91530.1 100.00% afis|EAW17715.1 100.00%  
Bootstrap support for afum|EAL91530.1 as seed ortholog is 100%.  
Bootstrap support for afis|EAW17715.1 as seed ortholog is 100%.

---

Group of orthologs #4737. Best score 896 bits

Score difference with first non-orthologous sequence - *A. fumigatus*:896 *A. fischeri*:896  
afum|EAL92487.1 100.00% afis|EAW21467.1 100.00%  
Bootstrap support for afum|EAL92487.1 as seed ortholog is 100%.  
Bootstrap support for afis|EAW21467.1 as seed ortholog is 100%.

---

Group of orthologs #4738. Best score 896 bits

Score difference with first non-orthologous sequence - *A. fumigatus*:896 *A. fischeri*:896  
afum|EAL91983.1 100.00% afis|EAW24127.1 100.00%

Bootstrap support for afum|EAL91983.1 as seed ortholog is 100%.  
Bootstrap support for afis|EAW24127.1 as seed ortholog is 100%.

---

Group of orthologs #4739. Best score 896 bits

Score difference with first non-orthologous sequence - *A. fumigatus*:896 *A. fischeri*:468

afum|EAL92020.1 100.00% afis|EAW24163.1 100.00%

Bootstrap support for afum|EAL92020.1 as seed ortholog is 100%.

Bootstrap support for afis|EAW24163.1 as seed ortholog is 100%.

---

Group of orthologs #4740. Best score 895 bits

Score difference with first non-orthologous sequence - *A. fumigatus*:895 *A. fischeri*:895

afum|EAL84573.1 100.00% afis|EAW20481.1 100.00%

Bootstrap support for afum|EAL84573.1 as seed ortholog is 100%.

Bootstrap support for afis|EAW20481.1 as seed ortholog is 100%.

---

Group of orthologs #4741. Best score 895 bits

Score difference with first non-orthologous sequence - *A. fumigatus*:895 *A. fischeri*:447

afum|EAL84493.1 100.00% afis|EAW20569.1 100.00%

Bootstrap support for afum|EAL84493.1 as seed ortholog is 100%.

Bootstrap support for afis|EAW20569.1 as seed ortholog is 100%.

---

Group of orthologs #4742. Best score 895 bits

Score difference with first non-orthologous sequence - *A. fumigatus*:895 *A. fischeri*:895

afum|EAL85264.1 100.00% afis|EAW20149.1 100.00%

Bootstrap support for afum|EAL85264.1 as seed ortholog is 100%.

Bootstrap support for afis|EAW20149.1 as seed ortholog is 100%.

---

Group of orthologs #4743. Best score 895 bits

Score difference with first non-orthologous sequence - *A. fumigatus*:895 *A. fischeri*:835

afum|EAL87017.1 100.00% afis|EAW19479.1 100.00%

Bootstrap support for afum|EAL87017.1 as seed ortholog is 100%.

Bootstrap support for afis|EAW19479.1 as seed ortholog is 100%.

---

Group of orthologs #4744. Best score 895 bits

Score difference with first non-orthologous sequence - *A. fumigatus*:895 *A. fischeri*:895

afum|EAL87045.1 100.00% afis|EAW19451.1 100.00%

Bootstrap support for afum|EAL87045.1 as seed ortholog is 100%.

Bootstrap support for afis|EAW19451.1 as seed ortholog is 100%.

---

Group of orthologs #4745. Best score 895 bits

Score difference with first non-orthologous sequence - *A. fumigatus*:895 *A. fischeri*:895

afum|EAL84274.1 100.00% afis|EAW25551.1 100.00%

Bootstrap support for afum|EAL84274.1 as seed ortholog is 100%.

Bootstrap support for afis|EAW25551.1 as seed ortholog is 100%.

---

Group of orthologs #4746. Best score 895 bits

Score difference with first non-orthologous sequence - *A. fumigatus*:895 *A. fischeri*:895

afum|EAL93060.1 100.00% afis|EAW18385.1 100.00%

Bootstrap support for afum|EAL93060.1 as seed ortholog is 100%.

Bootstrap support for afis|EAW18385.1 as seed ortholog is 100%.

---

Group of orthologs #4747. Best score 895 bits

Score difference with first non-orthologous sequence - *A. fumigatus*:895 *A. fischeri*:895

afum|EAL93278.1 100.00% afis|EAW18575.1 100.00%

Bootstrap support for afum|EAL93278.1 as seed ortholog is 100%.

Bootstrap support for afis|EAW18575.1 as seed ortholog is 100%.

---

Group of orthologs #4748. Best score 895 bits

Score difference with first non-orthologous sequence - *A. fumigatus*:895 *A. fischeri*:895

afum|EAL90227.2 100.00% afis|EAW22970.1 100.00%

Bootstrap support for afum|EAL90227.2 as seed ortholog is 100%.

Bootstrap support for afis|EAW22970.1 as seed ortholog is 100%.

---

Group of orthologs #4749. Best score 895 bits

Score difference with first non-orthologous sequence - *A. fumigatus*:895 *A. fischeri*:895

afum|EAL90168.1 100.00% afis|EAW25502.1 100.00%

Bootstrap support for afum|EAL90168.1 as seed ortholog is 100%.

Bootstrap support for afis|EAW25502.1 as seed ortholog is 100%.

---

Group of orthologs #4750. Best score 894 bits

Score difference with first non-orthologous sequence - *A. fumigatus*:894 *A. fischeri*:894

afum|EAL86467.1 100.00% afis|EAW16940.1 100.00%

Bootstrap support for afum|EAL86467.1 as seed ortholog is 100%.

Bootstrap support for afis|EAW16940.1 as seed ortholog is 100%.

---

Group of orthologs #4751. Best score 894 bits

Score difference with first non-orthologous sequence - *A. fumigatus*:894 *A. fischeri*:894

afum|EAL87160.2 100.00% afis|EAW23715.1 100.00%

Bootstrap support for afum|EAL87160.2 as seed ortholog is 100%.

Bootstrap support for afis|EAW23715.1 as seed ortholog is 100%.

---

Group of orthologs #4752. Best score 894 bits

Score difference with first non-orthologous sequence - *A. fumigatus*:894 *A. fischeri*:894

afum|EAL92702.1 100.00% afis|EAW21667.1 100.00%

Bootstrap support for afum|EAL92702.1 as seed ortholog is 100%.

Bootstrap support for afis|EAW21667.1 as seed ortholog is 100%.

---

Group of orthologs #4753. Best score 894 bits

Score difference with first non-orthologous sequence - *A. fumigatus*:894 *A. fischeri*:894

afum|EAL89481.2 100.00% afis|EAW24836.1 100.00%

Bootstrap support for afum|EAL89481.2 as seed ortholog is 100%.

Bootstrap support for afis|EAW24836.1 as seed ortholog is 100%.

---

Group of orthologs #4754. Best score 893 bits

Score difference with first non-orthologous sequence - *A. fumigatus*:893 *A. fischeri*:893

afum|EAL86401.1 100.00% afis|EAW16858.1 100.00%

Bootstrap support for afum|EAL86401.1 as seed ortholog is 100%.

Bootstrap support for afis|EAW16858.1 as seed ortholog is 100%.

---

Group of orthologs #4755. Best score 893 bits

Score difference with first non-orthologous sequence - *A. fumigatus*:454 *A. fischeri*:893

afum|EAL87500.1 100.00% afis|EAW18143.1 100.00%

Bootstrap support for afum|EAL87500.1 as seed ortholog is 100%.

Bootstrap support for afis|EAW18143.1 as seed ortholog is 100%.

---

Group of orthologs #4756. Best score 893 bits

Score difference with first non-orthologous sequence - *A. fumigatus*:893 *A. fischeri*:893

afum|EAL91760.1 100.00% afis|EAW17950.1 100.00%

Bootstrap support for afum|EAL91760.1 as seed ortholog is 100%.

Bootstrap support for afis|EAW17950.1 as seed ortholog is 100%.

---

Group of orthologs #4757. Best score 893 bits

Score difference with first non-orthologous sequence - *A. fumigatus*:893 *A. fischeri*:893  
afum|EAL93744.1 100.00% afis|EAW19010.1 100.00%  
Bootstrap support for afum|EAL93744.1 as seed ortholog is 100%.  
Bootstrap support for afis|EAW19010.1 as seed ortholog is 100%.

---

Group of orthologs #4758. Best score 893 bits

Score difference with first non-orthologous sequence - *A. fumigatus*:893 *A. fischeri*:893  
afum|EAL93976.1 100.00% afis|EAW19247.1 100.00%  
Bootstrap support for afum|EAL93976.1 as seed ortholog is 100%.  
Bootstrap support for afis|EAW19247.1 as seed ortholog is 100%.

---

Group of orthologs #4759. Best score 893 bits

Score difference with first non-orthologous sequence - *A. fumigatus*:893 *A. fischeri*:893  
afum|EAL90852.1 100.00% afis|EAW22340.1 100.00%  
Bootstrap support for afum|EAL90852.1 as seed ortholog is 100%.  
Bootstrap support for afis|EAW22340.1 as seed ortholog is 100%.

---

Group of orthologs #4760. Best score 893 bits

Score difference with first non-orthologous sequence - *A. fumigatus*:893 *A. fischeri*:893  
afum|EAL90976.1 100.00% afis|EAW22218.1 100.00%  
Bootstrap support for afum|EAL90976.1 as seed ortholog is 100%.  
Bootstrap support for afis|EAW22218.1 as seed ortholog is 100%.

---

Group of orthologs #4761. Best score 893 bits

Score difference with first non-orthologous sequence - *A. fumigatus*:893 *A. fischeri*:893  
afum|EAL89863.2 100.00% afis|EAW25200.1 100.00%  
Bootstrap support for afum|EAL89863.2 as seed ortholog is 100%.  
Bootstrap support for afis|EAW25200.1 as seed ortholog is 100%.

---

Group of orthologs #4762. Best score 892 bits

Score difference with first non-orthologous sequence - *A. fumigatus*:892 *A. fischeri*:892  
afum|EAL89003.1 100.00% afis|EAW16378.1 100.00%  
Bootstrap support for afum|EAL89003.1 as seed ortholog is 100%.  
Bootstrap support for afis|EAW16378.1 as seed ortholog is 100%.

---

Group of orthologs #4763. Best score 892 bits

Score difference with first non-orthologous sequence - *A. fumigatus*:892 *A. fischeri*:892  
afum|EAL89027.1 100.00% afis|EAW16399.1 100.00%  
Bootstrap support for afum|EAL89027.1 as seed ortholog is 100%.  
Bootstrap support for afis|EAW16399.1 as seed ortholog is 100%.

---

Group of orthologs #4764. Best score 892 bits

Score difference with first non-orthologous sequence - *A. fumigatus*:892 *A. fischeri*:892  
afum|EAL85218.1 100.00% afis|EAW20101.1 100.00%  
Bootstrap support for afum|EAL85218.1 as seed ortholog is 100%.  
Bootstrap support for afis|EAW20101.1 as seed ortholog is 100%.

---

Group of orthologs #4765. Best score 892 bits

Score difference with first non-orthologous sequence - *A. fumigatus*:892 *A. fischeri*:892  
afum|EAL86829.1 100.00% afis|EAW19698.1 100.00%  
Bootstrap support for afum|EAL86829.1 as seed ortholog is 100%.  
Bootstrap support for afis|EAW19698.1 as seed ortholog is 100%.

---

Group of orthologs #4766. Best score 892 bits

Score difference with first non-orthologous sequence - *A. fumigatus*:722 *A. fischeri*:773  
afum|EAL91613.1 100.00% afis|EAW17805.1 100.00%

Bootstrap support for afum|EAL91613.1 as seed ortholog is 100%.  
Bootstrap support for afis|EAW17805.1 as seed ortholog is 100%.

---

Group of orthologs #4767. Best score 892 bits

Score difference with first non-orthologous sequence - *A. fumigatus*:892 *A. fischeri*:892

|                 |         |                 |         |
|-----------------|---------|-----------------|---------|
| afum EAL91902.1 | 100.00% | afis EAW18094.1 | 100.00% |
|-----------------|---------|-----------------|---------|

Bootstrap support for afum|EAL91902.1 as seed ortholog is 100%.

Bootstrap support for afis|EAW18094.1 as seed ortholog is 100%.

---

Group of orthologs #4768. Best score 892 bits

Score difference with first non-orthologous sequence - *A. fumigatus*:892 *A. fischeri*:892

|                 |         |                 |         |
|-----------------|---------|-----------------|---------|
| afum EAL86086.1 | 100.00% | afis EAW24417.1 | 100.00% |
|-----------------|---------|-----------------|---------|

Bootstrap support for afum|EAL86086.1 as seed ortholog is 100%.

Bootstrap support for afis|EAW24417.1 as seed ortholog is 100%.

---

Group of orthologs #4769. Best score 892 bits

Score difference with first non-orthologous sequence - *A. fumigatus*:892 *A. fischeri*:892

|                 |         |                 |         |
|-----------------|---------|-----------------|---------|
| afum EAL93079.1 | 100.00% | afis EAW18401.1 | 100.00% |
|-----------------|---------|-----------------|---------|

Bootstrap support for afum|EAL93079.1 as seed ortholog is 100%.

Bootstrap support for afis|EAW18401.1 as seed ortholog is 100%.

---

Group of orthologs #4770. Best score 892 bits

Score difference with first non-orthologous sequence - *A. fumigatus*:892 *A. fischeri*:892

|                 |         |                 |         |
|-----------------|---------|-----------------|---------|
| afum EAL88298.1 | 100.00% | afis EAW23185.1 | 100.00% |
|-----------------|---------|-----------------|---------|

Bootstrap support for afum|EAL88298.1 as seed ortholog is 100%.

Bootstrap support for afis|EAW23185.1 as seed ortholog is 100%.

---

Group of orthologs #4771. Best score 892 bits

Score difference with first non-orthologous sequence - *A. fumigatus*:892 *A. fischeri*:892

|                 |         |                 |         |
|-----------------|---------|-----------------|---------|
| afum EAL87894.1 | 100.00% | afis EAW23572.1 | 100.00% |
|-----------------|---------|-----------------|---------|

Bootstrap support for afum|EAL87894.1 as seed ortholog is 100%.

Bootstrap support for afis|EAW23572.1 as seed ortholog is 100%.

---

Group of orthologs #4772. Best score 892 bits

Score difference with first non-orthologous sequence - *A. fumigatus*:892 *A. fischeri*:294

|                 |         |                 |         |
|-----------------|---------|-----------------|---------|
| afum EAL93960.1 | 100.00% | afis EAW19231.1 | 100.00% |
|-----------------|---------|-----------------|---------|

Bootstrap support for afum|EAL93960.1 as seed ortholog is 100%.

Bootstrap support for afis|EAW19231.1 as seed ortholog is 100%.

---

Group of orthologs #4773. Best score 891 bits

Score difference with first non-orthologous sequence - *A. fumigatus*:891 *A. fischeri*:891

|                 |         |                 |         |
|-----------------|---------|-----------------|---------|
| afum EAL87179.1 | 100.00% | afis EAW23742.1 | 100.00% |
|-----------------|---------|-----------------|---------|

Bootstrap support for afum|EAL87179.1 as seed ortholog is 100%.

Bootstrap support for afis|EAW23742.1 as seed ortholog is 100%.

---

Group of orthologs #4774. Best score 891 bits

Score difference with first non-orthologous sequence - *A. fumigatus*:891 *A. fischeri*:891

|                 |         |                 |         |
|-----------------|---------|-----------------|---------|
| afum EAL87358.1 | 100.00% | afis EAW23933.1 | 100.00% |
|-----------------|---------|-----------------|---------|

Bootstrap support for afum|EAL87358.1 as seed ortholog is 100%.

Bootstrap support for afis|EAW23933.1 as seed ortholog is 100%.

---

Group of orthologs #4775. Best score 891 bits

Score difference with first non-orthologous sequence - *A. fumigatus*:891 *A. fischeri*:891

|                 |         |                 |         |
|-----------------|---------|-----------------|---------|
| afum EAL92035.1 | 100.00% | afis EAW24173.1 | 100.00% |
|-----------------|---------|-----------------|---------|

Bootstrap support for afum|EAL92035.1 as seed ortholog is 100%.

Bootstrap support for afis|EAW24173.1 as seed ortholog is 100%.

---

Group of orthologs #4776. Best score 890 bits

Score difference with first non-orthologous sequence - *A. fumigatus*:890 *A. fischeri*:890

afum|EAL87092.1 100.00% afis|EAW19403.1 100.00%

Bootstrap support for afum|EAL87092.1 as seed ortholog is 100%.

Bootstrap support for afis|EAW19403.1 as seed ortholog is 100%.

---

Group of orthologs #4777. Best score 890 bits

Score difference with first non-orthologous sequence - *A. fumigatus*:890 *A. fischeri*:890

afum|EAL88248.1 100.00% afis|EAW23234.1 100.00%

Bootstrap support for afum|EAL88248.1 as seed ortholog is 100%.

Bootstrap support for afis|EAW23234.1 as seed ortholog is 100%.

---

Group of orthologs #4778. Best score 890 bits

Score difference with first non-orthologous sequence - *A. fumigatus*:890 *A. fischeri*:890

afum|EAL87976.1 100.00% afis|EAW23487.1 100.00%

Bootstrap support for afum|EAL87976.1 as seed ortholog is 100%.

Bootstrap support for afis|EAW23487.1 as seed ortholog is 100%.

---

Group of orthologs #4779. Best score 890 bits

Score difference with first non-orthologous sequence - *A. fumigatus*:890 *A. fischeri*:890

afum|EAL90070.1 100.00% afis|EAW25411.1 100.00%

Bootstrap support for afum|EAL90070.1 as seed ortholog is 100%.

Bootstrap support for afis|EAW25411.1 as seed ortholog is 100%.

---

Group of orthologs #4780. Best score 889 bits

Score difference with first non-orthologous sequence - *A. fumigatus*:889 *A. fischeri*:889

afum|EAL87491.1 100.00% afis|EAW18134.1 100.00%

Bootstrap support for afum|EAL87491.1 as seed ortholog is 100%.

Bootstrap support for afis|EAW18134.1 as seed ortholog is 100%.

---

Group of orthologs #4781. Best score 889 bits

Score difference with first non-orthologous sequence - *A. fumigatus*:889 *A. fischeri*:842

afum|EAL87524.1 100.00% afis|EAW18164.1 100.00%

Bootstrap support for afum|EAL87524.1 as seed ortholog is 100%.

Bootstrap support for afis|EAW18164.1 as seed ortholog is 100%.

---

Group of orthologs #4782. Best score 889 bits

Score difference with first non-orthologous sequence - *A. fumigatus*:178 *A. fischeri*:889

afum|EAL85364.1 100.00% afis|EAW20246.1 100.00%

Bootstrap support for afum|EAL85364.1 as seed ortholog is 100%.

Bootstrap support for afis|EAW20246.1 as seed ortholog is 100%.

---

Group of orthologs #4783. Best score 889 bits

Score difference with first non-orthologous sequence - *A. fumigatus*:889 *A. fischeri*:889

afum|EAL85415.1 100.00% afis|EAW20281.1 100.00%

Bootstrap support for afum|EAL85415.1 as seed ortholog is 100%.

Bootstrap support for afis|EAW20281.1 as seed ortholog is 100%.

---

Group of orthologs #4784. Best score 889 bits

Score difference with first non-orthologous sequence - *A. fumigatus*:889 *A. fischeri*:889

afum|EAL91329.1 100.00% afis|EAW17507.1 100.00%

Bootstrap support for afum|EAL91329.1 as seed ortholog is 100%.

Bootstrap support for afis|EAW17507.1 as seed ortholog is 100%.

---

Group of orthologs #4785. Best score 889 bits

Score difference with first non-orthologous sequence - *A. fumigatus*:889 *A. fischeri*:889  
afum|EAL85896.1 100.00% afis|EAW24227.1 100.00%  
Bootstrap support for afum|EAL85896.1 as seed ortholog is 100%.  
Bootstrap support for afis|EAW24227.1 as seed ortholog is 100%.

---

Group of orthologs #4786. Best score 889 bits

Score difference with first non-orthologous sequence - *A. fumigatus*:889 *A. fischeri*:889  
afum|EAL88407.1 100.00% afis|EAW23072.1 100.00%  
Bootstrap support for afum|EAL88407.1 as seed ortholog is 100%.  
Bootstrap support for afis|EAW23072.1 as seed ortholog is 100%.

---

Group of orthologs #4787. Best score 889 bits

Score difference with first non-orthologous sequence - *A. fumigatus*:889 *A. fischeri*:889  
afum|EAL93601.1 100.00% afis|EAW18869.1 100.00%  
Bootstrap support for afum|EAL93601.1 as seed ortholog is 100%.  
Bootstrap support for afis|EAW18869.1 as seed ortholog is 100%.

---

Group of orthologs #4788. Best score 889 bits

Score difference with first non-orthologous sequence - *A. fumigatus*:889 *A. fischeri*:889  
afum|EAL90477.1 100.00% afis|EAW22717.1 100.00%  
Bootstrap support for afum|EAL90477.1 as seed ortholog is 100%.  
Bootstrap support for afis|EAW22717.1 as seed ortholog is 100%.

---

Group of orthologs #4789. Best score 889 bits

Score difference with first non-orthologous sequence - *A. fumigatus*:889 *A. fischeri*:889  
afum|EAL90156.1 100.00% afis|EAW25491.1 100.00%  
Bootstrap support for afum|EAL90156.1 as seed ortholog is 100%.  
Bootstrap support for afis|EAW25491.1 as seed ortholog is 100%.

---

Group of orthologs #4790. Best score 888 bits

Score difference with first non-orthologous sequence - *A. fumigatus*:888 *A. fischeri*:888  
afum|EAL89262.1 100.00% afis|EAW16658.1 100.00%  
Bootstrap support for afum|EAL89262.1 as seed ortholog is 100%.  
Bootstrap support for afis|EAW16658.1 as seed ortholog is 100%.

---

Group of orthologs #4791. Best score 888 bits

Score difference with first non-orthologous sequence - *A. fumigatus*:888 *A. fischeri*:888  
afum|EAL93672.1 100.00% afis|EAW18939.1 100.00%  
Bootstrap support for afum|EAL93672.1 as seed ortholog is 100%.  
Bootstrap support for afis|EAW18939.1 as seed ortholog is 100%.

---

Group of orthologs #4792. Best score 888 bits

Score difference with first non-orthologous sequence - *A. fumigatus*:888 *A. fischeri*:888  
afum|EAL91029.1 100.00% afis|EAW22162.1 100.00%  
Bootstrap support for afum|EAL91029.1 as seed ortholog is 100%.  
Bootstrap support for afis|EAW22162.1 as seed ortholog is 100%.

---

Group of orthologs #4793. Best score 888 bits

Score difference with first non-orthologous sequence - *A. fumigatus*:714 *A. fischeri*:888  
afum|EAL92610.1 100.00% afis|EAW21592.1 100.00%  
Bootstrap support for afum|EAL92610.1 as seed ortholog is 100%.  
Bootstrap support for afis|EAW21592.1 as seed ortholog is 100%.

---

Group of orthologs #4794. Best score 888 bits

Score difference with first non-orthologous sequence - *A. fumigatus*:888 *A. fischeri*:888  
afum|EAL89528.1 100.00% afis|EAW24878.1 100.00%



Bootstrap support for afum|EAL89528.1 as seed ortholog is 100%.  
Bootstrap support for afis|EAW24878.1 as seed ortholog is 100%.

---

Group of orthologs #4795. Best score 888 bits

Score difference with first non-orthologous sequence - *A. fumigatus*:888 *A. fischeri*:888

afum|EAL89658.1 100.00% afis|EAW25036.1 100.00%

Bootstrap support for afum|EAL89658.1 as seed ortholog is 100%.

Bootstrap support for afis|EAW25036.1 as seed ortholog is 100%.

---

Group of orthologs #4796. Best score 887 bits

Score difference with first non-orthologous sequence - *A. fumigatus*:887 *A. fischeri*:887

afum|EAL88570.1 100.00% afis|EAW15934.1 100.00%

Bootstrap support for afum|EAL88570.1 as seed ortholog is 100%.

Bootstrap support for afis|EAW15934.1 as seed ortholog is 100%.

---

Group of orthologs #4797. Best score 887 bits

Score difference with first non-orthologous sequence - *A. fumigatus*:810 *A. fischeri*:776

afum|EAL84925.1 100.00% afis|EAW19990.1 100.00%

Bootstrap support for afum|EAL84925.1 as seed ortholog is 100%.

Bootstrap support for afis|EAW19990.1 as seed ortholog is 100%.

---

Group of orthologs #4798. Best score 887 bits

Score difference with first non-orthologous sequence - *A. fumigatus*:887 *A. fischeri*:887

afum|EAL85399.1 100.00% afis|EAW20625.1 100.00%

Bootstrap support for afum|EAL85399.1 as seed ortholog is 100%.

Bootstrap support for afis|EAW20625.1 as seed ortholog is 100%.

---

Group of orthologs #4799. Best score 887 bits

Score difference with first non-orthologous sequence - *A. fumigatus*:887 *A. fischeri*:887

afum|EAL91377.1 100.00% afis|EAW17563.1 100.00%

Bootstrap support for afum|EAL91377.1 as seed ortholog is 100%.

Bootstrap support for afis|EAW17563.1 as seed ortholog is 100%.

---

Group of orthologs #4800. Best score 887 bits

Score difference with first non-orthologous sequence - *A. fumigatus*:887 *A. fischeri*:887

afum|EAL86172.1 100.00% afis|EAW24504.1 100.00%

Bootstrap support for afum|EAL86172.1 as seed ortholog is 100%.

Bootstrap support for afis|EAW24504.1 as seed ortholog is 100%.

---

Group of orthologs #4801. Best score 887 bits

Score difference with first non-orthologous sequence - *A. fumigatus*:887 *A. fischeri*:887

afum|EAL93273.1 100.00% afis|EAW18570.1 100.00%

Bootstrap support for afum|EAL93273.1 as seed ortholog is 100%.

Bootstrap support for afis|EAW18570.1 as seed ortholog is 100%.

---

Group of orthologs #4802. Best score 887 bits

Score difference with first non-orthologous sequence - *A. fumigatus*:887 *A. fischeri*:887

afum|EAL93860.1 100.00% afis|EAW19128.1 100.00%

Bootstrap support for afum|EAL93860.1 as seed ortholog is 100%.

Bootstrap support for afis|EAW19128.1 as seed ortholog is 100%.

---

Group of orthologs #4803. Best score 887 bits

Score difference with first non-orthologous sequence - *A. fumigatus*:887 *A. fischeri*:887

afum|EAL92657.2 100.00% afis|EAW21621.1 100.00%

Bootstrap support for afum|EAL92657.2 as seed ortholog is 100%.

Bootstrap support for afis|EAW21621.1 as seed ortholog is 100%.

---

Group of orthologs #4804. Best score 887 bits

Score difference with first non-orthologous sequence - *A. fumigatus*:887 *A. fischeri*:887

afum|EBA27228.1 100.00% afis|EAW21814.1 100.00%

Bootstrap support for afum|EBA27228.1 as seed ortholog is 100%.

Bootstrap support for afis|EAW21814.1 as seed ortholog is 100%.

---

Group of orthologs #4805. Best score 886 bits

Score difference with first non-orthologous sequence - *A. fumigatus*:886 *A. fischeri*:736

afum|EAL86381.1 100.00% afis|EAW16834.1 100.00%

Bootstrap support for afum|EAL86381.1 as seed ortholog is 100%.

Bootstrap support for afis|EAW16834.1 as seed ortholog is 100%.

---

Group of orthologs #4806. Best score 886 bits

Score difference with first non-orthologous sequence - *A. fumigatus*:886 *A. fischeri*:817

afum|EAL87095.1 100.00% afis|EAW19399.1 100.00%

Bootstrap support for afum|EAL87095.1 as seed ortholog is 100%.

Bootstrap support for afis|EAW19399.1 as seed ortholog is 100%.

---

Group of orthologs #4807. Best score 886 bits

Score difference with first non-orthologous sequence - *A. fumigatus*:886 *A. fischeri*:886

afum|EAL87923.2 100.00% afis|EAW23543.1 100.00%

Bootstrap support for afum|EAL87923.2 as seed ortholog is 100%.

Bootstrap support for afis|EAW23543.1 as seed ortholog is 100%.

---

Group of orthologs #4808. Best score 886 bits

Score difference with first non-orthologous sequence - *A. fumigatus*:886 *A. fischeri*:886

afum|EAL93499.1 100.00% afis|EAW18768.1 100.00%

Bootstrap support for afum|EAL93499.1 as seed ortholog is 100%.

Bootstrap support for afis|EAW18768.1 as seed ortholog is 100%.

---

Group of orthologs #4809. Best score 886 bits

Score difference with first non-orthologous sequence - *A. fumigatus*:886 *A. fischeri*:886

afum|EAL90527.1 100.00% afis|EAW22665.1 100.00%

Bootstrap support for afum|EAL90527.1 as seed ortholog is 100%.

Bootstrap support for afis|EAW22665.1 as seed ortholog is 100%.

---

Group of orthologs #4810. Best score 886 bits

Score difference with first non-orthologous sequence - *A. fumigatus*:886 *A. fischeri*:886

afum|EAL89876.1 100.00% afis|EAW25215.1 100.00%

Bootstrap support for afum|EAL89876.1 as seed ortholog is 100%.

Bootstrap support for afis|EAW25215.1 as seed ortholog is 100%.

---

Group of orthologs #4811. Best score 885 bits

Score difference with first non-orthologous sequence - *A. fumigatus*:885 *A. fischeri*:885

afum|EAL90668.1 100.00% afis|EAW22526.1 100.00%

Bootstrap support for afum|EAL90668.1 as seed ortholog is 100%.

Bootstrap support for afis|EAW22526.1 as seed ortholog is 100%.

---

Group of orthologs #4812. Best score 884 bits

Score difference with first non-orthologous sequence - *A. fumigatus*:884 *A. fischeri*:884

afum|EAL86816.2 100.00% afis|EAW19711.1 100.00%

Bootstrap support for afum|EAL86816.2 as seed ortholog is 100%.

Bootstrap support for afis|EAW19711.1 as seed ortholog is 100%.

---

Group of orthologs #4813. Best score 884 bits

Score difference with first non-orthologous sequence - *A. fumigatus*:884 *A. fischeri*:884  
afum|EAL91862.1 100.00% afis|EAW18051.1 100.00%  
Bootstrap support for afum|EAL91862.1 as seed ortholog is 100%.  
Bootstrap support for afis|EAW18051.1 as seed ortholog is 100%.

---

Group of orthologs #4814. Best score 884 bits

Score difference with first non-orthologous sequence - *A. fumigatus*:884 *A. fischeri*:884  
afum|EAL84384.1 100.00% afis|EAW25711.1 100.00%  
Bootstrap support for afum|EAL84384.1 as seed ortholog is 100%.  
Bootstrap support for afis|EAW25711.1 as seed ortholog is 100%.

---

Group of orthologs #4815. Best score 884 bits

Score difference with first non-orthologous sequence - *A. fumigatus*:884 *A. fischeri*:884  
afum|EAL87167.1 100.00% afis|EAW23729.1 100.00%  
Bootstrap support for afum|EAL87167.1 as seed ortholog is 100%.  
Bootstrap support for afis|EAW23729.1 as seed ortholog is 100%.

---

Group of orthologs #4816. Best score 884 bits

Score difference with first non-orthologous sequence - *A. fumigatus*:884 *A. fischeri*:842  
afum|EAL88375.1 100.00% afis|EAW23104.1 100.00%  
Bootstrap support for afum|EAL88375.1 as seed ortholog is 100%.  
Bootstrap support for afis|EAW23104.1 as seed ortholog is 100%.

---

Group of orthologs #4817. Best score 884 bits

Score difference with first non-orthologous sequence - *A. fumigatus*:884 *A. fischeri*:884  
afum|EAL93284.1 100.00% afis|EAW18580.1 100.00%  
Bootstrap support for afum|EAL93284.1 as seed ortholog is 100%.  
Bootstrap support for afis|EAW18580.1 as seed ortholog is 100%.

---

Group of orthologs #4818. Best score 884 bits

Score difference with first non-orthologous sequence - *A. fumigatus*:884 *A. fischeri*:884  
afum|EAL93586.1 100.00% afis|EAW18855.1 100.00%  
Bootstrap support for afum|EAL93586.1 as seed ortholog is 100%.  
Bootstrap support for afis|EAW18855.1 as seed ortholog is 100%.

---

Group of orthologs #4819. Best score 883 bits

Score difference with first non-orthologous sequence - *A. fumigatus*:259 *A. fischeri*:547  
afum|EAL84968.2 100.00% afis|EAW19947.1 100.00%  
Bootstrap support for afum|EAL84968.2 as seed ortholog is 100%.  
Bootstrap support for afis|EAW19947.1 as seed ortholog is 100%.

---

Group of orthologs #4820. Best score 883 bits

Score difference with first non-orthologous sequence - *A. fumigatus*:883 *A. fischeri*:883  
afum|EAL88918.1 100.00% afis|EAW16296.1 100.00%  
Bootstrap support for afum|EAL88918.1 as seed ortholog is 100%.  
Bootstrap support for afis|EAW16296.1 as seed ortholog is 100%.

---

Group of orthologs #4821. Best score 883 bits

Score difference with first non-orthologous sequence - *A. fumigatus*:883 *A. fischeri*:883  
afum|EAL86003.1 100.00% afis|EAW24333.1 100.00%  
Bootstrap support for afum|EAL86003.1 as seed ortholog is 100%.  
Bootstrap support for afis|EAW24333.1 as seed ortholog is 100%.

---

Group of orthologs #4822. Best score 883 bits

Score difference with first non-orthologous sequence - *A. fumigatus*:883 *A. fischeri*:691  
afum|EAL86145.1 100.00% afis|EAW24472.1 100.00%

Bootstrap support for afum|EAL86145.1 as seed ortholog is 100%.  
Bootstrap support for afis|EAW24472.1 as seed ortholog is 100%.

---

Group of orthologs #4823. Best score 883 bits

Score difference with first non-orthologous sequence - *A. fumigatus*:883 *A. fischeri*:883

afum|EAL88288.2 100.00% afis|EAW23195.1 100.00%

Bootstrap support for afum|EAL88288.2 as seed ortholog is 100%.

Bootstrap support for afis|EAW23195.1 as seed ortholog is 100%.

---

Group of orthologs #4824. Best score 883 bits

Score difference with first non-orthologous sequence - *A. fumigatus*:883 *A. fischeri*:883

afum|EAL90080.2 100.00% afis|EAW25421.1 100.00%

Bootstrap support for afum|EAL90080.2 as seed ortholog is 100%.

Bootstrap support for afis|EAW25421.1 as seed ortholog is 100%.

---

Group of orthologs #4825. Best score 882 bits

Score difference with first non-orthologous sequence - *A. fumigatus*:818 *A. fischeri*:648

afum|EAL84864.1 100.00% afis|EAW20753.1 100.00%

Bootstrap support for afum|EAL84864.1 as seed ortholog is 100%.

Bootstrap support for afis|EAW20753.1 as seed ortholog is 100%.

---

Group of orthologs #4826. Best score 882 bits

Score difference with first non-orthologous sequence - *A. fumigatus*:882 *A. fischeri*:882

afum|EAL89259.1 100.00% afis|EAW16655.1 100.00%

Bootstrap support for afum|EAL89259.1 as seed ortholog is 100%.

Bootstrap support for afis|EAW16655.1 as seed ortholog is 100%.

---

Group of orthologs #4827. Best score 882 bits

Score difference with first non-orthologous sequence - *A. fumigatus*:882 *A. fischeri*:882

afum|EAL93661.1 100.00% afis|EAW18930.1 100.00%

Bootstrap support for afum|EAL93661.1 as seed ortholog is 100%.

Bootstrap support for afis|EAW18930.1 as seed ortholog is 100%.

---

Group of orthologs #4828. Best score 881 bits

Score difference with first non-orthologous sequence - *A. fumigatus*:881 *A. fischeri*:789

afum|EAL85679.1 100.00% afis|EAW15669.1 100.00%

Bootstrap support for afum|EAL85679.1 as seed ortholog is 100%.

Bootstrap support for afis|EAW15669.1 as seed ortholog is 100%.

---

Group of orthologs #4829. Best score 881 bits

Score difference with first non-orthologous sequence - *A. fumigatus*:881 *A. fischeri*:795

afum|EAL85572.1 100.00% afis|EAW15777.1 100.00%

Bootstrap support for afum|EAL85572.1 as seed ortholog is 100%.

Bootstrap support for afis|EAW15777.1 as seed ortholog is 100%.

---

Group of orthologs #4830. Best score 881 bits

Score difference with first non-orthologous sequence - *A. fumigatus*:881 *A. fischeri*:881

afum|EAL88541.1 100.00% afis|EAW15906.1 100.00%

Bootstrap support for afum|EAL88541.1 as seed ortholog is 100%.

Bootstrap support for afis|EAW15906.1 as seed ortholog is 100%.

---

Group of orthologs #4831. Best score 881 bits

Score difference with first non-orthologous sequence - *A. fumigatus*:881 *A. fischeri*:636

afum|EAL85420.1 100.00% afis|EAW20289.1 100.00%

Bootstrap support for afum|EAL85420.1 as seed ortholog is 100%.

Bootstrap support for afis|EAW20289.1 as seed ortholog is 100%.

---

Group of orthologs #4832. Best score 881 bits

Score difference with first non-orthologous sequence - *A. fumigatus*:881 *A. fischeri*:881  
afum|EAL85940.2 100.00% afis|EAW24272.1 100.00%

Bootstrap support for afum|EAL85940.2 as seed ortholog is 100%.

Bootstrap support for afis|EAW24272.1 as seed ortholog is 100%.

---

Group of orthologs #4833. Best score 881 bits

Score difference with first non-orthologous sequence - *A. fumigatus*:881 *A. fischeri*:881  
afum|EAL87302.1 100.00% afis|EAW23874.1 100.00%

Bootstrap support for afum|EAL87302.1 as seed ortholog is 100%.

Bootstrap support for afis|EAW23874.1 as seed ortholog is 100%.

---

Group of orthologs #4834. Best score 881 bits

Score difference with first non-orthologous sequence - *A. fumigatus*:881 *A. fischeri*:881  
afum|EAL89538.2 100.00% afis|EAW24887.1 100.00%

Bootstrap support for afum|EAL89538.2 as seed ortholog is 100%.

Bootstrap support for afis|EAW24887.1 as seed ortholog is 100%.

---

Group of orthologs #4835. Best score 881 bits

Score difference with first non-orthologous sequence - *A. fumigatus*:881 *A. fischeri*:881  
afum|EAL89988.1 100.00% afis|EAW25327.1 100.00%

Bootstrap support for afum|EAL89988.1 as seed ortholog is 100%.

Bootstrap support for afis|EAW25327.1 as seed ortholog is 100%.

---

Group of orthologs #4836. Best score 880 bits

Score difference with first non-orthologous sequence - *A. fumigatus*:880 *A. fischeri*:880  
afum|EAL85791.1 100.00% afis|EAW15539.1 100.00%

Bootstrap support for afum|EAL85791.1 as seed ortholog is 100%.

Bootstrap support for afis|EAW15539.1 as seed ortholog is 100%.

---

Group of orthologs #4837. Best score 880 bits

Score difference with first non-orthologous sequence - *A. fumigatus*:880 *A. fischeri*:880  
afum|EAL88713.1 100.00% afis|EAW16081.1 100.00%

Bootstrap support for afum|EAL88713.1 as seed ortholog is 100%.

Bootstrap support for afis|EAW16081.1 as seed ortholog is 100%.

---

Group of orthologs #4838. Best score 880 bits

Score difference with first non-orthologous sequence - *A. fumigatus*:880 *A. fischeri*:880  
afum|EAL86969.2 100.00% afis|EAW19537.1 100.00%

Bootstrap support for afum|EAL86969.2 as seed ortholog is 100%.

Bootstrap support for afis|EAW19537.1 as seed ortholog is 100%.

---

Group of orthologs #4839. Best score 880 bits

Score difference with first non-orthologous sequence - *A. fumigatus*:880 *A. fischeri*:880  
afum|EAL90259.1 100.00% afis|EAW22937.1 100.00%

Bootstrap support for afum|EAL90259.1 as seed ortholog is 100%.

Bootstrap support for afis|EAW22937.1 as seed ortholog is 100%.

---

Group of orthologs #4840. Best score 880 bits

Score difference with first non-orthologous sequence - *A. fumigatus*:880 *A. fischeri*:880  
afum|EAL89896.2 100.00% afis|EAW25235.1 100.00%

Bootstrap support for afum|EAL89896.2 as seed ortholog is 100%.

Bootstrap support for afis|EAW25235.1 as seed ortholog is 100%.

---

Group of orthologs #4841. Best score 879 bits

Score difference with first non-orthologous sequence - *A. fumigatus*:718 *A. fischeri*:879  
afum|EAL88568.1 100.00% afis|EAW15932.1 100.00%  
Bootstrap support for afum|EAL88568.1 as seed ortholog is 100%.  
Bootstrap support for afis|EAW15932.1 as seed ortholog is 100%.

---

Group of orthologs #4842. Best score 879 bits

Score difference with first non-orthologous sequence - *A. fumigatus*:879 *A. fischeri*:879  
afum|EAL84694.1 100.00% afis|EAW20940.1 100.00%  
Bootstrap support for afum|EAL84694.1 as seed ortholog is 100%.  
Bootstrap support for afis|EAW20940.1 as seed ortholog is 100%.

---

Group of orthologs #4843. Best score 879 bits

Score difference with first non-orthologous sequence - *A. fumigatus*:879 *A. fischeri*:879  
afum|EAL87361.1 100.00% afis|EAW23936.1 100.00%  
Bootstrap support for afum|EAL87361.1 as seed ortholog is 100%.  
Bootstrap support for afis|EAW23936.1 as seed ortholog is 100%.

---

Group of orthologs #4844. Best score 878 bits

Score difference with first non-orthologous sequence - *A. fumigatus*:878 *A. fischeri*:878  
afum|EAL91315.1 100.00% afis|EAW17493.1 100.00%  
Bootstrap support for afum|EAL91315.1 as seed ortholog is 100%.  
Bootstrap support for afis|EAW17493.1 as seed ortholog is 100%.

---

Group of orthologs #4845. Best score 878 bits

Score difference with first non-orthologous sequence - *A. fumigatus*:878 *A. fischeri*:878  
afum|EAL90571.1 100.00% afis|EAW22625.1 100.00%  
Bootstrap support for afum|EAL90571.1 as seed ortholog is 100%.  
Bootstrap support for afis|EAW22625.1 as seed ortholog is 100%.

---

Group of orthologs #4846. Best score 878 bits

Score difference with first non-orthologous sequence - *A. fumigatus*:804 *A. fischeri*:676  
afum|EAL92187.1 100.00% afis|EAW21168.1 100.00%  
Bootstrap support for afum|EAL92187.1 as seed ortholog is 100%.  
Bootstrap support for afis|EAW21168.1 as seed ortholog is 100%.

---

Group of orthologs #4847. Best score 878 bits

Score difference with first non-orthologous sequence - *A. fumigatus*:878 *A. fischeri*:878  
afum|EAL92558.2 100.00% afis|EAW21538.1 100.00%  
Bootstrap support for afum|EAL92558.2 as seed ortholog is 100%.  
Bootstrap support for afis|EAW21538.1 as seed ortholog is 100%.

---

Group of orthologs #4848. Best score 878 bits

Score difference with first non-orthologous sequence - *A. fumigatus*:878 *A. fischeri*:878  
afum|EAL92982.1 100.00% afis|EAW21968.1 100.00%  
Bootstrap support for afum|EAL92982.1 as seed ortholog is 100%.  
Bootstrap support for afis|EAW21968.1 as seed ortholog is 100%.

---

Group of orthologs #4849. Best score 878 bits

Score difference with first non-orthologous sequence - *A. fumigatus*:878 *A. fischeri*:878  
afum|EAL89891.1 100.00% afis|EAW25230.1 100.00%  
Bootstrap support for afum|EAL89891.1 as seed ortholog is 100%.  
Bootstrap support for afis|EAW25230.1 as seed ortholog is 100%.

---

Group of orthologs #4850. Best score 878 bits

Score difference with first non-orthologous sequence - *A. fumigatus*:878 *A. fischeri*:878  
afum|EAL90069.1 100.00% afis|EAW25410.1 100.00%

Bootstrap support for afum|EAL90069.1 as seed ortholog is 100%.  
Bootstrap support for afis|EAW25410.1 as seed ortholog is 100%.

---

Group of orthologs #4851. Best score 877 bits

Score difference with first non-orthologous sequence - *A. fumigatus*:877 *A. fischeri*:877

|                 |         |                 |         |
|-----------------|---------|-----------------|---------|
| afum EAL85533.1 | 100.00% | afis EAW15818.1 | 100.00% |
|-----------------|---------|-----------------|---------|

Bootstrap support for afum|EAL85533.1 as seed ortholog is 100%.

Bootstrap support for afis|EAW15818.1 as seed ortholog is 100%.

---

Group of orthologs #4852. Best score 877 bits

Score difference with first non-orthologous sequence - *A. fumigatus*:877 *A. fischeri*:877

|                 |         |                 |         |
|-----------------|---------|-----------------|---------|
| afum EAL85521.1 | 100.00% | afis EAW15831.1 | 100.00% |
|-----------------|---------|-----------------|---------|

Bootstrap support for afum|EAL85521.1 as seed ortholog is 100%.

Bootstrap support for afis|EAW15831.1 as seed ortholog is 100%.

---

Group of orthologs #4853. Best score 877 bits

Score difference with first non-orthologous sequence - *A. fumigatus*:877 *A. fischeri*:738

|                 |         |                 |         |
|-----------------|---------|-----------------|---------|
| afum EAL89197.1 | 100.00% | afis EAW16601.1 | 100.00% |
|-----------------|---------|-----------------|---------|

Bootstrap support for afum|EAL89197.1 as seed ortholog is 100%.

Bootstrap support for afis|EAW16601.1 as seed ortholog is 100%.

---

Group of orthologs #4854. Best score 877 bits

Score difference with first non-orthologous sequence - *A. fumigatus*:877 *A. fischeri*:877

|                 |         |                 |         |
|-----------------|---------|-----------------|---------|
| afum EAL85870.1 | 100.00% | afis EAW24198.1 | 100.00% |
|-----------------|---------|-----------------|---------|

Bootstrap support for afum|EAL85870.1 as seed ortholog is 100%.

Bootstrap support for afis|EAW24198.1 as seed ortholog is 100%.

---

Group of orthologs #4855. Best score 877 bits

Score difference with first non-orthologous sequence - *A. fumigatus*:877 *A. fischeri*:877

|                 |         |                 |         |
|-----------------|---------|-----------------|---------|
| afum EAL93801.1 | 100.00% | afis EAW19073.1 | 100.00% |
|-----------------|---------|-----------------|---------|

Bootstrap support for afum|EAL93801.1 as seed ortholog is 100%.

Bootstrap support for afis|EAW19073.1 as seed ortholog is 100%.

---

Group of orthologs #4856. Best score 877 bits

Score difference with first non-orthologous sequence - *A. fumigatus*:877 *A. fischeri*:877

|                 |         |                 |         |
|-----------------|---------|-----------------|---------|
| afum EAL92406.1 | 100.00% | afis EAW21392.1 | 100.00% |
|-----------------|---------|-----------------|---------|

Bootstrap support for afum|EAL92406.1 as seed ortholog is 100%.

Bootstrap support for afis|EAW21392.1 as seed ortholog is 100%.

---

Group of orthologs #4857. Best score 877 bits

Score difference with first non-orthologous sequence - *A. fumigatus*:877 *A. fischeri*:877

|                 |         |                 |         |
|-----------------|---------|-----------------|---------|
| afum EAL89994.1 | 100.00% | afis EAW25332.1 | 100.00% |
|-----------------|---------|-----------------|---------|

Bootstrap support for afum|EAL89994.1 as seed ortholog is 100%.

Bootstrap support for afis|EAW25332.1 as seed ortholog is 100%.

---

Group of orthologs #4858. Best score 876 bits

Score difference with first non-orthologous sequence - *A. fumigatus*:876 *A. fischeri*:876

|                 |         |                 |         |
|-----------------|---------|-----------------|---------|
| afum EAL85829.1 | 100.00% | afis EAW15494.1 | 100.00% |
|-----------------|---------|-----------------|---------|

Bootstrap support for afum|EAL85829.1 as seed ortholog is 100%.

Bootstrap support for afis|EAW15494.1 as seed ortholog is 100%.

---

Group of orthologs #4859. Best score 876 bits

Score difference with first non-orthologous sequence - *A. fumigatus*:876 *A. fischeri*:496

|                 |         |                 |         |
|-----------------|---------|-----------------|---------|
| afum EAL86376.1 | 100.00% | afis EAW16827.1 | 100.00% |
|-----------------|---------|-----------------|---------|

Bootstrap support for afum|EAL86376.1 as seed ortholog is 100%.

Bootstrap support for afis|EAW16827.1 as seed ortholog is 100%.

---

Group of orthologs #4860. Best score 876 bits

Score difference with first non-orthologous sequence - *A. fumigatus*:876 *A. fischeri*:819

afum|EAL86013.1 100.00% afis|EAW24342.1 100.00%

Bootstrap support for afum|EAL86013.1 as seed ortholog is 100%.

Bootstrap support for afis|EAW24342.1 as seed ortholog is 100%.

---

Group of orthologs #4861. Best score 876 bits

Score difference with first non-orthologous sequence - *A. fumigatus*:876 *A. fischeri*:876

afum|EAL89494.1 100.00% afis|EAW24848.1 100.00%

Bootstrap support for afum|EAL89494.1 as seed ortholog is 100%.

Bootstrap support for afis|EAW24848.1 as seed ortholog is 100%.

---

Group of orthologs #4862. Best score 875 bits

Score difference with first non-orthologous sequence - *A. fumigatus*:875 *A. fischeri*:875

afum|EAL86346.1 100.00% afis|EAW16777.1 100.00%

Bootstrap support for afum|EAL86346.1 as seed ortholog is 100%.

Bootstrap support for afis|EAW16777.1 as seed ortholog is 100%.

---

Group of orthologs #4863. Best score 875 bits

Score difference with first non-orthologous sequence - *A. fumigatus*:875 *A. fischeri*:875

afum|EAL87063.1 100.00% afis|EAW19431.1 100.00%

Bootstrap support for afum|EAL87063.1 as seed ortholog is 100%.

Bootstrap support for afis|EAW19431.1 as seed ortholog is 100%.

---

Group of orthologs #4864. Best score 875 bits

Score difference with first non-orthologous sequence - *A. fumigatus*:875 *A. fischeri*:875

afum|EAL87932.1 100.00% afis|EAW23534.1 100.00%

Bootstrap support for afum|EAL87932.1 as seed ortholog is 100%.

Bootstrap support for afis|EAW23534.1 as seed ortholog is 100%.

---

Group of orthologs #4865. Best score 875 bits

Score difference with first non-orthologous sequence - *A. fumigatus*:875 *A. fischeri*:746

afum|EAL92099.1 100.00% afis|EAW21076.1 100.00%

Bootstrap support for afum|EAL92099.1 as seed ortholog is 100%.

Bootstrap support for afis|EAW21076.1 as seed ortholog is 100%.

---

Group of orthologs #4866. Best score 875 bits

Score difference with first non-orthologous sequence - *A. fumigatus*:875 *A. fischeri*:875

afum|EAL91991.1 100.00% afis|EAW24136.1 100.00%

Bootstrap support for afum|EAL91991.1 as seed ortholog is 100%.

Bootstrap support for afis|EAW24136.1 as seed ortholog is 100%.

---

Group of orthologs #4867. Best score 874 bits

Score difference with first non-orthologous sequence - *A. fumigatus*:874 *A. fischeri*:874

afum|EAL85642.1 100.00% afis|EAW15705.1 100.00%

Bootstrap support for afum|EAL85642.1 as seed ortholog is 100%.

Bootstrap support for afis|EAW15705.1 as seed ortholog is 100%.

---

Group of orthologs #4868. Best score 874 bits

Score difference with first non-orthologous sequence - *A. fumigatus*:723 *A. fischeri*:822

afum|EAL84666.1 100.00% afis|EAW20967.1 100.00%

Bootstrap support for afum|EAL84666.1 as seed ortholog is 100%.

Bootstrap support for afis|EAW20967.1 as seed ortholog is 100%.

---

Group of orthologs #4869. Best score 874 bits



Score difference with first non-orthologous sequence - *A. fumigatus*:874 *A. fischeri*:874  
afum|EAL87705.1 100.00% afis|EAW18342.1 100.00%  
Bootstrap support for afum|EAL87705.1 as seed ortholog is 100%.  
Bootstrap support for afis|EAW18342.1 as seed ortholog is 100%.

---

Group of orthologs #4870. Best score 874 bits

Score difference with first non-orthologous sequence - *A. fumigatus*:874 *A. fischeri*:874  
afum|EAL91810.1 100.00% afis|EAW17999.1 100.00%  
Bootstrap support for afum|EAL91810.1 as seed ortholog is 100%.  
Bootstrap support for afis|EAW17999.1 as seed ortholog is 100%.

---

Group of orthologs #4871. Best score 874 bits

Score difference with first non-orthologous sequence - *A. fumigatus*:874 *A. fischeri*:874  
afum|EAL87354.1 100.00% afis|EAW23929.1 100.00%  
Bootstrap support for afum|EAL87354.1 as seed ortholog is 100%.  
Bootstrap support for afis|EAW23929.1 as seed ortholog is 100%.

---

Group of orthologs #4872. Best score 874 bits

Score difference with first non-orthologous sequence - *A. fumigatus*:874 *A. fischeri*:874  
afum|EAL93739.1 100.00% afis|EAW19005.1 100.00%  
Bootstrap support for afum|EAL93739.1 as seed ortholog is 100%.  
Bootstrap support for afis|EAW19005.1 as seed ortholog is 100%.

---

Group of orthologs #4873. Best score 874 bits

Score difference with first non-orthologous sequence - *A. fumigatus*:874 *A. fischeri*:874  
afum|EAL92312.1 100.00% afis|EAW21295.1 100.00%  
Bootstrap support for afum|EAL92312.1 as seed ortholog is 100%.  
Bootstrap support for afis|EAW21295.1 as seed ortholog is 100%.

---

Group of orthologs #4874. Best score 874 bits

Score difference with first non-orthologous sequence - *A. fumigatus*:874 *A. fischeri*:542  
afum|EAL89402.1 100.00% afis|EAW24760.1 100.00%  
Bootstrap support for afum|EAL89402.1 as seed ortholog is 100%.  
Bootstrap support for afis|EAW24760.1 as seed ortholog is 100%.

---

Group of orthologs #4875. Best score 874 bits

Score difference with first non-orthologous sequence - *A. fumigatus*:107 *A. fischeri*:874  
afum|EAL89592.1 100.00% afis|EAW24935.1 100.00%  
Bootstrap support for afum|EAL89592.1 as seed ortholog is 99%.  
Bootstrap support for afis|EAW24935.1 as seed ortholog is 100%.

---

Group of orthologs #4876. Best score 874 bits

Score difference with first non-orthologous sequence - *A. fumigatus*:874 *A. fischeri*:874  
afum|EAL92885.1 100.00% afis|EAW21871.1 100.00%  
Bootstrap support for afum|EAL92885.1 as seed ortholog is 100%.  
Bootstrap support for afis|EAW21871.1 as seed ortholog is 100%.

---

Group of orthologs #4877. Best score 873 bits

Score difference with first non-orthologous sequence - *A. fumigatus*:873 *A. fischeri*:873  
afum|EAL84987.2 100.00% afis|EAW19922.1 100.00%  
Bootstrap support for afum|EAL84987.2 as seed ortholog is 100%.  
Bootstrap support for afis|EAW19922.1 as seed ortholog is 100%.

---

Group of orthologs #4878. Best score 873 bits

Score difference with first non-orthologous sequence - *A. fumigatus*:255 *A. fischeri*:103  
afum|EAL88796.1 100.00% afis|EAW20719.1 100.00%

Bootstrap support for afum|EAL88796.1 as seed ortholog is 100%.  
Bootstrap support for afis|EAW20719.1 as seed ortholog is 99%.

---

Group of orthologs #4879. Best score 873 bits

Score difference with first non-orthologous sequence - *A. fumigatus*:873 *A. fischeri*:873

afum|EAL89599.1 100.00% afis|EAW24942.1 100.00%

Bootstrap support for afum|EAL89599.1 as seed ortholog is 100%.

Bootstrap support for afis|EAW24942.1 as seed ortholog is 100%.

---

Group of orthologs #4880. Best score 872 bits

Score difference with first non-orthologous sequence - *A. fumigatus*:872 *A. fischeri*:872

afum|EAL86804.2 100.00% afis|EAW19722.1 100.00%

Bootstrap support for afum|EAL86804.2 as seed ortholog is 100%.

Bootstrap support for afis|EAW19722.1 as seed ortholog is 100%.

---

Group of orthologs #4881. Best score 872 bits

Score difference with first non-orthologous sequence - *A. fumigatus*:872 *A. fischeri*:872

afum|EAL93365.1 100.00% afis|EAW18649.1 100.00%

Bootstrap support for afum|EAL93365.1 as seed ortholog is 100%.

Bootstrap support for afis|EAW18649.1 as seed ortholog is 100%.

---

Group of orthologs #4882. Best score 871 bits

Score difference with first non-orthologous sequence - *A. fumigatus*:871 *A. fischeri*:871

afum|EAL85525.1 100.00% afis|EAW15826.1 100.00%

Bootstrap support for afum|EAL85525.1 as seed ortholog is 100%.

Bootstrap support for afis|EAW15826.1 as seed ortholog is 100%.

---

Group of orthologs #4883. Best score 871 bits

Score difference with first non-orthologous sequence - *A. fumigatus*:871 *A. fischeri*:871

afum|EAL84722.1 100.00% afis|EAW20912.1 100.00%

Bootstrap support for afum|EAL84722.1 as seed ortholog is 100%.

Bootstrap support for afis|EAW20912.1 as seed ortholog is 100%.

---

Group of orthologs #4884. Best score 871 bits

Score difference with first non-orthologous sequence - *A. fumigatus*:871 *A. fischeri*:56

afum|EAL86274.1 100.00% afis|EAW20692.1 100.00%

Bootstrap support for afum|EAL86274.1 as seed ortholog is 100%.

Bootstrap support for afis|EAW20692.1 as seed ortholog is 95%.

---

Group of orthologs #4885. Best score 871 bits

Score difference with first non-orthologous sequence - *A. fumigatus*:871 *A. fischeri*:871

afum|EAL92245.1 100.00% afis|EAW21233.1 100.00%

Bootstrap support for afum|EAL92245.1 as seed ortholog is 100%.

Bootstrap support for afis|EAW21233.1 as seed ortholog is 100%.

---

Group of orthologs #4886. Best score 871 bits

Score difference with first non-orthologous sequence - *A. fumigatus*:871 *A. fischeri*:871

afum|EAL89869.1 100.00% afis|EAW25208.1 100.00%

Bootstrap support for afum|EAL89869.1 as seed ortholog is 100%.

Bootstrap support for afis|EAW25208.1 as seed ortholog is 100%.

---

Group of orthologs #4887. Best score 870 bits

Score difference with first non-orthologous sequence - *A. fumigatus*:870 *A. fischeri*:718

afum|EAL84210.1 100.00% afis|EAW15434.1 100.00%

Bootstrap support for afum|EAL84210.1 as seed ortholog is 100%.

Bootstrap support for afis|EAW15434.1 as seed ortholog is 100%.

---

Group of orthologs #4888. Best score 870 bits

Score difference with first non-orthologous sequence - *A. fumigatus*:870 *A. fischeri*:870

afum|EAL89088.1 100.00% afis|EAW16494.1 100.00%

Bootstrap support for afum|EAL89088.1 as seed ortholog is 100%.

Bootstrap support for afis|EAW16494.1 as seed ortholog is 100%.

---

Group of orthologs #4889. Best score 870 bits

Score difference with first non-orthologous sequence - *A. fumigatus*:870 *A. fischeri*:707

afum|EAL89122.1 100.00% afis|EAW16526.1 100.00%

Bootstrap support for afum|EAL89122.1 as seed ortholog is 100%.

Bootstrap support for afis|EAW16526.1 as seed ortholog is 100%.

---

Group of orthologs #4890. Best score 870 bits

Score difference with first non-orthologous sequence - *A. fumigatus*:870 *A. fischeri*:582

afum|EAL85339.1 100.00% afis|EAW20224.1 100.00%

Bootstrap support for afum|EAL85339.1 as seed ortholog is 100%.

Bootstrap support for afis|EAW20224.1 as seed ortholog is 100%.

---

Group of orthologs #4891. Best score 870 bits

Score difference with first non-orthologous sequence - *A. fumigatus*:672 *A. fischeri*:562

afum|EAL84814.1 100.00% afis|EAW20814.1 100.00%

Bootstrap support for afum|EAL84814.1 as seed ortholog is 100%.

Bootstrap support for afis|EAW20814.1 as seed ortholog is 100%.

---

Group of orthologs #4892. Best score 870 bits

Score difference with first non-orthologous sequence - *A. fumigatus*:870 *A. fischeri*:870

afum|EBA27349.1 100.00% afis|EAW15849.1 100.00%

Bootstrap support for afum|EBA27349.1 as seed ortholog is 100%.

Bootstrap support for afis|EAW15849.1 as seed ortholog is 100%.

---

Group of orthologs #4893. Best score 870 bits

Score difference with first non-orthologous sequence - *A. fumigatus*:870 *A. fischeri*:713

afum|EAL90906.1 100.00% afis|EAW22275.1 100.00%

Bootstrap support for afum|EAL90906.1 as seed ortholog is 100%.

Bootstrap support for afis|EAW22275.1 as seed ortholog is 100%.

---

Group of orthologs #4894. Best score 869 bits

Score difference with first non-orthologous sequence - *A. fumigatus*:805 *A. fischeri*:628

afum|EAL87033.1 100.00% afis|EAW19463.1 100.00%

Bootstrap support for afum|EAL87033.1 as seed ortholog is 100%.

Bootstrap support for afis|EAW19463.1 as seed ortholog is 100%.

---

Group of orthologs #4895. Best score 869 bits

Score difference with first non-orthologous sequence - *A. fumigatus*:869 *A. fischeri*:869

afum|EAL90336.1 100.00% afis|EAW22864.1 100.00%

Bootstrap support for afum|EAL90336.1 as seed ortholog is 100%.

Bootstrap support for afis|EAW22864.1 as seed ortholog is 100%.

---

Group of orthologs #4896. Best score 869 bits

Score difference with first non-orthologous sequence - *A. fumigatus*:869 *A. fischeri*:869

afum|EAL94092.1 100.00% afis|EAW19378.1 100.00%

Bootstrap support for afum|EAL94092.1 as seed ortholog is 100%.

Bootstrap support for afis|EAW19378.1 as seed ortholog is 100%.

---

Group of orthologs #4897. Best score 868 bits

Score difference with first non-orthologous sequence - *A. fumigatus*:385 *A. fischeri*:868  
afum|EAL85817.1 100.00% afis|EAW15514.1 100.00%  
Bootstrap support for afum|EAL85817.1 as seed ortholog is 100%.  
Bootstrap support for afis|EAW15514.1 as seed ortholog is 100%.

---

Group of orthologs #4898. Best score 868 bits

Score difference with first non-orthologous sequence - *A. fumigatus*:868 *A. fischeri*:868  
afum|EAL86515.1 100.00% afis|EAW16991.1 100.00%  
Bootstrap support for afum|EAL86515.1 as seed ortholog is 100%.  
Bootstrap support for afis|EAW16991.1 as seed ortholog is 100%.

---

Group of orthologs #4899. Best score 868 bits

Score difference with first non-orthologous sequence - *A. fumigatus*:868 *A. fischeri*:780  
afum|EAL84479.1 100.00% afis|EAW20586.1 100.00%  
Bootstrap support for afum|EAL84479.1 as seed ortholog is 100%.  
Bootstrap support for afis|EAW20586.1 as seed ortholog is 100%.

---

Group of orthologs #4900. Best score 868 bits

Score difference with first non-orthologous sequence - *A. fumigatus*:868 *A. fischeri*:868  
afum|EAL89101.1 100.00% afis|EAW16506.1 100.00%  
Bootstrap support for afum|EAL89101.1 as seed ortholog is 100%.  
Bootstrap support for afis|EAW16506.1 as seed ortholog is 100%.

---

Group of orthologs #4901. Best score 868 bits

Score difference with first non-orthologous sequence - *A. fumigatus*:868 *A. fischeri*:868  
afum|EAL87077.1 100.00% afis|EAW19417.1 100.00%  
Bootstrap support for afum|EAL87077.1 as seed ortholog is 100%.  
Bootstrap support for afis|EAW19417.1 as seed ortholog is 100%.

---

Group of orthologs #4902. Best score 868 bits

Score difference with first non-orthologous sequence - *A. fumigatus*:868 *A. fischeri*:868  
afum|EAL86085.2 100.00% afis|EAW24416.1 100.00%  
Bootstrap support for afum|EAL86085.2 as seed ortholog is 100%.  
Bootstrap support for afis|EAW24416.1 as seed ortholog is 100%.

---

Group of orthologs #4903. Best score 868 bits

Score difference with first non-orthologous sequence - *A. fumigatus*:868 *A. fischeri*:220  
afum|EAL88126.1 100.00% afis|EAW23350.1 100.00%  
Bootstrap support for afum|EAL88126.1 as seed ortholog is 100%.  
Bootstrap support for afis|EAW23350.1 as seed ortholog is 100%.

---

Group of orthologs #4904. Best score 868 bits

Score difference with first non-orthologous sequence - *A. fumigatus*:735 *A. fischeri*:422  
afum|EAL93564.1 100.00% afis|EAW18830.1 100.00%  
Bootstrap support for afum|EAL93564.1 as seed ortholog is 100%.  
Bootstrap support for afis|EAW18830.1 as seed ortholog is 100%.

---

Group of orthologs #4905. Best score 868 bits

Score difference with first non-orthologous sequence - *A. fumigatus*:713 *A. fischeri*:868  
afum|EAL90848.1 100.00% afis|EAW22343.1 100.00%  
Bootstrap support for afum|EAL90848.1 as seed ortholog is 100%.  
Bootstrap support for afis|EAW22343.1 as seed ortholog is 100%.

---

Group of orthologs #4906. Best score 868 bits

Score difference with first non-orthologous sequence - *A. fumigatus*:868 *A. fischeri*:868  
afum|EAL90377.1 100.00% afis|EAW22823.1 100.00%

Bootstrap support for afum|EAL90377.1 as seed ortholog is 100%.  
Bootstrap support for afis|EAW22823.1 as seed ortholog is 100%.

---

Group of orthologs #4907. Best score 868 bits

Score difference with first non-orthologous sequence - *A. fumigatus*:868 *A. fischeri*:868

afum|EAL92343.1 100.00% afis|EAW21325.1 100.00%

Bootstrap support for afum|EAL92343.1 as seed ortholog is 100%.

Bootstrap support for afis|EAW21325.1 as seed ortholog is 100%.

---

Group of orthologs #4908. Best score 868 bits

Score difference with first non-orthologous sequence - *A. fumigatus*:868 *A. fischeri*:868

afum|EAL92491.1 100.00% afis|EAW21472.1 100.00%

Bootstrap support for afum|EAL92491.1 as seed ortholog is 100%.

Bootstrap support for afis|EAW21472.1 as seed ortholog is 100%.

---

Group of orthologs #4909. Best score 868 bits

Score difference with first non-orthologous sequence - *A. fumigatus*:868 *A. fischeri*:868

afum|EAL89641.1 100.00% afis|EAW24981.1 100.00%

Bootstrap support for afum|EAL89641.1 as seed ortholog is 100%.

Bootstrap support for afis|EAW24981.1 as seed ortholog is 100%.

---

Group of orthologs #4910. Best score 868 bits

Score difference with first non-orthologous sequence - *A. fumigatus*:868 *A. fischeri*:868

afum|EAL90203.1 100.00% afis|EAW25540.1 100.00%

Bootstrap support for afum|EAL90203.1 as seed ortholog is 100%.

Bootstrap support for afis|EAW25540.1 as seed ortholog is 100%.

---

Group of orthologs #4911. Best score 867 bits

Score difference with first non-orthologous sequence - *A. fumigatus*:770 *A. fischeri*:783

afum|EAL86309.1 100.00% afis|EAW16735.1 100.00%

Bootstrap support for afum|EAL86309.1 as seed ortholog is 100%.

Bootstrap support for afis|EAW16735.1 as seed ortholog is 100%.

---

Group of orthologs #4912. Best score 867 bits

Score difference with first non-orthologous sequence - *A. fumigatus*:600 *A. fischeri*:681

afum|EAL84922.1 100.00% afis|EAW19995.1 100.00%

Bootstrap support for afum|EAL84922.1 as seed ortholog is 100%.

Bootstrap support for afis|EAW19995.1 as seed ortholog is 100%.

---

Group of orthologs #4913. Best score 867 bits

Score difference with first non-orthologous sequence - *A. fumigatus*:867 *A. fischeri*:867

afum|EAL94047.1 100.00% afis|EAW19330.1 100.00%

Bootstrap support for afum|EAL94047.1 as seed ortholog is 100%.

Bootstrap support for afis|EAW19330.1 as seed ortholog is 100%.

---

Group of orthologs #4914. Best score 866 bits

Score difference with first non-orthologous sequence - *A. fumigatus*:866 *A. fischeri*:866

afum|EAL91371.1 100.00% afis|EAW17557.1 100.00%

Bootstrap support for afum|EAL91371.1 as seed ortholog is 100%.

Bootstrap support for afis|EAW17557.1 as seed ortholog is 100%.

---

Group of orthologs #4915. Best score 866 bits

Score difference with first non-orthologous sequence - *A. fumigatus*:866 *A. fischeri*:808

afum|EAL91656.1 100.00% afis|EAW17847.1 100.00%

Bootstrap support for afum|EAL91656.1 as seed ortholog is 100%.

Bootstrap support for afis|EAW17847.1 as seed ortholog is 100%.

---

Group of orthologs #4916. Best score 866 bits

Score difference with first non-orthologous sequence - *A. fumigatus*:709 *A. fischeri*:517

afum|EAL87172.1 100.00% afis|EAW23734.1 100.00%

Bootstrap support for afum|EAL87172.1 as seed ortholog is 100%.

Bootstrap support for afis|EAW23734.1 as seed ortholog is 100%.

---

Group of orthologs #4917. Best score 866 bits

Score difference with first non-orthologous sequence - *A. fumigatus*:866 *A. fischeri*:866

afum|EAL87251.1 100.00% afis|EAW23816.1 100.00%

Bootstrap support for afum|EAL87251.1 as seed ortholog is 100%.

Bootstrap support for afis|EAW23816.1 as seed ortholog is 100%.

---

Group of orthologs #4918. Best score 866 bits

Score difference with first non-orthologous sequence - *A. fumigatus*:866 *A. fischeri*:866

afum|EAL90625.1 100.00% afis|EAW22573.1 100.00%

Bootstrap support for afum|EAL90625.1 as seed ortholog is 100%.

Bootstrap support for afis|EAW22573.1 as seed ortholog is 100%.

---

Group of orthologs #4919. Best score 866 bits

Score difference with first non-orthologous sequence - *A. fumigatus*:866 *A. fischeri*:866

afum|EAL89729.1 100.00% afis|EAW25061.1 100.00%

Bootstrap support for afum|EAL89729.1 as seed ortholog is 100%.

Bootstrap support for afis|EAW25061.1 as seed ortholog is 100%.

---

Group of orthologs #4920. Best score 866 bits

Score difference with first non-orthologous sequence - *A. fumigatus*:866 *A. fischeri*:866

afum|EAL89769.1 100.00% afis|EAW25098.1 100.00%

Bootstrap support for afum|EAL89769.1 as seed ortholog is 100%.

Bootstrap support for afis|EAW25098.1 as seed ortholog is 100%.

---

Group of orthologs #4921. Best score 866 bits

Score difference with first non-orthologous sequence - *A. fumigatus*:866 *A. fischeri*:866

afum|EBA27385.1 100.00% afis|EAW24984.1 100.00%

Bootstrap support for afum|EBA27385.1 as seed ortholog is 100%.

Bootstrap support for afis|EAW24984.1 as seed ortholog is 100%.

---

Group of orthologs #4922. Best score 865 bits

Score difference with first non-orthologous sequence - *A. fumigatus*:765 *A. fischeri*:742

afum|EAL86555.1 100.00% afis|EAW17059.1 100.00%

Bootstrap support for afum|EAL86555.1 as seed ortholog is 100%.

Bootstrap support for afis|EAW17059.1 as seed ortholog is 100%.

---

Group of orthologs #4923. Best score 865 bits

Score difference with first non-orthologous sequence - *A. fumigatus*:865 *A. fischeri*:865

afum|EAL88964.1 100.00% afis|EAW16339.1 100.00%

Bootstrap support for afum|EAL88964.1 as seed ortholog is 100%.

Bootstrap support for afis|EAW16339.1 as seed ortholog is 100%.

---

Group of orthologs #4924. Best score 865 bits

Score difference with first non-orthologous sequence - *A. fumigatus*:865 *A. fischeri*:865

afum|EAL91539.1 100.00% afis|EAW17724.1 100.00%

Bootstrap support for afum|EAL91539.1 as seed ortholog is 100%.

Bootstrap support for afis|EAW17724.1 as seed ortholog is 100%.

---

Group of orthologs #4925. Best score 865 bits

Score difference with first non-orthologous sequence - *A. fumigatus*:865 *A. fischeri*:865  
afum|EAL86051.1 100.00% afis|EAW24379.1 100.00%  
Bootstrap support for afum|EAL86051.1 as seed ortholog is 100%.  
Bootstrap support for afis|EAW24379.1 as seed ortholog is 100%.

---

Group of orthologs #4926. Best score 865 bits

Score difference with first non-orthologous sequence - *A. fumigatus*:865 *A. fischeri*:865  
afum|EAL88376.1 100.00% afis|EAW23103.1 100.00%  
Bootstrap support for afum|EAL88376.1 as seed ortholog is 100%.  
Bootstrap support for afis|EAW23103.1 as seed ortholog is 100%.

---

Group of orthologs #4927. Best score 865 bits

Score difference with first non-orthologous sequence - *A. fumigatus*:865 *A. fischeri*:865  
afum|EAL87961.1 100.00% afis|EAW23501.1 100.00%  
Bootstrap support for afum|EAL87961.1 as seed ortholog is 100%.  
Bootstrap support for afis|EAW23501.1 as seed ortholog is 100%.

---

Group of orthologs #4928. Best score 865 bits

Score difference with first non-orthologous sequence - *A. fumigatus*:813 *A. fischeri*:721  
afum|EAL93622.1 100.00% afis|EAW18889.1 100.00%  
Bootstrap support for afum|EAL93622.1 as seed ortholog is 100%.  
Bootstrap support for afis|EAW18889.1 as seed ortholog is 100%.

---

Group of orthologs #4929. Best score 865 bits

Score difference with first non-orthologous sequence - *A. fumigatus*:865 *A. fischeri*:865  
afum|EAL90560.1 100.00% afis|EAW22633.1 100.00%  
Bootstrap support for afum|EAL90560.1 as seed ortholog is 100%.  
Bootstrap support for afis|EAW22633.1 as seed ortholog is 100%.

---

Group of orthologs #4930. Best score 864 bits

Score difference with first non-orthologous sequence - *A. fumigatus*:864 *A. fischeri*:864  
afum|EAL88544.1 100.00% afis|EAW15909.1 100.00%  
Bootstrap support for afum|EAL88544.1 as seed ortholog is 100%.  
Bootstrap support for afis|EAW15909.1 as seed ortholog is 100%.

---

Group of orthologs #4931. Best score 864 bits

Score difference with first non-orthologous sequence - *A. fumigatus*:625 *A. fischeri*:195  
afum|EAL85417.1 100.00% afis|EAW20283.1 100.00%  
Bootstrap support for afum|EAL85417.1 as seed ortholog is 100%.  
Bootstrap support for afis|EAW20283.1 as seed ortholog is 100%.

---

Group of orthologs #4932. Best score 864 bits

Score difference with first non-orthologous sequence - *A. fumigatus*:864 *A. fischeri*:671  
afum|EAL85450.1 100.00% afis|EAW20325.1 100.00%  
Bootstrap support for afum|EAL85450.1 as seed ortholog is 100%.  
Bootstrap support for afis|EAW20325.1 as seed ortholog is 100%.

---

Group of orthologs #4933. Best score 864 bits

Score difference with first non-orthologous sequence - *A. fumigatus*:864 *A. fischeri*:864  
afum|EAL86979.1 100.00% afis|EAW19518.1 100.00%  
Bootstrap support for afum|EAL86979.1 as seed ortholog is 100%.  
Bootstrap support for afis|EAW19518.1 as seed ortholog is 100%.

---

Group of orthologs #4934. Best score 864 bits

Score difference with first non-orthologous sequence - *A. fumigatus*:864 *A. fischeri*:864  
afum|EAL91387.1 100.00% afis|EAW17574.1 100.00%

Bootstrap support for afum|EAL91387.1 as seed ortholog is 100%.  
Bootstrap support for afis|EAW17574.1 as seed ortholog is 100%.

---

Group of orthologs #4935. Best score 864 bits

Score difference with first non-orthologous sequence - *A. fumigatus*:864 *A. fischeri*:864

afum|EAL93307.1 100.00% afis|EAW18599.1 100.00%

Bootstrap support for afum|EAL93307.1 as seed ortholog is 100%.

Bootstrap support for afis|EAW18599.1 as seed ortholog is 100%.

---

Group of orthologs #4936. Best score 864 bits

Score difference with first non-orthologous sequence - *A. fumigatus*:479 *A. fischeri*:784

afum|EBA27290.1 100.00% afis|EAW19708.1 100.00%

Bootstrap support for afum|EBA27290.1 as seed ortholog is 100%.

Bootstrap support for afis|EAW19708.1 as seed ortholog is 100%.

---

Group of orthologs #4937. Best score 864 bits

Score difference with first non-orthologous sequence - *A. fumigatus*:864 *A. fischeri*:864

afum|EAL92962.1 100.00% afis|EAW21948.1 100.00%

Bootstrap support for afum|EAL92962.1 as seed ortholog is 100%.

Bootstrap support for afis|EAW21948.1 as seed ortholog is 100%.

---

Group of orthologs #4938. Best score 863 bits

Score difference with first non-orthologous sequence - *A. fumigatus*:863 *A. fischeri*:863

afum|EAL84846.1 100.00% afis|EAW20773.1 100.00%

Bootstrap support for afum|EAL84846.1 as seed ortholog is 100%.

Bootstrap support for afis|EAW20773.1 as seed ortholog is 100%.

---

Group of orthologs #4939. Best score 863 bits

Score difference with first non-orthologous sequence - *A. fumigatus*:863 *A. fischeri*:863

afum|EAL91323.1 100.00% afis|EAW17500.1 100.00%

Bootstrap support for afum|EAL91323.1 as seed ortholog is 100%.

Bootstrap support for afis|EAW17500.1 as seed ortholog is 100%.

---

Group of orthologs #4940. Best score 863 bits

Score difference with first non-orthologous sequence - *A. fumigatus*:863 *A. fischeri*:863

afum|EAL91896.1 100.00% afis|EAW18084.1 100.00%

Bootstrap support for afum|EAL91896.1 as seed ortholog is 100%.

Bootstrap support for afis|EAW18084.1 as seed ortholog is 100%.

---

Group of orthologs #4941. Best score 863 bits

Score difference with first non-orthologous sequence - *A. fumigatus*:863 *A. fischeri*:863

afum|EAL87298.1 100.00% afis|EAW23870.1 100.00%

Bootstrap support for afum|EAL87298.1 as seed ortholog is 100%.

Bootstrap support for afis|EAW23870.1 as seed ortholog is 100%.

---

Group of orthologs #4942. Best score 863 bits

Score difference with first non-orthologous sequence - *A. fumigatus*:863 *A. fischeri*:863

afum|EAL87364.1 100.00% afis|EAW23939.1 100.00%

Bootstrap support for afum|EAL87364.1 as seed ortholog is 100%.

Bootstrap support for afis|EAW23939.1 as seed ortholog is 100%.

---

Group of orthologs #4943. Best score 863 bits

Score difference with first non-orthologous sequence - *A. fumigatus*:863 *A. fischeri*:863

afum|EAL93903.1 100.00% afis|EAW19173.1 100.00%

Bootstrap support for afum|EAL93903.1 as seed ortholog is 100%.

Bootstrap support for afis|EAW19173.1 as seed ortholog is 100%.



---

Group of orthologs #4944. Best score 863 bits

Score difference with first non-orthologous sequence - *A. fumigatus*:863 *A. fischeri*:863

afum|EAL90646.1 100.00% afis|EAW22549.1 100.00%

Bootstrap support for afum|EAL90646.1 as seed ortholog is 100%.

Bootstrap support for afis|EAW22549.1 as seed ortholog is 100%.

---

Group of orthologs #4945. Best score 863 bits

Score difference with first non-orthologous sequence - *A. fumigatus*:863 *A. fischeri*:863

afum|EBA27250.1 100.00% afis|EAW24224.1 100.00%

Bootstrap support for afum|EBA27250.1 as seed ortholog is 100%.

Bootstrap support for afis|EAW24224.1 as seed ortholog is 100%.

---

Group of orthologs #4946. Best score 862 bits

Score difference with first non-orthologous sequence - *A. fumigatus*:862 *A. fischeri*:862

afum|EAL86498.1 100.00% afis|EAW16970.1 100.00%

Bootstrap support for afum|EAL86498.1 as seed ortholog is 100%.

Bootstrap support for afis|EAW16970.1 as seed ortholog is 100%.

---

Group of orthologs #4947. Best score 862 bits

Score difference with first non-orthologous sequence - *A. fumigatus*:862 *A. fischeri*:862

afum|EAL85933.1 100.00% afis|EAW24265.1 100.00%

Bootstrap support for afum|EAL85933.1 as seed ortholog is 100%.

Bootstrap support for afis|EAW24265.1 as seed ortholog is 100%.

---

Group of orthologs #4948. Best score 862 bits

Score difference with first non-orthologous sequence - *A. fumigatus*:862 *A. fischeri*:746

afum|EAL89901.1 100.00% afis|EAW25240.1 100.00%

Bootstrap support for afum|EAL89901.1 as seed ortholog is 100%.

Bootstrap support for afis|EAW25240.1 as seed ortholog is 100%.

---

Group of orthologs #4949. Best score 862 bits

Score difference with first non-orthologous sequence - *A. fumigatus*:862 *A. fischeri*:862

afum|EAL91990.1 100.00% afis|EAW24135.1 100.00%

Bootstrap support for afum|EAL91990.1 as seed ortholog is 100%.

Bootstrap support for afis|EAW24135.1 as seed ortholog is 100%.

---

Group of orthologs #4950. Best score 861 bits

Score difference with first non-orthologous sequence - *A. fumigatus*:861 *A. fischeri*:861

afum|EAL85655.1 100.00% afis|EAW15693.1 100.00%

Bootstrap support for afum|EAL85655.1 as seed ortholog is 100%.

Bootstrap support for afis|EAW15693.1 as seed ortholog is 100%.

---

Group of orthologs #4951. Best score 861 bits

Score difference with first non-orthologous sequence - *A. fumigatus*:669 *A. fischeri*:861

afum|EAL88725.1 100.00% afis|EAW16093.1 100.00%

Bootstrap support for afum|EAL88725.1 as seed ortholog is 100%.

Bootstrap support for afis|EAW16093.1 as seed ortholog is 100%.

---

Group of orthologs #4952. Best score 861 bits

Score difference with first non-orthologous sequence - *A. fumigatus*:861 *A. fischeri*:502

afum|EAL88841.1 100.00% afis|EAW16214.1 100.00%

Bootstrap support for afum|EAL88841.1 as seed ortholog is 100%.

Bootstrap support for afis|EAW16214.1 as seed ortholog is 100%.

---

Group of orthologs #4953. Best score 861 bits

Score difference with first non-orthologous sequence - *A. fumigatus*:861 *A. fischeri*:861  
afum|EAL84786.1 100.00% afis|EAW20847.1 100.00%  
Bootstrap support for afum|EAL84786.1 as seed ortholog is 100%.  
Bootstrap support for afis|EAW20847.1 as seed ortholog is 100%.

---

Group of orthologs #4954. Best score 861 bits

Score difference with first non-orthologous sequence - *A. fumigatus*:861 *A. fischeri*:861  
afum|EAL86123.1 100.00% afis|EAW24454.1 100.00%  
Bootstrap support for afum|EAL86123.1 as seed ortholog is 100%.  
Bootstrap support for afis|EAW24454.1 as seed ortholog is 100%.

---

Group of orthologs #4955. Best score 861 bits

Score difference with first non-orthologous sequence - *A. fumigatus*:861 *A. fischeri*:548  
afum|EAL91052.1 100.00% afis|EAW22138.1 100.00%  
Bootstrap support for afum|EAL91052.1 as seed ortholog is 100%.  
Bootstrap support for afis|EAW22138.1 as seed ortholog is 100%.

---

Group of orthologs #4956. Best score 861 bits

Score difference with first non-orthologous sequence - *A. fumigatus*:861 *A. fischeri*:861  
afum|EAL90985.1 100.00% afis|EAW22209.1 100.00%  
Bootstrap support for afum|EAL90985.1 as seed ortholog is 100%.  
Bootstrap support for afis|EAW22209.1 as seed ortholog is 100%.

---

Group of orthologs #4957. Best score 861 bits

Score difference with first non-orthologous sequence - *A. fumigatus*:861 *A. fischeri*:861  
afum|EAL92378.1 100.00% afis|EAW21362.1 100.00%  
Bootstrap support for afum|EAL92378.1 as seed ortholog is 100%.  
Bootstrap support for afis|EAW21362.1 as seed ortholog is 100%.

---

Group of orthologs #4958. Best score 861 bits

Score difference with first non-orthologous sequence - *A. fumigatus*:861 *A. fischeri*:861  
afum|EAL92414.1 100.00% afis|EAW21400.1 100.00%  
Bootstrap support for afum|EAL92414.1 as seed ortholog is 100%.  
Bootstrap support for afis|EAW21400.1 as seed ortholog is 100%.

---

Group of orthologs #4959. Best score 860 bits

Score difference with first non-orthologous sequence - *A. fumigatus*:860 *A. fischeri*:300  
afum|EAL85052.1 100.00% afis|EAW19843.1 100.00%  
Bootstrap support for afum|EAL85052.1 as seed ortholog is 100%.  
Bootstrap support for afis|EAW19843.1 as seed ortholog is 100%.

---

Group of orthologs #4960. Best score 860 bits

Score difference with first non-orthologous sequence - *A. fumigatus*:860 *A. fischeri*:860  
afum|EAL85189.1 100.00% afis|EAW20071.1 100.00%  
Bootstrap support for afum|EAL85189.1 as seed ortholog is 100%.  
Bootstrap support for afis|EAW20071.1 as seed ortholog is 100%.

---

Group of orthologs #4961. Best score 860 bits

Score difference with first non-orthologous sequence - *A. fumigatus*:860 *A. fischeri*:860  
afum|EAL84755.1 100.00% afis|EAW20877.1 100.00%  
Bootstrap support for afum|EAL84755.1 as seed ortholog is 100%.  
Bootstrap support for afis|EAW20877.1 as seed ortholog is 100%.

---

Group of orthologs #4962. Best score 860 bits

Score difference with first non-orthologous sequence - *A. fumigatus*:860 *A. fischeri*:860  
afum|EAL91781.1 100.00% afis|EAW17972.1 100.00%

Bootstrap support for afum|EAL91781.1 as seed ortholog is 100%.  
Bootstrap support for afis|EAW17972.1 as seed ortholog is 100%.

---

Group of orthologs #4963. Best score 860 bits

Score difference with first non-orthologous sequence - *A. fumigatus*:807 *A. fischeri*:860

afum|EAL88339.1 100.00% afis|EAW23142.1 100.00%

Bootstrap support for afum|EAL88339.1 as seed ortholog is 100%.

Bootstrap support for afis|EAW23142.1 as seed ortholog is 100%.

---

Group of orthologs #4964. Best score 860 bits

Score difference with first non-orthologous sequence - *A. fumigatus*:860 *A. fischeri*:860

afum|EAL92418.1 100.00% afis|EAW21404.1 100.00%

Bootstrap support for afum|EAL92418.1 as seed ortholog is 100%.

Bootstrap support for afis|EAW21404.1 as seed ortholog is 100%.

---

Group of orthologs #4965. Best score 860 bits

Score difference with first non-orthologous sequence - *A. fumigatus*:860 *A. fischeri*:860

afum|EAL89375.2 100.00% afis|EAW24727.1 100.00%

Bootstrap support for afum|EAL89375.2 as seed ortholog is 100%.

Bootstrap support for afis|EAW24727.1 as seed ortholog is 100%.

---

Group of orthologs #4966. Best score 860 bits

Score difference with first non-orthologous sequence - *A. fumigatus*:860 *A. fischeri*:860

afum|EAL90153.1 100.00% afis|EAW25488.1 100.00%

Bootstrap support for afum|EAL90153.1 as seed ortholog is 100%.

Bootstrap support for afis|EAW25488.1 as seed ortholog is 100%.

---

Group of orthologs #4967. Best score 860 bits

Score difference with first non-orthologous sequence - *A. fumigatus*:860 *A. fischeri*:860

afum|EAL92012.2 100.00% afis|EAW24157.1 100.00%

Bootstrap support for afum|EAL92012.2 as seed ortholog is 100%.

Bootstrap support for afis|EAW24157.1 as seed ortholog is 100%.

---

Group of orthologs #4968. Best score 859 bits

Score difference with first non-orthologous sequence - *A. fumigatus*:859 *A. fischeri*:859

afum|EAL87685.1 100.00% afis|EAW18318.1 100.00%

Bootstrap support for afum|EAL87685.1 as seed ortholog is 100%.

Bootstrap support for afis|EAW18318.1 as seed ortholog is 100%.

---

Group of orthologs #4969. Best score 859 bits

Score difference with first non-orthologous sequence - *A. fumigatus*:859 *A. fischeri*:859

afum|EAL91741.1 100.00% afis|EAW17930.1 100.00%

Bootstrap support for afum|EAL91741.1 as seed ortholog is 100%.

Bootstrap support for afis|EAW17930.1 as seed ortholog is 100%.

---

Group of orthologs #4970. Best score 859 bits

Score difference with first non-orthologous sequence - *A. fumigatus*:859 *A. fischeri*:859

afum|EAL85926.2 100.00% afis|EAW24258.1 100.00%

Bootstrap support for afum|EAL85926.2 as seed ortholog is 100%.

Bootstrap support for afis|EAW24258.1 as seed ortholog is 100%.

---

Group of orthologs #4971. Best score 859 bits

Score difference with first non-orthologous sequence - *A. fumigatus*:859 *A. fischeri*:859

afum|EBA27368.1 100.00% afis|EAW16575.1 100.00%

Bootstrap support for afum|EBA27368.1 as seed ortholog is 100%.

Bootstrap support for afis|EAW16575.1 as seed ortholog is 100%.

---

Group of orthologs #4972. Best score 859 bits

Score difference with first non-orthologous sequence - *A. fumigatus*:631 *A. fischeri*:859

afum|EAL87874.1 100.00% afis|EAW23592.1 100.00%

Bootstrap support for afum|EAL87874.1 as seed ortholog is 100%.

Bootstrap support for afis|EAW23592.1 as seed ortholog is 100%.

---

Group of orthologs #4973. Best score 858 bits

Score difference with first non-orthologous sequence - *A. fumigatus*:858 *A. fischeri*:763

afum|EAL91621.1 100.00% afis|EAW17812.1 100.00%

Bootstrap support for afum|EAL91621.1 as seed ortholog is 100%.

Bootstrap support for afis|EAW17812.1 as seed ortholog is 100%.

---

Group of orthologs #4974. Best score 858 bits

Score difference with first non-orthologous sequence - *A. fumigatus*:858 *A. fischeri*:858

afum|EAL87990.1 100.00% afis|EAW23475.1 100.00%

Bootstrap support for afum|EAL87990.1 as seed ortholog is 100%.

Bootstrap support for afis|EAW23475.1 as seed ortholog is 100%.

---

Group of orthologs #4975. Best score 858 bits

Score difference with first non-orthologous sequence - *A. fumigatus*:858 *A. fischeri*:858

afum|EAL89457.1 100.00% afis|EAW24813.1 100.00%

Bootstrap support for afum|EAL89457.1 as seed ortholog is 100%.

Bootstrap support for afis|EAW24813.1 as seed ortholog is 100%.

---

Group of orthologs #4976. Best score 858 bits

Score difference with first non-orthologous sequence - *A. fumigatus*:858 *A. fischeri*:858

afum|EAL92741.1 100.00% afis|EAW21706.1 100.00%

Bootstrap support for afum|EAL92741.1 as seed ortholog is 100%.

Bootstrap support for afis|EAW21706.1 as seed ortholog is 100%.

---

Group of orthologs #4977. Best score 857 bits

Score difference with first non-orthologous sequence - *A. fumigatus*:857 *A. fischeri*:543

afum|EAL85731.1 100.00% afis|EAW15602.1 100.00%

Bootstrap support for afum|EAL85731.1 as seed ortholog is 100%.

Bootstrap support for afis|EAW15602.1 as seed ortholog is 100%.

---

Group of orthologs #4978. Best score 857 bits

Score difference with first non-orthologous sequence - *A. fumigatus*:857 *A. fischeri*:857

afum|EAL88657.1 100.00% afis|EAW16027.1 100.00%

Bootstrap support for afum|EAL88657.1 as seed ortholog is 100%.

Bootstrap support for afis|EAW16027.1 as seed ortholog is 100%.

---

Group of orthologs #4979. Best score 857 bits

Score difference with first non-orthologous sequence - *A. fumigatus*:729 *A. fischeri*:676

afum|EAL88827.1 100.00% afis|EAW16200.1 100.00%

Bootstrap support for afum|EAL88827.1 as seed ortholog is 100%.

Bootstrap support for afis|EAW16200.1 as seed ortholog is 100%.

---

Group of orthologs #4980. Best score 857 bits

Score difference with first non-orthologous sequence - *A. fumigatus*:857 *A. fischeri*:857

afum|EAL84709.1 100.00% afis|EAW20925.1 100.00%

Bootstrap support for afum|EAL84709.1 as seed ortholog is 100%.

Bootstrap support for afis|EAW20925.1 as seed ortholog is 100%.

---

Group of orthologs #4981. Best score 857 bits

Score difference with first non-orthologous sequence - *A. fumigatus*:857 *A. fischeri*:857  
afum|EAL92417.1 100.00% afis|EAW21403.1 100.00%  
Bootstrap support for afum|EAL92417.1 as seed ortholog is 100%.  
Bootstrap support for afis|EAW21403.1 as seed ortholog is 100%.

---

Group of orthologs #4982. Best score 856 bits

Score difference with first non-orthologous sequence - *A. fumigatus*:856 *A. fischeri*:856  
afum|EAL85062.1 100.00% afis|EAW19830.1 100.00%  
Bootstrap support for afum|EAL85062.1 as seed ortholog is 100%.  
Bootstrap support for afis|EAW19830.1 as seed ortholog is 100%.

---

Group of orthologs #4983. Best score 856 bits

Score difference with first non-orthologous sequence - *A. fumigatus*:856 *A. fischeri*:507  
afum|EAL84971.1 100.00% afis|EAW19942.1 100.00%  
Bootstrap support for afum|EAL84971.1 as seed ortholog is 100%.  
Bootstrap support for afis|EAW19942.1 as seed ortholog is 100%.

---

Group of orthologs #4984. Best score 856 bits

Score difference with first non-orthologous sequence - *A. fumigatus*:856 *A. fischeri*:856  
afum|EAL89016.2 100.00% afis|EAW16390.1 100.00%  
Bootstrap support for afum|EAL89016.2 as seed ortholog is 100%.  
Bootstrap support for afis|EAW16390.1 as seed ortholog is 100%.

---

Group of orthologs #4985. Best score 856 bits

Score difference with first non-orthologous sequence - *A. fumigatus*:704 *A. fischeri*:697  
afum|EAL84818.1 100.00% afis|EAW20810.1 100.00%  
Bootstrap support for afum|EAL84818.1 as seed ortholog is 100%.  
Bootstrap support for afis|EAW20810.1 as seed ortholog is 100%.

---

Group of orthologs #4986. Best score 856 bits

Score difference with first non-orthologous sequence - *A. fumigatus*:856 *A. fischeri*:856  
afum|EAL87375.1 100.00% afis|EAW23949.1 100.00%  
Bootstrap support for afum|EAL87375.1 as seed ortholog is 100%.  
Bootstrap support for afis|EAW23949.1 as seed ortholog is 100%.

---

Group of orthologs #4987. Best score 856 bits

Score difference with first non-orthologous sequence - *A. fumigatus*:856 *A. fischeri*:856  
afum|EAL88429.1 100.00% afis|EAW23051.1 100.00%  
Bootstrap support for afum|EAL88429.1 as seed ortholog is 100%.  
Bootstrap support for afis|EAW23051.1 as seed ortholog is 100%.

---

Group of orthologs #4988. Best score 856 bits

Score difference with first non-orthologous sequence - *A. fumigatus*:856 *A. fischeri*:856  
afum|EAL92519.1 100.00% afis|EAW21500.1 100.00%  
Bootstrap support for afum|EAL92519.1 as seed ortholog is 100%.  
Bootstrap support for afis|EAW21500.1 as seed ortholog is 100%.

---

Group of orthologs #4989. Best score 855 bits

Score difference with first non-orthologous sequence - *A. fumigatus*:855 *A. fischeri*:855  
afum|EAL85528.1 100.00% afis|EAW15823.1 100.00%  
Bootstrap support for afum|EAL85528.1 as seed ortholog is 100%.  
Bootstrap support for afis|EAW15823.1 as seed ortholog is 100%.

---

Group of orthologs #4990. Best score 855 bits

Score difference with first non-orthologous sequence - *A. fumigatus*:855 *A. fischeri*:855  
afum|EAL86412.1 100.00% afis|EAW16875.1 100.00%

Bootstrap support for afum|EAL86412.1 as seed ortholog is 100%.  
Bootstrap support for afis|EAW16875.1 as seed ortholog is 100%.

---

Group of orthologs #4991. Best score 855 bits

Score difference with first non-orthologous sequence - *A. fumigatus*:855 *A. fischeri*:855

afum|EAL87551.1 100.00% afis|EAW18188.1 100.00%

Bootstrap support for afum|EAL87551.1 as seed ortholog is 100%.

Bootstrap support for afis|EAW18188.1 as seed ortholog is 100%.

---

Group of orthologs #4992. Best score 855 bits

Score difference with first non-orthologous sequence - *A. fumigatus*:855 *A. fischeri*:855

afum|EAL86818.1 100.00% afis|EAW19709.1 100.00%

Bootstrap support for afum|EAL86818.1 as seed ortholog is 100%.

Bootstrap support for afis|EAW19709.1 as seed ortholog is 100%.

---

Group of orthologs #4993. Best score 855 bits

Score difference with first non-orthologous sequence - *A. fumigatus*:855 *A. fischeri*:855

afum|EAL87323.1 100.00% afis|EAW23895.1 100.00%

Bootstrap support for afum|EAL87323.1 as seed ortholog is 100%.

Bootstrap support for afis|EAW23895.1 as seed ortholog is 100%.

---

Group of orthologs #4994. Best score 855 bits

Score difference with first non-orthologous sequence - *A. fumigatus*:855 *A. fischeri*:855

afum|EAL93433.1 100.00% afis|EAW18710.1 100.00%

Bootstrap support for afum|EAL93433.1 as seed ortholog is 100%.

Bootstrap support for afis|EAW18710.1 as seed ortholog is 100%.

---

Group of orthologs #4995. Best score 855 bits

Score difference with first non-orthologous sequence - *A. fumigatus*:855 *A. fischeri*:316

afum|EAL93788.1 100.00% afis|EAW19059.1 100.00%

Bootstrap support for afum|EAL93788.1 as seed ortholog is 100%.

Bootstrap support for afis|EAW19059.1 as seed ortholog is 100%.

---

Group of orthologs #4996. Best score 855 bits

Score difference with first non-orthologous sequence - *A. fumigatus*:855 *A. fischeri*:582

afum|EAL92125.1 100.00% afis|EAW21104.1 100.00%

Bootstrap support for afum|EAL92125.1 as seed ortholog is 100%.

Bootstrap support for afis|EAW21104.1 as seed ortholog is 100%.

---

Group of orthologs #4997. Best score 855 bits

Score difference with first non-orthologous sequence - *A. fumigatus*:403 *A. fischeri*:855

afum|EAL90484.1 100.00% afis|EAW22708.1 100.00%

Bootstrap support for afum|EAL90484.1 as seed ortholog is 100%.

Bootstrap support for afis|EAW22708.1 as seed ortholog is 100%.

---

Group of orthologs #4998. Best score 855 bits

Score difference with first non-orthologous sequence - *A. fumigatus*:855 *A. fischeri*:855

afum|EAL91984.1 100.00% afis|EAW24128.1 100.00%

Bootstrap support for afum|EAL91984.1 as seed ortholog is 100%.

Bootstrap support for afis|EAW24128.1 as seed ortholog is 100%.

---

Group of orthologs #4999. Best score 854 bits

Score difference with first non-orthologous sequence - *A. fumigatus*:854 *A. fischeri*:854

afum|EAL88537.1 100.00% afis|EAW15902.1 100.00%

Bootstrap support for afum|EAL88537.1 as seed ortholog is 100%.

Bootstrap support for afis|EAW15902.1 as seed ortholog is 100%.

---

Group of orthologs #5000. Best score 854 bits

Score difference with first non-orthologous sequence - *A. fumigatus*:854 *A. fischeri*:854  
afum|EAL84416.2 100.00% afis|EAW20680.1 100.00%

Bootstrap support for afum|EAL84416.2 as seed ortholog is 100%.

Bootstrap support for afis|EAW20680.1 as seed ortholog is 100%.

---

Group of orthologs #5001. Best score 854 bits

Score difference with first non-orthologous sequence - *A. fumigatus*:764 *A. fischeri*:854  
afum|EAL90535.1 100.00% afis|EAW22657.1 100.00%

Bootstrap support for afum|EAL90535.1 as seed ortholog is 100%.

Bootstrap support for afis|EAW22657.1 as seed ortholog is 100%.

---

Group of orthologs #5002. Best score 853 bits

Score difference with first non-orthologous sequence - *A. fumigatus*:853 *A. fischeri*:853  
afum|EAL85589.1 100.00% afis|EAW15759.1 100.00%

Bootstrap support for afum|EAL85589.1 as seed ortholog is 100%.

Bootstrap support for afis|EAW15759.1 as seed ortholog is 100%.

---

Group of orthologs #5003. Best score 853 bits

Score difference with first non-orthologous sequence - *A. fumigatus*:853 *A. fischeri*:537  
afum|EAL85344.1 100.00% afis|EAW20227.1 100.00%

Bootstrap support for afum|EAL85344.1 as seed ortholog is 100%.

Bootstrap support for afis|EAW20227.1 as seed ortholog is 100%.

---

Group of orthologs #5004. Best score 853 bits

Score difference with first non-orthologous sequence - *A. fumigatus*:853 *A. fischeri*:853  
afum|EAL91651.1 100.00% afis|EAW17842.1 100.00%

Bootstrap support for afum|EAL91651.1 as seed ortholog is 100%.

Bootstrap support for afis|EAW17842.1 as seed ortholog is 100%.

---

Group of orthologs #5005. Best score 853 bits

Score difference with first non-orthologous sequence - *A. fumigatus*:853 *A. fischeri*:853  
afum|EAL87226.1 100.00% afis|EAW23792.1 100.00%

Bootstrap support for afum|EAL87226.1 as seed ortholog is 100%.

Bootstrap support for afis|EAW23792.1 as seed ortholog is 100%.

---

Group of orthologs #5006. Best score 852 bits

Score difference with first non-orthologous sequence - *A. fumigatus*:852 *A. fischeri*:852  
afum|EAL88187.1 100.00% afis|EAW23292.1 100.00%

Bootstrap support for afum|EAL88187.1 as seed ortholog is 100%.

Bootstrap support for afis|EAW23292.1 as seed ortholog is 100%.

---

Group of orthologs #5007. Best score 852 bits

Score difference with first non-orthologous sequence - *A. fumigatus*:852 *A. fischeri*:852  
afum|EAL93676.1 100.00% afis|EAW18943.1 100.00%

Bootstrap support for afum|EAL93676.1 as seed ortholog is 100%.

Bootstrap support for afis|EAW18943.1 as seed ortholog is 100%.

---

Group of orthologs #5008. Best score 852 bits

Score difference with first non-orthologous sequence - *A. fumigatus*:852 *A. fischeri*:852  
afum|EAL92155.1 100.00% afis|EAW21136.1 100.00%

Bootstrap support for afum|EAL92155.1 as seed ortholog is 100%.

Bootstrap support for afis|EAW21136.1 as seed ortholog is 100%.

---

Group of orthologs #5009. Best score 852 bits

Score difference with first non-orthologous sequence - *A. fumigatus*:852 *A. fischeri*:687  
afum|EAL89341.2 100.00% afis|EAW24699.1 100.00%  
Bootstrap support for afum|EAL89341.2 as seed ortholog is 100%.  
Bootstrap support for afis|EAW24699.1 as seed ortholog is 100%.

---

Group of orthologs #5010. Best score 852 bits

Score difference with first non-orthologous sequence - *A. fumigatus*:852 *A. fischeri*:852  
afum|EAL93002.1 100.00% afis|EAW21986.1 100.00%  
Bootstrap support for afum|EAL93002.1 as seed ortholog is 100%.  
Bootstrap support for afis|EAW21986.1 as seed ortholog is 100%.

---

Group of orthologs #5011. Best score 851 bits

Score difference with first non-orthologous sequence - *A. fumigatus*:851 *A. fischeri*:736  
afum|EAL87831.1 100.00% afis|EAW23629.1 100.00%  
Bootstrap support for afum|EAL87831.1 as seed ortholog is 100%.  
Bootstrap support for afis|EAW23629.1 as seed ortholog is 100%.

---

Group of orthologs #5012. Best score 851 bits

Score difference with first non-orthologous sequence - *A. fumigatus*:851 *A. fischeri*:851  
afum|EAL89950.1 100.00% afis|EAW25287.1 100.00%  
Bootstrap support for afum|EAL89950.1 as seed ortholog is 100%.  
Bootstrap support for afis|EAW25287.1 as seed ortholog is 100%.

---

Group of orthologs #5013. Best score 850 bits

Score difference with first non-orthologous sequence - *A. fumigatus*:850 *A. fischeri*:850  
afum|EAL86508.1 100.00% afis|EAW16981.1 100.00%  
Bootstrap support for afum|EAL86508.1 as seed ortholog is 100%.  
Bootstrap support for afis|EAW16981.1 as seed ortholog is 100%.

---

Group of orthologs #5014. Best score 850 bits

Score difference with first non-orthologous sequence - *A. fumigatus*:850 *A. fischeri*:850  
afum|EAL84910.1 100.00% afis|EAW20008.1 100.00%  
Bootstrap support for afum|EAL84910.1 as seed ortholog is 100%.  
Bootstrap support for afis|EAW20008.1 as seed ortholog is 100%.

---

Group of orthologs #5015. Best score 850 bits

Score difference with first non-orthologous sequence - *A. fumigatus*:748 *A. fischeri*:850  
afum|EAL90569.1 100.00% afis|EAW22627.1 100.00%  
Bootstrap support for afum|EAL90569.1 as seed ortholog is 100%.  
Bootstrap support for afis|EAW22627.1 as seed ortholog is 100%.

---

Group of orthologs #5016. Best score 850 bits

Score difference with first non-orthologous sequence - *A. fumigatus*:850 *A. fischeri*:850  
afum|EAL92423.1 100.00% afis|EAW21409.1 100.00%  
Bootstrap support for afum|EAL92423.1 as seed ortholog is 100%.  
Bootstrap support for afis|EAW21409.1 as seed ortholog is 100%.

---

Group of orthologs #5017. Best score 850 bits

Score difference with first non-orthologous sequence - *A. fumigatus*:850 *A. fischeri*:850  
afum|EAL89525.1 100.00% afis|EAW24875.1 100.00%  
Bootstrap support for afum|EAL89525.1 as seed ortholog is 100%.  
Bootstrap support for afis|EAW24875.1 as seed ortholog is 100%.

---

Group of orthologs #5018. Best score 850 bits

Score difference with first non-orthologous sequence - *A. fumigatus*:850 *A. fischeri*:850  
afum|EAL89529.1 100.00% afis|EAW24879.1 100.00%



Bootstrap support for afum|EAL89529.1 as seed ortholog is 100%.  
Bootstrap support for afis|EAW24879.1 as seed ortholog is 100%.

---

Group of orthologs #5019. Best score 850 bits

Score difference with first non-orthologous sequence - *A. fumigatus*:850 *A. fischeri*:850

afum|EAL89587.1 100.00% afis|EAW24931.1 100.00%

Bootstrap support for afum|EAL89587.1 as seed ortholog is 100%.

Bootstrap support for afis|EAW24931.1 as seed ortholog is 100%.

---

Group of orthologs #5020. Best score 850 bits

Score difference with first non-orthologous sequence - *A. fumigatus*:850 *A. fischeri*:850

afum|EAL90059.1 100.00% afis|EAW25400.1 100.00%

Bootstrap support for afum|EAL90059.1 as seed ortholog is 100%.

Bootstrap support for afis|EAW25400.1 as seed ortholog is 100%.

---

Group of orthologs #5021. Best score 849 bits

Score difference with first non-orthologous sequence - *A. fumigatus*:768 *A. fischeri*:793

afum|EAL84225.1 100.00% afis|EAW15419.1 100.00%

Bootstrap support for afum|EAL84225.1 as seed ortholog is 100%.

Bootstrap support for afis|EAW15419.1 as seed ortholog is 100%.

---

Group of orthologs #5022. Best score 849 bits

Score difference with first non-orthologous sequence - *A. fumigatus*:782 *A. fischeri*:721

afum|EAL86859.2 100.00% afis|EAW19663.1 100.00%

Bootstrap support for afum|EAL86859.2 as seed ortholog is 100%.

Bootstrap support for afis|EAW19663.1 as seed ortholog is 100%.

---

Group of orthologs #5023. Best score 849 bits

Score difference with first non-orthologous sequence - *A. fumigatus*:849 *A. fischeri*:849

afum|EAL92573.1 100.00% afis|EAW21553.1 100.00%

Bootstrap support for afum|EAL92573.1 as seed ortholog is 100%.

Bootstrap support for afis|EAW21553.1 as seed ortholog is 100%.

---

Group of orthologs #5024. Best score 849 bits

Score difference with first non-orthologous sequence - *A. fumigatus*:849 *A. fischeri*:849

afum|EAL91918.1 100.00% afis|EAW24063.1 100.00%

Bootstrap support for afum|EAL91918.1 as seed ortholog is 100%.

Bootstrap support for afis|EAW24063.1 as seed ortholog is 100%.

---

Group of orthologs #5025. Best score 848 bits

Score difference with first non-orthologous sequence - *A. fumigatus*:848 *A. fischeri*:848

afum|EAL91118.1 100.00% afis|EAW20299.1 100.00%

afum|EAL90938.1 36.36%

Bootstrap support for afum|EAL91118.1 as seed ortholog is 100%.

Bootstrap support for afis|EAW20299.1 as seed ortholog is 100%.

---

Group of orthologs #5026. Best score 848 bits

Score difference with first non-orthologous sequence - *A. fumigatus*:848 *A. fischeri*:669

afum|EAL86599.1 100.00% afis|EAW17162.1 100.00%

Bootstrap support for afum|EAL86599.1 as seed ortholog is 100%.

Bootstrap support for afis|EAW17162.1 as seed ortholog is 100%.

---

Group of orthologs #5027. Best score 848 bits

Score difference with first non-orthologous sequence - *A. fumigatus*:848 *A. fischeri*:848

afum|EAL89255.1 100.00% afis|EAW16651.1 100.00%

Bootstrap support for afum|EAL89255.1 as seed ortholog is 100%.

Bootstrap support for afis|EAW16651.1 as seed ortholog is 100%.

---

Group of orthologs #5028. Best score 848 bits

Score difference with first non-orthologous sequence - *A. fumigatus*:848 *A. fischeri*:801

afum|EAL84823.1 100.00% afis|EAW20805.1 100.00%

Bootstrap support for afum|EAL84823.1 as seed ortholog is 100%.

Bootstrap support for afis|EAW20805.1 as seed ortholog is 100%.

---

Group of orthologs #5029. Best score 848 bits

Score difference with first non-orthologous sequence - *A. fumigatus*:848 *A. fischeri*:848

afum|EAL87599.1 100.00% afis|EAW18231.1 100.00%

Bootstrap support for afum|EAL87599.1 as seed ortholog is 100%.

Bootstrap support for afis|EAW18231.1 as seed ortholog is 100%.

---

Group of orthologs #5030. Best score 848 bits

Score difference with first non-orthologous sequence - *A. fumigatus*:848 *A. fischeri*:848

afum|EAL85987.1 100.00% afis|EAW24318.1 100.00%

Bootstrap support for afum|EAL85987.1 as seed ortholog is 100%.

Bootstrap support for afis|EAW24318.1 as seed ortholog is 100%.

---

Group of orthologs #5031. Best score 848 bits

Score difference with first non-orthologous sequence - *A. fumigatus*:848 *A. fischeri*:848

afum|EAL93211.1 100.00% afis|EAW18516.1 100.00%

Bootstrap support for afum|EAL93211.1 as seed ortholog is 100%.

Bootstrap support for afis|EAW18516.1 as seed ortholog is 100%.

---

Group of orthologs #5032. Best score 848 bits

Score difference with first non-orthologous sequence - *A. fumigatus*:848 *A. fischeri*:848

afum|EAL88330.2 100.00% afis|EAW23151.1 100.00%

Bootstrap support for afum|EAL88330.2 as seed ortholog is 100%.

Bootstrap support for afis|EAW23151.1 as seed ortholog is 100%.

---

Group of orthologs #5033. Best score 848 bits

Score difference with first non-orthologous sequence - *A. fumigatus*:848 *A. fischeri*:848

afum|EAL89472.1 100.00% afis|EAW24827.1 100.00%

Bootstrap support for afum|EAL89472.1 as seed ortholog is 100%.

Bootstrap support for afis|EAW24827.1 as seed ortholog is 100%.

---

Group of orthologs #5034. Best score 848 bits

Score difference with first non-orthologous sequence - *A. fumigatus*:848 *A. fischeri*:848

afum|EAL90101.1 100.00% afis|EAW25443.1 100.00%

Bootstrap support for afum|EAL90101.1 as seed ortholog is 100%.

Bootstrap support for afis|EAW25443.1 as seed ortholog is 100%.

---

Group of orthologs #5035. Best score 847 bits

Score difference with first non-orthologous sequence - *A. fumigatus*:847 *A. fischeri*:847

afum|EAL86790.1 100.00% afis|EAW19739.1 100.00%

Bootstrap support for afum|EAL86790.1 as seed ortholog is 100%.

Bootstrap support for afis|EAW19739.1 as seed ortholog is 100%.

---

Group of orthologs #5036. Best score 847 bits

Score difference with first non-orthologous sequence - *A. fumigatus*:847 *A. fischeri*:682

afum|EAL91224.1 100.00% afis|EAW17388.1 100.00%

Bootstrap support for afum|EAL91224.1 as seed ortholog is 100%.

Bootstrap support for afis|EAW17388.1 as seed ortholog is 100%.

---

Group of orthologs #5037. Best score 847 bits

Score difference with first non-orthologous sequence - *A. fumigatus*:847 *A. fischeri*:847

afum|EAL90302.1 100.00% afis|EAW22896.1 100.00%

Bootstrap support for afum|EAL90302.1 as seed ortholog is 100%.

Bootstrap support for afis|EAW22896.1 as seed ortholog is 100%.

---

Group of orthologs #5038. Best score 847 bits

Score difference with first non-orthologous sequence - *A. fumigatus*:847 *A. fischeri*:847

afum|EAL94069.1 100.00% afis|EAW19349.1 100.00%

Bootstrap support for afum|EAL94069.1 as seed ortholog is 100%.

Bootstrap support for afis|EAW19349.1 as seed ortholog is 100%.

---

Group of orthologs #5039. Best score 847 bits

Score difference with first non-orthologous sequence - *A. fumigatus*:847 *A. fischeri*:847

afum|EAL89998.1 100.00% afis|EAW25335.1 100.00%

Bootstrap support for afum|EAL89998.1 as seed ortholog is 100%.

Bootstrap support for afis|EAW25335.1 as seed ortholog is 100%.

---

Group of orthologs #5040. Best score 847 bits

Score difference with first non-orthologous sequence - *A. fumigatus*:847 *A. fischeri*:847

afum|EAL90007.1 100.00% afis|EAW25344.1 100.00%

Bootstrap support for afum|EAL90007.1 as seed ortholog is 100%.

Bootstrap support for afis|EAW25344.1 as seed ortholog is 100%.

---

Group of orthologs #5041. Best score 846 bits

Score difference with first non-orthologous sequence - *A. fumigatus*:846 *A. fischeri*:846

afum|EAL88837.1 100.00% afis|EAW16210.1 100.00%

Bootstrap support for afum|EAL88837.1 as seed ortholog is 100%.

Bootstrap support for afis|EAW16210.1 as seed ortholog is 100%.

---

Group of orthologs #5042. Best score 846 bits

Score difference with first non-orthologous sequence - *A. fumigatus*:846 *A. fischeri*:661

afum|EAL88874.1 100.00% afis|EAW16246.1 100.00%

Bootstrap support for afum|EAL88874.1 as seed ortholog is 100%.

Bootstrap support for afis|EAW16246.1 as seed ortholog is 100%.

---

Group of orthologs #5043. Best score 846 bits

Score difference with first non-orthologous sequence - *A. fumigatus*:846 *A. fischeri*:846

afum|EAL89078.1 100.00% afis|EAW16484.1 100.00%

Bootstrap support for afum|EAL89078.1 as seed ortholog is 100%.

Bootstrap support for afis|EAW16484.1 as seed ortholog is 100%.

---

Group of orthologs #5044. Best score 846 bits

Score difference with first non-orthologous sequence - *A. fumigatus*:846 *A. fischeri*:846

afum|EAL91692.1 100.00% afis|EAW17884.1 100.00%

Bootstrap support for afum|EAL91692.1 as seed ortholog is 100%.

Bootstrap support for afis|EAW17884.1 as seed ortholog is 100%.

---

Group of orthologs #5045. Best score 846 bits

Score difference with first non-orthologous sequence - *A. fumigatus*:846 *A. fischeri*:846

afum|EAL93893.1 100.00% afis|EAW19163.1 100.00%

Bootstrap support for afum|EAL93893.1 as seed ortholog is 100%.

Bootstrap support for afis|EAW19163.1 as seed ortholog is 100%.

---

Group of orthologs #5046. Best score 846 bits

Score difference with first non-orthologous sequence - *A. fumigatus*:846 *A. fischeri*:332

|                 |         |                 |         |
|-----------------|---------|-----------------|---------|
| afum EAL93904.1 | 100.00% | afis EAW19174.1 | 100.00% |
|-----------------|---------|-----------------|---------|

Bootstrap support for afum|EAL93904.1 as seed ortholog is 100%.

Bootstrap support for afis|EAW19174.1 as seed ortholog is 100%.

---

Group of orthologs #5047. Best score 846 bits

Score difference with first non-orthologous sequence - *A. fumigatus*:846 *A. fischeri*:846

|                 |         |                 |         |
|-----------------|---------|-----------------|---------|
| afum EAL90849.1 | 100.00% | afis EAW22342.1 | 100.00% |
|-----------------|---------|-----------------|---------|

Bootstrap support for afum|EAL90849.1 as seed ortholog is 100%.

Bootstrap support for afis|EAW22342.1 as seed ortholog is 100%.

---

Group of orthologs #5048. Best score 845 bits

Score difference with first non-orthologous sequence - *A. fumigatus*:845 *A. fischeri*:845

|                 |         |                 |         |
|-----------------|---------|-----------------|---------|
| afum EAL88564.1 | 100.00% | afis EAW15928.1 | 100.00% |
|-----------------|---------|-----------------|---------|

Bootstrap support for afum|EAL88564.1 as seed ortholog is 100%.

Bootstrap support for afis|EAW15928.1 as seed ortholog is 100%.

---

Group of orthologs #5049. Best score 845 bits

Score difference with first non-orthologous sequence - *A. fumigatus*:845 *A. fischeri*:845

|                 |         |                 |         |
|-----------------|---------|-----------------|---------|
| afum EAL88919.1 | 100.00% | afis EAW16297.1 | 100.00% |
|-----------------|---------|-----------------|---------|

Bootstrap support for afum|EAL88919.1 as seed ortholog is 100%.

Bootstrap support for afis|EAW16297.1 as seed ortholog is 100%.

---

Group of orthologs #5050. Best score 845 bits

Score difference with first non-orthologous sequence - *A. fumigatus*:589 *A. fischeri*:768

|                 |         |                 |         |
|-----------------|---------|-----------------|---------|
| afum EAL85338.1 | 100.00% | afis EAW20223.1 | 100.00% |
|-----------------|---------|-----------------|---------|

Bootstrap support for afum|EAL85338.1 as seed ortholog is 100%.

Bootstrap support for afis|EAW20223.1 as seed ortholog is 100%.

---

Group of orthologs #5051. Best score 845 bits

Score difference with first non-orthologous sequence - *A. fumigatus*:789 *A. fischeri*:723

|                 |         |                 |         |
|-----------------|---------|-----------------|---------|
| afum EAL91244.2 | 100.00% | afis EAW17410.1 | 100.00% |
|-----------------|---------|-----------------|---------|

Bootstrap support for afum|EAL91244.2 as seed ortholog is 100%.

Bootstrap support for afis|EAW17410.1 as seed ortholog is 100%.

---

Group of orthologs #5052. Best score 845 bits

Score difference with first non-orthologous sequence - *A. fumigatus*:845 *A. fischeri*:694

|                 |         |                 |         |
|-----------------|---------|-----------------|---------|
| afum EAL91689.2 | 100.00% | afis EAW17881.1 | 100.00% |
|-----------------|---------|-----------------|---------|

Bootstrap support for afum|EAL91689.2 as seed ortholog is 100%.

Bootstrap support for afis|EAW17881.1 as seed ortholog is 100%.

---

Group of orthologs #5053. Best score 845 bits

Score difference with first non-orthologous sequence - *A. fumigatus*:845 *A. fischeri*:845

|                 |         |                 |         |
|-----------------|---------|-----------------|---------|
| afum EAL88264.1 | 100.00% | afis EAW23220.1 | 100.00% |
|-----------------|---------|-----------------|---------|

Bootstrap support for afum|EAL88264.1 as seed ortholog is 100%.

Bootstrap support for afis|EAW23220.1 as seed ortholog is 100%.

---

Group of orthologs #5054. Best score 845 bits

Score difference with first non-orthologous sequence - *A. fumigatus*:845 *A. fischeri*:466

|                 |         |                 |         |
|-----------------|---------|-----------------|---------|
| afum EAL90588.1 | 100.00% | afis EAW22610.1 | 100.00% |
|-----------------|---------|-----------------|---------|

Bootstrap support for afum|EAL90588.1 as seed ortholog is 100%.

Bootstrap support for afis|EAW22610.1 as seed ortholog is 100%.

---

Group of orthologs #5055. Best score 845 bits

Score difference with first non-orthologous sequence - *A. fumigatus*:845 *A. fischeri*:845

|                 |         |                 |         |
|-----------------|---------|-----------------|---------|
| afum EAL92362.1 | 100.00% | afis EAW21345.1 | 100.00% |
|-----------------|---------|-----------------|---------|

Bootstrap support for afum|EAL92362.1 as seed ortholog is 100%.

Bootstrap support for afis|EAW21345.1 as seed ortholog is 100%.

---

Group of orthologs #5056. Best score 845 bits

Score difference with first non-orthologous sequence - *A. fumigatus*:845 *A. fischeri*:845

afum|EAL89660.1 100.00% afis|EAW25034.1 100.00%

Bootstrap support for afum|EAL89660.1 as seed ortholog is 100%.

Bootstrap support for afis|EAW25034.1 as seed ortholog is 100%.

---

Group of orthologs #5057. Best score 844 bits

Score difference with first non-orthologous sequence - *A. fumigatus*:844 *A. fischeri*:844

afum|EAL86326.1 100.00% afis|EAW16754.1 100.00%

Bootstrap support for afum|EAL86326.1 as seed ortholog is 100%.

Bootstrap support for afis|EAW16754.1 as seed ortholog is 100%.

---

Group of orthologs #5058. Best score 844 bits

Score difference with first non-orthologous sequence - *A. fumigatus*:844 *A. fischeri*:844

afum|EAL86014.1 100.00% afis|EAW24343.1 100.00%

Bootstrap support for afum|EAL86014.1 as seed ortholog is 100%.

Bootstrap support for afis|EAW24343.1 as seed ortholog is 100%.

---

Group of orthologs #5059. Best score 844 bits

Score difference with first non-orthologous sequence - *A. fumigatus*:844 *A. fischeri*:844

afum|EAL88374.1 100.00% afis|EAW23105.1 100.00%

Bootstrap support for afum|EAL88374.1 as seed ortholog is 100%.

Bootstrap support for afis|EAW23105.1 as seed ortholog is 100%.

---

Group of orthologs #5060. Best score 844 bits

Score difference with first non-orthologous sequence - *A. fumigatus*:844 *A. fischeri*:844

afum|EAL93861.1 100.00% afis|EAW19129.1 100.00%

Bootstrap support for afum|EAL93861.1 as seed ortholog is 100%.

Bootstrap support for afis|EAW19129.1 as seed ortholog is 100%.

---

Group of orthologs #5061. Best score 844 bits

Score difference with first non-orthologous sequence - *A. fumigatus*:844 *A. fischeri*:779

afum|EAL90485.1 100.00% afis|EAW22707.1 100.00%

Bootstrap support for afum|EAL90485.1 as seed ortholog is 100%.

Bootstrap support for afis|EAW22707.1 as seed ortholog is 100%.

---

Group of orthologs #5062. Best score 843 bits

Score difference with first non-orthologous sequence - *A. fumigatus*:843 *A. fischeri*:843

afum|EAL91386.1 100.00% afis|EAW17572.1 100.00%

Bootstrap support for afum|EAL91386.1 as seed ortholog is 100%.

Bootstrap support for afis|EAW17572.1 as seed ortholog is 100%.

---

Group of orthologs #5063. Best score 843 bits

Score difference with first non-orthologous sequence - *A. fumigatus*:800 *A. fischeri*:678

afum|EAL93102.1 100.00% afis|EAW18418.1 100.00%

Bootstrap support for afum|EAL93102.1 as seed ortholog is 100%.

Bootstrap support for afis|EAW18418.1 as seed ortholog is 100%.

---

Group of orthologs #5064. Best score 843 bits

Score difference with first non-orthologous sequence - *A. fumigatus*:843 *A. fischeri*:746

afum|EAL93280.1 100.00% afis|EAW18577.1 100.00%

Bootstrap support for afum|EAL93280.1 as seed ortholog is 100%.

Bootstrap support for afis|EAW18577.1 as seed ortholog is 100%.

---

Group of orthologs #5065. Best score 843 bits

Score difference with first non-orthologous sequence - *A. fumigatus*:843 *A. fischeri*:843

afum|EAL90947.1 100.00% afis|EAW22246.1 100.00%

Bootstrap support for afum|EAL90947.1 as seed ortholog is 100%.

Bootstrap support for afis|EAW22246.1 as seed ortholog is 100%.

---

Group of orthologs #5066. Best score 842 bits

Score difference with first non-orthologous sequence - *A. fumigatus*:842 *A. fischeri*:842

afum|EAL85566.1 100.00% afis|EAW15784.1 100.00%

Bootstrap support for afum|EAL85566.1 as seed ortholog is 100%.

Bootstrap support for afis|EAW15784.1 as seed ortholog is 100%.

---

Group of orthologs #5067. Best score 842 bits

Score difference with first non-orthologous sequence - *A. fumigatus*:842 *A. fischeri*:842

afum|EAL88924.1 100.00% afis|EAW16302.1 100.00%

Bootstrap support for afum|EAL88924.1 as seed ortholog is 100%.

Bootstrap support for afis|EAW16302.1 as seed ortholog is 100%.

---

Group of orthologs #5068. Best score 842 bits

Score difference with first non-orthologous sequence - *A. fumigatus*:842 *A. fischeri*:842

afum|EAL84574.1 100.00% afis|EAW20480.1 100.00%

Bootstrap support for afum|EAL84574.1 as seed ortholog is 100%.

Bootstrap support for afis|EAW20480.1 as seed ortholog is 100%.

---

Group of orthologs #5069. Best score 842 bits

Score difference with first non-orthologous sequence - *A. fumigatus*:842 *A. fischeri*:842

afum|EAL91339.2 100.00% afis|EAW17524.1 100.00%

Bootstrap support for afum|EAL91339.2 as seed ortholog is 100%.

Bootstrap support for afis|EAW17524.1 as seed ortholog is 100%.

---

Group of orthologs #5070. Best score 842 bits

Score difference with first non-orthologous sequence - *A. fumigatus*:842 *A. fischeri*:842

afum|EAL87399.1 100.00% afis|EAW23969.1 100.00%

Bootstrap support for afum|EAL87399.1 as seed ortholog is 100%.

Bootstrap support for afis|EAW23969.1 as seed ortholog is 100%.

---

Group of orthologs #5071. Best score 842 bits

Score difference with first non-orthologous sequence - *A. fumigatus*:842 *A. fischeri*:842

afum|EAL88468.1 100.00% afis|EAW23013.1 100.00%

Bootstrap support for afum|EAL88468.1 as seed ortholog is 100%.

Bootstrap support for afis|EAW23013.1 as seed ortholog is 100%.

---

Group of orthologs #5072. Best score 842 bits

Score difference with first non-orthologous sequence - *A. fumigatus*:713 *A. fischeri*:716

afum|EAL88173.1 100.00% afis|EAW23304.1 100.00%

Bootstrap support for afum|EAL88173.1 as seed ortholog is 100%.

Bootstrap support for afis|EAW23304.1 as seed ortholog is 100%.

---

Group of orthologs #5073. Best score 842 bits

Score difference with first non-orthologous sequence - *A. fumigatus*:842 *A. fischeri*:842

afum|EAL88003.1 100.00% afis|EAW23463.1 100.00%

Bootstrap support for afum|EAL88003.1 as seed ortholog is 100%.

Bootstrap support for afis|EAW23463.1 as seed ortholog is 100%.

---

Group of orthologs #5074. Best score 842 bits

Score difference with first non-orthologous sequence - *A. fumigatus*:842 *A. fischeri*:842

|                 |         |                 |         |
|-----------------|---------|-----------------|---------|
| afum EAL89565.1 | 100.00% | afis EAW24911.1 | 100.00% |
|-----------------|---------|-----------------|---------|

Bootstrap support for afum|EAL89565.1 as seed ortholog is 100%.

Bootstrap support for afis|EAW24911.1 as seed ortholog is 100%.

---

Group of orthologs #5075. Best score 841 bits

Score difference with first non-orthologous sequence - *A. fumigatus*:841 *A. fischeri*:841

|                 |         |                 |         |
|-----------------|---------|-----------------|---------|
| afum EAL87280.1 | 100.00% | afis EAW23852.1 | 100.00% |
|-----------------|---------|-----------------|---------|

Bootstrap support for afum|EAL87280.1 as seed ortholog is 100%.

Bootstrap support for afis|EAW23852.1 as seed ortholog is 100%.

---

Group of orthologs #5076. Best score 841 bits

Score difference with first non-orthologous sequence - *A. fumigatus*:841 *A. fischeri*:841

|                 |         |                 |         |
|-----------------|---------|-----------------|---------|
| afum EAL93262.1 | 100.00% | afis EAW18561.1 | 100.00% |
|-----------------|---------|-----------------|---------|

Bootstrap support for afum|EAL93262.1 as seed ortholog is 100%.

Bootstrap support for afis|EAW18561.1 as seed ortholog is 100%.

---

Group of orthologs #5077. Best score 841 bits

Score difference with first non-orthologous sequence - *A. fumigatus*:841 *A. fischeri*:841

|                 |         |                 |         |
|-----------------|---------|-----------------|---------|
| afum EAL92124.1 | 100.00% | afis EAW21103.1 | 100.00% |
|-----------------|---------|-----------------|---------|

Bootstrap support for afum|EAL92124.1 as seed ortholog is 100%.

Bootstrap support for afis|EAW21103.1 as seed ortholog is 100%.

---

Group of orthologs #5078. Best score 841 bits

Score difference with first non-orthologous sequence - *A. fumigatus*:763 *A. fischeri*:744

|                 |         |                 |         |
|-----------------|---------|-----------------|---------|
| afum EAL90455.1 | 100.00% | afis EAW22740.1 | 100.00% |
|-----------------|---------|-----------------|---------|

Bootstrap support for afum|EAL90455.1 as seed ortholog is 100%.

Bootstrap support for afis|EAW22740.1 as seed ortholog is 100%.

---

Group of orthologs #5079. Best score 841 bits

Score difference with first non-orthologous sequence - *A. fumigatus*:841 *A. fischeri*:841

|                 |         |                 |         |
|-----------------|---------|-----------------|---------|
| afum EBA27458.1 | 100.00% | afis EAW21270.1 | 100.00% |
|-----------------|---------|-----------------|---------|

Bootstrap support for afum|EBA27458.1 as seed ortholog is 100%.

Bootstrap support for afis|EAW21270.1 as seed ortholog is 100%.

---

Group of orthologs #5080. Best score 840 bits

Score difference with first non-orthologous sequence - *A. fumigatus*:785 *A. fischeri*:751

|                 |         |                 |         |
|-----------------|---------|-----------------|---------|
| afum EAL91044.1 | 100.00% | afis EAW22146.1 | 100.00% |
|-----------------|---------|-----------------|---------|

Bootstrap support for afum|EAL91044.1 as seed ortholog is 100%.

Bootstrap support for afis|EAW22146.1 as seed ortholog is 100%.

---

Group of orthologs #5081. Best score 839 bits

Score difference with first non-orthologous sequence - *A. fumigatus*:839 *A. fischeri*:839

|                 |         |                 |         |
|-----------------|---------|-----------------|---------|
| afum EAL87058.1 | 100.00% | afis EAW19438.1 | 100.00% |
|-----------------|---------|-----------------|---------|

Bootstrap support for afum|EAL87058.1 as seed ortholog is 100%.

Bootstrap support for afis|EAW19438.1 as seed ortholog is 100%.

---

Group of orthologs #5082. Best score 839 bits

Score difference with first non-orthologous sequence - *A. fumigatus*:706 *A. fischeri*:716

|                 |         |                 |         |
|-----------------|---------|-----------------|---------|
| afum EAL85694.1 | 100.00% | afis EAW22085.1 | 100.00% |
|-----------------|---------|-----------------|---------|

Bootstrap support for afum|EAL85694.1 as seed ortholog is 100%.

Bootstrap support for afis|EAW22085.1 as seed ortholog is 100%.

---

Group of orthologs #5083. Best score 839 bits

Score difference with first non-orthologous sequence - *A. fumigatus*:839 *A. fischeri*:839

|                 |         |                 |         |
|-----------------|---------|-----------------|---------|
| afum EAL85899.2 | 100.00% | afis EAW24230.1 | 100.00% |
|-----------------|---------|-----------------|---------|

Bootstrap support for afum|EAL85899.2 as seed ortholog is 100%.

Bootstrap support for afis|EAW24230.1 as seed ortholog is 100%.

---

Group of orthologs #5084. Best score 839 bits

Score difference with first non-orthologous sequence - *A. fumigatus*:839 *A. fischeri*:839

|                 |         |                 |         |
|-----------------|---------|-----------------|---------|
| afum EAL91001.1 | 100.00% | afis EAW22190.1 | 100.00% |
|-----------------|---------|-----------------|---------|

Bootstrap support for afum|EAL91001.1 as seed ortholog is 100%.

Bootstrap support for afis|EAW22190.1 as seed ortholog is 100%.

---

Group of orthologs #5085. Best score 839 bits

Score difference with first non-orthologous sequence - *A. fumigatus*:839 *A. fischeri*:839

|                 |         |                 |         |
|-----------------|---------|-----------------|---------|
| afum EAL90369.1 | 100.00% | afis EAW22833.1 | 100.00% |
|-----------------|---------|-----------------|---------|

Bootstrap support for afum|EAL90369.1 as seed ortholog is 100%.

Bootstrap support for afis|EAW22833.1 as seed ortholog is 100%.

---

Group of orthologs #5086. Best score 839 bits

Score difference with first non-orthologous sequence - *A. fumigatus*:839 *A. fischeri*:839

|                 |         |                 |         |
|-----------------|---------|-----------------|---------|
| afum EAL92733.1 | 100.00% | afis EAW21699.1 | 100.00% |
|-----------------|---------|-----------------|---------|

Bootstrap support for afum|EAL92733.1 as seed ortholog is 100%.

Bootstrap support for afis|EAW21699.1 as seed ortholog is 100%.

---

Group of orthologs #5087. Best score 839 bits

Score difference with first non-orthologous sequence - *A. fumigatus*:839 *A. fischeri*:839

|                 |         |                 |         |
|-----------------|---------|-----------------|---------|
| afum EAL89678.1 | 100.00% | afis EAW25017.1 | 100.00% |
|-----------------|---------|-----------------|---------|

Bootstrap support for afum|EAL89678.1 as seed ortholog is 100%.

Bootstrap support for afis|EAW25017.1 as seed ortholog is 100%.

---

Group of orthologs #5088. Best score 838 bits

Score difference with first non-orthologous sequence - *A. fumigatus*:838 *A. fischeri*:838

|                 |         |                 |         |
|-----------------|---------|-----------------|---------|
| afum EAL88652.1 | 100.00% | afis EAW16023.1 | 100.00% |
|-----------------|---------|-----------------|---------|

Bootstrap support for afum|EAL88652.1 as seed ortholog is 100%.

Bootstrap support for afis|EAW16023.1 as seed ortholog is 100%.

---

Group of orthologs #5089. Best score 838 bits

Score difference with first non-orthologous sequence - *A. fumigatus*:775 *A. fischeri*:838

|                 |         |                 |         |
|-----------------|---------|-----------------|---------|
| afum EAL87019.1 | 100.00% | afis EAW19477.1 | 100.00% |
|-----------------|---------|-----------------|---------|

Bootstrap support for afum|EAL87019.1 as seed ortholog is 100%.

Bootstrap support for afis|EAW19477.1 as seed ortholog is 100%.

---

Group of orthologs #5090. Best score 838 bits

Score difference with first non-orthologous sequence - *A. fumigatus*:838 *A. fischeri*:538

|                 |         |                 |         |
|-----------------|---------|-----------------|---------|
| afum EAL86888.1 | 100.00% | afis EAW19634.1 | 100.00% |
|-----------------|---------|-----------------|---------|

Bootstrap support for afum|EAL86888.1 as seed ortholog is 100%.

Bootstrap support for afis|EAW19634.1 as seed ortholog is 100%.

---

Group of orthologs #5091. Best score 838 bits

Score difference with first non-orthologous sequence - *A. fumigatus*:838 *A. fischeri*:838

|                 |         |                 |         |
|-----------------|---------|-----------------|---------|
| afum EAL92090.1 | 100.00% | afis EAW21054.1 | 100.00% |
|-----------------|---------|-----------------|---------|

Bootstrap support for afum|EAL92090.1 as seed ortholog is 100%.

Bootstrap support for afis|EAW21054.1 as seed ortholog is 100%.

---

Group of orthologs #5092. Best score 838 bits

Score difference with first non-orthologous sequence - *A. fumigatus*:838 *A. fischeri*:838

|                 |         |                 |         |
|-----------------|---------|-----------------|---------|
| afum EAL90214.1 | 100.00% | afis EAW22985.1 | 100.00% |
|-----------------|---------|-----------------|---------|

Bootstrap support for afum|EAL90214.1 as seed ortholog is 100%.

Bootstrap support for afis|EAW22985.1 as seed ortholog is 100%.

---



Group of orthologs #5093. Best score 837 bits

Score difference with first non-orthologous sequence - *A. fumigatus*:837 *A. fischeri*:837

afum|EAL84889.1 100.00% afis|EAW20028.1 100.00%

Bootstrap support for afum|EAL84889.1 as seed ortholog is 100%.

Bootstrap support for afis|EAW20028.1 as seed ortholog is 100%.

---

Group of orthologs #5094. Best score 837 bits

Score difference with first non-orthologous sequence - *A. fumigatus*:837 *A. fischeri*:692

afum|EAL89248.1 100.00% afis|EAW16644.1 100.00%

Bootstrap support for afum|EAL89248.1 as seed ortholog is 100%.

Bootstrap support for afis|EAW16644.1 as seed ortholog is 100%.

---

Group of orthologs #5095. Best score 837 bits

Score difference with first non-orthologous sequence - *A. fumigatus*:584 *A. fischeri*:723

afum|EBA27444.1 100.00% afis|EAW18067.1 100.00%

Bootstrap support for afum|EBA27444.1 as seed ortholog is 100%.

Bootstrap support for afis|EAW18067.1 as seed ortholog is 100%.

---

Group of orthologs #5096. Best score 837 bits

Score difference with first non-orthologous sequence - *A. fumigatus*:837 *A. fischeri*:837

afum|EAL90326.1 100.00% afis|EAW22872.1 100.00%

Bootstrap support for afum|EAL90326.1 as seed ortholog is 100%.

Bootstrap support for afis|EAW22872.1 as seed ortholog is 100%.

---

Group of orthologs #5097. Best score 836 bits

Score difference with first non-orthologous sequence - *A. fumigatus*:672 *A. fischeri*:836

afum|EAL85536.1 100.00% afis|EAW15815.1 100.00%

Bootstrap support for afum|EAL85536.1 as seed ortholog is 100%.

Bootstrap support for afis|EAW15815.1 as seed ortholog is 100%.

---

Group of orthologs #5098. Best score 836 bits

Score difference with first non-orthologous sequence - *A. fumigatus*:836 *A. fischeri*:836

afum|EAL87047.1 100.00% afis|EAW19449.1 100.00%

Bootstrap support for afum|EAL87047.1 as seed ortholog is 100%.

Bootstrap support for afis|EAW19449.1 as seed ortholog is 100%.

---

Group of orthologs #5099. Best score 836 bits

Score difference with first non-orthologous sequence - *A. fumigatus*:523 *A. fischeri*:721

afum|EAL86869.1 100.00% afis|EAW19653.1 100.00%

Bootstrap support for afum|EAL86869.1 as seed ortholog is 100%.

Bootstrap support for afis|EAW19653.1 as seed ortholog is 100%.

---

Group of orthologs #5100. Best score 836 bits

Score difference with first non-orthologous sequence - *A. fumigatus*:836 *A. fischeri*:836

afum|EAL91439.1 100.00% afis|EAW17625.1 100.00%

Bootstrap support for afum|EAL91439.1 as seed ortholog is 100%.

Bootstrap support for afis|EAW17625.1 as seed ortholog is 100%.

---

Group of orthologs #5101. Best score 836 bits

Score difference with first non-orthologous sequence - *A. fumigatus*:836 *A. fischeri*:836

afum|EAL91536.1 100.00% afis|EAW17721.1 100.00%

Bootstrap support for afum|EAL91536.1 as seed ortholog is 100%.

Bootstrap support for afis|EAW17721.1 as seed ortholog is 100%.

---

Group of orthologs #5102. Best score 836 bits

Score difference with first non-orthologous sequence - *A. fumigatus*:836 *A. fischeri*:836

|                 |         |                 |         |
|-----------------|---------|-----------------|---------|
| afum EAL91884.1 | 100.00% | afis EAW18072.1 | 100.00% |
|-----------------|---------|-----------------|---------|

Bootstrap support for afum|EAL91884.1 as seed ortholog is 100%.

Bootstrap support for afis|EAW18072.1 as seed ortholog is 100%.

---

Group of orthologs #5103. Best score 836 bits

Score difference with first non-orthologous sequence - *A. fumigatus*:567 *A. fischeri*:558

|                 |         |                 |         |
|-----------------|---------|-----------------|---------|
| afum EAL87265.1 | 100.00% | afis EAW23834.1 | 100.00% |
|-----------------|---------|-----------------|---------|

Bootstrap support for afum|EAL87265.1 as seed ortholog is 100%.

Bootstrap support for afis|EAW23834.1 as seed ortholog is 100%.

---

Group of orthologs #5104. Best score 836 bits

Score difference with first non-orthologous sequence - *A. fumigatus*:836 *A. fischeri*:836

|                 |         |                 |         |
|-----------------|---------|-----------------|---------|
| afum EAL92065.1 | 100.00% | afis EAW21027.1 | 100.00% |
|-----------------|---------|-----------------|---------|

Bootstrap support for afum|EAL92065.1 as seed ortholog is 100%.

Bootstrap support for afis|EAW21027.1 as seed ortholog is 100%.

---

Group of orthologs #5105. Best score 836 bits

Score difference with first non-orthologous sequence - *A. fumigatus*:836 *A. fischeri*:742

|                 |         |                 |         |
|-----------------|---------|-----------------|---------|
| afum EAL90669.1 | 100.00% | afis EAW22525.1 | 100.00% |
|-----------------|---------|-----------------|---------|

Bootstrap support for afum|EAL90669.1 as seed ortholog is 100%.

Bootstrap support for afis|EAW22525.1 as seed ortholog is 100%.

---

Group of orthologs #5106. Best score 836 bits

Score difference with first non-orthologous sequence - *A. fumigatus*:836 *A. fischeri*:836

|                 |         |                 |         |
|-----------------|---------|-----------------|---------|
| afum EAL90605.1 | 100.00% | afis EAW22594.1 | 100.00% |
|-----------------|---------|-----------------|---------|

Bootstrap support for afum|EAL90605.1 as seed ortholog is 100%.

Bootstrap support for afis|EAW22594.1 as seed ortholog is 100%.

---

Group of orthologs #5107. Best score 836 bits

Score difference with first non-orthologous sequence - *A. fumigatus*:836 *A. fischeri*:836

|                 |         |                 |         |
|-----------------|---------|-----------------|---------|
| afum EAL92620.1 | 100.00% | afis EAW21601.1 | 100.00% |
|-----------------|---------|-----------------|---------|

Bootstrap support for afum|EAL92620.1 as seed ortholog is 100%.

Bootstrap support for afis|EAW21601.1 as seed ortholog is 100%.

---

Group of orthologs #5108. Best score 836 bits

Score difference with first non-orthologous sequence - *A. fumigatus*:836 *A. fischeri*:836

|                 |         |                 |         |
|-----------------|---------|-----------------|---------|
| afum EAL92946.1 | 100.00% | afis EAW21933.1 | 100.00% |
|-----------------|---------|-----------------|---------|

Bootstrap support for afum|EAL92946.1 as seed ortholog is 100%.

Bootstrap support for afis|EAW21933.1 as seed ortholog is 100%.

---

Group of orthologs #5109. Best score 836 bits

Score difference with first non-orthologous sequence - *A. fumigatus*:836 *A. fischeri*:836

|                 |         |                 |         |
|-----------------|---------|-----------------|---------|
| afum EAL89762.2 | 100.00% | afis EAW25092.1 | 100.00% |
|-----------------|---------|-----------------|---------|

Bootstrap support for afum|EAL89762.2 as seed ortholog is 100%.

Bootstrap support for afis|EAW25092.1 as seed ortholog is 100%.

---

Group of orthologs #5110. Best score 835 bits

Score difference with first non-orthologous sequence - *A. fumigatus*:667 *A. fischeri*:612

|                 |         |                 |         |
|-----------------|---------|-----------------|---------|
| afum EAL84996.2 | 100.00% | afis EAW19910.1 | 100.00% |
|-----------------|---------|-----------------|---------|

Bootstrap support for afum|EAL84996.2 as seed ortholog is 100%.

Bootstrap support for afis|EAW19910.1 as seed ortholog is 100%.

---

Group of orthologs #5111. Best score 835 bits

Score difference with first non-orthologous sequence - *A. fumigatus*:835 *A. fischeri*:835

|                 |         |                 |         |
|-----------------|---------|-----------------|---------|
| afum EAL88912.1 | 100.00% | afis EAW16290.1 | 100.00% |
|-----------------|---------|-----------------|---------|

Bootstrap support for afum|EAL88912.1 as seed ortholog is 100%.

Bootstrap support for afis|EAW16290.1 as seed ortholog is 100%.

---

Group of orthologs #5112. Best score 835 bits

Score difference with first non-orthologous sequence - *A. fumigatus*:835 *A. fischeri*:835

afum|EAL88997.1 100.00% afis|EAW16373.1 100.00%

Bootstrap support for afum|EAL88997.1 as seed ortholog is 100%.

Bootstrap support for afis|EAW16373.1 as seed ortholog is 100%.

---

Group of orthologs #5113. Best score 835 bits

Score difference with first non-orthologous sequence - *A. fumigatus*:835 *A. fischeri*:730

afum|EAL85315.1 100.00% afis|EAW20195.1 100.00%

Bootstrap support for afum|EAL85315.1 as seed ortholog is 100%.

Bootstrap support for afis|EAW20195.1 as seed ortholog is 100%.

---

Group of orthologs #5114. Best score 835 bits

Score difference with first non-orthologous sequence - *A. fumigatus*:835 *A. fischeri*:835

afum|EAL88393.1 100.00% afis|EAW23086.1 100.00%

Bootstrap support for afum|EAL88393.1 as seed ortholog is 100%.

Bootstrap support for afis|EAW23086.1 as seed ortholog is 100%.

---

Group of orthologs #5115. Best score 835 bits

Score difference with first non-orthologous sequence - *A. fumigatus*:835 *A. fischeri*:835

afum|EAL88267.1 100.00% afis|EAW23217.1 100.00%

Bootstrap support for afum|EAL88267.1 as seed ortholog is 100%.

Bootstrap support for afis|EAW23217.1 as seed ortholog is 100%.

---

Group of orthologs #5116. Best score 835 bits

Score difference with first non-orthologous sequence - *A. fumigatus*:835 *A. fischeri*:835

afum|EAL87970.1 100.00% afis|EAW23493.1 100.00%

Bootstrap support for afum|EAL87970.1 as seed ortholog is 100%.

Bootstrap support for afis|EAW23493.1 as seed ortholog is 100%.

---

Group of orthologs #5117. Best score 834 bits

Score difference with first non-orthologous sequence - *A. fumigatus*:834 *A. fischeri*:834

afum|EAL85534.1 100.00% afis|EAW15817.1 100.00%

Bootstrap support for afum|EAL85534.1 as seed ortholog is 100%.

Bootstrap support for afis|EAW15817.1 as seed ortholog is 100%.

---

Group of orthologs #5118. Best score 834 bits

Score difference with first non-orthologous sequence - *A. fumigatus*:834 *A. fischeri*:834

afum|EAL85202.1 100.00% afis|EAW20083.1 100.00%

Bootstrap support for afum|EAL85202.1 as seed ortholog is 100%.

Bootstrap support for afis|EAW20083.1 as seed ortholog is 100%.

---

Group of orthologs #5119. Best score 834 bits

Score difference with first non-orthologous sequence - *A. fumigatus*:834 *A. fischeri*:581

afum|EAL87195.1 100.00% afis|EAW23762.1 100.00%

Bootstrap support for afum|EAL87195.1 as seed ortholog is 100%.

Bootstrap support for afis|EAW23762.1 as seed ortholog is 100%.

---

Group of orthologs #5120. Best score 834 bits

Score difference with first non-orthologous sequence - *A. fumigatus*:834 *A. fischeri*:834

afum|EAL93062.1 100.00% afis|EAW18387.1 100.00%

Bootstrap support for afum|EAL93062.1 as seed ortholog is 100%.

Bootstrap support for afis|EAW18387.1 as seed ortholog is 100%.

---

Group of orthologs #5121. Best score 833 bits

Score difference with first non-orthologous sequence - *A. fumigatus*:710 *A. fischeri*:618

afum|EAL85908.1 100.00% afis|EAW24240.1 100.00%

Bootstrap support for afum|EAL85908.1 as seed ortholog is 100%.

Bootstrap support for afis|EAW24240.1 as seed ortholog is 100%.

---

Group of orthologs #5122. Best score 833 bits

Score difference with first non-orthologous sequence - *A. fumigatus*:833 *A. fischeri*:833

afum|EAL93055.1 100.00% afis|EAW18380.1 100.00%

Bootstrap support for afum|EAL93055.1 as seed ortholog is 100%.

Bootstrap support for afis|EAW18380.1 as seed ortholog is 100%.

---

Group of orthologs #5123. Best score 833 bits

Score difference with first non-orthologous sequence - *A. fumigatus*:833 *A. fischeri*:833

afum|EAL87933.1 100.00% afis|EAW23533.1 100.00%

Bootstrap support for afum|EAL87933.1 as seed ortholog is 100%.

Bootstrap support for afis|EAW23533.1 as seed ortholog is 100%.

---

Group of orthologs #5124. Best score 833 bits

Score difference with first non-orthologous sequence - *A. fumigatus*:833 *A. fischeri*:833

afum|EAL90885.1 100.00% afis|EAW22296.1 100.00%

Bootstrap support for afum|EAL90885.1 as seed ortholog is 100%.

Bootstrap support for afis|EAW22296.1 as seed ortholog is 100%.

---

Group of orthologs #5125. Best score 833 bits

Score difference with first non-orthologous sequence - *A. fumigatus*:833 *A. fischeri*:833

afum|EAL92671.1 100.00% afis|EAW21637.1 100.00%

Bootstrap support for afum|EAL92671.1 as seed ortholog is 100%.

Bootstrap support for afis|EAW21637.1 as seed ortholog is 100%.

---

Group of orthologs #5126. Best score 832 bits

Score difference with first non-orthologous sequence - *A. fumigatus*:832 *A. fischeri*:832

afum|EAL84591.1 100.00% afis|EAW20462.1 100.00%

Bootstrap support for afum|EAL84591.1 as seed ortholog is 100%.

Bootstrap support for afis|EAW20462.1 as seed ortholog is 100%.

---

Group of orthologs #5127. Best score 832 bits

Score difference with first non-orthologous sequence - *A. fumigatus*:832 *A. fischeri*:832

afum|EAL85318.1 100.00% afis|EAW20198.1 100.00%

Bootstrap support for afum|EAL85318.1 as seed ortholog is 100%.

Bootstrap support for afis|EAW20198.1 as seed ortholog is 100%.

---

Group of orthologs #5128. Best score 832 bits

Score difference with first non-orthologous sequence - *A. fumigatus*:645 *A. fischeri*:832

afum|EAL84849.1 100.00% afis|EAW20770.1 100.00%

Bootstrap support for afum|EAL84849.1 as seed ortholog is 100%.

Bootstrap support for afis|EAW20770.1 as seed ortholog is 100%.

---

Group of orthologs #5129. Best score 832 bits

Score difference with first non-orthologous sequence - *A. fumigatus*:832 *A. fischeri*:832

afum|EAL87044.1 100.00% afis|EAW19452.1 100.00%

Bootstrap support for afum|EAL87044.1 as seed ortholog is 100%.

Bootstrap support for afis|EAW19452.1 as seed ortholog is 100%.

---

Group of orthologs #5130. Best score 832 bits

Score difference with first non-orthologous sequence - *A. fumigatus*:832 *A. fischeri*:832

|                 |         |                 |         |
|-----------------|---------|-----------------|---------|
| afum EAL91283.1 | 100.00% | afis EAW17455.1 | 100.00% |
|-----------------|---------|-----------------|---------|

Bootstrap support for afum|EAL91283.1 as seed ortholog is 100%.

Bootstrap support for afis|EAW17455.1 as seed ortholog is 100%.

---

Group of orthologs #5131. Best score 832 bits

Score difference with first non-orthologous sequence - *A. fumigatus*:832 *A. fischeri*:832

|                 |         |                 |         |
|-----------------|---------|-----------------|---------|
| afum EAL86028.1 | 100.00% | afis EAW24358.1 | 100.00% |
|-----------------|---------|-----------------|---------|

Bootstrap support for afum|EAL86028.1 as seed ortholog is 100%.

Bootstrap support for afis|EAW24358.1 as seed ortholog is 100%.

---

Group of orthologs #5132. Best score 832 bits

Score difference with first non-orthologous sequence - *A. fumigatus*:832 *A. fischeri*:832

|                 |         |                 |         |
|-----------------|---------|-----------------|---------|
| afum EAL87877.1 | 100.00% | afis EAW23587.1 | 100.00% |
|-----------------|---------|-----------------|---------|

Bootstrap support for afum|EAL87877.1 as seed ortholog is 100%.

Bootstrap support for afis|EAW23587.1 as seed ortholog is 100%.

---

Group of orthologs #5133. Best score 832 bits

Score difference with first non-orthologous sequence - *A. fumigatus*:832 *A. fischeri*:471

|                 |         |                 |         |
|-----------------|---------|-----------------|---------|
| afum EAL93319.1 | 100.00% | afis EAW18609.1 | 100.00% |
|-----------------|---------|-----------------|---------|

Bootstrap support for afum|EAL93319.1 as seed ortholog is 100%.

Bootstrap support for afis|EAW18609.1 as seed ortholog is 100%.

---

Group of orthologs #5134. Best score 831 bits

Score difference with first non-orthologous sequence - *A. fumigatus*:831 *A. fischeri*:831

|                 |         |                 |         |
|-----------------|---------|-----------------|---------|
| afum EAL84571.1 | 100.00% | afis EAW20484.1 | 100.00% |
|-----------------|---------|-----------------|---------|

Bootstrap support for afum|EAL84571.1 as seed ortholog is 100%.

Bootstrap support for afis|EAW20484.1 as seed ortholog is 100%.

---

Group of orthologs #5135. Best score 831 bits

Score difference with first non-orthologous sequence - *A. fumigatus*:831 *A. fischeri*:831

|                 |         |                 |         |
|-----------------|---------|-----------------|---------|
| afum EAL85929.1 | 100.00% | afis EAW24261.1 | 100.00% |
|-----------------|---------|-----------------|---------|

Bootstrap support for afum|EAL85929.1 as seed ortholog is 100%.

Bootstrap support for afis|EAW24261.1 as seed ortholog is 100%.

---

Group of orthologs #5136. Best score 831 bits

Score difference with first non-orthologous sequence - *A. fumigatus*:831 *A. fischeri*:831

|                 |         |                 |         |
|-----------------|---------|-----------------|---------|
| afum EAL88402.1 | 100.00% | afis EAW23077.1 | 100.00% |
|-----------------|---------|-----------------|---------|

Bootstrap support for afum|EAL88402.1 as seed ortholog is 100%.

Bootstrap support for afis|EAW23077.1 as seed ortholog is 100%.

---

Group of orthologs #5137. Best score 831 bits

Score difference with first non-orthologous sequence - *A. fumigatus*:831 *A. fischeri*:831

|                 |         |                 |         |
|-----------------|---------|-----------------|---------|
| afum EAL93874.1 | 100.00% | afis EAW19143.1 | 100.00% |
|-----------------|---------|-----------------|---------|

Bootstrap support for afum|EAL93874.1 as seed ortholog is 100%.

Bootstrap support for afis|EAW19143.1 as seed ortholog is 100%.

---

Group of orthologs #5138. Best score 831 bits

Score difference with first non-orthologous sequence - *A. fumigatus*:831 *A. fischeri*:646

|                 |         |                 |         |
|-----------------|---------|-----------------|---------|
| afum EAL94040.1 | 100.00% | afis EAW19322.1 | 100.00% |
|-----------------|---------|-----------------|---------|

Bootstrap support for afum|EAL94040.1 as seed ortholog is 100%.

Bootstrap support for afis|EAW19322.1 as seed ortholog is 100%.

---

Group of orthologs #5139. Best score 831 bits

Score difference with first non-orthologous sequence - *A. fumigatus*:542 *A. fischeri*:697

|                 |         |                 |         |
|-----------------|---------|-----------------|---------|
| afum EBA27245.1 | 100.00% | afis EAW25746.1 | 100.00% |
|-----------------|---------|-----------------|---------|

Bootstrap support for afum|EBA27245.1 as seed ortholog is 100%.

Bootstrap support for afis|EAW25746.1 as seed ortholog is 100%.

---

Group of orthologs #5140. Best score 830 bits

Score difference with first non-orthologous sequence - *A. fumigatus*:830 *A. fischeri*:830

afum|EAL88605.1 100.00% afis|EAW15973.1 100.00%

Bootstrap support for afum|EAL88605.1 as seed ortholog is 100%.

Bootstrap support for afis|EAW15973.1 as seed ortholog is 100%.

---

Group of orthologs #5141. Best score 830 bits

Score difference with first non-orthologous sequence - *A. fumigatus*:830 *A. fischeri*:830

afum|EAL88757.1 100.00% afis|EAW16127.1 100.00%

Bootstrap support for afum|EAL88757.1 as seed ortholog is 100%.

Bootstrap support for afis|EAW16127.1 as seed ortholog is 100%.

---

Group of orthologs #5142. Best score 830 bits

Score difference with first non-orthologous sequence - *A. fumigatus*:830 *A. fischeri*:830

afum|EAL84568.1 100.00% afis|EAW20487.1 100.00%

Bootstrap support for afum|EAL84568.1 as seed ortholog is 100%.

Bootstrap support for afis|EAW20487.1 as seed ortholog is 100%.

---

Group of orthologs #5143. Best score 830 bits

Score difference with first non-orthologous sequence - *A. fumigatus*:761 *A. fischeri*:745

afum|EAL84799.1 100.00% afis|EAW20833.1 100.00%

Bootstrap support for afum|EAL84799.1 as seed ortholog is 100%.

Bootstrap support for afis|EAW20833.1 as seed ortholog is 100%.

---

Group of orthologs #5144. Best score 830 bits

Score difference with first non-orthologous sequence - *A. fumigatus*:830 *A. fischeri*:830

afum|EAL84681.2 100.00% afis|EAW20953.1 100.00%

Bootstrap support for afum|EAL84681.2 as seed ortholog is 100%.

Bootstrap support for afis|EAW20953.1 as seed ortholog is 100%.

---

Group of orthologs #5145. Best score 830 bits

Score difference with first non-orthologous sequence - *A. fumigatus*:319 *A. fischeri*:711

afum|EAL86967.1 100.00% afis|EAW19541.1 100.00%

Bootstrap support for afum|EAL86967.1 as seed ortholog is 100%.

Bootstrap support for afis|EAW19541.1 as seed ortholog is 100%.

---

Group of orthologs #5146. Best score 830 bits

Score difference with first non-orthologous sequence - *A. fumigatus*:830 *A. fischeri*:830

afum|EAL91434.1 100.00% afis|EAW17621.1 100.00%

Bootstrap support for afum|EAL91434.1 as seed ortholog is 100%.

Bootstrap support for afis|EAW17621.1 as seed ortholog is 100%.

---

Group of orthologs #5147. Best score 830 bits

Score difference with first non-orthologous sequence - *A. fumigatus*:830 *A. fischeri*:830

afum|EAL91474.1 100.00% afis|EAW17659.1 100.00%

Bootstrap support for afum|EAL91474.1 as seed ortholog is 100%.

Bootstrap support for afis|EAW17659.1 as seed ortholog is 100%.

---

Group of orthologs #5148. Best score 830 bits

Score difference with first non-orthologous sequence - *A. fumigatus*:830 *A. fischeri*:830

afum|EAL89419.1 100.00% afis|EAW24780.1 100.00%

Bootstrap support for afum|EAL89419.1 as seed ortholog is 100%.

Bootstrap support for afis|EAW24780.1 as seed ortholog is 100%.

---

Group of orthologs #5149. Best score 830 bits

Score difference with first non-orthologous sequence - *A. fumigatus*:830 *A. fischeri*:830

afum|EBA27197.1 100.00% afis|EAW20445.1 100.00%

Bootstrap support for afum|EBA27197.1 as seed ortholog is 100%.

Bootstrap support for afis|EAW20445.1 as seed ortholog is 100%.

---

Group of orthologs #5150. Best score 830 bits

Score difference with first non-orthologous sequence - *A. fumigatus*:830 *A. fischeri*:830

afum|EAL90176.2 100.00% afis|EAW25510.1 100.00%

Bootstrap support for afum|EAL90176.2 as seed ortholog is 100%.

Bootstrap support for afis|EAW25510.1 as seed ortholog is 100%.

---

Group of orthologs #5151. Best score 829 bits

Score difference with first non-orthologous sequence - *A. fumigatus*:829 *A. fischeri*:710

afum|EAL87174.1 100.00% afis|EAW23736.1 100.00%

Bootstrap support for afum|EAL87174.1 as seed ortholog is 100%.

Bootstrap support for afis|EAW23736.1 as seed ortholog is 100%.

---

Group of orthologs #5152. Best score 828 bits

Score difference with first non-orthologous sequence - *A. fumigatus*:828 *A. fischeri*:697

afum|EAL85249.1 100.00% afis|EAW20133.1 100.00%

Bootstrap support for afum|EAL85249.1 as seed ortholog is 100%.

Bootstrap support for afis|EAW20133.1 as seed ortholog is 100%.

---

Group of orthologs #5153. Best score 828 bits

Score difference with first non-orthologous sequence - *A. fumigatus*:828 *A. fischeri*:828

afum|EAL91481.1 100.00% afis|EAW17667.1 100.00%

Bootstrap support for afum|EAL91481.1 as seed ortholog is 100%.

Bootstrap support for afis|EAW17667.1 as seed ortholog is 100%.

---

Group of orthologs #5154. Best score 828 bits

Score difference with first non-orthologous sequence - *A. fumigatus*:828 *A. fischeri*:828

afum|EAL86073.1 100.00% afis|EAW24402.1 100.00%

Bootstrap support for afum|EAL86073.1 as seed ortholog is 100%.

Bootstrap support for afis|EAW24402.1 as seed ortholog is 100%.

---

Group of orthologs #5155. Best score 828 bits

Score difference with first non-orthologous sequence - *A. fumigatus*:828 *A. fischeri*:828

afum|EAL87867.1 100.00% afis|EAW23600.1 100.00%

Bootstrap support for afum|EAL87867.1 as seed ortholog is 100%.

Bootstrap support for afis|EAW23600.1 as seed ortholog is 100%.

---

Group of orthologs #5156. Best score 828 bits

Score difference with first non-orthologous sequence - *A. fumigatus*:828 *A. fischeri*:828

afum|EAL93511.1 100.00% afis|EAW18779.1 100.00%

Bootstrap support for afum|EAL93511.1 as seed ortholog is 100%.

Bootstrap support for afis|EAW18779.1 as seed ortholog is 100%.

---

Group of orthologs #5157. Best score 828 bits

Score difference with first non-orthologous sequence - *A. fumigatus*:828 *A. fischeri*:751

afum|EAL90463.1 100.00% afis|EAW22732.1 100.00%

Bootstrap support for afum|EAL90463.1 as seed ortholog is 100%.

Bootstrap support for afis|EAW22732.1 as seed ortholog is 100%.

---

Group of orthologs #5158. Best score 828 bits

Score difference with first non-orthologous sequence - *A. fumigatus*:828 *A. fischeri*:828

|                 |         |                 |         |
|-----------------|---------|-----------------|---------|
| afum EAL89532.1 | 100.00% | afis EAW24882.1 | 100.00% |
|-----------------|---------|-----------------|---------|

Bootstrap support for afum|EAL89532.1 as seed ortholog is 100%.

Bootstrap support for afis|EAW24882.1 as seed ortholog is 100%.

---

Group of orthologs #5159. Best score 827 bits

Score difference with first non-orthologous sequence - *A. fumigatus*:827 *A. fischeri*:827

|                 |         |                 |         |
|-----------------|---------|-----------------|---------|
| afum EAL84787.1 | 100.00% | afis EAW20846.1 | 100.00% |
|-----------------|---------|-----------------|---------|

Bootstrap support for afum|EAL84787.1 as seed ortholog is 100%.

Bootstrap support for afis|EAW20846.1 as seed ortholog is 100%.

---

Group of orthologs #5160. Best score 827 bits

Score difference with first non-orthologous sequence - *A. fumigatus*:753 *A. fischeri*:543

|                 |         |                 |         |
|-----------------|---------|-----------------|---------|
| afum EAL84792.1 | 100.00% | afis EAW20841.1 | 100.00% |
|-----------------|---------|-----------------|---------|

Bootstrap support for afum|EAL84792.1 as seed ortholog is 100%.

Bootstrap support for afis|EAW20841.1 as seed ortholog is 100%.

---

Group of orthologs #5161. Best score 827 bits

Score difference with first non-orthologous sequence - *A. fumigatus*:827 *A. fischeri*:827

|                 |         |                 |         |
|-----------------|---------|-----------------|---------|
| afum EAL84757.1 | 100.00% | afis EAW20876.1 | 100.00% |
|-----------------|---------|-----------------|---------|

Bootstrap support for afum|EAL84757.1 as seed ortholog is 100%.

Bootstrap support for afis|EAW20876.1 as seed ortholog is 100%.

---

Group of orthologs #5162. Best score 827 bits

Score difference with first non-orthologous sequence - *A. fumigatus*:827 *A. fischeri*:827

|                 |         |                 |         |
|-----------------|---------|-----------------|---------|
| afum EAL91477.2 | 100.00% | afis EAW17663.1 | 100.00% |
|-----------------|---------|-----------------|---------|

Bootstrap support for afum|EAL91477.2 as seed ortholog is 100%.

Bootstrap support for afis|EAW17663.1 as seed ortholog is 100%.

---

Group of orthologs #5163. Best score 827 bits

Score difference with first non-orthologous sequence - *A. fumigatus*:827 *A. fischeri*:827

|                 |         |                 |         |
|-----------------|---------|-----------------|---------|
| afum EAL92240.1 | 100.00% | afis EAW21228.1 | 100.00% |
|-----------------|---------|-----------------|---------|

Bootstrap support for afum|EAL92240.1 as seed ortholog is 100%.

Bootstrap support for afis|EAW21228.1 as seed ortholog is 100%.

---

Group of orthologs #5164. Best score 827 bits

Score difference with first non-orthologous sequence - *A. fumigatus*:827 *A. fischeri*:827

|                 |         |                 |         |
|-----------------|---------|-----------------|---------|
| afum EAL92754.1 | 100.00% | afis EAW21721.1 | 100.00% |
|-----------------|---------|-----------------|---------|

Bootstrap support for afum|EAL92754.1 as seed ortholog is 100%.

Bootstrap support for afis|EAW21721.1 as seed ortholog is 100%.

---

Group of orthologs #5165. Best score 826 bits

Score difference with first non-orthologous sequence - *A. fumigatus*:826 *A. fischeri*:826

|                 |         |                 |         |
|-----------------|---------|-----------------|---------|
| afum EAL85606.1 | 100.00% | afis EAW15742.1 | 100.00% |
|-----------------|---------|-----------------|---------|

Bootstrap support for afum|EAL85606.1 as seed ortholog is 100%.

Bootstrap support for afis|EAW15742.1 as seed ortholog is 100%.

---

Group of orthologs #5166. Best score 826 bits

Score difference with first non-orthologous sequence - *A. fumigatus*:826 *A. fischeri*:826

|                 |         |                 |         |
|-----------------|---------|-----------------|---------|
| afum EAL86392.1 | 100.00% | afis EAW16846.1 | 100.00% |
|-----------------|---------|-----------------|---------|

Bootstrap support for afum|EAL86392.1 as seed ortholog is 100%.

Bootstrap support for afis|EAW16846.1 as seed ortholog is 100%.

---

Group of orthologs #5167. Best score 826 bits

Score difference with first non-orthologous sequence - *A. fumigatus*:826 *A. fischeri*:826

|                 |         |                 |         |
|-----------------|---------|-----------------|---------|
| afum EAL88913.1 | 100.00% | afis EAW16291.1 | 100.00% |
|-----------------|---------|-----------------|---------|

Bootstrap support for afum|EAL88913.1 as seed ortholog is 100%.



Bootstrap support for afis|EAW16291.1 as seed ortholog is 100%.

---

Group of orthologs #5168. Best score 826 bits

Score difference with first non-orthologous sequence - *A. fumigatus*:826 *A. fischeri*:826

afum|EAL87480.1 100.00% afis|EAW18122.1 100.00%

Bootstrap support for afum|EAL87480.1 as seed ortholog is 100%.

Bootstrap support for afis|EAW18122.1 as seed ortholog is 100%.

---

Group of orthologs #5169. Best score 826 bits

Score difference with first non-orthologous sequence - *A. fumigatus*:826 *A. fischeri*:826

afum|EAL84685.1 100.00% afis|EAW20949.1 100.00%

Bootstrap support for afum|EAL84685.1 as seed ortholog is 100%.

Bootstrap support for afis|EAW20949.1 as seed ortholog is 100%.

---

Group of orthologs #5170. Best score 826 bits

Score difference with first non-orthologous sequence - *A. fumigatus*:826 *A. fischeri*:826

afum|EAL87005.1 100.00% afis|EAW19489.1 100.00%

Bootstrap support for afum|EAL87005.1 as seed ortholog is 100%.

Bootstrap support for afis|EAW19489.1 as seed ortholog is 100%.

---

Group of orthologs #5171. Best score 826 bits

Score difference with first non-orthologous sequence - *A. fumigatus*:826 *A. fischeri*:826

afum|EAL86059.1 100.00% afis|EAW24387.1 100.00%

Bootstrap support for afum|EAL86059.1 as seed ortholog is 100%.

Bootstrap support for afis|EAW24387.1 as seed ortholog is 100%.

---

Group of orthologs #5172. Best score 826 bits

Score difference with first non-orthologous sequence - *A. fumigatus*:826 *A. fischeri*:826

afum|EAL87978.2 100.00% afis|EAW23485.1 100.00%

Bootstrap support for afum|EAL87978.2 as seed ortholog is 100%.

Bootstrap support for afis|EAW23485.1 as seed ortholog is 100%.

---

Group of orthologs #5173. Best score 826 bits

Score difference with first non-orthologous sequence - *A. fumigatus*:826 *A. fischeri*:826

afum|EAL90487.1 100.00% afis|EAW22705.1 100.00%

Bootstrap support for afum|EAL90487.1 as seed ortholog is 100%.

Bootstrap support for afis|EAW22705.1 as seed ortholog is 100%.

---

Group of orthologs #5174. Best score 826 bits

Score difference with first non-orthologous sequence - *A. fumigatus*:826 *A. fischeri*:826

afum|EAL92562.1 100.00% afis|EAW21542.1 100.00%

Bootstrap support for afum|EAL92562.1 as seed ortholog is 100%.

Bootstrap support for afis|EAW21542.1 as seed ortholog is 100%.

---

Group of orthologs #5175. Best score 826 bits

Score difference with first non-orthologous sequence - *A. fumigatus*:764 *A. fischeri*:826

afum|EAL92713.1 100.00% afis|EAW21679.1 100.00%

Bootstrap support for afum|EAL92713.1 as seed ortholog is 100%.

Bootstrap support for afis|EAW21679.1 as seed ortholog is 100%.

---

Group of orthologs #5176. Best score 826 bits

Score difference with first non-orthologous sequence - *A. fumigatus*:826 *A. fischeri*:826

afum|EBA27448.1 100.00% afis|EAW21120.1 100.00%

Bootstrap support for afum|EBA27448.1 as seed ortholog is 100%.

Bootstrap support for afis|EAW21120.1 as seed ortholog is 100%.

---

Group of orthologs #5177. Best score 826 bits

Score difference with first non-orthologous sequence - *A. fumigatus*:826 *A. fischeri*:826

afum|EBA27453.1 100.00% afis|EAW21221.1 100.00%

Bootstrap support for afum|EBA27453.1 as seed ortholog is 100%.

Bootstrap support for afis|EAW21221.1 as seed ortholog is 100%.

---

Group of orthologs #5178. Best score 825 bits

Score difference with first non-orthologous sequence - *A. fumigatus*:825 *A. fischeri*:825

afum|EAL86621.1 100.00% afis|EAW17193.1 100.00%

Bootstrap support for afum|EAL86621.1 as seed ortholog is 100%.

Bootstrap support for afis|EAW17193.1 as seed ortholog is 100%.

---

Group of orthologs #5179. Best score 825 bits

Score difference with first non-orthologous sequence - *A. fumigatus*:825 *A. fischeri*:825

afum|EAL85304.2 100.00% afis|EAW20185.1 100.00%

Bootstrap support for afum|EAL85304.2 as seed ortholog is 100%.

Bootstrap support for afis|EAW20185.1 as seed ortholog is 100%.

---

Group of orthologs #5180. Best score 825 bits

Score difference with first non-orthologous sequence - *A. fumigatus*:825 *A. fischeri*:825

afum|EAL87504.1 100.00% afis|EAW18146.1 100.00%

Bootstrap support for afum|EAL87504.1 as seed ortholog is 100%.

Bootstrap support for afis|EAW18146.1 as seed ortholog is 100%.

---

Group of orthologs #5181. Best score 825 bits

Score difference with first non-orthologous sequence - *A. fumigatus*:825 *A. fischeri*:825

afum|EAL87162.1 100.00% afis|EAW23722.1 100.00%

Bootstrap support for afum|EAL87162.1 as seed ortholog is 100%.

Bootstrap support for afis|EAW23722.1 as seed ortholog is 100%.

---

Group of orthologs #5182. Best score 825 bits

Score difference with first non-orthologous sequence - *A. fumigatus*:825 *A. fischeri*:825

afum|EAL88137.2 100.00% afis|EAW23341.1 100.00%

Bootstrap support for afum|EAL88137.2 as seed ortholog is 100%.

Bootstrap support for afis|EAW23341.1 as seed ortholog is 100%.

---

Group of orthologs #5183. Best score 825 bits

Score difference with first non-orthologous sequence - *A. fumigatus*:825 *A. fischeri*:825

afum|EAL93975.1 100.00% afis|EAW19246.1 100.00%

Bootstrap support for afum|EAL93975.1 as seed ortholog is 100%.

Bootstrap support for afis|EAW19246.1 as seed ortholog is 100%.

---

Group of orthologs #5184. Best score 825 bits

Score difference with first non-orthologous sequence - *A. fumigatus*:825 *A. fischeri*:825

afum|EAL90889.1 100.00% afis|EAW22292.1 100.00%

Bootstrap support for afum|EAL90889.1 as seed ortholog is 100%.

Bootstrap support for afis|EAW22292.1 as seed ortholog is 100%.

---

Group of orthologs #5185. Best score 825 bits

Score difference with first non-orthologous sequence - *A. fumigatus*:637 *A. fischeri*:462

afum|EAL91047.1 100.00% afis|EAW22143.1 100.00%

Bootstrap support for afum|EAL91047.1 as seed ortholog is 100%.

Bootstrap support for afis|EAW22143.1 as seed ortholog is 100%.

---

Group of orthologs #5186. Best score 824 bits

Score difference with first non-orthologous sequence - *A. fumigatus*:824 *A. fischeri*:824

|                 |         |                 |         |
|-----------------|---------|-----------------|---------|
| afum EAL84788.1 | 100.00% | afis EAW20845.1 | 100.00% |
|-----------------|---------|-----------------|---------|

Bootstrap support for afum|EAL84788.1 as seed ortholog is 100%.

Bootstrap support for afis|EAW20845.1 as seed ortholog is 100%.

---

Group of orthologs #5187. Best score 824 bits

Score difference with first non-orthologous sequence - *A. fumigatus*:824 *A. fischeri*:824

|                 |         |                 |         |
|-----------------|---------|-----------------|---------|
| afum EAL86939.1 | 100.00% | afis EAW19579.1 | 100.00% |
|-----------------|---------|-----------------|---------|

Bootstrap support for afum|EAL86939.1 as seed ortholog is 100%.

Bootstrap support for afis|EAW19579.1 as seed ortholog is 100%.

---

Group of orthologs #5188. Best score 824 bits

Score difference with first non-orthologous sequence - *A. fumigatus*:824 *A. fischeri*:824

|                 |         |                 |         |
|-----------------|---------|-----------------|---------|
| afum EAL86931.1 | 100.00% | afis EAW19587.1 | 100.00% |
|-----------------|---------|-----------------|---------|

Bootstrap support for afum|EAL86931.1 as seed ortholog is 100%.

Bootstrap support for afis|EAW19587.1 as seed ortholog is 100%.

---

Group of orthologs #5189. Best score 824 bits

Score difference with first non-orthologous sequence - *A. fumigatus*:698 *A. fischeri*:669

|                 |         |                 |         |
|-----------------|---------|-----------------|---------|
| afum EAL91846.1 | 100.00% | afis EAW18035.1 | 100.00% |
|-----------------|---------|-----------------|---------|

Bootstrap support for afum|EAL91846.1 as seed ortholog is 100%.

Bootstrap support for afis|EAW18035.1 as seed ortholog is 100%.

---

Group of orthologs #5190. Best score 824 bits

Score difference with first non-orthologous sequence - *A. fumigatus*:824 *A. fischeri*:824

|                 |         |                 |         |
|-----------------|---------|-----------------|---------|
| afum EAL93996.1 | 100.00% | afis EAW19269.1 | 100.00% |
|-----------------|---------|-----------------|---------|

Bootstrap support for afum|EAL93996.1 as seed ortholog is 100%.

Bootstrap support for afis|EAW19269.1 as seed ortholog is 100%.

---

Group of orthologs #5191. Best score 824 bits

Score difference with first non-orthologous sequence - *A. fumigatus*:824 *A. fischeri*:824

|                 |         |                 |         |
|-----------------|---------|-----------------|---------|
| afum EAL90422.1 | 100.00% | afis EAW22776.1 | 100.00% |
|-----------------|---------|-----------------|---------|

Bootstrap support for afum|EAL90422.1 as seed ortholog is 100%.

Bootstrap support for afis|EAW22776.1 as seed ortholog is 100%.

---

Group of orthologs #5192. Best score 824 bits

Score difference with first non-orthologous sequence - *A. fumigatus*:824 *A. fischeri*:824

|                 |         |                 |         |
|-----------------|---------|-----------------|---------|
| afum EBA27415.1 | 100.00% | afis EAW22366.1 | 100.00% |
|-----------------|---------|-----------------|---------|

Bootstrap support for afum|EBA27415.1 as seed ortholog is 100%.

Bootstrap support for afis|EAW22366.1 as seed ortholog is 100%.

---

Group of orthologs #5193. Best score 823 bits

Score difference with first non-orthologous sequence - *A. fumigatus*:823 *A. fischeri*:823

|                 |         |                 |         |
|-----------------|---------|-----------------|---------|
| afum EAL85060.1 | 100.00% | afis EAW19832.1 | 100.00% |
|-----------------|---------|-----------------|---------|

Bootstrap support for afum|EAL85060.1 as seed ortholog is 100%.

Bootstrap support for afis|EAW19832.1 as seed ortholog is 100%.

---

Group of orthologs #5194. Best score 823 bits

Score difference with first non-orthologous sequence - *A. fumigatus*:823 *A. fischeri*:747

|                 |         |                 |         |
|-----------------|---------|-----------------|---------|
| afum EAL85010.1 | 100.00% | afis EAW19888.1 | 100.00% |
|-----------------|---------|-----------------|---------|

Bootstrap support for afum|EAL85010.1 as seed ortholog is 100%.

Bootstrap support for afis|EAW19888.1 as seed ortholog is 100%.

---

Group of orthologs #5195. Best score 823 bits

Score difference with first non-orthologous sequence - *A. fumigatus*:823 *A. fischeri*:823

|                 |         |                 |         |
|-----------------|---------|-----------------|---------|
| afum EAL84464.1 | 100.00% | afis EAW20597.1 | 100.00% |
|-----------------|---------|-----------------|---------|

Bootstrap support for afum|EAL84464.1 as seed ortholog is 100%.

Bootstrap support for afis|EAW20597.1 as seed ortholog is 100%.

---

Group of orthologs #5196. Best score 823 bits

Score difference with first non-orthologous sequence - *A. fumigatus*:823 *A. fischeri*:823

afum|EAL87482.1 100.00% afis|EAW18124.1 100.00%

Bootstrap support for afum|EAL87482.1 as seed ortholog is 100%.

Bootstrap support for afis|EAW18124.1 as seed ortholog is 100%.

---

Group of orthologs #5197. Best score 823 bits

Score difference with first non-orthologous sequence - *A. fumigatus*:823 *A. fischeri*:823

afum|EAL86908.1 100.00% afis|EAW19614.1 100.00%

Bootstrap support for afum|EAL86908.1 as seed ortholog is 100%.

Bootstrap support for afis|EAW19614.1 as seed ortholog is 100%.

---

Group of orthologs #5198. Best score 823 bits

Score difference with first non-orthologous sequence - *A. fumigatus*:823 *A. fischeri*:823

afum|EAL91225.1 100.00% afis|EAW17389.1 100.00%

Bootstrap support for afum|EAL91225.1 as seed ortholog is 100%.

Bootstrap support for afis|EAW17389.1 as seed ortholog is 100%.

---

Group of orthologs #5199. Best score 823 bits

Score difference with first non-orthologous sequence - *A. fumigatus*:823 *A. fischeri*:823

afum|EAL86057.1 100.00% afis|EAW24385.1 100.00%

Bootstrap support for afum|EAL86057.1 as seed ortholog is 100%.

Bootstrap support for afis|EAW24385.1 as seed ortholog is 100%.

---

Group of orthologs #5200. Best score 823 bits

Score difference with first non-orthologous sequence - *A. fumigatus*:823 *A. fischeri*:823

afum|EAL88331.1 100.00% afis|EAW23150.1 100.00%

Bootstrap support for afum|EAL88331.1 as seed ortholog is 100%.

Bootstrap support for afis|EAW23150.1 as seed ortholog is 100%.

---

Group of orthologs #5201. Best score 823 bits

Score difference with first non-orthologous sequence - *A. fumigatus*:635 *A. fischeri*:823

afum|EAL89389.1 100.00% afis|EAW24743.1 100.00%

Bootstrap support for afum|EAL89389.1 as seed ortholog is 100%.

Bootstrap support for afis|EAW24743.1 as seed ortholog is 100%.

---

Group of orthologs #5202. Best score 822 bits

Score difference with first non-orthologous sequence - *A. fumigatus*:822 *A. fischeri*:569

afum|EAL84970.1 100.00% afis|EAW19943.1 100.00%

Bootstrap support for afum|EAL84970.1 as seed ortholog is 100%.

Bootstrap support for afis|EAW19943.1 as seed ortholog is 100%.

---

Group of orthologs #5203. Best score 822 bits

Score difference with first non-orthologous sequence - *A. fumigatus*:663 *A. fischeri*:681

afum|EAL91494.1 100.00% afis|EAW17680.1 100.00%

Bootstrap support for afum|EAL91494.1 as seed ortholog is 100%.

Bootstrap support for afis|EAW17680.1 as seed ortholog is 100%.

---

Group of orthologs #5204. Best score 822 bits

Score difference with first non-orthologous sequence - *A. fumigatus*:822 *A. fischeri*:822

afum|EAL88414.1 100.00% afis|EAW23065.1 100.00%

Bootstrap support for afum|EAL88414.1 as seed ortholog is 100%.

Bootstrap support for afis|EAW23065.1 as seed ortholog is 100%.

---

Group of orthologs #5205. Best score 822 bits

Score difference with first non-orthologous sequence - *A. fumigatus*:822 *A. fischeri*:822

afum|EAL88279.1 100.00% afis|EAW23204.1 100.00%

Bootstrap support for afum|EAL88279.1 as seed ortholog is 100%.

Bootstrap support for afis|EAW23204.1 as seed ortholog is 100%.

---

Group of orthologs #5206. Best score 822 bits

Score difference with first non-orthologous sequence - *A. fumigatus*:822 *A. fischeri*:822

afum|EAL90262.1 100.00% afis|EAW22934.1 100.00%

Bootstrap support for afum|EAL90262.1 as seed ortholog is 100%.

Bootstrap support for afis|EAW22934.1 as seed ortholog is 100%.

---

Group of orthologs #5207. Best score 822 bits

Score difference with first non-orthologous sequence - *A. fumigatus*:822 *A. fischeri*:720

afum|EAL92393.1 100.00% afis|EAW21376.1 100.00%

Bootstrap support for afum|EAL92393.1 as seed ortholog is 100%.

Bootstrap support for afis|EAW21376.1 as seed ortholog is 100%.

---

Group of orthologs #5208. Best score 822 bits

Score difference with first non-orthologous sequence - *A. fumigatus*:822 *A. fischeri*:822

afum|EAL89573.1 100.00% afis|EAW24918.1 100.00%

Bootstrap support for afum|EAL89573.1 as seed ortholog is 100%.

Bootstrap support for afis|EAW24918.1 as seed ortholog is 100%.

---

Group of orthologs #5209. Best score 821 bits

Score difference with first non-orthologous sequence - *A. fumigatus*:821 *A. fischeri*:638

afum|EAL88594.1 100.00% afis|EAW15961.1 100.00%

Bootstrap support for afum|EAL88594.1 as seed ortholog is 100%.

Bootstrap support for afis|EAW15961.1 as seed ortholog is 100%.

---

Group of orthologs #5210. Best score 821 bits

Score difference with first non-orthologous sequence - *A. fumigatus*:821 *A. fischeri*:821

afum|EAL84912.1 100.00% afis|EAW20006.1 100.00%

Bootstrap support for afum|EAL84912.1 as seed ortholog is 100%.

Bootstrap support for afis|EAW20006.1 as seed ortholog is 100%.

---

Group of orthologs #5211. Best score 821 bits

Score difference with first non-orthologous sequence - *A. fumigatus*:821 *A. fischeri*:821

afum|EAL87054.1 100.00% afis|EAW19442.1 100.00%

Bootstrap support for afum|EAL87054.1 as seed ortholog is 100%.

Bootstrap support for afis|EAW19442.1 as seed ortholog is 100%.

---

Group of orthologs #5212. Best score 821 bits

Score difference with first non-orthologous sequence - *A. fumigatus*:821 *A. fischeri*:821

afum|EAL87201.1 100.00% afis|EAW23767.1 100.00%

Bootstrap support for afum|EAL87201.1 as seed ortholog is 100%.

Bootstrap support for afis|EAW23767.1 as seed ortholog is 100%.

---

Group of orthologs #5213. Best score 821 bits

Score difference with first non-orthologous sequence - *A. fumigatus*:821 *A. fischeri*:821

afum|EAL87253.1 100.00% afis|EAW23818.1 100.00%

Bootstrap support for afum|EAL87253.1 as seed ortholog is 100%.

Bootstrap support for afis|EAW23818.1 as seed ortholog is 100%.

---

Group of orthologs #5214. Best score 821 bits

Score difference with first non-orthologous sequence - *A. fumigatus*:821 *A. fischeri*:821

|                 |         |                 |         |
|-----------------|---------|-----------------|---------|
| afum EAL87386.1 | 100.00% | afis EAW23958.1 | 100.00% |
|-----------------|---------|-----------------|---------|

Bootstrap support for afum|EAL87386.1 as seed ortholog is 100%.

Bootstrap support for afis|EAW23958.1 as seed ortholog is 100%.

---

Group of orthologs #5215. Best score 821 bits

Score difference with first non-orthologous sequence - *A. fumigatus*:821 *A. fischeri*:821

|                 |         |                 |         |
|-----------------|---------|-----------------|---------|
| afum EAL88462.1 | 100.00% | afis EAW23020.1 | 100.00% |
|-----------------|---------|-----------------|---------|

Bootstrap support for afum|EAL88462.1 as seed ortholog is 100%.

Bootstrap support for afis|EAW23020.1 as seed ortholog is 100%.

---

Group of orthologs #5216. Best score 821 bits

Score difference with first non-orthologous sequence - *A. fumigatus*:821 *A. fischeri*:821

|                 |         |                 |         |
|-----------------|---------|-----------------|---------|
| afum EAL89751.1 | 100.00% | afis EAW25082.1 | 100.00% |
|-----------------|---------|-----------------|---------|

Bootstrap support for afum|EAL89751.1 as seed ortholog is 100%.

Bootstrap support for afis|EAW25082.1 as seed ortholog is 100%.

---

Group of orthologs #5217. Best score 821 bits

Score difference with first non-orthologous sequence - *A. fumigatus*:821 *A. fischeri*:821

|                 |         |                 |         |
|-----------------|---------|-----------------|---------|
| afum EAL90108.1 | 100.00% | afis EAW25449.1 | 100.00% |
|-----------------|---------|-----------------|---------|

Bootstrap support for afum|EAL90108.1 as seed ortholog is 100%.

Bootstrap support for afis|EAW25449.1 as seed ortholog is 100%.

---

Group of orthologs #5218. Best score 820 bits

Score difference with first non-orthologous sequence - *A. fumigatus*:820 *A. fischeri*:694

|                 |         |                 |         |
|-----------------|---------|-----------------|---------|
| afum EAL88491.1 | 100.00% | afis EAW15855.1 | 100.00% |
|-----------------|---------|-----------------|---------|

Bootstrap support for afum|EAL88491.1 as seed ortholog is 100%.

Bootstrap support for afis|EAW15855.1 as seed ortholog is 100%.

---

Group of orthologs #5219. Best score 820 bits

Score difference with first non-orthologous sequence - *A. fumigatus*:820 *A. fischeri*:820

|                 |         |                 |         |
|-----------------|---------|-----------------|---------|
| afum EAL85285.1 | 100.00% | afis EAW20167.1 | 100.00% |
|-----------------|---------|-----------------|---------|

Bootstrap support for afum|EAL85285.1 as seed ortholog is 100%.

Bootstrap support for afis|EAW20167.1 as seed ortholog is 100%.

---

Group of orthologs #5220. Best score 820 bits

Score difference with first non-orthologous sequence - *A. fumigatus*:820 *A. fischeri*:820

|                 |         |                 |         |
|-----------------|---------|-----------------|---------|
| afum EAL93171.1 | 100.00% | afis EAW18482.1 | 100.00% |
|-----------------|---------|-----------------|---------|

Bootstrap support for afum|EAL93171.1 as seed ortholog is 100%.

Bootstrap support for afis|EAW18482.1 as seed ortholog is 100%.

---

Group of orthologs #5221. Best score 820 bits

Score difference with first non-orthologous sequence - *A. fumigatus*:820 *A. fischeri*:731

|                 |         |                 |         |
|-----------------|---------|-----------------|---------|
| afum EAL91023.1 | 100.00% | afis EAW22168.1 | 100.00% |
|-----------------|---------|-----------------|---------|

Bootstrap support for afum|EAL91023.1 as seed ortholog is 100%.

Bootstrap support for afis|EAW22168.1 as seed ortholog is 100%.

---

Group of orthologs #5222. Best score 820 bits

Score difference with first non-orthologous sequence - *A. fumigatus*:820 *A. fischeri*:820

|                 |         |                 |         |
|-----------------|---------|-----------------|---------|
| afum EAL90990.1 | 100.00% | afis EAW22202.1 | 100.00% |
|-----------------|---------|-----------------|---------|

Bootstrap support for afum|EAL90990.1 as seed ortholog is 100%.

Bootstrap support for afis|EAW22202.1 as seed ortholog is 100%.

---

Group of orthologs #5223. Best score 820 bits

Score difference with first non-orthologous sequence - *A. fumigatus*:820 *A. fischeri*:820

|                 |         |                 |         |
|-----------------|---------|-----------------|---------|
| afum EAL89370.1 | 100.00% | afis EAW24721.1 | 100.00% |
|-----------------|---------|-----------------|---------|

Bootstrap support for afum|EAL89370.1 as seed ortholog is 100%.

Bootstrap support for afis|EAW24721.1 as seed ortholog is 100%.

---

Group of orthologs #5224. Best score 820 bits

Score difference with first non-orthologous sequence - *A. fumigatus*:820 *A. fischeri*:820

afum|EAL90038.1 100.00% afis|EAW25379.1 100.00%

Bootstrap support for afum|EAL90038.1 as seed ortholog is 100%.

Bootstrap support for afis|EAW25379.1 as seed ortholog is 100%.

---

Group of orthologs #5225. Best score 818 bits

Score difference with first non-orthologous sequence - *A. fumigatus*:818 *A. fischeri*:818

afum|EAL85860.1 100.00% afis|EAW15459.1 100.00%

Bootstrap support for afum|EAL85860.1 as seed ortholog is 100%.

Bootstrap support for afis|EAW15459.1 as seed ortholog is 100%.

---

Group of orthologs #5226. Best score 818 bits

Score difference with first non-orthologous sequence - *A. fumigatus*:818 *A. fischeri*:818

afum|EAL93699.1 100.00% afis|EAW18967.1 100.00%

Bootstrap support for afum|EAL93699.1 as seed ortholog is 100%.

Bootstrap support for afis|EAW18967.1 as seed ortholog is 100%.

---

Group of orthologs #5227. Best score 818 bits

Score difference with first non-orthologous sequence - *A. fumigatus*:818 *A. fischeri*:818

afum|EAL90596.1 100.00% afis|EAW22602.1 100.00%

Bootstrap support for afum|EAL90596.1 as seed ortholog is 100%.

Bootstrap support for afis|EAW22602.1 as seed ortholog is 100%.

---

Group of orthologs #5228. Best score 818 bits

Score difference with first non-orthologous sequence - *A. fumigatus*:818 *A. fischeri*:818

afum|EAL92814.1 100.00% afis|EAW21787.1 100.00%

Bootstrap support for afum|EAL92814.1 as seed ortholog is 100%.

Bootstrap support for afis|EAW21787.1 as seed ortholog is 100%.

---

Group of orthologs #5229. Best score 817 bits

Score difference with first non-orthologous sequence - *A. fumigatus*:732 *A. fischeri*:517

afum|EAL85026.1 100.00% afis|EAW19871.1 100.00%

Bootstrap support for afum|EAL85026.1 as seed ortholog is 100%.

Bootstrap support for afis|EAW19871.1 as seed ortholog is 100%.

---

Group of orthologs #5230. Best score 817 bits

Score difference with first non-orthologous sequence - *A. fumigatus*:817 *A. fischeri*:700

afum|EAL84977.2 100.00% afis|EAW19932.1 100.00%

Bootstrap support for afum|EAL84977.2 as seed ortholog is 100%.

Bootstrap support for afis|EAW19932.1 as seed ortholog is 100%.

---

Group of orthologs #5231. Best score 817 bits

Score difference with first non-orthologous sequence - *A. fumigatus*:817 *A. fischeri*:817

afum|EAL84645.1 100.00% afis|EAW20985.1 100.00%

Bootstrap support for afum|EAL84645.1 as seed ortholog is 100%.

Bootstrap support for afis|EAW20985.1 as seed ortholog is 100%.

---

Group of orthologs #5232. Best score 817 bits

Score difference with first non-orthologous sequence - *A. fumigatus*:713 *A. fischeri*:722

afum|EAL84654.1 100.00% afis|EAW20979.1 100.00%

Bootstrap support for afum|EAL84654.1 as seed ortholog is 100%.

Bootstrap support for afis|EAW20979.1 as seed ortholog is 100%.

---

Group of orthologs #5233. Best score 817 bits

Score difference with first non-orthologous sequence - *A. fumigatus*:817 *A. fischeri*:817

afum|EAL87186.2 100.00% afis|EAW20267.1 100.00%

Bootstrap support for afum|EAL87186.2 as seed ortholog is 100%.

Bootstrap support for afis|EAW20267.1 as seed ortholog is 100%.

---

Group of orthologs #5234. Best score 817 bits

Score difference with first non-orthologous sequence - *A. fumigatus*:817 *A. fischeri*:817

afum|EAL93155.1 100.00% afis|EAW18469.1 100.00%

Bootstrap support for afum|EAL93155.1 as seed ortholog is 100%.

Bootstrap support for afis|EAW18469.1 as seed ortholog is 100%.

---

Group of orthologs #5235. Best score 817 bits

Score difference with first non-orthologous sequence - *A. fumigatus*:817 *A. fischeri*:817

afum|EAL87372.1 100.00% afis|EAW23946.1 100.00%

Bootstrap support for afum|EAL87372.1 as seed ortholog is 100%.

Bootstrap support for afis|EAW23946.1 as seed ortholog is 100%.

---

Group of orthologs #5236. Best score 817 bits

Score difference with first non-orthologous sequence - *A. fumigatus*:817 *A. fischeri*:817

afum|EAL88191.1 100.00% afis|EAW23288.1 100.00%

Bootstrap support for afum|EAL88191.1 as seed ortholog is 100%.

Bootstrap support for afis|EAW23288.1 as seed ortholog is 100%.

---

Group of orthologs #5237. Best score 817 bits

Score difference with first non-orthologous sequence - *A. fumigatus*:817 *A. fischeri*:817

afum|EAL89555.1 100.00% afis|EAW24901.1 100.00%

Bootstrap support for afum|EAL89555.1 as seed ortholog is 100%.

Bootstrap support for afis|EAW24901.1 as seed ortholog is 100%.

---

Group of orthologs #5238. Best score 817 bits

Score difference with first non-orthologous sequence - *A. fumigatus*:735 *A. fischeri*:547

afum|EAL91971.1 100.00% afis|EAW24116.1 100.00%

Bootstrap support for afum|EAL91971.1 as seed ortholog is 100%.

Bootstrap support for afis|EAW24116.1 as seed ortholog is 100%.

---

Group of orthologs #5239. Best score 816 bits

Score difference with first non-orthologous sequence - *A. fumigatus*:816 *A. fischeri*:816

afum|EAL88646.1 100.00% afis|EAW16017.1 100.00%

Bootstrap support for afum|EAL88646.1 as seed ortholog is 100%.

Bootstrap support for afis|EAW16017.1 as seed ortholog is 100%.

---

Group of orthologs #5240. Best score 816 bits

Score difference with first non-orthologous sequence - *A. fumigatus*:816 *A. fischeri*:816

afum|EAL88699.1 100.00% afis|EAW16067.1 100.00%

Bootstrap support for afum|EAL88699.1 as seed ortholog is 100%.

Bootstrap support for afis|EAW16067.1 as seed ortholog is 100%.

---

Group of orthologs #5241. Best score 816 bits

Score difference with first non-orthologous sequence - *A. fumigatus*:816 *A. fischeri*:816

afum|EAL85121.1 100.00% afis|EAW19776.1 100.00%

Bootstrap support for afum|EAL85121.1 as seed ortholog is 100%.

Bootstrap support for afis|EAW19776.1 as seed ortholog is 100%.

---

Group of orthologs #5242. Best score 816 bits

Score difference with first non-orthologous sequence - *A. fumigatus*:816 *A. fischeri*:816



|                 |         |                 |         |
|-----------------|---------|-----------------|---------|
| afum EAL85498.1 | 100.00% | afis EAW20399.1 | 100.00% |
|-----------------|---------|-----------------|---------|

Bootstrap support for afum|EAL85498.1 as seed ortholog is 100%.

Bootstrap support for afis|EAW20399.1 as seed ortholog is 100%.

---

Group of orthologs #5243. Best score 816 bits

Score difference with first non-orthologous sequence - *A. fumigatus*:738 *A. fischeri*:816

|                 |         |                 |         |
|-----------------|---------|-----------------|---------|
| afum EAL91063.1 | 100.00% | afis EAW22125.1 | 100.00% |
|-----------------|---------|-----------------|---------|

Bootstrap support for afum|EAL91063.1 as seed ortholog is 100%.

Bootstrap support for afis|EAW22125.1 as seed ortholog is 100%.

---

Group of orthologs #5244. Best score 816 bits

Score difference with first non-orthologous sequence - *A. fumigatus*:816 *A. fischeri*:816

|                 |         |                 |         |
|-----------------|---------|-----------------|---------|
| afum EAL90019.1 | 100.00% | afis EAW25357.1 | 100.00% |
|-----------------|---------|-----------------|---------|

Bootstrap support for afum|EAL90019.1 as seed ortholog is 100%.

Bootstrap support for afis|EAW25357.1 as seed ortholog is 100%.

---

Group of orthologs #5245. Best score 815 bits

Score difference with first non-orthologous sequence - *A. fumigatus*:815 *A. fischeri*:815

|                 |         |                 |         |
|-----------------|---------|-----------------|---------|
| afum EAL85239.1 | 100.00% | afis EAW20121.1 | 100.00% |
|-----------------|---------|-----------------|---------|

Bootstrap support for afum|EAL85239.1 as seed ortholog is 100%.

Bootstrap support for afis|EAW20121.1 as seed ortholog is 100%.

---

Group of orthologs #5246. Best score 815 bits

Score difference with first non-orthologous sequence - *A. fumigatus*:764 *A. fischeri*:697

|                 |         |                 |         |
|-----------------|---------|-----------------|---------|
| afum EAL91367.1 | 100.00% | afis EAW17553.1 | 100.00% |
|-----------------|---------|-----------------|---------|

Bootstrap support for afum|EAL91367.1 as seed ortholog is 100%.

Bootstrap support for afis|EAW17553.1 as seed ortholog is 100%.

---

Group of orthologs #5247. Best score 815 bits

Score difference with first non-orthologous sequence - *A. fumigatus*:815 *A. fischeri*:815

|                 |         |                 |         |
|-----------------|---------|-----------------|---------|
| afum EAL85991.1 | 100.00% | afis EAW24321.1 | 100.00% |
|-----------------|---------|-----------------|---------|

Bootstrap support for afum|EAL85991.1 as seed ortholog is 100%.

Bootstrap support for afis|EAW24321.1 as seed ortholog is 100%.

---

Group of orthologs #5248. Best score 815 bits

Score difference with first non-orthologous sequence - *A. fumigatus*:697 *A. fischeri*:307

|                 |         |                 |         |
|-----------------|---------|-----------------|---------|
| afum EAL87376.1 | 100.00% | afis EAW23950.1 | 100.00% |
|-----------------|---------|-----------------|---------|

Bootstrap support for afum|EAL87376.1 as seed ortholog is 100%.

Bootstrap support for afis|EAW23950.1 as seed ortholog is 100%.

---

Group of orthologs #5249. Best score 815 bits

Score difference with first non-orthologous sequence - *A. fumigatus*:815 *A. fischeri*:815

|                 |         |                 |         |
|-----------------|---------|-----------------|---------|
| afum EAL90387.1 | 100.00% | afis EAW22814.1 | 100.00% |
|-----------------|---------|-----------------|---------|

Bootstrap support for afum|EAL90387.1 as seed ortholog is 100%.

Bootstrap support for afis|EAW22814.1 as seed ortholog is 100%.

---

Group of orthologs #5250. Best score 814 bits

Score difference with first non-orthologous sequence - *A. fumigatus*:814 *A. fischeri*:814

|                 |         |                 |         |
|-----------------|---------|-----------------|---------|
| afum EAL88767.1 | 100.00% | afis EAW16138.1 | 100.00% |
|-----------------|---------|-----------------|---------|

Bootstrap support for afum|EAL88767.1 as seed ortholog is 100%.

Bootstrap support for afis|EAW16138.1 as seed ortholog is 100%.

---

Group of orthologs #5251. Best score 814 bits

Score difference with first non-orthologous sequence - *A. fumigatus*:814 *A. fischeri*:814

|                 |         |                 |         |
|-----------------|---------|-----------------|---------|
| afum EAL85345.2 | 100.00% | afis EAW20228.1 | 100.00% |
|-----------------|---------|-----------------|---------|

Bootstrap support for afum|EAL85345.2 as seed ortholog is 100%.

Bootstrap support for afis|EAW20228.1 as seed ortholog is 100%.

---

Group of orthologs #5252. Best score 814 bits

Score difference with first non-orthologous sequence - *A. fumigatus*:814 *A. fischeri*:814

afum|EAL91797.1 100.00% afis|EAW17988.1 100.00%

Bootstrap support for afum|EAL91797.1 as seed ortholog is 100%.

Bootstrap support for afis|EAW17988.1 as seed ortholog is 100%.

---

Group of orthologs #5253. Best score 814 bits

Score difference with first non-orthologous sequence - *A. fumigatus*:814 *A. fischeri*:814

afum|EAL92590.1 100.00% afis|EAW21572.1 100.00%

Bootstrap support for afum|EAL92590.1 as seed ortholog is 100%.

Bootstrap support for afis|EAW21572.1 as seed ortholog is 100%.

---

Group of orthologs #5254. Best score 813 bits

Score difference with first non-orthologous sequence - *A. fumigatus*:813 *A. fischeri*:700

afum|EAL89251.1 100.00% afis|EAW16647.1 100.00%

Bootstrap support for afum|EAL89251.1 as seed ortholog is 100%.

Bootstrap support for afis|EAW16647.1 as seed ortholog is 100%.

---

Group of orthologs #5255. Best score 813 bits

Score difference with first non-orthologous sequence - *A. fumigatus*:813 *A. fischeri*:813

afum|EAL88058.1 100.00% afis|EAW23411.1 100.00%

Bootstrap support for afum|EAL88058.1 as seed ortholog is 100%.

Bootstrap support for afis|EAW23411.1 as seed ortholog is 100%.

---

Group of orthologs #5256. Best score 813 bits

Score difference with first non-orthologous sequence - *A. fumigatus*:813 *A. fischeri*:813

afum|EAL93764.2 100.00% afis|EAW19035.1 100.00%

Bootstrap support for afum|EAL93764.2 as seed ortholog is 100%.

Bootstrap support for afis|EAW19035.1 as seed ortholog is 100%.

---

Group of orthologs #5257. Best score 813 bits

Score difference with first non-orthologous sequence - *A. fumigatus*:813 *A. fischeri*:768

afum|EAL92829.2 100.00% afis|EAW21803.1 100.00%

Bootstrap support for afum|EAL92829.2 as seed ortholog is 100%.

Bootstrap support for afis|EAW21803.1 as seed ortholog is 100%.

---

Group of orthologs #5258. Best score 813 bits

Score difference with first non-orthologous sequence - *A. fumigatus*:813 *A. fischeri*:700

afum|EAL89993.1 100.00% afis|EAW25331.1 100.00%

Bootstrap support for afum|EAL89993.1 as seed ortholog is 100%.

Bootstrap support for afis|EAW25331.1 as seed ortholog is 100%.

---

Group of orthologs #5259. Best score 812 bits

Score difference with first non-orthologous sequence - *A. fumigatus*:812 *A. fischeri*:294

afum|EAL86669.1 100.00% afis|EAW17250.1 100.00%

Bootstrap support for afum|EAL86669.1 as seed ortholog is 100%.

Bootstrap support for afis|EAW17250.1 as seed ortholog is 100%.

---

Group of orthologs #5260. Best score 812 bits

Score difference with first non-orthologous sequence - *A. fumigatus*:812 *A. fischeri*:812

afum|EAL85097.1 100.00% afis|EAW19793.1 100.00%

Bootstrap support for afum|EAL85097.1 as seed ortholog is 100%.

Bootstrap support for afis|EAW19793.1 as seed ortholog is 100%.

---

Group of orthologs #5261. Best score 812 bits

Score difference with first non-orthologous sequence - *A. fumigatus*:812 *A. fischeri*:812

afum|EAL84530.1 100.00% afis|EAW20527.1 100.00%

Bootstrap support for afum|EAL84530.1 as seed ortholog is 100%.

Bootstrap support for afis|EAW20527.1 as seed ortholog is 100%.

---

Group of orthologs #5262. Best score 812 bits

Score difference with first non-orthologous sequence - *A. fumigatus*:812 *A. fischeri*:649

afum|EAL91622.1 100.00% afis|EAW17813.1 100.00%

Bootstrap support for afum|EAL91622.1 as seed ortholog is 100%.

Bootstrap support for afis|EAW17813.1 as seed ortholog is 100%.

---

Group of orthologs #5263. Best score 812 bits

Score difference with first non-orthologous sequence - *A. fumigatus*:812 *A. fischeri*:486

afum|EAL86221.1 100.00% afis|EAW24558.1 100.00%

Bootstrap support for afum|EAL86221.1 as seed ortholog is 100%.

Bootstrap support for afis|EAW24558.1 as seed ortholog is 100%.

---

Group of orthologs #5264. Best score 811 bits

Score difference with first non-orthologous sequence - *A. fumigatus*:811 *A. fischeri*:811

afum|EAL87070.1 100.00% afis|EAW19424.1 100.00%

Bootstrap support for afum|EAL87070.1 as seed ortholog is 100%.

Bootstrap support for afis|EAW19424.1 as seed ortholog is 100%.

---

Group of orthologs #5265. Best score 811 bits

Score difference with first non-orthologous sequence - *A. fumigatus*:811 *A. fischeri*:811

afum|EAL86924.1 100.00% afis|EAW19594.1 100.00%

Bootstrap support for afum|EAL86924.1 as seed ortholog is 100%.

Bootstrap support for afis|EAW19594.1 as seed ortholog is 100%.

---

Group of orthologs #5266. Best score 811 bits

Score difference with first non-orthologous sequence - *A. fumigatus*:811 *A. fischeri*:321

afum|EAL91148.1 100.00% afis|EAW17313.1 100.00%

Bootstrap support for afum|EAL91148.1 as seed ortholog is 100%.

Bootstrap support for afis|EAW17313.1 as seed ortholog is 100%.

---

Group of orthologs #5267. Best score 811 bits

Score difference with first non-orthologous sequence - *A. fumigatus*:811 *A. fischeri*:811

afum|EAL91211.1 100.00% afis|EAW17375.1 100.00%

Bootstrap support for afum|EAL91211.1 as seed ortholog is 100%.

Bootstrap support for afis|EAW17375.1 as seed ortholog is 100%.

---

Group of orthologs #5268. Best score 811 bits

Score difference with first non-orthologous sequence - *A. fumigatus*:811 *A. fischeri*:811

afum|EAL91564.1 100.00% afis|EAW17751.1 100.00%

Bootstrap support for afum|EAL91564.1 as seed ortholog is 100%.

Bootstrap support for afis|EAW17751.1 as seed ortholog is 100%.

---

Group of orthologs #5269. Best score 811 bits

Score difference with first non-orthologous sequence - *A. fumigatus*:811 *A. fischeri*:724

afum|EAL87890.1 100.00% afis|EAW23575.1 100.00%

Bootstrap support for afum|EAL87890.1 as seed ortholog is 100%.

Bootstrap support for afis|EAW23575.1 as seed ortholog is 100%.

---

Group of orthologs #5270. Best score 811 bits

Score difference with first non-orthologous sequence - *A. fumigatus*:811 *A. fischeri*:744

|                 |         |                 |         |
|-----------------|---------|-----------------|---------|
| afum EAL93448.1 | 100.00% | afis EAW18723.1 | 100.00% |
|-----------------|---------|-----------------|---------|

Bootstrap support for afum|EAL93448.1 as seed ortholog is 100%.

Bootstrap support for afis|EAW18723.1 as seed ortholog is 100%.

---

Group of orthologs #5271. Best score 811 bits

Score difference with first non-orthologous sequence - *A. fumigatus*:692 *A. fischeri*:385

|                 |         |                 |         |
|-----------------|---------|-----------------|---------|
| afum EAL93890.2 | 100.00% | afis EAW19160.1 | 100.00% |
|-----------------|---------|-----------------|---------|

Bootstrap support for afum|EAL93890.2 as seed ortholog is 100%.

Bootstrap support for afis|EAW19160.1 as seed ortholog is 100%.

---

Group of orthologs #5272. Best score 811 bits

Score difference with first non-orthologous sequence - *A. fumigatus*:811 *A. fischeri*:811

|                 |         |                 |         |
|-----------------|---------|-----------------|---------|
| afum EAL92506.1 | 100.00% | afis EAW21486.1 | 100.00% |
|-----------------|---------|-----------------|---------|

Bootstrap support for afum|EAL92506.1 as seed ortholog is 100%.

Bootstrap support for afis|EAW21486.1 as seed ortholog is 100%.

---

Group of orthologs #5273. Best score 811 bits

Score difference with first non-orthologous sequence - *A. fumigatus*:811 *A. fischeri*:811

|                 |         |                 |         |
|-----------------|---------|-----------------|---------|
| afum EAL89594.1 | 100.00% | afis EAW24937.1 | 100.00% |
|-----------------|---------|-----------------|---------|

Bootstrap support for afum|EAL89594.1 as seed ortholog is 100%.

Bootstrap support for afis|EAW24937.1 as seed ortholog is 100%.

---

Group of orthologs #5274. Best score 811 bits

Score difference with first non-orthologous sequence - *A. fumigatus*:811 *A. fischeri*:811

|                 |         |                 |         |
|-----------------|---------|-----------------|---------|
| afum EAL89640.1 | 100.00% | afis EAW24980.1 | 100.00% |
|-----------------|---------|-----------------|---------|

Bootstrap support for afum|EAL89640.1 as seed ortholog is 100%.

Bootstrap support for afis|EAW24980.1 as seed ortholog is 100%.

---

Group of orthologs #5275. Best score 811 bits

Score difference with first non-orthologous sequence - *A. fumigatus*:811 *A. fischeri*:811

|                 |         |                 |         |
|-----------------|---------|-----------------|---------|
| afum EAL91956.1 | 100.00% | afis EAW24102.1 | 100.00% |
|-----------------|---------|-----------------|---------|

Bootstrap support for afum|EAL91956.1 as seed ortholog is 100%.

Bootstrap support for afis|EAW24102.1 as seed ortholog is 100%.

---

Group of orthologs #5276. Best score 810 bits

Score difference with first non-orthologous sequence - *A. fumigatus*:810 *A. fischeri*:810

|                 |         |                 |         |
|-----------------|---------|-----------------|---------|
| afum EAL85820.1 | 100.00% | afis EAW15504.1 | 100.00% |
|-----------------|---------|-----------------|---------|

Bootstrap support for afum|EAL85820.1 as seed ortholog is 100%.

Bootstrap support for afis|EAW15504.1 as seed ortholog is 100%.

---

Group of orthologs #5277. Best score 810 bits

Score difference with first non-orthologous sequence - *A. fumigatus*:810 *A. fischeri*:810

|                 |         |                 |         |
|-----------------|---------|-----------------|---------|
| afum EAL89191.1 | 100.00% | afis EAW16595.1 | 100.00% |
|-----------------|---------|-----------------|---------|

Bootstrap support for afum|EAL89191.1 as seed ortholog is 100%.

Bootstrap support for afis|EAW16595.1 as seed ortholog is 100%.

---

Group of orthologs #5278. Best score 810 bits

Score difference with first non-orthologous sequence - *A. fumigatus*:810 *A. fischeri*:810

|                 |         |                 |         |
|-----------------|---------|-----------------|---------|
| afum EAL86884.1 | 100.00% | afis EAW19638.1 | 100.00% |
|-----------------|---------|-----------------|---------|

Bootstrap support for afum|EAL86884.1 as seed ortholog is 100%.

Bootstrap support for afis|EAW19638.1 as seed ortholog is 100%.

---

Group of orthologs #5279. Best score 810 bits

Score difference with first non-orthologous sequence - *A. fumigatus*:810 *A. fischeri*:810

|                 |         |                 |         |
|-----------------|---------|-----------------|---------|
| afum EAL88206.1 | 100.00% | afis EAW23273.1 | 100.00% |
|-----------------|---------|-----------------|---------|

Bootstrap support for afum|EAL88206.1 as seed ortholog is 100%.

Bootstrap support for afis|EAW23273.1 as seed ortholog is 100%.

---

Group of orthologs #5280. Best score 810 bits

Score difference with first non-orthologous sequence - *A. fumigatus*:810 *A. fischeri*:810

afum|EAL90526.1 100.00% afis|EAW22666.1 100.00%

Bootstrap support for afum|EAL90526.1 as seed ortholog is 100%.

Bootstrap support for afis|EAW22666.1 as seed ortholog is 100%.

---

Group of orthologs #5281. Best score 810 bits

Score difference with first non-orthologous sequence - *A. fumigatus*:810 *A. fischeri*:810

afum|EAL92345.1 100.00% afis|EAW21327.1 100.00%

Bootstrap support for afum|EAL92345.1 as seed ortholog is 100%.

Bootstrap support for afis|EAW21327.1 as seed ortholog is 100%.

---

Group of orthologs #5282. Best score 810 bits

Score difference with first non-orthologous sequence - *A. fumigatus*:810 *A. fischeri*:810

afum|EAL92446.2 100.00% afis|EAW21431.1 100.00%

Bootstrap support for afum|EAL92446.2 as seed ortholog is 100%.

Bootstrap support for afis|EAW21431.1 as seed ortholog is 100%.

---

Group of orthologs #5283. Best score 809 bits

Score difference with first non-orthologous sequence - *A. fumigatus*:809 *A. fischeri*:809

afum|EAL85770.1 100.00% afis|EAW15562.1 100.00%

Bootstrap support for afum|EAL85770.1 as seed ortholog is 100%.

Bootstrap support for afis|EAW15562.1 as seed ortholog is 100%.

---

Group of orthologs #5284. Best score 809 bits

Score difference with first non-orthologous sequence - *A. fumigatus*:809 *A. fischeri*:809

afum|EAL85867.1 100.00% afis|EAW24195.1 100.00%

Bootstrap support for afum|EAL85867.1 as seed ortholog is 100%.

Bootstrap support for afis|EAW24195.1 as seed ortholog is 100%.

---

Group of orthologs #5285. Best score 809 bits

Score difference with first non-orthologous sequence - *A. fumigatus*:747 *A. fischeri*:605

afum|EAL87334.1 100.00% afis|EAW23906.1 100.00%

Bootstrap support for afum|EAL87334.1 as seed ortholog is 100%.

Bootstrap support for afis|EAW23906.1 as seed ortholog is 100%.

---

Group of orthologs #5286. Best score 809 bits

Score difference with first non-orthologous sequence - *A. fumigatus*:809 *A. fischeri*:649

afum|EAL90442.2 100.00% afis|EAW22757.1 100.00%

Bootstrap support for afum|EAL90442.2 as seed ortholog is 100%.

Bootstrap support for afis|EAW22757.1 as seed ortholog is 100%.

---

Group of orthologs #5287. Best score 809 bits

Score difference with first non-orthologous sequence - *A. fumigatus*:809 *A. fischeri*:809

afum|EAL92416.1 100.00% afis|EAW21402.1 100.00%

Bootstrap support for afum|EAL92416.1 as seed ortholog is 100%.

Bootstrap support for afis|EAW21402.1 as seed ortholog is 100%.

---

Group of orthologs #5288. Best score 808 bits

Score difference with first non-orthologous sequence - *A. fumigatus*:808 *A. fischeri*:808

afum|EAL85659.1 100.00% afis|EAW15689.1 100.00%

Bootstrap support for afum|EAL85659.1 as seed ortholog is 100%.

Bootstrap support for afis|EAW15689.1 as seed ortholog is 100%.

---

Group of orthologs #5289. Best score 808 bits

Score difference with first non-orthologous sequence - *A. fumigatus*:808 *A. fischeri*:721

afum|EAL88860.1 100.00% afis|EAW16239.1 100.00%

Bootstrap support for afum|EAL88860.1 as seed ortholog is 100%.

Bootstrap support for afis|EAW16239.1 as seed ortholog is 100%.

---

Group of orthologs #5290. Best score 808 bits

Score difference with first non-orthologous sequence - *A. fumigatus*:808 *A. fischeri*:808

afum|EAL84679.1 100.00% afis|EAW20955.1 100.00%

Bootstrap support for afum|EAL84679.1 as seed ortholog is 100%.

Bootstrap support for afis|EAW20955.1 as seed ortholog is 100%.

---

Group of orthologs #5291. Best score 808 bits

Score difference with first non-orthologous sequence - *A. fumigatus*:808 *A. fischeri*:724

afum|EBA27424.1 100.00% afis|EAW17342.1 100.00%

Bootstrap support for afum|EBA27424.1 as seed ortholog is 100%.

Bootstrap support for afis|EAW17342.1 as seed ortholog is 100%.

---

Group of orthologs #5292. Best score 808 bits

Score difference with first non-orthologous sequence - *A. fumigatus*:808 *A. fischeri*:808

afum|EAL88440.1 100.00% afis|EAW23041.1 100.00%

Bootstrap support for afum|EAL88440.1 as seed ortholog is 100%.

Bootstrap support for afis|EAW23041.1 as seed ortholog is 100%.

---

Group of orthologs #5293. Best score 808 bits

Score difference with first non-orthologous sequence - *A. fumigatus*:808 *A. fischeri*:808

afum|EAL93923.2 100.00% afis|EAW19192.1 100.00%

Bootstrap support for afum|EAL93923.2 as seed ortholog is 100%.

Bootstrap support for afis|EAW19192.1 as seed ortholog is 100%.

---

Group of orthologs #5294. Best score 808 bits

Score difference with first non-orthologous sequence - *A. fumigatus*:808 *A. fischeri*:808

afum|EAL89942.1 100.00% afis|EAW25279.1 100.00%

Bootstrap support for afum|EAL89942.1 as seed ortholog is 100%.

Bootstrap support for afis|EAW25279.1 as seed ortholog is 100%.

---

Group of orthologs #5295. Best score 807 bits

Score difference with first non-orthologous sequence - *A. fumigatus*:807 *A. fischeri*:807

afum|EAL85581.1 100.00% afis|EAW15767.1 100.00%

Bootstrap support for afum|EAL85581.1 as seed ortholog is 100%.

Bootstrap support for afis|EAW15767.1 as seed ortholog is 100%.

---

Group of orthologs #5296. Best score 807 bits

Score difference with first non-orthologous sequence - *A. fumigatus*:807 *A. fischeri*:807

afum|EAL88526.2 100.00% afis|EAW15891.1 100.00%

Bootstrap support for afum|EAL88526.2 as seed ortholog is 100%.

Bootstrap support for afis|EAW15891.1 as seed ortholog is 100%.

---

Group of orthologs #5297. Best score 807 bits

Score difference with first non-orthologous sequence - *A. fumigatus*:807 *A. fischeri*:807

afum|EAL88729.1 100.00% afis|EAW16097.1 100.00%

Bootstrap support for afum|EAL88729.1 as seed ortholog is 100%.

Bootstrap support for afis|EAW16097.1 as seed ortholog is 100%.

---

Group of orthologs #5298. Best score 807 bits

Score difference with first non-orthologous sequence - *A. fumigatus*:807 *A. fischeri*:807

|                 |         |                 |         |
|-----------------|---------|-----------------|---------|
| afum EAL87075.1 | 100.00% | afis EAW19419.1 | 100.00% |
|-----------------|---------|-----------------|---------|

Bootstrap support for afum|EAL87075.1 as seed ortholog is 100%.

Bootstrap support for afis|EAW19419.1 as seed ortholog is 100%.

---

Group of orthologs #5299. Best score 807 bits

Score difference with first non-orthologous sequence - *A. fumigatus*:807 *A. fischeri*:807

|                 |         |                 |         |
|-----------------|---------|-----------------|---------|
| afum EAL86854.2 | 100.00% | afis EAW19669.1 | 100.00% |
|-----------------|---------|-----------------|---------|

Bootstrap support for afum|EAL86854.2 as seed ortholog is 100%.

Bootstrap support for afis|EAW19669.1 as seed ortholog is 100%.

---

Group of orthologs #5300. Best score 807 bits

Score difference with first non-orthologous sequence - *A. fumigatus*:807 *A. fischeri*:648

|                 |         |                 |         |
|-----------------|---------|-----------------|---------|
| afum EAL92201.1 | 100.00% | afis EAW21180.1 | 100.00% |
|-----------------|---------|-----------------|---------|

Bootstrap support for afum|EAL92201.1 as seed ortholog is 100%.

Bootstrap support for afis|EAW21180.1 as seed ortholog is 100%.

---

Group of orthologs #5301. Best score 807 bits

Score difference with first non-orthologous sequence - *A. fumigatus*:757 *A. fischeri*:539

|                 |         |                 |         |
|-----------------|---------|-----------------|---------|
| afum EAL89964.1 | 100.00% | afis EAW25301.1 | 100.00% |
|-----------------|---------|-----------------|---------|

Bootstrap support for afum|EAL89964.1 as seed ortholog is 100%.

Bootstrap support for afis|EAW25301.1 as seed ortholog is 100%.

---

Group of orthologs #5302. Best score 807 bits

Score difference with first non-orthologous sequence - *A. fumigatus*:807 *A. fischeri*:807

|                 |         |                 |         |
|-----------------|---------|-----------------|---------|
| afum EBA27342.1 | 100.00% | afis EAW23207.1 | 100.00% |
|-----------------|---------|-----------------|---------|

Bootstrap support for afum|EBA27342.1 as seed ortholog is 100%.

Bootstrap support for afis|EAW23207.1 as seed ortholog is 100%.

---

Group of orthologs #5303. Best score 806 bits

Score difference with first non-orthologous sequence - *A. fumigatus*:689 *A. fischeri*:668

|                 |         |                 |         |
|-----------------|---------|-----------------|---------|
| afum EAL86317.2 | 100.00% | afis EAW16742.1 | 100.00% |
|-----------------|---------|-----------------|---------|

Bootstrap support for afum|EAL86317.2 as seed ortholog is 100%.

Bootstrap support for afis|EAW16742.1 as seed ortholog is 100%.

---

Group of orthologs #5304. Best score 806 bits

Score difference with first non-orthologous sequence - *A. fumigatus*:806 *A. fischeri*:806

|                 |         |                 |         |
|-----------------|---------|-----------------|---------|
| afum EAL86361.1 | 100.00% | afis EAW16792.1 | 100.00% |
|-----------------|---------|-----------------|---------|

Bootstrap support for afum|EAL86361.1 as seed ortholog is 100%.

Bootstrap support for afis|EAW16792.1 as seed ortholog is 100%.

---

Group of orthologs #5305. Best score 806 bits

Score difference with first non-orthologous sequence - *A. fumigatus*:806 *A. fischeri*:806

|                 |         |                 |         |
|-----------------|---------|-----------------|---------|
| afum EAL86020.2 | 100.00% | afis EAW24350.1 | 100.00% |
|-----------------|---------|-----------------|---------|

Bootstrap support for afum|EAL86020.2 as seed ortholog is 100%.

Bootstrap support for afis|EAW24350.1 as seed ortholog is 100%.

---

Group of orthologs #5306. Best score 806 bits

Score difference with first non-orthologous sequence - *A. fumigatus*:806 *A. fischeri*:737

|                 |         |                 |         |
|-----------------|---------|-----------------|---------|
| afum EAL93371.1 | 100.00% | afis EAW18655.1 | 100.00% |
|-----------------|---------|-----------------|---------|

Bootstrap support for afum|EAL93371.1 as seed ortholog is 100%.

Bootstrap support for afis|EAW18655.1 as seed ortholog is 100%.

---

Group of orthologs #5307. Best score 806 bits

Score difference with first non-orthologous sequence - *A. fumigatus*:806 *A. fischeri*:806

|                 |         |                 |         |
|-----------------|---------|-----------------|---------|
| afum EAL93717.1 | 100.00% | afis EAW18981.1 | 100.00% |
|-----------------|---------|-----------------|---------|

Bootstrap support for afum|EAL93717.1 as seed ortholog is 100%.

Bootstrap support for afis|EAW18981.1 as seed ortholog is 100%.

---

Group of orthologs #5308. Best score 806 bits

Score difference with first non-orthologous sequence - *A. fumigatus*:806 *A. fischeri*:626

afum|EAL88040.1 100.00% afis|EAW24586.1 100.00%

Bootstrap support for afum|EAL88040.1 as seed ortholog is 100%.

Bootstrap support for afis|EAW24586.1 as seed ortholog is 100%.

---

Group of orthologs #5309. Best score 806 bits

Score difference with first non-orthologous sequence - *A. fumigatus*:806 *A. fischeri*:806

afum|EAL93008.1 100.00% afis|EAW21993.1 100.00%

Bootstrap support for afum|EAL93008.1 as seed ortholog is 100%.

Bootstrap support for afis|EAW21993.1 as seed ortholog is 100%.

---

Group of orthologs #5310. Best score 805 bits

Score difference with first non-orthologous sequence - *A. fumigatus*:805 *A. fischeri*:805

afum|EAL91374.1 100.00% afis|EAW17560.1 100.00%

Bootstrap support for afum|EAL91374.1 as seed ortholog is 100%.

Bootstrap support for afis|EAW17560.1 as seed ortholog is 100%.

---

Group of orthologs #5311. Best score 805 bits

Score difference with first non-orthologous sequence - *A. fumigatus*:805 *A. fischeri*:805

afum|EAL91636.1 100.00% afis|EAW17826.1 100.00%

Bootstrap support for afum|EAL91636.1 as seed ortholog is 100%.

Bootstrap support for afis|EAW17826.1 as seed ortholog is 100%.

---

Group of orthologs #5312. Best score 805 bits

Score difference with first non-orthologous sequence - *A. fumigatus*:805 *A. fischeri*:805

afum|EAL91725.2 100.00% afis|EAW17915.1 100.00%

Bootstrap support for afum|EAL91725.2 as seed ortholog is 100%.

Bootstrap support for afis|EAW17915.1 as seed ortholog is 100%.

---

Group of orthologs #5313. Best score 805 bits

Score difference with first non-orthologous sequence - *A. fumigatus*:805 *A. fischeri*:805

afum|EAL86050.1 100.00% afis|EAW24378.1 100.00%

Bootstrap support for afum|EAL86050.1 as seed ortholog is 100%.

Bootstrap support for afis|EAW24378.1 as seed ortholog is 100%.

---

Group of orthologs #5314. Best score 805 bits

Score difference with first non-orthologous sequence - *A. fumigatus*:805 *A. fischeri*:805

afum|EAL87437.1 100.00% afis|EAW24007.1 100.00%

Bootstrap support for afum|EAL87437.1 as seed ortholog is 100%.

Bootstrap support for afis|EAW24007.1 as seed ortholog is 100%.

---

Group of orthologs #5315. Best score 805 bits

Score difference with first non-orthologous sequence - *A. fumigatus*:805 *A. fischeri*:805

afum|EAL94023.1 100.00% afis|EAW19305.1 100.00%

Bootstrap support for afum|EAL94023.1 as seed ortholog is 100%.

Bootstrap support for afis|EAW19305.1 as seed ortholog is 100%.

---

Group of orthologs #5316. Best score 804 bits

Score difference with first non-orthologous sequence - *A. fumigatus*:804 *A. fischeri*:804

afum|EAL87762.1 100.00% afis|EAW20056.1 100.00%

afum|EAL85176.2 97.44%

Bootstrap support for afum|EAL87762.1 as seed ortholog is 100%.

Bootstrap support for afis|EAW20056.1 as seed ortholog is 100%.



---

Group of orthologs #5317. Best score 804 bits

Score difference with first non-orthologous sequence - *A. fumigatus*:804 *A. fischeri*:519

afum|EAL85836.1 100.00% afis|EAW15487.1 100.00%

Bootstrap support for afum|EAL85836.1 as seed ortholog is 100%.

Bootstrap support for afis|EAW15487.1 as seed ortholog is 100%.

---

Group of orthologs #5318. Best score 804 bits

Score difference with first non-orthologous sequence - *A. fumigatus*:804 *A. fischeri*:720

afum|EAL86363.1 100.00% afis|EAW16794.1 100.00%

Bootstrap support for afum|EAL86363.1 as seed ortholog is 100%.

Bootstrap support for afis|EAW16794.1 as seed ortholog is 100%.

---

Group of orthologs #5319. Best score 804 bits

Score difference with first non-orthologous sequence - *A. fumigatus*:804 *A. fischeri*:804

afum|EAL84643.1 100.00% afis|EAW20987.1 100.00%

Bootstrap support for afum|EAL84643.1 as seed ortholog is 100%.

Bootstrap support for afis|EAW20987.1 as seed ortholog is 100%.

---

Group of orthologs #5320. Best score 804 bits

Score difference with first non-orthologous sequence - *A. fumigatus*:804 *A. fischeri*:804

afum|EAL91826.1 100.00% afis|EAW18014.1 100.00%

Bootstrap support for afum|EAL91826.1 as seed ortholog is 100%.

Bootstrap support for afis|EAW18014.1 as seed ortholog is 100%.

---

Group of orthologs #5321. Best score 804 bits

Score difference with first non-orthologous sequence - *A. fumigatus*:804 *A. fischeri*:804

afum|EAL93506.1 100.00% afis|EAW18774.1 100.00%

Bootstrap support for afum|EAL93506.1 as seed ortholog is 100%.

Bootstrap support for afis|EAW18774.1 as seed ortholog is 100%.

---

Group of orthologs #5322. Best score 804 bits

Score difference with first non-orthologous sequence - *A. fumigatus*:804 *A. fischeri*:804

afum|EAL90327.1 100.00% afis|EAW22871.1 100.00%

Bootstrap support for afum|EAL90327.1 as seed ortholog is 100%.

Bootstrap support for afis|EAW22871.1 as seed ortholog is 100%.

---

Group of orthologs #5323. Best score 803 bits

Score difference with first non-orthologous sequence - *A. fumigatus*:673 *A. fischeri*:512

afum|EAL88877.1 100.00% afis|EAW16249.1 100.00%

Bootstrap support for afum|EAL88877.1 as seed ortholog is 100%.

Bootstrap support for afis|EAW16249.1 as seed ortholog is 100%.

---

Group of orthologs #5324. Best score 803 bits

Score difference with first non-orthologous sequence - *A. fumigatus*:803 *A. fischeri*:803

afum|EAL89161.1 100.00% afis|EAW16564.1 100.00%

Bootstrap support for afum|EAL89161.1 as seed ortholog is 100%.

Bootstrap support for afis|EAW16564.1 as seed ortholog is 100%.

---

Group of orthologs #5325. Best score 803 bits

Score difference with first non-orthologous sequence - *A. fumigatus*:803 *A. fischeri*:803

afum|EAL86886.1 100.00% afis|EAW19636.1 100.00%

Bootstrap support for afum|EAL86886.1 as seed ortholog is 100%.

Bootstrap support for afis|EAW19636.1 as seed ortholog is 100%.

---

Group of orthologs #5326. Best score 803 bits

Score difference with first non-orthologous sequence - *A. fumigatus*:803 *A. fischeri*:803  
afum|EAL88368.1 100.00% afis|EAW23111.1 100.00%  
Bootstrap support for afum|EAL88368.1 as seed ortholog is 100%.  
Bootstrap support for afis|EAW23111.1 as seed ortholog is 100%.

---

Group of orthologs #5327. Best score 803 bits

Score difference with first non-orthologous sequence - *A. fumigatus*:803 *A. fischeri*:803  
afum|EAL88100.1 100.00% afis|EAW23372.1 100.00%  
Bootstrap support for afum|EAL88100.1 as seed ortholog is 100%.  
Bootstrap support for afis|EAW23372.1 as seed ortholog is 100%.

---

Group of orthologs #5328. Best score 803 bits

Score difference with first non-orthologous sequence - *A. fumigatus*:803 *A. fischeri*:803  
afum|EAL92795.1 100.00% afis|EAW21765.1 100.00%  
Bootstrap support for afum|EAL92795.1 as seed ortholog is 100%.  
Bootstrap support for afis|EAW21765.1 as seed ortholog is 100%.

---

Group of orthologs #5329. Best score 802 bits

Score difference with first non-orthologous sequence - *A. fumigatus*:802 *A. fischeri*:713  
afum|EAL86503.1 100.00% afis|EAW16978.1 100.00%  
Bootstrap support for afum|EAL86503.1 as seed ortholog is 100%.  
Bootstrap support for afis|EAW16978.1 as seed ortholog is 100%.

---

Group of orthologs #5330. Best score 802 bits

Score difference with first non-orthologous sequence - *A. fumigatus*:802 *A. fischeri*:802  
afum|EAL88963.1 100.00% afis|EAW16337.1 100.00%  
Bootstrap support for afum|EAL88963.1 as seed ortholog is 100%.  
Bootstrap support for afis|EAW16337.1 as seed ortholog is 100%.

---

Group of orthologs #5331. Best score 802 bits

Score difference with first non-orthologous sequence - *A. fumigatus*:802 *A. fischeri*:802  
afum|EAL91506.1 100.00% afis|EAW17692.1 100.00%  
Bootstrap support for afum|EAL91506.1 as seed ortholog is 100%.  
Bootstrap support for afis|EAW17692.1 as seed ortholog is 100%.

---

Group of orthologs #5332. Best score 802 bits

Score difference with first non-orthologous sequence - *A. fumigatus*:747 *A. fischeri*:802  
afum|EAL91610.1 100.00% afis|EAW17802.1 100.00%  
Bootstrap support for afum|EAL91610.1 as seed ortholog is 100%.  
Bootstrap support for afis|EAW17802.1 as seed ortholog is 100%.

---

Group of orthologs #5333. Best score 802 bits

Score difference with first non-orthologous sequence - *A. fumigatus*:802 *A. fischeri*:802  
afum|EAL91818.1 100.00% afis|EAW18006.1 100.00%  
Bootstrap support for afum|EAL91818.1 as seed ortholog is 100%.  
Bootstrap support for afis|EAW18006.1 as seed ortholog is 100%.

---

Group of orthologs #5334. Best score 802 bits

Score difference with first non-orthologous sequence - *A. fumigatus*:802 *A. fischeri*:802  
afum|EAL85861.1 100.00% afis|EAW24188.1 100.00%  
Bootstrap support for afum|EAL85861.1 as seed ortholog is 100%.  
Bootstrap support for afis|EAW24188.1 as seed ortholog is 100%.

---

Group of orthologs #5335. Best score 802 bits

Score difference with first non-orthologous sequence - *A. fumigatus*:655 *A. fischeri*:629  
afum|EAL87239.1 100.00% afis|EAW23806.1 100.00%

Bootstrap support for afum|EAL87239.1 as seed ortholog is 100%.  
Bootstrap support for afis|EAW23806.1 as seed ortholog is 100%.

---

Group of orthologs #5336. Best score 802 bits

Score difference with first non-orthologous sequence - *A. fumigatus*:573 *A. fischeri*:432

afum|EAL93769.1 100.00% afis|EAW19040.1 100.00%

Bootstrap support for afum|EAL93769.1 as seed ortholog is 100%.

Bootstrap support for afis|EAW19040.1 as seed ortholog is 100%.

---

Group of orthologs #5337. Best score 802 bits

Score difference with first non-orthologous sequence - *A. fumigatus*:802 *A. fischeri*:802

afum|EAL91952.1 100.00% afis|EAW24098.1 100.00%

Bootstrap support for afum|EAL91952.1 as seed ortholog is 100%.

Bootstrap support for afis|EAW24098.1 as seed ortholog is 100%.

---

Group of orthologs #5338. Best score 801 bits

Score difference with first non-orthologous sequence - *A. fumigatus*:801 *A. fischeri*:369

afum|EAL84207.1 100.00% afis|EAW15438.1 100.00%

Bootstrap support for afum|EAL84207.1 as seed ortholog is 100%.

Bootstrap support for afis|EAW15438.1 as seed ortholog is 100%.

---

Group of orthologs #5339. Best score 801 bits

Score difference with first non-orthologous sequence - *A. fumigatus*:756 *A. fischeri*:801

afum|EAL85267.1 100.00% afis|EAW20152.1 100.00%

Bootstrap support for afum|EAL85267.1 as seed ortholog is 100%.

Bootstrap support for afis|EAW20152.1 as seed ortholog is 100%.

---

Group of orthologs #5340. Best score 801 bits

Score difference with first non-orthologous sequence - *A. fumigatus*:801 *A. fischeri*:801

afum|EAL86985.1 100.00% afis|EAW19510.1 100.00%

Bootstrap support for afum|EAL86985.1 as seed ortholog is 100%.

Bootstrap support for afis|EAW19510.1 as seed ortholog is 100%.

---

Group of orthologs #5341. Best score 801 bits

Score difference with first non-orthologous sequence - *A. fumigatus*:391 *A. fischeri*:289

afum|EAL93843.2 100.00% afis|EAW19112.1 100.00%

Bootstrap support for afum|EAL93843.2 as seed ortholog is 100%.

Bootstrap support for afis|EAW19112.1 as seed ortholog is 100%.

---

Group of orthologs #5342. Best score 801 bits

Score difference with first non-orthologous sequence - *A. fumigatus*:801 *A. fischeri*:801

afum|EAL90759.1 100.00% afis|EAW22432.1 100.00%

Bootstrap support for afum|EAL90759.1 as seed ortholog is 100%.

Bootstrap support for afis|EAW22432.1 as seed ortholog is 100%.

---

Group of orthologs #5343. Best score 801 bits

Score difference with first non-orthologous sequence - *A. fumigatus*:801 *A. fischeri*:801

afum|EAL90549.2 100.00% afis|EAW22643.1 100.00%

Bootstrap support for afum|EAL90549.2 as seed ortholog is 100%.

Bootstrap support for afis|EAW22643.1 as seed ortholog is 100%.

---

Group of orthologs #5344. Best score 801 bits

Score difference with first non-orthologous sequence - *A. fumigatus*:801 *A. fischeri*:801

afum|EAL94063.1 100.00% afis|EAW19344.1 100.00%

Bootstrap support for afum|EAL94063.1 as seed ortholog is 100%.

Bootstrap support for afis|EAW19344.1 as seed ortholog is 100%.

---

Group of orthologs #5345. Best score 800 bits

Score difference with first non-orthologous sequence - *A. fumigatus*:800 *A. fischeri*:800

afum|EAL85247.1 100.00% afis|EAW20131.1 100.00%

Bootstrap support for afum|EAL85247.1 as seed ortholog is 100%.

Bootstrap support for afis|EAW20131.1 as seed ortholog is 100%.

---

Group of orthologs #5346. Best score 800 bits

Score difference with first non-orthologous sequence - *A. fumigatus*:675 *A. fischeri*:758

afum|EAL86197.1 100.00% afis|EAW24531.1 100.00%

Bootstrap support for afum|EAL86197.1 as seed ortholog is 100%.

Bootstrap support for afis|EAW24531.1 as seed ortholog is 100%.

---

Group of orthologs #5347. Best score 799 bits

Score difference with first non-orthologous sequence - *A. fumigatus*:799 *A. fischeri*:799

afum|EAL86449.1 100.00% afis|EAW16923.1 100.00%

Bootstrap support for afum|EAL86449.1 as seed ortholog is 100%.

Bootstrap support for afis|EAW16923.1 as seed ortholog is 100%.

---

Group of orthologs #5348. Best score 799 bits

Score difference with first non-orthologous sequence - *A. fumigatus*:799 *A. fischeri*:635

afum|EAL91482.1 100.00% afis|EAW17668.1 100.00%

Bootstrap support for afum|EAL91482.1 as seed ortholog is 100%.

Bootstrap support for afis|EAW17668.1 as seed ortholog is 100%.

---

Group of orthologs #5349. Best score 799 bits

Score difference with first non-orthologous sequence - *A. fumigatus*:799 *A. fischeri*:799

afum|EAL93117.1 100.00% afis|EAW18436.1 100.00%

Bootstrap support for afum|EAL93117.1 as seed ortholog is 100%.

Bootstrap support for afis|EAW18436.1 as seed ortholog is 100%.

---

Group of orthologs #5350. Best score 799 bits

Score difference with first non-orthologous sequence - *A. fumigatus*:746 *A. fischeri*:701

afum|EAL87921.2 100.00% afis|EAW23545.1 100.00%

Bootstrap support for afum|EAL87921.2 as seed ortholog is 100%.

Bootstrap support for afis|EAW23545.1 as seed ortholog is 100%.

---

Group of orthologs #5351. Best score 799 bits

Score difference with first non-orthologous sequence - *A. fumigatus*:799 *A. fischeri*:799

afum|EAL92503.1 100.00% afis|EAW21483.1 100.00%

Bootstrap support for afum|EAL92503.1 as seed ortholog is 100%.

Bootstrap support for afis|EAW21483.1 as seed ortholog is 100%.

---

Group of orthologs #5352. Best score 798 bits

Score difference with first non-orthologous sequence - *A. fumigatus*:647 *A. fischeri*:644

afum|EAL85702.1 100.00% afis|EAW15637.1 100.00%

Bootstrap support for afum|EAL85702.1 as seed ortholog is 100%.

Bootstrap support for afis|EAW15637.1 as seed ortholog is 100%.

---

Group of orthologs #5353. Best score 798 bits

Score difference with first non-orthologous sequence - *A. fumigatus*:798 *A. fischeri*:798

afum|EAL84810.1 100.00% afis|EAW20819.1 100.00%

Bootstrap support for afum|EAL84810.1 as seed ortholog is 100%.

Bootstrap support for afis|EAW20819.1 as seed ortholog is 100%.

---

Group of orthologs #5354. Best score 798 bits

Score difference with first non-orthologous sequence - *A. fumigatus*:798 *A. fischeri*:798  
afum|EAL91491.1 100.00% afis|EAW17678.1 100.00%  
Bootstrap support for afum|EAL91491.1 as seed ortholog is 100%.  
Bootstrap support for afis|EAW17678.1 as seed ortholog is 100%.

---

Group of orthologs #5355. Best score 798 bits

Score difference with first non-orthologous sequence - *A. fumigatus*:696 *A. fischeri*:443  
afum|EAL85893.1 100.00% afis|EAW24225.1 100.00%  
Bootstrap support for afum|EAL85893.1 as seed ortholog is 100%.  
Bootstrap support for afis|EAW24225.1 as seed ortholog is 100%.

---

Group of orthologs #5356. Best score 798 bits

Score difference with first non-orthologous sequence - *A. fumigatus*:798 *A. fischeri*:798  
afum|EAL87419.1 100.00% afis|EAW23989.1 100.00%  
Bootstrap support for afum|EAL87419.1 as seed ortholog is 100%.  
Bootstrap support for afis|EAW23989.1 as seed ortholog is 100%.

---

Group of orthologs #5357. Best score 798 bits

Score difference with first non-orthologous sequence - *A. fumigatus*:751 *A. fischeri*:654  
afum|EAL87879.1 100.00% afis|EAW23585.1 100.00%  
Bootstrap support for afum|EAL87879.1 as seed ortholog is 100%.  
Bootstrap support for afis|EAW23585.1 as seed ortholog is 100%.

---

Group of orthologs #5358. Best score 798 bits

Score difference with first non-orthologous sequence - *A. fumigatus*:798 *A. fischeri*:798  
afum|EAL93570.1 100.00% afis|EAW18834.1 100.00%  
Bootstrap support for afum|EAL93570.1 as seed ortholog is 100%.  
Bootstrap support for afis|EAW18834.1 as seed ortholog is 100%.

---

Group of orthologs #5359. Best score 798 bits

Score difference with first non-orthologous sequence - *A. fumigatus*:798 *A. fischeri*:798  
afum|EAL90763.1 100.00% afis|EAW22428.1 100.00%  
Bootstrap support for afum|EAL90763.1 as seed ortholog is 100%.  
Bootstrap support for afis|EAW22428.1 as seed ortholog is 100%.

---

Group of orthologs #5360. Best score 798 bits

Score difference with first non-orthologous sequence - *A. fumigatus*:798 *A. fischeri*:706  
afum|EAL90465.1 100.00% afis|EAW22730.1 100.00%  
Bootstrap support for afum|EAL90465.1 as seed ortholog is 100%.  
Bootstrap support for afis|EAW22730.1 as seed ortholog is 100%.

---

Group of orthologs #5361. Best score 798 bits

Score difference with first non-orthologous sequence - *A. fumigatus*:798 *A. fischeri*:719  
afum|EAL90441.1 100.00% afis|EAW22758.1 100.00%  
Bootstrap support for afum|EAL90441.1 as seed ortholog is 100%.  
Bootstrap support for afis|EAW22758.1 as seed ortholog is 100%.

---

Group of orthologs #5362. Best score 798 bits

Score difference with first non-orthologous sequence - *A. fumigatus*:798 *A. fischeri*:746  
afum|EBA27507.1 100.00% afis|EAW19159.1 100.00%  
Bootstrap support for afum|EBA27507.1 as seed ortholog is 100%.  
Bootstrap support for afis|EAW19159.1 as seed ortholog is 100%.

---

Group of orthologs #5363. Best score 798 bits

Score difference with first non-orthologous sequence - *A. fumigatus*:798 *A. fischeri*:798  
afum|EAL92642.1 100.00% afis|EAW21608.1 100.00%

Bootstrap support for afum|EAL92642.1 as seed ortholog is 100%.  
Bootstrap support for afis|EAW21608.1 as seed ortholog is 100%.

---

Group of orthologs #5364. Best score 798 bits

Score difference with first non-orthologous sequence - *A. fumigatus*:680 *A. fischeri*:544

afum|EAL89619.1 100.00% afis|EAW24961.1 100.00%

Bootstrap support for afum|EAL89619.1 as seed ortholog is 100%.

Bootstrap support for afis|EAW24961.1 as seed ortholog is 100%.

---

Group of orthologs #5365. Best score 797 bits

Score difference with first non-orthologous sequence - *A. fumigatus*:797 *A. fischeri*:797

afum|EAL87588.1 100.00% afis|EAW18222.1 100.00%

Bootstrap support for afum|EAL87588.1 as seed ortholog is 100%.

Bootstrap support for afis|EAW18222.1 as seed ortholog is 100%.

---

Group of orthologs #5366. Best score 797 bits

Score difference with first non-orthologous sequence - *A. fumigatus*:797 *A. fischeri*:797

afum|EAL93603.1 100.00% afis|EAW18871.1 100.00%

Bootstrap support for afum|EAL93603.1 as seed ortholog is 100%.

Bootstrap support for afis|EAW18871.1 as seed ortholog is 100%.

---

Group of orthologs #5367. Best score 797 bits

Score difference with first non-orthologous sequence - *A. fumigatus*:797 *A. fischeri*:645

afum|EAL93957.1 100.00% afis|EAW19226.1 100.00%

Bootstrap support for afum|EAL93957.1 as seed ortholog is 100%.

Bootstrap support for afis|EAW19226.1 as seed ortholog is 100%.

---

Group of orthologs #5368. Best score 797 bits

Score difference with first non-orthologous sequence - *A. fumigatus*:797 *A. fischeri*:797

afum|EAL90978.1 100.00% afis|EAW22216.1 100.00%

Bootstrap support for afum|EAL90978.1 as seed ortholog is 100%.

Bootstrap support for afis|EAW22216.1 as seed ortholog is 100%.

---

Group of orthologs #5369. Best score 796 bits

Score difference with first non-orthologous sequence - *A. fumigatus*:796 *A. fischeri*:796

afum|EAL88687.1 100.00% afis|EAW16055.1 100.00%

Bootstrap support for afum|EAL88687.1 as seed ortholog is 100%.

Bootstrap support for afis|EAW16055.1 as seed ortholog is 100%.

---

Group of orthologs #5370. Best score 796 bits

Score difference with first non-orthologous sequence - *A. fumigatus*:796 *A. fischeri*:796

afum|EAL86107.1 100.00% afis|EAW24439.1 100.00%

Bootstrap support for afum|EAL86107.1 as seed ortholog is 100%.

Bootstrap support for afis|EAW24439.1 as seed ortholog is 100%.

---

Group of orthologs #5371. Best score 796 bits

Score difference with first non-orthologous sequence - *A. fumigatus*:796 *A. fischeri*:796

afum|EAL87130.1 100.00% afis|EAW23685.1 100.00%

Bootstrap support for afum|EAL87130.1 as seed ortholog is 100%.

Bootstrap support for afis|EAW23685.1 as seed ortholog is 100%.

---

Group of orthologs #5372. Best score 796 bits

Score difference with first non-orthologous sequence - *A. fumigatus*:796 *A. fischeri*:649

afum|EAL93988.1 100.00% afis|EAW19261.1 100.00%

Bootstrap support for afum|EAL93988.1 as seed ortholog is 100%.

Bootstrap support for afis|EAW19261.1 as seed ortholog is 100%.

---

Group of orthologs #5373. Best score 796 bits

Score difference with first non-orthologous sequence - *A. fumigatus*:796 *A. fischeri*:796

afum|EAL92606.1 100.00% afis|EAW21588.1 100.00%

Bootstrap support for afum|EAL92606.1 as seed ortholog is 100%.

Bootstrap support for afis|EAW21588.1 as seed ortholog is 100%.

---

Group of orthologs #5374. Best score 796 bits

Score difference with first non-orthologous sequence - *A. fumigatus*:796 *A. fischeri*:796

afum|EAL89608.1 100.00% afis|EAW24951.1 100.00%

Bootstrap support for afum|EAL89608.1 as seed ortholog is 100%.

Bootstrap support for afis|EAW24951.1 as seed ortholog is 100%.

---

Group of orthologs #5375. Best score 795 bits

Score difference with first non-orthologous sequence - *A. fumigatus*:795 *A. fischeri*:701

afum|EAL85743.1 100.00% afis|EAW15589.1 100.00%

Bootstrap support for afum|EAL85743.1 as seed ortholog is 100%.

Bootstrap support for afis|EAW15589.1 as seed ortholog is 100%.

---

Group of orthologs #5376. Best score 795 bits

Score difference with first non-orthologous sequence - *A. fumigatus*:795 *A. fischeri*:795

afum|EAL85614.1 100.00% afis|EAW15733.1 100.00%

Bootstrap support for afum|EAL85614.1 as seed ortholog is 100%.

Bootstrap support for afis|EAW15733.1 as seed ortholog is 100%.

---

Group of orthologs #5377. Best score 795 bits

Score difference with first non-orthologous sequence - *A. fumigatus*:795 *A. fischeri*:795

afum|EAL86698.1 100.00% afis|EAW17280.1 100.00%

Bootstrap support for afum|EAL86698.1 as seed ortholog is 100%.

Bootstrap support for afis|EAW17280.1 as seed ortholog is 100%.

---

Group of orthologs #5378. Best score 795 bits

Score difference with first non-orthologous sequence - *A. fumigatus*:795 *A. fischeri*:795

afum|EAL85207.1 100.00% afis|EAW20088.1 100.00%

Bootstrap support for afum|EAL85207.1 as seed ortholog is 100%.

Bootstrap support for afis|EAW20088.1 as seed ortholog is 100%.

---

Group of orthologs #5379. Best score 795 bits

Score difference with first non-orthologous sequence - *A. fumigatus*:722 *A. fischeri*:500

afum|EAL91146.1 100.00% afis|EAW17311.1 100.00%

Bootstrap support for afum|EAL91146.1 as seed ortholog is 100%.

Bootstrap support for afis|EAW17311.1 as seed ortholog is 100%.

---

Group of orthologs #5380. Best score 795 bits

Score difference with first non-orthologous sequence - *A. fumigatus*:795 *A. fischeri*:795

afum|EAL90959.1 100.00% afis|EAW22234.1 100.00%

Bootstrap support for afum|EAL90959.1 as seed ortholog is 100%.

Bootstrap support for afis|EAW22234.1 as seed ortholog is 100%.

---

Group of orthologs #5381. Best score 795 bits

Score difference with first non-orthologous sequence - *A. fumigatus*:795 *A. fischeri*:795

afum|EAL90533.1 100.00% afis|EAW22659.1 100.00%

Bootstrap support for afum|EAL90533.1 as seed ortholog is 100%.

Bootstrap support for afis|EAW22659.1 as seed ortholog is 100%.

---

Group of orthologs #5382. Best score 795 bits

Score difference with first non-orthologous sequence - *A. fumigatus*:795 *A. fischeri*:795  
afum|EAL92798.1 100.00% afis|EAW21769.1 100.00%  
Bootstrap support for afum|EAL92798.1 as seed ortholog is 100%.  
Bootstrap support for afis|EAW21769.1 as seed ortholog is 100%.

---

Group of orthologs #5383. Best score 794 bits

Score difference with first non-orthologous sequence - *A. fumigatus*:794 *A. fischeri*:794  
afum|EAL88677.1 100.00% afis|EAW16045.1 100.00%  
Bootstrap support for afum|EAL88677.1 as seed ortholog is 100%.  
Bootstrap support for afis|EAW16045.1 as seed ortholog is 100%.

---

Group of orthologs #5384. Best score 794 bits

Score difference with first non-orthologous sequence - *A. fumigatus*:794 *A. fischeri*:611  
afum|EAL87085.1 100.00% afis|EAW19409.1 100.00%  
Bootstrap support for afum|EAL87085.1 as seed ortholog is 100%.  
Bootstrap support for afis|EAW19409.1 as seed ortholog is 100%.

---

Group of orthologs #5385. Best score 794 bits

Score difference with first non-orthologous sequence - *A. fumigatus*:794 *A. fischeri*:794  
afum|EAL86898.1 100.00% afis|EAW19624.1 100.00%  
Bootstrap support for afum|EAL86898.1 as seed ortholog is 100%.  
Bootstrap support for afis|EAW19624.1 as seed ortholog is 100%.

---

Group of orthologs #5386. Best score 794 bits

Score difference with first non-orthologous sequence - *A. fumigatus*:794 *A. fischeri*:794  
afum|EAL91337.1 100.00% afis|EAW17519.1 100.00%  
Bootstrap support for afum|EAL91337.1 as seed ortholog is 100%.  
Bootstrap support for afis|EAW17519.1 as seed ortholog is 100%.

---

Group of orthologs #5387. Best score 794 bits

Score difference with first non-orthologous sequence - *A. fumigatus*:750 *A. fischeri*:693  
afum|EAL91580.1 100.00% afis|EAW17771.1 100.00%  
Bootstrap support for afum|EAL91580.1 as seed ortholog is 100%.  
Bootstrap support for afis|EAW17771.1 as seed ortholog is 100%.

---

Group of orthologs #5388. Best score 794 bits

Score difference with first non-orthologous sequence - *A. fumigatus*:794 *A. fischeri*:794  
afum|EAL86154.1 100.00% afis|EAW24485.1 100.00%  
Bootstrap support for afum|EAL86154.1 as seed ortholog is 100%.  
Bootstrap support for afis|EAW24485.1 as seed ortholog is 100%.

---

Group of orthologs #5389. Best score 794 bits

Score difference with first non-orthologous sequence - *A. fumigatus*:794 *A. fischeri*:794  
afum|EAL89722.1 100.00% afis|EAW25054.1 100.00%  
Bootstrap support for afum|EAL89722.1 as seed ortholog is 100%.  
Bootstrap support for afis|EAW25054.1 as seed ortholog is 100%.

---

Group of orthologs #5390. Best score 793 bits

Score difference with first non-orthologous sequence - *A. fumigatus*:793 *A. fischeri*:793  
afum|EAL85716.1 100.00% afis|EAW15619.1 100.00%  
Bootstrap support for afum|EAL85716.1 as seed ortholog is 100%.  
Bootstrap support for afis|EAW15619.1 as seed ortholog is 100%.

---

Group of orthologs #5391. Best score 793 bits

Score difference with first non-orthologous sequence - *A. fumigatus*:793 *A. fischeri*:793  
afum|EBA27355.1 100.00% afis|EAW16037.1 100.00%



Bootstrap support for afum|EBA27355.1 as seed ortholog is 100%.  
Bootstrap support for afis|EAW16037.1 as seed ortholog is 100%.

---

Group of orthologs #5392. Best score 793 bits

Score difference with first non-orthologous sequence - *A. fumigatus*:793 *A. fischeri*:713

afum|EAL90772.1 100.00% afis|EAW22420.1 100.00%

Bootstrap support for afum|EAL90772.1 as seed ortholog is 100%.

Bootstrap support for afis|EAW22420.1 as seed ortholog is 100%.

---

Group of orthologs #5393. Best score 793 bits

Score difference with first non-orthologous sequence - *A. fumigatus*:793 *A. fischeri*:793

afum|EBA27347.1 100.00% afis|EAW23018.1 100.00%

Bootstrap support for afum|EBA27347.1 as seed ortholog is 100%.

Bootstrap support for afis|EAW23018.1 as seed ortholog is 100%.

---

Group of orthologs #5394. Best score 792 bits

Score difference with first non-orthologous sequence - *A. fumigatus*:792 *A. fischeri*:792

afum|EAL88610.1 100.00% afis|EAW15978.1 100.00%

Bootstrap support for afum|EAL88610.1 as seed ortholog is 100%.

Bootstrap support for afis|EAW15978.1 as seed ortholog is 100%.

---

Group of orthologs #5395. Best score 792 bits

Score difference with first non-orthologous sequence - *A. fumigatus*:728 *A. fischeri*:387

afum|EAL84822.1 100.00% afis|EAW20806.1 100.00%

Bootstrap support for afum|EAL84822.1 as seed ortholog is 100%.

Bootstrap support for afis|EAW20806.1 as seed ortholog is 100%.

---

Group of orthologs #5396. Best score 792 bits

Score difference with first non-orthologous sequence - *A. fumigatus*:792 *A. fischeri*:792

afum|EAL93512.1 100.00% afis|EAW18780.1 100.00%

Bootstrap support for afum|EAL93512.1 as seed ortholog is 100%.

Bootstrap support for afis|EAW18780.1 as seed ortholog is 100%.

---

Group of orthologs #5397. Best score 792 bits

Score difference with first non-orthologous sequence - *A. fumigatus*:792 *A. fischeri*:792

afum|EAL93855.1 100.00% afis|EAW19123.1 100.00%

Bootstrap support for afum|EAL93855.1 as seed ortholog is 100%.

Bootstrap support for afis|EAW19123.1 as seed ortholog is 100%.

---

Group of orthologs #5398. Best score 791 bits

Score difference with first non-orthologous sequence - *A. fumigatus*:791 *A. fischeri*:791

afum|EAL85537.1 100.00% afis|EAW15814.1 100.00%

Bootstrap support for afum|EAL85537.1 as seed ortholog is 100%.

Bootstrap support for afis|EAW15814.1 as seed ortholog is 100%.

---

Group of orthologs #5399. Best score 791 bits

Score difference with first non-orthologous sequence - *A. fumigatus*:791 *A. fischeri*:791

afum|EAL86517.1 100.00% afis|EAW16993.1 100.00%

Bootstrap support for afum|EAL86517.1 as seed ortholog is 100%.

Bootstrap support for afis|EAW16993.1 as seed ortholog is 100%.

---

Group of orthologs #5400. Best score 791 bits

Score difference with first non-orthologous sequence - *A. fumigatus*:791 *A. fischeri*:791

afum|EAL86727.1 100.00% afis|EAW17155.1 100.00%

Bootstrap support for afum|EAL86727.1 as seed ortholog is 100%.

Bootstrap support for afis|EAW17155.1 as seed ortholog is 100%.

---

Group of orthologs #5401. Best score 791 bits

Score difference with first non-orthologous sequence - *A. fumigatus*:791 *A. fischeri*:791

afum|EAL87715.1 100.00% afis|EAW18352.1 100.00%

Bootstrap support for afum|EAL87715.1 as seed ortholog is 100%.

Bootstrap support for afis|EAW18352.1 as seed ortholog is 100%.

---

Group of orthologs #5402. Best score 791 bits

Score difference with first non-orthologous sequence - *A. fumigatus*:715 *A. fischeri*:728

afum|EAL86175.1 100.00% afis|EAW24507.1 100.00%

Bootstrap support for afum|EAL86175.1 as seed ortholog is 100%.

Bootstrap support for afis|EAW24507.1 as seed ortholog is 100%.

---

Group of orthologs #5403. Best score 791 bits

Score difference with first non-orthologous sequence - *A. fumigatus*:791 *A. fischeri*:791

afum|EBA27425.1 100.00% afis|EAW17343.1 100.00%

Bootstrap support for afum|EBA27425.1 as seed ortholog is 100%.

Bootstrap support for afis|EAW17343.1 as seed ortholog is 100%.

---

Group of orthologs #5404. Best score 791 bits

Score difference with first non-orthologous sequence - *A. fumigatus*:791 *A. fischeri*:791

afum|EAL87919.1 100.00% afis|EAW23547.1 100.00%

Bootstrap support for afum|EAL87919.1 as seed ortholog is 100%.

Bootstrap support for afis|EAW23547.1 as seed ortholog is 100%.

---

Group of orthologs #5405. Best score 791 bits

Score difference with first non-orthologous sequence - *A. fumigatus*:791 *A. fischeri*:791

afum|EAL87895.2 100.00% afis|EAW23571.1 100.00%

Bootstrap support for afum|EAL87895.2 as seed ortholog is 100%.

Bootstrap support for afis|EAW23571.1 as seed ortholog is 100%.

---

Group of orthologs #5406. Best score 791 bits

Score difference with first non-orthologous sequence - *A. fumigatus*:791 *A. fischeri*:791

afum|EAL91034.1 100.00% afis|EAW22156.1 100.00%

Bootstrap support for afum|EAL91034.1 as seed ortholog is 100%.

Bootstrap support for afis|EAW22156.1 as seed ortholog is 100%.

---

Group of orthologs #5407. Best score 791 bits

Score difference with first non-orthologous sequence - *A. fumigatus*:791 *A. fischeri*:791

afum|EAL92241.2 100.00% afis|EAW21229.1 100.00%

Bootstrap support for afum|EAL92241.2 as seed ortholog is 100%.

Bootstrap support for afis|EAW21229.1 as seed ortholog is 100%.

---

Group of orthologs #5408. Best score 791 bits

Score difference with first non-orthologous sequence - *A. fumigatus*:791 *A. fischeri*:791

afum|EAL92510.1 100.00% afis|EAW21491.1 100.00%

Bootstrap support for afum|EAL92510.1 as seed ortholog is 100%.

Bootstrap support for afis|EAW21491.1 as seed ortholog is 100%.

---

Group of orthologs #5409. Best score 791 bits

Score difference with first non-orthologous sequence - *A. fumigatus*:791 *A. fischeri*:791

afum|EAL89878.1 100.00% afis|EAW25217.1 100.00%

Bootstrap support for afum|EAL89878.1 as seed ortholog is 100%.

Bootstrap support for afis|EAW25217.1 as seed ortholog is 100%.

---

Group of orthologs #5410. Best score 790 bits

Score difference with first non-orthologous sequence - *A. fumigatus*:790 *A. fischeri*:790  
afum|EAL85192.1 100.00% afis|EAW20074.1 100.00%  
Bootstrap support for afum|EAL85192.1 as seed ortholog is 100%.  
Bootstrap support for afis|EAW20074.1 as seed ortholog is 100%.

---

Group of orthologs #5411. Best score 790 bits

Score difference with first non-orthologous sequence - *A. fumigatus*:790 *A. fischeri*:790  
afum|EAL89195.1 100.00% afis|EAW16599.1 100.00%  
Bootstrap support for afum|EAL89195.1 as seed ortholog is 100%.  
Bootstrap support for afis|EAW16599.1 as seed ortholog is 100%.

---

Group of orthologs #5412. Best score 790 bits

Score difference with first non-orthologous sequence - *A. fumigatus*:723 *A. fischeri*:690  
afum|EAL91389.1 100.00% afis|EAW17576.1 100.00%  
Bootstrap support for afum|EAL91389.1 as seed ortholog is 100%.  
Bootstrap support for afis|EAW17576.1 as seed ortholog is 100%.

---

Group of orthologs #5413. Best score 790 bits

Score difference with first non-orthologous sequence - *A. fumigatus*:790 *A. fischeri*:790  
afum|EAL90312.1 100.00% afis|EAW22886.1 100.00%  
Bootstrap support for afum|EAL90312.1 as seed ortholog is 100%.  
Bootstrap support for afis|EAW22886.1 as seed ortholog is 100%.

---

Group of orthologs #5414. Best score 790 bits

Score difference with first non-orthologous sequence - *A. fumigatus*:790 *A. fischeri*:790  
afum|EAL91981.1 100.00% afis|EAW24125.1 100.00%  
Bootstrap support for afum|EAL91981.1 as seed ortholog is 100%.  
Bootstrap support for afis|EAW24125.1 as seed ortholog is 100%.

---

Group of orthologs #5415. Best score 789 bits

Score difference with first non-orthologous sequence - *A. fumigatus*:789 *A. fischeri*:689  
afum|EAL87541.1 100.00% afis|EAW18180.1 100.00%  
Bootstrap support for afum|EAL87541.1 as seed ortholog is 100%.  
Bootstrap support for afis|EAW18180.1 as seed ortholog is 100%.

---

Group of orthologs #5416. Best score 789 bits

Score difference with first non-orthologous sequence - *A. fumigatus*:789 *A. fischeri*:789  
afum|EAL87619.1 100.00% afis|EAW18256.1 100.00%  
Bootstrap support for afum|EAL87619.1 as seed ortholog is 100%.  
Bootstrap support for afis|EAW18256.1 as seed ortholog is 100%.

---

Group of orthologs #5417. Best score 789 bits

Score difference with first non-orthologous sequence - *A. fumigatus*:789 *A. fischeri*:595  
afum|EAL85444.1 100.00% afis|EAW20316.1 100.00%  
Bootstrap support for afum|EAL85444.1 as seed ortholog is 100%.  
Bootstrap support for afis|EAW20316.1 as seed ortholog is 100%.

---

Group of orthologs #5418. Best score 789 bits

Score difference with first non-orthologous sequence - *A. fumigatus*:719 *A. fischeri*:676  
afum|EAL91468.1 100.00% afis|EAW17653.1 100.00%  
Bootstrap support for afum|EAL91468.1 as seed ortholog is 100%.  
Bootstrap support for afis|EAW17653.1 as seed ortholog is 100%.

---

Group of orthologs #5419. Best score 789 bits

Score difference with first non-orthologous sequence - *A. fumigatus*:789 *A. fischeri*:789  
afum|EAL88287.1 100.00% afis|EAW23196.1 100.00%

Bootstrap support for afum|EAL88287.1 as seed ortholog is 100%.  
Bootstrap support for afis|EAW23196.1 as seed ortholog is 100%.

---

Group of orthologs #5420. Best score 789 bits

Score difference with first non-orthologous sequence - *A. fumigatus*:789 *A. fischeri*:789

|                 |         |                 |         |
|-----------------|---------|-----------------|---------|
| afum EAL93243.1 | 100.00% | afis EAW18543.1 | 100.00% |
|-----------------|---------|-----------------|---------|

Bootstrap support for afum|EAL93243.1 as seed ortholog is 100%.

Bootstrap support for afis|EAW18543.1 as seed ortholog is 100%.

---

Group of orthologs #5421. Best score 789 bits

Score difference with first non-orthologous sequence - *A. fumigatus*:789 *A. fischeri*:789

|                 |         |                 |         |
|-----------------|---------|-----------------|---------|
| afum EAL93710.1 | 100.00% | afis EAW18975.1 | 100.00% |
|-----------------|---------|-----------------|---------|

Bootstrap support for afum|EAL93710.1 as seed ortholog is 100%.

Bootstrap support for afis|EAW18975.1 as seed ortholog is 100%.

---

Group of orthologs #5422. Best score 789 bits

Score difference with first non-orthologous sequence - *A. fumigatus*:789 *A. fischeri*:789

|                 |         |                 |         |
|-----------------|---------|-----------------|---------|
| afum EAL92716.2 | 100.00% | afis EAW21682.1 | 100.00% |
|-----------------|---------|-----------------|---------|

Bootstrap support for afum|EAL92716.2 as seed ortholog is 100%.

Bootstrap support for afis|EAW21682.1 as seed ortholog is 100%.

---

Group of orthologs #5423. Best score 789 bits

Score difference with first non-orthologous sequence - *A. fumigatus*:789 *A. fischeri*:789

|                 |         |                 |         |
|-----------------|---------|-----------------|---------|
| afum EAL89961.1 | 100.00% | afis EAW25298.1 | 100.00% |
|-----------------|---------|-----------------|---------|

Bootstrap support for afum|EAL89961.1 as seed ortholog is 100%.

Bootstrap support for afis|EAW25298.1 as seed ortholog is 100%.

---

Group of orthologs #5424. Best score 788 bits

Score difference with first non-orthologous sequence - *A. fumigatus*:714 *A. fischeri*:676

|                 |         |                 |         |
|-----------------|---------|-----------------|---------|
| afum EAL88635.2 | 100.00% | afis EAW16003.1 | 100.00% |
|-----------------|---------|-----------------|---------|

Bootstrap support for afum|EAL88635.2 as seed ortholog is 100%.

Bootstrap support for afis|EAW16003.1 as seed ortholog is 100%.

---

Group of orthologs #5425. Best score 788 bits

Score difference with first non-orthologous sequence - *A. fumigatus*:788 *A. fischeri*:788

|                 |         |                 |         |
|-----------------|---------|-----------------|---------|
| afum EAL88647.1 | 100.00% | afis EAW16018.1 | 100.00% |
|-----------------|---------|-----------------|---------|

Bootstrap support for afum|EAL88647.1 as seed ortholog is 100%.

Bootstrap support for afis|EAW16018.1 as seed ortholog is 100%.

---

Group of orthologs #5426. Best score 788 bits

Score difference with first non-orthologous sequence - *A. fumigatus*:788 *A. fischeri*:788

|                 |         |                 |         |
|-----------------|---------|-----------------|---------|
| afum EAL85276.1 | 100.00% | afis EAW20159.1 | 100.00% |
|-----------------|---------|-----------------|---------|

Bootstrap support for afum|EAL85276.1 as seed ortholog is 100%.

Bootstrap support for afis|EAW20159.1 as seed ortholog is 100%.

---

Group of orthologs #5427. Best score 788 bits

Score difference with first non-orthologous sequence - *A. fumigatus*:788 *A. fischeri*:788

|                 |         |                 |         |
|-----------------|---------|-----------------|---------|
| afum EAL84858.1 | 100.00% | afis EAW20761.1 | 100.00% |
|-----------------|---------|-----------------|---------|

Bootstrap support for afum|EAL84858.1 as seed ortholog is 100%.

Bootstrap support for afis|EAW20761.1 as seed ortholog is 100%.

---

Group of orthologs #5428. Best score 788 bits

Score difference with first non-orthologous sequence - *A. fumigatus*:788 *A. fischeri*:788

|                 |         |                 |         |
|-----------------|---------|-----------------|---------|
| afum EAL84293.1 | 100.00% | afis EAW25583.1 | 100.00% |
|-----------------|---------|-----------------|---------|

Bootstrap support for afum|EAL84293.1 as seed ortholog is 100%.

Bootstrap support for afis|EAW25583.1 as seed ortholog is 100%.

---

Group of orthologs #5429. Best score 788 bits

Score difference with first non-orthologous sequence - *A. fumigatus*:788 *A. fischeri*:788

afum|EAL93902.1 100.00% afis|EAW19172.1 100.00%

Bootstrap support for afum|EAL93902.1 as seed ortholog is 100%.

Bootstrap support for afis|EAW19172.1 as seed ortholog is 100%.

---

Group of orthologs #5430. Best score 787 bits

Score difference with first non-orthologous sequence - *A. fumigatus*:787 *A. fischeri*:787

afum|EAL85840.1 100.00% afis|EAW15482.1 100.00%

Bootstrap support for afum|EAL85840.1 as seed ortholog is 100%.

Bootstrap support for afis|EAW15482.1 as seed ortholog is 100%.

---

Group of orthologs #5431. Best score 787 bits

Score difference with first non-orthologous sequence - *A. fumigatus*:787 *A. fischeri*:657

afum|EAL86510.1 100.00% afis|EAW16983.1 100.00%

Bootstrap support for afum|EAL86510.1 as seed ortholog is 100%.

Bootstrap support for afis|EAW16983.1 as seed ortholog is 100%.

---

Group of orthologs #5432. Best score 787 bits

Score difference with first non-orthologous sequence - *A. fumigatus*:787 *A. fischeri*:787

afum|EAL88056.1 100.00% afis|EAW23413.1 100.00%

Bootstrap support for afum|EAL88056.1 as seed ortholog is 100%.

Bootstrap support for afis|EAW23413.1 as seed ortholog is 100%.

---

Group of orthologs #5433. Best score 787 bits

Score difference with first non-orthologous sequence - *A. fumigatus*:787 *A. fischeri*:787

afum|EAL92438.1 100.00% afis|EAW21423.1 100.00%

Bootstrap support for afum|EAL92438.1 as seed ortholog is 100%.

Bootstrap support for afis|EAW21423.1 as seed ortholog is 100%.

---

Group of orthologs #5434. Best score 787 bits

Score difference with first non-orthologous sequence - *A. fumigatus*:787 *A. fischeri*:787

afum|EAL89434.1 100.00% afis|EAW24792.1 100.00%

Bootstrap support for afum|EAL89434.1 as seed ortholog is 100%.

Bootstrap support for afis|EAW24792.1 as seed ortholog is 100%.

---

Group of orthologs #5435. Best score 786 bits

Score difference with first non-orthologous sequence - *A. fumigatus*:786 *A. fischeri*:657

afum|EAL84236.1 100.00% afis|EAW15410.1 100.00%

Bootstrap support for afum|EAL84236.1 as seed ortholog is 100%.

Bootstrap support for afis|EAW15410.1 as seed ortholog is 100%.

---

Group of orthologs #5436. Best score 786 bits

Score difference with first non-orthologous sequence - *A. fumigatus*:738 *A. fischeri*:693

afum|EAL86403.2 100.00% afis|EAW16864.1 100.00%

Bootstrap support for afum|EAL86403.2 as seed ortholog is 100%.

Bootstrap support for afis|EAW16864.1 as seed ortholog is 100%.

---

Group of orthologs #5437. Best score 786 bits

Score difference with first non-orthologous sequence - *A. fumigatus*:363 *A. fischeri*:503

afum|EAL86497.1 100.00% afis|EAW16969.1 100.00%

Bootstrap support for afum|EAL86497.1 as seed ortholog is 100%.

Bootstrap support for afis|EAW16969.1 as seed ortholog is 100%.

---

Group of orthologs #5438. Best score 786 bits

Score difference with first non-orthologous sequence - *A. fumigatus*:786 *A. fischeri*:786  
afum|EAL88517.1 100.00% afis|EAW15883.1 100.00%  
Bootstrap support for afum|EAL88517.1 as seed ortholog is 100%.  
Bootstrap support for afis|EAW15883.1 as seed ortholog is 100%.

---

Group of orthologs #5439. Best score 786 bits

Score difference with first non-orthologous sequence - *A. fumigatus*:786 *A. fischeri*:786  
afum|EAL86826.1 100.00% afis|EAW19701.1 100.00%  
Bootstrap support for afum|EAL86826.1 as seed ortholog is 100%.  
Bootstrap support for afis|EAW19701.1 as seed ortholog is 100%.

---

Group of orthologs #5440. Best score 786 bits

Score difference with first non-orthologous sequence - *A. fumigatus*:786 *A. fischeri*:671  
afum|EAL92116.1 100.00% afis|EAW21093.1 100.00%  
Bootstrap support for afum|EAL92116.1 as seed ortholog is 100%.  
Bootstrap support for afis|EAW21093.1 as seed ortholog is 100%.

---

Group of orthologs #5441. Best score 786 bits

Score difference with first non-orthologous sequence - *A. fumigatus*:786 *A. fischeri*:786  
afum|EAL92369.1 100.00% afis|EAW21354.1 100.00%  
Bootstrap support for afum|EAL92369.1 as seed ortholog is 100%.  
Bootstrap support for afis|EAW21354.1 as seed ortholog is 100%.

---

Group of orthologs #5442. Best score 786 bits

Score difference with first non-orthologous sequence - *A. fumigatus*:646 *A. fischeri*:658  
afum|EAL89665.1 100.00% afis|EAW25030.1 100.00%  
Bootstrap support for afum|EAL89665.1 as seed ortholog is 100%.  
Bootstrap support for afis|EAW25030.1 as seed ortholog is 100%.

---

Group of orthologs #5443. Best score 785 bits

Score difference with first non-orthologous sequence - *A. fumigatus*:732 *A. fischeri*:585  
afum|EAL87553.1 100.00% afis|EAW18189.1 100.00%  
Bootstrap support for afum|EAL87553.1 as seed ortholog is 100%.  
Bootstrap support for afis|EAW18189.1 as seed ortholog is 100%.

---

Group of orthologs #5444. Best score 785 bits

Score difference with first non-orthologous sequence - *A. fumigatus*:785 *A. fischeri*:785  
afum|EAL87164.1 100.00% afis|EAW23725.1 100.00%  
Bootstrap support for afum|EAL87164.1 as seed ortholog is 100%.  
Bootstrap support for afis|EAW23725.1 as seed ortholog is 100%.

---

Group of orthologs #5445. Best score 785 bits

Score difference with first non-orthologous sequence - *A. fumigatus*:704 *A. fischeri*:471  
afum|EAL92392.1 100.00% afis|EAW21375.1 100.00%  
Bootstrap support for afum|EAL92392.1 as seed ortholog is 100%.  
Bootstrap support for afis|EAW21375.1 as seed ortholog is 100%.

---

Group of orthologs #5446. Best score 785 bits

Score difference with first non-orthologous sequence - *A. fumigatus*:785 *A. fischeri*:785  
afum|EBA27223.1 100.00% afis|EAW20039.1 100.00%  
Bootstrap support for afum|EBA27223.1 as seed ortholog is 100%.  
Bootstrap support for afis|EAW20039.1 as seed ortholog is 100%.

---

Group of orthologs #5447. Best score 785 bits

Score difference with first non-orthologous sequence - *A. fumigatus*:785 *A. fischeri*:785  
afum|EAL92692.1 100.00% afis|EAW21657.1 100.00%

Bootstrap support for afum|EAL92692.1 as seed ortholog is 100%.  
Bootstrap support for afis|EAW21657.1 as seed ortholog is 100%.

---

Group of orthologs #5448. Best score 785 bits

Score difference with first non-orthologous sequence - *A. fumigatus*:785 *A. fischeri*:785

afum|EAL89488.1 100.00% afis|EAW24842.1 100.00%

Bootstrap support for afum|EAL89488.1 as seed ortholog is 100%.

Bootstrap support for afis|EAW24842.1 as seed ortholog is 100%.

---

Group of orthologs #5449. Best score 784 bits

Score difference with first non-orthologous sequence - *A. fumigatus*:784 *A. fischeri*:784

afum|EAL85146.1 100.00% afis|EAW19751.1 100.00%

Bootstrap support for afum|EAL85146.1 as seed ortholog is 100%.

Bootstrap support for afis|EAW19751.1 as seed ortholog is 100%.

---

Group of orthologs #5450. Best score 784 bits

Score difference with first non-orthologous sequence - *A. fumigatus*:784 *A. fischeri*:512

afum|EAL91435.1 100.00% afis|EAW17622.1 100.00%

Bootstrap support for afum|EAL91435.1 as seed ortholog is 100%.

Bootstrap support for afis|EAW17622.1 as seed ortholog is 100%.

---

Group of orthologs #5451. Best score 784 bits

Score difference with first non-orthologous sequence - *A. fumigatus*:784 *A. fischeri*:784

afum|EAL91062.1 100.00% afis|EAW22126.1 100.00%

Bootstrap support for afum|EAL91062.1 as seed ortholog is 100%.

Bootstrap support for afis|EAW22126.1 as seed ortholog is 100%.

---

Group of orthologs #5452. Best score 784 bits

Score difference with first non-orthologous sequence - *A. fumigatus*:784 *A. fischeri*:784

afum|EAL92180.1 100.00% afis|EAW21161.1 100.00%

Bootstrap support for afum|EAL92180.1 as seed ortholog is 100%.

Bootstrap support for afis|EAW21161.1 as seed ortholog is 100%.

---

Group of orthologs #5453. Best score 783 bits

Score difference with first non-orthologous sequence - *A. fumigatus*:783 *A. fischeri*:783

afum|EAL86354.1 100.00% afis|EAW16783.1 100.00%

Bootstrap support for afum|EAL86354.1 as seed ortholog is 100%.

Bootstrap support for afis|EAW16783.1 as seed ortholog is 100%.

---

Group of orthologs #5454. Best score 783 bits

Score difference with first non-orthologous sequence - *A. fumigatus*:783 *A. fischeri*:570

afum|EAL85012.1 100.00% afis|EAW19885.1 100.00%

Bootstrap support for afum|EAL85012.1 as seed ortholog is 100%.

Bootstrap support for afis|EAW19885.1 as seed ortholog is 100%.

---

Group of orthologs #5455. Best score 783 bits

Score difference with first non-orthologous sequence - *A. fumigatus*:783 *A. fischeri*:783

afum|EAL84893.1 100.00% afis|EAW20024.1 100.00%

Bootstrap support for afum|EAL84893.1 as seed ortholog is 100%.

Bootstrap support for afis|EAW20024.1 as seed ortholog is 100%.

---

Group of orthologs #5456. Best score 783 bits

Score difference with first non-orthologous sequence - *A. fumigatus*:783 *A. fischeri*:783

afum|EAL84605.1 100.00% afis|EAW20447.1 100.00%

Bootstrap support for afum|EAL84605.1 as seed ortholog is 100%.

Bootstrap support for afis|EAW20447.1 as seed ortholog is 100%.

---

Group of orthologs #5457. Best score 783 bits

Score difference with first non-orthologous sequence - *A. fumigatus*:783 *A. fischeri*:783

afum|EAL91707.1 100.00% afis|EAW17899.1 100.00%

Bootstrap support for afum|EAL91707.1 as seed ortholog is 100%.

Bootstrap support for afis|EAW17899.1 as seed ortholog is 100%.

---

Group of orthologs #5458. Best score 783 bits

Score difference with first non-orthologous sequence - *A. fumigatus*:783 *A. fischeri*:783

afum|EAL85921.2 100.00% afis|EAW24252.1 100.00%

Bootstrap support for afum|EAL85921.2 as seed ortholog is 100%.

Bootstrap support for afis|EAW24252.1 as seed ortholog is 100%.

---

Group of orthologs #5459. Best score 783 bits

Score difference with first non-orthologous sequence - *A. fumigatus*:783 *A. fischeri*:519

afum|EAL88145.1 100.00% afis|EAW23333.1 100.00%

Bootstrap support for afum|EAL88145.1 as seed ortholog is 100%.

Bootstrap support for afis|EAW23333.1 as seed ortholog is 100%.

---

Group of orthologs #5460. Best score 783 bits

Score difference with first non-orthologous sequence - *A. fumigatus*:783 *A. fischeri*:783

afum|EAL93740.1 100.00% afis|EAW19006.1 100.00%

Bootstrap support for afum|EAL93740.1 as seed ortholog is 100%.

Bootstrap support for afis|EAW19006.1 as seed ortholog is 100%.

---

Group of orthologs #5461. Best score 783 bits

Score difference with first non-orthologous sequence - *A. fumigatus*:783 *A. fischeri*:783

afum|EAL91005.1 100.00% afis|EAW22184.1 100.00%

Bootstrap support for afum|EAL91005.1 as seed ortholog is 100%.

Bootstrap support for afis|EAW22184.1 as seed ortholog is 100%.

---

Group of orthologs #5462. Best score 783 bits

Score difference with first non-orthologous sequence - *A. fumigatus*:783 *A. fischeri*:783

afum|EAL92394.1 100.00% afis|EAW21379.1 100.00%

Bootstrap support for afum|EAL92394.1 as seed ortholog is 100%.

Bootstrap support for afis|EAW21379.1 as seed ortholog is 100%.

---

Group of orthologs #5463. Best score 783 bits

Score difference with first non-orthologous sequence - *A. fumigatus*:783 *A. fischeri*:783

afum|EAL90165.1 100.00% afis|EAW25499.1 100.00%

Bootstrap support for afum|EAL90165.1 as seed ortholog is 100%.

Bootstrap support for afis|EAW25499.1 as seed ortholog is 100%.

---

Group of orthologs #5464. Best score 782 bits

Score difference with first non-orthologous sequence - *A. fumigatus*:782 *A. fischeri*:782

afum|EAL85599.1 100.00% afis|EAW15750.1 100.00%

Bootstrap support for afum|EAL85599.1 as seed ortholog is 100%.

Bootstrap support for afis|EAW15750.1 as seed ortholog is 100%.

---

Group of orthologs #5465. Best score 782 bits

Score difference with first non-orthologous sequence - *A. fumigatus*:527 *A. fischeri*:507

afum|EAL88863.1 100.00% afis|EAW16241.1 100.00%

Bootstrap support for afum|EAL88863.1 as seed ortholog is 100%.

Bootstrap support for afis|EAW16241.1 as seed ortholog is 100%.

---

Group of orthologs #5466. Best score 782 bits



Score difference with first non-orthologous sequence - *A. fumigatus*:653 *A. fischeri*:653  
afum|EAL91199.1 100.00% afis|EAW17362.1 100.00%  
Bootstrap support for afum|EAL91199.1 as seed ortholog is 100%.  
Bootstrap support for afis|EAW17362.1 as seed ortholog is 100%.

---

Group of orthologs #5467. Best score 782 bits

Score difference with first non-orthologous sequence - *A. fumigatus*:782 *A. fischeri*:782  
afum|EAL88164.1 100.00% afis|EAW23313.1 100.00%  
Bootstrap support for afum|EAL88164.1 as seed ortholog is 100%.  
Bootstrap support for afis|EAW23313.1 as seed ortholog is 100%.

---

Group of orthologs #5468. Best score 782 bits

Score difference with first non-orthologous sequence - *A. fumigatus*:782 *A. fischeri*:782  
afum|EAL93660.1 100.00% afis|EAW18929.1 100.00%  
Bootstrap support for afum|EAL93660.1 as seed ortholog is 100%.  
Bootstrap support for afis|EAW18929.1 as seed ortholog is 100%.

---

Group of orthologs #5469. Best score 782 bits

Score difference with first non-orthologous sequence - *A. fumigatus*:782 *A. fischeri*:782  
afum|EAL93869.1 100.00% afis|EAW19137.1 100.00%  
Bootstrap support for afum|EAL93869.1 as seed ortholog is 100%.  
Bootstrap support for afis|EAW19137.1 as seed ortholog is 100%.

---

Group of orthologs #5470. Best score 782 bits

Score difference with first non-orthologous sequence - *A. fumigatus*:782 *A. fischeri*:782  
afum|EAL90426.1 100.00% afis|EAW22772.1 100.00%  
Bootstrap support for afum|EAL90426.1 as seed ortholog is 100%.  
Bootstrap support for afis|EAW22772.1 as seed ortholog is 100%.

---

Group of orthologs #5471. Best score 782 bits

Score difference with first non-orthologous sequence - *A. fumigatus*:631 *A. fischeri*:782  
afum|EAL89476.1 100.00% afis|EAW24831.1 100.00%  
Bootstrap support for afum|EAL89476.1 as seed ortholog is 100%.  
Bootstrap support for afis|EAW24831.1 as seed ortholog is 100%.

---

Group of orthologs #5472. Best score 781 bits

Score difference with first non-orthologous sequence - *A. fumigatus*:781 *A. fischeri*:781  
afum|EAL88284.1 100.00% afis|EAW23199.1 100.00%  
Bootstrap support for afum|EAL88284.1 as seed ortholog is 100%.  
Bootstrap support for afis|EAW23199.1 as seed ortholog is 100%.

---

Group of orthologs #5473. Best score 781 bits

Score difference with first non-orthologous sequence - *A. fumigatus*:741 *A. fischeri*:576  
afum|EAL90925.1 100.00% afis|EAW22249.1 100.00%  
Bootstrap support for afum|EAL90925.1 as seed ortholog is 100%.  
Bootstrap support for afis|EAW22249.1 as seed ortholog is 100%.

---

Group of orthologs #5474. Best score 781 bits

Score difference with first non-orthologous sequence - *A. fumigatus*:781 *A. fischeri*:781  
afum|EAL90317.1 100.00% afis|EAW22882.1 100.00%  
Bootstrap support for afum|EAL90317.1 as seed ortholog is 100%.  
Bootstrap support for afis|EAW22882.1 as seed ortholog is 100%.

---

Group of orthologs #5475. Best score 780 bits

Score difference with first non-orthologous sequence - *A. fumigatus*:780 *A. fischeri*:780  
afum|EAL88559.1 100.00% afis|EAW15922.1 100.00%

Bootstrap support for afum|EAL88559.1 as seed ortholog is 100%.  
Bootstrap support for afis|EAW15922.1 as seed ortholog is 100%.

---

Group of orthologs #5476. Best score 780 bits

Score difference with first non-orthologous sequence - *A. fumigatus*:780 *A. fischeri*:780

afum|EAL84961.1 100.00% afis|EAW19954.1 100.00%

Bootstrap support for afum|EAL84961.1 as seed ortholog is 100%.

Bootstrap support for afis|EAW19954.1 as seed ortholog is 100%.

---

Group of orthologs #5477. Best score 780 bits

Score difference with first non-orthologous sequence - *A. fumigatus*:780 *A. fischeri*:293

afum|EAL84928.1 100.00% afis|EAW19987.1 100.00%

Bootstrap support for afum|EAL84928.1 as seed ortholog is 100%.

Bootstrap support for afis|EAW19987.1 as seed ortholog is 100%.

---

Group of orthologs #5478. Best score 780 bits

Score difference with first non-orthologous sequence - *A. fumigatus*:677 *A. fischeri*:655

afum|EAL87140.1 100.00% afis|EAW23699.1 100.00%

Bootstrap support for afum|EAL87140.1 as seed ortholog is 100%.

Bootstrap support for afis|EAW23699.1 as seed ortholog is 100%.

---

Group of orthologs #5479. Best score 780 bits

Score difference with first non-orthologous sequence - *A. fumigatus*:780 *A. fischeri*:780

afum|EAL92229.1 100.00% afis|EAW21217.1 100.00%

Bootstrap support for afum|EAL92229.1 as seed ortholog is 100%.

Bootstrap support for afis|EAW21217.1 as seed ortholog is 100%.

---

Group of orthologs #5480. Best score 780 bits

Score difference with first non-orthologous sequence - *A. fumigatus*:701 *A. fischeri*:700

afum|EAL92300.2 100.00% afis|EAW21283.1 100.00%

Bootstrap support for afum|EAL92300.2 as seed ortholog is 100%.

Bootstrap support for afis|EAW21283.1 as seed ortholog is 100%.

---

Group of orthologs #5481. Best score 779 bits

Score difference with first non-orthologous sequence - *A. fumigatus*:779 *A. fischeri*:779

afum|EAL86524.1 100.00% afis|EAW16999.1 100.00%

Bootstrap support for afum|EAL86524.1 as seed ortholog is 100%.

Bootstrap support for afis|EAW16999.1 as seed ortholog is 100%.

---

Group of orthologs #5482. Best score 779 bits

Score difference with first non-orthologous sequence - *A. fumigatus*:779 *A. fischeri*:779

afum|EAL88905.1 100.00% afis|EAW16284.1 100.00%

Bootstrap support for afum|EAL88905.1 as seed ortholog is 100%.

Bootstrap support for afis|EAW16284.1 as seed ortholog is 100%.

---

Group of orthologs #5483. Best score 779 bits

Score difference with first non-orthologous sequence - *A. fumigatus*:779 *A. fischeri*:779

afum|EAL87654.2 100.00% afis|EAW18288.1 100.00%

Bootstrap support for afum|EAL87654.2 as seed ortholog is 100%.

Bootstrap support for afis|EAW18288.1 as seed ortholog is 100%.

---

Group of orthologs #5484. Best score 779 bits

Score difference with first non-orthologous sequence - *A. fumigatus*:779 *A. fischeri*:779

afum|EAL86945.1 100.00% afis|EAW19572.1 100.00%

Bootstrap support for afum|EAL86945.1 as seed ortholog is 100%.

Bootstrap support for afis|EAW19572.1 as seed ortholog is 100%.

---

Group of orthologs #5485. Best score 779 bits

Score difference with first non-orthologous sequence - *A. fumigatus*:779 *A. fischeri*:701

afum|EAL87875.1 100.00% afis|EAW23591.1 100.00%

Bootstrap support for afum|EAL87875.1 as seed ortholog is 100%.

Bootstrap support for afis|EAW23591.1 as seed ortholog is 100%.

---

Group of orthologs #5486. Best score 779 bits

Score difference with first non-orthologous sequence - *A. fumigatus*:779 *A. fischeri*:570

afum|EAL92524.1 100.00% afis|EAW21505.1 100.00%

Bootstrap support for afum|EAL92524.1 as seed ortholog is 100%.

Bootstrap support for afis|EAW21505.1 as seed ortholog is 100%.

---

Group of orthologs #5487. Best score 779 bits

Score difference with first non-orthologous sequence - *A. fumigatus*:668 *A. fischeri*:648

afum|EAL89621.1 100.00% afis|EAW24963.1 100.00%

Bootstrap support for afum|EAL89621.1 as seed ortholog is 100%.

Bootstrap support for afis|EAW24963.1 as seed ortholog is 100%.

---

Group of orthologs #5488. Best score 779 bits

Score difference with first non-orthologous sequence - *A. fumigatus*:779 *A. fischeri*:779

afum|EAL92941.1 100.00% afis|EAW21928.1 100.00%

Bootstrap support for afum|EAL92941.1 as seed ortholog is 100%.

Bootstrap support for afis|EAW21928.1 as seed ortholog is 100%.

---

Group of orthologs #5489. Best score 779 bits

Score difference with first non-orthologous sequence - *A. fumigatus*:779 *A. fischeri*:779

afum|EAL92991.1 100.00% afis|EAW21976.1 100.00%

Bootstrap support for afum|EAL92991.1 as seed ortholog is 100%.

Bootstrap support for afis|EAW21976.1 as seed ortholog is 100%.

---

Group of orthologs #5490. Best score 778 bits

Score difference with first non-orthologous sequence - *A. fumigatus*:778 *A. fischeri*:778

afum|EAL85032.1 100.00% afis|EAW19863.1 100.00%

Bootstrap support for afum|EAL85032.1 as seed ortholog is 100%.

Bootstrap support for afis|EAW19863.1 as seed ortholog is 100%.

---

Group of orthologs #5491. Best score 778 bits

Score difference with first non-orthologous sequence - *A. fumigatus*:778 *A. fischeri*:778

afum|EAL88952.1 100.00% afis|EAW16328.1 100.00%

Bootstrap support for afum|EAL88952.1 as seed ortholog is 100%.

Bootstrap support for afis|EAW16328.1 as seed ortholog is 100%.

---

Group of orthologs #5492. Best score 778 bits

Score difference with first non-orthologous sequence - *A. fumigatus*:778 *A. fischeri*:778

afum|EAL91687.1 100.00% afis|EAW17879.1 100.00%

Bootstrap support for afum|EAL91687.1 as seed ortholog is 100%.

Bootstrap support for afis|EAW17879.1 as seed ortholog is 100%.

---

Group of orthologs #5493. Best score 778 bits

Score difference with first non-orthologous sequence - *A. fumigatus*:778 *A. fischeri*:532

afum|EAL84350.1 100.00% afis|EAW25680.1 100.00%

Bootstrap support for afum|EAL84350.1 as seed ortholog is 100%.

Bootstrap support for afis|EAW25680.1 as seed ortholog is 100%.

---

Group of orthologs #5494. Best score 778 bits

Score difference with first non-orthologous sequence - *A. fumigatus*:778 *A. fischeri*:778  
afum|EAL90071.1 100.00% afis|EAW25412.1 100.00%  
Bootstrap support for afum|EAL90071.1 as seed ortholog is 100%.  
Bootstrap support for afis|EAW25412.1 as seed ortholog is 100%.

---

Group of orthologs #5495. Best score 777 bits

Score difference with first non-orthologous sequence - *A. fumigatus*:350 *A. fischeri*:420  
afum|EAL84639.1 100.00% afis|EAW20990.1 100.00%  
Bootstrap support for afum|EAL84639.1 as seed ortholog is 100%.  
Bootstrap support for afis|EAW20990.1 as seed ortholog is 100%.

---

Group of orthologs #5496. Best score 777 bits

Score difference with first non-orthologous sequence - *A. fumigatus*:777 *A. fischeri*:777  
afum|EAL87649.1 100.00% afis|EAW18283.1 100.00%  
Bootstrap support for afum|EAL87649.1 as seed ortholog is 100%.  
Bootstrap support for afis|EAW18283.1 as seed ortholog is 100%.

---

Group of orthologs #5497. Best score 777 bits

Score difference with first non-orthologous sequence - *A. fumigatus*:777 *A. fischeri*:777  
afum|EAL88199.1 100.00% afis|EAW23280.1 100.00%  
Bootstrap support for afum|EAL88199.1 as seed ortholog is 100%.  
Bootstrap support for afis|EAW23280.1 as seed ortholog is 100%.

---

Group of orthologs #5498. Best score 777 bits

Score difference with first non-orthologous sequence - *A. fumigatus*:777 *A. fischeri*:777  
afum|EAL93318.1 100.00% afis|EAW18608.1 100.00%  
Bootstrap support for afum|EAL93318.1 as seed ortholog is 100%.  
Bootstrap support for afis|EAW18608.1 as seed ortholog is 100%.

---

Group of orthologs #5499. Best score 777 bits

Score difference with first non-orthologous sequence - *A. fumigatus*:777 *A. fischeri*:777  
afum|EAL90550.2 100.00% afis|EAW22642.1 100.00%  
Bootstrap support for afum|EAL90550.2 as seed ortholog is 100%.  
Bootstrap support for afis|EAW22642.1 as seed ortholog is 100%.

---

Group of orthologs #5500. Best score 777 bits

Score difference with first non-orthologous sequence - *A. fumigatus*:777 *A. fischeri*:777  
afum|EBA27455.1 100.00% afis|EAW21225.1 100.00%  
Bootstrap support for afum|EBA27455.1 as seed ortholog is 100%.  
Bootstrap support for afis|EAW21225.1 as seed ortholog is 100%.

---

Group of orthologs #5501. Best score 776 bits

Score difference with first non-orthologous sequence - *A. fumigatus*:776 *A. fischeri*:776  
afum|EAL89246.1 100.00% afis|EAW16643.1 100.00%  
Bootstrap support for afum|EAL89246.1 as seed ortholog is 100%.  
Bootstrap support for afis|EAW16643.1 as seed ortholog is 100%.

---

Group of orthologs #5502. Best score 776 bits

Score difference with first non-orthologous sequence - *A. fumigatus*:776 *A. fischeri*:776  
afum|EAL91499.1 100.00% afis|EAW17685.1 100.00%  
Bootstrap support for afum|EAL91499.1 as seed ortholog is 100%.  
Bootstrap support for afis|EAW17685.1 as seed ortholog is 100%.

---

Group of orthologs #5503. Best score 776 bits

Score difference with first non-orthologous sequence - *A. fumigatus*:776 *A. fischeri*:776  
afum|EAL86200.1 100.00% afis|EAW24535.1 100.00%

Bootstrap support for afum|EAL86200.1 as seed ortholog is 100%.  
Bootstrap support for afis|EAW24535.1 as seed ortholog is 100%.

---

Group of orthologs #5504. Best score 776 bits

Score difference with first non-orthologous sequence - *A. fumigatus*:776 *A. fischeri*:776

|                 |         |                 |         |
|-----------------|---------|-----------------|---------|
| afum EAL88002.1 | 100.00% | afis EAW23464.1 | 100.00% |
|-----------------|---------|-----------------|---------|

Bootstrap support for afum|EAL88002.1 as seed ortholog is 100%.

Bootstrap support for afis|EAW23464.1 as seed ortholog is 100%.

---

Group of orthologs #5505. Best score 776 bits

Score difference with first non-orthologous sequence - *A. fumigatus*:776 *A. fischeri*:776

|                 |         |                 |         |
|-----------------|---------|-----------------|---------|
| afum EAL93653.1 | 100.00% | afis EAW18922.1 | 100.00% |
|-----------------|---------|-----------------|---------|

Bootstrap support for afum|EAL93653.1 as seed ortholog is 100%.

Bootstrap support for afis|EAW18922.1 as seed ortholog is 100%.

---

Group of orthologs #5506. Best score 776 bits

Score difference with first non-orthologous sequence - *A. fumigatus*:776 *A. fischeri*:776

|                 |         |                 |         |
|-----------------|---------|-----------------|---------|
| afum EAL93979.1 | 100.00% | afis EAW19250.1 | 100.00% |
|-----------------|---------|-----------------|---------|

Bootstrap support for afum|EAL93979.1 as seed ortholog is 100%.

Bootstrap support for afis|EAW19250.1 as seed ortholog is 100%.

---

Group of orthologs #5507. Best score 776 bits

Score difference with first non-orthologous sequence - *A. fumigatus*:776 *A. fischeri*:776

|                 |         |                 |         |
|-----------------|---------|-----------------|---------|
| afum EAL92427.1 | 100.00% | afis EAW21413.1 | 100.00% |
|-----------------|---------|-----------------|---------|

Bootstrap support for afum|EAL92427.1 as seed ortholog is 100%.

Bootstrap support for afis|EAW21413.1 as seed ortholog is 100%.

---

Group of orthologs #5508. Best score 776 bits

Score difference with first non-orthologous sequence - *A. fumigatus*:776 *A. fischeri*:776

|                 |         |                 |         |
|-----------------|---------|-----------------|---------|
| afum EAL89705.1 | 100.00% | afis EAW24996.1 | 100.00% |
|-----------------|---------|-----------------|---------|

Bootstrap support for afum|EAL89705.1 as seed ortholog is 100%.

Bootstrap support for afis|EAW24996.1 as seed ortholog is 100%.

---

Group of orthologs #5509. Best score 775 bits

Score difference with first non-orthologous sequence - *A. fumigatus*:653 *A. fischeri*:552

|                 |         |                 |         |
|-----------------|---------|-----------------|---------|
| afum EAL84395.2 | 100.00% | afis EAW25721.1 | 100.00% |
|-----------------|---------|-----------------|---------|

Bootstrap support for afum|EAL84395.2 as seed ortholog is 100%.

Bootstrap support for afis|EAW25721.1 as seed ortholog is 100%.

---

Group of orthologs #5510. Best score 775 bits

Score difference with first non-orthologous sequence - *A. fumigatus*:775 *A. fischeri*:638

|                 |         |                 |         |
|-----------------|---------|-----------------|---------|
| afum EAL90692.1 | 100.00% | afis EAW22501.1 | 100.00% |
|-----------------|---------|-----------------|---------|

Bootstrap support for afum|EAL90692.1 as seed ortholog is 100%.

Bootstrap support for afis|EAW22501.1 as seed ortholog is 100%.

---

Group of orthologs #5511. Best score 775 bits

Score difference with first non-orthologous sequence - *A. fumigatus*:775 *A. fischeri*:775

|                 |         |                 |         |
|-----------------|---------|-----------------|---------|
| afum EAL92728.1 | 100.00% | afis EAW21694.1 | 100.00% |
|-----------------|---------|-----------------|---------|

Bootstrap support for afum|EAL92728.1 as seed ortholog is 100%.

Bootstrap support for afis|EAW21694.1 as seed ortholog is 100%.

---

Group of orthologs #5512. Best score 774 bits

Score difference with first non-orthologous sequence - *A. fumigatus*:774 *A. fischeri*:774

|                 |         |                 |         |
|-----------------|---------|-----------------|---------|
| afum EAL84189.1 | 100.00% | afis EAW15456.1 | 100.00% |
|-----------------|---------|-----------------|---------|

Bootstrap support for afum|EAL84189.1 as seed ortholog is 100%.

Bootstrap support for afis|EAW15456.1 as seed ortholog is 100%.

---

Group of orthologs #5513. Best score 774 bits

Score difference with first non-orthologous sequence - *A. fumigatus*:774 *A. fischeri*:774

afum|EAL85559.1 100.00% afis|EAW15791.1 100.00%

Bootstrap support for afum|EAL85559.1 as seed ortholog is 100%.

Bootstrap support for afis|EAW15791.1 as seed ortholog is 100%.

---

Group of orthologs #5514. Best score 774 bits

Score difference with first non-orthologous sequence - *A. fumigatus*:774 *A. fischeri*:774

afum|EAL88878.1 100.00% afis|EAW16257.1 100.00%

Bootstrap support for afum|EAL88878.1 as seed ortholog is 100%.

Bootstrap support for afis|EAW16257.1 as seed ortholog is 100%.

---

Group of orthologs #5515. Best score 774 bits

Score difference with first non-orthologous sequence - *A. fumigatus*:774 *A. fischeri*:774

afum|EAL84377.1 100.00% afis|EAW25704.1 100.00%

Bootstrap support for afum|EAL84377.1 as seed ortholog is 100%.

Bootstrap support for afis|EAW25704.1 as seed ortholog is 100%.

---

Group of orthologs #5516. Best score 773 bits

Score difference with first non-orthologous sequence - *A. fumigatus*:773 *A. fischeri*:773

afum|EAL86587.1 100.00% afis|EAW17127.1 100.00%

Bootstrap support for afum|EAL86587.1 as seed ortholog is 100%.

Bootstrap support for afis|EAW17127.1 as seed ortholog is 100%.

---

Group of orthologs #5517. Best score 773 bits

Score difference with first non-orthologous sequence - *A. fumigatus*:773 *A. fischeri*:488

afum|EAL88809.2 100.00% afis|EAW16176.1 100.00%

Bootstrap support for afum|EAL88809.2 as seed ortholog is 100%.

Bootstrap support for afis|EAW16176.1 as seed ortholog is 100%.

---

Group of orthologs #5518. Best score 773 bits

Score difference with first non-orthologous sequence - *A. fumigatus*:620 *A. fischeri*:773

afum|EAL84938.1 100.00% afis|EAW19972.1 100.00%

Bootstrap support for afum|EAL84938.1 as seed ortholog is 100%.

Bootstrap support for afis|EAW19972.1 as seed ortholog is 100%.

---

Group of orthologs #5519. Best score 773 bits

Score difference with first non-orthologous sequence - *A. fumigatus*:773 *A. fischeri*:773

afum|EAL91330.1 100.00% afis|EAW17511.1 100.00%

Bootstrap support for afum|EAL91330.1 as seed ortholog is 100%.

Bootstrap support for afis|EAW17511.1 as seed ortholog is 100%.

---

Group of orthologs #5520. Best score 773 bits

Score difference with first non-orthologous sequence - *A. fumigatus*:620 *A. fischeri*:773

afum|EAL87152.1 100.00% afis|EAW23708.1 100.00%

Bootstrap support for afum|EAL87152.1 as seed ortholog is 100%.

Bootstrap support for afis|EAW23708.1 as seed ortholog is 100%.

---

Group of orthologs #5521. Best score 773 bits

Score difference with first non-orthologous sequence - *A. fumigatus*:773 *A. fischeri*:773

afum|EAL88326.1 100.00% afis|EAW23157.1 100.00%

Bootstrap support for afum|EAL88326.1 as seed ortholog is 100%.

Bootstrap support for afis|EAW23157.1 as seed ortholog is 100%.

---

Group of orthologs #5522. Best score 773 bits

Score difference with first non-orthologous sequence - *A. fumigatus*:773 *A. fischeri*:773  
afum|EAL93815.1 100.00% afis|EAW19085.1 100.00%  
Bootstrap support for afum|EAL93815.1 as seed ortholog is 100%.  
Bootstrap support for afis|EAW19085.1 as seed ortholog is 100%.

---

Group of orthologs #5523. Best score 773 bits

Score difference with first non-orthologous sequence - *A. fumigatus*:773 *A. fischeri*:773  
afum|EAL93822.1 100.00% afis|EAW19092.1 100.00%  
Bootstrap support for afum|EAL93822.1 as seed ortholog is 100%.  
Bootstrap support for afis|EAW19092.1 as seed ortholog is 100%.

---

Group of orthologs #5524. Best score 773 bits

Score difference with first non-orthologous sequence - *A. fumigatus*:773 *A. fischeri*:773  
afum|EAL90488.1 100.00% afis|EAW22704.1 100.00%  
Bootstrap support for afum|EAL90488.1 as seed ortholog is 100%.  
Bootstrap support for afis|EAW22704.1 as seed ortholog is 100%.

---

Group of orthologs #5525. Best score 773 bits

Score difference with first non-orthologous sequence - *A. fumigatus*:773 *A. fischeri*:773  
afum|EAL90482.1 100.00% afis|EAW22712.1 100.00%  
Bootstrap support for afum|EAL90482.1 as seed ortholog is 100%.  
Bootstrap support for afis|EAW22712.1 as seed ortholog is 100%.

---

Group of orthologs #5526. Best score 773 bits

Score difference with first non-orthologous sequence - *A. fumigatus*:773 *A. fischeri*:773  
afum|EAL92379.1 100.00% afis|EAW21363.1 100.00%  
Bootstrap support for afum|EAL92379.1 as seed ortholog is 100%.  
Bootstrap support for afis|EAW21363.1 as seed ortholog is 100%.

---

Group of orthologs #5527. Best score 773 bits

Score difference with first non-orthologous sequence - *A. fumigatus*:773 *A. fischeri*:773  
afum|EAL89330.1 100.00% afis|EAW24689.1 100.00%  
Bootstrap support for afum|EAL89330.1 as seed ortholog is 100%.  
Bootstrap support for afis|EAW24689.1 as seed ortholog is 100%.

---

Group of orthologs #5528. Best score 773 bits

Score difference with first non-orthologous sequence - *A. fumigatus*:773 *A. fischeri*:692  
afum|EAL89560.1 100.00% afis|EAW24907.1 100.00%  
Bootstrap support for afum|EAL89560.1 as seed ortholog is 100%.  
Bootstrap support for afis|EAW24907.1 as seed ortholog is 100%.

---

Group of orthologs #5529. Best score 773 bits

Score difference with first non-orthologous sequence - *A. fumigatus*:773 *A. fischeri*:773  
afum|EAL89703.1 100.00% afis|EAW24998.1 100.00%  
Bootstrap support for afum|EAL89703.1 as seed ortholog is 100%.  
Bootstrap support for afis|EAW24998.1 as seed ortholog is 100%.

---

Group of orthologs #5530. Best score 773 bits

Score difference with first non-orthologous sequence - *A. fumigatus*:773 *A. fischeri*:773  
afum|EAL89904.1 100.00% afis|EAW25242.1 100.00%  
Bootstrap support for afum|EAL89904.1 as seed ortholog is 100%.  
Bootstrap support for afis|EAW25242.1 as seed ortholog is 100%.

---

Group of orthologs #5531. Best score 773 bits

Score difference with first non-orthologous sequence - *A. fumigatus*:773 *A. fischeri*:773  
afum|EAL90067.1 100.00% afis|EAW25408.1 100.00%

Bootstrap support for afum|EAL90067.1 as seed ortholog is 100%.  
Bootstrap support for afis|EAW25408.1 as seed ortholog is 100%.

---

Group of orthologs #5532. Best score 772 bits

Score difference with first non-orthologous sequence - *A. fumigatus*:675 *A. fischeri*:543

afum|EAL85762.1 100.00% afis|EAW15571.1 100.00%

Bootstrap support for afum|EAL85762.1 as seed ortholog is 100%.

Bootstrap support for afis|EAW15571.1 as seed ortholog is 100%.

---

Group of orthologs #5533. Best score 772 bits

Score difference with first non-orthologous sequence - *A. fumigatus*:722 *A. fischeri*:636

afum|EAL84909.1 100.00% afis|EAW20009.1 100.00%

Bootstrap support for afum|EAL84909.1 as seed ortholog is 100%.

Bootstrap support for afis|EAW20009.1 as seed ortholog is 100%.

---

Group of orthologs #5534. Best score 772 bits

Score difference with first non-orthologous sequence - *A. fumigatus*:772 *A. fischeri*:772

afum|EAL91319.1 100.00% afis|EAW17496.1 100.00%

Bootstrap support for afum|EAL91319.1 as seed ortholog is 100%.

Bootstrap support for afis|EAW17496.1 as seed ortholog is 100%.

---

Group of orthologs #5535. Best score 772 bits

Score difference with first non-orthologous sequence - *A. fumigatus*:772 *A. fischeri*:652

afum|EAL93323.1 100.00% afis|EAW18613.1 100.00%

Bootstrap support for afum|EAL93323.1 as seed ortholog is 100%.

Bootstrap support for afis|EAW18613.1 as seed ortholog is 100%.

---

Group of orthologs #5536. Best score 772 bits

Score difference with first non-orthologous sequence - *A. fumigatus*:772 *A. fischeri*:772

afum|EAL92321.1 100.00% afis|EAW21305.1 100.00%

Bootstrap support for afum|EAL92321.1 as seed ortholog is 100%.

Bootstrap support for afis|EAW21305.1 as seed ortholog is 100%.

---

Group of orthologs #5537. Best score 771 bits

Score difference with first non-orthologous sequence - *A. fumigatus*:771 *A. fischeri*:771

afum|EAL85518.1 100.00% afis|EAW15834.1 100.00%

Bootstrap support for afum|EAL85518.1 as seed ortholog is 100%.

Bootstrap support for afis|EAW15834.1 as seed ortholog is 100%.

---

Group of orthologs #5538. Best score 771 bits

Score difference with first non-orthologous sequence - *A. fumigatus*:771 *A. fischeri*:771

afum|EAL88900.1 100.00% afis|EAW16279.1 100.00%

Bootstrap support for afum|EAL88900.1 as seed ortholog is 100%.

Bootstrap support for afis|EAW16279.1 as seed ortholog is 100%.

---

Group of orthologs #5539. Best score 771 bits

Score difference with first non-orthologous sequence - *A. fumigatus*:771 *A. fischeri*:771

afum|EAL84777.1 100.00% afis|EAW20858.1 100.00%

Bootstrap support for afum|EAL84777.1 as seed ortholog is 100%.

Bootstrap support for afis|EAW20858.1 as seed ortholog is 100%.

---

Group of orthologs #5540. Best score 771 bits

Score difference with first non-orthologous sequence - *A. fumigatus*:771 *A. fischeri*:771

afum|EAL84690.2 100.00% afis|EAW20944.1 100.00%

Bootstrap support for afum|EAL84690.2 as seed ortholog is 100%.

Bootstrap support for afis|EAW20944.1 as seed ortholog is 100%.



---

Group of orthologs #5541. Best score 771 bits

Score difference with first non-orthologous sequence - *A. fumigatus*:771 *A. fischeri*:584

afum|EAL86140.1 100.00% afis|EAW24468.1 100.00%

Bootstrap support for afum|EAL86140.1 as seed ortholog is 100%.

Bootstrap support for afis|EAW24468.1 as seed ortholog is 100%.

---

Group of orthologs #5542. Best score 771 bits

Score difference with first non-orthologous sequence - *A. fumigatus*:771 *A. fischeri*:771

afum|EAL87124.1 100.00% afis|EAW23681.1 100.00%

Bootstrap support for afum|EAL87124.1 as seed ortholog is 100%.

Bootstrap support for afis|EAW23681.1 as seed ortholog is 100%.

---

Group of orthologs #5543. Best score 771 bits

Score difference with first non-orthologous sequence - *A. fumigatus*:771 *A. fischeri*:718

afum|EAL89325.1 100.00% afis|EAW24685.1 100.00%

Bootstrap support for afum|EAL89325.1 as seed ortholog is 100%.

Bootstrap support for afis|EAW24685.1 as seed ortholog is 100%.

---

Group of orthologs #5544. Best score 771 bits

Score difference with first non-orthologous sequence - *A. fumigatus*:771 *A. fischeri*:771

afum|EAL90160.1 100.00% afis|EAW25494.1 100.00%

Bootstrap support for afum|EAL90160.1 as seed ortholog is 100%.

Bootstrap support for afis|EAW25494.1 as seed ortholog is 100%.

---

Group of orthologs #5545. Best score 770 bits

Score difference with first non-orthologous sequence - *A. fumigatus*:702 *A. fischeri*:658

afum|EAL84214.1 100.00% afis|EAW15429.1 100.00%

Bootstrap support for afum|EAL84214.1 as seed ortholog is 100%.

Bootstrap support for afis|EAW15429.1 as seed ortholog is 100%.

---

Group of orthologs #5546. Best score 770 bits

Score difference with first non-orthologous sequence - *A. fumigatus*:770 *A. fischeri*:527

afum|EAL88825.1 100.00% afis|EAW16194.1 100.00%

Bootstrap support for afum|EAL88825.1 as seed ortholog is 100%.

Bootstrap support for afis|EAW16194.1 as seed ortholog is 100%.

---

Group of orthologs #5547. Best score 770 bits

Score difference with first non-orthologous sequence - *A. fumigatus*:770 *A. fischeri*:770

afum|EAL84564.1 100.00% afis|EAW20490.1 100.00%

Bootstrap support for afum|EAL84564.1 as seed ortholog is 100%.

Bootstrap support for afis|EAW20490.1 as seed ortholog is 100%.

---

Group of orthologs #5548. Best score 770 bits

Score difference with first non-orthologous sequence - *A. fumigatus*:770 *A. fischeri*:770

afum|EAL87498.1 100.00% afis|EAW18141.1 100.00%

Bootstrap support for afum|EAL87498.1 as seed ortholog is 100%.

Bootstrap support for afis|EAW18141.1 as seed ortholog is 100%.

---

Group of orthologs #5549. Best score 770 bits

Score difference with first non-orthologous sequence - *A. fumigatus*:722 *A. fischeri*:694

afum|EAL91188.1 100.00% afis|EAW17344.1 100.00%

Bootstrap support for afum|EAL91188.1 as seed ortholog is 100%.

Bootstrap support for afis|EAW17344.1 as seed ortholog is 100%.

---

Group of orthologs #5550. Best score 770 bits

Score difference with first non-orthologous sequence - *A. fumigatus*:770 *A. fischeri*:770  
afum|EAL86104.1 100.00% afis|EAW24436.1 100.00%  
Bootstrap support for afum|EAL86104.1 as seed ortholog is 100%.  
Bootstrap support for afis|EAW24436.1 as seed ortholog is 100%.

---

Group of orthologs #5551. Best score 770 bits

Score difference with first non-orthologous sequence - *A. fumigatus*:770 *A. fischeri*:569  
afum|EAL87221.1 100.00% afis|EAW23787.1 100.00%  
Bootstrap support for afum|EAL87221.1 as seed ortholog is 100%.  
Bootstrap support for afis|EAW23787.1 as seed ortholog is 100%.

---

Group of orthologs #5552. Best score 770 bits

Score difference with first non-orthologous sequence - *A. fumigatus*:770 *A. fischeri*:770  
afum|EAL88347.1 100.00% afis|EAW23134.1 100.00%  
Bootstrap support for afum|EAL88347.1 as seed ortholog is 100%.  
Bootstrap support for afis|EAW23134.1 as seed ortholog is 100%.

---

Group of orthologs #5553. Best score 770 bits

Score difference with first non-orthologous sequence - *A. fumigatus*:770 *A. fischeri*:770  
afum|EAL88143.1 100.00% afis|EAW23335.1 100.00%  
Bootstrap support for afum|EAL88143.1 as seed ortholog is 100%.  
Bootstrap support for afis|EAW23335.1 as seed ortholog is 100%.

---

Group of orthologs #5554. Best score 770 bits

Score difference with first non-orthologous sequence - *A. fumigatus*:770 *A. fischeri*:549  
afum|EAL87430.1 100.00% afis|EAW24000.1 100.00%  
Bootstrap support for afum|EAL87430.1 as seed ortholog is 100%.  
Bootstrap support for afis|EAW24000.1 as seed ortholog is 100%.

---

Group of orthologs #5555. Best score 770 bits

Score difference with first non-orthologous sequence - *A. fumigatus*:770 *A. fischeri*:770  
afum|EAL92211.1 100.00% afis|EAW21191.1 100.00%  
Bootstrap support for afum|EAL92211.1 as seed ortholog is 100%.  
Bootstrap support for afis|EAW21191.1 as seed ortholog is 100%.

---

Group of orthologs #5556. Best score 770 bits

Score difference with first non-orthologous sequence - *A. fumigatus*:770 *A. fischeri*:648  
afum|EAL89398.1 100.00% afis|EAW24755.1 100.00%  
Bootstrap support for afum|EAL89398.1 as seed ortholog is 100%.  
Bootstrap support for afis|EAW24755.1 as seed ortholog is 100%.

---

Group of orthologs #5557. Best score 770 bits

Score difference with first non-orthologous sequence - *A. fumigatus*:770 *A. fischeri*:770  
afum|EAL92704.1 100.00% afis|EAW21669.1 100.00%  
Bootstrap support for afum|EAL92704.1 as seed ortholog is 100%.  
Bootstrap support for afis|EAW21669.1 as seed ortholog is 100%.

---

Group of orthologs #5558. Best score 769 bits

Score difference with first non-orthologous sequence - *A. fumigatus*:677 *A. fischeri*:621  
afum|EAL85501.1 100.00% afis|EAW20402.1 100.00%  
Bootstrap support for afum|EAL85501.1 as seed ortholog is 100%.  
Bootstrap support for afis|EAW20402.1 as seed ortholog is 100%.

---

Group of orthologs #5559. Best score 769 bits

Score difference with first non-orthologous sequence - *A. fumigatus*:769 *A. fischeri*:769  
afum|EAL93178.1 100.00% afis|EAW18488.1 100.00%

Bootstrap support for afum|EAL93178.1 as seed ortholog is 100%.  
Bootstrap support for afis|EAW18488.1 as seed ortholog is 100%.

---

Group of orthologs #5560. Best score 769 bits

Score difference with first non-orthologous sequence - *A. fumigatus*:769 *A. fischeri*:769

afum|EAL92385.2 100.00% afis|EAW21368.1 100.00%

Bootstrap support for afum|EAL92385.2 as seed ortholog is 100%.

Bootstrap support for afis|EAW21368.1 as seed ortholog is 100%.

---

Group of orthologs #5561. Best score 769 bits

Score difference with first non-orthologous sequence - *A. fumigatus*:769 *A. fischeri*:769

afum|EAL89418.1 100.00% afis|EAW24778.1 100.00%

Bootstrap support for afum|EAL89418.1 as seed ortholog is 100%.

Bootstrap support for afis|EAW24778.1 as seed ortholog is 100%.

---

Group of orthologs #5562. Best score 769 bits

Score difference with first non-orthologous sequence - *A. fumigatus*:769 *A. fischeri*:769

afum|EAL92932.1 100.00% afis|EAW21920.1 100.00%

Bootstrap support for afum|EAL92932.1 as seed ortholog is 100%.

Bootstrap support for afis|EAW21920.1 as seed ortholog is 100%.

---

Group of orthologs #5563. Best score 768 bits

Score difference with first non-orthologous sequence - *A. fumigatus*:768 *A. fischeri*:558

afum|EAL87582.1 100.00% afis|EAW18216.1 100.00%

Bootstrap support for afum|EAL87582.1 as seed ortholog is 100%.

Bootstrap support for afis|EAW18216.1 as seed ortholog is 100%.

---

Group of orthologs #5564. Best score 768 bits

Score difference with first non-orthologous sequence - *A. fumigatus*:768 *A. fischeri*:768

afum|EAL87640.1 100.00% afis|EAW18274.1 100.00%

Bootstrap support for afum|EAL87640.1 as seed ortholog is 100%.

Bootstrap support for afis|EAW18274.1 as seed ortholog is 100%.

---

Group of orthologs #5565. Best score 768 bits

Score difference with first non-orthologous sequence - *A. fumigatus*:768 *A. fischeri*:768

afum|EAL87979.1 100.00% afis|EAW23484.1 100.00%

Bootstrap support for afum|EAL87979.1 as seed ortholog is 100%.

Bootstrap support for afis|EAW23484.1 as seed ortholog is 100%.

---

Group of orthologs #5566. Best score 768 bits

Score difference with first non-orthologous sequence - *A. fumigatus*:768 *A. fischeri*:768

afum|EAL93288.1 100.00% afis|EAW18583.1 100.00%

Bootstrap support for afum|EAL93288.1 as seed ortholog is 100%.

Bootstrap support for afis|EAW18583.1 as seed ortholog is 100%.

---

Group of orthologs #5567. Best score 768 bits

Score difference with first non-orthologous sequence - *A. fumigatus*:768 *A. fischeri*:768

afum|EAL92088.2 100.00% afis|EAW21052.1 100.00%

Bootstrap support for afum|EAL92088.2 as seed ortholog is 100%.

Bootstrap support for afis|EAW21052.1 as seed ortholog is 100%.

---

Group of orthologs #5568. Best score 768 bits

Score difference with first non-orthologous sequence - *A. fumigatus*:768 *A. fischeri*:768

afum|EAL90735.1 100.00% afis|EAW22456.1 100.00%

Bootstrap support for afum|EAL90735.1 as seed ortholog is 100%.

Bootstrap support for afis|EAW22456.1 as seed ortholog is 100%.

---

Group of orthologs #5569. Best score 767 bits

Score difference with first non-orthologous sequence - *A. fumigatus*:767 *A. fischeri*:767

afum|EAL84965.1 100.00% afis|EAW19950.1 100.00%

Bootstrap support for afum|EAL84965.1 as seed ortholog is 100%.

Bootstrap support for afis|EAW19950.1 as seed ortholog is 100%.

---

Group of orthologs #5570. Best score 767 bits

Score difference with first non-orthologous sequence - *A. fumigatus*:767 *A. fischeri*:767

afum|EAL84611.1 100.00% afis|EAW20441.1 100.00%

Bootstrap support for afum|EAL84611.1 as seed ortholog is 100%.

Bootstrap support for afis|EAW20441.1 as seed ortholog is 100%.

---

Group of orthologs #5571. Best score 767 bits

Score difference with first non-orthologous sequence - *A. fumigatus*:679 *A. fischeri*:336

afum|EAL87839.1 100.00% afis|EAW17484.1 100.00%

Bootstrap support for afum|EAL87839.1 as seed ortholog is 100%.

Bootstrap support for afis|EAW17484.1 as seed ortholog is 100%.

---

Group of orthologs #5572. Best score 767 bits

Score difference with first non-orthologous sequence - *A. fumigatus*:767 *A. fischeri*:452

afum|EAL84878.1 100.00% afis|EAW20703.1 100.00%

Bootstrap support for afum|EAL84878.1 as seed ortholog is 100%.

Bootstrap support for afis|EAW20703.1 as seed ortholog is 100%.

---

Group of orthologs #5573. Best score 767 bits

Score difference with first non-orthologous sequence - *A. fumigatus*:767 *A. fischeri*:767

afum|EAL84800.1 100.00% afis|EAW20832.1 100.00%

Bootstrap support for afum|EAL84800.1 as seed ortholog is 100%.

Bootstrap support for afis|EAW20832.1 as seed ortholog is 100%.

---

Group of orthologs #5574. Best score 767 bits

Score difference with first non-orthologous sequence - *A. fumigatus*:697 *A. fischeri*:767

afum|EAL85998.1 100.00% afis|EAW24328.1 100.00%

Bootstrap support for afum|EAL85998.1 as seed ortholog is 100%.

Bootstrap support for afis|EAW24328.1 as seed ortholog is 100%.

---

Group of orthologs #5575. Best score 767 bits

Score difference with first non-orthologous sequence - *A. fumigatus*:767 *A. fischeri*:767

afum|EAL87973.2 100.00% afis|EAW23490.1 100.00%

Bootstrap support for afum|EAL87973.2 as seed ortholog is 100%.

Bootstrap support for afis|EAW23490.1 as seed ortholog is 100%.

---

Group of orthologs #5576. Best score 767 bits

Score difference with first non-orthologous sequence - *A. fumigatus*:767 *A. fischeri*:767

afum|EAL93589.2 100.00% afis|EAW18857.1 100.00%

Bootstrap support for afum|EAL93589.2 as seed ortholog is 100%.

Bootstrap support for afis|EAW18857.1 as seed ortholog is 100%.

---

Group of orthologs #5577. Best score 767 bits

Score difference with first non-orthologous sequence - *A. fumigatus*:767 *A. fischeri*:767

afum|EAL93599.1 100.00% afis|EAW18867.1 100.00%

Bootstrap support for afum|EAL93599.1 as seed ortholog is 100%.

Bootstrap support for afis|EAW18867.1 as seed ortholog is 100%.

---

Group of orthologs #5578. Best score 767 bits

Score difference with first non-orthologous sequence - *A. fumigatus*:767 *A. fischeri*:767  
afum|EAL90865.1 100.00% afis|EAW22327.1 100.00%  
Bootstrap support for afum|EAL90865.1 as seed ortholog is 100%.  
Bootstrap support for afis|EAW22327.1 as seed ortholog is 100%.

---

Group of orthologs #5579. Best score 767 bits

Score difference with first non-orthologous sequence - *A. fumigatus*:767 *A. fischeri*:767  
afum|EAL90566.1 100.00% afis|EAW22629.1 100.00%  
Bootstrap support for afum|EAL90566.1 as seed ortholog is 100%.  
Bootstrap support for afis|EAW22629.1 as seed ortholog is 100%.

---

Group of orthologs #5580. Best score 767 bits

Score difference with first non-orthologous sequence - *A. fumigatus*:767 *A. fischeri*:767  
afum|EAL90439.1 100.00% afis|EAW22760.1 100.00%  
Bootstrap support for afum|EAL90439.1 as seed ortholog is 100%.  
Bootstrap support for afis|EAW22760.1 as seed ortholog is 100%.

---

Group of orthologs #5581. Best score 767 bits

Score difference with first non-orthologous sequence - *A. fumigatus*:767 *A. fischeri*:767  
afum|EAL90281.1 100.00% afis|EAW22916.1 100.00%  
Bootstrap support for afum|EAL90281.1 as seed ortholog is 100%.  
Bootstrap support for afis|EAW22916.1 as seed ortholog is 100%.

---

Group of orthologs #5582. Best score 766 bits

Score difference with first non-orthologous sequence - *A. fumigatus*:766 *A. fischeri*:766  
afum|EAL88832.1 100.00% afis|EAW16204.1 100.00%  
Bootstrap support for afum|EAL88832.1 as seed ortholog is 100%.  
Bootstrap support for afis|EAW16204.1 as seed ortholog is 100%.

---

Group of orthologs #5583. Best score 766 bits

Score difference with first non-orthologous sequence - *A. fumigatus*:671 *A. fischeri*:628  
afum|EAL91709.1 100.00% afis|EAW17901.1 100.00%  
Bootstrap support for afum|EAL91709.1 as seed ortholog is 100%.  
Bootstrap support for afis|EAW17901.1 as seed ortholog is 100%.

---

Group of orthologs #5584. Best score 766 bits

Score difference with first non-orthologous sequence - *A. fumigatus*:766 *A. fischeri*:766  
afum|EAL88179.1 100.00% afis|EAW23300.1 100.00%  
Bootstrap support for afum|EAL88179.1 as seed ortholog is 100%.  
Bootstrap support for afis|EAW23300.1 as seed ortholog is 100%.

---

Group of orthologs #5585. Best score 766 bits

Score difference with first non-orthologous sequence - *A. fumigatus*:634 *A. fischeri*:499  
afum|EAL93317.1 100.00% afis|EAW18607.1 100.00%  
Bootstrap support for afum|EAL93317.1 as seed ortholog is 100%.  
Bootstrap support for afis|EAW18607.1 as seed ortholog is 100%.

---

Group of orthologs #5586. Best score 766 bits

Score difference with first non-orthologous sequence - *A. fumigatus*:766 *A. fischeri*:766  
afum|EAL90920.1 100.00% afis|EAW22260.1 100.00%  
Bootstrap support for afum|EAL90920.1 as seed ortholog is 100%.  
Bootstrap support for afis|EAW22260.1 as seed ortholog is 100%.

---

Group of orthologs #5587. Best score 766 bits

Score difference with first non-orthologous sequence - *A. fumigatus*:766 *A. fischeri*:766  
afum|EAL90529.1 100.00% afis|EAW22663.1 100.00%

Bootstrap support for afum|EAL90529.1 as seed ortholog is 100%.  
Bootstrap support for afis|EAW22663.1 as seed ortholog is 100%.

---

Group of orthologs #5588. Best score 766 bits

Score difference with first non-orthologous sequence - *A. fumigatus*:766 *A. fischeri*:766

afum|EAL89598.1 100.00% afis|EAW24941.1 100.00%

Bootstrap support for afum|EAL89598.1 as seed ortholog is 100%.

Bootstrap support for afis|EAW24941.1 as seed ortholog is 100%.

---

Group of orthologs #5589. Best score 765 bits

Score difference with first non-orthologous sequence - *A. fumigatus*:765 *A. fischeri*:765

afum|EAL84457.1 100.00% afis|EAW20604.1 100.00%

Bootstrap support for afum|EAL84457.1 as seed ortholog is 100%.

Bootstrap support for afis|EAW20604.1 as seed ortholog is 100%.

---

Group of orthologs #5590. Best score 765 bits

Score difference with first non-orthologous sequence - *A. fumigatus*:765 *A. fischeri*:765

afum|EAL91813.1 100.00% afis|EAW18002.1 100.00%

Bootstrap support for afum|EAL91813.1 as seed ortholog is 100%.

Bootstrap support for afis|EAW18002.1 as seed ortholog is 100%.

---

Group of orthologs #5591. Best score 765 bits

Score difference with first non-orthologous sequence - *A. fumigatus*:482 *A. fischeri*:659

afum|EAL87177.1 100.00% afis|EAW23740.1 100.00%

Bootstrap support for afum|EAL87177.1 as seed ortholog is 100%.

Bootstrap support for afis|EAW23740.1 as seed ortholog is 100%.

---

Group of orthologs #5592. Best score 765 bits

Score difference with first non-orthologous sequence - *A. fumigatus*:765 *A. fischeri*:765

afum|EAL88395.1 100.00% afis|EAW23084.1 100.00%

Bootstrap support for afum|EAL88395.1 as seed ortholog is 100%.

Bootstrap support for afis|EAW23084.1 as seed ortholog is 100%.

---

Group of orthologs #5593. Best score 764 bits

Score difference with first non-orthologous sequence - *A. fumigatus*:480 *A. fischeri*:764

afum|EAL84241.1 100.00% afis|EAW15405.1 100.00%

Bootstrap support for afum|EAL84241.1 as seed ortholog is 100%.

Bootstrap support for afis|EAW15405.1 as seed ortholog is 100%.

---

Group of orthologs #5594. Best score 764 bits

Score difference with first non-orthologous sequence - *A. fumigatus*:764 *A. fischeri*:712

afum|EAL84202.1 100.00% afis|EAW15445.1 100.00%

Bootstrap support for afum|EAL84202.1 as seed ortholog is 100%.

Bootstrap support for afis|EAW15445.1 as seed ortholog is 100%.

---

Group of orthologs #5595. Best score 764 bits

Score difference with first non-orthologous sequence - *A. fumigatus*:764 *A. fischeri*:764

afum|EAL84575.1 100.00% afis|EAW20479.1 100.00%

Bootstrap support for afum|EAL84575.1 as seed ortholog is 100%.

Bootstrap support for afis|EAW20479.1 as seed ortholog is 100%.

---

Group of orthologs #5596. Best score 764 bits

Score difference with first non-orthologous sequence - *A. fumigatus*:764 *A. fischeri*:764

afum|EAL89227.1 100.00% afis|EAW16631.1 100.00%

Bootstrap support for afum|EAL89227.1 as seed ortholog is 100%.

Bootstrap support for afis|EAW16631.1 as seed ortholog is 100%.

---

Group of orthologs #5597. Best score 764 bits

Score difference with first non-orthologous sequence - *A. fumigatus*:764 *A. fischeri*:764

afum|EAL86783.1 100.00% afis|EAW19743.1 100.00%

Bootstrap support for afum|EAL86783.1 as seed ortholog is 100%.

Bootstrap support for afis|EAW19743.1 as seed ortholog is 100%.

---

Group of orthologs #5598. Best score 764 bits

Score difference with first non-orthologous sequence - *A. fumigatus*:764 *A. fischeri*:764

afum|EAL91745.1 100.00% afis|EAW17934.1 100.00%

Bootstrap support for afum|EAL91745.1 as seed ortholog is 100%.

Bootstrap support for afis|EAW17934.1 as seed ortholog is 100%.

---

Group of orthologs #5599. Best score 764 bits

Score difference with first non-orthologous sequence - *A. fumigatus*:764 *A. fischeri*:764

afum|EAL86233.1 100.00% afis|EAW24570.1 100.00%

Bootstrap support for afum|EAL86233.1 as seed ortholog is 100%.

Bootstrap support for afis|EAW24570.1 as seed ortholog is 100%.

---

Group of orthologs #5600. Best score 764 bits

Score difference with first non-orthologous sequence - *A. fumigatus*:764 *A. fischeri*:764

afum|EAL93477.1 100.00% afis|EAW18750.1 100.00%

Bootstrap support for afum|EAL93477.1 as seed ortholog is 100%.

Bootstrap support for afis|EAW18750.1 as seed ortholog is 100%.

---

Group of orthologs #5601. Best score 764 bits

Score difference with first non-orthologous sequence - *A. fumigatus*:764 *A. fischeri*:764

afum|EAL93895.1 100.00% afis|EAW19165.1 100.00%

Bootstrap support for afum|EAL93895.1 as seed ortholog is 100%.

Bootstrap support for afis|EAW19165.1 as seed ortholog is 100%.

---

Group of orthologs #5602. Best score 764 bits

Score difference with first non-orthologous sequence - *A. fumigatus*:764 *A. fischeri*:764

afum|EAL90856.1 100.00% afis|EAW22336.1 100.00%

Bootstrap support for afum|EAL90856.1 as seed ortholog is 100%.

Bootstrap support for afis|EAW22336.1 as seed ortholog is 100%.

---

Group of orthologs #5603. Best score 764 bits

Score difference with first non-orthologous sequence - *A. fumigatus*:764 *A. fischeri*:764

afum|EAL92523.1 100.00% afis|EAW21504.1 100.00%

Bootstrap support for afum|EAL92523.1 as seed ortholog is 100%.

Bootstrap support for afis|EAW21504.1 as seed ortholog is 100%.

---

Group of orthologs #5604. Best score 764 bits

Score difference with first non-orthologous sequence - *A. fumigatus*:764 *A. fischeri*:764

afum|EAL92723.2 100.00% afis|EAW21689.1 100.00%

Bootstrap support for afum|EAL92723.2 as seed ortholog is 100%.

Bootstrap support for afis|EAW21689.1 as seed ortholog is 100%.

---

Group of orthologs #5605. Best score 764 bits

Score difference with first non-orthologous sequence - *A. fumigatus*:764 *A. fischeri*:764

afum|EAL93016.1 100.00% afis|EAW22001.1 100.00%

Bootstrap support for afum|EAL93016.1 as seed ortholog is 100%.

Bootstrap support for afis|EAW22001.1 as seed ortholog is 100%.

---

Group of orthologs #5606. Best score 763 bits

Score difference with first non-orthologous sequence - *A. fumigatus*:500 *A. fischeri*:301  
afum|EAL87548.1 100.00% afis|EAW18185.1 100.00%  
Bootstrap support for afum|EAL87548.1 as seed ortholog is 100%.  
Bootstrap support for afis|EAW18185.1 as seed ortholog is 100%.

---

Group of orthologs #5607. Best score 763 bits

Score difference with first non-orthologous sequence - *A. fumigatus*:763 *A. fischeri*:208  
afum|EAL91641.1 100.00% afis|EAW17831.1 100.00%  
Bootstrap support for afum|EAL91641.1 as seed ortholog is 100%.  
Bootstrap support for afis|EAW17831.1 as seed ortholog is 100%.

---

Group of orthologs #5608. Best score 763 bits

Score difference with first non-orthologous sequence - *A. fumigatus*:763 *A. fischeri*:763  
afum|EAL91663.1 100.00% afis|EAW17855.1 100.00%  
Bootstrap support for afum|EAL91663.1 as seed ortholog is 100%.  
Bootstrap support for afis|EAW17855.1 as seed ortholog is 100%.

---

Group of orthologs #5609. Best score 763 bits

Score difference with first non-orthologous sequence - *A. fumigatus*:763 *A. fischeri*:763  
afum|EAL88033.1 100.00% afis|EAW23423.1 100.00%  
Bootstrap support for afum|EAL88033.1 as seed ortholog is 100%.  
Bootstrap support for afis|EAW23423.1 as seed ortholog is 100%.

---

Group of orthologs #5610. Best score 763 bits

Score difference with first non-orthologous sequence - *A. fumigatus*:763 *A. fischeri*:763  
afum|EAL90645.1 100.00% afis|EAW22550.1 100.00%  
Bootstrap support for afum|EAL90645.1 as seed ortholog is 100%.  
Bootstrap support for afis|EAW22550.1 as seed ortholog is 100%.

---

Group of orthologs #5611. Best score 762 bits

Score difference with first non-orthologous sequence - *A. fumigatus*:580 *A. fischeri*:544  
afum|EAL85025.1 100.00% afis|EAW19874.1 100.00%  
Bootstrap support for afum|EAL85025.1 as seed ortholog is 100%.  
Bootstrap support for afis|EAW19874.1 as seed ortholog is 100%.

---

Group of orthologs #5612. Best score 762 bits

Score difference with first non-orthologous sequence - *A. fumigatus*:762 *A. fischeri*:762  
afum|EAL86147.1 100.00% afis|EAW24475.1 100.00%  
Bootstrap support for afum|EAL86147.1 as seed ortholog is 100%.  
Bootstrap support for afis|EAW24475.1 as seed ortholog is 100%.

---

Group of orthologs #5613. Best score 762 bits

Score difference with first non-orthologous sequence - *A. fumigatus*:762 *A. fischeri*:599  
afum|EAL86218.1 100.00% afis|EAW24553.1 100.00%  
Bootstrap support for afum|EAL86218.1 as seed ortholog is 100%.  
Bootstrap support for afis|EAW24553.1 as seed ortholog is 100%.

---

Group of orthologs #5614. Best score 762 bits

Score difference with first non-orthologous sequence - *A. fumigatus*:762 *A. fischeri*:762  
afum|EAL92126.1 100.00% afis|EAW21105.1 100.00%  
Bootstrap support for afum|EAL92126.1 as seed ortholog is 100%.  
Bootstrap support for afis|EAW21105.1 as seed ortholog is 100%.

---

Group of orthologs #5615. Best score 762 bits

Score difference with first non-orthologous sequence - *A. fumigatus*:762 *A. fischeri*:762  
afum|EAL90845.1 100.00% afis|EAW22347.1 100.00%



Bootstrap support for afum|EAL90845.1 as seed ortholog is 100%.  
Bootstrap support for afis|EAW22347.1 as seed ortholog is 100%.

---

Group of orthologs #5616. Best score 762 bits

Score difference with first non-orthologous sequence - *A. fumigatus*:762 *A. fischeri*:762

afum|EAL89710.1 100.00% afis|EAW25042.1 100.00%

Bootstrap support for afum|EAL89710.1 as seed ortholog is 100%.

Bootstrap support for afis|EAW25042.1 as seed ortholog is 100%.

---

Group of orthologs #5617. Best score 761 bits

Score difference with first non-orthologous sequence - *A. fumigatus*:761 *A. fischeri*:761

afum|EAL88736.1 100.00% afis|EAW16104.1 100.00%

Bootstrap support for afum|EAL88736.1 as seed ortholog is 100%.

Bootstrap support for afis|EAW16104.1 as seed ortholog is 100%.

---

Group of orthologs #5618. Best score 761 bits

Score difference with first non-orthologous sequence - *A. fumigatus*:761 *A. fischeri*:644

afum|EAL88805.1 100.00% afis|EAW16173.1 100.00%

Bootstrap support for afum|EAL88805.1 as seed ortholog is 100%.

Bootstrap support for afis|EAW16173.1 as seed ortholog is 100%.

---

Group of orthologs #5619. Best score 761 bits

Score difference with first non-orthologous sequence - *A. fumigatus*:395 *A. fischeri*:519

afum|EAL85138.1 100.00% afis|EAW19764.1 100.00%

Bootstrap support for afum|EAL85138.1 as seed ortholog is 100%.

Bootstrap support for afis|EAW19764.1 as seed ortholog is 100%.

---

Group of orthologs #5620. Best score 760 bits

Score difference with first non-orthologous sequence - *A. fumigatus*:462 *A. fischeri*:248

afum|EAL88847.1 100.00% afis|EAW16219.1 100.00%

Bootstrap support for afum|EAL88847.1 as seed ortholog is 100%.

Bootstrap support for afis|EAW16219.1 as seed ortholog is 100%.

---

Group of orthologs #5621. Best score 760 bits

Score difference with first non-orthologous sequence - *A. fumigatus*:679 *A. fischeri*:760

afum|EAL84815.1 100.00% afis|EAW20813.1 100.00%

Bootstrap support for afum|EAL84815.1 as seed ortholog is 100%.

Bootstrap support for afis|EAW20813.1 as seed ortholog is 100%.

---

Group of orthologs #5622. Best score 760 bits

Score difference with first non-orthologous sequence - *A. fumigatus*:760 *A. fischeri*:760

afum|EAL84382.1 100.00% afis|EAW25709.1 100.00%

Bootstrap support for afum|EAL84382.1 as seed ortholog is 100%.

Bootstrap support for afis|EAW25709.1 as seed ortholog is 100%.

---

Group of orthologs #5623. Best score 760 bits

Score difference with first non-orthologous sequence - *A. fumigatus*:760 *A. fischeri*:760

afum|EAL85954.1 100.00% afis|EAW24285.1 100.00%

Bootstrap support for afum|EAL85954.1 as seed ortholog is 100%.

Bootstrap support for afis|EAW24285.1 as seed ortholog is 100%.

---

Group of orthologs #5624. Best score 760 bits

Score difference with first non-orthologous sequence - *A. fumigatus*:760 *A. fischeri*:760

afum|EAL86191.1 100.00% afis|EAW24527.1 100.00%

Bootstrap support for afum|EAL86191.1 as seed ortholog is 100%.

Bootstrap support for afis|EAW24527.1 as seed ortholog is 100%.

---

Group of orthologs #5625. Best score 760 bits

Score difference with first non-orthologous sequence - *A. fumigatus*:760 *A. fischeri*:552

afum|EAL93111.2 100.00% afis|EAW18431.1 100.00%

Bootstrap support for afum|EAL93111.2 as seed ortholog is 100%.

Bootstrap support for afis|EAW18431.1 as seed ortholog is 100%.

---

Group of orthologs #5626. Best score 760 bits

Score difference with first non-orthologous sequence - *A. fumigatus*:760 *A. fischeri*:672

afum|EAL92083.1 100.00% afis|EAW21047.1 100.00%

Bootstrap support for afum|EAL92083.1 as seed ortholog is 100%.

Bootstrap support for afis|EAW21047.1 as seed ortholog is 100%.

---

Group of orthologs #5627. Best score 760 bits

Score difference with first non-orthologous sequence - *A. fumigatus*:760 *A. fischeri*:760

afum|EAL92542.1 100.00% afis|EAW21521.1 100.00%

Bootstrap support for afum|EAL92542.1 as seed ortholog is 100%.

Bootstrap support for afis|EAW21521.1 as seed ortholog is 100%.

---

Group of orthologs #5628. Best score 759 bits

Score difference with first non-orthologous sequence - *A. fumigatus*:759 *A. fischeri*:759

afum|EAL85507.1 100.00% afis|EAW15844.1 100.00%

Bootstrap support for afum|EAL85507.1 as seed ortholog is 100%.

Bootstrap support for afis|EAW15844.1 as seed ortholog is 100%.

---

Group of orthologs #5629. Best score 759 bits

Score difference with first non-orthologous sequence - *A. fumigatus*:759 *A. fischeri*:759

afum|EAL88723.1 100.00% afis|EAW16091.1 100.00%

Bootstrap support for afum|EAL88723.1 as seed ortholog is 100%.

Bootstrap support for afis|EAW16091.1 as seed ortholog is 100%.

---

Group of orthologs #5630. Best score 759 bits

Score difference with first non-orthologous sequence - *A. fumigatus*:759 *A. fischeri*:759

afum|EAL85082.1 100.00% afis|EAW19810.1 100.00%

Bootstrap support for afum|EAL85082.1 as seed ortholog is 100%.

Bootstrap support for afis|EAW19810.1 as seed ortholog is 100%.

---

Group of orthologs #5631. Best score 759 bits

Score difference with first non-orthologous sequence - *A. fumigatus*:759 *A. fischeri*:467

afum|EAL84975.2 100.00% afis|EAW19935.1 100.00%

Bootstrap support for afum|EAL84975.2 as seed ortholog is 100%.

Bootstrap support for afis|EAW19935.1 as seed ortholog is 100%.

---

Group of orthologs #5632. Best score 759 bits

Score difference with first non-orthologous sequence - *A. fumigatus*:759 *A. fischeri*:759

afum|EAL85405.2 100.00% afis|EAW20271.1 100.00%

Bootstrap support for afum|EAL85405.2 as seed ortholog is 100%.

Bootstrap support for afis|EAW20271.1 as seed ortholog is 100%.

---

Group of orthologs #5633. Best score 759 bits

Score difference with first non-orthologous sequence - *A. fumigatus*:759 *A. fischeri*:759

afum|EAL91678.1 100.00% afis|EAW17870.1 100.00%

Bootstrap support for afum|EAL91678.1 as seed ortholog is 100%.

Bootstrap support for afis|EAW17870.1 as seed ortholog is 100%.

---

Group of orthologs #5634. Best score 759 bits

Score difference with first non-orthologous sequence - *A. fumigatus*:759 *A. fischeri*:759  
afum|EAL89898.1 100.00% afis|EAW25237.1 100.00%  
Bootstrap support for afum|EAL89898.1 as seed ortholog is 100%.  
Bootstrap support for afis|EAW25237.1 as seed ortholog is 100%.

---

Group of orthologs #5635. Best score 758 bits

Score difference with first non-orthologous sequence - *A. fumigatus*:758 *A. fischeri*:758  
afum|EAL87282.1 100.00% afis|EAW23854.1 100.00%  
Bootstrap support for afum|EAL87282.1 as seed ortholog is 100%.  
Bootstrap support for afis|EAW23854.1 as seed ortholog is 100%.

---

Group of orthologs #5636. Best score 758 bits

Score difference with first non-orthologous sequence - *A. fumigatus*:670 *A. fischeri*:670  
afum|EAL90199.1 100.00% afis|EAW25535.1 100.00%  
Bootstrap support for afum|EAL90199.1 as seed ortholog is 100%.  
Bootstrap support for afis|EAW25535.1 as seed ortholog is 100%.

---

Group of orthologs #5637. Best score 757 bits

Score difference with first non-orthologous sequence - *A. fumigatus*:757 *A. fischeri*:503  
afum|EAL86331.1 100.00% afis|EAW16759.1 100.00%  
Bootstrap support for afum|EAL86331.1 as seed ortholog is 100%.  
Bootstrap support for afis|EAW16759.1 as seed ortholog is 100%.

---

Group of orthologs #5638. Best score 757 bits

Score difference with first non-orthologous sequence - *A. fumigatus*:757 *A. fischeri*:757  
afum|EAL86334.1 100.00% afis|EAW16763.1 100.00%  
Bootstrap support for afum|EAL86334.1 as seed ortholog is 100%.  
Bootstrap support for afis|EAW16763.1 as seed ortholog is 100%.

---

Group of orthologs #5639. Best score 757 bits

Score difference with first non-orthologous sequence - *A. fumigatus*:757 *A. fischeri*:757  
afum|EAL86663.2 100.00% afis|EAW17243.1 100.00%  
Bootstrap support for afum|EAL86663.2 as seed ortholog is 100%.  
Bootstrap support for afis|EAW17243.1 as seed ortholog is 100%.

---

Group of orthologs #5640. Best score 757 bits

Score difference with first non-orthologous sequence - *A. fumigatus*:757 *A. fischeri*:757  
afum|EAL84995.1 100.00% afis|EAW19912.1 100.00%  
Bootstrap support for afum|EAL84995.1 as seed ortholog is 100%.  
Bootstrap support for afis|EAW19912.1 as seed ortholog is 100%.

---

Group of orthologs #5641. Best score 757 bits

Score difference with first non-orthologous sequence - *A. fumigatus*:757 *A. fischeri*:757  
afum|EAL87281.1 100.00% afis|EAW23853.1 100.00%  
Bootstrap support for afum|EAL87281.1 as seed ortholog is 100%.  
Bootstrap support for afis|EAW23853.1 as seed ortholog is 100%.

---

Group of orthologs #5642. Best score 757 bits

Score difference with first non-orthologous sequence - *A. fumigatus*:757 *A. fischeri*:757  
afum|EAL92266.1 100.00% afis|EAW21252.1 100.00%  
Bootstrap support for afum|EAL92266.1 as seed ortholog is 100%.  
Bootstrap support for afis|EAW21252.1 as seed ortholog is 100%.

---

Group of orthologs #5643. Best score 757 bits

Score difference with first non-orthologous sequence - *A. fumigatus*:757 *A. fischeri*:757  
afum|EAL92893.1 100.00% afis|EAW21879.1 100.00%

Bootstrap support for afum|EAL92893.1 as seed ortholog is 100%.  
Bootstrap support for afis|EAW21879.1 as seed ortholog is 100%.

---

Group of orthologs #5644. Best score 757 bits

Score difference with first non-orthologous sequence - *A. fumigatus*:757 *A. fischeri*:757

afum|EAL92914.1 100.00% afis|EAW21901.1 100.00%

Bootstrap support for afum|EAL92914.1 as seed ortholog is 100%.

Bootstrap support for afis|EAW21901.1 as seed ortholog is 100%.

---

Group of orthologs #5645. Best score 757 bits

Score difference with first non-orthologous sequence - *A. fumigatus*:757 *A. fischeri*:757

afum|EAL92022.1 100.00% afis|EAW24165.1 100.00%

Bootstrap support for afum|EAL92022.1 as seed ortholog is 100%.

Bootstrap support for afis|EAW24165.1 as seed ortholog is 100%.

---

Group of orthologs #5646. Best score 756 bits

Score difference with first non-orthologous sequence - *A. fumigatus*:756 *A. fischeri*:256

afum|EAL86357.1 100.00% afis|EAW16787.1 100.00%

Bootstrap support for afum|EAL86357.1 as seed ortholog is 100%.

Bootstrap support for afis|EAW16787.1 as seed ortholog is 100%.

---

Group of orthologs #5647. Best score 756 bits

Score difference with first non-orthologous sequence - *A. fumigatus*:520 *A. fischeri*:704

afum|EAL87501.1 100.00% afis|EAW18144.1 100.00%

Bootstrap support for afum|EAL87501.1 as seed ortholog is 100%.

Bootstrap support for afis|EAW18144.1 as seed ortholog is 100%.

---

Group of orthologs #5648. Best score 756 bits

Score difference with first non-orthologous sequence - *A. fumigatus*:756 *A. fischeri*:756

afum|EAL89490.1 100.00% afis|EAW24844.1 100.00%

Bootstrap support for afum|EAL89490.1 as seed ortholog is 100%.

Bootstrap support for afis|EAW24844.1 as seed ortholog is 100%.

---

Group of orthologs #5649. Best score 755 bits

Score difference with first non-orthologous sequence - *A. fumigatus*:755 *A. fischeri*:755

afum|EAL84554.1 100.00% afis|EAW20501.1 100.00%

Bootstrap support for afum|EAL84554.1 as seed ortholog is 100%.

Bootstrap support for afis|EAW20501.1 as seed ortholog is 100%.

---

Group of orthologs #5650. Best score 755 bits

Score difference with first non-orthologous sequence - *A. fumigatus*:639 *A. fischeri*:619

afum|EAL84348.1 100.00% afis|EAW25678.1 100.00%

Bootstrap support for afum|EAL84348.1 as seed ortholog is 100%.

Bootstrap support for afis|EAW25678.1 as seed ortholog is 100%.

---

Group of orthologs #5651. Best score 755 bits

Score difference with first non-orthologous sequence - *A. fumigatus*:755 *A. fischeri*:755

afum|EAL93226.1 100.00% afis|EAW18529.1 100.00%

Bootstrap support for afum|EAL93226.1 as seed ortholog is 100%.

Bootstrap support for afis|EAW18529.1 as seed ortholog is 100%.

---

Group of orthologs #5652. Best score 755 bits

Score difference with first non-orthologous sequence - *A. fumigatus*:755 *A. fischeri*:755

afum|EAL90774.1 100.00% afis|EAW22418.1 100.00%

Bootstrap support for afum|EAL90774.1 as seed ortholog is 100%.

Bootstrap support for afis|EAW22418.1 as seed ortholog is 100%.

---

Group of orthologs #5653. Best score 755 bits

Score difference with first non-orthologous sequence - *A. fumigatus*:755 *A. fischeri*:755

afum|EAL89714.1 100.00% afis|EAW25046.1 100.00%

Bootstrap support for afum|EAL89714.1 as seed ortholog is 100%.

Bootstrap support for afis|EAW25046.1 as seed ortholog is 100%.

---

Group of orthologs #5654. Best score 755 bits

Score difference with first non-orthologous sequence - *A. fumigatus*:669 *A. fischeri*:569

afum|EAL89918.1 100.00% afis|EAW25257.1 100.00%

Bootstrap support for afum|EAL89918.1 as seed ortholog is 100%.

Bootstrap support for afis|EAW25257.1 as seed ortholog is 100%.

---

Group of orthologs #5655. Best score 754 bits

Score difference with first non-orthologous sequence - *A. fumigatus*:427 *A. fischeri*:561

afum|EAL86432.1 100.00% afis|EAW16895.1 100.00%

Bootstrap support for afum|EAL86432.1 as seed ortholog is 100%.

Bootstrap support for afis|EAW16895.1 as seed ortholog is 100%.

---

Group of orthologs #5656. Best score 754 bits

Score difference with first non-orthologous sequence - *A. fumigatus*:754 *A. fischeri*:754

afum|EAL88771.1 100.00% afis|EAW16142.1 100.00%

Bootstrap support for afum|EAL88771.1 as seed ortholog is 100%.

Bootstrap support for afis|EAW16142.1 as seed ortholog is 100%.

---

Group of orthologs #5657. Best score 754 bits

Score difference with first non-orthologous sequence - *A. fumigatus*:754 *A. fischeri*:754

afum|EAL87989.2 100.00% afis|EAW23476.1 100.00%

Bootstrap support for afum|EAL87989.2 as seed ortholog is 100%.

Bootstrap support for afis|EAW23476.1 as seed ortholog is 100%.

---

Group of orthologs #5658. Best score 754 bits

Score difference with first non-orthologous sequence - *A. fumigatus*:754 *A. fischeri*:754

afum|EAL87455.1 100.00% afis|EAW24024.1 100.00%

Bootstrap support for afum|EAL87455.1 as seed ortholog is 100%.

Bootstrap support for afis|EAW24024.1 as seed ortholog is 100%.

---

Group of orthologs #5659. Best score 754 bits

Score difference with first non-orthologous sequence - *A. fumigatus*:754 *A. fischeri*:754

afum|EAL92135.1 100.00% afis|EAW21112.1 100.00%

Bootstrap support for afum|EAL92135.1 as seed ortholog is 100%.

Bootstrap support for afis|EAW21112.1 as seed ortholog is 100%.

---

Group of orthologs #5660. Best score 754 bits

Score difference with first non-orthologous sequence - *A. fumigatus*:754 *A. fischeri*:754

afum|EAL90345.1 100.00% afis|EAW22855.1 100.00%

Bootstrap support for afum|EAL90345.1 as seed ortholog is 100%.

Bootstrap support for afis|EAW22855.1 as seed ortholog is 100%.

---

Group of orthologs #5661. Best score 754 bits

Score difference with first non-orthologous sequence - *A. fumigatus*:754 *A. fischeri*:754

afum|EAL92275.1 100.00% afis|EAW21260.1 100.00%

Bootstrap support for afum|EAL92275.1 as seed ortholog is 100%.

Bootstrap support for afis|EAW21260.1 as seed ortholog is 100%.

---

Group of orthologs #5662. Best score 754 bits

Score difference with first non-orthologous sequence - *A. fumigatus*:754 *A. fischeri*:754  
afum|EAL92306.1 100.00% afis|EAW21289.1 100.00%  
Bootstrap support for afum|EAL92306.1 as seed ortholog is 100%.  
Bootstrap support for afis|EAW21289.1 as seed ortholog is 100%.

---

Group of orthologs #5663. Best score 754 bits

Score difference with first non-orthologous sequence - *A. fumigatus*:754 *A. fischeri*:754  
afum|EAL89437.1 100.00% afis|EAW24795.1 100.00%  
Bootstrap support for afum|EAL89437.1 as seed ortholog is 100%.  
Bootstrap support for afis|EAW24795.1 as seed ortholog is 100%.

---

Group of orthologs #5664. Best score 753 bits

Score difference with first non-orthologous sequence - *A. fumigatus*:753 *A. fischeri*:753  
afum|EAL84429.1 100.00% afis|EAW20641.1 100.00%  
Bootstrap support for afum|EAL84429.1 as seed ortholog is 100%.  
Bootstrap support for afis|EAW20641.1 as seed ortholog is 100%.

---

Group of orthologs #5665. Best score 753 bits

Score difference with first non-orthologous sequence - *A. fumigatus*:753 *A. fischeri*:753  
afum|EAL89142.2 100.00% afis|EAW16544.1 100.00%  
Bootstrap support for afum|EAL89142.2 as seed ortholog is 100%.  
Bootstrap support for afis|EAW16544.1 as seed ortholog is 100%.

---

Group of orthologs #5666. Best score 753 bits

Score difference with first non-orthologous sequence - *A. fumigatus*:753 *A. fischeri*:753  
afum|EAL87483.1 100.00% afis|EAW18125.1 100.00%  
Bootstrap support for afum|EAL87483.1 as seed ortholog is 100%.  
Bootstrap support for afis|EAW18125.1 as seed ortholog is 100%.

---

Group of orthologs #5667. Best score 753 bits

Score difference with first non-orthologous sequence - *A. fumigatus*:753 *A. fischeri*:753  
afum|EAL87006.1 100.00% afis|EAW19488.1 100.00%  
Bootstrap support for afum|EAL87006.1 as seed ortholog is 100%.  
Bootstrap support for afis|EAW19488.1 as seed ortholog is 100%.

---

Group of orthologs #5668. Best score 753 bits

Score difference with first non-orthologous sequence - *A. fumigatus*:753 *A. fischeri*:753  
afum|EAL91814.2 100.00% afis|EAW18003.1 100.00%  
Bootstrap support for afum|EAL91814.2 as seed ortholog is 100%.  
Bootstrap support for afis|EAW18003.1 as seed ortholog is 100%.

---

Group of orthologs #5669. Best score 753 bits

Score difference with first non-orthologous sequence - *A. fumigatus*:753 *A. fischeri*:753  
afum|EAL87900.1 100.00% afis|EAW23567.1 100.00%  
Bootstrap support for afum|EAL87900.1 as seed ortholog is 100%.  
Bootstrap support for afis|EAW23567.1 as seed ortholog is 100%.

---

Group of orthologs #5670. Best score 753 bits

Score difference with first non-orthologous sequence - *A. fumigatus*:753 *A. fischeri*:753  
afum|EAL94006.1 100.00% afis|EAW19280.1 100.00%  
Bootstrap support for afum|EAL94006.1 as seed ortholog is 100%.  
Bootstrap support for afis|EAW19280.1 as seed ortholog is 100%.

---

Group of orthologs #5671. Best score 753 bits

Score difference with first non-orthologous sequence - *A. fumigatus*:753 *A. fischeri*:753  
afum|EAL90604.1 100.00% afis|EAW22595.1 100.00%

Bootstrap support for afum|EAL90604.1 as seed ortholog is 100%.  
Bootstrap support for afis|EAW22595.1 as seed ortholog is 100%.

---

Group of orthologs #5672. Best score 753 bits

Score difference with first non-orthologous sequence - *A. fumigatus*:753 *A. fischeri*:753

afum|EAL92184.1 100.00% afis|EAW21165.1 100.00%

Bootstrap support for afum|EAL92184.1 as seed ortholog is 100%.

Bootstrap support for afis|EAW21165.1 as seed ortholog is 100%.

---

Group of orthologs #5673. Best score 753 bits

Score difference with first non-orthologous sequence - *A. fumigatus*:753 *A. fischeri*:753

afum|EAL92845.1 100.00% afis|EAW21830.1 100.00%

Bootstrap support for afum|EAL92845.1 as seed ortholog is 100%.

Bootstrap support for afis|EAW21830.1 as seed ortholog is 100%.

---

Group of orthologs #5674. Best score 753 bits

Score difference with first non-orthologous sequence - *A. fumigatus*:753 *A. fischeri*:753

afum|EAL91911.1 100.00% afis|EAW25195.1 100.00%

Bootstrap support for afum|EAL91911.1 as seed ortholog is 100%.

Bootstrap support for afis|EAW25195.1 as seed ortholog is 100%.

---

Group of orthologs #5675. Best score 752 bits

Score difference with first non-orthologous sequence - *A. fumigatus*:642 *A. fischeri*:617

afum|EAL86344.1 100.00% afis|EAW16775.1 100.00%

Bootstrap support for afum|EAL86344.1 as seed ortholog is 100%.

Bootstrap support for afis|EAW16775.1 as seed ortholog is 100%.

---

Group of orthologs #5676. Best score 752 bits

Score difference with first non-orthologous sequence - *A. fumigatus*:752 *A. fischeri*:752

afum|EAL87477.1 100.00% afis|EAW18119.1 100.00%

Bootstrap support for afum|EAL87477.1 as seed ortholog is 100%.

Bootstrap support for afis|EAW18119.1 as seed ortholog is 100%.

---

Group of orthologs #5677. Best score 752 bits

Score difference with first non-orthologous sequence - *A. fumigatus*:674 *A. fischeri*:655

afum|EAL89218.1 100.00% afis|EAW16619.1 100.00%

Bootstrap support for afum|EAL89218.1 as seed ortholog is 100%.

Bootstrap support for afis|EAW16619.1 as seed ortholog is 100%.

---

Group of orthologs #5678. Best score 752 bits

Score difference with first non-orthologous sequence - *A. fumigatus*:752 *A. fischeri*:752

afum|EAL87242.1 100.00% afis|EAW23808.1 100.00%

Bootstrap support for afum|EAL87242.1 as seed ortholog is 100%.

Bootstrap support for afis|EAW23808.1 as seed ortholog is 100%.

---

Group of orthologs #5679. Best score 752 bits

Score difference with first non-orthologous sequence - *A. fumigatus*:752 *A. fischeri*:752

afum|EAL93326.1 100.00% afis|EAW18616.1 100.00%

Bootstrap support for afum|EAL93326.1 as seed ortholog is 100%.

Bootstrap support for afis|EAW18616.1 as seed ortholog is 100%.

---

Group of orthologs #5680. Best score 752 bits

Score difference with first non-orthologous sequence - *A. fumigatus*:752 *A. fischeri*:631

afum|EAL93745.2 100.00% afis|EAW19011.1 100.00%

Bootstrap support for afum|EAL93745.2 as seed ortholog is 100%.

Bootstrap support for afis|EAW19011.1 as seed ortholog is 100%.

---

Group of orthologs #5681. Best score 752 bits

Score difference with first non-orthologous sequence - *A. fumigatus*:752 *A. fischeri*:752

afum|EAL92428.1 100.00% afis|EAW21414.1 100.00%

Bootstrap support for afum|EAL92428.1 as seed ortholog is 100%.

Bootstrap support for afis|EAW21414.1 as seed ortholog is 100%.

---

Group of orthologs #5682. Best score 751 bits

Score difference with first non-orthologous sequence - *A. fumigatus*:751 *A. fischeri*:751

afum|EAL87506.1 100.00% afis|EAW18148.1 100.00%

Bootstrap support for afum|EAL87506.1 as seed ortholog is 100%.

Bootstrap support for afis|EAW18148.1 as seed ortholog is 100%.

---

Group of orthologs #5683. Best score 751 bits

Score difference with first non-orthologous sequence - *A. fumigatus*:751 *A. fischeri*:751

afum|EAL84715.1 100.00% afis|EAW20919.1 100.00%

Bootstrap support for afum|EAL84715.1 as seed ortholog is 100%.

Bootstrap support for afis|EAW20919.1 as seed ortholog is 100%.

---

Group of orthologs #5684. Best score 751 bits

Score difference with first non-orthologous sequence - *A. fumigatus*:751 *A. fischeri*:751

afum|EAL91514.1 100.00% afis|EAW17699.1 100.00%

Bootstrap support for afum|EAL91514.1 as seed ortholog is 100%.

Bootstrap support for afis|EAW17699.1 as seed ortholog is 100%.

---

Group of orthologs #5685. Best score 751 bits

Score difference with first non-orthologous sequence - *A. fumigatus*:656 *A. fischeri*:544

afum|EAL88193.1 100.00% afis|EAW23286.1 100.00%

Bootstrap support for afum|EAL88193.1 as seed ortholog is 100%.

Bootstrap support for afis|EAW23286.1 as seed ortholog is 100%.

---

Group of orthologs #5686. Best score 751 bits

Score difference with first non-orthologous sequence - *A. fumigatus*:751 *A. fischeri*:751

afum|EAL93992.1 100.00% afis|EAW19265.1 100.00%

Bootstrap support for afum|EAL93992.1 as seed ortholog is 100%.

Bootstrap support for afis|EAW19265.1 as seed ortholog is 100%.

---

Group of orthologs #5687. Best score 751 bits

Score difference with first non-orthologous sequence - *A. fumigatus*:751 *A. fischeri*:751

afum|EAL90754.1 100.00% afis|EAW22437.1 100.00%

Bootstrap support for afum|EAL90754.1 as seed ortholog is 100%.

Bootstrap support for afis|EAW22437.1 as seed ortholog is 100%.

---

Group of orthologs #5688. Best score 751 bits

Score difference with first non-orthologous sequence - *A. fumigatus*:751 *A. fischeri*:751

afum|EAL90287.1 100.00% afis|EAW22910.1 100.00%

Bootstrap support for afum|EAL90287.1 as seed ortholog is 100%.

Bootstrap support for afis|EAW22910.1 as seed ortholog is 100%.

---

Group of orthologs #5689. Best score 751 bits

Score difference with first non-orthologous sequence - *A. fumigatus*:751 *A. fischeri*:686

afum|EAL89535.2 100.00% afis|EAW24885.1 100.00%

Bootstrap support for afum|EAL89535.2 as seed ortholog is 100%.

Bootstrap support for afis|EAW24885.1 as seed ortholog is 100%.

---

Group of orthologs #5690. Best score 751 bits



Score difference with first non-orthologous sequence - *A. fumigatus*:751 *A. fischeri*:751  
afum|EAL92981.1 100.00% afis|EAW21967.1 100.00%  
Bootstrap support for afum|EAL92981.1 as seed ortholog is 100%.  
Bootstrap support for afis|EAW21967.1 as seed ortholog is 100%.

---

Group of orthologs #5691. Best score 751 bits

Score difference with first non-orthologous sequence - *A. fumigatus*:751 *A. fischeri*:751  
afum|EAL89799.1 100.00% afis|EAW25128.1 100.00%  
Bootstrap support for afum|EAL89799.1 as seed ortholog is 100%.  
Bootstrap support for afis|EAW25128.1 as seed ortholog is 100%.

---

Group of orthologs #5692. Best score 750 bits

Score difference with first non-orthologous sequence - *A. fumigatus*:750 *A. fischeri*:750  
afum|EAL89120.1 100.00% afis|EAW16525.1 100.00%  
Bootstrap support for afum|EAL89120.1 as seed ortholog is 100%.  
Bootstrap support for afis|EAW16525.1 as seed ortholog is 100%.

---

Group of orthologs #5693. Best score 750 bits

Score difference with first non-orthologous sequence - *A. fumigatus*:750 *A. fischeri*:750  
afum|EAL85953.1 100.00% afis|EAW24284.1 100.00%  
Bootstrap support for afum|EAL85953.1 as seed ortholog is 100%.  
Bootstrap support for afis|EAW24284.1 as seed ortholog is 100%.

---

Group of orthologs #5694. Best score 750 bits

Score difference with first non-orthologous sequence - *A. fumigatus*:750 *A. fischeri*:750  
afum|EAL88299.1 100.00% afis|EAW23184.1 100.00%  
Bootstrap support for afum|EAL88299.1 as seed ortholog is 100%.  
Bootstrap support for afis|EAW23184.1 as seed ortholog is 100%.

---

Group of orthologs #5695. Best score 750 bits

Score difference with first non-orthologous sequence - *A. fumigatus*:750 *A. fischeri*:542  
afum|EAL92205.1 100.00% afis|EAW21184.1 100.00%  
Bootstrap support for afum|EAL92205.1 as seed ortholog is 100%.  
Bootstrap support for afis|EAW21184.1 as seed ortholog is 100%.

---

Group of orthologs #5696. Best score 750 bits

Score difference with first non-orthologous sequence - *A. fumigatus*:750 *A. fischeri*:750  
afum|EAL92210.1 100.00% afis|EAW21188.1 100.00%  
Bootstrap support for afum|EAL92210.1 as seed ortholog is 100%.  
Bootstrap support for afis|EAW21188.1 as seed ortholog is 100%.

---

Group of orthologs #5697. Best score 749 bits

Score difference with first non-orthologous sequence - *A. fumigatus*:749 *A. fischeri*:749  
afum|EAL93633.1 100.00% afis|EAW18901.1 100.00%  
Bootstrap support for afum|EAL93633.1 as seed ortholog is 100%.  
Bootstrap support for afis|EAW18901.1 as seed ortholog is 100%.

---

Group of orthologs #5698. Best score 749 bits

Score difference with first non-orthologous sequence - *A. fumigatus*:749 *A. fischeri*:749  
afum|EAL90522.1 100.00% afis|EAW22670.1 100.00%  
Bootstrap support for afum|EAL90522.1 as seed ortholog is 100%.  
Bootstrap support for afis|EAW22670.1 as seed ortholog is 100%.

---

Group of orthologs #5699. Best score 749 bits

Score difference with first non-orthologous sequence - *A. fumigatus*:749 *A. fischeri*:539  
afum|EAL90355.1 100.00% afis|EAW22847.1 100.00%

Bootstrap support for afum|EAL90355.1 as seed ortholog is 100%.  
Bootstrap support for afis|EAW22847.1 as seed ortholog is 100%.

---

Group of orthologs #5700. Best score 749 bits

Score difference with first non-orthologous sequence - *A. fumigatus*:536 *A. fischeri*:293

afum|EAL92662.1 100.00% afis|EAW21627.1 100.00%

Bootstrap support for afum|EAL92662.1 as seed ortholog is 100%.

Bootstrap support for afis|EAW21627.1 as seed ortholog is 100%.

---

Group of orthologs #5701. Best score 749 bits

Score difference with first non-orthologous sequence - *A. fumigatus*:749 *A. fischeri*:749

afum|EAL92857.2 100.00% afis|EAW21845.1 100.00%

Bootstrap support for afum|EAL92857.2 as seed ortholog is 100%.

Bootstrap support for afis|EAW21845.1 as seed ortholog is 100%.

---

Group of orthologs #5702. Best score 749 bits

Score difference with first non-orthologous sequence - *A. fumigatus*:749 *A. fischeri*:749

afum|EAL92992.1 100.00% afis|EAW21977.1 100.00%

Bootstrap support for afum|EAL92992.1 as seed ortholog is 100%.

Bootstrap support for afis|EAW21977.1 as seed ortholog is 100%.

---

Group of orthologs #5703. Best score 748 bits

Score difference with first non-orthologous sequence - *A. fumigatus*:748 *A. fischeri*:748

afum|EAL87625.1 100.00% afis|EAW18261.1 100.00%

Bootstrap support for afum|EAL87625.1 as seed ortholog is 100%.

Bootstrap support for afis|EAW18261.1 as seed ortholog is 100%.

---

Group of orthologs #5704. Best score 748 bits

Score difference with first non-orthologous sequence - *A. fumigatus*:748 *A. fischeri*:684

afum|EAL86055.1 100.00% afis|EAW24383.1 100.00%

Bootstrap support for afum|EAL86055.1 as seed ortholog is 100%.

Bootstrap support for afis|EAW24383.1 as seed ortholog is 100%.

---

Group of orthologs #5705. Best score 748 bits

Score difference with first non-orthologous sequence - *A. fumigatus*:748 *A. fischeri*:748

afum|EAL93523.1 100.00% afis|EAW18789.1 100.00%

Bootstrap support for afum|EAL93523.1 as seed ortholog is 100%.

Bootstrap support for afis|EAW18789.1 as seed ortholog is 100%.

---

Group of orthologs #5706. Best score 748 bits

Score difference with first non-orthologous sequence - *A. fumigatus*:748 *A. fischeri*:748

afum|EAL93616.1 100.00% afis|EAW18883.1 100.00%

Bootstrap support for afum|EAL93616.1 as seed ortholog is 100%.

Bootstrap support for afis|EAW18883.1 as seed ortholog is 100%.

---

Group of orthologs #5707. Best score 748 bits

Score difference with first non-orthologous sequence - *A. fumigatus*:748 *A. fischeri*:748

afum|EAL93857.1 100.00% afis|EAW19125.1 100.00%

Bootstrap support for afum|EAL93857.1 as seed ortholog is 100%.

Bootstrap support for afis|EAW19125.1 as seed ortholog is 100%.

---

Group of orthologs #5708. Best score 748 bits

Score difference with first non-orthologous sequence - *A. fumigatus*:748 *A. fischeri*:748

afum|EAL90753.1 100.00% afis|EAW22438.1 100.00%

Bootstrap support for afum|EAL90753.1 as seed ortholog is 100%.

Bootstrap support for afis|EAW22438.1 as seed ortholog is 100%.

---

Group of orthologs #5709. Best score 748 bits

Score difference with first non-orthologous sequence - *A. fumigatus*:597 *A. fischeri*:456

afum|EAL90303.1 100.00% afis|EAW22895.1 100.00%

Bootstrap support for afum|EAL90303.1 as seed ortholog is 100%.

Bootstrap support for afis|EAW22895.1 as seed ortholog is 100%.

---

Group of orthologs #5710. Best score 748 bits

Score difference with first non-orthologous sequence - *A. fumigatus*:748 *A. fischeri*:423

afum|EAL94083.1 100.00% afis|EAW19364.1 100.00%

Bootstrap support for afum|EAL94083.1 as seed ortholog is 100%.

Bootstrap support for afis|EAW19364.1 as seed ortholog is 100%.

---

Group of orthologs #5711. Best score 747 bits

Score difference with first non-orthologous sequence - *A. fumigatus*:747 *A. fischeri*:747

afum|EAL86643.2 100.00% afis|EAW17218.1 100.00%

Bootstrap support for afum|EAL86643.2 as seed ortholog is 100%.

Bootstrap support for afis|EAW17218.1 as seed ortholog is 100%.

---

Group of orthologs #5712. Best score 747 bits

Score difference with first non-orthologous sequence - *A. fumigatus*:747 *A. fischeri*:651

afum|EAL84924.1 100.00% afis|EAW19993.1 100.00%

Bootstrap support for afum|EAL84924.1 as seed ortholog is 100%.

Bootstrap support for afis|EAW19993.1 as seed ortholog is 100%.

---

Group of orthologs #5713. Best score 747 bits

Score difference with first non-orthologous sequence - *A. fumigatus*:747 *A. fischeri*:747

afum|EAL91040.1 100.00% afis|EAW22150.1 100.00%

Bootstrap support for afum|EAL91040.1 as seed ortholog is 100%.

Bootstrap support for afis|EAW22150.1 as seed ortholog is 100%.

---

Group of orthologs #5714. Best score 747 bits

Score difference with first non-orthologous sequence - *A. fumigatus*:747 *A. fischeri*:747

afum|EAL90986.2 100.00% afis|EAW22207.1 100.00%

Bootstrap support for afum|EAL90986.2 as seed ortholog is 100%.

Bootstrap support for afis|EAW22207.1 as seed ortholog is 100%.

---

Group of orthologs #5715. Best score 747 bits

Score difference with first non-orthologous sequence - *A. fumigatus*:747 *A. fischeri*:747

afum|EAL90248.1 100.00% afis|EAW22949.1 100.00%

Bootstrap support for afum|EAL90248.1 as seed ortholog is 100%.

Bootstrap support for afis|EAW22949.1 as seed ortholog is 100%.

---

Group of orthologs #5716. Best score 746 bits

Score difference with first non-orthologous sequence - *A. fumigatus*:746 *A. fischeri*:746

afum|EAL84990.1 100.00% afis|EAW19918.1 100.00%

Bootstrap support for afum|EAL84990.1 as seed ortholog is 100%.

Bootstrap support for afis|EAW19918.1 as seed ortholog is 100%.

---

Group of orthologs #5717. Best score 746 bits

Score difference with first non-orthologous sequence - *A. fumigatus*:746 *A. fischeri*:746

afum|EAL88168.1 100.00% afis|EAW23309.1 100.00%

Bootstrap support for afum|EAL88168.1 as seed ortholog is 100%.

Bootstrap support for afis|EAW23309.1 as seed ortholog is 100%.

---

Group of orthologs #5718. Best score 745 bits

Score difference with first non-orthologous sequence - *A. fumigatus*:745 *A. fischeri*:745  
afum|EAL86602.1 100.00% afis|EAW17170.1 100.00%  
Bootstrap support for afum|EAL86602.1 as seed ortholog is 100%.  
Bootstrap support for afis|EAW17170.1 as seed ortholog is 100%.

---

Group of orthologs #5719. Best score 745 bits

Score difference with first non-orthologous sequence - *A. fumigatus*:745 *A. fischeri*:745  
afum|EAL88580.1 100.00% afis|EAW15947.1 100.00%  
Bootstrap support for afum|EAL88580.1 as seed ortholog is 100%.  
Bootstrap support for afis|EAW15947.1 as seed ortholog is 100%.

---

Group of orthologs #5720. Best score 745 bits

Score difference with first non-orthologous sequence - *A. fumigatus*:664 *A. fischeri*:117  
afum|EAL88651.1 100.00% afis|EAW16022.1 100.00%  
Bootstrap support for afum|EAL88651.1 as seed ortholog is 100%.  
Bootstrap support for afis|EAW16022.1 as seed ortholog is 99%.

---

Group of orthologs #5721. Best score 745 bits

Score difference with first non-orthologous sequence - *A. fumigatus*:745 *A. fischeri*:745  
afum|EAL85100.2 100.00% afis|EAW19791.1 100.00%  
Bootstrap support for afum|EAL85100.2 as seed ortholog is 100%.  
Bootstrap support for afis|EAW19791.1 as seed ortholog is 100%.

---

Group of orthologs #5722. Best score 745 bits

Score difference with first non-orthologous sequence - *A. fumigatus*:745 *A. fischeri*:745  
afum|EAL85160.1 100.00% afis|EAW20040.1 100.00%  
Bootstrap support for afum|EAL85160.1 as seed ortholog is 100%.  
Bootstrap support for afis|EAW20040.1 as seed ortholog is 100%.

---

Group of orthologs #5723. Best score 745 bits

Score difference with first non-orthologous sequence - *A. fumigatus*:745 *A. fischeri*:516  
afum|EAL86242.1 100.00% afis|EAW24612.1 100.00%  
Bootstrap support for afum|EAL86242.1 as seed ortholog is 100%.  
Bootstrap support for afis|EAW24612.1 as seed ortholog is 100%.

---

Group of orthologs #5724. Best score 745 bits

Score difference with first non-orthologous sequence - *A. fumigatus*:745 *A. fischeri*:745  
afum|EAL87410.1 100.00% afis|EAW23980.1 100.00%  
Bootstrap support for afum|EAL87410.1 as seed ortholog is 100%.  
Bootstrap support for afis|EAW23980.1 as seed ortholog is 100%.

---

Group of orthologs #5725. Best score 745 bits

Score difference with first non-orthologous sequence - *A. fumigatus*:745 *A. fischeri*:745  
afum|EAL90478.1 100.00% afis|EAW22716.1 100.00%  
Bootstrap support for afum|EAL90478.1 as seed ortholog is 100%.  
Bootstrap support for afis|EAW22716.1 as seed ortholog is 100%.

---

Group of orthologs #5726. Best score 745 bits

Score difference with first non-orthologous sequence - *A. fumigatus*:745 *A. fischeri*:745  
afum|EAL89811.1 100.00% afis|EAW25139.1 100.00%  
Bootstrap support for afum|EAL89811.1 as seed ortholog is 100%.  
Bootstrap support for afis|EAW25139.1 as seed ortholog is 100%.

---

Group of orthologs #5727. Best score 744 bits

Score difference with first non-orthologous sequence - *A. fumigatus*:744 *A. fischeri*:744  
afum|EAL88879.1 100.00% afis|EAW16258.1 100.00%

Bootstrap support for afum|EAL88879.1 as seed ortholog is 100%.  
Bootstrap support for afis|EAW16258.1 as seed ortholog is 100%.

---

Group of orthologs #5728. Best score 744 bits

Score difference with first non-orthologous sequence - *A. fumigatus*:744 *A. fischeri*:744

afum|EAL84552.1 100.00% afis|EAW20504.1 100.00%

Bootstrap support for afum|EAL84552.1 as seed ortholog is 100%.

Bootstrap support for afis|EAW20504.1 as seed ortholog is 100%.

---

Group of orthologs #5729. Best score 744 bits

Score difference with first non-orthologous sequence - *A. fumigatus*:744 *A. fischeri*:744

afum|EAL85946.1 100.00% afis|EAW24277.1 100.00%

Bootstrap support for afum|EAL85946.1 as seed ortholog is 100%.

Bootstrap support for afis|EAW24277.1 as seed ortholog is 100%.

---

Group of orthologs #5730. Best score 744 bits

Score difference with first non-orthologous sequence - *A. fumigatus*:744 *A. fischeri*:744

afum|EAL93882.1 100.00% afis|EAW19151.1 100.00%

Bootstrap support for afum|EAL93882.1 as seed ortholog is 100%.

Bootstrap support for afis|EAW19151.1 as seed ortholog is 100%.

---

Group of orthologs #5731. Best score 744 bits

Score difference with first non-orthologous sequence - *A. fumigatus*:744 *A. fischeri*:356

afum|EAL89349.1 100.00% afis|EAW24707.1 100.00%

Bootstrap support for afum|EAL89349.1 as seed ortholog is 100%.

Bootstrap support for afis|EAW24707.1 as seed ortholog is 100%.

---

Group of orthologs #5732. Best score 743 bits

Score difference with first non-orthologous sequence - *A. fumigatus*:743 *A. fischeri*:743

afum|EAL85584.1 100.00% afis|EAW15764.1 100.00%

Bootstrap support for afum|EAL85584.1 as seed ortholog is 100%.

Bootstrap support for afis|EAW15764.1 as seed ortholog is 100%.

---

Group of orthologs #5733. Best score 743 bits

Score difference with first non-orthologous sequence - *A. fumigatus*:743 *A. fischeri*:743

afum|EAL88624.2 100.00% afis|EAW15992.1 100.00%

Bootstrap support for afum|EAL88624.2 as seed ortholog is 100%.

Bootstrap support for afis|EAW15992.1 as seed ortholog is 100%.

---

Group of orthologs #5734. Best score 743 bits

Score difference with first non-orthologous sequence - *A. fumigatus*:743 *A. fischeri*:743

afum|EAL84927.1 100.00% afis|EAW19988.1 100.00%

Bootstrap support for afum|EAL84927.1 as seed ortholog is 100%.

Bootstrap support for afis|EAW19988.1 as seed ortholog is 100%.

---

Group of orthologs #5735. Best score 743 bits

Score difference with first non-orthologous sequence - *A. fumigatus*:743 *A. fischeri*:743

afum|EAL91338.1 100.00% afis|EAW17523.1 100.00%

Bootstrap support for afum|EAL91338.1 as seed ortholog is 100%.

Bootstrap support for afis|EAW17523.1 as seed ortholog is 100%.

---

Group of orthologs #5736. Best score 743 bits

Score difference with first non-orthologous sequence - *A. fumigatus*:743 *A. fischeri*:743

afum|EAL91512.1 100.00% afis|EAW17698.1 100.00%

Bootstrap support for afum|EAL91512.1 as seed ortholog is 100%.

Bootstrap support for afis|EAW17698.1 as seed ortholog is 100%.

---

Group of orthologs #5737. Best score 742 bits

Score difference with first non-orthologous sequence - *A. fumigatus*:742 *A. fischeri*:742

afum|EAL84838.2 100.00% afis|EAW20786.1 100.00%

Bootstrap support for afum|EAL84838.2 as seed ortholog is 100%.

Bootstrap support for afis|EAW20786.1 as seed ortholog is 100%.

---

Group of orthologs #5738. Best score 742 bits

Score difference with first non-orthologous sequence - *A. fumigatus*:742 *A. fischeri*:742

afum|EAL87719.1 100.00% afis|EAW18356.1 100.00%

Bootstrap support for afum|EAL87719.1 as seed ortholog is 100%.

Bootstrap support for afis|EAW18356.1 as seed ortholog is 100%.

---

Group of orthologs #5739. Best score 742 bits

Score difference with first non-orthologous sequence - *A. fumigatus*:742 *A. fischeri*:742

afum|EAL91567.1 100.00% afis|EAW17754.1 100.00%

Bootstrap support for afum|EAL91567.1 as seed ortholog is 100%.

Bootstrap support for afis|EAW17754.1 as seed ortholog is 100%.

---

Group of orthologs #5740. Best score 742 bits

Score difference with first non-orthologous sequence - *A. fumigatus*:612 *A. fischeri*:421

afum|EAL89010.1 100.00% afis|EAW20387.1 100.00%

Bootstrap support for afum|EAL89010.1 as seed ortholog is 100%.

Bootstrap support for afis|EAW20387.1 as seed ortholog is 100%.

---

Group of orthologs #5741. Best score 742 bits

Score difference with first non-orthologous sequence - *A. fumigatus*:742 *A. fischeri*:742

afum|EAL86237.1 100.00% afis|EAW24607.1 100.00%

Bootstrap support for afum|EAL86237.1 as seed ortholog is 100%.

Bootstrap support for afis|EAW24607.1 as seed ortholog is 100%.

---

Group of orthologs #5742. Best score 742 bits

Score difference with first non-orthologous sequence - *A. fumigatus*:742 *A. fischeri*:742

afum|EAL93205.1 100.00% afis|EAW18510.1 100.00%

Bootstrap support for afum|EAL93205.1 as seed ortholog is 100%.

Bootstrap support for afis|EAW18510.1 as seed ortholog is 100%.

---

Group of orthologs #5743. Best score 742 bits

Score difference with first non-orthologous sequence - *A. fumigatus*:742 *A. fischeri*:742

afum|EAL90996.1 100.00% afis|EAW22195.1 100.00%

Bootstrap support for afum|EAL90996.1 as seed ortholog is 100%.

Bootstrap support for afis|EAW22195.1 as seed ortholog is 100%.

---

Group of orthologs #5744. Best score 742 bits

Score difference with first non-orthologous sequence - *A. fumigatus*:742 *A. fischeri*:742

afum|EAL90664.1 100.00% afis|EAW22530.1 100.00%

Bootstrap support for afum|EAL90664.1 as seed ortholog is 100%.

Bootstrap support for afis|EAW22530.1 as seed ortholog is 100%.

---

Group of orthologs #5745. Best score 742 bits

Score difference with first non-orthologous sequence - *A. fumigatus*:742 *A. fischeri*:686

afum|EAL90583.1 100.00% afis|EAW22615.1 100.00%

Bootstrap support for afum|EAL90583.1 as seed ortholog is 100%.

Bootstrap support for afis|EAW22615.1 as seed ortholog is 100%.

---

Group of orthologs #5746. Best score 742 bits

Score difference with first non-orthologous sequence - *A. fumigatus*:742 *A. fischeri*:456  
afum|EAL92221.1 100.00% afis|EAW21210.1 100.00%  
Bootstrap support for afum|EAL92221.1 as seed ortholog is 100%.  
Bootstrap support for afis|EAW21210.1 as seed ortholog is 100%.

---

Group of orthologs #5747. Best score 742 bits

Score difference with first non-orthologous sequence - *A. fumigatus*:742 *A. fischeri*:742  
afum|EAL92900.1 100.00% afis|EAW21886.1 100.00%  
Bootstrap support for afum|EAL92900.1 as seed ortholog is 100%.  
Bootstrap support for afis|EAW21886.1 as seed ortholog is 100%.

---

Group of orthologs #5748. Best score 742 bits

Score difference with first non-orthologous sequence - *A. fumigatus*:742 *A. fischeri*:742  
afum|EAL89846.1 100.00% afis|EAW25172.1 100.00%  
Bootstrap support for afum|EAL89846.1 as seed ortholog is 100%.  
Bootstrap support for afis|EAW25172.1 as seed ortholog is 100%.

---

Group of orthologs #5749. Best score 741 bits

Score difference with first non-orthologous sequence - *A. fumigatus*:741 *A. fischeri*:741  
afum|EAL85551.1 100.00% afis|EAW15799.1 100.00%  
Bootstrap support for afum|EAL85551.1 as seed ortholog is 100%.  
Bootstrap support for afis|EAW15799.1 as seed ortholog is 100%.

---

Group of orthologs #5750. Best score 741 bits

Score difference with first non-orthologous sequence - *A. fumigatus*:741 *A. fischeri*:741  
afum|EAL90897.1 100.00% afis|EAW22284.1 100.00%  
Bootstrap support for afum|EAL90897.1 as seed ortholog is 100%.  
Bootstrap support for afis|EAW22284.1 as seed ortholog is 100%.

---

Group of orthologs #5751. Best score 741 bits

Score difference with first non-orthologous sequence - *A. fumigatus*:672 *A. fischeri*:648  
afum|EAL92225.1 100.00% afis|EAW21214.1 100.00%  
Bootstrap support for afum|EAL92225.1 as seed ortholog is 100%.  
Bootstrap support for afis|EAW21214.1 as seed ortholog is 100%.

---

Group of orthologs #5752. Best score 740 bits

Score difference with first non-orthologous sequence - *A. fumigatus*:640 *A. fischeri*:740  
afum|EAL91766.1 100.00% afis|EAW17955.1 100.00%  
Bootstrap support for afum|EAL91766.1 as seed ortholog is 100%.  
Bootstrap support for afis|EAW17955.1 as seed ortholog is 100%.

---

Group of orthologs #5753. Best score 740 bits

Score difference with first non-orthologous sequence - *A. fumigatus*:583 *A. fischeri*:589  
afum|EAL92120.1 100.00% afis|EAW21097.1 100.00%  
Bootstrap support for afum|EAL92120.1 as seed ortholog is 100%.  
Bootstrap support for afis|EAW21097.1 as seed ortholog is 100%.

---

Group of orthologs #5754. Best score 740 bits

Score difference with first non-orthologous sequence - *A. fumigatus*:740 *A. fischeri*:740  
afum|EAL91051.1 100.00% afis|EAW22139.1 100.00%  
Bootstrap support for afum|EAL91051.1 as seed ortholog is 100%.  
Bootstrap support for afis|EAW22139.1 as seed ortholog is 100%.

---

Group of orthologs #5755. Best score 740 bits

Score difference with first non-orthologous sequence - *A. fumigatus*:740 *A. fischeri*:740  
afum|EAL92742.1 100.00% afis|EAW21707.1 100.00%

Bootstrap support for afum|EAL92742.1 as seed ortholog is 100%.  
Bootstrap support for afis|EAW21707.1 as seed ortholog is 100%.

---

Group of orthologs #5756. Best score 739 bits

Score difference with first non-orthologous sequence - *A. fumigatus*:739 *A. fischeri*:739

|                 |         |                 |         |
|-----------------|---------|-----------------|---------|
| afum EAL85721.1 | 100.00% | afis EAW15614.1 | 100.00% |
|-----------------|---------|-----------------|---------|

Bootstrap support for afum|EAL85721.1 as seed ortholog is 100%.

Bootstrap support for afis|EAW15614.1 as seed ortholog is 100%.

---

Group of orthologs #5757. Best score 739 bits

Score difference with first non-orthologous sequence - *A. fumigatus*:739 *A. fischeri*:40

|                 |         |                 |         |
|-----------------|---------|-----------------|---------|
| afum EAL84427.1 | 100.00% | afis EAW20646.1 | 100.00% |
|-----------------|---------|-----------------|---------|

Bootstrap support for afum|EAL84427.1 as seed ortholog is 100%.

Bootstrap support for afis|EAW20646.1 as seed ortholog is 94%.

---

Group of orthologs #5758. Best score 739 bits

Score difference with first non-orthologous sequence - *A. fumigatus*:739 *A. fischeri*:739

|                 |         |                 |         |
|-----------------|---------|-----------------|---------|
| afum EAL87484.1 | 100.00% | afis EAW18126.1 | 100.00% |
|-----------------|---------|-----------------|---------|

Bootstrap support for afum|EAL87484.1 as seed ortholog is 100%.

Bootstrap support for afis|EAW18126.1 as seed ortholog is 100%.

---

Group of orthologs #5759. Best score 739 bits

Score difference with first non-orthologous sequence - *A. fumigatus*:739 *A. fischeri*:739

|                 |         |                 |         |
|-----------------|---------|-----------------|---------|
| afum EAL86005.1 | 100.00% | afis EAW24335.1 | 100.00% |
|-----------------|---------|-----------------|---------|

Bootstrap support for afum|EAL86005.1 as seed ortholog is 100%.

Bootstrap support for afis|EAW24335.1 as seed ortholog is 100%.

---

Group of orthologs #5760. Best score 739 bits

Score difference with first non-orthologous sequence - *A. fumigatus*:739 *A. fischeri*:621

|                 |         |                 |         |
|-----------------|---------|-----------------|---------|
| afum EAL87293.1 | 100.00% | afis EAW23865.1 | 100.00% |
|-----------------|---------|-----------------|---------|

Bootstrap support for afum|EAL87293.1 as seed ortholog is 100%.

Bootstrap support for afis|EAW23865.1 as seed ortholog is 100%.

---

Group of orthologs #5761. Best score 739 bits

Score difference with first non-orthologous sequence - *A. fumigatus*:739 *A. fischeri*:739

|                 |         |                 |         |
|-----------------|---------|-----------------|---------|
| afum EAL90718.1 | 100.00% | afis EAW22473.1 | 100.00% |
|-----------------|---------|-----------------|---------|

Bootstrap support for afum|EAL90718.1 as seed ortholog is 100%.

Bootstrap support for afis|EAW22473.1 as seed ortholog is 100%.

---

Group of orthologs #5762. Best score 739 bits

Score difference with first non-orthologous sequence - *A. fumigatus*:739 *A. fischeri*:739

|                 |         |                 |         |
|-----------------|---------|-----------------|---------|
| afum EAL90246.1 | 100.00% | afis EAW22951.1 | 100.00% |
|-----------------|---------|-----------------|---------|

Bootstrap support for afum|EAL90246.1 as seed ortholog is 100%.

Bootstrap support for afis|EAW22951.1 as seed ortholog is 100%.

---

Group of orthologs #5763. Best score 738 bits

Score difference with first non-orthologous sequence - *A. fumigatus*:738 *A. fischeri*:738

|                 |         |                 |         |
|-----------------|---------|-----------------|---------|
| afum EAL88576.1 | 100.00% | afis EAW15942.1 | 100.00% |
|-----------------|---------|-----------------|---------|

Bootstrap support for afum|EAL88576.1 as seed ortholog is 100%.

Bootstrap support for afis|EAW15942.1 as seed ortholog is 100%.

---

Group of orthologs #5764. Best score 738 bits

Score difference with first non-orthologous sequence - *A. fumigatus*:738 *A. fischeri*:738

|                 |         |                 |         |
|-----------------|---------|-----------------|---------|
| afum EAL84673.1 | 100.00% | afis EAW20960.1 | 100.00% |
|-----------------|---------|-----------------|---------|

Bootstrap support for afum|EAL84673.1 as seed ortholog is 100%.

Bootstrap support for afis|EAW20960.1 as seed ortholog is 100%.



---

Group of orthologs #5765. Best score 738 bits

Score difference with first non-orthologous sequence - *A. fumigatus*:663 *A. fischeri*:609

afum|EAL86987.1 100.00% afis|EAW19507.1 100.00%

Bootstrap support for afum|EAL86987.1 as seed ortholog is 100%.

Bootstrap support for afis|EAW19507.1 as seed ortholog is 100%.

---

Group of orthologs #5766. Best score 738 bits

Score difference with first non-orthologous sequence - *A. fumigatus*:738 *A. fischeri*:738

afum|EAL93306.1 100.00% afis|EAW18598.1 100.00%

Bootstrap support for afum|EAL93306.1 as seed ortholog is 100%.

Bootstrap support for afis|EAW18598.1 as seed ortholog is 100%.

---

Group of orthologs #5767. Best score 738 bits

Score difference with first non-orthologous sequence - *A. fumigatus*:738 *A. fischeri*:738

afum|EAL89416.1 100.00% afis|EAW24775.1 100.00%

Bootstrap support for afum|EAL89416.1 as seed ortholog is 100%.

Bootstrap support for afis|EAW24775.1 as seed ortholog is 100%.

---

Group of orthologs #5768. Best score 738 bits

Score difference with first non-orthologous sequence - *A. fumigatus*:738 *A. fischeri*:738

afum|EAL89524.1 100.00% afis|EAW24874.1 100.00%

Bootstrap support for afum|EAL89524.1 as seed ortholog is 100%.

Bootstrap support for afis|EAW24874.1 as seed ortholog is 100%.

---

Group of orthologs #5769. Best score 738 bits

Score difference with first non-orthologous sequence - *A. fumigatus*:738 *A. fischeri*:738

afum|EAL89713.1 100.00% afis|EAW25045.1 100.00%

Bootstrap support for afum|EAL89713.1 as seed ortholog is 100%.

Bootstrap support for afis|EAW25045.1 as seed ortholog is 100%.

---

Group of orthologs #5770. Best score 737 bits

Score difference with first non-orthologous sequence - *A. fumigatus*:656 *A. fischeri*:737

afum|EAL84200.1 100.00% afis|EAW15446.1 100.00%

Bootstrap support for afum|EAL84200.1 as seed ortholog is 100%.

Bootstrap support for afis|EAW15446.1 as seed ortholog is 100%.

---

Group of orthologs #5771. Best score 737 bits

Score difference with first non-orthologous sequence - *A. fumigatus*:737 *A. fischeri*:737

afum|EAL86360.1 100.00% afis|EAW16791.1 100.00%

Bootstrap support for afum|EAL86360.1 as seed ortholog is 100%.

Bootstrap support for afis|EAW16791.1 as seed ortholog is 100%.

---

Group of orthologs #5772. Best score 737 bits

Score difference with first non-orthologous sequence - *A. fumigatus*:737 *A. fischeri*:737

afum|EAL88700.2 100.00% afis|EAW16068.1 100.00%

Bootstrap support for afum|EAL88700.2 as seed ortholog is 100%.

Bootstrap support for afis|EAW16068.1 as seed ortholog is 100%.

---

Group of orthologs #5773. Best score 737 bits

Score difference with first non-orthologous sequence - *A. fumigatus*:635 *A. fischeri*:393

afum|EAL85271.1 100.00% afis|EAW20156.1 100.00%

Bootstrap support for afum|EAL85271.1 as seed ortholog is 100%.

Bootstrap support for afis|EAW20156.1 as seed ortholog is 100%.

---

Group of orthologs #5774. Best score 737 bits

Score difference with first non-orthologous sequence - *A. fumigatus*:737 *A. fischeri*:737  
afum|EAL88481.1 100.00% afis|EAW22999.1 100.00%  
Bootstrap support for afum|EAL88481.1 as seed ortholog is 100%.  
Bootstrap support for afis|EAW22999.1 as seed ortholog is 100%.

---

Group of orthologs #5775. Best score 737 bits

Score difference with first non-orthologous sequence - *A. fumigatus*:737 *A. fischeri*:737  
afum|EAL88240.1 100.00% afis|EAW23242.1 100.00%  
Bootstrap support for afum|EAL88240.1 as seed ortholog is 100%.  
Bootstrap support for afis|EAW23242.1 as seed ortholog is 100%.

---

Group of orthologs #5776. Best score 737 bits

Score difference with first non-orthologous sequence - *A. fumigatus*:737 *A. fischeri*:737  
afum|EAL92227.2 100.00% afis|EAW21216.1 100.00%  
Bootstrap support for afum|EAL92227.2 as seed ortholog is 100%.  
Bootstrap support for afis|EAW21216.1 as seed ortholog is 100%.

---

Group of orthologs #5777. Best score 736 bits

Score difference with first non-orthologous sequence - *A. fumigatus*:736 *A. fischeri*:736  
afum|EAL85063.1 100.00% afis|EAW19829.1 100.00%  
Bootstrap support for afum|EAL85063.1 as seed ortholog is 100%.  
Bootstrap support for afis|EAW19829.1 as seed ortholog is 100%.

---

Group of orthologs #5778. Best score 736 bits

Score difference with first non-orthologous sequence - *A. fumigatus*:736 *A. fischeri*:736  
afum|EAL85261.1 100.00% afis|EAW20146.1 100.00%  
Bootstrap support for afum|EAL85261.1 as seed ortholog is 100%.  
Bootstrap support for afis|EAW20146.1 as seed ortholog is 100%.

---

Group of orthologs #5779. Best score 736 bits

Score difference with first non-orthologous sequence - *A. fumigatus*:736 *A. fischeri*:674  
afum|EAL84828.1 100.00% afis|EAW20801.1 100.00%  
Bootstrap support for afum|EAL84828.1 as seed ortholog is 100%.  
Bootstrap support for afis|EAW20801.1 as seed ortholog is 100%.

---

Group of orthologs #5780. Best score 736 bits

Score difference with first non-orthologous sequence - *A. fumigatus*:736 *A. fischeri*:656  
afum|EAL86102.1 100.00% afis|EAW24434.1 100.00%  
Bootstrap support for afum|EAL86102.1 as seed ortholog is 100%.  
Bootstrap support for afis|EAW24434.1 as seed ortholog is 100%.

---

Group of orthologs #5781. Best score 736 bits

Score difference with first non-orthologous sequence - *A. fumigatus*:736 *A. fischeri*:736  
afum|EAL87241.1 100.00% afis|EAW23807.1 100.00%  
Bootstrap support for afum|EAL87241.1 as seed ortholog is 100%.  
Bootstrap support for afis|EAW23807.1 as seed ortholog is 100%.

---

Group of orthologs #5782. Best score 736 bits

Score difference with first non-orthologous sequence - *A. fumigatus*:736 *A. fischeri*:736  
afum|EAL93700.2 100.00% afis|EAW18968.1 100.00%  
Bootstrap support for afum|EAL93700.2 as seed ortholog is 100%.  
Bootstrap support for afis|EAW18968.1 as seed ortholog is 100%.

---

Group of orthologs #5783. Best score 736 bits

Score difference with first non-orthologous sequence - *A. fumigatus*:736 *A. fischeri*:736  
afum|EAL92761.1 100.00% afis|EAW21728.1 100.00%

Bootstrap support for afum|EAL92761.1 as seed ortholog is 100%.  
Bootstrap support for afis|EAW21728.1 as seed ortholog is 100%.

---

Group of orthologs #5784. Best score 735 bits

Score difference with first non-orthologous sequence - *A. fumigatus*:735 *A. fischeri*:735

|                 |         |                 |         |
|-----------------|---------|-----------------|---------|
| afum EAL84829.1 | 100.00% | afis EAW20800.1 | 100.00% |
|-----------------|---------|-----------------|---------|

Bootstrap support for afum|EAL84829.1 as seed ortholog is 100%.

Bootstrap support for afis|EAW20800.1 as seed ortholog is 100%.

---

Group of orthologs #5785. Best score 735 bits

Score difference with first non-orthologous sequence - *A. fumigatus*:735 *A. fischeri*:735

|                 |         |                 |         |
|-----------------|---------|-----------------|---------|
| afum EAL91789.1 | 100.00% | afis EAW17980.1 | 100.00% |
|-----------------|---------|-----------------|---------|

Bootstrap support for afum|EAL91789.1 as seed ortholog is 100%.

Bootstrap support for afis|EAW17980.1 as seed ortholog is 100%.

---

Group of orthologs #5786. Best score 735 bits

Score difference with first non-orthologous sequence - *A. fumigatus*:735 *A. fischeri*:735

|                 |         |                 |         |
|-----------------|---------|-----------------|---------|
| afum EAL91795.1 | 100.00% | afis EAW17986.1 | 100.00% |
|-----------------|---------|-----------------|---------|

Bootstrap support for afum|EAL91795.1 as seed ortholog is 100%.

Bootstrap support for afis|EAW17986.1 as seed ortholog is 100%.

---

Group of orthologs #5787. Best score 735 bits

Score difference with first non-orthologous sequence - *A. fumigatus*:735 *A. fischeri*:735

|                 |         |                 |         |
|-----------------|---------|-----------------|---------|
| afum EAL93320.1 | 100.00% | afis EAW18610.1 | 100.00% |
|-----------------|---------|-----------------|---------|

Bootstrap support for afum|EAL93320.1 as seed ortholog is 100%.

Bootstrap support for afis|EAW18610.1 as seed ortholog is 100%.

---

Group of orthologs #5788. Best score 735 bits

Score difference with first non-orthologous sequence - *A. fumigatus*:735 *A. fischeri*:735

|                 |         |                 |         |
|-----------------|---------|-----------------|---------|
| afum EAL90630.1 | 100.00% | afis EAW22568.1 | 100.00% |
|-----------------|---------|-----------------|---------|

Bootstrap support for afum|EAL90630.1 as seed ortholog is 100%.

Bootstrap support for afis|EAW22568.1 as seed ortholog is 100%.

---

Group of orthologs #5789. Best score 735 bits

Score difference with first non-orthologous sequence - *A. fumigatus*:735 *A. fischeri*:735

|                 |         |                 |         |
|-----------------|---------|-----------------|---------|
| afum EAL92236.1 | 100.00% | afis EAW21223.1 | 100.00% |
|-----------------|---------|-----------------|---------|

Bootstrap support for afum|EAL92236.1 as seed ortholog is 100%.

Bootstrap support for afis|EAW21223.1 as seed ortholog is 100%.

---

Group of orthologs #5790. Best score 735 bits

Score difference with first non-orthologous sequence - *A. fumigatus*:735 *A. fischeri*:735

|                 |         |                 |         |
|-----------------|---------|-----------------|---------|
| afum EAL92252.1 | 100.00% | afis EAW21239.1 | 100.00% |
|-----------------|---------|-----------------|---------|

Bootstrap support for afum|EAL92252.1 as seed ortholog is 100%.

Bootstrap support for afis|EAW21239.1 as seed ortholog is 100%.

---

Group of orthologs #5791. Best score 735 bits

Score difference with first non-orthologous sequence - *A. fumigatus*:735 *A. fischeri*:476

|                 |         |                 |         |
|-----------------|---------|-----------------|---------|
| afum EAL92272.1 | 100.00% | afis EAW21257.1 | 100.00% |
|-----------------|---------|-----------------|---------|

Bootstrap support for afum|EAL92272.1 as seed ortholog is 100%.

Bootstrap support for afis|EAW21257.1 as seed ortholog is 100%.

---

Group of orthologs #5792. Best score 734 bits

Score difference with first non-orthologous sequence - *A. fumigatus*:734 *A. fischeri*:734

|                 |         |                 |         |
|-----------------|---------|-----------------|---------|
| afum EAL84212.1 | 100.00% | afis EAW15431.1 | 100.00% |
|-----------------|---------|-----------------|---------|

Bootstrap support for afum|EAL84212.1 as seed ortholog is 100%.

Bootstrap support for afis|EAW15431.1 as seed ortholog is 100%.

---

Group of orthologs #5793. Best score 734 bits

Score difference with first non-orthologous sequence - *A. fumigatus*:734 *A. fischeri*:734

afum|EAL88579.1 100.00% afis|EAW15945.1 100.00%

Bootstrap support for afum|EAL88579.1 as seed ortholog is 100%.

Bootstrap support for afis|EAW15945.1 as seed ortholog is 100%.

---

Group of orthologs #5794. Best score 734 bits

Score difference with first non-orthologous sequence - *A. fumigatus*:734 *A. fischeri*:734

afum|EAL88883.1 100.00% afis|EAW16262.1 100.00%

Bootstrap support for afum|EAL88883.1 as seed ortholog is 100%.

Bootstrap support for afis|EAW16262.1 as seed ortholog is 100%.

---

Group of orthologs #5795. Best score 734 bits

Score difference with first non-orthologous sequence - *A. fumigatus*:734 *A. fischeri*:555

afum|EAL84585.1 100.00% afis|EAW20467.1 100.00%

Bootstrap support for afum|EAL84585.1 as seed ortholog is 100%.

Bootstrap support for afis|EAW20467.1 as seed ortholog is 100%.

---

Group of orthologs #5796. Best score 734 bits

Score difference with first non-orthologous sequence - *A. fumigatus*:679 *A. fischeri*:634

afum|EAL93058.1 100.00% afis|EAW18383.1 100.00%

Bootstrap support for afum|EAL93058.1 as seed ortholog is 100%.

Bootstrap support for afis|EAW18383.1 as seed ortholog is 100%.

---

Group of orthologs #5797. Best score 734 bits

Score difference with first non-orthologous sequence - *A. fumigatus*:734 *A. fischeri*:734

afum|EAL93991.1 100.00% afis|EAW19264.1 100.00%

Bootstrap support for afum|EAL93991.1 as seed ortholog is 100%.

Bootstrap support for afis|EAW19264.1 as seed ortholog is 100%.

---

Group of orthologs #5798. Best score 734 bits

Score difference with first non-orthologous sequence - *A. fumigatus*:734 *A. fischeri*:734

afum|EAL90324.1 100.00% afis|EAW22874.1 100.00%

Bootstrap support for afum|EAL90324.1 as seed ortholog is 100%.

Bootstrap support for afis|EAW22874.1 as seed ortholog is 100%.

---

Group of orthologs #5799. Best score 734 bits

Score difference with first non-orthologous sequence - *A. fumigatus*:734 *A. fischeri*:734

afum|EAL89719.1 100.00% afis|EAW25051.1 100.00%

Bootstrap support for afum|EAL89719.1 as seed ortholog is 100%.

Bootstrap support for afis|EAW25051.1 as seed ortholog is 100%.

---

Group of orthologs #5800. Best score 733 bits

Score difference with first non-orthologous sequence - *A. fumigatus*:733 *A. fischeri*:733

afum|EAL85250.1 100.00% afis|EAW20134.1 100.00%

Bootstrap support for afum|EAL85250.1 as seed ortholog is 100%.

Bootstrap support for afis|EAW20134.1 as seed ortholog is 100%.

---

Group of orthologs #5801. Best score 733 bits

Score difference with first non-orthologous sequence - *A. fumigatus*:733 *A. fischeri*:733

afum|EAL87026.1 100.00% afis|EAW19470.1 100.00%

Bootstrap support for afum|EAL87026.1 as seed ortholog is 100%.

Bootstrap support for afis|EAW19470.1 as seed ortholog is 100%.

---

Group of orthologs #5802. Best score 733 bits

Score difference with first non-orthologous sequence - *A. fumigatus*:733 *A. fischeri*:733  
afum|EAL90716.1 100.00% afis|EAW22475.1 100.00%  
Bootstrap support for afum|EAL90716.1 as seed ortholog is 100%.  
Bootstrap support for afis|EAW22475.1 as seed ortholog is 100%.

---

Group of orthologs #5803. Best score 733 bits

Score difference with first non-orthologous sequence - *A. fumigatus*:733 *A. fischeri*:733  
afum|EAL90344.1 100.00% afis|EAW22856.1 100.00%  
Bootstrap support for afum|EAL90344.1 as seed ortholog is 100%.  
Bootstrap support for afis|EAW22856.1 as seed ortholog is 100%.

---

Group of orthologs #5804. Best score 732 bits

Score difference with first non-orthologous sequence - *A. fumigatus*:732 *A. fischeri*:732  
afum|EAL85061.1 100.00% afis|EAW19831.1 100.00%  
Bootstrap support for afum|EAL85061.1 as seed ortholog is 100%.  
Bootstrap support for afis|EAW19831.1 as seed ortholog is 100%.

---

Group of orthologs #5805. Best score 732 bits

Score difference with first non-orthologous sequence - *A. fumigatus*:732 *A. fischeri*:732  
afum|EAL88923.1 100.00% afis|EAW16301.1 100.00%  
Bootstrap support for afum|EAL88923.1 as seed ortholog is 100%.  
Bootstrap support for afis|EAW16301.1 as seed ortholog is 100%.

---

Group of orthologs #5806. Best score 732 bits

Score difference with first non-orthologous sequence - *A. fumigatus*:732 *A. fischeri*:549  
afum|EAL84501.1 100.00% afis|EAW20560.1 100.00%  
Bootstrap support for afum|EAL84501.1 as seed ortholog is 100%.  
Bootstrap support for afis|EAW20560.1 as seed ortholog is 100%.

---

Group of orthologs #5807. Best score 732 bits

Score difference with first non-orthologous sequence - *A. fumigatus*:732 *A. fischeri*:732  
afum|EAL88238.1 100.00% afis|EAW23244.1 100.00%  
Bootstrap support for afum|EAL88238.1 as seed ortholog is 100%.  
Bootstrap support for afis|EAW23244.1 as seed ortholog is 100%.

---

Group of orthologs #5808. Best score 732 bits

Score difference with first non-orthologous sequence - *A. fumigatus*:732 *A. fischeri*:469  
afum|EAL92110.2 100.00% afis|EAW21087.1 100.00%  
Bootstrap support for afum|EAL92110.2 as seed ortholog is 100%.  
Bootstrap support for afis|EAW21087.1 as seed ortholog is 100%.

---

Group of orthologs #5809. Best score 731 bits

Score difference with first non-orthologous sequence - *A. fumigatus*:731 *A. fischeri*:731  
afum|EAL85585.1 100.00% afis|EAW15763.1 100.00%  
Bootstrap support for afum|EAL85585.1 as seed ortholog is 100%.  
Bootstrap support for afis|EAW15763.1 as seed ortholog is 100%.

---

Group of orthologs #5810. Best score 731 bits

Score difference with first non-orthologous sequence - *A. fumigatus*:731 *A. fischeri*:731  
afum|EAL87615.1 100.00% afis|EAW18250.1 100.00%  
Bootstrap support for afum|EAL87615.1 as seed ortholog is 100%.  
Bootstrap support for afis|EAW18250.1 as seed ortholog is 100%.

---

Group of orthologs #5811. Best score 731 bits

Score difference with first non-orthologous sequence - *A. fumigatus*:731 *A. fischeri*:731  
afum|EBA27201.1 100.00% afis|EAW20968.1 100.00%

Bootstrap support for afum|EBA27201.1 as seed ortholog is 100%.  
Bootstrap support for afis|EAW20968.1 as seed ortholog is 100%.

---

Group of orthologs #5812. Best score 730 bits

Score difference with first non-orthologous sequence - *A. fumigatus*:730 *A. fischeri*:730

afum|EAL85220.1 100.00% afis|EAW20103.1 100.00%

Bootstrap support for afum|EAL85220.1 as seed ortholog is 100%.

Bootstrap support for afis|EAW20103.1 as seed ortholog is 100%.

---

Group of orthologs #5813. Best score 730 bits

Score difference with first non-orthologous sequence - *A. fumigatus*:730 *A. fischeri*:730

afum|EAL91496.1 100.00% afis|EAW17682.1 100.00%

Bootstrap support for afum|EAL91496.1 as seed ortholog is 100%.

Bootstrap support for afis|EAW17682.1 as seed ortholog is 100%.

---

Group of orthologs #5814. Best score 730 bits

Score difference with first non-orthologous sequence - *A. fumigatus*:730 *A. fischeri*:730

afum|EAL93049.1 100.00% afis|EAW18374.1 100.00%

Bootstrap support for afum|EAL93049.1 as seed ortholog is 100%.

Bootstrap support for afis|EAW18374.1 as seed ortholog is 100%.

---

Group of orthologs #5815. Best score 730 bits

Score difference with first non-orthologous sequence - *A. fumigatus*:730 *A. fischeri*:730

afum|EAL88453.2 100.00% afis|EAW23028.1 100.00%

Bootstrap support for afum|EAL88453.2 as seed ortholog is 100%.

Bootstrap support for afis|EAW23028.1 as seed ortholog is 100%.

---

Group of orthologs #5816. Best score 730 bits

Score difference with first non-orthologous sequence - *A. fumigatus*:730 *A. fischeri*:730

afum|EAL93750.1 100.00% afis|EAW19018.1 100.00%

Bootstrap support for afum|EAL93750.1 as seed ortholog is 100%.

Bootstrap support for afis|EAW19018.1 as seed ortholog is 100%.

---

Group of orthologs #5817. Best score 730 bits

Score difference with first non-orthologous sequence - *A. fumigatus*:730 *A. fischeri*:730

afum|EAL90636.1 100.00% afis|EAW22559.1 100.00%

Bootstrap support for afum|EAL90636.1 as seed ortholog is 100%.

Bootstrap support for afis|EAW22559.1 as seed ortholog is 100%.

---

Group of orthologs #5818. Best score 730 bits

Score difference with first non-orthologous sequence - *A. fumigatus*:599 *A. fischeri*:477

afum|EAL90322.1 100.00% afis|EAW22877.1 100.00%

Bootstrap support for afum|EAL90322.1 as seed ortholog is 100%.

Bootstrap support for afis|EAW22877.1 as seed ortholog is 100%.

---

Group of orthologs #5819. Best score 730 bits

Score difference with first non-orthologous sequence - *A. fumigatus*:730 *A. fischeri*:730

afum|EAL92787.1 100.00% afis|EAW21757.1 100.00%

Bootstrap support for afum|EAL92787.1 as seed ortholog is 100%.

Bootstrap support for afis|EAW21757.1 as seed ortholog is 100%.

---

Group of orthologs #5820. Best score 730 bits

Score difference with first non-orthologous sequence - *A. fumigatus*:730 *A. fischeri*:730

afum|EAL89530.1 100.00% afis|EAW24880.1 100.00%

Bootstrap support for afum|EAL89530.1 as seed ortholog is 100%.

Bootstrap support for afis|EAW24880.1 as seed ortholog is 100%.

---

Group of orthologs #5821. Best score 730 bits

Score difference with first non-orthologous sequence - *A. fumigatus*:730 *A. fischeri*:730

afum|EAL89637.1 100.00% afis|EAW24977.1 100.00%

Bootstrap support for afum|EAL89637.1 as seed ortholog is 100%.

Bootstrap support for afis|EAW24977.1 as seed ortholog is 100%.

---

Group of orthologs #5822. Best score 730 bits

Score difference with first non-orthologous sequence - *A. fumigatus*:730 *A. fischeri*:730

afum|EAL92937.1 100.00% afis|EAW21924.1 100.00%

Bootstrap support for afum|EAL92937.1 as seed ortholog is 100%.

Bootstrap support for afis|EAW21924.1 as seed ortholog is 100%.

---

Group of orthologs #5823. Best score 730 bits

Score difference with first non-orthologous sequence - *A. fumigatus*:730 *A. fischeri*:730

afum|EBA27308.1 100.00% afis|EAW23886.1 100.00%

Bootstrap support for afum|EBA27308.1 as seed ortholog is 100%.

Bootstrap support for afis|EAW23886.1 as seed ortholog is 100%.

---

Group of orthologs #5824. Best score 729 bits

Score difference with first non-orthologous sequence - *A. fumigatus*:729 *A. fischeri*:729

afum|EAL84588.1 100.00% afis|EAW20465.1 100.00%

Bootstrap support for afum|EAL84588.1 as seed ortholog is 100%.

Bootstrap support for afis|EAW20465.1 as seed ortholog is 100%.

---

Group of orthologs #5825. Best score 729 bits

Score difference with first non-orthologous sequence - *A. fumigatus*:729 *A. fischeri*:729

afum|EAL91428.1 100.00% afis|EAW17615.1 100.00%

Bootstrap support for afum|EAL91428.1 as seed ortholog is 100%.

Bootstrap support for afis|EAW17615.1 as seed ortholog is 100%.

---

Group of orthologs #5826. Best score 729 bits

Score difference with first non-orthologous sequence - *A. fumigatus*:729 *A. fischeri*:729

afum|EAL85876.1 100.00% afis|EAW24206.1 100.00%

Bootstrap support for afum|EAL85876.1 as seed ortholog is 100%.

Bootstrap support for afis|EAW24206.1 as seed ortholog is 100%.

---

Group of orthologs #5827. Best score 729 bits

Score difference with first non-orthologous sequence - *A. fumigatus*:729 *A. fischeri*:729

afum|EAL93252.1 100.00% afis|EAW18552.1 100.00%

Bootstrap support for afum|EAL93252.1 as seed ortholog is 100%.

Bootstrap support for afis|EAW18552.1 as seed ortholog is 100%.

---

Group of orthologs #5828. Best score 729 bits

Score difference with first non-orthologous sequence - *A. fumigatus*:729 *A. fischeri*:729

afum|EAL87463.1 100.00% afis|EAW24032.1 100.00%

Bootstrap support for afum|EAL87463.1 as seed ortholog is 100%.

Bootstrap support for afis|EAW24032.1 as seed ortholog is 100%.

---

Group of orthologs #5829. Best score 729 bits

Score difference with first non-orthologous sequence - *A. fumigatus*:729 *A. fischeri*:729

afum|EAL93793.2 100.00% afis|EAW19064.1 100.00%

Bootstrap support for afum|EAL93793.2 as seed ortholog is 100%.

Bootstrap support for afis|EAW19064.1 as seed ortholog is 100%.

---

Group of orthologs #5830. Best score 729 bits

Score difference with first non-orthologous sequence - *A. fumigatus*:729 *A. fischeri*:729  
afum|EAL92695.1 100.00% afis|EAW21660.1 100.00%  
Bootstrap support for afum|EAL92695.1 as seed ortholog is 100%.  
Bootstrap support for afis|EAW21660.1 as seed ortholog is 100%.

---

Group of orthologs #5831. Best score 729 bits

Score difference with first non-orthologous sequence - *A. fumigatus*:729 *A. fischeri*:729  
afum|EAL89559.1 100.00% afis|EAW24906.1 100.00%  
Bootstrap support for afum|EAL89559.1 as seed ortholog is 100%.  
Bootstrap support for afis|EAW24906.1 as seed ortholog is 100%.

---

Group of orthologs #5832. Best score 729 bits

Score difference with first non-orthologous sequence - *A. fumigatus*:729 *A. fischeri*:729  
afum|EAL92835.1 100.00% afis|EAW21819.1 100.00%  
Bootstrap support for afum|EAL92835.1 as seed ortholog is 100%.  
Bootstrap support for afis|EAW21819.1 as seed ortholog is 100%.

---

Group of orthologs #5833. Best score 728 bits

Score difference with first non-orthologous sequence - *A. fumigatus*:728 *A. fischeri*:728  
afum|EAL86312.1 100.00% afis|EAW16737.1 100.00%  
Bootstrap support for afum|EAL86312.1 as seed ortholog is 100%.  
Bootstrap support for afis|EAW16737.1 as seed ortholog is 100%.

---

Group of orthologs #5834. Best score 728 bits

Score difference with first non-orthologous sequence - *A. fumigatus*:728 *A. fischeri*:728  
afum|EAL86568.1 100.00% afis|EAW17090.1 100.00%  
Bootstrap support for afum|EAL86568.1 as seed ortholog is 100%.  
Bootstrap support for afis|EAW17090.1 as seed ortholog is 100%.

---

Group of orthologs #5835. Best score 728 bits

Score difference with first non-orthologous sequence - *A. fumigatus*:728 *A. fischeri*:728  
afum|EAL93206.1 100.00% afis|EAW18511.1 100.00%  
Bootstrap support for afum|EAL93206.1 as seed ortholog is 100%.  
Bootstrap support for afis|EAW18511.1 as seed ortholog is 100%.

---

Group of orthologs #5836. Best score 728 bits

Score difference with first non-orthologous sequence - *A. fumigatus*:728 *A. fischeri*:728  
afum|EAL90728.1 100.00% afis|EAW22463.1 100.00%  
Bootstrap support for afum|EAL90728.1 as seed ortholog is 100%.  
Bootstrap support for afis|EAW22463.1 as seed ortholog is 100%.

---

Group of orthologs #5837. Best score 728 bits

Score difference with first non-orthologous sequence - *A. fumigatus*:728 *A. fischeri*:728  
afum|EAL92869.1 100.00% afis|EAW21856.1 100.00%  
Bootstrap support for afum|EAL92869.1 as seed ortholog is 100%.  
Bootstrap support for afis|EAW21856.1 as seed ortholog is 100%.

---

Group of orthologs #5838. Best score 727 bits

Score difference with first non-orthologous sequence - *A. fumigatus*:496 *A. fischeri*:637  
afum|EAL88810.1 100.00% afis|EAW16177.1 100.00%  
Bootstrap support for afum|EAL88810.1 as seed ortholog is 100%.  
Bootstrap support for afis|EAW16177.1 as seed ortholog is 100%.

---

Group of orthologs #5839. Best score 727 bits

Score difference with first non-orthologous sequence - *A. fumigatus*:727 *A. fischeri*:727  
afum|EAL86948.1 100.00% afis|EAW19564.1 100.00%



Bootstrap support for afum|EAL86948.1 as seed ortholog is 100%.  
Bootstrap support for afis|EAW19564.1 as seed ortholog is 100%.

---

Group of orthologs #5840. Best score 727 bits

Score difference with first non-orthologous sequence - *A. fumigatus*:727 *A. fischeri*:727

afum|EAL87175.1 100.00% afis|EAW23738.1 100.00%

Bootstrap support for afum|EAL87175.1 as seed ortholog is 100%.

Bootstrap support for afis|EAW23738.1 as seed ortholog is 100%.

---

Group of orthologs #5841. Best score 727 bits

Score difference with first non-orthologous sequence - *A. fumigatus*:727 *A. fischeri*:627

afum|EAL88031.1 100.00% afis|EAW23430.1 100.00%

Bootstrap support for afum|EAL88031.1 as seed ortholog is 100%.

Bootstrap support for afis|EAW23430.1 as seed ortholog is 100%.

---

Group of orthologs #5842. Best score 727 bits

Score difference with first non-orthologous sequence - *A. fumigatus*:727 *A. fischeri*:727

afum|EAL93347.1 100.00% afis|EAW18634.1 100.00%

Bootstrap support for afum|EAL93347.1 as seed ortholog is 100%.

Bootstrap support for afis|EAW18634.1 as seed ortholog is 100%.

---

Group of orthologs #5843. Best score 727 bits

Score difference with first non-orthologous sequence - *A. fumigatus*:727 *A. fischeri*:727

afum|EAL93375.1 100.00% afis|EAW18658.1 100.00%

Bootstrap support for afum|EAL93375.1 as seed ortholog is 100%.

Bootstrap support for afis|EAW18658.1 as seed ortholog is 100%.

---

Group of orthologs #5844. Best score 727 bits

Score difference with first non-orthologous sequence - *A. fumigatus*:727 *A. fischeri*:237

afum|EAL89338.1 100.00% afis|EAW24696.1 100.00%

Bootstrap support for afum|EAL89338.1 as seed ortholog is 100%.

Bootstrap support for afis|EAW24696.1 as seed ortholog is 100%.

---

Group of orthologs #5845. Best score 727 bits

Score difference with first non-orthologous sequence - *A. fumigatus*:727 *A. fischeri*:605

afum|EAL89697.1 100.00% afis|EAW25001.1 100.00%

Bootstrap support for afum|EAL89697.1 as seed ortholog is 100%.

Bootstrap support for afis|EAW25001.1 as seed ortholog is 100%.

---

Group of orthologs #5846. Best score 726 bits

Score difference with first non-orthologous sequence - *A. fumigatus*:726 *A. fischeri*:280

afum|EAL88602.1 100.00% afis|EAW15969.1 100.00%

Bootstrap support for afum|EAL88602.1 as seed ortholog is 100%.

Bootstrap support for afis|EAW15969.1 as seed ortholog is 100%.

---

Group of orthologs #5847. Best score 726 bits

Score difference with first non-orthologous sequence - *A. fumigatus*:649 *A. fischeri*:655

afum|EAL91672.1 100.00% afis|EAW17864.1 100.00%

Bootstrap support for afum|EAL91672.1 as seed ortholog is 100%.

Bootstrap support for afis|EAW17864.1 as seed ortholog is 100%.

---

Group of orthologs #5848. Best score 726 bits

Score difference with first non-orthologous sequence - *A. fumigatus*:726 *A. fischeri*:726

afum|EAL88219.1 100.00% afis|EAW23261.1 100.00%

Bootstrap support for afum|EAL88219.1 as seed ortholog is 100%.

Bootstrap support for afis|EAW23261.1 as seed ortholog is 100%.

---

Group of orthologs #5849. Best score 726 bits

Score difference with first non-orthologous sequence - *A. fumigatus*:625 *A. fischeri*:525

afum|EAL93871.2 100.00% afis|EAW19139.1 100.00%

Bootstrap support for afum|EAL93871.2 as seed ortholog is 100%.

Bootstrap support for afis|EAW19139.1 as seed ortholog is 100%.

---

Group of orthologs #5850. Best score 726 bits

Score difference with first non-orthologous sequence - *A. fumigatus*:726 *A. fischeri*:726

afum|EAL90505.1 100.00% afis|EAW22688.1 100.00%

Bootstrap support for afum|EAL90505.1 as seed ortholog is 100%.

Bootstrap support for afis|EAW22688.1 as seed ortholog is 100%.

---

Group of orthologs #5851. Best score 726 bits

Score difference with first non-orthologous sequence - *A. fumigatus*:726 *A. fischeri*:726

afum|EAL90433.1 100.00% afis|EAW22766.1 100.00%

Bootstrap support for afum|EAL90433.1 as seed ortholog is 100%.

Bootstrap support for afis|EAW22766.1 as seed ortholog is 100%.

---

Group of orthologs #5852. Best score 726 bits

Score difference with first non-orthologous sequence - *A. fumigatus*:726 *A. fischeri*:661

afum|EAL94081.1 100.00% afis|EAW19361.1 100.00%

Bootstrap support for afum|EAL94081.1 as seed ortholog is 100%.

Bootstrap support for afis|EAW19361.1 as seed ortholog is 100%.

---

Group of orthologs #5853. Best score 725 bits

Score difference with first non-orthologous sequence - *A. fumigatus*:725 *A. fischeri*:725

afum|EAL88574.1 100.00% afis|EAW15939.1 100.00%

Bootstrap support for afum|EAL88574.1 as seed ortholog is 100%.

Bootstrap support for afis|EAW15939.1 as seed ortholog is 100%.

---

Group of orthologs #5854. Best score 725 bits

Score difference with first non-orthologous sequence - *A. fumigatus*:725 *A. fischeri*:725

afum|EAL84282.1 100.00% afis|EAW25558.1 100.00%

Bootstrap support for afum|EAL84282.1 as seed ortholog is 100%.

Bootstrap support for afis|EAW25558.1 as seed ortholog is 100%.

---

Group of orthologs #5855. Best score 725 bits

Score difference with first non-orthologous sequence - *A. fumigatus*:725 *A. fischeri*:725

afum|EAL84376.1 100.00% afis|EAW25703.1 100.00%

Bootstrap support for afum|EAL84376.1 as seed ortholog is 100%.

Bootstrap support for afis|EAW25703.1 as seed ortholog is 100%.

---

Group of orthologs #5856. Best score 725 bits

Score difference with first non-orthologous sequence - *A. fumigatus*:725 *A. fischeri*:725

afum|EAL86124.1 100.00% afis|EAW24455.1 100.00%

Bootstrap support for afum|EAL86124.1 as seed ortholog is 100%.

Bootstrap support for afis|EAW24455.1 as seed ortholog is 100%.

---

Group of orthologs #5857. Best score 725 bits

Score difference with first non-orthologous sequence - *A. fumigatus*:725 *A. fischeri*:725

afum|EAL88165.1 100.00% afis|EAW23312.1 100.00%

Bootstrap support for afum|EAL88165.1 as seed ortholog is 100%.

Bootstrap support for afis|EAW23312.1 as seed ortholog is 100%.

---

Group of orthologs #5858. Best score 725 bits

Score difference with first non-orthologous sequence - *A. fumigatus*:725 *A. fischeri*:725  
afum|EAL87850.1 100.00% afis|EAW23613.1 100.00%  
Bootstrap support for afum|EAL87850.1 as seed ortholog is 100%.  
Bootstrap support for afis|EAW23613.1 as seed ortholog is 100%.

---

Group of orthologs #5859. Best score 725 bits

Score difference with first non-orthologous sequence - *A. fumigatus*:725 *A. fischeri*:725  
afum|EBA27493.1 100.00% afis|EAW18717.1 100.00%  
Bootstrap support for afum|EBA27493.1 as seed ortholog is 100%.  
Bootstrap support for afis|EAW18717.1 as seed ortholog is 100%.

---

Group of orthologs #5860. Best score 725 bits

Score difference with first non-orthologous sequence - *A. fumigatus*:725 *A. fischeri*:725  
afum|EAL92601.2 100.00% afis|EAW21583.1 100.00%  
Bootstrap support for afum|EAL92601.2 as seed ortholog is 100%.  
Bootstrap support for afis|EAW21583.1 as seed ortholog is 100%.

---

Group of orthologs #5861. Best score 724 bits

Score difference with first non-orthologous sequence - *A. fumigatus*:724 *A. fischeri*:724  
afum|EAL88682.1 100.00% afis|EAW16049.1 100.00%  
Bootstrap support for afum|EAL88682.1 as seed ortholog is 100%.  
Bootstrap support for afis|EAW16049.1 as seed ortholog is 100%.

---

Group of orthologs #5862. Best score 723 bits

Score difference with first non-orthologous sequence - *A. fumigatus*:723 *A. fischeri*:723  
afum|EAL85941.2 100.00% afis|EAW24273.1 100.00%  
Bootstrap support for afum|EAL85941.2 as seed ortholog is 100%.  
Bootstrap support for afis|EAW24273.1 as seed ortholog is 100%.

---

Group of orthologs #5863. Best score 723 bits

Score difference with first non-orthologous sequence - *A. fumigatus*:723 *A. fischeri*:503  
afum|EAL87149.1 100.00% afis|EAW23705.1 100.00%  
Bootstrap support for afum|EAL87149.1 as seed ortholog is 100%.  
Bootstrap support for afis|EAW23705.1 as seed ortholog is 100%.

---

Group of orthologs #5864. Best score 723 bits

Score difference with first non-orthologous sequence - *A. fumigatus*:723 *A. fischeri*:723  
afum|EAL90473.1 100.00% afis|EAW22723.1 100.00%  
Bootstrap support for afum|EAL90473.1 as seed ortholog is 100%.  
Bootstrap support for afis|EAW22723.1 as seed ortholog is 100%.

---

Group of orthologs #5865. Best score 723 bits

Score difference with first non-orthologous sequence - *A. fumigatus*:723 *A. fischeri*:723  
afum|EBA27191.1 100.00% afis|EAW20513.1 100.00%  
Bootstrap support for afum|EBA27191.1 as seed ortholog is 100%.  
Bootstrap support for afis|EAW20513.1 as seed ortholog is 100%.

---

Group of orthologs #5866. Best score 723 bits

Score difference with first non-orthologous sequence - *A. fumigatus*:723 *A. fischeri*:723  
afum|EAL89784.1 100.00% afis|EAW25113.1 100.00%  
Bootstrap support for afum|EAL89784.1 as seed ortholog is 100%.  
Bootstrap support for afis|EAW25113.1 as seed ortholog is 100%.

---

Group of orthologs #5867. Best score 723 bits

Score difference with first non-orthologous sequence - *A. fumigatus*:723 *A. fischeri*:723  
afum|EAL92005.1 100.00% afis|EAW24150.1 100.00%

Bootstrap support for afum|EAL92005.1 as seed ortholog is 100%.  
Bootstrap support for afis|EAW24150.1 as seed ortholog is 100%.

---

Group of orthologs #5868. Best score 722 bits

Score difference with first non-orthologous sequence - *A. fumigatus*:722 *A. fischeri*:722

afum|EAL85358.1 100.00% afis|EAW20240.1 100.00%

Bootstrap support for afum|EAL85358.1 as seed ortholog is 100%.

Bootstrap support for afis|EAW20240.1 as seed ortholog is 100%.

---

Group of orthologs #5869. Best score 722 bits

Score difference with first non-orthologous sequence - *A. fumigatus*:603 *A. fischeri*:549

afum|EAL92722.1 100.00% afis|EAW21688.1 100.00%

Bootstrap support for afum|EAL92722.1 as seed ortholog is 100%.

Bootstrap support for afis|EAW21688.1 as seed ortholog is 100%.

---

Group of orthologs #5870. Best score 722 bits

Score difference with first non-orthologous sequence - *A. fumigatus*:659 *A. fischeri*:516

afum|EAL92041.1 100.00% afis|EAW24180.1 100.00%

Bootstrap support for afum|EAL92041.1 as seed ortholog is 100%.

Bootstrap support for afis|EAW24180.1 as seed ortholog is 100%.

---

Group of orthologs #5871. Best score 721 bits

Score difference with first non-orthologous sequence - *A. fumigatus*:721 *A. fischeri*:721

afum|EAL84945.2 100.00% afis|EAW19964.1 100.00%

Bootstrap support for afum|EAL84945.2 as seed ortholog is 100%.

Bootstrap support for afis|EAW19964.1 as seed ortholog is 100%.

---

Group of orthologs #5872. Best score 721 bits

Score difference with first non-orthologous sequence - *A. fumigatus*:553 *A. fischeri*:721

afum|EAL87476.1 100.00% afis|EAW18118.1 100.00%

Bootstrap support for afum|EAL87476.1 as seed ortholog is 100%.

Bootstrap support for afis|EAW18118.1 as seed ortholog is 100%.

---

Group of orthologs #5873. Best score 721 bits

Score difference with first non-orthologous sequence - *A. fumigatus*:721 *A. fischeri*:721

afum|EAL85370.1 100.00% afis|EAW20252.1 100.00%

Bootstrap support for afum|EAL85370.1 as seed ortholog is 100%.

Bootstrap support for afis|EAW20252.1 as seed ortholog is 100%.

---

Group of orthologs #5874. Best score 721 bits

Score difference with first non-orthologous sequence - *A. fumigatus*:721 *A. fischeri*:721

afum|EAL92495.1 100.00% afis|EAW21475.1 100.00%

Bootstrap support for afum|EAL92495.1 as seed ortholog is 100%.

Bootstrap support for afis|EAW21475.1 as seed ortholog is 100%.

---

Group of orthologs #5875. Best score 721 bits

Score difference with first non-orthologous sequence - *A. fumigatus*:721 *A. fischeri*:721

afum|EAL94037.1 100.00% afis|EAW20260.1 100.00%

Bootstrap support for afum|EAL94037.1 as seed ortholog is 100%.

Bootstrap support for afis|EAW20260.1 as seed ortholog is 100%.

---

Group of orthologs #5876. Best score 721 bits

Score difference with first non-orthologous sequence - *A. fumigatus*:721 *A. fischeri*:644

afum|EAL92990.1 100.00% afis|EAW21975.1 100.00%

Bootstrap support for afum|EAL92990.1 as seed ortholog is 100%.

Bootstrap support for afis|EAW21975.1 as seed ortholog is 100%.

---

Group of orthologs #5877. Best score 721 bits

Score difference with first non-orthologous sequence - *A. fumigatus*:721 *A. fischeri*:721

afum|EAL90173.2 100.00% afis|EAW25507.1 100.00%

Bootstrap support for afum|EAL90173.2 as seed ortholog is 100%.

Bootstrap support for afis|EAW25507.1 as seed ortholog is 100%.

---

Group of orthologs #5878. Best score 720 bits

Score difference with first non-orthologous sequence - *A. fumigatus*:720 *A. fischeri*:720

afum|EAL88511.1 100.00% afis|EAW15877.1 100.00%

Bootstrap support for afum|EAL88511.1 as seed ortholog is 100%.

Bootstrap support for afis|EAW15877.1 as seed ortholog is 100%.

---

Group of orthologs #5879. Best score 720 bits

Score difference with first non-orthologous sequence - *A. fumigatus*:720 *A. fischeri*:720

afum|EAL89105.1 100.00% afis|EAW16510.1 100.00%

Bootstrap support for afum|EAL89105.1 as seed ortholog is 100%.

Bootstrap support for afis|EAW16510.1 as seed ortholog is 100%.

---

Group of orthologs #5880. Best score 720 bits

Score difference with first non-orthologous sequence - *A. fumigatus*:639 *A. fischeri*:653

afum|EAL89212.2 100.00% afis|EAW16625.1 100.00%

Bootstrap support for afum|EAL89212.2 as seed ortholog is 100%.

Bootstrap support for afis|EAW16625.1 as seed ortholog is 100%.

---

Group of orthologs #5881. Best score 720 bits

Score difference with first non-orthologous sequence - *A. fumigatus*:720 *A. fischeri*:720

afum|EAL87197.1 100.00% afis|EAW23764.1 100.00%

Bootstrap support for afum|EAL87197.1 as seed ortholog is 100%.

Bootstrap support for afis|EAW23764.1 as seed ortholog is 100%.

---

Group of orthologs #5882. Best score 720 bits

Score difference with first non-orthologous sequence - *A. fumigatus*:720 *A. fischeri*:720

afum|EAL88124.2 100.00% afis|EAW23352.1 100.00%

Bootstrap support for afum|EAL88124.2 as seed ortholog is 100%.

Bootstrap support for afis|EAW23352.1 as seed ortholog is 100%.

---

Group of orthologs #5883. Best score 720 bits

Score difference with first non-orthologous sequence - *A. fumigatus*:720 *A. fischeri*:548

afum|EAL87908.1 100.00% afis|EAW23558.1 100.00%

Bootstrap support for afum|EAL87908.1 as seed ortholog is 100%.

Bootstrap support for afis|EAW23558.1 as seed ortholog is 100%.

---

Group of orthologs #5884. Best score 720 bits

Score difference with first non-orthologous sequence - *A. fumigatus*:720 *A. fischeri*:720

afum|EAL93629.1 100.00% afis|EAW18897.1 100.00%

Bootstrap support for afum|EAL93629.1 as seed ortholog is 100%.

Bootstrap support for afis|EAW18897.1 as seed ortholog is 100%.

---

Group of orthologs #5885. Best score 720 bits

Score difference with first non-orthologous sequence - *A. fumigatus*:678 *A. fischeri*:648

afum|EAL90992.1 100.00% afis|EAW22200.1 100.00%

Bootstrap support for afum|EAL90992.1 as seed ortholog is 100%.

Bootstrap support for afis|EAW22200.1 as seed ortholog is 100%.

---

Group of orthologs #5886. Best score 720 bits

Score difference with first non-orthologous sequence - *A. fumigatus*:641 *A. fischeri*:600  
afum|EAL94087.1 100.00% afis|EAW19368.1 100.00%  
Bootstrap support for afum|EAL94087.1 as seed ortholog is 100%.  
Bootstrap support for afis|EAW19368.1 as seed ortholog is 100%.

---

Group of orthologs #5887. Best score 720 bits

Score difference with first non-orthologous sequence - *A. fumigatus*:720 *A. fischeri*:720  
afum|EAL92947.1 100.00% afis|EAW21934.1 100.00%  
Bootstrap support for afum|EAL92947.1 as seed ortholog is 100%.  
Bootstrap support for afis|EAW21934.1 as seed ortholog is 100%.

---

Group of orthologs #5888. Best score 720 bits

Score difference with first non-orthologous sequence - *A. fumigatus*:720 *A. fischeri*:459  
afum|EAL90087.1 100.00% afis|EAW25428.1 100.00%  
Bootstrap support for afum|EAL90087.1 as seed ortholog is 100%.  
Bootstrap support for afis|EAW25428.1 as seed ortholog is 100%.

---

Group of orthologs #5889. Best score 719 bits

Score difference with first non-orthologous sequence - *A. fumigatus*:719 *A. fischeri*:719  
afum|EAL84494.1 100.00% afis|EAW20568.1 100.00%  
Bootstrap support for afum|EAL84494.1 as seed ortholog is 100%.  
Bootstrap support for afis|EAW20568.1 as seed ortholog is 100%.

---

Group of orthologs #5890. Best score 719 bits

Score difference with first non-orthologous sequence - *A. fumigatus*:719 *A. fischeri*:719  
afum|EAL87502.1 100.00% afis|EAW18145.1 100.00%  
Bootstrap support for afum|EAL87502.1 as seed ortholog is 100%.  
Bootstrap support for afis|EAW18145.1 as seed ortholog is 100%.

---

Group of orthologs #5891. Best score 719 bits

Score difference with first non-orthologous sequence - *A. fumigatus*:719 *A. fischeri*:719  
afum|EAL85449.1 100.00% afis|EAW20324.1 100.00%  
Bootstrap support for afum|EAL85449.1 as seed ortholog is 100%.  
Bootstrap support for afis|EAW20324.1 as seed ortholog is 100%.

---

Group of orthologs #5892. Best score 719 bits

Score difference with first non-orthologous sequence - *A. fumigatus*:719 *A. fischeri*:719  
afum|EAL87402.1 100.00% afis|EAW23972.1 100.00%  
Bootstrap support for afum|EAL87402.1 as seed ortholog is 100%.  
Bootstrap support for afis|EAW23972.1 as seed ortholog is 100%.

---

Group of orthologs #5893. Best score 719 bits

Score difference with first non-orthologous sequence - *A. fumigatus*:625 *A. fischeri*:613  
afum|EAL90731.1 100.00% afis|EAW22460.1 100.00%  
Bootstrap support for afum|EAL90731.1 as seed ortholog is 100%.  
Bootstrap support for afis|EAW22460.1 as seed ortholog is 100%.

---

Group of orthologs #5894. Best score 718 bits

Score difference with first non-orthologous sequence - *A. fumigatus*:718 *A. fischeri*:718  
afum|EAL86415.1 100.00% afis|EAW16878.1 100.00%  
Bootstrap support for afum|EAL86415.1 as seed ortholog is 100%.  
Bootstrap support for afis|EAW16878.1 as seed ortholog is 100%.

---

Group of orthologs #5895. Best score 718 bits

Score difference with first non-orthologous sequence - *A. fumigatus*:718 *A. fischeri*:718  
afum|EAL89272.1 100.00% afis|EAW16668.1 100.00%

Bootstrap support for afum|EAL89272.1 as seed ortholog is 100%.  
Bootstrap support for afis|EAW16668.1 as seed ortholog is 100%.

---

Group of orthologs #5896. Best score 718 bits

Score difference with first non-orthologous sequence - *A. fumigatus*:718 *A. fischeri*:718

afum|EAL87105.1 100.00% afis|EAW19390.1 100.00%

Bootstrap support for afum|EAL87105.1 as seed ortholog is 100%.

Bootstrap support for afis|EAW19390.1 as seed ortholog is 100%.

---

Group of orthologs #5897. Best score 718 bits

Score difference with first non-orthologous sequence - *A. fumigatus*:718 *A. fischeri*:718

afum|EAL91571.1 100.00% afis|EAW17761.1 100.00%

Bootstrap support for afum|EAL91571.1 as seed ortholog is 100%.

Bootstrap support for afis|EAW17761.1 as seed ortholog is 100%.

---

Group of orthologs #5898. Best score 718 bits

Score difference with first non-orthologous sequence - *A. fumigatus*:718 *A. fischeri*:718

afum|EAL87244.1 100.00% afis|EAW23810.1 100.00%

Bootstrap support for afum|EAL87244.1 as seed ortholog is 100%.

Bootstrap support for afis|EAW23810.1 as seed ortholog is 100%.

---

Group of orthologs #5899. Best score 718 bits

Score difference with first non-orthologous sequence - *A. fumigatus*:718 *A. fischeri*:718

afum|EBA27440.1 100.00% afis|EAW17965.1 100.00%

Bootstrap support for afum|EBA27440.1 as seed ortholog is 100%.

Bootstrap support for afis|EAW17965.1 as seed ortholog is 100%.

---

Group of orthologs #5900. Best score 718 bits

Score difference with first non-orthologous sequence - *A. fumigatus*:718 *A. fischeri*:718

afum|EAL93533.1 100.00% afis|EAW18797.1 100.00%

Bootstrap support for afum|EAL93533.1 as seed ortholog is 100%.

Bootstrap support for afis|EAW18797.1 as seed ortholog is 100%.

---

Group of orthologs #5901. Best score 718 bits

Score difference with first non-orthologous sequence - *A. fumigatus*:718 *A. fischeri*:718

afum|EAL92806.1 100.00% afis|EAW21777.1 100.00%

Bootstrap support for afum|EAL92806.1 as seed ortholog is 100%.

Bootstrap support for afis|EAW21777.1 as seed ortholog is 100%.

---

Group of orthologs #5902. Best score 718 bits

Score difference with first non-orthologous sequence - *A. fumigatus*:718 *A. fischeri*:718

afum|EAL89836.1 100.00% afis|EAW25161.1 100.00%

Bootstrap support for afum|EAL89836.1 as seed ortholog is 100%.

Bootstrap support for afis|EAW25161.1 as seed ortholog is 100%.

---

Group of orthologs #5903. Best score 717 bits

Score difference with first non-orthologous sequence - *A. fumigatus*:640 *A. fischeri*:613

afum|EAL88902.1 100.00% afis|EAW16281.1 100.00%

Bootstrap support for afum|EAL88902.1 as seed ortholog is 100%.

Bootstrap support for afis|EAW16281.1 as seed ortholog is 100%.

---

Group of orthologs #5904. Best score 717 bits

Score difference with first non-orthologous sequence - *A. fumigatus*:717 *A. fischeri*:717

afum|EAL88933.1 100.00% afis|EAW16311.1 100.00%

Bootstrap support for afum|EAL88933.1 as seed ortholog is 100%.

Bootstrap support for afis|EAW16311.1 as seed ortholog is 100%.

---

Group of orthologs #5905. Best score 717 bits

Score difference with first non-orthologous sequence - *A. fumigatus*:717 *A. fischeri*:717

|                 |         |                 |         |
|-----------------|---------|-----------------|---------|
| afum EAL84563.1 | 100.00% | afis EAW20491.1 | 100.00% |
|-----------------|---------|-----------------|---------|

Bootstrap support for afum|EAL84563.1 as seed ortholog is 100%.

Bootstrap support for afis|EAW20491.1 as seed ortholog is 100%.

---

Group of orthologs #5906. Best score 717 bits

Score difference with first non-orthologous sequence - *A. fumigatus*:717 *A. fischeri*:717

|                 |         |                 |         |
|-----------------|---------|-----------------|---------|
| afum EAL87470.1 | 100.00% | afis EAW18113.1 | 100.00% |
|-----------------|---------|-----------------|---------|

Bootstrap support for afum|EAL87470.1 as seed ortholog is 100%.

Bootstrap support for afis|EAW18113.1 as seed ortholog is 100%.

---

Group of orthologs #5907. Best score 716 bits

Score difference with first non-orthologous sequence - *A. fumigatus*:716 *A. fischeri*:716

|                 |         |                 |         |
|-----------------|---------|-----------------|---------|
| afum EAL88595.1 | 100.00% | afis EAW15962.1 | 100.00% |
|-----------------|---------|-----------------|---------|

Bootstrap support for afum|EAL88595.1 as seed ortholog is 100%.

Bootstrap support for afis|EAW15962.1 as seed ortholog is 100%.

---

Group of orthologs #5908. Best score 716 bits

Score difference with first non-orthologous sequence - *A. fumigatus*:716 *A. fischeri*:716

|                 |         |                 |         |
|-----------------|---------|-----------------|---------|
| afum EAL87647.1 | 100.00% | afis EAW18281.1 | 100.00% |
|-----------------|---------|-----------------|---------|

Bootstrap support for afum|EAL87647.1 as seed ortholog is 100%.

Bootstrap support for afis|EAW18281.1 as seed ortholog is 100%.

---

Group of orthologs #5909. Best score 716 bits

Score difference with first non-orthologous sequence - *A. fumigatus*:716 *A. fischeri*:716

|                 |         |                 |         |
|-----------------|---------|-----------------|---------|
| afum EAL86808.1 | 100.00% | afis EAW19718.1 | 100.00% |
|-----------------|---------|-----------------|---------|

Bootstrap support for afum|EAL86808.1 as seed ortholog is 100%.

Bootstrap support for afis|EAW19718.1 as seed ortholog is 100%.

---

Group of orthologs #5910. Best score 716 bits

Score difference with first non-orthologous sequence - *A. fumigatus*:716 *A. fischeri*:716

|                 |         |                 |         |
|-----------------|---------|-----------------|---------|
| afum EAL91483.1 | 100.00% | afis EAW17669.1 | 100.00% |
|-----------------|---------|-----------------|---------|

Bootstrap support for afum|EAL91483.1 as seed ortholog is 100%.

Bootstrap support for afis|EAW17669.1 as seed ortholog is 100%.

---

Group of orthologs #5911. Best score 716 bits

Score difference with first non-orthologous sequence - *A. fumigatus*:716 *A. fischeri*:716

|                 |         |                 |         |
|-----------------|---------|-----------------|---------|
| afum EAL87268.1 | 100.00% | afis EAW23837.1 | 100.00% |
|-----------------|---------|-----------------|---------|

Bootstrap support for afum|EAL87268.1 as seed ortholog is 100%.

Bootstrap support for afis|EAW23837.1 as seed ortholog is 100%.

---

Group of orthologs #5912. Best score 716 bits

Score difference with first non-orthologous sequence - *A. fumigatus*:716 *A. fischeri*:716

|                 |         |                 |         |
|-----------------|---------|-----------------|---------|
| afum EAL88364.1 | 100.00% | afis EAW23116.1 | 100.00% |
|-----------------|---------|-----------------|---------|

Bootstrap support for afum|EAL88364.1 as seed ortholog is 100%.

Bootstrap support for afis|EAW23116.1 as seed ortholog is 100%.

---

Group of orthologs #5913. Best score 716 bits

Score difference with first non-orthologous sequence - *A. fumigatus*:716 *A. fischeri*:716

|                 |         |                 |         |
|-----------------|---------|-----------------|---------|
| afum EAL93249.1 | 100.00% | afis EAW18549.1 | 100.00% |
|-----------------|---------|-----------------|---------|

Bootstrap support for afum|EAL93249.1 as seed ortholog is 100%.

Bootstrap support for afis|EAW18549.1 as seed ortholog is 100%.

---

Group of orthologs #5914. Best score 715 bits



Score difference with first non-orthologous sequence - *A. fumigatus*:715 *A. fischeri*:715  
afum|EAL86458.1 100.00% afis|EAW16933.1 100.00%  
Bootstrap support for afum|EAL86458.1 as seed ortholog is 100%.  
Bootstrap support for afis|EAW16933.1 as seed ortholog is 100%.

---

Group of orthologs #5915. Best score 715 bits

Score difference with first non-orthologous sequence - *A. fumigatus*:715 *A. fischeri*:715  
afum|EAL85994.1 100.00% afis|EAW24324.1 100.00%  
Bootstrap support for afum|EAL85994.1 as seed ortholog is 100%.  
Bootstrap support for afis|EAW24324.1 as seed ortholog is 100%.

---

Group of orthologs #5916. Best score 715 bits

Score difference with first non-orthologous sequence - *A. fumigatus*:715 *A. fischeri*:715  
afum|EAL90791.1 100.00% afis|EAW22400.1 100.00%  
Bootstrap support for afum|EAL90791.1 as seed ortholog is 100%.  
Bootstrap support for afis|EAW22400.1 as seed ortholog is 100%.

---

Group of orthologs #5917. Best score 715 bits

Score difference with first non-orthologous sequence - *A. fumigatus*:715 *A. fischeri*:715  
afum|EAL90681.1 100.00% afis|EAW22512.1 100.00%  
Bootstrap support for afum|EAL90681.1 as seed ortholog is 100%.  
Bootstrap support for afis|EAW22512.1 as seed ortholog is 100%.

---

Group of orthologs #5918. Best score 715 bits

Score difference with first non-orthologous sequence - *A. fumigatus*:715 *A. fischeri*:715  
afum|EAL92786.1 100.00% afis|EAW21756.1 100.00%  
Bootstrap support for afum|EAL92786.1 as seed ortholog is 100%.  
Bootstrap support for afis|EAW21756.1 as seed ortholog is 100%.

---

Group of orthologs #5919. Best score 714 bits

Score difference with first non-orthologous sequence - *A. fumigatus*:571 *A. fischeri*:714  
afum|EAL88950.1 100.00% afis|EAW16326.1 100.00%  
Bootstrap support for afum|EAL88950.1 as seed ortholog is 100%.  
Bootstrap support for afis|EAW16326.1 as seed ortholog is 100%.

---

Group of orthologs #5920. Best score 714 bits

Score difference with first non-orthologous sequence - *A. fumigatus*:714 *A. fischeri*:714  
afum|EAL84857.1 100.00% afis|EAW20762.1 100.00%  
Bootstrap support for afum|EAL84857.1 as seed ortholog is 100%.  
Bootstrap support for afis|EAW20762.1 as seed ortholog is 100%.

---

Group of orthologs #5921. Best score 714 bits

Score difference with first non-orthologous sequence - *A. fumigatus*:714 *A. fischeri*:714  
afum|EAL85883.1 100.00% afis|EAW24214.1 100.00%  
Bootstrap support for afum|EAL85883.1 as seed ortholog is 100%.  
Bootstrap support for afis|EAW24214.1 as seed ortholog is 100%.

---

Group of orthologs #5922. Best score 714 bits

Score difference with first non-orthologous sequence - *A. fumigatus*:714 *A. fischeri*:365  
afum|EAL84396.1 100.00% afis|EAW25723.1 100.00%  
Bootstrap support for afum|EAL84396.1 as seed ortholog is 100%.  
Bootstrap support for afis|EAW25723.1 as seed ortholog is 100%.

---

Group of orthologs #5923. Best score 714 bits

Score difference with first non-orthologous sequence - *A. fumigatus*:714 *A. fischeri*:714  
afum|EAL93737.1 100.00% afis|EAW19003.1 100.00%

Bootstrap support for afum|EAL93737.1 as seed ortholog is 100%.  
Bootstrap support for afis|EAW19003.1 as seed ortholog is 100%.

---

Group of orthologs #5924. Best score 714 bits

Score difference with first non-orthologous sequence - *A. fumigatus*:714 *A. fischeri*:714

afum|EAL91090.1 100.00% afis|EAW22099.1 100.00%

Bootstrap support for afum|EAL91090.1 as seed ortholog is 100%.

Bootstrap support for afis|EAW22099.1 as seed ortholog is 100%.

---

Group of orthologs #5925. Best score 714 bits

Score difference with first non-orthologous sequence - *A. fumigatus*:714 *A. fischeri*:714

afum|EAL90540.1 100.00% afis|EAW22652.1 100.00%

Bootstrap support for afum|EAL90540.1 as seed ortholog is 100%.

Bootstrap support for afis|EAW22652.1 as seed ortholog is 100%.

---

Group of orthologs #5926. Best score 714 bits

Score difference with first non-orthologous sequence - *A. fumigatus*:714 *A. fischeri*:714

afum|EAL92202.1 100.00% afis|EAW21181.1 100.00%

Bootstrap support for afum|EAL92202.1 as seed ortholog is 100%.

Bootstrap support for afis|EAW21181.1 as seed ortholog is 100%.

---

Group of orthologs #5927. Best score 713 bits

Score difference with first non-orthologous sequence - *A. fumigatus*:713 *A. fischeri*:713

afum|EAL91242.1 100.00% afis|EAW17407.1 100.00%

Bootstrap support for afum|EAL91242.1 as seed ortholog is 100%.

Bootstrap support for afis|EAW17407.1 as seed ortholog is 100%.

---

Group of orthologs #5928. Best score 713 bits

Score difference with first non-orthologous sequence - *A. fumigatus*:713 *A. fischeri*:713

afum|EAL91360.1 100.00% afis|EAW17546.1 100.00%

Bootstrap support for afum|EAL91360.1 as seed ortholog is 100%.

Bootstrap support for afis|EAW17546.1 as seed ortholog is 100%.

---

Group of orthologs #5929. Best score 713 bits

Score difference with first non-orthologous sequence - *A. fumigatus*:713 *A. fischeri*:713

afum|EAL87351.1 100.00% afis|EAW23926.1 100.00%

Bootstrap support for afum|EAL87351.1 as seed ortholog is 100%.

Bootstrap support for afis|EAW23926.1 as seed ortholog is 100%.

---

Group of orthologs #5930. Best score 713 bits

Score difference with first non-orthologous sequence - *A. fumigatus*:713 *A. fischeri*:713

afum|EAL88078.1 100.00% afis|EAW23392.1 100.00%

Bootstrap support for afum|EAL88078.1 as seed ortholog is 100%.

Bootstrap support for afis|EAW23392.1 as seed ortholog is 100%.

---

Group of orthologs #5931. Best score 713 bits

Score difference with first non-orthologous sequence - *A. fumigatus*:713 *A. fischeri*:713

afum|EAL91037.1 100.00% afis|EAW22153.1 100.00%

Bootstrap support for afum|EAL91037.1 as seed ortholog is 100%.

Bootstrap support for afis|EAW22153.1 as seed ortholog is 100%.

---

Group of orthologs #5932. Best score 713 bits

Score difference with first non-orthologous sequence - *A. fumigatus*:713 *A. fischeri*:713

afum|EAL90595.1 100.00% afis|EAW22603.1 100.00%

Bootstrap support for afum|EAL90595.1 as seed ortholog is 100%.

Bootstrap support for afis|EAW22603.1 as seed ortholog is 100%.

---

Group of orthologs #5933. Best score 713 bits

Score difference with first non-orthologous sequence - *A. fumigatus*:713 *A. fischeri*:713

afum|EAL92433.1 100.00% afis|EAW21418.1 100.00%

Bootstrap support for afum|EAL92433.1 as seed ortholog is 100%.

Bootstrap support for afis|EAW21418.1 as seed ortholog is 100%.

---

Group of orthologs #5934. Best score 713 bits

Score difference with first non-orthologous sequence - *A. fumigatus*:713 *A. fischeri*:713

afum|EAL92677.1 100.00% afis|EAW21643.1 100.00%

Bootstrap support for afum|EAL92677.1 as seed ortholog is 100%.

Bootstrap support for afis|EAW21643.1 as seed ortholog is 100%.

---

Group of orthologs #5935. Best score 713 bits

Score difference with first non-orthologous sequence - *A. fumigatus*:713 *A. fischeri*:713

afum|EAL92745.1 100.00% afis|EAW21710.1 100.00%

Bootstrap support for afum|EAL92745.1 as seed ortholog is 100%.

Bootstrap support for afis|EAW21710.1 as seed ortholog is 100%.

---

Group of orthologs #5936. Best score 713 bits

Score difference with first non-orthologous sequence - *A. fumigatus*:713 *A. fischeri*:713

afum|EAL92906.1 100.00% afis|EAW21892.1 100.00%

Bootstrap support for afum|EAL92906.1 as seed ortholog is 100%.

Bootstrap support for afis|EAW21892.1 as seed ortholog is 100%.

---

Group of orthologs #5937. Best score 713 bits

Score difference with first non-orthologous sequence - *A. fumigatus*:713 *A. fischeri*:713

afum|EAL92934.1 100.00% afis|EAW21921.1 100.00%

Bootstrap support for afum|EAL92934.1 as seed ortholog is 100%.

Bootstrap support for afis|EAW21921.1 as seed ortholog is 100%.

---

Group of orthologs #5938. Best score 713 bits

Score difference with first non-orthologous sequence - *A. fumigatus*:713 *A. fischeri*:713

afum|EAL90092.1 100.00% afis|EAW25434.1 100.00%

Bootstrap support for afum|EAL90092.1 as seed ortholog is 100%.

Bootstrap support for afis|EAW25434.1 as seed ortholog is 100%.

---

Group of orthologs #5939. Best score 712 bits

Score difference with first non-orthologous sequence - *A. fumigatus*:712 *A. fischeri*:534

afum|EAL86411.1 100.00% afis|EAW16873.1 100.00%

Bootstrap support for afum|EAL86411.1 as seed ortholog is 100%.

Bootstrap support for afis|EAW16873.1 as seed ortholog is 100%.

---

Group of orthologs #5940. Best score 712 bits

Score difference with first non-orthologous sequence - *A. fumigatus*:712 *A. fischeri*:712

afum|EAL84873.1 100.00% afis|EAW20698.1 100.00%

Bootstrap support for afum|EAL84873.1 as seed ortholog is 100%.

Bootstrap support for afis|EAW20698.1 as seed ortholog is 100%.

---

Group of orthologs #5941. Best score 712 bits

Score difference with first non-orthologous sequence - *A. fumigatus*:712 *A. fischeri*:712

afum|EAL91259.1 100.00% afis|EAW17431.1 100.00%

Bootstrap support for afum|EAL91259.1 as seed ortholog is 100%.

Bootstrap support for afis|EAW17431.1 as seed ortholog is 100%.

---

Group of orthologs #5942. Best score 712 bits

Score difference with first non-orthologous sequence - *A. fumigatus*:712 *A. fischeri*:712  
afum|EAL87150.1 100.00% afis|EAW23706.1 100.00%  
Bootstrap support for afum|EAL87150.1 as seed ortholog is 100%.  
Bootstrap support for afis|EAW23706.1 as seed ortholog is 100%.

---

Group of orthologs #5943. Best score 712 bits

Score difference with first non-orthologous sequence - *A. fumigatus*:712 *A. fischeri*:712  
afum|EAL88055.1 100.00% afis|EAW23414.1 100.00%  
Bootstrap support for afum|EAL88055.1 as seed ortholog is 100%.  
Bootstrap support for afis|EAW23414.1 as seed ortholog is 100%.

---

Group of orthologs #5944. Best score 712 bits

Score difference with first non-orthologous sequence - *A. fumigatus*:712 *A. fischeri*:712  
afum|EAL92253.1 100.00% afis|EAW21240.1 100.00%  
Bootstrap support for afum|EAL92253.1 as seed ortholog is 100%.  
Bootstrap support for afis|EAW21240.1 as seed ortholog is 100%.

---

Group of orthologs #5945. Best score 711 bits

Score difference with first non-orthologous sequence - *A. fumigatus*:633 *A. fischeri*:577  
afum|EAL91661.1 100.00% afis|EAW17853.1 100.00%  
Bootstrap support for afum|EAL91661.1 as seed ortholog is 100%.  
Bootstrap support for afis|EAW17853.1 as seed ortholog is 100%.

---

Group of orthologs #5946. Best score 711 bits

Score difference with first non-orthologous sequence - *A. fumigatus*:711 *A. fischeri*:711  
afum|EAL93502.1 100.00% afis|EAW18771.1 100.00%  
Bootstrap support for afum|EAL93502.1 as seed ortholog is 100%.  
Bootstrap support for afis|EAW18771.1 as seed ortholog is 100%.

---

Group of orthologs #5947. Best score 711 bits

Score difference with first non-orthologous sequence - *A. fumigatus*:711 *A. fischeri*:711  
afum|EAL90695.1 100.00% afis|EAW22498.1 100.00%  
Bootstrap support for afum|EAL90695.1 as seed ortholog is 100%.  
Bootstrap support for afis|EAW22498.1 as seed ortholog is 100%.

---

Group of orthologs #5948. Best score 711 bits

Score difference with first non-orthologous sequence - *A. fumigatus*:711 *A. fischeri*:711  
afum|EAL90268.1 100.00% afis|EAW22929.1 100.00%  
Bootstrap support for afum|EAL90268.1 as seed ortholog is 100%.  
Bootstrap support for afis|EAW22929.1 as seed ortholog is 100%.

---

Group of orthologs #5949. Best score 711 bits

Score difference with first non-orthologous sequence - *A. fumigatus*:608 *A. fischeri*:570  
afum|EAL92504.1 100.00% afis|EAW21484.1 100.00%  
Bootstrap support for afum|EAL92504.1 as seed ortholog is 100%.  
Bootstrap support for afis|EAW21484.1 as seed ortholog is 100%.

---

Group of orthologs #5950. Best score 711 bits

Score difference with first non-orthologous sequence - *A. fumigatus*:711 *A. fischeri*:711  
afum|EAL93021.2 100.00% afis|EAW22006.1 100.00%  
Bootstrap support for afum|EAL93021.2 as seed ortholog is 100%.  
Bootstrap support for afis|EAW22006.1 as seed ortholog is 100%.

---

Group of orthologs #5951. Best score 710 bits

Score difference with first non-orthologous sequence - *A. fumigatus*:710 *A. fischeri*:710  
afum|EAL84215.1 100.00% afis|EAW15428.1 100.00%

Bootstrap support for afum|EAL84215.1 as seed ortholog is 100%.  
Bootstrap support for afis|EAW15428.1 as seed ortholog is 100%.

---

Group of orthologs #5952. Best score 710 bits

Score difference with first non-orthologous sequence - *A. fumigatus*:710 *A. fischeri*:710

afum|EAL86564.2 100.00% afis|EAW17087.1 100.00%

Bootstrap support for afum|EAL86564.2 as seed ortholog is 100%.

Bootstrap support for afis|EAW17087.1 as seed ortholog is 100%.

---

Group of orthologs #5953. Best score 710 bits

Score difference with first non-orthologous sequence - *A. fumigatus*:710 *A. fischeri*:710

afum|EAL84488.2 100.00% afis|EAW20577.1 100.00%

Bootstrap support for afum|EAL84488.2 as seed ortholog is 100%.

Bootstrap support for afis|EAW20577.1 as seed ortholog is 100%.

---

Group of orthologs #5954. Best score 710 bits

Score difference with first non-orthologous sequence - *A. fumigatus*:308 *A. fischeri*:130

afum|EAL85274.1 100.00% afis|EAW20158.1 100.00%

Bootstrap support for afum|EAL85274.1 as seed ortholog is 100%.

Bootstrap support for afis|EAW20158.1 as seed ortholog is 99%.

---

Group of orthologs #5955. Best score 710 bits

Score difference with first non-orthologous sequence - *A. fumigatus*:710 *A. fischeri*:710

afum|EAL87580.1 100.00% afis|EAW18214.1 100.00%

Bootstrap support for afum|EAL87580.1 as seed ortholog is 100%.

Bootstrap support for afis|EAW18214.1 as seed ortholog is 100%.

---

Group of orthologs #5956. Best score 710 bits

Score difference with first non-orthologous sequence - *A. fumigatus*:612 *A. fischeri*:421

afum|EAL84698.1 100.00% afis|EAW20936.1 100.00%

Bootstrap support for afum|EAL84698.1 as seed ortholog is 100%.

Bootstrap support for afis|EAW20936.1 as seed ortholog is 100%.

---

Group of orthologs #5957. Best score 710 bits

Score difference with first non-orthologous sequence - *A. fumigatus*:710 *A. fischeri*:710

afum|EAL90639.1 100.00% afis|EAW22556.1 100.00%

Bootstrap support for afum|EAL90639.1 as seed ortholog is 100%.

Bootstrap support for afis|EAW22556.1 as seed ortholog is 100%.

---

Group of orthologs #5958. Best score 710 bits

Score difference with first non-orthologous sequence - *A. fumigatus*:710 *A. fischeri*:710

afum|EAL90264.1 100.00% afis|EAW22932.1 100.00%

Bootstrap support for afum|EAL90264.1 as seed ortholog is 100%.

Bootstrap support for afis|EAW22932.1 as seed ortholog is 100%.

---

Group of orthologs #5959. Best score 709 bits

Score difference with first non-orthologous sequence - *A. fumigatus*:709 *A. fischeri*:709

afum|EAL84495.1 100.00% afis|EAW20566.1 100.00%

Bootstrap support for afum|EAL84495.1 as seed ortholog is 100%.

Bootstrap support for afis|EAW20566.1 as seed ortholog is 100%.

---

Group of orthologs #5960. Best score 709 bits

Score difference with first non-orthologous sequence - *A. fumigatus*:709 *A. fischeri*:709

afum|EAL89475.1 100.00% afis|EAW24830.1 100.00%

Bootstrap support for afum|EAL89475.1 as seed ortholog is 100%.

Bootstrap support for afis|EAW24830.1 as seed ortholog is 100%.

---

Group of orthologs #5961. Best score 709 bits

Score difference with first non-orthologous sequence - *A. fumigatus*:709 *A. fischeri*:709

afum|EAL89808.2 100.00% afis|EAW25137.1 100.00%

Bootstrap support for afum|EAL89808.2 as seed ortholog is 100%.

Bootstrap support for afis|EAW25137.1 as seed ortholog is 100%.

---

Group of orthologs #5962. Best score 708 bits

Score difference with first non-orthologous sequence - *A. fumigatus*:708 *A. fischeri*:708

afum|EAL85522.2 100.00% afis|EAW15829.1 100.00%

Bootstrap support for afum|EAL85522.2 as seed ortholog is 100%.

Bootstrap support for afis|EAW15829.1 as seed ortholog is 100%.

---

Group of orthologs #5963. Best score 708 bits

Score difference with first non-orthologous sequence - *A. fumigatus*:539 *A. fischeri*:548

afum|EAL87189.1 100.00% afis|EAW23752.1 100.00%

Bootstrap support for afum|EAL87189.1 as seed ortholog is 100%.

Bootstrap support for afis|EAW23752.1 as seed ortholog is 100%.

---

Group of orthologs #5964. Best score 708 bits

Score difference with first non-orthologous sequence - *A. fumigatus*:708 *A. fischeri*:241

afum|EAL92085.1 100.00% afis|EAW21049.1 100.00%

Bootstrap support for afum|EAL92085.1 as seed ortholog is 100%.

Bootstrap support for afis|EAW21049.1 as seed ortholog is 100%.

---

Group of orthologs #5965. Best score 708 bits

Score difference with first non-orthologous sequence - *A. fumigatus*:708 *A. fischeri*:708

afum|EAL90332.1 100.00% afis|EAW22867.1 100.00%

Bootstrap support for afum|EAL90332.1 as seed ortholog is 100%.

Bootstrap support for afis|EAW22867.1 as seed ortholog is 100%.

---

Group of orthologs #5966. Best score 707 bits

Score difference with first non-orthologous sequence - *A. fumigatus*:707 *A. fischeri*:544

afum|EAL85852.1 100.00% afis|EAW15470.1 100.00%

Bootstrap support for afum|EAL85852.1 as seed ortholog is 100%.

Bootstrap support for afis|EAW15470.1 as seed ortholog is 100%.

---

Group of orthologs #5967. Best score 707 bits

Score difference with first non-orthologous sequence - *A. fumigatus*:707 *A. fischeri*:707

afum|EAL89242.1 100.00% afis|EAW16640.1 100.00%

Bootstrap support for afum|EAL89242.1 as seed ortholog is 100%.

Bootstrap support for afis|EAW16640.1 as seed ortholog is 100%.

---

Group of orthologs #5968. Best score 707 bits

Score difference with first non-orthologous sequence - *A. fumigatus*:707 *A. fischeri*:565

afum|EAL86836.1 100.00% afis|EAW19690.1 100.00%

Bootstrap support for afum|EAL86836.1 as seed ortholog is 100%.

Bootstrap support for afis|EAW19690.1 as seed ortholog is 100%.

---

Group of orthologs #5969. Best score 707 bits

Score difference with first non-orthologous sequence - *A. fumigatus*:707 *A. fischeri*:707

afum|EAL89234.2 100.00% afis|EAW20410.1 100.00%

Bootstrap support for afum|EAL89234.2 as seed ortholog is 100%.

Bootstrap support for afis|EAW20410.1 as seed ortholog is 100%.

---

Group of orthologs #5970. Best score 707 bits

Score difference with first non-orthologous sequence - *A. fumigatus*:707 *A. fischeri*:707  
afum|EAL91825.1 100.00% afis|EAW18013.1 100.00%  
Bootstrap support for afum|EAL91825.1 as seed ortholog is 100%.  
Bootstrap support for afis|EAW18013.1 as seed ortholog is 100%.

---

Group of orthologs #5971. Best score 707 bits

Score difference with first non-orthologous sequence - *A. fumigatus*:707 *A. fischeri*:707  
afum|EAL86080.1 100.00% afis|EAW24411.1 100.00%  
Bootstrap support for afum|EAL86080.1 as seed ortholog is 100%.  
Bootstrap support for afis|EAW24411.1 as seed ortholog is 100%.

---

Group of orthologs #5972. Best score 707 bits

Score difference with first non-orthologous sequence - *A. fumigatus*:707 *A. fischeri*:707  
afum|EAL90135.1 100.00% afis|EAW25471.1 100.00%  
Bootstrap support for afum|EAL90135.1 as seed ortholog is 100%.  
Bootstrap support for afis|EAW25471.1 as seed ortholog is 100%.

---

Group of orthologs #5973. Best score 706 bits

Score difference with first non-orthologous sequence - *A. fumigatus*:706 *A. fischeri*:706  
afum|EAL91194.1 100.00% afis|EAW17351.1 100.00%  
Bootstrap support for afum|EAL91194.1 as seed ortholog is 100%.  
Bootstrap support for afis|EAW17351.1 as seed ortholog is 100%.

---

Group of orthologs #5974. Best score 706 bits

Score difference with first non-orthologous sequence - *A. fumigatus*:706 *A. fischeri*:706  
afum|EAL91782.1 100.00% afis|EAW17973.1 100.00%  
Bootstrap support for afum|EAL91782.1 as seed ortholog is 100%.  
Bootstrap support for afis|EAW17973.1 as seed ortholog is 100%.

---

Group of orthologs #5975. Best score 706 bits

Score difference with first non-orthologous sequence - *A. fumigatus*:706 *A. fischeri*:706  
afum|EAL88113.1 100.00% afis|EAW23361.1 100.00%  
Bootstrap support for afum|EAL88113.1 as seed ortholog is 100%.  
Bootstrap support for afis|EAW23361.1 as seed ortholog is 100%.

---

Group of orthologs #5976. Best score 706 bits

Score difference with first non-orthologous sequence - *A. fumigatus*:706 *A. fischeri*:706  
afum|EAL92842.1 100.00% afis|EAW21827.1 100.00%  
Bootstrap support for afum|EAL92842.1 as seed ortholog is 100%.  
Bootstrap support for afis|EAW21827.1 as seed ortholog is 100%.

---

Group of orthologs #5977. Best score 705 bits

Score difference with first non-orthologous sequence - *A. fumigatus*:705 *A. fischeri*:705  
afum|EAL85720.1 100.00% afis|EAW15615.1 100.00%  
Bootstrap support for afum|EAL85720.1 as seed ortholog is 100%.  
Bootstrap support for afis|EAW15615.1 as seed ortholog is 100%.

---

Group of orthologs #5978. Best score 705 bits

Score difference with first non-orthologous sequence - *A. fumigatus*:705 *A. fischeri*:705  
afum|EAL86324.1 100.00% afis|EAW16752.1 100.00%  
Bootstrap support for afum|EAL86324.1 as seed ortholog is 100%.  
Bootstrap support for afis|EAW16752.1 as seed ortholog is 100%.

---

Group of orthologs #5979. Best score 705 bits

Score difference with first non-orthologous sequence - *A. fumigatus*:437 *A. fischeri*:627  
afum|EAL86387.1 100.00% afis|EAW16840.1 100.00%

Bootstrap support for afum|EAL86387.1 as seed ortholog is 100%.  
Bootstrap support for afis|EAW16840.1 as seed ortholog is 100%.

---

Group of orthologs #5980. Best score 705 bits

Score difference with first non-orthologous sequence - *A. fumigatus*:705 *A. fischeri*:705

afum|EAL88738.1 100.00% afis|EAW16106.1 100.00%

Bootstrap support for afum|EAL88738.1 as seed ortholog is 100%.

Bootstrap support for afis|EAW16106.1 as seed ortholog is 100%.

---

Group of orthologs #5981. Best score 705 bits

Score difference with first non-orthologous sequence - *A. fumigatus*:705 *A. fischeri*:705

afum|EAL85309.1 100.00% afis|EAW20190.1 100.00%

Bootstrap support for afum|EAL85309.1 as seed ortholog is 100%.

Bootstrap support for afis|EAW20190.1 as seed ortholog is 100%.

---

Group of orthologs #5982. Best score 705 bits

Score difference with first non-orthologous sequence - *A. fumigatus*:312 *A. fischeri*:705

afum|EAL91587.1 100.00% afis|EAW17778.1 100.00%

Bootstrap support for afum|EAL91587.1 as seed ortholog is 100%.

Bootstrap support for afis|EAW17778.1 as seed ortholog is 100%.

---

Group of orthologs #5983. Best score 705 bits

Score difference with first non-orthologous sequence - *A. fumigatus*:705 *A. fischeri*:705

afum|EAL86247.1 100.00% afis|EAW24619.1 100.00%

Bootstrap support for afum|EAL86247.1 as seed ortholog is 100%.

Bootstrap support for afis|EAW24619.1 as seed ortholog is 100%.

---

Group of orthologs #5984. Best score 705 bits

Score difference with first non-orthologous sequence - *A. fumigatus*:705 *A. fischeri*:705

afum|EAL89436.1 100.00% afis|EAW24794.1 100.00%

Bootstrap support for afum|EAL89436.1 as seed ortholog is 100%.

Bootstrap support for afis|EAW24794.1 as seed ortholog is 100%.

---

Group of orthologs #5985. Best score 704 bits

Score difference with first non-orthologous sequence - *A. fumigatus*:704 *A. fischeri*:704

afum|EAL86592.1 100.00% afis|EAW17132.1 100.00%

Bootstrap support for afum|EAL86592.1 as seed ortholog is 100%.

Bootstrap support for afis|EAW17132.1 as seed ortholog is 100%.

---

Group of orthologs #5986. Best score 704 bits

Score difference with first non-orthologous sequence - *A. fumigatus*:704 *A. fischeri*:704

afum|EAL88720.1 100.00% afis|EAW16088.1 100.00%

Bootstrap support for afum|EAL88720.1 as seed ortholog is 100%.

Bootstrap support for afis|EAW16088.1 as seed ortholog is 100%.

---

Group of orthologs #5987. Best score 704 bits

Score difference with first non-orthologous sequence - *A. fumigatus*:704 *A. fischeri*:704

afum|EAL85208.1 100.00% afis|EAW20089.1 100.00%

Bootstrap support for afum|EAL85208.1 as seed ortholog is 100%.

Bootstrap support for afis|EAW20089.1 as seed ortholog is 100%.

---

Group of orthologs #5988. Best score 704 bits

Score difference with first non-orthologous sequence - *A. fumigatus*:704 *A. fischeri*:526

afum|EAL87621.1 100.00% afis|EAW18258.1 100.00%

Bootstrap support for afum|EAL87621.1 as seed ortholog is 100%.

Bootstrap support for afis|EAW18258.1 as seed ortholog is 100%.



---

Group of orthologs #5989. Best score 704 bits

Score difference with first non-orthologous sequence - *A. fumigatus*:704 *A. fischeri*:704

afum|EAL91697.1 100.00% afis|EAW17888.1 100.00%

Bootstrap support for afum|EAL91697.1 as seed ortholog is 100%.

Bootstrap support for afis|EAW17888.1 as seed ortholog is 100%.

---

Group of orthologs #5990. Best score 704 bits

Score difference with first non-orthologous sequence - *A. fumigatus*:704 *A. fischeri*:704

afum|EAL87869.1 100.00% afis|EAW23597.1 100.00%

Bootstrap support for afum|EAL87869.1 as seed ortholog is 100%.

Bootstrap support for afis|EAW23597.1 as seed ortholog is 100%.

---

Group of orthologs #5991. Best score 704 bits

Score difference with first non-orthologous sequence - *A. fumigatus*:704 *A. fischeri*:704

afum|EAL93282.1 100.00% afis|EAW18579.1 100.00%

Bootstrap support for afum|EAL93282.1 as seed ortholog is 100%.

Bootstrap support for afis|EAW18579.1 as seed ortholog is 100%.

---

Group of orthologs #5992. Best score 704 bits

Score difference with first non-orthologous sequence - *A. fumigatus*:704 *A. fischeri*:704

afum|EAL92087.1 100.00% afis|EAW21051.1 100.00%

Bootstrap support for afum|EAL92087.1 as seed ortholog is 100%.

Bootstrap support for afis|EAW21051.1 as seed ortholog is 100%.

---

Group of orthologs #5993. Best score 704 bits

Score difference with first non-orthologous sequence - *A. fumigatus*:704 *A. fischeri*:704

afum|EAL90649.1 100.00% afis|EAW22546.1 100.00%

Bootstrap support for afum|EAL90649.1 as seed ortholog is 100%.

Bootstrap support for afis|EAW22546.1 as seed ortholog is 100%.

---

Group of orthologs #5994. Best score 704 bits

Score difference with first non-orthologous sequence - *A. fumigatus*:704 *A. fischeri*:704

afum|EAL89753.1 100.00% afis|EAW25084.1 100.00%

Bootstrap support for afum|EAL89753.1 as seed ortholog is 100%.

Bootstrap support for afis|EAW25084.1 as seed ortholog is 100%.

---

Group of orthologs #5995. Best score 704 bits

Score difference with first non-orthologous sequence - *A. fumigatus*:704 *A. fischeri*:704

afum|EAL90076.1 100.00% afis|EAW25417.1 100.00%

Bootstrap support for afum|EAL90076.1 as seed ortholog is 100%.

Bootstrap support for afis|EAW25417.1 as seed ortholog is 100%.

---

Group of orthologs #5996. Best score 704 bits

Score difference with first non-orthologous sequence - *A. fumigatus*:704 *A. fischeri*:704

afum|EAL90201.1 100.00% afis|EAW25538.1 100.00%

Bootstrap support for afum|EAL90201.1 as seed ortholog is 100%.

Bootstrap support for afis|EAW25538.1 as seed ortholog is 100%.

---

Group of orthologs #5997. Best score 703 bits

Score difference with first non-orthologous sequence - *A. fumigatus*:703 *A. fischeri*:703

afum|EAL87388.1 100.00% afis|EAW23959.1 100.00%

Bootstrap support for afum|EAL87388.1 as seed ortholog is 100%.

Bootstrap support for afis|EAW23959.1 as seed ortholog is 100%.

---

Group of orthologs #5998. Best score 703 bits

Score difference with first non-orthologous sequence - *A. fumigatus*:703 *A. fischeri*:703  
afum|EAL93595.1 100.00% afis|EAW18863.1 100.00%  
Bootstrap support for afum|EAL93595.1 as seed ortholog is 100%.  
Bootstrap support for afis|EAW18863.1 as seed ortholog is 100%.

---

Group of orthologs #5999. Best score 703 bits

Score difference with first non-orthologous sequence - *A. fumigatus*:703 *A. fischeri*:703  
afum|EAL90902.1 100.00% afis|EAW22279.1 100.00%  
Bootstrap support for afum|EAL90902.1 as seed ortholog is 100%.  
Bootstrap support for afis|EAW22279.1 as seed ortholog is 100%.

---

Group of orthologs #6000. Best score 703 bits

Score difference with first non-orthologous sequence - *A. fumigatus*:703 *A. fischeri*:703  
afum|EAL92160.1 100.00% afis|EAW21141.1 100.00%  
Bootstrap support for afum|EAL92160.1 as seed ortholog is 100%.  
Bootstrap support for afis|EAW21141.1 as seed ortholog is 100%.

---

Group of orthologs #6001. Best score 703 bits

Score difference with first non-orthologous sequence - *A. fumigatus*:703 *A. fischeri*:661  
afum|EAL90043.1 100.00% afis|EAW25384.1 100.00%  
Bootstrap support for afum|EAL90043.1 as seed ortholog is 100%.  
Bootstrap support for afis|EAW25384.1 as seed ortholog is 100%.

---

Group of orthologs #6002. Best score 702 bits

Score difference with first non-orthologous sequence - *A. fumigatus*:702 *A. fischeri*:702  
afum|EAL86462.1 100.00% afis|EAW16937.1 100.00%  
Bootstrap support for afum|EAL86462.1 as seed ortholog is 100%.  
Bootstrap support for afis|EAW16937.1 as seed ortholog is 100%.

---

Group of orthologs #6003. Best score 702 bits

Score difference with first non-orthologous sequence - *A. fumigatus*:702 *A. fischeri*:702  
afum|EAL87384.1 100.00% afis|EAW23956.1 100.00%  
Bootstrap support for afum|EAL87384.1 as seed ortholog is 100%.  
Bootstrap support for afis|EAW23956.1 as seed ortholog is 100%.

---

Group of orthologs #6004. Best score 702 bits

Score difference with first non-orthologous sequence - *A. fumigatus*:524 *A. fischeri*:527  
afum|EAL87991.2 100.00% afis|EAW23474.1 100.00%  
Bootstrap support for afum|EAL87991.2 as seed ortholog is 100%.  
Bootstrap support for afis|EAW23474.1 as seed ortholog is 100%.

---

Group of orthologs #6005. Best score 702 bits

Score difference with first non-orthologous sequence - *A. fumigatus*:702 *A. fischeri*:401  
afum|EAL93841.2 100.00% afis|EAW19110.1 100.00%  
Bootstrap support for afum|EAL93841.2 as seed ortholog is 100%.  
Bootstrap support for afis|EAW19110.1 as seed ortholog is 100%.

---

Group of orthologs #6006. Best score 702 bits

Score difference with first non-orthologous sequence - *A. fumigatus*:702 *A. fischeri*:702  
afum|EAL92096.1 100.00% afis|EAW21073.1 100.00%  
Bootstrap support for afum|EAL92096.1 as seed ortholog is 100%.  
Bootstrap support for afis|EAW21073.1 as seed ortholog is 100%.

---

Group of orthologs #6007. Best score 702 bits

Score difference with first non-orthologous sequence - *A. fumigatus*:702 *A. fischeri*:702  
afum|EAL90883.1 100.00% afis|EAW22298.1 100.00%

Bootstrap support for afum|EAL90883.1 as seed ortholog is 100%.  
Bootstrap support for afis|EAW22298.1 as seed ortholog is 100%.

---

Group of orthologs #6008. Best score 702 bits

Score difference with first non-orthologous sequence - *A. fumigatus*:702 *A. fischeri*:702

afum|EBA27394.1 100.00% afis|EAW25380.1 100.00%

Bootstrap support for afum|EBA27394.1 as seed ortholog is 100%.

Bootstrap support for afis|EAW25380.1 as seed ortholog is 100%.

---

Group of orthologs #6009. Best score 701 bits

Score difference with first non-orthologous sequence - *A. fumigatus*:701 *A. fischeri*:532

afum|EAL85841.1 100.00% afis|EAW15481.1 100.00%

Bootstrap support for afum|EAL85841.1 as seed ortholog is 100%.

Bootstrap support for afis|EAW15481.1 as seed ortholog is 100%.

---

Group of orthologs #6010. Best score 701 bits

Score difference with first non-orthologous sequence - *A. fumigatus*:601 *A. fischeri*:595

afum|EAL88967.1 100.00% afis|EAW16342.1 100.00%

Bootstrap support for afum|EAL88967.1 as seed ortholog is 100%.

Bootstrap support for afis|EAW16342.1 as seed ortholog is 100%.

---

Group of orthologs #6011. Best score 701 bits

Score difference with first non-orthologous sequence - *A. fumigatus*:701 *A. fischeri*:701

afum|EAL89152.1 100.00% afis|EAW16554.1 100.00%

Bootstrap support for afum|EAL89152.1 as seed ortholog is 100%.

Bootstrap support for afis|EAW16554.1 as seed ortholog is 100%.

---

Group of orthologs #6012. Best score 701 bits

Score difference with first non-orthologous sequence - *A. fumigatus*:701 *A. fischeri*:701

afum|EAL86957.1 100.00% afis|EAW19552.1 100.00%

Bootstrap support for afum|EAL86957.1 as seed ortholog is 100%.

Bootstrap support for afis|EAW19552.1 as seed ortholog is 100%.

---

Group of orthologs #6013. Best score 701 bits

Score difference with first non-orthologous sequence - *A. fumigatus*:701 *A. fischeri*:581

afum|EAL86958.1 100.00% afis|EAW19551.1 100.00%

Bootstrap support for afum|EAL86958.1 as seed ortholog is 100%.

Bootstrap support for afis|EAW19551.1 as seed ortholog is 100%.

---

Group of orthologs #6014. Best score 701 bits

Score difference with first non-orthologous sequence - *A. fumigatus*:701 *A. fischeri*:701

afum|EAL92584.1 100.00% afis|EAW21565.1 100.00%

Bootstrap support for afum|EAL92584.1 as seed ortholog is 100%.

Bootstrap support for afis|EAW21565.1 as seed ortholog is 100%.

---

Group of orthologs #6015. Best score 700 bits

Score difference with first non-orthologous sequence - *A. fumigatus*:700 *A. fischeri*:700

afum|EAL85824.1 100.00% afis|EAW15499.1 100.00%

Bootstrap support for afum|EAL85824.1 as seed ortholog is 100%.

Bootstrap support for afis|EAW15499.1 as seed ortholog is 100%.

---

Group of orthologs #6016. Best score 700 bits

Score difference with first non-orthologous sequence - *A. fumigatus*:625 *A. fischeri*:50

afum|EAL86477.2 100.00% afis|EAW16950.1 100.00%

Bootstrap support for afum|EAL86477.2 as seed ortholog is 100%.

Bootstrap support for afis|EAW16950.1 as seed ortholog is 96%.

---

Group of orthologs #6017. Best score 700 bits

Score difference with first non-orthologous sequence - *A. fumigatus*:700 *A. fischeri*:700

afum|EAL86501.1 100.00% afis|EAW17526.1 100.00%

Bootstrap support for afum|EAL86501.1 as seed ortholog is 100%.

Bootstrap support for afis|EAW17526.1 as seed ortholog is 100%.

---

Group of orthologs #6018. Best score 700 bits

Score difference with first non-orthologous sequence - *A. fumigatus*:700 *A. fischeri*:700

afum|EAL91298.1 100.00% afis|EAW17469.1 100.00%

Bootstrap support for afum|EAL91298.1 as seed ortholog is 100%.

Bootstrap support for afis|EAW17469.1 as seed ortholog is 100%.

---

Group of orthologs #6019. Best score 700 bits

Score difference with first non-orthologous sequence - *A. fumigatus*:700 *A. fischeri*:700

afum|EAL90817.1 100.00% afis|EAW22375.1 100.00%

Bootstrap support for afum|EAL90817.1 as seed ortholog is 100%.

Bootstrap support for afis|EAW22375.1 as seed ortholog is 100%.

---

Group of orthologs #6020. Best score 700 bits

Score difference with first non-orthologous sequence - *A. fumigatus*:700 *A. fischeri*:543

afum|EAL92270.1 100.00% afis|EAW21255.1 100.00%

Bootstrap support for afum|EAL92270.1 as seed ortholog is 100%.

Bootstrap support for afis|EAW21255.1 as seed ortholog is 100%.

---

Group of orthologs #6021. Best score 699 bits

Score difference with first non-orthologous sequence - *A. fumigatus*:699 *A. fischeri*:699

afum|EAL86416.1 100.00% afis|EAW16879.1 100.00%

Bootstrap support for afum|EAL86416.1 as seed ortholog is 100%.

Bootstrap support for afis|EAW16879.1 as seed ortholog is 100%.

---

Group of orthologs #6022. Best score 699 bits

Score difference with first non-orthologous sequence - *A. fumigatus*:699 *A. fischeri*:699

afum|EAL84569.1 100.00% afis|EAW20486.1 100.00%

Bootstrap support for afum|EAL84569.1 as seed ortholog is 100%.

Bootstrap support for afis|EAW20486.1 as seed ortholog is 100%.

---

Group of orthologs #6023. Best score 699 bits

Score difference with first non-orthologous sequence - *A. fumigatus*:699 *A. fischeri*:699

afum|EAL85164.2 100.00% afis|EAW20044.1 100.00%

Bootstrap support for afum|EAL85164.2 as seed ortholog is 100%.

Bootstrap support for afis|EAW20044.1 as seed ortholog is 100%.

---

Group of orthologs #6024. Best score 699 bits

Score difference with first non-orthologous sequence - *A. fumigatus*:699 *A. fischeri*:699

afum|EAL91616.1 100.00% afis|EAW17808.1 100.00%

Bootstrap support for afum|EAL91616.1 as seed ortholog is 100%.

Bootstrap support for afis|EAW17808.1 as seed ortholog is 100%.

---

Group of orthologs #6025. Best score 699 bits

Score difference with first non-orthologous sequence - *A. fumigatus*:699 *A. fischeri*:699

afum|EAL86101.1 100.00% afis|EAW24433.1 100.00%

Bootstrap support for afum|EAL86101.1 as seed ortholog is 100%.

Bootstrap support for afis|EAW24433.1 as seed ortholog is 100%.

---

Group of orthologs #6026. Best score 699 bits

Score difference with first non-orthologous sequence - *A. fumigatus*:699 *A. fischeri*:699  
afum|EAL93057.1 100.00% afis|EAW18382.1 100.00%  
Bootstrap support for afum|EAL93057.1 as seed ortholog is 100%.  
Bootstrap support for afis|EAW18382.1 as seed ortholog is 100%.

---

Group of orthologs #6027. Best score 698 bits

Score difference with first non-orthologous sequence - *A. fumigatus*:698 *A. fischeri*:698  
afum|EAL89007.1 100.00% afis|EAW16382.1 100.00%  
Bootstrap support for afum|EAL89007.1 as seed ortholog is 100%.  
Bootstrap support for afis|EAW16382.1 as seed ortholog is 100%.

---

Group of orthologs #6028. Best score 698 bits

Score difference with first non-orthologous sequence - *A. fumigatus*:598 *A. fischeri*:698  
afum|EAL89162.1 100.00% afis|EAW16565.1 100.00%  
Bootstrap support for afum|EAL89162.1 as seed ortholog is 100%.  
Bootstrap support for afis|EAW16565.1 as seed ortholog is 100%.

---

Group of orthologs #6029. Best score 698 bits

Score difference with first non-orthologous sequence - *A. fumigatus*:698 *A. fischeri*:698  
afum|EAL87493.1 100.00% afis|EAW18136.1 100.00%  
Bootstrap support for afum|EAL87493.1 as seed ortholog is 100%.  
Bootstrap support for afis|EAW18136.1 as seed ortholog is 100%.

---

Group of orthologs #6030. Best score 698 bits

Score difference with first non-orthologous sequence - *A. fumigatus*:698 *A. fischeri*:698  
afum|EAL87020.1 100.00% afis|EAW19476.1 100.00%  
Bootstrap support for afum|EAL87020.1 as seed ortholog is 100%.  
Bootstrap support for afis|EAW19476.1 as seed ortholog is 100%.

---

Group of orthologs #6031. Best score 698 bits

Score difference with first non-orthologous sequence - *A. fumigatus*:698 *A. fischeri*:698  
afum|EAL86855.1 100.00% afis|EAW19668.1 100.00%  
Bootstrap support for afum|EAL86855.1 as seed ortholog is 100%.  
Bootstrap support for afis|EAW19668.1 as seed ortholog is 100%.

---

Group of orthologs #6032. Best score 698 bits

Score difference with first non-orthologous sequence - *A. fumigatus*:698 *A. fischeri*:698  
afum|EBA27354.1 100.00% afis|EAW16036.1 100.00%  
Bootstrap support for afum|EBA27354.1 as seed ortholog is 100%.  
Bootstrap support for afis|EAW16036.1 as seed ortholog is 100%.

---

Group of orthologs #6033. Best score 698 bits

Score difference with first non-orthologous sequence - *A. fumigatus*:698 *A. fischeri*:698  
afum|EAL88250.1 100.00% afis|EAW23232.1 100.00%  
Bootstrap support for afum|EAL88250.1 as seed ortholog is 100%.  
Bootstrap support for afis|EAW23232.1 as seed ortholog is 100%.

---

Group of orthologs #6034. Best score 698 bits

Score difference with first non-orthologous sequence - *A. fumigatus*:698 *A. fischeri*:698  
afum|EAL87945.2 100.00% afis|EAW23519.1 100.00%  
Bootstrap support for afum|EAL87945.2 as seed ortholog is 100%.  
Bootstrap support for afis|EAW23519.1 as seed ortholog is 100%.

---

Group of orthologs #6035. Best score 698 bits

Score difference with first non-orthologous sequence - *A. fumigatus*:698 *A. fischeri*:614  
afum|EAL93387.1 100.00% afis|EAW18669.1 100.00%

Bootstrap support for afum|EAL93387.1 as seed ortholog is 100%.  
Bootstrap support for afis|EAW18669.1 as seed ortholog is 100%.

---

Group of orthologs #6036. Best score 698 bits

Score difference with first non-orthologous sequence - *A. fumigatus*:614 *A. fischeri*:698

afum|EAL93519.1 100.00% afis|EAW18786.1 100.00%

Bootstrap support for afum|EAL93519.1 as seed ortholog is 100%.

Bootstrap support for afis|EAW18786.1 as seed ortholog is 100%.

---

Group of orthologs #6037. Best score 698 bits

Score difference with first non-orthologous sequence - *A. fumigatus*:698 *A. fischeri*:698

afum|EAL90650.1 100.00% afis|EAW22545.1 100.00%

Bootstrap support for afum|EAL90650.1 as seed ortholog is 100%.

Bootstrap support for afis|EAW22545.1 as seed ortholog is 100%.

---

Group of orthologs #6038. Best score 698 bits

Score difference with first non-orthologous sequence - *A. fumigatus*:698 *A. fischeri*:698

afum|EAL92534.1 100.00% afis|EAW21514.1 100.00%

Bootstrap support for afum|EAL92534.1 as seed ortholog is 100%.

Bootstrap support for afis|EAW21514.1 as seed ortholog is 100%.

---

Group of orthologs #6039. Best score 697 bits

Score difference with first non-orthologous sequence - *A. fumigatus*:697 *A. fischeri*:697

afum|EAL84458.1 100.00% afis|EAW20603.1 100.00%

Bootstrap support for afum|EAL84458.1 as seed ortholog is 100%.

Bootstrap support for afis|EAW20603.1 as seed ortholog is 100%.

---

Group of orthologs #6040. Best score 697 bits

Score difference with first non-orthologous sequence - *A. fumigatus*:697 *A. fischeri*:637

afum|EAL87532.1 100.00% afis|EAW18170.1 100.00%

Bootstrap support for afum|EAL87532.1 as seed ortholog is 100%.

Bootstrap support for afis|EAW18170.1 as seed ortholog is 100%.

---

Group of orthologs #6041. Best score 697 bits

Score difference with first non-orthologous sequence - *A. fumigatus*:621 *A. fischeri*:597

afum|EAL86181.1 100.00% afis|EAW24515.1 100.00%

Bootstrap support for afum|EAL86181.1 as seed ortholog is 100%.

Bootstrap support for afis|EAW24515.1 as seed ortholog is 100%.

---

Group of orthologs #6042. Best score 696 bits

Score difference with first non-orthologous sequence - *A. fumigatus*:696 *A. fischeri*:696

afum|EAL84567.1 100.00% afis|EAW20488.1 100.00%

Bootstrap support for afum|EAL84567.1 as seed ortholog is 100%.

Bootstrap support for afis|EAW20488.1 as seed ortholog is 100%.

---

Group of orthologs #6043. Best score 696 bits

Score difference with first non-orthologous sequence - *A. fumigatus*:696 *A. fischeri*:696

afum|EAL87010.1 100.00% afis|EAW19485.1 100.00%

Bootstrap support for afum|EAL87010.1 as seed ortholog is 100%.

Bootstrap support for afis|EAW19485.1 as seed ortholog is 100%.

---

Group of orthologs #6044. Best score 696 bits

Score difference with first non-orthologous sequence - *A. fumigatus*:696 *A. fischeri*:696

afum|EAL91767.1 100.00% afis|EAW17956.1 100.00%

Bootstrap support for afum|EAL91767.1 as seed ortholog is 100%.

Bootstrap support for afis|EAW17956.1 as seed ortholog is 100%.

---

Group of orthologs #6045. Best score 696 bits

Score difference with first non-orthologous sequence - *A. fumigatus*:696 *A. fischeri*:696

afum|EAL85948.1 100.00% afis|EAW24279.1 100.00%

Bootstrap support for afum|EAL85948.1 as seed ortholog is 100%.

Bootstrap support for afis|EAW24279.1 as seed ortholog is 100%.

---

Group of orthologs #6046. Best score 696 bits

Score difference with first non-orthologous sequence - *A. fumigatus*:696 *A. fischeri*:696

afum|EAL90796.1 100.00% afis|EAW22395.1 100.00%

Bootstrap support for afum|EAL90796.1 as seed ortholog is 100%.

Bootstrap support for afis|EAW22395.1 as seed ortholog is 100%.

---

Group of orthologs #6047. Best score 695 bits

Score difference with first non-orthologous sequence - *A. fumigatus*:695 *A. fischeri*:695

afum|EAL84199.2 100.00% afis|EAW15447.1 100.00%

Bootstrap support for afum|EAL84199.2 as seed ortholog is 100%.

Bootstrap support for afis|EAW15447.1 as seed ortholog is 100%.

---

Group of orthologs #6048. Best score 695 bits

Score difference with first non-orthologous sequence - *A. fumigatus*:695 *A. fischeri*:695

afum|EAL84436.1 100.00% afis|EAW20631.1 100.00%

Bootstrap support for afum|EAL84436.1 as seed ortholog is 100%.

Bootstrap support for afis|EAW20631.1 as seed ortholog is 100%.

---

Group of orthologs #6049. Best score 695 bits

Score difference with first non-orthologous sequence - *A. fumigatus*:566 *A. fischeri*:519

afum|EAL91612.1 100.00% afis|EAW17804.1 100.00%

Bootstrap support for afum|EAL91612.1 as seed ortholog is 100%.

Bootstrap support for afis|EAW17804.1 as seed ortholog is 100%.

---

Group of orthologs #6050. Best score 695 bits

Score difference with first non-orthologous sequence - *A. fumigatus*:695 *A. fischeri*:695

afum|EBA27277.1 100.00% afis|EAW16987.1 100.00%

Bootstrap support for afum|EBA27277.1 as seed ortholog is 100%.

Bootstrap support for afis|EAW16987.1 as seed ortholog is 100%.

---

Group of orthologs #6051. Best score 695 bits

Score difference with first non-orthologous sequence - *A. fumigatus*:695 *A. fischeri*:695

afum|EAL93182.1 100.00% afis|EAW18492.1 100.00%

Bootstrap support for afum|EAL93182.1 as seed ortholog is 100%.

Bootstrap support for afis|EAW18492.1 as seed ortholog is 100%.

---

Group of orthologs #6052. Best score 694 bits

Score difference with first non-orthologous sequence - *A. fumigatus*:694 *A. fischeri*:449

afum|EAL89134.1 100.00% afis|EAW16537.1 100.00%

Bootstrap support for afum|EAL89134.1 as seed ortholog is 100%.

Bootstrap support for afis|EAW16537.1 as seed ortholog is 100%.

---

Group of orthologs #6053. Best score 694 bits

Score difference with first non-orthologous sequence - *A. fumigatus*:694 *A. fischeri*:694

afum|EAL87596.1 100.00% afis|EAW18229.1 100.00%

Bootstrap support for afum|EAL87596.1 as seed ortholog is 100%.

Bootstrap support for afis|EAW18229.1 as seed ortholog is 100%.

---

Group of orthologs #6054. Best score 694 bits

Score difference with first non-orthologous sequence - *A. fumigatus*:694 *A. fischeri*:694  
afum|EAL91582.1 100.00% afis|EAW17773.1 100.00%  
Bootstrap support for afum|EAL91582.1 as seed ortholog is 100%.  
Bootstrap support for afis|EAW17773.1 as seed ortholog is 100%.

---

Group of orthologs #6055. Best score 694 bits

Score difference with first non-orthologous sequence - *A. fumigatus*:694 *A. fischeri*:694  
afum|EAL91642.1 100.00% afis|EAW17832.1 100.00%  
Bootstrap support for afum|EAL91642.1 as seed ortholog is 100%.  
Bootstrap support for afis|EAW17832.1 as seed ortholog is 100%.

---

Group of orthologs #6056. Best score 694 bits

Score difference with first non-orthologous sequence - *A. fumigatus*:694 *A. fischeri*:585  
afum|EAL84358.1 100.00% afis|EAW25689.1 100.00%  
Bootstrap support for afum|EAL84358.1 as seed ortholog is 100%.  
Bootstrap support for afis|EAW25689.1 as seed ortholog is 100%.

---

Group of orthologs #6057. Best score 694 bits

Score difference with first non-orthologous sequence - *A. fumigatus*:694 *A. fischeri*:694  
afum|EAL88063.2 100.00% afis|EAW23407.1 100.00%  
Bootstrap support for afum|EAL88063.2 as seed ortholog is 100%.  
Bootstrap support for afis|EAW23407.1 as seed ortholog is 100%.

---

Group of orthologs #6058. Best score 694 bits

Score difference with first non-orthologous sequence - *A. fumigatus*:694 *A. fischeri*:694  
afum|EAL92107.2 100.00% afis|EAW21085.1 100.00%  
Bootstrap support for afum|EAL92107.2 as seed ortholog is 100%.  
Bootstrap support for afis|EAW21085.1 as seed ortholog is 100%.

---

Group of orthologs #6059. Best score 694 bits

Score difference with first non-orthologous sequence - *A. fumigatus*:694 *A. fischeri*:694  
afum|EAL89789.1 100.00% afis|EAW25118.1 100.00%  
Bootstrap support for afum|EAL89789.1 as seed ortholog is 100%.  
Bootstrap support for afis|EAW25118.1 as seed ortholog is 100%.

---

Group of orthologs #6060. Best score 693 bits

Score difference with first non-orthologous sequence - *A. fumigatus*:613 *A. fischeri*:618  
afum|EAL87018.1 100.00% afis|EAW19478.1 100.00%  
Bootstrap support for afum|EAL87018.1 as seed ortholog is 100%.  
Bootstrap support for afis|EAW19478.1 as seed ortholog is 100%.

---

Group of orthologs #6061. Best score 693 bits

Score difference with first non-orthologous sequence - *A. fumigatus*:693 *A. fischeri*:592  
afum|EAL86959.1 100.00% afis|EAW19550.1 100.00%  
Bootstrap support for afum|EAL86959.1 as seed ortholog is 100%.  
Bootstrap support for afis|EAW19550.1 as seed ortholog is 100%.

---

Group of orthologs #6062. Best score 693 bits

Score difference with first non-orthologous sequence - *A. fumigatus*:693 *A. fischeri*:693  
afum|EAL87208.1 100.00% afis|EAW23774.1 100.00%  
Bootstrap support for afum|EAL87208.1 as seed ortholog is 100%.  
Bootstrap support for afis|EAW23774.1 as seed ortholog is 100%.

---

Group of orthologs #6063. Best score 693 bits

Score difference with first non-orthologous sequence - *A. fumigatus*:693 *A. fischeri*:693  
afum|EAL90392.1 100.00% afis|EAW22809.1 100.00%



Bootstrap support for afum|EAL90392.1 as seed ortholog is 100%.  
Bootstrap support for afis|EAW22809.1 as seed ortholog is 100%.

---

Group of orthologs #6064. Best score 692 bits

Score difference with first non-orthologous sequence - *A. fumigatus*:692 *A. fischeri*:692

afum|EAL88751.1 100.00% afis|EAW16120.1 100.00%

Bootstrap support for afum|EAL88751.1 as seed ortholog is 100%.

Bootstrap support for afis|EAW16120.1 as seed ortholog is 100%.

---

Group of orthologs #6065. Best score 692 bits

Score difference with first non-orthologous sequence - *A. fumigatus*:692 *A. fischeri*:494

afum|EAL85128.1 100.00% afis|EAW19772.1 100.00%

Bootstrap support for afum|EAL85128.1 as seed ortholog is 100%.

Bootstrap support for afis|EAW19772.1 as seed ortholog is 100%.

---

Group of orthologs #6066. Best score 692 bits

Score difference with first non-orthologous sequence - *A. fumigatus*:692 *A. fischeri*:692

afum|EAL87060.1 100.00% afis|EAW19435.1 100.00%

Bootstrap support for afum|EAL87060.1 as seed ortholog is 100%.

Bootstrap support for afis|EAW19435.1 as seed ortholog is 100%.

---

Group of orthologs #6067. Best score 692 bits

Score difference with first non-orthologous sequence - *A. fumigatus*:692 *A. fischeri*:692

afum|EAL91757.1 100.00% afis|EAW17947.1 100.00%

Bootstrap support for afum|EAL91757.1 as seed ortholog is 100%.

Bootstrap support for afis|EAW17947.1 as seed ortholog is 100%.

---

Group of orthologs #6068. Best score 692 bits

Score difference with first non-orthologous sequence - *A. fumigatus*:692 *A. fischeri*:692

afum|EAL87888.1 100.00% afis|EAW23577.1 100.00%

Bootstrap support for afum|EAL87888.1 as seed ortholog is 100%.

Bootstrap support for afis|EAW23577.1 as seed ortholog is 100%.

---

Group of orthologs #6069. Best score 692 bits

Score difference with first non-orthologous sequence - *A. fumigatus*:692 *A. fischeri*:692

afum|EAL93936.1 100.00% afis|EAW19206.1 100.00%

Bootstrap support for afum|EAL93936.1 as seed ortholog is 100%.

Bootstrap support for afis|EAW19206.1 as seed ortholog is 100%.

---

Group of orthologs #6070. Best score 692 bits

Score difference with first non-orthologous sequence - *A. fumigatus*:692 *A. fischeri*:692

afum|EAL92986.1 100.00% afis|EAW21971.1 100.00%

Bootstrap support for afum|EAL92986.1 as seed ortholog is 100%.

Bootstrap support for afis|EAW21971.1 as seed ortholog is 100%.

---

Group of orthologs #6071. Best score 691 bits

Score difference with first non-orthologous sequence - *A. fumigatus*:691 *A. fischeri*:691

afum|EAL85838.1 100.00% afis|EAW15484.1 100.00%

Bootstrap support for afum|EAL85838.1 as seed ortholog is 100%.

Bootstrap support for afis|EAW15484.1 as seed ortholog is 100%.

---

Group of orthologs #6072. Best score 691 bits

Score difference with first non-orthologous sequence - *A. fumigatus*:691 *A. fischeri*:691

afum|EAL88936.1 100.00% afis|EAW16314.1 100.00%

Bootstrap support for afum|EAL88936.1 as seed ortholog is 100%.

Bootstrap support for afis|EAW16314.1 as seed ortholog is 100%.

---

Group of orthologs #6073. Best score 691 bits

Score difference with first non-orthologous sequence - *A. fumigatus*:691 *A. fischeri*:691  
afum|EAL91489.1 100.00% afis|EAW17676.1 100.00%  
Bootstrap support for afum|EAL91489.1 as seed ortholog is 100%.  
Bootstrap support for afis|EAW17676.1 as seed ortholog is 100%.

---

Group of orthologs #6074. Best score 691 bits

Score difference with first non-orthologous sequence - *A. fumigatus*:691 *A. fischeri*:446  
afum|EAL91895.1 100.00% afis|EAW18083.1 100.00%  
Bootstrap support for afum|EAL91895.1 as seed ortholog is 100%.  
Bootstrap support for afis|EAW18083.1 as seed ortholog is 100%.

---

Group of orthologs #6075. Best score 691 bits

Score difference with first non-orthologous sequence - *A. fumigatus*:599 *A. fischeri*:607  
afum|EAL87457.1 100.00% afis|EAW24026.1 100.00%  
Bootstrap support for afum|EAL87457.1 as seed ortholog is 100%.  
Bootstrap support for afis|EAW24026.1 as seed ortholog is 100%.

---

Group of orthologs #6076. Best score 691 bits

Score difference with first non-orthologous sequence - *A. fumigatus*:691 *A. fischeri*:691  
afum|EAL93910.1 100.00% afis|EAW19180.1 100.00%  
Bootstrap support for afum|EAL93910.1 as seed ortholog is 100%.  
Bootstrap support for afis|EAW19180.1 as seed ortholog is 100%.

---

Group of orthologs #6077. Best score 691 bits

Score difference with first non-orthologous sequence - *A. fumigatus*:691 *A. fischeri*:691  
afum|EAL92489.1 100.00% afis|EAW21470.1 100.00%  
Bootstrap support for afum|EAL92489.1 as seed ortholog is 100%.  
Bootstrap support for afis|EAW21470.1 as seed ortholog is 100%.

---

Group of orthologs #6078. Best score 691 bits

Score difference with first non-orthologous sequence - *A. fumigatus*:691 *A. fischeri*:691  
afum|EAL92669.1 100.00% afis|EAW21635.1 100.00%  
Bootstrap support for afum|EAL92669.1 as seed ortholog is 100%.  
Bootstrap support for afis|EAW21635.1 as seed ortholog is 100%.

---

Group of orthologs #6079. Best score 691 bits

Score difference with first non-orthologous sequence - *A. fumigatus*:691 *A. fischeri*:691  
afum|EAL90096.1 100.00% afis|EAW25438.1 100.00%  
Bootstrap support for afum|EAL90096.1 as seed ortholog is 100%.  
Bootstrap support for afis|EAW25438.1 as seed ortholog is 100%.

---

Group of orthologs #6080. Best score 691 bits

Score difference with first non-orthologous sequence - *A. fumigatus*:691 *A. fischeri*:691  
afum|EAL90186.2 100.00% afis|EAW25521.1 100.00%  
Bootstrap support for afum|EAL90186.2 as seed ortholog is 100%.  
Bootstrap support for afis|EAW25521.1 as seed ortholog is 100%.

---

Group of orthologs #6081. Best score 690 bits

Score difference with first non-orthologous sequence - *A. fumigatus*:690 *A. fischeri*:690  
afum|EAL85297.1 100.00% afis|EAW20179.1 100.00%  
Bootstrap support for afum|EAL85297.1 as seed ortholog is 100%.  
Bootstrap support for afis|EAW20179.1 as seed ortholog is 100%.

---

Group of orthologs #6082. Best score 690 bits

Score difference with first non-orthologous sequence - *A. fumigatus*:638 *A. fischeri*:646  
afum|EAL85423.1 100.00% afis|EAW20291.1 100.00%  
Bootstrap support for afum|EAL85423.1 as seed ortholog is 100%.  
Bootstrap support for afis|EAW20291.1 as seed ortholog is 100%.

---

Group of orthologs #6083. Best score 690 bits

Score difference with first non-orthologous sequence - *A. fumigatus*:690 *A. fischeri*:690  
afum|EAL91574.1 100.00% afis|EAW17764.1 100.00%  
Bootstrap support for afum|EAL91574.1 as seed ortholog is 100%.  
Bootstrap support for afis|EAW17764.1 as seed ortholog is 100%.

---

Group of orthologs #6084. Best score 690 bits

Score difference with first non-orthologous sequence - *A. fumigatus*:690 *A. fischeri*:690  
afum|EAL92970.2 100.00% afis|EAW21956.1 100.00%  
Bootstrap support for afum|EAL92970.2 as seed ortholog is 100%.  
Bootstrap support for afis|EAW21956.1 as seed ortholog is 100%.

---

Group of orthologs #6085. Best score 690 bits

Score difference with first non-orthologous sequence - *A. fumigatus*:690 *A. fischeri*:690  
afum|EAL89743.1 100.00% afis|EAW25074.1 100.00%  
Bootstrap support for afum|EAL89743.1 as seed ortholog is 100%.  
Bootstrap support for afis|EAW25074.1 as seed ortholog is 100%.

---

Group of orthologs #6086. Best score 690 bits

Score difference with first non-orthologous sequence - *A. fumigatus*:690 *A. fischeri*:690  
afum|EAL89892.1 100.00% afis|EAW25231.1 100.00%  
Bootstrap support for afum|EAL89892.1 as seed ortholog is 100%.  
Bootstrap support for afis|EAW25231.1 as seed ortholog is 100%.

---

Group of orthologs #6087. Best score 689 bits

Score difference with first non-orthologous sequence - *A. fumigatus*:689 *A. fischeri*:689  
afum|EAL84312.1 100.00% afis|EAW25624.1 100.00%  
Bootstrap support for afum|EAL84312.1 as seed ortholog is 100%.  
Bootstrap support for afis|EAW25624.1 as seed ortholog is 100%.

---

Group of orthologs #6088. Best score 689 bits

Score difference with first non-orthologous sequence - *A. fumigatus*:435 *A. fischeri*:689  
afum|EAL86100.1 100.00% afis|EAW24432.1 100.00%  
Bootstrap support for afum|EAL86100.1 as seed ortholog is 100%.  
Bootstrap support for afis|EAW24432.1 as seed ortholog is 100%.

---

Group of orthologs #6089. Best score 689 bits

Score difference with first non-orthologous sequence - *A. fumigatus*:689 *A. fischeri*:689  
afum|EAL93156.1 100.00% afis|EAW18470.1 100.00%  
Bootstrap support for afum|EAL93156.1 as seed ortholog is 100%.  
Bootstrap support for afis|EAW18470.1 as seed ortholog is 100%.

---

Group of orthologs #6090. Best score 689 bits

Score difference with first non-orthologous sequence - *A. fumigatus*:689 *A. fischeri*:689  
afum|EAL92844.1 100.00% afis|EAW21829.1 100.00%  
Bootstrap support for afum|EAL92844.1 as seed ortholog is 100%.  
Bootstrap support for afis|EAW21829.1 as seed ortholog is 100%.

---

Group of orthologs #6091. Best score 688 bits

Score difference with first non-orthologous sequence - *A. fumigatus*:688 *A. fischeri*:688  
afum|EAL86428.2 100.00% afis|EAW16890.1 100.00%

Bootstrap support for afum|EAL86428.2 as seed ortholog is 100%.  
Bootstrap support for afis|EAW16890.1 as seed ortholog is 100%.

---

Group of orthologs #6092. Best score 688 bits

Score difference with first non-orthologous sequence - *A. fumigatus*:546 *A. fischeri*:541

afum|EAL86446.1 100.00% afis|EAW16910.1 100.00%

Bootstrap support for afum|EAL86446.1 as seed ortholog is 100%.

Bootstrap support for afis|EAW16910.1 as seed ortholog is 100%.

---

Group of orthologs #6093. Best score 688 bits

Score difference with first non-orthologous sequence - *A. fumigatus*:688 *A. fischeri*:688

afum|EAL88614.1 100.00% afis|EAW15982.1 100.00%

Bootstrap support for afum|EAL88614.1 as seed ortholog is 100%.

Bootstrap support for afis|EAW15982.1 as seed ortholog is 100%.

---

Group of orthologs #6094. Best score 688 bits

Score difference with first non-orthologous sequence - *A. fumigatus*:688 *A. fischeri*:688

afum|EAL84863.1 100.00% afis|EAW20755.1 100.00%

Bootstrap support for afum|EAL84863.1 as seed ortholog is 100%.

Bootstrap support for afis|EAW20755.1 as seed ortholog is 100%.

---

Group of orthologs #6095. Best score 688 bits

Score difference with first non-orthologous sequence - *A. fumigatus*:688 *A. fischeri*:688

afum|EAL84383.1 100.00% afis|EAW25710.1 100.00%

Bootstrap support for afum|EAL84383.1 as seed ortholog is 100%.

Bootstrap support for afis|EAW25710.1 as seed ortholog is 100%.

---

Group of orthologs #6096. Best score 688 bits

Score difference with first non-orthologous sequence - *A. fumigatus*:550 *A. fischeri*:589

afum|EAL86202.1 100.00% afis|EAW24538.1 100.00%

Bootstrap support for afum|EAL86202.1 as seed ortholog is 100%.

Bootstrap support for afis|EAW24538.1 as seed ortholog is 100%.

---

Group of orthologs #6097. Best score 688 bits

Score difference with first non-orthologous sequence - *A. fumigatus*:688 *A. fischeri*:688

afum|EAL88420.1 100.00% afis|EAW23059.1 100.00%

Bootstrap support for afum|EAL88420.1 as seed ortholog is 100%.

Bootstrap support for afis|EAW23059.1 as seed ortholog is 100%.

---

Group of orthologs #6098. Best score 688 bits

Score difference with first non-orthologous sequence - *A. fumigatus*:688 *A. fischeri*:688

afum|EAL87873.1 100.00% afis|EAW23594.1 100.00%

Bootstrap support for afum|EAL87873.1 as seed ortholog is 100%.

Bootstrap support for afis|EAW23594.1 as seed ortholog is 100%.

---

Group of orthologs #6099. Best score 688 bits

Score difference with first non-orthologous sequence - *A. fumigatus*:688 *A. fischeri*:453

afum|EAL93883.1 100.00% afis|EAW19152.1 100.00%

Bootstrap support for afum|EAL93883.1 as seed ortholog is 100%.

Bootstrap support for afis|EAW19152.1 as seed ortholog is 100%.

---

Group of orthologs #6100. Best score 688 bits

Score difference with first non-orthologous sequence - *A. fumigatus*:688 *A. fischeri*:688

afum|EAL90325.2 100.00% afis|EAW22873.1 100.00%

Bootstrap support for afum|EAL90325.2 as seed ortholog is 100%.

Bootstrap support for afis|EAW22873.1 as seed ortholog is 100%.

---

Group of orthologs #6101. Best score 688 bits

Score difference with first non-orthologous sequence - *A. fumigatus*:688 *A. fischeri*:688

afum|EAL90295.1 100.00% afis|EAW22902.1 100.00%

Bootstrap support for afum|EAL90295.1 as seed ortholog is 100%.

Bootstrap support for afis|EAW22902.1 as seed ortholog is 100%.

---

Group of orthologs #6102. Best score 688 bits

Score difference with first non-orthologous sequence - *A. fumigatus*:688 *A. fischeri*:688

afum|EAL89930.1 100.00% afis|EAW25267.1 100.00%

Bootstrap support for afum|EAL89930.1 as seed ortholog is 100%.

Bootstrap support for afis|EAW25267.1 as seed ortholog is 100%.

---

Group of orthologs #6103. Best score 688 bits

Score difference with first non-orthologous sequence - *A. fumigatus*:688 *A. fischeri*:688

afum|EAL89952.1 100.00% afis|EAW25289.1 100.00%

Bootstrap support for afum|EAL89952.1 as seed ortholog is 100%.

Bootstrap support for afis|EAW25289.1 as seed ortholog is 100%.

---

Group of orthologs #6104. Best score 687 bits

Score difference with first non-orthologous sequence - *A. fumigatus*:687 *A. fischeri*:687

afum|EAL84674.1 100.00% afis|EAW20959.1 100.00%

Bootstrap support for afum|EAL84674.1 as seed ortholog is 100%.

Bootstrap support for afis|EAW20959.1 as seed ortholog is 100%.

---

Group of orthologs #6105. Best score 687 bits

Score difference with first non-orthologous sequence - *A. fumigatus*:687 *A. fischeri*:687

afum|EAL91572.1 100.00% afis|EAW17762.1 100.00%

Bootstrap support for afum|EAL91572.1 as seed ortholog is 100%.

Bootstrap support for afis|EAW17762.1 as seed ortholog is 100%.

---

Group of orthologs #6106. Best score 687 bits

Score difference with first non-orthologous sequence - *A. fumigatus*:687 *A. fischeri*:514

afum|EAL88473.1 100.00% afis|EAW23007.1 100.00%

Bootstrap support for afum|EAL88473.1 as seed ortholog is 100%.

Bootstrap support for afis|EAW23007.1 as seed ortholog is 100%.

---

Group of orthologs #6107. Best score 687 bits

Score difference with first non-orthologous sequence - *A. fumigatus*:687 *A. fischeri*:687

afum|EAL93580.1 100.00% afis|EAW18849.1 100.00%

Bootstrap support for afum|EAL93580.1 as seed ortholog is 100%.

Bootstrap support for afis|EAW18849.1 as seed ortholog is 100%.

---

Group of orthologs #6108. Best score 686 bits

Score difference with first non-orthologous sequence - *A. fumigatus*:92 *A. fischeri*:686

afum|EAL85475.1 100.00% afis|EAW20358.1 100.00%

Bootstrap support for afum|EAL85475.1 as seed ortholog is 99%.

Bootstrap support for afis|EAW20358.1 as seed ortholog is 100%.

---

Group of orthologs #6109. Best score 686 bits

Score difference with first non-orthologous sequence - *A. fumigatus*:686 *A. fischeri*:686

afum|EAL85917.2 100.00% afis|EAW24249.1 100.00%

Bootstrap support for afum|EAL85917.2 as seed ortholog is 100%.

Bootstrap support for afis|EAW24249.1 as seed ortholog is 100%.

---

Group of orthologs #6110. Best score 686 bits

Score difference with first non-orthologous sequence - *A. fumigatus*:686 *A. fischeri*:686  
afum|EAL93138.1 100.00% afis|EAW18453.1 100.00%  
Bootstrap support for afum|EAL93138.1 as seed ortholog is 100%.  
Bootstrap support for afis|EAW18453.1 as seed ortholog is 100%.

---

Group of orthologs #6111. Best score 686 bits

Score difference with first non-orthologous sequence - *A. fumigatus*:686 *A. fischeri*:686  
afum|EAL93011.1 100.00% afis|EAW21996.1 100.00%  
Bootstrap support for afum|EAL93011.1 as seed ortholog is 100%.  
Bootstrap support for afis|EAW21996.1 as seed ortholog is 100%.

---

Group of orthologs #6112. Best score 685 bits

Score difference with first non-orthologous sequence - *A. fumigatus*:685 *A. fischeri*:685  
afum|EAL85550.2 100.00% afis|EAW15800.1 100.00%  
Bootstrap support for afum|EAL85550.2 as seed ortholog is 100%.  
Bootstrap support for afis|EAW15800.1 as seed ortholog is 100%.

---

Group of orthologs #6113. Best score 685 bits

Score difference with first non-orthologous sequence - *A. fumigatus*:685 *A. fischeri*:685  
afum|EAL84855.1 100.00% afis|EAW20764.1 100.00%  
Bootstrap support for afum|EAL84855.1 as seed ortholog is 100%.  
Bootstrap support for afis|EAW20764.1 as seed ortholog is 100%.

---

Group of orthologs #6114. Best score 685 bits

Score difference with first non-orthologous sequence - *A. fumigatus*:685 *A. fischeri*:685  
afum|EAL86891.1 100.00% afis|EAW19631.1 100.00%  
Bootstrap support for afum|EAL86891.1 as seed ortholog is 100%.  
Bootstrap support for afis|EAW19631.1 as seed ortholog is 100%.

---

Group of orthologs #6115. Best score 685 bits

Score difference with first non-orthologous sequence - *A. fumigatus*:685 *A. fischeri*:685  
afum|EAL91364.1 100.00% afis|EAW17550.1 100.00%  
Bootstrap support for afum|EAL91364.1 as seed ortholog is 100%.  
Bootstrap support for afis|EAW17550.1 as seed ortholog is 100%.

---

Group of orthologs #6116. Best score 685 bits

Score difference with first non-orthologous sequence - *A. fumigatus*:615 *A. fischeri*:633  
afum|EAL87182.1 100.00% afis|EAW23747.1 100.00%  
Bootstrap support for afum|EAL87182.1 as seed ortholog is 100%.  
Bootstrap support for afis|EAW23747.1 as seed ortholog is 100%.

---

Group of orthologs #6117. Best score 685 bits

Score difference with first non-orthologous sequence - *A. fumigatus*:685 *A. fischeri*:685  
afum|EAL88258.1 100.00% afis|EAW23225.1 100.00%  
Bootstrap support for afum|EAL88258.1 as seed ortholog is 100%.  
Bootstrap support for afis|EAW23225.1 as seed ortholog is 100%.

---

Group of orthologs #6118. Best score 685 bits

Score difference with first non-orthologous sequence - *A. fumigatus*:685 *A. fischeri*:685  
afum|EAL93982.1 100.00% afis|EAW19253.1 100.00%  
Bootstrap support for afum|EAL93982.1 as seed ortholog is 100%.  
Bootstrap support for afis|EAW19253.1 as seed ortholog is 100%.

---

Group of orthologs #6119. Best score 685 bits

Score difference with first non-orthologous sequence - *A. fumigatus*:685 *A. fischeri*:685  
afum|EAL92717.1 100.00% afis|EAW21683.1 100.00%

Bootstrap support for afum|EAL92717.1 as seed ortholog is 100%.  
Bootstrap support for afis|EAW21683.1 as seed ortholog is 100%.

---

Group of orthologs #6120. Best score 685 bits

Score difference with first non-orthologous sequence - *A. fumigatus*:685 *A. fischeri*:685

afum|EAL92831.1 100.00% afis|EAW21815.1 100.00%

Bootstrap support for afum|EAL92831.1 as seed ortholog is 100%.

Bootstrap support for afis|EAW21815.1 as seed ortholog is 100%.

---

Group of orthologs #6121. Best score 684 bits

Score difference with first non-orthologous sequence - *A. fumigatus*:684 *A. fischeri*:684

afum|EAL84845.1 100.00% afis|EAW20775.1 100.00%

Bootstrap support for afum|EAL84845.1 as seed ortholog is 100%.

Bootstrap support for afis|EAW20775.1 as seed ortholog is 100%.

---

Group of orthologs #6122. Best score 684 bits

Score difference with first non-orthologous sequence - *A. fumigatus*:684 *A. fischeri*:684

afum|EAL91748.1 100.00% afis|EAW17937.1 100.00%

Bootstrap support for afum|EAL91748.1 as seed ortholog is 100%.

Bootstrap support for afis|EAW17937.1 as seed ortholog is 100%.

---

Group of orthologs #6123. Best score 684 bits

Score difference with first non-orthologous sequence - *A. fumigatus*:684 *A. fischeri*:684

afum|EAL93399.1 100.00% afis|EAW18679.1 100.00%

Bootstrap support for afum|EAL93399.1 as seed ortholog is 100%.

Bootstrap support for afis|EAW18679.1 as seed ortholog is 100%.

---

Group of orthologs #6124. Best score 683 bits

Score difference with first non-orthologous sequence - *A. fumigatus*:683 *A. fischeri*:683

afum|EAL84900.1 100.00% afis|EAW20017.1 100.00%

Bootstrap support for afum|EAL84900.1 as seed ortholog is 100%.

Bootstrap support for afis|EAW20017.1 as seed ortholog is 100%.

---

Group of orthologs #6125. Best score 682 bits

Score difference with first non-orthologous sequence - *A. fumigatus*:682 *A. fischeri*:682

afum|EAL85804.1 100.00% afis|EAW15524.1 100.00%

Bootstrap support for afum|EAL85804.1 as seed ortholog is 100%.

Bootstrap support for afis|EAW15524.1 as seed ortholog is 100%.

---

Group of orthologs #6126. Best score 682 bits

Score difference with first non-orthologous sequence - *A. fumigatus*:682 *A. fischeri*:682

afum|EAL85773.1 100.00% afis|EAW15559.1 100.00%

Bootstrap support for afum|EAL85773.1 as seed ortholog is 100%.

Bootstrap support for afis|EAW15559.1 as seed ortholog is 100%.

---

Group of orthologs #6127. Best score 682 bits

Score difference with first non-orthologous sequence - *A. fumigatus*:682 *A. fischeri*:682

afum|EAL84982.2 100.00% afis|EAW19927.1 100.00%

Bootstrap support for afum|EAL84982.2 as seed ortholog is 100%.

Bootstrap support for afis|EAW19927.1 as seed ortholog is 100%.

---

Group of orthologs #6128. Best score 682 bits

Score difference with first non-orthologous sequence - *A. fumigatus*:682 *A. fischeri*:682

afum|EAL87022.1 100.00% afis|EAW19474.1 100.00%

Bootstrap support for afum|EAL87022.1 as seed ortholog is 100%.

Bootstrap support for afis|EAW19474.1 as seed ortholog is 100%.

---

Group of orthologs #6129. Best score 682 bits

Score difference with first non-orthologous sequence - *A. fumigatus*:682 *A. fischeri*:682

afum|EAL87173.1 100.00% afis|EAW23735.1 100.00%

Bootstrap support for afum|EAL87173.1 as seed ortholog is 100%.

Bootstrap support for afis|EAW23735.1 as seed ortholog is 100%.

---

Group of orthologs #6130. Best score 682 bits

Score difference with first non-orthologous sequence - *A. fumigatus*:682 *A. fischeri*:682

afum|EAL93343.2 100.00% afis|EAW18631.1 100.00%

Bootstrap support for afum|EAL93343.2 as seed ortholog is 100%.

Bootstrap support for afis|EAW18631.1 as seed ortholog is 100%.

---

Group of orthologs #6131. Best score 682 bits

Score difference with first non-orthologous sequence - *A. fumigatus*:682 *A. fischeri*:682

afum|EAL89624.2 100.00% afis|EAW24966.1 100.00%

Bootstrap support for afum|EAL89624.2 as seed ortholog is 100%.

Bootstrap support for afis|EAW24966.1 as seed ortholog is 100%.

---

Group of orthologs #6132. Best score 682 bits

Score difference with first non-orthologous sequence - *A. fumigatus*:682 *A. fischeri*:682

afum|EAL89830.1 100.00% afis|EAW25155.1 100.00%

Bootstrap support for afum|EAL89830.1 as seed ortholog is 100%.

Bootstrap support for afis|EAW25155.1 as seed ortholog is 100%.

---

Group of orthologs #6133. Best score 681 bits

Score difference with first non-orthologous sequence - *A. fumigatus*:681 *A. fischeri*:681

afum|EAL84237.1 100.00% afis|EAW15409.1 100.00%

Bootstrap support for afum|EAL84237.1 as seed ortholog is 100%.

Bootstrap support for afis|EAW15409.1 as seed ortholog is 100%.

---

Group of orthologs #6134. Best score 681 bits

Score difference with first non-orthologous sequence - *A. fumigatus*:619 *A. fischeri*:681

afum|EAL84198.2 100.00% afis|EAW15448.1 100.00%

Bootstrap support for afum|EAL84198.2 as seed ortholog is 100%.

Bootstrap support for afis|EAW15448.1 as seed ortholog is 100%.

---

Group of orthologs #6135. Best score 681 bits

Score difference with first non-orthologous sequence - *A. fumigatus*:681 *A. fischeri*:356

afum|EAL86864.1 100.00% afis|EAW19659.1 100.00%

Bootstrap support for afum|EAL86864.1 as seed ortholog is 100%.

Bootstrap support for afis|EAW19659.1 as seed ortholog is 100%.

---

Group of orthologs #6136. Best score 681 bits

Score difference with first non-orthologous sequence - *A. fumigatus*:428 *A. fischeri*:398

afum|EAL87949.1 100.00% afis|EAW23514.1 100.00%

Bootstrap support for afum|EAL87949.1 as seed ortholog is 100%.

Bootstrap support for afis|EAW23514.1 as seed ortholog is 100%.

---

Group of orthologs #6137. Best score 681 bits

Score difference with first non-orthologous sequence - *A. fumigatus*:681 *A. fischeri*:681

afum|EAL93990.1 100.00% afis|EAW19263.1 100.00%

Bootstrap support for afum|EAL93990.1 as seed ortholog is 100%.

Bootstrap support for afis|EAW19263.1 as seed ortholog is 100%.

---

Group of orthologs #6138. Best score 680 bits



Score difference with first non-orthologous sequence - *A. fumigatus*:680 *A. fischeri*:363  
afum|EAL85143.1 100.00% afis|EAW19754.1 100.00%  
Bootstrap support for afum|EAL85143.1 as seed ortholog is 100%.  
Bootstrap support for afis|EAW19754.1 as seed ortholog is 100%.

---

Group of orthologs #6139. Best score 680 bits

Score difference with first non-orthologous sequence - *A. fumigatus*:680 *A. fischeri*:680  
afum|EAL89290.1 100.00% afis|EAW16690.1 100.00%  
Bootstrap support for afum|EAL89290.1 as seed ortholog is 100%.  
Bootstrap support for afis|EAW16690.1 as seed ortholog is 100%.

---

Group of orthologs #6140. Best score 680 bits

Score difference with first non-orthologous sequence - *A. fumigatus*:680 *A. fischeri*:680  
afum|EAL89782.2 100.00% afis|EAW25111.1 100.00%  
Bootstrap support for afum|EAL89782.2 as seed ortholog is 100%.  
Bootstrap support for afis|EAW25111.1 as seed ortholog is 100%.

---

Group of orthologs #6141. Best score 679 bits

Score difference with first non-orthologous sequence - *A. fumigatus*:679 *A. fischeri*:679  
afum|EAL86668.1 100.00% afis|EAW17249.1 100.00%  
Bootstrap support for afum|EAL86668.1 as seed ortholog is 100%.  
Bootstrap support for afis|EAW17249.1 as seed ortholog is 100%.

---

Group of orthologs #6142. Best score 679 bits

Score difference with first non-orthologous sequence - *A. fumigatus*:679 *A. fischeri*:679  
afum|EAL88601.1 100.00% afis|EAW15968.1 100.00%  
Bootstrap support for afum|EAL88601.1 as seed ortholog is 100%.  
Bootstrap support for afis|EAW15968.1 as seed ortholog is 100%.

---

Group of orthologs #6143. Best score 679 bits

Score difference with first non-orthologous sequence - *A. fumigatus*:588 *A. fischeri*:679  
afum|EAL88823.1 100.00% afis|EAW16192.1 100.00%  
Bootstrap support for afum|EAL88823.1 as seed ortholog is 100%.  
Bootstrap support for afis|EAW16192.1 as seed ortholog is 100%.

---

Group of orthologs #6144. Best score 679 bits

Score difference with first non-orthologous sequence - *A. fumigatus*:609 *A. fischeri*:591  
afum|EAL89185.1 100.00% afis|EAW16590.1 100.00%  
Bootstrap support for afum|EAL89185.1 as seed ortholog is 100%.  
Bootstrap support for afis|EAW16590.1 as seed ortholog is 100%.

---

Group of orthologs #6145. Best score 679 bits

Score difference with first non-orthologous sequence - *A. fumigatus*:378 *A. fischeri*:679  
afum|EAL91583.1 100.00% afis|EAW17775.1 100.00%  
Bootstrap support for afum|EAL91583.1 as seed ortholog is 100%.  
Bootstrap support for afis|EAW17775.1 as seed ortholog is 100%.

---

Group of orthologs #6146. Best score 679 bits

Score difference with first non-orthologous sequence - *A. fumigatus*:679 *A. fischeri*:679  
afum|EAL87318.1 100.00% afis|EAW23890.1 100.00%  
Bootstrap support for afum|EAL87318.1 as seed ortholog is 100%.  
Bootstrap support for afis|EAW23890.1 as seed ortholog is 100%.

---

Group of orthologs #6147. Best score 679 bits

Score difference with first non-orthologous sequence - *A. fumigatus*:679 *A. fischeri*:679  
afum|EAL87914.2 100.00% afis|EAW23552.1 100.00%

Bootstrap support for afum|EAL87914.2 as seed ortholog is 100%.  
Bootstrap support for afis|EAW23552.1 as seed ortholog is 100%.

---

Group of orthologs #6148. Best score 679 bits

Score difference with first non-orthologous sequence - *A. fumigatus*:679 *A. fischeri*:629

afum|EAL90977.1 100.00% afis|EAW22217.1 100.00%

Bootstrap support for afum|EAL90977.1 as seed ortholog is 100%.

Bootstrap support for afis|EAW22217.1 as seed ortholog is 100%.

---

Group of orthologs #6149. Best score 679 bits

Score difference with first non-orthologous sequence - *A. fumigatus*:679 *A. fischeri*:679

afum|EAL90789.1 100.00% afis|EAW22402.1 100.00%

Bootstrap support for afum|EAL90789.1 as seed ortholog is 100%.

Bootstrap support for afis|EAW22402.1 as seed ortholog is 100%.

---

Group of orthologs #6150. Best score 679 bits

Score difference with first non-orthologous sequence - *A. fumigatus*:679 *A. fischeri*:679

afum|EAL92478.1 100.00% afis|EAW21459.1 100.00%

Bootstrap support for afum|EAL92478.1 as seed ortholog is 100%.

Bootstrap support for afis|EAW21459.1 as seed ortholog is 100%.

---

Group of orthologs #6151. Best score 679 bits

Score difference with first non-orthologous sequence - *A. fumigatus*:679 *A. fischeri*:679

afum|EAL89373.1 100.00% afis|EAW24724.1 100.00%

Bootstrap support for afum|EAL89373.1 as seed ortholog is 100%.

Bootstrap support for afis|EAW24724.1 as seed ortholog is 100%.

---

Group of orthologs #6152. Best score 678 bits

Score difference with first non-orthologous sequence - *A. fumigatus*:678 *A. fischeri*:678

afum|EAL88609.1 100.00% afis|EAW15977.1 100.00%

Bootstrap support for afum|EAL88609.1 as seed ortholog is 100%.

Bootstrap support for afis|EAW15977.1 as seed ortholog is 100%.

---

Group of orthologs #6153. Best score 678 bits

Score difference with first non-orthologous sequence - *A. fumigatus*:678 *A. fischeri*:678

afum|EAL88959.1 100.00% afis|EAW16334.1 100.00%

Bootstrap support for afum|EAL88959.1 as seed ortholog is 100%.

Bootstrap support for afis|EAW16334.1 as seed ortholog is 100%.

---

Group of orthologs #6154. Best score 678 bits

Score difference with first non-orthologous sequence - *A. fumigatus*:678 *A. fischeri*:678

afum|EAL89095.1 100.00% afis|EAW16500.1 100.00%

Bootstrap support for afum|EAL89095.1 as seed ortholog is 100%.

Bootstrap support for afis|EAW16500.1 as seed ortholog is 100%.

---

Group of orthologs #6155. Best score 678 bits

Score difference with first non-orthologous sequence - *A. fumigatus*:678 *A. fischeri*:678

afum|EAL84850.1 100.00% afis|EAW20768.1 100.00%

Bootstrap support for afum|EAL84850.1 as seed ortholog is 100%.

Bootstrap support for afis|EAW20768.1 as seed ortholog is 100%.

---

Group of orthologs #6156. Best score 678 bits

Score difference with first non-orthologous sequence - *A. fumigatus*:678 *A. fischeri*:678

afum|EAL86929.1 100.00% afis|EAW19589.1 100.00%

Bootstrap support for afum|EAL86929.1 as seed ortholog is 100%.

Bootstrap support for afis|EAW19589.1 as seed ortholog is 100%.

---

Group of orthologs #6157. Best score 678 bits

Score difference with first non-orthologous sequence - *A. fumigatus*:678 *A. fischeri*:678

|                 |         |                 |         |
|-----------------|---------|-----------------|---------|
| afum EAL89606.1 | 100.00% | afis EAW24949.1 | 100.00% |
|-----------------|---------|-----------------|---------|

Bootstrap support for afum|EAL89606.1 as seed ortholog is 100%.

Bootstrap support for afis|EAW24949.1 as seed ortholog is 100%.

---

Group of orthologs #6158. Best score 677 bits

Score difference with first non-orthologous sequence - *A. fumigatus*:677 *A. fischeri*:677

|                 |         |                 |         |
|-----------------|---------|-----------------|---------|
| afum EAL87985.1 | 100.00% | afis EAW20747.1 | 100.00% |
|-----------------|---------|-----------------|---------|

Bootstrap support for afum|EAL87985.1 as seed ortholog is 100%.

Bootstrap support for afis|EAW20747.1 as seed ortholog is 100%.

---

Group of orthologs #6159. Best score 677 bits

Score difference with first non-orthologous sequence - *A. fumigatus*:677 *A. fischeri*:677

|                 |         |                 |         |
|-----------------|---------|-----------------|---------|
| afum EAL87205.1 | 100.00% | afis EAW23771.1 | 100.00% |
|-----------------|---------|-----------------|---------|

Bootstrap support for afum|EAL87205.1 as seed ortholog is 100%.

Bootstrap support for afis|EAW23771.1 as seed ortholog is 100%.

---

Group of orthologs #6160. Best score 677 bits

Score difference with first non-orthologous sequence - *A. fumigatus*:677 *A. fischeri*:677

|                 |         |                 |         |
|-----------------|---------|-----------------|---------|
| afum EAL92927.1 | 100.00% | afis EAW21915.1 | 100.00% |
|-----------------|---------|-----------------|---------|

Bootstrap support for afum|EAL92927.1 as seed ortholog is 100%.

Bootstrap support for afis|EAW21915.1 as seed ortholog is 100%.

---

Group of orthologs #6161. Best score 676 bits

Score difference with first non-orthologous sequence - *A. fumigatus*:676 *A. fischeri*:676

|                 |         |                 |         |
|-----------------|---------|-----------------|---------|
| afum EAL88683.1 | 100.00% | afis EAW16050.1 | 100.00% |
|-----------------|---------|-----------------|---------|

Bootstrap support for afum|EAL88683.1 as seed ortholog is 100%.

Bootstrap support for afis|EAW16050.1 as seed ortholog is 100%.

---

Group of orthologs #6162. Best score 676 bits

Score difference with first non-orthologous sequence - *A. fumigatus*:676 *A. fischeri*:566

|                 |         |                 |         |
|-----------------|---------|-----------------|---------|
| afum EAL84989.2 | 100.00% | afis EAW19919.1 | 100.00% |
|-----------------|---------|-----------------|---------|

Bootstrap support for afum|EAL84989.2 as seed ortholog is 100%.

Bootstrap support for afis|EAW19919.1 as seed ortholog is 100%.

---

Group of orthologs #6163. Best score 676 bits

Score difference with first non-orthologous sequence - *A. fumigatus*:587 *A. fischeri*:592

|                 |         |                 |         |
|-----------------|---------|-----------------|---------|
| afum EAL88932.1 | 100.00% | afis EAW16310.1 | 100.00% |
|-----------------|---------|-----------------|---------|

Bootstrap support for afum|EAL88932.1 as seed ortholog is 100%.

Bootstrap support for afis|EAW16310.1 as seed ortholog is 100%.

---

Group of orthologs #6164. Best score 676 bits

Score difference with first non-orthologous sequence - *A. fumigatus*:676 *A. fischeri*:514

|                 |         |                 |         |
|-----------------|---------|-----------------|---------|
| afum EAL87539.1 | 100.00% | afis EAW18178.1 | 100.00% |
|-----------------|---------|-----------------|---------|

Bootstrap support for afum|EAL87539.1 as seed ortholog is 100%.

Bootstrap support for afis|EAW18178.1 as seed ortholog is 100%.

---

Group of orthologs #6165. Best score 676 bits

Score difference with first non-orthologous sequence - *A. fumigatus*:676 *A. fischeri*:676

|                 |         |                 |         |
|-----------------|---------|-----------------|---------|
| afum EAL84859.1 | 100.00% | afis EAW20760.1 | 100.00% |
|-----------------|---------|-----------------|---------|

Bootstrap support for afum|EAL84859.1 as seed ortholog is 100%.

Bootstrap support for afis|EAW20760.1 as seed ortholog is 100%.

---

Group of orthologs #6166. Best score 676 bits

Score difference with first non-orthologous sequence - *A. fumigatus*:676 *A. fischeri*:676  
afum|EAL91579.1 100.00% afis|EAW17770.1 100.00%  
Bootstrap support for afum|EAL91579.1 as seed ortholog is 100%.  
Bootstrap support for afis|EAW17770.1 as seed ortholog is 100%.

---

Group of orthologs #6167. Best score 676 bits

Score difference with first non-orthologous sequence - *A. fumigatus*:676 *A. fischeri*:676  
afum|EAL90873.1 100.00% afis|EAW22317.1 100.00%  
Bootstrap support for afum|EAL90873.1 as seed ortholog is 100%.  
Bootstrap support for afis|EAW22317.1 as seed ortholog is 100%.

---

Group of orthologs #6168. Best score 676 bits

Score difference with first non-orthologous sequence - *A. fumigatus*:676 *A. fischeri*:676  
afum|EAL89516.1 100.00% afis|EAW24866.1 100.00%  
Bootstrap support for afum|EAL89516.1 as seed ortholog is 100%.  
Bootstrap support for afis|EAW24866.1 as seed ortholog is 100%.

---

Group of orthologs #6169. Best score 675 bits

Score difference with first non-orthologous sequence - *A. fumigatus*:675 *A. fischeri*:675  
afum|EAL85106.2 100.00% afis|EAW19788.1 100.00%  
Bootstrap support for afum|EAL85106.2 as seed ortholog is 100%.  
Bootstrap support for afis|EAW19788.1 as seed ortholog is 100%.

---

Group of orthologs #6170. Best score 675 bits

Score difference with first non-orthologous sequence - *A. fumigatus*:675 *A. fischeri*:675  
afum|EAL85028.1 100.00% afis|EAW19869.1 100.00%  
Bootstrap support for afum|EAL85028.1 as seed ortholog is 100%.  
Bootstrap support for afis|EAW19869.1 as seed ortholog is 100%.

---

Group of orthologs #6171. Best score 675 bits

Score difference with first non-orthologous sequence - *A. fumigatus*:574 *A. fischeri*:675  
afum|EAL84918.1 100.00% afis|EAW20001.1 100.00%  
Bootstrap support for afum|EAL84918.1 as seed ortholog is 100%.  
Bootstrap support for afis|EAW20001.1 as seed ortholog is 100%.

---

Group of orthologs #6172. Best score 675 bits

Score difference with first non-orthologous sequence - *A. fumigatus*:675 *A. fischeri*:675  
afum|EAL91804.1 100.00% afis|EAW17994.1 100.00%  
Bootstrap support for afum|EAL91804.1 as seed ortholog is 100%.  
Bootstrap support for afis|EAW17994.1 as seed ortholog is 100%.

---

Group of orthologs #6173. Best score 675 bits

Score difference with first non-orthologous sequence - *A. fumigatus*:220 *A. fischeri*:352  
afum|EAL84310.1 100.00% afis|EAW25622.1 100.00%  
Bootstrap support for afum|EAL84310.1 as seed ortholog is 100%.  
Bootstrap support for afis|EAW25622.1 as seed ortholog is 100%.

---

Group of orthologs #6174. Best score 675 bits

Score difference with first non-orthologous sequence - *A. fumigatus*:675 *A. fischeri*:609  
afum|EAL90860.1 100.00% afis|EAW22332.1 100.00%  
Bootstrap support for afum|EAL90860.1 as seed ortholog is 100%.  
Bootstrap support for afis|EAW22332.1 as seed ortholog is 100%.

---

Group of orthologs #6175. Best score 675 bits

Score difference with first non-orthologous sequence - *A. fumigatus*:675 *A. fischeri*:675  
afum|EAL92572.2 100.00% afis|EAW21552.1 100.00%

Bootstrap support for afum|EAL92572.2 as seed ortholog is 100%.  
Bootstrap support for afis|EAW21552.1 as seed ortholog is 100%.

---

Group of orthologs #6176. Best score 674 bits

Score difference with first non-orthologous sequence - *A. fumigatus*:674 *A. fischeri*:674

afum|EAL84531.1 100.00% afis|EAW20526.1 100.00%

Bootstrap support for afum|EAL84531.1 as seed ortholog is 100%.

Bootstrap support for afis|EAW20526.1 as seed ortholog is 100%.

---

Group of orthologs #6177. Best score 674 bits

Score difference with first non-orthologous sequence - *A. fumigatus*:674 *A. fischeri*:674

afum|EAL89071.1 100.00% afis|EAW16477.1 100.00%

Bootstrap support for afum|EAL89071.1 as seed ortholog is 100%.

Bootstrap support for afis|EAW16477.1 as seed ortholog is 100%.

---

Group of orthologs #6178. Best score 674 bits

Score difference with first non-orthologous sequence - *A. fumigatus*:674 *A. fischeri*:674

afum|EAL93825.1 100.00% afis|EAW19094.1 100.00%

Bootstrap support for afum|EAL93825.1 as seed ortholog is 100%.

Bootstrap support for afis|EAW19094.1 as seed ortholog is 100%.

---

Group of orthologs #6179. Best score 674 bits

Score difference with first non-orthologous sequence - *A. fumigatus*:674 *A. fischeri*:674

afum|EBA27213.1 100.00% afis|EAW19976.1 100.00%

Bootstrap support for afum|EBA27213.1 as seed ortholog is 100%.

Bootstrap support for afis|EAW19976.1 as seed ortholog is 100%.

---

Group of orthologs #6180. Best score 673 bits

Score difference with first non-orthologous sequence - *A. fumigatus*:585 *A. fischeri*:578

afum|EAL85687.1 100.00% afis|EAW15661.1 100.00%

Bootstrap support for afum|EAL85687.1 as seed ortholog is 100%.

Bootstrap support for afis|EAW15661.1 as seed ortholog is 100%.

---

Group of orthologs #6181. Best score 673 bits

Score difference with first non-orthologous sequence - *A. fumigatus*:673 *A. fischeri*:673

afum|EAL88606.1 100.00% afis|EAW15974.1 100.00%

Bootstrap support for afum|EAL88606.1 as seed ortholog is 100%.

Bootstrap support for afis|EAW15974.1 as seed ortholog is 100%.

---

Group of orthologs #6182. Best score 673 bits

Score difference with first non-orthologous sequence - *A. fumigatus*:673 *A. fischeri*:673

afum|EAL85024.1 100.00% afis|EAW19875.1 100.00%

Bootstrap support for afum|EAL85024.1 as seed ortholog is 100%.

Bootstrap support for afis|EAW19875.1 as seed ortholog is 100%.

---

Group of orthologs #6183. Best score 673 bits

Score difference with first non-orthologous sequence - *A. fumigatus*:673 *A. fischeri*:673

afum|EAL89086.1 100.00% afis|EAW16492.1 100.00%

Bootstrap support for afum|EAL89086.1 as seed ortholog is 100%.

Bootstrap support for afis|EAW16492.1 as seed ortholog is 100%.

---

Group of orthologs #6184. Best score 673 bits

Score difference with first non-orthologous sequence - *A. fumigatus*:673 *A. fischeri*:673

afum|EAL91465.1 100.00% afis|EAW17649.1 100.00%

Bootstrap support for afum|EAL91465.1 as seed ortholog is 100%.

Bootstrap support for afis|EAW17649.1 as seed ortholog is 100%.

---

Group of orthologs #6185. Best score 673 bits

Score difference with first non-orthologous sequence - *A. fumigatus*:673 *A. fischeri*:495

afum|EAL91769.1 100.00% afis|EAW17958.1 100.00%

Bootstrap support for afum|EAL91769.1 as seed ortholog is 100%.

Bootstrap support for afis|EAW17958.1 as seed ortholog is 100%.

---

Group of orthologs #6186. Best score 673 bits

Score difference with first non-orthologous sequence - *A. fumigatus*:625 *A. fischeri*:376

afum|EAL86069.1 100.00% afis|EAW24398.1 100.00%

Bootstrap support for afum|EAL86069.1 as seed ortholog is 100%.

Bootstrap support for afis|EAW24398.1 as seed ortholog is 100%.

---

Group of orthologs #6187. Best score 673 bits

Score difference with first non-orthologous sequence - *A. fumigatus*:673 *A. fischeri*:673

afum|EAL86135.1 100.00% afis|EAW24464.1 100.00%

Bootstrap support for afum|EAL86135.1 as seed ortholog is 100%.

Bootstrap support for afis|EAW24464.1 as seed ortholog is 100%.

---

Group of orthologs #6188. Best score 673 bits

Score difference with first non-orthologous sequence - *A. fumigatus*:673 *A. fischeri*:673

afum|EAL87321.1 100.00% afis|EAW23893.1 100.00%

Bootstrap support for afum|EAL87321.1 as seed ortholog is 100%.

Bootstrap support for afis|EAW23893.1 as seed ortholog is 100%.

---

Group of orthologs #6189. Best score 673 bits

Score difference with first non-orthologous sequence - *A. fumigatus*:673 *A. fischeri*:673

afum|EAL93946.1 100.00% afis|EAW19213.1 100.00%

Bootstrap support for afum|EAL93946.1 as seed ortholog is 100%.

Bootstrap support for afis|EAW19213.1 as seed ortholog is 100%.

---

Group of orthologs #6190. Best score 673 bits

Score difference with first non-orthologous sequence - *A. fumigatus*:673 *A. fischeri*:673

afum|EAL90621.1 100.00% afis|EAW22577.1 100.00%

Bootstrap support for afum|EAL90621.1 as seed ortholog is 100%.

Bootstrap support for afis|EAW22577.1 as seed ortholog is 100%.

---

Group of orthologs #6191. Best score 673 bits

Score difference with first non-orthologous sequence - *A. fumigatus*:673 *A. fischeri*:673

afum|EAL89681.1 100.00% afis|EAW25015.1 100.00%

Bootstrap support for afum|EAL89681.1 as seed ortholog is 100%.

Bootstrap support for afis|EAW25015.1 as seed ortholog is 100%.

---

Group of orthologs #6192. Best score 673 bits

Score difference with first non-orthologous sequence - *A. fumigatus*:673 *A. fischeri*:673

afum|EAL93012.1 100.00% afis|EAW21997.1 100.00%

Bootstrap support for afum|EAL93012.1 as seed ortholog is 100%.

Bootstrap support for afis|EAW21997.1 as seed ortholog is 100%.

---

Group of orthologs #6193. Best score 673 bits

Score difference with first non-orthologous sequence - *A. fumigatus*:581 *A. fischeri*:454

afum|EAL89916.1 100.00% afis|EAW25253.1 100.00%

Bootstrap support for afum|EAL89916.1 as seed ortholog is 100%.

Bootstrap support for afis|EAW25253.1 as seed ortholog is 100%.

---

Group of orthologs #6194. Best score 672 bits

Score difference with first non-orthologous sequence - *A. fumigatus*:672 *A. fischeri*:672  
afum|EAL86339.2 100.00% afis|EAW16771.1 100.00%  
Bootstrap support for afum|EAL86339.2 as seed ortholog is 100%.  
Bootstrap support for afis|EAW16771.1 as seed ortholog is 100%.

---

Group of orthologs #6195. Best score 672 bits

Score difference with first non-orthologous sequence - *A. fumigatus*:672 *A. fischeri*:672  
afum|EAL88926.1 100.00% afis|EAW16304.1 100.00%  
Bootstrap support for afum|EAL88926.1 as seed ortholog is 100%.  
Bootstrap support for afis|EAW16304.1 as seed ortholog is 100%.

---

Group of orthologs #6196. Best score 672 bits

Score difference with first non-orthologous sequence - *A. fumigatus*:672 *A. fischeri*:672  
afum|EAL85188.1 100.00% afis|EAW20070.1 100.00%  
Bootstrap support for afum|EAL85188.1 as seed ortholog is 100%.  
Bootstrap support for afis|EAW20070.1 as seed ortholog is 100%.

---

Group of orthologs #6197. Best score 672 bits

Score difference with first non-orthologous sequence - *A. fumigatus*:672 *A. fischeri*:672  
afum|EAL87690.2 100.00% afis|EAW18323.1 100.00%  
Bootstrap support for afum|EAL87690.2 as seed ortholog is 100%.  
Bootstrap support for afis|EAW18323.1 as seed ortholog is 100%.

---

Group of orthologs #6198. Best score 672 bits

Score difference with first non-orthologous sequence - *A. fumigatus*:672 *A. fischeri*:672  
afum|EAL87078.1 100.00% afis|EAW19416.1 100.00%  
Bootstrap support for afum|EAL87078.1 as seed ortholog is 100%.  
Bootstrap support for afis|EAW19416.1 as seed ortholog is 100%.

---

Group of orthologs #6199. Best score 672 bits

Score difference with first non-orthologous sequence - *A. fumigatus*:672 *A. fischeri*:589  
afum|EAL86846.1 100.00% afis|EAW19676.1 100.00%  
Bootstrap support for afum|EAL86846.1 as seed ortholog is 100%.  
Bootstrap support for afis|EAW19676.1 as seed ortholog is 100%.

---

Group of orthologs #6200. Best score 672 bits

Score difference with first non-orthologous sequence - *A. fumigatus*:672 *A. fischeri*:525  
afum|EAL91206.2 100.00% afis|EAW17369.1 100.00%  
Bootstrap support for afum|EAL91206.2 as seed ortholog is 100%.  
Bootstrap support for afis|EAW17369.1 as seed ortholog is 100%.

---

Group of orthologs #6201. Best score 672 bits

Score difference with first non-orthologous sequence - *A. fumigatus*:672 *A. fischeri*:672  
afum|EAL86099.1 100.00% afis|EAW24431.1 100.00%  
Bootstrap support for afum|EAL86099.1 as seed ortholog is 100%.  
Bootstrap support for afis|EAW24431.1 as seed ortholog is 100%.

---

Group of orthologs #6202. Best score 672 bits

Score difference with first non-orthologous sequence - *A. fumigatus*:672 *A. fischeri*:672  
afum|EAL90656.2 100.00% afis|EAW22538.1 100.00%  
Bootstrap support for afum|EAL90656.2 as seed ortholog is 100%.  
Bootstrap support for afis|EAW22538.1 as seed ortholog is 100%.

---

Group of orthologs #6203. Best score 672 bits

Score difference with first non-orthologous sequence - *A. fumigatus*:672 *A. fischeri*:672  
afum|EBA27299.1 100.00% afis|EAW19448.1 100.00%

Bootstrap support for afum|EBA27299.1 as seed ortholog is 100%.  
Bootstrap support for afis|EAW19448.1 as seed ortholog is 100%.

---

Group of orthologs #6204. Best score 672 bits

Score difference with first non-orthologous sequence - *A. fumigatus*:580 *A. fischeri*:605

afum|EAL92527.1 100.00% afis|EAW21507.1 100.00%

Bootstrap support for afum|EAL92527.1 as seed ortholog is 100%.

Bootstrap support for afis|EAW21507.1 as seed ortholog is 100%.

---

Group of orthologs #6205. Best score 671 bits

Score difference with first non-orthologous sequence - *A. fumigatus*:671 *A. fischeri*:671

afum|EAL91700.1 100.00% afis|EAW17891.1 100.00%

Bootstrap support for afum|EAL91700.1 as seed ortholog is 100%.

Bootstrap support for afis|EAW17891.1 as seed ortholog is 100%.

---

Group of orthologs #6206. Best score 671 bits

Score difference with first non-orthologous sequence - *A. fumigatus*:671 *A. fischeri*:671

afum|EAL88073.1 100.00% afis|EAW23397.1 100.00%

Bootstrap support for afum|EAL88073.1 as seed ortholog is 100%.

Bootstrap support for afis|EAW23397.1 as seed ortholog is 100%.

---

Group of orthologs #6207. Best score 671 bits

Score difference with first non-orthologous sequence - *A. fumigatus*:671 *A. fischeri*:671

afum|EAL93677.1 100.00% afis|EAW18944.1 100.00%

Bootstrap support for afum|EAL93677.1 as seed ortholog is 100%.

Bootstrap support for afis|EAW18944.1 as seed ortholog is 100%.

---

Group of orthologs #6208. Best score 671 bits

Score difference with first non-orthologous sequence - *A. fumigatus*:671 *A. fischeri*:671

afum|EAL93989.1 100.00% afis|EAW19262.1 100.00%

Bootstrap support for afum|EAL93989.1 as seed ortholog is 100%.

Bootstrap support for afis|EAW19262.1 as seed ortholog is 100%.

---

Group of orthologs #6209. Best score 671 bits

Score difference with first non-orthologous sequence - *A. fumigatus*:488 *A. fischeri*:303

afum|EAL90338.1 100.00% afis|EAW22862.1 100.00%

Bootstrap support for afum|EAL90338.1 as seed ortholog is 100%.

Bootstrap support for afis|EAW22862.1 as seed ortholog is 100%.

---

Group of orthologs #6210. Best score 671 bits

Score difference with first non-orthologous sequence - *A. fumigatus*:671 *A. fischeri*:671

afum|EAL92561.1 100.00% afis|EAW21541.1 100.00%

Bootstrap support for afum|EAL92561.1 as seed ortholog is 100%.

Bootstrap support for afis|EAW21541.1 as seed ortholog is 100%.

---

Group of orthologs #6211. Best score 671 bits

Score difference with first non-orthologous sequence - *A. fumigatus*:589 *A. fischeri*:671

afum|EAL89907.2 100.00% afis|EAW25245.1 100.00%

Bootstrap support for afum|EAL89907.2 as seed ortholog is 100%.

Bootstrap support for afis|EAW25245.1 as seed ortholog is 100%.

---

Group of orthologs #6212. Best score 671 bits

Score difference with first non-orthologous sequence - *A. fumigatus*:671 *A. fischeri*:671

afum|EAL90147.1 100.00% afis|EAW25482.1 100.00%

Bootstrap support for afum|EAL90147.1 as seed ortholog is 100%.

Bootstrap support for afis|EAW25482.1 as seed ortholog is 100%.



---

Group of orthologs #6213. Best score 670 bits

Score difference with first non-orthologous sequence - *A. fumigatus*:670 *A. fischeri*:670

afum|EAL85081.1 100.00% afis|EAW19811.1 100.00%

Bootstrap support for afum|EAL85081.1 as seed ortholog is 100%.

Bootstrap support for afis|EAW19811.1 as seed ortholog is 100%.

---

Group of orthologs #6214. Best score 670 bits

Score difference with first non-orthologous sequence - *A. fumigatus*:670 *A. fischeri*:670

afum|EAL86933.1 100.00% afis|EAW19585.1 100.00%

Bootstrap support for afum|EAL86933.1 as seed ortholog is 100%.

Bootstrap support for afis|EAW19585.1 as seed ortholog is 100%.

---

Group of orthologs #6215. Best score 670 bits

Score difference with first non-orthologous sequence - *A. fumigatus*:670 *A. fischeri*:670

afum|EAL93600.1 100.00% afis|EAW18868.1 100.00%

Bootstrap support for afum|EAL93600.1 as seed ortholog is 100%.

Bootstrap support for afis|EAW18868.1 as seed ortholog is 100%.

---

Group of orthologs #6216. Best score 670 bits

Score difference with first non-orthologous sequence - *A. fumigatus*:670 *A. fischeri*:670

afum|EAL91030.1 100.00% afis|EAW22161.1 100.00%

Bootstrap support for afum|EAL91030.1 as seed ortholog is 100%.

Bootstrap support for afis|EAW22161.1 as seed ortholog is 100%.

---

Group of orthologs #6217. Best score 670 bits

Score difference with first non-orthologous sequence - *A. fumigatus*:670 *A. fischeri*:670

afum|EAL90734.1 100.00% afis|EAW22457.1 100.00%

Bootstrap support for afum|EAL90734.1 as seed ortholog is 100%.

Bootstrap support for afis|EAW22457.1 as seed ortholog is 100%.

---

Group of orthologs #6218. Best score 670 bits

Score difference with first non-orthologous sequence - *A. fumigatus*:670 *A. fischeri*:670

afum|EAL92699.1 100.00% afis|EAW21664.1 100.00%

Bootstrap support for afum|EAL92699.1 as seed ortholog is 100%.

Bootstrap support for afis|EAW21664.1 as seed ortholog is 100%.

---

Group of orthologs #6219. Best score 669 bits

Score difference with first non-orthologous sequence - *A. fumigatus*:570 *A. fischeri*:415

afum|EAL86574.1 100.00% afis|EAW17110.1 100.00%

Bootstrap support for afum|EAL86574.1 as seed ortholog is 100%.

Bootstrap support for afis|EAW17110.1 as seed ortholog is 100%.

---

Group of orthologs #6220. Best score 669 bits

Score difference with first non-orthologous sequence - *A. fumigatus*:669 *A. fischeri*:147

afum|EAL89915.1 100.00% afis|EAW16226.1 100.00%

Bootstrap support for afum|EAL89915.1 as seed ortholog is 100%.

Bootstrap support for afis|EAW16226.1 as seed ortholog is 100%.

---

Group of orthologs #6221. Best score 669 bits

Score difference with first non-orthologous sequence - *A. fumigatus*:669 *A. fischeri*:669

afum|EAL87101.1 100.00% afis|EAW19393.1 100.00%

Bootstrap support for afum|EAL87101.1 as seed ortholog is 100%.

Bootstrap support for afis|EAW19393.1 as seed ortholog is 100%.

---

Group of orthologs #6222. Best score 669 bits

Score difference with first non-orthologous sequence - *A. fumigatus*:669 *A. fischeri*:669  
afum|EAL93404.1 100.00% afis|EAW18683.1 100.00%  
Bootstrap support for afum|EAL93404.1 as seed ortholog is 100%.  
Bootstrap support for afis|EAW18683.1 as seed ortholog is 100%.

---

Group of orthologs #6223. Best score 669 bits

Score difference with first non-orthologous sequence - *A. fumigatus*:669 *A. fischeri*:669  
afum|EAL93444.1 100.00% afis|EAW18720.1 100.00%  
Bootstrap support for afum|EAL93444.1 as seed ortholog is 100%.  
Bootstrap support for afis|EAW18720.1 as seed ortholog is 100%.

---

Group of orthologs #6224. Best score 669 bits

Score difference with first non-orthologous sequence - *A. fumigatus*:669 *A. fischeri*:669  
afum|EAL90534.1 100.00% afis|EAW22658.1 100.00%  
Bootstrap support for afum|EAL90534.1 as seed ortholog is 100%.  
Bootstrap support for afis|EAW22658.1 as seed ortholog is 100%.

---

Group of orthologs #6225. Best score 669 bits

Score difference with first non-orthologous sequence - *A. fumigatus*:669 *A. fischeri*:669  
afum|EAL92168.1 100.00% afis|EAW21149.1 100.00%  
Bootstrap support for afum|EAL92168.1 as seed ortholog is 100%.  
Bootstrap support for afis|EAW21149.1 as seed ortholog is 100%.

---

Group of orthologs #6226. Best score 669 bits

Score difference with first non-orthologous sequence - *A. fumigatus*:669 *A. fischeri*:669  
afum|EAL89735.2 100.00% afis|EAW25066.1 100.00%  
Bootstrap support for afum|EAL89735.2 as seed ortholog is 100%.  
Bootstrap support for afis|EAW25066.1 as seed ortholog is 100%.

---

Group of orthologs #6227. Best score 668 bits

Score difference with first non-orthologous sequence - *A. fumigatus*:668 *A. fischeri*:668  
afum|EAL88618.1 100.00% afis|EAW15986.1 100.00%  
Bootstrap support for afum|EAL88618.1 as seed ortholog is 100%.  
Bootstrap support for afis|EAW15986.1 as seed ortholog is 100%.

---

Group of orthologs #6228. Best score 668 bits

Score difference with first non-orthologous sequence - *A. fumigatus*:668 *A. fischeri*:668  
afum|EAL91378.1 100.00% afis|EAW17564.1 100.00%  
Bootstrap support for afum|EAL91378.1 as seed ortholog is 100%.  
Bootstrap support for afis|EAW17564.1 as seed ortholog is 100%.

---

Group of orthologs #6229. Best score 668 bits

Score difference with first non-orthologous sequence - *A. fumigatus*:668 *A. fischeri*:668  
afum|EAL86094.1 100.00% afis|EAW24426.1 100.00%  
Bootstrap support for afum|EAL86094.1 as seed ortholog is 100%.  
Bootstrap support for afis|EAW24426.1 as seed ortholog is 100%.

---

Group of orthologs #6230. Best score 668 bits

Score difference with first non-orthologous sequence - *A. fumigatus*:668 *A. fischeri*:668  
afum|EAL93885.1 100.00% afis|EAW19154.1 100.00%  
Bootstrap support for afum|EAL93885.1 as seed ortholog is 100%.  
Bootstrap support for afis|EAW19154.1 as seed ortholog is 100%.

---

Group of orthologs #6231. Best score 668 bits

Score difference with first non-orthologous sequence - *A. fumigatus*:668 *A. fischeri*:668  
afum|EAL90097.1 100.00% afis|EAW25439.1 100.00%

Bootstrap support for afum|EAL90097.1 as seed ortholog is 100%.  
Bootstrap support for afis|EAW25439.1 as seed ortholog is 100%.

---

Group of orthologs #6232. Best score 667 bits

Score difference with first non-orthologous sequence - *A. fumigatus*:667 *A. fischeri*:667

|                 |         |                 |         |
|-----------------|---------|-----------------|---------|
| afum EAL91393.1 | 100.00% | afis EAW17580.1 | 100.00% |
|-----------------|---------|-----------------|---------|

Bootstrap support for afum|EAL91393.1 as seed ortholog is 100%.

Bootstrap support for afis|EAW17580.1 as seed ortholog is 100%.

---

Group of orthologs #6233. Best score 667 bits

Score difference with first non-orthologous sequence - *A. fumigatus*:667 *A. fischeri*:667

|                 |         |                 |         |
|-----------------|---------|-----------------|---------|
| afum EAL91644.1 | 100.00% | afis EAW17834.1 | 100.00% |
|-----------------|---------|-----------------|---------|

Bootstrap support for afum|EAL91644.1 as seed ortholog is 100%.

Bootstrap support for afis|EAW17834.1 as seed ortholog is 100%.

---

Group of orthologs #6234. Best score 667 bits

Score difference with first non-orthologous sequence - *A. fumigatus*:667 *A. fischeri*:667

|                 |         |                 |         |
|-----------------|---------|-----------------|---------|
| afum EAL87123.1 | 100.00% | afis EAW23680.1 | 100.00% |
|-----------------|---------|-----------------|---------|

Bootstrap support for afum|EAL87123.1 as seed ortholog is 100%.

Bootstrap support for afis|EAW23680.1 as seed ortholog is 100%.

---

Group of orthologs #6235. Best score 667 bits

Score difference with first non-orthologous sequence - *A. fumigatus*:667 *A. fischeri*:600

|                 |         |                 |         |
|-----------------|---------|-----------------|---------|
| afum EAL93749.1 | 100.00% | afis EAW19016.1 | 100.00% |
|-----------------|---------|-----------------|---------|

Bootstrap support for afum|EAL93749.1 as seed ortholog is 100%.

Bootstrap support for afis|EAW19016.1 as seed ortholog is 100%.

---

Group of orthologs #6236. Best score 667 bits

Score difference with first non-orthologous sequence - *A. fumigatus*:667 *A. fischeri*:521

|                 |         |                 |         |
|-----------------|---------|-----------------|---------|
| afum EAL90575.1 | 100.00% | afis EAW22621.1 | 100.00% |
|-----------------|---------|-----------------|---------|

Bootstrap support for afum|EAL90575.1 as seed ortholog is 100%.

Bootstrap support for afis|EAW22621.1 as seed ortholog is 100%.

---

Group of orthologs #6237. Best score 666 bits

Score difference with first non-orthologous sequence - *A. fumigatus*:666 *A. fischeri*:666

|                 |         |                 |         |
|-----------------|---------|-----------------|---------|
| afum EAL86684.1 | 100.00% | afis EAW17267.1 | 100.00% |
|-----------------|---------|-----------------|---------|

Bootstrap support for afum|EAL86684.1 as seed ortholog is 100%.

Bootstrap support for afis|EAW17267.1 as seed ortholog is 100%.

---

Group of orthologs #6238. Best score 666 bits

Score difference with first non-orthologous sequence - *A. fumigatus*:666 *A. fischeri*:666

|                 |         |                 |         |
|-----------------|---------|-----------------|---------|
| afum EAL88846.1 | 100.00% | afis EAW16218.1 | 100.00% |
|-----------------|---------|-----------------|---------|

Bootstrap support for afum|EAL88846.1 as seed ortholog is 100%.

Bootstrap support for afis|EAW16218.1 as seed ortholog is 100%.

---

Group of orthologs #6239. Best score 666 bits

Score difference with first non-orthologous sequence - *A. fumigatus*:666 *A. fischeri*:666

|                 |         |                 |         |
|-----------------|---------|-----------------|---------|
| afum EAL91734.1 | 100.00% | afis EAW17923.1 | 100.00% |
|-----------------|---------|-----------------|---------|

Bootstrap support for afum|EAL91734.1 as seed ortholog is 100%.

Bootstrap support for afis|EAW17923.1 as seed ortholog is 100%.

---

Group of orthologs #6240. Best score 666 bits

Score difference with first non-orthologous sequence - *A. fumigatus*:666 *A. fischeri*:666

|                 |         |                 |         |
|-----------------|---------|-----------------|---------|
| afum EAL86113.1 | 100.00% | afis EAW24444.1 | 100.00% |
|-----------------|---------|-----------------|---------|

Bootstrap support for afum|EAL86113.1 as seed ortholog is 100%.

Bootstrap support for afis|EAW24444.1 as seed ortholog is 100%.

---

Group of orthologs #6241. Best score 666 bits

Score difference with first non-orthologous sequence - *A. fumigatus*:666 *A. fischeri*:666  
afum|EAL93454.1 100.00% afis|EAW18729.1 100.00%  
Bootstrap support for afum|EAL93454.1 as seed ortholog is 100%.  
Bootstrap support for afis|EAW18729.1 as seed ortholog is 100%.

---

Group of orthologs #6242. Best score 666 bits

Score difference with first non-orthologous sequence - *A. fumigatus*:305 *A. fischeri*:666  
afum|EAL90746.1 100.00% afis|EAW22445.1 100.00%  
Bootstrap support for afum|EAL90746.1 as seed ortholog is 100%.  
Bootstrap support for afis|EAW22445.1 as seed ortholog is 100%.

---

Group of orthologs #6243. Best score 666 bits

Score difference with first non-orthologous sequence - *A. fumigatus*:666 *A. fischeri*:666  
afum|EAL90775.1 100.00% afis|EAW22417.1 100.00%  
Bootstrap support for afum|EAL90775.1 as seed ortholog is 100%.  
Bootstrap support for afis|EAW22417.1 as seed ortholog is 100%.

---

Group of orthologs #6244. Best score 665 bits

Score difference with first non-orthologous sequence - *A. fumigatus*:665 *A. fischeri*:665  
afum|EAL86648.1 100.00% afis|EAW17226.1 100.00%  
Bootstrap support for afum|EAL86648.1 as seed ortholog is 100%.  
Bootstrap support for afis|EAW17226.1 as seed ortholog is 100%.

---

Group of orthologs #6245. Best score 665 bits

Score difference with first non-orthologous sequence - *A. fumigatus*:665 *A. fischeri*:665  
afum|EAL91755.1 100.00% afis|EAW17944.1 100.00%  
Bootstrap support for afum|EAL91755.1 as seed ortholog is 100%.  
Bootstrap support for afis|EAW17944.1 as seed ortholog is 100%.

---

Group of orthologs #6246. Best score 665 bits

Score difference with first non-orthologous sequence - *A. fumigatus*:665 *A. fischeri*:665  
afum|EAL93268.1 100.00% afis|EAW18566.1 100.00%  
Bootstrap support for afum|EAL93268.1 as seed ortholog is 100%.  
Bootstrap support for afis|EAW18566.1 as seed ortholog is 100%.

---

Group of orthologs #6247. Best score 665 bits

Score difference with first non-orthologous sequence - *A. fumigatus*:665 *A. fischeri*:665  
afum|EAL93802.1 100.00% afis|EAW19074.1 100.00%  
Bootstrap support for afum|EAL93802.1 as seed ortholog is 100%.  
Bootstrap support for afis|EAW19074.1 as seed ortholog is 100%.

---

Group of orthologs #6248. Best score 664 bits

Score difference with first non-orthologous sequence - *A. fumigatus*:664 *A. fischeri*:664  
afum|EAL91144.1 100.00% afis|EAW17309.1 100.00%  
Bootstrap support for afum|EAL91144.1 as seed ortholog is 100%.  
Bootstrap support for afis|EAW17309.1 as seed ortholog is 100%.

---

Group of orthologs #6249. Best score 664 bits

Score difference with first non-orthologous sequence - *A. fumigatus*:664 *A. fischeri*:664  
afum|EAL85936.1 100.00% afis|EAW24268.1 100.00%  
Bootstrap support for afum|EAL85936.1 as seed ortholog is 100%.  
Bootstrap support for afis|EAW24268.1 as seed ortholog is 100%.

---

Group of orthologs #6250. Best score 664 bits

Score difference with first non-orthologous sequence - *A. fumigatus*:664 *A. fischeri*:664  
afum|EAL93209.1 100.00% afis|EAW18514.1 100.00%  
Bootstrap support for afum|EAL93209.1 as seed ortholog is 100%.  
Bootstrap support for afis|EAW18514.1 as seed ortholog is 100%.

---

Group of orthologs #6251. Best score 664 bits

Score difference with first non-orthologous sequence - *A. fumigatus*:664 *A. fischeri*:664  
afum|EAL92058.1 100.00% afis|EAW21020.1 100.00%  
Bootstrap support for afum|EAL92058.1 as seed ortholog is 100%.  
Bootstrap support for afis|EAW21020.1 as seed ortholog is 100%.

---

Group of orthologs #6252. Best score 664 bits

Score difference with first non-orthologous sequence - *A. fumigatus*:664 *A. fischeri*:664  
afum|EBA27199.1 100.00% afis|EAW20443.1 100.00%  
Bootstrap support for afum|EBA27199.1 as seed ortholog is 100%.  
Bootstrap support for afis|EAW20443.1 as seed ortholog is 100%.

---

Group of orthologs #6253. Best score 664 bits

Score difference with first non-orthologous sequence - *A. fumigatus*:664 *A. fischeri*:664  
afum|EAL89616.1 100.00% afis|EAW24958.1 100.00%  
Bootstrap support for afum|EAL89616.1 as seed ortholog is 100%.  
Bootstrap support for afis|EAW24958.1 as seed ortholog is 100%.

---

Group of orthologs #6254. Best score 664 bits

Score difference with first non-orthologous sequence - *A. fumigatus*:664 *A. fischeri*:664  
afum|EAL89921.1 100.00% afis|EAW25259.1 100.00%  
Bootstrap support for afum|EAL89921.1 as seed ortholog is 100%.  
Bootstrap support for afis|EAW25259.1 as seed ortholog is 100%.

---

Group of orthologs #6255. Best score 664 bits

Score difference with first non-orthologous sequence - *A. fumigatus*:664 *A. fischeri*:664  
afum|EAL90057.1 100.00% afis|EAW25398.1 100.00%  
Bootstrap support for afum|EAL90057.1 as seed ortholog is 100%.  
Bootstrap support for afis|EAW25398.1 as seed ortholog is 100%.

---

Group of orthologs #6256. Best score 663 bits

Score difference with first non-orthologous sequence - *A. fumigatus*:663 *A. fischeri*:663  
afum|EAL88935.1 100.00% afis|EAW16313.1 100.00%  
Bootstrap support for afum|EAL88935.1 as seed ortholog is 100%.  
Bootstrap support for afis|EAW16313.1 as seed ortholog is 100%.

---

Group of orthologs #6257. Best score 663 bits

Score difference with first non-orthologous sequence - *A. fumigatus*:576 *A. fischeri*:557  
afum|EAL84517.2 100.00% afis|EAW20541.1 100.00%  
Bootstrap support for afum|EAL84517.2 as seed ortholog is 100%.  
Bootstrap support for afis|EAW20541.1 as seed ortholog is 100%.

---

Group of orthologs #6258. Best score 663 bits

Score difference with first non-orthologous sequence - *A. fumigatus*:663 *A. fischeri*:663  
afum|EAL87584.1 100.00% afis|EAW18218.1 100.00%  
Bootstrap support for afum|EAL87584.1 as seed ortholog is 100%.  
Bootstrap support for afis|EAW18218.1 as seed ortholog is 100%.

---

Group of orthologs #6259. Best score 663 bits

Score difference with first non-orthologous sequence - *A. fumigatus*:663 *A. fischeri*:498  
afum|EAL84354.1 100.00% afis|EAW25685.1 100.00%

Bootstrap support for afum|EAL84354.1 as seed ortholog is 100%.  
Bootstrap support for afis|EAW25685.1 as seed ortholog is 100%.

---

Group of orthologs #6260. Best score 663 bits

Score difference with first non-orthologous sequence - *A. fumigatus*:663 *A. fischeri*:663

afum|EAL91056.1 100.00% afis|EAW22134.1 100.00%

Bootstrap support for afum|EAL91056.1 as seed ortholog is 100%.

Bootstrap support for afis|EAW22134.1 as seed ortholog is 100%.

---

Group of orthologs #6261. Best score 663 bits

Score difference with first non-orthologous sequence - *A. fumigatus*:663 *A. fischeri*:663

afum|EAL90637.1 100.00% afis|EAW22558.1 100.00%

Bootstrap support for afum|EAL90637.1 as seed ortholog is 100%.

Bootstrap support for afis|EAW22558.1 as seed ortholog is 100%.

---

Group of orthologs #6262. Best score 663 bits

Score difference with first non-orthologous sequence - *A. fumigatus*:663 *A. fischeri*:558

afum|EAL91928.1 100.00% afis|EAW24072.1 100.00%

Bootstrap support for afum|EAL91928.1 as seed ortholog is 100%.

Bootstrap support for afis|EAW24072.1 as seed ortholog is 100%.

---

Group of orthologs #6263. Best score 663 bits

Score difference with first non-orthologous sequence - *A. fumigatus*:663 *A. fischeri*:663

afum|EBA27380.1 100.00% afis|EAW24740.1 100.00%

Bootstrap support for afum|EBA27380.1 as seed ortholog is 100%.

Bootstrap support for afis|EAW24740.1 as seed ortholog is 100%.

---

Group of orthologs #6264. Best score 662 bits

Score difference with first non-orthologous sequence - *A. fumigatus*:662 *A. fischeri*:662

afum|EAL93247.1 100.00% afis|EAW18547.1 100.00%

Bootstrap support for afum|EAL93247.1 as seed ortholog is 100%.

Bootstrap support for afis|EAW18547.1 as seed ortholog is 100%.

---

Group of orthologs #6265. Best score 661 bits

Score difference with first non-orthologous sequence - *A. fumigatus*:552 *A. fischeri*:430

afum|EAL87550.1 100.00% afis|EAW18187.1 100.00%

Bootstrap support for afum|EAL87550.1 as seed ortholog is 100%.

Bootstrap support for afis|EAW18187.1 as seed ortholog is 100%.

---

Group of orthologs #6266. Best score 661 bits

Score difference with first non-orthologous sequence - *A. fumigatus*:452 *A. fischeri*:661

afum|EAL86548.1 100.00% afis|EAW19903.1 100.00%

Bootstrap support for afum|EAL86548.1 as seed ortholog is 100%.

Bootstrap support for afis|EAW19903.1 as seed ortholog is 100%.

---

Group of orthologs #6267. Best score 661 bits

Score difference with first non-orthologous sequence - *A. fumigatus*:661 *A. fischeri*:661

afum|EAL85903.1 100.00% afis|EAW24234.1 100.00%

Bootstrap support for afum|EAL85903.1 as seed ortholog is 100%.

Bootstrap support for afis|EAW24234.1 as seed ortholog is 100%.

---

Group of orthologs #6268. Best score 661 bits

Score difference with first non-orthologous sequence - *A. fumigatus*:661 *A. fischeri*:661

afum|EAL86046.1 100.00% afis|EAW24374.1 100.00%

Bootstrap support for afum|EAL86046.1 as seed ortholog is 100%.

Bootstrap support for afis|EAW24374.1 as seed ortholog is 100%.

---

Group of orthologs #6269. Best score 661 bits

Score difference with first non-orthologous sequence - *A. fumigatus*:661 *A. fischeri*:661  
afum|EAL87438.1 100.00% afis|EAW24008.1 100.00%

Bootstrap support for afum|EAL87438.1 as seed ortholog is 100%.

Bootstrap support for afis|EAW24008.1 as seed ortholog is 100%.

---

Group of orthologs #6270. Best score 660 bits

Score difference with first non-orthologous sequence - *A. fumigatus*:660 *A. fischeri*:570  
afum|EAL85496.1 100.00% afis|EAW20385.1 100.00%

Bootstrap support for afum|EAL85496.1 as seed ortholog is 100%.

Bootstrap support for afis|EAW20385.1 as seed ortholog is 100%.

---

Group of orthologs #6271. Best score 660 bits

Score difference with first non-orthologous sequence - *A. fumigatus*:660 *A. fischeri*:660  
afum|EAL86178.1 100.00% afis|EAW24509.1 100.00%

Bootstrap support for afum|EAL86178.1 as seed ortholog is 100%.

Bootstrap support for afis|EAW24509.1 as seed ortholog is 100%.

---

Group of orthologs #6272. Best score 660 bits

Score difference with first non-orthologous sequence - *A. fumigatus*:660 *A. fischeri*:660  
afum|EAL90342.1 100.00% afis|EAW22858.1 100.00%

Bootstrap support for afum|EAL90342.1 as seed ortholog is 100%.

Bootstrap support for afis|EAW22858.1 as seed ortholog is 100%.

---

Group of orthologs #6273. Best score 660 bits

Score difference with first non-orthologous sequence - *A. fumigatus*:660 *A. fischeri*:660  
afum|EAL92476.1 100.00% afis|EAW21457.1 100.00%

Bootstrap support for afum|EAL92476.1 as seed ortholog is 100%.

Bootstrap support for afis|EAW21457.1 as seed ortholog is 100%.

---

Group of orthologs #6274. Best score 659 bits

Score difference with first non-orthologous sequence - *A. fumigatus*:599 *A. fischeri*:598  
afum|EAL86330.1 100.00% afis|EAW16758.1 100.00%

Bootstrap support for afum|EAL86330.1 as seed ortholog is 100%.

Bootstrap support for afis|EAW16758.1 as seed ortholog is 100%.

---

Group of orthologs #6275. Best score 659 bits

Score difference with first non-orthologous sequence - *A. fumigatus*:501 *A. fischeri*:409  
afum|EAL86683.1 100.00% afis|EAW17266.1 100.00%

Bootstrap support for afum|EAL86683.1 as seed ortholog is 100%.

Bootstrap support for afis|EAW17266.1 as seed ortholog is 100%.

---

Group of orthologs #6276. Best score 659 bits

Score difference with first non-orthologous sequence - *A. fumigatus*:659 *A. fischeri*:659  
afum|EAL88755.1 100.00% afis|EAW16125.1 100.00%

Bootstrap support for afum|EAL88755.1 as seed ortholog is 100%.

Bootstrap support for afis|EAW16125.1 as seed ortholog is 100%.

---

Group of orthologs #6277. Best score 659 bits

Score difference with first non-orthologous sequence - *A. fumigatus*:659 *A. fischeri*:659  
afum|EAL84761.1 100.00% afis|EAW20873.1 100.00%

Bootstrap support for afum|EAL84761.1 as seed ortholog is 100%.

Bootstrap support for afis|EAW20873.1 as seed ortholog is 100%.

---

Group of orthologs #6278. Best score 659 bits

Score difference with first non-orthologous sequence - *A. fumigatus*:659 *A. fischeri*:475  
afum|EAL90577.1 100.00% afis|EAW22619.1 100.00%  
Bootstrap support for afum|EAL90577.1 as seed ortholog is 100%.  
Bootstrap support for afis|EAW22619.1 as seed ortholog is 100%.

---

Group of orthologs #6279. Best score 658 bits

Score difference with first non-orthologous sequence - *A. fumigatus*:658 *A. fischeri*:658  
afum|EAL86262.1 100.00% afis|EAW15656.1 100.00%  
Bootstrap support for afum|EAL86262.1 as seed ortholog is 100%.  
Bootstrap support for afis|EAW15656.1 as seed ortholog is 100%.

---

Group of orthologs #6280. Best score 658 bits

Score difference with first non-orthologous sequence - *A. fumigatus*:658 *A. fischeri*:658  
afum|EAL89131.1 100.00% afis|EAW16534.1 100.00%  
Bootstrap support for afum|EAL89131.1 as seed ortholog is 100%.  
Bootstrap support for afis|EAW16534.1 as seed ortholog is 100%.

---

Group of orthologs #6281. Best score 658 bits

Score difference with first non-orthologous sequence - *A. fumigatus*:658 *A. fischeri*:658  
afum|EAL84743.1 100.00% afis|EAW20890.1 100.00%  
Bootstrap support for afum|EAL84743.1 as seed ortholog is 100%.  
Bootstrap support for afis|EAW20890.1 as seed ortholog is 100%.

---

Group of orthologs #6282. Best score 658 bits

Score difference with first non-orthologous sequence - *A. fumigatus*:658 *A. fischeri*:658  
afum|EAL85947.1 100.00% afis|EAW24278.1 100.00%  
Bootstrap support for afum|EAL85947.1 as seed ortholog is 100%.  
Bootstrap support for afis|EAW24278.1 as seed ortholog is 100%.

---

Group of orthologs #6283. Best score 658 bits

Score difference with first non-orthologous sequence - *A. fumigatus*:658 *A. fischeri*:658  
afum|EAL89463.1 100.00% afis|EAW24819.1 100.00%  
Bootstrap support for afum|EAL89463.1 as seed ortholog is 100%.  
Bootstrap support for afis|EAW24819.1 as seed ortholog is 100%.

---

Group of orthologs #6284. Best score 658 bits

Score difference with first non-orthologous sequence - *A. fumigatus*:658 *A. fischeri*:658  
afum|EAL92818.1 100.00% afis|EAW21793.1 100.00%  
Bootstrap support for afum|EAL92818.1 as seed ortholog is 100%.  
Bootstrap support for afis|EAW21793.1 as seed ortholog is 100%.

---

Group of orthologs #6285. Best score 657 bits

Score difference with first non-orthologous sequence - *A. fumigatus*:657 *A. fischeri*:657  
afum|EAL85531.1 100.00% afis|EAW15820.1 100.00%  
Bootstrap support for afum|EAL85531.1 as seed ortholog is 100%.  
Bootstrap support for afis|EAW15820.1 as seed ortholog is 100%.

---

Group of orthologs #6286. Best score 657 bits

Score difference with first non-orthologous sequence - *A. fumigatus*:657 *A. fischeri*:657  
afum|EAL87260.1 100.00% afis|EAW23828.1 100.00%  
Bootstrap support for afum|EAL87260.1 as seed ortholog is 100%.  
Bootstrap support for afis|EAW23828.1 as seed ortholog is 100%.

---

Group of orthologs #6287. Best score 657 bits

Score difference with first non-orthologous sequence - *A. fumigatus*:657 *A. fischeri*:657  
afum|EAL90679.1 100.00% afis|EAW22514.1 100.00%



Bootstrap support for afum|EAL90679.1 as seed ortholog is 100%.  
Bootstrap support for afis|EAW22514.1 as seed ortholog is 100%.

---

Group of orthologs #6288. Best score 657 bits

Score difference with first non-orthologous sequence - *A. fumigatus*:657 *A. fischeri*:657

afum|EAL90339.1 100.00% afis|EAW22861.1 100.00%

Bootstrap support for afum|EAL90339.1 as seed ortholog is 100%.

Bootstrap support for afis|EAW22861.1 as seed ortholog is 100%.

---

Group of orthologs #6289. Best score 657 bits

Score difference with first non-orthologous sequence - *A. fumigatus*:657 *A. fischeri*:657

afum|EAL92767.1 100.00% afis|EAW21734.1 100.00%

Bootstrap support for afum|EAL92767.1 as seed ortholog is 100%.

Bootstrap support for afis|EAW21734.1 as seed ortholog is 100%.

---

Group of orthologs #6290. Best score 657 bits

Score difference with first non-orthologous sequence - *A. fumigatus*:657 *A. fischeri*:657

afum|EAL89797.1 100.00% afis|EAW25126.1 100.00%

Bootstrap support for afum|EAL89797.1 as seed ortholog is 100%.

Bootstrap support for afis|EAW25126.1 as seed ortholog is 100%.

---

Group of orthologs #6291. Best score 656 bits

Score difference with first non-orthologous sequence - *A. fumigatus*:656 *A. fischeri*:656

afum|EAL84424.1 100.00% afis|EAW20649.1 100.00%

Bootstrap support for afum|EAL84424.1 as seed ortholog is 100%.

Bootstrap support for afis|EAW20649.1 as seed ortholog is 100%.

---

Group of orthologs #6292. Best score 656 bits

Score difference with first non-orthologous sequence - *A. fumigatus*:449 *A. fischeri*:308

afum|EAL89024.1 100.00% afis|EAW16402.1 100.00%

Bootstrap support for afum|EAL89024.1 as seed ortholog is 100%.

Bootstrap support for afis|EAW16402.1 as seed ortholog is 100%.

---

Group of orthologs #6293. Best score 656 bits

Score difference with first non-orthologous sequence - *A. fumigatus*:656 *A. fischeri*:571

afum|EAL85477.1 100.00% afis|EAW20360.1 100.00%

Bootstrap support for afum|EAL85477.1 as seed ortholog is 100%.

Bootstrap support for afis|EAW20360.1 as seed ortholog is 100%.

---

Group of orthologs #6294. Best score 656 bits

Score difference with first non-orthologous sequence - *A. fumigatus*:656 *A. fischeri*:656

afum|EAL91731.1 100.00% afis|EAW17920.1 100.00%

Bootstrap support for afum|EAL91731.1 as seed ortholog is 100%.

Bootstrap support for afis|EAW17920.1 as seed ortholog is 100%.

---

Group of orthologs #6295. Best score 656 bits

Score difference with first non-orthologous sequence - *A. fumigatus*:656 *A. fischeri*:516

afum|EBA27280.1 100.00% afis|EAW17184.1 100.00%

Bootstrap support for afum|EBA27280.1 as seed ortholog is 100%.

Bootstrap support for afis|EAW17184.1 as seed ortholog is 100%.

---

Group of orthologs #6296. Best score 656 bits

Score difference with first non-orthologous sequence - *A. fumigatus*:656 *A. fischeri*:656

afum|EAL92159.1 100.00% afis|EAW21140.1 100.00%

Bootstrap support for afum|EAL92159.1 as seed ortholog is 100%.

Bootstrap support for afis|EAW21140.1 as seed ortholog is 100%.

---

Group of orthologs #6297. Best score 655 bits

Score difference with first non-orthologous sequence - *A. fumigatus*:595 *A. fischeri*:571

afum|EAL87889.1 100.00% afis|EAW23576.1 100.00%

Bootstrap support for afum|EAL87889.1 as seed ortholog is 100%.

Bootstrap support for afis|EAW23576.1 as seed ortholog is 100%.

---

Group of orthologs #6298. Best score 655 bits

Score difference with first non-orthologous sequence - *A. fumigatus*:586 *A. fischeri*:655

afum|EAL93956.1 100.00% afis|EAW19225.1 100.00%

Bootstrap support for afum|EAL93956.1 as seed ortholog is 100%.

Bootstrap support for afis|EAW19225.1 as seed ortholog is 100%.

---

Group of orthologs #6299. Best score 655 bits

Score difference with first non-orthologous sequence - *A. fumigatus*:655 *A. fischeri*:655

afum|EBA27179.1 100.00% afis|EAW20584.1 100.00%

Bootstrap support for afum|EBA27179.1 as seed ortholog is 100%.

Bootstrap support for afis|EAW20584.1 as seed ortholog is 100%.

---

Group of orthologs #6300. Best score 654 bits

Score difference with first non-orthologous sequence - *A. fumigatus*:654 *A. fischeri*:654

afum|EAL85708.1 100.00% afis|EAW15626.1 100.00%

Bootstrap support for afum|EAL85708.1 as seed ortholog is 100%.

Bootstrap support for afis|EAW15626.1 as seed ortholog is 100%.

---

Group of orthologs #6301. Best score 654 bits

Score difference with first non-orthologous sequence - *A. fumigatus*:654 *A. fischeri*:654

afum|EAL85612.2 100.00% afis|EAW15736.1 100.00%

Bootstrap support for afum|EAL85612.2 as seed ortholog is 100%.

Bootstrap support for afis|EAW15736.1 as seed ortholog is 100%.

---

Group of orthologs #6302. Best score 654 bits

Score difference with first non-orthologous sequence - *A. fumigatus*:654 *A. fischeri*:654

afum|EAL88489.1 100.00% afis|EAW15853.1 100.00%

Bootstrap support for afum|EAL88489.1 as seed ortholog is 100%.

Bootstrap support for afis|EAW15853.1 as seed ortholog is 100%.

---

Group of orthologs #6303. Best score 654 bits

Score difference with first non-orthologous sequence - *A. fumigatus*:654 *A. fischeri*:654

afum|EAL88740.1 100.00% afis|EAW16108.1 100.00%

Bootstrap support for afum|EAL88740.1 as seed ortholog is 100%.

Bootstrap support for afis|EAW16108.1 as seed ortholog is 100%.

---

Group of orthologs #6304. Best score 654 bits

Score difference with first non-orthologous sequence - *A. fumigatus*:654 *A. fischeri*:654

afum|EAL85949.1 100.00% afis|EAW24280.1 100.00%

Bootstrap support for afum|EAL85949.1 as seed ortholog is 100%.

Bootstrap support for afis|EAW24280.1 as seed ortholog is 100%.

---

Group of orthologs #6305. Best score 654 bits

Score difference with first non-orthologous sequence - *A. fumigatus*:654 *A. fischeri*:654

afum|EAL88399.1 100.00% afis|EAW23080.1 100.00%

Bootstrap support for afum|EAL88399.1 as seed ortholog is 100%.

Bootstrap support for afis|EAW23080.1 as seed ortholog is 100%.

---

Group of orthologs #6306. Best score 654 bits

Score difference with first non-orthologous sequence - *A. fumigatus*:654 *A. fischeri*:654  
afum|EAL88161.2 100.00% afis|EAW23316.1 100.00%  
Bootstrap support for afum|EAL88161.2 as seed ortholog is 100%.  
Bootstrap support for afis|EAW23316.1 as seed ortholog is 100%.

---

Group of orthologs #6307. Best score 654 bits

Score difference with first non-orthologous sequence - *A. fumigatus*:654 *A. fischeri*:654  
afum|EAL87984.1 100.00% afis|EAW23480.1 100.00%  
Bootstrap support for afum|EAL87984.1 as seed ortholog is 100%.  
Bootstrap support for afis|EAW23480.1 as seed ortholog is 100%.

---

Group of orthologs #6308. Best score 654 bits

Score difference with first non-orthologous sequence - *A. fumigatus*:654 *A. fischeri*:654  
afum|EAL93397.1 100.00% afis|EAW18677.1 100.00%  
Bootstrap support for afum|EAL93397.1 as seed ortholog is 100%.  
Bootstrap support for afis|EAW18677.1 as seed ortholog is 100%.

---

Group of orthologs #6309. Best score 654 bits

Score difference with first non-orthologous sequence - *A. fumigatus*:654 *A. fischeri*:600  
afum|EAL92136.1 100.00% afis|EAW21113.1 100.00%  
Bootstrap support for afum|EAL92136.1 as seed ortholog is 100%.  
Bootstrap support for afis|EAW21113.1 as seed ortholog is 100%.

---

Group of orthologs #6310. Best score 653 bits

Score difference with first non-orthologous sequence - *A. fumigatus*:592 *A. fischeri*:574  
afum|EAL85701.2 100.00% afis|EAW15638.1 100.00%  
Bootstrap support for afum|EAL85701.2 as seed ortholog is 100%.  
Bootstrap support for afis|EAW15638.1 as seed ortholog is 100%.

---

Group of orthologs #6311. Best score 653 bits

Score difference with first non-orthologous sequence - *A. fumigatus*:653 *A. fischeri*:653  
afum|EAL85333.1 100.00% afis|EAW20218.1 100.00%  
Bootstrap support for afum|EAL85333.1 as seed ortholog is 100%.  
Bootstrap support for afis|EAW20218.1 as seed ortholog is 100%.

---

Group of orthologs #6312. Best score 653 bits

Score difference with first non-orthologous sequence - *A. fumigatus*:653 *A. fischeri*:653  
afum|EAL84299.2 100.00% afis|EAW25592.1 100.00%  
Bootstrap support for afum|EAL84299.2 as seed ortholog is 100%.  
Bootstrap support for afis|EAW25592.1 as seed ortholog is 100%.

---

Group of orthologs #6313. Best score 653 bits

Score difference with first non-orthologous sequence - *A. fumigatus*:653 *A. fischeri*:653  
afum|EAL93132.1 100.00% afis|EAW18447.1 100.00%  
Bootstrap support for afum|EAL93132.1 as seed ortholog is 100%.  
Bootstrap support for afis|EAW18447.1 as seed ortholog is 100%.

---

Group of orthologs #6314. Best score 653 bits

Score difference with first non-orthologous sequence - *A. fumigatus*:653 *A. fischeri*:653  
afum|EAL87993.1 100.00% afis|EAW23473.1 100.00%  
Bootstrap support for afum|EAL87993.1 as seed ortholog is 100%.  
Bootstrap support for afis|EAW23473.1 as seed ortholog is 100%.

---

Group of orthologs #6315. Best score 653 bits

Score difference with first non-orthologous sequence - *A. fumigatus*:653 *A. fischeri*:653  
afum|EAL93559.1 100.00% afis|EAW18822.1 100.00%

Bootstrap support for afum|EAL93559.1 as seed ortholog is 100%.  
Bootstrap support for afis|EAW18822.1 as seed ortholog is 100%.

---

Group of orthologs #6316. Best score 652 bits

Score difference with first non-orthologous sequence - *A. fumigatus*:652 *A. fischeri*:652

afum|EAL88172.1 100.00% afis|EAW23305.1 100.00%

Bootstrap support for afum|EAL88172.1 as seed ortholog is 100%.

Bootstrap support for afis|EAW23305.1 as seed ortholog is 100%.

---

Group of orthologs #6317. Best score 652 bits

Score difference with first non-orthologous sequence - *A. fumigatus*:652 *A. fischeri*:113

afum|EAL93583.1 100.00% afis|EAW18852.1 100.00%

Bootstrap support for afum|EAL93583.1 as seed ortholog is 100%.

Bootstrap support for afis|EAW18852.1 as seed ortholog is 100%.

---

Group of orthologs #6318. Best score 652 bits

Score difference with first non-orthologous sequence - *A. fumigatus*:652 *A. fischeri*:652

afum|EBA27502.1 100.00% afis|EAW19015.1 100.00%

Bootstrap support for afum|EBA27502.1 as seed ortholog is 100%.

Bootstrap support for afis|EAW19015.1 as seed ortholog is 100%.

---

Group of orthologs #6319. Best score 652 bits

Score difference with first non-orthologous sequence - *A. fumigatus*:652 *A. fischeri*:652

afum|EAL92684.1 100.00% afis|EAW21650.1 100.00%

Bootstrap support for afum|EAL92684.1 as seed ortholog is 100%.

Bootstrap support for afis|EAW21650.1 as seed ortholog is 100%.

---

Group of orthologs #6320. Best score 651 bits

Score difference with first non-orthologous sequence - *A. fumigatus*:651 *A. fischeri*:651

afum|EAL88732.1 100.00% afis|EAW16100.1 100.00%

Bootstrap support for afum|EAL88732.1 as seed ortholog is 100%.

Bootstrap support for afis|EAW16100.1 as seed ortholog is 100%.

---

Group of orthologs #6321. Best score 651 bits

Score difference with first non-orthologous sequence - *A. fumigatus*:651 *A. fischeri*:651

afum|EAL87093.1 100.00% afis|EAW19402.1 100.00%

Bootstrap support for afum|EAL87093.1 as seed ortholog is 100%.

Bootstrap support for afis|EAW19402.1 as seed ortholog is 100%.

---

Group of orthologs #6322. Best score 651 bits

Score difference with first non-orthologous sequence - *A. fumigatus*:651 *A. fischeri*:651

afum|EAL93548.1 100.00% afis|EAW18812.1 100.00%

Bootstrap support for afum|EAL93548.1 as seed ortholog is 100%.

Bootstrap support for afis|EAW18812.1 as seed ortholog is 100%.

---

Group of orthologs #6323. Best score 651 bits

Score difference with first non-orthologous sequence - *A. fumigatus*:651 *A. fischeri*:651

afum|EAL93691.1 100.00% afis|EAW18958.1 100.00%

Bootstrap support for afum|EAL93691.1 as seed ortholog is 100%.

Bootstrap support for afis|EAW18958.1 as seed ortholog is 100%.

---

Group of orthologs #6324. Best score 651 bits

Score difference with first non-orthologous sequence - *A. fumigatus*:651 *A. fischeri*:462

afum|EAL90815.1 100.00% afis|EAW22377.1 100.00%

Bootstrap support for afum|EAL90815.1 as seed ortholog is 100%.

Bootstrap support for afis|EAW22377.1 as seed ortholog is 100%.

---

Group of orthologs #6325. Best score 651 bits

Score difference with first non-orthologous sequence - *A. fumigatus*:651 *A. fischeri*:651  
afum|EAL89426.1 100.00% afis|EAW24787.1 100.00%  
Bootstrap support for afum|EAL89426.1 as seed ortholog is 100%.  
Bootstrap support for afis|EAW24787.1 as seed ortholog is 100%.

---

Group of orthologs #6326. Best score 651 bits

Score difference with first non-orthologous sequence - *A. fumigatus*:651 *A. fischeri*:651  
afum|EAL92816.1 100.00% afis|EAW21791.1 100.00%  
Bootstrap support for afum|EAL92816.1 as seed ortholog is 100%.  
Bootstrap support for afis|EAW21791.1 as seed ortholog is 100%.

---

Group of orthologs #6327. Best score 651 bits

Score difference with first non-orthologous sequence - *A. fumigatus*:651 *A. fischeri*:651  
afum|EAL89837.1 100.00% afis|EAW25163.1 100.00%  
Bootstrap support for afum|EAL89837.1 as seed ortholog is 100%.  
Bootstrap support for afis|EAW25163.1 as seed ortholog is 100%.

---

Group of orthologs #6328. Best score 650 bits

Score difference with first non-orthologous sequence - *A. fumigatus*:650 *A. fischeri*:650  
afum|EAL89115.1 100.00% afis|EAW16520.1 100.00%  
Bootstrap support for afum|EAL89115.1 as seed ortholog is 100%.  
Bootstrap support for afis|EAW16520.1 as seed ortholog is 100%.

---

Group of orthologs #6329. Best score 650 bits

Score difference with first non-orthologous sequence - *A. fumigatus*:650 *A. fischeri*:650  
afum|EAL85299.1 100.00% afis|EAW20181.1 100.00%  
Bootstrap support for afum|EAL85299.1 as seed ortholog is 100%.  
Bootstrap support for afis|EAW20181.1 as seed ortholog is 100%.

---

Group of orthologs #6330. Best score 650 bits

Score difference with first non-orthologous sequence - *A. fumigatus*:650 *A. fischeri*:650  
afum|EAL86956.1 100.00% afis|EAW19553.1 100.00%  
Bootstrap support for afum|EAL86956.1 as seed ortholog is 100%.  
Bootstrap support for afis|EAW19553.1 as seed ortholog is 100%.

---

Group of orthologs #6331. Best score 650 bits

Score difference with first non-orthologous sequence - *A. fumigatus*:650 *A. fischeri*:650  
afum|EAL91142.1 100.00% afis|EAW17306.1 100.00%  
Bootstrap support for afum|EAL91142.1 as seed ortholog is 100%.  
Bootstrap support for afis|EAW17306.1 as seed ortholog is 100%.

---

Group of orthologs #6332. Best score 650 bits

Score difference with first non-orthologous sequence - *A. fumigatus*:650 *A. fischeri*:650  
afum|EAL84295.2 100.00% afis|EAW25588.1 100.00%  
Bootstrap support for afum|EAL84295.2 as seed ortholog is 100%.  
Bootstrap support for afis|EAW25588.1 as seed ortholog is 100%.

---

Group of orthologs #6333. Best score 650 bits

Score difference with first non-orthologous sequence - *A. fumigatus*:571 *A. fischeri*:540  
afum|EAL93840.1 100.00% afis|EAW19109.1 100.00%  
Bootstrap support for afum|EAL93840.1 as seed ortholog is 100%.  
Bootstrap support for afis|EAW19109.1 as seed ortholog is 100%.

---

Group of orthologs #6334. Best score 650 bits

Score difference with first non-orthologous sequence - *A. fumigatus*:650 *A. fischeri*:650  
afum|EAL93842.2 100.00% afis|EAW19111.1 100.00%  
Bootstrap support for afum|EAL93842.2 as seed ortholog is 100%.  
Bootstrap support for afis|EAW19111.1 as seed ortholog is 100%.

---

Group of orthologs #6335. Best score 650 bits

Score difference with first non-orthologous sequence - *A. fumigatus*:650 *A. fischeri*:650  
afum|EBA27511.1 100.00% afis|EAW19271.1 100.00%  
Bootstrap support for afum|EBA27511.1 as seed ortholog is 100%.  
Bootstrap support for afis|EAW19271.1 as seed ortholog is 100%.

---

Group of orthologs #6336. Best score 650 bits

Score difference with first non-orthologous sequence - *A. fumigatus*:650 *A. fischeri*:650  
afum|EAL91916.1 100.00% afis|EAW24061.1 100.00%  
Bootstrap support for afum|EAL91916.1 as seed ortholog is 100%.  
Bootstrap support for afis|EAW24061.1 as seed ortholog is 100%.

---

Group of orthologs #6337. Best score 649 bits

Score difference with first non-orthologous sequence - *A. fumigatus*:407 *A. fischeri*:293  
afum|EAL86386.1 100.00% afis|EAW16839.1 100.00%  
Bootstrap support for afum|EAL86386.1 as seed ortholog is 100%.  
Bootstrap support for afis|EAW16839.1 as seed ortholog is 100%.

---

Group of orthologs #6338. Best score 649 bits

Score difference with first non-orthologous sequence - *A. fumigatus*:552 *A. fischeri*:514  
afum|EAL84402.2 100.00% afis|EAW25731.1 100.00%  
Bootstrap support for afum|EAL84402.2 as seed ortholog is 100%.  
Bootstrap support for afis|EAW25731.1 as seed ortholog is 100%.

---

Group of orthologs #6339. Best score 649 bits

Score difference with first non-orthologous sequence - *A. fumigatus*:649 *A. fischeri*:649  
afum|EAL93037.1 100.00% afis|EAW18364.1 100.00%  
Bootstrap support for afum|EAL93037.1 as seed ortholog is 100%.  
Bootstrap support for afis|EAW18364.1 as seed ortholog is 100%.

---

Group of orthologs #6340. Best score 649 bits

Score difference with first non-orthologous sequence - *A. fumigatus*:649 *A. fischeri*:649  
afum|EAL92568.1 100.00% afis|EAW21548.1 100.00%  
Bootstrap support for afum|EAL92568.1 as seed ortholog is 100%.  
Bootstrap support for afis|EAW21548.1 as seed ortholog is 100%.

---

Group of orthologs #6341. Best score 649 bits

Score difference with first non-orthologous sequence - *A. fumigatus*:649 *A. fischeri*:649  
afum|EAL89433.1 100.00% afis|EAW24791.1 100.00%  
Bootstrap support for afum|EAL89433.1 as seed ortholog is 100%.  
Bootstrap support for afis|EAW24791.1 as seed ortholog is 100%.

---

Group of orthologs #6342. Best score 649 bits

Score difference with first non-orthologous sequence - *A. fumigatus*:649 *A. fischeri*:649  
afum|EAL90133.1 100.00% afis|EAW25469.1 100.00%  
Bootstrap support for afum|EAL90133.1 as seed ortholog is 100%.  
Bootstrap support for afis|EAW25469.1 as seed ortholog is 100%.

---

Group of orthologs #6343. Best score 648 bits

Score difference with first non-orthologous sequence - *A. fumigatus*:648 *A. fischeri*:648  
afum|EAL85671.1 100.00% afis|EAW15676.1 100.00%

Bootstrap support for afum|EAL85671.1 as seed ortholog is 100%.  
Bootstrap support for afis|EAW15676.1 as seed ortholog is 100%.

---

Group of orthologs #6344. Best score 648 bits

Score difference with first non-orthologous sequence - *A. fumigatus*:579 *A. fischeri*:582

afum|EAL86313.2 100.00% afis|EAW16738.1 100.00%

Bootstrap support for afum|EAL86313.2 as seed ortholog is 100%.

Bootstrap support for afis|EAW16738.1 as seed ortholog is 100%.

---

Group of orthologs #6345. Best score 648 bits

Score difference with first non-orthologous sequence - *A. fumigatus*:648 *A. fischeri*:648

afum|EAL87100.1 100.00% afis|EAW19394.1 100.00%

Bootstrap support for afum|EAL87100.1 as seed ortholog is 100%.

Bootstrap support for afis|EAW19394.1 as seed ortholog is 100%.

---

Group of orthologs #6346. Best score 648 bits

Score difference with first non-orthologous sequence - *A. fumigatus*:405 *A. fischeri*:567

afum|EAL86841.1 100.00% afis|EAW19681.1 100.00%

Bootstrap support for afum|EAL86841.1 as seed ortholog is 100%.

Bootstrap support for afis|EAW19681.1 as seed ortholog is 100%.

---

Group of orthologs #6347. Best score 648 bits

Score difference with first non-orthologous sequence - *A. fumigatus*:574 *A. fischeri*:648

afum|EAL90177.1 100.00% afis|EAW25511.1 100.00%

Bootstrap support for afum|EAL90177.1 as seed ortholog is 100%.

Bootstrap support for afis|EAW25511.1 as seed ortholog is 100%.

---

Group of orthologs #6348. Best score 647 bits

Score difference with first non-orthologous sequence - *A. fumigatus*:325 *A. fischeri*:556

afum|EAL85667.1 100.00% afis|EAW15681.1 100.00%

Bootstrap support for afum|EAL85667.1 as seed ortholog is 100%.

Bootstrap support for afis|EAW15681.1 as seed ortholog is 100%.

---

Group of orthologs #6349. Best score 647 bits

Score difference with first non-orthologous sequence - *A. fumigatus*:647 *A. fischeri*:135

afum|EAL84480.1 100.00% afis|EAW20585.1 100.00%

Bootstrap support for afum|EAL84480.1 as seed ortholog is 100%.

Bootstrap support for afis|EAW20585.1 as seed ortholog is 100%.

---

Group of orthologs #6350. Best score 647 bits

Score difference with first non-orthologous sequence - *A. fumigatus*:647 *A. fischeri*:647

afum|EAL84701.1 100.00% afis|EAW20933.1 100.00%

Bootstrap support for afum|EAL84701.1 as seed ortholog is 100%.

Bootstrap support for afis|EAW20933.1 as seed ortholog is 100%.

---

Group of orthologs #6351. Best score 647 bits

Score difference with first non-orthologous sequence - *A. fumigatus*:647 *A. fischeri*:647

afum|EAL85473.1 100.00% afis|EAW20356.1 100.00%

Bootstrap support for afum|EAL85473.1 as seed ortholog is 100%.

Bootstrap support for afis|EAW20356.1 as seed ortholog is 100%.

---

Group of orthologs #6352. Best score 647 bits

Score difference with first non-orthologous sequence - *A. fumigatus*:422 *A. fischeri*:355

afum|EAL86173.1 100.00% afis|EAW24505.1 100.00%

Bootstrap support for afum|EAL86173.1 as seed ortholog is 100%.

Bootstrap support for afis|EAW24505.1 as seed ortholog is 100%.

---

Group of orthologs #6353. Best score 647 bits

Score difference with first non-orthologous sequence - *A. fumigatus*:647 *A. fischeri*:647

afum|EAL93791.1 100.00% afis|EAW19062.1 100.00%

Bootstrap support for afum|EAL93791.1 as seed ortholog is 100%.

Bootstrap support for afis|EAW19062.1 as seed ortholog is 100%.

---

Group of orthologs #6354. Best score 647 bits

Score difference with first non-orthologous sequence - *A. fumigatus*:647 *A. fischeri*:500

afum|EAL90872.2 100.00% afis|EAW22318.1 100.00%

Bootstrap support for afum|EAL90872.2 as seed ortholog is 100%.

Bootstrap support for afis|EAW22318.1 as seed ortholog is 100%.

---

Group of orthologs #6355. Best score 647 bits

Score difference with first non-orthologous sequence - *A. fumigatus*:647 *A. fischeri*:647

afum|EAL90795.1 100.00% afis|EAW22396.1 100.00%

Bootstrap support for afum|EAL90795.1 as seed ortholog is 100%.

Bootstrap support for afis|EAW22396.1 as seed ortholog is 100%.

---

Group of orthologs #6356. Best score 647 bits

Score difference with first non-orthologous sequence - *A. fumigatus*:202 *A. fischeri*:647

afum|EAL91907.2 100.00% afis|EAW24053.1 100.00%

Bootstrap support for afum|EAL91907.2 as seed ortholog is 100%.

Bootstrap support for afis|EAW24053.1 as seed ortholog is 100%.

---

Group of orthologs #6357. Best score 646 bits

Score difference with first non-orthologous sequence - *A. fumigatus*:646 *A. fischeri*:646

afum|EAL84988.1 100.00% afis|EAW19921.1 100.00%

Bootstrap support for afum|EAL84988.1 as seed ortholog is 100%.

Bootstrap support for afis|EAW19921.1 as seed ortholog is 100%.

---

Group of orthologs #6358. Best score 646 bits

Score difference with first non-orthologous sequence - *A. fumigatus*:646 *A. fischeri*:646

afum|EAL89205.1 100.00% afis|EAW16609.1 100.00%

Bootstrap support for afum|EAL89205.1 as seed ortholog is 100%.

Bootstrap support for afis|EAW16609.1 as seed ortholog is 100%.

---

Group of orthologs #6359. Best score 646 bits

Score difference with first non-orthologous sequence - *A. fumigatus*:646 *A. fischeri*:646

afum|EAL87331.1 100.00% afis|EAW23903.1 100.00%

Bootstrap support for afum|EAL87331.1 as seed ortholog is 100%.

Bootstrap support for afis|EAW23903.1 as seed ortholog is 100%.

---

Group of orthologs #6360. Best score 646 bits

Score difference with first non-orthologous sequence - *A. fumigatus*:646 *A. fischeri*:646

afum|EAL88466.1 100.00% afis|EAW23015.1 100.00%

Bootstrap support for afum|EAL88466.1 as seed ortholog is 100%.

Bootstrap support for afis|EAW23015.1 as seed ortholog is 100%.

---

Group of orthologs #6361. Best score 646 bits

Score difference with first non-orthologous sequence - *A. fumigatus*:646 *A. fischeri*:646

afum|EAL90952.1 100.00% afis|EAW22241.1 100.00%

Bootstrap support for afum|EAL90952.1 as seed ortholog is 100%.

Bootstrap support for afis|EAW22241.1 as seed ortholog is 100%.

---

Group of orthologs #6362. Best score 646 bits



Score difference with first non-orthologous sequence - *A. fumigatus*:646 *A. fischeri*:646  
afum|EAL89446.1 100.00% afis|EAW24804.1 100.00%  
Bootstrap support for afum|EAL89446.1 as seed ortholog is 100%.  
Bootstrap support for afis|EAW24804.1 as seed ortholog is 100%.

---

Group of orthologs #6363. Best score 645 bits

Score difference with first non-orthologous sequence - *A. fumigatus*:645 *A. fischeri*:645  
afum|EAL88854.1 100.00% afis|EAW16231.1 100.00%  
Bootstrap support for afum|EAL88854.1 as seed ortholog is 100%.  
Bootstrap support for afis|EAW16231.1 as seed ortholog is 100%.

---

Group of orthologs #6364. Best score 645 bits

Score difference with first non-orthologous sequence - *A. fumigatus*:645 *A. fischeri*:645  
afum|EAL89026.1 100.00% afis|EAW16401.1 100.00%  
Bootstrap support for afum|EAL89026.1 as seed ortholog is 100%.  
Bootstrap support for afis|EAW16401.1 as seed ortholog is 100%.

---

Group of orthologs #6365. Best score 645 bits

Score difference with first non-orthologous sequence - *A. fumigatus*:645 *A. fischeri*:645  
afum|EAL86885.1 100.00% afis|EAW19637.1 100.00%  
Bootstrap support for afum|EAL86885.1 as seed ortholog is 100%.  
Bootstrap support for afis|EAW19637.1 as seed ortholog is 100%.

---

Group of orthologs #6366. Best score 645 bits

Score difference with first non-orthologous sequence - *A. fumigatus*:645 *A. fischeri*:645  
afum|EAL88385.1 100.00% afis|EAW23093.1 100.00%  
Bootstrap support for afum|EAL88385.1 as seed ortholog is 100%.  
Bootstrap support for afis|EAW23093.1 as seed ortholog is 100%.

---

Group of orthologs #6367. Best score 645 bits

Score difference with first non-orthologous sequence - *A. fumigatus*:645 *A. fischeri*:645  
afum|EAL88091.1 100.00% afis|EAW23380.1 100.00%  
Bootstrap support for afum|EAL88091.1 as seed ortholog is 100%.  
Bootstrap support for afis|EAW23380.1 as seed ortholog is 100%.

---

Group of orthologs #6368. Best score 644 bits

Score difference with first non-orthologous sequence - *A. fumigatus*:644 *A. fischeri*:644  
afum|EAL88962.1 100.00% afis|EAW16336.1 100.00%  
Bootstrap support for afum|EAL88962.1 as seed ortholog is 100%.  
Bootstrap support for afis|EAW16336.1 as seed ortholog is 100%.

---

Group of orthologs #6369. Best score 644 bits

Score difference with first non-orthologous sequence - *A. fumigatus*:589 *A. fischeri*:569  
afum|EAL86998.1 100.00% afis|EAW19496.1 100.00%  
Bootstrap support for afum|EAL86998.1 as seed ortholog is 100%.  
Bootstrap support for afis|EAW19496.1 as seed ortholog is 100%.

---

Group of orthologs #6370. Best score 644 bits

Score difference with first non-orthologous sequence - *A. fumigatus*:644 *A. fischeri*:644  
afum|EAL87262.1 100.00% afis|EAW23830.1 100.00%  
Bootstrap support for afum|EAL87262.1 as seed ortholog is 100%.  
Bootstrap support for afis|EAW23830.1 as seed ortholog is 100%.

---

Group of orthologs #6371. Best score 644 bits

Score difference with first non-orthologous sequence - *A. fumigatus*:644 *A. fischeri*:644  
afum|EAL88421.1 100.00% afis|EAW23058.1 100.00%

Bootstrap support for afum|EAL88421.1 as seed ortholog is 100%.  
Bootstrap support for afis|EAW23058.1 as seed ortholog is 100%.

---

Group of orthologs #6372. Best score 644 bits

Score difference with first non-orthologous sequence - *A. fumigatus*:644 *A. fischeri*:644

afum|EAL89321.1 100.00% afis|EAW22771.1 100.00%

Bootstrap support for afum|EAL89321.1 as seed ortholog is 100%.

Bootstrap support for afis|EAW22771.1 as seed ortholog is 100%.

---

Group of orthologs #6373. Best score 644 bits

Score difference with first non-orthologous sequence - *A. fumigatus*:538 *A. fischeri*:541

afum|EAL90785.1 100.00% afis|EAW22407.1 100.00%

Bootstrap support for afum|EAL90785.1 as seed ortholog is 100%.

Bootstrap support for afis|EAW22407.1 as seed ortholog is 100%.

---

Group of orthologs #6374. Best score 644 bits

Score difference with first non-orthologous sequence - *A. fumigatus*:644 *A. fischeri*:566

afum|EAL90480.1 100.00% afis|EAW22714.1 100.00%

Bootstrap support for afum|EAL90480.1 as seed ortholog is 100%.

Bootstrap support for afis|EAW22714.1 as seed ortholog is 100%.

---

Group of orthologs #6375. Best score 644 bits

Score difference with first non-orthologous sequence - *A. fumigatus*:644 *A. fischeri*:644

afum|EAL92666.2 100.00% afis|EAW21633.1 100.00%

Bootstrap support for afum|EAL92666.2 as seed ortholog is 100%.

Bootstrap support for afis|EAW21633.1 as seed ortholog is 100%.

---

Group of orthologs #6376. Best score 644 bits

Score difference with first non-orthologous sequence - *A. fumigatus*:644 *A. fischeri*:644

afum|EAL89486.1 100.00% afis|EAW24840.1 100.00%

Bootstrap support for afum|EAL89486.1 as seed ortholog is 100%.

Bootstrap support for afis|EAW24840.1 as seed ortholog is 100%.

---

Group of orthologs #6377. Best score 644 bits

Score difference with first non-orthologous sequence - *A. fumigatus*:644 *A. fischeri*:644

afum|EAL92951.2 100.00% afis|EAW22060.1 100.00%

Bootstrap support for afum|EAL92951.2 as seed ortholog is 100%.

Bootstrap support for afis|EAW22060.1 as seed ortholog is 100%.

---

Group of orthologs #6378. Best score 643 bits

Score difference with first non-orthologous sequence - *A. fumigatus*:643 *A. fischeri*:585

afum|EAL86623.1 100.00% afis|EAW17195.1 100.00%

Bootstrap support for afum|EAL86623.1 as seed ortholog is 100%.

Bootstrap support for afis|EAW17195.1 as seed ortholog is 100%.

---

Group of orthologs #6379. Best score 643 bits

Score difference with first non-orthologous sequence - *A. fumigatus*:583 *A. fischeri*:557

afum|EAL91849.1 100.00% afis|EAW18038.1 100.00%

Bootstrap support for afum|EAL91849.1 as seed ortholog is 100%.

Bootstrap support for afis|EAW18038.1 as seed ortholog is 100%.

---

Group of orthologs #6380. Best score 643 bits

Score difference with first non-orthologous sequence - *A. fumigatus*:643 *A. fischeri*:643

afum|EAL93256.1 100.00% afis|EAW18556.1 100.00%

Bootstrap support for afum|EAL93256.1 as seed ortholog is 100%.

Bootstrap support for afis|EAW18556.1 as seed ortholog is 100%.

---

Group of orthologs #6381. Best score 643 bits

Score difference with first non-orthologous sequence - *A. fumigatus*:643 *A. fischeri*:643

afum|EAL90632.1 100.00% afis|EAW22563.1 100.00%

Bootstrap support for afum|EAL90632.1 as seed ortholog is 100%.

Bootstrap support for afis|EAW22563.1 as seed ortholog is 100%.

---

Group of orthologs #6382. Best score 642 bits

Score difference with first non-orthologous sequence - *A. fumigatus*:642 *A. fischeri*:642

afum|EAL86676.1 100.00% afis|EAW17259.1 100.00%

Bootstrap support for afum|EAL86676.1 as seed ortholog is 100%.

Bootstrap support for afis|EAW17259.1 as seed ortholog is 100%.

---

Group of orthologs #6383. Best score 642 bits

Score difference with first non-orthologous sequence - *A. fumigatus*:642 *A. fischeri*:642

afum|EAL91670.2 100.00% afis|EAW17862.1 100.00%

Bootstrap support for afum|EAL91670.2 as seed ortholog is 100%.

Bootstrap support for afis|EAW17862.1 as seed ortholog is 100%.

---

Group of orthologs #6384. Best score 642 bits

Score difference with first non-orthologous sequence - *A. fumigatus*:554 *A. fischeri*:382

afum|EBA27174.1 100.00% afis|EAW25637.1 100.00%

Bootstrap support for afum|EBA27174.1 as seed ortholog is 100%.

Bootstrap support for afis|EAW25637.1 as seed ortholog is 100%.

---

Group of orthologs #6385. Best score 641 bits

Score difference with first non-orthologous sequence - *A. fumigatus*:641 *A. fischeri*:641

afum|EAL88538.1 100.00% afis|EAW15903.1 100.00%

Bootstrap support for afum|EAL88538.1 as seed ortholog is 100%.

Bootstrap support for afis|EAW15903.1 as seed ortholog is 100%.

---

Group of orthologs #6386. Best score 641 bits

Score difference with first non-orthologous sequence - *A. fumigatus*:641 *A. fischeri*:350

afum|EAL85493.1 100.00% afis|EAW20380.1 100.00%

Bootstrap support for afum|EAL85493.1 as seed ortholog is 100%.

Bootstrap support for afis|EAW20380.1 as seed ortholog is 100%.

---

Group of orthologs #6387. Best score 641 bits

Score difference with first non-orthologous sequence - *A. fumigatus*:641 *A. fischeri*:641

afum|EAL86142.1 100.00% afis|EAW24470.1 100.00%

Bootstrap support for afum|EAL86142.1 as seed ortholog is 100%.

Bootstrap support for afis|EAW24470.1 as seed ortholog is 100%.

---

Group of orthologs #6388. Best score 641 bits

Score difference with first non-orthologous sequence - *A. fumigatus*:641 *A. fischeri*:641

afum|EBA27276.1 100.00% afis|EAW16985.1 100.00%

Bootstrap support for afum|EBA27276.1 as seed ortholog is 100%.

Bootstrap support for afis|EAW16985.1 as seed ortholog is 100%.

---

Group of orthologs #6389. Best score 641 bits

Score difference with first non-orthologous sequence - *A. fumigatus*:641 *A. fischeri*:641

afum|EAL92109.1 100.00% afis|EAW21086.1 100.00%

Bootstrap support for afum|EAL92109.1 as seed ortholog is 100%.

Bootstrap support for afis|EAW21086.1 as seed ortholog is 100%.

---

Group of orthologs #6390. Best score 640 bits

Score difference with first non-orthologous sequence - *A. fumigatus*:640 *A. fischeri*:640  
afum|EAL87468.1 100.00% afis|EAW18111.1 100.00%  
Bootstrap support for afum|EAL87468.1 as seed ortholog is 100%.  
Bootstrap support for afis|EAW18111.1 as seed ortholog is 100%.

---

Group of orthologs #6391. Best score 640 bits

Score difference with first non-orthologous sequence - *A. fumigatus*:598 *A. fischeri*:543  
afum|EAL91366.1 100.00% afis|EAW17552.1 100.00%  
Bootstrap support for afum|EAL91366.1 as seed ortholog is 100%.  
Bootstrap support for afis|EAW17552.1 as seed ortholog is 100%.

---

Group of orthologs #6392. Best score 640 bits

Score difference with first non-orthologous sequence - *A. fumigatus*:640 *A. fischeri*:640  
afum|EAL86098.1 100.00% afis|EAW24430.1 100.00%  
Bootstrap support for afum|EAL86098.1 as seed ortholog is 100%.  
Bootstrap support for afis|EAW24430.1 as seed ortholog is 100%.

---

Group of orthologs #6393. Best score 640 bits

Score difference with first non-orthologous sequence - *A. fumigatus*:319 *A. fischeri*:140  
afum|EAL87858.1 100.00% afis|EAW23607.1 100.00%  
Bootstrap support for afum|EAL87858.1 as seed ortholog is 100%.  
Bootstrap support for afis|EAW23607.1 as seed ortholog is 100%.

---

Group of orthologs #6394. Best score 640 bits

Score difference with first non-orthologous sequence - *A. fumigatus*:569 *A. fischeri*:553  
afum|EAL90727.1 100.00% afis|EAW22464.1 100.00%  
Bootstrap support for afum|EAL90727.1 as seed ortholog is 100%.  
Bootstrap support for afis|EAW22464.1 as seed ortholog is 100%.

---

Group of orthologs #6395. Best score 639 bits

Score difference with first non-orthologous sequence - *A. fumigatus*:639 *A. fischeri*:639  
afum|EAL85279.1 100.00% afis|EAW20161.1 100.00%  
Bootstrap support for afum|EAL85279.1 as seed ortholog is 100%.  
Bootstrap support for afis|EAW20161.1 as seed ortholog is 100%.

---

Group of orthologs #6396. Best score 639 bits

Score difference with first non-orthologous sequence - *A. fumigatus*:564 *A. fischeri*:554  
afum|EAL89250.1 100.00% afis|EAW16646.1 100.00%  
Bootstrap support for afum|EAL89250.1 as seed ortholog is 100%.  
Bootstrap support for afis|EAW16646.1 as seed ortholog is 100%.

---

Group of orthologs #6397. Best score 639 bits

Score difference with first non-orthologous sequence - *A. fumigatus*:639 *A. fischeri*:639  
afum|EAL93080.1 100.00% afis|EAW18402.1 100.00%  
Bootstrap support for afum|EAL93080.1 as seed ortholog is 100%.  
Bootstrap support for afis|EAW18402.1 as seed ortholog is 100%.

---

Group of orthologs #6398. Best score 639 bits

Score difference with first non-orthologous sequence - *A. fumigatus*:639 *A. fischeri*:639  
afum|EAL93539.1 100.00% afis|EAW18803.1 100.00%  
Bootstrap support for afum|EAL93539.1 as seed ortholog is 100%.  
Bootstrap support for afis|EAW18803.1 as seed ortholog is 100%.

---

Group of orthologs #6399. Best score 639 bits

Score difference with first non-orthologous sequence - *A. fumigatus*:639 *A. fischeri*:639  
afum|EAL90631.1 100.00% afis|EAW22567.1 100.00%

Bootstrap support for afum|EAL90631.1 as seed ortholog is 100%.  
Bootstrap support for afis|EAW22567.1 as seed ortholog is 100%.

---

Group of orthologs #6400. Best score 639 bits

Score difference with first non-orthologous sequence - *A. fumigatus*:639 *A. fischeri*:639

afum|EAL91913.1 100.00% afis|EAW24057.1 100.00%

Bootstrap support for afum|EAL91913.1 as seed ortholog is 100%.

Bootstrap support for afis|EAW24057.1 as seed ortholog is 100%.

---

Group of orthologs #6401. Best score 638 bits

Score difference with first non-orthologous sequence - *A. fumigatus*:638 *A. fischeri*:638

afum|EAL84432.1 100.00% afis|EAW20636.1 100.00%

Bootstrap support for afum|EAL84432.1 as seed ortholog is 100%.

Bootstrap support for afis|EAW20636.1 as seed ortholog is 100%.

---

Group of orthologs #6402. Best score 638 bits

Score difference with first non-orthologous sequence - *A. fumigatus*:638 *A. fischeri*:436

afum|EAL87113.1 100.00% afis|EAW23668.1 100.00%

Bootstrap support for afum|EAL87113.1 as seed ortholog is 100%.

Bootstrap support for afis|EAW23668.1 as seed ortholog is 100%.

---

Group of orthologs #6403. Best score 638 bits

Score difference with first non-orthologous sequence - *A. fumigatus*:638 *A. fischeri*:638

afum|EAL88361.1 100.00% afis|EAW23119.1 100.00%

Bootstrap support for afum|EAL88361.1 as seed ortholog is 100%.

Bootstrap support for afis|EAW23119.1 as seed ortholog is 100%.

---

Group of orthologs #6404. Best score 638 bits

Score difference with first non-orthologous sequence - *A. fumigatus*:638 *A. fischeri*:566

afum|EAL93360.1 100.00% afis|EAW18645.1 100.00%

Bootstrap support for afum|EAL93360.1 as seed ortholog is 100%.

Bootstrap support for afis|EAW18645.1 as seed ortholog is 100%.

---

Group of orthologs #6405. Best score 638 bits

Score difference with first non-orthologous sequence - *A. fumigatus*:638 *A. fischeri*:638

afum|EAL92884.1 100.00% afis|EAW21870.1 100.00%

Bootstrap support for afum|EAL92884.1 as seed ortholog is 100%.

Bootstrap support for afis|EAW21870.1 as seed ortholog is 100%.

---

Group of orthologs #6406. Best score 637 bits

Score difference with first non-orthologous sequence - *A. fumigatus*:637 *A. fischeri*:637

afum|EAL85630.2 100.00% afis|EAW15718.1 100.00%

Bootstrap support for afum|EAL85630.2 as seed ortholog is 100%.

Bootstrap support for afis|EAW15718.1 as seed ortholog is 100%.

---

Group of orthologs #6407. Best score 637 bits

Score difference with first non-orthologous sequence - *A. fumigatus*:637 *A. fischeri*:637

afum|EAL88927.1 100.00% afis|EAW16305.1 100.00%

Bootstrap support for afum|EAL88927.1 as seed ortholog is 100%.

Bootstrap support for afis|EAW16305.1 as seed ortholog is 100%.

---

Group of orthologs #6408. Best score 637 bits

Score difference with first non-orthologous sequence - *A. fumigatus*:637 *A. fischeri*:637

afum|EAL88362.1 100.00% afis|EAW23118.1 100.00%

Bootstrap support for afum|EAL88362.1 as seed ortholog is 100%.

Bootstrap support for afis|EAW23118.1 as seed ortholog is 100%.

---

Group of orthologs #6409. Best score 637 bits

Score difference with first non-orthologous sequence - *A. fumigatus*:637 *A. fischeri*:637

afum|EAL88329.1 100.00% afis|EAW23152.1 100.00%

Bootstrap support for afum|EAL88329.1 as seed ortholog is 100%.

Bootstrap support for afis|EAW23152.1 as seed ortholog is 100%.

---

Group of orthologs #6410. Best score 637 bits

Score difference with first non-orthologous sequence - *A. fumigatus*:637 *A. fischeri*:637

afum|EAL91012.1 100.00% afis|EAW22177.1 100.00%

Bootstrap support for afum|EAL91012.1 as seed ortholog is 100%.

Bootstrap support for afis|EAW22177.1 as seed ortholog is 100%.

---

Group of orthologs #6411. Best score 637 bits

Score difference with first non-orthologous sequence - *A. fumigatus*:637 *A. fischeri*:637

afum|EBA27470.1 100.00% afis|EAW21715.1 100.00%

Bootstrap support for afum|EBA27470.1 as seed ortholog is 100%.

Bootstrap support for afis|EAW21715.1 as seed ortholog is 100%.

---

Group of orthologs #6412. Best score 636 bits

Score difference with first non-orthologous sequence - *A. fumigatus*:636 *A. fischeri*:636

afum|EAL88672.1 100.00% afis|EAW16040.1 100.00%

Bootstrap support for afum|EAL88672.1 as seed ortholog is 100%.

Bootstrap support for afis|EAW16040.1 as seed ortholog is 100%.

---

Group of orthologs #6413. Best score 636 bits

Score difference with first non-orthologous sequence - *A. fumigatus*:636 *A. fischeri*:636

afum|EAL88690.2 100.00% afis|EAW16058.1 100.00%

Bootstrap support for afum|EAL88690.2 as seed ortholog is 100%.

Bootstrap support for afis|EAW16058.1 as seed ortholog is 100%.

---

Group of orthologs #6414. Best score 636 bits

Score difference with first non-orthologous sequence - *A. fumigatus*:636 *A. fischeri*:636

afum|EAL86189.1 100.00% afis|EAW24524.1 100.00%

Bootstrap support for afum|EAL86189.1 as seed ortholog is 100%.

Bootstrap support for afis|EAW24524.1 as seed ortholog is 100%.

---

Group of orthologs #6415. Best score 636 bits

Score difference with first non-orthologous sequence - *A. fumigatus*:636 *A. fischeri*:636

afum|EAL88274.1 100.00% afis|EAW23210.1 100.00%

Bootstrap support for afum|EAL88274.1 as seed ortholog is 100%.

Bootstrap support for afis|EAW23210.1 as seed ortholog is 100%.

---

Group of orthologs #6416. Best score 636 bits

Score difference with first non-orthologous sequence - *A. fumigatus*:636 *A. fischeri*:636

afum|EAL91089.1 100.00% afis|EAW22100.1 100.00%

Bootstrap support for afum|EAL91089.1 as seed ortholog is 100%.

Bootstrap support for afis|EAW22100.1 as seed ortholog is 100%.

---

Group of orthologs #6417. Best score 636 bits

Score difference with first non-orthologous sequence - *A. fumigatus*:636 *A. fischeri*:636

afum|EAL90502.1 100.00% afis|EAW22690.1 100.00%

Bootstrap support for afum|EAL90502.1 as seed ortholog is 100%.

Bootstrap support for afis|EAW22690.1 as seed ortholog is 100%.

---

Group of orthologs #6418. Best score 636 bits

Score difference with first non-orthologous sequence - *A. fumigatus*:636 *A. fischeri*:636  
afum|EAL92589.1 100.00% afis|EAW21571.1 100.00%  
Bootstrap support for afum|EAL92589.1 as seed ortholog is 100%.  
Bootstrap support for afis|EAW21571.1 as seed ortholog is 100%.

---

Group of orthologs #6419. Best score 636 bits

Score difference with first non-orthologous sequence - *A. fumigatus*:636 *A. fischeri*:636  
afum|EAL92870.1 100.00% afis|EAW21857.1 100.00%  
Bootstrap support for afum|EAL92870.1 as seed ortholog is 100%.  
Bootstrap support for afis|EAW21857.1 as seed ortholog is 100%.

---

Group of orthologs #6420. Best score 636 bits

Score difference with first non-orthologous sequence - *A. fumigatus*:636 *A. fischeri*:636  
afum|EAL89675.1 100.00% afis|EAW25020.1 100.00%  
Bootstrap support for afum|EAL89675.1 as seed ortholog is 100%.  
Bootstrap support for afis|EAW25020.1 as seed ortholog is 100%.

---

Group of orthologs #6421. Best score 636 bits

Score difference with first non-orthologous sequence - *A. fumigatus*:636 *A. fischeri*:636  
afum|EAL90193.2 100.00% afis|EAW25528.1 100.00%  
Bootstrap support for afum|EAL90193.2 as seed ortholog is 100%.  
Bootstrap support for afis|EAW25528.1 as seed ortholog is 100%.

---

Group of orthologs #6422. Best score 635 bits

Score difference with first non-orthologous sequence - *A. fumigatus*:635 *A. fischeri*:635  
afum|EAL86327.1 100.00% afis|EAW16755.1 100.00%  
Bootstrap support for afum|EAL86327.1 as seed ortholog is 100%.  
Bootstrap support for afis|EAW16755.1 as seed ortholog is 100%.

---

Group of orthologs #6423. Best score 635 bits

Score difference with first non-orthologous sequence - *A. fumigatus*:635 *A. fischeri*:635  
afum|EAL88911.1 100.00% afis|EAW16289.1 100.00%  
Bootstrap support for afum|EAL88911.1 as seed ortholog is 100%.  
Bootstrap support for afis|EAW16289.1 as seed ortholog is 100%.

---

Group of orthologs #6424. Best score 635 bits

Score difference with first non-orthologous sequence - *A. fumigatus*:635 *A. fischeri*:635  
afum|EAL93451.1 100.00% afis|EAW18726.1 100.00%  
Bootstrap support for afum|EAL93451.1 as seed ortholog is 100%.  
Bootstrap support for afis|EAW18726.1 as seed ortholog is 100%.

---

Group of orthologs #6425. Best score 635 bits

Score difference with first non-orthologous sequence - *A. fumigatus*:635 *A. fischeri*:635  
afum|EAL93606.1 100.00% afis|EAW18874.1 100.00%  
Bootstrap support for afum|EAL93606.1 as seed ortholog is 100%.  
Bootstrap support for afis|EAW18874.1 as seed ortholog is 100%.

---

Group of orthologs #6426. Best score 635 bits

Score difference with first non-orthologous sequence - *A. fumigatus*:635 *A. fischeri*:635  
afum|EAL93779.1 100.00% afis|EAW19050.1 100.00%  
Bootstrap support for afum|EAL93779.1 as seed ortholog is 100%.  
Bootstrap support for afis|EAW19050.1 as seed ortholog is 100%.

---

Group of orthologs #6427. Best score 635 bits

Score difference with first non-orthologous sequence - *A. fumigatus*:635 *A. fischeri*:635  
afum|EAL91065.1 100.00% afis|EAW22122.1 100.00%

Bootstrap support for afum|EAL91065.1 as seed ortholog is 100%.  
Bootstrap support for afis|EAW22122.1 as seed ortholog is 100%.

---

Group of orthologs #6428. Best score 635 bits

Score difference with first non-orthologous sequence - *A. fumigatus*:635 *A. fischeri*:635

afum|EAL89839.1 100.00% afis|EAW25166.1 100.00%

Bootstrap support for afum|EAL89839.1 as seed ortholog is 100%.

Bootstrap support for afis|EAW25166.1 as seed ortholog is 100%.

---

Group of orthologs #6429. Best score 634 bits

Score difference with first non-orthologous sequence - *A. fumigatus*:439 *A. fischeri*:345

afum|EAL88806.1 100.00% afis|EAW16174.1 100.00%

Bootstrap support for afum|EAL88806.1 as seed ortholog is 100%.

Bootstrap support for afis|EAW16174.1 as seed ortholog is 100%.

---

Group of orthologs #6430. Best score 634 bits

Score difference with first non-orthologous sequence - *A. fumigatus*:634 *A. fischeri*:634

afum|EAL84426.1 100.00% afis|EAW20647.1 100.00%

Bootstrap support for afum|EAL84426.1 as seed ortholog is 100%.

Bootstrap support for afis|EAW20647.1 as seed ortholog is 100%.

---

Group of orthologs #6431. Best score 634 bits

Score difference with first non-orthologous sequence - *A. fumigatus*:634 *A. fischeri*:257

afum|EAL91897.1 100.00% afis|EAW18085.1 100.00%

Bootstrap support for afum|EAL91897.1 as seed ortholog is 100%.

Bootstrap support for afis|EAW18085.1 as seed ortholog is 100%.

---

Group of orthologs #6432. Best score 634 bits

Score difference with first non-orthologous sequence - *A. fumigatus*:634 *A. fischeri*:634

afum|EAL86179.1 100.00% afis|EAW24510.1 100.00%

Bootstrap support for afum|EAL86179.1 as seed ortholog is 100%.

Bootstrap support for afis|EAW24510.1 as seed ortholog is 100%.

---

Group of orthologs #6433. Best score 634 bits

Score difference with first non-orthologous sequence - *A. fumigatus*:634 *A. fischeri*:634

afum|EAL87956.1 100.00% afis|EAW23505.1 100.00%

Bootstrap support for afum|EAL87956.1 as seed ortholog is 100%.

Bootstrap support for afis|EAW23505.1 as seed ortholog is 100%.

---

Group of orthologs #6434. Best score 633 bits

Score difference with first non-orthologous sequence - *A. fumigatus*:633 *A. fischeri*:633

afum|EAL85011.1 100.00% afis|EAW19886.1 100.00%

Bootstrap support for afum|EAL85011.1 as seed ortholog is 100%.

Bootstrap support for afis|EAW19886.1 as seed ortholog is 100%.

---

Group of orthologs #6435. Best score 633 bits

Score difference with first non-orthologous sequence - *A. fumigatus*:633 *A. fischeri*:633

afum|EAL88934.1 100.00% afis|EAW16312.1 100.00%

Bootstrap support for afum|EAL88934.1 as seed ortholog is 100%.

Bootstrap support for afis|EAW16312.1 as seed ortholog is 100%.

---

Group of orthologs #6436. Best score 633 bits

Score difference with first non-orthologous sequence - *A. fumigatus*:633 *A. fischeri*:633

afum|EAL84672.1 100.00% afis|EAW20961.1 100.00%

Bootstrap support for afum|EAL84672.1 as seed ortholog is 100%.

Bootstrap support for afis|EAW20961.1 as seed ortholog is 100%.



---

Group of orthologs #6437. Best score 633 bits

Score difference with first non-orthologous sequence - *A. fumigatus*:633 *A. fischeri*:633

afum|EAL88018.1 100.00% afis|EAW23447.1 100.00%

Bootstrap support for afum|EAL88018.1 as seed ortholog is 100%.

Bootstrap support for afis|EAW23447.1 as seed ortholog is 100%.

---

Group of orthologs #6438. Best score 633 bits

Score difference with first non-orthologous sequence - *A. fumigatus*:633 *A. fischeri*:432

afum|EAL93391.1 100.00% afis|EAW18672.1 100.00%

Bootstrap support for afum|EAL93391.1 as seed ortholog is 100%.

Bootstrap support for afis|EAW18672.1 as seed ortholog is 100%.

---

Group of orthologs #6439. Best score 633 bits

Score difference with first non-orthologous sequence - *A. fumigatus*:633 *A. fischeri*:633

afum|EAL90688.1 100.00% afis|EAW22505.1 100.00%

Bootstrap support for afum|EAL90688.1 as seed ortholog is 100%.

Bootstrap support for afis|EAW22505.1 as seed ortholog is 100%.

---

Group of orthologs #6440. Best score 633 bits

Score difference with first non-orthologous sequence - *A. fumigatus*:633 *A. fischeri*:633

afum|EBA27329.1 100.00% afis|EAW23457.1 100.00%

Bootstrap support for afum|EBA27329.1 as seed ortholog is 100%.

Bootstrap support for afis|EAW23457.1 as seed ortholog is 100%.

---

Group of orthologs #6441. Best score 632 bits

Score difference with first non-orthologous sequence - *A. fumigatus*:632 *A. fischeri*:632

afum|EAL86320.1 100.00% afis|EAW16745.1 100.00%

Bootstrap support for afum|EAL86320.1 as seed ortholog is 100%.

Bootstrap support for afis|EAW16745.1 as seed ortholog is 100%.

---

Group of orthologs #6442. Best score 632 bits

Score difference with first non-orthologous sequence - *A. fumigatus*:632 *A. fischeri*:632

afum|EAL88518.1 100.00% afis|EAW15884.1 100.00%

Bootstrap support for afum|EAL88518.1 as seed ortholog is 100%.

Bootstrap support for afis|EAW15884.1 as seed ortholog is 100%.

---

Group of orthologs #6443. Best score 632 bits

Score difference with first non-orthologous sequence - *A. fumigatus*:632 *A. fischeri*:632

afum|EAL84577.1 100.00% afis|EAW20476.1 100.00%

Bootstrap support for afum|EAL84577.1 as seed ortholog is 100%.

Bootstrap support for afis|EAW20476.1 as seed ortholog is 100%.

---

Group of orthologs #6444. Best score 632 bits

Score difference with first non-orthologous sequence - *A. fumigatus*:632 *A. fischeri*:632

afum|EAL92388.1 100.00% afis|EAW21371.1 100.00%

Bootstrap support for afum|EAL92388.1 as seed ortholog is 100%.

Bootstrap support for afis|EAW21371.1 as seed ortholog is 100%.

---

Group of orthologs #6445. Best score 632 bits

Score difference with first non-orthologous sequence - *A. fumigatus*:632 *A. fischeri*:632

afum|EAL90077.1 100.00% afis|EAW25418.1 100.00%

Bootstrap support for afum|EAL90077.1 as seed ortholog is 100%.

Bootstrap support for afis|EAW25418.1 as seed ortholog is 100%.

---

Group of orthologs #6446. Best score 631 bits

Score difference with first non-orthologous sequence - *A. fumigatus*:518 *A. fischeri*:571  
afum|EAL85739.2 100.00% afis|EAW15593.1 100.00%  
Bootstrap support for afum|EAL85739.2 as seed ortholog is 100%.  
Bootstrap support for afis|EAW15593.1 as seed ortholog is 100%.

---

Group of orthologs #6447. Best score 631 bits

Score difference with first non-orthologous sequence - *A. fumigatus*:631 *A. fischeri*:383  
afum|EAL85635.1 100.00% afis|EAW15713.1 100.00%  
Bootstrap support for afum|EAL85635.1 as seed ortholog is 100%.  
Bootstrap support for afis|EAW15713.1 as seed ortholog is 100%.

---

Group of orthologs #6448. Best score 631 bits

Score difference with first non-orthologous sequence - *A. fumigatus*:61 *A. fischeri*:208  
afum|EAL89046.1 100.00% afis|EAW16449.1 100.00%  
Bootstrap support for afum|EAL89046.1 as seed ortholog is 76%.  
Bootstrap support for afis|EAW16449.1 as seed ortholog is 99%.

---

Group of orthologs #6449. Best score 631 bits

Score difference with first non-orthologous sequence - *A. fumigatus*:631 *A. fischeri*:631  
afum|EAL91303.1 100.00% afis|EAW17474.1 100.00%  
Bootstrap support for afum|EAL91303.1 as seed ortholog is 100%.  
Bootstrap support for afis|EAW17474.1 as seed ortholog is 100%.

---

Group of orthologs #6450. Best score 631 bits

Score difference with first non-orthologous sequence - *A. fumigatus*:631 *A. fischeri*:631  
afum|EAL93998.1 100.00% afis|EAW19272.1 100.00%  
Bootstrap support for afum|EAL93998.1 as seed ortholog is 100%.  
Bootstrap support for afis|EAW19272.1 as seed ortholog is 100%.

---

Group of orthologs #6451. Best score 631 bits

Score difference with first non-orthologous sequence - *A. fumigatus*:631 *A. fischeri*:631  
afum|EAL89584.2 100.00% afis|EAW24928.1 100.00%  
Bootstrap support for afum|EAL89584.2 as seed ortholog is 100%.  
Bootstrap support for afis|EAW24928.1 as seed ortholog is 100%.

---

Group of orthologs #6452. Best score 630 bits

Score difference with first non-orthologous sequence - *A. fumigatus*:630 *A. fischeri*:630  
afum|EAL89304.1 100.00% afis|EAW25774.1 100.00%  
afis|EAW23657.1 99.38%  
afis|EAW24635.1 99.11%  
afis|EAW15379.1 23.79%  
afis|EAW23656.1 20.92%  
Bootstrap support for afum|EAL89304.1 as seed ortholog is 100%.  
Bootstrap support for afis|EAW25774.1 as seed ortholog is 100%.

---

Group of orthologs #6453. Best score 630 bits

Score difference with first non-orthologous sequence - *A. fumigatus*:630 *A. fischeri*:630  
afum|EAL85931.1 100.00% afis|EAW24263.1 100.00%  
Bootstrap support for afum|EAL85931.1 as seed ortholog is 100%.  
Bootstrap support for afis|EAW24263.1 as seed ortholog is 100%.

---

Group of orthologs #6454. Best score 630 bits

Score difference with first non-orthologous sequence - *A. fumigatus*:590 *A. fischeri*:461  
afum|EAL92498.1 100.00% afis|EAW21478.1 100.00%  
Bootstrap support for afum|EAL92498.1 as seed ortholog is 100%.  
Bootstrap support for afis|EAW21478.1 as seed ortholog is 100%.

---

Group of orthologs #6455. Best score 630 bits

Score difference with first non-orthologous sequence - *A. fumigatus*:630 *A. fischeri*:630

afum|EAL92936.1 100.00% afis|EAW21923.1 100.00%

Bootstrap support for afum|EAL92936.1 as seed ortholog is 100%.

Bootstrap support for afis|EAW21923.1 as seed ortholog is 100%.

---

Group of orthologs #6456. Best score 629 bits

Score difference with first non-orthologous sequence - *A. fumigatus*:629 *A. fischeri*:629

afum|EAL85078.1 100.00% afis|EAW19813.1 100.00%

Bootstrap support for afum|EAL85078.1 as seed ortholog is 100%.

Bootstrap support for afis|EAW19813.1 as seed ortholog is 100%.

---

Group of orthologs #6457. Best score 629 bits

Score difference with first non-orthologous sequence - *A. fumigatus*:629 *A. fischeri*:629

afum|EAL85195.1 100.00% afis|EAW20077.1 100.00%

Bootstrap support for afum|EAL85195.1 as seed ortholog is 100%.

Bootstrap support for afis|EAW20077.1 as seed ortholog is 100%.

---

Group of orthologs #6458. Best score 629 bits

Score difference with first non-orthologous sequence - *A. fumigatus*:629 *A. fischeri*:373

afum|EAL84774.1 100.00% afis|EAW20861.1 100.00%

Bootstrap support for afum|EAL84774.1 as seed ortholog is 100%.

Bootstrap support for afis|EAW20861.1 as seed ortholog is 100%.

---

Group of orthologs #6459. Best score 629 bits

Score difference with first non-orthologous sequence - *A. fumigatus*:629 *A. fischeri*:629

afum|EBA27479.1 100.00% afis|EAW21896.1 100.00%

Bootstrap support for afum|EBA27479.1 as seed ortholog is 100%.

Bootstrap support for afis|EAW21896.1 as seed ortholog is 100%.

---

Group of orthologs #6460. Best score 628 bits

Score difference with first non-orthologous sequence - *A. fumigatus*:519 *A. fischeri*:493

afum|EAL86375.1 100.00% afis|EAW16826.1 100.00%

Bootstrap support for afum|EAL86375.1 as seed ortholog is 100%.

Bootstrap support for afis|EAW16826.1 as seed ortholog is 100%.

---

Group of orthologs #6461. Best score 628 bits

Score difference with first non-orthologous sequence - *A. fumigatus*:628 *A. fischeri*:628

afum|EAL88498.1 100.00% afis|EAW15863.1 100.00%

Bootstrap support for afum|EAL88498.1 as seed ortholog is 100%.

Bootstrap support for afis|EAW15863.1 as seed ortholog is 100%.

---

Group of orthologs #6462. Best score 628 bits

Score difference with first non-orthologous sequence - *A. fumigatus*:628 *A. fischeri*:628

afum|EAL91568.1 100.00% afis|EAW17755.1 100.00%

Bootstrap support for afum|EAL91568.1 as seed ortholog is 100%.

Bootstrap support for afis|EAW17755.1 as seed ortholog is 100%.

---

Group of orthologs #6463. Best score 628 bits

Score difference with first non-orthologous sequence - *A. fumigatus*:628 *A. fischeri*:628

afum|EAL93188.1 100.00% afis|EAW18498.1 100.00%

Bootstrap support for afum|EAL93188.1 as seed ortholog is 100%.

Bootstrap support for afis|EAW18498.1 as seed ortholog is 100%.

---

Group of orthologs #6464. Best score 628 bits

Score difference with first non-orthologous sequence - *A. fumigatus*:628 *A. fischeri*:291  
afum|EAL90866.1 100.00% afis|EAW22326.1 100.00%  
Bootstrap support for afum|EAL90866.1 as seed ortholog is 100%.  
Bootstrap support for afis|EAW22326.1 as seed ortholog is 100%.

---

Group of orthologs #6465. Best score 627 bits

Score difference with first non-orthologous sequence - *A. fumigatus*:627 *A. fischeri*:627  
afum|EAL85800.1 100.00% afis|EAW15528.1 100.00%  
Bootstrap support for afum|EAL85800.1 as seed ortholog is 100%.  
Bootstrap support for afis|EAW15528.1 as seed ortholog is 100%.

---

Group of orthologs #6466. Best score 627 bits

Score difference with first non-orthologous sequence - *A. fumigatus*:627 *A. fischeri*:627  
afum|EAL88531.1 100.00% afis|EAW15896.1 100.00%  
Bootstrap support for afum|EAL88531.1 as seed ortholog is 100%.  
Bootstrap support for afis|EAW15896.1 as seed ortholog is 100%.

---

Group of orthologs #6467. Best score 627 bits

Score difference with first non-orthologous sequence - *A. fumigatus*:627 *A. fischeri*:627  
afum|EAL92071.1 100.00% afis|EAW21033.1 100.00%  
Bootstrap support for afum|EAL92071.1 as seed ortholog is 100%.  
Bootstrap support for afis|EAW21033.1 as seed ortholog is 100%.

---

Group of orthologs #6468. Best score 627 bits

Score difference with first non-orthologous sequence - *A. fumigatus*:627 *A. fischeri*:627  
afum|EAL90886.1 100.00% afis|EAW22295.1 100.00%  
Bootstrap support for afum|EAL90886.1 as seed ortholog is 100%.  
Bootstrap support for afis|EAW22295.1 as seed ortholog is 100%.

---

Group of orthologs #6469. Best score 627 bits

Score difference with first non-orthologous sequence - *A. fumigatus*:627 *A. fischeri*:627  
afum|EAL90882.1 100.00% afis|EAW22308.1 100.00%  
Bootstrap support for afum|EAL90882.1 as seed ortholog is 100%.  
Bootstrap support for afis|EAW22308.1 as seed ortholog is 100%.

---

Group of orthologs #6470. Best score 627 bits

Score difference with first non-orthologous sequence - *A. fumigatus*:627 *A. fischeri*:627  
afum|EAL89289.1 100.00% afis|EAW25571.1 100.00%  
Bootstrap support for afum|EAL89289.1 as seed ortholog is 100%.  
Bootstrap support for afis|EAW25571.1 as seed ortholog is 100%.

---

Group of orthologs #6471. Best score 626 bits

Score difference with first non-orthologous sequence - *A. fumigatus*:626 *A. fischeri*:626  
afum|EAL88821.2 100.00% afis|EAW16190.1 100.00%  
Bootstrap support for afum|EAL88821.2 as seed ortholog is 100%.  
Bootstrap support for afis|EAW16190.1 as seed ortholog is 100%.

---

Group of orthologs #6472. Best score 626 bits

Score difference with first non-orthologous sequence - *A. fumigatus*:626 *A. fischeri*:455  
afum|EAL91213.1 100.00% afis|EAW17378.1 100.00%  
Bootstrap support for afum|EAL91213.1 as seed ortholog is 100%.  
Bootstrap support for afis|EAW17378.1 as seed ortholog is 100%.

---

Group of orthologs #6473. Best score 626 bits

Score difference with first non-orthologous sequence - *A. fumigatus*:626 *A. fischeri*:626  
afum|EAL91304.1 100.00% afis|EAW17475.1 100.00%

Bootstrap support for afum|EAL91304.1 as seed ortholog is 100%.  
Bootstrap support for afis|EAW17475.1 as seed ortholog is 100%.

---

Group of orthologs #6474. Best score 626 bits

Score difference with first non-orthologous sequence - *A. fumigatus*:626 *A. fischeri*:626

afum|EAL93526.1 100.00% afis|EAW18791.1 100.00%

Bootstrap support for afum|EAL93526.1 as seed ortholog is 100%.

Bootstrap support for afis|EAW18791.1 as seed ortholog is 100%.

---

Group of orthologs #6475. Best score 626 bits

Score difference with first non-orthologous sequence - *A. fumigatus*:626 *A. fischeri*:626

afum|EAL93776.1 100.00% afis|EAW19047.1 100.00%

Bootstrap support for afum|EAL93776.1 as seed ortholog is 100%.

Bootstrap support for afis|EAW19047.1 as seed ortholog is 100%.

---

Group of orthologs #6476. Best score 625 bits

Score difference with first non-orthologous sequence - *A. fumigatus*:625 *A. fischeri*:625

afum|EAL86516.1 100.00% afis|EAW16992.1 100.00%

Bootstrap support for afum|EAL86516.1 as seed ortholog is 100%.

Bootstrap support for afis|EAW16992.1 as seed ortholog is 100%.

---

Group of orthologs #6477. Best score 625 bits

Score difference with first non-orthologous sequence - *A. fumigatus*:625 *A. fischeri*:625

afum|EAL84602.1 100.00% afis|EAW20451.1 100.00%

Bootstrap support for afum|EAL84602.1 as seed ortholog is 100%.

Bootstrap support for afis|EAW20451.1 as seed ortholog is 100%.

---

Group of orthologs #6478. Best score 625 bits

Score difference with first non-orthologous sequence - *A. fumigatus*:625 *A. fischeri*:625

afum|EAL91236.1 100.00% afis|EAW17398.1 100.00%

Bootstrap support for afum|EAL91236.1 as seed ortholog is 100%.

Bootstrap support for afis|EAW17398.1 as seed ortholog is 100%.

---

Group of orthologs #6479. Best score 625 bits

Score difference with first non-orthologous sequence - *A. fumigatus*:625 *A. fischeri*:625

afum|EAL91806.2 100.00% afis|EAW17996.1 100.00%

Bootstrap support for afum|EAL91806.2 as seed ortholog is 100%.

Bootstrap support for afis|EAW17996.1 as seed ortholog is 100%.

---

Group of orthologs #6480. Best score 625 bits

Score difference with first non-orthologous sequence - *A. fumigatus*:625 *A. fischeri*:625

afum|EAL93531.1 100.00% afis|EAW18795.1 100.00%

Bootstrap support for afum|EAL93531.1 as seed ortholog is 100%.

Bootstrap support for afis|EAW18795.1 as seed ortholog is 100%.

---

Group of orthologs #6481. Best score 625 bits

Score difference with first non-orthologous sequence - *A. fumigatus*:403 *A. fischeri*:249

afum|EAL94012.2 100.00% afis|EAW19978.1 100.00%

Bootstrap support for afum|EAL94012.2 as seed ortholog is 100%.

Bootstrap support for afis|EAW19978.1 as seed ortholog is 100%.

---

Group of orthologs #6482. Best score 625 bits

Score difference with first non-orthologous sequence - *A. fumigatus*:625 *A. fischeri*:625

afum|EAL92721.2 100.00% afis|EAW21687.1 100.00%

Bootstrap support for afum|EAL92721.2 as seed ortholog is 100%.

Bootstrap support for afis|EAW21687.1 as seed ortholog is 100%.

---

Group of orthologs #6483. Best score 625 bits

Score difference with first non-orthologous sequence - *A. fumigatus*:625 *A. fischeri*:625

afum|EAL92731.1 100.00% afis|EAW21697.1 100.00%

Bootstrap support for afum|EAL92731.1 as seed ortholog is 100%.

Bootstrap support for afis|EAW21697.1 as seed ortholog is 100%.

---

Group of orthologs #6484. Best score 624 bits

Score difference with first non-orthologous sequence - *A. fumigatus*:624 *A. fischeri*:467

afum|EAL86329.1 100.00% afis|EAW16757.1 100.00%

Bootstrap support for afum|EAL86329.1 as seed ortholog is 100%.

Bootstrap support for afis|EAW16757.1 as seed ortholog is 100%.

---

Group of orthologs #6485. Best score 624 bits

Score difference with first non-orthologous sequence - *A. fumigatus*:624 *A. fischeri*:624

afum|EAL86578.1 100.00% afis|EAW17116.1 100.00%

Bootstrap support for afum|EAL86578.1 as seed ortholog is 100%.

Bootstrap support for afis|EAW17116.1 as seed ortholog is 100%.

---

Group of orthologs #6486. Best score 624 bits

Score difference with first non-orthologous sequence - *A. fumigatus*:624 *A. fischeri*:549

afum|EAL85119.2 100.00% afis|EAW19779.1 100.00%

Bootstrap support for afum|EAL85119.2 as seed ortholog is 100%.

Bootstrap support for afis|EAW19779.1 as seed ortholog is 100%.

---

Group of orthologs #6487. Best score 624 bits

Score difference with first non-orthologous sequence - *A. fumigatus*:624 *A. fischeri*:624

afum|EAL84537.1 100.00% afis|EAW20520.1 100.00%

Bootstrap support for afum|EAL84537.1 as seed ortholog is 100%.

Bootstrap support for afis|EAW20520.1 as seed ortholog is 100%.

---

Group of orthologs #6488. Best score 624 bits

Score difference with first non-orthologous sequence - *A. fumigatus*:624 *A. fischeri*:536

afum|EAL89055.1 100.00% afis|EAW16459.1 100.00%

Bootstrap support for afum|EAL89055.1 as seed ortholog is 100%.

Bootstrap support for afis|EAW16459.1 as seed ortholog is 100%.

---

Group of orthologs #6489. Best score 624 bits

Score difference with first non-orthologous sequence - *A. fumigatus*:499 *A. fischeri*:510

afum|EAL85236.2 100.00% afis|EAW20119.1 100.00%

Bootstrap support for afum|EAL85236.2 as seed ortholog is 100%.

Bootstrap support for afis|EAW20119.1 as seed ortholog is 100%.

---

Group of orthologs #6490. Best score 624 bits

Score difference with first non-orthologous sequence - *A. fumigatus*:624 *A. fischeri*:624

afum|EAL91291.1 100.00% afis|EAW17462.1 100.00%

Bootstrap support for afum|EAL91291.1 as seed ortholog is 100%.

Bootstrap support for afis|EAW17462.1 as seed ortholog is 100%.

---

Group of orthologs #6491. Best score 624 bits

Score difference with first non-orthologous sequence - *A. fumigatus*:624 *A. fischeri*:624

afum|EAL87426.1 100.00% afis|EAW23996.1 100.00%

Bootstrap support for afum|EAL87426.1 as seed ortholog is 100%.

Bootstrap support for afis|EAW23996.1 as seed ortholog is 100%.

---

Group of orthologs #6492. Best score 624 bits

Score difference with first non-orthologous sequence - *A. fumigatus*:624 *A. fischeri*:624  
afum|EAL93312.1 100.00% afis|EAW18604.1 100.00%  
Bootstrap support for afum|EAL93312.1 as seed ortholog is 100%.  
Bootstrap support for afis|EAW18604.1 as seed ortholog is 100%.

---

Group of orthologs #6493. Best score 624 bits

Score difference with first non-orthologous sequence - *A. fumigatus*:624 *A. fischeri*:624  
afum|EBA27441.1 100.00% afis|EAW18057.1 100.00%  
Bootstrap support for afum|EBA27441.1 as seed ortholog is 100%.  
Bootstrap support for afis|EAW18057.1 as seed ortholog is 100%.

---

Group of orthologs #6494. Best score 624 bits

Score difference with first non-orthologous sequence - *A. fumigatus*:624 *A. fischeri*:624  
afum|EAL94021.1 100.00% afis|EAW19303.1 100.00%  
Bootstrap support for afum|EAL94021.1 as seed ortholog is 100%.  
Bootstrap support for afis|EAW19303.1 as seed ortholog is 100%.

---

Group of orthologs #6495. Best score 624 bits

Score difference with first non-orthologous sequence - *A. fumigatus*:624 *A. fischeri*:624  
afum|EAL90887.1 100.00% afis|EAW22294.1 100.00%  
Bootstrap support for afum|EAL90887.1 as seed ortholog is 100%.  
Bootstrap support for afis|EAW22294.1 as seed ortholog is 100%.

---

Group of orthologs #6496. Best score 624 bits

Score difference with first non-orthologous sequence - *A. fumigatus*:503 *A. fischeri*:391  
afum|EAL90767.1 100.00% afis|EAW22424.1 100.00%  
Bootstrap support for afum|EAL90767.1 as seed ortholog is 100%.  
Bootstrap support for afis|EAW22424.1 as seed ortholog is 100%.

---

Group of orthologs #6497. Best score 623 bits

Score difference with first non-orthologous sequence - *A. fumigatus*:623 *A. fischeri*:623  
afum|EAL85845.1 100.00% afis|EAW15476.1 100.00%  
Bootstrap support for afum|EAL85845.1 as seed ortholog is 100%.  
Bootstrap support for afis|EAW15476.1 as seed ortholog is 100%.

---

Group of orthologs #6498. Best score 623 bits

Score difference with first non-orthologous sequence - *A. fumigatus*:623 *A. fischeri*:623  
afum|EAL84935.1 100.00% afis|EAW19980.1 100.00%  
Bootstrap support for afum|EAL84935.1 as seed ortholog is 100%.  
Bootstrap support for afis|EAW19980.1 as seed ortholog is 100%.

---

Group of orthologs #6499. Best score 623 bits

Score difference with first non-orthologous sequence - *A. fumigatus*:623 *A. fischeri*:623  
afum|EAL85330.1 100.00% afis|EAW20213.1 100.00%  
Bootstrap support for afum|EAL85330.1 as seed ortholog is 100%.  
Bootstrap support for afis|EAW20213.1 as seed ortholog is 100%.

---

Group of orthologs #6500. Best score 623 bits

Score difference with first non-orthologous sequence - *A. fumigatus*:529 *A. fischeri*:527  
afum|EAL89438.1 100.00% afis|EAW24796.1 100.00%  
Bootstrap support for afum|EAL89438.1 as seed ortholog is 100%.  
Bootstrap support for afis|EAW24796.1 as seed ortholog is 100%.

---

Group of orthologs #6501. Best score 623 bits

Score difference with first non-orthologous sequence - *A. fumigatus*:623 *A. fischeri*:623  
afum|EAL89949.1 100.00% afis|EAW25286.1 100.00%

Bootstrap support for afum|EAL89949.1 as seed ortholog is 100%.  
Bootstrap support for afis|EAW25286.1 as seed ortholog is 100%.

---

Group of orthologs #6502. Best score 622 bits

Score difference with first non-orthologous sequence - *A. fumigatus*:622 *A. fischeri*:622

afum|EAL85573.1 100.00% afis|EAW15776.1 100.00%

Bootstrap support for afum|EAL85573.1 as seed ortholog is 100%.

Bootstrap support for afis|EAW15776.1 as seed ortholog is 100%.

---

Group of orthologs #6503. Best score 622 bits

Score difference with first non-orthologous sequence - *A. fumigatus*:622 *A. fischeri*:622

afum|EAL84595.1 100.00% afis|EAW20457.1 100.00%

Bootstrap support for afum|EAL84595.1 as seed ortholog is 100%.

Bootstrap support for afis|EAW20457.1 as seed ortholog is 100%.

---

Group of orthologs #6504. Best score 622 bits

Score difference with first non-orthologous sequence - *A. fumigatus*:525 *A. fischeri*:507

afum|EAL87035.1 100.00% afis|EAW19461.1 100.00%

Bootstrap support for afum|EAL87035.1 as seed ortholog is 100%.

Bootstrap support for afis|EAW19461.1 as seed ortholog is 100%.

---

Group of orthologs #6505. Best score 622 bits

Score difference with first non-orthologous sequence - *A. fumigatus*:622 *A. fischeri*:622

afum|EAL87347.1 100.00% afis|EAW23922.1 100.00%

Bootstrap support for afum|EAL87347.1 as seed ortholog is 100%.

Bootstrap support for afis|EAW23922.1 as seed ortholog is 100%.

---

Group of orthologs #6506. Best score 622 bits

Score difference with first non-orthologous sequence - *A. fumigatus*:622 *A. fischeri*:622

afum|EBA27414.1 100.00% afis|EAW22390.1 100.00%

Bootstrap support for afum|EBA27414.1 as seed ortholog is 100%.

Bootstrap support for afis|EAW22390.1 as seed ortholog is 100%.

---

Group of orthologs #6507. Best score 621 bits

Score difference with first non-orthologous sequence - *A. fumigatus*:621 *A. fischeri*:621

afum|EAL88499.1 100.00% afis|EAW15865.1 100.00%

Bootstrap support for afum|EAL88499.1 as seed ortholog is 100%.

Bootstrap support for afis|EAW15865.1 as seed ortholog is 100%.

---

Group of orthologs #6508. Best score 621 bits

Score difference with first non-orthologous sequence - *A. fumigatus*:621 *A. fischeri*:621

afum|EAL91511.1 100.00% afis|EAW17697.1 100.00%

Bootstrap support for afum|EAL91511.1 as seed ortholog is 100%.

Bootstrap support for afis|EAW17697.1 as seed ortholog is 100%.

---

Group of orthologs #6509. Best score 621 bits

Score difference with first non-orthologous sequence - *A. fumigatus*:555 *A. fischeri*:510

afum|EAL87229.2 100.00% afis|EAW23795.1 100.00%

Bootstrap support for afum|EAL87229.2 as seed ortholog is 100%.

Bootstrap support for afis|EAW23795.1 as seed ortholog is 100%.

---

Group of orthologs #6510. Best score 621 bits

Score difference with first non-orthologous sequence - *A. fumigatus*:621 *A. fischeri*:621

afum|EAL92570.1 100.00% afis|EAW21550.1 100.00%

Bootstrap support for afum|EAL92570.1 as seed ortholog is 100%.

Bootstrap support for afis|EAW21550.1 as seed ortholog is 100%.



---

Group of orthologs #6511. Best score 621 bits

Score difference with first non-orthologous sequence - *A. fumigatus*:621 *A. fischeri*:621

afum|EAL89462.1 100.00% afis|EAW24818.1 100.00%

Bootstrap support for afum|EAL89462.1 as seed ortholog is 100%.

Bootstrap support for afis|EAW24818.1 as seed ortholog is 100%.

---

Group of orthologs #6512. Best score 620 bits

Score difference with first non-orthologous sequence - *A. fumigatus*:620 *A. fischeri*:620

afum|EAL85622.1 100.00% afis|EAW15725.1 100.00%

Bootstrap support for afum|EAL85622.1 as seed ortholog is 100%.

Bootstrap support for afis|EAW15725.1 as seed ortholog is 100%.

---

Group of orthologs #6513. Best score 620 bits

Score difference with first non-orthologous sequence - *A. fumigatus*:620 *A. fischeri*:620

afum|EAL85561.1 100.00% afis|EAW15789.1 100.00%

Bootstrap support for afum|EAL85561.1 as seed ortholog is 100%.

Bootstrap support for afis|EAW15789.1 as seed ortholog is 100%.

---

Group of orthologs #6514. Best score 620 bits

Score difference with first non-orthologous sequence - *A. fumigatus*:620 *A. fischeri*:620

afum|EAL86704.1 100.00% afis|EAW17286.1 100.00%

Bootstrap support for afum|EAL86704.1 as seed ortholog is 100%.

Bootstrap support for afis|EAW17286.1 as seed ortholog is 100%.

---

Group of orthologs #6515. Best score 620 bits

Score difference with first non-orthologous sequence - *A. fumigatus*:620 *A. fischeri*:517

afum|EAL84978.1 100.00% afis|EAW19931.1 100.00%

Bootstrap support for afum|EAL84978.1 as seed ortholog is 100%.

Bootstrap support for afis|EAW19931.1 as seed ortholog is 100%.

---

Group of orthologs #6516. Best score 620 bits

Score difference with first non-orthologous sequence - *A. fumigatus*:620 *A. fischeri*:620

afum|EAL91201.1 100.00% afis|EAW17364.1 100.00%

Bootstrap support for afum|EAL91201.1 as seed ortholog is 100%.

Bootstrap support for afis|EAW17364.1 as seed ortholog is 100%.

---

Group of orthologs #6517. Best score 620 bits

Score difference with first non-orthologous sequence - *A. fumigatus*:620 *A. fischeri*:620

afum|EAL91780.1 100.00% afis|EAW17971.1 100.00%

Bootstrap support for afum|EAL91780.1 as seed ortholog is 100%.

Bootstrap support for afis|EAW17971.1 as seed ortholog is 100%.

---

Group of orthologs #6518. Best score 620 bits

Score difference with first non-orthologous sequence - *A. fumigatus*:620 *A. fischeri*:620

afum|EAL92148.1 100.00% afis|EAW21130.1 100.00%

Bootstrap support for afum|EAL92148.1 as seed ortholog is 100%.

Bootstrap support for afis|EAW21130.1 as seed ortholog is 100%.

---

Group of orthologs #6519. Best score 620 bits

Score difference with first non-orthologous sequence - *A. fumigatus*:620 *A. fischeri*:620

afum|EAL92623.1 100.00% afis|EAW21604.1 100.00%

Bootstrap support for afum|EAL92623.1 as seed ortholog is 100%.

Bootstrap support for afis|EAW21604.1 as seed ortholog is 100%.

---

Group of orthologs #6520. Best score 620 bits

Score difference with first non-orthologous sequence - *A. fumigatus*:620 *A. fischeri*:620  
afum|EAL89514.1 100.00% afis|EAW24864.1 100.00%  
Bootstrap support for afum|EAL89514.1 as seed ortholog is 100%.  
Bootstrap support for afis|EAW24864.1 as seed ortholog is 100%.

---

Group of orthologs #6521. Best score 620 bits

Score difference with first non-orthologous sequence - *A. fumigatus*:620 *A. fischeri*:620  
afum|EAL92967.1 100.00% afis|EAW21953.1 100.00%  
Bootstrap support for afum|EAL92967.1 as seed ortholog is 100%.  
Bootstrap support for afis|EAW21953.1 as seed ortholog is 100%.

---

Group of orthologs #6522. Best score 620 bits

Score difference with first non-orthologous sequence - *A. fumigatus*:620 *A. fischeri*:620  
afum|EAL89928.1 100.00% afis|EAW25265.1 100.00%  
Bootstrap support for afum|EAL89928.1 as seed ortholog is 100%.  
Bootstrap support for afis|EAW25265.1 as seed ortholog is 100%.

---

Group of orthologs #6523. Best score 619 bits

Score difference with first non-orthologous sequence - *A. fumigatus*:619 *A. fischeri*:444  
afum|EAL86581.1 100.00% afis|EAW17119.1 100.00%  
Bootstrap support for afum|EAL86581.1 as seed ortholog is 100%.  
Bootstrap support for afis|EAW17119.1 as seed ortholog is 100%.

---

Group of orthologs #6524. Best score 619 bits

Score difference with first non-orthologous sequence - *A. fumigatus*:440 *A. fischeri*:329  
afum|EAL86612.1 100.00% afis|EAW17186.1 100.00%  
Bootstrap support for afum|EAL86612.1 as seed ortholog is 100%.  
Bootstrap support for afis|EAW17186.1 as seed ortholog is 100%.

---

Group of orthologs #6525. Best score 619 bits

Score difference with first non-orthologous sequence - *A. fumigatus*:524 *A. fischeri*:518  
afum|EAL89221.1 100.00% afis|EAW16615.1 100.00%  
Bootstrap support for afum|EAL89221.1 as seed ortholog is 100%.  
Bootstrap support for afis|EAW16615.1 as seed ortholog is 100%.

---

Group of orthologs #6526. Best score 619 bits

Score difference with first non-orthologous sequence - *A. fumigatus*:619 *A. fischeri*:619  
afum|EAL84748.1 100.00% afis|EAW20885.1 100.00%  
Bootstrap support for afum|EAL84748.1 as seed ortholog is 100%.  
Bootstrap support for afis|EAW20885.1 as seed ortholog is 100%.

---

Group of orthologs #6527. Best score 619 bits

Score difference with first non-orthologous sequence - *A. fumigatus*:619 *A. fischeri*:619  
afum|EAL84684.1 100.00% afis|EAW20950.1 100.00%  
Bootstrap support for afum|EAL84684.1 as seed ortholog is 100%.  
Bootstrap support for afis|EAW20950.1 as seed ortholog is 100%.

---

Group of orthologs #6528. Best score 619 bits

Score difference with first non-orthologous sequence - *A. fumigatus*:619 *A. fischeri*:619  
afum|EAL87064.1 100.00% afis|EAW19430.1 100.00%  
Bootstrap support for afum|EAL87064.1 as seed ortholog is 100%.  
Bootstrap support for afis|EAW19430.1 as seed ortholog is 100%.

---

Group of orthologs #6529. Best score 619 bits

Score difference with first non-orthologous sequence - *A. fumigatus*:619 *A. fischeri*:619  
afum|EAL91667.1 100.00% afis|EAW17859.1 100.00%

Bootstrap support for afum|EAL91667.1 as seed ortholog is 100%.  
Bootstrap support for afis|EAW17859.1 as seed ortholog is 100%.

---

Group of orthologs #6530. Best score 619 bits

Score difference with first non-orthologous sequence - *A. fumigatus*:619 *A. fischeri*:619

|                 |         |                 |         |
|-----------------|---------|-----------------|---------|
| afum EAL88461.1 | 100.00% | afis EAW23021.1 | 100.00% |
|-----------------|---------|-----------------|---------|

Bootstrap support for afum|EAL88461.1 as seed ortholog is 100%.

Bootstrap support for afis|EAW23021.1 as seed ortholog is 100%.

---

Group of orthologs #6531. Best score 619 bits

Score difference with first non-orthologous sequence - *A. fumigatus*:619 *A. fischeri*:619

|                 |         |                 |         |
|-----------------|---------|-----------------|---------|
| afum EAL87997.1 | 100.00% | afis EAW23469.1 | 100.00% |
|-----------------|---------|-----------------|---------|

Bootstrap support for afum|EAL87997.1 as seed ortholog is 100%.

Bootstrap support for afis|EAW23469.1 as seed ortholog is 100%.

---

Group of orthologs #6532. Best score 619 bits

Score difference with first non-orthologous sequence - *A. fumigatus*:619 *A. fischeri*:619

|                 |         |                 |         |
|-----------------|---------|-----------------|---------|
| afum EAL93864.1 | 100.00% | afis EAW19132.1 | 100.00% |
|-----------------|---------|-----------------|---------|

Bootstrap support for afum|EAL93864.1 as seed ortholog is 100%.

Bootstrap support for afis|EAW19132.1 as seed ortholog is 100%.

---

Group of orthologs #6533. Best score 619 bits

Score difference with first non-orthologous sequence - *A. fumigatus*:619 *A. fischeri*:619

|                 |         |                 |         |
|-----------------|---------|-----------------|---------|
| afum EAL90620.2 | 100.00% | afis EAW22578.1 | 100.00% |
|-----------------|---------|-----------------|---------|

Bootstrap support for afum|EAL90620.2 as seed ortholog is 100%.

Bootstrap support for afis|EAW22578.1 as seed ortholog is 100%.

---

Group of orthologs #6534. Best score 619 bits

Score difference with first non-orthologous sequence - *A. fumigatus*:619 *A. fischeri*:619

|                 |         |                 |         |
|-----------------|---------|-----------------|---------|
| afum EAL92333.1 | 100.00% | afis EAW21316.1 | 100.00% |
|-----------------|---------|-----------------|---------|

Bootstrap support for afum|EAL92333.1 as seed ortholog is 100%.

Bootstrap support for afis|EAW21316.1 as seed ortholog is 100%.

---

Group of orthologs #6535. Best score 619 bits

Score difference with first non-orthologous sequence - *A. fumigatus*:619 *A. fischeri*:619

|                 |         |                 |         |
|-----------------|---------|-----------------|---------|
| afum EAL92817.1 | 100.00% | afis EAW21792.1 | 100.00% |
|-----------------|---------|-----------------|---------|

Bootstrap support for afum|EAL92817.1 as seed ortholog is 100%.

Bootstrap support for afis|EAW21792.1 as seed ortholog is 100%.

---

Group of orthologs #6536. Best score 618 bits

Score difference with first non-orthologous sequence - *A. fumigatus*:618 *A. fischeri*:618

|                 |         |                 |         |
|-----------------|---------|-----------------|---------|
| afum EAL88747.1 | 100.00% | afis EAW16116.1 | 100.00% |
|-----------------|---------|-----------------|---------|

Bootstrap support for afum|EAL88747.1 as seed ortholog is 100%.

Bootstrap support for afis|EAW16116.1 as seed ortholog is 100%.

---

Group of orthologs #6537. Best score 618 bits

Score difference with first non-orthologous sequence - *A. fumigatus*:618 *A. fischeri*:618

|                 |         |                 |         |
|-----------------|---------|-----------------|---------|
| afum EAL85290.1 | 100.00% | afis EAW20172.1 | 100.00% |
|-----------------|---------|-----------------|---------|

Bootstrap support for afum|EAL85290.1 as seed ortholog is 100%.

Bootstrap support for afis|EAW20172.1 as seed ortholog is 100%.

---

Group of orthologs #6538. Best score 618 bits

Score difference with first non-orthologous sequence - *A. fumigatus*:618 *A. fischeri*:618

|                 |         |                 |         |
|-----------------|---------|-----------------|---------|
| afum EAL87721.1 | 100.00% | afis EAW18357.1 | 100.00% |
|-----------------|---------|-----------------|---------|

Bootstrap support for afum|EAL87721.1 as seed ortholog is 100%.

Bootstrap support for afis|EAW18357.1 as seed ortholog is 100%.

---

Group of orthologs #6539. Best score 618 bits

Score difference with first non-orthologous sequence - *A. fumigatus*:454 *A. fischeri*:424

afum|EAL91234.2 100.00% afis|EAW17396.1 100.00%

Bootstrap support for afum|EAL91234.2 as seed ortholog is 100%.

Bootstrap support for afis|EAW17396.1 as seed ortholog is 100%.

---

Group of orthologs #6540. Best score 618 bits

Score difference with first non-orthologous sequence - *A. fumigatus*:618 *A. fischeri*:618

afum|EAL91327.1 100.00% afis|EAW17505.1 100.00%

Bootstrap support for afum|EAL91327.1 as seed ortholog is 100%.

Bootstrap support for afis|EAW17505.1 as seed ortholog is 100%.

---

Group of orthologs #6541. Best score 618 bits

Score difference with first non-orthologous sequence - *A. fumigatus*:618 *A. fischeri*:618

afum|EAL93154.1 100.00% afis|EAW18468.1 100.00%

Bootstrap support for afum|EAL93154.1 as seed ortholog is 100%.

Bootstrap support for afis|EAW18468.1 as seed ortholog is 100%.

---

Group of orthologs #6542. Best score 618 bits

Score difference with first non-orthologous sequence - *A. fumigatus*:618 *A. fischeri*:618

afum|EAL89806.2 100.00% afis|EAW25135.1 100.00%

Bootstrap support for afum|EAL89806.2 as seed ortholog is 100%.

Bootstrap support for afis|EAW25135.1 as seed ortholog is 100%.

---

Group of orthologs #6543. Best score 617 bits

Score difference with first non-orthologous sequence - *A. fumigatus*:617 *A. fischeri*:617

afum|EAL89029.2 100.00% afis|EAW16398.1 100.00%

Bootstrap support for afum|EAL89029.2 as seed ortholog is 100%.

Bootstrap support for afis|EAW16398.1 as seed ortholog is 100%.

---

Group of orthologs #6544. Best score 617 bits

Score difference with first non-orthologous sequence - *A. fumigatus*:617 *A. fischeri*:617

afum|EAL85229.1 100.00% afis|EAW20112.1 100.00%

Bootstrap support for afum|EAL85229.1 as seed ortholog is 100%.

Bootstrap support for afis|EAW20112.1 as seed ortholog is 100%.

---

Group of orthologs #6545. Best score 617 bits

Score difference with first non-orthologous sequence - *A. fumigatus*:617 *A. fischeri*:617

afum|EAL87277.1 100.00% afis|EAW23849.1 100.00%

Bootstrap support for afum|EAL87277.1 as seed ortholog is 100%.

Bootstrap support for afis|EAW23849.1 as seed ortholog is 100%.

---

Group of orthologs #6546. Best score 617 bits

Score difference with first non-orthologous sequence - *A. fumigatus*:543 *A. fischeri*:445

afum|EAL87391.2 100.00% afis|EAW23962.1 100.00%

Bootstrap support for afum|EAL87391.2 as seed ortholog is 100%.

Bootstrap support for afis|EAW23962.1 as seed ortholog is 100%.

---

Group of orthologs #6547. Best score 617 bits

Score difference with first non-orthologous sequence - *A. fumigatus*:617 *A. fischeri*:617

afum|EAL93909.1 100.00% afis|EAW19179.1 100.00%

Bootstrap support for afum|EAL93909.1 as seed ortholog is 100%.

Bootstrap support for afis|EAW19179.1 as seed ortholog is 100%.

---

Group of orthologs #6548. Best score 616 bits

Score difference with first non-orthologous sequence - *A. fumigatus*:616 *A. fischeri*:616  
afum|EAL86577.1 100.00% afis|EAW17115.1 100.00%  
Bootstrap support for afum|EAL86577.1 as seed ortholog is 100%.  
Bootstrap support for afis|EAW17115.1 as seed ortholog is 100%.

---

Group of orthologs #6549. Best score 616 bits

Score difference with first non-orthologous sequence - *A. fumigatus*:616 *A. fischeri*:616  
afum|EAL88853.1 100.00% afis|EAW16230.1 100.00%  
Bootstrap support for afum|EAL88853.1 as seed ortholog is 100%.  
Bootstrap support for afis|EAW16230.1 as seed ortholog is 100%.

---

Group of orthologs #6550. Best score 616 bits

Score difference with first non-orthologous sequence - *A. fumigatus*:616 *A. fischeri*:616  
afum|EAL85120.1 100.00% afis|EAW19775.1 100.00%  
Bootstrap support for afum|EAL85120.1 as seed ortholog is 100%.  
Bootstrap support for afis|EAW19775.1 as seed ortholog is 100%.

---

Group of orthologs #6551. Best score 616 bits

Score difference with first non-orthologous sequence - *A. fumigatus*:616 *A. fischeri*:616  
afum|EAL91873.1 100.00% afis|EAW18062.1 100.00%  
Bootstrap support for afum|EAL91873.1 as seed ortholog is 100%.  
Bootstrap support for afis|EAW18062.1 as seed ortholog is 100%.

---

Group of orthologs #6552. Best score 616 bits

Score difference with first non-orthologous sequence - *A. fumigatus*:616 *A. fischeri*:616  
afum|EAL87345.1 100.00% afis|EAW23919.1 100.00%  
Bootstrap support for afum|EAL87345.1 as seed ortholog is 100%.  
Bootstrap support for afis|EAW23919.1 as seed ortholog is 100%.

---

Group of orthologs #6553. Best score 616 bits

Score difference with first non-orthologous sequence - *A. fumigatus*:616 *A. fischeri*:616  
afum|EAL93298.1 100.00% afis|EAW18591.1 100.00%  
Bootstrap support for afum|EAL93298.1 as seed ortholog is 100%.  
Bootstrap support for afis|EAW18591.1 as seed ortholog is 100%.

---

Group of orthologs #6554. Best score 616 bits

Score difference with first non-orthologous sequence - *A. fumigatus*:616 *A. fischeri*:616  
afum|EAL90835.1 100.00% afis|EAW22356.1 100.00%  
Bootstrap support for afum|EAL90835.1 as seed ortholog is 100%.  
Bootstrap support for afis|EAW22356.1 as seed ortholog is 100%.

---

Group of orthologs #6555. Best score 616 bits

Score difference with first non-orthologous sequence - *A. fumigatus*:616 *A. fischeri*:616  
afum|EAL91933.1 100.00% afis|EAW24078.1 100.00%  
Bootstrap support for afum|EAL91933.1 as seed ortholog is 100%.  
Bootstrap support for afis|EAW24078.1 as seed ortholog is 100%.

---

Group of orthologs #6556. Best score 616 bits

Score difference with first non-orthologous sequence - *A. fumigatus*:616 *A. fischeri*:616  
afum|EAL91977.1 100.00% afis|EAW24121.1 100.00%  
Bootstrap support for afum|EAL91977.1 as seed ortholog is 100%.  
Bootstrap support for afis|EAW24121.1 as seed ortholog is 100%.

---

Group of orthologs #6557. Best score 615 bits

Score difference with first non-orthologous sequence - *A. fumigatus*:615 *A. fischeri*:615  
afum|EAL85471.1 100.00% afis|EAW20353.1 100.00%

Bootstrap support for afum|EAL85471.1 as seed ortholog is 100%.  
Bootstrap support for afis|EAW20353.1 as seed ortholog is 100%.

---

Group of orthologs #6558. Best score 615 bits

Score difference with first non-orthologous sequence - *A. fumigatus*:615 *A. fischeri*:615

|                 |         |                 |         |
|-----------------|---------|-----------------|---------|
| afum EAL91720.1 | 100.00% | afis EAW17911.1 | 100.00% |
|-----------------|---------|-----------------|---------|

Bootstrap support for afum|EAL91720.1 as seed ortholog is 100%.

Bootstrap support for afis|EAW17911.1 as seed ortholog is 100%.

---

Group of orthologs #6559. Best score 615 bits

Score difference with first non-orthologous sequence - *A. fumigatus*:615 *A. fischeri*:615

|                 |         |                 |         |
|-----------------|---------|-----------------|---------|
| afum EAL93816.1 | 100.00% | afis EAW19086.1 | 100.00% |
|-----------------|---------|-----------------|---------|

Bootstrap support for afum|EAL93816.1 as seed ortholog is 100%.

Bootstrap support for afis|EAW19086.1 as seed ortholog is 100%.

---

Group of orthologs #6560. Best score 615 bits

Score difference with first non-orthologous sequence - *A. fumigatus*:615 *A. fischeri*:615

|                 |         |                 |         |
|-----------------|---------|-----------------|---------|
| afum EAL90640.1 | 100.00% | afis EAW22555.1 | 100.00% |
|-----------------|---------|-----------------|---------|

Bootstrap support for afum|EAL90640.1 as seed ortholog is 100%.

Bootstrap support for afis|EAW22555.1 as seed ortholog is 100%.

---

Group of orthologs #6561. Best score 615 bits

Score difference with first non-orthologous sequence - *A. fumigatus*:615 *A. fischeri*:615

|                 |         |                 |         |
|-----------------|---------|-----------------|---------|
| afum EAL92158.2 | 100.00% | afis EAW21139.1 | 100.00% |
|-----------------|---------|-----------------|---------|

Bootstrap support for afum|EAL92158.2 as seed ortholog is 100%.

Bootstrap support for afis|EAW21139.1 as seed ortholog is 100%.

---

Group of orthologs #6562. Best score 615 bits

Score difference with first non-orthologous sequence - *A. fumigatus*:615 *A. fischeri*:615

|                 |         |                 |         |
|-----------------|---------|-----------------|---------|
| afum EAL92475.1 | 100.00% | afis EAW21456.1 | 100.00% |
|-----------------|---------|-----------------|---------|

Bootstrap support for afum|EAL92475.1 as seed ortholog is 100%.

Bootstrap support for afis|EAW21456.1 as seed ortholog is 100%.

---

Group of orthologs #6563. Best score 615 bits

Score difference with first non-orthologous sequence - *A. fumigatus*:266 *A. fischeri*:615

|                 |         |                 |         |
|-----------------|---------|-----------------|---------|
| afum EAL89569.1 | 100.00% | afis EAW24915.1 | 100.00% |
|-----------------|---------|-----------------|---------|

Bootstrap support for afum|EAL89569.1 as seed ortholog is 100%.

Bootstrap support for afis|EAW24915.1 as seed ortholog is 100%.

---

Group of orthologs #6564. Best score 615 bits

Score difference with first non-orthologous sequence - *A. fumigatus*:615 *A. fischeri*:615

|                 |         |                 |         |
|-----------------|---------|-----------------|---------|
| afum EAL91959.1 | 100.00% | afis EAW24105.1 | 100.00% |
|-----------------|---------|-----------------|---------|

Bootstrap support for afum|EAL91959.1 as seed ortholog is 100%.

Bootstrap support for afis|EAW24105.1 as seed ortholog is 100%.

---

Group of orthologs #6565. Best score 615 bits

Score difference with first non-orthologous sequence - *A. fumigatus*:615 *A. fischeri*:615

|                 |         |                 |         |
|-----------------|---------|-----------------|---------|
| afum EBA27346.1 | 100.00% | afis EAW23019.1 | 100.00% |
|-----------------|---------|-----------------|---------|

Bootstrap support for afum|EBA27346.1 as seed ortholog is 100%.

Bootstrap support for afis|EAW23019.1 as seed ortholog is 100%.

---

Group of orthologs #6566. Best score 614 bits

Score difference with first non-orthologous sequence - *A. fumigatus*:614 *A. fischeri*:614

|                 |         |                 |         |
|-----------------|---------|-----------------|---------|
| afum EAL88749.1 | 100.00% | afis EAW16118.1 | 100.00% |
|-----------------|---------|-----------------|---------|

Bootstrap support for afum|EAL88749.1 as seed ortholog is 100%.

Bootstrap support for afis|EAW16118.1 as seed ortholog is 100%.

---

Group of orthologs #6567. Best score 614 bits

Score difference with first non-orthologous sequence - *A. fumigatus*:564 *A. fischeri*:614

afum|EAL85322.1 100.00% afis|EAW20202.1 100.00%

Bootstrap support for afum|EAL85322.1 as seed ortholog is 100%.

Bootstrap support for afis|EAW20202.1 as seed ortholog is 100%.

---

Group of orthologs #6568. Best score 614 bits

Score difference with first non-orthologous sequence - *A. fumigatus*:614 *A. fischeri*:614

afum|EAL86072.1 100.00% afis|EAW24401.1 100.00%

Bootstrap support for afum|EAL86072.1 as seed ortholog is 100%.

Bootstrap support for afis|EAW24401.1 as seed ortholog is 100%.

---

Group of orthologs #6569. Best score 614 bits

Score difference with first non-orthologous sequence - *A. fumigatus*:614 *A. fischeri*:614

afum|EAL87259.1 100.00% afis|EAW23827.1 100.00%

Bootstrap support for afum|EAL87259.1 as seed ortholog is 100%.

Bootstrap support for afis|EAW23827.1 as seed ortholog is 100%.

---

Group of orthologs #6570. Best score 614 bits

Score difference with first non-orthologous sequence - *A. fumigatus*:512 *A. fischeri*:451

afum|EAL91031.1 100.00% afis|EAW22159.1 100.00%

Bootstrap support for afum|EAL91031.1 as seed ortholog is 100%.

Bootstrap support for afis|EAW22159.1 as seed ortholog is 100%.

---

Group of orthologs #6571. Best score 614 bits

Score difference with first non-orthologous sequence - *A. fumigatus*:614 *A. fischeri*:614

afum|EAL90989.1 100.00% afis|EAW22203.1 100.00%

Bootstrap support for afum|EAL90989.1 as seed ortholog is 100%.

Bootstrap support for afis|EAW22203.1 as seed ortholog is 100%.

---

Group of orthologs #6572. Best score 614 bits

Score difference with first non-orthologous sequence - *A. fumigatus*:614 *A. fischeri*:614

afum|EAL90598.1 100.00% afis|EAW22600.1 100.00%

Bootstrap support for afum|EAL90598.1 as seed ortholog is 100%.

Bootstrap support for afis|EAW22600.1 as seed ortholog is 100%.

---

Group of orthologs #6573. Best score 614 bits

Score difference with first non-orthologous sequence - *A. fumigatus*:614 *A. fischeri*:488

afum|EAL89761.2 100.00% afis|EAW25091.1 100.00%

Bootstrap support for afum|EAL89761.2 as seed ortholog is 100%.

Bootstrap support for afis|EAW25091.1 as seed ortholog is 100%.

---

Group of orthologs #6574. Best score 613 bits

Score difference with first non-orthologous sequence - *A. fumigatus*:613 *A. fischeri*:613

afum|EAL88973.1 100.00% afis|EAW16348.1 100.00%

Bootstrap support for afum|EAL88973.1 as seed ortholog is 100%.

Bootstrap support for afis|EAW16348.1 as seed ortholog is 100%.

---

Group of orthologs #6575. Best score 613 bits

Score difference with first non-orthologous sequence - *A. fumigatus*:560 *A. fischeri*:508

afum|EAL86811.1 100.00% afis|EAW19716.1 100.00%

Bootstrap support for afum|EAL86811.1 as seed ortholog is 100%.

Bootstrap support for afis|EAW19716.1 as seed ortholog is 100%.

---

Group of orthologs #6576. Best score 613 bits

Score difference with first non-orthologous sequence - *A. fumigatus*:613 *A. fischeri*:525  
afum|EAL87389.1 100.00% afis|EAW23960.1 100.00%  
Bootstrap support for afum|EAL87389.1 as seed ortholog is 100%.  
Bootstrap support for afis|EAW23960.1 as seed ortholog is 100%.

---

Group of orthologs #6577. Best score 613 bits

Score difference with first non-orthologous sequence - *A. fumigatus*:613 *A. fischeri*:252  
afum|EAL89343.1 100.00% afis|EAW24701.1 100.00%  
Bootstrap support for afum|EAL89343.1 as seed ortholog is 100%.  
Bootstrap support for afis|EAW24701.1 as seed ortholog is 100%.

---

Group of orthologs #6578. Best score 613 bits

Score difference with first non-orthologous sequence - *A. fumigatus*:613 *A. fischeri*:613  
afum|EAL91978.1 100.00% afis|EAW24122.1 100.00%  
Bootstrap support for afum|EAL91978.1 as seed ortholog is 100%.  
Bootstrap support for afis|EAW24122.1 as seed ortholog is 100%.

---

Group of orthologs #6579. Best score 612 bits

Score difference with first non-orthologous sequence - *A. fumigatus*:612 *A. fischeri*:612  
afum|EAL86966.1 100.00% afis|EAW19542.1 100.00%  
Bootstrap support for afum|EAL86966.1 as seed ortholog is 100%.  
Bootstrap support for afis|EAW19542.1 as seed ortholog is 100%.

---

Group of orthologs #6580. Best score 612 bits

Score difference with first non-orthologous sequence - *A. fumigatus*:612 *A. fischeri*:612  
afum|EAL85874.2 100.00% afis|EAW24204.1 100.00%  
Bootstrap support for afum|EAL85874.2 as seed ortholog is 100%.  
Bootstrap support for afis|EAW24204.1 as seed ortholog is 100%.

---

Group of orthologs #6581. Best score 612 bits

Score difference with first non-orthologous sequence - *A. fumigatus*:612 *A. fischeri*:612  
afum|EAL92466.1 100.00% afis|EAW21447.1 100.00%  
Bootstrap support for afum|EAL92466.1 as seed ortholog is 100%.  
Bootstrap support for afis|EAW21447.1 as seed ortholog is 100%.

---

Group of orthologs #6582. Best score 612 bits

Score difference with first non-orthologous sequence - *A. fumigatus*:612 *A. fischeri*:612  
afum|EAL89540.1 100.00% afis|EAW24889.1 100.00%  
Bootstrap support for afum|EAL89540.1 as seed ortholog is 100%.  
Bootstrap support for afis|EAW24889.1 as seed ortholog is 100%.

---

Group of orthologs #6583. Best score 611 bits

Score difference with first non-orthologous sequence - *A. fumigatus*:611 *A. fischeri*:485  
afum|EAL91516.1 100.00% afis|EAW17701.1 100.00%  
Bootstrap support for afum|EAL91516.1 as seed ortholog is 100%.  
Bootstrap support for afis|EAW17701.1 as seed ortholog is 100%.

---

Group of orthologs #6584. Best score 611 bits

Score difference with first non-orthologous sequence - *A. fumigatus*:611 *A. fischeri*:611  
afum|EAL93879.1 100.00% afis|EAW19148.1 100.00%  
Bootstrap support for afum|EAL93879.1 as seed ortholog is 100%.  
Bootstrap support for afis|EAW19148.1 as seed ortholog is 100%.

---

Group of orthologs #6585. Best score 611 bits

Score difference with first non-orthologous sequence - *A. fumigatus*:503 *A. fischeri*:512  
afum|EAL90770.1 100.00% afis|EAW22422.1 100.00%



Bootstrap support for afum|EAL90770.1 as seed ortholog is 100%.  
Bootstrap support for afis|EAW22422.1 as seed ortholog is 100%.

---

Group of orthologs #6586. Best score 611 bits

Score difference with first non-orthologous sequence - *A. fumigatus*:526 *A. fischeri*:457

afum|EAL94078.1 100.00% afis|EAW19358.1 100.00%

Bootstrap support for afum|EAL94078.1 as seed ortholog is 100%.

Bootstrap support for afis|EAW19358.1 as seed ortholog is 100%.

---

Group of orthologs #6587. Best score 611 bits

Score difference with first non-orthologous sequence - *A. fumigatus*:611 *A. fischeri*:611

afum|EAL92783.1 100.00% afis|EAW21753.1 100.00%

Bootstrap support for afum|EAL92783.1 as seed ortholog is 100%.

Bootstrap support for afis|EAW21753.1 as seed ortholog is 100%.

---

Group of orthologs #6588. Best score 611 bits

Score difference with first non-orthologous sequence - *A. fumigatus*:611 *A. fischeri*:611

afum|EAL89959.2 100.00% afis|EAW25296.1 100.00%

Bootstrap support for afum|EAL89959.2 as seed ortholog is 100%.

Bootstrap support for afis|EAW25296.1 as seed ortholog is 100%.

---

Group of orthologs #6589. Best score 610 bits

Score difference with first non-orthologous sequence - *A. fumigatus*:443 *A. fischeri*:406

afum|EAL84503.1 100.00% afis|EAW20558.1 100.00%

Bootstrap support for afum|EAL84503.1 as seed ortholog is 100%.

Bootstrap support for afis|EAW20558.1 as seed ortholog is 100%.

---

Group of orthologs #6590. Best score 610 bits

Score difference with first non-orthologous sequence - *A. fumigatus*:610 *A. fischeri*:610

afum|EAL84809.1 100.00% afis|EAW20820.1 100.00%

Bootstrap support for afum|EAL84809.1 as seed ortholog is 100%.

Bootstrap support for afis|EAW20820.1 as seed ortholog is 100%.

---

Group of orthologs #6591. Best score 610 bits

Score difference with first non-orthologous sequence - *A. fumigatus*:610 *A. fischeri*:610

afum|EAL87603.1 100.00% afis|EAW18236.1 100.00%

Bootstrap support for afum|EAL87603.1 as seed ortholog is 100%.

Bootstrap support for afis|EAW18236.1 as seed ortholog is 100%.

---

Group of orthologs #6592. Best score 610 bits

Score difference with first non-orthologous sequence - *A. fumigatus*:610 *A. fischeri*:610

afum|EAL86890.1 100.00% afis|EAW19632.1 100.00%

Bootstrap support for afum|EAL86890.1 as seed ortholog is 100%.

Bootstrap support for afis|EAW19632.1 as seed ortholog is 100%.

---

Group of orthologs #6593. Best score 610 bits

Score difference with first non-orthologous sequence - *A. fumigatus*:610 *A. fischeri*:610

afum|EBA27237.1 100.00% afis|EAW15734.1 100.00%

Bootstrap support for afum|EBA27237.1 as seed ortholog is 100%.

Bootstrap support for afis|EAW15734.1 as seed ortholog is 100%.

---

Group of orthologs #6594. Best score 610 bits

Score difference with first non-orthologous sequence - *A. fumigatus*:610 *A. fischeri*:610

afum|EAL91866.1 100.00% afis|EAW18055.1 100.00%

Bootstrap support for afum|EAL91866.1 as seed ortholog is 100%.

Bootstrap support for afis|EAW18055.1 as seed ortholog is 100%.

---

Group of orthologs #6595. Best score 610 bits

Score difference with first non-orthologous sequence - *A. fumigatus*:610 *A. fischeri*:610

afum|EAL90063.1 100.00% afis|EAW25404.1 100.00%

Bootstrap support for afum|EAL90063.1 as seed ortholog is 100%.

Bootstrap support for afis|EAW25404.1 as seed ortholog is 100%.

---

Group of orthologs #6596. Best score 609 bits

Score difference with first non-orthologous sequence - *A. fumigatus*:609 *A. fischeri*:609

afum|EAL84746.1 100.00% afis|EAW20887.1 100.00%

Bootstrap support for afum|EAL84746.1 as seed ortholog is 100%.

Bootstrap support for afis|EAW20887.1 as seed ortholog is 100%.

---

Group of orthologs #6597. Best score 609 bits

Score difference with first non-orthologous sequence - *A. fumigatus*:609 *A. fischeri*:609

afum|EAL91310.1 100.00% afis|EAW17487.1 100.00%

Bootstrap support for afum|EAL91310.1 as seed ortholog is 100%.

Bootstrap support for afis|EAW17487.1 as seed ortholog is 100%.

---

Group of orthologs #6598. Best score 609 bits

Score difference with first non-orthologous sequence - *A. fumigatus*:609 *A. fischeri*:609

afum|EAL87916.1 100.00% afis|EAW23550.1 100.00%

Bootstrap support for afum|EAL87916.1 as seed ortholog is 100%.

Bootstrap support for afis|EAW23550.1 as seed ortholog is 100%.

---

Group of orthologs #6599. Best score 609 bits

Score difference with first non-orthologous sequence - *A. fumigatus*:609 *A. fischeri*:609

afum|EAL90301.1 100.00% afis|EAW22897.1 100.00%

Bootstrap support for afum|EAL90301.1 as seed ortholog is 100%.

Bootstrap support for afis|EAW22897.1 as seed ortholog is 100%.

---

Group of orthologs #6600. Best score 608 bits

Score difference with first non-orthologous sequence - *A. fumigatus*:265 *A. fischeri*:608

afum|EAL86525.1 100.00% afis|EAW17000.1 100.00%

Bootstrap support for afum|EAL86525.1 as seed ortholog is 100%.

Bootstrap support for afis|EAW17000.1 as seed ortholog is 100%.

---

Group of orthologs #6601. Best score 608 bits

Score difference with first non-orthologous sequence - *A. fumigatus*:608 *A. fischeri*:608

afum|EAL88857.1 100.00% afis|EAW16236.1 100.00%

Bootstrap support for afum|EAL88857.1 as seed ortholog is 100%.

Bootstrap support for afis|EAW16236.1 as seed ortholog is 100%.

---

Group of orthologs #6602. Best score 608 bits

Score difference with first non-orthologous sequence - *A. fumigatus*:608 *A. fischeri*:153

afum|EAL84959.1 100.00% afis|EAW19955.1 100.00%

Bootstrap support for afum|EAL84959.1 as seed ortholog is 100%.

Bootstrap support for afis|EAW19955.1 as seed ortholog is 99%.

---

Group of orthologs #6603. Best score 608 bits

Score difference with first non-orthologous sequence - *A. fumigatus*:608 *A. fischeri*:608

afum|EAL84442.1 100.00% afis|EAW20628.1 100.00%

Bootstrap support for afum|EAL84442.1 as seed ortholog is 100%.

Bootstrap support for afis|EAW20628.1 as seed ortholog is 100%.

---

Group of orthologs #6604. Best score 608 bits

Score difference with first non-orthologous sequence - *A. fumigatus*:608 *A. fischeri*:608  
afum|EAL91470.1 100.00% afis|EAW17655.1 100.00%  
Bootstrap support for afum|EAL91470.1 as seed ortholog is 100%.  
Bootstrap support for afis|EAW17655.1 as seed ortholog is 100%.

---

Group of orthologs #6605. Best score 608 bits

Score difference with first non-orthologous sequence - *A. fumigatus*:608 *A. fischeri*:608  
afum|EAL87390.1 100.00% afis|EAW23961.1 100.00%  
Bootstrap support for afum|EAL87390.1 as seed ortholog is 100%.  
Bootstrap support for afis|EAW23961.1 as seed ortholog is 100%.

---

Group of orthologs #6606. Best score 608 bits

Score difference with first non-orthologous sequence - *A. fumigatus*:608 *A. fischeri*:608  
afum|EAL87998.1 100.00% afis|EAW23468.1 100.00%  
Bootstrap support for afum|EAL87998.1 as seed ortholog is 100%.  
Bootstrap support for afis|EAW23468.1 as seed ortholog is 100%.

---

Group of orthologs #6607. Best score 608 bits

Score difference with first non-orthologous sequence - *A. fumigatus*:546 *A. fischeri*:526  
afum|EAL88037.1 100.00% afis|EAW24602.1 100.00%  
Bootstrap support for afum|EAL88037.1 as seed ortholog is 100%.  
Bootstrap support for afis|EAW24602.1 as seed ortholog is 100%.

---

Group of orthologs #6608. Best score 608 bits

Score difference with first non-orthologous sequence - *A. fumigatus*:608 *A. fischeri*:608  
afum|EAL92451.1 100.00% afis|EAW21436.1 100.00%  
Bootstrap support for afum|EAL92451.1 as seed ortholog is 100%.  
Bootstrap support for afis|EAW21436.1 as seed ortholog is 100%.

---

Group of orthologs #6609. Best score 608 bits

Score difference with first non-orthologous sequence - *A. fumigatus*:608 *A. fischeri*:608  
afum|EAL92720.1 100.00% afis|EAW21686.1 100.00%  
Bootstrap support for afum|EAL92720.1 as seed ortholog is 100%.  
Bootstrap support for afis|EAW21686.1 as seed ortholog is 100%.

---

Group of orthologs #6610. Best score 608 bits

Score difference with first non-orthologous sequence - *A. fumigatus*:608 *A. fischeri*:608  
afum|EAL92749.1 100.00% afis|EAW21714.1 100.00%  
Bootstrap support for afum|EAL92749.1 as seed ortholog is 100%.  
Bootstrap support for afis|EAW21714.1 as seed ortholog is 100%.

---

Group of orthologs #6611. Best score 608 bits

Score difference with first non-orthologous sequence - *A. fumigatus*:608 *A. fischeri*:608  
afum|EAL93022.1 100.00% afis|EAW22007.1 100.00%  
Bootstrap support for afum|EAL93022.1 as seed ortholog is 100%.  
Bootstrap support for afis|EAW22007.1 as seed ortholog is 100%.

---

Group of orthologs #6612. Best score 607 bits

Score difference with first non-orthologous sequence - *A. fumigatus*:607 *A. fischeri*:607  
afum|EAL87972.1 100.00% afis|EAW23491.1 100.00%  
Bootstrap support for afum|EAL87972.1 as seed ortholog is 100%.  
Bootstrap support for afis|EAW23491.1 as seed ortholog is 100%.

---

Group of orthologs #6613. Best score 606 bits

Score difference with first non-orthologous sequence - *A. fumigatus*:606 *A. fischeri*:606  
afum|EAL88547.2 100.00% afis|EAW15912.1 100.00%

Bootstrap support for afum|EAL88547.2 as seed ortholog is 100%.  
Bootstrap support for afis|EAW15912.1 as seed ortholog is 100%.

---

Group of orthologs #6614. Best score 606 bits

Score difference with first non-orthologous sequence - *A. fumigatus*:606 *A. fischeri*:557

afum|EAL84984.2 100.00% afis|EAW19925.1 100.00%

Bootstrap support for afum|EAL84984.2 as seed ortholog is 100%.

Bootstrap support for afis|EAW19925.1 as seed ortholog is 100%.

---

Group of orthologs #6615. Best score 606 bits

Score difference with first non-orthologous sequence - *A. fumigatus*:606 *A. fischeri*:606

afum|EAL84895.1 100.00% afis|EAW20022.1 100.00%

Bootstrap support for afum|EAL84895.1 as seed ortholog is 100%.

Bootstrap support for afis|EAW20022.1 as seed ortholog is 100%.

---

Group of orthologs #6616. Best score 606 bits

Score difference with first non-orthologous sequence - *A. fumigatus*:606 *A. fischeri*:606

afum|EAL91373.1 100.00% afis|EAW17559.1 100.00%

Bootstrap support for afum|EAL91373.1 as seed ortholog is 100%.

Bootstrap support for afis|EAW17559.1 as seed ortholog is 100%.

---

Group of orthologs #6617. Best score 606 bits

Score difference with first non-orthologous sequence - *A. fumigatus*:606 *A. fischeri*:606

afum|EAL91778.1 100.00% afis|EAW17969.1 100.00%

Bootstrap support for afum|EAL91778.1 as seed ortholog is 100%.

Bootstrap support for afis|EAW17969.1 as seed ortholog is 100%.

---

Group of orthologs #6618. Best score 606 bits

Score difference with first non-orthologous sequence - *A. fumigatus*:606 *A. fischeri*:606

afum|EAL90289.1 100.00% afis|EAW22908.1 100.00%

Bootstrap support for afum|EAL90289.1 as seed ortholog is 100%.

Bootstrap support for afis|EAW22908.1 as seed ortholog is 100%.

---

Group of orthologs #6619. Best score 606 bits

Score difference with first non-orthologous sequence - *A. fumigatus*:606 *A. fischeri*:606

afum|EAL92507.1 100.00% afis|EAW21488.1 100.00%

Bootstrap support for afum|EAL92507.1 as seed ortholog is 100%.

Bootstrap support for afis|EAW21488.1 as seed ortholog is 100%.

---

Group of orthologs #6620. Best score 606 bits

Score difference with first non-orthologous sequence - *A. fumigatus*:606 *A. fischeri*:606

afum|EAL89967.2 100.00% afis|EAW25304.1 100.00%

Bootstrap support for afum|EAL89967.2 as seed ortholog is 100%.

Bootstrap support for afis|EAW25304.1 as seed ortholog is 100%.

---

Group of orthologs #6621. Best score 605 bits

Score difference with first non-orthologous sequence - *A. fumigatus*:605 *A. fischeri*:605

afum|EAL84719.1 100.00% afis|EAW20915.1 100.00%

Bootstrap support for afum|EAL84719.1 as seed ortholog is 100%.

Bootstrap support for afis|EAW20915.1 as seed ortholog is 100%.

---

Group of orthologs #6622. Best score 605 bits

Score difference with first non-orthologous sequence - *A. fumigatus*:605 *A. fischeri*:605

afum|EAL91510.1 100.00% afis|EAW17696.1 100.00%

Bootstrap support for afum|EAL91510.1 as seed ortholog is 100%.

Bootstrap support for afis|EAW17696.1 as seed ortholog is 100%.

---

Group of orthologs #6623. Best score 605 bits

Score difference with first non-orthologous sequence - *A. fumigatus*:605 *A. fischeri*:605

afum|EAL87394.1 100.00% afis|EAW23964.1 100.00%

Bootstrap support for afum|EAL87394.1 as seed ortholog is 100%.

Bootstrap support for afis|EAW23964.1 as seed ortholog is 100%.

---

Group of orthologs #6624. Best score 605 bits

Score difference with first non-orthologous sequence - *A. fumigatus*:535 *A. fischeri*:530

afum|EAL93741.1 100.00% afis|EAW19007.1 100.00%

Bootstrap support for afum|EAL93741.1 as seed ortholog is 100%.

Bootstrap support for afis|EAW19007.1 as seed ortholog is 100%.

---

Group of orthologs #6625. Best score 605 bits

Score difference with first non-orthologous sequence - *A. fumigatus*:389 *A. fischeri*:465

afum|EAL91098.2 100.00% afis|EAW22072.1 100.00%

Bootstrap support for afum|EAL91098.2 as seed ortholog is 100%.

Bootstrap support for afis|EAW22072.1 as seed ortholog is 100%.

---

Group of orthologs #6626. Best score 605 bits

Score difference with first non-orthologous sequence - *A. fumigatus*:605 *A. fischeri*:605

afum|EAL90457.1 100.00% afis|EAW22738.1 100.00%

Bootstrap support for afum|EAL90457.1 as seed ortholog is 100%.

Bootstrap support for afis|EAW22738.1 as seed ortholog is 100%.

---

Group of orthologs #6627. Best score 604 bits

Score difference with first non-orthologous sequence - *A. fumigatus*:604 *A. fischeri*:604

afum|EAL88660.1 100.00% afis|EAW16029.1 100.00%

Bootstrap support for afum|EAL88660.1 as seed ortholog is 100%.

Bootstrap support for afis|EAW16029.1 as seed ortholog is 100%.

---

Group of orthologs #6628. Best score 604 bits

Score difference with first non-orthologous sequence - *A. fumigatus*:604 *A. fischeri*:604

afum|EAL88756.1 100.00% afis|EAW16126.1 100.00%

Bootstrap support for afum|EAL88756.1 as seed ortholog is 100%.

Bootstrap support for afis|EAW16126.1 as seed ortholog is 100%.

---

Group of orthologs #6629. Best score 604 bits

Score difference with first non-orthologous sequence - *A. fumigatus*:604 *A. fischeri*:604

afum|EAL88943.1 100.00% afis|EAW16319.1 100.00%

Bootstrap support for afum|EAL88943.1 as seed ortholog is 100%.

Bootstrap support for afis|EAW16319.1 as seed ortholog is 100%.

---

Group of orthologs #6630. Best score 604 bits

Score difference with first non-orthologous sequence - *A. fumigatus*:604 *A. fischeri*:604

afum|EAL87515.1 100.00% afis|EAW18156.1 100.00%

Bootstrap support for afum|EAL87515.1 as seed ortholog is 100%.

Bootstrap support for afis|EAW18156.1 as seed ortholog is 100%.

---

Group of orthologs #6631. Best score 604 bits

Score difference with first non-orthologous sequence - *A. fumigatus*:496 *A. fischeri*:468

afum|EAL86018.1 100.00% afis|EAW24348.1 100.00%

Bootstrap support for afum|EAL86018.1 as seed ortholog is 100%.

Bootstrap support for afis|EAW24348.1 as seed ortholog is 100%.

---

Group of orthologs #6632. Best score 604 bits

Score difference with first non-orthologous sequence - *A. fumigatus*:510 *A. fischeri*:304  
afum|EAL94026.2 100.00% afis|EAW19309.1 100.00%  
Bootstrap support for afum|EAL94026.2 as seed ortholog is 100%.  
Bootstrap support for afis|EAW19309.1 as seed ortholog is 100%.

---

Group of orthologs #6633. Best score 604 bits

Score difference with first non-orthologous sequence - *A. fumigatus*:604 *A. fischeri*:604  
afum|EAL92047.1 100.00% afis|EAW24187.1 100.00%  
Bootstrap support for afum|EAL92047.1 as seed ortholog is 100%.  
Bootstrap support for afis|EAW24187.1 as seed ortholog is 100%.

---

Group of orthologs #6634. Best score 603 bits

Score difference with first non-orthologous sequence - *A. fumigatus*:603 *A. fischeri*:603  
afum|EAL85763.1 100.00% afis|EAW15570.1 100.00%  
Bootstrap support for afum|EAL85763.1 as seed ortholog is 100%.  
Bootstrap support for afis|EAW15570.1 as seed ortholog is 100%.

---

Group of orthologs #6635. Best score 603 bits

Score difference with first non-orthologous sequence - *A. fumigatus*:603 *A. fischeri*:603  
afum|EAL86404.1 100.00% afis|EAW16865.1 100.00%  
Bootstrap support for afum|EAL86404.1 as seed ortholog is 100%.  
Bootstrap support for afis|EAW16865.1 as seed ortholog is 100%.

---

Group of orthologs #6636. Best score 603 bits

Score difference with first non-orthologous sequence - *A. fumigatus*:603 *A. fischeri*:603  
afum|EAL85465.1 100.00% afis|EAW20345.1 100.00%  
Bootstrap support for afum|EAL85465.1 as seed ortholog is 100%.  
Bootstrap support for afis|EAW20345.1 as seed ortholog is 100%.

---

Group of orthologs #6637. Best score 603 bits

Score difference with first non-orthologous sequence - *A. fumigatus*:603 *A. fischeri*:438  
afum|EAL87122.2 100.00% afis|EAW23679.1 100.00%  
Bootstrap support for afum|EAL87122.2 as seed ortholog is 100%.  
Bootstrap support for afis|EAW23679.1 as seed ortholog is 100%.

---

Group of orthologs #6638. Best score 603 bits

Score difference with first non-orthologous sequence - *A. fumigatus*:543 *A. fischeri*:603  
afum|EAL92176.1 100.00% afis|EAW21158.1 100.00%  
Bootstrap support for afum|EAL92176.1 as seed ortholog is 100%.  
Bootstrap support for afis|EAW21158.1 as seed ortholog is 100%.

---

Group of orthologs #6639. Best score 603 bits

Score difference with first non-orthologous sequence - *A. fumigatus*:603 *A. fischeri*:543  
afum|EAL92239.2 100.00% afis|EAW21227.1 100.00%  
Bootstrap support for afum|EAL92239.2 as seed ortholog is 100%.  
Bootstrap support for afis|EAW21227.1 as seed ortholog is 100%.

---

Group of orthologs #6640. Best score 603 bits

Score difference with first non-orthologous sequence - *A. fumigatus*:553 *A. fischeri*:532  
afum|EAL89315.1 100.00% afis|EAW24655.1 100.00%  
Bootstrap support for afum|EAL89315.1 as seed ortholog is 100%.  
Bootstrap support for afis|EAW24655.1 as seed ortholog is 100%.

---

Group of orthologs #6641. Best score 603 bits

Score difference with first non-orthologous sequence - *A. fumigatus*:603 *A. fischeri*:603  
afum|EAL89546.1 100.00% afis|EAW24893.1 100.00%

Bootstrap support for afum|EAL89546.1 as seed ortholog is 100%.  
Bootstrap support for afis|EAW24893.1 as seed ortholog is 100%.

---

Group of orthologs #6642. Best score 603 bits

Score difference with first non-orthologous sequence - *A. fumigatus*:603 *A. fischeri*:282

afum|EAL90002.1 100.00% afis|EAW25339.1 100.00%

Bootstrap support for afum|EAL90002.1 as seed ortholog is 100%.

Bootstrap support for afis|EAW25339.1 as seed ortholog is 100%.

---

Group of orthologs #6643. Best score 603 bits

Score difference with first non-orthologous sequence - *A. fumigatus*:603 *A. fischeri*:603

afum|EAL90058.1 100.00% afis|EAW25399.1 100.00%

Bootstrap support for afum|EAL90058.1 as seed ortholog is 100%.

Bootstrap support for afis|EAW25399.1 as seed ortholog is 100%.

---

Group of orthologs #6644. Best score 602 bits

Score difference with first non-orthologous sequence - *A. fumigatus*:602 *A. fischeri*:602

afum|EAL85397.1 100.00% afis|EAW17757.1 100.00%

Bootstrap support for afum|EAL85397.1 as seed ortholog is 100%.

Bootstrap support for afis|EAW17757.1 as seed ortholog is 100%.

---

Group of orthologs #6645. Best score 602 bits

Score difference with first non-orthologous sequence - *A. fumigatus*:602 *A. fischeri*:602

afum|EAL84472.1 100.00% afis|EAW20589.1 100.00%

Bootstrap support for afum|EAL84472.1 as seed ortholog is 100%.

Bootstrap support for afis|EAW20589.1 as seed ortholog is 100%.

---

Group of orthologs #6646. Best score 602 bits

Score difference with first non-orthologous sequence - *A. fumigatus*:602 *A. fischeri*:602

afum|EAL93686.1 100.00% afis|EAW18951.1 100.00%

Bootstrap support for afum|EAL93686.1 as seed ortholog is 100%.

Bootstrap support for afis|EAW18951.1 as seed ortholog is 100%.

---

Group of orthologs #6647. Best score 602 bits

Score difference with first non-orthologous sequence - *A. fumigatus*:602 *A. fischeri*:602

afum|EAL92989.1 100.00% afis|EAW21974.1 100.00%

Bootstrap support for afum|EAL92989.1 as seed ortholog is 100%.

Bootstrap support for afis|EAW21974.1 as seed ortholog is 100%.

---

Group of orthologs #6648. Best score 601 bits

Score difference with first non-orthologous sequence - *A. fumigatus*:601 *A. fischeri*:601

afum|EAL84664.1 100.00% afis|EAW20970.1 100.00%

Bootstrap support for afum|EAL84664.1 as seed ortholog is 100%.

Bootstrap support for afis|EAW20970.1 as seed ortholog is 100%.

---

Group of orthologs #6649. Best score 601 bits

Score difference with first non-orthologous sequence - *A. fumigatus*:601 *A. fischeri*:452

afum|EAL86229.1 100.00% afis|EAW24566.1 100.00%

Bootstrap support for afum|EAL86229.1 as seed ortholog is 100%.

Bootstrap support for afis|EAW24566.1 as seed ortholog is 100%.

---

Group of orthologs #6650. Best score 601 bits

Score difference with first non-orthologous sequence - *A. fumigatus*:601 *A. fischeri*:601

afum|EAL93839.1 100.00% afis|EAW19108.1 100.00%

Bootstrap support for afum|EAL93839.1 as seed ortholog is 100%.

Bootstrap support for afis|EAW19108.1 as seed ortholog is 100%.

---

Group of orthologs #6651. Best score 601 bits

Score difference with first non-orthologous sequence - *A. fumigatus*:418 *A. fischeri*:340

afum|EAL94053.1 100.00% afis|EAW19336.1 100.00%

Bootstrap support for afum|EAL94053.1 as seed ortholog is 100%.

Bootstrap support for afis|EAW19336.1 as seed ortholog is 100%.

---

Group of orthologs #6652. Best score 600 bits

Score difference with first non-orthologous sequence - *A. fumigatus*:600 *A. fischeri*:600

afum|EAL86298.1 100.00% afis|EAW16724.1 100.00%

Bootstrap support for afum|EAL86298.1 as seed ortholog is 100%.

Bootstrap support for afis|EAW16724.1 as seed ortholog is 100%.

---

Group of orthologs #6653. Best score 600 bits

Score difference with first non-orthologous sequence - *A. fumigatus*:600 *A. fischeri*:496

afum|EAL92076.2 100.00% afis|EAW21037.1 100.00%

Bootstrap support for afum|EAL92076.2 as seed ortholog is 100%.

Bootstrap support for afis|EAW21037.1 as seed ortholog is 100%.

---

Group of orthologs #6654. Best score 600 bits

Score difference with first non-orthologous sequence - *A. fumigatus*:600 *A. fischeri*:600

afum|EAL90383.1 100.00% afis|EAW22818.1 100.00%

Bootstrap support for afum|EAL90383.1 as seed ortholog is 100%.

Bootstrap support for afis|EAW22818.1 as seed ortholog is 100%.

---

Group of orthologs #6655. Best score 600 bits

Score difference with first non-orthologous sequence - *A. fumigatus*:600 *A. fischeri*:551

afum|EAL94085.1 100.00% afis|EAW19366.1 100.00%

Bootstrap support for afum|EAL94085.1 as seed ortholog is 100%.

Bootstrap support for afis|EAW19366.1 as seed ortholog is 100%.

---

Group of orthologs #6656. Best score 600 bits

Score difference with first non-orthologous sequence - *A. fumigatus*:600 *A. fischeri*:600

afum|EAL92580.1 100.00% afis|EAW21561.1 100.00%

Bootstrap support for afum|EAL92580.1 as seed ortholog is 100%.

Bootstrap support for afis|EAW21561.1 as seed ortholog is 100%.

---

Group of orthologs #6657. Best score 600 bits

Score difference with first non-orthologous sequence - *A. fumigatus*:600 *A. fischeri*:600

afum|EAL89864.1 100.00% afis|EAW25201.1 100.00%

Bootstrap support for afum|EAL89864.1 as seed ortholog is 100%.

Bootstrap support for afis|EAW25201.1 as seed ortholog is 100%.

---

Group of orthologs #6658. Best score 599 bits

Score difference with first non-orthologous sequence - *A. fumigatus*:599 *A. fischeri*:599

afum|EAL88831.1 100.00% afis|EAW16203.1 100.00%

Bootstrap support for afum|EAL88831.1 as seed ortholog is 100%.

Bootstrap support for afis|EAW16203.1 as seed ortholog is 100%.

---

Group of orthologs #6659. Best score 599 bits

Score difference with first non-orthologous sequence - *A. fumigatus*:599 *A. fischeri*:599

afum|EAL85056.1 100.00% afis|EAW19836.1 100.00%

Bootstrap support for afum|EAL85056.1 as seed ortholog is 100%.

Bootstrap support for afis|EAW19836.1 as seed ortholog is 100%.

---

Group of orthologs #6660. Best score 599 bits



Score difference with first non-orthologous sequence - *A. fumigatus*:599 *A. fischeri*:599  
afum|EAL84926.1 100.00% afis|EAW19989.1 100.00%  
Bootstrap support for afum|EAL84926.1 as seed ortholog is 100%.  
Bootstrap support for afis|EAW19989.1 as seed ortholog is 100%.

---

Group of orthologs #6661. Best score 599 bits

Score difference with first non-orthologous sequence - *A. fumigatus*:599 *A. fischeri*:599  
afum|EAL91335.1 100.00% afis|EAW17517.1 100.00%  
Bootstrap support for afum|EAL91335.1 as seed ortholog is 100%.  
Bootstrap support for afis|EAW17517.1 as seed ortholog is 100%.

---

Group of orthologs #6662. Best score 599 bits

Score difference with first non-orthologous sequence - *A. fumigatus*:599 *A. fischeri*:599  
afum|EAL91892.1 100.00% afis|EAW18080.1 100.00%  
Bootstrap support for afum|EAL91892.1 as seed ortholog is 100%.  
Bootstrap support for afis|EAW18080.1 as seed ortholog is 100%.

---

Group of orthologs #6663. Best score 599 bits

Score difference with first non-orthologous sequence - *A. fumigatus*:599 *A. fischeri*:599  
afum|EAL92839.1 100.00% afis|EAW21823.1 100.00%  
Bootstrap support for afum|EAL92839.1 as seed ortholog is 100%.  
Bootstrap support for afis|EAW21823.1 as seed ortholog is 100%.

---

Group of orthologs #6664. Best score 598 bits

Score difference with first non-orthologous sequence - *A. fumigatus*:598 *A. fischeri*:598  
afum|EAL84219.1 100.00% afis|EAW15425.1 100.00%  
Bootstrap support for afum|EAL84219.1 as seed ortholog is 100%.  
Bootstrap support for afis|EAW15425.1 as seed ortholog is 100%.

---

Group of orthologs #6665. Best score 598 bits

Score difference with first non-orthologous sequence - *A. fumigatus*:598 *A. fischeri*:598  
afum|EAL84489.1 100.00% afis|EAW20576.1 100.00%  
Bootstrap support for afum|EAL84489.1 as seed ortholog is 100%.  
Bootstrap support for afis|EAW20576.1 as seed ortholog is 100%.

---

Group of orthologs #6666. Best score 598 bits

Score difference with first non-orthologous sequence - *A. fumigatus*:598 *A. fischeri*:598  
afum|EAL86823.1 100.00% afis|EAW19703.1 100.00%  
Bootstrap support for afum|EAL86823.1 as seed ortholog is 100%.  
Bootstrap support for afis|EAW19703.1 as seed ortholog is 100%.

---

Group of orthologs #6667. Best score 598 bits

Score difference with first non-orthologous sequence - *A. fumigatus*:598 *A. fischeri*:598  
afum|EAL91331.1 100.00% afis|EAW17512.1 100.00%  
Bootstrap support for afum|EAL91331.1 as seed ortholog is 100%.  
Bootstrap support for afis|EAW17512.1 as seed ortholog is 100%.

---

Group of orthologs #6668. Best score 598 bits

Score difference with first non-orthologous sequence - *A. fumigatus*:146 *A. fischeri*:412  
afum|EAL89354.1 100.00% afis|EAW20704.1 100.00%  
Bootstrap support for afum|EAL89354.1 as seed ortholog is 97%.  
Bootstrap support for afis|EAW20704.1 as seed ortholog is 100%.

---

Group of orthologs #6669. Best score 598 bits

Score difference with first non-orthologous sequence - *A. fumigatus*:598 *A. fischeri*:598  
afum|EAL86089.1 100.00% afis|EAW24420.1 100.00%

Bootstrap support for afum|EAL86089.1 as seed ortholog is 100%.  
Bootstrap support for afis|EAW24420.1 as seed ortholog is 100%.

---

Group of orthologs #6670. Best score 598 bits

Score difference with first non-orthologous sequence - *A. fumigatus*:598 *A. fischeri*:598

afum|EAL93780.1 100.00% afis|EAW19051.1 100.00%

Bootstrap support for afum|EAL93780.1 as seed ortholog is 100%.

Bootstrap support for afis|EAW19051.1 as seed ortholog is 100%.

---

Group of orthologs #6671. Best score 598 bits

Score difference with first non-orthologous sequence - *A. fumigatus*:598 *A. fischeri*:365

afum|EAL90907.1 100.00% afis|EAW22274.1 100.00%

Bootstrap support for afum|EAL90907.1 as seed ortholog is 100%.

Bootstrap support for afis|EAW22274.1 as seed ortholog is 100%.

---

Group of orthologs #6672. Best score 598 bits

Score difference with first non-orthologous sequence - *A. fumigatus*:598 *A. fischeri*:598

afum|EAL90658.1 100.00% afis|EAW22536.1 100.00%

Bootstrap support for afum|EAL90658.1 as seed ortholog is 100%.

Bootstrap support for afis|EAW22536.1 as seed ortholog is 100%.

---

Group of orthologs #6673. Best score 598 bits

Score difference with first non-orthologous sequence - *A. fumigatus*:598 *A. fischeri*:598

afum|EAL92276.1 100.00% afis|EAW21261.1 100.00%

Bootstrap support for afum|EAL92276.1 as seed ortholog is 100%.

Bootstrap support for afis|EAW21261.1 as seed ortholog is 100%.

---

Group of orthologs #6674. Best score 597 bits

Score difference with first non-orthologous sequence - *A. fumigatus*:597 *A. fischeri*:597

afum|EAL84751.1 100.00% afis|EAW20881.1 100.00%

Bootstrap support for afum|EAL84751.1 as seed ortholog is 100%.

Bootstrap support for afis|EAW20881.1 as seed ortholog is 100%.

---

Group of orthologs #6675. Best score 597 bits

Score difference with first non-orthologous sequence - *A. fumigatus*:597 *A. fischeri*:505

afum|EAL86019.2 100.00% afis|EAW24349.1 100.00%

Bootstrap support for afum|EAL86019.2 as seed ortholog is 100%.

Bootstrap support for afis|EAW24349.1 as seed ortholog is 100%.

---

Group of orthologs #6676. Best score 597 bits

Score difference with first non-orthologous sequence - *A. fumigatus*:509 *A. fischeri*:490

afum|EAL87238.1 100.00% afis|EAW23804.1 100.00%

Bootstrap support for afum|EAL87238.1 as seed ortholog is 100%.

Bootstrap support for afis|EAW23804.1 as seed ortholog is 100%.

---

Group of orthologs #6677. Best score 597 bits

Score difference with first non-orthologous sequence - *A. fumigatus*:597 *A. fischeri*:597

afum|EAL93355.1 100.00% afis|EAW18641.1 100.00%

Bootstrap support for afum|EAL93355.1 as seed ortholog is 100%.

Bootstrap support for afis|EAW18641.1 as seed ortholog is 100%.

---

Group of orthologs #6678. Best score 597 bits

Score difference with first non-orthologous sequence - *A. fumigatus*:484 *A. fischeri*:489

afum|EBA27437.1 100.00% afis|EAW17673.1 100.00%

Bootstrap support for afum|EBA27437.1 as seed ortholog is 100%.

Bootstrap support for afis|EAW17673.1 as seed ortholog is 100%.

---

Group of orthologs #6679. Best score 597 bits

Score difference with first non-orthologous sequence - *A. fumigatus*:597 *A. fischeri*:597

afum|EAL93473.1 100.00% afis|EAW18747.1 100.00%

Bootstrap support for afum|EAL93473.1 as seed ortholog is 100%.

Bootstrap support for afis|EAW18747.1 as seed ortholog is 100%.

---

Group of orthologs #6680. Best score 597 bits

Score difference with first non-orthologous sequence - *A. fumigatus*:597 *A. fischeri*:597

afum|EAL89510.1 100.00% afis|EAW24861.1 100.00%

Bootstrap support for afum|EAL89510.1 as seed ortholog is 100%.

Bootstrap support for afis|EAW24861.1 as seed ortholog is 100%.

---

Group of orthologs #6681. Best score 597 bits

Score difference with first non-orthologous sequence - *A. fumigatus*:597 *A. fischeri*:597

afum|EAL92901.1 100.00% afis|EAW21887.1 100.00%

Bootstrap support for afum|EAL92901.1 as seed ortholog is 100%.

Bootstrap support for afis|EAW21887.1 as seed ortholog is 100%.

---

Group of orthologs #6682. Best score 597 bits

Score difference with first non-orthologous sequence - *A. fumigatus*:597 *A. fischeri*:597

afum|EAL89945.1 100.00% afis|EAW25282.1 100.00%

Bootstrap support for afum|EAL89945.1 as seed ortholog is 100%.

Bootstrap support for afis|EAW25282.1 as seed ortholog is 100%.

---

Group of orthologs #6683. Best score 597 bits

Score difference with first non-orthologous sequence - *A. fumigatus*:249 *A. fischeri*:597

afum|EAL90121.1 100.00% afis|EAW25460.1 100.00%

Bootstrap support for afum|EAL90121.1 as seed ortholog is 100%.

Bootstrap support for afis|EAW25460.1 as seed ortholog is 100%.

---

Group of orthologs #6684. Best score 596 bits

Score difference with first non-orthologous sequence - *A. fumigatus*:596 *A. fischeri*:532

afum|EAL86430.2 100.00% afis|EAW16892.1 100.00%

Bootstrap support for afum|EAL86430.2 as seed ortholog is 100%.

Bootstrap support for afis|EAW16892.1 as seed ortholog is 100%.

---

Group of orthologs #6685. Best score 596 bits

Score difference with first non-orthologous sequence - *A. fumigatus*:372 *A. fischeri*:433

afum|EAL84504.1 100.00% afis|EAW20557.1 100.00%

Bootstrap support for afum|EAL84504.1 as seed ortholog is 100%.

Bootstrap support for afis|EAW20557.1 as seed ortholog is 100%.

---

Group of orthologs #6686. Best score 596 bits

Score difference with first non-orthologous sequence - *A. fumigatus*:184 *A. fischeri*:49

afum|EAL84279.2 100.00% afis|EAW25556.1 100.00%

Bootstrap support for afum|EAL84279.2 as seed ortholog is 100%.

Bootstrap support for afis|EAW25556.1 as seed ortholog is 99%.

---

Group of orthologs #6687. Best score 596 bits

Score difference with first non-orthologous sequence - *A. fumigatus*:596 *A. fischeri*:596

afum|EAL87212.1 100.00% afis|EAW23778.1 100.00%

Bootstrap support for afum|EAL87212.1 as seed ortholog is 100%.

Bootstrap support for afis|EAW23778.1 as seed ortholog is 100%.

---

Group of orthologs #6688. Best score 596 bits

Score difference with first non-orthologous sequence - *A. fumigatus*:596 *A. fischeri*:596  
afum|EAL87395.1 100.00% afis|EAW23965.1 100.00%  
Bootstrap support for afum|EAL87395.1 as seed ortholog is 100%.  
Bootstrap support for afis|EAW23965.1 as seed ortholog is 100%.

---

Group of orthologs #6689. Best score 596 bits

Score difference with first non-orthologous sequence - *A. fumigatus*:596 *A. fischeri*:493  
afum|EAL88325.1 100.00% afis|EAW23158.1 100.00%  
Bootstrap support for afum|EAL88325.1 as seed ortholog is 100%.  
Bootstrap support for afis|EAW23158.1 as seed ortholog is 100%.

---

Group of orthologs #6690. Best score 596 bits

Score difference with first non-orthologous sequence - *A. fumigatus*:596 *A. fischeri*:596  
afum|EAL92654.1 100.00% afis|EAW21618.1 100.00%  
Bootstrap support for afum|EAL92654.1 as seed ortholog is 100%.  
Bootstrap support for afis|EAW21618.1 as seed ortholog is 100%.

---

Group of orthologs #6691. Best score 595 bits

Score difference with first non-orthologous sequence - *A. fumigatus*:595 *A. fischeri*:595  
afum|EAL87097.1 100.00% afis|EAW19397.1 100.00%  
Bootstrap support for afum|EAL87097.1 as seed ortholog is 100%.  
Bootstrap support for afis|EAW19397.1 as seed ortholog is 100%.

---

Group of orthologs #6692. Best score 595 bits

Score difference with first non-orthologous sequence - *A. fumigatus*:595 *A. fischeri*:595  
afum|EAL90555.1 100.00% afis|EAW22637.1 100.00%  
Bootstrap support for afum|EAL90555.1 as seed ortholog is 100%.  
Bootstrap support for afis|EAW22637.1 as seed ortholog is 100%.

---

Group of orthologs #6693. Best score 595 bits

Score difference with first non-orthologous sequence - *A. fumigatus*:595 *A. fischeri*:595  
afum|EAL89604.1 100.00% afis|EAW24947.1 100.00%  
Bootstrap support for afum|EAL89604.1 as seed ortholog is 100%.  
Bootstrap support for afis|EAW24947.1 as seed ortholog is 100%.

---

Group of orthologs #6694. Best score 594 bits

Score difference with first non-orthologous sequence - *A. fumigatus*:594 *A. fischeri*:515  
afum|EAL85008.1 100.00% afis|EAW18941.1 100.00%  
Bootstrap support for afum|EAL85008.1 as seed ortholog is 100%.  
Bootstrap support for afis|EAW18941.1 as seed ortholog is 100%.

---

Group of orthologs #6695. Best score 594 bits

Score difference with first non-orthologous sequence - *A. fumigatus*:495 *A. fischeri*:479  
afum|EAL88764.1 100.00% afis|EAW16134.1 100.00%  
Bootstrap support for afum|EAL88764.1 as seed ortholog is 100%.  
Bootstrap support for afis|EAW16134.1 as seed ortholog is 100%.

---

Group of orthologs #6696. Best score 594 bits

Score difference with first non-orthologous sequence - *A. fumigatus*:594 *A. fischeri*:594  
afum|EAL85084.1 100.00% afis|EAW19808.1 100.00%  
Bootstrap support for afum|EAL85084.1 as seed ortholog is 100%.  
Bootstrap support for afis|EAW19808.1 as seed ortholog is 100%.

---

Group of orthologs #6697. Best score 594 bits

Score difference with first non-orthologous sequence - *A. fumigatus*:594 *A. fischeri*:594  
afum|EAL85017.1 100.00% afis|EAW19881.1 100.00%

Bootstrap support for afum|EAL85017.1 as seed ortholog is 100%.  
Bootstrap support for afis|EAW19881.1 as seed ortholog is 100%.

---

Group of orthologs #6698. Best score 594 bits

Score difference with first non-orthologous sequence - *A. fumigatus*:594 *A. fischeri*:594

afum|EAL85355.1 100.00% afis|EAW20237.1 100.00%

Bootstrap support for afum|EAL85355.1 as seed ortholog is 100%.

Bootstrap support for afis|EAW20237.1 as seed ortholog is 100%.

---

Group of orthologs #6699. Best score 594 bits

Score difference with first non-orthologous sequence - *A. fumigatus*:594 *A. fischeri*:594

afum|EAL91730.1 100.00% afis|EAW17919.1 100.00%

Bootstrap support for afum|EAL91730.1 as seed ortholog is 100%.

Bootstrap support for afis|EAW17919.1 as seed ortholog is 100%.

---

Group of orthologs #6700. Best score 594 bits

Score difference with first non-orthologous sequence - *A. fumigatus*:594 *A. fischeri*:594

afum|EAL88152.1 100.00% afis|EAW23327.1 100.00%

Bootstrap support for afum|EAL88152.1 as seed ortholog is 100%.

Bootstrap support for afis|EAW23327.1 as seed ortholog is 100%.

---

Group of orthologs #6701. Best score 594 bits

Score difference with first non-orthologous sequence - *A. fumigatus*:594 *A. fischeri*:594

afum|EAL90169.2 100.00% afis|EAW25503.1 100.00%

Bootstrap support for afum|EAL90169.2 as seed ortholog is 100%.

Bootstrap support for afis|EAW25503.1 as seed ortholog is 100%.

---

Group of orthologs #6702. Best score 593 bits

Score difference with first non-orthologous sequence - *A. fumigatus*:518 *A. fischeri*:479

afum|EAL88848.1 100.00% afis|EAW16220.1 100.00%

Bootstrap support for afum|EAL88848.1 as seed ortholog is 100%.

Bootstrap support for afis|EAW16220.1 as seed ortholog is 100%.

---

Group of orthologs #6703. Best score 593 bits

Score difference with first non-orthologous sequence - *A. fumigatus*:593 *A. fischeri*:593

afum|EAL91356.1 100.00% afis|EAW17542.1 100.00%

Bootstrap support for afum|EAL91356.1 as seed ortholog is 100%.

Bootstrap support for afis|EAW17542.1 as seed ortholog is 100%.

---

Group of orthologs #6704. Best score 593 bits

Score difference with first non-orthologous sequence - *A. fumigatus*:593 *A. fischeri*:593

afum|EAL91518.1 100.00% afis|EAW17703.1 100.00%

Bootstrap support for afum|EAL91518.1 as seed ortholog is 100%.

Bootstrap support for afis|EAW17703.1 as seed ortholog is 100%.

---

Group of orthologs #6705. Best score 593 bits

Score difference with first non-orthologous sequence - *A. fumigatus*:593 *A. fischeri*:593

afum|EAL91535.2 100.00% afis|EAW17720.1 100.00%

Bootstrap support for afum|EAL91535.2 as seed ortholog is 100%.

Bootstrap support for afis|EAW17720.1 as seed ortholog is 100%.

---

Group of orthologs #6706. Best score 593 bits

Score difference with first non-orthologous sequence - *A. fumigatus*:593 *A. fischeri*:593

afum|EAL89232.1 100.00% afis|EAW20412.1 100.00%

Bootstrap support for afum|EAL89232.1 as seed ortholog is 100%.

Bootstrap support for afis|EAW20412.1 as seed ortholog is 100%.

---

Group of orthologs #6707. Best score 593 bits

Score difference with first non-orthologous sequence - *A. fumigatus*:593 *A. fischeri*:593

afum|EAL91027.1 100.00% afis|EAW22164.1 100.00%

Bootstrap support for afum|EAL91027.1 as seed ortholog is 100%.

Bootstrap support for afis|EAW22164.1 as seed ortholog is 100%.

---

Group of orthologs #6708. Best score 593 bits

Score difference with first non-orthologous sequence - *A. fumigatus*:593 *A. fischeri*:593

afum|EAL92000.1 100.00% afis|EAW24145.1 100.00%

Bootstrap support for afum|EAL92000.1 as seed ortholog is 100%.

Bootstrap support for afis|EAW24145.1 as seed ortholog is 100%.

---

Group of orthologs #6709. Best score 592 bits

Score difference with first non-orthologous sequence - *A. fumigatus*:592 *A. fischeri*:592

afum|EAL88712.1 100.00% afis|EAW16080.1 100.00%

Bootstrap support for afum|EAL88712.1 as seed ortholog is 100%.

Bootstrap support for afis|EAW16080.1 as seed ortholog is 100%.

---

Group of orthologs #6710. Best score 592 bits

Score difference with first non-orthologous sequence - *A. fumigatus*:592 *A. fischeri*:432

afum|EAL87472.1 100.00% afis|EAW18115.1 100.00%

Bootstrap support for afum|EAL87472.1 as seed ortholog is 100%.

Bootstrap support for afis|EAW18115.1 as seed ortholog is 100%.

---

Group of orthologs #6711. Best score 592 bits

Score difference with first non-orthologous sequence - *A. fumigatus*:592 *A. fischeri*:592

afum|EAL91634.1 100.00% afis|EAW17824.1 100.00%

Bootstrap support for afum|EAL91634.1 as seed ortholog is 100%.

Bootstrap support for afis|EAW17824.1 as seed ortholog is 100%.

---

Group of orthologs #6712. Best score 592 bits

Score difference with first non-orthologous sequence - *A. fumigatus*:592 *A. fischeri*:542

afum|EAL93072.1 100.00% afis|EAW18396.1 100.00%

Bootstrap support for afum|EAL93072.1 as seed ortholog is 100%.

Bootstrap support for afis|EAW18396.1 as seed ortholog is 100%.

---

Group of orthologs #6713. Best score 592 bits

Score difference with first non-orthologous sequence - *A. fumigatus*:592 *A. fischeri*:592

afum|EAL88286.1 100.00% afis|EAW23197.1 100.00%

Bootstrap support for afum|EAL88286.1 as seed ortholog is 100%.

Bootstrap support for afis|EAW23197.1 as seed ortholog is 100%.

---

Group of orthologs #6714. Best score 592 bits

Score difference with first non-orthologous sequence - *A. fumigatus*:592 *A. fischeri*:461

afum|EAL93955.1 100.00% afis|EAW19224.1 100.00%

Bootstrap support for afum|EAL93955.1 as seed ortholog is 100%.

Bootstrap support for afis|EAW19224.1 as seed ortholog is 100%.

---

Group of orthologs #6715. Best score 592 bits

Score difference with first non-orthologous sequence - *A. fumigatus*:592 *A. fischeri*:592

afum|EAL92541.1 100.00% afis|EAW21520.1 100.00%

Bootstrap support for afum|EAL92541.1 as seed ortholog is 100%.

Bootstrap support for afis|EAW21520.1 as seed ortholog is 100%.

---

Group of orthologs #6716. Best score 591 bits

Score difference with first non-orthologous sequence - *A. fumigatus*:591 *A. fischeri*:591  
afum|EAL84649.2 100.00% afis|EAW20981.1 100.00%  
Bootstrap support for afum|EAL84649.2 as seed ortholog is 100%.  
Bootstrap support for afis|EAW20981.1 as seed ortholog is 100%.

---

Group of orthologs #6717. Best score 591 bits

Score difference with first non-orthologous sequence - *A. fumigatus*:591 *A. fischeri*:591  
afum|EAL85447.1 100.00% afis|EAW20319.1 100.00%  
Bootstrap support for afum|EAL85447.1 as seed ortholog is 100%.  
Bootstrap support for afis|EAW20319.1 as seed ortholog is 100%.

---

Group of orthologs #6718. Best score 591 bits

Score difference with first non-orthologous sequence - *A. fumigatus*:591 *A. fischeri*:591  
afum|EAL87826.1 100.00% afis|EAW23634.1 100.00%  
Bootstrap support for afum|EAL87826.1 as seed ortholog is 100%.  
Bootstrap support for afis|EAW23634.1 as seed ortholog is 100%.

---

Group of orthologs #6719. Best score 591 bits

Score difference with first non-orthologous sequence - *A. fumigatus*:591 *A. fischeri*:591  
afum|EAL90467.1 100.00% afis|EAW22728.1 100.00%  
Bootstrap support for afum|EAL90467.1 as seed ortholog is 100%.  
Bootstrap support for afis|EAW22728.1 as seed ortholog is 100%.

---

Group of orthologs #6720. Best score 591 bits

Score difference with first non-orthologous sequence - *A. fumigatus*:591 *A. fischeri*:591  
afum|EAL90414.1 100.00% afis|EAW22785.1 100.00%  
Bootstrap support for afum|EAL90414.1 as seed ortholog is 100%.  
Bootstrap support for afis|EAW22785.1 as seed ortholog is 100%.

---

Group of orthologs #6721. Best score 591 bits

Score difference with first non-orthologous sequence - *A. fumigatus*:591 *A. fischeri*:591  
afum|EBA27183.1 100.00% afis|EAW20555.1 100.00%  
Bootstrap support for afum|EBA27183.1 as seed ortholog is 100%.  
Bootstrap support for afis|EAW20555.1 as seed ortholog is 100%.

---

Group of orthologs #6722. Best score 591 bits

Score difference with first non-orthologous sequence - *A. fumigatus*:591 *A. fischeri*:591  
afum|EAL89744.1 100.00% afis|EAW25075.1 100.00%  
Bootstrap support for afum|EAL89744.1 as seed ortholog is 100%.  
Bootstrap support for afis|EAW25075.1 as seed ortholog is 100%.

---

Group of orthologs #6723. Best score 590 bits

Score difference with first non-orthologous sequence - *A. fumigatus*:282 *A. fischeri*:415  
afum|EAL86534.1 100.00% afis|EAW16825.1 100.00%  
Bootstrap support for afum|EAL86534.1 as seed ortholog is 100%.  
Bootstrap support for afis|EAW16825.1 as seed ortholog is 100%.

---

Group of orthologs #6724. Best score 590 bits

Score difference with first non-orthologous sequence - *A. fumigatus*:590 *A. fischeri*:590  
afum|EAL88557.2 100.00% afis|EAW15921.1 100.00%  
Bootstrap support for afum|EAL88557.2 as seed ortholog is 100%.  
Bootstrap support for afis|EAW15921.1 as seed ortholog is 100%.

---

Group of orthologs #6725. Best score 590 bits

Score difference with first non-orthologous sequence - *A. fumigatus*:590 *A. fischeri*:455  
afum|EAL85127.1 100.00% afis|EAW19773.1 100.00%

Bootstrap support for afum|EAL85127.1 as seed ortholog is 100%.  
Bootstrap support for afis|EAW19773.1 as seed ortholog is 100%.

---

Group of orthologs #6726. Best score 590 bits

Score difference with first non-orthologous sequence - *A. fumigatus*:590 *A. fischeri*:590

afum|EAL84536.1 100.00% afis|EAW20521.1 100.00%

Bootstrap support for afum|EAL84536.1 as seed ortholog is 100%.

Bootstrap support for afis|EAW20521.1 as seed ortholog is 100%.

---

Group of orthologs #6727. Best score 590 bits

Score difference with first non-orthologous sequence - *A. fumigatus*:590 *A. fischeri*:590

afum|EAL85244.1 100.00% afis|EAW20126.1 100.00%

Bootstrap support for afum|EAL85244.1 as seed ortholog is 100%.

Bootstrap support for afis|EAW20126.1 as seed ortholog is 100%.

---

Group of orthologs #6728. Best score 590 bits

Score difference with first non-orthologous sequence - *A. fumigatus*:590 *A. fischeri*:590

afum|EAL87155.1 100.00% afis|EAW23711.1 100.00%

Bootstrap support for afum|EAL87155.1 as seed ortholog is 100%.

Bootstrap support for afis|EAW23711.1 as seed ortholog is 100%.

---

Group of orthologs #6729. Best score 589 bits

Score difference with first non-orthologous sequence - *A. fumigatus*:589 *A. fischeri*:589

afum|EAL88492.1 100.00% afis|EAW15856.1 100.00%

Bootstrap support for afum|EAL88492.1 as seed ortholog is 100%.

Bootstrap support for afis|EAW15856.1 as seed ortholog is 100%.

---

Group of orthologs #6730. Best score 589 bits

Score difference with first non-orthologous sequence - *A. fumigatus*:589 *A. fischeri*:589

afum|EAL88645.1 100.00% afis|EAW16016.1 100.00%

Bootstrap support for afum|EAL88645.1 as seed ortholog is 100%.

Bootstrap support for afis|EAW16016.1 as seed ortholog is 100%.

---

Group of orthologs #6731. Best score 589 bits

Score difference with first non-orthologous sequence - *A. fumigatus*:589 *A. fischeri*:589

afum|EAL89202.2 100.00% afis|EAW16605.1 100.00%

Bootstrap support for afum|EAL89202.2 as seed ortholog is 100%.

Bootstrap support for afis|EAW16605.1 as seed ortholog is 100%.

---

Group of orthologs #6732. Best score 589 bits

Score difference with first non-orthologous sequence - *A. fumigatus*:589 *A. fischeri*:589

afum|EAL87660.1 100.00% afis|EAW18294.1 100.00%

Bootstrap support for afum|EAL87660.1 as seed ortholog is 100%.

Bootstrap support for afis|EAW18294.1 as seed ortholog is 100%.

---

Group of orthologs #6733. Best score 589 bits

Score difference with first non-orthologous sequence - *A. fumigatus*:589 *A. fischeri*:589

afum|EAL87074.1 100.00% afis|EAW19420.1 100.00%

Bootstrap support for afum|EAL87074.1 as seed ortholog is 100%.

Bootstrap support for afis|EAW19420.1 as seed ortholog is 100%.

---

Group of orthologs #6734. Best score 589 bits

Score difference with first non-orthologous sequence - *A. fumigatus*:589 *A. fischeri*:589

afum|EBA27379.1 100.00% afis|EAW24739.1 100.00%

Bootstrap support for afum|EBA27379.1 as seed ortholog is 100%.

Bootstrap support for afis|EAW24739.1 as seed ortholog is 100%.



---

Group of orthologs #6735. Best score 588 bits

Score difference with first non-orthologous sequence - *A. fumigatus*:309 *A. fischeri*:588

afum|EAL89114.1 100.00% afis|EAW16519.1 100.00%

Bootstrap support for afum|EAL89114.1 as seed ortholog is 100%.

Bootstrap support for afis|EAW16519.1 as seed ortholog is 100%.

---

Group of orthologs #6736. Best score 588 bits

Score difference with first non-orthologous sequence - *A. fumigatus*:588 *A. fischeri*:588

afum|EAL87650.1 100.00% afis|EAW18284.1 100.00%

Bootstrap support for afum|EAL87650.1 as seed ortholog is 100%.

Bootstrap support for afis|EAW18284.1 as seed ortholog is 100%.

---

Group of orthologs #6737. Best score 588 bits

Score difference with first non-orthologous sequence - *A. fumigatus*:452 *A. fischeri*:588

afum|EAL91150.1 100.00% afis|EAW17314.1 100.00%

Bootstrap support for afum|EAL91150.1 as seed ortholog is 100%.

Bootstrap support for afis|EAW17314.1 as seed ortholog is 100%.

---

Group of orthologs #6738. Best score 588 bits

Score difference with first non-orthologous sequence - *A. fumigatus*:588 *A. fischeri*:588

afum|EAL86167.1 100.00% afis|EAW24497.1 100.00%

Bootstrap support for afum|EAL86167.1 as seed ortholog is 100%.

Bootstrap support for afis|EAW24497.1 as seed ortholog is 100%.

---

Group of orthologs #6739. Best score 588 bits

Score difference with first non-orthologous sequence - *A. fumigatus*:588 *A. fischeri*:588

afum|EAL88183.1 100.00% afis|EAW23295.1 100.00%

Bootstrap support for afum|EAL88183.1 as seed ortholog is 100%.

Bootstrap support for afis|EAW23295.1 as seed ortholog is 100%.

---

Group of orthologs #6740. Best score 588 bits

Score difference with first non-orthologous sequence - *A. fumigatus*:588 *A. fischeri*:588

afum|EBA27233.1 100.00% afis|EAW20336.1 100.00%

Bootstrap support for afum|EBA27233.1 as seed ortholog is 100%.

Bootstrap support for afis|EAW20336.1 as seed ortholog is 100%.

---

Group of orthologs #6741. Best score 588 bits

Score difference with first non-orthologous sequence - *A. fumigatus*:588 *A. fischeri*:588

afum|EAL92784.1 100.00% afis|EAW21754.1 100.00%

Bootstrap support for afum|EAL92784.1 as seed ortholog is 100%.

Bootstrap support for afis|EAW21754.1 as seed ortholog is 100%.

---

Group of orthologs #6742. Best score 587 bits

Score difference with first non-orthologous sequence - *A. fumigatus*:587 *A. fischeri*:587

afum|EAL87563.1 100.00% afis|EAW18198.1 100.00%

Bootstrap support for afum|EAL87563.1 as seed ortholog is 100%.

Bootstrap support for afis|EAW18198.1 as seed ortholog is 100%.

---

Group of orthologs #6743. Best score 587 bits

Score difference with first non-orthologous sequence - *A. fumigatus*:587 *A. fischeri*:587

afum|EAL85983.1 100.00% afis|EAW24315.1 100.00%

Bootstrap support for afum|EAL85983.1 as seed ortholog is 100%.

Bootstrap support for afis|EAW24315.1 as seed ortholog is 100%.

---

Group of orthologs #6744. Best score 587 bits

Score difference with first non-orthologous sequence - *A. fumigatus*:587 *A. fischeri*:587  
afum|EAL90272.1 100.00% afis|EAW22925.1 100.00%  
Bootstrap support for afum|EAL90272.1 as seed ortholog is 100%.  
Bootstrap support for afis|EAW22925.1 as seed ortholog is 100%.

---

Group of orthologs #6745. Best score 587 bits

Score difference with first non-orthologous sequence - *A. fumigatus*:587 *A. fischeri*:587  
afum|EBA27200.1 100.00% afis|EAW20427.1 100.00%  
Bootstrap support for afum|EBA27200.1 as seed ortholog is 100%.  
Bootstrap support for afis|EAW20427.1 as seed ortholog is 100%.

---

Group of orthologs #6746. Best score 587 bits

Score difference with first non-orthologous sequence - *A. fumigatus*:587 *A. fischeri*:587  
afum|EAL92996.1 100.00% afis|EAW21981.1 100.00%  
Bootstrap support for afum|EAL92996.1 as seed ortholog is 100%.  
Bootstrap support for afis|EAW21981.1 as seed ortholog is 100%.

---

Group of orthologs #6747. Best score 587 bits

Score difference with first non-orthologous sequence - *A. fumigatus*:587 *A. fischeri*:587  
afum|EAL93024.1 100.00% afis|EAW22009.1 100.00%  
Bootstrap support for afum|EAL93024.1 as seed ortholog is 100%.  
Bootstrap support for afis|EAW22009.1 as seed ortholog is 100%.

---

Group of orthologs #6748. Best score 586 bits

Score difference with first non-orthologous sequence - *A. fumigatus*:586 *A. fischeri*:313  
afum|EAL87214.1 100.00% afis|EAW23780.1 100.00%  
Bootstrap support for afum|EAL87214.1 as seed ortholog is 100%.  
Bootstrap support for afis|EAW23780.1 as seed ortholog is 100%.

---

Group of orthologs #6749. Best score 586 bits

Score difference with first non-orthologous sequence - *A. fumigatus*:586 *A. fischeri*:586  
afum|EAL87286.1 100.00% afis|EAW23858.1 100.00%  
Bootstrap support for afum|EAL87286.1 as seed ortholog is 100%.  
Bootstrap support for afis|EAW23858.1 as seed ortholog is 100%.

---

Group of orthologs #6750. Best score 586 bits

Score difference with first non-orthologous sequence - *A. fumigatus*:6 *A. fischeri*:586  
afum|EAL91117.1 100.00% afis|EAW20298.1 100.00%  
Bootstrap support for afum|EAL91117.1 as seed ortholog is 57%. Alternative seed ortholog is afum|EAL85427.1 (6 bits away from this cluster)  
Bootstrap support for afis|EAW20298.1 as seed ortholog is 100%.

---

Group of orthologs #6751. Best score 585 bits

Score difference with first non-orthologous sequence - *A. fumigatus*:585 *A. fischeri*:585  
afum|EAL85623.1 100.00% afis|EAW15724.1 100.00%  
Bootstrap support for afum|EAL85623.1 as seed ortholog is 100%.  
Bootstrap support for afis|EAW15724.1 as seed ortholog is 100%.

---

Group of orthologs #6752. Best score 585 bits

Score difference with first non-orthologous sequence - *A. fumigatus*:585 *A. fischeri*:585  
afum|EAL91269.1 100.00% afis|EAW17443.1 100.00%  
Bootstrap support for afum|EAL91269.1 as seed ortholog is 100%.  
Bootstrap support for afis|EAW17443.1 as seed ortholog is 100%.

---

Group of orthologs #6753. Best score 585 bits

Score difference with first non-orthologous sequence - *A. fumigatus*:585 *A. fischeri*:585

|                 |         |                 |         |
|-----------------|---------|-----------------|---------|
| afum EAL84351.1 | 100.00% | afis EAW25681.1 | 100.00% |
|-----------------|---------|-----------------|---------|

Bootstrap support for afum|EAL84351.1 as seed ortholog is 100%.

Bootstrap support for afis|EAW25681.1 as seed ortholog is 100%.

---

Group of orthologs #6754. Best score 585 bits

Score difference with first non-orthologous sequence - *A. fumigatus*:585 *A. fischeri*:537

|                 |         |                 |         |
|-----------------|---------|-----------------|---------|
| afum EAL93074.1 | 100.00% | afis EAW18397.1 | 100.00% |
|-----------------|---------|-----------------|---------|

Bootstrap support for afum|EAL93074.1 as seed ortholog is 100%.

Bootstrap support for afis|EAW18397.1 as seed ortholog is 100%.

---

Group of orthologs #6755. Best score 585 bits

Score difference with first non-orthologous sequence - *A. fumigatus*:585 *A. fischeri*:585

|                 |         |                 |         |
|-----------------|---------|-----------------|---------|
| afum EAL88465.1 | 100.00% | afis EAW23016.1 | 100.00% |
|-----------------|---------|-----------------|---------|

Bootstrap support for afum|EAL88465.1 as seed ortholog is 100%.

Bootstrap support for afis|EAW23016.1 as seed ortholog is 100%.

---

Group of orthologs #6756. Best score 585 bits

Score difference with first non-orthologous sequence - *A. fumigatus*:585 *A. fischeri*:585

|                 |         |                 |         |
|-----------------|---------|-----------------|---------|
| afum EAL87968.1 | 100.00% | afis EAW23495.1 | 100.00% |
|-----------------|---------|-----------------|---------|

Bootstrap support for afum|EAL87968.1 as seed ortholog is 100%.

Bootstrap support for afis|EAW23495.1 as seed ortholog is 100%.

---

Group of orthologs #6757. Best score 585 bits

Score difference with first non-orthologous sequence - *A. fumigatus*:585 *A. fischeri*:585

|                 |         |                 |         |
|-----------------|---------|-----------------|---------|
| afum EAL89794.1 | 100.00% | afis EAW25123.1 | 100.00% |
|-----------------|---------|-----------------|---------|

Bootstrap support for afum|EAL89794.1 as seed ortholog is 100%.

Bootstrap support for afis|EAW25123.1 as seed ortholog is 100%.

---

Group of orthologs #6758. Best score 584 bits

Score difference with first non-orthologous sequence - *A. fumigatus*:584 *A. fischeri*:584

|                 |         |                 |         |
|-----------------|---------|-----------------|---------|
| afum EAL85570.1 | 100.00% | afis EAW15779.1 | 100.00% |
|-----------------|---------|-----------------|---------|

Bootstrap support for afum|EAL85570.1 as seed ortholog is 100%.

Bootstrap support for afis|EAW15779.1 as seed ortholog is 100%.

---

Group of orthologs #6759. Best score 584 bits

Score difference with first non-orthologous sequence - *A. fumigatus*:584 *A. fischeri*:584

|                 |         |                 |         |
|-----------------|---------|-----------------|---------|
| afum EAL88512.1 | 100.00% | afis EAW15878.1 | 100.00% |
|-----------------|---------|-----------------|---------|

Bootstrap support for afum|EAL88512.1 as seed ortholog is 100%.

Bootstrap support for afis|EAW15878.1 as seed ortholog is 100%.

---

Group of orthologs #6760. Best score 584 bits

Score difference with first non-orthologous sequence - *A. fumigatus*:584 *A. fischeri*:584

|                 |         |                 |         |
|-----------------|---------|-----------------|---------|
| afum EAL86930.1 | 100.00% | afis EAW19588.1 | 100.00% |
|-----------------|---------|-----------------|---------|

Bootstrap support for afum|EAL86930.1 as seed ortholog is 100%.

Bootstrap support for afis|EAW19588.1 as seed ortholog is 100%.

---

Group of orthologs #6761. Best score 584 bits

Score difference with first non-orthologous sequence - *A. fumigatus*:584 *A. fischeri*:584

|                 |         |                 |         |
|-----------------|---------|-----------------|---------|
| afum EAL91528.1 | 100.00% | afis EAW17713.1 | 100.00% |
|-----------------|---------|-----------------|---------|

Bootstrap support for afum|EAL91528.1 as seed ortholog is 100%.

Bootstrap support for afis|EAW17713.1 as seed ortholog is 100%.

---

Group of orthologs #6762. Best score 584 bits

Score difference with first non-orthologous sequence - *A. fumigatus*:584 *A. fischeri*:584

|                 |         |                 |         |
|-----------------|---------|-----------------|---------|
| afum EAL91683.1 | 100.00% | afis EAW17875.1 | 100.00% |
|-----------------|---------|-----------------|---------|

Bootstrap support for afum|EAL91683.1 as seed ortholog is 100%.

Bootstrap support for afis|EAW17875.1 as seed ortholog is 100%.

---

Group of orthologs #6763. Best score 584 bits

Score difference with first non-orthologous sequence - *A. fumigatus*:584 *A. fischeri*:584

afum|EAL91693.1 100.00% afis|EAW17885.1 100.00%

Bootstrap support for afum|EAL91693.1 as seed ortholog is 100%.

Bootstrap support for afis|EAW17885.1 as seed ortholog is 100%.

---

Group of orthologs #6764. Best score 584 bits

Score difference with first non-orthologous sequence - *A. fumigatus*:531 *A. fischeri*:79

afum|EAL84374.1 100.00% afis|EAW25701.1 100.00%

Bootstrap support for afum|EAL84374.1 as seed ortholog is 100%.

Bootstrap support for afis|EAW25701.1 as seed ortholog is 99%.

---

Group of orthologs #6765. Best score 584 bits

Score difference with first non-orthologous sequence - *A. fumigatus*:584 *A. fischeri*:584

afum|EAL93185.1 100.00% afis|EAW18495.1 100.00%

Bootstrap support for afum|EAL93185.1 as seed ortholog is 100%.

Bootstrap support for afis|EAW18495.1 as seed ortholog is 100%.

---

Group of orthologs #6766. Best score 584 bits

Score difference with first non-orthologous sequence - *A. fumigatus*:584 *A. fischeri*:584

afum|EAL88054.1 100.00% afis|EAW23415.1 100.00%

Bootstrap support for afum|EAL88054.1 as seed ortholog is 100%.

Bootstrap support for afis|EAW23415.1 as seed ortholog is 100%.

---

Group of orthologs #6767. Best score 584 bits

Score difference with first non-orthologous sequence - *A. fumigatus*:584 *A. fischeri*:584

afum|EAL93265.2 100.00% afis|EAW18563.1 100.00%

Bootstrap support for afum|EAL93265.2 as seed ortholog is 100%.

Bootstrap support for afis|EAW18563.1 as seed ortholog is 100%.

---

Group of orthologs #6768. Best score 584 bits

Score difference with first non-orthologous sequence - *A. fumigatus*:584 *A. fischeri*:584

afum|EAL93734.1 100.00% afis|EAW18999.1 100.00%

Bootstrap support for afum|EAL93734.1 as seed ortholog is 100%.

Bootstrap support for afis|EAW18999.1 as seed ortholog is 100%.

---

Group of orthologs #6769. Best score 584 bits

Score difference with first non-orthologous sequence - *A. fumigatus*:584 *A. fischeri*:584

afum|EAL90979.1 100.00% afis|EAW22215.1 100.00%

Bootstrap support for afum|EAL90979.1 as seed ortholog is 100%.

Bootstrap support for afis|EAW22215.1 as seed ortholog is 100%.

---

Group of orthologs #6770. Best score 584 bits

Score difference with first non-orthologous sequence - *A. fumigatus*:584 *A. fischeri*:584

afum|EAL90346.1 100.00% afis|EAW22854.1 100.00%

Bootstrap support for afum|EAL90346.1 as seed ortholog is 100%.

Bootstrap support for afis|EAW22854.1 as seed ortholog is 100%.

---

Group of orthologs #6771. Best score 584 bits

Score difference with first non-orthologous sequence - *A. fumigatus*:584 *A. fischeri*:584

afum|EAL92485.1 100.00% afis|EAW21465.1 100.00%

Bootstrap support for afum|EAL92485.1 as seed ortholog is 100%.

Bootstrap support for afis|EAW21465.1 as seed ortholog is 100%.

---

Group of orthologs #6772. Best score 584 bits

Score difference with first non-orthologous sequence - *A. fumigatus*:584 *A. fischeri*:584

afum|EAL91993.1 100.00% afis|EAW24138.1 100.00%

Bootstrap support for afum|EAL91993.1 as seed ortholog is 100%.

Bootstrap support for afis|EAW24138.1 as seed ortholog is 100%.

---

Group of orthologs #6773. Best score 583 bits

Score difference with first non-orthologous sequence - *A. fumigatus*:583 *A. fischeri*:583

afum|EAL86356.1 100.00% afis|EAW16786.1 100.00%

Bootstrap support for afum|EAL86356.1 as seed ortholog is 100%.

Bootstrap support for afis|EAW16786.1 as seed ortholog is 100%.

---

Group of orthologs #6774. Best score 583 bits

Score difference with first non-orthologous sequence - *A. fumigatus*:583 *A. fischeri*:515

afum|EAL88820.2 100.00% afis|EAW16189.1 100.00%

Bootstrap support for afum|EAL88820.2 as seed ortholog is 100%.

Bootstrap support for afis|EAW16189.1 as seed ortholog is 100%.

---

Group of orthologs #6775. Best score 583 bits

Score difference with first non-orthologous sequence - *A. fumigatus*:583 *A. fischeri*:583

afum|EAL85130.1 100.00% afis|EAW19770.1 100.00%

Bootstrap support for afum|EAL85130.1 as seed ortholog is 100%.

Bootstrap support for afis|EAW19770.1 as seed ortholog is 100%.

---

Group of orthologs #6776. Best score 583 bits

Score difference with first non-orthologous sequence - *A. fumigatus*:501 *A. fischeri*:498

afum|EAL86151.2 100.00% afis|EAW24480.1 100.00%

Bootstrap support for afum|EAL86151.2 as seed ortholog is 100%.

Bootstrap support for afis|EAW24480.1 as seed ortholog is 100%.

---

Group of orthologs #6777. Best score 583 bits

Score difference with first non-orthologous sequence - *A. fumigatus*:583 *A. fischeri*:583

afum|EAL86245.1 100.00% afis|EAW24616.1 100.00%

Bootstrap support for afum|EAL86245.1 as seed ortholog is 100%.

Bootstrap support for afis|EAW24616.1 as seed ortholog is 100%.

---

Group of orthologs #6778. Best score 583 bits

Score difference with first non-orthologous sequence - *A. fumigatus*:583 *A. fischeri*:583

afum|EAL88290.1 100.00% afis|EAW23193.1 100.00%

Bootstrap support for afum|EAL88290.1 as seed ortholog is 100%.

Bootstrap support for afis|EAW23193.1 as seed ortholog is 100%.

---

Group of orthologs #6779. Best score 583 bits

Score difference with first non-orthologous sequence - *A. fumigatus*:583 *A. fischeri*:583

afum|EAL93504.1 100.00% afis|EAW18772.1 100.00%

Bootstrap support for afum|EAL93504.1 as seed ortholog is 100%.

Bootstrap support for afis|EAW18772.1 as seed ortholog is 100%.

---

Group of orthologs #6780. Best score 583 bits

Score difference with first non-orthologous sequence - *A. fumigatus*:583 *A. fischeri*:583

afum|EAL92757.1 100.00% afis|EAW21724.1 100.00%

Bootstrap support for afum|EAL92757.1 as seed ortholog is 100%.

Bootstrap support for afis|EAW21724.1 as seed ortholog is 100%.

---

Group of orthologs #6781. Best score 583 bits

Score difference with first non-orthologous sequence - *A. fumigatus*:583 *A. fischeri*:583

|                 |         |                 |         |
|-----------------|---------|-----------------|---------|
| afum EAL89786.1 | 100.00% | afis EAW25115.1 | 100.00% |
|-----------------|---------|-----------------|---------|

Bootstrap support for afum|EAL89786.1 as seed ortholog is 100%.

Bootstrap support for afis|EAW25115.1 as seed ortholog is 100%.

---

Group of orthologs #6782. Best score 583 bits

Score difference with first non-orthologous sequence - *A. fumigatus*:517 *A. fischeri*:583

|                 |         |                 |         |
|-----------------|---------|-----------------|---------|
| afum EBA27445.1 | 100.00% | afis EAW24045.1 | 100.00% |
|-----------------|---------|-----------------|---------|

Bootstrap support for afum|EBA27445.1 as seed ortholog is 100%.

Bootstrap support for afis|EAW24045.1 as seed ortholog is 100%.

---

Group of orthologs #6783. Best score 582 bits

Score difference with first non-orthologous sequence - *A. fumigatus*:536 *A. fischeri*:518

|                 |         |                 |         |
|-----------------|---------|-----------------|---------|
| afum EAL88881.1 | 100.00% | afis EAW16260.1 | 100.00% |
|-----------------|---------|-----------------|---------|

Bootstrap support for afum|EAL88881.1 as seed ortholog is 100%.

Bootstrap support for afis|EAW16260.1 as seed ortholog is 100%.

---

Group of orthologs #6784. Best score 582 bits

Score difference with first non-orthologous sequence - *A. fumigatus*:582 *A. fischeri*:582

|                 |         |                 |         |
|-----------------|---------|-----------------|---------|
| afum EAL85075.1 | 100.00% | afis EAW19816.1 | 100.00% |
|-----------------|---------|-----------------|---------|

Bootstrap support for afum|EAL85075.1 as seed ortholog is 100%.

Bootstrap support for afis|EAW19816.1 as seed ortholog is 100%.

---

Group of orthologs #6785. Best score 582 bits

Score difference with first non-orthologous sequence - *A. fumigatus*:582 *A. fischeri*:582

|                 |         |                 |         |
|-----------------|---------|-----------------|---------|
| afum EAL91395.1 | 100.00% | afis EAW17582.1 | 100.00% |
|-----------------|---------|-----------------|---------|

Bootstrap support for afum|EAL91395.1 as seed ortholog is 100%.

Bootstrap support for afis|EAW17582.1 as seed ortholog is 100%.

---

Group of orthologs #6786. Best score 582 bits

Score difference with first non-orthologous sequence - *A. fumigatus*:582 *A. fischeri*:582

|                 |         |                 |         |
|-----------------|---------|-----------------|---------|
| afum EAL91545.1 | 100.00% | afis EAW17730.1 | 100.00% |
|-----------------|---------|-----------------|---------|

Bootstrap support for afum|EAL91545.1 as seed ortholog is 100%.

Bootstrap support for afis|EAW17730.1 as seed ortholog is 100%.

---

Group of orthologs #6787. Best score 582 bits

Score difference with first non-orthologous sequence - *A. fumigatus*:582 *A. fischeri*:582

|                 |         |                 |         |
|-----------------|---------|-----------------|---------|
| afum EAL84278.1 | 100.00% | afis EAW25554.1 | 100.00% |
|-----------------|---------|-----------------|---------|

Bootstrap support for afum|EAL84278.1 as seed ortholog is 100%.

Bootstrap support for afis|EAW25554.1 as seed ortholog is 100%.

---

Group of orthologs #6788. Best score 582 bits

Score difference with first non-orthologous sequence - *A. fumigatus*:582 *A. fischeri*:521

|                 |         |                 |         |
|-----------------|---------|-----------------|---------|
| afum EAL90745.1 | 100.00% | afis EAW22446.1 | 100.00% |
|-----------------|---------|-----------------|---------|

Bootstrap support for afum|EAL90745.1 as seed ortholog is 100%.

Bootstrap support for afis|EAW22446.1 as seed ortholog is 100%.

---

Group of orthologs #6789. Best score 582 bits

Score difference with first non-orthologous sequence - *A. fumigatus*:582 *A. fischeri*:463

|                 |         |                 |         |
|-----------------|---------|-----------------|---------|
| afum EAL90138.2 | 100.00% | afis EAW25475.1 | 100.00% |
|-----------------|---------|-----------------|---------|

Bootstrap support for afum|EAL90138.2 as seed ortholog is 100%.

Bootstrap support for afis|EAW25475.1 as seed ortholog is 100%.

---

Group of orthologs #6790. Best score 582 bits

Score difference with first non-orthologous sequence - *A. fumigatus*:582 *A. fischeri*:582

|                 |         |                 |         |
|-----------------|---------|-----------------|---------|
| afum EBA27462.1 | 100.00% | afis EAW21534.1 | 100.00% |
|-----------------|---------|-----------------|---------|

Bootstrap support for afum|EBA27462.1 as seed ortholog is 100%.

Bootstrap support for afis|EAW21534.1 as seed ortholog is 100%.

---

Group of orthologs #6791. Best score 581 bits

Score difference with first non-orthologous sequence - *A. fumigatus*:581 *A. fischeri*:581

afum|EAL86594.1 100.00% afis|EAW17150.1 100.00%

Bootstrap support for afum|EAL86594.1 as seed ortholog is 100%.

Bootstrap support for afis|EAW17150.1 as seed ortholog is 100%.

---

Group of orthologs #6792. Best score 581 bits

Score difference with first non-orthologous sequence - *A. fumigatus*:336 *A. fischeri*:486

afum|EAL88548.2 100.00% afis|EAW15913.1 100.00%

Bootstrap support for afum|EAL88548.2 as seed ortholog is 100%.

Bootstrap support for afis|EAW15913.1 as seed ortholog is 100%.

---

Group of orthologs #6793. Best score 581 bits

Score difference with first non-orthologous sequence - *A. fumigatus*:581 *A. fischeri*:581

afum|EAL88770.2 100.00% afis|EAW16141.1 100.00%

Bootstrap support for afum|EAL88770.2 as seed ortholog is 100%.

Bootstrap support for afis|EAW16141.1 as seed ortholog is 100%.

---

Group of orthologs #6794. Best score 581 bits

Score difference with first non-orthologous sequence - *A. fumigatus*:581 *A. fischeri*:581

afum|EAL84589.1 100.00% afis|EAW20464.1 100.00%

Bootstrap support for afum|EAL84589.1 as seed ortholog is 100%.

Bootstrap support for afis|EAW20464.1 as seed ortholog is 100%.

---

Group of orthologs #6795. Best score 581 bits

Score difference with first non-orthologous sequence - *A. fumigatus*:581 *A. fischeri*:581

afum|EAL88989.1 100.00% afis|EAW16364.1 100.00%

Bootstrap support for afum|EAL88989.1 as seed ortholog is 100%.

Bootstrap support for afis|EAW16364.1 as seed ortholog is 100%.

---

Group of orthologs #6796. Best score 581 bits

Score difference with first non-orthologous sequence - *A. fumigatus*:492 *A. fischeri*:391

afum|EAL86272.1 100.00% afis|EAW20694.1 100.00%

Bootstrap support for afum|EAL86272.1 as seed ortholog is 100%.

Bootstrap support for afis|EAW20694.1 as seed ortholog is 100%.

---

Group of orthologs #6797. Best score 581 bits

Score difference with first non-orthologous sequence - *A. fumigatus*:581 *A. fischeri*:581

afum|EAL91500.1 100.00% afis|EAW17686.1 100.00%

Bootstrap support for afum|EAL91500.1 as seed ortholog is 100%.

Bootstrap support for afis|EAW17686.1 as seed ortholog is 100%.

---

Group of orthologs #6798. Best score 581 bits

Score difference with first non-orthologous sequence - *A. fumigatus*:492 *A. fischeri*:430

afum|EAL85922.1 100.00% afis|EAW24254.1 100.00%

Bootstrap support for afum|EAL85922.1 as seed ortholog is 100%.

Bootstrap support for afis|EAW24254.1 as seed ortholog is 100%.

---

Group of orthologs #6799. Best score 581 bits

Score difference with first non-orthologous sequence - *A. fumigatus*:581 *A. fischeri*:581

afum|EAL86015.1 100.00% afis|EAW24344.1 100.00%

Bootstrap support for afum|EAL86015.1 as seed ortholog is 100%.

Bootstrap support for afis|EAW24344.1 as seed ortholog is 100%.

---

Group of orthologs #6800. Best score 581 bits

Score difference with first non-orthologous sequence - *A. fumigatus*:581 *A. fischeri*:247

afum|EAL86249.1 100.00% afis|EAW24621.1 100.00%

Bootstrap support for afum|EAL86249.1 as seed ortholog is 100%.

Bootstrap support for afis|EAW24621.1 as seed ortholog is 100%.

---

Group of orthologs #6801. Best score 581 bits

Score difference with first non-orthologous sequence - *A. fumigatus*:581 *A. fischeri*:581

afum|EAL93056.1 100.00% afis|EAW18381.1 100.00%

Bootstrap support for afum|EAL93056.1 as seed ortholog is 100%.

Bootstrap support for afis|EAW18381.1 as seed ortholog is 100%.

---

Group of orthologs #6802. Best score 581 bits

Score difference with first non-orthologous sequence - *A. fumigatus*:581 *A. fischeri*:581

afum|EAL93507.1 100.00% afis|EAW18775.1 100.00%

Bootstrap support for afum|EAL93507.1 as seed ortholog is 100%.

Bootstrap support for afis|EAW18775.1 as seed ortholog is 100%.

---

Group of orthologs #6803. Best score 581 bits

Score difference with first non-orthologous sequence - *A. fumigatus*:581 *A. fischeri*:581

afum|EAL92075.1 100.00% afis|EAW21036.1 100.00%

Bootstrap support for afum|EAL92075.1 as seed ortholog is 100%.

Bootstrap support for afis|EAW21036.1 as seed ortholog is 100%.

---

Group of orthologs #6804. Best score 581 bits

Score difference with first non-orthologous sequence - *A. fumigatus*:581 *A. fischeri*:581

afum|EAL90894.1 100.00% afis|EAW22287.1 100.00%

Bootstrap support for afum|EAL90894.1 as seed ortholog is 100%.

Bootstrap support for afis|EAW22287.1 as seed ortholog is 100%.

---

Group of orthologs #6805. Best score 581 bits

Score difference with first non-orthologous sequence - *A. fumigatus*:360 *A. fischeri*:581

afum|EAL94073.1 100.00% afis|EAW19353.1 100.00%

Bootstrap support for afum|EAL94073.1 as seed ortholog is 100%.

Bootstrap support for afis|EAW19353.1 as seed ortholog is 100%.

---

Group of orthologs #6806. Best score 581 bits

Score difference with first non-orthologous sequence - *A. fumigatus*:581 *A. fischeri*:581

afum|EBA27294.1 100.00% afis|EAW19623.1 100.00%

Bootstrap support for afum|EBA27294.1 as seed ortholog is 100%.

Bootstrap support for afis|EAW19623.1 as seed ortholog is 100%.

---

Group of orthologs #6807. Best score 581 bits

Score difference with first non-orthologous sequence - *A. fumigatus*:420 *A. fischeri*:363

afum|EAL92665.1 100.00% afis|EAW21632.1 100.00%

Bootstrap support for afum|EAL92665.1 as seed ortholog is 100%.

Bootstrap support for afis|EAW21632.1 as seed ortholog is 100%.

---

Group of orthologs #6808. Best score 581 bits

Score difference with first non-orthologous sequence - *A. fumigatus*:581 *A. fischeri*:506

afum|EAL92896.1 100.00% afis|EAW21882.1 100.00%

Bootstrap support for afum|EAL92896.1 as seed ortholog is 100%.

Bootstrap support for afis|EAW21882.1 as seed ortholog is 100%.

---

Group of orthologs #6809. Best score 580 bits

Score difference with first non-orthologous sequence - *A. fumigatus*:580 *A. fischeri*:580



|                 |         |                 |         |
|-----------------|---------|-----------------|---------|
| afum EAL85469.1 | 100.00% | afis EAW20351.1 | 100.00% |
|-----------------|---------|-----------------|---------|

Bootstrap support for afum|EAL85469.1 as seed ortholog is 100%.

Bootstrap support for afis|EAW20351.1 as seed ortholog is 100%.

---

Group of orthologs #6810. Best score 580 bits

Score difference with first non-orthologous sequence - *A. fumigatus*:580 *A. fischeri*:580

|                 |         |                 |         |
|-----------------|---------|-----------------|---------|
| afum EAL86074.1 | 100.00% | afis EAW24403.1 | 100.00% |
|-----------------|---------|-----------------|---------|

Bootstrap support for afum|EAL86074.1 as seed ortholog is 100%.

Bootstrap support for afis|EAW24403.1 as seed ortholog is 100%.

---

Group of orthologs #6811. Best score 580 bits

Score difference with first non-orthologous sequence - *A. fumigatus*:580 *A. fischeri*:580

|                 |         |                 |         |
|-----------------|---------|-----------------|---------|
| afum EAL86201.1 | 100.00% | afis EAW24537.1 | 100.00% |
|-----------------|---------|-----------------|---------|

Bootstrap support for afum|EAL86201.1 as seed ortholog is 100%.

Bootstrap support for afis|EAW24537.1 as seed ortholog is 100%.

---

Group of orthologs #6812. Best score 580 bits

Score difference with first non-orthologous sequence - *A. fumigatus*:580 *A. fischeri*:292

|                 |         |                 |         |
|-----------------|---------|-----------------|---------|
| afum EAL89344.2 | 100.00% | afis EAW24702.1 | 100.00% |
|-----------------|---------|-----------------|---------|

Bootstrap support for afum|EAL89344.2 as seed ortholog is 100%.

Bootstrap support for afis|EAW24702.1 as seed ortholog is 100%.

---

Group of orthologs #6813. Best score 579 bits

Score difference with first non-orthologous sequence - *A. fumigatus*:579 *A. fischeri*:579

|                 |         |                 |         |
|-----------------|---------|-----------------|---------|
| afum EAL88497.1 | 100.00% | afis EAW15862.1 | 100.00% |
|-----------------|---------|-----------------|---------|

Bootstrap support for afum|EAL88497.1 as seed ortholog is 100%.

Bootstrap support for afis|EAW15862.1 as seed ortholog is 100%.

---

Group of orthologs #6814. Best score 579 bits

Score difference with first non-orthologous sequence - *A. fumigatus*:579 *A. fischeri*:579

|                 |         |                 |         |
|-----------------|---------|-----------------|---------|
| afum EAL87011.1 | 100.00% | afis EAW19484.1 | 100.00% |
|-----------------|---------|-----------------|---------|

Bootstrap support for afum|EAL87011.1 as seed ortholog is 100%.

Bootstrap support for afis|EAW19484.1 as seed ortholog is 100%.

---

Group of orthologs #6815. Best score 579 bits

Score difference with first non-orthologous sequence - *A. fumigatus*:319 *A. fischeri*:509

|                 |         |                 |         |
|-----------------|---------|-----------------|---------|
| afum EAL91219.1 | 100.00% | afis EAW17384.1 | 100.00% |
|-----------------|---------|-----------------|---------|

Bootstrap support for afum|EAL91219.1 as seed ortholog is 100%.

Bootstrap support for afis|EAW17384.1 as seed ortholog is 100%.

---

Group of orthologs #6816. Best score 579 bits

Score difference with first non-orthologous sequence - *A. fumigatus*:579 *A. fischeri*:579

|                 |         |                 |         |
|-----------------|---------|-----------------|---------|
| afum EAL90794.1 | 100.00% | afis EAW22397.1 | 100.00% |
|-----------------|---------|-----------------|---------|

Bootstrap support for afum|EAL90794.1 as seed ortholog is 100%.

Bootstrap support for afis|EAW22397.1 as seed ortholog is 100%.

---

Group of orthologs #6817. Best score 579 bits

Score difference with first non-orthologous sequence - *A. fumigatus*:579 *A. fischeri*:579

|                 |         |                 |         |
|-----------------|---------|-----------------|---------|
| afum EAL89765.2 | 100.00% | afis EAW25094.1 | 100.00% |
|-----------------|---------|-----------------|---------|

Bootstrap support for afum|EAL89765.2 as seed ortholog is 100%.

Bootstrap support for afis|EAW25094.1 as seed ortholog is 100%.

---

Group of orthologs #6818. Best score 578 bits

Score difference with first non-orthologous sequence - *A. fumigatus*:578 *A. fischeri*:578

|                 |         |                 |         |
|-----------------|---------|-----------------|---------|
| afum EAL86345.1 | 100.00% | afis EAW16776.1 | 100.00% |
|-----------------|---------|-----------------|---------|

Bootstrap support for afum|EAL86345.1 as seed ortholog is 100%.

Bootstrap support for afis|EAW16776.1 as seed ortholog is 100%.

---

Group of orthologs #6819. Best score 578 bits

Score difference with first non-orthologous sequence - *A. fumigatus*:578 *A. fischeri*:578

|                 |         |                 |         |
|-----------------|---------|-----------------|---------|
| afum EAL89951.1 | 100.00% | afis EAW25288.1 | 100.00% |
|-----------------|---------|-----------------|---------|

Bootstrap support for afum|EAL89951.1 as seed ortholog is 100%.

Bootstrap support for afis|EAW25288.1 as seed ortholog is 100%.

---

Group of orthologs #6820. Best score 577 bits

Score difference with first non-orthologous sequence - *A. fumigatus*:577 *A. fischeri*:577

|                 |         |                 |         |
|-----------------|---------|-----------------|---------|
| afum EAL91719.2 | 100.00% | afis EAW17910.1 | 100.00% |
|-----------------|---------|-----------------|---------|

Bootstrap support for afum|EAL91719.2 as seed ortholog is 100%.

Bootstrap support for afis|EAW17910.1 as seed ortholog is 100%.

---

Group of orthologs #6821. Best score 577 bits

Score difference with first non-orthologous sequence - *A. fumigatus*:577 *A. fischeri*:577

|                 |         |                 |         |
|-----------------|---------|-----------------|---------|
| afum EAL84313.2 | 100.00% | afis EAW25625.1 | 100.00% |
|-----------------|---------|-----------------|---------|

Bootstrap support for afum|EAL84313.2 as seed ortholog is 100%.

Bootstrap support for afis|EAW25625.1 as seed ortholog is 100%.

---

Group of orthologs #6822. Best score 577 bits

Score difference with first non-orthologous sequence - *A. fumigatus*:577 *A. fischeri*:577

|                 |         |                 |         |
|-----------------|---------|-----------------|---------|
| afum EAL87899.1 | 100.00% | afis EAW23568.1 | 100.00% |
|-----------------|---------|-----------------|---------|

Bootstrap support for afum|EAL87899.1 as seed ortholog is 100%.

Bootstrap support for afis|EAW23568.1 as seed ortholog is 100%.

---

Group of orthologs #6823. Best score 577 bits

Score difference with first non-orthologous sequence - *A. fumigatus*:577 *A. fischeri*:577

|                 |         |                 |         |
|-----------------|---------|-----------------|---------|
| afum EAL89521.1 | 100.00% | afis EAW24871.1 | 100.00% |
|-----------------|---------|-----------------|---------|

Bootstrap support for afum|EAL89521.1 as seed ortholog is 100%.

Bootstrap support for afis|EAW24871.1 as seed ortholog is 100%.

---

Group of orthologs #6824. Best score 576 bits

Score difference with first non-orthologous sequence - *A. fumigatus*:576 *A. fischeri*:534

|                 |         |                 |         |
|-----------------|---------|-----------------|---------|
| afum EAL85761.1 | 100.00% | afis EAW15573.1 | 100.00% |
|-----------------|---------|-----------------|---------|

Bootstrap support for afum|EAL85761.1 as seed ortholog is 100%.

Bootstrap support for afis|EAW15573.1 as seed ortholog is 100%.

---

Group of orthologs #6825. Best score 576 bits

Score difference with first non-orthologous sequence - *A. fumigatus*:576 *A. fischeri*:576

|                 |         |                 |         |
|-----------------|---------|-----------------|---------|
| afum EAL84359.1 | 100.00% | afis EAW25690.1 | 100.00% |
|-----------------|---------|-----------------|---------|

Bootstrap support for afum|EAL84359.1 as seed ortholog is 100%.

Bootstrap support for afis|EAW25690.1 as seed ortholog is 100%.

---

Group of orthologs #6826. Best score 576 bits

Score difference with first non-orthologous sequence - *A. fumigatus*:576 *A. fischeri*:576

|                 |         |                 |         |
|-----------------|---------|-----------------|---------|
| afum EAL87246.1 | 100.00% | afis EAW23811.1 | 100.00% |
|-----------------|---------|-----------------|---------|

Bootstrap support for afum|EAL87246.1 as seed ortholog is 100%.

Bootstrap support for afis|EAW23811.1 as seed ortholog is 100%.

---

Group of orthologs #6827. Best score 576 bits

Score difference with first non-orthologous sequence - *A. fumigatus*:515 *A. fischeri*:576

|                 |         |                 |         |
|-----------------|---------|-----------------|---------|
| afum EAL87902.1 | 100.00% | afis EAW23566.1 | 100.00% |
|-----------------|---------|-----------------|---------|

Bootstrap support for afum|EAL87902.1 as seed ortholog is 100%.

Bootstrap support for afis|EAW23566.1 as seed ortholog is 100%.

---

Group of orthologs #6828. Best score 576 bits

Score difference with first non-orthologous sequence - *A. fumigatus*:477 *A. fischeri*:484

afum|EAL92052.1 100.00% afis|EAW21014.1 100.00%

Bootstrap support for afum|EAL92052.1 as seed ortholog is 100%.

Bootstrap support for afis|EAW21014.1 as seed ortholog is 100%.

---

Group of orthologs #6829. Best score 576 bits

Score difference with first non-orthologous sequence - *A. fumigatus*:576 *A. fischeri*:576

afum|EAL92715.1 100.00% afis|EAW21681.1 100.00%

Bootstrap support for afum|EAL92715.1 as seed ortholog is 100%.

Bootstrap support for afis|EAW21681.1 as seed ortholog is 100%.

---

Group of orthologs #6830. Best score 576 bits

Score difference with first non-orthologous sequence - *A. fumigatus*:471 *A. fischeri*:576

afum|EAL89666.1 100.00% afis|EAW25029.1 100.00%

Bootstrap support for afum|EAL89666.1 as seed ortholog is 100%.

Bootstrap support for afis|EAW25029.1 as seed ortholog is 100%.

---

Group of orthologs #6831. Best score 576 bits

Score difference with first non-orthologous sequence - *A. fumigatus*:576 *A. fischeri*:576

afum|EAL90185.1 100.00% afis|EAW25520.1 100.00%

Bootstrap support for afum|EAL90185.1 as seed ortholog is 100%.

Bootstrap support for afis|EAW25520.1 as seed ortholog is 100%.

---

Group of orthologs #6832. Best score 575 bits

Score difference with first non-orthologous sequence - *A. fumigatus*:575 *A. fischeri*:575

afum|EAL84192.1 100.00% afis|EAW15453.1 100.00%

Bootstrap support for afum|EAL84192.1 as seed ortholog is 100%.

Bootstrap support for afis|EAW15453.1 as seed ortholog is 100%.

---

Group of orthologs #6833. Best score 575 bits

Score difference with first non-orthologous sequence - *A. fumigatus*:575 *A. fischeri*:575

afum|EAL86705.1 100.00% afis|EAW17287.1 100.00%

Bootstrap support for afum|EAL86705.1 as seed ortholog is 100%.

Bootstrap support for afis|EAW17287.1 as seed ortholog is 100%.

---

Group of orthologs #6834. Best score 575 bits

Score difference with first non-orthologous sequence - *A. fumigatus*:575 *A. fischeri*:575

afum|EAL88575.1 100.00% afis|EAW15941.1 100.00%

Bootstrap support for afum|EAL88575.1 as seed ortholog is 100%.

Bootstrap support for afis|EAW15941.1 as seed ortholog is 100%.

---

Group of orthologs #6835. Best score 575 bits

Score difference with first non-orthologous sequence - *A. fumigatus*:575 *A. fischeri*:507

afum|EAL85047.1 100.00% afis|EAW19847.1 100.00%

Bootstrap support for afum|EAL85047.1 as seed ortholog is 100%.

Bootstrap support for afis|EAW19847.1 as seed ortholog is 100%.

---

Group of orthologs #6836. Best score 575 bits

Score difference with first non-orthologous sequence - *A. fumigatus*:575 *A. fischeri*:575

afum|EAL89037.1 100.00% afis|EAW16413.1 100.00%

Bootstrap support for afum|EAL89037.1 as seed ortholog is 100%.

Bootstrap support for afis|EAW16413.1 as seed ortholog is 100%.

---

Group of orthologs #6837. Best score 575 bits

Score difference with first non-orthologous sequence - *A. fumigatus*:575 *A. fischeri*:575

|                 |         |                 |         |
|-----------------|---------|-----------------|---------|
| afum EAL85470.1 | 100.00% | afis EAW20352.1 | 100.00% |
|-----------------|---------|-----------------|---------|

Bootstrap support for afum|EAL85470.1 as seed ortholog is 100%.

Bootstrap support for afis|EAW20352.1 as seed ortholog is 100%.

---

Group of orthologs #6838. Best score 575 bits

Score difference with first non-orthologous sequence - *A. fumigatus*:575 *A. fischeri*:575

|                 |         |                 |         |
|-----------------|---------|-----------------|---------|
| afum EAL91602.1 | 100.00% | afis EAW17793.1 | 100.00% |
|-----------------|---------|-----------------|---------|

Bootstrap support for afum|EAL91602.1 as seed ortholog is 100%.

Bootstrap support for afis|EAW17793.1 as seed ortholog is 100%.

---

Group of orthologs #6839. Best score 575 bits

Score difference with first non-orthologous sequence - *A. fumigatus*:575 *A. fischeri*:575

|                 |         |                 |         |
|-----------------|---------|-----------------|---------|
| afum EAL88372.1 | 100.00% | afis EAW23107.1 | 100.00% |
|-----------------|---------|-----------------|---------|

Bootstrap support for afum|EAL88372.1 as seed ortholog is 100%.

Bootstrap support for afis|EAW23107.1 as seed ortholog is 100%.

---

Group of orthologs #6840. Best score 575 bits

Score difference with first non-orthologous sequence - *A. fumigatus*:575 *A. fischeri*:575

|                 |         |                 |         |
|-----------------|---------|-----------------|---------|
| afum EAL87778.1 | 100.00% | afis EAW24661.1 | 100.00% |
|-----------------|---------|-----------------|---------|

Bootstrap support for afum|EAL87778.1 as seed ortholog is 100%.

Bootstrap support for afis|EAW24661.1 as seed ortholog is 100%.

---

Group of orthologs #6841. Best score 575 bits

Score difference with first non-orthologous sequence - *A. fumigatus*:575 *A. fischeri*:575

|                 |         |                 |         |
|-----------------|---------|-----------------|---------|
| afum EAL90960.1 | 100.00% | afis EAW22233.1 | 100.00% |
|-----------------|---------|-----------------|---------|

Bootstrap support for afum|EAL90960.1 as seed ortholog is 100%.

Bootstrap support for afis|EAW22233.1 as seed ortholog is 100%.

---

Group of orthologs #6842. Best score 575 bits

Score difference with first non-orthologous sequence - *A. fumigatus*:575 *A. fischeri*:575

|                 |         |                 |         |
|-----------------|---------|-----------------|---------|
| afum EAL89556.1 | 100.00% | afis EAW24902.1 | 100.00% |
|-----------------|---------|-----------------|---------|

Bootstrap support for afum|EAL89556.1 as seed ortholog is 100%.

Bootstrap support for afis|EAW24902.1 as seed ortholog is 100%.

---

Group of orthologs #6843. Best score 574 bits

Score difference with first non-orthologous sequence - *A. fumigatus*:574 *A. fischeri*:574

|                 |         |                 |         |
|-----------------|---------|-----------------|---------|
| afum EAL88701.2 | 100.00% | afis EAW16069.1 | 100.00% |
|-----------------|---------|-----------------|---------|

Bootstrap support for afum|EAL88701.2 as seed ortholog is 100%.

Bootstrap support for afis|EAW16069.1 as seed ortholog is 100%.

---

Group of orthologs #6844. Best score 574 bits

Score difference with first non-orthologous sequence - *A. fumigatus*:574 *A. fischeri*:574

|                 |         |                 |         |
|-----------------|---------|-----------------|---------|
| afum EAL87824.1 | 100.00% | afis EAW23636.1 | 100.00% |
|-----------------|---------|-----------------|---------|

Bootstrap support for afum|EAL87824.1 as seed ortholog is 100%.

Bootstrap support for afis|EAW23636.1 as seed ortholog is 100%.

---

Group of orthologs #6845. Best score 574 bits

Score difference with first non-orthologous sequence - *A. fumigatus*:574 *A. fischeri*:574

|                 |         |                 |         |
|-----------------|---------|-----------------|---------|
| afum EAL93758.1 | 100.00% | afis EAW19028.1 | 100.00% |
|-----------------|---------|-----------------|---------|

Bootstrap support for afum|EAL93758.1 as seed ortholog is 100%.

Bootstrap support for afis|EAW19028.1 as seed ortholog is 100%.

---

Group of orthologs #6846. Best score 574 bits

Score difference with first non-orthologous sequence - *A. fumigatus*:574 *A. fischeri*:574

|                 |         |                 |         |
|-----------------|---------|-----------------|---------|
| afum EAL93993.1 | 100.00% | afis EAW19266.1 | 100.00% |
|-----------------|---------|-----------------|---------|

Bootstrap support for afum|EAL93993.1 as seed ortholog is 100%.

Bootstrap support for afis|EAW19266.1 as seed ortholog is 100%.

---

Group of orthologs #6847. Best score 573 bits

Score difference with first non-orthologous sequence - *A. fumigatus*:573 *A. fischeri*:573

afum|EAL84502.1 100.00% afis|EAW20559.1 100.00%

Bootstrap support for afum|EAL84502.1 as seed ortholog is 100%.

Bootstrap support for afis|EAW20559.1 as seed ortholog is 100%.

---

Group of orthologs #6848. Best score 573 bits

Score difference with first non-orthologous sequence - *A. fumigatus*:573 *A. fischeri*:573

afum|EAL89150.1 100.00% afis|EAW16552.1 100.00%

Bootstrap support for afum|EAL89150.1 as seed ortholog is 100%.

Bootstrap support for afis|EAW16552.1 as seed ortholog is 100%.

---

Group of orthologs #6849. Best score 573 bits

Score difference with first non-orthologous sequence - *A. fumigatus*:573 *A. fischeri*:573

afum|EAL91263.1 100.00% afis|EAW17436.1 100.00%

Bootstrap support for afum|EAL91263.1 as seed ortholog is 100%.

Bootstrap support for afis|EAW17436.1 as seed ortholog is 100%.

---

Group of orthologs #6850. Best score 573 bits

Score difference with first non-orthologous sequence - *A. fumigatus*:573 *A. fischeri*:573

afum|EAL89464.1 100.00% afis|EAW24820.1 100.00%

Bootstrap support for afum|EAL89464.1 as seed ortholog is 100%.

Bootstrap support for afis|EAW24820.1 as seed ortholog is 100%.

---

Group of orthologs #6851. Best score 572 bits

Score difference with first non-orthologous sequence - *A. fumigatus*:572 *A. fischeri*:572

afum|EAL84240.1 100.00% afis|EAW15406.1 100.00%

Bootstrap support for afum|EAL84240.1 as seed ortholog is 100%.

Bootstrap support for afis|EAW15406.1 as seed ortholog is 100%.

---

Group of orthologs #6852. Best score 572 bits

Score difference with first non-orthologous sequence - *A. fumigatus*:485 *A. fischeri*:491

afum|EAL86358.1 100.00% afis|EAW16788.1 100.00%

Bootstrap support for afum|EAL86358.1 as seed ortholog is 100%.

Bootstrap support for afis|EAW16788.1 as seed ortholog is 100%.

---

Group of orthologs #6853. Best score 572 bits

Score difference with first non-orthologous sequence - *A. fumigatus*:572 *A. fischeri*:572

afum|EAL88763.1 100.00% afis|EAW16133.1 100.00%

Bootstrap support for afum|EAL88763.1 as seed ortholog is 100%.

Bootstrap support for afis|EAW16133.1 as seed ortholog is 100%.

---

Group of orthologs #6854. Best score 572 bits

Score difference with first non-orthologous sequence - *A. fumigatus*:572 *A. fischeri*:572

afum|EAL85040.1 100.00% afis|EAW19855.1 100.00%

Bootstrap support for afum|EAL85040.1 as seed ortholog is 100%.

Bootstrap support for afis|EAW19855.1 as seed ortholog is 100%.

---

Group of orthologs #6855. Best score 572 bits

Score difference with first non-orthologous sequence - *A. fumigatus*:572 *A. fischeri*:572

afum|EAL84962.1 100.00% afis|EAW19953.1 100.00%

Bootstrap support for afum|EAL84962.1 as seed ortholog is 100%.

Bootstrap support for afis|EAW19953.1 as seed ortholog is 100%.

---

Group of orthologs #6856. Best score 572 bits

Score difference with first non-orthologous sequence - *A. fumigatus*:572 *A. fischeri*:572

afum|EAL85342.1 100.00% afis|EAW20225.1 100.00%

Bootstrap support for afum|EAL85342.1 as seed ortholog is 100%.

Bootstrap support for afis|EAW20225.1 as seed ortholog is 100%.

---

Group of orthologs #6857. Best score 572 bits

Score difference with first non-orthologous sequence - *A. fumigatus*:572 *A. fischeri*:572

afum|EAL91771.1 100.00% afis|EAW17960.1 100.00%

Bootstrap support for afum|EAL91771.1 as seed ortholog is 100%.

Bootstrap support for afis|EAW17960.1 as seed ortholog is 100%.

---

Group of orthologs #6858. Best score 572 bits

Score difference with first non-orthologous sequence - *A. fumigatus*:572 *A. fischeri*:572

afum|EAL88139.1 100.00% afis|EAW23339.1 100.00%

Bootstrap support for afum|EAL88139.1 as seed ortholog is 100%.

Bootstrap support for afis|EAW23339.1 as seed ortholog is 100%.

---

Group of orthologs #6859. Best score 572 bits

Score difference with first non-orthologous sequence - *A. fumigatus*:572 *A. fischeri*:572

afum|EAL90543.1 100.00% afis|EAW22649.1 100.00%

Bootstrap support for afum|EAL90543.1 as seed ortholog is 100%.

Bootstrap support for afis|EAW22649.1 as seed ortholog is 100%.

---

Group of orthologs #6860. Best score 572 bits

Score difference with first non-orthologous sequence - *A. fumigatus*:572 *A. fischeri*:572

afum|EAL92486.1 100.00% afis|EAW21466.1 100.00%

Bootstrap support for afum|EAL92486.1 as seed ortholog is 100%.

Bootstrap support for afis|EAW21466.1 as seed ortholog is 100%.

---

Group of orthologs #6861. Best score 572 bits

Score difference with first non-orthologous sequence - *A. fumigatus*:572 *A. fischeri*:446

afum|EAL89943.1 100.00% afis|EAW25280.1 100.00%

Bootstrap support for afum|EAL89943.1 as seed ortholog is 100%.

Bootstrap support for afis|EAW25280.1 as seed ortholog is 100%.

---

Group of orthologs #6862. Best score 571 bits

Score difference with first non-orthologous sequence - *A. fumigatus*:318 *A. fischeri*:348

afum|EAL88500.1 100.00% afis|EAW15866.1 100.00%

Bootstrap support for afum|EAL88500.1 as seed ortholog is 100%.

Bootstrap support for afis|EAW15866.1 as seed ortholog is 100%.

---

Group of orthologs #6863. Best score 571 bits

Score difference with first non-orthologous sequence - *A. fumigatus*:571 *A. fischeri*:571

afum|EAL88577.1 100.00% afis|EAW15943.1 100.00%

Bootstrap support for afum|EAL88577.1 as seed ortholog is 100%.

Bootstrap support for afis|EAW15943.1 as seed ortholog is 100%.

---

Group of orthologs #6864. Best score 571 bits

Score difference with first non-orthologous sequence - *A. fumigatus*:571 *A. fischeri*:571

afum|EAL93277.1 100.00% afis|EAW18574.1 100.00%

Bootstrap support for afum|EAL93277.1 as seed ortholog is 100%.

Bootstrap support for afis|EAW18574.1 as seed ortholog is 100%.

---

Group of orthologs #6865. Best score 571 bits

Score difference with first non-orthologous sequence - *A. fumigatus*:571 *A. fischeri*:571

|                 |         |                 |         |
|-----------------|---------|-----------------|---------|
| afum EAL90926.1 | 100.00% | afis EAW22248.1 | 100.00% |
|-----------------|---------|-----------------|---------|

Bootstrap support for afum|EAL90926.1 as seed ortholog is 100%.

Bootstrap support for afis|EAW22248.1 as seed ortholog is 100%.

---

Group of orthologs #6866. Best score 571 bits

Score difference with first non-orthologous sequence - *A. fumigatus*:571 *A. fischeri*:571

|                 |         |                 |         |
|-----------------|---------|-----------------|---------|
| afum EAL92281.1 | 100.00% | afis EAW21266.1 | 100.00% |
|-----------------|---------|-----------------|---------|

Bootstrap support for afum|EAL92281.1 as seed ortholog is 100%.

Bootstrap support for afis|EAW21266.1 as seed ortholog is 100%.

---

Group of orthologs #6867. Best score 570 bits

Score difference with first non-orthologous sequence - *A. fumigatus*:570 *A. fischeri*:570

|                 |         |                 |         |
|-----------------|---------|-----------------|---------|
| afum EAL91159.1 | 100.00% | afis EAW17323.1 | 100.00% |
|-----------------|---------|-----------------|---------|

Bootstrap support for afum|EAL91159.1 as seed ortholog is 100%.

Bootstrap support for afis|EAW17323.1 as seed ortholog is 100%.

---

Group of orthologs #6868. Best score 570 bits

Score difference with first non-orthologous sequence - *A. fumigatus*:570 *A. fischeri*:570

|                 |         |                 |         |
|-----------------|---------|-----------------|---------|
| afum EAL84291.1 | 100.00% | afis EAW25580.1 | 100.00% |
|-----------------|---------|-----------------|---------|

Bootstrap support for afum|EAL84291.1 as seed ortholog is 100%.

Bootstrap support for afis|EAW25580.1 as seed ortholog is 100%.

---

Group of orthologs #6869. Best score 570 bits

Score difference with first non-orthologous sequence - *A. fumigatus*:570 *A. fischeri*:570

|                 |         |                 |         |
|-----------------|---------|-----------------|---------|
| afum EAL87231.2 | 100.00% | afis EAW23797.1 | 100.00% |
|-----------------|---------|-----------------|---------|

Bootstrap support for afum|EAL87231.2 as seed ortholog is 100%.

Bootstrap support for afis|EAW23797.1 as seed ortholog is 100%.

---

Group of orthologs #6870. Best score 570 bits

Score difference with first non-orthologous sequence - *A. fumigatus*:570 *A. fischeri*:404

|                 |         |                 |         |
|-----------------|---------|-----------------|---------|
| afum EAL88184.1 | 100.00% | afis EAW23294.1 | 100.00% |
|-----------------|---------|-----------------|---------|

Bootstrap support for afum|EAL88184.1 as seed ortholog is 100%.

Bootstrap support for afis|EAW23294.1 as seed ortholog is 100%.

---

Group of orthologs #6871. Best score 570 bits

Score difference with first non-orthologous sequence - *A. fumigatus*:570 *A. fischeri*:570

|                 |         |                 |         |
|-----------------|---------|-----------------|---------|
| afum EAL93759.1 | 100.00% | afis EAW19029.1 | 100.00% |
|-----------------|---------|-----------------|---------|

Bootstrap support for afum|EAL93759.1 as seed ortholog is 100%.

Bootstrap support for afis|EAW19029.1 as seed ortholog is 100%.

---

Group of orthologs #6872. Best score 569 bits

Score difference with first non-orthologous sequence - *A. fumigatus*:569 *A. fischeri*:569

|                 |         |                 |         |
|-----------------|---------|-----------------|---------|
| afum EAL88530.1 | 100.00% | afis EAW15895.1 | 100.00% |
|-----------------|---------|-----------------|---------|

Bootstrap support for afum|EAL88530.1 as seed ortholog is 100%.

Bootstrap support for afis|EAW15895.1 as seed ortholog is 100%.

---

Group of orthologs #6873. Best score 569 bits

Score difference with first non-orthologous sequence - *A. fumigatus*:569 *A. fischeri*:569

|                 |         |                 |         |
|-----------------|---------|-----------------|---------|
| afum EAL88353.1 | 100.00% | afis EAW23127.1 | 100.00% |
|-----------------|---------|-----------------|---------|

Bootstrap support for afum|EAL88353.1 as seed ortholog is 100%.

Bootstrap support for afis|EAW23127.1 as seed ortholog is 100%.

---

Group of orthologs #6874. Best score 569 bits

Score difference with first non-orthologous sequence - *A. fumigatus*:569 *A. fischeri*:569

|                 |         |                 |         |
|-----------------|---------|-----------------|---------|
| afum EAL88192.1 | 100.00% | afis EAW23287.1 | 100.00% |
|-----------------|---------|-----------------|---------|

Bootstrap support for afum|EAL88192.1 as seed ortholog is 100%.

Bootstrap support for afis|EAW23287.1 as seed ortholog is 100%.

---

Group of orthologs #6875. Best score 569 bits

Score difference with first non-orthologous sequence - *A. fumigatus*:569 *A. fischeri*:569

afum|EAL93438.1 100.00% afis|EAW18713.1 100.00%

Bootstrap support for afum|EAL93438.1 as seed ortholog is 100%.

Bootstrap support for afis|EAW18713.1 as seed ortholog is 100%.

---

Group of orthologs #6876. Best score 569 bits

Score difference with first non-orthologous sequence - *A. fumigatus*:569 *A. fischeri*:569

afum|EAL90519.1 100.00% afis|EAW22673.1 100.00%

Bootstrap support for afum|EAL90519.1 as seed ortholog is 100%.

Bootstrap support for afis|EAW22673.1 as seed ortholog is 100%.

---

Group of orthologs #6877. Best score 569 bits

Score difference with first non-orthologous sequence - *A. fumigatus*:569 *A. fischeri*:277

afum|EAL90117.1 100.00% afis|EAW25457.1 100.00%

Bootstrap support for afum|EAL90117.1 as seed ortholog is 100%.

Bootstrap support for afis|EAW25457.1 as seed ortholog is 100%.

---

Group of orthologs #6878. Best score 569 bits

Score difference with first non-orthologous sequence - *A. fumigatus*:569 *A. fischeri*:569

afum|EBA27419.1 100.00% afis|EAW22198.1 100.00%

Bootstrap support for afum|EBA27419.1 as seed ortholog is 100%.

Bootstrap support for afis|EAW22198.1 as seed ortholog is 100%.

---

Group of orthologs #6879. Best score 568 bits

Score difference with first non-orthologous sequence - *A. fumigatus*:568 *A. fischeri*:568

afum|EAL86213.1 100.00% afis|EAW24549.1 100.00%

Bootstrap support for afum|EAL86213.1 as seed ortholog is 100%.

Bootstrap support for afis|EAW24549.1 as seed ortholog is 100%.

---

Group of orthologs #6880. Best score 568 bits

Score difference with first non-orthologous sequence - *A. fumigatus*:568 *A. fischeri*:568

afum|EAL93424.1 100.00% afis|EAW18701.1 100.00%

Bootstrap support for afum|EAL93424.1 as seed ortholog is 100%.

Bootstrap support for afis|EAW18701.1 as seed ortholog is 100%.

---

Group of orthologs #6881. Best score 568 bits

Score difference with first non-orthologous sequence - *A. fumigatus*:568 *A. fischeri*:568

afum|EAL93598.1 100.00% afis|EAW18866.1 100.00%

Bootstrap support for afum|EAL93598.1 as seed ortholog is 100%.

Bootstrap support for afis|EAW18866.1 as seed ortholog is 100%.

---

Group of orthologs #6882. Best score 567 bits

Score difference with first non-orthologous sequence - *A. fumigatus*:567 *A. fischeri*:567

afum|EAL86385.1 100.00% afis|EAW16837.1 100.00%

Bootstrap support for afum|EAL86385.1 as seed ortholog is 100%.

Bootstrap support for afis|EAW16837.1 as seed ortholog is 100%.

---

Group of orthologs #6883. Best score 567 bits

Score difference with first non-orthologous sequence - *A. fumigatus*:567 *A. fischeri*:567

afum|EAL89709.1 100.00% afis|EAW25041.1 100.00%

Bootstrap support for afum|EAL89709.1 as seed ortholog is 100%.

Bootstrap support for afis|EAW25041.1 as seed ortholog is 100%.

---



Group of orthologs #6884. Best score 566 bits

Score difference with first non-orthologous sequence - *A. fumigatus*:566 *A. fischeri*:566

afum|EAL85728.1 100.00% afis|EAW15605.1 100.00%

Bootstrap support for afum|EAL85728.1 as seed ortholog is 100%.

Bootstrap support for afis|EAW15605.1 as seed ortholog is 100%.

---

Group of orthologs #6885. Best score 566 bits

Score difference with first non-orthologous sequence - *A. fumigatus*:566 *A. fischeri*:566

afum|EAL88714.1 100.00% afis|EAW16082.1 100.00%

Bootstrap support for afum|EAL88714.1 as seed ortholog is 100%.

Bootstrap support for afis|EAW16082.1 as seed ortholog is 100%.

---

Group of orthologs #6886. Best score 566 bits

Score difference with first non-orthologous sequence - *A. fumigatus*:566 *A. fischeri*:566

afum|EAL89118.1 100.00% afis|EAW16523.1 100.00%

Bootstrap support for afum|EAL89118.1 as seed ortholog is 100%.

Bootstrap support for afis|EAW16523.1 as seed ortholog is 100%.

---

Group of orthologs #6887. Best score 566 bits

Score difference with first non-orthologous sequence - *A. fumigatus*:566 *A. fischeri*:566

afum|EAL85361.1 100.00% afis|EAW20244.1 100.00%

Bootstrap support for afum|EAL85361.1 as seed ortholog is 100%.

Bootstrap support for afis|EAW20244.1 as seed ortholog is 100%.

---

Group of orthologs #6888. Best score 566 bits

Score difference with first non-orthologous sequence - *A. fumigatus*:566 *A. fischeri*:566

afum|EAL93063.1 100.00% afis|EAW18388.1 100.00%

Bootstrap support for afum|EAL93063.1 as seed ortholog is 100%.

Bootstrap support for afis|EAW18388.1 as seed ortholog is 100%.

---

Group of orthologs #6889. Best score 566 bits

Score difference with first non-orthologous sequence - *A. fumigatus*:566 *A. fischeri*:566

afum|EAL93830.1 100.00% afis|EAW19098.1 100.00%

Bootstrap support for afum|EAL93830.1 as seed ortholog is 100%.

Bootstrap support for afis|EAW19098.1 as seed ortholog is 100%.

---

Group of orthologs #6890. Best score 566 bits

Score difference with first non-orthologous sequence - *A. fumigatus*:566 *A. fischeri*:566

afum|EAL93937.1 100.00% afis|EAW19207.1 100.00%

Bootstrap support for afum|EAL93937.1 as seed ortholog is 100%.

Bootstrap support for afis|EAW19207.1 as seed ortholog is 100%.

---

Group of orthologs #6891. Best score 566 bits

Score difference with first non-orthologous sequence - *A. fumigatus*:566 *A. fischeri*:566

afum|EAL92106.1 100.00% afis|EAW21084.1 100.00%

Bootstrap support for afum|EAL92106.1 as seed ortholog is 100%.

Bootstrap support for afis|EAW21084.1 as seed ortholog is 100%.

---

Group of orthologs #6892. Best score 566 bits

Score difference with first non-orthologous sequence - *A. fumigatus*:566 *A. fischeri*:566

afum|EAL89777.1 100.00% afis|EAW25106.1 100.00%

Bootstrap support for afum|EAL89777.1 as seed ortholog is 100%.

Bootstrap support for afis|EAW25106.1 as seed ortholog is 100%.

---

Group of orthologs #6893. Best score 565 bits

Score difference with first non-orthologous sequence - *A. fumigatus*:509 *A. fischeri*:509

|                 |         |                 |         |
|-----------------|---------|-----------------|---------|
| afum EAL86520.1 | 100.00% | afis EAW16996.1 | 100.00% |
|-----------------|---------|-----------------|---------|

Bootstrap support for afum|EAL86520.1 as seed ortholog is 100%.

Bootstrap support for afis|EAW16996.1 as seed ortholog is 100%.

---

Group of orthologs #6894. Best score 565 bits

Score difference with first non-orthologous sequence - *A. fumigatus*:565 *A. fischeri*:565

|                 |         |                 |         |
|-----------------|---------|-----------------|---------|
| afum EAL84519.2 | 100.00% | afis EAW20539.1 | 100.00% |
|-----------------|---------|-----------------|---------|

Bootstrap support for afum|EAL84519.2 as seed ortholog is 100%.

Bootstrap support for afis|EAW20539.1 as seed ortholog is 100%.

---

Group of orthologs #6895. Best score 565 bits

Score difference with first non-orthologous sequence - *A. fumigatus*:285 *A. fischeri*:565

|                 |         |                 |         |
|-----------------|---------|-----------------|---------|
| afum EAL85426.1 | 100.00% | afis EAW20297.1 | 100.00% |
|-----------------|---------|-----------------|---------|

Bootstrap support for afum|EAL85426.1 as seed ortholog is 100%.

Bootstrap support for afis|EAW20297.1 as seed ortholog is 100%.

---

Group of orthologs #6896. Best score 565 bits

Score difference with first non-orthologous sequence - *A. fumigatus*:565 *A. fischeri*:565

|                 |         |                 |         |
|-----------------|---------|-----------------|---------|
| afum EAL86906.2 | 100.00% | afis EAW19616.1 | 100.00% |
|-----------------|---------|-----------------|---------|

Bootstrap support for afum|EAL86906.2 as seed ortholog is 100%.

Bootstrap support for afis|EAW19616.1 as seed ortholog is 100%.

---

Group of orthologs #6897. Best score 565 bits

Score difference with first non-orthologous sequence - *A. fumigatus*:565 *A. fischeri*:565

|                 |         |                 |         |
|-----------------|---------|-----------------|---------|
| afum EAL89583.1 | 100.00% | afis EAW24927.1 | 100.00% |
|-----------------|---------|-----------------|---------|

Bootstrap support for afum|EAL89583.1 as seed ortholog is 100%.

Bootstrap support for afis|EAW24927.1 as seed ortholog is 100%.

---

Group of orthologs #6898. Best score 565 bits

Score difference with first non-orthologous sequence - *A. fumigatus*:565 *A. fischeri*:565

|                 |         |                 |         |
|-----------------|---------|-----------------|---------|
| afum EAL90197.1 | 100.00% | afis EAW25533.1 | 100.00% |
|-----------------|---------|-----------------|---------|

Bootstrap support for afum|EAL90197.1 as seed ortholog is 100%.

Bootstrap support for afis|EAW25533.1 as seed ortholog is 100%.

---

Group of orthologs #6899. Best score 564 bits

Score difference with first non-orthologous sequence - *A. fumigatus*:564 *A. fischeri*:564

|                 |         |                 |         |
|-----------------|---------|-----------------|---------|
| afum EAL89139.1 | 100.00% | afis EAW16542.1 | 100.00% |
|-----------------|---------|-----------------|---------|

Bootstrap support for afum|EAL89139.1 as seed ortholog is 100%.

Bootstrap support for afis|EAW16542.1 as seed ortholog is 100%.

---

Group of orthologs #6900. Best score 564 bits

Score difference with first non-orthologous sequence - *A. fumigatus*:564 *A. fischeri*:564

|                 |         |                 |         |
|-----------------|---------|-----------------|---------|
| afum EAL86903.1 | 100.00% | afis EAW19619.1 | 100.00% |
|-----------------|---------|-----------------|---------|

Bootstrap support for afum|EAL86903.1 as seed ortholog is 100%.

Bootstrap support for afis|EAW19619.1 as seed ortholog is 100%.

---

Group of orthologs #6901. Best score 564 bits

Score difference with first non-orthologous sequence - *A. fumigatus*:564 *A. fischeri*:564

|                 |         |                 |         |
|-----------------|---------|-----------------|---------|
| afum EAL86883.1 | 100.00% | afis EAW19639.1 | 100.00% |
|-----------------|---------|-----------------|---------|

Bootstrap support for afum|EAL86883.1 as seed ortholog is 100%.

Bootstrap support for afis|EAW19639.1 as seed ortholog is 100%.

---

Group of orthologs #6902. Best score 564 bits

Score difference with first non-orthologous sequence - *A. fumigatus*:564 *A. fischeri*:564

|                 |         |                 |         |
|-----------------|---------|-----------------|---------|
| afum EAL86832.1 | 100.00% | afis EAW19695.1 | 100.00% |
|-----------------|---------|-----------------|---------|

Bootstrap support for afum|EAL86832.1 as seed ortholog is 100%.

Bootstrap support for afis|EAW19695.1 as seed ortholog is 100%.

---

Group of orthologs #6903. Best score 564 bits

Score difference with first non-orthologous sequence - *A. fumigatus*:564 *A. fischeri*:564

afum|EAL91243.1 100.00% afis|EAW17409.1 100.00%

Bootstrap support for afum|EAL91243.1 as seed ortholog is 100%.

Bootstrap support for afis|EAW17409.1 as seed ortholog is 100%.

---

Group of orthologs #6904. Best score 564 bits

Score difference with first non-orthologous sequence - *A. fumigatus*:564 *A. fischeri*:564

afum|EAL84300.1 100.00% afis|EAW25593.1 100.00%

Bootstrap support for afum|EAL84300.1 as seed ortholog is 100%.

Bootstrap support for afis|EAW25593.1 as seed ortholog is 100%.

---

Group of orthologs #6905. Best score 564 bits

Score difference with first non-orthologous sequence - *A. fumigatus*:564 *A. fischeri*:335

afum|EAL93407.1 100.00% afis|EAW18686.1 100.00%

Bootstrap support for afum|EAL93407.1 as seed ortholog is 100%.

Bootstrap support for afis|EAW18686.1 as seed ortholog is 100%.

---

Group of orthologs #6906. Best score 564 bits

Score difference with first non-orthologous sequence - *A. fumigatus*:564 *A. fischeri*:321

afum|EAL93702.1 100.00% afis|EAW18969.1 100.00%

Bootstrap support for afum|EAL93702.1 as seed ortholog is 100%.

Bootstrap support for afis|EAW18969.1 as seed ortholog is 100%.

---

Group of orthologs #6907. Best score 564 bits

Score difference with first non-orthologous sequence - *A. fumigatus*:564 *A. fischeri*:564

afum|EAL89634.1 100.00% afis|EAW24974.1 100.00%

Bootstrap support for afum|EAL89634.1 as seed ortholog is 100%.

Bootstrap support for afis|EAW24974.1 as seed ortholog is 100%.

---

Group of orthologs #6908. Best score 564 bits

Score difference with first non-orthologous sequence - *A. fumigatus*:564 *A. fischeri*:564

afum|EBA27331.1 100.00% afis|EAW23450.1 100.00%

Bootstrap support for afum|EBA27331.1 as seed ortholog is 100%.

Bootstrap support for afis|EAW23450.1 as seed ortholog is 100%.

---

Group of orthologs #6909. Best score 563 bits

Score difference with first non-orthologous sequence - *A. fumigatus*:563 *A. fischeri*:563

afum|EAL86161.1 100.00% afis|EAW24492.1 100.00%

Bootstrap support for afum|EAL86161.1 as seed ortholog is 100%.

Bootstrap support for afis|EAW24492.1 as seed ortholog is 100%.

---

Group of orthologs #6910. Best score 563 bits

Score difference with first non-orthologous sequence - *A. fumigatus*:563 *A. fischeri*:563

afum|EAL88257.1 100.00% afis|EAW23226.1 100.00%

Bootstrap support for afum|EAL88257.1 as seed ortholog is 100%.

Bootstrap support for afis|EAW23226.1 as seed ortholog is 100%.

---

Group of orthologs #6911. Best score 562 bits

Score difference with first non-orthologous sequence - *A. fumigatus*:562 *A. fischeri*:562

afum|EAL86297.2 100.00% afis|EAW16723.1 100.00%

Bootstrap support for afum|EAL86297.2 as seed ortholog is 100%.

Bootstrap support for afis|EAW16723.1 as seed ortholog is 100%.

---

Group of orthologs #6912. Best score 562 bits

Score difference with first non-orthologous sequence - *A. fumigatus*:371 *A. fischeri*:562

afum|EAL86408.2 100.00% afis|EAW16869.1 100.00%

Bootstrap support for afum|EAL86408.2 as seed ortholog is 100%.

Bootstrap support for afis|EAW16869.1 as seed ortholog is 100%.

---

Group of orthologs #6913. Best score 562 bits

Score difference with first non-orthologous sequence - *A. fumigatus*:562 *A. fischeri*:562

afum|EAL87071.1 100.00% afis|EAW19423.1 100.00%

Bootstrap support for afum|EAL87071.1 as seed ortholog is 100%.

Bootstrap support for afis|EAW19423.1 as seed ortholog is 100%.

---

Group of orthologs #6914. Best score 562 bits

Score difference with first non-orthologous sequence - *A. fumigatus*:562 *A. fischeri*:562

afum|EAL91305.1 100.00% afis|EAW17476.1 100.00%

Bootstrap support for afum|EAL91305.1 as seed ortholog is 100%.

Bootstrap support for afis|EAW17476.1 as seed ortholog is 100%.

---

Group of orthologs #6915. Best score 562 bits

Score difference with first non-orthologous sequence - *A. fumigatus*:562 *A. fischeri*:562

afum|EAL91501.1 100.00% afis|EAW17687.1 100.00%

Bootstrap support for afum|EAL91501.1 as seed ortholog is 100%.

Bootstrap support for afis|EAW17687.1 as seed ortholog is 100%.

---

Group of orthologs #6916. Best score 562 bits

Score difference with first non-orthologous sequence - *A. fumigatus*:562 *A. fischeri*:562

afum|EAL87258.1 100.00% afis|EAW23826.1 100.00%

Bootstrap support for afum|EAL87258.1 as seed ortholog is 100%.

Bootstrap support for afis|EAW23826.1 as seed ortholog is 100%.

---

Group of orthologs #6917. Best score 562 bits

Score difference with first non-orthologous sequence - *A. fumigatus*:562 *A. fischeri*:562

afum|EAL88312.2 100.00% afis|EAW23171.1 100.00%

Bootstrap support for afum|EAL88312.2 as seed ortholog is 100%.

Bootstrap support for afis|EAW23171.1 as seed ortholog is 100%.

---

Group of orthologs #6918. Best score 562 bits

Score difference with first non-orthologous sequence - *A. fumigatus*:562 *A. fischeri*:562

afum|EAL93482.1 100.00% afis|EAW18755.1 100.00%

Bootstrap support for afum|EAL93482.1 as seed ortholog is 100%.

Bootstrap support for afis|EAW18755.1 as seed ortholog is 100%.

---

Group of orthologs #6919. Best score 562 bits

Score difference with first non-orthologous sequence - *A. fumigatus*:562 *A. fischeri*:562

afum|EAL93611.1 100.00% afis|EAW18879.1 100.00%

Bootstrap support for afum|EAL93611.1 as seed ortholog is 100%.

Bootstrap support for afis|EAW18879.1 as seed ortholog is 100%.

---

Group of orthologs #6920. Best score 562 bits

Score difference with first non-orthologous sequence - *A. fumigatus*:562 *A. fischeri*:562

afum|EAL93642.1 100.00% afis|EAW18911.1 100.00%

Bootstrap support for afum|EAL93642.1 as seed ortholog is 100%.

Bootstrap support for afis|EAW18911.1 as seed ortholog is 100%.

---

Group of orthologs #6921. Best score 561 bits

Score difference with first non-orthologous sequence - *A. fumigatus*:561 *A. fischeri*:561

|                 |         |                 |         |
|-----------------|---------|-----------------|---------|
| afum EAL85224.1 | 100.00% | afis EAW20107.1 | 100.00% |
|-----------------|---------|-----------------|---------|

Bootstrap support for afum|EAL85224.1 as seed ortholog is 100%.

Bootstrap support for afis|EAW20107.1 as seed ortholog is 100%.

---

Group of orthologs #6922. Best score 561 bits

Score difference with first non-orthologous sequence - *A. fumigatus*:561 *A. fischeri*:257

|                 |         |                 |         |
|-----------------|---------|-----------------|---------|
| afum EAL86857.1 | 100.00% | afis EAW19666.1 | 100.00% |
|-----------------|---------|-----------------|---------|

Bootstrap support for afum|EAL86857.1 as seed ortholog is 100%.

Bootstrap support for afis|EAW19666.1 as seed ortholog is 100%.

---

Group of orthologs #6923. Best score 561 bits

Score difference with first non-orthologous sequence - *A. fumigatus*:561 *A. fischeri*:561

|                 |         |                 |         |
|-----------------|---------|-----------------|---------|
| afum EAL90755.1 | 100.00% | afis EAW22436.1 | 100.00% |
|-----------------|---------|-----------------|---------|

Bootstrap support for afum|EAL90755.1 as seed ortholog is 100%.

Bootstrap support for afis|EAW22436.1 as seed ortholog is 100%.

---

Group of orthologs #6924. Best score 561 bits

Score difference with first non-orthologous sequence - *A. fumigatus*:561 *A. fischeri*:561

|                 |         |                 |         |
|-----------------|---------|-----------------|---------|
| afum EAL89696.1 | 100.00% | afis EAW25002.1 | 100.00% |
|-----------------|---------|-----------------|---------|

Bootstrap support for afum|EAL89696.1 as seed ortholog is 100%.

Bootstrap support for afis|EAW25002.1 as seed ortholog is 100%.

---

Group of orthologs #6925. Best score 561 bits

Score difference with first non-orthologous sequence - *A. fumigatus*:561 *A. fischeri*:561

|                 |         |                 |         |
|-----------------|---------|-----------------|---------|
| afum EAL89992.1 | 100.00% | afis EAW25330.1 | 100.00% |
|-----------------|---------|-----------------|---------|

Bootstrap support for afum|EAL89992.1 as seed ortholog is 100%.

Bootstrap support for afis|EAW25330.1 as seed ortholog is 100%.

---

Group of orthologs #6926. Best score 560 bits

Score difference with first non-orthologous sequence - *A. fumigatus*:560 *A. fischeri*:560

|                 |         |                 |         |
|-----------------|---------|-----------------|---------|
| afum EAL84209.1 | 100.00% | afis EAW15436.1 | 100.00% |
|-----------------|---------|-----------------|---------|

Bootstrap support for afum|EAL84209.1 as seed ortholog is 100%.

Bootstrap support for afis|EAW15436.1 as seed ortholog is 100%.

---

Group of orthologs #6927. Best score 560 bits

Score difference with first non-orthologous sequence - *A. fumigatus*:464 *A. fischeri*:419

|                 |         |                 |         |
|-----------------|---------|-----------------|---------|
| afum EAL85077.1 | 100.00% | afis EAW19814.1 | 100.00% |
|-----------------|---------|-----------------|---------|

Bootstrap support for afum|EAL85077.1 as seed ortholog is 100%.

Bootstrap support for afis|EAW19814.1 as seed ortholog is 100%.

---

Group of orthologs #6928. Best score 560 bits

Score difference with first non-orthologous sequence - *A. fumigatus*:560 *A. fischeri*:560

|                 |         |                 |         |
|-----------------|---------|-----------------|---------|
| afum EAL89708.1 | 100.00% | afis EAW25040.1 | 100.00% |
|-----------------|---------|-----------------|---------|

Bootstrap support for afum|EAL89708.1 as seed ortholog is 100%.

Bootstrap support for afis|EAW25040.1 as seed ortholog is 100%.

---

Group of orthologs #6929. Best score 559 bits

Score difference with first non-orthologous sequence - *A. fumigatus*:559 *A. fischeri*:559

|                 |         |                 |         |
|-----------------|---------|-----------------|---------|
| afum EAL85779.1 | 100.00% | afis EAW15554.1 | 100.00% |
|-----------------|---------|-----------------|---------|

Bootstrap support for afum|EAL85779.1 as seed ortholog is 100%.

Bootstrap support for afis|EAW15554.1 as seed ortholog is 100%.

---

Group of orthologs #6930. Best score 559 bits

Score difference with first non-orthologous sequence - *A. fumigatus*:559 *A. fischeri*:559

|                 |         |                 |         |
|-----------------|---------|-----------------|---------|
| afum EAL88075.1 | 100.00% | afis EAW23395.1 | 100.00% |
|-----------------|---------|-----------------|---------|

Bootstrap support for afum|EAL88075.1 as seed ortholog is 100%.

Bootstrap support for afis|EAW23395.1 as seed ortholog is 100%.

---

Group of orthologs #6931. Best score 559 bits

Score difference with first non-orthologous sequence - *A. fumigatus*:559 *A. fischeri*:559

|                 |         |                 |         |
|-----------------|---------|-----------------|---------|
| afum EAL93675.1 | 100.00% | afis EAW18942.1 | 100.00% |
|-----------------|---------|-----------------|---------|

Bootstrap support for afum|EAL93675.1 as seed ortholog is 100%.

Bootstrap support for afis|EAW18942.1 as seed ortholog is 100%.

---

Group of orthologs #6932. Best score 559 bits

Score difference with first non-orthologous sequence - *A. fumigatus*:559 *A. fischeri*:559

|                 |         |                 |         |
|-----------------|---------|-----------------|---------|
| afum EAL92137.1 | 100.00% | afis EAW21114.1 | 100.00% |
|-----------------|---------|-----------------|---------|

Bootstrap support for afum|EAL92137.1 as seed ortholog is 100%.

Bootstrap support for afis|EAW21114.1 as seed ortholog is 100%.

---

Group of orthologs #6933. Best score 559 bits

Score difference with first non-orthologous sequence - *A. fumigatus*:559 *A. fischeri*:559

|                 |         |                 |         |
|-----------------|---------|-----------------|---------|
| afum EAL90385.1 | 100.00% | afis EAW22816.1 | 100.00% |
|-----------------|---------|-----------------|---------|

Bootstrap support for afum|EAL90385.1 as seed ortholog is 100%.

Bootstrap support for afis|EAW22816.1 as seed ortholog is 100%.

---

Group of orthologs #6934. Best score 559 bits

Score difference with first non-orthologous sequence - *A. fumigatus*:559 *A. fischeri*:559

|                 |         |                 |         |
|-----------------|---------|-----------------|---------|
| afum EAL90371.2 | 100.00% | afis EAW22831.1 | 100.00% |
|-----------------|---------|-----------------|---------|

Bootstrap support for afum|EAL90371.2 as seed ortholog is 100%.

Bootstrap support for afis|EAW22831.1 as seed ortholog is 100%.

---

Group of orthologs #6935. Best score 559 bits

Score difference with first non-orthologous sequence - *A. fumigatus*:559 *A. fischeri*:559

|                 |         |                 |         |
|-----------------|---------|-----------------|---------|
| afum EAL91960.1 | 100.00% | afis EAW24106.1 | 100.00% |
|-----------------|---------|-----------------|---------|

Bootstrap support for afum|EAL91960.1 as seed ortholog is 100%.

Bootstrap support for afis|EAW24106.1 as seed ortholog is 100%.

---

Group of orthologs #6936. Best score 558 bits

Score difference with first non-orthologous sequence - *A. fumigatus*:558 *A. fischeri*:382

|                 |         |                 |         |
|-----------------|---------|-----------------|---------|
| afum EAL86316.1 | 100.00% | afis EAW16741.1 | 100.00% |
|-----------------|---------|-----------------|---------|

Bootstrap support for afum|EAL86316.1 as seed ortholog is 100%.

Bootstrap support for afis|EAW16741.1 as seed ortholog is 100%.

---

Group of orthologs #6937. Best score 558 bits

Score difference with first non-orthologous sequence - *A. fumigatus*:558 *A. fischeri*:558

|                 |         |                 |         |
|-----------------|---------|-----------------|---------|
| afum EAL88627.1 | 100.00% | afis EAW15995.1 | 100.00% |
|-----------------|---------|-----------------|---------|

Bootstrap support for afum|EAL88627.1 as seed ortholog is 100%.

Bootstrap support for afis|EAW15995.1 as seed ortholog is 100%.

---

Group of orthologs #6938. Best score 558 bits

Score difference with first non-orthologous sequence - *A. fumigatus*:558 *A. fischeri*:558

|                 |         |                 |         |
|-----------------|---------|-----------------|---------|
| afum EAL86241.1 | 100.00% | afis EAW24611.1 | 100.00% |
|-----------------|---------|-----------------|---------|

Bootstrap support for afum|EAL86241.1 as seed ortholog is 100%.

Bootstrap support for afis|EAW24611.1 as seed ortholog is 100%.

---

Group of orthologs #6939. Best score 558 bits

Score difference with first non-orthologous sequence - *A. fumigatus*:558 *A. fischeri*:558

|                 |         |                 |         |
|-----------------|---------|-----------------|---------|
| afum EAL88445.1 | 100.00% | afis EAW23036.1 | 100.00% |
|-----------------|---------|-----------------|---------|

Bootstrap support for afum|EAL88445.1 as seed ortholog is 100%.

Bootstrap support for afis|EAW23036.1 as seed ortholog is 100%.

---

Group of orthologs #6940. Best score 558 bits

Score difference with first non-orthologous sequence - *A. fumigatus*:558 *A. fischeri*:558

afum|EAL93517.2 100.00% afis|EAW18785.1 100.00%

Bootstrap support for afum|EAL93517.2 as seed ortholog is 100%.

Bootstrap support for afis|EAW18785.1 as seed ortholog is 100%.

---

Group of orthologs #6941. Best score 558 bits

Score difference with first non-orthologous sequence - *A. fumigatus*:558 *A. fischeri*:558

afum|EAL90659.1 100.00% afis|EAW22535.1 100.00%

Bootstrap support for afum|EAL90659.1 as seed ortholog is 100%.

Bootstrap support for afis|EAW22535.1 as seed ortholog is 100%.

---

Group of orthologs #6942. Best score 558 bits

Score difference with first non-orthologous sequence - *A. fumigatus*:558 *A. fischeri*:558

afum|EAL90190.2 100.00% afis|EAW25525.1 100.00%

Bootstrap support for afum|EAL90190.2 as seed ortholog is 100%.

Bootstrap support for afis|EAW25525.1 as seed ortholog is 100%.

---

Group of orthologs #6943. Best score 557 bits

Score difference with first non-orthologous sequence - *A. fumigatus*:557 *A. fischeri*:557

afum|EAL84389.2 100.00% afis|EAW25715.1 100.00%

Bootstrap support for afum|EAL84389.2 as seed ortholog is 100%.

Bootstrap support for afis|EAW25715.1 as seed ortholog is 100%.

---

Group of orthologs #6944. Best score 557 bits

Score difference with first non-orthologous sequence - *A. fumigatus*:557 *A. fischeri*:557

afum|EAL90321.1 100.00% afis|EAW22878.1 100.00%

Bootstrap support for afum|EAL90321.1 as seed ortholog is 100%.

Bootstrap support for afis|EAW22878.1 as seed ortholog is 100%.

---

Group of orthologs #6945. Best score 557 bits

Score difference with first non-orthologous sequence - *A. fumigatus*:468 *A. fischeri*:557

afum|EBA27230.1 100.00% afis|EAW20284.1 100.00%

Bootstrap support for afum|EBA27230.1 as seed ortholog is 100%.

Bootstrap support for afis|EAW20284.1 as seed ortholog is 100%.

---

Group of orthologs #6946. Best score 557 bits

Score difference with first non-orthologous sequence - *A. fumigatus*:557 *A. fischeri*:432

afum|EAL89825.1 100.00% afis|EAW25150.1 100.00%

Bootstrap support for afum|EAL89825.1 as seed ortholog is 100%.

Bootstrap support for afis|EAW25150.1 as seed ortholog is 100%.

---

Group of orthologs #6947. Best score 556 bits

Score difference with first non-orthologous sequence - *A. fumigatus*:556 *A. fischeri*:147

afum|EAL89282.1 100.00% afis|EAW16677.1 100.00%

Bootstrap support for afum|EAL89282.1 as seed ortholog is 100%.

Bootstrap support for afis|EAW16677.1 as seed ortholog is 100%.

---

Group of orthologs #6948. Best score 556 bits

Score difference with first non-orthologous sequence - *A. fumigatus*:556 *A. fischeri*:380

afum|EAL92161.1 100.00% afis|EAW21142.1 100.00%

Bootstrap support for afum|EAL92161.1 as seed ortholog is 100%.

Bootstrap support for afis|EAW21142.1 as seed ortholog is 100%.

---

Group of orthologs #6949. Best score 556 bits

Score difference with first non-orthologous sequence - *A. fumigatus*:556 *A. fischeri*:556

|                 |         |                 |         |
|-----------------|---------|-----------------|---------|
| afum EBA27186.1 | 100.00% | afis EAW20551.1 | 100.00% |
|-----------------|---------|-----------------|---------|

Bootstrap support for afum|EBA27186.1 as seed ortholog is 100%.

Bootstrap support for afis|EAW20551.1 as seed ortholog is 100%.

---

Group of orthologs #6950. Best score 555 bits

Score difference with first non-orthologous sequence - *A. fumigatus*:555 *A. fischeri*:555

|                 |         |                 |         |
|-----------------|---------|-----------------|---------|
| afum EAL91418.1 | 100.00% | afis EAW17605.1 | 100.00% |
|-----------------|---------|-----------------|---------|

Bootstrap support for afum|EAL91418.1 as seed ortholog is 100%.

Bootstrap support for afis|EAW17605.1 as seed ortholog is 100%.

---

Group of orthologs #6951. Best score 555 bits

Score difference with first non-orthologous sequence - *A. fumigatus*:481 *A. fischeri*:479

|                 |         |                 |         |
|-----------------|---------|-----------------|---------|
| afum EAL91067.1 | 100.00% | afis EAW22119.1 | 100.00% |
|-----------------|---------|-----------------|---------|

Bootstrap support for afum|EAL91067.1 as seed ortholog is 100%.

Bootstrap support for afis|EAW22119.1 as seed ortholog is 100%.

---

Group of orthologs #6952. Best score 554 bits

Score difference with first non-orthologous sequence - *A. fumigatus*:554 *A. fischeri*:554

|                 |         |                 |         |
|-----------------|---------|-----------------|---------|
| afum EAL87003.1 | 100.00% | afis EAW19491.1 | 100.00% |
|-----------------|---------|-----------------|---------|

Bootstrap support for afum|EAL87003.1 as seed ortholog is 100%.

Bootstrap support for afis|EAW19491.1 as seed ortholog is 100%.

---

Group of orthologs #6953. Best score 554 bits

Score difference with first non-orthologous sequence - *A. fumigatus*:554 *A. fischeri*:554

|                 |         |                 |         |
|-----------------|---------|-----------------|---------|
| afum EAL86912.1 | 100.00% | afis EAW19610.1 | 100.00% |
|-----------------|---------|-----------------|---------|

Bootstrap support for afum|EAL86912.1 as seed ortholog is 100%.

Bootstrap support for afis|EAW19610.1 as seed ortholog is 100%.

---

Group of orthologs #6954. Best score 554 bits

Score difference with first non-orthologous sequence - *A. fumigatus*:554 *A. fischeri*:554

|                 |         |                 |         |
|-----------------|---------|-----------------|---------|
| afum EAL91271.1 | 100.00% | afis EAW17445.1 | 100.00% |
|-----------------|---------|-----------------|---------|

Bootstrap support for afum|EAL91271.1 as seed ortholog is 100%.

Bootstrap support for afis|EAW17445.1 as seed ortholog is 100%.

---

Group of orthologs #6955. Best score 554 bits

Score difference with first non-orthologous sequence - *A. fumigatus*:554 *A. fischeri*:554

|                 |         |                 |         |
|-----------------|---------|-----------------|---------|
| afum EAL91746.1 | 100.00% | afis EAW17935.1 | 100.00% |
|-----------------|---------|-----------------|---------|

Bootstrap support for afum|EAL91746.1 as seed ortholog is 100%.

Bootstrap support for afis|EAW17935.1 as seed ortholog is 100%.

---

Group of orthologs #6956. Best score 554 bits

Score difference with first non-orthologous sequence - *A. fumigatus*:554 *A. fischeri*:554

|                 |         |                 |         |
|-----------------|---------|-----------------|---------|
| afum EAL85864.1 | 100.00% | afis EAW24191.1 | 100.00% |
|-----------------|---------|-----------------|---------|

Bootstrap support for afum|EAL85864.1 as seed ortholog is 100%.

Bootstrap support for afis|EAW24191.1 as seed ortholog is 100%.

---

Group of orthologs #6957. Best score 554 bits

Score difference with first non-orthologous sequence - *A. fumigatus*:554 *A. fischeri*:554

|                 |         |                 |         |
|-----------------|---------|-----------------|---------|
| afum EAL84345.1 | 100.00% | afis EAW25675.1 | 100.00% |
|-----------------|---------|-----------------|---------|

Bootstrap support for afum|EAL84345.1 as seed ortholog is 100%.

Bootstrap support for afis|EAW25675.1 as seed ortholog is 100%.

---

Group of orthologs #6958. Best score 554 bits

Score difference with first non-orthologous sequence - *A. fumigatus*:554 *A. fischeri*:554

|                 |         |                 |         |
|-----------------|---------|-----------------|---------|
| afum EAL88249.1 | 100.00% | afis EAW23233.1 | 100.00% |
|-----------------|---------|-----------------|---------|

Bootstrap support for afum|EAL88249.1 as seed ortholog is 100%.



Bootstrap support for afis|EAW23233.1 as seed ortholog is 100%.

---

Group of orthologs #6959. Best score 554 bits

Score difference with first non-orthologous sequence - *A. fumigatus*:554 *A. fischeri*:298

afum|EAL90343.1 100.00% afis|EAW22857.1 100.00%

Bootstrap support for afum|EAL90343.1 as seed ortholog is 100%.

Bootstrap support for afis|EAW22857.1 as seed ortholog is 100%.

---

Group of orthologs #6960. Best score 553 bits

Score difference with first non-orthologous sequence - *A. fumigatus*:553 *A. fischeri*:553

afum|EAL85308.1 100.00% afis|EAW20189.1 100.00%

Bootstrap support for afum|EAL85308.1 as seed ortholog is 100%.

Bootstrap support for afis|EAW20189.1 as seed ortholog is 100%.

---

Group of orthologs #6961. Best score 553 bits

Score difference with first non-orthologous sequence - *A. fumigatus*:493 *A. fischeri*:509

afum|EAL85445.1 100.00% afis|EAW20317.1 100.00%

Bootstrap support for afum|EAL85445.1 as seed ortholog is 100%.

Bootstrap support for afis|EAW20317.1 as seed ortholog is 100%.

---

Group of orthologs #6962. Best score 553 bits

Score difference with first non-orthologous sequence - *A. fumigatus*:553 *A. fischeri*:553

afum|EAL91899.1 100.00% afis|EAW18087.1 100.00%

Bootstrap support for afum|EAL91899.1 as seed ortholog is 100%.

Bootstrap support for afis|EAW18087.1 as seed ortholog is 100%.

---

Group of orthologs #6963. Best score 553 bits

Score difference with first non-orthologous sequence - *A. fumigatus*:553 *A. fischeri*:553

afum|EAL93086.1 100.00% afis|EAW18406.1 100.00%

Bootstrap support for afum|EAL93086.1 as seed ortholog is 100%.

Bootstrap support for afis|EAW18406.1 as seed ortholog is 100%.

---

Group of orthologs #6964. Best score 553 bits

Score difference with first non-orthologous sequence - *A. fumigatus*:553 *A. fischeri*:553

afum|EAL88433.1 100.00% afis|EAW23047.1 100.00%

Bootstrap support for afum|EAL88433.1 as seed ortholog is 100%.

Bootstrap support for afis|EAW23047.1 as seed ortholog is 100%.

---

Group of orthologs #6965. Best score 553 bits

Score difference with first non-orthologous sequence - *A. fumigatus*:457 *A. fischeri*:553

afum|EAL92430.1 100.00% afis|EAW21415.1 100.00%

Bootstrap support for afum|EAL92430.1 as seed ortholog is 100%.

Bootstrap support for afis|EAW21415.1 as seed ortholog is 100%.

---

Group of orthologs #6966. Best score 553 bits

Score difference with first non-orthologous sequence - *A. fumigatus*:553 *A. fischeri*:438

afum|EBA27286.1 100.00% afis|EAW23710.1 100.00%

Bootstrap support for afum|EBA27286.1 as seed ortholog is 100%.

Bootstrap support for afis|EAW23710.1 as seed ortholog is 100%.

---

Group of orthologs #6967. Best score 552 bits

Score difference with first non-orthologous sequence - *A. fumigatus*:552 *A. fischeri*:552

afum|EAL91495.1 100.00% afis|EAW17681.1 100.00%

Bootstrap support for afum|EAL91495.1 as seed ortholog is 100%.

Bootstrap support for afis|EAW17681.1 as seed ortholog is 100%.

---

Group of orthologs #6968. Best score 552 bits

Score difference with first non-orthologous sequence - *A. fumigatus*:552 *A. fischeri*:552

afum|EAL93052.1 100.00% afis|EAW18377.1 100.00%

Bootstrap support for afum|EAL93052.1 as seed ortholog is 100%.

Bootstrap support for afis|EAW18377.1 as seed ortholog is 100%.

---

Group of orthologs #6969. Best score 552 bits

Score difference with first non-orthologous sequence - *A. fumigatus*:552 *A. fischeri*:552

afum|EAL92693.1 100.00% afis|EAW21658.1 100.00%

Bootstrap support for afum|EAL92693.1 as seed ortholog is 100%.

Bootstrap support for afis|EAW21658.1 as seed ortholog is 100%.

---

Group of orthologs #6970. Best score 552 bits

Score difference with first non-orthologous sequence - *A. fumigatus*:205 *A. fischeri*:552

afum|EAL89588.1 100.00% afis|EAW24932.1 100.00%

Bootstrap support for afum|EAL89588.1 as seed ortholog is 100%.

Bootstrap support for afis|EAW24932.1 as seed ortholog is 100%.

---

Group of orthologs #6971. Best score 552 bits

Score difference with first non-orthologous sequence - *A. fumigatus*:552 *A. fischeri*:552

afum|EAL90049.1 100.00% afis|EAW25390.1 100.00%

Bootstrap support for afum|EAL90049.1 as seed ortholog is 100%.

Bootstrap support for afis|EAW25390.1 as seed ortholog is 100%.

---

Group of orthologs #6972. Best score 551 bits

Score difference with first non-orthologous sequence - *A. fumigatus*:551 *A. fischeri*:551

afum|EAL88864.1 100.00% afis|EAW16242.1 100.00%

Bootstrap support for afum|EAL88864.1 as seed ortholog is 100%.

Bootstrap support for afis|EAW16242.1 as seed ortholog is 100%.

---

Group of orthologs #6973. Best score 551 bits

Score difference with first non-orthologous sequence - *A. fumigatus*:551 *A. fischeri*:551

afum|EAL84699.1 100.00% afis|EAW20935.1 100.00%

Bootstrap support for afum|EAL84699.1 as seed ortholog is 100%.

Bootstrap support for afis|EAW20935.1 as seed ortholog is 100%.

---

Group of orthologs #6974. Best score 551 bits

Score difference with first non-orthologous sequence - *A. fumigatus*:551 *A. fischeri*:551

afum|EAL93217.1 100.00% afis|EAW18522.1 100.00%

Bootstrap support for afum|EAL93217.1 as seed ortholog is 100%.

Bootstrap support for afis|EAW18522.1 as seed ortholog is 100%.

---

Group of orthologs #6975. Best score 551 bits

Score difference with first non-orthologous sequence - *A. fumigatus*:551 *A. fischeri*:551

afum|EBA27249.1 100.00% afis|EAW24223.1 100.00%

Bootstrap support for afum|EBA27249.1 as seed ortholog is 100%.

Bootstrap support for afis|EAW24223.1 as seed ortholog is 100%.

---

Group of orthologs #6976. Best score 550 bits

Score difference with first non-orthologous sequence - *A. fumigatus*:550 *A. fischeri*:550

afum|EAL86670.1 100.00% afis|EAW17251.1 100.00%

Bootstrap support for afum|EAL86670.1 as seed ortholog is 100%.

Bootstrap support for afis|EAW17251.1 as seed ortholog is 100%.

---

Group of orthologs #6977. Best score 550 bits

Score difference with first non-orthologous sequence - *A. fumigatus*:550 *A. fischeri*:550

|                 |         |                 |         |
|-----------------|---------|-----------------|---------|
| afum EAL84929.1 | 100.00% | afis EAW19986.1 | 100.00% |
|-----------------|---------|-----------------|---------|

Bootstrap support for afum|EAL84929.1 as seed ortholog is 100%.

Bootstrap support for afis|EAW19986.1 as seed ortholog is 100%.

---

Group of orthologs #6978. Best score 550 bits

Score difference with first non-orthologous sequence - *A. fumigatus*:550 *A. fischeri*:550

|                 |         |                 |         |
|-----------------|---------|-----------------|---------|
| afum EAL87151.1 | 100.00% | afis EAW23707.1 | 100.00% |
|-----------------|---------|-----------------|---------|

Bootstrap support for afum|EAL87151.1 as seed ortholog is 100%.

Bootstrap support for afis|EAW23707.1 as seed ortholog is 100%.

---

Group of orthologs #6979. Best score 550 bits

Score difference with first non-orthologous sequence - *A. fumigatus*:550 *A. fischeri*:440

|                 |         |                 |         |
|-----------------|---------|-----------------|---------|
| afum EAL93462.1 | 100.00% | afis EAW18737.1 | 100.00% |
|-----------------|---------|-----------------|---------|

Bootstrap support for afum|EAL93462.1 as seed ortholog is 100%.

Bootstrap support for afis|EAW18737.1 as seed ortholog is 100%.

---

Group of orthologs #6980. Best score 549 bits

Score difference with first non-orthologous sequence - *A. fumigatus*:303 *A. fischeri*:549

|                 |         |                 |         |
|-----------------|---------|-----------------|---------|
| afum EAL89281.1 | 100.00% | afis EAW16676.1 | 100.00% |
|-----------------|---------|-----------------|---------|

Bootstrap support for afum|EAL89281.1 as seed ortholog is 100%.

Bootstrap support for afis|EAW16676.1 as seed ortholog is 100%.

---

Group of orthologs #6981. Best score 549 bits

Score difference with first non-orthologous sequence - *A. fumigatus*:549 *A. fischeri*:549

|                 |         |                 |         |
|-----------------|---------|-----------------|---------|
| afum EAL89283.1 | 100.00% | afis EAW16679.1 | 100.00% |
|-----------------|---------|-----------------|---------|

Bootstrap support for afum|EAL89283.1 as seed ortholog is 100%.

Bootstrap support for afis|EAW16679.1 as seed ortholog is 100%.

---

Group of orthologs #6982. Best score 549 bits

Score difference with first non-orthologous sequence - *A. fumigatus*:549 *A. fischeri*:549

|                 |         |                 |         |
|-----------------|---------|-----------------|---------|
| afum EAL84321.1 | 100.00% | afis EAW25633.1 | 100.00% |
|-----------------|---------|-----------------|---------|

Bootstrap support for afum|EAL84321.1 as seed ortholog is 100%.

Bootstrap support for afis|EAW25633.1 as seed ortholog is 100%.

---

Group of orthologs #6983. Best score 549 bits

Score difference with first non-orthologous sequence - *A. fumigatus*:549 *A. fischeri*:447

|                 |         |                 |         |
|-----------------|---------|-----------------|---------|
| afum EAL86037.1 | 100.00% | afis EAW24365.1 | 100.00% |
|-----------------|---------|-----------------|---------|

Bootstrap support for afum|EAL86037.1 as seed ortholog is 100%.

Bootstrap support for afis|EAW24365.1 as seed ortholog is 100%.

---

Group of orthologs #6984. Best score 548 bits

Score difference with first non-orthologous sequence - *A. fumigatus*:548 *A. fischeri*:548

|                 |         |                 |         |
|-----------------|---------|-----------------|---------|
| afum EAL85828.1 | 100.00% | afis EAW15495.1 | 100.00% |
|-----------------|---------|-----------------|---------|

Bootstrap support for afum|EAL85828.1 as seed ortholog is 100%.

Bootstrap support for afis|EAW15495.1 as seed ortholog is 100%.

---

Group of orthologs #6985. Best score 548 bits

Score difference with first non-orthologous sequence - *A. fumigatus*:548 *A. fischeri*:548

|                 |         |                 |         |
|-----------------|---------|-----------------|---------|
| afum EAL91420.1 | 100.00% | afis EAW17607.1 | 100.00% |
|-----------------|---------|-----------------|---------|

Bootstrap support for afum|EAL91420.1 as seed ortholog is 100%.

Bootstrap support for afis|EAW17607.1 as seed ortholog is 100%.

---

Group of orthologs #6986. Best score 548 bits

Score difference with first non-orthologous sequence - *A. fumigatus*:548 *A. fischeri*:548

|                 |         |                 |         |
|-----------------|---------|-----------------|---------|
| afum EAL93183.1 | 100.00% | afis EAW18493.1 | 100.00% |
|-----------------|---------|-----------------|---------|

Bootstrap support for afum|EAL93183.1 as seed ortholog is 100%.

Bootstrap support for afis|EAW18493.1 as seed ortholog is 100%.

---

Group of orthologs #6987. Best score 548 bits

Score difference with first non-orthologous sequence - *A. fumigatus*:548 *A. fischeri*:548

afum|EAL92355.2 100.00% afis|EAW21337.1 100.00%

Bootstrap support for afum|EAL92355.2 as seed ortholog is 100%.

Bootstrap support for afis|EAW21337.1 as seed ortholog is 100%.

---

Group of orthologs #6988. Best score 548 bits

Score difference with first non-orthologous sequence - *A. fumigatus*:548 *A. fischeri*:548

afum|EAL92698.1 100.00% afis|EAW21663.1 100.00%

Bootstrap support for afum|EAL92698.1 as seed ortholog is 100%.

Bootstrap support for afis|EAW21663.1 as seed ortholog is 100%.

---

Group of orthologs #6989. Best score 548 bits

Score difference with first non-orthologous sequence - *A. fumigatus*:548 *A. fischeri*:548

afum|EAL92046.1 100.00% afis|EAW24186.1 100.00%

Bootstrap support for afum|EAL92046.1 as seed ortholog is 100%.

Bootstrap support for afis|EAW24186.1 as seed ortholog is 100%.

---

Group of orthologs #6990. Best score 547 bits

Score difference with first non-orthologous sequence - *A. fumigatus*:547 *A. fischeri*:547

afum|EAL85560.1 100.00% afis|EAW15790.1 100.00%

Bootstrap support for afum|EAL85560.1 as seed ortholog is 100%.

Bootstrap support for afis|EAW15790.1 as seed ortholog is 100%.

---

Group of orthologs #6991. Best score 547 bits

Score difference with first non-orthologous sequence - *A. fumigatus*:547 *A. fischeri*:547

afum|EAL87467.1 100.00% afis|EAW18110.1 100.00%

Bootstrap support for afum|EAL87467.1 as seed ortholog is 100%.

Bootstrap support for afis|EAW18110.1 as seed ortholog is 100%.

---

Group of orthologs #6992. Best score 547 bits

Score difference with first non-orthologous sequence - *A. fumigatus*:547 *A. fischeri*:547

afum|EAL91581.1 100.00% afis|EAW17772.1 100.00%

Bootstrap support for afum|EAL91581.1 as seed ortholog is 100%.

Bootstrap support for afis|EAW17772.1 as seed ortholog is 100%.

---

Group of orthologs #6993. Best score 547 bits

Score difference with first non-orthologous sequence - *A. fumigatus*:547 *A. fischeri*:547

afum|EAL88335.1 100.00% afis|EAW23146.1 100.00%

Bootstrap support for afum|EAL88335.1 as seed ortholog is 100%.

Bootstrap support for afis|EAW23146.1 as seed ortholog is 100%.

---

Group of orthologs #6994. Best score 547 bits

Score difference with first non-orthologous sequence - *A. fumigatus*:547 *A. fischeri*:547

afum|EAL92243.1 100.00% afis|EAW21231.1 100.00%

Bootstrap support for afum|EAL92243.1 as seed ortholog is 100%.

Bootstrap support for afis|EAW21231.1 as seed ortholog is 100%.

---

Group of orthologs #6995. Best score 546 bits

Score difference with first non-orthologous sequence - *A. fumigatus*:546 *A. fischeri*:546

afum|EAL86523.1 100.00% afis|EAW16998.1 100.00%

Bootstrap support for afum|EAL86523.1 as seed ortholog is 100%.

Bootstrap support for afis|EAW16998.1 as seed ortholog is 100%.

---

Group of orthologs #6996. Best score 546 bits

Score difference with first non-orthologous sequence - *A. fumigatus*:546 *A. fischeri*:546

afum|EAL85163.1 100.00% afis|EAW20043.1 100.00%

Bootstrap support for afum|EAL85163.1 as seed ortholog is 100%.

Bootstrap support for afis|EAW20043.1 as seed ortholog is 100%.

---

Group of orthologs #6997. Best score 546 bits

Score difference with first non-orthologous sequence - *A. fumigatus*:546 *A. fischeri*:546

afum|EAL87636.1 100.00% afis|EAW18271.1 100.00%

Bootstrap support for afum|EAL87636.1 as seed ortholog is 100%.

Bootstrap support for afis|EAW18271.1 as seed ortholog is 100%.

---

Group of orthologs #6998. Best score 546 bits

Score difference with first non-orthologous sequence - *A. fumigatus*:546 *A. fischeri*:546

afum|EAL93732.1 100.00% afis|EAW18997.1 100.00%

Bootstrap support for afum|EAL93732.1 as seed ortholog is 100%.

Bootstrap support for afis|EAW18997.1 as seed ortholog is 100%.

---

Group of orthologs #6999. Best score 545 bits

Score difference with first non-orthologous sequence - *A. fumigatus*:545 *A. fischeri*:545

afum|EAL85508.1 100.00% afis|EAW15843.1 100.00%

Bootstrap support for afum|EAL85508.1 as seed ortholog is 100%.

Bootstrap support for afis|EAW15843.1 as seed ortholog is 100%.

---

Group of orthologs #7000. Best score 545 bits

Score difference with first non-orthologous sequence - *A. fumigatus*:545 *A. fischeri*:200

afum|EAL86741.1 100.00% afis|EAW20666.1 100.00%

Bootstrap support for afum|EAL86741.1 as seed ortholog is 100%.

Bootstrap support for afis|EAW20666.1 as seed ortholog is 100%.

---

Group of orthologs #7001. Best score 545 bits

Score difference with first non-orthologous sequence - *A. fumigatus*:545 *A. fischeri*:500

afum|EAL87845.1 100.00% afis|EAW23617.1 100.00%

Bootstrap support for afum|EAL87845.1 as seed ortholog is 100%.

Bootstrap support for afis|EAW23617.1 as seed ortholog is 100%.

---

Group of orthologs #7002. Best score 544 bits

Score difference with first non-orthologous sequence - *A. fumigatus*:544 *A. fischeri*:544

afum|EAL85759.1 100.00% afis|EAW15575.1 100.00%

Bootstrap support for afum|EAL85759.1 as seed ortholog is 100%.

Bootstrap support for afis|EAW15575.1 as seed ortholog is 100%.

---

Group of orthologs #7003. Best score 544 bits

Score difference with first non-orthologous sequence - *A. fumigatus*:544 *A. fischeri*:368

afum|EAL85109.1 100.00% afis|EAW19780.1 100.00%

Bootstrap support for afum|EAL85109.1 as seed ortholog is 100%.

Bootstrap support for afis|EAW19780.1 as seed ortholog is 100%.

---

Group of orthologs #7004. Best score 544 bits

Score difference with first non-orthologous sequence - *A. fumigatus*:544 *A. fischeri*:412

afum|EAL84275.1 100.00% afis|EAW25552.1 100.00%

Bootstrap support for afum|EAL84275.1 as seed ortholog is 100%.

Bootstrap support for afis|EAW25552.1 as seed ortholog is 100%.

---

Group of orthologs #7005. Best score 544 bits

Score difference with first non-orthologous sequence - *A. fumigatus*:544 *A. fischeri*:544

|                 |         |                 |         |
|-----------------|---------|-----------------|---------|
| afum EAL86198.1 | 100.00% | afis EAW24532.1 | 100.00% |
|-----------------|---------|-----------------|---------|

Bootstrap support for afum|EAL86198.1 as seed ortholog is 100%.

Bootstrap support for afis|EAW24532.1 as seed ortholog is 100%.

---

Group of orthologs #7006. Best score 544 bits

Score difference with first non-orthologous sequence - *A. fumigatus*:431 *A. fischeri*:381

|                 |         |                 |         |
|-----------------|---------|-----------------|---------|
| afum EAL86199.1 | 100.00% | afis EAW24533.1 | 100.00% |
|-----------------|---------|-----------------|---------|

Bootstrap support for afum|EAL86199.1 as seed ortholog is 100%.

Bootstrap support for afis|EAW24533.1 as seed ortholog is 100%.

---

Group of orthologs #7007. Best score 544 bits

Score difference with first non-orthologous sequence - *A. fumigatus*:544 *A. fischeri*:185

|                 |         |                 |         |
|-----------------|---------|-----------------|---------|
| afum EAL87328.1 | 100.00% | afis EAW23901.1 | 100.00% |
|-----------------|---------|-----------------|---------|

Bootstrap support for afum|EAL87328.1 as seed ortholog is 100%.

Bootstrap support for afis|EAW23901.1 as seed ortholog is 100%.

---

Group of orthologs #7008. Best score 544 bits

Score difference with first non-orthologous sequence - *A. fumigatus*:544 *A. fischeri*:462

|                 |         |                 |         |
|-----------------|---------|-----------------|---------|
| afum EAL93650.2 | 100.00% | afis EAW18919.1 | 100.00% |
|-----------------|---------|-----------------|---------|

Bootstrap support for afum|EAL93650.2 as seed ortholog is 100%.

Bootstrap support for afis|EAW18919.1 as seed ortholog is 100%.

---

Group of orthologs #7009. Best score 544 bits

Score difference with first non-orthologous sequence - *A. fumigatus*:544 *A. fischeri*:544

|                 |         |                 |         |
|-----------------|---------|-----------------|---------|
| afum EAL92018.1 | 100.00% | afis EAW24162.1 | 100.00% |
|-----------------|---------|-----------------|---------|

Bootstrap support for afum|EAL92018.1 as seed ortholog is 100%.

Bootstrap support for afis|EAW24162.1 as seed ortholog is 100%.

---

Group of orthologs #7010. Best score 543 bits

Score difference with first non-orthologous sequence - *A. fumigatus*:543 *A. fischeri*:543

|                 |         |                 |         |
|-----------------|---------|-----------------|---------|
| afum EAL85351.1 | 100.00% | afis EAW20234.1 | 100.00% |
|-----------------|---------|-----------------|---------|

Bootstrap support for afum|EAL85351.1 as seed ortholog is 100%.

Bootstrap support for afis|EAW20234.1 as seed ortholog is 100%.

---

Group of orthologs #7011. Best score 543 bits

Score difference with first non-orthologous sequence - *A. fumigatus*:543 *A. fischeri*:543

|                 |         |                 |         |
|-----------------|---------|-----------------|---------|
| afum EAL87028.1 | 100.00% | afis EAW19468.1 | 100.00% |
|-----------------|---------|-----------------|---------|

Bootstrap support for afum|EAL87028.1 as seed ortholog is 100%.

Bootstrap support for afis|EAW19468.1 as seed ortholog is 100%.

---

Group of orthologs #7012. Best score 543 bits

Score difference with first non-orthologous sequence - *A. fumigatus*:543 *A. fischeri*:543

|                 |         |                 |         |
|-----------------|---------|-----------------|---------|
| afum EAL91558.1 | 100.00% | afis EAW17746.1 | 100.00% |
|-----------------|---------|-----------------|---------|

Bootstrap support for afum|EAL91558.1 as seed ortholog is 100%.

Bootstrap support for afis|EAW17746.1 as seed ortholog is 100%.

---

Group of orthologs #7013. Best score 543 bits

Score difference with first non-orthologous sequence - *A. fumigatus*:543 *A. fischeri*:543

|                 |         |                 |         |
|-----------------|---------|-----------------|---------|
| afum EAL86096.1 | 100.00% | afis EAW24428.1 | 100.00% |
|-----------------|---------|-----------------|---------|

Bootstrap support for afum|EAL86096.1 as seed ortholog is 100%.

Bootstrap support for afis|EAW24428.1 as seed ortholog is 100%.

---

Group of orthologs #7014. Best score 543 bits

Score difference with first non-orthologous sequence - *A. fumigatus*:543 *A. fischeri*:543

|                 |         |                 |         |
|-----------------|---------|-----------------|---------|
| afum EAL87352.1 | 100.00% | afis EAW23927.1 | 100.00% |
|-----------------|---------|-----------------|---------|

Bootstrap support for afum|EAL87352.1 as seed ortholog is 100%.

Bootstrap support for afis|EAW23927.1 as seed ortholog is 100%.

---

Group of orthologs #7015. Best score 543 bits

Score difference with first non-orthologous sequence - *A. fumigatus*:543 *A. fischeri*:543

afum|EAL93409.1 100.00% afis|EAW18688.1 100.00%

Bootstrap support for afum|EAL93409.1 as seed ortholog is 100%.

Bootstrap support for afis|EAW18688.1 as seed ortholog is 100%.

---

Group of orthologs #7016. Best score 543 bits

Score difference with first non-orthologous sequence - *A. fumigatus*:543 *A. fischeri*:543

afum|EAL92421.1 100.00% afis|EAW21407.1 100.00%

Bootstrap support for afum|EAL92421.1 as seed ortholog is 100%.

Bootstrap support for afis|EAW21407.1 as seed ortholog is 100%.

---

Group of orthologs #7017. Best score 542 bits

Score difference with first non-orthologous sequence - *A. fumigatus*:542 *A. fischeri*:542

afum|EAL90378.2 100.00% afis|EAW22822.1 100.00%

Bootstrap support for afum|EAL90378.2 as seed ortholog is 100%.

Bootstrap support for afis|EAW22822.1 as seed ortholog is 100%.

---

Group of orthologs #7018. Best score 541 bits

Score difference with first non-orthologous sequence - *A. fumigatus*:541 *A. fischeri*:541

afum|EAL86350.1 100.00% afis|EAW16779.1 100.00%

Bootstrap support for afum|EAL86350.1 as seed ortholog is 100%.

Bootstrap support for afis|EAW16779.1 as seed ortholog is 100%.

---

Group of orthologs #7019. Best score 541 bits

Score difference with first non-orthologous sequence - *A. fumigatus*:541 *A. fischeri*:541

afum|EAL86677.1 100.00% afis|EAW17260.1 100.00%

Bootstrap support for afum|EAL86677.1 as seed ortholog is 100%.

Bootstrap support for afis|EAW17260.1 as seed ortholog is 100%.

---

Group of orthologs #7020. Best score 541 bits

Score difference with first non-orthologous sequence - *A. fumigatus*:541 *A. fischeri*:541

afum|EAL88619.1 100.00% afis|EAW15987.1 100.00%

Bootstrap support for afum|EAL88619.1 as seed ortholog is 100%.

Bootstrap support for afis|EAW15987.1 as seed ortholog is 100%.

---

Group of orthologs #7021. Best score 541 bits

Score difference with first non-orthologous sequence - *A. fumigatus*:541 *A. fischeri*:541

afum|EAL89220.1 100.00% afis|EAW16616.1 100.00%

Bootstrap support for afum|EAL89220.1 as seed ortholog is 100%.

Bootstrap support for afis|EAW16616.1 as seed ortholog is 100%.

---

Group of orthologs #7022. Best score 541 bits

Score difference with first non-orthologous sequence - *A. fumigatus*:541 *A. fischeri*:475

afum|EAL91609.1 100.00% afis|EAW17801.1 100.00%

Bootstrap support for afum|EAL91609.1 as seed ortholog is 100%.

Bootstrap support for afis|EAW17801.1 as seed ortholog is 100%.

---

Group of orthologs #7023. Best score 541 bits

Score difference with first non-orthologous sequence - *A. fumigatus*:541 *A. fischeri*:541

afum|EAL93054.1 100.00% afis|EAW18379.1 100.00%

Bootstrap support for afum|EAL93054.1 as seed ortholog is 100%.

Bootstrap support for afis|EAW18379.1 as seed ortholog is 100%.

---

Group of orthologs #7024. Best score 541 bits

Score difference with first non-orthologous sequence - *A. fumigatus*:541 *A. fischeri*:541

afum|EAL87337.1 100.00% afis|EAW23909.1 100.00%

Bootstrap support for afum|EAL87337.1 as seed ortholog is 100%.

Bootstrap support for afis|EAW23909.1 as seed ortholog is 100%.

---

Group of orthologs #7025. Best score 541 bits

Score difference with first non-orthologous sequence - *A. fumigatus*:541 *A. fischeri*:465

afum|EAL90958.1 100.00% afis|EAW22235.1 100.00%

Bootstrap support for afum|EAL90958.1 as seed ortholog is 100%.

Bootstrap support for afis|EAW22235.1 as seed ortholog is 100%.

---

Group of orthologs #7026. Best score 541 bits

Score difference with first non-orthologous sequence - *A. fumigatus*:541 *A. fischeri*:302

afum|EAL89342.1 100.00% afis|EAW24700.1 100.00%

Bootstrap support for afum|EAL89342.1 as seed ortholog is 100%.

Bootstrap support for afis|EAW24700.1 as seed ortholog is 100%.

---

Group of orthologs #7027. Best score 540 bits

Score difference with first non-orthologous sequence - *A. fumigatus*:540 *A. fischeri*:540

afum|EAL88974.1 100.00% afis|EAW16349.1 100.00%

Bootstrap support for afum|EAL88974.1 as seed ortholog is 100%.

Bootstrap support for afis|EAW16349.1 as seed ortholog is 100%.

---

Group of orthologs #7028. Best score 540 bits

Score difference with first non-orthologous sequence - *A. fumigatus*:540 *A. fischeri*:448

afum|EAL84630.1 100.00% afis|EAW20419.1 100.00%

Bootstrap support for afum|EAL84630.1 as seed ortholog is 100%.

Bootstrap support for afis|EAW20419.1 as seed ortholog is 100%.

---

Group of orthologs #7029. Best score 540 bits

Score difference with first non-orthologous sequence - *A. fumigatus*:540 *A. fischeri*:540

afum|EAL85300.1 100.00% afis|EAW20182.1 100.00%

Bootstrap support for afum|EAL85300.1 as seed ortholog is 100%.

Bootstrap support for afis|EAW20182.1 as seed ortholog is 100%.

---

Group of orthologs #7030. Best score 540 bits

Score difference with first non-orthologous sequence - *A. fumigatus*:540 *A. fischeri*:540

afum|EAL85441.1 100.00% afis|EAW20315.1 100.00%

Bootstrap support for afum|EAL85441.1 as seed ortholog is 100%.

Bootstrap support for afis|EAW20315.1 as seed ortholog is 100%.

---

Group of orthologs #7031. Best score 540 bits

Score difference with first non-orthologous sequence - *A. fumigatus*:540 *A. fischeri*:540

afum|EAL91266.1 100.00% afis|EAW17440.1 100.00%

Bootstrap support for afum|EAL91266.1 as seed ortholog is 100%.

Bootstrap support for afis|EAW17440.1 as seed ortholog is 100%.

---

Group of orthologs #7032. Best score 540 bits

Score difference with first non-orthologous sequence - *A. fumigatus*:452 *A. fischeri*:449

afum|EAL84315.1 100.00% afis|EAW25627.1 100.00%

Bootstrap support for afum|EAL84315.1 as seed ortholog is 100%.

Bootstrap support for afis|EAW25627.1 as seed ortholog is 100%.

---

Group of orthologs #7033. Best score 540 bits

Score difference with first non-orthologous sequence - *A. fumigatus*:540 *A. fischeri*:540



|                 |         |                 |         |
|-----------------|---------|-----------------|---------|
| afum EAL90847.1 | 100.00% | afis EAW22344.1 | 100.00% |
|-----------------|---------|-----------------|---------|

Bootstrap support for afum|EAL90847.1 as seed ortholog is 100%.

Bootstrap support for afis|EAW22344.1 as seed ortholog is 100%.

---

Group of orthologs #7034. Best score 540 bits

Score difference with first non-orthologous sequence - *A. fumigatus*:540 *A. fischeri*:294

|                 |         |                 |         |
|-----------------|---------|-----------------|---------|
| afum EAL92674.1 | 100.00% | afis EAW21640.1 | 100.00% |
|-----------------|---------|-----------------|---------|

Bootstrap support for afum|EAL92674.1 as seed ortholog is 100%.

Bootstrap support for afis|EAW21640.1 as seed ortholog is 100%.

---

Group of orthologs #7035. Best score 539 bits

Score difference with first non-orthologous sequence - *A. fumigatus*:539 *A. fischeri*:539

|                 |         |                 |         |
|-----------------|---------|-----------------|---------|
| afum EAL85594.1 | 100.00% | afis EAW15755.1 | 100.00% |
|-----------------|---------|-----------------|---------|

Bootstrap support for afum|EAL85594.1 as seed ortholog is 100%.

Bootstrap support for afis|EAW15755.1 as seed ortholog is 100%.

---

Group of orthologs #7036. Best score 539 bits

Score difference with first non-orthologous sequence - *A. fumigatus*:539 *A. fischeri*:539

|                 |         |                 |         |
|-----------------|---------|-----------------|---------|
| afum EAL86364.1 | 100.00% | afis EAW16795.1 | 100.00% |
|-----------------|---------|-----------------|---------|

Bootstrap support for afum|EAL86364.1 as seed ortholog is 100%.

Bootstrap support for afis|EAW16795.1 as seed ortholog is 100%.

---

Group of orthologs #7037. Best score 539 bits

Score difference with first non-orthologous sequence - *A. fumigatus*:539 *A. fischeri*:539

|                 |         |                 |         |
|-----------------|---------|-----------------|---------|
| afum EAL89083.1 | 100.00% | afis EAW16489.1 | 100.00% |
|-----------------|---------|-----------------|---------|

Bootstrap support for afum|EAL89083.1 as seed ortholog is 100%.

Bootstrap support for afis|EAW16489.1 as seed ortholog is 100%.

---

Group of orthologs #7038. Best score 539 bits

Score difference with first non-orthologous sequence - *A. fumigatus*:539 *A. fischeri*:539

|                 |         |                 |         |
|-----------------|---------|-----------------|---------|
| afum EAL84807.1 | 100.00% | afis EAW20822.1 | 100.00% |
|-----------------|---------|-----------------|---------|

Bootstrap support for afum|EAL84807.1 as seed ortholog is 100%.

Bootstrap support for afis|EAW20822.1 as seed ortholog is 100%.

---

Group of orthologs #7039. Best score 539 bits

Score difference with first non-orthologous sequence - *A. fumigatus*:539 *A. fischeri*:539

|                 |         |                 |         |
|-----------------|---------|-----------------|---------|
| afum EAL87641.1 | 100.00% | afis EAW18275.1 | 100.00% |
|-----------------|---------|-----------------|---------|

Bootstrap support for afum|EAL87641.1 as seed ortholog is 100%.

Bootstrap support for afis|EAW18275.1 as seed ortholog is 100%.

---

Group of orthologs #7040. Best score 539 bits

Score difference with first non-orthologous sequence - *A. fumigatus*:539 *A. fischeri*:539

|                 |         |                 |         |
|-----------------|---------|-----------------|---------|
| afum EAL93868.1 | 100.00% | afis EAW19136.1 | 100.00% |
|-----------------|---------|-----------------|---------|

Bootstrap support for afum|EAL93868.1 as seed ortholog is 100%.

Bootstrap support for afis|EAW19136.1 as seed ortholog is 100%.

---

Group of orthologs #7041. Best score 539 bits

Score difference with first non-orthologous sequence - *A. fumigatus*:539 *A. fischeri*:212

|                 |         |                 |         |
|-----------------|---------|-----------------|---------|
| afum EAL90200.1 | 100.00% | afis EAW25536.1 | 100.00% |
|-----------------|---------|-----------------|---------|

Bootstrap support for afum|EAL90200.1 as seed ortholog is 100%.

Bootstrap support for afis|EAW25536.1 as seed ortholog is 100%.

---

Group of orthologs #7042. Best score 538 bits

Score difference with first non-orthologous sequence - *A. fumigatus*:538 *A. fischeri*:538

|                 |         |                 |         |
|-----------------|---------|-----------------|---------|
| afum EAL84919.1 | 100.00% | afis EAW20000.1 | 100.00% |
|-----------------|---------|-----------------|---------|

Bootstrap support for afum|EAL84919.1 as seed ortholog is 100%.

Bootstrap support for afis|EAW20000.1 as seed ortholog is 100%.

---

Group of orthologs #7043. Best score 538 bits

Score difference with first non-orthologous sequence - *A. fumigatus*:538 *A. fischeri*:538

afum|EAL84794.2 100.00% afis|EAW20839.1 100.00%

Bootstrap support for afum|EAL84794.2 as seed ortholog is 100%.

Bootstrap support for afis|EAW20839.1 as seed ortholog is 100%.

---

Group of orthologs #7044. Best score 538 bits

Score difference with first non-orthologous sequence - *A. fumigatus*:538 *A. fischeri*:538

afum|EAL86788.1 100.00% afis|EAW19741.1 100.00%

Bootstrap support for afum|EAL86788.1 as seed ortholog is 100%.

Bootstrap support for afis|EAW19741.1 as seed ortholog is 100%.

---

Group of orthologs #7045. Best score 538 bits

Score difference with first non-orthologous sequence - *A. fumigatus*:538 *A. fischeri*:538

afum|EAL87157.1 100.00% afis|EAW23713.1 100.00%

Bootstrap support for afum|EAL87157.1 as seed ortholog is 100%.

Bootstrap support for afis|EAW23713.1 as seed ortholog is 100%.

---

Group of orthologs #7046. Best score 538 bits

Score difference with first non-orthologous sequence - *A. fumigatus*:494 *A. fischeri*:538

afum|EBA27282.1 100.00% afis|EAW17199.1 100.00%

Bootstrap support for afum|EBA27282.1 as seed ortholog is 100%.

Bootstrap support for afis|EAW17199.1 as seed ortholog is 100%.

---

Group of orthologs #7047. Best score 538 bits

Score difference with first non-orthologous sequence - *A. fumigatus*:538 *A. fischeri*:538

afum|EAL87407.1 100.00% afis|EAW23977.1 100.00%

Bootstrap support for afum|EAL87407.1 as seed ortholog is 100%.

Bootstrap support for afis|EAW23977.1 as seed ortholog is 100%.

---

Group of orthologs #7048. Best score 538 bits

Score difference with first non-orthologous sequence - *A. fumigatus*:538 *A. fischeri*:368

afum|EAL93726.1 100.00% afis|EAW18990.1 100.00%

Bootstrap support for afum|EAL93726.1 as seed ortholog is 100%.

Bootstrap support for afis|EAW18990.1 as seed ortholog is 100%.

---

Group of orthologs #7049. Best score 538 bits

Score difference with first non-orthologous sequence - *A. fumigatus*:538 *A. fischeri*:538

afum|EAL90675.1 100.00% afis|EAW22518.1 100.00%

Bootstrap support for afum|EAL90675.1 as seed ortholog is 100%.

Bootstrap support for afis|EAW22518.1 as seed ortholog is 100%.

---

Group of orthologs #7050. Best score 537 bits

Score difference with first non-orthologous sequence - *A. fumigatus*:537 *A. fischeri*:351

afum|EAL88744.1 100.00% afis|EAW16113.1 100.00%

Bootstrap support for afum|EAL88744.1 as seed ortholog is 100%.

Bootstrap support for afis|EAW16113.1 as seed ortholog is 100%.

---

Group of orthologs #7051. Best score 537 bits

Score difference with first non-orthologous sequence - *A. fumigatus*:537 *A. fischeri*:537

afum|EAL85015.1 100.00% afis|EAW19884.1 100.00%

Bootstrap support for afum|EAL85015.1 as seed ortholog is 100%.

Bootstrap support for afis|EAW19884.1 as seed ortholog is 100%.

---

Group of orthologs #7052. Best score 537 bits

Score difference with first non-orthologous sequence - *A. fumigatus*:537 *A. fischeri*:537

afum|EAL87518.1 100.00% afis|EAW18159.1 100.00%

Bootstrap support for afum|EAL87518.1 as seed ortholog is 100%.

Bootstrap support for afis|EAW18159.1 as seed ortholog is 100%.

---

Group of orthologs #7053. Best score 537 bits

Score difference with first non-orthologous sequence - *A. fumigatus*:537 *A. fischeri*:537

afum|EAL93918.1 100.00% afis|EAW19187.1 100.00%

Bootstrap support for afum|EAL93918.1 as seed ortholog is 100%.

Bootstrap support for afis|EAW19187.1 as seed ortholog is 100%.

---

Group of orthologs #7054. Best score 537 bits

Score difference with first non-orthologous sequence - *A. fumigatus*:537 *A. fischeri*:537

afum|EAL89833.1 100.00% afis|EAW25158.1 100.00%

Bootstrap support for afum|EAL89833.1 as seed ortholog is 100%.

Bootstrap support for afis|EAW25158.1 as seed ortholog is 100%.

---

Group of orthologs #7055. Best score 536 bits

Score difference with first non-orthologous sequence - *A. fumigatus*:536 *A. fischeri*:536

afum|EAL88549.1 100.00% afis|EAW15914.1 100.00%

Bootstrap support for afum|EAL88549.1 as seed ortholog is 100%.

Bootstrap support for afis|EAW15914.1 as seed ortholog is 100%.

---

Group of orthologs #7056. Best score 535 bits

Score difference with first non-orthologous sequence - *A. fumigatus*:318 *A. fischeri*:373

afum|EAL86974.1 100.00% afis|EAW19532.1 100.00%

Bootstrap support for afum|EAL86974.1 as seed ortholog is 100%.

Bootstrap support for afis|EAW19532.1 as seed ortholog is 100%.

---

Group of orthologs #7057. Best score 535 bits

Score difference with first non-orthologous sequence - *A. fumigatus*:479 *A. fischeri*:474

afum|EAL91207.2 100.00% afis|EAW17370.1 100.00%

Bootstrap support for afum|EAL91207.2 as seed ortholog is 100%.

Bootstrap support for afis|EAW17370.1 as seed ortholog is 100%.

---

Group of orthologs #7058. Best score 535 bits

Score difference with first non-orthologous sequence - *A. fumigatus*:535 *A. fischeri*:535

afum|EAL90362.2 100.00% afis|EAW22841.1 100.00%

Bootstrap support for afum|EAL90362.2 as seed ortholog is 100%.

Bootstrap support for afis|EAW22841.1 as seed ortholog is 100%.

---

Group of orthologs #7059. Best score 534 bits

Score difference with first non-orthologous sequence - *A. fumigatus*:534 *A. fischeri*:418

afum|EAL86425.2 100.00% afis|EAW16887.1 100.00%

Bootstrap support for afum|EAL86425.2 as seed ortholog is 100%.

Bootstrap support for afis|EAW16887.1 as seed ortholog is 100%.

---

Group of orthologs #7060. Best score 534 bits

Score difference with first non-orthologous sequence - *A. fumigatus*:534 *A. fischeri*:534

afum|EAL86647.1 100.00% afis|EAW17225.1 100.00%

Bootstrap support for afum|EAL86647.1 as seed ortholog is 100%.

Bootstrap support for afis|EAW17225.1 as seed ortholog is 100%.

---

Group of orthologs #7061. Best score 534 bits

Score difference with first non-orthologous sequence - *A. fumigatus*:534 *A. fischeri*:534

afum|EAL90929.1 100.00% afis|EAW16824.1 100.00%

Bootstrap support for afum|EAL90929.1 as seed ortholog is 100%.

Bootstrap support for afis|EAW16824.1 as seed ortholog is 100%.

---

Group of orthologs #7062. Best score 534 bits

Score difference with first non-orthologous sequence - *A. fumigatus*:534 *A. fischeri*:534

afum|EAL91228.1 100.00% afis|EAW17391.1 100.00%

Bootstrap support for afum|EAL91228.1 as seed ortholog is 100%.

Bootstrap support for afis|EAW17391.1 as seed ortholog is 100%.

---

Group of orthologs #7063. Best score 534 bits

Score difference with first non-orthologous sequence - *A. fumigatus*:534 *A. fischeri*:534

afum|EAL91275.2 100.00% afis|EAW17448.1 100.00%

Bootstrap support for afum|EAL91275.2 as seed ortholog is 100%.

Bootstrap support for afis|EAW17448.1 as seed ortholog is 100%.

---

Group of orthologs #7064. Best score 534 bits

Score difference with first non-orthologous sequence - *A. fumigatus*:534 *A. fischeri*:534

afum|EAL93366.1 100.00% afis|EAW18650.1 100.00%

Bootstrap support for afum|EAL93366.1 as seed ortholog is 100%.

Bootstrap support for afis|EAW18650.1 as seed ortholog is 100%.

---

Group of orthologs #7065. Best score 534 bits

Score difference with first non-orthologous sequence - *A. fumigatus*:534 *A. fischeri*:534

afum|EAL90297.2 100.00% afis|EAW22900.1 100.00%

Bootstrap support for afum|EAL90297.2 as seed ortholog is 100%.

Bootstrap support for afis|EAW22900.1 as seed ortholog is 100%.

---

Group of orthologs #7066. Best score 534 bits

Score difference with first non-orthologous sequence - *A. fumigatus*:534 *A. fischeri*:534

afum|EAL89541.2 100.00% afis|EAW24890.1 100.00%

Bootstrap support for afum|EAL89541.2 as seed ortholog is 100%.

Bootstrap support for afis|EAW24890.1 as seed ortholog is 100%.

---

Group of orthologs #7067. Best score 534 bits

Score difference with first non-orthologous sequence - *A. fumigatus*:534 *A. fischeri*:534

afum|EBA27418.1 100.00% afis|EAW22199.1 100.00%

Bootstrap support for afum|EBA27418.1 as seed ortholog is 100%.

Bootstrap support for afis|EAW22199.1 as seed ortholog is 100%.

---

Group of orthologs #7068. Best score 533 bits

Score difference with first non-orthologous sequence - *A. fumigatus*:533 *A. fischeri*:533

afum|EAL88858.1 100.00% afis|EAW16237.1 100.00%

Bootstrap support for afum|EAL88858.1 as seed ortholog is 100%.

Bootstrap support for afis|EAW16237.1 as seed ortholog is 100%.

---

Group of orthologs #7069. Best score 533 bits

Score difference with first non-orthologous sequence - *A. fumigatus*:533 *A. fischeri*:533

afum|EAL93596.1 100.00% afis|EAW18864.1 100.00%

Bootstrap support for afum|EAL93596.1 as seed ortholog is 100%.

Bootstrap support for afis|EAW18864.1 as seed ortholog is 100%.

---

Group of orthologs #7070. Best score 533 bits

Score difference with first non-orthologous sequence - *A. fumigatus*:533 *A. fischeri*:533

afum|EAL90446.2 100.00% afis|EAW22753.1 100.00%

Bootstrap support for afum|EAL90446.2 as seed ortholog is 100%.

Bootstrap support for afis|EAW22753.1 as seed ortholog is 100%.

---

Group of orthologs #7071. Best score 533 bits

Score difference with first non-orthologous sequence - *A. fumigatus*:533 *A. fischeri*:533

afum|EAL92958.1 100.00% afis|EAW21944.1 100.00%

Bootstrap support for afum|EAL92958.1 as seed ortholog is 100%.

Bootstrap support for afis|EAW21944.1 as seed ortholog is 100%.

---

Group of orthologs #7072. Best score 532 bits

Score difference with first non-orthologous sequence - *A. fumigatus*:532 *A. fischeri*:532

afum|EAL89153.1 100.00% afis|EAW16555.1 100.00%

Bootstrap support for afum|EAL89153.1 as seed ortholog is 100%.

Bootstrap support for afis|EAW16555.1 as seed ortholog is 100%.

---

Group of orthologs #7073. Best score 532 bits

Score difference with first non-orthologous sequence - *A. fumigatus*:532 *A. fischeri*:532

afum|EAL91152.1 100.00% afis|EAW17316.1 100.00%

Bootstrap support for afum|EAL91152.1 as seed ortholog is 100%.

Bootstrap support for afis|EAW17316.1 as seed ortholog is 100%.

---

Group of orthologs #7074. Best score 532 bits

Score difference with first non-orthologous sequence - *A. fumigatus*:532 *A. fischeri*:532

afum|EAL87936.1 100.00% afis|EAW23530.1 100.00%

Bootstrap support for afum|EAL87936.1 as seed ortholog is 100%.

Bootstrap support for afis|EAW23530.1 as seed ortholog is 100%.

---

Group of orthologs #7075. Best score 532 bits

Score difference with first non-orthologous sequence - *A. fumigatus*:532 *A. fischeri*:532

afum|EAL92952.2 100.00% afis|EAW22061.1 100.00%

Bootstrap support for afum|EAL92952.2 as seed ortholog is 100%.

Bootstrap support for afis|EAW22061.1 as seed ortholog is 100%.

---

Group of orthologs #7076. Best score 531 bits

Score difference with first non-orthologous sequence - *A. fumigatus*:531 *A. fischeri*:531

afum|EAL87034.1 100.00% afis|EAW19462.1 100.00%

Bootstrap support for afum|EAL87034.1 as seed ortholog is 100%.

Bootstrap support for afis|EAW19462.1 as seed ortholog is 100%.

---

Group of orthologs #7077. Best score 531 bits

Score difference with first non-orthologous sequence - *A. fumigatus*:531 *A. fischeri*:531

afum|EAL84334.1 100.00% afis|EAW25660.1 100.00%

Bootstrap support for afum|EAL84334.1 as seed ortholog is 100%.

Bootstrap support for afis|EAW25660.1 as seed ortholog is 100%.

---

Group of orthologs #7078. Best score 531 bits

Score difference with first non-orthologous sequence - *A. fumigatus*:432 *A. fischeri*:531

afum|EAL87153.1 100.00% afis|EAW23709.1 100.00%

Bootstrap support for afum|EAL87153.1 as seed ortholog is 100%.

Bootstrap support for afis|EAW23709.1 as seed ortholog is 100%.

---

Group of orthologs #7079. Best score 531 bits

Score difference with first non-orthologous sequence - *A. fumigatus*:460 *A. fischeri*:117

afum|EAL92066.1 100.00% afis|EAW21129.1 100.00%

Bootstrap support for afum|EAL92066.1 as seed ortholog is 100%.

Bootstrap support for afis|EAW21129.1 as seed ortholog is 96%.

---

Group of orthologs #7080. Best score 531 bits

Score difference with first non-orthologous sequence - *A. fumigatus*:531 *A. fischeri*:531

afum|EAL92930.1 100.00% afis|EAW21918.1 100.00%

Bootstrap support for afum|EAL92930.1 as seed ortholog is 100%.

Bootstrap support for afis|EAW21918.1 as seed ortholog is 100%.

---

Group of orthologs #7081. Best score 530 bits

Score difference with first non-orthologous sequence - *A. fumigatus*:530 *A. fischeri*:530

afum|EAL87479.1 100.00% afis|EAW18121.1 100.00%

Bootstrap support for afum|EAL87479.1 as seed ortholog is 100%.

Bootstrap support for afis|EAW18121.1 as seed ortholog is 100%.

---

Group of orthologs #7082. Best score 530 bits

Score difference with first non-orthologous sequence - *A. fumigatus*:530 *A. fischeri*:530

afum|EAL93783.1 100.00% afis|EAW19054.1 100.00%

Bootstrap support for afum|EAL93783.1 as seed ortholog is 100%.

Bootstrap support for afis|EAW19054.1 as seed ortholog is 100%.

---

Group of orthologs #7083. Best score 529 bits

Score difference with first non-orthologous sequence - *A. fumigatus*:529 *A. fischeri*:529

afum|EAL85608.1 100.00% afis|EAW15740.1 100.00%

Bootstrap support for afum|EAL85608.1 as seed ortholog is 100%.

Bootstrap support for afis|EAW15740.1 as seed ortholog is 100%.

---

Group of orthologs #7084. Best score 528 bits

Score difference with first non-orthologous sequence - *A. fumigatus*:528 *A. fischeri*:311

afum|EAL86410.2 100.00% afis|EAW16872.1 100.00%

Bootstrap support for afum|EAL86410.2 as seed ortholog is 100%.

Bootstrap support for afis|EAW16872.1 as seed ortholog is 100%.

---

Group of orthologs #7085. Best score 528 bits

Score difference with first non-orthologous sequence - *A. fumigatus*:528 *A. fischeri*:528

afum|EAL85411.1 100.00% afis|EAW20277.1 100.00%

Bootstrap support for afum|EAL85411.1 as seed ortholog is 100%.

Bootstrap support for afis|EAW20277.1 as seed ortholog is 100%.

---

Group of orthologs #7086. Best score 528 bits

Score difference with first non-orthologous sequence - *A. fumigatus*:216 *A. fischeri*:528

afum|EAL91151.1 100.00% afis|EAW17315.1 100.00%

Bootstrap support for afum|EAL91151.1 as seed ortholog is 100%.

Bootstrap support for afis|EAW17315.1 as seed ortholog is 100%.

---

Group of orthologs #7087. Best score 528 bits

Score difference with first non-orthologous sequence - *A. fumigatus*:528 *A. fischeri*:528

afum|EAL85877.1 100.00% afis|EAW24207.1 100.00%

Bootstrap support for afum|EAL85877.1 as seed ortholog is 100%.

Bootstrap support for afis|EAW24207.1 as seed ortholog is 100%.

---

Group of orthologs #7088. Best score 528 bits

Score difference with first non-orthologous sequence - *A. fumigatus*:528 *A. fischeri*:528

afum|EAL85960.1 100.00% afis|EAW24292.1 100.00%

Bootstrap support for afum|EAL85960.1 as seed ortholog is 100%.

Bootstrap support for afis|EAW24292.1 as seed ortholog is 100%.

---

Group of orthologs #7089. Best score 528 bits

Score difference with first non-orthologous sequence - *A. fumigatus*:528 *A. fischeri*:528

|                 |         |                 |         |
|-----------------|---------|-----------------|---------|
| afum EAL87891.1 | 100.00% | afis EAW23574.1 | 100.00% |
|-----------------|---------|-----------------|---------|

Bootstrap support for afum|EAL87891.1 as seed ortholog is 100%.

Bootstrap support for afis|EAW23574.1 as seed ortholog is 100%.

---

Group of orthologs #7090. Best score 528 bits

Score difference with first non-orthologous sequence - *A. fumigatus*:528 *A. fischeri*:528

|                 |         |                 |         |
|-----------------|---------|-----------------|---------|
| afum EAL89352.1 | 100.00% | afis EAW24711.1 | 100.00% |
|-----------------|---------|-----------------|---------|

Bootstrap support for afum|EAL89352.1 as seed ortholog is 100%.

Bootstrap support for afis|EAW24711.1 as seed ortholog is 100%.

---

Group of orthologs #7091. Best score 528 bits

Score difference with first non-orthologous sequence - *A. fumigatus*:528 *A. fischeri*:528

|                 |         |                 |         |
|-----------------|---------|-----------------|---------|
| afum EAL89849.1 | 100.00% | afis EAW25176.1 | 100.00% |
|-----------------|---------|-----------------|---------|

Bootstrap support for afum|EAL89849.1 as seed ortholog is 100%.

Bootstrap support for afis|EAW25176.1 as seed ortholog is 100%.

---

Group of orthologs #7092. Best score 527 bits

Score difference with first non-orthologous sequence - *A. fumigatus*:527 *A. fischeri*:470

|                 |         |                 |         |
|-----------------|---------|-----------------|---------|
| afum EAL88476.2 | 100.00% | afis EAW23004.1 | 100.00% |
|-----------------|---------|-----------------|---------|

Bootstrap support for afum|EAL88476.2 as seed ortholog is 100%.

Bootstrap support for afis|EAW23004.1 as seed ortholog is 100%.

---

Group of orthologs #7093. Best score 527 bits

Score difference with first non-orthologous sequence - *A. fumigatus*:527 *A. fischeri*:527

|                 |         |                 |         |
|-----------------|---------|-----------------|---------|
| afum EAL88108.1 | 100.00% | afis EAW23365.1 | 100.00% |
|-----------------|---------|-----------------|---------|

Bootstrap support for afum|EAL88108.1 as seed ortholog is 100%.

Bootstrap support for afis|EAW23365.1 as seed ortholog is 100%.

---

Group of orthologs #7094. Best score 527 bits

Score difference with first non-orthologous sequence - *A. fumigatus*:527 *A. fischeri*:527

|                 |         |                 |         |
|-----------------|---------|-----------------|---------|
| afum EAL92679.1 | 100.00% | afis EAW21645.1 | 100.00% |
|-----------------|---------|-----------------|---------|

Bootstrap support for afum|EAL92679.1 as seed ortholog is 100%.

Bootstrap support for afis|EAW21645.1 as seed ortholog is 100%.

---

Group of orthologs #7095. Best score 527 bits

Score difference with first non-orthologous sequence - *A. fumigatus*:527 *A. fischeri*:527

|                 |         |                 |         |
|-----------------|---------|-----------------|---------|
| afum EBA27377.1 | 100.00% | afis EAW24728.1 | 100.00% |
|-----------------|---------|-----------------|---------|

Bootstrap support for afum|EBA27377.1 as seed ortholog is 100%.

Bootstrap support for afis|EAW24728.1 as seed ortholog is 100%.

---

Group of orthologs #7096. Best score 526 bits

Score difference with first non-orthologous sequence - *A. fumigatus*:526 *A. fischeri*:526

|                 |         |                 |         |
|-----------------|---------|-----------------|---------|
| afum EAL84816.1 | 100.00% | afis EAW20812.1 | 100.00% |
|-----------------|---------|-----------------|---------|

Bootstrap support for afum|EAL84816.1 as seed ortholog is 100%.

Bootstrap support for afis|EAW20812.1 as seed ortholog is 100%.

---

Group of orthologs #7097. Best score 526 bits

Score difference with first non-orthologous sequence - *A. fumigatus*:526 *A. fischeri*:526

|                 |         |                 |         |
|-----------------|---------|-----------------|---------|
| afum EAL91828.1 | 100.00% | afis EAW18016.1 | 100.00% |
|-----------------|---------|-----------------|---------|

Bootstrap support for afum|EAL91828.1 as seed ortholog is 100%.

Bootstrap support for afis|EAW18016.1 as seed ortholog is 100%.

---

Group of orthologs #7098. Best score 526 bits

Score difference with first non-orthologous sequence - *A. fumigatus*:526 *A. fischeri*:526

|                 |         |                 |         |
|-----------------|---------|-----------------|---------|
| afum EAL87283.1 | 100.00% | afis EAW23855.1 | 100.00% |
|-----------------|---------|-----------------|---------|

Bootstrap support for afum|EAL87283.1 as seed ortholog is 100%.

Bootstrap support for afis|EAW23855.1 as seed ortholog is 100%.

---

Group of orthologs #7099. Best score 526 bits

Score difference with first non-orthologous sequence - *A. fumigatus*:526 *A. fischeri*:526

|                 |         |                 |         |
|-----------------|---------|-----------------|---------|
| afum EAL92271.1 | 100.00% | afis EAW21256.1 | 100.00% |
|-----------------|---------|-----------------|---------|

Bootstrap support for afum|EAL92271.1 as seed ortholog is 100%.

Bootstrap support for afis|EAW21256.1 as seed ortholog is 100%.

---

Group of orthologs #7100. Best score 525 bits

Score difference with first non-orthologous sequence - *A. fumigatus*:525 *A. fischeri*:525

|                 |         |                 |         |
|-----------------|---------|-----------------|---------|
| afum EAL89023.1 | 100.00% | afis EAW16405.1 | 100.00% |
|-----------------|---------|-----------------|---------|

Bootstrap support for afum|EAL89023.1 as seed ortholog is 100%.

Bootstrap support for afis|EAW16405.1 as seed ortholog is 100%.

---

Group of orthologs #7101. Best score 525 bits

Score difference with first non-orthologous sequence - *A. fumigatus*:525 *A. fischeri*:525

|                 |         |                 |         |
|-----------------|---------|-----------------|---------|
| afum EAL89245.1 | 100.00% | afis EAW16642.1 | 100.00% |
|-----------------|---------|-----------------|---------|

Bootstrap support for afum|EAL89245.1 as seed ortholog is 100%.

Bootstrap support for afis|EAW16642.1 as seed ortholog is 100%.

---

Group of orthologs #7102. Best score 525 bits

Score difference with first non-orthologous sequence - *A. fumigatus*:525 *A. fischeri*:525

|                 |         |                 |         |
|-----------------|---------|-----------------|---------|
| afum EAL91762.1 | 100.00% | afis EAW17952.1 | 100.00% |
|-----------------|---------|-----------------|---------|

Bootstrap support for afum|EAL91762.1 as seed ortholog is 100%.

Bootstrap support for afis|EAW17952.1 as seed ortholog is 100%.

---

Group of orthologs #7103. Best score 525 bits

Score difference with first non-orthologous sequence - *A. fumigatus*:525 *A. fischeri*:525

|                 |         |                 |         |
|-----------------|---------|-----------------|---------|
| afum EAL86041.1 | 100.00% | afis EAW24369.1 | 100.00% |
|-----------------|---------|-----------------|---------|

Bootstrap support for afum|EAL86041.1 as seed ortholog is 100%.

Bootstrap support for afis|EAW24369.1 as seed ortholog is 100%.

---

Group of orthologs #7104. Best score 525 bits

Score difference with first non-orthologous sequence - *A. fumigatus*:525 *A. fischeri*:525

|                 |         |                 |         |
|-----------------|---------|-----------------|---------|
| afum EAL88268.1 | 100.00% | afis EAW23216.1 | 100.00% |
|-----------------|---------|-----------------|---------|

Bootstrap support for afum|EAL88268.1 as seed ortholog is 100%.

Bootstrap support for afis|EAW23216.1 as seed ortholog is 100%.

---

Group of orthologs #7105. Best score 525 bits

Score difference with first non-orthologous sequence - *A. fumigatus*:525 *A. fischeri*:525

|                 |         |                 |         |
|-----------------|---------|-----------------|---------|
| afum EAL90738.1 | 100.00% | afis EAW22453.1 | 100.00% |
|-----------------|---------|-----------------|---------|

Bootstrap support for afum|EAL90738.1 as seed ortholog is 100%.

Bootstrap support for afis|EAW22453.1 as seed ortholog is 100%.

---

Group of orthologs #7106. Best score 525 bits

Score difference with first non-orthologous sequence - *A. fumigatus*:525 *A. fischeri*:525

|                 |         |                 |         |
|-----------------|---------|-----------------|---------|
| afum EAL90786.1 | 100.00% | afis EAW22406.1 | 100.00% |
|-----------------|---------|-----------------|---------|

Bootstrap support for afum|EAL90786.1 as seed ortholog is 100%.

Bootstrap support for afis|EAW22406.1 as seed ortholog is 100%.

---

Group of orthologs #7107. Best score 525 bits

Score difference with first non-orthologous sequence - *A. fumigatus*:525 *A. fischeri*:525

|                 |         |                 |         |
|-----------------|---------|-----------------|---------|
| afum EAL90299.1 | 100.00% | afis EAW22898.1 | 100.00% |
|-----------------|---------|-----------------|---------|

Bootstrap support for afum|EAL90299.1 as seed ortholog is 100%.

Bootstrap support for afis|EAW22898.1 as seed ortholog is 100%.

---



Group of orthologs #7108. Best score 525 bits

Score difference with first non-orthologous sequence - *A. fumigatus*:525 *A. fischeri*:525

afum|EAL89395.2 100.00% afis|EAW24750.1 100.00%

Bootstrap support for afum|EAL89395.2 as seed ortholog is 100%.

Bootstrap support for afis|EAW24750.1 as seed ortholog is 100%.

---

Group of orthologs #7109. Best score 525 bits

Score difference with first non-orthologous sequence - *A. fumigatus*:525 *A. fischeri*:392

afum|EAL89506.2 100.00% afis|EAW24858.1 100.00%

Bootstrap support for afum|EAL89506.2 as seed ortholog is 100%.

Bootstrap support for afis|EAW24858.1 as seed ortholog is 100%.

---

Group of orthologs #7110. Best score 525 bits

Score difference with first non-orthologous sequence - *A. fumigatus*:525 *A. fischeri*:471

afum|EAL89984.1 100.00% afis|EAW25323.1 100.00%

Bootstrap support for afum|EAL89984.1 as seed ortholog is 100%.

Bootstrap support for afis|EAW25323.1 as seed ortholog is 100%.

---

Group of orthologs #7111. Best score 525 bits

Score difference with first non-orthologous sequence - *A. fumigatus*:525 *A. fischeri*:525

afum|EAL89999.1 100.00% afis|EAW25336.1 100.00%

Bootstrap support for afum|EAL89999.1 as seed ortholog is 100%.

Bootstrap support for afis|EAW25336.1 as seed ortholog is 100%.

---

Group of orthologs #7112. Best score 524 bits

Score difference with first non-orthologous sequence - *A. fumigatus*:524 *A. fischeri*:524

afum|EAL84596.1 100.00% afis|EAW20456.1 100.00%

Bootstrap support for afum|EAL84596.1 as seed ortholog is 100%.

Bootstrap support for afis|EAW20456.1 as seed ortholog is 100%.

---

Group of orthologs #7113. Best score 524 bits

Score difference with first non-orthologous sequence - *A. fumigatus*:524 *A. fischeri*:524

afum|EAL91645.1 100.00% afis|EAW17835.1 100.00%

Bootstrap support for afum|EAL91645.1 as seed ortholog is 100%.

Bootstrap support for afis|EAW17835.1 as seed ortholog is 100%.

---

Group of orthologs #7114. Best score 524 bits

Score difference with first non-orthologous sequence - *A. fumigatus*:524 *A. fischeri*:524

afum|EAL93039.1 100.00% afis|EAW18365.1 100.00%

Bootstrap support for afum|EAL93039.1 as seed ortholog is 100%.

Bootstrap support for afis|EAW18365.1 as seed ortholog is 100%.

---

Group of orthologs #7115. Best score 523 bits

Score difference with first non-orthologous sequence - *A. fumigatus*:523 *A. fischeri*:523

afum|EAL84663.1 100.00% afis|EAW20971.1 100.00%

Bootstrap support for afum|EAL84663.1 as seed ortholog is 100%.

Bootstrap support for afis|EAW20971.1 as seed ortholog is 100%.

---

Group of orthologs #7116. Best score 523 bits

Score difference with first non-orthologous sequence - *A. fumigatus*:363 *A. fischeri*:394

afum|EAL86773.1 100.00% afis|EAW20294.1 100.00%

Bootstrap support for afum|EAL86773.1 as seed ortholog is 100%.

Bootstrap support for afis|EAW20294.1 as seed ortholog is 100%.

---

Group of orthologs #7117. Best score 523 bits

Score difference with first non-orthologous sequence - *A. fumigatus*:523 *A. fischeri*:481

|                 |         |                 |         |
|-----------------|---------|-----------------|---------|
| afum EAL84378.1 | 100.00% | afis EAW25705.1 | 100.00% |
|-----------------|---------|-----------------|---------|

Bootstrap support for afum|EAL84378.1 as seed ortholog is 100%.

Bootstrap support for afis|EAW25705.1 as seed ortholog is 100%.

---

Group of orthologs #7118. Best score 523 bits

Score difference with first non-orthologous sequence - *A. fumigatus*:523 *A. fischeri*:523

|                 |         |                 |         |
|-----------------|---------|-----------------|---------|
| afum EAL86127.1 | 100.00% | afis EAW24457.1 | 100.00% |
|-----------------|---------|-----------------|---------|

Bootstrap support for afum|EAL86127.1 as seed ortholog is 100%.

Bootstrap support for afis|EAW24457.1 as seed ortholog is 100%.

---

Group of orthologs #7119. Best score 523 bits

Score difference with first non-orthologous sequence - *A. fumigatus*:523 *A. fischeri*:523

|                 |         |                 |         |
|-----------------|---------|-----------------|---------|
| afum EAL93777.1 | 100.00% | afis EAW19048.1 | 100.00% |
|-----------------|---------|-----------------|---------|

Bootstrap support for afum|EAL93777.1 as seed ortholog is 100%.

Bootstrap support for afis|EAW19048.1 as seed ortholog is 100%.

---

Group of orthologs #7120. Best score 523 bits

Score difference with first non-orthologous sequence - *A. fumigatus*:523 *A. fischeri*:523

|                 |         |                 |         |
|-----------------|---------|-----------------|---------|
| afum EAL93833.1 | 100.00% | afis EAW19101.1 | 100.00% |
|-----------------|---------|-----------------|---------|

Bootstrap support for afum|EAL93833.1 as seed ortholog is 100%.

Bootstrap support for afis|EAW19101.1 as seed ortholog is 100%.

---

Group of orthologs #7121. Best score 523 bits

Score difference with first non-orthologous sequence - *A. fumigatus*:523 *A. fischeri*:523

|                 |         |                 |         |
|-----------------|---------|-----------------|---------|
| afum EAL91036.1 | 100.00% | afis EAW22154.1 | 100.00% |
|-----------------|---------|-----------------|---------|

Bootstrap support for afum|EAL91036.1 as seed ortholog is 100%.

Bootstrap support for afis|EAW22154.1 as seed ortholog is 100%.

---

Group of orthologs #7122. Best score 523 bits

Score difference with first non-orthologous sequence - *A. fumigatus*:523 *A. fischeri*:452

|                 |         |                 |         |
|-----------------|---------|-----------------|---------|
| afum EAL90397.1 | 100.00% | afis EAW22802.1 | 100.00% |
|-----------------|---------|-----------------|---------|

Bootstrap support for afum|EAL90397.1 as seed ortholog is 100%.

Bootstrap support for afis|EAW22802.1 as seed ortholog is 100%.

---

Group of orthologs #7123. Best score 523 bits

Score difference with first non-orthologous sequence - *A. fumigatus*:523 *A. fischeri*:523

|                 |         |                 |         |
|-----------------|---------|-----------------|---------|
| afum EAL89931.1 | 100.00% | afis EAW25268.1 | 100.00% |
|-----------------|---------|-----------------|---------|

Bootstrap support for afum|EAL89931.1 as seed ortholog is 100%.

Bootstrap support for afis|EAW25268.1 as seed ortholog is 100%.

---

Group of orthologs #7124. Best score 522 bits

Score difference with first non-orthologous sequence - *A. fumigatus*:522 *A. fischeri*:219

|                 |         |                 |         |
|-----------------|---------|-----------------|---------|
| afum EAL86921.1 | 100.00% | afis EAW19597.1 | 100.00% |
|-----------------|---------|-----------------|---------|

Bootstrap support for afum|EAL86921.1 as seed ortholog is 100%.

Bootstrap support for afis|EAW19597.1 as seed ortholog is 100%.

---

Group of orthologs #7125. Best score 522 bits

Score difference with first non-orthologous sequence - *A. fumigatus*:522 *A. fischeri*:522

|                 |         |                 |         |
|-----------------|---------|-----------------|---------|
| afum EAL90213.1 | 100.00% | afis EAW22986.1 | 100.00% |
|-----------------|---------|-----------------|---------|

Bootstrap support for afum|EAL90213.1 as seed ortholog is 100%.

Bootstrap support for afis|EAW22986.1 as seed ortholog is 100%.

---

Group of orthologs #7126. Best score 522 bits

Score difference with first non-orthologous sequence - *A. fumigatus*:522 *A. fischeri*:522

|                 |         |                 |         |
|-----------------|---------|-----------------|---------|
| afum EAL89458.2 | 100.00% | afis EAW24814.1 | 100.00% |
|-----------------|---------|-----------------|---------|

Bootstrap support for afum|EAL89458.2 as seed ortholog is 100%.

Bootstrap support for afis|EAW24814.1 as seed ortholog is 100%.

---

Group of orthologs #7127. Best score 522 bits

Score difference with first non-orthologous sequence - *A. fumigatus*:522 *A. fischeri*:522

|                 |         |                 |         |
|-----------------|---------|-----------------|---------|
| afum EAL92862.1 | 100.00% | afis EAW21849.1 | 100.00% |
|-----------------|---------|-----------------|---------|

Bootstrap support for afum|EAL92862.1 as seed ortholog is 100%.

Bootstrap support for afis|EAW21849.1 as seed ortholog is 100%.

---

Group of orthologs #7128. Best score 522 bits

Score difference with first non-orthologous sequence - *A. fumigatus*:522 *A. fischeri*:522

|                 |         |                 |         |
|-----------------|---------|-----------------|---------|
| afum EAL89737.2 | 100.00% | afis EAW25068.1 | 100.00% |
|-----------------|---------|-----------------|---------|

Bootstrap support for afum|EAL89737.2 as seed ortholog is 100%.

Bootstrap support for afis|EAW25068.1 as seed ortholog is 100%.

---

Group of orthologs #7129. Best score 521 bits

Score difference with first non-orthologous sequence - *A. fumigatus*:521 *A. fischeri*:521

|                 |         |                 |         |
|-----------------|---------|-----------------|---------|
| afum EAL86444.1 | 100.00% | afis EAW16908.1 | 100.00% |
|-----------------|---------|-----------------|---------|

Bootstrap support for afum|EAL86444.1 as seed ortholog is 100%.

Bootstrap support for afis|EAW16908.1 as seed ortholog is 100%.

---

Group of orthologs #7130. Best score 521 bits

Score difference with first non-orthologous sequence - *A. fumigatus*:386 *A. fischeri*:317

|                 |         |                 |         |
|-----------------|---------|-----------------|---------|
| afum EAL86597.1 | 100.00% | afis EAW17160.1 | 100.00% |
|-----------------|---------|-----------------|---------|

Bootstrap support for afum|EAL86597.1 as seed ortholog is 100%.

Bootstrap support for afis|EAW17160.1 as seed ortholog is 100%.

---

Group of orthologs #7131. Best score 521 bits

Score difference with first non-orthologous sequence - *A. fumigatus*:521 *A. fischeri*:521

|                 |         |                 |         |
|-----------------|---------|-----------------|---------|
| afum EAL84594.2 | 100.00% | afis EAW20459.1 | 100.00% |
|-----------------|---------|-----------------|---------|

Bootstrap support for afum|EAL84594.2 as seed ortholog is 100%.

Bootstrap support for afis|EAW20459.1 as seed ortholog is 100%.

---

Group of orthologs #7132. Best score 521 bits

Score difference with first non-orthologous sequence - *A. fumigatus*:521 *A. fischeri*:521

|                 |         |                 |         |
|-----------------|---------|-----------------|---------|
| afum EAL89189.1 | 100.00% | afis EAW16593.1 | 100.00% |
|-----------------|---------|-----------------|---------|

Bootstrap support for afum|EAL89189.1 as seed ortholog is 100%.

Bootstrap support for afis|EAW16593.1 as seed ortholog is 100%.

---

Group of orthologs #7133. Best score 521 bits

Score difference with first non-orthologous sequence - *A. fumigatus*:521 *A. fischeri*:521

|                 |         |                 |         |
|-----------------|---------|-----------------|---------|
| afum EAL87586.1 | 100.00% | afis EAW18220.1 | 100.00% |
|-----------------|---------|-----------------|---------|

Bootstrap support for afum|EAL87586.1 as seed ortholog is 100%.

Bootstrap support for afis|EAW18220.1 as seed ortholog is 100%.

---

Group of orthologs #7134. Best score 521 bits

Score difference with first non-orthologous sequence - *A. fumigatus*:521 *A. fischeri*:521

|                 |         |                 |         |
|-----------------|---------|-----------------|---------|
| afum EAL88357.1 | 100.00% | afis EAW23123.1 | 100.00% |
|-----------------|---------|-----------------|---------|

Bootstrap support for afum|EAL88357.1 as seed ortholog is 100%.

Bootstrap support for afis|EAW23123.1 as seed ortholog is 100%.

---

Group of orthologs #7135. Best score 521 bits

Score difference with first non-orthologous sequence - *A. fumigatus*:521 *A. fischeri*:521

|                 |         |                 |         |
|-----------------|---------|-----------------|---------|
| afum EAL92995.1 | 100.00% | afis EAW21980.1 | 100.00% |
|-----------------|---------|-----------------|---------|

Bootstrap support for afum|EAL92995.1 as seed ortholog is 100%.

Bootstrap support for afis|EAW21980.1 as seed ortholog is 100%.

---

Group of orthologs #7136. Best score 520 bits

Score difference with first non-orthologous sequence - *A. fumigatus*:520 *A. fischeri*:520

afum|EAL90351.1 100.00% afis|EAW22849.1 100.00%

Bootstrap support for afum|EAL90351.1 as seed ortholog is 100%.

Bootstrap support for afis|EAW22849.1 as seed ortholog is 100%.

---

Group of orthologs #7137. Best score 520 bits

Score difference with first non-orthologous sequence - *A. fumigatus*:473 *A. fischeri*:462

afum|EAL92710.1 100.00% afis|EAW21676.1 100.00%

Bootstrap support for afum|EAL92710.1 as seed ortholog is 100%.

Bootstrap support for afis|EAW21676.1 as seed ortholog is 100%.

---

Group of orthologs #7138. Best score 520 bits

Score difference with first non-orthologous sequence - *A. fumigatus*:520 *A. fischeri*:520

afum|EAL90013.1 100.00% afis|EAW25350.1 100.00%

Bootstrap support for afum|EAL90013.1 as seed ortholog is 100%.

Bootstrap support for afis|EAW25350.1 as seed ortholog is 100%.

---

Group of orthologs #7139. Best score 520 bits

Score difference with first non-orthologous sequence - *A. fumigatus*:520 *A. fischeri*:520

afum|EAL90132.1 100.00% afis|EAW25468.1 100.00%

Bootstrap support for afum|EAL90132.1 as seed ortholog is 100%.

Bootstrap support for afis|EAW25468.1 as seed ortholog is 100%.

---

Group of orthologs #7140. Best score 519 bits

Score difference with first non-orthologous sequence - *A. fumigatus*:519 *A. fischeri*:519

afum|EAL85506.2 100.00% afis|EAW15845.1 100.00%

Bootstrap support for afum|EAL85506.2 as seed ortholog is 100%.

Bootstrap support for afis|EAW15845.1 as seed ortholog is 100%.

---

Group of orthologs #7141. Best score 519 bits

Score difference with first non-orthologous sequence - *A. fumigatus*:519 *A. fischeri*:519

afum|EAL88590.1 100.00% afis|EAW15957.1 100.00%

Bootstrap support for afum|EAL88590.1 as seed ortholog is 100%.

Bootstrap support for afis|EAW15957.1 as seed ortholog is 100%.

---

Group of orthologs #7142. Best score 519 bits

Score difference with first non-orthologous sequence - *A. fumigatus*:519 *A. fischeri*:519

afum|EAL89149.1 100.00% afis|EAW16551.1 100.00%

Bootstrap support for afum|EAL89149.1 as seed ortholog is 100%.

Bootstrap support for afis|EAW16551.1 as seed ortholog is 100%.

---

Group of orthologs #7143. Best score 519 bits

Score difference with first non-orthologous sequence - *A. fumigatus*:519 *A. fischeri*:519

afum|EAL91488.1 100.00% afis|EAW17675.1 100.00%

Bootstrap support for afum|EAL91488.1 as seed ortholog is 100%.

Bootstrap support for afis|EAW17675.1 as seed ortholog is 100%.

---

Group of orthologs #7144. Best score 519 bits

Score difference with first non-orthologous sequence - *A. fumigatus*:519 *A. fischeri*:519

afum|EAL90544.1 100.00% afis|EAW22648.1 100.00%

Bootstrap support for afum|EAL90544.1 as seed ortholog is 100%.

Bootstrap support for afis|EAW22648.1 as seed ortholog is 100%.

---

Group of orthologs #7145. Best score 519 bits

Score difference with first non-orthologous sequence - *A. fumigatus*:519 *A. fischeri*:519

|                 |         |                 |         |
|-----------------|---------|-----------------|---------|
| afum EAL89715.1 | 100.00% | afis EAW25047.1 | 100.00% |
|-----------------|---------|-----------------|---------|

Bootstrap support for afum|EAL89715.1 as seed ortholog is 100%.

Bootstrap support for afis|EAW25047.1 as seed ortholog is 100%.

---

Group of orthologs #7146. Best score 518 bits

Score difference with first non-orthologous sequence - *A. fumigatus*:518 *A. fischeri*:518

|                 |         |                 |         |
|-----------------|---------|-----------------|---------|
| afum EAL86847.2 | 100.00% | afis EAW19674.1 | 100.00% |
|-----------------|---------|-----------------|---------|

Bootstrap support for afum|EAL86847.2 as seed ortholog is 100%.

Bootstrap support for afis|EAW19674.1 as seed ortholog is 100%.

---

Group of orthologs #7147. Best score 518 bits

Score difference with first non-orthologous sequence - *A. fumigatus*:518 *A. fischeri*:518

|                 |         |                 |         |
|-----------------|---------|-----------------|---------|
| afum EAL86795.1 | 100.00% | afis EAW19734.1 | 100.00% |
|-----------------|---------|-----------------|---------|

Bootstrap support for afum|EAL86795.1 as seed ortholog is 100%.

Bootstrap support for afis|EAW19734.1 as seed ortholog is 100%.

---

Group of orthologs #7148. Best score 518 bits

Score difference with first non-orthologous sequence - *A. fumigatus*:518 *A. fischeri*:518

|                 |         |                 |         |
|-----------------|---------|-----------------|---------|
| afum EAL87237.1 | 100.00% | afis EAW23803.1 | 100.00% |
|-----------------|---------|-----------------|---------|

Bootstrap support for afum|EAL87237.1 as seed ortholog is 100%.

Bootstrap support for afis|EAW23803.1 as seed ortholog is 100%.

---

Group of orthologs #7149. Best score 518 bits

Score difference with first non-orthologous sequence - *A. fumigatus*:518 *A. fischeri*:518

|                 |         |                 |         |
|-----------------|---------|-----------------|---------|
| afum EAL88096.1 | 100.00% | afis EAW23375.1 | 100.00% |
|-----------------|---------|-----------------|---------|

Bootstrap support for afum|EAL88096.1 as seed ortholog is 100%.

Bootstrap support for afis|EAW23375.1 as seed ortholog is 100%.

---

Group of orthologs #7150. Best score 518 bits

Score difference with first non-orthologous sequence - *A. fumigatus*:518 *A. fischeri*:518

|                 |         |                 |         |
|-----------------|---------|-----------------|---------|
| afum EAL90546.1 | 100.00% | afis EAW22646.1 | 100.00% |
|-----------------|---------|-----------------|---------|

Bootstrap support for afum|EAL90546.1 as seed ortholog is 100%.

Bootstrap support for afis|EAW22646.1 as seed ortholog is 100%.

---

Group of orthologs #7151. Best score 518 bits

Score difference with first non-orthologous sequence - *A. fumigatus*:518 *A. fischeri*:518

|                 |         |                 |         |
|-----------------|---------|-----------------|---------|
| afum EAL92262.1 | 100.00% | afis EAW21249.1 | 100.00% |
|-----------------|---------|-----------------|---------|

Bootstrap support for afum|EAL92262.1 as seed ortholog is 100%.

Bootstrap support for afis|EAW21249.1 as seed ortholog is 100%.

---

Group of orthologs #7152. Best score 518 bits

Score difference with first non-orthologous sequence - *A. fumigatus*:518 *A. fischeri*:518

|                 |         |                 |         |
|-----------------|---------|-----------------|---------|
| afum EAL89948.1 | 100.00% | afis EAW25285.1 | 100.00% |
|-----------------|---------|-----------------|---------|

Bootstrap support for afum|EAL89948.1 as seed ortholog is 100%.

Bootstrap support for afis|EAW25285.1 as seed ortholog is 100%.

---

Group of orthologs #7153. Best score 518 bits

Score difference with first non-orthologous sequence - *A. fumigatus*:518 *A. fischeri*:518

|                 |         |                 |         |
|-----------------|---------|-----------------|---------|
| afum EBA27411.1 | 100.00% | afis EAW22579.1 | 100.00% |
|-----------------|---------|-----------------|---------|

Bootstrap support for afum|EBA27411.1 as seed ortholog is 100%.

Bootstrap support for afis|EAW22579.1 as seed ortholog is 100%.

---

Group of orthologs #7154. Best score 518 bits

Score difference with first non-orthologous sequence - *A. fumigatus*:518 *A. fischeri*:368

|                 |         |                 |         |
|-----------------|---------|-----------------|---------|
| afum EBA27382.1 | 100.00% | afis EAW24776.1 | 100.00% |
|-----------------|---------|-----------------|---------|

Bootstrap support for afum|EBA27382.1 as seed ortholog is 100%.

Bootstrap support for afis|EAW24776.1 as seed ortholog is 100%.

---

Group of orthologs #7155. Best score 517 bits

Score difference with first non-orthologous sequence - *A. fumigatus*:517 *A. fischeri*:517

|                 |         |                 |         |
|-----------------|---------|-----------------|---------|
| afum EAL92526.1 | 100.00% | afis EAW21506.1 | 100.00% |
|-----------------|---------|-----------------|---------|

Bootstrap support for afum|EAL92526.1 as seed ortholog is 100%.

Bootstrap support for afis|EAW21506.1 as seed ortholog is 100%.

---

Group of orthologs #7156. Best score 516 bits

Score difference with first non-orthologous sequence - *A. fumigatus*:516 *A. fischeri*:447

|                 |         |                 |         |
|-----------------|---------|-----------------|---------|
| afum EAL86301.1 | 100.00% | afis EAW16727.1 | 100.00% |
|-----------------|---------|-----------------|---------|

Bootstrap support for afum|EAL86301.1 as seed ortholog is 100%.

Bootstrap support for afis|EAW16727.1 as seed ortholog is 100%.

---

Group of orthologs #7157. Best score 516 bits

Score difference with first non-orthologous sequence - *A. fumigatus*:516 *A. fischeri*:516

|                 |         |                 |         |
|-----------------|---------|-----------------|---------|
| afum EAL88612.1 | 100.00% | afis EAW15980.1 | 100.00% |
|-----------------|---------|-----------------|---------|

Bootstrap support for afum|EAL88612.1 as seed ortholog is 100%.

Bootstrap support for afis|EAW15980.1 as seed ortholog is 100%.

---

Group of orthologs #7158. Best score 516 bits

Score difference with first non-orthologous sequence - *A. fumigatus*:516 *A. fischeri*:516

|                 |         |                 |         |
|-----------------|---------|-----------------|---------|
| afum EAL91900.1 | 100.00% | afis EAW18088.1 | 100.00% |
|-----------------|---------|-----------------|---------|

Bootstrap support for afum|EAL91900.1 as seed ortholog is 100%.

Bootstrap support for afis|EAW18088.1 as seed ortholog is 100%.

---

Group of orthologs #7159. Best score 516 bits

Score difference with first non-orthologous sequence - *A. fumigatus*:516 *A. fischeri*:516

|                 |         |                 |         |
|-----------------|---------|-----------------|---------|
| afum EAL94004.1 | 100.00% | afis EAW19278.1 | 100.00% |
|-----------------|---------|-----------------|---------|

Bootstrap support for afum|EAL94004.1 as seed ortholog is 100%.

Bootstrap support for afis|EAW19278.1 as seed ortholog is 100%.

---

Group of orthologs #7160. Best score 516 bits

Score difference with first non-orthologous sequence - *A. fumigatus*:516 *A. fischeri*:516

|                 |         |                 |         |
|-----------------|---------|-----------------|---------|
| afum EAL90330.2 | 100.00% | afis EAW22869.1 | 100.00% |
|-----------------|---------|-----------------|---------|

Bootstrap support for afum|EAL90330.2 as seed ortholog is 100%.

Bootstrap support for afis|EAW22869.1 as seed ortholog is 100%.

---

Group of orthologs #7161. Best score 516 bits

Score difference with first non-orthologous sequence - *A. fumigatus*:516 *A. fischeri*:516

|                 |         |                 |         |
|-----------------|---------|-----------------|---------|
| afum EAL92768.1 | 100.00% | afis EAW21735.1 | 100.00% |
|-----------------|---------|-----------------|---------|

Bootstrap support for afum|EAL92768.1 as seed ortholog is 100%.

Bootstrap support for afis|EAW21735.1 as seed ortholog is 100%.

---

Group of orthologs #7162. Best score 516 bits

Score difference with first non-orthologous sequence - *A. fumigatus*:516 *A. fischeri*:516

|                 |         |                 |         |
|-----------------|---------|-----------------|---------|
| afum EAL89690.1 | 100.00% | afis EAW25007.1 | 100.00% |
|-----------------|---------|-----------------|---------|

Bootstrap support for afum|EAL89690.1 as seed ortholog is 100%.

Bootstrap support for afis|EAW25007.1 as seed ortholog is 100%.

---

Group of orthologs #7163. Best score 515 bits

Score difference with first non-orthologous sequence - *A. fumigatus*:515 *A. fischeri*:515

|                 |         |                 |         |
|-----------------|---------|-----------------|---------|
| afum EAL84640.2 | 100.00% | afis EAW20989.1 | 100.00% |
|-----------------|---------|-----------------|---------|

Bootstrap support for afum|EAL84640.2 as seed ortholog is 100%.

Bootstrap support for afis|EAW20989.1 as seed ortholog is 100%.

---

Group of orthologs #7164. Best score 515 bits

Score difference with first non-orthologous sequence - *A. fumigatus*:515 *A. fischeri*:515

afum|EAL87007.1 100.00% afis|EAW19487.1 100.00%

Bootstrap support for afum|EAL87007.1 as seed ortholog is 100%.

Bootstrap support for afis|EAW19487.1 as seed ortholog is 100%.

---

Group of orthologs #7165. Best score 515 bits

Score difference with first non-orthologous sequence - *A. fumigatus*:515 *A. fischeri*:515

afum|EAL85979.1 100.00% afis|EAW24311.1 100.00%

Bootstrap support for afum|EAL85979.1 as seed ortholog is 100%.

Bootstrap support for afis|EAW24311.1 as seed ortholog is 100%.

---

Group of orthologs #7166. Best score 515 bits

Score difference with first non-orthologous sequence - *A. fumigatus*:515 *A. fischeri*:515

afum|EAL93614.1 100.00% afis|EAW18882.1 100.00%

Bootstrap support for afum|EAL93614.1 as seed ortholog is 100%.

Bootstrap support for afis|EAW18882.1 as seed ortholog is 100%.

---

Group of orthologs #7167. Best score 515 bits

Score difference with first non-orthologous sequence - *A. fumigatus*:515 *A. fischeri*:515

afum|EAL91038.1 100.00% afis|EAW22152.1 100.00%

Bootstrap support for afum|EAL91038.1 as seed ortholog is 100%.

Bootstrap support for afis|EAW22152.1 as seed ortholog is 100%.

---

Group of orthologs #7168. Best score 515 bits

Score difference with first non-orthologous sequence - *A. fumigatus*:418 *A. fischeri*:515

afum|EAL92222.1 100.00% afis|EAW21211.1 100.00%

Bootstrap support for afum|EAL92222.1 as seed ortholog is 100%.

Bootstrap support for afis|EAW21211.1 as seed ortholog is 100%.

---

Group of orthologs #7169. Best score 515 bits

Score difference with first non-orthologous sequence - *A. fumigatus*:515 *A. fischeri*:515

afum|EAL89474.1 100.00% afis|EAW24829.1 100.00%

Bootstrap support for afum|EAL89474.1 as seed ortholog is 100%.

Bootstrap support for afis|EAW24829.1 as seed ortholog is 100%.

---

Group of orthologs #7170. Best score 515 bits

Score difference with first non-orthologous sequence - *A. fumigatus*:515 *A. fischeri*:515

afum|EAL92815.1 100.00% afis|EAW21789.1 100.00%

Bootstrap support for afum|EAL92815.1 as seed ortholog is 100%.

Bootstrap support for afis|EAW21789.1 as seed ortholog is 100%.

---

Group of orthologs #7171. Best score 514 bits

Score difference with first non-orthologous sequence - *A. fumigatus*:514 *A. fischeri*:514

afum|EAL85856.1 100.00% afis|EAW15466.1 100.00%

Bootstrap support for afum|EAL85856.1 as seed ortholog is 100%.

Bootstrap support for afis|EAW15466.1 as seed ortholog is 100%.

---

Group of orthologs #7172. Best score 514 bits

Score difference with first non-orthologous sequence - *A. fumigatus*:514 *A. fischeri*:514

afum|EAL87213.1 100.00% afis|EAW23779.1 100.00%

Bootstrap support for afum|EAL87213.1 as seed ortholog is 100%.

Bootstrap support for afis|EAW23779.1 as seed ortholog is 100%.

---

Group of orthologs #7173. Best score 513 bits

Score difference with first non-orthologous sequence - *A. fumigatus*:513 *A. fischeri*:513

|                 |         |                 |         |
|-----------------|---------|-----------------|---------|
| afum EAL87048.1 | 100.00% | afis EAW19447.1 | 100.00% |
|-----------------|---------|-----------------|---------|

Bootstrap support for afum|EAL87048.1 as seed ortholog is 100%.

Bootstrap support for afis|EAW19447.1 as seed ortholog is 100%.

---

Group of orthologs #7174. Best score 513 bits

Score difference with first non-orthologous sequence - *A. fumigatus*:513 *A. fischeri*:513

|                 |         |                 |         |
|-----------------|---------|-----------------|---------|
| afum EAL87217.2 | 100.00% | afis EAW23783.1 | 100.00% |
|-----------------|---------|-----------------|---------|

Bootstrap support for afum|EAL87217.2 as seed ortholog is 100%.

Bootstrap support for afis|EAW23783.1 as seed ortholog is 100%.

---

Group of orthologs #7175. Best score 513 bits

Score difference with first non-orthologous sequence - *A. fumigatus*:513 *A. fischeri*:513

|                 |         |                 |         |
|-----------------|---------|-----------------|---------|
| afum EAL93756.1 | 100.00% | afis EAW19025.1 | 100.00% |
|-----------------|---------|-----------------|---------|

Bootstrap support for afum|EAL93756.1 as seed ortholog is 100%.

Bootstrap support for afis|EAW19025.1 as seed ortholog is 100%.

---

Group of orthologs #7176. Best score 513 bits

Score difference with first non-orthologous sequence - *A. fumigatus*:513 *A. fischeri*:513

|                 |         |                 |         |
|-----------------|---------|-----------------|---------|
| afum EBA27490.1 | 100.00% | afis EAW18662.1 | 100.00% |
|-----------------|---------|-----------------|---------|

Bootstrap support for afum|EBA27490.1 as seed ortholog is 100%.

Bootstrap support for afis|EAW18662.1 as seed ortholog is 100%.

---

Group of orthologs #7177. Best score 513 bits

Score difference with first non-orthologous sequence - *A. fumigatus*:513 *A. fischeri*:513

|                 |         |                 |         |
|-----------------|---------|-----------------|---------|
| afum EAL93908.1 | 100.00% | afis EAW19178.1 | 100.00% |
|-----------------|---------|-----------------|---------|

Bootstrap support for afum|EAL93908.1 as seed ortholog is 100%.

Bootstrap support for afis|EAW19178.1 as seed ortholog is 100%.

---

Group of orthologs #7178. Best score 513 bits

Score difference with first non-orthologous sequence - *A. fumigatus*:513 *A. fischeri*:513

|                 |         |                 |         |
|-----------------|---------|-----------------|---------|
| afum EBA27391.1 | 100.00% | afis EAW25262.1 | 100.00% |
|-----------------|---------|-----------------|---------|

Bootstrap support for afum|EBA27391.1 as seed ortholog is 100%.

Bootstrap support for afis|EAW25262.1 as seed ortholog is 100%.

---

Group of orthologs #7179. Best score 512 bits

Score difference with first non-orthologous sequence - *A. fumigatus*:512 *A. fischeri*:512

|                 |         |                 |         |
|-----------------|---------|-----------------|---------|
| afum EAL91241.1 | 100.00% | afis EAW17406.1 | 100.00% |
|-----------------|---------|-----------------|---------|

Bootstrap support for afum|EAL91241.1 as seed ortholog is 100%.

Bootstrap support for afis|EAW17406.1 as seed ortholog is 100%.

---

Group of orthologs #7180. Best score 512 bits

Score difference with first non-orthologous sequence - *A. fumigatus*:512 *A. fischeri*:512

|                 |         |                 |         |
|-----------------|---------|-----------------|---------|
| afum EAL93299.2 | 100.00% | afis EAW18592.1 | 100.00% |
|-----------------|---------|-----------------|---------|

Bootstrap support for afum|EAL93299.2 as seed ortholog is 100%.

Bootstrap support for afis|EAW18592.1 as seed ortholog is 100%.

---

Group of orthologs #7181. Best score 512 bits

Score difference with first non-orthologous sequence - *A. fumigatus*:512 *A. fischeri*:512

|                 |         |                 |         |
|-----------------|---------|-----------------|---------|
| afum EAL90689.1 | 100.00% | afis EAW22504.1 | 100.00% |
|-----------------|---------|-----------------|---------|

Bootstrap support for afum|EAL90689.1 as seed ortholog is 100%.

Bootstrap support for afis|EAW22504.1 as seed ortholog is 100%.

---

Group of orthologs #7182. Best score 512 bits

Score difference with first non-orthologous sequence - *A. fumigatus*:512 *A. fischeri*:512

|                 |         |                 |         |
|-----------------|---------|-----------------|---------|
| afum EAL90000.1 | 100.00% | afis EAW25337.1 | 100.00% |
|-----------------|---------|-----------------|---------|

Bootstrap support for afum|EAL90000.1 as seed ortholog is 100%.



Bootstrap support for afis|EAW25337.1 as seed ortholog is 100%.

---

Group of orthologs #7183. Best score 511 bits

Score difference with first non-orthologous sequence - *A. fumigatus*:511 *A. fischeri*:511

afum|EAL88694.1 100.00% afis|EAW16062.1 100.00%

Bootstrap support for afum|EAL88694.1 as seed ortholog is 100%.

Bootstrap support for afis|EAW16062.1 as seed ortholog is 100%.

---

Group of orthologs #7184. Best score 511 bits

Score difference with first non-orthologous sequence - *A. fumigatus*:511 *A. fischeri*:511

afum|EAL84538.1 100.00% afis|EAW20519.1 100.00%

Bootstrap support for afum|EAL84538.1 as seed ortholog is 100%.

Bootstrap support for afis|EAW20519.1 as seed ortholog is 100%.

---

Group of orthologs #7185. Best score 511 bits

Score difference with first non-orthologous sequence - *A. fumigatus*:511 *A. fischeri*:511

afum|EAL85305.1 100.00% afis|EAW20186.1 100.00%

Bootstrap support for afum|EAL85305.1 as seed ortholog is 100%.

Bootstrap support for afis|EAW20186.1 as seed ortholog is 100%.

---

Group of orthologs #7186. Best score 511 bits

Score difference with first non-orthologous sequence - *A. fumigatus*:511 *A. fischeri*:511

afum|EAL91251.1 100.00% afis|EAW17423.1 100.00%

Bootstrap support for afum|EAL91251.1 as seed ortholog is 100%.

Bootstrap support for afis|EAW17423.1 as seed ortholog is 100%.

---

Group of orthologs #7187. Best score 511 bits

Score difference with first non-orthologous sequence - *A. fumigatus*:511 *A. fischeri*:511

afum|EAL87944.1 100.00% afis|EAW23520.1 100.00%

Bootstrap support for afum|EAL87944.1 as seed ortholog is 100%.

Bootstrap support for afis|EAW23520.1 as seed ortholog is 100%.

---

Group of orthologs #7188. Best score 511 bits

Score difference with first non-orthologous sequence - *A. fumigatus*:511 *A. fischeri*:511

afum|EAL87848.1 100.00% afis|EAW23614.1 100.00%

Bootstrap support for afum|EAL87848.1 as seed ortholog is 100%.

Bootstrap support for afis|EAW23614.1 as seed ortholog is 100%.

---

Group of orthologs #7189. Best score 511 bits

Score difference with first non-orthologous sequence - *A. fumigatus*:511 *A. fischeri*:511

afum|EAL89578.2 100.00% afis|EAW24923.1 100.00%

Bootstrap support for afum|EAL89578.2 as seed ortholog is 100%.

Bootstrap support for afis|EAW24923.1 as seed ortholog is 100%.

---

Group of orthologs #7190. Best score 511 bits

Score difference with first non-orthologous sequence - *A. fumigatus*:511 *A. fischeri*:511

afum|EAL89857.1 100.00% afis|EAW25183.1 100.00%

Bootstrap support for afum|EAL89857.1 as seed ortholog is 100%.

Bootstrap support for afis|EAW25183.1 as seed ortholog is 100%.

---

Group of orthologs #7191. Best score 510 bits

Score difference with first non-orthologous sequence - *A. fumigatus*:510 *A. fischeri*:510

afum|EAL85565.1 100.00% afis|EAW15785.1 100.00%

Bootstrap support for afum|EAL85565.1 as seed ortholog is 100%.

Bootstrap support for afis|EAW15785.1 as seed ortholog is 100%.

---

Group of orthologs #7192. Best score 510 bits

Score difference with first non-orthologous sequence - *A. fumigatus*:430 *A. fischeri*:510

afum|EAL86620.1 100.00% afis|EAW17192.1 100.00%

Bootstrap support for afum|EAL86620.1 as seed ortholog is 100%.

Bootstrap support for afis|EAW17192.1 as seed ortholog is 100%.

---

Group of orthologs #7193. Best score 510 bits

Score difference with first non-orthologous sequence - *A. fumigatus*:510 *A. fischeri*:510

afum|EAL91145.1 100.00% afis|EAW17310.1 100.00%

Bootstrap support for afum|EAL91145.1 as seed ortholog is 100%.

Bootstrap support for afis|EAW17310.1 as seed ortholog is 100%.

---

Group of orthologs #7194. Best score 510 bits

Score difference with first non-orthologous sequence - *A. fumigatus*:510 *A. fischeri*:510

afum|EAL87937.1 100.00% afis|EAW23529.1 100.00%

Bootstrap support for afum|EAL87937.1 as seed ortholog is 100%.

Bootstrap support for afis|EAW23529.1 as seed ortholog is 100%.

---

Group of orthologs #7195. Best score 510 bits

Score difference with first non-orthologous sequence - *A. fumigatus*:510 *A. fischeri*:510

afum|EAL93025.1 100.00% afis|EAW22010.1 100.00%

Bootstrap support for afum|EAL93025.1 as seed ortholog is 100%.

Bootstrap support for afis|EAW22010.1 as seed ortholog is 100%.

---

Group of orthologs #7196. Best score 510 bits

Score difference with first non-orthologous sequence - *A. fumigatus*:350 *A. fischeri*:321

afum|EAL89818.1 100.00% afis|EAW25145.1 100.00%

Bootstrap support for afum|EAL89818.1 as seed ortholog is 100%.

Bootstrap support for afis|EAW25145.1 as seed ortholog is 100%.

---

Group of orthologs #7197. Best score 510 bits

Score difference with first non-orthologous sequence - *A. fumigatus*:510 *A. fischeri*:510

afum|EAL90175.2 100.00% afis|EAW25509.1 100.00%

Bootstrap support for afum|EAL90175.2 as seed ortholog is 100%.

Bootstrap support for afis|EAW25509.1 as seed ortholog is 100%.

---

Group of orthologs #7198. Best score 509 bits

Score difference with first non-orthologous sequence - *A. fumigatus*:509 *A. fischeri*:509

afum|EAL84208.2 100.00% afis|EAW15437.1 100.00%

Bootstrap support for afum|EAL84208.2 as seed ortholog is 100%.

Bootstrap support for afis|EAW15437.1 as seed ortholog is 100%.

---

Group of orthologs #7199. Best score 509 bits

Score difference with first non-orthologous sequence - *A. fumigatus*:509 *A. fischeri*:454

afum|EAL84601.1 100.00% afis|EAW20452.1 100.00%

Bootstrap support for afum|EAL84601.1 as seed ortholog is 100%.

Bootstrap support for afis|EAW20452.1 as seed ortholog is 100%.

---

Group of orthologs #7200. Best score 509 bits

Score difference with first non-orthologous sequence - *A. fumigatus*:509 *A. fischeri*:509

afum|EAL85357.1 100.00% afis|EAW20239.1 100.00%

Bootstrap support for afum|EAL85357.1 as seed ortholog is 100%.

Bootstrap support for afis|EAW20239.1 as seed ortholog is 100%.

---

Group of orthologs #7201. Best score 509 bits

Score difference with first non-orthologous sequence - *A. fumigatus*:509 *A. fischeri*:509

|                 |         |                 |         |
|-----------------|---------|-----------------|---------|
| afum EAL93534.1 | 100.00% | afis EAW18798.1 | 100.00% |
|-----------------|---------|-----------------|---------|

Bootstrap support for afum|EAL93534.1 as seed ortholog is 100%.

Bootstrap support for afis|EAW18798.1 as seed ortholog is 100%.

---

Group of orthologs #7202. Best score 509 bits

Score difference with first non-orthologous sequence - *A. fumigatus*:509 *A. fischeri*:509

|                 |         |                 |         |
|-----------------|---------|-----------------|---------|
| afum EAL90714.1 | 100.00% | afis EAW22481.1 | 100.00% |
|-----------------|---------|-----------------|---------|

Bootstrap support for afum|EAL90714.1 as seed ortholog is 100%.

Bootstrap support for afis|EAW22481.1 as seed ortholog is 100%.

---

Group of orthologs #7203. Best score 509 bits

Score difference with first non-orthologous sequence - *A. fumigatus*:509 *A. fischeri*:509

|                 |         |                 |         |
|-----------------|---------|-----------------|---------|
| afum EAL92602.1 | 100.00% | afis EAW21584.1 | 100.00% |
|-----------------|---------|-----------------|---------|

Bootstrap support for afum|EAL92602.1 as seed ortholog is 100%.

Bootstrap support for afis|EAW21584.1 as seed ortholog is 100%.

---

Group of orthologs #7204. Best score 508 bits

Score difference with first non-orthologous sequence - *A. fumigatus*:508 *A. fischeri*:508

|                 |         |                 |         |
|-----------------|---------|-----------------|---------|
| afum EAL88994.1 | 100.00% | afis EAW16369.1 | 100.00% |
|-----------------|---------|-----------------|---------|

Bootstrap support for afum|EAL88994.1 as seed ortholog is 100%.

Bootstrap support for afis|EAW16369.1 as seed ortholog is 100%.

---

Group of orthologs #7205. Best score 508 bits

Score difference with first non-orthologous sequence - *A. fumigatus*:508 *A. fischeri*:508

|                 |         |                 |         |
|-----------------|---------|-----------------|---------|
| afum EBA27426.1 | 100.00% | afis EAW17385.1 | 100.00% |
|-----------------|---------|-----------------|---------|

Bootstrap support for afum|EBA27426.1 as seed ortholog is 100%.

Bootstrap support for afis|EAW17385.1 as seed ortholog is 100%.

---

Group of orthologs #7206. Best score 508 bits

Score difference with first non-orthologous sequence - *A. fumigatus*:508 *A. fischeri*:508

|                 |         |                 |         |
|-----------------|---------|-----------------|---------|
| afum EAL88201.1 | 100.00% | afis EAW23278.1 | 100.00% |
|-----------------|---------|-----------------|---------|

Bootstrap support for afum|EAL88201.1 as seed ortholog is 100%.

Bootstrap support for afis|EAW23278.1 as seed ortholog is 100%.

---

Group of orthologs #7207. Best score 508 bits

Score difference with first non-orthologous sequence - *A. fumigatus*:508 *A. fischeri*:508

|                 |         |                 |         |
|-----------------|---------|-----------------|---------|
| afum EAL88254.1 | 100.00% | afis EAW23229.1 | 100.00% |
|-----------------|---------|-----------------|---------|

Bootstrap support for afum|EAL88254.1 as seed ortholog is 100%.

Bootstrap support for afis|EAW23229.1 as seed ortholog is 100%.

---

Group of orthologs #7208. Best score 508 bits

Score difference with first non-orthologous sequence - *A. fumigatus*:508 *A. fischeri*:508

|                 |         |                 |         |
|-----------------|---------|-----------------|---------|
| afum EAL88141.1 | 100.00% | afis EAW23337.1 | 100.00% |
|-----------------|---------|-----------------|---------|

Bootstrap support for afum|EAL88141.1 as seed ortholog is 100%.

Bootstrap support for afis|EAW23337.1 as seed ortholog is 100%.

---

Group of orthologs #7209. Best score 508 bits

Score difference with first non-orthologous sequence - *A. fumigatus*:508 *A. fischeri*:508

|                 |         |                 |         |
|-----------------|---------|-----------------|---------|
| afum EAL93362.1 | 100.00% | afis EAW18647.1 | 100.00% |
|-----------------|---------|-----------------|---------|

Bootstrap support for afum|EAL93362.1 as seed ortholog is 100%.

Bootstrap support for afis|EAW18647.1 as seed ortholog is 100%.

---

Group of orthologs #7210. Best score 508 bits

Score difference with first non-orthologous sequence - *A. fumigatus*:508 *A. fischeri*:508

|                 |         |                 |         |
|-----------------|---------|-----------------|---------|
| afum EAL91026.1 | 100.00% | afis EAW22165.1 | 100.00% |
|-----------------|---------|-----------------|---------|

Bootstrap support for afum|EAL91026.1 as seed ortholog is 100%.

Bootstrap support for afis|EAW22165.1 as seed ortholog is 100%.

---

Group of orthologs #7211. Best score 508 bits

Score difference with first non-orthologous sequence - *A. fumigatus*:508 *A. fischeri*:508

afum|EAL90869.1 100.00% afis|EAW22322.1 100.00%

Bootstrap support for afum|EAL90869.1 as seed ortholog is 100%.

Bootstrap support for afis|EAW22322.1 as seed ortholog is 100%.

---

Group of orthologs #7212. Best score 508 bits

Score difference with first non-orthologous sequence - *A. fumigatus*:508 *A. fischeri*:508

afum|EAL90833.1 100.00% afis|EAW22358.1 100.00%

Bootstrap support for afum|EAL90833.1 as seed ortholog is 100%.

Bootstrap support for afis|EAW22358.1 as seed ortholog is 100%.

---

Group of orthologs #7213. Best score 507 bits

Score difference with first non-orthologous sequence - *A. fumigatus*:507 *A. fischeri*:507

afum|EAL87673.1 100.00% afis|EAW18307.1 100.00%

Bootstrap support for afum|EAL87673.1 as seed ortholog is 100%.

Bootstrap support for afis|EAW18307.1 as seed ortholog is 100%.

---

Group of orthologs #7214. Best score 507 bits

Score difference with first non-orthologous sequence - *A. fumigatus*:507 *A. fischeri*:507

afum|EAL87278.2 100.00% afis|EAW23850.1 100.00%

Bootstrap support for afum|EAL87278.2 as seed ortholog is 100%.

Bootstrap support for afis|EAW23850.1 as seed ortholog is 100%.

---

Group of orthologs #7215. Best score 507 bits

Score difference with first non-orthologous sequence - *A. fumigatus*:507 *A. fischeri*:507

afum|EAL90499.1 100.00% afis|EAW22694.1 100.00%

Bootstrap support for afum|EAL90499.1 as seed ortholog is 100%.

Bootstrap support for afis|EAW22694.1 as seed ortholog is 100%.

---

Group of orthologs #7216. Best score 506 bits

Score difference with first non-orthologous sequence - *A. fumigatus*:506 *A. fischeri*:506

afum|EAL88519.1 100.00% afis|EAW15885.1 100.00%

Bootstrap support for afum|EAL88519.1 as seed ortholog is 100%.

Bootstrap support for afis|EAW15885.1 as seed ortholog is 100%.

---

Group of orthologs #7217. Best score 506 bits

Score difference with first non-orthologous sequence - *A. fumigatus*:506 *A. fischeri*:506

afum|EAL88428.2 100.00% afis|EAW23052.1 100.00%

Bootstrap support for afum|EAL88428.2 as seed ortholog is 100%.

Bootstrap support for afis|EAW23052.1 as seed ortholog is 100%.

---

Group of orthologs #7218. Best score 506 bits

Score difference with first non-orthologous sequence - *A. fumigatus*:506 *A. fischeri*:506

afum|EAL88369.1 100.00% afis|EAW23110.1 100.00%

Bootstrap support for afum|EAL88369.1 as seed ortholog is 100%.

Bootstrap support for afis|EAW23110.1 as seed ortholog is 100%.

---

Group of orthologs #7219. Best score 506 bits

Score difference with first non-orthologous sequence - *A. fumigatus*:506 *A. fischeri*:506

afum|EAL93349.1 100.00% afis|EAW18636.1 100.00%

Bootstrap support for afum|EAL93349.1 as seed ortholog is 100%.

Bootstrap support for afis|EAW18636.1 as seed ortholog is 100%.

---

Group of orthologs #7220. Best score 506 bits

Score difference with first non-orthologous sequence - *A. fumigatus*:352 *A. fischeri*:410

afum|EAL91093.2 100.00% afis|EAW22077.1 100.00%

Bootstrap support for afum|EAL91093.2 as seed ortholog is 100%.

Bootstrap support for afis|EAW22077.1 as seed ortholog is 100%.

---

Group of orthologs #7221. Best score 506 bits

Score difference with first non-orthologous sequence - *A. fumigatus*:506 *A. fischeri*:506

afum|EAL90670.1 100.00% afis|EAW22524.1 100.00%

Bootstrap support for afum|EAL90670.1 as seed ortholog is 100%.

Bootstrap support for afis|EAW22524.1 as seed ortholog is 100%.

---

Group of orthologs #7222. Best score 506 bits

Score difference with first non-orthologous sequence - *A. fumigatus*:506 *A. fischeri*:506

afum|EAL90409.1 100.00% afis|EAW22790.1 100.00%

Bootstrap support for afum|EAL90409.1 as seed ortholog is 100%.

Bootstrap support for afis|EAW22790.1 as seed ortholog is 100%.

---

Group of orthologs #7223. Best score 506 bits

Score difference with first non-orthologous sequence - *A. fumigatus*:506 *A. fischeri*:463

afum|EAL89720.1 100.00% afis|EAW25052.1 100.00%

Bootstrap support for afum|EAL89720.1 as seed ortholog is 100%.

Bootstrap support for afis|EAW25052.1 as seed ortholog is 100%.

---

Group of orthologs #7224. Best score 504 bits

Score difference with first non-orthologous sequence - *A. fumigatus*:504 *A. fischeri*:347

afum|EAL89062.1 100.00% afis|EAW16466.1 100.00%

Bootstrap support for afum|EAL89062.1 as seed ortholog is 100%.

Bootstrap support for afis|EAW16466.1 as seed ortholog is 100%.

---

Group of orthologs #7225. Best score 504 bits

Score difference with first non-orthologous sequence - *A. fumigatus*:504 *A. fischeri*:504

afum|EAL86799.1 100.00% afis|EAW19728.1 100.00%

Bootstrap support for afum|EAL86799.1 as seed ortholog is 100%.

Bootstrap support for afis|EAW19728.1 as seed ortholog is 100%.

---

Group of orthologs #7226. Best score 504 bits

Score difference with first non-orthologous sequence - *A. fumigatus*:504 *A. fischeri*:504

afum|EAL91712.1 100.00% afis|EAW17904.1 100.00%

Bootstrap support for afum|EAL91712.1 as seed ortholog is 100%.

Bootstrap support for afis|EAW17904.1 as seed ortholog is 100%.

---

Group of orthologs #7227. Best score 504 bits

Score difference with first non-orthologous sequence - *A. fumigatus*:504 *A. fischeri*:353

afum|EAL92062.1 100.00% afis|EAW21023.1 100.00%

Bootstrap support for afum|EAL92062.1 as seed ortholog is 100%.

Bootstrap support for afis|EAW21023.1 as seed ortholog is 100%.

---

Group of orthologs #7228. Best score 503 bits

Score difference with first non-orthologous sequence - *A. fumigatus*:503 *A. fischeri*:503

afum|EAL85571.1 100.00% afis|EAW15778.1 100.00%

Bootstrap support for afum|EAL85571.1 as seed ortholog is 100%.

Bootstrap support for afis|EAW15778.1 as seed ortholog is 100%.

---

Group of orthologs #7229. Best score 503 bits

Score difference with first non-orthologous sequence - *A. fumigatus*:503 *A. fischeri*:503

|                 |         |                 |         |
|-----------------|---------|-----------------|---------|
| afum EAL88898.1 | 100.00% | afis EAW16277.1 | 100.00% |
|-----------------|---------|-----------------|---------|

Bootstrap support for afum|EAL88898.1 as seed ortholog is 100%.

Bootstrap support for afis|EAW16277.1 as seed ortholog is 100%.

---

Group of orthologs #7230. Best score 503 bits

Score difference with first non-orthologous sequence - *A. fumigatus*:503 *A. fischeri*:503

|                 |         |                 |         |
|-----------------|---------|-----------------|---------|
| afum EAL84629.1 | 100.00% | afis EAW20421.1 | 100.00% |
|-----------------|---------|-----------------|---------|

Bootstrap support for afum|EAL84629.1 as seed ortholog is 100%.

Bootstrap support for afis|EAW20421.1 as seed ortholog is 100%.

---

Group of orthologs #7231. Best score 503 bits

Score difference with first non-orthologous sequence - *A. fumigatus*:503 *A. fischeri*:503

|                 |         |                 |         |
|-----------------|---------|-----------------|---------|
| afum EAL91448.1 | 100.00% | afis EAW17633.1 | 100.00% |
|-----------------|---------|-----------------|---------|

Bootstrap support for afum|EAL91448.1 as seed ortholog is 100%.

Bootstrap support for afis|EAW17633.1 as seed ortholog is 100%.

---

Group of orthologs #7232. Best score 503 bits

Score difference with first non-orthologous sequence - *A. fumigatus*:414 *A. fischeri*:503

|                 |         |                 |         |
|-----------------|---------|-----------------|---------|
| afum EAL90215.1 | 100.00% | afis EAW22983.1 | 100.00% |
|-----------------|---------|-----------------|---------|

Bootstrap support for afum|EAL90215.1 as seed ortholog is 100%.

Bootstrap support for afis|EAW22983.1 as seed ortholog is 100%.

---

Group of orthologs #7233. Best score 503 bits

Score difference with first non-orthologous sequence - *A. fumigatus*:503 *A. fischeri*:503

|                 |         |                 |         |
|-----------------|---------|-----------------|---------|
| afum EAL90211.1 | 100.00% | afis EAW22988.1 | 100.00% |
|-----------------|---------|-----------------|---------|

Bootstrap support for afum|EAL90211.1 as seed ortholog is 100%.

Bootstrap support for afis|EAW22988.1 as seed ortholog is 100%.

---

Group of orthologs #7234. Best score 503 bits

Score difference with first non-orthologous sequence - *A. fumigatus*:503 *A. fischeri*:503

|                 |         |                 |         |
|-----------------|---------|-----------------|---------|
| afum EAL90085.1 | 100.00% | afis EAW25426.1 | 100.00% |
|-----------------|---------|-----------------|---------|

Bootstrap support for afum|EAL90085.1 as seed ortholog is 100%.

Bootstrap support for afis|EAW25426.1 as seed ortholog is 100%.

---

Group of orthologs #7235. Best score 502 bits

Score difference with first non-orthologous sequence - *A. fumigatus*:502 *A. fischeri*:502

|                 |         |                 |         |
|-----------------|---------|-----------------|---------|
| afum EAL85830.1 | 100.00% | afis EAW15493.1 | 100.00% |
|-----------------|---------|-----------------|---------|

Bootstrap support for afum|EAL85830.1 as seed ortholog is 100%.

Bootstrap support for afis|EAW15493.1 as seed ortholog is 100%.

---

Group of orthologs #7236. Best score 502 bits

Score difference with first non-orthologous sequence - *A. fumigatus*:502 *A. fischeri*:502

|                 |         |                 |         |
|-----------------|---------|-----------------|---------|
| afum EAL85043.1 | 100.00% | afis EAW19850.1 | 100.00% |
|-----------------|---------|-----------------|---------|

Bootstrap support for afum|EAL85043.1 as seed ortholog is 100%.

Bootstrap support for afis|EAW19850.1 as seed ortholog is 100%.

---

Group of orthologs #7237. Best score 502 bits

Score difference with first non-orthologous sequence - *A. fumigatus*:502 *A. fischeri*:502

|                 |         |                 |         |
|-----------------|---------|-----------------|---------|
| afum EAL86139.1 | 100.00% | afis EAW24467.1 | 100.00% |
|-----------------|---------|-----------------|---------|

Bootstrap support for afum|EAL86139.1 as seed ortholog is 100%.

Bootstrap support for afis|EAW24467.1 as seed ortholog is 100%.

---

Group of orthologs #7238. Best score 501 bits

Score difference with first non-orthologous sequence - *A. fumigatus*:501 *A. fischeri*:450

|                 |         |                 |         |
|-----------------|---------|-----------------|---------|
| afum EAL87825.1 | 100.00% | afis EAW23635.1 | 100.00% |
|-----------------|---------|-----------------|---------|

Bootstrap support for afum|EAL87825.1 as seed ortholog is 100%.

Bootstrap support for afis|EAW23635.1 as seed ortholog is 100%.

---

Group of orthologs #7239. Best score 501 bits

Score difference with first non-orthologous sequence - *A. fumigatus*:127 *A. fischeri*:501

afum|EAL92056.1 100.00% afis|EAW21018.1 100.00%

Bootstrap support for afum|EAL92056.1 as seed ortholog is 99%.

Bootstrap support for afis|EAW21018.1 as seed ortholog is 100%.

---

Group of orthologs #7240. Best score 500 bits

Score difference with first non-orthologous sequence - *A. fumigatus*:500 *A. fischeri*:500

afum|EAL88572.1 100.00% afis|EAW15936.1 100.00%

Bootstrap support for afum|EAL88572.1 as seed ortholog is 100%.

Bootstrap support for afis|EAW15936.1 as seed ortholog is 100%.

---

Group of orthologs #7241. Best score 500 bits

Score difference with first non-orthologous sequence - *A. fumigatus*:500 *A. fischeri*:500

afum|EAL84920.1 100.00% afis|EAW19996.1 100.00%

Bootstrap support for afum|EAL84920.1 as seed ortholog is 100%.

Bootstrap support for afis|EAW19996.1 as seed ortholog is 100%.

---

Group of orthologs #7242. Best score 500 bits

Score difference with first non-orthologous sequence - *A. fumigatus*:500 *A. fischeri*:500

afum|EAL91438.1 100.00% afis|EAW17624.1 100.00%

Bootstrap support for afum|EAL91438.1 as seed ortholog is 100%.

Bootstrap support for afis|EAW17624.1 as seed ortholog is 100%.

---

Group of orthologs #7243. Best score 500 bits

Score difference with first non-orthologous sequence - *A. fumigatus*:500 *A. fischeri*:500

afum|EAL84346.1 100.00% afis|EAW25676.1 100.00%

Bootstrap support for afum|EAL84346.1 as seed ortholog is 100%.

Bootstrap support for afis|EAW25676.1 as seed ortholog is 100%.

---

Group of orthologs #7244. Best score 500 bits

Score difference with first non-orthologous sequence - *A. fumigatus*:500 *A. fischeri*:500

afum|EAL90036.1 100.00% afis|EAW25377.1 100.00%

Bootstrap support for afum|EAL90036.1 as seed ortholog is 100%.

Bootstrap support for afis|EAW25377.1 as seed ortholog is 100%.

---

Group of orthologs #7245. Best score 499 bits

Score difference with first non-orthologous sequence - *A. fumigatus*:499 *A. fischeri*:499

afum|EAL89168.1 100.00% afis|EAW16571.1 100.00%

Bootstrap support for afum|EAL89168.1 as seed ortholog is 100%.

Bootstrap support for afis|EAW16571.1 as seed ortholog is 100%.

---

Group of orthologs #7246. Best score 499 bits

Score difference with first non-orthologous sequence - *A. fumigatus*:408 *A. fischeri*:400

afum|EAL91195.1 100.00% afis|EAW17353.1 100.00%

Bootstrap support for afum|EAL91195.1 as seed ortholog is 100%.

Bootstrap support for afis|EAW17353.1 as seed ortholog is 100%.

---

Group of orthologs #7247. Best score 499 bits

Score difference with first non-orthologous sequence - *A. fumigatus*:499 *A. fischeri*:499

afum|EAL91521.2 100.00% afis|EAW17707.1 100.00%

Bootstrap support for afum|EAL91521.2 as seed ortholog is 100%.

Bootstrap support for afis|EAW17707.1 as seed ortholog is 100%.

---

Group of orthologs #7248. Best score 499 bits

Score difference with first non-orthologous sequence - *A. fumigatus*:399 *A. fischeri*:231

afum|EAL91611.1 100.00% afis|EAW17803.1 100.00%

Bootstrap support for afum|EAL91611.1 as seed ortholog is 100%.

Bootstrap support for afis|EAW17803.1 as seed ortholog is 100%.

---

Group of orthologs #7249. Best score 499 bits

Score difference with first non-orthologous sequence - *A. fumigatus*:499 *A. fischeri*:215

afum|EAL92093.2 100.00% afis|EAW21058.1 100.00%

Bootstrap support for afum|EAL92093.2 as seed ortholog is 100%.

Bootstrap support for afis|EAW21058.1 as seed ortholog is 100%.

---

Group of orthologs #7250. Best score 499 bits

Score difference with first non-orthologous sequence - *A. fumigatus*:499 *A. fischeri*:499

afum|EAL90093.1 100.00% afis|EAW25435.1 100.00%

Bootstrap support for afum|EAL90093.1 as seed ortholog is 100%.

Bootstrap support for afis|EAW25435.1 as seed ortholog is 100%.

---

Group of orthologs #7251. Best score 498 bits

Score difference with first non-orthologous sequence - *A. fumigatus*:498 *A. fischeri*:498

afum|EAL85057.1 100.00% afis|EAW19835.1 100.00%

Bootstrap support for afum|EAL85057.1 as seed ortholog is 100%.

Bootstrap support for afis|EAW19835.1 as seed ortholog is 100%.

---

Group of orthologs #7252. Best score 498 bits

Score difference with first non-orthologous sequence - *A. fumigatus*:498 *A. fischeri*:498

afum|EAL93854.1 100.00% afis|EAW19122.1 100.00%

Bootstrap support for afum|EAL93854.1 as seed ortholog is 100%.

Bootstrap support for afis|EAW19122.1 as seed ortholog is 100%.

---

Group of orthologs #7253. Best score 498 bits

Score difference with first non-orthologous sequence - *A. fumigatus*:498 *A. fischeri*:498

afum|EAL90474.1 100.00% afis|EAW22721.1 100.00%

Bootstrap support for afum|EAL90474.1 as seed ortholog is 100%.

Bootstrap support for afis|EAW22721.1 as seed ortholog is 100%.

---

Group of orthologs #7254. Best score 498 bits

Score difference with first non-orthologous sequence - *A. fumigatus*:498 *A. fischeri*:498

afum|EAL90238.1 100.00% afis|EAW22959.1 100.00%

Bootstrap support for afum|EAL90238.1 as seed ortholog is 100%.

Bootstrap support for afis|EAW22959.1 as seed ortholog is 100%.

---

Group of orthologs #7255. Best score 498 bits

Score difference with first non-orthologous sequence - *A. fumigatus*:498 *A. fischeri*:498

afum|EBA27480.1 100.00% afis|EAW21905.1 100.00%

Bootstrap support for afum|EBA27480.1 as seed ortholog is 100%.

Bootstrap support for afis|EAW21905.1 as seed ortholog is 100%.

---

Group of orthologs #7256. Best score 497 bits

Score difference with first non-orthologous sequence - *A. fumigatus*:497 *A. fischeri*:497

afum|EAL86628.1 100.00% afis|EAW17201.1 100.00%

Bootstrap support for afum|EAL86628.1 as seed ortholog is 100%.

Bootstrap support for afis|EAW17201.1 as seed ortholog is 100%.

---

Group of orthologs #7257. Best score 497 bits

Score difference with first non-orthologous sequence - *A. fumigatus*:497 *A. fischeri*:497



|                 |         |                 |         |
|-----------------|---------|-----------------|---------|
| afum EAL84675.1 | 100.00% | afis EAW20958.1 | 100.00% |
|-----------------|---------|-----------------|---------|

Bootstrap support for afum|EAL84675.1 as seed ortholog is 100%.

Bootstrap support for afis|EAW20958.1 as seed ortholog is 100%.

---

Group of orthologs #7258. Best score 497 bits

Score difference with first non-orthologous sequence - *A. fumigatus*:497 *A. fischeri*:497

|                 |         |                 |         |
|-----------------|---------|-----------------|---------|
| afum EAL87270.1 | 100.00% | afis EAW23839.1 | 100.00% |
|-----------------|---------|-----------------|---------|

Bootstrap support for afum|EAL87270.1 as seed ortholog is 100%.

Bootstrap support for afis|EAW23839.1 as seed ortholog is 100%.

---

Group of orthologs #7259. Best score 497 bits

Score difference with first non-orthologous sequence - *A. fumigatus*:497 *A. fischeri*:497

|                 |         |                 |         |
|-----------------|---------|-----------------|---------|
| afum EAL90407.2 | 100.00% | afis EAW22792.1 | 100.00% |
|-----------------|---------|-----------------|---------|

Bootstrap support for afum|EAL90407.2 as seed ortholog is 100%.

Bootstrap support for afis|EAW22792.1 as seed ortholog is 100%.

---

Group of orthologs #7260. Best score 497 bits

Score difference with first non-orthologous sequence - *A. fumigatus*:497 *A. fischeri*:497

|                 |         |                 |         |
|-----------------|---------|-----------------|---------|
| afum EAL89887.1 | 100.00% | afis EAW25226.1 | 100.00% |
|-----------------|---------|-----------------|---------|

Bootstrap support for afum|EAL89887.1 as seed ortholog is 100%.

Bootstrap support for afis|EAW25226.1 as seed ortholog is 100%.

---

Group of orthologs #7261. Best score 496 bits

Score difference with first non-orthologous sequence - *A. fumigatus*:496 *A. fischeri*:158

|                 |         |                 |         |
|-----------------|---------|-----------------|---------|
| afum EAL85707.1 | 100.00% | afis EAW15627.1 | 100.00% |
|-----------------|---------|-----------------|---------|

Bootstrap support for afum|EAL85707.1 as seed ortholog is 100%.

Bootstrap support for afis|EAW15627.1 as seed ortholog is 100%.

---

Group of orthologs #7262. Best score 496 bits

Score difference with first non-orthologous sequence - *A. fumigatus*:496 *A. fischeri*:496

|                 |         |                 |         |
|-----------------|---------|-----------------|---------|
| afum EAL87471.1 | 100.00% | afis EAW18114.1 | 100.00% |
|-----------------|---------|-----------------|---------|

Bootstrap support for afum|EAL87471.1 as seed ortholog is 100%.

Bootstrap support for afis|EAW18114.1 as seed ortholog is 100%.

---

Group of orthologs #7263. Best score 496 bits

Score difference with first non-orthologous sequence - *A. fumigatus*:496 *A. fischeri*:496

|                 |         |                 |         |
|-----------------|---------|-----------------|---------|
| afum EAL89273.1 | 100.00% | afis EAW16669.1 | 100.00% |
|-----------------|---------|-----------------|---------|

Bootstrap support for afum|EAL89273.1 as seed ortholog is 100%.

Bootstrap support for afis|EAW16669.1 as seed ortholog is 100%.

---

Group of orthologs #7264. Best score 496 bits

Score difference with first non-orthologous sequence - *A. fumigatus*:496 *A. fischeri*:496

|                 |         |                 |         |
|-----------------|---------|-----------------|---------|
| afum EAL86878.1 | 100.00% | afis EAW19644.1 | 100.00% |
|-----------------|---------|-----------------|---------|

Bootstrap support for afum|EAL86878.1 as seed ortholog is 100%.

Bootstrap support for afis|EAW19644.1 as seed ortholog is 100%.

---

Group of orthologs #7265. Best score 496 bits

Score difference with first non-orthologous sequence - *A. fumigatus*:445 *A. fischeri*:279

|                 |         |                 |         |
|-----------------|---------|-----------------|---------|
| afum EAL84327.2 | 100.00% | afis EAW25640.1 | 100.00% |
|-----------------|---------|-----------------|---------|

Bootstrap support for afum|EAL84327.2 as seed ortholog is 100%.

Bootstrap support for afis|EAW25640.1 as seed ortholog is 100%.

---

Group of orthologs #7266. Best score 496 bits

Score difference with first non-orthologous sequence - *A. fumigatus*:496 *A. fischeri*:496

|                 |         |                 |         |
|-----------------|---------|-----------------|---------|
| afum EAL93235.1 | 100.00% | afis EAW18537.1 | 100.00% |
|-----------------|---------|-----------------|---------|

Bootstrap support for afum|EAL93235.1 as seed ortholog is 100%.

Bootstrap support for afis|EAW18537.1 as seed ortholog is 100%.

---

Group of orthologs #7267. Best score 496 bits

Score difference with first non-orthologous sequence - *A. fumigatus*:496 *A. fischeri*:360

|                 |         |                 |         |
|-----------------|---------|-----------------|---------|
| afum EAL93941.1 | 100.00% | afis EAW19211.1 | 100.00% |
|-----------------|---------|-----------------|---------|

Bootstrap support for afum|EAL93941.1 as seed ortholog is 100%.

Bootstrap support for afis|EAW19211.1 as seed ortholog is 100%.

---

Group of orthologs #7268. Best score 496 bits

Score difference with first non-orthologous sequence - *A. fumigatus*:496 *A. fischeri*:496

|                 |         |                 |         |
|-----------------|---------|-----------------|---------|
| afum EAL92101.1 | 100.00% | afis EAW21079.1 | 100.00% |
|-----------------|---------|-----------------|---------|

Bootstrap support for afum|EAL92101.1 as seed ortholog is 100%.

Bootstrap support for afis|EAW21079.1 as seed ortholog is 100%.

---

Group of orthologs #7269. Best score 496 bits

Score difference with first non-orthologous sequence - *A. fumigatus*:496 *A. fischeri*:400

|                 |         |                 |         |
|-----------------|---------|-----------------|---------|
| afum EAL91042.1 | 100.00% | afis EAW22148.1 | 100.00% |
|-----------------|---------|-----------------|---------|

Bootstrap support for afum|EAL91042.1 as seed ortholog is 100%.

Bootstrap support for afis|EAW22148.1 as seed ortholog is 100%.

---

Group of orthologs #7270. Best score 496 bits

Score difference with first non-orthologous sequence - *A. fumigatus*:496 *A. fischeri*:496

|                 |         |                 |         |
|-----------------|---------|-----------------|---------|
| afum EAL92279.1 | 100.00% | afis EAW21264.1 | 100.00% |
|-----------------|---------|-----------------|---------|

Bootstrap support for afum|EAL92279.1 as seed ortholog is 100%.

Bootstrap support for afis|EAW21264.1 as seed ortholog is 100%.

---

Group of orthologs #7271. Best score 496 bits

Score difference with first non-orthologous sequence - *A. fumigatus*:496 *A. fischeri*:496

|                 |         |                 |         |
|-----------------|---------|-----------------|---------|
| afum EAL92483.1 | 100.00% | afis EAW21463.1 | 100.00% |
|-----------------|---------|-----------------|---------|

Bootstrap support for afum|EAL92483.1 as seed ortholog is 100%.

Bootstrap support for afis|EAW21463.1 as seed ortholog is 100%.

---

Group of orthologs #7272. Best score 496 bits

Score difference with first non-orthologous sequence - *A. fumigatus*:496 *A. fischeri*:496

|                 |         |                 |         |
|-----------------|---------|-----------------|---------|
| afum EAL92587.1 | 100.00% | afis EAW21568.1 | 100.00% |
|-----------------|---------|-----------------|---------|

Bootstrap support for afum|EAL92587.1 as seed ortholog is 100%.

Bootstrap support for afis|EAW21568.1 as seed ortholog is 100%.

---

Group of orthologs #7273. Best score 495 bits

Score difference with first non-orthologous sequence - *A. fumigatus*:495 *A. fischeri*:495

|                 |         |                 |         |
|-----------------|---------|-----------------|---------|
| afum EAL88177.1 | 100.00% | afis EAW23302.1 | 100.00% |
|-----------------|---------|-----------------|---------|

Bootstrap support for afum|EAL88177.1 as seed ortholog is 100%.

Bootstrap support for afis|EAW23302.1 as seed ortholog is 100%.

---

Group of orthologs #7274. Best score 495 bits

Score difference with first non-orthologous sequence - *A. fumigatus*:495 *A. fischeri*:495

|                 |         |                 |         |
|-----------------|---------|-----------------|---------|
| afum EAL90809.1 | 100.00% | afis EAW22382.1 | 100.00% |
|-----------------|---------|-----------------|---------|

Bootstrap support for afum|EAL90809.1 as seed ortholog is 100%.

Bootstrap support for afis|EAW22382.1 as seed ortholog is 100%.

---

Group of orthologs #7275. Best score 494 bits

Score difference with first non-orthologous sequence - *A. fumigatus*:494 *A. fischeri*:494

|                 |         |                 |         |
|-----------------|---------|-----------------|---------|
| afum EAL91120.1 | 100.00% | afis EAW15511.1 | 100.00% |
|-----------------|---------|-----------------|---------|

|                 |        |
|-----------------|--------|
| afum EAL90936.1 | 20.13% |
|-----------------|--------|

Bootstrap support for afum|EAL91120.1 as seed ortholog is 100%.

Bootstrap support for afis|EAW15511.1 as seed ortholog is 100%.

---

Group of orthologs #7276. Best score 494 bits

Score difference with first non-orthologous sequence - *A. fumigatus*:494 *A. fischeri*:494

afum|EAL85657.1 100.00% afis|EAW15691.1 100.00%

Bootstrap support for afum|EAL85657.1 as seed ortholog is 100%.

Bootstrap support for afis|EAW15691.1 as seed ortholog is 100%.

---

Group of orthologs #7277. Best score 494 bits

Score difference with first non-orthologous sequence - *A. fumigatus*:402 *A. fischeri*:400

afum|EAL92762.1 100.00% afis|EAW21729.1 100.00%

Bootstrap support for afum|EAL92762.1 as seed ortholog is 100%.

Bootstrap support for afis|EAW21729.1 as seed ortholog is 100%.

---

Group of orthologs #7278. Best score 494 bits

Score difference with first non-orthologous sequence - *A. fumigatus*:494 *A. fischeri*:494

afum|EAL89822.1 100.00% afis|EAW25147.1 100.00%

Bootstrap support for afum|EAL89822.1 as seed ortholog is 100%.

Bootstrap support for afis|EAW25147.1 as seed ortholog is 100%.

---

Group of orthologs #7279. Best score 493 bits

Score difference with first non-orthologous sequence - *A. fumigatus*:493 *A. fischeri*:493

afum|EAL86162.1 100.00% afis|EAW24493.1 100.00%

Bootstrap support for afum|EAL86162.1 as seed ortholog is 100%.

Bootstrap support for afis|EAW24493.1 as seed ortholog is 100%.

---

Group of orthologs #7280. Best score 492 bits

Score difference with first non-orthologous sequence - *A. fumigatus*:492 *A. fischeri*:492

afum|EAL89102.1 100.00% afis|EAW16507.1 100.00%

Bootstrap support for afum|EAL89102.1 as seed ortholog is 100%.

Bootstrap support for afis|EAW16507.1 as seed ortholog is 100%.

---

Group of orthologs #7281. Best score 492 bits

Score difference with first non-orthologous sequence - *A. fumigatus*:492 *A. fischeri*:492

afum|EBA27269.1 100.00% afis|EAW16790.1 100.00%

Bootstrap support for afum|EBA27269.1 as seed ortholog is 100%.

Bootstrap support for afis|EAW16790.1 as seed ortholog is 100%.

---

Group of orthologs #7282. Best score 492 bits

Score difference with first non-orthologous sequence - *A. fumigatus*:492 *A. fischeri*:492

afum|EAL89889.1 100.00% afis|EAW25228.1 100.00%

Bootstrap support for afum|EAL89889.1 as seed ortholog is 100%.

Bootstrap support for afis|EAW25228.1 as seed ortholog is 100%.

---

Group of orthologs #7283. Best score 491 bits

Score difference with first non-orthologous sequence - *A. fumigatus*:491 *A. fischeri*:491

afum|EAL91774.1 100.00% afis|EAW17964.1 100.00%

Bootstrap support for afum|EAL91774.1 as seed ortholog is 100%.

Bootstrap support for afis|EAW17964.1 as seed ortholog is 100%.

---

Group of orthologs #7284. Best score 491 bits

Score difference with first non-orthologous sequence - *A. fumigatus*:491 *A. fischeri*:491

afum|EBA27435.1 100.00% afis|EAW17661.1 100.00%

Bootstrap support for afum|EBA27435.1 as seed ortholog is 100%.

Bootstrap support for afis|EAW17661.1 as seed ortholog is 100%.

---

Group of orthologs #7285. Best score 491 bits

Score difference with first non-orthologous sequence - *A. fumigatus*:491 *A. fischeri*:491  
afum|EAL93545.1 100.00% afis|EAW18809.1 100.00%  
Bootstrap support for afum|EAL93545.1 as seed ortholog is 100%.  
Bootstrap support for afis|EAW18809.1 as seed ortholog is 100%.

---

Group of orthologs #7286. Best score 491 bits

Score difference with first non-orthologous sequence - *A. fumigatus*:491 *A. fischeri*:491  
afum|EAL93630.1 100.00% afis|EAW18898.1 100.00%  
Bootstrap support for afum|EAL93630.1 as seed ortholog is 100%.  
Bootstrap support for afis|EAW18898.1 as seed ortholog is 100%.

---

Group of orthologs #7287. Best score 491 bits

Score difference with first non-orthologous sequence - *A. fumigatus*:491 *A. fischeri*:491  
afum|EAL92397.1 100.00% afis|EAW21382.1 100.00%  
Bootstrap support for afum|EAL92397.1 as seed ortholog is 100%.  
Bootstrap support for afis|EAW21382.1 as seed ortholog is 100%.

---

Group of orthologs #7288. Best score 491 bits

Score difference with first non-orthologous sequence - *A. fumigatus*:491 *A. fischeri*:341  
afum|EAL92938.1 100.00% afis|EAW21925.1 100.00%  
Bootstrap support for afum|EAL92938.1 as seed ortholog is 100%.  
Bootstrap support for afis|EAW21925.1 as seed ortholog is 100%.

---

Group of orthologs #7289. Best score 491 bits

Score difference with first non-orthologous sequence - *A. fumigatus*:491 *A. fischeri*:491  
afum|EAL93017.1 100.00% afis|EAW22002.1 100.00%  
Bootstrap support for afum|EAL93017.1 as seed ortholog is 100%.  
Bootstrap support for afis|EAW22002.1 as seed ortholog is 100%.

---

Group of orthologs #7290. Best score 490 bits

Score difference with first non-orthologous sequence - *A. fumigatus*:394 *A. fischeri*:368  
afum|EAL91685.1 100.00% afis|EAW17877.1 100.00%  
Bootstrap support for afum|EAL91685.1 as seed ortholog is 100%.  
Bootstrap support for afis|EAW17877.1 as seed ortholog is 100%.

---

Group of orthologs #7291. Best score 490 bits

Score difference with first non-orthologous sequence - *A. fumigatus*:490 *A. fischeri*:490  
afum|EAL91758.1 100.00% afis|EAW17948.1 100.00%  
Bootstrap support for afum|EAL91758.1 as seed ortholog is 100%.  
Bootstrap support for afis|EAW17948.1 as seed ortholog is 100%.

---

Group of orthologs #7292. Best score 490 bits

Score difference with first non-orthologous sequence - *A. fumigatus*:490 *A. fischeri*:490  
afum|EAL88679.1 100.00% afis|EAW21810.1 100.00%  
Bootstrap support for afum|EAL88679.1 as seed ortholog is 100%.  
Bootstrap support for afis|EAW21810.1 as seed ortholog is 100%.

---

Group of orthologs #7293. Best score 490 bits

Score difference with first non-orthologous sequence - *A. fumigatus*:490 *A. fischeri*:418  
afum|EAL87161.1 100.00% afis|EAW23721.1 100.00%  
Bootstrap support for afum|EAL87161.1 as seed ortholog is 100%.  
Bootstrap support for afis|EAW23721.1 as seed ortholog is 100%.

---

Group of orthologs #7294. Best score 489 bits

Score difference with first non-orthologous sequence - *A. fumigatus*:489 *A. fischeri*:489  
afum|EAL88834.1 100.00% afis|EAW16206.1 100.00%

Bootstrap support for afum|EAL88834.1 as seed ortholog is 100%.  
Bootstrap support for afis|EAW16206.1 as seed ortholog is 100%.

---

Group of orthologs #7295. Best score 489 bits

Score difference with first non-orthologous sequence - *A. fumigatus*:489 *A. fischeri*:489

afum|EAL85233.1 100.00% afis|EAW20116.1 100.00%

Bootstrap support for afum|EAL85233.1 as seed ortholog is 100%.

Bootstrap support for afis|EAW20116.1 as seed ortholog is 100%.

---

Group of orthologs #7296. Best score 489 bits

Score difference with first non-orthologous sequence - *A. fumigatus*:489 *A. fischeri*:489

afum|EAL92320.1 100.00% afis|EAW21303.1 100.00%

Bootstrap support for afum|EAL92320.1 as seed ortholog is 100%.

Bootstrap support for afis|EAW21303.1 as seed ortholog is 100%.

---

Group of orthologs #7297. Best score 489 bits

Score difference with first non-orthologous sequence - *A. fumigatus*:489 *A. fischeri*:489

afum|EAL90145.1 100.00% afis|EAW25480.1 100.00%

Bootstrap support for afum|EAL90145.1 as seed ortholog is 100%.

Bootstrap support for afis|EAW25480.1 as seed ortholog is 100%.

---

Group of orthologs #7298. Best score 488 bits

Score difference with first non-orthologous sequence - *A. fumigatus*:488 *A. fischeri*:488

afum|EAL85624.1 100.00% afis|EAW15723.1 100.00%

Bootstrap support for afum|EAL85624.1 as seed ortholog is 100%.

Bootstrap support for afis|EAW15723.1 as seed ortholog is 100%.

---

Group of orthologs #7299. Best score 488 bits

Score difference with first non-orthologous sequence - *A. fumigatus*:488 *A. fischeri*:488

afum|EAL89136.1 100.00% afis|EAW16539.1 100.00%

Bootstrap support for afum|EAL89136.1 as seed ortholog is 100%.

Bootstrap support for afis|EAW16539.1 as seed ortholog is 100%.

---

Group of orthologs #7300. Best score 488 bits

Score difference with first non-orthologous sequence - *A. fumigatus*:488 *A. fischeri*:488

afum|EAL85495.1 100.00% afis|EAW20382.1 100.00%

Bootstrap support for afum|EAL85495.1 as seed ortholog is 100%.

Bootstrap support for afis|EAW20382.1 as seed ortholog is 100%.

---

Group of orthologs #7301. Best score 488 bits

Score difference with first non-orthologous sequence - *A. fumigatus*:488 *A. fischeri*:488

afum|EAL91681.1 100.00% afis|EAW17873.1 100.00%

Bootstrap support for afum|EAL91681.1 as seed ortholog is 100%.

Bootstrap support for afis|EAW17873.1 as seed ortholog is 100%.

---

Group of orthologs #7302. Best score 488 bits

Score difference with first non-orthologous sequence - *A. fumigatus*:488 *A. fischeri*:488

afum|EAL87305.1 100.00% afis|EAW23877.1 100.00%

Bootstrap support for afum|EAL87305.1 as seed ortholog is 100%.

Bootstrap support for afis|EAW23877.1 as seed ortholog is 100%.

---

Group of orthologs #7303. Best score 488 bits

Score difference with first non-orthologous sequence - *A. fumigatus*:488 *A. fischeri*:488

afum|EAL90224.1 100.00% afis|EAW22973.1 100.00%

Bootstrap support for afum|EAL90224.1 as seed ortholog is 100%.

Bootstrap support for afis|EAW22973.1 as seed ortholog is 100%.

---

Group of orthologs #7304. Best score 488 bits

Score difference with first non-orthologous sequence - *A. fumigatus*:488 *A. fischeri*:488

afum|EAL92174.1 100.00% afis|EAW21156.1 100.00%

Bootstrap support for afum|EAL92174.1 as seed ortholog is 100%.

Bootstrap support for afis|EAW21156.1 as seed ortholog is 100%.

---

Group of orthologs #7305. Best score 487 bits

Score difference with first non-orthologous sequence - *A. fumigatus*:487 *A. fischeri*:487

afum|EAL91756.1 100.00% afis|EAW17945.1 100.00%

Bootstrap support for afum|EAL91756.1 as seed ortholog is 100%.

Bootstrap support for afis|EAW17945.1 as seed ortholog is 100%.

---

Group of orthologs #7306. Best score 487 bits

Score difference with first non-orthologous sequence - *A. fumigatus*:487 *A. fischeri*:487

afum|EAL87413.1 100.00% afis|EAW23984.1 100.00%

Bootstrap support for afum|EAL87413.1 as seed ortholog is 100%.

Bootstrap support for afis|EAW23984.1 as seed ortholog is 100%.

---

Group of orthologs #7307. Best score 487 bits

Score difference with first non-orthologous sequence - *A. fumigatus*:487 *A. fischeri*:487

afum|EAL87994.1 100.00% afis|EAW23472.1 100.00%

Bootstrap support for afum|EAL87994.1 as seed ortholog is 100%.

Bootstrap support for afis|EAW23472.1 as seed ortholog is 100%.

---

Group of orthologs #7308. Best score 487 bits

Score difference with first non-orthologous sequence - *A. fumigatus*:421 *A. fischeri*:345

afum|EBA27320.1 100.00% afis|EAW18238.1 100.00%

Bootstrap support for afum|EBA27320.1 as seed ortholog is 100%.

Bootstrap support for afis|EAW18238.1 as seed ortholog is 100%.

---

Group of orthologs #7309. Best score 486 bits

Score difference with first non-orthologous sequence - *A. fumigatus*:486 *A. fischeri*:486

afum|EAL85359.1 100.00% afis|EAW20242.1 100.00%

Bootstrap support for afum|EAL85359.1 as seed ortholog is 100%.

Bootstrap support for afis|EAW20242.1 as seed ortholog is 100%.

---

Group of orthologs #7310. Best score 486 bits

Score difference with first non-orthologous sequence - *A. fumigatus*:486 *A. fischeri*:486

afum|EAL86895.1 100.00% afis|EAW19626.1 100.00%

Bootstrap support for afum|EAL86895.1 as seed ortholog is 100%.

Bootstrap support for afis|EAW19626.1 as seed ortholog is 100%.

---

Group of orthologs #7311. Best score 486 bits

Score difference with first non-orthologous sequence - *A. fumigatus*:486 *A. fischeri*:486

afum|EAL91178.1 100.00% afis|EAW17335.1 100.00%

Bootstrap support for afum|EAL91178.1 as seed ortholog is 100%.

Bootstrap support for afis|EAW17335.1 as seed ortholog is 100%.

---

Group of orthologs #7312. Best score 486 bits

Score difference with first non-orthologous sequence - *A. fumigatus*:486 *A. fischeri*:486

afum|EAL91832.1 100.00% afis|EAW18020.1 100.00%

Bootstrap support for afum|EAL91832.1 as seed ortholog is 100%.

Bootstrap support for afis|EAW18020.1 as seed ortholog is 100%.

---

Group of orthologs #7313. Best score 486 bits

Score difference with first non-orthologous sequence - *A. fumigatus*:486 *A. fischeri*:486  
afum|EAL88311.2 100.00% afis|EAW23172.1 100.00%  
Bootstrap support for afum|EAL88311.2 as seed ortholog is 100%.  
Bootstrap support for afis|EAW23172.1 as seed ortholog is 100%.

---

Group of orthologs #7314. Best score 486 bits

Score difference with first non-orthologous sequence - *A. fumigatus*:486 *A. fischeri*:486  
afum|EAL91006.2 100.00% afis|EAW22183.1 100.00%  
Bootstrap support for afum|EAL91006.2 as seed ortholog is 100%.  
Bootstrap support for afis|EAW22183.1 as seed ortholog is 100%.

---

Group of orthologs #7315. Best score 486 bits

Score difference with first non-orthologous sequence - *A. fumigatus*:486 *A. fischeri*:486  
afum|EAL90736.1 100.00% afis|EAW22455.1 100.00%  
Bootstrap support for afum|EAL90736.1 as seed ortholog is 100%.  
Bootstrap support for afis|EAW22455.1 as seed ortholog is 100%.

---

Group of orthologs #7316. Best score 486 bits

Score difference with first non-orthologous sequence - *A. fumigatus*:486 *A. fischeri*:486  
afum|EAL90267.1 100.00% afis|EAW22930.1 100.00%  
Bootstrap support for afum|EAL90267.1 as seed ortholog is 100%.  
Bootstrap support for afis|EAW22930.1 as seed ortholog is 100%.

---

Group of orthologs #7317. Best score 486 bits

Score difference with first non-orthologous sequence - *A. fumigatus*:486 *A. fischeri*:486  
afum|EAL90294.1 100.00% afis|EAW22903.1 100.00%  
Bootstrap support for afum|EAL90294.1 as seed ortholog is 100%.  
Bootstrap support for afis|EAW22903.1 as seed ortholog is 100%.

---

Group of orthologs #7318. Best score 486 bits

Score difference with first non-orthologous sequence - *A. fumigatus*:486 *A. fischeri*:486  
afum|EAL89382.1 100.00% afis|EAW24735.1 100.00%  
Bootstrap support for afum|EAL89382.1 as seed ortholog is 100%.  
Bootstrap support for afis|EAW24735.1 as seed ortholog is 100%.

---

Group of orthologs #7319. Best score 486 bits

Score difference with first non-orthologous sequence - *A. fumigatus*:486 *A. fischeri*:486  
afum|EAL89815.2 100.00% afis|EAW25143.1 100.00%  
Bootstrap support for afum|EAL89815.2 as seed ortholog is 100%.  
Bootstrap support for afis|EAW25143.1 as seed ortholog is 100%.

---

Group of orthologs #7320. Best score 485 bits

Score difference with first non-orthologous sequence - *A. fumigatus*:485 *A. fischeri*:485  
afum|EAL86688.1 100.00% afis|EAW17271.1 100.00%  
Bootstrap support for afum|EAL86688.1 as seed ortholog is 100%.  
Bootstrap support for afis|EAW17271.1 as seed ortholog is 100%.

---

Group of orthologs #7321. Best score 485 bits

Score difference with first non-orthologous sequence - *A. fumigatus*:485 *A. fischeri*:485  
afum|EAL85246.1 100.00% afis|EAW20130.1 100.00%  
Bootstrap support for afum|EAL85246.1 as seed ortholog is 100%.  
Bootstrap support for afis|EAW20130.1 as seed ortholog is 100%.

---

Group of orthologs #7322. Best score 485 bits

Score difference with first non-orthologous sequence - *A. fumigatus*:485 *A. fischeri*:485  
afum|EAL85916.1 100.00% afis|EAW24248.1 100.00%

Bootstrap support for afum|EAL85916.1 as seed ortholog is 100%.  
Bootstrap support for afis|EAW24248.1 as seed ortholog is 100%.

---

Group of orthologs #7323. Best score 485 bits

Score difference with first non-orthologous sequence - *A. fumigatus*:485 *A. fischeri*:485

|                 |         |                 |         |
|-----------------|---------|-----------------|---------|
| afum EAL88142.1 | 100.00% | afis EAW23336.1 | 100.00% |
|-----------------|---------|-----------------|---------|

Bootstrap support for afum|EAL88142.1 as seed ortholog is 100%.

Bootstrap support for afis|EAW23336.1 as seed ortholog is 100%.

---

Group of orthologs #7324. Best score 485 bits

Score difference with first non-orthologous sequence - *A. fumigatus*:485 *A. fischeri*:485

|                 |         |                 |         |
|-----------------|---------|-----------------|---------|
| afum EAL89539.2 | 100.00% | afis EAW24888.1 | 100.00% |
|-----------------|---------|-----------------|---------|

Bootstrap support for afum|EAL89539.2 as seed ortholog is 100%.

Bootstrap support for afis|EAW24888.1 as seed ortholog is 100%.

---

Group of orthologs #7325. Best score 484 bits

Score difference with first non-orthologous sequence - *A. fumigatus*:484 *A. fischeri*:484

|                 |         |                 |         |
|-----------------|---------|-----------------|---------|
| afum EAL84469.1 | 100.00% | afis EAW20592.1 | 100.00% |
|-----------------|---------|-----------------|---------|

Bootstrap support for afum|EAL84469.1 as seed ortholog is 100%.

Bootstrap support for afis|EAW20592.1 as seed ortholog is 100%.

---

Group of orthologs #7326. Best score 484 bits

Score difference with first non-orthologous sequence - *A. fumigatus*:484 *A. fischeri*:484

|                 |         |                 |         |
|-----------------|---------|-----------------|---------|
| afum EAL85298.1 | 100.00% | afis EAW20180.1 | 100.00% |
|-----------------|---------|-----------------|---------|

Bootstrap support for afum|EAL85298.1 as seed ortholog is 100%.

Bootstrap support for afis|EAW20180.1 as seed ortholog is 100%.

---

Group of orthologs #7327. Best score 484 bits

Score difference with first non-orthologous sequence - *A. fumigatus*:484 *A. fischeri*:484

|                 |         |                 |         |
|-----------------|---------|-----------------|---------|
| afum EAL84373.1 | 100.00% | afis EAW25698.1 | 100.00% |
|-----------------|---------|-----------------|---------|

Bootstrap support for afum|EAL84373.1 as seed ortholog is 100%.

Bootstrap support for afis|EAW25698.1 as seed ortholog is 100%.

---

Group of orthologs #7328. Best score 484 bits

Score difference with first non-orthologous sequence - *A. fumigatus*:484 *A. fischeri*:484

|                 |         |                 |         |
|-----------------|---------|-----------------|---------|
| afum EAL93271.1 | 100.00% | afis EAW18569.1 | 100.00% |
|-----------------|---------|-----------------|---------|

Bootstrap support for afum|EAL93271.1 as seed ortholog is 100%.

Bootstrap support for afis|EAW18569.1 as seed ortholog is 100%.

---

Group of orthologs #7329. Best score 484 bits

Score difference with first non-orthologous sequence - *A. fumigatus*:484 *A. fischeri*:484

|                 |         |                 |         |
|-----------------|---------|-----------------|---------|
| afum EAL89378.1 | 100.00% | afis EAW24731.1 | 100.00% |
|-----------------|---------|-----------------|---------|

Bootstrap support for afum|EAL89378.1 as seed ortholog is 100%.

Bootstrap support for afis|EAW24731.1 as seed ortholog is 100%.

---

Group of orthologs #7330. Best score 483 bits

Score difference with first non-orthologous sequence - *A. fumigatus*:483 *A. fischeri*:483

|                 |         |                 |         |
|-----------------|---------|-----------------|---------|
| afum EAL88567.1 | 100.00% | afis EAW15931.1 | 100.00% |
|-----------------|---------|-----------------|---------|

Bootstrap support for afum|EAL88567.1 as seed ortholog is 100%.

Bootstrap support for afis|EAW15931.1 as seed ortholog is 100%.

---

Group of orthologs #7331. Best score 483 bits

Score difference with first non-orthologous sequence - *A. fumigatus*:483 *A. fischeri*:483

|                 |         |                 |         |
|-----------------|---------|-----------------|---------|
| afum EAL91394.1 | 100.00% | afis EAW17581.1 | 100.00% |
|-----------------|---------|-----------------|---------|

Bootstrap support for afum|EAL91394.1 as seed ortholog is 100%.

Bootstrap support for afis|EAW17581.1 as seed ortholog is 100%.



---

Group of orthologs #7332. Best score 482 bits

Score difference with first non-orthologous sequence - *A. fumigatus*:482 *A. fischeri*:482

afum|EAL88894.1 100.00% afis|EAW16273.1 100.00%

Bootstrap support for afum|EAL88894.1 as seed ortholog is 100%.

Bootstrap support for afis|EAW16273.1 as seed ortholog is 100%.

---

Group of orthologs #7333. Best score 482 bits

Score difference with first non-orthologous sequence - *A. fumigatus*:482 *A. fischeri*:376

afum|EAL89392.1 100.00% afis|EAW18104.1 100.00%

Bootstrap support for afum|EAL89392.1 as seed ortholog is 100%.

Bootstrap support for afis|EAW18104.1 as seed ortholog is 100%.

---

Group of orthologs #7334. Best score 482 bits

Score difference with first non-orthologous sequence - *A. fumigatus*:482 *A. fischeri*:482

afum|EAL88446.1 100.00% afis|EAW23035.1 100.00%

Bootstrap support for afum|EAL88446.1 as seed ortholog is 100%.

Bootstrap support for afis|EAW23035.1 as seed ortholog is 100%.

---

Group of orthologs #7335. Best score 482 bits

Score difference with first non-orthologous sequence - *A. fumigatus*:482 *A. fischeri*:482

afum|EAL93714.1 100.00% afis|EAW18978.1 100.00%

Bootstrap support for afum|EAL93714.1 as seed ortholog is 100%.

Bootstrap support for afis|EAW18978.1 as seed ortholog is 100%.

---

Group of orthologs #7336. Best score 482 bits

Score difference with first non-orthologous sequence - *A. fumigatus*:482 *A. fischeri*:482

afum|EAL92560.1 100.00% afis|EAW21540.1 100.00%

Bootstrap support for afum|EAL92560.1 as seed ortholog is 100%.

Bootstrap support for afis|EAW21540.1 as seed ortholog is 100%.

---

Group of orthologs #7337. Best score 482 bits

Score difference with first non-orthologous sequence - *A. fumigatus*:482 *A. fischeri*:482

afum|EAL91999.1 100.00% afis|EAW24144.1 100.00%

Bootstrap support for afum|EAL91999.1 as seed ortholog is 100%.

Bootstrap support for afis|EAW24144.1 as seed ortholog is 100%.

---

Group of orthologs #7338. Best score 482 bits

Score difference with first non-orthologous sequence - *A. fumigatus*:482 *A. fischeri*:482

afum|EBA27255.1 100.00% afis|EAW24367.1 100.00%

Bootstrap support for afum|EBA27255.1 as seed ortholog is 100%.

Bootstrap support for afis|EAW24367.1 as seed ortholog is 100%.

---

Group of orthologs #7339. Best score 481 bits

Score difference with first non-orthologous sequence - *A. fumigatus*:481 *A. fischeri*:481

afum|EAL86591.1 100.00% afis|EAW17131.1 100.00%

Bootstrap support for afum|EAL86591.1 as seed ortholog is 100%.

Bootstrap support for afis|EAW17131.1 as seed ortholog is 100%.

---

Group of orthologs #7340. Best score 481 bits

Score difference with first non-orthologous sequence - *A. fumigatus*:481 *A. fischeri*:481

afum|EAL89110.2 100.00% afis|EAW16515.1 100.00%

Bootstrap support for afum|EAL89110.2 as seed ortholog is 100%.

Bootstrap support for afis|EAW16515.1 as seed ortholog is 100%.

---

Group of orthologs #7341. Best score 481 bits

Score difference with first non-orthologous sequence - *A. fumigatus*:350 *A. fischeri*:481  
afum|EAL93139.1 100.00% afis|EAW18454.1 100.00%  
Bootstrap support for afum|EAL93139.1 as seed ortholog is 100%.  
Bootstrap support for afis|EAW18454.1 as seed ortholog is 100%.

---

Group of orthologs #7342. Best score 481 bits

Score difference with first non-orthologous sequence - *A. fumigatus*:481 *A. fischeri*:481  
afum|EAL92807.1 100.00% afis|EAW21778.1 100.00%  
Bootstrap support for afum|EAL92807.1 as seed ortholog is 100%.  
Bootstrap support for afis|EAW21778.1 as seed ortholog is 100%.

---

Group of orthologs #7343. Best score 481 bits

Score difference with first non-orthologous sequence - *A. fumigatus*:481 *A. fischeri*:421  
afum|EAL89832.2 100.00% afis|EAW25157.1 100.00%  
Bootstrap support for afum|EAL89832.2 as seed ortholog is 100%.  
Bootstrap support for afis|EAW25157.1 as seed ortholog is 100%.

---

Group of orthologs #7344. Best score 481 bits

Score difference with first non-orthologous sequence - *A. fumigatus*:481 *A. fischeri*:481  
afum|EAL90127.1 100.00% afis|EAW25464.1 100.00%  
Bootstrap support for afum|EAL90127.1 as seed ortholog is 100%.  
Bootstrap support for afis|EAW25464.1 as seed ortholog is 100%.

---

Group of orthologs #7345. Best score 480 bits

Score difference with first non-orthologous sequence - *A. fumigatus*:389 *A. fischeri*:380  
afum|EAL91487.1 100.00% afis|EAW17674.1 100.00%  
Bootstrap support for afum|EAL91487.1 as seed ortholog is 100%.  
Bootstrap support for afis|EAW17674.1 as seed ortholog is 100%.

---

Group of orthologs #7346. Best score 480 bits

Score difference with first non-orthologous sequence - *A. fumigatus*:480 *A. fischeri*:480  
afum|EAL90841.1 100.00% afis|EAW22351.1 100.00%  
Bootstrap support for afum|EAL90841.1 as seed ortholog is 100%.  
Bootstrap support for afis|EAW22351.1 as seed ortholog is 100%.

---

Group of orthologs #7347. Best score 480 bits

Score difference with first non-orthologous sequence - *A. fumigatus*:480 *A. fischeri*:480  
afum|EAL92838.1 100.00% afis|EAW21822.1 100.00%  
Bootstrap support for afum|EAL92838.1 as seed ortholog is 100%.  
Bootstrap support for afis|EAW21822.1 as seed ortholog is 100%.

---

Group of orthologs #7348. Best score 479 bits

Score difference with first non-orthologous sequence - *A. fumigatus*:479 *A. fischeri*:479  
afum|EAL85626.1 100.00% afis|EAW15721.1 100.00%  
Bootstrap support for afum|EAL85626.1 as seed ortholog is 100%.  
Bootstrap support for afis|EAW15721.1 as seed ortholog is 100%.

---

Group of orthologs #7349. Best score 479 bits

Score difference with first non-orthologous sequence - *A. fumigatus*:479 *A. fischeri*:479  
afum|EAL89068.1 100.00% afis|EAW16474.1 100.00%  
Bootstrap support for afum|EAL89068.1 as seed ortholog is 100%.  
Bootstrap support for afis|EAW16474.1 as seed ortholog is 100%.

---

Group of orthologs #7350. Best score 479 bits

Score difference with first non-orthologous sequence - *A. fumigatus*:479 *A. fischeri*:479  
afum|EAL91473.1 100.00% afis|EAW17658.1 100.00%

Bootstrap support for afum|EAL91473.1 as seed ortholog is 100%.  
Bootstrap support for afis|EAW17658.1 as seed ortholog is 100%.

---

Group of orthologs #7351. Best score 479 bits

Score difference with first non-orthologous sequence - *A. fumigatus*:479 *A. fischeri*:479

|                 |         |                 |         |
|-----------------|---------|-----------------|---------|
| afum EAL91750.1 | 100.00% | afis EAW17939.1 | 100.00% |
|-----------------|---------|-----------------|---------|

Bootstrap support for afum|EAL91750.1 as seed ortholog is 100%.

Bootstrap support for afis|EAW17939.1 as seed ortholog is 100%.

---

Group of orthologs #7352. Best score 479 bits

Score difference with first non-orthologous sequence - *A. fumigatus*:479 *A. fischeri*:479

|                 |         |                 |         |
|-----------------|---------|-----------------|---------|
| afum EAL92758.1 | 100.00% | afis EAW21725.1 | 100.00% |
|-----------------|---------|-----------------|---------|

Bootstrap support for afum|EAL92758.1 as seed ortholog is 100%.

Bootstrap support for afis|EAW21725.1 as seed ortholog is 100%.

---

Group of orthologs #7353. Best score 479 bits

Score difference with first non-orthologous sequence - *A. fumigatus*:479 *A. fischeri*:479

|                 |         |                 |         |
|-----------------|---------|-----------------|---------|
| afum EAL89745.1 | 100.00% | afis EAW25076.1 | 100.00% |
|-----------------|---------|-----------------|---------|

Bootstrap support for afum|EAL89745.1 as seed ortholog is 100%.

Bootstrap support for afis|EAW25076.1 as seed ortholog is 100%.

---

Group of orthologs #7354. Best score 479 bits

Score difference with first non-orthologous sequence - *A. fumigatus*:479 *A. fischeri*:337

|                 |         |                 |         |
|-----------------|---------|-----------------|---------|
| afum EBA27474.1 | 100.00% | afis EAW21783.1 | 100.00% |
|-----------------|---------|-----------------|---------|

Bootstrap support for afum|EBA27474.1 as seed ortholog is 100%.

Bootstrap support for afis|EAW21783.1 as seed ortholog is 100%.

---

Group of orthologs #7355. Best score 478 bits

Score difference with first non-orthologous sequence - *A. fumigatus*:478 *A. fischeri*:478

|                 |         |                 |         |
|-----------------|---------|-----------------|---------|
| afum EAL88525.2 | 100.00% | afis EAW15890.1 | 100.00% |
|-----------------|---------|-----------------|---------|

Bootstrap support for afum|EAL88525.2 as seed ortholog is 100%.

Bootstrap support for afis|EAW15890.1 as seed ortholog is 100%.

---

Group of orthologs #7356. Best score 478 bits

Score difference with first non-orthologous sequence - *A. fumigatus*:478 *A. fischeri*:478

|                 |         |                 |         |
|-----------------|---------|-----------------|---------|
| afum EAL89060.1 | 100.00% | afis EAW16464.1 | 100.00% |
|-----------------|---------|-----------------|---------|

Bootstrap support for afum|EAL89060.1 as seed ortholog is 100%.

Bootstrap support for afis|EAW16464.1 as seed ortholog is 100%.

---

Group of orthologs #7357. Best score 478 bits

Score difference with first non-orthologous sequence - *A. fumigatus*:478 *A. fischeri*:478

|                 |         |                 |         |
|-----------------|---------|-----------------|---------|
| afum EAL88121.1 | 100.00% | afis EAW23355.1 | 100.00% |
|-----------------|---------|-----------------|---------|

Bootstrap support for afum|EAL88121.1 as seed ortholog is 100%.

Bootstrap support for afis|EAW23355.1 as seed ortholog is 100%.

---

Group of orthologs #7358. Best score 478 bits

Score difference with first non-orthologous sequence - *A. fumigatus*:478 *A. fischeri*:478

|                 |         |                 |         |
|-----------------|---------|-----------------|---------|
| afum EAL93471.1 | 100.00% | afis EAW18745.1 | 100.00% |
|-----------------|---------|-----------------|---------|

Bootstrap support for afum|EAL93471.1 as seed ortholog is 100%.

Bootstrap support for afis|EAW18745.1 as seed ortholog is 100%.

---

Group of orthologs #7359. Best score 478 bits

Score difference with first non-orthologous sequence - *A. fumigatus*:478 *A. fischeri*:478

|                 |         |                 |         |
|-----------------|---------|-----------------|---------|
| afum EAL92508.1 | 100.00% | afis EAW21489.1 | 100.00% |
|-----------------|---------|-----------------|---------|

Bootstrap support for afum|EAL92508.1 as seed ortholog is 100%.

Bootstrap support for afis|EAW21489.1 as seed ortholog is 100%.

---

Group of orthologs #7360. Best score 477 bits

Score difference with first non-orthologous sequence - *A. fumigatus*:477 *A. fischeri*:477

afum|EAL85854.1 100.00% afis|EAW15468.1 100.00%

Bootstrap support for afum|EAL85854.1 as seed ortholog is 100%.

Bootstrap support for afis|EAW15468.1 as seed ortholog is 100%.

---

Group of orthologs #7361. Best score 477 bits

Score difference with first non-orthologous sequence - *A. fumigatus*:477 *A. fischeri*:477

afum|EAL86907.1 100.00% afis|EAW19615.1 100.00%

Bootstrap support for afum|EAL86907.1 as seed ortholog is 100%.

Bootstrap support for afis|EAW19615.1 as seed ortholog is 100%.

---

Group of orthologs #7362. Best score 477 bits

Score difference with first non-orthologous sequence - *A. fumigatus*:477 *A. fischeri*:477

afum|EBA27278.1 100.00% afis|EAW17056.1 100.00%

Bootstrap support for afum|EBA27278.1 as seed ortholog is 100%.

Bootstrap support for afis|EAW17056.1 as seed ortholog is 100%.

---

Group of orthologs #7363. Best score 477 bits

Score difference with first non-orthologous sequence - *A. fumigatus*:477 *A. fischeri*:477

afum|EAL93214.1 100.00% afis|EAW18519.1 100.00%

Bootstrap support for afum|EAL93214.1 as seed ortholog is 100%.

Bootstrap support for afis|EAW18519.1 as seed ortholog is 100%.

---

Group of orthologs #7364. Best score 477 bits

Score difference with first non-orthologous sequence - *A. fumigatus*:477 *A. fischeri*:477

afum|EAL93520.1 100.00% afis|EAW18787.1 100.00%

Bootstrap support for afum|EAL93520.1 as seed ortholog is 100%.

Bootstrap support for afis|EAW18787.1 as seed ortholog is 100%.

---

Group of orthologs #7365. Best score 476 bits

Score difference with first non-orthologous sequence - *A. fumigatus*:476 *A. fischeri*:476

afum|EAL85206.1 100.00% afis|EAW20087.1 100.00%

Bootstrap support for afum|EAL85206.1 as seed ortholog is 100%.

Bootstrap support for afis|EAW20087.1 as seed ortholog is 100%.

---

Group of orthologs #7366. Best score 476 bits

Score difference with first non-orthologous sequence - *A. fumigatus*:476 *A. fischeri*:476

afum|EAL88229.1 100.00% afis|EAW23252.1 100.00%

Bootstrap support for afum|EAL88229.1 as seed ortholog is 100%.

Bootstrap support for afis|EAW23252.1 as seed ortholog is 100%.

---

Group of orthologs #7367. Best score 476 bits

Score difference with first non-orthologous sequence - *A. fumigatus*:476 *A. fischeri*:476

afum|EAL94003.1 100.00% afis|EAW19277.1 100.00%

Bootstrap support for afum|EAL94003.1 as seed ortholog is 100%.

Bootstrap support for afis|EAW19277.1 as seed ortholog is 100%.

---

Group of orthologs #7368. Best score 476 bits

Score difference with first non-orthologous sequence - *A. fumigatus*:476 *A. fischeri*:476

afum|EAL92799.1 100.00% afis|EAW21770.1 100.00%

Bootstrap support for afum|EAL92799.1 as seed ortholog is 100%.

Bootstrap support for afis|EAW21770.1 as seed ortholog is 100%.

---

Group of orthologs #7369. Best score 476 bits

Score difference with first non-orthologous sequence - *A. fumigatus*:476 *A. fischeri*:476  
afum|EAL92961.1 100.00% afis|EAW21947.1 100.00%  
Bootstrap support for afum|EAL92961.1 as seed ortholog is 100%.  
Bootstrap support for afis|EAW21947.1 as seed ortholog is 100%.

---

Group of orthologs #7370. Best score 475 bits

Score difference with first non-orthologous sequence - *A. fumigatus*:475 *A. fischeri*:475  
afum|EAL87663.1 100.00% afis|EAW18297.1 100.00%  
Bootstrap support for afum|EAL87663.1 as seed ortholog is 100%.  
Bootstrap support for afis|EAW18297.1 as seed ortholog is 100%.

---

Group of orthologs #7371. Best score 475 bits

Score difference with first non-orthologous sequence - *A. fumigatus*:475 *A. fischeri*:475  
afum|EAL90963.1 100.00% afis|EAW22230.1 100.00%  
Bootstrap support for afum|EAL90963.1 as seed ortholog is 100%.  
Bootstrap support for afis|EAW22230.1 as seed ortholog is 100%.

---

Group of orthologs #7372. Best score 475 bits

Score difference with first non-orthologous sequence - *A. fumigatus*:475 *A. fischeri*:475  
afum|EAL90983.2 100.00% afis|EAW22211.1 100.00%  
Bootstrap support for afum|EAL90983.2 as seed ortholog is 100%.  
Bootstrap support for afis|EAW22211.1 as seed ortholog is 100%.

---

Group of orthologs #7373. Best score 475 bits

Score difference with first non-orthologous sequence - *A. fumigatus*:475 *A. fischeri*:475  
afum|EAL90152.1 100.00% afis|EAW25487.1 100.00%  
Bootstrap support for afum|EAL90152.1 as seed ortholog is 100%.  
Bootstrap support for afis|EAW25487.1 as seed ortholog is 100%.

---

Group of orthologs #7374. Best score 474 bits

Score difference with first non-orthologous sequence - *A. fumigatus*:474 *A. fischeri*:387  
afum|EAL86506.1 100.00% afis|EAW16979.1 100.00%  
Bootstrap support for afum|EAL86506.1 as seed ortholog is 100%.  
Bootstrap support for afis|EAW16979.1 as seed ortholog is 100%.

---

Group of orthologs #7375. Best score 474 bits

Score difference with first non-orthologous sequence - *A. fumigatus*:474 *A. fischeri*:474  
afum|EAL87398.2 100.00% afis|EAW23968.1 100.00%  
Bootstrap support for afum|EAL87398.2 as seed ortholog is 100%.  
Bootstrap support for afis|EAW23968.1 as seed ortholog is 100%.

---

Group of orthologs #7376. Best score 474 bits

Score difference with first non-orthologous sequence - *A. fumigatus*:474 *A. fischeri*:474  
afum|EAL88060.1 100.00% afis|EAW23410.1 100.00%  
Bootstrap support for afum|EAL88060.1 as seed ortholog is 100%.  
Bootstrap support for afis|EAW23410.1 as seed ortholog is 100%.

---

Group of orthologs #7377. Best score 474 bits

Score difference with first non-orthologous sequence - *A. fumigatus*:474 *A. fischeri*:474  
afum|EAL87931.1 100.00% afis|EAW23535.1 100.00%  
Bootstrap support for afum|EAL87931.1 as seed ortholog is 100%.  
Bootstrap support for afis|EAW23535.1 as seed ortholog is 100%.

---

Group of orthologs #7378. Best score 474 bits

Score difference with first non-orthologous sequence - *A. fumigatus*:474 *A. fischeri*:474  
afum|EAL90699.1 100.00% afis|EAW22494.1 100.00%

Bootstrap support for afum|EAL90699.1 as seed ortholog is 100%.  
Bootstrap support for afis|EAW22494.1 as seed ortholog is 100%.

---

Group of orthologs #7379. Best score 474 bits

Score difference with first non-orthologous sequence - *A. fumigatus*:474 *A. fischeri*:474

afum|EAL92708.1 100.00% afis|EAW21674.1 100.00%

Bootstrap support for afum|EAL92708.1 as seed ortholog is 100%.

Bootstrap support for afis|EAW21674.1 as seed ortholog is 100%.

---

Group of orthologs #7380. Best score 473 bits

Score difference with first non-orthologous sequence - *A. fumigatus*:473 *A. fischeri*:473

afum|EAL89004.1 100.00% afis|EAW16379.1 100.00%

Bootstrap support for afum|EAL89004.1 as seed ortholog is 100%.

Bootstrap support for afis|EAW16379.1 as seed ortholog is 100%.

---

Group of orthologs #7381. Best score 473 bits

Score difference with first non-orthologous sequence - *A. fumigatus*:473 *A. fischeri*:473

afum|EAL90610.1 100.00% afis|EAW22589.1 100.00%

Bootstrap support for afum|EAL90610.1 as seed ortholog is 100%.

Bootstrap support for afis|EAW22589.1 as seed ortholog is 100%.

---

Group of orthologs #7382. Best score 473 bits

Score difference with first non-orthologous sequence - *A. fumigatus*:473 *A. fischeri*:473

afum|EAL90440.1 100.00% afis|EAW22759.1 100.00%

Bootstrap support for afum|EAL90440.1 as seed ortholog is 100%.

Bootstrap support for afis|EAW22759.1 as seed ortholog is 100%.

---

Group of orthologs #7383. Best score 473 bits

Score difference with first non-orthologous sequence - *A. fumigatus*:473 *A. fischeri*:473

afum|EAL90277.1 100.00% afis|EAW22920.1 100.00%

Bootstrap support for afum|EAL90277.1 as seed ortholog is 100%.

Bootstrap support for afis|EAW22920.1 as seed ortholog is 100%.

---

Group of orthologs #7384. Best score 473 bits

Score difference with first non-orthologous sequence - *A. fumigatus*:473 *A. fischeri*:473

afum|EAL89919.1 100.00% afis|EAW25258.1 100.00%

Bootstrap support for afum|EAL89919.1 as seed ortholog is 100%.

Bootstrap support for afis|EAW25258.1 as seed ortholog is 100%.

---

Group of orthologs #7385. Best score 472 bits

Score difference with first non-orthologous sequence - *A. fumigatus*:472 *A. fischeri*:326

afum|EAL87665.1 100.00% afis|EAW18299.1 100.00%

Bootstrap support for afum|EAL87665.1 as seed ortholog is 100%.

Bootstrap support for afis|EAW18299.1 as seed ortholog is 100%.

---

Group of orthologs #7386. Best score 472 bits

Score difference with first non-orthologous sequence - *A. fumigatus*:472 *A. fischeri*:472

afum|EAL89807.2 100.00% afis|EAW25136.1 100.00%

Bootstrap support for afum|EAL89807.2 as seed ortholog is 100%.

Bootstrap support for afis|EAW25136.1 as seed ortholog is 100%.

---

Group of orthologs #7387. Best score 471 bits

Score difference with first non-orthologous sequence - *A. fumigatus*:471 *A. fischeri*:471

afum|EAL86502.1 100.00% afis|EAW17527.1 100.00%

Bootstrap support for afum|EAL86502.1 as seed ortholog is 100%.

Bootstrap support for afis|EAW17527.1 as seed ortholog is 100%.

---

Group of orthologs #7388. Best score 471 bits

Score difference with first non-orthologous sequence - *A. fumigatus*:471 *A. fischeri*:471

afum|EAL85167.1 100.00% afis|EAW20046.1 100.00%

Bootstrap support for afum|EAL85167.1 as seed ortholog is 100%.

Bootstrap support for afis|EAW20046.1 as seed ortholog is 100%.

---

Group of orthologs #7389. Best score 471 bits

Score difference with first non-orthologous sequence - *A. fumigatus*:471 *A. fischeri*:471

afum|EAL91550.1 100.00% afis|EAW17735.1 100.00%

Bootstrap support for afum|EAL91550.1 as seed ortholog is 100%.

Bootstrap support for afis|EAW17735.1 as seed ortholog is 100%.

---

Group of orthologs #7390. Best score 471 bits

Score difference with first non-orthologous sequence - *A. fumigatus*:471 *A. fischeri*:471

afum|EAL91631.1 100.00% afis|EAW17821.1 100.00%

Bootstrap support for afum|EAL91631.1 as seed ortholog is 100%.

Bootstrap support for afis|EAW17821.1 as seed ortholog is 100%.

---

Group of orthologs #7391. Best score 471 bits

Score difference with first non-orthologous sequence - *A. fumigatus*:471 *A. fischeri*:414

afum|EBA27433.1 100.00% afis|EAW17597.1 100.00%

Bootstrap support for afum|EBA27433.1 as seed ortholog is 100%.

Bootstrap support for afis|EAW17597.1 as seed ortholog is 100%.

---

Group of orthologs #7392. Best score 471 bits

Score difference with first non-orthologous sequence - *A. fumigatus*:471 *A. fischeri*:471

afum|EAL93853.1 100.00% afis|EAW19121.1 100.00%

Bootstrap support for afum|EAL93853.1 as seed ortholog is 100%.

Bootstrap support for afis|EAW19121.1 as seed ortholog is 100%.

---

Group of orthologs #7393. Best score 471 bits

Score difference with first non-orthologous sequence - *A. fumigatus*:471 *A. fischeri*:471

afum|EAL90411.1 100.00% afis|EAW22788.1 100.00%

Bootstrap support for afum|EAL90411.1 as seed ortholog is 100%.

Bootstrap support for afis|EAW22788.1 as seed ortholog is 100%.

---

Group of orthologs #7394. Best score 471 bits

Score difference with first non-orthologous sequence - *A. fumigatus*:471 *A. fischeri*:471

afum|EAL92204.1 100.00% afis|EAW21183.1 100.00%

Bootstrap support for afum|EAL92204.1 as seed ortholog is 100%.

Bootstrap support for afis|EAW21183.1 as seed ortholog is 100%.

---

Group of orthologs #7395. Best score 471 bits

Score difference with first non-orthologous sequence - *A. fumigatus*:471 *A. fischeri*:471

afum|EAL89453.2 100.00% afis|EAW24810.1 100.00%

Bootstrap support for afum|EAL89453.2 as seed ortholog is 100%.

Bootstrap support for afis|EAW24810.1 as seed ortholog is 100%.

---

Group of orthologs #7396. Best score 470 bits

Score difference with first non-orthologous sequence - *A. fumigatus*:470 *A. fischeri*:470

afum|EAL87422.1 100.00% afis|EAW23992.1 100.00%

Bootstrap support for afum|EAL87422.1 as seed ortholog is 100%.

Bootstrap support for afis|EAW23992.1 as seed ortholog is 100%.

---

Group of orthologs #7397. Best score 470 bits

Score difference with first non-orthologous sequence - *A. fumigatus*:470 *A. fischeri*:470  
afum|EAL93877.1 100.00% afis|EAW19146.1 100.00%  
Bootstrap support for afum|EAL93877.1 as seed ortholog is 100%.  
Bootstrap support for afis|EAW19146.1 as seed ortholog is 100%.

---

Group of orthologs #7398. Best score 470 bits

Score difference with first non-orthologous sequence - *A. fumigatus*:470 *A. fischeri*:470  
afum|EAL90314.1 100.00% afis|EAW22884.1 100.00%  
Bootstrap support for afum|EAL90314.1 as seed ortholog is 100%.  
Bootstrap support for afis|EAW22884.1 as seed ortholog is 100%.

---

Group of orthologs #7399. Best score 469 bits

Score difference with first non-orthologous sequence - *A. fumigatus*:469 *A. fischeri*:469  
afum|EAL88569.1 100.00% afis|EAW15933.1 100.00%  
Bootstrap support for afum|EAL88569.1 as seed ortholog is 100%.  
Bootstrap support for afis|EAW15933.1 as seed ortholog is 100%.

---

Group of orthologs #7400. Best score 469 bits

Score difference with first non-orthologous sequence - *A. fumigatus*:469 *A. fischeri*:469  
afum|EAL89169.2 100.00% afis|EAW16572.1 100.00%  
Bootstrap support for afum|EAL89169.2 as seed ortholog is 100%.  
Bootstrap support for afis|EAW16572.1 as seed ortholog is 100%.

---

Group of orthologs #7401. Best score 469 bits

Score difference with first non-orthologous sequence - *A. fumigatus*:469 *A. fischeri*:469  
afum|EAL93095.1 100.00% afis|EAW18414.1 100.00%  
Bootstrap support for afum|EAL93095.1 as seed ortholog is 100%.  
Bootstrap support for afis|EAW18414.1 as seed ortholog is 100%.

---

Group of orthologs #7402. Best score 469 bits

Score difference with first non-orthologous sequence - *A. fumigatus*:469 *A. fischeri*:469  
afum|EAL88001.1 100.00% afis|EAW23465.1 100.00%  
Bootstrap support for afum|EAL88001.1 as seed ortholog is 100%.  
Bootstrap support for afis|EAW23465.1 as seed ortholog is 100%.

---

Group of orthologs #7403. Best score 469 bits

Score difference with first non-orthologous sequence - *A. fumigatus*:469 *A. fischeri*:469  
afum|EAL92624.1 100.00% afis|EAW21605.1 100.00%  
Bootstrap support for afum|EAL92624.1 as seed ortholog is 100%.  
Bootstrap support for afis|EAW21605.1 as seed ortholog is 100%.

---

Group of orthologs #7404. Best score 468 bits

Score difference with first non-orthologous sequence - *A. fumigatus*:468 *A. fischeri*:468  
afum|EAL84222.1 100.00% afis|EAW15422.1 100.00%  
Bootstrap support for afum|EAL84222.1 as seed ortholog is 100%.  
Bootstrap support for afis|EAW15422.1 as seed ortholog is 100%.

---

Group of orthologs #7405. Best score 468 bits

Score difference with first non-orthologous sequence - *A. fumigatus*:468 *A. fischeri*:376  
afum|EAL85332.1 100.00% afis|EAW20217.1 100.00%  
Bootstrap support for afum|EAL85332.1 as seed ortholog is 100%.  
Bootstrap support for afis|EAW20217.1 as seed ortholog is 100%.

---

Group of orthologs #7406. Best score 468 bits

Score difference with first non-orthologous sequence - *A. fumigatus*:468 *A. fischeri*:468  
afum|EAL87574.1 100.00% afis|EAW18208.1 100.00%



Bootstrap support for afum|EAL87574.1 as seed ortholog is 100%.  
Bootstrap support for afis|EAW18208.1 as seed ortholog is 100%.

---

Group of orthologs #7407. Best score 468 bits

Score difference with first non-orthologous sequence - *A. fumigatus*:284 *A. fischeri*:256

afum|EAL84697.1 100.00% afis|EAW20937.1 100.00%

Bootstrap support for afum|EAL84697.1 as seed ortholog is 100%.

Bootstrap support for afis|EAW20937.1 as seed ortholog is 100%.

---

Group of orthologs #7408. Best score 468 bits

Score difference with first non-orthologous sequence - *A. fumigatus*:468 *A. fischeri*:468

afum|EAL84302.1 100.00% afis|EAW25596.1 100.00%

Bootstrap support for afum|EAL84302.1 as seed ortholog is 100%.

Bootstrap support for afis|EAW25596.1 as seed ortholog is 100%.

---

Group of orthologs #7409. Best score 468 bits

Score difference with first non-orthologous sequence - *A. fumigatus*:468 *A. fischeri*:468

afum|EAL85955.1 100.00% afis|EAW24286.1 100.00%

Bootstrap support for afum|EAL85955.1 as seed ortholog is 100%.

Bootstrap support for afis|EAW24286.1 as seed ortholog is 100%.

---

Group of orthologs #7410. Best score 468 bits

Score difference with first non-orthologous sequence - *A. fumigatus*:468 *A. fischeri*:468

afum|EAL90984.2 100.00% afis|EAW22210.1 100.00%

Bootstrap support for afum|EAL90984.2 as seed ortholog is 100%.

Bootstrap support for afis|EAW22210.1 as seed ortholog is 100%.

---

Group of orthologs #7411. Best score 468 bits

Score difference with first non-orthologous sequence - *A. fumigatus*:468 *A. fischeri*:468

afum|EAL92372.1 100.00% afis|EAW21357.1 100.00%

Bootstrap support for afum|EAL92372.1 as seed ortholog is 100%.

Bootstrap support for afis|EAW21357.1 as seed ortholog is 100%.

---

Group of orthologs #7412. Best score 468 bits

Score difference with first non-orthologous sequence - *A. fumigatus*:468 *A. fischeri*:468

afum|EAL89564.1 100.00% afis|EAW24910.1 100.00%

Bootstrap support for afum|EAL89564.1 as seed ortholog is 100%.

Bootstrap support for afis|EAW24910.1 as seed ortholog is 100%.

---

Group of orthologs #7413. Best score 468 bits

Score difference with first non-orthologous sequence - *A. fumigatus*:468 *A. fischeri*:468

afum|EAL89835.1 100.00% afis|EAW25160.1 100.00%

Bootstrap support for afum|EAL89835.1 as seed ortholog is 100%.

Bootstrap support for afis|EAW25160.1 as seed ortholog is 100%.

---

Group of orthologs #7414. Best score 467 bits

Score difference with first non-orthologous sequence - *A. fumigatus*:467 *A. fischeri*:467

afum|EAL86409.1 100.00% afis|EAW16871.1 100.00%

Bootstrap support for afum|EAL86409.1 as seed ortholog is 100%.

Bootstrap support for afis|EAW16871.1 as seed ortholog is 100%.

---

Group of orthologs #7415. Best score 467 bits

Score difference with first non-orthologous sequence - *A. fumigatus*:467 *A. fischeri*:241

afum|EAL88545.1 100.00% afis|EAW15910.1 100.00%

Bootstrap support for afum|EAL88545.1 as seed ortholog is 100%.

Bootstrap support for afis|EAW15910.1 as seed ortholog is 100%.

---

Group of orthologs #7416. Best score 467 bits

Score difference with first non-orthologous sequence - *A. fumigatus*:467 *A. fischeri*:467

afum|EAL88759.1 100.00% afis|EAW16129.1 100.00%

Bootstrap support for afum|EAL88759.1 as seed ortholog is 100%.

Bootstrap support for afis|EAW16129.1 as seed ortholog is 100%.

---

Group of orthologs #7417. Best score 467 bits

Score difference with first non-orthologous sequence - *A. fumigatus*:467 *A. fischeri*:467

afum|EAL89718.1 100.00% afis|EAW25050.1 100.00%

Bootstrap support for afum|EAL89718.1 as seed ortholog is 100%.

Bootstrap support for afis|EAW25050.1 as seed ortholog is 100%.

---

Group of orthologs #7418. Best score 467 bits

Score difference with first non-orthologous sequence - *A. fumigatus*:467 *A. fischeri*:467

afum|EAL90194.1 100.00% afis|EAW25529.1 100.00%

Bootstrap support for afum|EAL90194.1 as seed ortholog is 100%.

Bootstrap support for afis|EAW25529.1 as seed ortholog is 100%.

---

Group of orthologs #7419. Best score 466 bits

Score difference with first non-orthologous sequence - *A. fumigatus*:466 *A. fischeri*:95

afum|EAL85371.1 100.00% afis|EAW18106.1 100.00%

Bootstrap support for afum|EAL85371.1 as seed ortholog is 100%.

Bootstrap support for afis|EAW18106.1 as seed ortholog is 99%.

---

Group of orthologs #7420. Best score 466 bits

Score difference with first non-orthologous sequence - *A. fumigatus*:466 *A. fischeri*:466

afum|EAL89694.1 100.00% afis|EAW25004.1 100.00%

Bootstrap support for afum|EAL89694.1 as seed ortholog is 100%.

Bootstrap support for afis|EAW25004.1 as seed ortholog is 100%.

---

Group of orthologs #7421. Best score 466 bits

Score difference with first non-orthologous sequence - *A. fumigatus*:466 *A. fischeri*:466

afum|EAL89958.1 100.00% afis|EAW25295.1 100.00%

Bootstrap support for afum|EAL89958.1 as seed ortholog is 100%.

Bootstrap support for afis|EAW25295.1 as seed ortholog is 100%.

---

Group of orthologs #7422. Best score 465 bits

Score difference with first non-orthologous sequence - *A. fumigatus*:465 *A. fischeri*:465

afum|EAL85835.1 100.00% afis|EAW15488.1 100.00%

Bootstrap support for afum|EAL85835.1 as seed ortholog is 100%.

Bootstrap support for afis|EAW15488.1 as seed ortholog is 100%.

---

Group of orthologs #7423. Best score 465 bits

Score difference with first non-orthologous sequence - *A. fumigatus*:465 *A. fischeri*:465

afum|EAL85704.1 100.00% afis|EAW15630.1 100.00%

Bootstrap support for afum|EAL85704.1 as seed ortholog is 100%.

Bootstrap support for afis|EAW15630.1 as seed ortholog is 100%.

---

Group of orthologs #7424. Best score 465 bits

Score difference with first non-orthologous sequence - *A. fumigatus*:465 *A. fischeri*:465

afum|EAL86608.1 100.00% afis|EAW17178.1 100.00%

Bootstrap support for afum|EAL86608.1 as seed ortholog is 100%.

Bootstrap support for afis|EAW17178.1 as seed ortholog is 100%.

---

Group of orthologs #7425. Best score 465 bits

Score difference with first non-orthologous sequence - *A. fumigatus*:465 *A. fischeri*:465  
afum|EAL90773.1 100.00% afis|EAW22419.1 100.00%  
Bootstrap support for afum|EAL90773.1 as seed ortholog is 100%.  
Bootstrap support for afis|EAW22419.1 as seed ortholog is 100%.

---

Group of orthologs #7426. Best score 465 bits

Score difference with first non-orthologous sequence - *A. fumigatus*:465 *A. fischeri*:465  
afum|EAL92548.1 100.00% afis|EAW21527.1 100.00%  
Bootstrap support for afum|EAL92548.1 as seed ortholog is 100%.  
Bootstrap support for afis|EAW21527.1 as seed ortholog is 100%.

---

Group of orthologs #7427. Best score 465 bits

Score difference with first non-orthologous sequence - *A. fumigatus*:465 *A. fischeri*:465  
afum|EBA27397.1 100.00% afis|EAW25530.1 100.00%  
Bootstrap support for afum|EBA27397.1 as seed ortholog is 100%.  
Bootstrap support for afis|EAW25530.1 as seed ortholog is 100%.

---

Group of orthologs #7428. Best score 464 bits

Score difference with first non-orthologous sequence - *A. fumigatus*:464 *A. fischeri*:464  
afum|EAL84834.1 100.00% afis|EAW20792.1 100.00%  
Bootstrap support for afum|EAL84834.1 as seed ortholog is 100%.  
Bootstrap support for afis|EAW20792.1 as seed ortholog is 100%.

---

Group of orthologs #7429. Best score 463 bits

Score difference with first non-orthologous sequence - *A. fumigatus*:463 *A. fischeri*:463  
afum|EAL88501.1 100.00% afis|EAW15867.1 100.00%  
Bootstrap support for afum|EAL88501.1 as seed ortholog is 100%.  
Bootstrap support for afis|EAW15867.1 as seed ortholog is 100%.

---

Group of orthologs #7430. Best score 463 bits

Score difference with first non-orthologous sequence - *A. fumigatus*:359 *A. fischeri*:360  
afum|EAL84808.1 100.00% afis|EAW20821.1 100.00%  
Bootstrap support for afum|EAL84808.1 as seed ortholog is 100%.  
Bootstrap support for afis|EAW20821.1 as seed ortholog is 100%.

---

Group of orthologs #7431. Best score 463 bits

Score difference with first non-orthologous sequence - *A. fumigatus*:463 *A. fischeri*:463  
afum|EAL91257.1 100.00% afis|EAW17429.1 100.00%  
Bootstrap support for afum|EAL91257.1 as seed ortholog is 100%.  
Bootstrap support for afis|EAW17429.1 as seed ortholog is 100%.

---

Group of orthologs #7432. Best score 463 bits

Score difference with first non-orthologous sequence - *A. fumigatus*:463 *A. fischeri*:463  
afum|EAL91533.1 100.00% afis|EAW17718.1 100.00%  
Bootstrap support for afum|EAL91533.1 as seed ortholog is 100%.  
Bootstrap support for afis|EAW17718.1 as seed ortholog is 100%.

---

Group of orthologs #7433. Best score 463 bits

Score difference with first non-orthologous sequence - *A. fumigatus*:463 *A. fischeri*:373  
afum|EAL87114.1 100.00% afis|EAW23669.1 100.00%  
Bootstrap support for afum|EAL87114.1 as seed ortholog is 100%.  
Bootstrap support for afis|EAW23669.1 as seed ortholog is 100%.

---

Group of orthologs #7434. Best score 463 bits

Score difference with first non-orthologous sequence - *A. fumigatus*:463 *A. fischeri*:463  
afum|EAL88205.1 100.00% afis|EAW23274.1 100.00%

Bootstrap support for afum|EAL88205.1 as seed ortholog is 100%.  
Bootstrap support for afis|EAW23274.1 as seed ortholog is 100%.

---

Group of orthologs #7435. Best score 463 bits

Score difference with first non-orthologous sequence - *A. fumigatus*:463 *A. fischeri*:463

afum|EAL92220.1 100.00% afis|EAW21209.1 100.00%

Bootstrap support for afum|EAL92220.1 as seed ortholog is 100%.

Bootstrap support for afis|EAW21209.1 as seed ortholog is 100%.

---

Group of orthologs #7436. Best score 463 bits

Score difference with first non-orthologous sequence - *A. fumigatus*:463 *A. fischeri*:463

afum|EAL92511.1 100.00% afis|EAW21492.1 100.00%

Bootstrap support for afum|EAL92511.1 as seed ortholog is 100%.

Bootstrap support for afis|EAW21492.1 as seed ortholog is 100%.

---

Group of orthologs #7437. Best score 463 bits

Score difference with first non-orthologous sequence - *A. fumigatus*:463 *A. fischeri*:463

afum|EAL89989.1 100.00% afis|EAW25328.1 100.00%

Bootstrap support for afum|EAL89989.1 as seed ortholog is 100%.

Bootstrap support for afis|EAW25328.1 as seed ortholog is 100%.

---

Group of orthologs #7438. Best score 462 bits

Score difference with first non-orthologous sequence - *A. fumigatus*:462 *A. fischeri*:462

afum|EAL85637.1 100.00% afis|EAW15710.1 100.00%

Bootstrap support for afum|EAL85637.1 as seed ortholog is 100%.

Bootstrap support for afis|EAW15710.1 as seed ortholog is 100%.

---

Group of orthologs #7439. Best score 462 bits

Score difference with first non-orthologous sequence - *A. fumigatus*:462 *A. fischeri*:462

afum|EAL90492.1 100.00% afis|EAW22700.1 100.00%

Bootstrap support for afum|EAL90492.1 as seed ortholog is 100%.

Bootstrap support for afis|EAW22700.1 as seed ortholog is 100%.

---

Group of orthologs #7440. Best score 461 bits

Score difference with first non-orthologous sequence - *A. fumigatus*:461 *A. fischeri*:461

afum|EAL88953.1 100.00% afis|EAW16329.1 100.00%

Bootstrap support for afum|EAL88953.1 as seed ortholog is 100%.

Bootstrap support for afis|EAW16329.1 as seed ortholog is 100%.

---

Group of orthologs #7441. Best score 461 bits

Score difference with first non-orthologous sequence - *A. fumigatus*:461 *A. fischeri*:461

afum|EAL87303.1 100.00% afis|EAW23875.1 100.00%

Bootstrap support for afum|EAL87303.1 as seed ortholog is 100%.

Bootstrap support for afis|EAW23875.1 as seed ortholog is 100%.

---

Group of orthologs #7442. Best score 461 bits

Score difference with first non-orthologous sequence - *A. fumigatus*:461 *A. fischeri*:461

afum|EAL93388.1 100.00% afis|EAW18670.1 100.00%

Bootstrap support for afum|EAL93388.1 as seed ortholog is 100%.

Bootstrap support for afis|EAW18670.1 as seed ortholog is 100%.

---

Group of orthologs #7443. Best score 461 bits

Score difference with first non-orthologous sequence - *A. fumigatus*:461 *A. fischeri*:461

afum|EAL90046.2 100.00% afis|EAW25387.1 100.00%

Bootstrap support for afum|EAL90046.2 as seed ortholog is 100%.

Bootstrap support for afis|EAW25387.1 as seed ortholog is 100%.

---

Group of orthologs #7444. Best score 460 bits

Score difference with first non-orthologous sequence - *A. fumigatus*:460 *A. fischeri*:460

afum|EAL87943.1 100.00% afis|EAW23521.1 100.00%

Bootstrap support for afum|EAL87943.1 as seed ortholog is 100%.

Bootstrap support for afis|EAW23521.1 as seed ortholog is 100%.

---

Group of orthologs #7445. Best score 460 bits

Score difference with first non-orthologous sequence - *A. fumigatus*:460 *A. fischeri*:460

afum|EAL93954.1 100.00% afis|EAW19222.1 100.00%

Bootstrap support for afum|EAL93954.1 as seed ortholog is 100%.

Bootstrap support for afis|EAW19222.1 as seed ortholog is 100%.

---

Group of orthologs #7446. Best score 460 bits

Score difference with first non-orthologous sequence - *A. fumigatus*:460 *A. fischeri*:460

afum|EAL91113.1 100.00% afis|EAW22299.1 100.00%

Bootstrap support for afum|EAL91113.1 as seed ortholog is 100%.

Bootstrap support for afis|EAW22299.1 as seed ortholog is 100%.

---

Group of orthologs #7447. Best score 459 bits

Score difference with first non-orthologous sequence - *A. fumigatus*:459 *A. fischeri*:459

afum|EAL85586.1 100.00% afis|EAW15762.1 100.00%

Bootstrap support for afum|EAL85586.1 as seed ortholog is 100%.

Bootstrap support for afis|EAW15762.1 as seed ortholog is 100%.

---

Group of orthologs #7448. Best score 459 bits

Score difference with first non-orthologous sequence - *A. fumigatus*:459 *A. fischeri*:459

afum|EAL88906.1 100.00% afis|EAW16285.1 100.00%

Bootstrap support for afum|EAL88906.1 as seed ortholog is 100%.

Bootstrap support for afis|EAW16285.1 as seed ortholog is 100%.

---

Group of orthologs #7449. Best score 459 bits

Score difference with first non-orthologous sequence - *A. fumigatus*:459 *A. fischeri*:459

afum|EAL84667.1 100.00% afis|EAW20966.1 100.00%

Bootstrap support for afum|EAL84667.1 as seed ortholog is 100%.

Bootstrap support for afis|EAW20966.1 as seed ortholog is 100%.

---

Group of orthologs #7450. Best score 459 bits

Score difference with first non-orthologous sequence - *A. fumigatus*:459 *A. fischeri*:459

afum|EAL93330.1 100.00% afis|EAW18620.1 100.00%

Bootstrap support for afum|EAL93330.1 as seed ortholog is 100%.

Bootstrap support for afis|EAW18620.1 as seed ortholog is 100%.

---

Group of orthologs #7451. Best score 459 bits

Score difference with first non-orthologous sequence - *A. fumigatus*:459 *A. fischeri*:459

afum|EBA27408.1 100.00% afis|EAW22693.1 100.00%

Bootstrap support for afum|EBA27408.1 as seed ortholog is 100%.

Bootstrap support for afis|EAW22693.1 as seed ortholog is 100%.

---

Group of orthologs #7452. Best score 458 bits

Score difference with first non-orthologous sequence - *A. fumigatus*:458 *A. fischeri*:458

afum|EAL85683.1 100.00% afis|EAW15665.1 100.00%

Bootstrap support for afum|EAL85683.1 as seed ortholog is 100%.

Bootstrap support for afis|EAW15665.1 as seed ortholog is 100%.

---

Group of orthologs #7453. Best score 458 bits

Score difference with first non-orthologous sequence - *A. fumigatus*:458 *A. fischeri*:458  
afum|EAL91226.1 100.00% afis|EAW17390.1 100.00%  
Bootstrap support for afum|EAL91226.1 as seed ortholog is 100%.  
Bootstrap support for afis|EAW17390.1 as seed ortholog is 100%.

---

Group of orthologs #7454. Best score 458 bits

Score difference with first non-orthologous sequence - *A. fumigatus*:458 *A. fischeri*:458  
afum|EAL91606.1 100.00% afis|EAW17798.1 100.00%  
Bootstrap support for afum|EAL91606.1 as seed ortholog is 100%.  
Bootstrap support for afis|EAW17798.1 as seed ortholog is 100%.

---

Group of orthologs #7455. Best score 458 bits

Score difference with first non-orthologous sequence - *A. fumigatus*:458 *A. fischeri*:458  
afum|EAL87196.1 100.00% afis|EAW23763.1 100.00%  
Bootstrap support for afum|EAL87196.1 as seed ortholog is 100%.  
Bootstrap support for afis|EAW23763.1 as seed ortholog is 100%.

---

Group of orthologs #7456. Best score 458 bits

Score difference with first non-orthologous sequence - *A. fumigatus*:458 *A. fischeri*:458  
afum|EAL93168.1 100.00% afis|EAW18479.1 100.00%  
Bootstrap support for afum|EAL93168.1 as seed ortholog is 100%.  
Bootstrap support for afis|EAW18479.1 as seed ortholog is 100%.

---

Group of orthologs #7457. Best score 458 bits

Score difference with first non-orthologous sequence - *A. fumigatus*:458 *A. fischeri*:458  
afum|EAL93405.1 100.00% afis|EAW18684.1 100.00%  
Bootstrap support for afum|EAL93405.1 as seed ortholog is 100%.  
Bootstrap support for afis|EAW18684.1 as seed ortholog is 100%.

---

Group of orthologs #7458. Best score 458 bits

Score difference with first non-orthologous sequence - *A. fumigatus*:458 *A. fischeri*:296  
afum|EAL92547.1 100.00% afis|EAW21526.1 100.00%  
Bootstrap support for afum|EAL92547.1 as seed ortholog is 100%.  
Bootstrap support for afis|EAW21526.1 as seed ortholog is 100%.

---

Group of orthologs #7459. Best score 457 bits

Score difference with first non-orthologous sequence - *A. fumigatus*:457 *A. fischeri*:457  
afum|EAL91534.2 100.00% afis|EAW17719.1 100.00%  
Bootstrap support for afum|EAL91534.2 as seed ortholog is 100%.  
Bootstrap support for afis|EAW17719.1 as seed ortholog is 100%.

---

Group of orthologs #7460. Best score 457 bits

Score difference with first non-orthologous sequence - *A. fumigatus*:457 *A. fischeri*:457  
afum|EAL86022.1 100.00% afis|EAW24352.1 100.00%  
Bootstrap support for afum|EAL86022.1 as seed ortholog is 100%.  
Bootstrap support for afis|EAW24352.1 as seed ortholog is 100%.

---

Group of orthologs #7461. Best score 457 bits

Score difference with first non-orthologous sequence - *A. fumigatus*:457 *A. fischeri*:457  
afum|EAL87865.1 100.00% afis|EAW23602.1 100.00%  
Bootstrap support for afum|EAL87865.1 as seed ortholog is 100%.  
Bootstrap support for afis|EAW23602.1 as seed ortholog is 100%.

---

Group of orthologs #7462. Best score 456 bits

Score difference with first non-orthologous sequence - *A. fumigatus*:456 *A. fischeri*:456  
afum|EAL84618.1 100.00% afis|EAW20433.1 100.00%

Bootstrap support for afum|EAL84618.1 as seed ortholog is 100%.  
Bootstrap support for afis|EAW20433.1 as seed ortholog is 100%.

---

Group of orthologs #7463. Best score 456 bits

Score difference with first non-orthologous sequence - *A. fumigatus*:456 *A. fischeri*:456

afum|EAL91591.2 100.00% afis|EAW17783.1 100.00%

Bootstrap support for afum|EAL91591.2 as seed ortholog is 100%.

Bootstrap support for afis|EAW17783.1 as seed ortholog is 100%.

---

Group of orthologs #7464. Best score 456 bits

Score difference with first non-orthologous sequence - *A. fumigatus*:456 *A. fischeri*:456

afum|EAL84390.2 100.00% afis|EAW25716.1 100.00%

Bootstrap support for afum|EAL84390.2 as seed ortholog is 100%.

Bootstrap support for afis|EAW25716.1 as seed ortholog is 100%.

---

Group of orthologs #7465. Best score 456 bits

Score difference with first non-orthologous sequence - *A. fumigatus*:456 *A. fischeri*:456

afum|EAL93128.1 100.00% afis|EAW18444.1 100.00%

Bootstrap support for afum|EAL93128.1 as seed ortholog is 100%.

Bootstrap support for afis|EAW18444.1 as seed ortholog is 100%.

---

Group of orthologs #7466. Best score 456 bits

Score difference with first non-orthologous sequence - *A. fumigatus*:456 *A. fischeri*:456

afum|EAL87431.1 100.00% afis|EAW24001.1 100.00%

Bootstrap support for afum|EAL87431.1 as seed ortholog is 100%.

Bootstrap support for afis|EAW24001.1 as seed ortholog is 100%.

---

Group of orthologs #7467. Best score 456 bits

Score difference with first non-orthologous sequence - *A. fumigatus*:456 *A. fischeri*:456

afum|EAL90239.1 100.00% afis|EAW22958.1 100.00%

Bootstrap support for afum|EAL90239.1 as seed ortholog is 100%.

Bootstrap support for afis|EAW22958.1 as seed ortholog is 100%.

---

Group of orthologs #7468. Best score 456 bits

Score difference with first non-orthologous sequence - *A. fumigatus*:456 *A. fischeri*:456

afum|EAL89550.1 100.00% afis|EAW24896.1 100.00%

Bootstrap support for afum|EAL89550.1 as seed ortholog is 100%.

Bootstrap support for afis|EAW24896.1 as seed ortholog is 100%.

---

Group of orthologs #7469. Best score 456 bits

Score difference with first non-orthologous sequence - *A. fumigatus*:456 *A. fischeri*:456

afum|EBA27172.1 100.00% afis|EAW25601.1 100.00%

Bootstrap support for afum|EBA27172.1 as seed ortholog is 100%.

Bootstrap support for afis|EAW25601.1 as seed ortholog is 100%.

---

Group of orthologs #7470. Best score 455 bits

Score difference with first non-orthologous sequence - *A. fumigatus*:455 *A. fischeri*:455

afum|EBA27240.1 100.00% afis|EAW15596.1 100.00%

Bootstrap support for afum|EBA27240.1 as seed ortholog is 100%.

Bootstrap support for afis|EAW15596.1 as seed ortholog is 100%.

---

Group of orthologs #7471. Best score 455 bits

Score difference with first non-orthologous sequence - *A. fumigatus*:455 *A. fischeri*:455

afum|EAL90229.1 100.00% afis|EAW22968.1 100.00%

Bootstrap support for afum|EAL90229.1 as seed ortholog is 100%.

Bootstrap support for afis|EAW22968.1 as seed ortholog is 100%.

---

Group of orthologs #7472. Best score 455 bits

Score difference with first non-orthologous sequence - *A. fumigatus*:455 *A. fischeri*:455

afum|EAL90278.1 100.00% afis|EAW22919.1 100.00%

Bootstrap support for afum|EAL90278.1 as seed ortholog is 100%.

Bootstrap support for afis|EAW22919.1 as seed ortholog is 100%.

---

Group of orthologs #7473. Best score 454 bits

Score difference with first non-orthologous sequence - *A. fumigatus*:454 *A. fischeri*:454

afum|EAL84896.2 100.00% afis|EAW20021.1 100.00%

Bootstrap support for afum|EAL84896.2 as seed ortholog is 100%.

Bootstrap support for afis|EAW20021.1 as seed ortholog is 100%.

---

Group of orthologs #7474. Best score 454 bits

Score difference with first non-orthologous sequence - *A. fumigatus*:454 *A. fischeri*:454

afum|EAL92145.1 100.00% afis|EAW21122.1 100.00%

Bootstrap support for afum|EAL92145.1 as seed ortholog is 100%.

Bootstrap support for afis|EAW21122.1 as seed ortholog is 100%.

---

Group of orthologs #7475. Best score 454 bits

Score difference with first non-orthologous sequence - *A. fumigatus*:454 *A. fischeri*:454

afum|EAL89377.1 100.00% afis|EAW24730.1 100.00%

Bootstrap support for afum|EAL89377.1 as seed ortholog is 100%.

Bootstrap support for afis|EAW24730.1 as seed ortholog is 100%.

---

Group of orthologs #7476. Best score 453 bits

Score difference with first non-orthologous sequence - *A. fumigatus*:453 *A. fischeri*:453

afum|EAL91790.1 100.00% afis|EAW17981.1 100.00%

Bootstrap support for afum|EAL91790.1 as seed ortholog is 100%.

Bootstrap support for afis|EAW17981.1 as seed ortholog is 100%.

---

Group of orthologs #7477. Best score 453 bits

Score difference with first non-orthologous sequence - *A. fumigatus*:453 *A. fischeri*:453

afum|EAL87368.1 100.00% afis|EAW23943.1 100.00%

Bootstrap support for afum|EAL87368.1 as seed ortholog is 100%.

Bootstrap support for afis|EAW23943.1 as seed ortholog is 100%.

---

Group of orthologs #7478. Best score 453 bits

Score difference with first non-orthologous sequence - *A. fumigatus*:453 *A. fischeri*:453

afum|EAL90956.1 100.00% afis|EAW22237.1 100.00%

Bootstrap support for afum|EAL90956.1 as seed ortholog is 100%.

Bootstrap support for afis|EAW22237.1 as seed ortholog is 100%.

---

Group of orthologs #7479. Best score 453 bits

Score difference with first non-orthologous sequence - *A. fumigatus*:453 *A. fischeri*:453

afum|EAL90270.1 100.00% afis|EAW22927.1 100.00%

Bootstrap support for afum|EAL90270.1 as seed ortholog is 100%.

Bootstrap support for afis|EAW22927.1 as seed ortholog is 100%.

---

Group of orthologs #7480. Best score 453 bits

Score difference with first non-orthologous sequence - *A. fumigatus*:453 *A. fischeri*:295

afum|EAL92299.1 100.00% afis|EAW21282.1 100.00%

Bootstrap support for afum|EAL92299.1 as seed ortholog is 100%.

Bootstrap support for afis|EAW21282.1 as seed ortholog is 100%.

---

Group of orthologs #7481. Best score 453 bits



Score difference with first non-orthologous sequence - *A. fumigatus*:453 *A. fischeri*:453  
afum|EAL92356.1 100.00% afis|EAW21338.1 100.00%  
Bootstrap support for afum|EAL92356.1 as seed ortholog is 100%.  
Bootstrap support for afis|EAW21338.1 as seed ortholog is 100%.

---

Group of orthologs #7482. Best score 453 bits

Score difference with first non-orthologous sequence - *A. fumigatus*:453 *A. fischeri*:453  
afum|EAL89489.1 100.00% afis|EAW24843.1 100.00%  
Bootstrap support for afum|EAL89489.1 as seed ortholog is 100%.  
Bootstrap support for afis|EAW24843.1 as seed ortholog is 100%.

---

Group of orthologs #7483. Best score 453 bits

Score difference with first non-orthologous sequence - *A. fumigatus*:453 *A. fischeri*:453  
afum|EAL90187.1 100.00% afis|EAW25522.1 100.00%  
Bootstrap support for afum|EAL90187.1 as seed ortholog is 100%.  
Bootstrap support for afis|EAW25522.1 as seed ortholog is 100%.

---

Group of orthologs #7484. Best score 452 bits

Score difference with first non-orthologous sequence - *A. fumigatus*:452 *A. fischeri*:452  
afum|EAL86398.1 100.00% afis|EAW16851.1 100.00%  
Bootstrap support for afum|EAL86398.1 as seed ortholog is 100%.  
Bootstrap support for afis|EAW16851.1 as seed ortholog is 100%.

---

Group of orthologs #7485. Best score 452 bits

Score difference with first non-orthologous sequence - *A. fumigatus*:452 *A. fischeri*:452  
afum|EAL86112.1 100.00% afis|EAW24443.1 100.00%  
Bootstrap support for afum|EAL86112.1 as seed ortholog is 100%.  
Bootstrap support for afis|EAW24443.1 as seed ortholog is 100%.

---

Group of orthologs #7486. Best score 452 bits

Score difference with first non-orthologous sequence - *A. fumigatus*:452 *A. fischeri*:452  
afum|EAL93191.2 100.00% afis|EAW18500.1 100.00%  
Bootstrap support for afum|EAL93191.2 as seed ortholog is 100%.  
Bootstrap support for afis|EAW18500.1 as seed ortholog is 100%.

---

Group of orthologs #7487. Best score 452 bits

Score difference with first non-orthologous sequence - *A. fumigatus*:452 *A. fischeri*:452  
afum|EAL88180.1 100.00% afis|EAW23299.1 100.00%  
Bootstrap support for afum|EAL88180.1 as seed ortholog is 100%.  
Bootstrap support for afis|EAW23299.1 as seed ortholog is 100%.

---

Group of orthologs #7488. Best score 452 bits

Score difference with first non-orthologous sequence - *A. fumigatus*:452 *A. fischeri*:452  
afum|EAL93781.1 100.00% afis|EAW19052.1 100.00%  
Bootstrap support for afum|EAL93781.1 as seed ortholog is 100%.  
Bootstrap support for afis|EAW19052.1 as seed ortholog is 100%.

---

Group of orthologs #7489. Best score 451 bits

Score difference with first non-orthologous sequence - *A. fumigatus*:451 *A. fischeri*:451  
afum|EAL85793.1 100.00% afis|EAW15535.1 100.00%  
Bootstrap support for afum|EAL85793.1 as seed ortholog is 100%.  
Bootstrap support for afis|EAW15535.1 as seed ortholog is 100%.

---

Group of orthologs #7490. Best score 451 bits

Score difference with first non-orthologous sequence - *A. fumigatus*:451 *A. fischeri*:451  
afum|EAL84451.1 100.00% afis|EAW20609.1 100.00%

Bootstrap support for afum|EAL84451.1 as seed ortholog is 100%.  
Bootstrap support for afis|EAW20609.1 as seed ortholog is 100%.

---

Group of orthologs #7491. Best score 451 bits

Score difference with first non-orthologous sequence - *A. fumigatus*:451 *A. fischeri*:451

afum|EAL93464.1 100.00% afis|EAW18738.1 100.00%

Bootstrap support for afum|EAL93464.1 as seed ortholog is 100%.

Bootstrap support for afis|EAW18738.1 as seed ortholog is 100%.

---

Group of orthologs #7492. Best score 450 bits

Score difference with first non-orthologous sequence - *A. fumigatus*:450 *A. fischeri*:450

afum|EAL88674.1 100.00% afis|EAW16042.1 100.00%

Bootstrap support for afum|EAL88674.1 as seed ortholog is 100%.

Bootstrap support for afis|EAW16042.1 as seed ortholog is 100%.

---

Group of orthologs #7493. Best score 450 bits

Score difference with first non-orthologous sequence - *A. fumigatus*:450 *A. fischeri*:450

afum|EAL90370.1 100.00% afis|EAW22832.1 100.00%

Bootstrap support for afum|EAL90370.1 as seed ortholog is 100%.

Bootstrap support for afis|EAW22832.1 as seed ortholog is 100%.

---

Group of orthologs #7494. Best score 450 bits

Score difference with first non-orthologous sequence - *A. fumigatus*:450 *A. fischeri*:450

afum|EAL92931.1 100.00% afis|EAW21919.1 100.00%

Bootstrap support for afum|EAL92931.1 as seed ortholog is 100%.

Bootstrap support for afis|EAW21919.1 as seed ortholog is 100%.

---

Group of orthologs #7495. Best score 450 bits

Score difference with first non-orthologous sequence - *A. fumigatus*:450 *A. fischeri*:409

afum|EAL92044.1 100.00% afis|EAW24184.1 100.00%

Bootstrap support for afum|EAL92044.1 as seed ortholog is 100%.

Bootstrap support for afis|EAW24184.1 as seed ortholog is 100%.

---

Group of orthologs #7496. Best score 450 bits

Score difference with first non-orthologous sequence - *A. fumigatus*:450 *A. fischeri*:450

afum|EBA27247.1 100.00% afis|EAW24200.1 100.00%

Bootstrap support for afum|EBA27247.1 as seed ortholog is 100%.

Bootstrap support for afis|EAW24200.1 as seed ortholog is 100%.

---

Group of orthologs #7497. Best score 449 bits

Score difference with first non-orthologous sequence - *A. fumigatus*:449 *A. fischeri*:449

afum|EAL91544.1 100.00% afis|EAW17729.1 100.00%

Bootstrap support for afum|EAL91544.1 as seed ortholog is 100%.

Bootstrap support for afis|EAW17729.1 as seed ortholog is 100%.

---

Group of orthologs #7498. Best score 449 bits

Score difference with first non-orthologous sequence - *A. fumigatus*:449 *A. fischeri*:449

afum|EAL92315.1 100.00% afis|EAW21298.1 100.00%

Bootstrap support for afum|EAL92315.1 as seed ortholog is 100%.

Bootstrap support for afis|EAW21298.1 as seed ortholog is 100%.

---

Group of orthologs #7499. Best score 449 bits

Score difference with first non-orthologous sequence - *A. fumigatus*:449 *A. fischeri*:449

afum|EAL92401.1 100.00% afis|EAW21386.1 100.00%

Bootstrap support for afum|EAL92401.1 as seed ortholog is 100%.

Bootstrap support for afis|EAW21386.1 as seed ortholog is 100%.

---

Group of orthologs #7500. Best score 449 bits

Score difference with first non-orthologous sequence - *A. fumigatus*:449 *A. fischeri*:449

afum|EBA27251.1 100.00% afis|EAW24289.1 100.00%

Bootstrap support for afum|EBA27251.1 as seed ortholog is 100%.

Bootstrap support for afis|EAW24289.1 as seed ortholog is 100%.

---

Group of orthologs #7501. Best score 448 bits

Score difference with first non-orthologous sequence - *A. fumigatus*:448 *A. fischeri*:448

afum|EAL88917.1 100.00% afis|EAW16295.1 100.00%

Bootstrap support for afum|EAL88917.1 as seed ortholog is 100%.

Bootstrap support for afis|EAW16295.1 as seed ortholog is 100%.

---

Group of orthologs #7502. Best score 448 bits

Score difference with first non-orthologous sequence - *A. fumigatus*:448 *A. fischeri*:448

afum|EAL84773.1 100.00% afis|EAW20862.1 100.00%

Bootstrap support for afum|EAL84773.1 as seed ortholog is 100%.

Bootstrap support for afis|EAW20862.1 as seed ortholog is 100%.

---

Group of orthologs #7503. Best score 448 bits

Score difference with first non-orthologous sequence - *A. fumigatus*:448 *A. fischeri*:448

afum|EAL88140.1 100.00% afis|EAW23338.1 100.00%

Bootstrap support for afum|EAL88140.1 as seed ortholog is 100%.

Bootstrap support for afis|EAW23338.1 as seed ortholog is 100%.

---

Group of orthologs #7504. Best score 448 bits

Score difference with first non-orthologous sequence - *A. fumigatus*:448 *A. fischeri*:350

afum|EAL91035.1 100.00% afis|EAW22155.1 100.00%

Bootstrap support for afum|EAL91035.1 as seed ortholog is 100%.

Bootstrap support for afis|EAW22155.1 as seed ortholog is 100%.

---

Group of orthologs #7505. Best score 447 bits

Score difference with first non-orthologous sequence - *A. fumigatus*:447 *A. fischeri*:447

afum|EAL86371.1 100.00% afis|EAW16821.1 100.00%

Bootstrap support for afum|EAL86371.1 as seed ortholog is 100%.

Bootstrap support for afis|EAW16821.1 as seed ortholog is 100%.

---

Group of orthologs #7506. Best score 447 bits

Score difference with first non-orthologous sequence - *A. fumigatus*:294 *A. fischeri*:447

afum|EAL87841.1 100.00% afis|EAW17482.1 100.00%

Bootstrap support for afum|EAL87841.1 as seed ortholog is 100%.

Bootstrap support for afis|EAW17482.1 as seed ortholog is 100%.

---

Group of orthologs #7507. Best score 447 bits

Score difference with first non-orthologous sequence - *A. fumigatus*:447 *A. fischeri*:447

afum|EAL89723.2 100.00% afis|EAW25055.1 100.00%

Bootstrap support for afum|EAL89723.2 as seed ortholog is 100%.

Bootstrap support for afis|EAW25055.1 as seed ortholog is 100%.

---

Group of orthologs #7508. Best score 447 bits

Score difference with first non-orthologous sequence - *A. fumigatus*:447 *A. fischeri*:447

afum|EAL89877.1 100.00% afis|EAW25216.1 100.00%

Bootstrap support for afum|EAL89877.1 as seed ortholog is 100%.

Bootstrap support for afis|EAW25216.1 as seed ortholog is 100%.

---

Group of orthologs #7509. Best score 447 bits

Score difference with first non-orthologous sequence - *A. fumigatus*:447 *A. fischeri*:447  
afum|EBA27460.1 100.00% afis|EAW21340.1 100.00%  
Bootstrap support for afum|EBA27460.1 as seed ortholog is 100%.  
Bootstrap support for afis|EAW21340.1 as seed ortholog is 100%.

---

Group of orthologs #7510. Best score 446 bits

Score difference with first non-orthologous sequence - *A. fumigatus*:446 *A. fischeri*:446  
afum|EAL85813.1 100.00% afis|EAW15516.1 100.00%  
Bootstrap support for afum|EAL85813.1 as seed ortholog is 100%.  
Bootstrap support for afis|EAW15516.1 as seed ortholog is 100%.

---

Group of orthologs #7511. Best score 446 bits

Score difference with first non-orthologous sequence - *A. fumigatus*:446 *A. fischeri*:446  
afum|EAL86697.1 100.00% afis|EAW17279.1 100.00%  
Bootstrap support for afum|EAL86697.1 as seed ortholog is 100%.  
Bootstrap support for afis|EAW17279.1 as seed ortholog is 100%.

---

Group of orthologs #7512. Best score 446 bits

Score difference with first non-orthologous sequence - *A. fumigatus*:446 *A. fischeri*:446  
afum|EAL88945.1 100.00% afis|EAW16322.1 100.00%  
Bootstrap support for afum|EAL88945.1 as seed ortholog is 100%.  
Bootstrap support for afis|EAW16322.1 as seed ortholog is 100%.

---

Group of orthologs #7513. Best score 446 bits

Score difference with first non-orthologous sequence - *A. fumigatus*:446 *A. fischeri*:446  
afum|EAL91253.1 100.00% afis|EAW17425.1 100.00%  
Bootstrap support for afum|EAL91253.1 as seed ortholog is 100%.  
Bootstrap support for afis|EAW17425.1 as seed ortholog is 100%.

---

Group of orthologs #7514. Best score 446 bits

Score difference with first non-orthologous sequence - *A. fumigatus*:446 *A. fischeri*:446  
afum|EAL91296.1 100.00% afis|EAW17467.1 100.00%  
Bootstrap support for afum|EAL91296.1 as seed ortholog is 100%.  
Bootstrap support for afis|EAW17467.1 as seed ortholog is 100%.

---

Group of orthologs #7515. Best score 446 bits

Score difference with first non-orthologous sequence - *A. fumigatus*:446 *A. fischeri*:446  
afum|EAL87247.1 100.00% afis|EAW23812.1 100.00%  
Bootstrap support for afum|EAL87247.1 as seed ortholog is 100%.  
Bootstrap support for afis|EAW23812.1 as seed ortholog is 100%.

---

Group of orthologs #7516. Best score 446 bits

Score difference with first non-orthologous sequence - *A. fumigatus*:446 *A. fischeri*:446  
afum|EAL92834.1 100.00% afis|EAW21818.1 100.00%  
Bootstrap support for afum|EAL92834.1 as seed ortholog is 100%.  
Bootstrap support for afis|EAW21818.1 as seed ortholog is 100%.

---

Group of orthologs #7517. Best score 445 bits

Score difference with first non-orthologous sequence - *A. fumigatus*:139 *A. fischeri*:150  
afum|EAL86843.1 100.00% afis|EAW23523.1 100.00%  
afis|EAW16853.1 10.20%  
afis|EAW15552.1 7.28%  
Bootstrap support for afum|EAL86843.1 as seed ortholog is 90%.  
Bootstrap support for afis|EAW23523.1 as seed ortholog is 97%.

---

Group of orthologs #7518. Best score 445 bits

Score difference with first non-orthologous sequence - *A. fumigatus*:445 *A. fischeri*:445  
afum|EAL86590.1 100.00% afis|EAW17130.1 100.00%  
Bootstrap support for afum|EAL86590.1 as seed ortholog is 100%.  
Bootstrap support for afis|EAW17130.1 as seed ortholog is 100%.

---

Group of orthologs #7519. Best score 445 bits

Score difference with first non-orthologous sequence - *A. fumigatus*:445 *A. fischeri*:445  
afum|EAL85335.1 100.00% afis|EAW20221.1 100.00%  
Bootstrap support for afum|EAL85335.1 as seed ortholog is 100%.  
Bootstrap support for afis|EAW20221.1 as seed ortholog is 100%.

---

Group of orthologs #7520. Best score 445 bits

Score difference with first non-orthologous sequence - *A. fumigatus*:445 *A. fischeri*:445  
afum|EAL91333.1 100.00% afis|EAW17515.1 100.00%  
Bootstrap support for afum|EAL91333.1 as seed ortholog is 100%.  
Bootstrap support for afis|EAW17515.1 as seed ortholog is 100%.

---

Group of orthologs #7521. Best score 445 bits

Score difference with first non-orthologous sequence - *A. fumigatus*:445 *A. fischeri*:445  
afum|EAL90501.1 100.00% afis|EAW22691.1 100.00%  
Bootstrap support for afum|EAL90501.1 as seed ortholog is 100%.  
Bootstrap support for afis|EAW22691.1 as seed ortholog is 100%.

---

Group of orthologs #7522. Best score 445 bits

Score difference with first non-orthologous sequence - *A. fumigatus*:223 *A. fischeri*:128  
afum|EAL89025.2 100.00% afis|EAW24555.1 100.00%  
Bootstrap support for afum|EAL89025.2 as seed ortholog is 100%.  
Bootstrap support for afis|EAW24555.1 as seed ortholog is 99%.

---

Group of orthologs #7523. Best score 445 bits

Score difference with first non-orthologous sequence - *A. fumigatus*:358 *A. fischeri*:238  
afum|EAL92037.1 100.00% afis|EAW24175.1 100.00%  
Bootstrap support for afum|EAL92037.1 as seed ortholog is 100%.  
Bootstrap support for afis|EAW24175.1 as seed ortholog is 100%.

---

Group of orthologs #7524. Best score 444 bits

Score difference with first non-orthologous sequence - *A. fumigatus*:444 *A. fischeri*:444  
afum|EAL85984.1 100.00% afis|EAW24316.1 100.00%  
Bootstrap support for afum|EAL85984.1 as seed ortholog is 100%.  
Bootstrap support for afis|EAW24316.1 as seed ortholog is 100%.

---

Group of orthologs #7525. Best score 444 bits

Score difference with first non-orthologous sequence - *A. fumigatus*:444 *A. fischeri*:444  
afum|EAL86108.1 100.00% afis|EAW24440.1 100.00%  
Bootstrap support for afum|EAL86108.1 as seed ortholog is 100%.  
Bootstrap support for afis|EAW24440.1 as seed ortholog is 100%.

---

Group of orthologs #7526. Best score 444 bits

Score difference with first non-orthologous sequence - *A. fumigatus*:444 *A. fischeri*:444  
afum|EAL93529.1 100.00% afis|EAW18793.1 100.00%  
Bootstrap support for afum|EAL93529.1 as seed ortholog is 100%.  
Bootstrap support for afis|EAW18793.1 as seed ortholog is 100%.

---

Group of orthologs #7527. Best score 443 bits

Score difference with first non-orthologous sequence - *A. fumigatus*:443 *A. fischeri*:443  
afum|EAL85758.1 100.00% afis|EAW15576.1 100.00%

Bootstrap support for afum|EAL85758.1 as seed ortholog is 100%.  
Bootstrap support for afis|EAW15576.1 as seed ortholog is 100%.

---

Group of orthologs #7528. Best score 443 bits

Score difference with first non-orthologous sequence - *A. fumigatus*:443 *A. fischeri*:443

afum|EAL86335.1 100.00% afis|EAW16764.1 100.00%

Bootstrap support for afum|EAL86335.1 as seed ortholog is 100%.

Bootstrap support for afis|EAW16764.1 as seed ortholog is 100%.

---

Group of orthologs #7529. Best score 443 bits

Score difference with first non-orthologous sequence - *A. fumigatus*:443 *A. fischeri*:443

afum|EAL85254.1 100.00% afis|EAW20139.1 100.00%

Bootstrap support for afum|EAL85254.1 as seed ortholog is 100%.

Bootstrap support for afis|EAW20139.1 as seed ortholog is 100%.

---

Group of orthologs #7530. Best score 443 bits

Score difference with first non-orthologous sequence - *A. fumigatus*:443 *A. fischeri*:443

afum|EAL85476.1 100.00% afis|EAW20359.1 100.00%

Bootstrap support for afum|EAL85476.1 as seed ortholog is 100%.

Bootstrap support for afis|EAW20359.1 as seed ortholog is 100%.

---

Group of orthologs #7531. Best score 443 bits

Score difference with first non-orthologous sequence - *A. fumigatus*:443 *A. fischeri*:443

afum|EAL86812.1 100.00% afis|EAW19715.1 100.00%

Bootstrap support for afum|EAL86812.1 as seed ortholog is 100%.

Bootstrap support for afis|EAW19715.1 as seed ortholog is 100%.

---

Group of orthologs #7532. Best score 443 bits

Score difference with first non-orthologous sequence - *A. fumigatus*:443 *A. fischeri*:443

afum|EAL91427.1 100.00% afis|EAW17614.1 100.00%

Bootstrap support for afum|EAL91427.1 as seed ortholog is 100%.

Bootstrap support for afis|EAW17614.1 as seed ortholog is 100%.

---

Group of orthologs #7533. Best score 443 bits

Score difference with first non-orthologous sequence - *A. fumigatus*:443 *A. fischeri*:443

afum|EAL86071.1 100.00% afis|EAW24400.1 100.00%

Bootstrap support for afum|EAL86071.1 as seed ortholog is 100%.

Bootstrap support for afis|EAW24400.1 as seed ortholog is 100%.

---

Group of orthologs #7534. Best score 443 bits

Score difference with first non-orthologous sequence - *A. fumigatus*:443 *A. fischeri*:443

afum|EAL88398.1 100.00% afis|EAW23081.1 100.00%

Bootstrap support for afum|EAL88398.1 as seed ortholog is 100%.

Bootstrap support for afis|EAW23081.1 as seed ortholog is 100%.

---

Group of orthologs #7535. Best score 443 bits

Score difference with first non-orthologous sequence - *A. fumigatus*:443 *A. fischeri*:443

afum|EAL94034.1 100.00% afis|EAW19317.1 100.00%

Bootstrap support for afum|EAL94034.1 as seed ortholog is 100%.

Bootstrap support for afis|EAW19317.1 as seed ortholog is 100%.

---

Group of orthologs #7536. Best score 443 bits

Score difference with first non-orthologous sequence - *A. fumigatus*:443 *A. fischeri*:443

afum|EAL90673.1 100.00% afis|EAW22520.1 100.00%

Bootstrap support for afum|EAL90673.1 as seed ortholog is 100%.

Bootstrap support for afis|EAW22520.1 as seed ortholog is 100%.

---

Group of orthologs #7537. Best score 443 bits

Score difference with first non-orthologous sequence - *A. fumigatus*:443 *A. fischeri*:443

afum|EAL92540.1 100.00% afis|EAW21519.1 100.00%

Bootstrap support for afum|EAL92540.1 as seed ortholog is 100%.

Bootstrap support for afis|EAW21519.1 as seed ortholog is 100%.

---

Group of orthologs #7538. Best score 442 bits

Score difference with first non-orthologous sequence - *A. fumigatus*:442 *A. fischeri*:442

afum|EAL85517.1 100.00% afis|EAW15835.1 100.00%

Bootstrap support for afum|EAL85517.1 as seed ortholog is 100%.

Bootstrap support for afis|EAW15835.1 as seed ortholog is 100%.

---

Group of orthologs #7539. Best score 442 bits

Score difference with first non-orthologous sequence - *A. fumigatus*:442 *A. fischeri*:442

afum|EAL92250.1 100.00% afis|EAW21238.1 100.00%

Bootstrap support for afum|EAL92250.1 as seed ortholog is 100%.

Bootstrap support for afis|EAW21238.1 as seed ortholog is 100%.

---

Group of orthologs #7540. Best score 442 bits

Score difference with first non-orthologous sequence - *A. fumigatus*:442 *A. fischeri*:442

afum|EAL92375.1 100.00% afis|EAW21359.1 100.00%

Bootstrap support for afum|EAL92375.1 as seed ortholog is 100%.

Bootstrap support for afis|EAW21359.1 as seed ortholog is 100%.

---

Group of orthologs #7541. Best score 442 bits

Score difference with first non-orthologous sequence - *A. fumigatus*:442 *A. fischeri*:442

afum|EAL89975.1 100.00% afis|EAW25314.1 100.00%

Bootstrap support for afum|EAL89975.1 as seed ortholog is 100%.

Bootstrap support for afis|EAW25314.1 as seed ortholog is 100%.

---

Group of orthologs #7542. Best score 441 bits

Score difference with first non-orthologous sequence - *A. fumigatus*:441 *A. fischeri*:441

afum|EAL85597.1 100.00% afis|EAW15752.1 100.00%

Bootstrap support for afum|EAL85597.1 as seed ortholog is 100%.

Bootstrap support for afis|EAW15752.1 as seed ortholog is 100%.

---

Group of orthologs #7543. Best score 441 bits

Score difference with first non-orthologous sequence - *A. fumigatus*:441 *A. fischeri*:441

afum|EAL89141.1 100.00% afis|EAW16543.1 100.00%

Bootstrap support for afum|EAL89141.1 as seed ortholog is 100%.

Bootstrap support for afis|EAW16543.1 as seed ortholog is 100%.

---

Group of orthologs #7544. Best score 441 bits

Score difference with first non-orthologous sequence - *A. fumigatus*:441 *A. fischeri*:394

afum|EAL87136.1 100.00% afis|EAW23693.1 100.00%

Bootstrap support for afum|EAL87136.1 as seed ortholog is 100%.

Bootstrap support for afis|EAW23693.1 as seed ortholog is 100%.

---

Group of orthologs #7545. Best score 441 bits

Score difference with first non-orthologous sequence - *A. fumigatus*:441 *A. fischeri*:441

afum|EBA27319.1 100.00% afis|EAW18234.1 100.00%

Bootstrap support for afum|EBA27319.1 as seed ortholog is 100%.

Bootstrap support for afis|EAW18234.1 as seed ortholog is 100%.

---

Group of orthologs #7546. Best score 441 bits

Score difference with first non-orthologous sequence - *A. fumigatus*:441 *A. fischeri*:441  
afum|EAL89425.1 100.00% afis|EAW24786.1 100.00%  
Bootstrap support for afum|EAL89425.1 as seed ortholog is 100%.  
Bootstrap support for afis|EAW24786.1 as seed ortholog is 100%.

---

Group of orthologs #7547. Best score 440 bits

Score difference with first non-orthologous sequence - *A. fumigatus*:381 *A. fischeri*:386  
afum|EAL84190.1 100.00% afis|EAW15455.1 100.00%  
Bootstrap support for afum|EAL84190.1 as seed ortholog is 100%.  
Bootstrap support for afis|EAW15455.1 as seed ortholog is 100%.

---

Group of orthologs #7548. Best score 440 bits

Score difference with first non-orthologous sequence - *A. fumigatus*:440 *A. fischeri*:440  
afum|EAL86333.1 100.00% afis|EAW16762.1 100.00%  
Bootstrap support for afum|EAL86333.1 as seed ortholog is 100%.  
Bootstrap support for afis|EAW16762.1 as seed ortholog is 100%.

---

Group of orthologs #7549. Best score 440 bits

Score difference with first non-orthologous sequence - *A. fumigatus*:440 *A. fischeri*:440  
afum|EAL85295.1 100.00% afis|EAW20177.1 100.00%  
Bootstrap support for afum|EAL85295.1 as seed ortholog is 100%.  
Bootstrap support for afis|EAW20177.1 as seed ortholog is 100%.

---

Group of orthologs #7550. Best score 440 bits

Score difference with first non-orthologous sequence - *A. fumigatus*:440 *A. fischeri*:440  
afum|EAL93727.1 100.00% afis|EAW18991.1 100.00%  
Bootstrap support for afum|EAL93727.1 as seed ortholog is 100%.  
Bootstrap support for afis|EAW18991.1 as seed ortholog is 100%.

---

Group of orthologs #7551. Best score 440 bits

Score difference with first non-orthologous sequence - *A. fumigatus*:440 *A. fischeri*:440  
afum|EAL94002.1 100.00% afis|EAW19276.1 100.00%  
Bootstrap support for afum|EAL94002.1 as seed ortholog is 100%.  
Bootstrap support for afis|EAW19276.1 as seed ortholog is 100%.

---

Group of orthologs #7552. Best score 440 bits

Score difference with first non-orthologous sequence - *A. fumigatus*:440 *A. fischeri*:440  
afum|EAL92664.1 100.00% afis|EAW21630.1 100.00%  
Bootstrap support for afum|EAL92664.1 as seed ortholog is 100%.  
Bootstrap support for afis|EAW21630.1 as seed ortholog is 100%.

---

Group of orthologs #7553. Best score 439 bits

Score difference with first non-orthologous sequence - *A. fumigatus*:439 *A. fischeri*:439  
afum|EAL85577.1 100.00% afis|EAW15771.1 100.00%  
Bootstrap support for afum|EAL85577.1 as seed ortholog is 100%.  
Bootstrap support for afis|EAW15771.1 as seed ortholog is 100%.

---

Group of orthologs #7554. Best score 439 bits

Score difference with first non-orthologous sequence - *A. fumigatus*:439 *A. fischeri*:439  
afum|EAL93153.1 100.00% afis|EAW18467.1 100.00%  
Bootstrap support for afum|EAL93153.1 as seed ortholog is 100%.  
Bootstrap support for afis|EAW18467.1 as seed ortholog is 100%.

---

Group of orthologs #7555. Best score 438 bits

Score difference with first non-orthologous sequence - *A. fumigatus*:438 *A. fischeri*:438  
afum|EAL85574.1 100.00% afis|EAW15775.1 100.00%



Bootstrap support for afum|EAL85574.1 as seed ortholog is 100%.  
Bootstrap support for afis|EAW15775.1 as seed ortholog is 100%.

---

Group of orthologs #7556. Best score 438 bits

Score difference with first non-orthologous sequence - *A. fumigatus*:438 *A. fischeri*:438

afum|EAL90251.1 100.00% afis|EAW22946.1 100.00%

Bootstrap support for afum|EAL90251.1 as seed ortholog is 100%.

Bootstrap support for afis|EAW22946.1 as seed ortholog is 100%.

---

Group of orthologs #7557. Best score 438 bits

Score difference with first non-orthologous sequence - *A. fumigatus*:173 *A. fischeri*:273

afum|EBA27291.1 100.00% afis|EAW19707.1 100.00%

Bootstrap support for afum|EBA27291.1 as seed ortholog is 100%.

Bootstrap support for afis|EAW19707.1 as seed ortholog is 100%.

---

Group of orthologs #7558. Best score 438 bits

Score difference with first non-orthologous sequence - *A. fumigatus*:438 *A. fischeri*:397

afum|EAL89384.1 100.00% afis|EAW24737.1 100.00%

Bootstrap support for afum|EAL89384.1 as seed ortholog is 100%.

Bootstrap support for afis|EAW24737.1 as seed ortholog is 100%.

---

Group of orthologs #7559. Best score 437 bits

Score difference with first non-orthologous sequence - *A. fumigatus*:437 *A. fischeri*:437

afum|EAL85705.1 100.00% afis|EAW15629.1 100.00%

Bootstrap support for afum|EAL85705.1 as seed ortholog is 100%.

Bootstrap support for afis|EAW15629.1 as seed ortholog is 100%.

---

Group of orthologs #7560. Best score 437 bits

Score difference with first non-orthologous sequence - *A. fumigatus*:437 *A. fischeri*:437

afum|EAL84923.1 100.00% afis|EAW19994.1 100.00%

Bootstrap support for afum|EAL84923.1 as seed ortholog is 100%.

Bootstrap support for afis|EAW19994.1 as seed ortholog is 100%.

---

Group of orthologs #7561. Best score 437 bits

Score difference with first non-orthologous sequence - *A. fumigatus*:437 *A. fischeri*:437

afum|EAL87555.1 100.00% afis|EAW18196.1 100.00%

Bootstrap support for afum|EAL87555.1 as seed ortholog is 100%.

Bootstrap support for afis|EAW18196.1 as seed ortholog is 100%.

---

Group of orthologs #7562. Best score 437 bits

Score difference with first non-orthologous sequence - *A. fumigatus*:437 *A. fischeri*:437

afum|EAL85494.1 100.00% afis|EAW20381.1 100.00%

Bootstrap support for afum|EAL85494.1 as seed ortholog is 100%.

Bootstrap support for afis|EAW20381.1 as seed ortholog is 100%.

---

Group of orthologs #7563. Best score 437 bits

Score difference with first non-orthologous sequence - *A. fumigatus*:437 *A. fischeri*:285

afum|EAL91633.1 100.00% afis|EAW17823.1 100.00%

Bootstrap support for afum|EAL91633.1 as seed ortholog is 100%.

Bootstrap support for afis|EAW17823.1 as seed ortholog is 100%.

---

Group of orthologs #7564. Best score 437 bits

Score difference with first non-orthologous sequence - *A. fumigatus*:437 *A. fischeri*:437

afum|EAL86084.1 100.00% afis|EAW24415.1 100.00%

Bootstrap support for afum|EAL86084.1 as seed ortholog is 100%.

Bootstrap support for afis|EAW24415.1 as seed ortholog is 100%.

---

Group of orthologs #7565. Best score 437 bits

Score difference with first non-orthologous sequence - *A. fumigatus*:437 *A. fischeri*:437

afum|EAL87234.2 100.00% afis|EAW23799.1 100.00%

Bootstrap support for afum|EAL87234.2 as seed ortholog is 100%.

Bootstrap support for afis|EAW23799.1 as seed ortholog is 100%.

---

Group of orthologs #7566. Best score 437 bits

Score difference with first non-orthologous sequence - *A. fumigatus*:437 *A. fischeri*:379

afum|EAL87904.1 100.00% afis|EAW23564.1 100.00%

Bootstrap support for afum|EAL87904.1 as seed ortholog is 100%.

Bootstrap support for afis|EAW23564.1 as seed ortholog is 100%.

---

Group of orthologs #7567. Best score 437 bits

Score difference with first non-orthologous sequence - *A. fumigatus*:437 *A. fischeri*:437

afum|EAL94049.1 100.00% afis|EAW19332.1 100.00%

Bootstrap support for afum|EAL94049.1 as seed ortholog is 100%.

Bootstrap support for afis|EAW19332.1 as seed ortholog is 100%.

---

Group of orthologs #7568. Best score 437 bits

Score difference with first non-orthologous sequence - *A. fumigatus*:437 *A. fischeri*:437

afum|EAL90552.2 100.00% afis|EAW22640.1 100.00%

Bootstrap support for afum|EAL90552.2 as seed ortholog is 100%.

Bootstrap support for afis|EAW22640.1 as seed ortholog is 100%.

---

Group of orthologs #7569. Best score 437 bits

Score difference with first non-orthologous sequence - *A. fumigatus*:437 *A. fischeri*:437

afum|EAL89424.1 100.00% afis|EAW24785.1 100.00%

Bootstrap support for afum|EAL89424.1 as seed ortholog is 100%.

Bootstrap support for afis|EAW24785.1 as seed ortholog is 100%.

---

Group of orthologs #7570. Best score 437 bits

Score difference with first non-orthologous sequence - *A. fumigatus*:437 *A. fischeri*:437

afum|EBA27398.1 100.00% afis|EAW25531.1 100.00%

Bootstrap support for afum|EBA27398.1 as seed ortholog is 100%.

Bootstrap support for afis|EAW25531.1 as seed ortholog is 100%.

---

Group of orthologs #7571. Best score 436 bits

Score difference with first non-orthologous sequence - *A. fumigatus*:436 *A. fischeri*:436

afum|EAL86475.1 100.00% afis|EAW16948.1 100.00%

Bootstrap support for afum|EAL86475.1 as seed ortholog is 100%.

Bootstrap support for afis|EAW16948.1 as seed ortholog is 100%.

---

Group of orthologs #7572. Best score 436 bits

Score difference with first non-orthologous sequence - *A. fumigatus*:436 *A. fischeri*:436

afum|EAL89156.1 100.00% afis|EAW16558.1 100.00%

Bootstrap support for afum|EAL89156.1 as seed ortholog is 100%.

Bootstrap support for afis|EAW16558.1 as seed ortholog is 100%.

---

Group of orthologs #7573. Best score 436 bits

Score difference with first non-orthologous sequence - *A. fumigatus*:436 *A. fischeri*:436

afum|EAL93036.1 100.00% afis|EAW18363.1 100.00%

Bootstrap support for afum|EAL93036.1 as seed ortholog is 100%.

Bootstrap support for afis|EAW18363.1 as seed ortholog is 100%.

---

Group of orthologs #7574. Best score 436 bits

Score difference with first non-orthologous sequence - *A. fumigatus*:436 *A. fischeri*:436  
afum|EAL93561.1 100.00% afis|EAW18827.1 100.00%  
Bootstrap support for afum|EAL93561.1 as seed ortholog is 100%.  
Bootstrap support for afis|EAW18827.1 as seed ortholog is 100%.

---

Group of orthologs #7575. Best score 436 bits

Score difference with first non-orthologous sequence - *A. fumigatus*:436 *A. fischeri*:436  
afum|EAL92447.1 100.00% afis|EAW21432.1 100.00%  
Bootstrap support for afum|EAL92447.1 as seed ortholog is 100%.  
Bootstrap support for afis|EAW21432.1 as seed ortholog is 100%.

---

Group of orthologs #7576. Best score 435 bits

Score difference with first non-orthologous sequence - *A. fumigatus*:435 *A. fischeri*:435  
afum|EAL85711.1 100.00% afis|EAW15623.1 100.00%  
Bootstrap support for afum|EAL85711.1 as seed ortholog is 100%.  
Bootstrap support for afis|EAW15623.1 as seed ortholog is 100%.

---

Group of orthologs #7577. Best score 435 bits

Score difference with first non-orthologous sequence - *A. fumigatus*:435 *A. fischeri*:435  
afum|EAL86338.1 100.00% afis|EAW16770.1 100.00%  
Bootstrap support for afum|EAL86338.1 as seed ortholog is 100%.  
Bootstrap support for afis|EAW16770.1 as seed ortholog is 100%.

---

Group of orthologs #7578. Best score 435 bits

Score difference with first non-orthologous sequence - *A. fumigatus*:435 *A. fischeri*:435  
afum|EAL88859.1 100.00% afis|EAW16238.1 100.00%  
Bootstrap support for afum|EAL88859.1 as seed ortholog is 100%.  
Bootstrap support for afis|EAW16238.1 as seed ortholog is 100%.

---

Group of orthologs #7579. Best score 435 bits

Score difference with first non-orthologous sequence - *A. fumigatus*:435 *A. fischeri*:435  
afum|EAL84737.2 100.00% afis|EAW20896.1 100.00%  
Bootstrap support for afum|EAL84737.2 as seed ortholog is 100%.  
Bootstrap support for afis|EAW20896.1 as seed ortholog is 100%.

---

Group of orthologs #7580. Best score 435 bits

Score difference with first non-orthologous sequence - *A. fumigatus*:435 *A. fischeri*:435  
afum|EAL90647.1 100.00% afis|EAW22548.1 100.00%  
Bootstrap support for afum|EAL90647.1 as seed ortholog is 100%.  
Bootstrap support for afis|EAW22548.1 as seed ortholog is 100%.

---

Group of orthologs #7581. Best score 434 bits

Score difference with first non-orthologous sequence - *A. fumigatus*:434 *A. fischeri*:434  
afum|EAL85610.1 100.00% afis|EAW15738.1 100.00%  
Bootstrap support for afum|EAL85610.1 as seed ortholog is 100%.  
Bootstrap support for afis|EAW15738.1 as seed ortholog is 100%.

---

Group of orthologs #7582. Best score 434 bits

Score difference with first non-orthologous sequence - *A. fumigatus*:434 *A. fischeri*:434  
afum|EAL85509.1 100.00% afis|EAW15842.1 100.00%  
Bootstrap support for afum|EAL85509.1 as seed ortholog is 100%.  
Bootstrap support for afis|EAW15842.1 as seed ortholog is 100%.

---

Group of orthologs #7583. Best score 434 bits

Score difference with first non-orthologous sequence - *A. fumigatus*:434 *A. fischeri*:434  
afum|EAL88503.1 100.00% afis|EAW15869.1 100.00%

Bootstrap support for afum|EAL88503.1 as seed ortholog is 100%.  
Bootstrap support for afis|EAW15869.1 as seed ortholog is 100%.

---

Group of orthologs #7584. Best score 434 bits

Score difference with first non-orthologous sequence - *A. fumigatus*:434 *A. fischeri*:434

afum|EAL88908.1 100.00% afis|EAW16286.1 100.00%

Bootstrap support for afum|EAL88908.1 as seed ortholog is 100%.

Bootstrap support for afis|EAW16286.1 as seed ortholog is 100%.

---

Group of orthologs #7585. Best score 434 bits

Score difference with first non-orthologous sequence - *A. fumigatus*:434 *A. fischeri*:434

afum|EAL84795.1 100.00% afis|EAW20838.1 100.00%

Bootstrap support for afum|EAL84795.1 as seed ortholog is 100%.

Bootstrap support for afis|EAW20838.1 as seed ortholog is 100%.

---

Group of orthologs #7586. Best score 434 bits

Score difference with first non-orthologous sequence - *A. fumigatus*:434 *A. fischeri*:434

afum|EAL92277.1 100.00% afis|EAW21262.1 100.00%

Bootstrap support for afum|EAL92277.1 as seed ortholog is 100%.

Bootstrap support for afis|EAW21262.1 as seed ortholog is 100%.

---

Group of orthologs #7587. Best score 434 bits

Score difference with first non-orthologous sequence - *A. fumigatus*:434 *A. fischeri*:306

afum|EAL92899.1 100.00% afis|EAW21885.1 100.00%

Bootstrap support for afum|EAL92899.1 as seed ortholog is 100%.

Bootstrap support for afis|EAW21885.1 as seed ortholog is 100%.

---

Group of orthologs #7588. Best score 433 bits

Score difference with first non-orthologous sequence - *A. fumigatus*:433 *A. fischeri*:433

afum|EAL90700.1 100.00% afis|EAW22493.1 100.00%

Bootstrap support for afum|EAL90700.1 as seed ortholog is 100%.

Bootstrap support for afis|EAW22493.1 as seed ortholog is 100%.

---

Group of orthologs #7589. Best score 433 bits

Score difference with first non-orthologous sequence - *A. fumigatus*:433 *A. fischeri*:433

afum|EAL92247.1 100.00% afis|EAW21235.1 100.00%

Bootstrap support for afum|EAL92247.1 as seed ortholog is 100%.

Bootstrap support for afis|EAW21235.1 as seed ortholog is 100%.

---

Group of orthologs #7590. Best score 432 bits

Score difference with first non-orthologous sequence - *A. fumigatus*:432 *A. fischeri*:432

afum|EAL85035.1 100.00% afis|EAW19860.1 100.00%

Bootstrap support for afum|EAL85035.1 as seed ortholog is 100%.

Bootstrap support for afis|EAW19860.1 as seed ortholog is 100%.

---

Group of orthologs #7591. Best score 432 bits

Score difference with first non-orthologous sequence - *A. fumigatus*:432 *A. fischeri*:432

afum|EAL84419.1 100.00% afis|EAW24043.1 100.00%

Bootstrap support for afum|EAL84419.1 as seed ortholog is 100%.

Bootstrap support for afis|EAW24043.1 as seed ortholog is 100%.

---

Group of orthologs #7592. Best score 432 bits

Score difference with first non-orthologous sequence - *A. fumigatus*:432 *A. fischeri*:432

afum|EAL88464.1 100.00% afis|EAW23017.1 100.00%

Bootstrap support for afum|EAL88464.1 as seed ortholog is 100%.

Bootstrap support for afis|EAW23017.1 as seed ortholog is 100%.

---

Group of orthologs #7593. Best score 431 bits

Score difference with first non-orthologous sequence - *A. fumigatus*:431 *A. fischeri*:431  
afum|EAL84854.1 100.00% afis|EAW20765.1 100.00%

Bootstrap support for afum|EAL84854.1 as seed ortholog is 100%.

Bootstrap support for afis|EAW20765.1 as seed ortholog is 100%.

---

Group of orthologs #7594. Best score 431 bits

Score difference with first non-orthologous sequence - *A. fumigatus*:221 *A. fischeri*:139  
afum|EAL86960.1 100.00% afis|EAW19549.1 100.00%

Bootstrap support for afum|EAL86960.1 as seed ortholog is 100%.

Bootstrap support for afis|EAW19549.1 as seed ortholog is 99%.

---

Group of orthologs #7595. Best score 431 bits

Score difference with first non-orthologous sequence - *A. fumigatus*:431 *A. fischeri*:431  
afum|EAL88346.1 100.00% afis|EAW23135.1 100.00%

Bootstrap support for afum|EAL88346.1 as seed ortholog is 100%.

Bootstrap support for afis|EAW23135.1 as seed ortholog is 100%.

---

Group of orthologs #7596. Best score 431 bits

Score difference with first non-orthologous sequence - *A. fumigatus*:431 *A. fischeri*:431  
afum|EBA27431.1 100.00% afis|EAW17568.1 100.00%

Bootstrap support for afum|EBA27431.1 as seed ortholog is 100%.

Bootstrap support for afis|EAW17568.1 as seed ortholog is 100%.

---

Group of orthologs #7597. Best score 431 bits

Score difference with first non-orthologous sequence - *A. fumigatus*:431 *A. fischeri*:431  
afum|EAL91043.1 100.00% afis|EAW22147.1 100.00%

Bootstrap support for afum|EAL91043.1 as seed ortholog is 100%.

Bootstrap support for afis|EAW22147.1 as seed ortholog is 100%.

---

Group of orthologs #7598. Best score 431 bits

Score difference with first non-orthologous sequence - *A. fumigatus*:431 *A. fischeri*:431  
afum|EAL92036.2 100.00% afis|EAW24174.1 100.00%

Bootstrap support for afum|EAL92036.2 as seed ortholog is 100%.

Bootstrap support for afis|EAW24174.1 as seed ortholog is 100%.

---

Group of orthologs #7599. Best score 430 bits

Score difference with first non-orthologous sequence - *A. fumigatus*:430 *A. fischeri*:390  
afum|EAL85741.1 100.00% afis|EAW15591.1 100.00%

Bootstrap support for afum|EAL85741.1 as seed ortholog is 100%.

Bootstrap support for afis|EAW15591.1 as seed ortholog is 100%.

---

Group of orthologs #7600. Best score 430 bits

Score difference with first non-orthologous sequence - *A. fumigatus*:430 *A. fischeri*:430  
afum|EAL86584.1 100.00% afis|EAW17123.1 100.00%

Bootstrap support for afum|EAL86584.1 as seed ortholog is 100%.

Bootstrap support for afis|EAW17123.1 as seed ortholog is 100%.

---

Group of orthologs #7601. Best score 430 bits

Score difference with first non-orthologous sequence - *A. fumigatus*:430 *A. fischeri*:430  
afum|EAL84465.1 100.00% afis|EAW20596.1 100.00%

Bootstrap support for afum|EAL84465.1 as seed ortholog is 100%.

Bootstrap support for afis|EAW20596.1 as seed ortholog is 100%.

---

Group of orthologs #7602. Best score 430 bits

Score difference with first non-orthologous sequence - *A. fumigatus*:430 *A. fischeri*:430  
afum|EAL84332.1 100.00% afis|EAW25646.1 100.00%  
Bootstrap support for afum|EAL84332.1 as seed ortholog is 100%.  
Bootstrap support for afis|EAW25646.1 as seed ortholog is 100%.

---

Group of orthologs #7603. Best score 430 bits

Score difference with first non-orthologous sequence - *A. fumigatus*:430 *A. fischeri*:430  
afum|EAL88125.2 100.00% afis|EAW23351.1 100.00%  
Bootstrap support for afum|EAL88125.2 as seed ortholog is 100%.  
Bootstrap support for afis|EAW23351.1 as seed ortholog is 100%.

---

Group of orthologs #7604. Best score 430 bits

Score difference with first non-orthologous sequence - *A. fumigatus*:430 *A. fischeri*:430  
afum|EAL88081.1 100.00% afis|EAW23390.1 100.00%  
Bootstrap support for afum|EAL88081.1 as seed ortholog is 100%.  
Bootstrap support for afis|EAW23390.1 as seed ortholog is 100%.

---

Group of orthologs #7605. Best score 429 bits

Score difference with first non-orthologous sequence - *A. fumigatus*:429 *A. fischeri*:429  
afum|EAL89249.1 100.00% afis|EAW16645.1 100.00%  
Bootstrap support for afum|EAL89249.1 as seed ortholog is 100%.  
Bootstrap support for afis|EAW16645.1 as seed ortholog is 100%.

---

Group of orthologs #7606. Best score 429 bits

Score difference with first non-orthologous sequence - *A. fumigatus*:429 *A. fischeri*:429  
afum|EAL86558.1 100.00% afis|EAW20707.1 100.00%  
Bootstrap support for afum|EAL86558.1 as seed ortholog is 100%.  
Bootstrap support for afis|EAW20707.1 as seed ortholog is 100%.

---

Group of orthologs #7607. Best score 429 bits

Score difference with first non-orthologous sequence - *A. fumigatus*:429 *A. fischeri*:429  
afum|EAL91664.1 100.00% afis|EAW17856.1 100.00%  
Bootstrap support for afum|EAL91664.1 as seed ortholog is 100%.  
Bootstrap support for afis|EAW17856.1 as seed ortholog is 100%.

---

Group of orthologs #7608. Best score 429 bits

Score difference with first non-orthologous sequence - *A. fumigatus*:429 *A. fischeri*:429  
afum|EAL87336.1 100.00% afis|EAW23908.1 100.00%  
Bootstrap support for afum|EAL87336.1 as seed ortholog is 100%.  
Bootstrap support for afis|EAW23908.1 as seed ortholog is 100%.

---

Group of orthologs #7609. Best score 429 bits

Score difference with first non-orthologous sequence - *A. fumigatus*:429 *A. fischeri*:429  
afum|EAL89824.1 100.00% afis|EAW25149.1 100.00%  
Bootstrap support for afum|EAL89824.1 as seed ortholog is 100%.  
Bootstrap support for afis|EAW25149.1 as seed ortholog is 100%.

---

Group of orthologs #7610. Best score 429 bits

Score difference with first non-orthologous sequence - *A. fumigatus*:429 *A. fischeri*:429  
afum|EAL90014.1 100.00% afis|EAW25351.1 100.00%  
Bootstrap support for afum|EAL90014.1 as seed ortholog is 100%.  
Bootstrap support for afis|EAW25351.1 as seed ortholog is 100%.

---

Group of orthologs #7611. Best score 428 bits

Score difference with first non-orthologous sequence - *A. fumigatus*:428 *A. fischeri*:428  
afum|EAL85512.1 100.00% afis|EAW15839.1 100.00%

Bootstrap support for afum|EAL85512.1 as seed ortholog is 100%.  
Bootstrap support for afis|EAW15839.1 as seed ortholog is 100%.

---

Group of orthologs #7612. Best score 428 bits

Score difference with first non-orthologous sequence - *A. fumigatus*:428 *A. fischeri*:428

afum|EAL86378.1 100.00% afis|EAW16830.1 100.00%

Bootstrap support for afum|EAL86378.1 as seed ortholog is 100%.

Bootstrap support for afis|EAW16830.1 as seed ortholog is 100%.

---

Group of orthologs #7613. Best score 428 bits

Score difference with first non-orthologous sequence - *A. fumigatus*:428 *A. fischeri*:428

afum|EAL85900.1 100.00% afis|EAW24231.1 100.00%

Bootstrap support for afum|EAL85900.1 as seed ortholog is 100%.

Bootstrap support for afis|EAW24231.1 as seed ortholog is 100%.

---

Group of orthologs #7614. Best score 428 bits

Score difference with first non-orthologous sequence - *A. fumigatus*:428 *A. fischeri*:428

afum|EAL91003.1 100.00% afis|EAW22187.1 100.00%

Bootstrap support for afum|EAL91003.1 as seed ortholog is 100%.

Bootstrap support for afis|EAW22187.1 as seed ortholog is 100%.

---

Group of orthologs #7615. Best score 428 bits

Score difference with first non-orthologous sequence - *A. fumigatus*:428 *A. fischeri*:428

afum|EAL90164.1 100.00% afis|EAW25498.1 100.00%

Bootstrap support for afum|EAL90164.1 as seed ortholog is 100%.

Bootstrap support for afis|EAW25498.1 as seed ortholog is 100%.

---

Group of orthologs #7616. Best score 427 bits

Score difference with first non-orthologous sequence - *A. fumigatus*:427 *A. fischeri*:427

afum|EAL88513.1 100.00% afis|EAW15879.1 100.00%

Bootstrap support for afum|EAL88513.1 as seed ortholog is 100%.

Bootstrap support for afis|EAW15879.1 as seed ortholog is 100%.

---

Group of orthologs #7617. Best score 427 bits

Score difference with first non-orthologous sequence - *A. fumigatus*:427 *A. fischeri*:427

afum|EAL91648.1 100.00% afis|EAW17838.1 100.00%

Bootstrap support for afum|EAL91648.1 as seed ortholog is 100%.

Bootstrap support for afis|EAW17838.1 as seed ortholog is 100%.

---

Group of orthologs #7618. Best score 427 bits

Score difference with first non-orthologous sequence - *A. fumigatus*:427 *A. fischeri*:427

afum|EAL93576.2 100.00% afis|EAW17531.1 100.00%

Bootstrap support for afum|EAL93576.2 as seed ortholog is 100%.

Bootstrap support for afis|EAW17531.1 as seed ortholog is 100%.

---

Group of orthologs #7619. Best score 427 bits

Score difference with first non-orthologous sequence - *A. fumigatus*:427 *A. fischeri*:427

afum|EAL87910.1 100.00% afis|EAW23556.1 100.00%

Bootstrap support for afum|EAL87910.1 as seed ortholog is 100%.

Bootstrap support for afis|EAW23556.1 as seed ortholog is 100%.

---

Group of orthologs #7620. Best score 427 bits

Score difference with first non-orthologous sequence - *A. fumigatus*:427 *A. fischeri*:427

afum|EAL87847.2 100.00% afis|EAW23615.1 100.00%

Bootstrap support for afum|EAL87847.2 as seed ortholog is 100%.

Bootstrap support for afis|EAW23615.1 as seed ortholog is 100%.

---

Group of orthologs #7621. Best score 427 bits

Score difference with first non-orthologous sequence - *A. fumigatus*:427 *A. fischeri*:427

afum|EAL93474.1 100.00% afis|EAW18748.1 100.00%

Bootstrap support for afum|EAL93474.1 as seed ortholog is 100%.

Bootstrap support for afis|EAW18748.1 as seed ortholog is 100%.

---

Group of orthologs #7622. Best score 427 bits

Score difference with first non-orthologous sequence - *A. fumigatus*:427 *A. fischeri*:427

afum|EAL92255.1 100.00% afis|EAW21242.1 100.00%

Bootstrap support for afum|EAL92255.1 as seed ortholog is 100%.

Bootstrap support for afis|EAW21242.1 as seed ortholog is 100%.

---

Group of orthologs #7623. Best score 426 bits

Score difference with first non-orthologous sequence - *A. fumigatus*:426 *A. fischeri*:426

afum|EAL85703.1 100.00% afis|EAW15634.1 100.00%

Bootstrap support for afum|EAL85703.1 as seed ortholog is 100%.

Bootstrap support for afis|EAW15634.1 as seed ortholog is 100%.

---

Group of orthologs #7624. Best score 426 bits

Score difference with first non-orthologous sequence - *A. fumigatus*:426 *A. fischeri*:426

afum|EAL88766.2 100.00% afis|EAW16136.1 100.00%

Bootstrap support for afum|EAL88766.2 as seed ortholog is 100%.

Bootstrap support for afis|EAW16136.1 as seed ortholog is 100%.

---

Group of orthologs #7625. Best score 426 bits

Score difference with first non-orthologous sequence - *A. fumigatus*:426 *A. fischeri*:426

afum|EAL84485.2 100.00% afis|EAW20579.1 100.00%

Bootstrap support for afum|EAL84485.2 as seed ortholog is 100%.

Bootstrap support for afis|EAW20579.1 as seed ortholog is 100%.

---

Group of orthologs #7626. Best score 426 bits

Score difference with first non-orthologous sequence - *A. fumigatus*:426 *A. fischeri*:353

afum|EAL84428.1 100.00% afis|EAW20645.1 100.00%

Bootstrap support for afum|EAL84428.1 as seed ortholog is 100%.

Bootstrap support for afis|EAW20645.1 as seed ortholog is 100%.

---

Group of orthologs #7627. Best score 426 bits

Score difference with first non-orthologous sequence - *A. fumigatus*:426 *A. fischeri*:426

afum|EAL93159.2 100.00% afis|EAW18472.1 100.00%

Bootstrap support for afum|EAL93159.2 as seed ortholog is 100%.

Bootstrap support for afis|EAW18472.1 as seed ortholog is 100%.

---

Group of orthologs #7628. Best score 426 bits

Score difference with first non-orthologous sequence - *A. fumigatus*:426 *A. fischeri*:426

afum|EAL92298.1 100.00% afis|EAW21281.1 100.00%

Bootstrap support for afum|EAL92298.1 as seed ortholog is 100%.

Bootstrap support for afis|EAW21281.1 as seed ortholog is 100%.

---

Group of orthologs #7629. Best score 426 bits

Score difference with first non-orthologous sequence - *A. fumigatus*:426 *A. fischeri*:426

afum|EAL89976.1 100.00% afis|EAW25315.1 100.00%

Bootstrap support for afum|EAL89976.1 as seed ortholog is 100%.

Bootstrap support for afis|EAW25315.1 as seed ortholog is 100%.

---

Group of orthologs #7630. Best score 426 bits



Score difference with first non-orthologous sequence - *A. fumigatus*:426 *A. fischeri*:426  
afum|EAL91964.1 100.00% afis|EAW24110.1 100.00%  
Bootstrap support for afum|EAL91964.1 as seed ortholog is 100%.  
Bootstrap support for afis|EAW24110.1 as seed ortholog is 100%.

---

Group of orthologs #7631. Best score 425 bits

Score difference with first non-orthologous sequence - *A. fumigatus*:425 *A. fischeri*:425  
afum|EAL93151.2 100.00% afis|EAW18464.1 100.00%  
Bootstrap support for afum|EAL93151.2 as seed ortholog is 100%.  
Bootstrap support for afis|EAW18464.1 as seed ortholog is 100%.

---

Group of orthologs #7632. Best score 425 bits

Score difference with first non-orthologous sequence - *A. fumigatus*:425 *A. fischeri*:425  
afum|EAL94038.1 100.00% afis|EAW19320.1 100.00%  
Bootstrap support for afum|EAL94038.1 as seed ortholog is 100%.  
Bootstrap support for afis|EAW19320.1 as seed ortholog is 100%.

---

Group of orthologs #7633. Best score 425 bits

Score difference with first non-orthologous sequence - *A. fumigatus*:425 *A. fischeri*:425  
afum|EAL90743.1 100.00% afis|EAW22448.1 100.00%  
Bootstrap support for afum|EAL90743.1 as seed ortholog is 100%.  
Bootstrap support for afis|EAW22448.1 as seed ortholog is 100%.

---

Group of orthologs #7634. Best score 425 bits

Score difference with first non-orthologous sequence - *A. fumigatus*:425 *A. fischeri*:425  
afum|EAL90252.1 100.00% afis|EAW22945.1 100.00%  
Bootstrap support for afum|EAL90252.1 as seed ortholog is 100%.  
Bootstrap support for afis|EAW22945.1 as seed ortholog is 100%.

---

Group of orthologs #7635. Best score 425 bits

Score difference with first non-orthologous sequence - *A. fumigatus*:425 *A. fischeri*:425  
afum|EAL92734.1 100.00% afis|EAW21700.1 100.00%  
Bootstrap support for afum|EAL92734.1 as seed ortholog is 100%.  
Bootstrap support for afis|EAW21700.1 as seed ortholog is 100%.

---

Group of orthologs #7636. Best score 425 bits

Score difference with first non-orthologous sequence - *A. fumigatus*:425 *A. fischeri*:425  
afum|EAL92743.1 100.00% afis|EAW21708.1 100.00%  
Bootstrap support for afum|EAL92743.1 as seed ortholog is 100%.  
Bootstrap support for afis|EAW21708.1 as seed ortholog is 100%.

---

Group of orthologs #7637. Best score 424 bits

Score difference with first non-orthologous sequence - *A. fumigatus*:424 *A. fischeri*:424  
afum|EAL88523.1 100.00% afis|EAW15889.1 100.00%  
Bootstrap support for afum|EAL88523.1 as seed ortholog is 100%.  
Bootstrap support for afis|EAW15889.1 as seed ortholog is 100%.

---

Group of orthologs #7638. Best score 424 bits

Score difference with first non-orthologous sequence - *A. fumigatus*:424 *A. fischeri*:424  
afum|EAL84784.1 100.00% afis|EAW20849.1 100.00%  
Bootstrap support for afum|EAL84784.1 as seed ortholog is 100%.  
Bootstrap support for afis|EAW20849.1 as seed ortholog is 100%.

---

Group of orthologs #7639. Best score 424 bits

Score difference with first non-orthologous sequence - *A. fumigatus*:424 *A. fischeri*:424  
afum|EAL88370.1 100.00% afis|EAW23109.1 100.00%

Bootstrap support for afum|EAL88370.1 as seed ortholog is 100%.  
Bootstrap support for afis|EAW23109.1 as seed ortholog is 100%.

---

Group of orthologs #7640. Best score 424 bits

Score difference with first non-orthologous sequence - *A. fumigatus*:424 *A. fischeri*:367

afum|EAL93434.1 100.00% afis|EAW18711.1 100.00%

Bootstrap support for afum|EAL93434.1 as seed ortholog is 100%.

Bootstrap support for afis|EAW18711.1 as seed ortholog is 100%.

---

Group of orthologs #7641. Best score 424 bits

Score difference with first non-orthologous sequence - *A. fumigatus*:424 *A. fischeri*:424

afum|EAL92452.2 100.00% afis|EAW21437.1 100.00%

Bootstrap support for afum|EAL92452.2 as seed ortholog is 100%.

Bootstrap support for afis|EAW21437.1 as seed ortholog is 100%.

---

Group of orthologs #7642. Best score 424 bits

Score difference with first non-orthologous sequence - *A. fumigatus*:424 *A. fischeri*:424

afum|EAL89383.2 100.00% afis|EAW24736.1 100.00%

Bootstrap support for afum|EAL89383.2 as seed ortholog is 100%.

Bootstrap support for afis|EAW24736.1 as seed ortholog is 100%.

---

Group of orthologs #7643. Best score 424 bits

Score difference with first non-orthologous sequence - *A. fumigatus*:424 *A. fischeri*:424

afum|EAL92823.2 100.00% afis|EAW21798.1 100.00%

Bootstrap support for afum|EAL92823.2 as seed ortholog is 100%.

Bootstrap support for afis|EAW21798.1 as seed ortholog is 100%.

---

Group of orthologs #7644. Best score 424 bits

Score difference with first non-orthologous sequence - *A. fumigatus*:424 *A. fischeri*:424

afum|EAL89630.2 100.00% afis|EAW24971.1 100.00%

Bootstrap support for afum|EAL89630.2 as seed ortholog is 100%.

Bootstrap support for afis|EAW24971.1 as seed ortholog is 100%.

---

Group of orthologs #7645. Best score 423 bits

Score difference with first non-orthologous sequence - *A. fumigatus*:423 *A. fischeri*:423

afum|EAL88826.2 100.00% afis|EAW16195.1 100.00%

Bootstrap support for afum|EAL88826.2 as seed ortholog is 100%.

Bootstrap support for afis|EAW16195.1 as seed ortholog is 100%.

---

Group of orthologs #7646. Best score 423 bits

Score difference with first non-orthologous sequence - *A. fumigatus*:423 *A. fischeri*:423

afum|EAL84841.1 100.00% afis|EAW20782.1 100.00%

Bootstrap support for afum|EAL84841.1 as seed ortholog is 100%.

Bootstrap support for afis|EAW20782.1 as seed ortholog is 100%.

---

Group of orthologs #7647. Best score 423 bits

Score difference with first non-orthologous sequence - *A. fumigatus*:362 *A. fischeri*:423

afum|EAL86231.1 100.00% afis|EAW24568.1 100.00%

Bootstrap support for afum|EAL86231.1 as seed ortholog is 100%.

Bootstrap support for afis|EAW24568.1 as seed ortholog is 100%.

---

Group of orthologs #7648. Best score 423 bits

Score difference with first non-orthologous sequence - *A. fumigatus*:423 *A. fischeri*:423

afum|EAL87228.2 100.00% afis|EAW23794.1 100.00%

Bootstrap support for afum|EAL87228.2 as seed ortholog is 100%.

Bootstrap support for afis|EAW23794.1 as seed ortholog is 100%.

---

Group of orthologs #7649. Best score 423 bits

Score difference with first non-orthologous sequence - *A. fumigatus*:423 *A. fischeri*:423

afum|EAL88005.1 100.00% afis|EAW23461.1 100.00%

Bootstrap support for afum|EAL88005.1 as seed ortholog is 100%.

Bootstrap support for afis|EAW23461.1 as seed ortholog is 100%.

---

Group of orthologs #7650. Best score 423 bits

Score difference with first non-orthologous sequence - *A. fumigatus*:423 *A. fischeri*:423

afum|EAL93393.2 100.00% afis|EAW18673.1 100.00%

Bootstrap support for afum|EAL93393.2 as seed ortholog is 100%.

Bootstrap support for afis|EAW18673.1 as seed ortholog is 100%.

---

Group of orthologs #7651. Best score 423 bits

Score difference with first non-orthologous sequence - *A. fumigatus*:423 *A. fischeri*:423

afum|EAL92162.2 100.00% afis|EAW21143.1 100.00%

Bootstrap support for afum|EAL92162.2 as seed ortholog is 100%.

Bootstrap support for afis|EAW21143.1 as seed ortholog is 100%.

---

Group of orthologs #7652. Best score 423 bits

Score difference with first non-orthologous sequence - *A. fumigatus*:423 *A. fischeri*:423

afum|EAL89813.1 100.00% afis|EAW25141.1 100.00%

Bootstrap support for afum|EAL89813.1 as seed ortholog is 100%.

Bootstrap support for afis|EAW25141.1 as seed ortholog is 100%.

---

Group of orthologs #7653. Best score 422 bits

Score difference with first non-orthologous sequence - *A. fumigatus*:422 *A. fischeri*:422

afum|EAL89090.1 100.00% afis|EAW16496.1 100.00%

Bootstrap support for afum|EAL89090.1 as seed ortholog is 100%.

Bootstrap support for afis|EAW16496.1 as seed ortholog is 100%.

---

Group of orthologs #7654. Best score 422 bits

Score difference with first non-orthologous sequence - *A. fumigatus*:422 *A. fischeri*:422

afum|EAL88348.1 100.00% afis|EAW23133.1 100.00%

Bootstrap support for afum|EAL88348.1 as seed ortholog is 100%.

Bootstrap support for afis|EAW23133.1 as seed ortholog is 100%.

---

Group of orthologs #7655. Best score 422 bits

Score difference with first non-orthologous sequence - *A. fumigatus*:381 *A. fischeri*:422

afum|EAL92612.1 100.00% afis|EAW21594.1 100.00%

Bootstrap support for afum|EAL92612.1 as seed ortholog is 100%.

Bootstrap support for afis|EAW21594.1 as seed ortholog is 100%.

---

Group of orthologs #7656. Best score 422 bits

Score difference with first non-orthologous sequence - *A. fumigatus*:422 *A. fischeri*:422

afum|EAL90027.1 100.00% afis|EAW25367.1 100.00%

Bootstrap support for afum|EAL90027.1 as seed ortholog is 100%.

Bootstrap support for afis|EAW25367.1 as seed ortholog is 100%.

---

Group of orthologs #7657. Best score 421 bits

Score difference with first non-orthologous sequence - *A. fumigatus*:421 *A. fischeri*:421

afum|EAL91573.1 100.00% afis|EAW17763.1 100.00%

Bootstrap support for afum|EAL91573.1 as seed ortholog is 100%.

Bootstrap support for afis|EAW17763.1 as seed ortholog is 100%.

---

Group of orthologs #7658. Best score 421 bits

Score difference with first non-orthologous sequence - *A. fumigatus*:421 *A. fischeri*:421  
afum|EAL86118.1 100.00% afis|EAW24449.1 100.00%  
Bootstrap support for afum|EAL86118.1 as seed ortholog is 100%.  
Bootstrap support for afis|EAW24449.1 as seed ortholog is 100%.

---

Group of orthologs #7659. Best score 420 bits

Score difference with first non-orthologous sequence - *A. fumigatus*:420 *A. fischeri*:420  
afum|EAL85648.1 100.00% afis|EAW15700.1 100.00%  
Bootstrap support for afum|EAL85648.1 as seed ortholog is 100%.  
Bootstrap support for afis|EAW15700.1 as seed ortholog is 100%.

---

Group of orthologs #7660. Best score 420 bits

Score difference with first non-orthologous sequence - *A. fumigatus*:420 *A. fischeri*:420  
afum|EAL85651.2 100.00% afis|EAW15697.1 100.00%  
Bootstrap support for afum|EAL85651.2 as seed ortholog is 100%.  
Bootstrap support for afis|EAW15697.1 as seed ortholog is 100%.

---

Group of orthologs #7661. Best score 420 bits

Score difference with first non-orthologous sequence - *A. fumigatus*:420 *A. fischeri*:420  
afum|EAL87256.1 100.00% afis|EAW23821.1 100.00%  
Bootstrap support for afum|EAL87256.1 as seed ortholog is 100%.  
Bootstrap support for afis|EAW23821.1 as seed ortholog is 100%.

---

Group of orthologs #7662. Best score 420 bits

Score difference with first non-orthologous sequence - *A. fumigatus*:420 *A. fischeri*:420  
afum|EAL93803.1 100.00% afis|EAW19075.1 100.00%  
Bootstrap support for afum|EAL93803.1 as seed ortholog is 100%.  
Bootstrap support for afis|EAW19075.1 as seed ortholog is 100%.

---

Group of orthologs #7663. Best score 420 bits

Score difference with first non-orthologous sequence - *A. fumigatus*:420 *A. fischeri*:420  
afum|EBA27332.1 100.00% afis|EAW23449.1 100.00%  
Bootstrap support for afum|EBA27332.1 as seed ortholog is 100%.  
Bootstrap support for afis|EAW23449.1 as seed ortholog is 100%.

---

Group of orthologs #7664. Best score 419 bits

Score difference with first non-orthologous sequence - *A. fumigatus*:419 *A. fischeri*:419  
afum|EAL91112.2 100.00% afis|EAW17303.1 100.00%  
Bootstrap support for afum|EAL91112.2 as seed ortholog is 100%.  
Bootstrap support for afis|EAW17303.1 as seed ortholog is 100%.

---

Group of orthologs #7665. Best score 419 bits

Score difference with first non-orthologous sequence - *A. fumigatus*:419 *A. fischeri*:419  
afum|EAL93932.1 100.00% afis|EAW19202.1 100.00%  
Bootstrap support for afum|EAL93932.1 as seed ortholog is 100%.  
Bootstrap support for afis|EAW19202.1 as seed ortholog is 100%.

---

Group of orthologs #7666. Best score 418 bits

Score difference with first non-orthologous sequence - *A. fumigatus*:418 *A. fischeri*:418  
afum|EAL88488.1 100.00% afis|EAW15852.1 100.00%  
Bootstrap support for afum|EAL88488.1 as seed ortholog is 100%.  
Bootstrap support for afis|EAW15852.1 as seed ortholog is 100%.

---

Group of orthologs #7667. Best score 418 bits

Score difference with first non-orthologous sequence - *A. fumigatus*:418 *A. fischeri*:418  
afum|EAL84437.1 100.00% afis|EAW20630.1 100.00%

Bootstrap support for afum|EAL84437.1 as seed ortholog is 100%.  
Bootstrap support for afis|EAW20630.1 as seed ortholog is 100%.

---

Group of orthologs #7668. Best score 418 bits

Score difference with first non-orthologous sequence - *A. fumigatus*:418 *A. fischeri*:418

afum|EAL85328.1 100.00% afis|EAW20211.1 100.00%

Bootstrap support for afum|EAL85328.1 as seed ortholog is 100%.

Bootstrap support for afis|EAW20211.1 as seed ortholog is 100%.

---

Group of orthologs #7669. Best score 417 bits

Score difference with first non-orthologous sequence - *A. fumigatus*:417 *A. fischeri*:417

afum|EAL84603.1 100.00% afis|EAW20450.1 100.00%

Bootstrap support for afum|EAL84603.1 as seed ortholog is 100%.

Bootstrap support for afis|EAW20450.1 as seed ortholog is 100%.

---

Group of orthologs #7670. Best score 416 bits

Score difference with first non-orthologous sequence - *A. fumigatus*:314 *A. fischeri*:138

afum|EAL85780.1 100.00% afis|EAW16713.1 100.00%

Bootstrap support for afum|EAL85780.1 as seed ortholog is 100%.

Bootstrap support for afis|EAW16713.1 as seed ortholog is 99%.

---

Group of orthologs #7671. Best score 416 bits

Score difference with first non-orthologous sequence - *A. fumigatus*:416 *A. fischeri*:369

afum|EAL91704.1 100.00% afis|EAW17896.1 100.00%

Bootstrap support for afum|EAL91704.1 as seed ortholog is 100%.

Bootstrap support for afis|EAW17896.1 as seed ortholog is 100%.

---

Group of orthologs #7672. Best score 416 bits

Score difference with first non-orthologous sequence - *A. fumigatus*:416 *A. fischeri*:416

afum|EAL91014.1 100.00% afis|EAW22175.1 100.00%

Bootstrap support for afum|EAL91014.1 as seed ortholog is 100%.

Bootstrap support for afis|EAW22175.1 as seed ortholog is 100%.

---

Group of orthologs #7673. Best score 415 bits

Score difference with first non-orthologous sequence - *A. fumigatus*:415 *A. fischeri*:415

afum|EBA27182.1 100.00% afis|EAW20571.1 100.00%

afis|EAW15461.1 53.82%

Bootstrap support for afum|EBA27182.1 as seed ortholog is 100%.

Bootstrap support for afis|EAW20571.1 as seed ortholog is 100%.

---

Group of orthologs #7674. Best score 415 bits

Score difference with first non-orthologous sequence - *A. fumigatus*:415 *A. fischeri*:415

afum|EAL88591.1 100.00% afis|EAW15958.1 100.00%

Bootstrap support for afum|EAL88591.1 as seed ortholog is 100%.

Bootstrap support for afis|EAW15958.1 as seed ortholog is 100%.

---

Group of orthologs #7675. Best score 415 bits

Score difference with first non-orthologous sequence - *A. fumigatus*:415 *A. fischeri*:305

afum|EAL84831.1 100.00% afis|EAW20798.1 100.00%

Bootstrap support for afum|EAL84831.1 as seed ortholog is 100%.

Bootstrap support for afis|EAW20798.1 as seed ortholog is 100%.

---

Group of orthologs #7676. Best score 415 bits

Score difference with first non-orthologous sequence - *A. fumigatus*:44 *A. fischeri*:415

afum|EAL90927.1 100.00% afis|EAW17066.1 100.00%

Bootstrap support for afum|EAL90927.1 as seed ortholog is 99%.

Bootstrap support for afis|EAW17066.1 as seed ortholog is 100%.

---

Group of orthologs #7677. Best score 415 bits

Score difference with first non-orthologous sequence - *A. fumigatus*:415 *A. fischeri*:415

afum|EAL91576.1 100.00% afis|EAW17767.1 100.00%

Bootstrap support for afum|EAL91576.1 as seed ortholog is 100%.

Bootstrap support for afis|EAW17767.1 as seed ortholog is 100%.

---

Group of orthologs #7678. Best score 415 bits

Score difference with first non-orthologous sequence - *A. fumigatus*:415 *A. fischeri*:415

afum|EAL91652.1 100.00% afis|EAW17843.1 100.00%

Bootstrap support for afum|EAL91652.1 as seed ortholog is 100%.

Bootstrap support for afis|EAW17843.1 as seed ortholog is 100%.

---

Group of orthologs #7679. Best score 415 bits

Score difference with first non-orthologous sequence - *A. fumigatus*:415 *A. fischeri*:415

afum|EAL92676.1 100.00% afis|EAW21642.1 100.00%

Bootstrap support for afum|EAL92676.1 as seed ortholog is 100%.

Bootstrap support for afis|EAW21642.1 as seed ortholog is 100%.

---

Group of orthologs #7680. Best score 415 bits

Score difference with first non-orthologous sequence - *A. fumigatus*:415 *A. fischeri*:415

afum|EAL89466.1 100.00% afis|EAW24822.1 100.00%

Bootstrap support for afum|EAL89466.1 as seed ortholog is 100%.

Bootstrap support for afis|EAW24822.1 as seed ortholog is 100%.

---

Group of orthologs #7681. Best score 415 bits

Score difference with first non-orthologous sequence - *A. fumigatus*:415 *A. fischeri*:415

afum|EAL92810.1 100.00% afis|EAW21782.1 100.00%

Bootstrap support for afum|EAL92810.1 as seed ortholog is 100%.

Bootstrap support for afis|EAW21782.1 as seed ortholog is 100%.

---

Group of orthologs #7682. Best score 414 bits

Score difference with first non-orthologous sequence - *A. fumigatus*:414 *A. fischeri*:414

afum|EAL87928.1 100.00% afis|EAW23538.1 100.00%

Bootstrap support for afum|EAL87928.1 as seed ortholog is 100%.

Bootstrap support for afis|EAW23538.1 as seed ortholog is 100%.

---

Group of orthologs #7683. Best score 414 bits

Score difference with first non-orthologous sequence - *A. fumigatus*:414 *A. fischeri*:414

afum|EAL93346.1 100.00% afis|EAW18633.1 100.00%

Bootstrap support for afum|EAL93346.1 as seed ortholog is 100%.

Bootstrap support for afis|EAW18633.1 as seed ortholog is 100%.

---

Group of orthologs #7684. Best score 413 bits

Score difference with first non-orthologous sequence - *A. fumigatus*:413 *A. fischeri*:413

afum|EBA27270.1 100.00% afis|EAW16819.1 100.00%

Bootstrap support for afum|EBA27270.1 as seed ortholog is 100%.

Bootstrap support for afis|EAW16819.1 as seed ortholog is 100%.

---

Group of orthologs #7685. Best score 413 bits

Score difference with first non-orthologous sequence - *A. fumigatus*:413 *A. fischeri*:413

afum|EAL87236.1 100.00% afis|EAW23802.1 100.00%

Bootstrap support for afum|EAL87236.1 as seed ortholog is 100%.

Bootstrap support for afis|EAW23802.1 as seed ortholog is 100%.

---

Group of orthologs #7686. Best score 413 bits

Score difference with first non-orthologous sequence - *A. fumigatus*:413 *A. fischeri*:413

afum|EAL89758.2 100.00% afis|EAW25089.1 100.00%

Bootstrap support for afum|EAL89758.2 as seed ortholog is 100%.

Bootstrap support for afis|EAW25089.1 as seed ortholog is 100%.

---

Group of orthologs #7687. Best score 412 bits

Score difference with first non-orthologous sequence - *A. fumigatus*:412 *A. fischeri*:412

afum|EAL86681.1 100.00% afis|EAW17264.1 100.00%

Bootstrap support for afum|EAL86681.1 as seed ortholog is 100%.

Bootstrap support for afis|EAW17264.1 as seed ortholog is 100%.

---

Group of orthologs #7688. Best score 412 bits

Score difference with first non-orthologous sequence - *A. fumigatus*:412 *A. fischeri*:412

afum|EAL84617.1 100.00% afis|EAW20435.1 100.00%

Bootstrap support for afum|EAL84617.1 as seed ortholog is 100%.

Bootstrap support for afis|EAW20435.1 as seed ortholog is 100%.

---

Group of orthologs #7689. Best score 412 bits

Score difference with first non-orthologous sequence - *A. fumigatus*:412 *A. fischeri*:412

afum|EAL85201.1 100.00% afis|EAW20082.1 100.00%

Bootstrap support for afum|EAL85201.1 as seed ortholog is 100%.

Bootstrap support for afis|EAW20082.1 as seed ortholog is 100%.

---

Group of orthologs #7690. Best score 412 bits

Score difference with first non-orthologous sequence - *A. fumigatus*:412 *A. fischeri*:412

afum|EAL84747.1 100.00% afis|EAW20886.1 100.00%

Bootstrap support for afum|EAL84747.1 as seed ortholog is 100%.

Bootstrap support for afis|EAW20886.1 as seed ortholog is 100%.

---

Group of orthologs #7691. Best score 412 bits

Score difference with first non-orthologous sequence - *A. fumigatus*:412 *A. fischeri*:412

afum|EAL91735.2 100.00% afis|EAW17924.1 100.00%

Bootstrap support for afum|EAL91735.2 as seed ortholog is 100%.

Bootstrap support for afis|EAW17924.1 as seed ortholog is 100%.

---

Group of orthologs #7692. Best score 412 bits

Score difference with first non-orthologous sequence - *A. fumigatus*:412 *A. fischeri*:412

afum|EAL92166.1 100.00% afis|EAW21147.1 100.00%

Bootstrap support for afum|EAL92166.1 as seed ortholog is 100%.

Bootstrap support for afis|EAW21147.1 as seed ortholog is 100%.

---

Group of orthologs #7693. Best score 411 bits

Score difference with first non-orthologous sequence - *A. fumigatus*:266 *A. fischeri*:411

afum|EAL84430.1 100.00% afis|EAW20639.1 100.00%

Bootstrap support for afum|EAL84430.1 as seed ortholog is 100%.

Bootstrap support for afis|EAW20639.1 as seed ortholog is 100%.

---

Group of orthologs #7694. Best score 411 bits

Score difference with first non-orthologous sequence - *A. fumigatus*:411 *A. fischeri*:411

afum|EAL90234.1 100.00% afis|EAW22963.1 100.00%

Bootstrap support for afum|EAL90234.1 as seed ortholog is 100%.

Bootstrap support for afis|EAW22963.1 as seed ortholog is 100%.

---

Group of orthologs #7695. Best score 411 bits

Score difference with first non-orthologous sequence - *A. fumigatus*:411 *A. fischeri*:411

|                 |         |                 |         |
|-----------------|---------|-----------------|---------|
| afum EAL89322.1 | 100.00% | afis EAW24664.1 | 100.00% |
|-----------------|---------|-----------------|---------|

Bootstrap support for afum|EAL89322.1 as seed ortholog is 100%.

Bootstrap support for afis|EAW24664.1 as seed ortholog is 100%.

---

Group of orthologs #7696. Best score 410 bits

Score difference with first non-orthologous sequence - *A. fumigatus*:410 *A. fischeri*:410

|                 |         |                 |         |
|-----------------|---------|-----------------|---------|
| afum EAL85257.1 | 100.00% | afis EAW20142.1 | 100.00% |
|-----------------|---------|-----------------|---------|

Bootstrap support for afum|EAL85257.1 as seed ortholog is 100%.

Bootstrap support for afis|EAW20142.1 as seed ortholog is 100%.

---

Group of orthologs #7697. Best score 410 bits

Score difference with first non-orthologous sequence - *A. fumigatus*:410 *A. fischeri*:410

|                 |         |                 |         |
|-----------------|---------|-----------------|---------|
| afum EAL86236.1 | 100.00% | afis EAW20690.1 | 100.00% |
|-----------------|---------|-----------------|---------|

Bootstrap support for afum|EAL86236.1 as seed ortholog is 100%.

Bootstrap support for afis|EAW20690.1 as seed ortholog is 100%.

---

Group of orthologs #7698. Best score 410 bits

Score difference with first non-orthologous sequence - *A. fumigatus*:410 *A. fischeri*:410

|                 |         |                 |         |
|-----------------|---------|-----------------|---------|
| afum EBA27463.1 | 100.00% | afis EAW21535.1 | 100.00% |
|-----------------|---------|-----------------|---------|

Bootstrap support for afum|EBA27463.1 as seed ortholog is 100%.

Bootstrap support for afis|EAW21535.1 as seed ortholog is 100%.

---

Group of orthologs #7699. Best score 409 bits

Score difference with first non-orthologous sequence - *A. fumigatus*:409 *A. fischeri*:409

|                 |         |                 |         |
|-----------------|---------|-----------------|---------|
| afum EAL91547.1 | 100.00% | afis EAW17732.1 | 100.00% |
|-----------------|---------|-----------------|---------|

Bootstrap support for afum|EAL91547.1 as seed ortholog is 100%.

Bootstrap support for afis|EAW17732.1 as seed ortholog is 100%.

---

Group of orthologs #7700. Best score 409 bits

Score difference with first non-orthologous sequence - *A. fumigatus*:409 *A. fischeri*:409

|                 |         |                 |         |
|-----------------|---------|-----------------|---------|
| afum EAL91788.1 | 100.00% | afis EAW17979.1 | 100.00% |
|-----------------|---------|-----------------|---------|

Bootstrap support for afum|EAL91788.1 as seed ortholog is 100%.

Bootstrap support for afis|EAW17979.1 as seed ortholog is 100%.

---

Group of orthologs #7701. Best score 409 bits

Score difference with first non-orthologous sequence - *A. fumigatus*:409 *A. fischeri*:409

|                 |         |                 |         |
|-----------------|---------|-----------------|---------|
| afum EAL87211.1 | 100.00% | afis EAW23777.1 | 100.00% |
|-----------------|---------|-----------------|---------|

Bootstrap support for afum|EAL87211.1 as seed ortholog is 100%.

Bootstrap support for afis|EAW23777.1 as seed ortholog is 100%.

---

Group of orthologs #7702. Best score 409 bits

Score difference with first non-orthologous sequence - *A. fumigatus*:409 *A. fischeri*:409

|                 |         |                 |         |
|-----------------|---------|-----------------|---------|
| afum EAL87411.1 | 100.00% | afis EAW23981.1 | 100.00% |
|-----------------|---------|-----------------|---------|

Bootstrap support for afum|EAL87411.1 as seed ortholog is 100%.

Bootstrap support for afis|EAW23981.1 as seed ortholog is 100%.

---

Group of orthologs #7703. Best score 409 bits

Score difference with first non-orthologous sequence - *A. fumigatus*:409 *A. fischeri*:409

|                 |         |                 |         |
|-----------------|---------|-----------------|---------|
| afum EAL88450.1 | 100.00% | afis EAW23032.1 | 100.00% |
|-----------------|---------|-----------------|---------|

Bootstrap support for afum|EAL88450.1 as seed ortholog is 100%.

Bootstrap support for afis|EAW23032.1 as seed ortholog is 100%.

---

Group of orthologs #7704. Best score 409 bits

Score difference with first non-orthologous sequence - *A. fumigatus*:409 *A. fischeri*:409

|                 |         |                 |         |
|-----------------|---------|-----------------|---------|
| afum EAL90537.1 | 100.00% | afis EAW22655.1 | 100.00% |
|-----------------|---------|-----------------|---------|

Bootstrap support for afum|EAL90537.1 as seed ortholog is 100%.



Bootstrap support for afis|EAW22655.1 as seed ortholog is 100%.

---

Group of orthologs #7705. Best score 408 bits

Score difference with first non-orthologous sequence - *A. fumigatus*:408 *A. fischeri*:408

afum|EAL85811.1 100.00% afis|EAW15518.1 100.00%

Bootstrap support for afum|EAL85811.1 as seed ortholog is 100%.

Bootstrap support for afis|EAW15518.1 as seed ortholog is 100%.

---

Group of orthologs #7706. Best score 408 bits

Score difference with first non-orthologous sequence - *A. fumigatus*:408 *A. fischeri*:408

afum|EAL88516.1 100.00% afis|EAW15882.1 100.00%

Bootstrap support for afum|EAL88516.1 as seed ortholog is 100%.

Bootstrap support for afis|EAW15882.1 as seed ortholog is 100%.

---

Group of orthologs #7707. Best score 408 bits

Score difference with first non-orthologous sequence - *A. fumigatus*:408 *A. fischeri*:408

afum|EAL86093.1 100.00% afis|EAW24425.1 100.00%

Bootstrap support for afum|EAL86093.1 as seed ortholog is 100%.

Bootstrap support for afis|EAW24425.1 as seed ortholog is 100%.

---

Group of orthologs #7708. Best score 408 bits

Score difference with first non-orthologous sequence - *A. fumigatus*:408 *A. fischeri*:408

afum|EAL93429.1 100.00% afis|EAW18706.1 100.00%

Bootstrap support for afum|EAL93429.1 as seed ortholog is 100%.

Bootstrap support for afis|EAW18706.1 as seed ortholog is 100%.

---

Group of orthologs #7709. Best score 408 bits

Score difference with first non-orthologous sequence - *A. fumigatus*:408 *A. fischeri*:408

afum|EAL93029.1 100.00% afis|EAW22014.1 100.00%

Bootstrap support for afum|EAL93029.1 as seed ortholog is 100%.

Bootstrap support for afis|EAW22014.1 as seed ortholog is 100%.

---

Group of orthologs #7710. Best score 407 bits

Score difference with first non-orthologous sequence - *A. fumigatus*:407 *A. fischeri*:407

afum|EAL84446.1 100.00% afis|EAW20615.1 100.00%

Bootstrap support for afum|EAL84446.1 as seed ortholog is 100%.

Bootstrap support for afis|EAW20615.1 as seed ortholog is 100%.

---

Group of orthologs #7711. Best score 407 bits

Score difference with first non-orthologous sequence - *A. fumigatus*:407 *A. fischeri*:407

afum|EAL93411.2 100.00% afis|EAW18690.1 100.00%

Bootstrap support for afum|EAL93411.2 as seed ortholog is 100%.

Bootstrap support for afis|EAW18690.1 as seed ortholog is 100%.

---

Group of orthologs #7712. Best score 407 bits

Score difference with first non-orthologous sequence - *A. fumigatus*:407 *A. fischeri*:407

afum|EAL92598.1 100.00% afis|EAW21580.1 100.00%

Bootstrap support for afum|EAL92598.1 as seed ortholog is 100%.

Bootstrap support for afis|EAW21580.1 as seed ortholog is 100%.

---

Group of orthologs #7713. Best score 407 bits

Score difference with first non-orthologous sequence - *A. fumigatus*:407 *A. fischeri*:407

afum|EAL92605.1 100.00% afis|EAW21587.1 100.00%

Bootstrap support for afum|EAL92605.1 as seed ortholog is 100%.

Bootstrap support for afis|EAW21587.1 as seed ortholog is 100%.

---

Group of orthologs #7714. Best score 406 bits

Score difference with first non-orthologous sequence - *A. fumigatus*:406 *A. fischeri*:406

afum|EAL86332.1 100.00% afis|EAW16761.1 100.00%

Bootstrap support for afum|EAL86332.1 as seed ortholog is 100%.

Bootstrap support for afis|EAW16761.1 as seed ortholog is 100%.

---

Group of orthologs #7715. Best score 406 bits

Score difference with first non-orthologous sequence - *A. fumigatus*:406 *A. fischeri*:406

afum|EAL86619.2 100.00% afis|EAW17191.1 100.00%

Bootstrap support for afum|EAL86619.2 as seed ortholog is 100%.

Bootstrap support for afis|EAW17191.1 as seed ortholog is 100%.

---

Group of orthologs #7716. Best score 406 bits

Score difference with first non-orthologous sequence - *A. fumigatus*:406 *A. fischeri*:406

afum|EAL90022.1 100.00% afis|EAW25360.1 100.00%

Bootstrap support for afum|EAL90022.1 as seed ortholog is 100%.

Bootstrap support for afis|EAW25360.1 as seed ortholog is 100%.

---

Group of orthologs #7717. Best score 405 bits

Score difference with first non-orthologous sequence - *A. fumigatus*:405 *A. fischeri*:405

afum|EAL88716.1 100.00% afis|EAW16084.1 100.00%

Bootstrap support for afum|EAL88716.1 as seed ortholog is 100%.

Bootstrap support for afis|EAW16084.1 as seed ortholog is 100%.

---

Group of orthologs #7718. Best score 405 bits

Score difference with first non-orthologous sequence - *A. fumigatus*:405 *A. fischeri*:405

afum|EAL84847.1 100.00% afis|EAW20772.1 100.00%

Bootstrap support for afum|EAL84847.1 as seed ortholog is 100%.

Bootstrap support for afis|EAW20772.1 as seed ortholog is 100%.

---

Group of orthologs #7719. Best score 405 bits

Score difference with first non-orthologous sequence - *A. fumigatus*:405 *A. fischeri*:405

afum|EAL86813.1 100.00% afis|EAW19714.1 100.00%

Bootstrap support for afum|EAL86813.1 as seed ortholog is 100%.

Bootstrap support for afis|EAW19714.1 as seed ortholog is 100%.

---

Group of orthologs #7720. Best score 405 bits

Score difference with first non-orthologous sequence - *A. fumigatus*:405 *A. fischeri*:405

afum|EAL92134.1 100.00% afis|EAW21111.1 100.00%

Bootstrap support for afum|EAL92134.1 as seed ortholog is 100%.

Bootstrap support for afis|EAW21111.1 as seed ortholog is 100%.

---

Group of orthologs #7721. Best score 405 bits

Score difference with first non-orthologous sequence - *A. fumigatus*:405 *A. fischeri*:405

afum|EBA27327.1 100.00% afis|EAW23528.1 100.00%

Bootstrap support for afum|EBA27327.1 as seed ortholog is 100%.

Bootstrap support for afis|EAW23528.1 as seed ortholog is 100%.

---

Group of orthologs #7722. Best score 404 bits

Score difference with first non-orthologous sequence - *A. fumigatus*:404 *A. fischeri*:404

afum|EAL89513.1 100.00% afis|EAW24863.1 100.00%

Bootstrap support for afum|EAL89513.1 as seed ortholog is 100%.

Bootstrap support for afis|EAW24863.1 as seed ortholog is 100%.

---

Group of orthologs #7723. Best score 404 bits

Score difference with first non-orthologous sequence - *A. fumigatus*:404 *A. fischeri*:404

|                 |         |                 |         |
|-----------------|---------|-----------------|---------|
| afum EAL89600.1 | 100.00% | afis EAW24943.1 | 100.00% |
|-----------------|---------|-----------------|---------|

Bootstrap support for afum|EAL89600.1 as seed ortholog is 100%.

Bootstrap support for afis|EAW24943.1 as seed ortholog is 100%.

---

Group of orthologs #7724. Best score 404 bits

Score difference with first non-orthologous sequence - *A. fumigatus*:404 *A. fischeri*:404

|                 |         |                 |         |
|-----------------|---------|-----------------|---------|
| afum EAL92871.1 | 100.00% | afis EAW21858.1 | 100.00% |
|-----------------|---------|-----------------|---------|

Bootstrap support for afum|EAL92871.1 as seed ortholog is 100%.

Bootstrap support for afis|EAW21858.1 as seed ortholog is 100%.

---

Group of orthologs #7725. Best score 403 bits

Score difference with first non-orthologous sequence - *A. fumigatus*:403 *A. fischeri*:403

|                 |         |                 |         |
|-----------------|---------|-----------------|---------|
| afum EAL88983.1 | 100.00% | afis EAW16358.1 | 100.00% |
|-----------------|---------|-----------------|---------|

Bootstrap support for afum|EAL88983.1 as seed ortholog is 100%.

Bootstrap support for afis|EAW16358.1 as seed ortholog is 100%.

---

Group of orthologs #7726. Best score 403 bits

Score difference with first non-orthologous sequence - *A. fumigatus*:403 *A. fischeri*:403

|                 |         |                 |         |
|-----------------|---------|-----------------|---------|
| afum EAL85360.1 | 100.00% | afis EAW20243.1 | 100.00% |
|-----------------|---------|-----------------|---------|

Bootstrap support for afum|EAL85360.1 as seed ortholog is 100%.

Bootstrap support for afis|EAW20243.1 as seed ortholog is 100%.

---

Group of orthologs #7727. Best score 403 bits

Score difference with first non-orthologous sequence - *A. fumigatus*:403 *A. fischeri*:403

|                 |         |                 |         |
|-----------------|---------|-----------------|---------|
| afum EAL86871.1 | 100.00% | afis EAW19651.1 | 100.00% |
|-----------------|---------|-----------------|---------|

Bootstrap support for afum|EAL86871.1 as seed ortholog is 100%.

Bootstrap support for afis|EAW19651.1 as seed ortholog is 100%.

---

Group of orthologs #7728. Best score 403 bits

Score difference with first non-orthologous sequence - *A. fumigatus*:403 *A. fischeri*:403

|                 |         |                 |         |
|-----------------|---------|-----------------|---------|
| afum EBA27476.1 | 100.00% | afis EAW21839.1 | 100.00% |
|-----------------|---------|-----------------|---------|

Bootstrap support for afum|EBA27476.1 as seed ortholog is 100%.

Bootstrap support for afis|EAW21839.1 as seed ortholog is 100%.

---

Group of orthologs #7729. Best score 403 bits

Score difference with first non-orthologous sequence - *A. fumigatus*:403 *A. fischeri*:403

|                 |         |                 |         |
|-----------------|---------|-----------------|---------|
| afum EBA27406.1 | 100.00% | afis EAW22808.1 | 100.00% |
|-----------------|---------|-----------------|---------|

Bootstrap support for afum|EBA27406.1 as seed ortholog is 100%.

Bootstrap support for afis|EAW22808.1 as seed ortholog is 100%.

---

Group of orthologs #7730. Best score 402 bits

Score difference with first non-orthologous sequence - *A. fumigatus*:402 *A. fischeri*:402

|                 |         |                 |         |
|-----------------|---------|-----------------|---------|
| afum EAL91209.1 | 100.00% | afis EAW17371.1 | 100.00% |
|-----------------|---------|-----------------|---------|

Bootstrap support for afum|EAL91209.1 as seed ortholog is 100%.

Bootstrap support for afis|EAW17371.1 as seed ortholog is 100%.

---

Group of orthologs #7731. Best score 402 bits

Score difference with first non-orthologous sequence - *A. fumigatus*:402 *A. fischeri*:402

|                 |         |                 |         |
|-----------------|---------|-----------------|---------|
| afum EAL93081.1 | 100.00% | afis EAW18403.1 | 100.00% |
|-----------------|---------|-----------------|---------|

Bootstrap support for afum|EAL93081.1 as seed ortholog is 100%.

Bootstrap support for afis|EAW18403.1 as seed ortholog is 100%.

---

Group of orthologs #7732. Best score 402 bits

Score difference with first non-orthologous sequence - *A. fumigatus*:402 *A. fischeri*:402

|                 |         |                 |         |
|-----------------|---------|-----------------|---------|
| afum EAL88048.2 | 100.00% | afis EAW23421.1 | 100.00% |
|-----------------|---------|-----------------|---------|

Bootstrap support for afum|EAL88048.2 as seed ortholog is 100%.

Bootstrap support for afis|EAW23421.1 as seed ortholog is 100%.

---

Group of orthologs #7733. Best score 402 bits

Score difference with first non-orthologous sequence - *A. fumigatus*:402 *A. fischeri*:402

|                 |         |                 |         |
|-----------------|---------|-----------------|---------|
| afum EAL93609.1 | 100.00% | afis EAW18877.1 | 100.00% |
|-----------------|---------|-----------------|---------|

Bootstrap support for afum|EAL93609.1 as seed ortholog is 100%.

Bootstrap support for afis|EAW18877.1 as seed ortholog is 100%.

---

Group of orthologs #7734. Best score 402 bits

Score difference with first non-orthologous sequence - *A. fumigatus*:402 *A. fischeri*:402

|                 |         |                 |         |
|-----------------|---------|-----------------|---------|
| afum EAL92544.1 | 100.00% | afis EAW21523.1 | 100.00% |
|-----------------|---------|-----------------|---------|

Bootstrap support for afum|EAL92544.1 as seed ortholog is 100%.

Bootstrap support for afis|EAW21523.1 as seed ortholog is 100%.

---

Group of orthologs #7735. Best score 402 bits

Score difference with first non-orthologous sequence - *A. fumigatus*:402 *A. fischeri*:402

|                 |         |                 |         |
|-----------------|---------|-----------------|---------|
| afum EAL89760.2 | 100.00% | afis EAW25090.1 | 100.00% |
|-----------------|---------|-----------------|---------|

Bootstrap support for afum|EAL89760.2 as seed ortholog is 100%.

Bootstrap support for afis|EAW25090.1 as seed ortholog is 100%.

---

Group of orthologs #7736. Best score 402 bits

Score difference with first non-orthologous sequence - *A. fumigatus*:402 *A. fischeri*:402

|                 |         |                 |         |
|-----------------|---------|-----------------|---------|
| afum EAL91995.1 | 100.00% | afis EAW24140.1 | 100.00% |
|-----------------|---------|-----------------|---------|

Bootstrap support for afum|EAL91995.1 as seed ortholog is 100%.

Bootstrap support for afis|EAW24140.1 as seed ortholog is 100%.

---

Group of orthologs #7737. Best score 401 bits

Score difference with first non-orthologous sequence - *A. fumigatus*:401 *A. fischeri*:401

|                 |         |                 |         |
|-----------------|---------|-----------------|---------|
| afum EAL85802.1 | 100.00% | afis EAW15526.1 | 100.00% |
|-----------------|---------|-----------------|---------|

Bootstrap support for afum|EAL85802.1 as seed ortholog is 100%.

Bootstrap support for afis|EAW15526.1 as seed ortholog is 100%.

---

Group of orthologs #7738. Best score 401 bits

Score difference with first non-orthologous sequence - *A. fumigatus*:401 *A. fischeri*:401

|                 |         |                 |         |
|-----------------|---------|-----------------|---------|
| afum EAL86798.1 | 100.00% | afis EAW19729.1 | 100.00% |
|-----------------|---------|-----------------|---------|

Bootstrap support for afum|EAL86798.1 as seed ortholog is 100%.

Bootstrap support for afis|EAW19729.1 as seed ortholog is 100%.

---

Group of orthologs #7739. Best score 401 bits

Score difference with first non-orthologous sequence - *A. fumigatus*:23 *A. fischeri*:77

|                 |         |                 |         |
|-----------------|---------|-----------------|---------|
| afum EAL91132.1 | 100.00% | afis EAW16922.1 | 100.00% |
|-----------------|---------|-----------------|---------|

Bootstrap support for afum|EAL91132.1 as seed ortholog is 67%. Alternative seed ortholog is afum|EAL91922.1 (23 bits away from this cluster)

Bootstrap support for afis|EAW16922.1 as seed ortholog is 94%.

---

Group of orthologs #7740. Best score 401 bits

Score difference with first non-orthologous sequence - *A. fumigatus*:401 *A. fischeri*:401

|                 |         |                 |         |
|-----------------|---------|-----------------|---------|
| afum EAL88227.1 | 100.00% | afis EAW23254.1 | 100.00% |
|-----------------|---------|-----------------|---------|

Bootstrap support for afum|EAL88227.1 as seed ortholog is 100%.

Bootstrap support for afis|EAW23254.1 as seed ortholog is 100%.

---

Group of orthologs #7741. Best score 401 bits

Score difference with first non-orthologous sequence - *A. fumigatus*:401 *A. fischeri*:401

|                 |         |                 |         |
|-----------------|---------|-----------------|---------|
| afum EAL92462.2 | 100.00% | afis EAW21444.1 | 100.00% |
|-----------------|---------|-----------------|---------|

Bootstrap support for afum|EAL92462.2 as seed ortholog is 100%.

Bootstrap support for afis|EAW21444.1 as seed ortholog is 100%.

---

Group of orthologs #7742. Best score 401 bits

Score difference with first non-orthologous sequence - *A. fumigatus*:292 *A. fischeri*:262

afum|EBA27363.1 100.00% afis|EAW21811.1 100.00%

Bootstrap support for afum|EBA27363.1 as seed ortholog is 99%.

Bootstrap support for afis|EAW21811.1 as seed ortholog is 99%.

---

Group of orthologs #7743. Best score 400 bits

Score difference with first non-orthologous sequence - *A. fumigatus*:400 *A. fischeri*:400

afum|EAL86160.1 100.00% afis|EAW24491.1 100.00%

Bootstrap support for afum|EAL86160.1 as seed ortholog is 100%.

Bootstrap support for afis|EAW24491.1 as seed ortholog is 100%.

---

Group of orthologs #7744. Best score 400 bits

Score difference with first non-orthologous sequence - *A. fumigatus*:400 *A. fischeri*:400

afum|EAL93480.1 100.00% afis|EAW18753.1 100.00%

Bootstrap support for afum|EAL93480.1 as seed ortholog is 100%.

Bootstrap support for afis|EAW18753.1 as seed ortholog is 100%.

---

Group of orthologs #7745. Best score 400 bits

Score difference with first non-orthologous sequence - *A. fumigatus*:400 *A. fischeri*:400

afum|EAL93689.2 100.00% afis|EAW18953.1 100.00%

Bootstrap support for afum|EAL93689.2 as seed ortholog is 100%.

Bootstrap support for afis|EAW18953.1 as seed ortholog is 100%.

---

Group of orthologs #7746. Best score 399 bits

Score difference with first non-orthologous sequence - *A. fumigatus*:399 *A. fischeri*:399

afum|EAL85774.1 100.00% afis|EAW15558.1 100.00%

Bootstrap support for afum|EAL85774.1 as seed ortholog is 100%.

Bootstrap support for afis|EAW15558.1 as seed ortholog is 100%.

---

Group of orthologs #7747. Best score 399 bits

Score difference with first non-orthologous sequence - *A. fumigatus*:399 *A. fischeri*:399

afum|EAL85240.1 100.00% afis|EAW20122.1 100.00%

Bootstrap support for afum|EAL85240.1 as seed ortholog is 100%.

Bootstrap support for afis|EAW20122.1 as seed ortholog is 100%.

---

Group of orthologs #7748. Best score 399 bits

Score difference with first non-orthologous sequence - *A. fumigatus*:399 *A. fischeri*:399

afum|EAL89106.1 100.00% afis|EAW16511.1 100.00%

Bootstrap support for afum|EAL89106.1 as seed ortholog is 100%.

Bootstrap support for afis|EAW16511.1 as seed ortholog is 100%.

---

Group of orthologs #7749. Best score 399 bits

Score difference with first non-orthologous sequence - *A. fumigatus*:399 *A. fischeri*:399

afum|EAL85277.1 100.00% afis|EAW20160.1 100.00%

Bootstrap support for afum|EAL85277.1 as seed ortholog is 100%.

Bootstrap support for afis|EAW20160.1 as seed ortholog is 100%.

---

Group of orthologs #7750. Best score 399 bits

Score difference with first non-orthologous sequence - *A. fumigatus*:399 *A. fischeri*:399

afum|EAL86824.1 100.00% afis|EAW19702.1 100.00%

Bootstrap support for afum|EAL86824.1 as seed ortholog is 100%.

Bootstrap support for afis|EAW19702.1 as seed ortholog is 100%.

---

Group of orthologs #7751. Best score 399 bits

Score difference with first non-orthologous sequence - *A. fumigatus*:399 *A. fischeri*:399  
afum|EAL84331.1 100.00% afis|EAW25645.1 100.00%  
Bootstrap support for afum|EAL84331.1 as seed ortholog is 100%.  
Bootstrap support for afis|EAW25645.1 as seed ortholog is 100%.

---

Group of orthologs #7752. Best score 399 bits

Score difference with first non-orthologous sequence - *A. fumigatus*:399 *A. fischeri*:399  
afum|EAL85977.2 100.00% afis|EAW24309.1 100.00%  
Bootstrap support for afum|EAL85977.2 as seed ortholog is 100%.  
Bootstrap support for afis|EAW24309.1 as seed ortholog is 100%.

---

Group of orthologs #7753. Best score 399 bits

Score difference with first non-orthologous sequence - *A. fumigatus*:399 *A. fischeri*:399  
afum|EAL93720.1 100.00% afis|EAW18984.1 100.00%  
Bootstrap support for afum|EAL93720.1 as seed ortholog is 100%.  
Bootstrap support for afis|EAW18984.1 as seed ortholog is 100%.

---

Group of orthologs #7754. Best score 399 bits

Score difference with first non-orthologous sequence - *A. fumigatus*:399 *A. fischeri*:399  
afum|EAL93848.2 100.00% afis|EAW19116.1 100.00%  
Bootstrap support for afum|EAL93848.2 as seed ortholog is 100%.  
Bootstrap support for afis|EAW19116.1 as seed ortholog is 100%.

---

Group of orthologs #7755. Best score 399 bits

Score difference with first non-orthologous sequence - *A. fumigatus*:399 *A. fischeri*:399  
afum|EAL92439.1 100.00% afis|EAW21424.1 100.00%  
Bootstrap support for afum|EAL92439.1 as seed ortholog is 100%.  
Bootstrap support for afis|EAW21424.1 as seed ortholog is 100%.

---

Group of orthologs #7756. Best score 399 bits

Score difference with first non-orthologous sequence - *A. fumigatus*:399 *A. fischeri*:399  
afum|EAL92727.1 100.00% afis|EAW21693.1 100.00%  
Bootstrap support for afum|EAL92727.1 as seed ortholog is 100%.  
Bootstrap support for afis|EAW21693.1 as seed ortholog is 100%.

---

Group of orthologs #7757. Best score 399 bits

Score difference with first non-orthologous sequence - *A. fumigatus*:399 *A. fischeri*:399  
afum|EAL90150.1 100.00% afis|EAW25485.1 100.00%  
Bootstrap support for afum|EAL90150.1 as seed ortholog is 100%.  
Bootstrap support for afis|EAW25485.1 as seed ortholog is 100%.

---

Group of orthologs #7758. Best score 398 bits

Score difference with first non-orthologous sequence - *A. fumigatus*:398 *A. fischeri*:398  
afum|EAL87612.1 100.00% afis|EAW18247.1 100.00%  
Bootstrap support for afum|EAL87612.1 as seed ortholog is 100%.  
Bootstrap support for afis|EAW18247.1 as seed ortholog is 100%.

---

Group of orthologs #7759. Best score 398 bits

Score difference with first non-orthologous sequence - *A. fumigatus*:398 *A. fischeri*:195  
afum|EAL94089.1 100.00% afis|EAW19370.1 100.00%  
Bootstrap support for afum|EAL94089.1 as seed ortholog is 100%.  
Bootstrap support for afis|EAW19370.1 as seed ortholog is 100%.

---

Group of orthologs #7760. Best score 398 bits

Score difference with first non-orthologous sequence - *A. fumigatus*:398 *A. fischeri*:398  
afum|EAL89724.1 100.00% afis|EAW25056.1 100.00%

Bootstrap support for afum|EAL89724.1 as seed ortholog is 100%.  
Bootstrap support for afis|EAW25056.1 as seed ortholog is 100%.

---

Group of orthologs #7761. Best score 398 bits

Score difference with first non-orthologous sequence - *A. fumigatus*:398 *A. fischeri*:398

|                 |         |                 |         |
|-----------------|---------|-----------------|---------|
| afum EAL90088.1 | 100.00% | afis EAW25429.1 | 100.00% |
|-----------------|---------|-----------------|---------|

Bootstrap support for afum|EAL90088.1 as seed ortholog is 100%.

Bootstrap support for afis|EAW25429.1 as seed ortholog is 100%.

---

Group of orthologs #7762. Best score 397 bits

Score difference with first non-orthologous sequence - *A. fumigatus*:397 *A. fischeri*:397

|                 |         |                 |         |
|-----------------|---------|-----------------|---------|
| afum EAL88801.1 | 100.00% | afis EAW16166.1 | 100.00% |
|-----------------|---------|-----------------|---------|

Bootstrap support for afum|EAL88801.1 as seed ortholog is 100%.

Bootstrap support for afis|EAW16166.1 as seed ortholog is 100%.

---

Group of orthologs #7763. Best score 397 bits

Score difference with first non-orthologous sequence - *A. fumigatus*:397 *A. fischeri*:229

|                 |         |                 |         |
|-----------------|---------|-----------------|---------|
| afum EAL94055.1 | 100.00% | afis EAW19337.1 | 100.00% |
|-----------------|---------|-----------------|---------|

Bootstrap support for afum|EAL94055.1 as seed ortholog is 100%.

Bootstrap support for afis|EAW19337.1 as seed ortholog is 100%.

---

Group of orthologs #7764. Best score 397 bits

Score difference with first non-orthologous sequence - *A. fumigatus*:397 *A. fischeri*:397

|                 |         |                 |         |
|-----------------|---------|-----------------|---------|
| afum EAL90437.1 | 100.00% | afis EAW22762.1 | 100.00% |
|-----------------|---------|-----------------|---------|

Bootstrap support for afum|EAL90437.1 as seed ortholog is 100%.

Bootstrap support for afis|EAW22762.1 as seed ortholog is 100%.

---

Group of orthologs #7765. Best score 397 bits

Score difference with first non-orthologous sequence - *A. fumigatus*:397 *A. fischeri*:397

|                 |         |                 |         |
|-----------------|---------|-----------------|---------|
| afum EAL91957.1 | 100.00% | afis EAW24103.1 | 100.00% |
|-----------------|---------|-----------------|---------|

Bootstrap support for afum|EAL91957.1 as seed ortholog is 100%.

Bootstrap support for afis|EAW24103.1 as seed ortholog is 100%.

---

Group of orthologs #7766. Best score 397 bits

Score difference with first non-orthologous sequence - *A. fumigatus*:397 *A. fischeri*:397

|                 |         |                 |         |
|-----------------|---------|-----------------|---------|
| afum EBA27312.1 | 100.00% | afis EAW23921.1 | 100.00% |
|-----------------|---------|-----------------|---------|

Bootstrap support for afum|EBA27312.1 as seed ortholog is 100%.

Bootstrap support for afis|EAW23921.1 as seed ortholog is 100%.

---

Group of orthologs #7767. Best score 396 bits

Score difference with first non-orthologous sequence - *A. fumigatus*:396 *A. fischeri*:396

|                 |         |                 |         |
|-----------------|---------|-----------------|---------|
| afum EAL85825.1 | 100.00% | afis EAW15498.1 | 100.00% |
|-----------------|---------|-----------------|---------|

Bootstrap support for afum|EAL85825.1 as seed ortholog is 100%.

Bootstrap support for afis|EAW15498.1 as seed ortholog is 100%.

---

Group of orthologs #7768. Best score 396 bits

Score difference with first non-orthologous sequence - *A. fumigatus*:396 *A. fischeri*:396

|                 |         |                 |         |
|-----------------|---------|-----------------|---------|
| afum EAL89063.1 | 100.00% | afis EAW16469.1 | 100.00% |
|-----------------|---------|-----------------|---------|

Bootstrap support for afum|EAL89063.1 as seed ortholog is 100%.

Bootstrap support for afis|EAW16469.1 as seed ortholog is 100%.

---

Group of orthologs #7769. Best score 396 bits

Score difference with first non-orthologous sequence - *A. fumigatus*:396 *A. fischeri*:396

|                 |         |                 |         |
|-----------------|---------|-----------------|---------|
| afum EAL87466.1 | 100.00% | afis EAW18109.1 | 100.00% |
|-----------------|---------|-----------------|---------|

Bootstrap support for afum|EAL87466.1 as seed ortholog is 100%.

Bootstrap support for afis|EAW18109.1 as seed ortholog is 100%.

---

Group of orthologs #7770. Best score 396 bits

Score difference with first non-orthologous sequence - *A. fumigatus*:396 *A. fischeri*:396

afum|EAL85479.1 100.00% afis|EAW20363.1 100.00%

Bootstrap support for afum|EAL85479.1 as seed ortholog is 100%.

Bootstrap support for afis|EAW20363.1 as seed ortholog is 100%.

---

Group of orthologs #7771. Best score 396 bits

Score difference with first non-orthologous sequence - *A. fumigatus*:396 *A. fischeri*:396

afum|EAL87084.2 100.00% afis|EAW19410.1 100.00%

Bootstrap support for afum|EAL87084.2 as seed ortholog is 100%.

Bootstrap support for afis|EAW19410.1 as seed ortholog is 100%.

---

Group of orthologs #7772. Best score 396 bits

Score difference with first non-orthologous sequence - *A. fumigatus*:396 *A. fischeri*:396

afum|EAL87325.1 100.00% afis|EAW23898.1 100.00%

Bootstrap support for afum|EAL87325.1 as seed ortholog is 100%.

Bootstrap support for afis|EAW23898.1 as seed ortholog is 100%.

---

Group of orthologs #7773. Best score 396 bits

Score difference with first non-orthologous sequence - *A. fumigatus*:396 *A. fischeri*:305

afum|EBA27305.1 100.00% afis|EAW23761.1 100.00%

Bootstrap support for afum|EBA27305.1 as seed ortholog is 100%.

Bootstrap support for afis|EAW23761.1 as seed ortholog is 100%.

---

Group of orthologs #7774. Best score 395 bits

Score difference with first non-orthologous sequence - *A. fumigatus*:395 *A. fischeri*:395

afum|EAL87159.1 100.00% afis|EAW23714.1 100.00%

Bootstrap support for afum|EAL87159.1 as seed ortholog is 100%.

Bootstrap support for afis|EAW23714.1 as seed ortholog is 100%.

---

Group of orthologs #7775. Best score 395 bits

Score difference with first non-orthologous sequence - *A. fumigatus*:395 *A. fischeri*:395

afum|EBA27296.1 100.00% afis|EAW19535.1 100.00%

Bootstrap support for afum|EBA27296.1 as seed ortholog is 100%.

Bootstrap support for afis|EAW19535.1 as seed ortholog is 100%.

---

Group of orthologs #7776. Best score 394 bits

Score difference with first non-orthologous sequence - *A. fumigatus*:394 *A. fischeri*:394

afum|EAL88765.1 100.00% afis|EAW16135.1 100.00%

Bootstrap support for afum|EAL88765.1 as seed ortholog is 100%.

Bootstrap support for afis|EAW16135.1 as seed ortholog is 100%.

---

Group of orthologs #7777. Best score 394 bits

Score difference with first non-orthologous sequence - *A. fumigatus*:394 *A. fischeri*:394

afum|EAL86976.2 100.00% afis|EAW19528.1 100.00%

Bootstrap support for afum|EAL86976.2 as seed ortholog is 100%.

Bootstrap support for afis|EAW19528.1 as seed ortholog is 100%.

---

Group of orthologs #7778. Best score 394 bits

Score difference with first non-orthologous sequence - *A. fumigatus*:394 *A. fischeri*:394

afum|EAL90737.1 100.00% afis|EAW22454.1 100.00%

Bootstrap support for afum|EAL90737.1 as seed ortholog is 100%.

Bootstrap support for afis|EAW22454.1 as seed ortholog is 100%.

---

Group of orthologs #7779. Best score 394 bits



Score difference with first non-orthologous sequence - *A. fumigatus*:394 *A. fischeri*:394  
afum|EAL90044.1 100.00% afis|EAW25385.1 100.00%  
Bootstrap support for afum|EAL90044.1 as seed ortholog is 100%.  
Bootstrap support for afis|EAW25385.1 as seed ortholog is 100%.

---

Group of orthologs #7780. Best score 393 bits

Score difference with first non-orthologous sequence - *A. fumigatus*:393 *A. fischeri*:393  
afum|EAL85764.1 100.00% afis|EAW15569.1 100.00%  
Bootstrap support for afum|EAL85764.1 as seed ortholog is 100%.  
Bootstrap support for afis|EAW15569.1 as seed ortholog is 100%.

---

Group of orthologs #7781. Best score 393 bits

Score difference with first non-orthologous sequence - *A. fumigatus*:393 *A. fischeri*:393  
afum|EAL91232.1 100.00% afis|EAW17394.1 100.00%  
Bootstrap support for afum|EAL91232.1 as seed ortholog is 100%.  
Bootstrap support for afis|EAW17394.1 as seed ortholog is 100%.

---

Group of orthologs #7782. Best score 393 bits

Score difference with first non-orthologous sequence - *A. fumigatus*:393 *A. fischeri*:393  
afum|EAL88471.1 100.00% afis|EAW23009.1 100.00%  
Bootstrap support for afum|EAL88471.1 as seed ortholog is 100%.  
Bootstrap support for afis|EAW23009.1 as seed ortholog is 100%.

---

Group of orthologs #7783. Best score 393 bits

Score difference with first non-orthologous sequence - *A. fumigatus*:393 *A. fischeri*:393  
afum|EAL87863.2 100.00% afis|EAW23603.1 100.00%  
Bootstrap support for afum|EAL87863.2 as seed ortholog is 100%.  
Bootstrap support for afis|EAW23603.1 as seed ortholog is 100%.

---

Group of orthologs #7784. Best score 393 bits

Score difference with first non-orthologous sequence - *A. fumigatus*:393 *A. fischeri*:393  
afum|EAL93232.1 100.00% afis|EAW18534.1 100.00%  
Bootstrap support for afum|EAL93232.1 as seed ortholog is 100%.  
Bootstrap support for afis|EAW18534.1 as seed ortholog is 100%.

---

Group of orthologs #7785. Best score 393 bits

Score difference with first non-orthologous sequence - *A. fumigatus*:393 *A. fischeri*:393  
afum|EAL90337.1 100.00% afis|EAW22863.1 100.00%  
Bootstrap support for afum|EAL90337.1 as seed ortholog is 100%.  
Bootstrap support for afis|EAW22863.1 as seed ortholog is 100%.

---

Group of orthologs #7786. Best score 393 bits

Score difference with first non-orthologous sequence - *A. fumigatus*:393 *A. fischeri*:393  
afum|EAL92791.1 100.00% afis|EAW21761.1 100.00%  
Bootstrap support for afum|EAL92791.1 as seed ortholog is 100%.  
Bootstrap support for afis|EAW21761.1 as seed ortholog is 100%.

---

Group of orthologs #7787. Best score 392 bits

Score difference with first non-orthologous sequence - *A. fumigatus*:392 *A. fischeri*:392  
afum|EAL90888.1 100.00% afis|EAW22293.1 100.00%  
Bootstrap support for afum|EAL90888.1 as seed ortholog is 100%.  
Bootstrap support for afis|EAW22293.1 as seed ortholog is 100%.

---

Group of orthologs #7788. Best score 392 bits

Score difference with first non-orthologous sequence - *A. fumigatus*:392 *A. fischeri*:392  
afum|EAL89399.1 100.00% afis|EAW24757.1 100.00%

Bootstrap support for afum|EAL89399.1 as seed ortholog is 100%.  
Bootstrap support for afis|EAW24757.1 as seed ortholog is 100%.

---

Group of orthologs #7789. Best score 392 bits

Score difference with first non-orthologous sequence - *A. fumigatus*:392 *A. fischeri*:392

afum|EAL89479.1 100.00% afis|EAW24834.1 100.00%

Bootstrap support for afum|EAL89479.1 as seed ortholog is 100%.

Bootstrap support for afis|EAW24834.1 as seed ortholog is 100%.

---

Group of orthologs #7790. Best score 392 bits

Score difference with first non-orthologous sequence - *A. fumigatus*:392 *A. fischeri*:156

afum|EAL89644.1 100.00% afis|EAW24983.1 100.00%

Bootstrap support for afum|EAL89644.1 as seed ortholog is 100%.

Bootstrap support for afis|EAW24983.1 as seed ortholog is 100%.

---

Group of orthologs #7791. Best score 391 bits

Score difference with first non-orthologous sequence - *A. fumigatus*:391 *A. fischeri*:391

afum|EAL85306.1 100.00% afis|EAW20187.1 100.00%

Bootstrap support for afum|EAL85306.1 as seed ortholog is 100%.

Bootstrap support for afis|EAW20187.1 as seed ortholog is 100%.

---

Group of orthologs #7792. Best score 391 bits

Score difference with first non-orthologous sequence - *A. fumigatus*:391 *A. fischeri*:391

afum|EAL91400.1 100.00% afis|EAW17587.1 100.00%

Bootstrap support for afum|EAL91400.1 as seed ortholog is 100%.

Bootstrap support for afis|EAW17587.1 as seed ortholog is 100%.

---

Group of orthologs #7793. Best score 391 bits

Score difference with first non-orthologous sequence - *A. fumigatus*:144 *A. fischeri*:267

afum|EAL86541.1 100.00% afis|EAW23604.1 100.00%

Bootstrap support for afum|EAL86541.1 as seed ortholog is 99%.

Bootstrap support for afis|EAW23604.1 as seed ortholog is 100%.

---

Group of orthologs #7794. Best score 391 bits

Score difference with first non-orthologous sequence - *A. fumigatus*:391 *A. fischeri*:391

afum|EAL87320.1 100.00% afis|EAW23892.1 100.00%

Bootstrap support for afum|EAL87320.1 as seed ortholog is 100%.

Bootstrap support for afis|EAW23892.1 as seed ortholog is 100%.

---

Group of orthologs #7795. Best score 391 bits

Score difference with first non-orthologous sequence - *A. fumigatus*:391 *A. fischeri*:391

afum|EAL91088.1 100.00% afis|EAW22102.1 100.00%

Bootstrap support for afum|EAL91088.1 as seed ortholog is 100%.

Bootstrap support for afis|EAW22102.1 as seed ortholog is 100%.

---

Group of orthologs #7796. Best score 391 bits

Score difference with first non-orthologous sequence - *A. fumigatus*:391 *A. fischeri*:391

afum|EAL89732.1 100.00% afis|EAW25063.1 100.00%

Bootstrap support for afum|EAL89732.1 as seed ortholog is 100%.

Bootstrap support for afis|EAW25063.1 as seed ortholog is 100%.

---

Group of orthologs #7797. Best score 390 bits

Score difference with first non-orthologous sequence - *A. fumigatus*:390 *A. fischeri*:390

afum|EAL85280.1 100.00% afis|EAW20162.1 100.00%

Bootstrap support for afum|EAL85280.1 as seed ortholog is 100%.

Bootstrap support for afis|EAW20162.1 as seed ortholog is 100%.

---

Group of orthologs #7798. Best score 390 bits

Score difference with first non-orthologous sequence - *A. fumigatus*:390 *A. fischeri*:390

afum|EAL89178.1 100.00% afis|EAW16583.1 100.00%

Bootstrap support for afum|EAL89178.1 as seed ortholog is 100%.

Bootstrap support for afis|EAW16583.1 as seed ortholog is 100%.

---

Group of orthologs #7799. Best score 390 bits

Score difference with first non-orthologous sequence - *A. fumigatus*:390 *A. fischeri*:390

afum|EAL93044.1 100.00% afis|EAW18369.1 100.00%

Bootstrap support for afum|EAL93044.1 as seed ortholog is 100%.

Bootstrap support for afis|EAW18369.1 as seed ortholog is 100%.

---

Group of orthologs #7800. Best score 390 bits

Score difference with first non-orthologous sequence - *A. fumigatus*:390 *A. fischeri*:390

afum|EAL88373.1 100.00% afis|EAW23106.1 100.00%

Bootstrap support for afum|EAL88373.1 as seed ortholog is 100%.

Bootstrap support for afis|EAW23106.1 as seed ortholog is 100%.

---

Group of orthologs #7801. Best score 390 bits

Score difference with first non-orthologous sequence - *A. fumigatus*:390 *A. fischeri*:302

afum|EAL90225.1 100.00% afis|EAW22972.1 100.00%

Bootstrap support for afum|EAL90225.1 as seed ortholog is 100%.

Bootstrap support for afis|EAW22972.1 as seed ortholog is 100%.

---

Group of orthologs #7802. Best score 390 bits

Score difference with first non-orthologous sequence - *A. fumigatus*:390 *A. fischeri*:390

afum|EAL89469.1 100.00% afis|EAW24825.1 100.00%

Bootstrap support for afum|EAL89469.1 as seed ortholog is 100%.

Bootstrap support for afis|EAW24825.1 as seed ortholog is 100%.

---

Group of orthologs #7803. Best score 389 bits

Score difference with first non-orthologous sequence - *A. fumigatus*:389 *A. fischeri*:303

afum|EAL86488.2 100.00% afis|EAW16960.1 100.00%

Bootstrap support for afum|EAL86488.2 as seed ortholog is 100%.

Bootstrap support for afis|EAW16960.1 as seed ortholog is 100%.

---

Group of orthologs #7804. Best score 389 bits

Score difference with first non-orthologous sequence - *A. fumigatus*:389 *A. fischeri*:389

afum|EAL91577.1 100.00% afis|EAW17769.1 100.00%

Bootstrap support for afum|EAL91577.1 as seed ortholog is 100%.

Bootstrap support for afis|EAW17769.1 as seed ortholog is 100%.

---

Group of orthologs #7805. Best score 389 bits

Score difference with first non-orthologous sequence - *A. fumigatus*:389 *A. fischeri*:389

afum|EAL91747.1 100.00% afis|EAW17936.1 100.00%

Bootstrap support for afum|EAL91747.1 as seed ortholog is 100%.

Bootstrap support for afis|EAW17936.1 as seed ortholog is 100%.

---

Group of orthologs #7806. Best score 389 bits

Score difference with first non-orthologous sequence - *A. fumigatus*:389 *A. fischeri*:389

afum|EAL93605.1 100.00% afis|EAW18873.1 100.00%

Bootstrap support for afum|EAL93605.1 as seed ortholog is 100%.

Bootstrap support for afis|EAW18873.1 as seed ortholog is 100%.

---

Group of orthologs #7807. Best score 389 bits

Score difference with first non-orthologous sequence - *A. fumigatus*:389 *A. fischeri*:389  
afum|EAL91988.1 100.00% afis|EAW24133.1 100.00%  
Bootstrap support for afum|EAL91988.1 as seed ortholog is 100%.  
Bootstrap support for afis|EAW24133.1 as seed ortholog is 100%.

---

Group of orthologs #7808. Best score 388 bits

Score difference with first non-orthologous sequence - *A. fumigatus*:388 *A. fischeri*:388  
afum|EAL92055.1 100.00% afis|EAW21017.1 100.00%  
Bootstrap support for afum|EAL92055.1 as seed ortholog is 100%.  
Bootstrap support for afis|EAW21017.1 as seed ortholog is 100%.

---

Group of orthologs #7809. Best score 387 bits

Score difference with first non-orthologous sequence - *A. fumigatus*:387 *A. fischeri*:387  
afum|EAL93729.1 100.00% afis|EAW18994.1 100.00%  
Bootstrap support for afum|EAL93729.1 as seed ortholog is 100%.  
Bootstrap support for afis|EAW18994.1 as seed ortholog is 100%.

---

Group of orthologs #7810. Best score 387 bits

Score difference with first non-orthologous sequence - *A. fumigatus*:387 *A. fischeri*:387  
afum|EAL90105.1 100.00% afis|EAW25447.1 100.00%  
Bootstrap support for afum|EAL90105.1 as seed ortholog is 100%.  
Bootstrap support for afis|EAW25447.1 as seed ortholog is 100%.

---

Group of orthologs #7811. Best score 387 bits

Score difference with first non-orthologous sequence - *A. fumigatus*:387 *A. fischeri*:387  
afum|EAL91963.1 100.00% afis|EAW24109.1 100.00%  
Bootstrap support for afum|EAL91963.1 as seed ortholog is 100%.  
Bootstrap support for afis|EAW24109.1 as seed ortholog is 100%.

---

Group of orthologs #7812. Best score 386 bits

Score difference with first non-orthologous sequence - *A. fumigatus*:386 *A. fischeri*:386  
afum|EAL87138.1 100.00% afis|EAW16171.1 100.00%  
Bootstrap support for afum|EAL87138.1 as seed ortholog is 100%.  
Bootstrap support for afis|EAW16171.1 as seed ortholog is 100%.

---

Group of orthologs #7813. Best score 386 bits

Score difference with first non-orthologous sequence - *A. fumigatus*:386 *A. fischeri*:386  
afum|EAL86496.1 100.00% afis|EAW16968.1 100.00%  
Bootstrap support for afum|EAL86496.1 as seed ortholog is 100%.  
Bootstrap support for afis|EAW16968.1 as seed ortholog is 100%.

---

Group of orthologs #7814. Best score 386 bits

Score difference with first non-orthologous sequence - *A. fumigatus*:386 *A. fischeri*:386  
afum|EAL86166.1 100.00% afis|EAW24496.1 100.00%  
Bootstrap support for afum|EAL86166.1 as seed ortholog is 100%.  
Bootstrap support for afis|EAW24496.1 as seed ortholog is 100%.

---

Group of orthologs #7815. Best score 386 bits

Score difference with first non-orthologous sequence - *A. fumigatus*:386 *A. fischeri*:386  
afum|EAL93637.1 100.00% afis|EAW18905.1 100.00%  
Bootstrap support for afum|EAL93637.1 as seed ortholog is 100%.  
Bootstrap support for afis|EAW18905.1 as seed ortholog is 100%.

---

Group of orthologs #7816. Best score 386 bits

Score difference with first non-orthologous sequence - *A. fumigatus*:386 *A. fischeri*:386  
afum|EAL92079.1 100.00% afis|EAW21040.1 100.00%

Bootstrap support for afum|EAL92079.1 as seed ortholog is 100%.  
Bootstrap support for afis|EAW21040.1 as seed ortholog is 100%.

---

Group of orthologs #7817. Best score 386 bits

Score difference with first non-orthologous sequence - *A. fumigatus*:386 *A. fischeri*:386

afum|EAL90629.1 100.00% afis|EAW22569.1 100.00%

Bootstrap support for afum|EAL90629.1 as seed ortholog is 100%.

Bootstrap support for afis|EAW22569.1 as seed ortholog is 100%.

---

Group of orthologs #7818. Best score 386 bits

Score difference with first non-orthologous sequence - *A. fumigatus*:386 *A. fischeri*:386

afum|EAL92025.1 100.00% afis|EAW24167.1 100.00%

Bootstrap support for afum|EAL92025.1 as seed ortholog is 100%.

Bootstrap support for afis|EAW24167.1 as seed ortholog is 100%.

---

Group of orthologs #7819. Best score 386 bits

Score difference with first non-orthologous sequence - *A. fumigatus*:386 *A. fischeri*:386

afum|EBA27392.1 100.00% afis|EAW25341.1 100.00%

Bootstrap support for afum|EBA27392.1 as seed ortholog is 100%.

Bootstrap support for afis|EAW25341.1 as seed ortholog is 100%.

---

Group of orthologs #7820. Best score 385 bits

Score difference with first non-orthologous sequence - *A. fumigatus*:385 *A. fischeri*:385

afum|EBA27235.1 100.00% afis|EAW15780.1 100.00%

Bootstrap support for afum|EBA27235.1 as seed ortholog is 100%.

Bootstrap support for afis|EAW15780.1 as seed ortholog is 100%.

---

Group of orthologs #7821. Best score 385 bits

Score difference with first non-orthologous sequence - *A. fumigatus*:385 *A. fischeri*:385

afum|EAL87423.1 100.00% afis|EAW23993.1 100.00%

Bootstrap support for afum|EAL87423.1 as seed ortholog is 100%.

Bootstrap support for afis|EAW23993.1 as seed ortholog is 100%.

---

Group of orthologs #7822. Best score 384 bits

Score difference with first non-orthologous sequence - *A. fumigatus*:384 *A. fischeri*:384

afum|EAL85795.1 100.00% afis|EAW15533.1 100.00%

Bootstrap support for afum|EAL85795.1 as seed ortholog is 100%.

Bootstrap support for afis|EAW15533.1 as seed ortholog is 100%.

---

Group of orthologs #7823. Best score 384 bits

Score difference with first non-orthologous sequence - *A. fumigatus*:331 *A. fischeri*:384

afum|EAL84997.1 100.00% afis|EAW19909.1 100.00%

Bootstrap support for afum|EAL84997.1 as seed ortholog is 100%.

Bootstrap support for afis|EAW19909.1 as seed ortholog is 100%.

---

Group of orthologs #7824. Best score 384 bits

Score difference with first non-orthologous sequence - *A. fumigatus*:384 *A. fischeri*:384

afum|EBA27271.1 100.00% afis|EAW16820.1 100.00%

Bootstrap support for afum|EBA27271.1 as seed ortholog is 100%.

Bootstrap support for afis|EAW16820.1 as seed ortholog is 100%.

---

Group of orthologs #7825. Best score 384 bits

Score difference with first non-orthologous sequence - *A. fumigatus*:384 *A. fischeri*:384

afum|EAL93688.1 100.00% afis|EAW18952.1 100.00%

Bootstrap support for afum|EAL93688.1 as seed ortholog is 100%.

Bootstrap support for afis|EAW18952.1 as seed ortholog is 100%.

---

Group of orthologs #7826. Best score 384 bits

Score difference with first non-orthologous sequence - *A. fumigatus*:384 *A. fischeri*:384

afum|EAL92872.1 100.00% afis|EAW21859.1 100.00%

Bootstrap support for afum|EAL92872.1 as seed ortholog is 100%.

Bootstrap support for afis|EAW21859.1 as seed ortholog is 100%.

---

Group of orthologs #7827. Best score 383 bits

Score difference with first non-orthologous sequence - *A. fumigatus*:383 *A. fischeri*:383

afum|EAL85039.1 100.00% afis|EAW19856.1 100.00%

Bootstrap support for afum|EAL85039.1 as seed ortholog is 100%.

Bootstrap support for afis|EAW19856.1 as seed ortholog is 100%.

---

Group of orthologs #7828. Best score 383 bits

Score difference with first non-orthologous sequence - *A. fumigatus*:383 *A. fischeri*:383

afum|EAL91848.1 100.00% afis|EAW18037.1 100.00%

Bootstrap support for afum|EAL91848.1 as seed ortholog is 100%.

Bootstrap support for afis|EAW18037.1 as seed ortholog is 100%.

---

Group of orthologs #7829. Best score 383 bits

Score difference with first non-orthologous sequence - *A. fumigatus*:383 *A. fischeri*:383

afum|EAL93733.1 100.00% afis|EAW18998.1 100.00%

Bootstrap support for afum|EAL93733.1 as seed ortholog is 100%.

Bootstrap support for afis|EAW18998.1 as seed ortholog is 100%.

---

Group of orthologs #7830. Best score 383 bits

Score difference with first non-orthologous sequence - *A. fumigatus*:383 *A. fischeri*:383

afum|EAL93933.1 100.00% afis|EAW19203.1 100.00%

Bootstrap support for afum|EAL93933.1 as seed ortholog is 100%.

Bootstrap support for afis|EAW19203.1 as seed ortholog is 100%.

---

Group of orthologs #7831. Best score 383 bits

Score difference with first non-orthologous sequence - *A. fumigatus*:383 *A. fischeri*:383

afum|EAL89829.2 100.00% afis|EAW25154.1 100.00%

Bootstrap support for afum|EAL89829.2 as seed ortholog is 100%.

Bootstrap support for afis|EAW25154.1 as seed ortholog is 100%.

---

Group of orthologs #7832. Best score 382 bits

Score difference with first non-orthologous sequence - *A. fumigatus*:382 *A. fischeri*:382

afum|EAL88895.1 100.00% afis|EAW16274.1 100.00%

Bootstrap support for afum|EAL88895.1 as seed ortholog is 100%.

Bootstrap support for afis|EAW16274.1 as seed ortholog is 100%.

---

Group of orthologs #7833. Best score 382 bits

Score difference with first non-orthologous sequence - *A. fumigatus*:382 *A. fischeri*:382

afum|EBA27229.1 100.00% afis|EAW20269.1 100.00%

Bootstrap support for afum|EBA27229.1 as seed ortholog is 100%.

Bootstrap support for afis|EAW20269.1 as seed ortholog is 100%.

---

Group of orthologs #7834. Best score 381 bits

Score difference with first non-orthologous sequence - *A. fumigatus*:381 *A. fischeri*:381

afum|EAL84658.1 100.00% afis|EAW20975.1 100.00%

Bootstrap support for afum|EAL84658.1 as seed ortholog is 100%.

Bootstrap support for afis|EAW20975.1 as seed ortholog is 100%.

---

Group of orthologs #7835. Best score 381 bits

Score difference with first non-orthologous sequence - *A. fumigatus*:381 *A. fischeri*:381  
afum|EAL87073.1 100.00% afis|EAW19421.1 100.00%  
Bootstrap support for afum|EAL87073.1 as seed ortholog is 100%.  
Bootstrap support for afis|EAW19421.1 as seed ortholog is 100%.

---

Group of orthologs #7836. Best score 381 bits

Score difference with first non-orthologous sequence - *A. fumigatus*:381 *A. fischeri*:381  
afum|EAL86868.1 100.00% afis|EAW19654.1 100.00%  
Bootstrap support for afum|EAL86868.1 as seed ortholog is 100%.  
Bootstrap support for afis|EAW19654.1 as seed ortholog is 100%.

---

Group of orthologs #7837. Best score 381 bits

Score difference with first non-orthologous sequence - *A. fumigatus*:381 *A. fischeri*:381  
afum|EAL93664.1 100.00% afis|EAW18932.1 100.00%  
Bootstrap support for afum|EAL93664.1 as seed ortholog is 100%.  
Bootstrap support for afis|EAW18932.1 as seed ortholog is 100%.

---

Group of orthologs #7838. Best score 381 bits

Score difference with first non-orthologous sequence - *A. fumigatus*:301 *A. fischeri*:381  
afum|EAL92364.1 100.00% afis|EAW21347.1 100.00%  
Bootstrap support for afum|EAL92364.1 as seed ortholog is 100%.  
Bootstrap support for afis|EAW21347.1 as seed ortholog is 100%.

---

Group of orthologs #7839. Best score 381 bits

Score difference with first non-orthologous sequence - *A. fumigatus*:381 *A. fischeri*:381  
afum|EAL89652.1 100.00% afis|EAW24992.1 100.00%  
Bootstrap support for afum|EAL89652.1 as seed ortholog is 100%.  
Bootstrap support for afis|EAW24992.1 as seed ortholog is 100%.

---

Group of orthologs #7840. Best score 380 bits

Score difference with first non-orthologous sequence - *A. fumigatus*:380 *A. fischeri*:380  
afum|EAL89257.1 100.00% afis|EAW16653.1 100.00%  
Bootstrap support for afum|EAL89257.1 as seed ortholog is 100%.  
Bootstrap support for afis|EAW16653.1 as seed ortholog is 100%.

---

Group of orthologs #7841. Best score 380 bits

Score difference with first non-orthologous sequence - *A. fumigatus*:380 *A. fischeri*:380  
afum|EAL88291.1 100.00% afis|EAW23192.1 100.00%  
Bootstrap support for afum|EAL88291.1 as seed ortholog is 100%.  
Bootstrap support for afis|EAW23192.1 as seed ortholog is 100%.

---

Group of orthologs #7842. Best score 380 bits

Score difference with first non-orthologous sequence - *A. fumigatus*:380 *A. fischeri*:380  
afum|EAL92197.1 100.00% afis|EAW21177.1 100.00%  
Bootstrap support for afum|EAL92197.1 as seed ortholog is 100%.  
Bootstrap support for afis|EAW21177.1 as seed ortholog is 100%.

---

Group of orthologs #7843. Best score 380 bits

Score difference with first non-orthologous sequence - *A. fumigatus*:380 *A. fischeri*:380  
afum|EAL92346.2 100.00% afis|EAW21328.1 100.00%  
Bootstrap support for afum|EAL92346.2 as seed ortholog is 100%.  
Bootstrap support for afis|EAW21328.1 as seed ortholog is 100%.

---

Group of orthologs #7844. Best score 380 bits

Score difference with first non-orthologous sequence - *A. fumigatus*:380 *A. fischeri*:380  
afum|EAL89455.1 100.00% afis|EAW24812.1 100.00%

Bootstrap support for afum|EAL89455.1 as seed ortholog is 100%.  
Bootstrap support for afis|EAW24812.1 as seed ortholog is 100%.

---

Group of orthologs #7845. Best score 380 bits

Score difference with first non-orthologous sequence - *A. fumigatus*:380 *A. fischeri*:380

afum|EAL92882.1 100.00% afis|EAW21868.1 100.00%

Bootstrap support for afum|EAL92882.1 as seed ortholog is 100%.

Bootstrap support for afis|EAW21868.1 as seed ortholog is 100%.

---

Group of orthologs #7846. Best score 379 bits

Score difference with first non-orthologous sequence - *A. fumigatus*:234 *A. fischeri*:379

afum|EAL85433.1 100.00% afis|EAW20305.1 100.00%

Bootstrap support for afum|EAL85433.1 as seed ortholog is 100%.

Bootstrap support for afis|EAW20305.1 as seed ortholog is 100%.

---

Group of orthologs #7847. Best score 379 bits

Score difference with first non-orthologous sequence - *A. fumigatus*:379 *A. fischeri*:379

afum|EAL91255.1 100.00% afis|EAW17427.1 100.00%

Bootstrap support for afum|EAL91255.1 as seed ortholog is 100%.

Bootstrap support for afis|EAW17427.1 as seed ortholog is 100%.

---

Group of orthologs #7848. Best score 379 bits

Score difference with first non-orthologous sequence - *A. fumigatus*:379 *A. fischeri*:379

afum|EBA27279.1 100.00% afis|EAW17081.1 100.00%

Bootstrap support for afum|EBA27279.1 as seed ortholog is 100%.

Bootstrap support for afis|EAW17081.1 as seed ortholog is 100%.

---

Group of orthologs #7849. Best score 378 bits

Score difference with first non-orthologous sequence - *A. fumigatus*:378 *A. fischeri*:378

afum|EAL84656.1 100.00% afis|EAW20977.1 100.00%

Bootstrap support for afum|EAL84656.1 as seed ortholog is 100%.

Bootstrap support for afis|EAW20977.1 as seed ortholog is 100%.

---

Group of orthologs #7850. Best score 378 bits

Score difference with first non-orthologous sequence - *A. fumigatus*:378 *A. fischeri*:315

afum|EAL85873.2 100.00% afis|EAW24203.1 100.00%

Bootstrap support for afum|EAL85873.2 as seed ortholog is 100%.

Bootstrap support for afis|EAW24203.1 as seed ortholog is 100%.

---

Group of orthologs #7851. Best score 378 bits

Score difference with first non-orthologous sequence - *A. fumigatus*:378 *A. fischeri*:378

afum|EAL88022.1 100.00% afis|EAW23440.1 100.00%

Bootstrap support for afum|EAL88022.1 as seed ortholog is 100%.

Bootstrap support for afis|EAW23440.1 as seed ortholog is 100%.

---

Group of orthologs #7852. Best score 378 bits

Score difference with first non-orthologous sequence - *A. fumigatus*:378 *A. fischeri*:378

afum|EAL90892.1 100.00% afis|EAW22289.1 100.00%

Bootstrap support for afum|EAL90892.1 as seed ortholog is 100%.

Bootstrap support for afis|EAW22289.1 as seed ortholog is 100%.

---

Group of orthologs #7853. Best score 378 bits

Score difference with first non-orthologous sequence - *A. fumigatus*:378 *A. fischeri*:378

afum|EAL92965.1 100.00% afis|EAW21951.1 100.00%

Bootstrap support for afum|EAL92965.1 as seed ortholog is 100%.

Bootstrap support for afis|EAW21951.1 as seed ortholog is 100%.



---

Group of orthologs #7854. Best score 377 bits

Score difference with first non-orthologous sequence - *A. fumigatus*:377 *A. fischeri*:377

afum|EAL85658.1 100.00% afis|EAW15690.1 100.00%

Bootstrap support for afum|EAL85658.1 as seed ortholog is 100%.

Bootstrap support for afis|EAW15690.1 as seed ortholog is 100%.

---

Group of orthologs #7855. Best score 377 bits

Score difference with first non-orthologous sequence - *A. fumigatus*:377 *A. fischeri*:197

afum|EAL91643.1 100.00% afis|EAW17833.1 100.00%

Bootstrap support for afum|EAL91643.1 as seed ortholog is 100%.

Bootstrap support for afis|EAW17833.1 as seed ortholog is 100%.

---

Group of orthologs #7856. Best score 377 bits

Score difference with first non-orthologous sequence - *A. fumigatus*:377 *A. fischeri*:377

afum|EAL92532.1 100.00% afis|EAW21512.1 100.00%

Bootstrap support for afum|EAL92532.1 as seed ortholog is 100%.

Bootstrap support for afis|EAW21512.1 as seed ortholog is 100%.

---

Group of orthologs #7857. Best score 377 bits

Score difference with first non-orthologous sequence - *A. fumigatus*:377 *A. fischeri*:377

afum|EAL92650.1 100.00% afis|EAW21616.1 100.00%

Bootstrap support for afum|EAL92650.1 as seed ortholog is 100%.

Bootstrap support for afis|EAW21616.1 as seed ortholog is 100%.

---

Group of orthologs #7858. Best score 377 bits

Score difference with first non-orthologous sequence - *A. fumigatus*:377 *A. fischeri*:377

afum|EAL92828.1 100.00% afis|EAW21802.1 100.00%

Bootstrap support for afum|EAL92828.1 as seed ortholog is 100%.

Bootstrap support for afis|EAW21802.1 as seed ortholog is 100%.

---

Group of orthologs #7859. Best score 377 bits

Score difference with first non-orthologous sequence - *A. fumigatus*:377 *A. fischeri*:377

afum|EAL89725.1 100.00% afis|EAW25057.1 100.00%

Bootstrap support for afum|EAL89725.1 as seed ortholog is 100%.

Bootstrap support for afis|EAW25057.1 as seed ortholog is 100%.

---

Group of orthologs #7860. Best score 376 bits

Score difference with first non-orthologous sequence - *A. fumigatus*:376 *A. fischeri*:376

afum|EAL88233.1 100.00% afis|EAW23248.1 100.00%

Bootstrap support for afum|EAL88233.1 as seed ortholog is 100%.

Bootstrap support for afis|EAW23248.1 as seed ortholog is 100%.

---

Group of orthologs #7861. Best score 376 bits

Score difference with first non-orthologous sequence - *A. fumigatus*:376 *A. fischeri*:376

afum|EAL90853.1 100.00% afis|EAW22339.1 100.00%

Bootstrap support for afum|EAL90853.1 as seed ortholog is 100%.

Bootstrap support for afis|EAW22339.1 as seed ortholog is 100%.

---

Group of orthologs #7862. Best score 375 bits

Score difference with first non-orthologous sequence - *A. fumigatus*:375 *A. fischeri*:375

afum|EAL85797.1 100.00% afis|EAW15531.1 100.00%

Bootstrap support for afum|EAL85797.1 as seed ortholog is 100%.

Bootstrap support for afis|EAW15531.1 as seed ortholog is 100%.

---

Group of orthologs #7863. Best score 375 bits

Score difference with first non-orthologous sequence - *A. fumigatus*:375 *A. fischeri*:375  
afum|EAL85519.1 100.00% afis|EAW15833.1 100.00%  
Bootstrap support for afum|EAL85519.1 as seed ortholog is 100%.  
Bootstrap support for afis|EAW15833.1 as seed ortholog is 100%.

---

Group of orthologs #7864. Best score 375 bits

Score difference with first non-orthologous sequence - *A. fumigatus*:375 *A. fischeri*:375  
afum|EAL85957.1 100.00% afis|EAW24288.1 100.00%  
Bootstrap support for afum|EAL85957.1 as seed ortholog is 100%.  
Bootstrap support for afis|EAW24288.1 as seed ortholog is 100%.

---

Group of orthologs #7865. Best score 375 bits

Score difference with first non-orthologous sequence - *A. fumigatus*:375 *A. fischeri*:375  
afum|EAL86029.1 100.00% afis|EAW24359.1 100.00%  
Bootstrap support for afum|EAL86029.1 as seed ortholog is 100%.  
Bootstrap support for afis|EAW24359.1 as seed ortholog is 100%.

---

Group of orthologs #7866. Best score 375 bits

Score difference with first non-orthologous sequence - *A. fumigatus*:375 *A. fischeri*:375  
afum|EAL90255.1 100.00% afis|EAW22941.1 100.00%  
Bootstrap support for afum|EAL90255.1 as seed ortholog is 100%.  
Bootstrap support for afis|EAW22941.1 as seed ortholog is 100%.

---

Group of orthologs #7867. Best score 375 bits

Score difference with first non-orthologous sequence - *A. fumigatus*:375 *A. fischeri*:375  
afum|EAL92455.1 100.00% afis|EAW21439.1 100.00%  
Bootstrap support for afum|EAL92455.1 as seed ortholog is 100%.  
Bootstrap support for afis|EAW21439.1 as seed ortholog is 100%.

---

Group of orthologs #7868. Best score 374 bits

Score difference with first non-orthologous sequence - *A. fumigatus*:374 *A. fischeri*:374  
afum|EAL86379.1 100.00% afis|EAW16831.1 100.00%  
Bootstrap support for afum|EAL86379.1 as seed ortholog is 100%.  
Bootstrap support for afis|EAW16831.1 as seed ortholog is 100%.

---

Group of orthologs #7869. Best score 374 bits

Score difference with first non-orthologous sequence - *A. fumigatus*:374 *A. fischeri*:374  
afum|EAL91401.1 100.00% afis|EAW17588.1 100.00%  
Bootstrap support for afum|EAL91401.1 as seed ortholog is 100%.  
Bootstrap support for afis|EAW17588.1 as seed ortholog is 100%.

---

Group of orthologs #7870. Best score 374 bits

Score difference with first non-orthologous sequence - *A. fumigatus*:374 *A. fischeri*:374  
afum|EAL84301.1 100.00% afis|EAW25595.1 100.00%  
Bootstrap support for afum|EAL84301.1 as seed ortholog is 100%.  
Bootstrap support for afis|EAW25595.1 as seed ortholog is 100%.

---

Group of orthologs #7871. Best score 374 bits

Score difference with first non-orthologous sequence - *A. fumigatus*:374 *A. fischeri*:374  
afum|EAL94060.1 100.00% afis|EAW19341.1 100.00%  
Bootstrap support for afum|EAL94060.1 as seed ortholog is 100%.  
Bootstrap support for afis|EAW19341.1 as seed ortholog is 100%.

---

Group of orthologs #7872. Best score 374 bits

Score difference with first non-orthologous sequence - *A. fumigatus*:374 *A. fischeri*:374  
afum|EAL92182.1 100.00% afis|EAW21163.1 100.00%

Bootstrap support for afum|EAL92182.1 as seed ortholog is 100%.  
Bootstrap support for afis|EAW21163.1 as seed ortholog is 100%.

---

Group of orthologs #7873. Best score 373 bits

Score difference with first non-orthologous sequence - *A. fumigatus*:373 *A. fischeri*:373

afum|EAL86396.1 100.00% afis|EAW16850.1 100.00%

Bootstrap support for afum|EAL86396.1 as seed ortholog is 100%.

Bootstrap support for afis|EAW16850.1 as seed ortholog is 100%.

---

Group of orthologs #7874. Best score 373 bits

Score difference with first non-orthologous sequence - *A. fumigatus*:373 *A. fischeri*:373

afum|EAL88306.1 100.00% afis|EAW23177.1 100.00%

Bootstrap support for afum|EAL88306.1 as seed ortholog is 100%.

Bootstrap support for afis|EAW23177.1 as seed ortholog is 100%.

---

Group of orthologs #7875. Best score 373 bits

Score difference with first non-orthologous sequence - *A. fumigatus*:373 *A. fischeri*:373

afum|EAL88118.1 100.00% afis|EAW23358.1 100.00%

Bootstrap support for afum|EAL88118.1 as seed ortholog is 100%.

Bootstrap support for afis|EAW23358.1 as seed ortholog is 100%.

---

Group of orthologs #7876. Best score 373 bits

Score difference with first non-orthologous sequence - *A. fumigatus*:373 *A. fischeri*:373

afum|EAL93876.1 100.00% afis|EAW19145.1 100.00%

Bootstrap support for afum|EAL93876.1 as seed ortholog is 100%.

Bootstrap support for afis|EAW19145.1 as seed ortholog is 100%.

---

Group of orthologs #7877. Best score 373 bits

Score difference with first non-orthologous sequence - *A. fumigatus*:373 *A. fischeri*:373

afum|EAL90081.1 100.00% afis|EAW25422.1 100.00%

Bootstrap support for afum|EAL90081.1 as seed ortholog is 100%.

Bootstrap support for afis|EAW25422.1 as seed ortholog is 100%.

---

Group of orthologs #7878. Best score 373 bits

Score difference with first non-orthologous sequence - *A. fumigatus*:373 *A. fischeri*:373

afum|EAL90191.2 100.00% afis|EAW25526.1 100.00%

Bootstrap support for afum|EAL90191.2 as seed ortholog is 100%.

Bootstrap support for afis|EAW25526.1 as seed ortholog is 100%.

---

Group of orthologs #7879. Best score 373 bits

Score difference with first non-orthologous sequence - *A. fumigatus*:373 *A. fischeri*:313

afum|EBA27176.1 100.00% afis|EAW25722.1 100.00%

Bootstrap support for afum|EBA27176.1 as seed ortholog is 100%.

Bootstrap support for afis|EAW25722.1 as seed ortholog is 100%.

---

Group of orthologs #7880. Best score 371 bits

Score difference with first non-orthologous sequence - *A. fumigatus*:314 *A. fischeri*:289

afum|EAL86417.1 100.00% afis|EAW16880.1 100.00%

Bootstrap support for afum|EAL86417.1 as seed ortholog is 100%.

Bootstrap support for afis|EAW16880.1 as seed ortholog is 100%.

---

Group of orthologs #7881. Best score 371 bits

Score difference with first non-orthologous sequence - *A. fumigatus*:371 *A. fischeri*:313

afum|EAL85485.1 100.00% afis|EAW20371.1 100.00%

Bootstrap support for afum|EAL85485.1 as seed ortholog is 100%.

Bootstrap support for afis|EAW20371.1 as seed ortholog is 100%.

---

Group of orthologs #7882. Best score 371 bits

Score difference with first non-orthologous sequence - *A. fumigatus*:371 *A. fischeri*:371

afum|EAL91230.1 100.00% afis|EAW17392.1 100.00%

Bootstrap support for afum|EAL91230.1 as seed ortholog is 100%.

Bootstrap support for afis|EAW17392.1 as seed ortholog is 100%.

---

Group of orthologs #7883. Best score 371 bits

Score difference with first non-orthologous sequence - *A. fumigatus*:371 *A. fischeri*:371

afum|EAL93628.1 100.00% afis|EAW18896.1 100.00%

Bootstrap support for afum|EAL93628.1 as seed ortholog is 100%.

Bootstrap support for afis|EAW18896.1 as seed ortholog is 100%.

---

Group of orthologs #7884. Best score 370 bits

Score difference with first non-orthologous sequence - *A. fumigatus*:370 *A. fischeri*:370

afum|EAL85158.1 100.00% afis|EAW20037.1 100.00%

Bootstrap support for afum|EAL85158.1 as seed ortholog is 100%.

Bootstrap support for afis|EAW20037.1 as seed ortholog is 100%.

---

Group of orthologs #7885. Best score 370 bits

Score difference with first non-orthologous sequence - *A. fumigatus*:370 *A. fischeri*:370

afum|EAL91880.1 100.00% afis|EAW18068.1 100.00%

Bootstrap support for afum|EAL91880.1 as seed ortholog is 100%.

Bootstrap support for afis|EAW18068.1 as seed ortholog is 100%.

---

Group of orthologs #7886. Best score 370 bits

Score difference with first non-orthologous sequence - *A. fumigatus*:370 *A. fischeri*:370

afum|EAL93592.1 100.00% afis|EAW18860.1 100.00%

Bootstrap support for afum|EAL93592.1 as seed ortholog is 100%.

Bootstrap support for afis|EAW18860.1 as seed ortholog is 100%.

---

Group of orthologs #7887. Best score 370 bits

Score difference with first non-orthologous sequence - *A. fumigatus*:370 *A. fischeri*:370

afum|EAL93952.1 100.00% afis|EAW19219.1 100.00%

Bootstrap support for afum|EAL93952.1 as seed ortholog is 100%.

Bootstrap support for afis|EAW19219.1 as seed ortholog is 100%.

---

Group of orthologs #7888. Best score 370 bits

Score difference with first non-orthologous sequence - *A. fumigatus*:241 *A. fischeri*:370

afum|EAL90751.1 100.00% afis|EAW22440.1 100.00%

Bootstrap support for afum|EAL90751.1 as seed ortholog is 100%.

Bootstrap support for afis|EAW22440.1 as seed ortholog is 100%.

---

Group of orthologs #7889. Best score 370 bits

Score difference with first non-orthologous sequence - *A. fumigatus*:370 *A. fischeri*:370

afum|EAL89852.1 100.00% afis|EAW25178.1 100.00%

Bootstrap support for afum|EAL89852.1 as seed ortholog is 100%.

Bootstrap support for afis|EAW25178.1 as seed ortholog is 100%.

---

Group of orthologs #7890. Best score 369 bits

Score difference with first non-orthologous sequence - *A. fumigatus*:369 *A. fischeri*:369

afum|EAL91332.1 100.00% afis|EAW17514.1 100.00%

Bootstrap support for afum|EAL91332.1 as seed ortholog is 100%.

Bootstrap support for afis|EAW17514.1 as seed ortholog is 100%.

---

Group of orthologs #7891. Best score 369 bits

Score difference with first non-orthologous sequence - *A. fumigatus*:369 *A. fischeri*:369  
afum|EAL91549.1 100.00% afis|EAW17734.1 100.00%  
Bootstrap support for afum|EAL91549.1 as seed ortholog is 100%.  
Bootstrap support for afis|EAW17734.1 as seed ortholog is 100%.

---

Group of orthologs #7892. Best score 369 bits

Score difference with first non-orthologous sequence - *A. fumigatus*:369 *A. fischeri*:369  
afum|EAL90423.1 100.00% afis|EAW22775.1 100.00%  
Bootstrap support for afum|EAL90423.1 as seed ortholog is 100%.  
Bootstrap support for afis|EAW22775.1 as seed ortholog is 100%.

---

Group of orthologs #7893. Best score 368 bits

Score difference with first non-orthologous sequence - *A. fumigatus*:368 *A. fischeri*:368  
afum|EBA27243.1 100.00% afis|EAW15542.1 100.00%  
Bootstrap support for afum|EBA27243.1 as seed ortholog is 100%.  
Bootstrap support for afis|EAW15542.1 as seed ortholog is 100%.

---

Group of orthologs #7894. Best score 368 bits

Score difference with first non-orthologous sequence - *A. fumigatus*:368 *A. fischeri*:368  
afum|EAL88419.1 100.00% afis|EAW23060.1 100.00%  
Bootstrap support for afum|EAL88419.1 as seed ortholog is 100%.  
Bootstrap support for afis|EAW23060.1 as seed ortholog is 100%.

---

Group of orthologs #7895. Best score 368 bits

Score difference with first non-orthologous sequence - *A. fumigatus*:368 *A. fischeri*:368  
afum|EAL93772.1 100.00% afis|EAW19043.1 100.00%  
Bootstrap support for afum|EAL93772.1 as seed ortholog is 100%.  
Bootstrap support for afis|EAW19043.1 as seed ortholog is 100%.

---

Group of orthologs #7896. Best score 368 bits

Score difference with first non-orthologous sequence - *A. fumigatus*:368 *A. fischeri*:368  
afum|EAL93824.1 100.00% afis|EAW19093.1 100.00%  
Bootstrap support for afum|EAL93824.1 as seed ortholog is 100%.  
Bootstrap support for afis|EAW19093.1 as seed ortholog is 100%.

---

Group of orthologs #7897. Best score 368 bits

Score difference with first non-orthologous sequence - *A. fumigatus*:368 *A. fischeri*:368  
afum|EAL93003.1 100.00% afis|EAW21987.1 100.00%  
Bootstrap support for afum|EAL93003.1 as seed ortholog is 100%.  
Bootstrap support for afis|EAW21987.1 as seed ortholog is 100%.

---

Group of orthologs #7898. Best score 368 bits

Score difference with first non-orthologous sequence - *A. fumigatus*:368 *A. fischeri*:368  
afum|EAL90118.2 100.00% afis|EAW25458.1 100.00%  
Bootstrap support for afum|EAL90118.2 as seed ortholog is 100%.  
Bootstrap support for afis|EAW25458.1 as seed ortholog is 100%.

---

Group of orthologs #7899. Best score 368 bits

Score difference with first non-orthologous sequence - *A. fumigatus*:368 *A. fischeri*:368  
afum|EAL91930.2 100.00% afis|EAW24074.1 100.00%  
Bootstrap support for afum|EAL91930.2 as seed ortholog is 100%.  
Bootstrap support for afis|EAW24074.1 as seed ortholog is 100%.

---

Group of orthologs #7900. Best score 368 bits

Score difference with first non-orthologous sequence - *A. fumigatus*:368 *A. fischeri*:368  
afum|EBA27301.1 100.00% afis|EAW23727.1 100.00%

Bootstrap support for afum|EBA27301.1 as seed ortholog is 100%.  
Bootstrap support for afis|EAW23727.1 as seed ortholog is 100%.

---

Group of orthologs #7901. Best score 367 bits

Score difference with first non-orthologous sequence - *A. fumigatus*:279 *A. fischeri*:367

afum|EAL86537.1 100.00% afis|EAW17053.1 100.00%

Bootstrap support for afum|EAL86537.1 as seed ortholog is 100%.

Bootstrap support for afis|EAW17053.1 as seed ortholog is 100%.

---

Group of orthologs #7902. Best score 367 bits

Score difference with first non-orthologous sequence - *A. fumigatus*:367 *A. fischeri*:367

afum|EAL88608.1 100.00% afis|EAW15976.1 100.00%

Bootstrap support for afum|EAL88608.1 as seed ortholog is 100%.

Bootstrap support for afis|EAW15976.1 as seed ortholog is 100%.

---

Group of orthologs #7903. Best score 367 bits

Score difference with first non-orthologous sequence - *A. fumigatus*:367 *A. fischeri*:367

afum|EAL88197.2 100.00% afis|EAW23282.1 100.00%

Bootstrap support for afum|EAL88197.2 as seed ortholog is 100%.

Bootstrap support for afis|EAW23282.1 as seed ortholog is 100%.

---

Group of orthologs #7904. Best score 367 bits

Score difference with first non-orthologous sequence - *A. fumigatus*:367 *A. fischeri*:367

afum|EAL87461.1 100.00% afis|EAW24030.1 100.00%

Bootstrap support for afum|EAL87461.1 as seed ortholog is 100%.

Bootstrap support for afis|EAW24030.1 as seed ortholog is 100%.

---

Group of orthologs #7905. Best score 367 bits

Score difference with first non-orthologous sequence - *A. fumigatus*:367 *A. fischeri*:367

afum|EAL92827.1 100.00% afis|EAW21801.1 100.00%

Bootstrap support for afum|EAL92827.1 as seed ortholog is 100%.

Bootstrap support for afis|EAW21801.1 as seed ortholog is 100%.

---

Group of orthologs #7906. Best score 367 bits

Score difference with first non-orthologous sequence - *A. fumigatus*:367 *A. fischeri*:367

afum|EAL89844.1 100.00% afis|EAW25171.1 100.00%

Bootstrap support for afum|EAL89844.1 as seed ortholog is 100%.

Bootstrap support for afis|EAW25171.1 as seed ortholog is 100%.

---

Group of orthologs #7907. Best score 367 bits

Score difference with first non-orthologous sequence - *A. fumigatus*:367 *A. fischeri*:302

afum|EBA27389.1 100.00% afis|EAW25199.1 100.00%

Bootstrap support for afum|EBA27389.1 as seed ortholog is 100%.

Bootstrap support for afis|EAW25199.1 as seed ortholog is 100%.

---

Group of orthologs #7908. Best score 366 bits

Score difference with first non-orthologous sequence - *A. fumigatus*:366 *A. fischeri*:366

afum|EAL87049.1 100.00% afis|EAW19446.1 100.00%

Bootstrap support for afum|EAL87049.1 as seed ortholog is 100%.

Bootstrap support for afis|EAW19446.1 as seed ortholog is 100%.

---

Group of orthologs #7909. Best score 366 bits

Score difference with first non-orthologous sequence - *A. fumigatus*:196 *A. fischeri*:11

afum|EAL87770.2 100.00% afis|EAW19678.1 100.00%

Bootstrap support for afum|EAL87770.2 as seed ortholog is 100%.

Bootstrap support for afis|EAW19678.1 as seed ortholog is 60%. Alternative seed ortholog is afis|EAW24039.1 (11 bits away from this cluster)

---

Group of orthologs #7910. Best score 366 bits

Score difference with first non-orthologous sequence - *A. fumigatus*:366 *A. fischeri*:366

|                 |         |                 |         |
|-----------------|---------|-----------------|---------|
| afum EAL94022.1 | 100.00% | afis EAW19304.1 | 100.00% |
|-----------------|---------|-----------------|---------|

Bootstrap support for afum|EAL94022.1 as seed ortholog is 100%.

Bootstrap support for afis|EAW19304.1 as seed ortholog is 100%.

---

Group of orthologs #7911. Best score 366 bits

Score difference with first non-orthologous sequence - *A. fumigatus*:366 *A. fischeri*:366

|                 |         |                 |         |
|-----------------|---------|-----------------|---------|
| afum EAL92331.1 | 100.00% | afis EAW21314.1 | 100.00% |
|-----------------|---------|-----------------|---------|

Bootstrap support for afum|EAL92331.1 as seed ortholog is 100%.

Bootstrap support for afis|EAW21314.1 as seed ortholog is 100%.

---

Group of orthologs #7912. Best score 365 bits

Score difference with first non-orthologous sequence - *A. fumigatus*:365 *A. fischeri*:365

|                 |         |                 |         |
|-----------------|---------|-----------------|---------|
| afum EAL91677.1 | 100.00% | afis EAW17869.1 | 100.00% |
|-----------------|---------|-----------------|---------|

Bootstrap support for afum|EAL91677.1 as seed ortholog is 100%.

Bootstrap support for afis|EAW17869.1 as seed ortholog is 100%.

---

Group of orthologs #7913. Best score 365 bits

Score difference with first non-orthologous sequence - *A. fumigatus*:365 *A. fischeri*:365

|                 |         |                 |         |
|-----------------|---------|-----------------|---------|
| afum EBA27326.1 | 100.00% | afis EAW17485.1 | 100.00% |
|-----------------|---------|-----------------|---------|

Bootstrap support for afum|EBA27326.1 as seed ortholog is 100%.

Bootstrap support for afis|EAW17485.1 as seed ortholog is 100%.

---

Group of orthologs #7914. Best score 365 bits

Score difference with first non-orthologous sequence - *A. fumigatus*:365 *A. fischeri*:365

|                 |         |                 |         |
|-----------------|---------|-----------------|---------|
| afum EAL93304.2 | 100.00% | afis EAW18596.1 | 100.00% |
|-----------------|---------|-----------------|---------|

Bootstrap support for afum|EAL93304.2 as seed ortholog is 100%.

Bootstrap support for afis|EAW18596.1 as seed ortholog is 100%.

---

Group of orthologs #7915. Best score 365 bits

Score difference with first non-orthologous sequence - *A. fumigatus*:365 *A. fischeri*:365

|                 |         |                 |         |
|-----------------|---------|-----------------|---------|
| afum EAL90280.1 | 100.00% | afis EAW22917.1 | 100.00% |
|-----------------|---------|-----------------|---------|

Bootstrap support for afum|EAL90280.1 as seed ortholog is 100%.

Bootstrap support for afis|EAW22917.1 as seed ortholog is 100%.

---

Group of orthologs #7916. Best score 364 bits

Score difference with first non-orthologous sequence - *A. fumigatus*:69 *A. fischeri*:364

|                 |         |                 |         |
|-----------------|---------|-----------------|---------|
| afum EAL86288.2 | 100.00% | afis EAW16389.1 | 100.00% |
|-----------------|---------|-----------------|---------|

|                 |         |
|-----------------|---------|
| afum EAL89015.1 | 100.00% |
|-----------------|---------|

Bootstrap support for afum|EAL86288.2 as seed ortholog is 99%.

Bootstrap support for afum|EAL89015.1 as seed ortholog is 99%.

Bootstrap support for afis|EAW16389.1 as seed ortholog is 100%.

---

Group of orthologs #7917. Best score 364 bits

Score difference with first non-orthologous sequence - *A. fumigatus*:364 *A. fischeri*:364

|                 |         |                 |         |
|-----------------|---------|-----------------|---------|
| afum EAL84991.1 | 100.00% | afis EAW19916.1 | 100.00% |
|-----------------|---------|-----------------|---------|

Bootstrap support for afum|EAL84991.1 as seed ortholog is 100%.

Bootstrap support for afis|EAW19916.1 as seed ortholog is 100%.

---

Group of orthologs #7918. Best score 364 bits

Score difference with first non-orthologous sequence - *A. fumigatus*:364 *A. fischeri*:364

|                 |         |                 |         |
|-----------------|---------|-----------------|---------|
| afum EAL84992.1 | 100.00% | afis EAW19915.1 | 100.00% |
|-----------------|---------|-----------------|---------|

Bootstrap support for afum|EAL84992.1 as seed ortholog is 100%.  
Bootstrap support for afis|EAW19915.1 as seed ortholog is 100%.

---

Group of orthologs #7919. Best score 364 bits

Score difference with first non-orthologous sequence - *A. fumigatus*:364 *A. fischeri*:364

afum|EAL91313.1 100.00% afis|EAW17491.1 100.00%

Bootstrap support for afum|EAL91313.1 as seed ortholog is 100%.

Bootstrap support for afis|EAW17491.1 as seed ortholog is 100%.

---

Group of orthologs #7920. Best score 364 bits

Score difference with first non-orthologous sequence - *A. fumigatus*:194 *A. fischeri*:364

afum|EAL86105.1 100.00% afis|EAW24437.1 100.00%

Bootstrap support for afum|EAL86105.1 as seed ortholog is 100%.

Bootstrap support for afis|EAW24437.1 as seed ortholog is 100%.

---

Group of orthologs #7921. Best score 364 bits

Score difference with first non-orthologous sequence - *A. fumigatus*:364 *A. fischeri*:364

afum|EAL93133.2 100.00% afis|EAW18448.1 100.00%

Bootstrap support for afum|EAL93133.2 as seed ortholog is 100%.

Bootstrap support for afis|EAW18448.1 as seed ortholog is 100%.

---

Group of orthologs #7922. Best score 364 bits

Score difference with first non-orthologous sequence - *A. fumigatus*:364 *A. fischeri*:364

afum|EAL90559.1 100.00% afis|EAW22634.1 100.00%

Bootstrap support for afum|EAL90559.1 as seed ortholog is 100%.

Bootstrap support for afis|EAW22634.1 as seed ortholog is 100%.

---

Group of orthologs #7923. Best score 364 bits

Score difference with first non-orthologous sequence - *A. fumigatus*:364 *A. fischeri*:314

afum|EBA27512.1 100.00% afis|EAW19326.1 100.00%

Bootstrap support for afum|EBA27512.1 as seed ortholog is 100%.

Bootstrap support for afis|EAW19326.1 as seed ortholog is 100%.

---

Group of orthologs #7924. Best score 364 bits

Score difference with first non-orthologous sequence - *A. fumigatus*:364 *A. fischeri*:364

afum|EAL89867.1 100.00% afis|EAW25206.1 100.00%

Bootstrap support for afum|EAL89867.1 as seed ortholog is 100%.

Bootstrap support for afis|EAW25206.1 as seed ortholog is 100%.

---

Group of orthologs #7925. Best score 363 bits

Score difference with first non-orthologous sequence - *A. fumigatus*:363 *A. fischeri*:363

afum|EAL88514.1 100.00% afis|EAW15880.1 100.00%

Bootstrap support for afum|EAL88514.1 as seed ortholog is 100%.

Bootstrap support for afis|EAW15880.1 as seed ortholog is 100%.

---

Group of orthologs #7926. Best score 363 bits

Score difference with first non-orthologous sequence - *A. fumigatus*:363 *A. fischeri*:363

afum|EAL89056.2 100.00% afis|EAW16460.1 100.00%

Bootstrap support for afum|EAL89056.2 as seed ortholog is 100%.

Bootstrap support for afis|EAW16460.1 as seed ortholog is 100%.

---

Group of orthologs #7927. Best score 363 bits

Score difference with first non-orthologous sequence - *A. fumigatus*:363 *A. fischeri*:363

afum|EBA27246.1 100.00% afis|EAW15513.1 100.00%

Bootstrap support for afum|EBA27246.1 as seed ortholog is 100%.

Bootstrap support for afis|EAW15513.1 as seed ortholog is 100%.



---

Group of orthologs #7928. Best score 363 bits

Score difference with first non-orthologous sequence - *A. fumigatus*:363 *A. fischeri*:363

afum|EAL93339.1 100.00% afis|EAW18627.1 100.00%

Bootstrap support for afum|EAL93339.1 as seed ortholog is 100%.

Bootstrap support for afis|EAW18627.1 as seed ortholog is 100%.

---

Group of orthologs #7929. Best score 363 bits

Score difference with first non-orthologous sequence - *A. fumigatus*:363 *A. fischeri*:363

afum|EAL92070.1 100.00% afis|EAW21031.1 100.00%

Bootstrap support for afum|EAL92070.1 as seed ortholog is 100%.

Bootstrap support for afis|EAW21031.1 as seed ortholog is 100%.

---

Group of orthologs #7930. Best score 362 bits

Score difference with first non-orthologous sequence - *A. fumigatus*:362 *A. fischeri*:362

afum|EAL85564.1 100.00% afis|EAW15786.1 100.00%

Bootstrap support for afum|EAL85564.1 as seed ortholog is 100%.

Bootstrap support for afis|EAW15786.1 as seed ortholog is 100%.

---

Group of orthologs #7931. Best score 362 bits

Score difference with first non-orthologous sequence - *A. fumigatus*:362 *A. fischeri*:362

afum|EAL88762.1 100.00% afis|EAW16132.1 100.00%

Bootstrap support for afum|EAL88762.1 as seed ortholog is 100%.

Bootstrap support for afis|EAW16132.1 as seed ortholog is 100%.

---

Group of orthologs #7932. Best score 362 bits

Score difference with first non-orthologous sequence - *A. fumigatus*:362 *A. fischeri*:362

afum|EAL93540.1 100.00% afis|EAW18804.1 100.00%

Bootstrap support for afum|EAL93540.1 as seed ortholog is 100%.

Bootstrap support for afis|EAW18804.1 as seed ortholog is 100%.

---

Group of orthologs #7933. Best score 362 bits

Score difference with first non-orthologous sequence - *A. fumigatus*:362 *A. fischeri*:311

afum|EAL93557.1 100.00% afis|EAW18820.1 100.00%

Bootstrap support for afum|EAL93557.1 as seed ortholog is 100%.

Bootstrap support for afis|EAW18820.1 as seed ortholog is 100%.

---

Group of orthologs #7934. Best score 362 bits

Score difference with first non-orthologous sequence - *A. fumigatus*:362 *A. fischeri*:362

afum|EAL90196.2 100.00% afis|EAW25532.1 100.00%

Bootstrap support for afum|EAL90196.2 as seed ortholog is 100%.

Bootstrap support for afis|EAW25532.1 as seed ortholog is 100%.

---

Group of orthologs #7935. Best score 361 bits

Score difference with first non-orthologous sequence - *A. fumigatus*:361 *A. fischeri*:361

afum|EAL91430.1 100.00% afis|EAW17617.1 100.00%

Bootstrap support for afum|EAL91430.1 as seed ortholog is 100%.

Bootstrap support for afis|EAW17617.1 as seed ortholog is 100%.

---

Group of orthologs #7936. Best score 361 bits

Score difference with first non-orthologous sequence - *A. fumigatus*:361 *A. fischeri*:361

afum|EAL88216.1 100.00% afis|EAW23264.1 100.00%

Bootstrap support for afum|EAL88216.1 as seed ortholog is 100%.

Bootstrap support for afis|EAW23264.1 as seed ortholog is 100%.

---

Group of orthologs #7937. Best score 361 bits

Score difference with first non-orthologous sequence - *A. fumigatus*:361 *A. fischeri*:361  
afum|EAL92922.2 100.00% afis|EAW21910.1 100.00%  
Bootstrap support for afum|EAL92922.2 as seed ortholog is 100%.  
Bootstrap support for afis|EAW21910.1 as seed ortholog is 100%.

---

Group of orthologs #7938. Best score 360 bits

Score difference with first non-orthologous sequence - *A. fumigatus*:360 *A. fischeri*:360  
afum|EAL88163.1 100.00% afis|EAW23314.1 100.00%  
Bootstrap support for afum|EAL88163.1 as seed ortholog is 100%.  
Bootstrap support for afis|EAW23314.1 as seed ortholog is 100%.

---

Group of orthologs #7939. Best score 360 bits

Score difference with first non-orthologous sequence - *A. fumigatus*:360 *A. fischeri*:360  
afum|EAL92714.1 100.00% afis|EAW21680.1 100.00%  
Bootstrap support for afum|EAL92714.1 as seed ortholog is 100%.  
Bootstrap support for afis|EAW21680.1 as seed ortholog is 100%.

---

Group of orthologs #7940. Best score 359 bits

Score difference with first non-orthologous sequence - *A. fumigatus*:359 *A. fischeri*:359  
afum|EAL84197.1 100.00% afis|EAW15449.1 100.00%  
Bootstrap support for afum|EAL84197.1 as seed ortholog is 100%.  
Bootstrap support for afis|EAW15449.1 as seed ortholog is 100%.

---

Group of orthologs #7941. Best score 359 bits

Score difference with first non-orthologous sequence - *A. fumigatus*:359 *A. fischeri*:359  
afum|EBA27353.1 100.00% afis|EAW16008.1 100.00%  
Bootstrap support for afum|EBA27353.1 as seed ortholog is 100%.  
Bootstrap support for afis|EAW16008.1 as seed ortholog is 100%.

---

Group of orthologs #7942. Best score 359 bits

Score difference with first non-orthologous sequence - *A. fumigatus*:359 *A. fischeri*:359  
afum|EAL90790.1 100.00% afis|EAW22401.1 100.00%  
Bootstrap support for afum|EAL90790.1 as seed ortholog is 100%.  
Bootstrap support for afis|EAW22401.1 as seed ortholog is 100%.

---

Group of orthologs #7943. Best score 359 bits

Score difference with first non-orthologous sequence - *A. fumigatus*:359 *A. fischeri*:359  
afum|EAL92880.2 100.00% afis|EAW21866.1 100.00%  
Bootstrap support for afum|EAL92880.2 as seed ortholog is 100%.  
Bootstrap support for afis|EAW21866.1 as seed ortholog is 100%.

---

Group of orthologs #7944. Best score 359 bits

Score difference with first non-orthologous sequence - *A. fumigatus*:359 *A. fischeri*:359  
afum|EAL89783.2 100.00% afis|EAW25112.1 100.00%  
Bootstrap support for afum|EAL89783.2 as seed ortholog is 100%.  
Bootstrap support for afis|EAW25112.1 as seed ortholog is 100%.

---

Group of orthologs #7945. Best score 358 bits

Score difference with first non-orthologous sequence - *A. fumigatus*:358 *A. fischeri*:358  
afum|EAL86359.1 100.00% afis|EAW16789.1 100.00%  
Bootstrap support for afum|EAL86359.1 as seed ortholog is 100%.  
Bootstrap support for afis|EAW16789.1 as seed ortholog is 100%.

---

Group of orthologs #7946. Best score 358 bits

Score difference with first non-orthologous sequence - *A. fumigatus*:358 *A. fischeri*:358  
afum|EAL88637.2 100.00% afis|EAW16005.1 100.00%

Bootstrap support for afum|EAL88637.2 as seed ortholog is 100%.  
Bootstrap support for afis|EAW16005.1 as seed ortholog is 100%.

---

Group of orthologs #7947. Best score 358 bits

Score difference with first non-orthologous sequence - *A. fumigatus*:358 *A. fischeri*:358

afum|EAL85213.1 100.00% afis|EAW20095.1 100.00%

Bootstrap support for afum|EAL85213.1 as seed ortholog is 100%.

Bootstrap support for afis|EAW20095.1 as seed ortholog is 100%.

---

Group of orthologs #7948. Best score 358 bits

Score difference with first non-orthologous sequence - *A. fumigatus*:358 *A. fischeri*:358

afum|EAL87725.1 100.00% afis|EAW23649.1 100.00%

Bootstrap support for afum|EAL87725.1 as seed ortholog is 100%.

Bootstrap support for afis|EAW23649.1 as seed ortholog is 100%.

---

Group of orthologs #7949. Best score 358 bits

Score difference with first non-orthologous sequence - *A. fumigatus*:291 *A. fischeri*:279

afum|EAL92030.1 100.00% afis|EAW23114.1 100.00%

Bootstrap support for afum|EAL92030.1 as seed ortholog is 100%.

Bootstrap support for afis|EAW23114.1 as seed ortholog is 100%.

---

Group of orthologs #7950. Best score 358 bits

Score difference with first non-orthologous sequence - *A. fumigatus*:358 *A. fischeri*:358

afum|EBA27313.1 100.00% afis|EAW23983.1 100.00%

Bootstrap support for afum|EBA27313.1 as seed ortholog is 100%.

Bootstrap support for afis|EAW23983.1 as seed ortholog is 100%.

---

Group of orthologs #7951. Best score 357 bits

Score difference with first non-orthologous sequence - *A. fumigatus*:357 *A. fischeri*:357

afum|EAL87712.2 100.00% afis|EAW18348.1 100.00%

Bootstrap support for afum|EAL87712.2 as seed ortholog is 100%.

Bootstrap support for afis|EAW18348.1 as seed ortholog is 100%.

---

Group of orthologs #7952. Best score 357 bits

Score difference with first non-orthologous sequence - *A. fumigatus*:357 *A. fischeri*:357

afum|EAL87935.1 100.00% afis|EAW23531.1 100.00%

Bootstrap support for afum|EAL87935.1 as seed ortholog is 100%.

Bootstrap support for afis|EAW23531.1 as seed ortholog is 100%.

---

Group of orthologs #7953. Best score 357 bits

Score difference with first non-orthologous sequence - *A. fumigatus*:357 *A. fischeri*:357

afum|EAL90685.1 100.00% afis|EAW22508.1 100.00%

Bootstrap support for afum|EAL90685.1 as seed ortholog is 100%.

Bootstrap support for afis|EAW22508.1 as seed ortholog is 100%.

---

Group of orthologs #7954. Best score 356 bits

Score difference with first non-orthologous sequence - *A. fumigatus*:356 *A. fischeri*:356

afum|EBA27383.1 100.00% afis|EAW24777.1 100.00%

Bootstrap support for afum|EBA27383.1 as seed ortholog is 100%.

Bootstrap support for afis|EAW24777.1 as seed ortholog is 100%.

---

Group of orthologs #7955. Best score 355 bits

Score difference with first non-orthologous sequence - *A. fumigatus*:355 *A. fischeri*:355

afum|EAL90489.1 100.00% afis|EAW22703.1 100.00%

Bootstrap support for afum|EAL90489.1 as seed ortholog is 100%.

Bootstrap support for afis|EAW22703.1 as seed ortholog is 100%.

---

Group of orthologs #7956. Best score 355 bits

Score difference with first non-orthologous sequence - *A. fumigatus*:355 *A. fischeri*:355

afum|EAL92444.1 100.00% afis|EAW21429.1 100.00%

Bootstrap support for afum|EAL92444.1 as seed ortholog is 100%.

Bootstrap support for afis|EAW21429.1 as seed ortholog is 100%.

---

Group of orthologs #7957. Best score 355 bits

Score difference with first non-orthologous sequence - *A. fumigatus*:355 *A. fischeri*:355

afum|EAL89611.1 100.00% afis|EAW24954.1 100.00%

Bootstrap support for afum|EAL89611.1 as seed ortholog is 100%.

Bootstrap support for afis|EAW24954.1 as seed ortholog is 100%.

---

Group of orthologs #7958. Best score 354 bits

Score difference with first non-orthologous sequence - *A. fumigatus*:354 *A. fischeri*:354

afum|EAL87521.1 100.00% afis|EAW18161.1 100.00%

Bootstrap support for afum|EAL87521.1 as seed ortholog is 100%.

Bootstrap support for afis|EAW18161.1 as seed ortholog is 100%.

---

Group of orthologs #7959. Best score 354 bits

Score difference with first non-orthologous sequence - *A. fumigatus*:354 *A. fischeri*:354

afum|EAL86095.1 100.00% afis|EAW24427.1 100.00%

Bootstrap support for afum|EAL86095.1 as seed ortholog is 100%.

Bootstrap support for afis|EAW24427.1 as seed ortholog is 100%.

---

Group of orthologs #7960. Best score 354 bits

Score difference with first non-orthologous sequence - *A. fumigatus*:354 *A. fischeri*:354

afum|EAL93621.1 100.00% afis|EAW18888.1 100.00%

Bootstrap support for afum|EAL93621.1 as seed ortholog is 100%.

Bootstrap support for afis|EAW18888.1 as seed ortholog is 100%.

---

Group of orthologs #7961. Best score 354 bits

Score difference with first non-orthologous sequence - *A. fumigatus*:354 *A. fischeri*:354

afum|EAL94020.1 100.00% afis|EAW19301.1 100.00%

Bootstrap support for afum|EAL94020.1 as seed ortholog is 100%.

Bootstrap support for afis|EAW19301.1 as seed ortholog is 100%.

---

Group of orthologs #7962. Best score 353 bits

Score difference with first non-orthologous sequence - *A. fumigatus*:353 *A. fischeri*:353

afum|EAL84623.1 100.00% afis|EAW20426.1 100.00%

Bootstrap support for afum|EAL84623.1 as seed ortholog is 100%.

Bootstrap support for afis|EAW20426.1 as seed ortholog is 100%.

---

Group of orthologs #7963. Best score 353 bits

Score difference with first non-orthologous sequence - *A. fumigatus*:353 *A. fischeri*:353

afum|EAL86942.1 100.00% afis|EAW19575.1 100.00%

Bootstrap support for afum|EAL86942.1 as seed ortholog is 100%.

Bootstrap support for afis|EAW19575.1 as seed ortholog is 100%.

---

Group of orthologs #7964. Best score 353 bits

Score difference with first non-orthologous sequence - *A. fumigatus*:353 *A. fischeri*:353

afum|EAL87254.1 100.00% afis|EAW23819.1 100.00%

Bootstrap support for afum|EAL87254.1 as seed ortholog is 100%.

Bootstrap support for afis|EAW23819.1 as seed ortholog is 100%.

---

Group of orthologs #7965. Best score 353 bits

Score difference with first non-orthologous sequence - *A. fumigatus*:353 *A. fischeri*:353  
afum|EAL88051.2 100.00% afis|EAW23418.1 100.00%  
Bootstrap support for afum|EAL88051.2 as seed ortholog is 100%.  
Bootstrap support for afis|EAW23418.1 as seed ortholog is 100%.

---

Group of orthologs #7966. Best score 353 bits

Score difference with first non-orthologous sequence - *A. fumigatus*:353 *A. fischeri*:180  
afum|EAL89348.2 100.00% afis|EAW24706.1 100.00%  
Bootstrap support for afum|EAL89348.2 as seed ortholog is 100%.  
Bootstrap support for afis|EAW24706.1 as seed ortholog is 100%.

---

Group of orthologs #7967. Best score 353 bits

Score difference with first non-orthologous sequence - *A. fumigatus*:353 *A. fischeri*:353  
afum|EAL89391.1 100.00% afis|EAW24745.1 100.00%  
Bootstrap support for afum|EAL89391.1 as seed ortholog is 100%.  
Bootstrap support for afis|EAW24745.1 as seed ortholog is 100%.

---

Group of orthologs #7968. Best score 353 bits

Score difference with first non-orthologous sequence - *A. fumigatus*:353 *A. fischeri*:353  
afum|EAL92772.1 100.00% afis|EAW21738.1 100.00%  
Bootstrap support for afum|EAL92772.1 as seed ortholog is 100%.  
Bootstrap support for afis|EAW21738.1 as seed ortholog is 100%.

---

Group of orthologs #7969. Best score 353 bits

Score difference with first non-orthologous sequence - *A. fumigatus*:353 *A. fischeri*:353  
afum|EBA27378.1 100.00% afis|EAW24729.1 100.00%  
Bootstrap support for afum|EBA27378.1 as seed ortholog is 100%.  
Bootstrap support for afis|EAW24729.1 as seed ortholog is 100%.

---

Group of orthologs #7970. Best score 352 bits

Score difference with first non-orthologous sequence - *A. fumigatus*:352 *A. fischeri*:352  
afum|EAL85788.1 100.00% afis|EAW15543.1 100.00%  
Bootstrap support for afum|EAL85788.1 as seed ortholog is 100%.  
Bootstrap support for afis|EAW15543.1 as seed ortholog is 100%.

---

Group of orthologs #7971. Best score 352 bits

Score difference with first non-orthologous sequence - *A. fumigatus*:352 *A. fischeri*:352  
afum|EAL88261.1 100.00% afis|EAW23223.1 100.00%  
Bootstrap support for afum|EAL88261.1 as seed ortholog is 100%.  
Bootstrap support for afis|EAW23223.1 as seed ortholog is 100%.

---

Group of orthologs #7972. Best score 351 bits

Score difference with first non-orthologous sequence - *A. fumigatus*:351 *A. fischeri*:351  
afum|EAL86877.1 100.00% afis|EAW19645.1 100.00%  
Bootstrap support for afum|EAL86877.1 as seed ortholog is 100%.  
Bootstrap support for afis|EAW19645.1 as seed ortholog is 100%.

---

Group of orthologs #7973. Best score 351 bits

Score difference with first non-orthologous sequence - *A. fumigatus*:351 *A. fischeri*:351  
afum|EBA27275.1 100.00% afis|EAW16984.1 100.00%  
Bootstrap support for afum|EBA27275.1 as seed ortholog is 100%.  
Bootstrap support for afis|EAW16984.1 as seed ortholog is 100%.

---

Group of orthologs #7974. Best score 351 bits

Score difference with first non-orthologous sequence - *A. fumigatus*:351 *A. fischeri*:351  
afum|EAL93602.1 100.00% afis|EAW18870.1 100.00%

Bootstrap support for afum|EAL93602.1 as seed ortholog is 100%.  
Bootstrap support for afis|EAW18870.1 as seed ortholog is 100%.

---

Group of orthologs #7975. Best score 351 bits

Score difference with first non-orthologous sequence - *A. fumigatus*:351 *A. fischeri*:351

afum|EAL92102.1 100.00% afis|EAW21081.1 100.00%

Bootstrap support for afum|EAL92102.1 as seed ortholog is 100%.

Bootstrap support for afis|EAW21081.1 as seed ortholog is 100%.

---

Group of orthologs #7976. Best score 350 bits

Score difference with first non-orthologous sequence - *A. fumigatus*:350 *A. fischeri*:350

afum|EAL94042.1 100.00% afis|EAW19324.1 100.00%

Bootstrap support for afum|EAL94042.1 as seed ortholog is 100%.

Bootstrap support for afis|EAW19324.1 as seed ortholog is 100%.

---

Group of orthologs #7977. Best score 350 bits

Score difference with first non-orthologous sequence - *A. fumigatus*:350 *A. fischeri*:350

afum|EAL90334.1 100.00% afis|EAW22865.1 100.00%

Bootstrap support for afum|EAL90334.1 as seed ortholog is 100%.

Bootstrap support for afis|EAW22865.1 as seed ortholog is 100%.

---

Group of orthologs #7978. Best score 350 bits

Score difference with first non-orthologous sequence - *A. fumigatus*:350 *A. fischeri*:350

afum|EAL90111.1 100.00% afis|EAW25452.1 100.00%

Bootstrap support for afum|EAL90111.1 as seed ortholog is 100%.

Bootstrap support for afis|EAW25452.1 as seed ortholog is 100%.

---

Group of orthologs #7979. Best score 349 bits

Score difference with first non-orthologous sequence - *A. fumigatus*:349 *A. fischeri*:349

afum|EAL86323.1 100.00% afis|EAW16750.1 100.00%

Bootstrap support for afum|EAL86323.1 as seed ortholog is 100%.

Bootstrap support for afis|EAW16750.1 as seed ortholog is 100%.

---

Group of orthologs #7980. Best score 349 bits

Score difference with first non-orthologous sequence - *A. fumigatus*:349 *A. fischeri*:349

afum|EAL90733.1 100.00% afis|EAW22459.1 100.00%

Bootstrap support for afum|EAL90733.1 as seed ortholog is 100%.

Bootstrap support for afis|EAW22459.1 as seed ortholog is 100%.

---

Group of orthologs #7981. Best score 349 bits

Score difference with first non-orthologous sequence - *A. fumigatus*:349 *A. fischeri*:349

afum|EAL90273.1 100.00% afis|EAW22924.1 100.00%

Bootstrap support for afum|EAL90273.1 as seed ortholog is 100%.

Bootstrap support for afis|EAW22924.1 as seed ortholog is 100%.

---

Group of orthologs #7982. Best score 348 bits

Score difference with first non-orthologous sequence - *A. fumigatus*:348 *A. fischeri*:348

afum|EAL85547.1 100.00% afis|EAW15803.1 100.00%

Bootstrap support for afum|EAL85547.1 as seed ortholog is 100%.

Bootstrap support for afis|EAW15803.1 as seed ortholog is 100%.

---

Group of orthologs #7983. Best score 348 bits

Score difference with first non-orthologous sequence - *A. fumigatus*:222 *A. fischeri*:173

afum|EAL89047.1 100.00% afis|EAW16447.1 100.00%

Bootstrap support for afum|EAL89047.1 as seed ortholog is 100%.

Bootstrap support for afis|EAW16447.1 as seed ortholog is 99%.

---

Group of orthologs #7984. Best score 348 bits

Score difference with first non-orthologous sequence - *A. fumigatus*:348 *A. fischeri*:348

afum|EAL87306.1 100.00% afis|EAW23878.1 100.00%

Bootstrap support for afum|EAL87306.1 as seed ortholog is 100%.

Bootstrap support for afis|EAW23878.1 as seed ortholog is 100%.

---

Group of orthologs #7985. Best score 348 bits

Score difference with first non-orthologous sequence - *A. fumigatus*:348 *A. fischeri*:348

afum|EAL92949.2 100.00% afis|EAW21936.1 100.00%

Bootstrap support for afum|EAL92949.2 as seed ortholog is 100%.

Bootstrap support for afis|EAW21936.1 as seed ortholog is 100%.

---

Group of orthologs #7986. Best score 347 bits

Score difference with first non-orthologous sequence - *A. fumigatus*:347 *A. fischeri*:347

afum|EAL87507.1 100.00% afis|EAW18149.1 100.00%

Bootstrap support for afum|EAL87507.1 as seed ortholog is 100%.

Bootstrap support for afis|EAW18149.1 as seed ortholog is 100%.

---

Group of orthologs #7987. Best score 347 bits

Score difference with first non-orthologous sequence - *A. fumigatus*:347 *A. fischeri*:347

afum|EAL93076.2 100.00% afis|EAW18399.1 100.00%

Bootstrap support for afum|EAL93076.2 as seed ortholog is 100%.

Bootstrap support for afis|EAW18399.1 as seed ortholog is 100%.

---

Group of orthologs #7988. Best score 346 bits

Score difference with first non-orthologous sequence - *A. fumigatus*:294 *A. fischeri*:346

afum|EAL85414.1 100.00% afis|EAW20279.1 100.00%

Bootstrap support for afum|EAL85414.1 as seed ortholog is 100%.

Bootstrap support for afis|EAW20279.1 as seed ortholog is 100%.

---

Group of orthologs #7989. Best score 346 bits

Score difference with first non-orthologous sequence - *A. fumigatus*:346 *A. fischeri*:346

afum|EAL86953.1 100.00% afis|EAW19558.1 100.00%

Bootstrap support for afum|EAL86953.1 as seed ortholog is 100%.

Bootstrap support for afis|EAW19558.1 as seed ortholog is 100%.

---

Group of orthologs #7990. Best score 346 bits

Score difference with first non-orthologous sequence - *A. fumigatus*:346 *A. fischeri*:346

afum|EAL86899.2 100.00% afis|EAW19622.1 100.00%

Bootstrap support for afum|EAL86899.2 as seed ortholog is 100%.

Bootstrap support for afis|EAW19622.1 as seed ortholog is 100%.

---

Group of orthologs #7991. Best score 346 bits

Score difference with first non-orthologous sequence - *A. fumigatus*:346 *A. fischeri*:346

afum|EBA27369.1 100.00% afis|EAW16576.1 100.00%

Bootstrap support for afum|EBA27369.1 as seed ortholog is 100%.

Bootstrap support for afis|EAW16576.1 as seed ortholog is 100%.

---

Group of orthologs #7992. Best score 346 bits

Score difference with first non-orthologous sequence - *A. fumigatus*:264 *A. fischeri*:346

afum|EAL87360.1 100.00% afis|EAW23935.1 100.00%

Bootstrap support for afum|EAL87360.1 as seed ortholog is 100%.

Bootstrap support for afis|EAW23935.1 as seed ortholog is 100%.

---

Group of orthologs #7993. Best score 345 bits

Score difference with first non-orthologous sequence - *A. fumigatus*:345 *A. fischeri*:345  
afum|EAL88836.1 100.00% afis|EAW16209.1 100.00%  
Bootstrap support for afum|EAL88836.1 as seed ortholog is 100%.  
Bootstrap support for afis|EAW16209.1 as seed ortholog is 100%.

---

Group of orthologs #7994. Best score 344 bits

Score difference with first non-orthologous sequence - *A. fumigatus*:344 *A. fischeri*:344  
afum|EAL84760.1 100.00% afis|EAW20874.1 100.00%  
Bootstrap support for afum|EAL84760.1 as seed ortholog is 100%.  
Bootstrap support for afis|EAW20874.1 as seed ortholog is 100%.

---

Group of orthologs #7995. Best score 344 bits

Score difference with first non-orthologous sequence - *A. fumigatus*:344 *A. fischeri*:344  
afum|EAL90245.1 100.00% afis|EAW22952.1 100.00%  
Bootstrap support for afum|EAL90245.1 as seed ortholog is 100%.  
Bootstrap support for afis|EAW22952.1 as seed ortholog is 100%.

---

Group of orthologs #7996. Best score 343 bits

Score difference with first non-orthologous sequence - *A. fumigatus*:85 *A. fischeri*:192  
afum|EAL86719.2 100.00% afis|EAW20668.1 100.00%  
afum|EAL92228.1 24.18%  
Bootstrap support for afum|EAL86719.2 as seed ortholog is 39%. Alternative seed ortholog is afum|EAL84364.1 (85 bits away from this cluster)  
Bootstrap support for afis|EAW20668.1 as seed ortholog is 90%.

---

Group of orthologs #7997. Best score 343 bits

Score difference with first non-orthologous sequence - *A. fumigatus*:343 *A. fischeri*:343  
afum|EAL86519.2 100.00% afis|EAW16995.1 100.00%  
Bootstrap support for afum|EAL86519.2 as seed ortholog is 100%.  
Bootstrap support for afis|EAW16995.1 as seed ortholog is 100%.

---

Group of orthologs #7998. Best score 343 bits

Score difference with first non-orthologous sequence - *A. fumigatus*:343 *A. fischeri*:343  
afum|EAL93345.1 100.00% afis|EAW18632.1 100.00%  
Bootstrap support for afum|EAL93345.1 as seed ortholog is 100%.  
Bootstrap support for afis|EAW18632.1 as seed ortholog is 100%.

---

Group of orthologs #7999. Best score 343 bits

Score difference with first non-orthologous sequence - *A. fumigatus*:343 *A. fischeri*:343  
afum|EAL93401.1 100.00% afis|EAW18680.1 100.00%  
Bootstrap support for afum|EAL93401.1 as seed ortholog is 100%.  
Bootstrap support for afis|EAW18680.1 as seed ortholog is 100%.

---

Group of orthologs #8000. Best score 343 bits

Score difference with first non-orthologous sequence - *A. fumigatus*:343 *A. fischeri*:343  
afum|EAL89859.1 100.00% afis|EAW25184.1 100.00%  
Bootstrap support for afum|EAL89859.1 as seed ortholog is 100%.  
Bootstrap support for afis|EAW25184.1 as seed ortholog is 100%.

---

Group of orthologs #8001. Best score 343 bits

Score difference with first non-orthologous sequence - *A. fumigatus*:343 *A. fischeri*:343  
afum|EBA27417.1 100.00% afis|EAW22208.1 100.00%  
Bootstrap support for afum|EBA27417.1 as seed ortholog is 100%.  
Bootstrap support for afis|EAW22208.1 as seed ortholog is 100%.

---

Group of orthologs #8002. Best score 342 bits



Score difference with first non-orthologous sequence - *A. fumigatus*:342 *A. fischeri*:342  
afum|EAL91267.1 100.00% afis|EAW17441.1 100.00%  
Bootstrap support for afum|EAL91267.1 as seed ortholog is 100%.  
Bootstrap support for afis|EAW17441.1 as seed ortholog is 100%.

---

Group of orthologs #8003. Best score 342 bits

Score difference with first non-orthologous sequence - *A. fumigatus*:342 *A. fischeri*:342  
afum|EAL91498.1 100.00% afis|EAW17684.1 100.00%  
Bootstrap support for afum|EAL91498.1 as seed ortholog is 100%.  
Bootstrap support for afis|EAW17684.1 as seed ortholog is 100%.

---

Group of orthologs #8004. Best score 342 bits

Score difference with first non-orthologous sequence - *A. fumigatus*:342 *A. fischeri*:342  
afum|EAL93949.1 100.00% afis|EAW19216.1 100.00%  
Bootstrap support for afum|EAL93949.1 as seed ortholog is 100%.  
Bootstrap support for afis|EAW19216.1 as seed ortholog is 100%.

---

Group of orthologs #8005. Best score 341 bits

Score difference with first non-orthologous sequence - *A. fumigatus*:285 *A. fischeri*:83  
afum|EAL89347.1 100.00% afis|EAW24705.1 100.00%  
Bootstrap support for afum|EAL89347.1 as seed ortholog is 100%.  
Bootstrap support for afis|EAW24705.1 as seed ortholog is 99%.

---

Group of orthologs #8006. Best score 341 bits

Score difference with first non-orthologous sequence - *A. fumigatus*:341 *A. fischeri*:341  
afum|EBA27484.1 100.00% afis|EAW21990.1 100.00%  
Bootstrap support for afum|EBA27484.1 as seed ortholog is 100%.  
Bootstrap support for afis|EAW21990.1 as seed ortholog is 100%.

---

Group of orthologs #8007. Best score 340 bits

Score difference with first non-orthologous sequence - *A. fumigatus*:340 *A. fischeri*:340  
afum|EAL85368.1 100.00% afis|EAW20250.1 100.00%  
Bootstrap support for afum|EAL85368.1 as seed ortholog is 100%.  
Bootstrap support for afis|EAW20250.1 as seed ortholog is 100%.

---

Group of orthologs #8008. Best score 340 bits

Score difference with first non-orthologous sequence - *A. fumigatus*:340 *A. fischeri*:340  
afum|EAL91352.1 100.00% afis|EAW17538.1 100.00%  
Bootstrap support for afum|EAL91352.1 as seed ortholog is 100%.  
Bootstrap support for afis|EAW17538.1 as seed ortholog is 100%.

---

Group of orthologs #8009. Best score 340 bits

Score difference with first non-orthologous sequence - *A. fumigatus*:272 *A. fischeri*:263  
afum|EAL93826.1 100.00% afis|EAW19095.1 100.00%  
Bootstrap support for afum|EAL93826.1 as seed ortholog is 100%.  
Bootstrap support for afis|EAW19095.1 as seed ortholog is 100%.

---

Group of orthologs #8010. Best score 339 bits

Score difference with first non-orthologous sequence - *A. fumigatus*:339 *A. fischeri*:339  
afum|EAL86380.1 100.00% afis|EAW16832.1 100.00%  
Bootstrap support for afum|EAL86380.1 as seed ortholog is 100%.  
Bootstrap support for afis|EAW16832.1 as seed ortholog is 100%.

---

Group of orthologs #8011. Best score 339 bits

Score difference with first non-orthologous sequence - *A. fumigatus*:339 *A. fischeri*:339  
afum|EBA27503.1 100.00% afis|EAW19017.1 100.00%

Bootstrap support for afum|EBA27503.1 as seed ortholog is 100%.  
Bootstrap support for afis|EAW19017.1 as seed ortholog is 100%.

---

Group of orthologs #8012. Best score 338 bits

Score difference with first non-orthologous sequence - *A. fumigatus*:338 *A. fischeri*:254

afum|EAL91668.1 100.00% afis|EAW17860.1 100.00%

Bootstrap support for afum|EAL91668.1 as seed ortholog is 100%.

Bootstrap support for afis|EAW17860.1 as seed ortholog is 100%.

---

Group of orthologs #8013. Best score 338 bits

Score difference with first non-orthologous sequence - *A. fumigatus*:338 *A. fischeri*:338

afum|EAL91743.1 100.00% afis|EAW17932.1 100.00%

Bootstrap support for afum|EAL91743.1 as seed ortholog is 100%.

Bootstrap support for afis|EAW17932.1 as seed ortholog is 100%.

---

Group of orthologs #8014. Best score 338 bits

Score difference with first non-orthologous sequence - *A. fumigatus*:338 *A. fischeri*:338

afum|EAL92354.1 100.00% afis|EAW21336.1 100.00%

Bootstrap support for afum|EAL92354.1 as seed ortholog is 100%.

Bootstrap support for afis|EAW21336.1 as seed ortholog is 100%.

---

Group of orthologs #8015. Best score 337 bits

Score difference with first non-orthologous sequence - *A. fumigatus*:337 *A. fischeri*:271

afum|EAL88705.1 100.00% afis|EAW16073.1 100.00%

Bootstrap support for afum|EAL88705.1 as seed ortholog is 100%.

Bootstrap support for afis|EAW16073.1 as seed ortholog is 100%.

---

Group of orthologs #8016. Best score 337 bits

Score difference with first non-orthologous sequence - *A. fumigatus*:280 *A. fischeri*:337

afum|EBA27178.1 100.00% afis|EAW20642.1 100.00%

Bootstrap support for afum|EBA27178.1 as seed ortholog is 100%.

Bootstrap support for afis|EAW20642.1 as seed ortholog is 100%.

---

Group of orthologs #8017. Best score 336 bits

Score difference with first non-orthologous sequence - *A. fumigatus*:336 *A. fischeri*:336

afum|EAL84206.1 100.00% afis|EAW15440.1 100.00%

Bootstrap support for afum|EAL84206.1 as seed ortholog is 100%.

Bootstrap support for afis|EAW15440.1 as seed ortholog is 100%.

---

Group of orthologs #8018. Best score 336 bits

Score difference with first non-orthologous sequence - *A. fumigatus*:336 *A. fischeri*:336

afum|EAL86426.1 100.00% afis|EAW16888.1 100.00%

Bootstrap support for afum|EAL86426.1 as seed ortholog is 100%.

Bootstrap support for afis|EAW16888.1 as seed ortholog is 100%.

---

Group of orthologs #8019. Best score 336 bits

Score difference with first non-orthologous sequence - *A. fumigatus*:336 *A. fischeri*:336

afum|EAL86629.2 100.00% afis|EAW17203.1 100.00%

Bootstrap support for afum|EAL86629.2 as seed ortholog is 100%.

Bootstrap support for afis|EAW17203.1 as seed ortholog is 100%.

---

Group of orthologs #8020. Best score 336 bits

Score difference with first non-orthologous sequence - *A. fumigatus*:336 *A. fischeri*:336

afum|EAL84892.1 100.00% afis|EAW20025.1 100.00%

Bootstrap support for afum|EAL84892.1 as seed ortholog is 100%.

Bootstrap support for afis|EAW20025.1 as seed ortholog is 100%.

---

Group of orthologs #8021. Best score 336 bits

Score difference with first non-orthologous sequence - *A. fumigatus*:336 *A. fischeri*:336

afum|EAL86097.1 100.00% afis|EAW24429.1 100.00%

Bootstrap support for afum|EAL86097.1 as seed ortholog is 100%.

Bootstrap support for afis|EAW24429.1 as seed ortholog is 100%.

---

Group of orthologs #8022. Best score 336 bits

Score difference with first non-orthologous sequence - *A. fumigatus*:336 *A. fischeri*:336

afum|EAL89827.1 100.00% afis|EAW25152.1 100.00%

Bootstrap support for afum|EAL89827.1 as seed ortholog is 100%.

Bootstrap support for afis|EAW25152.1 as seed ortholog is 100%.

---

Group of orthologs #8023. Best score 335 bits

Score difference with first non-orthologous sequence - *A. fumigatus*:335 *A. fischeri*:335

afum|EAL85579.1 100.00% afis|EAW15769.1 100.00%

Bootstrap support for afum|EAL85579.1 as seed ortholog is 100%.

Bootstrap support for afis|EAW15769.1 as seed ortholog is 100%.

---

Group of orthologs #8024. Best score 335 bits

Score difference with first non-orthologous sequence - *A. fumigatus*:335 *A. fischeri*:335

afum|EAL84946.1 100.00% afis|EAW19965.1 100.00%

Bootstrap support for afum|EAL84946.1 as seed ortholog is 100%.

Bootstrap support for afis|EAW19965.1 as seed ortholog is 100%.

---

Group of orthologs #8025. Best score 334 bits

Score difference with first non-orthologous sequence - *A. fumigatus*:334 *A. fischeri*:334

afum|EAL86642.1 100.00% afis|EAW17216.1 100.00%

Bootstrap support for afum|EAL86642.1 as seed ortholog is 100%.

Bootstrap support for afis|EAW17216.1 as seed ortholog is 100%.

---

Group of orthologs #8026. Best score 334 bits

Score difference with first non-orthologous sequence - *A. fumigatus*:334 *A. fischeri*:334

afum|EAL85088.2 100.00% afis|EAW19805.1 100.00%

Bootstrap support for afum|EAL85088.2 as seed ortholog is 100%.

Bootstrap support for afis|EAW19805.1 as seed ortholog is 100%.

---

Group of orthologs #8027. Best score 333 bits

Score difference with first non-orthologous sequence - *A. fumigatus*:333 *A. fischeri*:333

afum|EAL84853.1 100.00% afis|EAW20766.1 100.00%

Bootstrap support for afum|EAL84853.1 as seed ortholog is 100%.

Bootstrap support for afis|EAW20766.1 as seed ortholog is 100%.

---

Group of orthologs #8028. Best score 333 bits

Score difference with first non-orthologous sequence - *A. fumigatus*:333 *A. fischeri*:333

afum|EBA27434.1 100.00% afis|EAW17601.1 100.00%

Bootstrap support for afum|EBA27434.1 as seed ortholog is 100%.

Bootstrap support for afis|EAW17601.1 as seed ortholog is 100%.

---

Group of orthologs #8029. Best score 333 bits

Score difference with first non-orthologous sequence - *A. fumigatus*:333 *A. fischeri*:333

afum|EAL93494.1 100.00% afis|EAW18762.1 100.00%

Bootstrap support for afum|EAL93494.1 as seed ortholog is 100%.

Bootstrap support for afis|EAW18762.1 as seed ortholog is 100%.

---

Group of orthologs #8030. Best score 333 bits

Score difference with first non-orthologous sequence - *A. fumigatus*:333 *A. fischeri*:333  
afum|EAL90232.1 100.00% afis|EAW22965.1 100.00%  
Bootstrap support for afum|EAL90232.1 as seed ortholog is 100%.  
Bootstrap support for afis|EAW22965.1 as seed ortholog is 100%.

---

Group of orthologs #8031. Best score 333 bits

Score difference with first non-orthologous sequence - *A. fumigatus*:333 *A. fischeri*:333  
afum|EAL90354.1 100.00% afis|EAW22848.1 100.00%  
Bootstrap support for afum|EAL90354.1 as seed ortholog is 100%.  
Bootstrap support for afis|EAW22848.1 as seed ortholog is 100%.

---

Group of orthologs #8032. Best score 332 bits

Score difference with first non-orthologous sequence - *A. fumigatus*:332 *A. fischeri*:332  
afum|EAL84204.1 100.00% afis|EAW15443.1 100.00%  
Bootstrap support for afum|EAL84204.1 as seed ortholog is 100%.  
Bootstrap support for afis|EAW15443.1 as seed ortholog is 100%.

---

Group of orthologs #8033. Best score 332 bits

Score difference with first non-orthologous sequence - *A. fumigatus*:332 *A. fischeri*:332  
afum|EAL88584.1 100.00% afis|EAW15951.1 100.00%  
Bootstrap support for afum|EAL88584.1 as seed ortholog is 100%.  
Bootstrap support for afis|EAW15951.1 as seed ortholog is 100%.

---

Group of orthologs #8034. Best score 332 bits

Score difference with first non-orthologous sequence - *A. fumigatus*:332 *A. fischeri*:332  
afum|EAL85036.1 100.00% afis|EAW19859.1 100.00%  
Bootstrap support for afum|EAL85036.1 as seed ortholog is 100%.  
Bootstrap support for afis|EAW19859.1 as seed ortholog is 100%.

---

Group of orthologs #8035. Best score 332 bits

Score difference with first non-orthologous sequence - *A. fumigatus*:332 *A. fischeri*:332  
afum|EAL85258.1 100.00% afis|EAW20143.1 100.00%  
Bootstrap support for afum|EAL85258.1 as seed ortholog is 100%.  
Bootstrap support for afis|EAW20143.1 as seed ortholog is 100%.

---

Group of orthologs #8036. Best score 332 bits

Score difference with first non-orthologous sequence - *A. fumigatus*:332 *A. fischeri*:332  
afum|EAL93028.1 100.00% afis|EAW22013.1 100.00%  
Bootstrap support for afum|EAL93028.1 as seed ortholog is 100%.  
Bootstrap support for afis|EAW22013.1 as seed ortholog is 100%.

---

Group of orthologs #8037. Best score 331 bits

Score difference with first non-orthologous sequence - *A. fumigatus*:331 *A. fischeri*:331  
afum|EAL93627.1 100.00% afis|EAW18895.1 100.00%  
Bootstrap support for afum|EAL93627.1 as seed ortholog is 100%.  
Bootstrap support for afis|EAW18895.1 as seed ortholog is 100%.

---

Group of orthologs #8038. Best score 331 bits

Score difference with first non-orthologous sequence - *A. fumigatus*:331 *A. fischeri*:331  
afum|EAL90578.1 100.00% afis|EAW22618.1 100.00%  
Bootstrap support for afum|EAL90578.1 as seed ortholog is 100%.  
Bootstrap support for afis|EAW22618.1 as seed ortholog is 100%.

---

Group of orthologs #8039. Best score 331 bits

Score difference with first non-orthologous sequence - *A. fumigatus*:331 *A. fischeri*:331  
afum|EBA27401.1 100.00% afis|EAW22894.1 100.00%

Bootstrap support for afum|EBA27401.1 as seed ortholog is 100%.  
Bootstrap support for afis|EAW22894.1 as seed ortholog is 100%.

---

Group of orthologs #8040. Best score 330 bits

Score difference with first non-orthologous sequence - *A. fumigatus*:330 *A. fischeri*:330

afum|EAL86580.1 100.00% afis|EAW17118.1 100.00%

Bootstrap support for afum|EAL86580.1 as seed ortholog is 100%.

Bootstrap support for afis|EAW17118.1 as seed ortholog is 100%.

---

Group of orthologs #8041. Best score 329 bits

Score difference with first non-orthologous sequence - *A. fumigatus*:329 *A. fischeri*:284

afum|EAL84491.1 100.00% afis|EAW20574.1 100.00%

Bootstrap support for afum|EAL84491.1 as seed ortholog is 100%.

Bootstrap support for afis|EAW20574.1 as seed ortholog is 100%.

---

Group of orthologs #8042. Best score 329 bits

Score difference with first non-orthologous sequence - *A. fumigatus*:329 *A. fischeri*:329

afum|EAL88277.1 100.00% afis|EAW23206.1 100.00%

Bootstrap support for afum|EAL88277.1 as seed ortholog is 100%.

Bootstrap support for afis|EAW23206.1 as seed ortholog is 100%.

---

Group of orthologs #8043. Best score 329 bits

Score difference with first non-orthologous sequence - *A. fumigatus*:329 *A. fischeri*:329

afum|EAL88211.1 100.00% afis|EAW23268.1 100.00%

Bootstrap support for afum|EAL88211.1 as seed ortholog is 100%.

Bootstrap support for afis|EAW23268.1 as seed ortholog is 100%.

---

Group of orthologs #8044. Best score 329 bits

Score difference with first non-orthologous sequence - *A. fumigatus*:329 *A. fischeri*:329

afum|EAL93896.1 100.00% afis|EAW19166.1 100.00%

Bootstrap support for afum|EAL93896.1 as seed ortholog is 100%.

Bootstrap support for afis|EAW19166.1 as seed ortholog is 100%.

---

Group of orthologs #8045. Best score 329 bits

Score difference with first non-orthologous sequence - *A. fumigatus*:329 *A. fischeri*:329

afum|EAL92411.1 100.00% afis|EAW21397.1 100.00%

Bootstrap support for afum|EAL92411.1 as seed ortholog is 100%.

Bootstrap support for afis|EAW21397.1 as seed ortholog is 100%.

---

Group of orthologs #8046. Best score 328 bits

Score difference with first non-orthologous sequence - *A. fumigatus*:328 *A. fischeri*:328

afum|EAL88680.1 100.00% afis|EAW16047.1 100.00%

Bootstrap support for afum|EAL88680.1 as seed ortholog is 100%.

Bootstrap support for afis|EAW16047.1 as seed ortholog is 100%.

---

Group of orthologs #8047. Best score 328 bits

Score difference with first non-orthologous sequence - *A. fumigatus*:328 *A. fischeri*:328

afum|EAL84463.1 100.00% afis|EAW20598.1 100.00%

Bootstrap support for afum|EAL84463.1 as seed ortholog is 100%.

Bootstrap support for afis|EAW20598.1 as seed ortholog is 100%.

---

Group of orthologs #8048. Best score 328 bits

Score difference with first non-orthologous sequence - *A. fumigatus*:328 *A. fischeri*:171

afum|EAL85466.1 100.00% afis|EAW20346.1 100.00%

Bootstrap support for afum|EAL85466.1 as seed ortholog is 100%.

Bootstrap support for afis|EAW20346.1 as seed ortholog is 100%.

---

Group of orthologs #8049. Best score 328 bits

Score difference with first non-orthologous sequence - *A. fumigatus*:328 *A. fischeri*:328

afum|EAL93449.1 100.00% afis|EAW18724.1 100.00%

Bootstrap support for afum|EAL93449.1 as seed ortholog is 100%.

Bootstrap support for afis|EAW18724.1 as seed ortholog is 100%.

---

Group of orthologs #8050. Best score 328 bits

Score difference with first non-orthologous sequence - *A. fumigatus*:328 *A. fischeri*:328

afum|EAL92322.1 100.00% afis|EAW21306.1 100.00%

Bootstrap support for afum|EAL92322.1 as seed ortholog is 100%.

Bootstrap support for afis|EAW21306.1 as seed ortholog is 100%.

---

Group of orthologs #8051. Best score 327 bits

Score difference with first non-orthologous sequence - *A. fumigatus*:327 *A. fischeri*:327

afum|EAL84553.1 100.00% afis|EAW20503.1 100.00%

Bootstrap support for afum|EAL84553.1 as seed ortholog is 100%.

Bootstrap support for afis|EAW20503.1 as seed ortholog is 100%.

---

Group of orthologs #8052. Best score 327 bits

Score difference with first non-orthologous sequence - *A. fumigatus*:327 *A. fischeri*:327

afum|EAL88245.1 100.00% afis|EAW23237.1 100.00%

Bootstrap support for afum|EAL88245.1 as seed ortholog is 100%.

Bootstrap support for afis|EAW23237.1 as seed ortholog is 100%.

---

Group of orthologs #8053. Best score 327 bits

Score difference with first non-orthologous sequence - *A. fumigatus*:327 *A. fischeri*:327

afum|EAL87833.1 100.00% afis|EAW23627.1 100.00%

Bootstrap support for afum|EAL87833.1 as seed ortholog is 100%.

Bootstrap support for afis|EAW23627.1 as seed ortholog is 100%.

---

Group of orthologs #8054. Best score 327 bits

Score difference with first non-orthologous sequence - *A. fumigatus*:327 *A. fischeri*:327

afum|EAL90155.1 100.00% afis|EAW25490.1 100.00%

Bootstrap support for afum|EAL90155.1 as seed ortholog is 100%.

Bootstrap support for afis|EAW25490.1 as seed ortholog is 100%.

---

Group of orthologs #8055. Best score 326 bits

Score difference with first non-orthologous sequence - *A. fumigatus*:249 *A. fischeri*:253

afum|EAL88998.1 100.00% afis|EAW16374.1 100.00%

Bootstrap support for afum|EAL88998.1 as seed ortholog is 100%.

Bootstrap support for afis|EAW16374.1 as seed ortholog is 100%.

---

Group of orthologs #8056. Best score 326 bits

Score difference with first non-orthologous sequence - *A. fumigatus*:326 *A. fischeri*:326

afum|EAL89166.1 100.00% afis|EAW16569.1 100.00%

Bootstrap support for afum|EAL89166.1 as seed ortholog is 100%.

Bootstrap support for afis|EAW16569.1 as seed ortholog is 100%.

---

Group of orthologs #8057. Best score 326 bits

Score difference with first non-orthologous sequence - *A. fumigatus*:326 *A. fischeri*:326

afum|EAL89196.1 100.00% afis|EAW16600.1 100.00%

Bootstrap support for afum|EAL89196.1 as seed ortholog is 100%.

Bootstrap support for afis|EAW16600.1 as seed ortholog is 100%.

---

Group of orthologs #8058. Best score 326 bits

Score difference with first non-orthologous sequence - *A. fumigatus*:326 *A. fischeri*:326  
afum|EAL86749.1 100.00% afis|EAW24648.1 100.00%  
Bootstrap support for afum|EAL86749.1 as seed ortholog is 100%.  
Bootstrap support for afis|EAW24648.1 as seed ortholog is 100%.

---

Group of orthologs #8059. Best score 326 bits

Score difference with first non-orthologous sequence - *A. fumigatus*:326 *A. fischeri*:326  
afum|EAL87458.1 100.00% afis|EAW24027.1 100.00%  
Bootstrap support for afum|EAL87458.1 as seed ortholog is 100%.  
Bootstrap support for afis|EAW24027.1 as seed ortholog is 100%.

---

Group of orthologs #8060. Best score 326 bits

Score difference with first non-orthologous sequence - *A. fumigatus*:326 *A. fischeri*:326  
afum|EAL90747.1 100.00% afis|EAW22444.1 100.00%  
Bootstrap support for afum|EAL90747.1 as seed ortholog is 100%.  
Bootstrap support for afis|EAW22444.1 as seed ortholog is 100%.

---

Group of orthologs #8061. Best score 326 bits

Score difference with first non-orthologous sequence - *A. fumigatus*:326 *A. fischeri*:326  
afum|EAL89905.1 100.00% afis|EAW25243.1 100.00%  
Bootstrap support for afum|EAL89905.1 as seed ortholog is 100%.  
Bootstrap support for afis|EAW25243.1 as seed ortholog is 100%.

---

Group of orthologs #8062. Best score 326 bits

Score difference with first non-orthologous sequence - *A. fumigatus*:326 *A. fischeri*:326  
afum|EAL90001.1 100.00% afis|EAW25338.1 100.00%  
Bootstrap support for afum|EAL90001.1 as seed ortholog is 100%.  
Bootstrap support for afis|EAW25338.1 as seed ortholog is 100%.

---

Group of orthologs #8063. Best score 326 bits

Score difference with first non-orthologous sequence - *A. fumigatus*:326 *A. fischeri*:326  
afum|EAL92031.1 100.00% afis|EAW24169.1 100.00%  
Bootstrap support for afum|EAL92031.1 as seed ortholog is 100%.  
Bootstrap support for afis|EAW24169.1 as seed ortholog is 100%.

---

Group of orthologs #8064. Best score 325 bits

Score difference with first non-orthologous sequence - *A. fumigatus*:325 *A. fischeri*:325  
afum|EAL91809.2 100.00% afis|EAW17998.1 100.00%  
Bootstrap support for afum|EAL91809.2 as seed ortholog is 100%.  
Bootstrap support for afis|EAW17998.1 as seed ortholog is 100%.

---

Group of orthologs #8065. Best score 324 bits

Score difference with first non-orthologous sequence - *A. fumigatus*:324 *A. fischeri*:324  
afum|EAL87055.1 100.00% afis|EAW19441.1 100.00%  
Bootstrap support for afum|EAL87055.1 as seed ortholog is 100%.  
Bootstrap support for afis|EAW19441.1 as seed ortholog is 100%.

---

Group of orthologs #8066. Best score 324 bits

Score difference with first non-orthologous sequence - *A. fumigatus*:324 *A. fischeri*:324  
afum|EAL85943.1 100.00% afis|EAW24275.1 100.00%  
Bootstrap support for afum|EAL85943.1 as seed ortholog is 100%.  
Bootstrap support for afis|EAW24275.1 as seed ortholog is 100%.

---

Group of orthologs #8067. Best score 324 bits

Score difference with first non-orthologous sequence - *A. fumigatus*:324 *A. fischeri*:173  
afum|EAL86109.1 100.00% afis|EAW24441.1 100.00%

Bootstrap support for afum|EAL86109.1 as seed ortholog is 100%.  
Bootstrap support for afis|EAW24441.1 as seed ortholog is 100%.

---

Group of orthologs #8068. Best score 324 bits

Score difference with first non-orthologous sequence - *A. fumigatus*:324 *A. fischeri*:237  
afum|EAL91055.1 100.00% afis|EAW22135.1 100.00%  
Bootstrap support for afum|EAL91055.1 as seed ortholog is 100%.  
Bootstrap support for afis|EAW22135.1 as seed ortholog is 100%.

---

Group of orthologs #8069. Best score 324 bits

Score difference with first non-orthologous sequence - *A. fumigatus*:324 *A. fischeri*:324  
afum|EAL90711.1 100.00% afis|EAW22483.1 100.00%  
Bootstrap support for afum|EAL90711.1 as seed ortholog is 100%.  
Bootstrap support for afis|EAW22483.1 as seed ortholog is 100%.

---

Group of orthologs #8070. Best score 324 bits

Score difference with first non-orthologous sequence - *A. fumigatus*:324 *A. fischeri*:324  
afum|EAL90310.1 100.00% afis|EAW22888.1 100.00%  
Bootstrap support for afum|EAL90310.1 as seed ortholog is 100%.  
Bootstrap support for afis|EAW22888.1 as seed ortholog is 100%.

---

Group of orthologs #8071. Best score 323 bits

Score difference with first non-orthologous sequence - *A. fumigatus*:323 *A. fischeri*:323  
afum|EAL88132.1 100.00% afis|EAW23345.1 100.00%  
Bootstrap support for afum|EAL88132.1 as seed ortholog is 100%.  
Bootstrap support for afis|EAW23345.1 as seed ortholog is 100%.

---

Group of orthologs #8072. Best score 323 bits

Score difference with first non-orthologous sequence - *A. fumigatus*:323 *A. fischeri*:323  
afum|EAL93939.2 100.00% afis|EAW19209.1 100.00%  
Bootstrap support for afum|EAL93939.2 as seed ortholog is 100%.  
Bootstrap support for afis|EAW19209.1 as seed ortholog is 100%.

---

Group of orthologs #8073. Best score 322 bits

Score difference with first non-orthologous sequence - *A. fumigatus*:272 *A. fischeri*:233  
afum|EAL86589.1 100.00% afis|EAW17129.1 100.00%  
Bootstrap support for afum|EAL86589.1 as seed ortholog is 100%.  
Bootstrap support for afis|EAW17129.1 as seed ortholog is 100%.

---

Group of orthologs #8074. Best score 322 bits

Score difference with first non-orthologous sequence - *A. fumigatus*:322 *A. fischeri*:322  
afum|EAL86603.1 100.00% afis|EAW17172.1 100.00%  
Bootstrap support for afum|EAL86603.1 as seed ortholog is 100%.  
Bootstrap support for afis|EAW17172.1 as seed ortholog is 100%.

---

Group of orthologs #8075. Best score 322 bits

Score difference with first non-orthologous sequence - *A. fumigatus*:322 *A. fischeri*:322  
afum|EAL90687.1 100.00% afis|EAW22506.1 100.00%  
Bootstrap support for afum|EAL90687.1 as seed ortholog is 100%.  
Bootstrap support for afis|EAW22506.1 as seed ortholog is 100%.

---

Group of orthologs #8076. Best score 321 bits

Score difference with first non-orthologous sequence - *A. fumigatus*:321 *A. fischeri*:321  
afum|EAL87729.1 100.00% afis|EAW16109.1 100.00%  
afum|EAL88789.1 86.13%  
Bootstrap support for afum|EAL87729.1 as seed ortholog is 100%.



Bootstrap support for afis|EAW16109.1 as seed ortholog is 100%.

---

Group of orthologs #8077. Best score 321 bits

Score difference with first non-orthologous sequence - *A. fumigatus*:321 *A. fischeri*:321

afum|EAL92832.1 100.00% afis|EAW21816.1 100.00%

Bootstrap support for afum|EAL92832.1 as seed ortholog is 100%.

Bootstrap support for afis|EAW21816.1 as seed ortholog is 100%.

---

Group of orthologs #8078. Best score 320 bits

Score difference with first non-orthologous sequence - *A. fumigatus*:320 *A. fischeri*:320

afum|EAL84532.1 100.00% afis|EAW20525.1 100.00%

Bootstrap support for afum|EAL84532.1 as seed ortholog is 100%.

Bootstrap support for afis|EAW20525.1 as seed ortholog is 100%.

---

Group of orthologs #8079. Best score 320 bits

Score difference with first non-orthologous sequence - *A. fumigatus*:320 *A. fischeri*:320

afum|EAL87907.1 100.00% afis|EAW23559.1 100.00%

Bootstrap support for afum|EAL87907.1 as seed ortholog is 100%.

Bootstrap support for afis|EAW23559.1 as seed ortholog is 100%.

---

Group of orthologs #8080. Best score 320 bits

Score difference with first non-orthologous sequence - *A. fumigatus*:320 *A. fischeri*:320

afum|EAL93244.1 100.00% afis|EAW18544.1 100.00%

Bootstrap support for afum|EAL93244.1 as seed ortholog is 100%.

Bootstrap support for afis|EAW18544.1 as seed ortholog is 100%.

---

Group of orthologs #8081. Best score 320 bits

Score difference with first non-orthologous sequence - *A. fumigatus*:320 *A. fischeri*:320

afum|EAL93935.1 100.00% afis|EAW19205.1 100.00%

Bootstrap support for afum|EAL93935.1 as seed ortholog is 100%.

Bootstrap support for afis|EAW19205.1 as seed ortholog is 100%.

---

Group of orthologs #8082. Best score 319 bits

Score difference with first non-orthologous sequence - *A. fumigatus*:125 *A. fischeri*:319

afum|EAL86973.1 100.00% afis|EAW19533.1 100.00%

Bootstrap support for afum|EAL86973.1 as seed ortholog is 99%.

Bootstrap support for afis|EAW19533.1 as seed ortholog is 100%.

---

Group of orthologs #8083. Best score 319 bits

Score difference with first non-orthologous sequence - *A. fumigatus*:319 *A. fischeri*:319

afum|EAL87178.1 100.00% afis|EAW23741.1 100.00%

Bootstrap support for afum|EAL87178.1 as seed ortholog is 100%.

Bootstrap support for afis|EAW23741.1 as seed ortholog is 100%.

---

Group of orthologs #8084. Best score 319 bits

Score difference with first non-orthologous sequence - *A. fumigatus*:319 *A. fischeri*:319

afum|EAL93325.1 100.00% afis|EAW18615.1 100.00%

Bootstrap support for afum|EAL93325.1 as seed ortholog is 100%.

Bootstrap support for afis|EAW18615.1 as seed ortholog is 100%.

---

Group of orthologs #8085. Best score 319 bits

Score difference with first non-orthologous sequence - *A. fumigatus*:319 *A. fischeri*:319

afum|EAL90514.1 100.00% afis|EAW22678.1 100.00%

Bootstrap support for afum|EAL90514.1 as seed ortholog is 100%.

Bootstrap support for afis|EAW22678.1 as seed ortholog is 100%.

---

Group of orthologs #8086. Best score 319 bits

Score difference with first non-orthologous sequence - *A. fumigatus*:319 *A. fischeri*:319

afum|EAL89617.2 100.00% afis|EAW24959.1 100.00%

Bootstrap support for afum|EAL89617.2 as seed ortholog is 100%.

Bootstrap support for afis|EAW24959.1 as seed ortholog is 100%.

---

Group of orthologs #8087. Best score 319 bits

Score difference with first non-orthologous sequence - *A. fumigatus*:319 *A. fischeri*:319

afum|EAL90056.1 100.00% afis|EAW25397.1 100.00%

Bootstrap support for afum|EAL90056.1 as seed ortholog is 100%.

Bootstrap support for afis|EAW25397.1 as seed ortholog is 100%.

---

Group of orthologs #8088. Best score 318 bits

Score difference with first non-orthologous sequence - *A. fumigatus*:318 *A. fischeri*:318

afum|EAL84680.2 100.00% afis|EAW20954.1 100.00%

Bootstrap support for afum|EAL84680.2 as seed ortholog is 100%.

Bootstrap support for afis|EAW20954.1 as seed ortholog is 100%.

---

Group of orthologs #8089. Best score 318 bits

Score difference with first non-orthologous sequence - *A. fumigatus*:318 *A. fischeri*:318

afum|EAL91484.1 100.00% afis|EAW17670.1 100.00%

Bootstrap support for afum|EAL91484.1 as seed ortholog is 100%.

Bootstrap support for afis|EAW17670.1 as seed ortholog is 100%.

---

Group of orthologs #8090. Best score 318 bits

Score difference with first non-orthologous sequence - *A. fumigatus*:318 *A. fischeri*:318

afum|EAL84298.2 100.00% afis|EAW25590.1 100.00%

Bootstrap support for afum|EAL84298.2 as seed ortholog is 100%.

Bootstrap support for afis|EAW25590.1 as seed ortholog is 100%.

---

Group of orthologs #8091. Best score 318 bits

Score difference with first non-orthologous sequence - *A. fumigatus*:318 *A. fischeri*:318

afum|EAL91997.1 100.00% afis|EAW24142.1 100.00%

Bootstrap support for afum|EAL91997.1 as seed ortholog is 100%.

Bootstrap support for afis|EAW24142.1 as seed ortholog is 100%.

---

Group of orthologs #8092. Best score 317 bits

Score difference with first non-orthologous sequence - *A. fumigatus*:317 *A. fischeri*:317

afum|EAL88972.1 100.00% afis|EAW16347.1 100.00%

Bootstrap support for afum|EAL88972.1 as seed ortholog is 100%.

Bootstrap support for afis|EAW16347.1 as seed ortholog is 100%.

---

Group of orthologs #8093. Best score 317 bits

Score difference with first non-orthologous sequence - *A. fumigatus*:317 *A. fischeri*:317

afum|EAL88345.2 100.00% afis|EAW23136.1 100.00%

Bootstrap support for afum|EAL88345.2 as seed ortholog is 100%.

Bootstrap support for afis|EAW23136.1 as seed ortholog is 100%.

---

Group of orthologs #8094. Best score 316 bits

Score difference with first non-orthologous sequence - *A. fumigatus*:316 *A. fischeri*:316

afum|EAL87481.1 100.00% afis|EAW18123.1 100.00%

Bootstrap support for afum|EAL87481.1 as seed ortholog is 100%.

Bootstrap support for afis|EAW18123.1 as seed ortholog is 100%.

---

Group of orthologs #8095. Best score 315 bits

Score difference with first non-orthologous sequence - *A. fumigatus*:315 *A. fischeri*:315

|                 |         |                 |         |
|-----------------|---------|-----------------|---------|
| afum EAL89108.1 | 100.00% | afis EAW16513.1 | 100.00% |
|-----------------|---------|-----------------|---------|

Bootstrap support for afum|EAL89108.1 as seed ortholog is 100%.

Bootstrap support for afis|EAW16513.1 as seed ortholog is 100%.

---

Group of orthologs #8096. Best score 315 bits

Score difference with first non-orthologous sequence - *A. fumigatus*:315 *A. fischeri*:315

|                 |         |                 |         |
|-----------------|---------|-----------------|---------|
| afum EAL91306.1 | 100.00% | afis EAW17477.1 | 100.00% |
|-----------------|---------|-----------------|---------|

Bootstrap support for afum|EAL91306.1 as seed ortholog is 100%.

Bootstrap support for afis|EAW17477.1 as seed ortholog is 100%.

---

Group of orthologs #8097. Best score 315 bits

Score difference with first non-orthologous sequence - *A. fumigatus*:315 *A. fischeri*:315

|                 |         |                 |         |
|-----------------|---------|-----------------|---------|
| afum EAL88256.1 | 100.00% | afis EAW23227.1 | 100.00% |
|-----------------|---------|-----------------|---------|

Bootstrap support for afum|EAL88256.1 as seed ortholog is 100%.

Bootstrap support for afis|EAW23227.1 as seed ortholog is 100%.

---

Group of orthologs #8098. Best score 315 bits

Score difference with first non-orthologous sequence - *A. fumigatus*:315 *A. fischeri*:315

|                 |         |                 |         |
|-----------------|---------|-----------------|---------|
| afum EAL90374.2 | 100.00% | afis EAW22826.1 | 100.00% |
|-----------------|---------|-----------------|---------|

Bootstrap support for afum|EAL90374.2 as seed ortholog is 100%.

Bootstrap support for afis|EAW22826.1 as seed ortholog is 100%.

---

Group of orthologs #8099. Best score 315 bits

Score difference with first non-orthologous sequence - *A. fumigatus*:315 *A. fischeri*:315

|                 |         |                 |         |
|-----------------|---------|-----------------|---------|
| afum EBA27510.1 | 100.00% | afis EAW19270.1 | 100.00% |
|-----------------|---------|-----------------|---------|

Bootstrap support for afum|EBA27510.1 as seed ortholog is 100%.

Bootstrap support for afis|EAW19270.1 as seed ortholog is 100%.

---

Group of orthologs #8100. Best score 314 bits

Score difference with first non-orthologous sequence - *A. fumigatus*:314 *A. fischeri*:314

|                 |         |                 |         |
|-----------------|---------|-----------------|---------|
| afum EAL85656.1 | 100.00% | afis EAW15692.1 | 100.00% |
|-----------------|---------|-----------------|---------|

Bootstrap support for afum|EAL85656.1 as seed ortholog is 100%.

Bootstrap support for afis|EAW15692.1 as seed ortholog is 100%.

---

Group of orthologs #8101. Best score 314 bits

Score difference with first non-orthologous sequence - *A. fumigatus*:314 *A. fischeri*:314

|                 |         |                 |         |
|-----------------|---------|-----------------|---------|
| afum EAL93148.2 | 100.00% | afis EAW18462.1 | 100.00% |
|-----------------|---------|-----------------|---------|

Bootstrap support for afum|EAL93148.2 as seed ortholog is 100%.

Bootstrap support for afis|EAW18462.1 as seed ortholog is 100%.

---

Group of orthologs #8102. Best score 314 bits

Score difference with first non-orthologous sequence - *A. fumigatus*:314 *A. fischeri*:314

|                 |         |                 |         |
|-----------------|---------|-----------------|---------|
| afum EAL92054.1 | 100.00% | afis EAW21016.1 | 100.00% |
|-----------------|---------|-----------------|---------|

Bootstrap support for afum|EAL92054.1 as seed ortholog is 100%.

Bootstrap support for afis|EAW21016.1 as seed ortholog is 100%.

---

Group of orthologs #8103. Best score 314 bits

Score difference with first non-orthologous sequence - *A. fumigatus*:314 *A. fischeri*:314

|                 |         |                 |         |
|-----------------|---------|-----------------|---------|
| afum EAL90901.1 | 100.00% | afis EAW22280.1 | 100.00% |
|-----------------|---------|-----------------|---------|

Bootstrap support for afum|EAL90901.1 as seed ortholog is 100%.

Bootstrap support for afis|EAW22280.1 as seed ortholog is 100%.

---

Group of orthologs #8104. Best score 313 bits

Score difference with first non-orthologous sequence - *A. fumigatus*:247 *A. fischeri*:313

|                 |         |                 |         |
|-----------------|---------|-----------------|---------|
| afum EAL86579.1 | 100.00% | afis EAW17117.1 | 100.00% |
|-----------------|---------|-----------------|---------|

Bootstrap support for afum|EAL86579.1 as seed ortholog is 100%.

Bootstrap support for afis|EAW17117.1 as seed ortholog is 100%.

---

Group of orthologs #8105. Best score 313 bits

Score difference with first non-orthologous sequence - *A. fumigatus*:313 *A. fischeri*:313

afum|EAL88431.1 100.00% afis|EAW23049.1 100.00%

Bootstrap support for afum|EAL88431.1 as seed ortholog is 100%.

Bootstrap support for afis|EAW23049.1 as seed ortholog is 100%.

---

Group of orthologs #8106. Best score 313 bits

Score difference with first non-orthologous sequence - *A. fumigatus*:313 *A. fischeri*:313

afum|EAL92304.1 100.00% afis|EAW21287.1 100.00%

Bootstrap support for afum|EAL92304.1 as seed ortholog is 100%.

Bootstrap support for afis|EAW21287.1 as seed ortholog is 100%.

---

Group of orthologs #8107. Best score 312 bits

Score difference with first non-orthologous sequence - *A. fumigatus*:312 *A. fischeri*:312

afum|EAL85616.1 100.00% afis|EAW15731.1 100.00%

Bootstrap support for afum|EAL85616.1 as seed ortholog is 100%.

Bootstrap support for afis|EAW15731.1 as seed ortholog is 100%.

---

Group of orthologs #8108. Best score 312 bits

Score difference with first non-orthologous sequence - *A. fumigatus*:312 *A. fischeri*:312

afum|EAL85002.1 100.00% afis|EAW19905.1 100.00%

Bootstrap support for afum|EAL85002.1 as seed ortholog is 100%.

Bootstrap support for afis|EAW19905.1 as seed ortholog is 100%.

---

Group of orthologs #8109. Best score 312 bits

Score difference with first non-orthologous sequence - *A. fumigatus*:312 *A. fischeri*:260

afum|EAL84471.1 100.00% afis|EAW20590.1 100.00%

Bootstrap support for afum|EAL84471.1 as seed ortholog is 100%.

Bootstrap support for afis|EAW20590.1 as seed ortholog is 100%.

---

Group of orthologs #8110. Best score 312 bits

Score difference with first non-orthologous sequence - *A. fumigatus*:312 *A. fischeri*:312

afum|EAL92426.1 100.00% afis|EAW21412.1 100.00%

Bootstrap support for afum|EAL92426.1 as seed ortholog is 100%.

Bootstrap support for afis|EAW21412.1 as seed ortholog is 100%.

---

Group of orthologs #8111. Best score 312 bits

Score difference with first non-orthologous sequence - *A. fumigatus*:312 *A. fischeri*:312

afum|EAL92918.2 100.00% afis|EAW21906.1 100.00%

Bootstrap support for afum|EAL92918.2 as seed ortholog is 100%.

Bootstrap support for afis|EAW21906.1 as seed ortholog is 100%.

---

Group of orthologs #8112. Best score 312 bits

Score difference with first non-orthologous sequence - *A. fumigatus*:312 *A. fischeri*:312

afum|EAL89803.1 100.00% afis|EAW25132.1 100.00%

Bootstrap support for afum|EAL89803.1 as seed ortholog is 100%.

Bootstrap support for afis|EAW25132.1 as seed ortholog is 100%.

---

Group of orthologs #8113. Best score 312 bits

Score difference with first non-orthologous sequence - *A. fumigatus*:312 *A. fischeri*:312

afum|EBA27253.1 100.00% afis|EAW24355.1 100.00%

Bootstrap support for afum|EBA27253.1 as seed ortholog is 100%.

Bootstrap support for afis|EAW24355.1 as seed ortholog is 100%.

---

Group of orthologs #8114. Best score 311 bits

Score difference with first non-orthologous sequence - *A. fumigatus*:311 *A. fischeri*:311

afum|EAL86407.1 100.00% afis|EAW16868.1 100.00%

Bootstrap support for afum|EAL86407.1 as seed ortholog is 100%.

Bootstrap support for afis|EAW16868.1 as seed ortholog is 100%.

---

Group of orthologs #8115. Best score 311 bits

Score difference with first non-orthologous sequence - *A. fumigatus*:311 *A. fischeri*:311

afum|EAL87565.1 100.00% afis|EAW18200.1 100.00%

Bootstrap support for afum|EAL87565.1 as seed ortholog is 100%.

Bootstrap support for afis|EAW18200.1 as seed ortholog is 100%.

---

Group of orthologs #8116. Best score 311 bits

Score difference with first non-orthologous sequence - *A. fumigatus*:311 *A. fischeri*:311

afum|EAL85902.1 100.00% afis|EAW24233.1 100.00%

Bootstrap support for afum|EAL85902.1 as seed ortholog is 100%.

Bootstrap support for afis|EAW24233.1 as seed ortholog is 100%.

---

Group of orthologs #8117. Best score 311 bits

Score difference with first non-orthologous sequence - *A. fumigatus*:311 *A. fischeri*:311

afum|EAL91068.1 100.00% afis|EAW22118.1 100.00%

Bootstrap support for afum|EAL91068.1 as seed ortholog is 100%.

Bootstrap support for afis|EAW22118.1 as seed ortholog is 100%.

---

Group of orthologs #8118. Best score 310 bits

Score difference with first non-orthologous sequence - *A. fumigatus*:310 *A. fischeri*:310

afum|EAL85031.1 100.00% afis|EAW19865.1 100.00%

Bootstrap support for afum|EAL85031.1 as seed ortholog is 100%.

Bootstrap support for afis|EAW19865.1 as seed ortholog is 100%.

---

Group of orthologs #8119. Best score 310 bits

Score difference with first non-orthologous sequence - *A. fumigatus*:310 *A. fischeri*:149

afum|EAL85928.1 100.00% afis|EAW24260.1 100.00%

Bootstrap support for afum|EAL85928.1 as seed ortholog is 100%.

Bootstrap support for afis|EAW24260.1 as seed ortholog is 100%.

---

Group of orthologs #8120. Best score 310 bits

Score difference with first non-orthologous sequence - *A. fumigatus*:310 *A. fischeri*:310

afum|EAL93459.1 100.00% afis|EAW18734.1 100.00%

Bootstrap support for afum|EAL93459.1 as seed ortholog is 100%.

Bootstrap support for afis|EAW18734.1 as seed ortholog is 100%.

---

Group of orthologs #8121. Best score 310 bits

Score difference with first non-orthologous sequence - *A. fumigatus*:310 *A. fischeri*:310

afum|EAL90855.1 100.00% afis|EAW22337.1 100.00%

Bootstrap support for afum|EAL90855.1 as seed ortholog is 100%.

Bootstrap support for afis|EAW22337.1 as seed ortholog is 100%.

---

Group of orthologs #8122. Best score 309 bits

Score difference with first non-orthologous sequence - *A. fumigatus*:309 *A. fischeri*:309

afum|EAL88093.1 100.00% afis|EAW23378.1 100.00%

Bootstrap support for afum|EAL88093.1 as seed ortholog is 100%.

Bootstrap support for afis|EAW23378.1 as seed ortholog is 100%.

---

Group of orthologs #8123. Best score 309 bits

Score difference with first non-orthologous sequence - *A. fumigatus*:309 *A. fischeri*:309

afum|EAL93270.1 100.00% afis|EAW18568.1 100.00%

Bootstrap support for afum|EAL93270.1 as seed ortholog is 100%.

Bootstrap support for afis|EAW18568.1 as seed ortholog is 100%.

---

Group of orthologs #8124. Best score 309 bits

Score difference with first non-orthologous sequence - *A. fumigatus*:309 *A. fischeri*:207

afum|EBA27185.1 100.00% afis|EAW20552.1 100.00%

Bootstrap support for afum|EBA27185.1 as seed ortholog is 100%.

Bootstrap support for afis|EAW20552.1 as seed ortholog is 100%.

---

Group of orthologs #8125. Best score 308 bits

Score difference with first non-orthologous sequence - *A. fumigatus*:308 *A. fischeri*:308

afum|EAL88200.1 100.00% afis|EAW23279.1 100.00%

Bootstrap support for afum|EAL88200.1 as seed ortholog is 100%.

Bootstrap support for afis|EAW23279.1 as seed ortholog is 100%.

---

Group of orthologs #8126. Best score 308 bits

Score difference with first non-orthologous sequence - *A. fumigatus*:308 *A. fischeri*:308

afum|EBA27335.1 100.00% afis|EAW23360.1 100.00%

Bootstrap support for afum|EBA27335.1 as seed ortholog is 100%.

Bootstrap support for afis|EAW23360.1 as seed ortholog is 100%.

---

Group of orthologs #8127. Best score 308 bits

Score difference with first non-orthologous sequence - *A. fumigatus*:308 *A. fischeri*:308

afum|EBA27328.1 100.00% afis|EAW23527.1 100.00%

Bootstrap support for afum|EBA27328.1 as seed ortholog is 100%.

Bootstrap support for afis|EAW23527.1 as seed ortholog is 100%.

---

Group of orthologs #8128. Best score 307 bits

Score difference with first non-orthologous sequence - *A. fumigatus*:307 *A. fischeri*:307

afum|EAL84949.1 100.00% afis|EAW19967.1 100.00%

Bootstrap support for afum|EAL84949.1 as seed ortholog is 100%.

Bootstrap support for afis|EAW19967.1 as seed ortholog is 100%.

---

Group of orthologs #8129. Best score 307 bits

Score difference with first non-orthologous sequence - *A. fumigatus*:229 *A. fischeri*:307

afum|EBA27194.1 100.00% afis|EAW20470.1 100.00%

Bootstrap support for afum|EBA27194.1 as seed ortholog is 100%.

Bootstrap support for afis|EAW20470.1 as seed ortholog is 100%.

---

Group of orthologs #8130. Best score 307 bits

Score difference with first non-orthologous sequence - *A. fumigatus*:307 *A. fischeri*:142

afum|EAL90012.1 100.00% afis|EAW25349.1 100.00%

Bootstrap support for afum|EAL90012.1 as seed ortholog is 100%.

Bootstrap support for afis|EAW25349.1 as seed ortholog is 100%.

---

Group of orthologs #8131. Best score 307 bits

Score difference with first non-orthologous sequence - *A. fumigatus*:307 *A. fischeri*:307

afum|EAL90162.1 100.00% afis|EAW25496.1 100.00%

Bootstrap support for afum|EAL90162.1 as seed ortholog is 100%.

Bootstrap support for afis|EAW25496.1 as seed ortholog is 100%.

---

Group of orthologs #8132. Best score 307 bits

Score difference with first non-orthologous sequence - *A. fumigatus*:240 *A. fischeri*:307

afum|EAL92015.1 100.00% afis|EAW24159.1 100.00%

Bootstrap support for afum|EAL92015.1 as seed ortholog is 100%.

Bootstrap support for afis|EAW24159.1 as seed ortholog is 100%.

---

Group of orthologs #8133. Best score 306 bits

Score difference with first non-orthologous sequence - *A. fumigatus*:306 *A. fischeri*:306

afum|EAL89193.1 100.00% afis|EAW16597.1 100.00%

Bootstrap support for afum|EAL89193.1 as seed ortholog is 100%.

Bootstrap support for afis|EAW16597.1 as seed ortholog is 100%.

---

Group of orthologs #8134. Best score 306 bits

Score difference with first non-orthologous sequence - *A. fumigatus*:306 *A. fischeri*:306

afum|EAL87296.1 100.00% afis|EAW23868.1 100.00%

Bootstrap support for afum|EAL87296.1 as seed ortholog is 100%.

Bootstrap support for afis|EAW23868.1 as seed ortholog is 100%.

---

Group of orthologs #8135. Best score 305 bits

Score difference with first non-orthologous sequence - *A. fumigatus*:305 *A. fischeri*:305

afum|EAL85520.1 100.00% afis|EAW15832.1 100.00%

Bootstrap support for afum|EAL85520.1 as seed ortholog is 100%.

Bootstrap support for afis|EAW15832.1 as seed ortholog is 100%.

---

Group of orthologs #8136. Best score 305 bits

Score difference with first non-orthologous sequence - *A. fumigatus*:207 *A. fischeri*:222

afum|EAL85068.1 100.00% afis|EAW19824.1 100.00%

Bootstrap support for afum|EAL85068.1 as seed ortholog is 99%.

Bootstrap support for afis|EAW19824.1 as seed ortholog is 100%.

---

Group of orthologs #8137. Best score 305 bits

Score difference with first non-orthologous sequence - *A. fumigatus*:305 *A. fischeri*:305

afum|EAL84648.2 100.00% afis|EAW20982.1 100.00%

Bootstrap support for afum|EAL84648.2 as seed ortholog is 100%.

Bootstrap support for afis|EAW20982.1 as seed ortholog is 100%.

---

Group of orthologs #8138. Best score 304 bits

Score difference with first non-orthologous sequence - *A. fumigatus*:304 *A. fischeri*:304

afum|EAL84999.1 100.00% afis|EAW19907.1 100.00%

Bootstrap support for afum|EAL84999.1 as seed ortholog is 100%.

Bootstrap support for afis|EAW19907.1 as seed ortholog is 100%.

---

Group of orthologs #8139. Best score 304 bits

Score difference with first non-orthologous sequence - *A. fumigatus*:304 *A. fischeri*:304

afum|EAL93593.2 100.00% afis|EAW18861.1 100.00%

Bootstrap support for afum|EAL93593.2 as seed ortholog is 100%.

Bootstrap support for afis|EAW18861.1 as seed ortholog is 100%.

---

Group of orthologs #8140. Best score 304 bits

Score difference with first non-orthologous sequence - *A. fumigatus*:304 *A. fischeri*:304

afum|EAL90449.1 100.00% afis|EAW22750.1 100.00%

Bootstrap support for afum|EAL90449.1 as seed ortholog is 100%.

Bootstrap support for afis|EAW22750.1 as seed ortholog is 100%.

---

Group of orthologs #8141. Best score 303 bits

Score difference with first non-orthologous sequence - *A. fumigatus*:303 *A. fischeri*:303

afum|EAL86337.1 100.00% afis|EAW16769.1 100.00%

Bootstrap support for afum|EAL86337.1 as seed ortholog is 100%.

Bootstrap support for afis|EAW16769.1 as seed ortholog is 100%.

---

Group of orthologs #8142. Best score 303 bits

Score difference with first non-orthologous sequence - *A. fumigatus*:303 *A. fischeri*:303

afum|EAL88413.1 100.00% afis|EAW23066.1 100.00%

Bootstrap support for afum|EAL88413.1 as seed ortholog is 100%.

Bootstrap support for afis|EAW23066.1 as seed ortholog is 100%.

---

Group of orthologs #8143. Best score 303 bits

Score difference with first non-orthologous sequence - *A. fumigatus*:303 *A. fischeri*:303

afum|EAL93958.1 100.00% afis|EAW19228.1 100.00%

Bootstrap support for afum|EAL93958.1 as seed ortholog is 100%.

Bootstrap support for afis|EAW19228.1 as seed ortholog is 100%.

---

Group of orthologs #8144. Best score 303 bits

Score difference with first non-orthologous sequence - *A. fumigatus*:303 *A. fischeri*:303

afum|EAL92518.1 100.00% afis|EAW21499.1 100.00%

Bootstrap support for afum|EAL92518.1 as seed ortholog is 100%.

Bootstrap support for afis|EAW21499.1 as seed ortholog is 100%.

---

Group of orthologs #8145. Best score 302 bits

Score difference with first non-orthologous sequence - *A. fumigatus*:302 *A. fischeri*:302

afum|EAL85562.1 100.00% afis|EAW15788.1 100.00%

Bootstrap support for afum|EAL85562.1 as seed ortholog is 100%.

Bootstrap support for afis|EAW15788.1 as seed ortholog is 100%.

---

Group of orthologs #8146. Best score 302 bits

Score difference with first non-orthologous sequence - *A. fumigatus*:302 *A. fischeri*:302

afum|EAL88835.1 100.00% afis|EAW16208.1 100.00%

Bootstrap support for afum|EAL88835.1 as seed ortholog is 100%.

Bootstrap support for afis|EAW16208.1 as seed ortholog is 100%.

---

Group of orthologs #8147. Best score 302 bits

Score difference with first non-orthologous sequence - *A. fumigatus*:302 *A. fischeri*:189

afum|EAL84660.1 100.00% afis|EAW20973.1 100.00%

Bootstrap support for afum|EAL84660.1 as seed ortholog is 100%.

Bootstrap support for afis|EAW20973.1 as seed ortholog is 100%.

---

Group of orthologs #8148. Best score 302 bits

Score difference with first non-orthologous sequence - *A. fumigatus*:302 *A. fischeri*:302

afum|EAL86873.1 100.00% afis|EAW19649.1 100.00%

Bootstrap support for afum|EAL86873.1 as seed ortholog is 100%.

Bootstrap support for afis|EAW19649.1 as seed ortholog is 100%.

---

Group of orthologs #8149. Best score 302 bits

Score difference with first non-orthologous sequence - *A. fumigatus*:302 *A. fischeri*:302

afum|EAL85923.1 100.00% afis|EAW24255.1 100.00%

Bootstrap support for afum|EAL85923.1 as seed ortholog is 100%.

Bootstrap support for afis|EAW24255.1 as seed ortholog is 100%.

---

Group of orthologs #8150. Best score 302 bits

Score difference with first non-orthologous sequence - *A. fumigatus*:302 *A. fischeri*:302

afum|EAL92535.1 100.00% afis|EAW21515.1 100.00%

Bootstrap support for afum|EAL92535.1 as seed ortholog is 100%.

Bootstrap support for afis|EAW21515.1 as seed ortholog is 100%.

---

Group of orthologs #8151. Best score 302 bits

Score difference with first non-orthologous sequence - *A. fumigatus*:302 *A. fischeri*:302



|                 |         |                 |         |
|-----------------|---------|-----------------|---------|
| afum EAL89756.1 | 100.00% | afis EAW25087.1 | 100.00% |
|-----------------|---------|-----------------|---------|

Bootstrap support for afum|EAL89756.1 as seed ortholog is 100%.

Bootstrap support for afis|EAW25087.1 as seed ortholog is 100%.

---

Group of orthologs #8152. Best score 302 bits

Score difference with first non-orthologous sequence - *A. fumigatus*:302 *A. fischeri*:302

|                 |         |                 |         |
|-----------------|---------|-----------------|---------|
| afum EBA27324.1 | 100.00% | afis EAW23631.1 | 100.00% |
|-----------------|---------|-----------------|---------|

Bootstrap support for afum|EBA27324.1 as seed ortholog is 100%.

Bootstrap support for afis|EAW23631.1 as seed ortholog is 100%.

---

Group of orthologs #8153. Best score 301 bits

Score difference with first non-orthologous sequence - *A. fumigatus*:301 *A. fischeri*:301

|                 |         |                 |         |
|-----------------|---------|-----------------|---------|
| afum EAL92718.2 | 100.00% | afis EAW21684.1 | 100.00% |
|-----------------|---------|-----------------|---------|

Bootstrap support for afum|EAL92718.2 as seed ortholog is 100%.

Bootstrap support for afis|EAW21684.1 as seed ortholog is 100%.

---

Group of orthologs #8154. Best score 300 bits

Score difference with first non-orthologous sequence - *A. fumigatus*:300 *A. fischeri*:300

|                 |         |                 |         |
|-----------------|---------|-----------------|---------|
| afum EAL91143.1 | 100.00% | afis EAW17308.1 | 100.00% |
|-----------------|---------|-----------------|---------|

Bootstrap support for afum|EAL91143.1 as seed ortholog is 100%.

Bootstrap support for afis|EAW17308.1 as seed ortholog is 100%.

---

Group of orthologs #8155. Best score 300 bits

Score difference with first non-orthologous sequence - *A. fumigatus*:300 *A. fischeri*:300

|                 |         |                 |         |
|-----------------|---------|-----------------|---------|
| afum EAL88388.1 | 100.00% | afis EAW23091.1 | 100.00% |
|-----------------|---------|-----------------|---------|

Bootstrap support for afum|EAL88388.1 as seed ortholog is 100%.

Bootstrap support for afis|EAW23091.1 as seed ortholog is 100%.

---

Group of orthologs #8156. Best score 300 bits

Score difference with first non-orthologous sequence - *A. fumigatus*:300 *A. fischeri*:300

|                 |         |                 |         |
|-----------------|---------|-----------------|---------|
| afum EBA27376.1 | 100.00% | afis EAW24725.1 | 100.00% |
|-----------------|---------|-----------------|---------|

Bootstrap support for afum|EBA27376.1 as seed ortholog is 100%.

Bootstrap support for afis|EAW24725.1 as seed ortholog is 100%.

---

Group of orthologs #8157. Best score 299 bits

Score difference with first non-orthologous sequence - *A. fumigatus*:299 *A. fischeri*:299

|                 |         |                 |         |
|-----------------|---------|-----------------|---------|
| afum EAL87686.1 | 100.00% | afis EAW18319.1 | 100.00% |
|-----------------|---------|-----------------|---------|

Bootstrap support for afum|EAL87686.1 as seed ortholog is 100%.

Bootstrap support for afis|EAW18319.1 as seed ortholog is 100%.

---

Group of orthologs #8158. Best score 299 bits

Score difference with first non-orthologous sequence - *A. fumigatus*:299 *A. fischeri*:299

|                 |         |                 |         |
|-----------------|---------|-----------------|---------|
| afum EAL93496.2 | 100.00% | afis EAW18764.1 | 100.00% |
|-----------------|---------|-----------------|---------|

Bootstrap support for afum|EAL93496.2 as seed ortholog is 100%.

Bootstrap support for afis|EAW18764.1 as seed ortholog is 100%.

---

Group of orthologs #8159. Best score 298 bits

Score difference with first non-orthologous sequence - *A. fumigatus*:89 *A. fischeri*:298

|                 |         |                 |         |
|-----------------|---------|-----------------|---------|
| afum EAL84921.1 | 100.00% | afis EAW15395.1 | 100.00% |
|-----------------|---------|-----------------|---------|

Bootstrap support for afum|EAL84921.1 as seed ortholog is 96%.

Bootstrap support for afis|EAW15395.1 as seed ortholog is 100%.

---

Group of orthologs #8160. Best score 298 bits

Score difference with first non-orthologous sequence - *A. fumigatus*:298 *A. fischeri*:298

|                 |         |                 |         |
|-----------------|---------|-----------------|---------|
| afum EAL85746.1 | 100.00% | afis EAW15586.1 | 100.00% |
|-----------------|---------|-----------------|---------|

Bootstrap support for afum|EAL85746.1 as seed ortholog is 100%.

Bootstrap support for afis|EAW15586.1 as seed ortholog is 100%.

---

Group of orthologs #8161. Best score 298 bits

Score difference with first non-orthologous sequence - *A. fumigatus*:298 *A. fischeri*:298

afum|EAL87648.1 100.00% afis|EAW18282.1 100.00%

Bootstrap support for afum|EAL87648.1 as seed ortholog is 100%.

Bootstrap support for afis|EAW18282.1 as seed ortholog is 100%.

---

Group of orthologs #8162. Best score 298 bits

Score difference with first non-orthologous sequence - *A. fumigatus*:298 *A. fischeri*:298

afum|EAL91082.1 100.00% afis|EAW16966.1 100.00%

Bootstrap support for afum|EAL91082.1 as seed ortholog is 100%.

Bootstrap support for afis|EAW16966.1 as seed ortholog is 100%.

---

Group of orthologs #8163. Best score 298 bits

Score difference with first non-orthologous sequence - *A. fumigatus*:298 *A. fischeri*:298

afum|EAL85974.1 100.00% afis|EAW24306.1 100.00%

Bootstrap support for afum|EAL85974.1 as seed ortholog is 100%.

Bootstrap support for afis|EAW24306.1 as seed ortholog is 100%.

---

Group of orthologs #8164. Best score 298 bits

Score difference with first non-orthologous sequence - *A. fumigatus*:298 *A. fischeri*:298

afum|EAL88246.1 100.00% afis|EAW23236.1 100.00%

Bootstrap support for afum|EAL88246.1 as seed ortholog is 100%.

Bootstrap support for afis|EAW23236.1 as seed ortholog is 100%.

---

Group of orthologs #8165. Best score 298 bits

Score difference with first non-orthologous sequence - *A. fumigatus*:298 *A. fischeri*:298

afum|EBA27430.1 100.00% afis|EAW17503.1 100.00%

Bootstrap support for afum|EBA27430.1 as seed ortholog is 100%.

Bootstrap support for afis|EAW17503.1 as seed ortholog is 100%.

---

Group of orthologs #8166. Best score 298 bits

Score difference with first non-orthologous sequence - *A. fumigatus*:298 *A. fischeri*:298

afum|EAL93428.1 100.00% afis|EAW18705.1 100.00%

Bootstrap support for afum|EAL93428.1 as seed ortholog is 100%.

Bootstrap support for afis|EAW18705.1 as seed ortholog is 100%.

---

Group of orthologs #8167. Best score 298 bits

Score difference with first non-orthologous sequence - *A. fumigatus*:298 *A. fischeri*:298

afum|EAL90828.1 100.00% afis|EAW22363.1 100.00%

Bootstrap support for afum|EAL90828.1 as seed ortholog is 100%.

Bootstrap support for afis|EAW22363.1 as seed ortholog is 100%.

---

Group of orthologs #8168. Best score 298 bits

Score difference with first non-orthologous sequence - *A. fumigatus*:298 *A. fischeri*:298

afum|EAL90824.1 100.00% afis|EAW22368.1 100.00%

Bootstrap support for afum|EAL90824.1 as seed ortholog is 100%.

Bootstrap support for afis|EAW22368.1 as seed ortholog is 100%.

---

Group of orthologs #8169. Best score 297 bits

Score difference with first non-orthologous sequence - *A. fumigatus*:221 *A. fischeri*:176

afum|EAL91185.1 100.00% afis|EAW17340.1 100.00%

Bootstrap support for afum|EAL91185.1 as seed ortholog is 100%.

Bootstrap support for afis|EAW17340.1 as seed ortholog is 100%.

---

Group of orthologs #8170. Best score 297 bits

Score difference with first non-orthologous sequence - *A. fumigatus*:297 *A. fischeri*:297

afum|EAL87898.2 100.00% afis|EAW23569.1 100.00%

Bootstrap support for afum|EAL87898.2 as seed ortholog is 100%.

Bootstrap support for afis|EAW23569.1 as seed ortholog is 100%.

---

Group of orthologs #8171. Best score 297 bits

Score difference with first non-orthologous sequence - *A. fumigatus*:297 *A. fischeri*:297

afum|EAL93308.1 100.00% afis|EAW18600.1 100.00%

Bootstrap support for afum|EAL93308.1 as seed ortholog is 100%.

Bootstrap support for afis|EAW18600.1 as seed ortholog is 100%.

---

Group of orthologs #8172. Best score 296 bits

Score difference with first non-orthologous sequence - *A. fumigatus*:296 *A. fischeri*:296

afum|EAL89263.1 100.00% afis|EAW16659.1 100.00%

Bootstrap support for afum|EAL89263.1 as seed ortholog is 100%.

Bootstrap support for afis|EAW16659.1 as seed ortholog is 100%.

---

Group of orthologs #8173. Best score 296 bits

Score difference with first non-orthologous sequence - *A. fumigatus*:296 *A. fischeri*:296

afum|EBA27169.1 100.00% afis|EAW15435.1 100.00%

Bootstrap support for afum|EBA27169.1 as seed ortholog is 100%.

Bootstrap support for afis|EAW15435.1 as seed ortholog is 100%.

---

Group of orthologs #8174. Best score 296 bits

Score difference with first non-orthologous sequence - *A. fumigatus*:296 *A. fischeri*:296

afum|EAL88070.1 100.00% afis|EAW23400.1 100.00%

Bootstrap support for afum|EAL88070.1 as seed ortholog is 100%.

Bootstrap support for afis|EAW23400.1 as seed ortholog is 100%.

---

Group of orthologs #8175. Best score 296 bits

Score difference with first non-orthologous sequence - *A. fumigatus*:296 *A. fischeri*:296

afum|EBA27438.1 100.00% afis|EAW17894.1 100.00%

Bootstrap support for afum|EBA27438.1 as seed ortholog is 100%.

Bootstrap support for afis|EAW17894.1 as seed ortholog is 100%.

---

Group of orthologs #8176. Best score 296 bits

Score difference with first non-orthologous sequence - *A. fumigatus*:296 *A. fischeri*:231

afum|EAL90475.1 100.00% afis|EAW22719.1 100.00%

Bootstrap support for afum|EAL90475.1 as seed ortholog is 100%.

Bootstrap support for afis|EAW22719.1 as seed ortholog is 100%.

---

Group of orthologs #8177. Best score 296 bits

Score difference with first non-orthologous sequence - *A. fumigatus*:296 *A. fischeri*:296

afum|EAL92167.1 100.00% afis|EAW21148.1 100.00%

Bootstrap support for afum|EAL92167.1 as seed ortholog is 100%.

Bootstrap support for afis|EAW21148.1 as seed ortholog is 100%.

---

Group of orthologs #8178. Best score 296 bits

Score difference with first non-orthologous sequence - *A. fumigatus*:296 *A. fischeri*:296

afum|EAL90073.1 100.00% afis|EAW25414.1 100.00%

Bootstrap support for afum|EAL90073.1 as seed ortholog is 100%.

Bootstrap support for afis|EAW25414.1 as seed ortholog is 100%.

---

Group of orthologs #8179. Best score 295 bits

Score difference with first non-orthologous sequence - *A. fumigatus*:295 *A. fischeri*:295

|                 |         |                 |         |
|-----------------|---------|-----------------|---------|
| afum EAL91119.1 | 100.00% | afis EAW20300.1 | 100.00% |
| afum EAL90937.1 | 25.00%  |                 |         |

Bootstrap support for afum|EAL91119.1 as seed ortholog is 100%.

Bootstrap support for afis|EAW20300.1 as seed ortholog is 100%.

---

Group of orthologs #8180. Best score 295 bits

Score difference with first non-orthologous sequence - *A. fumigatus*:295 *A. fischeri*:295

|                 |         |                 |         |
|-----------------|---------|-----------------|---------|
| afum EAL88349.1 | 100.00% | afis EAW23132.1 | 100.00% |
|-----------------|---------|-----------------|---------|

Bootstrap support for afum|EAL88349.1 as seed ortholog is 100%.

Bootstrap support for afis|EAW23132.1 as seed ortholog is 100%.

---

Group of orthologs #8181. Best score 295 bits

Score difference with first non-orthologous sequence - *A. fumigatus*:295 *A. fischeri*:295

|                 |         |                 |         |
|-----------------|---------|-----------------|---------|
| afum EBA27215.1 | 100.00% | afis EAW19923.1 | 100.00% |
|-----------------|---------|-----------------|---------|

Bootstrap support for afum|EBA27215.1 as seed ortholog is 100%.

Bootstrap support for afis|EAW19923.1 as seed ortholog is 100%.

---

Group of orthologs #8182. Best score 295 bits

Score difference with first non-orthologous sequence - *A. fumigatus*:295 *A. fischeri*:295

|                 |         |                 |         |
|-----------------|---------|-----------------|---------|
| afum EAL92719.1 | 100.00% | afis EAW21685.1 | 100.00% |
|-----------------|---------|-----------------|---------|

Bootstrap support for afum|EAL92719.1 as seed ortholog is 100%.

Bootstrap support for afis|EAW21685.1 as seed ortholog is 100%.

---

Group of orthologs #8183. Best score 294 bits

Score difference with first non-orthologous sequence - *A. fumigatus*:294 *A. fischeri*:294

|                 |         |                 |         |
|-----------------|---------|-----------------|---------|
| afum EAL91247.1 | 100.00% | afis EAW17422.1 | 100.00% |
|-----------------|---------|-----------------|---------|

Bootstrap support for afum|EAL91247.1 as seed ortholog is 100%.

Bootstrap support for afis|EAW17422.1 as seed ortholog is 100%.

---

Group of orthologs #8184. Best score 294 bits

Score difference with first non-orthologous sequence - *A. fumigatus*:294 *A. fischeri*:294

|                 |         |                 |         |
|-----------------|---------|-----------------|---------|
| afum EAL86224.1 | 100.00% | afis EAW24563.1 | 100.00% |
|-----------------|---------|-----------------|---------|

Bootstrap support for afum|EAL86224.1 as seed ortholog is 100%.

Bootstrap support for afis|EAW24563.1 as seed ortholog is 100%.

---

Group of orthologs #8185. Best score 294 bits

Score difference with first non-orthologous sequence - *A. fumigatus*:294 *A. fischeri*:294

|                 |         |                 |         |
|-----------------|---------|-----------------|---------|
| afum EAL93835.1 | 100.00% | afis EAW19103.1 | 100.00% |
|-----------------|---------|-----------------|---------|

Bootstrap support for afum|EAL93835.1 as seed ortholog is 100%.

Bootstrap support for afis|EAW19103.1 as seed ortholog is 100%.

---

Group of orthologs #8186. Best score 293 bits

Score difference with first non-orthologous sequence - *A. fumigatus*:293 *A. fischeri*:293

|                 |         |                 |         |
|-----------------|---------|-----------------|---------|
| afum EAL88539.1 | 100.00% | afis EAW15904.1 | 100.00% |
|-----------------|---------|-----------------|---------|

Bootstrap support for afum|EAL88539.1 as seed ortholog is 100%.

Bootstrap support for afis|EAW15904.1 as seed ortholog is 100%.

---

Group of orthologs #8187. Best score 293 bits

Score difference with first non-orthologous sequence - *A. fumigatus*:293 *A. fischeri*:293

|                 |         |                 |         |
|-----------------|---------|-----------------|---------|
| afum EAL89163.1 | 100.00% | afis EAW16566.1 | 100.00% |
|-----------------|---------|-----------------|---------|

Bootstrap support for afum|EAL89163.1 as seed ortholog is 100%.

Bootstrap support for afis|EAW16566.1 as seed ortholog is 100%.

---

Group of orthologs #8188. Best score 293 bits

Score difference with first non-orthologous sequence - *A. fumigatus*:293 *A. fischeri*:293

|                 |         |                 |         |
|-----------------|---------|-----------------|---------|
| afum EAL93728.1 | 100.00% | afis EAW18993.1 | 100.00% |
|-----------------|---------|-----------------|---------|

Bootstrap support for afum|EAL93728.1 as seed ortholog is 100%.  
Bootstrap support for afis|EAW18993.1 as seed ortholog is 100%.

---

Group of orthologs #8189. Best score 292 bits

Score difference with first non-orthologous sequence - *A. fumigatus*:292 *A. fischeri*:292

afum|EAL85535.1 100.00% afis|EAW15816.1 100.00%

Bootstrap support for afum|EAL85535.1 as seed ortholog is 100%.

Bootstrap support for afis|EAW15816.1 as seed ortholog is 100%.

---

Group of orthologs #8190. Best score 292 bits

Score difference with first non-orthologous sequence - *A. fumigatus*:292 *A. fischeri*:292

afum|EAL89222.2 100.00% afis|EAW16614.1 100.00%

Bootstrap support for afum|EAL89222.2 as seed ortholog is 100%.

Bootstrap support for afis|EAW16614.1 as seed ortholog is 100%.

---

Group of orthologs #8191. Best score 292 bits

Score difference with first non-orthologous sequence - *A. fumigatus*:292 *A. fischeri*:292

afum|EAL89911.1 100.00% afis|EAW25249.1 100.00%

Bootstrap support for afum|EAL89911.1 as seed ortholog is 100%.

Bootstrap support for afis|EAW25249.1 as seed ortholog is 100%.

---

Group of orthologs #8192. Best score 292 bits

Score difference with first non-orthologous sequence - *A. fumigatus*:292 *A. fischeri*:292

afum|EBA27393.1 100.00% afis|EAW25366.1 100.00%

Bootstrap support for afum|EBA27393.1 as seed ortholog is 100%.

Bootstrap support for afis|EAW25366.1 as seed ortholog is 100%.

---

Group of orthologs #8193. Best score 291 bits

Score difference with first non-orthologous sequence - *A. fumigatus*:291 *A. fischeri*:291

afum|EAL84551.1 100.00% afis|EAW20505.1 100.00%

Bootstrap support for afum|EAL84551.1 as seed ortholog is 100%.

Bootstrap support for afis|EAW20505.1 as seed ortholog is 100%.

---

Group of orthologs #8194. Best score 291 bits

Score difference with first non-orthologous sequence - *A. fumigatus*:291 *A. fischeri*:291

afum|EAL91834.1 100.00% afis|EAW18022.1 100.00%

Bootstrap support for afum|EAL91834.1 as seed ortholog is 100%.

Bootstrap support for afis|EAW18022.1 as seed ortholog is 100%.

---

Group of orthologs #8195. Best score 291 bits

Score difference with first non-orthologous sequence - *A. fumigatus*:291 *A. fischeri*:173

afum|EAL87734.1 100.00% afis|EAW22033.1 100.00%

Bootstrap support for afum|EAL87734.1 as seed ortholog is 100%.

Bootstrap support for afis|EAW22033.1 as seed ortholog is 99%.

---

Group of orthologs #8196. Best score 291 bits

Score difference with first non-orthologous sequence - *A. fumigatus*:291 *A. fischeri*:291

afum|EAL90389.1 100.00% afis|EAW22812.1 100.00%

Bootstrap support for afum|EAL90389.1 as seed ortholog is 100%.

Bootstrap support for afis|EAW22812.1 as seed ortholog is 100%.

---

Group of orthologs #8197. Best score 291 bits

Score difference with first non-orthologous sequence - *A. fumigatus*:291 *A. fischeri*:291

afum|EAL90379.2 100.00% afis|EAW22821.1 100.00%

Bootstrap support for afum|EAL90379.2 as seed ortholog is 100%.

Bootstrap support for afis|EAW22821.1 as seed ortholog is 100%.

---

Group of orthologs #8198. Best score 291 bits

Score difference with first non-orthologous sequence - *A. fumigatus*:291 *A. fischeri*:291

afum|EAL90283.1 100.00% afis|EAW22914.1 100.00%

Bootstrap support for afum|EAL90283.1 as seed ortholog is 100%.

Bootstrap support for afis|EAW22914.1 as seed ortholog is 100%.

---

Group of orthologs #8199. Best score 290 bits

Score difference with first non-orthologous sequence - *A. fumigatus*:290 *A. fischeri*:290

afum|EAL88455.1 100.00% afis|EAW23027.1 100.00%

Bootstrap support for afum|EAL88455.1 as seed ortholog is 100%.

Bootstrap support for afis|EAW23027.1 as seed ortholog is 100%.

---

Group of orthologs #8200. Best score 290 bits

Score difference with first non-orthologous sequence - *A. fumigatus*:290 *A. fischeri*:290

afum|EAL92732.1 100.00% afis|EAW21698.1 100.00%

Bootstrap support for afum|EAL92732.1 as seed ortholog is 100%.

Bootstrap support for afis|EAW21698.1 as seed ortholog is 100%.

---

Group of orthologs #8201. Best score 289 bits

Score difference with first non-orthologous sequence - *A. fumigatus*:289 *A. fischeri*:289

afum|EAL84976.2 100.00% afis|EAW19933.1 100.00%

Bootstrap support for afum|EAL84976.2 as seed ortholog is 100%.

Bootstrap support for afis|EAW19933.1 as seed ortholog is 100%.

---

Group of orthologs #8202. Best score 289 bits

Score difference with first non-orthologous sequence - *A. fumigatus*:289 *A. fischeri*:289

afum|EAL87604.2 100.00% afis|EAW18237.1 100.00%

Bootstrap support for afum|EAL87604.2 as seed ortholog is 100%.

Bootstrap support for afis|EAW18237.1 as seed ortholog is 100%.

---

Group of orthologs #8203. Best score 289 bits

Score difference with first non-orthologous sequence - *A. fumigatus*:289 *A. fischeri*:289

afum|EAL92603.2 100.00% afis|EAW21585.1 100.00%

Bootstrap support for afum|EAL92603.2 as seed ortholog is 100%.

Bootstrap support for afis|EAW21585.1 as seed ortholog is 100%.

---

Group of orthologs #8204. Best score 289 bits

Score difference with first non-orthologous sequence - *A. fumigatus*:289 *A. fischeri*:289

afum|EBA27193.1 100.00% afis|EAW20474.1 100.00%

Bootstrap support for afum|EBA27193.1 as seed ortholog is 100%.

Bootstrap support for afis|EAW20474.1 as seed ortholog is 100%.

---

Group of orthologs #8205. Best score 289 bits

Score difference with first non-orthologous sequence - *A. fumigatus*:289 *A. fischeri*:289

afum|EAL89571.1 100.00% afis|EAW24916.1 100.00%

Bootstrap support for afum|EAL89571.1 as seed ortholog is 100%.

Bootstrap support for afis|EAW24916.1 as seed ortholog is 100%.

---

Group of orthologs #8206. Best score 289 bits

Score difference with first non-orthologous sequence - *A. fumigatus*:59 *A. fischeri*:90

afum|EBA27227.1 100.00% afis|EAW24094.1 100.00%

Bootstrap support for afum|EBA27227.1 as seed ortholog is 85%.

Bootstrap support for afis|EAW24094.1 as seed ortholog is 93%.

---

Group of orthologs #8207. Best score 288 bits

Score difference with first non-orthologous sequence - *A. fumigatus*:288 *A. fischeri*:96  
afum|EAL85154.2 100.00% afis|EAW23663.1 100.00%  
Bootstrap support for afum|EAL85154.2 as seed ortholog is 100%.  
Bootstrap support for afis|EAW23663.1 as seed ortholog is 97%.

---

Group of orthologs #8208. Best score 288 bits

Score difference with first non-orthologous sequence - *A. fumigatus*:288 *A. fischeri*:288  
afum|EAL91726.1 100.00% afis|EAW17916.1 100.00%  
Bootstrap support for afum|EAL91726.1 as seed ortholog is 100%.  
Bootstrap support for afis|EAW17916.1 as seed ortholog is 100%.

---

Group of orthologs #8209. Best score 288 bits

Score difference with first non-orthologous sequence - *A. fumigatus*:288 *A. fischeri*:288  
afum|EAL86187.1 100.00% afis|EAW24522.1 100.00%  
Bootstrap support for afum|EAL86187.1 as seed ortholog is 100%.  
Bootstrap support for afis|EAW24522.1 as seed ortholog is 100%.

---

Group of orthologs #8210. Best score 288 bits

Score difference with first non-orthologous sequence - *A. fumigatus*:288 *A. fischeri*:288  
afum|EBA27446.1 100.00% afis|EAW24075.1 100.00%  
Bootstrap support for afum|EBA27446.1 as seed ortholog is 100%.  
Bootstrap support for afis|EAW24075.1 as seed ortholog is 100%.

---

Group of orthologs #8211. Best score 287 bits

Score difference with first non-orthologous sequence - *A. fumigatus*:287 *A. fischeri*:287  
afum|EAL88746.1 100.00% afis|EAW16115.1 100.00%  
Bootstrap support for afum|EAL88746.1 as seed ortholog is 100%.  
Bootstrap support for afis|EAW16115.1 as seed ortholog is 100%.

---

Group of orthologs #8212. Best score 287 bits

Score difference with first non-orthologous sequence - *A. fumigatus*:287 *A. fischeri*:287  
afum|EAL88451.2 100.00% afis|EAW23031.1 100.00%  
Bootstrap support for afum|EAL88451.2 as seed ortholog is 100%.  
Bootstrap support for afis|EAW23031.1 as seed ortholog is 100%.

---

Group of orthologs #8213. Best score 287 bits

Score difference with first non-orthologous sequence - *A. fumigatus*:287 *A. fischeri*:26  
afum|EAL92224.2 100.00% afis|EAW21213.1 100.00%  
Bootstrap support for afum|EAL92224.2 as seed ortholog is 100%.  
Bootstrap support for afis|EAW21213.1 as seed ortholog is 88%.

---

Group of orthologs #8214. Best score 286 bits

Score difference with first non-orthologous sequence - *A. fumigatus*:286 *A. fischeri*:286  
afum|EAL89237.1 100.00% afis|EAW16635.1 100.00%  
Bootstrap support for afum|EAL89237.1 as seed ortholog is 100%.  
Bootstrap support for afis|EAW16635.1 as seed ortholog is 100%.

---

Group of orthologs #8215. Best score 286 bits

Score difference with first non-orthologous sequence - *A. fumigatus*:286 *A. fischeri*:286  
afum|EAL84635.1 100.00% afis|EAW20993.1 100.00%  
Bootstrap support for afum|EAL84635.1 as seed ortholog is 100%.  
Bootstrap support for afis|EAW20993.1 as seed ortholog is 100%.

---

Group of orthologs #8216. Best score 286 bits

Score difference with first non-orthologous sequence - *A. fumigatus*:286 *A. fischeri*:286  
afum|EAL90536.1 100.00% afis|EAW22656.1 100.00%

Bootstrap support for afum|EAL90536.1 as seed ortholog is 100%.  
Bootstrap support for afis|EAW22656.1 as seed ortholog is 100%.

---

Group of orthologs #8217. Best score 285 bits

Score difference with first non-orthologous sequence - *A. fumigatus*:285 *A. fischeri*:285

afum|EAL87435.1 100.00% afis|EAW24005.1 100.00%

Bootstrap support for afum|EAL87435.1 as seed ortholog is 100%.

Bootstrap support for afis|EAW24005.1 as seed ortholog is 100%.

---

Group of orthologs #8218. Best score 285 bits

Score difference with first non-orthologous sequence - *A. fumigatus*:285 *A. fischeri*:285

afum|EAL92344.1 100.00% afis|EAW21326.1 100.00%

Bootstrap support for afum|EAL92344.1 as seed ortholog is 100%.

Bootstrap support for afis|EAW21326.1 as seed ortholog is 100%.

---

Group of orthologs #8219. Best score 284 bits

Score difference with first non-orthologous sequence - *A. fumigatus*:284 *A. fischeri*:284

afum|EAL87425.1 100.00% afis|EAW23995.1 100.00%

Bootstrap support for afum|EAL87425.1 as seed ortholog is 100%.

Bootstrap support for afis|EAW23995.1 as seed ortholog is 100%.

---

Group of orthologs #8220. Best score 284 bits

Score difference with first non-orthologous sequence - *A. fumigatus*:284 *A. fischeri*:284

afum|EAL90618.1 100.00% afis|EAW22581.1 100.00%

Bootstrap support for afum|EAL90618.1 as seed ortholog is 100%.

Bootstrap support for afis|EAW22581.1 as seed ortholog is 100%.

---

Group of orthologs #8221. Best score 284 bits

Score difference with first non-orthologous sequence - *A. fumigatus*:284 *A. fischeri*:284

afum|EAL89853.2 100.00% afis|EAW25179.1 100.00%

Bootstrap support for afum|EAL89853.2 as seed ortholog is 100%.

Bootstrap support for afis|EAW25179.1 as seed ortholog is 100%.

---

Group of orthologs #8222. Best score 283 bits

Score difference with first non-orthologous sequence - *A. fumigatus*:283 *A. fischeri*:283

afum|EAL85104.1 100.00% afis|EAW19837.1 100.00%

Bootstrap support for afum|EAL85104.1 as seed ortholog is 100%.

Bootstrap support for afis|EAW19837.1 as seed ortholog is 100%.

---

Group of orthologs #8223. Best score 282 bits

Score difference with first non-orthologous sequence - *A. fumigatus*:282 *A. fischeri*:282

afum|EAL88095.1 100.00% afis|EAW23376.1 100.00%

Bootstrap support for afum|EAL88095.1 as seed ortholog is 100%.

Bootstrap support for afis|EAW23376.1 as seed ortholog is 100%.

---

Group of orthologs #8224. Best score 281 bits

Score difference with first non-orthologous sequence - *A. fumigatus*:281 *A. fischeri*:281

afum|EAL87950.1 100.00% afis|EAW23513.1 100.00%

Bootstrap support for afum|EAL87950.1 as seed ortholog is 100%.

Bootstrap support for afis|EAW23513.1 as seed ortholog is 100%.

---

Group of orthologs #8225. Best score 281 bits

Score difference with first non-orthologous sequence - *A. fumigatus*:281 *A. fischeri*:281

afum|EAL92905.1 100.00% afis|EAW21891.1 100.00%

Bootstrap support for afum|EAL92905.1 as seed ortholog is 100%.

Bootstrap support for afis|EAW21891.1 as seed ortholog is 100%.



---

Group of orthologs #8226. Best score 280 bits

Score difference with first non-orthologous sequence - *A. fumigatus*:280 *A. fischeri*:280

afum|EAL84894.1 100.00% afis|EAW20023.1 100.00%

Bootstrap support for afum|EAL84894.1 as seed ortholog is 100%.

Bootstrap support for afis|EAW20023.1 as seed ortholog is 100%.

---

Group of orthologs #8227. Best score 280 bits

Score difference with first non-orthologous sequence - *A. fumigatus*:280 *A. fischeri*:280

afum|EAL89224.2 100.00% afis|EAW16629.1 100.00%

Bootstrap support for afum|EAL89224.2 as seed ortholog is 100%.

Bootstrap support for afis|EAW16629.1 as seed ortholog is 100%.

---

Group of orthologs #8228. Best score 280 bits

Score difference with first non-orthologous sequence - *A. fumigatus*:280 *A. fischeri*:280

afum|EAL87312.1 100.00% afis|EAW23884.1 100.00%

Bootstrap support for afum|EAL87312.1 as seed ortholog is 100%.

Bootstrap support for afis|EAW23884.1 as seed ortholog is 100%.

---

Group of orthologs #8229. Best score 280 bits

Score difference with first non-orthologous sequence - *A. fumigatus*:280 *A. fischeri*:280

afum|EAL93725.1 100.00% afis|EAW18989.1 100.00%

Bootstrap support for afum|EAL93725.1 as seed ortholog is 100%.

Bootstrap support for afis|EAW18989.1 as seed ortholog is 100%.

---

Group of orthologs #8230. Best score 280 bits

Score difference with first non-orthologous sequence - *A. fumigatus*:280 *A. fischeri*:280

afum|EAL92154.1 100.00% afis|EAW21135.1 100.00%

Bootstrap support for afum|EAL92154.1 as seed ortholog is 100%.

Bootstrap support for afis|EAW21135.1 as seed ortholog is 100%.

---

Group of orthologs #8231. Best score 279 bits

Score difference with first non-orthologous sequence - *A. fumigatus*:279 *A. fischeri*:279

afum|EAL93760.2 100.00% afis|EAW19031.1 100.00%

Bootstrap support for afum|EAL93760.2 as seed ortholog is 100%.

Bootstrap support for afis|EAW19031.1 as seed ortholog is 100%.

---

Group of orthologs #8232. Best score 279 bits

Score difference with first non-orthologous sequence - *A. fumigatus*:279 *A. fischeri*:279

afum|EAL90284.1 100.00% afis|EAW22913.1 100.00%

Bootstrap support for afum|EAL90284.1 as seed ortholog is 100%.

Bootstrap support for afis|EAW22913.1 as seed ortholog is 100%.

---

Group of orthologs #8233. Best score 279 bits

Score difference with first non-orthologous sequence - *A. fumigatus*:279 *A. fischeri*:279

afum|EAL89798.1 100.00% afis|EAW25127.1 100.00%

Bootstrap support for afum|EAL89798.1 as seed ortholog is 100%.

Bootstrap support for afis|EAW25127.1 as seed ortholog is 100%.

---

Group of orthologs #8234. Best score 278 bits

Score difference with first non-orthologous sequence - *A. fumigatus*:278 *A. fischeri*:278

afum|EAL87324.1 100.00% afis|EAW23896.1 100.00%

Bootstrap support for afum|EAL87324.1 as seed ortholog is 100%.

Bootstrap support for afis|EAW23896.1 as seed ortholog is 100%.

---

Group of orthologs #8235. Best score 278 bits

Score difference with first non-orthologous sequence - *A. fumigatus*:278 *A. fischeri*:278  
afum|EAL90271.1 100.00% afis|EAW22926.1 100.00%  
Bootstrap support for afum|EAL90271.1 as seed ortholog is 100%.  
Bootstrap support for afis|EAW22926.1 as seed ortholog is 100%.

---

Group of orthologs #8236. Best score 278 bits

Score difference with first non-orthologous sequence - *A. fumigatus*:278 *A. fischeri*:278  
afum|EBA27501.1 100.00% afis|EAW19014.1 100.00%  
Bootstrap support for afum|EBA27501.1 as seed ortholog is 100%.  
Bootstrap support for afis|EAW19014.1 as seed ortholog is 100%.

---

Group of orthologs #8237. Best score 277 bits

Score difference with first non-orthologous sequence - *A. fumigatus*:277 *A. fischeri*:277  
afum|EAL93513.1 100.00% afis|EAW18781.1 100.00%  
Bootstrap support for afum|EAL93513.1 as seed ortholog is 100%.  
Bootstrap support for afis|EAW18781.1 as seed ortholog is 100%.

---

Group of orthologs #8238. Best score 277 bits

Score difference with first non-orthologous sequence - *A. fumigatus*:277 *A. fischeri*:277  
afum|EAL89764.1 100.00% afis|EAW25093.1 100.00%  
Bootstrap support for afum|EAL89764.1 as seed ortholog is 100%.  
Bootstrap support for afis|EAW25093.1 as seed ortholog is 100%.

---

Group of orthologs #8239. Best score 276 bits

Score difference with first non-orthologous sequence - *A. fumigatus*:276 *A. fischeri*:276  
afum|EAL84789.1 100.00% afis|EAW20844.1 100.00%  
Bootstrap support for afum|EAL84789.1 as seed ortholog is 100%.  
Bootstrap support for afis|EAW20844.1 as seed ortholog is 100%.

---

Group of orthologs #8240. Best score 276 bits

Score difference with first non-orthologous sequence - *A. fumigatus*:276 *A. fischeri*:276  
afum|EAL87602.2 100.00% afis|EAW18235.1 100.00%  
Bootstrap support for afum|EAL87602.2 as seed ortholog is 100%.  
Bootstrap support for afis|EAW18235.1 as seed ortholog is 100%.

---

Group of orthologs #8241. Best score 276 bits

Score difference with first non-orthologous sequence - *A. fumigatus*:276 *A. fischeri*:276  
afum|EBA27478.1 100.00% afis|EAW21895.1 100.00%  
Bootstrap support for afum|EBA27478.1 as seed ortholog is 100%.  
Bootstrap support for afis|EAW21895.1 as seed ortholog is 100%.

---

Group of orthologs #8242. Best score 275 bits

Score difference with first non-orthologous sequence - *A. fumigatus*:275 *A. fischeri*:275  
afum|EAL89058.1 100.00% afis|EAW16462.1 100.00%  
Bootstrap support for afum|EAL89058.1 as seed ortholog is 100%.  
Bootstrap support for afis|EAW16462.1 as seed ortholog is 100%.

---

Group of orthologs #8243. Best score 275 bits

Score difference with first non-orthologous sequence - *A. fumigatus*:275 *A. fischeri*:275  
afum|EAL87581.1 100.00% afis|EAW18215.1 100.00%  
Bootstrap support for afum|EAL87581.1 as seed ortholog is 100%.  
Bootstrap support for afis|EAW18215.1 as seed ortholog is 100%.

---

Group of orthologs #8244. Best score 275 bits

Score difference with first non-orthologous sequence - *A. fumigatus*:275 *A. fischeri*:275  
afum|EAL86980.2 100.00% afis|EAW19517.1 100.00%

Bootstrap support for afum|EAL86980.2 as seed ortholog is 100%.  
Bootstrap support for afis|EAW19517.1 as seed ortholog is 100%.

---

Group of orthologs #8245. Best score 275 bits

Score difference with first non-orthologous sequence - *A. fumigatus*:275 *A. fischeri*:275

|                 |         |                 |         |
|-----------------|---------|-----------------|---------|
| afum EBA27356.1 | 100.00% | afis EAW16137.1 | 100.00% |
|-----------------|---------|-----------------|---------|

Bootstrap support for afum|EBA27356.1 as seed ortholog is 100%.

Bootstrap support for afis|EAW16137.1 as seed ortholog is 100%.

---

Group of orthologs #8246. Best score 275 bits

Score difference with first non-orthologous sequence - *A. fumigatus*:275 *A. fischeri*:275

|                 |         |                 |         |
|-----------------|---------|-----------------|---------|
| afum EBA27284.1 | 100.00% | afis EAW17244.1 | 100.00% |
|-----------------|---------|-----------------|---------|

Bootstrap support for afum|EBA27284.1 as seed ortholog is 100%.

Bootstrap support for afis|EAW17244.1 as seed ortholog is 100%.

---

Group of orthologs #8247. Best score 275 bits

Score difference with first non-orthologous sequence - *A. fumigatus*:275 *A. fischeri*:275

|                 |         |                 |         |
|-----------------|---------|-----------------|---------|
| afum EAL93116.1 | 100.00% | afis EAW18435.1 | 100.00% |
|-----------------|---------|-----------------|---------|

Bootstrap support for afum|EAL93116.1 as seed ortholog is 100%.

Bootstrap support for afis|EAW18435.1 as seed ortholog is 100%.

---

Group of orthologs #8248. Best score 274 bits

Score difference with first non-orthologous sequence - *A. fumigatus*:274 *A. fischeri*:274

|                 |         |                 |         |
|-----------------|---------|-----------------|---------|
| afum EAL85294.1 | 100.00% | afis EAW20176.1 | 100.00% |
|-----------------|---------|-----------------|---------|

Bootstrap support for afum|EAL85294.1 as seed ortholog is 100%.

Bootstrap support for afis|EAW20176.1 as seed ortholog is 100%.

---

Group of orthologs #8249. Best score 274 bits

Score difference with first non-orthologous sequence - *A. fumigatus*:274 *A. fischeri*:274

|                 |         |                 |         |
|-----------------|---------|-----------------|---------|
| afum EAL87340.1 | 100.00% | afis EAW23911.1 | 100.00% |
|-----------------|---------|-----------------|---------|

Bootstrap support for afum|EAL87340.1 as seed ortholog is 100%.

Bootstrap support for afis|EAW23911.1 as seed ortholog is 100%.

---

Group of orthologs #8250. Best score 274 bits

Score difference with first non-orthologous sequence - *A. fumigatus*:274 *A. fischeri*:274

|                 |         |                 |         |
|-----------------|---------|-----------------|---------|
| afum EAL87379.1 | 100.00% | afis EAW23951.1 | 100.00% |
|-----------------|---------|-----------------|---------|

Bootstrap support for afum|EAL87379.1 as seed ortholog is 100%.

Bootstrap support for afis|EAW23951.1 as seed ortholog is 100%.

---

Group of orthologs #8251. Best score 274 bits

Score difference with first non-orthologous sequence - *A. fumigatus*:274 *A. fischeri*:274

|                 |         |                 |         |
|-----------------|---------|-----------------|---------|
| afum EAL92656.1 | 100.00% | afis EAW21620.1 | 100.00% |
|-----------------|---------|-----------------|---------|

Bootstrap support for afum|EAL92656.1 as seed ortholog is 100%.

Bootstrap support for afis|EAW21620.1 as seed ortholog is 100%.

---

Group of orthologs #8252. Best score 274 bits

Score difference with first non-orthologous sequence - *A. fumigatus*:274 *A. fischeri*:274

|                 |         |                 |         |
|-----------------|---------|-----------------|---------|
| afum EBA27188.1 | 100.00% | afis EAW20545.1 | 100.00% |
|-----------------|---------|-----------------|---------|

Bootstrap support for afum|EBA27188.1 as seed ortholog is 100%.

Bootstrap support for afis|EAW20545.1 as seed ortholog is 100%.

---

Group of orthologs #8253. Best score 274 bits

Score difference with first non-orthologous sequence - *A. fumigatus*:274 *A. fischeri*:274

|                 |         |                 |         |
|-----------------|---------|-----------------|---------|
| afum EAL92942.1 | 100.00% | afis EAW21930.1 | 100.00% |
|-----------------|---------|-----------------|---------|

Bootstrap support for afum|EAL92942.1 as seed ortholog is 100%.

Bootstrap support for afis|EAW21930.1 as seed ortholog is 100%.

---

Group of orthologs #8254. Best score 273 bits

Score difference with first non-orthologous sequence - *A. fumigatus*:192 *A. fischeri*:273

afum|EAL86212.1 100.00% afis|EAW24548.1 100.00%

Bootstrap support for afum|EAL86212.1 as seed ortholog is 100%.

Bootstrap support for afis|EAW24548.1 as seed ortholog is 100%.

---

Group of orthologs #8255. Best score 273 bits

Score difference with first non-orthologous sequence - *A. fumigatus*:273 *A. fischeri*:273

afum|EAL93210.1 100.00% afis|EAW18515.1 100.00%

Bootstrap support for afum|EAL93210.1 as seed ortholog is 100%.

Bootstrap support for afis|EAW18515.1 as seed ortholog is 100%.

---

Group of orthologs #8256. Best score 273 bits

Score difference with first non-orthologous sequence - *A. fumigatus*:273 *A. fischeri*:273

afum|EAL90401.1 100.00% afis|EAW22798.1 100.00%

Bootstrap support for afum|EAL90401.1 as seed ortholog is 100%.

Bootstrap support for afis|EAW22798.1 as seed ortholog is 100%.

---

Group of orthologs #8257. Best score 273 bits

Score difference with first non-orthologous sequence - *A. fumigatus*:273 *A. fischeri*:273

afum|EAL92175.1 100.00% afis|EAW21157.1 100.00%

Bootstrap support for afum|EAL92175.1 as seed ortholog is 100%.

Bootstrap support for afis|EAW21157.1 as seed ortholog is 100%.

---

Group of orthologs #8258. Best score 272 bits

Score difference with first non-orthologous sequence - *A. fumigatus*:272 *A. fischeri*:272

afum|EAL85754.1 100.00% afis|EAW15580.1 100.00%

Bootstrap support for afum|EAL85754.1 as seed ortholog is 100%.

Bootstrap support for afis|EAW15580.1 as seed ortholog is 100%.

---

Group of orthologs #8259. Best score 272 bits

Score difference with first non-orthologous sequence - *A. fumigatus*:272 *A. fischeri*:272

afum|EAL85756.1 100.00% afis|EAW15578.1 100.00%

Bootstrap support for afum|EAL85756.1 as seed ortholog is 100%.

Bootstrap support for afis|EAW15578.1 as seed ortholog is 100%.

---

Group of orthologs #8260. Best score 272 bits

Score difference with first non-orthologous sequence - *A. fumigatus*:272 *A. fischeri*:272

afum|EAL91946.2 100.00% afis|EAW24091.1 100.00%

Bootstrap support for afum|EAL91946.2 as seed ortholog is 100%.

Bootstrap support for afis|EAW24091.1 as seed ortholog is 100%.

---

Group of orthologs #8261. Best score 271 bits

Score difference with first non-orthologous sequence - *A. fumigatus*:271 *A. fischeri*:271

afum|EAL91926.1 100.00% afis|EAW24070.1 100.00%

Bootstrap support for afum|EAL91926.1 as seed ortholog is 100%.

Bootstrap support for afis|EAW24070.1 as seed ortholog is 100%.

---

Group of orthologs #8262. Best score 270 bits

Score difference with first non-orthologous sequence - *A. fumigatus*:270 *A. fischeri*:270

afum|EAL89171.2 100.00% afis|EAW16574.1 100.00%

Bootstrap support for afum|EAL89171.2 as seed ortholog is 100%.

Bootstrap support for afis|EAW16574.1 as seed ortholog is 100%.

---

Group of orthologs #8263. Best score 270 bits

Score difference with first non-orthologous sequence - *A. fumigatus*:270 *A. fischeri*:270  
afum|EAL89260.1 100.00% afis|EAW16656.1 100.00%  
Bootstrap support for afum|EAL89260.1 as seed ortholog is 100%.  
Bootstrap support for afis|EAW16656.1 as seed ortholog is 100%.

---

Group of orthologs #8264. Best score 269 bits

Score difference with first non-orthologous sequence - *A. fumigatus*:269 *A. fischeri*:269  
afum|EAL84804.1 100.00% afis|EAW20825.1 100.00%  
Bootstrap support for afum|EAL84804.1 as seed ortholog is 100%.  
Bootstrap support for afis|EAW20825.1 as seed ortholog is 100%.

---

Group of orthologs #8265. Best score 269 bits

Score difference with first non-orthologous sequence - *A. fumigatus*:269 *A. fischeri*:269  
afum|EAL91324.1 100.00% afis|EAW17501.1 100.00%  
Bootstrap support for afum|EAL91324.1 as seed ortholog is 100%.  
Bootstrap support for afis|EAW17501.1 as seed ortholog is 100%.

---

Group of orthologs #8266. Best score 269 bits

Score difference with first non-orthologous sequence - *A. fumigatus*:269 *A. fischeri*:269  
afum|EAL93536.1 100.00% afis|EAW18800.1 100.00%  
Bootstrap support for afum|EAL93536.1 as seed ortholog is 100%.  
Bootstrap support for afis|EAW18800.1 as seed ortholog is 100%.

---

Group of orthologs #8267. Best score 269 bits

Score difference with first non-orthologous sequence - *A. fumigatus*:269 *A. fischeri*:223  
afum|EBA27306.1 100.00% afis|EAW23805.1 100.00%  
Bootstrap support for afum|EBA27306.1 as seed ortholog is 100%.  
Bootstrap support for afis|EAW23805.1 as seed ortholog is 100%.

---

Group of orthologs #8268. Best score 268 bits

Score difference with first non-orthologous sequence - *A. fumigatus*:268 *A. fischeri*:268  
afum|EAL85849.1 100.00% afis|EAW15472.1 100.00%  
Bootstrap support for afum|EAL85849.1 as seed ortholog is 100%.  
Bootstrap support for afis|EAW15472.1 as seed ortholog is 100%.

---

Group of orthologs #8269. Best score 268 bits

Score difference with first non-orthologous sequence - *A. fumigatus*:218 *A. fischeri*:20  
afum|EAL86481.2 100.00% afis|EAW16954.1 100.00%  
Bootstrap support for afum|EAL86481.2 as seed ortholog is 100%.  
Bootstrap support for afis|EAW16954.1 as seed ortholog is 77%.

---

Group of orthologs #8270. Best score 267 bits

Score difference with first non-orthologous sequence - *A. fumigatus*:267 *A. fischeri*:267  
afum|EAL84453.1 100.00% afis|EAW20607.1 100.00%  
Bootstrap support for afum|EAL84453.1 as seed ortholog is 100%.  
Bootstrap support for afis|EAW20607.1 as seed ortholog is 100%.

---

Group of orthologs #8271. Best score 267 bits

Score difference with first non-orthologous sequence - *A. fumigatus*:267 *A. fischeri*:267  
afum|EAL89557.1 100.00% afis|EAW24904.1 100.00%  
Bootstrap support for afum|EAL89557.1 as seed ortholog is 100%.  
Bootstrap support for afis|EAW24904.1 as seed ortholog is 100%.

---

Group of orthologs #8272. Best score 266 bits

Score difference with first non-orthologous sequence - *A. fumigatus*:266 *A. fischeri*:266  
afum|EAL88084.1 100.00% afis|EAW23387.1 100.00%

Bootstrap support for afum|EAL88084.1 as seed ortholog is 100%.  
Bootstrap support for afis|EAW23387.1 as seed ortholog is 100%.

---

Group of orthologs #8273. Best score 265 bits

Score difference with first non-orthologous sequence - *A. fumigatus*:265 *A. fischeri*:265

afum|EAL84742.1 100.00% afis|EAW20891.1 100.00%

Bootstrap support for afum|EAL84742.1 as seed ortholog is 100%.

Bootstrap support for afis|EAW20891.1 as seed ortholog is 100%.

---

Group of orthologs #8274. Best score 265 bits

Score difference with first non-orthologous sequence - *A. fumigatus*:265 *A. fischeri*:265

afum|EAL93785.1 100.00% afis|EAW19056.1 100.00%

Bootstrap support for afum|EAL93785.1 as seed ortholog is 100%.

Bootstrap support for afis|EAW19056.1 as seed ortholog is 100%.

---

Group of orthologs #8275. Best score 264 bits

Score difference with first non-orthologous sequence - *A. fumigatus*:264 *A. fischeri*:264

afum|EBA27473.1 100.00% afis|EAW21751.1 100.00%

Bootstrap support for afum|EBA27473.1 as seed ortholog is 100%.

Bootstrap support for afis|EAW21751.1 as seed ortholog is 100%.

---

Group of orthologs #8276. Best score 263 bits

Score difference with first non-orthologous sequence - *A. fumigatus*:263 *A. fischeri*:263

afum|EAL93865.1 100.00% afis|EAW19133.1 100.00%

Bootstrap support for afum|EAL93865.1 as seed ortholog is 100%.

Bootstrap support for afis|EAW19133.1 as seed ortholog is 100%.

---

Group of orthologs #8277. Best score 263 bits

Score difference with first non-orthologous sequence - *A. fumigatus*:263 *A. fischeri*:263

afum|EAL90149.1 100.00% afis|EAW25484.1 100.00%

Bootstrap support for afum|EAL90149.1 as seed ortholog is 100%.

Bootstrap support for afis|EAW25484.1 as seed ortholog is 100%.

---

Group of orthologs #8278. Best score 263 bits

Score difference with first non-orthologous sequence - *A. fumigatus*:263 *A. fischeri*:263

afum|EAL91986.1 100.00% afis|EAW24130.1 100.00%

Bootstrap support for afum|EAL91986.1 as seed ortholog is 100%.

Bootstrap support for afis|EAW24130.1 as seed ortholog is 100%.

---

Group of orthologs #8279. Best score 262 bits

Score difference with first non-orthologous sequence - *A. fumigatus*:131 *A. fischeri*:69

afum|EAL86286.2 100.00% afis|EAW17202.1 100.00%

Bootstrap support for afum|EAL86286.2 as seed ortholog is 99%.

Bootstrap support for afis|EAW17202.1 as seed ortholog is 95%.

---

Group of orthologs #8280. Best score 262 bits

Score difference with first non-orthologous sequence - *A. fumigatus*:262 *A. fischeri*:262

afum|EAL84499.1 100.00% afis|EAW20562.1 100.00%

Bootstrap support for afum|EAL84499.1 as seed ortholog is 100%.

Bootstrap support for afis|EAW20562.1 as seed ortholog is 100%.

---

Group of orthologs #8281. Best score 262 bits

Score difference with first non-orthologous sequence - *A. fumigatus*:262 *A. fischeri*:262

afum|EAL85483.1 100.00% afis|EAW20367.1 100.00%

Bootstrap support for afum|EAL85483.1 as seed ortholog is 100%.

Bootstrap support for afis|EAW20367.1 as seed ortholog is 100%.

---

Group of orthologs #8282. Best score 261 bits

Score difference with first non-orthologous sequence - *A. fumigatus*:261 *A. fischeri*:261  
afum|EAL85514.1 100.00% afis|EAW15837.1 100.00%  
Bootstrap support for afum|EAL85514.1 as seed ortholog is 100%.  
Bootstrap support for afis|EAW15837.1 as seed ortholog is 100%.

---

Group of orthologs #8283. Best score 261 bits

Score difference with first non-orthologous sequence - *A. fumigatus*:261 *A. fischeri*:261  
afum|EAL84943.1 100.00% afis|EAW19962.1 100.00%  
Bootstrap support for afum|EAL84943.1 as seed ortholog is 100%.  
Bootstrap support for afis|EAW19962.1 as seed ortholog is 100%.

---

Group of orthologs #8284. Best score 261 bits

Score difference with first non-orthologous sequence - *A. fumigatus*:261 *A. fischeri*:261  
afum|EAL88294.2 100.00% afis|EAW23189.1 100.00%  
Bootstrap support for afum|EAL88294.2 as seed ortholog is 100%.  
Bootstrap support for afis|EAW23189.1 as seed ortholog is 100%.

---

Group of orthologs #8285. Best score 261 bits

Score difference with first non-orthologous sequence - *A. fumigatus*:261 *A. fischeri*:261  
afum|EAL93550.2 100.00% afis|EAW18814.1 100.00%  
Bootstrap support for afum|EAL93550.2 as seed ortholog is 100%.  
Bootstrap support for afis|EAW18814.1 as seed ortholog is 100%.

---

Group of orthologs #8286. Best score 261 bits

Score difference with first non-orthologous sequence - *A. fumigatus*:261 *A. fischeri*:261  
afum|EAL92143.1 100.00% afis|EAW21119.1 100.00%  
Bootstrap support for afum|EAL92143.1 as seed ortholog is 100%.  
Bootstrap support for afis|EAW21119.1 as seed ortholog is 100%.

---

Group of orthologs #8287. Best score 260 bits

Score difference with first non-orthologous sequence - *A. fumigatus*:260 *A. fischeri*:260  
afum|EAL89356.1 100.00% afis|EAW19608.1 100.00%  
Bootstrap support for afum|EAL89356.1 as seed ortholog is 100%.  
Bootstrap support for afis|EAW19608.1 as seed ortholog is 100%.

---

Group of orthologs #8288. Best score 260 bits

Score difference with first non-orthologous sequence - *A. fumigatus*:260 *A. fischeri*:260  
afum|EAL91772.1 100.00% afis|EAW17962.1 100.00%  
Bootstrap support for afum|EAL91772.1 as seed ortholog is 100%.  
Bootstrap support for afis|EAW17962.1 as seed ortholog is 100%.

---

Group of orthologs #8289. Best score 260 bits

Score difference with first non-orthologous sequence - *A. fumigatus*:260 *A. fischeri*:260  
afum|EAL87341.1 100.00% afis|EAW23912.1 100.00%  
Bootstrap support for afum|EAL87341.1 as seed ortholog is 100%.  
Bootstrap support for afis|EAW23912.1 as seed ortholog is 100%.

---

Group of orthologs #8290. Best score 259 bits

Score difference with first non-orthologous sequence - *A. fumigatus*:259 *A. fischeri*:259  
afum|EAL91479.1 100.00% afis|EAW17665.1 100.00%  
Bootstrap support for afum|EAL91479.1 as seed ortholog is 100%.  
Bootstrap support for afis|EAW17665.1 as seed ortholog is 100%.

---

Group of orthologs #8291. Best score 259 bits

Score difference with first non-orthologous sequence - *A. fumigatus*:259 *A. fischeri*:259  
afum|EAL93184.2 100.00% afis|EAW18494.1 100.00%  
Bootstrap support for afum|EAL93184.2 as seed ortholog is 100%.  
Bootstrap support for afis|EAW18494.1 as seed ortholog is 100%.

---

Group of orthologs #8292. Best score 259 bits

Score difference with first non-orthologous sequence - *A. fumigatus*:259 *A. fischeri*:259  
afum|EAL88354.1 100.00% afis|EAW23126.1 100.00%  
Bootstrap support for afum|EAL88354.1 as seed ortholog is 100%.  
Bootstrap support for afis|EAW23126.1 as seed ortholog is 100%.

---

Group of orthologs #8293. Best score 259 bits

Score difference with first non-orthologous sequence - *A. fumigatus*:259 *A. fischeri*:259  
afum|EAL88150.1 100.00% afis|EAW23329.1 100.00%  
Bootstrap support for afum|EAL88150.1 as seed ortholog is 100%.  
Bootstrap support for afis|EAW23329.1 as seed ortholog is 100%.

---

Group of orthologs #8294. Best score 258 bits

Score difference with first non-orthologous sequence - *A. fumigatus*:258 *A. fischeri*:258  
afum|EAL93110.2 100.00% afis|EAW18430.1 100.00%  
Bootstrap support for afum|EAL93110.2 as seed ortholog is 100%.  
Bootstrap support for afis|EAW18430.1 as seed ortholog is 100%.

---

Group of orthologs #8295. Best score 258 bits

Score difference with first non-orthologous sequence - *A. fumigatus*:258 *A. fischeri*:258  
afum|EAL87401.1 100.00% afis|EAW23971.1 100.00%  
Bootstrap support for afum|EAL87401.1 as seed ortholog is 100%.  
Bootstrap support for afis|EAW23971.1 as seed ortholog is 100%.

---

Group of orthologs #8296. Best score 258 bits

Score difference with first non-orthologous sequence - *A. fumigatus*:258 *A. fischeri*:258  
afum|EAL93878.1 100.00% afis|EAW19147.1 100.00%  
Bootstrap support for afum|EAL93878.1 as seed ortholog is 100%.  
Bootstrap support for afis|EAW19147.1 as seed ortholog is 100%.

---

Group of orthologs #8297. Best score 258 bits

Score difference with first non-orthologous sequence - *A. fumigatus*:258 *A. fischeri*:258  
afum|EAL92326.1 100.00% afis|EAW21310.1 100.00%  
Bootstrap support for afum|EAL92326.1 as seed ortholog is 100%.  
Bootstrap support for afis|EAW21310.1 as seed ortholog is 100%.

---

Group of orthologs #8298. Best score 258 bits

Score difference with first non-orthologous sequence - *A. fumigatus*:258 *A. fischeri*:258  
afum|EAL92353.1 100.00% afis|EAW21335.1 100.00%  
Bootstrap support for afum|EAL92353.1 as seed ortholog is 100%.  
Bootstrap support for afis|EAW21335.1 as seed ortholog is 100%.

---

Group of orthologs #8299. Best score 257 bits

Score difference with first non-orthologous sequence - *A. fumigatus*:257 *A. fischeri*:257  
afum|EAL93305.1 100.00% afis|EAW18597.1 100.00%  
Bootstrap support for afum|EAL93305.1 as seed ortholog is 100%.  
Bootstrap support for afis|EAW18597.1 as seed ortholog is 100%.

---

Group of orthologs #8300. Best score 257 bits

Score difference with first non-orthologous sequence - *A. fumigatus*:257 *A. fischeri*:257  
afum|EAL92089.1 100.00% afis|EAW21053.1 100.00%



Bootstrap support for afum|EAL92089.1 as seed ortholog is 100%.  
Bootstrap support for afis|EAW21053.1 as seed ortholog is 100%.

---

Group of orthologs #8301. Best score 256 bits

Score difference with first non-orthologous sequence - *A. fumigatus*:256 *A. fischeri*:256

afum|EAL86319.2 100.00% afis|EAW16744.1 100.00%

Bootstrap support for afum|EAL86319.2 as seed ortholog is 100%.

Bootstrap support for afis|EAW16744.1 as seed ortholog is 100%.

---

Group of orthologs #8302. Best score 256 bits

Score difference with first non-orthologous sequence - *A. fumigatus*:256 *A. fischeri*:256

afum|EAL93562.1 100.00% afis|EAW18828.1 100.00%

Bootstrap support for afum|EAL93562.1 as seed ortholog is 100%.

Bootstrap support for afis|EAW18828.1 as seed ortholog is 100%.

---

Group of orthologs #8303. Best score 256 bits

Score difference with first non-orthologous sequence - *A. fumigatus*:256 *A. fischeri*:256

afum|EAL92420.1 100.00% afis|EAW21406.1 100.00%

Bootstrap support for afum|EAL92420.1 as seed ortholog is 100%.

Bootstrap support for afis|EAW21406.1 as seed ortholog is 100%.

---

Group of orthologs #8304. Best score 255 bits

Score difference with first non-orthologous sequence - *A. fumigatus*:255 *A. fischeri*:255

afum|EAL92701.1 100.00% afis|EAW21666.1 100.00%

Bootstrap support for afum|EAL92701.1 as seed ortholog is 100%.

Bootstrap support for afis|EAW21666.1 as seed ortholog is 100%.

---

Group of orthologs #8305. Best score 255 bits

Score difference with first non-orthologous sequence - *A. fumigatus*:255 *A. fischeri*:255

afum|EAL92928.1 100.00% afis|EAW24536.1 100.00%

Bootstrap support for afum|EAL92928.1 as seed ortholog is 100%.

Bootstrap support for afis|EAW24536.1 as seed ortholog is 100%.

---

Group of orthologs #8306. Best score 254 bits

Score difference with first non-orthologous sequence - *A. fumigatus*:254 *A. fischeri*:254

afum|EAL86328.1 100.00% afis|EAW16756.1 100.00%

Bootstrap support for afum|EAL86328.1 as seed ortholog is 100%.

Bootstrap support for afis|EAW16756.1 as seed ortholog is 100%.

---

Group of orthologs #8307. Best score 254 bits

Score difference with first non-orthologous sequence - *A. fumigatus*:254 *A. fischeri*:254

afum|EAL88394.1 100.00% afis|EAW23085.1 100.00%

Bootstrap support for afum|EAL88394.1 as seed ortholog is 100%.

Bootstrap support for afis|EAW23085.1 as seed ortholog is 100%.

---

Group of orthologs #8308. Best score 254 bits

Score difference with first non-orthologous sequence - *A. fumigatus*:254 *A. fischeri*:254

afum|EAL92739.1 100.00% afis|EAW21705.1 100.00%

Bootstrap support for afum|EAL92739.1 as seed ortholog is 100%.

Bootstrap support for afis|EAW21705.1 as seed ortholog is 100%.

---

Group of orthologs #8309. Best score 253 bits

Score difference with first non-orthologous sequence - *A. fumigatus*:253 *A. fischeri*:253

afum|EAL85745.1 100.00% afis|EAW15587.1 100.00%

Bootstrap support for afum|EAL85745.1 as seed ortholog is 100%.

Bootstrap support for afis|EAW15587.1 as seed ortholog is 100%.

---

Group of orthologs #8310. Best score 253 bits

Score difference with first non-orthologous sequence - *A. fumigatus*:253 *A. fischeri*:253

afum|EAL84956.1 100.00% afis|EAW19959.1 100.00%

Bootstrap support for afum|EAL84956.1 as seed ortholog is 100%.

Bootstrap support for afis|EAW19959.1 as seed ortholog is 100%.

---

Group of orthologs #8311. Best score 253 bits

Score difference with first non-orthologous sequence - *A. fumigatus*:253 *A. fischeri*:253

afum|EAL88903.1 100.00% afis|EAW16282.1 100.00%

Bootstrap support for afum|EAL88903.1 as seed ortholog is 100%.

Bootstrap support for afis|EAW16282.1 as seed ortholog is 100%.

---

Group of orthologs #8312. Best score 253 bits

Score difference with first non-orthologous sequence - *A. fumigatus*:253 *A. fischeri*:253

afum|EAL89585.1 100.00% afis|EAW24929.1 100.00%

Bootstrap support for afum|EAL89585.1 as seed ortholog is 100%.

Bootstrap support for afis|EAW24929.1 as seed ortholog is 100%.

---

Group of orthologs #8313. Best score 251 bits

Score difference with first non-orthologous sequence - *A. fumigatus*:251 *A. fischeri*:251

afum|EAL87819.1 100.00% afis|EAW16225.1 100.00%

Bootstrap support for afum|EAL87819.1 as seed ortholog is 100%.

Bootstrap support for afis|EAW16225.1 as seed ortholog is 100%.

---

Group of orthologs #8314. Best score 251 bits

Score difference with first non-orthologous sequence - *A. fumigatus*:251 *A. fischeri*:251

afum|EAL88880.1 100.00% afis|EAW16259.1 100.00%

Bootstrap support for afum|EAL88880.1 as seed ortholog is 100%.

Bootstrap support for afis|EAW16259.1 as seed ortholog is 100%.

---

Group of orthologs #8315. Best score 251 bits

Score difference with first non-orthologous sequence - *A. fumigatus*:251 *A. fischeri*:251

afum|EAL91763.1 100.00% afis|EAW17953.1 100.00%

Bootstrap support for afum|EAL91763.1 as seed ortholog is 100%.

Bootstrap support for afis|EAW17953.1 as seed ortholog is 100%.

---

Group of orthologs #8316. Best score 251 bits

Score difference with first non-orthologous sequence - *A. fumigatus*:251 *A. fischeri*:251

afum|EAL93216.1 100.00% afis|EAW18521.1 100.00%

Bootstrap support for afum|EAL93216.1 as seed ortholog is 100%.

Bootstrap support for afis|EAW18521.1 as seed ortholog is 100%.

---

Group of orthologs #8317. Best score 251 bits

Score difference with first non-orthologous sequence - *A. fumigatus*:251 *A. fischeri*:251

afum|EAL92208.1 100.00% afis|EAW21186.1 100.00%

Bootstrap support for afum|EAL92208.1 as seed ortholog is 100%.

Bootstrap support for afis|EAW21186.1 as seed ortholog is 100%.

---

Group of orthologs #8318. Best score 250 bits

Score difference with first non-orthologous sequence - *A. fumigatus*:250 *A. fischeri*:250

afum|EAL87367.1 100.00% afis|EAW23942.1 100.00%

Bootstrap support for afum|EAL87367.1 as seed ortholog is 100%.

Bootstrap support for afis|EAW23942.1 as seed ortholog is 100%.

---

Group of orthologs #8319. Best score 250 bits

Score difference with first non-orthologous sequence - *A. fumigatus*:250 *A. fischeri*:250  
afum|EAL90531.1 100.00% afis|EAW22661.1 100.00%  
Bootstrap support for afum|EAL90531.1 as seed ortholog is 100%.  
Bootstrap support for afis|EAW22661.1 as seed ortholog is 100%.

---

Group of orthologs #8320. Best score 250 bits

Score difference with first non-orthologous sequence - *A. fumigatus*:250 *A. fischeri*:250  
afum|EAL90447.1 100.00% afis|EAW22752.1 100.00%  
Bootstrap support for afum|EAL90447.1 as seed ortholog is 100%.  
Bootstrap support for afis|EAW22752.1 as seed ortholog is 100%.

---

Group of orthologs #8321. Best score 249 bits

Score difference with first non-orthologous sequence - *A. fumigatus*:249 *A. fischeri*:249  
afum|EAL86433.1 100.00% afis|EAW16896.1 100.00%  
Bootstrap support for afum|EAL86433.1 as seed ortholog is 100%.  
Bootstrap support for afis|EAW16896.1 as seed ortholog is 100%.

---

Group of orthologs #8322. Best score 248 bits

Score difference with first non-orthologous sequence - *A. fumigatus*:92 *A. fischeri*:248  
afum|EAL86767.1 100.00% afis|EAW20712.1 100.00%  
afum|EAL86746.1 52.43%  
afum|EAL90935.1 9.24%  
afum|EAL91121.1 8.93%  
Bootstrap support for afum|EAL86767.1 as seed ortholog is 97%.  
Bootstrap support for afis|EAW20712.1 as seed ortholog is 100%.

---

Group of orthologs #8323. Best score 248 bits

Score difference with first non-orthologous sequence - *A. fumigatus*:248 *A. fischeri*:248  
afum|EAL86845.1 100.00% afis|EAW19677.1 100.00%  
Bootstrap support for afum|EAL86845.1 as seed ortholog is 100%.  
Bootstrap support for afis|EAW19677.1 as seed ortholog is 100%.

---

Group of orthologs #8324. Best score 248 bits

Score difference with first non-orthologous sequence - *A. fumigatus*:248 *A. fischeri*:248  
afum|EAL91595.1 100.00% afis|EAW19747.1 100.00%  
Bootstrap support for afum|EAL91595.1 as seed ortholog is 100%.  
Bootstrap support for afis|EAW19747.1 as seed ortholog is 100%.

---

Group of orthologs #8325. Best score 248 bits

Score difference with first non-orthologous sequence - *A. fumigatus*:248 *A. fischeri*:248  
afum|EAL89499.1 100.00% afis|EAW24852.1 100.00%  
Bootstrap support for afum|EAL89499.1 as seed ortholog is 100%.  
Bootstrap support for afis|EAW24852.1 as seed ortholog is 100%.

---

Group of orthologs #8326. Best score 248 bits

Score difference with first non-orthologous sequence - *A. fumigatus*:248 *A. fischeri*:206  
afum|EAL89727.1 100.00% afis|EAW25059.1 100.00%  
Bootstrap support for afum|EAL89727.1 as seed ortholog is 100%.  
Bootstrap support for afis|EAW25059.1 as seed ortholog is 100%.

---

Group of orthologs #8327. Best score 248 bits

Score difference with first non-orthologous sequence - *A. fumigatus*:248 *A. fischeri*:248  
afum|EAL89956.1 100.00% afis|EAW25293.1 100.00%  
Bootstrap support for afum|EAL89956.1 as seed ortholog is 100%.  
Bootstrap support for afis|EAW25293.1 as seed ortholog is 100%.

---

Group of orthologs #8328. Best score 248 bits

Score difference with first non-orthologous sequence - *A. fumigatus*:248 *A. fischeri*:248

afum|EBA27177.1 100.00% afis|EAW25727.1 100.00%

Bootstrap support for afum|EBA27177.1 as seed ortholog is 100%.

Bootstrap support for afis|EAW25727.1 as seed ortholog is 100%.

---

Group of orthologs #8329. Best score 247 bits

Score difference with first non-orthologous sequence - *A. fumigatus*:247 *A. fischeri*:247

afum|EAL85394.1 100.00% afis|EAW20659.1 100.00%

Bootstrap support for afum|EAL85394.1 as seed ortholog is 100%.

Bootstrap support for afis|EAW20659.1 as seed ortholog is 100%.

---

Group of orthologs #8330. Best score 247 bits

Score difference with first non-orthologous sequence - *A. fumigatus*:247 *A. fischeri*:247

afum|EAL93136.1 100.00% afis|EAW18451.1 100.00%

Bootstrap support for afum|EAL93136.1 as seed ortholog is 100%.

Bootstrap support for afis|EAW18451.1 as seed ortholog is 100%.

---

Group of orthologs #8331. Best score 246 bits

Score difference with first non-orthologous sequence - *A. fumigatus*:246 *A. fischeri*:246

afum|EAL86856.1 100.00% afis|EAW19667.1 100.00%

Bootstrap support for afum|EAL86856.1 as seed ortholog is 100%.

Bootstrap support for afis|EAW19667.1 as seed ortholog is 100%.

---

Group of orthologs #8332. Best score 246 bits

Score difference with first non-orthologous sequence - *A. fumigatus*:14 *A. fischeri*:4

afum|EAL90710.1 100.00% afis|EAW22484.1 100.00%

Bootstrap support for afum|EAL90710.1 as seed ortholog is 100%.

Bootstrap support for afis|EAW22484.1 as seed ortholog is 75%.

---

Group of orthologs #8333. Best score 246 bits

Score difference with first non-orthologous sequence - *A. fumigatus*:246 *A. fischeri*:161

afum|EBA27187.1 100.00% afis|EAW20549.1 100.00%

Bootstrap support for afum|EBA27187.1 as seed ortholog is 100%.

Bootstrap support for afis|EAW20549.1 as seed ortholog is 100%.

---

Group of orthologs #8334. Best score 245 bits

Score difference with first non-orthologous sequence - *A. fumigatus*:245 *A. fischeri*:245

afum|EAL86209.1 100.00% afis|EAW24545.1 100.00%

Bootstrap support for afum|EAL86209.1 as seed ortholog is 100%.

Bootstrap support for afis|EAW24545.1 as seed ortholog is 100%.

---

Group of orthologs #8335. Best score 245 bits

Score difference with first non-orthologous sequence - *A. fumigatus*:245 *A. fischeri*:245

afum|EAL93569.1 100.00% afis|EAW18833.1 100.00%

Bootstrap support for afum|EAL93569.1 as seed ortholog is 100%.

Bootstrap support for afis|EAW18833.1 as seed ortholog is 100%.

---

Group of orthologs #8336. Best score 245 bits

Score difference with first non-orthologous sequence - *A. fumigatus*:245 *A. fischeri*:245

afum|EAL93594.1 100.00% afis|EAW18862.1 100.00%

Bootstrap support for afum|EAL93594.1 as seed ortholog is 100%.

Bootstrap support for afis|EAW18862.1 as seed ortholog is 100%.

---

Group of orthologs #8337. Best score 245 bits

Score difference with first non-orthologous sequence - *A. fumigatus*:245 *A. fischeri*:245

|                 |         |                 |         |
|-----------------|---------|-----------------|---------|
| afum EAL92564.1 | 100.00% | afis EAW21544.1 | 100.00% |
|-----------------|---------|-----------------|---------|

Bootstrap support for afum|EAL92564.1 as seed ortholog is 100%.

Bootstrap support for afis|EAW21544.1 as seed ortholog is 100%.

---

Group of orthologs #8338. Best score 244 bits

Score difference with first non-orthologous sequence - *A. fumigatus*:244 *A. fischeri*:244

|                 |         |                 |         |
|-----------------|---------|-----------------|---------|
| afum EAL88490.1 | 100.00% | afis EAW15854.1 | 100.00% |
|-----------------|---------|-----------------|---------|

Bootstrap support for afum|EAL88490.1 as seed ortholog is 100%.

Bootstrap support for afis|EAW15854.1 as seed ortholog is 100%.

---

Group of orthologs #8339. Best score 244 bits

Score difference with first non-orthologous sequence - *A. fumigatus*:244 *A. fischeri*:180

|                 |         |                 |         |
|-----------------|---------|-----------------|---------|
| afum EAL86190.1 | 100.00% | afis EAW24526.1 | 100.00% |
|-----------------|---------|-----------------|---------|

Bootstrap support for afum|EAL86190.1 as seed ortholog is 100%.

Bootstrap support for afis|EAW24526.1 as seed ortholog is 100%.

---

Group of orthologs #8340. Best score 244 bits

Score difference with first non-orthologous sequence - *A. fumigatus*:244 *A. fischeri*:244

|                 |         |                 |         |
|-----------------|---------|-----------------|---------|
| afum EAL90481.1 | 100.00% | afis EAW22713.1 | 100.00% |
|-----------------|---------|-----------------|---------|

Bootstrap support for afum|EAL90481.1 as seed ortholog is 100%.

Bootstrap support for afis|EAW22713.1 as seed ortholog is 100%.

---

Group of orthologs #8341. Best score 244 bits

Score difference with first non-orthologous sequence - *A. fumigatus*:244 *A. fischeri*:244

|                 |         |                 |         |
|-----------------|---------|-----------------|---------|
| afum EAL92521.1 | 100.00% | afis EAW21502.1 | 100.00% |
|-----------------|---------|-----------------|---------|

Bootstrap support for afum|EAL92521.1 as seed ortholog is 100%.

Bootstrap support for afis|EAW21502.1 as seed ortholog is 100%.

---

Group of orthologs #8342. Best score 242 bits

Score difference with first non-orthologous sequence - *A. fumigatus*:242 *A. fischeri*:242

|                 |         |                 |         |
|-----------------|---------|-----------------|---------|
| afum EAL92121.1 | 100.00% | afis EAW21098.1 | 100.00% |
|-----------------|---------|-----------------|---------|

Bootstrap support for afum|EAL92121.1 as seed ortholog is 100%.

Bootstrap support for afis|EAW21098.1 as seed ortholog is 100%.

---

Group of orthologs #8343. Best score 242 bits

Score difference with first non-orthologous sequence - *A. fumigatus*:242 *A. fischeri*:242

|                 |         |                 |         |
|-----------------|---------|-----------------|---------|
| afum EAL92014.2 | 100.00% | afis EAW24158.1 | 100.00% |
|-----------------|---------|-----------------|---------|

Bootstrap support for afum|EAL92014.2 as seed ortholog is 100%.

Bootstrap support for afis|EAW24158.1 as seed ortholog is 100%.

---

Group of orthologs #8344. Best score 241 bits

Score difference with first non-orthologous sequence - *A. fumigatus*:241 *A. fischeri*:241

|                 |         |                 |         |
|-----------------|---------|-----------------|---------|
| afum EAL89132.1 | 100.00% | afis EAW16535.1 | 100.00% |
|-----------------|---------|-----------------|---------|

Bootstrap support for afum|EAL89132.1 as seed ortholog is 100%.

Bootstrap support for afis|EAW16535.1 as seed ortholog is 100%.

---

Group of orthologs #8345. Best score 241 bits

Score difference with first non-orthologous sequence - *A. fumigatus*:241 *A. fischeri*:241

|                 |         |                 |         |
|-----------------|---------|-----------------|---------|
| afum EAL90761.1 | 100.00% | afis EAW22430.1 | 100.00% |
|-----------------|---------|-----------------|---------|

Bootstrap support for afum|EAL90761.1 as seed ortholog is 100%.

Bootstrap support for afis|EAW22430.1 as seed ortholog is 100%.

---

Group of orthologs #8346. Best score 240 bits

Score difference with first non-orthologous sequence - *A. fumigatus*:240 *A. fischeri*:240

|                 |         |                 |         |
|-----------------|---------|-----------------|---------|
| afum EAL85684.1 | 100.00% | afis EAW15664.1 | 100.00% |
|-----------------|---------|-----------------|---------|

Bootstrap support for afum|EAL85684.1 as seed ortholog is 100%.

Bootstrap support for afis|EAW15664.1 as seed ortholog is 100%.

---

Group of orthologs #8347. Best score 240 bits

Score difference with first non-orthologous sequence - *A. fumigatus*:240 *A. fischeri*:240

afum|EAL85698.2 100.00% afis|EAW15652.1 100.00%

Bootstrap support for afum|EAL85698.2 as seed ortholog is 100%.

Bootstrap support for afis|EAW15652.1 as seed ortholog is 100%.

---

Group of orthologs #8348. Best score 240 bits

Score difference with first non-orthologous sequence - *A. fumigatus*:240 *A. fischeri*:240

afum|EAL89061.1 100.00% afis|EAW16465.1 100.00%

Bootstrap support for afum|EAL89061.1 as seed ortholog is 100%.

Bootstrap support for afis|EAW16465.1 as seed ortholog is 100%.

---

Group of orthologs #8349. Best score 240 bits

Score difference with first non-orthologous sequence - *A. fumigatus*:240 *A. fischeri*:240

afum|EAL91421.1 100.00% afis|EAW17608.1 100.00%

Bootstrap support for afum|EAL91421.1 as seed ortholog is 100%.

Bootstrap support for afis|EAW17608.1 as seed ortholog is 100%.

---

Group of orthologs #8350. Best score 239 bits

Score difference with first non-orthologous sequence - *A. fumigatus*:239 *A. fischeri*:239

afum|EAL85401.1 100.00% afis|EAW21807.1 100.00%

afum|EAL86716.1 14.44% afis|EAW20671.1 14.29%

afis|EAW18099.1 11.56%

Bootstrap support for afum|EAL85401.1 as seed ortholog is 100%.

Bootstrap support for afis|EAW21807.1 as seed ortholog is 100%.

---

Group of orthologs #8351. Best score 239 bits

Score difference with first non-orthologous sequence - *A. fumigatus*:175 *A. fischeri*:239

afum|EAL87692.1 100.00% afis|EAW18326.1 100.00%

Bootstrap support for afum|EAL87692.1 as seed ortholog is 100%.

Bootstrap support for afis|EAW18326.1 as seed ortholog is 100%.

---

Group of orthologs #8352. Best score 239 bits

Score difference with first non-orthologous sequence - *A. fumigatus*:239 *A. fischeri*:239

afum|EAL87396.1 100.00% afis|EAW23966.1 100.00%

Bootstrap support for afum|EAL87396.1 as seed ortholog is 100%.

Bootstrap support for afis|EAW23966.1 as seed ortholog is 100%.

---

Group of orthologs #8353. Best score 239 bits

Score difference with first non-orthologous sequence - *A. fumigatus*:239 *A. fischeri*:239

afum|EBA27459.1 100.00% afis|EAW21339.1 100.00%

Bootstrap support for afum|EBA27459.1 as seed ortholog is 100%.

Bootstrap support for afis|EAW21339.1 as seed ortholog is 100%.

---

Group of orthologs #8354. Best score 239 bits

Score difference with first non-orthologous sequence - *A. fumigatus*:239 *A. fischeri*:239

afum|EAL91941.1 100.00% afis|EAW24086.1 100.00%

Bootstrap support for afum|EAL91941.1 as seed ortholog is 100%.

Bootstrap support for afis|EAW24086.1 as seed ortholog is 100%.

---

Group of orthologs #8355. Best score 238 bits

Score difference with first non-orthologous sequence - *A. fumigatus*:238 *A. fischeri*:238

afum|EAL87642.1 100.00% afis|EAW18276.1 100.00%

Bootstrap support for afum|EAL87642.1 as seed ortholog is 100%.

Bootstrap support for afis|EAW18276.1 as seed ortholog is 100%.

---

Group of orthologs #8356. Best score 238 bits

Score difference with first non-orthologous sequence - *A. fumigatus*:238 *A. fischeri*:238

afum|EAL92583.1 100.00% afis|EAW21564.1 100.00%

Bootstrap support for afum|EAL92583.1 as seed ortholog is 100%.

Bootstrap support for afis|EAW21564.1 as seed ortholog is 100%.

---

Group of orthologs #8357. Best score 238 bits

Score difference with first non-orthologous sequence - *A. fumigatus*:238 *A. fischeri*:123

afum|EBA27260.1 100.00% afis|EAW24512.1 100.00%

Bootstrap support for afum|EBA27260.1 as seed ortholog is 100%.

Bootstrap support for afis|EAW24512.1 as seed ortholog is 100%.

---

Group of orthologs #8358. Best score 237 bits

Score difference with first non-orthologous sequence - *A. fumigatus*:237 *A. fischeri*:237

afum|EAL84380.1 100.00% afis|EAW25707.1 100.00%

Bootstrap support for afum|EAL84380.1 as seed ortholog is 100%.

Bootstrap support for afis|EAW25707.1 as seed ortholog is 100%.

---

Group of orthologs #8359. Best score 237 bits

Score difference with first non-orthologous sequence - *A. fumigatus*:237 *A. fischeri*:237

afum|EAL88321.1 100.00% afis|EAW23162.1 100.00%

Bootstrap support for afum|EAL88321.1 as seed ortholog is 100%.

Bootstrap support for afis|EAW23162.1 as seed ortholog is 100%.

---

Group of orthologs #8360. Best score 236 bits

Score difference with first non-orthologous sequence - *A. fumigatus*:236 *A. fischeri*:236

afum|EAL88196.2 100.00% afis|EAW23283.1 100.00%

Bootstrap support for afum|EAL88196.2 as seed ortholog is 100%.

Bootstrap support for afis|EAW23283.1 as seed ortholog is 100%.

---

Group of orthologs #8361. Best score 235 bits

Score difference with first non-orthologous sequence - *A. fumigatus*:235 *A. fischeri*:235

afum|EAL85096.2 100.00% afis|EAW19794.1 100.00%

Bootstrap support for afum|EAL85096.2 as seed ortholog is 100%.

Bootstrap support for afis|EAW19794.1 as seed ortholog is 100%.

---

Group of orthologs #8362. Best score 235 bits

Score difference with first non-orthologous sequence - *A. fumigatus*:235 *A. fischeri*:235

afum|EAL84449.1 100.00% afis|EAW20612.1 100.00%

Bootstrap support for afum|EAL84449.1 as seed ortholog is 100%.

Bootstrap support for afis|EAW20612.1 as seed ortholog is 100%.

---

Group of orthologs #8363. Best score 235 bits

Score difference with first non-orthologous sequence - *A. fumigatus*:235 *A. fischeri*:235

afum|EAL92735.1 100.00% afis|EAW21701.1 100.00%

Bootstrap support for afum|EAL92735.1 as seed ortholog is 100%.

Bootstrap support for afis|EAW21701.1 as seed ortholog is 100%.

---

Group of orthologs #8364. Best score 234 bits

Score difference with first non-orthologous sequence - *A. fumigatus*:234 *A. fischeri*:234

afum|EAL86414.1 100.00% afis|EAW16877.1 100.00%

Bootstrap support for afum|EAL86414.1 as seed ortholog is 100%.

Bootstrap support for afis|EAW16877.1 as seed ortholog is 100%.

---

Group of orthologs #8365. Best score 234 bits

Score difference with first non-orthologous sequence - *A. fumigatus*:234 *A. fischeri*:234

afum|EAL92892.1 100.00% afis|EAW21878.1 100.00%

Bootstrap support for afum|EAL92892.1 as seed ortholog is 100%.

Bootstrap support for afis|EAW21878.1 as seed ortholog is 100%.

---

Group of orthologs #8366. Best score 233 bits

Score difference with first non-orthologous sequence - *A. fumigatus*:233 *A. fischeri*:233

afum|EBA27364.1 100.00% afis|EAW16321.1 100.00%

Bootstrap support for afum|EBA27364.1 as seed ortholog is 100%.

Bootstrap support for afis|EAW16321.1 as seed ortholog is 100%.

---

Group of orthologs #8367. Best score 233 bits

Score difference with first non-orthologous sequence - *A. fumigatus*:233 *A. fischeri*:233

afum|EAL86222.1 100.00% afis|EAW24561.1 100.00%

Bootstrap support for afum|EAL86222.1 as seed ortholog is 100%.

Bootstrap support for afis|EAW24561.1 as seed ortholog is 100%.

---

Group of orthologs #8368. Best score 233 bits

Score difference with first non-orthologous sequence - *A. fumigatus*:233 *A. fischeri*:233

afum|EAL90495.1 100.00% afis|EAW22697.1 100.00%

Bootstrap support for afum|EAL90495.1 as seed ortholog is 100%.

Bootstrap support for afis|EAW22697.1 as seed ortholog is 100%.

---

Group of orthologs #8369. Best score 233 bits

Score difference with first non-orthologous sequence - *A. fumigatus*:233 *A. fischeri*:233

afum|EAL92195.1 100.00% afis|EAW21175.1 100.00%

Bootstrap support for afum|EAL92195.1 as seed ortholog is 100%.

Bootstrap support for afis|EAW21175.1 as seed ortholog is 100%.

---

Group of orthologs #8370. Best score 232 bits

Score difference with first non-orthologous sequence - *A. fumigatus*:232 *A. fischeri*:232

afum|EAL84452.1 100.00% afis|EAW20608.1 100.00%

Bootstrap support for afum|EAL84452.1 as seed ortholog is 100%.

Bootstrap support for afis|EAW20608.1 as seed ortholog is 100%.

---

Group of orthologs #8371. Best score 232 bits

Score difference with first non-orthologous sequence - *A. fumigatus*:232 *A. fischeri*:232

afum|EAL88157.1 100.00% afis|EAW23319.1 100.00%

Bootstrap support for afum|EAL88157.1 as seed ortholog is 100%.

Bootstrap support for afis|EAW23319.1 as seed ortholog is 100%.

---

Group of orthologs #8372. Best score 232 bits

Score difference with first non-orthologous sequence - *A. fumigatus*:232 *A. fischeri*:232

afum|EBA27262.1 100.00% afis|EAW24541.1 100.00%

Bootstrap support for afum|EBA27262.1 as seed ortholog is 100%.

Bootstrap support for afis|EAW24541.1 as seed ortholog is 100%.

---

Group of orthologs #8373. Best score 231 bits

Score difference with first non-orthologous sequence - *A. fumigatus*:231 *A. fischeri*:231

afum|EBA27292.1 100.00% afis|EAW19628.1 100.00%

Bootstrap support for afum|EBA27292.1 as seed ortholog is 100%.

Bootstrap support for afis|EAW19628.1 as seed ortholog is 100%.

---

Group of orthologs #8374. Best score 230 bits

Score difference with first non-orthologous sequence - *A. fumigatus*:230 *A. fischeri*:230



|                 |         |                 |         |
|-----------------|---------|-----------------|---------|
| afum EAL88920.1 | 100.00% | afis EAW16298.1 | 100.00% |
|-----------------|---------|-----------------|---------|

Bootstrap support for afum|EAL88920.1 as seed ortholog is 100%.

Bootstrap support for afis|EAW16298.1 as seed ortholog is 100%.

---

Group of orthologs #8375. Best score 228 bits

Score difference with first non-orthologous sequence - *A. fumigatus*:228 *A. fischeri*:228

|                 |         |                 |         |
|-----------------|---------|-----------------|---------|
| afum EAL85742.1 | 100.00% | afis EAW15590.1 | 100.00% |
|-----------------|---------|-----------------|---------|

Bootstrap support for afum|EAL85742.1 as seed ortholog is 100%.

Bootstrap support for afis|EAW15590.1 as seed ortholog is 100%.

---

Group of orthologs #8376. Best score 228 bits

Score difference with first non-orthologous sequence - *A. fumigatus*:228 *A. fischeri*:228

|                 |         |                 |         |
|-----------------|---------|-----------------|---------|
| afum EBA27482.1 | 100.00% | afis EAW21914.1 | 100.00% |
|-----------------|---------|-----------------|---------|

Bootstrap support for afum|EBA27482.1 as seed ortholog is 100%.

Bootstrap support for afis|EAW21914.1 as seed ortholog is 100%.

---

Group of orthologs #8377. Best score 227 bits

Score difference with first non-orthologous sequence - *A. fumigatus*:227 *A. fischeri*:227

|                 |         |                 |         |
|-----------------|---------|-----------------|---------|
| afum EAL93090.1 | 100.00% | afis EAW18410.1 | 100.00% |
|-----------------|---------|-----------------|---------|

Bootstrap support for afum|EAL93090.1 as seed ortholog is 100%.

Bootstrap support for afis|EAW18410.1 as seed ortholog is 100%.

---

Group of orthologs #8378. Best score 226 bits

Score difference with first non-orthologous sequence - *A. fumigatus*:226 *A. fischeri*:226

|                 |         |                 |         |
|-----------------|---------|-----------------|---------|
| afum EAL86874.1 | 100.00% | afis EAW19648.1 | 100.00% |
|-----------------|---------|-----------------|---------|

Bootstrap support for afum|EAL86874.1 as seed ortholog is 100%.

Bootstrap support for afis|EAW19648.1 as seed ortholog is 100%.

---

Group of orthologs #8379. Best score 225 bits

Score difference with first non-orthologous sequence - *A. fumigatus*:225 *A. fischeri*:225

|                 |         |                 |         |
|-----------------|---------|-----------------|---------|
| afum EAL88232.2 | 100.00% | afis EAW23249.1 | 100.00% |
|-----------------|---------|-----------------|---------|

Bootstrap support for afum|EAL88232.2 as seed ortholog is 100%.

Bootstrap support for afis|EAW23249.1 as seed ortholog is 100%.

---

Group of orthologs #8380. Best score 225 bits

Score difference with first non-orthologous sequence - *A. fumigatus*:225 *A. fischeri*:225

|                 |         |                 |         |
|-----------------|---------|-----------------|---------|
| afum EAL92763.1 | 100.00% | afis EAW21730.1 | 100.00% |
|-----------------|---------|-----------------|---------|

Bootstrap support for afum|EAL92763.1 as seed ortholog is 100%.

Bootstrap support for afis|EAW21730.1 as seed ortholog is 100%.

---

Group of orthologs #8381. Best score 224 bits

Score difference with first non-orthologous sequence - *A. fumigatus*:160 *A. fischeri*:224

|                 |         |                 |         |
|-----------------|---------|-----------------|---------|
| afum EAL91154.1 | 100.00% | afis EAW17318.1 | 100.00% |
|-----------------|---------|-----------------|---------|

Bootstrap support for afum|EAL91154.1 as seed ortholog is 100%.

Bootstrap support for afis|EAW17318.1 as seed ortholog is 100%.

---

Group of orthologs #8382. Best score 223 bits

Score difference with first non-orthologous sequence - *A. fumigatus*:223 *A. fischeri*:223

|                 |         |                 |         |
|-----------------|---------|-----------------|---------|
| afum EAL85890.1 | 100.00% | afis EAW24221.1 | 100.00% |
|-----------------|---------|-----------------|---------|

Bootstrap support for afum|EAL85890.1 as seed ortholog is 100%.

Bootstrap support for afis|EAW24221.1 as seed ortholog is 100%.

---

Group of orthologs #8383. Best score 223 bits

Score difference with first non-orthologous sequence - *A. fumigatus*:223 *A. fischeri*:223

|                 |         |                 |         |
|-----------------|---------|-----------------|---------|
| afum EAL93917.1 | 100.00% | afis EAW19186.1 | 100.00% |
|-----------------|---------|-----------------|---------|

Bootstrap support for afum|EAL93917.1 as seed ortholog is 100%.

Bootstrap support for afis|EAW19186.1 as seed ortholog is 100%.

---

Group of orthologs #8384. Best score 223 bits

Score difference with first non-orthologous sequence - *A. fumigatus*:10 *A. fischeri*:223

afum|EAL90453.1 100.00% afis|EAW22742.1 100.00%

Bootstrap support for afum|EAL90453.1 as seed ortholog is 76%.

Bootstrap support for afis|EAW22742.1 as seed ortholog is 100%.

---

Group of orthologs #8385. Best score 223 bits

Score difference with first non-orthologous sequence - *A. fumigatus*:223 *A. fischeri*:223

afum|EBA27412.1 100.00% afis|EAW22543.1 100.00%

Bootstrap support for afum|EBA27412.1 as seed ortholog is 100%.

Bootstrap support for afis|EAW22543.1 as seed ortholog is 100%.

---

Group of orthologs #8386. Best score 222 bits

Score difference with first non-orthologous sequence - *A. fumigatus*:222 *A. fischeri*:222

afum|EAL86507.1 100.00% afis|EAW16980.1 100.00%

Bootstrap support for afum|EAL86507.1 as seed ortholog is 100%.

Bootstrap support for afis|EAW16980.1 as seed ortholog is 100%.

---

Group of orthologs #8387. Best score 222 bits

Score difference with first non-orthologous sequence - *A. fumigatus*:222 *A. fischeri*:222

afum|EAL90541.1 100.00% afis|EAW22651.1 100.00%

Bootstrap support for afum|EAL90541.1 as seed ortholog is 100%.

Bootstrap support for afis|EAW22651.1 as seed ortholog is 100%.

---

Group of orthologs #8388. Best score 220 bits

Score difference with first non-orthologous sequence - *A. fumigatus*:220 *A. fischeri*:220

afum|EAL85059.1 100.00% afis|EAW19833.1 100.00%

Bootstrap support for afum|EAL85059.1 as seed ortholog is 100%.

Bootstrap support for afis|EAW19833.1 as seed ortholog is 100%.

---

Group of orthologs #8389. Best score 220 bits

Score difference with first non-orthologous sequence - *A. fumigatus*:220 *A. fischeri*:220

afum|EAL85353.1 100.00% afis|EAW20236.1 100.00%

Bootstrap support for afum|EAL85353.1 as seed ortholog is 100%.

Bootstrap support for afis|EAW20236.1 as seed ortholog is 100%.

---

Group of orthologs #8390. Best score 220 bits

Score difference with first non-orthologous sequence - *A. fumigatus*:220 *A. fischeri*:220

afum|EAL87203.1 100.00% afis|EAW23769.1 100.00%

Bootstrap support for afum|EAL87203.1 as seed ortholog is 100%.

Bootstrap support for afis|EAW23769.1 as seed ortholog is 100%.

---

Group of orthologs #8391. Best score 220 bits

Score difference with first non-orthologous sequence - *A. fumigatus*:220 *A. fischeri*:174

afum|EAL87941.1 100.00% afis|EAW23524.1 100.00%

Bootstrap support for afum|EAL87941.1 as seed ortholog is 100%.

Bootstrap support for afis|EAW23524.1 as seed ortholog is 100%.

---

Group of orthologs #8392. Best score 220 bits

Score difference with first non-orthologous sequence - *A. fumigatus*:220 *A. fischeri*:220

afum|EAL90412.1 100.00% afis|EAW22787.1 100.00%

Bootstrap support for afum|EAL90412.1 as seed ortholog is 100%.

Bootstrap support for afis|EAW22787.1 as seed ortholog is 100%.

---

Group of orthologs #8393. Best score 220 bits

Score difference with first non-orthologous sequence - *A. fumigatus*:220 *A. fischeri*:220

afum|EBA27261.1 100.00% afis|EAW24513.1 100.00%

Bootstrap support for afum|EBA27261.1 as seed ortholog is 100%.

Bootstrap support for afis|EAW24513.1 as seed ortholog is 100%.

---

Group of orthologs #8394. Best score 219 bits

Score difference with first non-orthologous sequence - *A. fumigatus*:219 *A. fischeri*:219

afum|EAL89089.1 100.00% afis|EAW16495.1 100.00%

Bootstrap support for afum|EAL89089.1 as seed ortholog is 100%.

Bootstrap support for afis|EAW16495.1 as seed ortholog is 100%.

---

Group of orthologs #8395. Best score 219 bits

Score difference with first non-orthologous sequence - *A. fumigatus*:219 *A. fischeri*:9

afum|EAL88871.1 100.00% afis|EAW21127.1 100.00%

Bootstrap support for afum|EAL88871.1 as seed ortholog is 100%.

Bootstrap support for afis|EAW21127.1 as seed ortholog is 56%. Alternative seed ortholog is afis|EAW21125.1 (9 bits away from this cluster)

---

Group of orthologs #8396. Best score 218 bits

Score difference with first non-orthologous sequence - *A. fumigatus*:218 *A. fischeri*:218

afum|EAL91858.1 100.00% afis|EAW18046.1 100.00%

Bootstrap support for afum|EAL91858.1 as seed ortholog is 100%.

Bootstrap support for afis|EAW18046.1 as seed ortholog is 100%.

---

Group of orthologs #8397. Best score 218 bits

Score difference with first non-orthologous sequence - *A. fumigatus*:218 *A. fischeri*:218

afum|EAL89740.1 100.00% afis|EAW25071.1 100.00%

Bootstrap support for afum|EAL89740.1 as seed ortholog is 100%.

Bootstrap support for afis|EAW25071.1 as seed ortholog is 100%.

---

Group of orthologs #8398. Best score 217 bits

Score difference with first non-orthologous sequence - *A. fumigatus*:217 *A. fischeri*:217

afum|EAL88484.1 100.00% afis|EAW15848.1 100.00%

Bootstrap support for afum|EAL88484.1 as seed ortholog is 100%.

Bootstrap support for afis|EAW15848.1 as seed ortholog is 100%.

---

Group of orthologs #8399. Best score 217 bits

Score difference with first non-orthologous sequence - *A. fumigatus*:217 *A. fischeri*:217

afum|EAL87655.1 100.00% afis|EAW18290.1 100.00%

Bootstrap support for afum|EAL87655.1 as seed ortholog is 100%.

Bootstrap support for afis|EAW18290.1 as seed ortholog is 100%.

---

Group of orthologs #8400. Best score 217 bits

Score difference with first non-orthologous sequence - *A. fumigatus*:217 *A. fischeri*:217

afum|EBA27241.1 100.00% afis|EAW15564.1 100.00%

Bootstrap support for afum|EBA27241.1 as seed ortholog is 100%.

Bootstrap support for afis|EAW15564.1 as seed ortholog is 100%.

---

Group of orthologs #8401. Best score 217 bits

Score difference with first non-orthologous sequence - *A. fumigatus*:217 *A. fischeri*:217

afum|EAL93149.1 100.00% afis|EAW18463.1 100.00%

Bootstrap support for afum|EAL93149.1 as seed ortholog is 100%.

Bootstrap support for afis|EAW18463.1 as seed ortholog is 100%.

---

Group of orthologs #8402. Best score 217 bits

Score difference with first non-orthologous sequence - *A. fumigatus*:217 *A. fischeri*:217  
afum|EAL87454.1 100.00% afis|EAW24023.1 100.00%  
Bootstrap support for afum|EAL87454.1 as seed ortholog is 100%.  
Bootstrap support for afis|EAW24023.1 as seed ortholog is 100%.

---

Group of orthologs #8403. Best score 215 bits

Score difference with first non-orthologous sequence - *A. fumigatus*:215 *A. fischeri*:91  
afum|EAL85363.2 100.00% afis|EAW20245.1 100.00%  
Bootstrap support for afum|EAL85363.2 as seed ortholog is 100%.  
Bootstrap support for afis|EAW20245.1 as seed ortholog is 100%.

---

Group of orthologs #8404. Best score 214 bits

Score difference with first non-orthologous sequence - *A. fumigatus*:214 *A. fischeri*:77  
afum|EAL84825.1 100.00% afis|EAW20803.1 100.00%  
Bootstrap support for afum|EAL84825.1 as seed ortholog is 100%.  
Bootstrap support for afis|EAW20803.1 as seed ortholog is 99%.

---

Group of orthologs #8405. Best score 213 bits

Score difference with first non-orthologous sequence - *A. fumigatus*:213 *A. fischeri*:213  
afum|EAL86740.1 100.00% afis|EAW16818.1 100.00%  
Bootstrap support for afum|EAL86740.1 as seed ortholog is 100%.  
Bootstrap support for afis|EAW16818.1 as seed ortholog is 100%.

---

Group of orthologs #8406. Best score 213 bits

Score difference with first non-orthologous sequence - *A. fumigatus*:213 *A. fischeri*:213  
afum|EAL88076.1 100.00% afis|EAW23394.1 100.00%  
Bootstrap support for afum|EAL88076.1 as seed ortholog is 100%.  
Bootstrap support for afis|EAW23394.1 as seed ortholog is 100%.

---

Group of orthologs #8407. Best score 213 bits

Score difference with first non-orthologous sequence - *A. fumigatus*:213 *A. fischeri*:213  
afum|EAL93818.1 100.00% afis|EAW19088.1 100.00%  
Bootstrap support for afum|EAL93818.1 as seed ortholog is 100%.  
Bootstrap support for afis|EAW19088.1 as seed ortholog is 100%.

---

Group of orthologs #8408. Best score 213 bits

Score difference with first non-orthologous sequence - *A. fumigatus*:213 *A. fischeri*:213  
afum|EAL90980.2 100.00% afis|EAW22214.1 100.00%  
Bootstrap support for afum|EAL90980.2 as seed ortholog is 100%.  
Bootstrap support for afis|EAW22214.1 as seed ortholog is 100%.

---

Group of orthologs #8409. Best score 213 bits

Score difference with first non-orthologous sequence - *A. fumigatus*:213 *A. fischeri*:213  
afum|EAL90023.1 100.00% afis|EAW25361.1 100.00%  
Bootstrap support for afum|EAL90023.1 as seed ortholog is 100%.  
Bootstrap support for afis|EAW25361.1 as seed ortholog is 100%.

---

Group of orthologs #8410. Best score 212 bits

Score difference with first non-orthologous sequence - *A. fumigatus*:212 *A. fischeri*:212  
afum|EAL91193.1 100.00% afis|EAW17350.1 100.00%  
Bootstrap support for afum|EAL91193.1 as seed ortholog is 100%.  
Bootstrap support for afis|EAW17350.1 as seed ortholog is 100%.

---

Group of orthologs #8411. Best score 212 bits

Score difference with first non-orthologous sequence - *A. fumigatus*:212 *A. fischeri*:118  
afum|EAL91905.2 100.00% afis|EAW18097.1 100.00%

Bootstrap support for afum|EAL91905.2 as seed ortholog is 100%.  
Bootstrap support for afis|EAW18097.1 as seed ortholog is 100%.

---

Group of orthologs #8412. Best score 212 bits

Score difference with first non-orthologous sequence - *A. fumigatus*:212 *A. fischeri*:212

|                 |         |                 |         |
|-----------------|---------|-----------------|---------|
| afum EBA27322.1 | 100.00% | afis EAW18289.1 | 100.00% |
|-----------------|---------|-----------------|---------|

Bootstrap support for afum|EBA27322.1 as seed ortholog is 100%.

Bootstrap support for afis|EAW18289.1 as seed ortholog is 100%.

---

Group of orthologs #8413. Best score 210 bits

Score difference with first non-orthologous sequence - *A. fumigatus*:210 *A. fischeri*:210

|                 |         |                 |         |
|-----------------|---------|-----------------|---------|
| afum EAL93987.1 | 100.00% | afis EAW19260.1 | 100.00% |
|-----------------|---------|-----------------|---------|

Bootstrap support for afum|EAL93987.1 as seed ortholog is 100%.

Bootstrap support for afis|EAW19260.1 as seed ortholog is 100%.

---

Group of orthologs #8414. Best score 210 bits

Score difference with first non-orthologous sequence - *A. fumigatus*:210 *A. fischeri*:210

|                 |         |                 |         |
|-----------------|---------|-----------------|---------|
| afum EAL92646.1 | 100.00% | afis EAW21612.1 | 100.00% |
|-----------------|---------|-----------------|---------|

Bootstrap support for afum|EAL92646.1 as seed ortholog is 100%.

Bootstrap support for afis|EAW21612.1 as seed ortholog is 100%.

---

Group of orthologs #8415. Best score 209 bits

Score difference with first non-orthologous sequence - *A. fumigatus*:209 *A. fischeri*:209

|                 |         |                 |         |
|-----------------|---------|-----------------|---------|
| afum EAL86583.1 | 100.00% | afis EAW17122.1 | 100.00% |
|-----------------|---------|-----------------|---------|

Bootstrap support for afum|EAL86583.1 as seed ortholog is 100%.

Bootstrap support for afis|EAW17122.1 as seed ortholog is 100%.

---

Group of orthologs #8416. Best score 209 bits

Score difference with first non-orthologous sequence - *A. fumigatus*:209 *A. fischeri*:209

|                 |         |                 |         |
|-----------------|---------|-----------------|---------|
| afum EBA27404.1 | 100.00% | afis EAW22839.1 | 100.00% |
|-----------------|---------|-----------------|---------|

Bootstrap support for afum|EBA27404.1 as seed ortholog is 100%.

Bootstrap support for afis|EAW22839.1 as seed ortholog is 100%.

---

Group of orthologs #8417. Best score 208 bits

Score difference with first non-orthologous sequence - *A. fumigatus*:208 *A. fischeri*:208

|                 |         |                 |         |
|-----------------|---------|-----------------|---------|
| afum EAL86944.1 | 100.00% | afis EAW19573.1 | 100.00% |
|-----------------|---------|-----------------|---------|

Bootstrap support for afum|EAL86944.1 as seed ortholog is 100%.

Bootstrap support for afis|EAW19573.1 as seed ortholog is 100%.

---

Group of orthologs #8418. Best score 208 bits

Score difference with first non-orthologous sequence - *A. fumigatus*:208 *A. fischeri*:208

|                 |         |                 |         |
|-----------------|---------|-----------------|---------|
| afum EAL84404.1 | 100.00% | afis EAW25744.1 | 100.00% |
|-----------------|---------|-----------------|---------|

Bootstrap support for afum|EAL84404.1 as seed ortholog is 100%.

Bootstrap support for afis|EAW25744.1 as seed ortholog is 100%.

---

Group of orthologs #8419. Best score 206 bits

Score difference with first non-orthologous sequence - *A. fumigatus*:206 *A. fischeri*:206

|                 |         |                 |         |
|-----------------|---------|-----------------|---------|
| afum EAL86054.1 | 100.00% | afis EAW24382.1 | 100.00% |
|-----------------|---------|-----------------|---------|

Bootstrap support for afum|EAL86054.1 as seed ortholog is 100%.

Bootstrap support for afis|EAW24382.1 as seed ortholog is 100%.

---

Group of orthologs #8420. Best score 206 bits

Score difference with first non-orthologous sequence - *A. fumigatus*:206 *A. fischeri*:206

|                 |         |                 |         |
|-----------------|---------|-----------------|---------|
| afum EAL87974.1 | 100.00% | afis EAW23489.1 | 100.00% |
|-----------------|---------|-----------------|---------|

Bootstrap support for afum|EAL87974.1 as seed ortholog is 100%.

Bootstrap support for afis|EAW23489.1 as seed ortholog is 100%.

---

Group of orthologs #8421. Best score 206 bits

Score difference with first non-orthologous sequence - *A. fumigatus*:206 *A. fischeri*:206

afum|EAL90109.2 100.00% afis|EAW25450.1 100.00%

Bootstrap support for afum|EAL90109.2 as seed ortholog is 100%.

Bootstrap support for afis|EAW25450.1 as seed ortholog is 100%.

---

Group of orthologs #8422. Best score 205 bits

Score difference with first non-orthologous sequence - *A. fumigatus*:205 *A. fischeri*:205

afum|EAL85578.1 100.00% afis|EAW15770.1 100.00%

Bootstrap support for afum|EAL85578.1 as seed ortholog is 100%.

Bootstrap support for afis|EAW15770.1 as seed ortholog is 100%.

---

Group of orthologs #8423. Best score 204 bits

Score difference with first non-orthologous sequence - *A. fumigatus*:204 *A. fischeri*:204

afum|EAL88281.1 100.00% afis|EAW23202.1 100.00%

Bootstrap support for afum|EAL88281.1 as seed ortholog is 100%.

Bootstrap support for afis|EAW23202.1 as seed ortholog is 100%.

---

Group of orthologs #8424. Best score 204 bits

Score difference with first non-orthologous sequence - *A. fumigatus*:204 *A. fischeri*:204

afum|EBA27311.1 100.00% afis|EAW23920.1 100.00%

Bootstrap support for afum|EBA27311.1 as seed ortholog is 100%.

Bootstrap support for afis|EAW23920.1 as seed ortholog is 100%.

---

Group of orthologs #8425. Best score 203 bits

Score difference with first non-orthologous sequence - *A. fumigatus*:203 *A. fischeri*:203

afum|EAL85636.1 100.00% afis|EAW15712.1 100.00%

Bootstrap support for afum|EAL85636.1 as seed ortholog is 100%.

Bootstrap support for afis|EAW15712.1 as seed ortholog is 100%.

---

Group of orthologs #8426. Best score 203 bits

Score difference with first non-orthologous sequence - *A. fumigatus*:203 *A. fischeri*:203

afum|EAL84316.1 100.00% afis|EAW25628.1 100.00%

Bootstrap support for afum|EAL84316.1 as seed ortholog is 100%.

Bootstrap support for afis|EAW25628.1 as seed ortholog is 100%.

---

Group of orthologs #8427. Best score 203 bits

Score difference with first non-orthologous sequence - *A. fumigatus*:203 *A. fischeri*:203

afum|EAL92904.1 100.00% afis|EAW21890.1 100.00%

Bootstrap support for afum|EAL92904.1 as seed ortholog is 100%.

Bootstrap support for afis|EAW21890.1 as seed ortholog is 100%.

---

Group of orthologs #8428. Best score 203 bits

Score difference with first non-orthologous sequence - *A. fumigatus*:203 *A. fischeri*:203

afum|EAL90129.2 100.00% afis|EAW25466.1 100.00%

Bootstrap support for afum|EAL90129.2 as seed ortholog is 100%.

Bootstrap support for afis|EAW25466.1 as seed ortholog is 100%.

---

Group of orthologs #8429. Best score 202 bits

Score difference with first non-orthologous sequence - *A. fumigatus*:202 *A. fischeri*:202

afum|EAL93069.1 100.00% afis|EAW18393.1 100.00%

Bootstrap support for afum|EAL93069.1 as seed ortholog is 100%.

Bootstrap support for afis|EAW18393.1 as seed ortholog is 100%.

---

Group of orthologs #8430. Best score 201 bits

Score difference with first non-orthologous sequence - *A. fumigatus*:73 *A. fischeri*:59  
afum|EAL85018.1 100.00% afis|EAW19880.1 100.00%  
Bootstrap support for afum|EAL85018.1 as seed ortholog is 51%. Alternative seed ortholog is afum|EAL87816.2 (73 bits away from this cluster)  
Bootstrap support for afis|EAW19880.1 as seed ortholog is 76%.

---

Group of orthologs #8431. Best score 201 bits  
Score difference with first non-orthologous sequence - *A. fumigatus*:201 *A. fischeri*:201  
afum|EAL91701.1 100.00% afis|EAW17892.1 100.00%  
Bootstrap support for afum|EAL91701.1 as seed ortholog is 100%.  
Bootstrap support for afis|EAW17892.1 as seed ortholog is 100%.

---

Group of orthologs #8432. Best score 200 bits  
Score difference with first non-orthologous sequence - *A. fumigatus*:200 *A. fischeri*:200  
afum|EAL89085.1 100.00% afis|EAW16491.1 100.00%  
Bootstrap support for afum|EAL89085.1 as seed ortholog is 100%.  
Bootstrap support for afis|EAW16491.1 as seed ortholog is 100%.

---

Group of orthologs #8433. Best score 198 bits  
Score difference with first non-orthologous sequence - *A. fumigatus*:198 *A. fischeri*:198  
afum|EAL84692.1 100.00% afis|EAW20942.1 100.00%  
Bootstrap support for afum|EAL84692.1 as seed ortholog is 100%.  
Bootstrap support for afis|EAW20942.1 as seed ortholog is 100%.

---

Group of orthologs #8434. Best score 198 bits  
Score difference with first non-orthologous sequence - *A. fumigatus*:198 *A. fischeri*:198  
afum|EAL89736.1 100.00% afis|EAW25067.1 100.00%  
Bootstrap support for afum|EAL89736.1 as seed ortholog is 100%.  
Bootstrap support for afis|EAW25067.1 as seed ortholog is 100%.

---

Group of orthologs #8435. Best score 198 bits  
Score difference with first non-orthologous sequence - *A. fumigatus*:198 *A. fischeri*:198  
afum|EAL89842.1 100.00% afis|EAW25169.1 100.00%  
Bootstrap support for afum|EAL89842.1 as seed ortholog is 100%.  
Bootstrap support for afis|EAW25169.1 as seed ortholog is 100%.

---

Group of orthologs #8436. Best score 196 bits  
Score difference with first non-orthologous sequence - *A. fumigatus*:196 *A. fischeri*:196  
afum|EAL89128.1 100.00% afis|EAW16531.1 100.00%  
Bootstrap support for afum|EAL89128.1 as seed ortholog is 100%.  
Bootstrap support for afis|EAW16531.1 as seed ortholog is 100%.

---

Group of orthologs #8437. Best score 196 bits  
Score difference with first non-orthologous sequence - *A. fumigatus*:196 *A. fischeri*:196  
afum|EAL93113.1 100.00% afis|EAW18432.1 100.00%  
Bootstrap support for afum|EAL93113.1 as seed ortholog is 100%.  
Bootstrap support for afis|EAW18432.1 as seed ortholog is 100%.

---

Group of orthologs #8438. Best score 196 bits  
Score difference with first non-orthologous sequence - *A. fumigatus*:196 *A. fischeri*:196  
afum|EAL92730.1 100.00% afis|EAW21696.1 100.00%  
Bootstrap support for afum|EAL92730.1 as seed ortholog is 100%.  
Bootstrap support for afis|EAW21696.1 as seed ortholog is 100%.

---

Group of orthologs #8439. Best score 194 bits  
Score difference with first non-orthologous sequence - *A. fumigatus*:194 *A. fischeri*:194

|                 |         |                 |         |
|-----------------|---------|-----------------|---------|
| afum EAL92092.2 | 100.00% | afis EAW21057.1 | 100.00% |
|-----------------|---------|-----------------|---------|

Bootstrap support for afum|EAL92092.2 as seed ortholog is 100%.

Bootstrap support for afis|EAW21057.1 as seed ortholog is 100%.

---

Group of orthologs #8440. Best score 193 bits

Score difference with first non-orthologous sequence - *A. fumigatus*:193 *A. fischeri*:76

|                 |         |                 |         |
|-----------------|---------|-----------------|---------|
| afum EAL84242.1 | 100.00% | afis EAW17742.1 | 100.00% |
|-----------------|---------|-----------------|---------|

Bootstrap support for afum|EAL84242.1 as seed ortholog is 100%.

Bootstrap support for afis|EAW17742.1 as seed ortholog is 96%.

---

Group of orthologs #8441. Best score 193 bits

Score difference with first non-orthologous sequence - *A. fumigatus*:193 *A. fischeri*:193

|                 |         |                 |         |
|-----------------|---------|-----------------|---------|
| afum EAL85323.1 | 100.00% | afis EAW20203.1 | 100.00% |
|-----------------|---------|-----------------|---------|

Bootstrap support for afum|EAL85323.1 as seed ortholog is 100%.

Bootstrap support for afis|EAW20203.1 as seed ortholog is 100%.

---

Group of orthologs #8442. Best score 193 bits

Score difference with first non-orthologous sequence - *A. fumigatus*:193 *A. fischeri*:193

|                 |         |                 |         |
|-----------------|---------|-----------------|---------|
| afum EAL90811.1 | 100.00% | afis EAW22380.1 | 100.00% |
|-----------------|---------|-----------------|---------|

Bootstrap support for afum|EAL90811.1 as seed ortholog is 100%.

Bootstrap support for afis|EAW22380.1 as seed ortholog is 100%.

---

Group of orthologs #8443. Best score 193 bits

Score difference with first non-orthologous sequence - *A. fumigatus*:193 *A. fischeri*:193

|                 |         |                 |         |
|-----------------|---------|-----------------|---------|
| afum EAL90318.1 | 100.00% | afis EAW22881.1 | 100.00% |
|-----------------|---------|-----------------|---------|

Bootstrap support for afum|EAL90318.1 as seed ortholog is 100%.

Bootstrap support for afis|EAW22881.1 as seed ortholog is 100%.

---

Group of orthologs #8444. Best score 192 bits

Score difference with first non-orthologous sequence - *A. fumigatus*:192 *A. fischeri*:192

|                 |         |                 |         |
|-----------------|---------|-----------------|---------|
| afum EAL90680.1 | 100.00% | afis EAW22513.1 | 100.00% |
|-----------------|---------|-----------------|---------|

Bootstrap support for afum|EAL90680.1 as seed ortholog is 100%.

Bootstrap support for afis|EAW22513.1 as seed ortholog is 100%.

---

Group of orthologs #8445. Best score 191 bits

Score difference with first non-orthologous sequence - *A. fumigatus*:191 *A. fischeri*:191

|                 |         |                 |         |
|-----------------|---------|-----------------|---------|
| afum EAL85862.1 | 100.00% | afis EAW24189.1 | 100.00% |
|-----------------|---------|-----------------|---------|

Bootstrap support for afum|EAL85862.1 as seed ortholog is 100%.

Bootstrap support for afis|EAW24189.1 as seed ortholog is 100%.

---

Group of orthologs #8446. Best score 191 bits

Score difference with first non-orthologous sequence - *A. fumigatus*:191 *A. fischeri*:191

|                 |         |                 |         |
|-----------------|---------|-----------------|---------|
| afum EAL90003.1 | 100.00% | afis EAW25340.1 | 100.00% |
|-----------------|---------|-----------------|---------|

Bootstrap support for afum|EAL90003.1 as seed ortholog is 100%.

Bootstrap support for afis|EAW25340.1 as seed ortholog is 100%.

---

Group of orthologs #8447. Best score 190 bits

Score difference with first non-orthologous sequence - *A. fumigatus*:190 *A. fischeri*:190

|                 |         |                 |         |
|-----------------|---------|-----------------|---------|
| afum EAL85718.1 | 100.00% | afis EAW15617.1 | 100.00% |
|-----------------|---------|-----------------|---------|

Bootstrap support for afum|EAL85718.1 as seed ortholog is 100%.

Bootstrap support for afis|EAW15617.1 as seed ortholog is 100%.

---

Group of orthologs #8448. Best score 190 bits

Score difference with first non-orthologous sequence - *A. fumigatus*:190 *A. fischeri*:190

|                 |         |                 |         |
|-----------------|---------|-----------------|---------|
| afum EAL91490.1 | 100.00% | afis EAW17677.1 | 100.00% |
|-----------------|---------|-----------------|---------|

Bootstrap support for afum|EAL91490.1 as seed ortholog is 100%.



Bootstrap support for afis|EAW17677.1 as seed ortholog is 100%.

---

Group of orthologs #8449. Best score 189 bits

Score difference with first non-orthologous sequence - *A. fumigatus*:189 *A. fischeri*:189

afum|EBA27447.1 100.00% afis|EAW21044.1 100.00%

afis|EAW20263.1 12.64%

Bootstrap support for afum|EBA27447.1 as seed ortholog is 100%.

Bootstrap support for afis|EAW21044.1 as seed ortholog is 100%.

---

Group of orthologs #8450. Best score 188 bits

Score difference with first non-orthologous sequence - *A. fumigatus*:188 *A. fischeri*:188

afum|EAL85263.1 100.00% afis|EAW20148.1 100.00%

Bootstrap support for afum|EAL85263.1 as seed ortholog is 100%.

Bootstrap support for afis|EAW20148.1 as seed ortholog is 100%.

---

Group of orthologs #8451. Best score 188 bits

Score difference with first non-orthologous sequence - *A. fumigatus*:188 *A. fischeri*:188

afum|EAL88014.1 100.00% afis|EAW23452.1 100.00%

Bootstrap support for afum|EAL88014.1 as seed ortholog is 100%.

Bootstrap support for afis|EAW23452.1 as seed ortholog is 100%.

---

Group of orthologs #8452. Best score 188 bits

Score difference with first non-orthologous sequence - *A. fumigatus*:188 *A. fischeri*:188

afum|EAL90217.1 100.00% afis|EAW22980.1 100.00%

Bootstrap support for afum|EAL90217.1 as seed ortholog is 100%.

Bootstrap support for afis|EAW22980.1 as seed ortholog is 100%.

---

Group of orthologs #8453. Best score 188 bits

Score difference with first non-orthologous sequence - *A. fumigatus*:188 *A. fischeri*:188

afum|EAL92804.1 100.00% afis|EAW21775.1 100.00%

Bootstrap support for afum|EAL92804.1 as seed ortholog is 100%.

Bootstrap support for afis|EAW21775.1 as seed ortholog is 100%.

---

Group of orthologs #8454. Best score 188 bits

Score difference with first non-orthologous sequence - *A. fumigatus*:188 *A. fischeri*:188

afum|EBA27472.1 100.00% afis|EAW21748.1 100.00%

Bootstrap support for afum|EBA27472.1 as seed ortholog is 100%.

Bootstrap support for afis|EAW21748.1 as seed ortholog is 100%.

---

Group of orthologs #8455. Best score 187 bits

Score difference with first non-orthologous sequence - *A. fumigatus*:187 *A. fischeri*:187

afum|EAL87490.1 100.00% afis|EAW18131.1 100.00%

Bootstrap support for afum|EAL87490.1 as seed ortholog is 100%.

Bootstrap support for afis|EAW18131.1 as seed ortholog is 100%.

---

Group of orthologs #8456. Best score 186 bits

Score difference with first non-orthologous sequence - *A. fumigatus*:186 *A. fischeri*:186

afum|EBA27232.1 100.00% afis|EAW20335.1 100.00%

Bootstrap support for afum|EBA27232.1 as seed ortholog is 100%.

Bootstrap support for afis|EAW20335.1 as seed ortholog is 100%.

---

Group of orthologs #8457. Best score 185 bits

Score difference with first non-orthologous sequence - *A. fumigatus*:185 *A. fischeri*:185

afum|EAL93242.1 100.00% afis|EAW18542.1 100.00%

Bootstrap support for afum|EAL93242.1 as seed ortholog is 100%.

Bootstrap support for afis|EAW18542.1 as seed ortholog is 100%.

---

Group of orthologs #8458. Best score 184 bits

Score difference with first non-orthologous sequence - *A. fumigatus*:184 *A. fischeri*:184

afum|EBA27252.1 100.00% afis|EAW24310.1 100.00%

Bootstrap support for afum|EBA27252.1 as seed ortholog is 100%.

Bootstrap support for afis|EAW24310.1 as seed ortholog is 100%.

---

Group of orthologs #8459. Best score 182 bits

Score difference with first non-orthologous sequence - *A. fumigatus*:182 *A. fischeri*:182

afum|EAL86839.1 100.00% afis|EAW19685.1 100.00%

Bootstrap support for afum|EAL86839.1 as seed ortholog is 100%.

Bootstrap support for afis|EAW19685.1 as seed ortholog is 100%.

---

Group of orthologs #8460. Best score 182 bits

Score difference with first non-orthologous sequence - *A. fumigatus*:182 *A. fischeri*:182

afum|EAL89801.1 100.00% afis|EAW25130.1 100.00%

Bootstrap support for afum|EAL89801.1 as seed ortholog is 100%.

Bootstrap support for afis|EAW25130.1 as seed ortholog is 100%.

---

Group of orthologs #8461. Best score 181 bits

Score difference with first non-orthologous sequence - *A. fumigatus*:181 *A. fischeri*:181

afum|EBA27168.1 100.00% afis|EAW15439.1 100.00%

Bootstrap support for afum|EBA27168.1 as seed ortholog is 100%.

Bootstrap support for afis|EAW15439.1 as seed ortholog is 100%.

---

Group of orthologs #8462. Best score 181 bits

Score difference with first non-orthologous sequence - *A. fumigatus*:181 *A. fischeri*:181

afum|EAL90606.1 100.00% afis|EAW22593.1 100.00%

Bootstrap support for afum|EAL90606.1 as seed ortholog is 100%.

Bootstrap support for afis|EAW22593.1 as seed ortholog is 100%.

---

Group of orthologs #8463. Best score 181 bits

Score difference with first non-orthologous sequence - *A. fumigatus*:181 *A. fischeri*:181

afum|EAL92800.1 100.00% afis|EAW21771.1 100.00%

Bootstrap support for afum|EAL92800.1 as seed ortholog is 100%.

Bootstrap support for afis|EAW21771.1 as seed ortholog is 100%.

---

Group of orthologs #8464. Best score 180 bits

Score difference with first non-orthologous sequence - *A. fumigatus*:180 *A. fischeri*:180

afum|EAL88437.1 100.00% afis|EAW23044.1 100.00%

Bootstrap support for afum|EAL88437.1 as seed ortholog is 100%.

Bootstrap support for afis|EAW23044.1 as seed ortholog is 100%.

---

Group of orthologs #8465. Best score 180 bits

Score difference with first non-orthologous sequence - *A. fumigatus*:180 *A. fischeri*:180

afum|EAL93847.2 100.00% afis|EAW19115.1 100.00%

Bootstrap support for afum|EAL93847.2 as seed ortholog is 100%.

Bootstrap support for afis|EAW19115.1 as seed ortholog is 100%.

---

Group of orthologs #8466. Best score 180 bits

Score difference with first non-orthologous sequence - *A. fumigatus*:180 *A. fischeri*:180

afum|EAL90715.1 100.00% afis|EAW22477.1 100.00%

Bootstrap support for afum|EAL90715.1 as seed ortholog is 100%.

Bootstrap support for afis|EAW22477.1 as seed ortholog is 100%.

---

Group of orthologs #8467. Best score 179 bits

Score difference with first non-orthologous sequence - *A. fumigatus*:179 *A. fischeri*:179  
afum|EBA27352.1 100.00% afis|EAW15924.1 100.00%  
Bootstrap support for afum|EBA27352.1 as seed ortholog is 100%.  
Bootstrap support for afis|EAW15924.1 as seed ortholog is 100%.

---

Group of orthologs #8468. Best score 178 bits

Score difference with first non-orthologous sequence - *A. fumigatus*:178 *A. fischeri*:178  
afum|EAL87683.1 100.00% afis|EAW18316.1 100.00%  
Bootstrap support for afum|EAL87683.1 as seed ortholog is 100%.  
Bootstrap support for afis|EAW18316.1 as seed ortholog is 100%.

---

Group of orthologs #8469. Best score 178 bits

Score difference with first non-orthologous sequence - *A. fumigatus*:178 *A. fischeri*:178  
afum|EAL89303.1 100.00% afis|EAW22066.1 100.00%  
Bootstrap support for afum|EAL89303.1 as seed ortholog is 100%.  
Bootstrap support for afis|EAW22066.1 as seed ortholog is 100%.

---

Group of orthologs #8470. Best score 177 bits

Score difference with first non-orthologous sequence - *A. fumigatus*:177 *A. fischeri*:177  
afum|EAL89041.1 100.00% afis|EAW16438.1 100.00%  
Bootstrap support for afum|EAL89041.1 as seed ortholog is 100%.  
Bootstrap support for afis|EAW16438.1 as seed ortholog is 100%.

---

Group of orthologs #8471. Best score 176 bits

Score difference with first non-orthologous sequence - *A. fumigatus*:176 *A. fischeri*:176  
afum|EAL86954.1 100.00% afis|EAW19557.1 100.00%  
Bootstrap support for afum|EAL86954.1 as seed ortholog is 100%.  
Bootstrap support for afis|EAW19557.1 as seed ortholog is 100%.

---

Group of orthologs #8472. Best score 176 bits

Score difference with first non-orthologous sequence - *A. fumigatus*:176 *A. fischeri*:176  
afum|EAL91358.1 100.00% afis|EAW17544.1 100.00%  
Bootstrap support for afum|EAL91358.1 as seed ortholog is 100%.  
Bootstrap support for afis|EAW17544.1 as seed ortholog is 100%.

---

Group of orthologs #8473. Best score 176 bits

Score difference with first non-orthologous sequence - *A. fumigatus*:176 *A. fischeri*:176  
afum|EAL87188.1 100.00% afis|EAW23751.1 100.00%  
Bootstrap support for afum|EAL87188.1 as seed ortholog is 100%.  
Bootstrap support for afis|EAW23751.1 as seed ortholog is 100%.

---

Group of orthologs #8474. Best score 176 bits

Score difference with first non-orthologous sequence - *A. fumigatus*:176 *A. fischeri*:176  
afum|EAL93297.1 100.00% afis|EAW18590.1 100.00%  
Bootstrap support for afum|EAL93297.1 as seed ortholog is 100%.  
Bootstrap support for afis|EAW18590.1 as seed ortholog is 100%.

---

Group of orthologs #8475. Best score 176 bits

Score difference with first non-orthologous sequence - *A. fumigatus*:176 *A. fischeri*:176  
afum|EAL91066.1 100.00% afis|EAW22120.1 100.00%  
Bootstrap support for afum|EAL91066.1 as seed ortholog is 100%.  
Bootstrap support for afis|EAW22120.1 as seed ortholog is 100%.

---

Group of orthologs #8476. Best score 174 bits

Score difference with first non-orthologous sequence - *A. fumigatus*:11 *A. fischeri*:174  
afum|EAL86216.1 100.00% afis|EAW24551.1 100.00%

Bootstrap support for afum|EAL86216.1 as seed ortholog is 68%. Alternative seed ortholog is afum|EAL91136.1 (11 bits away from this cluster)

Bootstrap support for afis|EAW24551.1 as seed ortholog is 100%.

---

Group of orthologs #8477. Best score 174 bits

Score difference with first non-orthologous sequence - *A. fumigatus*:174 *A. fischeri*:174

afum|EAL93866.1 100.00% afis|EAW19134.1 100.00%

Bootstrap support for afum|EAL93866.1 as seed ortholog is 100%.

Bootstrap support for afis|EAW19134.1 as seed ortholog is 100%.

---

Group of orthologs #8478. Best score 173 bits

Score difference with first non-orthologous sequence - *A. fumigatus*:173 *A. fischeri*:173

afum|EAL93227.1 100.00% afis|EAW18530.1 100.00%

Bootstrap support for afum|EAL93227.1 as seed ortholog is 100%.

Bootstrap support for afis|EAW18530.1 as seed ortholog is 100%.

---

Group of orthologs #8479. Best score 172 bits

Score difference with first non-orthologous sequence - *A. fumigatus*:172 *A. fischeri*:172

afum|EBA27242.1 100.00% afis|EAW15545.1 100.00%

Bootstrap support for afum|EBA27242.1 as seed ortholog is 100%.

Bootstrap support for afis|EAW15545.1 as seed ortholog is 100%.

---

Group of orthologs #8480. Best score 170 bits

Score difference with first non-orthologous sequence - *A. fumigatus*:170 *A. fischeri*:170

afum|EAL86978.1 100.00% afis|EAW19519.1 100.00%

Bootstrap support for afum|EAL86978.1 as seed ortholog is 100%.

Bootstrap support for afis|EAW19519.1 as seed ortholog is 100%.

---

Group of orthologs #8481. Best score 170 bits

Score difference with first non-orthologous sequence - *A. fumigatus*:170 *A. fischeri*:170

afum|EAL87791.1 100.00% afis|EAW20710.1 100.00%

Bootstrap support for afum|EAL87791.1 as seed ortholog is 100%.

Bootstrap support for afis|EAW20710.1 as seed ortholog is 100%.

---

Group of orthologs #8482. Best score 170 bits

Score difference with first non-orthologous sequence - *A. fumigatus*:170 *A. fischeri*:170

afum|EAL92429.1 100.00% afis|EAW22413.1 100.00%

Bootstrap support for afum|EAL92429.1 as seed ortholog is 100%.

Bootstrap support for afis|EAW22413.1 as seed ortholog is 100%.

---

Group of orthologs #8483. Best score 169 bits

Score difference with first non-orthologous sequence - *A. fumigatus*:169 *A. fischeri*:169

afum|EAL88970.1 100.00% afis|EAW16345.1 100.00%

Bootstrap support for afum|EAL88970.1 as seed ortholog is 100%.

Bootstrap support for afis|EAW16345.1 as seed ortholog is 100%.

---

Group of orthologs #8484. Best score 169 bits

Score difference with first non-orthologous sequence - *A. fumigatus*:169 *A. fischeri*:169

afum|EAL89596.1 100.00% afis|EAW24939.1 100.00%

Bootstrap support for afum|EAL89596.1 as seed ortholog is 100%.

Bootstrap support for afis|EAW24939.1 as seed ortholog is 100%.

---

Group of orthologs #8485. Best score 169 bits

Score difference with first non-orthologous sequence - *A. fumigatus*:169 *A. fischeri*:169

afum|EBA27175.1 100.00% afis|EAW25720.1 100.00%

Bootstrap support for afum|EBA27175.1 as seed ortholog is 100%.

Bootstrap support for afis|EAW25720.1 as seed ortholog is 100%.

---

Group of orthologs #8486. Best score 168 bits

Score difference with first non-orthologous sequence - *A. fumigatus*:168 *A. fischeri*:168

afum|EAL86478.1 100.00% afis|EAW16951.1 100.00%

Bootstrap support for afum|EAL86478.1 as seed ortholog is 100%.

Bootstrap support for afis|EAW16951.1 as seed ortholog is 100%.

---

Group of orthologs #8487. Best score 166 bits

Score difference with first non-orthologous sequence - *A. fumigatus*:166 *A. fischeri*:166

afum|EAL85352.1 100.00% afis|EAW20235.1 100.00%

Bootstrap support for afum|EAL85352.1 as seed ortholog is 100%.

Bootstrap support for afis|EAW20235.1 as seed ortholog is 100%.

---

Group of orthologs #8488. Best score 166 bits

Score difference with first non-orthologous sequence - *A. fumigatus*:166 *A. fischeri*:166

afum|EAL88023.1 100.00% afis|EAW23439.1 100.00%

Bootstrap support for afum|EAL88023.1 as seed ortholog is 100%.

Bootstrap support for afis|EAW23439.1 as seed ortholog is 100%.

---

Group of orthologs #8489. Best score 164 bits

Score difference with first non-orthologous sequence - *A. fumigatus*:164 *A. fischeri*:164

afum|EAL84205.1 100.00% afis|EAW15442.1 100.00%

Bootstrap support for afum|EAL84205.1 as seed ortholog is 100%.

Bootstrap support for afis|EAW15442.1 as seed ortholog is 100%.

---

Group of orthologs #8490. Best score 164 bits

Score difference with first non-orthologous sequence - *A. fumigatus*:164 *A. fischeri*:164

afum|EAL85660.1 100.00% afis|EAW15688.1 100.00%

Bootstrap support for afum|EAL85660.1 as seed ortholog is 100%.

Bootstrap support for afis|EAW15688.1 as seed ortholog is 100%.

---

Group of orthologs #8491. Best score 164 bits

Score difference with first non-orthologous sequence - *A. fumigatus*:164 *A. fischeri*:164

afum|EAL90944.1 100.00% afis|EAW24645.1 100.00%

Bootstrap support for afum|EAL90944.1 as seed ortholog is 100%.

Bootstrap support for afis|EAW24645.1 as seed ortholog is 100%.

---

Group of orthologs #8492. Best score 163 bits

Score difference with first non-orthologous sequence - *A. fumigatus*:163 *A. fischeri*:163

afum|EAL91198.1 100.00% afis|EAW17361.1 100.00%

Bootstrap support for afum|EAL91198.1 as seed ortholog is 100%.

Bootstrap support for afis|EAW17361.1 as seed ortholog is 100%.

---

Group of orthologs #8493. Best score 163 bits

Score difference with first non-orthologous sequence - *A. fumigatus*:163 *A. fischeri*:163

afum|EAL89551.1 100.00% afis|EAW24897.1 100.00%

Bootstrap support for afum|EAL89551.1 as seed ortholog is 100%.

Bootstrap support for afis|EAW24897.1 as seed ortholog is 100%.

---

Group of orthologs #8494. Best score 161 bits

Score difference with first non-orthologous sequence - *A. fumigatus*:161 *A. fischeri*:161

afum|EBA27204.1 100.00% afis|EAW20851.1 100.00%

Bootstrap support for afum|EBA27204.1 as seed ortholog is 100%.

Bootstrap support for afis|EAW20851.1 as seed ortholog is 100%.

---

Group of orthologs #8495. Best score 159 bits

Score difference with first non-orthologous sequence - *A. fumigatus*:159 *A. fischeri*:159

afum|EAL92627.1 100.00% afis|EAW19670.1 100.00%

Bootstrap support for afum|EAL92627.1 as seed ortholog is 100%.

Bootstrap support for afis|EAW19670.1 as seed ortholog is 100%.

---

Group of orthologs #8496. Best score 159 bits

Score difference with first non-orthologous sequence - *A. fumigatus*:159 *A. fischeri*:159

afum|EAL92144.1 100.00% afis|EAW21121.1 100.00%

Bootstrap support for afum|EAL92144.1 as seed ortholog is 100%.

Bootstrap support for afis|EAW21121.1 as seed ortholog is 100%.

---

Group of orthologs #8497. Best score 158 bits

Score difference with first non-orthologous sequence - *A. fumigatus*:158 *A. fischeri*:158

afum|EAL85982.1 100.00% afis|EAW24314.1 100.00%

Bootstrap support for afum|EAL85982.1 as seed ortholog is 100%.

Bootstrap support for afis|EAW24314.1 as seed ortholog is 100%.

---

Group of orthologs #8498. Best score 158 bits

Score difference with first non-orthologous sequence - *A. fumigatus*:158 *A. fischeri*:158

afum|EBA27206.1 100.00% afis|EAW20817.1 100.00%

Bootstrap support for afum|EBA27206.1 as seed ortholog is 100%.

Bootstrap support for afis|EAW20817.1 as seed ortholog is 100%.

---

Group of orthologs #8499. Best score 157 bits

Score difference with first non-orthologous sequence - *A. fumigatus*:157 *A. fischeri*:157

afum|EAL84824.1 100.00% afis|EAW20804.1 100.00%

Bootstrap support for afum|EAL84824.1 as seed ortholog is 100%.

Bootstrap support for afis|EAW20804.1 as seed ortholog is 100%.

---

Group of orthologs #8500. Best score 157 bits

Score difference with first non-orthologous sequence - *A. fumigatus*:157 *A. fischeri*:157

afum|EAL90590.1 100.00% afis|EAW22608.1 100.00%

Bootstrap support for afum|EAL90590.1 as seed ortholog is 100%.

Bootstrap support for afis|EAW22608.1 as seed ortholog is 100%.

---

Group of orthologs #8501. Best score 157 bits

Score difference with first non-orthologous sequence - *A. fumigatus*:157 *A. fischeri*:157

afum|EAL89517.2 100.00% afis|EAW24867.1 100.00%

Bootstrap support for afum|EAL89517.2 as seed ortholog is 100%.

Bootstrap support for afis|EAW24867.1 as seed ortholog is 100%.

---

Group of orthologs #8502. Best score 155 bits

Score difference with first non-orthologous sequence - *A. fumigatus*:155 *A. fischeri*:155

afum|EAL89795.1 100.00% afis|EAW25124.1 100.00%

Bootstrap support for afum|EAL89795.1 as seed ortholog is 100%.

Bootstrap support for afis|EAW25124.1 as seed ortholog is 100%.

---

Group of orthologs #8503. Best score 154 bits

Score difference with first non-orthologous sequence - *A. fumigatus*:154 *A. fischeri*:154

afum|EAL94109.1 100.00% afis|EAW25759.1 100.00%

afum|EAL92048.1 69.55% afis|EAW24638.1 44.99%

afum|EAL87107.1 38.53%

Bootstrap support for afum|EAL94109.1 as seed ortholog is 100%.

Bootstrap support for afis|EAW25759.1 as seed ortholog is 100%.

---

Group of orthologs #8504. Best score 154 bits

Score difference with first non-orthologous sequence - *A. fumigatus*:154 *A. fischeri*:154

afum|EAL91083.1 100.00% afis|EAW19744.1 100.00%

Bootstrap support for afum|EAL91083.1 as seed ortholog is 100%.

Bootstrap support for afis|EAW19744.1 as seed ortholog is 100%.

---

Group of orthologs #8505. Best score 152 bits

Score difference with first non-orthologous sequence - *A. fumigatus*:152 *A. fischeri*:152

afum|EAL87156.2 100.00% afis|EAW23712.1 100.00%

Bootstrap support for afum|EAL87156.2 as seed ortholog is 100%.

Bootstrap support for afis|EAW23712.1 as seed ortholog is 100%.

---

Group of orthologs #8506. Best score 152 bits

Score difference with first non-orthologous sequence - *A. fumigatus*:152 *A. fischeri*:152

afum|EAL87416.1 100.00% afis|EAW23987.1 100.00%

Bootstrap support for afum|EAL87416.1 as seed ortholog is 100%.

Bootstrap support for afis|EAW23987.1 as seed ortholog is 100%.

---

Group of orthologs #8507. Best score 151 bits

Score difference with first non-orthologous sequence - *A. fumigatus*:151 *A. fischeri*:151

afum|EAL87942.1 100.00% afis|EAW23522.1 100.00%

Bootstrap support for afum|EAL87942.1 as seed ortholog is 100%.

Bootstrap support for afis|EAW23522.1 as seed ortholog is 100%.

---

Group of orthologs #8508. Best score 151 bits

Score difference with first non-orthologous sequence - *A. fumigatus*:151 *A. fischeri*:151

afum|EAL92122.1 100.00% afis|EAW21101.1 100.00%

Bootstrap support for afum|EAL92122.1 as seed ortholog is 100%.

Bootstrap support for afis|EAW21101.1 as seed ortholog is 100%.

---

Group of orthologs #8509. Best score 150 bits

Score difference with first non-orthologous sequence - *A. fumigatus*:150 *A. fischeri*:150

afum|EAL87043.1 100.00% afis|EAW19453.1 100.00%

Bootstrap support for afum|EAL87043.1 as seed ortholog is 100%.

Bootstrap support for afis|EAW19453.1 as seed ortholog is 100%.

---

Group of orthologs #8510. Best score 149 bits

Score difference with first non-orthologous sequence - *A. fumigatus*:149 *A. fischeri*:149

afum|EAL92878.2 100.00% afis|EAW21864.1 100.00%

Bootstrap support for afum|EAL92878.2 as seed ortholog is 100%.

Bootstrap support for afis|EAW21864.1 as seed ortholog is 100%.

---

Group of orthologs #8511. Best score 148 bits

Score difference with first non-orthologous sequence - *A. fumigatus*:148 *A. fischeri*:148

afum|EAL89112.1 100.00% afis|EAW16517.1 100.00%

Bootstrap support for afum|EAL89112.1 as seed ortholog is 100%.

Bootstrap support for afis|EAW16517.1 as seed ortholog is 100%.

---

Group of orthologs #8512. Best score 148 bits

Score difference with first non-orthologous sequence - *A. fumigatus*:148 *A. fischeri*:148

afum|EAL85975.1 100.00% afis|EAW24307.1 100.00%

Bootstrap support for afum|EAL85975.1 as seed ortholog is 100%.

Bootstrap support for afis|EAW24307.1 as seed ortholog is 100%.

---

Group of orthologs #8513. Best score 148 bits

Score difference with first non-orthologous sequence - *A. fumigatus*:148 *A. fischeri*:148

|                 |         |                 |         |
|-----------------|---------|-----------------|---------|
| afum EAL92530.1 | 100.00% | afis EAW21510.1 | 100.00% |
|-----------------|---------|-----------------|---------|

Bootstrap support for afum|EAL92530.1 as seed ortholog is 100%.

Bootstrap support for afis|EAW21510.1 as seed ortholog is 100%.

---

Group of orthologs #8514. Best score 147 bits

Score difference with first non-orthologous sequence - *A. fumigatus*:147 *A. fischeri*:147

|                 |         |                 |         |
|-----------------|---------|-----------------|---------|
| afum EAL87185.1 | 100.00% | afis EAW23689.1 | 100.00% |
|-----------------|---------|-----------------|---------|

Bootstrap support for afum|EAL87185.1 as seed ortholog is 100%.

Bootstrap support for afis|EAW23689.1 as seed ortholog is 100%.

---

Group of orthologs #8515. Best score 146 bits

Score difference with first non-orthologous sequence - *A. fumigatus*:146 *A. fischeri*:146

|                 |         |                 |         |
|-----------------|---------|-----------------|---------|
| afum EAL92348.1 | 100.00% | afis EAW21330.1 | 100.00% |
|-----------------|---------|-----------------|---------|

Bootstrap support for afum|EAL92348.1 as seed ortholog is 100%.

Bootstrap support for afis|EAW21330.1 as seed ortholog is 100%.

---

Group of orthologs #8516. Best score 144 bits

Score difference with first non-orthologous sequence - *A. fumigatus*:144 *A. fischeri*:144

|                 |         |                 |         |
|-----------------|---------|-----------------|---------|
| afum EAL84259.1 | 100.00% | afis EAW17040.1 | 100.00% |
|-----------------|---------|-----------------|---------|

Bootstrap support for afum|EAL84259.1 as seed ortholog is 100%.

Bootstrap support for afis|EAW17040.1 as seed ortholog is 100%.

---

Group of orthologs #8517. Best score 144 bits

Score difference with first non-orthologous sequence - *A. fumigatus*:144 *A. fischeri*:144

|                 |         |                 |         |
|-----------------|---------|-----------------|---------|
| afum EAL84704.1 | 100.00% | afis EAW20930.1 | 100.00% |
|-----------------|---------|-----------------|---------|

Bootstrap support for afum|EAL84704.1 as seed ortholog is 100%.

Bootstrap support for afis|EAW20930.1 as seed ortholog is 100%.

---

Group of orthologs #8518. Best score 144 bits

Score difference with first non-orthologous sequence - *A. fumigatus*:144 *A. fischeri*:144

|                 |         |                 |         |
|-----------------|---------|-----------------|---------|
| afum EAL90154.1 | 100.00% | afis EAW25489.1 | 100.00% |
|-----------------|---------|-----------------|---------|

Bootstrap support for afum|EAL90154.1 as seed ortholog is 100%.

Bootstrap support for afis|EAW25489.1 as seed ortholog is 100%.

---

Group of orthologs #8519. Best score 141 bits

Score difference with first non-orthologous sequence - *A. fumigatus*:141 *A. fischeri*:141

|                 |         |                 |         |
|-----------------|---------|-----------------|---------|
| afum EAL86588.1 | 100.00% | afis EAW17128.1 | 100.00% |
|-----------------|---------|-----------------|---------|

Bootstrap support for afum|EAL86588.1 as seed ortholog is 100%.

Bootstrap support for afis|EAW17128.1 as seed ortholog is 100%.

---

Group of orthologs #8520. Best score 141 bits

Score difference with first non-orthologous sequence - *A. fumigatus*:42 *A. fischeri*:47

|                 |         |                 |         |
|-----------------|---------|-----------------|---------|
| afum EAL92223.1 | 100.00% | afis EAW16436.1 | 100.00% |
|-----------------|---------|-----------------|---------|

Bootstrap support for afum|EAL92223.1 as seed ortholog is 83%.

Bootstrap support for afis|EAW16436.1 as seed ortholog is 90%.

---

Group of orthologs #8521. Best score 141 bits

Score difference with first non-orthologous sequence - *A. fumigatus*:141 *A. fischeri*:141

|                 |         |                 |         |
|-----------------|---------|-----------------|---------|
| afum EAL93804.1 | 100.00% | afis EAW19076.1 | 100.00% |
|-----------------|---------|-----------------|---------|

Bootstrap support for afum|EAL93804.1 as seed ortholog is 100%.

Bootstrap support for afis|EAW19076.1 as seed ortholog is 100%.

---

Group of orthologs #8522. Best score 141 bits

Score difference with first non-orthologous sequence - *A. fumigatus*:141 *A. fischeri*:141

|                 |         |                 |         |
|-----------------|---------|-----------------|---------|
| afum EBA27310.1 | 100.00% | afis EAW23897.1 | 100.00% |
|-----------------|---------|-----------------|---------|

Bootstrap support for afum|EBA27310.1 as seed ortholog is 100%.



Bootstrap support for afis|EAW23897.1 as seed ortholog is 100%.

---

Group of orthologs #8523. Best score 140 bits

Score difference with first non-orthologous sequence - *A. fumigatus*:140 *A. fischeri*:140

afum|EAL84744.1 100.00% afis|EAW20889.1 100.00%

Bootstrap support for afum|EAL84744.1 as seed ortholog is 100%.

Bootstrap support for afis|EAW20889.1 as seed ortholog is 100%.

---

Group of orthologs #8524. Best score 138 bits

Score difference with first non-orthologous sequence - *A. fumigatus*:138 *A. fischeri*:138

afum|EAL90973.1 100.00% afis|EAW22221.1 100.00%

Bootstrap support for afum|EAL90973.1 as seed ortholog is 100%.

Bootstrap support for afis|EAW22221.1 as seed ortholog is 100%.

---

Group of orthologs #8525. Best score 137 bits

Score difference with first non-orthologous sequence - *A. fumigatus*:137 *A. fischeri*:137

afum|EAL85161.2 100.00% afis|EAW20041.1 100.00%

Bootstrap support for afum|EAL85161.2 as seed ortholog is 100%.

Bootstrap support for afis|EAW20041.1 as seed ortholog is 100%.

---

Group of orthologs #8526. Best score 137 bits

Score difference with first non-orthologous sequence - *A. fumigatus*:137 *A. fischeri*:137

afum|EAL87799.1 100.00% afis|EAW19105.1 100.00%

Bootstrap support for afum|EAL87799.1 as seed ortholog is 100%.

Bootstrap support for afis|EAW19105.1 as seed ortholog is 100%.

---

Group of orthologs #8527. Best score 137 bits

Score difference with first non-orthologous sequence - *A. fumigatus*:137 *A. fischeri*:137

afum|EBA27489.1 100.00% afis|EAW18639.1 100.00%

Bootstrap support for afum|EBA27489.1 as seed ortholog is 100%.

Bootstrap support for afis|EAW18639.1 as seed ortholog is 100%.

---

Group of orthologs #8528. Best score 136 bits

Score difference with first non-orthologous sequence - *A. fumigatus*:136 *A. fischeri*:136

afum|EAL85794.1 100.00% afis|EAW15534.1 100.00%

Bootstrap support for afum|EAL85794.1 as seed ortholog is 100%.

Bootstrap support for afis|EAW15534.1 as seed ortholog is 100%.

---

Group of orthologs #8529. Best score 134 bits

Score difference with first non-orthologous sequence - *A. fumigatus*:134 *A. fischeri*:134

afum|EAL87142.1 100.00% afis|EAW23701.1 100.00%

Bootstrap support for afum|EAL87142.1 as seed ortholog is 100%.

Bootstrap support for afis|EAW23701.1 as seed ortholog is 100%.

---

Group of orthologs #8530. Best score 132 bits

Score difference with first non-orthologous sequence - *A. fumigatus*:132 *A. fischeri*:57

afum|EAL87067.1 100.00% afis|EAW19427.1 100.00%

Bootstrap support for afum|EAL87067.1 as seed ortholog is 100%.

Bootstrap support for afis|EAW19427.1 as seed ortholog is 99%.

---

Group of orthologs #8531. Best score 131 bits

Score difference with first non-orthologous sequence - *A. fumigatus*:131 *A. fischeri*:131

afum|EBA27234.1 100.00% afis|EAW15830.1 100.00%

Bootstrap support for afum|EBA27234.1 as seed ortholog is 100%.

Bootstrap support for afis|EAW15830.1 as seed ortholog is 100%.

---

Group of orthologs #8532. Best score 131 bits

Score difference with first non-orthologous sequence - *A. fumigatus*:131 *A. fischeri*:131

afum|EBA27390.1 100.00% afis|EAW25261.1 100.00%

Bootstrap support for afum|EBA27390.1 as seed ortholog is 100%.

Bootstrap support for afis|EAW25261.1 as seed ortholog is 100%.

---

Group of orthologs #8533. Best score 129 bits

Score difference with first non-orthologous sequence - *A. fumigatus*:129 *A. fischeri*:129

afum|EAL90102.1 100.00% afis|EAW25444.1 100.00%

Bootstrap support for afum|EAL90102.1 as seed ortholog is 100%.

Bootstrap support for afis|EAW25444.1 as seed ortholog is 100%.

---

Group of orthologs #8534. Best score 127 bits

Score difference with first non-orthologous sequence - *A. fumigatus*:127 *A. fischeri*:127

afum|EAL94065.1 100.00% afis|EAW19345.1 100.00%

Bootstrap support for afum|EAL94065.1 as seed ortholog is 100%.

Bootstrap support for afis|EAW19345.1 as seed ortholog is 100%.

---

Group of orthologs #8535. Best score 126 bits

Score difference with first non-orthologous sequence - *A. fumigatus*:74 *A. fischeri*:2

afum|EAL86781.1 100.00% afis|EAW25743.1 100.00%

afis|EAW19901.1 19.14%

Bootstrap support for afum|EAL86781.1 as seed ortholog is 97%.

Bootstrap support for afis|EAW25743.1 as seed ortholog is 54%. Alternative seed ortholog is afis|EAW19890.1 (2 bits away from this cluster)

---

Group of orthologs #8536. Best score 125 bits

Score difference with first non-orthologous sequence - *A. fumigatus*:125 *A. fischeri*:125

afum|EAL89698.1 100.00% afis|EAW25000.1 100.00%

Bootstrap support for afum|EAL89698.1 as seed ortholog is 100%.

Bootstrap support for afis|EAW25000.1 as seed ortholog is 100%.

---

Group of orthologs #8537. Best score 123 bits

Score difference with first non-orthologous sequence - *A. fumigatus*:123 *A. fischeri*:123

afum|EAL90672.1 100.00% afis|EAW22522.1 100.00%

Bootstrap support for afum|EAL90672.1 as seed ortholog is 100%.

Bootstrap support for afis|EAW22522.1 as seed ortholog is 100%.

---

Group of orthologs #8538. Best score 120 bits

Score difference with first non-orthologous sequence - *A. fumigatus*:120 *A. fischeri*:120

afum|EBA27272.1 100.00% afis|EAW16863.1 100.00%

Bootstrap support for afum|EBA27272.1 as seed ortholog is 100%.

Bootstrap support for afis|EAW16863.1 as seed ortholog is 100%.

---

Group of orthologs #8539. Best score 118 bits

Score difference with first non-orthologous sequence - *A. fumigatus*:118 *A. fischeri*:118

afum|EAL86402.1 100.00% afis|EAW16406.1 100.00%

afum|EBA27374.1 100.00%

Bootstrap support for afum|EAL86402.1 as seed ortholog is 100%.

Bootstrap support for afum|EBA27374.1 as seed ortholog is 100%.

Bootstrap support for afis|EAW16406.1 as seed ortholog is 100%.

---

Group of orthologs #8540. Best score 118 bits

Score difference with first non-orthologous sequence - *A. fumigatus*:25 *A. fischeri*:118

afum|EAL85379.1 100.00% afis|EAW19387.1 100.00%

afum|EAL87817.1 73.48%

Bootstrap support for afum|EAL85379.1 as seed ortholog is 75%.  
Bootstrap support for afis|EAW19387.1 as seed ortholog is 100%.

---

Group of orthologs #8541. Best score 118 bits

Score difference with first non-orthologous sequence - *A. fumigatus*:118 *A. fischeri*:118

|                 |         |                 |         |
|-----------------|---------|-----------------|---------|
| afum EAL88458.1 | 100.00% | afis EAW23024.1 | 100.00% |
|-----------------|---------|-----------------|---------|

Bootstrap support for afum|EAL88458.1 as seed ortholog is 100%.

Bootstrap support for afis|EAW23024.1 as seed ortholog is 100%.

---

Group of orthologs #8542. Best score 115 bits

Score difference with first non-orthologous sequence - *A. fumigatus*:115 *A. fischeri*:115

|                 |         |                 |         |
|-----------------|---------|-----------------|---------|
| afum EAL87023.1 | 100.00% | afis EAW19473.1 | 100.00% |
|-----------------|---------|-----------------|---------|

Bootstrap support for afum|EAL87023.1 as seed ortholog is 100%.

Bootstrap support for afis|EAW19473.1 as seed ortholog is 100%.

---

Group of orthologs #8543. Best score 113 bits

Score difference with first non-orthologous sequence - *A. fumigatus*:113 *A. fischeri*:113

|                 |         |                 |         |
|-----------------|---------|-----------------|---------|
| afum EAL90934.1 | 100.00% | afis EAW20714.1 | 100.00% |
|-----------------|---------|-----------------|---------|

|                 |        |
|-----------------|--------|
| afum EAL91122.1 | 50.31% |
|-----------------|--------|

Bootstrap support for afum|EAL90934.1 as seed ortholog is 100%.

Bootstrap support for afis|EAW20714.1 as seed ortholog is 100%.

---

Group of orthologs #8544. Best score 106 bits

Score difference with first non-orthologous sequence - *A. fumigatus*:106 *A. fischeri*:106

|                 |         |                 |         |
|-----------------|---------|-----------------|---------|
| afum EAL91212.1 | 100.00% | afis EAW17377.1 | 100.00% |
|-----------------|---------|-----------------|---------|

Bootstrap support for afum|EAL91212.1 as seed ortholog is 100%.

Bootstrap support for afis|EAW17377.1 as seed ortholog is 100%.

---

Group of orthologs #8545. Best score 101 bits

Score difference with first non-orthologous sequence - *A. fumigatus*:101 *A. fischeri*:101

|                 |         |                 |         |
|-----------------|---------|-----------------|---------|
| afum EAL87512.1 | 100.00% | afis EAW18153.1 | 100.00% |
|-----------------|---------|-----------------|---------|

Bootstrap support for afum|EAL87512.1 as seed ortholog is 100%.

Bootstrap support for afis|EAW18153.1 as seed ortholog is 100%.

---

Group of orthologs #8546. Best score 100 bits

Score difference with first non-orthologous sequence - *A. fumigatus*:100 *A. fischeri*:100

|                 |         |                 |         |
|-----------------|---------|-----------------|---------|
| afum EAL92635.1 | 100.00% | afis EAW16912.1 | 100.00% |
|-----------------|---------|-----------------|---------|

Bootstrap support for afum|EAL92635.1 as seed ortholog is 100%.

Bootstrap support for afis|EAW16912.1 as seed ortholog is 100%.

---

Group of orthologs #8547. Best score 97 bits

Score difference with first non-orthologous sequence - *A. fumigatus*:97 *A. fischeri*:97

|                 |         |                 |         |
|-----------------|---------|-----------------|---------|
| afum EBA27210.1 | 100.00% | afis EAW19982.1 | 100.00% |
|-----------------|---------|-----------------|---------|

Bootstrap support for afum|EBA27210.1 as seed ortholog is 100%.

Bootstrap support for afis|EAW19982.1 as seed ortholog is 100%.

---

Group of orthologs #8548. Best score 93 bits

Score difference with first non-orthologous sequence - *A. fumigatus*:93 *A. fischeri*:93

|                 |         |                 |         |
|-----------------|---------|-----------------|---------|
| afum EAL86553.1 | 100.00% | afis EAW17057.1 | 100.00% |
|-----------------|---------|-----------------|---------|

Bootstrap support for afum|EAL86553.1 as seed ortholog is 100%.

Bootstrap support for afis|EAW17057.1 as seed ortholog is 100%.

---

Group of orthologs #8549. Best score 88 bits

Score difference with first non-orthologous sequence - *A. fumigatus*:88 *A. fischeri*:88

|                 |         |                 |         |
|-----------------|---------|-----------------|---------|
| afum EAL84371.1 | 100.00% | afis EAW19872.1 | 100.00% |
|-----------------|---------|-----------------|---------|

Bootstrap support for afum|EAL84371.1 as seed ortholog is 100%.

Bootstrap support for afis|EAW19872.1 as seed ortholog is 100%.

---

Group of orthologs #8550. Best score 86 bits

Score difference with first non-orthologous sequence - *A. fumigatus*:86 *A. fischeri*:86

|                 |         |                 |         |
|-----------------|---------|-----------------|---------|
| afum EBA27450.1 | 100.00% | afis EAW17120.1 | 100.00% |
|-----------------|---------|-----------------|---------|

|                 |       |
|-----------------|-------|
| afis EAW17354.1 | 9.70% |
|-----------------|-------|

Bootstrap support for afum|EBA27450.1 as seed ortholog is 100%.

Bootstrap support for afis|EAW17120.1 as seed ortholog is 100%.

---

Group of orthologs #8551. Best score 85 bits

Score difference with first non-orthologous sequence - *A. fumigatus*:85 *A. fischeri*:85

|                 |         |                 |         |
|-----------------|---------|-----------------|---------|
| afum EAL92339.1 | 100.00% | afis EAW21322.1 | 100.00% |
|-----------------|---------|-----------------|---------|

Bootstrap support for afum|EAL92339.1 as seed ortholog is 100%.

Bootstrap support for afis|EAW21322.1 as seed ortholog is 100%.

---

Group of orthologs #8552. Best score 83 bits

Score difference with first non-orthologous sequence - *A. fumigatus*:83 *A. fischeri*:83

|                 |         |                 |         |
|-----------------|---------|-----------------|---------|
| afum EAL87807.1 | 100.00% | afis EAW22023.1 | 100.00% |
|-----------------|---------|-----------------|---------|

|                 |        |
|-----------------|--------|
| afum EAL86764.1 | 30.82% |
|-----------------|--------|

Bootstrap support for afum|EAL87807.1 as seed ortholog is 100%.

Bootstrap support for afis|EAW22023.1 as seed ortholog is 100%.

---

Group of orthologs #8553. Best score 83 bits

Score difference with first non-orthologous sequence - *A. fumigatus*:83 *A. fischeri*:37

|                 |         |                 |         |
|-----------------|---------|-----------------|---------|
| afum EAL93575.1 | 100.00% | afis EAW24573.1 | 100.00% |
|-----------------|---------|-----------------|---------|

Bootstrap support for afum|EAL93575.1 as seed ortholog is 100%.

Bootstrap support for afis|EAW24573.1 as seed ortholog is 77%.

---

Group of orthologs #8554. Best score 82 bits

Score difference with first non-orthologous sequence - *A. fumigatus*:82 *A. fischeri*:82

|                 |         |                 |         |
|-----------------|---------|-----------------|---------|
| afum EAL84497.1 | 100.00% | afis EAW20564.1 | 100.00% |
|-----------------|---------|-----------------|---------|

Bootstrap support for afum|EAL84497.1 as seed ortholog is 100%.

Bootstrap support for afis|EAW20564.1 as seed ortholog is 100%.

---

Group of orthologs #8555. Best score 68 bits

Score difference with first non-orthologous sequence - *A. fumigatus*:68 *A. fischeri*:68

|                 |         |                 |         |
|-----------------|---------|-----------------|---------|
| afum EAL89871.1 | 100.00% | afis EAW22091.1 | 100.00% |
|-----------------|---------|-----------------|---------|

Bootstrap support for afum|EAL89871.1 as seed ortholog is 100%.

Bootstrap support for afis|EAW22091.1 as seed ortholog is 100%.

---

Group of orthologs #8556. Best score 63 bits

Score difference with first non-orthologous sequence - *A. fumigatus*:63 *A. fischeri*:63

|                 |         |                 |         |
|-----------------|---------|-----------------|---------|
| afum EAL84803.1 | 100.00% | afis EAW17752.1 | 100.00% |
|-----------------|---------|-----------------|---------|

Bootstrap support for afum|EAL84803.1 as seed ortholog is 100%.

Bootstrap support for afis|EAW17752.1 as seed ortholog is 100%.

---

Group of orthologs #8557. Best score 63 bits

Score difference with first non-orthologous sequence - *A. fumigatus*:63 *A. fischeri*:63

|                 |         |                 |         |
|-----------------|---------|-----------------|---------|
| afum EAL93071.1 | 100.00% | afis EAW18395.1 | 100.00% |
|-----------------|---------|-----------------|---------|

Bootstrap support for afum|EAL93071.1 as seed ortholog is 100%.

Bootstrap support for afis|EAW18395.1 as seed ortholog is 100%.

---

Group of orthologs #8558. Best score 60 bits

Score difference with first non-orthologous sequence - *A. fumigatus*:60 *A. fischeri*:60

|                 |         |                 |         |
|-----------------|---------|-----------------|---------|
| afum EAL91589.1 | 100.00% | afis EAW18844.1 | 100.00% |
|-----------------|---------|-----------------|---------|

Bootstrap support for afum|EAL91589.1 as seed ortholog is 100%.

Bootstrap support for afis|EAW18844.1 as seed ortholog is 100%.

---

Group of orthologs #8559. Best score 60 bits

Score difference with first non-orthologous sequence - *A. fumigatus*:60 *A. fischeri*:60

|                 |         |                 |         |
|-----------------|---------|-----------------|---------|
| afum EBA27361.1 | 100.00% | afis EAW20663.1 | 100.00% |
|-----------------|---------|-----------------|---------|

Bootstrap support for afum|EBA27361.1 as seed ortholog is 100%.

Bootstrap support for afis|EAW20663.1 as seed ortholog is 100%.

---

Group of orthologs #8560. Best score 59 bits

Score difference with first non-orthologous sequence - *A. fumigatus*:59 *A. fischeri*:59

|                 |         |                 |         |
|-----------------|---------|-----------------|---------|
| afum EAL85009.1 | 100.00% | afis EAW22095.1 | 100.00% |
|-----------------|---------|-----------------|---------|

Bootstrap support for afum|EAL85009.1 as seed ortholog is 100%.

Bootstrap support for afis|EAW22095.1 as seed ortholog is 100%.

---

Group of orthologs #8561. Best score 53 bits

Score difference with first non-orthologous sequence - *A. fumigatus*:53 *A. fischeri*:53

|                 |         |                 |         |
|-----------------|---------|-----------------|---------|
| afum EAL90928.1 | 100.00% | afis EAW16894.1 | 100.00% |
|-----------------|---------|-----------------|---------|

Bootstrap support for afum|EAL90928.1 as seed ortholog is 100%.

Bootstrap support for afis|EAW16894.1 as seed ortholog is 100%.

---

Group of orthologs #8562. Best score 53 bits

Score difference with first non-orthologous sequence - *A. fumigatus*:53 *A. fischeri*:53

|                 |         |                 |         |
|-----------------|---------|-----------------|---------|
| afum EBA27449.1 | 100.00% | afis EAW21152.1 | 100.00% |
|-----------------|---------|-----------------|---------|

Bootstrap support for afum|EBA27449.1 as seed ortholog is 100%.

Bootstrap support for afis|EAW21152.1 as seed ortholog is 100%.

---

Abbreviations: afum - *A. fumigatus*; afis - *A. fischeri*
